# Supplementary material for: Heck reaction prediction using a transformer model based on a transfer learning strategy
Source: Royal Society of Chemistry journal article supplement (doi:10.1039/d0cc02657c), 2020-01-01

**Table S14B. Comparisons and representative examples of transformer-transfer learning model' predictions, and the model makes SMILES error in the reaction prediction of the test 1**

| Reactants                                                                           | Transformer-transfer learning model's predictions                                   | Ground truth                                                                          |
|-------------------------------------------------------------------------------------|-------------------------------------------------------------------------------------|---------------------------------------------------------------------------------------|
| 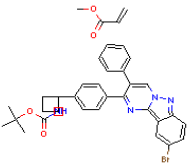   | SMILES error                                                                        |    |
|    | SMILES error                                                                        |    |
|   | SMILES error                                                                        |   |
|  |  |  |
|  | SMILES error                                                                        |  |
|  |  |  |
|  |  |  |

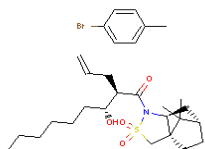

SMILES error

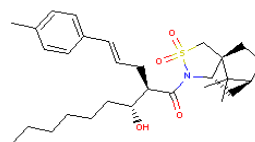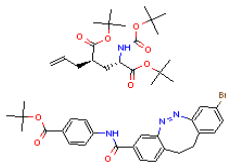

SMILES error

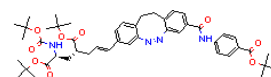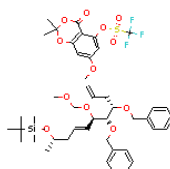

SMILES error

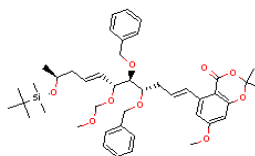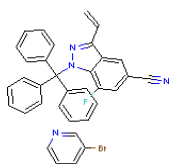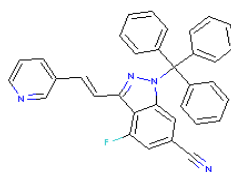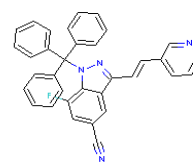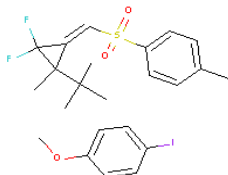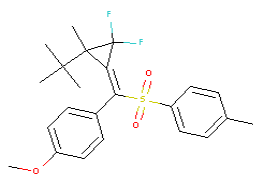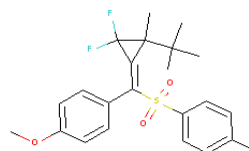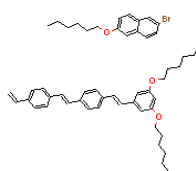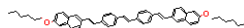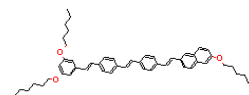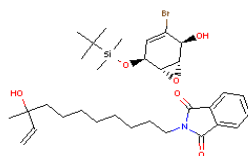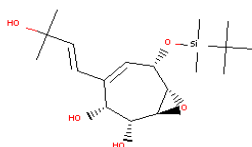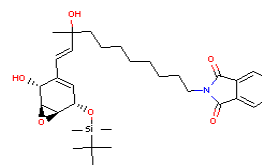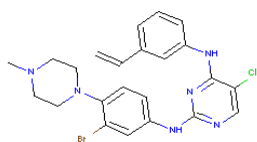

SMILES error

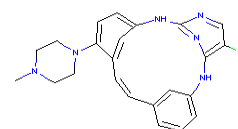

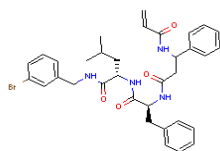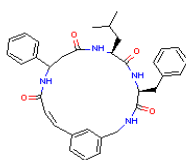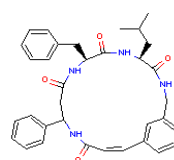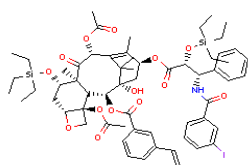

SMILES error

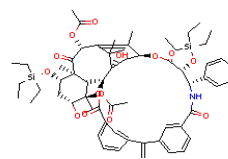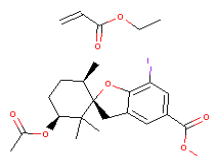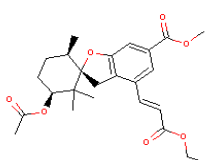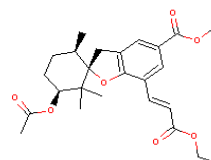

Supplement: d0cc02657c1.zip [file d0cc02657c1.zip]
