# Supplementary material for: Heck reaction prediction using a transformer model based on a transfer learning strategy
Source: Royal Society of Chemistry journal article supplement (doi:10.1039/d0cc02657c), 2020-01-01
Supplement: d0cc02657c1.zip [file d0cc02657c1.zip]

**Table S6A. Intramolecular Heck reaction dataset in our research for transformer-baseline and transformer-transfer learning models**

| Reaction ID | Reaction SMILES                                                                                                                                                                                                          |
|-------------|--------------------------------------------------------------------------------------------------------------------------------------------------------------------------------------------------------------------------|
| 1           | <chem>C=CCCC[C@@H](C=C)CN(c1cccc1Br)S(=O)(=O)c1ccc(C)cc1&gt;&gt;C=CCCC[C@@H]1CN(S(=O)(=O)c2ccc(C)cc2)c2ccccc2C1=C</chem>                                                                                                 |
| 2           | <chem>C=CCN(Cc1nnn(CCCCC)c1I)S(=O)(=O)c1ccc(C)cc1&gt;&gt;C=C1CN(S(=O)(=O)c2ccc(C)cc2)Cc2nnn(CCCCC)c21</chem>                                                                                                             |
| 3           | <chem>C=C[C@@H]1[C@@H]2[C@H](CN1c1cc(C(=O)OC)cc(OCc3ccccc3)c1I)N2C(=O)OC(C)(C)C&gt;&gt;C=C1c2c(OCc3ccccc3)cc(C(=O)OC)cc2N2C[C@H]3[C@@H]([C@@H]12)N3C(=O)OC(C)(C)C</chem>                                                 |
| 4           | <chem>C=CCc1c(N(CC)C(=O)c2ccccc2I)ccc2oc(=O)ccc12&gt;&gt;C=C1Cc2c(ccc3oc(=O)ccc23)N(CC)C(=O)c2ccccc21</chem>                                                                                                             |
| 5           | <chem>C=C[C@@H](Cn1c(Br)c(-c2ccc(Oc3ccc(OC(F)(F)F)cc3)cc2)c2c(N)ncnc21)NC(=O)OC(C)(C)C&gt;&gt;C=C1c2c(-c3ccc(Oc4ccc(OC(F)(F)F)cc4)cc3)c3c(N)ncnc3n2C[C@H]1NC(=O)OC(C)(C)C</chem>                                         |
| 6           | <chem>C=Cc1cccc(Nc2nc(Nc3cc(Br)c(N4CCN(C)CC4)cc3OC)nc2Cl)c1&gt;&gt;COc1cc(N2CCN(C)CC2)c2cc1Nc1ncc(Cl)c(n1)Nc1cccc(c1)/C=C\2</chem>                                                                                       |
| 7           | <chem>C=C[C@@H](O[Si](C)(C)C(C)(C)C)[C@@H](CCCO[Si](C)(C)C(C)(C)C)[C@@H](C/C(I)=C/CO)O[Si](C)(C)C(C)(C)C&gt;&gt;C=C1/C(=C/CO)C[C@@H](O[Si](C)(C)C(C)(C)C)[C@@H](CCCO[Si](C)(C)C(C)(C)C)[C@@H]1O[Si](C)(C)C(C)(C)C</chem> |
| 8           | <chem>C=C[C@@H](OCc1cccc1I)Oc1cccc1&gt;&gt;C=C1c2ccccc2CO[C@H]1Oc1cccc1</chem>                                                                                                                                           |
| 9           | <chem>CCCCC/C(=C/I)OC(=O)/C=C/c1cccs1&gt;&gt;CCCCCCC1=C/C(=C\c2cccs2)C(=O)O1</chem>                                                                                                                                      |
| 10          | <chem>CCCCC/C(=C/I)OC(=O)/C=C/c1cccc1&gt;&gt;CCCCCCC1=C/C(=C\c2ccccc2)C(=O)O1</chem>                                                                                                                                     |
| 11          | <chem>C=CCCOc1ccc2ccc(OC)cc2c1Br&gt;&gt;C=C1CCOCc2ccc3ccc(OC)cc3c21</chem>                                                                                                                                               |
| 12          | <chem>C=CCN(Cc1cccc1I)C1CCCCC1&gt;&gt;C=C1CN(C2CCCCC2)Cc2ccccc21</chem>                                                                                                                                                  |
| 13          | <chem>C=C[C@@H](O[Si](C)(C)C(C)(C)C)[C@@H](C)[C@@H](CC(I)=CCO)O[Si](C)(C)C(C)(C)C&gt;&gt;C=C1C(=CCO)C[C@@H](O[Si](C)(C)C(C)(C)C)[C@@H](C)[C@@H]1O[Si](C)(C)C(C)(C)C</chem>                                               |
| 14          | <chem>C=CCC(Nc1cccc1Br)c1cccn1C&gt;&gt;C=C1CC(c2cccn2C)Nc2ccccc21</chem>                                                                                                                                                 |
| 15          | <chem>C=CCC(C(=O)OC)(C(=O)OC)C(c1cc(OC)c(OC)c(OC)c1)c1cc2c(cc1Br)OCO2&gt;&gt;C=C1CC(C(=O)OC)(C(=O)OC)C(c2cc(OC)c(OC)c(OC)c2)c2cc3c(cc21)OCO3</chem>                                                                      |
| 16          | <chem>C=CCC1c2ccccc2CCN1Cc1cccc1Br&gt;&gt;C=C1CC2c3ccccc3CCN2Cc2ccccc21</chem>                                                                                                                                           |
| 17          | <chem>C=Cc1cc(C)ccc1OCc1cc(OC)ccc1Br&gt;&gt;COc1ccc2c(c1)COc1ccc(C)cc1/C=C\2</chem>                                                                                                                                      |
| 18          | <chem>C=CCCN(c1cccn1Br)S(=O)(=O)c1cccc1&gt;&gt;C=C1CCN(S(=O)(=O)c2ccccc2)c2cccn21</chem>                                                                                                                                 |
| 19          | <chem>C=CCCC(O)C=C(Br)c1cccc1&gt;&gt;C=C1CCCC(O)C=C1c1cccc1</chem>                                                                                                                                                       |
| 20          | <chem>CC=C(c1cccc1)c1c(OCc2ccccc2Br)c(=O)n(C)c(=O)n1C&gt;&gt;C/C1=C(\c2ccccc2)c2c(c(=O)n(C)c(=O)n2C)OCO2ccccc21</chem>                                                                                                   |
| 21          | <chem>C=CC(=O)N(C)[C@@H](CO)Cc1ccc(OC)cc1Br&gt;&gt;C=C1C(=O)N(C)[C@@H](CO)Cc2ccc(OC)cc21</chem>                                                                                                                          |
| 22          | <chem>C=CCOCC1=C(Br)c2ccc(OC)cc2CC1&gt;&gt;C=C1CCOCC2=C1c1ccc(OC)cc1CC2</chem>                                                                                                                                           |
| 23          | <chem>C=CCCc1c(Br)cncc1C1=N[C@H](c2ccccc2)CO1&gt;&gt;C=C1CCc2c1nccc2C1=N[C@H](c2ccccc2)CO1</chem>                                                                                                                        |
| 24          | <chem>C=CCc1c(OCc2ccccc2Br)c(=O)oc2ccccc12&gt;&gt;O=c1oc2ccccc2c2c1OCc1cccc1/C=C\2</chem>                                                                                                                                |
| 25          | <chem>C=CCCC(O)C=C(Br)c1ccc2ccccc2c1&gt;&gt;C=C1CCCC(O)C=C1c1ccc2ccccc2c1</chem>                                                                                                                                         |
| 26          | <chem>C=CCn1c(N(c2ccc(C)cc2I)S(=O)(=O)c2cccs2)cc2cc(Br)ccc21&gt;&gt;Cc1ccc2c(c1)/C=C\Cn1c(cc3cc(Br)ccc31)N2S(=O)(=O)c1cccs1</chem>                                                                                       |
| 27          | <chem>C=CCC(NCc1cc(F)ccc1Br)(C(=O)OC)C(C)C&gt;&gt;C=C1CC(C(=O)OC)(C(C)C)NCc2cc(F)ccc21</chem>                                                                                                                            |
| 28          | <chem>C=CCN1CCc2c([nH]c3ccccc23)C1Cc1cccc1Br&gt;&gt;C=C1CN2CCc3c([nH]c4ccccc34)C2Cc2ccccc21</chem>                                                                                                                       |
| 29          | <chem>C=C[Si](C)(C)c1ccc(F)cc1/C=C\c1cccc1Br&gt;&gt;C=C1c2ccccc2/C=C\c2cc(F)ccc2[Si]1(C)C</chem>                                                                                                                         |
| 30          | <chem>C=Cc1cc(Cl)c(C)cc1OCc1cccc1Br&gt;&gt;Cc1cc2c(cc1Cl)/C=C\c1cccc1CO2</chem>                                                                                                                                          |
| 31          | <chem>C=Cc1cc(CCCCC)ccc1N(C)C(=O)c1cccc1I&gt;&gt;C=C1c2ccccc2C(=O)N(C)c2ccc(CCCCC)cc21</chem>                                                                                                                            |
| 32          | <chem>C=CC(CC)(CC)C(=O)Nc1cccc1Br&gt;&gt;C=C1c2ccccc2NC(=O)C1(CC)CC</chem>                                                                                                                                               |
| 33          | <chem>C=C[C@@H](Cn1c(Br)c(-c2ccc(Oc3ccc(F)cc3)cc2)c2c(N)ncnc21)NC(=O)OC(C)(C)C&gt;&gt;C=C1c2c(-c3ccc(Oc4ccc(F)cc4)cc3)c3c(N)ncnc3n2C[C@H]1NC(=O)OC(C)(C)C</chem>                                                         |
| 34          | <chem>C=CCN(CC1=C(Br)CCCC1)c1ccc(C)cc1&gt;&gt;C=C1CN(c2ccc(C)cc2)CC2=C1CCCC2</chem>                                                                                                                                      |
| 35          | <chem>C=CCn1c(-c2ccc3ccccc3c2Br)nc2ccccc21&gt;&gt;C=C1Cn2c(nc3ccccc32)-c2ccc3ccccc3c21</chem>                                                                                                                            |
| 36          | <chem>C=CCO[C@H](CSc1cccc1Br)[C@H]1O[C@@H]2OC(C)(C)O[C@@H]2[C@H]1OCc1cccc1&gt;&gt;C=C1CO[C@@H]([C@H]2O[C@@H]3OC(C)(C)O[C@@H]3[C@H]2OCc2ccccc2)CSc2ccccc21</chem>                                                         |
| 37          | <chem>C=CC(C)c1ccc2ccccc2c1OS(=O)(=O)c1cccc1Br&gt;&gt;C=C1c2ccccc2S(=O)(=O)Oc2c(ccc3ccccc23)C1C</chem>                                                                                                                   |
| 38          | <chem>C=CCc1c(OCc2ccccc2I)c(=O)oc2ccccc12&gt;&gt;C=C1Cc2c(c(=O)oc3ccccc23)OCc2ccccc21</chem>                                                                                                                             |
| 39          | <chem>C=C(C(=O)OC)C(O)c1cc2ccccc2n1Cc1cccc1I&gt;&gt;COC(=O)/C1=C/c2ccccc2Cn2c(cc3ccccc32)C1O</chem>                                                                                                                      |

40 C=C[C@H](O[Si](C)(C)C(C)(C)C)[C@H](CCCO[Si](c1cccc1)(c1cccc1)C(C)(C)C)[C@@H](C/C(I)=C/CO)O[Si](C)(C)C(C)(C)C>>C=C1/C(=C)CO[C@H](O[Si](C)(C)C(C)(C)C)[C@@H](CCCO[Si](c2cccc2)(c2cccc2)C(C)(C)C)[C@H]1O[Si](C)(C)C(C)(C)C

41 C=CC(OCC(=C)Br)c1cccc(Cl)c1>>C=C1COC(c2cccc(Cl)c2)C1=C

42 C=CCC(O)c1cnccl1Br>>C=C1CC(O)c2cnccl2

43 C=CCN(CCc1c(Br)n(C(=O)OC(C)(C)C)c2cccc12)C(=O)C(F)(F)F>>C=C1CN(C(=O)C(F)(F)F)CCc2c1n(C(=O)OC(C)(C)C)c1cccc21

44 C=CCc1c(N(C)C(=O)Cc2cccc2I)ccc2c1ccc(=O)n2C>>C=C1Cc2c(ccc3c2ccc(=O)n3C)N(C)C(=O)Cc2cccc21

45 C=CC(OCC(=C)Br)c1cccc(OC)c1>>C=C1COC(c2cccc(OC)c2)C1=C

46 C=CCN(CC1=C(Br)CCc2cccc21)c1ccc(Cl)cc1>>C=C1CN(c2ccc(Cl)cc2)CC2=C1CCc1cccc12

47 C=CC(C)CCc1cccc(CC(C)(NC(=O)OC(C)(C)C)C(=O)OCc2cc(Cl)nc(N(C)S(C)(=O)=O)c2)c1>>CC1/C=C/c2cc(cc(N(C)S(C)(=O)=O)n2)COC(=O)C(C)(NC(=O)OC(C)(C)C)Cc2cccc(c2)CC1

48 C=C[Si](C)(C)c1cc(OC)c(OC)cc1-c1cc(OC)c(OC)cc1Br>>C=C1c2cc(OC)c(OC)cc2-c2cc(OC)c(OC)cc2[Si]1(C)C

49 C=CCC1c2[nH]c3cccc3c2CCN1Cc1cccc1Br>>C=C1CC2c3[nH]c4cccc4c3CCN2Cc2cccc21

50 C=CCCC(C)C1=C(Br)CCC(C)C1>>C=C1CCCC(O)C2=C1CCC(C)C2

51 C=CCc1c(N(CC)C(=O)c2cccc2I)ccc2c1ccc(=O)n2C>>C=C1Cc2c(ccc3c2ccc(=O)n3C)N(CC)C(=O)c2cccc21

52 C=C[C@H](CC)COc1cccc1Br>>C=C1c2cccc2OC[C@H]1CC

53 C=C(C)CC(OCC(=C)Br)c1ccc(Cl)cc1>>C=C1C=C(C)CC(c2ccc(Cl)cc2)OC1

54 C=CCC[C@H](C=C)CN(c1cccc1Br)S(=O)(=O)c1ccc(C)cc1>>C=CCC[C@H]1CN(S(=O)(=O)c2ccc(C)cc2)c2cccc2C1=C

55 C=CC(CC)(CC)C(=O)Nc1ccc(OC)cc1Br>>C=C1c2cc(OC)ccc2NC(=O)C1(CC)CC

56 C=Cc1cc(OC)c(OC)cc1CC(Nc1cccc1)c1cc2c(cc1Br)OCO2>>C=C1c2cc(OC)c(OC)cc2CC(Nc2cccc2)c2cc3c(cc21)OCO3

57 C=C[C@H]1O[C@H]2OC(C)(C)O[C@H]2[C@H]1N(Cc1cc(OC)ccc1Br)S(=O)(=O)c1ccc(C)cc1>>C=C1c2ccc(OC)cc2CN(S(=O)(=O)c2ccc(C)cc2)[C@H]2[C@H]1O[C@H]1OC(C)(C)O[C@H]2

58 C=Cc1cc(OC)ccc1N(C)C(=O)c1cccc1I>>C=C1c2cccc2C(=O)N(C)c2ccc(O)cc21

59 C=CC[C@H](N=C(c1cccc1)c1cccc1)c1cccc1Br>>C=C1[C@H](N=C(c2cccc2)c2cccc2)c2cccc2

60 C=CCOCC1=C(Br)c2cccc2C(C)C1>>C=C1CCOCC2=C1c1cccc1C(C)C2

61 C=CCN(CC1=C(Br)CCCCC1)c1ccc(Cl)cc1>>C=C1CN(c2ccc(Cl)cc2)CC2=C1CCCCC2

62 C=CCc1ccc2cccc2c1N(C(=O)c1cccc1I)S(=O)(=O)c1ccc(C)cc1>>C=C1Cc2ccc3cccc3c2N(S(=O)(=O)c2ccc(C)cc2)C(=O)c2cccc21

63 C=CCN(C)CCc1ccc([N+](=O)[O-])cc1Br>>C=C1CN(C)CCc2ccc([N+](=O)[O-])cc21

64 COC(=O)/C=C/Oc1c(C)cccc1-c1cccc1Br>>COC(=O)/C=C1/Oc2c(C)cccc2-c2cccc21

65 CC(C)COC(=O)[C@@H](C)OC(=O)[C@@H](C/C=C1CCN([13c]2[13cH][13cH][13cH][13cH][13cH]2)C1=O)Nc1cc(Cl)ccc1>>CC(C)COC(=O)[C@@H](C)OC(=O)[C@@H]1C/C=C2/CCN([13c]3[13cH][13cH][13cH][13cH][13cH]3)C2=O)c2ccc(Cl)cc2N1

66 C=Cc1cccc(Nc2nc(Nc3ccc(N4CCN(C)CC4)c(Br)c3)ncc2Cl)c1>>CN1CCN(c2ccc3cc2/C=C/c2cccc(c2)Nc2nc(ncc2Cl)N3)CC1

67 C=CCc1ccc2ccc(C)nc2c1OCc1cccc1Br>>C=C1Cc2ccc3ccc(C)nc3c2OCc2cccc21

68 C=CCN(CCI)S(=O)(=O)c1cccc1Br>>C=C1CCN(S(=O)(=O)c2cccc2Br)C1

69 C=C[C@@H]1CC(C(=O)OC)(C(=O)OC)[C@H](c2cccc2)N(c2cccc2I)O1>>C=C1c2cccc2N2O[C@@H]1CC(C(=O)OC)(C(=O)OC)[C@H]2c1cccc1

70 C=CCN1c2c(Br)cc([N+](=O)[O-])cc2C(=O)N2C1C(C)(C)SC2(C)C>>C=C1CN2c3c1cc([N+](=O)[O-])cc3C(=O)N1C2C(C)(C)SC1(C)C

71 C=C[C@H](NC(=O)OC(C)(C)C)[C@@H](O)[C@H](C)C(=O)NCC(=O)N[C@H](C)C(=O)Nc1cc(OCc2cccc2)ccc1I>>C[C@H]1C(=O)NCC(=O)N[C@H](C)C(=O)Nc2cc(OCc3cccc3)ccc2/C=C/[C@H]1(NC(=O)OC(C)(C)C)[C@H]1O

72 C=CCN(CC1=C(Br)CCC1)c1ccc(Cl)cc1>>C=C1CN(c2ccc(Cl)cc2)CC2=C1CCC2

73 C=CCOCC1=C(Br)c2cc(OC)ccc2CC1>>C=C1CCOCC2=C1c1cc(OC)ccc1CC2

74 C=CCN(Cc1cc2cccc2nc1Cl)c1ccc(OC)cc1>>C=C1CN(c2ccc(OC)cc2)Cc2cc3cccc3nc21

75 C=CCN(Cc1cc2ccc(C)cc2nc1Cl)c1ccc(OC)cc1>>C=C1CN(c2ccc(OC)cc2)Cc2cc3ccc(C)cc3nc21

76 C=CCN(C(=O)c1ccc2cccc2c1Br)C(C(=O)NC(C)(C)C)c1ccc(OC)cc1>>C=C1CN(C(C(=O)NC(C)(C)C)c2ccc(OC)cc2)C(=O)c2ccc3cccc3c21

77 C=CCO[C@@H]1[C@@H](OCc2cccc2)[C@H](OCc2cccc2)[C@@H](COc2cccc2)O[C@@H]1Sc1cccc1Br>>C=C1CO[C@@H]2[C@@H](OCc3cccc3)[C@H](OCc3cccc3)[C@@H](COc3cccc3)O[C@@H]2Sc2cccc21

C=Cc1cccc(C(=O)O[C@H]2[C@H]3[C@](C)(C(=O)[C@H](OC(C)=O)C4=C(C)[C@@H](OC(=O)[C@H](O[Si](C(C)C)(C(C)C)C(C)C)[C@H](C=C(C)C)NC(=O)c5cccc(1)c5)C[C@]2(O)C4(C)C)[C@@H](O[Si](CC)(CC)CC)C[C@H]2OC[C@]23OC(C)=O)c1>>C=C1c2cccc(c2)C(=O)N[C@@H](C=C(C)C)[C@@H](O[Si](C(C)C)(C(C)C)C(C)C)C(=O)O[C@H]2C[C@@]3(O)[C@@H](OC(=O)c4cccc1c4)[C@H]1[C@]1(C)(C(=O)[C@H](OC(C)=O)C(=C2C)C3(C)C)[C@@H](O[Si](CC)(CC)CC)C[C@H]2C=CCCC[C@@H](C=C)COc1cccc1Br>>C=CCCC[C@@H]1COc2cccc2C1=C  
C=C[C@H](CC)CN(c1cccc1Br)S(=O)(=O)c1ccc(C)cc1>>C=C1c2cccc2N(S(=O)(=O)c2ccc(C)cc2)[C@H]1CC  
C=CCC(CCBr)c1cc2cccc2o1>>C=C1CCC(c2cc3cccc3o2)C1  
C=C(C(=O)OCC)c1cccc1CN(C(=O)C(F)F)c1cccc1Br>>CCOC(=O)/C1=C/c2cccc2N(C(=O)C(F)F)Cc2cccc21  
C=Cc1ccc(N(C)S(C)(=O)=O)c(Nc2nc(Nc3cc(Br)c(N4CCN(C)CC4)cc3OC)ncc2Cl)c1>>COc1cc(N2CN(C)CC2)c2cc1Nc1ncc(Cl)c(n1)Nc1cc(ccc1N(C)S(C)(=O)=O)/C=C\2  
C=CCCN(c1cccc1OC)S(=O)(=O)c1cccc1Br>>C=C1CCN(c2cccc2OC)S(=O)(=O)c2cccc21  
C=CC[C@@H](N[S@@](=O)C(C)(C)C)c1cc(F)ccc1Br>>C=C1C[C@@H](N[S@@](=O)C(C)(C)C)c2cc(F)ccc21  
C=C[C@H]1O[C@@H]2OC(C)(C)O[C@@H]2[C@H]1N(Cc1cc2c(cc1Br)OCO2)C(=O)OC>>C=C1c2cc3c(cc2CN(C(=O)OC)[C@H]2[C@@H]1O[C@@H]1OC(C)(C)O[C@H]21)OCO3  
C=Cc1cc(OC)ccc1OS(=O)(=O)c1cccc1Br>>COc1ccc2c(c1)/C=C\c1cccc1S(=O)(=O)O2  
C=CCc1c(N(C)C(=O)c2cccc2I)ccc2oc(=O)ccc12>>C=C1Cc2c(ccc3oc(=O)ccc23)N(C)C(=O)c2ccccC=CC[C@@H](C[C@H](CC=C)O[Si](C)(C)C(C)(C)C)Oc1c(Br)cccc1C(=O)OC(C)(C)C>>C=CC[C@@H](C[C@H]1CC(=C)c2cccc(C(=O)OC(C)(C)C)c2O1)O[Si](C)(C)C(C)(C)C  
C=CCN(Cc1cccc1I)C(=O)C(F)F>>C=C1CN(C(=O)C(F)F)Cc2cccc21  
C=C[C@@H](O[Si](C)(C)C(C)(C)C)[C@@H](CCCC)[C@@H](C/C(I)=C/CO)O[Si](C)(C)C(C)(C)C>>C=C1/C(=C\CO)C[C@@H](O[Si](C)(C)C(C)(C)C)[C@H](CCCC)[C@@H]1O[Si](C)(C)C(C)(C)C  
C=CC[C@H](N[S@](=O)C(C)(C)C)c1cccc1I>>C=C1C[C@H](N[S@](=O)C(C)(C)C)c2cccc21  
C=CC[C@@H](CCc1ccnc1Br)COc1cccc1>>C=C1C[C@H](COc2cccc2)CCc2ccnc21  
C=CCN(Cc1cccc1I)S(=O)(=O)c1ccc(C)cc1>>C=C1CN(S(=O)(=O)c2ccc(C)cc2)Cc2cccc21  
C=C[C@H](C)CN(c1cccc1Br)S(=O)(=O)c1ccc(C)cc1>>C=C1c2cccc2N(S(=O)(=O)c2ccc(C)cc2)[C@H]1C  
C=CCn1c(N(c2cccc2I)S(=O)(=O)c2cccs2)cc2cccc21>>O=S(=O)(c1cccs1)N1c2cccc2/C=C\Cn2c1c1cccc12  
COC(=O)/C=C/Oc1cccc1-c1cccc1Cl>>COC(=O)/C=C1/Oc2cccc2-c2cccc21  
C=CC[C@H](N[S@](=O)C(C)(C)C)c1cccc1Br>>C=C1C[C@H](N[S@](=O)C(C)(C)C)c2cccc21  
C=CCN(Cc1cc2cc(C)ccc2nc1Cl)c1cccc1>>C=C1CN(c2cccc2)Cc2cc3cc(C)ccc3nc21  
C=CC(COc1cccc1I)NC(=O)OCc1cccc1>>C=C1c2cccc2OCC1NC(=O)OCc1cccc1  
C=CC[C@](C)(CCc1cccc1Br)N[S@@](=O)C(C)(C)C>>C=C1C[C@@](C)(N[S@@](=O)C(C)(C)C)CCc2cccc21  
C=CCN(CCc1ccc(Cl)cc1I)C(=O)C(F)F>>C=C1CN(C(=O)C(F)F)CCc2ccc(Cl)cc21  
C=CCn1c(N(c2ccc(C)cc2I)S(C)(=O)=O)cc2cc(Cl)ccc21>>Cc1ccc2c(c1)/C=C\Cn1c(cc3cc(Cl)ccc31)N2S(C)(=O)=O  
C=CCN(Cc1ccc(F)cc1)Cc1cc2cccc(C)c2nc1Cl>>C=C1CN(Cc2ccc(F)cc2)Cc2cc3cccc(C)c3nc21  
C=CC[C@@H]1CCCCN1Cc1cccc1I>>C=C1C[C@@H]2CCCCN2Cc2cccc21  
C=CCCCN(c1ccnc1Br)S(=O)(=O)c1cccc1>>C=C1CCCN(S(=O)(=O)c2cccc2)c2ccnc21  
C=C/C(Br)=C/[C@]1(C)C(=O)OC[C@]1(C)/C=C\C(=O)OC>>C=CC1=C[C@]2(C)C(=O)OC[C@]2(C)/C1=C/C(=O)OC  
C=CCOCC1=C(Br)CCc2cccc21>>C=C1COCC2=C1CCc1cccc12  
C=CCN1CCc2cccc2C1Cc1cccc1Br>>C=C1CN2CCc3cccc3C2Cc2cccc21  
C=CCC1c2cc(OC)c(OC)cc2CCN1CC(=C)I>>C=C1CC2c3cc(OC)c(OC)cc3CCN2CC1=C  
C=CCCN(c1cccc1C(C)C)S(=O)(=O)c1cccc1Br>>C=C1CCN(c2cccc2C(C)C)S(=O)(=O)c2cccc21  
C=C(C(=O)OCC)c1cccc1COc1cccc1I>>CCOC(=O)/C1=C/c2cccc2OCc2cccc21  
C=CCC(c1cccc1)N(C)c1cccc1I>>C=C1CC(c2cccc2)N(C)c2cccc21  
C=CCCCC1=C(I)C(=O)C(C(C)C)CC1>>C=C1CCCC2=C1C(=O)C(C(C)C)CC2  
C=CC1CCC(=O)N1CCI>>C=C1CCN2C(=O)CCC12  
C=CCn1c(-c2ccc3cc(OC)ccc3c2Br)nc2cccc21>>C=C1Cn2c(nc3cccc32)-c2ccc3cc(OC)ccc3c21  
C=Cc1cc(OC)ccc1OCc1cc(OC)ccc1Br>>COc1ccc2c(c1)/C=C\c1ccc(OC)cc1CO2  
C=CCCOc1cc(=O)n(C)cc1-c1cc(NS(=O)(=O)CC)ccc1Oc1ccc(Cl)cc1I>>CCS(=O)(=O)Nc1ccc2c(c1)-c1cn(C)c(=O)cc1OCC/C=C/c1cc(Cl)ccc1O2  
C=CCn1c(N(c2ccc(Cl)cc2I)S(=O)(=O)c2ccc(C)cc2)cc2cccc21>>Cc1ccc(S(=O)(=O)N2c3ccc(Cl)cc3/C=C\Cn3c2cc2cccc23)cc1

120 C=CCc1c(N(C)C(=O)c2ccccc2I)ccc2c1ccc(=O)n2C>>C=C1Cc2c(ccc3c2ccc(=O)n3C)N(C)C(=O)c2cc  
ccc21  
121 C=CCc1ccccc1N(C(=O)c1ccccc1I)S(=O)(=O)c1ccc(C)cc1>>C=C1Cc2ccccc2N(S(=O)(=O)c2ccc(C)cc  
2)C(=O)c2ccccc21  
122 C=CCN(c1ccc2oc(=O)cc(OCC)c2c1)S(=O)(=O)c1ccccc1Br>>C=C1CN(c2ccc3oc(=O)cc(OCC)c3c2)S  
(=O)(=O)c2ccccc21  
123 C=CCn1c(N(c2ccc(C)cc2I)S(=O)(=O)c2cccs2)cc2cc(Cl)ccc21>>Cc1ccc2c(c1)/C=C\Cn1c(cc3cc(Cl)cc  
c31)N2S(=O)(=O)c1cccs1  
124 C=C[C@H](O[Si](C)(C)C(C)(C)C)[C@H](c1ccccc1)[C@H](CC(I)=CCO)O[Si](C)(C)C(C)(C)  
C>>C=C1C(=CCO)C[C@H](O[Si](C)(C)C(C)(C)C)[C@H](c2ccccc2)[C@H]1O[Si](C)(C)C(C)(C)  
125 CC(=O)Oc1ccc(/C=C/C(=O)O/C(=C\I)c2ccc(OC(C)=O)c(OC(C)=O)c2)cc1OC(C)=O>>CC(=O)Oc1cc  
c(/C=C2\C=C(c3ccc(OC(C)=O)c(OC(C)=O)c3)OC2=O)cc1OC(C)=O  
126 C=C[C@H](O[Si](C)(C)C(C)(C)C)[C@H](CCCC)[C@H](CC(I)=CCO)O[Si](C)(C)C(C)(C)C>  
127 >C=C1C(=CCO)C[C@H](O[Si](C)(C)C(C)(C)C)[C@H](CCCC)[C@H]1O[Si](C)(C)C(C)(C)C  
C=CC(C)(C)Nc1nc(Cl)ccc1Br>>C=C1c2cnc(Cl)nc2NC1(C)C  
128 C=CC(=O)NC[C@H](OC)[C@H](OC)c1ccccc1NC(=O)[C@H](Cc1ccccc1)NC(=O)c1cccc(Br)c1>>  
129 CO[C@H]1CNC(=O)/C=C/c2ccccc2C(=O)N[C@H](Cc2ccccc2)C(=O)Nc2ccccc2[C@H]1OC  
C=CCCN(c1ccccc1)S(=O)(=O)c1ccccc1Br>>C=C1CCN(c2ccccc2)S(=O)(=O)c2ccccc21  
130 C=CCC(CCBrc1ccc2ccccc2c1)>>C=C1CCC(c2ccc3ccccc3c2)C1  
131 C=CCC(COCc1ccccc1)N(C)c1ccccc1I>>C=C1CC(COCc2ccccc2)N(C)c2ccccc21  
132 C=CCn1c(N(c2ccc(Br)cc2I)S(=O)(=O)c2ccc(C)cc2)cc2cc(C)ccc21>>Cc1ccc(S(=O)(=O)N2c3ccc(Br)c  
c3/C=C\Cn3c2cc2cc(C)ccc23)cc1  
133 C=CCOC(Cl)c1ccc(OC)cc1>>C=C1COC(c2ccc(OC)cc2)C1  
134 COC(=O)/C=C/Oc1ccccc1-c1ccccc1Br>>COC(=O)/C=C1/Oc2ccccc2-c2ccccc21  
135 CCCCCC/C(=C\I)OC(=O)/C=C/c1ccc(C)cc1>>CCCCCCC1=C/C(=C\c2ccc(C)cc2)C(=O)O1  
136 O=C/C=C/c1ccccc1O/C(=C\I)C1CCCCC1>>O=C1OC(C2CCCCC2)=C/C1=C\c1ccccc1  
137 C=CC1CCCN1C(=O)C(c1ccccc1Br)N(Cc1ccccc1)C(=O)CC>>C=C1c2ccccc2C(N(Cc2ccccc2)C(=O)C  
C)C(=O)N2CCCC12  
138 C=CC[C@H](N[S@](=O)C(C)(C)C)c1c(F)cccc1I>>C=C1C[C@H](N[S@](=O)C(C)(C)C)c2c(F)cccc2  
139 C=C[C@H](O[Si](C)(C)C(C)(C)C)[C@H](Cc1ccccc1)[C@H](CC(I)=CCO)O[Si](C)(C)C(C)(C)  
)C>>C=C1C(=CCO)C[C@H](O[Si](C)(C)C(C)(C)C)[C@H](Cc2ccccc2)[C@H]1O[Si](C)(C)C(C)(C)  
140 C=CCN(Cc1ccccc1I)C1CCCC1>>C=C1CN(C2CCCC2)Cc2ccccc21  
141 C=C[C@H](O[Si](C)(C)C(C)(C)C)[C@H](C)[C@H](C/C(I)=C/CO)O[Si](C)(C)C(C)(C)C>>C=  
142 C1/C(=C\CO)C[C@H](O[Si](C)(C)C(C)(C)C)[C@H](C)[C@H]1O[Si](C)(C)C(C)(C)C  
C=CCOc1ccc(C(NC(=O)c2ccccc2)C(=O)OC)cc1I>>C=C1COc2ccc(C(NC(=O)c3ccccc3)C(=O)OC)cc  
143 C=CCOCC1=C(Br)CCc2ccccc21>>C=C1CCOCC2=C1CCc1ccccc12  
144 C=CCOCc1c(Br)c(OC)c2ccccc2c1OC>>C=C1COCc2c1c(OC)c1ccccc1c2OC  
145 C=CCC1c2[nH]c3ccccc3c2CCN1CC(=C)I>>C=C1CC2c3[nH]c4ccccc4c3CCN2CC1=C  
146 C=CC(C)OCc1c(Br)c(OC)c2ccccc2c1OC>>C=C1c2c(c(OC)c3ccccc3c2OC)COC1C  
147 C=Cc1ccccc1OCc1ccccc1Br>>C1=C\c2ccccc2OCc2ccccc2/1  
148 C=CCN(CC1=C(Br)CCCCC1)c1ccc2ccccc12>>C=C1CN(c2ccc3ccccc23)CC2=C1CCCCC2  
149 C=CC(CC)(CC)C(=O)Nc1ccc(F)cc1Br>>C=C1c2cc(F)ccc2NC(=O)C1(CC)CC  
150 COC(=O)/C=C/Oc1ccccc1-c1cc(C)c(C)cc1Br>>COC(=O)/C=C1/Oc2ccccc2-c2cc(C)c(C)cc21  
151 C=CCN(CC1=C(Br)CCCCC1)c1ccc(Cl)cc1>>C=C1CN(c2ccc(Cl)cc2)CC2=C1CCCCC2  
152 C=CS(=O)(=O)N(CC(=C)Br)Cc1ccccc1>>C=C1C=CS(=O)(=O)N(Cc2ccccc2)C1  
153 C=CCC[C@H](C=C)COc1ccccc1Br>>C=CCC[C@H]1COc2ccccc2C1=C  
154 C=CCC1(C(=O)OC)CCN1Cc1ccccc1Br>>C=C1CC2(C(=O)OC)CCN2Cc2ccccc21  
C=Cc1cccc(C(=O)N[C@H](c2ccccc2)[C@H](O[Si](CC)(CC)CC)C(=O)O[C@H]2C[C@H]3(O)[  
C@H](OC(=O)c4cccc(I)c4)[C@H]4[C@H](C)(C(=O)[C@H](OC(C)=O)C(=C2C)C3(C)C)[C@H](  
155 O[Si](CC)(CC)CC)C[C@H]2OC[C@H]24OC(C)=O)c1>>CC[Si](CC)(CC)O[C@H]1C[C@H]2OC[C@  
@]2(OC(C)=O)[C@H]2[C@H]3OC(=O)c4cccc(c4)/C=C\c4cccc(c4)C(=O)N[C@H](c4ccccc4)[C  
@H]1(O[Si](CC)(CC)CC)C(=O)O[C@H]4C1C@H3(O)C(C)(C)C(=C4C)C[C@H]1(OC(C)=O)C(=O)I  
156 C=CCN(Cc1ccccc1)Cc1cc2cc(OC)ccc2nc1Cl>>C=C1CN(Cc2ccccc2)Cc2cc3cc(OC)ccc3nc21  
157 C=CCCOc1ccc2cc(OC)ccc2c1Br>>C=C1CCOCc2ccc3cc(OC)ccc3c21  
158 C=CCOCc1ccc2ccccc2c1Br>>C=C1COCc2ccc3ccccc3c21  
159 C=CCCN1c2c(Br)cc([N+](=O)[O-]  
]cc2C(=O)N2C1C(C)(C)SC2(C)C>>C=C1CCN2c3c1cc([N+](=O)[O-]  
160 C=CCN(CC=C)Cc1ccccc1I>>C=CCN1CC(=C)c2ccccc2C1  
C=Cc1cc(C(O)(C(F)(F)F)C(F)(F)F)ccc1N(C)C(=O)c1ccccc1I>>C=C1c2ccccc2C(=O)N(C)c2ccc(C(O)  
161 (C(F)(F)F)C(F)(F)F)cc21  
162 C=CCN(CCC1ccc(F)cc1I)C(=O)C(F)(F)F>>C=C1CN(C(=O)C(F)(F)F)CCc2ccc(F)cc21

163 C=CCc1cc(Cl)c2ccenc2e1OCc1cccc1Br>>C=C1Cc2cc(Cl)c3ccenc3c2OCc2cccc21  
164 C=Cc1cccc1OS(=O)(=O)c1cccc1Br>>O=S1(=O)Oc2cccc2/C=C\c2cccc21  
165 C=CCc1cccc(C)c1N(C(=O)c1cccc1I)S(=O)(=O)c1ccc(C)cc1>>C=C1Cc2cccc(C)c2N(S(=O)(=O)c2cc  
c(C)cc2)C(=O)c2cccc21  
166 C=CC(CC)(CC)C(=O)Nc1ccc(C(F)(F)F)cc1Br>>C=C1c2cc(C(F)(F)F)ccc2NC(=O)C1(CC)CC  
167 C=CCc1c(N(C)C(=O)c2cccc2I)ccc2c1ccc(=O)n2CC>>C=C1Cc2c(ccc3c2ccc(=O)n3CC)N(C)C(=O)c  
2cccc21  
168 C=CC[C@H](N[S@](=O)C(C)(C)C)c1cc(C(F)(F)F)ccc1I>>C=C1C[C@H](N[S@](=O)C(C)(C)C)c2cc  
(C(F)(F)F)ccc21  
169 C=C(Br)CCN1C(=O)C[C@@H]2C=CCC[C@@]21/C=C\C(=O)OC>>C=C1CCN2C(=O)C[C@@H]3  
C=CCC[C@@]32/C1=C/C(=O)OC  
170 C=CCN(CCc1cccc1I)C(=O)C(F)(F)F>>C=C1CN(C(=O)C(F)(F)F)CCc2cccc21  
171 C=CCN(CCc1ccc(C(F)(F)F)cc1I)C(=O)C(F)(F)F>>C=C1CN(C(=O)C(F)(F)F)CCc2ccc(C(F)(F)F)cc21  
172 C=CCC(CCBr)CCCCCCCC>>C=C1CCC(CCCCCCCC)C1  
173 C=C(C(=O)OCC)c1cccc1OCc1cccc1Br>>CCOC(=O)/C1=C/c2cccc2OCc2cccc21  
174 C=CCC(OCC(=C)Br)c1ccc(Cl)cc1>>C=C1COC(c2ccc(Cl)cc2)CC1=C  
175 CCCCC/C=C/I)OC(=O)/C=C/c1ccc(OC)cc1>>CCCCCCC1=C/C(=C\c2ccc(OC)cc2)C(=O)O1  
176 C=Cc1cc(C(C)(C)C)ccc1N(C)C(=O)c1cccc1I>>C=C1c2cccc2C(=O)N(C)c2ccc(C(C)(C)C)cc21  
177 O=C/C=C/Oc1cccc1-c1cccc1Br)OCc1cccc1>>O=C/C=C1/Oc2cccc2-c2cccc21)OCc1cccc1  
178 C=Cc1cc(C(=O)OCC)ccc1N(C)C(=O)c1cccc1I>>C=C1c2cccc2C(=O)N(C)c2ccc(C(=O)OCC)cc21  
179 C=CCN(C(=O)c1cccc1Br)C(C)(C)C>>C=C1CN(C(C)(C)C)C(=O)c2cccc21  
180 C=C(C)CC(OCC(=C)Br)c1cccc(OC)c1>>C=C1C=C(C)CC(c2ccc(OC)c2)OC1  
181 COc1ccc(/C=C/C(=O)O/C(=C\I)c2ccc3cccc3c2)cc1>>COc1ccc(/C=C2\C=C(c3ccc4cccc4c3)OC2=O  
182 C=CCCC(O)C1=C(Br)CCCCC1>>C=C1CCCC(O)C2=C1CCCCC2  
183 C=CCC(CCBr)(C(=O)OCC)C(=O)OCC>>C=C1CCC(C(=O)OCC)(C(=O)OCC)C1  
184 C=CCCN([C@@H](C)C(=O)OC)S(=O)(=O)c1cccc1Br>>C=C1CCN([C@@H](C)C(=O)OC)S(=O)(=O)c2cccc21  
185 C=C(C(=O)OCC)c1cccc1CS(=O)(=O)c1cccc1Br>>CCOC(=O)/C1=C/c2cccc2S(=O)(=O)Cc2cccc  
C=CCN1c2c(Br)cc([N+](=O)[O-  
186 ])cc2C(=O)N2C1C(C)(C)OC21CCCCC1>>C=C1CN2c3c1cc([N+](=O)[O-  
])cc3C(=O)N1C2C(C)(C)OC12CCCCC2  
187 C=CCOc1cc2c(cc1I)-c1c(cc(OC)c(OC)c1OC)CC[C@@H]2NC(=O)CO>>C=C1COc2cc3c(cc21)-  
c1c(cc(OC)c(OC)c1OC)CC[C@@H]3NC(=O)CO  
188 CC(C)COC(=O)[C@@H](C)OC(=O)[C@@H](C/C=C1\CCN([14c]2[14cH][14cH][14cH][14cH][14c  
H]2)C1=O)Nc1cc(Cl)ccc1I>>CC(C)COC(=O)[C@@H](C)OC(=O)[C@H]1C/C=C2\CCN([14c]3[14c  
H][14cH][14cH][14cH][14cH]3)C2=O)c2ccc(Cl)cc2N1  
189 C=C[Si](C)(C)c1cccc1/C=C\c1cccc1Br>>C=C1c2cccc2/C=C\c2cccc2[Si]1(C)C  
190 C=Cc1c2c(cc(OC)c1C(OCc1cccc1)c1cccc(OC)c1I)COC(C)(C)O2>>C=C1c2c(OC)cccc2C(OCc2cccc  
c2)c2c(OC)cc3c(c21)OC(C)(C)OC3  
191 C=CC[C@H]1CCCCN1Cc1cccc1I>>C=C1C[C@H]2CCCCN2Cc2cccc21  
C=Cc1cccc(C(=O)O[C@H]2[C@H]3[C@](C)(C(=O)[C@H](OC(C)=O)C4=C(C)[C@@H](OC(=O)[C  
@H](O[Si](CC)(CC)CC)[C@@H](NC(=O)c5cccc(I)c5)c5cccc5)C[C@]2(O)C4(C)C)[C@@H](O[Si]  
192 (CC)(CC)CC)C[C@H]2OC[C@]23OC(C)=O)c1>>C=C1c2cccc(c2)C(=O)N[C@@H](c2cccc2)[C@  
@H](O[Si](CC)(CC)CC)C(=O)O[C@H]2C[C@@]3(O)[C@@H](OC(=O)c4cccc1c4)[C@H]1[C@](C)  
(C(=O)I[C@H](OC(C)=O)C(=C2C)C3(C)C)I[C@@H](O[Si](CC)(CC)CC)C1C@H12OC1C@121OC(C)  
C=CC(=O)OCCCCCCCCC(CCc1ccenc1)OC(=O)[C@@H]1CCCCN1C(=O)C(=O)c1cccc(I)c1>>O=C  
193 1/C=C/c2cccc(c2)C(=O)C(=O)N2CCCC[C@H]2C(=O)OC(CCc2ccenc2)CCCCCCCCO1  
194 C=CCc1c(OCc2cc(OC)ccc2Br)c(=O)n(C)c(=O)n1C>>COc1ccc2c(c1)COc1c(n(C)c(=O)n(C)c1=O)C/C  
195 C=CCc1c(N(CC)C(=O)Cc2cccc2I)ccc2oc(=O)ccc12>>C=C1Cc2c(ccc3oc(=O)ccc23)N(CC)C(=O)Cc  
2cccc21  
196 C=CCCN(Cc1cccc1)S(=O)(=O)c1cccc1Br>>C=C1CCN(Cc2cccc2)S(=O)(=O)c2cccc21  
197 C=CCc1cccc(F)c1N(C(=O)c1cccc1I)S(=O)(=O)c1ccc(C)cc1>>C=C1Cc2cccc(F)c2N(S(=O)(=O)c2cc  
c(C)cc2)C(=O)c2cccc21  
198 C=CC(C)c1c(OC(=O)c2cccc2I)c(=O)n(C)c(=O)n1C>>CC1/C=C\c2cccc2C(=O)Oc2c1n(C)c(=O)n(C  
)c2=O  
199 C=CCN(C)C(=O)C1(CC(=C)Br)CC/C=C\c2cccc2)C1=O>>C=C1CN(C)C(=O)C2(CC/C=C\c3cccc  
3)C2=O)CC1=C  
200 C=CCN(CCc1c(Br)n(C(=O)OCc2cccc2)c2cccc12)C(=O)C(F)(F)F>>C=C1CN(C(=O)C(F)(F)F)CCc2  
c1n(C(=O)OCc1cccc1)c1cccc21  
201 C=CCc1cc(Cl)c2ccenc2e1OCc1ccc(OC)cc1Br>>C=C1Cc2cc(Cl)c3ccenc3c2OCc2ccc(OC)cc21  
202 C=CCn1c(-c2ccc3ccc(OC)cc3c2Br)nc2cccc21>>C=C1Cn2c(nc3cccc32)-c2ccc3ccc(OC)cc3c21

203 C=C(C(=O)OC)N(CCCCCc1ccccc1I)C(=O)OC(C)(C)C>>COC(=O)/C1=C/c2ccccc2CCCCCN1C(=O)OC(C)(C)C  
204 C=CCCN(C(=O)c1ccccc1)c1ccccc1Br>>C=C1CCCN(C(=O)c2ccccc2)c2ccccc21  
205 C=CCC(Cc1nnn(CCCCCC)c1I)(C(=O)OCC)C(=O)OCC>>C=C1CC(C(=O)OCC)(C(=O)OCC)Cc2nnn(CCCCCC)c21  
206 C=CCC(O)c1cc2ccccc(CC)c2nc1Cl>>C=C1CC(O)c2cc3ccccc(CC)c3nc21  
207 C=CCN(C(=O)c1ccc2ccccc2c1Br)C(C(=O)NC(C)(C)C)c1ccccc1>>C=C1CN(C(C(=O)NC(C)(C)C)c2ccccc2)C(=O)c2ccc3ccccc3c21  
208 C=CCC(OCC(=C)Br)c1ccc(OC)cc1>>C=C1COC(c2ccc(OC)cc2)CC1=C  
209 C=CCOCc1nnn(Cc2ccccc2)c1I>>C=C1COCc2nnn(Cc3ccccc3)c21  
210 C=CCC(OCC(=C)Br)c1ccccc1>>C=C1COC(c2ccccc2)CC1=C  
211 C=C[C@H](Cn1c(Br)c(-c2ccc(C(=O)NCc3ccccc3)cc2)c2c(N)ncnc21)NC(=O)OC(C)(C)C>>C=C1c2c(-C=C[C@H]1C[C@H](OCc2ccccc2)[C@H](O[Si](C)(C)C(C)(C)C)C[C@H]1NCc1cc2c(cc1Br)OCO2>>C=C1c2cc3c(cc2CN[C@H]2C[C@H](O[Si](C)(C)C(C)(C)C)[C@H](OCc4ccccc4)C[C@H]12)OCO3  
212 C=C[Si](C)(C)c1ccc2ccccc2c1-c1c(Br)ccc2ccccc12>>C=C1c2ccc3ccccc3c2-C=CCCC[C@H](C=C)CN(c1ccccc1Br)S(=O)(=O)c1ccc(C)cc1>>C=CCCC[C@H]1CN(S(=O)(=O)c2ccc(C)cc2)c2ccccc2C1=C  
213 C=C[Si](C)(C)c1cc(C)c(C)cc1-c1cc(C)c(C)cc1Br>>C=C1c2cc(C)c(C)cc2-c2cc(C)c(C)cc2[Si]1(C)C  
214 C=CCOCc1nnn(Cc2ccsc2)c1I>>C=C1COCc2nnn(Cc3ccsc3)c21  
215 C=C[Si](C)(C)c1ccccc1-c1ccccc1Br>>C=C1c2ccccc2-c2ccccc2[Si]1(C)C  
216 C=CCN(Cc1ccc(F)cc1)Cc1cc2ccccc2nc1Cl>>C=C1CN(Cc2ccc(F)cc2)Cc2cc3ccccc3nc21  
217 C=CCO[C@H]1[C@H](Sc2ccccc2Br)O[C@H](COCc2ccccc2)[C@H](OCc2ccccc2)[C@H]1OCc1ccccc1>>C=C1CO[C@H]2[C@H](O[C@H](COCc3ccccc3)[C@H](OCc3ccccc3)[C@H]2OCc2ccccc2)Sc2ccccc21  
218 C=Cc1cc(C(C)C)ccc1N(C)C(=O)c1ccccc1I>>C=C1c2ccccc2C(=O)N(C)c2ccc(C(C)C)cc21  
219 C=CCN(Cc1ccccc1)Cc1cc2ccc(C)cc2nc1Cl>>C=C1CN(Cc2ccccc2)Cc2cc3ccc(C)cc3nc21  
220 C=Cc1ccc(S(=O)(=O)C(C)C)c(Nc2nc(Nc3cc(Br)c(N4CCN(C)CC4)cc3OC)nc2Cl)c1>>COc1cc(N2CCN(C)CC2)c2cc1Nc1ncc(Cl)c(n1)Nc1cc(ccc1S(=O)(=O)C(C)C)/C=C\2  
221 C=Cc1ccc([N+](=O)[O-])ccc1N(C)C(=O)c1ccccc1I>>C=C1c2ccccc2C(=O)N(C)c2ccc([N+](=O)[O-])C=C\2  
222 C=Cc1ccc(Nc2ncc(Cl)c(Nc3cc(Br)ccc3OC)n2)c1>>COc1ccc2cc1Nc1ncc(Cl)Nc1ccccc1)/C=C\2  
223 C=CCc1cc2c(cc1C/C(I)=C/CO)c1cc(OC)c(OC)c(OC)c1OCO2>>C=C1Cc2cc3c(cc2C(c2cc(OC)c(OC)c(OC)c2)/C1=C/CO)OCO3  
224 CC(=O)/C=C/Oc1ccccc1-c1ncccc1Br>>CC(=O)/C=C1/Oc2ccccc2-c2ncccc21  
225 C=CCN(/C=C\c1ccccc1Br)C(C)=O>>C=C1CN(C(C)=O)C=Cc2ccccc21  
226 C=CC(F)(F)Oc1ccc2ccccc2c1Br>>C=C1c2c(ccc3ccccc23)OC1(F)F  
227 C=CC(Cn1c(Br)c(-c2ccc(OCc3ccccc3)cc2)c2c(N)ncnc21)NC(=O)OC(C)(C)C>>C=C1c2c(-c3ccc(OCc4ccccc4)cc3)c3c(N)ncnc3n2CC1NC(=O)OC(C)(C)C  
228 C=CCCN(c1ccccc1[N+](=O)[O-])S(=O)(=O)c1ccccc1Br>>C=C1CCN(c2ccccc2[N+](=O)[O-])S(=O)(=O)c2ccccc21  
229 C=CCn1c(N(c2ccc(F)cc2I)S(=O)(=O)c2cccs2)cc2cc(Br)ccc21>>O=S(=O)(c1cccs1)N1c2ccc(F)cc2/C=C\2  
230 C=CCN(c1ccc2c(ccc(=O)n2CC)c1)S(=O)(=O)c1ccccc1Br>>C=C1CN(c2ccc3c(ccc(=O)n3CC)c2)S(=O)(=O)c2ccccc21  
231 C=CCOCc1cc(C)c2ccccc2c1Br>>C=C1CCOCc2cc(C)c3ccccc3c21  
232 C=CCc1c(OS(=O)(=O)c2ccccc2Br)ccc2ccccc12>>C=C1Cc2c(ccc3ccccc23)OS(=O)(=O)c2ccccc21  
233 C=CC(COc1ccc([N+](=O)[O-])c1I)NC(=O)OCc1ccccc1>>C=C1c2c(cccc2[N+](=O)[O-])OCC1NC(=O)OCc1ccccc1  
234 C=CC(C)(C)OC(CI)OCCCC>>C=C1CC(OCCCC)OC1(C)C  
235 COc1cc(/C=C/C(=O)Oc2ccccc2I)cc(OC)c1OC>>COc1cc(/C=C2/C(=O)Oc3ccccc32)cc(OC)c1OC  
236 C=CCc1cc(OC)ccc1N(C(=O)c1ccccc1I)S(=O)(=O)c1ccc(C)cc1>>C=C1Cc2cc(OC)ccc2N(S(=O)(=O)c2ccc(C)cc2)C(=O)c2ccccc21  
237 C=CCC(OC)C1=C(Br)c2ccccc3ccccc1c23>>C=C1CC(OC)C2=C1c1ccccc3ccccc2e13  
238 C=CCCOCC1=C(Br)c2ccccc(OC)c2CC1>>C=C1CCOCC2=C1c1ccccc(OC)c1CC2  
239 C=Cc1ccc(OC)c(Nc2nc(Nc3ccc(N4CCOCC4)c(Br)c3)nc2Cl)c1>>COc1ccc2cc1Nc1nc(ncc1Cl)Nc1ccc(N3CCOCC3)c(c1)/C=C\2  
240 C=C[C@H](Cn1c(Br)c(-c2ccc(C(=O)Nc3ccccc3)cc2)c2c(N)ncnc21)NC(=O)OC(C)(C)C>>C=C1c2c(-C=CCC1c2ccccc2CCN1CC(=C)I>>C=C1CC2c3ccccc3CCN2CC1=C  
241  
242  
243

244 C=C[C@@H](OCc1ccc(OC)cc1)[C@H](CCCC)OC(=O)c1c(C)cccc1Oe1ccc2c(c1I)COC(C)(C)O2>>  
CCCC[C@@H]1OC(=O)c2c(C)cccc2Oc2ccc3c(c2/C=C/[C@H]1OCc1ccc(OC)cc1)COC(C)(C)O3  
245 O=C(/C=C/c1cccc1)O/C(=C\I)c1ccc(Br)cc1>>O=C1OC(c2ccc(Br)cc2)=C/C1=C\c1cccc1  
246 C=CCN(Cc1cc2cccc2nc1Cl)c1ccc(C)cc1>>C=C1CN(c2ccc(C)cc2)Cc2cc3cccc3nc21  
247 C=CCCN1c2c(Br)cc([N+](=O)[O-]  
248 ]cc2C(=O)N2C1C(C)(C)OC2(C)C>>C=C1CCN2c3c1cc([N+](=O)[O-]  
249 COC(=O)/C=C/Oc1cccc1-c1csccl1Br>>COC(=O)/C=C1/Oc2cccc2-c2cscc21  
250 C=CCCC[C@@H](C=C)COc1cccc1Br>>C=CCCC[C@@H]1COc2cccc2C1=C  
251 C=CC(=O)NC(CC(=O)N[C@@H](Cc1cccc1)C(=O)N[C@@H](CC(C)C)C(=O)NCc1cccc(Br)c1)c1c  
252 cccc1>>CC(C)C[C@@H]1NC(=O)[C@H](Cc2cccc2)NC(=O)CC(c2cccc2)NC(=O)/C=C/c2cccc(c2)  
253 C=CCN(CCI)S(=O)(=O)c1ccc(C)cc1>>C=C1CCN(S(=O)(=O)c2ccc(C)cc2)C1  
254 C=CCCN(Cc1cccn1Br)S(=O)(=O)c1cccc1>>C=C1CCN(S(=O)(=O)c2cccc2)Cc2cccn1  
255 C=CCn1c(N(c2ccc(F)cc2I)S(=O)(=O)c2cccs2)cc2cccc21>>O=S(=O)(c1cccs1)N1c2ccc(F)cc2/C=C\C  
256 n2c1cc1cccc12  
257 C=CCC(O)c1cc2cc(Br)ccc2nc1Cl>>C=C1CC(O)c2cc3cc(Br)ccc3nc21  
258 COc1cc(Br)c(-c2cccc2O/C=C/C(C)=O)cc1OC>>COc1cc2c(cc1OC)-c1cccc1O/C2=C/C(C)=O  
259 C=C[C@H]1O[C@@H]2OC(C)(C)O[C@@H]2[C@@H]1N(Cc1cccc1Br)S(=O)(=O)c1ccc(C)cc1>>  
260 C=C1c2cccc2CN(S(=O)(=O)c2ccc(C)cc2)[C@@H]2[C@@H]1O[C@@H]1OC(C)(C)O[C@@H]12  
261 C=C[C@H](C)OCc1c(Br)ccc(OCc2cccc2)c1OCc1cccc1>>C=C1c2ccc(OCc3cccc3)c(OCc3cccc  
262 3)c2CO[C@@H]1C  
263 COc1ccc(/C=C/C(=O)O/C(=C\I)c2cccc2)cc1>>COc1ccc(/C=C2\C=C(c3cccc3)OC2=O)cc1  
264 C=CC1(OCCL)CN(C(=O)OC(C)(C)C)C1>>C=C1CCOC12CN(C(=O)OC(C)(C)C)C2  
265 C=C[C@@H](C[C@H](C/C(=C/CO)OS(=O)(=O)C(F)(F)F)O[Si](C)(C)C(C)(C)C)O[Si](C)(C)C(C)(C  
266 )C>>C=C1/C(=C\CO)C[C@H](O[Si](C)(C)C(C)(C)C)C[C@H]1O[Si](C)(C)C(C)(C)C  
267 C=Cc1cccn1N(Cc1cc(Br)ccc1I)C(C)=O>>CC(=O)N1Cc2cc(Br)ccc2/C=C\c2cccn1  
268 C=CCC(CC(=C)Br)(C(=O)OCC)C(=O)OCC>>C=C1CC(C(=O)OCC)(C(=O)OCC)CC1=C  
269 C=C[C@H](Cn1c(Br)c(-  
270 c2ccc(Oc3ccc(C(F)(F)F)cc3)cc2)c2c(N)ncnc21)NC(=O)OC(C)(C)C>>C=C1c2c(-  
271 c3ccc(Oc4ccc(C(F)(F)F)cc4)cc3)c3c(N)ncnc3n2C[C@H]1NC(=O)OC(C)(C)C  
272 C=CCN(C(=O)c1ccc2cccc2c1Br)C(C(=O)NC1CCCC1)c1cccc1>>C=C1CN(C(C(=O)NC2CCCC  
273 2)c2cccc2)C(=O)c2ccc3cccc3c21  
274 C=Cc1cc(C)ccc1OS(=O)(=O)c1cccc1Br>>Cc1ccc2c(c1)/C=C\c1cccc1S(=O)(=O)O2  
275 C=CCCC(O)C1=C(Br)CCC1>>C=C1CCCC(O)C2=C1CCC2  
276 C=CC(C)(C)[C@H](N[S@@](=O)C(C)(C)C)c1cccc1Br>>C=C1c2cccc2[C@H](N[S@@](=O)C(  
277 C)(C)C)C1(C)C  
278 O=C(/C=C/Oc1cccc1-c1cccc1Br)c1cccc1>>O=C(/C=C1/Oc2cccc2-c2cccc21)c1cccc1  
279 C=CC(CCC1(C)OCCO1)C(Cc1cccc1Br)(C(=O)OC)C(=O)OC>>C=C1c2cccc2CC(C(=O)OC)(C(=O)  
280 OC)C1CCC1(C)OCCO1  
281 C=CCOCC1=C(Br)c2ccc(OC)cc2CC1>>C=C1COCC2=C1c1ccc(OC)cc1CC2  
282 C=C[C@@H](O)CC[C@@]1(C)OC(I)=C(C(=O)OC)[C@H]2[C@H]3[C@@H](C[C@H]21)C(C)=C[C  
283 @H]1[C@@H](O[Si](C)(C)C)(C(C)C)C(C)C)[C@H](C)[C@@H](O[Si](C)(C)C(C)(C)C)[C@@H]13>  
284 >C=C1C2=C(C(=O)OC)[C@H]3[C@H]4[C@@H](C[C@H]3[C@](C)(CC[C@@H]1O)O2)C(C)=C[C  
285 @H]1[C@@H](O[Si](C)(C)C)(C(C)C)C(C)C)[C@H](C)[C@@H](O[Si](C)(C)C(C)(C)C)[C@@H]14  
286 C=Cc1ccc(C(C)(C)C)ccc1OCc1cc(OC)ccc1Br>>COc1ccc2c(c1)COc1ccc(C(C)(C)C)cc1/C=C\2  
287 C=CCCN(Cc1cc2c(cc1Br)OCO2)C(=O)OC>>C=C1CCN(C(=O)OC)Cc2cc3c(cc21)OCO3  
288 C=CC[C@@H]1C(C)(C)CCC[C@@]1(O)Cc1cc(OC)ccc1Br>>C=C1C[C@@H]2C(C)(C)CCC[C@@]  
289 2(O)Cc2cc(OC)ccc21  
290 C=CC[C@H]1CC[C@@H]2CC(=O)O[C@]12CI>>C=C1C[C@H]2CC[C@@H]3CC(=O)O[C@]23C1  
291 C=CCC(O)c1cc2cccc(C)c2nc1Cl>>C=C1CC(O)c2cc3cccc(C)c3nc21  
292 CC(=O)/C=C/Oc1cccc1-c1cccc1Br>>CC(=O)/C=C1/Oc2cccc2-c2cccc21  
293 C=C[C@H]1O[C@@H]2OC(C)(C)O[C@@H]2[C@@H]1N(Cc1cccc1Br)C(=O)OC>>C=C1c2cccc  
294 2CN(C(=O)OC)[C@@H]2[C@@H]1O[C@@H]1OC(C)(C)O[C@@H]12  
295 C=C[C@@H](O[Si](C)(C)C(C)(C)C)[C@@H](OCCCO[Si](C)(C)C(C)(C)C)[C@@H](C/C(I)=C/CO)  
296 O[Si](C)(C)C(C)(C)C>>C=C1/C(=C\CO)C[C@H](O[Si](C)(C)C(C)(C)C)[C@H](OCCCO[Si](C)(C  
297 )C(C)(C)C)[C@@H]1O[Si](C)(C)C(C)(C)C  
298 C=CCN(C)C(=O)C1(CC(=C)Br)CS/C(=C\c2cccc2)C1=O>>C=C1CN(C)C(=O)C2(CS/C(=C\c3cccc3  
299 )C2=O)CC1=C  
300 C=CC(=O)OCCCCC(=O)CCCC(CCc1cccn1)OC(=O)[C@@H]1CCCCN1C(=O)C(=O)c1cccc(I)c1>>  
301 O=C1CCCCOC(=O)/C=C/c2cccc(c2)C(=O)C(=O)N2CCCC[C@H]2C(=O)OC(CCc2cccn2)CCC1  
302 C=CCCCC(=O)N(Cc1cccc1)c1cccc1I>>C=C1CCCC(=O)N(Cc2cccc2)c2cccc21  
303 C=CCc1ccc2cccn2c1OCc1cccc1Br>>C=C1Cc2ccc3cccn3c2OCc2cccc21

284 C=Cc1ccccc1N(C)C(=O)c1ccccc1I>>C=C1c2ccccc2C(=O)N(C)c2ccccc21  
 285 C=CCc1c(OCc2ccccc2Br)c(=O)n(C)c(=O)n1C>>Cn1c2c(c(=O)n(C)c1=O)OCc1ccccc1/C=C\C2  
 286 C=CCOCc1ccc2cc(OC)ccc2c1Br>>C=C1COCc2ccc3ccc(OC)ccc3c21  
 287 C=CCc1c(OCc2ccccc2Br)c2ccccc2n(-c2ccccc2)c1=O>>C=C1Cc2c(c3ccccc3n(-  
 c3ccccc3)c2=O)OCc2ccccc21  
 288 C=Cc1cc(OC)ccc1OCc1ccccc1Br>>COc1ccc2c(c1)/C=C\c1ccccc1CO2  
 289 C=CC(CC)(CC)C(=O)Nc1ccc(C)cc1Br>>C=C1c2cc(C)ccc2NC(=O)C1(CC)CC  
 290 C=C[C@@H]1CC(C(=O)OC)(C(=O)OC)[C@H](c2ccco2)N(c2ccccc2I)O1>>C=C1c2ccccc2N2O[C@  
 H]1CC(C(=O)OC)(C(=O)OC)[C@@H]2c1ccc1  
 291 Cc1ccc(/C=C/C(=O)O/C(=C\I)C2CC2)cc1>>Cc1ccc(/C=C2\C=C(C3CC3)OC2=O)cc1  
 292 C=CC(OCC(=C)Br)c1ccc2c(ccn2COCC[Si](C)(C)C)c1>>C=C1COC(c2ccc3c(ccn3COCC[Si](C)(C)C)  
 c2)C1=C  
 C=CCCCC(O[Si](C(C)C)(C(C)C)(C(C)C)c1nc(-  
 293 c2cn(S(=O)(=O)c3ccc(C)cc3)c3ccccc23)c(OC)nc1Br>>C=C1CCCC(O[Si](C(C)C)(C(C)C)(C(C)C)c2nc  
 (-c3cn(S(=O)(=O)c4ccc(C)cc4)c4ccccc34)c(OC)nc21  
 294 C=C[C@H]1OC(C)(C)O[C@@H]1[C@@H](C/C(I)=C/CO)O[Si](C)(C)C(C)(C)C>>C=C1/C(=C\CO)  
 C[C@@H](O[Si](C)(C)C(C)(C)C)[C@H]2OC(C)(C)O[C@H]12  
 295 C=CCn1c(N(c2ccc(Br)cc2I)S(=O)(=O)c2cccs2)cc2cc(C)ccc21>>Cc1ccc2c(c1)cc1n2C/C=C\c2cc(Br)c  
 cc2N1S(=O)(=O)c1cccs1  
 296 C=CCOC(C)c1c(Br)c(OC)c2ccccc2c1OC>>C=C1COC(C)c2c1c(OC)c1ccccc1c2OC  
 297 C=CCCN(C)c1ccccc1I>>C=C1CCN(C)c2ccccc21  
 298 C=CCOCc1nnn(Cc2ccc(OC)cc2)c1I>>C=C1COCc2nnn(Cc3ccc(OC)cc3)c21  
 299 C=CCC(Cc1ccccc1)(Nc1ccccc1Br)C(=O)OC>>C=C1CC(Cc2ccccc2)(C(=O)OC)Nc2ccccc21  
 C=C[C@H]1CC(C(=O)OC)(C(=O)OC)[C@@H](c2cn(S(=O)(=O)c3ccc(C)cc3)c3ccccc23)N(c2ccccc2  
 300 I)O1>>C=C1c2ccccc2N2O[C@@H]1CC(C(=O)OC)(C(=O)OC)[C@H]2c1cn(S(=O)(=O)c2ccc(C)cc2)  
 c2ccccc12  
 C=C[C@@H](Cn1c(Br)c(-  
 301 c2ccc(Oc3ccc(C(C)(C)C)cc3)cc2)c2c(N)ncnc21)NC(=O)OC(C)(C)C>>C=C1c2c(-  
 c3ccc(Oc4ccc(C(C)(C)C)cc4)cc3)c3c(N)ncnc3n2C[C@H]1NC(=O)OC(C)(C)C  
 302 C=CC(C)(C)C1CCC(=O)N1CC(=C)Br>>C=C1CN2C(=O)CCC2C(C)(C)C1=C  
 303 C=CCC(OCC(=C)Br)c1cccs1>>C=C1COC(c2cccs2)CC1=C  
 304 C=CCC(NCc1cc(C)ccc1Br)(C(=O)OC)C(C)C>>C=C1CC(C(=O)OC)(C(C)C)NCc2ccc(C)ccc21  
 305 C=Cc1c(OCc2ccccc2Br)ccc2ccccc12>>C1=C\c2c(ccc3ccccc23)OCc2ccccc2/1  
 306 C=CCCC[C@@]1(C)C(OS(=O)(=O)C(F)(F)F)=CC[C@@H]1C(C)C>>C=C1CCC[C@@]2(C)C1=CC  
 [C@@H]2C(C)C  
 307 C=CCOC(c1ccccc1)c1c(Br)c(OC)c2ccccc2c1OC>>C=C1COC(c2ccccc2)c2c1c(OC)c1ccccc1c2OC  
 308 C=Cc1cc(CC)ccc1N(C)C(=O)c1cc(OC)ccc1I>>C=C1c2ccc(OC)cc2C(=O)N(C)c2ccc(CC)cc21  
 309 C=CCN(CC1=C(Br)CCC1)c1cccc2ccccc12>>C=C1CN(c2ccc3ccccc23)CC2=C1CCC2  
 310 C=CCN(CC1=C(Br)c2ccccc2CC1)c1ccc(Cl)cc1>>C=C1CN(c2ccc(Cl)cc2)CC2=C1c1ccccc1CC2  
 311 C=CC(=O)NC[C@@H](OC)[C@H](OC)c1ccccc1NC(=O)[C@H](C)NC(=O)c1cccc(Br)c1>>CO[C@  
 H]1CNC(=O)/C=C/c2ccc(c2)C(=O)N[C@@H](C)C(=O)Nc2ccccc2[C@H]1OC  
 312 C=CCC(O)c1cc2ccc(C)cc2nc1Cl>>C=C1CC(O)c2cc3ccc(C)cc3nc21  
 313 C=C[C@@H](O[Si](C)(C)C(C)(C)C)[C@@H](c1ccccc1)[C@@H](C/C(I)=C/CO)O[Si](C)(C)C(C)(C)  
 C>>C=C1/C(=C\CO)C[C@@H](O[Si](C)(C)C(C)(C)C)[C@H](c2ccccc2)[C@@H]1O[Si](C)(C)C(C)(C)  
 C=C[C@@H](Cn1c(Br)c(-  
 314 c2ccc(C(=O)N[C@@H](COC)c3ccccc3)cc2)c2c(N)ncnc21)NC(=O)OC(C)(C)C>>C=C1c2c(-  
 c3ccc(C(=O)N[C@@H](COC)c4ccccc4)cc3)c3c(N)ncnc3n2C[C@H]1NC(=O)OC(C)(C)C  
 315 C=CCCOc1ccccc1Br>>C=C1CCOc2ccccc21  
 C=C[C@@H](Cn1c(Br)c(-  
 316 c2ccc(C(=O)Nc3cc(C(F)(F)F)ccn3)cc2)c2c(N)ncnc21)NC(=O)OC(C)(C)C>>C=C1c2c(-  
 c3ccc(C(=O)Nc4cc(C(F)(F)F)ccn4)cc3)c3c(N)ncnc3n2C[C@H]1NC(=O)OC(C)(C)C  
 317 C=CCCOc1ccc2ccccc2c1Br>>C=C1CCOCc2ccc3ccccc3c21  
 318 C=CCC(C=C(C)C)c1cc(C)c(OC)cc1OS(=O)(=O)C(F)(F)F>>C=C1CC(C=C(C)C)c2cc(C)c(OC)cc21  
 319 C=CC(C)c1c(OCc2cc(OC)ccc2Br)c(=O)oc2ccccc12>>COc1ccc2c(c1)COc1c(c3ccccc3oc1=O)C(C)/C  
 320 C=CC(=O)NC[C@@H](OC)[C@H](OC)c1ccccc1NC(=O)[C@@H](NC(=O)c1cccc(Br)c1)C(C)C>>C  
 O[C@@H]1CNC(=O)/C=C/c2ccc(c2)C(=O)N[C@@H](C(C)C)C(=O)Nc2ccccc2[C@H]1OC  
 321 C=C[C@@H](O[Si](C)(C)C(C)(C)C)[C@@H](Cc1ccccc1)[C@@H](C/C(I)=C/CO)O[Si](C)(C)C(C)(C)  
 C>>C=C1/C(=C\CO)C[C@@H](O[Si](C)(C)C(C)(C)C)[C@H](Cc2ccccc2)[C@@H]1O[Si](C)(C)C  
 322 C[C@@H](OC(=O)[C@@H](C/C=C1\CCN(c2ccccc2)C1=O)Nc1cc(Cl)ccc1I)C(=O)OC(C)(C)C>>C[  
 C@@H](OC(=O)[C@@H]1C/C(=C2\CCN(c3ccccc3)C2=O)c2ccc(Cl)cc2N1)C(=O)OC(C)(C)C  
 323 C=CCc1c(OCc2cc(OC)ccc2Br)cc(C)n(C)c1=O>>C=C1Cc2c(cc(C)n(C)c2=O)OCc2cc(OC)ccc21



324 C=CCn1c(N(c2ccc(Cl)cc2)S(=O)(=O)c2ccc(C)cc2)cc2cc(C)ccc21>>Cc1ccc(S(=O)(=O)N2c3ccc(Cl)cc3/C=C\Cn3c2cc2cc(C)ccc23)cc1  
 325 C=CCN(CCI)S(=O)(=O)c1cccs1>>C=C1CCN(S(=O)(=O)c2cccs2)C1  
 326 C=CC(F)(F)Oc1ccc(OC)cc1Br>>C=C1c2cc(OC)ccc2OC1(F)F  
 327 C=CCCCC(O)C=C(Br)c1cccc(C)c1>>C=C1CCCC(O)C=C1c1cccc(C)c1  
 328 C=CCOCC1=C(Br)c2ccccc2CC1>>C=C1CCOCC2=C1c1ccccc1CC2  
 329 C=CCN(C(=O)c1ccccc1Br)C(C)C>>C=C1CN(C(C)C)C(=O)c2ccccc21  
 330 C=C[C@H]1CC(C(=O)OC)(C(=O)OC)[C@H](c2ccc3c(c2)OCO3)N(c2ccccc2)O1>>C=C1c2ccccc2N2O[C@H]1CC(C(=O)OC)(C(=O)OC)[C@H]2c1ccc2c(c1)OCO2  
 331 C=CCC(O)c1cc2ccccc2nc1Cl>>C=C1CC(O)c2cc3ccccc3nc21  
 332 C=CCN(C(=O)c1ccc2ccccc2c1Br)C(C(=O)NC1CCCCC1)c1ccc2ccccc2c1>>C=C1CN(C(C(=O)NC2CCCC2)c2ccc3ccccc3c2)C(=O)c2ccc3ccccc3c21  
 333 C=CC1CCCN1Cc1ccccc1I>>C=C1c2ccccc2CN2CCCC12  
 334 C=CCOC(O[Si](C)(C)C(C)(C)C(I)CCCCCCCC>>C=C1COC(O[Si](C)(C)C(C)(C)C)C1CCCCCCCC  
 335 C=C(C)CN1C(=O)[C@H](Oc2ccccc2)[C@H]1[C@H](CC(=C)Br)OC(C)=O>>C=C1/C=C(/C)CN2C(=O)[C@H](Oc3ccccc3)[C@H]2[C@H](OC(C)=O)C1  
 336 C=CCOC1O[C@H](COC(C)=O)[C@H](OC(C)=O)C=C1I>>C=C1COC2O[C@H](COC(C)=O)[C@H](OC(C)=O)C=C12  
 337 C=CCc1cc(C)ccc1N(Cc1cc(OC)ccc1Br)S(=O)(=O)c1ccc(C)cc1>>C=C1Cc2cc(C)ccc2N(S(=O)(=O)c2ccc(C)cc2)Cc2cc(OC)ccc21  
 338 C=CCC1c2cc(OC)c(OC)cc2CCN1Cc1ccccc1Br>>C=C1CC2c3cc(OC)c(OC)cc3CCN2Cc2ccccc21  
 339 C=CCOCc1nnn(Cc2ccc(C)cc2)c1I>>C=C1COCc2nnn(Cc3ccc(C)cc3)c21  
 340 C=CCN(c1ccc2c(c1)OCO2)S(=O)(=O)c1ccccc1Br>>C=C1CN(c2ccc3c(c2)OCO3)S(=O)(=O)c2ccccc2  
 341 C=C(C(=O)OCC)c1ccccc1CN(C(=O)C(F)(F)F)c1ccccc1I>>CCOC(=O)/C1=C/c2ccccc2N(C(=O)C(F)(F)F)Cc2ccccc21  
 342 O=C(/C=C/c1cccs1)O/C(=C\I)c1ccccc1>>O=C1OC(c2ccccc2)=C/C1=C\c1cccs1  
 343 C=CCn1c(N(c2ccc(C)cc2)S(=O)(=O)c2cccs2)cc2ccccc21>>Cc1ccc2c(c1)/C=C\Cn1c(cc3ccccc3)N2S(=O)(=O)c1cccs1  
 344 C=CCN(Cc1ccc(F)cc1)Cc1cc2ccc(C)cc2nc1Cl>>C=C1CN(Cc2ccc(F)cc2)Cc2cc3ccc(C)cc3nc21  
 345 C=Cc1cccc(O)c1C(=O)Oc1cccc(C(CCCCC)OC)c1I>>C=C1c2cccc(O)c2C(=O)Oc2cccc(C(CCCCC)O)C)c21  
 346 C=CCCC(CBr)CCCCCCCC>>C=C1CCC(CCCCCCCC)C1  
 347 C=CCc1c(OC(=O)c2ccccc2)c(=O)n(C)c(=O)n1C>>Cn1c2c(c(=O)n(C)c1=O)OC(=O)c1ccccc1/C=C\C  
 348 C=CCN(Cc1cc2ccc(C)cc2nc1Cl)c1ccc(C)cc1>>C=C1CN(c2ccc(C)cc2)Cc2cc3ccc(C)cc3nc21  
 349 C=CCc1ccc2ccccc2c1OCc1cc(OC)ccc1Br>>C=C1Cc2ccc3ccccc3c2OCc2cc(OC)ccc21  
 350 C=CCc1cccc(F)c1N(Cc1ccccc1Br)S(=O)(=O)c1ccc(C)cc1>>C=C1Cc2cccc(F)c2N(S(=O)(=O)c2ccc(C)cc2)Cc2ccccc21  
 351 C=C[C@H](O[Si](C)(C)C(C)(C)C)[C@H](CCCO[Si](C)(C)C(C)(C)C)[C@H](CC(I)=CCO)O[S  
 352 i](C)(C)C(C)(C)C>>C=C1C(=CCO)C[C@H](O[Si](C)(C)C(C)(C)C)[C@H](CCCO[Si](C)(C)C(C)(C)C)[C@H]1O[Si](C)(C)C(C)(C)C  
 353 C=CCC(C(=O)OCC)N(C)c1ccccc1Br>>C=C1CC(C(=O)OCC)N(C)c2ccccc21  
 354 C=CCc1ccc2ccccc2c1OCc1ccccc1Br>>C=C1Cc2ccc3ccccc3c2OCc2ccccc21  
 355 O=C(/C=C/c1ccccc1)O/C(=C\I)c1ccccc1>>O=C1OC(c2ccccc2)=C/C1=C\c1ccccc1  
 356 C=CCN(c1ccc2oc(=O)cc(OC)c2c1)S(=O)(=O)c1ccccc1Br>>C=C1CN(c2ccc3oc(=O)cc(OC)c3c2)S(=O)(=O)c2ccccc21  
 357 C=C[Si](C)(C)c1ccccc1/C=C\c1ccc(C)cc1Br>>C=C1c2cc(C)ccc2/C=C\c2ccccc2[Si]1(C)C  
 358 C=CCN(CCc1cc(Cl)ccc1)C(=O)C(F)(F)F>>C=C1CN(C(=O)C(F)(F)F)CCc2cc(Cl)ccc21  
 359 C=CCCCOc1ccccc1Br>>C=C1CCCOc2ccccc21  
 360 C=CCC(CCCl)CCCCCCCC>>C=C1CCC(CCCCCCCC)C1  
 361 C=CCC(O)c1cc2ccc(OC)cc2nc1Cl>>C=C1CC(O)c2cc3ccc(OC)cc3nc21  
 362 C=CCN(c1ccc2oc(=O)ccc2c1)S(=O)(=O)c1ccccc1Br>>C=C1CN(c2ccc3oc(=O)ccc3c2)S(=O)(=O)c2ccccc21  
 363 COC(=O)/C=C/Oc1ccc(F)cc1-c1ccccc1Br>>COC(=O)/C=C1/Oc2ccc(F)cc2-c2ccccc21  
 364 C=C(C)CC(OC(=C)Br)c1ccccc1>>C=C1C=C(C)CC(c2ccccc2)OC1  
 365 C=Cc1cc(Cl)ccc1OS(=O)(=O)c1ccccc1Br>>O=S1(=O)Oc2ccc(Cl)cc2/C=C\c2ccccc21  
 366 C=C[C@H](O[Si](C)(C)C(C)(C)C)[C@H](OCCCC[Si](c1ccccc1)(c1ccccc1)C(C)(C)C)[C@H](C/C(I)=C/CO)O[Si](C)(C)C(C)(C)C>>C=C1/C=C\CO)C[C@H](O[Si](C)(C)C(C)(C)C)[C@H](OCCC  
 367 O[Si](c2ccccc2)(c2ccccc2)C(C)(C)C)[C@H]1O[Si](C)(C)C(C)(C)C  
 368 C=Cc1ccc(OC)c(Nc2nc(Nc3ccc(N4CCN(C)CC4)c(Br)c3)nc2Cl)c1>>COc1ccc2cc1Nc1nc(ncc1Cl)Nc1ccc(N3CCN(C)CC3)c(c1)/C=C\2  
 369 C=CCC(NCc1cc(F)ccc1Br)C(=O)OC>>C=C1CC(C(=O)OC)NCc2cc(F)ccc21

368 C=CCN(Cc1cccc1)Cc1cc2cccc(C)c2nc1Cl>>C=C1CN(Cc2cccc2)Cc2cc3cccc(C)c3nc21  
369 C=Cc1c(OS(=O)(=O)c2cccc2Br)ccc2cccc12>>O=S1(=O)Oc2ccc3cccc3c2/C=C\c2cccc21  
370 C=CCC(NCc1ccc(C)cc1Br)(C(=O)OC)C(C)C>>C=C1CC(C(=O)OC)(C(C)C)NCc2ccc(C)cc21  
371 C=CCc1c(N(C)C(=O)Cc2cccc2I)ccc2oc(=O)ccc12>>C=C1Cc2c(ccc3oc(=O)ccc23)N(C)C(=O)Cc2cc  
ccc21  
372 C=CCc1c(OCc2cccc2I)ccc2c1ccc(=O)n2C>>C=C1Cc2c(ccc3c2ccc(=O)n3C)OCc2cccc21  
373 C=CCCN(c1cccc1N1CCOCC1)S(=O)(=O)c1cccc1Br>>C=C1CCN(c2cccc2N2CCOCC2)S(=O)(=O)  
)c2cccc21  
374 C=CCC(Nc1cccc1I)c1cccc1>>C=C1CC(c2cccc2)Nc2cccc21  
375 C=CCCCNc1cccc1Cl>>C=C1CCCNc2cccc21  
376 C=CCCN([C@@H](CC(C)C)C(=O)OC)S(=O)(=O)c1cccc1Br>>C=C1CCN([C@@H](CC(C)C)C(=O)  
)OC)S(=O)(=O)c2cccc21  
377 C=CCC[C@@H](O[Si](C)(C)C(C)(C)C)c1nnn(Cc2ccc(OC)cc2)c1I>>C=C1CC[C@@H](O[Si](C)(C)  
C(C)(C)C)c2nnn(Cc3ccc(OC)cc3)c21  
378 C=CCc1c(N(CC)C(=O)Cc2cccc2I)ccc2c1ccc(=O)n2C>>C=C1Cc2c(ccc3c2ccc(=O)n3C)N(CC)C(=O)  
Cc2cccc21  
379 C=Cc1cccc(Nc2nc(Nc3ccc(N4CCOCC4)c(Br)c3)nc2Cl)c1>>Clc1cnc2nc1Nc1cccc(c1)/C=C\c1cc(ccc  
1N1CCOCC1)N2  
380 C=CC(F)(F)Oc1ccc(C)cc1Br>>C=C1c2cc(C)ccc2OC1(F)F  
381 C=Cc1cc(CC)ccc1N(C)C(=O)c1cccc1I>>C=C1c2cccc2C(=O)N(C)c2ccc(CC)cc21  
382 C=CCCN(C(=O)c1cccc1)c1cccc1I>>C=C1CCCN(C(=O)c2cccc2)c2cccc21  
383 C=CCC(C1=C(OS(=O)(=O)C(F)(F)F)OCC1)c1ccc(OC)cc1>>C=C1CC(c2ccc(OC)cc2)C2=C1OCCC  
384 C=CCC(O)c1cc(-c2cccc2)enc1Cl>>C=C1CC(O)c2cc(-c3cccc3)enc21  
385 C=CCN(C(=O)c1ccc2cccc2c1Br)C(C(=O)NC1CCCCC1)c1ccc(OC)c(OC)c1>>C=C1CN(C(C(=O)NC  
2CCCCC2)c2ccc(OC)c(OC)c2)C(=O)c2ccc3cccc3c21  
386 C=CCn1c(N(c2cccc2I)S(=O)(=O)c2cccs2)cc2cc(C)ccc21>>Cc1ccc2c(c1)cc1n2C/C=C\c2cccc2N1S(  
=O)(=O)c1cccs1  
387 C=C[C@@H]1CC(C(=O)OC)(C(=O)OC)[C@@H](c2cc(OC)c(OC)c(OC)c2)N(c2cccc2I)O1>>C=C1c2  
cccc2N2O[C@@H]1CC(C(=O)OC)(C(=O)OC)[C@@H]2c1cc(OC)c(OC)c(OC)c1  
388 Cc1ccc(/C=C/C(=O)O/C(=C\I)c2cccc2)cc1>>Cc1ccc(/C=C2\C=C(c3cccc3)OC2=O)cc1  
389 C=CCC(Oc1ccc(Cl)cc1Br)C(=O)OCC>>C=C1CC(C(=O)OCC)Oc2ccc(Cl)cc21  
390 C=CCc1cc2c(C)cc(=O)oc2c(C)c1OCc1cccc1I>>C=C1Cc2cc3c(C)cc(=O)oc3c(C)c2OCc2cccc21  
391 C=CCN(Cc1ccc(OC)cc1)Cc1cc2ccc(C)cc2nc1Cl>>C=C1CN(Cc2ccc(OC)cc2)Cc2cc3ccc(C)cc3nc21  
392 O=C(/C=C/C/c1cccs1)O/C(=C\I)c1ccc(Br)cc1>>O=C1OC(c2ccc(Br)cc2)=C/C1=C\c1cccs1  
393 C=CCOCc1nnn(CCCCCC)c1I>>C=C1COCc2nnn(CCCCCC)c21  
394 C=Cc1cccc(Nc2nc(Nc3ccc(OCCN4CCCC4)c(Br)c3)nc2Cl)c1>>Clc1cnc2nc1Nc1cccc(c1)/C=C\c1cc(  
ccc1OCCN1CCCC1)N2  
395 C=CCC(CC(=C)Br)(C(=O)OCC)C(=O)OCC>>C=C1C=CCC(C(=O)OCC)(C(=O)OCC)C1  
396 C=CC(C)c1c(OS(=O)(=O)c2cccc2Br)ccc2cccc12>>C=C1c2cccc2S(=O)(=O)Oc2ccc3cccc3c2C1C  
397 C=CCC(C1=C(OS(=O)(=O)C(F)(F)F)CCC1)c1ccc(OC)cc1>>C=C1CC(c2ccc(OC)cc2)C2=C1CCC2  
398 C=CCO[C@@H]1[C@@H](OCc2cccc2)[C@@H](COCc2cccc2)O[C@@H]1Sc1cccc1Br>>C=C1  
CO[C@@H]2[C@@H](OCc3cccc3)[C@@H](COCc3cccc3)O[C@@H]2Sc2cccc21  
399 C=CCc1c(N(CC)C(=O)c2cccc2I)ccc2c1ccc(=O)n2CC>>C=C1Cc2c(ccc3c2ccc(=O)n3CC)N(CC)C(=  
O)c2cccc21  
400 C=C[C@@H]1[C@@H]2[C@@H](CN1c1cc(C(=O)OC)cc(OCc3cccc3)c1I)N2C(=O)OC(C)(C)C>>C=C1  
c2c(OCc3cccc3)cc(C(=O)OC)cc2N2C[C@@H]3[C@@H]([C@@H]12)N3C(=O)OC(C)(C)C  
C=C[C@@H]1C[C@@H](OCc2cccc2)[C@@H](O[Si](C)(C)C(C)(C)C)C[C@@H]1N(Cc1cc2c(cc1  
401 Br)OCO2)C(C)=O>>C=C1c2cc3c(cc2CN(C(C)=O)[C@@H]2C[C@@H](O[Si](C)(C)C(C)(C)C)[C@@H](O  
Cc4cccc4)C[C@@H]12)OCO3  
402 COC(=O)/C=C/Oc1cccc1-c1cccc1I>>COC(=O)/C=C1/Oc2cccc2-c2cccc21  
403 C=CCn1c(N(c2ccc(F)cc2I)S(=O)(=O)c2ccc(C)cc2)cc2cc(Br)ccc21>>Cc1ccc(S(=O)(=O)N2c3ccc(F)cc  
3/C=C\N3c2cc2cc(Br)ccc23)cc1  
404 C=Cc1cccc1CO[Si](Cl)(C(C)C)C(C)C>>CC(C)[Si]1(C(C)C)C/C=C\c2cccc2CO1  
405 C=CCN(Cc1cccc1)Cc1cc2cccc2nc1Cl>>C=C1CN(Cc2cccc2)Cc2cc3cccc3nc21  
406 C=CCC(OC=CC(=O)OCC)c1cccc1CC1>>C=C1Cc2cccc2C(OC=CC(=O)OCC)C1  
407 O=C(/C=C/C/Oc1cccc1-c1ncccc1Br)OCc1cccc1>>O=C(/C=C1/Oc2cccc2-c2ncccc21)OCc1cccc1  
408 C=CCC(OCC(=C)Br)c1ccc(OC)c(OC)c1>>C=C1COC(c2ccc(OC)c(OC)c2)CC1=C  
409 C=CCC(CCBr)c1ccc(C(F)(F)F)cc1>>C=C1CCC(c2ccc(C(F)(F)F)cc2)C1  
410 C=C[C@@H]1O[C@@H]2OC(C)(C)O[C@@H]2[C@@H]1N(Cc1cccc1Br)S(=O)(=O)c1ccc(C)cc1>>C=  
C1c2cccc2CN(S(=O)(=O)c2ccc(C)cc2)[C@@H]2[C@@H]1O[C@@H]1OC(C)(C)O[C@@H]21  
411 C=C[C@@H](C)COc1cccc1Br>>C=C1c2cccc2OC[C@@H]1C

412 C=C[C@@H](O[Si](C)(C)C(C)(C)C)[C@H](C)[C@@H](C/C(I)=C/CO)O[Si](C)(C)C(C)(C)C>>C=C  
 1/C(=C\CO)C[C@@H](O[Si](C)(C)C(C)(C)C)[C@H](C)[C@@H]1O[Si](C)(C)C(C)(C)C  
 413 C=CCC(OCC(=C)Br)c1cccc(Cl)c1>>C=C1COC(c2cccc(Cl)c2)CC1=C  
 414 C=CCN(CC(C)C)C(=O)c1cccc1Br>>C=C1CN(CC(C)C)C(=O)c2cccc21  
 415 C=C[C@H](OCc1ccc(OC)cc1)[C@@H](CCCC)OC(=O)c1c(C)cccc1Oc1ccc2c(c1Br)COC(C)(C)O2  
 >>CCCC[C@H]1OC(=O)c2c(C)cccc2Oc2ccc3c(c2/C=C/[C@@H]1OCc1ccc(OC)cc1)COC(C)(C)O3  
 416 COC(=O)/C=C/Oc1c(C)cccc1-c1cc(C)c(C)cc1Br>>COC(=O)/C=C1/Oc2c(C)cccc2-c2cc(C)c(C)cc21  
 417 Cc1cc(Br)c(-c2cccc2O/C=C/C(=O)OCc2cccc2)cc1C>>Cc1cc2c(cc1C)-  
 c1cccc1O/C2=C/C(=O)OCc1cccc1  
 418 C=COC(=O)c1cccc1Br>>C=C1OC(=O)c2cccc21  
 419 C=CCC[C@H]1C(OS(=O)(=O)C(F)(F)F)=C[C@]2(C(C)C)C=C[C@]1(C)O2>>C=C1CC[C@H]2C1  
 =C[C@]1(C(C)C)C=C[C@]2(C)O1  
 420 C=Cc1cc(C)ccc1N(C)C(=O)c1cccc1I>>C=C1c2cccc2C(=O)N(C)c2ccc(C)cc21  
 421 C=CCc1ccc2cccc2c1OS(=O)(=O)c1cccc1Br>>C=C1Cc2ccc3cccc3c2OS(=O)(=O)c2cccc21  
 422 C=CCC(CCBr)c1cccc1>>C=C1CCC(c2cccc2)C1  
 423 CC(=O)/C=C/Oc1c(C)cccc1-c1cccc1Br>>CC(=O)/C=C1/Oc2c(C)cccc2-c2cccc21  
 424 C=CCN(CC1=C(Br)c2cccc2CC1)c1ccc(C)cc1>>C=C1CN(c2ccc(C)cc2)CC2=C1c1cccc1CC2  
 425 C=CC[C@H](CC/C(I)=C/CO)O[Si](C)(C)C(C)(C)C>>C=C1C[C@@H](O[Si](C)(C)C(C)(C)C)CC/C1  
 =C/CO  
 426 C=CCn1c(N(c2ccc(F)cc2I)S(=O)(=O)c2ccc(C)cc2)cc2cccc21>>Cc1ccc(S(=O)(=O)N2c3ccc(F)cc3/C  
 =C\N3c2cc2cccc23)cc1  
 427 C=CCN(CCc1cc(OC)ccc1I)C(=O)C(F)(F)F>>C=C1CN(C(=O)C(F)(F)F)CCc2cc(OC)ccc21  
 428 C=CCc1cc(C)ccc1N(C(=O)c1cccc1I)S(=O)(=O)c1ccc(C)cc1>>C=C1Cc2cc(C)ccc2N(S(=O)(=O)c2cc  
 c(C)cc2)C(=O)c2cccc21  
 429 C=CCCCC1=C(I)C(=O)[C@H](C(C)C)CC1>>C=C1CCCC2=C1C(=O)[C@H](C(C)C)CC2  
 430 C=CCN(Cc1ccc(F)cc1)Cc1cc2cc(OC)ccc2nc1Cl>>C=C1CN(Cc2ccc(F)cc2)Cc2cc3cc(OC)ccc3nc21  
 431 C=C(C)CC(OCC(=C)Br)c1ccc(OC)cc1>>C=C1C=C(C)CC(c2ccc(OC)cc2)OC1  
 432 C=CCN(CCI)S(=O)(=O)c1ccc(CO)cc1>>C=C1CCN(S(=O)(=O)c2ccc(CO)cc2)C1  
 433 C=CCN(C(=O)c1ccc2cccc2c1Br)C(C(=O)NC1CCCC1)c1ccc(Cl)cc1>>C=C1CN(C(C(=O)NC2CCC  
 CC2)c2ccc(Cl)cc2)C(=O)c2ccc3cccc3c21  
 434 COc1cc(Br)c(-c2cccc2O/C=C/C(=O)OCc2cccc2)cc1OC>>COc1cc2c(cc1OC)-  
 c1cccc1O/C2=C/C(=O)OCc1cccc1  
 435 C=CCN(C)Cc1cccc1I>>C=C1CN(C)Cc2cccc21  
 436 C=C(C(=O)OCC)C(O)c1cc2cccc2n1Cc1cccc1I>>CCOC(=O)/C1=C/c2cccc2Cn2c(cc3cccc32)C1O  
 437 Cc1cc(Br)c(-c2cccc2O/C=C/C(=O)c2cccc2)cc1C>>Cc1cc2c(cc1C)-  
 CCOC(=O)[C@@H](C/C=C1\CCN(c2cccc2)C1=O)Nc1cc(Cl)ccc1I>>CCOC(=O)[C@H]1C/C(=C2/  
 CCN(c3cccc3)C2=O)c2ccc(Cl)cc2N1  
 438 C=CCn1c(N(c2ccc(F)cc2I)S(=O)(=O)c2ccc(C)cc2)cc2cc(OC)ccc21>>COc1ccc2c(c1)cc1n2C/C=C\c2c  
 c(F)ccc2N1S(=O)(=O)c1ccc(C)cc1  
 439 COC(=O)/C(=C\CCN(C(=O)OC(C)(C)C)C(=O)c1c(I)c2cccc2n1C(=O)OC(C)(C)C)OCc1cccc1>>CO  
 C(=O)/C(=O)OCc1cccc1=C1/CCN(C(=O)OC(C)(C)C)C(=O)c2c1c1cccc1n2C(=O)OC(C)(C)C  
 440 C=CCC(NC(C(=O)NCc1cccc1)c1cccc1Br)C(=O)OC>>C=C1CC(C(=O)OC)NC(C(=O)NCc2cccc2)  
 c2cccc21  
 441 C=CCC(CCBr)c1ccc(OC)cc1>>C=C1CCC(c2ccc(OC)cc2)C1  
 442 C=CCc1c(OCc2cccc2Br)cc(C)n(C)c1=O>>C=C1Cc2c(cc(C)n(C)c2=O)OCc2cccc21  
 443 C=CCO[C@H]1[C@H](Sc2cccc2Br)O[C@H](COCc2cccc2)[C@@H]1OCc1cccc1>>C=C1CO[C  
 @H]2[C@@H](O[C@H](COCc3cccc3)[C@@H]2OCc2cccc2)Sc2cccc21  
 444 C=C[C@H](O[Si](C)(C)C(C)(C)C)[C@H](C)[C@@H](C/C(I)=C/CO)O[Si](C)(C)C(C)(C)C>>C=C1/  
 C(=C\CO)C[C@@H](O[Si](C)(C)C(C)(C)C)[C@@H](C)[C@H]1O[Si](C)(C)C(C)(C)C  
 445 C=CCN(Cc1ccc(OC)cc1)Cc1cc2cccc2nc1Cl>>C=C1CN(Cc2ccc(OC)cc2)Cc2cc3cccc3nc21  
 446 C=C[C@H]1O[C@@H]2OC(C)(C)O[C@@H]2[C@H]1N(Cc1cccc1Br)C(=O)OC>>C=C1c2cccc2C  
 N(C(=O)OC)[C@H]2[C@@H]1O[C@@H]1OC(C)(C)O[C@H]21  
 447 C=CC(=O)NC[C@@H](OC)[C@H](OC)c1cccc1NC(=O)[C@H](CC(C)C)NC(=O)c1cccc(Br)c1>>C  
 O[C@@H]1CNC(=O)/C=C/c2cccc(c2)C(=O)N[C@@H](CC(C)C)C(=O)Nc2cccc2[C@H]1OC  
 448 C=CCc1cccc1N(Cc1cc(OC)ccc1Br)S(=O)(=O)c1ccc(C)cc1>>C=C1Cc2cccc2N(S(=O)(=O)c2ccc(C)  
 cc2)Cc2cc(OC)ccc21  
 449 C=CCc1c(OCc2cc(OC)ccc2Br)c(=O)n(C)c2cccc12>>C=C1Cc2c(c(=O)n(C)c3cccc23)OCc2cc(OC)c  
 C=CCc1cc(C)ccc1N(Cc1cccc1Br)S(=O)(=O)c1ccc(C)cc1>>C=C1Cc2cc(C)ccc2N(S(=O)(=O)c2ccc(C)  
 )cc2)Cc2cccc21  
 450 C=CC(OCC(=C)Br)c1ccc(OC)cc1>>C=C1COC(c2ccc(OC)cc2)C1=C  
 451 C=Cc1c(OCc2cc(OC)ccc2Br)ccc2cccc12>>COc1ccc2c(c1)COc1ccc3cccc3c1/C=C\2  
 452  
 453

454 CCOC(=O)/C=C/Oc1cccc1-c1cccc1Br>>CCOC(=O)/C=C1/Oc2cccc2-c2cccc21  
455 O=C(/C=C/c1cccc1)O/C(=C\I)C1CC1>>O=C1OC(C2CC2)=C/C1=C\c1cccc1  
456 C=CCOCC1=C(Br)c2cccc2CC1>>C=C1COCC2=C1c1cccc1CC2  
457 C=CCC(O)c1cc2cc(C)ccc2nc1Cl>>C=C1CC(O)c2cc3cc(C)ccc3nc21  
458 C=Cc1cc(C)ccc1OCc1cccc1Br>>Cc1ccc2c(c1)/C=C\c1cccc1CO2  
459 C=CCN(CCI)S(=O)(=O)c1ccnc1>>C=C1CCN(S(=O)(=O)c2ccnc2)C1  
460 C=CC(=O)OCCCCC(CCc1ccnc1)OC(=O)[C@@H]1CCCCN1C(=O)C(=O)c1cccc(I)c1>>O=C1/C=C/  
c2cccc(c2)C(=O)C(=O)N2CCCC[C@H]2C(=O)OC(CCc2ccnc2)CCCCO1  
461 C=CCC(C(=O)OC)N(C(=O)c1cccc1I)C(C(=O)NCc1cccc1)c1cccc1>>C=C1CC(C(=O)OC)N(C(C(=O)NCc2cccc2)c2cccc2)C(=O)c2cccc21  
462 C=CC(OCC(=C)Br)c1cccc1>>C=C1COC(c2cccc2)C1=C  
463 C=CCC(NCc1ccc(F)cc1Br)(C(=O)OC)C(C)C>>C=C1CC(C(=O)OC)(C(C)C)NCc2ccc(F)cc21  
464 C=Cc1cc(Nc2ncc(Cl)c(Nc3cc(Br)ccc3C(=O)OC)n2)ccc1N1CCN(C)CC1>>COC(=O)c1ccc2cc1Nc1nc(ncc1Cl)Nc1ccc(N3CCN(C)CC3)c(c1)/C=C\2  
465 C=CCN(c1ccc2c(ccc(=O)n2C)c1)S(=O)(=O)c1cccc1Br>>C=C1CN(c2ccc3c(ccc(=O)n3C)c2)S(=O)(=O)c2cccc21  
466 C=Cc1cccc1OCc1cc(OC)ccc1Br>>COc1ccc2c(c1)COc1cccc1/C=C\2  
467 C=CCN(C(=O)c1ccc2cccc2c1Br)C(C(=O)NC1CCCC1)c1ccc(F)cc1>>C=C1CN(C(C(=O)NC2CCC  
CC2)c2ccc(F)cc2)C(=O)c2ccc3cccc3c21  
468 C=CC(F)(F)Oc1ccc(C#N)cc1Br>>C=C1c2cc(C#N)ccc2OC1(F)F  
469 C=Cc1cccc(OC)c1C(=O)c1c(Br)c(OC)c(C)c2c1OC(C)(C)OC2>>C=C1c2cccc(OC)c2C(=O)c2c3c(c(C)c(OC)c21)COC(C)(C)O3  
470 C=C[C@@H]1CC(S(=O)(=O)c2cccc2)(S(=O)(=O)c2cccc2)C[C@H]1[C@@H](c1cccc1)c1cc(OC)c(OC)cc1Br>>C=C1c2cc(OC)c(OC)cc2[C@H](c2cccc2)[C@@H]2CC(S(=O)(=O)c3cccc3)(S(=O)(=O)c3cccc3)C[C@H]12  
471 C=CCC[C@H]1C(OS(=O)(=O)C(F)(F)F)=C[C@@]2(C)C=C[C@]1(C(C)C)O2>>C=C1CC[C@H]2C1=C[C@]@1(C)C=C[C@]2(C(C)C)O1  
472 C=CCCN(c1ccc(Cl)cc1)S(=O)(=O)c1cccc1Br>>C=C1CCN(c2ccc(Cl)cc2)S(=O)(=O)c2cccc21  
473 CC=C(c1cccc1)c1c(OCc2cc(OC)ccc2Br)c(=O)n(C)c(=O)n1C>>COc1ccc2c(c1)COc1c(n(C)c(=O)n(C)c1=O)/C(c1cccc1)=C\2C  
474 C=CCc1c(OCc2cc(OC)ccc2Br)c(=O)oc2cccc12>>COc1ccc2c(c1)COc1c(c3cccc3oc1=O)C/C=C\2  
475 C=CCN(CCI)S(=O)(=O)c1ccc(C=O)cc1>>C=C1CCN(S(=O)(=O)c2ccc(C=O)cc2)C1  
476 C=CC(=O)N(C)c1cccc1I>>C=C1C(=O)N(C)c2cccc21  
477 C=Cc1cccc(Nc2ncc(Cl)c(Nc3cccc(Br)c3)n2)c1>>Clc1cnc2nc1Nc1cccc(c1)/C=C\c1cccc(c1)N2  
478 C=C[C@@H](O[Si](C)(C)C(C)(C)C)[C@@H](OCCCCO[Si](C)(C)C(C)(C)C)[C@@H](CC(I)=CCO)O[Si](C)(C)C(C)(C)C>>C=C1C(=CCO)C[C@H](O[Si](C)(C)C(C)(C)C)[C@H](OCCCCO[Si](C)(C)C(C)(C)C)[C@@H]1O[Si](C)(C)C(C)(C)C  
479 C=CCOCc1nnn(Cc2ccc([N+](=O)[O-])cc2)c1I>>C=C1COCc2nnn(Cc3ccc([N+](=O)[O-])cc3)c21  
480 C=CCC(CCCl)c1ccc(OC)cc1>>C=C1CCC(c2ccc(OC)cc2)C1  
481 C=C(C)CC(OCC(=C)Br)c1ccc(-c2cccc2)cc1>>C=C1C=C(C)CC(c2ccc(-c3cccc3)cc2)OC1  
482 C=CCC(O)c1cccc1C=CI>>C=C1C=Cc2cccc2C(O)C1  
483 C=CCCC(CCl)CCCCCCCC>>C=C1CCC(CCCCCCCC)C1  
484 C=CCOCC1=C(Br)CCCCC1>>C=C1COCC2=C1CCCCC2  
485 C=CCCC(=O)c1nnn(Cc2ccc(OC)cc2)c1I>>C=C1CCC(=O)c2nnn(Cc3ccc(OC)cc3)c21  
486 C=CCC(OC)c1cc2cccc2nc1Cl>>C=C1CC(OC)c2cc3cccc3nc21  
487 O=C(/C=C/c1cccc1)O/C(=C\I)c1ccc2cccc2c1>>O=C1OC(c2ccc3cccc3c2)=C/C1=C\c1cccc1  
488 C=C[C@H]1O[C@@H]2OC(C)(C)O[C@@H]2[C@H]1N(Cc1cc(OC)ccc1Br)C(=O)OC>>C=C1c2ccc(OC)cc2CN(C(=O)OC)[C@H]2[C@@H]1O[C@@H]1OC(C)(C)O[C@H]21  
489 C=CC(F)(F)Oc1ccc(Cl)cc1Br>>C=C1c2cc(Cl)ccc2OC1(F)F  
490 C=CCCN(Cc1cc2c(cc1Br)OCO2)C(=O)OC(C)(C)C>>C=C1CCN(C(=O)OC(C)(C)C)Cc2cc3c(cc21)O  
491 C=CCN(CCI)S(=O)(=O)c1ccc(C#N)cc1>>C=C1CCN(S(=O)(=O)c2ccc(C#N)cc2)C1  
492 C=CCC(c1cccc1I)N(CC(=O)OC)Cc1cccc1>>C=C1CC(N(CC(=O)OC)Cc2cccc2)c2cccc21  
493 C=CC(=O)N(Cc1cccc1)C(C(=O)NCc1cccc1)c1cccc1Br>>C=C1C(=O)N(Cc2cccc2)C(C(=O)NCc2cccc2)c2cccc21  
494 C=CCc1c(OCc2cc(OC)ccc2Br)ccc2cccc12>>C=C1Cc2c(ccc3cccc23)OCc2cc(OC)ccc21  
495 C=C[C@H]1COC(=O)[C@@H]1[C@H](c1cc(OC)c(OC)c(OC)c1)c1cc2c(cc1OS(=O)(=O)C(F)(F)F)OCO2>>C=C1c2cc3c(cc2[C@@H](c2cc(OC)c(OC)c(OC)c2)[C@H]2C(=O)OC[C@H]12)OCO3  
496 C=CCN(C)C(=O)c1cccc1Br>>C=C1CN(C)C(=O)c2cccc21  
497 C=CCCCC(O)C=C(Br)c1ccc2c(c1)OCO2>>C=C1CCCC(O)C=C1c1ccc2c(c1)OCO2  
498 C=CCCCC(I)CCCCC>>C=C1CCCC1CCCCC

499 C=CCC(CCCl)(C(=O)OCC)C(=O)OCC>>C=C1CCC(C(=O)OCC)(C(=O)OCC)C1  
 500 COC(=O)/C=C/Oc1cccc1-c1cc(F)c(F)cc1Br>>COC(=O)/C=C1/Oc2cccc2-c2cc(F)c(F)cc21  
 501 C=CCC(OCC(=C)Br)c1ccoc1>>C=C1COC(c2ccoc2)CC1=C  
 502 C=CCN(Cc1cccc1)C(=O)c1cccc1Br>>C=C1CN(Cc2cccc2)C(=O)c2cccc21  
 503 C=C[C@H](NC(=O)OC(C)(C)C)[C@H](O)[C@H](C)C(=O)NCC(=O)N[C@H](C)C(=O)Nc1cc(OC  
 504 )ccc1I>>COc1ccc2c(c1)NC(=O)[C@H](C)NC(=O)CNC(=O)[C@H](C)[C@H](O)[C@H](NC(=O)OC(C)(C)C)/C=C/2  
 505 C=CCC(c1cccc1I)N(CC(=O)OC)c1cccc1>>C=C1CC(N(CC(=O)OC)c2cccc2)c2cccc21  
 506 C=CCN(c1cccc2cccc12)S(=O)(=O)c1cccc1Br>>C=C1CN(c2cccc3cccc23)S(=O)(=O)c2cccc21  
 507 C=CC(=O)NC[C@H](OC)[C@H](OC)c1cccc1NC(=O)[C@H](NC(=O)c1cccc(Br)c1)[C@H](C)CC>>CC[C@H](C)[C@H]1NC(=O)c2cccc(c2)/C=C/C(=O)NC[C@H](OC)[C@H](OC)c2cccc  
 508 C=CCN1[C@H](c2cccc2I)O[C@H]2C[C@H](C)CC[C@H]2C1(C)C>>C=C1CN2[C@H](O)[C@H]3C[C@H](C)CC[C@H]3C2(C)C)c2cccc21  
 509 C=CCC(Nc1cccc1Br)c1ccn(C)c1>>C=C1CC(c2ccn(C)c2)Nc2cccc21  
 510 C=CC[C@H](N[S@@](=O)C(C)(C)C)c1c(F)cccc1Br>>C=C1C[C@H](N[S@@](=O)C(C)(C)C)c2c(F)cccc21  
 511 C=C[Si](C)(c1cccc1)c1cccc1-c1cccc1Br>>C=C1c2cccc2-c2cccc2[Si]1(C)c1cccc1  
 512 C=CCC1(c2cccc2Br)SCCCS1>>C=C1CC2(SCCCS2)c2cccc21  
 513 C=CC(CN(c1cccc1I)S(C)(=O)=O)NC(=O)OCc1cccc1>>C=C1c2cccc2N(S(C)(=O)=O)CC1NC(=O)OCc1cccc1  
 514 C=CCCN(c1cccc2cccc12)S(=O)(=O)c1cccc1Br>>C=C1CCN(c2cccc3cccc23)S(=O)(=O)c2cccc21  
 515 COC(=O)/C=C/Oc1cccc1-c1cc(OC)c(OC)cc1Br>>COC(=O)/C=C1/Oc2cccc2-c2cc(OC)c(OC)cc21  
 516 C=CCCC(=O)N(Cc1cccc1)c1cccc1I>>C=C1CCC(=O)N(Cc2cccc2)c2cccc21  
 517 C=C[C@H](OCc1ccc(OC)cc1)[C@H](CCCC)OC(=O)c1c(C)cccc1Oc1ccc2c(c1I)COC(C)(C)O2>>CCCC[C@H]1OC(=O)c2c(C)cccc2Oc2ccc3c(c2/C=C/[C@H]1OCc1ccc(OC)cc1)COC(C)(C)O3  
 518 C=CCO[C@H]1[C@H]([C@H](O)CSc2cccc2Br)O[C@H]2OC(C)(C)O[C@H]12>>C=C1CO[C@H]2[C@H](O[C@H]3OC(C)(C)O[C@H]23)[C@H](O)CSc2cccc21  
 519 C=CCn1c(N(c2ccc(Cl)cc2I)S(C)(=O)=O)cc2cc([N+](=O)[O-])ccc21>>CS(=O)(=O)N1c2ccc(Cl)cc2/C=C/Cn2c1cc1cc([N+](=O)[O-])ccc12  
 520 C=CCN(CCCc1cc(OC)c(OC)cc1Br)C(=O)c1cccc(OC)c1OC>>C=C1CN(C(=O)c2cccc(OC)c2OC)CCc2c  
 521 c(OC)c(OC)cc21  
 522 C=CCc1c(OCc2cccc2Br)c(=O)n(C)c2cccc12>>C=C1Cc2c(c(=O)n(C)c3cccc23)OCc2cccc21  
 523 C=C[C@H](NC(=O)OC(C)(C)C)[C@H](O)[C@H](C)C(=O)NCC(=O)N[C@H](C)C(=O)Nc1cc(OC  
 524 c2cccc2)ccc1I>>C[C@H]1C(=O)NCC(=O)N[C@H](C)C(=O)Nc2cc(OCc3cccc3)ccc2/C=C/[C@H](NC(=O)OC(C)(C)C)[C@H]1O  
 525 C=CCc1cccc(F)c1N(Cc1cc(OC)ccc1Br)S(=O)(=O)c1ccc(C)cc1>>C=C1Cc2cccc(F)c2N(S(=O)(=O)c2cc  
 526 cc(C)cc2)Cc2cc(OC)ccc21  
 527 C=CCN(CC1=C(Br)CCCC1)c1ccc(Cl)cc1>>C=C1CN(c2ccc(Cl)cc2)CC2=C1CCCC2  
 528 C=CC(CC)(CC)C(=O)Nc1ccc(OC(F)(F)F)cc1Br>>C=C1c2cc(OC(F)(F)F)ccc2NC(=O)C1(CC)CC  
 529 O=C/C=C/Oc1cccc1-c1cc(F)c(F)cc1Br)OCc1cccc1>>O=C/C=C1/Oc2cccc2-c2cc(F)c(F)cc21)OCc1cccc1  
 530 C=CCn1c(N(c2ccc(F)cc2I)S(=O)(=O)c2cccs2)cc2cc(C)ccc21>>Cc1ccc2c(c1)cc1n2C/C=C/c2cc(F)ccc  
 531 2N1S(=O)(=O)c1cccs1  
 532 C=CCC(NC1ccc(F)cc1Br)C(=O)OC>>C=C1CC(C(=O)OC)NCc2ccc(F)cc21  
 533 COC(=O)/C=C/Oc1cccc1-c1ccncc1Br>>COC(=O)/C=C1/Oc2cccc2-c2ccncc21  
 534 C=CCc1cc(Cl)c2ccncc2c1OCc1ccc(F)cc1Br>>C=C1Cc2ccc(Cl)c3ccncc3c2OCc2ccc(F)cc21  
 535 C=CC[C@H]1C(=O)N(c2ccc(OC)cc2)[C@H]1[C@H](CC(=C)Br)OC(C)=O>>C=C1/C=C/C[C@H]2C(=O)N(c3ccc(OC)cc3)[C@H]2[C@H](OC(C)=O)C1  
 536 C=CCc1cccc1CCl>>C=C1Cc2cccc2C1  
 537 COc1ccc(/C=C/C(=O)Oc2cccc2I)cc1>>COc1ccc(/C=C2/C(=O)Oc3cccc32)cc1  
 538 C=CC[C@H](N[S@@](=O)C(C)(C)C)c1cccc1Br>>C=C1C[C@H](N[S@@](=O)C(C)(C)C)c2ccccc21  
 539 C=CCCN(CC(=O)OC)S(=O)(=O)c1cccc1Br>>C=C1CCN(CC(=O)OC)S(=O)(=O)c2cccc21  
 540 C=CCN(C(=O)c1ccc2cccc2c1Br)C(C(=O)NC(C)(C)C)c1ccc(C)cc1>>C=C1CN(C(C(=O)NC(C)(C)C)c2ccc(C)cc2)C(=O)c2ccc3cccc3c21  
 541 C=CCCCNc1cccc1I>>C=C1CCCNc2cccc21  
 542 C=CC(=O)N[C@H](Cc1cccc1)C(=O)N[C@H](C)C(=O)N[C@H](CC(C)C)C(=O)NCc1cccc(B  
 543 r)c1>>CC(C)C[C@H]1NC(=O)[C@H](C)NC(=O)[C@H](Cc2cccc2)NC(=O)/C=C/c2cccc(c2)CNC  
 544 C=C[C@H](Cn1c(Br)c(-  
 545 c2ccc(C(=O)N[C@H](C)c3ccccc3)cc2)c2c(N)ncnc21)NC(=O)OC(C)(C)C>>C=C1c2c(-  
 546 c3ccc(C(=O)N[C@H](C)c4ccccc4)cc3)c3c(N)ncnc3n2C[C@H]1NC(=O)OC(C)(C)C

539 C=CS(=O)(=O)N(CC(=C)Br)[C@H](C(=O)OC)C(C)C>>C=C1C=CS(=O)(=O)N([C@H](C(=O)OC)C(C)C)C1  
 540 C=CCCCC(O)C=C(Br)c1ccc(C)cc1>>C=C1CCCC(O)C=C1c1ccc(C)cc1  
 541 C=Cc1cc(CCCCCCCCCCCC)ccc1N(C)C(=O)c1cccc1I>>C=C1c2ccccc2C(=O)N(C)c2ccc(CCCCCC)cc21  
 542 COC(=O)/C=C/Oc1cccc1-c1ncccc1Br>>COC(=O)/C=C1/Oc2ccccc2-c2ncccc21  
 543 C=C(C(=O)OCC)c1cccc1CS(=O)(=O)c1cccc1I>>CCOC(=O)/C1=C/c2ccccc2S(=O)(=O)Cc2ccccc21  
 544 C=C[Si](C)(C)OCc1cccc1Br>>C=C1c2ccccc2CO[Si]1(C)C  
 545 C=CC(C)(C)C(C(=O)NCc1cccc1)c1cccc1Br>>C=C1c2ccccc2C(C(=O)NCc2ccccc2)C1(C)C  
 546 C=CC(F)(F)Oc1cccc1Br>>C=C1c2ccccc2OC1(F)F  
 547 C=CCN(Cc1cccc1)Cc1cc2cc(C)ccc2nc1Cl>>C=C1CN(Cc2ccccc2)Cc2cc3cc(C)ccc3nc21  
 548 C=CCCCNc1cccc1Br>>C=C1CCCNc2ccccc21  
 549 C=CCN(CCc1cc(OC)c(OC)cc1Br)C(=O)OC(C)(C)C>>C=C1CN(C(=O)OC(C)(C)C)CCc2cc(OC)c(OC)cc21  
 550 C=Cc1cc(C(C)=O)ccc1N(C)C(=O)c1cccc1I>>C=C1c2ccccc2C(=O)N(C)c2ccc(C(C)=O)cc21  
 551 C=CCN(Cc1ccc(F)cc1)Cc1cc2cc(C)ccc2nc1Cl>>C=C1CN(Cc2ccc(F)cc2)Cc2cc3cc(C)ccc3nc21  
 552 C=CCN1nnc(CCCC)c1I>>C=C1CCN2nnc(CCCC)c21  
 553 C=C[C@H](O[Si](C)(C)C(C)(C)C)[C@H](OCCCO[Si](c1cccc1)(c1cccc1)C(C)(C)C)[C@H](C/C(I)=C/CO)O[Si](C)(C)C(C)(C)C>>C=C1/C(=C\CO)C[C@H](O[Si](C)(C)C(C)(C)C)[C@H](OCCCO[Si](c2ccccc2)(c2ccccc2)C(C)(C)C)[C@H]1O[Si](C)(C)C(C)(C)C  
 554 C=CC(C)c1c(OCc2ccccc2Br)c(=O)oc2ccccc12>>CC1/C=C\c2ccccc2COc2c1c1cccc1oc2=O
