# Supplementary material for: Heck reaction prediction using a transformer model based on a transfer learning strategy
Source: Royal Society of Chemistry journal article supplement (doi:10.1039/d0cc02657c), 2020-01-01
Supplement: d0cc02657c1.zip [file d0cc02657c1.zip]

**Table S4C. Data used for transformer-baseline and transformer-transfer learning models testing in Heck reaction (Dataset for testing in experiment 1)**

| Reaction ID | Reaction SMILES                                                                                                                                                                                                            |
|-------------|----------------------------------------------------------------------------------------------------------------------------------------------------------------------------------------------------------------------------|
| 1           | <chem>C=Cc1ccc2c(c1)CC[C@@H]1[C@@H]2CC[C@]2(C)C(=O)CC[C@@]12C.CCOC(=O)C(F)Br&gt;&gt;CCOC(=O)C(F)/C=C/c1ccc2c(c1)CC[C@@H]1[C@@H]2CC[C@]2(C)C(=O)CC[C@@]12C</chem>                                                           |
| 2           | <chem>C=C.Oc1cc(Br)c2oc(-c3ccc(O)c(F)c3)nc2c1&gt;&gt;C=Cc1cc(O)cc2nc(-c3ccc(O)c(F)c3)oc12</chem>                                                                                                                           |
| 3           | <chem>C=C[C@@H]1CCCCN1C(=O)OC(C)(C)C.O=[N+](O-)]c1ccc(I)cc1&gt;&gt;CC(C)(C)OC(=O)N1CCCC[C@H]1/C=C/c1ccc([N+](=O)[O-])cc1</chem>                                                                                            |
| 4           | <chem>C=CC(=O)OC.COc1ccc(OC)c(Cc2ccc(I)cc2)c1&gt;&gt;COC(=O)/C=C/c1ccc(Cc2cc(OC)ccc2OC)cc1</chem>                                                                                                                          |
| 5           | <chem>C=Cc1cccn1.N#Cc1ccccc1-c1cc(Br)cn(-c2ccccc2)c1=O&gt;&gt;N#Cc1ccccc1-c1cc(/C=C/c2cccn2)cn(-c2ccccc2)c1=O</chem>                                                                                                       |
| 6           | <chem>C=CC(=O)N(C)OC.N#Cc1ccc(Br)cc1&gt;&gt;CON(C)C(=O)/C=C/c1ccc(C#N)cc1</chem>                                                                                                                                           |
| 7           | <chem>C=CC(C)O.COC(=O)c1ccc(I)cc1&gt;&gt;COC(=O)c1ccc(/C=C/C(C)O)cc1</chem>                                                                                                                                                |
| 8           | <chem>C=CC(=O)OC.CC(C)(C)c1ccc(I)c(O)c1&gt;&gt;COC(=O)/C=C/c1ccc(C(C)(C)C)cc1O</chem>                                                                                                                                      |
| 9           | <chem>Br1ccccc1I.C=C1CC(c2ccc(C)cc2)OC1=O&gt;&gt;Cc1ccc(C2C/C(=C\c3ccccc3Br)C(=O)O2)cc1</chem>                                                                                                                             |
| 10          | <chem>C=CC(=O)OC(C)(C)C.COc1ccc2cc(Br)ccc2c1&gt;&gt;COc1ccc2cc(/C=C/C(=O)OC(C)(C)C)ccc2c1</chem>                                                                                                                           |
| 11          | <chem>C=CCCCCCC.O=[N+](O-)]c1ccccc1OS(=O)(=O)C(F)(F)F&gt;&gt;C=C(CCCCCC)c1ccccc1[N+](=O)[O-]</chem>                                                                                                                        |
| 12          | <chem>C=Cc1ccncc1.CCCCN(CCCC)c1ccc2cc(Br)ccc2c1&gt;&gt;CCCCN(CCCC)c1ccc2cc(/C=C/c3ccncc3)ccc2c1</chem>                                                                                                                     |
| 13          | <chem>C=Cc1ccccc1.O=Cc1c(Br)sc2ccccc12&gt;&gt;O=Cc1c(/C=C/c2ccccc2)sc2ccccc12</chem>                                                                                                                                       |
| 14          | <chem>C=CC(=O)OC(C)(C)C.N#Cc1ccc(Br)cc1&gt;&gt;CC(C)(C)OC(=O)/C=C/c1ccc(C#N)cc1</chem>                                                                                                                                     |
| 15          | <chem>BrC1=CCCC2(C1)OCCO2.C=CC(=O)OC&gt;&gt;COC(=O)/C=C/C1=CCCC2(C1)OCCO2</chem>                                                                                                                                           |
| 16          | <chem>C=Cc1ccc(Cl)cc1.Oc1ccc(Br)cc1&gt;&gt;Oc1ccc(/C=C/c2ccc(Cl)cc2)cc1</chem>                                                                                                                                             |
| 17          | <chem>C=CC(=O)N1N=Cc2ccccc2C1CCC.COc1cc(Cc2nc(N)nc2N)cc(I)c1OCc1ccccc1&gt;&gt;CCCC1c2ccccc2C=NN1C(=O)/C=C/c1cc(Cc2nc(N)nc2N)cc(OC)c1OCc1ccccc1</chem>                                                                      |
| 18          | <chem>C=CC(CCCC)n1nnc2ccccc21.Cc1ccc(I)cc1&gt;&gt;CCCC(/C=C/c1ccc(C)cc1)n1nnc2ccccc21</chem>                                                                                                                               |
| 19          | <chem>C=CP(=O)(OCC)OCC.CCOC(=O)CNc1ccccc1Br&gt;&gt;CCOC(=O)CNc1ccccc1/C=C/P(=O)(OCC)OCC</chem>                                                                                                                             |
| 20          | <chem>C=C(CC(=O)OC)C(=O)OC.N#Cc1ccccc1I&gt;&gt;COC(=O)C/C(=C\c1ccccc1C#N)C(=O)OC</chem>                                                                                                                                    |
| 21          | <chem>C=CCN(CC1=C(Br)c2ccccc2CC1)c1ccc(C)cc1&gt;&gt;C=C1CN(c2ccc(C)cc2)CC2=C1c1ccccc1CC2</chem>                                                                                                                            |
| 22          | <chem>C=C[C@H]1O[C@@H]2OC(C)(C)O[C@@H]2[C@H]1OC.Cc1ccc(I)cc1&gt;&gt;CO[C@H]1[C@@H](/C=C/c2ccc(C)cc2)O[C@@H]2OC(C)(C)O[C@H]12</chem>                                                                                        |
| 23          | <chem>C=Cc1ccncc(F)c1.CC(C)(C)OC(=O)N1CCC[C@H]1COc1nc(Cl)c(I)c1&gt;&gt;CC(C)(C)OC(=O)N1CCC[C@H]1COc1nc(Cl)c(/C=C/c2ccncc(F)c2)c1</chem>                                                                                    |
| 24          | <chem>C=CC(=O)OCC.CC(C)(C)OC(=O)N1CCC(C#N)(c2ccccc2Br)CC1&gt;&gt;CCOC(=O)/C=C/c1ccccc1C1(C#N)CCN(C(=O)OC(C)(C)C)CC1</chem>                                                                                                 |
| 25          | <chem>C=CC(=O)Nc1ccccc1NC(=O)OC(C)(C)C.CCOC(=O)[C@H]1CN(Cc2ccccc2)C[C@@H]1c1ccc(Br)cc1&gt;&gt;CCOC(=O)[C@H]1CN(Cc2ccccc2)C[C@@H]1c1ccc(/C=C/C(=O)Nc2ccccc2NC(=O)OC(C)(C)C)cc1</chem>                                       |
| 26          | <chem>C=CC=O.Fc1cncc(Br)c1&gt;&gt;O=C/C=C/c1cncc(F)c1</chem>                                                                                                                                                               |
| 27          | <chem>C=C(CC(=O)OCC)C(=O)OCC.COc1ccc2c(OC)c(Br)ccc12&gt;&gt;CCOC(=O)C/C(=C\c1ccc2c(OC)ccc2c1OC)C(=O)OCC</chem>                                                                                                             |
| 28          | <chem>C=CCc1c(OCc2ccccc2Br)c(=O)n(C)c(=O)n1C&gt;&gt;Cn1c2c(c(=O)n(C)c1=O)OCc1ccccc1/C=C\C2</chem>                                                                                                                          |
| 29          | <chem>C=Cc1ccncc1.Cc1ccccc(Br)c1&gt;&gt;Cc1ccccc(/C=C/c2ccncc2)c1</chem>                                                                                                                                                   |
| 30          | <chem>C=CC(=O)OCC.CN1CCc2cc(Br)ccc2C1&gt;&gt;CCOC(=O)/C=C/c1ccc2c(c1)CCN(C)C2</chem>                                                                                                                                       |
| 31          | <chem>C=Cc1ccccc1.Cc1ccccc(NC(=O)c2ccc(I)c2)n1&gt;&gt;Cc1ccccc(NC(=O)c2cccc(/C=C/c3ccccc3)c2)n1</chem>                                                                                                                     |
| 32          | <chem>C=Cc1ccc(OC)cc1.CC(=S)NS(=O)(=O)c1ccc(Br)cc1&gt;&gt;COc1ccc(/C=C/c2ccc(S(=O)(=O)NC(C)=S)cc2</chem>                                                                                                                   |
| 33          | <chem>C=CC(=O)O.O=[N+](O-)]c1ccc(Cl)cc1&gt;&gt;O=C(O)/C=C/c1ccc([N+](=O)[O-])cc1</chem>                                                                                                                                    |
| 34          | <chem>Br1cc2ccc1CCc1ccc(cc1)CC2.C=Cc1ccccc1&gt;&gt;C(=C/c1cc2ccc1CCc1ccc(cc1)CC2)\c1ccccc1</chem>                                                                                                                          |
| 35          | <chem>C=CC(C)(C)CC(=O)O.COc1ccc(I)cc1&gt;&gt;COc1ccc(/C=C/C(C)(C)CC(=O)O)cc1</chem>                                                                                                                                        |
| 36          | <chem>Br1ccc(I)cc1.C=Cc1ccc(C)cc1&gt;&gt;Cc1ccc(/C=C/c2ccc(Br)cc2)cc1</chem>                                                                                                                                               |
| 37          | <chem>C=CC(=O)OC.COc1cc(Br)cc(F)c1C=O&gt;&gt;COC(=O)/C=C/c1cc(F)c(C=O)c(OC)c1</chem>                                                                                                                                       |
| 38          | <chem>C=Cc1ccc(/C=C/c2ccc(N(C)C)cc2)cc1.CC1(C)C2=CC(=O)C(F)=CC2=C(c2ccc(Br)cc2S(=O)(=O)O)c2cc(F)c(O)cc21&gt;&gt;CN(C)c1ccc(/C=C/c2ccc(/C=C/c3ccc(C4=C5C=C(F)C(=O)C=C5C(C)(C)c5cc(O)c(F)cc54)c(S(=O)(=O)O)c3)cc2)cc1</chem> |
| 39          | <chem>Br1ccc2nccn2c1.C=CS(=O)(=O)c1ccccc1&gt;&gt;O=S(=O)(/C=C/c1ccc2nccn2c1)c1ccccc1</chem>                                                                                                                                |
| 40          | <chem>C=C[Si](C)(C)C.CC(=O)c1ccc(I)cc1&gt;&gt;CC(=O)c1ccc(/C=C/[Si](C)(C)C)cc1</chem>                                                                                                                                      |
| 41          | <chem>Br1ccccc1.C=C1c2ccccc2C1(C#N)CC&gt;&gt;CCC1(C#N)/C(=C/c2ccccc2)c2ccccc21</chem>                                                                                                                                      |
| 42          | <chem>C=Cc1ccccc(F)c1.O=Cc1ccccc(Br)c1&gt;&gt;O=Cc1ccccc(/C=C/c2ccccc(F)c2)c1</chem>                                                                                                                                       |

43 C=C/C=C/C(=O)N(CCCC)CCCC.Clc1cccc(Br)c1>>CCCCN(CCCC)C(=O)/C=C/C=C/c1cccc(Cl)c1  
44 C=Cc1cc(CCCCCC)ccc1N(C)C(=O)c1cccc1I>>C=C1c2cccc2C(=O)N(C)c2ccc(CCCCCC)cc21  
45 C=C[C@H]1O[C@@H]2OC(C)(C)O[C@@H]2[C@H]1OC.COc1ccc(I)cc1>>COc1ccc(/C=C/[C@H]2  
O[C@@H]3OC(C)(C)O[C@@H]3[C@H]2OC)cc1  
46 C=CC(=O)OC.CCCCCC1(CCCCCC)c2cccc2-c2c1c1c(c3c2C(CCCCCC)(CCCCC)c2cc(I)ccc2-  
3)C(CCCCCC)(CCCCC)c2cccc2-1>>CCCCC1(CCCCCC)c2cccc2-  
c2c1c1c(c3c2C(CCCCCC)(CCCCC)c2cc(/C=C/C(=O)OC)ccc2-3)C(CCCCCC)(CCCCC)c2cccc2-  
47 C=Cc1ccc(CO)cn1.Cc1c(Nc2c(I)cncc2C#N)ccc2[nH]ccc12>>Cc1c(Nc2c(C#N)cncc2/C=C/c2ccc(CO)c  
n2)ccc2[nH]ccc12  
48 C=CC(=O)OCC.CN(C)c1ccc(-c2cccc2I)cc1>>CCOC(=O)/C=C/c1cccc1-c1ccc(N(C)C)cc1  
C=Cc1ccc([N+](=O)[O-  
49 ])cc1.COC(=O)c1cc2cc(Br)ccc2cc1OC(C)=O>>COC(=O)c1cc2cc(/C=C/c3ccc([N+](=O)[O-  
]ccc3)ccc2cc1OC(C)=O  
50 C=CC(=O)N1N=Cc2cccc2C1CCC.CCOc1c(I)cc(Cc2cnc(N)nc2N)cc1OC>>CCCC1c2cccc2C=NN1  
C(=O)/C=C/c1cc(Cc2cnc(N)nc2N)cc(OC)c1OCC  
51 C=CC(F)(F)F.FC(F)(F)c1cccc(Br)c1>>FC(F)(F)/C=C/c1cccc(C(F)(F)F)c1  
52 C=Cc1cccc1.CCN(CC)CC(=O)Nc1c(C)ccc(Br)c1C>>CCN(CC)CC(=O)Nc1c(C)ccc(/C=C/c2cccc2)c  
C=C/C=C/C(=O)N(CCCC)CCCC.COc1cc(Br)cc(OC)c1>>CCCCN(CCCC)C(=O)/C=C/C=C/c1cc(OC)  
53 cc(OC)c1  
C=C[C@H]1CN(S(=O)(=O)c2ccc(C)cc2)[C@H](c2ccc(OC)cc2)N1OC.Ic1cccc1>>COc1ccc([C@@H  
54 ]2N(OC)[C@@H](/C=C/c3cccc3)CN2S(=O)(=O)c2ccc(C)cc2)cc1  
55 C=CC(=O)OC.O=C1Nc2c(Br)cccc2C1=O>>COC(=O)/C=C/c1cccc2c1NC(=O)C2=O  
56 C=Cc1cnccn1.Cc1cc2c(cc1[N+](=O)[O-])c(I)nn2C1CCCCO1>>Cc1cc2c(cc1[N+](=O)[O-  
57 ])c(/C=C/c1cnccn1)nn2C1CCCCO1  
C=C/C=C/C(=O)N(CCCC)CCCC.COc1ccc(Br)cc1>>CCCCN(CCCC)C(=O)/C=C/C=C/c1ccc(OC)cc1  
58 C=CC#N.Cc1noc(-c2cccc2)c1I>>Cc1noc(-c2cccc2)c1/C=C/C#N  
59 C=Cc1cccc(CO)n1.Cc1ncc(C#N)c(Nc2ccc3[nH]ccc3c2C)c1I>>Cc1ncc(C#N)c(Nc2ccc3[nH]ccc3c2C)c  
1/C=C/c1cccc(CO)n1  
60 Brc1c2cccc2cc2cccc12.C=CC(=O)OC>>COC(=O)/C=C/c1c2cccc2cc2cccc12  
61 Brc1cccc1.C=Cc1cc2ccc(N(CC)CC)cc2oc1=O>>CCN(CC)c1ccc2cc(/C=C/c3cccc3)c(=O)oc2c1  
62 C=CC(=O)OC.N#Cc1cccc(Br)c1>>COC(=O)/C=C/c1cccc(C#N)c1  
63 Brc1cccn2nncc12.C=CC(=O)OC>>COC(=O)/C=C/c1cccn2nncc12  
64 C=Cc1cccc1.Cc1ccc(NC(=O)OC(C)(C)C)c(Br)c1>>Cc1ccc(NC(=O)OC(C)(C)C)c(/C=C/c2cccc2)c1  
65 C=CC(=O)OCC.Ic1nn(Cc2cccc2)c2cccc12>>CCOC(=O)/C=C/c1nn(Cc2cccc2)c2cccc12  
66 C=Cc1cncc1.CCCCCCOCc1ccc(Br)c(F)c1>>CCCCCCCCOCc1ccc(/C=C/c2cncc2)c(F)c1  
67 C=CNC(=O)/C=C/c1cccc1.O=S(=O)(Oc1ccc2cccc2c1)C(F)(F)F>>C=C(NC(=O)/C=C/c1cccc1)c1c  
cc2cccc2c1  
68 C=Cc1ccc(C(C)(C)C)cc1.CCCCC(Br)C(F)(F)F>>CCCCC(/C=C/c1ccc(C(C)(C)C)cc1)C(F)(F)F  
C=CCO[C@H]1O[C@H](COC(C)=O)[C@@H](OC(C)=O)[C@H](OC(C)=O)[C@@H]1OC(C)=O.Ic  
69 1cccc1>>CC(=O)OC[C@H]1O[C@H](OC/C=C/c2cccc2)[C@@H](OC(C)=O)[C@@H](OC(C)=O)[  
C@@H]1OC(C)=O  
70 C=CS(=O)c1cccc1.COc1c(C)c(Br)c(OC)c2cccc12>>COc1c(C)c(/C=C/S(=O)c2cccc2)c(OC)c2cccc  
71 C=CCC(O)c1cc2cc(C)ccc2nc1Cl>>C=C1CC(O)c2cc3cc(C)ccc3nc21  
72 C=Cc1cccn1.CNC(=O)c1cccc1Sc1ccc2c(I)n[nH]c2c1>>CNC(=O)c1cccc1Sc1ccc2c(/C=C/c3cccn3  
n[nH]c2c1  
73 C=CCn1c(N(c2ccc(C)cc2I)S(=O)(=O)c2cccs2)cc2cccc21>>Cc1ccc2c(c1)/C=C/Cn1c(cc3cccc31)N2  
S(=O)(=O)c1cccs1  
74 C=CC(=O)N(C)Cc1cc2cccc2n1C.CCC1(CC)C(=O)Nc2ncc(Br)cc21>>CCC1(CC)C(=O)Nc2ncc(/C=C  
/C(=O)N(C)Cc3cc4cccc4n3C)cc21  
75 C=CCO.COC(=O)c1ccc(Br)cc1>>C=C(CO)c1ccc(C(=O)OC)cc1  
76 C=CC(=O)OC.COc1ccc2c(c1)CCN(c1ccc(C)cc1)C2(C)c1ccc(Br)cc1>>COC(=O)/C=C/c1ccc(C2(C)c3  
ccc(OC)cc3CCN2c2ccc(C)cc2)cc1  
77 C=CC(=O)OC.Clc1ccc(Br)cc1>>COC(=O)/C=C/c1ccc(Cl)cc1  
78 C=C(C)C(=O)OC.Cc1ccc(I)cc1>>COC(=O)/C(C)=C/c1ccc(C)cc1  
79 C=CC(=O)OC.O=C(NCc1ccc(F)cc1F)c1c(NCCO)c2cc(Br)cn2n(OCc2cccc2)c1=O>>COC(=O)/C=C  
/c1cnc2c(c1)c(NCCO)c(C(=O)NCc1ccc(F)cc1F)c(=O)n2OCc1cccc1  
80 C=CC(C)=O.Cc1cc(C)c(N)c(I)c1>>CC(=O)/C=C/c1cc(C)cc(C)c1N  
81 C=CC(=O)OC.O=c1[nH]c(=O)n([C@@H]2O[C@H](CO)[C@@H](O)[C@H]2F)cc1I>>COC(=O)/C=  
C/c1cn([C@@H]2O[C@H](CO)[C@@H](O)[C@H]2F)c(=O)[nH]c1=O  
82 C=CC1(O)CCC1.Clc1ccc(I)cc1>>OC1(/C=C/c2ccc(Cl)cc2)CCC1

83 C=C(NC(=O)OC(C)(C)C(=O)OC.CCOC(=O)c1[nH]c2ccccc2c1Br>>CCOC(=O)c1[nH]c2ccccc2c1/  
C=C(\NC(=O)OC(C)(C)C(=O)OC  
84 C=C[C@H]1O[C@H]2OC(C)(C)O[C@H]2[C@H]1O.O=c1ccoc2ccc(Br)cc12>>CC1(C)O[C@H]  
2O[C@H](/C=C/c3ccc4occc(=O)c4c3)[C@H](O)[C@H]2O1  
85 C=Cc1ccccc1Cl.CCOC(=O)C(F)I>>CCOC(=O)C(F)/C=C/c1ccccc1Cl  
86 Br1ccccc1.C=C[S@@](=O)c1ccc(C)cc1>>Cc1ccc([S@](=O)/C=C/c2ccccc2)cc1  
87 C=Cc1ccccc1.O=[N+](=[O-])c1ccc(N(c2ccc(Br)cc2)c2ccc([N+](=O)[O-])cc2)cc1>>O=[N+](=[O-])  
c1ccc(N(c2ccc(/C=C/c3ccccc3)cc2)c2ccc([N+](=O)[O-])cc2)cc1  
88 C=CS(=O)(=O)NCCc1ccccc1.CC(C)(C)OC(=O)NCCc1ccccc1Br>>CC(C)(C)OC(=O)NCCc1ccccc1/C  
=C/S(=O)(=O)NCCc1ccccc1  
89 C=CC(=O)N1CCOCC1.O=c1n(Cc2nc3cc(Cl)ccn3c2I)c2nccc2n1C1CC1>>O=C(/C=C/c1c(Cn2c(=O)n  
(C3CC3)c3ccccc32)nc2cc(Cl)ccn12)N1CCOCC1  
90 Br1ccc(NCCNc2ccccc2)nc1.C=CC(=O)OC(C)(C)C>>CC(C)(C)OC(=O)/C=C/c1ccc(NCCNc2ccccc2)  
91 C=CCCCCCC.O=Cc1ccc(Cl)cc1>>CCCCC/C=C/c1ccc(C=O)cc1  
92 C=CC(N)=O.Cc1ccc(I)cc1>>Cc1ccc(/C=C/C(N)=O)cc1  
93 C=Cc1ccc(COC(C)=O)cc1.COc1ccc2c(c1)cc(C#N)c1ccc(Br)cc12>>COc1ccc2c(c1)cc(C#N)c1ccc(/C=  
C/c3ccc(COC(C)=O)cc3)cc12  
94 C=Cc1ccccc1.O=[N+](=[O-])c1ccc(Cl)c([N+](=O)[O-])c1>>O=[N+](=[O-])  
c1ccc(/C=C/c2ccccc2)c([N+](=O)[O-])c1  
95 C=C(NC(C)=O)C(=O)OC.CC1cc(OC(C)=O)cc(C)c1I>>CC1cc(OC(C)=O)cc(C)c1/C=C(\NC(C)=O)  
C(=O)OC  
96 C=C(F)[Si](C)(c1ccccc1)c1ccccc1.Cc1ccc(I)c(C)c1>>Cc1ccc(/C=C(\F)[Si](C)(c2ccccc2)c2ccccc2)c(C  
C=CC(=O)OCC.COCC(=O)c1ccc(I)c2c(c1)C[C@]1(O2)[C@H](C)CC[C@H](OC(C)=O)C1(C)C>>CCO  
97 C(=O)/C=C/c1cc(C(=O)OC)cc2c1O[C@]1(2)[C@H](C)CC[C@H](OC(C)=O)C1(C)C  
98 C=Cc1ccc(Cl)cc1.O=Cc1ccccc1Br>>O=Cc1ccccc1/C=C/c1ccc(Cl)cc1  
99 C=CC(=O)OCC.O=c1c(Br)c(-c2ccc(Cl)cc2)oc2ccccc12>>CCOC(=O)/C=C/c1c(-  
c2ccc(Cl)cc2)oc2ccccc2c1=O  
100 C=COCCCCCCC.Oc1ccc(Br)cc1>>C=C(OCCCCCCC)c1ccc(OC)cc1  
101 Br1ccccc1.C=CC(=O)CCCCC>>CCCCC(=O)/C=C/c1ccccc1  
102 C=CC(=O)OC(C)(C)C.FC(F)(F)Oc1ccc(CNc2ccc(Br)cn2)cc1>>CC(C)(C)OC(=O)/C=C/c1ccc(NCc2cc  
c(OC(F)(F)F)cc2)nc1  
103 C=Cc1ccc(CC(=O)OC(C)(C)C)cc1.COc1cc(/C=C/c2ccc(CNC(=O)OC(C)(C)C)cc2)c(OC)cc1I>>COc1  
cc(/C=C/c2ccc(CC(=O)OC(C)(C)C)cc2)c(OC)cc1/C=C/c1ccc(CNC(=O)OC(C)(C)C)cc1  
104 C=Cc1ccc(C(=O)OCC)cc1.CC1(C)CC=C(Sc2ccccc2)c2cc(Br)ccc21>>CCOC(=O)c1ccc(/C=C/c2ccc3c  
(c2)C(Sc2ccccc2)=CCC3(C)C)cc1  
105 C=CC(=O)O.Cc1ccc(S(=O)(=O)N(C)c2ccc(I)c2)c1>>Cc1ccc(S(=O)(=O)N(C)c2ccc(/C=C/C(=O)  
O)c2)c1  
106 C=Cc1nc(C(=O)OCC)co1.COc1ccc(I)cc1>>CCOC(=O)c1ccc(/C=C/c2ccc(OC)cc2)n1  
107 BrC12CC3CC(CC(C3)C1)C2.C=Cc1ccc(OC)cc1>>COc1ccc(/C=C/C23CC4CC(CC(C4)C2)C3)cc1  
108 C=CC(C)=O.Nc1ccc(Br)cn1>>CC(=O)/C=C/c1ccc(N)nc1  
109 C=CC(=O)OC.CCN(CC)S(=O)(=O)Oc1ccccc1I>>CCN(CC)S(=O)(=O)Oc1ccccc1/C=C/C(=O)OC  
110 C=CC#N.CC(=O)c1ccc(Cl)cc1>>CC(=O)c1ccc(/C=C/C#N)cc1  
111 C=CC(=O)OC.Fc1ccccc1I>>COC(=O)/C=C/c1ccccc1F  
112 C=C[Si](C)(C)c1cc(OC)c(OC)cc1-c1cc(OC)c(OC)cc1Br>>C=C1c2cc(OC)c(OC)cc2-  
c2cc(OC)c(OC)cc2[Si]1(C)C  
113 C=CC(=O)OCCCCC(=O)CCCC(CCc1ccccc1)OC(=O)[C@H]1CCCCN1C(=O)C(=O)c1ccccc1I>>  
O=C1CCCCOC(=O)/C=C/c2ccccc2)C(=O)C(=O)N2CCCC[C@H]2C(=O)OC(CCc2ccccc2)CCC1  
114 C=Cc1sccc1C.O=C1CCC(c2ccc(Br)cc2)O1>>Cc1nccc1/C=C/c1ccc(C2CCC(=O)O2)cc1  
115 C=CC(=O)OC(C)(C)C.O=Cc1ccc(Br)s1>>CC(C)(C)OC(=O)/C=C/c1ccc(C=O)s1  
116 C=CCCCCCC.FC(F)(F)c1ccc(Cl)cc1>>C=C(CCCCCC)c1ccc(C(F)(F)F)cc1  
117 C=CC(=O)OC1CCCCC1.Ic1ccc(OCc2ccccc2)cc1>>O=C(/C=C/c1ccc(OCc2ccccc2)cc1)OC1CCCCC1  
118 C=CC(=O)N(C)CCN(C)C.C[Si](C)(C)CCOCn1nc(I)c2ccc(C=O)cc21>>CN(C)CCN(C)C(=O)/C=C/c1  
nn(COCC[Si](C)(C)C)c2cc(C=O)ccc12  
119 C=Cc1ccccc1.Cc1ccc(Br)c1O>>Cc1ccc(/C=C/c2ccccc2)c1O  
120 C=Cc1ccc(O)cc1.COc1ccc(Br)c1>>COc1ccc(/C=C/c2ccc(O)cc2)c1  
121 C=Cc1ccc(NC)cc1.OCCOc1ccc(I)cc1Br>>CNc1ccc(/C=C/c2ccc(OCCO)c(Br)c2)cc1  
122 C=CCNS(=O)(=O)c1ccc(C)cc1.N#Cc1ccccc1Br>>Cc1ccc(S(=O)(=O)NC/C=C/c2ccccc2C#N)cc1  
123 C=CCCCCCC.COc1ccc2cc(Br)ccc2c1>>C=C(CCCCCC)c1ccc2ccc(OC)ccc2c1  
124 Br1ccc(-c2nc3ccccc3n2)cc1.C=CCn1c(-c2cc(OC)ccc2OC)nc2ccccc2c1=O>>COc1ccc(OC)c(-  
c2nc3ccccc3c(=O)n2C/C=C/c2ccc(-c3ccc4ccccc4n3)cc2)c1  
125 C=CC(=O)OCC.COc1cc(Br)c(C=O)cc1OC>>CCOC(=O)/C=C/c1cc(OC)c(OC)cc1C=O

126 Br1ccc(-c2cccs2)s1.C=Cc1ccc(C=O)cc1>>O=Cc1ccc(/C=C/c2ccc(-c3cccs3)s2)cc1  
 127 C=CC(=O)OCCCC.CCOC(=O)c1ccc(-c2nc(-  
 128 c3cc(OC)cc(OC)c3)sc2Cl)cc1>>CCCCOC(=O)/C=C/c1sc(-c2cc(OC)cc(OC)c2)nc1-  
 129 C=COCCCC.Fc1ccc(Br)cc1>>C=C(OCCCC)c1ccc(F)cc1  
 130 C=Cc1cccc1.COC(=O)c1cc(OC)c(OC)cc1I>>COC(=O)c1cc(OC)c(OC)cc1/C=C/c1cccc1  
 131 C=Cc1cncnc1.C[C@H](COc1cnc(Cl)c(I)c1)N(C)C(=O)OC(C)(C)C>>C[C@H](COc1cnc(Cl)c(/C=C/c  
 132 2cncnc2)c1)N(C)C(=O)OC(C)(C)C  
 133 C=CCOc1cccc1C.COc1cccc1I>>COc1cccc1/C=C/COc1cccc1C  
 134 C=Cc1cccc(Cl)c1.FC(F)(F)Cl>>FC(F)(F)C/C=C/c1cccc(Cl)c1  
 135 C=CS(C)(=O)=O.FC(F)(F)c1cc(Br)cc(C(F)(F)F)c1>>CS(=O)(=O)/C=C/c1cc(C(F)(F)F)cc(C(F)(F)F)c1  
 136 C=Cc1cncnc1.COc1cc(Nc2c(C#N)cnc3cc(Br)ccc23)cc(OC)c1OC>>COc1cc(Nc2c(C#N)cnc3cc(/C=C/  
 137 c4cncnc4)ccc23)cc(OC)c1OC  
 138 C=CCN(C(=O)OC(C)(C)C)C(=O)OC(C)(C)C.Cc1cccc1Cl>>Cc1cccc1/C=C/CN(C(=O)OC(C)(C)C)  
 139 C(=O)OC(C)(C)C  
 140 C=CC(=O)OCCCC.FC(F)(F)c1ccc(Br)cc1>>CCCCOC(=O)/C=C/c1ccc(C(F)(F)F)cc1  
 141 C=CCN(C(=O)OC(C)(C)C)C(=O)OC(C)(C)C.Clc1ccnc1>>CC(C)(C)OC(=O)N(C/C=C/c1ccnc1)C(=  
 142 O)OC(C)(C)C  
 143 C=C(NC(C)=O)C(=O)OC.CC[C@@]1(O)C(=O)OCc2c1cc1n(c2=O)Cc2cc3c(Br)cccc3nc2-  
 144 1>>CC[C@@]1(O)C(=O)OCc2c1cc1n(c2=O)Cc2cc3c(/C=C(\NC(C)=O)C(=O)OC)cccc3nc2-1  
 145 C=Cc1ccc(OC)cc1OC.Nc1cccc(I)c1>>COc1ccc(/C=C/c2cccc(N)c2)c(OC)c1  
 146 C=CCN1C(=O)c2cccc2C1=O.CC(=O)c1ccc(Br)cc1>>CC(=O)c1ccc(/C=C/CN2C(=O)c3cccc3C2=O  
 147 C=CC(=O)N(C)C.COc1cc(Br)ccc1Cc1c(C)nc(N)nc1OS(=O)(=O)c1c(C(C)C)cc(C(C)C)cc1(C)C>>C  
 148 Oc1cc(/C=C/C(=O)N(C)C)ccc1Cc1c(C)nc(N)nc1OS(=O)(=O)c1c(C(C)C)cc(C(C)C)cc1(C)C  
 149 Br1cnc2ccnc12.C=CC(=O)OCC>>CCOC(=O)/C=C/c1cnc2ccnc12  
 150 C=CC(=O)OC.Cc1cccc(C)c1Cn1nc(C)c2ccc(Br)cc21>>COC(=O)/C=C/c1ccc2c(C)nn(Cc3c(C)cccc3C)  
 151 C=CC(=O)OCCCCCCCCC.Ic1cccc1>>CCCCCCCCOC(=O)/C=C/c1cccc1  
 152 C=CC(=O)OC(C)(C)C.N#Cc1cccc(I)c1>>CC(C)(C)OC(=O)/C=C/c1cccc(C#N)c1  
 153 C=CC(=O)OCC.O=C(O)c1ccc(I)cc1>>CCOC(=O)/C=C/c1ccc(C(=O)O)cc1  
 154 C=CC(OCC(=C)Br)c1cccc(Cl)c1>>C=C1COC(c2cccc(Cl)c2)C1=C  
 155 C=Cc1cc(OC)cc(OC)c1.CC(C)(Oc1ccc(C(=O)c2ccc(Cl)cc2)cc1)C(=O)Oc1ccc(I)cc1>>COc1cc(/C=C/c  
 156 2ccc(OC(=O)C(C)(C)Oc3ccc(C(=O)c4ccc(Cl)cc4)cc3)cc2)cc(OC)c1  
 157 C=CC(=O)N1N=Cc2cccc2C1CC(C)C.COc1cc(Cc2cnc(N)nc2N)cc(I)c1OC>>COc1cc(Cc2cnc(N)nc2  
 158 N)cc(/C=C/C(=O)N2N=Cc3cccc3C2CC(C)C)c1OC  
 159 C=Cc1cccc(Cl)c1.Cn1nc(Br)c2cccc21>>Cn1nc(/C=C/c2cccc(Cl)c2)c2cccc21  
 160 C=CC(=O)OCC.CN(C)c1ccc(Br)cc1>>CCOC(=O)/C=C/c1ccc(N(C)C)cc1  
 161 C=CC1CC(=O)N1.COc1ccc(I)cc1>>COc1ccc(/C=C/C2CC(=O)N2)cc1  
 162 C=CC(=O)OCC.CCOC(=O)c1ccc(-c2ccccc2)c(I)c1>>CCOC(=O)/C=C/c1cc(C(=O)OCC)ccc1-  
 163 C=Cc1ccc(/C=C(/c2ccccc2)C2CCC2)c2ccc3c(c2)c(F)nn3C2CCCCO2)cc1.Ic1ccnc1>>Fc1nn(C2CCC  
 164 CO2)c2ccc(/C=C(/c3ccccc3)C3CCC3)c3ccc(/C=C/c4ccnc4)cc3)cc12  
 165 C=C.CCCCC(C)COc1cc(/C=C/c2ccc(/C=C/c3ccc(Br)cc3)cc2)c(OCC(C)CCCC)cc1C>>C=Cc1ccc(/  
 166 C=C/c2ccc(/C=C/c3cc(OCC(C)CCCC)c(C)cc3OCC(C)CCCC)cc2)cc1  
 167 C=CC(=O)OC.Cc1ccc(Br)cc1>>COC(=O)/C=C/c1ccc(C)cc1  
 168 C=CC(=O)OC(C)(C)C.COc1cccc(S(=O)(=O)N2CCc3cc(Br)cnc32)c1>>COc1cccc(S(=O)(=O)N2CCc3  
 169 cc(/C=C/C(=O)OC(C)(C)C)enc32)c1  
 170 C=CCO[C@@H]1CC(=O)O[C@H](C)C/C=C/C=C/[C@H](O[Si](C)(C)C(C)(C)C)[C@H](C)C[C@H]  
 171 (CC(OC)OC)[C@H](O[C@@H]2O[C@H](C)[C@@H](O[C@H]3C[C@@H](C)(O)[C@@H](OC(=O)  
 172 CC)[C@H](C)O3)[C@H](N(C)C)[C@H]2OC(C)=O)[C@H]1OC.Fc1ccc(I)cc1>>CCC(=O)O[C@H]1[  
 173 C@H](C)O[C@@H](O[C@H]2[C@H](N(C)C)[C@@H](OC(C)=O)[C@H](O[C@@H]3[C@@H](O  
 174 C)[C@H](OC/C=C/c4ccc(F)cc4)CC(=O)O[C@H](C)C/C=C/C=C/[C@H](O[Si](C)(C)C(C)(C)C)[C@  
 175 H](C)C[C@@H]3CC(C)OC(C)O[C@@H]2C)C[C@@H]1C)C>>CC(C)(C)OC(=O)N(C/C=C/c1cnc  
 176 2ccccc2c1)C(=O)OCc1cccc1  
 177 C=CC(=O)OC(C)(C)C.COC(=O)CCc1cccc(N(Cc2ccc(Br)cc2)C(=O)C2CCCC2)c1>>COC(=O)CCc1  
 178 cccc(N(Cc2ccc(/C=C/C(=O)OC(C)(C)C)cc2)C(=O)C2CCCC2)c1  
 179 C=CCCCCCC.Cc1ccc(C)c(OS(=O)(=O)C(F)(F)F)c1>>C=C(CCCCCC)c1cc(C)ccc1C  
 180 C=Cc1cccc1.COc1ccc(Br)cc1F>>COc1ccc(/C=C/c2ccccc2)cc1F  
 181 C=CC(=O)OC.Nc1cc(C(F)(F)F)ccc1Br>>COC(=O)/C=C/c1ccc(C(F)(F)F)cc1N  
 182 C=CC(=O)OC.CCOC(=O)c1ccc(NC=O)c(I)c1>>CCOC(=O)c1ccc(NC=O)c(/C=C/C(=O)OC)c1  
 183 C=Cc1cccc1.CCCCCCCC0c1cc(/C=C/c2ccc(Br)cc2)c(OCCCCCCCC)cc1/C=C/c1cccc1>>CCCCC  
 184 CCCOc1cc(/C=C/c2ccc(/C=C/c3ccccc3)cc2)c(OCCCCCCCC)cc1/C=C/c1cccc1  
 185 Br1cccs1.C=CC(=O)OC(C)(C)C>>CC(C)(C)OC(=O)/C=C/c1cccs1

167 \*CNCCCCOCCOCCOCCNC(=O)COc1ccc(C(Cc2cc(OC)cc(OC)c2)NC(=O)c2cccc(C=C)c2)cc1.O=[N  
 +]([O-])c1ccc(I)c([N+](=O)[O-]  
 168 ]c1>>\*CNCCCCOCCOCCOCCNC(=O)COc1ccc(C(Cc2cc(OC)cc(OC)c2)NC(=O)c2cccc(/C=C/c3ccc  
 ([N+](=O)[O-])cc3[N+](=O)[O-])c2)cc1  
 C=CC(=O)NC[C@H](OC)[C@H](OC)c1cccc1NC(=O)[C@H](CC(C)C)NC(=O)c1cccc(Br)c1>>C  
 O[C@H]1CNC(=O)/C=C/c2cccc(c2)C(=O)N[C@H](CC(C)C)C(=O)Nc2cccc2[C@H]1OC  
 169 C/C=C/C(=O)OC.Ic1cccc1>>COC(=O)/C=C/C(=O)c1cccc1  
 170 C=CC(=O)CCC.O=[N+]([O-])c1ccc(Br)cc1>>CCCC(=O)/C=C/c1ccc([N+](=O)[O-])cc1  
 171 C=CC(=O)Oc1cccc1.Nc1nc(N)c2cc(I)ccc2n1>>Nc1nc(N)c2cc(/C=C/C(=O)Oc3cccc3)ccc2n1  
 172 C=Cc1ccc(OC)cc1.CS(=O)(=O)c1ccc(Br)cc1>>COc1ccc(/C=C/c2ccc(S(C)(=O)=O)cc2)cc1  
 173 Brc1cncnc1.C=Cc1ccc(Cn2cc(C)c(=O)n(C)c2=O)cc1>>Cc1cn(Cc2ccc(/C=C/c3cncnc3)cc2)c(=O)n(C)c  
 174 C=CC(=O)C(C)CC(=O)OC.C=CC(C)(C)O[C@H]1COc2ccc(Br)cc2OC1(C)C>>C=CC(C)(C)O[C@H]  
 1COc2ccc(/C=C/C(=O)C(C)CC(=O)OC)cc2OC1(C)C  
 C=CC(=O)NC(C)(C)C.[C@H]12C[C@H]34C=C(Sc5cccc(I)c5)C(=O)[C@@](C)(CCC(=O)Nc5c(O)cc  
 175 c(C(=O)O)c5O)[C@@H]3[C@H](C[C@H]1C4)O2>>CC(C)(C)NC(=O)/C=C/c1cccc(SC2=C[C@H]3  
 4C[C@H]5C[C@H](O[C@H]5(C)C3)[C@H]4[C@H](C)(CCC(=O)Nc3c(O)ccc(C(=O)O)c3O)C2=O)c1  
 C=Cc1cncnc1.CC(C)(C)OC(=O)N[C@H](COc1cncnc(Br)c1)C(=O)O>>CC(C)(C)OC(=O)N[C@H](CO  
 176 c1cncnc(/C=C/c2cncnc2)c1)C(=O)O  
 Brc1cccc(I)c1.C=CC(F)(F)C(F)(F)C(F)(F)C(F)(F)C(F)(F)C(F)(F)F>>FC(F)(F)C(F)(F)C(F)(F)C(F)(F)  
 177 C(F)(F)C(F)(F)C(F)(F)C(F)(F)C(F)(F)C(F)(F)C(F)(F)C(F)(F)C(F)(F)C(F)(F)C(F)(F)C(F)(F)C(F)(F)  
 C=C[C@H]1O[C@H]2OC(C)(C)O[C@H]2[C@H]1OC.COC(=O)[C@H](Cc1ccc(I)cc1)NC(=O)O  
 178 C(C)(C)C>>COC(=O)[C@H](Cc1ccc(/C=C/[C@H]2O[C@H]3OC(C)(C)O[C@H]3[C@H]2OC)c  
 c1)NC(=O)OC(C)(C)C  
 Brc1cncnc1.C=CC(F)(F)C(F)(F)C(F)(F)C(F)(F)C(F)(F)C(F)(F)C(F)(F)C(F)(F)C(F)(F)F>>FC(F)(F)C(F)(F)C(F)(F)  
 179 )C(F)(F)C(F)(F)C(F)(F)C(F)(F)C(F)(F)C(F)(F)C(F)(F)C(F)(F)C(F)(F)C(F)(F)C(F)(F)C(F)(F)C(F)(F)  
 C=COCCCC.COc1ccc2cccc(OS(=O)(=O)C(F)(F)F)c2n1>>C=C(OCCCC)c1cncnc2ccc(OC)nc12  
 180 C=CC(=O)OCc1cccc1.CC(=O)c1cccc1Br>>CC(=O)c1cccc1/C=C/C(=O)OCc1cccc1  
 181 C=Cc1cccc(C(=O)O[C@H]2[C@H]3[C@H](C)(C(=O)[C@H](OC(C)=O)C4=C(C)[C@H](OC(=O)[C  
 @H](O[Si](CC)(CC)CC)[C@H](NC(=O)c5cccc(I)c5)c5cccc5)C[C@H]2(O)C4(C)C)[C@H](O[Si]  
 182 (CC)(CC)CC)C[C@H]2OC[C@H]23OC(C)=O)c1>>C=C1c2cccc(c2)C(=O)N[C@H](c2cccc2)[C@  
 @H](O[Si](CC)(CC)CC)C(=O)O[C@H]2C[C@H]3(O)[C@H](OC(=O)c4cccc1c4)[C@H]1[C@H](C)  
 (C(=O)I[C@H](OC(C)=O)C(=C2C)C3(C)C)I[C@H](O[Si](CC)(CC)CC)C[C@H]2OC[C@H]21OC(C)  
 183 C=CC(=O)OCC.Cc1cccc(C#C/C=C/c2ccc(Br)cc2)c1>>CCOC(=O)/C=C/c1ccc(/C=C/C#Cc2cccc(C)c2  
 184 C=CC(=O)OC.COc1ccc(Br)c(OC)c1>>COC(=O)/C=C/c1ccc(OC)cc1OC  
 185 Brc1ccc(/N=N/c2cccc2)cc1.C=Cc1ccc(OC)cc1>>COc1ccc(/C=C/c2ccc(/N=N/c3cccc3)cc2)cc1  
 186 C=CC(=O)OC(C)(C)C.Cc1ccc(CNC(=O)c2cc(Br)cc(I)c2)cc1>>Cc1ccc(CNC(=O)c2cc(Br)cc(/C=C/C(  
 =O)OC(C)(C)C)c2)cc1  
 C=CC(Cn1c(Br)c(-c2ccc(Oc3cccc3)cc2)c2c(N)ncnc21)NC(=O)OC(C)(C)C>>C=C1c2c(-  
 187 c3ccc(Oc4cccc4)cc3)c3c(N)ncnc3n2CC1NC(=O)OC(C)(C)C  
 C=Cc1cccc1.N#Cc1cccc1Cl>>N#Cc1cccc1/C=C/c1cccc1  
 188 C=Cc1cccc1.Cc1ccc(S(=O)(=O)Nc2cccc2Br)cc1>>Cc1ccc(S(=O)(=O)Nc2cccc2/C=C/c2cccc2)cc1  
 189 C=CC(=O)OC(C)(C)C.CC(C)(C)OC(=O)N1CCNc2ccc(Br)cc2C1>>CC(C)(C)OC(=O)/C=C/c1ccc2c(c  
 190 1)CN(C(=O)OC(C)(C)C)CCN2  
 C=C(NC(C)=O)C(=O)OC.COC(=O)c1cccc(I)c1>>COC(=O)/C=C/c1cccc(C(=O)OC)c1)NC(C)=O  
 191 Brc1ccc(OCCCCc2cccc2)cc1.C/C=C(\CCO)C(=O)OCC>>CCOC(=O)/C(CCO)=C(I)C1ccc(OCCCCc  
 192 2cccc2)cc1  
 C=Cc1cccc(Cl)c1.Cn1c(=O)c2c(cc(Br)n2C)n(C)c1=O>>Cn1c(=O)c2c(cc(/C=C/c3cccc(Cl)c3)n2C)n(C  
 193 )c1=O  
 C=CC(=O)OCC.CC1(C)CC(=O)C2=C(C1)Oc1c(I)c(-  
 194 c3cccc3)oc(=O)c1C2c1cccc(O)c1>>CCOC(=O)/C=C/c1c(-  
 c2cccc2)oc(=O)c2c1OC1=C(C(=O)CC(C)(C)C1)C2c1cccc(O)c1  
 195 C=CC(=O)OC(C)(C)C.COc1cccc1Br>>COc1cccc1/C=C/C(=O)OC(C)(C)C  
 196 C=Cc1ccc(S(=O)(=O)c2cccc2F)en1.COc1cc(F)ccc1I>>COc1cc(F)ccc1/C=C/c1ccc(S(=O)(=O)c2cccc  
 c2F)en1  
 C=CC(=O)OC(C)(C)C.Nc1ncc(I)en1>>CC(C)(C)OC(=O)/C=C/c1cnc(N)nc1  
 197 CC(=O)/C=C/CCc1cccc1.Cc1ccc(Br)cc1>>CC(=O)/C=C(/CCc1cccc1)c1ccc(C)cc1  
 198 C=CNC(C)=O.CN(C)c1cccc(OS(=O)(=O)C(F)(F)F)c1>>C=C(NC(C)=O)c1cccc(N(C)C)c1  
 199 C=CC(=O)OCC.CCCCCc1ccc(-c2ccc(I)cc2OCCO)cc1>>CCCCC1ccc(-  
 200 c2ccc(/C=C/C(=O)OCC)cc2OCCO)cc1  
 C=C1C(=O)O[C@H]2/C=C(\C)CC/C=C(\C)CC[C@H]12.Ic1cccc1>>C/C1=C\ [C@H]2OC(=O)/  
 201 C(=C/c3cccc3)[C@@H]2CC/C(C)=C/CC1

202 C=COCC.CCOC(=O)N1[C@@H]2CC=C(OS(=O)(=O)C(F)(F)F)[C@H]1CC2>>C=C(OCC)C1=CC[C  
203 @H]2CC[C@H]1N2C(=O)OCC  
204 C=CC(=O)OC.Ic1c(-c2ccccc2)oc2ccccc12>>COC(=O)/C=C/c1c(-c2ccccc2)oc2ccccc12  
205 C=Cc1nn(C2CCCCO2)c2cc([N+](=O)[O-]  
206 ]ccc12.Cc1cc(C)nc(Br)c1>>Cc1cc(C)nc(/C=C/c2nn(C3CCCCO3)c3cc([N+](=O)[O-])ccc23)c1  
207 C=CC(=O)OC.CN(C)Cc1cn(Cc2ccc(Br)cc2)c2ccccc12>>COC(=O)/C=C/c1ccc(Cn2cc(CN(C)C)c3cccc  
208 c32)cc1  
209 Br1ccccc1I.C=CC(N)=O>>NC(=O)/C=C/c1ccccc1Br  
210 C=C1c2ccccc2C1(C#N)CC.COc1cc(Br)cc(OC)c1OC>>CCC1(C#N)/C(=C/c2cc(OC)c(OC)c(OC)c2)c2  
211 cccc21  
212 C=Cc1ccccc1.O=Cc1cc2c(cc1Br)OCO2>>O=Cc1cc2c(cc1/C=C/c1ccccc1)OCO2  
213 C=CC(F)(F)F.Cc1ccc(I)cc1>>Cc1ccc(/C=C/C(F)(F)F)cc1  
214 C=CP(=O)(OCC)OCC.COc1ccc(Br)cc1>>CCOP(=O)(/C=C/c1ccc(OC)cc1)OCC  
215 C=CC(=O)OCC.CC(C)(C)OC(=O)N1CCc2ccc(Br)cc2CC1>>CCOC(=O)/C=C/c1ccc2c(c1)CCN(C(=O  
216 )OC(C)(C)C)CC2  
217 C=CC(=O)OCC.CC(C)c1nc(C(C)C)c(Cl)n1>>CCOC(=O)/C=C/c1nc(C(C)C)enc1C(C)C  
218 C=CC(=O)NCCCCCNC(=O)C(F)(F)F.CC(=O)OC[C@H]1C=C[C@H](n2cc(I)c(=O)[nH]c2=O)O1  
219 >>CC(=O)OC[C@H]1C=C[C@H](n2cc(/C=C/C(=O)NCCCCCNC(=O)C(F)(F)F)c(=O)[nH]c2=O)  
220 Br1ccoc1.C=CCNS(=O)(=O)c1ccc(C)cc1>>Cc1ccc(S(=O)(=O)NC/C=C/c2ccoc2)cc1  
221 C=C.Cc1nc(C)c(I)c(Cl)n1>>C=Cc1c(C)nc(C)nc1Cl  
222 C=Cc1ccccc1.O=C(N1CCOCC1)C(F)(F)Br>>O=C(N1CCOCC1)C(F)(F)/C=C/c1ccccc1  
223 C=Cc1ccccc1F.CCOC(=O)C(F)Br>>CCOC(=O)C(F)/C=C/c1ccccc1F  
224 C=CC(=O)[C@H](CCNC(=O)OC(C)(C)C)O[Si](C)(C)C(C)(C)C.COC(=O)n1c(Br)c(CCO[Si](C)(C)C(C)  
225 C)(C)C)c2ccccc21>>COC(=O)n1c(/C=C/C(=O)[C@H](CCNC(=O)OC(C)(C)C)O[Si](C)(C)C(C)(C)C)  
226 c(CCO[Si](C)(C)C(C)(C)C)c2ccccc21  
227 Br1ccccc1.C=C(C)c1ccccc1>>C/C=C/c1ccccc1)c1ccccc1  
228 C=CC(=O)OC.COc1c(CN(C(=O)c2ccccc2)c2cccc(Br)c2)ccc2c1OC(C)(C)[C@H](O)[C@H]2Sc1ccccc  
229 1>>COC(=O)/C=C/c1ccc(N(Cc2ccc3c(c2OC)OC(C)(C)[C@H](O)[C@H]3Sc2ccccc2)C(=O)c2ccccc2  
230 Br1ccc2ccc3ccc4ccccc4c3c2c1.C=Cc1ccc(COC(C)=O)cc1>>CC(=O)OCc1ccc(/C=C/c2ccc3ccc4ccc5  
231 cccc5c4c3c2)cc1  
232 C=CCNC1=NCCN1.Ic1ccccc1>>C(=C/c1ccccc1)\CNC1=NCCN1  
233 C=CCCC(=O)CCCC[Se]c1ccccc1.Ic1ccccc1>>O=C(CC/C=C/c1ccccc1)CCCC[Se]c1ccccc1  
234 C=Cc1cncnc1.COc1cc(Nc2c(C#N)cnc3ccc(Br)cc23)cc(OC)c1OC>>COc1cc(Nc2c(C#N)cnc3ccc(/C=C  
235 /c4ccncc4)cc23)cc(OC)c1OC  
236 Br1ccc(-c2nc3ccccc3n2Cc2ccccc2)cc1.C=CC(=O)OCC>>CCOC(=O)/C=C/c1ccc(-  
237 c2nc3ccccc3n2Cc2ccccc2)cc1  
238 C=CC(=O)OC(C)(C)C.COc1ccc(S(=O)(=O)N2CCc3cc(Br)cnc32)cc1OC>>COc1ccc(S(=O)(=O)N2CC  
239 c3cc(/C=C/C(=O)OC(C)(C)C)cnc32)cc1OC  
240 C=CCN(C(=O)OC(C)(C)C)C(=O)OC(C)(C)C.COc1cc(Cl)cc(OC)c1OC>>COc1cc(/C=C/CN(C(=O)OC  
241 (C)(C)C)C(=O)OC(C)(C)C)cc(OC)c1OC  
242 C=CC(=O)c1ccc(OC)cc1OC.COc1cc(OC)c(OC)cc1I>>COc1ccc(C(=O)/C=C/c2cc(OC)c(OC)cc2OC)c  
243 (OC)c1  
244 C=CC(=O)OC.CC(C)(C)OC(=O)n1cc(C=O)c2c(Br)cccc21>>COC(=O)/C=C/c1ccc2c1c(C=O)cn2C(=  
245 O)OC(C)(C)C  
246 C=Cc1ccccc1.Cc1ccc(N)c1Br>>Cc1ccc(N)c1/C=C/c1ccccc1  
247 C=CC(=O)OC.COc1ccc(-c2oc3cc(OC)ccc3c(=O)c2I)cc1>>COC(=O)/C=C/c1c(-  
248 c2ccc(OC)cc2)oc2cc(OC)ccc2c1=O  
249 C=Cc1ccc2c(c1)C(CCCCCCCC)(CCCCCCCC)c1ccccc1-  
250 2.CCCCCCCCCC1(CCCCCCCC)c2cc(Br)ccc2-  
251 c2ccc(C=O)cc21>>CCCCCCCCC1(CCCCCCCC)c2ccccc2-  
252 C=CC(=O)N(C)C.CCc1nc2cc(O)ccc2c(Oc2ccc(Br)cc2)c1-  
253 c1ccccc1>>CCc1nc2cc(O)ccc2c(Oc2ccc(/C=C/C(=O)N(C)C)cc2)c1-c1ccccc1  
254 C=Cc1ccccc1.COc1nc(Br)c(-c2ccccc2)n(Cc2ccccc2)c1=O>>COc1nc(/C=C/c2ccccc2)c(-  
255 c2ccccc2)n(Cc2ccccc2)c1=O  
256 Br1ccc(-c2cc(-c3ccccc3)nc(-c3ccccc3)c2)cc1.C=Cc1ccccc1>>C(=C/c1ccc(-c2cc(-c3ccccc3)nc(-  
257 c3ccccc3)c2)cc1)\c1ccccc1  
258 Br1cncc2ccccc12.C=Cc1cn(COCC[Si](C)(C)C)nc1-  
259 c1nc(C(F)(F)F)en1COCC[Si](C)(C)C>>C[Si](C)(C)CCOCn1cc(/C=C/c2cncc3ccccc23)c(-  
260 c2nc(C(F)(F)F)en2COCC[Si](C)(C)C)n1  
261 C=Cc1ccccc1.COc1ccc(/C=C/c2[nH]c3ccccc3c(=O)c2I)cc1>>COc1ccc(/C=C/c2[nH]c3ccccc3c(=O)c2  
262 /C=C/c2ccccc2)cc1  
263 Br1c2ccccc2c2ccccc12.C=CCn1nnc2ccccc21>>C(=C/c1c2ccccc2cc2ccccc12)\Cn1nnc2ccccc21

239 C=CC(=O)N1N=Cc2c2ccccc2C1c1ccc(F)cc1.COc1cc(Cc2cnc(N)  
nc2N)cc(/C=C/C(=O)N2N=Cc3ccccc3C2c2ccc(F)cc2)c1OC  
240 C=CS(=O)(=O)F.Oc1cccc(I)c1>>O=S(=O)(F)/C=C/c1cccc(O)c1  
241 C=C(C)C(=O)OC.O=C1C(O)=C(I)C(=O)c2ccccc21>>COC(=O)/C(C)=C/C1=C(O)C(=O)c2ccccc2C1=  
242 C=COCCCC.Cc1ccc(Br)cc1>>C=C(OCCCC)c1ccc(C)cc1  
243 C=CCC1C=Cc2cccn2N1C(=O)Oc1cccc1.CCOC(=O)CC(c1ccc(OC)nc1)c1nc(Br)cs1>>CCOC(=O)C  
C(c1ccc(OC)nc1)c1nc(/C=C/CC2C=Cc3cccn3N2C(=O)Oc2ccccc2)cs1  
244 C=CC(O)c1cc(OC)c(OC)c(OC)c1Br.COc1ccc(I)cc1OC>>COc1ccc(/C=C/C(O)c2cc(OC)c(OC)c(OC)c  
2Br)cc1OC  
245 C=C(C)C(=O)OCC.Fc1cccc(I)c1>>CCOC(=O)/C(C)=C/c1cccc(F)c1  
246 C=C[C@H]1CN2CC[C@H]1C[C@@H]2[C@H](O)c1cnc2ccc(OC)cc12.COc1ccc(Br)cc1>>COc1ccc  
(/C=C/[C@H]2CN3CC[C@H]2C[C@@H]3[C@H](O)c2ccnc3ccc(OC)cc23)cc1  
247 C=C(OC)C(=O)OC.COc1ccc(I)cc1>>COC(=O)/C(=C/c1ccc(OC)cc1)OC  
248 C=CSclcccc1.CC(=O)c1ccc(Br)cc1>>CC(=O)c1ccc(/C=C/Sc2ccccc2)cc1  
249 C=CC(=O)OC(C)(C)C.Oc1nn(-c2ccccc2)cc1Br>>CC(C)(C)OC(=O)/C=C/c1cn(-c2ccccc2)nc1O  
250 C=CC(=O)OCC.O=[N+][([O-])c1cccc(I)c1>>CCOC(=O)/C=C/c1cccc([N+](=O)[O-])c1  
251 C=Cc1cccc(F)c1.CCNC(=O)c1cc(-c2cc(Br)c(OCc3ccccc3)cc2OCc2ccccc2)on1>>CCNC(=O)c1cc(-  
c2cc(/C=C/c3cccc(F)c3)c(OCc3ccccc3)cc2OCc2ccccc2)on1  
252 C=Cc1cc(OCCCCCCCCCCCC)cc(OCCCCCCCCCCCC)c1.Oc1ccc(I)cc1>>CCCCCCCCCCCCCOc1cc(  
/C=C/c2ccc(O)cc2)cc(OCCCCCCCCCCCC)c1  
253 C=CC(=O)OC.CC(C)[C@H]1C=C(OS(=O)(=O)C(F)(F)F)[C@@H](C)CC1>>COC(=O)/C=C/C1=C[C  
@H](C(C)C)CC[C@@H]1C  
254 C=Cc1ccc(F)cc1.CC(=O)c1ccc(Cl)cc1>>CC(=O)c1ccc(/C=C/c2ccc(F)cc2)cc1  
255 Brc1cnc2ccccc2c1.C=CC(=O)CC>>CCC(=O)/C=C/c1cnc2ccccc2c1  
256 C=CC(=O)OC.CC(C)(C)OC(=O)Cn1c(Br)cnc(NC2CCC2)c1=O>>COC(=O)/C=C/c1cnc(NC2CCC2)c(  
=O)n1CC(=O)OC(C)(C)C  
257 C=C(C)C(=O)OC.O=C(O)c1ccc(I)cc1>>COC(=O)/C(C)=C/c1ccc(C(=O)O)cc1  
258 C=C.Cc1cccc(I)c1>>C=Cc1cccc(C)c1  
259 C=C[C@@H](O[Si](C)(C)C(C)(C)C)[C@H](OCCCCO[Si](c1cccc1)(c1cccc1)C(C)(C)C)[C@@H](C/  
C(I)=C/CO)O[Si](C)(C)C(C)(C)C>>C=C1/C=C(CO)C[C@@H](O[Si](C)(C)C(C)(C)C)[C@@H](OC  
CCO[Si](c2ccccc2)(c2ccccc2)C(C)(C)C)[C@H]1O[Si](C)(C)C(C)(C)C  
260 C=Cc1cccc1O.Oc1cc(O)cc(I)c1>>Oc1cc(O)cc(/C=C/c2ccccc2O)c1  
261 C=CC(=O)OC.Cc1ccc(C(=C(I)CCSc2ccccc2)c2ccc(C)cc2)cc1>>COC(=O)/C=C/C(CCSc1cccc1)=C(c  
1ccc(C)cc1)c1ccc(C)cc1  
262 C=CN1CCCC1=O.COc1ccc(Cl)cc1>>C=C(c1ccc(OC)cc1)N1CCCC1=O  
263 C=CC(=O)OCCCC.Ic1cnnc2nnc(Cc3ccccc3)c12>>CCCCOC(=O)/C=C/c1cnnc2nnc(Cc3ccccc3)c12  
264 C=CC(=O)OCC.Ic1cccc2ccccc12>>CCOC(=O)/C=C/c1cccc2ccccc12  
265 C=CC(=O)NCCc1ccc(F)cc1.COc1cc2oc(-c3ccccc3)c(I)c(=O)c2cc1OC>>COc1cc2oc(-  
c3ccccc3)c(/C=C/C(=O)NCCc3ccc(F)cc3)c(=O)c2cc1OC  
266 C=CC(=O)OCC.COc1ccc(-c2cnccc2Br)cc1>>CCOC(=O)/C=C/c1cnccc1-c1ccc(OC)cc1  
267 Brc1cccc1.C=CC(C)=O>>CC(=O)/C=C/c1cccc1  
268 C=C.ClCc1cc2ccccc2o1>>C=CCc1cc2ccccc2o1  
269 C=Cc1ccc(OC)cc1.Cc1ccc(Br)cc1>>COc1ccc(/C=C/c2ccc(C)cc2)cc1  
270 C=CC(=O)OCC.Cc1nnn(Cc2cc(Cl)ccc2Br)n1>>CCOC(=O)/C=C/c1ccc(Cl)cc1Cn1nnc(C)n1  
271 C=Cc1cncc1.C[Si](C)(C)CCOCn1nc(I)c2ccc([C@@H]3C[C@@H]34C(=O)Nc3ccccc34)cc21>>C[Si](  
C)(C)CCOCn1nc(/C=C/c2cnccc2)c2ccc([C@@H]3C[C@@H]34C(=O)Nc3ccccc34)cc21  
272 C=C.ClCc1ccc(-c2ccccc2)cc1>>C=CCc1ccc(-c2ccccc2)cc1  
273 C=CC(=O)OCC.COc1cc(Br)c(C)c2nnn(C)c12>>CCOC(=O)/C=C/c1cc(OC)c2c(nnn2C)c1C  
274 C=CC(=O)OCC.COc1cc(Br)c(-c2cc3ccccc3o2)cc1OC>>CCOC(=O)/C=C/c1cc(OC)c(OC)cc1-  
c1cc2ccccc2o1  
275 C=CC(=O)OCC.Cc1nc(-  
n2c(C)ccc2C)cc(N[C@H]2CC[C@H](O)CC2)c1Br>>CCOC(=O)/C=C/c1c(N[C@H]2CC[C@H](O)C  
C2)cc(-n2c(C)ccc2C)nc1C  
276 C=CC(=O)OCC.CCOC(=O)C1=C(C)N(c2cccc(C(F)(F)F)c2)C(=O)N(Cc2ccccc(Br)c2)C1c1ccc(C#N)cc  
1>>CCOC(=O)/C=C/c1cccc(CN2C(=O)N(c3cccc(C(F)(F)F)c3)C(C)=C(C(=O)OCC)C2c2ccc(C#N)cc2  
277 C=C(NC(C)=O)C(=O)OC.N#Cc1ccc(Br)cc1>>COC(=O)/C=C/c1ccc(C#N)cc1)NC(C)=O  
278 C=CC(=O)OC(C)(C)C.CN1CC(=O)Nc2ncc(Br)cc2C1>>CN1CC(=O)Nc2ncc(/C=C/C(=O)OC(C)(C)C)  
cc2C1  
279 C=Cc1cccc1.Clc1cn[nH]c1>>C=C/c1cn[nH]c1)\c1cccc1  
280 C=Cc1cccc1OC.Nc1cccc1Br>>COc1cccc1/C=C/c1cccc1N

281 C=CC(=O)N1N=Cc2ccccc2C1C=C(C)C.COc1cc(C(=O)c2cnc(N)nc2N)cc(I)c1OC>>COc1cc(C(=O)c2  
cnc(N)nc2N)cc(/C=C/C(=O)N2N=Cc3ccccc3C2C=C(C)C)c1OC  
 282 C=Cc1ccc(Cl)cc1.CCOC(=O)C(F)(F)I>>CCOC(=O)C(F)(F)/C=C/c1ccc(Cl)cc1  
 283 C=CC(=O)OC.O=C1Cc2cc(Br)ccc2N1>>COC(=O)/C=C/c1ccc2c(c1)CC(=O)N2  
 284 C=CC(=O)OCCCC.Cn1nc(Br)c2ccc(C#N)cc21>>CCCCOC(=O)/C=C/c1nn(C)c2cc(C#N)ccc12  
 285 C=CC(=O)OC.COc1ccc2c(c1Br)CCC=C2c1cc(OC)c(OC)c(OC)c1>>COC(=O)/C=C/c1c(OC)ccc2c1C  
CC=C2c1cc(OC)c(OC)c(OC)c1  
 286 C=CCNC(=O)OC(C)(C)C.Clc1ccccc1>>C=C(CNC(=O)OC(C)(C)C)c1ccccc1  
 287 C=C(C)C(=O)NCc1ccccc1.Clc1ccccc1>>C/C(=C\c1ccccc1)C(=O)NCc1ccccc1  
 288 C=C(F)C(=O)OC.Cc1cc(C)c(I)c(C)c1>>COC(=O)/C(F)=C/c1c(C)cc(C)cc1C  
C=CC(=O)OCC.Cn1cc(C(=O)Nc2ccc(-  
 289 c3ccccc3)c(C(F)(F)F)c2)c(=O)c2ccc(Br)cc21>>CCOC(=O)/C=C/c1ccc2c(=O)c(C(=O)Nc3ccc(-  
c4ccccc4)c(C(F)(F)F)c3)cn(C)c2c1  
 290 C=CC(=O)OC.Ic1cnn(C2CCCCO2)c1>>COC(=O)/C=C/c1enn(C2CCCCO2)c1  
 291 C=CC(=O)OCC.Cc1ccc(Br)cc1>>CCOC(=O)/C=C/c1ccc(C)cc1  
C=CC(=O)Nc1ccccc1NC(=O)OC(C)(C)C.O=C(Nc1ccc(Cl)cc1)[C@H]1CN(CC(F)F)C[C@@H]1c1ccc  
 292 (Br)cc1>>CC(C)(C)OC(=O)Nc1ccccc1NC(=O)/C=C/c1ccc([C@H]2CN(CC(F)F)C[C@@H]2C(=O)Nc  
2ccc(Cl)cc2)cc1  
 293 C=CNC(C)=O.CCOC(=O)c1ccc(I)cc1>>C=C(NC(C)=O)c1ccc(C(=O)OCC)cc1  
 294 C=CC(=O)OC.Fc1cnc(Br)c1>>COC(=O)/C=C/c1cnc(F)c1  
 295 C=CC(=O)CCC.COc1ccc(Br)cc1>>CCCC(=O)/C=C/c1ccc(OC)cc1  
 296 C=Cc1ccc(OC)c(OC)c1.Cn1cc(I)c(=O)c2ccccc21>>COc1ccc(/C=C/c2cn(C)c3ccccc3c2=O)cc1OC  
 297 C=CC(=O)OC.O=[N+][O-]c1ccc(C2=C(I)C2(F)F)cc1>>COC(=O)/C=C/C1=C(c2ccc([N+](=O)[O-  
]cc2)C1(F)F  
 298 C=CC(=O)C1=CN(CC(C)C)CCC1(C)C.COc1ccc(Br)cc1>>COc1ccc(/C=C/C(=O)C2=CN(CC(C)C)CC  
C2(C)C)cc1  
 299 C=Cc1ccc(F)cc1.Ic1ccccc1>>Fc1ccc(/C=C/c2ccccc2)cc1  
 300 C=CC(CO)N1C(=O)c2ccccc2C1=O.COc1ccc(Br)c1>>COc1ccc(/C=C/C(CO)N2C(=O)c3ccccc3C2=  
C=CCn1c(=O)c(-c2ccc(OC)cc2)cc2cc(OC)c(OC)cc21.O=C(O)Cc1ccc(Br)cc1>>COc1ccc(-  
 301 c2cc3cc(OC)c(OC)cc3n(C/C=C/c3ccc(CC(=O)O)cc3)c2=O)cc1  
 302 C=CCOCC1=C(Br)CCc2ccccc21>>C=C1CCOCC2=C1CCc1ccccc12  
 303 Br1ccccc2ccccc12.C=Cc1ccccc1>>C(=C/c1ccccc2ccccc12)\c1ccccc1  
 304 C=CC(=O)OC.Nc1cc(C(F)(F)F)cc(C(F)(F)F)c1Br>>COC(=O)/C=C/c1c(N)cc(C(F)(F)F)cc1C(F)(F)F  
C=Cc1ccc(C)nc1.COc1cc(I)c2c3c1O[C@@H]1[C@]34CCN(C)[C@H](C2)[C@]42C=C[C@@]1(OC)  
 305 c1c(O)ccc(O)c12>>COc1cc(/C=C/c2ccc(C)nc2)c2c3c1O[C@@H]1[C@]34CCN(C)[C@H](C2)[C@]4  
2C=C[C@@]1(OC)c1c(O)ccc(O)c12  
 306 C=Cc1ccccc1.CC(C)c1cnnc(Nc2ccc3ncc(Br)cc3n2)c1>>CC(C)c1cnnc(Nc2ccc3ncc(/C=C/c4ccccc4)cc  
3n2)c1  
 307 C=CC#N.O=CC1=C(Br)c2ccccc2CC1>>N#C/C=C/C1=C(C(=O)CCc2ccccc21  
 308 C=CC[C@H](NC(=O)OCc1ccccc1)C(=O)OC(C)(C)C.Clc1ccc(I)cc1>>CC(C)(C)OC(=O)[C@H](C/C=  
C/c1ccc(Cl)cc1)NC(=O)OCc1ccccc1  
 309 C=CC(=O)N(C)Cc1cc2ccccc2n1C.CC1(C)NCc2cc(Br)cnc2NC1=O>>CN(Cc1cc2ccccc2n1C)C(=O)/C  
=C/c1cnc2c(c1)CNC(C)(C)C(=O)N2  
 310 C=CC(C)=O.CN1C(c2ccccc2)=C(I)c2ccsc2S1(=O)=O>>CC(=O)/C=C/C1=C(c2ccccc2)N(C)S(=O)(=O  
)c2sccc21  
 311 Br1ccc(OCCN2CCCC2)cc1.C=Cc1c(C)ccc(C#N)c1Nc1ccc2[nH]ccc2c1C>>Cc1ncc(C#N)c(Nc2ccc3[  
nH]ccc3c2C)c1/C=C/c1ccc(OCCN2CCCC2)cc1  
 312 C=CC(=O)OC.CCn1nnc2c(C)c(Br)ccc21>>CCn1nnc2c(C)c(/C=C/C(=O)OC)ccc21  
 313 C=Cc1ccccc1.N#Cc1ccc(OS(=O)(=O)C(F)(F)F)cc1>>C=C(c1ccccc1)c1ccc(C#N)cc1  
 314 C=CC(=O)OCC.CCOC(=O)c1ccc(Br)cc1C>>CCOC(=O)/C=C/c1ccc(C(=O)OCC)c(C)c1  
 315 C=C1CC(c2ccc(Cl)cc2)OC1=O.Cc1ccc(I)c1>>Cc1ccc(/C=C2\CC(c3ccc(Cl)cc3)OC2=O)c1  
 316 C=Cc1ccccc1.O=[N+][O-]c1ccc(Br)c1>>O=[N+][O-]c1ccc(/C=C/c2ccccc2)c1  
 317 C=Cc1ccccc1.CCC(OC)(C(=O)OC)c1cc2n(c(=O)c1OS(=O)(=O)C(F)(F)F)CCC2>>CCC(OC)(C(=O)O  
C)c1cc2n(c(=O)c1/C=C/c1ccccc1)CCC2  
 318 C=Cc1ccc(OC)c(O[Si](C)(C)C(C)(C)C)c1.COc1cc(I)cc(OC)c1OC>>COc1ccc(/C=C/c2cc(OC)c(OC)c(  
OC)c2)cc1O[Si](C)(C)C(C)(C)C  
 319 C=CC(C)=O.N#Cc1ccc(N)c(I)c1>>CC(=O)/C=C/c1cc(C#N)ccc1N  
 320 C=CCN(C(=O)Cc1ccccc1)c1ccccc1.FC(F)(F)c1ccc(I)cc1>>O=C(Cc1ccccc1)N(C/C=C/c1ccc(C(F)(F)F  
)cc1)c1ccccc1  
 321 C=Cc1cc2cc(OC)c(OC)cc2oc1=O.Ic1ccccc1>>COc1cc2cc(/C=C/c3ccccc3)c(=O)oc2cc1OC  
 322 C=CC(C)=O.FC1(F)C(I)=C1c1ccccc1>>CC(=O)/C=C/C1=C(c2ccccc2)C1(F)F



323 C=Cc1ccncc1.CC(C)(C)OC(=O)N[C@H](COc1cncc(Br)c1)Cc1cccc(O)c1>>CC(C)(C)OC(=O)N[C@H](COc1cncc(/C=C/c2cnc2)c1)Cc1cccc(O)c1  
 324 C=CCC(O)c1cc2cccc(C)c2nc1Cl>>C=C1CC(O)c2cc3cccc(C)c3nc21  
 325 C=CCN(C(=O)C(C)(C)C)[C@H](C)c1ccc(Cl)cc1.O=C1Nc2ncccc2[C@@]12Cc1cc(Br)enc1C2>>C[C@H](c1ccc(Cl)cc1)N(C/C=C/c1enc2c(c1)C[C@@]1(C2)C(=O)Nc2ncccc21)C(=O)C(C)(C)C  
 326 C=CC(=O)OC.FC(F)(F)c1cccc(I)c1>>COC(=O)/C=C/c1cccc(C(F)(F)F)c1  
 327 C=C(NC(C)=O)C(=O)OC.COC(=O)c1cccc1I>>COC(=O)/C(=C/c1cccc1C(=O)OC)NC(C)=O  
 328 C=CC(=O)OC.COC(=O)c1c(Br)ccc2nn(C)c(C)c12>>COC(=O)/C=C/c1ccc2nn(C)c(C)c2c1C(=O)OC  
 329 C=CC(=O)OC.O=Cc1c(F)cc(Br)cc1Cl>>COC(=O)/C=C/c1cc(F)c(C=O)c(Cl)c1  
 330 C=CC(C)(C)O.O=S(=O)(c1cccc1)n1ccc2ccc(Br)cc21>>CC(C)(O)/C=C/c1ccc2ccn(S(=O)(=O)c3cccc3)c2c1  
 331 C=CC(=O)OCC.Clc1cccc(Br)c1>>CCOC(=O)/C=C/c1cccc(Cl)c1  
 332 C=C[C@H]1[C@@H]2[C@H]3(CN1c1cc(C(=O)OC)cc(OCc3cccc3)c1I)N2C(=O)OC(C)(C)C>>C=C1c2c(OCc3cccc3)cc(C(=O)OC)cc2N2C[C@H]3[C@@H]([C@H]12)N3C(=O)OC(C)(C)C  
 333 C=CC(=O)OC.O=Cc1ccc(F)cc1Br>>COC(=O)/C=C/c1cc(F)ccc1C=O  
 334 C=Cc1cccc1.Cn1nc(NC(=O)C(C)(C)C)c2cc(I)enc21>>Cn1nc(NC(=O)C(C)(C)C)c2cc(/C=C/c3cccc3)cnc21  
 335 C=CCCC(=O)O.FC(F)(F)c1ccc(I)cc1>>O=C(O)CC/C=C/c1ccc(C(F)(F)F)cc1  
 336 C=Cc1cccc(O[Si](C)(C)C(C)(C)C)c1.C[Si](C)(C)OS(=O)(=O)C(F)(F)F>>CC(C)(C)[Si](C)(C)Oc1cccc(/C=C/[Si](C)(C)C)c1  
 337 C=C(C)C(=O)OC.Cc1ccsc1Br>>COC(=O)/C(C)=C/c1secc1C  
 338 C=CCC(C)O.Cc1ccc(Br)cc1[N+](=O)[O-]>>Cc1ccc(/C=C/CC(C)O)cc1[N+](=O)[O-]  
 339 C=CC(=O)OC(C)(C)C.O=C1Nc2cccc2O/C1=C\c1ccc(Br)s1>>CC(C)(C)OC(=O)/C=C/c1ccc(/C=C2\Oc3cccc3NC2=O)s1  
 340 C=CC(=O)NC1CCCCC1.O=c1c(I)c(-c2ccc(O)cc2)oc2cc(O)ccc12>>O=C(/C=C/c1c(-c2ccc(O)cc2)oc2cc(O)ccc2c1=O)NC1CCCCC1  
 341 C=CCNC(=O)c1cc(C)on1.Cc1ccc(I)cc1>>Cc1ccc(/C=C/CNC(=O)c2cc(C)on2)cc1  
 342 C=CC(=O)OCCCC.COc1cc(Br)cc(OC)c1>>CCCCOC(=O)/C=C/c1cc(OC)cc(OC)c1  
 343 C=Cc1cccc(Cl)c1.CC(=O)Nc1ccc(Br)cc1>>CC(=O)Nc1ccc(/C=C/c2cccc(Cl)c2)cc1  
 344 COC(=O)/C=C/Oc1cccc1-c1cc(C)c(C)cc1Br>>COC(=O)/C=C1/Oc2cccc2-c2cc(C)c(C)cc21  
 345 C=CCC(=O)OC.O=c1ccn(Cc2ccc(I)cc2)c(=O)[nH]1>>COC(=O)C/C=C/c1ccc(Cn2ccc(=O)[nH]c2=O)  
 346 C=C(C)c1cccc1.Fc1c(F)c(F)c(Br)c(F)c1F>>C/C(=C\c1c(F)c(F)c(F)c1F)c1cccc1  
 347 Br1cccn1.C=CCCC(C(=O)OCC)C(=O)OCC>>CCOC(=O)C(CCC/C=C/c1cccn1)C(=O)OCC  
 348 C=CC(=O)O.FC(F)(F)C1(c2cccc(Br)c2)N=N1>>O=C(O)/C=C/c1cccc(C2(C(F)(F)F)N=N2)c1  
 349 C=CC(=O)OCc1cccc1.O=C1NCCCC[C@@H]1N1Cc2c(I)cccc2C1=O>>O=C(/C=C/c1cccc2c1CN([C@@H]1CCCCNC1=O)C2=O)OCc1cccc1  
 350 C=CC(=O)OC.O=C(Nc1cc(Br)ccn1)C1CCCCC1>>COC(=O)/C=C/c1ccnc(NC(=O)C2CCCCC2)c1  
 351 C=CC(=O)OC.O=c1[nH]c(=O)n([C@H]2O[C@@H](CO)[C@H](O)[C@@H]2F)cc1I>>COC(=O)/C=C/c1cn([C@H]2O[C@@H](CO)[C@H](O)[C@@H]2F)c(=O)[nH]c1=O  
 352 C=CC(=O)OC(C)(C)C.Nc1cccc(Br)c1F>>CC(C)(C)OC(=O)/C=C/c1cccc(N)c1F  
 353 Br1ccc2cccc2c1.C=COCCCCO>>C=C(OCCCCO)c1ccc2cccc2c1  
 354 Br1cccn2nnnc12.C=Cc1cc(OC)c(OC)c(OC)c1>>COc1cc(/C=C/c2cccn3nnnc23)cc(OC)c1OC  
 355 C=Cc1ccc(Cl)cc1.CC(C)(C)c1ccc(Br)cc1>>C=C(c1ccc(Cl)cc1)c1ccc(C(C)(C)C)cc1  
 356 C=C(C)c1cccc1.Cc1ccc(I)cc1>>C/C(=C\c1ccc(C)cc1)c1cccc1  
 357 C=Cc1cncc1.CCNc1ccc(Br)cc1>>CCNc1ccc(/C=C/c2cnc2)cc1  
 358 C=CC(=O)OC(C)(C)C.O=C1Nc2cccc2O/C1=C\c1ccc(Br)cc1>>CC(C)(C)OC(=O)/C=C/c1ccc(/C=C2\Oc3cccc3NC2=O)cc1  
 359 C=Cn1nnnc1CC.Ic1cccc1>>CCc1nnnn1/C=C/c1cccc1  
 360 C=Cc1cc(OCc2cccc2)ccc1OCc1cccc1.O=C(NCCc1ccc(F)cc1)c1cc(I)ccc1O>>O=C(NCCc1ccc(F)cc1)c1cc(/C=C/c2cc(OCc3cccc3)ccc2OCc2cccc2)ccc1O  
 361 C=CC(=O)O.FC(F)(F)c1ccc(I)c(Cl)c1>>O=C(O)/C=C/c1ccc(C(F)(F)F)cc1Cl  
 362 CC(=O)c1ccc(I)cc1.CCOC(=O)/C(F)=C\CCc1cccc1>>CCOC(=O)/C(F)=C(\CCc1cccc1)c1ccc(C(C)=O)cc1  
 363 C=COCC.CCOC(=O)C(=O)Cl>>CCO/C=C/C(=O)C(=O)OCC  
 364 C=CC(=O)OCc1cccc1.Cc1oc(-c2cccc2)cc1CCOc1ccnc2c(Cl)cccc12>>Cc1oc(-c2cccc2)cc1CCOc1ccnc2c(/C=C/C(=O)OCc3cccc3)cccc12  
 365 Br1ccc2ccc3cccc4ccc1c2c34.C=CC(=O)OCCCCC(C)C>>CC(C)CCCCCOC(=O)/C=C/c1ccc2ccc3cccc4ccc1c2c34  
 366 C=CC(=O)N(C)Cc1cc2cccc2n1C.COc1nn(C(=O)OC(C)(C)C)c2ncc(Br)cc12>>COc1nn(C(=O)OC(C)(C)C)c2ncc(/C=C/C(=O)N(C)Cc3cc4cccc4n3C)cc12

367 C=Cc1ccc2cc(F)c(F)cc2n1.OC1c2cc(Br)ccc2OCc2ncccc21>>OC1c2cc(/C=C/c3ccc4cc(F)c(F)cc4n3)cc  
c2OCc2ncccc21  
 368 C=C.COC(=O)c1cc(Br)cc(C(=O)OC)n1>>C=Cc1cc(C(=O)OC)nc(C(=O)OC)c1  
 369 C=CCCCCCC.CC(C)(C)c1ccc(Br)cc1>>C=C(CCCCCC)c1ccc(C(C)(C)C)cc1  
 370 C=Cc1ccc(C(C)(C)C)cc1.CCOC(=O)C(F)I>>CCOC(=O)C(F)/C=C/c1ccc(C(C)(C)C)cc1  
 371 C=Cc1cccc1CO[Si](Cl)(C(C)C)C(C)C>>CC(C)[Si]1(C(C)C)C/C=C/c2cccc2CO1  
 372 C=CC(=O)OC.COc1ccc2[nH]ccc2c1Br>>COC(=O)/C=C/c1c(OC)ccc2[nH]ccc12  
 373 C=CC(N)=O.Clc1cccc1>>NC(=O)/C=C/c1cccc1  
 374 C=Cc1cn(C)cn1.Oc1ccc(-c2sc3cc(O)ccc3c2Oe2ccc(Br)cc2)cc1>>Cn1cnc(/C=C/c2ccc(Oc3c(-  
c4ccc(O)cc4)sc4cc(O)ccc34)cc2)c1  
 375 C=CC(=O)O.O=[N+](O-)]c1cccc(Br)c1>>O=C(O)/C=C/c1cccc([N+](=O)[O-])c1  
C=CC(=O)OC.CC(C)(C)OC(=O)NC1(c2ccc(-c3nc4c5cc(Br)ccc5nn4cc3-  
 376 c3cccc3)cc2)CCC1>>COC(=O)/C=C/c1ccc2nn3cc(-c4cccc4)c(-  
c4ccc(C5(NC(=O)OC(C)(C)C)CCC5)cc4)nc3c2c1  
 377 C=Cc1cccc1.CN(C(=O)c1cccc1)c1ccc2c(c1)[nH]c(=NC(=O)c1ccc(Br)s1)n2CCC(N)=O>>CN(C(=O  
)c1cccc1)c1ccc2c(c1)[nH]c(=NC(=O)c1ccc(/C=C/c3cccc3)s1)n2CCC(N)=O  
 378 C=CC(OCC)OCC.O=[N+](O-)]c1ccc(I)cc1>>CCOC(/C=C/c1ccc([N+](=O)[O-])cc1)OCC  
 379 C=Cc1ccc2cccc2c1.Clc1cccc1>>C=C/c1ccc2cccc2c1)\c1cccc1  
 380 C=CC(C)(C)O.Nc1cccc(Br)c1>>CC(C)(O)/C=C/c1cccc(N)c1  
 381 C=CC(CC)(CC)C(=O)Nc1ccc(C(F)(F)F)cc1Br>>C=C1c2cc(C(F)(F)F)ccc2NC(=O)C1(CC)CC  
 382 C=COCCCC.Clc1ccc2cccc2c1>>C=C(OCCCC)c1ccc2cccc2c1  
 383 C=CC(=O)OCC.Cc1cc(O)c(Br)cc1C#N>>CCOC(=O)/C=C/c1cc(C#N)c(C)cc1O  
 384 C=Cc1ccc(N(C)C)cc1.Cc1nc2cc(Br)ccc2nc1-c1cccc1>>Cc1nc2cc(/C=C/c3ccc(N(C)C)cc3)ccc2nc1-  
c1cccc1  
 385 C=CS(=O)(=O)F.COc1cccc1I>>COc1cccc1/C=C/S(=O)(=O)F  
 386 C=Cc1cccc1OC.Nc1ccc(Br)cc1>>COc1cccc1/C=C/c1ccc(N)cc1  
 387 C=CC(=O)N(C)C.C[C@H]1COCc2nc3c(N)nc4cc(Br)ccc4c3n21>>C[C@H]1COCc2nc3c(N)nc4cc(/C  
=C/C(=O)N(C)C)ccc4c3n21  
 388 C=CC(=O)OCC.O=c1oc2cccc2c(OS(=O)(=O)C(F)(F)F)c1C(c1cccc1)c1cccc1>>CCOC(=O)/C=C/c  
1c(C(c2cccc2)c2cccc2)c(=O)oc2cccc12  
 389 C=Cc1cncnc1.CN1CCC[C@H]1COc1cnc(Br)c1>>CN1CCC[C@H]1COc1cnc(/C=C/c2cncnc2)c1  
 390 C=CC(=O)OC(C)(C)C.O=C1Nc2cccc2O/C1=C/c1cc(Br)es1>>CC(C)(C)OC(=O)/C=C/c1esc(/C=C2\  
Oc3cccc3NC2=O)c1  
C=CC(C)(O)CCCCCCCCN1C(=O)c2cccc2C1=O.CC(C)(C)[Si](C)(C)O[C@H]1C=C(Br)[C@@H](O  
 391 )[C@@H]2O[C@H]12>>CC(O)/C=C/C1=C[C@H](O[Si](C)(C)C(C)(C)C)[C@H]2O[C@H]2[C@@  
H]1O)CCCCCCCCN1C(=O)c2cccc2C1=O  
 392 C=CS(N)(=O)=O.Cc1ccc(C)c(Br)c1>>Cc1ccc(C)c(/C=C/S(N)(=O)=O)c1  
 393 Br1nccn1.C=Cc1cccc1OC>>COc1cccc1/C=C/c1nccn1  
 394 C=CC(N)=O.FC(F)(F)Oc1ccc(I)cc1>>NC(=O)/C=C/c1ccc(OC(F)(F)F)cc1  
C=CC(C)(C)O.CC(C)(C)OC(=O)N1CCC[C@H](Nc2cc(C(F)(F)F)c(-  
 395 c3cn(S(=O)(=O)c4cccc4)c4cc(Br)ccc34)n2C1>>CC(C)(O)/C=C/c1ccc2c(-  
c3nc(N[C@H]4CCCN(C(=O)OC(C)(C)C)C4)ccc3C(F)(F)F)cn(S(=O)(=O)c3cccc3)c2c1  
 396 C=COCCCC.Cc1cc(Br)c2nc(N3CCOCC3)cc(=O)n2c1>>C=C(OCCCC)c1cc(C)cn2c(=O)cc(N3CCOC  
C3)nc12  
 397 Br1cc2ccc3cccc3c2c2c1ccc1cccc12.C=CC(=O)OC>>COC(=O)/C=C/c1cc2ccc3cccc3c2c2c1ccc1c  
cccc12  
 398 C=CC#N.CC(C)N(CC[C@H](c1cccc1)c1cc(Br)ccc1OCc1cccc1)C(C)C>>CC(C)N(CC[C@H](c1ccc  
cc1)c1cc(/C=C/C#N)ccc1OCc1cccc1)C(C)C  
 399 C=Cc1cncnc1.CCCCN(CCCC)c1ccc(Br)cc1>>CCCN(CCCC)c1ccc(/C=C/c2cncnc2)cc1  
 400 C=CC(=O)OCCCC.Cn1nc(Br)c2cccc(Cl)c21>>CCCCOC(=O)/C=C/c1nn(C)c2c(Cl)cccc12  
 401 C=C[C@@H](C)[C@H](C/C=C/C(=O)OC(C)(C)C)O[Si](C)(C)C(C)(C)C.Ic1cccc1>>C[C@H](/C=C  
/c1cccc1)[C@H](C/C=C/C(=O)OC(C)(C)C)O[Si](C)(C)C(C)(C)C  
 402 C=Cc1cccc1.CCn1cnc1-c1ccc(Br)o1>>CCn1cnc1-c1ccc(/C=C/c2cccc2)o1  
 403 C=Cc1ccc(C)cc1.CC(=O)c1ccc(Cl)cc1>>CC(=O)c1ccc(/C=C/c2ccc(C)cc2)cc1  
 404 C=CC(=O)OC.COC(=O)c1ccc2c1oc1ccc(-c3sc(-c4ccc(I)cc4)n3)cc12>>COC(=O)/C=C/c1ccc(-  
c2nc(-c3ccc4oc5c(C(=O)OC)cccc5c4c3)es2)cc1  
 405 C=CC(=O)OCC.Cc1cncnc1Br>>CCOC(=O)/C=C/c1cncnc1C  
 406 C=COCCCC.O=S(=O)(Oc1ccc2cccc2c1)C(F)(F)F>>C=C(OCCCC)c1ccc2cccc2c1  
 407 C=Cc1cncnc1.Cc1cc(N2CCCC2)nc(Cl)n1>>Cc1cc(N2CCCC2)nc(/C=C/c2cncnc2)n1  
 408 Br1cccs1.C=CC(=O)OCCCC>>CCCCOC(=O)/C=C/c1cccs1  
 409 C=CS(=O)(=O)F.FC(F)(F)c1ccc(I)cc1>>O=S(=O)(F)/C=C/c1ccc(C(F)(F)F)cc1

410 C=CC(=O)OC.O=c1oc(Br)cc2ccccc12>>COC(=O)/C=C/c1cc2ccccc2c(=O)o1  
 411 Br1cncnc1.C=Cc1cccc(OC)c1>>COc1cccc(/C=C/c2cncnc2)c1  
 412 C=CC(=O)OC.CC1c2ccc(Br)cc2CCN1C(=O)OC(C)(C)C>>COC(=O)/C=C/c1ccc2c(c1)CCN(C(=O)O  
 413 C(C)(C)C)C2C  
 413 C=CC(=O)OC(C)(C)C.CC(C)OC(=O)c1sccc1Br>>CC(C)OC(=O)c1sccc1/C=C/C(=O)OC(C)(C)C  
 414 C=CC(=O)OCC.O=S(=O)(Oc1ccc(C(=C2C3CCCC2CCC3)c2ccc(O)cc2)cc1)C(F)(F)F>>CCOC(=O)/C  
 415 =C/c1ccc(C(=C2C3CCCC2CCC3)c2ccc(O)cc2)cc1  
 415 C=Cc1cncnc1.Fc1ccc(I)c(F)c1>>Fc1ccc(/C=C/c2cncnc2)c(F)c1  
 416 C=CC(=O)OCCCC.O=C(Cc1c(-  
 417 c2cccc(Br)c2)c2cc(CN3CCN(c4ccccc4)CC3)c(Cl)cc2oc1=O)Nc1ccc(F)cc1C(F)(F)F>>CCCCOC(=O)/  
 418 C=C/c1cccc(-c2c(CC(=O)Nc3ccc(F)cc3C(F)(F)F)c(=O)oc3cc(Cl)c(CN4CCN(c5ccccc5)CC4)cc23)c1  
 419 C=C[C@H](O[Si](C)(C)C(C)(C)C)[C@H](OCCCC[Si](c1ccccc1)(c1ccccc1)C(C)(C)C)[C@H](C/C(  
 420 I)=C/CO)O[Si](C)(C)C(C)(C)C>>C=C1/C(=C(CO)C[C@H](O[Si](C)(C)C(C)(C)C)[C@H](OCCC  
 421 O[Si](c2ccccc2)(c2ccccc2)C(C)(C)C)[C@H]1O[Si](C)(C)C(C)(C)C  
 422 Br1ccc2ccc3cccc4ccc1c2c34.C=CC(=O)OC(C)(C)C>>CC(C)(C)OC(=O)/C=C/c1ccc2ccc3cccc4ccc1c  
 423 2c34  
 424 C=CC(=O)OC(C)(C)C.CC(C)CN1C(c2ccc(Br)cc2)c2ccc3c(cnn3C3CCCCO3)c2CC1(C)C>>CC(C)CN  
 425 1C(c2ccc(/C=C/C(=O)OC(C)(C)C)cc2)c2ccc3c(cnn3C3CCCCO3)c2CC1(C)C  
 426 C=Cc1cccc(OC)c1.FC(F)(F)c1ccccc1I>>COc1cccc(/C=C/c2ccccc2C(F)(F)F)c1  
 427 C=COCC.COc1ccc(Br)cc1>>C=C(OCC)c1ccc(OC)cc1  
 428 C=CC(=O)N(C)Cc1cccc(C(C)C)c1OCCC.O=C1CNCCc2cc(Br)enc2N1>>CCCOc1c(CN(C)C(=O)/C=C/  
 429 c2cnc3c(c2)CNCC(=O)N3)cccc1C(C)C  
 430 C=CC(=O)OCCCC.Oc1ccc(Br)cc1>>CCCCOC(=O)/C=C/c1ccc(O)cc1  
 431 Br1ccccc(I)c1.C=CC(=O)OCC>>CCOC(=O)/C=C/c1cccc(Br)c1  
 432 C=CN1CCCC1=O.CCOC(=O)C(F)(F)Br>>CCOC(=O)C(F)(F)/C=C/N1CCCC1=O  
 433 C=CC(=O)OCc1cc(OCCCCCCCCCCCCCCCCCCC)c(OCCCCCCCCCCCCCCCCCCC)c(OCCCCCCCC  
 434 CCCCCCCCCCC)c1.Ic1ccccc1>>CCCCCCCCCCCCCCCCCCCCOc1cc(COC(=O)/C=C/c2ccccc2)cc(OCC  
 435 CCCCCCCCCCCCCCCCCCC)c1OCCCCCCCCCCCCCCCCCCC  
 436 C=CCCN1C(=O)c2ccccc2C1=O.Ic1ccc(C2OCCO2)cc1>>O=C1c2ccccc2C(=O)N1CC/C=C/c1ccc(C2  
 437 OCCO2)cc1  
 438 C=CC(=O)OC(C)(C)C.CC(C)(C)c1cc(Cl)c2ccccc2n1>>CC(C)(C)OC(=O)/C=C/c1cc(C(C)(C)C)nc2ccc  
 439 cc12  
 440 C=Cc1ccccc1.CC(C)n1cnc2c(Cl)nc(I)nc21>>CC(C)n1cnc2c(Cl)nc(/C=C/c3ccccc3)nc21  
 441 C=CS(=O)(=O)F.Cc1ccccc1I>>Cc1ccccc1/C=C/S(=O)(=O)F  
 442 C=CC(=O)OC.O=CC1=C(Br)CCCCC1>>COC(=O)/C=C/C1=C(C=O)CCCCC1  
 443 C=CC(=O)OCC.COc1ccc(Br)cc1CC(=O)Nc1cnc(C(=O)NC(C)(C)C)c1>>CCOC(=O)/C=C/c1ccc(OC)  
 444 c(CC(=O)Nc2ccnc(C(=O)NC(C)(C)C)c2)c1  
 445 C=CC(=O)N1CCC2(CC1)OCCO2.CC(C)(C)OC(=O)c1ccccc1Br>>CC(C)(C)OC(=O)c1ccccc1/C=C/C(  
 446 =O)N1CCC2(CC1)OCCO2  
 447 C=CC(=O)OC.FC(F)(F)c1ccc(Br)en1>>COC(=O)/C=C/c1ccc(C(F)(F)F)nc1  
 448 C=Cc1ccccc1.CCOC(=O)C(F)(F)I>>CCOC(=O)C(F)(F)/C=C/c1ccccc1  
 449 C=CC(=O)O.C[C@]12C[C@@]34C=C(Se5cccc(I)c5)C(=O)[C@@](C)(CCC(=O)Nc5c(O)ccc(C(=O)  
 450 O)c5O)[C@@H]3[C@H](C[C@@H]1C4)O2>>C[C@]12C[C@@]34C=C(Se5cccc(/C=C/C(=O)O)c5)  
 451 C(=O)[C@@](C)(CCC(=O)Nc5c(O)ccc(C(=O)O)c5O)[C@@H]3[C@H](C[C@@H]1C4)O2  
 452 C=CC#N.Nc1ccccc1I>>N#C/C=C/c1ccccc1N  
 453 C=CC(=O)OCC.Cc1nc(Br)c([N+](=O)[O-])n1C>>CCOC(=O)/C=C/c1nc(C)n(C)c1[N+](=O)[O-]  
 454 C=CC(=O)OC.O=c1oc2cc(Br)enc2n1CCc1cccn1>>COC(=O)/C=C/c1cnc2c(c1)oc(=O)n2CCc1cccn1  
 455 C=Cc1ccc(C(=O)OCC)cc1.CCSC1=CCC(C)(C)c2ccc(Br)cc21>>CCOC(=O)c1ccc(/C=C/c2ccc3c(c2)C  
 456 (SCC)=CCC3(C)C)cc1  
 457 C=CC(=O)N1N=Cc2ccccc2C1C1CCCC1.COc1cc(Cc2cnc(N)nc2N)cc(I)c1OC>>COc1cc(Cc2cnc(N)nc  
 458 2N)cc(/C=C/C(=O)N2N=Cc3ccccc3C2C2CCCC2)c1OC  
 459 C=CCOC.CCN(C)/C=N/c1cc2ccccc(Br)c2nc1C>>CCN(C)/C=N/c1cc2ccccc(/C=C/COC)c2nc1C  
 460 C=CNC=O.COc1cc(Br)ccc1F>>COc1cc(/C=C/NC=O)ccc1F  
 461 C=CC(=O)OC.COc1cc(Br)c(C=O)cc1OC>>COC(=O)/C=C/c1cc(OC)c(OC)cc1C=O  
 462 C=CC(=O)OC.CC(=O)Oc1ccc(Br)cc1CC=C(C)C>>COC(=O)/C=C/c1ccc(OC(C)=O)c(CC=C(C)C)c1  
 463 C=CCN(Cc1cc(F)cc(F)c1)C(=O)C(C)(C)C.O=C1Nc2ncccc2[C@@]12Cc1cc(Br)enc1C2>>CC(C)(C)C  
 464 (=O)N(C/C=C/c1cnc2c(c1)C[C@@]1(C2)C(=O)Nc2ncccc21)Cc1cc(F)cc(F)c1  
 465 C=CC(=O)OC.Cc1cc(Cl)ccc1C(F)(F)F>>COC(=O)/C=C/c1ccc(C(F)(F)F)c(C)c1

448 C=Cc1cccn1.CCN1C[C@]2(OC(=O)c3cc(I)ccc3NC(C)=O)CC[C@H](OC)[C@@]34[C@@H]2C[C@H]([C@@H]13)[C@@]1(O)C[C@H](OC)[C@H]2C[C@H]4[C@@]1(O)[C@H]2OC>>CCN1C[C@]2(OC(=O)c3cc(/C=C/c4cccn4)ccc3NC(C)=O)CC[C@H](OC)[C@@]34[C@@H]2C[C@H]([C@@H]13)[C@@]1(O)C[C@H](OC)[C@H]2C[C@H]4[C@@]1(O)[C@H]2OC  
449 C=Cc1ccc2c(c1)C1c3cccc4cccc(c34)C21.N#Cc1ccc(I)cc1C#N>>N#Cc1ccc(/C=C/c2ccc3c(c2)C2c4ccc  
c5cccc(c45)C32)cc1C#N  
450 C=CC(C)=O.CC(C)(C)OC(=O)Nc1ccsc1Br>>CC(=O)/C=C/c1sc1NC(=O)OC(C)(C)C  
451 Br1ccc2ccc3cccc4ccc1c2c34.C=C[C@H](CO[Si](C)(C)C(C)(C)NC(=O)OCc1cccc1>>CC(C)(C)[  
Si](C)(C)OC[C@H](/C=C/c1ccc2ccc3cccc4ccc1c2c34)NC(=O)OCc1cccc1  
452 C=Cc1ccc(C(C)(C)C)cc1.Cc1ccc([Si](C)(C)I)o1>>Cc1ccc([Si](C)(C)/C=C/c2ccc(C(C)(C)C)cc2)o1  
453 C=Cc1ccncc1.CCCCOc1ccc(I)cc1>>CCCOc1ccc(/C=C/c2ccncc2)cc1  
454 C=CNC(C)=O.Cc1cccc1Br>>C=C(NC(C)=O)c1cccc1C  
455 C=CC(C)c1ccc2cccc2c1OS(=O)(=O)c1cccc1Br>>C=C1c2cccc2S(=O)(=O)Oc2c(ccc3cccc23)C1C  
456 C=CC(=O)OC.CC(C)(F)CN1[C@H](C(F)F)Cc2c(ccc3c2cnn3C2CCCCO2)[C@@]1(C)c1c(F)cc(Br)cc  
1F>>COC(=O)/C=C/c1cc(F)c([C@]2(C)c3ccc4c(cnn4C4CCCCO4)c3C[C@H](C(F)F)N2CC(C)(C)F  
457 C=CC(=O)OCC.CCOC(=O)c1ccc(I)cc1>>CCOC(=O)/C=C/c1ccc(C(=O)OCC)cc1  
458 C=CN1C(=O)c2cccc2C1=O.FC(F)(F)c1ccc(Cl)cc1>>O=C1c2cccc2C(=O)N1/C=C/c1ccc(C(F)(F)F)c  
459 C=CC(=O)OCC.Oc1ccc(F)cc1Br>>CCOC(=O)/C=C/c1cc(F)ccc1O  
460 C=CCO.O=C(c1cccc1)c1ccc(Br)cc1>>C=C(CO)c1ccc(C(=O)c2cccc2)cc1  
461 C=C.COc1cccc1Br>>C=Cc1cccc1OC  
462 C=C(C(=O)OCC)c1cccc1CN(C(=O)C(F)F)c1cccc1Br>>CCOC(=O)/C1=C/c2cccc2N(C(=O)C(F)  
(F)F)Cc2cccc21  
463 C=COCCN(C)C.O=S(=O)(Oc1cccc1)C(F)(F)F>>C=C(OCCN(C)C)c1cccc1  
464 C=CS(N)(=O)=O.Cc1ccc(Br)c(C)c1>>Cc1ccc(/C=C/S(N)(=O)=O)c(C)c1  
465 C=CCCCC(=O)OCC.O=S(=O)(Oc1ccc(C(=C2C3CCCC2CCC3)c2ccc(O)cc2)cc1)C(F)(F)F>>CCOC(  
=O)CCCC/C=C/c1ccc(C(=C2C3CCCC2CCC3)c2ccc(O)cc2)cc1  
466 C=Cc1c(OC)cc(OC)cc1OC.Cc1ccc(S(=O)(=O)Oc2cccc3c(Br)ccncc23)cc1>>COc1cc(OC)c(/C=C/c2ccn  
c3c(OS(=O)(=O)c4ccc(C)cc4)cccc23)c(OC)c1  
467 C=Cc1ccc([N+](=O)[O-])cc1.COC(=O)c1ccc(Br)cc1>>COC(=O)c1ccc(/C=C/c2ccc([N+](=O)[O-]  
468 C=CC(=O)N(C)Cc1sc2cccc2c1C.CC1(C)NCC2cc(Br)cncc2NC1=O>>Cc1c(CN(C)C(=O)/C=C/c2cnc3c  
(c2)CNC(C)(C)C(=O)N3)sc2cccc12  
469 C=CCCC(=O)OCC.CC(C)(CC1Cc2cccc2C1)NC[C@H](O)COc1cc(Br)cc(F)c1F>>CCOC(=O)CC/  
C=C/c1cc(F)c(F)c(OC[C@H](O)CNC(C)(C)CC2Cc3cccc3C2)c1  
470 C=Cc1ccc(N(C)C)cc1.CCCCN1C(=O)C(=Cc2ccc(I)cc2)C(=O)N(CCCC)C1=O>>CCCN1C(=O)C(=  
Cc2ccc(/C=C/c3ccc(N(C)C)cc3)cc2)C(=O)N(CCCC)C1=O  
471 C=CC(F)(F)C(F)(F)C(F)(F)C(F)(F)C(F)(F)F.CC(C)c1cc(I)cc(C(C)C)c1N>>CC(C)c1cc(/C=C/C  
(F)(F)C(F)(F)C(F)(F)C(F)(F)C(F)(F)F)cc(C(C)C)c1N  
472 C=CC(=O)OCCCC.Cc1ccc(C)c(Br)c1>>CCCCOC(=O)/C=C/c1cc(C)ccc1C  
473 C=CC(=O)OC(C)(C)C.FC(F)(F)c1ccc(Br)cc1>>CC(C)(C)OC(=O)/C=C/c1ccc(C(F)(F)F)cc1  
474 C=CCN(Cc1cc2ccc(C)cc2nc1Cl)c1ccc(OC)cc1>>C=C1CN(c2ccc(OC)cc2)Cc2cc3ccc(C)cc3nc21  
475 C=Cc1cccc(Nc2nc(Nc3ccc(N4CCN(C)CC4)c(Br)c3)nc2Cl)c1>>CN1CCN(c2ccc3cc2/C=C/c2cccc(c2  
)Nc2nc(nc2Cl)N3)CC1  
476 C=CC(=O)OC.Ic1cccc1C[Se]c1cccc1>>COC(=O)/C=C/c1cccc1C[Se]c1cccc1  
477 C=CC(=O)OC.Cc1cc(F)ccc1Br>>COC(=O)/C=C/c1ccc(F)cc1C  
478 C=Cc1ccc(C#N)cc1.Cc1ccc(S(=O)(=O)Oc2cccc3c(Br)ccncc23)cc1>>Cc1ccc(S(=O)(=O)Oc2cccc3c(/C  
=C/c4ccc(C#N)cc4)ccncc23)cc1  
479 C=CC(N)=O.Cc1cccc1I>>Cc1cccc1/C=C/C(N)=O  
480 C=CC(=O)OC(C)(C)C.O=C1Nc2ccc(Br)cc2C1=O>>CC(C)(C)OC(=O)/C=C/c1ccc2c(c1)C(=O)C(=O)  
481 C=Cc1cccc1.COc1ccc(/C=C/C(=O)c2ccc(I)cc2)cc1>>COc1ccc(/C=C/C(=O)c2ccc(/C=C/c3cccc3)cc  
2)cc1  
482 C=CC(C)(C)O.Cc1ccc(Br)cc1>>Cc1ccc(/C=C/C(C)(C)O)cc1  
483 C=CC(=O)Nc1ccc(Cl)cc1.COc1ccc2c(=O)c(I)coc2c1>>COc1ccc2c(=O)c(/C=C/C(=O)Nc3ccc(Cl)cc3)  
coc2c1  
484 \*CNCCCOCCOCCOCCCN(C(=O)COc1ccc(C(Cc2cc(OC)cc(OC)c2)NC(=O)c2ccc(C=C)cc2)cc1.CCOc  
1ccc(I)cc1>>\*CNCCCOCCOCCOCCCN(C(=O)COc1ccc(C(Cc2cc(OC)cc(OC)c2)NC(=O)c2ccc(/C=C/  
c3ccc(OCC)cc3)cc2)cc1  
485 C=Cc1ncc(N)en1.CN(C(=O)c1cccc1)c1ccc2c(c1)[nH]c(=NC(=O)c1ccc(Br)s1)n2CCC(N)=O>>CN(C(  
=O)c1cccc1)c1ccc2c(c1)[nH]c(=NC(=O)c1ccc(/C=C/c3ncc(N)en3)s1)n2CCC(N)=O  
486 C=CC(=O)CC.O=C(c1cccc1)c1ccc(Br)cc1>>CCC(=O)/C=C/c1ccc(C(=O)c2cccc2)cc1  
487 Br1cccc2[nH]ccc12.C=Cn1cnc2c(Nc3ccc(P(C)(C)=O)cc3)ncnc21>>CP(C)(=O)c1ccc(Nc2ncnc3c2ncn  
3/C=C/c2cccc3[nH]ccc23)cc1

488 Br1cccc1.C=C(COCCCC>>C=C(OCCCC)c1cccc1  
 489 C=CC(=O)N(C)OC.N#Cc1ccc2cc(Br)ccc2c1>>CON(C)C(=O)/C=C/c1ccc2cc(C#N)ccc2c1  
 C=CC(F)(F)C(F)(F)C(F)(F)C(F)(F)C(F)(F)C(F)(F)C(F)(F)F.O=[N+][O-  
 490 ]c1cccc1Br>>O=[N+][O-  
 ]c1cccc1/C=C/C(F)(F)C(F)(F)C(F)(F)C(F)(F)C(F)(F)C(F)(F)C(F)(F)F  
 491 C=CCCCCCCCCO.COCCc1cc(Br)c(OCOC)c(OC)c1>>COCCc1cc(/C=C/CCCCCCCCO)c(OCOC)c(  
 OC)c1  
 492 C=CC(=O)OC(C)(C)C.CC(C)(C)OC(=O)CCOCc1cccc1Br>>CC(C)(C)OC(=O)/C=C/c1cccc1COCC  
 C(=O)OC(C)(C)C  
 493 C=CCC(=O)Nc1ccc2cccnc12.CCOC(=O)c1ccc(OS(=O)(=O)C(F)(F)F)cc1>>CCOC(=O)c1ccc(/C=C/  
 CC(=O)Nc2cccc3cccnc23)cc1  
 494 C=CC(=O)OC.CCc1nc2c(C)cc(C)nc2n1Cc1ccc(Br)cc1>>CCc1nc2c(C)cc(C)nc2n1Cc1ccc(/C=C/C(=O  
 )OC)cc1  
 495 C=C[Si](CC)(CC)CC.N#Cc1cccc1Br>>CC[Si](/C=C/c1cccc1C#N)(CC)CC  
 496 C=CC(=O)Nc1cccc1NC(=O)OC(C)(C)C.COC(=O)C(CCC1CCCN1C)c1ccc(Br)cc1>>COC(=O)C(CC  
 C1CCCN1C)c1ccc(/C=C/C(=O)Nc2cccc2NC(=O)OC(C)(C)C)cc1  
 497 C=C1C(=O)O[C@H]2C3=C(C)CCC[C@]3(C)C(=O)C[C@]@H]12.Fc1ccc(I)cc1>>CC1=C2[C@]@H]3  
 OC(=O)/C=C/c4ccc(F)cc4)[C@]@H]3CC(=O)[C@]@]2(C)CCC1  
 498 Br1ccc(C(=C2CCCCC2)c2cccc2)cc1.C=CC(=O)OC(C)(C)C>>CC(C)(C)OC(=O)/C=C/c1ccc(C(=C  
 2CCCCC2)c2cccc2)cc1  
 499 C=Cc1nc2c(N)ncnc2n1[C@H]1C[C@H](O)[C@]@H](CO)O1.CC(=O)c1ccc(Br)cc1>>CC(=O)c1ccc(/  
 C=C/c2nc3c(N)ncnc3n2[C@H]2C[C@H](O)[C@]@H](CO)O2)cc1  
 500 C=COCCOC=C.N#Cc1ccc(Br)cc1>>C=COCCOC(=C)c1ccc(C#N)cc1  
 501 C=CC(=O)OC.CS(=O)(=O)N(Cc1cccc1)c1oc2cccc2c1I>>COC(=O)/C=C/c1c(N(Cc2cccc2)S(C)(=O  
 )=O)oc2cccc12  
 502 C=Cc1cc(Nc2ncc(Cl)c(Nc3cc(Br)ccc3C(=O)OC)n2)ccc1N1CCN(C)CC1>>COC(=O)c1ccc2cc1Nc1nc(  
 ncc1Cl)Nc1ccc(N3CCN(C)CC3)c(c1)/C=C/2  
 503 C=CCN(C(=O)OC(C)(C)C(=O)OC(C)(C)C.N#Cc1cccc1Br>>CC(C)(C)OC(=O)N(C/C=C/c1cccc1  
 C#N)C(=O)OC(C)(C)C  
 504 C=CC(=O)OCC.O=C1CCCc2ccc(Br)cc2C1>>CCOC(=O)/C=C/c1ccc2c(c1)CC(=O)CCC2  
 505 C=CCc1c(OCc2cccc2Br)c(=O)n(C)c2cccc12>>C=C1Cc2c(c(=O)n(C)c3cccc23)OCc2cccc21  
 506 C=Cc1ccc(C)cc1.Cn1nc(Br)c2cccc21>>Cc1ccc(/C=C/c2nn(C)c3cccc23)cc1  
 C=CC1(C(=O)O)COC(C)(C)OC1.CC(C)[C@H](O)C(=O)N[C@]@H](C)C(=O)N1CCC[C@]@H](C(=O  
 507 )N[C@H](C)c2ccc3ccc(Br)cc3n2)N1>>CC(C)[C@H](O)C(=O)N[C@]@H](C)C(=O)N1CCC[C@]@H]  
 (C(=O)N[C@H](C)c2ccc3ccc(/C=C/C4(C(=O)O)COC(C)(C)OC4)cc3n2)N1  
 508 C=Cc1cc(O)c(OC)cc1F.Oc1cc(O)cc(I)c1>>COc1cc(F)c(/C=C/c2cc(O)cc(O)c2)cc1O  
 509 C=COCCCC.CC(=O)c1ccc(I)cc1>>C=C(OCCCC)c1ccc(C(C)=O)cc1  
 510 C=CC(=O)N1[C@]@H]2C[C@H]3CC[C@]2(CS1(=O)=O)C3(C)C.Ic1cccc1>>CC1(C)[C@]@H]2CC[  
 C@]13CS(=O)(=O)N(C(=O)/C=C/c1cccc1)[C@]@H]3C2  
 511 C=CC(=O)CCCC.FC(F)(F)c1ccc(Br)cc1>>CCCCC(=O)/C=C/c1ccc(C(F)(F)F)cc1  
 512 C=CC#N.COc1ccc2c(c1)CCN(c1ccc(F)cc1)C2(C)c1ccc(Br)cc1>>COc1ccc2c(c1)CCN(c1ccc(F)cc1)C  
 2(C)c1ccc(/C=C/C#N)cc1  
 513 C=C(F)C(=O)OC.COc1cccc1I>>COC(=O)/C(F)=C/c1cccc1OC  
 514 C=Cc1cccc1.Cc1ccc(C=O)c(Br)c1>>Cc1ccc(C=O)c(/C=C/c2cccc2)c1  
 515 C=Cc1cccc(OC)c1.C[Si](C)(C)OS(=O)(=O)C(F)(F)F>>COc1cccc(/C=C/[Si](C)(C)C)c1  
 516 C=CC(N)=O.Cc1cc(Br)cc(C)c1Nc1ccnc(Nc2ccc(C#N)cc2)n1>>Cc1cc(/C=C/C(N)=O)cc(C)c1Nc1ccnc  
 (Nc2ccc(C#N)cc2)n1  
 517 C=CC(=O)OC.Nc1nc(N)c2c(I)cn([C@H]3C[C@H](O)[C@]@H](CO)O3)c2n1>>COC(=O)/C=C/c1cn(  
 [C@H]2C[C@H](O)[C@]@H](CO)O2)c2nc(N)nc(N)c12  
 518 C=CC(=O)OC(C)(C)C.COC(=O)/C=C/c1cccc(N(Cc2cccc2Br)C(=O)C2CCCC2)c1>>COC(=O)/C=  
 C/c1cccc(N(Cc2cccc2/C=C/C(=O)OC(C)(C)C)C(=O)C2CCCC2)c1  
 519 C=Cc1ccc(C(=O)OC)cc1.Cn1cc(I)c(=O)c2cccc21>>COC(=O)c1ccc(/C=C/c2cn(C)c3cccc3c2=O)cc1  
 520 C=CN1CCCC1=O.O=C1CCC(N2C(=O)c3ccc(Br)cc3C2=O)C(=O)N1>>O=C1CCC(N2C(=O)c3ccc(/C  
 =C/N4CCCC4O)cc3C2=O)C(=O)N1  
 521 C=CC(=O)O.Oc1ccc(I)cc1Cl>>O=C(O)/C=C/c1ccc(O)c(Cl)c1  
 522 C=CCCN(c1cccc1[N+](=O)[O-])S(=O)(=O)c1cccc1Br>>C=C1CCN(c2cccc2[N+](=O)[O-  
 ])S(=O)(=O)c2cccc21  
 523 C=CC(=O)NC(CC(=O)N[C@]@H](Cc1cccc1)C(=O)N[C@]@H](CC(C)C)C(=O)Nc1cccc(Br)c1)c1c  
 cccc1>>CC(C)C[C@]@H]1NC(=O)[C@H](Cc2cccc2)NC(=O)CC(c2cccc2)NC(=O)/C=C/c2cccc(c2)  
 524 Cc1ccc(/C=C/C(=O)O/C(=C)I)C2CC2)cc1>>Cc1ccc(/C=C2\C=C(C3CC3)OC2=O)cc1  
 525 C=CC(=O)OC.O=C1CCC(N2C(=O)c3ccc(Br)cc3C2=O)C(=O)N1>>COC(=O)/C=C/c1ccc2c(c1)C(=O)  
 N(C1CCC(=O)NC1=O)C2=O

526 Bre1cccc1.C=CCN(Cc1cccc2cccc12)C(=O)OCC>>CCOC(=O)N(C/C=C/c1cccc1)Cc1cccc2cccc12  
527 C=Cc1cncnc1.COc1ccc2c(c1)cc(C#N)c1ccc(Br)cc12>>COc1ccc2c(c1)cc(C#N)c1ccc(/C=C/c3ccncc3)c  
C=C[C@H]1COC(C)(C)O1.CCOC(=O)[C@@H](Cc1cc(Br)ccc1OCc1cnc(-  
528 c2cccc2OC)n1)OC(C)=O>>CCOC(=O)[C@@H](Cc1cc(/C=C/[C@H]2COC(C)(C)O2)ccc1OCc1cnc  
(-c2cccc2OC)n1)OC(C)=O  
C=CC(=O)N(C)C.O=c1ccc(-c2nc(-  
529 c3ccc(OC(F)(F)F)cc3)no2)cn1Cc1cccc(Br)c1>>CN(C)C(=O)/C=C/c1cccc(Cn2cc(-c3nc(-  
c4ccc(OC(F)(F)F)cc4)no3)ccc2=O)c1  
530 C=CC(=O)Nc1cccc1C.O=c1c(I)coc2cc(O)ccc12>>Cc1cccc1NC(=O)/C=C/c1coc2cc(O)ccc2c1=O  
C=CC(=O)OCCCC.COc1ccc2cc([N+])(=O)[O-]ccc2c1-  
531 c1c(OC(=O)C(C)(C)C)ccc2cc(Br)ccc12>>CCCCOC(=O)/C=C/c1ccc2c(-c3c(OC)ccc4cc([N+])(=O)[O-  
])ccc34)c(OC(=O)C(C)(C)C)ccc2c1  
532 C=CCOCC/C=C/CC.COc1cc(Br)ccc1O>>CC/C=C/CCOC/C=C/c1ccc(O)c(OC)c1  
533 C=CC(=O)NCc1cccc1.COc1ccc2c(=O)c(I)coc2c1>>COc1ccc2c(=O)c(/C=C/C(=O)NCc3cccc3)coc2  
BrC1=C(C2=CCN(Cc3cccc3)CC2)CCCC1.C=CC(=O)OC(C)(C)C>>CC(C)(C)OC(=O)/C=C/C1=C(C  
534 2=CCN(Cc3cccc3)CC2)CCCC1  
C=CC(=O)O.Oc1ccc(I)cc1>>O=C(O)/C=C/c1ccc(O)cc1  
535 C=CCC(=O)O.C[C@H](O)c1ccc2ccc(Br)cc2c1>>C[C@H](O)c1ccc2ccc(/C=C/CC(=O)O)cc2c1  
536 C=CC(=O)OC.CC(C)n1cnc2c(NCc3cccc(Br)c3)nc(N3CCCC3)nc21>>COC(=O)/C=C/c1cccc(CNc2nc(  
537 N3CCCC3)nc3c2ncn3C(C)C)c1  
C=CC(=O)OCC.Cc1ccc(S(=O)(=O)n2cc(C=O)c3c(Br)cccc32)cc1>>CCOC(=O)/C=C/c1cccc2c1c(C=O  
538 )cn2S(=O)(=O)c1ccc(C)cc1  
C=CC(=O)Oc1cccc1.O=c1cc(I)cn1Cc1cccc1>>O=C(/C=C/c1enn(Cc2cccc2)c(=O)c1)Oc1cccc1  
539 COC(=O)/C=C/C(=O)OC.Ic1cccc1>>COC(=O)/C=C/C(=O)OC)c1cccc1  
540 C=Cc1cccc1.CN1C(=O)CC[C@H]1c1cncc(Br)c1>>CN1C(=O)CC[C@H]1c1cncc(/C=C/c2cccc2)c1  
541 C=CC(=O)NCc1cccc1.COc1ccc(-c2oc3cc(OC)ccc3c(=O)c2I)cc1>>COc1ccc(-  
542 c2oc3cc(OC)ccc3c(=O)c2/C=C/C(=O)NCc2cccc2)cc1  
543 C=CCO.CC(=O)c1ccc(Br)cc1>>C=C(CO)c1ccc(C(C)=O)cc1  
544 C=Cc1ccc(OCCCCC)c(OCCCCC)c1.O=Cc1ccc(Br)cc1>>CCCCCOc1ccc(/C=C/c2ccc(C=O)cc2)c  
c1OCCCCC  
545 C=C(CC(=O)OC)C(=O)OC.COc1cccc2c(OCc3cccc3)c(Br)ccc12>>COC(=O)C/C=C/c1ccc2c(OC)cc  
cc2c1OCc1cccc1)C(=O)OC  
546 C=CC=O.COc1ccc(-c2ccc(CN(C(=O)CC(C)(C)C)c3nccc4cc(Br)ccc34)cc2)cc1C>>COc1ccc(-  
c2ccc(CN(C(=O)CC(C)(C)C)c3nccc4cc(/C=C/C(=O)ccc34)cc2)cc1C  
547 C=Cc1cncnc1.CC(C)(C)OC(=O)N[C@H](COc1cncc(Br)c1)Cc1cccc1>>CC(C)(C)OC(=O)N[C@H](C  
Oc1cncc(/C=C/c2cnc2)c1)Cc1cccc1  
548 C=CC(=O)OCC.CCOC(=O)C1(c2cccc(Br)c2)CC1>>CCOC(=O)/C=C/c1cccc(C2(C(=O)OCC)CC2)c1  
549 C=CN1C(=O)c2cccc2C1=O.COc1ccc(Cl)cc1>>COc1ccc(/C=C/N2C(=O)c3cccc3C2=O)cc1  
550 C=C(Br)CC.C=Cc1cccc1>>C=C(/C=C/c1cccc1)CC  
551 C=Cc1cccc1.Cc1ccc2c(-c3ccc(C(F)(F)F)cc3)c(Br)c(=O)oc2c1>>Cc1ccc2c(-  
552 c3ccc(C(F)(F)F)cc3)c(/C=C/c3cccc3)c(=O)oc2c1  
553 Bre1ccnc1.C=Cc1cccc(Nc2ncccc2[N+])(=O)[O-]c1>>O=[N+](O-  
554 C=Cc1cccc1.Fc1cccc1I>>Fc1cccc1/C=C/c1cccc1  
555 C=CC(=O)OCCCC.O=C(O)c1ccc(I)cc1>>CCCCOC(=O)/C=C/c1ccc(C(=O)O)cc1  
556 C=Cc1cccc1.N#Cc1cncc(Br)c1>>N#Cc1cncc(/C=C/c2cccc2)c1  
557 C=CCC(OC)c1cc2cccc2nc1Cl>>C=C1CC(OC)c2ccc3cccc3nc21  
C=CC(=O)OCC.[2H]c1c([2H])c(C([2H])([2H])[2H])c([2H])c([2H])c1C(=O)c1cccc(Br)n1>>[2H]c1c([  
2H])c(C([2H])([2H])[2H])c([2H])c([2H])c1C(=O)c1cccc(/C=C/C(=O)OCC)n1  
558 C=Cc1ccc(F)cc1.Cn1c(=O)c2c(cc(Br)n2C)n(C)c1=O>>Cn1c(=O)c2c(cc(/C=C/c3ccc(F)cc3)n2C)n(C)c  
559 C=Cc1ccc(OC)cc1.O=P1(c2cccc2)C(Br)=Cc2cccc21>>COc1ccc(/C=C/C2=Cc3cccc3P2(=O)c2cccc  
c2)cc1  
560 C=CCN(CC1=C(Br)CCc2cccc21)c1ccc(Cl)cc1>>C=C1CN(c2ccc(Cl)cc2)CC2=C1CCc1cccc12  
561 Bre1cccc1.C=Cc1cccc1C>>Cc1cccc1/C=C/c1cccc1  
562 C=Cc1ccc(N(c2cccc2)c2cccc2)cc1.CCCCC(CC)CN1C(=O)c2cccc3c(Br)ccc(c23)C1=O>>CCCCC(C  
C)CN1C(=O)c2cccc3c(/C=C/c4ccc(N(c5cccc5)c5cccc5)cc4)ccc(c23)C1=O  
563 C=Cc1cncnc1.COc1ccc(Br)c(F)c1>>COc1ccc(/C=C/c2cnc2)c(F)c1  
564 C=CCCc1ccc(CC)cc1.O=C1CCOc2cc(Br)ccc21>>CCc1ccc(CC/C=C/c2ccc3c(c2)OCCC3=O)cc1  
565 C=Cc1ccc(F)cc1.CCOC(=O)C(F)Br>>CCOC(=O)C(F)/C=C/c1ccc(F)cc1  
566 C=Cc1ccc(F)cc1.CC(=S)NS(=O)(=O)c1ccc(Br)cc1>>CC(=S)NS(=O)(=O)c1ccc(/C=C/c2ccc(F)cc2)cc1  
567 C=CCC(O)c1cncnc1Br>>C=C1CC(O)c2cncnc21

568 C=CC(=O)OC(C)(C)C.COc1ccc(I)c([N+](=O)[O-]  
 ]c1>>COc1ccc(/C=C/C(=O)OC(C)(C)C)c([N+](=O)[O-])c1  
 \*CNCCCOCCOCCOCCCN(C(=O)COc1ccc(C(Cc2cc(OC)cc(OC)c2)NC(=O)c2cccc(C=C)c2)cc1.FC(F)  
 569 (F)c1ccc(I)cc1>>\*CNCCCOCCOCCOCCCN(C(=O)COc1ccc(C(Cc2cc(OC)cc(OC)c2)NC(=O)c2cccc(/  
 C=C/c3ccc(C(F)(F)F)cc3)c2)cc1  
 570 C=CCC1c2[nH]c3cccc3c2CCN1CC(=C)I>>C=C1CC2c3[nH]c4cccc4c3CCN2CC1=C  
 571 C=COCC.Cc1ccc(I)cc1>>CCO/C=C/c1ccc(C)cc1  
 572 C=CC(C)=O.O=C(O)c1ccc(Cl)cc1>>CC(=O)/C=C/c1ccc(C(=O)O)cc1  
 573 C=CSclcccc1.COc1ccc(Br)cc1>>COc1ccc(/C=C/Sc2cccc2)cc1  
 574 C=Cc1nnc2c1nen2C1CCCCO1.Clc1ccc(I)cc1>>Clc1ccc(/C=C/c2nnc3c2nen3C2CCCCO2)cc1  
 575 C=C[C@H]1O[C@@H]2OC(C)(C)O[C@@H]2[C@H]1OC.Ic1cccc1>>CO[C@H]1[C@@H](/C=C/c  
 2cccc2)O[C@@H]2OC(C)(C)O[C@H]12  
 576 C=CC(=O)OCCCC.COC(=O)c1ccc(I)cc1>>CCCCOC(=O)/C=C/c1ccc(C(=O)OC)cc1  
 577 C=CC(=O)OC.O=C1Nc2cccc(Br)c2C12OCCO2>>COC(=O)/C=C/c1cccc2c1C1(OCCO1)C(=O)N2  
 578 C=CC(=O)OC.N#Cc1ccc(I)cc1Cl>>COC(=O)/C=C/c1ccc(C#N)c(Cl)c1  
 579 C=Cc1cnccl.CC(C)(C)OC(=O)N[C@H](COc1nnc(Cl)c(Br)c1)Cc1c[nH]c2cccc12>>CC(C)(C)OC(=O)  
 N[C@H](COc1nnc(Cl)c(/C=C/c2cnc2)c1)Cc1c[nH]c2cccc12  
 580 C=CC(=O)OCC.Oc1ccc(I)c(C(F)(F)F)c1C(F)(F)F>>CCOC(=O)/C=C/c1ccc(O)c(C(F)(F)F)c1C(F)(F)F  
 581 C=CC#N.COC(=O)/C(Br)=C1\CCCCO1>>COC(=O)C(/C=C/C#N)=C1\CCCCO1  
 582 C=C/C=C/C(=O)OC.COc1c(CN(C(=O)C2CC2)c2cccc(Br)c2)ccc2c1OC(C)(C)C=C2>>COC(=O)/C=C  
 /C=C/c1cccc(N(Cc2ccc3c(c2OC)OC(C)(C)C=C3)C(=O)C2CC2)c1  
 583 C=CC(=O)OC(C)(C)C.CN(C(=O)CSCc1cccc1)c1c(F)cc(F)cc1Br>>CN(C(=O)CSCc1cccc1)c1c(F)cc  
 (F)cc1/C=C/C(=O)OC(C)(C)C  
 584 C=C(F)[Si](C)(c1cccc1)c1cccc1.COc1ccc(I)c1>>COc1ccc(/C=C(\F)[Si](C)(c2cccc2)c2cccc2)c1  
 585 Brclcccc(N2CCN(c3ncccn3)CC2)n1.C=Cc1cccc1>>C(=C/c1cccc(N2CCN(c3ncccn3)CC2)n1)\c1cccc  
 586 C=CC(=O)OC.Cc1ccsc1C(=O)c1sc2cc(O)ccc2c1Oc1ccc(Br)cc1>>COC(=O)/C=C/c1ccc(Oc2c(C(=O)c  
 3sccc3C)sc3cc(O)ccc23)cc1  
 587 Brclccc(OCCN2CCCC2)cc1.C=Cc1cnc(C#N)c1Nc1ccc2[nH]ccc2c1C>>Cc1c(Nc2c(C#N)cncc2/C=C  
 /c2ccc(OCCN3CCCC3)cc2)ccc2[nH]ccc12  
 588 C=Cc1ccc(OC)cc1.O=c1cc(-c2cccc2)oc2cc(Br)ccc12>>COc1ccc(/C=C/c2ccc3c(=O)cc(-  
 c4cccc4)oc3c2)cc1  
 589 Brclcccc2cccc12.C=CNC(C)=O>>C=C(NC(C)=O)c1cccc2cccc12  
 590 C=COCCCC.COc1ccc(I)cc1>>C=C(OCCCC)c1ccc(OC)cc1  
 591 C=COCC.Cc1ccc(I)cc1>>C=C(OCC)c1ccc(C)cc1  
 C=Cc1ccc(C=O)s1.CCCCC(=O)Nc1cc(OCCN(CCOc2cc(NC(=O)CCCC)nc(NC(=O)CCCC)c2)c2  
 592 ccc(Br)cc2)cc(NC(=O)CCCC)n1>>CCCCC(=O)Nc1cc(OCCN(CCOc2cc(NC(=O)CCCC)nc(NC(=O)  
 O)CCCC)c2)c2ccc(/C=C/c3ccc(C=O)s3)cc2)cc(NC(=O)CCCC)n1  
 C=Cc1cccc1NC(=O)C(F)(F)C.CC(C)(C)[Si](C)(C)OC[C@H]1O[C@@H](c2ccc(Br)cc2)C[C@H]1  
 593 O[Si](C)(C)C(C)(C)C>>CC(C)(C)[Si](C)(C)OC[C@H]1O[C@@H](c2ccc(/C=C/c3cccc3NC(=O)C(F)  
 )(F)F)cc2)C[C@H]1O[Si](C)(C)C(C)(C)C  
 594 C=C(CC(=O)OCC)C(=O)OCC.Cc1c(N)ccc(I)c1[N+](=O)[O-]  
 ]>>CCOC(=O)C/C(=C\c1ccc(N)c(C)c1[N+](=O)[O-])C(=O)OCC  
 595 C=CC(=O)OCC.CCCCC(=C(c1ccc(O)cc1)c1ccc(O)cc1)c1ccc(Br)cc1>>CCCCC(=C(c1ccc(O)cc1)c1cc  
 c(O)cc1)c1ccc(/C=C/C(=O)OCC)cc1  
 596 C=CC#N.CCOC(=O)/C=C/c1ccc(Br)cc1>>CCOC(=O)/C=C/c1ccc(/C=C/C#N)cc1  
 597 C=Cc1ccc(OC)cc1.Cc1ccc2c(-c3cccc3)c(Br)c(=O)oc2c1>>COc1ccc(/C=C/c2cc(-  
 c3cccc3)c3ccc(C)cc3oc2=O)cc1  
 598 C=CS(=O)c1cccc1.FC(F)(F)c1ccc(Br)cc1>>O=S(/C=C/c1ccc(C(F)(F)F)cc1)c1cccc1  
 599 C=Cc1ccc2cccc2c1.CCCCC(Br)C(F)(F)F>>CCCCC(/C=C/c1ccc2cccc2c1)C(F)(F)F  
 600 C=CC(=O)OC.Cc1cccc1I>>COC(=O)/C=C/c1cccc1C  
 601 C=Cc1nnn(C)n1.COc1ccc(I)cc1>>COc1ccc(/C=C/c2nnn(C)n2)cc1  
 602 C=CC(=O)OC.CN(C)CCCOc1ccc(I)cc1Cl>>COC(=O)/C=C/c1ccc(OCCCN(C)C)c(Cl)c1  
 603 C=CC(F)(F)C(F)(F)C(F)(F)C(F)(F)C(F)(F)C(F)(F)F.CC(=O)c1ccc(Br)cc1>>CC(=O)c1ccc(/C=C/C(F)(  
 F)C(F)(F)C(F)(F)C(F)(F)C(F)(F)F)cc1  
 604 C=CC(=O)OC.Cc1cc2c(c(C)c1Br)C(=O)CC2>>COC(=O)/C=C/c1c(C)cc2c(c1C)C(=O)CC2  
 \*CNCCCOCCOCCOCCCN(C(=O)COc1ccc(C(Cc2cc(OC)cc(OC)c2)NC(=O)c2cccc(C=C)c2)cc1.Cc1cc  
 605 (I)ccc1[N+](=O)[O-]  
 ]>>\*CNCCCOCCOCCOCCCN(C(=O)COc1ccc(C(Cc2cc(OC)cc(OC)c2)NC(=O)c2cccc(/C=C/c3ccc([N  
 +](=O)[O-])c(C)c3)c2)cc1  
 606 C=CC(=O)OCC.O=C(O)c1ccoc(Br)c1>>CCOC(=O)/C=C/c1cc(C(=O)O)co1

607 C=CC(=O)OC.Cc1cc2oc(=O)c(CC(=O)Nc3cccc(F)cc3C(F)(F)F)c(-  
 c3cccc3)c2cc1Br>>COC(=O)/C=C/c1cc2c(-  
 608 C=Cc1cccc1.O=C(Nc1cccc1)c1nccc(Cl)c1I>>O=C(Nc1cccc1)c1nccc(Cl)c1/C=C/c1cccc1  
 609 C=CC(=O)OC.COcn1c(C=O)c(I)c2cccc21>>COcn1c(C=O)c(/C=C/C(=O)OC)c2cccc21  
 610 C=Cc1cccc1.COc1ccc2c(=O)c(I)coc2c1>>COc1ccc2c(=O)c(/C=C/c3cccc3)coc2c1  
 611 C=CC(=O)OC(C)(C)C.COCC(=O)c1cc(I)ccc1OC(C)=O>>COC(=O)c1cc(/C=C/C(=O)OC(C)(C)C)ccc1  
 OC(C)=O  
 612 C=CCC1(C(=O)OC)CCCCC1.COc1ccc(I)cc1>>COC(=O)C1(C/C=C/c2ccc(OC)cc2)CCCCC1  
 613 C=Cc1ccc(Cl)cc1.CC(C)(C)OC(=O)N(C(=O)OC(C)(C)C)C1=NC(C)(c2cccc(Br)c2)CCS1>>CC(C)(C)  
 OC(=O)N(C(=O)OC(C)(C)C)C1=NC(C)(c2cccc(/C=C/c3ccc(Cl)cc3)c2)CCS1  
 614 C=Cc1cccc1.Cc1ccc(I)cc1C>>Cc1ccc(/C=C/c2cccc2)cc1C  
 615 C=C1C(=O)O[C@H]2[C@H]1C[C@@H](O)/C(C)=C/CC[C@@]1(C)O[C@H]21.COc1cccc1I>>C  
 Oc1cccc1/C=C1/C(=O)O[C@H]2[C@H]1C[C@@H](O)/C(C)=C/CC[C@@]1(C)O[C@H]21  
 616 C=CCCCCCC.O=S(=O)(Oc1ccc2cccc2c1)C(F)(F)F>>C=C(CCCCCC)c1ccc2cccc2c1  
 617 C=Cc1ccc(Cl)cc1.Cc1ccc(I)cc1>>Cc1ccc(/C=C/c2ccc(Cl)cc2)cc1  
 618 C=CCN(C(=O)OC(C)(C)C)C(=O)OC(C)(C)C.COc1cccc(Br)c1>>COc1cccc(/C=C/CN(C(=O)OC(C)(C)  
 )C)C(=O)OC(C)(C)C)c1  
 619 Br1cc2cccc2c2cccc12.C=C[C@@H](CO[Si](C)(C)C(C)C)NC(=O)OCc1cccc1>>CC(C)(C)[Si]  
 (C)(C)OC[C@H](/C=C/c1cc2cccc2c2cccc12)NC(=O)OCc1cccc1  
 620 C=CC(=O)OC(C)(C)C.Ic1ccc(-c2cccc2)cc1>>CC(C)(C)OC(=O)/C=C/c1ccc(-c2cccc2)cc1  
 621 C=Cc1cccc1.CC(=O)c1ccc(Cl)c1>>CC(=O)c1ccc(/C=C/c2cccc2)c1  
 622 Br1cccc1.C=CCN(C(=O)OC(C)(C)C)C(=O)OC(C)(C)C>>CC(C)(C)OC(=O)N(C/C=C/c1cccc1)C(=  
 O)OC(C)(C)C  
 623 C=C1CC(c2ccc(C)cc2)OC1=O.CC(C)(C)c1ccc(I)cc1>>Cc1ccc(C2C/C(=C\c3ccc(C(C)(C)C)cc3)C(=O)  
 O2)cc1  
 624 C=CC(=O)OC(C)(C)C.COc1ncc(Br)c(OC)n1>>COc1ncc(/C=C/C(=O)OC(C)(C)C)c(OC)n1  
 625 Br1c2cccc2cc2cccc12.C=Cc1cccc1>>C(=C/c1c2cccc2cc2cccc12)c1cccc1  
 626 C=C(Br)CC.C=Cc1ccc(OC)cc1>>C=C(/C=C/c1ccc(OC)cc1)CC  
 627 C=CN1C(=O)c2cccc2C1=O.Cc1ccc(CNC(=O)Cc2cccc(Br)c2)cc1C>>Cc1ccc(CNC(=O)Cc2cccc(/C=  
 C/N3C(=O)c4cccc4C3=O)c2)cc1C  
 628 C=CCC(CCBr)c1ccc(C(F)(F)F)cc1>>C=C1CCC(c2ccc(C(F)(F)F)cc2)C1  
 629 C=C(C(=O)OC)[C@@H]1CC[C@H]2(C)CCC[C@@](C)(OCOC)[C@H]2C1.Cn1c(=O)oc2cc(Br)c  
 nc21>>COCO[C@]1(C)CCC[C@]2(C)CC[C@H](/C(=C\c3cnc4c(c3)oc(=O)n4C)C(=O)OC)C[C@H]  
 C=CC[C@H](C(=O)N1[C@H]2C[C@@H]3CC[C@@]2(CS1(=O)=O)C3(C)C)[C@H](O)CCCCC.  
 630 Cc1ccc(Br)cc1>>CCCCC[C@@H](O)[C@@H](C/C=C/c1ccc(C)cc1)C(=O)N1[C@H]2C[C@@H]3  
 CC[C@@]2(CS1(=O)=O)C3(C)C  
 Br1cnc2cccc2c1.C=CCO[C@@]1(C)C[C@@H](C)C(=O)[C@H](C)[C@H]2NC(=O)O[C@]2(C)[C  
 @H](CC)OC(=O)[C@H](C)C(=O)[C@H](C)[C@H]1O[C@@H]1O[C@H](C)C[C@H](N(C)C)[C  
 631 @H]1OC(C)=O>>CC[C@H]1OC(=O)[C@H](C)C(=O)[C@H](C)[C@@H](O[C@@H]2O[C@H](C)  
 C[C@H](N(C)C)[C@H]2OC(C)=O)[C@@](C)(OC/C=C/c2cnc3cccc3c2)C[C@@H](C)C(=O)[C@H]  
 (C)[C@H]2NC(=O)O[C@]212C  
 632 C=CC(=O)OC.CC(C)(C)OC(=O)Nc1ccsc1Br>>COC(=O)/C=C/c1scsc1NC(=O)OC(C)(C)C  
 633 C=CC(=O)c1ccc(OC)cc1OC.Ic1cccc1>>COc1ccc(C(=O)/C=C/c2cccc2)c(OC)c1  
 634 C=Cc1ccc(OC)c(OC)c1.CC(=O)Oc1ccc(I)cc1>>COc1ccc(/C=C/c2ccc(OC(C)=O)cc2)cc1OC  
 635 Br1ccc2en[nH]c2c1.C=CC(N)=O>>NC(=O)/C=C/c1ccc2cn[nH]c2c1  
 636 C=CCO[C@H](C)C(=O)N1CCOCC1.Cc1ccc(C(=O)c2cccn2Cc2ccc(I)cc2)cc1>>Cc1ccc(C(=O)c2cccn  
 2Cc2ccc(/C=C/CO[C@H](C)C(=O)N3CCOCC3)cc2)cc1  
 C=CC(=O)OCC.COc1ccc(-c2c(-  
 637 c3ccc(OC)cc3)c3c(nc4cccn43)c3ccc(Br)cc23)cc1>>CCOC(=O)/C=C/c1ccc2c(c1)c(-c1ccc(OC)cc1)c(-  
 c1ccc(OC)cc1)c1c2nc2cccn21  
 638 C=CC(=O)Nc1cccc1.O=c1c(I)coc2cc(O)ccc12>>O=C(/C=C/c1coc2cc(O)ccc2c1=O)Nc1cccc1  
 639 Cc1cccc(I)c1.NC(=O)/C=C/c1cccc1>>Cc1cccc(/C(=C\C(N)=O)c2cccc2)c1  
 640 C=CC(=O)OC.CC(=O)n1nc(C)c(I)c1C>>COC(=O)/C=C/c1c(C)nm(C(C)=O)c1C  
 641 C=Cc1ccc(OC)cc1.COC(=O)Cn1c(=O)c(Cl)nc2cc(Br)cnc21>>COC(=O)Cn1c(=O)c(/C=C/c2ccc(OC)c  
 c2)nc2cc(Br)cnc21  
 642 C=CC(=O)OCC.O=C(O)c1cccc2c(Br)cccc12>>CCOC(=O)/C=C/c1cccc2c(C(=O)O)cccc12  
 643 C=CC(=O)OCCCC.COc1cc(N)c(Br)cn1>>CCCCOC(=O)/C=C/c1cnc(OC)cc1N  
 C=CC(OCC)OCC.COCCOc1ccc(-c2cc(CC(C)C)n(-c3ccc(Br)cc3C(=O)OC)c2-  
 644 c2ccc(OCOC)cc2)cc1>>CCOC(/C=C/c1ccc(-n2c(CC(C)C)cc(-c3ccc(OCOC)cc3)c2-  
 c2ccc(OCOC)cc2)c(C(=O)OC)c1)OCC



645 Br1cccc1.C=Cc1ccc(C(=O)OC(C)(C)C)c(Nc2ccc(F)cc2)c1>>CC(C)(C)OC(=O)c1ccc(/C=C/c2ccccc2)cc1Nc1ccc(F)cc1  
646 C=CCCCCCC.Cc1ccc(OS(=O)(=O)C(F)(F)F)cc1>>C=C(CCCCCC)c1ccc(C)cc1  
647 Br1cccc1.C=CS(N)(=O)=O>>NS(=O)(=O)/C=C/c1ccccc1  
648 C=Cc1cccc1.CCOC(=O)c1cccc1Br>>CCOC(=O)c1cccc1/C=C/c1cccc1  
649 C=CC(=O)OCC.COcn1nc(-c2ccccc2)c(Br)cc1=O>>CCOC(=O)/C=C/c1cc(=O)n(COC)nc1-c1ccccc1  
650 C=COCCCC.O=C1c2cccc(OS(=O)(=O)C(F)(F)F)c2C(=O)c2cccc(OCc3ccccc3)c21>>C=C(OCCCC)c1cccc2c1C(=O)c1cccc(OCc3ccccc3)c1C2=O  
651 C=CCOC(=O)/C=C/c1ccc(OC(C)=O)c(OC(C)=O)c1.Fc1ccc(I)cc1>>CC(=O)Oc1ccc(/C=C/C(=O)OC/C=C/c2ccc(F)cc2)cc1OC(C)=O  
652 C=COCCCC.COCC(=O)c1ccc(Br)cc1>>C=C(OCCCC)c1ccc(C(=O)OC)cc1  
653 C=Cc1cccc1.O=C(c1cccc1)c1ccc(Cl)cc1>>O=C(c1cccc1)c1ccc(/C=C/c2ccccc2)cc1  
654 C=COCCCC.COCC(=O)c1cccc(Br)c1>>C=C(OCCCC)c1cccc(C(=O)OC)c1  
655 C=CC(=O)N(C)[C@@H](CO)Cc1ccc(OC)cc1Br>>C=C1C(=O)N(C)[C@@H](CO)Cc2ccc(OC)cc21  
656 C=COCCCC.COc1ccc(Br)cc1>>C=C(OCCCC)c1ccc(OC)cc1  
657 C=Cc1ccc(C(F)(F)F)cc1.CCOC(=O)C(F)I>>CCOC(=O)C(F)/C=C/c1ccc(C(F)(F)F)cc1  
658 C=CC(=O)OC.CCc1nn2c(C)cc(C)nc2c1Cc1ccc(Br)cc1>>CCc1nn2c(C)cc(C)nc2c1Cc1ccc(/C=C/C(=O)OC)cc1  
659 C=Cc1ccc2ccccc2n1.O=Cc1ccc(Br)cc1>>O=Cc1ccc(/C=C/c2ccc3ccccc3n2)cc1  
660 C=C(C)C.CC(Cl)c1cccc1>>CC(C)=CC(C)c1cccc1  
661 Br1ccc(NCc2ccccc2)nc1.C=CC(=O)OC(C)(C)C>>CC(C)(C)OC(=O)/C=C/c1ccc(NCc2ccccc2)nc1  
662 Br1cccc1.C=CC(=O)OCc1cccc1>>O=C(/C=C/c1cccc1)OCc1cccc1  
663 C=C(C)C(=O)O.O=S(=O)(Nc1ccc(I)cc1)c1cccc1>>C/C(=C)c1ccc(NS(=O)(=O)c2ccccc2)cc1C(=O)O  
664 C=Cc1cccn1.Clc1ccc(COc2ccccc2)c(Br)c1>>Clc1ccc(COc2ccccc2)c(/C=C/c2cccn2)c1  
665 C=Cc1ccc(CN(C)C)cc1.C[Si](C)(C)CCOcn1nc(I)c2ccc(C=O)cc21>>CN(C)Cc1ccc(/C=C/c2nn(COCC[Si](C)(C)C)c3cc(C=O)ccc23)cc1  
666 C=CC(OC)OC.IC1CCCC1>>COC(/C=C/C1CCCC1)OC  
667 C=CC(=O)OCC.Fc1ccc(I)cc1>>CCOC(=O)/C=C/c1ccc(F)cc1  
668 C=Cc1ccc(C(=O)OC[C@H]2O[C@@H]3OC(C)(C)O[C@H]3[C@H]3OC(C)(C)O[C@H]32)cc1.CCOC(=O)C(F)Br>>CCOC(=O)C(F)/C=C/c1ccc(C(=O)OC[C@H]2O[C@@H]3OC(C)(C)O[C@H]3[C@H]3OC(C)(C)O[C@H]32)cc1  
669 C=CC(=O)OCCCC.Ic1ccc2[nH]ccc2c1>>CCCCOC(=O)/C=C/c1ccc2[nH]ccc2c1  
670 C=Cc1cccc1.Ic1nnc2nnc(Cc3ccccc3)c12>>C=C/c1nnc2nnc(Cc3ccccc3)c12)\c1cccc1  
671 C=CN1C(=O)c2ccccc2C1=O.COCC(=O)c1cc(OC)nc1Br>>COC(=O)c1cc(OC)nc1/C=C/N1C(=O)c2ccccc2C1=O  
672 C=Cc1ccc(OC)cc1.O=Cc1cccc1Br>>COc1ccc(/C=C/c2ccccc2C=O)cc1  
673 C=CC(C)=O.Cc1cccc(I)c1>>CC(=O)/C=C/c1cccc(C)c1  
674 C=C[C@H](O[Si](C)(C)C(C)(C)C)[C@H](Cc1cccc1)[C@H](CC(I)=CCO)O[Si](C)(C)C(C)(C)C>>C=C1C(=CCO)C[C@H](O[Si](C)(C)C(C)(C)C)[C@H](Cc2ccccc2)[C@H]1O[Si](C)(C)C(C)C  
675 C=CC(=O)OCCCC.Ic1cccs1>>CCCCOC(=O)/C=C/c1cccs1  
676 C=CC(=O)OC.Cc1ccc(S(=O)(=O)NCCc2ccccc2Br)cc1>>COC(=O)/C=C/c1cccc1CCNS(=O)(=O)c1cc(C)cc1  
677 C=C1C(=O)N2C[C@H](O)C[C@@H]2[C@H]1O.Ic1cccc1>>O=C1/C(=C/c2ccccc2)[C@H](O)[C@H]2C[C@@H](O)CN12  
678 C=CNC(C)=O.COCC(=O)c1cccc(Br)c1>>C=C(NC(C)=O)c1cccc(C(=O)OC)c1  
679 Br[C@H]1C[C@@H]2CC[C@H]1C2.C=Cc1ccc(OC)cc1>>COc1ccc(/C=C/[C@H]2C[C@@H]3CC[C@H]2C3)cc1  
680 C=CS(=O)(=O)NCCCC.CC(C)(C)OC(=O)NCc1cccc1Br>>CCCCNS(=O)(=O)/C=C/c1cccc1CNC(=O)OC(C)(C)C  
681 C=CC(=O)Nc1cccc2ccccc12.Cc1ccc(I)cc1C>>Cc1ccc(/C=C/C(=O)Nc2cccc3ccccc23)cc1C  
682 C=CC(=O)OCCCC.Nc1cccc1Br>>CCCCOC(=O)/C=C/c1cccc1N  
683 C=CC(=O)OC.C[Si](C)(C)c1cc2n(c(=O)c1I)CCC21OCCO1>>COC(=O)/C=C/c1c([Si](C)(C)C)cc2n(c1=O)CCC21OCCO1  
684 C=CCOC(C)=O.CC(C)(C)c1ccc([I+](c2ccc(C(C)(C)C)cc2)cc1>>CC(=O)OC/C=C/c1ccc(C(C)(C)C)cc1  
685 C=Cc1cccc1.COCC(=O)c1cc(C)cc(I)c1>>COC(=O)c1cc(C)cc(/C=C/c2ccccc2)c1  
686 C=Cc1cc(OC)c(OC)c(OC)c1.COc1cc(C=O)c(Br)c(OC)c1OC>>COc1cc(/C=C/c2c(C=O)cc(OC)c(OC)c2OC)cc(OC)c1OC  
687 C=CC(=O)OCc1cn(S(=O)(=O)c2ccccc2[N+](=O)[O-])c2ccc([N+](=O)[O-])cc12.CC(=O)OCCc1ccc(I)cc1>>CC(=O)OCCc1ccc(/C=C/C(=O)OCc2cn(S(=O)(=O)c3ccccc3[N+](=O)[O-])c3ccc([N+](=O)[O-])cc23)cc1

Brc1ccccl.C=CInc2c(N)ncncc2n1[C@@H]O[C@H](C(C)(C)(C)[C@@H](O[Si](C)(C)  
 C(C)(C))OC(=O)c1ccc(O[Si](C)(C)(C)(C)(C)[C@@H]O[C@H](C(C)(C)(C)(C)  
 ccc3)nc3c(N)nccn32)]C@H](O[Si](C)(C)(C)(C)(C)[C@@H]O[Si](C)(C)(C)(C)  
 Brc1ccccl.C=CC(F)(F)F>>FC(F)(F)/C=C/c1cccc1  
 C=Cc1cccc1.CC(C)(C)c1cccc(OS(=O)=O)C(F)(F)Fc1>>C=C(c1cccc1)c1cccc(C(C)(C)(C)c1  
 C=CC(=O)OCCCC.COc1cc(CO[Si](C)(C)(C)(C)(C)cc(Cl)n1)>>CCCCOC(=O)/C=C/c1cc(CO[Si](C)(  
 C)(C)(C)(C)cc(OC)n1  
 Brc1ccccl.C=CS(=O)=O)c1cccc1>>O=S(=O)/(C=C/c1cccc1)c1cccc1  
 C=CC(=O)OC.FC(F)(F)Oc1ccc(-  
 c2ccc3c(Br)nc(C(F)(F)Fn3cc2)cc1>>COC(=O)/C=C/c1nc(C(F)(F)Fn2cc(-c3ccc(OC(F)(F)Cc3)ccc12  
 C=CC1(C)OC(=O)Nc2ccc(-c3cc(F)cc(Br)c3)cc21.COc1ccc(-c2oc3ccccc3c(=O)c2I)cc1>>COc1ccc(-  
 c2oc3ccccc3c(=O)c2/C=C/C2(C)OC(=O)Nc3ccc(-c4cc(F)cc(Br)c4)cc32)cc1  
 C=CCC.O.Clc1nc(Oc2ccccc2)c2cc(Br)cn2n1>>OCC/C=C/c1cc2c(Oc3ccccc3)nc(Cl)nn2c1  
 C=Cc1cccc1.Cc1cccc(Br)c1>>Cc1cccc(/C=C/c2ccccc2)c1  
 C=CC(=O)OC(F)(F)C(F)(F)C(F)(F)C(F)(F)C(F)(F)C(F)(F)C(F)(F)C(F)(F)C[F][C@]12C  
 [C@@]34C=C(Sc5cccc(I)c5)C(=O)[C@@](C)(CCC(=O)Ne5c(O)ccc(C(=O)O)c5O)[C@@H]3[C@H]  
 (C[C@@H]1C4)O2>>C[C@]12C[C@@]34C=C(Sc5cccc(/C=C/C(=O)OC(F)(F)C(F)(F)C(F)(F)C(F)(F)  
 )C(F)(F)C(F)(F)C(F)(F)C(F)(F)C(F)(F)C(F)(F)C(F)(F)F)c5)C(=O)[C@@](C)(CCC(=O)Ne5c(O)ccc(C(=O)O)  
 c5O)IC@[H]3[C@H]1[C@@H]1(CI[C@@H]1C4)O2  
 C=CCCCCCC.N(C)c1cccc1OS(=O)=O)C(F)(F)F>>C=C(CCCCCCC)c1cccc1N(C)C  
 C=CCOCc1ccc2ccccc2c1Br>>C=C1COCe2ccc3ccccc3c21  
 C=Cc1ccc(OC)cc1.O=[N+](([O-])c1ccc(-n2cc(I)cn2)cc1)>>COc1ccc(/C=C/c2cnn(-c3ccc([N+]=(O)[O-]  
 ])cc3)c2)cc1  
 C=CC(=O)OC(C)(C)C.CC(=O)Cc1cc2c(cc1Br)OCO2>>CC(=O)Cc1cc2c(cc1/C=C/C(=O)OC(C)(C)C)  
 OCO2  
 C=CC(=O)N(C)Cc1oc2ccccc2c1C.O=C1CNCCe2cc(Br)enc2N1>>Cc1c(CN(C)C(=O)/C=C/c2cnc3c(c2)  
 CNCC(=O)N3)oc2ccccc12  
 C=CCNC1=NCCN1.COc1cccc(I)c1>>COc1cccc(/C=C/CNC2=NCCN2)c1  
 C=CS(=O)=ONCCCCCCCC.CC(C)(C)OC(=O)NCCc1cccc1Br>>CCCCCCCCNS(=O)=O)/C=C/c1  
 ccccc1CCNC(=O)OC(C)(C)C  
 C=CCCC(=O)CCCC[Se]c1cccc1.Ic1cccc1>>O=C(CC/C=C/c1cccc1)CCCC[Se]c1cccc1  
 C=CC(=O)OC(C)(C)C.Nc1nce(Br)cc1CN1CCCC1>>CC(C)(C)OC(=O)/C=C/c1ene(N)c(CN2CCCC  
 CCC(=O)/C=C/CC(CCc1cccc1)NS(=O)=O)c1ccc(C)cc1.Cc1ccc(Br)cc1>>CCC(=O)/C=C/CC(CCc1  
 ccccc1)NS(=O)=O)c1ccc(C)cc1)c1ccc(C)cc1  
 C=CC(=O)OC(C)(C)C.COc1ccc2c(C(=O)e3cc(OC)c(OC)c(OC)c3)en(Cc3ccc(Br)cc3)c2c1>>COc1ccc  
 2c(C(=O)e3cc(OC)c(OC)c(OC)c3)en(Cc3ccc(/C=C/C(=O)OC(C)(C)C)cc3)c2c1  
 C=CC(=O)OCCCC.Nc1ccc(Br)cc1>>CCCCOC(=O)/C=C/c1ccc(N)cc1  
 C=CC(=O)N1CCOCCI.O=C(C=P(c1cccc1))(c1cccc1)c1cccc1)c1ccc(I)cc1>>O=C(C=P(c1cccc1))(c  
 1cccc1)c1cccc1)c1ccc(/C=C/C(=O)N2CCOCC2)cc1  
 COc1ccc(I)cc1.Cc1ccc(S(=O)=O)/C=C2/C(F)(F)C2(C)(C)(C)c1>>COc1ccc(/C=C2\C(F)(F)C2(  
 C)(C)(C)(C)S(=O)=O)c2ccc(C)cc2)cc1  
 C=CC(=O)OCCCC.Clc1cccc1Br>>CCCCOC(=O)/C=C/c1cccc1Cl  
 C=CC(=O)N(C)OC.N#Cc1cc2ccc(Br)cc2cc1C#N>>CON(C)C(=O)/C=C/c1ccc2cc(C#N)c(C#N)cc2c1  
 Br/C(=C/[Te]c1cccc1)c1cccc1.C=CCCC>>CCCC/C=C/C(=C/[Te]c1cccc1)c1cccc1  
 C=CC(=O)OC.CC(C)(C)[Si](C)(C)OCc1c(I)nc(SC2CCCC2)n1 -  
 c1cccne1>>COC(=O)/C=C/c1nc(SC2CCCC2)n(-c2ccenn2)c1CO[Si](C)(C)(C)(C)C  
 C=CC(=O)O.CCOC(=O)Cn1cc(I)c(=O)[nH]c1=O>>CCOC(=O)Cn1cc(/C=C/C(=O)O)c(=O)[nH]c1=O  
 \*CNCCCCOCCOCCOCCNC(=O)COc1ccc(C(Cc2cc(OC)cc(OC)c2)NC(=O)c2cccc(C=C)c2)cc1.Cc1cc  
 c(I)cc1F>>\*CNCCCCOCCOCCOCCNC(=O)COc1ccc(C(Cc2cc(OC)cc(OC)c2)NC(=O)c2cccc(/C=C/c  
 3ccc(C)c(F)c3)c2)cc1  
 C=Cc1cccc1.Cc1nec(-c2ccc(Cl)cc2)n1C>>Cc1nec(-c2ccc(/C=C/c3ccccc3)cc2)n1C  
 Brc1ceesl.C=C[Si](CC)(CC)CC>>CC[Si]/C=C/c1cesel1)(CC)CC  
 Brc1ccc(-c2coen2)cc1.C=CC(=O)OCC>>CCOC(=O)/C=C/c1ccc(-c2coen2)cc1  
 Brc1ccsl.C=CCOc1cccc1>>C(=C/c1ccsl1)\COc1cccc1  
 C=C1C(=O)O[C@H]2[C@H]1CCC(=C)[C@@H]1C[C@H](OC(C)=O)C(=C)[C@H]21.Cc1ccc(I)cc1[I  
 N+]=(O)[O-]>>C=C1CC[C@H]2/C=C\c3ccc(C)c([N+]=(O)[O-]  
 ]c3)C(=O)O[C@@H]2[C@H]2C(=C)[C@@H](OC(C)=O)C[C@@H]12  
 C=CC(=O)N(C)C.C[C@]12C[C@@]34C=C(Sc5cccc(I)c5)C(=O)[C@@](C)(CCC(=O)Ne5c(O)ccc(C(  
 =O)O)c5O)[C@@H]3[C@H](C[C@@H]1C4)O2>>CN(C)C(=O)/C=C/c1cccc(SC2=C[C@]34C[C@H]  
 [5C][C@H](O[C@@]5(C)C3)[C@H]4[C@@](C)(CCC(=O)Ne3c(O)ccc(C(=O)O)c3O)C2=O)c1

724 C=CS(=O)(=O)Nc1ccc(OC2CCN(C(=O)OC(C)(C)C)CC2)cc1.N#Cc1ccc(Br)cc1>>CC(C)(C)OC(=O)N1CCC(OC2ccc(NS(=O)(=O)/C=C/c3ccc(C#N)cc3)cc2)CC1  
 725 C=CCOC(C)=O.Ic1ccc(-c2ccccc2)cc1>>CC(=O)OC/C=C/c1ccc(-c2ccccc2)cc1  
 726 C=CCC[C@@H](C=C)COc1ccccc1Br>>C=CCC[C@@H]1COc2ccccc2C1=C  
 727 C=Cc1ccc(Br)cc1.Cc1c(Nc2c(I)cncc2C#N)ccc2[nH]ccc12>>Cc1c(Nc2c(C#N)cncc2/C=C/c2ccc(Br)cc2)ccc2[nH]ccc12  
 728 C=COCCO.O=C(c1ccccc1)c1ccc(Br)cc1>>C=C(OCCO)c1ccc(C(=O)c2ccccc2)cc1  
 729 Br1ccc(-c2cnco2)o1.C=Cc1ccccc1>>C=C/c1ccc(-c2cnco2)o1)c1ccccc1  
 730 C=CC(=O)OCc1ccccc1.CCOC(=O)N1c2ccc(OC)nc2C(N(Cc2cc(C(F)(F)F)cc(C(F)(F)F)c2)c2ncc(Br)cn2)CC1CC>>CCOC(=O)N1c2ccc(OC)nc2C(N(Cc2cc(C(F)(F)F)cc(C(F)(F)F)c2)c2ncc(/C=C/C(=O)OCc3ccccc3)cn2)CC1CC  
 731 Br1ccc2ccccc2c1.C=CC(=O)N(C)OC>>CON(C)C(=O)/C=C/c1ccc2ccccc2c1  
 732 C=CCC(O)c1ccc(-c2cc(OC)nc2F)cn1.COC(=O)[C@@H](C)[C@H](c1ccc(I)c(O)c1)C1CC1>>COC(=O)[C@@H](C)[C@H](c1ccc(/C=C/CC(O)c2ccc(-c3cc(OC)nc3F)cn2)c(O)c1)C1CC1  
 733 C=CC(=O)OC(C)(C)C.Nc1ccc(Br)cc1>>CC(C)(C)OC(=O)/C=C/c1ccc(N)cc1  
 734 C=CC[C@H](OCc1ccccc1)[C@H](OCc1ccccc1)[C@H](OCc1ccccc1)/C=C/C[C@H](C)O[Si](C)(C)C(C)(C)CO  
 735 COC.COc1cc2c(c(OS(=O)(=O)C(F)(F)F)c1)C(=O)OC(C)(C)O2>>COCO[C@H](/C=C/C[C@H](C)O[Si](C)(C)C(C)(C)C)[C@H](OCc1ccccc1)[C@H](OCc1ccccc1)/C=C/c1cc(OC)cc2c1C(=O)OC(C)(C)O2)OCc1cC=CC(=O)OCCOC.Cc1[nH]c(=O)c2c(N)nn(C)c2c1Br>>CCOCCOC(=O)/C=C/c1c(C)[nH]c(=O)c2c(N)nn(C)c12  
 736 C=Cc1cccc(CN2CCN(C)CC2)n1.Cc1c(Nc2c(I)cncc2C#N)cc(Cl)c2[nH]ccc12>>Cc1c(Nc2c(C#N)cncc2/C=C/c2cccc(CN3CCN(C)CC3)n2)cc(Cl)c2[nH]ccc12  
 737 C=CC.O=[N+](O-)]c1ccc(Br)cc1>>C/C=C/c1ccc([N+](=O)[O-])cc1  
 738 C=Cc1cncc1.CC(C)(C)OC(=O)N[C@H](COc1cncc(Br)c1)Cc1cccc2ccccc12>>CC(C)(C)OC(=O)N[C@H](COc1cncc(/C=C/c2cncc2)c1)Cc1cccc2ccccc12  
 739 C=CC(=O)N1N=Cc2ccccc2C1Cc1ccc(OC)cc1.COc1cc(Cc2cnc(N)nc2N)cc(I)c1OC>>COc1ccc(CC2c3ccccc3C=NN2C(=O)/C=C/c2cc(Cc3cnc(N)nc3N)cc(OC)c2OC)cc1  
 740 C=Cc1cccc(F)c1.N[C@@H](Cc1c[nH]c2c(Br)cccc12)C(=O)O>>N[C@@H](Cc1c[nH]c2c(/C=C/c3ccc(F)c3)cccc12)C(=O)O  
 741 Br1ccc2ccccc2c1.C=CC(=O)OCC>>CCOC(=O)/C=C/c1ccc2ccccc2c1  
 742 C=C(C)C(=O)OC.COc1ccc(Cl)cc1>>COC(=O)/C(C)=C/c1ccc(OC)cc1  
 743 C=CP(=O)(OCC)OCC.O=[N+](O-)]c1ccc(-c2ccccc3ccccc23)c2nc(Cl)ccc2c1>>CCOP(=O)(/C=C/c1ccc2cc([N+](=O)[O-])cc(-c3ccccc4ccccc34)c2n1)OCC  
 744 C=CC(=O)OC(C)(C)C.CC1(C)C(=O)N(c2ccc(C#N)c(C(F)(F)F)c2)C(=S)N1c1ccc(Br)c(F)c1>>CC(C)(C)OC(=O)/C=C/c1ccc(N2C(=S)N(c3ccc(C#N)c(C(F)(F)F)c3)C(=O)C2(C)C)cc1F  
 745 C=COCCCCC.CC(=O)c1cncc(Br)c1>>C=C(OCCCC)c1cncc(C(C)=O)c1  
 746 C=CCN(C(=O)c1c(C)noc1C)[C@H](C)c1cc(F)cc(F)c1.O=C1Nc2nccccc2[C@@]12Cc1cc(Br)cn1C2>>Cc1noc(C)c1C(=O)N(C/C=C/c1cnc2c(c1)C[C@@]1(C2)C(=O)Nc2nccccc21)[C@H](C)c1cc(F)cc(F)cC=CC(=O)O.FC(F)(F)c1ccc(I)c(Br)c1>>O=C(O)/C=C/c1ccc(C(F)(F)F)cc1Br  
 747 C=Cc1cnc2ccccc2c1.CN1C(=O)CC[C@]2(C)c3ccc(Br)cc3CC[C@]12>>CN1C(=O)CC[C@]2(C)c3ccc(/C=C/c4cnc5ccccc5c4)cc3CC[C@]12  
 748 C=Cc1ccc(C)cc1.COC(=O)c1ccccc1I>>COC(=O)c1ccccc1/C=C/c1ccc(C)cc1  
 749 Br1cccc(-c2ccccc2)c1.C=CC(=O)OCC>>CCOC(=O)/C=C/c1cccc(-c2ccccc2)c1  
 750 C=CC(=O)OC.O=C1c2ccc(OS(=O)(=O)C(F)(F)F)cc2C(=O)N1Cc1ccccc1>>COC(=O)/C=C/c1ccc2c(c1)C(=O)N(Cc1ccccc1)C2=O  
 751 C=Cc1ccc(N(c2ccc3ccccc3c2)c2ccc3ccccc3c2)cc1.COc1cc(C=O)c(OC)cc1I>>COc1cc(/C=C/c2ccc(N(c3ccc4ccccc4c3)c3ccc4ccccc4c3)cc2)c(OC)cc1C=O  
 752 C=CC1(O)CCCCC1.[2H]C(O)(CCNC(=O)C(F)(F)F)c1cccc(Br)c1>>[2H]C(O)(CCNC(=O)C(F)(F)F)c1ccccc1/C=C/C2(O)CCCCC2)c1  
 753 C=CC(=O)O.Oc1ccc(I)cc1F>>O=C(O)/C=C/c1ccc(O)c(F)c1  
 754 C=Cc1ccc(Cl)cc1.CCOC(=O)C(F)I>>CCOC(=O)C(F)/C=C/c1ccc(Cl)cc1  
 755 C=CCc1ccc(OCc2ccccc2)c(OC)c1.O=C(O)/C=C/c1ccccc1Br>>COc1cc(C/C=C/c2ccccc2/C=C/C(=O)O)ccc1OCc1ccccc1  
 756 C=CC(=O)OCC.Cc1ccc(Br)c(C=O)c1>>CCOC(=O)/C=C/c1ccc(C)cc1C=O  
 757 CCOC(=O)/C(F)=C\CCc1ccccc1.COc1ccc(I)cc1>>CCOC(=O)/C(F)=C\CCc1ccccc1)c1ccc(OC)cc1  
 758 C=CCn1c(N(c2ccc(F)cc2I)S(=O)(=O)c2cccs2)cc2ccccc21>>O=S(=O)(c1cccs1)N1c2ccc(F)cc2/C=C\Cn2c1cc1ccccc12  
 759 C=CC(=O)NC(C)(C)C.COc1cc2oc(-c3ccccc3)c(I)c(=O)c2cc1OC>>COc1cc2oc(-c3ccccc3)c(/C=C/C(=O)NC(C)(C)C)c(=O)c2cc1OC  
 760

761 Br1cccc2cccc12.C=CS(=O)c1cccc1>>O=S(/C=C/c1cccc2cccc12)c1cccc1  
762 C=CC(=O)OCCCC.O=C(c1cccc1)c1ccc(Cl)cc1>>CCCCOC(=O)/C=C/c1ccc(C(=O)c2cccc2)cc1  
763 C=C(C(=O)OC)N(CCCCCc1cccc1I)C(=O)OC(C)(C)C>>COC(=O)/C1=C/c2cccc2CCCCCN1C(=O)  
OC(C)(C)C  
764 C=CC(CCCC)(CCCC)n1nnc2cccc21.Cc1ccc(I)cc1>>CCCCC(/C=C/c1ccc(C)cc1)(CCCC)n1nnc2cccc  
765 C=CC(=O)OC.Cc1ccc(I)cc1>>C=C(C(=O)OC)c1ccc(C)cc1  
766 C=CC(=O)OCCCC.Ic1ccc(-c2cccc2)cc1>>CCCCOC(=O)/C=C/c1ccc(-c2cccc2)cc1  
767 C=CCNC(=O)OC(C)(C)C.CC(=O)c1ccc(Br)cc1>>C=C(CNC(=O)OC(C)(C)C)c1ccc(C(C)=O)cc1  
768 C=Cc1cccc(OC)c1.Cn1c(=O)c2c(cc(Br)n2C)n(C)c1=O>>COc1cccc(/C=C/c2cc3c(c(=O)n(C)c(=O)n3C  
)n2C)c1  
769 C=CC(=O)OC.N#Cc1ccc(-c2cc(I)cc(C=O)c2)cc1>>COC(=O)/C=C/c1cc(C=O)cc(-c2ccc(C#N)cc2)c1  
770 C=CC(=O)OCC.Cc1nc2cc(Br)ccc2s1>>CCOC(=O)/C=C/c1ccc2sc(C)nc2c1  
771 C=CC(=O)CCCC.CCc1cc(C)cc(CC)c1Br>>CCCCC(=O)/C=C/c1c(CC)cc(C)cc1CC  
772 C=CC(=O)OC.Clc1cncc(Br)c1>>COC(=O)/C=C/c1cncc(Cl)c1  
773 C=C.Cc1cccc1Br>>C=Cc1cccc1C  
774 C=Cc1ccc(OC)cc1.COC(=O)c1cc(OC)ccc1Br>>COC(=O)c1cc(OC)ccc1/C=C/c1ccc(OC)cc1  
775 C=CC(F)(F)C(F)(F)C(F)(F)C(F)(F)C(F)(F)C(F)(F)F.CC(=O)Nc1ccc(I)cc1>>CC(=O)Nc1ccc(/C=C/C(F  
)(F)C(F)(F)C(F)(F)C(F)(F)C(F)(F)C(F)(F)F)cc1  
776 C=CN1C(=O)c2cccc2C1=O.OC(c1ccc(Cl)cc1)c1ncccc1Br>>O=C1c2cccc2C(=O)N1/C=C/c1cccn1  
C(O)c1ccc(Cl)cc1  
777 C=Cc1cncc1.Cc1c(Nc2c(I)cncc2C#N)cc(Cl)c2[nH]ccc12>>Cc1c(Nc2c(C#N)cncc2/C=C/c2cncc2)cc  
(Cl)c2[nH]ccc12  
778 C=CC(=O)OC.Fc1ccc(I)cc1F>>COC(=O)/C=C/c1ccc(F)c(F)c1  
779 BrC1=C(C2=CCCO2)CCCC1.C=CC(=O)OC>>COC(=O)/C=C/C1=C(C2=CCCO2)CCCC1  
780 C=Cc1ccc(OC)c(Nc2nc(Nc3ccc(N4CCOCC4)c(Br)c3)nc2Cl)c1>>COc1ccc2cc1Nc1nc(ncc1Cl)Nc1cc  
c(N3CCOCC3)c(c1)/C=C\2  
781 C=CC(=O)NCc1cccc1.O=C1Cc2c([nH]c3ccc(I)cc23)-  
c2cccn2N1>>O=C(/C=C/c1ccc2[nH]c3c(c2c1)CC(=O)Nc1ncccc1-3)NCc1cccc1  
C=CC(=O)OCC.CN(C)c1ccc(-  
782 c2ccc(CN(C(=O)C3CCCC3)c3ccc(Br)c3)cc2)cc1>>CCOC(=O)/C=C/c1cccc(N(Cc2ccc(-  
c3ccc(N(C)C)cc3)cc2)C(=O)C2CCCC2)c1  
783 C=CCC(C(C)=O)C(=O)OC(C)(C)C.COc1ccc(I)cc1OC>>COc1ccc(/C=C/CC(C(C)=O)C(=O)OC(C)(C)  
C)cc1OC  
784 C=CC(=O)c1cccc1.Nc1c(I)ccc2c1C(=O)c1cccc1C2=O>>Nc1c(/C=C/C(=O)c2cccc2)ccc2c1C(=O)c  
1cccc1C2=O  
785 C=CC(=O)OC.O=C1c2ccc(OS(=O)(=O)C(F)(F)F)cc2C(=O)N1[C@@H](COCc1cccc1)c1cccc1>>C  
OC(=O)/C=C/c1ccc2c(c1)C(=O)N([C@@H](COCc1cccc1)c1cccc1)C2=O  
786 C=CC1CC(=O)N1.Cc1cccc(I)c1>>Cc1cccc(/C=C/C2CC(=O)N2)c1  
787 C=C(F)C(C)=O.Ic1cccc1-c1cccc1>>CC(=O)/C(F)=C/c1cccc1-c1cccc1  
788 C=Cc1ccc(C=C)cc1.COc1ccc(Br)cc1>>C=Cc1ccc(/C=C/c2ccc(OC)cc2)cc1  
C=Cc1cccc1.COc1cc(I)c2c3c1O[C@@H]1[C@]34CCN(C)[C@H](C2)[C@]42C=C[C@@]1(OC)c1c  
789 (OC(C)=O)ccc(O)c12>>COc1cc(/C=C/c2cccc2)c2c3c1O[C@@H]1[C@]34CCN(C)[C@H](C2)[C@]  
42C=C[C@@]1(OC)c1c(OC(C)=O)ccc(O)c12  
790 Br1ccc(-c2cccc2)cc1.C=CP(=O)(OCC)OCC>>CCOP(=O)/C=C/c1ccc(-c2cccc2)cc1OCC  
791 C=CC(=O)OC.Nc1cc(Cl)ccc1Br>>COC(=O)/C=C/c1ccc(Cl)cc1N  
C=Cc1cccc1.COC(=O)/C=C/c1cccc(N(Cc2ccc(Br)cc2)C(=O)C2CCCC2)c1>>COC(=O)/C=C/c1ccc  
792 c(N(Cc2ccc(/C=C/c3cccc3)cc2)C(=O)C2CCCC2)c1  
C=CC(=O)OCC.Cc1cc2ncc(Br)cc2n1-c1ccc(C#N)cc1>>CCOC(=O)/C=C/c1cn2cc(C)n(-  
793 c3ccc(C#N)cc3)c2c1  
794 C=CC(=O)OCC.Clc1ccc1>>CCOC(=O)/C=C/c1ccc1  
795 C=CC(=O)OCC.CC(=O)O[IH2](OC(C)=O)c1cccc1>>CCOC(=O)/C=C/c1cccc1  
796 C=CCN1C(=O)c2cccc2C1=O.N#Cc1ccc(Br)cc1>>N#Cc1ccc(/C=C/CN2C(=O)c3cccc3C2=O)cc1  
797 C=CC(=O)OCC.Nc1ccc(Br)c(F)c1>>CCOC(=O)/C=C/c1ccc(N)cc1F  
798 C=CS(=O)(=O)NC1CCCC1.COc1ccc(Br)c(CNC(=O)OC(C)(C)C)c1>>COc1ccc(/C=C/S(=O)(=O)NC2  
CCCC2)c(CNC(=O)OC(C)(C)C)c1  
799 C=CC(=O)OCc1cccc1.O=C1NCCCC[C@@H]1N1Cc2cc(Br)ccc2C1=O>>O=C(/C=C/c1ccc2c(c1)CN  
([C@@H]1CCCCN1=O)C2=O)OCc1cccc1  
800 C=CC#N.COc1cc(C(C)(C)C)c(OC)cc1Br>>COc1cc(C(C)(C)C)c(OC)cc1/C=C/C#N  
801 C=Cc1cccc1.Ic1cn2cccc2c1-c1cccc1>>C(=C/c1cn2cccc2c1-c1cccc1)c1cccc1  
802 C=Cc1cccc1.C[Si](C)(Cl)c1cccc1>>C[Si](C)/C=C/c1cccc1)c1cccc1

803 C=CC(=O)OC(C)(C)C.CCCc1nc(N(C)c2ccccc2)n2ncc(I)c2n1>>CCc1nc(N(C)c2ccccc2)n2ncc(/C=C/  
 C(=O)OC(C)(C)C)c2n1  
 804 C=CC(C)(C)O.CCNC(=O)C[C@H]1N=C(c2ccc(Br)cc2)c2cc(OC)ccc2-  
 n2c(C)nnc21>>CCNC(=O)C[C@H]1N=C(c2ccc(/C=C/C(C)(C)O)cc2)c2cc(OC)ccc2-n2c(C)nnc21  
 805 C=Cc1ccc(C)cc1.N#Cc1ccccc1Br>>Cc1ccc(/C=C/c2ccccc2C#N)cc1  
 806 C=CC#N.O=Cc1ccccc1Br>>N#C/C=C/c1ccccc1C=O  
 807 C=Cc1ccc(C)cc1.COc1ccc(Br)cc1>>COc1ccc(/C=C/c2ccc(C)cc2)cc1  
 808 C=CC(=O)OC.Cn1c(Br)enc1Sc1ccccc1>>COC(=O)/C=C/c1cnc(Sc2ccccc2)n1C  
 809 C=CC(C)=O.Clc1ccc(I)cc1>>CC(=O)/C=C/c1ccc(Cl)cc1  
 810 C=CC(=O)N(C)C.CC(=O)c1ccc(Cl)cc1>>CC(=O)c1ccc(/C=C/C(=O)N(C)C)cc1  
 811 C=Cc1ccccc([N+](=O)[O-])c1.N[C@H](Cc1c[nH]c2c(Br)cccc12)C(=O)O>>N[C@H](Cc1c[nH]c2c(/C=C/c3ccccc([N+](=O)[O-])c3)cccc12)C(=O)O  
 812 C=CC(=O)OC(C)(C)C.O=Cc1ccc(I)cc1>>CC(C)(C)OC(=O)/C=C/c1ccc(C=O)cc1  
 813 C=CC(=O)N(C)C.Cc1ccc(NC(=O)OC(C)(C)C)c(Br)c1>>Cc1ccc(NC(=O)OC(C)(C)C)c(/C=C/C(=O)N(C)C)c1  
 814 C=CC(=O)OC.COc1cc(I)c(NC(=O)C(C)(C)C)c(OC)c1[Si](C)(C)C>>COC(=O)/C=C/c1cc(OC)c([Si](C)(C)C)c(OC)c1NC(=O)C(C)(C)C  
 815 C=CC(=O)OC(C)(C)C.COc1ccc(CNc2c(I)cc(C)cc2[Si](C)(C)C)cc1>>COc1ccc(CNc2c(/C=C/C(=O)O(C)(C)C)cc2[Si](C)(C)C)cc1  
 816 C=Cc1ccc(/C=C/c2ccc(/C=C/c3ccc(OCCCCC)cc(OCCCCC)c3)cc2)cc1.CCCCCCOc1ccc2cc(Br)ccc2c1>>CCCCCOc1cc(/C=C/c2ccc(/C=C/c3ccc(/C=C/c4ccc5cc(OCCCCC)ccc5c4)cc3)cc2)cc(OCCC  
 817 C=Cc1ccccc1N(C)C(=O)c1ccccc1I>>C=C1c2ccccc2C(=O)N(C)c2ccccc21  
 818 C=CC(=O)O.O=S(=O)(Nc1ccc(I)cn1)c1ccc(-c2ccccc2)cc1>>O=C(O)/C=C/c1ccc(NS(=O)(=O)c2ccc(-c3ccccc3)cc2)nc1  
 819 C=CC(=O)OC.COc1ccc(Br)cc1OC>>COC(=O)/C=C/c1ccc(OC)c(OC)c1  
 820 C=Cc1ccc(C(=O)OCC)cc1.CC(C)=C1CCC(C)(C)c2ccc(Br)cc21>>CCOC(=O)c1ccc(/C=C/c2ccc3c(c2)C(=C(C)C)CCC3(C)C)cc1  
 821 C=CC(=O)OCC.O[C@H]1CCCC[C@H]1Nc1nc2ccc(Cn3cnc4cc(I)ccc43)cc2s1>>CCOC(=O)/C=C/c1ccc2c(c1)ncn2Cc1ccc2nc(N[C@H]3CCCC[C@H]3O)sc2c1  
 822 C=Cc1ccccc1.COc1ccc(/C=C/C(=O)c2ccc(Br)cc2)cc1>>COc1ccc(/C=C/C(=O)c2ccc(/C=C/c3ccccc3)c2)cc1  
 823 C=CC(=O)OC.Ic1nn(C(c2ccccc2)(c2ccccc2)c2ccccc2)c2cenc(OC3CCOCC3)c12>>COC(=O)/C=C/c1nn(C(c2ccccc2)(c2ccccc2)c2ccccc2)c2cenc(OC3CCOCC3)c12  
 824 C=CC(=O)OCCCC.NC(=O)c1ccc(I)cc1>>CCCCOC(=O)/C=C/c1ccc(C(N)=O)cc1  
 825 C=CC(=O)OC(C)(C)C.COc1ccc(CNc2ccc(Br)en2)cc1>>COc1ccc(CNc2ccc(/C=C/C(=O)OC(C)(C)C)cn2)cc1  
 826 C=CC(=O)OCC.Cc1cc(Br)ccn1>>CCOC(=O)/C=C/c1ccnc(C)c1  
 827 C=C(NC(C)=O)C(=O)OC.Fc1cc(Br)ccc1-c1ccccc1>>COC(=O)/C=C/c1ccc(-C=CC(=O)OC(C)(C)C.OCc1ccccc(I)c1>>CC(C)(C)OC(=O)/C=C/c1ccccc(CO)c1  
 828 C=CC(=O)OC(C)(C)C.OCc1ccccc(I)c1>>CC(C)(C)OC(=O)/C=C/c1ccccc(CO)c1  
 829 C=CC(=O)OC.COc1ccc2cc(Br)ccc2c1Cl>>COC(=O)/C=C/c1ccc2c(Cl)c(OC)ccc2c1  
 830 C=CCNC(=O)OC(C)(C)C.O=S(=O)(Oc1ccc(F)cc1Cl)C(F)(F)F>>C=C(CNC(=O)OC(C)(C)C)c1ccc(F)cc1Cl  
 831 C=Cc1ccccc1.Cc1noc(C)c1I>>Cc1noc(C)c1/C=C/c1ccccc1  
 832 C=CC(=O)OC.N#CCn1c(=O)oc2cc(Br)enc21>>COC(=O)/C=C/c1cnc2c(c1)oc(=O)n2CC#N  
 833 C=CC(OC)OC.COc1ccccc(I)c1>>COc1ccccc(/C=C/C(OC)OC)c1  
 834 C=CC(=O)OC.Cc1cc2c(cc1Br)OCO2>>COC(=O)/C=C/c1cc2c(cc1C)OCO2  
 835 Brclcnc(C2CC2)c1.C=CC(=O)OCC>>CCOC(=O)/C=C/c1ccnc(C2CC2)c1  
 836 C=CC(=O)OC.CC(C)(C)OC(=O)c1ccc(I)cc1>>COC(=O)/C=C/c1ccc(C(=O)OC(C)(C)C)cc1  
 837 C=Cc1ccccc1.Cc1ccsc1Br>>Cc1ccsc1/C=C/c1ccccc1  
 838 C=CC[C@H](C[C@H](NC(=O)OC(C)(C)C)C(=O)OC(C)(C)C)C(=O)OC(C)(C)C.CC(C)(C)OC(=O)c1ccc(NC(=O)c2ccc3c(c2)/N=N\c2cc(Br)ccc2CC3)cc1>>CC(C)(C)OC(=O)N[C@H](C[C@H](C/C=C/c1ccc2c(c1)/N=N\c1cc(C(=O)Nc3ccc(C(=O)OC(C)(C)C)cc3)ccc1CC2)C(=O)OC(C)(C)C)C(=O)OC\*CNCCCOCCOCCOCCCN(C(=O)COc1ccc(C(Cc2cc(OC)cc(OC)c2)NC(=O)c2ccc(C=C)cc2)cc1.N#Cc1ccccc(I)c1>>\*CNCCCOCCOCCOCCCN(C(=O)COc1ccc(C(Cc2cc(OC)cc(OC)c2)NC(=O)c2ccc(/C=C/c3ccccc(C#N)c3)cc2)cc1  
 840 C=CC(=O)OC.Fc1ccc(I)cc1>>COC(=O)/C=C/c1ccc(F)cc1  
 841 Brclccccc1.C=CCOC(C)=O>>CC(=O)OC/C=C/c1ccccc1  
 842 C=CCCNc1ccccc1Br>>C=C1CCCNc2ccccc21  
 843 C=CC(=O)OC.COc1c(CNc2ccccc(Br)c2)ccc2c1OC(C)(C)C=C2>>COC(=O)/C=C/c1ccccc(NCc2ccc3c(c2OC)OC(C)(C)C=C3)c1

844 C=CC(=O)OCC.O=c1oc(-c2ccccc2)c(I)c2sc3c(c12)CCC3>>CCOC(=O)/C=C/c1c(-  
c2ccccc2)oc(=O)c2c3c(sc12)CCC3

845 C=CC(=O)OC(C)(C)C.O=Cc1c(Br)cccc1Oc1ccc(OC(F)(F)F)cc1>>CC(C)(C)OC(=O)/C=C/c1cccc(Oc  
2ccc(OC(F)(F)F)cc2)c1C=O

846 C=CC(=O)O.Clc1ccc(I)cc1>>O=C(O)/C=C/c1ccc(Cl)cc1

847 C=Cc1ccc(O)cc1.COc1cc(I)cc(OC)c1>>COc1cc(/C=C/c2ccc(O)cc2)cc(OC)c1

848 C=Cc1cccc1.ClCc1cccc1>>C(=C/c1cccc1)\Cc1cccc1

849 C=CCNC(=O)OC(C)(C)C.O=S(=O)(Oc1cccc(C(F)(F)F)c1Cl)C(F)(F)F>>C=C(CNC(=O)OC(C)(C)C)c  
1cccc(C(F)(F)F)c1Cl

850 C=C[Si](C)(C)c1cccn1.Ic1cccn1>>C[Si](C)(/C=C/c1cccn1)c1cccn1

851 C=CC(=O)OC.CC(C)(C)OC(=O)c1ccccc1Br>>COC(=O)/C=C/c1ccccc1C(=O)OC(C)(C)C

852 C=CC(=O)NC(C)(C)C.COc1ccc(I)cc1>>COc1ccc(/C=C/C(=O)NC(C)(C)C)cc1

853 C=CC(=O)OC(C)(C)C.O=c1oc(Br)cc2ccccc12>>CC(C)(C)OC(=O)/C=C/c1cc2ccccc2c(=O)o1

854 C=CC(=O)OCC.CCOC(=O)CCOC(C)c1cc(OC)c(OC)cc1Br>>CCOC(=O)/C=C/c1cc(OC)c(OC)cc1C(  
C)OCCC(=O)OCC

855 C=Cc1ccccc1.COc1cc(OC)c(OC)cc1/C=C/C(=O)c1ccc(I)cc1>>COc1cc(OC)c(OC)cc1/C=C/C(=O)c1c  
cc(/C=C/c2ccccc2)cc1

856 C=Cc1cc(C(C)=O)ccc1N(C)C(=O)c1ccccc1I>>C=C1c2ccccc2C(=O)N(C)c2ccc(C(C)=O)cc21

857 C=CC(=O)OC.FC(F)(F)c1ccc(I)cc1>>COC(=O)/C=C/c1ccc(C(F)(F)F)cc1

858 C=C[Si](C)(C)c1ccccc1.CC(=O)c1ccc(Br)cc1>>CC(=O)c1ccc(/C=C/[Si](C)(C)c2ccccc2)cc1

859 C=CP(=O)(OCC)OCC.O=[N+](O-)]c1ccc(Br)cc1>>CCOP(=O)/C=C/c1ccc([N+](=O)[O-])cc1OCC

860 C=Cc1ccc(OC(C)=O)cc1.OCCCC(Br)C(F)(F)F>>CC(=O)Oc1ccc(/C=C/C(CCCO)C(F)(F)F)cc1

861 C=Cc1ccc(Cl)cc1.N#Cc1ccc2cc(Br)ccc2c1>>N#Cc1ccc2cc(/C=C/c3ccc(Cl)cc3)ccc2c1

862 C=CC(=O)OC(C)(C)C.CC(C)(C)n1nnc(-c2ccc(Br)cc2)n1>>CC(C)(C)OC(=O)/C=C/c1ccc(-  
c2nnn(C(C)(C)C)n2)cc1

863 C=CC(=O)OC.Cc1ccc(Cl)c(Br)c1>>COC(=O)/C=C/c1cc(C)ccc1Cl

864 C=Cc1ccccc1.Cc1cccc(Br)c1N>>Cc1cccc(/C=C/c2ccccc2)c1N

865 C=C[Si](C)(C)C.COc1ccc(I)cc1>>COc1ccc(/C=C/[Si](C)(C)C)cc1

866 C=CC(C)(C)C.O=c1oc2ccccc2cc1Br>>CC(C)(C)/C=C/c1cc2ccccc2oc1=O

867 C=Cc1ccc(N)cc1.O=C(O)c1ccc(I)cc1>>Nc1ccc(/C=C/c2ccc(C(=O)O)cc2)cc1

868 Brc1ccc2ccccc2c1.C=CN(C)C(C)=O>>C=C(c1ccc2ccccc2c1)N(C)C(C)=O

869 C=CC[C@H](N[S@](=O)C(C)(C)C)c1c(F)cccc1Br>>C=C1C[C@H](N[S@](=O)C(C)(C)C)c  
2c(F)cccc21

870 C=Cc1ccc(OC)cc1.CC(C)OC(=O)/C(Br)=C1\CCCO1>>C=C/C(C(=O)OC(C)C)=C1/CCCO1)c1ccc(O  
C)cc1

871 C=Cc1ccc(C)cc1.CC(=S)NS(=O)(=O)c1ccc(Br)cc1>>CC(=S)NS(=O)(=O)c1ccc(/C=C/c2ccc(C)cc2)cc

872 C=CC(=O)OC.O=Cc1cc(C(F)(F)F)ccc1Br>>COC(=O)/C=C/c1ccc(C(F)(F)F)cc1C=O

873 Brc1ccc2ccc3cccc4ccc1c2c34.C=Cc1ccc(OC(C)(C)C)cc1>>CC(C)(C)Oc1ccc(/C=C/c2ccc3cccc4cccc5c  
cc2c3c45)cc1

874 C=C[C@H](O[Si](C)(C)C(C)(C)C)[C@H](C)[C@H](C/C(I)=C/CO)O[Si](C)(C)C(C)(C)C>>C=  
C1/C(=C\CO)C[C@H](O[Si](C)(C)C(C)(C)C)[C@H](C)[C@H]1O[Si](C)(C)C(C)(C)C

875 C=CCCCC(=O)N(Cc1ccccc1)c1ccccc1I>>C=C1CCCC(=O)N(Cc2ccccc2)c2ccccc21

876 C=CCN(CCc1ccc(C(F)(F)F)cc1I)C(=O)C(F)(F)F>>C=C1CN(C(=O)C(F)(F)F)CCc2ccc(C(F)(F)F)cc21

877 C=Cc1cccc(Cl)c1.O=Cc1ccc(Br)c1>>O=Cc1cccc(/C=C/c2ccc(Cl)c2)c1

878 C=CC(OCC)OCC.Cc1ccc(I)cc1>>CCOC(/C=C/c1ccc(C)cc1)OCC

879 Brc1cccn1.C=Cc1nn(C(c2ccccc2)(c2ccccc2)c2ccc2)c2c(F)cc(C#N)cc12>>N#Cc1cc(F)c2c(c1)c(/C  
=C/c1cccn1)nn2C(c1ccccc1)(c1ccccc1)c1ccccc1

880 C=Cc1ccc(N(c2ccc(OC)cc2)c2ccc(OC)cc2)cc1.CC(C)(C)c1ccc(/C=C/c2ccc(/C=C/c3ccc(Br)cc3)cc2)cc  
1>>COc1ccc(N(c2ccc(/C=C/c3ccc(/C=C/c4ccc(/C=C/c5ccc(C(C)(C)C)cc5)cc4)cc3)cc2)c2ccc(OC)cc2)

881 C=CC(=O)NC(C)C.COc1ccc(CNc2c(C(=O)NCc3ccc(F)cc3F)c(=O)n(OCc3ccccc3)c3ncc(Br)cc23)c(O  
C)c1>>COc1ccc(CNc2c(C(=O)NCc3ccc(F)cc3F)c(=O)n(OCc3ccccc3)c3ncc(/C=C/C(=O)NC(C)C)cc2  
3)c(OC)c1

882 C=COCCCC.O=C(Cl)c1ccc(Br)cc1>>CCCCO/C=C/C(=O)c1ccc(Br)cc1

883 C=CC(O)(CO)CCC=C(C)C.COc1ccc(OC)c(Br)c1>>COc1ccc(OC)c(/C=C/C(O)(CO)CCC=C(C)C)c1

884 C=C(F)F.CCCCCC/C(F)=C(F)I>>CCCCC/C(F)=C(F)C=C(F)F

885 C=CCOc1ccc(C)cc1.Cc1ccc(I)cc1>>Cc1ccc(/C=C/COc2ccc(C)cc2)cc1

886 C=Cc1ccccc1.COc1ccccc1I>>COc1ccccc1/C=C/c1ccccc1

887 C=CC(=O)OCC.COC(C#N)c1ccccc1Br>>CCOC(=O)/C=C/c1ccccc1C(C#N)OC

888 C=CC(=O)N1N=Cc2ccccc2C1C=C(C)C.COc1cc(Cc2c(C)nc(N)nc2N)cc(I)c1OC>>COc1cc(Cc2c(C)nc  
(N)nc2N)cc(/C=C/C(=O)N2N=Cc3ccccc3C2C=C(C)C)c1OC

889 C=CC(=O)OC.CC(=O)c1ccc(Br)cc1>>COC(=O)/C=C/c1ccc(C(C)=O)cc1  
890 C=CC(=O)OC.COC(=O)CCOCc1cc(OCc2ccccc2)c(OC)cc1Br>>COC(=O)/C=C/c1cc(OC)c(OCc2ccccc  
c2)cc1COCCCC(=O)OC  
891 C=CC(C)=O.O=Cc1ccccc1Br>>CC(=O)/C=C/c1ccccc1C=O  
892 C=CC(=O)O.COC(=O)c1cc2c(cc1Br)OCO2>>COC(=O)c1cc2c(cc1/C=C/C(=O)O)OCO2  
\*CNCCCOCCOCCOCCNC(=O)COc1ccc(C(Cc2cc(OC)cc(OC)c2)NC(=O)c2ccccc(C=C)c2)cc1.Cc1cc  
893 cc(I)c1>>\*CNCCCOCCOCCOCCNC(=O)COc1ccc(C(Cc2cc(OC)cc(OC)c2)NC(=O)c2ccccc(/C=C/c3  
cccc(C)c3)c2)cc1  
894 C=CC(=O)OC.CCOC(=O)c1c2ccccc-2c(C(=O)OCC)c1Cl>>CCOC(=O)c1c2ccccc-  
2c(C(=O)OCC)c1/C=C/C(=O)OC  
895 C=Cc1ccccc1.Cn1cncc1-c1ccc(Br)cc1>>Cn1cncc1-c1ccc(/C=C/c2ccccc2)cc1  
896 C=CC(=O)NCc1cccc(F)c1.COc1ccc2c(=O)c(I)coc2c1>>COc1ccc2c(=O)c(/C=C/C(=O)NCc3cccc(F)c3  
)coc2c1  
897 C=CC(=O)OC(C)(C)C.Cc1ccccc1I>>Cc1ccccc1/C=C/C(=O)OC(C)(C)C  
898 C=Cn1nncc1C.Ic1ccccc1>>Cc1nnnn1/C=C/c1ccccc1  
899 C=CC(=O)OC.CC1(CC(N(Cc2cc3c(cc2I)OCO3)C[Si](C)(C)C)[Si](C)(C)C)OCCO1>>C=C(C(=O)OC)  
c1cc2c(cc1CN(C[Si](C)(C)C)C(CC1(C)OCCO1))[Si](C)(C)C)OCO2  
900 C=CC(=O)NCc1ccccc1.O=c1c(I)c(-c2ccc(O)cc2)oc2cc(O)ccc12>>O=C(/C=C/c1c(-  
c2ccc(O)cc2)oc2cc(O)ccc2c1=O)NCc1ccccc1  
901 C=CC(=O)OC.CCCc1ccc(N2CCc3cc(OC)ccc3C2(C)c2ccc(Br)cc2)cc1Cl>>CCCc1ccc(N2CCc3cc(OC)  
ccc3C2(C)c2ccc(/C=C/C(=O)OC)cc2)cc1Cl  
902 C=CCOc1ccc(C)cc1.Ic1ccccc1>>Cc1ccc(OC/C=C/c2ccccc2)cc1  
903 C=CC(=O)OCC.CCOC(=O)c1cnc2c(C)cc(OC)cc2c1Br>>CCOC(=O)/C=C/c1c(C(=O)OCC)cnc2c(C)c  
c(OC)cc12  
904 C=CC(=O)OC.OC1CC2(CCN(Cc3ccccc3)CC2)Oc2ccc(Br)cc21>>C=C(C(=O)OC)c1ccc2c(c1)C(O)C  
C1(CCN(Cc3ccccc3)CC1)O2  
905 C=CCCCCCC.Clc1ccccc1>>C=C(CCCCCC)c1ccccc1  
906 C=Cc1ccccc1.CCCCCCCCCCCCCl>>CCCCCCCCCCCC/C=C/c1ccccc1  
907 Brc1ccc2ccnc2c1.C=CC(=O)OC>>COC(=O)/C=C/c1ccc2ccnc2c1  
908 C=CC(=O)OC.COC(=O)[C@@H]1c2cc(Br)ccc2O[C@@H]1c1ccc(OCc2ccccc2)cc1>>COC(=O)/C=C  
/c1ccc2c(c1)[C@@H](C(=O)OC)[C@@H](c1ccc(OCc3ccccc3)cc1)O2  
909 C=C1C(=O)O[C@H]2[C@H]1CCC(=C)[C@@H]1C[C@H](OC(C)=O)C(=C)[C@H]21.Cc1ccccc1I>>  
C=C1CC[C@H]2/C(=C/c3ccccc3)C(=O)O[C@@H]2[C@H]2C(=C)[C@@H](OC(C)=O)C[C@@H]  
910 C=CS(C)(=O)=O.Fc1ccc(Br)cc1>>CS(=O)(=O)/C=C/c1ccc(F)cc1  
911 C=Cc1ccc(N(C)C)cc1.O=C/C=C/c1ccc(I)cc1>>CN(C)c1ccc(/C=C/c2ccc(/C=C/C(=O)cc2)cc1  
912 C=CC(F)(F)C(F)(F)C(F)(F)F.O=Cc1ccc(Br)cc1>>O=Cc1ccc(/C=C/C(F)(F)C(F)(F)C(F)(F)C(F)  
(F)F)cc1  
913 C=CCOCC1=C(Br)c2ccccc2C(C)C1>>C=C1CCOCC2=C1c1ccccc1C(C)C2  
914 C=CC(=O)O.O=C(O)c1ccc(Cl)cc1>>O=C(O)/C=C/c1ccc(C(=O)O)cc1  
915 C=Cc1ccc(OC)cc1.COc1cc(Br)c(C=O)c(OC)c1>>COc1ccc(/C=C/c2cc(OC)cc(OC)c2C=O)cc1  
916 C=CCN(Cc1ccc(OC)cc1)Cc1cc2ccccc2nc1Cl>>C=C1CN(Cc2ccc(OC)cc2)Cc2cc3ccccc3nc21  
917 C=CC(=O)OCCCC.Clc1ccccc1>>CCCCOC(=O)/C=C/c1ccccc1  
918 C=CCNC(=O)OC(C)(C)C.Cc1cc(Cl)c(OS(=O)(=O)C(F)(F)F)cc1C>>C=C(CNC(=O)OC(C)(C)C)c1cc(  
C)c(C)cc1Cl  
919 C=CN1CCCC1=O.Fc1ccc(Br)cc1>>C=C(c1ccc(F)cc1)N1CCCC1=O  
C=CC(=O)OC.COc1c(CN(C(=O)c2ccccc2)c2ccccc(Br)c2)ccc2c1OC(C)(C)[C@@H](OC(C)=O)[C@H]  
920 2OC(C)=O>>COC(=O)/C=C/c1cccc(N(Cc2ccc3c(c2OC)OC(C)(C)[C@@H](OC(C)=O)[C@H]3OC(C  
)=O)C(=O)c2ccccc2)c1  
921 C=CCn1c(N(c2ccc(F)cc2I)S(=O)(=O)c2cccs2)cc2cc(C)ccc21>>Cc1ccc2c(c1)cc1n2C/C=C/c2cc(F)ccc  
2N1S(=O)(=O)c1cccs1  
922 C=C1C(=O)O[C@@H]2/C=C(\C)CC/C=C(\C)CC[C@@H]12.O=[N+](O-  
)]c1ccccc1I>>C/C1=C[C@H]2OC(=O)/C=C/c3ccccc3[N+](=O)[O-])[C@@H]2CC/C(C)=C/CC1  
923 C=CC#N.N#Cc1c(-c2ccccc(Br)c2)cc(-c2ccccc2)nc1N>>N#C/C=C/c1cccc(-c2cc(-  
924 C=COCCCC.CC(=O)N1CCc2cc(Br)ccc21>>C=C(OCCCC)c1ccc2c(c1)CCN2C(C)=O  
925 C=CC(N)=O.O=Cc1ccc(I)o1>>NC(=O)/C=C/c1ccc(C=O)o1  
926 C=CCC(C)N(C)C(=O)OC(C)(C)C.CCOC1cncc(Br)c1>>CCOC1cncc(/C=C/CC(C)N(C)C(=O)OC(C)(C)  
927 C=CC(=O)OC.O=c1[nH]c(=O)n([C@@H]2CO[C@H](CO)[C@H]2CO)cc1I>>COC(=O)/C=C/c1cn([  
C@@H]2CO[C@H](CO)[C@H]2CO)c(=O)[nH]c1=O  
928 C=COCC.Fc1ccc(Br)cc1>>C=C(OCC)c1ccc(F)cc1  
929 C=Cc1cc(OC)cc(OC)c1.COc1cc(C=O)c(Br)c(OC)c1OC>>COc1cc(/C=C/c2c(C=O)cc(OC)c(OC)c2OC  
)cc(OC)c1

[illegible]



974 C=Cc1cccc(O)c1.Fc1cc(Br)cc(F)c1F>>Oc1cccc(/C=C/c2cc(F)c(F)c(F)c2)c1  
975 C=C(I)C(C)(C)OCCc1cccc1.C=CC(=O)OCC>>C=C(/C=C/C(=O)OCC)C(C)(C)OCCc1cccc1  
976 BrC1cccs1.C=Cc1ccc(C(=O)O)cc1>>O=C(O)c1ccc(/C=C/c2cccs2)cc1  
977 C=Cc1cc(C(F)(F)F)cc(C(F)(F)F)c1.FC(F)(F)c1ccc(Br)cc1>>FC(F)(F)c1ccc(/C=C/c2cc(C(F)(F)F)cc(C(F)(F)F)c2)cc1  
978 C=CC(=O)O.CC(C)(C)OC(=O)N[C@@H](Cc1c[nH]c2cccc(Br)c12)C(=O)O>>CC(C)(C)OC(=O)N[C@@H](Cc1c[nH]c2cccc(/C=C/C(=O)O)c12)C(=O)O  
979 C=C[C@](C)(C)(CCC=C(C)C)CO[Si](c1cccc1)(c1cccc1)C(C)(C)C.COc1ccc(I)cc1>>COc1ccc(/C=C/[C@](C)(C)(CCC=C(C)C)CO[Si](c2cccc2)(c2cccc2)C(C)(C)C)cc1  
980 C=C[C@H](O[Si](C)(C)C(C)(C)C)[C@@H](CCCC)[C@@H](C/C(I)=C/CO)O[Si](C)(C)C(C)(C)C>>C=C1/C(=C\CO)C[C@@H](O[Si](C)(C)C(C)(C)C)[C@@H](CCCC)[C@@H]1O[Si](C)(C)C(C)(C)C  
981 C=CC(=O)OC.CCN(CC)C(=O)Oc1cnccc1I>>CCN(CC)C(=O)Oc1cnccc1/C=C/C(=O)OC  
982 C=Cc1cccc1.COc1cccc1CNc1ccc2c(Br)cccc2n1>>COc1cccc1CNc1ccc2c(/C=C/c3cccc3)cccc2n1  
983 C=Cc1cccc1.Cc1cccc(I)c1>>Cc1cccc(/C=C/c2cccc2)c1  
984 C=CS(=O)(=O)N(CC(=C)Br)Cc1cccc1>>C=C1C=CS(=O)(=O)N(Cc2cccc2)C1  
985 C=C1SCCCS1=O.Ic1cccc1>>O=S1CCCS/C1=C\c1cccc1  
986 C=CC1CC(=O)N1.Cc1cccc1I>>Cc1cccc1/C=C/C1CC(=O)N1  
987 C=Cc1ccc2cccc2c1.CC(C)(C)c1ccc(Br)cc1>>CC(C)(C)c1ccc(/C=C/c2ccc3cccc3c2)cc1  
988 C=CC=O.Oc1cccc1I>>O=C/C=C/c1cccc1O  
989 C=CC(=O)OCC.O=Cc1cc(OCc2cccc2)ccc1Br>>CCOC(=O)/C=C/c1ccc(OCc2cccc2)cc1C=O  
990 C=CC(=O)O.Ic1ccc2[nH]ccc2c1>>O=C(O)/C=C/c1ccc2[nH]ccc2c1  
991 C=CC(=O)OC(CC)CCCC.N#Cc1cccc1Cl>>CCCCC(CC)OC(=O)/C=C/c1cccc1C#N  
992 C=CC(=O)OC.Nc1ccc(Cl)cc1I>>COC(=O)/C=C/c1cc(Cl)ccc1N  
993 C=CC(=O)OCC.Cc1cnc(C)c(Cl)n1>>CCOC(=O)/C=C/c1nc(C)cnc1C  
994 C=Cc1cccc1.Cc1cc(Br)ccc1C#N>>Cc1cc(/C=C/c2cccc2)ccc1C#N  
995 C=C(NC(C)=O)C(=O)OC.CC(=O)Oc1cc(C)c(I)c(C)c1C>>COC(=O)/C(=C/c1c(C)cc(OC(C)=O)c(C)c1C)NC(C)=O  
996 C=CC(=O)OCC.COc1cc(OC)nc(I)n1>>CCOC(=O)/C=C/c1nc(OC)cc(OC)n1
