# Supplementary material for: Heck reaction prediction using a transformer model based on a transfer learning strategy
Source: Royal Society of Chemistry journal article supplement (doi:10.1039/d0cc02657c), 2020-01-01
Supplement: d0cc02657c1.zip [file d0cc02657c1.zip]

**Table S8A. Heck reaction database of ethylene as reactant**

| Reaction ID | Reaction SMILES                                                                                                                                                                                             |
|-------------|-------------------------------------------------------------------------------------------------------------------------------------------------------------------------------------------------------------|
| 1           | <chem>C=C.CCCCC(CC)COc1cc(/C=C/c2ccc(/C=C/c3ccc(/C=C/c4ccc(I)cc4)cc3)cc2)c(OCC(CC)CCCC)cc1</chem><br><chem>C&gt;&gt;C=Cc1ccc(/C=C/c2ccc(/C=C/c3ccc(/C=C/c4cc(OCC(CC)CCCC)c(C)cc4OCC(CC)CCCC)cc3)cc2)</chem> |
| 2           | <chem>C=C.O=Cc1ccc(Br)cc1&gt;&gt;C=Cc1ccc(C=O)cc1</chem>                                                                                                                                                    |
| 3           | <chem>C=C.COC(=O)c1cccc(C)c1Br&gt;&gt;C=Cc1c(C)cccc1C(=O)OC</chem>                                                                                                                                          |
| 4           | <chem>C=C.COC(=O)c1ccc(NC(C)=O)c(Br)c1&gt;&gt;C=Cc1cc(C(=O)OC)ccc1NC(C)=O</chem>                                                                                                                            |
| 5           | <chem>C=C.COc1ccc(Br)cc1&gt;&gt;C=Cc1ccc(OC)cc1</chem>                                                                                                                                                      |
| 6           | <chem>C=C.O=C(CC(=O)C(F)(F)F)c1ccc(Br)s1&gt;&gt;C=Cc1ccc(C(=O)CC(=O)C(F)(F)F)s1</chem>                                                                                                                      |
| 7           | <chem>C=C.NC(=O)c1cc(Cl)ccc1Br&gt;&gt;C=Cc1ccc(Cl)cc1C(N)=O</chem>                                                                                                                                          |
| 8           | <chem>C=C.O=[N+][O-]c1cc(Cl)ccc1Br&gt;&gt;C=Cc1ccc(Cl)cc1[N+](=O)[O-]</chem>                                                                                                                                |
| 9           | <chem>C=C.CCOc1ccc(Br)cc1&gt;&gt;C=Cc1ccc(OCC)cc1</chem>                                                                                                                                                    |
| 10          | <chem>C=C.Cc1ccc(C(N)=O)c(Br)c1&gt;&gt;C=Cc1cc(C)ccc1C(N)=O</chem>                                                                                                                                          |
| 11          | <chem>C=C.Cn1cc(I)cn1&gt;&gt;C=Cc1cnn(C)c1</chem>                                                                                                                                                           |
| 12          | <chem>C=C.CC(C)(C)OC(=O)n1c(CCl)cc2ccccc2n1&gt;&gt;C=CCc1cc2ccccc2n1C(=O)OC(C)(C)C</chem>                                                                                                                   |
| 13          | <chem>C=C.COc1cc2c(cc1Br)NC(=O)c1ccc(Cl)cc1N2&gt;&gt;C=Cc1cc2c(cc1OC)Nc1cc(Cl)ccc1C(=O)N2</chem>                                                                                                            |
| 14          | <chem>C=C.O=C(CC(=O)C(F)(F)F)c1ccc(Br)cc1&gt;&gt;C=Cc1ccc(C(=O)CC(=O)C(F)(F)F)cc1</chem>                                                                                                                    |
| 15          | <chem>C=C.Oc1cccc(I)c1&gt;&gt;C=Cc1cccc(O)c1</chem>                                                                                                                                                         |
| 16          | <chem>C=C.NC(=O)c1ccc(Cl)cc1Br&gt;&gt;C=Cc1cc(Cl)ccc1C(N)=O</chem>                                                                                                                                          |
| 17          | <chem>Br1ccc2ccccc2c1.C=C&gt;&gt;C=Cc1ccc2ccccc2c1</chem>                                                                                                                                                   |
| 18          | <chem>C=C.COc1ccc(I)cc1OC&gt;&gt;C=Cc1ccc(OC)c(OC)c1</chem>                                                                                                                                                 |
| 19          | <chem>C=C.COC(=O)c1ccc(C)cc1Br&gt;&gt;C=Cc1cc(C)ccc1C(=O)OC</chem>                                                                                                                                          |
| 20          | <chem>C=C.COC(=O)c1ccc2cc(Br)ccc2c1&gt;&gt;C=Cc1ccc2cc(C(=O)OC)ccc2c1</chem>                                                                                                                                |
| 21          | <chem>C=C.CCOC(=O)c1cc(Br)ccc1C&gt;&gt;C=Cc1ccc(C)c(C(=O)OCC)c1</chem>                                                                                                                                      |
| 22          | <chem>C=C.CC(=O)c1cccc(Br)c1&gt;&gt;C=Cc1cccc(C(C)=O)c1</chem>                                                                                                                                              |
| 23          | <chem>C=C.Clc1ccc(Br)cc1&gt;&gt;C=Cc1ccc(Cl)cc1</chem>                                                                                                                                                      |
| 24          | <chem>C=C.CC(=O)c1cccc1Br&gt;&gt;C=Cc1cccc1C(C)=O</chem>                                                                                                                                                    |
| 25          | <chem>C=C.Cc1ccc(Cl)cc1&gt;&gt;C=Cc1ccc(C)cc1</chem>                                                                                                                                                        |
| 26          | <chem>C=C.FC(F)(F)c1cccc(CCl)c1&gt;&gt;C=CCc1cccc(C(F)(F)F)c1</chem>                                                                                                                                        |
| 27          | <chem>C=C.CC(=O)Nc1cc(Cl)ccc1Br&gt;&gt;C=Cc1ccc(Cl)cc1NC(C)=O</chem>                                                                                                                                        |
| 28          | <chem>Br1cnc2ncnc12.C=C&gt;&gt;C=Cc1cnc2ncnc12</chem>                                                                                                                                                       |
| 29          | <chem>C=C.FC(F)(F)c1cc(Br)cc(C(F)(F)F)c1&gt;&gt;C=Cc1cc(C(F)(F)F)cc(C(F)(F)F)c1</chem>                                                                                                                      |
| 30          | <chem>C=C.COc1cccc(I)c1&gt;&gt;C=Cc1cccc(OC)c1</chem>                                                                                                                                                       |
| 31          | <chem>C=C.COC(=O)c1cc(OC)ccc1Br&gt;&gt;C=Cc1ccc(OC)cc1C(=O)OC</chem>                                                                                                                                        |
| 32          | <chem>C=C.Cc1cc(C)c(CCl)c(C)c1&gt;&gt;C=CCc1c(C)cc(C)cc1C</chem>                                                                                                                                            |
| 33          | <chem>C=C.Cc1nc(C)c(I)c(Cl)n1&gt;&gt;C=Cc1c(C)nc(C)nc1Cl</chem>                                                                                                                                             |
| 34          | <chem>C=C.COc1ccc2cc(Br)ccc2c1[N+](=O)[O-]&gt;&gt;C=Cc1ccc2c([N+](=O)[O-])c(OC)ccc2c1</chem>                                                                                                                |
| 35          | <chem>C=C.O=[N+][O-]c1ccc(Br)cc1&gt;&gt;C=Cc1ccc([N+](=O)[O-])cc1</chem>                                                                                                                                    |
| 36          | <chem>C=C.Cc1cccc([N+](=O)[O-])c1Br&gt;&gt;C=Cc1c(C)cccc1[N+](=O)[O-]</chem>                                                                                                                                |
| 37          | <chem>C=C.Cc1c(Br)c(C(F)(F)F)nn1C&gt;&gt;C=Cc1c(C(F)(F)F)nn(C)c1C</chem>                                                                                                                                    |
| 38          | <chem>Br1ccenc1.C=C&gt;&gt;C=Cc1ccenc1</chem>                                                                                                                                                               |
| 39          | <chem>C=C.Cc1ccc(Br)c([N+](=O)[O-])c1&gt;&gt;C=Cc1ccc(C)cc1[N+](=O)[O-]</chem>                                                                                                                              |
| 40          | <chem>C=C.O=C(CC(=O)c1cccc(Br)c1)c1cccc1&gt;&gt;C=Cc1cccc(C(=O)CC(=O)c2ccccc2)c1</chem>                                                                                                                     |
| 41          | <chem>C=C.Clc1cc(I)cen1&gt;&gt;C=Cc1ccnc(Cl)c1</chem>                                                                                                                                                       |
| 42          | <chem>C=C.CC(=O)Nc1cccc(C)c1Br&gt;&gt;C=Cc1c(C)cccc1NC(C)=O</chem>                                                                                                                                          |
| 43          | <chem>C=C.ClC1cccc(Br)c1&gt;&gt;C=CC1cccc(Br)c1</chem>                                                                                                                                                      |
| 44          | <chem>C=C.C=CCCCC(=O)CCCC(C)OC(=O)c1c(OC)cc(OC)cc1OS(=O)(=O)C(F)(F)F&gt;&gt;C=CCCCC(=O)CC</chem><br><chem>CC(C)OC(=O)c1c(C=C)cc(OC)cc1OC</chem>                                                             |
| 45          | <chem>C=C.Clc1ccc(I)cc1&gt;&gt;C=Cc1ccc(Cl)cc1</chem>                                                                                                                                                       |
| 46          | <chem>C=C.COC(=O)c1ccc(CCl)cc1&gt;&gt;C=CCc1ccc(C(=O)OC)cc1</chem>                                                                                                                                          |
| 47          | <chem>C=C.ClC1cccc(-c2ccccc2)cc1&gt;&gt;C=CCc1cccc(-c2ccccc2)cc1</chem>                                                                                                                                     |
| 48          | <chem>C=C.COC(=O)c1cc(Br)cc(C(=O)OC)n1&gt;&gt;C=Cc1cc(C(=O)OC)nc(C(=O)OC)c1</chem>                                                                                                                          |
| 49          | <chem>C=C.COC(=O)c1ccc(Cl)cc1Br&gt;&gt;C=Cc1cc(Cl)ccc1C(=O)OC</chem>                                                                                                                                        |
| 50          | <chem>C=C.OCc1cccc1I&gt;&gt;C=Cc1cccc1CO</chem>                                                                                                                                                             |

51 C=C.COc1cccc(CCl)c1>>C=CCc1cccc(OC)c1  
52 C=C.FC(F)(F)c1ccc(I)cc1>>C=Cc1ccc(C(F)(F)F)cc1  
53 C=C.COc1ccc([N+](=O)[O-])c(Br)c1>>C=Cc1cc(OC)ccc1[N+](=O)[O-]  
54 C=C.COC(=O)c1ccc(Br)c([N+](=O)[O-])c1>>C=Cc1ccc(C(=O)OC)cc1[N+](=O)[O-]  
55 C=C.O=Cc1cc(Br)ccc1O>>C=Cc1ccc(O)c(C=O)c1  
56 C=C.O=C(CC(=O)c1ccc(Br)cc1)c1ccccc1>>C=Cc1ccc(C(=O)CC(=O)c2ccccc2)cc1  
57 C=C.CC(=O)Oc1cccc(I)c1>>C=Cc1cccc(OC(C)=O)c1  
58 C=C.C=CCCCCCCCCOC(=O)c1c(OC)cc(OC)cc1OS(=O)(=O)C(F)(F)F>>C=CCCCCCCCCOC(=O)c1c(C=C)cc(OC)cc1OC  
59 C=C.NC(=O)c1cccc1Br>>C=Cc1cccc1C(N)=O  
60 C=C.COc1ccc(CCl)cc1>>C=CCc1ccc(OC)cc1  
61 C=C.COC(=O)c1ccc(I)cc1>>C=Cc1ccc(C(=O)OC)cc1  
62 C=C.COC(=O)Cc1c(C(=O)OC)c2n(c(=O)c1Br)CCC2O>>C=Cc1c(CC(=O)OC)c(C(=O)OC)c2n(c1=O)CCC2O  
63 C=C.N#Cc1cccc(Br)c1>>C=Cc1cccc(C#N)c1  
64 C=C.Cc1ccc([C@@H](C)CCO)c(Br)c1>>C=Cc1cc(C)ccc1[C@@H](C)CCO  
65 C=C.O=[N+](=[O-])c1cc(I)cc([N+](=O)[O-])c1>>C=Cc1cc([N+](=O)[O-])cc([N+](=O)[O-])c1  
66 C=C.CC(=O)c1ccc(I)cc1>>C=Cc1ccc(C(C)=O)cc1  
67 C=C.CC(=O)Nc1cc(C)ccc1Br>>C=Cc1ccc(C)cc1NC(C)=O  
68 C=C.O=Cc1cc(Br)ccc1[N+](=O)[O-]>>C=Cc1ccc([N+](=O)[O-])c(C=O)c1  
69 C=C.O=C(c1ccccc1)c1cccc(Br)c1>>C=Cc1cccc(C(=O)c2ccccc2)c1  
70 C=C.O=C1Nc2ccc(I)cc2C1=O>>C=Cc1ccc2c(c1)C(=O)C(=O)N2  
71 C=C.ClCc1cccc1>>C=CCc1cccc1  
72 C=C.COC(=O)c1cc(Cl)ccc1Br>>C=Cc1ccc(Cl)cc1C(=O)OC  
73 C=C.COc1cc(Br)cc(OC)c1>>C=Cc1cc(OC)cc(OC)c1  
74 C=C.Cc1ccc(Br)cc1>>C=Cc1ccc(C)cc1  
75 C=C.Ic1ccc2[nH]ccc2c1>>C=Cc1ccc2[nH]ccc2c1  
76 BrC=Cc1cccc1.C=C>>C=CC=Cc1cccc1  
77 C=C.CCCCC(CC)COc1cc(/C=C/c2ccc(/C=C/c3ccc(/C=C/c4ccc(/C=C/c5ccc(I)cc5)cc4)cc3)cc2)c(OC(C)CCCC)cc1C>>C=Cc1ccc(/C=C/c2ccc(/C=C/c3ccc(/C=C/c4ccc(/C=C/c5cc(OC(C)CCCC)c(C)c5OCC(C)CCCC)cc4)cc3)cc2)cc1  
78 C=C.Oc1cc(Br)c2oc(-c3ccc(O)c(F)c3)nc2c1>>C=Cc1cc(O)cc2nc(-c3ccc(O)c(F)c3)oc12  
79 C=C.Ic1cccc1>>C=Cc1cccc1  
80 C=C.COc1cc(I)cc(OC)c1>>C=Cc1cc(OC)cc(OC)c1  
81 C=C.CCOP(=O)(Cc1ccc(Br)cc1)OCC>>C=Cc1ccc(CP(=O)(OCC)OCC)cc1  
82 C=C.Ic1ccc(-c2ccccc2)cc1>>C=Cc1ccc(-c2ccccc2)cc1  
83 Br1ccc(-c2nnc(-c3cccc4ccccc34)o2)cc1.C=C>>C=Cc1ccc(-c2nnc(-c3cccc4ccccc34)o2)cc1  
84 C=C.OC(c1ccc(Br)cc1)(C(F)(F)F)C(F)(F)F>>C=Cc1ccc(C(O)(C(F)(F)F)C(F)(F)F)cc1  
85 Br1cccc2cccc12.C=C>>C=Cc1cccc2cccc12  
86 C=C.CCOC(=O)c1c[nH]c(=O)c(I)c1>>C=Cc1cc(C(=O)OCC)c[nH]c1=O  
87 C=C.NC(=O)c1[nH]c2ccc(Br)cc2c1S(=O)(=O)N1CCOCC1>>C=Cc1ccc2[nH]c(C(N)=O)c(S(=O)(=O)N3CCOCC3)c2c1  
88 C=C.CC(=O)Nc1ccc(Br)cn1>>C=Cc1ccc(NC(C)=O)nc1  
89 C=C.N#Cc1ccc(I)cc1>>C=Cc1ccc(C#N)cc1  
90 C=C.Fc1ccc(I)cc1>>C=Cc1ccc(F)cc1  
91 C=C.Cc1ccc(I)cc1>>C=Cc1ccc(C)cc1  
92 C=C.COc1cccc1Br>>C=Cc1cccc1OC  
93 C=C.N#Cc1cccc(I)c1>>C=Cc1cccc(C#N)c1  
94 C=C.O=S(=O)(Oc1ccc(I)cc1)C(F)(F)F>>C=Cc1ccc(OS(=O)(=O)C(F)(F)F)cc1  
95 C=C.ClCc1cc2ccccc2s1>>C=CCc1cc2ccccc2s1  
96 C=C.CC(=O)Nc1ccc(I)cc1>>C=Cc1ccc(NC(C)=O)cc1  
97 C=C.O=[N+](=[O-])c1cc(Br)cc([N+](=O)[O-])c1>>C=Cc1cc([N+](=O)[O-])cc([N+](=O)[O-])c1  
98 C=C.COc1ccc2cc(Br)ccc2c1>>C=Cc1ccc2cc(OC)ccc2c1  
99 C=C.O=C(CC(=O)C(F)(F)F)c1ccc(Br)c2ccccc12>>C=Cc1ccc(C(=O)CC(=O)C(F)(F)F)c2ccccc12  
100 C=C.Cc1nsc1I>>C=Cc1scnc1C  
101 C=C.CC(=O)c1ccc(Br)cc1>>C=Cc1ccc(C(C)=O)cc1  
102 C=C.Nc1ccc(Br)cc1>>C=Cc1ccc(N)cc1  
103 Br1cncnc1.C=C>>C=Cc1cncnc1  
104 C=C.ClCc1csc2ccccc12>>C=CCc1csc2ccccc12

105 C=C.CC(=O)CC(=O)c1ccc(Br)cc1>>C=Cc1ccc(C(=O)CC(C)=O)cc1  
106 BrC1=CCCCC1.C=C>>C=CC1=CCCCC1  
107 Br1cc2ccc1CCc1ccc(cc1)CC2.C=C>>C=Cc1cc2ccc1CCc1ccc(cc1)CC2  
108 C=C.ClC1cccc(Oc2ccccc2)c1>>C=CCc1cccc(Oc2ccccc2)c1  
109 C=C.O/N=C/c1cc(Br)ccc1O>>C=Cc1ccc(O)c(/C=N/O)c1  
110 C=C.COC(=O)c1cccc(Br)c1NC(C)=O>>C=Cc1cccc(C(=O)OC)c1NC(C)=O  
111 C=C.C=CCCCC1(CCC[C@H](C)OC(=O)c2c(OC)cc(OC)cc2OS(=O)(=O)C(F)(F)F)OCCO1>>C=CCC  
CC1(CCC[C@H](C)OC(=O)c2c(C=C)cc(OC)cc2OC)OCCO1  
112 C=C.Fc1ccccc1I>>C=Cc1ccccc1F  
113 C=C.N#Cc1ccccc1Br>>C=Cc1ccccc1C#N  
114 C=C.Fc1cc(Br)ccc1-c1ccccc1>>C=Cc1ccc(-c2ccccc2)c(F)c1  
115 C=C.Cc1cccc(I)c1>>C=Cc1cccc(C)c1  
116 C=C.Ic1cccc2ccccc12>>C=Cc1cccc2ccccc12  
117 C=C.Clc1ccccc1I>>C=Cc1ccccc1Cl  
118 C=C.CC(=O)Nc1ccc(C)cc1Br>>C=Cc1cc(C)ccc1NC(C)=O  
119 C=C.Oc1cccc(Br)c1>>C=Cc1cccc(O)c1  
120 C=C.ClC1cc2ccccc2o1>>C=CCc1cc2ccccc2o1  
121 C=C.CC(C)Cc1ccc(Br)cc1>>C=Cc1ccc(CC(C)C)cc1  
122 C=C.Fc1ccc(I)cn1>>C=Cc1ccc(F)nc1  
123 C=C.N#Cc1ccc(Br)cc1>>C=Cc1ccc(C#N)cc1  
124 C=C.COC(=O)c1cccc(NC(C)=O)c1Br>>C=Cc1c(NC(C)=O)cccc1C(=O)OC  
125 C=C.Cc1cccc(Br)c1>>C=Cc1cccc(C)c1  
126 C=C.C=CCCCCCC(C)OC(=O)c1c(OC)cc(OC)cc1OS(=O)(=O)C(F)(F)F>>C=CCCCCCC(C)OC(=O)c  
1c(C=C)cc(OC)cc1OC  
127 Br1ccc2c(c1)OCCOCCOCCOCCOCCO2.C=C>>C=Cc1ccc2c(c1)OCCOCCOCCOCCOCCO2  
128 C=C.ClC1ccccc1I>>C=CCc1ccccc1I  
129 C=C.CC(C)(C)OC(=O)n1cc(CCl)c2ccccc21>>C=CCc1cn(C(=O)OC(C)(C)C)c2ccccc12  
130 C=C.O=C(O)c1ccc(I)cc1>>C=Cc1ccc(C(=O)O)cc1  
131 C=C.Cc1ccc(S(=O)(=O)n2cccc2CCl)cc1>>C=CCc1cccn1S(=O)(=O)c1ccc(C)cc1  
132 C=C.O=[N+](=[O-])c1ccc(I)cc1>>C=Cc1ccc([N+](=O)[O-])cc1  
133 C=C.COc1ccc(Br)c(C(N)=O)c1>>C=Cc1ccc(OC)cc1C(N)=O  
134 C=C.COc1ccc(I)cc1>>C=Cc1ccc(OC)cc1  
135 C=C.COC(=O)c1ccc(Br)c(NC(C)=O)c1>>C=Cc1ccc(C(=O)OC)cc1NC(C)=O  
136 C=C.COC(=O)C=CBr>>C=CC=CC(=O)OC  
137 C=C.CCCCC(CC)COc1cc(/C=C/c2ccc(/C=C/c3ccc(Br)cc3)cc2)c(OCC(CC)CCCC)cc1C>>C=Cc1ccc(/  
C=C/c2ccc(/C=C/c3cc(OCC(CC)CCCC)c(C)cc3OCC(CC)CCCC)cc2)cc1  
138 Br1ccc2c(c1)CC2.C=C>>C=Cc1ccc2c(c1)CC2  
139 C=C.COc1ccc(Br)c(NC(C)=O)c1>>C=Cc1ccc(OC)cc1NC(C)=O  
140 C=C.Cc1ccc([N+](=O)[O-])c(Br)c1>>C=Cc1cc(C)ccc1[N+](=O)[O-]  
141 C=C.Ic1cccn1>>C=Cc1cccn1  
142 C=C.CC(=O)Nc1ccccc1Br>>C=Cc1ccccc1NC(C)=O  
143 C=C.O=Cc1ccc(Br)cc1O>>C=Cc1ccc(C(=O)c(O)c1  
144 C=C.COC(=O)c1ccc(Br)cc1>>C=Cc1ccc(C(=O)OC)cc1  
145 C=C.COC(=O)c1cccc(Br)c1[N+](=O)[O-]>>C=Cc1cccc(C(=O)OC)c1[N+](=O)[O-]  
146 C=C.Cc1ccccc1Br>>C=Cc1ccccc1C  
147 C=C.Cc1cccc(C(N)=O)c1Br>>C=Cc1c(C)cccc1C(N)=O  
148 C=C.O=Cc1cccc(Br)c1>>C=Cc1cccc(C=O)c1  
149 C=C.Oc1ccc(I)cc1>>C=Cc1ccc(CO)cc1  
150 C=C.COc1ccc(NC(C)=O)c(Br)c1>>C=Cc1cc(OC)ccc1NC(C)=O  
151 C=C.N#CCc1ccccc1I>>C=Cc1ccccc1CC#N  
152 C=C.Cc1ccccc1I>>C=Cc1ccccc1C  
153 Br1cccs1.C=C>>C=Cc1cccs1  
154 C=C.Cc1cc(C)c(I)c(C)c1>>C=Cc1c(C)cc(C)cc1C  
155 C=C.COC(=O)c1ccccc1Br>>C=Cc1ccccc1C(=O)OC  
156 C=C.CC(C)(C)C1CC=C(Br)CC1>>C=CC1=CCC(C(C)(C)C)CC1  
157 C=C.Clc1cccc(I)c1>>C=Cc1cccc(Cl)c1
