# Supplementary material for: Heck reaction prediction using a transformer model based on a transfer learning strategy
Source: Royal Society of Chemistry journal article supplement (doi:10.1039/d0cc02657c), 2020-01-01
Supplement: d0cc02657c1.zip [file d0cc02657c1.zip]

**Table S8D. Heck reaction database of trisubstituted alkene alkene as reactant**

| Reaction ID | Reaction SMILES                                                                                                                                                                                                              |
|-------------|------------------------------------------------------------------------------------------------------------------------------------------------------------------------------------------------------------------------------|
| 1           | <chem>BrC1CCC(I)CC1.CCOC(=O)/C(F)=C\CCc1ccccc1&gt;&gt;CCOC(=O)/C(F)=C(\CCc1ccccc1)c1ccc(Br)cc1</chem>                                                                                                                        |
| 2           | <chem>CC(=O)c1ccc(I)cc1.CCOC(=O)/C(F)=C\CCc1ccccc1&gt;&gt;CCOC(=O)/C(F)=C(\CCc1ccccc1)c1ccc(C(C)=O)cc1</chem>                                                                                                                |
| 3           | <chem>CCOC(=O)/C(F)=C\CCc1ccccc1.COC(=O)c1ccccc1I&gt;&gt;CCOC(=O)/C(F)=C(\CCc1ccccc1)c1ccccc1C(=O)OC</chem>                                                                                                                  |
| 4           | <chem>COc1ccc(I)cc1.Cc1ccc(S(=O)(=O)/C=C2/C(F)(F)C2(C)C(C)(C)C)cc1&gt;&gt;COc1ccc(/C(=C2/C(F)(F)C2(C)C(C)(C)C)S(=O)(=O)c2ccc(C)cc2)cc1</chem>                                                                                |
| 5           | <chem>Cc1ccc(I)cc1.Cc1ccc(S(=O)(=O)/C=C2/C(C)(C)C2(F)F)cc1&gt;&gt;Cc1ccc(/C(=C2/C(C)(C)C2(F)F)S(=O)(=O)c2ccc(C)cc2)cc1</chem>                                                                                                |
| 6           | <chem>CCC1(C)/C=C\S(=O)(=O)c2ccc(C)cc2)C1(F)F.COc1ccc(I)cc1&gt;&gt;CCC1(C)/C(=C(/c2ccc(OC)cc2)S(=O)(=O)c2ccc(C)cc2)C1(F)F</chem>                                                                                             |
| 7           | <chem>Cc1ccc(S(=O)(=O)/C=C2/C(C)(C)C2(F)F)cc1.Ic1ccccc1&gt;&gt;Cc1ccc(S(=O)(=O)/C(=C2/C(C)(C)C2(F)F)c2ccccc2)cc1</chem>                                                                                                      |
| 8           | <chem>Cc1ccc(S(=O)(=O)/C=C2/C(C)(C)C2(F)F)cc1.Clc1ccc(I)cc1&gt;&gt;Cc1ccc(S(=O)(=O)/C(=C2/C(C)(C)C2(F)F)c2ccc(Cl)cc2)cc1</chem>                                                                                              |
| 9           | <chem>BrC1CCC(OCCCCc2ccccc2)cc1.C/C=C\CCOC(=O)OCC&gt;&gt;CCOC(=O)/C(CCO)=C(\C)c1ccc(OCCCCc2ccccc2)cc1</chem>                                                                                                                 |
| 10          | <chem>CC/C(=C\c1ccccc1)c1ccccc1.CN(C)CCOC1ccc(Br)cc1&gt;&gt;CC/C(=C(\c1ccccc1)c1ccc(OCCN(C)C)cc1)c1ccccc1</chem>                                                                                                             |
| 11          | <chem>COc1ccc(I)cc1.Cc1ccc(S(=O)(=O)/C=C2/C(C)(C)C2(F)F)cc1&gt;&gt;COc1ccc(/C(=C2/C(C)(C)C2(F)F)S(=O)(=O)c2ccc(C)cc2)cc1</chem>                                                                                              |
| 12          | <chem>CCOC(=O)/C(F)=C\CCc1ccccc1.Ic1ccccc1&gt;&gt;CCOC(=O)/C(F)=C(\CCc1ccccc1)c1ccccc1</chem>                                                                                                                                |
| 13          | <chem>COc1ccc(I)cc1.Cc1ccc(S(=O)(=O)/C=C2/C(F)(F)C23CCCCC3)cc1&gt;&gt;COc1ccc(/C(=C2/C(F)(F)C23CCCCC3)S(=O)(=O)c2ccc(C)cc2)cc1</chem>                                                                                        |
| 14          | <chem>CCOC(=O)/C(F)=C\CCc1ccccc1.COc1ccc(I)cc1&gt;&gt;CCOC(=O)/C(F)=C(\CCc1ccccc1)c1ccc(OC)cc1</chem>                                                                                                                        |
| 15          | <chem>C/C=C\NC(=O)OC(C)(C)C(=O)OC.CN(C)c1ccc(I)cc1&gt;&gt;COC(=O)/C(NC(=O)OC(C)(C)C)=C(\C)c1ccc(N(C)C)cc1</chem>                                                                                                             |
| 16          | <chem>CC=C(c1ccccc1)c1c(OCc2cc(OC)ccc2Br)c(=O)n(C)c(=O)n1C&gt;&gt;COc1ccc2c(c1)COc1c(n(C)c(=O)n(C)c1=O)/C(c1ccccc1)=C\2C</chem>                                                                                              |
| 17          | <chem>C[C@@H](OC(=O)[C@@H](C/C=C1\CCN(c2ccccc2)C1=O)Nc1cc(Cl)ccc1I)C(=O)OC(C)(C)C&gt;&gt;C[C@@H](OC(=O)[C@@H]1C/C(=C2/CCN(c3ccccc3)C2=O)c2ccc(Cl)cc2N1)C(=O)OC(C)(C)C</chem>                                                 |
| 18          | <chem>CC(C)COC(=O)[C@@H](C)OC(=O)[C@@H](C/C=C1\CCN([13c]2[13cH][13cH][13cH][13cH][13cH]2)C1=O)Nc1cc(Cl)ccc1I&gt;&gt;CC(C)COC(=O)[C@@H](C)OC(=O)[C@@H]1C/C(=C2/CCN([13c]3[13cH][13cH][13cH][13cH]3)C2=O)c2ccc(Cl)cc2N1</chem> |
| 19          | <chem>COC(=O)/C=C\CCN(C(=O)OC(C)(C)C)C(=O)c1c(I)c2ccccc2n1C(=O)OC(C)(C)COC1ccccc1&gt;&gt;CO</chem>                                                                                                                           |
| 20          | <chem>C(=O)/C(OCc1ccccc1)=C1/CCN(C(=O)OC(C)(C)C)C(=O)c2c1c1ccccc1n2C(=O)OC(C)(C)C</chem>                                                                                                                                     |
| 21          | <chem>CCOC(=O)[C@@H](C/C=C1\CCN(c2ccccc2)C1=O)Nc1cc(Cl)ccc1I&gt;&gt;CCOC(=O)[C@@H]1C/C(=C2/CCN(c3ccccc3)C2=O)c2ccc(Cl)cc2N1</chem>                                                                                           |
| 22          | <chem>CC(C)COC(=O)[C@@H](C)OC(=O)[C@@H](C/C=C1\CCN([14c]2[14cH][14cH][14cH][14cH][14cH]2)C1=O)Nc1cc(Cl)ccc1I&gt;&gt;CC(C)COC(=O)[C@@H](C)OC(=O)[C@@H]1C/C(=C2/CCN([14c]3[14cH][14cH][14cH][14cH]3)C2=O)c2ccc(Cl)cc2N1</chem> |
| 22          | <chem>CC=C(c1ccccc1)c1c(OCc2ccccc2Br)c(=O)n(C)c(=O)n1C&gt;&gt;C/C1=C(\c2ccccc2)c2c(c(=O)n(C)c(=O)n2C)OCc2ccccc21</chem>                                                                                                      |
