# Supplementary material for: Heck reaction prediction using a transformer model based on a transfer learning strategy
Source: Royal Society of Chemistry journal article supplement (doi:10.1039/d0cc02657c), 2020-01-01
Supplement: d0cc02657c1.zip [file d0cc02657c1.zip]

**Table S5D. Intermolecular Heck reaction dataset divided into test dataset in our research for transformer-baseline and transformer-transfer learning models (Dataset for testing in experiment 1)**

| Reaction ID | Reaction SMILES                                                                                                                                                                |
|-------------|--------------------------------------------------------------------------------------------------------------------------------------------------------------------------------|
| 1           | <chem>C=Cc1cccc1.O=[N+](O-)[c1ccc(Cl)c([N+](=O)[O-])c1]&gt;&gt;O=[N+](O-)[c1ccc(/C=C/c2cccc2)c([N+](=O)[O-])c1</chem>                                                          |
| 2           | <chem>C=CC1CC(=O)N1.COc1ccc(I)cc1&gt;&gt;COc1ccc(/C=C/C2CC(=O)N2)cc1</chem>                                                                                                    |
| 3           | <chem>C=CC(=O)OC.Cc1ccc(C(=C(I)CCSe2cccc2)c2ccc(C)cc2)cc1&gt;&gt;COC(=O)/C=C/C(CCS1cccc1)=C(c1ccc(C)cc1)c1ccc(C)cc1</chem>                                                     |
| 4           | <chem>C=Cc1ccc(N(C)C)cc1.O=CC#Cc1ccc(I)cc1&gt;&gt;CN(C)c1ccc(/C=C/c2ccc(C#CC=O)cc2)cc1</chem>                                                                                  |
| 5           | <chem>Brc1cccc2cccc12.C=Cc1cn(COCC[Si](C)(C)C)nc1-c1nc(C(F)(F)F)cn1COCC[Si](C)(C)C&gt;&gt;C[Si](C)(C)CCOCn1cc(/C=C/c2cncc3cccc23)c(-c2nc(C(F)(F)F)cn2COCC[Si](C)(C)C)n1</chem> |
| 6           | <chem>Brc1cccs1.C=Cc1ccc(C(=O)O)cc1&gt;&gt;O=C(O)c1ccc(/C=C/c2cccs2)cc1</chem>                                                                                                 |
| 7           | <chem>C=CC(=O)OCCCCCCCCC.Ic1cccc1&gt;&gt;CCCCCCCCOC(=O)/C=C/c1cccc1</chem>                                                                                                     |
| 8           | <chem>C=Cc1ccc(C)cc1.N#Cc1cccc1Br&gt;&gt;Cc1ccc(/C=C/c2cccc2C#N)cc1</chem>                                                                                                     |
| 9           | <chem>C=Cc1ccc(OC)cc1.Cc1ccc2c(-c3cccc3)c(Br)c(=O)oc2c1&gt;&gt;COc1ccc(/C=C/c2c(-c3cccc3)c3ccc(C)cc3oc2=O)cc1</chem>                                                           |
| 10          | <chem>C=CC(=O)OC.CC(C)(C)[Si](C)(C)OCc1c(I)nc(SC2CCCC2)n1-c1ccenc1&gt;&gt;COC(=O)/C=C/c1nc(SC2CCCC2)n(-c2ccenc2)c1CO[Si](C)(C)C(C)(C)C</chem>                                  |
| 11          | <chem>C=Cc1ccc(N(c2cccc2)c2cccc2)cc1.CCCCC(C)CN1C(=O)c2cccc3c(Br)ccc(c23)C1=O&gt;&gt;CCCC(C)CN1C(=O)c2cccc3c(/C=C/c4ccc(N(c5cccc5)c5cccc5)cc4)ccc(c23)C1=O</chem>              |
| 12          | <chem>C=Cc1cc(OC)cc(OC)c1.COc1cc(C=O)c(Br)c(OC)c1OC&gt;&gt;COc1cc(/C=C/c2c(C=O)cc(OC)c(OC)c2OC)cc(OC)c1</chem>                                                                 |
| 13          | <chem>C=Cc1ccc(OC)cc1.O=Cc1cccc1Br&gt;&gt;COc1ccc(/C=C/c2cccc2C=O)cc1</chem>                                                                                                   |
| 14          | <chem>C=CC(N)=O.Cc1ccc(I)cc1&gt;&gt;Cc1ccc(/C=C/C(N)=O)cc1</chem>                                                                                                              |
| 15          | <chem>C=Cc1cccn1.CNC(=O)c1cccc1Sc1ccc2c(I)n[nH]c2c1&gt;&gt;CNC(=O)c1cccc1Sc1ccc2c(/C=C/c3cccn3)n[nH]c2c1</chem>                                                                |
| 16          | <chem>C=Cc1ccc(OC)cc1.CC(C)OC(=O)/C(Br)=C1\CCCCO1&gt;&gt;C=C(/C(C(=O)OC(C)C)=C1/CCCCO1)c1ccc(O)cc1</chem>                                                                      |
| 17          | <chem>C=CC(=O)OCC.O=C(O)c1cccc2c(Br)cccc12&gt;&gt;CCOC(=O)/C=C/c1cccc2c(C(=O)O)cccc12</chem>                                                                                   |
| 18          | <chem>C=Cc1ccc(OC)c(O[Si](C)(C)C(C)(C)C)c1.COc1cc(I)cc(OC)c1OC&gt;&gt;COc1ccc(/C=C/c2cc(OC)c(OC)c(OC)c2)cc1O[Si](C)(C)C(C)(C)C</chem>                                          |
| 19          | <chem>Brc1ccc(I)cc1.C=Cc1ccc(C)cc1&gt;&gt;Cc1ccc(/C=C/c2ccc(Br)cc2)cc1</chem>                                                                                                  |
| 20          | <chem>C=CCCCCCC.COc1ccc2cc(Br)cccc2c1&gt;&gt;C=C(CCCCCC)c1ccc2cc(OC)ccc2c1</chem>                                                                                              |
| 21          | <chem>C=CC(=O)OC.Fc1cccc(Br)c1&gt;&gt;COC(=O)/C=C/c1cccc(F)c1</chem>                                                                                                           |
| 22          | <chem>C=C.Cc1cccc(I)c1&gt;&gt;C=Cc1cccc(C)c1</chem>                                                                                                                            |
| 23          | <chem>C=CC(C)(C)O.Cc1ccc(Br)cc1&gt;&gt;Cc1ccc(/C=C/C(C)(C)O)cc1</chem>                                                                                                         |
| 24          | <chem>C=C1C(=O)O[C@H]2C3=C(C)CCC[C@]3(C)C(=O)C[C@]2(C)C12.Fc1ccc(I)cc1&gt;&gt;CC1=C2[C@]3(C)OC(=O)/C=C/c4ccc(F)cc4)[C@]3(C)CC(=O)[C@]2(C)CCC1</chem>                           |
| 25          | <chem>C=COCCCC.COc1ccc(I)cc1&gt;&gt;C=C(OCCCC)c1ccc(OC)cc1</chem>                                                                                                              |
| 26          | <chem>C=C(F)F.CCCCCC/C(F)=C(\F)I&gt;&gt;CCCCC/C(F)=C(\F)C=C(F)F</chem>                                                                                                         |
| 27          | <chem>C=C[C@H]1CN2CC[C@H]1C[C@]2(C)[C@H](O)c1ccnc2ccc(OC)cc12.COc1ccc(Br)cc1&gt;&gt;COc1ccc(/C=C/[C@H]2CN3CC[C@H]2C[C@]3(C)[C@H](O)c2ccnc3ccc(OC)cc23)cc1</chem>               |
| 28          | <chem>C=Cc1ccc(Cl)cc1.N#Cc1ccc2cc(Br)ccc2c1&gt;&gt;N#Cc1ccc2cc(/C=C/c3ccc(Cl)cc3)ccc2c1</chem>                                                                                 |
| 29          | <chem>C=CC(=O)OC.COc1ccc2c(c1Br)CCC=C2c1cc(OC)c(OC)c(OC)c1&gt;&gt;COC(=O)/C=C/c1c(OC)ccc2c1C</chem>                                                                            |
| 30          | <chem>CC=C2c1cc(OC)c(OC)c(OC)c1</chem>                                                                                                                                         |
| 31          | <chem>C=Cc1cccc1.COc1ccc(Br)cc1F&gt;&gt;COc1ccc(/C=C/c2cccc2)cc1F</chem>                                                                                                       |
| 32          | <chem>C=CC(=O)OCC.Cc1nnn(Cc2cc(Cl)ccc2Br)n1&gt;&gt;CCOC(=O)/C=C/c1ccc(Cl)cc1Cn1nn(C)n1</chem>                                                                                  |
| 33          | <chem>C=CC(=O)OC.CC(=O)c1ccc(Br)cc1&gt;&gt;COC(=O)/C=C/c1ccc(C(C)=O)cc1</chem>                                                                                                 |
| 34          | <chem>C=Cc1cc2cc(OC)c(OC)cc2oc1=O.Ic1cccc1&gt;&gt;COc1cc2cc(/C=C/c3cccc3)c(=O)oc2cc1OC</chem>                                                                                  |
| 35          | <chem>C=CC(C)=O.Cc1cc(C)c(N)c(I)c1&gt;&gt;CC(=O)/C=C/c1cc(C)cc(C)c1N</chem>                                                                                                    |
| 36          | <chem>C=COCC.CCOC(=O)C(=O)Cl&gt;&gt;CCO/C=C/C(=O)C(=O)OCC</chem>                                                                                                               |
| 37          | <chem>C=Cc1cccc1.Cc1ccc(C=O)c(Br)c1&gt;&gt;Cc1ccc(C=O)c(/C=C/c2cccc2)c1</chem>                                                                                                 |
| 38          | <chem>C=Cc1ccc(OC(C)=O)cc1.OCCCC(Br)C(F)(F)F&gt;&gt;CC(=O)Oc1ccc(/C=C/C(CCCO)C(F)(F)F)cc1</chem>                                                                               |
| 39          | <chem>C=C(NC(C)=O)C(=O)OC.Fc1cc(Br)ccc1-c1cccc1&gt;&gt;COC(=O)/C=C/c1ccc(-C=Cc1cc(O)c(OC)cc1F.Oc1cc(O)cc(I)c1&gt;&gt;COc1cc(F)c(/C=C/c2cc(O)cc(O)c2)cc1O</chem>                |
| 40          | <chem>Brc1cccn1.C=CS(N)(=O)=O&gt;&gt;NS(=O)(=O)/C=C/c1cccn1</chem>                                                                                                             |

41 C=C(C(=O)OC)[C@@H]1CC[C@@]2(C)CCC[C@@](C)(OCOC)[C@@H]2C1.Cn1c(=O)oc2cc(Br)c  
42 nc21>>COCO[C@]1(C)CCC[C@]2(C)CC[C@@H]/(C(=C)c3cnc4c(c3)oc(=O)n4C)C(=O)OC)C[C@H]  
43 Br1cccc1I.C=C1CC(c2ccc(C)cc2)OC1=O>>Cc1ccc(C2C/C(=C)c3cccc3Br)C(=O)O2)cc1  
44 C=CC(=O)N1CCOCC1.O=C(C=P(c1cccc1)(c1cccc1)c1cccc1)c1ccc(I)cc1>>O=C(C=P(c1cccc1)(c  
45 1cccc1)c1cccc1)c1ccc(/C=C/C(=O)N2CCOCC2)cc1  
46 C=C(C)c1cccc1.Cc1ccc(I)cc1>>C/C(=C)c1ccc(C)cc1)c1cccc1  
47 C=Cc1cccc(Cl)c1.O=Cc1cccc(Br)c1>>O=Cc1cccc(/C=C/c2cccc(Cl)c2)c1  
48 C=CC(=O)OCC.COCC(=O)c1cc(I)c2c(c1)C[C@]1(O2)[C@H](C)CC[C@H](OC(C)=O)C1(C)C>>CCO  
49 C(=O)/C=C/c1cc(C(=O)OC)cc2c1O[C@@]1(C2)[C@H](C)CC[C@H](OC(C)=O)C1(C)C  
50 C=CCNS(=O)(=O)c1ccc(C)cc1.N#Cc1cccc1Br>>Cc1ccc(S(=O)(=O)NC/C=C/c2cccc2C#N)cc1  
51 C=CC(=O)OC.COc1ccc(OC)c(Cc2ccc(I)cc2)c1>>COC(=O)/C=C/c1ccc(Cc2cc(OC)ccc2OC)cc1  
52 C=Cc1cccc(Cl)c1.Cn1c(=O)c2c(cc(Br)n2C)n(C)c1=O>>Cn1c(=O)c2c(cc(/C=C/c3cccc(Cl)c3)n2C)n(C  
53 )c1=O  
54 C=Cc1ccncc1.C[Si](C)(C)CCOCn1nc(I)c2ccc([C@@H]3C[C@@]34C(=O)Nc3cccc34)cc21>>C[Si](  
55 C)(C)CCOCn1nc(/C=C/c2ccncc2)c2ccc([C@@H]3C[C@@]34C(=O)Nc3cccc34)cc21  
56 C=CC(=O)OC.Nc1cc(Cl)ccc1Br>>COC(=O)/C=C/c1ccc(Cl)cc1N  
57 C=C(Br)CC.C=Cc1ccncc1>>C=C/C(=C/c1ccncc1)CC  
58 Br1cnc2cccc2c1.C=CCO[C@@]1(C)C[C@H](C)C(=O)[C@H](C)[C@H]2NC(=O)O[C@]2(C)[C  
59 @H](CC)OC(=O)[C@H](C)C(=O)[C@H](C)[C@H]1O[C@H]1O[C@H](C)C[C@H](N(C)C)[C  
60 @H]1OC(C)=O>>CC[C@H]1OC(=O)[C@H](C)C(=O)[C@H](C)[C@@H](O[C@@H]2O[C@H](C)  
61 C[C@H](N(C)C)[C@H]2OC(C)=O)[C@@](C)(OC/C=C/c2cnc3cccc3c2)C[C@H](C)C(=O)[C@H]  
62 (C)[C@H]12NC(=O)O[C@]112C  
63 C=Cc1ccncc1.Cc1c(Nc2c(I)cncc2C#N)cc(Cl)c2[nH]ccc12>>Cc1c(Nc2c(C#N)cncc2/C=C/c2ccncc2)cc  
64 (Cl)c2[nH]ccc12  
65 C=CC(=O)OC(C)(C)C.COc1ccc(S(=O)(=O)N2CCc3cc(Br)cncc32)cc1OC>>COc1ccc(S(=O)(=O)N2CC  
66 c3cc(/C=C/C(=O)OC(C)(C)C)cncc32)cc1OC  
67 C=CC(=O)OC.Cc1ccc(Br)cc1>>COC(=O)/C=C/c1ccc(C)cc1  
68 C=CP(=O)(OCC)OCC.COc1ccc(Br)cc1>>CCOP(=O)(/C=C/c1ccc(OC)cc1)OCC  
69 C=CC(=O)N(C)C.Cc1ccc(NC(=O)OC(C)(C)C)c(Br)c1>>Cc1ccc(NC(=O)OC(C)(C)C)c(/C=C/C(=O)N  
70 (C)C)c1  
71 C=C[C@H]1CN(S(=O)(=O)c2ccc(C)cc2)[C@H](c2ccc(OC)cc2)N1OC.Ic1cccc1>>COc1ccc([C@@H  
72 ]2N(OC)[C@@H]/(C=C/c3cccc3)CN2S(=O)(=O)c2ccc(C)cc2)cc1  
73 C=COCCCC.N#Cc1ccc(OS(=O)(=O)C(F)(F)F)cc1>>C=C(OCCCC)c1ccc(C#N)cc1  
74 C=CC(=O)OCC.COCC(=O)c1ccc(I)cc1>>CCOC(=O)/C=C/c1ccc(C(=O)OCC)cc1  
75 C=CC(=O)OC(C)(C)C.N#Cc1ccc(Br)cc1>>CC(C)(C)OC(=O)/C=C/c1ccc(C#N)cc1  
76 C=Cc1ccc2cccc2c1.CCCCC(Br)C(F)(F)F>>CCCCC(/C=C/c1ccc2cccc2c1)C(F)(F)F  
77 Br1cccc2cccc12.C=CNC(C)=O>>C=C(NC(C)=O)c1cccc2cccc12  
78 C=CC(=O)Nc1ccc(Cl)cc1.COc1ccc2c(=O)c(I)ccc2c1>>COc1ccc2c(=O)c(/C=C/C(=O)Nc3ccc(Cl)cc3)  
79 coc2c1  
80 C=Cc1ccc(S(=O)(=O)c2cccc2F)cn1.COc1cc(F)ccc1I>>COc1cc(F)ccc1/C=C/c1ccc(S(=O)(=O)c2cccc  
81 c2F)cn1  
82 C=CC(=O)OC.COCCn1c(C=O)c(I)c2cccc21>>COCn1c(C=O)c(/C=C/C(=O)OC)c2cccc21  
83 C=CC(=O)OCC.CC1(C)CC(=O)C2=C(C1)Oc1c(I)c(-  
84 c3cccc3)oc(=O)c1C2c1cccc(O)c1>>CCOC(=O)/C=C/c1c(-  
85 c2cccc2)oc(=O)c2c1OC1=C(C(=O)CC(C)(C)C1)C2c1cccc(O)c1  
86 C=C1CC(c2ccc(Cl)cc2)OC1=O.Cc1cccc(I)c1>>Cc1cccc(/C=C2\CC(c3ccc(Cl)cc3)OC2=O)c1  
87 C=CC(=O)OC.Nc1nc(N)c2c(I)cn([C@H]3C[C@H](O)[C@@H](CO)O3)c2n1>>COC(=O)/C=C/c1cn(  
88 [C@H]2C[C@H](O)[C@@H](CO)O2)c2nc(N)nc(N)c12  
89 C=Cc1cccc(O)c1.Fc1cc(Br)cc(F)c1F>>Oc1cccc(/C=C/c2cc(F)c(F)c2)c1  
90 C=CC(=O)OC.Nc1cc(C(F)(F)F)ccc1Br>>COC(=O)/C=C/c1ccc(C(F)(F)F)cc1N  
91 C=CC(F)(F)C(F)(F)C(F)(F)F.O=Cc1ccc(Br)cc1>>O=Cc1ccc(/C=C/C(F)(F)C(F)(F)C(F)(F)C(F)(F)cc1  
92 (F)F)cc1  
93 C=CC(=O)OC.Ic1cnn(C2CCCCO2)c1>>COC(=O)/C=C/c1cnn(C2CCCCO2)c1  
94 Br1c2cccc2cc2cccc12.C=CC(=O)OC>>COC(=O)/C=C/c1c2cccc2cc2cccc12  
95 C=CCCCCCC.O=S(=O)(Oc1ccc2cccc2c1)C(F)(F)F>>C=C(CCCCC)c1ccc2cccc2c1  
96 C=Cc1ccncc1.CC(C)(C)OC(=O)N[C@H](COc1cncc(Br)c1)Cc1cccc1>>CC(C)(C)OC(=O)N[C@H](C  
97 Oc1cncc(/C=C/c2ccncc2)c1)Cc1cccc1  
98 C=CC(=O)NCc1cccc1.O=c1c(I)c(-c2ccc(O)cc2)oc2cc(O)ccc12>>O=C(/C=C/c1c(-  
99 c2ccc(O)cc2)oc2cc(O)ccc2c1=O)NCc1cccc1  
100 C=Cc1ccncc1.C[C@H](COc1cnc(Cl)c(I)c1)N(C)C(=O)OC(C)(C)C>>C[C@H](COc1cnc(Cl)c(/C=C/c  
2ccncc2)c1)N(C)C(=O)OC(C)(C)C

C=CCOC.CCN(C)/C=N/c1cc2cccc(Br)c2nc1C>>CCN(C)/C=N/c1cc2cccc(/C=C/COC)c2nc1C  
C=CC(=O)OC.CC(C)(C)OC(=O)Nc1ccsc1Br>>COC(=O)/C=C/c1cccc1NC(=O)OC(C)(C)C  
C=CC(=O)OC.Cc1ccc(S(=O)(=O)NCCc2cccc2Br)cc1>>COC(=O)/C=C/c1cccc1CCNS(=O)(=O)c1c  
cc(C)cc1  
C=Cc1cccc1.N#Cc1ccc(OS(=O)(=O)C(F)(F)F)cc1>>C=C(c1cccc1)c1ccc(C#N)cc1  
C=Cc1cc(OC)cc(OC)c1.CC(C)(Oc1ccc(C(=O)c2ccc(Cl)cc2)cc1)C(=O)Oc1ccc(I)cc1>>COc1cc(/C=C/c  
2ccc(OC(=O)C(C)(C)Oc3ccc(C(=O)c4ccc(Cl)cc4)cc3)cc2)cc(OC)c1  
C=COCC.Cc1ccc(I)cc1>>CCO/C=C/c1ccc(C)cc1  
C=C(F)C(=O)OC.COc1cccc1I>>COC(=O)/C(F)=C/c1cccc1OC  
CCC(=O)/C=C/CC(CCc1cccc1)NS(=O)(=O)c1ccc(C)cc1.Cc1ccc(Br)cc1>>CCC(=O)/C=C(/CC(CCc1  
cccc1)NS(=O)(=O)c1ccc(C)cc1)c1ccc(C)cc1  
C=CC(=O)OC(C)(C)C.N#Cc1cccc(I)c1>>CC(C)(C)OC(=O)/C=C/c1cccc(C#N)c1  
C=CC(=O)OCC.O=c1c(Br)c(-c2ccc(Cl)cc2)oc2cccc12>>CCOC(=O)/C=C/c1c(-  
c2ccc(Cl)cc2)oc2cccc2c1=O  
C=CN1CCCC1=O.COc1ccc(Cl)cc1>>C=C(c1ccc(OC)cc1)N1CCCC1=O  
C=Cc1cenc1.CN1CCC[C@H]1COc1cnc(Br)c1>>CN1CCC[C@H]1COc1cnc(/C=C/c2cnc2)c1  
Br1cccc1.C=C(C)c1cccc1>>C/C(=C/c1cccc1)c1cccc1  
C=CC(N)=O.Clc1cccc1>>NC(=O)/C=C/c1cccc1  
C=CC(F)(F)C(F)(F)C(F)(F)C(F)(F)C(F)(F)C(F)(F)C(F)(F)C(F)(F)F.O=[N+][([O-  
]c1cccc1Br>>O=[N+][([O-  
]c1cccc1/C=C/C(F)(F)C(F)(F)C(F)(F)C(F)(F)C(F)(F)C(F)(F)C(F)(F)C(F)(F)C(F)(F)F  
C=CCC(=O)Nc1cccc2ccnc12.CCOC(=O)c1ccc(OS(=O)(=O)C(F)(F)F)cc1>>CCOC(=O)c1ccc(/C=C/  
CC(=O)Nc2cccc3ccnc23)cc1  
Br1cnc2ccnc12.C=CC(=O)OCC>>CCOC(=O)/C=C/c1cnc2ccnc12  
C=CC#N.Cc1noc(-c2cccc2)c1I>>Cc1noc(-c2cccc2)c1/C=C/C#N  
C=CC(=O)OCCOCC.Cc1[nH]c(=O)c2c(N)nn(C)c2c1Br>>CCOCCOC(=O)/C=C/c1c(C)[nH]c(=O)c2c(  
N)nn(C)c12  
C=CSc1cccc1.CC(=O)c1ccc(Br)cc1>>CC(=O)c1ccc(/C=C/Sc2cccc2)cc1  
C=CC(=O)CCCC.CCc1cc(C)cc(CC)c1Br>>CCCCC(=O)/C=C/c1c(CC)cc(C)cc1CC  
C=CC(=O)OC.COC(=O)CCOCc1cc(OCc2cccc2)c(OC)cc1Br>>COC(=O)/C=C/c1cc(OC)c(OCc2cccc  
c2)cc1COCCC(=O)OC  
C=COCCCC.COc1ccc(Br)cc1>>C=C(OCCCC)c1ccc(OC)cc1  
C=CC(=O)OC.FC(F)(F)Oc1ccc(-  
c2ccc3c(Br)nc(C(F)(F)F)n3c2)cc1>>COC(=O)/C=C/c1nc(C(F)(F)F)n2cc(-c3ccc(OC(F)(F)F)cc3)ccc12  
C=CNC(C)=O.CN(C)c1cccc(OS(=O)(=O)C(F)(F)F)c1>>C=C(NC(C)=O)c1cccc(N(C)C)c1  
C=C[Si](C)(C)C.COc1ccc(I)cc1>>COc1ccc(/C=C/[Si](C)(C)C)cc1  
C=CC(=O)N(C)Cc1cc2cccc2n1C.CC1(C)NCc2cc(Br)enc2NC1=O>>CN(Cc1cc2cccc2n1C)C(=O)/C  
=C/c1enc2c(c1)CNC(C)(C)C(=O)N2  
C=Cc1ccc2cccc2c1.CC(C)(C)c1ccc(Br)cc1>>CC(C)(C)c1ccc(/C=C/c2ccc3cccc3c2)cc1  
C=CC#N.N#Cc1c(-c2cccc(Br)c2)cc(-c2cccc2)nc1N>>N#C/C=C/c1cccc(-c2cc(-  
Br1cccc2cccc12.C=Cc1cccn1>>C(=C/c1cccc2cccc12)/c1cccn1  
C=CC(=O)OC(C)(C)C.Nc1ccc(Br)cc1>>CC(C)(C)OC(=O)/C=C/c1ccc(N)cc1  
C=C/C=C/C(=O)N(CCCC)CCCC.COc1ccc(Br)cc1>>CCCCN(CCCC)C(=O)/C=C/C=C/c1ccc(OC)cc1  
C=Cc1cccc(OC)c1.FC(F)(F)c1cccc1I>>COc1cccc(/C=C/c2cccc2C(F)(F)F)c1  
C=CC(=O)OC.COC(=O)c1c(Br)ccc2nn(C)c(C)c12>>COC(=O)/C=C/c1ccc2nn(C)c(C)c2c1C(=O)OC  
Br1ccc(-c2coen2)cc1.C=CC(=O)OCC>>CCOC(=O)/C=C/c1ccc(-c2coen2)cc1  
BrC1=C(C2=CCCO2)CCCC1.C=CC(=O)OC>>COC(=O)/C=C/C1=C(C2=CCCO2)CCCC1  
C=CC(=O)OCC.COcn1nc(-c2cccc2)c(Br)cc1=O>>CCOC(=O)/C=C/c1cc(=O)n(COC)nc1-c1cccc1  
C=CC(=O)NCCCCCNC(=O)C(F)(F)F.CC(=O)OC[C@H]1C=C[C@H](n2cc(I)c(=O)[nH]c2=O)O1  
>>CC(=O)OC[C@H]1C=C[C@H](n2cc(/C=C/C(=O)NCCCCCNC(=O)C(F)(F)F)c(=O)[nH]c2=O)  
C=CC(=O)OC.CS(=O)(=O)N(Cc1cccc1)c1oc2cccc2c1I>>COC(=O)/C=C/c1c(N(Cc2cccc2)S(C)(=  
O)=O)oc2cccc12  
C=Cn1nnnc1C.Ic1cccc1>>Cc1nnnn1/C=C/c1cccc1  
Br1cenc1.C=Cc1ccc(Cn2cc(C)c(=O)n(C)c2=O)cc1>>Cc1cn(Cc2ccc(/C=C/c3ccnc3)cc2)c(=O)n(C)c  
C=CC(=O)OCCCC.FC(F)(F)c1ccc(Br)cc1>>CCCCOC(=O)/C=C/c1ccc(C(F)(F)F)cc1  
C=CC(=O)OC(CC)CCCC.N#Cc1cccc1Cl>>CCCCC(CC)OC(=O)/C=C/c1cccc1C#N  
C=CC(=O)OC.Ic1cccc2c1NCC2>>COC(=O)/C=C/c1cccc2c1NCC2  
C=Cc1cccc(Cl)c1.Cn1nc(Br)c2cccc2I>>Cn1nc(/C=C/c2cccc(Cl)c2)c2cccc2I

C=CP(=O)(OCC)OCC.O=[N+][([O-])c1ccc(-  
c2cccc3ccccc23)c2nc(Cl)ccc2c1>>CCOP(=O)/C=C/c1ccc2cc([N+](=O)[O-])cc(-  
c3cccc4ccccc34)c2n1)OCC  
C=COCCCC.Cc1cc(Br)c2nc(N3CCOCC3)cc(=O)n2c1>>C=C(OCCCC)c1cc(C)cn2c(=O)cc(N3CCOC  
C3)nc12  
C=CC(=O)NC1CCCCC1.O=c1e(I)c(-c2ccc(O)cc2)oc2cc(O)ccc12>>O=C(/C=C/c1c(-  
c2ccc(O)cc2)oc2cc(O)ccc2c1=O)NC1CCCCC1  
C=Cc1ccc(C(F)(F)F)cc1.CCOC(=O)C(F)I>>CCOC(=O)C(F)/C=C/c1ccc(C(F)(F)F)cc1  
C=C[C@H]1O[C@@H]2OC(C)(C)O[C@@H]2[C@H]1OC.COc1ccc(I)cc1>>COc1ccc(/C=C/[C@H]2  
O[C@@H]3OC(C)(C)O[C@@H]3[C@H]2OC)cc1  
C=CC(=O)OC.COc1ccc2cc(Br)ccc2c1Cl>>COC(=O)/C=C/c1ccc2c(Cl)c(OC)ccc2c1  
C=CC(=O)OC.CCOC(=O)c1c2cccccc-2c(C(=O)OCC)c1Cl>>CCOC(=O)c1c2cccccc-  
2c(C(=O)OCC)c1/C=C/C(=O)OC  
C=Cc1cccc1.CCCCCCCCOC1cc(/C=C/c2ccc(Br)cc2)c(OCCCCCCCC)cc1/C=C/c1cccc1>>CCCCC  
CCCCc1cc(/C=C/c2ccc(/C=C/c3cccc3)cc2)c(OCCCCCCCC)cc1/C=C/c1cccc1  
C=Cc1ccc(F)cc1.Ic1cccc1>>Fc1ccc(/C=C/c2cccc2)cc1  
C=CS(=O)(=O)F.FC(F)(F)c1ccc(I)cc1>>O=S(=O)(F)/C=C/c1ccc(C(F)(F)F)cc1  
C=CC(=O)OC.CC(C)(C)OC(=O)Cn1c(Br)enc(NC2CCC2)c1=O>>COC(=O)/C=C/c1enc(NC2CCC2)c(  
=O)n1CC(=O)OC(C)(C)C  
C=Cc1enc2cccc2c1.CN1C(=O)CC[C@]2(C)c3ccc(Br)cc3CC[C@]2(C)c3ccc(/C=C/c4enc5cccc5c4)cc3CC[C@]2(C)  
C=CC(=O)OC.O=[N+][([O-])c1ccc(C2=C(I)C2(F)F)cc1>>COC(=O)/C=C/C1=C(c2ccc([N+](=O)[O-]  
])cc2)C1(F)F  
C=C[C@H]1O[C@@H]2OC(C)(C)O[C@@H]2[C@H]1O.O=c1ccoc2ccc(Br)cc12>>CC1(C)O[C@H]  
2O[C@H]/C=C/c3ccc4occc(=O)c4c3)[C@H](O)[C@H]2O1  
\*CNCCCOCCOCCOCCNC(=O)COc1ccc(C(Cc2cc(OC)cc(OC)c2)NC(=O)c2cccc(C=C)c2)cc1.FC(F)  
(F)c1ccc(I)cc1>>\*CNCCCOCCOCCOCCNC(=O)COc1ccc(C(Cc2cc(OC)cc(OC)c2)NC(=O)c2cccc(/  
C=C/c3ccc(C(F)(F)F)cc3)c2)cc1  
C=CC(C)=O.N#Cc1ccc(N)c(I)c1>>CC(=O)/C=C/c1cc(C#N)ccc1N  
C=CC(=O)OC.FC(F)(F)c1ccc(I)cc1>>COC(=O)/C=C/c1ccc(C(F)(F)F)cc1  
CC(=O)/C=C/CCc1cccc1.Cc1ccc(Br)cc1>>CC(=O)/C=C/(CCc1cccc1)c1ccc(C)cc1  
C=Cc1cenec1.COc1ccc(Br)cc1C=O>>COc1ccc(/C=C/c2cenec2)cc1C=O  
C=CC(=O)OC.FC(F)(F)c1ccc(Br)en1>>COC(=O)/C=C/c1ccc(C(F)(F)F)nc1  
C=CC(=O)NC(C)(C)C.COc1cc2oc(-c3cccc3)c(I)c(=O)c2cc1OC>>COc1cc2oc(-  
c3cccc3)c(/C=C/C(=O)NC(C)(C)C)c(=O)c2cc1OC  
C=CC(=O)NCCc1ccc(F)cc1.COc1cc2oc(-c3cccc3)c(I)c(=O)c2cc1OC>>COc1cc2oc(-  
c3cccc3)c(/C=C/C(=O)NCCc3ccc(F)cc3)c(=O)c2cc1OC  
\*CNCCCOCCOCCOCCNC(=O)COc1ccc(C(Cc2cc(OC)cc(OC)c2)NC(=O)c2cccc(C=C)c2)cc1.Cc1cc  
c(I)cc1F>>\*CNCCCOCCOCCOCCNC(=O)COc1ccc(C(Cc2cc(OC)cc(OC)c2)NC(=O)c2cccc(/C=C/c  
3ccc(C)c(F)c3)c2)cc1  
C=C.C=CCCCCCCCCOC(=O)c1c(OC)cc(OC)cc1OS(=O)(=O)C(F)(F)F>>C=CCCCCCCCCOC(=O)c  
1c(C=C)cc(OC)cc1OC  
C=CC(=O)OC.N#Cc1cccc(Br)c1>>COC(=O)/C=C/c1cccc(C#N)c1  
C=CCNC1=NCCN1.Ic1cccc1>>C(=C/c1cccc1)\CNC1=NCCN1  
C=CC(=O)OCC.COc1ccc(Br)cc1CC(=O)Nc1cenec(C(=O)NC(C)(C)C)c1>>CCOC(=O)/C=C/c1ccc(OC)  
c(CC(=O)Nc2ccnc(C(=O)NC(C)(C)C)c2)c1  
C=CC(=O)OC(C)(C)C.Nc1ccc(I)en1>>CC(C)(C)OC(=O)/C=C/c1enc(N)nc1  
C=CC(=O)OCC.O=[N+][([O-])c1ccc(I)c1>>CCOC(=O)/C=C/c1cccc([N+](=O)[O-])c1  
Br1cccc1.C=CCN(Cc1cccc2cccc12)C(=O)OCC>>CCOC(=O)N(C/C=C/c1cccc1)Cc1cccc2cccc12  
C=CC(=O)OC.FC(F)(F)c1ccc(I)c1>>COC(=O)/C=C/c1cccc(C(F)(F)F)c1  
C=CC(=O)OC(C)(C)C.O=c1oc(Br)cc2cccc12>>CC(C)(C)OC(=O)/C=C/c1cc2cccc2c(=O)o1  
Br1cc2ccc3cccc3c2c2c1ccc1cccc12.C=CC(=O)OC>>COC(=O)/C=C/c1cc2ccc3cccc3c2c2c1ccc1c  
cccc12  
C=CC(=O)OC(C)(C)C.CC(C)(C)OC(=O)CCOCc1cccc1Br>>CC(C)(C)OC(=O)/C=C/c1cccc1COCC  
C(=O)OC(C)(C)C  
C=Cc1cccc1.Cc1ccsc1Br>>Cc1ccsc1/C=C/c1cccc1  
Br1cccc1I.C=CC(N)=O>>NC(=O)/C=C/c1cccc1Br  
\*CNCCCOCCOCCOCCNC(=O)COc1ccc(C(Cc2cc(OC)cc(OC)c2)NC(=O)c2cccc(C=C)cc2)cc1.CCOc  
1ccc(I)cc1>>\*CNCCCOCCOCCOCCNC(=O)COc1ccc(C(Cc2cc(OC)cc(OC)c2)NC(=O)c2cccc(/C=C/  
c3ccc(OCC)cc3)cc2)cc1  
C=Cc1cccc(Cl)c1.CC(=O)Nc1ccc(Br)cc1>>CC(=O)Nc1ccc(/C=C/c2cccc(Cl)c2)cc1

163 C=CC(OCC)OCC.O=[N+](O)c1ccc(I)cc1>>CCOC(/C=C/c1ccc([N+](=O)[O-])cc1)OCC  
164 C=CN1C(=O)c2ccccc2C1=O.OC(c1ccc(Cl)cc1)c1ncccc1Br>>O=C1c2ccccc2C(=O)N1/C=C/c1ccccc1  
C(O)c1ccc(Cl)cc1  
165 C=CC(=O)OC.CC(=O)Oc1ccc(Br)cc1CC=C(C)C>>COC(=O)/C=C/c1ccc(OC(C)=O)c(CC=C(C)C)c1  
166 C=CC(C)(C)C.O=c1oc2ccccc2cc1Br>>CC(C)(C)/C=C/c1cc2ccccc2oc1=O  
167 C=C(C)C(=O)OC.O=C(O)c1ccc(I)cc1>>COC(=O)/C(C)=C/c1ccc(C(=O)O)cc1  
168 C=COCC.Cc1ccc(I)cc1>>C=C(OCC)c1ccc(C)cc1  
169 BrC1=C(C2=CCN(Cc3ccccc3)CC2)CCCC1.C=CC(=O)OC(C)(C)C>>CC(C)(C)OC(=O)/C=C/C1=C(C  
2=CCN(Cc3ccccc3)CC2)CCCC1  
170 BrC1ccc2cn[nH]c2c1.C=CC(N)=O>>NC(=O)/C=C/c1ccc2cn[nH]c2c1  
171 C=CC(=O)OCC.CCOC(=O)c1cnc2c(C)cc(OC)cc2c1Br>>CCOC(=O)/C=C/c1c(C(=O)OCC)cnc2c(C)c  
c(OC)cc12  
C=CC[C@H](C(=O)N1[C@H]2C[C@@H]3CC[C@@]2(CS1(=O)=O)C3(C)C)[C@H](O)CCCCC.  
172 Cc1ccc(Br)cc1>>CCCCC[C@H](O)[C@@H](C/C=C/c1ccc(C)cc1)C(=O)N1[C@H]2C[C@@H]3  
CC[C@@]2(CS1(=O)=O)C3(C)C  
173 C=COCCCC.Clc1ccc2ccccc2c1>>C=C(OCCCC)c1ccc2ccccc2c1  
174 C=CC(=O)OCC.Cc1cnc(C)c(Cl)n1>>CCOC(=O)/C=C/c1nc(C)cnc1C  
175 C=CS(C)(=O)=O.FC(F)(F)c1cc(Br)cc(C(F)(F)F)c1>>CS(=O)(=O)/C=C/c1cc(C(F)(F)F)cc(C(F)(F)F)c1  
176 C=COCCCC.O=C1c2cccc(OS(=O)(=O)C(F)(F)F)c2C(=O)c2cccc(OCc3ccccc3)c21>>C=C(OCCCC)c1  
cccc2c1C(=O)c1cccc(OCc3ccccc3)c1C2=O  
177 C=C.Cc1ccc(I)cc1>>C=Cc1ccc(C)cc1  
178 C=CC(=O)OC.Cc1cc2oc(=O)c(CC(=O)Nc3ccc(F)cc3C(F)(F)F)c(-  
c3ccccc3)c2cc1Br>>COC(=O)/C=C/c1cc2c(-  
179 C=CC(=O)OC.O=C(NCc1ccc(F)cc1F)c1c(NCCO)c2cc(Br)cnc2n(OCc2ccccc2)c1=O>>COC(=O)/C=C  
/c1cnc2c(c1)c(NCCO)c(C(=O)Nc1ccc(F)cc1F)c(=O)n2OCc1ccccc1  
180 C=Cc1ccccc1.Cc1cccc(NC(=O)c2cccc(I)c2)n1>>Cc1cccc(NC(=O)c2cccc(/C=C/c3ccccc3)c2)n1  
181 C=CCCCCCC.CC(C)(C)c1ccc(Br)cc1>>C=C(CCCCCC)c1ccc(C(C)(C)C)cc1  
182 C=Cc1ccccc1.CCN(CC)CC(=O)Nc1c(C)ccc(Br)c1C>>CCN(CC)CC(=O)Nc1c(C)ccc(/C=C/c2ccccc2)c  
183 BrC1ccc(NCCNc2ccccc2)nc1.C=CC(=O)OC(C)(C)C>>CC(C)(C)OC(=O)/C=C/c1ccc(NCCNc2ccccc2)  
184 C=CC(=O)OC.Cc1cc(Cl)ccc1C(F)(F)F>>COC(=O)/C=C/c1ccc(C(F)(F)F)c(C)c1  
\*CNCCOCCOCCOCCNC(=O)COc1ccc(C(Cc2cc(OC)cc(OC)c2)NC(=O)c2cccc(C=C)c2)cc1.Cc1cc  
185 cc(I)c1>>\*CNCCOCCOCCOCCNC(=O)COc1ccc(C(Cc2cc(OC)cc(OC)c2)NC(=O)c2cccc(/C=C/c3  
cccc(C)c3)c2)cc1  
186 C=CC(C)=O.O=Cc1ccccc1Br>>CC(=O)/C=C/c1ccccc1C=O  
187 C=CC(O[Si](C)(C)C(C)(C)C(CCCCC)O[Si](C)(C)C(C)(C)C.O=Cc1ccc(Br)cc1>>CCCCC(O[Si](C  
)(C)C(C)(C)C)/C=C/c1ccc(C=O)cc1O[Si](C)(C)C(C)(C)C  
188 C=CC(=O)OC.CC(C)c1oc2cc3oc(=O)ccc3cc2c1OS(=O)(=O)C(F)(F)F>>COC(=O)/C=C/c1c(C(C)C)oc  
2cc3oc(=O)ccc3cc12  
189 C=CC(=O)OC.O=CC1=C(Br)CCCC1>>COC(=O)/C=C/C1=C(C=O)CCCCC1  
190 C=Cc1cnccl.Fc1ccc(I)c(F)c1>>Fc1ccc(/C=C/c2cnccl)c(F)c1  
191 C=CC(=O)OC(C)(C)C.O=Cc1ccc(I)cc1>>CC(C)(C)OC(=O)/C=C/c1ccc(C=O)cc1  
192 C=CC(=O)OCCCC.CCOC(=O)c1ccc(-c2nc(-  
c3cc(OC)cc(OC)c3)sc2Cl)cc1>>CCCCOC(=O)/C=C/c1sc(-c2cc(OC)cc(OC)c2)nc1-  
193 C=CC(=O)OC.CC(C)(C)OC(=O)n1cc(C=O)c2c(Br)cccc21>>COC(=O)/C=C/c1ccccc2c1c(C=O)cn2C(=O)OC(C)(C)C  
194 BrC1ccc2[nH]ccc2c1.C#CC=C>>C#C/C=C/c1ccc2[nH]ccc2c1  
195 C=CC(=O)OCC.Cc1ccc(Br)c(C=O)c1>>CCOC(=O)/C=C/c1ccc(C)cc1C=O  
196 C=CC(=O)OCC.CC(C)(C)OC(=O)N1CCC(C#N)(c2ccccc2Br)CC1>>CCOC(=O)/C=C/c1ccccc1C1(C#N)CCN(C(=O)OC(C)(C)C)CC1  
197 C=CC(=O)OC.CC1(CC(N(Cc2cc3c(cc2I)OCO3)C[Si](C)(C)C)[Si](C)(C)C)OCCO1>>C=C(C(=O)OC)  
c1cc2c(cc1CN(C[Si](C)(C)C)C(C)C(C)C1(C)OCCO1)[Si](C)(C)C)OCO2  
198 C=Cc1ccc(C)cc1.Cn1nc(Br)c2ccccc21>>Cc1ccc(/C=C/c2nn(C)c3ccccc23)cc1  
199 BrC1ccc(-c2nc3ccccc3n2Cc2ccccc2)cc1.C=CC(=O)OCC>>CCOC(=O)/C=C/c1ccc(-  
c2nc3ccccc3n2Cc2ccccc2)cc1  
200 C=CN1C(=O)c2ccccc2C1=O.COc1ccc(Cl)cc1>>COc1ccc(/C=C/N2C(=O)c3ccccc3C2=O)cc1  
201 C=CC(=O)OC(C)(C)C.Cc1ccccc1I>>Cc1ccccc1/C=C/C(=O)OC(C)(C)C  
202 C=CC(O)c1cc(OC)c(OC)c(OC)c1Br.COc1ccc(I)cc1OC>>COc1ccc(/C=C/C(O)c2cc(OC)c(OC)c(OC)c  
2Br)cc1OC  
203 C=CC#N.O=Cc1ccccc1Br>>N#C/C=C/c1ccccc1C=O  
204 C=CC(F)(F)F.FC(F)(F)c1ccccc(Br)c1>>FC(F)(F)/C=C/c1ccccc(C(F)(F)F)c1  
205 C=COCC.Fc1ccc(Br)cc1>>C=C(OCC)c1ccc(F)cc1

206 C=COCCCC.CC(=O)N1CCc2cc(Br)ccc21>>C=C(OCCCC)c1ccc2c(c1)CCN2C(C)=O  
207 C=C(NC(C)=O)C(=O)OC.CCc1cc(OC(C)=O)cc(C)c1I>>CCc1cc(OC(C)=O)cc(C)c1/C=C(\NC(C)=O)  
C(=O)OC  
208 C=Cc1ccc(N(c2ccc3ccccc3c2)c2ccc3ccccc3c2)cc1.COc1cc(C=O)c(OC)cc1I>>COc1cc(/C=C/c2ccc(N(  
c3ccc4ccccc4c3)c3ccc4ccccc4c3)cc2)c(OC)cc1C=O  
209 C=CC(=O)OC(C)(C)C.O=Cc1c(Br)cccc1Oc1ccc(OC(F)(F)F)cc1>>CC(C)(C)OC(=O)/C=C/c1cccc(Oc  
2ccc(OC(F)(F)F)cc2)c1C=O  
210 C=C.Oc1cc(Br)c2oc(-c3ccc(O)c(F)c3)nc2c1>>C=Cc1cc(O)cc2nc(-c3ccc(O)c(F)c3)oc12  
211 C=Cc1cccc1.O=Cc1cc2c(cc1Br)OCO2>>O=Cc1cc2c(cc1/C=C/c1cccc1)OCO2  
212 Brc1cccn2nnnc12.C=CC(=O)OC>>COC(=O)/C=C/c1cccn2nnnc12  
213 C=CC(F)(F)C(F)(F)C(F)(F)C(F)(F)C(F)(F)C(F)(F)F.CC(=O)c1ccc(Br)cc1>>CC(=O)c1ccc(/C=C/C(F)(  
F)C(F)(F)C(F)(F)C(F)(F)C(F)(F)C(F)(F)F)cc1  
214 C=CC(=O)OC(C)(C)C.COC(=O)/C=C/c1cccc(N(Cc2ccccc2Br)C(=O)C2CCCCC2)c1>>COC(=O)/C=  
C/c1cccc(N(Cc2ccccc2/C=C/C(=O)OC(C)(C)C(=O)C2CCCCC2)c1  
215 C=CC(=O)OC(C)(C)C.Oc1nn(-c2ccccc2)cc1Br>>CC(C)(C)OC(=O)/C=C/c1nn(-c2ccccc2)nc1O  
216 C=CC(=O)OCC.O[C@H]1CCCC[C@H]1Nc1nc2ccc(Cn3cnc4cc(I)ccc43)cc2s1>>CCOC(=O)/C=C/  
c1ccc2c(c1)ncn2Cc1ccc2nc(N[C@H]3CCCC[C@H]3)sc2c1  
217 C=CC(=O)O.CCOC(=O)Cn1cc(I)c(=O)[nH]c1=O>>CCOC(=O)Cn1cc(/C=C/C(=O)O)c(=O)[nH]c1=O  
218 C=CCC(C)N(C)C(=O)OC(C)(C)C.CCOc1cnc(Br)c1>>CCOc1cnc(/C=C/CC(C)N(C)C(=O)OC(C)(C)  
C=CC(=O)OC.Cn1nnc(N(Cc2cc(C(F)(F)F)cc(C(F)(F)F)c2)Cc2cc(C(F)(F)F)enc2Cl)n1>>COC(=O)/C=  
219 C/c1ncc(C(F)(F)F)cc1CN(Cc1cc(C(F)(F)F)cc(C(F)(F)F)c1)c1nnn(C)n1  
C=Cc1cccc(O[Si](C)(C)C(C)(C)C)c1.C[Si](C)(C)OS(=O)(=O)C(F)(F)F>>CC(C)(C)[Si](C)(C)Oc1cccc  
220 (/C=C/[Si](C)(C)C)c1  
221 C=CS(C)(=O)=O.Fc1ccc(Br)cc1>>CS(=O)(=O)/C=C/c1ccc(F)cc1  
222 C=CC(=O)NCc1cccc1.O=C1Cc2c([nH]c3ccc(I)cc23)-  
e2cccn2N1>>O=C(/C=C/c1ccc2[nH]c3c(c2c1)CC(=O)Nc1cccc1-3)NCc1cccc1  
223 C=CCCc1ccc(CC)cc1.O=C1CCOc2cc(Br)ccc21>>CCc1ccc(CC/C=C/c2ccc3c(c2)OCCC3=O)cc1  
224 C=C(C)C(=O)OCC.Fc1cccc(I)c1>>CCOC(=O)/C(C)=C/c1cccc(F)c1  
225 C=CC(=O)OC.COC(=O)c1c(-c2ccccc2)ccc(OC)c1Br>>COC(=O)/C=C/c1c(OC)ccc(-  
C=Cc1ccc2c(c1)CC[C@H]1[C@@H]2CC[C@]2(C)C(=O)CC[C@@]12C.CCOC(=O)C(F)Br>>CC  
226 OC(=O)C(F)/C=C/c1ccc2c(c1)CC[C@H]1[C@@H]2CC[C@]2(C)C(=O)CC[C@@]12C  
227 Brc1ccc2ccccc2c1.C=CC(=O)N(C)OC>>CON(C)C(=O)/C=C/c1ccc2ccccc2c1  
228 C=CC(=O)OCC.Nc1ccc(Br)c(F)c1>>CCOC(=O)/C=C/c1ccc(N)cc1F  
229 C=CC(=O)OC(C)(C)C.O=C1Ne2ccccc2O/C1=C\c1ccc(Br)s1>>CC(C)(C)OC(=O)/C=C/c1ccc(/C=C2\  
Oc3ccccc3NC2=O)s1  
230 C=CC(=O)OC.COc1ccc2c(c1)CCN(c1ccc(C)cc1)C2(C)c1ccc(Br)cc1>>COC(=O)/C=C/c1ccc(C2(C)c3  
ccc(OC)cc3CCN2c2ccc(C)cc2)cc1  
231 Brc1ccc(-c2cnco2)o1.C=Cc1cccc1>>C(=C/c1ccc(-c2cnco2)o1)\c1cccc1  
232 C=CC(OC)OC.IC1CCCC1>>COC(/C=C/C1CCCC1)OC  
C=Cc1cccc([N+](=O)[O-]  
233 ])c1.N[C@@H](Cc1c[nH]c2c(Br)cccc12)C(=O)O>>N[C@@H](Cc1c[nH]c2c(/C=C/c3cccc([N+](=O)[  
O-])c3)cccc12)C(=O)O  
234 C=Cc1ccc(OC)cc1.Cc1ccc(Br)cc1>>COc1ccc(/C=C/c2ccc(C)cc2)cc1  
235 Brc1cnc(C2CC2)c1.C=CC(=O)OCC>>CCOC(=O)/C=C/c1cnc(C2CC2)c1  
236 C=CC(=O)Nc1cccc1NC(=O)OC(C)(C)C.COC(=O)C(CCC1CCCN1C)c1ccc(Br)cc1>>COC(=O)C(CC  
C1CCCN1C)c1ccc(/C=C/C(=O)Nc2ccccc2NC(=O)OC(C)(C)C)cc1  
237 C=C(CC(=O)OCC)C(=O)OCC.Cc1c(N)ccc(I)c1[N+](=O)[O-]  
>>CCOC(=O)C/C(=C\c1ccc(N)c(C)c1[N+](=O)[O-])C(=O)OCC  
238 C=CC(=O)OC.N#Cc1ccc(-c2cc(I)cc(C=O)c2)cc1>>COC(=O)/C=C/c1cc(C=O)cc(-c2ccc(C#N)cc2)c1  
239 C=C(NC(C)=O)C(=O)OC.N#Cc1ccc(Br)cc1>>COC(=O)/C=C/c1ccc(C#N)cc1)NC(C)=O  
240 C=C1C[C@H]2[C@@H]3CCc4cc(OC)ccc4[C@H]3CC[C@]2(C)C1=O.Fc1ccc(Br)cc1>>COc1ccc2c(  
c1)CC[C@H]1[C@@H]2CC[C@]2(C)C(=O)/C=C/c3ccc(F)cc3)C[C@@H]12  
C=CCC(O)c1ccc(-  
241 c2cc(OC)nc2F)cn1.COC(=O)[C@@H](C)[C@H](c1ccc(I)c(O)c1)C1CC1>>COC(=O)[C@@H](C)[C  
@H](c1ccc(/C=C\CC(O)c2ccc(-c3cc(OC)nc3F)cn2)c(O)c1)C1CC1  
242 C=Cc1cccc1.O=[N+][O-]c1cccc(Br)c1>>O=[N+][O-]c1cccc(/C=C/c2ccccc2)c1  
243 C=CC(=O)CC.O=C(c1cccc1)c1ccc(Br)cc1>>CCC(=O)/C=C/c1ccc(C(=O)c2ccccc2)cc1  
244 Brc1ccc2ncn2c1.C=CS(=O)(=O)c1cccc1>>O=S(=O)(/C=C/c1ccc2ncn2c1)c1cccc1  
245 C=CC(=O)N1CCC2(CC1)OCCO2.CC(C)(C)OC(=O)c1cccc1Br>>CC(C)(C)OC(=O)c1cccc1/C=C/C(  
=O)N1CCC2(CC1)OCCO2  
246 Br/C(=C/[Te]c1cccc1)c1cccc1.C=CC#N>>N#C/C=C/C(=C/[Te]c1cccc1)c1cccc1

247 C=CC(=O)OCCCC.Cn1nc(Br)c2ccc(C#N)cc21>>CCCCOC(=O)/C=C/c1nn(C)c2cc(C#N)ccc12  
248 C=CC(=O)OCCCC.O=C(O)c1ccc(I)cc1>>CCCCOC(=O)/C=C/c1ccc(C(=O)O)cc1  
249 C=CC(C)=O.Nc1ncc(Br)en1>>CC(=O)/C=C/c1nnc(N)nc1  
250 C=CC(=O)C1=CN(CC(C)C)CCC1(C)C.COc1ccc(Br)cc1>>COc1ccc(/C=C/C(=O)C2=CN(CC(C)C)CC  
C2(C)C)cc1  
251 Br[C@H]1C[C@@H]2CC[C@H]1C2.C=Cc1ccc(OC)cc1>>COc1ccc(/C=C/[C@H]2C[C@@H]3CC[C@  
@H]2C3)cc1  
252 C=CCNC(=O)OC(C)(C)C.O=S(=O)(Oc1cccc(C(F)(F)F)c1Cl)C(F)(F)F>>C=C(CNC(=O)OC(C)(C)C)c  
1cccc(C(F)(F)F)c1Cl  
253 C=Cc1cccc(F)c1.CCNC(=O)c1cc(-c2cc(Br)c(OCc3ccccc3)cc2OCc2ccccc2)on1>>CCNC(=O)c1cc(-  
c2cc(/C=C/c3cccc(F)c3)c(OCc3ccccc3)cc2OCc2ccccc2)on1  
254 Br1ccc2ccccc2c1.C=COCCCCO>>C=C(OC(CCO)c1ccc2ccccc2c1  
255 C=C(C)C.CC(Cl)c1cccc1>>CC(C)=CC(C)c1cccc1  
256 C=CC(=O)NC(C)(C)C.COc1ccc(I)cc1>>COc1ccc(/C=C/C(=O)NC(C)(C)C)cc1  
257 C=CCCCCCC.Cc1ccc(C)c(OS(=O)(=O)C(F)(F)F)c1>>C=C(CCCCC)c1cc(C)ccc1C  
258 C=CC#N.CC(C)N(CC[C@H](c1cccc1)c1cc(Br)ccc1OCc1cccc1)C(C)C>>CC(C)N(CC[C@H](c1ccc  
c1)c1cc(/C=C/C#N)ccc1OCc1cccc1)C(C)C  
259 C=CCN(Cc1cc(F)cc(F)c1)C(=O)C(C)(C)C.O=C1Nc2ncccc2[C@@]12Cc1cc(Br)enc1C2>>CC(C)(C)C  
(=O)N(C/C=C/c1ncc2c(c1)C[C@@]1(C2)C(=O)Nc2ncccc21)Cc1cc(F)cc(F)c1  
260 C=CC(=O)OC.CC1c2ccc(Br)cc2CCN1C(=O)OC(C)(C)C>>COC(=O)/C=C/c1ccc2c(c1)CCN(C(=O)O  
C(C)(C)C)C2C  
261 C=CC(=O)Oc1cccc1.Nc1nc(N)c2cc(I)ccc2n1>>Nc1nc(N)c2cc(/C=C/C(=O)Oc3ccccc3)ccc2n1  
262 C=COCCCC.O=S(=O)(Oc1ccc2ccccc2c1)C(F)(F)F>>C=C(OC(CCC)c1ccc2ccccc2c1  
263 C=Cc1ccc(N(C)C)cc1.CCCCN1C(=O)C=Cc2ccc(I)cc2)C(=O)N(CCCC)C1=O>>CCCN1C(=O)C(=  
Cc2ccc(/C=C/c3ccc(N(C)C)cc3)cc2)C(=O)N(CCCC)C1=O  
264 C=CC(=O)OCC.Cc1cc(Br)ccn1>>CCOC(=O)/C=C/c1ccnc(C)c1  
265 C=Cc1ccc(C(C)C)cc1.Cc1ccc([Si](C)(C)I)o1>>Cc1ccc([Si](C)(C)/C=C/c2ccc(C(C)(C)C)cc2)o1  
266 C=CCOC(=O)/C=C/c1ccc(OC(C)=O)c(OC(C)=O)c1.Fc1ccc(I)cc1>>CC(=O)Oc1ccc(/C=C/C(=O)OC/  
C=C/c2ccc(F)cc2)cc1OC(C)=O  
267 C=CCOC(C)=O.O=[N+][O-]c1ccc(I)cc1>>CC(=O)OC/C=C/c1ccc([N+](=O)[O-])cc1  
268 C=CC(=O)OCC.Clc1ccc1>>CCOC(=O)/C=C/c1ccc1  
269 C=CC(=O)OC.O=C1CCC(N2C(=O)c3ccc(Br)cc3C2=O)C(=O)N1>>COC(=O)/C=C/c1ccc2c(c1)C(=O)  
N(C1CCC(=O)NC1=O)C2=O  
270 C=CC#N.CCOC(=O)/C=C/c1ccc(Br)cc1>>CCOC(=O)/C=C/c1ccc(/C=C/C#N)cc1  
271 C=CC(=O)O.O=[N+][O-]c1ccc(Cl)cc1>>O=C(O)/C=C/c1ccc([N+](=O)[O-])cc1  
272 C=CCOC(C)=O.Ic1ccc(-c2ccccc2)cc1>>CC(=O)OC/C=C/c1ccc(-c2ccccc2)cc1  
273 C=CC(N)=O.Cc1cc(Br)cc(C)c1Nc1ccnc(Nc2ccc(C#N)cc2)n1>>Cc1cc(/C=C/C(N)=O)cc(C)c1Nc1ccnc  
(Nc2ccc(C#N)cc2)n1  
C=Cc1cccc([N+](=O)[O-]  
274 )c1.COc1ccc2c(=O)c(I)coc2c1>>COc1ccc2c(=O)c(/C=C/c3cccc([N+](=O)[O-])c3)coc2c1  
275 C=Cc1cccc1.CCOC(=O)c1cccc1Br>>CCOC(=O)c1cccc1/C=C/c1cccc1  
276 C=C.COc1cccc1Br>>C=Cc1cccc1OC  
277 C=CC(=O)OCCCC.Ic1ccc2[nH]ccc2c1>>CCCCOC(=O)/C=C/c1ccc2[nH]ccc2c1  
278 C=CC(=O)OCC.CC(=O)O[IH2](OC(C)=O)c1cccc1>>CCOC(=O)/C=C/c1cccc1  
279 Br1ccc(C(=C2CCCCC2)c2ccccc2)cc1.C=CC(=O)OC(C)(C)C>>CC(C)(C)OC(=O)/C=C/c1ccc(C(=C  
2CCCCC2)c2ccccc2)cc1  
280 C=CCN(C(=O)OC(C)(C)C)C(=O)OC(C)(C)C.COc1cccc(Br)c1>>COc1cccc(/C=C/CN(C(=O)OC(C)(C  
)C)C(=O)OC(C)(C)C)c1  
281 C=C[C@](C)(CCC=C(C)C)CO[Si](c1cccc1)(c1cccc1)C(C)(C)C.COc1ccc(I)cc1>>COc1ccc(/C=C/[C  
@](C)(CCC=C(C)C)CO[Si](c2ccccc2)(c2ccccc2)C(C)(C)C)cc1  
282 Br1ccc2ccc3cccc4ccc1c2c34.C=CC(=O)OC(C)(C)C>>CC(C)(C)OC(=O)/C=C/c1ccc2ccc3cccc4ccc1c  
2c34  
283 C=Cc1cccc1.Cn1ncc1-c1ccc(Br)cc1>>Cn1ncc1-c1ccc(/C=C/c2ccccc2)cc1  
\*NCCCCOCCOCCOCCNC(=O)COc1ccc(C(Cc2cc(OC)cc(OC)c2)NC(=O)c2ccc(C=C)cc2)cc1.N#Cc  
284 1cccc(I)c1>>\*NCCCCOCCOCCOCCNC(=O)COc1ccc(C(Cc2cc(OC)cc(OC)c2)NC(=O)c2ccc(/C=C/  
c3cccc(C#N)c3)cc2)cc1  
285 C=CC(=O)OC.COc1ccc2[nH]ccc2c1Br>>COC(=O)/C=C/c1c(OC)ccc2[nH]ccc12  
286 C=CS(=O)(=O)NC1CCCC1.COc1ccc(Br)c(CNC(=O)OC(C)(C)C)c1>>COc1ccc(/C=C/S(=O)(=O)NC2  
CCCC2)c(CNC(=O)OC(C)(C)C)c1  
287 C=Cc1ccncc1.CC(C)(C)OC(=O)N[C@H](COc1ncc(Cl)c(Br)c1)Cc1c[nH]c2ccccc12>>CC(C)(C)OC(=  
O)N[C@H](COc1ncc(Cl)c(/C=C/c2ccncc2)c1)Cc1c[nH]c2ccccc12

288 C=CC.O=[N+][O-]c1ccc(Br)cc1>>C/C=C/c1ccc([N+](=O)[O-])cc1  
289 COc1ccc(I)cc1.Cc1ccc(S(=O)(=O)/C=C2/C(F)(F)C2(C)C(C)(C)C)cc1>>COc1ccc(/C(=C2\C(F)(F)C2(C)C(C)(C)C)S(=O)(=O)c2ccc(C)cc2)cc1  
290 C=CC(=O)OCCCC.Nc1ccc(Br)cc1>>CCCCOC(=O)/C=C/c1ccc(N)cc1  
291 C=Cc1ccc(Cl)cc1.Oc1ccc(Br)cc1>>Oc1ccc(/C=C/c2ccc(Cl)cc2)cc1  
292 C=CC(=O)OC.CCN(CC)S(=O)(=O)Oc1ccccc1I>>CCN(CC)S(=O)(=O)Oc1ccccc1/C=C/C(=O)OC  
293 C=Cc1ccc(OC)cc1.CS(=O)(=O)c1ccc(Br)cc1>>COc1ccc(/C=C/c2ccc(S(C)(=O)=O)cc2)cc1  
294 C=CC(=O)OC(C)(C)C.COc1ccc(CNc2ccc(Br)cc2)cc1>>COc1ccc(CNc2ccc(/C=C/C(=O)OC(C)(C)C)c2)cc1  
295 C=CC(=O)OC(C)(C)C.Cc1ccc(CNC(=O)c2cc(Br)cc(I)c2)cc1>>Cc1ccc(CNC(=O)c2cc(Br)cc(/C=C/C(=O)OC(C)(C)C)c2)cc1  
296 C=CC(=O)OCc1cn(S(=O)(=O)c2ccccc2[N+](=O)[O-])c2ccc([N+](=O)[O-])cc12.CC(=O)OCCc1ccc(I)cc1>>CC(=O)OCCc1ccc(/C=C/C(=O)OCc2cn(S(=O)(=O)c3ccccc3[N+](=O)[O-])c3ccc([N+](=O)[O-])cc23)cc1  
297 C=C1CC(c2ccc(C)cc2)OC1=O.CC(C)(C)c1ccc(I)cc1>>Cc1ccc(C2C/C(=C\C3ccc(C(C)(C)C)cc3)C(=O)O2)cc1  
298 C=Cc1ccccc1.O=Cc1c(Br)sc2ccccc12>>O=Cc1c(/C=C/c2ccccc2)sc2ccccc12  
299 C=CC(=O)N(C)Cc1cc2ccccc2s1.CCn1c(=O)[nH]c2ncc(Br)cc21>>CCn1c(=O)[nH]c2ncc(/C=C/C(=O)N(C)Cc3cc4ccccc4s3)cc21  
300 C=CCO[C@H](C)(C)=ON1CCOCC1.Cc1ccc(C(=O)c2cccn2Cc2ccc(I)cc2)cc1>>Cc1ccc(C(=O)c2cccn2Cc2ccc(/C=C/CO[C@H](C)C(=O)N3CCOCC3)cc2)cc1  
301 C=CC(=O)OC.O=Cc1c(F)cc(Br)cc1Cl>>COC(=O)/C=C/c1cc(F)c(C=O)c(Cl)c1  
302 C=Cc1ccccc1Cl.CCOC(=O)C(F)I>>CCOC(=O)C(F)/C=C/c1ccccc1Cl  
303 C=Cc1ccc(F)cc1.CC(=S)NS(=O)(=O)c1ccc(Br)cc1>>CC(=S)NS(=O)(=O)c1ccc(/C=C/c2ccc(F)cc2)cc1  
304 C=CC(F)(F)C(F)(F)C(F)(F)C(F)(F)C(F)(F)C(F)(F)F.CC(=O)Nc1ccc(I)cc1>>CC(=O)Nc1ccc(/C=C/C(F)(F)C(F)(F)C(F)(F)C(F)(F)C(F)(F)C(F)(F)cc1  
305 C=CC#N.COc1cc(C)(C)C)c(OC)cc1Br>>COc1cc(C)(C)C)c(OC)cc1/C=C/C#N  
306 C=Cc1ccccc1.Cc1ccc(Br)c1N>>Cc1cccc(/C=C/c2ccccc2)c1N  
307 C=Cc1ccccc1.COc1ccc(/C=C/C(=O)c2ccc(Br)cc2)cc1>>COc1ccc(/C=C/C(=O)c2ccc(/C=C/c3ccccc3)c2)cc1  
308 C=CC(=O)OCC.CCOC(=O)Cl(c2ccc(Br)c2)CC1>>CCOC(=O)/C=C/c1cccc(C2(C(=O)OCC)CC2)c1  
309 C=CC(=O)OC(C)(C)C.FC(F)(F)c1ccc(Br)cc1>>CC(C)(C)OC(=O)/C=C/c1ccc(C(F)(F)F)cc1  
310 C=Cc1ccc(OC)cc1.O=[N+][O-]c1ccc(-n2cc(I)cn2)cc1>>COc1ccc(/C=C/c2enn(-c3ccc([N+](=O)[O-])cc3)c2)cc1  
311 C=CC=O.COc1ccc(-c2ccc(CN(C(=O)CC(C)(C)C)c3nccc4cc(Br)ccc34)cc2)cc1C>>COc1ccc(-c2ccc(CN(C(=O)CC(C)(C)C)c3nccc4cc(/C=C/C(=O)ccc34)cc2)cc1C  
312 C=CNC(C)=O.Cc1ccccc1Br>>C=C(NC(C)=O)c1ccccc1C  
313 C=CC(=O)OCCCC.Clc1ccccc1Br>>CCCCOC(=O)/C=C/c1ccccc1Cl  
314 Brc1cccc2ccccc12.C=CS(=O)c1ccccc1>>O=S(/C=C/c1cccc2ccccc12)c1ccccc1  
315 C=CC(=O)OC(C)(C)C.CCCc1nc(N(C)c2ccccc2)n2ncc(I)c2n1>>CCCc1nc(N(C)c2ccccc2)n2ncc(/C=C/C(=O)OC(C)(C)C)c2n1  
316 C=CS(N)(=O)=O.Cc1ccc(C)c(Br)c1>>Cc1ccc(C)c(/C=C/S(N)(=O)=O)c1  
317 C=Cc1ccc(/C=C(/c2ccccc2)C2CCC2)c2ccc3c(c2)c(F)nn3C2CCCCO2)cc1.Ic1ccenc1>>Fe1nn(C2CCC CO2)c2ccc(/C=C(/c3ccccc3)C3CCC3)c3ccc(/C=C/c4ccccc4)cc3)cc12  
318 C=Cc1ccc(/C=C/c2ccc(N(C)C)cc2)cc1.CC1(C)C2=CC(=O)C(F)=CC2=C(c2ccc(Br)cc2S(=O)(=O)O)c2cc(F)c(O)cc21>>CN(C)c1ccc(/C=C/c2ccc(/C=C/c3ccc(C4=C5C=C(F)C(=O)C=C5C(C)(C)c5cc(O)c(F)cc54)c(S(=O)(=O)O)c3)cc2)cc1  
319 C=CCCCCCC.O=Cc1ccc(Cl)cc1>>CCCCC/C=C/c1ccc(C=O)cc1  
320 C=Cc1ccccc1.CCCCCCCCCCCCCC>>CCCCCCCCCCCC/C=C/c1ccccc1  
321 C=Cc1encen1.Cc1cc2c(cc1[N+](=O)[O-])c(I)nn2C1CCCCO1>>Cc1cc2c(cc1[N+](=O)[O-])c(/C=C/c1encen1)nn2C1CCCCO1  
322 C=CCCCCCCCCO.COc1cc(Br)c(OCOC)c(OC)c1>>COc1cc(/C=C/CCCCCCCCO)c(OCOC)c(OC)c1  
323 C=CC(=O)O.O=[N+][O-]c1cccc(Br)c1>>O=C(O)/C=C/c1cccc([N+](=O)[O-])c1  
324 C=CCn1c(=O)c(-c2ccc(OC)cc2)cc2cc(OC)c(OC)cc21.O=C(O)Cc1ccc(Br)cc1>>COc1ccc(-c2cc3cc(OC)c(OC)cc3n(C/C=C/c3ccc(CC(=O)O)cc3)c2=O)cc1  
325 C=Cc1ccc(COC(C)=O)cc1.COc1ccc2c(c1)cc(C#N)c1ccc(Br)cc12>>COc1ccc2c(c1)cc(C#N)c1ccc(/C=C/c3ccc(COC(C)=O)cc3)cc12  
326 C=CC(=O)OCC.COc1cc(Br)c(C)c2nnn(C)c12>>CCOC(=O)/C=C/c1cc(OC)c2c(nnn2C)c1C  
327 C=CC(=O)OC.CC(C)n1enc2c(NCc3cccc(Br)c3)nc(N3CCCC3)nc21>>COC(=O)/C=C/c1cccc(CNc2nc(N3CCCC3)nc3c2ncn3C(C)C)c1



328 C=CC(=O)OCC.O=c1oc2cccc2c(OS(=O)(=O)C(F)(F)F)c1C(c1cccc1)c1cccc1>>CCOC(=O)/C=C/c  
 1c(C(c2cccc2)c2cccc2)c(=O)oc2cccc12  
 C=C1C(=O)O[C@H]2[C@H]1CCC(=C)[C@@H]1C[C@H](OC(C)=O)C(=C)[C@H]21.Cc1ccc(I)cc1[  
 329 N+](=O)[O-]>>C=C1CC[C@H]2/C=C\c3ccc(C)c([N+](=O)[O-]  
 )c3)C(=O)O[C@H]2[C@H]2C(=C)[C@@H](OC(C)=O)C[C@@H]12  
 C=CC(C)(O)CCCCCCCCN1C(=O)c2cccc2C1=O.CC(C)(C)[Si](C)(C)O[C@H]1C=C(Br)[C@@H](O  
 330 )[C@@H]2O[C@H]12>>CC(O)/C=C/C1=C[C@H](O[Si](C)(C)C(C)(C)C)[C@H]2O[C@H]2[C@  
 H]1O)CCCCCCCCN1C(=O)c2cccc2C1=O  
 C=Cc1cccc1.Cc1cccc(N)c1Br>>Cc1cccc(N)c1/C=C/c1cccc1  
 331 C=Cc1ccc(NC)cc1.OCCOc1ncc(I)cc1Br>>CNc1ccc(/C=C/c2cnc(OCO)c(Br)c2)cc1  
 332 C=C[Si](C)(C)c1cccn1.Ic1cccn1>>C[Si](C)/C=C/c1cccn1)c1cccn1  
 333 C=CC(=O)OC(C)(C)C.CC(C)(C)O[C@H]1CC[C@H]2C=C(C3=C(Br)CN(S(=O)(=O)c4cccc4)CC3  
 334 )CC[C@H]12C>>CC(C)(C)OC(=O)/C=C/C1=C(C2=C[C@H]3CC[C@H](OC(C)(C)C)[C@@H]3(C)CC2  
 )CCN(S(=O)(=O)c2cccc2)C1  
 335 C=Cc1cccc1.Cc1cccc(I)c1>>Cc1cccc(/C=C/c2cccc2)c1  
 336 C=CS(=O)c1cccc1.FC(F)(F)c1ccc(Br)cc1>>O=S(/C=C/c1ccc(C(F)(F)F)cc1)c1cccc1  
 337 C=CC(=O)N1N=Cc2cccc2C1CCC.COc1cc(Cc2cnc(N)nc2N)cc(I)c1OCc1cccc1>>CCCC1c2cccc2C  
 =NN1C(=O)/C=C/c1cc(Cc2cnc(N)nc2N)cc(OC)c1OCc1cccc1  
 338 C=CCO.O=C(c1cccc1)c1ccc(Br)cc1>>C=C(CO)c1ccc(C(=O)c2cccc2)cc1  
 339 C=C1C(=O)N2C[C@H](O)C[C@@H]2[C@H]1O.Ic1cccc1>>O=C1/C(=C/c2cccc2)[C@H](O)[C@  
 H]2C[C@@H](O)CN12  
 340 C=Cc1cccc1.Ic1cnnc2nnc(Cc3cccc3)c12>>C(=C/c1cnnc2nnc(Cc3cccc3)c12)\c1cccc1  
 341 Brc1cc2ccc1CCc1ccc(cc1)CC2.C=Cc1cccc1>>C(=C/c1cc2ccc1CCc1ccc(cc1)CC2)\c1cccc1  
 342 C=Cc1nc(C(=O)OCC)co1.COc1ccc(I)cc1>>CCOC(=O)c1coc(/C=C/c2ccc(OC)cc2)n1  
 343 C=CC=O.Fc1cncc(Br)c1>>O=C/C=C/c1cncc(F)c1  
 344 C=C(C)C(=O)OC.O=C1C(O)=C(I)C(=O)c2cccc21>>COC(=O)/C(C)=C/C1=C(O)C(=O)c2cccc2C1=  
 345 C=Cc1cccc1O.Oc1cc(O)cc(I)c1>>Oc1cc(O)cc(/C=C/c2cccc2O)c1  
 346 C=CC(=O)OCc1cccc1.Cc1oc(-c2cccc2)cc1CCOc1cnnc2c(Cl)cccc12>>Cc1oc(-  
 c2cccc2)cc1CCOc1cnnc2c(/C=C/C(=O)OCc3cccc3)cccc12  
 347 C=CC(=O)CCC.COc1ccc(Br)cc1>>CCCC(=O)/C=C/c1ccc(OC)cc1  
 348 C=CC(=O)OCCCC.NC(=O)c1ccc(I)cc1>>CCCCOC(=O)/C=C/c1ccc(C(N)=O)cc1  
 349 C=COCCCC.COC(=O)c1cncc(Br)c1>>C=C(OCCCC)c1cncc(C(=O)OC)c1  
 350 C=Cc1cc(C(F)(F)F)cc(C(F)(F)F)c1.FC(F)(F)c1ccc(Br)cc1>>FC(F)(F)c1ccc(/C=C/c2cc(C(F)(F)F)cc(C  
 (F)(F)F)c2)cc1  
 351 C=CCCCCCC.O=[N+][O-]c1cccc1OS(=O)(=O)C(F)(F)F>>C=C(CCCCCC)c1cccc1[N+](=O)[O-]  
 352 Brc1cnnc1.C=Cc1cccc(OC)c1>>COc1cccc(/C=C/c2cnnc2)c1  
 353 C=CC(=O)OCC.CN(C)c1ccc(Br)cc1>>CCOC(=O)/C=C/c1ccc(N(C)C)cc1  
 354 C=CCCC(=O)OCC.CC(C)(CC1Cc2cccc2C1)NC[C@@H](O)COc1cc(Br)cc(F)c1F>>CCOC(=O)CC/  
 C=C/c1cc(F)c(F)c(OC[C@H](O)CNC(C)(C)CC2Cc3cccc3C2)c1  
 355 C=COCCO.O=C(c1cccc1)c1ccc(Br)cc1>>C=C(OCCO)c1ccc(C(=O)c2cccc2)cc1  
 356 C=CC(=O)OC(C)(C)C.COC(=O)c1cc(I)ccc1OC(C)=O>>COC(=O)c1cc(/C=C/C(=O)OC(C)(C)C)ccc1  
 OC(C)=O  
 357 C=C(F)C(=O)OC.Cc1cc(C)c(I)c(C)c1>>COC(=O)/C(F)=C/c1c(C)cc(C)cc1C  
 358 Brc1cnnc2cccc2c1.C=CCN(C(=O)OCc1cccc1)C(=O)OC(C)(C)C>>CC(C)(C)OC(=O)N(C/C=C/c1cnnc  
 2cccc2c1)C(=O)OCc1cccc1  
 359 C=CC(=O)O.COC(=O)c1cc2c(cc1Br)OCO2>>COC(=O)c1cc2c(cc1/C=C/C(=O)O)OCO2  
 360 C=CCN(C(=O)OC(C)(C)C)C(=O)OC(C)(C)C.Cc1cc(Nc2cnnc3ccc(I)cc23)ccc1Oc1cc2nnnc2cn1>>Cc1  
 cc(Nc2cnnc3ccc(/C=C/CN(C(=O)OC(C)(C)C)C(=O)OC(C)(C)C)cc23)ccc1Oc1cc2nnnc2cn1  
 361 C=CC(=O)OC(C)(C)C.COc1ncc(Br)c(OC)n1>>COc1ncc(/C=C/C(=O)OC(C)(C)C)c(OC)n1  
 362 C=CC(F)(F)C(F)(F)C(F)(F)C(F)(F)C(F)(F)C(F)(F)F.CC(C)c1cc(I)cc(C(C)C)c1N>>CC(C)c1cc(/C=C/C  
 (F)(F)C(F)(F)C(F)(F)C(F)(F)C(F)(F)F)cc(C(C)C)c1N  
 363 C=Cc1cccc1.CC(=O)c1cccc(Cl)c1>>CC(=O)c1cccc(/C=C/c2cccc2)c1  
 364 C=CC(=O)OCC.COc1cc(OC)nc(I)n1>>CCOC(=O)/C=C/c1nc(OC)cc(OC)n1  
 365 C=CC1(O)CCC1.Clc1ccc(I)cc1>>OC1(/C=C/c2ccc(Cl)cc2)CCC1  
 366 C=C(C)C(=O)O.O=S(=O)(Nc1ccc(I)cc1)c1cccc1>>C/C(=C/c1ccc(NS(=O)(=O)c2cccc2)cc1)C(=O)O  
 367 Brc1ccc2ccc3ccc4cccc4c3c2c1.C=Cc1ccc(COC(C)=O)cc1>>CC(=O)OCc1ccc(/C=C/c2ccc3ccc4ccc5  
 cccc5c4c3c2)cc1  
 368 C=CC(=O)OC(C)(C)C.CC(C)OC(=O)c1sccc1Br>>CC(C)OC(=O)c1sccc1/C=C/C(=O)OC(C)(C)C  
 369 C=CC(=O)OC.COc1cc(I)c(NC(=O)C(C)(C)C)c(OC)c1[Si](C)(C)C>>COC(=O)/C=C/c1cc(OC)c([Si](C  
 )(C)C)c(OC)c1NC(=O)C(C)(C)C  
 370 C=Cc1ccc(OC)cc1OC.Nc1cccc(I)c1>>COc1ccc(/C=C/c2cccc(N)c2)c(OC)c1

371 C=Cc1ccc2ccccc2c1.Clc1ccccc1>>C(=C/c1ccc2ccccc2c1)\c1ccccc1  
372 C=Cc1ccccc1.O=C(N1CCOCC1)C(F)(F)Br>>O=C(N1CCOCC1)C(F)(F)/C=C/c1ccccc1  
373 C=CC(=O)OC.CCCc1ccc(N2CCc3cc(OC)ccc3C2(C)c2ccc(Br)cc2)cc1Cl>>CCCc1ccc(N2CCc3cc(OC)  
ccc3C2(C)c2ccc(/C=C/C(=O)OC)cc2)cc1Cl  
374 Brclccc2ccc3ccccc4ccc1c2c34.C=CC(=O)OCCCCC(C)C>>CC(C)CCCCCOC(=O)/C=C/c1ccc2ccc3c  
ccc4ccc1c2c34  
375 C=C(I)C(C)(C)OCCc1ccccc1.C=CC(=O)OCC>>C=C(/C=C/C(=O)OCC)C(C)(C)OCCc1ccccc1  
376 C=Cc1ccccc1.Cn1nc(NC(=O)C(C)(C)C)c2cc(I)nc21>>Cn1nc(NC(=O)C(C)(C)C)c2cc(/C=C/c3ccccc3  
)cnc21  
377 C=C(CC(=O)OCC)C(=O)OCC.COc1cccc2c(OC)c(Br)ccc12>>CCOC(=O)C/C(=C\c1ccc2c(OC)cccc2c  
1OC)C(=O)OCC  
C=CC(=O)OCC.COc1ccc(-c2c(-  
378 c3ccc(OC)cc3)c3c(nc4cccn43)c3ccc(Br)cc23)cc1>>CCOC(=O)/C=C/c1ccc2c(c1)c(-c1ccc(OC)cc1)c(-  
c1ccc(OC)cc1)c1c2nc2cccn21  
379 C=C(NC(C)=O)C(=O)OC.CC[C@@]1(O)C(=O)OCc2c1cc1n(c2=O)Cc2cc3c(Br)cccc3nc2-  
1>>CC[C@@]1(O)C(=O)OCc2c1cc1n(c2=O)Cc2cc3c(/C=C\NC(C)=O)C(=O)OC)cccc3nc2-1  
380 C=CC(=O)OC.CN(C)CCCOc1ccc(I)cc1Cl>>COC(=O)/C=C/c1ccc(OCCCN(C)C)c(Cl)c1  
381 Brclccs1.C=CCOc1ccccc1>>C(=C/c1cccs1)\COc1ccccc1  
C=Cc1ccc2c(c1)C(CCCCCCCC)(CCCCCCCC)c1ccccc1-  
382 2.CCCCCCCCC1(CCCCCCCC)c2cc(Br)ccc2-  
c2ccc(C=O)cc21>>CCCCCCCCC1(CCCCCCCC)c2ccccc2-  
383 C=C1C(=O)O[C@H]2[C@H]1CCC(=C)[C@@H]1C[C@H](OC(C)=O)C(=C)[C@H]21.Cc1ccccc1I>>  
C=C1CC[C@H]2/C(=C\c3ccccc3C)C(=O)O[C@@H]2[C@H]2C(=C)[C@@H](OC(C)=O)C[C@@H]  
384 C=Cc1ccc(Cl)cc1.Cc1ccc(I)cc1>>Cc1ccc(/C=C/c2ccc(Cl)cc2)cc1  
C=COCC.CCOC(=O)N1[C@@H]2CC=C(OS(=O)(=O)C(F)(F)F)[C@H]1CC2>>C=C(OCC)C1=CC[C  
385 @H]2CC[C@H]1N2C(=O)OCC  
C=Cc1cnc(F)c1.CC(C)(C)OC(=O)N1CCC[C@H]1COc1cnc(Cl)c(I)c1>>CC(C)(C)OC(=O)N1CCC[C  
386 @H]1COc1cnc(Cl)c(/C=C/c2cnc(F)c2)c1  
C=CC(=O)N1N=Cc2ccccc2C1CCC.CCOc1c(I)cc(Cc2cnc(N)nc2N)cc1OC>>CCCC1c2ccccc2C=NN1  
387 C(=O)/C=C/c1cc(Cc2cnc(N)nc2N)cc(OC)c1OCC  
C=CC(=O)O.O=S(=O)(Nc1ccc(I)cn1)c1ccc(-c2ccccc2)cc1>>O=C(O)/C=C/c1ccc(NS(=O)(=O)c2ccc(-  
388 c3ccccc3)cc2)nc1  
C=CS(=O)(=O)F.Cc1ccccc1I>>Cc1ccccc1/C=C/S(=O)(=O)F  
389 C=CC(=O)N(C)OC.N#Cc1ccc2cc(Br)ccc2c1>>CON(C)C(=O)/C=C/c1ccc2cc(C#N)ccc2c1  
390 C=CC(=O)O.Ic1ccc2[nH]ccc2c1>>O=C(O)/C=C/c1ccc2[nH]ccc2c1  
391 Brclccc(-c2cc(-c3cccn3)nc(-c3cccn3)c2)cc1.C=Cc1ccccc1>>C(=C/c1ccc(-c2cc(-c3cccn3)nc(-  
392 c3cccn3)c2)cc1)\c1ccccc1  
Brclccccc1.C=CC(F)(F)F>>FC(F)(F)/C=C/c1ccccc1  
393 C=Cc1ccccc1.CCC(OC)(C(=O)OC)c1cc2n(c(=O)c1OS(=O)(=O)C(F)(F)F)CCC2>>CCC(OC)(C(=O)O  
394 C)c1cc2n(c(=O)c1/C=C/c1ccccc1)CCC2  
C=CN1CCCC1=O.O=C1CCC(N2C(=O)c3ccc(Br)cc3C2=O)C(=O)N1>>O=C1CCC(N2C(=O)c3ccc(/C  
395 =C/N4CCCC4=O)cc3C2=O)C(=O)N1  
C=CC(=O)N(C)Cc1cc2ccccc2n1C.CCC1(CC)C(=O)Nc2ncc(Br)cc21>>CCC1(CC)C(=O)Nc2ncc(/C=C  
396 /C(=O)N(C)Cc3cc4ccccc4n3C)cc21  
C=CC(=O)OC.CCOC(=O)c1ccc(NC=O)c(I)c1>>CCOC(=O)c1ccc(NC=O)c(/C=C/C(=O)OC)c1  
397 C=CC(=O)OC.OC1CC2(CCN(Cc3ccccc3)CC2)Oc2ccc(Br)cc21>>C=C(C(=O)OC)c1ccc2c(c1)C(O)C  
398 C1(CCN(Cc3ccccc3)CC1)O2  
C=Cc1ccccc1.CN(C(=O)c1ccccc1)c1ccc2c(c1)[nH]c(=NC(=O)c1ccc(Br)s1)n2CCC(N)=O>>CN(C(=O  
399 )c1ccccc1)c1ccc2c(c1)[nH]c(=NC(=O)c1ccc(/C=C/c3ccccc3)s1)n2CCC(N)=O  
C=CC=O.Oc1ccccc1I>>O=C/C=C/c1ccccc1O  
400 C=CC(=O)NC(C)C.COc1ccc(CNc2c(C(=O)NCc3ccc(F)cc3F)c(=O)n(OCc3ccccc3)c3ncc(Br)cc23)c(O  
401 C)c1>>COc1ccc(CNc2c(C(=O)NCc3ccc(F)cc3F)c(=O)n(OCc3ccccc3)c3ncc(/C=C/C(=O)NC(C)C)cc2  
3)c(OC)c1  
C=CC(=O)OCCCC.Clc1cccn1>>CCCCOC(=O)/C=C/c1cccn1  
402 C=CC(=O)Nc1ccccc1.O=c1c(I)coc2cc(O)ccc12>>O=C(/C=C/c1coc2cc(O)ccc2c1=O)Nc1ccccc1  
403 C=Cc1ccccc1.N#Cc1ccccc1Cl>>N#Cc1ccccc1/C=C/c1ccccc1  
404 Brclccs1.C=C[Si](CC)(CC)CC>>CC[Si](/C=C/c1ccs1)(CC)CC  
405 C=Cc1ccccc1F.CCOC(=O)C(F)Br>>CCOC(=O)C(F)/C=C/c1ccccc1F  
406 C=CC(=O)OC.Cc1ccs1C(=O)c1sc2cc(O)ccc2c1Oc1ccc(Br)cc1>>COC(=O)/C=C/c1ccc(Oc2c(C(=O)c  
407 3sccc3C)sc3cc(O)ccc23)cc1

408 C=CCN(C(=O)OC(C)(C)C(=O)OC(C)(C)C.N#Cc1cccc1Br>>CC(C)(C)OC(=O)N(C/C=C/c1cccc1  
C#N)C(=O)OC(C)(C)C  
409 C=C.CCCCC(CC)COc1cc(/C=C/c2ccc(/C=C/c3ccc(Br)cc3)cc2)c(OCC(CC)CCCC)cc1C>>C=Cc1ccc(/  
C=C/c2ccc(/C=C/c3cc(OCC(CC)CCCC)c(C)cc3OCC(CC)CCCC)cc2)cc1  
410 C=CC(=O)OC.CC(=O)n1nc(C)c(I)c1C>>COC(=O)/C=C/c1c(C)nn(C(C)=O)c1C  
411 C=CC(=O)OC.Cc1cc2c(cc1Br)OCO2>>COC(=O)/C=C/c1cc2c(cc1C)OCO2  
412 C=Cc1ccc(N(C)C)cc1.O=C/C=C/c1ccc(I)cc1>>CN(C)c1ccc(/C=C/c2ccc(/C=C/C=O)cc2)cc1  
413 C=CC(C)=O.CN1C(c2ccccc2)=C(I)c2ccsc2S1(=O)=O>>CC(=O)/C=C/C1=C(c2ccccc2)N(C)S(=O)(=O)  
c2sccc21  
414 C=C/C=C/C(=O)N(CCCC)CCCC.COc1cc(Br)cc(OC)c1>>CCCCN(CCCC)C(=O)/C=C/C=C/c1cc(OC)  
cc(OC)c1  
415 C=CCOC(C)=O.CC(C)(C)c1ccc([I+]c2ccc(C(C)(C)C)cc2)cc1>>CC(=O)OC/C=C/c1ccc(C(C)(C)C)cc1  
416 C=Cc1ccncc1.COc1cc(Nc2c(C#N)cnc3cc(Br)ccc23)cc(OC)c1OC>>COc1cc(Nc2c(C#N)cnc3cc(/C=C/  
c4ccncc4)ccc23)cc(OC)c1OC  
417 C=Cc1cccc1.Cc1ncc(-c2ccc(Cl)cc2)n1C>>Cc1ncc(-c2ccc(/C=C/c3ccccc3)cc2)n1C  
418 C=CC(=O)c1cccc1.Nc1c(I)ccc2c1C(=O)c1cccc1C2=O>>Nc1c(/C=C/C(=O)c2ccccc2)ccc2c1C(=O)c  
1cccc1C2=O  
419 C=CC(=O)OC.Nc1ccc(Cl)cc1I>>COC(=O)/C=C/c1cc(Cl)ccc1N  
420 C=CC(=O)OC.O=c1oc(Br)cc2ccccc12>>COC(=O)/C=C/c1cc2ccccc2c(=O)o1  
421 C=Cc1ccc2c(c1)C1c3cccc4cccc(c34)C21.N#Cc1ccc(I)cc1C#N>>N#Cc1ccc(/C=C/c2ccc3c(c2)C2c4ccc  
c5cccc(c45)C32)cc1C#N  
422 C=CC(=O)OC.COc1cc(Br)cc(F)c1C=O>>COC(=O)/C=C/c1cc(F)c(C=O)c(OC)c1  
423 C=CCCC(=O)O.FC(F)(F)c1ccc(I)cc1>>O=C(O)CC/C=C/c1ccc(C(F)(F)F)cc1  
424 C=CC(=O)OCC.COc1ccc(-c2cnccc2Br)cc1>>CCOC(=O)/C=C/c1cncc1-c1ccc(OC)cc1  
425 C=Cc1cccc1.COC(=O)c1cc(OC)c(OC)cc1I>>COC(=O)c1cc(OC)c(OC)cc1/C=C/c1cccc1  
426 C=CCCO.Clc1nc(Oc2ccccc2)c2cc(Br)en2n1>>OCC/C=C/c1cc2c(Oc3ccccc3)nc(Cl)nn2c1  
427 C=Cc1ccc(OC)cc1.COc1cc(Br)c(C=O)c(OC)c1>>COc1ccc(/C=C/c2cc(OC)cc(OC)c2C=O)cc1  
428 C=CC(=O)OC.O=c1[nH]c(=O)n([C@H]2O[C@@H](CO)[C@H](O)[C@@H]2F)cc1I>>COC(=O)/C=  
C/c1cn([C@H]2O[C@@H](CO)[C@H](O)[C@@H]2F)c(=O)[nH]c1=O  
429 C=CC(=O)OC(C)(C)C.FC(F)(F)Oc1ccc(CNc2ccc(Br)en2)cc1>>CC(C)(C)OC(=O)/C=C/c1ccc(NCc2cc  
c(OC(F)(F)F)cc2)nc1  
430 C=CC(=O)OC(C)(C)C.O=C1Nc2ccccc2O/C1=C\c1cc(Br)cs1>>CC(C)(C)OC(=O)/C=C/c1ccc(/C=C2\O  
c3ccccc3NC2=O)c1  
431 C=COCCOC=C.N#Cc1ccc(Br)cc1>>C=COCCOC(=C)c1ccc(C#N)cc1  
432 C=CS(=O)c1cccc1.COc1c(C)c(Br)c(OC)c2ccccc12>>COc1c(C)c(/C=C/S(=O)c2ccccc2)c(OC)c2cccc  
433 C=CC(=O)OCCCC.COc1cc(N)c(Br)cn1>>CCCCOC(=O)/C=C/c1ncc(OC)cc1N  
434 Brc1ccncc1.C=CCCC(C(=O)OCC)C(=O)OCC>>CCOC(=O)C(CCC/C=C/c1ccncc1)C(=O)OCC  
435 C=CC(=O)OC(C)(C)C.CN(C(=O)CSCc1cccc1)c1c(F)cc(F)cc1Br>>CN(C(=O)CSCc1cccc1)c1c(F)cc  
(F)cc1/C=C/C(=O)OC(C)(C)C  
436 C=CN1C(=O)c2ccccc2C1=O.Cc1ccc(CNC(=O)Cc2cccc(Br)c2)cc1C>>Cc1ccc(CNC(=O)Cc2cccc(/C=  
C/N3C(=O)c4ccccc4C3=O)c2)cc1C  
437 C=Cc1ccc2ccccc2n1.O=Cc1ccc(Br)cc1>>O=Cc1ccc(/C=C/c2ccc3ccccc3n2)cc1  
438 C=Cc1cccc1.CC(C)(C)c1cccc(OS(=O)(=O)C(F)(F)F)c1>>C=C(c1cccc1)c1cccc(C(C)(C)C)c1  
439 C=Cc1ccc(C(=O)OC)cc1.CCOC(=O)C(F)(F)Br>>CCOC(=O)C(F)(F)/C=C/c1ccc(C(=O)OC)cc1  
440 Brc1ccc2ccccc2c1.C=CC(=O)OCC>>CCOC(=O)/C=C/c1ccc2ccccc2c1  
441 C=Cc1ccc(C)nc1.COc1cc(I)c2c3c1O[C@@H]1[C@@]34CCN(C)[C@H](C2)[C@]42C=C[C@@]1(OC)  
c1c(O)ccc(O)c12>>COc1cc(/C=C/c2ccc(C)nc2)c2c3c1O[C@@H]1[C@@]34CCN(C)[C@H](C2)[C@]4  
2C=C[C@@]1(OC)c1c(O)ccc(O)c12  
442 C=CC(=O)OCC.O=Cc1cc(OCc2ccccc2)ccc1Br>>CCOC(=O)/C=C/c1ccc(OCc2ccccc2)cc1C=O  
443 C=CC(CCCC)n1nnc2ccccc21.Cc1ccc(I)cc1>>CCCC(/C=C/c1ccc(C)cc1)n1nnc2ccccc21  
444 Brc1ccs1.C=CC(=O)OC(C)(C)C>>CC(C)(C)OC(=O)/C=C/c1ccs1  
445 C=CS(=O)(=O)NCCc1cccc1.CC(C)(C)OC(=O)NCCc1cccc1Br>>CC(C)(C)OC(=O)NCCc1cccc1/C  
=C/S(=O)(=O)NCCc1cccc1  
446 Brc1cc2ccccc2c2ccccc12.C=C[C@H](CO[Si](C)(C)C(C)(C)C)NC(=O)OCc1cccc1>>CC(C)(C)[Si]  
(C)(C)OC[C@H](/C=C/c1cc2ccccc2c2ccccc12)NC(=O)OCc1cccc1  
447 C=Cc1cccc1.COc1cc(OC)c(OC)cc1/C=C/C(=O)c1ccc(I)cc1>>COc1cc(OC)c(OC)cc1/C=C/C(=O)c1c  
cc(/C=C/c2ccccc2)cc1  
448 C=CC(=O)OC.COc1c(CN(C(=O)c2ccccc2)c2cccc(Br)c2)ccc2c1OC(C)(C)[C@H](O)[C@H]2Sc1cccc  
1>>COC(=O)/C=C/c1cccc(N(Cc2ccc3c(c2OC)OC(C)(C)[C@H](O)[C@H]3Sc2ccccc2)C(=O)c2ccccc2  
449 C=CC(=O)CCC.O=[N+](O-)]c1ccc(Br)cc1>>CCCC(=O)/C=C/c1ccc([N+](=O)[O-])cc1  
450 C=CC(CCCC)(CCCC)n1nnc2ccccc21.Cc1ccc(I)cc1>>CCCC(/C=C/c1ccc(C)cc1)(CCCC)n1nnc2ccccc

451 C=C(NC(C)=O)C(=O)OC.CC(=O)Oe1ccc(C)c(I)c(C)c1C>>COC(=O)/C(=C/c1c(C)cc(OC(C)=O)c(C)c1  
C)NC(C)=O  
452 C=Cc1ccncc1.CC(C)(C)OC(=O)N[C@H](COc1cncc(Br)c1)Cc1cccc2cccc12>>CC(C)(C)OC(=O)N[C  
@H](COc1cncc(/C=C/c2cncc2)c1)Cc1cccc2cccc12  
453 C=CC(=O)OCc1cccc1.O=C1NCCCC[C@H]1N1Cc2cc(Br)ccc2C1=O>>O=C(/C=C/c1ccc2c(c1)CN  
([C@H]1CCCCNC1=O)C2=O)OCc1cccc1  
454 C=CC#N.O=CC1=C(Br)c2cccc2CC1>>N#C/C=C/C1=C(C=O)CCc2cccc21  
455 C=CC(=O)OC.Cc1cccc1I>>COC(=O)/C=C/c1cccc1C  
456 C=CC(=O)OC.O=C(Nc1cc(Br)ccn1)C1CCCC1>>COC(=O)/C=C/c1ccnc(NC(=O)C2CCCC2)c1  
457 C=CC(N)=O.O=Cc1ccc(I)o1>>NC(=O)/C=C/c1ccc(C=O)o1  
\*CNCCOCCOCCOCCNC(=O)COc1ccc(C(Cc2cc(OC)cc(OC)c2)NC(=O)c2cccc(C=C)c2)cc1.O=[N  
+][([O-])c1ccc(I)c([N+](=O)[O-  
458 ]c1>>\*CNCCOCCOCCOCCNC(=O)COc1ccc(C(Cc2cc(OC)cc(OC)c2)NC(=O)c2cccc(/C=C/c3ccc  
([N+](=O)[O-])cc3[N+](=O)[O-])c2)cc1  
459 C=COCCCC.Fc1ccc(Br)cc1>>C=C(OCCCC)c1ccc(F)cc1  
460 C=CC(C)=O.CC(C)(C)OC(=O)Nc1ccsc1Br>>CC(=O)/C=C/c1scsc1NC(=O)OC(C)(C)C  
461 C=Cc1ccc(C)cc1.COc1ccc(Br)cc1>>COc1ccc(/C=C/c2ccc(C)cc2)cc1  
462 C=CC(=O)OC.O=Cc1ccc(F)cc1Br>>COC(=O)/C=C/c1cc(F)ccc1C=O  
463 C=Cc1cncc2c1nen2C1CCCCO1.Clc1ccc(I)cc1>>Clc1ccc(/C=C/c2ncc3c2nen3C2CCCCO2)cc1  
464 C=CC#N.COC(=O)/C(Br)=C1\CCCCO1>>COC(=O)C(/C=C/C#N)=C1\CCCCO1  
465 C=CC(=O)OC.Cc1cccc(C)c1Cn1nc(C)c2ccc(Br)cc21>>COC(=O)/C=C/c1ccc2c(C)nn(Cc3c(C)cccc3C)  
C=CC(C)(C)O.CCNC(=O)C[C@H]1N=C(c2ccc(Br)cc2)c2cc(OC)ccc2-  
466 n2c(C)nnc21>>CCNC(=O)C[C@H]1N=C(c2ccc(/C=C/C(C)(C)O)cc2)c2cc(OC)ccc2-n2c(C)nnc21  
C=CC[C@H](C[C@H](NC(=O)OC(C)(C)C(=O)OC(C)(C)C(=O)OC(C)(C)C.CC(C)(C)OC(=O)c1  
467 ccc(NC(=O)c2ccc3c(c2)/N=N\c2cc(Br)ccc2CC3)cc1>>CC(C)(C)OC(=O)N[C@H](C[C@H](C/C=  
C/c1ccc2c(c1)/N=N\c1cc(C(=O)Nc3ccc(C(=O)OC(C)(C)C)cc3)ccc1CC2)C(=O)OC(C)(C)C(=O)OC  
468 Br1ccen1.C=CC(=O)CCCC>>CCCCC(=O)/C=C/c1ccen1  
469 C=CC(=O)N1[C@H]2C[C@H]3CC[C@H]2(CS1(=O)=O)C3(C)C.Ic1cccc1>>CC1(C)[C@H]2CC[  
C@H]13CS(=O)(=O)N(C(=O)/C=C/c1cccc1)[C@H]3C2  
470 C=Cc1cccc1OC.Nc1ccc(Br)cc1>>COc1cccc1/C=C/c1ccc(N)cc1  
471 C=C1C(=O)O[C@H]2/C=C\(\C)CC/C=C\(\C)CC[C@H]12.Ic1cccc1>>C/C1=C\([C@H]2OC(=O)/  
C(=C/c3cccc3)[C@H]2CC/C(C)=C/CC1  
472 C=CCC1C=Cc2ccncc2N1C(=O)Oc1cccc1.CCOC(=O)CC(c1ccc(OC)nc1)c1nc(Br)cs1>>CCOC(=O)C  
C(c1ccc(OC)nc1)c1nc(/C=C/CC2C=Cc3ccncc3N2C(=O)Oc2cccc2)cs1  
473 C=Cc1cc(O)c(OC)cc1F.COc1ccc(OC)c(I)c1>>COc1ccc(OC)c(/C=C/c2cc(O)c(OC)cc2F)c1  
474 C=CS(=O)(=O)NCCCCCCCC.CC(C)(C)OC(=O)NCCc1cccc1Br>>CCCCCCCCNS(=O)(=O)/C=C/c1  
cccc1CCNC(=O)OC(C)(C)C  
475 C=Cc1cccc1.COc1ccc2c(=O)c(I)coc2c1>>COc1ccc2c(=O)c(/C=C/c3cccc3)coc2c1  
476 Br/C(=C/[Te]c1cccc1)c1cccc1.C=CCCC>>CCCC/C=C/C(=C/[Te]c1cccc1)c1cccc1  
C=CCO[C@H]1O[C@H](COC(C)=O)[C@H](OC(C)=O)[C@H](OC(C)=O)[C@H]1OC(C)=O.Ic  
477 1cccc1>>CC(=O)OC[C@H]1O[C@H](OC/C=C/c2cccc2)[C@H](OC(C)=O)[C@H](OC(C)=O)[  
C@H]1OC(C)=O  
478 C=CC(=O)OC(C)(C)C.COc1ccc(I)c([N+](=O)[O-  
479 ]c1>>COc1ccc(/C=C/C(=O)OC(C)(C)C)c([N+](=O)[O-])c1  
C=Cc1ccc(O)cc1.COc1cc(I)cc(OC)c1>>COc1cc(/C=C/c2ccc(O)cc2)cc(OC)c1  
480 C=CN(C)=O.CCOC(=O)c1ccc(I)cc1>>C=C(NC(C)=O)c1ccc(C(=O)OCC)cc1  
481 C=C(C)C(=O)OC.Cc1ccc(I)cc1>>COC(=O)/C(C)=C/c1ccc(C)cc1  
482 C=Cc1cc(OCc2cccc2)ccc1OCc1cccc1.O=C(NCCc1ccc(F)cc1)c1cc(I)ccc1O>>O=C(NCCc1ccc(F)cc  
1)c1cc(/C=C/c2cc(OCc3cccc3)ccc2OCc2cccc2)ccc1O  
483 C=CC(=O)O.FC(F)(F)c1ccc(I)c(Cl)c1>>O=C(O)/C=C/c1ccc(C(F)(F)F)cc1Cl  
484 C=CC(=O)OC.CN(C)Cc1cn(Cc2ccc(Br)cc2)c2cccc12>>COC(=O)/C=C/c1ccc(Cn2cc(CN(C)C)c3cccc  
c32)cc1  
485 C=CC(=O)OCC.Cc1cc(O)c(Br)cc1C#N>>CCOC(=O)/C=C/c1cc(C#N)c(C)cc1O  
C=CC(OCC)OCC.COCCOc1ccc(-c2cc(CC(C)C)n(-c3ccc(Br)cc3C(=O)OC)c2-  
486 c2ccc(OCOC)cc2)cc1>>CCOC(/C=C/c1ccc(-n2c(CC(C)C)cc(-c3ccc(OCOC)cc3)c2-  
c2ccc(OCOC)cc2)c(C(=O)OC)c1)OCC  
487 C=CC(=O)C(C)CC(=O)OC.C=CC(C)(C)O[C@H]1COc2ccc(Br)cc2OC1(C)C>>C=CC(C)(C)O[C@H]  
1COc2ccc(/C=C/C(=O)C(C)CC(=O)OC)cc2OC1(C)C  
488 C=CCC(C)O.Cc1ccc(Br)cc1[N+](=O)[O-]>>Cc1ccc(/C=C/CC(C)O)cc1[N+](=O)[O-]  
489 C=CC(=O)N(C)Cc1cccc(C(C)C)c1OCCC.O=C1NCCc2cc(Br)cncc2N1>>CCCOc1c(CN(C)C(=O)/C=C/  
c2ncc3c(c2)CNCC(=O)N3)cccc1C(C)C

490 C=CC(=O)NCc1cccc(F)c1.COc1ccc2c(=O)c(I)coc2c1>>COc1ccc2c(=O)c(/C=C/C(=O)NCc3cccc(F)c3  
491 )coc2c1  
492 C=CCN(C(=O)C(C)(C)C)[C@H](C)c1ccc(Cl)cc1.O=C1Nc2ncccc2[C@@]12Cc1cc(Br)enc1C2>>C[C  
493 @H](c1ccc(Cl)cc1)N(C/C=C/c1enc2c(c1)C[C@@]1(C2)C(=O)Nc2ncccc21)C(=O)C(C)(C)C  
494 C=CC(=O)OCCCC.Ic1ccc(-c2ccccc2)cc1>>CCCCOC(=O)/C=C/c1ccc(-c2ccccc2)cc1  
495 C=CC(=O)OCCCC.Ic1cccs1>>CCCCOC(=O)/C=C/c1cccs1  
496 C=Cn1nnnc1CC.Ic1ccccc1>>CCc1nnnn1/C=C/c1ccccc1  
497 C=CC(=O)O.Oc1ccc(I)cc1Cl>>O=C(O)/C=C/c1ccc(O)c(Cl)c1  
498 C=Cc1ccccc1.Cc1cccc(Br)c1>>Cc1cccc(/C=C/c2ccccc2)c1  
499 C=Cc1ccccc1.COc1ccccc1CNc1ccc2c(Br)cccc2n1>>COc1ccccc1CNc1ccc2c(/C=C/c3ccccc3)cccc2n1  
500 Bre1cccc(I)c1.C=CC(F)(F)C(F)(F)C(F)(F)C(F)(F)C(F)(F)F>>FC(F)(F)C(F)(F)C(F)(F)C(F)(F)  
501 C(F)(F)C(F)(F)/C=C/c1cccc(Br)c1  
502 C=Cc1ccc(Cl)cc1.CC(C)(C)OC(=O)N(C(=O)OC(C)(C)C)C1=NC(C)(c2cccc(Br)c2)CCS1>>CC(C)(C)  
503 OC(=O)N(C(=O)OC(C)(C)C)C1=NC(C)(c2cccc(/C=C/c3ccc(Cl)cc3)c2)CCS1  
504 C=COCCCC.CC(=O)c1ccc(I)cc1>>C=C(OCCCC)c1ccc(C(C)=O)cc1  
505 C=CC(=O)OC.CCc1nc2c(C)cc(C)nc2n1Cc1ccc(Br)cc1>>CCc1nc2c(C)cc(C)nc2n1Cc1ccc(/C=C/C(=O)  
506 )OC)cc1  
507 C=Cc1ccc(-c2ccnc(N)n2)s1.Clc1cccc2sc(Br)nc12>>Nc1nccc(-c2ccc(/C=C/c3nc4c(Cl)cccc4s3)s2)n1  
508 Bre1c2ccccc2cc2ccccc12.C=Cc1ccccc1>>C(=C/c1c2ccccc2cc2ccccc12)c1ccccc1  
509 C=Cc1scnc1C.O=C1CCC(c2ccc(Br)cc2)O1>>Cc1nsc1/C=C/c1ccc(C2CCC(=O)O2)cc1  
510 C=CC(=O)OC.N#Cc1ccc(I)cc1Cl>>COC(=O)/C=C/c1ccc(C#N)c(Cl)c1  
511 C=CC[C@H](OCc1ccccc1)[C@H](OCc1ccccc1)[C@@H](/C=C/C[C@H](C)O[Si](C)(C)C(C)(C)O  
512 COC.COc1cc2c(c(OS(=O)(=O)C(F)(F)F)c1)C(=O)OC(C)(C)O2>>COCO[C@H](/C=C/C[C@H](C)O[  
513 Si](C)(C)C(C)(C)C)[C@@H](OCc1ccccc1)[C@H](C/C=C/c1cc(OC)cc2c1C(=O)OC(C)(C)O2)OCc1c  
514 C=COCCCC.CN(C)CCc1sc2ccccc2c1Br>>C=C(OCCCC)c1c(CCN(C)C)sc2ccccc12  
515 C=CC(C)=O.O=C(O)c1ccc(Cl)cc1>>CC(=O)/C=C/c1ccc(C(=O)O)cc1  
516 C=CC(=O)OC.O=Cc1cc(C(F)(F)F)ccc1Br>>COC(=O)/C=C/c1ccc(C(F)(F)F)cc1C=O  
517 C=COCCCC.Cc1ccc(Br)cc1>>C=C(OCCCC)c1ccc(C)cc1  
518 C=CC(=O)OCC.O=c1oc(-c2ccccc2)c(I)c2sc3c(c12)CCC3>>CCOC(=O)/C=C/c1c(-  
519 c2ccccc2)oc(=O)c2c3c(sc12)CCC3  
520 C=CC(=O)OC.Clc1encc(Br)c1>>COC(=O)/C=C/c1nccc(Cl)c1  
521 C=CCN(C(=O)OC(C)(C)C)C(=O)OC(C)(C)C.Cc1ccccc1Cl>>Cc1ccccc1/C=C/CN(C(=O)OC(C)(C)C)  
522 C(=O)OC(C)(C)C  
523 C=CC(C)=O.Clc1ccc(I)cc1>>CC(=O)/C=C/c1ccc(Cl)cc1  
524 C=C[C@H]1O[C@@H]2OC(C)(C)O[C@@H]2[C@H]1OC.Cc1ccc(I)cc1>>CO[C@H]1[C@@H](/C=  
525 C/c2ccc(C)cc2)O[C@@H]2OC(C)(C)O[C@H]12  
526 C=CC(=O)N(C)C.Cc1cc(Br)cc(C)c1O>>Cc1cc(/C=C/C(=O)N(C)C)cc(C)c1O  
527 C=Cc1ccc(C#N)cc1.Cc1ccc(S(=O)(=O)Oc2ccccc3c(Br)ccnc23)cc1>>Cc1ccc(S(=O)(=O)Oc2ccccc3c(/C  
528 =C/c4ccc(C#N)cc4)ccnc23)cc1  
529 C=CC(=O)OC.O=c1oc2cc(Br)enc2n1CCc1ccccc1>>COC(=O)/C=C/c1enc2c(c1)oc(=O)n2CCc1ccccc1  
530 C=CC(=O)Nc1ccccc2ccnc12.Cc1ccc(I)cc1C>>Cc1ccc(/C=C/C(=O)Nc2ccccc3ccnc23)cc1C  
531 C=Cc1cccc(F)c1.N[C@@H](Cc1c[nH]c2c(Br)cccc12)C(=O)O>>N[C@@H](Cc1c[nH]c2c(/C=C/c3cc  
532 cc(F)c3)cccc12)C(=O)O  
533 C=CC(=O)CCCC.FC(F)(F)c1ccc(Br)cc1>>CCCCCC(=O)/C=C/c1ccc(C(F)(F)F)cc1  
534 C=Cc1ccccc1.Cc1ccc(NC(=O)OC(C)(C)C)c(Br)c1>>Cc1ccc(NC(=O)OC(C)(C)C)c(/C=C/c2ccccc2)c1  
535 C=CC(=O)OCC.CCCCC(=C(c1ccc(O)cc1)c1ccc(O)cc1)c1ccc(Br)cc1>>CCCCC(=C(c1ccc(O)cc1)c1ccc  
536 c(O)cc1)c1ccc(/C=C/C(=O)OCC)cc1  
537 C=CNC(=O)/C=C/c1ccccc1.O=S(=O)(Oc1ccc2ccccc2c1)C(F)(F)F>>C=C(NC(=O)/C=C/c1ccccc1)c1c  
538 cc2ccccc2c1  
539 C=CC(=O)OC(C)(C)C.CC(C)(C)n1nnc(-c2ccc(Br)cc2)n1>>CC(C)(C)OC(=O)/C=C/c1ccc(-  
540 c2nnn(C(C)(C)C)n2)cc1  
541 Bre1ccccc1.C=CCN(C(=O)OC(C)(C)C)C(=O)OC(C)(C)C>>CC(C)(C)OC(=O)N(C/C=C/c1ccccc1)C(=  
542 O)OC(C)(C)C  
543 C=CC(=O)Nc1ccccc1C.O=c1c(I)coc2cc(O)ccc12>>Cc1ccccc1NC(=O)/C=C/c1coc2cc(O)ccc2c1=O  
544 C=C[C@H]1CCCCN1C(=O)OC(C)(C)C.O=[N+][O-]  
545 ]c1ccc(I)cc1>>CC(C)(C)OC(=O)N1CCCC[C@H]1/C=C/c1ccc([N+](=O)[O-])cc1  
546 C=CSc1ccccc1.COc1ccc(Br)cc1>>COc1ccc(/C=C/Sc2ccccc2)cc1  
547 C=CC(=O)OCC.Ic1nn(Cc2ccccc2)c2ccccc12>>CCOC(=O)/C=C/c1nn(Cc2ccccc2)c2ccccc12  
548 C=CC(=O)NC(C)(C)C.Cc1ccccc1Cl>>Cc1ccccc1/C=C/C(=O)NC(C)(C)C  
549 C=CC1CCCCC1.Cc1nc(-c2ccc(I)cc2)sc1-c1ccnc(N)n1>>Cc1nc(-c2ccc(/C=C/C3CCCCC3)cc2)sc1-  
550 c1ccnc(N)n1

533 C=CCCCCCC.Clc1cccc1>>C=C(CCCCCC)c1cccc1  
534 C=Cc1ccc(/C=C/c2ccc(/C=C/c3cc(OCCCCC)cc(OCCCCC)c3)cc2)cc1.CCCCCCOc1ccc2cc(Br)ccc  
535 2c1>>CCCCCOCc1ccc(/C=C/c2ccc(/C=C/c3ccc(/C=C/c4ccc5cc(OCCCCC)ccc5c4)cc3)cc2)cc(OCCC  
536 BrC12CC3CC(CC(C3)C1)C2.C=Cc1ccc(OC)cc1>>COc1ccc(/C=C/C23CC4CC(CC(C4)C2)C3)cc1  
537 C=CS(=O)(=O)Nc1ccc(OC2CCN(C(=O)OC(C)(C)C)CC2)cc1.N#Cc1ccc(Br)cc1>>CC(C)(C)OC(=O)  
538 N1CCC(Oc2ccc(NS(=O)(=O)/C=C/c3ccc(C#N)cc3)cc2)CC1  
539 C=CC(=O)OCC.CN1CCc2cc(Br)ccc2C1>>CCOC(=O)/C=C/c1ccc2c(c1)CCN(C)C2  
540 C=CC(=O)OC.Ic1c(-c2cccc2)oc2cccc12>>COC(=O)/C=C/c1c(-c2cccc2)oc2cccc12  
541 C=CC(=O)Nc1cccc1NC(=O)OC(C)(C)C.CCOC(=O)[C@H]1CN(Cc2cccc2)C[C@H]1c1ccc(Br)cc  
542 1>>CCOC(=O)[C@H]1CN(Cc2cccc2)C[C@H]1c1ccc(/C=C/C(=O)Nc2cccc2NC(=O)OC(C)(C)C)  
543 C=Cc1ccc(C=C)cc1.COc1ccc(Br)cc1>>C=Cc1ccc(/C=C/c2ccc(OC)cc2)cc1  
544 C=Cc1ccc(F)cc1.CC(C)(C)Br>>CC(C)(C)/C=C/c1ccc(F)cc1  
545 C=CCN(C(=O)OC(C)(C)C)C(=O)OC(C)(C)C.COc1cc(Cl)cc(OC)c1OC>>COc1cc(/C=C/CN(C(=O)OC  
546 (C)(C)C)C(=O)OC(C)(C)C)cc(OC)c1OC  
547 C=CCCCCCC.Cc1ccc(OS(=O)(=O)C(F)(F)F)cc1>>C=C(CCCCCC)c1ccc(C)cc1  
548 C=Cc1cccc1NC(=O)C(F)(F)F.CC(C)(C)[Si](C)(C)OC[C@H]1O[C@H](c2ccc(Br)cc2)C[C@H]1  
549 O[Si](C)(C)C(C)(C)C>>CC(C)(C)[Si](C)(C)OC[C@H]1O[C@H](c2ccc(/C=C/c3cccc3NC(=O)C(F  
550 )(F)F)cc2)C[C@H]1O[Si](C)(C)C(C)(C)C  
551 Br1ccc2cccc2c1.C=CN(C)C(C)=O>>C=C(c1ccc2cccc2c1)N(C)C(C)=O  
552 C=Cc1ccc1.CCCCCCOCc1ccc(Br)c(F)c1>>CCCCCOCc1ccc(/C=C/c2ccc2)c(F)c1  
553 C=Cc1cccc1.COc1ccc(/C=C/C(=O)c2ccc(I)cc2)cc1>>COc1ccc(/C=C/C(=O)c2ccc(/C=C/c3cccc3)cc  
554 2)cc1  
555 C=CC(=O)N1N=Cc2cccc2C1C=C(C)C.COc1cc(C(=O)c2cnc(N)nc2N)cc(I)c1OC>>COc1cc(C(=O)c2  
556 cnc(N)nc2N)cc(/C=C/C(=O)N2N=Cc3cccc3C2C=C(C)C)c1OC  
557 C=Cc1cccc1.O=C(Nc1cccc1)c1cccc(Cl)c1I>>O=C(Nc1cccc1)c1cccc(Cl)c1/C=C/c1cccc1  
558 C=CC1(O)CCCCC1.[2H]C(O)(CCNC(=O)C(F)(F)F)c1cccc(Br)c1>>[2H]C(O)(CCNC(=O)C(F)(F)F)c  
559 1cccc(/C=C/C2(O)CCCCC2)c1  
560 C=CC(=O)N(C)Cc1cc2cccc2n1C.COc1nn(C(=O)OC(C)(C)C)c2ncc(Br)cc12>>COc1nn(C(=O)OC(C)  
561 (C)C)c2ncc(/C=C/C(=O)N(C)Cc3cc4cccc4n3C)cc12  
562 C=Cc1ccc([N+](=O)[O-])cc1.COC(=O)c1ccc(Br)cc1>>COC(=O)c1ccc(/C=C/c2ccc([N+](=O)[O-  
563 C=Cc1ccc1.CCCCN(CCCC)c1ccc(Br)cc1>>CCCN(CCCC)c1ccc(/C=C/c2ccc2)cc1  
564 C=CC(=O)OC(C)(C)C.Ic1ccc(-c2cccc2)cc1>>CC(C)(C)OC(=O)/C=C/c1ccc(-c2cccc2)cc1  
565 C=C/C=C/C(=O)OC.COc1c(CN(C(=O)C2CC2)c2cccc(Br)c2)ccc2c1OC(C)(C)C=C2>>COC(=O)/C=C  
566 /C=C/c1cccc(N(Cc2ccc3c(c2OC)OC(C)(C)C=C3)C(=O)C2CC2)c1  
567 C=CC(=O)OCC.COc1cc(Br)c(-c2cc3cccc3o2)cc1OC>>CCOC(=O)/C=C/c1cc(OC)c(OC)cc1-  
568 c1cc2cccc2o1  
569 C=CC(=O)N(C)OC.N#Cc1cc2ccc(Br)cc2cc1C#N>>CON(C)C(=O)/C=C/c1ccc2cc(C#N)c(C#N)cc2c1  
570 C=CC(=O)OC.CCc1nn2c(C)cc(C)nc2c1Cc1ccc(Br)cc1>>CCc1nn2c(C)cc(C)nc2c1Cc1ccc(/C=C/C(=O  
571 )OC)cc1  
572 C=CC(=O)N1N=Cc2cccc2C1C1CCCC1.COc1cc(Cc2cnc(N)nc2N)cc(I)c1OC>>COc1cc(Cc2cnc(N)nc  
573 2N)cc(/C=C/C(=O)N2N=Cc3cccc3C2C2CCCC2)c1OC  
574 C=Cc1en(C)en1.Oc1ccc(-c2sc3cc(O)ccc3c2Oc2ccc(Br)cc2)cc1>>Cn1cnc(/C=C/c2ccc(Oc3c(-  
575 c4ccc(O)cc4)sc4cc(O)ccc34)cc2)c1  
576 C=CC(=O)OC(C)(C)C.OCc1cccc(I)c1>>CC(C)(C)OC(=O)/C=C/c1cccc(CO)c1  
577 C=Cc1cccc1.N#Cc1ccc(Br)c1>>N#Cc1ccc(/C=C/c2cccc2)c1  
578 Br1cccc1.C=CCOC(C)=O>>CC(=O)OC/C=C/c1cccc1  
579 C=Cc1cccc1.COc1cccc1I>>COc1cccc1/C=C/c1cccc1  
580 C=CCCCCCC.CN(C)c1cccc1OS(=O)(=O)C(F)(F)F>>C=C(CCCCCC)c1cccc1N(C)C  
581 C=CC(=O)OC(C)(C)C.COc1cccc1Br>>COc1cccc1/C=C/C(=O)OC(C)(C)C  
582 C=Cc1cccc(Cl)c1.FC(F)(F)CI>>FC(F)(F)C/C=C/c1cccc(Cl)c1  
583 C=CC(=O)OCc1cc(OCCCCCCCCCCCCCCCCC)c(OCCCCCCCCCCCCCCCCC)c(OCCCCCCCC  
584 CCCCCCCCCC)c1.Ic1cccc1>>CCCCCCCCCCCCCCCCCOCc1cc(COC(=O)/C=C/c2cccc2)cc(OCC  
585 CCCCCCCCCCCCCC)c1OCCCCCCCCCCCCCCCCC  
586 C=Cc1ccc(C)cc1.CC(=O)c1ccc(Cl)cc1>>CC(=O)c1ccc(/C=C/c2ccc(C)cc2)cc1  
587 C=Cc1nc2c(N)ncnc2n1[C@H]1C[C@H](O)[C@H](CO)O1.CC(=O)c1ccc(Br)cc1>>CC(=O)c1ccc(/  
588 C=C/c2nc3c(N)ncnc3n2[C@H]2C[C@H](O)[C@H](CO)O2)cc1  
589 C=Cc1ccc(C(C)(C)C)cc1.CCCCC(Br)C(F)(F)F>>CCCCC/C=C/c1ccc(C(C)(C)C)cc1C(F)(F)F  
590 C=CC(=O)OC(C)(C)C.COC(=O)CCc1cccc(N(Cc2ccc(Br)cc2)C(=O)C2CCCC2)c1>>COC(=O)CCc1  
591 cccc(N(Cc2ccc(/C=C/C(=O)OC(C)(C)C)cc2)C(=O)C2CCCC2)c1  
592 C=CC(=O)N(C)C.C[C@H]1COc2nc3c(N)nc4cc(Br)ccc4c3n21>>C[C@H]1COc2nc3c(N)nc4cc(/C  
593 =C/C(=O)N(C)C)ccc4c3n21

574 C=CC(=O)OC.COc1ccc(Br)c(OC)c1>>COC(=O)/C=C/c1ccc(OC)cc1OC  
575 C=CCO.CC(=O)c1ccc(Br)cc1>>C=C(CO)c1ccc(C(C)=O)cc1  
C=CC(=O)[C@H](CCNC(=O)OC(C)(C)C)O[Si](C)(C)C(C)(C)C.COCC(=O)n1c(Br)c(CCO[Si](C)(C)C(C)(C)C)c2ccccc21>>COC(=O)n1c(/C=C/C(=O)[C@H](CCNC(=O)OC(C)(C)C)O[Si](C)(C)C(C)(C)C)c(CCO[Si](C)(C)C(C)(C)C)c2ccccc21  
576 C=Cc1nnn(C)n1.COc1ccc(I)cc1>>COc1ccc(/C=C/c2nnn(C)n2)cc1  
577 Br1ccc(-c2ccccc2)cc1.C=CP(=O)(OCC)OCC>>CCOP(=O)/C=C/c1ccc(-c2ccccc2)cc1OCC  
578 C=CC(=O)N1N=Cc2ccccc2C1C=C(C)C.COc1cc(Cc2c(C)nc(N)nc2N)cc(I)c1OC>>COc1cc(Cc2c(C)nc(N)nc2N)cc(/C=C/C(=O)N2N=Cc3ccccc3C2C=C(C)C)c1OC  
579 Br1ccccc1.C=Cc1cc2ccc(N(CC)CC)cc2oc1=O>>CCN(CC)c1ccc2cc(/C=C/c3ccccc3)c(=O)oc2c1  
580 C=C.ClCc1cc2ccccc2o1>>C=CCc1cc2ccccc2o1  
581 C=CC(=O)N(C)C.O=c1ccc(-c2nc(-  
582 c3ccc(OC(F)(F)F)cc3)no2)en1Cc1cccc(Br)c1>>CN(C)C(=O)/C=C/c1cccc(Cn2cc(-c3nc(-  
c4ccc(OC(F)(F)F)cc4)no3)ccc2=O)c1  
583 C=Cc1cccc(CO)n1.Cc1ncc(C#N)c(Nc2ccc3[nH]ccc3c2C)c1I>>Cc1ncc(C#N)c(Nc2ccc3[nH]ccc3c2C)c1/C=C/c1cccc(CO)n1  
584 C=C(Br)CC.C=Cc1ccc(OC)cc1>>C=C(/C=C/c1ccc(OC)cc1)CC  
585 C=CC(=O)OC.COc1c(CNc2cccc(Br)c2)ccc2c1OC(C)(C)C=C2>>COC(=O)/C=C/c1cccc(NCc2ccc3c(c2OC)OC(C)(C)C=C3)c1  
586 C=CC(OC)OC.CCOc1ccc(I)cc1>>CCOc1ccc(/C=C/C(OC)OC)cc1  
587 C=CC(=O)OCC.COc1cc(Br)c(C=O)cc1OC>>CCOC(=O)/C=C/c1cc(OC)c(OC)cc1C=O  
C=Cc1ccccc1.COc1cc(I)c2c3c1O[C@@H]1[C@]34CCN(C)[C@H](C2)[C@]42C=C[C@@]1(OC)c1c(OC(C)=O)ccc(O)c12>>COc1cc(/C=C/c2ccccc2)c2c3c1O[C@@H]1[C@]34CCN(C)[C@H](C2)[C@]42C=C[C@@]1(OC)c1c(OC(C)=O)ccc(O)c12  
588 C=Cc1ccc(F)cc1.CCOC(=O)C(F)Br>>CCOC(=O)C(F)/C=C/c1ccc(F)cc1  
589 C=CC(=O)N1N=Cc2ccccc2C1CC(C)C.COc1cc(Cc2cnc(N)nc2N)cc(I)c1OC>>COc1cc(Cc2cnc(N)nc2N)cc(/C=C/C(=O)N2N=Cc3ccccc3C2CC(C)C)c1OC  
590 C=CC(OC)OC.COc1cccc(I)c1>>COc1cccc(/C=C/C(OC)OC)c1  
591 C=CC(=O)c1ccc(OC)cc1OC.Ic1ccccc1>>COc1ccc(C(=O)/C=C/c2ccccc2)c(OC)c1  
592 C=CC(=O)OC(C)(C)C.Nc1ncc(Br)cc1CN1CCCC1>>CC(C)(C)OC(=O)/C=C/c1cnc(N)c(CN2CCCCC=Cc1ccc(CO)en1.Cc1c(Nc2c(I)encc2C#N)ccc2[nH]ccc12>>Cc1c(Nc2c(C#N)encc2/C=C/c2ccc(CO)c2)ccc2[nH]ccc12  
593 C=C[C@H]1COC(C)(C)O1.CCOC(=O)[C@@H](Cc1cc(Br)ccc1OCc1ccnc(-  
594 c2ccccc2OC)n1)OC(C)=O>>CCOC(=O)[C@@H](Cc1cc(/C=C/[C@H]2COC(C)(C)O2)ccc1OCc1ccnc(-c2ccccc2OC)n1)OC(C)=O  
595 C=Cc1ccc(CC(=O)OC(C)(C)C)cc1.COc1cc(/C=C/c2ccc(CNC(=O)OC(C)(C)C)cc2)c(OC)cc1I>>COc1cc(/C=C/c2ccc(CC(=O)OC(C)(C)C)cc2)c(OC)cc1/C=C/c1ccc(CNC(=O)OC(C)(C)C)cc1  
596 C=CC(=O)N1CCOCC1.O=c1n(Cc2nc3cc(Cl)ccn3c2I)c2enccc2n1C1CC1>>O=C(/C=C/c1c(Cn2c(=O)n(C3CC3)c3ccncc32)nc2cc(Cl)ccn12)N1CCOCC1  
597 C=Cc1ccccc1.C[Si](C)(Cl)c1ccccc1>>C[Si](C)(/C=C/c1ccccc1)c1ccccc1  
598 C=Cc1ccc(OC)cc1.CC(=S)NS(=O)(=O)c1ccc(Br)cc1>>COc1ccc(/C=C/c2ccc(S(=O)(=O)NC(C)=S)cc2  
599 C=CC(=O)OCc1ccccc1.O=C1NCCCC[C@@H]1N1Cc2c(I)cccc2C1=O>>O=C(/C=C/c1cccc2c1CN([C@H]1CCCCNC1=O)C2=O)OCc1ccccc1  
600 C=CCC(C(C)=O)C(=O)OC(C)(C)C.COc1ccc(I)cc1OC>>COc1ccc(/C=C/CC(C(C)=O)C(=O)OC(C)(C)C)cc1OC  
601 C=CC(=O)OCC.Cn1cc(C(=O)Nc2ccc(-  
602 c3ccccc3)c(C(F)(F)F)c2)c(=O)c2ccc(Br)cc21>>CCOC(=O)/C=C/c1ccc2c(=O)c(C(=O)Nc3ccc(-c4ccccc4)c(C(F)(F)F)c3)cn(C)c2c1  
603 Br1ncccn1.C=Cc1ccccc1OC>>COc1ccccc1/C=C/c1ncccn1  
604 C=CC(=O)Oc1ccccc1.O=c1cc(I)nn1Cc1ccccc1>>O=C(/C=C/c1nn(Cc2ccccc2)c(=O)c1)Oc1ccccc1  
605 Br1ccc(I)c1.C=CC(=O)OCC>>CCOC(=O)/C=C/c1ccc(Br)c1  
606 C=CP(=O)(OCC)OCC.O=[N+][O-]c1ccc(Br)cc1>>CCOP(=O)/C=C/c1ccc([N+](=O)[O-])cc1OCC  
607 C=COCCCC.CC(=O)c1ncc(Br)c1>>C=C(OCCCC)c1ncc(C(C)=O)c1  
608 C=CC(=O)N1N=Cc2ccccc2C1CCC.COc1cc(Cc2cnc(N)nc2N)cc(I)c1OC>>CCCC1c2ccccc2C=NN1C(=O)/C=C/c1cc(Cc2cnc(N)nc2N)cc(OC)c1OC  
609 C=CC(=O)OCC.O=C(O)c1cc(Br)c1>>CCOC(=O)/C=C/c1cc(C(=O)O)co1  
610 Br1ccc(OCCN2CCCC2)cc1.C=Cc1c(C)ncc(C#N)c1Nc1ccc2[nH]ccc2c1C>>Cc1ncc(C#N)c(Nc2ccc3[nH]ccc3c2C)c1/C=C/c1ccc(OCCN2CCCC2)cc1  
611 C=Cc1ccc([N+](=O)[O-]  
])cc1.COC(=O)c1cc2cc(Br)ccc2cc1OC(C)=O>>COC(=O)c1cc2cc(/C=C/c3ccc([N+](=O)[O-])cc3)ccc2cc1OC(C)=O

612 C=C.COC(=O)c1cc(Br)cc(C(=O)OC)n1>>C=Cc1cc(C(=O)OC)nc(C(=O)OC)c1  
 613 C=CS(=O)(=O)F.COc1cccc1I>>COc1cccc1/C=C/S(=O)(=O)F  
 614 C=CC(=O)OCc1cccc1.CCOC(=O)N1c2ccc(OC)nc2C(N(Cc2cc(C(F)(F)F)cc(C(F)(F)F)c2)c2ncc(Br)cn  
 2)CC1CC>>CCOC(=O)N1c2ccc(OC)nc2C(N(Cc2cc(C(F)(F)F)cc(C(F)(F)F)c2)c2ncc(/C=C/C(=O)OCc  
 3cccc3)cn2)CC1CC  
 615 C=Cc1cccc1.Cc1noc(C)c1I>>Cc1noc(C)c1/C=C/c1cccc1  
 616 C=CC(=O)OC.Cn1c(Br)enc1Sc1cccc1>>COC(=O)/C=C/c1enc(Sc2cccc2)n1C  
 617 C=CC(=O)OC(C)(C)C.O=C1Nc2cccc2O/C1=C\c1ccc(Br)cc1>>CC(C)(C)OC(=O)/C=C/c1ccc(/C=C2\O  
 c3cccc3NC2=O)cc1  
 618 C=C1SCCCS1=O.Ic1cccc1>>O=S1CCCS/C1=C\c1cccc1  
 619 C=CC(=O)OC.CC(C)(C)c1ccc(I)c(O)c1>>COC(=O)/C=C/c1ccc(C(C)(C)C)cc1O  
 620 Br1ccc2ccc3cccc4ccc1c2c34.C=C[C@H](CO[Si](C)(C)C(C)(C)C)NC(=O)OCc1cccc1>>CC(C)(C)[  
 Si](C)(C)OC[C@H](/C=C/c1ccc2ccc3cccc4ccc1c2c34)NC(=O)OCc1cccc1  
 621 C=C(C)C(=O)OC.COc1ccc(Cl)cc1>>COC(=O)/C(C)=C/c1ccc(OC)cc1  
 622 C=Cc1cccc1.Cc1ccc(I)cc1C>>Cc1ccc(/C=C/c2cccc2)cc1C  
 623 Br1ccc2ccnc2c1.C=CC(=O)OC>>COC(=O)/C=C/c1ccc2ccnc2c1  
 624 C=CC(=O)OCC.Oc1ccc(I)c(C(F)(F)F)c1C(F)(F)F>>CCOC(=O)/C=C/c1ccc(O)c(C(F)(F)F)c1C(F)(F)F  
 625 C=Cc1ccc(OC)c(OC)c1.Cn1cc(I)c(=O)c2cccc21>>COc1ccc(/C=C/c2cn(C)c3cccc3c2=O)cc1OC  
 626 Br1cccs1.C=CC(=O)OCCCC>>CCCCOC(=O)/C=C/c1cccs1  
 627 Br1ccc(/N=N/c2cccc2)cc1.C=Cc1ccc(OC)cc1>>COc1ccc(/C=C/c2ccc(/N=N/c3cccc3)cc2)cc1  
 628 C=CC(=O)OCC.Cc1cccc(C#C/C=C/c2ccc(Br)cc2)c1>>CCOC(=O)/C=C/c1ccc(/C=C/C#Cc2cccc(C)c2  
 629 C=CC(=O)OCCCC.Cn1nc(Br)c2cccc(Cl)c21>>CCCCOC(=O)/C=C/c1nn(C)c2c(Cl)cccc12  
 630 C=CC(=O)OCC.O=S(=O)(Oc1ccc(C(=C2C3CCCC2CCC3)c2ccc(O)cc2)cc1)C(F)(F)F>>CCOC(=O)/C  
 =C/c1ccc(C(=C2C3CCCC2CCC3)c2ccc(O)cc2)cc1  
 631 C=CC(=O)OC.Cc1cc2c(c(C)c1Br)C(=O)CC2>>COC(=O)/C=C/c1c(C)cc2c(c1C)C(=O)CC2  
 632 C=CC(=O)OC.CCN(CC)C(=O)Oc1cnccc1I>>CCN(CC)C(=O)Oc1cnccc1/C=C/C(=O)OC  
 633 C=CCOc1ccc(C)cc1.Ic1cccc1>>Cc1ccc(OC/C=C/c2cccc2)cc1  
 634 C=Cc1ccc(C(=O)OC)cc1.Cn1cc(I)c(=O)c2cccc21>>COC(=O)c1ccc(/C=C/c2cn(C)c3cccc3c2=O)cc1  
 635 C=CC(=O)OC.C[Si](C)(C)c1cc2n(c(=O)c1I)CCC21OCCO1>>COC(=O)/C=C/c1c([Si](C)(C)C)cc2n(c  
 1=O)CCC21OCCO1  
 636 C=CC(F)(F)C(F)(F)C(F)(F)C(F)(F)C(F)(F)C(F)(F)C(F)(F)C(F)(F)C(F)(F)F.Cc1ccc(I)cc1>>Cc1ccc(/C=C/C(F)  
 (F)C(F)(F)C(F)(F)C(F)(F)C(F)(F)C(F)(F)C(F)(F)C(F)(F)F)cc1  
 637 C=Cc1cccc1.Clc1ccc(COc2cccc2)c(Br)c1>>Clc1ccc(COc2cccc2)c(/C=C/c2cccc2)c1  
 638 C=CCNC(=O)c1cc(C)on1.Cc1ccc(I)cc1>>Cc1ccc(/C=C/CNC(=O)c2cc(C)on2)cc1  
 639 C=CS(=O)(=O)F.Oc1cccc(I)c1>>O=S(=O)(F)/C=C/c1cccc(O)c1  
 640 C=CC(=O)OC.CCn1nnc2c(C)c(Br)ccc21>>CCn1nnc2c(C)c(/C=C/C(=O)OC)ccc21  
 641 C=CC(=O)NCc1cccc1.COc1ccc2c(=O)c(I)coc2c1>>COc1ccc2c(=O)c(/C=C/C(=O)NCc3cccc3)ccc2  
 642 C=Cc1ccc(C=O)s1.CCCCCC(=O)Nc1cc(OCCN(CCOc2cc(NC(=O)CCCC)nc(NC(=O)CCCC)c2)c2  
 ccc(Br)cc2)cc(NC(=O)CCCC)n1>>CCCCC(=O)Nc1cc(OCCN(CCOc2cc(NC(=O)CCCC)nc(NC(=O)  
 CCCCC)c2)c2ccc(/C=C/c3ccc(C=O)s3)cc2)cc(NC(=O)CCCC)n1  
 643 C=C1C(=O)O[C@H]2/C=C(\C)CC/C=C(\C)CC[C@H]12.O=[N+](O-  
 )c1cccc1I>>C/C1=C\C[C@H]2OC(=O)/C=C/c3cccc3[N+](=O)[O-][C@H]2CC/C(C)=C/CC1  
 644 Br1cccc1.C=CC(=O)OCc1cccc1>>O=C(/C=C/c1cccc1)OCc1cccc1  
 645 C=Cc1cncc1.Cc1cccc(Br)c1>>Cc1cccc(/C=C/c2cncc2)c1  
 646 C=CCNC1=NCCN1.COc1cccc(I)c1>>COc1cccc(/C=C/CNC2=NCCN2)c1  
 647 C=CC[C@H](C)N(C)C(=O)OC(C)(C)C.O=C(CCC(F)(F)F)N1CC[C@H](Oc2cc(Br)cn2Cl)C1>>C[C@  
 H](C)C/C=C/c1enc(Cl)c(O[C@H]2CCN(C(=O)CCC(F)(F)F)C2)c1N(C)C(=O)OC(C)(C)C  
 648 C=CC(=O)OC.O=C1Nc2c(Br)cccc2C1=O>>COC(=O)/C=C/c1cccc2c1NC(=O)C2=O  
 649 C=CC(=O)OCC.Clc1cccc(Br)c1>>CCOC(=O)/C=C/c1cccc(Cl)c1  
 650 C=Cc1cccc1.N#Cc1cccc1-c1cc(Br)cn(-c2cccc2)c1=O>>N#Cc1cccc1-c1cc(/C=C/c2cccc2)cn(-  
 c2cccc2)c1=O  
 651 C=CCOCC/C=C\CC.COc1cc(Br)ccc1O>>CC/C=C\CCOC/C=C/c1ccc(O)c(OC)c1  
 652 C=CC(=O)NCc1cccc1.COc1ccc(-c2oc3cc(OC)ccc3c(=O)c2I)cc1>>COc1ccc(-  
 c2oc3cc(OC)ccc3c(=O)c2/C=C/C(=O)NCc2cccc2)cc1  
 653 C=CC(N)=O.FC(F)(F)Oc1ccc(I)cc1>>NC(=O)/C=C/c1ccc(OC(F)(F)F)cc1  
 654 C=CC(=O)OCC.[2H]c1c([2H])c(C[2H])([2H])[2H]c([2H])c([2H])c1C(=O)c1cccc(Br)n1>>[2H]c1c([  
 2H])c(C([2H])([2H])[2H])c([2H])c([2H])c1C(=O)c1cccc(/C=C/C(=O)OCC)n1  
 655 C=CC(=O)N(C)Cc1oc2cccc2c1C.O=C1CNc2cc(Br)cn2N1>>Cc1c(CN(C)C(=O)/C=C/c2cnc3c(c2)  
 CNCC(=O)N3)oc2cccc12



656 C=CC(=O)OCC.CCOC(=O)C1=C(C)N(c2cccc(C(F)(F)F)c2)C(=O)N(Cc2cccc(Br)c2)C1c1ccc(C#N)cc  
1>>CCOC(=O)/C=C/c1cccc(CN2C(=O)N(c3cccc(C(F)(F)F)c3)C(C)=C(C(=O)OCC)C2c2ccc(C#N)cc2  
657 C=Cc1cccc1.Clc1cn[nH]c1>>C(=C/c1cn[nH]c1)\c1cccc1  
C=CC(=O)OC.CC(C)(C)OC(=O)NC1(c2ccc(-c3nc4c5cc(Br)ccc5nn4cc3-  
658 c3cccc3)cc2)CCC1>>COC(=O)/C=C/c1ccc2nn3ccc(-c4cccc4)c(-  
c4ccc(C5(NC(=O)OC(C)(C)C)CCC5)cc4)nc3c2c1  
659 C=CN1CCCC1=O.CCOC(=O)C(F)(F)Br>>CCOC(=O)C(F)(F)/C=C/N1CCCC1=O  
660 C=C(Br)CC.C=Cc1cccc1>>C=C/C=C/c1cccc1)CC  
661 C=CC(=O)OC.O=C1c2ccc(OS(=O)(=O)C(F)(F)F)cc2C(=O)N1Cc1cccc1>>COC(=O)/C=C/c1ccc2c(c  
1)C(=O)N(Cc1cccc1)C2=O  
662 C=CCOc1cccc1C.COc1cccc1I>>COc1cccc1/C=C/COc1cccc1C  
663 C=Cc1cccc1.ClC1cccc1>>C(=C/c1cccc1)\C1cccc1  
664 C=C(NC(C)=O)C(=O)OC.COC(=O)c1cccc1I>>COC(=O)/C(=C/c1cccc1C(=O)OC)NC(C)=O  
665 C=CC(=O)OC.Ic1nn(C(c2cccc2)(c2cccc2)c2cccc2)c2ccnc(OC3CCOCC3)c12>>COC(=O)/C=C/c1n  
n(C(c2cccc2)(c2cccc2)c2cccc2)c2ccnc(OC3CCOCC3)c12  
666 C=C[Si](C)(C)C.CC(=O)c1ccc(I)cc1>>CC(=O)c1ccc(/C=C/[Si](C)(C)C)cc1  
C=CC(=O)N(C)C.C[C@]12C[C@]34C=C(Sc5cccc(I)c5)C(=O)[C@](C)(CCC(=O)Nc5c(O)ccc(C(  
667 =O)O)c5O)[C@]3[C@H]3[C@H](C[C@]41C4)O2>>CN(C)C(=O)/C=C/c1cccc(SC2=C[C@]34C[C@H  
15C[C@H](O)[C@]15(C)C3)[C@H]4[C@](C)(CCC(=O)Nc3c(O)ccc(C(=O)O)c3O)C2=O)c1  
668 C=CC(=O)OC.Cc1ccc(I)cc1>>C=C(C(=O)OC)c1ccc(C)cc1  
669 C=CC(=O)O.FC(F)(F)c1ccc(I)c(Br)c1>>O=C(O)/C=C/c1ccc(C(F)(F)F)cc1Br  
670 C=COCCOC=C.CC(=O)c1ccc(Br)cc1>>C=COCCOC(=C)c1ccc(C(C)=O)cc1  
671 C=CC(=O)OCCCC.Cc1ccc(C)c(Br)c1>>CCCCOC(=O)/C=C/c1cc(C)ccc1C  
672 Brc1cccc1.C=C1c2cccc2C1(C#N)CC>>CCC1(C#N)/C(=C/c2cccc2)c2cccc21  
673 C=Cc1cc(OCCCCCCCCCCCC)cc(OCCCCCCCCCCCC)c1.Oc1ccc(I)cc1>>CCCCCCCCCCCCCOc1cc(  
/C=C/c2ccc(O)cc2)cc(OCCCCCCCCCCCC)c1  
674 C=CC(=O)OCC.Oc1ccc(F)cc1Br>>CCOC(=O)/C=C/c1cc(F)ccc1O  
675 C=CC(=O)OC.N#CCn1c(=O)oc2cc(Br)enc21>>COC(=O)/C=C/c1enc2c(c1)oc(=O)n2CC#N  
676 C=CC(=O)OC1CCCCC1.Ic1ccc(OCc2cccc2)cc1>>O=C(/C=C/c1ccc(OCc2cccc2)cc1)OC1CCCCC1  
677 C=CC(=O)OC.Nc1cc(C(F)(F)F)cc(C(F)(F)F)c1Br>>COC(=O)/C=C/c1c(N)cc(C(F)(F)F)cc1C(F)(F)F  
678 C=Cc1ccc(OCCCCC)c(OCCCCC)c1.O=Cc1ccc(Br)cc1>>CCCCCOc1ccc(/C=C/c2ccc(C=O)cc2)c  
c1OCCCCC  
679 C=Cc1ccc(Cl)cc1.O=Cc1cccc1Br>>O=Cc1cccc1/C=C/c1ccc(Cl)cc1  
680 C=C[C@]@H](C)[C@H](C/C=C/C(=O)OC(C)(C)C)O[Si](C)(C)C(C)(C)C.Ic1cccc1>>C[C@H](/C=C  
/c1cccc1)[C@H](C/C=C/C(=O)OC(C)(C)C)O[Si](C)(C)C(C)(C)C  
681 C=Cc1ccc(Cl)cc1.CCOC(=O)C(F)I>>CCOC(=O)C(F)/C=C/c1ccc(Cl)cc1  
682 Brc1cccc(-c2cccn2)c1.C=CC(=O)OCC>>CCOC(=O)/C=C/c1cccc(-c2cccn2)c1  
683 C=CC(=O)OC(C)(C)C.COc1cccc(S(=O)(=O)N2CCc3cc(Br)enc32)c1>>COc1cccc(S(=O)(=O)N2CCc3  
cc(/C=C/C(=O)OC(C)(C)C)enc32)c1  
684 C=Cc1ccc(C(=O)OCC)cc1.CCSC1=CCC(C)(C)c2ccc(Br)cc21>>CCOC(=O)c1ccc(/C=C/c2ccc3c(c2)C  
(SCC)=CCC3(C)C)cc1  
685 CC(=O)c1ccc(I)cc1.CCOC(=O)/C(F)=C\CCc1cccc1>>CCOC(=O)/C(F)=C(\CCc1cccc1)c1ccc(C(C)=  
O)cc1  
686 C=Cc1cccc(OC)c1.C[Si](C)(C)OS(=O)(=O)C(F)(F)F>>COc1cccc(/C=C/[Si](C)(C)C)c1  
687 C=CC1(C)OC(=O)Nc2ccc(-c3cc(F)cc(Br)c3)cc21.COc1ccc(-c2oc3cccc3c(=O)c2I)cc1>>COc1ccc(-  
c2oc3cccc3c(=O)c2/C=C/C2(C)OC(=O)Nc3ccc(-c4cc(F)cc(Br)c4)cc32)cc1  
688 Brc1ccc(NCc2cccc2)nc1.C=CC(=O)OC(C)(C)C>>CC(C)(C)OC(=O)/C=C/c1ccc(NCc2cccc2)nc1  
689 C=CC(=O)OC(C)(C)C.Nc1cc(Cl)ccc1I>>CC(C)(C)OC(=O)/C=C/c1ccc(Cl)cc1N  
690 Brc1ccn2nnnc12.C=Cc1cc(OC)c(OC)c(OC)c1>>COc1cc(/C=C/c2ccn3nnnc23)cc(OC)c1OC  
691 Brc1cccc2[nH]ccc12.C=Cn1enc2c(Nc3ccc(P(C)(C)=O)cc3)ncnc21>>CP(C)(=O)c1ccc(Nc2ncnc3c2ncn  
3/C=C/c2cccc3[nH]ccc23)cc1  
692 C=CC(=O)OCc1cccc1.O=C1CO[C@H]2Cc3ccc(Br)cc3[C@H]2N1O>>O=C(/C=C/c1ccc2c(c1)[C@  
@H]1[C@H](C2)OCC(=O)N1O)OCc1cccc1  
693 C=Cc1ccc(Cl)cc1.CCOC(=O)C(F)(F)I>>CCOC(=O)C(F)(F)/C=C/c1ccc(Cl)cc1  
694 C=CC(=O)OCC.CCOC(=O)c1ccc(-c2cccc2)c(I)c1>>CCOC(=O)/C=C/c1cc(C(=O)OCC)ccc1-  
695 C=Cc1cccc1.O=C(c1cccc1)c1ccc(Cl)cc1>>O=C(c1cccc1)c1ccc(/C=C/c2cccc2)cc1  
696 C=CC(C)(C)O.Nc1cccc1I>>CC(C)(O)/C=C/c1cccc1N  
697 C=CC(=O)OCC(CC)CCCC.Ic1cccc1>>CCCCC(CC)COC(=O)/C=C/c1cccc1

[illegible]

734 C=Cc1ccncc1.COc1cc(Nc2c(C#N)cnc3ccc(Br)cc23)cc(OC)c1OC>>COc1cc(Nc2c(C#N)cnc3ccc(/C=C/c4ccncc4)cc23)cc(OC)c1OC  
735 C=CC(=O)OC.Fc1ccc(I)cc1F>>COC(=O)/C=C/c1ccc(F)c(F)c1  
736 C=Cc1ccc(C)cc1.COC(=O)c1cccc1I>>COC(=O)c1cccc1/C=C/c1ccc(C)cc1  
737 C=CC(=O)OC.COc1ccc(-c2oc3cc(OC)ccc3c(=O)c2I)cc1>>COC(=O)/C=C/c1c(-c2ccc(OC)cc2)oc2cc(OC)ccc2c1=O  
738 C=CC(=O)OCC.Cc1nc(Br)c([N+](=O)[O-])n1C>>CCOC(=O)/C=C/c1nc(C)n(C)c1[N+](=O)[O-]  
739 BrC1=CCCC2(C1)OCCO2.C=CC(=O)OC>>COC(=O)/C=C/C1=CCCC2(C1)OCCO2  
740 C=CC(=O)OC.COc1c(CN(C(=O)c2cccc2)c2ccc(Br)c2)ccc2c1OC(C)(C)[C@@H](OC(C)=O)[C@H]2OC(C)=O>>COC(=O)/C=C/c1cccc(N(Cc2ccc3c(c2OC)OC(C)(C)[C@@H](OC(C)=O)[C@H]3OC(C)=O)C(=O)c2cccc2)c1  
741 C=Cc1ccncc1.CCCCOc1ccc(I)cc1>>CCCCOc1ccc(/C=C/c2ccncc2)cc1  
742 C=CC(=O)OCC.Cc1ccc(S(=O)(=O)n2cc(C=O)c3c(Br)cccc32)cc1>>CCOC(=O)/C=C/c1cccc2c1c(C=O)en2S(=O)(=O)c1ccc(C)cc1  
743 C=CC(=O)OCC.Cc1cc2ncc(Br)cc2n1-c1ccc(C#N)cc1>>CCOC(=O)/C=C/c1cnc2cc(C)n(-c3ccc(C#N)cc3)c2c1  
744 C=CC(=O)N(C)CCN(C)C.C[Si](C)(C)CCOCn1nc(I)c2ccc(C=O)cc21>>CN(C)CCN(C)C(=O)/C=C/c1nn(COCC[Si](C)(C)C)c2cc(C=O)ccc12  
745 C=Cc1ccc(F)cc1.CC(=O)c1ccc(Cl)cc1>>CC(=O)c1ccc(/C=C/c2ccc(F)cc2)cc1  
746 C=CC(=O)OCC.O=C(O)c1ccc(I)cc1>>CCOC(=O)/C=C/c1ccc(C(=O)O)cc1  
747 C=CC(=O)OCC.COC(C#N)c1cccc1Br>>CCOC(=O)/C=C/c1cccc1C(C#N)OC  
748 C=CC(=O)OCC.Cc1nc(-n2c(C)ccc2C)cc(N[C@H]2CC[C@H](O)CC2)c1Br>>CCOC(=O)/C=C/c1c(N[C@H]2CC[C@H](O)C2)cc(-n2c(C)ccc2C)nc1C  
749 C=C(OC)C(=O)OC.COc1ccc(I)cc1>>COC(=O)/C=C/c1ccc(OC)cc1OC  
750 C=Cc1c(OC)cc(OC)cc1OC.Cc1ccc(S(=O)(=O)Oc2ccc3c(Br)ccnc23)cc1>>COc1cc(OC)c(/C=C/c2ccn3c(OS(=O)(=O)c4ccc(C)cc4)cccc23)c(OC)c1  
751 C=C[C@H]1O[C@@H]2OC(C)(C)O[C@@H]2[C@H]1OC.Ic1cccc1>>CO[C@H]1[C@@H](/C=C/c2cccc2)O[C@@H]2OC(C)(C)O[C@H]12  
752 C=CC(=O)OC.Fc1cccc1I>>COC(=O)/C=C/c1cccc1F  
753 C=CCN(C(=O)Cc1cccc1)c1cccc1.FC(F)(F)c1ccc(I)cc1>>O=C(Cc1cccc1)N(C/C=C/c1ccc(C(F)(F)F)cc1)c1cccc1  
754 C=C(C)c1cccc1.Fc1c(F)c(F)c(Br)c(F)c1F>>C/C(=C)c1c(F)c(F)c(F)c1F)c1cccc1  
755 C=Cc1ccc(C(C)(C)C)cc1.CCOC(=O)C(F)I>>CCOC(=O)C(F)/C=C/c1ccc(C(C)(C)C)cc1  
756 C=Cc1ccncc1.Cc1cc(N2CCCC2)nc(Cl)n1>>Cc1cc(N2CCCC2)nc(/C=C/c2ccncc2)n1  
757 C=CC(=O)OCCCC.O=C(c1cccc1)c1ccc(Cl)cc1>>CCCCOC(=O)/C=C/c1ccc(C(=O)c2cccc2)cc1  
758 C=C(CC(=O)OC)C(=O)OC.COc1cccc2c(OCc3cccc3)c(Br)ccc12>>COC(=O)C/C(=C)c1ccc2c(OC)cc2c1OCc1cccc1C(=O)OC  
759 C=CC(=O)OCC.O=C1CCCc2ccc(Br)cc2C1>>CCOC(=O)/C=C/c1ccc2c(c1)CC(=O)CCC2  
760 Br1ccc(OCCN2CCCC2)cc1.C=Cc1ccncc(C#N)c1Nc1ccc2[nH]ccc2c1C>>Cc1c(Nc2c(C#N)cncc2/C=C/c2ccc(OCCN3CCCC3)cc2)ccc2[nH]ccc12  
761 C=CC(C)(C)O.Nc1cccc(Br)c1>>CC(C)(O)/C=C/c1cccc(N)c1  
762 C=CC(=O)OC.Fc1ccc(I)cc1>>COC(=O)/C=C/c1ccc(F)cc1  
763 C=CC(=O)OCC.CC(C)c1nc(C(C)C)c(Cl)n1>>CCOC(=O)/C=C/c1nc(C(C)C)enc1C(C)C  
764 C=CC(=O)OC.CCCCCC1(CCCCCC)c2cccc2-c2c1c1c(c3c2C(CCCCCC)(CCCCC)c2ccc(I)ccc2-3)C(CCCCCC)(CCCCC)c2cccc2-1>>CCCCCCC1(CCCCCC)c2cccc2-c2c1c1c(c3c2C(CCCCCC)(CCCCC)c2ccc(I)ccc2-3)C(CCCCCC)(CCCCC)c2cccc2-1  
765 C=CCN1C(=O)c2cccc2C1=O.CC(=O)c1ccc(Br)cc1>>CC(=O)c1ccc(/C=C/CN2C(=O)c3cccc3C2=O  
766 C=Cc1ccc(N(C)C)cc1.Cc1nc2cc(Br)ccc2nc1-c1cccc1>>Cc1nc2cc(/C=C/c3ccc(N(C)C)cc3)ccc2nc1-c1cccc1  
767 C=CCOc1ccc(C)cc1.Cc1ccc(I)cc1>>Cc1ccc(/C=C/COc2ccc(C)cc2)cc1  
768 C=Cc1cccc1OC.Nc1cccc1Br>>COc1cccc1/C=C/c1cccc1N  
769 C=CCC1(C(=O)OC)CCCCC1.COc1ccc(I)cc1>>COC(=O)C1(C/C=C/c2ccc(OC)cc2)CCCCC1  
770 C=CC(C)(C)O.CC(C)(C)OC(=O)N1CCC[C@H](Nc2ncc(C(F)(F)F)c(-c3cn(S(=O)(=O)c4cccc4)c4cc(Br)ccc34)n2)C1>>CC(C)(O)/C=C/c1ccc2c(-c3nc(N[C@H]4CCCN(C(=O)OC(C)(C)C)4)ccc3C(F)(F)F)en(S(=O)(=O)c3cccc3)c2c1  
771 C=Cc1cccc1.Cc1ccc(S(=O)(=O)Nc2cccc2Br)cc1>>Cc1ccc(S(=O)(=O)Nc2cccc2/C=C/c2cccc2)cc1  
772 C=CC1CC(=O)N1.Cc1cccc(I)c1>>Cc1cccc(/C=C/C2CC(=O)N2)c1  
773 C=C.Cc1nc(C)c(I)c(Cl)n1>>C=Cc1c(C)nc(C)nc1Cl

C=CCO[C@H]1CC(=O)O[C@H](C)C/C=C/C=C/[C@H](O[Si](C)(C)C(C)(C)C)[C@H](C)C[C@H]  
 (CC(OC)OC)[C@H](O[C@H]2O[C@H](C)[C@H](O[C@H]3C[C@@](C)(O)[C@H](OC(=O)  
 CC)[C@H](C)O3)[C@H](N(C)C)[C@H]2OC(C)=O)[C@H]1OC.Fc1ccc(I)cc1>>CCC(=O)O[C@H]1[  
 C@H](C)O[C@H](O[C@H]2[C@H](N(C)C)[C@H](OC(C)=O)[C@H](O[C@H]3[C@H](O  
 C)[C@H](OC/C=C/c4ccc(F)cc4)CC(=O)O[C@H](C)C/C=C/C=C/[C@H](O[Si](C)(C)C(C)(C)C)[C@  
 H](C)C1C@H13CC(OC)OC)O[C@H]2C1C@H12C1C@H11(C)O  
 C=CC(=O)OCCCC.O=C(Cc1c(-  
 e2cccc(Br)c2)c2cc(CN3CCN(c4cccc4)CC3)c(Cl)cc2oc1=O)Nc1ccc(F)cc1C(F)(F)F>>CCCCOC(=O)/  
 C=C/c1cccc(-c2c(CC(=O)Nc3ccc(F)cc3C(F)(F)F)c(=O)oc3cc(Cl)c(CN4CCN(c5cccc5)CC4)cc23)c1  
 C=CN1C(=O)c2cccc2C1=O.FC(F)(F)c1ccc(Cl)cc1>>O=C1c2cccc2C(=O)N1/C=C/c1ccc(C(F)(F)F)c  
 C=CC(=O)O.FC(F)(F)C1(c2cccc(Br)c2)N=N1>>O=C(O)/C=C/c1cccc(C2(C(F)(F)F)N=N2)c1  
 Brc1cccc(N2CCN(c3ncccn3)CC2)n1.C=Cc1cccc1>>C(=C/c1cccc(N2CCN(c3ncccn3)CC2)n1)\c1cccc  
 C=Cc1cc(OC)c(OC)c(OC)c1.COc1cc(C=O)c(Br)c(OC)c1OC>>COc1cc(/C=C/c2c(C=O)cc(OC)c(OC)c  
 2OC)cc(OC)c1OC  
 C=COCCCCCO.COc1ccc(Br)cc1>>C=C(OCCCCCO)c1ccc(OC)cc1  
 C=Cc1cccc(CN2CCN(C)CC2)n1.Cc1c(Nc2c(I)encc2C#N)cc(Cl)c2[nH]ccc12>>Cc1c(Nc2c(C#N)cncc  
 2/C=C/c2cccc(CN3CCN(C)CC3)n2)cc(Cl)c2[nH]ccc12  
 C=CCC(=O)O.C[C@H](O)c1ccc2ccc(Br)cc2c1>>C[C@H](O)c1ccc2ccc(/C=C/CC(=O)O)cc2c1  
 C=CC(=O)OC(C)(C)C.O=C1Nc2ccc(Br)cc2C1=O>>CC(C)(C)OC(=O)/C=C/c1ccc2c(c1)C(=O)C(=O)  
 C=Cc1ccncc1.CCCCN(CCCC)c1ccc2cc(Br)ccc2c1>>CCCN(CCCC)c1ccc2cc(/C=C/c3ccncc3)ccc2c1  
 C=CS(=O)(=O)NCCCC.CC(C)(C)OC(=O)NCc1cccc1Br>>CCCCNS(=O)(=O)/C=C/c1cccc1CNC(=O)  
 OC(C)(C)C  
 C=Cc1ccc(N(c2ccc(OC)cc2)c2ccc(OC)cc2)cc1.CC(C)(C)c1ccc(/C=C/c2ccc(/C=C/c3ccc(Br)cc3)cc2)cc  
 1>>COc1ccc(N(c2ccc(/C=C/c3ccc(/C=C/c4ccc(/C=C/c5ccc(C(C)(C)C)cc5)cc4)cc3)cc2)c2ccc(OC)cc2)  
 Brc1ccc(-c2nc3cccc3n2)cc1.C=CCn1c(-c2cc(OC)ccc2OC)nc2cccc2c1=O>>COc1ccc(OC)c(-  
 c2nc3cccc3c(=O)n2C/C=C/c2ccc(-c3nc4cccc4n3)cc2)c1  
 C=CC(=O)OCCCC.COc1cc(Br)cc(OC)c1>>CCCCOC(=O)/C=C/c1cc(OC)cc(OC)c1  
 C=CC(=O)O.Oc1ccc(I)cc1>>O=C(O)/C=C/c1ccc(O)cc1  
 C=CCCC(=O)CCCC[Se]c1cccc1.Ic1cccc1>>O=C(CC/C=C/c1cccc1)CCCC[Se]c1cccc1  
 C=C(F)[Si](C)(c1cccc1)c1cccc1.COc1ccc(I)c1>>COc1ccc(/C=C(F)[Si](C)(c2cccc2)c2cccc2)c1  
 C=CC(=O)OCC.Fc1ccc(I)cc1>>CCOC(=O)/C=C/c1ccc(F)cc1  
 C=Cc1ccc(O)cc1.COc1ccc(Br)c1>>COc1cccc(/C=C/c2ccc(O)cc2)c1  
 C=CC(=O)OCC.CN(C)c1ccc(-  
 e2ccc(CN(C(=O)C3CCCC3)c3cccc(Br)c3)cc2)cc1>>CCOC(=O)/C=C/c1cccc(N(Cc2ccc(-  
 c3ccc(N(C)C)cc3)cc2)C(=O)C2CCCC2)c1  
 C=Cc1ccc(OC)cc1.O=c1cc(-c2cccc2)oc2cc(Br)ccc12>>COc1ccc(/C=C/c2ccc3c(=O)cc(-  
 c4cccc4)oc3c2)cc1  
 C=C[Si](CC)(CC)CC.N#Cc1cccc1Br>>CC[Si](/C=C/c1cccc1C#N)(CC)CC  
 C=CC(=O)O.O=C(O)c1ccc(Cl)cc1>>O=C(O)/C=C/c1ccc(C(=O)O)cc1  
 Brc1cccc1.C=C[S@](=O)c1ccc(C)cc1>>Cc1ccc([S@](=O)/C=C/c2cccc2)cc1  
 C=Cc1cccc1.COC(=O)/C=C/c1cccc(N(Cc2ccc(Br)cc2)C(=O)C2CCCC2)c1>>COC(=O)/C=C/c1ccc  
 c(N(Cc2ccc(/C=C/c3cccc3)cc2)C(=O)C2CCCC2)c1  
 C=Cc1cccc1.Cc1ccc(Br)c1O>>Cc1ccc(/C=C/c2cccc2)c1O  
 C=CC(=O)O.Oc1ccc(I)cc1F>>O=C(O)/C=C/c1ccc(O)c(F)c1  
 C=CCC(=O)OC.O=c1ccn(Cc2ccc(I)cc2)c(=O)[nH]1>>COC(=O)C/C=C/c1ccc(Cn2ccc(=O)[nH]c2=O)  
 C=CC(=O)OC.COc1cc(Br)c(C=O)cc1OC>>COC(=O)/C=C/c1cc(OC)c(OC)cc1C=O  
 C=Cc1cccc1.CC(C)n1cnc2c(Cl)nc(I)nc21>>CC(C)n1cnc2c(Cl)nc(/C=C/c3cccc3)nc21  
 Brc1cnc2cccc2c1.C=CC(=O)CC>>CCC(=O)/C=C/c1cnc2cccc2c1  
 C=CC(=O)OC.CC(C)[C@H]1C=C(OS(=O)(=O)C(F)(F)F)[C@H](C)CC1>>COC(=O)/C=C/C1=C[C@  
 H](C(C)C)CC[C@H]1C  
 C=CC(=O)OCC.CN(C)c1ccc(-c2cccc2I)cc1>>CCOC(=O)/C=C/c1cccc1-c1ccc(N(C)C)cc1  
 C=CC1CC(=O)N1.Cc1cccc1I>>Cc1cccc1/C=C/C1CC(=O)N1  
 C=CC(=O)O.Clc1ccc(I)cc1>>O=C(O)/C=C/c1ccc(Cl)cc1  
 C=CC(=O)OC.Ic1cccc1C[Se]c1cccc1>>COC(=O)/C=C/c1cccc1C[Se]c1cccc1  
 C=C.Cc1cccc1Br>>C=Cc1cccc1C  
 C/C=C/C(=O)OC.Ic1cccc1>>COC(=O)/C=C(/C)c1cccc1  
 C=CC(=O)OCC.Cc1ccncc1Br>>CCOC(=O)/C=C/c1cccc1C  
 C=Cc1cccc1.COC(=O)c1cc(C)cc(I)c1>>COC(=O)c1cc(C)cc(/C=C/c2cccc2)c1

Br1cccc1.C=Cc1nc2c(N)ncnc2n1[C@@H]1O[C@H](CO[Si](C)(C)C(C)(C)C)[C@@H](O[Si](C)(C)C(C)(C)C)[C@H]1O[Si](C)(C)C(C)(C)C>>CC(C)(C)[Si](C)(C)OC[C@H]1O[C@@H](n2c(/C=C/c3ccc3)nc3c(N)ncnc32)[C@H](O[Si](C)(C)C(C)(C)C)[C@@H]1O[Si](C)(C)C(C)(C)C  
 815 C=COCCN(C)C.O=S(=O)(Oc1cccc1)C(F)(F)F>>C=C(OCCN(C)C)c1cccc1  
 816 C=Cc1cccc1.CCOC(=O)C(F)(F)I>>CCOC(=O)C(F)(F)/C=C/c1cccc1  
 817 C=CC(OCC)OCC.COc1cccc(I)c1>>CCOC(/C=C/c1cccc(OC)c1)OCC  
 818 C=CS(N)(=O)=O.Cc1ccc(Br)c(C)c1>>Cc1ccc(/C=C/S(N)(=O)=O)c(C)c1  
 819 C=CC(=O)OC(C)(C)C.O=Cc1ccc(Br)s1>>CC(C)(C)OC(=O)/C=C/c1ccc(C=O)s1  
 820 C=CCNC(=O)OC(C)(C)C.CC(=O)c1ccc(Br)cc1>>C=C(CNC(=O)OC(C)(C)C)c1ccc(C(C)=O)cc1  
 821 C=CC(O)(CO)CCC=C(C)C.COc1ccc(OC)c(Br)c1>>COc1ccc(OC)c(/C=C/C(O)(CO)CCC=C(C)C)c1  
 822 Br1cccc1.C=Cc1cccc1C>>Cc1cccc1/C=C/c1cccc1  
 823 C=CC(=O)OC.CC(C)(C)OC(=O)c1ccc(I)cc1>>COC(=O)/C=C/c1ccc(C(=O)OC(C)(C)C)cc1  
 824 C=C.COC(=O)c1cccc(C)c1Br>>C=Cc1c(C)cccc1C(=O)OC  
 825 C=CC(=O)OC(C)(C)C.COc1ccc(CNc2ccc(Br)en2)cc1>>COc1ccc(CNc2ccc(/C=C/C(=O)OC(C)(C)C)c  
 826 n2)cc1  
 C=Cc1cccc1.CCN1C[C@]2(OC(=O)c3ccc(I)ccc3NC(C)=O)CC[C@H](OC)[C@@]34[C@@H]2C[C  
 827 @H]([C@@H]13)[C@@]1(O)C[C@H](OC)[C@H]2C[C@@H]4[C@]1(O)[C@H]2OC>>CCN1C[C  
 @]2(OC(=O)c3ccc(/C=C/c4ccccn4)ccc3NC(C)=O)CC[C@H](OC)[C@@]34[C@@H]2C[C@H]([C@  
 828 @H]13)[C@@]1(O)C[C@H](OC)[C@H]2C[C@@H]4[C@]1(O)[C@H]2OC  
 C=C(NC(=O)OC(C)(C)C)C(=O)OC.CCOC(=O)c1[nH]c2cccc2c1Br>>CCOC(=O)c1[nH]c2cccc2c1/  
 829 C=C(\NC(=O)OC(C)(C)C)C(=O)OC  
 C=Cc1cccc1.CCN1ncnc1-c1ccc(Br)o1>>CCn1ncnc1-c1ccc(/C=C/c2cccc2)o1  
 830 C=CC(=O)N1N=Cc2cccc2C1Cc1ccc(OC)cc1.COc1cc(Cc2nc(N)nc2N)cc(I)c1OC>>COc1ccc(CC2c3  
 ccccc3C=NN2C(=O)/C=C/c2cc(Cc3nc(N)nc3N)cc(OC)c2OC)cc1  
 831 C=CC(=O)OC.Cc1ccc(Cl)c(Br)c1>>COC(=O)/C=C/c1cc(C)ccc1Cl  
 C=CC(=O)Nc1cccc1NC(=O)OC(C)(C)C.O=C(Nc1ccc(Cl)cc1)[C@H]1CN(CC(F)F)C[C@@H]1c1ccc  
 832 (Br)cc1>>CC(C)(C)OC(=O)Nc1cccc1NC(=O)/C=C/c1ccc([C@H]2CN(CC(F)F)C[C@@H]2C(=O)Nc  
 2ccc(Cl)cc2)cc1  
 833 C=CCCCC(=O)OCC.O=S(=O)(Oc1ccc(C(=C2C3CCCC2CCC3)c2ccc(O)cc2)cc1)C(F)(F)F>>CCOC(  
 =O)CCCC/C=C/c1ccc(C(=C2C3CCCC2CCC3)c2ccc(O)cc2)cc1  
 834 C=CC(F)(F)F.Cc1ccc(I)cc1>>Cc1ccc(/C=C/C(F)(F)F)cc1  
 835 C=Cc1cccc1.CN1C(=O)CC[C@H]1c1cncc(Br)c1>>CN1C(=O)CC[C@H]1c1cncc(/C=C/c2cccc2)c1  
 836 C=C.ClCc1ccc(-c2cccc2)cc1>>C=CCc1ccc(-c2cccc2)cc1  
 837 C=CC(OCC)OCC.Cc1ccc(I)cc1>>CCOC(/C=C/c1ccc(C)cc1)OCC  
 838 C=CC(=O)OC(C)(C)C.Nc1cccc(Br)c1F>>CC(C)(C)OC(=O)/C=C/c1cccc(N)c1F  
 839 C=Cc1cccc1.Cc1cc(Br)ccc1C#N>>Cc1cc(/C=C/c2cccc2)ccc1C#N  
 840 C=CC(=O)OC(C)(C)C.COc1ccc(CNc2c(I)cc(C)cc2[Si](C)(C)C)cc1>>COc1ccc(CNc2c(/C=C/C(=O)O  
 C(C)(C)C)cc2[Si](C)(C)C)cc1  
 841 C=CNC=O.COc1cc(Br)ccc1F>>COc1cc(/C=C/NC=O)ccc1F  
 \*CNCCOCCOCCOCCNC(=O)COc1ccc(C(Cc2cc(OC)cc(OC)c2)NC(=O)c2cccc(C=C)c2)cc1.Cc1cc  
 842 (I)ccc1[N+](=O)[O-]  
 ]>>\*CNCCOCCOCCOCCNC(=O)COc1ccc(C(Cc2cc(OC)cc(OC)c2)NC(=O)c2cccc(/C=C/c3ccc([N  
 +](=O)[O-])c(C)c3)c2)cc1  
 843 C=CC(=O)OCCCC.Oc1ccc(Br)cc1>>CCCCOC(=O)/C=C/c1ccc(O)cc1  
 844 C=CC(=O)OC.O=c1[nH]c(=O)n([C@@H]2O[C@H](CO)[C@H](O)[C@H]2F)cc1I>>COC(=O)/C=C  
 C/c1cn([C@@H]2O[C@H](CO)[C@H](O)[C@H]2F)c(=O)[nH]c1=O  
 845 C=C(CC(=O)OC)C(=O)OC.N#Cc1cccc1I>>COC(=O)C/C=C/c1cccc1C#N)C(=O)OC  
 846 C=Cc1ccc(N)cc1.O=C(O)c1ccc(I)cc1>>Nc1ccc(/C=C/c2ccc(C(=O)O)cc2)cc1  
 847 Br1ccc(-c2cccs2)s1.C=Cc1ccc(C=O)cc1>>O=Cc1ccc(/C=C/c2ccc(-c3cccs3)s2)cc1  
 848 C=CC(=O)OC(C)(C)C.COc1ccc2cc(Br)ccc2c1>>COc1ccc2cc(/C=C/C(=O)OC(C)(C)C)ccc2c1  
 849 C=C1C(=O)O[C@H]2[C@H]1C[C@@H](O)/C(C)=C/CC[C@@]1(C)O[C@@H]21.COc1cccc1I>>C  
 Oc1cccc1/C=C1/C(=O)O[C@H]2[C@H]1C[C@@H](O)/C(C)=C/CC[C@@]1(C)O[C@@H]21  
 850 C=CC(N)=O.Cc1cccc1I>>Cc1cccc1/C=C/C(N)=O  
 851 C=COCC.COc1ccc(Br)cc1>>C=C(OCC)c1ccc(OC)cc1  
 852 C=CC(=O)OCC.CC(C)(C)OC(=O)N1CCc2ccc(Br)cc2CC1>>CCOC(=O)/C=C/c1ccc2c(c1)CCN(C(=O  
 )OC(C)(C)C)CC2  
 853 C=CC(C)(C)O.O=S(=O)(c1cccc1)n1ccc2ccc(Br)cc21>>CC(C)(O)/C=C/c1ccc2ccn(S(=O)(=O)c3cccc  
 c3)c2c1  
 854 C=C[Si](C)(C)c1cccc1.CC(=O)c1ccc(Br)cc1>>CC(=O)c1ccc(/C=C/[Si](C)(C)c2cccc2)cc1  
 855 C=CCCN1C(=O)c2cccc2C1=O.Ic1ccc(C2OCCO2)cc1>>O=C1c2cccc2C(=O)N1CC/C=C/c1ccc(C2  
 OCCO2)cc1

856 C=CCCC(=O)CCCCC[Se]c1cccc1.Ic1cccc1>>O=C(CC/C=C/c1cccc1)CCCCC[Se]c1cccc1  
C=CC(=O)OCCCC.COc1ccc2cc([N+](=O)[O-])ccc2c1-

857 c1c(OC(=O)C(C)(C)C)ccc2cc(Br)ccc12>>CCCCOC(=O)/C=C/c1ccc2c(-c3c(OC)ccc4cc([N+](=O)[O-])ccc34)c(OC(=O)C(C)(C)C)ccc2c1

858 C=CCCCCCC.FC(F)(F)c1ccc(Cl)cc1>>C=C(CCCCCC)c1ccc(C(F)(F)F)cc1

859 C=CC#N.CC(=O)c1ccc(Cl)cc1>>CC(=O)c1ccc(/C=C/C#N)cc1

860 C=CCNC(=O)OC(C)(C)C.O=S(=O)(Oc1ccc(F)cc1Cl)C(F)(F)F>>C=C(CNC(=O)OC(C)(C)C)c1ccc(F)cc1Cl

861 C=CC(=O)OC.O=C1Cc2cc(Br)ccc2N1>>COC(=O)/C=C/c1ccc2c(c1)CC(=O)N2

862 Brc1cccn1.C=COC(C)C>>C=C(COC(C)C)c1cccn1

863 C=CC(=O)OC(C)(C)C.CC(=O)Cc1cc2c(cc1Br)OCO2>>CC(=O)Cc1cc2c(cc1/C=C/C(=O)OC(C)(C)C)OCO2

864 C=CC(=O)OC.O=c1[nH]c(=O)n([C@@H]2CO[C@H](CO)[C@H]2CO)cc1I>>COC(=O)/C=C/c1cn([C@@H]2CO[C@H](CO)[C@H]2CO)c(=O)[nH]c1=O

865 Brc1ccoc1.C=CCNS(=O)(=O)c1ccc(C)cc1>>Cc1ccc(S(=O)(=O)NC/C=C/c2ccoc2)cc1

866 C=Cc1cccc1.COc1ccc(/C=C/c2[nH]c3ccccc3c(=O)c2I)cc1>>COc1ccc(/C=C/c2[nH]c3ccccc3c(=O)c2/C=C/c2ccccc2)cc1

867 C=Cc1cccc1.Fc1cccc1I>>Fc1cccc1/C=C/c1cccc1

868 C=Cc1ccc(F)cc1.Cn1c(=O)c2c(cc(Br)n2C)n(C)c1=O>>Cn1c(=O)c2c(cc(/C=C/c3ccc(F)cc3)n2C)n(C)c

869 C=C(F)[Si](C)(c1cccc1)c1cccc1.Cc1ccc(I)c(C)c1>>Cc1ccc(/C=C(\F)[Si](C)(c2ccccc2)c2ccccc2)c(C

870 Brc1cccn1.C=Cc1nn(C(c2ccccc2)(c2ccccc2)c2ccccc2)c2c(F)cc(C#N)cc12>>N#Cc1cc(F)c2c(c1)c(/C=C/c1cccn1)nn2C(c1cccc1)(c1cccc1)c1cccc1

871 C=Cc1cccn1.CC(C)(C)OC(=O)N[C@H](COc1cncc(Br)c1)C(=O)O>>CC(C)(C)OC(=O)N[C@H](COc1cncc(/C=C/c2cccn2)c1)C(=O)O

872 C=Cc1cccc1.COc1nc(Br)c(-c2ccccc2)n(Cc2ccccc2)c1=O>>COc1nc(/C=C/c2ccccc2)c(-c2ccccc2)n(Cc2ccccc2)c1=O

873 C=CC(=O)OCC.Cc1ccc(Br)cc1>>CCOC(=O)/C=C/c1ccc(C)cc1

874 C=CC(CO)N1C(=O)c2ccccc2C1=O.COc1cccc(Br)c1>>COc1cccc(/C=C/C(CO)N2C(=O)c3ccccc3C2=C

875 C=CC(=O)OC.COC(=O)c1ccc2c1oc1ccc(-c3csc(-c4ccc(I)cc4)n3)cc12>>COC(=O)/C=C/c1ccc(-c2nc(-c3ccc4oc5c(C(=O)OC)cccc5c4c3)cs2)cc1

876 C=CC1(C(=O)O)COC(C)(C)OC1.CC(C)[C@H](O)C(=O)N[C@@H](C)C(=O)N1CCC[C@H](C(=O)N[C@H](C)c2ccc3ccc(Br)cc3n2)N1>>CC(C)[C@H](O)C(=O)N[C@@H](C)C(=O)N1CCC[C@H](C(=O)N[C@H](C)c2ccc3ccc(/C=C/C4(C(=O)O)COC(C)(C)OC4)cc3n2)N1

877 C=CP(=O)(OCC)OCC.CCOC(=O)CNc1ccccc1Br>>CCOC(=O)CNc1ccccc1/C=C/P(=O)(OCC)OCC

878 C=CC(=O)OC(C)(C)C.CC(C)CN1C(c2ccc(Br)cc2)c2ccc3c(cnn3C3CCCCO3)c2CC1(C)C>>CC(C)CN1C(c2ccc(/C=C/C(=O)OC(C)(C)C)cc2)c2ccc3c(cnn3C3CCCCO3)c2CC1(C)C

879 C=CC(=O)OC.Clc1ccc(Br)cc1>>COC(=O)/C=C/c1ccc(Cl)cc1

880 C=CC(=O)OC.CC(C)(F)CN1[C@H](C(F)F)Cc2c(ccc3c2cnn3C2CCCCO2)[C@@]1(C)c1c(F)cc(Br)cc1F>>COC(=O)/C=C/c1cc(F)c([C@]2(C)c3ccc4c(cnn4C4CCCCO4)c3C[C@@H](C(F)F)N2CC(C)(C)F

881 C=Cc1cccn1.COc1ccc(Br)c(F)c1>>COc1ccc(/C=C/c2cccn2)c(F)c1

882 C=C(F)C(C)=O.Ic1ccccc1-c1ccccc1>>CC(=O)/C(F)=C/c1ccccc1-c1ccccc1

883 C=C[C@H]1O[C@@H]2OC(C)(C)O[C@@H]2[C@H]1OC.COC(=O)[C@H](Cc1ccc(I)cc1)NC(=O)OC(C)(C)C>>COC(=O)[C@H](Cc1ccc(/C=C/[C@H]2O[C@@H]3OC(C)(C)O[C@@H]3[C@H]2OC)c1)NC(=O)OC(C)(C)C

884 C=C/C=C/C(=O)N(CCCC)CCCC.Clc1cccc(Br)c1>>CCCCN(CCCC)C(=O)/C=C/C=C/c1cccc(Cl)c1

885 Brc1ccc(OCCCCc2ccccc2)cc1.C/C=C(\CCO)C(=O)OCC>>CCOC(=O)/C(CCO)=C(\C)c1ccc(OCCCCc2ccccc2)cc1

886 C=Cc1cccc(OC)c1.Cn1c(=O)c2c(cc(Br)n2C)n(C)c1=O>>COc1cccc(/C=C/c2cc3c(c(=O)n(C)c(=O)n3C)n2C)c1

887 C=Cc1ccc(C(=O)OC[C@H]2O[C@@H]3OC(C)(C)O[C@@H]3[C@H]3OC(C)(C)O[C@H]32)cc1.CCOC(=O)C(F)Br>>CCOC(=O)C(F)/C=C/c1ccc(C(=O)OC[C@H]2O[C@@H]3OC(C)(C)O[C@@H]3[C@H]3OC(C)(C)O[C@H]32)cc1

888 C=CC(=O)OCC.CCOC(=O)CCOC(C)c1cc(OC)c(OC)cc1Br>>CCOC(=O)/C=C/c1cc(OC)c(OC)cc1C(C)OCCC(=O)OCC

889 C=C(C)C(=O)OC.Cc1ccsc1Br>>COC(=O)/C(C)=C/c1scsc1C

890 C=Cc1cccn1.CC(C)(C)OC(=O)N[C@H](COc1cncc(Br)c1)Cc1cccc(O)c1>>CC(C)(C)OC(=O)N[C@H](COc1cncc(/C=C/c2cccn2)c1)Cc1cccc(O)c1

891 C=CC(=O)OCC.Ic1cccc2ccccc12>>CCOC(=O)/C=C/c1cccc2ccccc12

892 C=CC(=O)N(C)Cc1sc2ccccc2c1C.CC1(C)NCc2cc(Br)cn2NC1=O>>Cc1c(CN(C)C(=O)/C=C/c2cnc3c(c2)CNC(C)(C)C(=O)N3)sc2ccccc12

893 C=CC#N.Nc1ccccc1I>>N#C/C=C/c1ccccc1N

894 C=Cc1ccc(OC)cc1.O=P1(c2ccccc2)C(Br)=Cc2ccccc21>>COc1ccc(/C=C/C2=Cc3ccccc3P2(=O)c2cccc  
 895 c2)cc1  
 896 C=CC(C)=O.Cc1cccc(I)c1>>CC(=O)/C=C/c1cccc(C)c1  
 897 C=CC(=O)OCCCC.Ic1nnc2nen(Cc3ccccc3)c12>>CCCCOC(=O)/C=C/c1nnc2nen(Cc3ccccc3)c12  
 898 C=Cc1ccc(Br)cc1.Cc1c(Nc2c(I)cncc2C#N)ccc2[nH]ccc12>>Cc1c(Nc2c(C#N)cncc2/C=C/c2ccc(Br)cc  
 899 2)ccc2[nH]ccc12  
 900 C=CC(=O)OC.COC(=O)[C@@H]1c2cc(Br)ccc2O[C@@H]1c1ccc(OCc2ccccc2)cc1>>COC(=O)/C=C  
 901 /c1ccc2c(c1)[C@@H](C(=O)OC)[C@@H](c1ccc(OCc3ccccc3)cc1)O2  
 902 C=CC#N.COc1ccc2c(c1)CCN(c1ccc(F)cc1)C2(C)c1ccc(Br)cc1>>COc1ccc2c(c1)CCN(c1ccc(F)cc1)C  
 903 2(C)c1ccc(/C=C/C#N)cc1  
 904 C=CCc1ccc(OCc2ccccc2)c(OC)c1.O=C(O)/C=C/c1ccccc1Br>>COc1cc(C/C=C/c2ccccc2/C=C/C(=O)  
 905 O)ccc1OCc1ccccc1  
 906 C=C(NC(C)=O)C(=O)OC.COC(=O)c1cccc(I)c1>>COC(=O)/C=C/c1cccc(C(=O)OC)c1)NC(C)=O  
 907 C=Cc1cncnc1.CCNc1ccc(Br)cc1>>CCNc1ccc(/C=C/c2cncnc2)cc1  
 908 C=CC(C)O.COC(=O)c1ccc(I)cc1>>COC(=O)c1ccc(/C=C/C(C)O)cc1  
 909 C=Cc1cncnc1.O=[N+][O-]c1ccc(N(c2ccc(Br)cc2)c2ccc([N+](=O)[O-])cc2)cc1>>O=[N+][O-  
 910 ]c1ccc(N(c2ccc(/C=C/c3cncnc3)cc2)c2ccc([N+](=O)[O-])cc2)cc1  
 911 C=CC(=O)OCC.CCOC(=O)c1ccc(Br)cc1C>>CCOC(=O)/C=C/c1ccc(C(=O)OCC)c(C)c1  
 912 C=Cc1cccn1.CC(C)c1cnn(Cc2ccc3ncc(Br)cc3n2)c1>>CC(C)c1cnn(Cc2ccc3ncc(/C=C/c4cccn4)cc  
 913 3n2)c1  
 914 C=Cc1ccc(OC)cc1.COC(=O)Cn1c(=O)c(Cl)nc2cc(Br)cnc21>>COC(=O)Cn1c(=O)c(/C=C/c2ccc(OC)c  
 915 c2)nc2cc(Br)cnc21  
 916 C=Cc1ccccc1.Ic1cnc2ccccc2c1-c1ccccc1>>C=C/c1cnc2ccccc2c1-c1ccccc1)c1ccccc1  
 917 Br1ccccc1.C=CC(C)=O>>CC(=O)/C=C/c1ccccc1  
 918 C=CC(=O)OCC.Cc1nc2cc(Br)ccc2s1>>CCOC(=O)/C=C/c1ccc2sc(C)nc2c1  
 919 C=CC(=O)OCCc1ccccc1.CC(=O)c1ccccc1Br>>CC(=O)c1ccccc1/C=C/C(=O)OCCc1ccccc1  
 920 C=CCN(C(=O)OC(C)(C)C)C(=O)OC(C)(C)C.Clc1cccn1>>CC(C)(C)OC(=O)N(C/C=C/c1cccn1)C(=  
 921 O)OC(C)(C)C  
 922 C=CC(=O)N(C)C.COc1cc(Br)ccc1Cc1c(C)nc(N)nc1OS(=O)(=O)c1c(C(C)C)cc(C(C)C)cc1C(C)C>>C  
 923 Oc1cc(/C=C/C(=O)N(C)C)ccc1Cc1c(C)nc(N)nc1OS(=O)(=O)c1c(C(C)C)cc(C(C)C)cc1C(C)C  
 924 C=Cc1ccc(C(=O)OCC)cc1.CC1(C)CC=C(Sc2ccccc2)c2cc(Br)ccc21>>CCOC(=O)c1ccc(/C=C/c2ccc3c  
 925 (c2)C(Sc2ccccc2)=CCC3(C)C)cc1  
 926 Br1ncccn1.C=Cc1cccc(OC)c1>>COc1cccc(/C=C/c2ncccn2)c1  
 927 C=CN1C(=O)c2ccccc2C1=O.COC(=O)c1cc(OC)nc1Br>>COC(=O)c1cc(OC)nc1/C=C/N1C(=O)c2c  
 928 cccc2C1=O  
 929 C=Cc1ccc(C(=O)OCC)cc1.CC(C)=C1CCC(C)(C)c2ccc(Br)cc21>>CCOC(=O)c1ccc(/C=C/c2ccc3c(c2)  
 930 C(=C(C)C)CCC3(C)C)cc1  
 931 C=CC(=O)OC(C)(C)C.CC(C)(C)OC(=O)N1CCNc2ccc(Br)cc2C1>>CC(C)(C)OC(=O)/C=C/c1ccc2c(c  
 932 1)CN(C(=O)OC(C)(C)C)CCN2  
 933 C=CC(=O)c1ccc(OC)cc1OC.COc1cc(OC)c(OC)cc1I>>COc1ccc(C(=O)/C=C/c2cc(OC)c(OC)cc2OC)c  
 934 (OC)c1  
 935 C=CCN(C(=O)c1c(C)noc1C)[C@H](C)c1cc(F)cc(F)c1.O=C1Nc2nccccc2[C@@]12Cc1cc(Br)cnc1C2>  
 936 >Cc1noc(C)c1C(=O)N(C/C=C/c1cnc2c(c1)C[C@@]1(C2)C(=O)Nc2nccccc21)[C@H](C)c1cc(F)cc(F)c  
 937 C=CC(=O)O.Cc1ccccc(S(=O)(=O)N(C)c2ccccc(I)c2)c1>>Cc1ccccc(S(=O)(=O)N(C)c2ccccc(/C=C/C(=O)  
 938 O)c2)c1  
 939 CCOC(=O)/C(F)=C\CCc1ccccc1.COc1ccc(I)cc1>>CCOC(=O)/C(F)=C\CCc1ccccc1)c1ccc(OC)cc1  
 940 C=Cc1ccc(OC)cc1.COC(=O)c1cc(OC)ccc1Br>>COC(=O)c1cc(OC)ccc1/C=C/c1ccc(OC)cc1  
 941 C=CC(=O)OCC.CCCCCc1ccc(-c2ccc(I)cc2OCCO)cc1>>CCCCCc1ccc(-  
 942 c2ccc(/C=C/C(=O)OCC)cc2OCCO)cc1  
 943 C=CC(=O)OCCCC.COc1cc(CO[Si](C)(C)C(C)(C)C)cc(Cl)n1>>CCCCOC(=O)/C=C/c1cc(CO[Si](C)(  
 944 C)C(C)(C)C)cc(OC)n1  
 945 C=CC(=O)O.CC(C)(C)OC(=O)N[C@@H](Cc1c[nH]c2ccccc(Br)c12)C(=O)O>>CC(C)(C)OC(=O)N[C  
 946 @H](Cc1c[nH]c2ccccc(/C=C/C(=O)O)c12)C(=O)O  
 947 Cc1ccccc(I)c1.NC(=O)/C=C/c1ccccc1>>Cc1ccccc(/C=C\C(N)=O)c2ccccc2)c1  
 948 C=Cc1nn(C2CCCCO2)c2cc([N+](=O)[O-]  
 949 ]ccc12.Cc1cc(C)nc(Br)c1>>Cc1cc(C)nc(/C=C/c2nn(C3CCCCO3)c3cc([N+](=O)[O-])ccc23)c1  
 950 C=CC(=O)N(C)OC.N#Cc1ccc(Br)cc1>>CON(C)C(=O)/C=C/c1ccc(C#N)cc1  
 951 C=CCNC(=O)OC(C)(C)C.Clc1ccccc1>>C=C(CNC(=O)OC(C)(C)C)c1ccccc1  
 952 C=COCCCC.COC(=O)c1ccc(Br)cc1>>C=C(OCCCC)c1ccc(C(=O)OC)cc1  
 953 C=CC(=O)OC.O=C1c2ccc(OS(=O)(=O)C(F)(F)F)cc2C(=O)N1[C@@H](COc1ccccc1)c1ccccc1>>C  
 954 OC(=O)/C=C/c1ccc2c(c1)C(=O)N([C@@H](COc1ccccc1)c1ccccc1)C2=O

933 C=CCN1C(=O)c2ccccc2C1=O.N#Cc1ccc(Br)cc1>>N#Cc1ccc(/C=C/CN2C(=O)c3ccccc3C2=O)cc1  
 934 C=CC(=O)N(C)C.CCc1nc2cc(O)ccc2c(Oc2ccc(Br)cc2)c1-c1ccccc1>>CCc1nc2cc(O)ccc2c(Oc2ccc(/C=C/C(=O)N(C)C)cc2)c1-c1ccccc1  
 935 BrC1C2ccccc2cc2ccccc12.C=CCn1nnc2ccccc21>>C(=C/c1c2ccccc2cc2ccccc12)\Cn1nnc2ccccc21  
 936 C=C(C)C(=O)NCc1ccccc1.Clc1ccccc1>>C/C(=C\c1ccccc1)C(=O)NCc1ccccc1  
 937 C=CC(=O)OC.O=C1Nc2cccc(Br)c2C12OCCO2>>COC(=O)/C=C/c1cccc2c1C1(OCCO1)C(=O)N2  
 938 C=CC(=O)OC.Cc1cc(F)ccc1Br>>COC(=O)/C=C/c1ccc(F)cc1C  
 939 C=CC(=O)OCCCC.COC(=O)c1ccc(I)cc1>>CCCCOC(=O)/C=C/c1ccc(C(=O)OC)cc1  
 940 C=CC(=O)N(C)C.CC(=O)c1ccc(Cl)cc1>>CC(=O)c1ccc(/C=C/C(=O)N(C)C)cc1  
 941 C=Cc1ccc(C)cc1.CC(=S)NS(=O)(=O)c1ccc(Br)cc1>>CC(=S)NS(=O)(=O)c1ccc(/C=C/c2ccc(C)cc2)cc
