# Supplementary material for: Heck reaction prediction using a transformer model based on a transfer learning strategy
Source: Royal Society of Chemistry journal article supplement (doi:10.1039/d0cc02657c), 2020-01-01
Supplement: d0cc02657c1.zip [file d0cc02657c1.zip]

**Table S4A. Data used for transformer-baseline and transformer-transfer learning models training in Heck reaction (Dataset for training in experiment 1)**

| Reaction ID | Reaction SMILES                                                                                                                                                                        |
|-------------|----------------------------------------------------------------------------------------------------------------------------------------------------------------------------------------|
| 1           | <chem>C=CCN1C(=O)c2ccccc2C1=O.FC(F)(F)c1cc(Br)cc(C(F)(F)F)c1&gt;&gt;O=C1c2ccccc2C(=O)N1C/C=C/c1cc(C(F)(F)F)cc(C(F)(F)F)c1</chem>                                                       |
| 2           | <chem>C=CC(=O)OC.CCCc1nc2c(N)nc3cc(Br)ccc3c2n1CC(C)C&gt;&gt;CCCc1nc2c(N)nc3cc(/C=C/C(=O)OC)ccc3c2n1CC(C)C</chem>                                                                       |
| 3           | <chem>C=Cc1cccc1.N#Cc1cccc(Br)c1&gt;&gt;N#Cc1cccc(/C=C/c2ccccc2)c1</chem>                                                                                                              |
| 4           | <chem>C=Cc1c(F)c(F)c(F)c(F)c1F.N#Cc1ccc(I)c2ccccc12&gt;&gt;N#Cc1ccc(/C=C/c2c(F)c(F)c(F)c2F)c2ccccc1</chem>                                                                             |
| 5           | <chem>C=CCO[C@H]1[C@@H]([C@H](O)CSc2ccccc2Br)O[C@@H]2OC(C)(C)O[C@H]12&gt;&gt;C=C1CO[C@H]2[C@H](O)[C@@H]3OC(C)(C)O[C@H]23[C@H](O)CSc2ccccc21</chem>                                     |
| 6           | <chem>C=CC(=O)OC.COc1ccc(CN2C(=O)C(=O)c3c(Br)cccc32)cc1&gt;&gt;COC(=O)/C=C/c1cccc2c1C(=O)C(=O)N2Cc1ccc(OC)cc1</chem>                                                                   |
| 7           | <chem>C=CC(=O)OC.CC1(C)CCC(C)(C)c2cc(C(=O)c3ccc(I)cc3)ccc21&gt;&gt;COC(=O)/C=C/c1ccc(C(=O)c2ccc3c(c2)C(C)(C)CCC3(C)C)cc1</chem>                                                        |
| 8           | <chem>Br1ccc2c(c1)OCO2.C=CCN1C(=O)c2ccccc2C1=O&gt;&gt;O=C1c2ccccc2C(=O)N1C/C=C/c1ccc2c(c1)OC</chem>                                                                                    |
| 9           | <chem>Br1cccc2ccccc12.C=C&gt;&gt;C=Cc1cccc2ccccc12</chem>                                                                                                                              |
| 10          | <chem>C=CC(=O)OCC.Fc1cccc(Br)c1&gt;&gt;CCOC(=O)/C=C/c1cccc(F)c1</chem>                                                                                                                 |
| 11          | <chem>C=Cc1ccc(/C=C/c2ccc(C=O)cc2)cc1.COCCOCCOCCOCC(COCCOCCOCCOCC)Oc1ccc(I)cc1&gt;&gt;COC</chem><br><chem>COCCOCCOCC(COCCOCCOCCOCC)Oc1ccc(/C=C/c2ccc(/C=C/c3ccc(C=O)cc3)cc2)cc1</chem> |
| 12          | <chem>C=CC(=O)O.O=[N+][O-]</chem><br><chem>c1c(I)ccc2c1C=CC1(CCCCC1)O2&gt;&gt;O=C(O)/C=C/c1ccc2c(c1)[N+](=O)[O-]</chem>                                                                |
| 13          | <chem>C=C.O=[N+][O-]c1cc(I)cc([N+](=O)[O-])c1&gt;&gt;C=Cc1cc([N+](=O)[O-])cc([N+](=O)[O-])c1</chem>                                                                                    |
| 14          | <chem>C=CC(=O)OC(C)(C)C.CC(C)=CCc1cc(I)ccc1O&gt;&gt;CC(C)=CCc1cc(/C=C/C(=O)OC(C)(C)C)ccc1O</chem>                                                                                      |
| 15          | <chem>C=CC(=O)Oc1cccc1.Ic1cccc1&gt;&gt;O=C(/C=C/c1cccc1)Oc1cccc1</chem>                                                                                                                |
| 16          | <chem>C=CCOCc1ccc2cc(OC)ccc2c1Br&gt;&gt;C=C1COCc2ccc3cc(OC)ccc3c21</chem>                                                                                                              |
| 17          | <chem>C=Cc1cccc1.CC(=O)c1cn(-c2ccccc2)nc1OS(=O)(=O)C(F)(F)F&gt;&gt;CC(=O)c1cn(-c2ccccc2)nc1/C=C/c1cccc1</chem>                                                                         |
| 18          | <chem>C=CC=O.O=[N+][O-]c1ccc(Br)cc1&gt;&gt;O=C/C=C/c1ccc([N+](=O)[O-])cc1</chem>                                                                                                       |
| 19          | <chem>C=CC(=O)OC(C)(C)C.Oc1ccc(C(=C2C3CCCC2CCC3)c2ccc(Br)cc2)cc1&gt;&gt;CC(C)(C)OC(=O)/C=C/c1ccc(C(=C2C3CCCC2CCC3)c2ccc(O)cc2)cc1</chem>                                               |
| 20          | <chem>C=Cc1cccc1.CC(C)(C)OC(=O)N[C@H](COc1cnc(Br)c1)Cc1c[nH]c2ccccc12&gt;&gt;CC(C)(C)OC(=O)N</chem><br><chem>[C@H](COc1cnc(/C=C/c2ccccc2)c1)Cc1c[nH]c2ccccc12</chem>                   |
| 21          | <chem>C=CC(N)=O.O=[N+][O-]c1cccc(Br)c1&gt;&gt;NC(=O)/C=C/c1cccc([N+](=O)[O-])c1</chem>                                                                                                 |
| 22          | <chem>C=CC(=O)OC.COc1cc2c(cc1Br)[C@H]1CCCC[C@H]1N2C(=O)C(C)(C)C&gt;&gt;COC(=O)/C=C/c1cc2c(cc1OC)N(C(=O)C(C)(C)C)[C@@H]1CCCC[C@H]121</chem>                                             |
| 23          | <chem>C=CCCCCCC.Cc1ccc(Br)cc1&gt;&gt;CCCCC/C=C/c1ccc(C)cc1</chem>                                                                                                                      |
| 24          | <chem>C=CC(=O)OCc1cccc1.O=[N+][O-]c1ccc(I)cc1&gt;&gt;O=C(/C=C/c1ccc([N+](=O)[O-])cc1)OCc1cccc1</chem>                                                                                  |
| 25          | <chem>C=CCCCCCC.CC(C)(C)c1cccc(OS(=O)(=O)C(F)(F)F)c1&gt;&gt;C=C(CCCCCC)c1cccc(C(C)(C)C)c1</chem>                                                                                       |
| 26          | <chem>C=CC(=O)OC(C)(C)C.O=Cc1cc(F)ccc1Br&gt;&gt;CC(C)(C)OC(=O)/C=C/c1ccc(F)cc1C=O</chem>                                                                                               |
| 27          | <chem>C=CC(=O)OC.O=S(=O)(c1ccc(F)cc1)N1CCc2cc(Br)nc21&gt;&gt;COC(=O)/C=C/c1cnc2c(c1)CCN2S(=O)(=O)c1ccc(F)cc1</chem>                                                                    |
| 28          | <chem>C=CC(=O)OCC.CC1(C)CC(=C(c2ccc(Br)cc2)c2ccc(O)c(F)c2)CC(C)(C)O1&gt;&gt;CCOC(=O)/C=C/c1ccc(C(=C2CC(C)(C)OC(C)(C)C2)c2ccc(O)c(F)c2)cc1</chem>                                       |
| 29          | <chem>C=Cc1cccc1.Ic1ccc(Cn2cc(-c3ccccc3)nn2)cc1&gt;&gt;C=C/c1ccc(Cn2cc(-c3ccccc3)nn2)cc1)c1cccc1</chem>                                                                                |
| 30          | <chem>C=CS(=O)(=O)F.Ic1cnn(-c2ccccc2)c1&gt;&gt;O=S(=O)(F)/C=C/c1cnn(-c2ccccc2)c1</chem>                                                                                                |
| 31          | <chem>C=C/C=C/c1cccc1.FC(F)(F)C(Br)CCc1cccc1&gt;&gt;FC(F)(F)C(/C=C/C=C/c1cccc1)CCc1cccc1</chem>                                                                                        |
| 32          | <chem>C=CCc1c(OCc2cc(OC)ccc2Br)c(=O)n(C)c(=O)n1C&gt;&gt;COc1ccc2c(c1)COc1c(n(C)c(=O)n(C)c1=O)C/C</chem>                                                                                |
| 33          | <chem>C=CC(=O)Nc1ccc(F)cc1.COc1ccc2c(=O)c(I)coc2c1&gt;&gt;COc1ccc2c(=O)c(/C=C/C(=O)Nc3ccc(F)cc3)co</chem><br><chem>c2c1</chem>                                                         |
| 34          | <chem>C=CCCCCO[Si](C)(C)C(C)C.O=S(=O)(Oc1cccc1)C(F)(F)F&gt;&gt;C=C(CCCCCO[Si](C)(C)C(C)(C)C)c1cccc1</chem>                                                                             |
| 35          | <chem>C=CC#N.CC1(C)O[C@H]2CCC=C(Br)[C@H]2O1&gt;&gt;CC1(C)O[C@H]2CCC=C(/C=C/C#N)[C@H]2</chem>                                                                                           |
| 36          | <chem>C=CCCCCCC(=O)OC.CC1(C)C(=O)N(c2ccc(C#N)c(C(F)(F)F)c2)C(=S)N1c1ccc(Br)c(F)c1&gt;&gt;COC(=O)CCCCC/C=C/c1ccc(N2C(=S)N(c3ccc(C#N)c(C(F)(F)F)c3)C(=O)C2(C)C)cc1F</chem>               |
| 37          | <chem>C=CC(=O)O.O=C(O)c1ccc(I)cc1&gt;&gt;O=C(O)/C=C/c1ccc(C(=O)O)cc1</chem>                                                                                                            |
| 38          | <chem>C=CS(C)(=O)=O.O=C(c1cccc1)c1ccc(Br)cc1&gt;&gt;CS(=O)(=O)/C=C/c1ccc(C(=O)c2ccccc2)cc1</chem>                                                                                      |

39 C=CC(=O)OC.COc1cc(C=O)c(Br)c(OC)c1>>COC(=O)/C=C/c1c(C=O)cc(OC)cc1OC  
40 C=Cc1ccc(-c2ccccc2)cc1.O=c1oc2ccccc2cc1Br>>O=c1oc2ccccc2cc1/C=C/c1ccc(-c2ccccc2)cc1  
41 C=CC(=O)OC(C)(C)C.COCC1CCC(C2=C[C@@H]3CC[C@H](OC(C)(C)C)[C@@]3(C)CC2)=C(Br)C  
42 1>>COC1CCC(C2=C[C@@H]3CC[C@H](OC(C)(C)C)[C@@]3(C)CC2)=C/C=C/C(=O)OC(C)(C)C  
43 C=CC(=O)OC.COc1ccc(Cl)cc1I>>COC(=O)/C=C/c1cc(Cl)ccc1OC  
44 C=CC(=O)OCC.Clc1ccc(I)cc1>>CCOC(=O)/C=C/c1ccc(Cl)cc1  
45 C=Cc1ccc(Cl)cc1.FC(F)(F)C(Br)CCc1ccccc1>>FC(F)(F)C(/C=C/c1ccc(Cl)cc1)CCc1ccccc1  
46 C=CC(=O)OC(C)(C)C.CC(C)(C)O[C@H]1CC[C@H]2C=C(C3=C(Br)CN(S(=O)(=O)c4ccccc4)CC3)C  
47 C[C@@]21C>>CC(C)(C)OC(=O)/C=C/C1=C(C2=C[C@@H]3CC[C@H](OC(C)(C)C)[C@@]3(C)C  
48 C2)CCN(S(=O)(=O)c2ccccc2)C1  
49 C=Cc1ccc(C(F)(F)F)cc1.Cc1ccc(Br)cc1>>Cc1ccc(/C=C/c2ccc(C(F)(F)F)cc2)cc1  
50 C=CC(=O)OCC.O=C1C(O)=C(I)C(=O)c2ccccc21>>CCOC(=O)/C=C/C1=C(O)C(=O)c2ccccc2C1=O  
51 C=CCCN(c1ccc(Cl)cc1)S(=O)(=O)c1ccccc1Br>>C=C1CCN(c2ccc(Cl)cc2)S(=O)(=O)c2ccccc21  
52 C=CC(=O)OCC.Nc1ccc(Cl)nc1I>>CCOC(=O)/C=C/c1nc(Cl)ccc1N  
53 C=CC(=O)OCC.CCOC(=O)CCOCc1cc(OCc2ccccc2)ccc1Br>>CCOC(=O)/C=C/c1ccc(OCc2ccccc2)cc  
54 1COCCC(=O)OCC  
55 C=CC(=O)OC.IC(CCSc1ccccc1)=C(c1ccccc1)c1ccccc1>>COC(=O)/C=C/C(CCSc1ccccc1)=C(c1ccccc  
56 1)c1ccccc1  
57 C=CC(=O)Oc1ccc(OC)cc1.Ic1ccccc1>>COc1ccc(OC(=O)/C=C/c2ccccc2)cc1  
58 C=Cc1ccccc(O)c1.Oc1cc(O)cc(I)c1>>Oc1ccccc(/C=C/c2cc(O)cc(O)c2)c1  
59 C=CC(=O)OCCCC.CCOC(=O)c1ccc(Br)cc1>>CCCCOC(=O)/C=C/c1ccc(C(=O)OCC)cc1  
60 Bre1ccsc1.C=COCCCC>>C=C(OCCCC)c1ccsc1  
61 C=Cc1ccc(OCCCCCCCCCCCC)cc1.Oc1ccc(I)cc1>>CCCCCCCCCCCCCOc1ccc(/C=C/c2ccc(O)cc2)cc  
62 C=Cc1ccc(OC)c(OC)c1.COC(=O)Cn1c(=O)c(Cl)nc2ccccc21>>COC(=O)Cn1c(=O)c(/C=C/c2ccc(OC)  
63 c(OC)c2)nc2ccccc21  
64 Bre1ccc(-c2nc3ccccc3n2)cc1.C=CCn1c(-c2ccc(OC)cc2)nc2ccccc2c1=O>>COc1ccc(-  
65 c2nc3ccccc3c(=O)n2C/C=C/c2ccc(-c3nc4ccccc4n3)cc2)cc1  
66 C=CC(=O)OC.Cc1cc(-c2nn(C(c3ccccc3)(c3ccccc3)c3ccccc3)c3cc([N+](=O)[O-  
67 ])(Br)cc23)ccn1>>COC(=O)/C=C/c1cc2c(-  
68 c3ccnc(C)c3)nn(C(c3ccccc3)(c3ccccc3)c3ccccc3)c2cc1[N+](=O)[O-]  
69 C=CC(=O)OCC.Ic1ccc2c(c1)OCCOCCOCCOCCO2>>CCOC(=O)/C=C/c1ccc2c(c1)OCCOCCOCCO  
70 C=C(NC(=O)OC(C)(C)C)C(=O)OCc1ccccc1.Ic1ccccc1>>CC(C)(C)OC(=O)N/C(=C/c1ccccc1)C(=O)  
71 OCc1ccccc1  
72 C=Cc1ccccc1.CCOC(=O)COc1ccc(I)cc1>>CCOC(=O)COc1ccc(/C=C/c2ccccc2)cc1  
73 C=CC(=O)OC.Cc1ccc(Br)c(N)c1>>COC(=O)/C=C/c1ccc(C)cc1N  
74 C=CC(=O)OCC.Cn1nnc2c(Cl)c(Br)ccc21>>CCOC(=O)/C=C/c1ccc2c(nnn2C)c1Cl  
75 C=C1C(=O)O[C@@H]2/C=C(\C)CC/C=C(\C)CC[C@@H]12.FC(F)(F)c1ccccc(I)c1>>C/C1=C[C@H]  
76 2OC(=O)/C(=C/c3cccc(C(F)(F)F)c3)[C@@H]2CC/C(C)=C/CC1  
77 C=CC(F)(F)F.O=C(O)c1ccc(I)cc1>>O=C(O)c1ccc(/C=C/C(F)(F)F)cc1  
78 C=CCCCC.CC(=S)NS(=O)(=O)c1ccc(Br)cc1>>CCCC/C=C/c1ccc(S(=O)(=O)NC(C)=S)cc1  
79 C=CCN(C(=O)OC(C)(C)C)C(=O)OC(C)(C)C.FC(F)(F)c1ccccc(Br)c1>>CC(C)(C)OC(=O)N(C/C=C/c1  
80 cccc(C(F)(F)F)c1)C(=O)OC(C)(C)C  
C=C1C(=O)O[C@H]2[C@H]1CC/C(C)=C/CC[C@@]1(C)O[C@@H]21.Ic1ccsc1>>C/C1=C\CC[C@  
@]2(C)O[C@H]2[C@H]2OC(=O)/C(=C/c3ccsc3)[C@@H]2CC1  
C=CC(O)CCCCC.I/C=C/C=C/C/CCCCOCc1ccccc1>>CCCCCC(O)/C=C/C=C/C/C/CCCCOCc1ccccc1  
C=Cc1ccc2c(c1)CC[C@@H]1[C@@H]2CC[C@]2(C)[C@@H](O[Si](C)(C)C)CC[C@@H]1  
2.C[Si](C)(OS(=O)(=O)C(F)(F)F)OS(=O)(=O)C(F)(F)F>>CC(C)(C)[Si](C)(C)O[C@H]1CC[C@H]2[  
C@@H]3CCc4cc(/C=C/[Si](C)(C)OS(=O)(=O)C(F)(F)F)ccc4[C@H]3CC[C@]12C  
C=CC(=O)OC.Fc1ccc(I)c1>>COC(=O)/C=C/c1ccc(F)c1  
C=CN1C(=O)c2ccccc2C1=O.COc1ccc2ccc(Br)cc2n1>>COc1ccc2ccc(/C=C/N3C(=O)c4ccccc4C3=O)  
cc2n1  
C=CS(=O)(=O)F.FC(F)(F)c1ccccc(I)c1>>O=S(=O)(F)/C=C/c1ccc(C(F)(F)F)c1  
C=COCCCCC.CC(C)(C)c1ccc(OS(=O)(=O)C(F)(F)F)cc1>>C=C(OCCCC)c1ccc(C(C)(C)C)cc1  
C=CC(=O)OC.O=Cc1ccc(Br)cn1>>COC(=O)/C=C/c1ccc(C=O)nc1  
C=Cc1ccc(F)cc1.CC(=O)c1ccc(Br)cc1>>CC(=O)c1ccc(/C=C/c2ccc(F)cc2)cc1  
C=CCC(=O)O.CC(=O)OC[C@H]1O[C@@H](Oc2n[nH]c(C(C)C)c2Cc2ccc(Br)cc2)[C@H](OC(C)=O  
)[C@@H](OC(C)=O)[C@@H]1OC(C)=O>>CC(=O)OC[C@H]1O[C@@H](Oc2n[nH]c(C(C)C)c2Cc  
2ccc(/C=C/CC(=O)O)cc2)[C@H](OC(C)=O)[C@@H](OC(C)=O)[C@@H]1OC(C)=O  
C=CCOc1cc2c(cc1I)-c1c(cc(OC)c(OC)c1OC)CC[C@@H]2NC(=O)CO>>C=C1COc2cc3c(cc21)-  
c1c(cc(OC)c(OC)c1OC)CC[C@@H]3NC(=O)CO  
C=CCCCCCC.O=S(=O)(Oc1ccccc(Oc2ccccc2)c1)C(F)(F)F>>C=C(CCCCCC)c1ccccc(Oc2ccccc2)c1

81 C=CC(=O)OC.CC1CC(n2c(Nc3ccc(OC(F)(F)F)cc3)nc3cc(Br)ccc32)CC(C)(C)C1>>COC(=O)/C=C\c1  
ccc2c(c1)nc(Nc1ccc(OC(F)(F)F)cc1)n2C1CC(C)CC(C)(C)C1  
82 C=CCN(C(=O)c1ncn1C)[C@H](C)c1cc(F)cc(F)c1.O=C1Nc2ncccc2[C@@]12Cc1cc(Br)cn1C2>>C[  
C@H](c1cc(F)cc(F)c1)N(C/C=C/c1nc2c(c1)C[C@@]1(C2)C(=O)Nc2ncccc21)C(=O)c1ncn1C  
83 C=Cc1cccc1.COc1cc[nH]c1/C=C1\C(=O)Nc2cccc(I)c21>>COc1cc[nH]c1/C=C1\C(=O)Nc2cccc(/C=  
C/c3cccc3)c21  
84 C=Cc1cccc1.O=Cc1cccc(F)c1Br>>O=Cc1cccc(F)c1/C=C/c1cccc1  
85 C=Cc1cccc1.COC(=O)c1ccc(Br)cc1NC(=O)c1cccc1>>COC(=O)c1ccc(/C=C/c2cccc2)cc1NC(=O)c  
1cccc1  
86 C=CCCCCCC.COc1ccc(Cl)cc1>>CCCCC/C=C/c1ccc(OC)cc1  
C=Cc1nc2c(N)ncn2n1[C@H]1C[C@H](O[Si](C)(C)C(C)(C)C)[C@@H](CO[Si](C)(C)C(C)(C)C)O1.  
87 Cc1cccc1Br>>Cc1cccc1/C=C/c1nc2c(N)ncn2n1[C@H]1C[C@H](O[Si](C)(C)C(C)(C)C)[C@@H](  
CO[Si](C)(C)C(C)(C)C)O1  
88 C=Cc1ccc(C)cc1.O=c1cc(-c2cccc2)oc2ccc(Br)cc12>>Cc1ccc(/C=C/c2ccc3oc(-  
89 C=CS(=O)c1cccc1.Ic1cccc1>>O=S(/C=C/c1cccc1)c1cccc1  
90 C=CCN(C(=O)OC(C)(C)C)C(=O)OC(C)(C)C.O=C(c1cccc(Br)c1)C1CCCCC1>>CC(C)(C)OC(=O)N(  
C/C=C/c1cccc(C(=O)C2CCCCC2)c1)C(=O)OC(C)(C)C  
91 C=Cc1cccc1O.COc1ccc(I)c(OC)c1>>COc1ccc(/C=C/c2cccc2O)c(OC)c1  
92 C=C[C@H](OCc1ccc(OC)cc1)[C@@H](CCCC)OC(=O)c1c(C)cccc1Oe1ccc2c(c1I)COC(C)(C)O2>>  
CCCC[C@H]1OC(=O)c2c(C)cccc2Oe2ccc3c(c2/C=C/[C@@H]1OCc1ccc(OC)cc1)COC(C)(C)O3  
93 Br1cn1cn1.C=CC(=O)OCCCC>>CCCCOC(=O)/C=C/c1cn1cn1  
94 C=CC(C)(C)C.CC(=O)c1ccc(Br)cc1>>CC(=O)c1ccc(/C=C/C(C)(C)C)cc1  
C=Cc1ccc(C(=O)N[C@@H](CCSC)C(=O)OC)c(-  
95 c2cccc2C)c1.OC1(c2cnccc2Br)CCCCC1>>COC(=O)[C@H](CCSC)NC(=O)c1ccc(/C=C/c2cnccc2C2  
(O)CCCCC2)cc1-c1cccc1C  
96 C=CC(=O)N(C)Cc1cc2cccc2n1C.O=C1Nc2ncc(Br)cc2C12CCC2>>CN(Cc1cc2cccc2n1C)C(=O)/C=  
C/c1nc2c(c1)C1(CCC1)C(=O)N2  
97 Br1ccn1.C=CC[C@@H](C)O>>C[C@@H](O)C/C=C/c1ccn1  
98 C=C.N#Cc1ccc(Br)cc1>>C=Cc1ccc(C#N)cc1  
99 C=COCCO.FC(F)(F)c1ccc(Br)cc1>>C=C(OCCO)c1ccc(C(F)(F)F)cc1  
100 C=CC(=O)OCc1cccc1.O=C1NCCCC[C@@H]1N1C(=O)c2cccc(I)c2C1=O>>O=C(/C=C/c1cccc2c1C  
(=O)N([C@H]1CCCCNC1=O)C2=O)OCc1cccc1  
101 C=CCN(/C=C\c1cccc1Br)C(C)=O>>C=C1CN(C(C)=O)C=Cc2cccc21  
102 C=CCCC.CS(=O)(=O)c1ccc(CCl)cc1>>C=C(CCCC)Cc1ccc(S(C)(=O)=O)cc1  
103 C=CC(=O)NCCc1cccc1F.COc1ccc2c(=O)c(I)ccc2c1>>COc1ccc2c(=O)c(/C=C/C(=O)NCCc3cccc3F  
)ccc2c1  
104 C=CC(=O)OCC.FC(F)(F)c1cccc1I>>CCOC(=O)/C=C/c1cccc1C(F)(F)F  
105 C=CC(=O)OC.COc1ccc2c(c1)CCN(c1cccc(F)c1)C2(C)c1ccc(Br)cc1>>COC(=O)/C=C/c1ccc(C2(C)c3  
ccc(OC)cc3CCN2c2cccc(F)c2)cc1  
106 C=COCCCCO.O=C(O)c1cc(Br)c2nc(N3CCOCC3)cc(=O)n2c1>>C=C(OCCCCO)c1cc(C(=O)O)cn2c(  
=O)cc(N3CCOCC3)nc12  
107 C=CC(=O)OCC.C[C@H](NC(=O)OC(C)(C)C)c1ccc(Br)cc1>>CCOC(=O)/C=C/c1ccc([C@H](C)NC(  
=O)OC(C)(C)C)cc1  
108 C=CC(=O)CC.O=[N+][O-]c1ccc(I)cc1>>CCC(=O)/C=C/c1ccc([N+](=O)[O-])cc1  
109 C=Cc1cccc1.O=Cc1cc(F)ccc1Br>>O=Cc1cc(F)ccc1/C=C/c1cccc1  
110 C=CC(=O)O.CCCCC(CC)CN1c2ccc(Br)cc2Sc2cc(C=O)ccc21>>CCCC(CC)CN1c2ccc(C=O)cc2Sc2  
cc(/C=C/C(=O)O)ccc21  
111 C=Cc1ccc(OCCCCCCCCCCCCC)c(OCCCCCCCCCCCCC)c1.Oc1ccc(I)cc1>>CCCCCCCCCCCCCOc1cc  
c(/C=C/c2ccc(O)cc2)cc1OCCCCCCCCCCCCC  
112 C=Cc1cccc2cccc12.Oc1cccc1I>>Oc1cccc1/C=C/c1cccc2cccc12  
113 C=CC(=O)OC(C)(C)C.CC(C)(O)c1cc(Br)cn1N>>CC(C)(C)OC(=O)/C=C/c1nc(N)c(C(C)(C)O)c1  
114 C=Cc1cncc1.O=Cc1c[nH]c2ccc(Br)cc12>>O=Cc1c[nH]c2ccc(/C=C/c3cnccc3)cc12  
115 C=CC(=O)OC.CC(C)(C)c1[nH]c2cccc2c1[C@H]1CCCN(Cc2ccc(Br)cc2)C1>>COC(=O)/C=C/c1ccc(  
CN2CCC[C@H](c3c(C(C)(C)C)[nH]c4cccc34)C2)cc1  
116 C=CC(=O)OCCCC.Fc1ccc(Br)cc1F>>CCCCOC(=O)/C=C/c1ccc(F)c(F)c1  
117 C=CP(=O)(OCC)OCC.CC(=O)NC(C#N)c1cccc(Br)c1>>CCOP(=O)(/C=C/c1cccc(C(C#N)NC(C)=O)c  
1)OCC  
118 C=Cc1ccc(F)cc1.COC(=O)c1cc([N+](=O)[O-])ccc1Cl>>COC(=O)c1cc([N+](=O)[O-  
)ccc1/C=C/c1ccc(F)cc1  
119 C=Cc1c2cccc2cc2cccc12.Ic1ccc2c(c1)C1c3cccc4cccc(c34)C21>>C(=C/c1c2cccc2cc2cccc12)\c1c  
cc2c(c1)C1c3cccc4cccc(c34)C21

120 C=C/C=C/c1ccccc1.O=C(OCCCC(Br)C(F)(F)F)c1ccccc1>>O=C(OCCCC(/C=C/C=C/c1ccccc1)C(F)(F)F)c1ccccc1  
121 C=Cc1ccc(C)cc1.Clc1ccccc1>>Cc1ccc(/C=C/c2ccccc2)cc1  
122 C=CC(=O)OCCCCCCCCC(CCc1ccccc1)OC(=O)[C@H]1CCCCN1C(=O)C(=O)c1cccc(I)c1>>O=C  
123 1/C=C/c2cccc(c2)C(=O)C(=O)N2CCCC[C@H]2C(=O)OC(CCc2ccccc2)CCCCCCCCO1  
124 C=Cc1nnn(C)n1.Clc1ccc(I)cc1>>Cn1nncc(/C=C/c2ccc(Cl)cc2)n1  
125 C=CC(F)(F)C(F)(F)C(F)(F)C(F)(F)F.Ic1ccc(OCc2ccccc2)cc1>>FC(F)(F)C(F)(F)C(F)(F)C(F)(F)/C=C/  
126 c1ccc(OCc2ccccc2)cc1  
127 C=Cc1cc(OCc2ccccc2)ccc1OCc1ccccc1.O=C(NCCc1ccccc1)c1cc(I)ccc1O>>O=C(NCCc1ccccc1)c1cc  
128 (/C=C/c2cc(OCc3ccccc3)ccc2OCc2ccccc2)ccc1O  
129 C=CC[C@H](CC(=O)OC(C)(C)C(=O)N[C@H](C(=O)N[C@H](C)c1ccccc1)C(C)(C)C.FC(F)(F)c1c  
130 c(Br)ccc1-c1ccccc1>>C[C@H](NC(=O)[C@@H](NC(=O)[C@H](C/C=C/c1ccc(-  
131 c2ccccc2)c(C(F)(F)F)c1)CC(=O)OC(C)(C)C(C)(C)C)c1ccccc1  
132 Br1ccc2c(cnn2C2CCCCO2)c1.C=Cc1ncc(N)cn1>>Nc1ncc(/C=C/c2ccc3c(cnn3C3CCCCO3)c2)nc1  
133 C=CCN(Cc1ccc(OC)cc1)Cc1cc2ccc(C)cc2nc1Cl>>C=C1CN(Cc2ccc(OC)cc2)Cc2cc3ccc(C)cc3nc21  
134 C=Cc1ccc(N(c2ccccc2)c2ccccc2)cc1.CC(C)(C)OC(=O)CCCCCCCCCOc1cc(Br)ccc1C=O>>CC(C)(C)  
135 OC(=O)CCCCCCCCCOc1cc(/C=C/c2ccc(N(c3ccccc3)c3ccccc3)cc2)ccc1C=O  
136 C=CCCCCCC.Cc1ccccc1Br>>CCCCC/C=C/c1ccccc1C  
137 Br1enc2ccccc2c1.C=CCO[C@@H]1CC(=O)O[C@H](C)C/C=C/C=C/[C@H](O[Si](C)(C)C(C)(C)C)  
138 [C@H](C)C[C@H](CC(OC)OC)[C@H](O[C@H]2O[C@H](C)[C@@H](O[C@H]3C[C@@](C)(O)  
139 [C@@H](OC(=O)CC)[C@H](C)O3)[C@H](N(C)C)[C@H]2OC(C)=O)[C@H]1OC>>CCC(=O)O[C@  
140 H]1[C@H](C)O[C@@H](O[C@H]2[C@H](N(C)C)[C@@H](OC(C)=O)[C@H](O[C@@H]3[C@@  
141 H)(OC)[C@H](OC/C=C/c4cnc5ccccc5c4)CC(=O)O[C@H](C)C/C=C/C=C/[C@H](O[Si](C)(C)C(C)(C)  
142 )C)[C@H](C)C[C@@H]3C(C)(OC)N[C@H]2C)[C@H]1(C)N  
143 C=Cc1cc(OC)c(OC)c(OC)c1-  
144 c1ccc(OC)c(OC)c1.COc1ccc(I)cc1>>COc1ccc(/C=C/c2cc(OC)c(OC)c(OC)c2-c2ccc(OC)c(OC)c2)cc1  
145 C=CCC1CCCC1.COC(=O)c1ccc2cc(Br)ccc2c1>>COC(=O)c1ccc2cc(/C=C/CC3CCCC3)ccc2c1  
146 C=CC(=O)O.COc1ccc(S(=O)(=O)Nc2ccc(I)cc2)cc1OC>>COc1ccc(S(=O)(=O)Nc2ccc(/C=C/C(=O)O)  
147 cc2)cc1OC  
148 C=Cc1ccccc1.N#Cc1ccccc1Br>>N#Cc1ccccc1/C=C/c1ccccc1  
149 C=CCC(=O)O.Cc1cc(OCc2ccccc2)c([C@@H]2S[C@H](COCc3ccccc3)[C@@H](OCc3ccccc3)[C@H]  
150 )(OCc3ccccc3)[C@H]2OCc2ccccc2)cc1Cc1ccc(Br)cc1>>Cc1cc(OCc2ccccc2)c([C@@H]2S[C@H](C  
151 OCc3ccccc3)[C@@H](OCc3ccccc3)[C@H](OCc3ccccc3)[C@H]2OCc2ccccc2)cc1Cc1ccc(/C=C/CC(  
152 C=Cc1ccc(OC)cc1.Cc1ccc2cc(Br)ccc2n1>>COc1ccc(/C=C/c2ccc3nc(C)ccc3c2)cc1  
153 C=CCn1c(N(c2ccc(Br)cc2)S(=O)(=O)c2cccs2)cc2cc(C)ccc21>>Cc1ccc2c(c1)cc1n2C/C=C/c2cc(Br)c  
154 cc2N1S(=O)(=O)c1cccs1  
155 C=CC(=O)OC.O=S(=O)(Oc1ccc2ccn(Cc3ccccc3)c2n1)C(F)(F)F>>COC(=O)/C=C/c1ccc2ccn(Cc3ccccc  
156 c3)c2n1  
157 C=CC1=CC(C)(C)N([O])C(C)(C)C1.CC1(C)C=C(I)CC(C)(C)N1[O]>>CC1(C)C=C(/C=C/C2=CC(C)(  
158 C)N([O])C(C)(C)C2)CC(C)(C)N1[O]  
159 C=CC(=O)OC.FC(F)(F)c1cc(Cl)cc(C(F)(F)F)c1>>COC(=O)/C=C/c1cc(C(F)(F)F)cc(C(F)(F)F)c1  
160 C=CNC(=O)NCCCC.O=S(=O)(Oc1ccc2ccccc2c1)C(F)(F)F>>C=C(NC(=O)NCCCC)c1ccc2ccccc2c1  
161 C=CC(=O)OC(C)(C)C.[C@@H](c1ccccc1)N(Cc1ccccc1)[C@H](CC(=O)OC(C)(C)C)c1ccccc1I>>C  
162 [C@@H](c1ccccc1)N(Cc1ccccc1)[C@H](CC(=O)OC(C)(C)C)c1ccccc1/C=C/C(=O)OC(C)(C)C  
163 C=CC(=O)OCC.COc1cc(-c2cc3cc(Br)cc(OC)c3o2)cc(OC)c1OC>>CCOC(=O)/C=C/c1cc(OC)c2oc(-  
164 c3cc(OC)c(OC)c(OC)c3)cc2c1  
165 C=CC(N)=O.Cc1ccc(Br)cc1>>Cc1ccc(/C=C/C(N)=O)cc1  
166 C=CC(=O)OC(C)(C)C.CC(C)(C)OC(=O)n1cc(C=O)c2c(Br)cccc21>>CC(C)(C)OC(=O)/C=C/c1cccc2c  
167 1c(C=O)cn2C(=O)OC(C)(C)C  
168 C=CC(=O)OC.Cc1cc(C)cc(I)c1>>COC(=O)/C=C/c1cc(C)cc(C)c1  
169 C=CC(=O)N1N=Cc2ccccc2C1Cc1ccccc1.COc1cc(Cc2cnc(N)nc2N)cc(I)c1OC>>COc1cc(Cc2cnc(N)nc  
170 2N)cc(/C=C/C(=O)N2N=Cc3ccccc3C2Cc2ccccc2)c1OC  
171 C=CC(=O)N1C(=O)OC[C@H]1c1ccccc1.Oc1ccc2c(Br)cccc12>>O=C(/C=C/c1cccc2c(O)cccc12)N  
172 1C(=O)OC[C@@H]1c1ccccc1  
173 C=Cc1ccccc1.FC(F)(F)c1ccc(Br)c1>>FC(F)(F)c1ccc(/C=C/c2ccccc2)c1  
174 C=C1C[C@H]2[C@@H]3CCc4cc(OC)ccc4[C@H]3CC[C@]2(C)C1=O.FC(F)(F)c1ccccc1Br>>COc1c  
175 cc2c(c1)CC[C@@H]1[C@@H]2CC[C@]2(C)C(=O)/C(=C/c3ccccc3(F)(F)F)[C@@H]12  
176 C=CC(=O)N(Cc1ccccc1)C(C(=O)NCCc1ccccc1)c1ccccc1Br>>C=C1C(=O)N(Cc2ccccc2)C(C(=O)NCCc2  
177 cccc2)c2ccccc21  
178 C=CC(C)(C)O.COcn1cc(C=O)c2c(I)cccc21>>COcn1cc(C=O)c2c(/C=C/C(C)(C)O)cccc21  
179 C=CCO.N#Cc1cccc(Br)c1>>C=C(CO)c1cccc(C#N)c1  
180 C=CS(=O)(=O)F.Cc1cc(I)ccc1Br>>Cc1cc(/C=C/S(=O)(=O)F)ccc1Br

156 C=C1ccc(C)cc1.O=[N+][[O-]]c1ccc(Br)cc1>>C1ccc(/C=C/c2ccc([N+])(=O)[O-])cc2)cc1  
 157 C=CCC(C)C.CC(C)(C)c1ccccc1OS(=O)(=O)C(F)(F)F>>C=C(CC(C)C)c1ccccc1C(C)(C)C  
 158 C=C1cncnc1.CC(C)(C)OC(=O)N1CCC[C@H]1COc1cnc(Cl)c(I)c1>>CC(C)(C)OC(=O)N1CCC[C@  
 159 H]1COc1cnc(Cl)c(/C=C/c2cncnc2)c1  
 160 C=CC(=O)OCC.COc1ccc2ccc(Br)cc2n1>>CCOC(=O)/C=C/c1ccc2ccc(OC)nc2c1  
 161 C=CC(=O)N(C)C.COc1ccc(Cl)cc1>>COc1ccc(/C=C/C(=O)N(C)C)cc1  
 162 BrC1c2nc(c(-c3ccccc3)c3ccc([nH]3)c(-c3ccccc3)c3nc(c(-  
 163 c4ccccc4)c4ccc1[nH]4)C=C3)C=C2.C=Cc1ccccc1>>C1=Cc2nc1c(/C=C/c1ccccc1)c1ccc([nH]1)c(-  
 164 c1ccccc1)c1nc(c(-c3ccccc3)c3ccc([nH]3)c2-c2ccccc2)C=C1  
 165 C=CC(=O)OC.FC1(F)C(I)=C1c1ccc(Br)cc1>>COC(=O)/C=C/C1=C(c2ccc(Br)cc2)C1(F)F  
 166 C=Cc1ccc(OC)cc1.COc1cc(Br)cc(OC)c1F>>COc1ccc(/C=C/c2cc(OC)c(F)c(OC)c2)cc1  
 167 C=Cc1ccccc1.CCCCCOc1ccc2cc(Br)ccc2c1>>CCCCCOc1ccc2cc(/C=C/c3ccccc3)ccc2c1  
 168 C=CC(=O)N1N=Cc2ccccc2C1CCC.CCc1nc(N)nc(N)c1Cc1cc(I)c(OC)c(OC)c1>>CCCC1c2ccccc2C=  
 169 NN1C(=O)/C=C/c1cc(Cc2c(N)nc(N)nc2CC)cc(OC)c1OC  
 170 C=Cc1ccc2ccccc2c1.Fc1ccc(Br)cc1>>Fc1ccc(/C=C/c2ccc3ccccc3c2)cc1  
 171 C=C(NC(C)=O)c1ccc(Cl)cn1.C=CC(=O)NC(C)(C)C>>C=C(NC(C)=O)c1ccc(/C=C/C(=O)NC(C)(C)C)  
 172 C=Cc1ccc(OC)cc1.CCOC(=O)C(C)(C)Br>>CCOC(=O)C(C)(C)/C=C/c1ccc(OC)cc1  
 173 C=CC(=O)OCCCC.COc1cc(Br)cc(OC)c1OC>>CCCCOC(=O)/C=C/c1cc(OC)c(OC)c(OC)c1  
 174 C=CC(=O)OC.COc1ccc(Cl)cc1>>COC(=O)/C=C/c1ccc(OC)cc1  
 175 C=Cc1ccc(SCC[Si](C)(C)C)cc1.O=[N+][[O-]  
 176 ]c1cc(/C=C/c2ccccc2)ccc1I>>C[Si](C)(C)CCSc1ccc(/C=C/c2ccc(/C=C/c3ccccc3)cc2[N+](=O)[O-  
 177 C=CC(=O)OCC.Nc1ccc(Br)cc1I>>CCOC(=O)/C=C/c1cc(Br)ccc1N  
 178 C=Cc1ccccc1.CCOC(=O)NCCc1cc(OC)c(OC)cc1I>>CCOC(=O)NCCc1cc(OC)c(OC)cc1/C=C/c1cccc  
 179 C=CC(=O)OC(C)(C)C.O=C(C=C(c1ccccc1)c1ccccc1)c1ccccc1Br>>CC(C)(C)OC(=O)/C=C/c1ccccc1  
 180 C(=O)C=C(c1ccccc1)c1ccccc1  
 181 C=C1C(=O)O[C@H]2[C@H]1CCC(=C)[C@H]1C[C@H](OC(C)=O)C(=C)[C@H]21.FC(F)(F)c1cc  
 182 cc(I)c1>>C=C1CC[C@H]2/C=C\C3cccc(C(F)(F)F)c3)C(=O)O[C@H]2[C@H]2C(=C)[C@H](OC  
 183 (C)=O)C[C@H]21  
 184 BrC1ccnc1.C=CCCC(=O)OC>>COC(=O)CC/C=C/c1ccccc1  
 185 C=Cc1cncnc1.COC(=O)[C@H](Cc1ccc(O)c(I)c1)NC(=O)OC(C)(C)C>>COC(=O)[C@H](Cc1ccc(O)c  
 186 (/C=C/c2cncnc2)c1)NC(=O)OC(C)(C)C  
 187 C=Cc1ccccc(C=O)c1.FC(F)(F)C(F)(F)C(F)(F)C(F)(F)C(F)(F)C(F)(F)C(F)(F)Br>>O=Cc1ccccc(/C=C/C(F)(F)C(  
 188 F)(F)C(F)(F)C(F)(F)C(F)(F)C(F)(F)F)c1  
 189 BrC1cnc2ccccc12.C=CCCN1C(=O)c2ccccc2C1=O>>O=C1c2ccccc2C(=O)N1CC/C=C/c1cnc2ccccc1  
 190 C=CC(=O)OCC.CC(C)(C)OC(=O)N1CCCCc2ccc(Cl)nc21>>CCOC(=O)/C=C/c1ccc2c(n1)N(C(=O)O  
 191 C(C)(C)C)CCCC2  
 192 BrC1ccccc1.C=CCN1C(=O)c2ccccc2C1=O>>O=C1c2ccccc2C(=O)N1C/C=C/c1ccccc1  
 193 C=Cc1cncnc1.C[Si](C)(C)CCOCn1nc(I)c2ccc(C=O)cc21>>C[Si](C)(C)CCOCn1nc(/C=C/c2cncnc2)c2  
 194 ccc(C=O)cc21  
 195 C=CC(=O)OC.Cc1cc(C)c(NCc2ccccc2)c(Br)c1>>COC(=O)/C=C/c1cc(C)cc(C)c1NCc1ccccc1  
 196 C=CB1OC(C)CC(C)(C)O1.COC(=O)c1ccccc1I>>COC(=O)c1ccccc1/C=C/B1OC(C)CC(C)(C)O1  
 197 C=CC(=O)OC.COc1ccccc1Br>>COC(=O)/C=C/c1ccccc1OC  
 198 BrC1CCCCC1.C=Cc1ccccc(C(=O)OC(C)(C)C)c1>>CC(C)(C)OC(=O)c1ccccc(/C=C/C2CCCCC2)c1  
 199 C=CC(=O)OC.CC(C)(C)CN(Cc1ccc(Br)cc1)c1cnc(Cl)n1>>COC(=O)/C=C/c1ccc(CN(CC(C)(C)C)c2  
 200 cnc(Cl)n2)cc1  
 201 C=Cc1ccccc1.COc1ccc(C=O)c(Br)c1>>COc1ccc(C=O)c(/C=C/c2ccccc2)c1  
 202 BrC1ccc2ccccc2c1.C=CC(=O)OC(C)(C)C>>CC(C)(C)OC(=O)/C=C/c1ccc2ccccc2c1  
 203 C/C=C(/NC(=O)OC(C)(C)C)C(=O)OC.CN(C)c1ccc(I)cc1>>COC(=O)/C(NC(=O)OC(C)(C)C)=C(\C)c  
 204 1ccc(N(C)C)cc1  
 205 C=CCc1ccc2ccnc2n1.CCOC(=O)CC(c1ccc(OC)c(F)c1)c1nc(Br)c(C)O1>>CCOC(=O)CC(c1ccc(OC)  
 206 c(F)c1)c1nc(/C=C/CCc2ccc3ccnc3n2)c(C)O1  
 207 C=CC(=O)OC.COc1cc(C2OCCO2)c(Br)c(OC)c1OC>>COC(=O)/C=C/c1c(C2OCCO2)cc(OC)c(OC)c  
 208 BrC1ccccc1.C=Cc1ccc(CCl)cc1>>ClC1ccc(/C=C/c2ccccc2)cc1  
 209 C=CC(=O)CCC.Fc1ccc(Br)cc1>>CCCC(=O)/C=C/c1ccc(F)cc1  
 210 C=C1C[C@H]2[C@@H]3CCc4cc(OC)ccc4[C@H]3CC[C@H]2(C)C1=O.N#Cc1ccc(Br)cc1>>COc1ccc  
 211 2c(c1)CC[C@H]1[C@H]2CC[C@H]2(C)C(=O)/C(=C/c3ccc(C#N)cc3)C[C@H]12  
 212 C=C/C=C(\CCCC)OCC.Cc1ccccc1I>>CCCC/C=C\C=Cc1ccccc1)OCC  
 213 C=Cc1ccccc1.C[Si](C)(C)I>>C[Si](C)(C)/C=C/c1ccccc1  
 214 BrC1=CCCCC12OCCO2.C=CC(=O)OC>>COC(=O)/C=C/C1=CCCCC12OCCO2  
 215 C=CC(C)=O.Cc1ccccc(C)c1Br>>CC(=O)/C=C/c1c(C)ccccc1C

200 C=CC(=O)OC.COC(=O)[C@@H]1C[C@@H]2CCC(Br)=C[C@@H]2N1C(=O)OC(C)(C)C>>COC(=O)/C=C/C1=C[C@@H]2[C@@H](CC1)C[C@@H](C(=O)OC)N2C(=O)OC(C)(C)C  
201 C=CC(=O)Nc1cccc1NC(=O)OC(C)(C)C.CCOC(=O)[C@@H]1CN(C)C[C@@H]1c1ccc(Br)cc1>>CCO  
C(=O)[C@@H]1CN(C)C[C@@H]1c1ccc(/C=C/C(=O)Nc2cccc2NC(=O)OC(C)(C)C)cc1  
C=CCO[C@@H]1CC(=O)O[C@@H](C)C=C/C=C/[C@@H](O[Si](C)(C)C(C)(C)C)[C@@H](C)C[C@@H]  
(CC(OC)OC)[C@@H](O[C@@H]2O[C@@H](C)[C@@H](O[C@@H]3C[C@@](C)(O)[C@@H](OC(=O)  
202 CC)[C@@H](C)O3)[C@@H](N(C)C)[C@@H]2OC(C)=O)[C@@H]1OC.Ic1cccc1>>CCC(=O)O[C@@H]1[C  
@H](C)O[C@@H](O[C@@H]2[C@@H](N(C)C)[C@@H](OC(C)=O)[C@@H](O[C@@H]3[C@@H](OC)  
[C@@H](OC/C=C/c4cccc4)CC(=O)O[C@@H](C)C/C=C/C=C/[C@@H](O[Si](C)(C)C(C)(C)C)[C@@H](C)  
C(C)C(=O)OC1CCCC1.CC(=O)c1ccc(I)cc1>>CC(=O)c1ccc(/C=C/C(=O)OC2CCCC2)cc1  
203 C=CC(=O)OC1CCCC1.CC(=O)c1ccc(I)cc1>>CC(=O)c1ccc(/C=C/C(=O)OC2CCCC2)cc1  
204 C=Cc1cccc1.Cc1ccc(S(=O)(=O)Oc2ccc3c(Br)ccnc23)cc1>>Cc1ccc(S(=O)(=O)Oc2ccc3c(/C=C/c4c  
cccc4)ccnc23)cc1  
205 C=CC(=O)C1CC1.OC/C=C/C1=C(Br)CCCC1>>O=C(/C=C/C1=C(/C=C/CO)CCCC1)C1CC1  
206 C=Cc1cccc1.COc1cccc(Cl)c1>>COc1cccc(/C=C/c2cccc2)c1  
207 C=CC(=O)OC.O=c1c2cccc2cc(Br)c2cccc12>>COC(=O)/C=C/c1cc2cccc2c(=O)c2cccc12  
208 C=CC(=O)OCCCC.O=[N+](O-)]c1ccc(I)c1>>CCCCOC(=O)/C=C/c1cccc([N+](=O)[O-])c1  
209 C=CC(N)=O.CC(C)n1cc(-c2nc(Br)c(N)nc2-c2cccc2)ccc1=O>>CC(C)n1cc(-  
c2nc(/C=C/C(N)=O)c(N)nc2-c2cccc2)ccc1=O  
210 C=CC(=O)O.COC(=O)c1ccc(Br)cc1>>COC(=O)c1ccc(/C=C/C(=O)O)cc1  
211 C=Cc1ccc(C)cc1.Cc1ccc(-c2oc3cccc3c(=O)c2Br)cc1>>Cc1ccc(/C=C/c2c(-  
c3ccc(C)cc3)oc3cccc3c2=O)cc1  
212 C=CC(COC(C)=O)OC(C)=O.c1ccc([I+])c2cccc2)cc1>>CC(=O)OCC(/C=C/c1cccc1)OC(C)=O  
213 C=CCCC(=O)c1nnn(Cc2ccc(OC)cc2)c1I>>C=C1CCC(=O)c2nnn(Cc3ccc(OC)cc3)c21  
214 C=CC(=O)OC.CN(C)c1cccc2c(S(=O)(=O)N3CCc4cc(Br)cnc43)cccc12>>COC(=O)/C=C/c1cnc2c(c1)  
CCN2S(=O)(=O)c1cccc2c(N(C)C)cccc12  
215 C=CC(=O)OCCCC.Nc1nnc2c1c(I)cn2[C@@H]1C[C@@H](O)[C@@H](CO)O1>>CCCCOC(=O)/C=C/c  
1cn([C@@H]2[C@@H](O)[C@@H](CO)O2)c2nnc(N)c12  
216 C=Cc1cccc1F.CN(C(=O)c1ncc2c(c1I)c1cccc1n2S(=O)(=O)N(C)C)c1cccc1>>CN(C(=O)c1ncc2c(c  
1/C=C/c1cccc1F)c1cccc1n2S(=O)(=O)N(C)C)c1cccc1  
217 C=CCC(Nc1cccc1Br)c1cccn1C>>C=C1CC(c2cccn2C)Nc2cccc21  
218 C=COCCCC.O=S(=O)(Oc1cccc2c1CCC=C2)C(F)(F)F>>C=C(OCCCC)c1cccc2c1CCC=C2  
219 Brc1cccn1.C=COCCCC>>C=C(OCCCC)c1cccn1  
220 C=CC(=O)OC.COc1ccc(NC(=O)C(C)(C)C)c(I)c1OC>>COC(=O)/C=C/c1c(NC(=O)C(C)(C)C)ccc(OC  
)c1OC  
221 C=Cc1cnc(F)c(Br)c1.CC(C)(C)OC(=O)N1CC[C@@H]1COc1cnc(Cl)c(I)c1>>CC(C)(C)OC(=O)N1CC[  
C@@H]1COc1cnc(Cl)c(/C=C/c2cnc(F)c(Br)c2)c1  
222 C=C[Si](C)(C)c1cccn1.Cc1cccc1I>>Cc1cccc1/C=C/[Si](C)(C)c1cccn1  
223 C=CC(=O)OCCCC.O=[N+](O-)]c1ccc([I+])c2cccc([N+](=O)[O-]  
)c2)c1>>CCCCOC(=O)/C=C/c1cccc([N+](=O)[O-])c1  
224 C=CC(=O)OC.COc1ccc2c(c1)CCN(c1ccc(C(F)(F)F)cc1)C2(C)c1ccc(Br)cc1>>COC(=O)/C=C/c1ccc(C  
2(C)c3ccc(OC)cc3CCN2c2ccc(C(F)(F)F)cc2)cc1  
225 C=Cc1ccc(OC(C)=O)cc1.CN1c2cccc2Sc2cc(Br)ccc21>>CC(=O)Oc1ccc(/C=C/c2ccc3c(c2)Sc2cccc2  
N3C)cc1  
226 C=CC(=O)OCCCC.Cc1cc(C)cc(Br)c1>>CCCCOC(=O)/C=C/c1cc(C)cc(C)c1  
227 C=CC(=O)OC.Cc1ccc(S(=O)(=O)n2cc(I)c([Si](C)(C)C)c2)cc1>>COC(=O)/C=C/c1cn(S(=O)(=O)c2cc  
c(C)cc2)cc1[Si](C)(C)C  
228 C=Cc1cccc2cccc12.FC(F)(F)c1cccc1I>>FC(F)(F)c1cccc1/C=C/c1cccc2cccc12  
229 C=Cc1ccc(Cl)cc1.CCCCC(Br)C(F)(F)F>>CCCCC(/C=C/c1ccc(Cl)cc1)C(F)(F)F  
Br1ccc(C=C(c2cccc2)c2cccc2)c2cccc2)cc1.C=Cc1ccc(-  
230 c2ccc3c(c2)c2cccc2n3CC)cc1>>CCn1c2cccc2c2cc(-  
c3ccc(/C=C/c4ccc(C=C(c5cccc5)c5cccc5)c5cccc5)cc4)cc3)ccc21  
231 C=CCOc1ccc(OC)cc1.Ic1cccc1>>COc1ccc(OC/C=C/c2cccc2)cc1  
232 C=CCN(C)CCc1ccc([N+](=O)[O-])cc1Br>>C=C1CN(C)CCc2ccc([N+](=O)[O-])cc21  
233 C=Cc1cccc1.O=C1C(I)=C(c2cccc2)[C@]23c4cccc4C=C[C@@H]2c2cccc2CN13>>O=C1C(/C=C/c2  
cccc2)=C(c2cccc2)[C@]23c4cccc4C=C[C@@H]2c2cccc2CN13  
234 C=Cc1cccc1.O=c1ccoc2ccc(Br)cc12>>O=c1ccoc2ccc(/C=C/c3cccc3)cc12  
C=Cc1ccc(C(=O)N[C@@H](CCSC)C(=O)OC)c(-  
235 c2cccc2C)c1.OC(c1cnc1Br)C12CC3CC(CC(C3)C1)C2>>COC(=O)[C@@H](CCSC)NC(=O)c1ccc(/  
C=C/c2cnc2C(O)C23CC4CC(CC(C4)C2)C3)cc1-c1cccc1C

C=CC(=O)N(C)C.Cc1ccc(C(=O)c2c(I)c(-  
236 c3cccc3)n3c2c(C=O)cc2cccc23)cc1>>Cc1ccc(C(=O)c2c(/C=C/C(=O)N(C)C)c(-  
c3cccc3)n3c2c(C=O)cc2cccc23)cc1  
237 C=CC(=O)OC(C)(C)C.Oc1ccc(C(=C2CCCCC2)c2ccc(Br)cc2)cc1>>CC(C)(C)OC(=O)/C=C/c1ccc(C  
(=C2CCCCC2)c2ccc(O)cc2)cc1  
238 C=CC(=O)OCC.Clc1ccc2nc(-c3cccc3)c(I)c(-c3cccc3)c2c1>>CCOC(=O)/C=C/c1c(-  
c2cccc2)nc2ccc(Cl)cc2c1-c1cccc1  
239 C=CC(CC)(CC)C(=O)Nc1ccc(OC(F)(F)F)cc1Br>>C=C1c2cc(OC(F)(F)F)ccc2NC(=O)C1(CC)CC  
240 C=CC(=O)CC.CCC(CC)(c1ccc(O)cc1)c1ccc(Br)c(C)c1>>CCC(=O)/C=C/c1ccc(C(CC)(CC)c2ccc(O)cc  
2)cc1C  
241 C=CCCP(=O)(OC)OC.Fc1ccc(I)cc1>>COP(=O)(CC/C=C/c1ccc(F)cc1)OC  
242 C=C[P@](C)(=O)c1cccc1.Cc1ccc2cccc2c1Br>>Cc1ccc2cccc2c1/C=C/[P@](C)(=O)c1cccc1  
243 C=CN1C(=O)c2cccc2C1=O.COc1ccc(I)cc1>>COc1ccc(/C=C/N2C(=O)c3cccc3C2=O)cc1  
244 Br1ccc(-c2ccc(OCCCN3CCCC3)cc2)cc1.C=CC(=O)OCC>>CCOC(=O)/C=C/c1ccc(-  
c2ccc(OCCCN3CCCC3)cc2)cc1  
245 C=CC(=O)OCC.Cc1cc(I)c2cccc2n1>>CCOC(=O)/C=C/c1cc(C)nc2cccc12  
246 C=CC(=O)OC.O=C(O)Cc1ccc(Br)cc1>>COC(=O)/C=C/c1ccc(CC(=O)O)cc1  
247 C=C[C@@H]1CCCCN1C(=O)OC(C)(C)C.CC(=O)c1ccc(I)cc1>>CC(=O)c1ccc(/C=C/[C@@H]2CCC  
CN2C(=O)OC(C)(C)C)cc1  
248 Br1ccc(I)cc1.C=CP(=O)(OCC)OCC>>CCOP(=O)(/C=C/c1ccc(Br)cc1)OCC  
249 C=CC(=O)OCCCC.Cc1cc(C)c(I)c(C)c1>>CCCCOC(=O)/C=C/c1c(C)cc(C)cc1C  
250 Br1ccenc1.C=Cc1cccc(OC)c1>>COc1cccc(/C=C/c2ccenc2)c1  
251 C=Cc1ccenc1.Nc1cncc(Br)c1>>Nc1cncc(/C=C/c2ccenc2)c1  
252 C=Cc1ccenc1.CCCCCCCC(=O)N1CCN(c2ccc(Br)cc2)CC1>>CCCCCCCC(=O)N1CCN(c2ccc(/C=C/c  
3ccnc3)cc2)CC1  
253 C=CC(=O)OC.CCOC(=O)c1ccc(I)cc1>>CCOC(=O)c1ccc(/C=C/C(=O)OC)cc1  
254 C=CC(=O)OCCCC.N#Cc1ccc(Br)cc1F>>CCCCOC(=O)/C=C/c1ccc(C#N)c(F)c1  
255 C=CC(=O)O.CN(c1ccc(I)cc1)S(=O)(=O)c1cccs1>>CN(c1ccc(/C=C/C(=O)O)cc1)S(=O)(=O)c1cccs1  
256 Br1cccc1.C=Cc1ccc(N(c2ccc(OC)cc2)c2ccc(OC)cc2)cc1>>COc1ccc(N(c2ccc(/C=C/c3cccc3)cc2)c  
2ccc(OC)cc2)cc1  
257 C=CCCCCCC.CCOC(=O)c1ccc(OS(=O)(=O)C(F)(F)F)cc1>>C=C(CCCCCC)c1ccc(C(=O)OCC)cc1  
C=CCC(=O)OC.CS[C@H]1O[C@H](c2ccc(C)c(Cc3ccc(Cl)cc3)c2)[C@H](OC(C)=O)[C@H](OC  
258 (C)=O)[C@H]1OC(C)=O>>COC(=O)C/C=C/c1ccc(Cc2cc([C@H]3O[C@H](SC)[C@H](OC(C  
)=O)[C@H](OC(C)=O)[C@H]3OC(C)=O)ccc2C)cc1  
COC(=O)/C=C/Oc1cccc1-c1cc(OC)c(OC)cc1Br>>COC(=O)/C=C1/Oc2cccc2-c2cc(OC)c(OC)cc21  
259 C=CC(=O)OC.OCc1cccc(Br)c1>>COC(=O)/C=C/c1cccc(CO)c1  
260 Br1ccc(I)cc1.C=Cc1ccc(O)cc1>>Oc1ccc(/C=C/c2ccc(Br)cc2)cc1  
261 C=CC(=O)OCC.Oc1cccc1I>>CCOC(=O)/C=C/c1cccc1O  
262 C=CC(=O)OC.COc1ccc(Br)c(CC(=O)N2CCCC2)c1OCc1cccc1>>COC(=O)/C=C/c1ccc(OC)c(OCc2c  
cccc2)c1CC(=O)N1CCCC1  
263 C=CC(=O)OC(C)(C)C.COc1cc(Br)cc(F)c1C1c2ccc3c(cnn3C3CCCCO3)c2CC(C)(C)N1C[C@H](C)CF  
264 >>COc1cc(/C=C/C(=O)OC(C)(C)C)cc(F)c1C1c2ccc3c(cnn3C3CCCCO3)c2CC(C)(C)N1C[C@H](C)C  
265 C=CC(=O)OCCCC.CN(C)c1ccc(Br)cc1>>CCCCOC(=O)/C=C/c1ccc(N(C)C)cc1  
266 C=C.COc1cccc(CCl)c1>>C=CCc1cccc(OC)c1  
267 C=CC(=O)OCc1cccc1.CC(C)(C)OC(=O)N1CCCc2cc(Br)enc21>>CC(C)(C)OC(=O)N1CCCc2cc(/C=  
C/C(=O)OCc3cccc3)enc21  
268 C=C[Si](CC)(CC)CC.Fc1ccc(Br)cc1>>CC[Si](/C=C/c1ccc(F)cc1)(CC)CC  
269 C=CC(=O)Nc1cccc(OC)c1.COc1ccc2c(=O)c(I)coc2c1>>COc1cccc(NC(=O)/C=C/c2coc3cc(OC)ccc3c  
2=O)c1  
270 C=C(OC)C(=O)OC.CC(=O)Nc1ccc(I)cc1>>COC(=O)/C=C/c1ccc(NC(C)=O)cc1OC  
271 C=COCCCC.Cc1ccc(I)cc1>>C=C(OCCCC)c1ccc(C)cc1  
272 C=Cc1cc(OC)cc(OC)c1.Oc1ccc(-c2cocc2-c2ccc(Br)cc2)cc1>>COc1cc(/C=C/c2ccc(-c3cocc3-  
c3ccc(O)cc3)cc2)cc(OC)c1  
273 C=CC(=O)OC.CN1CC[C@]23CCCC[C@H]2[C@H]1Cc1cc(I)c(N)cc13>>COC(=O)/C=C/c1cc2c(cc1  
N)[C@]13CCCC[C@H]1[C@H](C2)N(C)CC3  
274 C=Cc1cccc1.O=c1c(I)c[nH]c2cccc12>>O=c1c(/C=C/c2cccc2)c[nH]c2cccc12  
275 C=CCCCCCCCCCCCCCCCC.c1ccc([I+]-c2cccc2)cc1>>CCCCCCCCCCCCCCCCC/C=C/c1cccc1  
276 C=CCN(C(=O)C(C)(C)C)[C@H](C)c1cc(F)cc(F)c1.O=C1Nc2ncccc2[C@]12Cc1cc(Br)enc1C2>>C[  
C@H](c1cc(F)cc(F)c1)N(C/C=C/c1enc2c(c1)C[C@]1(C2)C(=O)Nc2ncccc21)C(=O)C(C)(C)C  
277 C=CC(=O)OCC.Fc1cccc1Oc1cccc(Br)c1>>CCOC(=O)/C=C/c1cccc(Oc2cccc2F)c1  
278 C=CC(=O)OC(C)(C)C.CC(=O)c1cccc1I>>CC(=O)c1cccc1/C=C/C(=O)OC(C)(C)C

279 C=COCCCC.O=S(=O)(O)c1ccc(-c2ccccc2)cc1)C(F)F>>C=C(OCCCC)c1ccc(-c2ccccc2)cc1  
280 COC(=O)/C=C/Oc1ccccc1-c1ccccc1Br>>COC(=O)/C=C1/Oc2ccccc2-c2ccccc21  
281 C=COCCCC.CN1CCc2cc(Br)ccc21>>C=C(OCCCC)c1ccc2c(c1)CCN2C  
282 Br1cccn1.C=Cc1cccc(OC)c1>>COc1cccc(/C=C/c2cccn2)c1  
283 C=CC(=O)OC(C)(C)C.Fc1cccc(I)c1>>CC(C)(C)OC(=O)/C=C/c1cccc(F)c1  
284 C=COCCCC.COc1ccc2cc(Br)ccc2c1>>C=C(OCCCC)c1ccc2cc(OC)ccc2c1  
285 C=CC(=O)OC.O=Cc1ccc(Cl)cc1>>COC(=O)/C=C/c1ccc(C=O)cc1  
286 C=CC(=O)O.CC(=O)Nc1ccc(Br)cn1>>CC(=O)Nc1ccc(/C=C/C(=O)O)cn1  
287 C=C(NC(C)=O)C(=O)OC.Cc1cc(C)c(I)c(C)c1>>COC(=O)/C(=C/c1c(C)cc(C)cc1C)NC(C)=O  
288 CCCCCC/C(=C/I)OC(=O)/C=C/c1cccs1>>CCCCCCC1=C/C(=C/c2cccs2)C(=O)O1  
289 C=CC(=O)OCC.FC(F)(F)c1cc(-c2nccc(Br)n2)cc(C(F)(F)F)c1>>CCOC(=O)/C=C/c1ccnc(-  
c2cc(C(F)(F)F)cc(C(F)(F)F)c2)n1  
290 Br1ccc(N(c2ccccc2)c2ccccc2)cc1.C=Cc1ccc(C(=O)OC)c(OC)c1>>COC(=O)c1ccc(/C=C/c2ccc(N(c3  
ccccc3)c3ccccc3)cc2)cc1OC  
291 C=CC(=O)OC.N#Cc1ccc(I)cc1>>COC(=O)/C=C/c1ccc(C#N)cc1  
292 C=Cc1ccccc1O.Fc1cc(Br)cc(F)c1F>>Oc1ccccc1/C=C/c1cc(F)c(F)c(F)c1  
293 C=CCN(CC=C)Cc1ccccc1I>>C=CCN1CC(=C)c2ccccc2C1  
294 C=CC(=O)OCC.COc1cc(I)c2c3c1O[C@H]1[C@H]34CCN(C)[C@H](C2)[C@]42C=C[C@@]1(OC)c  
1c(O)ccc(O)c12>>CCOC(=O)/C=C/c1cc(OC)c2c3c1C[C@H]1N(C)CC[C@H]34[C@@H](O2)[C@H]  
12(OC)C=C[C@H]O[C@]14c1c(O)ccc(O)c12  
295 C=Cc1ccccc1.COc1ccc(Cl)c(Nc2c(C#N)cnc3cc(OS(=O)(=O)C(F)(F)F)c(OC)cc23)c1>>COc1ccc(Cl)c(  
Nc2c(C#N)cnc3cc(/C=C/c4ccnc4)c(OC)cc23)c1  
296 C=Cc1ccccc1.O=C1CCCCc2cc(Br)ccc21>>O=C1CCCCc2cc(/C=C/c3ccccc3)ccc21  
297 C=Cc1ccc(OC)cc1.Clc1ccc(-c2cnc3cccn23)cc1>>COc1ccc(/C=C/c2ccc(-c3cnc4cccn34)cc2)cc1  
298 C=C[C@@](CO)(CCC)OCc1ccc(OC)cc1.Ic1ccccc1>>CCC[C@@](/C=C/c1ccccc1)(CO)OCc1ccc(OC  
299 C=Cc1ccc(C)cc1.Cc1ccc(OS(=O)(=O)C(F)(F)F)cc1>>C=C(c1ccc(C)cc1)c1ccc(C)cc1  
300 C=CCCC(=O)O.Ic1ccsc1>>O=C(O)CC/C=C/c1ccsc1  
301 C=CC(=O)OCC.Cc1cc(C#N)ccc1-c1sccl1Br>>CCOC(=O)/C=C/c1sccl1-c1ccc(C#N)cc1C  
302 C=CC(=O)OC.Cc1cc(C)n2nc(C)c(I)c2n1>>COC(=O)/C=C/c1c(C)nn2c(C)cc(C)nc12  
303 C=CC(=O)OC(C)(C)C.Cc1ccc(Br)en1>>Cc1ccc(/C=C/C(=O)OC(C)(C)C)en1  
304 C=CC(=O)OCC.O=C(O)c1ccc(Br)cc1>>CCOC(=O)/C=C/c1ccc(C(=O)O)cc1  
305 C=CC(F)(F)C(F)(F)C(F)(F)C(F)(F)C(F)(F)F.O=P(c1ccccc1)(c1ccccc1)c1ccc(Br)cc1>>O=P(c1  
ccccc1)(c1ccccc1)c1ccc(/C=C/C(F)(F)C(F)(F)C(F)(F)C(F)(F)C(F)(F)F)cc1  
306 C=CC(=O)OC.CCN(CC)C(=O)c1cc(OC)c(OC)cc1Br>>CCN(CC)C(=O)c1cc(OC)c(OC)cc1/C=C/C(=  
307 Br1ccc2c(cnn2C2CCCCO2)c1.C=CC(=O)OCC>>CCOC(=O)/C=C/c1ccc2c(cnn2C2CCCCO2)c1  
308 C=CC[C@@H]1CCCCN1Cc1ccccc1I>>C=C1C[C@@H]2CCCCN2Cc2ccccc21  
309 C=CC(=O)N(C)Cc1ccc(OC(F)(F)F)c1OCC.CC1(C)NCc2cc(Br)cnc2NC1=O>>CCOc1c(CN(C)C(=O)  
/C=C/c2cnc3c(c2)CNC(C)(C)C(=O)N3)cccc1OC(F)(F)F  
310 C=CC(=O)Nc1ccccc1.O=C1Cc2c([nH]c3c(I)cccc23)-c2cccn2N1>>O=C(/C=C/c1cccc2c3c([nH]c12)-  
c1cccn1NC(=O)C3)Nc1ccccc1  
311 C=C[Si](CC)(CC)CC.O=[N+](O)c1ccc(Br)cc1>>CC[Si](/C=C/c1ccc([N+](=O)[O-])cc1)(CC)CC  
312 C=CCn1c(-c2ccc3ccc(OC)cc3c2Br)nc2ccccc21>>C=C1Cn2c(nc3ccccc32)-c2ccc3ccc(OC)cc3c21  
313 C=Cc1ccc(C)cc1.N#CCc1ccc(Br)cc1>>Cc1ccc(/C=C/c2ccc(CC#N)cc2)cc1  
314 C=CC(=O)OC.CC1(C)O[C@@H]2[C@@H](CO[Si](C)(C)C(C)(C)O)[C@@H](n3cnc(C(N)=O)c3I)[  
C@@H]2O1>>COC(=O)/C=C/c1c(C(N)=O)cn1[C@@H]1O[C@@H](CO[Si](C)(C)C(C)(C)C)[C@H]  
2OC(C)C)O[C@H]21  
315 C=CC(=O)OC(C)(C)C.CC1(C)Cc2cc(Br)cnc2NC1=O>>CC(C)(C)OC(=O)/C=C/c1cnc2c(c1)CC(C)(C)  
C(=O)N2  
316 C=CC(=O)N(C)OC.Ic1ccc2ccccc2c1>>CON(C)C(=O)/C=C/c1ccc2ccccc2c1  
317 C=CCCc1ccc(OC)c1.COc1ccc(Br)c1>>COc1cccc(/C=C/CCc2ccccc(OC)c2)c1  
318 COC[C@@H](/N=C(\c1ccccc1)N1C=CCC[C@H]1C)C(C)C.Ic1cccn1>>COC[C@@H](/N=C(\c1ccc  
cc1)N1C=C(c2cccn2)CC[C@H]1C)C(C)C  
319 Br1ccccc1.C=COCCOC=C>>C=COCCOC(=C)c1ccccc1  
320 C=CC(=O)OC.CCCCc1ccc(N2CCc3cc(OC)ccc3C2(C)c2ccc(Br)cc2)cc1>>CCCCc1ccc(N2CCc3cc(OC  
321 )ccc3C2(C)c2ccc(/C=C/C(=O)OC)cc2)cc1  
322 Br1ccc(I)cc1.C=CC(=O)OC(C)(C)C>>CC(C)(C)OC(=O)/C=C/c1ccc(Br)cc1  
323 C=CC#N.Cc1cc(Br)cc(C)c1N>>Cc1cc(/C=C/C#N)cc(C)c1N  
\*CNCCCOCCOCCOCCCN(C=O)COc1ccc(C(Cc2cc(OC)cc(OC)c2)NC(=O)c2ccccc(C=C)c2)cc1.CC(C  
(C)c1ccc(I)cc1>>\*CNCCCOCCOCCOCCCN(C=O)COc1ccc(C(Cc2cc(OC)cc(OC)c2)NC(=O)c2ccccc  
/C=C/c3ccc(C(C)(C)C)cc3)c2)cc1



324 C=CCOC(C)=O.Cc1ccccc1I>>CC(=O)OC/C=C/c1ccccc1C  
325 C=CC(=O)OC.COC(=O)c1cc(OC)c(=O)c2c(OC)c(OC)cc(Br)c2c1>>COC(=O)/C=C/c1cc(OC)c(OC)c2  
c(=O)c(OC)cc(C(=O)OC)cc12  
326 C=Cc1ccccc1OS(=O)(=O)c1ccccc1Br>>O=S1(=O)Oc2ccccc2/C=C/c2ccccc21  
327 C=CC(=O)N(C)C.CC1(C)c2cc(C(O)(C(F)(F)F)C(F)(F)F)ccc2NC2c3cc(I)ccc3OCC21>>CN(C)C(=O)/  
C=C/c1ccc2c(c1)C1Nc3ccc(C(O)(C(F)(F)F)C(F)(F)F)cc3C(C)(C)C1CO2  
328 C=CC(=O)OCC.Clc1ccc(I)cn1>>CCOC(=O)/C=C/c1ccc(Cl)nc1  
329 C=CC(=O)OCC.Cc1ccc(I)c([N+](=O)[O-])c1>>CCOC(=O)/C=C/c1ccc(C)cc1[N+](=O)[O-]  
330 C=CP(=O)(OCC)OCC.O=[N+](=[O-])c1ccc(I)cc1>>CCOP(=O)(/C=C/c1ccc([N+](=O)[O-])cc1)OCC  
C=C[C@H](O)CC[C@H]1(C)OC(I)=C(C(=O)OC)[C@H]2[C@H]3[C@H]4[C@H]5[C@H]6[C@H]7[C@H]8[C@H]9[C@H]10[C@H]11[C@H]12[C@H]13[C@H]14  
331 >C=C1C2=C(C(=O)OC)[C@H]3[C@H]4[C@H]5[C@H]6[C@H]7[C@H]8[C@H]9[C@H]10[C@H]11[C@H]12[C@H]13[C@H]14  
C=CC(=O)NC(c1ccc(C(F)(F)F)c1)C(F)(F)F.O=C(O)c1ccc(I)cc1C(F)(F)F>>O=C(/C=C/c1ccc(C(=O)  
332 O)c(C(F)(F)F)c1)NC(c1ccc(C(F)(F)F)c1)C(F)(F)F  
333 C=CCNC(=O)OC(C)(C)C.N#Cc1ccccc1Br>>C=C(CNC(=O)OC(C)(C)C)c1ccccc1C#N  
334 C=Cc1ccc(OC)cc1.Cc1ccc(Cl)cc1>>COc1ccc(/C=C/c2ccc(C)cc2)cc1  
335 C=Cc1ccc(C#N)cc1.Cn1nc(Br)c2ccccc21>>Cn1nc(/C=C/c2ccc(C#N)cc2)c2ccccc21  
336 C=CC(=O)OCCCC.CC(=O)c1ccc(Cl)cc1>>CCCCOC(=O)/C=C/c1ccc(C(C)=O)cc1  
337 C=CC(=O)OCC.Oc1ccc(C(=C2CCCCC2)c2ccc(Br)cc2)cc1F>>CCOC(=O)/C=C/c1ccc(C(=C2CCCC  
CC2)c2ccc(O)c(F)c2)cc1  
338 C=CC(C)(C)O.Nc1ncc(Br)cn1>>CC(C)(O)/C=C/c1ncc(N)nc1  
339 C=C.Fc1ccccc1I>>C=Cc1ccccc1F  
340 C=Cc1ccc([Si](OC)(OC)OC)cc1.CC(C)(C)OP(=O)(Cc1ccc(/C=C/c2ccc(Br)cc2)cc1)OC(C)(C)C>>CO[  
Si](OC)(OC)c1ccc(/C=C/c2ccc(/C=C/c3ccc(CP(=O)(OC(C)(C)C)OC(C)(C)C)cc3)cc2)cc1  
341 C=CC(=O)OCC.Cn1ccccc1Cl>>CCOC(=O)/C=C/c1cccn1C  
342 C=CC(=O)OCC.O=c1ccoc2cc(OCc3ccccc3)c(Br)cc12>>CCOC(=O)/C=C/c1cc2c(=O)ccoc2cc1OCc1c  
cccc1  
343 C=Cc1ccc(OC)cc1.Cc1ccccc1Br>>COc1ccc(/C=C/c2ccccc2C)cc1  
344 C=Cc1ccc(S(=O)(=O)c2ccccc2F)cn1.Ic1cncnc1>>O=S(=O)(c1ccc(/C=C/c2cncnc2)nc1)c1ccccc1F  
345 C=CC(=O)OCCCC.Cc1ccc(I)cc1>>CCCCOC(=O)/C=C/c1ccc(C)cc1  
346 C=Cc1ccccc1O.Oc1ccccc1Br>>Oc1ccccc1/C=C/c1ccccc1O  
C=C[C@H]1C[C@H]1B1O[C@H](C(OC)(c2ccccc2)c2ccccc2)[C@H](C(OC)(c2ccccc2)c2ccccc2  
347 )O1.Ic1ccccc1>>COC(c1ccccc1)(c1ccccc1)[C@H]1OB([C@H]2C[C@H]2/C=C/c2ccccc2)O[C@  
H]1C(OC)(c1ccccc1)c1ccccc1  
348 C=CC(=O)O.Ic1cccc2ccccc12>>O=C(O)/C=C/c1cccc2ccccc12  
349 C=Cc1cncnc1.CCCCCCOc1ccc(I)cc1>>CCCCCOc1ccc(/C=C/c2cncnc2)cc1  
350 C=CP(=O)(OCC)OCC.Cc1ccc(Br)cc1>>CCOP(=O)(/C=C/c1ccc(C)cc1)OCC  
C=C[C@H]1O[C@H]2OC(C)(C)O[C@H]2[C@H]1O.O=c1cc(-  
351 c2ccccc2)oc2ccc(Br)cc12>>CC1(C)O[C@H]2O[C@H](/C=C/c3ccc4oc(-  
c5ccccc5)cc(=O)c4c3)[C@H](O)[C@H]2O1  
352 C=Cc1cccc(N)c1.CN(C(=O)c1ccccc1)c1ccc2c(c1)[nH]c(=NC(=O)c1ccc(Br)s1)n2CCC(N)=O>>CN(C(  
=O)c1ccccc1)c1ccc2c(c1)[nH]c(=NC(=O)c1ccc(/C=C/c3cccc(N)c3)s1)n2CCC(N)=O  
353 C=CC(=O)OCC.FC(F)(F)c1ccc(I)cc1>>CCOC(=O)/C=C/c1ccc(C(F)(F)F)cc1  
C=Cc1ccc2c(c1)Sc1ccccc1N2CCCC.CCCCN1c2ccc(Br)cc2Sc2cc(-c3nc4ccccc4n3-  
354 c3ccccc3)ccc21>>CCCCN1c2ccccc2Sc2cc(/C=C/c3ccc4c(c3)Sc3cc(-c5nc6ccccc6n5-  
c5ccccc5)ccc3N4CCCC)ccc21  
355 C=Cc1ccc(OC)c(OC)c1.COc1cc(I)cc(OC)c1>>COc1cc(/C=C/c2ccc(OC)c(OC)c2)cc(OC)c1  
C=Cc1cncnc1.COc1cc2c(Nc3cc(OC)c(OC)c(OC)c3)c(C#N)cnc2cc1OS(=O)(=O)C(F)(F)F>>COc1cc2c  
356 (Nc3cc(OC)c(OC)c(OC)c3)c(C#N)cnc2cc1/C=C/c1cncnc1  
C=CCCN(c1ccccc1N1CCOCC1)S(=O)(=O)c1ccccc1Br>>C=C1CCN(c2ccccc2N2CCOCC2)S(=O)(=O  
357 )c2ccccc21  
C=CCCc1ccccc1.C=Cc1ccc(CCl)cc1>>C=Cc1ccc(CC(=C)CCc2ccccc2)cc1  
358 Brc1cccc2ccccc12.C=COCCCC>>C=C(OCCCC)c1cccc2ccccc12  
359 C=CC(=O)OC.Oc1nc(-c2ccnc2)nc2ccc(I)cc12>>COC(=O)/C=C/c1ccc2nc(-c3ccnc3)nc(O)c2c1  
360 Brc1ccc2ccccc2c1.C=CC=O>>O=C/C=C/c1ccc2ccccc2c1  
361 C=C.ClCc1csc2ccccc12>>C=CCc1csc2ccccc12  
362 C=Cc1cccn1.O=[N+](=[O-])c1ccc(I)cc1>>O=[N+](=[O-])c1ccc(/C=C/c2cccn2)cc1  
363 C=Cc1ccc(OC)cc1.COc1cccc(Br)c1>>COc1ccc(/C=C/c2cccc(OC)c2)cc1  
364 C=Cc1ccccc1.COc1ccc(Br)cc1OC>>COc1ccc(/C=C/c2ccccc2)cc1OC  
365

366 C=Cc1cccc(O)c1C(=O)Oc1cccc(C(CCCCC)OC)c1I>>C=C1c2cccc(O)c2C(=O)Oc2cccc(C(CCCCC)O  
 C)c21  
 367 C=CC=O.FC1(F)C(I)=C1c1ccc(Br)cc1>>O=C/C=C/C1=C(c2ccc(Br)cc2)C1(F)F  
 368 BrC1=C(C2=CCCCC2)CCCC1.C=CC(=O)OC>>COC(=O)/C=C/C1=C(C2=CCCCC2)CCCC1  
 369 C=Cc1cccc1.O=[N+](O-)]c1cccc1I>>O=[N+](O-)]c1cccc1/C=C/c1cccc1  
 370 CCOC(=O)c1ccc(I)cc1.COC[C@@H](N=C\c1cccc1)N1C=CCC[C@H]1C(C)C>>CCOC(=O)c1c  
 cc(C2=CN/C(=N/[C@H](COC)C(C)C)c3cccc3)[C@H](C)CC2)cc1  
 C=CC(C)(C)O.COC(=O)N1c2cccc2[C@@]2(CCNC2=O)[C@]2(CCNC(=O)OC(C)(C)C)c3c(Br)cccc  
 371 3N(C)[C@H]12>>COC(=O)N1c2cccc2[C@@]2(CCNC2=O)[C@]2(CCNC(=O)OC(C)(C)C)c3c(/C=  
 C/C(C)(C)O)cccc3N(C)[C@H]12  
 372 C=CC(=O)OCC.Cc1ccc(NCc2cccc(Br)c2)n1>>CCOC(=O)/C=C/c1cccc(CNc2nc(C)cs2)c1  
 C=C[C@H]1O[C@H](Sc2cccc2)[C@H](OCc2cccc2)[C@@H](OCc2cccc2)[C@H]1OCc1ccc(  
 373 OC)cc1.O=c1cc(-  
 c2cccc2)oc2cc(Br)ccc12>>COc1ccc(CO[C@H]2[C@H](OCc3cccc3)[C@@H](OCc3cccc3)[C@H]  
 (Sc3cccc3)O[C@H]2/C=C/c2ccc3c(=O)ccc(-c4cccc4)oc3c2)cc1  
 374 C=CC(=O)OCC.Cn1ccc2nc3ccc(Br)cc3c(Cl)c21>>CCOC(=O)/C=C/c1ccc2nc3cnn(C)c3c(Cl)c2c1  
 C=CC(=O)OCC.COc1ccc(COC(=O)C)c2c(-  
 375 c3cccc(Br)c3)c3cc(C)c(Cl)cc3oc2=O)cc1>>CCOC(=O)/C=C/c1cccc(-  
 c2c(CC(=O)OCc3ccc(OC)cc3)c(=O)oc3cc(Cl)c(C)cc23)c1  
 376 C=Cc1cccc1.Cc1ccc([N+](=O)[O-])cc1Cl>>Cc1ccc([N+](=O)[O-])cc1/C=C/c1cccc1  
 377 C=CCCN(C)c1cccc1I>>C=C1CCN(C)c2cccc21  
 378 C=CS(N)(=O)=O.Nc1cc(-c2cccc(Br)c2)nen1>>Nc1cc(-c2cccc(/C=C/S(N)(=O)=O)c2)nen1  
 379 C=COCC.CC(=O)c1ccc(Br)cc1>>C=C(OCC)c1ccc(C(C)=O)cc1  
 C=CC(=O)OC.COc1cc[nH]c1/C=C1\C(=O)Nc2cccc(I)c21>>COC(=O)/C=C/c1cccc2c1/C=C/c1[nH]c  
 380 cc1OC(C)=O)N2  
 C=CC(=O)OC.Cc1[nH]c(-  
 381 c2cccc2)c(Br)c1C(=O)C(=O)N1CCN(c2cccc(C(F)(F)F)c2)CC1>>COC(=O)/C=C/c1c(-  
 c2cccc2)[nH]c(C)c1C(=O)C(=O)N1CCN(c2cccc(C(F)(F)F)c2)CC1  
 382 C=C1C(=O)O[C@@H]2[C@@H](C)C(=O)C/C=C\CC[C@@H]12.Fc1ccc(I)cc1>>C/C1=C\CC(=  
 O)[C@H](C)C[C@H]2OC(=O)/C=C/c3ccc(F)cc3)[C@@H]2CC1  
 C=Cc1ccc2c(c1)c1ccc(/C=C/c3ccc(N(c4cccc4)c4cccc4)cc3)cc1n2CCCCCCCC.CCCCCCCn1c2ccc  
 383 (I)cc2c2cc(C=O)ccc21>>CCCCCCCCn1c2ccc(C=O)cc2c2cc(/C=C/c3ccc4c(c3)c3ccc(/C=C/c5ccc(N(c  
 6cccc6)c6cccc6)cc5)cc3n4CCCCCCCC)ccc21  
 C=CC(=O)OCC.Fc1ccc(Oc2nc(-c3ccc(Br)cc3)nc3ccsc23)c(F)c1>>CCOC(=O)/C=C/c1ccc(-  
 384 c2nc(Oc3ccc(F)cc3F)c3sccc3n2)cc1  
 C=CP(=O)(OCC)OCC.CC(=O)c1ccc(Br)cc1>>CCOP(=O)(/C=C/c1ccc(C(C)=O)cc1)OCC  
 385 C=Cc1ccc(Cl)cc1.Oc1ccc2cccc2c1Br>>Oc1ccc2cccc2c1/C=C/c1ccc(Cl)cc1  
 C=CCC(O)c1c(C)noc1-c1ccc(-  
 387 c2ccc(C3(C(=O)OCC)CC3)cc2)cc1.FC(F)(F)c1ccc(I)cc1>>CCOC(=O)C1(c2ccc(-c3ccc(-  
 c4onc(C)c4C(O)C/C=C/c4ccc(C(F)(F)F)cc4)cc3)cc2)CC1  
 388 C=CC(=O)OCCCC.CCN(CC)c1cccc(Br)c1>>CCCCOC(=O)/C=C/c1cccc(N(CC)CC)c1  
 389 C=CC(=O)OCC.CS(=O)(=O)c1ccc(Br)cc1Cl>>CCOC(=O)/C=C/c1ccc(S(C)(=O)=O)c(Cl)c1  
 C=CC(=O)C(O[Si](CC)(CC)CC)c1c(OCc2cccc2)c(OC)c2c(OC)c(OC)cc(OC)c2c1OC.COC(=O)c1cc2  
 390 cc(I)c(OCc3cccc3)c(OC)c2c(=O)o1>>CC[Si](CC)(CC)OC(C(=O)/C=C/c1cc2cc(C(=O)OC)oc(=O)c2  
 c(OC)c1OCc1cccc1)c1c(OCc2cccc2)c(OC)c2c(OC)c(OC)cc(OC)c2c1OC  
 391 C=CC(C)=O.Nc1c(Br)cncc1I>>CC(=O)/C=C/c1cncc(Br)c1N  
 C=Cc1cccc1.COc1ccc(CCl)cc1>>COc1ccc(C/C=C/c2cccc2)cc1  
 392 Brc1cncc1.C=CC(=O)OCCCC>>CCCCOC(=O)/C=C/c1cncc1  
 C=CC(=O)Nc1cn(Cc2cccc(C(F)(F)F)c2)cn1.COC(=O)c1ccc(Br)cn1>>COC(=O)c1ccc(/C=C/C(=O)Nc  
 394 2cn(Cc3cccc(C(F)(F)F)c3)cn2)cn1  
 C=CC#N.CC1Cc2cc(Br)ccc2O1>>CC1Cc2cc(/C=C/C#N)ccc2O1  
 395 C=CC(=O)OC(C)(C)C.Cc1cccc(Br)c1>>Cc1cccc(/C=C/C(=O)OC(C)(C)C)c1  
 C=CC(=O)OC.Nc1cncc2c1c(I)cn2[C@H]1C[C@H](O)[C@@H](CO)O1>>COC(=O)/C=C/c1cn([C@  
 397 H]2[C@H](O)[C@@H](CO)O2)c2nnc(N)c12  
 Brc1ccc2[nH]c3ncccc3c2c1.C=CC(=O)N(C)Cc1cc2cccc2n1C>>CN(Cc1cc2cccc2n1C)(C(=O)/C=C/c  
 398 1ccc2[nH]c3ncccc3c2c1  
 C=CC(=O)OC.COC1(OC)C(Br)=CCON(Cc2cccc2)[C@@H]1[C@H]1COC(C)(C)O1>>COC(=O)/C  
 399 =C/C1=CCON(Cc2cccc2)[C@H]([C@H]2COC(C)(C)O2)C1(OC)OC  
 C=CCN(CCc1c(Br)n(C(=O)OC(C)(C)C)c2cccc12)C(=O)C(F)(F)F>>C=C1CN(C(=O)C(F)(F)F)CCc2  
 400 c1n(C(=O)OC(C)(C)C)c1cccc21  
 401 C=CCNC(=O)OC(C)(C)C.O=C1CCc2cc(Cl)ccc21>>C=C(CNC(=O)OC(C)(C)C)c1ccc2c(c1)CCC2=O

402 CC(=O)/C=C/CC(NS(=O)(=O)c1ccc(C)cc1)C(C)C.Cc1ccc(Br)cc1>>CC(=O)/C=C/CC(NS(=O)(=O)c1  
ccc(C)cc1)C(C)C)c1ccc(C)cc1  
403 Br1ccc2c(c1)OCO2.C=CC(=O)OC>>COC(=O)/C=C/c1ccc2c(c1)OCO2  
404 C=CC(=O)OC.O=C1Nc2c(Br)cccc2C1(F)F>>COC(=O)/C=C/c1cccc2c1NC(=O)C2(F)F  
405 C=CC(=O)OC.Cc1cc(-c2cccc2)n2nc(-c3ccc(Cl)cc3)c(I)c2n1>>COC(=O)/C=C/c1c(-  
c2ccc(Cl)cc2)nn2c(-c3cccc3)cc(C)nc12  
406 C=C(C)C(=O)OC.COc1ccc(Br)cc1>>COC(=O)/C(C)=C/c1ccc(OC)cc1  
407 Br1ccsc1.C=CC(CCC)OCc1ccccc1>>CCCC(/C=C/c1ccsc1)OCc1ccccc1  
408 C=CC(=O)OCC.Cc1cc(C)nc(I)n1>>CCOC(=O)/C=C/c1nc(C)cc(C)n1  
409 C=CC(=O)N1CCOCC1.COc1cc(Cl)ccc1C1=CCN(C(=O)OC(C)(C)C)CC1>>COc1cc(/C=C/C(=O)N2C  
COCC2)ccc1C1=CCN(C(=O)OC(C)(C)C)CC1  
410 C=CCOc1ccc(OC)cc1.Ic1ccsc1>>COc1ccc(OC/C=C/c2ccsc2)cc1  
411 C=CC(=O)OC.COc1cc(Br)ccc1-c1nc2c(C)nn(C3CCCC3)c2c(=O)[nH]1>>COC(=O)/C=C/c1ccc(-  
c2nc3c(C)nn(C4CCCC4)c3c(=O)[nH]2)c(OC)c1  
412 C=CC(C)(C)O.O=[N+][([O-]  
])CCc1c[nH]c2cccc(I)c12>>CC(C)(O)/C=C/c1cccc2[nH]cc(CC[N+](=O)[O-])c12  
413 C=CC(=O)N(C)Cc1cccc(OC)c1OCC(C)C.CC1(C)NCc2cc(Br)enc2NC1=O>>COc1cccc(CN(C)C(=O)/  
C=C/c2enc3c(c2)CNC(C)(C)C(=O)N3)c1OCC(C)C  
414 C=Cc1ccccc1.c1ccc([I+](c2cccc2)cc1>>C(=C/c1ccccc1)\c1ccccc1  
415 C=Cc1ccccc1.Ic1ccc2c(c1)OCCOCCOCCOCCO2>>C(=C/c1ccc2c(c1)OCCOCCOCCOCCO2)\c1ccccc1  
416 C=CC(=O)OCC.Cc1cccc(C)c1Cl>>CCOC(=O)/C=C/c1c(C)cccc1C  
417 C=CCCCCCC.COc1cccc(OS(=O)(=O)C(F)(F)F)c1>>C=C(CCCCCC)c1cccc(OC)c1  
418 C=Cc1cccc(C#N)c1.Nc1ncc(Cl)cc1Br>>N#Cc1cccc(/C=C/c2cc(Cl)enc2N)c1  
419 C=CC(=O)N1CCC(Cc2nnc(C)o2)CC1.Cc1nnn(Cc2cc(F)ccc2Br)n1>>Cc1nnn(Cc2cc(F)ccc2/C=C/C(=O)  
N2CCC(Cc3nnc(C)o3)CC2)n1  
420 C=C(C)C(=O)O.O=C1C(O)=C(I)C(=O)c2ccccc21>>C/C(=C/C1=C(O)C(=O)c2ccccc2C1=O)C(=O)O  
421 C=Cc1ccc2ccccc2c1.COC(=O)c1ccc(OCc2ccccc2)cc1OS(=O)(=O)C(F)(F)F>>COC(=O)c1ccc(OCc2cc  
ccc2)cc1/C=C/c1ccc2ccccc2c1  
422 C=CC(=O)OCCCC.FC(F)(F)c1cc(Br)cc(C(F)(F)F)c1>>CCCCOC(=O)/C=C/c1cc(C(F)(F)F)cc(C(F)(F)  
423 C=Cc1ccc(/C=C/c2ccc(OCCCCCCCCCCCC)cc2)cc1.CCCCOc1c(C)cc(I)cc1C>>CCCCCCCCCCCCCO  
c1ccc(/C=C/c2ccc(/C=C/c3ccc(C)c(OCCCC)c(C)c3)cc2)cc1  
424 C=CC(=O)OC(C)(C)C.Fc1ccc(Br)cc1>>CC(C)(C)OC(=O)/C=C/c1ccc(F)cc1  
425 C=CCCCN(C(=O)c1ccccc1)c1ccccc1I>>C=C1CCCN(C(=O)c2ccccc2)c2ccccc21  
426 C=Cc1ccc([N+](=O)[O-])cc1.O=Cc1ccc(Br)cc1>>O=Cc1ccc(/C=C/c2ccc([N+](=O)[O-])cc2)cc1  
427 C=CC(=O)OC(C)(C)C.CC(=O)c1ccc(Cl)cc1>>CC(=O)c1ccc(/C=C/C(=O)OC(C)(C)C)cc1  
428 C=Cc1cncnc1.COCCOCCn1c2ccccc2c2cc(Br)ccc21>>COCCOCCn1c2ccccc2c2cc(/C=C/c3cncnc3)ccc  
429 C=CC(=O)OC(C)(C)C.CC(C)=CCc1cc(I)ccc1OC(=O)CCc1ccccc1F>>CC(C)=CCc1cc(/C=C/C(=O)O  
C(C)(C)C)ccc1OC(=O)CCc1ccccc1F  
430 C=CC(=O)OC.O=C1c2ccc(OS(=O)(=O)C(F)(F)F)cc2C(=O)N1c1ccccc1>>COC(=O)/C=C/c1ccc2c(c1)  
C(=O)N(c1ccccc1)C2=O  
431 C=C[C@H]1COC(C)(C)N1C(=O)OCc1ccccc1.O=[N+][([O-]  
])c1ccccc1I>>CC1(C)OC[C@H]1/C=C/c2ccccc2[N+](=O)[O-])N1C(=O)OCc1ccccc1  
432 C=CC(=O)OCC.COC(=O)c1cc(Br)c2ccc(C)nc2c1OC>>CCOC(=O)/C=C/c1cc(C(=O)OC)c(OC)c2nc(C  
)ccc12  
433 C=CC(=O)OC(C)(C)C.COC(=O)/C=C/c1ccccc(N(Cc2ccc(Br)cc2)C(=O)C2CCCCC2)c1>>COC(=O)/C  
=C/c1ccccc(N(Cc2ccc(/C=C/C(=O)OC(C)(C)C)cc2)C(=O)C2CCCCC2)c1  
434 C=CC(=O)OC.O=c1oc2cc(Br)enc2n1CCc1cncnc1>>COC(=O)/C=C/c1cnc2c(c1)oc(=O)n2CCc1cncnc1  
435 C=CC(=O)OCC.O=C(Nc1ccccc1I)C12CC3CC(CC(C3)C1)C2>>CCOC(=O)/C=C/c1ccccc1NC(=O)C1  
2CC3CC(CC(C3)C1)C2  
436 C=CC(=O)O.O=c1[nH]ccc2c(I)cccc12>>O=C(O)/C=C/c1cccc2c(=O)[nH]ccc12  
437 C=CC(=O)O.O=C(c1ccccc1)c1ccc(Br)cc1>>O=C(O)/C=C/c1ccc(C(=O)c2ccccc2)cc1  
438 C=CC(=O)OC(C)(C)C.N#CCc1ccc(Br)cc1>>CC(C)(C)OC(=O)/C=C/c1ccc(CC#N)cc1  
439 Br1cnc2ccccc12.C=CC(=O)CC>>CCC(=O)/C=C/c1cnc2ccccc12  
440 C=C1C[C@H]2[C@@H]3CCc4cc(OC)ccc4[C@H]3CC[C@]2(C)C1=O.FC(F)(F)c1ccc(Br)cc1>>COc  
1ccc2c(c1)CC[C@H]1[C@@H]2CC[C@]2(C)C(=O)/C=C/c3ccc(C(F)(F)F)cc3)[C@H]12  
441 C=CC(C)=O.COC(=O)C1=C(OS(=O)(=O)C(F)(F)F)C(C)(C)CCC1>>COC(=O)C1=C(/C=C/C(C)=O)C  
(C)(C)CCC1  
442 C=CC(=O)c1ccc(OC)cc1OC.COc1ccc(I)c(OC)c1>>COc1ccc(/C=C/C(=O)c2ccc(OC)cc2OC)c(OC)c1  
443 C=CC(=O)OC(C)(C)C.COc1cc(C(=O)c2cn(S(=O)(=O)c3cccc(Br)c3)c3ccccc23)cc(OC)c1OC>>COc1c  
c(C(=O)c2cn(S(=O)(=O)c3cccc(/C=C/C(=O)OC(C)(C)C)c3)cc(OC)c1OC

444 C=Cc1ccc(N(C)C(=O)OC(C)(C)C)cc1.OCCOCCOCCOCCOe1ccc(I)en1>>CN(C(=O)OC(C)(C)C)c1c  
 cc(/C=C/c2ccc(OCCOCCOCCOCCO)nc2)cc1  
 445 Br1ccsc1.COC(=O)/C=C/c1ccccc1>>COC(=O)/C=C(/c1ccccc1)c1ccsc1  
 446 Br1ccccc1.C=Cc1ccccc1OC>>COc1ccccc1/C=C/c1ccccc1  
 447 C=C.CC(=O)Oc1ccccc(I)c1>>C=Cc1ccccc(OC(C)=O)c1  
 448 C=Cc1ccc(C(F)(F)F)cc1.O=Cc1ccc(Br)cc1>>O=Cc1ccc(/C=C/c2ccc(C(F)(F)F)cc2)cc1  
 449 C=CC(=O)OC.CC(=O)Oc1ccccc1-c1nnn(Cc2ccccc2)c1I>>COC(=O)/C=C/c1c(-  
 c2ccccc2OC(C)=O)nnn1Cc1ccccc1  
 450 Br1enc2ccccc2c1.C=Cc1ccccc([N+](=O)[O-])c1>>O=[N+](O)c1ccccc(/C=C/c2enc3ccccc3c2)c1  
 451 C=CC(=O)OC.Cc1cc(O)ccc1Br>>COC(=O)/C=C/c1ccc(O)cc1C  
 452 C=CC(=O)OCC.Cc1nnn2cc(Br)ccc12>>CCOC(=O)/C=C/c1ccc2c(C)nnn2c1  
 453 Br1ccc2cc[nH]c2n1.C=Cc1ccccc1>>C=C(/c1ccc2cc[nH]c2n1)\c1ccccc1  
 454 C=Cc1ccc(OC)cc1.COc1ccc(N)c(Br)c1>>COc1ccc(/C=C/c2cc(OC)ccc2N)cc1  
 455 C=CC(=O)OCCCC.O=C(c1ccc(Br)cc1)N1CCCC1>>CCCCOC(=O)/C=C/c1ccc(C(=O)N2CCCC2)cc1  
 456 Br1cccn2nnnc12.C=Cc1ccc(C(C)(C)C)cc1>>CC(C)(C)c1ccc(/C=C/c2cccn3nnnc23)cc1  
 457 C=CC#N.Nc1ccc(I)cc1>>N#C/C=C/c1ccc(N)cc1  
 458 Br1ccccc1I.C=CC(=O)OCC>>CCOC(=O)/C=C/c1ccccc1Br  
 459 C=Cc1ccc(OC(C)=O)cc1.COc1cc(OC(C)=O)ccc1Br>>COc1cc(OC(C)=O)ccc1/C=C/c1ccc(OC(C)=O)  
 460 Br1ccc(C(=C2CCCC2)c2ccc3c(cnn3C3CCCCO3)c2)cc1.C=CC(=O)OC>>COC(=O)/C=C/c1ccc(C(  
 =C2CCCC2)c2ccc3c(cnn3C3CCCCO3)c2)cc1  
 461 C=Cc1ccc(N2CCN(C(=O)OC(C)(C)C)CC2)cc1.Clc1cc(Br)cc(Cn2ccnc2)c1>>CC(C)(C)OC(=O)N1CC  
 N(c2ccc(/C=C/c3cc(Cl)cc(Cn4ccnc4)c3)cc2)CC1  
 462 C=CCNC(=O)NC(C)(C)CO.Cc1cc(OCc2ccccc2)c([C@@H]2O[C@H](COCc3ccccc3)[C@@H](OCc3  
 cccc3)[C@H](OCc3ccccc3)[C@H]2OCc2ccccc2)cc1Cc1ccc(Br)cc1>>Cc1cc(OCc2ccccc2)c([C@@H]  
 2O[C@H](COCc3ccccc3)[C@@H](OCc3ccccc3)[C@H](OCc3ccccc3)[C@H]2OCc2ccccc2)cc1Cc1c  
 cc(/C=C/CNC(=O)NC(C)(C)CO)cc1  
 463 Br1ccccc1.C=Cn1nn(-c2ccc(C)cc2)n1>>Cc1ccc(-c2nnn(/C=C/c3ccccc3)n2)cc1  
 464 C=CC(=O)OC.Cc1ccccc([N+](=O)[O-])c1Br>>COC(=O)/C=C/c1c(C)cccc1[N+](=O)[O-]  
 465 C=Cc1ccccc1.Cc1ccc(S(=O)(=O)n2ccc3c(Br)cccc32)cc1>>Cc1ccc(S(=O)(=O)n2ccc3c(/C=C/c4ccccc4  
 )cccc32)cc1  
 466 C=Cc1cc2ccc(OC)cc2oc1=O.Ic1ccccc1>>COc1ccc2cc(/C=C/c3ccccc3)c(=O)oc2c1  
 467 C=CC(=O)OCC.COc1ccc(-c2ccccc2)c(I)c1>>CCOC(=O)/C=C/c1cc(OC)ccc1-c1ccccc1  
 468 C=C(F)C(=O)OC.Ic1ccc2ccccc2c1>>COC(=O)/C(F)=C/c1ccc2ccccc2c1  
 469 C=CC(=O)OC.CC(C)(O)c1[nH]c2ccccc2c1C1CCCN(Cc2ccc(Br)cc2F)C1>>COC(=O)/C=C/c1ccc(CN  
 2CCCC(c3c(C(C)(C)O)[nH]c4ccccc34)C2)c(F)c1  
 470 C=CC(=O)OC(C)(C)C.CC(=O)Nc1cc(Cl)c(F)cc1Br>>CC(=O)Nc1cc(Cl)c(F)cc1/C=C/C(=O)OC(C)(C)  
 471 Br1ccccc2[nH]ncc12.C=CC(N)=O>>NC(=O)/C=C/c1ccccc2[nH]ncc12  
 472 C=C[C@H](C)[C@H]1CC[C@H]2[C@H]3CC(=O)[C@H]4C[C@H](O)CC[C@H]4(C)[C@H]3CC  
 [C@H]21C.Ic1ccccc1>>C[C@H](/C=C/c1ccccc1)[C@H]1CC[C@H]2[C@H]3CC(=O)[C@H]4C[C@H]  
 (O)CC[C@H]4(C)[C@H]3CC[C@H]21C  
 473 C=CC(=O)OCCCC.O=[N+](O)c1ccc(Br)cc1>>CCCCOC(=O)/C=C/c1ccc([N+](=O)[O-])cc1  
 474 C=Cc1ccc2ccc(Cl)cc2n1.CC(C)(O)c1ccccc1CCC(=O)c1ccccc(Br)c1>>CC(C)(O)c1ccccc1CCC(=O)c1c  
 ccc(/C=C/c2ccc3ccc(Cl)cc3n2)c1  
 475 C=CC(=O)OC(C)(C)C.Fc1ccc(I)cc1>>CC(C)(C)OC(=O)/C=C/c1ccc(F)cc1  
 476 C=CC(C)=O.CC(C)Oc1ccc(Oc2ncc(I)s2)cc1>>CC(=O)/C=C/c1enc(Oc2ccc(OC(C)C)cc2)s1  
 477 C=Cc1ccc(Cl)cc1.CCOC(=O)C(Cc1ccccc1I)C(C)=O>>CCOC(=O)C(Cc1ccccc1/C=C/c1ccc(Cl)cc1)C(  
 C)=O  
 478 C=CCC(C)(C)C.CC(C)(C)c1ccc(OS(=O)(=O)C(F)(F)F)cc1>>C=C(CC(C)(C)C)c1ccc(C(C)(C)C)cc1  
 479 C=CC(=O)OCc1ccccc1.COc1ccc(I)cc1>>COc1ccc(/C=C/C(=O)OCc2ccccc2)cc1  
 480 C=C(c1ccc(OC)c(Br)c1)c1cc(OC)c(OC)c(OC)c1.C=CC(=O)OC>>C=C(c1ccc(OC)c(/C=C/C(=O)OC)c  
 1)c1cc(OC)c(OC)c(OC)c1  
 481 C=CCCCO.CC(C)(C)c1ccc(OS(=O)(=O)C(F)(F)F)cc1>>C=C(CCCO)c1ccc(C(C)(C)C)cc1  
 482 C=CC(=O)OCC.O=C(N1CCc2cc(Br)c(F)cc2C1)C(F)(F)F>>CCOC(=O)/C=C/c1cc2c(cc1F)CN(C(=O)  
 C(F)(F)F)CC2  
 483 C=CC(=O)OCC.COC1CCC(Nc2nc(N)nc(C)c2Br)CC1>>CCOC(=O)/C=C/c1c(C)nc(N)nc1NC1CCC(O  
 C)CC1  
 484 C=CC(=O)OC.CCCCCC1=C(I)C1(F)F>>CCCCC1=C(/C=C/C(=O)OC)C1(F)F  
 485 C=Cc1cc(OC)ccc1OC.CCCCCCCCOCc1ccc2c(C)c(Br)c(=O)oc2c1>>CCCCCCCCOCc1ccc2c(C)c(/C=C/  
 c3cc(OC)ccc3OC)c(=O)oc2c1

C=CC(=O)OC.O=C1[C@H](COCc2ccc2)N(Cc2cn([C@H](CO)Cc3cccc3)nn2)(C=O)[C@H](Cc2cc  
 486 c(Br)cc2)N1CCCCO>>COC(=O)/C=C/c1ccc(C[C@H]2C(=O)N(Cc3cn([C@H](CO)Cc4cccc4)nn3)[C  
 @ @H](COCc3cccc3)C(=O)N2CCCCO)cc1  
 487 C=CCc1cc2c(cc1C(/C(I)=C/CO)c1cc(OC)c(OC)c(OC)c1)OCO2>>C=C1Cc2cc3c(cc2C(c2cc(OC)c(OC  
 )c(OC)c2)/C1=C/CO)OCO3  
 488 C=CC(=O)OC(C)(C)C.CC(C)c1cc(C(C)C)c(Br)c(C(C)C)c1>>CC(C)c1cc(C(C)C)c(/C=C/C(=O)OC(C)  
 (C)C)c(C(C)C)c1  
 489 C=Cc1cccc1.CC(=O)c1ccc(Br)cc1>>C=C(c1cccc1)c1ccc(C(C)=O)cc1  
 490 C=CC(=O)OC(C)(C)C.O=C1N=c2cc(Br)cnc2=N1>>CC(C)(C)OC(=O)/C=C/c1cnc2c(c1)=NC(=O)N=  
 491 C=CC(=O)OCC.Ic1cn(C(c2cccc2)(c2cccc2)c2cccc2)c(N=P(c2cccc2)(c2cccc2)c2cccc2)n1>>CC  
 OC(=O)/C=C/c1cn(C(c2cccc2)(c2cccc2)c2cccc2)c(N=P(c2cccc2)(c2cccc2)c2cccc2)n1  
 492 C=CCn1cnc1.CCOC(=O)c1ccc(I)cc1Cl>>CCOC(=O)c1ccc(/C=C/Cn2cnc2)cc1Cl  
 C=C[C@H]1C[C@ @H](O[Si](C)(C)C(C)(C)C)CC[C@ ]1(C)C1CC[C@ @ ]2(C)C(CCC23OCCO3)[C  
 493 @ @H]1OC(C)=O.CCOc1ccc(Br)cc1>>CCOc1ccc(/C=C/[C@H]2C[C@ @H](O[Si](C)(C)C(C)(C)C)C  
 C[C@ ]2(C)C2CC[C@ @ ]3(C)C(CCC34OCCO4)[C@ @H]2OC(C)=O)cc1  
 494 C=Cc1cccc1.COc1cc(Br)c(C=O)cc1OC>>COc1cc(C=O)c(/C=C/c2cccc2)cc1OC  
 Br1cccc1I.C=CC(F)(F)C(F)(F)C(F)(F)C(F)(F)C(F)(F)C(F)(F)F>>FC(F)(F)C(F)(F)C(F)(F)C(F)(F)C  
 495 F(F)(F)C(F)(F)/C=C/c1cccc1Br  
 Br1ccnc1.C=CCC(C)O>>CC(O)C/C=C/c1ccnc1  
 496 C=CC(=O)CCC.CC(=O)c1cccc(Br)c1>>CCCC(=O)/C=C/c1cccc(C(C)=O)c1  
 497 C=Cc1cnc1.Cc1cc(Cl)ccc1Br>>Cc1cc(Cl)ccc1/C=C/c1cnc1  
 498 Br1ccc(-c2nnc(-c3cccc4cccc34)o2)cc1.C=C[Si](OCC)(OCC)OCC>>CCO[Si](/C=C/c1ccc(-c2nnc(-  
 499 c3cccc4cccc34)o2)cc1)(OCC)OCC  
 C=CC(=O)OCC.Cc1ncc(-c2ccc(Br)cc2)o1>>CCOC(=O)/C=C/c1ccc(-c2cnc(C)o2)cc1  
 500 C=CC(N)=O.Clc1ccc(Br)cc1>>NC(=O)/C=C/c1ccc(Cl)cc1  
 501 Br1ccc2ccc3cccc4ccc1c2c34.C=CP(=O)(OCC)OCC>>CCOP(=O)(/C=C/c1ccc2ccc3cccc4ccc1c2c34)  
 502 C=Cc1ccc2c(c1)OCO2.Ic1ccc(OCc2cccc2)cc1>>C(=C/c1ccc2c(c1)OCO2)\c1ccc(OCc2cccc2)cc1  
 503 C=CC(=O)OCC.Cc1cn(Cc2ccc(I)cc2)c(=O)[nH]c1=O>>CCOC(=O)/C=C/c1ccc(Cn2cc(C)c(=O)[nH]c  
 504 2=O)cc1  
 C=CC(=O)OC.COc1ncc(I)cn1>>COC(=O)/C=C/c1cnc(OC)nc1  
 505 C=CC(=O)C(C)CC(=O)OC.COc1ccc(Br)cc1OC>>COC(=O)CC(C)C(=O)/C=C/c1ccc(OC)c(OC)c1  
 506 C=CC(O)C(F)(F)C(=O)OCC.Ic1cccc1>>CCOC(=O)C(F)(F)C(O)/C=C/c1cccc1  
 507 C=CC(F)(F)F.O=[N+][([O-])c1ccc(I)cc1>>O=[N+][([O-])c1ccc(/C=C/C(F)(F)F)cc1  
 508 C=CCOc1cccc1.Cc1cccc1I>>Cc1cccc1/C=C/COc1cccc1  
 509 C=Cc1cccc1.CCCCCCCCCCCC(=O)Nc1cccc1Br>>CCCCCCCCCCCC(=O)Nc1cccc1/C=C/c1cccc  
 510 C=C(NC(=O)OC(C)(C)C)C(=O)OCc1cccc1.CC(C)(C)OC(=O)C(C)(C)c1ccc(I)cc1>>CC(C)(C)OC(=  
 511 O)N/C(=C)c1ccc(C(C)(C)C(=O)OC(C)(C)C)cc1)C(=O)OCc1cccc1  
 C=CCN.Nc1nc(=O)n([C@H]2C[C@H](O)[C@ @H](COP(=O)(O)OP(=O)(O)OP(=O)(O)O)O2)cc1I>>  
 512 NC/C=C/c1cn([C@H]2C[C@H](O)[C@ @H](COP(=O)(O)OP(=O)(O)OP(=O)(O)O)O2)c(=O)nc1N  
 C=CC(=O)[C@ @ ]1(O)C[C@H]2CC[C@ ]1(C)C2(C)C.Clc1ccc(I)cc1>>CC1(C)[C@ @H]2CC[C@ @ ]1  
 513 (C)[C@ @ ](O)(C(=O)/C=C/c1ccc(Cl)cc1)C2  
 C=Cc1ccc2c(c1)C1CCCC1N2c1ccc(C)cc1.Cn1nc2c(Br)ccc(Nc3ncc(C4OCCO4)cn3)c2n1>>Cc1ccc(N  
 514 2c3ccc(/C=C/c4ccc(Nc5ncc(C6OCCO6)cn5)c5nn(C)nc45)cc3C3CCCC32)cc1  
 515 C=CCN1CCc2cccc2C1Cc1cccc1Br>>C=C1CN2CCc3cccc3C2Cc2cccc21  
 C=CC(=O)OC(C)(C)C.CC1(C)C(=O)Nc2ncc(Br)cc2C1O>>CC(C)(C)OC(=O)/C=C/c1cnc2c(c1)C(O)C  
 516 (C)(C)C(=O)N2  
 C=Cc1cc(C)c(OCOCCOC)c(C)c1.COc1ccc2oc(=O)c(Br)c(C)c2c1>>COCCOCOc1c(C)cc(/C=C/c2c(C  
 517 )c3cc(OC)ccc3oc2=O)cc1C  
 C=C[Si](CC)(CC)CC.Cc1ccc(Br)cc1>>CC[Si](/C=C/c1ccc(C)cc1)(CC)CC  
 518 C=CC(=O)OC.CC(=O)OC[C@H]1O[C@H](Oc2ccc(I)cc2)[C@H](OC(C)=O)[C@ @H](OC(C)=O)[C  
 519 @H]1OC(C)=O>>COC(=O)/C=C/c1ccc(O[C@H]2O[C@H](COC(C)=O)[C@H](OC(C)=O)[C@H](O  
 C(C)=O)[C@H]2OC(C)=O)cc1  
 520 C=CCNC(=O)OC(C)(C)C.COc1cc(-c2csc3c(I)cnc(N)c23)ccc1NC(=O)c1cc2cccc2n1C>>COc1cc(-  
 c2csc3c(/C=C/CNC(=O)OC(C)(C)C)cnc(N)c23)ccc1NC(=O)c1cc2cccc2n1C  
 521 C=Cc1ccc2c(c1)C1CCCC1N2c1ccc(C)cc1.N#Cc1cc([N+])(=O)[O-  
 ])ccc1Br>>Cc1ccc(N2c3ccc(/C=C/c4ccc([N+](=O)[O-])cc4C#N)cc3C3CCCC32)cc1  
 522 C=Cc1ccc2c(c1)Sc1cccc1N2CC.CCN(c1cccc1)c1ccc(Br)cc1>>CCN(c1cccc1)c1ccc(/C=C/c2ccc3c(  
 c2)Sc2cccc2N3CC)cc1  
 523 Br1ccc2cccc2c1.C=C>>C=Cc1ccc2cccc2c1  
 524 C=Cc1ccc(C#N)cc1.N[C@ @H](Cc1c[nH]c2ccc(Br)cc12)(C=O)O>>N#Cc1ccc(/C=C/c2ccc3[nH]cc(C[  
 C@H](N)C(=O)O)c3c2)cc1

525 C=Cc1ccc(OC)cc1.Cc1oc2ccccc2c(=O)c1Br>>COc1ccc(/C=C/c2c(C)oc3ccccc3c2=O)cc1  
526 C=Cc1ccccc1.CCCCCCCCCCCCCI>>CCCCCCCCCCCCC/C=C/c1ccccc1  
527 C=CC(=O)OC(C)(C)C.COCC(=O)Cc1cc(Cl)ccc1Br>>COC(=O)Cc1cc(Cl)ccc1/C=C/C(=O)OC(C)(C)C  
528 C=C.COc1cc(I)cc(OC)c1>>C=Cc1cc(OC)cc(OC)c1  
529 C=CC(=O)OCC.O=c1oc(-c2ccccc2)c(I)c2sc3c(c12)CCCC3>>CCOC(=O)/C=C/c1c(-  
c2ccccc2)oc(=O)c2c3c(sc12)CCCC3  
530 C=CC#N.COc1cccc2c1CCC(C=O)=C2Br>>COc1cccc2c1CCC(C=O)=C2/C=C/C#N  
531 C=CCc1cc(Cl)c2ccccc2c1OCc1ccccc1Br>>C=C1Cc2cc(Cl)c3ccccc3c2OCc2ccccc21  
532 Brc1ccc2ccccc2c1.C=CC(F)(F)F>>FC(F)(F)/C=C/c1ccc2ccccc2c1  
Brc1encc2ccccc12.C=CCOC1=C(C)C(=O)O[C@H](CC)[C@@](C)(O)C=C(C)C(=O)[C@H](C)C[C@  
533 @](C)(OC)[C@H](O)[C@@H]2O[C@H](C)C[C@H](N(C)C)[C@H]2OC(C)=O)[C@H]1C>>CC[C@  
H]1OC(=O)C(C)=C(OC/C=C/c2cccc3ccccc23)[C@H](C)[C@@H](O[C@@H]2O[C@H](C)C[C@H](  
N(C)C)[C@H]2OC(C)=O)[C@@](C)(OC)C[C@@H](C)C(=O)C(C)=C[C@H](C)O  
C=Cc1ccc(S(=O)(=O)c2ccccc2F)cn1.N#Cc1cc(F)ccc1I>>N#Cc1cc(F)ccc1/C=C/c1ccc(S(=O)(=O)c2cc  
534 ccc2F)cn1  
535 C=Cc1nnn(C)n1.Ic1ccccc1>>Cn1nnn(/C=C/c2ccccc2)n1  
C=C[C@@H]1CC(S(=O)(=O)c2ccccc2)(S(=O)(=O)c2ccccc2)C[C@H]1[C@@H](c1ccccc1)c1cc(OC)  
536 c(OC)cc1Br>>C=C1c2cc(OC)c(OC)cc2[C@H](c2ccccc2)[C@@H]2CC(S(=O)(=O)c3ccccc3)(S(=O)(=O)c3ccccc3)C[C@@H]12  
537 Brc1ccccc1.C=Cc1sccc1C>>Cc1nccc1/C=C/c1ccccc1  
538 Brc1encc2ccccc12.C=CC(=O)N(C)C>>CN(C)C(=O)/C=C/c1encc2ccccc12  
539 C=CC(=O)OCC.CC1(C)CC(=C(c2ccc(Br)cc2)c2ccc(O)c(Cl)c2)CC(C)(C)C1>>CCOC(=O)/C=C/c1ccc  
(C(=C2CC(C)(C)CC(C)(C)C2)c2ccc(O)c(Cl)c2)cc1  
540 C=C(Br)CC.C=Cc1ccc(C#N)cc1>>C=C(/C=C/c1ccc(C#N)cc1)CC  
541 C=Cc1ccc(C)cc1.COCC(=O)c1ccc(Br)cc1>>COC(=O)c1ccc(/C=C/c2ccc(C)cc2)cc1  
542 C=CC(=O)OC.Nc1ccc(OC(F)(F)F)cc1Br>>COC(=O)/C=C/c1cc(OC(F)(F)F)ccc1N  
543 C=CC(=O)OC(C)(C)C.CCOC(=O)c1encc(Br)c1>>CCOC(=O)c1encc(/C=C/C(=O)OC(C)(C)C)c1  
544 C=CC(=O)OC(C)(C)C.FC(F)(F)c1ccc(Br)nc1>>CC(C)(C)OC(=O)/C=C/c1ccc(C(F)(F)F)cn1  
545 C=CC(=O)OC.COc1cccc(Br)n1>>COC(=O)/C=C/c1cccc(OC)n1  
546 C=CC(=O)O.O=Cc1ccc(I)cc1>>O=Cc1ccc(/C=C/C(=O)O)cc1  
547 Brc1ccc(C2=CCCCc3ccccc32)cc1.C=CC(=O)OC>>COC(=O)/C=C/c1ccc(C2=CCCCc3ccccc32)cc1  
548 C=CC(=O)N[C@H](C)c1cccc2ccccc12.FC(F)(F)c1cccc(Br)c1>>C[C@@H](NC(=O)/C=C/c1cccc(C(F)  
)(F)F)c1c1cccc2ccccc12  
549 C=CC(=O)O.CCOC(=O)CCc1ccccc1-c1cccc(I)c1>>CCOC(=O)CCc1ccccc1-c1cccc(/C=C/C(=O)O)c1  
C=CC(=O)OC(C)(C)C.CCC(=C(c1ccc(F)cc1)c1ccc(F)cc1)c1ccc(Br)cc1>>CCC(=C(c1ccc(F)cc1)c1ccc  
550 (F)cc1)c1ccc(/C=C/C(=O)OC(C)(C)C)cc1  
551 Brc1ccccc1.C=C/C=C/C(=O)N(CCCC)CCCC>>CCCCN(CCCC)C(=O)/C=C/C=C/c1ccccc1  
552 C=CCc1c(OC(=O)c2ccccc2I)c(=O)n(C)c(=O)n1C>>Cn1c2c(c(=O)n(C)c1=O)OC(=O)c1ccccc1/C=C/C  
C=CC(=O)OC.Cc1ccc(F)cc1C(=O)c1sc2cc(O)ccc2c1Oc1ccc(Br)cc1>>COC(=O)/C=C/c1ccc(Oc2c(C(  
553 =O)c3cc(F)ccc3C)sc3cc(O)ccc23)cc1  
C=CC(N)=O.Ic1en(C(c2ccccc2)(c2ccccc2)c2ccccc2)c(N=P(c2ccccc2)(c2ccccc2)c2ccccc2)n1>>NC(=  
554 O)/C=C/c1en(C(c2ccccc2)(c2ccccc2)c2ccccc2)c(N=P(c2ccccc2)(c2ccccc2)c2ccccc2)n1  
555 C=Cc1ccccc1.Ic1ccccc1>>C(=C/c1ccccc1)c1ccccc1  
C=CC(=O)OCC.Cc1cc2c(-  
556 c3ccccc(Br)c3)c(CC(=O)Nc3ccc(F)cc3C(F)(F)F)c(=O)oc2cc1Cl>>CCOC(=O)/C=C/c1cccc(-  
c2c(CC(=O)Nc3ccc(F)cc3C(F)(F)F)c(=O)oc3cc(Cl)c(C)cc23)c1  
C=CCNC(=O)OC(C)(C)C.O=C(OC[C@H]1O[C@H](n2cc(I)c(=O)[nH]c2=O)C[C@@H]1OC(=O)c  
557 1ccccc1)c1ccccc1>>CC(C)(C)OC(=O)NC/C=C/c1en([C@H]2C[C@H](OC(=O)c3ccccc3)[C@@H](C  
OC(=O)c3ccccc3)O2)c(=O)[nH]c1=O  
558 C=Cc1ccccc1.CCCCCCOc1ccc(I)cc1>>CCCCCCCCOc1ccc(/C=C/c2ccccc2)cc1  
559 C=CC(=O)OC(C)(C)C.O=C(c1ccccc1)c1ccc(Cl)cc1>>CC(C)(C)OC(=O)/C=C/c1ccc(C(=O)c2ccccc2)c  
560 C=Cc1ccccc1.Clc1ncc(I)c(Nc2ccccc2)n1>>Clc1ncc(/C=C/c2ccccc2)c(Nc2ccccc2)n1  
561 C=Cn1ene2c(NC)nene21.Cc1cccc(C)c1I>>Cn1ene2c1nen2/C=C/c1c(C)cccc1C  
562 Brc1ccc2nccn2c1.C=CC(=O)OC>>COC(=O)/C=C/c1ccc2nccn2c1  
563 C=C(C)CC(OC(=C)Br)c1ccc(Cl)cc1>>C=C1C=C(C)CC(c2ccc(Cl)cc2)OC1  
564 C=CC(=O)OCC.COc1ccc(Cn2c(=O)ccc3cc(Br)ccc32)cc1>>CCOC(=O)/C=C/c1ccc2c(ccc(=O)n2Cc2c  
cc(OC)cc2)c1  
565 C=Cc1ccccc1.Ic1cccc2cc3c(nc12)-c1ccccc1CC3>>C(=C/c1cccc2cc3c(nc12)-c1ccccc1CC3)\c1ccccc1  
C=CC(=O)OC.CC(C)(C)c1[nH]c2ccccc2c1C1CCCN(Cc2ccc(Br)cc2)C1>>COC(=O)/C=C/c1ccc(CN2  
566 CCCC(c3c(C(C)(C)C)[nH]c4ccccc34)C2)cc1

567 C=CC#N.O=[N+](O)c1cccc(I)c1>>N#C/C=C/c1cccc([N+](=O)[O-])c1  
568 C=COC(CC)CCCCC.O=Cc1ccc(Br)cc1>>C=C(OC(CC)CCCC)c1ccc(C=O)cc1  
569 C=C(NC(C)=O)C(=O)OC.Cc1cccc1I>>COC(=O)/C=C/c1cccc1C)NC(C)=O  
570 C=CC(=O)CCC.CC(C)(C)c1ccc(Br)cc1>>CCCC(=O)/C=C/c1ccc(C(C)(C)C)cc1  
571 Bre1enc2cccc2c1.C=C[Si](CC)(CC)CC>>CC[Si]/C=C/c1enc2cccc2c1)(CC)CC  
572 C=CC(=O)OCCCC.COc1ccc2cc(Br)ccc2c1>>CCCCOC(=O)/C=C/c1ccc2cc(OC)ccc2c1  
573 C=CC(=O)OC.C[C@@H]1CN(c2ncc(Br)cc2C(F)(F)F)CCN1C(=O)OC(C)(C)C>>COC(=O)/C=C/c1cn  
574 c(N2CCN(C(=O)OC(C)(C)C)[C@H](C)C2)c(C(F)(F)F)c1  
575 C=Cc1ccc2cccc2n1.Cc1cc(N2CCCC2)nc(Cl)n1>>Cc1cc(N2CCCC2)nc(/C=C/c2ccc3cccc3n2)n1  
576 C=Cc1cccn1.O=[N+](O)c1ccc2c(Br)nn(C3CCCCO3)c2c1>>O=[N+](O-  
577 )c1ccc2c(/C=C/c3cccn3)nn(C3CCCCO3)c2c1  
578 C=CC(=O)OC.CC12CCCC(Br)=C1N(Cc1ccc3cccc3c1)C(=O)C2>>COC(=O)/C=C/C1=C2N(Cc3ccc4  
579 ccccc4c3)C(=O)CC2(C)CCC1  
580 C=CC(=O)OC(C)(C)C.O=C(NC[C@H]1CCc2cc(I)ccc2O1)OCc1cccc1>>CC(C)(C)OC(=O)/C=C/c1c  
581 cc2c(c1)CC[C@H](CNC(=O)OCc1cccc1)O2  
582 C=CC(=O)OC.Ic1ccc2c(c1)OCCOCCOCCOCCO2>>COC(=O)/C=C/c1ccc2c(c1)OCCOCCOCCOCC  
583 C=C1C(=O)O[C@H]2[C@H]1C[C@@H](O)/C(C)=C/CC[C@@]1(C)O[C@H]21.COc1ccc(I)cc1>>  
584 COc1ccc(/C=C2/C(=O)O[C@H]3[C@H]2C[C@@H](O)/C(C)=C/CC[C@@]2(C)O[C@H]32)cc1  
585 C=CC(=O)OCC.Clc1ccc(Br)cc1>>CCOC(=O)/C=C/c1ccc(Cl)cc1  
586 C=COCCCC.Fc1cccc(Cl)c1>>C=C(OCCCC)c1cccc(F)c1  
587 Bre1cccc1.C=Cc1ccncc1>>C(=C/c1ccncc1)\c1cccc1  
588 C=C.COc1ccc(CCl)cc1>>C=CCc1ccc(OC)cc1  
589 Bre1cc2cccc2c2cccc12.C=Cc1cccc1>>C(=C/c1cc2cccc2c2cccc12)\c1cccc1  
590 C=Cc1cccc1OC.COc1ccc(Br)cc1>>COc1ccc(/C=C/c2cccc2OC)cc1  
591 C=CC(=O)O.O=[N+](O)c1cccc(I+ )c2cccc([N+](=O)[O-]  
592 )c2)c1>>O=C(O)/C=C/c1cccc([N+](=O)[O-])c1  
593 C=Cc1ccc2c(c1)c1cccc1n2CC.CCn1c2cccc2c2cc(-  
594 n3c(C)nc4ccc(Br)cc4c3=O)ccc21>>CCn1c2cccc2c2cc(/C=C/c3ccc4nc(C)n(-  
595 c5ccc6c(c5)c5cccc5n6CC)c(=O)c4c3)ccc21  
596 Bre1cccc1.C=C(NC(=O)OC(C)(C)C)C(=O)OCc1cccc1>>CC(C)(C)OC(=O)N/C(=C/c1cccc1)C(=O)  
597 OCc1cccc1  
598 C=Cc1cc([N+](=O)[O-])ccc1N(C)C(=O)c1cccc1I>>C=C1c2cccc2C(=O)N(C)c2ccc([N+](=O)[O-]  
599 Bre1ccc(C=C(c2cccc2)c2cccc2)cc1.C=Cc1ccc(-  
600 n2c3cccc3c3cccc32)cc1>>C(=C(c1cccc1)c1cccc1)c1ccc(/C=C/c2ccc(-  
601 C=COCCCC.O=c1cc(Br)c2ccc(Cl)cc2[nH]1>>CCCCO/C=C/c1cc(=O)[nH]c2cc(Cl)ccc12  
602 C=C(C)C.O=[N+](O)c1cccc(Br)c1>>CC(C)=Cc1cccc([N+](=O)[O-])c1  
603 C=CC(=O)OC.Cn1enc2c(NCc3cccc(Br)c3)nc(N3CCOCC3)nc21>>COC(=O)/C=C/c1cccc(CNc2nc(N3  
604 CCOCC3)nc3c2ncn3C)c1  
605 C=CC(=O)OCC.O=Cc1cc([N+](=O)[O-])ccc1Br>>CCOC(=O)/C=C/c1ccc([N+](=O)[O-])cc1C=O  
606 C=CC(=O)CCC.COc1ccc2cc(Br)ccc2c1>>CCCC(=O)/C=C/c1ccc2cc(OC)ccc2c1  
607 Bre1cccs1.C=CCn1nnc2cccc21>>C(=C/c1cccs1)\Cn1nnc2cccc21  
608 C=CS(=O)(=O)F.CCOC(=O)c1cccc1I>>CCOC(=O)c1cccc1/C=C/S(=O)(=O)F  
609 C=Cc1ccc2c(c1)CC[C@@H]1[C@@H]2CC[C@]2(C)[C@@H](O[Si](C)(C)C(C)(C)C)CC[C@@H]1  
2.C[Si](C)(C)OS(=O)(=O)C(F)(F)F>>CC(C)(C)[Si](C)(C)O[C@H]1CC[C@H]2[C@@H]3CCc4cc(/C  
=C/[Si](C)(C)C)ccc4[C@H]3CC[C@]12C  
C=CC(=O)OCC.FC(F)(F)c1cccc(Br)c1>>CCOC(=O)/C=C/c1cccc(C(F)(F)F)c1  
C=Cc1ccc(O)cc1.Nc1ccc(Br)cc1>>Nc1ccc(/C=C/c2ccc(O)cc2)cc1  
C=C[C@H]1COC(C)(C)N1C(=O)OCc1cccc1.CCCCCn1cc(Br)c2c([N+](=O)[O-]  
)cccc21>>CCCCCn1cc(/C=C/[C@H]2COC(C)(C)N2C(=O)OCc2cccc2)c2c([N+](=O)[O-])cccc21  
C=Cc1ccc(O)c(OC)c1.O=c1ccc2ccc(OS(=O)(=O)C(F)(F)F)cc2o1>>COc1ccc(/C=C/c2ccc3ccc(=O)oc3c  
2)ccc1O  
C=Cc1ccncc1.Cc1ccc(Nc2c(C#N)nc3cc(Br)ccc23)c(C)c1>>Cc1ccc(Nc2c(C#N)nc3cc(/C=C/c4ccncc  
4)ccc23)c(C)c1  
C=Cc1cccc(O)c1.Nc1cccc(Br)c1>>Nc1cccc(/C=C/c2cccc(O)c2)c1  
C=CC(=O)OCC.Cc1cccc1Cl>>CCOC(=O)/C=C/c1cccc1C  
C=C1CC(c2ccc(C)cc2)OC1=O.Ic1cccc1>>Cc1ccc(C2C/C(=C/c3cccc3)C(=O)O2)cc1  
C=CCn1c(N(c2cccc2I)S(=O)(=O)c2cccs2)cc2cc(C)ccc21>>Cc1ccc2c(c1)cc1n2C/C=C/c2cccc2N1S(  
=O)(=O)c1cccs1  
C=CC(C)=O.O=Cc1ccc(Br)cc1>>CC(=O)/C=C/c1ccc(C=O)cc1  
C=CC(=O)CCCC.COc1ccc(Br)cc1>>CCCCC(=O)/C=C/c1ccc(OC)cc1

C=Cc1cccc1.COc1cc(Br)c2c3c1O[C@H]1[C@@H](O[Si](C)(C)C(C)C)C=C[C@@H]4[C@@H](  
 610 C2)N(C)CC[C@@]341>>COc1cc(/C=C/c2cccc2)c2c3c1O[C@H]1[C@@H](O[Si](C)(C)C(C)C)C  
 =C[C@@H]4[C@@H](C2)N(C)CC[C@@]341  
 611 C=Cc1cccc(O)c1.Nc1cccc1Br>>Nc1cccc1/C=C/c1cccc(O)c1  
 612 C=Cc1ccc(OCC)cc1.COc1ccc2c(=O)c(I)coc2c1>>CCOc1ccc(/C=C/c2coc3cc(OC)ccc3c2=O)cc1  
 613 C=Cc1cccc1.COc1ccc(Br)c(C)c1>>COc1ccc(/C=C/c2cccc2)c(C)c1  
 614 C=Cc1cccc2cccc12.CC(C)c1ccc(Br)cc1>>CC(C)c1ccc(/C=C/c2cccc3cccc23)cc1  
 615 C=Cc1ccc(Br)cc1.CCOC(=O)C(F)(F)I>>CCOC(=O)C(F)(F)/C=C/c1ccc(Br)cc1  
 616 C=CC(=O)OCCCC.Fc1cccc1I>>CCCCOC(=O)/C=C/c1cccc1F  
 C=CC(=O)NCCCN(C)C.CC(=O)OCC1Cn2c3cccc3c3c4c(c5c6cc(Br)ccc6n(c5c32)C1)C(=O)N(C(C)=  
 617 O)C4>>CC(=O)OCC1Cn2c3cccc3c3c4c(c5c6cc(/C=C/C(=O)NCCCN(C)C)ccc6n(c5c32)C1)C(=O)N(  
 C(C)=O)C4  
 C=CCN(c1ccc2c(ccc(=O)n2CC)c1)S(=O)(=O)c1cccc1Br>>C=C1CN(c2ccc3c(ccc(=O)n3CC)c2)S(=O  
 618 )(=O)c2cccc21  
 C=CC(=O)OC.C[Si](C)(C)/C=C/C1=C(Br)CCCC1>>COC(=O)/C=C/C1=C(/C=C/[Si](C)(C)C)CCCC1  
 619 C=Cc1cccc1.Oc1ccc(Br)cc1>>Oc1ccc(/C=C/c2cccc2)cc1  
 620 C=CCc1c(N(CC)C(=O)c2cccc2I)ccc2c1ccc(=O)n2CC>>C=C1Cc2c(ccc3c2ccc(=O)n3CC)N(CC)C(=  
 621 O)c2cccc21  
 C=CC=O.CS(=O)(=O)Oc1ccc(I)c([N+](=O)[O-])c1>>CS(=O)(=O)Oc1ccc(/C=C/C=O)c([N+](=O)[O-  
 622 C=CC(=O)OCCCC.CC(C)n1enc2c(Cl)nc(I)nc21>>CCCCOC(=O)/C=C/c1nc(Cl)c2ncn(C(C)C)c2n1  
 623 C=CB1OC(C)CC(C)(C)O1.C=CI>>C=C/C=C/B1OC(C)CC(C)(C)O1  
 624 C=CC=O.Cc1ccc(-c2c(C#N)c(CC(C)C)nc3ccc(Br)cc23)cc1>>Cc1ccc(-  
 625 c2c(C#N)c(CC(C)C)nc3ccc(/C=C/C=O)cc23)cc1  
 C=CC(=O)OC.Cc1ccc(C(=C(I)CC[Se]c2cccc2)c2ccc(C)cc2)cc1>>COC(=O)/C=C/C(CC[Se]c1cccc1  
 626 )=C(c1ccc(C)cc1)c1ccc(C)cc1  
 C=CCNC(=O)OC(C)(C)C.CC(=O)c1cccc(Cl)c1>>C=C(CNC(=O)OC(C)(C)C)c1cccc(C(C)=O)c1  
 627 C=CCCCCCCCC.Ic1cccc1>>CCCCCCCC/C=C/c1cccc1  
 628 C=CCc1ccc2cccc2c1N(C(=O)c1cccc1I)S(=O)(=O)c1ccc(C)cc1>>C=C1Cc2ccc3cccc3c2N(S(=O)(=  
 629 O)c2ccc(C)cc2)C(=O)c2cccc21  
 C=CCCCCCCCC.Cc1cccc1Br>>CCCCCCCC/C=C/c1cccc1C  
 630 C=Cc1ccc(OC)cc1.COC(=O)[C@H](Cc1ccc(O)c(I)c1)NC(=O)OC(C)(C)C>>COC(=O)[C@H](Cc1ccc  
 631 (O)c(/C=C/c2ccc(OC)cc2)c1)NC(=O)OC(C)(C)C  
 C=CC(=O)OC.CCn1cc(CC(=O)NC)c2c(OC)c(Br)cc(F)c21>>CCn1cc(CC(=O)NC)c2c(OC)c(/C=C/C(=  
 632 O)OC)cc(F)c21  
 C=Cc1cccc1.CC(C)(C)P(=O)(n1ccc2c(Br)cccc21)C(C)(C)C>>CC(C)(C)P(=O)(n1ccc2c(/C=C/c3cccc  
 633 c3)cccc21)C(C)(C)C  
 C=CC(=O)OC1CCCCC1.Ic1cccc2cccc12>>O=C(/C=C/c1cccc2cccc12)OC1CCCCC1  
 634 C=CC(=O)OCC.O=C1CCC(Cc2cccc2Br)CN1Cc1cccc1>>CCOC(=O)/C=C/c1cccc1CC1CCC(=O)  
 635 N(Cc2cccc2)C1  
 C=CC(=O)OCC.CCc1nc2cc(OC)ccc2c(Oc2cccc(Br)c2)c1-c1cccc1>>CCOC(=O)/C=C/c1cccc(Oc2c(-  
 636 c3cccc3)c(CC)nc3cc(OC)ccc23)c1  
 C=CC(OCC)OCC.FC(F)(F)c1ccc(Br)cc1>>CCOC(/C=C/c1ccc(C(F)(F)F)cc1)OCC  
 637 C=CS(N)(=O)=O.CCc1cccc(CC)c1Br>>CCc1cccc(CC)c1/C=C/S(N)(=O)=O  
 638 C=Cc1cccc1.Oc1ccc2cccc2c1Br>>Oc1ccc2cccc2c1/C=C/c1cccc1  
 639 C=Cc1cccc(C)c1.CCN1c2ncc(I)cc2C(=O)N(C)c2ccnc21>>CCN1c2ncc(/C=C/c3cccc(C)c3)cc2C(=O)  
 640 N(C)c2ccnc21  
 C=CC(=O)OC.COC(=O)c1ccnc1Br>>COC(=O)/C=C/c1cccc1C(=O)OC  
 641 C=CC(C)(C)O.Nc1cc(Br)ccc1C(=O)O>>CC(C)(O)/C=C/c1ccc(C(=O)O)c(N)c1  
 642 Brc1ccc(I)nc1.C=CCNC(=O)c1ccccn1>>O=C(NC/C=C/c1ccc(Br)cn1)c1ccccn1  
 643 C=C1C(=O)O[C@H]2[C@H]1C[C@@H](O)/C(C)=C/CC[C@@]1(C)O[C@@H]21.Nc1ccc(I)cc1>>C  
 644 /C1=C/CC[C@@]2(C)O[C@H]2[C@H]2OC(=O)/C(=C/c3ccc(N)cc3)[C@@H]2[C@H]1O  
 645 C=COCCCC.COc1cccc(Cl)c1>>C=C(OCCCC)c1cccc(OC)c1  
 646 C=Cc1ccnc1.CCCCCCCCCCOc1ccc(I)cc1>>CCCCCCCCCOc1ccc(/C=C/c2ccnc2)cc1  
 647 C=CS(=O)(=O)CC.CN1CCC(c2c[nH]c3ccc(Br)cc23)CC1>>CCS(=O)(=O)/C=C/c1ccc2[nH]cc(C3CC  
 N(C)CC3)c2c1  
 648 C=C.COc1ccc(I)cc1>>C=Cc1ccc(OC)cc1  
 649 C=CC(=O)Nc1cccc1C.COc1ccc2c(=O)c(I)coc2c1>>COc1ccc2c(=O)c(/C=C/C(=O)Nc3cccc3C)coc2  
 650 C=CC(=O)OC.NC(=O)c1cccc(I)c1>>COC(=O)/C=C/c1cccc(C(N)=O)c1  
 C=CC#N.Cn1c(=O)c(I)cn([C@H]2C[C@H](O[Si](C)(C)C(C)C)[C@@H](CO[Si](C)(C)C(C)C)  
 651 O2)c1=O>>Cn1c(=O)c(/C=C/C#N)cn([C@H]2C[C@H](O[Si](C)(C)C(C)C)[C@@H](CO[Si](C)(C)C  
 )(C)(C)C)O2)c1=O



652 C=Cc1cc(CCCCCCCCCC)ccc1N(C)C(=O)c1cccc1I>>C=C1c2ccccc2C(=O)N(C)c2ccc(CCCCCC  
CCCCC)cc21  
653 C=C[Si](C)(C)C.COC(=O)c1cccc1I>>COC(=O)c1cccc1/C=C/[Si](C)(C)C  
654 C=CC(=O)OC.Ic1cccc2cccc12>>COC(=O)/C=C/c1cccc2cccc12  
655 C=Cc1ccc(S(=O)(=O)c2ccccc2F)cn1.Fc1cccc(I)c1>>O=S(=O)(c1ccc(/C=C/c2cccc(F)c2)nc1)c1cccc1  
656 C=CC(=O)OCC.Cc1c(Br)oc2ccc(Cl)c(Oc3cnc3C(=O)N3CCN(C4CC4)c4cccc43)c12>>CCOC(=O)/  
C=C/c1oc2ccc(Cl)c(Oc3cnc3C(=O)N3CCN(C4CC4)c4cccc43)c2c1C  
657 C=Cc1cnc1.CCCCOc1ccc(Br)c(F)c1>>CCCCOc1ccc(/C=C/c2cnc2)c(F)c1  
658 C=CC(=O)OC.Ic1cn2c(n1)[C@H](OCc1cccc1)[C@@H](OCc1cccc1)[C@H](OCc1cccc1)[C@H]2  
COCc1cccc1>>COC(=O)/C=C/c1cn2c(n1)[C@H](OCc1cccc1)[C@@H](OCc1cccc1)[C@H](OCc1  
cccc1)[C@H]2COCc1cccc1  
659 C=CC(=O)N(C)Cc1cc2ccccc2n1C.Cn1c(=O)[nH]c2ncc(Br)cc21>>CN(Cc1cc2ccccc2n1C)C(=O)/C=C/  
c1cnc2[nH]c(=O)n(C)c2c1  
660 C=CCC(c1cccc1I)N(CC(=O)OC)Cc1cccc1>>C=C1CC(N(CC(=O)OC)Cc2ccccc2)c2ccccc21  
661 C=CCN(C(=O)c1ccc2ccccc2c1Br)C(C(=O)NC(C)(C)c1ccc(OC)cc1>>C=C1CN(C(C(=O)NC(C)(C)  
C)c2ccc(OC)cc2)C(=O)c2ccc3ccccc3c21  
662 C=Cc1cccc1.Cn1c(=O)c2c(cc(Br)n2C)n(C)c1=O>>Cn1c(=O)c2c(cc(/C=C/c3ccccc3)n2C)n(C)c1=O  
663 C=CC1CCCC1.Cc1cccc1OS(=O)(=O)C(F)(F)F>>C=C(c1cccc1C)C1CCCC1  
664 C=CC(=O)OC.COc1ccc2c(c1)CCN(c1ccc(CC(C)C)c(C)c1)C2(C)c1ccc(Br)cc1>>COC(=O)/C=C/c1ccc  
(C2(C)c3ccc(OC)cc3CCN2c2ccc(CC(C)C)c(C)c2)cc1  
665 C=CC(=O)c1cccc1.Ic1cccc1>>O=C(/C=C/c1cccc1)c1cccc1  
666 C=CC(=O)OCC(CC)CCCC.Cc1ccc(Br)cc1>>CCCC(CC)COC(=O)/C=C/c1ccc(C)cc1  
667 C=Cc1cccc1.CCOC(=O)c1ccc(Br)cc1>>CCOC(=O)c1ccc(/C=C/c2ccccc2)cc1  
668 C=CC(C)(C)O.CC(=O)Oc1ccc2ccc(=O)oc2c1>>CC(=O)Oc1ccc2ccc(=O)oc2c1/C=C/C(C)(C)O  
669 Br1cccc1.C=C[C@H]1COC(C)(C)N1C(=O)OCc1cccc1>>CC1(C)OC[C@H]1/C=C/c2ccccc2)  
N1C(=O)OCc1cccc1  
670 C=Cc1cnc1.Cn1cc(-c2cnc(N)c(C(=O)N[C@H]3CCN(C(=O)c4ccc(I)cc4)C3)c2)cn1>>Cn1cc(-  
c2cnc(N)c(C(=O)N[C@H]3CCN(C(=O)c4ccc(/C=C/c5cnc5)cc4)C3)c2)cn1  
671 C=Cc1cn(COCC[Si](C)(C)C)nc1-  
c1nc2ccc(OC)cc2n1COCC[Si](C)(C)C.Cc1cnc1Br>>COc1ccc2nc(-  
C=CC(=O)O.O=[N+](O-  
672 )c1c(I)ccc2c1C=CC1(O2)C2CC3CC(C2)CC1C3>>O=C(O)/C=C/c1ccc2c(c1[N+](=O)[O-  
])C=CC1(O2)C2CC3CC(C2)CC1C3  
673 C=Cc1ccc(OC)cc1.COc1ccc(C=O)c(Br)c1>>COc1ccc(/C=C/c2cc(OC)ccc2C=O)cc1  
674 Br1cnc2ccccc2c1.C=CCCCC>>C=C(CCCCCC)c1cnc2ccccc2c1  
675 C=Cc1ccc(C)cc1.CCOC(=O)C(F)I>>CCOC(=O)C(F)/C=C/c1ccc(C)cc1  
676 C=CC(=O)OC.O=Cc1cccc(Br)c1>>COC(=O)/C=C/c1cccc(C=O)c1  
677 C=C.ClCc1cccc1>>C=CCc1cccc1  
678 C=CC(=O)OC.O=C1c2ccccc2C(=O)N1c1cccc1I>>COC(=O)/C=C/c1cccc1N1C(=O)c2ccccc2C1=O  
679 C=Cc1ccc(N(C)C)cc1.CCOC(=O)C(C)(C)Br>>CCOC(=O)C(C)(C)/C=C/c1ccc(N(C)C)cc1  
680 C=Cc1ccc(OC)cc1.COC(=O)c1cccc(Br)c1>>COC(=O)c1cccc(/C=C/c2ccc(OC)cc2)c1  
681 C=CC(=O)OCC.CC1(C)CC(=C(c2ccc(O)cc2)c2ccc(Br)cc2)CC(C)(C)C1>>CCOC(=O)/C=C/c1ccc(C(  
=C2CC(C)(C)CC(C)(C)C2)c2ccc(O)cc2)cc1  
682 C=CC(N)=O.FC(F)(F)c1ccc(I)c(Cl)c1>>NC(=O)/C=C/c1ccc(C(F)(F)F)cc1Cl  
683 C=Cc1cc(OC)cc(OC)c1.O=C(O)c1ccc(Br)cc1>>COc1cc(/C=C/c2ccc(C(=O)O)cc2)cc(OC)c1  
684 C=CC(=O)OC.CC(C)(C)c1nn(-c2ccc(C(F)(F)F)cn2)cc1I>>COC(=O)/C=C/c1cn(-  
c2ccc(C(F)(F)F)cn2)nc1C(C)(C)C  
685 C=CC1(OCCI)CN(C(=O)OC(C)(C)C)C1>>C=C1CCOC12CN(C(=O)OC(C)(C)C)C2  
686 C=CC(C)=O.COC(=O)c1c(OC)c(OC)cc2occ(I)c(=O)c12>>COC(=O)c1c(OC)c(OC)cc2occ(/C=C/C(C)  
=O)c(=O)c12  
687 C=Cc1cccc1.Clc1ccc(-c2cnc3cccn23)cc1>>C=C/c1ccc(-c2cnc3cccn23)cc1)c1cccc1  
688 C=Cc1cnc1.COc1ccc(N(c2ccc(Br)cc2)c2ccc(OC)cc2)cc1>>COc1ccc(N(c2ccc(/C=C/c3cnc3)cc2)c  
2ccc(OC)cc2)cc1  
689 C=Cc1ccc(O)cc1.CC(C)(C#N)c1cc(Br)cc(Cn2cn2)c1>>CC(C)(C#N)c1cc(/C=C/c2ccc(O)cc2)cc(Cn2  
cn2)c1  
690 C=CCOC.COC(=O)/C=C/c1cccc(N(Cc2ccc(Br)cc2)C(=O)C2CCCC2)c1>>COC/C=C/c1ccc(NC(=O)  
C2CCCC2)c2ccccc2/C=C/C(=O)OC)c2)cc1  
691 C=Cc1ccc(OC)cc1.CCCOC(=O)/C=C/c1ccc(Cl)cc1>>CCCCOC(=O)/C=C/c1ccc(/C=C/c2ccc(OC)cc  
2)cc1  
692 C=CC[C@H](NC(=O)OC(C)(C)C)C(=O)OC.COc1ccc(I)cc1>>COC(=O)[C@H](C/C=C/c1ccc(OC)cc1  
)NC(=O)OC(C)(C)C

693 C=CC(=O)N(C)C.Cc1ccc(I)cc1>>Cc1ccc(/C=C/C(=O)N(C)C)cc1  
694 C=CCNC(=O)OC(C)(C)C.COc1ccc(OS(=O)(=O)C(F)(F)F)c(Cl)c1>>C=C(CNC(=O)OC(C)(C)C)c1ccc  
(OC)cc1Cl  
695 C=Cc1ccc([N+](=O)[O-])cc1.Oc1ccc(I)cc1>>O=[N+](O-)]c1ccc(/C=C/c2ccc(O)cc2)cc1  
696 Brc1cccnc1.C=CCC(CCCC#N)C(=O)OC>>COC(=O)C(C/C=C/c1cccnc1)CCCC#N  
C=CCO[C@]1(C)C[C@H](C)C(=O)[C@H](C)[C@H](O)[C@](C)(O)[C@H](CC)OC(=O)[C@  
H](C)C(=O)[C@H](C)[C@H]1O[C@@H]1O[C@H](C)C[C@H](N(C)C)[C@H]1OC(=O)c1cccc1.Cl  
697 c1ccc(I)cc1>>CC[C@H]1OC(=O)[C@H](C)C(=O)[C@H](C)[C@@H](O[C@@H]2O[C@H](C)C[C  
@H](N(C)C)[C@H]2OC(=O)c2ccccc2)[C@](C)(OC/C=C/c2ccc(Cl)cc2)C[C@@H](C)C(=O)[C@H](  
C)[C@@H](O)[C@]11(C)O  
698 C=CC(=O)OC(C)(C)C.CCOC(=O)c1cc(I)nn1COCC[Si](C)(C)C>>CCOC(=O)c1cc(/C=C/C(=O)OC(C)  
(C)C)nn1COCC[Si](C)(C)C  
699 C=CC(=O)n1c(C)ccc1C.Ic1cccc1>>Cc1ccc(C)n1C(=O)/C=C/c1cccc1  
700 C=CCCCCCC.Cc1cccc1Br>>C=C(CCCCCC)c1cccc1C  
701 C=C(OC(=O)c1cccc1)C(=O)OC.CC(=O)OCc1c(I)ccc(NC(=O)OC(C)(C)C)c1C>>COC(=O)/C=C/c1  
ccc(NC(=O)OC(C)(C)C)c(C)c1COC(C)=O)OC(=O)c1cccc1  
702 C=CC(=O)OCC.COc1cc(I)c2c3c1O[C@@H]1[C@]34CCN(C)[C@H](C2)[C@]42C=C[C@@]1(OC)c  
1c(O)cc(Cl)c(O)c12>>CCOC(=O)/C=C/c1cc(OC)c2c3c1C[C@H]1N(C)CC[C@@]34[C@@H](O2)[C  
@@]2(OC)C=C[C@@]14c1c(O)c(Cl)cc(O)c12  
703 C=CC(C)(C)O.N#Cc1cccc1Br>>CC(C)(O)/C=C/c1cccc1C#N  
704 C=C.Cc1nsc1I>>C=Cc1snc1C  
705 C=CC(=O)OC.O=C1Cc2c(I)cccc2N1>>COC(=O)/C=C/c1cccc2c1CC(=O)N2  
706 C=Cc1ccc(SC)cc1.Clc1c2ccc(Br)cc2nc2c1oc1cccc12>>CSc1ccc(/C=C/c2ccc3c(Cl)c4oc5cccc5c4nc3  
c2)cc1  
707 C=CS(=O)(=O)F.Fc1cc(I)cc(F)n1>>O=S(=O)(F)/C=C/c1cc(F)nc(F)c1  
708 Brc1ccc2ccc3cccc4ccc1c2c34.C=CC(=O)OCC>>CCOC(=O)/C=C/c1ccc2ccc3cccc4ccc1c2c34  
709 C=CC(=O)OC.Cc1c(COc2ccc(Br)cc2F)noc1-c1ccc(C(F)(F)F)cc1>>COC(=O)/C=C/c1ccc(OCc2noc(-  
c3ccc(C(F)(F)F)cc3)c2C)c(F)c1  
710 C=CC(=O)OC.CC(=O)OCCCN(CCCCO[Si](c1cccc1)(c1cccc1)C(C)(C)C(=O)[C@@H]1c2cc(Br)  
ccc2O[C@H]1c1ccc(OCc2ccccc2)cc1>>COC(=O)/C=C/c1ccc2c(c1)[C@@H](C(=O)N(CCCCO[Si](c  
1cccc1)(c1cccc1)C(C)(C)C)CCCOC(C)=O)[C@H](c1ccc(OCc3ccccc3)cc1)O2  
711 C=C(CC(=O)OC)C(=O)OC.CC(C)(C)OC(=O)NCCCOCCOCCOCCCN(Cc1cc(O[Si](c2ccccc2)(c2cccc  
c2)C(C)(C)C)ccc1Br)C(=O)OCc1cccc1>>COC(=O)C/C=C(c1ccc(O[Si](c2ccccc2)(c2ccccc2)C(C)(C  
)C)cc1CN(CCCOCCOCCOCCCN(C(=O)OC(C)(C)C(=O)OCc1cccc1)C(=O)OC  
712 C=C(NC(=O)OC(C)(C)C)C(=O)OC.Ic1cccc1>>COC(=O)/C=C/c1cccc1NC(=O)OC(C)(C)C  
713 C=CC(=O)OC.CC(C)(C)OC(=O)Nc1cccc1Br>>COC(=O)/C=C/c1cccc1NC(=O)OC(C)(C)C  
714 C=Cc1cccc([N+](=O)[O-])c1.Ic1sc1c1-c1cccc1>>O=[N+](O-)]c1ccc(/C=C/c2sc1c2-c2ccccc2)c1  
715 C=CC(=O)OC(C)(C)C.COc1ccc(Cl)cc1>>COc1ccc(/C=C/C(=O)OC(C)(C)C)cc1  
716 Brc1c2ccccc2cc2ccccc12.C=CP(=O)(OCC)OCC>>CCOP(=O)/C=C/c1c2ccccc2cc2ccccc12)OCC  
717 C=Cc1ccc(CN(CC)CC)cc1.CCOC(=O)c1cccc1Br>>CCOC(=O)c1cccc1/C=C/c1ccc(CN(CC)CC)cc1  
718 C=CN(C)C(C)=O.Clc1ccc2c(c1)OCO2>>C=C(c1ccc2c(c1)OCO2)N(C)C(C)=O  
719 C=C(C)CC(OCC(=C)Br)c1cccc1>>C=C1C=C(C)CC(c2ccccc2)OC1  
720 C=CCCCCCC.COc1ccc(Cl)cc1>>C=C(CCCCCC)c1ccc(OC)cc1  
721 C=CC(=O)OCC.CCC(=C(c1ccc(O)cc1)c1ccc(O)cc1)c1ccc(F)c(Br)c1>>CCOC(=O)/C=C/c1cc(C(CC)=  
C(c2ccc(O)cc2)c2ccc(O)cc2)ccc1F  
722 C=CC(C)=O.O=C1Nc2ccc(I)cc2/C1=C/c1ccc[nH]1>>CC(=O)/C=C/c1ccc2c(c1)/C=C/c1ccc[nH]1)C(  
=O)N2  
723 C=Cc1cccc1.Fc1ccc(Br)c(F)c1>>Fc1ccc(/C=C/c2ccccc2)c(F)c1  
724 C=CCCC.COc1ccc(Br)cc1>>CCC/C=C/c1ccc(OC)cc1  
725 C=CC(=O)OC.COc1c(CN(C(=O)C2CC2)c2ccccc(Br)c2)ccc2c1OC(C)(C)C=C2>>COC(=O)/C=C/c1ccc  
c(N(Cc2ccc3c(c2OC)OC(C)(C)C=C3)C(=O)C2CC2)c1  
726 C=Cc1c(C)cc(C)cc1C.FC(F)(F)c1ccc(Br)cc1>>Cc1cc(C)c(/C=C/c2ccc(C(F)(F)F)cc2)c(C)c1  
727 C=CC(N)=O.COc1c2[nH]c3ccc(F)cc3c2c(Br)c2c1[nH]c1ccc(F)cc12>>COc1c2[nH]c3ccc(F)cc3c2c(/C  
=C/C(N)=O)c2c1[nH]c1ccc(F)cc12  
728 C=C1C(=O)O[C@H]2[C@H]1CC/C(C)=C/CC[C@@]1(C)O[C@H]21.FC(F)(F)c1cccc1I>>C/C1=  
C\CC[C@@]2(C)O[C@H]2[C@H]2OC(=O)/C=C/c3ccccc3C(F)(F)F)[C@@H]2CC1  
729 C=CC(=O)OCC.Cc1c(Br)enc2c1nnn2C>>CCOC(=O)/C=C/c1cnc2c(nnn2C)c1C  
730 C=Cc1cccc1Cl.Ic1cccc1>>Clc1cccc1/C=C/c1cccc1  
731 C=Cc1cccc1.Nc1cc(Cl)ccc1I>>Nc1cc(Cl)ccc1/C=C/c1cccc1  
732 C=Cc1cc2ccc(N(CC)CC)cc2oc1=O.O=Cc1ccc(Br)cc1>>CCN(CC)c1ccc2cc(/C=C/c3ccc(C=O)cc3)c(=  
O)oc2c1

733 C=CCN1C(=O)c2ccccc2C1=O.FC(F)(F)c1cccc(Br)c1>>O=C1c2ccccc2C(=O)N1C/C=C/c1cccc(C(F)(F)F)c1

734 C=CS(=O)(=O)F.O=S(=O)(F)/C=C/c1cccc(I)c1>>O=S(=O)(F)/C=C/c1cccc(/C=C/S(=O)(=O)F)c1

735 C=CC(=O)Nc1cccc(C)c1.COc1ccc2c(=O)c(I)coc2c1>>COc1ccc2c(=O)c(/C=C/C(=O)Nc3cccc(C)c3)coc2c1

736 C=C(OC)C1=C(Br)C(O[Si](C)(C)C(C)(C)C)CCC1.C=CC(=O)OC(C)(C)C>>C=C(OC)C1=C(/C=C/C(=O)OC(C)(C)C)C(O[Si](C)(C)C(C)(C)C)CCC1

C=CCO[C@H]1CC(=O)O[C@H](C)C/C=C/C=C/[C@H](O[Si](C)(C)C(C)(C)C)[C@H](C)C[C@H](CC(OC)OC)[C@H](O[C@H]2O[C@H](C)[C@H](O[C@H]3C[C@H](C)(O)[C@H](OC(=O)CC)[C@H](C)O3)[C@H](N(C)C)[C@H]2OC(C)=O)[C@H]1OC.O=[N+](=[O-])c1ccc(I)cc1>>CCC(=O)O[C@H]1[C@H](C)O[C@H](O[C@H]2[C@H](N(C)C)[C@H](OC(C)=O)[C@H](O[C@H]3[C@H](OC)[C@H](OC/C=C/C/c4ccc([N+](=O)[O-])cc4)CC(=O)O[C@H](C)C/C=C/C=C/[C@H](O[Si](C)(C)C(C)(C)C)[C@H](C)C[C@H]3CC(OC)OC(C)C[C@H]1C

738 C=CS(C)(=O)=O.N#Cc1ccc(Br)cc1>>CS(=O)(=O)/C=C/c1ccc(C#N)cc1

739 C=Cc1cc(C(C)(C)C)c(O)c(C(C)(C)C)c1.Cc1cccc(C)c1-c1c(C)cc(I)cc1C>>Cc1cccc(C)c1-c1c(C)cc(/C=C/c2cc(C(C)(C)C)c(O)c(C(C)(C)C)c2)cc1C

740 C=CCC(OCC(=C)Br)c1ccc(Cl)cc1>>C=C1COC(c2ccc(Cl)cc2)CC1=C

741 C=CC(=O)OCC.CC(C)(C)OC(=O)c1cccc1I>>CCOC(=O)/C=C/c1cccc1C(=O)OC(C)(C)C

742 C=Cc1ccc(O)cc1.COc1cc(Br)cc(OC)c1F>>COc1cc(/C=C/c2ccc(O)cc2)ccc(OC)c1F

743 C=CC(CCC)OCc1cccc1.CC(=O)c1ccc(Br)cc1>>CCCC(/C=C/c1ccc(C(C)=O)cc1)OCc1cccc1

744 C=Cc1cccc1.CC(=O)c1cccc1Cl>>CC(=O)c1cccc1/C=C/c1cccc1

745 C=Cc1cccc1O.Nc1cccc1Br>>Nc1cccc1/C=C/c1cccc1O

746 C=CC#N.Cc1noc(C)c1I>>Cc1noc(C)c1/C=C/C#N

747 C=CC(=O)OCc1cccc1.Clc1cccc1>>O=C(/C=C/c1cccc1)OCc1cccc1

748 C=CC(=O)OC.O=Cc1ccc(Cl)cc1Br>>COC(=O)/C=C/c1cc(Cl)ccc1C=O

749 C=CC=O.FC(F)c1ccc(Br)cn1>>O=C/C=C/c1ccc(C(F)F)nc1

750 C=CC(C)(O)CCC=C(C)C.Oc1ccc(OCc2ccccc2)cc1Br>>CC(C)=CCCC(C)(O)/C=C/c1cc(OCc2ccccc2)cc1O

751 C=CC(=O)OC.CCn1cnc2c(NCc3cccc(Br)c3)nc(N3CCCC3)nc21>>CCn1cnc2c(NCc3cccc(/C=C/C(=O)OC)c3)nc(N3CCCC3)nc21

752 C=CC(=O)OCC.COc1cc(O)ccc1Br>>CCOC(=O)/C=C/c1ccc(O)cc1OC

753 C=Cc1nn(C2CCCCO2)c2nc(Cl)ccc(C(=O)N3CCN(C(=O)OC(C)(C)C)CC3)c12.CN(C)Cc1cccc(I)c1>>CN(C)Cc1cccc(/C=C/c2nn(C3CCCCO3)c3nc(Cl)ccc(C(=O)N4CCN(C(=O)OC(C)(C)C)CC4)c23)c1

754 C=Cc1ccc(N(c2ccccc2)c2cccc3ccccc23)cc1.O=Cc1ccc(Br)cc1F>>O=Cc1ccc(/C=C/c2ccc(N(c3ccccc3)c3cccc4ccccc34)cc2)cc1F

755 C=CCOCC1=C(Br)c2ccc(OC)cc2CC1>>C=C1COCC2=C1c1ccc(OC)cc1CC2

756 C=C.COC(=O)c1ccc(NC(C)=O)c(Br)c1>>C=Cc1cc(C(=O)OC)ccc1NC(C)=O

757 C=Cc1cccc1.O=C(O)/C=C/c1cccc1Br>>O=C(O)/C=C/c1cccc1/C=C/c1cccc1

758 C=CCCCCN1C(=O)c2ccccc2C1=O.FC(F)(F)c1ccc2c(Br)ccnc2c1>>O=C1c2ccccc2C(=O)N1CCCC/C=C/c1ccnc2cc(C(F)(F)F)ccc12

759 C=COCC.COc1ccc(I)cc1>>CCO/C=C/c1ccc(OC)cc1

760 C=CCCN1C(=O)c2ccccc2C1=O.ClCc1cccc(OCc2ccccc2)c1>>C=C(CCN1C(=O)c2ccccc2C1=O)Cc1ccc(c(OCc2ccccc2)c1

C=Cc1cccc(C(=O)N[C@H](c2ccccc2)[C@H](O[Si](CC)(CC)CC)C(=O)O[C@H]2C[C@@]3(O)[C@@H](OC(=O)c4cccc(I)c4)[C@H]4[C@H](C)(C(=O)[C@H](OC(C)=O)C(=C2C)C3(C)C)[C@H](O[Si](CC)(CC)CC)C[C@H]2OC[C@]24OC(C)=O)c1>>CC[Si](CC)(CC)O[C@H]1C[C@H]2OC[C@]2(OC(C)=O)[C@H]2[C@H]3OC(=O)c4cccc(c4)/C=C/c4cccc(c4)C(=O)N[C@H](c4ccccc4)[C@@H]1(O[Si](CC)(CC)CC)C(=O)O[C@H]4C[C@@]3(O)C(C)(C)C(=C4C)[C@H](OC(C)=O)C(=O)[C@@]12C[C@@]34C=C(Sc5ccc(I)cc5)C(=O)[C@H](C)(CCC(=O)Nc5c(O)ccc(C(=O)O)c5O)[C@H]3[C@H](C[C@H]1C4)O2>>CNC(=O)/C=C/c1ccc(SC2=C[C@]34C[C@H]5C[C@@H](O[C@@]5(C)C3)[C@H]4[C@H](C)(CCC(=O)Nc3c(O)ccc(C(=O)O)c3O)C2=O)cc1

762 C=CC(=O)N(C)Cc1sc2ccccc2c1C.CC1(C)C(=O)Nc2ncc(Br)cc21>>Cc1c(CN(C)C(=O)/C=C/c2cnc3c(c2)C(C)(C)C(=O)N3)sc2ccccc12

763 C=CCn1cccc1C(=O)c1ccc(C)cc1.CCOC(=O)c1cccc(I)c1>>CCOC(=O)c1cccc(/C=C/Cn2cccc2C(=O)c2ccc(C)cc2)c1

764 C=Cc1cccc(N)n1.CN(C(=O)c1cccc1)c1ccc2c(c1)[nH]c(=NC(=O)c1ccc(Br)s1)n2CCC(N)=O>>CN(C(=O)c1cccc1)c1ccc2c(c1)[nH]c(=NC(=O)c1ccc(/C=C/c3cccc(N)n3)s1)n2CCC(N)=O

765 C=CC(=O)OC.CNc1cccc2c1c(I)nn2Cc1ccc(OC)cc1>>CNc1cccc2c1c(/C=C/C(=O)OC)nn2Cc1ccc(OC

766 C=Cc1cc(OC)ccc1OCc1cc(OC)ccc1Br>>COc1ccc2c(c1)/C=C/c1ccc(OC)cc1CO2

767 C=CC(=O)OC.COc1ccc(I)nn1>>COC(=O)/C=C/c1ccc(OC)nn1

768

769 C=CC(C)n1nnc2ccccc21.Cc1ccc(I)cc1>>Cc1ccc(/C=C/C(C)n2nnc3ccccc32)cc1  
770 C=Cc1ccccc1.Cc1cc(I)ccc1-c1ccccc1>>Cc1cc(/C=C/c2ccccc2)ccc1-c1ccccc1  
771 C=Cc1ccccc1C.Nc1ccc(Cl)cc1Br>>Cc1ccccc1/C=C/c1cc(Cl)ccc1N  
772 C=CC(=O)O.COc1cc(I)ccc1Br>>COc1cc(/C=C/C(=O)O)ccc1Br  
773 C=C1CC(c2ccc(C)cc2)OC1=O.Cc1cccc(I)c1>>Cc1ccc(C2C/C(=C/c3cccc(C)c3)C(=O)O2)cc1  
774 C=Cc1ccccc1.CC(C)Oc1nc(N)nc(Nc2ccc(I)cc2)n1>>CC(C)Oc1nc(N)nc(Nc2ccc(/C=C/c3ccccc3)cc2)n  
775 C=Cc1ccccc1.CC(C)(C)OC(=O)c1ccc(Br)cc1[N+](=O)[O-]  
776 ]>>CC(C)(C)OC(=O)c1ccc(/C=C/c2ccccc2)cc1[N+](=O)[O-]  
777 C=CCN1CCN(C(=O)OC(C)(C)C)CC1=O.CCc1nn2c(C)cc(C)nc2c1Cc1ccc(Br)cc1>>CCc1nn2c(C)cc(C)  
778 C)nc2c1Cc1ccc(/C=C/CN2CCN(C(=O)OC(C)(C)C)CC2=O)cc1  
779 C=CC(=O)OC(C)(C)C.CC(C)OC(=O)c1cscc1Br>>CC(C)OC(=O)c1cscc1/C=C/C(=O)OC(C)(C)C  
780 C=C(F)C(C)=O.Cc1ccc(I)cc1>>CC(=O)/C(F)=C/c1ccc(C)cc1  
781 C=CN1C(=O)c2ccccc2C1=O.CNC(=O)c1cc(Oc2ccccc(I)c2)ccn1>>CNC(=O)c1cc(Oc2ccccc(/C=C/N3C(  
782 =O)c4ccccc4C3=O)c2)ccn1  
783 C=CC(=O)OC.CCN(CC)c1ccc2cc(-c3oc4cc(Br)ccc4c(=O)c3O)oc2c1>>CCN(CC)c1ccc2cc(-  
784 c3oc4cc(/C=C/C(=O)OC)ccc4c(=O)c3O)oc2c1  
785 C=COCCCC.O=S(=O)(Oc1cccc2ccccc12)C(F)(F)F>>C=C(OCCCC)c1cccc2ccccc12  
786 C=Cc1ccc(N(C)C)cc1.C[Si](C)(OS(=O)(=O)C(F)(F)F)OS(=O)(=O)C(F)(F)F>>CN(C)c1ccc(/C=C/[Si](  
787 C)(C)OS(=O)(=O)C(F)(F)F)cc1  
788 C=CC(=O)N1C(=O)OC[C@H]1c1ccccc1.CC(C)(C)OP(C)(=O)Cc1ccc(Br)cc1>>CC(C)(C)OP(C)(=O)  
789 Cc1ccc(/C=C/C(=O)N2C(=O)OC[C@H]2c2ccccc2)cc1  
790 C=CCNS(=O)(=O)c1cc(C(F)(F)F)cc(C(F)(F)F)c1.FC(F)(F)c1ccc(I)cc1>>O=S(=O)(NC/C=C/c1ccc(C(  
791 F)(F)F)cc1)c1cc(C(F)(F)F)cc(C(F)(F)F)c1  
792 Brc1nc2[nH]ncc2c1.C=CC(=O)N(C)Cc1cc2ccccc2n1C>>CN(Cc1cc2ccccc2n1C)C(=O)/C=C/c1nc2[  
793 nH]ncc2c1  
794 Brc1ccc(N2CCOCC2)c2ccccc12.C=CC(=O)OCc1ccccc1>>O=C(/C=C/c1ccc(N2CCOCC2)c2ccccc12)  
795 OCc1ccccc1  
796 C=Cc1ccc(C#N)cc1.FC(F)(F)CI>>N#Cc1ccc(/C=C/CC(F)(F)F)cc1  
797 C=Cc1ccccc1.O=S(=O)(Oc1ccccc1Cl)C(F)(F)F>>C=C(c1ccccc1)c1ccccc1Cl  
798 C=CC(N)=O.O=Cc1ccc(I)cc1>>NC(=O)/C=C/c1ccc(C=O)cc1  
799 C=C[Si](CC)(CC)CC.Cc1cc(C)c(Br)c(C)c1>>CC[Si](/C=C/c1c(C)cc(C)cc1C)(CC)CC  
800 Brc1cccc2ccccc12.C=CS(C)(=O)=O>>CS(=O)(=O)/C=C/c1cccc2ccccc12  
801 C=CC(=O)OCCCC.Cc1cc(C)c(Br)c(C)c1>>CCCCOC(=O)/C=C/c1c(C)cc(C)cc1C  
802 C=CCc1cc(C)ccc1N(Cc1ccccc1Br)S(=O)(=O)c1ccc(C)cc1>>C=C1Cc2cc(C)ccc2N(S(=O)(=O)c2ccc(C)  
803 )cc2)Cc2ccccc21  
804 C=CC(=O)OC.CC(=O)c1cccc(Br)c1>>COC(=O)/C=C/c1cccc(C(C)=O)c1  
805 C=CCCCC(=O)OC.CC(C)(C)c1ccc(OS(=O)(=O)C(F)(F)F)cc1>>C=C(CCCC(=O)OC)c1ccc(C(C)(C)C  
806 C=C(NC(=O)OCc1ccccc1)C(=O)OC.CC(=O)OCc1c(I)ccc(NC(=O)OC(C)(C)C)c1C>>COC(=O)/C=C  
807 /c1ccc(NC(=O)OC(C)(C)C)c(C)c1COC(C)=O)NC(=O)OCc1ccccc1  
808 C=CC(C)(C)[C@H](N[S@@])(=O)C(C)(C)c1ccccc1Br>>C=C1c2ccccc2[C@H](N[S@@])(=O)C(  
809 C)(C)C1(C)C  
810 C=CC(CC)OC(C)=O.Ic1ccccc1>>CCC(/C=C/c1ccccc1)OC(C)=O  
811 BrC1CCCCC1.C=Cc1ccc(Cl)cc1>>Clc1ccc(/C=C/C2CCCCC2)cc1  
812 C=CCO.Clc1ccccc1>>C=C(CO)c1ccccc1  
813 Brc1ccccc1.C=Cn1nnc(-c2ccccc2C#N)n1>>N#Cc1ccccc1-c1nnn(/C=C/c2ccccc2)n1  
814 C=CC(=O)Nc1ccccc1NC(=O)OC(C)(C)C.CCOC(=O)[C@H]1CN(CCF)C[C@H]1c1ccc(Br)cc1>>C  
815 COC(=O)[C@H]1CN(CCF)C[C@H]1c1ccc(/C=C/C(=O)Nc2ccccc2NC(=O)OC(C)(C)C)cc1  
816 C=CC(=O)OCCCC.Fc1cc(Br)ccc1OC(F)(F)F>>CCCCOC(=O)/C=C/c1ccc(OC(F)(F)F)c(F)c1  
817 C=Cc1ccccc1.CCOC(=O)C(C)(F)Br>>CCOC(=O)C(C)(F)/C=C/c1ccccc1  
818 C=Cc1ccccc1.CCOC(=O)c1ccc(Br)cc1>>CCOC(=O)c1ccc(/C=C/c2ccccc2)cc1  
819 C=CC(=O)O.O=S(=O)(Nc1ccc(-c2ccccc2)cc1)c1ccc(I)cc1>>O=C(O)/C=C/c1ccc(S(=O)(=O)Nc2ccc(-  
820 c3ccccc3)cc2)cc1  
821 C=CC(=O)OCCCC.O=C1c2ccccc2C(=O)N1c1cccc(I)c1>>CCCCOC(=O)/C=C/c1cccc(N2C(=O)c3ccc  
822 cc3C2=O)c1  
823 C=CC(=O)OC(C)(C)C.Ic1cnn(CCOCCc2ccccc2)c1>>CC(C)(C)OC(=O)/C=C/c1cnn(CCOCCc2ccccc2)c1  
824 C=CCC(=O)O.Cc1cc(Cl)ccc1Cc1cc([C@H]2S[C@H](COCc3ccccc3)[C@H](OCc3ccccc3)[C@H]  
825 (OCc3ccccc3)[C@H]2OCc2ccccc2)c(OCc2ccccc2)cc1C>>Cc1cc(/C=C/CC(=O)O)ccc1Cc1cc([C@H]  
826 2S[C@H](COCc3ccccc3)[C@H]2OCc3ccccc3)[C@H](OCc3ccccc3)[C@H]2OCc2ccccc2)c(OCc2c  
827 C=CC(=O)OC.CN(C)S(=O)(=O)n1cc([Si](C)(C)C)c(Br)c1[Si](C)(C)C>>COC(=O)/C=C/c1c([Si](C)(C)  
828 )C)cn(S(=O)(=O)N(C)C)c1[Si](C)(C)C  
829 C=CC(=O)OC.CC(=O)O[IH2](OC(C)=O)c1ccccc1>>COC(=O)/C=C/c1ccccc1

812 C=Cc1cccc(Cl)c1.Oc1cccc1I>>Oc1cccc1/C=C/c1cccc(Cl)c1  
813 C=CCNC(=O)OC(C)(C)C.CC1(C)OC(=O)c2c(cc(OCCN3CCOCC3)cc2OS(=O)(=O)C(F)(F)F)O1>>C  
C(C)(C)OC(=O)NC/C=C/c1cc(OCCN2CCOCC2)cc2c1C(=O)OC(C)(C)O2  
Br1ccc2cccc2c1.C=Cc1nc2c(N)ncnc2n1[C@@H]1O[C@H](CO[Si](C)(C)C(C)(C)C)[C@@H](O[Si]  
814 ](C)(C)C(C)(C)C)[C@H]1O[Si](C)(C)C(C)(C)C>>CC(C)(C)[Si](C)(C)OC[C@H]1O[C@@H](n2c(/C  
=C/c3ccc4cccc4c3)nc3c(N)ncnc32)[C@H](O[Si](C)(C)C(C)(C)C)[C@@H]1O[Si](C)(C)C(C)(C)C  
C=CCn1c(N(c2ccc(C)cc2I)S(=O)(=O)c2cccs2)cc2cc(Br)ccc21>>Cc1ccc2c(c1)/C=C/Cn1c(cc3cc(Br)cc  
815 c31)N2S(=O)(=O)c1cccs1  
C=CC(=O)O.O=[N+](O-)]c1c(I)ccc2c1C=CC1(CCCC1)O2>>O=C(O)/C=C/c1ccc2c(c1[N+](=O)[O-  
816 ]C=CC1(CCCC1)O2  
C=Cc1nc2c(N)ncnc2n1[C@H]1C[C@H](O[Si](C)(C)C(C)(C)C)[C@@H](CO[Si](C)(C)C(C)(C)C)O1.  
817 CC(=O)c1ccc(Br)cc1>>CC(=O)c1ccc(/C=C/c2nc3c(N)ncnc3n2[C@H]2C[C@H](O[Si](C)(C)C(C)(C)  
C)[C@@H](CO[Si](C)(C)C(C)(C)C)O2)cc1  
818 C=CC(C)O.CC(C)(C)OC(=O)NCCc1cc2c(cc1I)OCO2>>CC(O)/C=C/c1cc2c(cc1CCNC(=O)OC(C)(C)  
C)OCO2  
819 C=CC(=O)OC(C)(C)C.COc1cccc(CCC(=O)O)c2ccc(I)cc2CC=C(C)C)c1>>COc1cccc(CCC(=O)O)c2ccc  
(/C=C/C(=O)OC(C)(C)C)cc2CC=C(C)C)c1  
820 C=CC(=O)OCC.CC(C)(C)[Si](C)(C)OCc1cc(=O)c(OS(=O)(=O)C(F)(F)F)co1>>CCOC(=O)/C=C/c1co  
c(CO[Si](C)(C)C(C)(C)C)cc1=O  
821 C=C.O=C1Nc2ccc(I)cc2C1=O>>C=Cc1ccc2c(c1)C(=O)C(=O)N2  
Br1cnc2nc(-c3cccc3)c(-  
822 c3cccc3)nc2c1.C=CCN1C(=O)c2cccc2C1=O>>O=C1c2cccc2C(=O)N1C/C=C/c1cnc2nc(-  
c3cccc3)c(-c3cccc3)nc2c1  
823 C=CC(=O)OCC.COC(=O)c1cc(I)ccc1NC(C)=O>>CCOC(=O)/C=C/c1ccc(NC(C)=O)c(C(=O)OC)c1  
824 C=CC(=O)OCC.Cc1cc2enccc2c(F)c1Br>>CCOC(=O)/C=C/c1c(C)cc2enccc2c1F  
825 C=CCC(C1=C(OS(=O)(=O)C(F)(F)F)CCC1)c1ccc(OC)cc1>>C=C1CC(c2ccc(OC)cc2)C2=C1CCC2  
826 C=Cc1ccc(S(=O)(=O)C(C)C)c(Nc2nc(Nc3cc(Br)c(N4CCN(C)CC4)cc3OC)nc2Cl)c1>>COc1cc(N2C  
CN(C)CC2)c2cc1Nc1ncc(Cl)c(n1)Nc1cc(ccc1S(=O)(=O)C(C)C)/C=C\2  
827 C=CC(=O)OC.Nc1ccnc1Br>>COC(=O)/C=C/c1ncccc1N  
828 C=Cc1senc1C.COc1ccc(Br)cc1>>COc1ccc(/C=C/c2senc2C)cc1  
829 Br1ccc2cenc(N3CCCCC3)c2c1.C=CC(C)=O>>CC(=O)/C=C/c1ccc2cenc(N3CCCCC3)c2c1  
830 C=C1C[C@H]2[C@@H]3CCc4cc(OC)ccc4[C@H]3CC[C@]2(C)C1=O.Cc1cccc(Br)c1>>COc1ccc2c(  
c1)CC[C@]2[C@@H]1[C@@H]2CC[C@]2(C)C(=O)/C=C/c3cccc(C)c3)C[C@@H]12  
831 C=Cc1cccc1.N#Cc1cc2ccc(Br)cc2c1ccc1cccc12>>N#Cc1cc2ccc(/C=C/c3cccc3)cc2c1ccc1cccc  
832 C=CC(=O)OCC.COc1cccc(Oc2ccc(Br)c2)c1>>CCOC(=O)/C=C/c1cccc(Oc2ccc(OC)c2)c1  
833 C=CC(=O)OC.Cn1enc(Br)c1CC=C1CCCCC1>>COC(=O)/C=C/c1ncn(C)c1CC=C1CCCCC1  
834 C=CS(=O)(=O)F.CC(C)c1ccc(I)cc1>>CC(C)c1ccc(/C=C/S(=O)(=O)F)cc1  
835 C=CC(=O)OC(C)(C)C.Fc1ccc(Br)c(F)c1>>CC(C)(C)OC(=O)/C=C/c1ccc(F)cc1F  
836 C=CC(=O)OC.CCn1cc(I)c(=O)c2ccc(C)nc21>>CCn1cc(/C=C/C(=O)OC)c(=O)c2ccc(C)nc21  
837 Br1cccc1.C=CC#N>>N#C/C=C/c1cccc1  
838 C=CC(=O)OC.Cc1ccc(NCc2cccc2)c(Br)c1>>COC(=O)/C=C/c1cc(C)ccc1NCc1cccc1  
839 C=CC(=O)OCCCC.O=Cc1ccc(Br)cc1>>CCCCOC(=O)/C=C/c1ccc(C=O)cc1  
840 C=CC(=O)O.CN(c1cccc(I)c1)S(=O)(=O)c1ccc(Cl)cc1>>CN(c1cccc(/C=C/C(=O)O)c1)S(=O)(=O)c1cc  
c(Cl)cc1  
841 C=Cc1cccc1.N#Cc1cc2cc(Br)ccc2c1>>N#Cc1ccc2cc(/C=C/c3cccc3)ccc2c1  
842 C=Cc1cncnc1.CCCCN(CCCC)c1ccc(/C=C/c2ccc(Br)cc2)cc1>>CCCN(CCCC)c1ccc(/C=C/c2ccc(/C=  
C/c3cncnc3)cc2)cc1  
843 Br1ccc2ccc3cccc4ccc1c2c34.C=CC(=O)OCC(C)C>>CC(C)COC(=O)/C=C/c1ccc2ccc3cccc4ccc1c2c3  
844 C=CCCCCCC.CC(=O)Nc1cccc1OS(=O)(=O)C(F)(F)F>>C=C(CCCCCC)c1cccc1NC(C)=O  
845 C=C(C(=O)OC)[C@@H]1CC[C@@]2(C)CCC[C@@](C)(OCOC)[C@@H]2C1.Cc1ccc(I)cc1>>COC  
O[C@]1(C)CCC[C@]2(C)CC[C@]2[C@@H](/C=C\c3ccc(C)cc3)C(=O)OC)C[C@H]21  
846 C=CCCCCCCCCCCCC.COc1cccc(Br)c1[N+](=O)[O-  
]>>CCCCCCCCCCCCC/C=C/c1cccc(OC)c1[N+](=O)[O-]  
847 C=CC(=O)N(C)C.Cc1ccc(Br)s1>>Cc1ccc(/C=C/C(=O)N(C)C)s1  
C=Cc1ccc(C(=O)N[C@@H](CCSC)C(=O)OC)c(-  
848 c2cccc2C)c1.OC(c1cccc1)c1cncnc1Br>>COC(=O)[C@H](CCSC)NC(=O)c1ccc(/C=C/c2cncnc2C(O)  
c2cccc2)cc1-c1cccc1C  
C=Cc1ccnc1.C[C@H]1CC[C@H](Cn2cc(I)c3nc(C#N)nc(-  
849 c4cncc(Cl)c4)c32)CC1>>C[C@H]1CC[C@H](Cn2cc(/C=C/c3ccnc3)c3nc(C#N)nc(-  
c4cncc(Cl)c4)c32)CC1

850 C=CCN1C(=O)C2(CCCC2)NC[C@@]1(C)c1cc(F)cc(F)c1.O=C1Nc2ncccc2[C@@]12Cc1cc(Br)enc1  
 C2>>C[C@@]1(c2cc(F)cc(F)c2)CNC2(CCCC2)C(=O)N1C/C=C/c1cnc2c(c1)C[C@@]1(C2)C(=O)Nc  
 851 C=CCCOc1ccenc1Br>>C=C1CCOc2ccenc21  
 852 Br1ccc2nccn2c1.C=CC(C)(C)O>>CC(C)(O)/C=C/c1ccc2nccn2c1  
 853 C=CC(=O)OC.CC(C)(C)OC(=O)N1CCc2ccc(Br)cc2C1>>COC(=O)/C=C/c1ccc2c(c1)CN(C(=O)OC(C  
 )(C)C)CC2  
 854 C=CC(=O)OCC.CCC1=C(I)C2(CCCC2)C(=O)O1>>CCOC(=O)/C=C/C1=C(CC)OC(=O)C12CCCC2  
 855 C=C.O=[N+](=[O-])c1cc(Br)cc([N+](=O)[O-])c1>>C=Cc1cc([N+](=O)[O-])cc([N+](=O)[O-])c1  
 856 C=Cc1ccc2c(c1)C(=O)c1cccc1C2=O.Ic1ccc2c(=C3SC=CS3)c3cccc3c(=C3SC=CS3)c2c1>>O=C1c2  
 ccccc2C(=O)c2cc(/C=C/c3ccc4c(=C5SC=CS5)c5cccc5c(=C5SC=CS5)c4c3)ccc21  
 857 Br1ccse1.C=Cc1ccenc1>>C(=C/c1ccse1)\c1ccenc1  
 858 C=Cc1ccc(OC)cc1.CCCCOc1ccc2c(c1)cc(C#N)c1ccc(Br)cc12>>CCCCOc1ccc2c(c1)cc(C#N)c1ccc(/C  
 =C/c3ccc(OC)cc3)cc12  
 859 C=CN1C(=O)c2cccc2C1=O.CC(=O)c1ccc(Br)cc1>>CC(=O)c1ccc(/C=C/N2C(=O)c3cccc3C2=O)cc  
 C=C[C@@H]1C[C@H](CC(=O)OC(C)(C)C)OC(C)(C)O1.CC(C)c1nc(N(C)S(C)(=O)=O)nc(-  
 860 c2ccc(F)cc2)c1Br>>CC(C)c1nc(N(C)S(C)(=O)=O)nc(-  
 c2ccc(F)cc2)c1/C=C/[C@@H]1C[C@H](CC(=O)OC(C)(C)C)OC(C)(C)O1  
 861 C=CCCCCCC.Cc1cccc1OS(=O)(=O)C(F)(F)F>>C=C(CCCCCC)c1cccc1C  
 862 C=CCCCC(=O)OC.O=S(=O)(Oc1ccc(C(=C2C3CCCC2CCC3)c2ccc(O)cc2)cc1)C(F)(F)F>>COC(=O)  
 CCCC/C=C/c1ccc(C(=C2C3CCCC2CCC3)c2ccc(O)cc2)cc1  
 863 C=CS(=O)(=O)F.O=C(N[C@@H](Cc1ccc(I)cc1)C(=O)OCc1cccc1)OCC1c2cccc2-  
 c2cccc21>>O=C(N[C@@H](Cc1ccc(/C=C/S(=O)(=O)F)cc1)C(=O)OCc1cccc1)OCC1c2cccc2-  
 c2cccc21  
 864 Br1ccc2oc(-c3cc[nH]n3)cc2c1.C=CC(=O)OCC>>CCOC(=O)/C=C/c1ccc2oc(-c3cc[nH]n3)cc2c1  
 865 C=Cc1cccc1.C[Si](Cl)(c1cccc1)c1cccc1>>C[Si](/C=C/c1cccc1)(c1cccc1)c1cccc1  
 866 Br1ccccc1I.C=Cc1cccc(C)c1>>Cc1cccc(/C=C/c2cccc2Br)c1  
 867 C=CC(=O)NCCCCC.O=c1c(I)c(-c2ccc(O)cc2)oc2cc(O)ccc12>>CCCCCNC(=O)/C=C/c1c(-  
 c2ccc(O)cc2)oc2cc(O)ccc2c1=O  
 868 C=CCCCCCCCC.C1ccc([I+])c2cccc2)cc1>>CCCCCCCCC/C=C/c1cccc1  
 869 C=CC(=O)OC.CCOc1c(C(C)n2nc(C)c3c(N)ncnc32)cc(Cl)c(C)c1I>>CCOc1c(C(C)n2nc(C)c3c(N)ncnc  
 32)cc(Cl)c(C)c1/C=C/C(=O)OC  
 870 C=CCN(C(=O)C1(C(F)(F)F)CC1)[C@H](C)c1cc(F)cc(F)c1.O=C1Nc2ncccc2[C@@]12Cc1cc(Br)enc1  
 C2>>C[C@H](c1cc(F)cc(F)c1)N(C/C=C/c1cnc2c(c1)C[C@@]1(C2)C(=O)Nc2ncccc21)C(=O)C1(C(F  
 )(F)F)CC1  
 871 C=CCN(Cc1cccc1)C(=O)c1cccc1Br>>C=C1CN(Cc2cccc2)C(=O)c2cccc21  
 872 Br1ccc(I)cc1.C=CC(=O)N(C)OC>>CON(C)C(=O)/C=C/c1ccc(Br)cc1  
 873 C=Cc1cccc1.O=c1oc2c(ccc3cccc32)c(-c2cccc2)c1Br>>O=c1oc2c(ccc3cccc32)c(-  
 c2cccc2)c1/C=C/c1cccc1  
 874 C=CCCP(=O)(OC)OC.Ic1cccc1>>COP(=O)(CC/C=C/c1cccc1)OC  
 875 C=Cc1cccc1.IC1CCCC1>>C(=C/C1CCCC1)\c1cccc1  
 876 C=CC[C@H]1O[C@H](COC(=O)c2cccc2)[C@@H](OC(=O)c2cccc2)[C@H](OC(=O)c2cccc2)[C  
 @H]1OC(=O)c1cccc1.Ic1ccc(-c2cccc2)cc1>>O=C(OC[C@H]1O[C@H](C/C=C/c2ccc(-  
 c3cccc3)cc2)[C@@H](OC(=O)c2cccc2)[C@@H](OC(=O)c2cccc2)[C@@H]1OC(=O)c1cccc1)c1  
 cccc1  
 877 C=Cc1ccc(S(=O)(=O)c2cccc2F)cn1.Oc1cccc1I>>O=S(=O)(c1ccc(/C=C/c2cccc2O)nc1)c1cccc1F  
 878 C=CC(=O)Nc1cccc1NC(=O)OC(C)(C)C.CCOC(=O)[C@H]1CN(C(C)(C)C)C[C@@H]1c1ccc(Br)cc1  
 >>CCOC(=O)[C@H]1CN(C(C)(C)C)C[C@@H]1c1ccc(/C=C/C(=O)Nc2cccc2NC(=O)OC(C)(C)C)cc  
 879 C=CCOc1cccc1.Fc1ccc(Br)cc1>>Fc1ccc(/C=C/COc2cccc2)cc1  
 880 Br1ccc2[nH]ccc2c1.C=CC(=O)OCCCC>>CCCCOC(=O)/C=C/c1ccc2[nH]ccc2c1  
 881 C=CB1OC(C)CC(C)(C)O1.CCOc1nn(CC)cc1S(=O)(=O)N1C[C@H](CCC(=O)OC)Oc2ccc(Br)cc21>>  
 CCOc1nn(CC)cc1S(=O)(=O)N1C[C@H](CCC(=O)OC)Oc2ccc(/C=C/B3OC(C)CC(C)(C)O3)cc21  
 882 C=CC(=O)OCC.Nc1cc(F)c(Br)cc1I>>CCOC(=O)/C=C/c1cc(Br)c(F)cc1N  
 883 C=CC(=O)OC.CC(C)(C)OC(=O)N1CC2(CC(=O)c3cc(Br)ccc3O2)C1>>COC(=O)/C=C/c1ccc2c(c1)C(  
 =O)CC1(CN(C(=O)OC(C)(C)C)C1)O2  
 884 C=CCNC(=O)OC(C)(C)C.CC1(C)OC(=O)c2c(cc(OCc3ccc(F)cc3)cc2OS(=O)(=O)C(F)(F)F)O1>>C  
 C(C)(C)OC(=O)NC/C=C/c1cc(OCc2ccc(F)cc2)cc2c1C(=O)OC(C)(C)O2  
 885 Br1cccc2cccc12.C=CC(=O)OCC>>CCOC(=O)/C=C/c1cccc2cccc12  
 886 C=Cc1ccc(N(C)C)cc1.CCCn1c(=O)c(C)nc2ccc(Br)cc21>>CCCN1c(=O)c(C)nc2ccc(/C=C/c3ccc(N(C)  
 C)cc3)cc21  
 887 C=C/C=C/CCCCC.CC(=O)c1ccc(I)cc1>>CCCCC/C=C/C=C/c1ccc(C(C)=O)cc1  
 888 C=CC(=O)OC.O=C1Nc2c(Br)cccc2C12OCCO2>>COC(=O)/C=C/c1cccc2c1NC(=O)C21OCCO1

889 C=Cc1ccncc1.CC(C)(C)OC(=O)NCCCOc1cncc(Br)c1>>CC(C)(C)OC(=O)NCCCOc1cncc(/C=C/c2ccn  
cc2)c1  
890 C=CC(=O)OC.Cc1ccc([S@](=O)c2ccc(C)cc2Br)cc1>>COC(=O)/C=C/c1cc(C)ccc1[S@](=O)c1ccc(  
C)cc1  
891 C=CS(C)(=O)=O.COc1ccc(Br)cc1>>COc1ccc(/C=C/S(C)(=O)=O)cc1  
892 C=CC(=O)OC.N#Cc1cccc1Br>>COC(=O)/C=C/c1cccc1C#N  
893 C=Cc1ccc(C(=O)OCC)cc1.CC1(C)CCC(=O)c2cc(Br)ccc21>>CCOC(=O)c1ccc(/C=C/c2ccc3c(c2)C(=O)CCC3(C)C)cc1  
C=Cc1nc2c(N)ncnc2n1[C@@H]1O[C@H](CO[Si](C)(C)C(C)(C)C)[C@@H](O[Si](C)(C)C(C)(C)C)[C@H]1O[Si](C)(C)C(C)(C)C.N#Cc1ccc(Br)cc1>>CC(C)(C)[Si](C)(C)OC[C@H]1O[C@@H](n2c(/C=C/c3ccc(C#N)cc3)nc3c(N)ncnc32)[C@H](O[Si](C)(C)C(C)(C)C)[C@@H]1O[Si](C)(C)C(C)(C)C  
895 COC[C@@H](/N=C(\c1cccc1)N1C=CCC[C@H]1c1ccc1)C(C)C.Ic1cccc1>>COC[C@@H](/N=C(\c1cccc1)N1C=C(c2cccc2)CC[C@H]1c1ccc1)C(C)C  
\*CNCCCOCCOCCOCCNC(=O)COc1ccc(C(Cc2cc(OC)cc(OC)c2)NC(=O)c2cccc(C=C)c2)cc1.Cc1cc  
896 c(F)c(I)c1>>\*CNCCCOCCOCCOCCNC(=O)COc1ccc(C(Cc2cc(OC)cc(OC)c2)NC(=O)c2cccc(/C=C/c3ccc(C)ccc3F)c2)cc1  
897 C=Cc1cccc1.O=S(=O)(Oc1ccc2ncccc2c1)C(F)(F)F>>C=C(c1cccc1)c1ccc2ncccc2c1  
898 C=Cc1ccc2ccc(Cl)cc2n1.N#CCCC(c1ccc(Br)c1)n1ccc2cccc(OCC#N)c21>>N#CCCC(c1cccc(/C=C/c2ccc3ccc(Cl)cc3n2)c1)n1ccc2cccc(OCC#N)c21  
899 C=C.FC(F)(F)c1ccc(I)cc1>>C=Cc1ccc(C(F)(F)F)cc1  
900 Brc1cnc2cccc2c1.C=CCNC(=O)OC(C)(C)C>>C=C(CNC(=O)OC(C)(C)C)c1cnc2cccc2c1  
C=CC(=O)OCCCC.C[C@]12[C@@]34C=C(Sc5ccc(I)cc5)C(=O)[C@@](C)(CCC(=O)Nc5c(O)ccc(C(=O)O)c5O)[C@@H]3[C@H](C[C@@H]1C4)O2>>CCCCOC(=O)/C=C/c1ccc(SC2=C[C@]34[C@@H]5C[C@H](O[C@@]5(C)C3)[C@H]4[C@](C)(CCC(=O)Nc3c(O)ccc(C(=O)O)c3O)C2=O)cc1  
901 C=Cc1cccc1.FC(F)(F)c1ccc(I)c1>>FC(F)(F)c1cccc(/C=C/c2cccc2)c1  
902 C=C(NC(C)=O)C(=O)OC.Ic1ccc2c(c1)oc1cccc12>>COC(=O)/C=C(\c1ccc2c(c1)oc1cccc12)NC(C)=C=CC(=O)OC.O=C1c2ccc(OS(=O)(=O)C(F)(F)F)cc2C(=O)N1CCc1cccc1>>COC(=O)/C=C/c1ccc2c(c1)C(=O)N(CCc1cccc1)C2=O  
903 C=Cc1cccc1.N#Cc1ccc(N)c(Br)c1>>N#Cc1ccc(N)c(/C=C/c2cccc2)c1  
904 C=CC(=O)c1ccc(OC)cc1OC.CC(=O)Oc1ccc(I)cc1>>COc1ccc(C(=O)/C=C/c2ccc(OC(C)=O)cc2)c(OC  
905 C=CC(=O)OC.CC(=O)c1cc(Br)ccc1O>>COC(=O)/C=C/c1ccc(O)c(C(C)=O)c1  
906 C=CC(=O)OC.O=C(Cc1cccc(Br)c1)c1ccc(-c2cccc2)o1>>COC(=O)/C=C/c1cccc(CC(=O)c2ccc(-c3cccc3)o2)c1  
907 C=Cc1ccc(CN2C(=O)c3cccc3C2=O)cc1.CC(C)(C)Br>>CC(C)(C)/C=C/c1ccc(CN2C(=O)c3cccc3C2=O)cc1  
908 C=CC(OCC)OCC.CC(C)(C)c1cccc1OS(=O)(=O)C(F)(F)F>>C=C(c1cccc1C(C)(C)C(OCC)OCC  
909 C=CCN(C(=O)C(F)(F)F)c1cccc1C#Cc1cccc1.COc1ccc(I)cc1>>COc1ccc(/C=C/CN(C(=O)C(F)(F)F)c2cccc2C#Cc2cccc2)cc1  
910 C=Cc1ccc(OC(C)=O)cc1.COc1c(Br)ccc2c(OC)c(/C=C/c3ccncc3)ccc12>>COc1c(/C=C/c2ccncc2)ccc2c(OC)c(/C=C/c3ccc(OC(C)=O)cc3)ccc12  
911 C=CC(=O)c1ccc(OC)c(OC)c1.CC(=O)Oc1cccc1I>>COc1ccc(C(=O)/C=C/c2cccc2OC(C)=O)cc1OC  
912 C=Cc1cccc1.Cc1ccc2c(-c3cccc3)c(Br)c(=O)oc2c1>>Cc1ccc2c(-C=C[C@@H](CC(=O)OC(C)(C)C)NC(=O)c1cc(-c2c(OC)cccc2OC)n(C2CCCC2)n1.Fc1ccc(Br)cc1>>COc1ccc(OC)c1-c1cc(C(=O)N[C@@H](/C=C/c2ccc(F)cc2)CC(=O)OC(C)(C)C)nn1C1CCCC1  
913 C=CC(=O)OC.Cc1cc2c(c(C)c1Br)CCC2>>COC(=O)/C=C/c1c(C)cc2c(c1C)CCC2  
914 Brc1ccc2cccc2c1.C=Cc1nc2c(N)ncnc2n1[C@H]1C[C@H](O[Si](C)(C)C(C)(C)C)[C@@H](CO[Si](C)(C)C(C)(C)C)O1>>CC(C)(C)[Si](C)(C)OC[C@H]1O[C@@H](n2c(/C=C/c3ccc4cccc4c3)nc3c(N)ncnc32)C[C@@H]1O[Si](C)(C)C(C)(C)C  
915 C=CC(=O)OC.O=S(=O)(c1cccc1)n1c2ncccc2c2c(OS(=O)(=O)C(F)(F)F)nc3cccc3c21>>COC(=O)/C=C/c1nc2cccc2c2c1c1ccnc1n2S(=O)(=O)c1cccc1  
916 C=CC(=O)OC(C)(C)C.CC(C)CN1CCc2c(ccc3[nH]ncc23)C1c1ccc(Br)cc1>>CC(C)CN1CCc2c(ccc3[nH]ncc23)C1c1ccc(/C=C/C(=O)OC(C)(C)C)cc1  
917 C=CC(=O)OC.C[C@@H](c1cccc1)N1C(=O)c2ccc(OS(=O)(=O)C(F)(F)F)cc2C1=O>>COC(=O)/C=C/c1ccc2c(c1)C(=O)N([C@@H](C)c1cccc1)C2=O  
918 C=COCCCC.CC(=O)Nc1ccc(Br)cn1>>C=C(OCCCC)c1ccc(NC(C)=O)nc1  
919 C=C.Cn1cc(I)cn1>>C=Cc1cnn(C)c1  
920 CCOC(=O)/C=C/[C@H]1COC(C)(C)O1.Ic1cccc1>>CCOC(=O)/C=C(\c1cccc1)[C@H]1COC(C)(C)C  
921 C=Cc1c(F)c(F)c(F)c1F.IC1CCCCC1>>Fc1c(F)c(F)c(/C=C/C2CCCCC2)c(F)c1F  
922 C=Cc1cccc1C.CCOC(=O)C(F)I>>CCOC(=O)C(F)/C=C/c1cccc1C  
923 Brc1ccoc1.C=CB1OC(C)CC(C)(C)O1>>CC1CC(C)(C)OB(/C=C/c2ccoc2)O1

927 C=Cc1ccc(C(C)(C)C)cc1.CC(C)(C)Br>>CC(C)(C)/C=C/c1ccc(C(C)(C)C)cc1  
 928 C=C.C=CCCCCCC(C)OC(=O)c1c(OC)cc(OC)cc1OS(=O)(=O)C(F)(F)F>>C=CCCCCCC(C)OC(=O)c  
 1c(C=C)cc(OC)cc1OC  
 929 C=CC(=O)OC.COCCOc1cccn1Br>>COCCOc1cccn1/C=C/C(=O)OC  
 930 C=Cc1ccc2c(c1)Sc1ccccc1N2CC.O=[N+](O-  
 931 ]c1ccc(Br)cc1>>CCN1c2ccccc2Sc2cc(/C=C/c3ccc([N+](=O)[O-])cc3)ccc21  
 C=CC(=O)OC.Ic1cn(C(c2ccccc2)(c2ccccc2)c2ccccc2)c(N=P(c2ccccc2)(c2ccccc2)c2ccccc2)n1>>COC  
 (=O)/C=C/c1cn(C(c2ccccc2)(c2ccccc2)c2ccccc2)c(N=P(c2ccccc2)(c2ccccc2)c2ccccc2)n1  
 932 BrC1=C(C2=C[C@@H]3CCCC[C@H]3CC2)CCCC1.C=CC(=O)OC(C)(C)C>>CC(C)(C)OC(=O)/C=  
 C/C1=C(C2=C[C@H]3CCCC[C@H]3CC2)CCCC1  
 933 Br1c2ccccc2cc2ccccc12.C=Cc1ccc(-c2ccc3nc(-c4ccccc4)cc(-  
 934 c4ccccc4)c3c2)cc1>>C(=C/c1c2ccccc2cc2ccccc12)c1ccc(-c2ccc3nc(-c4ccccc4)cc(-c4ccccc4)c3c2)cc1  
 C=CCN(C)C(=O)OC(C)(C)C.CC(C)COc1cncc(Br)c1>>CC(C)COc1cncc(/C=C/CCN(C)C(=O)OC(C)  
 (C)C)c1  
 935 C=C1OC(=O)OC1(C)C.Ic1cccc2ccccc12>>CC1(C)OC(=O)O/C1=C/c1cccc2ccccc12  
 936 C=C.Cc1c(Br)c(C(F)(F)F)nn1C>>C=Cc1c(C(F)(F)F)nn(C)c1C  
 937 C=Cc1ccc(C(C)(C)C)cc1.O=Cc1ccc(Br)cc1>>CC(C)(C)c1ccc(/C=C/c2ccc(C=O)cc2)cc1  
 938 C=Cc1ccc(-c2cccs2)cc1.CC(C)(C)Br>>CC(C)(C)/C=C/c1ccc(-c2cccs2)cc1  
 939 C=CCOC(C)=O.COCC(=O)c1ccc(Br)cc1>>COC(=O)c1ccc(/C=C/COC(C)=O)cc1  
 940 C=CC(=O)OCC.COCC1OC(c2ccccc2)=C(I)c2ccccc21>>CCOC(=O)/C=C/C1=C(c2ccccc2)OC(OC)c2cc  
 ccc21  
 941 C=C[C@H]1O[C@@H]2OC(C)(C)O[C@H]2[C@H]1N(Cc1cc(OC)ccc1Br)S(=O)(=O)c1ccc(C)cc1  
 >>C=C1c2ccc(OC)cc2CN(S(=O)(=O)c2ccc(C)cc2)[C@H]2[C@@H]1O[C@@H]1OC(C)(C)O[C@H]  
 942 C=CC[C@H]1CCCCN1Cc1ccccc1I>>C=C1C[C@H]2CCCCN2Cc2ccccc21  
 C=Cc1ccc(OC)c(OC)c1.O=c1c(Br)c(-c2ccccc2)oc2ccccc12>>COc1ccc(/C=C/c2c(-  
 943 c3ccccc3)oc3ccccc3c2=O)cc1OC  
 944 C=Cc1ccccc1.COCC(C#N)c1ccccc1Br>>COCC(C#N)c1ccccc1/C=C/c1ccccc1  
 945 C=CC(=O)N1CCN(C)CC1.Clc1nc(N2CCOCC2)c2oc3ncc(Br)cc3c2n1>>CN1CCN(C(=O)/C=C/c2enc  
 3oc4c(N5CCOCC5)nc(Cl)nc4c3c2)CC1  
 946 C=CP(=O)(c1ccccc1)C(C)(C)C.Cc1ccc2ccccc2c1Br>>Cc1ccc2ccccc2c1/C=C/P(=O)(c1ccccc1)C(C)(C)  
 947 BrC1=C(C2=CCCCO2)CCCC1.C=Cc1ccccc1>>C1=C(C2=C(/C=C/c3ccccc3)CCCC2)OCCC1  
 948 C=Cc1ccc(Cl)cc1.CCn1c(=O)c2c(cc(Br)n2C)n(CC)c1=O>>CCn1c(=O)c2c(cc(/C=C/c3ccc(Cl)cc3)n2C  
 )n(CC)c1=O  
 949 C=Cc1ccc(F)cc1.Cn1cc(I)c(=O)c2ccccc21>>Cn1cc(/C=C/c2ccc(F)cc2)c(=O)c2ccccc21  
 C=CCS(=O)(=O)NC(C)(C)C(=O)OCc1ccccc1.CC(=O)OC[C@H]1O[C@@H](Oc2n[nH]c(C(C)C)c2C  
 950 c2ccc(Br)cc2)[C@H](OC(C)=O)[C@@H](OC(C)=O)[C@@H]1OC(C)=O>>CC(=O)OC[C@H]1O[C  
 @H](Oc2n[nH]c(C(C)C)c2Cc2ccc(/C=C/CS(=O)(=O)NC(C)(C)C(=O)OCc3ccccc3)cc2)[C@H](OC(  
 C)=O)[C@@H](OC(C)=O)[C@@H]1OC(C)=O  
 951 C=CC(=O)OC(C)(C)C.COc1nc(Cl)ccc1[N+](=O)[O-  
 952 ]>>COc1nc(/C=C/C(=O)OC(C)(C)C)ccc1[N+](=O)[O-]  
 C=CC(=O)OC(C)(C)C.COCC(=O)c1cc(Br)cc2ccccc12>>COC(=O)c1cc(/C=C/C(=O)OC(C)(C)C)cc2ccc  
 953 cc12  
 C=C(OC)C(=O)OC.Ic1cccc2ccccc12>>COC(=O)/C(=C/c1cccc2ccccc12)OC  
 954 C=Cc1ccc(Cl)cc1.O=c1c(Br)c(-c2ccccc2)oc2ccccc12>>O=c1c(/C=C/c2ccc(Cl)cc2)c(-  
 c2ccccc2)oc2ccccc12  
 955 C=CC(=O)OC.CC(C)(C)[Si](C)(C)OC(CCO)c1cccc2ccc(Br)cc12>>COC(=O)/C=C/c1ccc2cccc(C(CC  
 O)O[Si](C)(C)C(C)(C)C)c2c1  
 C=Cc1ccc(-  
 956 n2c3ccccc3c3ccccc32)cc1.CCCCC(CC)CN1C(=O)c2cccc3c(Br)ccc(c23)C1=O>>CCCCC(CC)CN1C(=  
 O)c2cccc3c(/C=C/c4ccc(-n5c6ccccc6c6ccccc65)cc4)ccc(c23)C1=O  
 957 C=CCCCCCC.CC(C)(C)OC(=O)n1ccc2cc(Br)ccc21>>C=C(CCCCCC)c1ccc2c(ccn2C(=O)OC(C)(C)C  
 958 C=CC(=O)OCC.Nc1ccc(Br)cn1>>CCOC(=O)/C=C/c1ccc(N)nc1  
 959 C=Cc1ccc(Cl)cc1.C=Cc1ccccc1>>C=Cc1ccc(/C=C/c2ccccc2)cc1  
 960 Br1ccc2ccc3cccc4ccc1c2c34.C=CC(=O)OC>>COC(=O)/C=C/c1ccc2ccc3cccc4ccc1c2c34  
 \*CNCCCOCCOCCOCCCN(C(=O)COc1ccc(C(Cc2cc(OC)cc(OC)c2)NC(=O)c2ccc(C=C)cc2)cc1.O=[N  
 961 +][O-  
 ]c1ccccc1I>>\*CNCCCOCCOCCOCCCN(C(=O)COc1ccc(C(Cc2cc(OC)cc(OC)c2)NC(=O)c2ccc(/C=C  
 /c3ccccc3[N+](=O)[O-])cc2)cc1  
 962 C=Cc1ccccc1.Cn1nc(Cl)c2ccccc21>>Cn1nc(/C=C/c2ccccc2)c2ccccc21  
 963 C=CC(=O)N1CCOCC1.COc1cc2c3ccccc3nc3c4ccc(Cl)cc4n(C)c(c1)c23>>COc1cc2c3ccccc3nc3c4ccc  
 (/C=C/C(=O)N5CCOCC5)cc4n(C)c(c1)c23



964 Br1ccc(CN2CC3CCC(C2)O3)cc1.C=CB1OC(C)CC(C)(C)O1>>CC1CC(C)(C)OB(/C=C/c2ccc(CN3C  
 C4CCC(C3)O4)cc2)O1  
 965 C=CC(=O)OCC.CCOC(=O)CCOCc1cc(OC)ccc1Br>>CCOC(=O)/C=C/c1ccc(OC)cc1COCCC(=O)OC  
 966 C=CC(=O)OC.Cc1c(Br)ccc2c1N(C)C(=O)C2=O>>COC(=O)/C=C/c1ccc2c(c1C)N(C)C(=O)C2=O  
 967 Br1cccn1.C=Cc1ccncc1>>C(=C/c1ccncc1)\c1ccncc1  
 968 C=C.COc1cc(Br)cc(OC)c1>>C=Cc1cc(OC)cc(OC)c1  
 969 C=Cc1ccc(C)cc1.CC(=O)c1ccc(I)cc1>>CC(=O)c1ccc(/C=C/c2ccc(C)cc2)cc1  
 970 Br1ccc2ccccc2c1.C=CC(=O)OC>>COC(=O)/C=C/c1ccc2ccccc2c1  
 971 C=Cc1ccccc1.O=c1c(Br)cc2ccccc12>>O=c1c(/C=C/c2ccccc2)cc2ccccc12  
 972 C=CN1C(=O)c2ccccc2C1=O.Cc1ccc(Br)cc1>>Cc1ccc(/C=C/N2C(=O)c3ccccc3C2=O)cc1  
 973 C=CC(=O)OC(C)(C)C.CCN(CC)c1ccc2c(CO[Si](C)(C)C(C)(C)C)c(Br)c(=O)oc2c1>>CCN(CC)c1ccc2  
 c(CO[Si](C)(C)C(C)(C)C)c(/C=C/C(=O)OC(C)(C)C)c(=O)oc2c1  
 974 C=CCCCCCC.O=S(=O)(Oc1ccc2ccncc12)C(F)(F)F>>C=C(CCCCCC)c1ccc2ccncc12  
 975 C=Cc1ccncc1.Nc1nc(Cl)c(Br)c1>>Nc1nc(Cl)c(/C=C/c2ccncc2)c1  
 976 C=C[Si](C)(C)C.CC(C)N(C(=O)c1ccccc1I)C(C)C>>CC(C)N(C(=O)c1ccccc1/C=C/[Si](C)(C)C)C(C)C  
 977 C=CS(=O)(=O)F.Fc1cccc(I)c1>>O=S(=O)(F)/C=C/c1cccc(F)c1  
 978 Br1cncc2ccccc12.C=COCCCC>>C=C(OCCCC)c1cncc2ccccc12  
 979 C=CC(OC)OC.Fc1cc(C(F)(F)F)ccc1I>>COC(/C=C/c1ccc(C(F)(F)F)cc1F)OC  
 980 C=C.Fc1ccc(I)cc1>>C=Cc1ccc(F)cc1  
 981 C=Cc1ccc(OC(C)(C)C)cc1.FC(F)(F)C(F)(F)C(F)(F)C(F)(F)C(F)(F)C(F)(F)Br>>CC(C)(C)Oc1ccc(/C=  
 C/C(F)(F)C(F)(F)C(F)(F)C(F)(F)C(F)(F)C(F)(F)C(F)(F)cc1  
 \*CNCCCOCCOCCOCCCN(C(=O)COc1ccc(C(Cc2cc(OC)cc(OC)c2)NC(=O)c2ccc(C=C)cc2)cc1.N#C  
 982 Cc1ccc(I)cc1>>\*CNCCCOCCOCCOCCCN(C(=O)COc1ccc(C(Cc2cc(OC)cc(OC)c2)NC(=O)c2ccc(/C=  
 C/c3ccc(CC#N)cc3)cc2)cc1  
 983 C=CS1ccccc1.N#Cc1ccc(Br)cc1>>N#Cc1ccc(/C=C/Sc2ccccc2)cc1  
 984 C=CCCO[Si](C)(C)C(C)(C)C.COc1cccc(CCl)c1>>C=C(CCO[Si](C)(C)C(C)(C)C)Cc1cccc(OC)c1  
 985 C=CS(=O)(=O)F.Fc1ccc(I)cc1>>O=S(=O)(F)/C=C/c1ccc(F)cc1  
 986 C=Cc1cc(OC)c(O)c(OC)c1.Oc1ccc(O)c(I)c1>>COc1cc(/C=C/c2cc(O)ccc2O)cc(OC)c1O  
 987 C=Cc1ccc(C(F)(F)F)cc1.Clc1cccc(/C=C/c2ccccc2)c1>>FC(F)(F)c1ccc(/C=C/c2ccccc/C=C/c3ccccc3)c  
 2)cc1  
 988 C=CCN1C(=O)c2ccccc2C1=O.Cc1ccc(Br)cc1>>Cc1ccc(/C=C/CN2C(=O)c3ccccc3C2=O)cc1  
 989 C=CC(=O)OC.Ic1secc1-c1ccccc1>>COC(=O)/C=C/c1secc1-c1ccccc1  
 990 C=C[C@@H](COC(C)=O)NS(C)(=O)=O.CC(=O)Oc1ccc(I)cc1>>CC(=O)OC[C@H](/C=C/c1ccc(OC(  
 C)=O)cc1)NS(C)(=O)=O  
 991 C=Cc1ccc(Cl)cc1.O=Cc1cc(F)ccc1Br>>O=Cc1cc(F)ccc1/C=C/c1ccc(Cl)cc1  
 992 C=CC(=O)OC.COCCOc1ccc(Br)c(COCCOCCOCCOCCOCCCN(C(=O)OC(C)(C)C)c1>>COCCOc1ccc(/C=  
 =C/C(=O)OC)c(COCCOCCOCCOCCOCCCN(C(=O)OC(C)(C)C)c1  
 993 C=Cc1ccc(N(c2ccccc2)c2ccccc2)cc1.CCCCCCN1c2ccc(Br)cc2Sc2cc(C=O)ccc21>>CCCCCCN1c2ccc  
 (C=O)cc2Sc2cc(/C=C/c3ccc(N(c4ccccc4)c4ccccc4)cc3)ccc21  
 994 C=C1CC(c2ccc(C)cc2)OC1=O.FC(F)(F)c1ccccc1I>>Cc1ccc(C2C/C(=C/c3ccccc3C(F)(F)F)C(=O)O2)c  
 995 C=CC(=O)OC.Nc1cc(Br)ccn1>>COC(=O)/C=C/c1ccncc(N)c1  
 996 C=CCOC(C)=O.Cc1ccc(S(=O)(=O)NCCc2cc3c(cc2I)OCO3)cc1>>CC(=O)OC/C=C/c1cc2c(cc1CCNS(  
 =O)(=O)c1ccc(C)cc1)OCO2  
 997 C=CC(C)O.Ic1ccccc1>>CC(O)/C=C/c1ccccc1  
 C=Cc1ccc([N+](=O)[O-])cc1.CCC1(CC)c2cc(Br)ccc2-  
 998 c2ccc(N(c3ccccc3)c3ccccc3)cc21>>CCC1(CC)c2cc(/C=C/c3ccc([N+](=O)[O-])cc3)ccc2-  
 c2ccc(N(c3ccccc3)c3ccccc3)cc21  
 999 C=CC(=O)OC.CSc1c2c(I)cccc2nn1C1CCCCO1>>COC(=O)/C=C/c1cccc2nn(C3CCCCO3)c(SC)c12  
 1000 C=CC(=O)N1CCN(C(C)=O)CC1.COc1cc2c3ccccc3nc3c4ccc(Cl)cc4n(C)c(c1)c23>>COc1cc2c3ccccc3  
 nc3c4ccc(/C=C/C(=O)N5CCN(C(C)=O)CC5)cc4n(C)c(c1)c23  
 1001 Br1ccc(/C=C/c2ccc(-n3c4ccccc4c4ccccc43)cc2)cc1.C=Cc1ccncc1>>C(=C/c1ccc(/C=C/c2ccc(-  
 n3c4ccccc4c4ccccc43)cc2)cc1)\c1ccncc1  
 1002 C=Cc1ccccc1C.Clc1ccccc1>>Cc1ccccc1/C=C/c1ccccc1  
 1003 C=Cc1ccc(F)cc1.Cc1nn(-c2ccc(C#N)c(Cl)c2)c(C)c1I>>Cc1nn(-  
 c2ccc(C#N)c(Cl)c2)c(C)c1/C=C/c1ccc(F)cc1  
 1004 C=C.O=C(CC(=O)C(F)(F)F)c1ccc(Br)cc1>>C=Cc1ccc(C(=O)CC(=O)C(F)(F)F)cc1  
 1005 Br1ccc(N2CCCCC2)c2nsnc12.C=Cc1ccncc1>>C(=C/c1ccc(N2CCCCC2)c2nsnc12)\c1ccncc1  
 1006 C=CC(=O)OC.CC(C)(C)OC(=O)N1CCC(C(=O)Nc2ccc(I)cc2C(=O)Nc2ccc(Cl)en2)CC1>>COC(=O)/  
 C=C/c1ccc(NC(=O)C2CCN(C(=O)OC(C)(C)C)CC2)c(C(=O)Nc2ccc(Cl)en2)c1  
 1007 C=CC(=O)OC.Cn1c(I)nc1Sc1ccccc1>>COC(=O)/C=C/c1nc(Sc2ccccc2)n1C

1008 C=CC(N)=O.CCCCC1(CCCC)C(=O)C(C2=NS(=O)(=O)c3cc(I)ccc3N2)=C(O)c2cc(F)ccc21>>CCCC  
C1(CCCC)C(=O)C(C2=NS(=O)(=O)c3cc(/C=C/C(N)=O)ccc3N2)=C(O)c2cc(F)ccc21  
1009 C=CC(=O)OC.CC(=O)OC[C@H]1OC=C(I)[C@@H](OC(C)=O)[C@@H]1OC(C)=O>>COC(=O)/C=  
C/C1=CO[C@H](COC(C)=O)[C@@H](OC(C)=O)[C@@H]1OC(C)=O  
1010 Br1cccc2cccc12.C=CN1CCCC1=O>>C=C(c1cccc2cccc12)N1CCCC1=O  
1011 C=CC(=O)OC.Cc1cccc(N(Cc2ccc(Br)cc2)CC(C)(C)C)n1>>COC(=O)/C=C/c1ccc(CN(CC(C)(C)C)c2c  
cnc(C)n2)cc1  
1012 Br1ccc(C(=C(c2cccc2)c2cccc2)c2cccc2)cc1.C=Cc1ccccc1>>C(=C/c1ccc(C(=C(c2cccc2)c2cccc  
2)c2cccc2)cc1)\c1ccccc1  
1013 Br1ccc(-c2cnc3cccc3n2)cc1.C=CCn1c(-c2ccc(OC)cc2OC)nc2cccc2c1=O>>COc1ccc(-  
c2nc3cccc3c(=O)n2C/C=C/c2ccc(-c3cnc4cccc4n3)cc2)c(OC)c1  
1014 C=CC(=O)OCCN(C)C.Ic1cnn2c(-c3cccc3)cc(-c3cccc3)nc12>>CN(C)CCOC(=O)/C=C/c1cnn2c(-  
c3cccc3)ccc(-c3cccc3)nc12  
1015 C=CC(=O)OCc1cccc1.CC(C)(C)OC(=O)CC1(C(=O)OC(C)(C)C)CC(c2cc(OCc3cccc3)ccc2Br)=NO  
1>>CC(C)(C)OC(=O)CC1(C(=O)OC(C)(C)C)CC(c2cc(OCc3cccc3)ccc2/C=C/C(=O)OCc2cccc2)=N  
1016 C=CC(=O)OCCCC.CCCCc1ccc(Br)cc1>>CCCCOC(=O)/C=C/c1ccc(CCCC)cc1  
1017 C=Cc1cccc1.CC(C)(C)C1CC=C(Cl)CC1>>CC(C)(C)C1CC=C(/C=C/c2cccc2)CC1  
1018 C=CC(=O)OCC.CC(C)(CC1Cc2cccc2C1)NC[C@@H](O)COc1c(Br)cccc1C#N>>CCOC(=O)/C=C/c  
1cccc(C#N)c1OC[C@H](O)CNC(C)(C)CC1Cc2cccc2C1  
1019 C=CC(=O)O.Fc1ccc(Br)cc1F>>O=C(O)/C=C/c1ccc(F)c(F)c1  
1020 C=C1c2cccc2C1(C#N)CC.COc1ccc(Br)cc1>>CCC1(C#N)/C(=C/c2ccc(OC)cc2)c2cccc21  
1021 C=CC(=O)OCC.N#Cc1cc(Br)ccc1OCc1cccc1>>CCOC(=O)/C=C/c1ccc(OCc2cccc2)c(C#N)c1  
1022 C=CCN1C(=O)c2cccc2C1=O.FC(F)(F)c1ccc(Br)cc1>>O=C1c2cccc2C(=O)N1C/C=C/c1ccc(C(F)(F)  
F)cc1  
1023 C=CC(=O)OC(C)(C)C.Cc1cccc(C=O)c1Br>>Cc1cccc(C=O)c1/C=C/C(=O)OC(C)(C)C  
1024 C=CCN.O=c1[nH]c(=O)n([C@H]2C[C@H](O)[C@@H](COP(=O)(O)OP(=O)(O)OP(=O)(O)O)O2)cc  
1I>>NC/C=C/c1cn([C@H]2C[C@H](O)[C@@H](COP(=O)(O)OP(=O)(O)OP(=O)(O)O)O2)c(=O)[n  
C=Cc1nn(C2CCCCO2)c2nc(-  
1025 c3ccc(O)cc3)cc(C(=O)N3CCN(C(=O)OC(C)(C)C)CC3)c12.Fc1ccc(I)cc1>>CC(C)(C)OC(=O)N1CCN(  
C(=O)c2cc(-c3ccc(O)cc3)nc3c2c(/C=C/c2ccc(F)cc2)nn3C2CCCCO2)CC1  
1026 C=C[C@H]1O[C@@H]2OC3(CCCCC3)O[C@@H]2[C@@H]1C.Ic1cccc1>>C[C@@H]1[C@@H](  
/C=C/c2cccc2)O[C@@H]2OC3(CCCCC3)O[C@@H]21  
1027 C=Cc1cccc1.ClCc1ccc(-c2cccc2)cc1>>C(=C/c1cccc1)\Cc1ccc(-c2cccc2)cc1  
1028 C=CC(=O)OCC(CC)CCCC.FC(F)(F)c1ccc(Cl)cc1>>CCCC(CC)COC(=O)/C=C/c1ccc(C(F)(F)F)cc1  
Br1c2cccc2cc2cccc12.C=Cc1nc2c(N)ncnc2n1[C@@H]1O[C@H](CO[Si](C)(C)C(C)(C)C)[C@@H]  
1029 )(O[Si](C)(C)C(C)(C)C)[C@H]1O[Si](C)(C)C(C)(C)C>>CC(C)(C)[Si](C)(C)OC[C@H]1O[C@@H](n  
2c(/C=C/c3c4cccc4cc4cccc34)nc3c(N)ncnc32)[C@H](O[Si](C)(C)C(C)(C)C)[C@@H]1O[Si](C)(C)  
C=Cc1ccc(C(=O)O[C@@H]2CC[C@@]3(C)C(CC[C@@H]4[C@@H]3CC[C@@]3(C)[C@H]4CC[C@  
1030 @H]3[C@H](C)CC(C)C)C2)cc1.CCOC(=O)C(F)Br>>CCOC(=O)C(F)/C=C/c1ccc(C(=O)O[C@@H  
12CC[C@@]3(C)C(CC[C@@H]4[C@@H]3CC[C@@]3(C)[C@H]4CC[C@@H]3[C@H](C)CC(C)C)  
1031 C=CC(=O)OC.Cc1c[nH]c2c(Br)cc(F)cc12>>COC(=O)/C=C/c1cc(F)cc2c(C)c[nH]c12  
1032 C=C(NC(=O)OCC[Si](C)(C)C)C(=O)OC.CC(C)(C)OC(=O)N/C(=C/c1ccc(Br)cc1)C(=O)OCc1cccc1>  
>COC(=O)/C=C/c1ccc(/C=C\NC(=O)OC(C)(C)C)C(=O)OCc2cccc2)cc1)NC(=O)OCC[Si](C)(C)C  
Br1enc2cccc2c1.C=CCO[C@]1(C)C[C@@H](C)C(=O)[C@H](C)[C@H]2NC(=O)O[C@@H]2[C@  
1033 @H](CC)OC(=O)[C@H](C)C(=O)[C@H](C)[C@H]1O[C@@H]1O[C@H](C)C[C@H](N(C)C)[C@H  
1]OC(=O)c1cccc1>>CC[C@H]1OC(=O)[C@H](C)C(=O)[C@H](C)[C@@H](O[C@@H]2O[C@H](  
C)C[C@H](N(C)C)[C@H]2OC(=O)c2cccc2)[C@](C)(OC/C=C/c2cnc3cccc3c2)C[C@@H](C)C(=O  
)\C@H(C)[C@H]2NC(=O)O[C@H]12  
1034 C=CCCCCO[Si](C)(C)C(C)(C)C.Clc1cccc1>>C=C(CCCCO[Si](C)(C)C(C)(C)C)c1cccc1  
1035 C=CCCN(Cc1cccc1)S(=O)(=O)c1cccc1Br>>C=C1CCN(Cc2cccc2)S(=O)(=O)c2cccc21  
1036 C=CCOC(C)=O.Cc1cc(C)c(I)c(C)c1>>CC(=O)OC/C=C/c1c(C)cc(C)cc1C  
1037 C=CCCP(=O)(OC)OC.Clc1ccc(I)cc1>>COP(=O)(CC/C=C/c1ccc(Cl)cc1)OC  
1038 C=Cc1ccc(OC)cc1.CN1CCCN(c2cccc(Br)n2)CC1>>COc1ccc(/C=C/c2cccc(N3CCCN(C)CC3)n2)cc1  
1039 C=C(C)C(=O)OCC.Ic1cccc1>>CCOC(=O)/C(C)=C/c1cccc1  
1040 C=Cc1ccnc(F)c1.CC(C)(C)OC(=O)N[C@H](COc1cnc(Br)c1)Cc1c[nH]c2cccc12>>CC(C)(C)OC(=O  
)N[C@H](COc1cnc(F)c2)c1)Cc1c[nH]c2cccc12  
1041 C=Cc1ccc(Cl)cc1.Cc1ccc(Br)cc1>>Cc1ccc(/C=C/c2ccc(Cl)cc2)cc1

[illegible]

1079 C=CC(=O)O.O=S(=O)(Nc1ccc(I)cc1)c1cccc(C(F)(F)F)c1>>O=C(O)/C=C/c1ccc(NS(=O)(=O)c2cccc(C  
(F)(F)F)c2)cc1  
1080 C=CC(C)=O.COCC(=O)C1(C(=O)OC)CC1Cc1cc(OC)ccc1I>>COC(=O)C1(C(=O)OC)CC1Cc1cc(OC)c  
cc1/C=C/C(C)=O  
1081 C=CC(=O)N(C)Cc1sc2ccccc2c1C.CCC1(CC)C(=O)Nc2ncc(Br)cc21>>CCC1(CC)C(=O)Nc2ncc(/C=C  
/C(=O)N(C)Cc3sc4ccccc4c3C)cc21  
1082 Br1cnc2ccccc2c1.C=Cc1ccc(C(C)=O)cc1>>CC(=O)c1ccc(/C=C/c2cnc3ccccc3c2)cc1  
1083 C=Cc1ccccc1.CCOC(=O)C(F)I>>CCOC(=O)C(F)/C=C/c1ccccc1  
1084 C=Cc1ccc(C(C)(C)C)cc1.COCC(=O)/C=C/c1ccc(N(Cc2ccc(Br)cc2)C(=O)C2CCCCC2)c1>>COC(=O)/  
C=C/c1ccc(N(Cc2ccc(/C=C/c3ccc(C(C)(C)C)cc3)cc2)C(=O)C2CCCCC2)c1  
1085 C=CC(=O)OCC.CCc1nc2c(N)nc3cc(Br)ccc3c2n1CC1CCOCC1>>CCOC(=O)/C=C/c1ccc2c(c1)nc(N)c  
1nc(CC)n(CC3CCOCC3)c12  
1086 C=CC(=O)OCC.COc1ccc(CCNC(=O)c2nn(Cc3ccccc3)c3ccc(Br)cc23)cc1OC>>CCOC(=O)/C=C/c1cc  
c2c(c1)c(C(=O)NCCc1ccc(OC)c(OC)c1)nn2Cc1ccccc1  
C=C[C@@H](NC(=O)OC(C)(C)C)[C@H](O)[C@H](C)C(=O)NCC(=O)N[C@H](C)C(=O)Nc1cc(OC  
1087 c2ccccc2)ccc1I>>C[C@@H]1C(=O)NCC(=O)N[C@H](C)C(=O)Nc2cc(OCc3ccccc3)ccc2/C=C/[C@  
@H](NC(=O)OC(C)(C)C)[C@H]1O  
1088 C=Cc1ccc(OC)c(O)c1.COc1cc(Br)cc(OC)c1F>>COc1ccc(/C=C/c2cc(OC)c(F)c(OC)c2)cc1O  
1089 Br1ccc(-c2cnc(C3CC3)o2)cc1.C=CC(=O)OCC>>CCOC(=O)/C=C/c1ccc(-c2cnc(C3CC3)o2)cc1  
1090 C=CC(=O)OCc1cn(S(=O)(=O)c2ccccc2[N+](=O)[O-])c2ccc([N+](=O)[O-]  
)cc12.Cc1ccc(I)cc1>>Cc1ccc(/C=C/C(=O)OCc2cn(S(=O)(=O)c3ccccc3[N+](=O)[O-]  
)c3ccc([N+](=O)[O-])cc23)cc1  
1091 C=CC#N.COc1ccc(CNc2c(C)cc(C)cc2I)cc1>>COc1ccc(CNc2c(C)cc(C)cc2/C=C/C#N)cc1  
1092 C=Cc1ccc(C=C)cc1.Cc1ccc(Br)cc1>>C=Cc1ccc(/C=C/c2ccc(C)cc2)cc1  
1093 C=CC(=O)N1N=Cc2ccccc2C1CC(=O)OC.COc1cc(Cc2cnc(N)nc2N)cc(I)c1OC>>COC(=O)CC1c2ccccc  
c2C=NN1C(=O)/C=C/c1cc(Cc2cnc(N)nc2N)cc(OC)c1OC  
1094 C=Cc1ccccc1.O=C(c1ccccc1)c1ccc(Br)cc1>>O=C(c1ccccc1)c1ccc(/C=C/c2ccccc2)cc1  
C=Cc1ccc(-  
1095 c2ccccc2)cc1.COCC(=O)c1cc(C(=O)OC)c2cc(Br)ccc2n1>>COC(=O)c1cc(C(=O)OC)c2cc(/C=C/c3ccc(-  
c4ccccc4)cc3)ccc2n1  
1096 C=COCCCC.COc1cnc(Br)c1>>C=C(OCCCC)c1cnc(OC)c1  
1097 C=CCN1C(=O)c2ccccc2C1=O.Nc1ncc(Br)en1>>Nc1ncc(/C=C/CN2C(=O)c3ccccc3C2=O)en1  
C=Cc1ccc(N(c2ccccc2)c2ccccc2)cc1.CCCCCCCCC1(CCCCCCCC)c2cc(Br)ccc2-  
1098 c2ccc(C=O)cc21>>CCCCCCCCC1(CCCCCCCC)c2cc(C=O)ccc2-  
c2ccc(/C=C/c3ccc(N(c4ccccc4)c4ccccc4)cc3)cc21  
1099 C=CC(=O)OCC.O=Cc1ccc(Br)c1>>CCOC(=O)/C=C/c1ccc(C=O)c1  
1100 C=CC(=O)OC.CC(C)(C)OC(=O)/C=C/c1ccc(CN(C(=O)C2CCCCC2)c2ccccc(Br)c2)cc1>>COC(=O)/C  
=C/c1ccc(N(Cc2ccc(/C=C/C(=O)OC(C)(C)C)cc2)C(=O)C2CCCCC2)c1  
1101 C=C(NC(C)=O)C(=O)OC.Cc1ccc(C)c1Br>>COC(=O)/C=C/c1c(C)cccc1C)NC(C)=O  
1102 Br1ccc2ccc3ccccc4ccc1c2c34.C=Cc1ccc(OC(C)=O)cc1>>CC(=O)Oc1ccc(/C=C/c2ccc3ccc4ccccc5ccc2  
c3c45)cc1  
1103 C=CC(C)(C)O.O=Cc1c(Br)cc2ccccc12>>CC(C)(O)/C=C/c1cc2ccccc2c1=O  
\*CNCCCOCCOCCOCCNC(=O)COc1ccc(C(Cc2cc(OC)cc(OC)c2)NC(=O)c2ccc(C=C)cc2)cc1.FC(F)  
1104 (F)Oc1ccccc1I>>\*CNCCCOCCOCCOCCNC(=O)COc1ccc(C(Cc2cc(OC)cc(OC)c2)NC(=O)c2ccc(/C  
=C/c3ccccc3OC(F)(F)F)cc2)cc1  
1105 C=CC(=O)O.CCc1nc2c(cnn2CC)c(NC2CCOCC2)c1I>>CCc1nc2c(cnn2CC)c(NC2CCOCC2)c1/C=C/  
C(=O)O  
1106 C=CCC(NCc1cc(F)ccc1Br)C(=O)OC>>C=C1CC(C(=O)OC)NCc2cc(F)ccc21  
1107 C=CC(=O)OCCCC.COCCc1ccc2cc(Br)ccc2c1-c1c(OC)ccc2ccccc12>>CCCCOC(=O)/C=C/c1ccc2c(-  
c3c(OC)ccc4ccccc34)c(OCOC)ccc2c1  
1108 C=C(C(=O)OCC)c1ccccc1CS(=O)(=O)c1ccccc1I>>CCOC(=O)/C1=C/c2ccccc2S(=O)(=O)Cc2ccccc21  
C=Cc1cn(COCC[Si](C)(C)C)nc1-  
1109 c1nc2ccc(OC)cc2n1COCC[Si](C)(C)C.O=Cc1cnc(Br)c1>>COc1ccc2nc(-  
c3nn(COCC[Si](C)(C)C)cc3/C=C/c3nccc(C=O)c3)n(COCC[Si](C)(C)C)c2c1  
1110 C=CC1(O)CCC1.Fc1ccc(I)cc1>>OC1(/C=C/c2ccc(F)cc2)CCC1  
1111 C=CC(=O)OC.COc1ccc2c(c1)CCN(c1ccc(CC(C)C)cc1)C2(C)c1ccc(Br)cc1>>COC(=O)/C=C/c1ccc(C  
2(C)c3ccc(OC)cc3CCN2c2ccc(CC(C)C)cc2)cc1  
1112 C=CC(=O)NCc1ccc(F)cc1.O=Cc1c(I)cc2cc(O)ccc12>>O=C(/C=C/c1cc2cc(O)ccc2c1=O)NCc1ccc(F)  
1113 C=CC(=O)OCC.Fc1ccc(Br)c1C1OCCCO1>>CCOC(=O)/C=C/c1ccc(F)c1C1OCCCO1  
1114 C=Cc1ccc(F)cc1.CCOC(=O)C(F)I>>CCOC(=O)C(F)/C=C/c1ccc(F)cc1  
1115 Br1cc2ccc3ccccc4ccc(c1)c2c34.C=CC(=O)OC>>COC(=O)/C=C/c1cc2ccc3ccccc4ccc(c1)c2c34

1116 C=Cc1cccc1.O=C(/C=C/c1cccc1)c1ccc(I)cc1>>O=C(/C=C/c1cccc1)c1ccc(/C=C/c2cccc2)cc1  
1117 C=Cc1cccc1OC.IC1CCCCC1>>COc1cccc1/C=C/C1CCCCC1  
C=CC(=O)OC(C)(C)C.CC(C)(C)O[C@H]1CC[C@H]2C=C(C3=C(Br)CC(O[Si](C)(C)C(C)(C)C)C  
1118 C3)CC[C@]12C>>CC(C)(C)OC(=O)/C=C/C1=C(C2=C[C@H]3CC[C@H](OC(C)(C)C)[C@]3(C)C  
C2)CCC(O[Si](C)(C)C(C)(C)C)C1  
1119 C=Cc1ccc(F)cc1.CCOC(=O)C(F)(F)I>>CCOC(=O)C(F)(F)/C=C/c1ccc(F)cc1  
C=Cc1ccc(/C=C/c2cccc2)cc1.CC1(C)c2cc(I)ccc2N2Cc3cc([N+](=O)[O-  
1120 ])ccc3OC21c1cccc1>>CC1(C)c2cc(/C=C/c3ccc(/C=C/c4cccc4)cc3)ccc2N2Cc3cc([N+](=O)[O-  
])ccc3OC21c1cccc1  
C=C[C@H]1O[C@H](OC)[C@H](OCc2cccc2)[C@H](OCc2cccc2)[C@H]1OCc1ccc2cccc2c1  
1121 .O=c1ccoc2ccc(Br)cc12>>CO[C@H]1O[C@H](/C=C/c2ccc3occc(=O)c3c2)[C@H](OCc2ccc3cccc  
3c2)[C@H](OCc2cccc2)[C@H]1OCc1cccc1  
Br1ccnc1.C=C1C[C@H]2[C@H]3CCc4cc(OC)ccc4[C@H]3CC[C@]2(C)C1=O>>COc1ccc2c(c1)  
1122 CC[C@H]1[C@H]2CC[C@]2(C)C(=O)/C=C/c3ccnc3)[C@H]12  
C=CCOC(C)=O.CC(C)(C)OC(=O)NCCc1cc2c(cc1I)OCO2>>CC(=O)OC/C=C/c1cc2c(cc1CCNC(=O)  
1123 OC(C)(C)C)OCO2  
C=Cc1ccnc1.CCN1C[C@]2(OC(=O)c3cc(I)ccc3NC(C)=O)CC[C@H](OC)[C@]34[C@@H]2[C@  
1124 @H]([C@H]13)[C@@]1(O)C[C@H](OC)[C@H]2[C@H]4[C@]1(O)[C@H]2OC>>CCN1C[C@  
@]2(OC(=O)c3cc(/C=C/c4ccnc4)ccc3NC(C)=O)CC[C@H](OC)[C@]34[C@@H]2[C@H]([C@  
@H]13)[C@@]1(O)C[C@H](OC)[C@H]2[C@H]4[C@]1(O)[C@H]2OC  
1125 C=CC(OCC)OCC.O=Cc1cccc1Br>>CCOC(/C=C/c1cccc1C=O)OCC  
C=CCN(C(=O)OC(C)(C)C)C(=O)OC(C)(C)C.CC(=O)c1ccc(Cl)cc1>>CC(=O)c1ccc(/C=C/CN(C(=O)  
1126 OC(C)(C)C)C(=O)OC(C)(C)C)cc1  
C=Cc1cccc1.Cc1ccc(O)c(I)c1>>Cc1ccc(O)c(/C=C/c2cccc2)c1  
1127 C=Cc1cc2cccc2oc1=O.O=[N+](O-)[c1ccc(Br)cc1>>O=c1oc2cccc2cc1/C=C/c1ccc([N+](=O)[O-  
1128 C=CCN(C(=O)OC(C)(C)C)C(=O)OC(C)(C)C.CC(=O)c1cccc(Cl)c1>>CC(=O)c1cccc(/C=C/CN(C(=O)  
1129 OC(C)(C)C)C(=O)OC(C)(C)C)c1  
C=C(CC(=O)OC)C(=O)OC.Ic1cccc1>>COC(=O)C/C=C/c1cccc1)C(=O)OC  
1130 C=CC(=O)OCC.CC(C)(C)OC(=O)N(Cc1cccc(Br)c1)c1nc(C(F)(F)F)co1>>CCOC(=O)/C=C/c1cccc(C  
1131 N(C(=O)OC(C)(C)C)c2nc(C(F)(F)F)co2)c1  
C=CC(CCCCC)OC1CCCCO1.COC(=O)CCCCC1=C(I)CCC1=O>>CCCCCC(/C=C/C1=C(CCCCC(=O)  
1132 OC)C(=O)CC1)OC1CCCCO1  
C=CC(=O)OCCCC.Cn1c(-c2cccc2)c(I)c2cccc21>>CCCCOC(=O)/C=C/c1c(-  
1133 C=Cc1cc(OCCC)c(OCCC)c(OCCC)c1.O=C1c2cccc2C(=O)N1c1ccc(I)cc1>>CCCOc1cc(/C=C/c2ccc(  
1134 N3C(=O)c4cccc4C3=O)cc2)cc(OCCC)c1OCCC  
C=CC(=O)OC(C)(C)C.COc1ccc2c(c1)CCN(c1ccc(C(C)C)s1)C2(C)c1ccc(Br)cc1>>COc1ccc2c(c1)CC  
1135 N(c1ccc(C(C)C)s1)C2(C)c1ccc(/C=C/C(=O)OC(C)(C)C)cc1  
C=CCC1c2cc(OC)c(OC)cc2CCN1Cc1cccc1Br>>C=C1CC2c3cc(OC)c(OC)cc3CCN2Cc2cccc21  
1136 C=Cc1ccc(OC)cc1.COC(=O)Cn1c(=O)c(Cl)nc2ccnc21>>COC(=O)Cn1c(=O)c(/C=C/c2ccc(OC)cc2)n  
1137 c2ccnc21  
C=Cc1ccnc1.CCCCCCCCCOc1ccc(I)cc1>>CCCCCCCCCOc1ccc(/C=C/c2ccnc2)cc1  
1138 C=CC(=O)OC.CCOC(=O)c1ccc(Br)cc1>>CCOC(=O)c1ccc(/C=C/C(=O)OC)cc1  
1139 C=CN1C(=O)c2cccc2C1=O.CC(C)(C)OC(=O)Cc1ccc(Br)cc1>>CC(C)(C)OC(=O)Cc1ccc(/C=C/N2C  
1140 (=O)c3cccc3C2=O)cc1  
C=CC(=O)OC(C)(C)C.O=S(=O)(c1ccc(F)cc1)n1ccc2cc(Br)cnc21>>CC(C)(C)OC(=O)/C=C/c1cnc2c(c  
1141 cn2S(=O)(=O)c2ccc(F)cc2)c1  
C=CCCN1C(=O)c2cccc2C1=O.CCOCc1nc2cnc3cc(Br)ccc3c2n1CCOC(C)C>>CCOCc1nc2cnc3cc(/  
1142 C=C/CCN4C(=O)c5cccc5C4=O)ccc3c2n1CCOC(C)C  
C=CC(=O)OC(C)(C)C.FC(F)(F)c1ccc(I)cc1>>CC(C)(C)OC(=O)/C=C/c1ccc(C(F)(F)F)cc1  
1143 C=CC(=O)N1N=Cc2cccc2C1c1cccn1.COc1cc(Cc2cnc(N)nc2N)cc(I)c1OC>>COc1cc(Cc2cnc(N)nc2  
1144 N)cc(/C=C/C(=O)N2N=Cc3cccc3C2c2cccn2)c1OC  
C=CC(C)(C)C.COC(=O)c1ccc(Br)cc1>>COC(=O)c1ccc(/C=C/C(C)(C)C)cc1  
1145 C=CC(F)(F)C(F)(F)C(F)(F)C(F)(F)C(F)(F)F.Cc1ccc(Br)cc1>>Cc1ccc(/C=C/C(F)(F)C(F)(F)C(  
1146 F)(F)C(F)(F)C(F)(F)C(F)(F)F)cc1  
C=CN1C(=O)c2cccc2C1=O.Ic1cccc1>>O=C1c2cccc2C(=O)N1/C=C/c1cccc1  
1147 C=CC(=O)OCC.Fc1cc2cnc2cc1Br>>CCOC(=O)/C=C/c1cc2cnc2cc1F  
C=Cc1cn[nH]c1.CN(C(=O)c1cccc1)c1ccc2c(c1)[nH]c(=NC(=O)c1ccc(Br)s1)n2CCC(N)=O>>CN(C(  
1149 =O)c1cccc1)c1ccc2c(c1)[nH]c(=NC(=O)c1ccc(/C=C/c3cn[nH]c3)s1)n2CCC(N)=O  
C=Cc1cncn1.Fc1ccc(Br)cc1>>Fc1ccc(/C=C/c2cncn2)cc1  
1150 C=CC(=O)OCC.CCc1c[n+](O-)[c(C)C(Cl)n1>>CCOC(=O)/C=C/c1nc(CC)c[n+](O-)[c1CC  
1151 C=CC(N)=O.Ic1ccsc1>>NC(=O)/C=C/c1ccsc1

1153 C=CC(=O)OCC.COc1ccc(Oc2cc(Br)ccc2NC[C@@H]2CCCN2C(=O)OC(C)(C)C)cc1>>CCOC(=O)/C=C/c1ccc(NC[C@@H]2CCCN2C(=O)OC(C)(C)C)c(Oc2ccc(OC)cc2)c1  
1154 C=C[Si](C)(C)C.Ic1ccsc1>>C[Si](C)(C)/C=C/c1ccsc1  
1155 CCCC=[11CH2].Ne1ccc(I)cc1>>CCC/C=[11CH]/c1ccc(N)cc1  
1156 C=C/C=C/c1cccc1.FC(F)(F)I>>FC(F)(F)/C=C/C=C/c1cccc1  
1157 C=Cc1cncnc1.Cc1nc(Br)c2c(c1O)COC(C)(C)OC2>>Cc1nc(/C=C/c2cncnc2)c2c(c1O)COC(C)(C)OC2  
1158 C=CC(=O)OC.CC(C)=CCc1c(Br)ncn1C>>COC(=O)/C=C/c1ncn(C)c1CC=C(C)C  
1159 C=CCC(C(=O)OCC)C(=O)OCC.Ic1cccc1>>CCOC(=O)C(C/C=C/c1cccc1)C(=O)OCC  
1160 Br1cnc2ccccc2c1.C=CCO[C@]1(C)C[C@@H](C)C(=O)[C@H](C)[C@H]2N(N)C(=O)O[C@]2(C)[C@@H](CC)OC(=O)[C@H](C)C(=O)[C@H](C)[C@H]1O[C@@H]1O[C@H](C)C[C@H](N(C)C)[C@H]1O>>CC[C@H]1OC(=O)[C@H](C)C(=O)[C@H](C)[C@H](O[C@@H]2O[C@H](C)C[C@H](N(C)C)[C@H]2O)[C@]1(C)(OC/C=C/c2cnc3ccccc3c2)C[C@@H](C)C(=O)[C@H](C)[C@H]2N(N)C  
1161 C=CC(=O)OCCCC.N#Cc1cccc(I)c1>>CCCCOC(=O)/C=C/c1cccc(C#N)c1  
1162 C=CC(=O)OC(C)(C)C.O=S(=O)(Oc1ccn(-c2ccccc2)n1)C(F)(F)F>>CC(C)(C)OC(=O)/C=C/c1ccn(-c2ccccc2)n1  
1163 C=C(C)CC(OCC(=C)Br)c1ccc(OC)cc1>>C=C1C=C(C)CC(c2ccc(OC)cc2)OC1  
1164 C=Cc1cncnc1.CCCCCCOc1ccc(Br)c(F)c1>>CCCCCCOc1ccc(/C=C/c2cncnc2)c(F)c1  
1165 C=CC(=O)OC.O=CC1=C(Br)CCCC1>>COC(=O)/C=C/C1=C(C=O)CCCC1  
1166 C=Cc1cncnc1.CN(C)[C@H](COc1cncnc(Br)c1)Cc1c[nH]c2ccccc12>>CN(C)[C@H](COc1cncnc(/C=C/c2cncnc2)c1)Cc1c[nH]c2ccccc12  
1167 C=CC(=O)NC(C)C.COc1ccc(Cl)cc1>>COc1ccc(/C=C/C(=O)NC(C)C)cc1  
1168 C=CCN(C(=O)c1cc(C)nn1C)[C@H](C)c1cc(F)cc(F)c1.O=C1Nc2ncccc2[C@]12Cc1ccc(Br)cc1C2>>C  
1169 c1cc(C(=O)N(C/C=C/c2ccc3c(c2)C[C@@]2(C3)C(=O)Nc3ncccc32)[C@H](C)c2cc(F)cc(F)c2)n(C)n1  
1170 C=COCCCC.Clc1cccs1>>C=C(OCCCC)c1cccs1  
1171 C=CC(=O)OC(C)(C)C.O=C(c1enn(-c2ccccc2)c1)c1cc(Br)ccc1O>>CC(C)(C)OC(=O)/C=C/c1ccc(O)c(C(=O)c2cnn(-c3ccccc3)c2)c1  
1172 C=CSCC.Cc1cccc(Br)c1>>CCS/C=C/c1cccc(C)c1  
1173 C=CC(=O)OC.C[C@]12C[C@@]34C=C(Sc5cccc(I)c5)C(=O)[C@@](C)(CCC(=O)Nc5c(O)ccc(C(=O)O)c5O)[C@@H]3[C@H](C[C@@H]1C4)O2>>COC(=O)/C=C/c1cccc(SC2=C[C@]34C[C@H]5C[C@H](O)[C@@]5(C)C3)[C@H]4[C@]1(C)(CCC(=O)Nc3c(O)ccc(C(=O)O)c3O)C2=O)c1  
1174 C=CCOC(C)=O.CC(C)(C)c1ccc(I)cc1>>CC(=O)OC/C=C/c1ccc(C(C)(C)C)cc1  
1175 C=Cc1ccc(OC)cc1.FC(F)(F)Oc1cccc(I)c1>>COc1ccc(/C=C/c2cccc(OC(F)(F)F)c2)cc1  
1176 Br1cc2ccccc2c2ccccc12.C=CC(=O)OC>>COC(=O)/C=C/c1cc2ccccc2c2ccccc12  
1177 C=CC(=O)OC(C)(C)C.Ic1ccc(Cc2ncc(-c3ccccc3)[nH]2)cc1>>CC(C)(C)OC(=O)/C=C/c1ccc(Cc2ncc(-c3ccccc3)[nH]2)cc1  
1178 C=CC(=O)OC(C)(C)C.Nc1ccc(I)cc1Br>>CC(C)(C)OC(=O)/C=C/c1ccc(N)c(Br)c1  
1179 C=CCCCCCC.CC(C)(C)c1ccc(OS(=O)(=O)C(F)(F)F)cc1>>C=C(CCCCCC)c1ccc(C(C)(C)C)cc1  
1180 C=CC(=O)OC.COc1nccc(N(Cc2ccc(Br)cc2)CC(C)(C)C)n1>>COC(=O)/C=C/c1ccc(CN(CC(C)(C)C)c2cnc(OC)n2)cc1  
1181 Br1cccs1.C=CC(=O)OCCSc1cccc1>>O=C(/C=C/c1cccs1)OCCSc1cccc1  
1182 Br1cccc1C1OCCCCO1.C=CC(=O)OC>>COC(=O)/C=C/c1cccc1C1OCCCCO1  
1183 N#C/C=C/c1cccc1.Oc1cccc(I)c1>>N#C/C=C(/c1cccc1)c1cccc(O)c1  
1184 C=Cc1cccc1.Cc1cc([N+](=O)[O-])ccc1I>>Cc1cc([N+](=O)[O-])ccc1/C=C/c1cccc1  
1185 C=CC(=O)OC.Ic1nn(-c2ccccc2)c2ncccc12>>COC(=O)/C=C/c1nn(-c2ccccc2)c2ncccc12  
1186 C=CC(=O)OC(C)(C)C.CC(=O)Cc1cccc1Br>>CC(=O)Cc1cccc1/C=C/C(=O)OC(C)(C)C  
1187 Br1ccc(-c2nc3ccccc3s2)cc1.C=Cc1ccc(N(c2ccccc2)c2ccccc2)cc1>>C(=C/c1ccc(N(c2ccccc2)c2ccccc2)cc1)\c1ccc(-c2nc3ccccc3s2)cc1  
1188 C=CCN1C(=O)C2(CCCC2)NC[C@@]1(C)c1cc(F)cc(F)c1.O=C1Nc2ncccc2[C@]12Cc1ccc(Br)cc1C2>>C[C@@]1(c2cc(F)cc(F)c2)CNC2(CCCC2)C(=O)N1C/C=C/c1ccc2c(c1)C[C@@]1(C2)C(=O)Nc2nc  
1189 C=Cc1ccc(C)cc1.O=Cc1cc(F)ccc1Br>>Cc1ccc(/C=C/c2ccc(F)cc2C=O)cc1  
1190 C=Cc1cccn1.CNC(=O)c1cccc1Sc1ccc2c(I)nn(C3CCCCO3)c2c1>>CNC(=O)c1cccc1Sc1ccc2c(/C=C/c3cccn3)nn(C3CCCCO3)c2c1  
1191 C=CCCO.CC(=O)OC[C@H]1O[C@]1(C)[C@@H](n2cc(Cc3ccc(Br)cc3)c3c(C)cccc32)[C@H](OC(C)=O)[C@]1(C)OC(C)=O  
1192 3c(C)cccc32)[C@H](OC(C)=O)[C@]1(C)OC(C)=O>>CC(=O)OC[C@H]1O[C@]1(C)[C@@H](n2cc(Cc3ccc(/C=C/CCO)cc3)c3c(C)cccc32)[C@H](OC(C)=O)[C@]1(C)OC(C)=O  
1193 C=CC(=O)OCC.O=c1ccoc2ccc(Br)cc12>>CCOC(=O)/C=C/c1ccc2occc(=O)c2c1  
1194 C=CC(=O)OC(C)(C)C.N#Cc1c(-c2ccccc(Br)c2)cc(-c2ccccc2)nc1N>>CC(C)(C)OC(=O)/C=C/c1cccc(-c2cc(-c3ccccc3)nc(N)c2C#N)c1  
1195 C=Cc1ccc(Cl)cc1.COc1cc(C=O)c(Br)c(OC)c1OC>>COc1cc(C=O)c(/C=C/c2ccc(Cl)cc2)c(OC)c1OC  
1196 C=CC(=O)OCC.O=[N+](O-)[O-]c1cccc(Cl)c1>>CCOC(=O)/C=C/c1cccc([N+](=O)[O-])c1

1195 C=C(NC(=O)OC(C)(C)C(=O)OC.Ic1enc(N(Cc2ccccc2)Cc2ccccc2)nc1>>COC(=O)/C(=C/c1enc(N(Cc2ccccc2)Cc2ccccc2)nc1)NC(=O)OC(C)(C)C  
1196 C=CC(=O)OC.Cc1ccc(Br)c([N+](=O)[O-])c1>>COC(=O)/C=C/c1ccc(C)cc1[N+](=O)[O-]  
1197 C=CC(=O)OCC.COc1cc(Br)c(CCN(C(=O)OC(C)(C)C)cc1OCc1ccccc1>>CCOC(=O)/C=C/c1cc(OC)c(OCc2ccccc2)cc1CCNC(=O)OC(C)(C)C  
1198 C=CC(=O)OC(C)(C)C.CC(=O)c1ccc(Br)cc1>>CC(=O)c1ccc(/C=C/C(=O)OC(C)(C)C)cc1  
1199 C=Cc1c(F)c(F)c(F)c(F)c1F.Ic1cccc2ccccc12>>Fc1c(F)c(F)c(/C=C/c2cccc3ccccc23)c(F)c1F  
1200 C=CC(=O)OC.Cc1[nH]c2ccccc2c1C1CCCN1Cc1ccc(Br)cc1>>COC(=O)/C=C/c1ccc(CN2CCCC2c2c(C)[nH]c3ccccc23)cc1  
1201 C=Cc1ccnc1.CCN1c2ncc(I)cc2C(=O)N(C)c2ccc(Cl)nc21>>CCN1c2ncc(/C=C/c3ccnc3)cc2C(=O)N(C)c2ccc(Cl)nc21  
1202 Br1enc2ccccc2c1.C=Cc1ccnc1>>C(=C/c1enc2ccccc2c1)\c1ccnc1  
1203 C=CC(=O)OCC.COc1ccc(-c2cc3cc(Br)cc(OC)c3o2)cc1OC>>CCOC(=O)/C=C/c1cc(OC)c2oc(-c3ccc(OC)c(OC)c3)cc2c1  
1204 C=Cc1ccc(OC)cc1.O=c1c2ccc(Br)cc2cnn1CCCN1CCNCC1>>COc1ccc(/C=C/c2ccc3c(=O)n(CCCN4CCNCC4)ncc3c2)cc1  
1205 Br1ccccc1C1OCCO1.C=CC(=O)OC>>COC(=O)/C=C/c1ccccc1C1OCCO1  
1206 C=CC(=O)OCC.CCNc1nc(SC)nc(C)c1I>>CCNc1nc(SC)nc(C)c1/C=C/C(=O)OCC  
1207 C=CC(=O)OC(C)(C)C.O=Cc1ccc(Br)cc1>>CC(C)(C)OC(=O)/C=C/c1ccc(C=O)cc1  
1208 C=Cc1ccc(/C=C/c2ccc(/C=C/c3ccc(OCCCCCCCCCCCCC)c(OCCCCCCCCCCCCC)c(OCCCCCCCCCCCCC)C)c3)cc2)cc1.CCCCOc1c(C)cc(I)cc1C>>CCCCCCCCCCCCCOc1cc(/C=C/c2ccc(/C=C/c3ccc(/C=C/c4cc(C)c(OCCCCC)c(C)c4)cc3)cc2)cc(OCCCCCCCCCCCCC)c1OCCCCCCCCCCCCC  
1209 C=CC(=O)OC(C)(C)C.O=Cc1ccc(Br)c1>>CC(C)(C)OC(=O)/C=C/c1ccc(C=O)c1  
1210 C=CC[C@H](NC(=O)OCc1ccccc1)C(=O)OC(C)(C)C.COc1ccc(I)cc1>>COc1ccc(/C=C/C[C@H](NC(=O)OCc2ccccc2)C(=O)OC(C)(C)C)cc1  
1211 C=Cc1ccc2c(c1)Sc1ccccc1N2CCCCCCCC.O=Cc1ccc(I)cc1>>CCCCCCCCCN1c2ccccc2Sc2cc(/C=C/c3ccc(C=O)cc3)ccc21  
1212 C=CCNC(=O)OC(C)(C)C.CC(=O)c1ccc(Cl)cc1>>C=C(CNC(=O)OC(C)(C)C)c1ccc(C(=O)O)cc1  
1213 C=CN1CCCC1=O.O=C1c2ccccc2C(=O)N1c1ccc(I)c1>>O=C1CCCN1/C=C/c1cccc(N2C(=O)c3ccccc3C2=O)c1  
1214 C=C(C)CC(OCC(=C)Br)c1ccc(-c2ccccc2)cc1>>C=C1C=C(C)CC(c2ccc(-c3ccccc3)cc2)OC1  
1215 C=CC(=O)OC.Ic1cc2ccccc2s1>>COC(=O)/C=C/c1cc2ccccc2s1  
1216 BrC1CCCCC1.C=Cc1cccc(Cl)c1>>Clc1cccc(/C=C/C2CCCCC2)c1  
1217 C=Cc1ccc(/C=C/c2ccc(/C=C/c3ccc(OCCCCCCCCCCCCC)cc(OCCCCCCCCCCCCC)c3)cc2)cc1.O=Cc1ccc(Br)cc1>>CCCCCCCCCCCCCOc1cc(/C=C/c2ccc(/C=C/c3ccc(/C=C/c4ccc(C=O)cc4)cc3)cc2)cc(OCCCCCCCCCCCCC)c1  
1218 C=CCNC(=O)COC.Cc1ccc(Oc2ccc(Nc3nnc4ccc(I)cc34)cc2C)en1>>COCC(=O)NC/C=C/c1ccc2nnc(Nc3ccc(Oc4ccc(C)nc4)c(C)c3)c2c1  
1219 Br1encc(OCc2ccccc2)c1.C=CCO>>OCC/C=C/c1encc(OCc2ccccc2)c1  
1220 C=CC(=O)NCc1ccccc1F.COc1ccc2c(=O)c(I)coc2c1>>COc1ccc2c(=O)c(/C=C/C(=O)NCc3ccccc3F)co  
1221 C=COCCCC.O=S(=O)(Oc1ccccc2c1CCCC2)C(F)(F)F>>C=C(OCCCC)c1ccccc2c1CCCC2  
1222 C=CC(=O)N(C)C.Ic1ccccc1C#Cc1ccccc1>>CN(C)C(=O)/C=C/c1ccccc1C#Cc1ccccc1  
1223 C=CC(=O)OCc1ccccc1.CC(=O)O[C@H]1CC(=O)N(Cc2cc3c(cc2I)OCO3)[C@H]1[Se]c1ccccc1>>CC(=O)O[C@H]1CC(=O)N(Cc2cc3c(cc2/C=C/C(=O)OCc2ccccc2)OCO3)[C@H]1[Se]c1ccccc1  
1224 C=Cc1ccccc1.O=c1cc(Br)c2ccccc2o1>>O=c1cc(/C=C/c2ccccc2)c2ccccc2o1  
1225 C=CC(C)=O.FC(F)C(F)(F)Cn1nnc(-c2ccccc2)c1I>>CC(=O)/C=C/c1c(-c2ccccc2)nnn1CC(F)(F)C(F)F  
1226 C=CC(=O)OCC.COC(=O)[C@]12CCC(C)(C)C[C@H]1C1=CC[C@H]3[C@@]4(C)C=C(I)C(=O)C(C)(C)[C@H]4CC[C@@]3(C)[C@]1(C)CC2>>CCOC(=O)/C=C/C1=C[C@@]2(C)[C@H](CC[C@@]3(C)[C@H]2CC=C2[C@@H]4CC(C)(C)CC[C@]4(C(=O)OC)CC[C@]23C)C(C)(C)C1=O  
1227 C=CC(=O)OC.CCCCCCCCC(=O)NCc1cc(OC)c(OCOCCOC)cc1I>>CCCCCCCCC(=O)NCc1cc(OC)c(OCOCCOC)cc1/C=C/C(=O)OC  
1228 C=CC[C@H]1C(=O)N(c2ccccc2)[C@H]1c1ccc(OC)cc1.OCc1ccccc1Br>>COc1ccc([C@@H]2[C@H](C/C=C/c3ccccc3CO)C(=O)N2c2ccccc2)cc1  
1229 C=CCNS(=O)(=O)c1ccc(C)cc1.Nc1ccccc1I>>Cc1ccc(S(=O)(=O)NC/C=C/c2ccccc2N)cc1  
1230 C=CC(=O)OC.CC(C)(C)OC(=O)N1CCC2(CC1)CC(=O)c1cc(Br)cc(F)c1O2>>COC(=O)/C=C/c1cc(F)c2c(c1)C(=O)CC1(CCN(C(=O)OC(C)(C)C)CC1)O2  
1231 C=C.O=Cc1cccc(Br)c1>>C=Cc1cccc(C=O)c1  
1232 C=Cc1ccc2c(c1)OCO2.O=c1ccc2ccc(OS(=O)(=O)C(F)(F)F)cc2o1>>O=c1ccc2ccc(/C=C/c3ccc4c(c3)OCO4)cc2o1  
1233 Br1ccccc2ccccc12.C=Cc1ccc(C)cc1>>Cc1ccc(/C=C/c2cccc3ccccc23)cc1  
1234 C=CC(=O)O.c1ccc([I+](c2cccs2)cc1>>O=C(O)/C=C/c1cccs1

1235 C=Cc1cc(CN2CCN(C)CC2)ccn1.Cc1c(Nc2c(I)encc2C#N)ccc2[nH]ccc12>>Cc1c(Nc2c(C#N)encc2/C=C/c2cc(CN3CCN(C)CC3)ccn2)ccc2[nH]ccc12  
C=C[C@H]1C[C@H](CC(=O)OCC)OC(C)(C)O1.COc1nccc(-n2nc(C(C)C)c(Br)c2-  
1236 c2cccc(C(F)(F)F)c2)n1>>CCOC(=O)C[C@H]1C[C@H](/C=C/c2c(C(C)C)nn(-c3ccnc(OC)n3)c2-  
c2cccc(C(F)(F)F)c2)OC(C)(C)O1  
1237 C=Cc1cccc1.CN(Cc1cccc1)c1cccc(Br)n1>>CN(Cc1cccc1)c1cccc(/C=C/c2cccc2)n1  
1238 C=CCCCCCC.COc1ccc(I)cc1>>CCCCC/C=C/c1ccc(OC)cc1  
1239 C=CS(=O)(=O)c1cccc1.O=Cc1ccc(Br)cc1>>O=Cc1ccc(/C=C/S(=O)(=O)c2cccc2)cc1  
1240 C=CC(=O)OCC.Nc1ccc(CO)cc1I>>CCOC(=O)/C=C/c1cc(CO)ccc1N  
1241 C=Cc1ccc(OC)cc1.COc1ccc(I)c(OC)c1>>COc1ccc(/C=C/c2ccc(OC)cc2OC)cc1  
1242 C=CC(=O)N(C)OC.FC(F)(F)c1ccc(I)cc1>>CON(C)C(=O)/C=C/c1ccc(C(F)(F)F)cc1  
1243 C=C[C@H](CCCCCCCC)CC(OC)OC.Ic1cccc1>>CCCCCCCC[C@H](/C=C/c1cccc1)CC(OC)OC  
1244 C=Cc1cccn1.COc1c(C)cc(Br)cc1C>>COc1c(C)cc(/C=C/c2cccn2)cc1C  
1245 C=Cc1cc(OC(C)=O)cc(OC(C)=O)c1.CC(=O)Oc1ccc(Cl)cc1>>CC(=O)Oc1ccc(/C=C/c2cc(OC(C)=O)c  
c(OC(C)=O)c2)cc1  
1246 C=CC(=O)OC.O=c1[nH]c(=O)n([C@H]2C[C@H](O)[C@@H](CO)O2)cc1I>>COC(=O)/C=C/c1cn([  
C@H]2C[C@H](O)[C@@H](CO)O2)c(=O)[nH]c1=O  
1247 Br1cccc1I.C=CC(=O)N(C)C>>CN(C)C(=O)/C=C/c1cccc1Br  
1248 C=C[C@H]1O[C@H]2OC(C)(C)O[C@@H]2[C@H]1N(Cc1cccc1Br)S(=O)(=O)c1ccc(C)cc1>>C=  
C1c2cccc2CN(S(=O)(=O)c2ccc(C)cc2)[C@H]2[C@@H]1O[C@@H]1OC(C)(C)O[C@H]21  
1249 C=Cc1cccc1.CCOC(=O)C(F)(F)Br>>CCOC(=O)C(F)(F)/C=C/c1cccc1  
1250 C=Cc1cccn1.O=[N+](=[O-])c1ccc(-c2cncc2Br)cc1>>O=[N+](=[O-])c1ccc(-  
1251 C=CC(=O)CCCC.CC(C)=C(C)Br>>CCCCC(=O)/C=C/C(C)=C(C)C  
1252 C=Cc1nnc2c1nnc2C1CCCCO1.Ic1cccc1>>C=C/c1nnc2c1nnc2C1CCCCO1)c1cccc1  
1253 C=COCCN(C)C.Cc1ccc(Br)cc1>>C=C(OCCN(C)C)c1ccc(C)cc1  
1254 C=Cc1cncc1.COC(=O)CCNc1ccc(Br)cc1>>COC(=O)CCNc1ccc(/C=C/c2cncc2)cc1  
C=Cc1ccc(/C=C/c2cc(CCCCC)c(C=O)cc2CCCCC)cc1.CCCCCc1cc(/C=C/c2ccc(C)cc2)c(CCCCC  
1255 C)cc1Br>>CCCCCc1cc(/C=C/c2ccc(/C=C/c3cc(CCCCC)c(/C=C/c4ccc(C)cc4)cc3CCCCC)cc2)c(  
CCCCC)cc1C=O  
1256 Cc1cc(Br)c(-c2cccc2O/C=C/C(=O)OCc2cccc2)cc1C>>Cc1cc2c(cc1C)-  
c1cccc1O/C2=C/C(=O)OCc1cccc1  
1257 C=CC(=O)OCC.Cc1nc(-n2c(C)ccc2C)cc(NC2CC2)c1Br>>CCOC(=O)/C=C/c1c(NC2CC2)cc(-  
n2c(C)ccc2C)nc1C  
1258 C=Cc1ccc(OC)c(OC)c1.COc1ccc(CN2C(=O)C(=C(c3ccc(O)cc3)c3ccc(O)cc3)c3cc(Br)ccc32)cc1>>C  
Oc1ccc(CN2C(=O)C(=C(c3ccc(O)cc3)c3ccc(O)cc3)c3cc(/C=C/c4ccc(OC)c(OC)c4)ccc32)cc1  
1259 C=CC(=O)OCCCC.N#Cc1cccc(Br)c1>>CCCCOC(=O)/C=C/c1cccc(C#N)c1  
1260 C=Cc1ccc2c(c1)OCCO2.CC(C)(C)OC(=O)c1ccc(Br)cc1[N+](=O)[O-]  
]>>CC(C)(C)OC(=O)c1ccc(/C=C/c2ccc3c(c2)OCCO3)cc1[N+](=O)[O-]  
1261 C=CCOC(C)=O.COC(=O)c1cc(Br)ccc1[N+](=O)[O-]  
]>>COC(=O)c1cc(/C=C/COC(C)=O)ccc1[N+](=O)[O-]  
1262 BrC=Cc1cccc1.C=CCCC(=O)OCC>>CCOC(=O)CC/C=C/C=C/c1cccc1  
1263 C=CC(=O)Nc1cccc1C(=O)OCC.CC(C)(C)OC(=O)Nc1nccc(Br)c1>>CCOC(=O)c1cccc1NC(=O)/C=  
C/c1nccc(NC(=O)OC(C)(C)C)c1  
1264 C=CC(=O)OC.CCCN1nc2c(NCc3cccc(Br)c3)nc(N3CCN(C)CC3)nc21>>CCCN1nc2c(NCc3cccc(/  
C=C/C(=O)OC)c3)nc(N3CCN(C)CC3)nc21  
1265 C=Cc1ccc(C#N)cc1.CC(C)=C(C)Br>>CC(C)=C(C)/C=C/c1ccc(C#N)cc1  
1266 C=Cc1cccc1.COC(=O)[C@@]1(NC(=O)OC(C)(C)C)CCc2cc(Br)ccc2C1>>COC(=O)[C@@]1(NC(=  
O)OC(C)(C)C)CCc2cc(/C=C/c3cccc3)ccc2C1  
1267 C=CB1OC(C)CC(C)(C)O1.COC(=O)/C=C(/C)I>>COC(=O)/C=C(C)C=C\B1OC(C)CC(C)(C)O1  
1268 C=CP(=O)(O)O.COc1ccc(N(c2ccc(I)cc2)c2ccc(OC)cc2)cc1>>COc1ccc(N(c2ccc(/C=C/P(=O)(O)O)cc  
2)c2ccc(OC)cc2)cc1  
1269 C=CC(=O)OC.Cc1c(Br)ccc(NS(=O)(=O)c2cccn2)c1C(=O)OCc1cccc1>>COC(=O)/C=C/c1ccc(NS(=  
O)(=O)c2cccn2)c(C(=O)OCc2cccc2)c1C  
1270 Br1ccc(I)cc1.C=Cc1cccc1>>Br1ccc(/C=C/c2cccc2)cc1  
1271 C=C.CC(C)Cc1ccc(Br)cc1>>C=Cc1ccc(CC(C)C)cc1  
1272 C=CC(=O)OC(C)(C)C.CCOC(=O)Nc1cccc1C1=C(I)CCN1S(=O)(=O)c1ccc(C)cc1>>CCOC(=O)Nc1  
cccc1C1=C(/C=C/C(=O)OC(C)(C)C)CCN1S(=O)(=O)c1ccc(C)cc1  
1273 Ic1cccc1.[11CH2]=Cc1cccc1>>C=[11CH]/c1cccc1)c1cccc1  
1274 C=C(F)C(=O)OC.O=S(=O)(c1cccc1)n1cc(I)c2cccc21>>COC(=O)/C(F)=C/c1cn(S(=O)(=O)c2cccc2  
)c2cccc12



1275 C=CC(=O)OCC.O=C1NCc2c1c1c(c3c2c2cc(Br)ccc2n3CCCO)Cc2ccccc2-1>>CCOC(=O)/C=C/c1ccc2c(c1)c1c3c(c4c(c1n2CCCO)Cc1ccccc1-4)C(=O)NC3  
 1276 C=Cc1ccncc1.CC(=O)Nc1ccc(I)cc1>>CC(=O)Nc1ccc(/C=C/c2ccncc2)cc1  
 1277 C=CC(=O)N(CC)CC.O=C1Cc2c([nH]c3ccc(I)cc23)-c2ccncc2N1>>CCN(CC)C(=O)/C=C/c1ccc2[nH]c3c(c2c1)CC(=O)Nc1ncccc1-3  
 1278 C=CC(OCC)OCC.COc1ccc(Br)c(C=O)c1>>CCOC(/C=C/c1ccc(OC)cc1C=O)OCC  
 1279 C=CCCN(C)C(=O)c1ccccc1.Nc1cccc(I)c1>>CN(CC/C=C/c1cccc(N)c1)C(=O)c1ccccc1  
 1280 C=Cc1ccc(O)cc1.Oc1ccc(Br)cc1>>Oc1ccc(/C=C/c2ccc(O)cc2)cc1  
 1281 C=CC#N.COc1c(CN(C(=O)C2CC2)c2cccc(Br)c2)ccc2c1OC(C)(C)C=C2>>COc1c(CN(C(=O)C2CC2)c2cccc(/C=C/C#N)c2)ccc2c1OC(C)(C)C=C2  
 1282 Br1cccs1.C=CB1OC(C)CC(C)(C)O1>>CC1CC(C)(C)OB(/C=C/c2cccs2)O1  
 1283 C=CC(O)C(F)(F)C(F)(F)F.Ic1ccccc1>>OC(/C=C/c1ccccc1)C(F)(F)C(F)(F)F  
 1284 C=Cc1ccncc(Br)c1.CC(C)(C)OC(=O)N1CCC[C@H]1COc1enc(Cl)c(I)c1>>CC(C)(C)OC(=O)N1CCC[C@H]1COc1enc(Cl)c(/C=C/c2ccncc(Br)c2)c1  
 1285 C=CC(N)=O.Cc1cc(Br)cc(C)c1O>>Cc1cc(/C=C/C(N)=O)cc(C)c1O  
 1286 C=CC(=O)OC.CCn1cnc2ccc(Br)cc21>>CCn1cnc2ccc(/C=C/C(=O)OC)cc21  
 1287 C=CCc1ccc2ccccc2c1OCc1cc(OC)ccc1Br>>C=C1Cc2ccc3ccccc3c2OCc2cc(OC)ccc21  
 1288 C=CC(=O)OC.Cc1cc(C)c(N)c(I)c1>>COC(=O)/C=C/c1cc(C)cc(C)c1N  
 1289 C=CC(=O)OC.CC1(C)NC(C)(C)c2cc(Br)ccc21>>COC(=O)/C=C/c1ccc2c(c1)C(C)(C)NC2(C)C  
 1290 C=CC(=O)O.COC(=O)c1ccccc1Br>>COC(=O)c1ccccc1/C=C/C(=O)O  
 1291 Br1ccncc1.C=Cc1nc2c(OCC[Si](C)(C)C)nc(N)nc2n1[C@H]1C[C@H](O[Si](C)(C)C(C)(C)C)[C@@H](CO[Si](C)(C)C(C)(C)C)O1>>CC(C)(C)[Si](C)(C)OC[C@H]1O[C@@H](n2c(/C=C/c3ccncc3)nc3c(OCC[Si](C)(C)C)nc(N)nc32)C[C@@H]1O[Si](C)(C)C(C)(C)C  
 1292 C=CC(=O)OCC.CCNc1nc(C)c(I)c(NC2CCCCC2)n1>>CCNc1nc(C)c(/C=C/C(=O)OCC)c(NC2CCCC  
 1293 C=Cc1cc([N+](=O)[O-])ccc1OCOCC[Si](C)(C)C.COc1cccc(I)c1>>COc1cccc(/C=C/c2cc([N+](=O)[O-])ccc1OCCCC.Cc1ccc(Br)c(C)c1>>CCCCOC(=O)/C=C/c1ccc(C)cc1C  
 1294 C=CC(=O)OCCCC.Cc1ccc(Br)c(C)c1>>CCCCOC(=O)/C=C/c1ccc(C)cc1C  
 1295 C=CCCCC(O)C1=C(Br)CCCC1>>C=C1CCCC(O)C2=C1CCC2  
 1296 C=Cc1cc2ccccc2oc1=O.Ic1ccccc1>>O=c1oc2ccccc2cc1/C=C/c1ccccc1  
 1297 C=Cc1ccc(OC)cc1.N[C@@H](Cc1c[nH]c2c(Br)cccc12)C(=O)O>>COc1ccc(/C=C/c2cccc3c(C[C@H](N)C(=O)O)c[nH]c23)cc1  
 1298 C=CC(=O)NCCCCc1ccccc1.COC(=O)C1CC(c2ccc(C(=O)C(=O)c3ccc(Br)cc3)cc2)=NO1>>COC(=O)C1CC(c2ccc(C(=O)C(=O)c3ccc(/C=C/C(=O)NCCCCc4ccccc4)cc3)cc2)=NO1  
 1299 C=CCO.Fc1ccccc1Br>>C=C(CO)c1ccccc1F  
 1300 C=C.Cc1cccc(C(N)=O)c1Br>>C=Cc1c(C)cccc1C(N)=O  
 1301 C=CC(=O)N1CCCCC1.CC(C)(C)c1ccc([N+](=O)[O-])cc1Br>>CC(C)(C)c1ccc([N+](=O)[O-])cc1/C=C/C(=O)N1CCCCC1  
 1302 C=CCCCCCC.COc1ccc(OS(=O)(=O)C(F)(F)F)cc1>>C=C(CCCCCC)c1ccc(OC)cc1  
 1303 C=C1C[C@H]2[C@@H]3CCc4cc(OC)ccc4[C@H]3CC[C@]2(C)C1=O.COc1cccc(Br)c1>>COc1cccc(/C=C2C[C@H]3[C@@H]4CCc5cc(OC)ccc5[C@H]4CC[C@]3(C)C2=O)c1  
 1304 C=C(C)C(=O)OC.O=[N+](O-)[O-]c1ccc(I)cc1>>COC(=O)/C(C)=C/c1ccc([N+](=O)[O-])cc1  
 1305 C=C/C=C/C(=O)N(CCCC)CCCC.FC(F)(F)c1ccc(Br)cc1>>CCCN(CCCC)C(=O)/C=C/C=C/c1ccc(C(F)(F)F)cc1  
 1306 C=CC(=O)N(C)Cc1cn(C)c2ccccc12.O=C1Nc2ncc(Br)cc2C12CCC2>>CN(Cc1cn(C)c2ccccc12)C(=O)/C=C/c1cnc2c(c1)C1(CCC1)C(=O)N2  
 1307 C=CCCCCCC.N#Cc1ccccc1OS(=O)(=O)C(F)(F)F>>C=C(CCCCCC)c1ccccc1C#N  
 1308 C=CCCC(=O)O.Clc1ccc(I)cc1>>O=C(O)CC/C=C/c1ccc(Cl)cc1  
 1309 C=C[C@@H](OCc1ccccc1)[C@@H](O)CCCC.COCOc1cccc(Br)c1>>CCCC[C@H](O)[C@@H](/C=C/c1cccc(OCOC)c1)OCc1ccccc1  
 1310 C=Cc1ccccc1.COc1ccc(-c2oc3ccccc3c(=O)c2Br)cc1>>COc1ccc(-c2ccccc2)c(C(F)(F)F)c1  
 1311 C=Cc1ccccc1.CN(C)c1ccc(I)c(C(F)(F)F)c1>>CN(C)c1ccc(/C=C/c2ccccc2)c(C(F)(F)F)c1  
 1312 C=CS(=O)(=O)F.CC(=O)c1ccccc1I>>CC(=O)c1ccccc1/C=C/S(=O)(=O)F  
 1313 C=Cc1ccc(OC)c(OC)c1.CC(C)C(=O)Nc1ccccc1I>>COc1ccc(/C=C/c2ccccc2NC(=O)C(C)C)cc1OC  
 1314 C=Cc1ccc(C#N)cc1.CCOC(C)n1cc(I)cn1>>CCOC(C)n1cc(/C=C/c2ccc(C#N)cc2)cn1  
 1315 C=CC(=O)OCCCC.CC(=O)c1cc2cc(Br)ccc2o1>>CCCCOC(=O)/C=C/c1ccc2oc(C(C)=O)cc2c1  
 1316 C=Cc1cncc(C#N)c1Nc1ccc2[nH]ccc2c1C.COc1c(Br)cccc1CN1CCN(C)CC1>>COc1c(/C=C/c2cncc(C#N)c2Nc2ccc3[nH]ccc3c2C)cccc1CN1CCN(C)CC1  
 1317 Br1ccc(-c2cnc3ccccc3n2)cc1.C=CCn1c(-c2ccccc2)nc2ccccc2c1=O>>O=c1c2ccccc2nc(-c2ccccc2)n1C/C=C/c1ccc(-c2cnc3ccccc3n2)cc1  
 1318 C=CC(=O)OCC.CN(C[C@H](O)CNC(C)(C)CC1Cc2ccccc2C1)S(=O)(=O)c1cc(Br)cc(C(F)(F)F)c1>>CCOC(=O)/C=C/c1cc(C(F)(F)F)cc(S(=O)(=O)N(C)C[C@H](O)CNC(C)(C)CC2Cc3ccccc3C2)c1

[illegible]

1361 C=CCNC1=NCCN1.Oc1ccc(I)cc1>>Oc1ccc(/C=C/CNC2=NCCN2)cc1  
1362 C=C(NC(C)=O)C(=O)OC.COc1ccc(CN(Cc2ccc(OC)cc2)c2ncc(I)cn2)cc1>>COC(=O)/C(=C/c1cnc(N(Cc2ccc(OC)cc2)Cc2ccc(OC)cc2)nc1)NC(C)=O  
1363 C=CC(=O)OC(C)(C)C.COc1ccc(CCNC(=O)c2cc(Br)cc(I)c2)cc1>>COc1ccc(CCNC(=O)c2cc(Br)cc(/C=C/C(=O)OC(C)(C)C)c2)cc1  
1364 C=Cc1ccc2ccccc2c1.COC(=O)c1ccc(Cl)cc1I>>COC(=O)c1ccc(Cl)cc1/C=C/c1ccc2ccccc2c1  
1365 C=CCn1c(-c2ccc(OC)cc2)nc2ccccc2c1=O.O=C(CN1C(=O)COc2ccccc21)c1ccc(Br)cc1>>COc1ccc(-c2nc3ccccc3c(=O)n2C/C=C/c2ccc(C(=O)CN3C(=O)COc4ccccc43)cc2)cc1  
1366 C=CC(=O)OCC.COc1cc(Br)cc2cc(-c3ccccc3)oc12>>CCOC(=O)/C=C/c1cc(OC)c2oc(-c3ccccc3)cc2c1  
1367 C=C[C@H](Cn1c(Br)c(-c2ccc(Oc3ccc(F)cc3)cc2)c2c(N)ncnc21)NC(=O)OC(C)(C)C>>C=C1c2c(-c3ccc(Oc4ccc(F)cc4)cc3)c3c(N)ncnc3n2C[C@H]1NC(=O)OC(C)(C)C  
1368 C=Cc1ccccc1.Nc1ccc(Cl)cc1I>>Nc1ccc(Cl)cc1/C=C/c1ccccc1  
1369 C=C(C)Cc1ccc(OS(=O)(=O)C(F)(F)F)c(C)c1.C=CC(=O)OCC>>C=C(C)Cc1ccc(/C=C/C(=O)OCC)c(C)C=CC(=O)OCC.O=C(NC1CCCCC1)c1cc(Br)cn(Cc2ccc(F)cc2)c1=O>>CCOC(=O)/C=C/c1cc(C(=O)NC2CCCCC2)c(=O)n(Cc2ccc(F)cc2)c1  
1371 C=Cc1ccccc1.COc1ccc2cc(Br)ccc2c1>>COc1ccc2cc(/C=C/c3ccccc3)ccc2c1  
1372 C=CC(=O)N1N=Cc2ccccc2C1C=C(C)C.CCCc1nc(N)nc(N)c1Cc1cc(I)c(OC)c(OC)c1>>CCCc1nc(N)nc(N)c1Cc1cc(/C=C/C(=O)N2N=Cc3ccccc3C2C=C(C)C)c(OC)c(OC)c1  
1373 C=CC(=O)OCC.O=C(Nc1ccccc1I)c1ccc([N+](=O)[O-])cc1>>CCOC(=O)/C=C/c1ccccc1NC(=O)c1ccc([N+](=O)[O-])cc1  
1374 C=Cc1ccc(N(C)C)cc1.OCCOc1ncc(I)cc1Br>>CN(C)c1ccc(/C=C/c2cnc(OCCO)c(Br)c2)cc1  
1375 C=CC(=O)O.Oc1ccc(/C=C/c2ccc(Br)cc2)cc1O>>O=C(O)/C=C/c1ccc(/C=C/c2ccc(O)c(O)c2)cc1  
1376 C=Cc1cc(OCc2ccccc2)c(OCc2ccccc2)nn1.Fc1cc(Br)cc(F)c1C(F)(F)F>>Fc1cc(/C=C/c2cc(OCc3ccccc3)c(OCc3ccccc3)nn2)cc(F)c1C(F)(F)F  
1377 C=CC(=O)OC.COc1c(CN(C(=O)c2ccccc2)c2ccccc(Br)c2)ccc2c1OC(C)(C)[C@H](OC(C)=O)[C@H]2N1CCCCC1>>COC(=O)/C=C/c1cccc(N(Cc2ccc3c(c2OC)OC(C)(C)[C@H](OC(C)=O)[C@H]3N2CCCCC2)C(=O)c2ccccc2)c1  
1378 C=CC(=O)NCc1ccc(F)cc1F.O=c1c(I)coc2cc(O)ccc12>>O=C(/C=C/c1coc2cc(O)ccc2c1=O)NCc1ccc(F)cc1F  
1379 CC(=O)/C=C/CC(CCc1ccccc1)NS(=O)(=O)c1ccc(C)cc1.Cc1ccc(Br)cc1>>CC(=O)/C=C(/CC(CCc1ccc(cc1)NS(=O)(=O)c1ccc(C)cc1)c1ccc(C)cc1  
1380 C=Cc1ccccc1.COc1ccc(/N=N/c2ccc(Br)cc2)cc1>>COc1ccc(/N=N/c2ccc(/C=C/c3ccccc3)cc2)cc1  
1381 C=CC(=O)OCC.Cn1c(=O)c(Br)c(-c2ccccc2)c2ccccc21>>CCOC(=O)/C=C/c1c(-c2ccccc2)c2ccccc2n(C)c1=O  
1382 C=CC(=O)OC(C)(C)C.Oc1ccc(C(=C2CCSCC2)c2ccc(Br)cc2)cc1>>CC(C)(C)OC(=O)/C=C/c1ccc(C(=C2CCSCC2)c2ccc(O)cc2)cc1  
1383 C=CC(=O)OCCCC.Clc1ccc(I)cn1>>CCCCOC(=O)/C=C/c1ccc(Cl)nc1  
1384 C=C[C@H]1OC2(CCCCC2)O[C@H]1CO[Si](C)(C)C(C)(C)C.CC1(C)OC(=O)c2c(cccc2OS(=O)(=O)C(F)(F)F)O1>>CC1(C)OC(=O)c2c(/C=C/[C@H]3OC4(CCCCC4)O[C@H]3CO[Si](C)(C)C(C)(C)C)cccc2O1  
1385 C=Cn1nnc(SC)n1.Ic1ccccc1>>CSc1nnn(/C=C/c2ccccc2)n1  
1386 C=Cc1ccccc1.O=c1oc2cc(Cl)ccc2c(-c2ccccc2)c1Br>>O=c1oc2cc(Cl)ccc2c(-c2ccccc2)c1  
1387 C=CCC(NC(C(=O)NCc1ccccc1)c1ccccc1Br)C(=O)OC>>C=C1CC(C(=O)OC)NC(C(=O)NCc2ccccc2)c2ccccc21  
1388 C=CC(=O)OC.OC/C=C/C1=C(Br)CCCC1>>COC(=O)/C=C/C1=C(/C=C/CO)CCCC1  
1389 C=CCN(C(=O)c1sccc1C)[C@H](C)c1cc(F)cc(F)c1.O=C1Nc2ncccc2[C@@]12Cc1cc(Br)cn1C2>>Cc1ccsc1C(=O)N(C/C=C/c1cnc2c(c1)C[C@@]1(C2)C(=O)Nc2ncccc21)[C@H](C)c1cc(F)cc(F)c1  
1390 C=CS(C)(=O)=O.CC(C)(C)OC(=O)NC(C(=O)OCc1ccccc1)c1ccc(Br)cc1>>CC(C)(C)OC(=O)NC(C(=O)OCc1ccccc1)c1ccc(/C=C/S(C)(=O)=O)cc1  
1391 C=CC[C@H](NC(=O)OC(C)(C)C)C(=O)O.Ic1cnccc1>>CC(C)(C)OC(=O)N[C@H](C/C=C/c1cnccc1)C(=O)O  
1392 C=CCC(C)C(=O)OCC.N#Cc1ccc(Br)cc1>>CCOC(=O)C(C)C/C=C/c1ccc(C#N)cc1  
1393 C=Cc1ccc(OC(C)=O)cc1.CCCCC(Br)C(F)(F)F>>CCCCC(/C=C/c1ccc(OC(C)=O)cc1)C(F)(F)F  
1394 C=CC#N.Clc1ccccc1>>N#C/C=C/c1ccccc1  
1395 C=CC[C@H]1C(C)(C)CCC[C@@]1(O)Cc1cc(OC)ccc1Br>>C=C1C[C@H]2C(C)(C)CCC[C@@]2(O)Cc2cc(OC)ccc21  
1396 C=CC(=O)OC(C)(C)C.COC1=C(I)CON(Cc2ccccc2)[C@H]1[C@H]1COC(C)(C)O1>>COC1=C(/C=C/C(=O)OC(C)(C)C)CON(Cc2ccccc2)[C@H]1[C@H]1COC(C)(C)O1  
1397 C=CC(=O)C(O)c1c(OC)ccc(OC)c1OCOC.COCOc1ccccc1I>>COCOc1ccccc1/C=C/C(=O)C(O)c1c(OC)ccc(OC)c1OCOC  
1398 C=CC(=O)OC.COC(=O)c1ccccc1Br>>COC(=O)/C=C/c1ccccc1C(=O)OC

C=CCCCC(=O)N(C)CC(O)C(O)C(O)CO.CC(C)(C)[Si](C)(C)OC(CCC1C(=O)N(c2ccc(F)cc2)C1  
 1399 c1ccc(Br)cc1)c1ccc(F)cc1>>CN(CC(O)C(O)C(O)C(O)CO)C(=O)CCC/C=C/c1ccc(C2C(CCC(O[Si](C)  
 (C)C(C)(C)C)c3ccc(F)cc3)C(=O)N2c2ccc(F)cc2)cc1  
 1400 C=CC(=O)OC.O=[N+][O-]c1cccc([I+])c2cccc([N+](=O)[O-]  
 ])c2)c1>>COC(=O)/C=C/c1cccc([N+](=O)[O-])c1  
 1401 C=CCC(OCC(=C)Br)c1ccoc1>>C=C1COC(c2ccoc2)CC1=C  
 1402 C=CP(=O)(OCC)OCC.CC(C)(C)OC(=O)Nc1cccc1Br>>CCOP(=O)/(C=C/c1cccc1NC(=O)OC(C)(C)  
 C)OCC  
 1403 Br1cccc1.C=C(NC(=O)OC(C)(C)C(=O)OC)>>COC(=O)/C=C/c1cccc1NC(=O)OC(C)(C)C  
 1404 C=Cc1ccnc1.CN(C)CCOc1cncc(Br)c1>>CN(C)CCOc1cncc(/C=C/c2ccnc2)c1  
 1405 Br1ccc2c(cen2-c2ccnc2)c1.C=CC(=O)OCC>>CCOC(=O)/C=C/c1ccc2c(cen2-c2ccnc2)c1  
 1406 C=CC(=O)OCC.Fc1cccc(I)c1>>CCOC(=O)/C=C/c1cccc(F)c1  
 1407 C=CC(=O)OC(C)(C)C.Oc1ccc(C=C2CCCC2)c2ccc(Br)cc2)cc1>>CC(C)(C)OC(=O)/C=C/c1ccc(C(=C2CCCC2)c2ccc(O)cc2)cc1  
 1408 C=Cc1ccnc1.CCCOc1ccc(Br)c(F)c1>>CCCOc1ccc(/C=C/c2ccnc2)c(F)c1  
 1409 C=C[C@H]1O[C@H]2OC(C)(C)O[C@H]2[C@H]1N(Cc1cc2c(cc1Br)OCO2)C(=O)OC>>C=C1c2cc3c(cc2CN(C(=O)OC)[C@H]2[C@H]1O[C@H]1OC(C)(C)O[C@H]21)OCO3  
 1410 C=CCN(C(=O)C(C)(C)C)[C@H](C)c1cccc1.O=C1Nc2ncccc2[C@@]12Cc1cc(Br)enc1C2>>C[C@H](c1cccc1)N(C/C=C/c1cnc2c(c1)C[C@@]1(C2)C(=O)Nc2ncccc21)C(=O)C(C)(C)C  
 1411 C=CC(=O)OC(C)(C)C.Fc1cccc(Br)c1>>CC(C)(C)OC(=O)/C=C/c1cccc(F)c1  
 1412 C=CC(=O)OCC.COc1ccc2c(=O)c(I)coc2c1>>CCOC(=O)/C=C/c1coc2cc(OC)ccc2c1=O  
 1413 C=CC(=O)OC(C)(C)C.CCOC(=O)CN1CC(=O)Nc2ncc(Br)cc2C1>>CCOC(=O)CN1CC(=O)Nc2ncc(/C=C/C(=O)OC(C)(C)C)cc2C1  
 1414 Br1ccc(-c2ccnc2)cc1.C=CCN1C(=O)c2cccc2C1=O>>O=C1c2cccc2C(=O)N1C/C=C/c1ccc(-c2ccnc2)cc1  
 1415 C=Cc1cccc1.COc1ccc(-c2oc3c(I)c(OC)cc(O)c3c(=O)c2OC)cc1OC>>COc1ccc(-c2oc3c(/C=C/c4cccc4)c(OC)cc(O)c3c(=O)c2OC)cc1OC  
 1416 C=CC(=O)OCCCC.CNc1cc(Cl)ccc1[N+](=O)[O-]>>CCCCOC(=O)/C=C/c1ccc([N+](=O)[O-]  
 1417 C=CS(N)(=O)=O.COc1ccc(Br)cc1>>COc1ccc(/C=C/S(N)(=O)=O)cc1  
 1418 C=CC(=O)Nc1ccc(OC)cc1.O=c1c(I)coc2cc(O)ccc12>>COc1ccc(NC(=O)/C=C/c2coc3cc(O)ccc3c2=O  
 1419 C=CCc1cccc1.COC(=O)c1ccc(CCl)cc1>>C=C(Cc1cccc1)Cc1ccc(C(=O)OC)cc1  
 1420 Br1cccc1.C=Cc1ccc(C(F)(F)F)cc1>>FC(F)(F)c1ccc(/C=C/c2cccc2)cc1  
 1421 C=Cc1cccc1.CC(=O)c1cccc(OS(=O)(=O)C(F)(F)F)c1>>C=C(c1cccc1)c1cccc(C(C)=O)c1  
 1422 C=CC(=O)OC(C)(C)C.CC(C)=CCc1cc(I)cc(CC=C(C)C)c1O>>CC(C)=CCc1cc(/C=C/C(=O)OC(C)(C)C)cc(C(C)=C(C)C)c1O  
 1423 C=CP(=O)(OCC)OCC.CCOC(=O)CNc1cccc(Br)c1>>CCOC(=O)CNc1cccc(/C=C/P(=O)(OCC)OCC)c  
 1424 C=CC(=O)N1N=Cc2cccc2C1c1ccco1.COc1cc(Cc2cnc(N)nc2N)cc(I)c1OC>>COc1cc(Cc2cnc(N)nc2N)cc(/C=C/C(=O)N2N=Cc3cccc3C2c2ccco2)c1OC  
 1425 C=CC(=O)OC.O=c1c(Br)coc2cccc12>>COC(=O)/C=C/c1coc2cccc2c1=O  
 1426 C=C(NC(=O)OCc1cccc1)C(=O)OC.CC(=O)OCc1c(Br)ccc(NC(=O)OC(C)(C)C)c1C>>COC(=O)/C=C/c1ccc(NC(=O)OC(C)(C)C)c1COC(C)=O)NC(=O)OCc1cccc1  
 1427 C=CC(=O)OCCN(C)C.Cc1ccc(NC(=O)c2cc(=O)c3cc(Br)ccc3o2)cc1>>Cc1ccc(NC(=O)c2cc(=O)c3cc(/C=C/C(=O)OCCN(C)C)ccc3o2)cc1  
 1428 C=CC(=O)OC.O=C1CCc2cc(Br)ccc21>>COC(=O)/C=C/c1ccc2c(c1)CCC2=O  
 1429 C=COCCCC.COc1ccc2c(Br)cc(=O)oc2c1>>CCCCO/C=C/c1cc(=O)oc2cc(OC)ccc12  
 1430 C=CC(=O)OC.CC1(C)CC(Nc2ccc(Br)c(F)c2[N+](=O)[O-]  
 1431 )CC(C)(C)C1>>COC(=O)/C=C/c1ccc(NC2CC(C)(C)CC(C)(C)C2)c([N+](=O)[O-])c1F  
 1432 C=CC(=O)OCC.Fc1ccc(Br)cc1>>CCOC(=O)/C=C/c1ccc(F)cc1  
 1433 C=Cc1ccnc1.CCCCN(CCCC)c1ccc(I)cc1>>CCCN(CCCC)c1ccc(/C=C/c2ccnc2)cc1  
 1434 C=CC(=O)N1N=Cc2cccc2C1CCCC.COc1cc(Cc2cnc(N)nc2N)cc(I)c1OC>>CCCCC1c2cccc2C=NN1C(=O)/C=C/c1cc(Cc2cnc(N)nc2N)cc(OC)c1OC  
 1435 C=CC1CC=CCC1.Fc1ccc(I)cc1>>Fc1ccc(/C=C/C2CC=CCC2)cc1  
 1436 C=CCOCc1cc(C)c2cccc2c1Br>>C=C1CCOCc2cc(C)c3cccc3c21  
 1437 C=C(C)C(=O)OC(C)(C)C.Ic1cccc1>>C/C(=C/c1cccc1)C(=O)OC(C)(C)C  
 1438 C=CC(=O)OC.N#Cc1ccc(-c2cc(I)cc(-c3ccco3)c2)cc1>>COC(=O)/C=C/c1cc(-c2ccc(C#N)cc2)cc(-c2ccco2)c1  
 1439 C=CCN1C(=O)c2cccc2C1=O.Cc1cc(Cl)c2cccc2n1>>Cc1cc(/C=C/CCN2C(=O)c3cccc3C2=O)c2cccc2n1  
 1440 C=CC(=O)O.N[C@@H](Cc1c[nH]c2c(Br)cccc12)C(=O)O>>N[C@@H](Cc1c[nH]c2c(/C=C/C(=O)O)cccc12)C(=O)O  
 C=CC(=O)OCC.O=Cc1cn(-c2cccc2)nc1OS(=O)(=O)C(F)(F)F>>CCOC(=O)/C=C/c1nn(-

1441 C=Cc1cccc1.CC[C@]12C=CCN3CC[C@]4(C(=C(C(=O)OC)C1)Nc1ccc(I)cc14)[C@@H]32>>CC[C@]  
@]12C=CCN3CC[C@]4(C(=C(C(=O)OC)C1)Nc1ccc(/C=C/c5cccc5)cc14)[C@@H]32  
1442 C=CC(=O)O.Cc1cc(C)cc(I)c1>>Cc1cc(C)cc(/C=C/C(=O)O)c1  
1443 C=CC(=O)OCCCC.CC(=O)c1ccc(I)cc1>>CCCCOC(=O)/C=C/c1ccc(C(C)=O)cc1  
1444 CCOC(=O)c1cccc(I)c1.[11CH2]=Cc1cccc1>>CCOC(=O)c1cccc(/[11CH]=C/c2cccc2)c1  
1445 Brc1enc2cccc2c1.C=CP(=O)(OCC)OCC>>CCOP(=O)/C=C/c1enc2cccc2c1)OCC  
1446 C=C1C(=O)O[C@H]2[C@H]1CC/C(C)=C/CC[C@]1(C)O[C@H]21.Clc1ccc(I)cc1>>C/C1=C\CC  
[C@]2(C)O[C@H]2[C@H]2OC(=O)/C=C/c3ccc(Cl)cc3)[C@@H]2CC1  
1447 COC(=O)/C=C/Oc1c(C)cccc1-c1cccc1Br>>COC(=O)/C=C1/Oc2c(C)cccc2-c2cccc21  
1448 C=CCNC(=O)OC(C)(C)C.N#Cc1cccc(Cl)c1>>C=C(CNC(=O)OC(C)(C)C)c1cccc(C#N)c1  
1449 C=CCOc1cccc1.Cc1ccc(I)cc1>>Cc1ccc(/C=C/COc2cccc2)cc1  
1450 C=CC(=O)N(C)OC.Oc1ccc(I)cc1>>CON(C)C(=O)/C=C/c1ccc(O)cc1  
1451 C=Cc1cccc1O.Nc1ccc(Br)cc1>>Nc1ccc(/C=C/c2cccc2O)cc1  
1452 C=CC#N.Cn1c2c(c3ccc(I)cc3c1=O)C(=O)c1cccc1-  
2>>Cn1c2c(c3ccc(/C=C/C#N)cc3c1=O)C(=O)c1cccc1-2  
1453 C=CC(=O)O.O=C(O)c1cc(Br)cs1>>O=C(O)/C=C/c1csc(C(=O)O)c1  
1454 C=CCN(Cc1ccc(F)cc1)Cc1cc2cc(C)ccc2nc1Cl>>C=C1CN(Cc2ccc(F)cc2)Cc2cc3cc(C)ccc3nc21  
1455 C=CC(C)(O)CCC=C(C)C.Fc1cccc1Br>>CC(C)=CCCC(C)(O)/C=C/c1cccc1F  
1456 C=Cc1ccc(OCc2cccc2)cc1.Nc1nc(N)c2cc(I)ccc2n1>>Nc1nc(N)c2cc(/C=C/c3ccc(OCc4cccc4)cc3)cc  
1457 C=CC(=O)OC(C)(C)C.COc1ccc(S(=O)(=O)c2nc3cccc3cc2Br)cc1>>COc1ccc(S(=O)(=O)c2nc3cccc  
3cc2/C=C/C(=O)OC(C)(C)C)cc1  
1458 C=CC1CCCCC1.Nc1ncc(Cl)cc1Br>>Nc1ncc(Cl)cc1/C=C/C1CCCCC1  
1459 C=Cc1ccc(OC(C)=O)cc1.COc1ccc(Br)c(S(C)(=O)=O)c1>>COc1ccc(/C=C/c2ccc(OC(C)=O)cc2)c(S(C  
)=(O)=O)c1  
1460 C=CC(OC)OC.FC(F)(F)c1ccc(Br)cn1>>COC(/C=C/c1ccc(C(F)(F)F)nc1)OC  
1461 C=CC(=O)OC.O=C(Oc1ccc(OC(=O)c2cccc2)c(I)c1)c1cccc1>>COC(=O)/C=C/c1cc(OC(=O)c2cccc  
2)ccc1OC(=O)c1cccc1  
1462 C=CC(=O)OC.Cc1ccc(OS(=O)(=O)C(F)(F)F)c(Br)n1>>COC(=O)/C=C/c1nc(C)ccc1OS(=O)(=O)C(F)(  
1463 C=Cc1cccc1OC.Cn1c(=O)c2c(cc(Br)n2C)n(C)c1=O>>COc1cccc1/C=C/c1cc2c(c(=O)n(C)c(=O)n2C  
1464 C=Cc1ccc(C(C)(C)C)cc1.CCOC(=O)C(F)(F)I>>CCOC(=O)C(F)(F)/C=C/c1ccc(C(C)(C)C)cc1  
1465 C=C(C)C(=O)OC.COc1ccc(I)cc1>>COC(=O)/C(C)=C/c1ccc(OC)cc1  
1466 C=Cc1nc2cccc2s1.CCN(CC)S(=O)(=O)c1ccc(Br)cc1Cl>>CCN(CC)S(=O)(=O)c1ccc(/C=C/c2nc3cccc  
c3s2)cc1Cl  
1467 C=Cc1ccc(OC)cc1.O=C1OC(O)c2cc(Br)ccc21>>COc1ccc(/C=C/c2ccc3c(c2)C(O)OC3=O)cc1  
1468 C=CC(=O)OC(C)(C)C.O=S(=O)(c1cccc(Br)c1)c1ccc2cccc2n1>>CC(C)(C)OC(=O)/C=C/c1cccc(S(=  
O)(=O)c2ccc3cccc3n2)c1  
1469 C=C.CCCCC(CC)COc1cc(/C=C/c2ccc(/C=C/c3ccc(/C=C/c4ccc(I)cc4)cc3)cc2)c(OCC(CC)CCCC)cc1  
C>>C=Cc1ccc(/C=C/c2ccc(/C=C/c3ccc(/C=C/c4cc(OCC(CC)CCCC)c(C)cc4OCC(CC)CCCC)cc3)cc2)  
1470 C=CC(=O)OC(C)(C)C.Cc1ccc(N)c(I)c1>>Cc1ccc(N)c(/C=C/C(=O)OC(C)(C)C)c1  
1471 C=CCC(OCC(=C)Br)c1ccc(OC)cc1>>C=C1COC(c2ccc(OC)cc2)CC1=C  
1472 C=CC(=O)OC.O=[N+][O-]c1cccc1I>>COC(=O)/C=C/c1cccc1[N+](=O)[O-]  
1473 C=CC(=O)OC.O=[14CH]c1ccc(Br)cc1>>COC(=O)/C=C/c1ccc([14CH]=O)cc1  
1474 C=CCCCCCCCC.COCC(=O)c1ccc2cc(Br)ccc2c1>>CCCCCCCCC/C=C/c1ccc2cc(C(=O)OC)ccc2c  
1475 C=Cc1cccc1.O=Cc1c(F)cccc1Br>>O=Cc1c(F)cccc1/C=C/c1cccc1  
1476 C=CCCCC=C(C)C.ClCc1cccc(Oc2cccc2)c1>>C=C(CCCC=C(C)C)Cc1cccc(Oc2cccc2)c1  
1477 C=Cc1nc2cccc2s1.CCN(CC)S(=O)(=O)c1ccc(Br)cc1F>>CCN(CC)S(=O)(=O)c1ccc(/C=C/c2nc3cccc  
c3s2)cc1F  
C=CC(=O)OC(C)(C)C.Cc1c(O)ccc2c(Cc3ccc(Br)cc3)c(-  
1478 c3ccc(OC(F)(F)F)cc3)c(=O)oc12>>Cc1c(O)ccc2c(Cc3ccc(/C=C/C(=O)OC(C)(C)C)cc3)c(-  
c3ccc(OC(F)(F)F)cc3)c(=O)oc12  
1479 C=CNC(C)=O.O=S(=O)(Oc1cccc1)C(F)(F)F>>C=C(NC(C)=O)c1cccc1  
1480 C=Cc1ccc(C)cc1.COc1cccc1Br>>COc1cccc1/C=C/c1ccc(C)cc1  
1481 C=Cc1cc(OC)c(OC)c(OC)c1.O=[N+][O-]c1ccc(I)cc1>>COc1cc(/C=C/c2ccc([N+](=O)[O-]  
)cc2)cc(OC)c1OC  
1482 C=CC(=O)OCCCC.Fc1cccc(Br)c1>>CCCCOC(=O)/C=C/c1cccc(F)c1  
1483 C=CCN(C(=O)C(C)(C)C)[C@H]1CCc2cccc21.O=C1Ne2ncccc2[C@]12Cc1ccc(Br)cc1C2>>CC(C)  
(C)C(=O)N(C/C=C/c1ccc2c(c1)C[C@@]1(C2)C(=O)Nc2ncccc21)[C@@H]1CCc2cccc21  
1484 C=CCCCCCC.O=S(=O)(Oc1cccc1)C(F)(F)F>>C=C(CCCCCC)c1cccc1  
1485 C=CCC(C(=O)OC)C(=O)OC.CC(C)(C)Oc1ccc(Br)cc1>>COC(=O)C(C/C=C/c1ccc(OC(C)(C)C)cc1)C(  
=O)OC

1486 C=CC(=O)OCC.Cc1cc(C)c(I)c(C)c1>>CCOC(=O)/C=C/c1c(C)cc(C)cc1C  
1487 C=C(F)C(C)=O.Clc1ccc(I)cc1>>CC(=O)/C(F)=C/c1ccc(Cl)cc1  
1488 C=Cc1cc(C)c(OCOCCOC)c(C)c1.O=[N+][[O-]  
1489 ]c1ccc2nc(Cl)ccc2c1>>COCCOCOc1c(C)cc(/C=C/c2ccc3cc([N+](=O)[O-])ccc3n2)cc1C  
1490 C=Cc1ccc(C)cc1.O=Cc1ccc(Cl)cc1>>Cc1ccc(/C=C/c2ccc(C=O)cc2)cc1  
1491 C=CC(C)(C)O.CC1(C)CC(Nc2cccc(-  
1492 c3cn(COCC[Si](C)(C)C)c4cc(Cl)c(F)cc34)n2)CC(C)(C)N1>>CC(C)(O)/C=C/c1cc2c(cc1F)c(-  
1493 c1ccnc(NC3CC(C)(C)NC(C)(C)C3)n1)cn2COCC[Si](C)(C)C  
1494 C=CC(=O)OCCN(CC)CC.O=C(Nc1ccccc1)c1cc(=O)c2cc(Br)ccc2o1>>CCN(CC)CCOC(=O)/C=C/c1c  
1495 cc2oc(C(=O)Nc3ccccc3)cc(=O)c2c1  
1496 C=CC(=O)OC.CC(=O)Oc1ccccc1Br>>COC(=O)/C=C/c1ccccc1OC(C)=O  
1497 C=CC(=O)OCC.COc1cc(Nc2ncc(Br)c(Nc3ccccc3)n2)cc(OC)c1OC>>CCOC(=O)/C=C/c1cnc(Nc2cc(O  
1498 C)c(OC)c(OC)c2)nc1Nc1ccccc1  
1499 C=CCOC(C)=O.C=CCc1ccc(Br)cc1>>C=CCc1ccc(/C=C/COC(C)=O)cc1  
1500 Br1ccccc1I.C=CC(=O)O>>O=C(O)/C=C/c1ccccc1Br  
1501 C=CC(=O)OCC.Cn1nc(-c2ccccc2)c(Br)cc1=O>>CCOC(=O)/C=C/c1cc(=O)n(C)nc1-c1ccccc1  
1502 C=CCc1ccc(OC)c(OC)c1.O=C(O)c1ccc(CCl)cc1>>C=C(Cc1ccc(C(=O)O)cc1)Cc1ccc(OC)c(OC)c1  
1503 Br1ccc2ccccc2c1.C=CC(=O)OCCCC>>CCCCOC(=O)/C=C/c1ccc2ccccc2c1  
1504 C=CC#N.CC(C)(C)c1ccc2[nH]c3c(c2c1)CC(=O)Nc1ccc(I)cc1-  
1505 3>>CC(C)(C)c1ccc2[nH]c3c(c2c1)CC(=O)Nc1ccc(/C=C/C#N)cc1-3  
1506 C=Cc1cc2ccc(N(CC)CC)cc2oc1=O.Ic1ccccc1>>CCN(CC)c1ccc2cc(/C=C/c3ccccc3)c(=O)oc2c1  
1507 C=CS(=O)(=O)c1ccccc1.O=[N+][[O-]]c1ccc(Br)cc1>>O=[N+][[O-]  
1508 Br1ccccc1.C=Cc1ccc(Cl)cc1>>Clc1ccc(/C=C/c2ccccc2)cc1  
1509 C=C.COc1ccc(NC(C)=O)c(Br)c1>>C=Cc1cc(OC)ccc1NC(C)=O  
1510 C=CN1CCCCC1=O.O=S(=O)(Oc1cc(F)ccc1Br)C(F)(F)F>>C=C(c1cc(F)ccc1Br)N1CCCCC1=O  
1511 C=CC(=O)NCCc1ccc(O)cc1.COc1ccc(I)cc1Br>>COc1ccc(/C=C/C(=O)NCCc2ccc(O)cc2)cc1Br  
1512 C=CCCC(=O)O.N#Cc1ccc(Br)cc1>>N#Cc1ccc(/C=C/CCC(=O)O)cc1  
1513 C=COCCCC.COCCN(c1ccc(Br)c1F)S(=O)(=O)c1cc(F)ccc1F>>C=C(OCCCC)c1ccc(N(COC)S(=O)(=O)c2cc(F)ccc2F)c1F  
1514 C=CC(=O)OC.Ic1ccccc1C#CCOC1CCCCO1>>COC(=O)/C=C/c1ccccc1C#CCOC1CCCCO1  
1515 C=C(OC)C1=C(Br)CCCC1.C=CC(=O)N1[C@H]2C[C@H]3CC[C@]2(CS1(=O)=O)C3(C)C>>C=C(O  
1516 C)C1=C(/C=C/C(=O)N2[C@H]3C[C@H]4CC[C@]3(CS2(=O)=O)C4(C)C)CCCC1  
1517 C=CC(=O)OC.CC1CC(C=O)=C(Br)c2ccccc21>>COC(=O)/C=C/C1=C(C=O)CC(C)c2ccccc21  
1518 C=Cc1ccc(Cl)c1.COc1ccc(Br)cc1>>COc1ccc(/C=C/c2ccc(Cl)c2)cc1  
1519 C=CC(=O)O.CCOC(=O)/C=C/c1ccc2c1Oc1c(I)ccc1C2(C)C>>CCOC(=O)/C=C/c1ccc2c1Oc1c(/C=  
1520 C/C(=O)O)ccc1C2(C)C  
1521 C=Cc1cc(OC)c(OC)c(OC)c1.COc1ccc(I)cc1>>COc1ccc(/C=C/c2cc(OC)c(OC)c(OC)c2)cc1  
1522 Br1ccc2c(c1)c1ccccc1n2-c1ccccc1.C=Cc1ccc(N)cc1>>Nc1ccc(/C=C/c2ccc3c(c2)c2ccccc2n3-  
1523 c2ccccc2)cc1  
1524 C=CC(=O)OC.Cn1ccc(I)n1>>COC(=O)/C=C/c1ccn(C)n1  
1525 C=Cc1ccc(C)cc1.COc1ccc(I)cc1>>COc1ccc(/C=C/c2ccc(C)cc2)cc1  
1526 C=Cc1ccnc2ccccc12.CCCCCCCC(=O)N1CCN(c2ccc(Br)cc2)CC1>>CCCCCCCC(=O)N1CCN(c2ccc(  
1527 /C=C/c3ccnc4ccccc34)cc2)CC1  
1528 C=Cc1ccccc1.CC(=O)Nc1ccccc1I>>CC(=O)Nc1ccccc1/C=C/c1ccccc1  
1529 C=CC(=O)OC.COc1ccc2c(I)nn(C(=O)OC(C)(C)C)c12>>COC(=O)/C=C/c1nn(C(=O)OC(C)(C)C)c2c  
1530 (OC)ccc12  
1531 C=C[C@H](O[Si](C)(C)C(C)(C)C)[C@H](C)[C@@H](C/C(I)=C/CO)O[Si](C)(C)C(C)(C)C>>C=C1/  
1532 C(=C\CO)C[C@H](O[Si](C)(C)C(C)(C)C)[C@@H](C)[C@H]1O[Si](C)(C)C(C)(C)C  
1533 C=CC(=O)OCC(CC)CCCC.Cc1ccccc1Cl>>CCCC(CC)COC(=O)/C=C/c1ccccc1C  
1534 C=CCC(=O)OC.O=S(=O)(c1ccccc1)n1cc(-c2ccccc2)c2cc(Br)ccc21>>COC(=O)/C=C/c1cnc2c(c1)c(-  
1535 c1ccccc1)cn2S(=O)(=O)c1ccccc1  
1536 C=C(CC(N=C(c1ccccc1)c1ccccc1)C(=O)OC)C(=O)OC.Ic1ccccc1>>COC(=O)/C=C(c1ccccc1)CC(N=  
1537 C(c1ccccc1)c1ccccc1)C(=O)OC  
1538 C=COCCOC=C.Ic1ccc2ccccc12>>C=COCCOC(=C)c1ccc2ccccc12  
1539 C=CC(=O)OCCCC.Ic1ccc2ccccc12>>CCCCOC(=O)/C=C/c1ccc2ccccc12  
1540 C=CC(OC)OCC.COc1ccc(C=O)c(Br)c1>>CCOC(/C=C/c1cc(OC)ccc1C=O)OCC  
1541 C=CCC(C)O.CN(C)c1ccc(Br)c1>>CC(O)C/C=C/c1ccc(N(C)C)c1  
1542 C=Cc1ccc(N(C)C)cc1.CCCCC1=C(CCCC)P(=O)(c2ccccc2)c2cc(I)ccc21>>CCCCC1=C(CCCC)P(=O)  
1543 (c2ccccc2)c2cc(/C=C/c3ccc(N(C)C)cc3)ccc21  
1544 C=CC(C)CC(=O)O.COc1ccc(I)cc1>>COc1ccc(/C=C/C(C)CC(=O)O)cc1

1530 C=CC(=O)OCC.O=C(c1cccc1)N1CCc2c(cc(I)cc2[N+](=O)[O-])C1>>CCOC(=O)/C=C/c1cc2c(c([N+](=O)[O-])c1)CCN(C(=O)c1cccc1)C2  
1531 C=C(NC(=O)OCc1cccc1)C(=O)OC.CC(=O)OCc1cc(F)c(F)cc1Br>>COC(=O)/C=C/c1cc(F)c(F)cc1C  
OC(C)=O)NC(=O)OCc1cccc1  
1532 C=CP(=O)(OCC)OCC.O=P(/C=C/c1cccc(Br)c1)(c1cccc1)c1cccc1>>CCOP(=O)(/C=C/c1cccc(/C=C/P(=O)(c2cccc2)c2cccc2)c1)OCC  
1533 Br1ccnc2cccc12.C=Cc1cccc1>>C(=C/c1ccnc2cccc12)\c1cccc1  
1534 C=CC(=O)OC.CN(C)S(=O)(=O)n1cc(I)c([Si](C)(C)C)c1>>COC(=O)/C=C/c1cn(S(=O)(=O)N(C)C)cc1  
[Si](C)(C)C  
1535 C=CCCCCCC.CC1(C)OC(=O)c2c(cccc2OS(=O)(=O)C(F)(F)F)O1>>CCCCC/C=C/c1cccc2c1C(=O)  
OC(C)(C)O2  
1536 C=C(NC(C)=O)C(=O)OC.Nc1ccc(Br)cc1N1CCCC1>>COC(=O)/C(=C\c1ccc(N)c(N2CCCC2)c1)N  
C(C)=O  
1537 C=Cc1ccc(OC)c(O)c1.Oc1cc(Br)cc(O)c1F>>COc1ccc(/C=C/c2cc(O)c(F)c(O)c2)cc1O  
1538 C=CC(=O)OCCCC.O=C1c2cccc2C(=O)N1c1cccc1I>>CCCCOC(=O)/C=C/c1cccc1N1C(=O)c2ccc  
cc2C1=O  
1539 C=Cc1nccc(C#N)c1Nc1ccc2[nH]ccc2c1C.COc1cc(CN2CCN(C)CC2)ccc1I>>COc1cc(CN2CCN(C)CC  
2)ccc1/C=C/c1nccc(C#N)c1Nc1ccc2[nH]ccc2c1C  
1540 Br1ccc(OCc2cccc2)cc1.C=CCCC(=O)[C@H]1CCCN1C(=O)C(=O)C(C)(C)CC>>CCC(C)(C)C(=  
O)C(=O)N1CCC[C@H]1C(=O)CC/C=C/c1ccc(OCc2cccc2)cc1  
1541 C=CC(=O)OC.COc1cc(I)c(CCNS(=O)(=O)c2ccc(C)cc2)cc1OC>>COC(=O)/C=C/c1cc(OC)c(OC)cc1C  
CNS(=O)(=O)c1ccc(C)cc1  
1542 C=Cc1ccc(N(C)C)cc1.O=Cc1ccc(I)cc1>>CN(C)c1ccc(/C=C/c2ccc(C=O)cc2)cc1  
1543 C=C/C=C/C(=O)N(CCCC)CCCC.COc1cccc(Br)c1>>CCCCN(CCCC)C(=O)/C=C/C=C/c1cccc(OC)c1  
1544 C=CC(=O)OCC.Cc1nc(N)nc(NC2CCC(O)CC2)c1Br>>CCOC(=O)/C=C/c1c(C)nc(N)nc1NC1CCC(O)  
1545 C=CC(=O)OCC.CNc1nc(-n2c(C)ccc2C)nc(C)c1Br>>CCOC(=O)/C=C/c1c(C)nc(-n2c(C)ccc2C)nc1NC  
1546 C=Cc1ccc2cccc2c1.COc1ccc(Br)cc1>>COc1ccc(/C=C/c2ccc3cccc3c2)cc1  
1547 C=CCOc1ccc(C)cc1.Ic1cccs1>>Cc1ccc(OC/C=C/c2cccs2)cc1  
1548 C=Cc1cccc1.Cn1c2cccc2c2cc(I)ccc21>>Cn1c2cccc2c2cc(/C=C/c3cccc3)ccc21  
1549 C=CC(=O)OC.CN(C)CCCOc1ccc(I)cc1Br>>COC(=O)/C=C/c1ccc(OCCCN(C)C)c(Br)c1  
1550 C=CN1CCCC1=O.COc1ccc2c(c1)CCC=C2OS(=O)(=O)C(F)(F)F>>C=C(C1=CCc2cc(OC)ccc21)N1  
CCCC1=O  
1551 C=COCCCC.N#Cc1cccc(Br)c1>>C=C(OCCCC)c1cccc(C#N)c1  
1552 C=Cc1ccc([N+](=O)[O-])cc1.Cc1cc(OCO)c(C)cc1I>>Cc1cc(OCO)c(C)cc1/C=C/c1ccc([N+](=O)[O-])cc1  
1553 C=Cc1ccnc1.Cc1cc(Nc2ccc([N+](=O)[O-])cc2[N+](=O)[O-])ccc1Br>>Cc1cc(Nc2ccc([N+](=O)[O-])  
cc2[N+](=O)[O-])ccc1/C=C/c1ccnc1  
1554 C=CC(=O)OC(C)(C)C.Cc1cc(C)cc(OS(=O)(=O)C(F)(F)F)c1>>Cc1cc(C)cc(/C=C/C(=O)OC(C)(C)C)c  
1555 BrC12CC3CC(CC(C3)C1)C2.C=Cc1cccc1>>C(=C/C12CC3CC(CC(C3)C1)C2)\c1cccc1  
1556 C=CC(OCC)OCC.CN(C)c1ccc(Br)cc1>>CCOC(/C=C/c1ccc(N(C)C)cc1)OCC  
1557 C=Cc1ccnc2cccc12.CCCCCN(CCCCC)c1ccc(Br)c(C)c1>>CCCCCN(CCCCC)c1ccc(/C=C/c2ccnc3cc  
ccc23)c(C)c1  
1558 C=CC(=O)OCCCC.Clc1ccc(I)cc1>>CCCCOC(=O)/C=C/c1ccc(Cl)cc1  
1559 C=CC(=O)OC.CC1(c2cc(-c3ccc(Br)cc3)ccc2O)CCCC1>>COC(=O)/C=C/c1ccc(-  
c2ccc(O)c(C3(C)CCCC3)c2)cc1  
1560 C=C.Clc1cccc(I)c1>>C=Cc1cccc(Cl)c1  
1561 C=CC(=O)OCC.Ic1cccc1N(Cc1cccc1)Cc1cccc1>>CCOC(=O)/C=C/c1cccc1N(Cc1cccc1)Cc1ccc  
C=CC(N)=O.Cc1cc(Br)c2nc(-c3ccc(C4(NC(=O)OC(C)(C)C)CCC4)cc3)c(-  
1562 c3cccc3)n2c1>>Cc1cc(/C=C/C(N)=O)c2nc(-c3ccc(C4(NC(=O)OC(C)(C)C)CCC4)cc3)c(-  
C=CC(=O)OC(C)(C)C.COc1cc2cccc2c(Br)c1OC>>COc1cc2cccc2c(/C=C/C(=O)OC(C)(C)C)c1OC  
1563 C=CC(N)=O.Clc1ccc(I)cc1>>NC(=O)/C=C/c1ccc(Cl)cc1  
1564 C=CC(O)CCCC.c1ccc([I+](c2cccs2)cc1>>CCCCC(O)/C=C/c1cccs1  
1565 Br1ccc2c(enn2C2CCCCO2)c1.C=Cc1ccnc1>>C(=C/c1ccc2c(enn2C2CCCCO2)c1)\c1ccnc1  
1566 C=CC(=O)O.O=C(O)Cc1cccc1Br>>O=C(O)/C=C/c1cccc1CC(=O)O  
1567 C=CC(N)=O.O=Cc1ccc(Br)cc1>>NC(=O)/C=C/c1ccc(C=O)cc1  
1568 Br1ccc(-c2nnc(-c3cccc4cccc34)o2)cc1.C=C[Si](C)(OCC)OCC>>CCO[Si](C)(/C=C/c1ccc(-c2nnc(-  
c3cccc4cccc34)o2)cc1)OCC  
1569 C=Cc1ccnc(F)c1.CC(C)(C)OC(=O)N1CC[C@H]1COc1cnc(Cl)c(I)c1>>CC(C)(C)OC(=O)N1CC[C@H]  
1]COc1cnc(Cl)c(/C=C/c2ccnc(F)c2)c1  
1570 Br1cccc1.C=CC1CCCC1>>C(=C/C1CCCC1)\c1cccc1  
1571 C=CC(=O)OC1CCCC1.CC(=O)c1ccc(Br)cc1>>CC(=O)c1ccc(/C=C/C(=O)OC2CCCC2)cc1  
1572

1573 C=CC[C@]1(C)c2ccccc2N(C)[C@H]1c1cccc1.Ic1cccc1>>CN1c2ccccc2[C@@](C)(C/C=C/c2ccccc  
2)[C@@H]1c1cccc1  
1574 O=C(/C=C/c1cccc1)O/C(=C\I)c1ccc2ccccc2c1>>O=C1OC(c2ccc3ccccc3c2)=C/C1=C\c1cccc1  
1575 C=Cc1cnc(C#N)c1Nc1ccc2[nH]ccc2c1C.COc1ccc(CN2CCN(C)CC2)cc1I>>COc1ccc(CN2CCN(C)C  
C2)cc1/C=C/c1cnc(C#N)c1Nc1ccc2[nH]ccc2c1C  
1576 C=Cc1ccc(C)nc1.COC(=O)c1cc2ccc(=O)oc2cc1OS(=O)(=O)C(F)(F)F>>COC(=O)c1cc2ccc(=O)oc2cc  
1/C=C/c1ccc(C)nc1  
1577 C=C[C@H]1CCCCN1C(=O)OC(C)(C)C.Cc1cccc(C)c1I>>Cc1cccc(C)c1/C=C/[C@@H]1CCCCN1  
C(=O)OC(C)(C)C  
1578 C=Cc1cccc1.CCOc1noc(C)c1I>>CCOc1noc(C)c1/C=C/c1cccc1  
C=CC(=O)N1CCOCC1.C[C@]12C[C@]34C=C(Sc5cccc(I)c5)C(=O)[C@@](C)(CCC(=O)Nc5c(O)c  
1579 cc(C(=O)O)c5O)[C@@H]3[C@H](C[C@H]1C4)O2>>C[C@]12C[C@]34C=C(Sc5cccc(/C=C/C(  
=O)N6CCOCC6)c5)C(=O)[C@@](C)(CCC(=O)Nc5c(O)ccc(C(=O)O)c5O)[C@@H]3[C@H](C[C@  
1580 Br1ccc(Oc2ccccc2)cc1.C=CC(=O)N1CCOCC1>>O=C(/C=C/c1ccc(Oc2ccccc2)cc1)N1CCOCC1  
1581 C=C[C@H](C)CCC=C(C)C.Clc1cccc1>>C=C(c1cccc1)[C@H](C)CCC=C(C)C  
1582 C=CC(=O)OCC.CN1C(c2ccccc2)=C(I)c2ccsc2S1(=O)=O>>CCOC(=O)/C=C/C1=C(c2ccccc2)N(C)S(  
=O)(=O)c2sc2c1  
1583 C=CNC(C)=O.CCOC(=O)c1sc2nc(C)ccc(C)c2c1Br>>CCOC(=O)c1sc2nc(C)ccc(C)c2c1/C=C/NC(C)=O  
1584 C=CC(=O)N(CC)CC.O=C1C2c([nH]c3c(I)cccc23)-  
c2cccn2N1>>CCN(CC)C(=O)/C=C/c1cccc2c3c([nH]c12)-c1cccn1NC(=O)C3  
1585 Br1cnc1.C=COCCCC>>C=C(OCCCC)c1cnc1  
1586 C=CC(=O)OCC.CCn1cc(Br)cn1>>CCOC(=O)/C=C/c1cnn(CC)c1  
1587 Br1ccs1.C=Cc1cccc1>>C(=C/c1ccs1)\c1cccc1  
1588 C=CCN(C(=O)OC(C)(C)C)C(=O)OC(C)(C)C.Clc1ccs1>>CC(C)(C)OC(=O)N(C/C=C/c1ccs1)C(=O)  
OC(C)(C)C  
1589 C=C(C(=O)OC)[C@@H]1CC[C@]2(C)CCC[C@](C)(OCOC)[C@@H]2C1.Ic1cccc1>>COCO[  
C@]1(C)CCC[C@]2(C)CC[C@H](/C=C\c3ccccc3)C(=O)OC)C[C@H]21  
1590 C=CCCC(CCl)CCCCCCCC>>C=C1CCC(CCCCCCCC)C1  
1591 C=CC(=O)OC.CC1(C)Cc2cccc(I)c2O1>>COC(=O)/C=C/c1cccc2c1OC(C)(C)C2  
1592 BrC1CC2CCC1C2.C=Cc1cccc1>>C(=C/C1CC2CCC1C2)\c1cccc1  
1593 C=CCc1c(OCCCCCc2cccc(OCCCC(=O)OC)c2CCC(=O)OC)ccc2c1CCCC2=O.Ic1cccc1>>COC(=  
O)CCCOc1cccc(CCCCCCOc2ccc3c(c2C/C=C/c2ccccc2)CCCC3=O)c1CCC(=O)OC  
1594 C=Cc1cccc1N.CN(C(=O)c1cccc1)c1ccc2c(c1)[nH]c(=NC(=O)c1ccc(Br)s1)n2CCC(N)=O>>CN(C(=  
O)c1cccc1)c1ccc2c(c1)[nH]c(=NC(=O)c1ccc(/C=C/c3ccccc3N)s1)n2CCC(N)=O  
1595 C=C(CC(=O)OC)C(=O)OC.Clc1ccc(I)cc1>>COC(=O)C/C(=C\c1ccc(Cl)cc1)C(=O)OC  
1596 C=Cc1cc([N+](=O)[O-])cc([N+](=O)[O-])c1.COc1ccc(I)cc1>>COc1ccc(/C=C/c2cc([N+](=O)[O-  
])cc([N+](=O)[O-])c2)cc1  
1597 C=CC(C)=O.COC(=O)c1ccc(N)c(I)c1>>COC(=O)c1ccc(N)c(/C=C/C(C)=O)c1  
1598 C=CC(=O)OC.COc1nnc(C)c1I>>COC(=O)/C=C/c1c(C)nnc1OC  
1599 C=C1CC(c2ccc(Cl)cc2)OC1=O.CCOc1ccc(I)cc1>>CCOc1ccc(/C=C2\CC(c3ccc(Cl)cc3)OC2=O)cc1  
1600 C=Cc1cccc1.O=C(Nc1cc(C(F)(F)F)cc(C(F)(F)F)c1)c1ccc(I)ccc1O>>O=C(Nc1cc(C(F)(F)F)cc(C(F)(F)  
F)c1)c1cc(/C=C/c2ccccc2)ccc1O  
1601 C=CC(=O)OC.Cc1cccc1C(=O)c1sc2cc(O)ccc2c1-c1ccc(Br)cc1>>COC(=O)/C=C/c1ccc(-  
c2c(C(=O)c3ccccc3C)sc3cc(O)ccc23)cc1  
1602 C=Cc1ccc(OC)cc1.FC(F)(F)c1cccc1I>>COc1ccc(/C=C/c2ccccc2C(F)(F)F)cc1  
\*CNCCOCCOCCOCCNC(=O)COc1ccc(C(Cc2cc(OC)cc(OC)c2)NC(=O)c2ccccc(C=C)c2)cc1.Cc1cc  
1603 ([N+](=O)[O-]  
)ccc1I>>\*CNCCOCCOCCOCCNC(=O)COc1ccc(C(Cc2cc(OC)cc(OC)c2)NC(=O)c2ccccc(/C=C/c3  
ccc([N+](=O)[O-])cc3C)c2)cc1  
1604 C=Cc1cnc1.Ic1ccc2c(c1)OCO2>>C(=C/c1ccc2c(c1)OCO2)\c1cnc1  
1605 C=C1CC(c2ccc(C)cc2)OC1=O.CCOc1ccc(I)cc1>>CCOc1ccc(/C=C2\CC(c3ccc(C)cc3)OC2=O)cc1  
1606 C=CC(=O)OC.COc1ccc(-  
c2cn(S(=O)(=O)c3ccccc3)c3ncc(Br)cc23)cc1>>COC(=O)/C=C/c1cnc2c(c1)c(-  
1607 C=Cc1ccc(F)cc1.C[C@H](c1ccc(Br)cn1)[C@@](O)(Cn1cnc1)c1ccc(F)cc1F>>C[C@H](c1ccc(/C=C/  
c2ccc(F)cc2)cn1)[C@@](O)(Cn1cnc1)c1ccc(F)cc1F  
1608 C=Cc1cnc1.Oc1ccc(Br)cc1>>Oc1ccc(/C=C/c2cnc2)cc1  
C=CCCO.CC(=O)OC[C@H]1O[C@@H](Oc2n[nH]c(C(C)C)c2Cc2ccc(Br)cc2C)[C@H](OC(C)=O)[C  
1609 @@H](OC(C)=O)[C@@H]1OC(C)=O>>CC(=O)OC[C@H]1O[C@@H](Oc2n[nH]c(C(C)C)c2Cc2cc  
c(/C=C/CCO)cc2C)[C@H](OC(C)=O)[C@@H](OC(C)=O)[C@@H]1OC(C)=O  
1610 C=Cc1cccc1.Clc1cccc(Br)c1>>Clc1cccc(/C=C/c2ccccc2)c1



C=Cc1ccc(OC)c(O)c1.CC(=O)OC[C@H]1O[C@@H](Oc2ccc(I)cc2)[C@H](OC(C)=O)[C@@H]1OC(C)=O>>COc1ccc(/C=C/c2ccc(O[C@@H]3O[C@H](COC(C)=O)[C@@H](OC(C)=O)[C@H]3OC(C)=O)cc2)cc1O  
1611  
C=CS(=O)(=O)NCC(C)C.CC(C)(C)OC(=O)NCCc1ccccc1Br>>CC(C)CNS(=O)(=O)/C=C/c1ccccc1CCNC(=O)OC(C)(C)C  
1612  
C=CN1CCCC1=O.O=C1CCC(N2C(=O)c3ccccc(I)c3C2=O)C(=O)N1>>O=C1CCC(N2C(=O)c3ccccc(/C=C/N4CCCC4=O)c3C2=O)C(=O)N1  
1613  
C=CC(=O)OCN1C(=O)c2ccccc2C1=O.CCOC(=O)CSc1ccc(Br)cc1>>CCOC(=O)CSc1ccc(/C=C/C(=O)OCN2C(=O)c3ccccc3C2=O)cc1  
1614  
C=CC(=O)OCC.FC(F)(F)c1ccccc(I)c1>>CCOC(=O)/C=C/c1ccccc(C(F)(F)F)c1  
1615  
C=C(C)C(=O)O.COc1ccc(I)cc1>>COc1ccc(/C=C(\C)C(=O)O)cc1  
1616  
C=CC(=O)N(C)c1ccccc1.Clc1ccccc1>>CN(C(=O)/C=C/c1ccccc1)c1ccccc1  
1617  
C=CCOC(C)=O.COc1ccc([I+](c2ccc(OC)cc2)cc1>>COc1ccc(/C=C/COC(C)=O)cc1  
1618  
C=CC(=O)OC(C)(C)C.Cc1cc(Br)sc1C=O>>Cc1cc(/C=C/C(=O)OC(C)(C)C)sc1C=O  
1619  
C=Cc1ccccc1.COc1ccc(Cl)c(Nc2c(C#N)cnc3cc(Br)ccc23)c1>>COc1ccc(Cl)c(Nc2c(C#N)cnc3cc(/C=C/c4ccccc4)ccc23)c1  
1620  
C=Cc1ccc(OC)cc1.N#Cc1ccc(/C=C/c2cc(Br)cc(/C=C/c3ccc(C#N)cc3)c2)cc1>>COc1ccc(/C=C/c2cc(/C=C/c3ccc(C#N)cc3)cc(/C=C/c3ccc(C#N)cc3)c2)cc1  
1621  
C=CCc1c(OCc2cc(OC)ccc2Br)c(=O)oc2ccccc12>>COc1ccc2c(c1)COc1c(c3ccccc3oc1=O)C/C=C\2  
1622  
C=CC(=O)O.COc1ccccc(Br)c1>>COc1ccccc(/C=C/C(=O)O)c1  
1623  
C=CCN(C)C(=O)c1ccccc1Br>>C=C1CN(C)C(=O)c2ccccc21  
1624  
C=CC(=O)Nc1ccccc1NC(=O)OC(C)(C)C.CC(NCCN1CCOCC1)(C(=O)Nc1ccc(C(F)(F)F)cc1)c1ccc(Br)cc1>>CC(C)(C)OC(=O)Nc1ccccc1NC(=O)/C=C/c1ccc(C(C)(NCCN2CCOCC2)C(=O)Nc2ccc(C(F)(F)F)cc2)cc1  
1625  
C=CC(=O)OC(C)(C)C.COC(=O)c1cc2cc(I)c(OCc3ccccc3)c(OC)c2c(=O)o1>>COC(=O)c1cc2cc(/C=C/C(=O)OC(C)(C)C)c(OCc3ccccc3)c(OC)c2c(=O)o1  
1626  
C=CC(=O)N1[C@@H]2[C@H]3CC[C@]2(CS1(=O)=O)C3(C)C.Clc1ccc(I)cn1>>CC1(C)[C@@H]2CC[C@]13CS(=O)(=O)N(C(=O)/C=C/c1ccc(Cl)nc1)[C@@H]3C2  
1627  
C=CCNC(=O)c1cc(C)on1.CCOC(=O)c1ccccc(I)c1>>CCOC(=O)c1ccccc(/C=C/CNC(=O)c2cc(C)on2)c1  
1628  
C=Cc1ccc(/C=C/c2ccc(N(C)C)cc2)cc1.CN(C)c1ccc2c(-c3ccc(Br)cc3C(=O)[O-])c3ccc(=[N+](C)C)cc-3oc2c1>>CN(C)c1ccc(/C=C/c2ccc(C=Cc3ccc(-c4c5ccc(=[N+](C)C)cc-5oc5cc(N(C)C)ccc45)c(C(=O)[O-])c3)cc2)cc1  
1629  
Br1cnc2ccccc12.C=CP(=O)(OCC)OCC>>CCOP(=O)(/C=C/c1cnc2ccccc12)OCC  
1630  
C=Cc1ccc(OC)cc1.COC(=O)c1cc2cc(Br)ccc2cc1OC(C)=O>>COC(=O)c1cc2cc(/C=C/c3ccc(OC)cc3)cc2cc1OC(C)=O  
1631  
C=CCCN([C@@H](C)C(=O)OC)S(=O)(=O)c1ccccc1Br>>C=C1CCN([C@@H](C)C(=O)OC)S(=O)(=O)c2ccccc21  
1632  
C=C[C@@H](O[Si](C)(C)C(C)(C)C)[C@@H](OCCCCO[Si](C)(C)C(C)(C)C)[C@@H](CC(I)=CCO)O[Si](C)(C)C(C)(C)C>>C=C1C(=CCO)C[C@@H](O[Si](C)(C)C(C)(C)C)[C@@H](OCCCCO[Si](C)(C)C(C)(C)C)[C@@H]1O[Si](C)(C)C(C)(C)C  
1633  
C=CC(=O)OC(C)(C)C.COc1ccc(NCc2ccc(Br)cc2)cc1OC>>COc1ccc(NCc2ccc(/C=C/C(=O)OC(C)(C)C)cc2)cc1OC  
1634  
C=CC(OCC)OCC.Cc1ccccc(Br)c1>>CCOC(/C=C/c1ccccc(C)c1)OCC  
1635  
C=CC(=O)N(C)C.CC(=O)c1ccc(I)cc1>>CC(=O)c1ccc(/C=C/C(=O)N(C)C)cc1  
1636  
C=C[Si](C)(C)OCc1ccccc1Br>>C=C1c2ccccc2CO[Si]1(C)C  
1637  
C=CP(=O)(OCC)OCC.Cc1ccccc1Br>>CCOP(=O)(/C=C/c1ccccc1C)OCC  
1638  
C=CC(N)=O.COc1ccccc2c1CCC(C=O)=C2Br>>COc1ccccc2c1CCC(C=O)=C2/C=C/C(N)=O  
1639  
C=CCC(C(=O)OCC)N(C)c1ccccc1Br>>C=C1CC(C(=O)OCC)N(C)c2ccccc21  
1640  
C=CS(C)(=O)=O.O=Cc1ccc(Br)cc1>>CS(=O)(=O)/C=C/c1ccc(C=O)cc1  
1641  
C=CC1(O)CCN(C(=O)OC(C)(C)C)CC1.CCc1nn2c(C)cc(C)nc2c1Cc1ccc(Br)cc1>>CCc1nn2c(C)cc(C)nc2c1Cc1ccc(/C=C/C2(O)CCN(C(=O)OC(C)(C)C)CC2)cc1  
1642  
COC[C@@H](/N=C(\c1ccccc1)N1C=CCC[C@H]1c1ccccc1)C(C)C.FC(F)(F)c1ccccc(I)c1>>COC[C@@H](/N=C(\c1ccccc1)N1C=C(c2ccccc(C(F)(F)F)c2)CC[C@H]1c1ccccc1)C(C)C  
1643  
C=Cc1ccc(C(OCOCOC)c(C)c1.COc1ccc2c(C)c(Br)c(=O)oc2c1>>COCCOCOCc1c(C)cc(/C=C/c2c(C)c3ccc(OC)cc3oc2=O)cc1C  
1644  
C=CC(=O)OC.Fc1ccc(Cl)cc1>>COC(=O)/C=C/c1ccc(F)cc1  
1645  
C=Cc1ccccc1.O=C1OC(O)c2cc(Br)ccc21>>O=C1OC(O)c2cc(/C=C/c3ccccc3)ccc21  
1646  
C=CNC(C)=O.COC(=O)c1ccccc(OS(=O)(=O)C(F)(F)F)c1>>C=C(NC(C)=O)c1ccccc(C(=O)OC)c1  
1647  
C=CC(=O)OCC.CC(C)[C@H]1CC[C@]2(C)C[C@H]1c1c(c(Br)cc3c1[nH]c1ccccc13)O2>>CCOC(=O)/C=C/c1cc2c([nH]c3ccccc32)c2c1O[C@]1(C)CC[C@H](C(C)C)[C@H]2C1  
1648  
C=Cc1ccc(OC)cc1.O=C1CCC(c2ccc(Br)cc2)O1>>COc1ccc(/C=C/c2ccc(C3CCC(=O)O3)cc2)cc1  
1649

1650 C=CC(=O)N1CCOCC1.CN(C(=O)CSCc1cccc1)c1cccc1Br>>CN(C(=O)CSCc1cccc1)c1cccc1/C=C/C(=O)N1CCOCC1  
1651 C=CC(=O)OC(C)(C)C.[Si](C)(C)/C=C/C1=C(Br)CCCC1>>CC(C)(C)OC(=O)/C=C/C1=C(/C=C/[Si](C)(C)C)CCCC1  
1652 Br1cces1.C=Cc1ccnce1>>C(=C/c1cces1)\c1ccnce1  
1653 Br1ccc(I)cc1.C=CCP(=O)(OCC)OCC>>CCOP(=O)(C/C=C/c1ccc(Br)cc1)OCC  
1654 C=C[C@H](C)CCC=C(C)C.O=S(=O)(Oc1cccc1)C(F)(F)F>>C=C(c1cccc1)[C@H](C)CCC=C(C)C  
1655 Br1ccene1.C=Cn1c(-c2cccc2)c(-c2cccc2)oc1=O>>O=c1oc(-c2cccc2)c(-  
1656 C=Cc1ccc(OC)cc1.CC(=O)c1ccc(Br)cc1>>COc1ccc(/C=C/c2ccc(C(C)=O)cc2)cc1  
1657 C=CN1CCCC1=O.O=S(=O)(Oc1ccc(-c2cccc2)cc1)C(F)(F)F>>C=C(c1ccc(-  
1658 C=CC[C@H](C[C@H](CC=C)O[Si](C)(C)C(C)(C)C)Oc1c(Br)cccc1C(=O)OC(C)(C)C>>C=CC[C@H](C[C@H](CC(=O)OC(C)(C)C)c2cccc(C(=O)OC(C)(C)C)c2O1)O[Si](C)(C)C(C)(C)C  
1659 C=CC(=O)O.Cc1ccc(S(=O)(=O)N(C)c2cccc(I)c2)cc1>>Cc1ccc(S(=O)(=O)N(C)c2cccc(/C=C/C(=O)O)c2)cc1  
1660 C=Cc1cc(C(=O)OCC)ccc1N(C)C(=O)c1cccc1I>>C=C1c2cccc2C(=O)N(C)c2ccc(C(=O)OCC)cc21  
1661 C=Cc1cccc1.COC(=O)c1ccc(N)c(I)c1>>COC(=O)c1ccc(N)c(/C=C/c2cccc2)c1  
1662 C=CC(=O)OC.Cn1nc(I)c2ccnc21>>COC(=O)/C=C/c1nn(C)c2ncccc12  
1663 C=CC(=O)NC(C)C.Cc1ccc(I)cc1>>Cc1ccc(/C=C/C(=O)NC(C)C)cc1  
1664 C=C(C)C(=O)OCC.Clc1ccc(I)c1>>CCOC(=O)/C(C)=C/c1ccc(I)c1  
1665 C=CC(N)=O.Cc1cccc(I)c1>>Cc1cccc(/C=C/C(N)=O)c1  
1666 Br1cnenc1.C=CCN1C(=O)c2cccc2C1=O>>O=C1c2cccc2C(=O)N1C/C=C/c1cnenc1  
1667 C=C/C=C(\CCCC)OCC.Ic1cccc2cccc12>>CCCC/C(=C\C=C\Cc1cccc2cccc12)OCC  
1668 C=Cc1cnenc1.Cc1ccc(Br)cc1>>Cc1ccc(/C=C/c2cnenc2)cc1  
1669 C=CCCCCCC.CC(=O)c1cccc1Br>>CCCCC/C=C/c1cccc1C(C)=O  
1670 C=CC=O.COC(=O)c1ccc(I)cc1OC>>COC(=O)c1ccc(/C=C/C(=O)cc1OC  
1671 C=Cc1cccc(Nc2ncc(Cl)c(Nc3cccc(Br)c3)n2)c1>>Clc1enc2nc1Nc1cccc(c1)/C=C\Cc1cccc(c1)N2  
1672 Br1ccc2cc[nH]c2c1.C=CC(=O)O>>O=C(O)/C=C/c1ccc2cc[nH]c2c1  
1673 Br1cccc2cccc12.C=CS(=O)(=O)c1cccc1>>O=S(=O)/C=C/c1cccc2cccc12)c1cccc1  
1674 C=CC(=O)OCC.CCc1enc(CC)c(Cl)n1>>CCOC(=O)/C=C/c1nc(CC)enc1CC  
1675 C=CC(=O)N1CCCCC1.CCc1nc2cc(O)ccc2c(Oc2ccc(Br)cc2)c1-c1cccc1>>CCc1nc2cc(O)ccc2c(Oc2ccc(/C=C/C(=O)N3CCCCC3)cc2)c1-c1cccc1  
1676 Br1ccc2c(c1)OCO2.C=Cc1ccc(C)cc1>>Cc1ccc(/C=C/c2ccc3c(c2)OCO3)cc1  
1677 C=CC(=O)OC.O=C1NCCN1c1ccc(Br)cc1F>>COC(=O)/C=C/c1ccc(N2CCNC2=O)c(F)c1  
1678 C=C(C)C(=O)OC.CC(C)(N)c1cccc(Br)c1>>COC(=O)/C(C)=C/c1cccc(C(C)(C)N)c1  
1679 Br1ccc(-c2cnenc2)cc1.C=Cc1cccn1>>C(=C/c1cccn1)\c1ccc(-c2cnenc2)cc1  
1680 C=CC(=O)O.O=S(=O)(Nc1cccc(I)c1)c1ccc(Cl)cc1>>O=C(O)/C=C/c1cccc(NS(=O)(=O)c2ccc(Cl)cc2)Br1ccc(/C=C/c2cnenc2)c2nsnc12.C=Cc1ccc2c(c1)c1cccc1n2CCCC>>CCCCn1c2cccc2c2cc(/C=C/c3ccc(/C=C/c4cnenc4)c4nsnc34)ccc21  
1681 Br1ense1.C=CC(=O)OC(C)(C)C>>CC(C)(C)OC(=O)/C=C/c1ense1  
1682 C=Cc1cccc1C.Oc1cccc1I>>Cc1cccc1/C=C/c1cccc1O  
1683 CC(=O)/C=C/CC(NS(=O)(=O)c1ccc(C)cc1)c1ccc2cccc2c1.Cc1ccc(Br)cc1>>CC(=O)/C=C/CC(NS(=O)(=O)c1ccc(C)cc1)c1ccc2cccc2c1)c1ccc(C)cc1  
1684 C=CC(C)(C)O.Fc1ccc(Br)cc1>>CC(C)(O)/C=C/c1ccc(F)cc1  
1685 C=CCc1c(OCc2cccc2I)c(=O)oc2cccc12>>C=C1Cc2c(c(=O)oc3cccc23)OCc2cccc21  
1686 C=CC(=O)OC.FC1(F)C(I)=C1c1cccc1>>COC(=O)/C=C/C1=C(c2cccc2)C1(F)F  
1687 C=CC(NC(=O)OC(C)(C)C)C(C)C.COC(=O)c1c(Br)ccn1C>>COC(=O)c1c(/C=C/C(NC(=O)OC(C)(C)C)C(C)C)ccn1C  
1688 C=Cc1cccc1.CCCCC(Br)C(F)(F)F>>CCCCC(/C=C/c1cccc1)C(F)(F)F  
1689 C=CC(=O)CC.COc1ccc2cc(Br)ccc2c1>>CCC(=O)/C=C/c1ccc2cc(OC)ccc2c1  
1690 C=Cc1ccc(Cl)cc1.Cc1ccc(O)c(I)c1>>Cc1ccc(O)c(/C=C/c2ccc(Cl)cc2)c1  
1691 C=CC(=O)OC.CC(C)(C)OC(=O)N1CCC2(CC1)CC(=O)c1cc(Br)ccc1O2>>COC(=O)/C=C/c1ccc2c(c1)C(=O)CC1(CCN(C(=O)OC(C)(C)C)CC1)O2  
1692 C=CC(=O)OC(C)(C)C.O=S(=O)(Oc1ccc(I)cc1)C(F)(F)F>>CC(C)(C)OC(=O)/C=C/c1ccc(OS(=O)(=O)C(F)(F)F)cc1  
1693 C=CC(=O)N(C)C.Cc1ccc(-c2cccc2Br)cc1>>Cc1ccc(-c2cccc2/C=C/C(=O)N(C)C)cc1  
1694 C=CC(=O)OC.COc1ccc2c(=O)c(I)ccc2c1>>COC(=O)/C=C/c1ccc2cc(OC)ccc2c1=O  
1695 C=CC(=O)N1CCN(C)CC1.CC(C)(C)c1ccc2[nH]c3c(c2c1)CC(=O)Nc1ccc(I)cc1-3>>CN1CCN(C(=O)/C=C/c2ccc3c(c2)-c2[nH]c4ccc(C(C)(C)C)cc4c2CC(=O)N3)CC1  
1696 C=CCC(C)C.COc1cccc1CCL>>C=C(Cc1cccc1OC)CC(C)C  
1697

1698 C=CCNS(=O)(=O)c1ccc(C)cc1.Cc1ccccc1OS(=O)(=O)C(F)(F)F>>C=C(CNS(=O)(=O)c1ccc(C)cc1)c1  
 ccccc1C  
 1699 C=C1CC(c2ccccc2)OC1=O.Clc1cccc(I)c1>>O=C1OC(c2ccccc2)C/C1=C\c1cccc(Cl)c1  
 1700 C=CC#N.Oc1ccnc2ccc(Br)cc12>>N#C/C=C/c1ccc2nccc(O)c2c1  
 C=CCNC1=NCCN1C(=O)OCC.CC(=O)OCC1Cn2c3ccccc3c3c4c(c5c6cc(Br)ccc6n(c5c32)C1)C(=O)N  
 1701 (C(C)=O)C4>>CCOC(=O)N1CCN=C1NC/C=C/c1ccc2c(c1)c1c3c(c4c5ccccc5n5c4c1n2CC(COC(C)=  
 O)C5)CN(C(C)=O)C3=O  
 1702 C=CCNS(=O)(=O)c1cc(C(F)(F)F)cc(C(F)(F)F)c1.COc1ccc(Br)cc1>>COc1ccc(/C=C/CNS(=O)(=O)c2  
 cc(C(F)(F)F)cc(C(F)(F)F)c2)cc1  
 1703 C=CC(=O)OCCCC.CCN(c1ccccc1)c1cccc(Br)n1>>CCCCOC(=O)/C=C/c1cccc(N(CC)c2ccccc2)n1  
 Br1cncnc1.C=CCO[C@H]1CC(=O)O[C@H](C)C/C=C/C=C/[C@H](O[Si](C)(C)C(C)(C)C)[C@H]  
 1704 (C)C[C@H](CC(OC)OC)[C@H](O[C@H]2O[C@H](C)[C@H](O[C@H]3C[C@@](C)(O)[C@@  
 H](OC(=O)CC)[C@H](C)O3)[C@H](N(C)C)[C@H]2OC(C)=O)[C@H]1OC>>CCC(=O)O[C@H]1[C  
 @H](C)O[C@@H](O[C@H]2[C@H](N(C)C)[C@H](OC(C)=O)[C@H](O[C@@H]3[C@@H](OC)  
 [C@H](OC/C=C/c4cncnc4)CC(=O)O[C@H](C)C/C=C/C=C/[C@H](O[Si](C)(C)C(C)(C)C)[C@H](C)  
 C[C@H]3CC(OC)OC)[C@H](O[C@H]2C[C@@H](C)C)[C@H]1O  
 C=Cc1nc2c(N)nncn2n1[C@@H]1O[C@H](CO[Si](C)(C)C(C)(C)C)[C@@H](O[Si](C)(C)C(C)(C)C)[  
 1705 C@H]1O[Si](C)(C)C(C)(C)C.COc1ccc(Br)cc1>>COc1ccc(/C=C/c2nc3c(N)nncn3n2[C@@H]2O[C@  
 H](CO[Si](C)(C)C(C)(C)C)[C@@H](O[Si](C)(C)C(C)(C)C)[C@H]2O[Si](C)(C)C(C)(C)C)cc1  
 1706 C=C(CC(=O)OCC)C(=O)OCC.CC(=O)OCc1c(I)ccc(NC(=O)OC(C)(C)C)c1C>>CCOC(=O)C/C(=C\c1  
 ccc(NC(=O)OC(C)(C)C)c(C)c1COC(C)=O)C(=O)OCC  
 1707 C=C[C@@](C)(/C=C/c1ccc(O)cc1)CCC=C(C)C.COc1ccc(Br)cc1C=O>>COc1ccc(/C=C/[C@@](C)(/  
 C=C/c2ccc(O)cc2)CCC=C(C)C)cc1C=O  
 1708 Br1cnc2[nH]ccc2c1.C=CC(=O)OC(C)(C)C>>CC(C)(C)OC(=O)/C=C/c1cnc2[nH]ccc2c1  
 1709 C=CS(=O)(=O)c1ccccc1.Cc1ccc(Br)cc1>>Cc1ccc(/C=C/S(=O)(=O)c2ccccc2)cc1  
 1710 C=CC[C@H](N[S@](=O)C(C)(C)C)c1cc(C(F)(F)F)ccc1I>>C=C1C[C@H](N[S@](=O)C(C)(C)C)c2cc  
 (C(F)(F)F)ccc21  
 1711 C=CC(=O)OCCCC.COC(CNc1nc(SC)ncc1Br)OC>>CCCCOC(=O)/C=C/c1cnc(SC)nc1NCC(OC)OC  
 1712 C=CC(=O)OC(C)(C)C.O=S(=O)(c1ccc(Br)cc1)n1ccc2ccnc21>>CC(C)(C)OC(=O)/C=C/c1ccc(S(=O)(  
 =O)n2ccc3ccnc32)cc1  
 1713 C=CC(=O)OC.Oc1ccc(-c2ccc(Br)cc2)cc1C12CC3CC(CC(C3)C1)C2>>COC(=O)/C=C/c1ccc(-  
 c2ccc(O)c(C34CC5CC(CC(C5)C3)C4)c2)cc1  
 1714 C=C[13C](=O)N(Cc1ccccc1)OC.CC1=C(OS(=O)(=O)C(F)(F)F)C(C)(C)CCC1>>CON(Cc1ccccc1)[13  
 C](=O)/C=C/C1=C(C)CCCC1(C)C  
 1715 C=CCC(C)C(=O)OCC.COc1ccc(Br)cc1>>CCOC(=O)C(C)C/C=C/c1ccc(OC)cc1  
 1716 C=C1CC(c2ccc(C)cc2)OC1=O.Fc1ccccc1I>>Cc1ccc(C2C/C(=C\c3ccccc3F)C(=O)O2)cc1  
 1717 C=CC(=O)OC(C)(C)C.COc1ccc(Br)c(C(C)OCCC(=O)OC(C)(C)C)c1>>COc1ccc(/C=C/C(=O)OC(C)(  
 C)C)c(C(C)OCCC(=O)OC(C)(C)C)c1  
 1718 C=COCCCC.Ic1ccccc1>>C=C(OCCCC)c1ccccc1  
 1719 C=Cc1ccc(C)c(C)c1.COc1ccc(CN2C(=O)C(=C(c3ccc(O)cc3)c3ccc(O)cc3)c3cc(Br)ccc32)cc1>>COc1  
 ccc(CN2C(=O)C(=C(c3ccc(O)cc3)c3ccc(O)cc3)c3cc(/C=C/c4ccc(C)c(C)c4)ccc32)cc1  
 1720 C=C[C@@H](CO[Si](c1ccccc1)(c1ccccc1)C(C)(C)C)NS(C)(=O)=O.CC(=O)Oc1ccc(Br)cc1>>CC(=O)  
 )Oc1ccc(/C=C/[C@@H](CO[Si](c2ccccc2)(c2ccccc2)C(C)(C)C)NS(C)(=O)=O)cc1  
 1721 C=CC(=O)OC(C)(C)C.Nc1cc(I)ccc1Br>>CC(C)(C)OC(=O)/C=C/c1ccc(Br)c(N)c1  
 1722 C=CC(=O)OC.O=S(=O)(c1ccccc2ccccc12)N1CCc2cc(Br)cnc21>>COC(=O)/C=C/c1cnc2c(c1)CCN2S(  
 =O)(=O)c1ccccc2ccccc12  
 1723 C=CC(=O)OC.Cc1cc(OCc2ccccc2)ccc1Br>>COC(=O)/C=C/c1ccc(OCc2ccccc2)cc1C  
 1724 C=Cc1ccc(OC)cc1.CCN(CC)c1ccc2cc(C(=O)OCc3cc(I)ccc3[N+](=O)[O-  
 ])c(=O)oc2c1>>CCN(CC)c1ccc2cc(C(=O)OCc3cc(/C=C/c4ccc(OC)cc4)ccc3[N+](=O)[O-  
 1725 Br1ccnc1.C=C[P@](C)(=O)c1ccccc1>>C[P@](=O)(/C=C/c1ccnc1)c1ccccc1  
 1726 C=CC(=O)OC(C)(C)C.CC(C)=CCc1cc(I)cc2c1OC(C)(C)C=C2>>CC(C)=CCc1cc(/C=C/C(=O)OC(C)(  
 C)C)cc2c1OC(C)(C)C=C2  
 1727 Br1cnc2ccccc12.C=CC(=O)OC(C)(C)C>>CC(C)(C)OC(=O)/C=C/c1cnc2ccccc12  
 1728 C=CC(=O)N1CCOCC1.CC(C)(C)OC(=O)c1ccccc1Br>>CC(C)(C)OC(=O)c1ccccc1/C=C/C(=O)N1CC  
 OCC1  
 1729 C=CC(=O)OC.COc1ccc(Br)c(C=O)c1>>COC(=O)/C=C/c1ccc(OC)cc1C=O  
 1730 C=CCC(CCBr)CCCCCCCC>>C=C1CCC(CCCCCCCC)C1  
 1731 C=CC(=O)OCC.Cc1cnc2[nH]c3c(C)cc(Br)cc3c2c1>>CCOC(=O)/C=C/c1cc(C)c2[nH]c3ncc(C)cc3c2c  
 \*CNCCOCCOCCOCCCN(C(=O)COc1ccc(C(Cc2cc(OC)cc(OC)c2)NC(=O)c2ccc(C=C)cc2)cc1.Ic1cc  
 1732 ccc1>>\*CNCCOCCOCCOCCCN(C(=O)COc1ccc(C(Cc2cc(OC)cc(OC)c2)NC(=O)c2ccc(/C=C/c3ccc  
 cc3)cc2)cc1

1733 C=Cc1ccc(O)c(OC)c1.COC(=O)Cn1c(=O)c(Cl)nc2cccnc21>>COC(=O)Cn1c(=O)c(/C=C/c2ccc(O)c(O)C)c2)nc2cccnc21  
1734 C=CC(=O)O.CC(C)=CCc1cc(I)cc(CC=C(C)C)c1O>>CC(C)=CCc1cc(/C=C/C(=O)O)cc(CC=C(C)C)c1  
1735 C=Cc1cccc1.Cc1ccc(Br)c2nnnn12>>Cc1ccc(/C=C/c2cccc2)c2nnnn12  
C=CCn1c(-  
1736 c2ccc(C(F)(F)F)cc2)nc2cccc2c1=O.O=C(CN1C(=O)COc2cccc21)c1ccc(Br)cc1>>O=C(CN1C(=O)COc2cccc21)c1ccc(/C=C/Cn2c(-c3ccc(C(F)(F)F)cc3)nc3cccc3c2=O)cc1  
1737 BrC1CCCC1.C=Cc1cccc1>>C(=C/C1CCCC1)\c1cccc1  
1738 C=C/C=C(/OCC)[Si](C)(C)C.COc1cccc1I>>CCO/C(=C/C=C/c1cccc1OC)[Si](C)(C)C  
1739 C=Cc1ccc(C)nc1.CN1C2CCC1c1c([nH]c3c(Br)cccc13)C2>>Cc1ccc(/C=C/c2cccc3c4c([nH]c23)CC2C)CC4N2C)cn1  
1740 C=CC(=O)OCC.O=Cc1cc2cccc2nc1I>>CCOC(=O)/C=C/c1nc2cccc2cc1C=O  
1741 C=C(F)C(=O)OC.CC(=O)c1ccc(I)cc1>>COC(=O)/C(F)=C/c1ccc(C(C)=O)cc1  
1742 C=CC(=O)OC(C)(C)C.COc1ccc2cccc2c1Br>>COc1ccc2cccc2c1/C=C/C(=O)OC(C)(C)C  
1743 C=CC=O.FC1(F)C(I)=C1c1cccc1>>O=C/C=C/C1=C(c2cccc2)C1(F)F  
1744 Br1cccc(N2CCCC2)n1.C=CC(=O)OCCCC>>CCCCOC(=O)/C=C/c1cccc(N2CCCC2)n1  
1745 C=CC(=O)Nc1cccc2ccnc12.COc1ccc(I)cc1>>COc1ccc(/C=C/C(=O)Nc2cccc3ccnc23)cc1  
1746 C=CC(C)=O.C[Si](C)(C)CN(Cc1cc2c(cc1I)OCO2)C(CCOC(=O)c1cccc1)[Si](C)(C)C>>CC(=O)/C=C/c1cc2c(cc1CN(C[Si](C)(C)C)C(CCOC(=O)c1cccc1)[Si](C)(C)C)OCO2  
1747 C=Cc1cccc1.N#CCc1ccc(Br)cc1>>N#CCc1ccc(/C=C/c2cccc2)cc1  
1748 C=Cc1cccc1C.CCOC(=O)C(C)Br>>CCOC(=O)C(C)/C=C/c1cccc1C  
1749 C=CC(=O)O.CC(=O)Nc1ncc(Br)cc1C>>CC(=O)Nc1ncc(/C=C/C(=O)O)cc1C  
1750 C=Cc1ccc(C(C)(C)C)cc1.C[Si](C)(C)OS(=O)(=O)C(F)(F)F>>CC(C)(C)c1ccc(/C=C/[Si](C)(C)C)cc1  
1751 C=CC(=O)OC(C)(C)C.COc1cccc1NCc1ccc(Br)cc1>>COc1cccc1NCc1ccc(/C=C/C(=O)OC(C)(C)C)cc1  
1752 C=C1CN(C(=O)OCC)N1C(=O)OCC.Ic1cccc1>>CCOC(=O)N1C/C(=C/c2cccc2)N1C(=O)OCC  
1753 C=CC(=O)OCC.C=CCn1nnc2c(C)c(Br)ccc21>>C=CCn1nnc2c(C)c(/C=C/C(=O)OCC)ccc21  
1754 C=CC(=O)OC(C)(C)C.O=Cc1ccc(Cl)cc1>>CC(C)(C)OC(=O)/C=C/c1ccc(C=O)cc1  
1755 COC(=O)/C=C/Oc1ccc(F)cc1-c1cccc1Br>>COC(=O)/C=C1/Oc2ccc(F)cc2-c2cccc21  
1756 C=CC(C)(O)CCC=C(C)C.Cc1cccc1Br>>CC(C)=CCCC(C)(O)/C=C/c1cccc1C  
1757 C=CC(=O)OCc1cccc1.Nc1ncc(Br)en1>>Nc1ncc(/C=C/C(=O)OCc2cccc2)en1  
1758 Br1ccc(-c2cccc(C34CC5CC(CC(C5)C3)C4)c2)cc1.C=CC(=O)OC>>COC(=O)/C=C/c1ccc(-c2cccc(C34CC5CC(CC(C5)C3)C4)c2)cc1  
1759 C=CC(=O)OCCCC.CCOC(=O)Nc1ccc(C)cc1C1=C(I)CCN1S(=O)(=O)c1ccc(C)cc1>>CCCCOC(=O)/C=C/C1=C(c2cc(C)ccc2NC(=O)OCC)N(S(=O)(=O)c2ccc(C)cc2)CC1  
1760 C=CCCCCBr.ClC1cccc(Oc2cccc2)c1>>C=C(CCCCCBr)C1cccc(Oc2cccc2)c1  
1761 Br1ccc2cccc2c1.C=CC(=O)C(C)CC(=O)OC>>COC(=O)CC(C)C(=O)/C=C/c1ccc2cccc2c1  
1762 C=C(C)C(=O)OCC.Cc1ccc(Cl)cc1>>CCOC(=O)/C(C)=C/c1ccc(C)cc1  
1763 C=CC(=O)OCC.COc1cccc(I)c1>>CCOC(=O)/C=C/c1cccc(OC)c1  
1764 C=CCCN1C(=O)c2cccc2C1=O.Cc1ccc(I)cc1>>Cc1ccc(/C=C/CCN2C(=O)c3cccc3C2=O)cc1  
1765 C=C(NC(=O)OC(C)(C)C)C(=O)OC.Cc1cc(I)ccc1N>>COC(=O)/C(=C/c1ccc(N)c(C)c1)NC(=O)OC(C)C=C[C@H]1O[C@@H]2OC(C)(C)O[C@@H]2[C@H]1O.O=c1cc(-c2cccc2)oc2cc(Br)ccc12>>CC1(C)O[C@H]2O[C@H]/C=C/c3ccc4c(=O)cc(-c5cccc5)oc4c3)[C@H](O)[C@H]2O1  
1767 C=C.C=CCCCC1(CCC[C@H](C)OC(=O)c2c(OC)cc(OC)cc2OS(=O)(=O)C(F)(F)F)OCCO1>>C=CCC1(CCC[C@H](C)OC(=O)c2c(C=C)cc(OC)cc2OC)OCCO1  
1768 Br1cnc2cccc2c1.C=CC(=O)OCCCC>>CCCCOC(=O)/C=C/c1cnc2cccc2c1  
1769 Br1cccs1.C=CCCCCCCC>>CCCCCCCC/C=C/c1cccs1  
1770 C=CC(C)(O)CC/C=C(C)CCC=C(C)C.Oc1ccc(OCc2cccc2)cc1Br>>CC(C)=CCC/C(C)=C/CCC(C)(O)/C=C/c1cc(OCc2cccc2)ccc1O  
C=Cc1cc(OC)c(OC)c(OC)c1-  
1771 c1ccc(F)c(C)c1.COc1ccc(I)cc1>>COc1ccc(/C=C/c2cc(OC)c(OC)c(OC)c2-c2ccc(F)c(C)c2)cc1  
1772 C=CC(N)=O.COc1ncccc1I>>COc1ncccc1/C=C/C(N)=O  
1773 C=Cc1cccc1.Cc1cccc(C)c1I>>Cc1cccc(C)c1/C=C/c1cccc1  
1774 C=Cc1cc(OCCCCCCCCCCCCC)c(OCCCCCCCCCCCCC)c(OCCCCCCCCCCCCC)c1.Oc1ccc(I)cc1>>CCCCCCCCCCCCCOc1cc(/C=C/c2ccc(O)cc2)cc(OCCCCCCCCCCCCC)c1OCCCCCCCCCCCCC  
1775 C=Cc1cccc1.CC(C)(C)OC(=O)n1ccc2cc(OS(=O)(=O)C(F)(F)F)ccc21>>C=C(c1cccc1)c1ccc2c(ccn2C(=O)OC(C)(C)C)c1  
1776 C=CC(=O)CCC.O=Cc1ccc(Br)cc1>>CCCC(=O)/C=C/c1ccc(C=O)cc1  
1777 C=C(C)C(=O)OC.CC(=O)c1ccc(Cl)cc1>>COC(=O)/C(C)=C/c1ccc(C(C)=O)cc1

C=Cc1ccc(C(=O)OC)ccl.FC(F)(F)C(F)(F)C(F)(F)C(F)(F)Br>>COC(=O)c1ccc(/C=C/C  
 (F)(F)C(F)(F)C(F)(F)C(F)(F)C(F)(F)C(F)(F)cc1  
 C=CC(=O)O.Cc1ccc(Br)cc1>>Cc1ccc(/C=C/C(=O)O)cc1  
 C=Cc1nc2c(N)ncnc2n1[C@ @H]1O[C@H](CO[Si](C)(C)C(C)(C)C)[C@ @H](O[Si](C)(C)C(C)(C)C)[  
 C@H]1O[Si](C)(C)C(C)(C)C.Ic1cccc1>>CC(C)(C)[Si](C)(C)OC[C@H]1O[C@ @H](n2c(/C=C/c3cc  
 ccc3)nc3c(N)ncnc32)[C@H](O[Si](C)(C)C(C)(C)C)[C@ @H]1O[Si](C)(C)C(C)(C)C  
 C=CC(=O)OC.COc1ccc2ccccc2c1I>>COC(=O)/C=C/c1c(OC)ccc2ccccc12  
 C=CC(C)=O.COc1ccc2ccc(=O)oc2c1I>>COc1ccc2ccc(=O)oc2c1/C=C/C(C)=O  
 C=CC(=O)OC.CC1(C)OC(=O)Nc2ccc(Br)cc21>>COC(=O)/C=C/c1ccc2c(c1)C(C)(C)OC(=O)N2  
 C=Cc1cccc1.Cc1cc(I)nc(C(C)C)n1>>Cc1cc(/C=C/c2cccc2)nc(C(C)C)n1  
 C=Cc1cccc1.Clc1cccc1Br>>Clc1cccc1/C=C/c1cccc1  
 C=CC(CC)O[Si](C)(C)C(C)(C)C.COCCc1cccc1Br>>CCC(/C=C/c1cccc1COC)O[Si](C)(C)C(C)(C)C  
 C=CC(=O)OCC.Fc1cccc(Cn2nc(I)c3cccc32)c1>>CCOC(=O)/C=C/c1nn(Cc2cccc(F)c2)c2cccc12  
 Cc1ccc(S(=O)(=O)/C=C2\C(C)(C)C2(F)F)cc1.Ic1cccc1>>Cc1ccc(S(=O)(=O)/C=C2\C(C)(C)C2(F)F)  
 c2cccc2)cc1  
 C=CC(=O)OCC.CC[C@ @](C)(Oc1cc(Br)ccc1OCc1cccc1)[C@ @H](COCOC)NC(=O)OC(C)(C)C>>  
 CCOC(=O)/C=C/c1ccc(OCc2ccccc2)c(O[C@ @](C)(CC)[C@ @H](COCOC)NC(=O)OC(C)(C)C)c1  
 C=CC(=O)OC.CC(=O)c1cccc1I>>COC(=O)/C=C/c1cccc1C(C)=O  
 C=CCN(CC=C)c1ccc2c(OS(=O)(=O)C(F)(F)F)cc(=O)[nH]c2c1.C=COCCCC>>C=CCN(CC=C)c1ccc2  
 c(C(=C)OCCCC)cc(=O)[nH]c2c1  
 C=CS(=O)(=O)Oc1cccc1.COc1ccc(Br)cc1>>COc1ccc(/C=C/S(=O)(=O)Oc2ccccc2)cc1  
 C=CC(=O)O.COc1ccc(S(=O)(=O)N(C)c2cccc(I)c2)cc1OC>>COc1ccc(S(=O)(=O)N(C)c2cccc(/C=C/C  
 (=O)O)c2)cc1OC  
 Brclcccs1.C=CCNS(=O)(=O)c1ccc(C)cc1>>Cc1ccc(S(=O)(=O)NC/C=C/c2cccs2)cc1  
 Brclcccs1.C=C[Si](CC)(CC)CC>>CC[Si](/C=C/c1cccs1)(CC)CC  
 Brclenc2ccccc2c1.C=CCO[C@ ]1(C)C[C@ @H](C)C(=O)[C@H](C)[C@ @H](O)[C@ ](C)(O)[C@ @H  
 ](CC)OC(=O)[C@H](C)[C@ @H](O[C@H]2C[C@ @](C)(OC)[C@ @H](O)[C@H](C)O2)[C@H](C)[  
 C@H]1O[C@ @H]1O[C@H](C)C[C@H](N(C)C)[C@H]1O>>CC[C@H]1OC(=O)[C@H](C)[C@ @H  
 ](O[C@H]2C[C@ @](C)(OC)[C@ @H](O)[C@H](C)O2)[C@H](C)[C@ @H](O[C@ @H]2O[C@H](C  
 )C[C@H](N(C)C)[C@H]2O)[C@l(C)(OC/C=C/c2nc3ccccc32)C[C@ @H](C)C(=O)[C@H](C)[C@  
 C=CC(=O)N1CCOCC1.CCc1nc2c(N)nc3cc(Br)ccc3c2n1CC1CCOCC1>>CCc1nc2c(N)nc3cc(/C=C/C(  
 =O)N4CCOCC4)ccc3c2n1CC1CCOCC1  
 C=Cc1ccc(F)cc1.CCCCC(Br)C(F)(F)F>>CCCCC(/C=C/c1ccc(F)cc1)C(F)(F)F  
 C=CC(=O)OC.O=c1oc2ccccc2ce1Br>>COC(=O)/C=C/c1cc2ccccc2oc1=O  
 C=Cc1cccc1.O=Cc1sc2ccccc2c1Br>>O=Cc1sc2ccccc2c1/C=C/c1cccc1  
 C=CC(=O)OC.COCCc1ccc(Cl)cc1>>COCCc1ccc(/C=C/C(=O)OC)cc1  
 C=C/C=C/c1cccc1.COC(=O)c1ccc(Br)cc1>>COC(=O)c1ccc(/C=C/C=C/c2ccccc2)cc1  
 C=Cc1cccc1.CNc1cccc1I>>CNc1cccc1/C=C/c1cccc1  
 Brclccc2c(c1)c(CCc1cccc1)cn2-  
 c1cccc1.C=CC(=O)OC>>COC(=O)/C=C/c1ccc2c(c1)c(CCc1cccc1)cn2-c1cccc1  
 C=CC(OC)OC.COc1ccc(I)cc1F>>COc1ccc(/C=C/C(OC)OC)cc1F  
 C=CC(=O)OC.CCSclcc(I)cncl-c1nc2cc(C(F)(F)F)cnc2n1C>>CCSclcc(/C=C/C(=O)OC)cnc1-  
 c1nc2cc(C(F)(F)F)cnc2n1C  
 C=CC(C)=O.CC1=C(I)C(C)(C)C[C@H](O[Si](C)(C)C(C)(C)C)C1>>CC(=O)/C=C/C1=C(C)C[C@ @  
 H](O[Si](C)(C)C(C)(C)C)CC1(C)C  
 C=Cc1ccc(OC)cc1.CCCCC(Br)C(F)(F)F>>CCCCC(/C=C/c1ccc(OC)cc1)C(F)(F)F  
 C=C/C=C/c1cccc1.Cc1cc(-c2ccccc2I)cc(C)c1O>>Cc1cc(-c2ccccc2/C=C/C=C/c2ccccc2)cc(C)c1O  
 C=Cc1cccc1.O=Cc1cccc(Cl)c1>>O=Cc1cccc(/C=C/c2ccccc2)c1  
 C=Cc1cccc1.CN(C)c1ccc(Br)cc1>>CN(C)c1ccc(/C=C/c2ccccc2)cc1  
 C=CC(=O)OC.COc1cccc1Cl>>COC(=O)/C=C/c1cccc1OC  
 C=CCNC(=O)OC(C)(C)C.COCC(=O)c1ccc(Br)cc1>>C=C(CNC(=O)OC(C)(C)C)c1ccc(C(=O)OC)cc1  
 C=CC(C)=O.C[Si](C)(C)c1cccc1I>>CC(=O)/C=C/c1cccc1[Si](C)(C)C  
 \*CNCCCOCCOCCOCCCN(C(=O)COc1ccc(C(Cc2cc(OC)cc(OC)c2)NC(=O)c2ccc(C=C)cc2)cc1.O=Cc  
 1ccc(I)cc1>>\*CNCCOCCOCCOCCCN(C(=O)COc1ccc(C(Cc2cc(OC)cc(OC)c2)NC(=O)c2ccc(/C=C/  
 c3ccc(C=O)cc3)cc2)cc1  
 C=CC(=O)OC.N#Cc1c(-c2cccc(Br)c2)cc(-c2ccccc2)nc1N>>COC(=O)/C=C/c1cccc(-c2cc(-  
 c3ccccc3)nc(N)c2C#N)c1  
 C=CC(C)=O.CC#Cc1ence(Br)c1>>CC#Cc1ence(/C=C/C(C)=O)c1  
 Brclcc2ccccc2c2ccccc12.C=CC(=O)OCCCC>>CCCCOC(=O)/C=C/c1cc2ccccc2c2ccccc12  
 C=CCNC(=O)OC(C)(C)C.O=Cc1cccc(Br)c1>>C=C(CNC(=O)OC(C)(C)C)c1cccc(C=O)c1

[illegible]

C=CC[C@H](CC(=O)OC(C)(C)C)C(=O)N[C@H](C(=O)N[C@H](C)c1ccccc1)C(C)(C)C.Cc1cc(Br)cc  
 1860 c1-  
 c1ccccc1>>Cc1cc(/C=C/C[C@H](CC(=O)OC(C)(C)C)C(=O)N[C@H](C(=O)N[C@H](C)c2ccccc2)C(  
 1861 C=CC(=O)OC.CCCCN1c(-c2ccc(Br)cc2)nc2ccccc21>>CCCN1c(-  
 1862 C=CCOC(C)=O.Fc1cccc(I)c1>>CC(=O)OC/C=C/c1cccc(F)c1  
 1863 C=Cc1ccccc1.N#CCCCCCCCBr>>N#CCCCCCCC/C=C/c1ccccc1  
 1864 C=CC(=O)OC.Fc1cc(Br)c2[nH]ccc2c1>>COC(=O)/C=C/c1cc(F)cc2cc[nH]c12  
 1865 C=CC(=O)OC.O=C(Nc1cccc(Br)c1)C1CCCCC1>>COC(=O)/C=C/c1cccc(NC(=O)C2CCCCC2)c1  
 1866 C=C.CC(=O)c1ccc(I)cc1>>C=Cc1ccc(C(C)=O)cc1  
 1867 C=CC(=O)N1N=Cc2ccccc2C1c1ccc(C)cc1.COc1cc(Cc2cnc(N)nc2N)cc(I)c1OC>>COc1cc(Cc2cnc(N)  
 nc2N)cc(/C=C/C(=O)N2N=Cc3ccccc3C2c2ccc(C)cc2)c1OC  
 C=C[C@H](O[Si](C)(C)C(C)(C)C)[C@H](CCCC(=O)OC)O[Si](C)(C)C(C)(C)C.CCCCCC(=O)c1n  
 1868 cc(Br)c2ccccc12>>CCCCC(=O)c1ncc(/C=C/[C@H](O[Si](C)(C)C(C)(C)C)[C@H](CCCC(=O)OC  
 )O[Si](C)(C)C(C)(C)C)c2ccccc12  
 1869 C=CC(=O)OC.CCn1cnc2c(NCc3cccc(Br)c3)nc(N3CCC(C)CC3)nc21>>CCn1cnc2c(NCc3cccc(/C=C/C  
 (=O)OC)c3)nc(N3CCC(C)CC3)nc21  
 1870 C=CC(=O)OC(C)(C)C.Clc1ccc(Br)cc1>>CC(C)(C)OC(=O)/C=C/c1ccc(Cl)cc1  
 1871 C=Cc1ccc(F)cc1.O=[N+](O-)c1ccc(Br)cc1>>O=[N+](O-)c1ccc(/C=C/c2ccc(F)cc2)cc1  
 1872 C=CC(=O)OCC.O=c1cc(I)enn1Cc1ccccc1>>CCOC(=O)/C=C/c1enn(Cc2ccccc2)c(=O)c1  
 C=Cc1nc2c(N)ncnc2n1[C@H]1O[C@H](CO[Si](C)(C)C(C)(C)C)[C@H](O[Si](C)(C)C(C)(C)C)[  
 1873 C@H]1O[Si](C)(C)C(C)(C)C.O=[N+](O-  
 )c1ccc(Cl)cc1>>CC(C)(C)[Si](C)(C)OC[C@H]1O[C@H](n2c(/C=C/c3ccc([N+](=O)[O-  
 ])cc3)nc3c(N)ncnc32)[C@H](O[Si](C)(C)C(C)(C)C)[C@H]1O[Si](C)(C)C(C)(C)C  
 1874 C=CC(=O)OC.CC(=O)OC[C@H]1O[C@H](n2cnc(C(N)=O)c2I)[C@H](OC(C)=O)[C@H]1OC(C  
 )=O>>COC(=O)/C=C/c1c(C(N)=O)ncn1[C@H]1O[C@H](COC(C)=O)[C@H](OC(C)=O)[C@H]  
 1875 C=CC(C)(C)O.COC(=O)c1cccc2nc3c(Br)cccc3nc12>>COC(=O)c1cccc2nc3c(/C=C/C(C)(C)O)cccc3n  
 Brclccnc1.C=CCOC1=C(C)C(=O)O[C@H](CC)[C@H](C)(O)C=C(C)C(=O)[C@H](C)[C@H](C)(  
 1876 OC)[C@H](O[C@H]2O[C@H](C)C[C@H](N(C)C)[C@H]2OC(C)=O)[C@H]1C>>CC[C@H]1OC(  
 =O)C(C)=C(OC/C=C/c2ccnc2)[C@H](C)[C@H](O[C@H]2O[C@H](C)C[C@H](N(C)C)[C@H]  
 2OC(C)=O)[C@H]1(C)(OC)C[C@H](C)C(=O)C(C)=C[C@H]1(C)O  
 1877 C=Cc1csc2ccccc12.CCOC(=O)C(F)I>>CCOC(=O)C(F)/C=C/c1csc2ccccc12  
 1878 C=CC(=O)OC.Ic1ccc(O)cc1>>COC(=O)/C=C/c1ccc(O)cc1  
 1879 C=CC(=O)OCC.Oc1ccc(C(=C2CCCCC2)c2ccc(Br)cc2F)cc1>>CCOC(=O)/C=C/c1ccc(C(=C2CCCC  
 CC2)c2ccc(O)cc2)c(F)c1  
 1880 C=CC(=O)OC.CC(C)(C)OC(=O)NCCc1c[nH]c2ccc(Br)cc12>>COC(=O)/C=C/c1ccc2[nH]cc(CCNC(=O)  
 OC(C)(C)C)c2c1  
 1881 C=CC(=O)OC(C)(C)C.Cn1cnc1Br>>Cn1cnc1/C=C/C(=O)OC(C)(C)C  
 1882 C=C[C@H]1CC(C(=O)OC)(C(=O)OC)[C@H](c2cc(OC)c(OC)c(OC)c2)N(c2ccccc2)O1>>C=C1c2  
 cccc2N2O[C@H]1CC(C(=O)OC)(C(=O)OC)[C@H]2c1cc(OC)c(OC)c(OC)c1  
 1883 C=COCCCC.CC(=O)Nc1ccc(Cl)cc1>>C=C(OCCCC)c1ccc(NC(C)=O)cc1  
 1884 C=C1C(=O)O[C@H]2C[C@H]3(C)CCCC(=C)[C@H]3C[C@H]12.Ic1ccnc1>>C=C1CCC[C@]  
 2(C)C[C@H]3OC(=O)/C=C/c4ccnc4)[C@H]3C[C@H]12  
 1885 C=Cc1ccc(C(C#N)C#N)cc1.Cc1cnc(C)c1-c1c(C)cc(I)cc1C>>Cc1cnc(C)c1-  
 c1c(C)cc(/C=C/c2ccc(C(C#N)C#N)cc2)cc1C  
 1886 C=CC(=O)OC.COc1ccc(Cn2nc(I)c3c(NC4CCOCC4)nc32)cc1>>COC(=O)/C=C/c1nn(Cc2ccc(OC)c  
 c2)c2ccnc(NC3CCOCC3)c12  
 Brclccc(-  
 c2ccccc2)cc1.C=CCO[C@H]1CC(=O)O[C@H](C)C/C=C/C=C/[C@H](O[Si](C)(C)C(C)(C)C)[C@  
 1887 H](C)C[C@H](CC(OC)OC)[C@H](O[C@H]2O[C@H](C)[C@H](O[C@H]3C[C@H](C)(O)[C@  
 @H](OC(=O)CC)[C@H](C)O3)[C@H](N(C)C)[C@H]2OC(C)=O)[C@H]1OC>>CCC(=O)O[C@H]1[  
 C@H](C)O[C@H](O[C@H]2[C@H](N(C)C)[C@H](OC(C)=O)[C@H](O[C@H]3[C@H](O  
 C)[C@H](OC/C=C/c4ccc(-  
 c5ccccc5)cc4)CC(=O)O[C@H](C)C/C=C/C=C/[C@H](O[Si](C)(C)C(C)(C)C)[C@H](C)C[C@H]3C  
 C(C)C(C)C(C)C[C@H]12C[C@H]1(C)O  
 1888 C=CC(=O)OC(C)(C)C.O=c1oc2cc(O)ccc2c(Cc2ccc(Br)cc2)c1Cl>>CC(C)(C)OC(=O)/C=C/c1ccc(Cc2  
 c(Cl)c(=O)oc3cc(O)ccc23)cc1  
 1889 C=Cc1ccc(OC)cc1.CCOC(=O)C(F)(F)Br>>CCOC(=O)C(F)(F)/C=C/c1ccc(OC)cc1  
 1890 C=CC#N.COc1ccc2c(c1)C(Br)=C(C=O)CC2>>COc1ccc2c(c1)C(/C=C/C#N)=C(C=O)CC2  
 1891 C=Cc1ccc(Cl)cc1.C[Si](C)(C)I>>C[Si](C)(C)/C=C/c1ccc(Cl)cc1  
 1892 C=CCCc1ccccc1.O=C(O)Cc1ccc(Br)cc1>>O=C(O)Cc1ccc(/C=C/CCc2ccccc2)cc1

1893 C=Cc1cccc1.Ic1ccc2c(c1)C1c3cccc4cccc(c34)C21>>C(=C/c1ccc2c(c1)C1c3cccc4cccc(c34)C21)\c1cccc1

1894 C=C1CC(c2cccc2)OC1=O.FC(F)(F)c1cccc1I>>O=C1OC(c2cccc2)C/C1=C\c1cccc1C(F)(F)F

1895 C=CC(=O)OC.Cc1cccc(Br)n1>>COC(=O)/C=C/c1cccc(C)n1

1896 C=CC(=O)OC(C)(C)C.Cc1ccc(Br)ccc1C#N>>Cc1cc(/C=C/C(=O)OC(C)(C)C)ccc1C#N

1897 C=Cc1cccc1.FC(F)(F)c1ccc(I)cc1>>FC(F)(F)c1ccc(/C=C/c2cccc2)cc1

1898 C=Cc1ccc(OC)c(OC)c1.COc1ccc(Br)c(CCNC(C)=O)cc1OC>>COc1ccc(/C=C/c2cc(OC)c(OC)cc2CCN C(C)=O)cc1OC

1899 C=C[Si](CC)(CC)CC.O=Cc1cccc(Br)c1>>CC[Si](/C=C/c1cccc(C=O)c1)(CC)CC

1900 Br1ccc(I)cc1.C=Cc1ccc(F)cc1>>Fc1ccc(/C=C/c2ccc(Br)cc2)cc1

1901 C=Cc1ccc(OC(C)=O)cc1.CCn1c2ccc(Br)cc2c2cc(C=O)ccc21>>CCn1c2ccc(C=O)cc2c2cc(/C=C/c3ccc(OC(C)=O)cc3)ccc21

1902 Br1ccc2c(c1)CCc1cccc1N2.C=CC(=O)OC(C)(C)C>>CC(C)(C)OC(=O)/C=C/c1ccc2c(c1)CCc1cccc

1903 C=Cc1ncnc2c1ncn2C1CCCCO1.Ic1cccs1>>C(=C/c1ncnc2c1ncn2C1CCCCO1)\c1cccs1

1904 C=CC(=O)OC(C)(C)C.O=S(=O)(Oc1ccc(Br)cc1)C(F)(F)F>>CC(C)(C)OC(=O)/C=C/c1ccc(OS(=O)(=O)C(F)(F)F)cc1

1905 C=Cc1ccc(OC)cc1.COC(=O)/C=C/c1cccc(N(Cc2ccc(Br)cc2)C(=O)C2CCCC2)c1>>COC(=O)/C=C/c1cccc(N(Cc2ccc(/C=C/c3ccc(OC)cc3)cc2)C(=O)C2CCCC2)c1

1906 Br1ccenc1.C=CC(=O)OCC>>CCOC(=O)/C=C\c1ccenc1

1907 C=Cc1ccc(OC)cc1.N#Cc1ccc(Br)cc1>>COc1ccc(/C=C/c2ccc(C#N)cc2)cc1

1908 C=C1C(=O)N2C[C@H](O)C[C@H]2[C@H]1O.O=[N+](O-)]c1ccc(I)cc1>>O=C1/C(=C\c2ccc([N+](=O)[O-])cc2)[C@H](O)[C@H]2C[C@H](O)CN12

1909 C=Cc1cccc1.Nc1cccc1Br>>Nc1cccc1/C=C/c1cccc1

1910 C=CC(=O)OCC.CCOc1ccc(C(=O)CCC(=O)Nc2cc(-c3cccc3)c(Cc3ccc(Br)cc3)s2)cc1OCC>>CCOC(=O)/C=C/c1ccc(Cc2sc(NC(=O)CCC(=O)c3ccc(OCC)c(OCC)c3)cc2-c2cccc2)cc1

1911 C=C(NC(=O)OC(C)(C)C)C(=O)OC.COc1ccc(I)cc1>>COC(=O)/C(=C/c1ccc(OC)cc1)NC(=O)OC(C)(C=C(c1cc(OC)c(OC)c(OC)c1)c1ccc(OC)c(Br)n1.C=CC(=O)OC>>C=C(c1cc(OC)c(OC)c(OC)c1)c1ccc(OC)c(/C=C/C(=O)OC)n1

1912 C=Cc1ccc2cccc2c1.O=Cc1ccc(Br)cc1>>O=Cc1ccc(/C=C/c2ccc3cccc3c2)cc1

1913 C=CC1(O)CCC1.Ic1ccsc1>>OC1(/C=C/c2ccsc2)CCC1

1914 C=CC(C)OC(C)=O.CCCCCCCCOc1nc(-c2ccc(Br)cc2)nc1>>CCCCCCCCOc1nc(-c2ccc(/C=C/C(C)OC(C)=O)cc2)nc1

1915 CCCCC/C(=C/I)OC(=O)/C=C/c1cccc1>>CCCCCCC1=C/C(=C\c2cccc2)C(=O)O1

1916 C=CCCC(O)C=C(Br)c1ccc2c(c1)OCO2>>C=C1CCCC(O)C=C1c1ccc2c(c1)OCO2

1917 C=CN1C(=O)c2cccc2C1=O.Cc1ccc(S(=O)(=O)n2cc(I)c3c(Br)cccc32)cc1>>Cc1ccc(S(=O)(=O)n2cc(/C=C/N3C(=O)c4cccc4C3=O)c3c(Br)cccc32)cc1

1918 C=Cc1cccn1.CC(C)c1oc2cc3oc(=O)ccc3cc2c1OS(=O)(=O)C(F)(F)F>>CC(C)c1oc2cc3oc(=O)ccc3cc2c1/C=C/c1cccn1

1919 C=Cc1cccc1.O=c1c(Br)c(-c2ccc([N+](=O)[O-])cc2)oc2cccc12>>O=c1c(/C=C/c2cccc2)c(-c2ccc([N+](=O)[O-])cc2)oc2cccc12

1920 C=CC(=O)NC(C)C.C[C@]12C[C@@]34C=C(Sc5ccc(I)cc5)C(=O)[C@@](C)(CCC(=O)Nc5c(O)ccc(C(=O)O)c5O)[C@@H]3[C@H](C[C@@H]1C4)O2>>CC(C)NC(=O)/C=C/c1ccc(SC2=C[C@]34C[C@H]5C[C@H](O)[C@@]5(C)C3)[C@H]4[C@](C)(CCC(=O)Nc3c(O)ccc(C(=O)O)c3O)C2=O)cc1

1921 C=CC(=O)OC.O=C(O)c1cccc1I>>COC(=O)/C=C/c1cccc1C(=O)O

1922 C=CC(=O)OC.COCOc1ccc(C)nc1Br>>COCOc1ccc(C)nc1/C=C/C(=O)OC

1923 COC(=O)/C=C/Oc1cccc1-c1cc(F)c(F)cc1Br>>COC(=O)/C=C1/Oc2cccc2-c2cc(F)c(F)cc21

1924 C=CS(N)(=O)=O.Cc1cc(C)c(Br)c(C)c1>>Cc1cc(C)c(/C=C/S(N)(=O)=O)c(C)c1

1925 Br1c2cccc2cc2cccc12.C=CC(OCC)OCC>>CCOC(/C=C/c1c2cccc2cc2cccc12)OCC

1926 C=CCO.Cc1cccc(I)c1>>Cc1cccc(/C=C/CO)c1

1927 C=Cc1ccc(C(C)=O)cc1.COc1ccc(Br)cc1>>COc1ccc(/C=C/c2ccc(C(C)=O)cc2)cc1

1928 C=CC#N.CSc1nc(N)nc(-c2ccco2)c1I>>CSc1nc(N)nc(-c2ccco2)c1/C=C/C#N

1929 C=CC(C)(O)CCC=C(C)C.Ic1cccc1>>CC(C)=CCCC(C)(O)/C=C/c1cccc1

1930 C=CCCN1C(=O)c2cccc2C1=O.FC(F)(F)c1ccc(CCl)c1>>C=C(CCN1C(=O)c2cccc2C1=O)Cc1cccc(C(F)(F)F)c1

1931 Br1ccc2oc3ccc(N(c4cccc4)c4cccc4)cc3c2c1.C=Cc1ccncc1>>C(=C/c1ccc2oc3ccc(N(c4cccc4)c4cccc4)cc3c2c1)\c1ccncc1

1932 C=CC(=O)OCC[Si](C)(C)C.O=C(C(=O)N1CCCC[C@H]1C(=O)O)c1cccc(I)c1>>C[Si](C)(C)CCOC(=O)/C=C/c1cccc(C(=O)C(=O)N2CCCC[C@H]2C(=O)O)c1

1933 C=CC(=O)OC.Cc1cc([N+](=O)[O-])c(Cl)cc1>>COC(=O)/C=C/c1cc(Cl)c([N+](=O)[O-])cc1C

1934 C=CC(=O)OCCCC.O=[N+](O-)]c1cccc(Cl)c1>>CCCCOC(=O)/C=C/c1cccc([N+](=O)[O-])c1

1935



1936 Br1ccc(-c2ccccc2)c2ccccc12.C=CC(=O)OCC>>CCOC(=O)/C=C/c1ccc(-c2ccccc2)c2ccccc12

1937 C=CN1C(=O)[C@@H]2CN(C(=O)OC(C)(C)CCN2C1=O.Clc1ccc(I)cc1>>CC(C)(C)OC(=O)N1CCN2C(=O)N(/C=C/c3ccc(Cl)cc3)C(=O)[C@@H]2C1

1938 Br1cccc1.C=CCOc1cccc(C)c1>>Cc1cccc(OC/C=C/c2ccccc2)c1

1939 C=CCN(C(=O)C(C)(C)CCl)[C@@H]1CCc2ccccc21.O=C1Nc2ncccc2[C@@]12Cc1cc(I)enc1C2>>CC(C)(CCl)C(=O)N(C/C=C/c1enc2c(c1)C[C@@]1(C2)C(=O)Nc2ncccc21)[C@@H]1CCc2ccccc21

1940 C=Cc1cccc1.CC(=O)NCCc1cccc1Br>>CC(=O)NCCc1cccc1/C=C/c1cccc1

1941 C=CS(=O)(=O)c1cccc1.O=C1NC(=O)/C(=C/c2c[nH]c3ccc(Br)cc23)S1>>O=C1NC(=O)/C(=C/c2c[nH]c3ccc(/C=C/S(=O)(=O)c4ccccc4)cc23)S1

1942 C=CC(=O)OC.C[C@@H]1CC=C[C@H]2[C@H]1C(=O)N(Cc1cccc1)[C@H]2c1cccc(Br)c1>>COC(=O)/C=C/c1cccc([C@H]2[C@H]3C=CC[C@H](C)[C@@H]3C(=O)N2Cc2ccccc2)c1

1943 Br1cccc(-c2ccccc2)n1.C=CC(=O)OCc1cccc1>>O=C(/C=C/c1cccc(-c2ccccc2)n1)OCc1cccc1

1944 C=CC(=O)OC.CC(C)(C)OC(=O)N1CCC[C@H]1c1ccc(Br)cc1>>COC(=O)/C=C/c1ccc([C@@H]2CCCN2C(=O)OC(C)(C)C)cc1

1945 C=Cc1cccc1.O=C(OC[C@H]1O[C@@H](n2cc(I)c(=O)[nH]c2=O)C[C@@H]1OC(=O)c1cccc1)c1cccc1>>O=C(OC[C@H]1O[C@@H](n2cc(/C=C/c3ccccc3)c(=O)[nH]c2=O)C[C@@H]1OC(=O)c1cccc1)c1cccc1

1946 C=C(NC(C)=O)C(=O)OC.Cc1cc(C)cc(I)c1>>COC(=O)/C(=C/c1cc(C)cc(C)c1)NC(C)=O

1947 C=CC(=O)OCCCC.CCOC(=O)c1ccc(I)cc1>>CCCCOC(=O)/C=C/c1ccc(C(=O)OCC)cc1

1948 C=CC(=O)O.Fc1cc(Cl)c(Br)cc1F>>O=C(O)/C=C/c1cc(F)c(F)cc1Cl

1949 C=Cc1ccc(O)c(OC)c1.COC(=O)Cn1c(=O)c(Cl)nc2ccccc21>>COC(=O)Cn1c(=O)c(/C=C/c2ccc(O)c(O)C)c2nc2ccccc21

1950 C=Cc1ccccc1.IC1CCCCC1>>C(=C/C1CCCCC1)\c1ccccc1

1951 C=CC(=O)N(C)OC.Cc1cccc(I)c1>>CON(C)C(=O)/C=C/c1cccc(C)c1

1952 C=CC(=O)O.CC1(C)C=Cc2cc(I)c([N+](=O)[O-])cc2O1>>CC1(C)C=Cc2cc(/C=C/C(=O)O)c([N+](=O)[O-])cc2O1

1953 C=COCCCCO.COC(=O)c1ccc(I)cc1>>COC(=O)c1ccc(/C=C/OCCCCO)cc1

1954 C=CC(=O)O.Fc1ccc(Br)c(F)c1>>O=C(O)/C=C/c1ccc(F)cc1F

1955 C=COCCCC.Cc1ccc(Cl)cc1>>C=C(OCCCC)c1ccc(C)cc1

1956 C=CC(=O)OC.COc1ccc(C2=Cc3nc4ccccc4cc3C(CC(C)=O)N2c2ccc(Br)cc2)cc1>>COC(=O)/C=C/c1ccc(N2C(c3ccc(OC)cc3)=Cc3nc4ccccc4cc3C2CC(C)=O)cc1

1957 C=CC(=O)OCCCC.CC(=O)Nc1cccc(F)c1I>>CCCCOC(=O)/C=C/c1c(F)cccc1NC(C)=O

1958 C=CC(=O)OCC.COc1cc2nnc(Oc3ccc(I)cc3)c2cc1OC>>CCOC(=O)/C=C/c1ccc(Oc2nnc3cc(OC)c(O)C)cc23)cc1

1959 C=Cc1ncnc2c1nnc2C1CCCCO1.Ic1ccc(I)>>C(=C/c1ncnc2c1nnc2C1CCCCO1)\c1ccc(I)Cc1ccc(I)cc1.Cc1ccc(S(=O)(=O)/C=C2/C(C)(C)C2(F)F)cc1>>Cc1ccc(/C(=C2/C(C)(C)C2(F)F)S(=O)(=O)c2ccc(C)cc2)cc1

1960 C=CC(=O)OC(C)(C)C.CC1(C)CCC(=C(c2ccc(O)cc2)c2ccc(Br)cc2)CC1>>CC1(C)CCC(=C(c2ccc(O)c2)c2ccc(/C=C/C(=O)OC(C)(C)C)cc2)CC1

1961 C=Cc1ccc2c(c1)Sc1cccc1N2CC.CCn1c2ccccc2c2cc(Br)ccc21>>CCN1c2ccccc2Sc2cc(/C=C/c3ccc4c(c3)c3ccccc3n4CC)ccc21

1962 C=CC(=O)Oc1cccc1.N#Cc1ccc(Cl)cc1>>N#Cc1ccc(/C=C/C(=O)Oc2ccccc2)cc1

1963 C=Cc1ccc(O)cc1.Oc1ccc(-c2oc3cc(O)cc(Br)c3c2-c2cc(O)cc(O)c2)cc1>>Oc1ccc(/C=C/c2cc(O)cc3oc(-c4ccc(O)cc4)c(-c4cc(O)cc(O)c4)c23)cc1

1964 C=CC(=O)OC.CCCn1enc2c(NCc3cccc(Br)c3)nc(N3CCOCC3)nc21>>CCCN1enc2c(NCc3cccc(/C=C/C(=O)OC)c3)nc(N3CCOCC3)nc21

1965 C=CC(C)(C)C(=O)NC(C)(C)C(=O)O.COc1cc(C(C)C)c(Cc2ccc(Br)cc2)cc1[C@@H]1O[C@H](COC(C)=O)[C@@H](OC(C)=O)[C@H](OC(C)=O)[C@H]1OC(C)=O>>COc1cc(C(C)C)c(Cc2ccc(/C=C/C(C)(C)C(=O)NC(C)(C)C(=O)O)cc2)cc1[C@@H]1O[C@H](COC(C)=O)[C@@H](OC(C)=O)[C@H](OC(C)=O)[C@H]1OC(C)=O

1966 C=CC(=O)OC.CN(C)c1ccc(I)cc1>>COC(=O)/C=C/c1ccc(N(C)C)cc1

1967 C=CCCCNCc1cccc1.Ic1cccc1>>C(=C/c1cccc1)\CCCCNCc1cccc1

1968 C=Cc1ccc(-c2c(-c3ccc(C=C)cc3)c(=O)c2=O)cc1.COc1ccc(I)cc1>>C=Cc1ccc(-c2c(-c3ccc(/C=C/c4ccc(OC)cc4)cc3)c(=O)c2=O)cc1

1969 C=CC(C)O.I/C=C/C=C/CCCCOCc1cccc1>>CC(O)/C=C/C=C/C=C/CCCCOCc1cccc1

1970 C=Cc1ccc(-n2ccc3cncnc32)nc1.Ic1cccc1>>C(=C/c1ccc(-n2ccc3cncnc32)nc1)\c1cccc1

1971 C=Cc1ccc(Cl)cc1.C[Si](C)(OS(=O)(=O)C(F)(F)F)OS(=O)(=O)C(F)(F)F>>C[Si](C)(/C=C/c1ccc(Cl)cc1)OS(=O)(=O)C(F)(F)F

1972 C=CC(F)(F)C(F)(F)C(F)(F)C(F)(F)C(F)(F)C(F)(F)C(F)(F)C(F)(F)C(F)(F)F.CC1=Nc2ccc(I)cc2C1(C)C>>CC1=Nc2ccc(/C=C/C(F)(F)C(F)(F)C(F)(F)C(F)(F)C(F)(F)C(F)(F)F)cc2C1(C)C

1973

1974 Br1ccc(-c2nc3ccccc3c3c[nH]cc23)cc1.C=CC(=O)OC>>COC(=O)/C=C/c1ccc(-  
c2nc3ccccc3c3c[nH]cc23)cc1

1975 C=CS(=O)(=O)c1ccccc1.COc1ccc(Br)cc1>>COc1ccc(/C=C/S(=O)(=O)c2ccccc2)cc1

1976 C=C(F)[Si](C)(c1ccccc1)c1ccccc1.CCOC(=O)c1ccc(I)cc1>>CCOC(=O)c1ccc(/C=C(F)[Si](C)(c2ccccc2)c2ccccc2)cc1

1977 C=CC(=O)OC.CCN(CC)C(=O)n1c(Br)c(C)c2ccccc21>>CCN(CC)C(=O)n1c(/C=C/C(=O)OC)c(C)c2ccccc21

1978 C=CNC(C)=O.O=S(=O)(Oc1ccccc1Cl)C(F)(F)F>>C=C(NC(C)=O)c1ccccc1Cl

1979 C=CC(=O)OCC.Cc1nn(-c2cc(I)c(Cl)cc2F)c(=O)n1C(F)F>>CCOC(=O)/C=C/c1ccc(-n2nc(C)n(C(F)F)c2=O)c(F)cc1Cl

1980 C=CC(=O)OC.COC(=O)c1cccc(Br)n1>>COC(=O)/C=C/c1cccc(C(=O)OC)n1

1981 Br1ccc2ccccc2n1.C=Cc1cccn1>>C(=C/c1ccc2ccccc2n1)c1cccn1  
C=CCO[C@H]1O[C@H](COC(C)=O)[C@@H](OC(C)=O)[C@H](OC(C)=O)[C@@H]1OC(C)=O.Ic

1982 1ccccc1-c1ccccc1>>CC(=O)OC[C@H]1O[C@H](OC/C=C/c2ccccc2-c2ccccc2)[C@@H](OC(C)=O)[C@@H](OC(C)=O)[C@@H]1OC(C)=O

1983 C=CC(=O)OCC.Cc1cc(I)ccn1>>CCOC(=O)/C=C/c1ccnc(C)c1  
\*CNCCCOCOCOCOCNC(=O)COc1ccc(C(Cc2cc(OC)cc(OC)c2)NC(=O)c2ccc(C=C)cc2)cc1.Oc1c

1984 cc(I)cc1>>\*CNCCCOCOCOCOCNC(=O)COc1ccc(C(Cc2cc(OC)cc(OC)c2)NC(=O)c2ccc(/C=C/c3ccccc3)cc2)cc1

1985 C=CCCCBr.COc1ccc(CCl)cc1>>C=C(CCCCCBr)Cc1ccc(OC)cc1

1986 C=CCCCCCC.Cl1ccccc1>>CCCCC/C=C/c1ccccc1

1987 C=CC[Si](C)(C)C.CC(=O)c1ccc(Br)cc1>>C=C(C[Si](C)(C)C)c1ccc(C(C)=O)cc1

1988 C=CC(=O)OC.Cc1cc2c(c(C)c1Br)CC(C)(C)C2=O>>COC(=O)/C=C/c1c(C)cc2c(c1C)CC(C)(C)C2=O

1989 C=CCCN1C(=O)c2ccccc2C1=O.Cl1ccccc(I)c1>>O=C1c2ccccc2C(=O)N1CC/C=C/c1cccc(Cl)c1

1990 C=COCCCC.Cc1cc(CO)ccc1I>>C=C(OCCCC)c1ccc(CO)cc1C

1991 C=Cc1ccccc1C.Cc1ccc(Br)cc1>>Cc1ccc(/C=C/c2ccccc2C)cc1

1992 C=Cc1ccc(Br)cc1.COc1ccc(CNc2c(C)cc(C)cc2I)cc1>>COc1ccc(CNc2c(C)cc(C)cc2/C=C/c2ccc(Br)cc2)cc1

1993 C=CC(=O)OCC.Nc1cncnc1Br>>CCOC(=O)/C=C/c1cncnc1N

1994 C=Cc1cncnc1.CCCCCCCCCCOc1ccc(I)cc1>>CCCCCCCCCOc1ccc(/C=C/c2cncnc2)cc1

1995 Br1ccc2[nH]ccc2c1.C=CC[C@H]1C(=O)N(c2ccccc2)[C@@H]1c1ccc(OC)cc1>>COc1ccc([C@@H]2[C@@H](C/C=C/c3ccc4[nH]ccc4c3)C(=O)N2c2ccccc2)cc1

1996 C=CC(=O)OCC.FC(F)(F)c1ccc(Br)cn1>>CCOC(=O)/C=C/c1ccc(C(F)(F)F)nc1

1997 C=CC(O)CC.Cl1ccc(I)cc1>>CCC(O)/C=C/c1ccc(Cl)cc1

1998 C=Cc1ccc(C(C)(C)C)cc1.CCOC(=O)C(F)(F)Br>>CCOC(=O)C(F)(F)/C=C/c1ccc(C(C)(C)C)cc1

1999 C=Cc1cncnc1.CC(C)(C)OC(=O)N[C@H](COc1cncnc1Br)c1Cc1csc2ccccc12>>CC(C)(C)OC(=O)N[C@H](COc1cncnc1/C=C/c2cncnc2)c1Cc1csc2ccccc12

2000 C=C/C=C(C)(CCCC)OCC.COc1ccc(I)cc1>>CCCC/C=C(C=C)c1ccc(OC)cc1OCC

2001 C=CC(=O)OC.COC1OC(c2ccc(C)cc2)=C(I)c2nc3ccccc3cc21>>COC(=O)/C=C/C1=C(c2ccc(C)cc2)OC(OC)c2cc3ccccc3nc21

2002 C=CCCCC(=O)OC.CC(C)(C)c1ccc(Br)cc1>>C=C(CCCCC(=O)OC)c1ccc(C(C)(C)C)cc1

2003 C=CC1(O)CCC1.FC(F)(F)c1ccc(I)cc1>>OC1/C=C/c2ccc(C(F)(F)F)cc2)CCC1

2004 C=Cc1ccc(Cl)cc1.Oc1ccccc1I>>Oc1ccccc1/C=C/c1ccc(Cl)cc1

2005 C=C(NC(=O)OC(C)(C)C)C(=O)OC.CC(=O)OCc1cc(OCc2ccccc2)ccc1I>>COC(=O)/C=C/c1ccc(OCc2ccccc2)cc1COC(C)=O)NC(=O)OC(C)(C)C

2006 C=Cc1ccc(CCl)cc1.Ic1ccccc1>>ClCc1ccc(/C=C/c2ccccc2)cc1  
C=C[C@H]1C[C@H](CC(=O)OCC)OC(C)(C)O1.CCC(C)c1c(Br)c(-c2ccc(F)cc2)nn1-

2007 c1cnc(Nc2ccccc2)c1>>CCOC(=O)C[C@H]1C[C@H](/C=C/c2c(-c3ccc(F)cc3)nn(-c3cnc(Nc4ccccc4)c3)c2C(C)CC)OC(C)(C)O1

2008 C=CCN(C(=O)C(C)(C)C)[C@H](C)c1ccccc1.O=C1Nc2ccccc2[C@]12Cc1ccc(Br)cc1C2>>C[C@H](c1ccccc1)N(C/C=C/c1ccc2c(c1)C[C@@]1(C2)C(=O)Nc2ccccc21)C(=O)C(C)(C)C

2009 C=CC(=O)O.O=C1C(O)=C(I)C(=O)c2ccccc21>>O=C(O)/C=C/C1=C(O)C(=O)c2ccccc2C1=O

2010 C=C.O=C(O)c1ccc(I)cc1>>C=Cc1ccc(C(=O)O)cc1

2011 C=Cc1ccc2ccccc12.COC(=O)c1ccccc1I>>COC(=O)c1ccccc1/C=C/c1ccc2ccccc12

2012 C=Cc1ccc(CO)cn1.Cc1ncc(C#N)c(Nc2ccc3[nH]ccc3c2C)c1I>>Cc1ncc(C#N)c(Nc2ccc3[nH]ccc3c2C)c1/C=C/c1ccc(CO)cn1

2013 C=CC(=O)N(C)Cc1sc2ccccc2c1C.O=C1Nc2ncc(Br)cc2C12CCCCC2>>Cc1c(CN(C)C(=O)/C=C/c2cnc3c(c2)C2(CCCCC2)C(=O)N3)sc2ccccc12  
C=Cc1ccc([N+](=O)[O-]

2014 )ccc1OCOCC[Si](C)(C)C.COC(=O)c1ccc(I)cc1>>COC(=O)c1ccc(/C=C/c2ccc([N+](=O)[O-])ccc2OCOCC[Si](C)(C)C)cc1

2015 Br1ccc(I)cc1.C=CCN1C(=O)c2ccccc2C1=O>>O=C1c2ccccc2C(=O)N1C/C=C/c1ccc(Br)cc1

2016 C=CC(=O)N(C)Cc1oc2ccccc2c1C.CC(C)(C)OC(=O)NC1Cc2cc(Br)enc2NC1=O>>Cc1c(CN(C)C(=O)/C=C/c2cnc3c(c2)CC(NC(=O)OC(C)(C)C(=O)N3)oc2ccccc12

2017 C=CC[C@H]1C(=O)N(c2ccccc2)[C@@H]1c1ccc(OC)cc1.FC(F)(F)c1ccc(Br)cc1>>COc1ccc([C@@H]2[C@@H](C/C=C/c3ccc(C(F)(F)F)cc3)C(=O)N2c2ccccc2)cc1

2018 C=C(NC(C)=O)C(=O)O.COc1ccc(Br)cc1>>COc1ccc(/C=C(\NC(C)=O)C(=O)O)cc1

2019 C=Cc1ccc(N(C)C)cc1.CCCn1c(=O)c(C)nc2cc(Br)ccc21>>CCCN1c(=O)c(C)nc2cc(/C=C/c3ccc(N(C)C)cc3)ccc21

2020 C=CC(=O)OC.Nc1cnc(F)cc1Br>>COC(=O)/C=C/c1cc(F)nc1N

2021 C=Cc1ccc2ccccc2c1.FC(F)(F)c1ccccc1I>>FC(F)(F)c1ccccc1/C=C/c1ccc2ccccc2c1

2022 C=CCOc1ccccc1.CC(=O)c1ccc(I)cc1>>CC(=O)c1ccc(/C=C/COc2ccccc2)cc1

2023 C=CCN(Cc1ccc(F)cc1)Cc1cc2cc(OC)ccc2nc1Cl>>C=C1CN(Cc2ccc(F)cc2)Cc2cc3cc(OC)ccc3nc21

2024 C=CC(C)NC(=O)OC(C)(C)C.Fc1ccc(-n2ccc3c(Br)cccc32)cc1>>CC(/C=C/c1ccccc2c1enn2-c1ccc(F)cc1)NC(=O)OC(C)(C)C

2025 Br1ccccc1.C=CC(N)=O>>NC(=O)/C=C/c1ccccc1

2026 Br1csc2ccccc12.C=CC(=O)OC(C)(C)C>>CC(C)(C)OC(=O)/C=C/c1csc2ccccc12

2027 C=CC(=O)OCC.COc1cccc(Cl)c1>>CCOC(=O)/C=C/c1cccc(OC)c1

2028 C=C.O=Cc1ccc(Br)cc1O>>C=Cc1ccc(C=O)c(O)c1

2029 C=CC(=O)OCC.Nc1ccccc1I>>CCOC(=O)/C=C/c1ccccc1N

2030 Br1ccc2ccc3cccc4ccc1c2c34.C=CC=O>>O=C/C=C/c1ccc2ccc3cccc4ccc1c2c34

2031 CC(C)COC(=O)[C@@H](C)OC(=O)[C@@H](C/C=C1CCN([14c]2[14cH][14cH][14cH][14cH][14cH]2)C1=O)Nc1cc(Cl)ccc1I>>CC(C)COC(=O)[C@@H](C)OC(=O)[C@H]1C/C=C2/CCN([14c]3[14cH][14cH][14cH][14cH][14cH]3)C2=O)c2ccc(Cl)cc2N1

2032 C=CS(=O)(=O)c1ccccc1.FC(F)(F)c1ccc(Br)cc1>>O=S(=O)(/C=C/c1ccc(C(F)(F)F)cc1)c1ccccc1

2033 C=CC(=O)OC.C[C@@H](OC[C@H]1CO1)c1ccccc1Br>>COC(=O)/C=C/c1ccccc1[C@@H](C)OC[C@H]1CO1

2034 C=Cc1ccccc1.CC(C)(C)OC(=O)N1C[C@@H]2C[C@H](C1)c1cc(Br)cc(=O)n1C2>>CC(C)(C)OC(=O)N1C[C@@H]2C[C@H](C1)c1cc(/C=C/c3ccccc3)cc(=O)n1C2

2035 C=Cc1ccccc1.CSc1ccc(Br)cc1>>CSc1ccc(/C=C/c2ccccc2)cc1

2036 C=CC(=O)OC(C)(C)C.N#Cc1ccc(I)cc1>>CC(C)(C)OC(=O)/C=C/c1ccc(C#N)cc1

2037 Br1ccccc1.C=CC(=O)OCC(CC)CCCC>>CCCCC(CC)COC(=O)/C=C/c1ccccc1

2038 C=COCCN(C)C.N#Cc1ccc(Br)cc1>>C=C(OCCN(C)C)c1ccc(C#N)cc1

2039 C=COCCCC.O=C(Cl)c1ccoc1>>CCCCO/C=C/C(=O)c1ccoc1

2040 C=CC(=O)OCC.CC(C)(C)Nc1nc2cc(Br)ccc2c2c1CCO2>>CCOC(=O)/C=C/c1ccc2c3c(c(NC(C)(C)C)n2c1)CCO3

2041 C=Cc1c(F)c(F)c(F)c(F)c1F.N#Cc1c(F)c(F)c(Br)c(F)c1F>>N#Cc1c(F)c(F)c(/C=C/c2c(F)c(F)c(F)c(F)c2F)c(F)c1F

2042 C=COCCCC.N#Cc1ccc(Cl)cc1>>C=C(OCCCC)c1ccc(C#N)cc1

2043 C=CC#N.CN(C(=O)c1ncc2c(c1I)c1ccccc1n2S(=O)(=O)N(C)C)c1ccccc1>>CN(C(=O)c1ncc2c(c1/C=C/C#N)c1ccccc1n2S(=O)(=O)N(C)C)c1ccccc1

2044 C=CC(=O)N(C)C.Clc1nc(N2CCOCC2)c2sc3ncc(Br)cc3c2n1>>CN(C)C(=O)/C=C/c1cnc2sc3c(N4CCOCC4)nc(Cl)nc3c2c1

2045 C=CC(=O)N1CCc2cc(OC)c(OC)cc2C1.Cn1c(-c2ccccc2)c(I)c2ccnc21>>COc1cc2c(cc1OC)CN(C(=O)/C=C/c1c(-c3ccccc3)n(C)c3ncccc13)CC2

2046 C=Cc1cc2c(c(=O)n(C)c(=O)n2C)n1C.CC(=O)c1ccc(Br)c1>>CC(=O)c1cccc(/C=C/c2cc3c(c(=O)n(C)c(=O)n3C)n2C)c1

2047 C=CC(=O)OC.Nc1ccccc1Br>>COC(=O)/C=C/c1ccccc1N

2048 C=C(C)C(=O)OC.CC(C)n1cnc2c(Cl)nc(I)nc21>>COC(=O)/C(C)=C/c1nc(Cl)c2ncn(C(C)C)c2n1

2049 C=CS(=O)(=O)F.O=[N+][O-]c1ccc(I)cc1>>O=[N+][O-]c1ccc(/C=C/S(=O)(=O)F)cc1

2050 C=CC(=O)OCC.CS(=O)(=O)N1CCC(C2c3ccc(Cl)cc3C=C(Br)c3ccnc32)CC1>>CCOC(=O)/C=C/C1=Cc2cc(Cl)ccc2C(C2CCN(S(C)(=O)=O)CC2)c2ncccc21

2051 C=Cc1ccc(/C=C/c2ccc(N(C)C)cc2)cc1.O=c1cc2oc3cc(O)c(F)cc3c(-c3ccc(I)cc3S(=O)(=O)O)c-2cc1F>>CN(C)c1ccc(/C=C/c2ccc(/C=C/c3ccc(-c4c5cc(F)c(=O)cc-5oc5cc(O)c(F)cc45)c(S(=O)(=O)O)c3)cc2)cc1

2052 C=CCOC(Cl)c1ccc(OC)cc1>>C=C1COC(c2ccc(OC)cc2)C1

2053 C=CC#N.O=C1C=C(Br)CCC1>>N#C/C=C/C1=CC(=O)CCC1

2054 C=Cc1ccc(-c2ccc(OC)cc2CO)c(OCc2ccccc2)c1.COc1ccc(I)cc1Oc1ccc(C=O)cc1>>COc1ccc(-c2ccc(/C=C/c3ccc(OC)c(Oc4ccc(C=O)cc4)c3)cc2OCc2ccccc2)c(CO)c1

2055 C=CC(=O)OCCCCC.Ic1ccccc1>>CCCCCOC(=O)/C=C/c1ccccc1

2056 C=CC(N)=O.O=[N+][O-]c1ccc(Br)cc1>>NC(=O)/C=C/c1ccc([N+](=O)[O-])cc1

2057 C=CC(=O)OC(C)(C)C.COc1ccc2c(Oc3ccc(Br)cc3)csc2c1>>COc1ccc2c(Oc3ccc(/C=C/C(=O)OC(C)(C)C)cc3)csc2c1

2058 C=CS(=O)(=O)F.CC(C)[Si](Oc1cccc(I)c1)(C(C)C)C(C)C>>CC(C)[Si](Oc1cccc(/C=C/S(=O)(=O)F)c1)(C(C)C)C(C)C

2059 C=CC(=O)N(C)Cc1cc2ccccc2n1C.O=c1[nH]c2cc(Br)enc2[nH]1>>CN(Cc1cc2ccccc2n1C)C(=O)/C=C/c1cnc2[nH]c(=O)[nH]c2c1

2060 C=Cc1cccc1.C[C@]12CC[C@@H]3c4ccc(OS(=O)(=O)C(F)(F)F)cc4CC[C@H]3[C@@H]1CCC2=O>>C=C(c1cccc1)c1ccc2c(c1)CC[C@@H]1[C@@H]2CC[C@]2(C)C(=O)CC[C@@H]12

2061 C=CC(=O)NCCCCN(CCCNC(=O)OC(C)(C)C)C(=O)OC(C)(C)C.O=C(O)CC[C@@]12CCC(=O)C[C@@H]1Oc1ccc(Br)cc12>>CC(C)(C)OC(=O)NCCCCN(CCCNC(=O)/C=C/c1ccc2c(c1)[C@]1(CCC(=O)O)CCC(=O)C[C@@H]1O2)C(=O)OC(C)(C)C

2062 Brclcccc1.C=CC(=O)OCC(C)C>>CC(C)COC(=O)/C=C/c1cccc1

2063 C=C.N#Cc1cccc(I)c1>>C=Cc1cccc(C#N)c1

2064 C=CC(=O)OC.CC(C)(C)OC(=O)NCCOCc1nnn(CCO)c1I>>COC(=O)/C=C/c1c(COCCNC(=O)OC(C)(C)C)nnn1CCO

2065 C=CC(=O)OCC.Fc1ccc(-c2c(Br)c(C(F)(F)F)nn2-c2cccn2)cc1>>CCOC(=O)/C=C/c1c(C(F)(F)F)nn(-c2cccn2)c1-c1ccc(F)cc1

2066 C=CC(=O)C(C)C.COc1ccc2cc(Br)ccc2c1>>COc1ccc2cc(/C=C/C(=O)C(C)C)ccc2c1

2067 C=CC(=O)N(C)C.O=Cc1cccc1Br>>CN(C)C(=O)/C=C/c1cccc1C=O

2068 C=CC(=O)O.COC(=O)c1c(I)cc2c(c1OCc1cccc1)OCO2>>COC(=O)c1c(/C=C/C(=O)O)cc2c(c1OCc1cccc1)OCO2

2069 C=CCOC(C)=O.CC(C)(C)OC(=O)n1cc(I)c2ccccc21>>CC(=O)OC/C=C/c1cn(C(=O)OC(C)(C)C)c2ccc

2070 C=CC(=O)NCCc1ccc(F)cc1.COc1ccc2c(=O)c(I)coc2c1>>COc1ccc2c(=O)c(/C=C/C(=O)NCCc3ccc(F)cc3)coc2c1

2071 C=CC(C)(C)C.COc1nc(Br)ccc1C1CC1>>COc1nc(/C=C/C(C)(C)C)ccc1C1CC1

2072 C=CC(=O)OC.CC(C)c1cccc(OS(=O)(=O)C(F)(F)F)c1>>COC(=O)/C=C/c1cccc(C(C)C)c1

2073 C=Cc1ccc(N(c2ccc(OC)cc2)c2ccc(OC)cc2)cc1.Cn1c2ccc(Br)cc2c2cc(C=O)ccc21>>COc1ccc(N(c2ccc(/C=C/c3ccc4c(c3)c3cc(C=O)ccc3n4C)cc2)c2ccc(OC)cc2)cc1

2074 C=CC(=O)N1N=Cc2ccccc2C1C=C(C)C.COc1cc(Cc2cnc(N)nc2N)cc(I)c1OC>>COc1cc(Cc2cnc(N)nc2N)cc(/C=C/C(=O)N2N=Cc3ccccc3C2C=C(C)C)c1OC

2075 C=CC(=O)OC.Cn1cnc(Br)c1CC=C1CCCC1>>COC(=O)/C=C/c1nnc(C)c1CC=C1CCCC1

2076 C=CC(=O)OCC.Cc1cccc(Cn2nc(I)c3ccccc32)c1>>CCOC(=O)/C=C/c1nn(Cc2cccc(C)c2)c2ccccc12

2077 Brclcc2c(cc1C1OCCO1)OCO2.C=CC(=O)OC>>COC(=O)/C=C/c1cc2c(cc1C1OCCO1)OCO2

2078 C=CC(=O)OC.Cc1cc(-c2ccccc2)n2nc(-c3ccccc3)c(I)c2n1>>COC(=O)/C=C/c1c(-c2ccccc2)nn2c(-c3ccccc3)cc(C)nc12

2079 C=CC(=O)OC.COc1ccc2c(c1)CCN(c1ccc(CC(C)C)cc1)C2(c1ccc(Br)cc1)C(F)F>>COC(=O)/C=C/c1ccc(C2(C(F)F)c3ccc(OC)cc3CCN2c2ccc(CC(C)C)cc2)cc1

2080 C=Cc1cccc(OC)c1C(=O)c1c(Br)c(OC)c(C)c2c1OC(C)(C)OC2>>C=C1c2cccc(OC)c2C(=O)c2c3c(c(C)c(OC)c21)COC(C)(C)O3

2081 C=CC(=O)OC(C)(C)C.CCOC(=O)c1cc(-c2ccccc2)n(-c2ccc(I)cc2)c1C(=O)c1cccc1>>CCOC(=O)c1cc(-c2ccccc2)n(-C=Cc1cccc1.CCC1=C(C)c2cc3[nH]c(c(C)c3CO)c(Br)c3nc(c4c5[nH]c(cc1n2)c(C)c5C(=O)C4)[C@@H](CCC(=O)OC)[C@@H]3C>>CCC1=C(C)c2cc3[nH]c(c(C)c3CO)c(/C=C/c3ccccc3)c3nc(c4c5[nH]c(cc1n2)c(C)c5C(=O)C4)[C@@H](CCC(=O)OC)[C@@H]3C

2082 C=CC(=O)OC.C[C@@H]1CCC[C@H](NC(=O)OC(C)(C)C)c2cc(ccn2)-c2cc(I)c(N)cc2NC1=O>>COC(=O)/C=C/c1cc2c(cc1N)NC(=O)[C@H](C)CCC[C@H](NC(=O)OC(C)(C)C)c1cc-2ccn1

2083 C=Cc1ccc([N+](=O)[O-])cc1.Oc1cc(Br)ccc1/N=N/c1cccc1>>O=[N+](O-)]c1ccc(/C=C/c2ccc(/N=N/c3ccccc3)c(O)c2)cc1

2084 C=Cc1cc(CC)ccc1N(C)C(=O)c1cccc1I>>C=C1c2ccccc2C(=O)N(C)c2ccc(CC)cc21

2085 C=CCCC(=O)O.N#Cc1ccc(Br)cc1>>N#Cc1ccc(/C=C/CCCC(=O)O)cc1

2086 C=CC(=O)O.FC1(F)Oc2ccccc(I)c2O1>>O=C(O)/C=C/c1cccc2c1OC(F)(F)O2

2087 C=CC(=O)OC.CC(C)(C)OC(=O)N1C[C@H](F)C[C@H]1C(=O)Nc1cccc(Br)c1F>>COC(=O)/C=C/c1cccc(NC(=O)[C@@H]2C[C@@H](F)CN2C(=O)OC(C)(C)C)c1F

2088 Brclccc2c(c1)Cc1cccc1-2.C=Cc1nc2c(=O)[nH]c(N=CN(C)C)nc2n1[C@@H]1C[C@H](O)[C@@H](COC(c2ccccc2)(c2ccc(O)C)cc2)c2ccc(OC)cc2)O1>>COc1ccc(C(OC[C@H]2O[C@H](n3c(/C=C/c4ccc5c(c4)Cc4ccccc4-5)nc4c(=O)[nH]c(N=CN(C)C)nc43)C[C@@H]2O)(c2ccccc2)c2ccc(OC)cc2)cc1

2089 Brclcncc2ccccc12.C=CCN(C(=O)OC(C)(C)C)C(=O)OC(C)(C)C>>CC(C)(C)OC(=O)N(C/C=C/c1cncc2ccccc12)C(=O)OC(C)(C)C

2090 C=CC(=O)OCC.CC(=O)Nc1ccc(Br)cc1I>>CCOC(=O)/C=C/c1cc(Br)ccc1NC(C)=O

2091 C=CC(C)=O.COc1ccc(I)cc1>>COc1ccc(/C=C/C(C)=O)cc1

2092

2093 C=Cc1cccc1.CN(C)CCCC(=O)c1cccc(Br)c1>>CN(C)CCCC(=O)c1cccc(/C=C/c2cccc2)c1  
C=Cc1ccc([Si](OC)(OC)OC)cc1.CCOP(=O)(Cc1ccc(/C=C/c2ccc(-  
2094 c3ccc(Br)cc3)cc2)cc1)OCC>>CCOP(=O)(Cc1ccc(/C=C/c2ccc(-  
c3ccc(/C=C/c4ccc([Si](OC)(OC)OC)cc4)cc3)cc2)cc1)OCC  
2095 C=Cc1cccc1.Fc1ccc(Br)cc1>>Fc1ccc(/C=C/c2cccc2)cc1  
2096 C=[Si](C)(C)C.O=[N+][O-]c1cccc(I)c1>>C[Si](C)(C)/C=C/c1cccc([N+](=O)[O-])c1  
2097 C=Cc1ccc(OC(C)=O)cc1.CCOC(=O)C(F)(F)I>>CCOC(=O)C(F)(F)/C=C/c1ccc(OC(C)=O)cc1  
2098 C=CC(=O)NC[C@H](OC)[C@H](OC)c1cccc1NC(=O)[C@H](NC(=O)c1cccc(Br)c1)[C@H](  
C)CC>>CC[C@H](C)[C@H]1NC(=O)c2cccc(c2)/C=C/C(=O)NC[C@H](OC)[C@H](OC)c2cccc  
2099 C=Cc1ccc(N(c2cccc2)c2cccc2)cc1.CC(C)(C)OC(=O)CCCCCOCc1cc(Br)ccc1C=O>>CC(C)(C)OC  
(=O)CCCCCOCc1cc(/C=C/c2ccc(N(c3cccc3)c3cccc3)cc2)ccc1C=O  
2100 C=CC#N.O=c1cc(I)nn1Cc1cccc1>>N#C/C=C/c1nn(Cc2cccc2)c(=O)c1  
2101 C=Cc1cccc1.Cc1ccc(I)cc1>>Cc1ccc(/C=C/c2cccc2)cc1  
2102 C=CCN1CCc2c([nH]c3cccc23)C1Cc1cccc1Br>>C=C1CN2CCc3c([nH]c4cccc34)C2Cc2cccc21  
2103 C=CC(=O)OCC.COc1cc(-  
c2cc3cc(Br)cc(OC)c3o2)ccc1OCc1cccc1>>CCOC(=O)/C=C/c1cc(OC)c2oc(-  
2104 C=CC(N)=O.O=C(O)/C=C/c1cccc(Br)c1>>NC(=O)/C=C/c1cccc(/C=C/C(=O)O)c1  
2105 C=CC(=O)OCC.Nc1nnc2c1c(I)nn2C1Cc2cccc2C1>>CCOC(=O)/C=C/c1nn(C2Cc3cccc3C2)c2nnc  
(N)c12  
2106 C=CS(=O)(=O)N1CCC2(CC1)N=C(C1CCCC1)NC2=O.CC(=O)Nc1ccc(Br)c(C)c1>>CC(=O)Nc1ccc  
(/C=C/S(=O)(=O)N2CCC3(CC2)N=C(C2CCCC2)NC3=O)c(C)c1  
2107 C=Cc1cnccl.C[C@H](COc1nnc(Cl)c(Br)c1)NC(=O)OC(C)(C)C>>C[C@H](COc1nnc(Cl)c(/C=C/c2c  
cncc2)c1)NC(=O)OC(C)(C)C  
2108 C=CCC(CC(=C)Br)(C(=O)OCC)C(=O)OCC>>C=C1CC(C(=O)OCC)(C(=O)OCC)CC1=C  
2109 C=CC(=O)OC.CCOC(=O)C(/C=C/C(=O)OC)=C(\Cl)c1cccc1>>CCOC(=O)C(/C=C/C(=O)OC)=C(\C  
=C(\C(=O)OC)c1cccc1  
2110 C=CCC(C)O.FC(F)(F)c1ncc(Cl)c1>>CC(O)C/C=C/c1ncc(C(F)(F)F)c1  
2111 C=CC(=O)OC.Cc1cc(Br)cc(C)c1N>>COC(=O)/C=C/c1cc(C)c(N)c(C)c1  
2112 C=Cc1cccc1.CCCCCC(C)Br>>CCCCCCC(C)/C=C/c1cccc1  
2113 C=CC(=O)[C@@]1(O)C[C@H]2CC[C@]1(C)C2(C)C.COc1ccc(I)cc1>>COc1ccc(/C=C/C(=O)[C@@  
]2(O)C[C@H]3CC[C@]2(C)C3(C)C)cc1  
2114 C=Cc1ccc(OC)cc1.O=[N+][O-]c1ccc(I)cc1CO>>COc1ccc(/C=C/c2ccc([N+](=O)[O-])c(CO)c2)cc1  
2115 C=C(Br)CCO.C=Cc1cccc1>>C=C(/C=C/c1cccc1)CCO  
2116 C=CC(=O)OC.CC(C)(C)c1ccc(Cn2nc(I)c3cccc32)cc1>>COC(=O)/C=C/c1nn(Cc2ccc(C(C)(C)C)cc2)  
c2cccc12  
2117 C=Cc1cnccl.Nc1cccc(Br)c1>>Nc1cccc(/C=C/c2ccncc2)c1  
2118 C=C1CC(c2ccc(Cl)cc2)OC1=O.COc1cccc(I)c1>>COc1cccc(/C=C2\CC(c3ccc(Cl)cc3)OC2=O)c1  
2119 C=C(NC(C)=O)C(=O)C(=O)OC.CCOC(=O)c1[nH]c2cccc2c1Br>>CCOC(=O)c1[nH]c2cccc2c1/C=C(\NC(  
C)=O)C(=O)OC  
2120 C=CC(C)(C)O.O=c1cc(-c2cccc2)oc2ccc(Br)cc12>>CC(C)(O)/C=C/c1ccc2oc(-c3cccc3)cc(=O)c2c1  
2121 C=CC(C)=O.IC1=CO[C@H](COCc2cccc2)[C@H](OCc2cccc2)[C@H]1OCc1cccc1>>CC(=O)  
/C=C/C1=CO[C@H](COCc2cccc2)[C@H](OCc2cccc2)[C@H]1OCc1cccc1  
2122 C=CB1OC(C)CC(C)(C)O1.O=[N+][O-]c1ccc(I)cc1>>CC1CC(C)(C)OB(/C=C/c2ccc([N+](=O)[O-  
)cc2)O1  
2123 C=CC(=O)OCC.COc1ccc(Cl)cc1Br>>CCOC(=O)/C=C/c1cc(Cl)ccc1OC  
2124 C=CC(=O)N(C)Cc1cc2cccc2n1C.CN(C)c1n[nH]c2ncc(Br)cc12>>CN(Cc1cc2cccc2n1C)C(=O)/C=C/  
c1cnc2[nH]nc(N(C)C)c2c1  
2125 C=Cc1ccc(C(F)(F)F)nc1.Cc1nn(C)c(=O)c(-c2c(F)ccc(Cl)c2Br)c1OC(=O)C(C)C>>Cc1nn(C)c(=O)c(-  
c2c(F)ccc(Cl)c2/C=C/c2ccc(C(F)(F)F)nc2)c1OC(=O)C(C)C  
2126 C=CC(=O)OC.COc1cccc(I)c1>>COC(=O)/C=C/c1cccc(OC)c1  
2127 C=Cc1cccc1.Nc1cc([N+](=O)[O-])ccc1Br>>Nc1cc([N+](=O)[O-])ccc1/C=C/c1cccc1  
2128 C=CC(=O)CCCC.CC(=O)c1ccc(Br)cc1>>CCCCC(=O)/C=C/c1ccc(C(C)=O)cc1  
2129 C=CC(=O)OCC.CCOC(=O)CCOCc1cc(OCc2cccc2)c(OC)cc1Br>>CCOC(=O)/C=C/c1cc(OC)c(OCc  
2cccc2)cc1COCCC(=O)OCC  
2130 C=CC(=O)N(C)Cc1oc2cccc2c1C.O=C1Nc2ncc(Br)cc2CNC12CCCC>>Cc1c(CN(C)C(=O)/C=C/c2c  
nc3c(c2)CNC2(CCCC2)C(=O)N3)oc2cccc12  
2131 C=Cc1cccc1.Cc1nc(Br)c(-c2cccc2)o1>>Cc1nc(/C=C/c2cccc2)c(-c2cccc2)o1  
2132 C=CC(=O)OC.CC(=O)Nc1ccc(I)cc1>>COC(=O)/C=C/c1ccc(NC(C)=O)cc1  
2133 C=CC(C)=O.COc1ccc(Br)cc1>>COc1ccc(/C=C/C(C)=O)cc1  
2134 C=COC(CC)CCCC.CC(=O)c1ccc(Br)cc1>>C=C(OC(CC)CCCC)c1ccc(C(C)=O)cc1

2135 C=CC(=O)N(C)C.COCC1nc(Nc2ccc(C#N)cc2)nc(Nc2c(C)cc(/C=C/C#N)cc2C)c1I>>COCC1nc(Nc2ccc(C#N)cc2)nc(Nc2c(C)cc(/C=C/C#N)cc2C)c1/C=C/C(=O)N(C)C

2136 C=CC(=O)OC.CCOC(=O)CSc1ccc(Br)cc1>>CCOC(=O)CSc1ccc(/C=C/C(=O)OC)cc1  
C=CCN1C(=O)c2ccccc2C1=O.COc1ccc2sc(CNc3nncc(-

2137 c4c(C)cc(Br)cc4C)n3)nc2c1>>COc1ccc2sc(CNc3nncc(-  
c4c(C)cc(/C=C/CN5C(=O)c6ccccc6C5=O)cc4C)n3)nc2c1

2138 C=Cc1ccc(OC)cc1.CCCCN1c(C(=O)NC(C)(C)C)nc(Br)c1C(=O)NC(C)(C)C>>CCCN1c(C(=O)NC(C)(C)C)nc(/C=C/C2ccc(OC)cc2)c1C(=O)NC(C)(C)C  
C=Cc1ccc([Si](OC)(OC)OC)cc1.CC(C)SC(SC(C)C)C(=O)Nc1ccc(I)cc1>>CO[Si](OC)(OC)c1ccc(/C=

2139 C/c2ccc(NC(=O)C(SC(C)C)SC(C)C)cc2)cc1

2140 C=CC(=O)OC.O=C(c1ccccc1)c1ccc(I)cc1>>COC(=O)/C=C/c1ccc(C(=O)c2ccccc2)cc1

2141 C=CC(=O)OC.CC(=O)c1cc2cc(Br)ccc2o1>>COC(=O)/C=C/c1ccc2oc(C(C)=O)cc2c1

2142 Br1ccc(-c2cccs2)cc1.C=CC(=O)OCCCC>>CCCCOC(=O)/C=C/c1ccc(-c2cccs2)cc1

2143 C=Cc1ccc2ccccc2c1.COc1cc(C=O)c(Br)c(OC)c1OC>>COc1cc(C=O)c(/C=C/c2ccc3ccccc3c2)c(OC)c1

2144 C=CCCN(c1ccc2ccccc12)S(=O)(=O)c1ccccc1Br>>C=C1CCN(c2ccccc3ccccc23)S(=O)(=O)c2ccccc21  
C=CCC(C(=O)OC)N(C(=O)c1ccccc1I)C(C(=O)NCc1ccccc1)c1ccccc1>>C=C1CC(C(=O)OC)N(C(C(=O)NCc2ccccc2)c2ccccc2)C(=O)c2ccccc21

2145 C=Cc1ccc(C)cc1.Cc1ccc(N)c(Br)c1>>Cc1ccc(/C=C/c2cc(C)ccc2N)cc1

2146 C=CC(=O)OC.CCc1ccc(-c2nc(C)c(Br)s2)cc1>>CCc1ccc(-c2nc(C)c(/C=C/C(=O)OC)s2)cc1

2147 C=CC(=O)OC.Cc1cc2c(c(C)c1Br)CC(C)(C)C2>>COC(=O)/C=C/c1c(C)cc2c(c1C)CC(C)(C)C2

2148 Br1ccc2ccc3ccccc4ccc1c2c34.C=CC(=O)OCC(CC)CCCC>>CCCCC(CC)COC(=O)/C=C/c1ccc2ccc3c  
ccc4ccc1c2c34

2149 C=CC(=O)OC.COc1ccc(OC)c1I>>COC(=O)/C=C/c1c(OC)cccc1OC

2150 C=CC(=O)OCC.Oc1ccc(Br)c(F)c1>>CCOC(=O)/C=C/c1ccc(O)cc1F

2151 C=C[C@H](C(=O)N1C(=O)OC(C)(C)[C@@H]1C(C)C)[C@H](O[Si](C)(C)C(C)(C)C)c1ccc(OS(=O))(=O)c2ccc(C)cc2)cc1.Cc1ccc(S(=O)(=O)Oc2ccc(I)cc2)cc1>>Cc1ccc(S(=O)(=O)Oc2ccc(/C=C/[C@H](C(=O)N3C(=O)OC(C)(C)[C@@H]3C(C)C)[C@H](O[Si](C)(C)C(C)(C)C)c3ccc(OS(=O)(=O)c4ccc(C)cc4)cc3)cc2)cc1

2152 C=Cc1ccc2ccccc2c1.CCOC(=O)C(F)Br>>CCOC(=O)C(F)/C=C/c1ccc2ccccc2c1

2153 C=CC(=O)N(C)c1ccccc1I>>C=C1C(=O)N(C)c2ccccc21

2154 C=CC(=O)OC.COc1cc(I)c(-c2c(Cl)cccc2[N+](=O)[O-])c(OCc2ccccc2)c1>>COC(=O)/C=C/c1cc(OC)cc(OCc2ccccc2)c1-c1c(Cl)cccc1[N+](=O)[O-]

2155 C=CC1CCCCC1.O=S(=O)(Oc1ccccc1)C(F)(F)F>>C=C(c1ccccc1)C1CCCCC1

2156 C=CC(=O)OC(C)(C)C.COc1cc(C(=O)c2cn(Cc3ccc(Br)cc3)c3ccccc23)cc(OC)c1OC>>COc1cc(C(=O)c2cn(Cc3ccc(/C=C/C(=O)OC(C)(C)C)cc3)c3ccccc23)cc(OC)c1OC

2157 C=CC#N.Nc1cc(Br)cc(C(F)(F)F)c1>>N#C/C=C/c1cc(N)cc(C(F)(F)F)c1

2158 C=CCCC(CBr)CCCCCCCC>>C=C1CCCC(CCCCCCCC)C1

2159 C=Cc1ccnc2ccccc12.CCCCCCCCCC(=O)N1CCN(c2ccc(Br)cc2)CC1>>CCCCCCCCC(=O)N1CCN(c2ccc(/C=C/c3ccnc4ccccc34)cc2)CC1

2160 C=CC#N.Cc1cc(Br)cc(C)c1Nc1ccnc(NC2CCN(C(=O)OC(C)(C)C)CC2)n1>>Cc1cc(/C=C/C#N)cc(C)c1Nc1ccnc(NC2CCN(C(=O)OC(C)(C)C)CC2)n1

2161 C=Cc1ccccc1.COCC1nc(-c2ccccc2)c(Br)cc1O>>COCN1nc(-c2ccccc2)c(/C=C/c2ccccc2)cc1=O

2162 C=C(C)c1ccccc1.COC(=O)c1ccccc1I>>COC(=O)c1ccccc1/C=C(\C)c1ccccc1

2163 C=C[C@@H]1CCCCN1C(=O)OC(C)(C)C.CCc1ccc(I)cc1>>CCc1ccc(/C=C/[C@@H]2CCCCN2C(=O)OC(C)(C)C)cc1

2164 C=CC(=O)OC.O=c1oc2ccccc2cc1-c1ccc(I)cc1>>COC(=O)/C=C/c1ccc(-c2cc3ccccc3oc2=O)cc1

2165 Br1ccc2ccccc12.C=CC(OCC)OCC>>CCOC(/C=C/c1ccc2ccccc12)OCC

2166 C=CC(=O)OC.Clc1ccc(I)c1>>COC(=O)/C=C/c1ccc(Cl)c1

2167 C=CC(=O)OC.COc1nc(C)enc1N(C(=O)OCC(C)C)S(=O)(=O)c1ccccc1-c1ccc(I)cc1>>COC(=O)/C=C/c1ccc(-c2ncccc2S(=O)(=O)N(C(=O)OCC(C)C)c2ncc(C)nc2OC)cc1

2168 C=CS(=O)(=O)c1ccccc1.N#Cc1ccc(Br)cc1>>N#Cc1ccc(/C=C/S(=O)(=O)c2ccccc2)cc1

2169 C=C(NC(=O)OC(C)(C)C)C(=O)OC.COc1ccc(C=O)cc1Oc1ccc(I)cc1>>COC(=O)/C=C/c1ccc(Oc2cc(C=O)ccc2OC)cc1)NC(=O)OC(C)(C)C

2170 C=CC(OCC)OCC.O=Cc1ccc(Cl)cc1>>CCOC(/C=C/c1ccc(C=O)cc1)OCC

2171 C=CC(=O)OCCCC.COc1ccccc1I>>CCCCOC(=O)/C=C/c1ccccc1OC

2172 C=Cc1ccc(OCC)cc1.COc1ccc(I)cc1>>CCOc1ccc(/C=C/c2ccc(OC)cc2)cc1

2173 C=C[C@H](Cn1c(Br)c(-c2ccc(Oc3ccc(C(F)(F)F)cc3)cc2)c2c(N)ncnc21)NC(=O)OC(C)(C)C>>C=C1c2c(-c3ccc(Oc4ccc(C(F)(F)F)cc4)cc3)c3c(N)ncnc3n2C[C@H]1NC(=O)OC(C)(C)C

2174 C=CC(=O)OC.Ic1c(-c2ccccc2)nnn1Cc1ccccc1>>COC(=O)/C=C/c1c(-c2ccccc2)nnn1Cc1ccccc1

2175 C=CC(=O)OC.CCCOC(=O)/C=C/c1ccc(I)cc1>>CCCCOC(=O)/C=C/c1ccc(/C=C/C(=O)OC)cc1

2176

|      |                                                                                                                                                                                                                                                                                                                |
|------|----------------------------------------------------------------------------------------------------------------------------------------------------------------------------------------------------------------------------------------------------------------------------------------------------------------|
| 2177 | C=CC(C)=O.Ic1nc2nnc(Cc3ccccc3)c12>>C=C(O)/C=C/c1nc2nnc(Cc3ccccc3)c12                                                                                                                                                                                                                                           |
| 2178 | C=Cc1cccc(OC(F)(F)F)cc1.Cn1nc(I)c2cccc(C=O)cc21>>Cn1nc(/C=C/e2cccc(OC(F)(F)F)cc2)e2cccc(C=O)<br>cc21                                                                                                                                                                                                           |
| 2179 | C=CC(=O)OC.Cc1c(Br)ccc2c1N(Cc1ccc(C(F)(F)F)cc1)C(=O)C2=O>>COC(=O)/C=C/C1ccc2c(c1C)N<br>(Cc1ccc(C(F)(F)F)cc1)C(=O)C2=O                                                                                                                                                                                          |
| 2180 | Brc1ccc2ccc3cccc4ccc1c2c34.C=CC(=O)OCCCCCCC>>CCCCCOC(=O)/C=C/c1ccc2ccc3cccc4ccc1c<br>C=CC(=O)OC.CC(=O)OC[C@H]1OC=C(I)[C@@H](OC(C)=O)[C@H]1OC(C)=O>>COC(=O)/C=C/<br>C1=CO[C@H](COC(C)=O)[C@H](OC(C)=O)[C@@H]1OC(C)=O                                                                                            |
| 2181 | C=CS(=O)(=O)c1ccccc1.Cn1cc(C=O)c2cc(Br)ccc21>>Cn1cc(C=O)c2cc(/C=C/S(=O)(=O)c3ccccc3)cc<br>C=CC(=O)OCC.CC(C)(CC1Cc2ccccc2C1)NC[C@@H](O)COc1ccc(Br)c(F)c1F>>CCOC(=O)/C=C/C1<br>ccc(OC[C@H](O)CNC(C)(C)CC2Cc3ccccc3C2)c(F)c1F                                                                                     |
| 2182 | Brc1ccc2c(c1)-c1ncen1CCO2.C=CC(=O)OC(C)(C)C>>CC(C)(C)OC(=O)/C=C/c1ccc2c(c1)-<br>C/C1=C/CC[C@](C)(O[Si])(C)(C)C(C)(C)C)[C@H]2C=C(OS(=O)(=O)C(F)(F)F)[C@@H](C1)O2.C=<br>COCC>>C=C(OCC)C1=C[C@H]2O[C@@H]1C/C(C)=C\CC[C@]2(C)O[Si](C)(C)C(C)(C)C<br>C=CC(=O)OC(C)(C)C.Oc1ccc(I)cc1>>CC(C)(C)OC(=O)/C=C/c1ccc(O)cc1 |
| 2183 | C=CCNC(=O)c1ccccc1NC(=O)c1ccccc1.Ic1ccccc1>>O=C(Nc1ccccc1C(=O)NC/C=C/c1ccccc1)c1ccccc<br>C=Cc1cc(OC)ccc1OCc1ccccc1Br>>COc1ccc2c(c1)/C=C\C1ccccc1CO2                                                                                                                                                            |
| 2184 | Brc1ccc2ccccc2c1.C=Cc1ccc(OC)cc1>>COc1ccc(/C=C/C2ccc3ccccc3c2)cc1                                                                                                                                                                                                                                              |
| 2185 | C=CC(=O)O.Ic1ccc2c(c1)OCCOCCOCCOCCOCCO2>>O=C(O)/C=C/c1ccc2c(c1)OCCOCCOCCOCC<br>COCCO2                                                                                                                                                                                                                          |
| 2186 | Brc1sc2ccccc12.C=CC=O>>O=C/C=C/c1sc2ccccc12                                                                                                                                                                                                                                                                    |
| 2187 | C=CC(=O)OC.Cc1cc(F)cc(C)c1C(=O)c1sc2cc(O)ccc2c1Oc1ccc(Br)cc1>>COC(=O)/C=C/c1ccc(Oc2c(<br>C(=O)c3c(C)cc(F)cc3C)sc3cc(O)ccc23)cc1                                                                                                                                                                                |
| 2188 | C=CCNC(=O)OC(C)(C)C.Cc1ccccc(Cl)c1>>C=C(CNC(=O)OC(C)(C)C)c1ccccc(C)c1                                                                                                                                                                                                                                          |
| 2189 | C=CC(F)(F)C(F)(F)C(F)(F)C(F)(F)C(F)(F)C(F)(F)C(F)(F)C(F)(F)C(F)(F)C(F)(F)C(F)(F)F.O=Cc1ccc(Br)cc1>>O=Cc1ccc(/C<br>=C/C(F)(F)C(F)(F)C(F)(F)C(F)(F)C(F)(F)C(F)(F)C(F)(F)C(F)(F)C(F)(F)C(F)(F)F)cc1                                                                                                               |
| 2190 | C=CC(=O)OCC.CC(=O)c1ccc(Br)cc1>>CCOC(=O)/C=C/c1ccc(C(C)=O)cc1                                                                                                                                                                                                                                                  |
| 2191 | C=CCN1C(=O)c2ccccc2C1=O.COCC(=O)c1ccc(Br)cc1>>CCOC(=O)c1ccc(/C=C/CN2C(=O)c3ccccc3<br>C2=O)cc1                                                                                                                                                                                                                  |
| 2192 | C=CC[Si](OCC)(OCC)OCC.CCCCC(CC)COc1cc(/C=C/C2ccc(/C=C/C3ccc(Br)cc3)cc2)c(OCC(CC)CC<br>CC)cc1C>>CCCCC(CC)COc1cc(/C=C/C2ccc(/C=C/C3ccc(/C=C/C[Si](OCC)(OCC)OCC)cc3)cc2)c(O<br>CC(CC)CCCC)cc1C                                                                                                                    |
| 2193 | C=CC(=O)OCCCC.Cc1cc(Br)ccc1I>>CCCCOC(=O)/C=C/c1ccc(Br)cc1C                                                                                                                                                                                                                                                     |
| 2194 | C=CCCC(=O)O.CC(C)(C)c1ccc(I)cc1>>CC(C)(C)c1ccc(/C=C/CCC(=O)O)cc1                                                                                                                                                                                                                                               |
| 2195 | C=Cc1ccc(N(c2ccccc2)c2ccccc3ccccc23)cc1.O=Cc1c(F)cc(Br)cc1F>>O=Cc1c(F)cc(/C=C/C2ccc(N(c3c<br>ccccc3)c3ccccc4ccccc34)cc2)cc1F                                                                                                                                                                                   |
| 2196 | C=CC(=O)OCCCC.Clc1ccccc(Br)c1>>CCCCOC(=O)/C=C/c1ccccc(Cl)c1                                                                                                                                                                                                                                                    |
| 2197 | C=CC(=O)OC.C=CC[C@H](O)c1ccc(Br)cc1>>C=CC[C@H](O)c1ccc(/C=C/C(=O)OC)cc1                                                                                                                                                                                                                                        |
| 2198 | C=CC(=O)OC.COc1cc(C#N)ccc1I>>COC(=O)/C=C/c1ccc(C#N)cc1OC                                                                                                                                                                                                                                                       |
| 2199 | C=C(C)c1ccccc1.O=[N+][([O-])c1ccc(I)cc1>>C/C(=C\c1ccc([N+]=(O)[O-])cc1)c1ccccc1                                                                                                                                                                                                                                |
| 2200 | C=CCOCe1nnn(Cc2ccccc2)c1I>>C=C1COCe2nnn(Cc3ccccc3)c21                                                                                                                                                                                                                                                          |
| 2201 | C=CC(=O)OC.CCn1c(-c2ccc(Br)cc2)nc2ccccc21>>CCn1c(-c2ccc(/C=C/C(=O)OC)cc2)nc2ccccc21                                                                                                                                                                                                                            |
| 2202 | C=C(F)C(=O)OC.Cc1ccccc1I>>COC(=O)/C(F)=C/c1ccccc1C                                                                                                                                                                                                                                                             |
| 2203 | Brc1cccs1.C=C1C[C@H]2[C@@H]3CCc4cc(OC)ccc4[C@H]3CC[C@]2(C)C1=O>>COc1ccc2c(c1)C<br>C[C@H]1[C@@H]2CC[C@]2(C)C(=O)/C(=C/c3cccs3)C[C@H]12                                                                                                                                                                          |
| 2204 | C=CC(=O)OC(C)(C)C.Fc1ccc(I)cn1>>CC(C)(C)OC(=O)/C=C/c1ccc(F)nc1                                                                                                                                                                                                                                                 |
| 2205 | C=CC(=O)OC.COCC1=N[C@H](C(C)C)C(OCC)=N[C@H]1Cc1c(Br)n(C(=O)OC(C)(C)C)c2cc(OC)c<br>cc12>>CCOC1=N[C@H](C(C)C)C(OCC)=N[C@H]1Cc1c(/C=C/C(=O)OC)n(C(=O)OC(C)(C)C)c2cc(<br>OC)ccc12                                                                                                                                  |
| 2206 | C=C(CC(=O)OC)C(=O)OC.FC(F)(F)Oc1ccc(I)cc1>>COC(=O)C/C(=C\c1ccc(OC(F)(F)F)cc1)C(=O)O                                                                                                                                                                                                                            |
| 2207 | C=C1CC(c2ccc(C)cc2)OC1=O.Clc1ccccc(I)c1>>Cc1ccc(C2C/C(=C\c3ccccc(Cl)c3)C(=O)O2)cc1                                                                                                                                                                                                                             |
| 2208 | C=CC(=O)OCC.CC1(C)CC(=C(c2ccccc2)c2ccc(Br)cc2)CC(C)(C)C1>>CCOC(=O)/C=C/c1ccc(C(=C2<br>CC(C)(C)CC(C)(C)C2)c2ccccc2)cc1                                                                                                                                                                                          |
| 2209 | C=C(NC(C)=O)C(=O)OC.CC(C)(C)OC(=O)N[C@H](CCC(=O)OCc1ccccc1)COc1cc(C#N)ccc1I>>C<br>OC(=O)/C(=C/c1ccc(C#N)cc1OC[C@H](CCC(=O)OCc1ccccc1)NC(=O)OC(C)(C)C)NC(C)=O                                                                                                                                                   |
| 2210 | C=Cc1ccc([Si](OC)(OC)OC)cc1.CCOP(=O)(Cc1ccc(Br)cc1)OCC>>CCOP(=O)(Cc1ccc(/C=C/C2ccc([<br>Si](OC)(OC)OC)cc2)cc1)OCC                                                                                                                                                                                              |
| 2211 | C=C[C@H]1CC(C(=O)OC)(C(=O)OC)[C@H](c2ccccc2)N(c2ccccc2)O1>>C=C1c2ccccc2N2O[C<br>@H]1CC(C(=O)OC)(C(=O)OC)[C@H]2c1ccccc1                                                                                                                                                                                         |
| 2212 | CCOC(=O)/C=C/Oc1ccccc1-c1ccccc1Br>>CCOC(=O)/C=C1/Oc2ccccc2-c2ccccc21                                                                                                                                                                                                                                           |
| 2213 | C=CC(=O)OCC.C[Si](C)(C)c1ccccc1Br>>CCOC(=O)/C=C/c1ccccc1[Si](C)(C)C                                                                                                                                                                                                                                            |
| 2214 |                                                                                                                                                                                                                                                                                                                |
| 2215 |                                                                                                                                                                                                                                                                                                                |
| 2216 |                                                                                                                                                                                                                                                                                                                |
| 2217 |                                                                                                                                                                                                                                                                                                                |
| 2218 |                                                                                                                                                                                                                                                                                                                |

2219 C=Cc1cccc(OC)c1.C[Si](C)(C)I>>COc1cccc(/C=C/[Si](C)(C)C)c1  
 2220 C=CC(=O)OCC.Cc1nc(-n2c(C)ccc2C)cc(NC2CCCC2)c1Br>>CCOC(=O)/C=C/c1c(NC2CCCC2)cc(-  
 n2c(C)ccc2C)nc1C  
 2221 C=CC(OC(C)=O)OC(C)=O.O=C1c2ccc(Br)cc2CCN1CCCc1ccccc1>>CC(=O)OC(/C=C/c1ccc2c(c1)C  
 CN(CCCc1ccccc1)C2=O)OC(C)=O  
 2222 C=CC(=O)OC(C)(C)C.CC(=O)c1ccccc1Br>>CC(=O)c1ccccc1/C=C/C(=O)OC(C)(C)C  
 2223 C=CC(=O)c1ccccc1.COc1ncc(I)c(OC)n1>>COc1ncc(/C=C/C(=O)c2ccccc2)c(OC)n1  
 2224 C=CP(=O)(OCC)OCC.Cc1cccc(Br)c1>>CCOP(=O)/C=C/c1cccc(C)c1)OCC  
 2225 C=CC[C@H](N[S@](=O)C(C)(C)C)c1c(F)cccc1I>>C=C1C[C@H](N[S@](=O)C(C)(C)C)c2c(F)cccc2  
 C=CCN.Nc1nc(=O)n([C@@H]2O[C@H](COP(=O)(O)OP(=O)(O)OP(=O)(O)OP(=O)(O)[C@@H](O)[C@H]2  
 O)cc1I>>NC/C=C/c1cn([C@@H]2O[C@H](COP(=O)(O)OP(=O)(O)OP(=O)(O)OP(=O)(O)[C@@H](O)[C@H]2  
 H)2O)c(=O)nc1N  
 2227 C=Cc1ccc(OC)cc1.O=[N+][([O-])c1cccc(Br)c1>>COc1ccc(/C=C/c2cccc([N+](=O)[O-])c2)cc1  
 2228 C=CC(=O)OCC.OCc1cccc(Br)n1>>CCOC(=O)/C=C/c1cccc(CO)n1  
 2229 C=CC(=O)OC.CCOC(=O)c1cc(Br)c2cc(Cc3ccc(F)cc3)cnc2c1OC>>CCOC(=O)c1cc(/C=C/C(=O)OC)c  
 2cc(Cc3ccc(F)cc3)cnc2c1OC  
 2230 Br1cccn1.C=Cc1c(C)n(Cc2ccccc2)ccc1=O>>Cc1c(/C=C/c2cccn2)c(=O)ccn1Cc1ccccc1  
 2231 C=CC(=O)OCC.Oc1ccc(I)cc1>>CCOC(=O)/C=C/c1ccc(O)cc1  
 2232 C=CCN(C(=O)OC(C)(C)C)C(=O)OC(C)(C)C.Clc1cccc1>>CC(C)(C)OC(=O)N(C/C=C/c1ccccc1)C(=O)OC(C)(C)C  
 2233 C=CCOC(C)=O.Cc1ccc([I+](c2ccc(C)cc2)cc1>>CC(=O)OC/C=C/c1ccc(C)cc1  
 2234 C=C/C=C/c1ccccc1.CCCCC(Br)C(F)(F)F>>CCCCC(/C=C/C=C/c1ccccc1)C(F)(F)F  
 2235 Cc1ccc(I)cc1.[11CH2]=Cc1ccccc1>>Cc1ccc(/[11CH]=C/c2ccccc2)cc1  
 2236 C=C[C@]1(CCCCC)CCSc2ccccc21.Ic1ccccc1>>CCCCC[C@]1(/C=C/c2ccccc2)CCSc2ccccc21  
 2237 C=Cc1cccn1.Cc1ncc(C#N)c(Nc2ccc3[nH]ccc3c2C)c1I>>Cc1ncc(C#N)c(Nc2ccc3[nH]ccc3c2C)c1/C=CC/c1cccn1  
 2238 C=CC(=O)OC.COC(=O)c1ccc(Br)cc1>>COC(=O)/C=C/c1ccc(C(=O)OC)cc1  
 2239 Br1ccc(-c2nc3ccccc3n2)cc1.C=CCn1c(-c2ccc(OCC)cc2)nc2ccccc2c1=O>>CCOc1ccc(-c2nc3ccccc3c(=O)n2C/C=C/c2ccc(-c3nc4ccccc4n3)cc2)cc1  
 2240 C=CCCCCCC.COc1ccccc1OS(=O)(=O)C(F)(F)F>>C=C(CCCCCC)c1ccccc1OC  
 2241 Br1ccc(OCc2ccccc2)cc1.C=Cc1cccc([N+](=O)[O-])c1>>O=[N+][([O-])c1cccc(/C=C/c2ccc(OCc3ccccc3)cc2)c1  
 2242 C=CB1OC(C)CC(C)(C)O1.Ic1ccccc1>>CC1CC(C)(C)OB(/C=C/c2ccccc2)O1  
 2243 C=CC(=O)OC(C)(C)C.CS(=O)(=O)c1ccc(Br)cc1>>CC(C)(C)OC(=O)/C=C/c1ccc(S(C)(=O)=O)cc1  
 2244 C=C/C=C/C(CCCC)OCC.CC(=O)c1ccc(Br)cc1>>CCCC/C(=C/C=C/c1ccc(C(C)=O)cc1)OCC  
 2245 C=CC(=O)OCC.CC(=O)O[IH2](OC(C)=O)c1c(C)cc(C)cc1C>>CCOC(=O)/C=C/c1c(C)cc(C)cc1C  
 C=Cc1nc2c(N)ncn2n1[C@H]1C[C@H](O[Si](C)(C)C(C)(C)C)[C@@H](CO[Si](C)(C)C(C)(C)C)O1.  
 2246 Ic1ccccc1>>CC(C)(C)[Si](C)(C)OC[C@H]1O[C@@H](n2c(/C=C/c3ccccc3)nc3c(N)ncn32)[C@@H]1O[Si](C)(C)C(C)(C)C  
 C=CC(=O)N1CCC(Cc2nnc(C)o2)CC1.Cc1nnn(Cc2cc(OC(F)(F)F)ccc2Br)n1>>Cc1nnn(Cc2cc(OC(F)(F)F)ccc2/C=C/C(=O)N2CCC(Cc3nnc(C)o3)CC2)n1  
 2247 C=CCc1c(O)c/N=N/c2ccc(Br)cc2)cc2c(C)cc(=O)oc12.C=Cc1ccncc1>>C=CCc1c(O)c/N=N/c2ccc/C=C/c3ccncc3)cc2)cc2c(C)cc(=O)oc12  
 2248 C=C[C@@H](C)[C@H](CCOCc1ccc(OC)cc1)O[Si](C)(C)C(C)(C)C.Ic1ccccc1>>COc1ccc(COCC[C@@H](O[Si](C)(C)C(C)(C)C)[C@H](C)/C=C/c2ccccc2)cc1  
 2249 C=CC(=O)OC(C)(C)C.CCOC(=O)c1c(OS(=O)(=O)C(F)(F)F)c2ccccc2n1C>>CCOC(=O)c1c(/C=C/C(=O)OC(C)(C)C)c2ccccc2n1C  
 2250 C=Cc1ccc(Cl)cc1.COc1ccc(I)cc1>>COc1ccc(/C=C/c2ccc(Cl)cc2)cc1  
 2251 C=CC[Si](C)(C)C.Cc1ccc(S(=O)(=O)Nc2ccccc2I)cc1>>Cc1ccc(S(=O)(=O)Nc2ccccc2/C=C/C[Si](C)(C)C)cc1  
 2252 C=Cc1cc(OC)c(OC)c(OC)c1.CC(C)(C)C(=O)Nc1nc(NC(=O)C(C)(C)C)c2cc(Br)ncn2n1>>COc1cc(/C=C/c2nc3nc(NC(=O)C(C)(C)C)nc(NC(=O)C(C)(C)C)c3c2)cc(OC)c1OC  
 2253 C=C[C@H]1O[C@@H]2OC(C)(C)O[C@@H]2[C@H]1O.O=C1ccoc2cc(Br)ccc12>>CC1(C)O[C@H]2O[C@H]1(/C=C/c3ccc4c(=O)ccoc4c3)[C@H](O)[C@H]2O1  
 2254 C=CCN(C(=O)OC(C)(C)C)C(=O)OC(C)(C)C.C#Cc1ccccc1Cl>>CC(C)(C)OC(=O)N(C/C=C/c1ccccc1C#N)C(=O)OC(C)(C)C  
 2255 C=CC(=O)OC.O=C(C=P(c1ccccc1)(c1ccccc1)c1ccccc1)c1ccc(I)cc1>>COC(=O)/C=C/c1ccc(C(=O)C=P(c2ccccc2)(c2ccccc2)c2ccccc2)cc1  
 2256 C=CC(=O)O.COc1ccc(S(=O)(=O)Nc2ccc(I)cc2)cc1>>COc1ccc(S(=O)(=O)Nc2ccc(/C=C/C(=O)O)cc2  
 2257 C=CC(=O)OC.CC1(C)CCC(C)(C)c2cc(C(=O)c3ccccc(I)c3)ccc21>>COC(=O)/C=C/c1ccc(C(=O)c2ccc3c(c2)C(C)(C)CCC3(C)C)c1  
 2258



2259 C=CC(=O)OC(CC)CCCC.O=[N+](O)c1ccc(Cl)cc1>>CCCCC(CC)OC(=O)/C=C/c1ccc([N+](=O)[O-])cc1  
 2260 Br1ccccc1.C=CS(C)(=O)=O>>CS(=O)(=O)/C=C/c1ccccc1  
 2261 C=CC(C)O.c1ccc([I+](c2cccs2)cc1)>>CC(O)/C=C/c1cccs1  
 2262 C=Cc1ccc(OC)c(O)c1.CC(=O)OC[C@H]1O[C@@H](Oc2ccc(I)cc2)[C@H](OC(C)=O)[C@@H](OC(C)=O)[C@@H]1OC(C)=O>>COc1ccc(/C=C/c2ccc(O[C@@H]3O[C@H](COC(C)=O)[C@@H](OC(C)=O)[C@H](OC(C)=O)[C@H]3OC(C)=O)cc2)cc1O  
 2263 C=CC(=O)OC.CN(C)c1ccc(-c2ccc(CN(C(=O)C3CCOCC3)c3cc(Br)ccn3)cc2)cc1>>COC(=O)/C=C/c1ccccc1N(Cc2ccc(-c3ccc(N(C)C)cc2)C(=O)C2CCOCC2)c1  
 2264 Br1cccc(-n2cnc3ccccc32)c1.C=Cc1cc(OC)c(OC)c1>>COc1cc(/C=C/c2cccc(-n3cnc4ccccc43)c2)cc(OC)c1OC  
 2265 C=CNC(=O)COC.O=S(=O)(Oc1ccc2ccccc2c1)C(F)(F)F>>C=C(NC(=O)COC)c1ccc2ccccc2c1  
 2266 C=C(C(=O)OC)N1CC[C@H](NC(=O)OC(C)(C)C)C1=O.FC(F)(F)Oc1cc2c(NC(c3ccccc3)(c3ccccc3)c3ccccc3)nc2cc1Br>>COC(=O)/C=C/c1cc2ccnc(NC(c3ccccc3)(c3ccccc3)c3ccccc3)c2cc1OC(F)(F)F  
 2267 C=Cc1ccc2c(c1)Sc1cc(/C=C/c3ccc4c(c3)Sc3ccccc3N4CCCCCCCC)ccc1N2CCCCCCCC.CCCCCCCC  
 2268 N1c2ccc(Br)cc2Sc2cc(C=O)ccc21>>CCCCCCCCN1c2ccccc2Sc2cc(/C=C/c3ccc4c(c3)Sc3cc(/C=C/c5ccc6c(c5)Sc5cc(C=O)ccc5N6CCCCCCCC)ccc3N4CCCCCCCC)ccc21  
 2269 Br1ccc2cnc2c1.C=Cc1ccc(OC)cc1>>COc1ccc(/C=C/c2ccc3cnc2c3)cc1  
 2270 C=CCOC.CC(C)(C)OC(=O)/C=C/c1ccc(CN(C(=O)C2CCCCC2)c2ccc(Br)c2)cc1>>COC/C=C/c1cccc(N(Cc2ccc(/C=C/C(=O)OC(C)(C)C)cc2)C(=O)C2CCCCC2)c1  
 2271 O=C(/C=C/c1ccccc1)O/C(=C)Ic1ccc(Br)cc1>>O=C1OC(c2ccc(Br)cc2)=C/C1=C/c1ccccc1  
 2272 C=CC(=O)NCCc1cccc(F)c1.COc1ccc2c(=O)c(I)coc2c1>>COc1ccc2c(=O)c(/C=C/C(=O)NCCc3cccc(F)c3)coc2c1  
 2273 C=Cc1ccc2ccccc2c1.CC(=O)c1ccc(Br)cc1>>CC(=O)c1ccc(/C=C/c2ccc3ccccc3c2)cc1  
 2274 C=CC(=O)OCC.COC(=O)/C=C/c1cccc(N(Cc2ccc(Br)cc2)C(=O)C2CCCCC2)c1>>CCOC(=O)/C=C/c1cccc(CN(C(=O)C2CCCCC2)c2ccc(/C=C/C(=O)OC)c2)cc1  
 2275 C=CC(C)=O.CC(C)(C)OC(=O)n1cc(I)c([Si](C)(C)C)c1>>CC(=O)/C=C/c1cn(C(=O)OC(C)(C)C)cc1[Si](C)(C)C  
 2276 C=C1CC(c2ccccc2)OC1=O.Fc1cccc(I)c1>>O=C1OC(c2ccccc2)C/C1=C/c1cccc(F)c1  
 2277 C=CC(=O)OCC.CC(C)(C)C(=O)Nc1ccccc1Br>>CCOC(=O)/C=C/c1ccccc1NC(=O)C(C)(C)C  
 2278 C=C[Si](C)(C)C.COc1cc(CO)c(I)c(OC)c1OC>>COc1cc(CO)c(/C=C/[Si](C)(C)C)c(OC)c1OC  
 2279 C=Cc1ccc(C(=O)OC)[nH]1.CC(C)(C)C(=O)Nc1nc(O)c2cc(Br)cnc2n1>>COC(=O)c1ccc(/C=C/c2cnc3nc(NC(=O)C(C)(C)C)nc(O)c3c2)[nH]1  
 2280 C=CS(=O)(=O)Nc1ccc(OC2CCN(C(=O)OC(C)(C)C)CC2)cc1.N#Cc1cccc(Br)c1>>CC(C)(C)OC(=O)N1CCC(Oc2ccc(NS(=O)(=O)/C=C/c3cccc(C#N)c3)cc2)CC1  
 2281 Br1cnc2ccccc2c1.C=CC=O>>O=C/C=C/c1cnc2ccccc2c1  
 2282 C=CC#N.Cc1cccc(NS(=O)(=O)c2ccc(Br)cc2)c1>>Cc1cccc(NS(=O)(=O)c2ccc(/C=C/C#N)cc2)c1  
 2283 Br1cnc(NCCc2ccccc2)c2ccccc12.C=CC(=O)OC(C)(C)C>>CC(C)(C)OC(=O)/C=C/c1cnc(NCCc2ccccc2)c2)c2ccccc12  
 2284 C=CC(OCC)OCC.CC(C)(C)c1ccc(OS(=O)(=O)C(F)(F)F)cc1>>C=C(c1ccc(C(C)(C)C)cc1)C(OCC)OC  
 2285 Br1ccc(I)cc1.CCOC(=O)/C(F)=C(CCc1ccccc1)c1ccc(Br)cc1  
 2286 Br1ccc(CNc2ccccc2)cc1.C=CC(=O)OC(C)(C)C>>CC(C)(C)OC(=O)/C=C/c1ccc(CNc2ccccc2)cc1  
 2287 C=Cc1ccccc1.CCCCCOc1ccc(Br)cc1F>>CCCCCOc1ccc(/C=C/c2ccccc2)cc1F  
 2288 C=C(NC(=O)OC(C)(C)C)C(=O)OC.Oc1ccc(I)cc1>>COC(=O)/C=C/c1ccc(O)cc1NC(=O)OC(C)(C)C  
 2289 Br1ccc(-c2nc3ccccc3s2)cc1.C=Cc1ccc2c(c1)Sc1ccccc1N2CC>>CCN1c2ccccc2Sc2cc(/C=C/c3ccc(-c4nc5ccccc5s4)cc3)ccc21  
 2290 C=Cc1ccc(C(C)(C)C)cc1.CC[Si](CC)(OS(=O)(=O)C(F)(F)F)OS(=O)(=O)C(F)(F)F>>CC[Si](/C=C/c1ccc(C(C)(C)C)cc1)(CC)OS(=O)(=O)C(F)(F)F  
 2291 C=Cc1ccc(C=O)cc1.O=S(=O)(c1ccc(Br)cc1)C(F)(F)F>>O=Cc1ccc(/C=C/c2ccc(S(=O)(=O)C(F)(F)F)c2)cc1  
 2292 Br1ccc(-c2ccccc2)cc1.C=CC[C@H](CC(=O)OC(C)(C)C)C(=O)N[C@H](C(=O)NC(c1ccccc1)c1ccccc1)C(C)(C)C>>CC(C)(C)OC(=O)C[C@H](C/C=C/c1ccc(-c2ccccc2)cc1)C(=O)N[C@H](C(=O)NC(c1ccccc1)c1ccccc1)C(C)(C)C  
 2293 C=CC(=O)OC(C)(C)C.O=C1Nc2ccc(Br)cc2C(=O)N2C[C@H](O)C[C@H]12>>CC(C)(C)OC(=O)/C=C/c1ccc2c(c1)C(=O)N1C[C@H](O)C[C@H]1C(=O)N2  
 2294 C=Cc1ccccc1.Ic1enn2c(-c3ccccc3)cc(-c3ccccc3)nc12>>C=C/c1enn2c(-c3ccccc3)cc(-c3ccccc3)nc12)c1ccccc1  
 2295 C=Cc1ccc(C#N)cc1.N#CCc1ccc(Br)cc1>>N#CCc1ccc(/C=C/c2ccc(C#N)cc2)cc1

2295 C=CCN1C(=O)c2ccccc2C1=O.Cn1c(=O)oc2cc(Br)cnc21>>Cn1c(=O)oc2cc(/C=C/CN3C(=O)c4ccccc4C3=O)cnc21  
 2296 C=CC(=O)O.COCC(=O)c1ccccc1I>>COC(=O)c1ccccc1/C=C/C(=O)O  
 2297 C=C(C)C(=O)OCCO.Ic1ccccc1>>C/C(=C\c1ccccc1)C(=O)OCCO  
 2298 C=C[Si](C)(C)c1ccccc1.CC(=O)c1ccc(I)cc1>>CC(=O)c1ccc(/C=C/[Si](C)(C)c2ccccc2)cc1  
 2299 C=CC(=O)OCC.O=Cc1cc2c(cc1Br)OCO2>>CCOC(=O)/C=C/c1cc2c(cc1C=O)OCO2  
 2300 C=CC(=O)OC.CC(C)N(C(=O)Cc1c(Br)cccc1I)C(C)C>>COC(=O)/C=C/c1cccc(Br)c1CC(=O)N(C(C)C)C(C)C  
 2301 C=CC(=O)C(O[Si](CC)(CC)CC)c1c(OC)ccc(OC)c1OCc1ccccc1.COC(=O)c1cc2cc(I)c(OCc3ccccc3)c(OC)c2c(=O)o1>>CC[Si](CC)(CC)OC(C(=O)/C=C/c1cc2cc(C(=O)OC)oc(=O)c2c(OC)c1OCc1ccccc1)c1c(OC)ccc(OC)c1OCc1ccccc1  
 2302 Br1cnc2ncnc12.C=C>>C=Cc1cnc2ncnc12  
 2303 C=Cc1cccc(C(=O)O[C@H]2[C@H]3[C@](C)(C(=O)[C@H](OC(C)=O)C4=C(C)[C@H](OC(=O)[C@H](O[Si](C(C)C)(C(C)C)C(C)C)[C@H](C=C(C)C)NC(=O)c5cccc(I)c5)C[C@]2(O)C4(C)C)[C@H](O[Si](CC)(CC)CC)C[C@H]2OC[C@]23OC(C)=O)c1>>C=C1c2cccc(c2)C(=O)N[C@H](C=C(C)C)[C@H](O[Si](C(C)C)(C(C)C)C(C)C)C(=O)O[C@H]2C[C@]3(O)[C@H](OC(=O)c4ccccc1c4)I[C@H]1I[C@](C)(C(=O)I[C@H](OC(C)=O)C(=C2C)C3(C)C)I[C@H](O[Si](CC)(CC)CC)C[C@H]2C=CC(=O)O[C@H]1C[C@H](C)CC[C@H]1C(C)C.O=Cc1ccccc1Br>>CC(C)[C@H]1CC[C@H](C)C[C@H]1OC(=O)/C=C/c1ccccc1C=O  
 2304 C=CC(=O)OC.COc1c(CN(C(=O)C2CC2)c2ccc(Br)cc2)ccc2c1OC(C)(C)C=C2>>COC(=O)/C=C/c1ccc(N(Cc2ccc3c(c2OC)OC(C)(C)C=C3)C(=O)C2CC2)cc1  
 2305 C=CC(=O)OC.OC[C@H]1O[C@H](Oc2ccc(I)cc2)C[C@H]1O>>COC(=O)/C=C/c1ccc(O[C@H]2C[C@H](O)[C@H](CO)O2)cc1  
 2306 Br1ccc2ccnc2c1.C=C[C@H]1C[C@H](n2ccc3c(Cl)ncnc32)[C@H]2OC(C)(C)O[C@H]21>>CC1(C)O[C@H]2[C@H](O1)I[C@H](/C=C/c1ccc3ccnc3c1)C[C@H]2n1ccc2c(Cl)ncnc21  
 2307 C=Cc1ccccc1.CCOC(=O)Cc1ccc(Br)cc1>>CCOC(=O)Cc1ccc(/C=C/c2ccccc2)cc1  
 2308 C=CC(=O)OCc1ccccc1.Ic1ccn(-c2ccccc2)n1>>O=C(/C=C/c1ccn(-c2ccccc2)n1)OCc1ccccc1  
 2309 C=Cc1ccc(F)cc1.COC(=O)c1cc(Br)ccc1OS(=O)(=O)C(F)(F)F>>C=C(c1ccc(F)cc1)c1ccc(Br)cc1C(=O)C=CC(=O)NCCCCC.COc1ccc(-c2oc3cc(OC)ccc3c(=O)c2I)cc1>>CCCCCNC(=O)/C=C/c1c(-c2ccc(OC)cc2)oc2cc(OC)ccc2c1=O  
 2310 C=CC(=O)N(C)C.Clc1nc(N2CCOCC2)c2oc3ncc(Br)cc3c2n1>>CN(C)C(=O)/C=C/c1cnc2oc3c(N4CCOCC4)nc(Cl)nc3c2c1  
 2311 O=C(/C=C/Oc1ccccc1-c1cc(F)c(F)cc1Br)OCc1ccccc1>>O=C(/C=C1/Oc2ccccc2-c2cc(F)c(F)cc21)OCc1ccccc1  
 2312 C=CCC(=O)O.Cc1cc(OCc2ccccc2)c([C@H]2O[C@H](COCc3ccccc3)[C@H](OCc3ccccc3)[C@H](OCc3ccccc3)[C@H]2OCc2ccccc2)cc1Cc1ccc(Br)cc1>>Cc1cc(OCc2ccccc2)c([C@H]2O[C@H](COCc3ccccc3)[C@H](OCc3ccccc3)[C@H](OCc3ccccc3)[C@H]2OCc2ccccc2)cc1Cc1ccc(/C=C/CCC=CC(=O)OCC.Cc1noc(-c2ccccc2)c1I>>CCOC(=O)/C=C/c1c(C)noc1-c1ccccc1  
 2313 C=CC(=O)OCCSc1ccccc1.Cc1ccc(Br)cc1>>Cc1ccc(/C=C/C(=O)OCCSc2ccccc2)cc1  
 2314 C=C[C@H](C)N1C(=O)c2ccccc2C1=O.COCC(=O)c1c(Br)ccn1C>>COC(=O)c1c(/C=C/[C@H](C)N2C(=O)c3ccccc3C2=O)ccn1C  
 2315 C=CC(=O)OCC.Fc1c(Br)ccc2cnccc12>>CCOC(=O)/C=C/c1ccc2cnccc2c1F  
 2316 C=CC(=O)OC.N#Cc1ccc(-c2cnccc3ccc(Br)cc23)c2ccccc12>>COC(=O)/C=C/c1ccc2cnccc(-c3ccc(C#N)c4ccccc34)c2c1  
 2317 C=CC(=O)OC.COc1ccc(Br)c([N+](=O)[O-])c1>>COC(=O)/C=C/c1ccc(OC)cc1[N+](=O)[O-]  
 2318 C=CCC(C)N(C)C(=O)OC(C)(C)C.O=C1c2ccccc2C(=O)N1c1cccc(Br)c1>>CC(C/C=C/c1cccc(N2C(=O)c3ccccc3C2=O)c1)N(C)C(=O)OC(C)(C)C  
 2319 C=CCNS(=O)(=O)c1cc(C(F)(F)F)cc(C(F)(F)F)c1.Clc1ccc(Br)cc1>>O=S(=O)(NC/C=C/c1ccc(Cl)cc1)c1cc(C(F)(F)F)cc(C(F)(F)F)c1  
 2320 C=CC(=O)OCC.CCN1C[C@]2(OC(=O)c3cc(I)ccc3NC(C)=O)CC[C@H](OC)[C@]34[C@@H]1[C@H](C)[C@H]23)[C@@]1(O)C[C@H](OC)[C@H]2C[C@@H]4[C@]1(O)[C@H]2OC>>CCOC(=O)/C=C/c1ccc(NC(C)=O)c(C(=O)O[C@@]23CC[C@H](OC)[C@]45[C@H]([C@H](C)[C@H]24)[C@@]2(O)C[C@H](OC)I[C@H]4C[C@@H]5[C@]12(O)I[C@H]4OC)N(CC)C3)c1  
 2321 C=CC=O.CCCCCC1=C(I)C1(F)F>>CCCCC1=C(/C=C/C=O)C1(F)F  
 2322 C=CCOc1ccccc1.COc1ccc(Br)cc1>>COc1ccc(/C=C/COc2ccccc2)cc1  
 2323 C=C(CC)C(C)=O.Oc1ccccc1I>>CC/C(=C\c1ccccc1O)C(C)=O  
 2324 CC(=O)/C=C/CC(NS(=O)(=O)c1ccc(C)cc1)C1CC1.Cc1ccc(Br)cc1>>CC(=O)/C=C(/CC(NS(=O)(=O)c1ccc(C)cc1)C1CC1)c1ccc(C)cc1  
 2325 C=Cc1ccccc1.CCOC(=O)C(C)(C)Br>>CCOC(=O)C(C)(C)/C=C/c1ccccc1  
 2326 C=COCC(C)CCCC.Fc1ccc(Br)cc1>>C=C(OC(CC)CCCC)c1ccc(F)cc1  
 2327 Br1cnc2ccccc2c1.C=CC(=O)OC>>COC(=O)/C=C/c1cnc2ccccc2c1

2331 C=CCN1C(=O)c2ccccc2C1=O.Cc1cc(C)cc(Br)c1>>Cc1cc(C)cc(/C=C/CN2C(=O)c3ccccc3C2=O)c1  
 2332 C=C1C(=O)O[C@@H]2C3=C(C)C(=O)C=C[C@]3(C)CC[C@H]12.Fc1ccccc1I>>CC1=C2[C@H]3  
 2333 OC(=O)/C=C/c4ccccc4F)[C@H]3CC[C@]2(C)C=CC1=O  
 2334 C=COCCCC.Clc1cccc2ccccc12>>C=C(OCCCC)c1cccc2ccccc12  
 2335 C=CC(C)=O.CC(=O)OC[C@H]1O[C@H](n2cnc3c(Cl)nc(I)nc32)[C@H](OC(C)=O)[C@H]1OC(  
 2336 C)=O>>CC(=O)/C=C/c1nc(Cl)c2ncn([C@H]3O[C@H](COC(C)=O)[C@H](OC(C)=O)[C@H]3O  
 2337 C(C)=O)c2n1  
 2338 C=Cc1ccc(F)cc1.CC(=O)NS(=O)(=O)c1ccc(Br)cc1>>CC(=O)NS(=O)(=O)c1ccc(/C=C/c2ccc(F)cc2)cc  
 2339 C=CC(=O)N1N=Cc2ccccc2C1C=C(C)C.CCOc1c(I)cc(Cc2cnc(N)nc2N)cc1OC>>CCOc1c(/C=C/C(=O  
 2340 )N2N=Cc3ccccc3C2C=C(C)C)cc(Cc2cnc(N)nc2N)cc1OC  
 2341 C=Cc1cccc1.N#Cc1ccc(Br)cc1>>N#Cc1ccc(/C=C/c2ccccc2)cc1  
 2342 C=CN(C=O)c1ccc(C(=O)N[C@H](CCC(=O)OCC)C(=O)OCC)cc1.CC(C)(C)C(=O)Nc1nc2ccc(Br)c  
 2343 c2c(=O)[nH]1>>CCOC(=O)CC[C@H](NC(=O)c1ccc(N(C=O)/C=C/c2cnc3nc(NC(=O)C(C)(C)C)[nH]  
 2344 c(=O)c3c2)cc1C(=O)OCC  
 2345 C=CCNS(=O)(=O)c1ccc(C)cc1.Cc1ccc(S(=O)(=O)n2cc(Br)c3ccccc32)cc1>>Cc1ccc(S(=O)(=O)NC/C  
 2346 =C/c2cn(S(=O)(=O)c3ccc(C)cc3)c3ccccc23)cc1  
 2347 C=CC(=O)OCC.Oc1ccc(Br)cc1>>CCOC(=O)/C=C/c1ccc(O)cc1  
 2348 C=CCC.ClCc1ccccc1I>>C=C(CC)Cc1ccccc1I  
 2349 C=Cc1ccc(Cl)cc1.COc1ccc(I)c1>>COc1ccc(/C=C/c2ccc(Cl)cc2)c1  
 2350 Br1ccccc2c(-c3ccccc3)cccc12.C=CC(=O)OCC>>CCOC(=O)/C=C/c1ccccc2c(-c3ccccc3)cccc12  
 2351 C=CCN(Cc1ccccc1)Cc1cc2cc(OC)ccc2nc1Cl>>C=C1CN(Cc2ccccc2)Cc2cc3cc(OC)ccc3nc21  
 2352 C=CC(=O)OC.CCc1ccc(I)cc1CO>>CCc1ccc(/C=C/C(=O)OC)cc1CO  
 2353 C=CC(=O)OCC.Cc1nnc(N)c1I>>CCOC(=O)/C=C/c1c(C)ncnc1N  
 2354 C=Cc1ccc(-c2cnc(-c3ccccc3)c2)cc1.OCCCCCOc1ccc(Br)cc1>>OCCCCCOc1ccc(/C=C/c2ccc(-  
 2355 c3cnc(-c4ccccc4)c3)cc2)cc1  
 2356 C=C[Si](C)(C)C.Cc1ccc(I)cc1>>Cc1ccc(/C=C/[Si](C)(C)C)cc1  
 2357 C=Cc1ccc(O)cc1.COc1ccc(OC)c(I)c1>>COc1ccc(OC)c(/C=C/c2ccc(O)cc2)c1  
 2358 C=CC(=O)OC.CCn1cnc2c(NCc3ccccc3)c3nc(N3CCCCC3)nc21>>CCn1cnc2c(NCc3ccccc3/C=C/C(=  
 2359 O)OC)c3)nc(N3CCCCC3)nc21  
 2360 C=CNC(C)=O.O=S(=O)(Oc1ccc2ccccc2c1)C(F)(F)F>>C=C(NC(C)=O)c1ccc2ccccc2c1  
 2361 C=CC(C)OCc1c(Br)c(OC)c2ccccc2c1OC>>C=C1c2c(c(OC)c3ccccc3c2OC)COC1C  
 2362 C=CC(=O)OCC.Cc1cc(C)cc(-c2ccccc2I)c1>>CCOC(=O)/C=C/c1ccccc1-c1cc(C)cc(C)c1  
 2363 C=Cc1ccc(N(C)C)cc1.FCCOCCOCCOc1ncc(I)cc1Br>>CN(C)c1ccc(/C=C/c2cnc(OCCOCCOCCF)c(B  
 2364 r)c2)cc1  
 2365 C=CC(O)CC.c1ccc([I+])c2cccs2)cc1>>CCC(O)/C=C/c1cccs1  
 2366 C=CCN(c1ccc2oc(=O)ccc2c1)S(=O)(=O)c1ccccc1Br>>C=C1CN(c2ccc3oc(=O)ccc3c2)S(=O)(=O)c2c  
 2367 cccc21  
 2368 C=CC(=O)OCCCC.COc1ccc([IH2](OC(C)=O)OC(C)=O)c1>>CCCCOC(=O)/C=C/c1ccc(OC)c1  
 2369 C=CC(C)(C)O.O=C(c1ccccc1)c1ccc(Br)cc1>>CC(C)(O)/C=C/c1ccc(C(=O)c2ccccc2)cc1  
 2370 C=CC(=O)OC.CC(=O)Oc1c(CC=C(C)C)cc(I)cc1C/C=C(\C)CCC=C(C)C>>COC(=O)/C=C/c1cc(CC=  
 2371 C(C)C)c(OC(C)=O)c(C/C=C(\C)CCC=C(C)C)c1  
 2372 C=CC(N)=O.O=CC1=C(Br)CCCC1>>NC(=O)/C=C/C1=C(C=O)CCCC1  
 2373 C=CCCO.CC(C)Oc1nccc(Br)c1>>CC(C)Oc1nccc(/C=C/CCO)c1  
 2374 C=CCOCC1=C(Br)c2ccc(OC)cc2CC1>>C=C1CCOCC2=C1c1ccc(OC)cc1CC2  
 2375 C=CC(=O)OC.CC(C)c1ccc(C(C)C)c(Br)c1>>COC(=O)/C=C/c1cc(C(C)C)ccc1C(C)C  
 2376 Br1ccc2ccc3ccc4ccccc4c3c2c1.C=Cc1ccc(OC)cc1>>COc1ccc(/C=C/c2ccc3ccc4ccc5ccccc5c4c3c2)cc  
 2377 C=CC(=O)OC(C)(C)C.Cc1cc(Cl)c2ccccc2n1>>Cc1cc(/C=C/C(=O)OC(C)(C)C)c2ccccc2n1  
 2378 C=C(CC(=O)OC)C(=O)OC.Cc1ccc(I)cc1>>COC(=O)C/C(=C)c1ccc(C)cc1C(=O)OC  
 2379 C=Cc1ccccc1.O=C1C(O)=C(I)C(=O)c2ccccc21>>O=C1C(O)=C(/C=C/c2ccccc2)C(=O)c2ccccc21  
 2380 C=CC(O)CC.Oc1ccc(I)c1>>CCC(O)/C=C/c1ccc(CO)c1  
 2381 C=COCCCC.CC(=O)c1ccc(Br)c1>>C=C(OCCCC)c1cccc(C(C)=O)c1  
 2382 C=CCNC(=O)OC(C)(C)C.O=C1CCCc2ccc(Br)cc21>>C=C(CNC(=O)OC(C)(C)C)c1ccc2c(c1)C(=O)C  
 2383 C=Cc1ccc(C(=O)OC)cc1.CC1(C)CCC(=O)c2cc(Br)ccc21>>COC(=O)c1ccc(/C=C/c2ccc3c(c2)C(=O)C  
 2384 CC3(C)C)cc1  
 2385 C=COCCCC.Fc1ccccc1Br>>C=C(OCCCC)c1ccccc1F  
 2386 C=CC(=O)OC.Ic1nn(Cc2ccccc2)c2ccccc12>>COC(=O)/C=C/c1nn(Cc2ccccc2)c2ccccc12  
 2387 C=C(OC(C)=O)C(=O)OCC(F)(F)F.COc1ccc(I)cc1>>COc1ccc(/C=C(\OC(C)=O)C(=O)OCC(F)(F)F)cc  
 2388 Br1ccsc1.C=Cc1ccc(C(=O)OC(C)(C)C)c(Nc2ccc(F)cc2)c1>>CC(C)(C)OC(=O)c1ccc(/C=C/c2ccsc2)c  
 2389 c1Nc1ccc(F)cc1

2376 C=CC(=O)OCC.CC(C)(C)OC(=O)N1CCN(c2ccc(Br)cn2)CC1>>CCOC(=O)/C=C/c1ccc(N2CCN(C(=O)OC(C)(C)C)CC2)nc1  
 2377 C=CC(=O)O.COC(=O)c1cc(Br)cs1>>COC(=O)c1cc(/C=C/C(=O)O)cs1  
 2378 C=CC(=O)OC.CC(C)(C)c1cc(-c2ccc(Br)cc2)ccc1O>>COC(=O)/C=C/c1ccc(-  
 2379 C=CC(=O)OCC(CC)CCCC.CC(=O)c1ccc(Cl)cc1>>CCCC(CC)COC(=O)/C=C/c1ccc(C(C)=O)cc1  
 2380 C=CC(=O)OCC.C[Si](C)(C)CN(Cc1cc2c(c1I)OCO2)C(CC1OCCO1)[Si](C)(C)C>>CCOC(=O)/C=C/c1cc2c(cc1CN(C[Si](C)(C)C)C(CC1OCCO1)[Si](C)(C)C)OCO2  
 2381 C=Cc1ccc(N(c2ccccc2)c2ccccc2)cc1.CCCCCCCCCCCCCCn1c2ccc(I)cc2c2cc(C=O)ccc21>>CCC  
 2382 CCCCCCCCCCCCCn1c2ccc(C=O)cc2c2cc(/C=C/c3ccc(N(c4ccccc4)c4ccccc4)cc3)ccc21  
 2383 Br1ccccc1.C=Cc1ccc(N(c2cccc(OC)c2)c2cccc(OC)c2)cc1>>COc1cccc(N(c2ccc(/C=C/c3ccccc3)cc2)c2cccc(OC)c2)c1  
 2384 Br1ccccc1.C=COCC>>C=C(OCC)c1ccccc1  
 2385 C=CC(=O)OC.CCCCCC#CI>>CCCCC#C/C=C/C(=O)OC  
 2386 C=CCOCC1=C(Br)c2ccccc2CC1>>C=C1CCOCC2=C1c1ccccc1CC2  
 2387 C=Cc1ccc(OC)c(OC)c1.Ic1ccc(OCc2ccccc2)cc1>>COc1ccc(/C=C/c2ccc(OCc3ccccc3)cc2)cc1OC  
 2388 C=CC(=O)OC.CC1(C)CC(=C(c2ccc(Br)cc2)c2ccc3c(c2)c(F)nn3C2CCCCO2)CC(C)(C)O1>>COC(=O)/C=C/c1ccc(C(=C2CC(C)(C)OC(C)(C)C2)c2ccc3c(c2)c(F)nn3C2CCCCO2)cc1  
 2389 C=CCN(c1ccccc1C(C)C)S(=O)(=O)c1ccccc1Br>>C=C1CCN(c2ccccc2C(C)C)S(=O)(=O)c2ccccc21  
 2390 C=CC(C)(C)O.COc1ccc2ccc(=O)oc2c1I>>COc1ccc2ccc(=O)oc2c1/C=C/C(C)(C)O  
 2391 C=Cc1ccccc1.O=[N+](O-)]c1ccc(OS(=O)(=O)C(F)(F)F)cc1>>C=C(c1ccccc1)c1ccc([N+](=O)[O-]C=C[C@H]1O[C@H]2OC(C)(C)O[C@@H]2[C@H]1O.O=C1/C(=C/c2ccccc2)Oc2ccc(Br)cc21>>C  
 2392 C1(C)O[C@H]2O[C@H](/C=C/c3ccc4c(c3)C(=O)/C(=C/c3ccccc3)O4)[C@H](O)[C@H]2O1  
 2393 C=CC(=O)OC.O=S(=O)(c1ccccc1)n1cc(-c2ccccc2)c2cc(Br)cn21>>COC(=O)/C=C/c1cnc2c(c1)c(-c1ccccc1)en2S(=O)(=O)c1ccccc1  
 2394 C=CC(C)=O.N#Cc1ccc2[nH]c3c(c2c1)CC(=O)Nc1ccc(I)cc1-3>>CC(=O)/C=C/c1ccc2c(c1)-c1[nH]c3ccc(C#N)cc3c1CC(=O)N2  
 2395 C=CC(=O)OCCCC.Cc1cccc(C)c1I>>CCCCOC(=O)/C=C/c1c(C)cccc1C  
 2396 C=CC(=O)OC.CC(=O)c1ccc(Cl)cc1>>COC(=O)/C=C/c1ccc(C(C)=O)cc1  
 2397 C=Cc1ccccc1.O=Cc1ccc(Cl)cc1Br>>O=Cc1ccc(Cl)cc1/C=C/c1ccccc1  
 2398 C=CCC[C@H](C=C)CN(c1ccccc1Br)S(=O)(=O)c1ccc(C)cc1>>C=CCC[C@H]1CN(S(=O)(=O)c2ccc(C)cc2)c2ccccc2C1=C  
 2399 C=CC(=O)OC(C)(C)C.Cc1nn(C)c(C)c1Br>>Cc1nn(C)c(C)c1/C=C/C(=O)OC(C)(C)C  
 2400 C=CCCC(O)C=C(Br)c1ccc2ccccc2c1>>C=C1CCCC(O)C=C1c1ccc2ccccc2c1  
 2401 C=C.Oc1cccc(I)c1>>C=Cc1cccc(O)c1  
 2402 C=CC(=O)N1C(=O)OC[C@H]1Cc1ccccc1.CC(C)(C)OP(=O)(Cc1ccc(Br)cc1)OC(C)(C)C>>CC(C)(C)OP(=O)(Cc1ccc(/C=C/C(=O)N2C(=O)OC[C@H]2Cc2ccccc2)cc1)OC(C)(C)C  
 2403 C=Cc1ccc(C)cc1.Fc1ccc(Br)cc1>>Cc1ccc(/C=C/c2ccc(F)cc2)cc1  
 2404 C=Cc1ccc(C(=O)OCC)cc1.CCC(CC)=C1CCC(C)(C)c2ccc(Br)cc21>>CCOC(=O)c1ccc(/C=C/c2ccc3c(c2)C(=C(CC)CC)CCC3(C)C)cc1  
 2405 C=CC(=O)OCC.COc1cccc(Br)c1CO[Si](C)(C)C(C)C>>CCOC(=O)/C=C/c1cccc(OC)c1CO[Si](C)(C)C(C)C  
 2406 C=CC(=O)OCC.O=C(NCc1ccc(Cl)cc1)c1cnc2c(F)cc(I)cc2c1O>>CCOC(=O)/C=C/c1cc(F)c2ncc(C(=O)NCc3ccc(Cl)cc3)c(O)c2c1  
 2407 C=C[C@H](C@H)(CO)NS(C)(=O)=O.Oc1ccc(I)cc1>>CS(=O)(=O)N[C@H](/C=C/c1ccc(O)cc1)CO  
 2408 C=CC(=O)OC(C)(C)C.Cc1c(Br)ccc(OCc2ccccc2)c1C>>Cc1c(/C=C/C(=O)OC(C)(C)C)ccc(OCc2ccccc2)c1C  
 2409 C=CNC(C)=O.CC(=O)c1ccc(OS(=O)(=O)C(F)(F)F)cc1>>C=C(NC(C)=O)c1ccc(C(C)=O)cc1  
 2410 C=Cc1ccc(O)cc1.COC(=O)Cn1c(=O)c(Cl)nc2ccccc21>>COC(=O)Cn1c(=O)c(/C=C/c2ccc(O)cc2)nc2ccccc21  
 2411 C=CCN(C(=O)C(C)(C)C)[C@H](C)c1ccc(C)c(F)c1.O=C1Nc2ncccc2[C@@]12Cc1cc(Br)cn1C2>>C  
 2412 c1ccc([C@H](C)N(C/C=C/c2cnc3c(c2)C[C@@]2(C3)C(=O)Nc3ncccc32)C(=O)C(C)(C)C)cc1F  
 2413 C=COCCCC.CC(C)(C)NC(=O)c1ccc(OS(=O)(=O)C(F)(F)F)cc1>>C=C(OCCCC)c1ccc(C(=O)NC(C)(C)C)cc1  
 2414 C=CC(C)=O.CCOC(=O)c1cn(CC)c2nc(C)c(Br)cc2c1=O>>CCOC(=O)c1cn(CC)c2nc(C)c(/C=C/C(C)=O)cc2c1=O  
 2415 C=Cc1cc(OC)c(O)c(OC)c1.COc1cc(I)cc(OC)c1>>COc1cc(/C=C/c2cc(OC)c(O)c(OC)c2)cc(OC)c1  
 2416 C=CCCN1C(=O)c2ccccc2C1=O.Cc1ccccc1I>>Cc1ccccc1/C=C/CCN1C(=O)c2ccccc2C1=O  
 2417 C=CC(=O)OC(C)(C)C.CC(C)(C)O[C@H]1CCC[C@H]2C=C(C3=C(Br)CCCC3)CC[C@@]21C>>CC(C)(C)OC(=O)/C=C/C1=C(C2=C[C@H]3CCC[C@H](OC(C)(C)C)[C@@]3(C)CC2)CCCC1  
 2418 C=CCC(OC=CC(=O)OCC)c1ccccc1CC1>>C=C1Cc2ccccc2C(OC=CC(=O)OCC)C1  
 2419 Br1ccc2c(cen2-c2ccccc2)c1.C=CC(=O)OC>>COC(=O)/C=C/c1ccc2c(cen2-c2ccccc2)c1

2418 C=Cc1ccc(OC(C)=O)cc1.CC(=O)OC[C@H]1O[C@@H](Oc2ccc(I)cc2)[C@H](OC(C)=O)[C@@H]1  
 OC(C)=O>>CC(=O)OC[C@H]1O[C@@H](Oc2ccc(/C=C/c3ccc(OC(C)=O)cc3)cc2)[C@H](OC(C)=O  
 )][C@@H]1OC(C)=O  
 2419 C=CC(=O)O.O=C(O)c1ccccc1I>>O=C(O)/C=C/c1ccccc1C(=O)O  
 2420 C=Cc1ccc(C(=O)OC)cc1.COc1ccc(Cn2nc(I)c3c(NC4CCCCC4)nc32)cc1>>COC(=O)c1ccc(/C=C/c2  
 nn(Cc3ccc(OC)cc3)c3cnc(NC4CCCCC4)c23)cc1  
 2421 C=CC#N.COc1cccc2c(OS(=O)(=O)C(F)(F)F)coc12>>COc1cccc2c(/C=C/C#N)coc12  
 2422 C=Cc1ccncc1.CC(C)(C)OC(=O)N[C@H](COc1cccc(Br)c1)Cc1c[nH]c2ccccc12>>CC(C)(C)OC(=O)N  
 [C@H](COc1cccc(/C=C/c2ccncc2)c1)Cc1c[nH]c2ccccc12  
 2423 C=CC#N.Fc1c(Cl)cccc1Br>>N#C/C=C/c1cccc(Cl)c1F  
 2424 C=CC(=O)NCCCCCNC(=O)OC(C)(C)C.CC(=O)OC[C@H]1C=C[C@H](n2cc(I)c(=O)[nH]c2=O)  
 O1>>CC(=O)OC[C@H]1C=C[C@H](n2cc(/C=C/C(=O)NCCCCCNC(=O)OC(C)(C)C)c(=O)[nH]c  
 2425 C=Cc1ccc(C)cc1.Cc1ccccc1Br>>Cc1ccc(/C=C/c2ccccc2C)cc1  
 2426 C=Cc1ccccc1.COC1(OC)C(=O)c2ccc(Br)cc2C1=O>>COC1(OC)C(=O)c2ccc(/C=C/c3ccccc3)cc2C1=  
 C=Cc1ccncc1.CCN1c2ncc(Br)cc2C(=O)N(C)c2ccc(F)nc21>>CCN1c2ncc(/C=C/c3ccncc3)cc2C(=O)N  
 (C)c2ccc(F)nc21  
 2428 C=CC(=O)OCCCC.CCN(CC)c1ccc(Br)cc1>>CCCCOC(=O)/C=C/c1ccc(N(CC)CC)cc1  
 C=CC(=O)OCC.CCN1C[C@]2(OC(=O)c3cc(Br)ccc3NC(C)=O)CC[C@H](OC)[C@]34[C@@H]1[C  
 2429 @H](C[C@H]23)[C@@]1(O)C[C@H](OC)[C@H]2[C@@H]4[C@]1(O)[C@H]2OC>>CCOC(=O)/  
 C=C/c1ccc(NC(C)=O)c(C(=O)O)[C@@]23CC[C@H](OC)[C@]45[C@H]1([C@H](C[C@H]24)[C@@]  
 2(C)C[C@H]1(OC)C@H14C[C@@H]5C@]2(O)C@H14OC)N(CC)C3)c1  
 C=Cc1nc2ccccc2s1.CCN(CC)S(=O)(=O)c1ccc(Br)cc1C>>CCN(CC)S(=O)(=O)c1ccc(/C=C/c2nc3cccc  
 2430 c3s2)cc1C  
 2431 C=Cc1ccncc1.CCCCCCCC0c1ccc(I)cc1>>CCCCCCCC0c1ccc(/C=C/c2ccncc2)cc1  
 2432 C=CC(=O)OC(C)(C)C.COc1cccc(S(=O)(=O)n2ccc3cc(Br)ccc32)c1>>COc1cccc(S(=O)(=O)n2ccc3cc(  
 /C=C/C(=O)OC(C)(C)C)ccc32)c1  
 2433 C=CC(N)=O.COc1ccc(I)c(OC)c1OC>>COc1ccc(/C=C/C(N)=O)c(OC)c1OC  
 2434 C=CC(N)=O.FC(F)(F)Oc1ccc(Br)cc1>>NC(=O)/C=C/c1ccc(OC(F)(F)F)cc1  
 2435 C=Cc1ccccc1OC.COCO[C@@]1(Cc2cc(Cl)ccn2)C(=O)N(COC)[C@H]1CC(C)C>>COCO[C@@]1(C  
 c2cc(/C=C/c3ccccc3OC)ccn2)C(=O)N(COC)[C@H]1CC(C)C  
 2436 C=CC(=O)OCC.Fc1cccc(Cn2ncc3cc(Nc4ncc41)ccc32)c1>>CCOC(=O)/C=C/c1cnccn1Nc1ccc2c(cnn  
 2Cc2cccc(F)c2)c1  
 2437 C=Cc1cc(O)c(OC)cc1F.Oc1ccc(O)c(I)c1>>COc1cc(F)c(/C=C/c2cc(O)ccc2O)cc1O  
 2438 C=Cc1ccc(N(CCCC)CCCC)cc1.O=Cc1ccc(Br)s1>>CCCN(CCCC)c1ccc(/C=C/c2ccc(C=O)s2)cc1  
 2439 C=CC(=O)OC(C)(C)C.O=C(CCc1ccccc1)Nc1cc(Br)cc(I)c1>>CC(C)(C)OC(=O)/C=C/c1cc(Br)cc(NC(  
 =O)CCc2ccccc2)c1  
 2440 C=CC(=O)OC.O=c1cc(Br)c2ccccc2o1>>COC(=O)/C=C/c1cc(=O)oc2ccccc12  
 2441 C=CC(=O)OC.CNc1ccccc1I>>CNc1ccccc1/C=C/C(=O)OC  
 2442 C=CC(=O)N1N=Cc2ccccc2C1Cc1ccc(C)cc1.COc1cc(Cc2cnc(N)nc2N)cc(I)c1OC>>COc1cc(Cc2cnc(  
 N)nc2N)cc(/C=C/C(=O)N2N=Cc3ccccc3C2Cc2ccc(C)cc2)c1OC  
 2443 C=CC(=O)N(C)Cc1oc2ccccc2c1C.CC1(C)NCc2cc(Br)ccc2NC1=O>>Cc1c(CN(C)C(=O)/C=C/c2cnc3  
 c(c2)CNC(C)(C)C(=O)N3)oc2ccccc12  
 2444 C=CC(=O)OC.CC(C)(C)OC(=O)NCCCN1c2c(c3ccc(Br)cc3c1=O)C(=O)c1ccccc1-  
 2>>COC(=O)/C=C/c1ccc2c3c(n(CCCNC(=O)OC(C)(C)C)c(=O)c2c1)-c1ccccc1C3=O  
 2445 C=CC(=O)OCc1ccc2ccc3cccc4ccc1c2c34.O=C(O)c1ccc(I)cc1>>O=C(/C=C/c1ccc(C(=O)O)cc1)OCc1  
 ccc2ccc3cccc4ccc1c2c34  
 2446 BrC1=C(C2=COCCO2)CCCC1.C=CC(=O)OC(C)(C)C>>CC(C)(C)OC(=O)/C=C/C1=C(C2=COCCO2  
 )CCCC1  
 2447 C=CC(=O)OCC.O=c1c(I)c(-c2ccc(O)cc2)oc2cc(O)ccc12>>CCOC(=O)/C=C/c1c(-  
 c2ccc(O)cc2)oc2cc(O)ccc2c1=O  
 2448 Brc1ccc2ccc3cccc4ccc1c2c34.C=Cc1ccc(C(C)(C)C)cc1>>CC(C)(C)c1ccc(/C=C/c2ccc3ccc4cccc5ccc2  
 c3c45)cc1  
 2449 C=Cc1ccccc1.O=C1OC2(C(I)=C(c3ccccc3)c3ccccc32)c2ccccc21>>O=C1OC2(C(/C=C/c3ccccc3)=C(c  
 3ccccc3)c3ccccc32)c2ccccc21  
 2450 C=Cc1ccccc1.Oc1ccc(-c2ccc2-c2ccc(Br)cc2)cc1>>Oc1ccc(-c2ccc2-c2ccc(/C=C/c3ccccc3)cc2)cc1  
 2451 C=CC(=O)NCCc1ccc(F)cc1.O=c1c(I)coc2cc(O)ccc12>>O=C(/C=C/c1coc2cc(O)ccc2c1=O)NCCc1ccc  
 (F)cc1  
 2452 C=CC(OC)OC.Ic1ccc2ccccc2c1>>COC(/C=C/c1ccc2ccccc2c1)OC  
 2453 C=C.Nc1ccc(Br)cc1>>C=Cc1ccc(N)cc1  
 2454 C=C[Si](C)(C)C.O=[N+](O-)[O-]c1ccc(I)cc1>>C[Si](C)(C)/C=C/c1ccc([N+](=O)[O-])cc1  
 2455 C=Cl.C=CP(=O)(OC)OC>>C=C/C=C/P(=O)(OC)OC

2456 C=CC(=O)OCC.Cc1ccc(C(N)=O)cc1I>>CCOC(=O)/C=C/c1cc(C(N)=O)ccc1C  
 2457 Bre1cccc1I.C=Cc1ccc(C)cc1C>>Cc1ccc(/C=C/c2cccc2Br)c(C)c1  
 2458 C=Cc1ccc(C#N)cc1.Oc1ccc(/N=N/c2ccc(Br)cc2)cc1>>N#Cc1ccc(/C=C/c2ccc(/N=N/c3ccc(O)cc3)cc2)  
 2459 C=CC(=O)OCCCC.COc1cccc(I)c1>>CCCCOC(=O)/C=C/c1cccc(OC)c1  
 2460 C=CC(=O)OC.Oc1ccc(/C=C/c2ccc(Br)cc2)cc1O>>COC(=O)/C=C/c1ccc(/C=C/c2ccc(O)c(O)c2)cc1  
 2461 C=Cc1ccc(OC)c(OC)c1.Ic1cccc2cccc12>>COc1ccc(/C=C/c2cccc3cccc23)cc1OC  
 2462 Bre1ccc(OCc2cccc2)c(OCc2cccc2)c1.C=Cc1ccc(C=C)cc1>>C=Cc1ccc(/C=C/c2ccc(OCc3cccc3)c(OCc3cccc3)c2)cc1  
 2463 C=CC(=O)OC.CC(C)(C)c1ccc(Cn2nnc(-c3cn(Cc4cccc4)nn3)c2I)cc1>>COC(=O)/C=C/c1c(-c2cn(Cc3cccc3)nn2)nnn1Cc1ccc(C(C)(C)C)cc1  
 2464 C=Cc1ccc(C=O)cc1.COC(=O)c1cc(OC)c(OC)cc1I>>COC(=O)c1cc(OC)c(OC)cc1/C=C/c1ccc(C=O)cc  
 2465 C=Cc1cccc1.Fc1ccc(I)cc1>>Fc1ccc(/C=C/c2cccc2)cc1  
 2466 C=CC(=O)OC.Nc1ncc(Br)cn1>>COC(=O)/C=C/c1ncc(N)nc1  
 2467 C=CC(=O)OC.O=C1Cc2c([nH]c3ccc(C(F)(F)F)cc23)-c2cc(I)ccc2N1>>COC(=O)/C=C/c1ccc2c(c1)-c1[nH]c3ccc(C(F)(F)F)cc3c1CC(=O)N2  
 2468 Bre1ccc(-c2cccc2)cc1.C=C(NC(C)=O)C(=O)OC>>COC(=O)/C(=C/c1ccc(-c2cccc2)cc1)NC(C)=O  
 2469 C=Cc1ccc(OC)cc1.Cn1c(/C=C/c2ccc(Cl)cc2)c(I)c(=O)c2cccc21>>COc1ccc(/C=C/c2c(/C=C/c3ccc(Cl)cc3)n(C)c3cccc3c2=O)cc1  
 2470 C=Cc1ccc(C)cc1.CCOC(=O)C(C)Br>>CCOC(=O)C(C)/C=C/c1ccc(C)cc1  
 2471 C=C1C(=O)O[C@H]2[C@H]1CCC(=C)[C@H]1C[C@H](OC(C)=O)C(=C)[C@H]21.Cc1ccc(I)cc1>>C=C1CC[C@H]2/C(=C/c3ccc(C)cc3)C(=O)O[C@H]2[C@H]2C(=C)[C@H](OC(C)=O)C[C@H]1C  
 2472 Bre1cccc1.C=CN(C)C(C)=O>>C=C(c1cccc1)N(C)C(C)=O  
 2473 C=CC(=O)O.O=Cc1ccc(Br)cc1>>O=Cc1ccc(/C=C/C(=O)O)cc1  
 2474 C=C(F)C(=O)OC.FC(F)(F)c1cc(I)cc(C(F)(F)F)c1>>COC(=O)/C(F)=C/c1cc(C(F)(F)F)cc(C(F)(F)F)c1  
 2475 C=CC(=O)OC(C)(C)C.O=C(Cc1ccc(Br)cc1)OCc1cccc1>>CC(C)(C)OC(=O)/C=C/c1ccc(CC(=O)OCc2cccc2)cc1  
 2476 C=C1C(=O)O[C@H]2/C=C(\C)CC/C=C(\C)CC[C@H]12.Ic1ccc2[nH]ccc2c1>>C/C1=C[C@H]2OC(=O)/C(=C/c3ccc4[nH]ccc4c3)[C@H]2CC/C(C)=C/CC1  
 2477 C=CC(=O)CC.CCOc1ncc(Br)c2cccc12>>CCOc1ncc(/C=C/C(=O)CC)c2cccc12  
 2478 C=CC(C)=O.CCCCc1nnn(CC(F)(F)C(F)F)c1I>>CCCCc1nnn(CC(F)(F)C(F)F)c1/C=C/C(C)=O  
 2479 Bre1cccc2cccc12.C=CC[C@H](NC(=O)OC(C)(C)C)C(=O)OC>>COC(=O)[C@H](C/C=C/c1cccc2ccc12)NC(=O)OC(C)(C)C  
 2480 C=CC(=O)OCC.CC(C)(C)OC(=O)CSc1ccc(Br)cc1>>CCOC(=O)/C=C/c1ccc(SCC(=O)OC(C)(C)C)cc1  
 2481 C=CCNC(=O)C(F)(F)F.O=c1[nH]c(=O)n([C@H]2C[C@H](O)[C@H](CO)O2)cc1I>>O=C(NC/C=C/c1cn([C@H]2C[C@H](O)[C@H](CO)O2)c(=O)[nH]c1=O)C(F)(F)F  
 2482 C=Cc1ccc(F)cc1.N#Cc1ccc2cc(Br)ccc2c1>>N#Cc1ccc2cc(/C=C/c3ccc(F)cc3)ccc2c1  
 2483 C=C.COC(=O)c1ccc(I)cc1>>C=Cc1ccc(C(=O)OC)cc1  
 2484 C=CC(=O)OCCCC.N#Cc1cccc1Br>>CCCCOC(=O)/C=C/c1cccc1C#N  
 2485 C=CC(N)=O.O=Cc1ccc(Cl)cc1>>NC(=O)/C=C/c1ccc(C=O)cc1  
 2486 C=C(Br)CCN1C(=O)C[C@H]2C=CCC[C@H]21/C=C(\C(=O)OC)>>C=C1CCN2C(=O)C[C@H]3C=CCC[C@H]32/C1=C/C(=O)OC  
 2487 C=CC(=O)OC.CCCCCCCN1C(=O)NC(c2cccc2)(c2ccc(I)cc2)C1=O>>CCCCCCCCN1C(=O)NC(c2cccc2)(c2ccc(/C=C/C(=O)OC)cc2)C1=O  
 2488 C=Cc1cccn1.CNC(=O)c1cccc1Sc1ccc2c(I)nn(C(C)=O)c2c1>>CNC(=O)c1cccc1Sc1ccc2c(/C=C/c3cccn3)nn(C(C)=O)c2c1  
 2489 C=Cc1cccn1.Cc1cc(N2CCCC2)nc(Cl)n1>>Cc1cc(N2CCCC2)nc(/C=C/c2cccn2)n1  
 2490 C=CC(=O)O.O=S(=O)(Nc1ccc(I)cc1)c1ccc2oc3cccc3c2c1>>O=C(O)/C=C/c1ccc(NS(=O)(=O)c2ccc3oc4cccc4c3c2)cc1  
 2491 C=C(OC)C(=O)OC.COC(=O)c1cccc(I)c1>>COC(=O)/C(=C/c1cccc(C(=O)OC)c1)OC  
 2492 C=CP(=O)(OCC)OCC.CS(=O)(=O)c1ccc([C@H](CC2CCCC2)C(=O)Nc2ccc(Br)cn2)cc1>>CCOP(=O)/C=C/c1ccc(NC(=O)[C@H](CC2CCCC2)c2ccc(S(C)(=O)=O)cc2)nc1)OCC  
 2493 C=CCCC(=O)OCC.CC(C)(CC1Cc2cccc2C1)NC[C@H](O)COc1c(Br)cccc1C#N>>CCOC(=O)CC/C=C/c1cccc(C#N)c1OC[C@H](O)CNC(C)(C)CC1Cc2cccc2C1  
 2494 C=CC(=O)OC.O=C1c2ccc(OS(=O)(=O)C(F)(F)F)cc2C(=O)N1CC(c1cccc1)c1cccc1>>COC(=O)/C=C/c1ccc2c(c1)C(=O)N(CC(c1cccc1)c1cccc1)C2=O  
 2495 C=CC(=O)OCC.CCOC(=O)Nc1cccc1C1=C(I)CCN1S(=O)(=O)c1ccc(C)cc1>>CCOC(=O)/C=C/C1=C(c2cccc2NC(=O)OCC)N(S(=O)(=O)c2ccc(C)cc2)CC1  
 2496 C=CC(OCC)OCC.O=Cc1ccc(F)cc1Br>>CCOC(/C=C/c1cc(F)ccc1C=O)OCC  
 2497 C=Cc1cccc1C.O=Cc1cccc1Br>>Cc1cccc1/C=C/c1cccc1C=O  
 2498 C=CC(=O)O.FC1(F)Oc2cccc(Br)c2O1>>O=C(O)/C=C/c1cccc2c1OC(F)(F)O2

2499 C=Cc1ccc2ccc(Cl)cc2n1.CC(C)(O)c1cccc1CC[C@H](O)c1cccc(Br)c1>>CC(C)(O)c1cccc1CC[C@H](O)c1cccc(/C=C/c2ccc3ccc(Cl)cc3n2)c1

2500 Br1enc2ccccc2c1.C=CC(=O)N(C)OC>>CON(C)C(=O)/C=C/c1enc2ccccc2c1

2501 COc1ccc(/C=C/C(=O)Oe2ccccc2I)cc1>>COc1ccc(/C=C2/C(=O)Oe3ccccc32)cc1

2502 C=Cc1cncnc1.CC(C)(C)OC(=O)N[C@H](COc1cncnc1Br)Cc1ccccc1>>CC(C)(C)OC(=O)N[C@H](COc1cncnc1/C=C/c1cncnc1)Cc1ccccc1

2503 C=CS(=O)(=O)NCc1ccccc1.CC(C)(C)OC(=O)NCc1cc(F)ccc1Br>>CC(C)(C)OC(=O)NCc1cc(F)ccc1/C=C/S(=O)(=O)NCc1ccccc1

2504 C=Cc1ccc2ccccc2c1.Cc1ccc(Br)cc1I>>Cc1ccc(Br)cc1/C=C/c1ccc2ccccc2c1

2505 C=Cc1cc(OC)c(O)c(OC)c1.COc1cc(Br)cc(OC)c1F>>COc1cc(/C=C/c2cc(OC)c(F)c(OC)c2)cc(OC)c1O

2506 C=CC(C)(C)O.COc1ccc(CCN(C)C)cc1I>>COc1ccc(CCN(C)C)cc1/C=C/C(C)(C)O

2507 C=CC(=O)OCc1ccccc1.Oc1ccc2cc(Br)ccc2c1>>O=C(/C=C/c1ccc2cc(O)ccc2c1)OCc1ccccc1

2508 C=CCCN(c1ccccc1)S(=O)(=O)c1ccccc1Br>>C=C1CCN(c2ccccc2)S(=O)(=O)c2ccccc21

2509 C=Cc1ccc(C)nc1.CN1CCc2[nH]c3c(Br)cccc3c2C1>>Cc1ccc(/C=C/c2cccc3c4c([nH]c23)CCN(C)C4)c

2510 C=CC(=O)OC.CC(C)c1cc(Br)c2c(c1)[C@]13CCCC[C@@H]1CCCC3=N2>>COC(=O)/C=C/c1cc(C(C)C)cc2c1N=C1CCC[C@H]3CCCC[C@@]123

2511 Br1ccc2ccccc2c1.C=CCN(C(=O)OC(C)(C)C)C(=O)OC(C)(C)C>>CC(C)(C)OC(=O)N(C/C=C/c1ccc2ccccc2c1)C(=O)OC(C)(C)C

2512 Br1ccc2ccccc2c1.C=COCC>>C=C(OCC)c1ccc2ccccc2c1

2513 C=CC(=O)OCCCC.COc1ccc(Br)c(N(CC2COC(=O)O2)C(=O)C(C)(C)C)n1>>CCCCOC(=O)/C=C/c1ccc(OC)nc1N(CC1COC(=O)O1)C(=O)C(C)(C)C

2514 C=Cc1ccc(C)cc1.Ic1ccccc1>>Cc1ccc(/C=C/c2ccccc2)cc1

2515 C=CCn1c(N(c2ccc(F)cc2I)S(=O)(=O)c2cccs2)cc2cc(Br)ccc21>>O=S(=O)(c1cccs1)N1c2ccc(F)cc2/C=C/C\N2c1cc1cc(Br)ccc12

2516 C=CCC(COCc1ccccc1)N(C)c1ccccc1I>>C=C1CC(COCc2ccccc2)N(C)c2ccccc21

2517 COc1cc(/C=C/C(=O)Oe2ccccc2I)cc(OC)c1OC>>COc1cc(/C=C2/C(=O)Oe3ccccc32)cc(OC)c1OC

2518 C=C.C=CCCCC(=O)CCCC(C)OC(=O)c1c(OC)cc(OC)cc1OS(=O)(=O)C(F)(F)F>>C=CCCCC(=O)CC

2519 CC(C)OC(=O)c1c(C=C)cc(OC)cc1OC

2519 C=Cc1cccc(C)c1.IC1CCCCC1>>Cc1cccc(/C=C/C2CCCCC2)c1

2520 C=CC(=O)N(C)Cc1oc2ccccc2c1C.CCC1(CC)C(=O)Nc2ncc(Br)cc21>>CCC1(CC)C(=O)Nc2ncc(/C=C/C(=O)N(C)Cc3oc4ccccc4c3C)cc21

2521 C=CC(=O)OCC.Cc1nnn(Cc2cc(C#N)ccc2Br)n1>>CCOC(=O)/C=C/c1ccc(C#N)cc1Cn1nnc(C)n1

2522 C=Cc1ccccc1.Cc1ccc2ccccc2c1Br>>Cc1ccc2ccccc2c1/C=C/c1ccccc1

2523 C=CCCO.CC(C)(C)c1ccc(Br)cc1>>C=C(CCO)c1ccc(C(C)(C)C)cc1

2523 C=C[C@]([H])1O[C@H](COC(C)=O)[C@]([H])(OC(C)=O)[C@H](OC(C)=O)[C@H]1OC(C)=O.Cc1ccc(N2C(=O)[C@H](CC[C@H](O)c3ccc(F)cc3)[C@H]2c2ccc(Br)cc2O[Si](C)(C)C(C)(C)C)cc1>>CC(=O)OC[C@H]1O[C@]([H])(/C=C/c2ccc([C@]([H])3[C@]([H])(CC[C@H](O)c4ccc(F)cc4)C(=O)N3c3ccc(C)cc3)c(O[Si](C)(C)C(C)(C)C)c2)[C@H](OC(C)=O)[C@]([H])(OC(C)=O)[C@]([H])1OC(C)=O

2524 C=Cc1cncnc1.CCCCOc1ccc(Br)cc1F>>CCCOc1ccc(/C=C/c2cncnc2)cc1F

2525 C=Cc1cncnc1.CCCCOc1ccc(Br)cc1F>>CCCOc1ccc(/C=C/c2cncnc2)cc1F

2526 C=CNC(C)=O.COc1cc(Br)cc(OC)c1OC>>C=C(NC(C)=O)c1cc(OC)c(OC)c(OC)c1

2527 C=Cc1ccc(/C=C/c2ccc(N(c3ccc(OCCCCC)cc3)c3ccc(OCCCCC)cc3)cc2)cc1.O=Cc1ccc(Br)cc1>>C

2527 CCCCCOc1ccc(N(c2ccc(/C=C/c3ccc(/C=C/c4ccc(C=O)cc4)cc3)cc2)c2ccc(OCCCCC)cc2)cc1

2528 C=Cc1ccc(N(C)C(=O)OC(C)(C)C)cc1.OCCOCCOCCOc1ccc(I)en1>>CN(C(=O)OC(C)(C)C)c1ccc(/C=C/c2ccc(OCCOCCOCCO)nc2)cc1

2529 C=CC(=O)OC(C)(C)C.CC(C)=CCc1cc(I)ccc1OC(=O)CCCc1ccccc1>>CC(C)=CCc1cc(/C=C/C(=O)OC(C)(C)C)ccc1OC(=O)CCCc1ccccc1

2530 C=CC(=O)OCC.Cc1ccc(N)c(I)c1>>CCOC(=O)/C=C/c1cc(C)ccc1N

2531 C=CC(=O)OCc1ccccc1.CCOC(=O)/C=C/c1ccc2ccc(Br)cc2c1>>CCOC(=O)/C=C/c1ccc2ccc(/C=C/C(=O)OCc3ccccc3)cc2c1

2532 C=CC(=O)N1N=Cc2ccccc2C1c1cc2ccccc2s1.COc1cc(Cc2enc(N)nc2N)cc(I)c1OC>>COc1cc(Cc2enc(N)nc2N)cc(/C=C/C(=O)N2N=Cc3ccccc3C2c2cc3ccccc3s2)c1OC

2533 C=CCCN1C(=O)c2ccccc2C1=O.Cc1ccc2ncc(Br)cc2c1>>Cc1ccc2ncc(/C=C/CCN3C(=O)c4ccccc4C3=O)cc2c1

2534 C=C(F)[Si](C)(c1ccccc1)c1ccccc1.COc1ccc(I)cc1>>COc1ccc(/C=C(\F)[Si](C)(c2ccccc2)c2ccccc2)cc1

2535 CC(=O)/C=C/CC(NS(=O)(=O)c1ccc(C)cc1)c1ccccc1.Cc1ccc(Br)cc1>>CC(=O)/C=C(/CC(NS(=O)(=O)c1ccc(C)cc1)c1ccccc1)c1ccc(C)cc1

2536 C=CC(=O)OC(C)(C)C.CCN1C(=O)c2ccc(Br)cc2C1=O>>CCN1C(=O)c2ccc(/C=C/C(=O)OC(C)(C)C)cc2C1=O

2537 C=CC(=O)OCC.O=[N+](O-)[O-]c1ccc(I)cc1>>CCOC(=O)/C=C/c1ccc([N+](=O)[O-])cc1

2538 C=CC(=O)OC(C)(C)C.O=S(=O)(c1ccccc1Br)c1n1ncc2ccccc21>>CC(C)(C)OC(=O)/C=C/c1ccccc1S(=O)(=O)n2ncc3ccccc32)c1

2539 C=CC(=O)OC.O=c1[nH]c(=O)n([C@@H]2C[C@H](CO)[C@H]2CO)cc1I>>COC(=O)/C=C/c1cn([C@@H]2C[C@H](CO)[C@H]2CO)c(=O)[nH]c1=O  
 2540 C=CCCC(C)=O.Oc1ccc(I)cc1>>CC(=O)CC/C=C/c1ccc(O)cc1  
 2541 Br1cccs1.C=CS(C)(=O)=O>>CS(=O)(=O)/C=C/c1cccs1  
 2542 C=CC(=O)OCC.N#Cc1c(-c2cccc(Br)c2)cc(-c2cccc2)nc1N>>CCOC(=O)/C=C/c1cccc(-c2cc(-c3cccc3)nc(N)c2C#N)c1  
 2543 C=CCN1C(=O)c2cccc2C1=O.Ic1ccc(C2(N3CCCCC3)CCCCC2)cc1>>O=C1c2cccc2C(=O)N1C/C=C/c1ccc(C2(N3CCCCC3)CCCCC2)cc1  
 2544 C=C.Cc1cccc(Br)c1>>C=Cc1cccc(C)c1  
 2545 C=C(F)C(=O)OC.Fc1ccc(I)cc1>>COC(=O)/C(F)=C/c1ccc(F)cc1  
 2546 C=CC(=O)OC(C)(C)C.CCOC(=O)/C(Br)=C1\CCCCO1>>CCOC(=O)C(/C=C/C(=O)OC(C)(C)C)=C1\CCCCO1  
 2547 Br1cccc2cccc12.C=CCS(N)(=O)=O>>NS(=O)(=O)C/C=C/c1cccc2cccc12  
 2548 C=CC(=O)OC.CCCCCC(O)c1cccc2ccc(Br)cc12>>CCCCC(O)c1cccc2ccc(/C=C/C(=O)OC)cc12  
 2549 C=C(F)C(C)=O.Ic1cccc2cccc12>>CC(=O)/C(F)=C/c1cccc2cccc12  
 2550 C=Cc1ccc(F)cc1.COc1ccc(Br)cc1>>COc1ccc(/C=C/c2ccc(F)cc2)cc1  
 2551 C=CC(C)OC(C)=O.C[Si](C)(C)Oc1ccc(-c2ccc(Br)cc2)nc1>>CC(=O)OC(C)/C=C/c1ccc(-c2ccc(O[Si](C)(C)C)en2)cc1  
 2552 C=Cc1ccc(CP(=O)(OCC)OCC)cc1.CCCOc1cc(C=O)c(OCCC)cc1Br>>CCCOc1cc(/C=C/c2ccc(CP(=O)(OCC)OCC)cc2)c(OCCC)cc1C=O  
 2553 C=CC(=O)OC(C)(C)C.COC(=O)c1cc(Cl)nc1Br>>COC(=O)c1cc(Cl)nc1/C=C/C(=O)OC(C)(C)C  
 2554 C=Cc1cccc(OC)c1.C[Si](C)(OS(=O)(=O)C(F)(F)F)OS(=O)(=O)C(F)(F)F>>COc1cccc(/C=C/[Si](C)(C)OS(=O)(=O)C(F)(F)F)c1  
 2555 C=CCCCC#N.CC(C)(C)c1ccc(Br)cc1>>C=C(CCCC#N)c1ccc(C(C)(C)C)cc1  
 2556 C=Cc1cccc1.FC(F)(F)c1cccc(Cl)c1>>FC(F)(F)c1cccc(/C=C/c2cccc2)c1  
 2557 C=CC(=O)OCC.Cc1ccc(S(=O)(=O)n2ccc3c(Br)cccc32)cc1>>CCOC(=O)/C=C/c1cccc2c1cn2S(=O)(=O)c1ccc(C)cc1  
 2558 Br1cccc(-c2cccn2)c1.C=Cc1cccc1>>C=C/c1cccc(-c2cccn2)c1)\c1cccc1  
 2559 C=CCC(Oc1ccc(Cl)cc1Br)C(=O)OCC>>C=C1CC(C(=O)OCC)Oc2ccc(Cl)cc21  
 2560 C=CC(=O)OC.CS(=O)(=O)Nc1cc2ccc(Br)cc2c(N2CCCCC2)n1>>COC(=O)/C=C/c1ccc2cc(NS(C)(=O)=O)nc(N3CCCCC3)c2c1  
 2561 C=CC(OC(C)=O)C(C)C.Ic1cccc1>>CC(=O)OC(/C=C/c1cccc1)C(C)C  
 2562 C=CC(=O)NCc1ccc(C)cc1.COc1ccc2c(=O)c(I)coc2c1>>COc1ccc2c(=O)c(/C=C/C(=O)NCc3ccc(C)cc3)coc2c1  
 2563 C=Cc1nc2c(N)ncnc2n1[C@@H]1O[C@H](CO[Si](C)(C)C(C)(C)C)[C@@H](O[Si](C)(C)C(C)(C)C)[C@H]1O[Si](C)(C)C(C)(C)C.Cc1ccc(Br)cc1>>Cc1ccc(/C=C/c2nc3c(N)ncnc3n2[C@@H]2O[C@H](CO[Si](C)(C)C(C)(C)C)[C@@H](O[Si](C)(C)C(C)(C)C)[C@H]2O[Si](C)(C)C(C)(C)C)cc1  
 2564 C=CC(=O)OC.CCC(C)c1ccc(N2CCc3cc(OC)ccc3C2(C)c2ccc(Br)cc2)cc1>>CCC(C)c1ccc(N2CCc3cc(OC)ccc3C2(C)c2ccc(/C=C/C(=O)OC)cc2)cc1  
 2565 C=C(C)C(=O)OC.O=[N+](O-)]c1cccc1I>>COC(=O)/C(C)=C/c1cccc1[N+](=O)[O-]  
 2566 C=CCN(C(=O)OC(C)(C)C)C(=O)OC(C)(C)C.N#Cc1ccc(Br)cc1>>CC(C)(C)OC(=O)N(C/C=C/c1ccc(C#N)cc1)C(=O)OC(C)(C)C  
 2567 C=CC(=O)OC.N#Cc1ccc(N)c(Br)c1>>COC(=O)/C=C/c1cc(C#N)ccc1N  
 2568 C=Cc1ccc(CO)cc1.IC1CCCCC1>>OCc1ccc(/C=C/C2CCCCC2)cc1  
 2569 Br1cccc1.C=Cc1cnn(-c2cccc2)c1>>C=C/c1cnn(-c2cccc2)c1)\c1cccc1  
 2570 C=C[C@@](C)(/C=C/c1ccc(O)cc1)CCC=C(C)C.COc1ccc(I)cc1>>COc1ccc(/C=C/[C@@](C)(/C=C/c2ccc(O)cc2)CCC=C(C)C)cc1  
 2571 C=CC1(O)CCC1.CC(C)(C)c1ccc(I)cc1>>CC(C)(C)c1ccc(/C=C/C2(O)CCC2)cc1  
 2572 C=CCN(Cc1cccc2cccc12)C(=O)OCC.CC(=O)c1ccc(Br)cc1>>CCOC(=O)N(C/C=C/c1ccc(C(C)=O)cc1)Cc1cccc2cccc12  
 2573 C=C1C(=O)O[C@@H]2CC(C)=C([C@@H](C)CCCOC(C)=O)[C@@H](OC(C)=O)[C@H]12.Fc1ccc(I)cc1>>CC(=O)OCCC[C@H](C)C1=C(C)C[C@H]2OC(=O)/C=C/c3ccc(F)cc3[C@H]2[C@@H]1O  
 2574 C=Cc1ccc(C)cc1.CCOC(=O)C1CCCN(c2cccc(Br)n2)C1>>CCOC(=O)C1CCCN(c2cccc(/C=C/c3ccc(C)cc3)n2)C1  
 2575 C=CC(OCC)OCC.Fc1ccc(Br)cc1>>CCOC(/C=C/c1ccc(F)cc1)OCC  
 2576 C=CC(=O)O.Ic1ccc(CNc2cccc(-c3cccn3)n2)cc1>>O=C(O)/C=C/c1ccc(CNc2cccc(-c3cccn3)n2)cc1  
 2577 C=Cc1ccc(OC)cc1.Cn1c(=O)c2c(cc(Br)n2C)n(C)c1=O>>COc1ccc(/C=C/c2cc3c(c(=O)n(C)c(=O)n3C)n2C)cc1  
 2578 Br1ccsc1.C=Cc1cccc1>>C=C/c1cccc1)\c1ccsc1  
 2579 C=CC(=O)OCCO.C[C@@H](Nc1ncnc2sc(Br)cc12)c1cccc1>>C[C@@H](Nc1ncnc2sc(/C=C/C(=O)OCCO)cc12)c1cccc1



2580 C=Cc1cccc1.COc1ccc(Br)c(N)c1>>COc1ccc(/C=C/c2ccccc2)c(N)c1  
 2581 C=CC#N.CCOC(=O)c1cn(CC)c2nc(C)c(Br)cc2c1=O>>CCOC(=O)c1cn(CC)c2nc(C)c(/C=C/C#N)cc2c  
 2582 C=CCc1c(OCc2ccccc2Br)cc(C)n(C)c1=O>>C=C1Cc2c(cc(C)n(C)c2=O)OCc2ccccc21  
 2583 C=Cc1ccc(C#N)cc1.CCOC(=O)C(F)(F)Br>>CCOC(=O)C(F)(F)/C=C/c1ccc(C#N)cc1  
 2584 C=Cc1cccc1.C[C@@H]1CC(=O)Nc2cccc(Br)c2N1>>C[C@@H]1CC(=O)Nc2cccc(/C=C/c3ccccc3)c  
 2585 C=CC(=O)OC(C)(C)C.Oc1ccc(Br)cc1>>CC(C)(C)OC(=O)/C=C/c1ccc(O)cc1  
 2586 C=C/C=C(/OCC)C(=O)OC.COc1ccc(I)cc1>>CCO/C=C/C=C/c1ccc(OC)cc1)C(=O)OC  
 2587 Brc1ccc2ccnc(N3CCOCC3)c2c1.C=CC(=O)OCC>>CCOC(=O)/C=C/c1ccc2ccnc(N3CCOCC3)c2c1  
 2588 C=Cc1ccc(S(=O)(=O)c2ccccc2F)cn1.Fc1ccc(I)c(Cl)c1>>O=S(=O)(c1ccc(/C=C/c2ccc(F)cc2Cl)nc1)c1c  
 cccc1F  
 2589 C=CC(=O)OC.Cc1cccc(C)c1-  
 c1cccc(C2CCc3cc(Br)ccc3O2)c1>>COC(=O)/C=C/c1ccc2c(c1)CCC(c1cccc(-c3c(C)cccc3C)c1)O2  
 2590 Brc1cccc(N2CCCC2)c1.C=CC(=O)OCCCC>>CCCCOC(=O)/C=C/c1cccc(N2CCCC2)c1  
 2591 C=CCN(CCc1ccc(F)cc1I)C(=O)C(F)(F)F>>C=C1CN(C(=O)C(F)(F)F)CCc2ccc(F)cc21  
 C=Cc1ccc(/C=C/c2ccc(N(C)C)cc2OC)cc1.O=c1ccc2c(-c3ccc(I)cc3S(=O)(=O)O)c3ccc(O)cc3oc-  
 2592 2c1>>COc1cc(N(C)C)ccc1/C=C/c1ccc(/C=C/c2ccc(-c3c4ccc(=O)cc-  
 4oc4cc(O)ccc34)c(S(=O)(=O)O)c2)cc1  
 C=CC1=CC=C(/C=C/c2ccc(OC)cc2)C2=CC(C(C)C)=CC=C(C)C2=C1C(=O)OC.O=[N+](O-  
 2593 )c1ccc(I)cc1>>COC(=O)C1=C2C(C)=CC=C(C(C)C)C=C2C(/C=C/c2ccc(OC)cc2)=CC=C1/C=C/c1cc  
 c([N+](=O)[O-])cc1  
 2594 C=CC(OCC)OCC.CCCCC(CC)CN1c2ccccc2Sc2cc(Br)ccc21>>CCCCC(CC)CN1c2ccccc2Sc2cc(/C=C  
 /C(OCC)OCC)ccc21  
 2595 C=Cc1cccc1Br.CCOC(=O)C(F)I>>CCOC(=O)C(F)/C=C/c1cccc1Br  
 2596 C=CC(=O)OC.O=S(=O)(c1ccc(Cl)cc1)N1CCc2cc(Br)enc21>>COC(=O)/C=C/c1enc2c(c1)CCN2S(=O  
 )(=O)c1ccc(Cl)cc1  
 2597 C=CCCCCCC.CC(=O)c1ccc(Br)cc1>>C=C(CCCCCC)c1ccc(C(C)=O)cc1  
 2598 C=CC1(O)CCC1.Cc1cccc(I)c1>>Cc1cccc(/C=C/C2(O)CCC2)c1  
 2599 C=CC(=O)COCCCC.CC(=O)c1ccc(I)cc1>>CCCCOCC(=O)/C=C/c1ccc(C(C)=O)cc1  
 2600 C=CCNS(=O)(=O)c1ccc(C)cc1.Cc1cccc(N)c1Br>>Cc1ccc(S(=O)(=O)NC/C=C/c2c(C)cccc2N)cc1  
 2601 C=Cc1ccc(C)cc1.Cc1ccc(I)cc1>>Cc1ccc(/C=C/c2ccc(C)cc2)cc1  
 2602 C=CC(OCC)OCC.Cc1ccc(C=O)c(Br)c1>>CCOC(/C=C/c1cc(C)ccc1C=O)OCC  
 2603 C=CC(=O)OC.Fc1cccc1Br>>COC(=O)/C=C/c1cccc1F  
 2604 C=CC(=O)OCCCC.Ic1c(-c2ccccc2)c2ccccc2c2c1ncc1cccc12>>CCCCOC(=O)/C=C/c1c(-  
 c2ccccc2)c2ccccc2c2c1ncc1cccc12  
 2605 C=CC(OC)OC.COC(=O)c1ccc(I)cc1>>COC(=O)c1ccc(/C=C/C(OC)OC)cc1  
 2606 C=CN1CCCC1=O.O=S(=O)(Oc1cccc1Br)C(F)(F)F>>C=C(c1cccc1Br)N1CCCC1=O  
 2607 C=Cc1cccn1.Cn1ccc(Br)n1>>Cn1ccc(/C=C/c2cccn2)n1  
 2608 C=CCN(CCI)S(=O)(=O)c1cccs1>>C=C1CCN(S(=O)(=O)c2cccs2)C1  
 2609 C=C(NC(=O)OCc1cccc1)C(=O)OC.CC(=O)OCc1cc(NC(=O)OC(C)(C)C)c(C)cc1Br>>COC(=O)/C(=  
 C/c1cc(C)c(NC(=O)OC(C)(C)C)cc1COC(C)=O)NC(=O)OCc1cccc1  
 2610 C=CC(=O)OC.Nc1cc(F)ccc1Br>>COC(=O)/C=C/c1ccc(F)cc1N  
 2611 C=CC(=O)OCC.O=C(c1cccc1)C(F)(F)c1cccc1I>>CCOC(=O)/C=C/c1cccc1C(F)(F)C(=O)c1cccc1  
 2612 Brc1ccc2ccc3cccc4ccc1c2c34.C=CC(=O)OCC(F)(F)F>>O=C(/C=C/c1ccc2ccc3cccc4ccc1c2c34)OCC(  
 F)(F)F  
 2613 C=Cc1ccc(N(C)C)cc1.CC(C)c1cccc(C(C)C)c1N1C(=O)c2cccc3c(Br)ccc(c23)C1=O>>CC(C)c1cccc(C(  
 C)C)c1N1C(=O)c2cccc3c(/C=C/c4ccc(N(C)C)cc4)ccc(c23)C1=O  
 2614 C=COCCCC.COc1cc(Cl)cc(OC)c1>>C=C(OCCCC)c1cc(OC)cc(OC)c1  
 2615 C=CC(=O)OCC.Cc1ccc(-c2oc3ccccc3c(=O)c2Br)cc1>>CCOC(=O)/C=C/c1c(-  
 c2ccc(C)cc2)oc2ccccc2c1=O  
 2616 C=CC(=O)NCCc1ccc(F)cc1.COc1ccc(-c2oc3cc(OC)ccc3c(=O)c2I)cc1>>COc1ccc(-  
 c2oc3cc(OC)ccc3c(=O)c2/C=C/C(=O)NCCc2ccc(F)cc2)cc1  
 2617 C=CC(=O)N(C)Cc1cc2ccccc2n1C.CC1(C)C(=O)Nc2ncc(Br)cc21>>CN(Cc1cc2ccccc2n1C)C(=O)/C=  
 C/c1enc2c(c1)C(C)(C)C(=O)N2  
 2618 Brc1cccc1C1OCCCO1.C=CC#N>>N#C/C=C/c1cccc1C1OCCCO1  
 2619 C=CC(=O)OC(C)(C)C.COc1cc(Br)c(COCCC(=O)OC(C)(C)C)cc1OCc1cccc1>>COc1cc(/C=C/C(=O)  
 OC(C)(C)C)c(COCCC(=O)OC(C)(C)C)cc1OCc1cccc1  
 2620 C=C[C@H]1COC(C)(C)N1C(=O)OC(C)(C)C.Ic1cccc1>>CC(C)(C)OC(=O)N1[C@H]/C=C/c2ccc  
 cc2)COC1(C)C  
 2621 C=CC(CC(=O)OC)[Si](C)(C)C.c1ccc([I+](c2ccccc2)cc1>>COC(=O)CC(/C=C/c1cccc1)[Si](C)(C)C  
 2622 C=CCN1C(=O)[C@H]2COCCN2C[C@H]1c1cc(F)cc(F)c1.O=C1Nc2ncccc2[C@H]12Cc1ccc(Br)cc1C2  
 >>O=C1[C@H]2COCCN2C[C@H](c2cc(F)cc(F)c2)N1C/C=C/c1ccc2c(c1)C[C@H]1(C2)C(=O)Nc

2623 C=CC(=O)OC.CC(C)Oc1ccc(N2CCc3cc(O)ccc3C2(C)c2ccc(Br)cc2)cc1>>COC(=O)/C=C/c1ccc(C2(C)c3ccc(O)cc3CCN2c2ccc(OC(C)C)cc2)cc1  
 2624 C=CC(=O)N1CCOCC1.CSc1ccc(Br)cc1>>CSc1ccc(/C=C/C(=O)N2CCOCC2)cc1  
 2625 C=Cc1ccc(O)cc1.COc1ccc(Br)cc1>>COc1ccc(/C=C/c2ccc(O)cc2)cc1  
 2626 C=CC(=O)CC.CC(C)(C)c1ccc(Br)cc1>>CCC(=O)/C=C/c1ccc(C(C)(C)C)cc1  
 2627 C=C[Si](CC)(CC)CC.FC(F)(F)c1cccc(Br)c1>>CC[Si](/C=C/c1cccc(C(F)(F)F)c1)(CC)CC  
 2628 C=Cc1ccc(Sc2ccccc2)cc1.CCCCCCCCCC1(CCCCCCCCCC)c2cc(I)ccc2-c2ccc([N+](=O)[O-])cc21>>CCCCCCCCCCCC1(CCCCCCCCCC)c2cc(/C=C/c3ccc(Sc4ccccc4)cc3)ccc2-c2ccc([N+](=O)[O-])cc21  
 2629 C=C(C(=O)OC)[C@@H]1CC[C@@]2(C)CCC[C@@](C)(OCOC)[C@@H]2C1.COc1cccc(I)c1>>CO  
 2630 CO[C@]1(C)CCC[C@]2(C)CC[C@@H](/C=C/c3cccc(OC)c3)C(=O)OC)[C@H]21  
 2631 C=CCO[Si](CC)(CC)CC.COc1cccc(CCl)c1>>C=C(CO[Si](CC)(CC)CC)Cc1cccc(OC)c1  
 2632 C=CC(=O)OCCCC.COC(CNc1ncnc1Cl)OC>>CCCCOC(=O)/C=C/c1ncnc1NCC(OC)OC  
 2633 C=CCC(C)C(=O)OCC.Cc1ccccc1Br>>CCOC(=O)C(C)C/C=C/c1ccccc1C  
 2634 C=CP(=O)(c1ccccc1)c1ccccc1.Cc1ccc2ccccc2c1Br>>Cc1ccc2ccccc2c1/C=C/P(=O)(c1ccccc1)c1ccccc1  
 2635 C=Cc1cc(OC)cc(OC)c1.Clc1ccc(I)cc1>>COc1cc(/C=C/c2ccc(Cl)cc2)cc(OC)c1  
 2636 C=CC(=O)OC.N#Cc1cc(Cl)ccc1C(F)(F)F>>COC(=O)/C=C/c1ccc(C(F)(F)F)c(C#N)c1  
 2637 C=CC(=O)OCC.Cc1nc(C)c(I)c(N)n1>>CCOC(=O)/C=C/c1c(C)nc(C)nc1N  
 2638 C=CC(=O)O.O=S(=O)(Nc1ccc(I)cc1)c1ccc(Cl)cc1>>O=C(O)/C=C/c1ccc(NS(=O)(=O)c2ccc(Cl)cc2)c  
 2639 C=CC(=O)OC.Fc1ccc(Br)nc1>>COC(=O)/C=C/c1ccc(F)cn1  
 2640 C=CC(=O)OCC.FC(F)(F)c1ccc(Br)c(C2OCCCO2)c1>>CCOC(=O)/C=C/c1ccc(C(F)(F)F)cc1C1OCCC  
 2641 C=Cc1ccc(C)cc1.COc1ccc(/C=C/c2cc(Br)cc(/C=C/c3ccc(OC)cc3)c2)cc1>>COc1ccc(/C=C/c2cc(/C=C/c3ccc(C)cc3)cc(/C=C/c3ccc(OC)cc3)c2)cc1  
 2642 Br1nn(Cc2ccccc2)c2ccccc12.C=CC(=O)OCCCC>>CCCCOC(=O)/C=C/c1nn(Cc2ccccc2)c2ccccc12  
 2643 C=CC(CC)(CC)C(=O)Nc1ccccc1Br>>C=C1c2ccccc2NC(=O)C1(CC)CC  
 2644 C=CC(=O)OCCCC.CC(=O)O[IH2](OC(C)=O)c1ccccc1>>CCCCOC(=O)/C=C/c1ccccc1  
 2645 C=Cc1ccccc1.O=c1c(Br)c(-c2ccccc2)oc2ccccc12>>O=c1c(/C=C/c2ccccc2)c(-c2ccccc2)oc2ccccc12  
 2646 C=COCCCC.CC=Cc1ccc(OS(=O)(=O)C(F)(F)F)c(OC)c1>>C=C(OCCCC)c1ccc(C=CC)cc1OC  
 2647 C=C.NC(=O)c1[nH]c2ccc(Br)cc2c1S(=O)(=O)N1CCOCC1>>C=Cc1ccc2[nH]c(C(N)=O)c(S(=O)(=O)N3CCOCC3)c2c1  
 2648 C=CN1CCCC1=O.CC(=O)c1ccc(Br)cc1>>C=C(c1ccc(C(C)=O)cc1)N1CCCC1=O  
 2649 Br1ccc(N2c3ccccc3N(c3ccccc3)c3c2c2ccccc2c2ccccc32)cc1.C=Cc1cncnc1>>C=C(c1ccc(N2c3ccccc3N(c3ccccc3)c3c2c2ccccc2c2ccccc32)cc1)c1cncnc1  
 2650 C=CCNC(=O)C(F)(F)F.O=c1[nH]c(=O)n([C@@H]2O[C@H](CO)[C@@H](O)[C@H]2O)cc1I>>O=C(NC/C=C/c1cn([C@@H]2O[C@H](CO)[C@@H](O)[C@H]2O)c(=O)[nH]c1=O)C(F)(F)F  
 2651 Br1cc2c(cc1C1OCCO1)OCO2.C=CC(=O)OC(C)(C)C>>CC(C)(C)OC(=O)/C=C/c1cc2c(cc1C1OCCO1)OCO2  
 2652 C=Cc1ccccc1.COC(=O)[C@]12Cc3cc4cc(Br)ccc4nc3C[C@@H]1CCN(C(=O)OC(C)(C)C)C2>>COC(=O)[C@]12Cc3cc4cc(/C=C/c5ccccc5)ccc4nc3C[C@@H]1CCN(C(=O)OC(C)(C)C)C2  
 2653 C=CC(=O)N1CCOCC1.Oc1ccc2c(c1)CCN(c1ccccc1)C2c1ccc(I)cc1>>O=C(/C=C/c1ccc(C2c3ccc(O)c3CCN2c2ccccc2)cc1)N1CCOCC1  
 2654 C=CCn1nnc(CCCC)c1I>>C=C1CCn2nnc(CCCC)c21  
 2655 C=CC(=O)OCC.Cc1cc(Br)ccc1O>>CCOC(=O)/C=C/c1ccc(O)c(C)c1  
 2656 C=CC(=O)OCC.NC(=O)c1cc(I)cc(OCc2ccccc2)c1>>CCOC(=O)/C=C/c1cc(OCc2ccccc2)cc(C(N)=O)c  
 2657 C=CC(=O)OCC.COc1ccc(OC)c(Cc2ccc(I)cc2)c1>>CCOC(=O)/C=C/c1ccc(Cc2cc(OC)ccc2OC)cc1  
 2658 \*CNCCOCCOCCOCCNC(=O)COc1ccc(C(Cc2cc(OC)cc(OC)c2)NC(=O)c2ccc(/C=C/c3cc(C)cc3)cc2)cc1  
 2659 C=Cc1ccc(C)cc1.CN(C)c1ccc(Cl)cc1>>Cc1ccc(/C=C/c2ccc(N(C)C)cc2)cc1  
 2660 C=C(CC(=O)O)C(=O)O.COc1ccc(Br)c(CN(CC(F)(F)F)C(=O)OC(C)(C)C)c1>>COc1ccc(/C=C(\CC(=O)O)C(=O)O)c(CN(CC(F)(F)F)C(=O)OC(C)(C)C)c1  
 2661 C=CC(=O)OCC.O=Cc1ccc(Br)nc1>>CCOC(=O)/C=C/c1ccc(C=O)cn1  
 2662 C=C[C@H](C)[C@H](O)C/C=C/C(=O)OC.COc1ccc(I)cc1>>COC(=O)/C=C/C[C@H](O)[C@H](C)/C=C/c1ccc(OC)cc1  
 2663 C=CC#N.[2H]C([2H])([2H])c1cc(I)cc(C([2H])([2H])[2H])c1N>>[2H]C([2H])([2H])c1cc(/C=C/C#N)c  
 2664 c(C([2H])([2H])[2H])c1N  
 2665 C=CC(=O)OC(C)(C)C.COc1ccc(CNc2c(I)cccc2OC)cc1>>COc1ccc(CNc2c(/C=C/C(=O)OC(C)(C)C)ccc2OC)cc1  
 2666 C=CC(=O)OC.COc1ccc2c(c1)CCN(c1ccccc1C(C)C)C2(C)c1ccc(Br)cc1>>COC(=O)/C=C/c1ccc(C2(C)c3ccc(OC)cc3CCN2c2ccccc2C(C)C)cc1  
 2667 C=CC(=O)OCC.O=[N+](O-)]c1ccccc1I>>CCOC(=O)/C=C/c1ccccc1[N+](=O)[O-]

2666 C=CCCc1cccc1.CC(C)(C)OC(=O)c1ccc(Br)cc1[N+](=O)[O-]  
 2667 ]>>CC(C)(C)OC(=O)c1ccc(/C=C/Cc2cccc2)cc1[N+](=O)[O-]  
 2668 C=CC(C)CC.Fc1cccc(CCl)c1>>C=C(Cc1cccc(F)c1)C(C)CC  
 2669 Br1ccc(-c2cnnc2)cc1.C=CC(N)=O>>NC(=O)/C=C/c1ccc(-c2cnnc2)cc1  
 2670 C=CC1CCCC1.Nc1cccc1Br>>Nc1cccc1/C=C/C1CCCC1  
 2671 C=CCC(O)c1cc2ccc(C)cc2nc1Cl>>C=C1CC(O)c2cc3ccc(C)cc3nc21  
 2672 C=CC(=O)OCC.COc1cc(Br)cc(OC)c1>>CCOC(=O)/C=C/c1cc(OC)cc(OC)c1  
 2673 C=Cc1cccn2nc(Cl)nc12.CN(c1cccc1Br)S(C)(=O)=O>>CN(c1cccc1/C=C/c1cccn2nc(Cl)nc12)S(C)(=O)=O  
 2674 C=Cc1ccc(CNC(=O)OC(C)(C)C)cc1.Cc1noc(-c2cccc2)c1I>>Cc1noc(-c2cccc2)c1/C=C/c1ccc(CNC(=O)OC(C)(C)C)cc1  
 2675 C=C1CC(c2cccc2)OC1=O.Ic1cccc1-c1ccc2cccc2c1>>O=C1OC(c2cccc2)/C=C/Cc1cccc1-c1ccc2cccc2c1  
 2676 C=CC(=O)OC.CC(C)(O)Cn1cnc2c(N)nc3cc(Br)ccc3c21>>COC(=O)/C=C/c1ccc2c(c1)nc(N)c1ncn(CC(C)(C)O)c12  
 2677 O=C(/C=C/Cc1cccc1)O/C(=C)C1CCCCC1>>O=C1OC(C2CCCCC2)=C/C1=C/Cc1cccc1  
 2678 C=C[C@H](Cn1c(Br)c(-c2ccc(C(=O)N[C@H](C)c3cccn3)cc2)c2c(N)ncnc21)NC(=O)OC(C)(C)C>>C=C1c2c(-c3ccc(C(=O)N[C@H](C)c4cccn4)cc3)c3c(N)ncnc3n2C[C@H]1NC(=O)OC(C)(C)C  
 2679 C=CC(=O)OCC.O=S(=O)(Oc1ccc2ccoc2c1)C(F)(F)F>>CCOC(=O)/C=C/c1ccc2ccoc2c1  
 2680 C=CCN(C(=O)OCc1cccc1)C(=O)OC(C)(C)C.COC(=O)c1ccc(Br)cc1>>COC(=O)c1ccc(/C=C/CN(C(=O)OCc2cccc2)C(=O)OC(C)(C)C)cc1  
 2681 C=C[Si](C)(C)c1cccc1/C=C/Cc1ccc(C)cc1Br>>C=C1c2cc(C)ccc2/C=C/Cc2cccc2[Si]1(C)C  
 2682 C=Cc1ccc(Cl)cc1.Ic1cccc1>>Clc1ccc(/C=C/Cc2cccc2)cc1  
 2683 C=CC(=O)OC(C)(C)C.CC(C)(C)OC(=O)CC1(C(=O)OC(C)(C)C)CC(c2cc(Br)cc(OCc3cccc3)c2)=NO1>>CC(C)(C)OC(=O)/C=C/c1cc(OCc2cccc2)cc(C2=NOCC(C(=O)OC(C)(C)C)(C(=O)OC(C)(C)C)C  
 2684 C=CC(C)CCc1cccc(CC(C)(NC(=O)OC(C)(C)C)C(=O)OCc2cc(Cl)nc(N)S(C)(=O)=O)c2c1>>CC1/C=C/c2cc(cc(N)S(C)(=O)=O)n2)COC(=O)C(C)(NC(=O)OC(C)(C)C)Cc2cccc(c2)CC1  
 2685 C=CC1CCN(C(=O)OC(C)C)CC1.CS(=O)(=O)N1CCN(c2ccc(Br)cn2)CC1>>CC(C)OC(=O)N1CCC(/C=C/c2ccc(N3CCN(S(C)(=O)=O)CC3)nc2)CC1  
 2686 C=Cc1cncnc1.CC(C)=C(C)Br>>CC(C)=C(C)/C=C/c1cncnc1  
 2687 C=CC(=O)OC.Oc1cccc(Br)c1>>COC(=O)/C=C/c1cccc(O)c1  
 2688 C=Cc1ccc(C)cc1.Cc1cccc(I)c1>>Cc1ccc(/C=C/Cc2cccc(C)c2)cc1  
 2689 C=CC(N)=O.CCc1cc(Br)ccc1Cl>>CCc1cc(/C=C/C(N)=O)ccc1Cl  
 2690 C=CC(=O)OC(C)(C)C.COc1cc(CNc2ccc(Br)cn2)cc(OC)c1OC>>COc1cc(CNc2ccc(/C=C/C(=O)OC(C)(C)C)cn2)cc(OC)c1OC  
 2691 C=CC(=O)OC(C)(C)C.COc1cc(Br)c(C(C)OCCC(=O)OC(C)(C)C)cc1OC>>COc1cc(/C=C/C(=O)OC(C)(C)C)c(C(C)OCCC(=O)OC(C)(C)C)cc1OC  
 2692 C=Cc1cccc1.OC/C=C/C1=C(Br)CCCC1>>OC/C=C/C1=C(/C=C/Cc2cccc2)CCCC1  
 2693 C=C(C)C(=O)OCCCC.O=Cc1ccc(Cl)cc1>>CCCCOC(=O)/C(C)=C/c1ccc(C=O)cc1  
 2694 Br1ccsc1.C=CC(=O)CCC>>CCCC(=O)/C=C/c1ccsc1  
 2695 C=CC(F)(F)F.O=[N+][O-]c1ccc(I)c(Cl)c1>>O=[N+][O-]c1ccc(/C=C/C(F)(F)F)c(Cl)c1  
 2696 C=CC(=O)OC.COc1ccc(Br)c(COCCOCCOCCNC(=O)OC(C)(C)C)c1>>COc1ccc(/C=C/C(=O)OC)c(COCCOCCOCCNC(=O)OC(C)(C)C)c1  
 2697 C=CC(=O)O.Cc1ccc(S(=O)(=O)N(C)c2ccc(I)cc2)cc1>>Cc1ccc(S(=O)(=O)N(C)c2ccc(/C=C/C(=O)O)c2)cc1  
 2698 Br1ccnc1.C=CCNC(=O)OC(C)(C)C>>C=C(CNC(=O)OC(C)(C)C)c1ccnc1  
 2699 C=Cc1ccc(C(C)(C)C)cc1.Cc1cc(Br)ccc1I>>Cc1cc(Br)ccc1/C=C/c1ccc(C(C)(C)C)cc1  
 2700 C=CN1C(=O)c2cccc2C1=O.FC(F)(F)Oc1ccc(Br)cc1OC(F)(F)F>>O=C1c2cccc2C(=O)N1/C=C/c1cc  
 2701 c(OC(F)(F)F)c(OC(F)(F)F)c1  
 2702 C=Cc1ccc(OC)cc1.Cc1ccc(I)cc1>>COc1ccc(/C=C/Cc2ccc(C)cc2)cc1  
 2703 C=C(C(=O)OCC)c1cccc1Br.Oc1cccc1I>>CCOC(=O)/C(=C/c1cccc1O)c1cccc1Br  
 2704 C=Cc1cnc(C#N)c1Nc1ccc2[nH]ccc2c1C.Clc1ccc(Br)n1>>Cc1c(Nc2c(C#N)ncnc2/C=C/Cc2ccc(Cl)n2)ccc2[nH]ccc12  
 2705 C=CC(C)(C)OC(Cl)OCCCC>>C=C1CC(OCCCC)OC1(C)C  
 2706 C=C.Clc1ccc(I)cc1>>C=Cc1ccc(Cl)cc1  
 2707 C=Cc1cc(O[Si](C)(C)C(C)C)cc(O[Si](C)(C)C(C)(C)C)c1.CC(=O)Oc1ccc(I)cc1>>CC(=O)Oc1ccc(/C=C/c2cc(O[Si](C)(C)C(C)C)cc(O[Si](C)(C)C(C)(C)C)c2)cc1  
 2708 C=Cc1cccn1.Cn1nc(Br)c2cccc21>>Cn1nc(/C=C/Cc2cccn2)c2cccc21  
 2709 C=CCN(CC1=C(Br)CCCCC1)c1cccc2cccc12>>C=C1CN(c2cccc3cccc23)CC2=C1CCCCC2

2708 Br1ccc(I)cc1.C=C[C@@H](C)[C@H]1CC[C@H]2[C@@H]3CC(=O)[C@H]4C[C@H](O)CC[C@]4  
 (C)[C@H]3CC[C@@]21C>>C[C@H]/(C=C/c1ccc(Br)cc1)[C@H]1CC[C@H]2[C@@H]3CC(=O)[C  
 2709 @H]4C[C@H](O)CC[C@]4(C)[C@H]3CC[C@@]21C  
 C=Cc1ccncc1.O=[N+][O-]c1ccncc1Nc1cccc/C=C/c2cncc(Br)c2)c1>>O=[N+][O-  
 ]c1ccncc1Nc1cccc/C=C/c2cncc/C=C/c3ccncc3)c2)c1  
 2710 C=CC(OCC(=C)Br)c1cccc1>>C=C1COC(c2cccc2)C1=C  
 2711 C=CC#N.O=S(=O)(Oc1coc2cccc12)C(F)(F)F>>N#C/C=C/c1coc2cccc12  
 2712 C=C(NC(C)=O)C(=O)OC.Clc1ccc(Br)cc1>>COC(=O)/C(=C/c1ccc(Cl)cc1)NC(C)=O  
 2713 C=C(C)C(=O)OC.Clc1ccc(Br)cc1>>COC(=O)/C(C)=C/c1ccc(Cl)cc1  
 2714 C=C(CP(=O)(OCC)OCC)C(=O)OCC.Ic1cccc1>>CCOC(=O)/C(=C/c1cccc1)CP(=O)(OCC)OCC  
 2715 C=Cc1ccc(OC)cc1.CCOC(=O)C(C)Br>>CCOC(=O)C(C)/C=C/c1ccc(OC)cc1  
 2716 C=CC[C@H](C)N(C)C(=O)OC(C)(C)C.CC(C)(C)CC(=O)N1CC[C@@H](Oc2cncc(Br)c2)C1>>C[C  
 @H](C/C=C/c1cncc(O[C@@H]2CCN(C(=O)CC(C)(C)C)C2)c1)N(C)C(=O)OC(C)(C)C  
 2717 C=C/C=C/CCCCC.COC(=O)c1ccc(I)cc1>>CCCCC/C=C/C=C/c1ccc(C(=O)OC)cc1  
 2718 C=COCCCC.O=C1CCCc2c(OS(=O)(=O)C(F)(F)F)cccc21>>C=C(OCCCC)c1cccc2c1CCCC2=O  
 2719 C=CC(N)=O.CCc1ccc(I)cc1>>CCc1ccc/C=C/C(N)=O)cc1  
 2720 C=CC(C)=O.Oc1ccc(Cl)cc1>>CC(=O)/C=C/c1ccc(O)cc1  
 C=C[C@@H](NC(=O)OC(C)(C)C)[C@H](O)[C@H](C)C(=O)NCC(=O)N[C@H](C)C(=O)Nc1cc(OC  
 2721 )ccc1I>>COc1ccc2c(c1)NC(=O)[C@@H](C)NC(=O)CNC(=O)[C@@H](C)[C@@H](O)[C@H](NC(  
 =O)OC(C)(C)C)/C=C/2  
 2722 C=Cc1cccc1.CC(=O)c1cc2cc(Br)ccc2o1>>CC(=O)c1cc2cc/C=C/c3cccc3)ccc2o1  
 2723 C=Cc1ccncc1.CCOC(=O)c1[nH]c(C(C)(C)C)nc1>>CCOC(=O)c1[nH]c(C(C)(C)C)nc1/C=C/c1ccncc1  
 2724 C=Cc1nnn(C=C)n1.Fc1cccc1I>>C=Cn1nnc/C=C/c2cccc2F)n1  
 2725 Br1ccc2cnccc2c1.C=Cc1cccc1>>C(=C/c1ccc2cnccc2c1)\c1cccc1  
 2726 C=Cc1ccncc1.O=Cc1cccc1Br>>O=Cc1cccc1/C=C/c1ccncc1  
 2727 C=CC(=O)OC.N#Cc1ccncc1Br>>COC(=O)/C=C/c1ncccc1C#N  
 2728 C=CC(=O)OCC.Oc1c(F)cc(Br)cc1F>>CCOC(=O)/C=C\c1cc(F)c(O)c(F)c1  
 2729 C=CCc1c(OCc2cccc2Br)c(=O)oc2cccc12>>O=c1oc2cccc2c1OCc1cccc1/C=C\C2  
 2730 Br1ccc(I)c1.COC[C@@H]/N=C(\c1cccc1)N1C=CCC[C@H]1C)C(C)C>>COC[C@@H]/N=C(\c1  
 ccccc1)N1C=C(c2cccc(Br)c2)CC[C@H]1C)C(C)C  
 2731 C=CC(=O)OC(C)(C)C.CC(C)=CCc1cc(I)ccc1OC(=O)c1ccncc1>>CC(C)=CCc1cc/C=C/C(=O)OC(C)(  
 C)C)ccc1OC(=O)c1ccncc1  
 2732 C=Cc1ccc([N+](=O)[O-])cc1.O=Cc1cccc1Br>>O=Cc1cccc1/C=C/c1ccc([N+](=O)[O-])cc1  
 2733 C=CC(=O)OC(C)(C)C.C[C@@H](c1cccc1)N(Cc1cccc1)[C@H](CC(=O)OC(C)(C)C)c1ccc(Br)cc1>  
 >C[C@@H](c1cccc1)N(Cc1cccc1)[C@H](CC(=O)OC(C)(C)C)c1ccc/C=C/C(=O)OC(C)(C)C)cc1  
 2734 C=CCCO.CC(C)(C)c1ccc(OS(=O)(=O)C(F)(F)F)cc1>>C=C(CCO)c1ccc(C(C)(C)C)cc1  
 2735 C=C/C=C/C(=O)N(CCCC)CCCC.N#Cc1ccc(Br)cc1>>CCCCN(CCCC)C(=O)/C=C/C=C/c1ccc(C#N)c  
 2736 C=Cc1cccc1.COC(=O)c1cccc1I>>COC(=O)c1cccc1/C=C/c1cccc1  
 2737 C=Cc1ccc(S(=O)(=O)c2cccc2F)cn1.Fc1cccc1I>>O=S(=O)(c1ccc/C=C/c2cccc2F)nc1)c1cccc1F  
 2738 C=Cc1ccc(Cl)cc1.CI>>C/C=C/c1ccc(Cl)cc1  
 2739 C=CC(=O)OC.CC(=O)N1CCc2cc(I)ccc21>>COC(=O)/C=C/c1ccc2c(c1)CCN2C(C)=O  
 2740 C=Cc1cc(OC)c(OC)cc1CC(Nc1cccc1)c1cc2c(cc1Br)OCO2>>C=C1c2cc(OC)c(OC)cc2CC(Nc2cccc  
 2)c2cc3c(cc21)OCO3  
 2741 C=CCN(C(=O)OC(C)(C)C)C(=O)OC(C)(C)C.O=C(c1cccc1)c1ccc(Cl)cc1>>CC(C)(C)OC(=O)N(C/C  
 =C/c1ccc(C(=O)c2cccc2)cc1)C(=O)OC(C)(C)C  
 2742 C=CC(OCC)OCC.Cc1cc(C)cc(Br)c1>>CCOC/C=C/c1cc(C)cc(C)c1)OCC  
 2743 COc1ccc(C(C/C=C/C(C)=O)NS(=O)(=O)c2ccc(C)cc2)cc1.Cc1ccc(Br)cc1>>COc1ccc(C(C/C=C/C(C)  
 =O)c2ccc(C)cc2)NS(=O)(=O)c2ccc(C)cc2)cc1  
 2744 C=Cc1cccc1.C[Si](C)(C)Cl>>C[Si](C)(C)/C=C/c1cccc1  
 2745 C=Cc1ccc(OC)cc1.CCOC(=O)C(F)I>>CCOC(=O)C(F)/C=C/c1ccc(OC)cc1  
 2746 C=Cc1enc2c(ccn2C(=O)OC(C)(C)C)c1OC.CCN1CCN(Cc2ccc(NC(=O)c3ccc(C)(I)c3)cc2C(F)(F)F)C  
 C1>>CCN1CCN(Cc2ccc(NC(=O)c3ccc(C)c/C=C/c4cnc5c(ccn5C(=O)OC(C)(C)C)c4OC)c3)cc2C(F)(  
 2747 C=CC(C)=O.Ic1cccc1>>CC(=O)/C=C/c1cccc1  
 Br1enc2cccc2c1.C=CCOC1=C(C)C(=O)O[C@H](CC)[C@@](C)(O)C=C(C)C(=O)[C@H](C)C[C@  
 2748 @](C)(OC)[C@H](O[C@@H]2O[C@H](C)C[C@H](N(C)C)[C@H]2OC(C)=O)[C@H]1C>>CC[C@  
 H]1OC(=O)C(C)=C(OC/C=C/c2cnc3cccc3c2)[C@H](C)[C@@H](O[C@@H]2O[C@H](C)C[C@H](  
 N(C)C)IC@H]2OC(C)=O)IC@l(C)(OC)ClC@@Hl(C)C(=O)C(C)=ClC@l1(C)O  
 2749 C=C(NC(C)=O)C(=O)OC.Fc1cccc(Br)c1>>COC(=O)/C=C/c1cccc(F)c1)NC(C)=O  
 2750 C=CC(=O)OC.O=[N+][O-]c1cc(Cl)cc(I)c1>>COC(=O)/C=C/c1cc(Cl)cc([N+](=O)[O-])c1

C=C[C@](C)(/C)/C/c1ccc(OC)cc1)CCC=C(C)(C).Oc1ccc(I)cc1>>COc1ccc(/C=C/[C@](C)(/C=C/c2cc(O)cc2)CCC=C(C)(C)cc1  
 C=Cc1cccc([N+](=O)[O-])c1.Cn1cc(I)c(=O)c2ccccc21>>Cn1cc(/C=C/c2cccc([N+](=O)[O-])c2)c(=O)c2ccccc21  
 C=CC(=O)N(C)OC.O=[N+]([O-])c1ccc(I)cc1>>CON(C)C(=O)/C=C/c1ccc([N+](=O)[O-])cc1  
 C=CC(=O)OCC.CN1C(=O)C(C)(C)c2cc(Br)ccc21>>CCOC(=O)/C=C/c1ccc2c(c1)C(C)(C)C(=O)N2C  
 Brclcccc1.C=Cn1nn(-c2ccc(C(F)(F)F)cc2)n1>>FC(F)(F)c1ccc(-c2nnn(/C=C/c3ccccc3)n2)cc1  
 C=CC(=O)OC.Nc1ccc(F)nc1Br>>COC(=O)/C=C/c1nc(F)ccc1N  
 C=Cc1ccc(OC)cc1.Cn1nc(Br)c2ccccc21>>COc1ccc(/C=C/c2nn(C)c3ccccc23)cc1  
 C=CSelneenl.Iclceccc1>>C(=C/c1ceccc1)\Sclneenl  
 C=C(CC(F)(F)C(=O)OCC)c1ccc(C)cc1.CCOC(=O)C(F)(F)I>>CCOC(=O)C(F)(F)/C=C(\CC(F)(F)C(=O)OCC)c1ccc(C)cc1  
 Brclccc(C#Cc2cccc(I)c2)cc1.C=CC(=O)OC>>COC(=O)/C=C/c1cccc(C#Cc2ccc(Br)cc2)c1  
 C=Cc1cc(OC)c(OC)c(OC)c1-c1ceccc1.Iclceccc1>>COc1cc(/C=C/c2ccccc2)c(-c2ccccc2)c(OC)c1OC  
 C=Cc1cccc1.CCOCc1nc2c(N)nc3cc(Br)ccc3c2n1CCCCO>>CCOCc1nc2c(N)nc3cc(/C=C/c4ccccn4)c  
 cc3c2n1CCCCO  
 C=CC(=O)OC(C)(C)C.Cc1c(-c2ccc(O)cc2)oc2ccc(Br)cc12>>Cc1c(-  
 c2ccc(O)cc2)oc2ccc(/C=C/C(=O)OC(C)(C)C)cc12  
 C=Cc1cccc(C(=O)OC)c1.COC(=O)c1cc2cc(Br)ccc2cc1OC(C)=O>>COC(=O)c1cccc(/C=C/c2ccc3cc(  
 OC(C)=O)c(C(=O)OC)cc3c2)c1  
 C=Cc1ccc(C(=O)OCC)cc1.[Si](C)(OS(=O)(=O)C(F)(F)F)OS(=O)(=O)C(F)(F)F>>CCOC(=O)c1ccc(/  
 C=C/[Si](C)(C)OS(=O)(=O)C(F)(F)F)cc1  
 C=CCOCc1ceccc1.Cc1ceccc1OS(=O)(=O)C(F)(F)F>>C=C(CCOCc1ceccc1)c1ceccc1C  
 C=COC(CC)CCCC.N#Cc1ccc(Br)cc1>>C=C(OC(CC)CCCC)c1ccc(C#N)cc1  
 C=CCC#N.CS[C@H]1O[C@@H](c2ccc(C)c(Cc3ccc(Cl)cc3)c2)[C@H](OC(C)=O)[C@@H](OC(C)=  
 O)[C@@H]1OC(C)=O>>CS[C@H]1O[C@@H](c2ccc(C)c(Cc3ccc(/C=C/CC#N)cc3)c2)[C@H](OC(  
 C)=O)[C@@H](OC(C)=O)[C@@H]1OC(C)=O  
 C=CC(=O)OC.O=[N+]([O-])c1ccc(Br)cc1>>COC(=O)/C=C/c1ccc([N+](=O)[O-])cc1  
 Brclcncc1.C=CC(=O)CCCC>>CCCCC(=O)/C=C/c1cncc1  
 C=CC(=O)OC.Nc1ccc(I)cc1>>COC(=O)/C=C/c1ccc(N)cc1  
 C=CC(=O)OC.Iclcn(C(c2ccccc2)(c2ccccc2)c2ccccc2)c1>>COC(=O)/C=C/c1cn(C(c2ccccc2)(c2ccc  
 cc2)c2ccccc2)c1  
 C=Cc1ence(C#N)c1.Cc1cc(Br)cc(C)c1I>>Cc1cc(Br)cc(C)c1/C=C/c1ence(C#N)c1  
 C=Cc1ccc(N(c2ccccc2)c2ccccc2)cc1.FC(F)(F)C(F)(F)C(F)(F)C(F)(F)C(F)(F)Br>>FC(F)(F)C(F)  
 )(F)C(F)(F)C(F)(F)C(F)(F)C(F)(F)C(F)(F)/C=C/c1ccc(N(c2ccccc2)c2ccccc2)cc1  
 C=C[C@H](CC)CN(c1ceccc1Br)S(=O)(=O)c1ccc(C)cc1>>C=C1c2ccccc2N(S(=O)(=O)c2ccc(C)cc2)C  
 [C@H]1CC  
 Brclccc2ccccc12.C=CS(=O)(=O)Oc1ceccc1>>O=S(=O)(/C=C/c1cccc2ccccc12)Oc1ceccc1  
 C=CCn1nn2ccccc21.Cc1ccc(Br)c2ccccc12>>Cc1ccc(/C=C/Cn2nn3ccccc32)c2ccccc12  
 Brclccc2c(c1)OCCOCCOCCOCCOCCO2.C=CC(=O)O>>O=C(O)/C=C/c1ccc2c(c1)OCCOCCOCCO  
 CCOCO2  
 C=Cc1ceccc1.CCOCc1ccc(Br)cc1>>CCOCc1ccc(/C=C/c2ccccc2)cc1  
 C=CS(=O)(=O)F.FC(F)(F)Oc1ccc(I)cc1>>O=S(=O)(F)/C=C/c1ccc(OC(F)(F)F)cc1  
 C=CCc1ceccc1.Iclceccc1>>C(=C/c1ceccc1)\Cc1ceccc1  
 C=CC(=O)N(C)Cc1oc2ccccc2c1C.CC1(C)Oe2cc(Br)enc2NC1=O>>Cc1c(CN(C)C(=O)/C=C/c2enc3c(  
 c2)OC(C)(C)C(=O)N3)oc2ccccc12  
 C=CC(=O)OC(C)(C)C.CCn1ccc(-c2ccc(Br)cc2)n1>>CCn1ccc(-c2ccc(/C=C/C(=O)OC(C)(C)C)cc2)n1  
 C=CCCc1ccc(CC)cc1.O=C1CCc2ccc(Br)cc21>>CCc1ccc(CC/C=C/c2ccc3c(c2)C(=O)CC3)cc1  
 C=CC(=O)OCC.CC(C)(C)OC(=O)N1CCC2(CC1)Cc1cc(Br)enc1NC2=O>>CCOC(=O)/C=C/c1enc2c(  
 c1)CC1(CCN(C(=O)OC(C)(C)C)CC1)C(=O)N2  
 C=CCN1C(=O)c2ccccc2C1=O.O=Cc1ccc(Br)cc1>>O=Cc1ccc(/C=C/CN2C(=O)e3ccccc3C2=O)cc1  
 C=CC(=O)OC.CC(=O)Nc1ccc(Cl)cc1I>>COC(=O)/C=C/c1cc(Cl)ccc1NC(C)=O  
 C=CCOc1ceccc1.FC(F)(F)c1ccc(I)cc1>>FC(F)(F)c1ccc(/C=C/COc2ccccc2)cc1  
 Brclenc2ccccc2c1.C=CS(C)(=O)=O>>CS(=O)(=O)/C=C/c1enc2ccccc2c1  
 C=CC(C)c1c(OCc2cc(OC)ccc2Br)c(=O)oc2ccccc12>>COc1ccc2c(c1)COc1c(c3ccccc3oc1=O)C(C)/C  
 C=CC(=O)OC.COc1ccc2c(c1)CCN(c1ccc(C(C)C)cc1)C2(C)c1ccc(Br)cc1>>COC(=O)/C=C/c1ccc(C2(  
 C)c3ccc(OC)cc3CCN2c2ccc(C(C)C)cc2)cc1  
 C=CC(=O)OC.CC(=O)c1ccc(I)cc1>>COC(=O)/C=C/c1ccc(C(C)=O)cc1  
 C=CC(=O)N1N=Cc2ccccc2C1CCC.COc1cc(Cc2c(C)nc(N)nc2N)cc(I)c1OC>>CCCC1c2ccccc2C=NN  
 1C(=O)/C=C/c1cc(Cc2c(C)nc(N)nc2N)cc(OC)c1OC

2794 C=CC(=O)OC.Cc1cc(CCN(C(=O)OC(C)(C)C)cc1I)c1O>>COC(=O)/C=C/c1cc(CCN(C(=O)OC(C)(C)C)cc1O  
2795 C=CC(=O)OCC.Nc1cccc(I)c1>>CCOC(=O)/C=C/c1cccc(N)c1  
2796 Brclccc(I)cc1.C=CCOc1cccc1>>Brclccc(/C=C/COc2cccc2)cc1  
2797 Brclcnnc1.C=Cc1ccc(OC)cc1>>COc1ccc(/C=C/c2cnnc2)cc1  
2798 C=CCCCCCCC.N#Cc1ccc(Br)cc1>>CCCCCCCC/C=C/c1ccc(C#N)cc1  
2799 C=CC(=O)Nc1ccc(C)cc1.CC(C)(C)c1ccc2[nH]c3c(c2c1)CC(=O)Nc1ccc(I)cc1-3>>Cc1ccc(NC(=O)/C=C/c2ccc3c(c2)-c2[nH]c4ccc(C(C)(C)C)cc4c2CC(=O)N3)cc1  
2800 C=Cc1cccc1.O=S(=O)(Oc1cccc2cccc12)C(F)(F)F>>C=C(c1cccc1)c1cccc2cccc12  
2801 C=CC(=O)OC.Cc1ccc2cc(Br)ccc2n1>>COC(=O)/C=C/c1ccc2nc(C)ccc2c1  
2802 C=CC(=O)Nc1ccc(OC)cc1.COc1ccc2c(=O)c(I)coc2c1>>COc1ccc(NC(=O)/C=C/c2coc3cc(OC)ccc3c2=O)cc1  
2803 C=COCCO.Clclccc2cccc2c1>>C=C(OCCO)c1ccc2cccc2c1  
2804 C=CC=C(C)C.Ic1cccc1>>CC(C)=C/C=C/c1cccc1  
2805 C=CC(C)(C)O.CCOC(Cc1cn(S(=O)(=O)c2ccc(C)cc2)c2cccc(Br)c12)OCC>>CCOC(Cc1cn(S(=O)(=O)c2ccc(C)cc2)c2cccc(/C=C/C(C)(C)O)c12)OCC  
2806 C=CC(=O)OC.CC(C)(C)C(=O)Oc1ccc(Br)c(CO[Si](C)(C)C(C)(C)C)c1>>COC(=O)/C=C/c1ccc(OC(=O)C(C)(C)C)cc1CO[Si](C)(C)C(C)(C)C  
2807 C=CC(=O)OCC.Cc1cc(F)ccc1Br>>CCOC(=O)/C=C/c1ccc(F)cc1C  
2808 C=CC(=O)OCC.COc1ccc(Br)cc1F>>CCOC(=O)/C=C/c1ccc(OC)c(F)c1  
2809 C=C[Si](C)(C)c1cc(C)c(C)cc1-c1cc(C)c(C)cc1Br>>C=C1c2cc(C)c(C)cc2-c2cc(C)c(C)cc2[Si]1(C)C  
2810 C=CC(N)=O.Cc1nc2cc(-c3cccc3)c(-c3ccc(C4(NC(=O)OC(C)(C)CCC4)cc3)nn2c1Br>>Cc1nc2cc(-c3cccc3)c(-c3ccc(C4(NC(=O)OC(C)(C)CCC4)cc3)nn2c1/C=C/C(N)=O  
2811 C=Cc1ccc(N)cc1.CCN1c2ncc(I)cc2C(=O)N(C)c2ccc(Cl)nc21>>CCN1c2ncc(/C=C/c3ccc(N)cc3)cc2C(=O)N(C)c2ccc(Cl)nc21  
2812 Brclcncc2cccc2c1.C=CCO[C@H]1CC(=O)O[C@H](C)C/C=C/C/[C@H](O[Si](C)(C)C(C)(C)C)[C@H](C)C[C@H](CC(OC)OC)[C@H](O[C@@H]2O[C@H](C)[C@@H](O[C@H]3C[C@@](C)(O)C(=O)CC)[C@@H](OC(=O)CCC)[C@H](C)O3)[C@H](N(C)C)[C@H]2OC(C)=O)[C@H]1OC>>CC  
2813 C=CC(=O)N(C)C.COc1cccc(I)c1>>COc1cccc(/C=C/C(=O)N(C)C)c1  
2814 C=CC(=O)OC.CCc1nc2c(C)cc(C)nn2c1Cc1ccc(Br)cc1>>CCc1nc2c(C)cc(C)nn2c1Cc1ccc(/C=C/C(=O)OC)cc1  
2815 C=CCCN1C(=O)c2cccc2C1=O.Ic1ccc(-c2cccc2)cc1>>O=C1c2cccc2C(=O)N1CC/C=C/c1ccc(-c2cccc2)cc1  
2816 C=CC(C)=O.O=C(c1cccc1)c1ccc(Br)cc1>>CC(=O)/C=C/c1ccc(C(=O)c2cccc2)cc1  
2817 C=CC#N.COc1ccc2c(=O)c(I)coc2c1>>COc1ccc2c(=O)c(/C=C/C#N)coc2c1  
2818 C=CC(=O)OC.C[C@@H](Nc1cnnc2sc(Br)cc12)c1cccc1>>COC(=O)/C=C/c1cc2c(N[C@H](C)c3cccc3)ncnc2s1  
2819 C=CC(C)=O.O=c1oc(Br)cc2cccc12>>CC(=O)/C=C/c1cc2cccc2c(=O)o1  
2820 Brclcccc1.C=Cc1cccc1>>C(=C/c1cccc1)c1cccc1  
2821 C=CC(=O)OCCCC.O=Cc1ccc(Br)c1>>CCCCOC(=O)/C=C/c1ccc(C=O)c1  
2822 C=CB1OC(C)CC(C)(C)O1.COc1ccc(I)cc1>>COc1ccc(/C=C/B2OC(C)CC(C)(C)O2)cc1  
2823 C=Cc1cccc1.Nc1ccc(Br)cc1>>Nc1ccc(/C=C/c2cccc2)cc1  
2824 C=Cc1c2c(cc(OC)c1C(OCc1cccc1)c1ccc(OC)c1I)COC(C)(C)O2>>C=C1c2c(OC)cccc2C(OCc2cccc2)c2c(OC)cc3c(c21)OC(C)(C)OC3  
2825 C=Cc1ccc(OC(C)=O)cc1.O=Cc1ccc(N(c2cccc2)c2ccc(Br)cc2)cc1>>CC(=O)Oc1ccc(/C=C/c2ccc(N(c3cccc3)c3ccc(C=O)cc3)cc2)cc1  
2826 C=CCn1nnc2cccc21.Cc1ccc(I)cc1>>Cc1ccc(/C=C/Cn2nnc3cccc32)cc1  
2827 C=CCN(C(=O)OCc1cccc1)C(=O)OC(C)(C)C.CC(=O)c1cccc(Br)c1>>CC(=O)c1cccc(/C=C/CN(C(=O)OCc2cccc2)C(=O)OC(C)(C)C)c1  
2828 \*CNCCOCCOCCOCCCN(C(=O)COc1ccc(C(Cc2cc(OC)cc(OC)c2)NC(=O)c2ccc(C=C)cc2)cc1.CC(C)(C)OC(=O)n1ccc2cc(I)ccc21>>\*CNCCOCCOCCOCCCN(C(=O)COc1ccc(C(Cc2cc(OC)cc(OC)c2)NC(=O)c2ccc(/C=C/c3ccc4c(ccn4C(=O)OC(C)(C)C)c3)cc2)cc1  
2829 C=CCc1c(N(C)C(=O)Cc2cccc2I)ccc2oc(=O)ccc12>>C=C1Cc2c(ccc3oc(=O)ccc23)N(C)C(=O)Cc2cccc21  
2830 C=CC(=O)CC.O=Cc1cccc1Br>>CCC(=O)/C=C/c1cccc1C=O  
2831 C=C(C)C(=O)OCC.O=c1cc(I)enn1Cc1cccc1>>CCOC(=O)/C(C)=C/c1enn(Cc2cccc2)c(=O)c1  
2832 C=C[Si](C)(C)c1cccc1.CN(C)c1ccc(Br)cc1>>CN(C)c1ccc(/C=C/[Si](C)(C)c2cccc2)cc1  
2833 C=CC(OCC)OCC.O=Cc1cccc(F)c1Br>>CCOC(/C=C/c1c(F)cccc1C=O)OCC

2834 C=Cc1cccc1.O=C(C)c1ccc(Br)cc1>>O=Cc1ccc(/C=C/c2cccc2)cc1  
 2835 C=CC(=O)OC.COc1cccc1Sc1cc(C)c(I)cc1[N+](=O)[O-]>>COC(=O)/C=C/c1cc([N+](=O)[O-])  
 2836 c(Sc2cccc2OC)cc1C  
 C=CC(=O)OC.CCC(CC)(c1ccc(OC)c(C)c1)c1ccc(C)c(Br)s1>>CCC(CC)(c1ccc(OC)c(C)c1)c1ccc(C)c(/C=C/C(=O)OC)s1  
 2837 C=Cc1cccc1.CC(C)(C)C(=O)Nc1nc(NC(=O)C(C)(C)C)c2cc(Br)cnc2n1>>CC(C)(C)C(=O)Nc1nc(NC(=O)C(C)(C)C)c2cc(/C=C/c3cccc3)cnc2n1  
 2838 C=CC(=O)N(C)C.Cc1cccc(C)c1Br>>Cc1cccc(C)c1/C=C/C(=O)N(C)C  
 2839 C=COCCCC.O=c1ccc2ccc(OS(=O)(=O)C(F)(F)F)cc2o1>>C=C(OCCCC)c1ccc2ccc(=O)oc2c1  
 2840 C=CC(C)(C)O.O=c1ccc2ccc(OCc3cccc3)c(I)e2o1>>CC(C)(O)/C=C/c1c(OCe2cccc2)ccc2ccc(=O)oc  
 2841 C=Cc1cc(C)ccc1OCc1cccc1Br>>Cc1ccc2c(c1)/C=C/c1cccc1CO2  
 2842 C=CS(=O)(=O)F.CC(=O)c1cccc(I)c1>>CC(=O)c1cccc(/C=C/S(=O)(=O)F)c1  
 2843 C=CC(=O)OC.O=[N+][[O-]]c1cccc1Br>>COC(=O)/C=C/c1cccc1[N+](=O)[O-]  
 2844 C=Cc1cccc1.O=C1CCC(c2ccc(Br)cc2)O1>>O=C1CCC(c2ccc(/C=C/c3cccc3)cc2)O1  
 2845 Brc1ccc2c(c1)OCO2.C=Cc1ccc(OC(C)=O)cc1>>CC(=O)Oc1ccc(/C=C/c2ccc3c(c2)OCO3)cc1  
 2846 C=CC(=O)OC.Cn1c(=O)n(CC2COC(C)(C)O2)c(=O)c2ccc(Br)cc21>>COC(=O)/C=C/c1ccc2c(=O)n(C  
 2847 C3COC(C)(C)O3)c(=O)n(C)c2c1  
 C=Cc1cccc(C#N)c1Ne1ccc2[nH]ccc2c1C.Clc1ccc(Br)cn1>>Cc1c(Nc2c(C#N)cnce2/C=C/c2ccc(Cl)nc  
 2848 2)ccc2[nH]ccc12  
 C=CC(=O)OCC.COc1cc(F)cc(Br)c1>>CCOC(=O)/C=C/c1cc(F)cc(OC)c1  
 2849 C=C1C(=O)O[C@H]2/C=C(\C)CC/C=C(\C)CC[C@H]12.Clc1ccc(I)cc1>>C/C1=C\C[C@H]2OC(=O)  
 2850 /C=(C/c3ccc(Cl)cc3)[C@H]2CC/C(C)=C/CC1  
 C=CC(=O)OCC.Clc1cc(Br)cc2c1NCCCC2>>CCOC(=O)/C=C/c1cc(Cl)c2c(c1)CCCN2  
 2851 C=Cc1ccc(OC)cc1.Nc1ccc(Cl)cc1Br>>COc1ccc(/C=C/c2cc(Cl)cnc2N)cc1  
 2852 C=Cc1cccc1.CC(=O)NS(=O)(=O)c1ccc(Br)cc1>>CC(=O)NS(=O)(=O)c1ccc(/C=C/c2cccc2)cc1  
 2853 C=CC(C)=O.FC(F)(F)c1ccc(Br)cc1>>CC(=O)/C=C/c1ccc(C(F)(F)F)cc1  
 2854 C=CC(=O)N(C)OC.Nc1cccc(I)c1>>CON(C)C(=O)/C=C/c1cccc(N)c1  
 2855 C=Cc1ccc2cccc2c1.Cc1ccc(Br)cc1>>Cc1ccc(/C=C/c2ccc3cccc3c2)cc1  
 2856 C=CCC(O)Cc1cccc1.COC(=O)c1cccc1I>>COC(=O)c1cccc1/C=C/CC(O)Cc1cccc1  
 2857 C=CC(=O)OC(C)(C)C.O=CNe1ccc(Cl)cc1I>>CC(C)(C)OC(=O)/C=C/c1cc(Cl)ccc1NC=O  
 2858 C=CC(=O)OC.COc1ccc2c(c1)CCN(c1ccc(C3CC3)cc1)C2(C)c1ccc(Br)cc1>>COC(=O)/C=C/c1ccc(C2  
 2859 (C)c3ccc(OC)cc3CCN2c2ccc(C3CC3)cc2)cc1  
 Bre1cccc1.C=C/C=C/C(=O)N(CCCC)CCCC>>CCCCN(CCCC)C(=O)/C=C/C=C/c1cccc1  
 2860 C=CS(N)(=O)=O.Ic1cccc1>>NS(=O)(=O)/C=C/c1cccc1  
 2861 Bre1ccc(-c2cccs2)cc1.C=Cc1cccc1>>C(=C/c1ccc(-c2cccs2)cc1)\c1cccc1  
 2862 C=CCCN1c2c(Br)cc([N+](=O)[O-])cc2C(=O)N2C1C(C)(C)SC2(C)C>>C=C1CCN2c3c1cc([N+](=O)[O-]  
 2863 C=CC(=O)OCC.O=S(=O)(Oc1cccc2c1CCO2)C(F)(F)F>>CCOC(=O)/C=C/c1cccc2c1CCO2  
 2864 C=CC(=O)OC.CCCCCc1ccc(N2CCc3cc(OC)ccc3C2(C)c2ccc(Br)cc2)cc1>>CCCCCc1ccc(N2CCc3cc(  
 2865 OC)ccc3C2(C)c2ccc(/C=C/C(=O)OC)cc2)cc1  
 C=CC(=O)OC.O=C(O)c1ccc(Br)c2cccc12>>COC(=O)/C=C/c1ccc(C(=O)O)c2cccc12  
 2866 C=CC(=O)OC(C)(C)C.COC(=O)Cc1cc(OC(C)C)c(OC)c(OC)c1Br>>COC(=O)Cc1cc(OC(C)C)c(OC)c  
 2867 (OC)c1/C=C/C(=O)OC(C)(C)C  
 C=CC(=O)O.CC(C)C(c1ccc(S(=O)(=O)Nc2ccc(I)cc2)cc1)>>CC(C)(C)c1ccc(S(=O)(=O)Nc2ccc(/C=C/  
 2868 C(=O)O)c2)cc1  
 C=CC(=O)CC.CC(=O)c1ccc(Br)cc1>>CCC(=O)/C=C/c1ccc(C(C)=O)cc1  
 Bre1ccc(C(=C(c2cccc2)c2cccc2)c2cccc2)cc1.C=Cc1ccc(-  
 2869 c2ccc3c4cccc4n(CC)c3c2)cc1>>CCn1c2cccc2c2ccc(-  
 2870 c3ccc(/C=C/c4ccc(C(=C(c5cccc5)c5cccc5)c5cccc5)cc4)cc3)cc21  
 C=C(C)C(=O)OC.CC1(C)CCC(C)(C)c2cc(C(=O)c3ccc(I)cc3)ccc21>>COC(=O)/C(C)=C/c1ccc(C(=O)  
 2871 c2ccc3c(c2)C(C)(C)CCC3(C)C)cc1  
 C=CC(=O)OC.Cc1cccc(Br)c1>>COC(=O)/C=C/c1cccc(C)c1  
 2872 C=CC(=O)OC.CC1(c2ccc(I)cc2)CC1>>COC(=O)/C=C/c1ccc(C2(C)CC2)cc1  
 C=Cc1cc(OCCCCCCCCCC)c(OCCCCCCCCCC)c(OCCCCCCCCCC)c1.O=Cc1ccc(Br)cc1>>CCCCCCCCCOc1c  
 2873 c(/C=C/c2ccc(C=O)cc2)cc(OCCCCCCCCCC)c1OCCCCCCCCCC  
 C=Cc1cccc1.Cc1ccc(-c2oc3cccc3c(=O)c2Br)cc1>>Cc1ccc(-c2oc3cccc3c(=O)c2/C=C/c2cccc2)cc1  
 2874 C=CC(=O)OC.COc1c(CN(C(=O)c2cccc2)c2cccc(Br)c2)ccc2c1OC(C)(C)CC2>>COC(=O)/C=C/c1ccc  
 2875 c(N(Cc2ccc3c(c2OC)OC(C)(C)CC3)C(=O)c2cccc2)c1  
 C=CCN(C)C(=O)OC(C)(C)C.CC(=O)c1ccc(Cl)cc1>>CC(=O)c1ccc(/C=C/CN(C)C(=O)OC(C)(C)C)cc  
 2876 C=CC(C)=O.Nc1ccc(Cl)cc1>>CC(=O)/C=C/c1ccc(N)cc1  
 2877 C=CC(C)=O.Nc1ccc(Cl)cc1>>CC(=O)/C=C/c1ccc(N)cc1

2878 C=Cc1ccc(C(F)(F)F)cc1.COC(=O)c1ccccc1I>>COC(=O)c1ccccc1/C=C/c1ccc(C(F)(F)F)cc1  
 2879 C=Cc1ccccc1.COc1cc(C=O)c(Br)c(OC)c1OC>>COc1cc(C=O)c(/C=C/c2ccccc2)c(OC)c1OC  
 2880 C=Cc1ccccc1N.COc1ccc(Br)c(OC)c1>>COc1ccc(/C=C/c2ccccc2N)c(OC)c1  
 2881 C=CC#N.Cn1ncc(I)cc1=O>>Cn1ncc(/C=C/C#N)cc1=O  
 2882 C=CC(=O)OC.COC(=O)[C@@H]1CCc2c(C(C)=O)cc(OS(=O)(=O)C(F)(F)F)c(=O)n21>>COC(=O)/C  
 =C/c1cc(C(C)=O)c2n(c1=O)[C@H](C(=O)OC)CC2  
 2883 C=CC(N)=O.O=C(c1ccccc1)c1ccc(I)cc1>>NC(=O)/C=C/c1ccc(C(=O)c2ccccc2)cc1  
 2884 C=Cc1cc2cc(OC)c(OC)cc2oc1=O.O=Cc1ccc(Br)cc1>>COc1cc2cc(/C=C/c3ccc(C=O)cc3)c(=O)oc2cc1  
 2885 C=Cl.C=CS(C)(=O)=O>>C=C/C=C/S(C)(=O)=O  
 2886 C=CC(=O)OCCCC.Cc1ccc(S(=O)(=O)NCCc2c(Br)[nH]c3ccccc23)cc1>>CCCCOC(=O)/C=C/c1[nH]c  
 2ccccc2c1CCNS(=O)(=O)c1ccc(C)cc1  
 2887 C=CC(=O)N1CCCC1.CC(C)(C)OC(=O)N1CCc2cc(Br)ccc2C1>>CC(C)(C)OC(=O)N1CCc2cc(/C=C/C  
 (=O)N3CCCC3)ccc2C1  
 2888 C=CC(=O)C(O[Si](CC)(CC)CC)c1c(OC)ccc(OC)c1OCc1ccccc1.Ic1ccccc1OCc1ccccc1>>CC[Si](CC)(  
 CC)OC(C(=O)/C=C/c1ccccc1OCc1ccccc1)c1c(OC)ccc(OC)c1OCc1ccccc1  
 2889 C=CC(=O)OC.Cc1cc2cc(Br)ccc2[nH]1>>COC(=O)/C=C/c1ccc2[nH]c(C)cc2c1  
 2890 C=C[Si](C)(C)c1ccccc1.CCOC(=O)c1ccc(/C=C/c2ccc(Br)cc2)cc1>>CCOC(=O)c1ccc(/C=C/c2ccc(/C=  
 C/[Si](C)(C)c3ccccc3)cc2)cc1  
 2891 C=CCCCC(O)C=C(Br)c1ccc(C)c1>>C=C1CCCC(O)C=C1c1ccc(C)c1  
 2892 C=CC(=O)OCC.OCc1ccc(I)cc1>>CCOC(=O)/C=C/c1ccc(CO)c1  
 2893 C=CC(=O)OC.COc1ccc(Br)cc1>>C=C(C(=O)OC)c1ccc(OC)cc1  
 2894 C=COCCCC.OCc1ccc(Br)c(O)c1>>C=C(OCCCC)c1ccc(O)cc1O  
 2895 C=Cc1ccccc1.COC(=O)c1cc(I)cc(C(=O)OC)c1>>COC(=O)c1cc(/C=C/c2ccccc2)cc(C(=O)OC)c1  
 2896 C=Cc1ccccc1.CCCCCOC(=O)/C=C/c1ccc(Cl)cc1>>CCCCOC(=O)/C=C/c1ccc(/C=C/c2ccccc2)cc1  
 2897 C=C[Si](CC)(CC)CC.FC(F)(F)c1ccc(Br)cc1>>CC[Si](/C=C/c1ccc(C(F)(F)F)cc1)(CC)CC  
 C=C[C@H](C)[C@H]1CC[C@H]2[C@H]3CC(=O)[C@H]4C[C@H](O)CC[C@H]4(C)[C@H]3CC  
 2898 [C@H]21C.Clc1ccc(I)cc1>>C[C@H](/C=C/c1ccc(Cl)cc1)[C@H]1CC[C@H]2[C@H]3CC(=O)[C@  
 H]4C[C@H](O)CC[C@H]4(C)[C@H]3CC[C@H]21C  
 2899 C=CC(=O)O.O=C1CCC(N2Cc3ccccc(Br)c3C2=O)C(=O)N1>>O=C(O)/C=C/c1ccc2c1C(=O)N(C1CC  
 C(=O)NC1=O)C2  
 2900 C=CC(N)=O.Nc1nccccc1Br>>NC(=O)/C=C/c1ccccc1N  
 2901 C=Cc1ccccc1C(=O)O.FC(F)(F)c1ccc(I)cc1>>O=C(O)c1ccccc1/C=C/c1ccc(C(F)(F)F)cc1  
 2902 C=CC(N)=O.O=CC1=C(Br)CCC1>>NC(=O)/C=C/C1=C(C=O)CCC1  
 2903 C=CC(=O)OC.OCc1ccc2nc(Br)sc2c1>>COC(=O)/C=C/c1nc2ccc(O)cc2s1  
 2904 C=CS(=O)(=O)c1ccccc1.Ic1ccccc1>>O=S(=O)(/C=C/c1ccccc1)c1ccccc1  
 2905 C=Cc1ccc(O)c(OC)c1.CCCCCCCCOCc1ccc2c(C)c(Br)c(=O)oc2c1>>CCCCCCCCOCc1ccc2c(C)c(/C=C/  
 c3ccc(O)c(OC)c3)c(=O)oc2c1  
 2906 Brc1cnc2ccccc2c1.C=CCO>>C=C(CO)c1cnc2ccccc2c1  
 2907 C=CCn1nnc2ccccc21.COc1ccc(I)cc1>>COc1ccc(/C=C/Cn2nnc3ccccc32)cc1  
 2908 C=Cc1ccccc1.CC(C)(C)c1nc(C(F)(F)F)cc2c(I)c(-  
 c3ccccc3)oc12>>CC(C)(C)c1nc(C(F)(F)F)cc2c(/C=C/c3ccccc3)c(-c3ccccc3)oc12  
 2909 C=CCC[C@H]1CCC(=O)N1CCCc1ccc(C(=O)OC(C)C)s1.FC(F)(F)c1ccc(I)cc1>>CC(C)OC(=O)c1ccc  
 (CCCN2C(=O)CC[C@H]2CC/C=C/c2ccccc(C(F)(F)F)c2)s1  
 2910 C=Cc1ccccc(C)c1.CCOC(=O)C(F)Br>>CCOC(=O)C(F)/C=C/c1ccccc(C)c1  
 2911 C=CC1CCCCC1.COc1ccc(Br)cc1>>COc1ccc(/C=C/C2CCCCC2)cc1  
 2912 C=C.CC(=O)Nc1ccccc1Br>>C=Cc1ccccc1NC(C)=O  
 2913 Brc1ccc(/C=C/c2ccccc2)c2nsc12.C=Cc1ccc2c(c1)Sc1ccccc1N2CCCC>>CCCCN1c2ccccc2Sc2cc(/C  
 =C/c3ccc(/C=C/c4ccccc4)c4nsc34)ccc21  
 2914 C=CCCCCCC.ClCc1ccc(-c2ccccc2)cc1>>C=C(CCCCCC)Cc1ccc(-c2ccccc2)cc1  
 2915 C=CC(=O)CCCCC.N#Cc1ccc(Br)cc1>>CCCCCC(=O)/C=C/c1ccc(C#N)cc1  
 2916 C=Cc1ccccc1OC.Cc1ccc(OS(=O)(=O)C(F)(F)F)cc1>>C=C(c1ccc(C)cc1)c1ccccc1OC  
 2917 C=C(NC(=O)OCc1ccccc1)C(=O)OC.CC(=O)OCc1cc(OCc2ccccc2)ccc1Br>>COC(=O)/C=C(c1ccc(O  
 Cc2ccccc2)cc1COC(C)=O)NC(=O)OCc1ccccc1  
 2918 C=C[Si](C)(C)C.O=c1ccc2ccc(O)c(I)c2o1>>C[Si](C)(C)/C=C/c1c(O)ccc2ccc(=O)oc12  
 2919 C=Cc1ccc(OC)cc1.Cc1ccc(S(=O)(=O)Oc2ccccc3c(Br)ccnc23)cc1>>COc1ccc(/C=C/c2ccccc3c(OS(=O)(  
 =O)c4ccc(C)cc4)ccccc23)cc1  
 C=Cc1cn(COCC[Si](C)(C)C)nc1-  
 2920 c1nc2ccc(OC)cc2n1COCC[Si](C)(C)C.N#Cc1ncc(Br)c1>>COc1ccc2nc(-  
 c3nn(COCC[Si](C)(C)C)cc3/C=C/c3nccc(C#N)c3)n(COCC[Si](C)(C)C)c2c1  
 2921 C=C1c2ccccc2C1(C#N)CC.CC(=O)c1ccc(Br)cc1>>CCC1(C#N)/C=C(c2ccc(C(C)=O)cc2)c2ccccc21



2922 Br1cccc2cccc12.C=CC(=O)CC>>CCC(=O)/C=C/c1cccc2cccc12  
 2923 C=CC1COC2(CCCCC2)OC1.Cc1ccc(S(=O)(=O)n2cc(C=O)c3c(Br)cccc32)cc1>>Cc1ccc(S(=O)(=O)n  
 2cc(C=O)c3c(/C=C/C4COC5(CCCCC5)OC4)cccc32)cc1  
 2924 C=COCCO.CC(=O)c1ccc(Br)cc1>>C=C(OCCO)c1ccc(C(C)=O)cc1  
 2925 C=CC(=O)OCCSc1cccc1.Ic1cccc1>>O=C(/C=C/c1cccc1)OCCSc1cccc1  
 2926 Br1ccc(I)cc1.C=CC(N)=O>>NC(=O)/C=C/c1ccc(Br)cc1  
 2927 C=CC(=O)OC(C)(C)C.COc1ccc(Br)cc1OC>>COc1ccc(/C=C/C(=O)OC(C)(C)C)cc1OC  
 2928 C=C1C(=O)O[C@@H]2CC(C)=C([C@@H](C)CCCOC(C)=O)[C@@H](OC(C)=O)[C@H]12.Ic1cccc  
 c1>>CC(=O)OCCC[C@H](C)C1=C(C)C[C@H]2OC(=O)/C=C/c3cccc3[C@H]2[C@@H]1OC(C)=  
 C=Cc1cncnc1.O=[N+](O-)]c1ccc(N(c2ccc(Br)cc2)c2ccc([N+](=O)[O-])cc2[N+](=O)[O-  
 2929 ]c([N+](=O)[O-])c1>>O=[N+](O-)]c1ccc(N(c2ccc(/C=C/c3cncnc3)cc2)c2ccc([N+](=O)[O-  
 ])cc2[N+](=O)[O-])c([N+](=O)[O-])c1  
 2930 C=CC(=O)O.COc1ccc(Br)cc1>>COc1ccc(/C=C/C(=O)O)cc1  
 2931 C=CC[C@@H]1O[C@H](COC(C)=O)[C@H]2OC(CC)(CC)O[C@@H]12.CC(C)(C)[Si](C)(C)Oc1ccc  
 2932 2[nH]cc(C3=C(Br)C(=O)NC3=O)c2c1>>CCC1(CC)O[C@H]2[C@H](C/C=C/C3=C(c4c[nH]c5ccc(O[  
 Si](C)(C)C(C)(C)C)cc45)C(=O)NC3=O)O[C@H](COC(C)=O)[C@H]2O1  
 2933 Br1ccsc1.C=CCN1C(=O)c2cccc2C1=O>>O=C1c2cccc2C(=O)N1C/C=C/c1ccsc1  
 2934 C=Cc1cncnc1.CCOc1ccc(I)cc1>>CCOc1ccc(/C=C/c2cncnc2)cc1  
 2935 C=Cc1ccc(OC)c(OC)c1.CC(C)(C)C(=O)Nc1nc(NC(=O)C(C)(C)C)c2cc(Br)cnc2n1>>COc1ccc(/C=C/c  
 2cnc3nc(NC(=O)C(C)(C)C)nc(NC(=O)C(C)(C)C)c3c2)cc1OC  
 2936 C=CC(=O)NC(C)(C)C.COc1ccc(-c2oc3cc(OC)ccc3c(=O)c2I)cc1>>COc1ccc(-  
 c2oc3cc(OC)ccc3c(=O)c2/C=C(=O)NC(C)(C)C)cc1  
 2937 C=Cc1ccc(C(=O)N[C@@H](CCSC)C(=O)OC)c(-  
 c2cccc2C)c1.OC(c1cncnc1Br)C1CCCCC1>>COC(=O)[C@H](CCSC)NC(=O)c1ccc(/C=C/c2cncnc2C  
 (O)C2CCCCC2)cc1-c1cccc1C  
 2938 C=CC[C@H](NC(=O)OC(C)(C)C)C(=O)OC.COC(=O)c1ccc(Br)cc1>>COC(=O)c1ccc(/C=C/C[C@H]  
 (NC(=O)OC(C)(C)C)C(=O)OC)cc1  
 2939 C=CC(=O)OCC.CN(C)Cc1cccc(Br)c1>>CCOC(=O)/C=C/c1cccc(CN(C)C)c1  
 2940 C=Cc1ccc(C(C)(C)C)cc1.FC(F)(F)C(F)(F)C(F)(F)C(F)(F)C(F)(F)Br>>CC(C)(C)c1ccc(/C=C/C  
 (F)(F)C(F)(F)C(F)(F)C(F)(F)C(F)(F)C(F)(F)C(F)(F)cc1  
 2941 C=CC(O)c1cccc1.I/C=C/C=C/CCCCOCc1cccc1>>OC(/C=C/C=C/C=C/CCCCOCc1cccc1)c1cccc1  
 2942 C=CC(=O)OC.N#CCCN1c(=O)oc2cc(Br)cnc21>>COC(=O)/C=C/c1cnc2c(c1)oc(=O)n2CCC#N  
 2943 C=Cc1ccc2cccc2c1.Cc1cccc1I>>Cc1cccc1/C=C/c1ccc2cccc2c1  
 2944 C=CCC(O)c1cc(-c2cccc2)cnc1Cl>>C=C1CC(O)c2cc(-c3cccc3)cnc21  
 2945 C=CC(NC(=O)OC)C(=O)O.CC(=O)OC[C@H]1O[C@@H](n2cnc3c(=O)n4c(I)c(C)nc4n(C)c32)[C@H  
 2946 ](OC(C)=O)[C@@H]1OC(C)=O>>COC(=O)NC(/C=C/c1c(C)nc2n(C)c3c(ncn3[C@@H]3O[C@H](C  
 OC(C)=O)[C@@H](OC(C)=O)[C@H]3OC(C)=O)c(=O)n12)C(=O)O  
 2947 Br1cccc2c1cc(-c1ccc(I)cc1)n2-c1ncccn1.C=CC(=O)OCC>>CCOC(=O)/C=C/c1ccc(-  
 c2cc3c(Br)cccc3n2-c2ncccn2)cc1  
 2948 C=CC(=O)OCC.Fc1cccc1I>>CCOC(=O)/C=C/c1cccc1F  
 2949 C=CS(C)(=O)=O.O=C1Nc2ccc(I)cc2/C1=C/c1ccc[nH]1>>CS(=O)(=O)/C=C/c1ccc2c(c1)/C(=C/c1ccc[  
 nH]1)C(=O)N2  
 2950 C=C.CC(=O)CC(=O)c1ccc(Br)cc1>>C=Cc1ccc(C(=O)CC(C)=O)cc1  
 2951 C=CC(=O)OC.COC(=O)c1ccc(I)cc1>>COC(=O)/C=C/c1ccc(C(=O)OC)cc1  
 2952 C=CCN(C(=O)c1ccc2cccc2c1Br)C(C(=O)NC1CCCCC1)c1ccc(OC)c(OC)c1>>C=C1CN(C(C(=O)NC  
 2CCCCC2)c2ccc(OC)c(OC)c2)C(=O)c2ccc3cccc3c21  
 2953 C=Cc1ccc(C(C)(C)C)cc1.Cc1ccc2c(-c3cccc3)c(Br)c(=O)oc2c1>>Cc1ccc2c(-  
 c3cccc3)c(/C=C/c3ccc(C(C)(C)C)cc3)c(=O)oc2c1  
 2954 C=CCO[Si](C)(C)C(C)(C)C.CC(C)(C)c1ccc(Br)cc1>>CC(C)(C)c1ccc(/C=C/CO[Si](C)(C)C(C)(C)C)c  
 2955 C=Cc1cccc(C=O)c1.FC(F)(F)I>>O=Cc1cccc(/C=C/C(F)(F)F)c1  
 2956 C=CC(OC)OC.IC1CCCCC1>>COC(/C=C/C1CCCCC1)OC  
 2957 C=CC(=O)OC.COc1ccc(I)c(C=O)c1>>COC(=O)/C=C/c1ccc(OC)cc1C=O  
 2958 C=CC(=O)OCc1cccc1.COC(=O)c1cc2c(Br)c(OC)ccc2[nH]1>>COC(=O)c1cc2c(/C=C/C(=O)OCc3cc  
 ccc3)c(OC)ccc2[nH]1  
 2959 C=CC(=O)OCC.CC(C)(C)OC(=O)N[C@@H](Cc1cc(Br)ccc1[N+](=O)[O-  
 2960 ])C(=O)OC(C)(C)C>>CCOC(=O)/C=C/c1ccc([N+](=O)[O-  
 ])c(C[C@H](NC(=O)OC(C)(C)C)C(=O)OC(C)(C)C)c1  
 2961 C=Cc1ccc([Si](OC)(OC)OC)cc1.CCOP(=O)(Cc1ccc(/C=C/c2ccc(Br)cc2)cc1)OCC>>CCOP(=O)(Cc1c  
 cc(/C=C/c2ccc(/C=C/c3ccc([Si](OC)(OC)OC)cc3)cc2)cc1)OCC  
 2962 C=C[C@](C)(O)CO.Clc1cccc1Br>>C[C@](O)(/C=C/c1cccc1Cl)CO  
 2963 Br1ccc(I)cc1.C=C[Si](C)(C)C>>C[Si](C)(C)/C=C/c1ccc(Br)cc1

2961 C=CC(=O)OC(C)(C)C.Cc1cc(O)ccc1Br>>Cc1cc(O)ccc1/C=C/C(=O)OC(C)(C)C  
2962 C=CC(=O)OCC.COc1c(C)c2c(c(C)c1I)C(c1cccc1)(c1cccc1)c1cccc1-  
2>>CCOC(=O)/C=C/c1c(C)c2c(c(C)c1OC)-c1cccc1C2(c1cccc1)c1cccc1  
2963 C=Cc1cncnc1.CC(C)[C@@H](COc1cncnc(Br)c1)NC(=O)OC(C)(C)C>>CC(C)[C@@H](COc1cncnc(/C=C/c2cncnc2)c1)NC(=O)OC(C)(C)C  
2964 C=Cc1ccc(N(c2ccc(OCCCCC)cc2)c2ccc(OCCCCC)cc2)cc1.O=Cc1ccc(Br)cc1>>CCCCCOc1ccc(N(c2ccc(/C=C/c3ccc(C=O)cc3)cc2)c2ccc(OCCCCC)cc2)cc1  
2965 C=Cc1ccc(OC)cc1.O=C1Nc2cccc(I)c2/C1=C/c1ccc[nH]1>>COc1ccc(/C=C/c2cccc3c2/C(=C/c2ccc[nH]2)C(=O)N3)cc1  
2966 Br1ccc(-c2cnc2)o1.C=Cc1ccc(C)cc1>>Cc1ccc(/C=C/c2ccc(-c3cnc3)o2)cc1  
2967 C=CCc1c(N(C)C(=O)c2cccc2I)ccc2oc(=O)ccc12>>C=C1Cc2c(ccc3oc(=O)ccc23)N(C)C(=O)c2cccc  
2968 C=Cc1cc2c(c(=O)n(C)c(=O)n2C)n1C.CC(=O)c1ccc(Br)cc1>>CC(=O)c1ccc(/C=C/c2cc3c(c(=O)n(C)c(=O)n3C)n2C)cc1  
2969 C=CC(=O)CC.CC(=O)c1cccc1Br>>CCC(=O)/C=C/c1cccc1C(C)=O  
2970 Br1ccc1.C=Cc1cnc2c1ncn2C1CCCCO1>>C(=C/c1cnc2c1ncn2C1CCCCO1)c1ccc1  
2971 C=Cc1ccc(N2CCN(C(=O)OC(C)(C)C)CC2)cc1.Fc1cc(Br)cc(Cn2cnc2)c1>>CC(C)(C)OC(=O)N1CC  
2972 N(c2ccc(/C=C/c3cc(F)cc(Cn4cnc4)c3)cc2)CC1  
2973 C=CC(=O)OCC.N#Cc1cccc1Br>>CCOC(=O)/C=C/c1cccc1C#N  
2974 C=CC(=O)OC.Oc1cc(-c2ccc(Br)cc2)cc(C23CC4CC(CC(C4)C2)C3)c1>>COC(=O)/C=C/c1ccc(-c2cc(O)cc(C34CC5CC(CC(C5)C3)C4)c2)cc1  
2975 C=CC#N.COc1ccc(Br)cc1OC>>COc1ccc(/C=C/C#N)cc1OC  
2976 C=C.O=S(=O)(Oc1ccc(I)cc1)C(F)(F)F>>C=Cc1ccc(OS(=O)(=O)C(F)(F)F)cc1  
2977 C=CCNC(=O)c1ccc(F)cc1NC(=O)c1cccc1.Ic1cccc1>>O=C(Nc1cc(F)ccc1C(=O)NC/C=C/c1cccc1)c1cccc1  
2978 C=C(OC(C)=O)C(=O)OCC(F)(F)F.Ic1cccc1>>CC(=O)O/C(=C/c1cccc1)C(=O)OCC(F)(F)F  
2979 C=C(NC(C)=O)C(=O)OC.CCc1cc(Br)ccc1N>>CCc1cc(/C=C(/NC(C)=O)C(=O)OC)ccc1N  
2980 C=CC=O.C[C@H](NC(=O)OC(C)(C)C)c1nc2cccc(Br)c2c(=O)n1-c1cccc1>>C[C@H](NC(=O)OC(C)(C)C)c1nc2cccc(/C=C/C=O)c2c(=O)n1-c1cccc1  
2981 C=CC(=O)[C@@]1(O)C[C@H]2CC[C@]1(C)C2(C)C.Ic1cccc1>>CC1(C)[C@@H]2CC[C@]1(C)[C@@]1(O)(C(=O)/C=C/c1cccc1)C2  
Br1cnc2cccc12.C=CCO[C@@H]1CC(=O)O[C@H](C)C/C=C/C=C/[C@H](O[Si](C)(C)C)(C)C[C@H](C)C[C@H](CC(OC)OC)[C@H](O[C@@H]2O[C@H](C)[C@@H](O[C@H]3[C@@](C)(O)[C@@H](OC(=O)CC)[C@H](C)O3)[C@H](N(C)C)[C@H]2OC(C)=O)[C@H]1OC>>CCC(=O)O[C@H]1[C@H](C)O[C@@H](O[C@H]2[C@H](N(C)C)[C@@H](OC(C)=O)[C@H](O[C@@H]3[C@@H](OC)[C@H](OC/C=C/c4cnc5cccc45)CC(=O)O[C@H](C)C/C=C/C=C/[C@H](O[Si](C)(C)C)(C)C(C)(C)C)[C@H]1C  
C=CC(=O)OC(C)(C)C.CC(C)(C)OC(=O)N1CCc2cc(Cl)cc3c2C1Cc1cccc1-  
2982 3>>CC(C)(C)OC(=O)/C=C/c1cc2c3c(c1)-c1cccc1CC3N(C(=O)OC(C)(C)C)CC2  
2983 C=CC(=O)OC.COc1c(NC(=O)C(C)(C)C)c1c(OC)c(OC)c1NC(=O)C(C)(C)C>>COC(=O)/C=C/c1c(NC(=O)C(C)(C)C)c(OC)c(NC(=O)C(C)(C)C)c(OC)c1OC  
2984 C=CC(=O)OC.COc1c(I)c(NC(=O)C(C)(C)C)c(OC)c([Si](C)(C)C)c1OC>>COC(=O)/C=C/c1c(NC(=O)C(C)(C)C)c(OC)c([Si](C)(C)C)c(OC)c1OC  
2985 C=CCOC(C)=O.O=[N+][[O-]]c1ccc(Br)cc1>>CC(=O)OC/C=C/c1ccc([N+](=O)[O-])cc1  
2986 C=CC(=O)OC(C)(C)C.Fc1cc(F)cc(Br)c1>>CC(C)(C)OC(=O)/C=C/c1cc(F)cc(F)c1  
C=CCO[C@H]1O[C@H](COC(C)=O)[C@@H](OC(C)=O)[C@H](OC(C)=O)[C@@H]1OC(C)=O.Ic1ccc(-c2cccc2)cc1>>CC(=O)OC[C@H]1O[C@H](OC/C=C/c2ccc(-c3cccc3)cc2)[C@@H](OC(C)=O)[C@@H](OC(C)=O)[C@@H]1OC(C)=O  
2988 C=Cc1ccc(OC)cc1.CCOC(=O)c1ccc(Br)cc1>>CCOC(=O)c1ccc(/C=C/c2ccc(OC)cc2)cc1  
2989 Br1ccnc1.C=CS(=O)c1cccc1>>O=S(/C=C/c1ccnc1)c1cccc1  
2990 C=CCNC(=O)OC(C)(C)C.CCOC(=O)CC(c1ccc(C)c(CN2CC(C)Cc3cc(Br)ccc3S2(=O)=O)c1)c1ccc2c(c1)nnn2C>>CCOC(=O)CC(c1ccc(C)c(CN2CC(C)Cc3cc(/C=C/CNC(=O)OC(C)(C)C)ccc3S2(=O)=O)c1)c1ccc2c(c1)nnn2C  
2991 C=C1C(=O)O[C@H]2[C@H]1CCC(=C)[C@@H]1C[C@H](OC(C)=O)C(=C)[C@H]21.Ic1cccc1>>C=C1CC[C@H]2/C(=C/c3cccc3)C(=O)O[C@@H]2[C@H]2C(=C)[C@@H](OC(C)=O)C[C@@H]12  
2992 C=CC(=O)OC.CC(C)(C)OC(=O)N1CCC2(CCN(c3cncnc3Oc3ccc(F)cc3Br)C2)C1>>COC(=O)/C=C/c1cc(F)ccc1Oc1cnc1N1CCC2(CCN(C(=O)OC(C)(C)C)C2)C1  
2993 C=CC(=O)OC.CC(C)(C)OC(=O)NCc1ccc(Br)cc1>>COC(=O)/C=C/c1ccc(CNC(=O)OC(C)(C)C)cc1  
2994 C=Cc1ccc(OC)cc1.Oc1ccc(I)cc1>>COc1ccc(/C=C/c2ccc(O)cc2)cc1  
2995 C=CC(=O)OC.FC(F)(F)c1cccc(Br)c1>>COC(=O)/C=C/c1cccc(C(F)(F)F)c1  
2996 C=Cc1ccc(OC)cc1.CSc1oc2ccc(Br)cc2c1-c1cccc1>>COc1ccc(/C=C/c2ccc3oc(SC)c(-C=CCNC(=O)c1cc(C)on1.Ic1ccc2c(c1)OCCO2>>Cc1cc(C(=O)NC/C=C/c2ccc3c(c2)OCCO3)no1  
2997

2998 C=Cc1cccc1.Cc1nc(-c2ccc(Br)cc2)cs1>>Cc1nc(-c2ccc(/C=C/c3cccc3)cc2)cs1  
C=Cc1nc2c(N)ncnc2n1[C@H]1C[C@H](O[Si](C)(C)C(C)(C)C)[C@@H](CO[Si](C)(C)C(C)(C)C)O1.

2999 N#Cc1ccc(Br)cc1>>CC(C)(C)[Si](C)(C)OC[C@H]1O[C@@H](n2c(/C=C/c3ccc(C#N)cc3)nc3c(N)ncnc32)C[C@@H]1O[Si](C)(C)C(C)(C)C

3000 C=CC(=O)OC(C)(C)C.O=C(O)Cc1ccc(Br)cc1>>CC(C)(C)OC(=O)/C=C/c1ccc(CC(=O)O)cc1

3001 C=CC(=O)NC(C)C.Ic1cccc1>>CC(C)NC(=O)/C=C/c1cccc1

3002 C=CC(=O)C(C)CC(=O)OC.COc1ccc(Br)cc1>>COC(=O)CC(C)C(=O)/C=C/c1ccc(OC)cc1

3003 C=CC1CCC(=O)N1CCI>>C=C1CCN2C(=O)CCC12

3004 C=CC(=O)OC.COcn1nc(-c2cccc2)c(Br)cc1=O>>COcn1nc(-c2cccc2)c(/C=C/C(=O)OC)cc1=O

3005 C=CC(=O)OCCCC.Cn1nc(Cl)c2cccc21>>CCCCOC(=O)/C=C/c1nn(C)c2cccc12

3006 C=Cc1cccc(O)c1.COc1cc(I)cc(OC)c1>>COc1cc(/C=C/c2cccc(O)c2)cc(OC)c1

3007 Br1cccc1.C=CN1CCCCC1=O>>C=C(c1cccc1)N1CCCCC1=O

3008 C=CC(=O)OCCCC.O=Cc1ccc(I)cc1>>CCCCOC(=O)/C=C/c1ccc(C=O)cc1

3009 C=CC(=O)OCC.Fc1c(F)c(F)c(Cl)c(F)c1F>>CCOC(=O)/C=C/c1c(F)c(F)c(F)c(F)c1F

3010 C=Cc1ccc(C)cc1.Cn1ncnc1-c1ccc(Br)cc1>>Cc1ccc(/C=C/c2ccc(-c3ncnc3C)cc2)cc1

3011 C=CS(=O)(=O)NCc1ccc(OC)cc1.CC(C)(C)OC(=O)NCc1cc(F)ccc1Br>>COc1ccc(CNS(=O)(=O)/C=C/c2ccc(F)cc2CNC(=O)OC(C)(C)C)cc1

3012 C=CC(=O)OC.COC(=O)c1ccc(Br)o1>>COC(=O)/C=C/c1ccc(C(=O)OC)o1

3013 C=CC(=O)OC.O=c1c(I)coc2cc(O)ccc12>>COC(=O)/C=C/c1coc2cc(O)ccc2c1=O

3014 C=CC(=O)OC.Cc1cc(O)c(C23CC4CC(CC(C4)C2)C3)cc1-c1ncc(Br)s1>>COC(=O)/C=C/c1cnc(-c2cc(C34CC5CC(CC(C5)C3)C4)c(O)cc2C)s1

3015 C=Cc1ccc(C)cc1C.[Si](C)(C)I>>Cc1ccc(/C=C/[Si](C)(C)C)c(C)c1

3016 C=CC(=O)OCCCC.CC(C)=C(C)Br>>CCCCOC(=O)/C=C/C(C)=C(C)C

3017 Br1ccc(CCN2CCOCC2)cc1.C=Cc1n[nH]c2cc([C@@H]3C[C@@]34C(=O)Nc3ccc(OC)cc34)ccc12>>COc1ccc2c(c1)[C@]1(C[C@H]1c1ccc3c(/C=C/c4ccc(CCN5CCOCC5)cc4)n[nH]c3c1)C(=O)N2

3018 C=CC(=O)OCCCC.O=[N+][O-]c1cccc(Br)c1>>CCCCOC(=O)/C=C/c1cccc([N+](=O)[O-])c1

3019 C=CC(=O)NCCO.COc1ccc(CNc2c(C(=O)NCc3ccc(F)cc3F)c(=O)n(OCc3cccc3)c3ncc(Br)cc23)c(OC)c1>>COc1ccc(CNc2c(C(=O)NCc3ccc(F)cc3F)c(=O)n(OCc3cccc3)c3ncc(/C=C/C(=O)NCCO)cc23)c(C=Cc1cccc1C.Nc1cccc1Br>>Cc1cccc1/C=C/c1cccc1N

3020 Br1enc2cccc2c1.C=CCO[C@]1(C)C[C@@H](C)C(=NO)[C@H](C)[C@@H](O)[C@](C)(O)[C@@H](CC)OC(=O)[C@H](C)[C@@H](O)[C@H](C)[C@H]1O[C@@H]1O[C@H](C)C[C@H](N(C)C)[C@H]1O>>CC[C@H]1OC(=O)[C@H](C)[C@@H](O)[C@H](C)[C@@H](O)[C@H]2O[C@H](C)C[C@H](N(C)C)[C@H]2O)[C@](C)(OC/C=C/c2cnc3cccc3c2)C[C@@H](C)C(=NO)[C@H](C)[C@@H](O)[C@]1(C)O

3021 C=Cc1cncnc1.CC(C)(C)OC(=O)N[C@H](COc1cncnc(Br)c1)Cc1c[nH]c2cccc12>>CC(C)(C)OC(=O)N[C@H](COc1cncnc(/C=C/c2cncnc2)c1)Cc1c[nH]c2cccc12

3022 Br1cccc(N2CCN(c3ncccn3)CC2)n1.C=CC(=O)OCCCC>>CCCCOC(=O)/C=C/c1cccc(N2CCN(c3ncccn3)CC2)n1

3023 C=CC(=O)OCC.Oc1ccc(Br)c(F)c1F>>CCOC(=O)/C=C/c1ccc(O)c(F)c1F

3024 C=Cc1ccc(OC)cc1.CCOC(=O)C(F)(F)I>>CCOC(=O)C(F)(F)/C=C/c1ccc(OC)cc1

3025 BrC1CCCCC1.C=Cc1ccc(C)cc1>>Cc1ccc(/C=C/C2CCCCC2)cc1

3026 C=Cc1cccc1.O=C(Oc1cccc1)c1ccc(Br)cc1>>O=C(Oc1cccc1)c1ccc(/C=C/c2cccc2)cc1

3027 C=CCP(=O)(OCC)OCC.COc1nc2ccc(Br)cc2nc1OC>>CCOP(=O)(C/C=C/c1ccc2nc(OC)c(OC)nc2c1)Br1ccc2c(c1)CC2.C=C>>C=Cc1ccc2c(c1)CC2

3028 C=CC(=O)N1[C@H]2C[C@H]3CC[C@]2(CS1(=O)=O)C3(C)C.Ic1cccc1>>CC1(C)[C@@H]2CC[C@@]13CS(=O)(=O)N(C(=O)/C=C/c1cccc1)[C@H]3C2

3029 C=CN1C(=O)c2cccc2C1=O.O=[N+][O-]c1ccc(Br)cc1>>O=C1c2cccc2C(=O)N1/C=C/c1ccc([N+](=O)[O-])cc1

3030 C=C.Cc1ccc([N+](=O)[O-])c(Br)c1>>C=Cc1cc(C)ccc1[N+](=O)[O-]

3031 C=C1C(=O)O[C@H]2[C@H]1CC/C(C)=C/CC[C@@]1(C)O[C@@H]21.Fc1ccc(I)cc1>>C/C1=C\CC[C@@]2(C)O[C@H]2[C@H]2OC(=O)/C(=C/c3ccc(F)cc3)[C@@H]2CC1

3032 C=CC(=O)NCc1ccc(F)cc1F.COc1ccc2c(=O)c(I)coc2c1>>COc1ccc2c(=O)c(/C=C/C(=O)NCc3ccc(F)cc3F)coc2c1

3033 C=Cc1ccc(OC)cc1.COc1cc2cc(Br)c(=O)oc2cc1OC>>COc1ccc(/C=C/c2cc3cc(OC)c(OC)cc3oc2=O)cc

3034 C=Cc1ccc(O)c(OC)c1.COc1ccc(OC)c(I)c1>>COc1ccc(OC)c(/C=C/c2ccc(O)c(OC)c2)c1

3035 C=CC(=O)OC.CC(C)(C)OC(=O)N1CCC2(CC1)CC(=O)c1ccc(Br)cc1O2>>COC(=O)/C=C/c1ccc2c(c1)OC1(CCN(C(=O)OC(C)(C)C)CC1)CC2=O

3036 C=Cc1cc(OC(C)=O)cc(OC(C)=O)c1.Nc1ccc(I)cc1>>CC(=O)Oc1cc(/C=C/c2ccc(N)cc2)cc(OC(C)=O)c

3037 C=CC(=O)OCC.FC(F)(F)c1ccc(Br)cc1>>CCOC(=O)/C=C/c1ccc(C(F)(F)F)cc1

3038 COC(=O)/C=C/Oc1cccc1-c1cccc1Cl>>COC(=O)/C=C1/Oc2cccc2-c2cccc21

3041 C=CCCC[C@@H](C=C)CN(c1ccccc1Br)S(=O)(=O)c1ccc(C)cc1>>C=CCCC[C@@H]1CN(S(=O)(=O)  
3042 )c2ccc(C)cc2)c2ccccc2C1=C  
3043 C=CC#N.Cc1cc(I)c2ccccc2n1>>Cc1cc(/C=C/C#N)c2ccccc2n1  
3044 C=CC(=O)OC.O=c1c(Cc2ccccc2)c(-  
3045 c2cccs2)oc2c(Cc3ccccc3)cc(Cl)cc12>>COC(=O)/C=C/c1cc(Cc2ccccc2)c2oc(-  
3046 c3cccs3)c(Cc3ccccc3)c(=O)c2c1  
3047 C=Cc1ccccc1.Nc1ccc(I)cc1[N+](=O)[O-]>>Nc1ccc(/C=C/c2ccccc2)cc1[N+](=O)[O-]  
3048 C=C(NC(C)=O)C(=O)OCc1ccccc1.COC(=O)/C(=C/c1cccc(Br)c1)NC(=O)OC(C)(C)C>>COC(=O)/C(  
3049 =C/c1cccc(/C=C(\NC(C)=O)C(=O)OCc2ccccc2)c1)NC(=O)OC(C)(C)C  
3050 C=CC(=O)OCC.Cc1cc(I)nc(C)n1>>CCOC(=O)/C=C/c1cc(C)nc(C)n1  
3051 C=CCN(C(=O)OC(C)(C)C)C(=O)OC(C)(C)C.Cc1ccc(Oc2ccc(Nc3ncnc4ccc(I)cc34)cc2C)cn1>>Cc1cc  
3052 c(Oc2ccc(Nc3ncnc4ccc(/C=C/CN(C(=O)OC(C)(C)C)C(=O)OC(C)(C)C)cc34)cc2C)cn1  
3053 C=Cc1ccccc1.CN(C(=O)c1ccccc1)c1ccc2c(c1)[nH]c(=NC(=O)c1ccc(Br)s1)n2CCC(N)=O>>CN(C(=O  
3054 )c1ccccc1)c1ccc2c(c1)[nH]c(=NC(=O)c1ccc(/C=C/c3ccccc3)s1)n2CCC(N)=O  
3055 C=CC(=O)OCC.COc1ccc(-c2ccc(Br)s2)cc1>>CCOC(=O)/C=C/c1ccc(-c2ccc(OC)cc2)s1  
3056 C=CC(=O)OC.CC(C)(C)OC(=O)n1c(Br)c(CCN2C(=O)c3ccccc3C2=O)c2ccccc21>>COC(=O)/C=C/c1  
3057 c(CCN2C(=O)c3ccccc3C2=O)c2ccccc2n1C(=O)OC(C)(C)C  
3058 C=CC(=O)OC.COc1ccc(Br)c(NC2ccccc2)c1>>COC(=O)/C=C/c1ccc(OC)cc1NCc1ccccc1  
3059 C=Cc1ccccc1.O=C(C=P(c1ccccc1)(c1ccccc1)c1ccccc1)c1ccc(I)cc1>>O=C(C=P(c1ccccc1)(c1ccccc1)c  
3060 1ccccc1)c1ccc(/C=C/c2ccccc2)cc1  
3061 C=COCC.Ic1cccc2ccccc12>>C=C(OCC)c1cccc2ccccc12  
3062 C=CCO[Si](C)(C)C(C)(C)C.FC(F)(F)c1ccc(Br)cc1>>CC(C)(C)[Si](C)(C)OC/C=C/c1ccc(C(F)(F)F)cc1  
3063 C=CCC(OC)C1=C(Br)c2cccc3ccccc1c23>>C=C1CC(OC)C2=C1c1cccc3ccccc2c13  
3064 Brc1cnnc1.C=CC(=O)OC(C)(C)C>>CC(C)(C)OC(=O)/C=C/c1cnnc1  
3065 C=Cc1ccc(N(c2ccc(OC)cc2)c2ccc(OC)cc2)cc1.Cc1cccc(Br)c1>>COc1ccc(N(c2ccc(/C=C/c3cccc(C)c3  
3066 )cc2)c2ccc(OC)cc2)cc1  
3067 C=CC(C)(C)O.CC(C)(C)c1ccc(Br)cc1>>CC(C)(O)/C=C/c1ccc(C(C)(C)C)cc1  
3068 C=Cc1ccc2c(ccc(=O)n2COCC[Si](C)(C)C)c1.FC(F)Oc1ccc(Nc2ncc(Br)cn2)cc1Cl>>C[Si](C)(C)CCO  
3069 Cn1c(=O)ccc2cc(/C=C/c3nnc(Nc4ccc(OC(F)F)c(Cl)c4)nc3)ccc21  
3070 C=CC(=O)OC.C[C@]12CC[C@H]3c4cc(I)c(O)cc4CC[C@H]3[C@H]1CC[C@H]2O>>COC(=  
3071 O)/C=C/c1cc2c(cc1O)CC[C@H]1[C@H]2CC[C@H]2(C)[C@H](O)CC[C@H]12  
3072 C=CC(=O)OCC.O=C(Nc1ccccc1Cl)c1ccc(Br)o1>>CCOC(=O)/C=C/c1ccc(C(=O)Nc2ccccc2Cl)o1  
3073 C=CC(=O)OCCCC.Nc1cc(F)cc([N+](=O)[O-]  
3074 C=Cc1ccc(OC)cc1.COc1ccc(/C=C/c2[nH]c3ccccc3c(=O)c2I)cc1>>COc1ccc(/C=C/c2[nH]c3ccccc3c(=  
3075 O)c2/C=C/c2ccc(OC)cc2)cc1  
3076 C=CC1(O)CCC1.Cc1ccccc1I>>Cc1ccccc1/C=C/C1(O)CCC1  
3077 C=Cc1ccc(/C=C/c2ccc(C(C)(C)C)cc2)cc1.Ic1ccc(C(c2ccccc2)(c2ccccc2)c2ccccc2)cc1>>CC(C)(C)c1c  
3078 cc(/C=C/c2ccc(/C=C/c3ccc(C(c4ccccc4)(c4ccccc4)c4ccccc4)cc3)cc2)cc1  
3079 C=CCN1C(=O)c2ccccc2C1=O.Nc1ccc(Br)cc1>>Nc1ccc(/C=C/CN2C(=O)c3ccccc3C2=O)cc1  
3080 C=CC(=O)OCC.Cc1noc(C)c1I>>CCOC(=O)/C=C/c1c(C)noc1C  
3081 C=Cc1ccccc1.Cc1oc2ccccc2c(=O)c1Br>>Cc1oc2ccccc2c(=O)c1/C=C/c1ccccc1  
3082 C=C.ClCc1cc2ccccc2s1>>C=CCc1cc2ccccc2s1  
3083 C=CC(=O)OCC.CC(C)(C)[Si](C)(C)n1c(=O)n([Si](C)(C)C(C)(C)C)c2nc3ccc(Br)cc3cc21>>CCOC(=O  
3084 )/C=C/c1ccc2nc3c(cc2c1)n([Si](C)(C)C(C)(C)C)c(=O)n3[Si](C)(C)C(C)(C)C  
3085 C=CC(=O)OC.O=C1Nc2ccc(Br)cc2C1=O>>COC(=O)/C=C/c1ccc2c(c1)C(=O)C(=O)N2  
3086 C=CC#N.O=c1oc2cnc3ccc(Br)cc3c2n1-c1cccc(C(F)(F)F)c1>>N#C/C=C/c1ccc2ncc3oc(=O)n(-  
3087 c4cccc(C(F)(F)F)c4)c3c2c1  
3088 C=CC(=O)OCCCC.O=C(/C=C/c1ccc(Br)cc1)c1ccc2sc3ccccc3c2c1>>CCCCOC(=O)/C=C/c1ccc(/C=C  
3089 /C(=O)c2ccc3sc4ccccc4c3c2)cc1  
3090 C=CCOC(C)=O.Cc1ccc(I)c(C)c1>>CC(=O)OC/C=C/c1ccc(C)cc1C  
3091 C=C[C@H]1O[C@H](COC(C)=O)[C@H](OC(C)=O)[C@H](OC(C)=O)[C@H]1OC(C)=O.CC(C  
3092 )(C)[Si](C)(C)Oc1cc(Br)ccc1[C@H]1[C@H](CC[C@H](O)c2ccc(F)cc2)C(=O)N1c1ccc(F)cc1>>  
3093 CC(=O)OC[C@H]1O[C@H](/C=C/c2ccc([C@H]3[C@H](CC[C@H](O)c4ccc(F)cc4)C(=O)N3  
3094 c3ccc(F)cc3)c(O[Si](C)(C)C(C)(C)C)c2[C@H](OC(C)=O)[C@H](OC(C)=O)[C@H]1OC(C)=O  
3095 C=C(NC(C)=O)C(=O)OC.Fc1ccc(Br)cc1>>COC(=O)/C=C/c1ccc(F)cc1)NC(C)=O  
3096 C=CCCN1C(=O)c2ccccc2C1=O.FC(F)(F)c1ccc(I)cc1>>O=C1c2ccccc2C(=O)N1CC/C=C/c1ccc(C(F)(  
3097 F)F)cc1  
3098 C=C[C@H](C)[C@H](O)C/C=C/C(=O)OC.Ic1ccccc1>>COC(=O)/C=C/C[C@H](O)[C@H](C)/C  
3099 =C/c1ccccc1  
3100 C=Cc1cc(C(C)(C)C)c(O)c(C(C)(C)C)c1.Cc1cncc(C)c1-c1c(C)cc(Br)cc1C>>Cc1cncc(C)c1-  
3101 c1c(C)cc(/C=C/c2cc(C(C)(C)C)c(O)c(C(C)(C)C)c2)cc1C

3080 C=CC(=O)OC.COC(=O)c1ccc(C#C[Si](C)(C)C)ccc1OS(=O)(=O)C(F)(F)F>>COC(=O)/C=C/c1ccc(C#  
 C[Si](C)(C)C)cc1C(=O)OC  
 3081 C=CC(=O)OC(C)(C)C.O=[N+](O-)]c1ccc(Cl)c([N+](=O)[O-]  
 ]c1>>CC(C)(C)OC(=O)/C=C/c1ccc([N+](=O)[O-])cc1[N+](=O)[O-]  
 3082 C=Cc1cccc1.COc1ccc(N)c(Br)c1>>COc1ccc(N)c(/C=C/c2cccc2)c1  
 3083 C=CC(=O)O[C@H]1C[C@H]2C[C@@H]([C@@H]1C)C2(C)C.O=Cc1cccc1Br>>C[C@@H]1[C@  
 @H](OC(=O)/C=C/c2cccc2C=O)C[C@H]2C[C@@H]1C2(C)C  
 3084 BrC1CCCCC1.C=Cc1ccc(OC)cc1>>COc1ccc(/C=C/C2CCCCC2)cc1  
 3085 C=Cc1cccc(Nc2ccc(Cl)c(Nc3cc(Br)ccc3OC)n2)c1>>COc1ccc2cc1Nc1nc(cc1Cl)Nc1cccc(c1)/C=C\2  
 3086 Br1ccnc2cccc12.C=CC(=O)OCCCC>>CCCCOC(=O)/C=C/c1ccnc2cccc12  
 3087 C=Cc1ccc(C)cc1.CS(=O)(=O)c1ccc(Br)cc1>>Cc1ccc(/C=C/c2ccc(S(C)(=O)=O)cc2)cc1  
 3088 Br1ccc(I)cc1.C=Cc1ccc(S(C)(=O)=O)cc1>>CS(=O)(=O)c1ccc(/C=C/c2ccc(Br)cc2)cc1  
 3089 C=Cc1cccc1.CCCCCC(C)I>>CCCCC(C)/C=C/c1cccc1  
 3090 C=CC(=O)OC.Ic1cccc1NCc1cccc1>>COC(=O)/C=C/c1cccc1NCc1cccc1  
 3091 C=Cc1cc(OC)c(OC)c(OC)c1.Nc1ccc(I)cc1>>COc1cc(/C=C/c2ccc(N)cc2)cc(OC)c1OC  
 3092 C=Cc1cccc1.Cc1nc(Br)c(-c2cccc2)n(Cc2cccc2)c1=O>>Cc1nc(/C=C/c2cccc2)c(-  
 c2cccc2)n(Cc2cccc2)c1=O  
 3093 C=CC(=O)OC(C)(C)C.COC(=O)c1ccc(I)cc1>>COC(=O)c1ccc(/C=C/C(=O)OC(C)(C)C)cc1  
 3094 C=CC[Si](C)(C)C.Fc1ccc(Br)cc1>>C=C(C[Si](C)(C)C)c1ccc(F)cc1  
 3095 C=CC(=O)OC.CC(C)n1enc2c(NCc3ccc(Br)cc3)nc(N3CCN(C)CC3)nc21>>COC(=O)/C=C/c1ccc(CNc  
 2nc(N3CCN(C)CC3)nc3c2nen3C(C)C)cc1  
 3096 C=CC(OCC)OCC.CC(=O)c1ccc(I)cc1>>CCOC(/C=C/c1ccc(C(C)=O)cc1)OCC  
 3097 C=CC(=O)OCC.CC1(C)CC(=C(c2ccc(Br)cc2)c2ccc(O)c(F)c2)CC(C)(C)C1>>CCOC(=O)/C=C/c1ccc(  
 C(=C2CC(C)(C)CC(C)(C)C2)c2ccc(O)c(F)c2)cc1  
 3098 C=CCN(Cc1cc2c(cc1Br)OCO2)C(=O)OC>>C=C1CCN(C(=O)OC)Cc2cc3c(cc21)OCO3  
 3099 C=CC(=O)OC.CCOC(=O)Nc1cccc1C1=C(I)CCO1>>CCOC(=O)Nc1cccc1C1=C(/C=C/C(=O)OC)C  
 3100 C=CC(=O)c1cccc(C)c1.COc1ncc(I)c(OC)n1>>COc1ncc(/C=C/C(=O)c2cccc(C)c2)c(OC)n1  
 3101 C=CC(=O)N(C)OC.N#Cc1ccc(I)cc1>>CON(C)C(=O)/C=C/c1ccc(C#N)cc1  
 3102 C=Cc1cccc(O[Si](C)(C)C(C)(C)C)c1.C[Si](C)(OS(=O)(=O)C(F)(F)F)OS(=O)(=O)C(F)(F)F>>CC(C)(  
 C)[Si](C)(C)Oc1cccc(/C=C/[Si](C)(C)OS(=O)(=O)C(F)(F)F)c1  
 3103 C=C(C)c1cccc1.Ic1ccc2c(c1)OCCOCCOCCOCCO2>>C/C(=C\c1ccc2c(c1)OCCOCCOCCOCCO2)c1  
 ccccc1  
 3104 C=C[C@@H](OCc1cccc1I)Oc1cccc1>>C=C1c2cccc2CO[C@H]1Oc1cccc1  
 3105 Br1cc2ccc1CCc1ccc(cc1)CC2.C=C>>C=Cc1cc2ccc1CCc1ccc(cc1)CC2  
 3106 C=CC(=O)OC.COc1c(CN(C(=O)c2cccc2)c2cccc(Br)c2)ccc2c1OC(C)(C)[C@H](O)[C@H]2N1CCCC  
 C1>>COC(=O)/C=C/c1cccc(N(Cc2ccc3c(c2OC)OC(C)(C)[C@H](O)[C@H]3N2CCCCC2)C(=O)c2cc  
 3107 BrC1=CCCCC1.C=C>>C=CC1=CCCCC1  
 3108 C=Cc1cccc1.CCC(=O)Nc1ccc(Br)cc1C(=O)OC>>CCC(=O)Nc1ccc(/C=C/c2cccc2)cc1C(=O)OC  
 3109 C=CCC1c2cccc2CCN1CC(=C)I>>C=C1CC2c3cccc3CCN2CC1=C  
 3110 C=C/C(Br)=C/[C@]1(C)C(=O)OC[C@]1(C)/C=C\C(=O)OC>>C=CC1=C[C@]2(C)C(=O)OC[C@]2(  
 C)/C1=C/C(=O)OC  
 3111 C=Cc1ccc(OC)cc1.O=c1oc2cccc2cc1Br>>COc1ccc(/C=C/c2cc3cccc3oc2=O)cc1  
 3112 Br1cccc1.C=CS(=O)c1cccc1>>O=S(/C=C/c1cccc1)c1cccc1  
 3113 C=CC(=O)O.Cc1cccc(S(=O)(=O)Nc2ccc(I)cc2)c1>>Cc1cccc(S(=O)(=O)Nc2ccc(/C=C/C(=O)O)cc2)c1  
 3114 C=C(F)C(=O)OC.N#Cc1ccc(I)cc1>>COC(=O)/C(F)=C/c1ccc(C#N)cc1  
 3115 C=CC(=O)CC.CCc1cc(C)cc(CC)c1Br>>CCC(=O)/C=C/c1c(CC)cc(C)cc1CC  
 3116 C=CC(=O)N(C)C.N#Cc1cccc1Cl>>CN(C)C(=O)/C=C/c1cccc1C#N  
 3117 C=CP(=O)(O)O.Fc1cc(Br)cc(F)c1C(F)(F)F>>O=P(O)(O)/C=C/c1cc(F)c(C(F)(F)F)c(F)c1  
 3118 C=CP(=O)(Cc1cccc1)c1cccc1.C[P@](=O)/C=C/c1ccc(Br)c1)c1cccc1>>C[P@](=O)/C=C/c1cccc  
 (/C=C/P(=O)(Cc2cccc2)c2cccc2)c1)c1cccc1  
 3119 C=CC(C)(C)C(=O)NC(C)(C)CO.CC(=O)OC[C@H]1O[C@@H](c2cc(Cc3ccc(Br)cc3F)c(C)cc2C)[C@  
 H](OC(C)=O)[C@@H](OC(C)=O)[C@@H]1OC(C)=O>>CC(=O)OC[C@H]1O[C@@H](c2cc(Cc3cc  
 c(/C=C/C(C)(C)C(=O)NC(C)(C)CO)cc3F)c(C)cc2C)[C@H](OC(C)=O)[C@@H](OC(C)=O)[C@@H]  
 3120 C=CC(=O)N1CCCC1.COc1cc(Br)c(C(=O)OC(C)(C)C)cc1OC>>COc1cc(/C=C/C(=O)N2CCCC2)c(C(  
 =O)OC(C)(C)C)cc1OC  
 3121 C=CC(=O)OC(C)(C)C.Oc1ccc(Cl)cc1>>CC(C)(C)OC(=O)/C=C/c1ccc(O)cc1  
 3122 Br1esc2cccc12.C=CP(=O)(OCC)OCC>>CCOP(=O)/C=C/c1esc2cccc12)OCC  
 3123 C=CC(=O)OC.Cc1ccc(Br)c2c1N(Cc1ccc(C(F)(F)F)cc1)C(=O)C2=O>>COC(=O)/C=C/c1ccc(C)c2c1C  
 (=O)C(=O)N2Cc1ccc(C(F)(F)F)cc1  
 3124 C=CC(=O)O.O=C(O)/C=C/c1cc(Br)cs1>>O=C(O)/C=C/c1csc(/C=C/C(=O)O)c1

3125 C=CC(=O)O.CC(=O)c1ccc(I)cc1>>CC(=O)c1ccc(/C=C/C(=O)O)cc1  
3126 C=C(NC(C)=O)C(=O)OC.Nc1ccc(Br)c2ccccc12>>COC(=O)/C=C/c1ccc(N)c2ccccc12)NC(C)=O  
3127 C=Cc1cc2c(c(=O)n(C)c(=O)n2C)n1C.N#Cc1cccc(Br)c1>>Cn1c(=O)c2c(cc(/C=C/c3cccc(C#N)c3)n2C  
)n(C)c1=O  
3128 C=Cc1cccc1C(F)(F)F.O=C(O)c1cccc(Br)c1>>O=C(O)c1cccc(/C=C/c2ccccc2C(F)(F)F)c1  
3129 Brc1ccc(-c2ccc(I)cc2)cc1.C=Cc1ccc(CP(=O)(OCC)OCC)cc1>>CCOP(=O)(Cc1ccc(/C=C/c2ccc(-  
c3ccc(Br)cc3)cc2)cc1)OCC  
3130 Brc1cccs1.C=CC(=O)OCC>>CCOC(=O)/C=C/c1cccs1  
3131 C=Cc1nc2c(=O)[nH]c(N=CN(C)C)nc2n1[C@H]1C[C@H](O)[C@@H](CO)O1.CC(=O)c1ccc(Br)cc1  
>>CC(=O)c1ccc(/C=C/c2nc3c(=O)[nH]c(N=CN(C)C)nc3n2[C@H]2C[C@H](O)[C@@H](CO)O2)cc1  
C=CC[C@H](CC(=O)OC(C)(C)C)C(=O)N[C@H](C(=O)NC)C(C)(C)C.FC(F)(F)c1cc(Br)ccc1-  
3132 c1ccccc1>>CNC(=O)[C@@H](NC(=O)[C@H](C/C=C/c1ccc(-  
c2ccccc2)c(C(F)(F)F)c1)CC(=O)OC(C)(C)C)C(C)(C)C  
3133 C=CC(=O)OC(C)C.Cn1c(-c2ccccc2)c(I)c2ccccc21>>Cn1c(-  
c2ccccc2)c(/C=C/C(=O)OC(C)(C)C)c2ccccc21  
3134 C=Cc1cccc1.Cn1ccc1-c1cccc(Br)c1>>Cn1ccc1-c1cccc(/C=C/c2ccccc2)c1  
Brc1cnc2ccccc2c1.C=CCO[C@]1(C)C[C@H](C)C(=O)[C@H](C)[C@H]2NC(=O)O[C@]2(C)[C@  
@H](CC)OC(=O)[C@H](C)C(=O)[C@H](C)[C@H]1O[C@H]1O[C@H](C)C[C@H](N(C)C)[C@H]  
3135 ]1OC(C)=O>>CC[C@H]1OC(=O)[C@H](C)C(=O)[C@H](C)[C@@H](O[C@@H]2O[C@H](C)C[C  
@H](N(C)C)[C@H]2OC(C)=O)[C@](C)(OC/C=C/c2cnc3ccccc3c2)C[C@@H](C)C(=O)[C@H](C)[C  
@H]2NC(=O)O)C@112C  
3136 C=CC(N)=O.Fc1cccc(I)c1>>NC(=O)/C=C/c1cccc(F)c1  
3137 Brc1ccc(Cn2c(-c3ccccc3)nc3ccccc32)cc1.C=Cc1cccc1>>C(=C/c1ccc(Cn2c(-  
c3ccccc3)nc3ccccc32)cc1)c1ccccc1  
3138 C=[Si](C)(C)c1cccn1.COc1ccc(I)cc1>>COc1ccc(/C=C/[Si](C)(C)c2cccn2)cc1  
3139 C=Cc1ccc(Br)cc1.Cn1cc(I)c(=O)c2ccccc21>>Cn1cc(/C=C/c2ccc(Br)cc2)c(=O)c2ccccc21  
3140 C=CC(=O)OCC.CC(C)(C)OC(=O)NC1(C(=O)Nc2ccc(I)cc2)CCC1>>CCOC(=O)/C=C/c1ccc(NC(=O)  
C2(NC(=O)OC(C)(C)C)CCC2)cc1  
3141 C=CC1(C)CCc2c(C)c(OC)c(C)c(C)c2O1.COc1c(C)c(I)c(C)c1C=O>>COc1c(C)c(/C=C/C2(C)CCc3  
c(C)c(OC)c(C)c(C)c3O2)c(C)c1C=O  
3142 C=CCOc1cccc1.COc1ccc(I)cc1>>COc1ccc(/C=C/COc2ccccc2)cc1  
3143 C=Cc1cncnc1.CC(C)(C)OC(=O)N1CCC[C@H]1COc1cncnc(Br)c1>>CC(C)(C)OC(=O)N1CCC[C@H]1  
COc1cncnc(/C=C/c2cncnc2)c1  
3144 C=CC(=O)OCC.CC(=O)c1ccc(Cl)cc1>>CCOC(=O)/C=C/c1ccc(C(C)=O)cc1  
3145 C=CCn1c(-  
c2ccc(OCC)cc2)nc2ccccc2c1=O.O=C(CN1C(=O)COc2ccccc21)c1ccc(Br)cc1>>CCOc1ccc(-  
3146 C=CC#N.C[Si](C)(C)c1ccc1I>>C[Si](C)(C)c1ccc1/C=C/C#N  
3147 C=C(C)C(=O)OC.Ic1ccccc1>>COC(=O)/C(C)=C/c1ccccc1  
3148 C=CS(=O)(=O)Nc1cccc(OC2CCN(C(=O)OC(C)(C)C)CC2)c1.N#Cc1cccc(Br)c1>>CC(C)(C)OC(=O)  
N1CCC(Oc2cccc(NS(=O)(=O)/C=C/c3cccc(C#N)c3)c2)CC1  
3149 C=CCc1c(OCc2cc(OC)ccc2Br)c(=O)n(C)c2ccccc12>>C=C1Cc2c(c(=O)n(C)c3ccccc23)OCc2cc(OC)c  
3150 C=CC#N.COC(=O)c1ncccc1Br>>COC(=O)c1ncccc1/C=C/C#N  
3151 C=CC(=O)OCC.Ic1ccc2c(c1)OCCOCCOCCOCCOCCO2>>CCOC(=O)/C=C/c1ccc2c(c1)OCCOCCO  
CCOCCOCCO2  
3152 C=CCNC(=O)OC(C)(C)C.CCOC(=O)c1cc(Cl)c(OS(=O)(=O)C(F)(F)F)c(OC)c1>>C=C(CNC(=O)OC(  
C)(C)C)c1c(Cl)cc(C(=O)OCC)cc1OC  
3153 C=Cc1ccccc1.N#Cc1cc2ccc3ccccc3c2c2cc(Br)ccc12>>N#Cc1cc2ccc3ccccc3c2c2cc(/C=C/c3ccccc3)cc  
3154 C=Cc1ccc2c(c1)CC2.C[Si](C)(C)I>>C[Si](C)(C)/C=C/c1ccc2c(c1)CC2  
3155 C=Cc1ccccc1.O=c1oc2ccccc2cc1Br>>O=c1oc2ccccc2cc1/C=C/c1ccccc1  
3156 C=Cc1ccc(C=C)cc1.O=Cc1ccc(Br)cc1>>C=Cc1ccc(/C=C/c2ccc(C=O)cc2)cc1  
3157 C=CC(C)=O.CCc1ccc2c(c1)C(OS(=O)(=O)C(F)(F)F)=CC(C)(C)CO2>>CCc1ccc2c(c1)C(/C=C/C(C)=  
O)=CC(C)(C)CO2  
3158 C=Cc1ccccc1.O=Cc1ccc(Br)cc1>>C=C(c1ccccc1)c1ccc(C=O)cc1  
3159 C=CC(=O)Nc1ccccc1.O=c1c(I)c(-c2ccc(O)cc2)oc2cc(O)ccc12>>O=C(/C=C/c1c(-  
c2ccc(O)cc2)oc2cc(O)ccc2c1=O)Nc1ccccc1  
3160 C=C.CC(C)(C)OC(=O)n1cc(CCl)c2ccccc21>>C=CCc1cn(C(=O)OC(C)(C)C)c2ccccc12  
3161 C=COCCCC.O=Cc1ccc(Br)c1>>C=C(OCCCC)c1ccc(C=O)c1  
3162 C=CC(=O)O.O=S(=O)(Nc1cccc(I)c1)c1cccs1>>O=C(O)/C=C/c1cccc(NS(=O)(=O)c2cccs2)c1  
3163 C=Cc1ccccc1.COc1cccc(Br)c1>>COc1cccc(/C=C/c2ccccc2)c1  
3164 C=Cc1ccccc1O.COc1cc(Br)cc(OC)c1F>>COc1cc(/C=C/c2ccccc2O)cc(OC)c1F  
3165 C=CN1CCCCC1=O.Cc1ccc(OS(=O)(=O)C(F)(F)F)c(Br)c1>>C=C(c1ccc(C)cc1Br)N1CCCCC1=O

3166 C=Cc1cccc1.FC(F)(F)Oc1ccc(Br)cc1>>FC(F)(F)Oc1ccc(/C=C/c2ccccc2)cc1  
 3167 C=CC(=O)N1CCOCC1.CC(=O)c1ccc(Br)cc1>>CC(=O)c1ccc(/C=C/C(=O)N2CCOCC2)cc1  
 3168 Brc1ncccn1.C=Cc1ccc(OC)cc1>>COc1ccc(/C=C/c2ncccn2)cc1  
 3169 C=Cc1ccc(OC)cc1.COc1ccc(I)cc1>>COc1ccc(/C=C/c2ccc(OC)cc2)cc1  
 3170 C=CC1CCCCC1.O=Cc1ccc(Br)o1>>O=Cc1ccc(/C=C/C2CCCCC2)o1  
 3171 C=Cc1cnccl1.O=S(=O)(c1ccc(Br)cc1)C(F)(F)C(F)(F)C(F)(F)C(F)(F)C(F)(F)C(F)(F)C(F)>  
 >O=S(=O)(c1ccc(/C=C/c2cnccl2)cc1)C(F)(F)C(F)(F)C(F)(F)C(F)(F)C(F)(F)C(F)(F)C(F)(F)C(F)  
 3172 C=Cc1ccc2c(cnn2C2CCCCO2)c1.FC(F)Oc1ccc(Nc2ncc(Br)en2)cc1Cl>>FC(F)Oc1ccc(Nc2ncc(/C=C/c  
 3ccc4c(cnn4C4CCCCO4)c3)cn2)cc1Cl  
 3173 C=CC(=O)OCCCC.COc1ccc(Br)c(NC(=O)C(C)(C)C)n1>>CCCCOC(=O)/C=C/c1ccc(OC)nc1NC(=O)  
 C(C)(C)C  
 3174 C=Cc1cccc1.CN1CC(c2ccc(Br)cc2)CCC1=O>>CN1CC(c2ccc(/C=C/c3cccc3)cc2)CCC1=O  
 3175 C=CC(C)(C)C.CC(C)(C)[Si](C)(C)O[C@H]1C=C(Br)C2(OCCCCO2)[C@H]2O[C@H]21>>CC(C)(C)  
 /C=C/C1=C[C@@H](O[Si](C)(C)C(C)(C)C)[C@H]2O[C@H]2C12OCCCCO2  
 3176 C=Cc1cccc1.O=C1CCC(Cl)O1>>O=C1CCC(C/C=C/c2ccccc2)O1  
 3177 C=CC(=O)OCC.CC(C)(CC1Cc2ccccc2C1)NC[C@H](O)COc1c(Br)ccc(F)c1F>>CCOC(=O)/C=C/c1  
 ccc(F)c(F)c1OC[C@H](O)CNC(C)(C)CC1Cc2ccccc2C1  
 3178 C=Cc1cccc1.O=Cc1ccc(Cl)cc1>>O=Cc1ccc(/C=C/c2ccccc2)cc1  
 3179 C=Cc1ccc2c(c1)OC(F)(F)O2.CC(C)(C)Br>>CC(C)(C)/C=C/c1ccc2c(c1)OC(F)(F)O2  
 3180 C=C(NC(=O)OCc1ccccc1)C(=O)OC.CC(=O)OCc1ccc(C)ccc1Br>>COC(=O)/C=C/c1ccc(C)cc1COC(  
 C)=O)NC(=O)OCc1ccccc1  
 3181 C=C(NC(C)=O)C(=O)OC.CC(C)(C)[Si](C)(C)OC[C@H]1O[C@H](c2ccc(Br)cc2)C=C[C@H]1O[Si]  
 ](C)(C)C(C)(C)C>>COC(=O)/C=C/c1ccc([C@H]2C=C[C@H](O[Si](C)(C)C(C)(C)C)[C@H](C  
 O[Si](C)(C)C(C)(C)C)O2)cc1)NC(C)=O  
 3182 C=CC(=O)OC.O=C(c1ccccc1)c1cn(-  
 c2ccccc2)c2ccc(Br)cc12>>COC(=O)/C=C/c1ccc2c(c1)c(C(=O)c1ccccc1)en2-c1ccccc1  
 3183 C=C1CC(c2ccc(Cl)cc2)OC1=O.Nc1ccccc1I>>Nc1ccccc1/C=C1(CC(c2ccc(Cl)cc2)OC1=O  
 3184 C=Cc1ccc(F)cc1.C[Si](C)(C)OS(=O)(=O)C(F)(F)F>>C[Si](C)(C)/C=C/c1ccc(F)cc1  
 3185 C=C.COC(=O)c1ccccc1Br>>C=Cc1ccccc1C(=O)OC  
 3186 C=CC(=O)OCC.Fe1ccc(Oc2ccccc(Br)e2)cc1>>CCOC(=O)/C=C/c1ccccc(Oc2ccccc(F)cc2)c1  
 3187 C=CC(=O)N1N=Cc2ccccc2C1c1ccccc1C.COc1ccc(Cc2cnc(N)nc2N)cc(I)c1OC>>COc1ccc(Cc2cnc(N)nc  
 2N)cc(/C=C/C(=O)N2N=Cc3ccccc3C2c2ccccc2C)c1OC  
 3188 C=CC(=O)OC.OCCc1cnccl1Br>>COC(=O)/C=C/c1cnccl1CCO  
 3189 C=CC(=O)OC.Fe1cc(-n2ennn2)c(I)cc1Cl>>COC(=O)/C=C/c1cc(Cl)c(F)cc1-n1ennn1  
 3190 C=CC(=O)N(C)OC.N#Cc1ccc2ccc(Br)cc2c1>>CON(C)C(=O)/C=C/c1ccc2ccc(C#N)cc2c1  
 3191 C=CC(=O)OC(C)(C)C.COc1ccccc(Br)c1>>COc1ccccc(/C=C/C(=O)OC(C)(C)C)c1  
 3192 C=CCCCCCCCC.CC(=O)c1ccc(Br)cc1>>CCCCCCCC/C=C/c1ccc(C(C)=O)cc1  
 3193 C=CC(F)(F)F.COC(=O)c1ccc(I)cc1>>COC(=O)c1ccc(/C=C/C(F)(F)F)cc1  
 3194 C=CC(=O)OCc1ccccc1.CC(C)(C)OC(=O)N1CCC2(CC1)Cc1ccc(Br)cnc1NC2=O>>CC(C)(C)OC(=O)N  
 1CCC2(CC1)Cc1ccc(/C=C/C(=O)OCc3ccccc3)cnc1NC2=O  
 3195 Brc1ccc(-c2ccccc2)cc1.C=Cc1ccccc1>>C(=C/c1ccc(-c2ccccc2)cc1)\c1ccccc1  
 3196 C=C.ClCc1ccccc(Br)c1>>C=CCc1ccccc(Br)c1  
 3197 C=CC(=O)OCC.COc1ccc(F)c2nccc(Br)c2c1>>CCOC(=O)/C=C/c1ccnc2c(F)cc(OC)cc12  
 3198 C=CCC1c2ccccc2CCN1Cc1ccccc1Br>>C=C1CC2c3ccccc3CCN2Cc2ccccc21  
 3199 C=CC(N)=O.N#Cc1ccc(I)cc1>>N#Cc1ccc(/C=C/C(N)=O)cc1  
 3200 C=Cc1cccc1.Nc1ccccc1I>>Nc1ccccc1/C=C/c1ccccc1  
 3201 C=Cc1cnnc2c1nnc2C1CCCCO1.Ic1ccsc1>>C(=C/c1cnnc2c1nnc2C1CCCCO1)\c1ccsc1  
 3202 C=CC(=O)NCCc1ccc(O)cc1.Oc1ccc(I)cc1>>O=C(/C=C/c1ccc(O)cc1)NCCc1ccc(O)cc1  
 3203 C=CC(=O)OC.Nc1cc(F)ccc1I>>COC(=O)/C=C/c1ccc(F)cc1N  
 3204 Brc1ccccc(OCC2CCOCC2)c1.C=CCNC(=O)C(F)(F)F>>O=C(NC/C=C/c1ccccc(OCC2CCOCC2)c1)C(F)  
 Brc1ccccc-  
 n2cnc2)cc1.C=CCO[C@H]1CC(=O)O[C@H](C)C/C=C/C=C/[C@H](O[Si](C)(C)C(C)(C)C)[C@H]  
 ](C)C[C@H](CC(OC)OC)[C@H](O[C@H]2O[C@H](C)[C@H](O[C@H]3C[C@@](C)(O)[C@  
 @H](OC(=O)CC)[C@H](C)O3)[C@H](N(C)C)[C@H]2OC(C)=O)[C@H]1OC>>CCC(=O)O[C@H]1[I]  
 C@H](C)O[C@H](O[C@H]2[C@H](N(C)C)[C@H](OC(C)=O)[C@H](O[C@H]3[C@H](O  
 C)[C@H](OC/C=C/c4ccc(-  
 n5ccnc5)cc4)CC(=O)O[C@H](C)C/C=C/C=C/[C@H](O[Si](C)(C)C(C)(C)C)[C@H](C)C[C@H]3C  
 C(C)(C)C)O[C@H](O[C@H]2C(C)(C)C)O[C@H]1C)O  
 3206 C=CCN(Cc1cc2ccccc2nc1Cl)c1ccc(C)cc1>>C=C1CN(c2ccc(C)cc2)Cc2cc3ccccc3nc21  
 3207 C=CC(C)(O)CCC=C(C)C.CC(C)(C)c1ccc(Br)cc1>>CC(C)=CCCC(C)(O)/C=C/c1ccc(C(C)(C)C)cc1

3208 C=CC(=O)OCCCCC.Ic1cccc1>>CCCCOC(=O)/C=C/c1cccc1  
3209 C=C(C)C.CC(C)(Cl)c1cccc1>>CC(C)=CC(C)(C)c1cccc1  
3210 C=CS(N)(=O)=O.CCc1ccc(Br)cc1>>CCc1ccc(/C=C/S(N)(=O)=O)cc1  
3211 Brc1ccc(I)cc1.C=Cc1c(F)c(F)c(F)c(F)c1F>>Fc1c(F)c(F)c(/C=C/c2ccc(Br)cc2)c(F)c1F  
3212 C=CC(=O)OCC.O=S(=O)(Oc1cccc1)C(F)(F)F>>CCOC(=O)/C=C/c1cccc1  
3213 C=Cc1ccc(C(=O)OCC)cc1.CCOC(=O)C(F)Br>>CCOC(=O)c1ccc(/C=C/C(F)C(=O)OCC)cc1  
3214 C=C[C@@H]1CCCCN1C(=O)OC(C)(C)C.Cc1ccc(I)cc1>>Cc1ccc(/C=C/[C@@H]2CCCCN2C(=O)O  
C(C)(C)C)cc1  
3215 C=CC#N.CC(C)n1cnc2c(Cl)nc(I)nc21>>CC(C)n1cnc2c(Cl)nc(/C=C/C#N)nc21  
3216 C=Cc1cccc1.Cc1ccc(-c2c(Br)c(=O)oc3cc(C)ccc23)cc1>>Cc1ccc(-  
c2c(/C=C/c3cccc3)c(=O)oc3cc(C)ccc23)cc1  
3217 C=CC(=O)OCCCC.COc1ccc(Cl)cc1>>CCCCOC(=O)/C=C/c1ccc(OC)cc1  
3218 C=CC(=O)Nc1ccc(Cl)c(C(F)(F)F)c1.Ic1ccc(Cc2cnc2)cc1>>O=C(/C=C/c1ccc(Cc2cnc2)cc1)Nc1cc  
c(Cl)c(C(F)(F)F)c1  
3219 C=Cc1ccc(C)cc1.Oc1ccc(Br)cc1>>Cc1ccc(/C=C/c2ccc(O)cc2)cc1  
3220 Brc1ccc(-c2cnc3cccc3n2)cc1.C=CCn1c(-c2ccc(F)cc2)nc2cccc2c1=O>>O=c1c2cccc2nc(-  
c2ccc(F)cc2)n1C/C=C/c1ccc(-c2cnc3cccc3n2)cc1  
3221 Brc1ccc2ccc3cccc4ccc1c2c34.C=Cc1ccc(OC)cc1>>COc1ccc(/C=C/c2ccc3ccc4cccc5ccc2c3c45)cc1  
3222 C=Cc1cccc1.C[Si](C)(C)CBr>>C[Si](C)(C)C/C=C/c1cccc1  
3223 C=CCC(O)c1cc2cccc2nc1Cl>>C=C1CC(O)c2cc3cccc3nc21  
3224 C=CCN(C(=O)OC(C)(C)C)C(=O)OC(C)(C)C.N#Cc1ccc(Cl)cc1>>CC(C)(C)OC(=O)N(C/C=C/c1ccc(  
C#N)cc1)C(=O)OC(C)(C)C  
3225 C=CCCCCN.ClCc1ccc(-c2cccc2)cc1>>C=C(CCCCN)Cc1ccc(-c2cccc2)cc1  
3226 C=CC(=O)OC.Oc1ccc(Br)cc1F>>COC(=O)/C=C/c1ccc(O)c(F)c1  
3227 C=CC(=O)OC.Nc1ccc(C(=O)O)cc1I>>COC(=O)/C=C/c1cc(C(=O)O)ccc1N  
3228 C=Cc1cccc1.Cc1cc(I)c2cccc2n1>>Cc1cc(/C=C/c2cccc2)c2cccc2n1  
3229 C=CS(C)(=O)=O.N#Cc1cccc1Br>>CS(=O)(=O)/C=C/c1cccc1C#N  
3230 C=C/C=C/C(=O)N(CCCC)CCCC.CCOC(=O)c1ccc(Br)cc1>>CCCCN(CCCC)C(=O)/C=C/C=C/c1ccc(  
C(=O)OCC)cc1  
3231 C=CCC(C)N(C)C(=O)OC(C)(C)C.Nc1ccc(Br)cn1>>CC(C/C=C/c1cnc(N)nc1)N(C)C(=O)OC(C)(C)C  
3232 C=CS(=O)(=O)F.Cc1cccc(I)c1>>Cc1cccc(/C=C/S(=O)(=O)F)c1  
3233 C=CC(=O)O.O=S(=O)(Nc1ccc(I)cc1)c1ccc(-c2cccc2)cc1>>O=C(O)/C=C/c1ccc(NS(=O)(=O)c2ccc(-  
c3cccc3)cc2)cc1  
3234 C=Cc1ccc(O)cc1.Cn1nc(Br)c2cccc21>>Cn1nc(/C=C/c2ccc(O)cc2)c2cccc21  
3235 C=CC(=O)NC(C)(C)C.CC(=O)Cc1cccc1Br>>CC(=O)Cc1cccc1/C=C/C(=O)NC(C)(C)C  
3236 C=Cc1cccc1.CCCCCCN1c2ccc(I)cc2Sc2cc(C=O)ccc21>>CCCCCN1c2ccc(C=O)cc2Sc2cc(/C=C/c3  
cccc3)ccc21  
3237 Brc1ccc(I)cc1.C=Cc1ccc(C(C)(C)C)cc1>>CC(C)(C)c1ccc(/C=C/c2ccc(Br)cc2)cc1  
3238 C=CC(=O)OCCCC.Nc1ccc(F)cc1I>>CCCCOC(=O)/C=C/c1cc(F)ccc1N  
3239 C=Cc1cc(OC)c(OC)c(OC)c1-  
c1ccc2c(c1)OCO2.COc1ccc(I)cc1>>COc1ccc(/C=C/c2cc(OC)c(OC)c(OC)c2-c2ccc3c(c2)OCO3)cc1  
3240 C=CC(=O)OC.O=c1[nH]c(=O)n([C@@H]2[C@H](O)[C@H](CO)C2)cc1I>>COC(=O)/C=C/c1cn([  
C@@H]2[C@H](O)[C@H](CO)C2)c(=O)[nH]c1=O  
3241 C=CC(=O)OC.Cc1cc(C)c(I)c(C)c1>>COC(=O)/C=C/c1c(C)cc(C)cc1C  
3242 C=CC(=O)OCCCC.Cc1cccc(C)c1Br>>CCCCOC(=O)/C=C/c1c(C)cccc1C  
3243 C=CC(=O)OCCCC.N#Cc1ccc(Cl)cc1>>CCCCOC(=O)/C=C/c1ccc(C#N)cc1  
3244 C=CC(=O)N(C)OC.N#Cc1cccc2c(Br)ccc12>>CON(C)C(=O)/C=C/c1cccc2c(C#N)ccc12  
3245 Brc1cccc1.C=CS(N)(=O)=O>>NS(=O)(=O)/C=C/c1cccc1  
3246 C=Cc1cccc1.O=S(=O)(Oc1ccc(CO)cc1)C(F)(F)F>>C=C(c1cccc1)c1ccc(CO)cc1  
3247 C=C/C=C/C(\CCCC)OCC.Ic1cccc1>>CCCC/C=C/C=C/c1cccc1)OCC  
3248 C=CC(=O)Nc1ccc(-c2ccc(C(=O)NCCN3CCCC3)c(NCC)n2)cc1F.Nc1ccc(Br)cn1>>CCNc1nc(-  
c2ccc(NC(=O)/C=C/c3ccc(N)nc3)c(F)c2)ccc1C(=O)NCCN1CCCC1  
3249 C=CCN(C(=O)C1CCOCC1)[C@H](C)c1cc(F)cc(F)c1.O=C1Nc2cccc2[C@]12Cc1ccc(Br)cc1C2>>C[  
C@H](c1cc(F)cc(F)c1)N(C/C=C/c1ccc2c(c1)C[C@]1(C2)C(=O)Nc2cccc21)C(=O)C1CCOCC1  
3250 C=CC(F)(F)C(F)(F)C(F)(F)C(F)(F)C(F)(F)C(F)(F)C(F)(F)C(F)(F)C(F)(F)C(F)(F)C(F)(F)C(F)(F)C(F)(F)cc1  
COC(=O)c1ccc(Br)cc1>>COC(=O)  
)c1ccc(/C=C/C(F)(F)C(F)(F)C(F)(F)C(F)(F)C(F)(F)C(F)(F)C(F)(F)C(F)(F)C(F)(F)C(F)(F)C(F)(F)cc1  
3251 C=CC(=O)OC(C)(C)C.Ic1ccsc1>>CC(C)(C)OC(=O)/C=C/c1ccsc1  
3252 C=CC(=O)OC(C)(C)C.COc1cc(COCCC(=O)OC(C)(C)C)c(Br)c(OC)c1OC>>COc1cc(COCCC(=O)OC  
(C)(C)C)c(/C=C/C(=O)OC(C)(C)C)c(OC)c1OC  
3253 C=CC(=O)OCC.Cc1cc(I)nc(C(C)C)n1>>CCOC(=O)/C=C/c1cc(C)nc(C(C)C)n1



3254 C=CC(=O)OC(C)(C)C.O=C1CCC(N2C(=O)c3cccc(Br)c3C2=O)C(=O)N1>>CC(C)(C)OC(=O)/C=C/c1cccc2c1C(=O)N(C1CCC(=O)NC1=O)C2=O  
 3255 C=CC(=O)OC.Cc1nc(Br)c(-c2cccc2)n(Cc2cccc2)c1=O>>COC(=O)/C=C/c1nc(C)c(=O)n(Cc2cccc2)c1-c1cccc1  
 3256 C=CC(=O)OCc1cccc1.Cc1ccc(-n2nc3c4cc(Br)ccc4[nH]c(=O)n3c2=O)cc1>>Cc1ccc(-n2nc3c4cc(/C=C/C(=O)OCc5cccc5)ccc4[nH]c(=O)n3c2=O)cc1  
 3257 C=CC(=O)N1N=Cc2cccc2C1C=C.COc1cc(Cc2cnc(N)nc2N)cc(I)c1OC>>C=CC1c2cccc2C=NN1C(=O)/C=C/c1cc(Cc2cnc(N)nc2N)cc(OC)c1OC  
 3258 C=CC12CCC(NC(=O)OC(C)(C)C)(CC1)CO2.COc1ccc2ncc(F)c(Br)c2n1>>COc1ccc2ncc(F)c(/C=C/C34CCC(NC(=O)OC(C)(C)C)(CC3)CO4)c2n1  
 3259 C=CC(=O)OCC.O=Cc1ccc(I)cc1>>CCOC(=O)/C=C/c1ccc(C=O)cc1  
 3260 C=C(C)C(=O)OC.Clc1ccnc1>>COC(=O)/C(C)=C/c1ccnc1  
 3261 C=CC(C)=O.CC1=C(OS(=O)(=O)C(F)(F)F)C(C)(C)C[C@H](O[Si](C)(C)C(C)(C)C)C1>>CC(=O)/C=C/C1=C(C)C[C@H](O[Si](C)(C)C(C)(C)C)CC1(C)C  
 3262 C=CCC(C(=O)OC)C(=O)OC.COc1cccc1Br>>COC(=O)C(C/C=C/c1cccc1OC)C(=O)OC  
 3263 C=CCN1C(=O)c2cccc2C1=O.COC(=O)c1ccc(Br)o1>>COC(=O)c1ccc(/C=C/CN2C(=O)c3cccc3C2=O)o1  
 3264 C=CC(=O)OC.Cn1cc(-c2cnc3ccc(OS(=O)(=O)C(F)(F)F)cc3c2)cn1>>COC(=O)/C=C/c1ccc2ncc(-c3cnn(C)c3)cc2c1  
 3265 C=CC(=O)OC.Cc1ccsc1Br>>COC(=O)/C=C/c1sccc1C  
 3266 C=Cc1cncnc1.CCCCCOc1ccc(I)cc1>>CCCCCOc1ccc(/C=C/c2cncnc2)cc1  
 3267 C=CC(=O)OC(C)(C)C.Fc1cc(C(F)(F)F)cc(F)c1Br>>CC(C)(C)OC(=O)/C=C/c1c(F)cc(C(F)(F)F)cc1F  
 3268 C=COCCCC.O=S(=O)(Oc1ccc2c(c1)OCO2)C(F)(F)F>>C=C(OCCCC)c1ccc2c(c1)OCO2  
 3269 C=CC(=O)OC.CC(C)N(CCc1c(C(C)(C)O)[nH]c2cccc12)Cc1ccc(Br)cc1>>COC(=O)/C=C/c1ccc(CN(CCc2c(C(C)(C)O)[nH]c3cccc23)C(C)C)cc1  
 3270 C=Cc1ccc(N(c2cccc2)c2cccc2)cc1.CCCCCCCCCC1(CCCCCCCCCC)c2cc(Br)ccc2-c2ccc(C=O)cc21>>CCCCCCCCCCCC1(CCCCCCCCCC)c2cc(C=O)ccc2-c2ccc(/C=C/c3ccc(N(c4cccc4)c4cccc4)cc3)cc21  
 3271 C=CN1C(=O)c2cccc2C1=O.FC(F)(F)c1ccc(Br)cc1>>O=C1c2cccc2C(=O)N1/C=C/c1ccc(C(F)(F)F)c1  
 3272 C=CC(=O)OC.N#Cc1ccc(Cl)cc1>>COC(=O)/C=C/c1ccc(C#N)cc1  
 3273 C=CC(=O)OC.CC(=O)Oc1ccc(I)cc1C/C=C(\C)CCC=C(C)C>>COC(=O)/C=C/c1ccc(OC(C)=O)c(C/C=C(\C)CCC=C(C)C)c1  
 3274 Br1cnc2cccc2c1.C=Cc1cncnc1>>C(=C/c1cnc2cccc2c1)\c1cncnc1  
 3275 C=CC(=O)OC.O=Cc1cc(Cl)ccc1OS(=O)(=O)C(F)(F)F>>COC(=O)/C=C/c1ccc(Cl)cc1C=O  
 3276 C=Cc1ccc(Br)cc1.CC(C)(C)OCc1cccc(I)c1>>CC(C)(C)OCc1cccc(/C=C/c2ccc(Br)cc2)c1  
 3277 C=Cc1ccc([N+](=O)[O-])cc1.O=[N+](O-)[O-]c1cc(I)cc([N+](=O)[O-])c1>>O=[N+](O-)[O-]c1ccc(/C=C/c2cc([N+](=O)[O-])cc([N+](=O)[O-])c2)cc1  
 3278 C=CC(=O)OC.COc1ccc(CN(C)S(=O)(=O)c2ccc(Br)cc2)cc1>>COC(=O)/C=C/c1ccc(S(=O)(=O)N(C)C2ccc(OC)cc2)cc1  
 3279 C=Cc1cccc2cccc12.Clc1cccc2cccc12>>C(=C/c1cccc2cccc12)\c1cccc2cccc12  
 3280 C=CNC(C)=O.N#Cc1ccc(Cl)cc1>>C=C(NC(C)=O)c1ccc(C#N)cc1  
 3281 C=Cc1cccc1.O=C1Nc2cccc(I)c2/C1=C/c1ccc[nH]1>>O=C1Nc2cccc(/C=C/c3cccc3)c2/C1=C/c1ccc[nH]1  
 3282 C=CC(=O)OC(C)(C)C.CCCCc1ccc(I)cc1>>CCCCc1ccc(/C=C/C(=O)OC(C)(C)C)cc1  
 3283 Br1ccc(/C(=C2/CCc3cccc32)c2ccc3c(cnn3C3CCCCO3)c2)cc1.C=CC(=O)OC>>COC(=O)/C=C/c1ccc(/C(=C2/CCc3cccc32)c2ccc3c(cnn3C3CCCCO3)c2)cc1  
 3284 C=CC(C)=O.CN1c2cccc2C(C)(C)C12C=Cc1cc(I)ccc1O2>>CC(=O)/C=C/c1ccc2c(c1)C=CC1(O2)N(C)C2cccc2C1(C)C  
 3285 C=CC(=O)n1cccn1.O=c1c(I)c(-c2ccc(O)cc2)oc2cc(O)ccc12>>O=C(/C=C/c1c(-c2ccc(O)cc2)oc2cc(O)ccc2c1=O)n1cccn1  
 3286 C=Cc1ccc(N(CCCC)CCCC)cc1.CCCn1c(=O)c(/C=C/c2ccc(N(C)C)cc2)nc2ccc(Br)cc21>>CCCCN(CC(C)c1ccc(/C=C/c2ccc3nc(/C=C/c4ccc(N(C)C)cc4)c(=O)n(CCC)c3c2)cc1  
 3287 C=CC1(C)C2cccc2N(C)C1c1cccc1.COc1ccc(I)cc1>>COc1ccc(/C=C/CC2(C)c3cccc3N(C)C2c2ccc2)cc1  
 3288 C=Cc1cncnc1.COc1ccc(Br)cc1>>COc1ccc(/C=C/c2cncnc2)cc1  
 3289 C=CC(=O)OCC.OCc1ccc(I)c(OCCc2ccc3cccc3c2)c1>>CCOC(=O)/C=C/c1ccc(CO)cc1OCCc1ccc2ccc2c1  
 3290 C=CC(=O)NCc1ccc(F)cc1.COc1ccc2c(=O)c(I)coc2c1>>COc1ccc2c(=O)c(/C=C/C(=O)NCc3ccc(F)cc3)coc2c1  
 3291 C=CS(=O)(=O)F.Ic1cc2cccc2o1>>O=S(=O)(F)/C=C/c1cc2cccc2o1

Br1ccc2ccc3ccccc4ccc1c2c34.C=Cc1nc2c(N)ncnc2n1[C@@H]1O[C@H](CO[Si](C)(C)C(C)(C)C)[C  
 3292 @H](O[Si](C)(C)C(C)(C)C)[C@H]1O[Si](C)(C)C(C)(C)C>>CC(C)(C)[Si](C)(C)OC[C@H]1O[C@  
 @H](n2c(/C=C/c3ccc4ccc5ccccc6ccc3c4c56)nc3c(N)ncnc32)[C@H](O[Si](C)(C)C(C)(C)C)[C@H]1  
 O[Si](C)(C)C(C)(C)C  
 3293 C=CCn1c(N(c2ccc(F)cc2I)S(=O)(=O)c2ccc(C)cc2)cc2cc(Br)ccc21>>Cc1ccc(S(=O)(=O)N2c3ccc(F)cc  
 3/ C=C/Cn3c2cc2cc(Br)ccc23)cc1  
 3294 C=CC(=O)OCC.Cc1ccc(S(=O)(=O)Cc2ccccc2I)cc1>>CCOC(=O)/C=C/c1ccccc1CS(=O)(=O)c1ccc(C)  
 3295 C=Cc1cc(OC)cc(OC)c1.N#Cc1ccc(I)cc1>>COc1cc(/C=C/c2ccc(C#N)cc2)cc(OC)c1  
 C=CCN1C(=O)C2(CCCC2)NC[C@@]1(C)c1cc(F)cc(F)c1.N#Cc1cc2c(cc1Br)C[C@@]1(C2)C(=O)Nc  
 3296 2nccccc21>>C[C@@]1(c2cc(F)cc(F)c2)CNC2(CCCC2)C(=O)N1C/C=C/c1cc2c(cc1C#N)C[C@]1(C2)  
 C(=O)Nc2nccccc21  
 3297 C=CCN(c1ccc2oc(=O)cc(OCC)c2c1)S(=O)(=O)c1ccccc1Br>>C=C1CN(c2ccc3oc(=O)cc(OCC)c3c2)S  
 (=O)(=O)c2ccccc21  
 3298 C=C1CC(c2ccccc2)OC1=O.Fc1ccccc1I>>O=C1OC(c2ccccc2)C/C1=C\c1ccccc1F  
 C=CCN1C(=O)c2ccccc2C1=O.O=[N+](O-  
 3299 )c1ccc(I)cc1>>O=C1c2ccccc2C(=O)N1C/C=C/c1ccc([N+](=O)[O-])cc1  
 3300 C=CC(=O)OCC.O=c1c(Br)c(-c2ccccc2)oc2ccccc12>>CCOC(=O)/C=C/c1c(-c2ccccc2)oc2ccccc2c1=O  
 3301 C=Cc1ccc(OC)c2oc(CCCC)cc12.COc1ccc(Br)cn1>>CCCCc1cc2c(/C=C/c3ccc(OC)nc3)ccc(OC)c2o1  
 3302 C=C[C@H](C)[C@H](C/C(=C/CO)OS(=O)(=O)C(F)(F)F)O[Si](C)(C)C(C)(C)C)O[Si](C)(C)C(C)(C)  
 )C>>C=C1/C=C(C\CO)C[C@H](O[Si](C)(C)C(C)(C)C)C[C@H]1O[Si](C)(C)C(C)(C)C  
 3303 C=CC(=O)OC.O=Cc1ccccc1Br>>COC(=O)/C=C/c1ccccc1C=O  
 3304 C=CC(=O)N(Cc1ccccc1)Cc1ccccc1.CC(C)(C)OC(=O)c1ccccc1Br>>CC(C)(C)OC(=O)c1ccccc1/C=C/  
 C(=O)N(Cc1ccccc1)Cc1ccccc1  
 3305 C=CC(=O)N1N=Cc2ccccc2C1CCC.Nc1ncc(Cc2cc(I)c3c(c2)OCO3)c(N)n1>>CCCC1c2ccccc2C=NN1  
 C(=O)/C=C/c1cc(Cc2cnc(N)nc2N)cc2c1OCO2  
 3306 C=CC(=O)N(C)C.O=Cc1cccc(Br)c1>>CN(C)C(=O)/C=C/c1cccc(C=O)c1  
 3307 C=Cc1ccccc1C.N#Cc1ccc(Cl)cc1>>Cc1ccccc1/C=C/c1ccc(C#N)cc1  
 3308 C=CC(=O)OC(C)(C)C.C=CC1=C(Br)CCCC1>>C=CC1=C/C=C/C(=O)OC(C)(C)C)CCCC1  
 3309 C=CC(C)(C)O.CC(C)(C)OC(=O)[C@H](Cc1cn(C(=O)OC(C)(C)C)c2ccc(I)c12)N=C(c1ccccc1)c1ccc  
 cc1>>CC(C)(O)/C=C/c1cccc2c1c(C[C@H](N=C(c1ccccc1)c1ccccc1)C(=O)OC(C)(C)C)cn2C(=O)OC(  
 3310 C=CC(C)=O.IC(CC[Se]c1ccccc1)=C(c1ccccc1)c1ccccc1>>CC(=O)/C=C/C(CC[Se]c1ccccc1)=C(c1ccc  
 cc1)c1ccccc1  
 3311 C=Cc1ccccc1.Cc1ccc(-c2c(I)nc3sc4ccccc4n23)cc1>>Cc1ccc(-  
 3312 C=Cc1ccc(C)nc1.CN1C2CCC1c1c([nH]c3ccc(Br)cc13)C2>>Cc1ccc(/C=C/c2ccc3[nH]c4c(c3c2)C2CC  
 C(C4)N2C)cn1  
 3313 C=Cc1ccc(N(c2ccccc2)c2ccccc2)cc1.Cc1ccc(Br)cc1>>Cc1ccc(/C=C/c2ccc(N(c3ccccc3)c3ccccc3)cc2)  
 3314 C=CS(=O)(=O)c1ccccc1.CC(=O)n1cc(C[C@H]2CCCN2C)c2cc(Br)ccc21>>CC(=O)n1cc(C[C@H]2C  
 CCN2C)c2cc(/C=C/S(=O)(=O)c3ccccc3)ccc21  
 3315 C=CC(=O)OC.Cc1ccc(I)c(C)c1>>COC(=O)/C=C/c1ccc(C)cc1C  
 3316 C=CC(=O)Nc1ccccc1.COc1ccc2c(=O)c(I)ccc2c1>>COc1ccc2c(=O)c(/C=C/C(=O)Nc3ccccc3)ccc2c1  
 3317 C=CC(=O)OCC.O=C(Nc1ccccc1I)C(F)(F)C(F)(F)C(F)(F)F>>CCOC(=O)/C=C/c1ccccc1NC(=O)C(F)(  
 F)C(F)(F)C(F)(F)F  
 3318 C=CCO.Cc1ccc(Br)cc1>>C=C(CO)c1ccc(C)cc1  
 3319 C=CC(=O)OC.CN1C(=O)C(=O)c2c(Br)ccc21>>COC(=O)/C=C/c1cccc2c1C(=O)C(=O)N2C  
 3320 Br1ccccc1.C=CC[Si](C)(C)C>>C=C(C[Si](C)(C)C)c1ccccc1  
 3321 C=Cc1ccccc1OC.CN(C(=O)c1ccccc1)c1ccc2c(c1)[nH]c(=NC(=O)c1ccc(Br)s1)n2CCC(N)=O>>COc1c  
 cccc1/C=C/c1ccc(C(=O)N=c2[nH]c3cc(N(C)C(=O)c4ccccc4)ccc3n2CCC(N)=O)s1  
 3322 BrC1=CCCc2ccccc21.C=CCCCCCC>>C=C(CCCCCC)C1=CCCc2ccccc21  
 3323 C=CC(=O)OCCCC.Cc1ccc(I)c1>>CCCCOC(=O)/C=C/c1cccc(C)c1  
 3324 C=Cc1ccc(N(C)C)cc1.C[Si](C)(C)I>>CN(C)c1ccc(/C=C/[Si](C)(C)C)cc1  
 3325 C=CC(=O)OCCCC.CCOC(CCNc1nc(SC)nc1Br)OCC>>CCCCOC(=O)/C=C/c1cnc(SC)nc1NCCC(O  
 CC)OCC  
 3326 C=Cc1c(F)c(F)c(F)c1F.CC(C)CCCC(C)(C)Br>>CC(C)CCCC(C)(C)/C=C/c1c(F)c(F)c(F)c1F  
 3327 C=Cc1cncnc1.CC(=O)c1ccc(Br)cc1>>CC(=O)c1ccc(/C=C/c2cncnc2)cc1  
 3328 C=CC#N.O=S(=O)(Nc1ccccc1)c1ccccc(Br)c1>>N#C/C=C/c1cccc(S(=O)(=O)Nc2ccccc2)c1  
 3329 C=Cc1cccc(C(F)(F)F)c1.Cn1c(=O)c2c(cc(Br)n2C)n(C)c1=O>>Cn1c(=O)c2c(cc(/C=C/c3cccc(C(F)(F)  
 F)c3)n2C)n(C)c1=O  
 3330 C=CCNC(=O)C(F)(F)F.CN(C)C=Nc1nc(=O)n([C@H]2C[C@H](O)[C@@H](CO)O2)cc1I>>CN(C)C  
 =Nc1nc(=O)n([C@H]2C[C@H](O)[C@@H](CO)O2)cc1/C=C/CNC(=O)C(F)(F)F  
 3331 Br1cccs1.C=COCCCC>>C=C(OCCCC)c1cccs1

3332 C=Cc1cccc1C(F)(F)F.CN(C(=O)c1cccc1)c1ccc2c(c1)[nH]c(=NC(=O)c1ccc(Br)s1)n2CCC(N)=O>>  
CN(C(=O)c1cccc1)c1ccc2c(c1)[nH]c(=NC(=O)c1ccc(/C=C/c3cccc3C(F)(F)F)s1)n2CCC(N)=O  
3333 C=CC(=O)OC(C)(C)C.O=C1Nc2cccc2O/C1=C/c1cc(Br)co1>>CC(C)(C)OC(=O)/C=C/c1coc(/C=C2\O  
c3cccc3NC2=O)c1  
3334 C=CC(=O)OC(C)(C)C.COc1ccc(S(=O)(=O)c2ccc3cccc(Br)c3n2)cc1>>COc1ccc(S(=O)(=O)c2ccc3ccc  
c(/C=C/C(=O)OC(C)(C)C)c3n2)cc1  
3335 C=CC(=O)OCC.Cc1ccc(S(=O)(=O)n2c(I)cc3c(Br)cn(C)c(=O)c32)cc1>>CCOC(=O)/C=C/c1cc2c(Br)c  
n(C)c(=O)c2n1S(=O)(=O)c1ccc(C)cc1  
3336 C=CC(=O)OCC.Cc1nc(N)nc(N[C@H]2CC[C@H](OCC(N)=O)CC2)c1Br>>CCOC(=O)/C=C/c1c(C)n  
c(N)nc1N[C@H]1CC[C@H](OCC(N)=O)CC1  
3337 Brc1cccn1.C=CCC(C)C(=O)OCC>>CCOC(=O)C(C)C/C=C/c1cccn1  
3338 C=CC(=O)OCC.Cc1nc(-  
n2c(C)ccc2C)cc(NC2CCOCC2)c1Br>>CCOC(=O)/C=C/c1c(NC2CCOCC2)cc(-n2c(C)ccc2C)nc1C  
3339 C=CC(=O)OC.Cc1c(Br)cccc1[N+](=O)[O-]>>COC(=O)/C=C/c1cccc([N+](=O)[O-])c1C  
3340 C=CCCC.COC(=O)CCn1c(=O)c2cc(I)ccc2n(Cc2en(C(=O)NC(C)(C)C)c3cccc23)c1=O>>CCC/C=C/c  
1ccc2c(c1)c(=O)n(CCC(=O)OC)c(=O)n2Cc1cn(C(=O)NC(C)(C)C)c2cccc12  
3341 Brc1encc(-c2cccc2)c1.C=CC(=O)OC>>COC(=O)/C=C/c1encc(-c2cccc2)c1  
3342 C=Cc1cccc1.COC(=O)C(CCC(=O)C(C)C)Cc1cccc1I>>COC(=O)C(CCC(=O)C(C)C)Cc1cccc1/C=C  
C/c1cccc1  
3343 C=CC(=O)OCC.CC(=O)Nc1ccc(I)cc1>>CCOC(=O)/C=C/c1ccc(NC(C)=O)cc1  
3344 C=CC(=O)OCCCC.Cc1cc(I)ccc1Br>>CCCCOC(=O)/C=C/c1ccc(Br)c(C)c1  
3345 C=CC(=O)OC.CN1CCC(Nc2cccc2I)CC1>>COC(=O)/C=C/c1cccc1NC1CCN(C)CC1  
3346 C=CC(=O)OC.CC(C)=CBr>>COC(=O)/C=C/C=C(C)C  
3347 C=Cc1cccn1.Cc1ccc(S(=O)(=O)Oc2cccc3c(Br)ccn23)cc1>>Cc1ccc(S(=O)(=O)Oc2cccc3c(/C=C/c4c  
cncc4)ccn23)cc1  
3348 C=Cc1cccc(C)c1.O=C(ON1CCc2c(Br)cccc2C1)C(F)(F)F>>Cc1cccc(/C=C/c2cccc3c2CCN(OC(=O)C(  
F)(F)F)C3)c1  
3349 C=CNC(C)=O.COC(=O)c1cccc(I)c1>>C=C(NC(C)=O)c1cccc(C(=O)OC)c1  
3350 C=CC(=O)OCCCC.COc1ccc(Br)c(CCNC(=O)OC(C)(C)C)c1C>>CCCCOC(=O)/C=C/c1ccc(OC)c(C)c  
1CCNC(=O)OC(C)(C)C  
3351 C=CC(=O)Nc1cccc1NC(=O)OC(C)(C)C.COC(=O)C(CCCCl)c1ccc(Br)cc1>>COC(=O)C(CCCCl)c1c  
cc(/C=C/C(=O)Nc2cccc2NC(=O)OC(C)(C)C)cc1  
3352 C=Cc1ccc(OC)c(OC)c1.COc1cc(Br)cc(OC)c1F>>COc1ccc(/C=C/c2cc(OC)c(F)c(OC)c2)cc1OC  
3353 C=CN1C(=O)c2cccc2C1=O.COc1ccc(Br)cc1>>COc1ccc(/C=C/N2C(=O)c3cccc3C2=O)cc1  
3354 C=CP(=O)(OCC)OCC.Clc1cccc1Br>>CCOP(=O)/C=C/c1cccc1Cl)OCC  
3355 C=CC(C)(C)O.Clc1cccc1>>CC(C)(O)/C=C/c1cccc1  
3356 C=CC(=O)OCC.CC1nc2cc(OC)ccc2c(Oc2ccc(Br)cc2)c1-c1cccc1>>CCOC(=O)/C=C/c1ccc(Oc2c(-  
c3cccc3)c(CC)nc3cc(OC)ccc23)cc1  
3357 C=CN1C(=O)c2cccc2C1=O.OC(c1ccc(C(F)(F)F)cc1)c1nccn1Br>>O=C1c2cccc2C(=O)N1/C=C/c1  
cnnc1C(O)c1ccc(C(F)(F)F)cc1  
3358 C=CC(N)=O.O=C(Nc1cccc(I)c1)Nc1cc(C(F)(F)F)ccc1F>>NC(=O)/C=C/c1cccc(NC(=O)Nc2cc(C(F)(F)  
)F)ccc2F)c1  
3359 C=CC(=O)OC.CCN(CC)c1ccc(-c2oc3cc(Br)ccc3c(=O)c2O)cc1>>CCN(CC)c1ccc(-  
c2oc3cc(/C=C/C(=O)OC)ccc3c(=O)c2O)cc1  
3360 C=CC(=O)OC.COC(=O)c1c(Br)ccc2nn(C)cc12>>COC(=O)/C=C/c1ccc2nn(C)cc2c1C(=O)OC  
3361 C=Cc1cccn1.C[Si](C)(C)CCOCn1nc(I)c2ccc(C=O)cc21>>C[Si](C)(C)CCOCn1nc(/C=C/c2cnccn2)c2  
ccc(C=O)cc21  
3362 C=Cc1cn(C(c2cccc2)(c2cccc2)c2cccc2)cn1.CC(=O)Oc1cc(C=O)c2ccc(Cl)ccc1-  
2>>CC(=O)Oc1cc(C=O)c2ccc(/C=C/c3cn(C(c4cccc4)(c4cccc4)c4cccc4)cn3)ccc1-2  
3363 C=Cc1cccc1.Cc1ccc(Cl)c1>>Cc1ccc(/C=C/c2cccc2)c1  
3364 C=C(C)[C@H](C(=O)OC)N1C(=O)c2cccc2C1=O.Ic1cccc1>>COC(=O)[C@@H]/(C(C)=C/c1cccc  
1)N1C(=O)c2cccc2C1=O  
3365 C=CC(=O)OC.O=S(=O)(c1cccc1)n1cc(-c2cncc2)c2cc(Br)cn21>>COC(=O)/C=C/c1cnc2c(c1)c(-  
c1cccn1)cn2S(=O)(=O)c1cccc1  
3366 C=CC(=O)OC.CC(C)c1cccc(Br)c1>>COC(=O)/C=C/c1cccc(C(C)C)c1  
3367 C=CNC(=O)Cc1cccc1.O=S(=O)(Oc1ccc2cccc2c1)C(F)(F)F>>C=C(NC(=O)Cc1cccc1)c1ccc2cccc  
3368 Brc1encc2cccc12.C=CCNC(=O)OC(C)(C)C>>C=C(NC(=O)OC(C)(C)C)c1encc2cccc12  
3369 C=Cc1ccc(Cl)cc1.O=[N+](O-)]c1ccc(Br)cc1>>O=[N+](O-)]c1ccc(/C=C/c2ccc(Cl)cc2)cc1  
3370 C=CC(=O)OC.O=C(C=P(c1cccc1)(c1cccc1)c1cccc1)c1ccc(Br)cc1>>COC(=O)/C=C/c1ccc(C(=O)C  
=P(c2cccc2)(c2cccc2)c2cccc2)cc1  
3371 C=C[Si](CC)(CC)CC.Fc1cccc1Br>>CC[Si]/(C=C/c1cccc1F)(CC)CC

3372 C=CCn1c(C)c(C(=O)c2ccc(C)cc2)c2cc(Cl)ccc21.C[C@@H](OCc1cccc(Br)c1)C(=O)N1CCOCC1>>C  
c1ccc(C(=O)c2c(C)n(C/C=C/c3cccc(CO[C@H](C)C(=O)N4CCOCC4)c3)c3ccc(Cl)cc23)cc1  
 3373 Br1cccc1.C=CSCC>>CCS/C=C/c1cccc1  
 3374 C=CC(=O)OC.O=c1[nH]c2cc(Br)ccc2c1CCC2>>COC(=O)/C=C/c1ccc2c3c(c(=O)[nH]c2c1)CCC3  
 3375 Br1cccc(Oc2ccc(OCc3ccccc3)cc2)c1.C=CC(C)=O>>CC(=O)/C=C/c1cccc(Oc2ccc(OCc3ccccc3)cc2)c  
 3376 C=CN1C(=O)c2cccc2C1=O.COC(=O)c1cc(OC(C)C)ncc1Br>>COC(=O)c1cc(OC(C)C)ncc1/C=C/N1  
C(=O)c2cccc2C1=O  
 3377 C=CC(=O)OCC.Cc1ccc(CC2CCC(=O)N(Cc3ccccc3)C2)c(Br)c1>>CCOC(=O)/C=C/c1cc(C)ccc1CC1  
CCC(=O)N(Cc2cccc2)C1  
 3378 C=CC#N.Cc1ncccc1Br>>Cc1ncccc1/C=C/C#N  
 3379 C=CC(=O)OC(C)(C)C.COc1ccc(Br)c(CC(C)=O)c1>>COc1ccc(/C=C/C(=O)OC(C)(C)C)c(CC(C)=O)c  
C=CC[C@ @H]1C[C@ @H]([C@ @H](O[Si](C(C)C)(C(C)C)C(C)C)c2ccc(OC)c(OC)c2)CO[C@H]1c1  
 3380 ccc(OC)c(OC)c1.COc1ccc(Br)cc1OC>>COc1ccc(/C=C/C[C@ @H]2C[C@ @H]([C@ @H](O[Si](C(C)  
C)(C(C)C)C(C)C)c3ccc(OC)c(OC)c3)CO[C@H]2c2ccc(OC)c(OC)c2)cc1OC  
 3381 C=CC(=O)OC.C=CC[C@ @H](O)c1cccc(Br)c1>>C=CC[C@ @H](O)c1cccc(/C=C/C(=O)OC)c1  
 3382 C=Cc1ccc(N)cc1.COc1ccc(Br)cc1>>COc1ccc(/C=C/c2ccc(N)cc2)cc1  
C=Cc1ccc(NC(=O)OC(C)(C)C)cc1.O=C(OC[C@H]1O[C@ @H](n2cc(I)c(=O)[nH]c2=O)C[C@ @H]1  
 3383 OC(=O)c1cccc1)c1cccc1>>CC(C)(C)OC(=O)Nc1ccc(/C=C/c2cn([C@H]3C[C@H](OC(=O)c4ccccc  
4)[C@ @H](COC(=O)c4ccccc4)O3)c(=O)[nH]c2=O)cc1  
 3384 C=C[C@ @H](O[Si](C)(C)C(C)(C)C)[C@ @H](Cc1cccc1)[C@ @H](C(C(I)=C/CO)O[Si](C)(C)C(C)(  
C)C>>C=C1/C(=C\CO)C[C@ @H](O[Si](C)(C)C(C)(C)C)[C@H](Cc2ccccc2)[C@ @H]1O[Si](C)(C)C  
 3385 C=Cc1ccc(OC)cc1.Cc1ncc(-c2ccc(Cl)cc2)n1C>>COc1ccc(/C=C/c2ccc(-c3cnc(C)n3C)cc2)cc1  
C=C[C@H]1C[C@H]2CC[C@ @H](C(=O)OC)N2C(=O)[C@ @](Cc2ccccc2)(NC(=O)OCc2ccccc2)[C  
 3386 @H]1OC(C)=O.O=[N+][O-  
]c1ccc(Br)cc1>>COC(=O)[C@ @H]1CC[C@ @H]2C[C@H](/C=C/c3ccc([N+](=O)[O-  
1)cc3)[C@H](OC(C)=O)C@1(Cc3ccccc3)(NC(=O)OCc3ccccc3)C(=O)N12  
 3387 C=CC(=O)OC(C)(C)C.Fc1ccc(CNc2ccc(Br)cn2)cc1>>CC(C)(C)OC(=O)/C=C/c1ccc(NCc2ccc(F)cc2)n  
 3388 C=CC(=O)OC.FS(F)(F)(F)c1ccc(I)cc1>>COC(=O)/C=C/c1ccc(S(F)(F)(F)F)cc1  
 3389 C=CC(=O)OC.Cn1c(=O)oc2cc(Br)cn21>>COC(=O)/C=C/c1cnc2c(c1)oc(=O)n2C  
 3390 C=C(NC(C)=O)C(=O)OC.CC(=O)c1ccc(Br)cc1>>COC(=O)/C=C/c1ccc(C(C)=O)cc1)NC(C)=O  
C=Cc1cccc1.C[Si](C)(C)[Si](C)(C)C1[Si](C)(C)[Si](C)(C)C(c2ccc(I)cc2)[Si](C)(C)[Si]1(C)C>>C[Si]  
 3391 (C)(C)[Si](C)(C)C1[Si](C)(C)[Si](C)(C)C(c2ccc(/C=C/c3ccccc3)cc2)[Si](C)(C)[Si]1(C)C  
 3392 C=CCC(CcBr)c1cc2ccccc2o1>>C=C1CCC(c2cc3ccccc3o2)C1  
 3393 C=CS(=O)(=O)F.CCc1ccc(I)cc1>>CCc1ccc(/C=C/S(=O)(=O)F)cc1  
 3394 C=CC(=O)OC(C)(C)C.COC(OC)c1cc2c(cc1Br)OCO2>>COC(OC)c1cc2c(cc1/C=C/C(=O)OC(C)(C)C  
)OCO2  
 3395 C=CCc1cc(Cl)c2ccncc2c1OCc1ccc(F)cc1Br>>C=C1Cc2cc(Cl)c3ccncc3c2OCc2ccc(F)cc21  
 3396 C=CSc1cccc1.O=[N+][O-]c1ccc(Br)cc1>>O=[N+][O-]c1ccc(/C=C/Sc2ccccc2)cc1  
 3397 C=CC(=O)OCC.Cc1cc(F)c(CN(C)C)cc1Br>>CCOC(=O)/C=C/c1cc(CN(C)C)c(F)cc1C  
 3398 C=CC(=O)OC.OCc1cc(-c2ccc(Br)cc2)cc(C23CC4CC(C(C4)C2)C3)c1O>>COC(=O)/C=C/c1ccc(-  
c2cc(CO)c(O)c(C34CC5CC(C(C5)C3)C4)c2)cc1  
 3399 C=CC(C)(C)O.Nc1cccc(I)c1>>CC(C)(O)/C=C/c1cccc(N)c1  
 3400 C=CC(C)(C)O.FC(F)(F)c1ccc(Br)cc1>>CC(C)(O)/C=C/c1ccc(C(F)(F)F)cc1  
C=Cc1ccc2c(c1)c1cccc1n2CCCCCCCC.CCCCCCCN1c2ccc(I)cc2c2cc(C=O)ccc21>>CCCCCCCCN  
 3401 1c2ccccc2c2cc(/C=C/c3ccc4c(c3)c3cc(C=O)ccc3n4CCCCCCCC)ccc21  
C=C(NC(C)=O)C(=O)OC.CC(=O)Oc1cc(C(C)C)c(I)c(C(C)C)c1>>COC(=O)/C=C/c1c(C(C)C)cc(OC(  
 3402 C)=O)cc1C(C)C)NC(C)=O  
 3403 C=CC(=O)OC.O=[N+][O-]c1ccc2cc(Br)cn2c1>>COC(=O)/C=C/c1cnc2cc([N+](=O)[O-])ccc2c1  
 3404 C=CC(O)CCCC.Clc1ccc(I)cc1>>CCCCC(O)/C=C/c1ccc(Cl)cc1  
 3405 C=CC(N)=O.CCc1cccc1Br>>CCc1cccc1/C=C/C(N)=O  
 3406 C=C/C=C/c1cccc1.CCOC(=O)C(F)(F)I>>CCOC(=O)C(F)(F)/C=C/C=C/c1cccc1  
 3407 C=C(NC(C)=O)C(=O)OC.CCOC(=O)c1cc2c(Br)cccc2[nH]1>>CCOC(=O)c1cc2c(/C=C(\NC(C)=O)C(  
=O)OC)cccc2[nH]1  
 3408 C=Cc1cccc1.CC(C)N(C(=O)Oc1ccc(Br)cc1)C(C)C>>CC(C)N(C(=O)Oc1ccc(/C=C/c2ccccc2)cc1)C(  
C=CC(=O)O[C@H]1C[C@ @H](C)CC[C@ @H]1C(C)C.COc1cc(Br)c(C(=O)c(OC)c1>>COc1cc(/C=C/  
 3409 C(=O)O[C@H]2C[C@ @H](C)CC[C@ @H]2C(C)C)c(C=O)c(OC)c1  
 3410 Br1cnc2nc(-c3ccccc3)oc2c1.C=CC(=O)OC>>COC(=O)/C=C/c1cnc2nc(-c3ccccc3)oc2c1  
 3411 C=CCCCC(C(=O)OC)C(=O)OC.Ic1cccc1>>COC(=O)C(CCCC/C=C/c1cccc1)C(=O)OC  
 3412 C=CC(=O)O.COC(=O)c1ccc(I)cc1>>COC(=O)c1ccc(/C=C/C(=O)O)cc1  
 3413 C=Cc1cccc1.Cc1cc(Br)ccc1N>>Cc1cc(/C=C/c2ccccc2)ccc1N  
 3414 C=CC(OCC)OCC.O=Cc1cc2c(cc1Br)OCO2>>CCOC(/C=C/c1cc2c(cc1C=O)OCO2)OCC

3415 C=CC(=O)OCC.O=c1oc2ceccc2cc1Br>>CCOC(=O)/C=C/c1cc2ceccc2oc1=O  
3416 C=Cc1ceccc1.Ic1c(COCc2ceccc2)nnn1Cc1ceccc1>>C(=C/c1c(COCc2ceccc2)nnn1Cc1ceccc1)\c1ceccc  
3417 C=C.CCOP(=O)(Cc1ccc(Br)cc1)OCC>>C=Cc1ccc(CP(=O)(OCC)OCC)cc1  
3418 C=CCC(C)N(C)C(=O)OC(C)(C)C.COc1ccc(Br)cn1>>COc1ccc(/C=C/CC(C)N(C)C(=O)OC(C)(C)C)c  
C=Cc1nn(C2CCCCO2)c2nc(-  
3419 c3ccc(O)cc3)cc(C(=O)N3CCN(C(=O)OC(C)(C)C)CC3)c12.O=C1CCCN1c1ceccc(I)c1>>CC(C)(C)OC(  
=O)N1CCN(C(=O)c2ccc(-c3ccc(O)cc3)nc3c2c(/C=C/c2ceccc(N4CCCC4=O)c2)nn3C2CCCCO2)CC1  
3420 C=CC(=O)OC.Cc1ccc2nc3c(cc2c1)c(I)c(-c1ceccc1)c1sccc13>>COC(=O)/C=C/c1c(-  
c2ceccc2)c2sccc2c2nc3ccc(C)cc3cc12  
3421 C=CC(=O)OC(C)(C)C.Cc1nc(I)ccc1OCc1ceccc1>>Cc1nc(/C=C/C(=O)OC(C)(C)C)ccc1OCc1ceccc1  
3422 C=CC(=O)OC.Ic1ccc2ncnc(Oc3ceccc3)c2c1>>COC(=O)/C=C/c1ccc2ncnc(Oc3ceccc3)c2c1  
3423 C=CC(=O)OCC.O=c1cc(-c2ceccc2)oc2ccc(Br)cc12>>CCOC(=O)/C=C/c1ccc2oc(-  
C=CC(=O)OC.NS(=O)(=O)c1ccc(-  
3424 c2cn(S(=O)(=O)c3ceccc3)c3ncc(Br)cc23)cc1>>COC(=O)/C=C/c1cnc2c(c1)c(-  
c1ccc(S(N)(=O)=O)cc1)cn2S(=O)(=O)c1ceccc1  
3425 C=CC(=O)O.Clc1ceccc1>>O=C(O)/C=C/c1ceccc1  
3426 C=CC(=O)OC.COC(=O)c1cc(Br)c2ceccc2n1>>COC(=O)/C=C/c1cc(C(=O)OC)nc2ceccc12  
3427 C=C(c1cc(OC)c(OC)c(OC)c1)c1oc2cc(OC)c(I)cc2c1C.C=CC(=O)OCC>>C=C(c1cc(OC)c(OC)c(OC)c  
1)c1oc2cc(OC)c(/C=C/C(=O)OCC)cc2c1C  
3428 C=C(Br)CO[Si](C)(C)C(C)(C)C.C=CC(=O)OC>>C=C(/C=C/C(=O)OC)CO[Si](C)(C)C(C)(C)C  
3429 C=CC(=O)OCCCC.COc1ccc2ncc(F)c(Br)c2n1>>CCCCOC(=O)/C=C/c1c(F)nc2ccc(OC)nc12  
C=Cc1nc2c(N)ncnc2n1[C@H]1C[C@H](O[Si](C)(C)C(C)(C)C)[C@@H](CO[Si](C)(C)C(C)(C)C)O1.  
3430 Cc1ccc(I)cc1>>Cc1ccc(/C=C/c2nc3c(N)ncnc3n2[C@H]2C[C@H](O[Si](C)(C)C(C)(C)C)[C@@H](C  
O[Si](C)(C)C(C)(C)C)O2)cc1  
Br1cc2ceccc2c2ceccc12.C=Cc1nc2c(N)ncnc2n1[C@H]1C[C@H](O[Si](C)(C)C(C)(C)C)[C@@H](C  
3431 O[Si](C)(C)C(C)(C)C)O1>>CC(C)(C)[Si](C)(C)OC[C@H]1O[C@@H](n2c(/C=C/c3cc4ceccc4c4cecc  
c34)nc3c(N)ncnc32)C[C@@H]1O[Si](C)(C)C(C)(C)C  
3432 Br1ccc(/C=C/c2ccc(N(c3ceccc3)c3ceccc3)cc2)cc1.C=Cc1cncnc1>>C(=C/c1ccc(/C=C/c2ccc(N(c3ccc  
cc3)c3ceccc3)cc2)cc1)\c1cncnc1  
3433 C=CC(=O)OC(C)(C)C.CCOC(=O)/C=C/c1cc(Br)cc(Oc2ccnc2)c1>>CCOC(=O)/C=C/c1cc(/C=C/C(=O)  
OC(C)(C)C)cc(Oc2ccnc2)c1  
3434 C=Cc1ccc(OC)c(Nc2nc(Nc3ccc(N4CCN(C)CC4)c(Br)c3)nc2Cl)c1>>COc1ccc2cc1Nc1nc(nc1Cl)Nc  
1ccc(N3CCN(C)CC3)c(c1)/C=C\2  
3435 C=CC1(O)CCC1.Ic1ceccc2ceccc12>>OC1(/C=C/c2ceccc3ceccc23)CCC1  
3436 C=CC(=O)OCC.O=C1c2ccc(Br)cc2CN1CC(F)(F)F>>CCOC(=O)/C=C/c1ccc2c(c1)CN(CC(F)(F)F)C2  
3437 C=Cc1cc2c(mn1)Oc1ceccc1O2.Fc1cc(F)cc(Br)c1>>Fc1cc(F)cc(/C=C/c2cc3c(mn2)Oc2ceccc2O3)c1  
3438 C=C(C(=O)OCC)C(O)c1cc2ceccc2n1Cc1ceccc1>>CCOC(=O)/C1=C/c2ceccc2Cn2c(cc3ceccc32)C1O  
3439 C=CS(N)(=O)=O.CCc1cc(Br)cc(C(=O)c2ceccc2)c1>>CCc1cc(/C=C/S(N)(=O)=O)cc(C(=O)c2ceccc2)  
3440 C=CC(=O)OC(C)(C)C.COC(=O)c1cc2c(Oc3ccc(Br)cc3)cncc2s1>>COC(=O)c1cc2c(Oc3ccc(/C=C/C(=O)  
OC(C)(C)C)cc3)cncc2s1  
3441 C=CC(=O)OCc1ceccc1.Cc1noc(C)c1-c1cnc2c(I)cn(S(=O)(=O)c3ceccc3)c2c1>>Cc1noc(C)c1-  
c1cnc2c(/C=C/C(=O)OCc3ceccc3)cn(S(=O)(=O)c3ceccc3)c2c1  
3442 Br1cccs1.C=CCO>>C=C(CO)c1cccs1  
3443 C=CC(=O)OC.CC(C)(C)OC(=O)N1CCC2(CC1)NC(=O)c1cc(Br)ccc1O2>>COC(=O)/C=C/c1ccc2c(c1  
)C(=O)NC1(CCN(C(=O)OC(C)(C)C)CC1)O2  
3444 C=Cc1ccc(OC)cc1.Nc1ceccc1Br>>COc1ccc(/C=C/c2ceccc2N)cc1  
3445 C=CC(=O)OCC.O=C1Nc2ccc(Br)cc2C1=O>>CCOC(=O)/C=C/c1ccc2c(c1)C(=O)C(=O)N2  
3446 C=Cc1ceccc1.COc1cc(Br)c(C=O)c(OC)c1>>COc1cc(/C=C/c2ceccc2)c(C=O)c(OC)c1  
3447 C=C[Si](C)(C)C.CC1(C)OC(=O)c2c(cccc2OS(=O)(=O)C(F)(F)F)O1>>CC1(C)OC(=O)c2c(/C=C/[Si](  
C)(C)C)cccc2O1  
3448 C=CC(=O)CCCC.Cc1ccc(Br)cc1>>CCCCC(=O)/C=C/c1ccc(C)cc1  
3449 C=Cc1ceccc(Cl)c1.O=S(=O)(c1ceccc1)C(F)(F)Br>>O=S(=O)(c1ceccc1)C(F)(F)/C=C/c1ceccc(Cl)c1  
3450 C=CC(=O)NC1CCc2ceccc21.Cc1cn(-c2ccc(Br)cc2C#N)cn1>>Cc1cn(-  
c2ccc(/C=C/C(=O)NC3CCc4ceccc43)cc2C#N)cn1  
3451 Br1ceccc2ceccc12.C=CP(=O)(c1ceccc1)C(C)(C)C>>CC(C)(C)P(=O)/C=C/c1ccc2ceccc12)c1ceccc1  
3452 C=CC(N)=O.CC(=O)c1ccc(I)cc1>>CC(=O)c1ccc(/C=C/C(N)=O)cc1  
3453 C=CC(=O)OCC.O=[N+](O-)\c1ccc(Br)cc1>>CCOC(=O)/C=C/c1ccc([N+](=O)[O-])cc1  
3454 C=Cc1ccc(C)cc1.Cc1c(Br)c(=O)oc2cc(N)ccc12>>Cc1ccc(/C=C/c2c(C)c3ccc(N)cc3oc2=O)cc1  
3455 C=CCN(CCI)S(=O)(=O)c1ccc(C)cc1>>C=C1CCN(S(=O)(=O)c2ccc(C)cc2)C1  
3456 C=CCCN(C(=O)c1ceccc1)c1ceccc1Br>>C=C1CCCN(C(=O)c2ceccc2)c2ceccc21  
3457 C=Cc1ccc(S(=O)(=O)c2ceccc2F)cn1.Cc1cc(F)ccc1I>>Cc1cc(F)ccc1/C=C/c1ccc(S(=O)(=O)c2ceccc2F

3458 C=Cc1cccc(OC)c1.IC1CCCCC1>>COc1cccc(/C=C/C2CCCCC2)c1  
3459 C=COCCCC.O=c1cc(Br)c2ccc(Cl)cc2o1>>CCCCO/C=C/c1cc(=O)oc2cc(Cl)ccc12  
3460 C=C[C@H]1OC(C)(C)O[C@H]1CCCCC.CC(C)(C)OC(=O)CCCC(=O)c1cccc1Br>>CCCC[C@@H]  
11OC(C)(C)O[C@@H]1/C=C/c1cccc1C(=O)CCCC(=O)OC(C)(C)C  
3461 C=CCn1ccn1.CC(=O)OCC1Cn2c3cccc3c3c4c(c5c6cc(Br)ccc6n(c5c32)C1)C(=O)N(C(C)=O)C4>>C  
C(=O)OCC1Cn2c3cccc3c3c4c(c5c6cc(/C=C/Cn7ccnc7)ccc6n(c5c32)C1)C(=O)N(C(C)=O)C4  
3462 C=Cc1ccc(OC)c(OC)c1.O=C(Nc1cccc1I)C1CCCCC1>>COc1ccc(/C=C/c2cccc2NC(=O)C2CCCCC2  
)cc1OC  
3463 C=CC(=O)N(CC)CC.Cn1nc(Br)c2cccc21>>CCN(CC)C(=O)/C=C/c1nn(C)c2cccc12  
3464 C=CC(C)(C)CC(=O)OC.COc1ccc(I)cc1>>COC(=O)CC(C)(C)/C=C/c1ccc(OC)cc1  
3465 C=CC(=O)OCC.O=Cc1cc(Cl)ccc1Br>>CCOC(=O)/C=C/c1ccc(Cl)cc1C=O  
3466 C=Cc1cccc1.Cc1cc(C)c(OS(=O)(=O)C(F)(F)F)c(C)c1>>C=C(c1cccc1)c1c(C)cc(C)cc1C  
3467 C=CC(=O)OCC.Nc1ccc(Br)nc1I>>CCOC(=O)/C=C/c1nc(Br)ccc1N  
3468 C=CC(=O)OC.CO[C@H]1O[C@H](COC(C)=O)[C@H](OC(C)=O)C=C1I>>COC(=O)/C=C/C1=C[C  
@@H](OC(C)=O)[C@@H](COC(C)=O)O[C@@H]1OC  
3469 C=CC(=O)OCC.Fc1ccc(Br)c(C2OCCCO2)c1>>CCOC(=O)/C=C/c1ccc(F)cc1C1OCCCO1  
3470 C=C(C)C(=O)OC.CC(=O)c1cccc(Br)c1>>COC(=O)/C(C)=C/c1cccc(C(C)=O)c1  
3471 C=Cc1cccc(C=O)c1.CN1CCN(c2cc3c(cc2NS(C)=O)=O)c(I)nn3C2CCCCO2)CC1>>CN1CCN(c2cc3c  
(cc2NS(C)=O)=O)c(/C=C/c2cccc(C=O)c2)nn3C2CCCCO2)CC1  
3472 C=Cc1cccc1.COC(=O)Cn1c(=O)c(Cl)nc2cccc21>>COC(=O)Cn1c(=O)c(/C=C/c2cccc2)nc2cccc21  
3473 C=Cc1ccc(C#N)cc1.OCCCC(Br)C(F)(F)F>>N#Cc1ccc(/C=C/C(CCCO)C(F)(F)F)cc1  
3474 C=Cc1n[nH]c2cc([C@@H]3C[C@@]34C(=O)Nc3ccc(OC)cc34)ccc12.CN1CCN(c2ccc(Br)cc2)CC1>  
>COc1ccc2c(c1)[C@]1(C[C@H]1c1ccc3c(/C=C/c4ccc(N5CCN(C)CC5)cc4)n[nH]c3c1)C(=O)N2  
3475 C=Cc1cccc1.O=[N+](=[O-])c1cccc(Br)c1>>O=[N+](=[O-])c1cccc(/C=C/c2cccc2)c1  
3476 C=CC(=O)OC.COc1cc(Br)c2c3c1O[C@H]1[C@@H](O[Si](C)(C)C(C)(C)C)C=C[C@@H]4[C@@H]  
(C2)N(C)CC[C@@]341>>COC(=O)/C=C/c1cc(OC)c2c3c1C[C@@H]1[C@H]4C=C[C@H](O[Si](C)(  
C)C(C)(C)C)[C@H](O2)[C@]34CCN1C  
3477 C=CC#N.Cc1c(Br)ccc2c1nnn2C>>Cc1c(/C=C/C#N)ccc2c1nnn2C  
3478 C=CCOC(C)=O.COC(=O)c1ccc(I)cc1>>COC(=O)c1ccc(/C=C/COC(C)=O)cc1  
3479 C=CC#N.CCOC(=O)/C=C/c1ccc(I)cc1C>>CCOC(=O)/C=C/c1ccc(/C=C/C#N)cc1C  
3480 C=Cc1ccc([N+](=O)[O-])cc1.Oc1ccc(/N=N/c2ccc(Br)cc2)cc1>>O=[N+](=[O-  
)c1ccc(/C=C/c2ccc(/N=N/c3ccc(O)cc3)cc2)cc1  
3481 C=CCO.Fc1ccc(Br)cc1>>C=C(CO)c1ccc(F)cc1  
3482 C=CC(=O)OCCCC.CC(C)=CBr>>CCCCOC(=O)/C=C/C=C(C)C  
3483 C=Cc1cccc1.CCCCOC(=O)/C=C/c1cccc(Cl)c1>>CCCCOC(=O)/C=C/c1cccc(/C=C/c2cccc2)c1  
3484 Brc1ccc(/C=C/c2cccc2)cc1.C=C[Si](C)(C)c1cccc1>>C[Si](C)(C)/C=C/c1ccc(/C=C/c2cccc2)cc1)c1cc  
ccn1  
3485 C=CCOc1cccc1.CC(C)c1ccc(I)cc1>>CC(C)c1ccc(/C=C/COc2cccc2)cc1  
3486 C=CC(=O)O.O=[N+](=[O-])c1cccc1Cl>>O=C(O)/C=C/c1cccc1[N+](=O)[O-]  
3487 C=Cc1cccc([N+](=O)[O-]  
)c1.O=C1C(O)=C(I)C(=O)c2cccc21>>O=C1C(O)=C(/C=C/c2cccc([N+](=O)[O-  
3488 C=Cc1ccc(C(C)(C)C)cc1.C[Si](C)(C)Cl>>CC(C)(C)c1ccc(/C=C/[Si](C)(C)C)cc1  
3489 C=C1CC(c2ccc(Cl)cc2)OC1=O.Fc1cccc1I>>O=C1OC(c2ccc(Cl)cc2)C/C1=C/c1cccc1F  
3490 C=C[C@H](NC(=O)OC(C)(C)C)[C@@H](O)[C@H](C)C(=O)NCC(=O)N[C@H](C)C(=O)Nc1cc(OC  
c2cccc2)ccc1I>>C[C@@H]1C(=O)NCC(=O)N[C@H](C)C(=O)Nc2cc(OCc3cccc3)ccc2/C=C/[C@H  
1(NC(=O)OC(C)(C)C)[C@H]1O  
3491 C=CC(C)(C)O.COc1cc(C=O)c(Br)cc1OCc1cccc1>>COc1cc(C=O)c(/C=C/C(C)(C)O)cc1OCc1cccc1  
3492 C=C[C@H]1O[C@H](OC)[C@H](OCc2cccc2)[C@@H](OCc2cccc2)[C@@H]1OCc1ccc2cccc2c1  
.O=c1cc(-c2cccc2)oc2ccc(Br)cc12>>CO[C@H]1O[C@H](/C=C/c2ccc3oc(-  
c4cccc4)cc(=O)c3c2)[C@@H](OCc2ccc3cccc3c2)[C@H](OCc2cccc2)[C@H]1OCc1cccc1  
3493 C=CC(=O)OC(C)(C)C.Ic1enn(C(c2cccc2)(c2cccc2)c2cccc2)c1>>CC(C)(C)OC(=O)/C=C/c1enn(C(  
c2cccc2)(c2cccc2)c2cccc2)c1  
3494 C=CC(=O)OCC.CC(C)(C)OC(=O)NCCOc1cc(C#N)ccc1I>>CCOC(=O)/C=C/c1ccc(C#N)cc1OCCNC(  
=O)OC(C)(C)C  
3495 C=Cc1cccc1.CCOC(=C(Br)c1cccc1)C(F)(F)F>>CCOC(=C(/C=C/c1cccc1)c1cccc1)C(F)(F)F  
3496 C=CC(=O)OC.Cc1cc(N[C@H]2C[C@@H](C)CC(C)(C)C2)c([N+](=O)[O-  
)cc1Br>>COC(=O)/C=C/c1cc([N+](=O)[O-])c(N[C@H]2C[C@@H](C)CC(C)(C)C2)cc1C  
3497 C=CC(=O)OCC.O=[N+](=[O-])c1ccc(-c2ccncc2Br)cc1>>CCOC(=O)/C=C/c1ncccc1-  
c1ccc([N+](=O)[O-])cc1  
3498 C=CC(=O)OC(C)(C)C.COCOc1ccc(I)nc1Cl>>COCOc1ccc(/C=C/C(=O)OC(C)(C)C)nc1Cl  
3499 C=CC(=O)OC.CC(C)=CCc1cc(I)ccc1O>>COC(=O)/C=C/c1ccc(O)c(CC=C(C)C)c1

3500 C=CC#N.O=[N+](O)c1ccc(Br)cc1>>N#C/C=C/c1ccc([N+](=O)[O-])cc1  
3501 C=CCN(C(=O)OC(C)(C)C(=O)OC(C)(C)C.O=Cc1ccc(Br)cc1>>CC(C)(C)OC(=O)N(C/C=C/c1ccc(C=O)cc1)C(=O)OC(C)(C)C  
C=C1C(=O)O[C@H]2[C@H]1CCC(=C)[C@@H]1C[C@H](OC(C)=O)C(=C)[C@H]21.Cc1ccc(I)c([N  
3502 +](=O)[O-])c1>>C=C1CC[C@H]2/C=C/c3ccc(C)cc3[N+](=O)[O-  
]C(=O)O[C@@H]2[C@H]2C(=C)[C@@H](OC(C)=O)C[C@@H]12  
3503 C=CC(=O)OC.Oc1ccc2cc(Br)ccc2c1>>COC(=O)/C=C/c1ccc2ccc(O)ccc2c1  
3504 C=Cc1cccc1.Nc1ccc(Br)cc1I>>Nc1ccc(Br)cc1/C=C/c1cccc1  
3505 C=COCCCC.Cc1c(Br)c(=O)n(C2CCCC2)c2nc(Nc3ccc(N4CCN(C(=O)OC(C)(C)C)CC4)cn3)ccc12>>  
C=C(OCCCC)c1c(C)c2enc(Nc3ccc(N4CCN(C(=O)OC(C)(C)C)CC4)cn3)nc2n(C2CCCC2)c1=O  
3506 C=CC(=O)OCC.Cc1cc(N)ccc1Br>>CCOC(=O)/C=C/c1cnc(N)cc1C  
3507 C=CC(C)=O.IC1=CO[C@H](COCc2cccc2)[C@H](OCc2cccc2)[C@@H]1OCc1cccc1>>CC(=O)/C  
=C/C1=CO[C@H](COCc2cccc2)[C@H](OCc2cccc2)[C@@H]1OCc1cccc1  
C=CC(=O)OCCC.C[C@@]12C[C@@]34C=C(Sc5cccc(I)c5)C(=O)[C@@](C)(CCC(=O)Nc5c(O)ccc(C(  
3508 =O)O)c5O)[C@@H]3[C@H](C[C@H]1C4)O2>>CCOC(=O)/C=C/c1cccc(SC2=C[C@]34C[C@H  
]5C[C@H](O[C@@]15(C)C3)[C@H]4[C@@](C)(CCC(=O)Nc3c(O)ccc(C(=O)O)c3O)C2=O)c1  
3509 C=CCc1ccc2c(c1)OCO2.CS(=O)(=O)c1ccc(CCl)cc1>>C=C(Cc1ccc(S(C)(=O)=O)cc1)Cc1ccc2c(c1)O  
3510 C=CC(C)(C)O.O=c1c(Br)c(-c2cccc2)oc2cccc12>>CC(C)(O)/C=C/c1c(-c2cccc2)oc2cccc2c1=O  
3511 C=CCC(=O)O.CCOC(=O)c1ccc(I)cc1>>CCOC(=O)c1ccc(/C=C/CC(=O)O)cc1  
3512 C=CCC1(C(=O)OC)CCN1Cc1cccc1Br>>C=C1CC2(C(=O)OC)CCN2Cc2cccc21  
3513 C=Cc1cccc(Cl)c1.Cc1ccc2c(-c3cccc3)c(Br)c(=O)oc2c1>>Cc1ccc2c(-  
c3cccc3)c(/C=C/c3cccc(Cl)c3)c(=O)oc2c1  
3514 C=Cc1cccc1.Cc1ccc(OS(=O)(=O)C(F)(F)F)cc1>>C=C(c1cccc1)c1ccc(C)cc1  
3515 C=CCC(CCBr)(C(=O)OCC)C(=O)OCC>>C=C1CCC(C(=O)OCC)(C(=O)OCC)C1  
3516 C=CC(C)(C)O.O=c1oc2cccc2cc1Br>>CC(C)(O)/C=C/c1cc2cccc2oc1=O  
3517 C=Cc1cccn1.CN(C(=O)c1cccc1)c1ccc2c(c1)[nH]c(=NC(=O)c1ccc(Br)s1)n2CCC(N)=O>>CN(C(=O)  
c1cccc1)c1ccc2c(c1)[nH]c(=NC(=O)c1ccc(/C=C/c3cccn3)s1)n2CCC(N)=O  
3518 C=Cc1ccc(OC)c(OC)c1.COc1ccc2c(c1)cc(C#N)c1ccc(Br)cc12>>COc1ccc2c(c1)cc(C#N)c1ccc(/C=C/c  
3ccc(OC)c(OC)c3)cc12  
C=C(NC(=O)OCC[Si](C)(C)C(=O)OC.CC(C)(C)OC(=O)N/C(=C)c1ccc(-  
3519 c2ccc(I)cc2)cc1)C(=O)OCc1cccc1>>COC(=O)/C=C/c1ccc(-  
c2ccc(/C=C/NC(=O)OC(C)(C)C(=O)OCc3cccc3)cc2)cc1)NC(=O)OCC[Si](C)(C)C  
3520 C=CC=O.Fc1ccc(Br)cc1>>O=C/C=C/c1ccc(F)cc1  
3521 C=CC(=O)OC.Cc1ccc(S(=O)(=O)n2ccc3cc(I)ccc32)cc1>>COC(=O)/C=C/c1ccc2c(ccn2S(=O)(=O)c2c  
cc(C)cc2)c1  
3522 C=Cc1cccc(O)c1.COc1ccc(I)c(OC)c1>>COc1ccc(/C=C/c2cccc(O)c2)c(OC)c1  
3523 C=Cc1ccc([N+](=O)[O-])cc1.FC(F)(F)Oc1cccc(I)c1>>O=[N+](O-  
]c1ccc(/C=C/c2cccc(OC(F)(F)F)c2)cc1  
3524 C=CC(=O)OC.COC(=O)c1c([Si](C)(C)C)c(I)cn1S(=O)(=O)N(C)C>>COC(=O)/C=C/c1cn(S(=O)(=O)  
N(C)C)c(C(=O)OC)c1[Si](C)(C)C  
3525 C=CC(F)(F)F.Fc1cccc(Br)c1>>Fc1cccc(/C=C/C(F)(F)F)c1  
3526 C=C[C@H](CC(=O)OC)[C@@H](COC(C)=O)NC(=O)OC(C)(C)C.Ic1cccc1>>COC(=O)C[C@@H](  
/C=C/c1cccc1)[C@@H](COC(C)=O)NC(=O)OC(C)(C)C  
3527 C=C[C@H](O)[C@@H](O)COCc1ccc(OC)cc1.Ic1cccc1>>COc1ccc(COC[C@H](O)[C@@H](O)/C  
=C/c2cccc2)cc1  
C=Cc1ccc2c(c1)Sc1cccc1N2CCCCCCCCCCCCCCCCC.CCCCCCCCCCCCCCCCCCn1c2ccc(I)cc2c2cc(  
3528 C=O)ccc21>>CCCCCCCCCCCCCCCCN1c2cccc2Sc2cc(/C=C/c3ccc4c(c3)c3cc(C=O)ccc3n4CCCC  
CCCCCCCCCCCC)ccc21  
C=CC(=O)OC.COc1ccc2c(c1)CCN(c1ccc(F)cc1)C2(C)c1ccc(Br)c(C)c1>>COC(=O)/C=C/c1ccc(C2(C  
3529 )c3ccc(OC)cc3CCN2c2ccc(F)cc2)cc1C  
C=Cc1ccc2ccc(Cl)cc2n1.CC(C)(O)c1cccc1CC[C@@H](SCC1(CC#N)CC1)c1cccc(Br)c1>>CC(C)(O)  
3530 c1cccc1CC[C@@H](SCC1(CC#N)CC1)c1cccc(/C=C/c2ccc3ccc(Cl)cc3n2)c1  
C=CC(=O)OC.COc1ccc2c(c1)CCN(c1ccc(C(C)C)c(F)c1)C2(C)c1ccc(Br)cc1>>COC(=O)/C=C/c1ccc(  
3531 C2(C)c3ccc(OC)cc3CCN2c2ccc(C(C)C)c(F)c2)cc1  
Br1cccc2cccc12.C=C1C[C@H]2[C@@H]3CCc4cc(OC)ccc4[C@H]3CC[C@]2(C)C1=O>>COc1ccc  
3532 2c(c1)CC[C@@H]1[C@@H]2CC[C@]2(C)C(=O)/C=C/c3cccc4cccc34)C[C@@H]12  
C=COCCCC.FC(F)(F)c1ccc(Cl)cc1>>C=C(OCCCC)c1ccc(C(F)(F)F)cc1  
3533 C=C(NC(C)=O)C(=O)OC.Fc1cccc1Br>>COC(=O)/C=C/c1cccc1F)NC(C)=O  
3534 C=Cc1cccc1.O=[N+](O-)]c1ccc(I)cc1>>O=[N+](O-)]c1ccc(/C=C/c2cccc2)cc1  
3535 C=CC(=O)OCCCC.COc1ccc2ccc(F)c(Br)c2n1>>CCCCOC(=O)/C=C/c1c(F)ccc2ccc(OC)nc12

C=Cc1cccc1C(F)(F)F.CCS(=O)(=O)c1ccc(Cl)nc1-  
 3537 c1nc2cc(C(F)(F)F)ncc2n1C>>CCS(=O)(=O)c1ccc(/C=C/c2ccccc2C(F)(F)F)nc1-  
 c1nc2cc(C(F)(F)F)ncc2n1C  
 3538 C=Cc1cccc1.CCCCN1c2ccc(Br)cc2Sc2cc(-c3nc4ccccc4n3-  
 c3ccccc3)ccc21>>CCCN1c2ccc(/C=C/c3ccccc3)cc2Sc2cc(-c3nc4ccccc4n3-c3ccccc3)ccc21  
 3539 C=CCCNc1cccc1I>>C=C1CCCNc2ccccc21  
 3540 O=C(/C=C/Oc1cccc1-c1cccc1Br)c1cccc1>>O=C(/C=C1/Oc2ccccc2-c2ccccc21)c1cccc1  
 3541 C=CC(=O)OC.O=Cc1secc1Br>>COC(=O)/C=C/c1ccsc1C=O  
 3542 C=Cc1cccc1.Nc1cccc(Br)n1>>Nc1cccc(/C=C/c2ccccc2)n1  
 3543 Brc1cccc1.C=CC(=C)C>>C=C(C)/C=C/c1cccc1  
 3544 C=CC(=O)OC(C)(C)C.COC(=O)c1c(N)c(Br)cc2c1CCCC2>>COC(=O)c1c(N)c(/C=C/C(=O)OC(C)(C)  
 C)cc2c1CCCC2  
 3545 Brc1nn(C2CCCCO2)c2ccccc12.C=CC(=O)OCCCC>>CCCCOC(=O)/C=C/c1nn(C2CCCCO2)c2ccccc1  
 3546 C=C.Cc1ccc(Br)cc1>>C=Cc1ccc(C)cc1  
 3547 CC[C@H]1CCC=CN1/C(=N/[C@H](COC)C(C)C)c1cccc1.Ic1cccc1>>CC[C@H]1CCC(c2cccc  
 c2)=CN1/C(=N/[C@H](COC)C(C)C)c1cccc1  
 3548 C=CC(N)=O.Ic1cccc1>>NC(=O)/C=C/c1cccc1  
 3549 C=Cc1cncnc1.COC(=O)/C=C/c1ccc(Cl)cc1>>COC(=O)/C=C/c1ccc(/C=C/c2cncnc2)cc1  
 3550 C=CS(=O)c1cccc1.O=[N+](O-)]c1ccc(Br)cc1>>O=[N+](O-)]c1ccc(/C=C/S(=O)c2ccccc2)cc1  
 3551 C=CC(=O)OC.CC1(C)CC(=C(c2ccc3c(cnn3C3CCCCO3)c2)c(F)cc(Br)cc2F)CC(C)(C)O1>>COC(=O)  
 /C=C/c1cc(F)c(C(=C2CC(C)(C)OC(C)(C)C2)c2ccc3c(cnn3C3CCCCO3)c2)c(F)c1  
 3552 Brc1ccc(NCCCc2ccccc2)nc1.C=CC(=O)OC(C)(C)C>>CC(C)(C)OC(=O)/C=C/c1ccc(NCCCc2ccccc2)  
 3553 C=CC(=O)OC.COC(=O)c1cccc(Br)c1>>COC(=O)/C=C/c1cccc(C(=O)OC)c1  
 3554 C=CC(=O)OCCCC.Fc1ccc(Br)c(F)c1>>CCCCOC(=O)/C=C/c1ccc(F)cc1F  
 3555 C=CC(O)C1CCCCC1.I/C=C/C=C/CCCCOCc1cccc1>>OC(/C=C/C=C/C=C/CCCCOCc1cccc1)C1C  
 CCCC1  
 3556 C=CC(=O)OCC.Nc1cncnc1I>>CCOC(=O)/C=C/c1cncnc1N  
 3557 Brc1ccsc1.C=CC(=O)OCC>>CCOC(=O)/C=C/c1ccsc1  
 3558 C=Cc1cncnc1.CC(=O)Nc1ccc(Br)cc1>>CC(=O)Nc1ccc(/C=C/c2cncnc2)cc1  
 3559 C=CS(=O)c1cccc1.Cc1cccc1Br>>Cc1cccc1/C=C/S(=O)c1cccc1  
 3560 C=CC(=O)OCCCC.Cc1cccc(Br)c1>>CCCCOC(=O)/C=C/c1cccc(C)c1  
 3561 C=CC(=O)OCCCC.CC(=O)O[IH2](OC(C)=O)c1c(C)cc(C)cc1C>>CCCCOC(=O)/C=C/c1c(C)cc(C)cc  
 3562 Brc1ccc2c(c1)OCCOCCOCCOCCOCCO2.C=C>>C=Cc1ccc2c(c1)OCCOCCOCCOCCOCCO2  
 3563 C=CC(=O)OC(C)(C)C.CCCCCC(=O)Oc1ccc(I)cc1CC=C(C)C>>CCCCC(=O)Oc1ccc(/C=C/C(=O)O  
 C(C)(C)C)cc1CC=C(C)C  
 3564 C=Cc1ccc(C)cc1.COc1cccc(Br)c1>>COc1cccc(/C=C/c2ccc(C)cc2)c1  
 3565 C=CCNC(=O)OC(C)(C)C.FC(F)(F)c1ccc(Cl)cc1>>C=C(CNC(=O)OC(C)(C)C)c1ccc(C(F)(F)F)cc1  
 3566 C=Cc1cncnc1.CN(C(=O)c1cccc1)c1ccc2c(c1)[nH]c(=NC(=O)c1ccc(Br)s1)n2CCC(N)=O>>CN(C(=O)  
 )c1cccc1)c1ccc2c(c1)[nH]c(=NC(=O)c1ccc(/C=C/c3cncnc3)s1)n2CCC(N)=O  
 3567 C=Cc1ccc(O)cc1.Oc1cc(O)cc(I)c1>>Oc1ccc(/C=C/c2cc(O)cc(O)c2)cc1  
 3568 C=Cc1ccc(OC)cc1.N#CCc1ccc(Br)cc1>>COc1ccc(/C=C/c2ccc(CC#N)cc2)cc1  
 3569 Brc1ccc2ccccc2c1.C=CS(N)(=O)=O>>NS(=O)(=O)/C=C/c1ccc2ccccc2c1  
 3570 C=Cc1cccc1.Cc1ncnc2c1c(I)cn2[C@@H]1O[C@H](CO)[C@@H](O)[C@@]1(C)F>>Cc1ncnc2c1c(/  
 C=C/c1cccc1)cn2[C@@H]1O[C@H](CO)[C@@H](O)[C@@]1(C)F  
 3571 C=CC(=O)N(CC)CC.O=Cc1ccc(Cl)cc1>>CCN(CC)C(=O)/C=C/c1ccc(C=O)cc1  
 3572 C=CC(=O)OCCCC.Nc1cccc1I>>CCCCOC(=O)/C=C/c1cccc1N  
 3573 C=C[Si](C)(C)c1cccn1.CC(=O)c1ccc(/C=C/c2ccc(Br)cc2)cc1>>CC(=O)c1ccc(/C=C/c2ccc(/C=C/[Si](  
 C)(C)c3cccn3)cc2)cc1  
 3574 C=C[C@H](O[Si](C)(C)C(C)(C)C)[C@H](CCCO[Si](c1cccc1)(c1cccc1)C(C)(C)C)[C@@H](C/C(I)  
 =C/CO)O[Si](C)(C)C(C)(C)C>>C=C1/C(=C\CO)C[C@@H](O[Si](C)(C)C(C)(C)C)[C@@H](CCCO[  
 Si](c2ccccc2)(c2ccccc2)C(C)(C)C)[C@H]1O[Si](C)(C)C(C)(C)C  
 3575 Brc1cccn1.C=C>>C=Cc1cccn1  
 3576 C=CC(=O)OC(C)(C)C.COc1ccc2nc(S(=O)(=O)c3ccccc(Br)c3)ccc2c1>>COc1ccc2nc(S(=O)(=O)c3ccccc  
 (/C=C/C(=O)OC(C)(C)C)c3)ccc2c1  
 3577 C=CC(=O)OC.Fc1ccc(Br)cn1>>COC(=O)/C=C/c1ccc(F)nc1  
 3578 C=COCCCC.COc1cccc2cc(Br)ccc12>>C=C(OCCCC)c1ccc2c(OC)cccc2c1  
 3579 C=CC(=O)OCCCC.COc1ccc(I)cc1OC>>CCCCOC(=O)/C=C/c1ccc(OC)c(OC)c1  
 3580 Brc1cccc2ccccc12.C=CCC(C)C(=O)OCC>>CCOC(=O)C(C)C/C=C/c1cccc2ccccc12  
 3581 C=Cc1cccc1.ClC12CC3CC(CC(C3)C1)C2>>C=C(C12CC3CC(CC(C3)C1)C2)\c1cccc1  
 3582 C=CS(=O)(=O)F.O=Cc1cccc1I>>O=Cc1cccc1/C=C/S(=O)(=O)F



C=CC1(C(=O)O)COCCOC1.CC(C)[C@H](O)C(=O)N[C@@H](C)C(=O)N1CCC[C@@H](C(=O)N[  
3583 C@H](C)c2ccc3ccc(Br)cc3n2)N1>>CC(C)[C@H](O)C(=O)N[C@@H](C)C(=O)N1CCC[C@@H](C(  
=O)N[C@H](C)c2ccc3ccc(/C=C/C4(C(=O)O)COCCOC4)cc3n2)N1  
3584 C=CC(=O)OC.CCOc1noc(C)c1I>>CCOc1noc(C)c1/C=C/C(=O)OC  
Br1cnc2cccc2c1.C=CCO/N=C1/[C@H](C)[C@H]2OC(=O)O[C@]2(C)[C@@H](CC)OC(=O)[C@H  
3585 ](C)[C@@H](O)[C@H](C)[C@@H](O)[C@H]2O[C@H](C)C[C@H](N(C)C)[C@H]2OC(C)=O)[C@]  
(C)(OC)C[C@H]1C>>CC[C@H]1OC(=O)[C@H](C)[C@@H](O)[C@H](C)[C@@H](O)[C@H]2O[C  
@H](C)C[C@H](N(C)C)[C@H]2OC(C)=O)[C@](C)(OC)C[C@@H](C)/C(=N\OC/C=C/c2cnc3cccc  
3c2)I[C@H](C)I[C@H]2OC(=O)O[C@]112C  
3586 C=Cc1cccn1.Cc1c(Nc2c(I)cncc2C#N)ccc2[nH]ccc12>>Cc1c(Nc2c(C#N)cncc2/C=C/c2cccn2)ccc2[n  
H]ccc12  
3587 Br1cccn1.C=CC(=O)CC>>CCC(=O)/C=C/c1cccn1  
3588 C=Cc1ccc(OC(C)=O)cc1.Ic1ccccc1>>CC(=O)Oc1ccc(/C=C/c2ccccc2)cc1  
3589 C=CC(=O)OC(C)(C)C.O=C1CCNc2cc(Br)cn2N1>>CC(C)(C)OC(=O)/C=C/c1cnc2c(c1)NCCC(=O)N  
3590 C=Cc1ccccc1.CCOC(=O)CCc1cc(-c2ccc(Br)cc2)ccc1S(=O)(=O)c1ccccc1>>CCOC(=O)CCc1cc(-  
c2ccc(/C=C/c3ccccc3)cc2)ccc1S(=O)(=O)c1ccccc1  
3591 Br1ccccc2cccc12.CC(=O)/C=C/CC(NS(=O)(=O)c1ccc(C)cc1)c1ccccc1>>CC(=O)/C=C/CC(NS(=O)(  
=O)c1ccc(C)cc1)c1ccccc1)c1ccccc2cccc12  
3592 C=CC(=O)OC(C)(C)C.O=C1Nc2ccccc2O/C1=C\c1ccccc1Br>>CC(C)(C)OC(=O)/C=C/c1ccccc1/C=C  
1\Oc2ccccc2NC1=O  
3593 C=CC(=O)OC(C)(C)C.Cc1cc(Br)cc(C)c1N>>Cc1cc(/C=C/C(=O)OC(C)(C)C)cc(C)c1N  
3594 C=CCCCCCC.Fc1ccc(CCl)c(F)c1>>C=C(CCCCCC)Cc1ccc(F)cc1F  
3595 C=CC(=O)OCC.Ic1ccccc1C#CCOC1CCCCO1>>CCOC(=O)/C=C/c1ccccc1C#CCOC1CCCCO1  
3596 Br1ccccc2cccc12.C=CC(F)(F)F>>FC(F)(F)/C=C/c1ccccc2cccc12  
3597 C=C[C@@H](CCCC)OC1CCCCO1.COC(=O)CCCC1=C(I)CCC1=O>>CCCC[C@H]/C=C/C1=  
C(CCCCC(=O)OC)C(=O)CC1)OC1CCCCO1  
3598 C=CC(=O)OCC.CCN(CCC1OCCO1)C(=O)c1ccc(Br)cc1>>CCOC(=O)/C=C/c1ccc(C(=O)N(CC)CCC  
2OCCO2)cc1  
3599 C=Cc1ccc(OC)cc1.CCCCC(I)C(F)(F)C(=O)OCC>>CCCCC(/C=C/c1ccc(OC)cc1)C(F)(F)C(=O)OCC  
3600 C=CC(=O)OC.CCCc1nc2c(C)cc(C)nc2n1Cc1ccc(Br)cc1>>CCc1nc2c(C)cc(C)nc2n1Cc1ccc(/C=C/C(  
=O)OC)cc1  
3601 C=Cc1cccn1.C[C@H](COc1cnc(Cl)c(I)c1)NC(=O)OC(C)(C)C>>C[C@H](COc1cnc(Cl)c(/C=C/c2cc  
ncc2)c1)NC(=O)OC(C)(C)C  
3602 C=Cc1ccc(OC)cc1.O=C(N1CCOCC1)C(F)(F)Br>>COc1ccc(/C=C/C(F)(F)C(=O)N2CCOCC2)cc1  
3603 C=Cc1ccc(C=O)cc1.CCN(CC)/N=N/c1ccc(I)cc1>>CCN(CC)/N=N/c1ccc(/C=C/c2ccc(C=O)cc2)cc1  
3604 C=CC(=O)OCC.Cc1ccccc(I)c1C>>CCOC(=O)/C=C/c1ccccc(C)c1C  
3605 C=CCCCC1=C(I)C(=O)C(C(C)C)CC1>>C=C1CCCC2=C1C(=O)C(C(C)C)CC2  
3606 C=CC(=O)Nc1ccccc1Cl.COc1ccc2c(=O)c(I)ccc2c1>>COc1ccc2c(=O)c(/C=C/C(=O)Nc3ccccc3Cl)ccc  
3607 C=CC(=O)O.COc1cc(/C=C/c2ccc(Br)cc2)cc(OC)c1O>>COc1cc(/C=C/c2ccc(/C=C/C(=O)O)cc2)cc(O  
C)c1O  
C=Cc1ccc(OC)cc1.COc1ccc(-  
3608 c2cc(=O)c3c(OC)cc(OC)c(I)c3o2)cc1>>COc1ccc(/C=C/c2c(OC)cc(OC)c3c(=O)cc(-  
c4ccc(OC)cc4)oc23)cc1  
3609 C=CC(=O)OC(C)(C)C.CCOC(=O)c1ccccc1I>>CCOC(=O)c1ccccc1/C=C/C(=O)OC(C)(C)C  
3610 C=COCCCC.Cc1ccccc(Br)c1>>C=C(OCCCC)c1ccccc(C)c1  
3611 C=Cc1cc(OC)cc(OC)c1.CCOC(=O)c1ccc(I)cc1>>CCOC(=O)c1ccc(/C=C/c2cc(OC)cc(OC)c2)cc1  
C=CC(C)(C)[C@]1(OC)O[C@H](C[C@@H](OCc2ccc(OC)cc2)[C@@H](C)O[Si](C)(C)C(C)(C)C)/  
3612 C(=C\C(=O)OC)[C@@H]1OC(C)=O.CC[Si](CC)(CC)O[C@@H](CCO)Cc1ccccc(Cc2cccc(Br)c2)c1>>  
CC[Si](CC)(CC)O[C@@H](CCO)Cc1ccccc(Cc2cccc(/C=C/C(C)(C)[C@]3(OC)O[C@H](C[C@@H](O  
Cc4ccc(OC)cc4)[C@@H](C)O[Si](C)(C)C(C)(C)C)/C(=C\C(=O)OC)[C@@H]3OC(C)=O)c2)c1  
3613 C=CC(=O)OC(C)(C)C.C[Si](C)(C)c1ccccc(Br)n1>>CC(C)(C)OC(=O)/C=C/c1ccccc([Si](C)(C)C)n1  
3614 C=CC(N)=O.Ic1cccn1>>NC(=O)/C=C/c1cccn1  
C=Cc1ccc(C(=O)N[C@@H](CCSC)C(=O)OC)c(-  
3615 c2ccccc2)c1.O=C(c1ccccc1)c1cccn1Br>>COC(=O)[C@H](CCSC)NC(=O)c1ccc(/C=C/c2cnc2C(  
=O)c2ccccc2)cc1-c1ccccc1C  
3616 C=CC(=O)OCC.Cc1[nH]cc2c(=O)n(-c3ccc(Cl)cc3)nc-2c1Br>>CCOC(=O)/C=C/c1c2nn(-  
c3ccc(Cl)cc3)c(=O)c-2c[nH]c1C  
3617 C=CC(=O)OC.COc1cc(Br)cc2cc(-c3ccc4c(c3)OCO4)oc12>>COC(=O)/C=C/c1cc(OC)c2oc(-  
c3ccc4c(c3)OCO4)cc2c1  
3618 C=C(C)C(=O)OCC.Cn1ccc(I)cc1=O>>CCOC(=O)/C(C)=C/c1cmn(C)c(=O)c1  
3619 C=CCCCCCCCC.FC(F)(F)c1ccc(Br)cc1>>CCCCCCCC/C=C/c1ccc(C(F)(F)F)cc1

3620 C=Cc1nnn(C)n1.Cc1ccc(I)cc1>>Cc1ccc(/C=C/c2nnn(C)n2)cc1  
3621 C=Cc1ccc(C)cc1.Cc1cc(I)cc(C)c1O>>Cc1ccc(/C=C/C#N)cc1CC(C)C  
3622 C=CC#N.COc1ccc(I)cc1CC(C)C>>COc1ccc(/C=C/C#N)cc1CC(C)C  
3623 C=CS(=O)(=O)F.O=Cc1ccc(I)o1>>O=Cc1ccc(/C=C/S(=O)(=O)F)o1  
C=CC[C@H](CC(=O)OC(C)(C)C)(=O)N[C@H](C(=O)NC(C)(C)C).Cc1cc(OS(=O)(=O)C(F)(F)F)  
3624 ccc1-c1cccc1>>CNC(=O)[C@@H](NC(=O))[C@H](C/C=C/c1ccc(-  
c2ccccc2)c(C)c1)CC(=O)OC(C)(C)C(C)(C)C  
3625 C=Cc1cccc1.Clc1ccc(I)cc1>>Clc1ccc(/C=C/c2ccccc2)cc1  
3626 C=CC(=O)N(C(C)C)C(C)C.Cc1ccc(I)s1>>Cc1ccc(/C=C/C(=O)N(C(C)C)C(C)C)s1  
3627 C=CC(=O)OC(C)(C)C.COC(=O)c1ccc(Br)o1>>COC(=O)c1ccc(/C=C/C(=O)OC(C)(C)C)o1  
3628 C=CC(C)(C)O.Cc1cc(O[Si](C)(C)C(C)(C)C)c1cc1O[Si](C)(C)C(C)(C)C>>Cc1cc(O[Si](C)(C)C(C)(C)C)  
)C)/C=C/C(C)(C)O)cc1O[Si](C)(C)C(C)(C)C  
3629 C=CC(C)=O.Cc1cc(C)c([I+]c2c(C)cc(C)cc2C)c(C)c1>>CC(=O)/C=C/c1c(C)cc(C)cc1C  
3630 C=CCCCl.Cc1cccn1-c1c(OS(=O)(=O)C(F)(F)F)ccc2ccccc12>>C=C(OCCCl)c1ccc2ccccc2c1-  
c1neccc1C  
3631 C=CC#N.COc1cc(I)ccc1N>>COc1cc(/C=C/C#N)ccc1N  
3632 C=Cc1ccc(C)cc1.IC1CCCCC1>>Cc1ccc(/C=C/C2CCCCC2)cc1  
3633 C=CC(=O)O.O=C(O)c1cccc(I)e1>>O=C(O)/C=C/c1cccc(C(=O)O)e1  
3634 C=CN1CCCCCCC1=O.O=S(=O)(Oc1cccc1Br)C(F)(F)F>>C=C(c1cccc1Br)N1CCCCCCC1=O  
3635 C=CC(=O)OC.COC(=O)c1ccc(Br)c(C(=O)OC)n1>>COC(=O)/C=C/c1ccc(C(=O)OC)nc1C(=O)OC  
3636 C=Cc1ccc(/C=C/C2cccn2C(=O)OC(C)(C)C)cc1.CCOC(=O)c1c(C)c(C)c1n1C(=O)OC(C)(C)C>>CCO  
C(=O)c1c(C)c(C)c(/C=C/C2ccc(/C=C/C3cccn3C(=O)OC(C)(C)C)cc2)n1C(=O)OC(C)(C)C  
3637 C=CN1C(=O)c2ccccc2C1=O.OC(c1ccc(C(F)(F)F)cc1)c1ccnec1Br>>O=C1c2ccccc2C(=O)N1/C=C/c1  
cnccc1C(O)c1ccc(C(F)(F)F)cc1  
3638 C=CCN(Cc1cccc1)Cc1cc2cc(C)ccc2nc1Cl>>C=C1CN(Cc2ccccc2)Ce2cc3cc(C)ccc3nc21  
3639 C=Cc1cccc([N+](=O)[O-])c1.Cc1ccc(Br)cc1>>Cc1ccc(/C=C/C2cccc([N+](=O)[O-])c2)cc1  
3640 C=Cc1ccc(C(F)(F)F)cc1.CCCOC(=O)/C=C/c1ccc(Cl)cc1>>CCOC(=O)/C=C/c1ccc(/C=C/C2ccc(C  
(F)(F)F)cc2)cc1  
3641 Bre1ccc(I)cc1.C=Cc1ccc(CP(=O)(OC(C)(C)C)OC(C)(C)C)cc1>>CC(C)(C)OP(=O)(Cc1ccc(/C=C/C2ccc  
c(Br)cc2)cc1)OC(C)(C)C  
3642 C=CC(=O)OC(C)(C)C.CC(C)(C)OC(=O)CCOCc1cc(OCc2ccccc2)ccc1Br>>CC(C)(C)OC(=O)/C=C/c1  
ccc(OCc2ccccc2)cc1COCCC(=O)OC(C)(C)C  
3643 C=CC(F)(F)C(F)(F)C(F)(F)C(F)(F)C(F)(F)C(F)(F)C(F)(F)C(F)(F)C(F)(F)C(F)(F)C(F)(F)FC(F)(F)c1ccc(Br)  
cc1>>FC(F)(F)c1ccc(/C=C/C(F)(F)C(F)(F)C(F)(F)C(F)(F)C(F)(F)C(F)(F)C(F)(F)C(F)(F)C(F)(F)C(F)(F)C(F)(F))  
F)cc1  
3644 C=CC(=O)Nc1cccc(C)c1.N#Cc1c(-c2ccccc2)cc(-c2ccccc2)nc1Cl>>Cc1cccc(NC(=O)/C=C/c2nc(-  
c3ccccc3)cc(-c3ccccc3)c2C#N)c1  
3645 C=C(NC(=O)OC(C)(C)C)(=O)OCc1cccc1.CC(C)(C)OC(=O)N/C(=C\c1ccc(Br)cc1)C(=O)OCc1cccc  
c1>>CC(C)(C)OC(=O)N/C(=C\c1ccc(/C=C(\NC(=O)OC(C)(C)C)(=O)OCc2ccccc2)cc1)C(=O)OCc1c  
3646 C=CC.ClCc1cccc(Oc2ccccc2)c1>>C=C(C)Cc1cccc(Oc2ccccc2)c1  
3647 C=CC(C)=O.CCCCCC1=C(I)C1(F)F>>CCCCCC1=C(/C=C/C(C)=O)C1(F)F  
3648 C=CC(C)(C)O.COC(=O)[C@H](Cc1c(I)n(C(=O)OC(C)(C)C)c2ccccc12)N(C(=O)OC(C)(C)C)(=O)O  
C(C)(C)C>>COC(=O)[C@H](Cc1c(/C=C/C(C)(C)O)n(C(=O)OC(C)(C)C)c2ccccc12)N(C(=O)OC(C)(  
C)C)C(=O)OC(C)(C)C  
3649 C=CC(=O)N1CCOCC1.[C][C@H]1COCc2nc3c(N)nc4cc(Br)ccc4c3n21>>C[C@H]1COCc2nc3c(N)nc4  
cc(/C=C/C(=O)N5CCOCC5)ccc4c3n21  
3650 C=Cc1cccc1.Oc1ccc(O)c(Br)c1>>Oc1ccc(O)c(/C=C/C2ccccc2)c1  
3651 C=CCn1c(N(c2ccc(F)cc2)S(=O)(=O)c2ccc(C)cc2)cc2ccccc21>>Cc1ccc(S(=O)(=O)N2c3ccc(F)cc3/  
=C\Cn3c2cc2ccccc23)cc1  
3652 C=CC(=O)OCCN(C)C.O=C(Nc1cccc(Cl)c1)c1cc(=O)c2cc(Br)ccc2o1>>CN(C)CCOC(=O)/C=C/c1ccc  
2oc(C(=O)Ne3cccc(Cl)c3)cc(=O)c2c1  
3653 C=CC(=O)OC(C)(C)C.CC(C)(C)O[C@H]1CC[C@H]2C=C(C3=C(Br)CC4(CC3)OCO4)CC[C@@]  
1C>>CC(C)(C)OC(=O)/C=C/C1=C(C2=[C@H]3CC[C@H](OC(C)(C)C)[C@@]3(C)CC2)CCC2(  
C1)OCCO2  
3654 C=CC(=O)OC(C)(C)C.FC(F)(F)c1cccc1I>>CC(C)(C)OC(=O)/C=C/c1cccc1C(F)(F)F  
3655 C=CC[C@@](C)(C=C)c1cccc1.Ic1ceccc1>>C=C[C@](C)(C/C=C/c1cccc1)c1ceccc1  
3656 C=CCN(C)C(=O)C1(CC(=C)Br)CS/C(=C\c2ccccc2)C1=O>>C=C1CN(C)C(=O)C2(CS/C(=C\c3ccccc3  
)C2=O)CC1=C  
3657 C=CCCCCCC.O=S(=O)(OC1=CCCCe2ccccc21)C(F)(F)F>>C=C(CCCCCC)C1=CCCCe2ccccc21  
3658 C=CC(C)=O.Cn1c(=O)oc2cc(Br)cnc21>>CC(=O)/C=C/c1cnc2c(c1)oc(=O)n2C

3659 C=CN(C)C(C)=O.COc1ccc2c(c1)CCC=C2OS(=O)(=O)C(F)(F)F>>C=C(C1=CCCc2cc(OC)ccc21)N(C)C(C)=O  
 3660 C=CCCC(=O)OCC.O=S(=O)(Oc1ccc(C(=C2C3CCCC2CCC3)c2ccc(O)cc2)cc1)C(F)(F)F>>CCOC(=O)CC/C=C/c1ccc(C(=C2C3CCCC2CCC3)c2ccc(O)cc2)cc1  
 3661 Br1ccsc1.C=CS(N)(=O)=O>>NS(=O)(=O)/C=C/c1ccsc1  
 3662 C=CC(=O)OC.O=Cc1ccc([N+](=O)[O-])cc1Br>>COC(=O)/C=C/c1cc([N+](=O)[O-])ccc1C=O  
 3663 C=Cc1ccc2c(c1)OCO2.FC1(F)Oc2ccc(Br)cc2OC1(F)F>>FC1(F)Oc2ccc(/C=C/c3ccc4c(c3)OCO4)cc2OC1(F)F  
 3664 C=Cc1ccc(OC(=O)OC(C)(C)C)cc1.O=S(=O)(c1ccc(Br)cc1)N(CCO)CCO>>CC(C)(C)OC(=O)Oc1ccc(/C=C/c2ccc(S(=O)(=O)N(CCO)CCO)cc2)cc1  
 3665 C=CC(=O)OC.O=c1cc(I)cnn1Cc1cccc1>>COC(=O)/C=C/c1cnn(Cc2ccccc2)c(=O)c1  
 3666 C=CC(=O)OCC.CCN(Cc1cc(=O)n2c(Br)c(C)sc2n1)c1ccc(F)cc1>>CCOC(=O)/C=C/c1c(C)sc2nc(CN(CC)c3ccc(F)cc3)cc(=O)n12  
 3667 C=Cc1ccc(C(=O)OC)cc1.COc1ccc(I)cc1>>COC(=O)c1ccc(/C=C/c2ccc(OC)cc2)cc1  
 3668 C=CCN1cc([N+](=O)[O-])cn1.CCOC(=O)c1ccc(Br)cc1>>CCOC(=O)c1ccc(/C=C/CCn2cc([N+](=O)[O-])cn2)cc1  
 3669 C=Cc1cnc(C#N)c1Nc1ccc2[nH]ccc2c1C.COCCOc1ccc(Br)cc1OCCOC>>COCCOc1ccc(/C=C/c2cnc(C#N)c2Nc2ccc3[nH]ccc3c2C)cc1OCCOC  
 3670 C=CC(=O)O.O=S(=O)(Nc1ccc(I)cc1)c1ccsc1>>O=C(O)/C=C/c1ccc(NS(=O)(=O)c2ccsc2)cc1  
 3671 C=CC(N)=O.Fc1cc(Br)cc(C(F)(F)F)c1>>NC(=O)/C=C/c1cc(F)cc(C(F)(F)F)c1  
 3672 C=CC(=O)OC(C)(C)C.Cc1cc(Br)cnc1N>>Cc1cc(/C=C/C(=O)OC(C)(C)C)cnc1N  
 3673 C=CC(O)c1cccc1Br.COc1ccc(I)c(OC)c1OC>>COc1ccc(/C=C/C(O)c2ccccc2Br)c(OC)c1OC  
 3674 C=Cc1ccc(P(=O)(OCC)OCC)cc1.CCC1(CC)c2cc(Br)ccc2-c2ccc(N(c3ccccc3)c3ccccc3)cc21>>CCOP(=O)(OCC)c1ccc(/C=C/c2ccc3c(c2)C(CC)(CC)c2cc(N(c4ccccc4)c4ccccc4)ccc2-3)cc1  
 3675 C=Cc1ccc(N(c2ccc(OC)cc2)c2ccc(OC)cc2)cc1.Cc1ccc(Br)cc1>>COc1ccc(N(c2ccc(/C=C/c3ccc(C)cc3)cc2)c2ccc(OC)cc2)cc1  
 3676 C=Cc1cc(C)ccc1OS(=O)(=O)c1cccc1Br>>Cc1ccc2c(c1)/C=C/c1cccc1S(=O)(=O)O2  
 3677 C=C[Si](CC)(CC)CC.COC(=O)c1ccc(Br)cc1>>CC[Si](/C=C/c1ccc(C(=O)OC)cc1)(CC)CC  
 3678 C=CC#N.COc1cc(C#N)ccc1Oc1cccc(I)c1>>COc1cc(C#N)ccc1Oc1cccc(/C=C/C#N)c1  
 3679 C=CC(=O)OC(C)(C)C.O=C(c1ccc(I)cc1)c1ccnc1Cl>>CC(C)(C)OC(=O)/C=C/c1ccc(C(=O)c2ccnc2Cl)cc1  
 3680 C=CC(=O)O.Oc1cccc1I>>O=C(O)/C=C/c1cccc1O  
 3681 C=CC(=O)OC.COC(=O)c1cccc1I>>COC(=O)/C=C/c1cccc1C(=O)OC  
 3682 C=CP(=O)(O)O.Fc1cccc(F)c1I>>O=P(O)(O)/C=C/c1c(F)cccc1F  
 3683 C=Cc1ccc(OC)cc1.COc1cc(I)cc(OC)c1OC>>COc1ccc(/C=C/c2cc(OC)c(OC)c(OC)c2)cc1  
 3684 Br1ccc(I)cc1.C=Cc1ccc(Cl)cc1>>Clc1ccc(/C=C/c2ccc(Br)cc2)cc1  
 3685 C=CCNC(=O)OC(C)(C)C.O=C(c1cccc1)c1ccc(Cl)cc1>>C=C(CNC(=O)OC(C)(C)C)c1ccc(C(=O)c2cccc2)cc1  
 3686 C=Cc1cccc1.O=[N+](O-)]c1ccc(C(O)c2ccccc2I)cc1>>O=[N+](O-)]c1ccc(C(O)c2ccccc2)cc1  
 3687 C=CC(=O)OCC(CC)CCCC.COc1ccc(Br)cc1>>CCCC(CC)COC(=O)/C=C/c1ccc(OC)cc1  
 3688 C=CCN(Cc1ccc(F)cc1)Cc1cc2ccc(C)cc2nc1Cl>>C=C1CN(Cc2ccc(F)cc2)Cc2cc3ccc(C)cc3nc21  
 3689 C=CC(=O)OC.Cc1ccc(Cl)cc1>>COC(=O)/C=C/c1ccc(C)cc1  
 3690 Br1ccccc1.C=CC[C@H]1CCCN(C)C[C@H](OC(C)=O)[C@H](C)C[C@H](CC(OC)OC)[C@H](O)[C@@H]2O[C@H](C)[C@@H](O[C@H]3C[C@@](C)(O)[C@@H](OC(=O)CC)[C@H](C)O3)[C@H](N(C)C)[C@H]2OC(C)=O)[C@@H](OC)[C@H](OC(=O)CC)CC(=O)O1>>CCC(=O)O[C@H]1[C@H](C)O[C@@H](O[C@H]2[C@H](N(C)C)[C@@H](OC(C)=O)[C@H](O[C@@H]3[C@@H](OC)[C@H](OC(=O)CC)CC(=O)O[C@@H](C/C=C/c4ccccc4)CCCN(C)C[C@H](OC(C)=O)[C@H](C)C[C@@H]13CC(C)C)O[C@@H]1C@H2C1C@H(C)@H11(C)N  
 3691 C=C(C(=O)OC)N1CC[C@H](NC(=O)OCc2ccccc2)C1=O.Fc1c(Br)ccc2c(NC(c3ccccc3)(c3ccccc3)c3ccccc3)nc12>>COC(=O)/C=C/c1ccc2c(NC(c3ccccc3)(c3ccccc3)c3ccccc3)nc12c1F)N1CC[C@H](NC(=O)OCc2ccccc2)C1=O  
 3692 C=CC(=O)OCC.COC(=O)c1cccc1I>>CCOC(=O)/C=C/c1cccc1C(=O)OC  
 3693 C=CCC(=O)OC.Cc1ccc(CNc2ccc3c(Br)cccc3n2)o1>>COC(=O)C/C=C/c1cccc2nc(NCc3ccc(C)o3)ccc  
 3694 C=COCCCC.N#Cc1ccc(Br)cc1>>C=C(OCCCC)c1ccc(C#N)cc1  
 3695 C=CN(C)C(C)=O.CC(=O)c1ccc(Br)cc1>>C=C(c1ccc(C(C)=O)cc1)N(C)C(C)=O  
 3696 C=CC(N)=O.Cc1cc(F)ccc1Br>>Cc1cc(F)ccc1/C=C/C(N)=O  
 3697 Br1ccoc1.C=CS(=O)c1cccc1>>O=S(=O)/C=C/c1ccoc1)c1cccc1  
 3698 C=Cc1nnn(C)n1.N#Cc1cccc(Br)c1>>Cn1nnc(/C=C/c2cccc(C#N)c2)n1  
 3699 C=Cc1nnn(C)n1.COC(=O)c1cccc(Br)c1>>COC(=O)c1cccc(/C=C/c2nnn(C)n2)c1

3700 C=CC(=O)OCC.OCC1c(F)cc(Br)cc1F>>CCOC(=O)/C=C/c1cc(F)c(CO)c(F)c1  
3701 C=Cc1cccc1.Cc1ccc(S(=O)(=O)Cc2ccccc2I)cc1>>Cc1ccc(S(=O)(=O)Cc2ccccc2/C=C/c2ccccc2)cc1  
3702 C=Cc1cccc1Cl.COC(=O)c1cccc1I>>COC(=O)c1cccc1/C=C/c1cccc1Cl  
3703 C=Cc1ccc(F)cc1.N#CCCS(=O)(=O)c1ccc(Br)cc1>>N#CCCS(=O)(=O)c1ccc(/C=C/c2ccc(F)cc2)cc1  
3704 C=Cc1cccc(Cl)c1.CC(C)(C)Br>>CC(C)(C)/C=C/c1cccc(Cl)c1  
3705 C=CCCC(=O)OCC1cccc1.N#Cc1ccc(I)cc1C#N>>N#Cc1ccc(/C=C/CCC(=O)OCC2ccccc2)cc1C#N  
3706 C=CC(=O)OC(C)(C)C.O=C1CN(CCCN2CCOCC2)Cc2cc(Br)cnc2N1>>CC(C)(C)OC(=O)/C=C/c1cnc  
2c(c1)CN(CCCN1CCOCC1)CC(=O)N2  
3707 C=C1C(=O)O[C@@H]2C3=C(C)C(=O)C=C[C@]3(C)CC[C@H]12.Clc1ccc(I)cc1>>CC1=C2[C@H  
]3OC(=O)/C(=C/c4ccc(Cl)cc4)[C@@H]3CC[C@]2(C)C=CC1=O  
3708 Brclcccc(-c2ccccc2)c1.C=CC(=O)OCCCC>>CCCCOC(=O)/C=C/c1cccc(-c2ccccc2)c1  
3709 C=Cc1cccc1C.CCCCC(Br)C(F)(F)F>>CCCCC(/C=C/c1cccc1C)C(F)(F)F  
3710 C=CC(=O)O.O=S(=O)(Nc1ccc(I)cc1)c1cccc2ccccc12>>O=C(O)/C=C/c1ccc(NS(=O)(=O)c2ccccc3cccc  
c23)cc1  
3711 C=Cc1ccccc1.O=Cc1ccc2c(I)nn(C3CCCCO3)c2c1>>O=Cc1ccc2c(/C=C/c3ccccc3)nn(C3CCCCO3)c2  
3712 C=CC(=O)OC.Fc1ccc(C(=C(I)CC[Se]c2ccccc2)c2ccc(F)cc2)cc1>>COC(=O)/C=C/C(CC[Se]c1cccc1)  
=C(c1ccc(F)cc1)c1ccc(F)cc1  
3713 C=Cc1ccc(C)cc1.O=Cc1cc(C(F)(F)F)ccc1Br>>Cc1ccc(/C=C/c2ccc(C(F)(F)F)cc2C=O)cc1  
3714 C=Cc1ccccc1Br.O=[N+](=[O-])c1ccccc1I>>O=[N+](=[O-])c1ccccc1/C=C/c1ccccc1Br  
3715 C=Cc1cccc([N+](=O)[O-])c1.Oc1cccc1I>>O=[N+](=[O-])c1cccc(/C=C/c2ccccc2O)c1  
3716 C=CS(C)(=O)=O.CC(C)CCn1nc(-  
c2cccs2)c(O)c(C2=NS(=O)(=O)c3cc(I)ccc3N2)c1=O>>CC(C)CCn1nc(-  
3717 C=Cc1c2ccccc2cc2ccccc12.FC(F)(F)c1ccc(Br)cc1>>FC(F)(F)c1ccc(/C=C/c2c3ccccc3cc3ccccc23)cc1  
3718 C=Cc1ccccc1.COC(=O)c1cc(S(C)(=O)=O)c(Br)cc1C>>COC(=O)c1cc(S(C)(=O)=O)c(/C=C/c2ccccc2)  
cc1C  
3719 C=COCCCC.CNc1nc(C)c2cc(Br)c(=O)n(C3CCCC3)c2n1>>CCCCO/C=C/c1cc2c(C)nc(NC)nc2n(C2C  
CCC2)c1=O  
3720 COc1ccc(/C=C/C(=O)O/C(=C\I)c2ccc3ccccc3c2)cc1>>COc1ccc(/C=C2\C=C(c3ccc4ccccc4c3)OC2=O  
3721 C=C(C)C(=C)C.Cc1ccc(I)cc1>>C=C(C)C(C)=Cc1ccc(C)cc1  
3722 C=Cc1ccccc1.O=P(c1ccccc1)(c1ccccc1)c1sc2ccccc2c1I>>O=P(c1ccccc1)(c1ccccc1)c1sc2ccccc2c1/C=  
C/c1ccccc1  
3723 C=CC(=O)OC(C)(C)C.Ic1ccccc1>>CC(C)(C)OC(=O)/C=C/c1ccccc1  
3724 C=Cc1ccc(C(F)(F)F)cc1.CN(C(=O)c1ccccc1)c1ccc2c(c1)[nH]c(=NC(=O)c1ccc(Br)s1)n2CCC(N)=O>  
>CN(C(=O)c1ccccc1)c1ccc2c(c1)[nH]c(=NC(=O)c1ccc(/C=C/c3ccc(C(F)(F)F)cc3)s1)n2CCC(N)=O  
3725 C=C(NC(=O)OC(C)(C)C)C(=O)OC.Nc1ccc(I)cc1>>COC(=O)/C=C/c1ccc(N)cc1)NC(=O)OC(C)(C)C  
3726 C=CC(=O)OC.Cn1ccc2c(Br)cccc21>>COC(=O)/C=C/c1cccc2c1ccn2C  
3727 C=CNC(C)=O.CCOC(=O)/C=C(\C)OS(=O)(=O)C(F)(F)F>>C=C(NC(C)=O)/C(C)=C/C(=O)OCC  
3728 C=CC1(C(=O)OC)CCOCC1.C[C@H](NC(=O)OC(C)(C)C)c1ccc2ccc(Br)cc2n1>>COC(=O)C1(/C=  
C/c2ccc3ccc([C@H](C)NC(=O)OC(C)(C)C)nc3c2)CCOCC1  
3729 C=CC(=O)OCCCC.CCOC(=O)Nc1ccccc1C1=C(I)CCN1S(=O)(=O)c1ccc(C)cc1>>CCCCOC(=O)/C=  
C/C1=C(c2ccccc2NC(=O)OCC)N(S(=O)(=O)c2ccc(C)cc2)CC1  
3730 C/C(=N/O)c1ccc(Br)cc1.C=CC(=O)OC>>COC(=O)/C=C/c1ccc(/C(C)=N/O)cc1  
3731 C=CC(=O)N(C)Cc1oc2ccccc2c1C.CC1(C)C(=O)Nc2ncc(Br)cc21>>Cc1c(CN(C)C(=O)/C=C/c2cnc3c(  
c2)C(C)(C)C(=O)N3)oc2ccccc12  
3732 C=Cc1ccc(N(c2ccccc2)c2ccccc2)cc1.Cn1c2ccc(Br)cc2c2cc(C=O)ccc21>>Cn1c2ccc(C=O)cc2c2cc(/C=  
C/c3ccc(N(c4ccccc4)c4ccccc4)cc3)ccc21  
3733 Brclccc2c(c1)Sc1ccccc1N2.C=Cc1ccc(N)cc1>>Nc1ccc(/C=C/c2ccc3c(c2)Sc2ccccc2N3)cc1  
3734 C=COCCO.COc1ccccc1Br>>C=C(OCCO)c1ccccc1OC  
3735 C=CC(N)=O.Cc1cc(Br)cc(C)c1N>>Cc1cc(/C=C/C(N)=O)cc(C)c1N  
3736 C=Cc1cnccl.COc1ccc(I)cc1>>COc1ccc(/C=C/c2cnccl)cc1  
3737 C=C[Si](C)(C)c1ccccc1.CC(C)(C)c1ccc(Br)cc1>>CC(C)(C)c1ccc(/C=C/[Si](C)(C)c2ccccc2)cc1  
3738 C=CC(=O)OCC.COC(=O)c1cccc(I)c1>>CCOC(=O)/C=C/c1cccc(C(=O)OC)c1  
3739 C=Cc1ccc2ccccc2c1.COC(=O)c1cccc1I>>COC(=O)c1ccccc1/C=C/c1ccc2ccccc2c1  
3740 C=CC(=O)O.Fc1ccc(I)cc1>>O=C(O)/C=C/c1ccc(F)cc1  
3741 C=CC(=O)OC.Fc1ccc(Br)cc1>>COC(=O)/C=C/c1ccc(F)cc1  
3742 C=C(Br)CC1(C)Cc2ccccc2C1=O.C=CC(=O)OCC>>C=C(/C=C/C(=O)OCC)CC1(C)Cc2ccccc2C1=O  
C=Cc1cnccl.CCCCCCCCCCCCCOc1cc(/C=C/c2ccc(I)cc2)cc(OCCCCCCCCCCCCC)c1OCCCCCCCCC  
3743 CCCC>>CCCCCCCCCCCCCOc1cc(/C=C/c2ccc(/C=C/c3cnc3)cc2)cc(OCCCCCCCCCCCCC)c1OCCCC  
CCCCCCCCC

3744 C=CC(=O)OC.COC(=O)c1c(Br)ccc(NC(C)=O)c1[N+](=O)[O-]  
 ]>>COC(=O)/C=C/c1ccc(NC(C)=O)c([N+](=O)[O-])c1C(=O)OC  
 3745 C=CN1C(=O)c2cccc2C1=O.Cc1ccc(Cl)cc1>>Cc1ccc(/C=C/N2C(=O)c3cccc3C2=O)cc1  
 3746 C=Cc1cccc1.Fc1ccc(Cl)cc1>>Fc1ccc(/C=C/c2cccc2)cc1  
 3747 C=CC(=O)O.CN(c1ccc(I)cc1)S(=O)(=O)c1ccc(-  
 c2cccc2)cc1>>CN(c1ccc(/C=C/C(=O)O)cc1)S(=O)(=O)c1ccc(-c2cccc2)cc1  
 C=Cc1nc(C#N)c(C#N)n1CCCCC.CN(C)c1ccc(/C=C/c2ccc(N(c3ccc(I)cc3)c3ccc(/C=C/c4ccc(N(C)C)  
 3748 cc4)cc3)cc2)cc1>>CCCCCn1c(/C=C/c2ccc(N(c3ccc(/C=C/c4ccc(N(C)C)cc4)cc3)c3ccc(/C=C/c4ccc(  
 N(C)C)cc4)cc3)cc2)nc(C#N)c1C#N  
 3749 C=Cc1ccc(N(CCCCCCCCCCO)CCCCCCCCCCCCO)cc1.O=C(c1ccc(Br)cc1)C(F)(F)F>>O=C(c1ccc(/  
 C=C/c2ccc(N(CCCCCCCCCCO)CCCCCCCCCCCCO)cc2)cc1)C(F)(F)F  
 C=C[C@@H](O[Si](C)(C)C(C)(C)C)[C@@H](OCCCCO[Si](C)(C)C(C)(C)C)[C@@H](C(C)I)=C/CO)  
 3750 O[Si](C)(C)C(C)(C)C>>C=C1/C=C\C(CO)C[C@@H](O[Si](C)(C)C(C)(C)C)[C@@H](OCCCCO[Si](C)(C)  
 )C(C)(C)C)[C@@H]1O[Si](C)(C)C(C)(C)C  
 3751 C=CC(=O)OC.Oc1cc(-c2ccc(Br)cc2)cc(C23CC4CC(CC(C4)C2)C3)c1O>>COC(=O)/C=C/c1ccc(-  
 c2ccc(O)c(O)c(C34CC5CC(CC(C5)C3)C4)c2)cc1  
 3752 C=CC(=O)OC(C)(C)C.CC(C)(C)OC(=O)N1CCN(c2nnc3c(Br)cccc23)CC1>>CC(C)(C)OC(=O)/C=C/  
 c1cccc2c(N3CCN(C(=O)OC(C)(C)C)CC3)nnc12  
 CC(C)COC(=O)[C@@H](C)OC(=O)[C@@H](C/C=C1\CCN([13c]2[13cH][13cH][13cH][13cH][13c  
 3753 H]2)C1=O)Nc1cc(Cl)ccc1I>>CC(C)COC(=O)[C@@H](C)OC(=O)[C@@H]1C/C=C2/CCN([13c]3[13c  
 H][13cH][13cH][13cH][13cH]3)C2=O)c2ccc(Cl)cc2N1  
 3754 C=C1N=C(c2cccc2)[C@@H](C(C)C)N(C(=O)OC(C)(C)C)C1=O.Cc1cccc1I>>Cc1cccc1/C=C1\N=C(  
 c2cccc2)[C@@H](C(C)C)N(C(=O)OC(C)(C)C)C1=O  
 3755 C=CC(=O)OC.Cc1cc(C)c(C(=O)c2sc3cc(O)ccc3c2O)c2ccc(Br)cc2)c(C)c1>>COC(=O)/C=C/c1ccc(Oc2  
 c(C(=O)c3c(C)cc(C)cc3C)sc3cc(O)ccc23)cc1  
 3756 C=C(F)C(C)=O.Ic1cc2cccc2c2cccc12>>CC(=O)/C(F)=C/c1cc2cccc2c2cccc12  
 3757 Br1ccc([C@@H]2CCCCO2)cc1.C=CC(=O)OCC>>CCOC(=O)/C=C/c1ccc([C@@H]2CCCCO2)cc1  
 3758 C=CC(=O)OC.CC(=O)Nc1ccc(Br)cc1>>COC(=O)/C=C/c1ccc(NC(C)=O)cc1  
 3759 C=Cc1cccc1.CCOC(=O)c1c(OC)nn(C)c1I>>CCOC(=O)c1c(OC)nn(C)c1/C=C/c1cccc1  
 3760 C=CC(=O)OCC.Cn1c(Br)cccc1=O>>CCOC(=O)/C=C/c1cccc(=O)n1C  
 3761 C=Cc1ccc(N(c2cccc2)c2cccc2)cc1.N#CC(=C(c1cccc1)c1cccc1)c1ccc(Br)cc1>>N#CC(=C(c1cccc  
 1)c1cccc1)c1ccc(/C=C/c2ccc(N(c3cccc3)c3cccc3)cc2)cc1  
 3762 Br1cccs1.C=CC(F)(F)F>>FC(F)(F)/C=C/c1cccs1  
 3763 C=Cc1cc(Cl)c(C)cc1OCc1cccc1Br>>Cc1cc2c(cc1Cl)/C=C\c1cccc1CO2  
 3764 C=CC(N)=O.COc1cccc1I>>COc1cccc1/C=C/C(N)=O  
 3765 C=Cc1ccc(OC)cc1.FC(F)(F)C(F)(F)C(F)(F)C(F)(F)C(F)(F)C(F)(F)C(F)(F)C(F)(F)C(F)(F)C(F)(F)C(F)(F)Br>>COc1cc  
 c(/C=C/C(F)C(F)(F)C(F)(F)C(F)(F)C(F)(F)C(F)(F)C(F)(F)C(F)(F)C(F)(F)C(F)(F)C(F)(F)C(F)(F)cc1  
 3766 C=Cc1cccc1.Cl1ccnc1>>C(=C/c1ccnc1)\c1cccc1  
 3767 C=C[C@@H](CO[Si](C)(C)C(C)(C)C)NC(=O)OCc1cccc1.COc1ccc2cc(Br)ccc2c1>>COc1ccc2cc(/C  
 =C/[C@@H](CO[Si](C)(C)C(C)(C)C)NC(=O)OCc3cccc3)ccc2c1  
 3768 C=CCN(C(=O)OC(C)(C)C)C(=O)OC(C)(C)C.COC(=O)c1ccc(Cl)cc1>>COC(=O)c1ccc(/C=C/CN(C(=O)  
 )OC(C)(C)C)C(=O)OC(C)(C)C)cc1  
 3769 C=C(C)C(=O)OC(C)(C)C.N#Cc1ccc(Br)cc1N>>C/C=C\c1ccc(C#N)c(N)c1)C(=O)OC(C)(C)C  
 3770 C=Cc1cccc(Cl)c1.CN1CCN(c2cccc(Br)n2)CC1>>CN1CCN(c2cccc(/C=C/c3cccc(Cl)c3)n2)CC1  
 3771 C=CC(=O)OC.Cc1ccc(S(=O)(=O)n2cc(I)cn2)cc1>>COC(=O)/C=C/c1cnn(S(=O)(=O)c2ccc(C)cc2)c1  
 3772 C=CC(=O)O.O=S(=O)(Nc1ccc(I)cc1)c1cccc2ccnc12>>O=C(O)/C=C/c1ccc(NS(=O)(=O)c2cccc3cccn  
 c23)cc1  
 3773 C=Cn1nnc(-c2cccc2C#N)n1.Ic1cccc1>>N#Cc1cccc1-c1nnn(/C=C/c2cccc2)n1  
 3774 C=Cc1ccc(F)cc1.CCOC(=O)C(C)(C)Br>>CCOC(=O)C(C)(C)/C=C/c1ccc(F)cc1  
 3775 C=CC(N)=O.O=[N+][O-]c1ccc(I)cc1>>NC(=O)/C=C/c1cccc([N+](=O)[O-])c1  
 3776 C=CCc1cccc(F)c1N(C(=O)c1cccc1)S(=O)(=O)c1ccc(C)cc1>>C=C1Cc2cccc(F)c2N(S(=O)(=O)c2cc  
 c(C)cc2)C(=O)c2cccc21  
 3777 C=CCN1C(=O)c2cccc2C1=O.Fc1cc(Br)cc(F)c1F>>O=C1c2cccc2C(=O)N1C/C=C/c1cc(F)c(F)c(F)c  
 3778 C=CC(OCC)OCC.FC(F)(F)c1cccc(I)c1>>CCOC(/C=C/c1cccc(C(F)(F)F)c1)OCC  
 3779 C=CC(=O)OC(C)(C)C.COc1ccc(Br)cc1C=O>>COc1ccc(/C=C/C(=O)OC(C)(C)C)cc1C=O  
 3780 C=CCCCCCCCC.O=Cc1ccc(Br)cc1>>CCCCCCCCC/C=C/c1ccc(C=O)cc1  
 3781 C=CCC(C)C(=O)O.COc1ccc(I)cc1>>COc1ccc(/C=C/CC(C)C(=O)O)cc1  
 3782 C=CCN(C)C(=O)OC(C)(C)C.Cc1ccc(Cl)cc1>>Cc1ccc(/C=C/CN(C)C(=O)OC(C)(C)C)cc1  
 C=CCn1c(-  
 3783 c2ccc(Cl)cc2)nc2cccc2c1=O.O=C(CN1C(=O)COc2cccc21)c1ccc(Br)cc1>>O=C(CN1C(=O)COc2cc  
 ccc21)c1ccc(/C=C/Cn2c(-c3ccc(Cl)cc3)nc3cccc3c2=O)cc1

C=CC(=O)OC.C(F)(Br)=C/c1cccc1>>CCOC(=O)/C=C/C(F)=C/c1ccccc1  
C=CC(=O)OC.COc1ccc2c(c1)CCN(C)c1ccc(C(C)(C))cc1)C2(C)c1ccc(Br)cc1>>COC(=O)/C=C/c1ccc(  
C2(C)c3ccc(OC)cc3CCN2c2ccc(C(C)(C))cc2)cc1  
Brc1ccsc1.C=Cc1ccc(OC)cc1>>COe1ccc(/C=C/c2ccsc2)cc1  
C=Cc1cc(C)c(OCCCCC)c(C)c1.Cc1c(Br)c(=O)oc2ccccc12>>COCCCOCOe1c(C)cc(/C=C/c2c(C)e3cc  
ccc3oc2=O)cc1C  
C=Cc1ccc(OCOC)c(OCOC)c1.COCOc1ce(OS(=O)=(O)C(F)(F)F)cc(OCOC)c1C/C=C(\C)CCC=C(C)C  
>>COCOe1ccc(/C=C/c2cc(OCOC)c(C/C=C(\C)CCC=C(C)C)c(OCOC)c2)cc1OCOC  
C=CC(=O)N(C(C)C)C(C)C.Clc1ccc(I)cc1>>CC(N)N(C(=O)/C=C/c1ccc(Cl)cc1)C(C)C  
C=CC(C)(O)CCC=C(C)C.Cc1ccc(O)c(Br)c1>>CC(C)=CCCC(C)(O)/C=C/c1cc(C)ccc1O  
Brc1ccc(-c2ccccc2)cc1.C=CC(=O)OCC>>CCOC(=O)/C=C/c1ccc(-c2ccccc2)cc1  
C=Cc1ccc(Cl)cc1.CS(=O)=(O)c1ccc(Br)cc1>>CS(=O)=(O)c1ccc(/C=C/c2ccc(Cl)cc2)cc1  
C=C[C@H]1C[C@@H](C)[C@H](C(=O)OC)N2C(=O)[C@@](Cc2ccccc2)(NC(=O)OCc2ccccc2)[  
C@H]1OC(C)=O.O=[N+][([O-]  
)]c1ccc(Br)cc1>>COC(=O)[C@@H]1CC[C@H]2C[C@H]/C=C/c3ccc([N+])(=O)[O-  
])cc3)[C@H](OC(C)=O)[C@l](Cc3ccccc3)(NC(=O)OCc3ccccc3)C(=O)N12  
C=Cc1cccn1.Nc1ncc(Cl)cc1Br>>Nc1ncc(Cl)cc1/C=C/c1cccn1  
C=Cc1ccc(OC2CCCCO2)cc1.O=[N+][([O-])c1ccc(I)cc1CO>>O=[N+][([O-]  
)]c1ccc(/C=C/c2ccc(OC3CCCCO3)cc2)cc1CO  
C=CCNC(=O)OC(C)(C)C.N#Cc1ccccc1Cl>>C=C(CNC(=O)OC(C)(C)C)c1ccccc1C#N  
C=CC(=O)OC(C)(C)C.Nc1ccc(F)cc1I>>CC(C)(C)OC(=O)/C=C/c1cc(F)ccc1N  
C=CC(=O)OCC.CC(C)(C)OC(=O)c1cc(COc2ccccc2)ccc1I>>CCOC(=O)/C=C/c1ccc(COc2ccccc2)cc1  
C(=O)OC(C)(C)C  
C=CC(=O)OC.NCCc1ccccc(Br)c1>>COC(=O)/C=C/c1ccccc(CCNC)c1  
C=Cc1ccc(N(C)C)cc1.CCCCN1C(=O)C(=C/C=C/c2ccc(I)cc2)C(=O)N(CCCC)C1=O>>CCCN1C(=O)  
C(=C/C=C/c2ccc(/C=C/c3ccc(N(C)C)cc3)cc2)C(=O)N(CCCC)C1=O  
C=C(C)C(=O)OC.CC(S)NS(=O)=(O)c1ccc(Br)cc1>>COC(=O)/C(C)=C/c1ccc(S(=O))(=O)NC(C)=S)c  
C=CP(=O)(OCC)OCC.CC(=O)Nc1ccc(Br)cc1>>CCOP(=O)/(C=C/c1ccc(NC(C)=O)cc1)OCC  
C=Cc1cc(O)c(OC)cc1F.COe1ccc(I)c(OC)c1>>COe1ccc(/C=C/c2cc(O)c(OC)cc2F)c(OC)c1  
C=CC(F)(F)C(F)(F)C(F)(F)C(F)(F)C(F)(F)C(F)(F)C(F)(F)C(F)(F)F.COC(=O)c1ccc(Br)cc1C>>COC(=  
O)c1ccc(/C=C/C(F)(F)C(F)(F)C(F)(F)C(F)(F)C(F)(F)C(F)(F)C(F)(F)F)cc1C  
C=CC(C)(C)C.COC(=O)c1ccc(Br)cc1C>>COC(=O)c1ccc(/C=C/C(C)(C)C)cc1C  
C=CP(=O)(OCC)OCC.FC(F)(F)c1ccc(Br)cc1>>CCOP(=O)/(C=C/c1ccc(C(F)(F)F)cc1)OCC  
C=CC[C@H]1O[C@@H]2O[C@@H]3(C)CC[C@H]4[C@H](C)CC[C@@H]([C@H]1C)[C@]42OO3.  
Cc1ccc(I)cc1>>Cc1ccc(/C=C/C[C@H]2O[C@@H]3O[C@@H]4(C)CC[C@H]5[C@H](C)CC[C@@H](  
[C@H]2C)[C@]53OO4)cc1  
C=CC(=O)OC(C)(C)C.Cn1cc(Br)nn1>>Cn1cc(/C=C/C(=O)OC(C)(C)C)nn1  
C=CS(=O)=(O)F.O=Cc1ccc(I)cc1>>O=Cc1ccc(/C=S(=O)(=O)F)cc1  
C=CC(N)=O.FC(F)(F)c1ccccc(I)c1>>NC(=O)/C=C/c1ccccc(C(F)(F)F)c1  
C=CC(=O)OC(C)(C)C.O=C(NCc1ccc(OC(F)(F)F)cc1)c1cc(Br)cc(I)c1>>CC(C)(C)OC(=O)/C=C/c1cc(  
Br)cc(C(=O)NCc2ccc(OC(F)(F)F)cc2)c1  
C=CCOC(=O)/C=C/c1ccc(OC(C)=O)c(OC(C)=O)c1.Ic1ccccc1>>CC(=O)Oc1ccc(/C=C/C(=O)OC/C=  
C/e2ccccc2)cc1OC(C)=O  
C=CC(=O)N(C)C.CC(=O)c1ccc(Br)cc1>>CC(=O)c1ccc(/C=C/C(=O)N(C)C)cc1  
C=CC(=O)OCC.Cc1ccccc(Br)c1>>CCOC(=O)/C=C/c1ccccc(C)c1  
C=CC(=O)NCCCc1ccccc1.CC(C)(C)OC(=O)C1CC(c2ccc(C(=O)C(=O)c3ccc(Br)cc3)cc2)=NO1>>CC  
(C)(C)OC(=O)C1CC(c2ccc(C(=O)C(=O)c3ccc(/C=C/C(=O)NCCCc4ccccc4)cc3)cc2)=NO1  
C=CC(C)(C)O.Cc1ccc(-c2oc3ccccc3c(=O)c2Br)cc1>>Cc1ccc(-  
C=CC(=O)OC.COc1cc(I)cc(CC=C(C)C)c1OC(C)=O>>COC(=O)/C=C/c1cc(CC=C(C)C)c(OC(C)=O)c  
(OC)c1  
Brc1enc2c(c1)COCCN2.C=CC(=O)OC(C)(C)C>>CC(C)(C)OC(=O)/C=C/c1enc2c(c1)COCCN2  
C=CC(=O)OC.O=Cc1cc(OCc2c(-c3ccc(Cl)cc3)nsc2C(F)(F)F)ccc1Br>>COC(=O)/C=C/c1ccc(OCc2(-  
c3ccc(Cl)cc3)nsc2C(F)(F)F)cc1C=O  
C=C.NC(=O)c1ccccc1Br>>C=Cc1ccccc1C(N)=O  
C=CC(=O)OCC.Oc1ccc(Br)c(C(F)(F)F)c1>>CCOC(=O)/C=C/c1ccc(O)cc1C(F)(F)F  
C=CC(OCC)OCC.CC(=O)c1ccc(Br)cc1>>CCOC(/C=C/c1ccc(C(C)=O)cc1)OCC  
C=CC(=O)OCC.CN1c2ccccc2C(C)(C)C12C=Cc1cc(I)ccc1O2>>CCOC(=O)/C=C/c1ccc2c(c1)C=CC1(  
O2)N(C)c2ccccc2C1(C)C  
C=CC(=O)OC.COe1cc([N+])(=O)[O-])ccc1I>>COC(=O)/C=C/c1ccc([N+])(=O)[O-])cc1OC  
C=Cc1ccccc1.COC(=O)c1ccccc(I)c1>>COC(=O)c1ccccc(/C=C/c2ccccc2)c1

3826 C=COCCCCC.CC(C)(C)C(=O)Oc1ccc(OS(=O)(=O)C(F)(F)F)cc1>>C=C(OCCCC)c1ccc(OC(=O)C(C)(C)C)cc1  
 3827 C=CC(=O)OC.COC(=O)c1ccc(N)c(I)c1>>COC(=O)/C=C/c1cc(C(=O)OC)ccc1N  
 3828 C=Cc1ccnc(Br)c1.CC(C)(C)OC(=O)N1CC[C@H]1COc1cnc(Cl)c(I)c1>>CC(C)(C)OC(=O)N1CC[C@H]1COc1cnc(Cl)c(/C=C/c2ccnc(Br)c2)c1  
 3829 C=CS(=O)(=O)F.Cc1ccc(S(=O)(=O)n2ccc3cc(I)ccc32)cc1>>Cc1ccc(S(=O)(=O)n2ccc3cc(/C=C/S(=O)(=O)F)ccc32)cc1  
 3830 C=CC(=O)OC.COc1cnc(Br)c1>>COC(=O)/C=C/c1cnc(OC)c1  
 3831 C=CCc1ccc2ccccc2c1OCc1ccccc1Br>>C=C1Cc2ccc3ccccc3c2OCc2ccccc21  
 3832 C=CC(=O)OCC.COc1cccc(-c2ccccc2)c1I>>CCOC(=O)/C=C/c1c(OC)cccc1-c1ccccc1  
 3833 C=Cc1ccccc1.Nc1ccc([N+](=O)[O-])cc1Br>>Nc1ccc([N+](=O)[O-])cc1/C=C/c1ccccc1  
 3834 C=Cc1ccc(SC)cc1.Clc1c2cc(Br)ccc2nc2c1[nH]c1ccccc12>>CSc1ccc(/C=C/c2ccc3nc4c([nH]c5ccccc54)c(Cl)c3c2)cc1  
 3835 C=Cc1cc(OC)cc(OC)c1.Ic1ccc(OCc2ccccc2)cc1>>COc1cc(/C=C/c2ccc(OCc3ccccc3)cc2)cc(OC)c1  
 3836 C=C(Br)CCO.C=CC(=O)OCCCC>>C=C(/C=C/C(=O)OCCCC)CCO  
 3837 C=CC(=O)OCC.Cc1nc(C(C)C)nc1I>>CCOC(=O)/C=C/c1cnc(C(C)C)nc1C  
 3838 C=C1CC(c2ccc(Cl)cc2)OC1=O.Ic1ccccc1>>O=C1OC(c2ccc(Cl)cc2)C/C1=C\c1ccccc1  
 3839 C=Cc1ccccc1.CC(=O)Oc1ccc(Br)cc1>>CC(=O)Oc1ccc(/C=C/c2ccccc2)cc1  
 3840 C=CCOC(C)=O.CC(=O)c1ccc(I)cc1>>CC(=O)OC/C=C/c1ccc(C(C)=O)cc1  
 3841 Br1ccc2ccccc2c1.C=CN1CCCCC1=O>>C=C(c1ccc2ccccc2c1)N1CCCCC1=O  
 3842 C=Cl.C=C[Si](OC)(OC)OC>>C=C/C=C/[Si](OC)(OC)OC  
 3843 C=CC(=O)OCCSc1ccccc1.O=[N+](O-)c1ccc(Br)c1>>O=C(/C=C/c1ccccc1[N+](=O)[O-])c1OCCSc1ccccc1  
 3844 C=CC(OCC)OCC.FC(F)(F)c1ccc(Br)c1>>CCOC(/C=C/c1ccc(C(F)(F)F)c1)OCC  
 3845 C=Cc1ccc(C=C)cc1.CCCCCCCC0c1cc(C=O)c(OCCCCCCCC)cc1I>>C=Cc1ccc(/C=C/c2cc(OCCCCCCCC)c(C=O)cc2OCCCCCCCC)cc1  
 3846 C=CCCC1CCN(C(=O)OC(C)C)CC1.CS(=O)(=O)N1CCc2cc(Br)ccc2C1>>CC(C)OC(=O)N1CCC(CC/C=C/c2ccc3c(c2)CCN(S(C)(=O)=O)C3)CC1  
 3847 C=CC(C)(C)O.COC(=O)c1cccc2nc3ccccc(Br)c3nc12>>COC(=O)c1cccc2nc3ccccc(/C=C/C(C)(C)O)c3n  
 3848 C=C(F)C(=O)OC.Ic1ccccc1>>COC(=O)/C(F)=C/c1ccccc1  
 3849 C=CC(=O)O.O=C1c2ccccc2CCc2ccc(Br)cc21>>O=C(O)/C=C/c1ccc2c(c1)C(=O)c1ccccc1CC2  
 3850 C=C[C@H]1O[C@H](OC)[C@H](OCc2ccccc2)[C@@H](OCc2ccccc2)[C@@H]1OCc1ccc2ccccc2c1.O=c1ccoc2cc(Br)ccc12>>CO[C@H]1O[C@H](/C=C/c2ccc3c(=O)ccoc3c2)[C@@H](OCc2ccc3ccccc3c2)[C@H](OCc2ccccc2)[C@H]1OCc1ccccc1  
 3851 C=CC(=O)C(C)CC(=O)OC.COc1cccc(Br)c1>>COC(=O)CC(C)C(=O)/C=C/c1cccc(OC)c1  
 3852 C=CC(=O)OC.COc1cc(Br)c(C=O)c(OC)c1>>COC(=O)/C=C/c1cc(OC)cc(OC)c1C=O  
 3853 C=CC.O=C1CC(c2ccccc2)(c2ccccc2Br)C1>>C/C=C\c1ccccc1C1(c2ccccc2)CC(=O)C1  
 3854 C=Cc1ccccc1.Fc1ccc(I)cc1F>>Fc1ccc(/C=C/c2ccccc2)cc1F  
 3855 C=C[Si](C)(C)c1ccccc1-c1ccccc1Br>>C=C1c2ccccc2-c2ccccc2[Si]1(C)C  
 3856 C=CCC(Cc1nnn(CCCCCC)c1I)(C(=O)OCC)C(=O)OCC>>C=C1CC(C(=O)OCC)(C(=O)OCC)Cc2nnn(CCCCCC)c21  
 3857 C=CC(=O)OCC.COc1nc(Br)cc2ccccc12>>CCOC(=O)/C=C/c1cc2ccccc2c(OC)n1  
 3858 Br1ccc(-c2ccccc2)cc1.C=CC(=O)OC(C)(C)C>>CC(C)(C)OC(=O)/C=C/c1ccc(-c2ccccc2)cc1  
 3859 C=Cc1scnc1C.CC(=O)OCC1Cn2c3ccccc3c3c4c(c5c6cc(Br)ccc6n(c5c32)C1)C(=O)N(C(C)=O)C4>>C(C(=O)OCC1Cn2c3ccccc3c3c4c(c5c6cc(/C=C/c7scnc7C)ccc6n(c5c32)C1)C(=O)N(C(C)=O)C4  
 3860 C=Cc1ccccc1.Nc1cc(F)ccc1Br>>Nc1cc(F)ccc1/C=C/c1ccccc1  
 3861 C=Cc1ccc(N(C)C)cc1.CCOC(=O)C(C)Br>>CCOC(=O)C(C)/C=C/c1ccc(N(C)C)cc1  
 3862 C=CC(=O)OC(C)(C)C.O=C(NCCc1ccccc1)c1cc(Br)cc(I)c1>>CC(C)(C)OC(=O)/C=C/c1cc(Br)cc(C(=O)NCCc2ccccc2)c1  
 3863 C=Cc1ccc(C#N)cc1.CCCCOc1ccc2c(c1)cc(C#N)c1ccc(Br)cc12>>CCCCOc1ccc2c(c1)cc(C#N)c1ccc(/C=C/c3ccc(C#N)cc3)cc12  
 3864 C=Cc1ccc(N)cc1.CN(C(=O)c1ccccc1)c1ccc2c(c1)[nH]c(=NC(=O)c1ccc(Br)s1)n2CCC(N)=O>>CN(C(=O)c1ccccc1)c1ccc2c(c1)[nH]c(=NC(=O)c1ccc(/C=C/c3ccc(N)cc3)s1)n2CCC(N)=O  
 3865 C=CC(=O)OC(C)(C)C.Cc1cc(C)cc(I)c1>>Cc1cc(C)cc(/C=C/C(=O)OC(C)(C)C)c1  
 3866 C=CC(=O)OC.N#Cc1ccc(Cl)c(F)c1Br>>COC(=O)/C=C/c1c(C#N)ccc(Cl)c1F  
 3867 C=Cc1ccccc(C)c1.O=Cc1ccc(Br)c1>>Cc1ccccc(/C=C/c2ccccc(C=O)c2)c1  
 3868 C=CC(=O)OC.Cc1c[nH]c2c(Br)cccc12>>COC(=O)/C=C/c1ccccc2c(C)c[nH]c12  
 3869 C=CC(=O)OC.CC(C)c1nn(Cc2ccccc2)cc1I>>COC(=O)/C=C/c1cn(Cc2ccccc2)nc1C(C)C  
 3870 C=CNC(=O)OCCC.O=S(=O)(Oc1ccc2ccccc2c1)C(F)(F)F>>C=C(NC(=O)OCCC)c1ccc2ccccc2c1

C=CC(=O)OC.CC(=O)c1ccc(-  
 3871 c2cn(S(=O)(=O)c3ccccc3)c3ncc(Br)cc23)cc1>>COC(=O)/C=C/c1cnc2c(c1)c(-  
 c1ccc(C(C)=O)cc1)cn2S(=O)(=O)c1ccccc1  
 3872 C=CC(=O)OCC.COc1ccccc1Br>>CCOC(=O)/C=C/c1ccccc1OC  
 3873 C=CCCN1C(=O)c2ccccc2C1=O.Ic1ccccc1>>O=C1c2ccccc2C(=O)N1CC/C=C/c1ccccc1  
 3874 C=Cc1ccc(N(CC)CCO)cc1.CS(=O)(=O)c1ccc(/C=C/c2ccc(Br)cc2)cc1>>CCN(CCO)c1ccc(/C=C/c2ccc  
 (/C=C/c3ccc(S(C)(=O)=O)cc3)cc2)cc1  
 3875 \*COC(=O)/C=C/c1ccc(N(Cc2ccc(Br)cc2)C(=O)C2CCCCC2)c1.C=Cc1ccccc1>>\*COC(=O)/C=C/c1c  
 ccc(N(Cc2ccc(/C=C/c3ccccc3)cc2)C(=O)C2CCCCC2)c1  
 3876 C=CC(=O)OC.CC1Nc2ccccc2N1c1ccc(I)cc1>>COC(=O)/C=C/c1ccc(N2c3ccccc3NC2C)cc1  
 3877 C=Cc1ccccc1.Clc1ccc(/C=C/c2ccccc2)cc1>>C(=C/c1ccc(/C=C/c2ccccc2)cc1)c1ccccc1  
 3878 C=Cc1cncnc1.Cc1ccccc1Br>>Cc1ccccc1/C=C/c1cncnc1  
 3879 C=CCCCCOC(C)=O.CC(C)(C)c1ccc(OS(=O)(=O)C(F)(F)F)cc1>>C=C(CCCCCOC(C)=O)c1ccc(C(C)(  
 C)C)cc1  
 3880 C=CCCCC[C@@H](C=C)COc1ccccc1Br>>C=CCCC[C@@H]1COc2ccccc2C1=C  
 3881 C=CC(=O)OCC(CC)CCCC.Ic1ccccc1>>CCCC(CC)COC(=O)/C=C/c1ccccc1  
 3882 C=Cc1ccccc1.Cc1cc(C)c(Br)c(C)c1>>Cc1cc(C)c(/C=C/c2ccccc2)c(C)c1  
 C=Cc1ccc(OC)c(OC)c1.CC(=O)OC[C@H]1O[C@@H](Oc2ccc(I)cc2)[C@H](OC(C)=O)[C@@H]1O  
 3883 C(C)=O>>COc1ccc(/C=C/c2ccc(O[C@@H]3O[C@H](COC(C)=O)[C@@H](OC(C)=O)[C@H]3OC(  
 C)=O)cc2)cc1OC  
 3884 C=Cc1ccccc1.Nc1c(Br)ccc2c1OCO2>>Nc1c(/C=C/c2ccccc2)ccc2c1OCO2  
 3885 C=Cc1ccccc1C.Ic1ccccc1>>Cc1ccccc1/C=C/c1ccccc1  
 3886 C=CC(=O)OC.O=CNc1ccc(Cl)cc1I>>COC(=O)/C=C/c1cc(Cl)ccc1NC=O  
 3887 C=CCCC(=C)C.Fc1ccc(CCl)c(F)c1>>C=C(C)CCC(=C)Cc1ccc(F)cc1F  
 3888 C=CCCCCCC.CC(=O)c1ccc(Cl)cc1>>CCCCC/C=C/c1ccc(C(C)=O)cc1  
 3889 C=Cc1ccc(OC)cc1.Cn1c(/C=C/c2ccccc2)c(I)c(=O)c2ccccc21>>COc1ccc(/C=C/c2c(/C=C/c3ccccc3)n(  
 C)c3ccccc3c2=O)cc1  
 3890 C=CC(=O)OCC.Cc1c[n+](([O-])c(C)c(Cl)n1>>CCOC(=O)/C=C/c1nc(C)c[n+](([O-])c1C  
 3891 C=CCOc1ccc(Cl)cc1.Ic1ccccc1>>Clc1ccc(OC/C=C/c2ccccc2)cc1  
 3892 C=Cc1ccc(N(c2ccccc2)c2ccccc2)cc1.CC(C)(C)Br>>CC(C)(C)/C=C/c1ccc(N(c2ccccc2)c2ccccc2)cc1  
 3893 C=CC(C)(C)O.CCOCOc1ccc(C(C)=O)c(OC)c1I>>CCOCOc1ccc(C(C)=O)c(OC)c1/C=C/C(C)(C)O  
 3894 C=COC.CCOC(=O)C(=O)Cl>>CCOC(=O)C(=O)/C=C/OC  
 3895 C=CC1CC(OC)=CC(=O)O1.Ic1ccc2c(c1)OCO2>>COC1=CC(=O)OC(/C=C/c2ccc3c(c2)OCO3)C1  
 3896 C=CC(=O)OC.CC(C)(C)OC(=O)NCc1ccccc1Br>>COC(=O)/C=C/c1ccccc1CNC(=O)OC(C)(C)C  
 3897 C=CC(=O)OC.Oc1ccc(I)cc1O>>COC(=O)/C=C/c1ccc(O)c(O)c1  
 3898 C=Cc1ccc(Cl)c1.CCOC(=O)C(F)I>>CCOC(=O)C(F)/C=C/c1ccc(Cl)c1  
 3899 C=Cc1ccc(/C=C/c2cccs2)cc1.O=Cc1ccc(Br)cc1>>O=Cc1ccc(/C=C/c2ccc(/C=C/c3cccs3)cc2)cc1  
 3900 C=CCc1c(C=O)cccc1OCc1ccccc1.O=C(OCc1ccccc1)c1ccc([N+](=O)[O-]  
 ])cc1Br>>O=Cc1ccc(OCc2ccccc2)c1C/C=C/c1cc([N+](=O)[O-])ccc1C(=O)OCc1ccccc1  
 C=Cc1ccc(N(CCCC)CCCC)cc1.CCCn1c(=O)c(C)nc2ccc(Br)cc21>>CCCN(CCCC)c1ccc(/C=C/c2ccc  
 3901 3nc(C)c(=O)n(CCC)c3c2)cc1  
 3902 C=CC(=O)OCC.CC(C)c1cc(C(C)C)c(I)c(C(C)C)c1>>CCOC(=O)/C=C/c1c(C(C)C)cc(C(C)C)cc1C(C)  
 3903 C=Cc1ccc(C#N)cc1.CC(C)=CBr>>CC(C)=C/C=C/c1ccc(C#N)cc1  
 3904 C=CC(=O)N1CCCC1.CC(C)(C)OC(=O)c1ccccc1Br>>CC(C)(C)OC(=O)c1ccccc1/C=C/C(=O)N1CCC  
 3905 C=CCOCC1=C(Br)CCCCC1>>C=C1COCC2=C1CCCCC2  
 3906 C=Cc1ccccc1.Nc1ncn2c(C3CCC3)nc(I)c12>>Nc1ncn2c(C3CCC3)nc(/C=C/c3ccccc3)c12  
 3907 C=Cc1sc(C=O)c(CCCCCC)c1CCCCC.CN(CC1CO1)c1ccc(I)cc1>>CCCCCSc1c(C=O)sc(/C=C/c2cc  
 c(N(C)CC3CO3)cc2)c1CCCCC  
 3908 C=C1C(=O)N2C[C@H](O)C[C@@H]2[C@H]1O.Oc1ccc(I)cc1>>O=C1/C(=C/c2ccc(O)cc2)[C@H](  
 O)[C@H]2C[C@@H](O)CN12  
 3909 COC[C@@H]/N=C(\c1ccccc1)N1C=CCC[C@H]1C)C(C)C.Ic1ccccc2ccccc12>>COC[C@@H]/N=C(  
 \c1ccccc1)N1C=C(c2ccccc3ccccc23)CC[C@H]1C)C(C)C  
 3910 C=Cc1cncnc1.N[C@@H](Cc1c[nH]c2c(Br)ccccc12)C(=O)O>>N[C@@H](Cc1c[nH]c2c(/C=C/c3cncnc  
 3)ccccc12)C(=O)O  
 3911 C=CC(=O)Nc1ccccc2ccnc12.Fc1ccc(I)cc1>>O=C(/C=C/c1ccc(F)cc1)Nc1ccccc2ccnc12  
 3912 C=Cc1ccccc1.COC(=O)c1cc(Br)ccc1Cl>>COC(=O)c1cc(/C=C/c2ccccc2)ccc1Cl  
 3913 C=CCc1c(OCc2cc(OC)ccc2Br)ccc2ccccc12>>C=C1Cc2c(ccc3ccccc23)OCc2cc(OC)ccc21  
 3914 C=CCNC(=O)OC(C)(C)C.CC(=O)c1ccccc1Br>>C=C(CNC(=O)OC(C)(C)C)c1ccccc1C(C)=O  
 3915 C=CC(=O)OCC.O=[N+](([O-])c1ccc(O)c1Br>>CCOC(=O)/C=C/c1c(O)cccc1[N+](=O)[O-]  
 3916 C=CC(OCC)OCC.COc1ccc(Br)cc1>>CCOC(/C=C/c1ccc(OC)cc1)OCC



3917 C=Cc1ence(C#N)c1Nc1ccc2[nH]ccc2c1C.ClCCOc1cccc(Br)c1>>Cc1c(Nc2c(C#N)ence2/C=C/c2cccc(OCCCl)c2)ccc2[nH]ccc12  
 3918 C=CC#N.CC(C)(C)[Si](C)(C)OC[C@H]1O[C@H](c2ccc(Br)cc2)C=C[C@@H]1O[Si](C)(C)C(C)(C)C>>CC(C)(C)[Si](C)(C)OC[C@H]1O[C@H](c2ccc(/C=C/C#N)cc2)C=C[C@@H]1O[Si](C)(C)C(C)(C)C=CCCC[C@@H](C=C)CN(c1cccc1Br)S(=O)(=O)c1ccc(C)cc1>>C=CCCC[C@@H]1CN(S(=O)(=O)c2ccc(C)cc2)c2cccc2C1=C  
 3920 Br1cenc1.C=Cc1cc2c(c(=O)n(C)c(=O)n2C)n1C>>Cn1c(=O)c2c(cc(/C=C/c3cnccc3)n2C)n(C)c1=O C=CC(=O)OCC.COc1cc(I)c2c3c1O[C@@H]1[C@]34CCN(C)[C@H](C2)[C@]42C=C[C@@]1(OC)c1c(OC(C)=O)ccc(O)c12>>CCOC(=O)/C=C/c1cc(OC)c2c3c1C[C@H]1N(C)CC[C@@]34[C@@H](O2)[C@@]2(OC)C=C[C@@]14c1c(O)ccc(OC(C)=O)c12  
 3921 Br1cenc1.C=CC[C@H]1C(=O)N(c2cccc2)[C@@H]1c1ccc(OC)cc1>>COc1ccc([C@@H]2[C@@H](C/C=C/c3cnccc3)C(=O)N2c2cccc2)cc1  
 3922 C=CC(=O)OC.O=C(OCc1cccc1)N1OCC(I)=C1c1cccc1>>COC(=O)/C=C/C1=C(c2cccc2)N(C(=O)OCc2cccc2)OC1  
 3923 C=COCCCC.Clc1ccc2c(c1)OCO2>>C=C(OCCCC)c1ccc2c(c1)OCO2  
 3924 C=CC(=O)OC(C)(C)C.O=Cc1cccc(I)c1>>CC(C)(C)OC(=O)/C=C/c1cccc(C=O)c1  
 3925 C=CCn1c(-c2ccc(F)cc2)nc2cccc2c1=O.O=C(CN1C(=O)COc2cccc21)c1ccc(Br)cc1>>O=C(CN1C(=O)COc2cccc21)c1ccc(/C=C/Cn2c(-c3ccc(F)cc3)nc3cccc3c2=O)cc1  
 3926 C=Cc1cenc1.CC(=O)Oc1ence(Br)c1>>CC(=O)Oc1ence(/C=C/c2cnccc2)c1  
 3927 C=C[Si](C)(c1cccc1)c1cccc1-c1cccc1Br>>C=C1c2cccc2-c2cccc2[Si]1(C)c1cccc1  
 3928 C=CC(=O)OC(C)(C)C.COc1ccc(-c2sc3cc(OC)ccc3c2C(=O)c2ccc(Br)cc2)cc1>>COc1ccc(-c2sc3cc(OC)ccc3c2C(=O)c2ccc(/C=C/C(=O)OC(C)(C)C)cc2)cc1  
 3929 Br1enc(NCc2cccc2)c2cccc12.C=CC(=O)OCC>>CCOC(=O)/C=C/c1enc(NCc2cccc2)c2cccc12  
 3930 C=CC(=O)OCC.Ic1cccs1>>CCOC(=O)/C=C/c1cccs1  
 3931 C=CC(N)=O.Ic1ccc2c(c1)OCCOCCOCCOCCO2>>NC(=O)/C=C/c1ccc2c(c1)OCCOCCOCCOCCO2  
 3932 C=C1C(=O)O[C@@H]2[C@@]3(C)CCCC(=C)[C@@H]3C[C@H]12.Cn1c(=O)c2c(nc(Br)n2C)n(C)c1=O>>C=C1CCC[C@@]2(C)C[C@H]3OC(=O)/C(=C/c4nc5c(c(=O)n(C)c(=O)n5C)n4C)[C@H]3[C]C=Cc1ccc(C(=O)OC)cc1.COCC(=O)c1cc2cc(Br)ccc2cc1OC(C)=O>>COC(=O)c1ccc(/C=C/c2ccc3cc(O C(C)=O)c(C(=O)OC)cc3c2)cc1  
 3933 C=CCN(Cc1nnn(CCCCC)c1I)S(=O)(=O)c1ccc(C)cc1>>C=C1CN(S(=O)(=O)c2ccc(C)cc2)Cc2nnn(CCCCC)c21  
 3934 C=CCN(c1ccc2oc(=O)cc(OC)c2c1)S(=O)(=O)c1cccc1Br>>C=C1CN(c2ccc3oc(=O)cc(OC)c3c2)S(=O)(=O)c2cccc21  
 3935 C=CC(=O)OC(C)(C)C.CN(C)CCN1Cc2cc(Br)enc2NC1=O>>CN(C)CCN1Cc2cc(/C=C/C(=O)OC(C)(C)C)enc2NC1=O  
 3936 C=Cc1cccc1.Ic1cccn1>>C(=C/c1cccn1)c1cccc1  
 3937 C=Cc1ccc(OC)c(OC)c1.Cc1oc2cccc2c(=O)c1Br>>COc1ccc(/C=C/c2c(C)oc3cccc3c2=O)cc1OC  
 3938 C=Cc1enc(C)nc1OC[C@H]1C[C@@H]1c1ccc(OC)cn1.Cc1ccc(Br)cn1>>COc1ccc([C@H]2[C@@H]2COc2nc(C)nc2/C=C/c2ccc(C)nc2)nc1  
 3939 C=C[C@@H]1[C@@H]2[C@H](CN1c1cc(C(=O)OC)cc(OCc3cccc3)c1I)N2C(=O)OC(C)(C)C>>C=C1c2c(OCc3cccc3)cc(C(=O)OC)cc2N2C[C@H]3[C@@H]([C@@H]12)N3C(=O)OC(C)(C)C  
 3940 C=CC(=O)OC.Cc1ccc(N)c(I)c1>>COC(=O)/C=C/c1cc(C)ccc1N  
 3941 C=CC(=O)OC.CO[C@H]1O[C@H](COC2O[C@H](COC(C)=O)[C@@H](OC(C)=O)C=C2I)[C@@H](OCc2cccc2)[C@H](OCc2cccc2)[C@H]1OCc1cccc1>>COC(=O)/C=C/C1=C[C@H](OC(C)=O)[C@@H](COC(C)=O)OC1OC[C@H]1O[C@H](OC)[C@H](OCc2cccc2)[C@@H](OCc2cccc2)[C@@H]1OCc1cccc1  
 3942 C=Cc1ccc(-c2cc(C(C)(C)C)c(OC(C)=O)c(C(C)(C)C)c2)cc1Br.CC(=O)Oc1c(C(C)(C)C)cc(-c2ccc(C)c(I)c2)cc1C(C)(C)C>>CC(=O)Oc1c(C(C)(C)C)cc(-c2ccc(/C=C/c3cc(-c4cc(C(C)(C)C)c(OC(C)=O)c(C(C)(C)C)c4)ccc3C)c(Br)c2)cc1C(C)(C)C  
 3943 C=Cc1cccc1.O=S(=O)(Oc1cccc1C(F)(F)F)C(F)(F)F>>C=C(c1cccc1)c1cccc1C(F)(F)F  
 3944 C=CC(=O)N(C)Cc1cccc(Cl)c1OCCC.CC1(C)NCc2cc(Br)enc2NC1=O>>CCCOc1c(Cl)cccc1CN(C)C(=O)/C=C/c1enc2c(c1)CNC(C)(C)C(=O)N2  
 3945 C=C(C)C(=O)OCC.COcn1nc(-c2cccc2)c(Br)cc1=O>>CCOC(=O)/C(C)=C/c1cc(=O)n(COC)nc1-C=CC(=O)OCC.COc1cc(/C=C/c2ccc(Br)cc2)cc(OC)c1OC>>CCOC(=O)/C=C/c1ccc(/C=C/c2cc(OC)c(OC)c(OC)c2)cc1  
 3946 Br1ccenc1.C=CCn1nnc2cccc21>>C(=C/c1ccenc1)\Cn1nnc2cccc21  
 3947 C=CCN(CC1=C(Br)CCCCC1)c1ccc(Cl)cc1>>C=C1CN(c2ccc(Cl)cc2)CC2=C1CCCCCCC2  
 3948 C=CC(=O)OC.O=[N+][([O-])c1ccc(Br)c([N+](=O)[O-])c1>>COC(=O)/C=C/c1ccc([N+](=O)[O-])cc1[N+](=O)[O-]  
 3949 C=Cc1ccc(OC)cc1.N#Cc1cccc(Br)c1>>COc1ccc(/C=C/c2cccc(C#N)c2)cc1  
 3950

3953 C=Cc1cccs1.Cc1ncnc2c1c(I)cn2[C@@H]1O[C@H](CO)[C@@H](O)[C@@]1(C)F>>Cc1ncnc2c1c(/C=C/c1cccs1)cn2[C@@H]1O[C@H](CO)[C@@H](O)[C@@]1(C)F  
 3954 C=Cc1ccccc1.COc1cccc(I)c1>>COc1cccc(/C=C/c2ccccc2)c1  
 3955 C=CC(=O)OC.COc1ccc2c(Oc3cccc(Br)cc3)esc2c1>>COC(=O)/C=C/c1ccc(Oc2csc3cc(OC)ccc23)cc1  
 3956 C=CC(=O)OC.CC(C)(C)OC(=O)N1CCCC2(CC1)CC(=O)c1cc(Br)ccc1O2>>COC(=O)/C=C/c1ccc2c(c1)C(=O)CC1(CCCN(C(=O)OC(C)(C)C)CC1)O2  
 3957 C=Cc1ccc(OC(C)=O)cc1.FCCOCCOCCOc1ncc(I)cc1Br>>CC(=O)Oc1ccc(/C=C/c2cnc(OCCOCCOC CF)c(Br)c2)cc1  
 3958 C=CC(=O)OCC.CC(C)(C)OC(=O)NCCCCOc1cc(C#N)ccc1I>>CCOC(=O)/C=C/c1ccc(C#N)cc1OCCC NC(=O)OC(C)(C)C  
 3959 C=Cc1ccccc1OC.Cc1c(Nc2c(I)cncc2C#N)ccc2[nH]ccc12>>COc1ccccc1/C=C/c1nccc(C#N)c1Nc1ccc2 [nH]ccc2c1C  
 3960 Br1ccc(-c2cccs2)s1.C=CC(=O)OCCCCC>>CCCCCOC(=O)/C=C/c1ccc(-c2cccs2)s1  
 3961 C=CC(=O)OCC.Cc1ccc(C2=C(I)c3cc(C)ccc3S(=O)(=O)N2C)cc1>>CCOC(=O)/C=C/C1=C(c2ccc(C)c c2)N(C)S(=O)(=O)c2ccc(C)cc21  
 3962 C=CC(=O)OCC.CC(C)(C)[Si](C)(C)OCc1cc(Br)ccn1>>CCOC(=O)/C=C/c1ccnc(CO[Si](C)(C)C(C)(C )C)c1  
 3963 Br1cnc2ccccc2c1.C=CCO[C@]1(C)C[C@@H](C)C(=O)[C@H](C)[C@H]2NC(=O)O[C@]2(C)[C@ @H](CC)OC(=O)[C@H](C)[C@@H](O[C@H]2C[C@]1(C)(OC)[C@@H](OC(C)=O)[C@H](C)O2) [C@H](C)[C@H]1O[C@]1(C)C[C@H](C)C[C@H](N(C)C)[C@H]1OC(C)=O>>CC[C@H]1OC(=O) [C@H](C)[C@]1(C)C[C@@H](O[C@H]2C[C@]1(C)(OC)[C@@H](OC(C)=O)[C@H](C)O2)[C@H](C)[C@ @H](O[C@]1(C)C[C@H](C)C[C@H](N(C)C)[C@H]2OC(C)=O)[C@]1(C)(OC/C=C/c2cnc3ccccc3c2)C I[C@]1(C)C[C@@H](C)C(=O)[C@H](C)C[C@H]2NC(=O)O[C@]2(C)C  
 3964 C=CC(=O)OC.CC(C)(C)c1[nH]c2ccccc2c1C1CCCN(Cc2ccc(Br)cc2Cl)C1>>COC(=O)/C=C/c1ccc(CN 2CCCC(c3c(C(C)(C)C)[nH]c4ccccc34)C2)c(Cl)c1  
 3965 C=Cc1ccccc1OC.Nc1cccc(Br)c1>>COc1ccccc1/C=C/c1cccc(N)c1  
 3966 C=CS(=O)(=O)NC1CCCC1.CC(C)(C)OC(=O)NCc1cc(F)ccc1Br>>CC(C)(C)OC(=O)NCc1cc(F)ccc1/ C=C/S(=O)(=O)NC1CCCC1  
 3967 C=CCCC#N.Ic1ccccc1>>N#CCC/C=C/c1ccccc1  
 3968 C=Cc1ccc(OC)cc1.CN(C(=O)c1ccccc1)c1ccc2c(c1)[nH]c(=NC(=O)c1ccc(Br)s1)n2CCC(N)=O>>COc 1ccc(/C=C/c2ccc(C(=O)N=c3[nH]c4cc(N(C)C(=O)c5ccccc5)ccc4n3CCC(N)=O)s2)cc1  
 3969 Br1cccc2ccccc12.C=Cc1nc2c(N)ncnc2n1[C@H]1C[C@H](O[Si](C)(C)C(C)(C)C)[C@@H](CO[Si]( C)(C)C(C)(C)C)O1>>CC(C)(C)[Si](C)(C)OC[C@H]1O[C@]1(C)C[C@@H](n2c(/C=C/c3cccc4ccccc34)nc3c(N)n enc32)C[C@]1(C)C[C@@H](O[Si](C)(C)C(C)(C)C)C  
 3970 C=CC(=O)Nc1ccccc1NC(=O)OC(C)(C)C.O=C(Nc1ccc(C(F)(F)F)cc1)C(O)c1ccc(Br)cc1>>CC(C)(C)O C(=O)Nc1ccccc1NC(=O)/C=C/c1ccc(C(O)C(=O)Nc2ccc(C(F)(F)F)cc2)cc1  
 3971 C=Cc1ccc(OC)cc1.Cc1ccc(I)s1>>COc1ccc(/C=C/c2ccc(C)s2)cc1  
 3972 Br1c2ccccc2c(-c2ccccc2)c2cc3ccccc3cc12.C=CC(=O)OCC>>CCOC(=O)/C=C/c1c2ccccc2c(- c2ccccc2)c2cc3ccccc3cc12  
 3973 C=Cc1ccc(C#N)cc1.CCCCC(Br)C(F)(F)F>>CCCCC(/C=C/c1ccc(C#N)cc1)C(F)(F)F  
 3974 C=CC(=O)NCc1ccc(OC)cc1.COc1ccc2c(=O)c(I)coc2c1>>COc1ccc(CNC(=O)/C=C/c2coc3cc(OC)ccc 3c2=O)cc1  
 3975 C=C(NC(=O)OC(C)(C)C)C(=O)OC.CC(C)(C)OC(=O)N(C(=O)OC(C)(C)C)c1ncc(I)cn1>>COC(=O)/C (=C/c1cnc(N(C(=O)OC(C)(C)C)C(=O)OC(C)(C)C)nc1)NC(=O)OC(C)(C)C  
 3976 C=CS(=O)(=O)F.Ic1cccs1>>O=S(=O)(F)/C=C/c1cccs1  
 3977 C=CC(=O)OC.Cc1ccc(NC(=O)OC(C)(C)C)c(Br)c1>>COC(=O)/C=C/c1cc(C)ccc1NC(=O)OC(C)(C)C  
 3978 C=Cc1cncnc1.CCN(CC)c1ccc(Br)cc1>>CCN(CC)c1ccc(/C=C/c2cncnc2)cc1  
 3979 C=Cc1ccc(-c2ccccc2)cc1.COC(=O)c1ccccc1I>>COC(=O)c1ccccc1/C=C/c1ccc(-c2ccccc2)cc1  
 3980 C=Cc1ccccc1.CN1C[C@H]2C[C@H](Cn3c2ccc(Br)c3=O)C1=O>>CN1C[C@H]2C[C@H](Cn3c2ccc( /C=C/c2ccccc2)c3=O)C1=O  
 3981 C=CC(=O)OC.OCCc1ccccc1Br>>COC(=O)/C=C/c1ccccc1CCO  
 3982 C=Cc1ccc2c(c1)CC[C@@H]1[C@@H]2CC[C@]2(C)C(=O)CC[C@]12.CCOC(=O)C(F)I>>CCO C(=O)C(F)/C=C/c1ccc2c(c1)CC[C@@H]1[C@@H]2CC[C@]2(C)C(=O)CC[C@]12  
 3983 C=Cc1cc2ccccc2o1.C[Si](C)(OS(=O)(=O)C(F)(F)F)OS(=O)(=O)C(F)(F)F>>C[Si](C)(/C=C/c1cc2cccc e2o1)OS(=O)(=O)C(F)(F)F  
 3984 C=Cc1cccn1.CN(C)c1ccc(-c2ccc(CN(C(=O)C3CCCCC3)c3ccccc(I)c3)cc2)cc1>>CN(C)c1ccc(- c2ccc(CN(C(=O)C3CCCCC3)c3ccccc(/C=C/c4cccn4)c3)cc2)cc1  
 3985 C=C.COc1ccc(Br)c(C(N)=O)c1>>C=Cc1ccc(OC)cc1C(N)=O  
 3986 C=CC=O.COC(=O)COc1ccccc(I)c1>>COC(=O)COc1ccccc(/C=C/C=O)c1  
 3987 C=CC(=O)OC.CCCCCCCCCC(F)(F)[C@H]1CC(c2ccc(Br)cc2)=N[C@@H]1C(=O)OCC>>CCCCC CCCC(F)(F)[C@H]1CC(c2ccc(/C=C/C(=O)OC)cc2)=N[C@@H]1C(=O)OCC

3988 C=CC(=O)OCC.COc1cc(Br)cc2cc(-c3ccc4c(c3)OCO4)oc12>>CCOC(=O)/C=C/c1cc(OC)c2oc(-  
c3ccc4c(c3)OCO4)cc2c1  
3989 C=CC(=O)OCC.N#Cc1cccc(Br)c1>>CCOC(=O)/C=C/c1cccc(C#N)c1  
3990 C=CC(=O)OC.COc1cc(C(=O)c2c(Br)oc3c(OC(C)=O)c(OC)ccc23)cc(OC)c1OC>>COC(=O)/C=C/c1o  
c2c(OC(C)=O)c(OC)ccc2c1C(=O)c1cc(OC)c(OC)c(OC)c1  
C=Cc1ccc(C)nc1.CCN1C[C@]2(OC(=O)c3cc(I)ccc3NC(C)=O)CC[C@H](OC)[C@]34[C@@H]1[C@  
3991 H](C[C@H]23)[C@]1(O)C[C@H](OC)[C@H]2C[C@]4[C@]1(O)[C@H]2OC>>CCN1C[C@]2  
(OC(=O)c3cc(/C=C/c4ccc(C)nc4)ccc3NC(C)=O)CC[C@H](OC)[C@]34[C@@H]1[C@H](C[C@H]23  
)[C@]1(O)C[C@H](OC)[C@H]2C[C@]4[C@]1(O)[C@H]2OC  
3992 C=Cc1cc(CC)ccc1N(C)C(=O)c1cc(OC)ccc1I>>C=C1c2ccc(OC)cc2C(=O)N(C)c2ccc(CC)cc21  
3993 C=Cc1cc(C)ccc1OCc1cc(OC)ccc1Br>>COc1ccc2c(c1)COc1ccc(C)cc1/C=C\2  
3994 C=CC(=O)OC.CC(C)[C@H]1C=C(OS(=O)(=O)C(F)(F)F)[C@H](C)CC1>>COC(=O)/C=C/C1=C[C@  
@H](C(C)C)CC[C@H]1C  
3995 C=CC(N)=O.COc1ccc(Br)cc1>>COc1ccc(/C=C/C(N)=O)cc1  
3996 C=CC(=O)O.O=c1c2ccc(F)cc2n(Cc2ccc(Br)cc2)c(=O)n1CCc1cccc1>>O=C(O)/C=C/c1ccc(Cn2c(=O)  
n(CCC3cccc3)c(=O)c3ccc(F)cc32)cc1  
C=CCCCC(O[Si](C(C)C)(C(C)C)C(C)C)c1nc(-  
3997 c2cn(S(=O)(=O)c3ccc(C)cc3)c3cccc23)c(OC)nc1Br>>C=C1CCCC(O[Si](C(C)C)(C(C)C)C(C)C)c2nc  
(-c3cn(S(=O)(=O)c4ccc(C)cc4)c4cccc34)c(OC)nc21  
C=CC(=O)OC.Cc1c(CN(C)C)c2cccc2n1Cc1ccc(Br)cc1>>COC(=O)/C=C/c1ccc(Cn2c(C)c(CN(C)C)c  
3998 3cccc32)cc1  
C=Cc1cc(OC)cc(OC)c1.CC1(C)C=C(I)CC(C)(C)N1[O]>>COc1cc(/C=C/C2=CC(C)(C)N([O])C(C)(C)  
3999 C2)cc(OC)c1  
4000 C=C1CC(O)c2cc3cccc3nc21.Ic1cccc1>>OC1C/C(=C\c2cccc2)c2nc3cccc3cc21  
4001 C=C(NC(=O)OC(C)(C)C(=O)OCc1cccc1.COC(=O)c1cccc(I)c1>>COC(=O)c1cccc(/C=C/(NC(=O)  
OC(C)(C)C(=O)OCc2cccc2)c1  
4002 C=Cc1ccc(/C=C/c2ccc(C(C)(C)C)cc2)cc1.CCCCCCOc1ccc2cc(Br)ccc2c1>>CCCCCOc1ccc2cc(/C=  
C/c3ccc(/C=C/c4ccc(C(C)(C)C)cc4)cc3)ccc2c1  
4003 C=Cc1cc(OC)c(OC)c(OC)c1.O=C(O)c1ccc(Br)cc1>>COc1cc(/C=C/c2ccc(C(=O)O)cc2)cc(OC)c1OC  
4004 C=CC(=O)OC.Cc1ccc(S(=O)(=O)n2cc(C=O)c3c(Br)cccc32)cc1>>COC(=O)/C=C/c1cccc2c1c(C=O)cn  
2S(=O)(=O)c1ccc(C)cc1  
4005 Br1ccc(C=C(c2cccc2)c2cccc2)cc1.C=Cc1ccc(-  
c2ccc3c(c2)c2cccc2n3CC)cc1>>CCn1c2cccc2c2cc(-  
C=Cc1ccc(/C=C/c2ccc(N(C)C)cc2)cc1.Cc1cc2c(-c3ccc(I)cc3S(=O)(=O)O)c3cc(C)c(=O)cc-  
4006 3oc2cc1O>>Cc1cc2c(-  
c3ccc(/C=C/c4ccc(/C=C/c5ccc(N(C)C)cc5)cc4)cc3S(=O)(=O)O)c3cc(C)c(=O)cc-3oc2cc1O  
4007 C=C[Si](C)(C)c1cccc1/C=C\c1cccc1Br>>C=C1c2cccc2/C=C\c2cccc2[Si]1(C)C  
4008 C=CC1(O)CCC2(CC1)OCCO2.CCOC(=O)c1cccc(I)c1>>CCOC(=O)c1cccc(/C=C/C2(O)CCC3(CC2)  
OCCO3)c1  
4009 C=CC(=O)OCCOCCOCCOCCOC.CC(C)Oc1nc(N)nc(Nc2ccc(I)cc2)n1>>COCCOCCOCCOCCOC(=  
O)/C=C/c1ccc(Nc2nc(N)nc(OC(C)C)n2)cc1  
4010 C=CC(=O)OCCCC.COc1cccc(Br)c1>>CCCCOC(=O)/C=C/c1cccc(OC)c1  
4011 C=Cc1cncnc1.Nc1cccc1Br>>Nc1cccc1/C=C/c1cncnc1  
4012 Br1cccc1.C=CCOc1cccc1CC>>CCc1cccc1OC/C=C/c1cccc1  
4013 C=CCN1C(=O)c2cccc2C1=O.CS(=O)(=O)c1ccc(Br)cc1>>CS(=O)(=O)c1ccc(/C=C/CN2C(=O)c3cccc  
c3C2=O)cc1  
4014 C=CC(=O)OC.C[C@H]1CC[C@H]2COCC2=C1Br>>COC(=O)/C=C/C1=C2COC[C@@H]2CC[C@  
@H]1C  
4015 C=CN1CCCC1=O.Cc1ccc(OS(=O)(=O)C(F)(F)F)c(Br)c1>>C=C(c1ccc(C)cc1Br)N1CCCC1=O  
4016 Br1cccc1I.C=Cc1ccc(Cl)cc1>>Clc1ccc(/C=C/c2cccc2Br)cc1  
C=Cc1cccn1.O=C(c1ccc(F)cc1)N1CCC(O)(Cn2cnc3c(cnn3-  
4017 c3ccc(Br)cc3)c2=O)CC1>>O=C(c1ccc(F)cc1)N1CCC(O)(Cn2cnc3c(cnn3-  
c3ccc(/C=C/c4cccn4)cc3)c2=O)CC1  
4018 C=C(F)C(=O)OC.N#Cc1cccc(I)c1>>COC(=O)/C(F)=C/c1cccc(C#N)c1  
4019 Br1c2cccc2cc2cccc12.C=CC(=O)CC>>CCC(=O)/C=C/c1c2cccc2cc2cccc12  
4020 C=CC#N.CN1C(c2cccc2)=C(I)c2ccsc2S1(=O)=O>>CN1C(c2cccc2)=C(/C=C/C#N)c2ccsc2S1(=O)=  
C=Cc1cc(OCc2cccc2)c(OCc2cccc2)nn1.Cc1cc(C(F)(F)F)ccc1Br>>Cc1cc(C(F)(F)F)ccc1/C=C/c1cc(  
4021 OCc2cccc2)c(OCc2cccc2)nn1  
4022 C=Cc1ccc2c(cnn2C2CCCCO2)c1.Clc1cccn1>>C(=C/c1ccc2c(cnn2C2CCCCO2)c1)\c1cccn1  
4023 C=CC(=O)OCCCC.OCc1ccc(I)cc1>>CCCCOC(=O)/C=C/c1ccc(CO)cc1  
4024 Br1cccc1.C=C(C)C(=O)OC(C)(C)C>>C/C(=C\c1cccc1)C(=O)OC(C)(C)C

4025 C=CC(=O)OCC.Clc1cccc1>>CCOC(=O)/C=C/c1cccc1  
4026 C=CP(=O)(O)O.O=[N+](O-)]c1ccc(Br)cc1>>O=[N+](O-)]c1ccc(/C=C/P(=O)(O)O)cc1  
4027 CCOC(=O)/C(F)=C\CCc1cccc1.Ic1cccc1>>CCOC(=O)/C(F)=C\CCc1cccc1)c1cccc1  
4028 C=Cc1cncnc1.CC(C)(C)OC(=O)N[C@H](COc1cncnc(Br)c1)C(=O)Nc1ccc2cccc2c1>>CC(C)(C)OC(=O)N[C@H](COc1cncnc(/C=C/c2cncnc2)c1)C(=O)Nc1ccc2cccc2c1  
4029 C=CC(C)(C)O.Ic1cccc1>>CC(C)(O)/C=C/c1cccc1  
4030 C=Cc1ccc2cc(F)c(F)cc2n1.OC1c2cc(Br)ccc2OCc2ccnc21>>OC1c2cc(/C=C/c3ccc4cc(F)c(F)cc4n3)cc2OCc2ccnc21  
4031 C=Cc1ccc(Cl)cc1.O=CN(C=O)CCCC(Br)C(F)(F)F>>O=CN(C=O)CCCC(/C=C/c1ccc(Cl)cc1)C(F)(F)F  
4032 C=CCOc1cccc1.Ic1cccs1>>C(=C/c1cccs1)\COc1cccc1  
4033 C=CC(=O)OCc1cn(S(=O)(=O)c2cccc2[N+](=O)[O-])c2ccc([N+](=O)[O-])cc12.Ic1ccc(CCCOC2CCCCO2)cc1>>O=C(/C=C/c1ccc(CCCOC2CCCCO2)cc1)OCc1cn(S(=O)(=O)c2cccc2[N+](=O)[O-])c2ccc([N+](=O)[O-])cc12  
4034 C=CC(=O)OC.O=C(c1cccc1)c1ccc(Cl)cc1>>COC(=O)/C=C/c1ccc(C(=O)c2cccc2)cc1  
4035 C=CC(=O)OCCN(C)C.COc1ccc(NC(=O)c2cc(=O)c3cc(Br)ccc3o2)cc1>>COc1ccc(NC(=O)c2cc(=O)c3cc(/C=C/C(=O)OCCN(C)C)ccc3o2)cc1  
4036 C=Cc1ccc(CP(=O)(OCC)OCC)cc1.CCCCCCCCc1cc(C=O)c(CCCCCCCC)cc1Br>>CCCCCCCCc1cc(/C=C/c2ccc(CP(=O)(OCC)OCC)cc2)c(CCCCCCCC)cc1C=O  
4037 C=CC(=O)OC.CN1C(=O)CN=C(c2cccc2)c2ccc(Br)cc21>>COC(=O)/C=C/c1ccc2c(c1)N(C)C(=O)CN=C2c1cccc1  
4038 C=CC(=O)OC.O=c1[nH]c(=O)n([C@H]2C[C@H](O)[C@]3(CO)C[C@H]23)cc1I>>COC(=O)/C=C/c1cn([C@H]2C[C@H](O)[C@]3(CO)C[C@H]23)c(=O)[nH]c1=O  
4039 C=CC(=O)OCC.Cc1nc(-n2c(C)ccc2C)cc(NC(C)C)c1Br>>CCOC(=O)/C=C/c1c(NC(C)C)cc(-n2c(C)ccc2C)nc1C  
4040 C=CC(C)(C)O.COc1ccc(Br)cc1>>COc1ccc(/C=C/C(C)(C)O)cc1  
4041 C=C(c1ccc(OC)c(I)c1)c1cc(OC)c(OC)c(OC)c1.C=CC(=O)OC>>C=C(c1ccc(OC)c(/C=C/C(=O)OC)c1)c1cc(OC)c(OC)c(OC)c1  
4042 C=C(NC(=O)OCC[Si](C)(C)C)C(=O)OC.CC(C)(C)OC(=O)N/C(=C\c1cccc(Br)c1)C(=O)OCc1cccc1>>COC(=O)/C=C/c1cccc(/C=C/C\NC(=O)OC(C)(C)C)C(=O)OCc2cccc2)c1)NC(=O)OCC[Si](C)(C)C  
4043 C=CC(C)c1c(OC(=O)c2cccc2I)c(=O)n(C)c(=O)n1C>>CC1/C=C\c2cccc2C(=O)Oc2c1n(C)c(=O)n(C)c2=O  
4044 O=C(/C=C/Oc1cccc1-c1ncccc1Br)OCc1cccc1>>O=C(/C=C1/Oc2cccc2-c2ncccc21)OCc1cccc1  
4045 C=CC(=O)OC.CN1c2cccc2Sc2cc(Br)ccc21>>COC(=O)/C=C/c1ccc2c(c1)Sc1cccc1N2C  
4046 C=Cc1ccc(N(c2ccc(C)cc2)c2ccc(C)cc2)cc1.N#Cc1cc([N+](=O)[O-])ccc1Br>>Cc1ccc(N(c2ccc(C)cc2)c2ccc(/C=C/c3ccc([N+](=O)[O-])cc3C#N)cc2)cc1  
4047 C=CC(=O)OCC.Clc1ccc(Br)cn1>>CCOC(=O)/C=C/c1ccc(Cl)nc1  
4048 C=C[C@](C)(CC=C(C)C)CO[Si](c1cccc1)(c1cccc1)C(C)(C)C.COc1ccc(I)cc1>>COc1ccc(/C=C/[C@](C)(CC=C(C)C)CO[Si](c2cccc2)(c2cccc2)C(C)(C)C)cc1  
4049 C=CC(=O)OC.Cc1cccc1C(=O)c1sc2cc(O)ccc2c1Oc1ccc(Br)cc1>>COC(=O)/C=C/c1ccc(Oc2c(C(=O)c3cccc3)sc3cc(O)ccc23)cc1  
4050 C=C(C(=O)OCC)c1cccc1Br.CC(C)(C)OC(=O)Nc1cccc1I>>CCOC(=O)/C=C/c1cccc1NC(=O)OC(C)(C)C)c1cccc1Br  
4051 C=Cc1cncnc1.Oc1cccc(Br)c1>>Oc1cccc(/C=C/c2cncnc2)c1  
4052 Brc1cccc(OCc2cccc2)c1.C=CC(OCC)OCC>>CCOC(/C=C/c1cccc(OCc2cccc2)c1)OCC  
4053 C=CC(=O)N(C)C.COC(=O)c1cc(Br)cc2c1OC(c1cccc1)(c1cccc1)O2>>COC(=O)c1cc(/C=C/C(=O)N(C)C)cc2c1OC(c1cccc1)(c1cccc1)O2  
4054 \*CNCCCCOCCOCCOCCNC(=O)COc1ccc(C(Cc2cc(OC)cc(OC)c2)NC(=O)c2cccc(C=C)c2)cc1.FC(F)(F)Oc1cccc(I)c1>>\*CNCCCCOCCOCCOCCNC(=O)COc1ccc(C(Cc2cc(OC)cc(OC)c2)NC(=O)c2cccc(/C=C/c3cccc(OC(F)(F)F)c3)c2)cc1  
4055 C=CC(N)=O.COC(=O)c1ccc(I)cc1>>COC(=O)c1ccc(/C=C/C(N)=O)cc1  
4056 C=CC1CCCC1.Cc1nc(-c2ccc(I)cc2)sc1-c1cnc(N)n1>>Cc1nc(-c2ccc(/C=C/C3CCCC3)cc2)sc1-c1cnc(N)n1  
4057 Brc1ccc(-c2cccs2)s1.C=CC(=O)OCCCC>>CCCCOC(=O)/C=C/c1ccc(-c2cccs2)s1  
4058 C=CC(=O)OC(C(F)(F)F)C(F)(F)F.Ic1cccc1>>O=C(/C=C/c1cccc1)OC(C(F)(F)F)C(F)(F)F  
4059 C=CC(=O)OC.COc1ccc(Br)cn1>>COC(=O)/C=C/c1cnc(OC)nc1  
4060 C=CC(=O)OC(C)(C)C.COc1ccc(S(=O)(=O)n2ccc3cc(Br)cn32)cc1>>COc1ccc(S(=O)(=O)n2ccc3cc(/C=C/C(=O)OC(C)(C)C)cn32)cc1  
4061 C=Cc1ccc(C=C)cc1.Nc1ccc(I)cc1>>C=Cc1ccc(/C=C/c2ccc(N)cc2)cc1  
4062 C=CC(=O)OC.O=c1[nH]c(=O)n([C@H]2O[C@H](CO)[C@H](O)[C@H]2F)cc1I>>COC(=O)/C=C/c1cn([C@H]2O[C@H](CO)[C@H](O)[C@H]2F)c(=O)[nH]c1=O  
4063 C=CC(=O)OC(C)(C)C.COC(=O)c1ccc(Br)c(F)c1>>COC(=O)c1ccc(/C=C/C(=O)OC(C)(C)C)c(F)c1

C=Cc1ccc(N(CCCC)CCCC)cc1.CCCCCCCCCC1(CCCCCCCCCC)c2cc(Br)ccc2-  
4064 c2ccc(C=O)cc21>>CCCCCCCCCCCC1(CCCCCCCCCC)c2cc(C=O)ccc2-  
c2ccc(/C=C/c3ccc(N(CCCC)CCCC)cc3)cc21  
C=CC(=O)OC.Ic1c(C[Se]c2ccccc2)c(-c2ccccc2)c2ccccc2c1-  
4065 c1ccccc1>>COC(=O)/C=C/c1c(C[Se]c2ccccc2)c(-c2ccccc2)c2ccccc2c1-c1ccccc1  
C=CC(=O)O.Cc1ccc(I)cc1>>Cc1ccc(/C=C/C(=O)O)cc1  
Br1cccc2cccc12.C=Cc1nc2c(N)ncnc2n1[C@@H]1O[C@H](CO[Si](C)(C)C(C)(C)C)[C@@H](O[Si  
4066 ])(C)(C)C(C)(C)C)[C@H]1O[Si](C)(C)C(C)(C)C>>CC(C)(C)[Si](C)(C)OC[C@H]1O[C@@H](n2c(/C  
=C/c3cccc4cccc34)nc3c(N)ncnc32)[C@H](O[Si](C)(C)C(C)(C)C)[C@@H]1O[Si](C)(C)C(C)(C)C  
4067 C=C.Cc1cc(C)c(I)c(C)c1>>C=Cc1c(C)cc(C)cc1C  
C=CC(=O)N(C)Cc1oc2ccccc2c1C.CC(C)(C)OC(=O)NCC1Cc2cc(Br)cnc2NC1=O>>Cc1c(CN(C)C(=  
4068 O)/C=C/c2nc3c(c2)CC(CNC(=O)OC(C)(C)C(=O)N3)oc2ccccc12  
C=CC#N.COc1ccc(I)cc1>>COc1ccc(/C=C/C#N)cc1  
C=CS(=O)(=O)N1CCC2(CC1)N=C([C@H]1CC[C@H](C)CC1)NC2=O.CNc1cc(C)c(Br)c(C)c1>>CN  
4069 c1cc(C)c(/C=C/S(=O)(=O)N2CCC3(CC2)N=C([C@H]2CC[C@H](C)CC2)NC3=O)c(C)c1  
C=CC(=O)O.NS(=O)(=O)c1ccc(S(=O)(=O)Nc2ccc(I)cc2)cc1>>NS(=O)(=O)c1ccc(S(=O)(=O)Nc2ccc(  
4070 /C=C/C(=O)O)cc2)cc1  
C=CC(=O)OC.CO1=C(I)CON(Cc2ccccc2)[C@H]1[C@H]1COC(C)(C)O1>>COC(=O)/C=C/C1=C(  
4071 OC)[C@H]([C@H]2COC(C)(C)O2)N(Cc2ccccc2)OC1  
C=CCCCCCCC.COc1ccc(Br)cc1>>CCCCCCCC/C=C/c1ccc(OC)cc1  
4072 C=CC(=O)N(C)OC.Ic1ccc2ccnc2c1>>CON(C)C(=O)/C=C/c1ccc2ccnc2c1  
COC[C@@H](/N=C(\c1ccccc1)N1C=CCC[C@H]1C)C(C)C.Fc1ccc(I)cc1>>COC[C@@H](/N=C(\c1c  
4073 cccc1)N1C=C(c2ccc(F)cc2)CC[C@H]1C)C(C)C  
C=CC(=O)OCCCC.CN[13c]1[13cH][13c](Cl)[13cH][13cH][13c]1[N+](=O)[O-  
4074 ]>>CCCCOC(=O)/C=C/[13c]1[13cH][13cH][13c](N+)(=O)[O-][13c](NC)[13cH]1  
C=Cc1ccc(OCOC)cc1.COCOc1cc(OS(=O)(=O)C(F)(F)F)cc(OCOC)c1C/C=C(\C)CC/C=C(\C)CCC=C(  
4075 C)C>>COCOc1ccc(/C=C/c2cc(OCOC)c(C/C=C(\C)CC/C=C(\C)CCC=C(C)C)c(OCOC)c2)cc1  
4076 Br1ccenc1.C=CC(C)(C)O>>CC(C)(O)/C=C/c1ccenc1  
C=Cc1ccccc1.CC(=O)O[IH2](OC(C)=O)c1ccccc1>>C(=C/c1ccccc1)\c1ccccc1  
4077 C=C1C(=O)O[C@H]2[C@H]1CCC(=C)[C@@H]1C[C@H](OC(C)=O)C(=C)[C@H]21.O=[N+](O-  
4078 )c1cc(Cl)ccc1I>>C=C1CC[C@H]2/C(=C)\c3ccc(Cl)cc3[N+](=O)[O-  
4079 ]C(=O)O[C@@H]2[C@H]2C(=C)[C@@H](OC(C)=O)C[C@@H]12  
C=CC(=O)N1C(=O)OC[C@@H]1c1ccccc1.CC(C)(C)OC(=O)C(C(=O)OC(C)(C)C)c1ccc(Br)cc1>>C  
4080 C(C)(C)OC(=O)C(C(=O)OC(C)(C)C)c1ccc(/C=C/C(=O)N2C(=O)OC[C@@H]2c2ccccc2)cc1  
C=CC(=O)OCC.Cc1cc(F)c(CCCN(C)C)cc1Br>>CCOC(=O)/C=C/c1cc(CCCN(C)C)c(F)cc1C  
4081 C=CS(=O)(=O)F.C[C@]12CC[C@@H]3c4ccc(OS(=O)(=O)Oc5ccc(I)cc5)cc4CC[C@H]3[C@@H]1C  
CC2=O>>C[C@]12CC[C@@H]3c4ccc(OS(=O)(=O)Oc5ccc(/C=C/S(=O)(=O)F)cc5)cc4CC[C@H]3[C@  
4082 @H]1CCC2=O  
C=Cc1ccccc1.O=[N+](O-)c1ccc(/C=C/c2ccc(I)cc2)cc1>>O=[N+](O-  
4083 )c1ccc(/C=C/c2ccc(/C=C/c3ccccc3)cc2)cc1  
Br1cnc2ccccc2c1.C=CCC1CCN(C)C[C@H](OC(C)=O)[C@H](C)C[C@H](CC(OC)OC)[C@H](O[C  
4084 @H]2O[C@H](C)[C@@H](O[C@H]3C[C@@](C)(O)[C@@H](OC(=O)CC)[C@H](C)O3)[C@H](  
N(C)C)[C@H]2OC(C)=O)[C@@H](OC)[C@H](OC(=O)CC)CC(=O)N1>>CCC(=O)O[C@H]1[C@H]  
4085 (C)O[C@@H](O[C@H]2[C@H](N(C)C)[C@@H](OC(C)=O)[C@H](O[C@@H]3[C@@H](OC)[C@  
H](OC(=O)CC)CC(=O)NC(C/C=C/c4cnc5ccccc5c4)CCN(C)C[C@H](OC(C)=O)[C@H](C)C[C@H  
13CC(OC)OC)O[C@@H]2C)C[C@@H]1(C)O  
4086 C=CC(=O)OC.Ic1cnn2c(-c3ccccc3)cc(-c3ccccc3)nc12>>COC(=O)/C=C/c1cnn2c(-c3ccccc3)cc(-  
c3ccccc3)nc12  
Br1cnc2ccccc2c1.C=CCC[C@H]1COC(C)(C)N1C(=O)OC(C)(C)C>>CC(C)(C)OC(=O)N1[C@@H](  
4087 CC/C=C/c2cnc3ccccc3c2)COC1(C)C  
C=CC(C)(C)O.CC(=O)O[C@H]1C(Br)=C[C@@H](O[Si](C)(C)C(C)(C)C)[C@@H]2O[C@H]12>>C  
4088 C(=O)O[C@H]1C(/C=C/C(C)(C)O)=C[C@@H](O[Si](C)(C)C(C)(C)C)[C@@H]2O[C@H]12  
C=CC(=O)N(C)OC.N#Cc1ccc2c(Br)cccc2c1>>CON(C)C(=O)/C=C/c1cccc2cc(C#N)ccc12  
4089 Br1ccc(C(c2ccc3c(cnn3C3CCCCO3)c2)=C2[C@H]3C[C@@H]4C[C@@H](C[C@H]2C4)C3)cc1.C  
4090 =CC(=O)OC>>COC(=O)/C=C/c1ccc(C(c2ccc3c(cnn3C3CCCCO3)c2)=C2[C@H]3C[C@@H]4C[C@  
@H](C[C@H]2C4)C3)cc1  
4091 C=Cc1ccccc1.[O-][N+](=Nc1ccc(Br)cc1)c1ccccc1>>[O-][N+](=Nc1ccc(/C=C/c2ccccc2)cc1)c1ccccc1  
C=CC(=O)OC.COc1ccc(-  
4092 c2ccc(CN(C(=O)CC(C)(C)C)c3nccc4cc(Br)ccc34)cc2)cc1C>>COC(=O)/C=C/c1ccc2c(N(Cc3ccc(-  
c4ccc(OC)c(C)c4)cc3)C(=O)CC(C)(C)C)cccc2c1  
4093 C=CC(=O)OCCCC.CCCCOC(=O)c1ccc(Br)cc1>>CCCCOC(=O)/C=C/c1ccc(C(=O)OCCCC)cc1  
4094

C=Cc1n[nH]c2cc([C@ @][H]3[C@@ @]j34C(=O)Nc3ccc(OC)c34)ccc12.CN(C)[C@l(cF)cc(Br)cc1F>>C  
 Oc1ccc2c(c1)[C@ ]1[C](C[H]1c1ccc3c(/C=C/c4cc(F)c(CN(C)C)c(F)c4)n[nH]c3c1)C(=O)N2  
 C=Cc1cccc(C)c1.CCOC(=O)C(Cc1cccc1I)C(C)=O>>CCOC(=O)C(Cc1cccc1/C=C/c1cccc(C)c1)C(C  
 C=COCCCC.COc1cccc1/N=N/c1ccc(OS(=O)(=O)C(F)(F)F)cc1>>C=C(OCCCC)c1ccc(/N=N/c2cccc  
 2OC)cc1  
 C=COCCO.N#Cc1ccc(Br)cc1>>C=C(OCCO)c1ccc(C#N)cc1  
 C=CC(=O)OC.CCOCe1nc2c(N)nc3cc(Br)ccc3c2n1CCCCN1CCCS1(=O)=O>>CCOCe1nc2c(N)nc3cc(  
 /C=C/C(=O)OC)ccc3c2n1CCCCN1CCCS1(=O)=O  
 C=CCNC(=O)OC(C)(C)C.Clc1ccc2cccc2c1>>C=C(CNC(=O)OC(C)(C)C)c1ccc2cccc2c1  
 C=Cc1cccc(C)c1.O=Cc1cccc1Br>>Cc1cccc(/C=C/c2cccc2C=O)c1  
 Brclccc2ccnc(N3CCCC3)c2c1.C=CC(=O)OC>>COC(=O)/C=C/c1ccc2ccnc(N3CCCC3)c2c1  
 C=COCCCC.Cc1cc(Br)c2nc(N3CCN(C)CC3)cc(=O)n2c1>>C=C(OCCCC)c1cc(C)cn2c(=O)cc(N3CC  
 N(C)CC3)nc12  
 C=CC(OC)OC.FC(F)(F)c1cccc(I)c1>>COC(/C=C/c1cccc(C(F)(F)F)c1)OC  
 C=Cc1ccc(OC)cc1.COC(=O)[C@H](Cc1cccc1)NC(=O)C(F)(F)Br>>COC(=O)[C@H](Cc1cccc1)NC  
 (=O)C(F)(F)/C=C/c1ccc(OC)cc1  
 C=CCC(Nc1cccc1I)c1cccc1>>C=C1CC(c2cccc2)Nc2cccc21  
 Brclccc(N(c2cccc2)c2cccc2)c1.C=Cc1ccc(C(=O)O)cc1>>O=C(O)c1ccc(/C=C/c2cccc(N(c3cccc3)  
 c3cccc3)c2)cc1  
 C=CC(=O)C(O[Si](CC)(CC)CC)c1c(OC)ccc(OC)c1OCc1cccc1.COC(=O)C1Cc2cc(I)c(OCc3cccc3)c  
 (OC)c2C(=O)O1>>CC[Si](CC)(CC)OC(C(=O)/C=C/c1cc2c(c(OC)c1OCc1cccc1)C(=O)OC(C(=O)O  
 C)C2)c1c(OC)ccc(OC)c1OCc1cccc1  
 C=CC(F)(F)C(F)(F)C(F)(F)C(F)(F)C(F)(F)C(F)(F)C(F)(F)C(F)(F)FC(F)(F)c1ccc(Br)cc1>>FC(F)(F)  
 c1ccc(/C=C/C(F)(F)C(F)(F)C(F)(F)C(F)(F)C(F)(F)C(F)(F)C(F)(F)C(F)(F)C(F)(F)F)cc1  
 C=CC#N.Nc1nc(N)c2c(I)cn([C@H]3[C@H](O)[C@ @H](CO)O3)c2n1>>N#C/C=C/c1cn([C@H]2C[  
 C@H](O)[C@ @H](CO)O2)c2nc(N)nc(N)c12  
 C=CC(C)=O.c1ccc([I+ ]c2cccc2)cc1>>CC(=O)/C=C/c1cccc1  
 Brclenc2c(c1)CNC1(CCCC1)CN2.C=CC(=O)OC(C)(C)C>>CC(C)(C)OC(=O)/C=C/c1cnc2c(c1)CNC  
 1(CCCC1)CN2  
 C=CCn1c(C)c(C(=O)c2ccc(C)cc2)c2cc(OC)ccc21.C[C@ @H](OCc1ccc(I)cc1)C(=O)O>>Co1ccc2c(c  
 1)c(C(=O)c1ccc(C)cc1)c(C)n2C/C=C/c1ccc(CO[C@H](C)C(=O)O)cc1  
 Brclccc(-c2cccs2)s1.C=CC(=O)OCC>>CCOC(=O)/C=C/c1ccc(-c2cccs2)s1  
 C=CC1CC1.Nc1cccc1Br>>Ne1cccc1/C=C\C1CC1  
 \*CNCCCOCCOCCOCCCN(C(=O)COc1ccc(C(Cc2cc(OC)cc(OC)c2)NC(=O)c2cccc(C=C)c2)cc1.N#C  
 Cc1cccc(I)c1>>\*CNCCCOCCOCCOCCCN(C(=O)COc1ccc(C(Cc2cc(OC)cc(OC)c2)NC(=O)c2cccc(/C  
 =C/c3cccc(CC#N)c3)c2)cc1  
 C=CC(=O)OC.CN(C)C1COc2c(Br)ccc3[nH]cc(c23)C1>>COC(=O)/C=C/c1ccc2[nH]cc3c2c1OCC(N(  
 C)C)C3  
 Brclccc2c(c1)Sc1cccc1N2.C=Cc1ccc(OC(C)=O)cc1>>CC(=O)Oc1ccc(/C=C/c2ccc3c(c2)Sc2cccc2N  
 3)cc1  
 C=Cc1ccc(C)cc1.O=[N+ ]([O- ])c1cccc(I)c1>>Cc1ccc(/C=C/c2cccc([N+ ](=O)[O- ])c2)cc1  
 C=CCC[C@H]1N[C@ @H]1C(=O)c1cccc1.Ic1cccc1>>O=C(c1cccc1)[C@H]1N[C@ @H]1CC/C=C  
 /c1cccc1  
 C=CC(C)(C)C1CCC(=O)N1CC(=C)Br>>C=C1CN2C(=O)CCC2C(C)(C)C1=C  
 C=Cc1nc2c(N)ncnc2n1[C@ @H]1O[C@H](CO[Si](C)(C)C(C)(C)C)[C@ @H](O[Si](C)(C)C(C)(C)C)[  
 C@H]1O[Si](C)(C)C(C)(C)C.Cc1cccc1Br>>Cc1cccc1/C=C/c1nc2c(N)ncnc2n1[C@ @H]1O[C@H](  
 CO[Si](C)(C)C(C)(C)C)[C@ @H](O[Si](C)(C)C(C)(C)C)[C@H]1O[Si](C)(C)C(C)(C)C  
 C=Cc1ccc(C(C)=O)cc1.IC1CCCCC1>>CC(=O)c1ccc(/C=C/C2CCCCC2)cc1  
 C=Cc1cccc1.Cc1cnc(C)c(Cl)n1>>Cc1cnc(C)c(/C=C/c2cccc2)n1  
 C=Cc1cnc1.Cn1cc[C@ @H](COc2cnc(Br)c2)NC(=O)OC(C)(C)C)c2cccc21>>Cn1cc[C@ @H]  
 )(COc2cnc(/C=C/c3cnc3)c2)NC(=O)OC(C)(C)C)c2cccc21  
 Brlccees1.C=Cc1ccc2cccc2c1>>C=(C/c1cces1)c1ccc2cccc2c1  
 C=C1C(=O)O[C@ @H]2/C=C(\C)CC/C=C(\C)CC[C@ @H]12.Cc1ccc(I)cc1>>C/C1=C[C@H]2OC(=  
 O)/C=C/c3ccc(C)cc3)[C@ @H]2CC/C(C)=C/CC1  
 C=CC(=O)OCC.Nc1c(I)enc(Cl)c1Br>>CCOC(=O)/C=C/c1enc(Cl)c(Br)c1N  
 C=CC(=O)OCC.C[C@H](c1cccc2cccc12)N(CC1CN(C)c2ccc(Br)cc2O1)C(=O)OC(C)(C)C>>CCOC(  
 =O)/C=C/c1ccc2c(c1)OC(CN(C(=O)OC(C)(C)C)[C@H](C)c1cccc3cccc13)CN2C  
 C=Cc1ccc2cccc2c1.FC(F)(F)C(Br)CCc1cccc1>>FC(F)(F)C(/C=C/c1ccc2cccc2c1)CCc1cccc1  
 C=CC(=O)O.O=S(=O)(Nc1ccc(I)cc1)c1cccc1>>O=C(O)/C=C/c1ccc(NS(=O)(=O)c2cccc2)cc1  
 C=Cc1cccc1.COC(=O)c1cccc1Br>>COC(=O)c1cccc1/C=C/c1cccc1

4133 C=CC(=O)NCc1ccccc1.CC(C)(C)OC(=O)c1ccccc1Br>>CC(C)(C)OC(=O)c1ccccc1/C=C/C(=O)NCc1ccccc1  
C=C(NC(=O)OCC[Si](C)(C)C)C(=O)OC.COc1ccc(-  
4134 c2ccc(OC)c(/C=C(\NC(=O)OC(C)(C)C)C(=O)OCc3ccccc3)c2)cc1I>>COC(=O)/C=C/c1ccc(-  
c2ccc(OC)c(/C=C(\NC(=O)OC(C)(C)C)C(=O)OCc3ccccc3)c2)ccc1OC)NC(=O)OCC[Si](C)(C)C  
4135 C=CC(=O)OC(C)(C)C.CC(=O)c1ccc(Cl)cc1Br>>CC(=O)c1ccc(Cl)cc1/C=C/C(=O)OC(C)(C)C  
4136 C=CCCN(C)C(=O)OC(C)(C)C.CCSc1encc(Br)c1>>CCSc1encc(/C=C/CCN(C)C(=O)OC(C)(C)C)c1  
C=CCNC(=O)OC(C)(C)C.CCOC(=O)CC(c1ccc(C)c(CN2CC(C)Cc3cc(Br)ccc3S2(=O)=O)c1)c1ccc(F)  
4137 cc1C>>CCOC(=O)CC(c1ccc(C)c(CN2CC(C)Cc3cc(/C=C/CNC(=O)OC(C)(C)C)ccc3S2(=O)=O)c1)c1ccc(F)cc1C  
4138 C=Cc1ccccc1.COC(=O)c1ccc(Br)cc1>>COC(=O)c1ccc(/C=C/c2ccccc2)cc1  
4139 Cc1cc(Br)c(-c2ccccc2O/C=C/C(=O)c2ccccc2)cc1C>>Cc1cc2c(cc1C)-  
4140 C=Cc1ccc(Br)cc1.CCOC(=O)c1ccc(I)cc1>>CCOC(=O)c1ccc(/C=C/c2ccc(Br)cc2)cc1  
4141 C=COCCCC.O=c1cc(Br)c2cc(F)ccc2o1>>CCCCO/C=C/c1cc(=O)oc2ccc(F)cc12  
4142 C=CP(=O)(O)O.COc1ccc(Br)cc1>>COc1ccc(/C=C/P(=O)(O)O)cc1  
4143 C=CC(=O)OCC.CC1(C)CC(=C(c2ccc(Br)cc2)c2ccc(O)c(Cl)c2)CC(C)(C)O1>>CCOC(=O)/C=C/c1ccc  
(C(=C2CC(C)(C)OC(C)(C)C2)c2ccc(O)c(Cl)c2)cc1  
4144 C=C[C@H]1O[C@@H]2OC(C)(C)O[C@@H]2[C@H]1N(Cc1ccccc1Br)C(=O)OC>>C=C1c2ccccc2C  
N(C(=O)OC)[C@H]2[C@@H]1O[C@@H]1OC(C)(C)O[C@H]21  
4145 C=Cc1ccccc1.Cn1c(-c2ccccc2)c(I)c(=O)c2ccccc21>>Cn1c(-  
4146 C=CC#N.CCOC(=O)c1ccccc1c1>>CCOC(=O)c1ccccc1/C=C/C#N)c1  
4147 C=CC(OC)OC.O=[N+](=[O-])c1ccccc1c1>>COC(/C=C/c1ccccc1[N+](=O)[O-])c1OC  
4148 C=CC(=O)OC.CNc1ncc(I)cc1C(=O)OC(C)(C)C>>CNc1ncc(/C=C/C(=O)OC)cc1C(=O)OC(C)(C)C  
4149 C=Cc1ccccc1.Nc1nc(N)c2cc(I)ccc2n1>>Nc1nc(N)c2cc(/C=C/c3ccccc3)ccc2n1  
4150 C=CS(=O)(=O)N(CC(=C)Br)[C@H](C(=O)OC)C(C)C>>C=C1C=CS(=O)(=O)N([C@H](C(=O)OC)C  
(C)C)C1  
4151 C=CCNC(=O)c1cc(C)cc(Br)c1NC(=O)c1ccccc1.Ic1ccccc1>>Cc1cc(Br)c(NC(=O)c2ccccc2)c(C(=O)N  
C/C=C/c2ccccc2)c1  
4152 C=C1C(=O)O[C@H]2[C@H]1CC/C(C)=C/CC[C@@]1(C)O[C@@H]21.Fc1ccccc1I>>C/C1=C/CC[C@  
@]2(C)O[C@H]2[C@H]2OC(=O)/C(=C/c3ccccc3F)[C@@H]2CC1  
4153 C=CC(=O)OCCCC.O=C1Nc2ccccc2CN1c1cc(OCc2nccccc2F)ccc1Br>>CCCCOC(=O)/C=C/c1ccc(OC  
c2nccccc2F)cc1N1Cc2ccccc2NC1=O  
4154 Br1ccc(Cc2ccccc2)cc1.C=CC(=O)OCC>>CCOC(=O)/C=C/c1ccc(Cc2ccccc2)cc1  
4155 C=CC(=O)OCC.CC1(C)Cc2cc(Br)ccc2C1=O>>CCOC(=O)/C=C/c1ccc2c(c1)CC(C)(C)C2=O  
4156 C=CC(C)=O.COc1cc2c(cc1Br)[C@H]1CCCC[C@H]1N2C(=O)C(C)(C)C>>COc1cc2c(cc1/C=C/C(C)  
=O)[C@H]1CCCC[C@H]1N2C(=O)C(C)(C)C  
4157 C=C1CC(c2ccc(Cl)cc2)OC1=O.Fc1ccccc1c1>>O=C1OC(c2ccc(Cl)cc2)/C=C1=C\c1ccccc(F)c1  
4158 C=CCN(C(=O)c1ccc2ccccc2c1Br)C(C(=O)NC1CCCCC1)c1ccc(Cl)cc1>>C=C1CN(C(C(=O)NC2CCC  
CC2)c2ccc(Cl)cc2)C(=O)c2ccc3ccccc3c21  
Br1enc2ccccc2c1.C=CCO[C@@]1(C)C[C@@H](C)C(=O)[C@H](C)[C@@]2(O)NC(=O)O[C@@]2(C)[  
C@@H](CC)OC(=O)[C@H](C)[C@@H](O[C@H]2[C@@](C)(OC)[C@@H](O[Si](C)(C)C)[C@H  
4159 ](C)O2)[C@H](C)[C@H]1O[C@@H]1O[C@H](C)C[C@H](N(C)C)[C@H]1O[Si](C)(C)C>>CC[C@  
H]1OC(=O)[C@H](C)[C@@H](O[C@H]2[C@@](C)(OC)[C@@H](O[Si](C)(C)C)[C@H](C)O2)[C  
@H](C)[C@@H](O[C@@H]2O[C@H](C)C[C@H](N(C)C)[C@H]2O[Si](C)(C)C)[C@](C)(OC/C=C/  
c2enc3ccccc3c2)C[C@@H](C)C(=O)[C@H](C)C[C@@]2(O)NC(=O)O[C@@]21?C  
4160 C=Cc1cc(OC(C)=O)cc(OC(C)=O)c1.CC(C)(Oc1ccc(C(=O)c2ccc(Cl)cc2)cc1)C(=O)Oc1ccc(I)cc1>>C  
C(=O)Oc1cc(/C=C/c2ccc(OC(=O)C(C)C)Oc3ccc(C(=O)c4ccc(Cl)cc4)cc3)cc2)cc(OC(C)=O)c1  
4161 C=CC(=O)OC(C)(C)C.COC(=O)Cc1ccc2oc(-c3ccc(Br)cc3F)nc2c1>>COC(=O)Cc1ccc2oc(-  
c3ccc(/C=C/C(=O)OC(C)(C)C)cc3F)nc2c1  
4162 C=CC(=O)OC.O=c1[nH]c(=O)n([C@H]2C=C[C@@H](CO)O2)cc1I>>COC(=O)/C=C/c1cn([C@H]2  
C=C[C@@H](CO)O2)c(=O)[nH]c1=O  
4163 Br1cccc2ccccc12.C=C[Si](C)(C)c1ccccc1>>C[Si](C)(C)/C=C/c1cccc2ccccc12)c1ccccc1  
4164 C=CC(OC)OCC.Cc1ccc(I)c1>>CCOC(/C=C/c1ccc(C)c1)OCC  
4165 C=CC(=O)N(C)Cc1oc2ccccc2c1C.O=C1Nc2ncc(Br)cc2CN2CCC[C@@H]12>>Cc1c(CN(C)C(=O)/C  
=C/c2enc3c(c2)CN2CCC[C@H]2C(=O)N3)oc2ccccc12  
4166 C=Cc1ccc(Cl)cc1.COc1cc(OC)c(OC)cc1/C=C/C(=O)c1ccc(I)cc1>>COc1cc(OC)c(OC)cc1/C=C/C(=O)  
c1ccc(/C=C/c2ccc(Cl)cc2)cc1  
4167 C=C[C@@H]1COC(C)(C)N1C(=O)OCc1ccccc1.COC(=O)c1ccc(Br)cc1>>COC(=O)c1ccc(/C=C/[C@  
@H]2COC(C)(C)N2C(=O)OCc2ccccc2)cc1  
4168 C=CCNC(=O)OC(C)(C)C.Cc1ccc(OS(=O)(=O)C(F)(F)F)c(Cl)c1>>C=C(CNC(=O)OC(C)(C)C)c1ccc(  
C)cc1Cl

4169 C=CC(=O)OC(C)(C)C.O=Cc1cc(O)ccc1Br>>CC(C)(C)OC(=O)/C=C/c1ccc(O)cc1C=O  
 4170 C=CC(=O)OC(C)(C)C.COC(=O)[C@@H]1c2cc(Br)ccc2O[C@H]1c1ccc(OC)c(OC)c1>>COC(=O)[C@@H]1c2cc(/C=C/C(=O)OC(C)(C)C)ccc2O[C@H]1c1ccc(OC)c(OC)c1  
 4171 C=C[Si](C)(C)c1ccc(F)cc1/C=C/c1cccc1Br>>C=C1c2cccc2/C=C/c2cc(F)ccc2[Si]1(C)C  
 4172 C=CC(N)=O.O=C(O)c1ccc(I)cc1>>NC(=O)/C=C/c1ccc(C(=O)O)cc1  
 4173 C=CC(C)=O.Cn1c(I)cnc1Sc1cccc1>>CC(=O)/C=C/c1cnc(Sc2cccc2)n1C  
 4174 C=Cc1cccc1.O=c1[nH]c(=O)n([C@H]2C[C@H](O)[C@@H](CO)O2)cc1I>>O=c1[nH]c(=O)n([C@H]2C[C@H](O)[C@@H](CO)O2)cc1/C=C/c1cccc1  
 4175 C=CC(=O)O.COc1cc(I)ccc1O>>COc1cc(/C=C/C(=O)O)ccc1O  
 4176 C=Cc1ccc(F)cc1.CCOC(=O)C(F)(F)Br>>CCOC(=O)C(F)(F)/C=C/c1ccc(F)cc1  
 4177 C=C1C(=O)O[C@@H]2C[C@H](C)C(=O)C/C=C(\C)CC[C@@H]12.Clc1ccc(I)cc1>>C/C1=C\CC(=O)[C@H](C)C[C@H]2OC(=O)/C(=C/c3ccc(Cl)cc3)[C@@H]2CC1  
 4178 C=CC(=O)OC.O=[N+][O-]c1ccc(Br)c(NC2cccc2)c1>>COC(=O)/C=C/c1ccc([N+](=O)[O-])cc1NCc1cccc1  
 4179 C=CC(=O)OC(C)(C)C.COc1ccc(CNC(=O)c2cc(Br)cc(I)c2)cc1>>COc1ccc(CNC(=O)c2cc(Br)cc(/C=C/C(=O)OC(C)(C)C)c2)cc1  
 4180 C=CCN1C(=O)c2cccc2C1=O.Fc1ccc(Br)c1>>O=C1c2cccc2C(=O)N1C/C=C/c1cccc(F)c1  
 4181 C=CCC1c2[nH]c3cccc3c2CCN1Cc1cccc1Br>>C=C1CC2c3[nH]c4cccc4c3CCN2Cc2cccc21  
 4182 C=COCCCC.COC(=O)Cc1cc(OC)c(OC)cc1Br>>C=C(OCCCC)c1cc(OC)c(OC)cc1CC(=O)OC  
 4183 C=Cc1cccc1.COC(=O)CCc1ccc(OCc2cccc(Br)c2)cc1>>COC(=O)CCc1ccc(OCc2cccc(/C=C/c3cccc3)c2)cc1  
 4184 C=Cc1cccc1.CC(C)(C)Br>>CC(C)(C)/C=C/c1cccc1  
 4185 C=CC(=O)OCC.Ic1cccc1>>CCOC(=O)/C=C/c1cccc1  
 4186 C=CC(=O)OC.O=Cc1cccc1Br>>COC(=O)/C=C/c1cccc1C=O  
 4187 Br1ccc2c(c1)OCO2.C=CC(=O)C(C)CC(=O)OC>>COC(=O)CC(C)C(=O)/C=C/c1ccc2c(c1)OCO2  
 4188 C=CC(=O)N(C)Cc1sc2cccc2c1C.O=C1Nc2ncc(Br)cc2C12CCC2>>Cc1c(CN(C)C(=O)/C=C/c2cnc3c(c2)C2(CCC2)C(=O)N3)sc2cccc12  
 4189 C=CC(=O)OCc1cccc1.CCn1nnc2c(F)c(Br)ccc21>>CCn1nnc2c(F)c(/C=C/C(=O)OCc3cccc3)ccc21  
 4190 C=CC(=O)O.Cc1cc(Br)cc(C)c1N>>Cc1cc(/C=C/C(=O)O)cc(C)c1N  
 4191 C=CC(CO)N1C(=O)c2cccc2C1=O.COc1ccc(Br)cc1>>COc1ccc(/C=C/C(CO)N2C(=O)c3cccc3C2=O  
 4192 C=CC(=O)OC.COc1ccc(OC)c(NC(=O)C(C)(C)C)c1I>>COC(=O)/C=C/c1c(OC)ccc(OC)c1NC(=O)C(C)(C)C  
 4193 C=CC1CC(=O)N1.COc1cccc1I>>COc1cccc1/C=C/C1CC(=O)N1  
 4194 C=Cc1ccc(O)cc1.COc1cccc1Br>>COc1cccc1/C=C/c1ccc(O)cc1  
 4195 C=Cc1cccc1.IC1CCCCC1>>C(=C/C1CCCCC1)\c1cccc1  
 4196 Br1cccn1.C=Cc1ccc(Cn2cc(C)c(=O)[nH]c2=O)cc1>>Cc1cn(Cc2ccc(/C=C/c3cccn3)cc2)c(=O)[nH]  
 4197 C=Cc1ccc(OC)cc1.Oc1ccc2cccc2c1Br>>COc1ccc(/C=C/c2c(O)ccc3cccc23)cc1  
 4198 C=CC(=O)OC.OCc1cccc1Br>>COC(=O)/C=C/c1cccc1CO  
 4199 C=CCCC[C@@H](C=C)COc1cccc1Br>>C=CCCC[C@@H]1COc2cccc2C1=C  
 4200 C=CC(=O)OC(C)(C)C.O=[N+][O-]c1ccc(S(=O)(=O)N2CCc3cc(Br)cnc32)cc1>>CC(C)(C)OC(=O)/C=C/c1cnc2c(c1)CCN2S(=O)(=O)c1ccc([N+](=O)[O-])cc1  
 4201 C=CC1(O)CCCCC1.O=C(NCCC(O)c1cc(F)cc(Br)c1)C(F)(F)F>>O=C(NCCC(O)c1cc(F)cc(/C=C/C2(O)CCCCC2)c1)C(F)(F)F  
 4202 C=Cc1cc(OC(C)=O)cc(OC(C)=O)c1.COc1ccc([C@@H]2Oc3ccc(Br)cc3[C@@H]2c2cc(OC)cc(OC)c2)cc1>>COc1ccc([C@@H]2Oc3ccc(/C=C/c4cc(OC(C)=O)cc(OC(C)=O)c4)cc3[C@@H]2c2cc(OC)cc(OC)c2)cc1  
 4203 C=Cc1cccc1.Cc1cc(C)c(OC(=O)C#Cc2cccc2)c(Br)c1>>Cc1cc(C)c(OC(=O)C#Cc2cccc2)c(/C=C/c2cccc2)c1  
 4204 C=CC(=O)OC.CC(C)(C)c1ccc(N)c(Br)c1>>COC(=O)/C=C/c1cc(C(C)(C)C)ccc1N  
 4205 C=CC(OCC)OCC.O=[N+][O-]c1cccc(Br)c1>>CCOC(/C=C/c1cccc([N+](=O)[O-])c1)OCC  
 4206 C=Cc1ccc(F)cc1.Cc1ccc2c(-c3cccc3)c(Br)c(=O)oc2c1>>Cc1ccc2c(-c3cccc3)c(/C=C/c3ccc(F)cc3)c(=O)oc2c1  
 4207 C=CC(=O)OC.Cc1ccc(Br)c(C=O)c1>>COC(=O)/C=C/c1ccc(C)cc1C=O  
 4208 Br1ence2cccc12.C=CCN1C(=O)c2cccc2C1=O>>O=C1c2cccc2C(=O)N1C/C=C/c1cnc2cccc12  
 4209 C=CC(=O)OCC(CC)CCCC.CC(C)CCCC(C)CCCC(C)CCOc1ccc(I)cc1>>CCCC(CC)COC(=O)/C=C/c1ccc(OCCC(C)CCCC(C)CCCC(C)C)cc1  
 4210 C=C[C@H](OC)[C@@H](C)[C@@H](OC)[C@@H](C)COCOC.Ic1cccc1>>COCOC[C@H](C)[C@H](OC)[C@H](C)[C@H](/C=C/c1cccc1)OC  
 4211 C=Cc1ccc(OC)cc1.Clc1ccc(/C=C/c2cccc2)cc1>>COc1ccc(/C=C/c2ccc(/C=C/c3cccc3)cc2)cc1



4212 C=Cc1ccc(N(c2ccccc2)c2ccccc2)cc1.O=Cc1ccc(Br)c2nc(-c3ccccc3)c(-c3ccccc3)nc12>>O=Cc1ccc(/C=C/c2ccc(N(c3ccccc3)c3ccccc3)cc2)c2nc(-c3ccccc3)c(-c3ccccc3)nc12  
\*CNCCCCOCCOCCOCCNC(=O)COc1ccc(C(Cc2cc(OC)cc(OC)c2)NC(=O)c2ccccc(C=C)c2)cc1.Ic1cc  
4213 c2ccccc2c1>>\*CNCCCCOCCOCCOCCNC(=O)COc1ccc(C(Cc2cc(OC)cc(OC)c2)NC(=O)c2ccccc(/C=C  
C/c3ccc4ccccc4c3)c2)cc1  
4214 C=CC(=O)N1N=Cc2ccccc2C1C(C)C.COc1cc(Cc2cnc(N)nc2N)cc(I)c1OC>>COc1cc(Cc2cnc(N)nc2N)  
cc(/C=C/C(=O)N2N=Cc3ccccc3C2C(C)C)c1OC  
4215 Br1ccc2ccccc2c1.C=Cc1c(F)c(F)c(F)c(F)c1F>>Fc1c(F)c(F)c(/C=C/c2ccc3ccccc3c2)c(F)c1F  
4216 C=Cc1ccccc1.Cn1nc(Br)c(=O)c2ccccc21>>Cn1nc(/C=C/c2ccccc2)c(=O)c2ccccc21  
C=CC(=O)CCC.CCC1=C[C@@H]2CN(C1)Cc1c([nH]c3ccc(I)cc13)[C@@](C(=O)OC)(c1cc3c(cc1O  
4217 C)N(C)[C@H]1[C@@](O)(C(=O)OC)[C@H](OC(C)=O)[C@]4(CC)C=CCN5CC[C@]31[C@@H]54)  
C2>>CCCC(=O)/C=C/c1ccc2[nH]c3c(c2c1)CN1CC(CC)=C[C@H](C1)C[C@]3(C(=O)OC)c1cc2c(cc1  
OC)N(C)[C@H]1[C@@](O)(C(=O)OC)[C@H](OC(C)=O)[C@]3(CC)C=CCN4CC[C@]211[C@@H]4  
4218 C=Cc1ccc(OC)cc1.Nc1ccc(Br)cc1>>COc1ccc(/C=C/c2ccc(N)cc2)cc1  
C=CC(=O)OC(C)(C)C.CCOC(=O)N1CCC2(CC1)CC(=O)c1cc(Br)ccc1O2>>CCOC(=O)N1CCC2(CC  
4219 1)CC(=O)c1cc(/C=C/C(=O)OC(C)(C)C)ccc1O2  
C=CCNC(=O)OC(C)(C)C.COc1cc2c(c(OS(=O)(=O)C(F)(F)F)c1)C(=O)OC(C)(C)O2>>COc1cc(/C=C/  
4220 CNC(=O)OC(C)(C)C)c2c(c1)OC(C)(C)OC2=O  
4221 C=CC(=O)OCC.COc1ccc2nccc(Br)c2c1>>CCOC(=O)/C=C/c1ccnc2ccc(OC)cc12  
4222 C=C(Br)CCO.C=CC(=O)CCCC>>C=C(/C=C/C(=O)CCCC)CCO  
C=Cc1ccc2c(c1)c1ccccc1n2CCCCCCCC.O=Cc1ccc(Br)cc1>>CCCCCCCCN1c2ccccc2c2cc(/C=C/c3cc  
4223 c(C=O)cc3)ccc21  
C=CCC(NCc1cc(C)ccc1Br)(C(=O)OC)C(C)C>>C=C1CC(C(=O)OC)(C(C)C)NCc2ccc(C)ccc21  
4224 C=Cc1ccccc1.O=Cc1ccccc1Cl>>O=Cc1ccccc1/C=C/c1ccccc1  
4225 C=Cc1cc(OCc2ccccc2)c(OCc2ccccc2)nn1.FC(F)(F)c1ccc(Cl)cc1C(F)(F)F>>FC(F)(F)c1ccc(/C=C/c2cc  
4226 (OCc3ccccc3)c(OCc3ccccc3)nn2)cc1C(F)(F)F  
C=CC(=O)OC(C)(C)C.CC(=O)O[IH2](OC(C)=O)c1c(C)cc(C)cc1C>>Cc1cc(C)c(/C=C/C(=O)OC(C)(  
4227 C)C)c(C)c1  
C=CC(=O)OCC.O=C1CCc2c(Br)ccc(OCc3ccccc3)c21>>CCOC(=O)/C=C/c1ccc(OCc2ccccc2)c2c1CC  
4228 C2=O  
C=CC(=O)OC.COc1ccc2c(c1)CCN(c1ccc(CC(F)(F)F)cc1)C2(C)c1ccc(Br)cc1>>COC(=O)/C=C/c1ccc(  
4229 C2(C)c3ccc(OC)cc3CCN2c2ccc(CC(F)(F)F)cc2)cc1  
C=Cc1ccc(OC)cc1.COc1cc(C=O)c(Br)c(OC)c1OC>>COc1ccc(/C=C/c2c(C=O)cc(OC)c(OC)c2OC)cc1  
4230 C=CC(=O)Oc1ccccc1.COc1ccc(I)cc1>>COc1ccc(/C=C/C(=O)Oc2ccccc2)cc1  
4231 C=CC=O.Clc1ccccc1>>O=C/C=C/c1ccccc1  
4232 C=Cc1ccc(OC)cc1.[O-][N+](=Nc1ccc(Br)cc1)c1ccccc1>>COc1ccc(/C=C/c2ccc(N=[N+])([O-  
4233 )c3ccccc3)cc2)cc1  
C=CCC(=O)OC(C)(C)C.C[C@@H](O)c1ccc2ccc(Br)cc2n1>>C[C@@H](O)c1ccc2ccc(/C=C/CC(=O)  
4234 OC(C)(C)C)cc2n1  
C=C1C(=O)O[C@H]2[C@H]1CCC(=C)[C@@H]1C[C@H](OC(C)=O)C(=C)[C@H]21.COc1ccccc([N  
4235 +] (=O)[O-])c1I>>C=C1CC[C@H]2/C(=C)c3c(OC)cccc3[N+](=O)[O-  
)C(=O)O[C@@H]2[C@H]2C(=C)[C@@H](OC(C)=O)C[C@@H]12  
4236 C=Cc1ccc(C)cc1.FC(F)(F)Cl>>Cc1ccc(/C=C/CC(F)(F)F)cc1  
4237 C=CC(=O)OC.O=C(O)c1ccc(Br)o1>>COC(=O)/C=C/c1ccc(C(=O)O)o1  
4238 Br1ccccc1.C=CS(=O)(=O)CC>>CCS(=O)(=O)/C=C/c1ccccc1  
C=CB1OC(C)CC(C)(C)O1.COC(=O)CC[C@H]1CN(S(=O)(=O)c2ccccc(C(F)(F)F)c2)c2cc(Br)ccc2O1>  
4239 >COC(=O)CC[C@H]1CN(S(=O)(=O)c2ccccc(C(F)(F)F)c2)c2cc(/C=C/B3OC(C)CC(C)(C)O3)ccc2O1  
C=C[C@@H](O[Si](C)(C)C(C)(C)C)[C@@H](CCCO[Si](C)(C)C(C)(C)C)[C@@H](C/C(I)=C/CO)O[  
4240 Si](C)(C)C(C)(C)C>>C=C1/C(=C)CO)C[C@@H](O[Si](C)(C)C(C)(C)C)[C@H](CCCO[Si](C)(C)C(C  
)C(C)C)[C@@H]1O[Si](C)(C)C(C)(C)C  
4241 C=CCCC=C(C)C.ClCc1ccccc1-c1ccccc1>>C=C(CCCC=C(C)C)Cc1ccccc1-c1ccccc1  
4242 C=Cc1ccccc1.Clc1ccc(-c2ccccc2)cc1>>C=C/c1ccc(-c2ccccc2)cc1)c1ccccc1  
C=CC(=O)OC(C)(C)C.CC(C)=CCc1cc(I)ccc1OC(=O)CC1CCCCC1>>CC(C)=CCc1cc(/C=C/C(=O)O  
4243 C(C)(C)C)ccc1OC(=O)CC1CCCCC1  
C=C[C@@H](C)[C@@H]1C/C=C/C(=O)N[C@H](Cc2ccc(OC)cc2)C(=O)NCCC(=O)O[C@@H](CC(  
4244 C)C)C(=O)O1.Ic1ccccc1>>COc1ccc(C[C@H]2NC(=O)/C=C/C[C@@H]([C@H](C)/C=C/c3ccccc3)O  
C(=O)[C@H](CC(C)C)OC(=O)CCNC2=O)cc1  
4245 C=CCN1C(=O)c2ccccc2C1=O.COc1ccc(I)cc1>>COc1ccc(/C=C/CN2C(=O)c3ccccc3C2=O)cc1  
4246 C=CP(C)(=O)c1ccccc1.CC(C)Oc1ccc2ccccc2c1Br>>CC(C)Oc1ccc2ccccc2c1/C=C/P(C)(=O)c1ccccc1  
4247 C=Cc1ccc(OC)cc1.COc1ccccc1Br>>COc1ccc(/C=C/c2ccccc2OC)cc1  
4248 C=CC(=O)OCCCC.FC(F)(F)c1ccc(Cl)cc1>>CCCCOC(=O)/C=C/c1ccc(C(F)(F)F)cc1

[illegible]

4288 C=Cc1cccc1.COc1ccc(-c2oc3cc(OC)c(I)c(O)c3c(=O)c2OC)cc1OC>>COc1ccc(-  
c2oc3cc(OC)c(/C=C/c4cccc4)c(O)c3c(=O)c2OC)cc1OC  
 4289 C=CC(C)=O.COc1ccc(Cl)cc1>>COc1ccc(/C=C/C(C)=O)cc1  
 4290 C=C/C=C/C1CCCCN1S(=O)(=O)c1ccc(C)cc1.Clc1ccc(I)en1>>Cc1ccc(S(=O)(=O)N2CCCCC2/C=C/C  
=C/c2ccc(Cl)nc2)cc1  
\*CNCCOCCOCCOCCNC(=O)COc1ccc(C(Cc2cc(OC)cc(OC)c2)NC(=O)c2cccc(C=C)c2)cc1.Fc1cc  
 4291 c(F)c(I)c1>>\*CNCCOCCOCCOCCNC(=O)COc1ccc(C(Cc2cc(OC)cc(OC)c2)NC(=O)c2cccc(/C=C/  
c3cc(F)ccc3F)c2)cc1  
C=Cc1cccc1.COc1ccc(-c2c(Br)c(=O)oc3cc(C)ccc23)cc1>>COc1ccc(-  
 4292 c2c(/C=C/c3cccc3)c(=O)oc3cc(C)ccc23)cc1  
 4293 C=CCC(O)c1cccc1C=Cl>>C=C1C=Cc2cccc2C(O)C1  
 4294 C=CC(=O)OCC.Cc1cc(F)cc(CN(C)C)c1Br>>CCOC(=O)/C=C/c1c(C)cc(F)cc1CN(C)C  
Br1ccc(C(=C(c2cccc2)c2cccc2)c2cccc2)cc1.C=Cc1ccc(-  
 4295 n2c3cccc3c3cccc32)cc1>>C(=C/c1ccc(-  
 4296 C=C.Ic1ccc(-c2cccc2)cc1>>C=Cc1ccc(-c2cccc2)cc1  
C=Cc1cn(COCC[Si](C)(C)C)nc1-  
 4297 c1nc(C(F)(F)F)cn1COCC[Si](C)(C)C.O=Cc1encc(Br)c1>>C[Si](C)(C)CCOCn1cc(/C=C/c2nccc(C=O)  
c2)c(-c2nc(C(F)(F)F)cn2COCC[Si](C)(C)C)n1  
 4298 C=CCNC(=O)OC(C)(C)C.O=C1CCc2cc(Br)ccc21>>C=C(CNC(=O)OC(C)(C)C)c1ccc2c(c1)CCC2=O  
 4299 Br1ccc2[nH]ccc2c1.C=CC(=O)N(C)OC>>CON(C)C(=O)/C=C/c1ccc2[nH]ccc2c1  
 4300 C=CC(=O)OC.Cn1cnc2c(Nc3ccc(Br)cc3)nc(N3CCCCC3)nc21>>COC(=O)/C=C/c1ccc(Nc2nc(N3CCC  
CC3)nc3c2nnc3C)cc1  
 4301 C=CN1CCCC1=O.Clc1ccc2c(c1)OCO2>>C=C(c1ccc2c(c1)OCO2)N1CCCC1=O  
 4302 C=CC(=O)OCc1cccc1.Cc1ccc(I)cc1>>Cc1ccc(/C=C/C(=O)OCc2cccc2)cc1  
C=C(I)[C@H]1CC[C@H]2[C@@H]3CC=C4C[C@H](OC(C)=O)CC[C@]4(C)[C@H]3CC[C@]12  
 4303 C.C=CC(=O)OC>>C=C(/C=C/C(=O)OC)[C@H]1CC[C@H]2[C@@H]3CC=C4C[C@H](OC(C)=O  
)CC[C@]4(C)[C@H]3CC[C@]12C  
 4304 C=CCC(=O)OC.Cc1nc2ccc(I)cc2s1>>COC(=O)C/C=C/c1ccc2nc(C)sc2c1  
 4305 C=CC(C)(C)C.COc1cc(Br)ccc1O>>COc1cc(/C=C/C(C)(C)C)ccc1O  
 4306 C=CC(=O)OC.CCOC(=O)C1(/C(C)=C(I)c2cccc2)CCCC1=O>>CCOC(=O)C1(/C(C)=C(/C=C/C(=O)  
OC)c2cccc2)CCCC1=O  
C=CCn1c(-  
 4307 c2ccc(OC)c(OC)c2OC)nc2cccc2c1=O.O=C(CN1C(=O)COc2cccc21)c1ccc(Br)cc1>>COc1ccc(-  
c2nc3cccc3c(=O)n2C/C=C/c2ccc(C(=O)CN3C(=O)COc4cccc43)cc2)c(OC)c1OC  
C=Cc1ccc(F)cc1.COC(=O)[14c]1[14cH][14c]([N+](=O)[O-  
 4308 ])[14cH][14cH][14c]1Br>>COC(=O)[14c]1[14cH][14c]([N+](=O)[O-  
])[14cH][14cH][14c]1/C=C/c1ccc(F)cc1  
 4309 Br1ccc2oc(-c3cc[nH]n3)cc2c1.C=CC#N>>N#C/C=C/c1ccc2oc(-c3cc[nH]n3)cc2c1  
 4310 C=Cc1enccc1Cl.COC(=O)[C@H](CCSC)NC(=O)c1ccc(I)cc1-  
c1cccc1C>>COC(=O)[C@H](CCSC)NC(=O)c1ccc(/C=C/c2enccc2Cl)cc1-c1cccc1C  
 4311 C=CC(C)(C)O.CC(C)(C)OC(=O)NCC(=O)Nc1cccc1I>>CC(C)(O)/C=C/c1cccc1NC(=O)CNC(=O)O  
C(C)(C)C  
 4312 C=C(NC(=O)OC(C)(C)C)C(=O)OC.N#Cc1ccc(N)c(I)c1>>COC(=O)/C=C/c1cc(C#N)ccc1N)NC(=O)  
OC(C)(C)C  
 4313 C=CS(=O)(=O)F.Ic1ccsc1>>O=S(=O)(F)/C=C/c1ccsc1  
 4314 C=Cc1ccc(C(=O)OC)cc1.O=[N+][([O-])c1ccc(Br)cc1>>COC(=O)c1ccc(/C=C/c2ccc([N+](=O)[O-  
 4315 Br1ccc2ccc3cccc4ccc1c2c34.C=C[C@H](CO[Si](C)(C)C(C)(C)C)NC(=O)OCc1cccc1>>CC(C)(C  
)[Si](C)(C)OC[C@H](/C=C/c1ccc2ccc3cccc4ccc1c2c34)NC(=O)OCc1cccc1  
 4316 C=Cc1ccc([N+](=O)[O-])cc1.Cn1cc(I)c(=O)c2cccc21>>Cn1cc(/C=C/c2ccc([N+](=O)[O-  
])cc2)c(=O)c2cccc21  
 4317 C=Cc1cccc1.Ic1cccc1>>C(=C/c1cccc1)\c1cccc1  
 4318 Br1ccc2cc[nH]c2c1.C=Cc1cccc1>>C(=C/c1ccc2cc[nH]c2c1)\c1cccc1  
 4319 C=Cc1ccc(OC)cc1.COc1cc(Br)cc(OC)c1OC>>COc1ccc(/C=C/c2cc(OC)c(OC)c(OC)c2)cc1  
 4320 C=C1N=C(c2cccc2)[C@H](C(C)C)N(C(=O)OC(C)(C)C)C1=O.Ic1cccc2cccc12>>CC(C)[C@H]1C(  
c2cccc2)=N/C(=C/c2cccc3cccc23)C(=O)N1C(=O)OC(C)(C)C  
 4321 C=C1c2cccc2C1(C#N)CC.CN(C)c1ccc(Br)cc1>>CCC1(C#N)/C(=C/c2ccc(N(C)C)cc2)c2cccc21  
 4322 C=CC(=O)OCC.CC(C)c1nn(-c2nc3cccc3s2)c(-c2ccc(F)cc2)c1Br>>CCOC(=O)/C=C/c1c(C(C)C)nn(-  
c2nc3cccc3s2)c1-c1ccc(F)cc1  
 4323 C=CC(=O)O.CC(C)(C)OC(=O)N[C@@H](Cc1ccc(Br)cc1)C(=O)O>>CC(C)(C)OC(=O)N[C@@H](C  
c1ccc(/C=C/C(=O)O)cc1)C(=O)O

4324 C=CCCCCCCCC(=O)O.Ic1ccc2c(c1)OCCOCCOCCOCCO2>>O=C(O)CCCCCCCC/C=C/c1ccc2c(c1)OCCOCCOCCOCCO2

4325 C=CC(=O)OC(C)(C)C.O=C1CNC2ncc(Br)cc2CN1>>CC(C)(C)OC(=O)/C=C/c1ccc2c(c1)CNC(=O)CN

4326 C=C(C)c1cccc1.Clc1ccc(I)cc1>>C/C(=C/c1ccc(Cl)cc1)c1cccc1

4327 C=Cc1cccnc1.CC(C)(C)OC(=O)N[C@@H](COCc1cccc1)COc1ccc(Br)c1>>CC(C)(C)OC(=O)N[C@@H](COCc1cccc1)COc1ccc(/C=C/c2cccnc2)c1

4328 C=COCCCC.CCOC(=O)c1ccc(OS(=O)(=O)C(F)(F)F)cc1>>C=C(OCCCC)c1ccc(C(=O)OCC)cc1

4329 C=Cc1cccnc1.CC(C)(C)OC(=O)NCCOc1ccc(Br)c1>>CC(C)(C)OC(=O)NCCOc1ccc(/C=C/c2cccnc1)cc1

4330 C=Cc1ccc(Cl)cc1.O=Cc1ccc(Br)cc1>>O=Cc1ccc(/C=C/c2ccc(Cl)cc2)cc1

4331 C=CC(=O)OCCCC.COc1ccc(Br)c(OC)c1>>CCCCOC(=O)/C=C/c1ccc(OC)cc1OC

4332 C=C[C@H]1COC(=O)[C@@H]1[C@H](c1cc(OC)c(OC)c(OC)c1)c1cc2c(cc1OS(=O)(=O)C(F)(F)F)OCO2>>C=C1c2cc3c(cc2[C@H](c2cc(OC)c(OC)c(OC)c2)[C@H]2C(=O)OC[C@H]12)OCO3

4333 C=CC#N.O=C(O)c1ccc(I)cc1>>N#C/C=C/c1ccc(C(=O)O)cc1

4334 C=C(F)C(=O)OC.COc1ccc(I)cc1>>COC(=O)/C(F)=C/c1ccc(OC)cc1

4335 C=CC(C)(O)CCC=C(C)C.FC(F)(F)c1ccc(Br)cc1>>CC(C)=CCCC(C)(O)/C=C/c1ccc(C(F)(F)F)cc1

4336 C=CCNC1=NCCN1.Cc1cccc1I>>Cc1cccc1/C=C/CNC1=NCCN1

4337 C=CCC(O)c1cc2cccc(CC)c2nc1Cl>>C=C1CC(O)c2cc3cccc(CC)c3nc21

4338 C=CC(=O)OCC.CC(C)c1nn(-c2cccnc2)c(-c2ccc(F)cc2)c1Br>>CCOC(=O)/C=C/c1c(C(C)C)nn(-c2cccnc2)c1-c1ccc(F)cc1

4339 C=CC(=O)OC(C)(C)C.COC(=O)c1ccc(Br)c(C)c1>>COC(=O)c1ccc(/C=C/C(=O)OC(C)(C)C)c(C)c1

4340 C=CC(=O)OC.O=c1c(I)c(-c2ccc(O)cc2)oc2cc(O)ccc12>>COC(=O)/C=C/c1c(-c2ccc(O)cc2)oc2cc(O)ccc2c1=O

4341 C=CC(=O)N(C)Cc1nc2cccc2s1.CCn1c(=O)[nH]c2ncc(Br)cc21>>CCn1c(=O)[nH]c2ncc(/C=C/C(=O)N(C)Cc3nc4cccc4s3)cc21

4342 C=CC(=O)N(C)Cc1oc2cccc2c1C.CC(C)(C)OC(=O)NCCn1c(=O)[nH]c2ncc(Br)cc2c1=O>>Cc1c(CN(C)C)(=O)/C=C/c2ccc3[nH]c(=O)nc(CCNC(=O)OC(C)(C)C)c(=O)c3c2)oc2cccc12

4343 C=CCNC(=O)c1cccc1NC(=O)c1cccc1.Fc1ccc(I)cc1>>O=C(Nc1cccc1C(=O)NC/C=C/c1ccc(F)cc1)c1cccc1

4344 C=CC(=O)OCCCC.CCOC(=O)Nc1cc(OC)ccc1C1=C(I)CCN1S(=O)(=O)c1ccc(C)cc1>>CCCCOC(=O)/C=C/C1=C(c2ccc(OC)cc2NC(=O)OCC)N(S(=O)(=O)c2ccc(C)cc2)CC1

4345 C=COCCCC.COc1cc(C(=O)Cl)cc(OC)c1OC>>CCCCO/C=C/C(=O)c1cc(OC)c(OC)c(OC)c1

4346 C=CC(=O)CC.Cc1cc(C)c(Br)c(C)c1>>CCC(=O)/C=C/c1c(C)cc(C)cc1CBr1c(-c2cccc2)nn(-c2ccc(Nc3cccc3)n2)c1-

4347 c1cccc1.C=C[C@H]1C[C@H](CC(=O)OCC)OC(C)(C)O1>>CCOC(=O)C[C@H]1C[C@H](/C=C/C/c2c(-c3cccc3)nn(-c3ccc(Nc4cccc4)n3)c2-c2cccc2)OC(C)(C)O1

4348 C=CC(=O)OCC.COc1nc(O)c(I)c(COC)n1>>CCOC(=O)/C=C/c1c(O)nc(COC)nc1COC

4349 C=CCNC(=O)OC(C)(C)C.N#Cc1ccc(Br)c1>>C=C(CNC(=O)OC(C)(C)C)c1cccc(C#N)c1

4350 C=CC(=O)OC.CC(C)(C)OC(=O)N1CCC(CN(C(=O)C2CCCCC2)c2ccc(Br)c2)CC1>>COC(=O)/C=C/c1ccc(N(CC2CCN(C(=O)OC(C)(C)C)CC2)C(=O)C2CCCCC2)c1

4351 C=CC(N)=O.O=C(c1cccc1)c1cccc1I>>NC(=O)/C=C/c1cccc1C(=O)c1cccc1

4352 Br1ccc(N2CCOCC2)nc1.C=CC(=O)OC>>COC(=O)/C=C/c1ccc(N2CCOCC2)nc1

4353 C=CC(=O)CCC.Cc1cc(C)c(Br)c(C)c1>>CCCC(=O)/C=C/c1c(C)cc(C)cc1C

4354 C=CC=O.CC(C)(C)c1cc(/C=C/c2cc(I)cc(/C=C/c3cc(C(C)(C)C)cc(C(C)(C)C)c3)c2)cc(C(C)(C)C)c1>>CC(C)(C)c1cc(/C=C/c2cc(/C=C/C=O)cc(/C=C/c3cc(C(C)(C)C)cc(C(C)(C)C)c3)c2)cc(C(C)(C)C)c1

4355 C=Cc1cccc1.COc1cc2cc(Br)c(=O)oc2cc1OC>>COc1cc2cc(/C=C/c3cccc3)c(=O)oc2cc1OC

4356 C=Cc1ccc(OC)c1.CN(C(=O)c1cccc1)c1ccc2c(c1)[nH]c(=NC(=O)c1ccc(Br)s1)n2CCC(N)=O>>COc1cccc(/C=C/c2ccc(C(=O)N=c3[nH]c4cc(N(C)C(=O)c5cccc5)ccc4n3CCC(N)=O)s2)c1

4357 C=CS(=O)(=O)c1cccc1.Fc1ccc(Br)cc1>>O=S(=O)(/C=C/c1ccc(F)cc1)c1cccc1

4358 C=CS(=O)(=O)F.COc1ccc(I)c1>>COc1ccc(/C=C/S(=O)(=O)F)c1

4359 C=CC(=O)OC.COC(=O)c1ccc(C)nc1Br>>COC(=O)/C=C/c1nc(C)ccc1C(=O)OC

4360 C=Cc1ccc(/C=C/c2ccc(N(C)C)cc2OC)cc1.Cc1cc2c(-c3ccc(I)cc3S(=O)(=O)c3cc(C)c(=O)cc-3oc2cc1O>>COc1cc(N(C)C)ccc1/C=C/c1ccc(/C=C/c2ccc(-c3c4cc(C)c(=O)cc-4oc4cc(O)c(C)cc34)c(S(=O)(=O)O)c2)cc1

4361 C=CCc1cccc1.CC(C)(C)c1ccc(Br)cc1>>C=C(Cc1cccc1)c1ccc(C(C)(C)C)cc1

4362 C=Cc1cccc1Cl.COCOc1c(OC)ccc(C)c1I>>COCOc1c(OC)ccc(C)c1/C=C/c1cccc1Cl

4363 C=CC[C@H](CC(=O)OC(C)(C)C)(=O)N[C@H](C(=O)N[C@H](C)c1cccc1)C(C)(C)C.O=S(=O)(O)c1ccc(-c2cccc2)c(Cl)c1)C(F)(F)F>>C[C@H](NC(=O)[C@H](NC(=O)[C@H](C/C=C/c1ccc(-c2cccc2)c(Cl)c1)CC(=O)OC(C)(C)C)C(C)C)c1cccc1

4364 C=CCC(=O)OC.Nc1ccc(Br)cc1>>COC(=O)/C=C/c1ccc(N)cc1

4365 C=CC(=O)OC.COc1ccc2c(c1)CCN(c1ccc(C(C)C)cc1F)C2(C)c1ccc(Br)cc1>>COC(=O)/C=C/c1ccc(C2(C)c3ccc(OC)cc3CCN2c2ccc(C(C)C)cc2F)cc1

4366 C=CC(OC)OC.COc1ccc(I)c(F)c1>>COc1ccc(/C=C/C(OC)OC)c(F)c1  
 4367 Br1cccc2cccc12.C=C[Si](CC)(CC)CC>>CC[Si](/C=C/c1cccc2cccc12)(CC)CC  
 4368 C=C(C)C.CC(=O)/C=C/Cl>>CC(=O)/C=C/C=C(C)C  
 4369 Br1cccc1.C=CC(=O)N(C)C>>CN(C)C(=O)/C=C/c1cccc1  
 4370 C=CC(=O)OC(C)(C)C.Nc1ccc(I)c2ccc(-c3ccc(Oc4cccc4)cc3)c12>>CC(C)(C)OC(=O)/C=C/c1ccc(N)c2c(-c3ccc(Oc4cccc4)cc3)csc12  
 4371 C=Cc1cccc1.COC(=O)Cn1c(=O)c(Cl)nc2ccnc21>>COC(=O)Cn1c(=O)c(/C=C/c2cccc2)nc2ccnc21  
 4372 C=CS(=O)(=O)c1cccc1.Cc1cccc1Br>>Cc1cccc1/C=C/S(=O)(=O)c1cccc1  
 4373 C=CC#N.Ic1cccc1>>N#C/C=C/c1cccc1  
 4374 C=Cc1ccnc1.Ic1cccc1>>C(=C/c1ccnc1)c1cccc1  
 4375 C=C(NC(C)=O)C(=O)OC.CC(=O)Oc1cc(C)c(I)c(C)c1>>COC(=O)/C=C/c1c(C)cc(OC(C)=O)cc1C)N  
 4376 C=CC(=O)OCC.COc1ccc2c3c1O[C@@H]1[C@]34CCN(C)[C@H](C2)[C@]42C=C[C@@]1(OC)[C@H]1C(=O)N(c3ccc(Br)cc3)C(=O)[C@H]12>>CCOC(=O)/C=C/c1ccc(N2C(=O)[C@H]3[C@@H](C2=O)[C@@]24C=C[C@]3(OC)[C@H]3O)c5c(OC)ccc6c5[C@@]32CCN(C)[C@H]4C6)cc1  
 4377 C=Cc1cccc1.O=S(=O)(OC1=CCCCC1)C(F)(F)F>>C=C(C1=CCCCC1)c1cccc1  
 4378 Br1cccc1-c1cccc1.C=CC(=O)OCCCC>>CCCCOC(=O)/C=C/c1cccc1-c1cccc1  
 4379 C=C(F)C(=O)OC.COc1ccc(C(c2ccc(I)cc2)=C2[C@H]3C[C@H]4C[C@H](C[C@H]2C4)C3)cc1>>CO  
 4380 C(=O)/C(F)=C/c1ccc(C(c2ccc(OC)cc2)=C2[C@H]3C[C@H]4C[C@H](C[C@H]2C4)C3)cc1  
 4381 Br1cccc2cccc12.C=CC(C)=O>>CC(=O)/C=C/c1cccc2cccc12  
 4382 C=CC(=O)N1CCOCC1.CCCCC(C)(Br)CC>>CCCCC(C)/C=C/C(=O)N1CCOCC1)CC  
 4383 C=CCOc1cccc(C)c1.COc1ccc(I)cc1>>COc1ccc(/C=C/COc2cccc(C)c2)cc1  
 4384 C=Cc1ccc(C(C)(C)C)cc1.O=Cc1cccc1Br>>CC(C)(C)c1ccc(/C=C/c2cccc2C=O)cc1  
 4385 C=CC(=O)OC.COc1ccc(I)nc1>>COC(=O)/C=C/c1ccc(OC)cn1  
 4386 C=Cc1cccc1.Cc1cc(C)nc(I)n1>>Cc1cc(C)nc(/C=C/c2cccc2)n1  
 4387 C=C(NC(=O)OC(C)(C)C)C(=O)OCc1cccc1.Cn1cc(I)cn1>>Cn1cc(/C=C/(NC(=O)OC(C)(C)C)C(=O)OCc2cccc2)cn1  
 4388 C=C[Si](C)(C)c1cccn1.COc1cccc(I)c1>>COc1cccc(/C=C/[Si](C)(C)c2cccn2)c1  
 4389 C=CC(=O)OC.CCOC(=O)c1cccc1I>>CCOC(=O)c1cccc1/C=C/C(=O)OC  
 4390 Br1cccc1.C=CC(=O)CC>>CCC(=O)/C=C/c1cccc1  
 4391 C=CC(=O)OCC.COc1ccc(Br)nc1>>CCOC(=O)/C=C/c1ccc(OC)cn1  
 4392 C=C/C=C(/OCC)C(=O)OC.Ic1cccc1>>CCO/C(=C/C=C/c1cccc1)C(=O)OC  
 4393 C=Cc1ccc(Cl)cc1.N#Cc1ccc(Br)cc1>>N#Cc1ccc(/C=C/c2ccc(Cl)cc2)cc1  
 4394 C=CC(=O)OC(C)(C)C.CC(C)(C)[Si](C)(C)Oc1ccc(Br)c(CN2C(=O)c3ccccc3C2=O)c1>>CC(C)(C)OC  
 4395 (=O)/C=C/c1ccc(O[Si](C)(C)C(C)(C)C)cc1CN1C(=O)c2cccc2C1=O  
 4396 Br1cccc1.C=CC(C)C(C)O>>CC(O)C(C)/C=C/c1cccc1  
 4397 C=Cc1ccc(OC)cc1.COc1cc(I)cc(OC)c1>>COc1ccc(/C=C/c2cc(OC)cc(OC)c2)cc1  
 4398 C=CC[Si](C)(C)C.N#Cc1ccc(Br)cc1>>C=C(C[Si](C)(C)C)c1ccc(C#N)cc1  
 4399 \*CNCCOCCOCCOCCOCCNC(=O)COc1ccc(C(Cc2cc(OC)cc(OC)c2)NC(=O)c2cccc(C=C)c2)cc1.Cc1cc  
 4400 ccc1I>>\*CNCCOCCOCCOCCOCCNC(=O)COc1ccc(C(Cc2cc(OC)cc(OC)c2)NC(=O)c2cccc(/C=C/c3ccc  
 4401 ccc3C)c2)cc1  
 4402 C=C.CC(C)(C)C1CC=C(Br)CC1>>C=CC1=CCC(C(C)(C)C)CC1  
 4403 C=CC(=O)OCC.CCc1cc(OCc2cccc2)ccc1Br>>CCOC(=O)/C=C/c1ccc(OCc2cccc2)cc1CC  
 4404 Br1cncc2cccc12.C=Cc1cn(COCC[Si](C)(C)C)nc1-c1nc2ccc(OC)cc2n1COCC[Si](C)(C)C>>COc1ccc2nc(-c3nn(COCC[Si](C)(C)C)cc3/C=C/c3cncc4cccc34)n(COCC[Si](C)(C)C)c2c1  
 4405 C=C(F)C(=O)OC.Ic1ccsc1>>COC(=O)/C(F)=C/c1ccsc1  
 4406 C=COCCCC.Fc1cccc(Br)c1>>C=C(OCCCC)c1cccc(F)c1  
 4407 C=CC(=O)CCC.N#Cc1ccc(Br)cc1>>CCCC(=O)/C=C/c1ccc(C#N)cc1  
 4408 C=Cc1cc[n+](O-)]cc1.COc1cc(Nc2c(C#N)nc3cc(Br)ccc23)cc(OC)c1OC>>COc1cc(Nc2c(C#N)nc3cc(/C=C/c4cc[n+](O-)]cc4)ccc23)cc(OC)c1OC  
 4409 C=COCCCC.Cn1c(=O)cc(Br)c2cccc21>>CCCCO/C=C/c1cc(=O)n(C)c2cccc12  
 4410 C=CC(=O)OC.COc1ccc(Br)c(C)c1>>COC(=O)/C=C/c1ccc(OC)cc1C  
 4411 C=CC(=O)OC.Ic1nn(C(c2cccc2)(c2cccc2)c2cccc2)c2ccnc(OC3CCCCC3)c12>>COC(=O)/C=C/c1nn(C(c2cccc2)(c2cccc2)c2cccc2)c2ccnc(OC3CCCCC3)c12  
 4412 C=CC(=O)OCCCC.Cn1cc(I)c(=O)c2cccc21>>CCCCOC(=O)/C=C/c1cn(C)c2cccc2c1=O  
 4413 C=CC(=O)OC.COC(=O)c1cc2cc([N+](=O)[O-])cc2s1>>COC(=O)/C=C/c1cc2sc(C(=O)OC)cc2cc1[N+](=O)[O-]  
 4414 C=Cc1cccc([N+](=O)[O-])c1.COC(=O)c1cccc1I>>COC(=O)c1cccc1/C=C/c1cccc([N+](=O)[O-])c1

4411 Br1c1cccc1.C=Cc1cccc1>>C(=C/c1cccc1)\c1cccc1  
 4412 C=CCCCCCC.N#Cc1ccc(Br)cc1>>CCCCC/C=C/c1ccc(C#N)cc1  
 C=CC(=O)NCCN(CCCNC(=O)OC(C)(C)C(=O)OC(C)(C)C.COC(=O)N[C@H]1[C@@H](Oc2ccc(I)  
 4413 )cc2)O[C@H](C)[C@@H](OC(C)=O)[C@@H]1OC(C)=O>>COC(=O)N[C@H]1[C@@H](Oc2ccc(/  
 C=C/C(=O)NCCN(CCCNC(=O)OC(C)(C)C(=O)OC(C)(C)C)cc2)O[C@H](C)[C@@H](OC(C)=O)[  
 C@@H]1OC(C)=O  
 4414 C=Cc1cccc1.Nc1cc(F)c(F)cc1Br>>Nc1cc(F)c(F)cc1/C=C/c1cccc1  
 4415 C=C(NC(C)=O)C(=O)OC.Ic1cnc(N(Cc2cccc2)Cc2cccc2)nc1>>COC(=O)/C(=C/c1cnc(N(Cc2cccc2  
 )Cc2cccc2)nc1)NC(C)=O  
 4416 C=CCCCC1=NOC(CC(=O)OC)(C(=O)OC)C1.FC(F)(F)c1cc(Cl)ccc1I>>COC(=O)CC1(C(=O)OC)C  
 C(CCCC/C=C/c2ccc(Cl)cc2C(F)(F)F)=NO1  
 4417 C=CC[Si](C)(C)C.COc1ccc(I)cc1>>COc1ccc(/C=C/C[Si](C)(C)C)cc1  
 4418 C=CCC[C@H]1C(OS(=O)(=O)C(F)(F)F)=C[C@@]2(C(C)C)C=C[C@]1(C)O2>>C=C1CC[C@H]2C1  
 =C[C@@]1(C(C)C)C=C[C@]2(C)O1  
 4419 C=CC(=O)OC.CC(C)(C)OC(=O)N(C1CCN(CC(O)COc2ccc(Br)cc2)CC1)[C@@H]1C[C@H]1c1cccc  
 1>>COC(=O)/C=C/c1ccc(OCC(O)CN2CCC(N(C(=O)OC(C)(C)C)[C@@H]3C[C@H]3c3cccc3)CC2)  
 4420 C=CC(=O)CC.CC(C)=C(C)Br>>CCC(=O)/C=C/C(C)=C(C)C  
 4421 C=CC(=O)OC.Cc1cc(-c2cccc2)n2nc(C)c(I)c2n1>>COC(=O)/C=C/c1c(C)nn2c(-c3cccc3)cc(C)nc12  
 4422 Br1ccnc1.C=CC(C)=O>>CC(=O)/C=C/c1ccnc1  
 4423 C=CC(N)=O.CCN(CC)c1ccc(NC(=O)C2(NC(=O)OCC(C)C)CCc3cc(Br)ccc3C2)cc1>>CCN(CC)c1ccc  
 (NC(=O)C2(NC(=O)OCC(C)C)CCc3cc(/C=C/C(N)=O)ccc3C2)cc1  
 4424 C=Cc1cccc1.CC(=O)Nc1cccc1Br>>CC(=O)Nc1cccc1/C=C/c1cccc1  
 4425 C=Cc1cccc1.CC(C)(C)C(=O)Nc1ccnc1Cl>>CC(C)(C)C(=O)Nc1ccnc1/C=C/c1cccc1  
 C=CC(=O)OCCCCCCCCCCCCCCCCC.C[C@]12C[C@@]34C=C(Sc5cccc(I)c5)C(=O)[C@@](C)(  
 4426 CCC(=O)Nc5c(O)ccc(C(=O)O)c5O)[C@@H]3[C@H](C[C@@H]1C4)O2>>CCCCCCCCCCCCCCCC  
 CCCOC(=O)/C=C/c1cccc(SC2=C[C@]34C[C@H]5C[C@H](O[C@@]5(C)C3)[C@H]4[C@](C)(CCC  
 (=O)Nc3c(O)ccc(C(=O)O)c3O)C2=O)c1  
 C=CC(=O)OCC.CCN1C[C@]2(OC(=O)c3cc(I)ccc3N)CC[C@H](OC)[C@]34[C@@H]1[C@H](C[C  
 4427 @H]23)[C@@]1(O)C[C@H](OC)[C@H]2C[C@@H]4[C@]1(O)[C@H]2OC>>CCOC(=O)/C=C/c1cc  
 c(N)c(C(=O)O)[C@@]23CC[C@H](OC)[C@]45[C@H]([C@H](C[C@H]24)[C@@]2(O)C[C@H](OC  
 )][C@H]4C[C@@H]5[C@]2(O)[C@H]4OC)N(CC)C3)c1  
 4428 C=C1CC(c2ccc(C)cc2)OC1=O.Nc1cccc1I>>Cc1ccc(C2C/C(=C/c3cccc3N)C(=O)O2)cc1  
 4429 C=CCC1c2cccc2C=NN1C(=O)C=C.COc1cc(Cc2cnc(N)nc2N)cc(I)c1OC>>C=CCC1c2cccc2C=NN1  
 C(=O)/C=C/c1cc(Cc2cnc(N)nc2N)cc(OC)c1OC  
 4430 C=Cc1cnc(C#N)c1Nc1ccc2[nH]ccc2c1C.COc1cc(Br)ccc1CN1CCN(C)CC1>>COc1cc(/C=C/c2cnc(  
 C#N)c2Nc2ccc3[nH]ccc3c2C)ccc1CN1CCN(C)CC1  
 4431 C=CC(=O)OC.Ic1enn(Cc2cccc2)c1>>COC(=O)/C=C/c1enn(Cc2cccc2)c1  
 4432 C=Cc1cccc1.CC(C)(Br)CCc1ccc2c(c1)OCO2>>CC(C)(/C=C/c1cccc1)CCc1ccc2c(c1)OCO2  
 C=Cc1nc2c(=O)[nH]c(NC(=O)C(C)C)nc2n1[C@@H]1O[C@H](CO[Si](C)(C)C(C)(C)C)[C@@H](O[  
 4433 Si](C)(C)C(C)(C)C)[C@H]1O[Si](C)(C)C(C)(C)C.CC(C)(C)[Si](C)(C)OC[C@H]1O[C@@H](n2cc(I)  
 c(N)nc2=O)[C@H](O[Si](C)(C)C(C)(C)C)[C@@H]1O[Si](C)(C)C(C)(C)C>>CC(C)C(=O)Nc1nc2c(n  
 c(/C=C/c3cn([C@@H]4O[C@H](CO[Si](C)(C)C(C)(C)C)[C@H](O[Si](C)(C)C(C)(C)C)[C@H]4O[  
 Si](C)(C)C(C)(C)C)c(=O)nc3N)n2[C@@H]2O[C@H](CO[Si](C)(C)C(C)(C)C)[C@@H](O[Si](C)(C)  
 C(C)(C)C)[C@H]2O[Si](C)(C)C(C)(C)C)c(=O)nc3N)n2[C@@H]2O[C@H](CO[Si](C)(C)C(C)(C)C)[C@@H](O[Si](C)(C)  
 4434 C(C)(C)C)[C@H]2O[Si](C)(C)C(C)(C)C)c(=O)nc3N)n2[C@@H]2O[C@H](CO[Si](C)(C)C(C)(C)C)[C@@H](O[Si](C)(C)  
 C(C)(C)C)[C@H]2O[Si](C)(C)C(C)(C)C)c(=O)nc3N)n2[C@@H]2O[C@H](CO[Si](C)(C)C(C)(C)C)[C@@H](O[Si](C)(C)  
 4435 C=CC(=O)OC.O=C1c2cccc2C(=O)N1c1ccc(I)cc1>>COC(=O)/C=C/c1ccc(N2C(=O)c3cccc3C2=O)c  
 C=CCC(CO[Si](C)(C)C(C)(C)C)c1cccc1[N+](=O)[O-]  
 4436 ].O=c1c2cccc2sc2ccc(I)cc12>>CC(C)(C)[Si](C)(C)OCC(C/C=C/c1ccc2sc3cccc3c(=O)c2c1)c1cccc  
 1[N+](=O)[O-]  
 4437 C=CC#N.COC(=C1C2CC3CC(C2)CC1C3)c1ccc(I)c(O)c1>>COC(=C1C2CC3CC(C2)CC1C3)c1ccc(/  
 C=C/C#N)c(O)c1  
 4438 Br1ccc2cc[nH]c2c1.C=CC(=O)OC>>COC(=O)/C=C/c1ccc2cc[nH]c2c1  
 4439 C=COCCCC.COc1ccc(Br)c(OC)n1>>C=C(OCCCC)c1ccc(OC)nc1OC  
 4440 C=CCNC(=O)OC(C)(C)C.COC(=O)c1ccc(Cl)cc1>>C=C(CNC(=O)OC(C)(C)C)c1ccc(C(=O)OC)cc1  
 4441 C=Cc1cccc1.O=P1(c2cccc2)C(Br)=Cc2cccc2I>>O=P1(c2cccc2)C(/C=C/c2cccc2)=Cc2cccc2I  
 4442 C=CC(=O)N[C@@H](Cc1cccc1)C(=O)N[C@@H](C)C(=O)N[C@@H](CC(C)C)C(=O)NCc1cccc(B  
 r)c1>>CC(C)C[C@@H]1NC(=O)[C@H](C)NC(=O)[C@H](Cc2cccc2)NC(=O)/C=C/c2cccc(c2)CNC  
 4443 C=CC(=O)OC.CCC(CC)(c1ccc(OCc2cccc2)c(C)c1)c1cn(C)c2cc(Br)ccc12>>CCC(CC)(c1ccc(OCc2c  
 cccc2)c(C)c1)c1cn(C)c2cc(/C=C/C(=O)OC)ccc12  
 4444 C=Cc1cccc1.O=[N+](O-)c1cccc(I)c1>>O=[N+](O-)c1cccc(/C=C/c2cccc2)c1

4445 C=CC(N)=O.N#Cc1cc(Cl)ccc1C(F)(F)F>>N#Cc1cc(/C=C/C(N)=O)ccc1C(F)(F)F  
 4446 C=Cc1ccc(OC)cc1.Nc1cccc(Br)c1>>COc1ccc(/C=C/c2cccc(N)c2)cc1  
 4447 C=Cc1cccc1.Clc1ccc(Br)cc1>>Clc1ccc(/C=C/c2cccc2)cc1  
 4448 C=Cc1ccc(C)cc1C.C[Si](C)(OS(=O)(=O)C(F)(F)F)OS(=O)(=O)C(F)(F)F>>Cc1ccc(/C=C/[Si](C)(C)O  
 S(=O)(=O)C(F)(F)F)c(C)c1  
 4449 C=CC(=O)OC(C)(C)C.CC(C)(C)OC(=O)/C=C/c1ccc(CN(C(=O)C2CCCC2)c2cccc(Br)c2)cc1>>CC(  
 C)(C)OC(=O)/C=C/c1ccc(CN(C(=O)C2CCCC2)c2cccc(/C=C/C(=O)OC(C)(C)C)c2)cc1  
 4450 C=CCc1c(N(C)C(=O)c2cccc2I)ccc2c1ccc(=O)n2CC>>C=C1Cc2c(ccc3c2ccc(=O)n3CC)N(C)C(=O)c  
 2cccc21  
 4451 C=CC(=O)OCC.CN1Cc2cc(Br)ccc2C1=O>>CCOC(=O)/C=C/c1ccc2c(c1)CN(C)C2=O  
 4452 C=CC(C)O.COc1ccc2cc(Br)ccc2c1>>COc1ccc2cc(/C=C/C(C)O)ccc2c1  
 4453 C=Cc1cccn1.CC1(Br)CCN(C(=O)OC(C)(C)C)CC1>>CC1(/C=C/c2cccn2)CCN(C(=O)OC(C)(C)C)  
 4454 C=CCN(C(=O)c1ccc2cccc2c1Br)C(C(=O)NC1CCCC1)c1ccc2cccc2c1>>C=C1CN(C(C(=O)NC2C  
 CCCC2)c2ccc3cccc3c2)C(=O)c2ccc3cccc3c21  
 4455 C=CC(=O)OCC.FC(F)(F)c1ccc(I)c(Cl)c1>>CCOC(=O)/C=C/c1ccc(C(F)(F)F)cc1Cl  
 4456 C=Cc1cccc1.Cc1ccc(I)cc1[N+](=O)[O-]>>Cc1ccc(/C=C/c2cccc2)cc1[N+](=O)[O-]  
 4457 C=CC(=O)OCCCC.Clc1cccc(I)c1>>CCCCOC(=O)/C=C/c1cccc(Cl)c1  
 4458 C=CC12CCC(NC(=O)OC(C)(C)C)(CC1)CO2.COc1ccc2ncc(Cl)c(Br)c2n1>>COc1ccc2ncc(Cl)c(/C=C/  
 C34CCC(NC(=O)OC(C)(C)C)(CC3)CO4)c2n1  
 4459 C=CC(=O)NCc1ccccc1.O=c1c(I)coc2cc(O)ccc12>>O=C(/C=C/c1coc2cc(O)ccc2c1=O)NCc1ccccc1  
 4460 C=CC(=O)OC(C)(C)C.COc1ccc(S(=O)(=O)c2ccc3c(Br)cccc3n2)cc1>>COc1ccc(S(=O)(=O)c2ccc3c(/  
 C=C/C(=O)OC(C)(C)C)cccc3n2)cc1  
 4461 C=Cc1cccc([N+](=O)[O-])c1.Ic1cccc1>>O=[N+](O)c1ccc(/C=C/c2cccc2)c1  
 4462 Brc1ncc2cccc12.C=CCC(C)C(=O)OCC>>CCOC(=O)C(C)C/C=C/c1ncc2cccc12  
 Brc1ccc2ncccc2c1.C=CCON=C1[C@H](C)[C@H]2OC(=O)O[C@]2(C)[C@H](CC)OC(=O)[C@@]  
 4463 (C)(F)C(=O)[C@H](C)[C@@H](O[C@@H]2O[C@H](C)C[C@H](N(C)C)[C@H]2OC(C)=O)[C@]  
 (C)(OC)C[C@H]1C>>CC[C@H]1OC(=O)[C@@](C)(F)C(=O)[C@H](C)[C@@H](O[C@@H]2O[C@  
 H](C)C[C@H](N(C)C)[C@H]2OC(C)=O)[C@](C)(OC)C[C@@H](C)C(=NOC/C=C/c2ccc3ncccc3c2)  
 I[C@H]1(C)I[C@H]2OC(=O)O[C@]112C  
 4464 C=CC(=O)OCC.COc1cc(C)c(Br)cn1>>CCOC(=O)/C=C/c1ncc(OC)cc1C  
 4465 C=CC(=O)OC.COc1cc([C@H]2Oc3c(OC)cc(Br)cc3[C@H]2COC(C)=O)ccc1OC(C)=O>>COC(=O)  
 /C=C/c1cc(OC)c2c(c1)[C@H](COC(C)=O)[C@@H](c1ccc(OC(C)=O)c(OC)c1)O2  
 4466 C=CC(=O)OC.COc1cc(Br)ccc1C=O>>COC(=O)/C=C/c1ccc(C=O)c(OC)c1  
 4467 C=Cc1cccc1.Cc1ncc(I)c(C)n1>>Cc1ncc(/C=C/c2cccc2)c(C)n1  
 4468 C=Cc1nc(C(=O)OCC)co1.Ic1cccc1>>CCOC(=O)c1coc(/C=C/c2cccc2)n1  
 4469 C=CC(=O)c1ccc(OC)cc1OC.COc1ccc(I)cc1OC>>COc1ccc(C(=O)/C=C/c2ccc(OC)c(OC)c2)c(OC)c1  
 4470 C=CCN(Cc1ccccc1I)C1CCCC1>>C=C1CN(C2CCCC2)Cc2cccc21  
 4471 C=CP(=O)(c1ccccc1)c1ccccc1OC.C[P@](=O)(/C=C/c1ccc(Br)c1)c1ccccc1>>COc1ccccc1P(=O)(/C=  
 C/c1cccc(/C=C/[P@](C)(=O)c2cccc2)c1)c1ccccc1  
 4472 C=Cc1ccc([Si](OC)(OC)OC)cc1.CO[Si](OC)(OC)c1ccc(Br)cc1>>CO[Si](OC)(OC)c1ccc(/C=C/c2ccc(  
 [Si](OC)(OC)OC)cc2)cc1  
 4473 C=Cc1cccc(N)c1.CCN1c2ncc(I)cc2C(=O)N(C)c2cccn21>>CCN1c2ncc(/C=C/c3cccc(N)c3)cc2C(=O)  
 N(C)c2cccn21  
 4474 Brc1cncc1.C=CS(C)(=O)=O>>CS(=O)(=O)/C=C/c1cncc1  
 4475 C=Cc1cc(C(C)(C)C)ccc1OCc1cc(OC)ccc1Br>>COc1ccc2c(c1)COc1ccc(C(C)(C)C)cc1/C=C\2  
 4476 C=CC(N)=O.O=C1Nc2ccc(Br)cc2C1=O>>NC(=O)/C=C/c1ccc2c(c1)C(=O)C(=O)N2  
 4477 C=CC(=O)OC.Ic1ccc2cccc2c1>>COC(=O)/C=C/c1ccc2cccc2c1  
 4478 C=CCN(Cc1ccccc1I)C(=O)C(F)(F)F>>C=C1CN(C(=O)C(F)(F)F)Cc2cccc21  
 4479 C=CC(N)=O.COc1ccc2c(c1)CCC(C=O)=C2Br>>COc1ccc2c(c1)CCC(C=O)=C2/C=C/C(N)=O  
 4480 C=CC(=O)OCCCC.COC(=O)c1ccccc1I>>CCCCOC(=O)/C=C/c1ccccc1C(=O)OC  
 4481 C=C[Si](CC)(CC)CC.FC(F)(F)c1cc(Br)cc(C(F)(F)F)c1>>CC[Si](/C=C/c1cc(C(F)(F)F)cc(C(F)(F)F)c1)  
 (CC)CC  
 4482 C=CCOCc1ccccc1.CC1(c2cccc2Br)CC(=O)C1>>CC1(c2cccc2/C=C/CCOCc2cccc2)CC(=O)C1  
 4483 C=CCN(C(=O)c1ccc2cccc2c1Br)C(C(=O)NC(C)(C)C)c1ccccc1>>C=C1CN(C(C(=O)NC(C)(C)C)c2c  
 cccc2)C(=O)c2ccc3cccc3c21  
 4484 C=CC(=O)OC(C)(C)C.COc1cc(COCCC(=O)OC(C)(C)C)c(Br)cc1OCc1ccccc1>>COc1cc(COCCC(=O)  
 )OC(C)(C)C)c(/C=C/C(=O)OC(C)(C)C)cc1OCc1ccccc1  
 4485 C=CCN(C(=O)OC(C)(C)C)C(=O)OC(C)(C)C.CC(=O)c1ccc(Br)c1>>CC(=O)c1cccc(/C=C/CN(C(=O)  
 OC(C)(C)C)C(=O)OC(C)(C)C)c1  
 4486 C=CC(=O)N(C)OC.Cc1ccc(I)cc1>>CON(C)C(=O)/C=C/c1ccc(C)cc1

4487 C/N=C1/Nc2ncc(Br)cc2OC1(C)C.C=CC(=O)N(C)Cc1sc2cccc2c1C>>C/N=C1/Nc2ncc(/C=C/C(=O)N  
(C)Cc3sc4cccc4c3C)cc2OC1(C)C  
4488 C=CC(=O)OCc1cccc1.Ic1cccc1>>O=C(/C=C/c1cccc1)OCc1cccc1  
4489 C=Cc1c(C)cc(C)cc1C.Cc1cc(C)c(Cl)c(C)c1>>Cc1cc(C)c(/C=C/c2c(C)cc(C)cc2C)c(C)c1  
4490 C=CCC1CCCC1.CC(C)(C)c1ccc(Br)cc1>>C=C(CC1CCCC1)c1ccc(C(C)(C)C)cc1  
4491 C=CC#N.CC(=O)Nc1cccc1I>>CC(=O)Nc1cccc1/C=C/C#N  
4492 Brc1cccc2cccc12.C=Cc1cc2ccc(OC)cc2oc1=O>>COc1ccc2cc(/C=C/c3cccc4cccc34)c(=O)oc2c1  
4493 C=CC(=O)OC(CC)CCCC.FC(F)(F)c1ccc(Cl)cc1>>CCCCC(CC)OC(=O)/C=C/c1ccc(C(F)(F)F)cc1  
4494 C=CCN(C(=O)c1cccc1Br)C(C)(C)C>>C=C1CN(C(C)(C)C)C(=O)c2cccc21  
4495 C=Cc1cccc(F)c1.COc1ccc2c(=O)c(I)cc2c1>>COc1ccc2c(=O)c(/C=C/c3cccc(F)c3)cc2c1  
4496 C=CC(=O)N(C)C.C[C@H]1C[C@@H](n2c(Nc3ccc(OC(F)(F)F)cc3)nc3cc(Br)ccc32)CC(C)(C)C1>>C  
[C@H]1C[C@@H](n2c(Nc3ccc(OC(F)(F)F)cc3)nc3cc(/C=C/C(=O)N(C)C)ccc32)CC(C)(C)C1  
4497 C=CCCCCCCCCN1C(=O)c2cccc2C1=O.O=S(=O)(Oc1ccc2cccc2c1)C(F)(F)F>>C=C(CCCCCCCC  
N1C(=O)c2cccc2C1=O)c1ccc2cccc2c1  
4498 C=CC(=O)OC(C)(C)C.CC(C)(C)O[C@H]1CC[C@@H]2C=C(C3=C(Br)CC4(CC3)OCCO4)CC[C@]1  
2C>>CC(C)(C)OC(=O)/C=C/C1=C(C2=C[C@H]3CC[C@H](OC(C)(C)C)[C@@]3(C)CC2)CCC2(C1)  
4499 C=CC#N.Ic1nnc2nnc(Cc3cccc3)c12>>N#C/C=C/c1nnc2nnc(Cc3cccc3)c12  
4500 C=CC(=O)OCC.Cc1ccc(C2OCCCO2)c(Br)c1>>CCOC(=O)/C=C/c1ccc(C)ccc1C1OCCCO1  
4501 C=CCOc1cccc1.Cc1cc(C)cc(I)c1>>Cc1cc(C)cc(/C=C/COc2cccc2)c1  
4502 C=CCN1C(=O)c2cccc2C1=O.O=C1NCCc2cc(Br)ccc21>>O=C1NCCc2cc(/C=C/CN3C(=O)c4cccc4  
C3=O)ccc21  
4503 C=CS(=O)(=O)c1cccc1.CC(=O)c1ccc(Br)cc1>>CC(=O)c1ccc(/C=C/S(=O)(=O)c2cccc2)cc1  
4504 C=Cc1ccc(N2CCN(C)CC2)nc1.C[Si](C)(C)CCOCn1nc(I)c2ccc(C=O)cc21>>CN1CCN(c2ccc(/C=C/c3  
nn(COCC[Si](C)(C)C)c4cc(C=O)ccc34)cn2)CC1  
4505 C=CC(=O)OC(C)(C)C.O=S(=O)(c1cccc1)n1ccc2cc(Br)cn21>>CC(C)(C)OC(=O)/C=C/c1nc2c(cen2  
S(=O)(=O)c2cccc2)c1  
4506 C=CCc1c(OS(=O)(=O)c2cccc2Br)ccc2cccc12>>C=C1Cc2c(ccc3cccc23)OS(=O)(=O)c2cccc21  
4507 C=CP(=O)(OCC)OCC.CN(C)c1ccc(Br)cc1>>CCOP(=O)(/C=C/c1ccc(N(C)C)cc1)OCC  
4508 C=Cn1nc2c(NC)nnc21.Cc1ccc(NC(=O)c2ccc(C(F)(F)F)c2)cc1I>>CNc1nnc2c1nnc2/C=C/c1cc(NC  
(=O)c2ccc(C(F)(F)F)c2)ccc1C  
4509 C=C(CC(=O)OC)C(=O)OC.O=[N+](I)c1ccc(I)cc1>>COC(=O)C/C(=C)c1ccc([N+](=O)[O-  
)cc1)C(=O)OC  
4510 C=CC(=O)N(C)C.FC(F)(F)c1cccc(I)c1>>CN(C)C(=O)/C=C/c1cccc(C(F)(F)F)c1  
4511 C=Cc1c(C)cc(C)cc1C.CCOC(=O)C(F)Br>>CCOC(=O)C(F)/C=C/c1c(C)cc(C)cc1C  
4512 C=CCNC(=O)OC(C)(C)C.O=Cc1cccc(Cl)c1>>C=C(CNC(=O)OC(C)(C)C)c1cccc(C=O)c1  
4513 C=CC(=O)Nc1cccc1NC(=O)OC(C)(C)C.COC(=O)C(O)c1ccc(Br)cc1>>COC(=O)C(O)c1ccc(/C=C/C  
(=O)Nc2cccc2NC(=O)OC(C)(C)C)cc1  
4514 C=CS(=O)(=O)F.O=S(=Nc1ccc(I)cc1)(Oc1cccc1)N1CCCC1>>O=S(=O)(F)/C=C/c1ccc(N=S(=O)(Oc  
2cccc2)N2CCCC2)cc1  
4515 C=C.N#CCc1cccc1I>>C=Cc1cccc1CC#N  
4516 C=Cc1ccc(Cl)cc1.COC(=O)c1ccc(I)cc1>>COC(=O)c1ccc(/C=C/c2ccc(Cl)cc2)cc1  
4517 C=CC(=O)OCC.COC(=O)c1cc(Br)ccc1OCc1cccc1>>CCOC(=O)/C=C/c1ccc(OCc2cccc2)c(C(=O)O  
4518 C=C[Si](CC)(CC)CC.Cc1cccc1Br>>CC[Si](/C=C/c1cccc1C)(CC)CC  
4519 C=CC(OC)OC.Cc1cccc1I>>COC(/C=C/c1cccc1C)OC  
4520 C=Cc1ccc(N(c2cccc2)c2cccc2)cc1.O=Cc1c(F)cc(Br)cc1F>>O=Cc1c(F)cc(/C=C/c2ccc(N(c3cccc3)c  
3cccc3)cc2)cc1F  
4521 C=Cc1ccc([Si](OC)(OC)OC)cc1.CCOP(=O)(Cc1ccc(/C=C/c2c3cccc3c(Br)c3cccc23)cc1)OCC>>CC  
OP(=O)(Cc1ccc(/C=C/c2c3cccc3c(/C=C/c3ccc([Si](OC)(OC)OC)cc3)c3cccc23)cc1)OCC  
4522 C=CC(=O)OC(C)(C)C.COc1ccc(-c2ccc(Br)cn2)cc1OC>>COc1ccc(-  
c2ccc(/C=C/C(=O)OC(C)(C)C)cn2)cc1OC  
4523 Brc1ccc(C=C2Cc3cccc3C2)c2ccc3c(cnn3C3CCCCO3)c2cc1.C=CC(=O)OC>>COC(=O)/C=C/c1ccc  
(C(=C2Cc3cccc3C2)c2ccc3c(cnn3C3CCCCO3)c2)cc1  
4524 C=Cc1cccc1.C[Si](C)(C)CCOCn1nc(I)c2ccc(C=O)cc21>>C[Si](C)(C)CCOCn1nc(/C=C/c2cccc2)c2  
ccc(C=O)cc21  
4525 C=Cc1cccc1.CC(=O)c1cn(C)c2c(Br)cccc12>>CC(=O)c1cn(C)c2c(/C=C/c3cccc3)cccc12  
4526 C=Cc1ccc(Br)cc1.Ic1cccc1>>Br1ccc(/C=C/c2cccc2)cc1  
4527 C=Cc1cc(Cl)ccc1OS(=O)(=O)c1cccc1Br>>O=S1(=O)Oc2ccc(Cl)cc2/C=C/c2cccc21  
4528 C=CCS(=O)(=O)c1cccc1.CCOC(=O)/C=C/c1cc(Br)cc(Cc2ccnc2)c1>>CCOC(=O)/C=C/c1cc(/C=C/  
CS(=O)(=O)c2cccc2)cc(Cc2ccnc2)c1  
4529 C=CC(=O)OCC.Fc1cccc(-  
n2nnc3cnc(Nc4cccc(Br)c4)nc32)c1>>CCOC(=O)/C=C/c1cccc(Nc2ncc3nnn(-c4cccc(F)c4)c3n2)c1



C=Cc1cc([N+](=O)[O-]  
 4530 ]ccc1OCOCC[Si](C)(C)C.N#Cc1cccc1I>>C[Si](C)(C)CCOCOc1ccc([N+](=O)[O-]  
 )cc1/C=C/c1cccc1C#N  
 4531 C=CC(=O)O.COc1ccc(S(=O)(=O)NCc2ccc(I)cc2)cc1OC>>COc1ccc(S(=O)(=O)NCc2ccc(/C=C/C(=O)  
 O)cc2)cc1OC  
 4532 C=CCNS(=O)(=O)c1cccc1.O=S(=O)(Oc1cccc1Cl)C(F)(F)F>>C=C(CNS(=O)(=O)c1cccc1)c1cccc  
 C=CC(C)=O.CNC(=O)c1c2cc(C3CC3)c(I)cc2nn1-  
 4533 c1ccc(Br)cc1>>CNC(=O)c1c2cc(C3CC3)c(/C=C/C(C)=O)cc2nn1-c1ccc(Br)cc1  
 4534 C=C.COC(=O)c1cc(OC)ccc1Br>>C=Cc1ccc(OC)cc1C(=O)OC  
 C=CC(=O)OC.CC(C)(C)[Si](C)(C)OCCc1ccc(NC(=O)CCc2ccc(Br)cc2)cc1>>COC(=O)/C=C/c1ccc(  
 4535 CCCC(=O)Nc2ccc(CCO[Si](C)(C)C(C)(C)C)cc2)cc1  
 C=Cc1ccccc1.COc1ccc2c(ccc3ccc4ccc(Br)cc4c32)c1>>COc1ccc2c(ccc3ccc4ccc(/C=C/c5ccccc5)cc4c  
 4536 32)c1  
 C=CC#N.Cc1ccc(Br)cc1>>Cc1ccc(/C=C/C#N)cc1  
 4537 C=CC(=O)OCCCC.O=C1CCC(N2C(=O)c3cccc(I)c3C2=O)C(=O)N1>>CCCCOC(=O)/C=C/c1cccc2c1  
 4538 C(=O)N(C1CCC(=O)NC1=O)C2=O  
 C=Cc1ccc(O[Si](C)(C)C(C)(C)C)c(OC)c1.C[Si](C)(OS(=O)(=O)C(F)(F)F)OS(=O)(=O)C(F)(F)F>>CO  
 4539 c1cc(/C=C/[Si](C)(C)OS(=O)(=O)C(F)(F)F)ccc1O[Si](C)(C)C(C)(C)C  
 C=CC(=O)OC.COc1ccc(C=O)c(Br)c1OC>>COC(=O)/C=C/c1c(C=O)ccc(OC)c1OC  
 4540 C=CC(=O)N(C)C.CC(=O)O[C@H]1CC[C@H]2[C@H]3[C@H](CC[C@]12C)c1ccc(O)cc1C[C@H]3  
 Sc1ccc(Br)cc1>>CC(=O)O[C@H]1CC[C@H]2[C@H]3[C@H](CC[C@]12C)c1ccc(O)cc1C[C@H]3S  
 4541 c1ccc(/C=C/C(=O)N(C)C)cc1  
 C=CC(OCC)OCC.O=[N+](O-)]c1ccc(Br)cc1>>CCOC(/C=C/c1ccc([N+](=O)[O-])cc1)OCC  
 4542 C=CCCN(Cc1cc2c(cc1Br)OCO2)C(=O)OC(C)(C)C>>C=C1CCN(C(=O)OC(C)(C)C)Cc2cc3c(cc21)O  
 4543 Brc1ccccc1.C=Cc1cccc1>>C(=C/c1ccccc1)\c1ccccc1  
 4544 Brc1cnc2cccc12.C=CC(=O)OCCCC>>CCCCOC(=O)/C=C/c1cnc2cccc12  
 4545 O=C(/C=C/c1ccccc1)O/C(=C/I)C1CC1>>O=C1OC(C2CC2)=C/C1=C\c1ccccc1  
 4546 C=CC(=O)OC.Cc1ccc(I)cc1>>COC(=O)/C=C/c1ccc(C)cc1  
 4547 C=CC(=O)OC.CC(=O)c1ccc(OS(=O)(=O)C(F)(F)F)cc1>>COC(=O)/C=C/c1ccc(C(C)=O)cc1  
 C=CN1CCCCC1=O.COc1ccc2c(c1)CCC=C2OS(=O)(=O)C(F)(F)F>>C=C(C1=CCCc2cc(OC)ccc21)  
 4548 N1CCCCC1=O  
 C=CC(=O)OC(C)(C)C.O=S(=O)(c1cccc(Br)c1)N1CCc2ccccc21>>CC(C)(C)OC(=O)/C=C/c1cccc(S(=O)(=O)N2CCc3ccccc32)c1  
 4549 C=CC(=O)OC(C)(C)C.O=C1Nc2ccc(Br)cc2CN2CCC[C@H]12>>CC(C)(C)OC(=O)/C=C/c1cnc2c(c1)  
 4550 CN1CCC[C@H]1C(=O)N2  
 C=Cc1cccc1.COC(=O)c1cc2ccc(=O)cc2cc1OS(=O)(=O)C(F)(F)F>>COC(=O)c1cc2ccc(=O)cc2cc1/C  
 4551 =C/c1ccccc1  
 C=CC(=O)OC(C)(C)C.OCCc1cc(Br)ccc1O>>CC(C)(C)OC(=O)/C=C/c1ccc(O)c(CCO)c1  
 4552 C=CCO[Si](C)(C)C(C)(C)C.CC(=O)c1ccc(Br)cc1>>CC(=O)c1ccc(/C=C/CO[Si](C)(C)C(C)(C)C)cc1  
 4553 C=CC#N.Nc1ccc(Br)c2c1COC2>>N#C/C=C/c1ccc(N)c2c1COC2  
 C=C[C@](C)(C)(C)/C=C/c1ccc(O)cc1)CCC=C(C)C.COc1ccccc1I>>COc1ccccc1/C=C/[C@](C)(C)/C=C/c  
 4554 1ccc(O)cc1)CCC=C(C)C  
 C=CC(=O)OC(C)(C)C.CC(C)(C)OC(=O)CCc1ccc(CN(C(=O)C2CCCCC2)c2cccc(Br)c2)cc1>>CC(C)(  
 4555 C)OC(=O)/C=C/c1cccc(N(Cc2ccc(CCC(=O)OC(C)(C)C)cc2)C(=O)C2CCCCC2)c1  
 C=CC(N)=O.COc1ccc2c(c1)C(Br)=C(C=O)CC2>>COc1ccc2c(c1)C(/C=C/C(N)=O)=C(C=O)CC2  
 4556 C=C[C@H](CC(C)C)NC(=O)OC(C)(C)C.CC1(C)OC(=O)c2c(cccc2OS(=O)(=O)C(F)(F)F)O1>>CC(C  
 )C[C@H](/C=C/c1cccc2c1C(=O)OC(C)(C)O2)NC(=O)OC(C)(C)C  
 4557 C=Cc1ccc(F)cc1.C[Si](C)(C)Cl>>C[Si](C)(C)/C=C/c1ccc(F)cc1  
 C=C(NC(C)=O)C(=O)OC.O=C(c1ccccc1)c1ccc(Br)cc1>>COC(=O)/C=C/c1ccc(C(=O)c2ccccc2)cc1)  
 4558 NC(C)=O  
 C=CC(=O)CCC.Cc1ccc(Br)cc1>>CCCC(=O)/C=C/c1ccc(C)cc1  
 4559 C=Cc1ccc(OC)cc1.CC(Br)C(=O)N1CCCCC1>>COc1ccc(/C=C/C(C)C(=O)N2CCCCC2)cc1  
 C=COCCCC.O=C(O)c1cccc(Cl)c1>>C=C(OCCCC)c1cccc(C(=O)O)c1  
 4560 C=CC(=O)OCC.CN1CCc2ccc(Br)cc2C1>>CCOC(=O)/C=C/c1ccc2c(c1)CN(C)CC2  
 Brc1cc2ccccc2[se]1.C=CC(=O)OC>>COC(=O)/C=C/c1cc2ccccc2[se]1  
 4561 C=Cc1ccc(N(c2ccc(C)cc2)c2ccc(C)cc2)cc1.O=Cc1ccc(Br)cc1>>Cc1ccc(N(c2ccc(C)cc2)c2ccc(/C=C/c  
 4562 3ccc(C=O)cc2)cc2)cc1  
 C=CC(=O)OCC.Cn1nnc2cc(Br)ccc21>>CCOC(=O)/C=C/c1cnc2c(c1)nnn2C  
 4563 \*CNCCCCOCCOCCOCCOCCNC(=O)COc1ccc(C(Cc2cc(OC)cc(OC)c2)NC(=O)c2ccc(C=C)cc2)cc1.CC(=O)c1ccc(I)cc1>>\*CNCCCCOCCOCCOCCOCCNC(=O)COc1ccc(C(Cc2cc(OC)cc(OC)c2)NC(=O)c2ccc(/C=C/c3ccc(C(C)=O)cc3)cc2)cc1  
 4564 C=C/c3ccc(C(C)=O)cc3)cc2)cc1  
 4565 C=CC(=O)OCC.Cn1nnc2cc(Br)ccc21>>CCOC(=O)/C=C/c1cnc2c(c1)nnn2C  
 4566 \*CNCCCCOCCOCCOCCOCCNC(=O)COc1ccc(C(Cc2cc(OC)cc(OC)c2)NC(=O)c2ccc(C=C)cc2)cc1.CC(=O)c1ccc(I)cc1>>\*CNCCCCOCCOCCOCCOCCNC(=O)COc1ccc(C(Cc2cc(OC)cc(OC)c2)NC(=O)c2ccc(/C=C/c3ccc(C(C)=O)cc3)cc2)cc1  
 4567 C=C/c3ccc(C(C)=O)cc3)cc2)cc1  
 4568 C=CC(=O)OCC.Cn1nnc2cc(Br)ccc21>>CCOC(=O)/C=C/c1cnc2c(c1)nnn2C  
 4569 \*CNCCCCOCCOCCOCCOCCNC(=O)COc1ccc(C(Cc2cc(OC)cc(OC)c2)NC(=O)c2ccc(C=C)cc2)cc1.CC(=O)c1ccc(I)cc1>>\*CNCCCCOCCOCCOCCOCCNC(=O)COc1ccc(C(Cc2cc(OC)cc(OC)c2)NC(=O)c2ccc(/C=C/c3ccc(C(C)=O)cc3)cc2)cc1  
 4570 C=C/c3ccc(C(C)=O)cc3)cc2)cc1

4570 Br1cnc2c(c1)CCCCN2.C=CC(=O)N(C)Cc1oc2ccccc2c1C>>Cc1c(CN(C)C(=O)/C=C/c2cnc3c(c2)CC  
CCN3)oc2ccccc12

4571 C=CN1CCCC1=O.Cc1ccc(Br)cc1>>C=C(c1ccc(C)cc1)N1CCCC1=O

4572 C=C1C(=O)O[C@@H]2/C=C(\C)CC/C=C(\C)CC[C@@H]12.COc1ccc(I)cc1>>COc1ccc(/C=C2/C(=O)O[C@@H]3/C=C(\C)CC/C=C(\C)CC[C@@H]23)cc1

4573 C=CC(F)=C1CCN(Cc2ccccc2)CC1.Ic1ccccc1>>FC(/C=C/c1ccccc1)=C1CCN(Cc2ccccc2)CC1

4574 C=CC(=O)OC.CC(C)NCCCn1c(Sc2cc3c(cc2I)OCO3)nc2c(N)ncnc21>>COC(=O)/C=C/c1cc2c(cc1Sc1nc3c(N)ncnc3n1CCCN(C)C)OCO2

4575 C=CC(F)(F)C(F)(F)C(F)(F)C(F)(F)C(F)(F)F.O=Cc1ccc(Br)cc1>>O=Cc1ccc(/C=C/C(F)(F)C(F)(F)C(F)(F)C(F)(F)C(F)(F)C(F)(F)F)cc1

4576 C=CC(=O)Nc1ccccc1C(=O)OCc1ccccc1.O=S(=O)(Oc1ccc2nc(Cl)ccc2c1)C(F)(F)F>>O=C(/C=C/c1cc2nc(Cl)ccc2c1)Nc1ccccc1C(=O)OCc1ccccc1

4577 C=CC(=O)OC.CCC(CC)(c1ccc(OCc2ccccc2)c(C)c1)c1c[nH]c2cc(Br)ccc12>>CCC(CC)(c1ccc(OCc2ccccc2)c(C)c1)c1c[nH]c2cc(/C=C/C(=O)OC)ccc12

4578 Nc1ccc(I)cc1.[11CH2]=Cc1ccccc1>>Nc1ccc(/[11CH]=C/c2ccccc2)cc1

4579 C=CCOC1CCCCO1.O=CNc1ccccc1I>>O=CNc1ccccc1/C=C\COC1CCCCO1

4580 C=CCN(C(=O)c1ccccc1Br)C(C)C>>C=C1CN(C(C)C)C(=O)c2ccccc21

4581 CC(=O)/C=C/CC(NS(=O)(=O)c1ccc(C)cc1)c1ccccc1.Cn1ccc2cc(Br)ccc21>>CC(=O)/C=C(/CC(NS(=O)(=O)c1ccc(C)cc1)c1ccccc1)c1ccc2c(ccn2C)c1

4582 C=CC(=O)OCC.Fc1ccc(Oc2ccccc2)cc1>>CCOC(=O)/C=C/c1ccc(Oc2ccccc2)cc1

4583 C=CC(=O)OC.CC(C)n1cnc2c(NCc3ccccc3)nc(N3CCCCC3)nc21>>COC(=O)/C=C/c1ccc(CNc2nc(N3CCCCC3)nc3c2ncn3C(C)C)c1

4584 C=CN1C(=O)c2ccccc2C1=O.Ic1ccc2c(c1)OCCOCCOCCOCCO2>>O=C1c2ccccc2C(=O)N1/C=C/c1ccc2c(c1)OCCOCCOCCOCCO2

4585 C=CC(=O)N1CCOCC1.CCOC(OCC)c1ccc(Br)cc1>>CCOC(OCC)c1ccc(/C=C/C(=O)N2CCOCC2)c1

4586 C=C(C)C.CCCC(=O)/C=C/Cl>>CCCC(=O)/C=C/C=C(C)C

4587 Br1ccccc1.C=Cc1ccc(N(c2ccc(C)cc2)c2ccc(C)cc2)cc1>>Cc1ccc(N(c2ccc(C)cc2)c2ccc(/C=C/c3ccccc3)cc2)cc1

4588 C=Cc1ccc(/C=C/c2cc(CCCCC)c(C=O)cc2CCCCC)cc1.CCCCCCc1cc(/C=C/c2ccc(C(=O)OC)cc2)c(CCCCC)cc1Br>>CCCCCCc1cc(/C=C/c2ccc(/C=C/c3cc(CCCCC)c(/C=C/c4ccc(C(=O)OC)cc4)cc3CCCCC)cc2)c(CCCCC)cc1C=O

4589 C=C(NC(=O)OC(C)(C)C)C(=O)OCc1ccccc1.Ic1ccccc1C1OCCCCO1>>CC(C)(C)OC(=O)N/C=C\c1ccc1C1OCCCCO1)C(=O)OCc1ccccc1

4590 C=Cc1ccc(OC)cc1.CCCCCCCOc1ccc2c(C)c(Br)c(=O)oc2c1>>CCCCCCCCOc1ccc2c(C)c(/C=C/c3ccc(OC)cc3)c(=O)oc2c1

4591 C=C1CC(c2ccccc2)OC1=O.CCOc1ccc(I)cc1>>CCOc1ccc(/C=C2\CC(c3ccccc3)OC2=O)cc1

4592 C=Cc1ccc(C(=O)OC)cc1.O=C(N1CCOCC1)C(F)(F)Br>>COC(=O)c1ccc(/C=C/C(F)(F)C(=O)N2CCOCC2)cc1

4593 C=CC(=O)OCC.Cc1ccc(I)cc1>>CCOC(=O)/C=C/c1ccc(C)cc1

4594 C=Cc1cncnc1.Oc1ccccc1Br>>Oc1ccccc1/C=C/c1cncnc1

4595 C=Cc1ccc(OCC)cc1.O=[N+](O-)]c1ccc(I)cc1CO>>CCOc1ccc(/C=C/c2ccc([N+](=O)[O-]C=COCCOC=C.COc1ccc2cc(Br)ccc12>>C=COCCOC(=C)c1ccc2c(OC)cccc2c1

4597 Br1ccccc1.C=Cc1cc2ccccc2oc1=O>>O=c1oc2ccccc2cc1/C=C/c1ccccc1

4598 C=CC(=O)OCc1ccccc1.C[Si](C)(C)CCOC(=O)c1ccc(I)c1>>C[Si](C)(C)CCOC(=O)c1ccc(/C=C/C(=O)OCc2ccccc2)c1

4599 C=CC(=O)CC.O=Cc1ccc(Br)cc1>>CCC(=O)/C=C/c1ccc(C=O)cc1

4600 C=CC(C)=O.COc1c(Br)cc(OC)c2c(OC)cccc12>>COc1c(/C=C/C(C)=O)cc(OC)c2c(OC)cccc12

4601 C=CC(=O)OC.Cl1ccc(Br)cc1>>COC(=O)/C=C/c1ccc(Cl)c1

4602 C=CC(=O)OC.CC(C)(C)OC(=O)N1Cc2c(O)ccc(Br)c2C1>>COC(=O)/C=C/c1ccc(O)c2c1CN(C(=O)OC(C)(C)C)C2

4603 C=CC(=O)OCC.Ic1cnn(C2CCCCO2)c1>>CCOC(=O)/C=C/c1cnn(C2CCCCO2)c1

4604 C=Cc1ccc2ccccc2c1.Cc1ccc(Cl)cc1I>>Cc1ccc(Cl)cc1/C=C/c1ccc2ccccc2c1

4605 Br1ccccc(I)c1.C=CC(=O)OC>>COC(=O)/C=C/c1ccc(Br)c1

4606 COC(=O)/C=C\Cc1CCN(C(=O)OC(C)(C)C)C(=O)c1c(I)c2ccccc2n1C(=O)OC(C)(C)C)OCc1ccccc1>>CO C(=O)/C(OCc1ccccc1)=C1/CCN(C(=O)OC(C)(C)C)C(=O)c2c1c1ccccc1n2C(=O)OC(C)(C)C

4607 C=CC1CC=CCC1.Cl1ccc(I)cc1>>Cl1ccc(/C=C/C2CC=CCC2)cc1

4608 C=CC(=O)O.CC(C)(C)OC(=O)Nc1ccc(Br)cc1>>CC(C)(C)OC(=O)Nc1ccc(/C=C/C(=O)O)cc1

4609 C=CS(=O)(=O)F.O=S(=O)(F)c1ccc(I)cc1>>O=S(=O)(F)/C=C/c1ccc(S(=O)(=O)F)cc1

4610 C=C[C@H](O[Si](C)(C)C(C)(C)C)[C@H](CCCC(=O)OCC)O[Si](C)(C)C(C)(C)C.O=Cc1ccccc1Br>>CCOC(=O)CCC[C@H](O[Si](C)(C)C(C)(C)C)[C@H](/C=C/c1ccccc1C=O)O[Si](C)(C)C(C)(C)C

4611 C=CC(=O)N(C)C.COc1ccc(CNc2c(C(=O)NCc3ccc(F)cc3F)c(=O)n(OCc3ccccc3)c3ncc(Br)cc23)c(OC)c1>>COc1ccc(CNc2c(C(=O)NCc3ccc(F)cc3F)c(=O)n(OCc3ccccc3)c3ncc(/C=C/C(=O)N(C)C)cc23)c(C=Cc1n[nH]c2cc([C@ @H]3C[C@ @]34C(=O)Nc3ccccc34)ccc12.Cc1ccc(Br)cn1>>Cc1ccc(/C=C/c2n[nH]c3cc([C@ @H]4C[C@ @]45C(=O)Nc4ccccc45)ccc23)cn1  
4612 C=COCCN(C)C.O=S(=O)(Oc1cccc2ccccc12)(C(F)(F)F)>>C=C(OCCN(C)C)c1cccc2ccccc12  
4613 C=CC(=O)OC(C)(C)C.FC(F)(F)c1ccc(I)c(Cl)c1>>CC(C)(C)OC(=O)/C=C/c1ccc(C(F)(F)F)cc1Cl  
4614 C=CC(=O)OCC.COc1ccc(Br)c(C(F)(F)F)c1C>>CCOC(=O)/C=C/c1ccc(OC)c(C)c1C(F)(F)F  
4615 C=CC(=O)OCC(CC)CCCC.Clc1cccc1>>CCCCC(CC)COC(=O)/C=C/c1cccc1  
4616 C=Cc1ccc2c(c1)OCO2.CCCCCCCCCOc1ccc2c(C)c(Br)c(=O)oc2c1>>CCCCCCCCOc1ccc2c(C)c(/C=C/c3ccc4c(c3)OCO4)c(=O)oc2c1  
4617 C=C(NC(=O)OCc1cccc1)(C(=O)OC.CC(=O)OCc1cc(Cl)ccc1I>>COC(=O)/C(=C/c1ccc(Cl)cc1COC(C)=O)NC(=O)OCc1cccc1  
4618 C=CC(=O)OCC.CC1OCCCC1Sc1c(I)enc2ccccc12>>CCOC(=O)/C=C/c1enc2ccccc2c1SC1CCOC1C  
4619 C=CC(=O)OCC.CCOC(=O)c1cc(Cl)cc(Br)c1>>CCOC(=O)/C=C/c1cc(Cl)cc(C(=O)OCC)c1  
4620 C=C.CCOc1ccc(Br)cc1>>C=Cc1ccc(OCC)cc1  
4621 C=CC(=O)OC(C)(C)C.O=C1C=CC23C(c4ccccc4)=C(Br)C(=O)N2Cc2ccccc2C3C1>>CC(C)(C)OC(=O)/C=C/C1=C(c2ccccc2)C23C=CC(=O)CC2c2ccccc2CN3C1=O  
4622 C=CC(=O)OC.CCCCN1c(C(=O)NC(C)(C)C)nc(Br)c1C(=O)NC(C)(C)C>>CCCCN1c(C(=O)NC(C)(C)C)nc(/C=C/C(=O)OC)c1C(=O)NC(C)(C)C  
4623 C=CC(=O)OC.COC(=O)C1=Nc2cc(I)ccc2OC12CC2>>COC(=O)/C=C/c1ccc2c(c1)N=C(C(=O)OC)C1(CC1)O2  
4624 C=Cc1ccc2[nH]c([C@ @H]3CCCN3C(=O)OC(C)(C)C)nc2c1.CC(C)(C)OC(=O)N1CCC[C@H]1c1nc(-c2ccc(Br)s2)c[nH]1>>CC(C)(C)OC(=O)N1CCC[C@H]1c1nc(-c2ccc(/C=C/c3ccc4[nH]c([C@ @H]5CCCN5C(=O)OC(C)(C)C)nc4c3)s2)c[nH]1  
4625 C=Cc1ccc(/C=C/c2ccc(N(C)C)cc2OC)cc1.CN(C)c1ccc2c(c1)[Si](C)(C)C1=CC(=[N+](C)C)C=CC1=C2c1ccc(Br)cc1S(=O)(=O)[O-]>>COc1cc(N(C)C)ccc1/C=C/c1ccc(/C=C/c2ccc(C3=C4C=CC(=[N+](C)C)C=C4[Si](C)(C)c4cc(N(C)C)ccc43)c(S(=O)(=O)[O-])c2)cc1  
4626 C=CC(=O)OC(C)(C)C.O=[N+](O-)]c1ccc(CNc2ccc(Br)cc2)cc1>>CC(C)(C)OC(=O)/C=C/c1ccc(NCc2ccc([N+](=O)[O-])cc2)cc1  
4627 C=Cc1cccc(O)c1.Nc1ccc(Br)cc1>>Nc1ccc(/C=C/c2cccc(O)c2)cc1  
4628 C=Cc1cccc1.O=C(Oc1cccc1)c1ccc(Br)o1>>O=C(Oc1cccc1)c1ccc(/C=C/c2cccc2)o1  
4629 \*CNCCCOCCOCCOCCNC(=O)COc1ccc(C(Cc2cc(OC)cc(OC)c2)NC(=O)c2ccccc(C=C)c2)cc1.COC(=O)c1cc(I)ccc1OC>>\*CNCCCOCCOCCOCCNC(=O)COc1ccc(C(Cc2cc(OC)cc(OC)c2)NC(=O)c2ccc(/C=C/c3ccc(OC)c(C(=O)OC)c3)c2)cc1  
4630 C=CC(=O)Nc1cccc2ccccc12.COc1cccc(I)c1>>COc1cccc(/C=C/C(=O)Nc2ccccc3ccccc23)c1  
4631 Br1ccccc1.C=Cc1ccc(Cn2cc(C)c(=O)[nH]c2=O)cc1>>Cc1cn(Cc2ccc(/C=C/c3ccccc3)cc2)c(=O)[nH]Br1cnc2nc(-c3ccccc3)c(-c3ccccc3)nc2c1.C=CC(=O)OC>>COC(=O)/C=C/c1cnc2nc(-c3ccccc3)c(-c3ccccc3)nc2c1  
4632 C=C[Si](C)(C)c1ccccn1.Ic1cccc1>>C[Si](C)(C)/C=C/c1cccc1)c1ccccn1  
4633 C=CCNC(=O)C(F)(F)F.Cn1c2ccccc2c2nc3ccc(Cl)cc3c3cc(OS(=O)(=O)C(F)(F)F)cc1c32>>Cn1c2ccccc2c2nc3ccc(Cl)cc3c3cc(/C=C/CNC(=O)C(F)(F)F)cc1c32  
4634 C=CC(=O)OC.Cc1cc(C)c2nc(CC(C)C)n(Cc3ccc(Br)cc3)c2n1>>COC(=O)/C=C/c1ccc(Cn2c(CC(C)C)n c3c(C)cc(C)nc32)cc1  
4635 C=CC(=O)N(C)Cc1sc2ccc(C)c2c1C.O=C1CCCc2cc(Br)cnc2N1>>Cc1sc2sc(CN(C)C(=O)/C=C/c3cnc4c(c3)CCCC(=O)N4)c(C)c12  
4636 C=C1CC(c2ccccc2)OC1=O.Cc1cccc(I)c1>>Cc1cccc(/C=C2\CC(c3ccccc3)OC2=O)c1  
4637 Br1ccc2oc(-c3cc[nH]n3)cc2c1.C=Cc1cccc1>>C(=C/c1ccc2oc(-c3cc[nH]n3)cc2c1)\c1cccc1  
4638 C=CC(=O)OC.COc1ccc(Cl)cc1Br>>COC(=O)/C=C/c1cc(Cl)ccc1OC  
4639 C=CC(=O)OC.CC(C)n1cnc2c(NCc3ccccc3)nc(N3CCN(C)CC3)nc21>>COC(=O)/C=C/c1cccc(CN c2nc(N3CCN(C)CC3)nc3c2ncn3C(C)C)c1  
4640 C=CC(=O)O.Cc1ccc(NS(=O)(=O)c2ccc(I)cc2)cc1>>Cc1ccc(NS(=O)(=O)c2ccc(/C=C/C(=O)O)cc2)cc1  
4641 COc1cc(Br)c(-c2ccccc2O/C=C/C(=O)cc1OC>>COc1cc2c(cc1OC)-c1cccc1O/C2=C/C(C)=O  
4642 C=CC(=O)OCC.CC(C)c1nn(-c2ccc3ccccc3n2)c(-c2ccc(F)cc2)c1Br>>CCOC(=O)/C=C/c1c(C(C)C)nn(-c2ccc3ccccc3n2)c1-c1ccc(F)cc1  
4643 C=Cc1ccc(OC)cc1.COc1ccc(Br)c(C=O)c1>>COc1ccc(/C=C/c2ccc(OC)cc2C=O)cc1  
4644 C=Cc1ccc(C(=O)OC)cc1.COc1cc[nH]c1/C=C1\C(=O)Nc2ccccc(I)c21>>COC(=O)c1ccc(/C=C/c2ccccc3 c2/C=C/c2[nH]ccc2OC)C(=O)N3)cc1  
4645 C=Cc1cccc1.FC(F)(F)c1ccc(Cl)cc1>>FC(F)(F)c1ccc(/C=C/c2ccccc2)cc1  
4646 C=Cc1cccc1.Clc1cccc2ccccc12>>C(=C/c1cccc2ccccc12)\c1cccc1

4649 C=CCNC(=O)[C@H](CC)NC(=O)OC(C)(C)CC(C)(C)OC(=O)n1cc(Br)c2ccccc21>>CC[C@H](NC(=O)OC(C)(C)C)(=O)NC/C=C/c1cn(C(=O)OC(C)(C)C)c2ccccc12  
 4650 C=CC(C)=O.[2H]C([2H])([2H])C1=C(OS(=O)(=O)C(F)(F)F)C(C)(C)CCC1>>[2H]C([2H])([2H])C1=C(/C=C/C(C)=O)C(C)(C)CCC1  
 4651 Brc1ccc2c(ccn2/C(=C/c2ccccc2)c2ccccc2)c1.C=CC(=O)OC>>COC(=O)/C=C/c1ccc2c(ccn2/C(=C/c2ccccc2)c2ccccc2)c1  
 4652 C=CCN(CCc1ccc(Cl)cc1I)C(=O)C(F)(F)F>>C=C1CN(C(=O)C(F)(F)F)CCc2ccc(Cl)cc21  
 C=CCC(O)c1ccc(-  
 4653 c2cc(OC)ncc2F)cc1.COC(=O)[C@@H](C)[C@H](c1ccc(I)c(O)c1)C1CC1>>COC(=O)[C@@H](C)[C@H](c1ccc(/C=C/CC(O)c2ccc(-c3cc(OC)ncc3F)cc2)c(O)c1)C1CC1  
 4654 C=CC(=O)Oc1cccc1.IC(CC[Se]c1cccc1)=C(c1cccc1)c1cccc1>>O=C(/C=C/C(CC[Se]c1cccc1)=C(c1cccc1)c1cccc1)Oc1cccc1  
 C=CCCCCCC.CC(C)(C)OC(=O)Nc1cccc(OS(=O)(=O)C(F)(F)F)c1>>C=C(CCCCCC)c1cccc(NC(=O)OC(C)(C)C)c1  
 4656 Brc1ccc(NCc2ccncc2)cc1.C=CC(=O)OC(C)(C)C>>CC(C)(C)OC(=O)/C=C/c1ccc(NCc2ccncc2)cc1  
 4657 C=C(F)C(C)=O.Ic1cccc1>>CC(=O)/C(F)=C/c1cccc1  
 C=Cc1cn(C(c2ccccc2)(c2ccccc2)c2ccccc2)cn1.CC(=O)Oc1ccc2ccc(Cl)ccc1-  
 4658 2>>CC(=O)Oc1ccc2ccc(/C=C/c3cn(C(c4ccccc4)(c4ccccc4)c4ccccc4)cn3)ccc1-2  
 C=CC(=O)OC(C)(C)C.Oc1ccc(C(=C2CCOCC2)c2ccc(Br)cc2)cc1>>CC(C)(C)OC(=O)/C=C/c1ccc(C(=C2CCOCC2)c2ccc(O)cc2)cc1  
 4660 Brc1cccs1.C=CC(=O)OC>>COC(=O)/C=C/c1cccs1  
 4661 C=CC(=O)OC(C)(C)C.Nc1cccc1I>>CC(C)(C)OC(=O)/C=C/c1cccc1N  
 4662 C=CCc1c(OCc2ccccc2I)ccc2c1ccc(=O)n2C>>C=C1Cc2c(ccc3c2ccc(=O)n3C)OCc2ccccc21  
 \*CNCCCOCCOCCOCCCN(C(=O)COc1ccc(C(Cc2cc(OC)cc(OC)c2)NC(=O)c2ccc(C=C)cc2)cc1.Cc1cc  
 4663 (C)cc(I)c1>>\*CNCCCOCCOCCOCCCN(C(=O)COc1ccc(C(Cc2cc(OC)cc(OC)c2)NC(=O)c2ccc(/C=C/c3cc(C)cc(C)c3)cc2)cc1  
 C=CCNC(=O)OC(C)(C)C.O=C(c1cccc(Br)c1)C1CCCCC1>>C=C(CNC(=O)OC(C)(C)C)c1cccc(C(=O)C2CCCCC2)c1  
 4665 C=CCN(C)Cc1cccc1I>>C=C1CN(C)Cc2ccccc21  
 \*CNCCCOCCOCCOCCCN(C(=O)COc1ccc(C(Cc2cc(OC)cc(OC)c2)NC(=O)c2ccc(C=C)c2)cc1.Cc1ccc(I)cc1C>>\*CNCCCOCCOCCOCCCN(C(=O)COc1ccc(C(Cc2cc(OC)cc(OC)c2)NC(=O)c2ccc(/C=C/c3ccc(C)c(C)c3)c2)cc1  
 4667 C=CC(=O)OCC.Nc1cc(-n2ccc3ccncc32)ncc1Br>>CCOC(=O)/C=C/c1enc(-n2ccc3ccncc32)cc1N  
 4668 C=Cc1cccc([N+](=O)[O-])c1.Clc1cccc(Br)c1>>O=[N+](=[O-])c1cccc(/C=C/c2ccc(Cl)c2)c1  
 C=CC(=O)OC.COc1ccc(S(=O)(=O)N2CCc3cc(Br)cc([N+](=O)[O-])c32)cc1>>COC(=O)/C=C/c1cc2c(c([N+](=O)[O-])c1)N(S(=O)(=O)c1ccc(OC)cc1)CC2  
 4670 C=CC(OCC)OCC.Cc1cccc1I>>CCOC(/C=C/c1cccc1C)OCC  
 C=CC(F)(F)C(F)(F)C(F)(F)C(F)(F)C(F)(F)C(F)(F)C(F)(F)F.N#Cc1ccc(Br)cc1>>N#Cc1ccc(/C=C/C(F)(F)C(F)(F)C(F)(F)C(F)(F)C(F)(F)C(F)(F)C(F)(F)C(F)(F)F)cc1  
 4671 C=CC[C@H]1C[C@H]([C@H](O)c2ccc(OC)c(OC)c2)CO[C@H]1c1ccc(OC)c(OC)c1.COc1ccc(Br)cc1OC>>COc1ccc(/C=C/C[C@H]2C[C@H]([C@H](O)c3ccc(OC)c(OC)c3)CO[C@H]2c2ccc(OC)c(OC)c2)cc1OC  
 4673 C=Cc1cccc1C.Cc1cccc(N)c1Br>>Cc1cccc1/C=C/c1c(C)cccc1N  
 4674 C=CCOCC1=C(Br)CCc2ccccc21>>C=C1COCC2=C1CCc1cccc12  
 4675 C=CCC(C=C(C)C)c1cc(C)c(OC)cc1OS(=O)(=O)C(F)(F)F>>C=C1CC(C=C(C)C)c2cc(C)c(OC)cc21  
 4676 C=C.CC(=O)c1cccc(Br)c1>>C=Cc1cccc(C(C)=O)c1  
 C=CC(=O)Nc1cccc1.COc1ccc(-c2oc3cc(OC)ccc3c(=O)c2I)cc1>>COc1ccc(-c2oc3cc(OC)ccc3c(=O)c2/C=C/C(=O)Nc2ccccc2)cc1  
 4678 C=Cc1ccc(OC)cc1.Fc1ccc(Br)cc1>>COc1ccc(/C=C/c2ccc(F)cc2)cc1  
 C=CC(=O)OC.O=[N+](=[O-])c1ccc(Cl)c([N+](=O)[O-])c1>>COC(=O)/C=C/c1ccc([N+](=O)[O-])cc1[N+](=O)[O-]  
 4680 C=C.ClC1cccc(Oc2ccccc2)c1>>C=CCc1cccc(Oc2ccccc2)c1  
 4681 C=CC(=O)OC(C)(C)C.Nc1ccc(Br)cc1I>>CC(C)(C)OC(=O)/C=C/c1cc(Br)ccc1N  
 4682 C=C(C)C(=O)Nc1cccc1.Clc1cccc1>>C/C(=C/c1cccc1)C(=O)Nc1cccc1  
 C=CC(=O)OC.CC(C)(C)OC(=O)N1CCC2(CC1)Oc1ccc(Br)cc1C2=O>>COC(=O)/C=C/c1ccc2c(c1)C(=O)C1(CCN(C(=O)OC(C)(C)C)CC1)O2  
 4684 C=Cc1cccc1.CC(C)c1oc2cc3oc(=O)ccc3cc2c1OS(=O)(=O)C(F)(F)F>>CC(C)c1oc2cc3oc(=O)ccc3cc2c1/C=C/c1cccc1  
 C=C[C@H](C)[C@H](CCO[Si](C)(C)C(C)C)OC(=O)[C@H](CC(C)C)NC(=O)OC(C)(C)C.COCOCc1ccc(I)cc1>>COCOCc1ccc(/C=C/[C@H](C)[C@H](CCO[Si](C)(C)C(C)C)OC(=O)[C@H](CC(C)C)NC(=O)OC(C)(C)C)cc1

4686 C=CC(=O)OC.CN1c2ccc(Br)cc2Sc2cc(CCNC(=O)OCc3ccccc3)ccc21>>COC(=O)/C=C/c1ccc2c(c1)Sc1cc(CCNC(=O)OCc3ccccc3)ccc1N2C  
 4687 C=CC(=O)OCC.COc1ncc(Br)c(N)c1I>>CCOC(=O)/C=C/c1c(OC)ncc(Br)c1N  
 4688 C=Cc1ccccc1.COc1ccc(Br)c(OC)c1>>COc1ccc(/C=C/c2ccccc2)c(OC)c1  
 4689 C=C[C@H]1O[C@@H]2OC(C)(C)O[C@@H]2[C@H]1OCc1ccccc1.Ic1ccccc1>>CC1(C)O[C@H]2O[C@H](/C=C/c3ccccc3)[C@H](OCc3ccccc3)[C@H]2O1  
 4690 C=Cc1ccccc1.Clc1ccc2c(c1)oc1ccccc12>>C(=C/c1ccc2c(c1)oc1ccccc12)\c1ccccc1  
 4691 C=CC(=O)OC.CCc1cccc(CC)c1Br>>CCc1cccc(CC)c1/C=C/C(=O)OC  
 4692 C=CCC1CCCCC1.C[C@H](NC(=O)OC(C)(C)C)c1nc2cccc(Br)c2c(=O)n1-c1ccccc1>>[C@H](NC(=O)OC(C)(C)C)c1nc2cccc(/C=C/CC3CCCCC3)c2c(=O)n1-c1ccccc1  
 4693 C=CCCCC(I)CCCCC>>C=C1CCCC1CCCCC  
 4694 C=CC(=O)O.CC(=O)Nc1ccc(F)cc1I>>CC(=O)Nc1ccc(F)cc1/C=C/C(=O)O  
 4695 C=CC(C)(C)O.COc1cc2oc(=O)ccc2cc1Br>>COc1cc2oc(=O)ccc2cc1/C=C/C(C)(C)O  
 4696 C=COCCCC.O=c1cc(Br)c2cc(F)ccc2[nH]1>>CCCCO/C=C/c1cc(=O)[nH]c2ccc(F)cc12  
 4697 Brc1ccc2ccccc2c1.C=CCO>>C=C(CO)c1ccc2ccccc2c1  
 4698 C=Cc1ccc(C)cc1.Nc1ccc(Cl)cc1Br>>Cc1ccc(/C=C/c2cc(Cl)ccc2N)cc1  
 4699 Brc1ccc2ccc3cccc4ccc1c2c34.C=Cc1ccc2c(c1)Sc1ccccc1N2CC>>CCN1c2ccccc2Sc2cc(/C=C/c3ccc4ccc5ccccc6ccc3c4c56)ccc21  
 4700 C=CC(=O)OC.CC[C@@]1(O)C(=O)OCc2c1cc1n(c2=O)Cc2cc3c(Br)cccc3nc2-1>>CC[C@@]1(O)C(=O)OCc2c1cc1n(c2=O)Cc2cc3c(/C=C/C(=O)OC)cccc3nc2-1  
 4701 C=CC(=O)OC.O=C(c1ccc(Br)cc1)C1CC1>>COC(=O)/C=C/c1ccc(C(=O)C2CC2)cc1  
 4702 C=Cc1cc2cc(OC)c(OC)cc2oc1=O.O=[N+](=[O-])c1ccc(Br)cc1>>COc1cc2cc(/C=C/c3ccc([N+](=O)[O-])cc3)c(=O)oc2cc1OC  
 4703 C=CC(=O)OC(C)(C)C.COc1ccc(S(=O)(=O)n2ccc3cc(Br)ccc32)cc1OC>>COc1ccc(S(=O)(=O)n2ccc3cc(/C=C/C(=O)OC(C)(C)C)ccc32)cc1OC  
 4704 C=CN1C(=O)c2ccccc2C1=O.Cc1ccc(I)cc1>>Cc1ccc(/C=C/N2C(=O)c3ccccc3C2=O)cc1  
 4705 C=CC(=O)CCC.CN(C)c1ccc(Br)cc1>>CCCC(=O)/C=C/c1ccc(N(C)C)cc1  
 4706 C=Cc1nn(C2CC2)c2nnc(N)c12.Clc1cccc(I)c1>>Nc1nnc2c1c(/C=C/c1cccc(Cl)c1)nn2C1CC1  
 4707 C=CN1CCCC1=O.O=S(=O)(Oc1cc(F)ccc1Br)C(F)(F)F>>C=C(c1cc(F)ccc1Br)N1CCCC1=O  
 4708 Brc1ccccc1.C=C[C@H]1CN2CC[C@H]1C[C@@H]2[C@H](O)c1ccnc2ccc(OC)cc12>>COc1ccc2ncc c([C@@H](O)[C@H]3C[C@@H]4CCN3C[C@@H]4/C=C/c3ccccc3)c2c1  
 4709 C=CC(=O)OC.COc1ccccc1I>>COC(=O)/C=C/c1ccccc1OC  
 4710 C=Cc1ccc(C(C)(C)C)cc1.COc1ccc(Br)cc1>>COc1ccc(/C=C/c2ccc(C(C)(C)C)cc2)cc1  
 4711 C=Cc1cccc(F)c1.CCN1c2ncc(I)cc2C(=O)N(C)c2cccn21>>CCN1c2ncc(/C=C/c3cccc(F)c3)cc2C(=O)N(C)c2cccn21  
 4712 C=Cc1ccc(Cl)cc1.O=c1cc(-c2ccccc2)oc2ccc(Br)cc12>>O=c1cc(-c2ccccc2)oc2ccc(/C=C/c3ccc(Cl)cc3)cc12  
 4713 C=CC(=O)OCC.Cc1nn(C)c(Oc2cc(Br)ccc2Cl)c1C=O>>CCOC(=O)/C=C/c1ccc(Cl)c(Oc2c(C=O)c(C)n n2C)c1  
 4714 C=CC(N)=O.COc1cccc(I)c1>>COc1cccc(/C=C/C(N)=O)c1  
 4715 C=CC(=O)N1CCOCC1.CC(=O)Cc1ccccc1Br>>CC(=O)Cc1ccccc1/C=C/C(=O)N1CCOCC1  
 4716 C=Cc1cccc(Nc2nc(Nc3ccc(OCCN4CCCC4)c(Br)c3)ccc2Cl)c1>>Clc1cnc2nc1Nc1ccccc1/C=C/c1cc(ccc1OCCN1CCCC1)N2  
 4717 C=Cc1ccccc1.Cc1cc(I)ccn1>>Cc1cc(/C=C/c2ccccc2)ccn1  
 4718 BrC1CCCCC1.C=Cc1ccccc1>>C(=C/C1CCCCC1)\c1ccccc1  
 4719 C=C[C@H]1OC(C)(C)O[C@@H]1[C@@H](C/C(I)=C/CO)O[Si](C)(C)C(C)(C)C>>C=C1/C(=C\CO)C[C@@H](O[Si](C)(C)C(C)(C)C)[C@H]2OC(C)(C)O[C@H]12  
 4720 C=CC(=O)OCC.COc1ccc(C(c2ccc(Br)cc2F)=C2[C@H]3C[C@H]4C[C@H](C[C@H]2C4)C3)cc1>>C COC(=O)/C=C/c1ccc(C(c2ccc(OC)cc2)=C2[C@H]3C[C@H]4C[C@H](C[C@H]2C4)C3)c(F)c1  
 4721 C=CC(=O)OC.CCCN(CCC)C1CCc2cc(Br)ccc2C1>>CCCN(CCC)C1CCc2cc(/C=C/C(=O)OC)ccc2C1  
 4722 C=COCCCC.COc1cccc(C(=O)Cl)c1>>CCCCO/C=C/C(=O)c1cccc(OC)c1  
 4723 C=CC(=O)OCc1ccccc1.O=C(O)c1ccc(Br)c2ccccc12>>O=C(/C=C/c1ccc(C(=O)O)c2ccccc12)OCc1ccc  
 4724 C=CC(=O)OC.CC(=O)Oc1ccc(I)cc1>>COC(=O)/C=C/c1ccc(OC(C)=O)cc1  
 4725 C=C[C@H]1O[C@@H](Sc2ccccc2)[C@H](OCc2ccccc2)[C@@H](OCc2ccccc2)[C@@H]1OCc1ccc(OC)cc1.O=c1cc(-c2ccccc2)oc2ccc(I)cc12>>COc1ccc(CO[C@H]2[C@H](OCc3ccccc3)[C@@H](OCc3ccccc3)[C@H](Sc3ccccc3)O[C@@H]2/C=C/c2ccc3oc(-c4ccccc4)cc(=O)c3c2)cc1  
 4726 C=Cc1ccc(OC)cc1.O=c1c(Br)c(-c2ccccc2)oc2ccccc12>>COc1ccc(/C=C/c2c(-c3ccccc3)oc3ccccc3c2=O)cc1  
 4727 C=Cc1ccc2ccccc2c1.Ic1ccccc1>>C(=C/c1ccc2ccccc2c1)\c1ccccc1  
 4728 C=Cc1ccc(F)cc1.C[Si](C)(C)I>>C[Si](C)(C)/C=C/c1ccc(F)cc1

4729 C=CCO.CcO1ccc2cc(Br)ccc2c1>>C=C(CO)c1ccc2cc(OC)ccc2c1  
 4730 C=CC(=O)OCCCC.CN(C)c1cccc(Cl)c1>>CCCCOC(=O)/C=C/c1cccc(N(C)C)c1  
 4731 C=C(C(=O)OC)[C@@H]1CC[C@@H]2(C)CC[C@@H](O)C(=C)[C@@H]2C1.Cc1ccc(I)cc1>>C=C1[C@@H](O)CC[C@H]2(C)CC[C@H](/C(=C)c3ccc(C)cc3)C(=O)OC[C@@H]12  
 4732 C=C[C@@H](O[Si](C)(C)C(C)(C)C)[C@@H](c1ccccc1)[C@@H](CC(I)=CCO)O[Si](C)(C)C(C)(C)C>>C=C1C(=CCO)C[C@@H](O[Si](C)(C)C(C)(C)C)[C@H](c2ccccc2)[C@@H]1O[Si](C)(C)C(C)(C)C  
 4733 C=CCOC(C)=O.Ic1ccccc1>>CC(=O)OC/C=C/c1ccccc1  
 4734 C=Cc1ccc(OC(C)=O)cc1.CC(=O)Oc1cc(Br)cc(OC(C)=O)c1>>CC(=O)Oc1ccc(/C=C/c2cc(OC(C)=O)c(OC(C)=O)c2)cc1  
 4735 C=CC(=O)OC.CC(O)(CSc1cccc2c(Br)cccc12)C(=O)Nc1ccc(C#N)c(C(F)(F)F)c1>>COC(=O)/C=C/c1ccc2c(SCC(C)(O)C(=O)Nc3ccc(C#N)c(C(F)(F)F)c3)cccc12  
 4736 C=Cc1ccc(F)cc1.Cc1nn(C)c(=O)c(-c2c(F)ccc(Cl)c2Br)c1OC(=O)C(C)C>>Cc1nn(C)c(=O)c(-c2c(F)ccc(Cl)c2/C=C/c2ccc(F)cc2)c1OC(=O)C(C)C  
 4737 C=CC(F)(F)C(F)(F)C(F)(F)C(F)(F)C(F)(F)C(F)(F)F.COC(=O)c1ccc(I)cc1>>COC(=O)c1ccc(/C=C/C(F)(F)C(F)(F)C(F)(F)C(F)(F)C(F)(F)C(F)(F)F)cc1  
 4738 Brc1ccnc1.C=C[Si](CC)(CC)CC>>CC[Si](/C=C/c1ccnc1)(CC)CC  
 4739 Brc1cnc2ccccc2c1.C=CCO[C@H]1(C)C[C@@H](C)CN(C)[C@H](C)[C@@H](O)[C@H](C)(O)[C@@H](CC)OC(=O)[C@H](C)[C@@H](O[C@H]2C[C@@H](C)(OC)[C@@H](O[Si](C)(C)C)[C@H](C)O2)[C@H](C)[C@H]1O[C@@H]1O[C@H](C)C[C@H](N(C)C)[C@H]1O[Si](C)(C)C>>CC[C@H]1OC(=O)[C@H](C)[C@@H](O[C@H]2C[C@@H](C)(OC)[C@@H](O[Si](C)(C)C)[C@H](C)O2)[C@H](C)[C@@H](O[C@H]2O[C@H](C)C[C@H](N(C)C)[C@H]2O[Si](C)(C)C)[C@H](C)(OC/C=C/c2cnc3cccc3c2)C[C@@H](C)CN(C)[C@H](C)[C@@H](O)[C@H](C)O  
 4740 C=CC(=O)OC.IC1=C(c2ccccc2)[Se]CC1>>COC(=O)/C=C/C1=C(c2ccccc2)[Se]CC1  
 4741 C=Cc1ccc(C)cc1.O=c1oc2ccccc2cc1Br>>Cc1ccc(/C=C/c2cc3ccccc3oc2=O)cc1  
 4742 Brc1ccc2ccc3ccccc4ccc1c2c34.C=Cc1ccc(Cl)cc1>>Clc1ccc(/C=C/c2ccc3ccc4ccccc5ccc2c3c45)cc1  
 4743 C=CC(=O)OC(C)C.O=Cc1cc(Cl)ccc1Br>>CC(C)(C)OC(=O)/C=C/c1ccc(Cl)cc1C=O  
 4744 C=Cc1ccc(OC)cc1.Oc1ccc(-c2nc3ccccc3c2-c2ccc(Br)cc2)cc1>>COc1ccc(/C=C/c2ccc(-c3c(-c4ccc(O)cc4)nc4ccccc34)cc2)cc1  
 4745 C=CC(=O)OCC.CC1=NC[C@H](c2ccccc2Br)O1>>CCOC(=O)/C=C/c1ccccc1[C@H]1CN=C(C)O1  
 4746 C=CC(C)=O.N#Cc1c(-c2ccccc(Br)c2)cc(-c2ccccc2)nc1N>>CC(=O)/C=C/c1ccccc(-c2cc(-c3ccccc3)nc(N)c2C#N)c1  
 4747 C=Cc1ccc([N+](=O)[O-])cc1.CCOc1ccc(/N=N/c2ccc(Br)cc2O)cc1>>CCOc1ccc(/N=N/c2ccc(/C=C/c3ccc([N+](=O)[O-])cc3)cc2O)cc1  
 4748 C=CS(=O)(=O)NCc1ccc(F)cc1.CC(C)(C)OC(=O)NCc1ccccc1Br>>CC(C)(C)OC(=O)NCc1ccccc1/C=C/S(=O)(=O)NCc1ccc(F)cc1  
 4749 C=Cc1ccc(N2CCN(C(C)=O)CC2)cc1.Clc1cc(Br)cc(Cn2ccnc2)c1>>CC(=O)N1CCN(c2ccc(/C=C/c3ccc(Cl)cc(Cn4ccnc4)c3)cc2)CC1  
 4750 C=CC(=O)N1CCOCC1.C[C@H]12C[C@@H]34C=C(Sc5ccc(I)cc5)C(=O)[C@@H](C)(CCC(=O)Nc5c(O)cc(C(=O)O)c5O)[C@@H]3[C@H](C[C@@H]1C4)O2>>C[C@H]12C[C@@H]34C=C(Sc5ccc(/C=C/C(=O)N6CCOCC6)cc5)C(=O)[C@@H](C)(CCC(=O)Nc5c(O)ccc(C(=O)O)c5O)[C@@H]3[C@H](C[C@@H]1C4)C=CC(=O)O.CC(=O)c1ccc(Br)cc1>>CC(=O)c1ccc(/C=C/C(=O)O)cc1  
 4751 CC(=O)/C=C/Oc1ccccc1-c1ccccc1Br>>CC(=O)/C=C1/Oc2ccccc2-c2ccccc21  
 4752 C=Cc1ccc(OC)cc1.COc1ccc(/C=C/c2c(I)c(=O)c3ccccc3n2C)cc1>>COc1ccc(/C=C/c2c(/C=C/c3ccc(O)C)cc3)n(C)c3ccccc3c2=O)cc1  
 4753 Brc1c2ccccc2cc2ccccc12.C=CS(C)(=O)=O>>CS(=O)(=O)/C=C/c1c2ccccc2cc2ccccc12  
 4754 C=C(NC(=O)OCc1ccccc1)C(=O)OC.CC(C)(C)[Si](C)(C)OC[C@@H]1CN(Cc2ccccc2)c2cc(OCc3ccccc3)cc(I)c21>>COC(=O)/C=C/c1cc(OCc2ccccc2)cc2c1[C@H](CO[Si](C)(C)C(C)(C)CN2Cc1ccccc1)NC(=O)OCc1ccccc1  
 4755 C=Cc1ccc(Cl)cc1.CC(=S)NS(=O)(=O)c1ccc(Br)cc1>>CC(=S)NS(=O)(=O)c1ccc(/C=C/c2ccc(Cl)cc2)c  
 4756 C=CC(N)=O.CC(C)(C)OC(=O)NC1(c2ccc(-c3nc4c5ccccc(Br)c5nn4cc3-c3ccccc3)cc2)CCC1>>CC(C)(C)OC(=O)NC1(c2ccc(-c3nc4c5ccccc(/C=C/C(N)=O)c5nn4cc3-c3ccccc3)cc2)CCC1  
 4757 C=CC(=O)OC.Cc1ccc(Br)cc1CO>>COC(=O)/C=C/c1ccc(C)c(CO)c1  
 4758 C=CC1CC(=O)N1.Cc1ccc(I)cc1>>Cc1ccc(/C=C/C2CC(=O)N2)cc1  
 4759 C=Cc1ccc(C)cc1.FC(F)(F)c1ccccc1I>>Cc1ccc(/C=C/c2ccccc2C(F)(F)F)cc1  
 4760 C=CC(C)=O.COc1cc(Br)c(OC)c2ccccc12>>COc1cc(/C=C/C(C)=O)c(OC)c2ccccc12  
 4761 C=CC(=O)OC.CCOC(=O)c1cc(-c2ccccc2)n(-c2ccc(I)cc2)c1C(=O)c1ccccc1>>CCOC(=O)c1cc(-c2ccccc2)n(-c2ccc(/C=C/C(=O)OC)cc2)c1C(=O)c1ccccc1  
 4762 C=CC(=O)N(C)Cc1ccccc(OC)c1OCCC.CC1(C)NCc2cc(Br)cnc2NC1=O>>CCCOc1c(CN(C)C(=O)/C=C/c2cnc3c(c2)CNC(C)(C)C(=O)N3)cccc1OC  
 4763

4764 C=C[C@H]1CN2CC[C@H]1C[C@@H]2[C@H](O)c1ccnc2ccc(OC)cc12.FC(F)(F)c1ccc(Br)cc1>>CO  
c1ccc2nccc([C@@H](O)[C@H]3C[C@@H]4CCN3C[C@@H]4/C=C/c3ccc(C(F)(F)F)cc3)c2c1  
4765 C=CC[C@H]1C(=O)N(c2ccc(OC)cc2)[C@@H]1[C@H](CC(=C)Br)OC(C)=O>>C=C1/C=C\C[C@  
@H]2C(=O)N(c3ccc(OC)cc3)[C@@H]2[C@@H](OC(C)=O)C1  
4766 C=CCn1ccnc1.CC(=O)OCC1Cn2c3ccc(CO)cc3c3c4c(c5c6cc(Br)ccc6n(c5c32)C1)C(=O)N(C(C)=O)C  
4>>CC(=O)OCC1Cn2c3ccc(CO)cc3c3c4c(c5c6cc(/C=C/Cn7ccnc7)ccc6n(c5c32)C1)C(=O)N(C(C)=O)  
C=CC(=O)NC(C)C.C[C@H]12C[C@@H]34C=C(Sc5cccc1)c5)C(=O)[C@@H](C)(CCC(=O)Nc5c(O)ccc(  
4767 C(=O)O)c5O)[C@@H]3[C@H](C[C@@H]1C4)O2>>CC(C)NC(=O)/C=C/c1cccc(SC2=C[C@H]34C[C@  
@H]5C[C@H](O)[C@@H]5(C)C3)[C@H]4[C@H](C)(CCC(=O)Nc3c(O)ccc(C(=O)O)c3O)C2=O)c1  
4768 C=Cc1cccc1.C[Si](C)(C)CCOCn1nc(I)c2cnc(Oc3ccc(F)cc3F)nc21>>C[Si](C)(C)CCOCn1nc(/C=C/c2  
cccc2)c2cnc(Oc3ccc(F)cc3F)nc21  
4769 C=Cc1ccc(F)cc1.O=Cc1cccc1S(=O)(=O)c1ccc(Br)cc1>>O=Cc1cccc1S(=O)(=O)c1ccc(/C=C/c2ccc(  
F)cc2)cc1  
4770 C=CC(=O)OC.O=c1[nH]c(=O)n([C@@H]2C=CC[C@@H]2CO)cc1I>>COC(=O)/C=C/c1cn([C@@H  
]2C=CC[C@@H]2CO)c(=O)[nH]c1=O  
4771 C=CC(=O)OCC.CCOC(=O)CCOCc1cccc1Br>>CCOC(=O)/C=C/c1cccc1COCCC(=O)OCC  
4772 C=CCCCCCC.CC(=O)c1ccc(Br)cc1>>CCCCC/C=C/c1ccc(C(C)=O)cc1  
4773 C=CC(N)=O.CCN1c2ncc(I)cc2C(=O)N(C)c2ccnc21>>CCN1c2ncc(/C=C/C(N)=O)cc2C(=O)N(C)c2c  
ccnc21  
4774 C=Cc1ccc(OC)c(OC)c1C(=O)OC.COc1c(I)c(CCNC(=O)OC(C)(C)C)cc2c1OCO2>>COC(=O)c1c(/C=  
C/c2c(CCNC(=O)OC(C)(C)C)cc3c(c2OC)OCO3)ccc(OC)c1OC  
4775 C=CC(C)(C)C.Ic1cccc1>>CC(C)(C)/C=C/c1cccc1  
4776 C=CCCCC1=C(I)C(=O)[C@H](C(C)C)CC1>>C=C1CCCC2=C1C(=O)[C@H](C(C)C)CC2  
4777 C=CC(=O)OCC.FC(F)(F)c1cn2ccc(Br)cc2n1>>CCOC(=O)/C=C/c1cn2cc(C(F)(F)F)nc2c1  
4778 C=C.Cc1ccc(S(=O)(=O)n2cccc2Cl)cc1>>C=CCc1cccn1S(=O)(=O)c1ccc(C)cc1  
4779 C=CC(=O)OCC.Fc1cc(Br)cc2none12>>CCOC(=O)/C=C/c1cc(F)c2none2c1  
4780 C=CC(=O)OCC.COc1ccc(CNc2nc(-n3c(C)ccc3C)nc(C)c2Br)cc1>>CCOC(=O)/C=C/c1c(C)nc(-  
n2c(C)ccc2C)nc1NCc1ccc(OC)cc1  
4781 C=CC(=O)N1N=Cc2cccc2C1CCC.COc1cc(C(=O)c2cnc(N)nc2N)cc(I)c1OC>>CCCC1c2cccc2C=N  
N1C(=O)/C=C/c1cc(C(=O)c2cnc(N)nc2N)cc(OC)c1OC  
4782 C=CC(OCC)OCC.CCCN1c2cccc2Sc2cc(Br)ccc21>>CCCN1c2cccc2Sc2cc(/C=C/C(OCC)OCC)ccc2  
4783 C=C[C@@H]1(C)COC(C)(C)O1.CCOCOc1c(C)c(C)c(OCOC)c(I)c1C>>CCOCOc1c(C)c(C)c(OCOC  
C)c(/C=C/[C@@H]2(C)COC(C)(C)O2)c1C  
4784 C=CCC(=O)OCCCC.Ic1cccc1>>CCCCOC(=O)C/C=C/c1cccc1  
4785 C=Cc1ccnc1.CC(C)(C)OC(=O)N[C@H](COc1cnc(Br)c1)C(c1cccc1)c1cccc1>>CC(C)(C)OC(=O)  
N[C@H](COc1cnc(/C=C/c2ccnc2)c1)C(c1cccc1)c1cccc1  
4786 C=Cc1cccc(O)c1.COc1cccc1Br>>COc1cccc1/C=C/c1cccc(O)c1  
4787 C=CC(=O)N(C)Cc1cc2cccc2n1C.COc1ccc(Cn2nc(N)c3cc(Br)enc32)cc1>>COc1ccc(Cn2nc(N)c3cc(/  
C=C/C(=O)N(C)Cc4cc5cccc5n4C)enc32)cc1  
4788 C=CC(=O)OC.FC(F)(F)c1cc(Cl)ccc1I>>COC(=O)/C=C/c1ccc(Cl)cc1C(F)(F)F  
4789 C=Cc1ccc([N+](=O)[O-])c(O)c1.Oc1ccc(-c2oc3cc(O)cc(Br)c3c2-c2cc(O)cc(O)c2)cc1>>O=[N+](O-  
)]c1ccc(/C=C/c2cc(O)cc3oc(-c4ccc(O)cc4)c(-c4cc(O)cc(O)c4)c23)cc1O  
4790 C=CC(=O)OC(C)(C)C.CCOC(=O)Cc1ccc(Br)cc1Cl>>CCOC(=O)Cc1ccc(/C=C/C(=O)OC(C)(C)C)cc1  
4791 C=Cc1ccnc1.CCCCCCCCCC(=O)N1CCN(c2ccc(Br)cc2)CC1>>CCCCCCCCC(=O)N1CCN(c2ccc(/  
C=C/c3ccnc3)cc2)CC1  
4792 C=CC(=O)OC.CC(C)(C)[Si](C)(C)OC[C@H]1O[C@H](c2ccc(Br)cc2)C=C[C@@H]1O[Si](C)(C)C(C  
)C(C)>>COC(=O)/C=C/c1ccc([C@@H]2C=C[C@H](O[Si](C)(C)C(C)(C)[C@@H](CO[Si](C)(C)C  
(C)(C)C)O2)cc1  
4793 C=CCNC(=O)OCc1cccc1.N#Cc1ccc(Cl)cc1>>C=C(CNC(=O)OCc1cccc1)c1ccc(C#N)cc1  
4794 C=CC(=O)OCC(C)CCCC.COc1ccc(I)cc1>>CCCCC(C)COC(=O)/C=C/c1ccc(OC)cc1  
4795 C=CC(=O)OC(C)(C)C.CC(C)(C)OC(=O)N1C[C@H](O)C[C@@H]1c1ccc(Br)cc1>>CC(C)(C)OC(=O)  
)C=C/c1ccc([C@H]2C[C@@H](O)CN2C(=O)OC(C)(C)C)cc1  
4796 C=CC(C)(C)C(=O)NC(C)(C)CO.CC(=O)OC[C@H]1O[C@@H](c2cc(Cc3ccc(Br)cc3C)c(C)cc2C)[C  
@H](OC(C)=O)[C@@H](OC(C)=O)[C@@H]1OC(C)=O>>CC(=O)OC[C@H]1O[C@@H](c2cc(Cc3  
ccc(/C=C/C(C)(C)C(=O)NC(C)(C)CO)cc3C)c(C)cc2C)[C@H](OC(C)=O)[C@@H](OC(C)=O)[C@@  
4797 C=CC(=O)OC.O=c1[nH]c(=O)n([C@H]2O[C@@H](CO)[C@H](O)[C@H]2O)cc1I>>COC(=O)/C=C/  
c1cn([C@H]2O[C@@H](CO)[C@H](O)[C@H]2O)c(=O)[nH]c1=O  
4798 C=CC(N)=O.COc1ccc(Br)cc1OC>>COc1ccc(/C=C/C(N)=O)cc1OC  
4799 Brc1ccsc1.C=Cc1cccc1>>C(=C/c1ccsc1)\c1cccc1  
4800 C=CC(=O)OC.CCCCCC(=O)c1nc(-c2cccc2)n(-c2cccc2)c1Br>>CCCCC(=O)c1nc(-c2cccc2)n(-  
c2cccc2)c1/C=C/C(=O)OC

4801 C=Cc1ccccn1.CC(C)(C)Br>>CC(C)(C)/C=C/c1ccccn1  
 4802 C=CCC(C)O.CC(C)(C)c1ccc(OS(=O)(=O)C(F)(F)F)cc1>>C=C(CC(C)O)c1ccc(C(C)(C)C)cc1  
 4803 C=Cc1cccc1.COC(=O)c1cc(C(=O)OC)c2c(Br)cccc2n1>>COC(=O)c1cc(C(=O)OC)c2c(/C=C/c3cccc3)cccc2n1  
 4804 C=CC(=O)OC.CC(=O)OCC(COC(C)=O)OCn1cc(I)c(=O)[nH]c1=O>>COC(=O)/C=C/c1cn(COC(COC(C)=O)COC(C)=O)c(=O)[nH]c1=O  
 4805 C=CC(=O)OC.CC(=O)c1cccc(I)c1>>COC(=O)/C=C/c1cccc(C(C)=O)c1  
 4806 Br1cccc2[nH]ccc12.C=CC(=O)OC>>COC(=O)/C=C/c1cccc2[nH]ccc12  
 4807 Br1cnc2cccc2c1.C=CC[C@H]1COC(C)(C)N1C(=O)OC(C)(C)C>>CC(C)(C)OC(=O)N1[C@@H](C/C=C/c2cnc3cccc3c2)COC1(C)C  
 4808 Br1cccc2cccc12.C=Cc1cccc1>>C(=C/c1cccc2cccc12)\c1cccc1  
 4809 Br1cenc1.C=CCC(C)C(=O)OCC>>CCOC(=O)C(C)C/C=C/c1cenc1  
 4810 C=CC(=O)OCC.CC(C)(C)OC(=O)N1CCc2c(ccc(Br)c2F)C1>>CCOC(=O)/C=C/c1ccc2c(c1F)CCN(C(=O)OC(C)(C)C)C2  
 4811 C=CS(C)(=O)=O.Ic1cccc1>>CS(=O)(=O)/C=C/c1cccc1  
 4812 C=CCCCCCC.COC(=O)c1cccc1OS(=O)(=O)C(F)(F)F>>C=C(CCCCCC)c1cccc1C(=O)OC  
 4813 C=Cc1cenc1.CC(C)=CBr>>CC(C)=C/C=C/c1cenc1  
 4814 C=CC(=O)OC(C)(C)C.O=[N+](=[O-])c1ccc(Oc2cenc2I)c(F)c1>>CC(C)(C)OC(=O)/C=C/c1cenc1Oc1ccc([N+](=O)[O-])cc1F  
 4815 C=C.OCc1ccc(I)cc1>>C=Cc1ccc(CO)cc1  
 4816 C=CC(N)=O.CC(C)(C)OC(=O)NC1(c2ccc(-c3nn4c(Br)enc4cc3-c3cccc3)cc2)CCC1>>CC(C)(C)OC(=O)NC1(c2ccc(-c3nn4c(/C=C/C(N)=O)enc4cc3-c3cccc3)cc2)CCC1  
 4817 C=COCCCC.O=Cc1cccc(Cl)c1>>C=C(OCCCC)c1cccc(C=O)c1  
 4818 C=CCOC1O[C@H](COC(C)=O)[C@@H](OC(C)=O)C=C1I>>C=C1COC2O[C@H](COC(C)=O)[C@@H](OC(C)=O)C=C12  
 4819 C=COC[C@@H]1CCCN1C.O=S(=O)(OC1=CCc2cccc21)C(F)(F)F>>CN1CCC[C@H]1CO/C=C/C1=CCc2cccc21  
 4820 C=CC#N.O=C1Cc2c([nH]c3ccc(C(F)(F)F)cc23)-c2cc(I)ccc2N1>>N#C/C=C/c1ccc2c(c1)-c1[nH]c3ccc(C(F)(F)F)cc3c1CC(=O)N2  
 4821 C=CC(=O)OC.N#Cc1ccc(NC=O)c(I)c1>>COC(=O)/C=C/c1cc(C#N)ccc1NC=O  
 4822 C=CCC(=O)OC(C)(C)C.COc1cc(N(C)C(=O)OC(C)(C)C)c(Br)cn1>>COc1cc(N(C)C(=O)OC(C)(C)C)/C=C/CC(=O)OC(C)(C)cn1  
 4823 C=CC(=O)OC.CCCc1cc2n(c(=O)c1I)CCC21OCCO1>>CCCc1cc2n(c(=O)c1/C=C/C(=O)OC)CCC21OCCO1  
 4824 C=CC(=O)OC.Cc1cc(F)ccc1C(=O)c1sc2cc(O)ccc2c1Oc1ccc(Br)cc1>>COC(=O)/C=C/c1ccc(Oc2c(C(=O)c3ccc(F)cc3C)sc3cc(O)ccc23)cc1  
 4825 C=CCn1c(N(c2ccc(C)cc2I)S(C)(=O)=O)cc2cc(Cl)ccc21>>Cc1ccc2c(c1)/C=C/Cn1c(cc3cc(Cl)ccc31)N2S(C)(=O)=O  
 4826 C=CCOCC.CC(C)(C)OC(=O)/C=C/c1ccc(CN(C(=O)C2CCCCC2)c2cccc(Br)c2)cc1>>CCOC/C=C/c1ccc(N(Cc2ccc(/C=C/C(=O)OC(C)(C)C)cc2)C(=O)C2CCCCC2)c1  
 4827 C=Cc1ccc2ccc(Cl)cc2n1.COC(=O)c1cccc1CCC(=O)c1cccc(Br)c1>>COC(=O)c1cccc1CCC(=O)c1ccc(/C=C/c2ccc3ccc(Cl)cc3n2)c1  
 4828 Br1ccc2c(c1)Sc1cccc1N2.C=Cc1cenc1>>C(=C/c1ccc2c(c1)Sc1cccc1N2)\c1cenc1  
 4829 C=Cc1cccc1.Oc1cccc1I>>Oc1cccc1/C=C/c1cccc1  
 4830 C=CC(=O)C1=CN(C(C)(C)C)CCC1(C)C.Ic1cccc1>>CC1(C)CCN(C(C)(C)C)C=C1C(=O)/C=C/c1ccc  
 4831 C=CC(=O)N1CCCCC1.O=c1c(I)c(-c2ccc(O)cc2)oc2cc(O)ccc12>>O=C(/C=C/c1c(-c2ccc(O)cc2)oc2cc(O)ccc2c1=O)N1CCCCC1  
 4832 C=Cc1cccc1.OCc1ccc(Cl)cc1>>OCc1ccc(/C=C/c2cccc2)cc1  
 4833 C=Cc1cccc1.CC(=O)OC[C@H]1O[C@@H](n2cnc3c(Cl)nc(I)nc32)[C@H](OC(C)=O)[C@@H]1OC(C)=O>>CC(=O)OC[C@H]1O[C@@H](n2cnc3c(Cl)nc(/C=C/c4cccc4)nc32)[C@H](OC(C)=O)[C@@H]1OC(C)=O  
 4834 C=Cc1ccc2c(c1)c1cc(/C=C/c3ccc4c(c3)c3cccc3n4CCCCCCCC)ccc1n2CCCCCCCC.N#CC(=C(c1ccc cc1)c1cccc1)c1ccc(Br)cc1>>CCCCCCCCN1c2cccc2c2cc(/C=C/c3ccc4c(c3)c3cc(/C=C/c5ccc(C(C#N)=C(c6cccc6)c6cccc6)cc5)ccc3n4CCCCCCCC)ccc21  
 4835 C=CC(=O)OCCO.C[C@]12C[C@@]34C=C(Sc5ccc(I)cc5)C(=O)[C@@](C)(CCC(=O)Nc5c(O)ccc(C(=O)O)c5O)[C@@H]3[C@H](C[C@@H]1C4)O2>>C[C@]12C[C@@]34C=C(Sc5ccc(/C=C/C(=O)OCCO)cc5)C(=O)[C@@](C)(CCC(=O)Nc5c(O)ccc(C(=O)O)c5O)[C@@H]3[C@H](C[C@@H]1C4)O2  
 4836 C=C1C(=O)O[C@@H]2/C=C(\C)CC/C=C(\C)CC[C@@H]12.Nc1ccc(I)cc1>>C/C1=C[C@H]2OC(=O)/C=C/c3ccc(N)cc3[C@@H]2CC/C(C)=C/CC1  
 4837 C=Cc1ccc(OC)cc1.Oc1ccc(O)c(I)c1>>COc1ccc(/C=C/c2cc(O)ccc2O)cc1  
 4838 Br1ccsc1.C=CC(=O)OCCCC>>CCCCOC(=O)/C=C/c1ccsc1



4839 C=CC(=O)COCCCC.Cc1cccc1I>>CCCCOCC(=O)/C=C/c1cccc1C  
 4840 C=CCc1cccc1.CN(C(=O)c1ncc2c(c1I)c1cccc1n2S(=O)(=O)N(C)C)c1cccc1>>CN(C(=O)c1ncc2c(c1/C=C/Cc1cccc1)c1cccc1n2S(=O)(=O)N(C)C)c1cccc1  
 4841 C=CCn1c(N(c2ccc(Cl)cc2I)S(C)(=O)=O)cc2cc([N+](=O)[O-])ccc21>>CS(=O)(=O)N1c2ccc(Cl)cc2/C=C\Cn2c1cc1cc([N+](=O)[O-])ccc12  
 4842 C=Cc1ccc(F)cc1.COC(=O)Cn1c(=O)c(Cl)nc2ccnc21>>COC(=O)Cn1c(=O)c(/C=C/c2ccc(F)cc2)nc2ccnc21  
 4843 C=Cc1ccc(OC)cc1.N#CC(CCBBr)(c1cccc1)c1cccc1>>COc1ccc(/C=C/CCC(C#N)(c2ccccc2)c2ccccc2  
 4844 C=C(Br)CC.C=CC(=O)OCCCC>>C=C(/C=C/C(=O)OCCCC)CC  
 4845 Br1c2ccccc2cc2ccccc12.C=C[C@H](CO[Si](C)(C)C(C)C)NC(=O)OCc1cccc1>>CC(C)(C)[Si](C)(C)OC[C@H](/C=C/c1c2ccccc2cc2ccccc12)NC(=O)OCc1cccc1  
 4846 C=CC#N.Cc1nc(Br)c(-c2ccccc2)o1>>Cc1nc(/C=C/C#N)c(-c2ccccc2)o1  
 4847 C=Cc1cccc1.O=c1c(I)c(-c2ccccc2)oc2ccccc12>>O=c1c(/C=C/c2ccccc2)c(-c2ccccc2)oc2ccccc12  
 4848 C=CCCCCCC.O=S(=O)(Oc1cccc1Cl)C(F)(F)F>>C=C(CCCCCC)c1cccc1Cl  
 4849 C=CC(=O)OC.CCN1c2ncc(I)cc2C(=O)N(C)c2ccnc21>>CCN1c2ncc(/C=C/C(=O)OC)cc2C(=O)N(C)c2ccnc21  
 4850 C=CC(=O)OC(C)(C)C.COc1ccc(Br)c(C=O)c1>>COc1ccc(/C=C/C(=O)OC(C)(C)C)c(C=O)c1  
 4851 C=CC(N)=O.CCOC(=O)c1cccc(I)c1>>CCOC(=O)c1cccc(/C=C/C(N)=O)c1  
 4852 C=CC(=O)OCCCC.Nc1ccc(I)cc1>>CCCCOC(=O)/C=C/c1ccc(N)cc1  
 4853 Br1ccc2c(c1)c1cccc1n2-c1cccc1.C=Cc1ccc(C(=O)OC)cc1>>COC(=O)c1ccc(/C=C/c2ccc3c(c2)c2ccccc2n3-c2ccccc2)cc1  
 4854 C=Cc1cccc1OC.FC(F)(F)c1cccc1I>>COc1cccc1/C=C/c1cccc1C(F)(F)F  
 4855 Br1cccc1.C=CC(=O)OC(C)(C)C>>CC(C)(C)OC(=O)/C=C/c1cccc1  
 4856 C=CC(=O)OC(C)(C)C.CC(C)(C)OC(=O)Nc1ccc(C(=O)OCc2ccccc2)c(CCCOc2c(OCc3ccccc3)ccc(Br)c2C=O)c1>>CC(C)(C)OC(=O)/C=C/c1ccc(OCc2ccccc2)c(OCc2cc(NC(=O)OC(C)(C)C)ccc2C(=O)OCc2ccccc2)c1C=O  
 4857 C=CCN1C(=O)c2ccccc2C1=O.CN(C)c1ccc(Br)cc1>>CN(C)c1ccc(/C=C/CN2C(=O)c3ccccc3C2=O)cc  
 4858 C=CC(=O)OC.Cc1cn(Cc2ccc3c(c2)OCCO3)c2c(Br)cc(F)cc12>>COC(=O)/C=C/c1cc(F)cc2c(C)cn(Cc3ccc4c(c3)OCCO4)c12  
 4859 C=CC(=O)OCC.COc1nc(C)c(Br)c1>>CCOC(=O)/C=C/c1cc(OC)nc1C  
 4860 C=CCc1ccc(OC)c(OC)c1.COC(=O)c1cc(OC)c(OC)cc1Br>>COC(=O)c1cc(OC)c(OC)cc1/C=C/Cc1ccc(OC)c(OC)c1  
 4861 C=Cc1ccc(-c2ccccc2)cc1.CC(C)(C)Br>>CC(C)(C)/C=C/c1ccc(-c2ccccc2)cc1  
 4862 C=Cc1ccc2ccccc2c1.N#Cc1ccc(I)cc1>>N#Cc1ccc(/C=C/c2ccc3ccccc3c2)cc1  
 4863 C=CC#N.CCOc1ccc(C(=O)CCC(=O)Nc2cc(-c3ccccc3)c3ccc(Br)cc3n2)cc1OCC>>CCOc1ccc(C(=O)CCC(=O)Nc2cc(-c3ccccc3)c3ccc(/C=C/C#N)cc3n2)cc1OCC  
 4864 C=CC(=O)OCCOC.C[C@H](Nc1ncnc2sc(Br)cc12)c1cccc1>>COCCOC(=O)/C=C/c1cc2c(N[C@H](C)c3ccccc3)ncnc2s1  
 4865 C=CCC(NCc1ccc(F)cc1Br)(C(=O)OC)C(C)C>>C=C1CC(C(=O)OC)(C(C)C)NCc2ccc(F)cc21  
 4866 C=CC(=O)OC(C)(C)C.O=c1ccc2cc(Br)enc2[nH]1>>CC(C)(C)OC(=O)/C=C/c1enc2[nH]c(=O)ccc2c1  
 4867 Br1cccc1I.C=C1CC(c2ccc(Cl)cc2)OC1=O>>O=C1OC(c2ccc(Cl)cc2)C/C1=C/c1cccc1Br  
 4868 C=CCOc1cccc1C(C)C.Ic1cccs1>>CC(C)c1cccc1OC/C=C/c1cccs1  
 4869 C=CC(=O)CC.Cc1cccc1Br>>CCC(=O)/C=C/c1cccc1C  
 4870 C=CC(=O)N1CCCC1.COc1cc(Br)c(C=O)cc1OCc1cccc1>>COc1cc(/C=C/C(=O)N2CCCC2)c(C=O)c1OCc1cccc1  
 4871 C=Cc1cccc1.CC(C)[Si](c1ccc(Br)cc1)(c1ncccn1)C(C)C>>CC(C)[Si](c1ccc(/C=C/c2ccccc2)cc1)(c1ncccn1)C(C)C  
 4872 C=C.FC(F)(F)c1cccc(CCl)c1>>C=CCc1cccc(C(F)(F)F)c1  
 4873 C=CC(=O)CC.Ic1cscc1-c1cccc1>>CCC(=O)/C=C/c1cscc1-c1cccc1  
 4874 C=CC(=O)OC(C)(C)C.COc1cc(NCc2ccc(Br)cn2)cc(OC)c1OC>>COc1cc(NCc2ccc(/C=C/C(=O)OC(C)(C)C)cn2)cc(OC)c1OC  
 4875 C=Cc1ccnc1N(Cc1cc(Br)ccc1I)C(C)=O>>CC(=O)N1Cc2cc(Br)ccc2/C=C/c2ccnc21  
 4876 C=Cc1cccc(S(=O)(=O)N(Cc2ccc(OC)cc2)Cc2ccc(OC)cc2)c1-c1nnn(Cc2ccc(OC)cc2)n1.CC(C)(C)OC(=O)Nc1ccc(Br)cn1>>COc1ccc(CN(Cc2ccc(OC)cc2)S(=O)(=O)c2ccccc2/C=C/c3ccc(NC(=O)OC(C)(C)C)nc3)c2-c2nnn(Cc3ccc(OC)cc3)n2)cc1  
 4877 C=CC(=O)Nc1cccc1NC(=O)OC(C)(C)C.CCNC(=O)N1C[C@H](c2ccc(Br)cc2)[C@H](C(=O)OCC)C1>>CCNC(=O)N1C[C@H](c2ccc(/C=C/C(=O)Nc3ccccc3NC(=O)OC(C)(C)C)cc2)[C@H](C(=O)OCC)C1  
 4878 C=C1CC(c2ccc(C)cc2)OC1=O.COc1cccc(I)c1>>COc1cccc(/C=C2\CC(c3ccc(C)cc3)OC2=O)c1  
 4879 C=CC(N)=O.Cc1cc(Cl)ccc1C(F)(F)F>>Cc1cc(/C=C/C(N)=O)ccc1C(F)(F)F

4880 C=Cc1ccc(N2CCN(C(=O)OC(C)(C)C)CC2)cc1.Fc1cc(Br)cc(-  
c2ccncc2)c1>>CC(C)(C)OC(=O)N1CCN(c2ccc(/C=C/c3cc(F)cc(-c4ccncc4)c3)cc2)CC1  
4881 C=CC(=O)OCC.O=Cc1ccc(Cl)cc1Br>>CCOC(=O)/C=C/c1cc(Cl)ccc1C=O  
4882 C=C.Ic1cccn1>>C=Cc1cccn1  
4883 C=Cc1cc(OCCCC)c(C=O)cc1OCCCC.CCN(CC)/N=N/c1ccc(I)cc1>>CCCCOc1cc(/C=C/c2ccc(/N=N/  
N(CC)CC)cc2)c(OCCCC)cc1C=O  
4884 C=Cc1ccccc1.Cn1c(/C=C/c2ccc(Cl)cc2)c(I)c(=O)c2ccccc21>>Cn1c(/C=C/c2ccc(Cl)cc2)c(/C=C/c2ccc  
cc2)c(=O)c2ccccc21  
4885 C=Cc1cc(O)c(OC)cc1F.COc1cc(Br)cc(OC)c1F>>COc1cc(F)c(/C=C/c2cc(OC)c(F)c(OC)c2)cc1O  
4886 Brc1ccc(Oc2ccccc2)cc1.C=CC(=O)NCCc1c(C)[nH]c2c(F)ccc(C)c12>>Cc1[nH]c2c(F)ccc(C)c2c1CCN  
C(=O)/C=C/c1ccc(Oc2ccccc2)cc1  
4887 C=CC1(C(=O)OCC)CCC(=O)CC1.C[C@@H](NC(=O)OC(C)(C)C)c1ccc2ccc(Br)cc2n1>>CCOC(=O)  
C1(/C=C/c2ccc3ccc([C@@H](C)NC(=O)OC(C)(C)C)nc3c2)CCC(=O)CC1  
4888 C=CC(CO)N1C(=O)c2ccccc2C1=O.Ic1ccccc1>>O=C1c2ccccc2C(=O)N1C(/C=C/c1ccccc1)CO  
4889 C=CC(=O)OCc1ccccc1.Oc1ccc(Br)c(Cl)c1>>O=C(/C=C/c1ccc(O)cc1Cl)OCc1ccccc1  
C=Cc1nc2c(N)ncnc2n1[C@@H]1O[C@H](CO[Si](C)(C)C(C)(C)C)[C@@H](O[Si](C)(C)C(C)(C)C)[  
4890 C@H]1O[Si](C)(C)C(C)(C)C.CC(=O)c1ccc(Cl)cc1>>CC(=O)c1ccc(/C=C/c2nc3c(N)ncnc3n2[C@@H]  
2O[C@H](CO[Si](C)(C)C(C)(C)C)[C@@H](O[Si](C)(C)C(C)(C)C)[C@H]2O[Si](C)(C)C(C)(C)C)cc  
4891 C=CC(OC)OC.Ic1cccs1>>COC(/C=C/c1cccs1)OC  
4892 C=C1C(=O)O[C@H]2C3=C(C)CCC[C@]3(C)C(=O)C[C@@H]12.COc1ccc(I)cc1OC>>COc1ccc(/C=  
C2/C(=O)O[C@H]3C4=C(C)CCC[C@]4(C)C(=O)C[C@@H]23)cc1OC  
4893 C=CCN(CCI)S(=O)(=O)c1ccc(CO)cc1>>C=C1CCN(S(=O)(=O)c2ccc(CO)cc2)C1  
4894 Brc1ccccc2ccccc12.C=C[C@H]1CN2CC[C@H]1C[C@@H]2[C@H](O)c1ccnc2ccc(OC)cc12>>COc1c  
cc2nccc([C@@H](O)[C@H]3C[C@@H]4CCN3C[C@@H]4/C=C/c3ccccc4ccccc34)c2c1  
4895 C=CC(F)(F)C(F)(F)C(F)(F)C(F)(F)C(F)(F)C(F)(F)F.COCC(=O)c1ccc(Br)cc1>>COC(=O)c1ccc(/C=C/C  
(F)(F)C(F)(F)C(F)(F)C(F)(F)C(F)(F)C(F)(F)F)cc1  
4896 C=CC(=O)OCC.COc1cc(Br)cncl[N+](=O)[O-]>>CCOC(=O)/C=C/c1cncl([N+](=O)[O-])c(OC)c1  
4897 C=CC(OCC)OCC.Clc1ccc(I)cc1>>CCOC(/C=C/c1ccc(Cl)cc1)OCC  
4898 C=Cc1ccc(F)cc1.Cc1ccc(I)cc1>>Cc1ccc(/C=C/c2ccc(F)cc2)cc1  
4899 C=CC(=O)OCC.Nc1ccc(Cl)cc1Br>>CCOC(=O)/C=C/c1cc(Cl)ccc1N  
4900 C=C1CC(c2ccc(C)cc2)OC1=O.Ic1ccccc1-c1ccc2ccccc2c1>>Cc1ccc(C2C/C(=C/c3ccccc3-  
c3ccc4ccccc4c3)C(=O)O2)cc1  
4901 C=C(C(=O)OC)C1C(I)=C(c2ccccc2)C2(C=CC(=O)C=C2)N1S(C)(=O)=O.C=CC(=O)OC>>C=C(C(=O)  
)OC)C1C(/C=C/C(=O)OC)=C(c2ccccc2)C2(C=CC(=O)C=C2)N1S(C)(=O)=O  
4902 C=Cc1ccc2c(c1)OCO2.C[Si](C)(C)OS(=O)(=O)C(F)(F)F>>C[Si](C)(C)/C=C/c1ccc2c(c1)OCO2  
4903 C=CCNC(=O)OC(C)(C)C.CC1(C)OC(=O)c2c(cc(OCCCN3CCOCC3)cc2OS(=O)(=O)C(F)(F)F)O1>>  
CC(C)(C)OC(=O)NC/C=C/c1ccc(OCCCN2CCOCC2)cc2c1C(=O)OC(C)(C)O2  
4904 C=Cc1ccccc1.CC[C@]12C=CCN3CC[C@@]4(c5cc(Br)c(OC)cc5N(C)[C@H]4[C@@](O)(C(=O)OC)  
[C@@H]1OC(C)=O)[C@@H]32>>CC[C@]12C=CCN3CC[C@@]4(c5cc(/C=C/c6ccccc6)c(OC)cc5N  
(C)[C@H]4[C@@](O)(C(=O)OC)[C@@H]1OC(C)=O)[C@@H]32  
4905 C=CCOCc1ccccc1.Ic1ccc2[nH]ccc2c1>>C(=C/c1ccc2[nH]ccc2c1)\COCc1ccccc1  
4906 C=COCCOC=C.COc1ccc(Br)cc1>>C=COCCOC(=C)c1ccc(OC)cc1  
4907 C=CC(=O)N1CCCCC1.Nc1nc(Br)ccc1-c1ccccc1>>Nc1nc(/C=C/C(=O)N2CCCCC2)ccc1-c1ccccc1  
4908 Brc1cccn1.C=CCNS(=O)(=O)c1ccc(C)cc1>>Cc1ccc(S(=O)(=O)NC/C=C/c2ccncc2)cc1  
4909 C=CC(=O)OC.Oc1ccc2c(Cc3ccc(Br)cc3)nc2c1>>COC(=O)/C=C/c1ccc(Cc2nccc3cc(O)ccc23)cc1  
4910 C=CC(=O)N(C)C.O=[N+](O-)]c1ccc(I)cc1>>CN(C)C(=O)/C=C/c1ccc([N+](=O)[O-])cc1  
4911 C=CC(C)(C)O.CON=CCc1cn(S(=O)(=O)c2ccc(C)cc2)c2ccccc(Br)c12>>CON=CCc1cn(S(=O)(=O)c2cc  
c(C)cc2)c2ccccc(/C=C/C(C)(C)O)c12  
4912 C=Cc1ccccc1.O=c1cc(-c2ccccc2)oc2ccc(Br)cc12>>O=c1cc(-c2ccccc2)oc2ccc(/C=C/c3ccccc3)cc12  
4913 Brc1ccccc1C1OCCCCO1.C=CC(=O)OCC>>CCOC(=O)/C=C/c1ccccc1C1OCCCCO1  
4914 C=Cc1ccc2ccc(Cl)cc2n1.COC(=O)c1ccccc1CC[C@H](O)c1ccc(Br)cc1>>COC(=O)c1ccccc1CC[C@H  
(O)c1ccc(/C=C/c2ccc3ccc(Cl)cc3n2)c1  
4915 C=Cc1ccc(OC)c(O)c1.COc1cc(I)cc(OC)c1>>COc1cc(/C=C/c2ccc(OC)c(O)c2)cc(OC)c1  
4916 C=CC(C)=O.N#Cc1ccc(Br)cc1>>CC(=O)/C=C/c1ccc(C#N)cc1  
4917 C=CC(O)C(F)(F)C(F)(F)C(F)(F)C(F)(F)C(F)(F)C(F)(F)F.Ic1ccccc1>>OC(/C=C/c1ccccc1)C(F)(F)C(F)  
(F)C(F)(F)C(F)(F)C(F)(F)C(F)(F)F  
4918 C=CS(=O)(=O)F.Clc1ccccc(I)c1>>O=S(=O)(F)/C=C/c1ccccc(Cl)c1  
4919 C=CC(=O)OC.CC(C)(C)OC(=O)NC1(c2ccc(-c3nc4cc(Br)ccn4c3-  
c3ccccc3)cc2)CCC1>>COC(=O)/C=C/c1ccn2c(-c3ccccc3)c(-  
c3ccc(C4(NC(=O)OC(C)(C)C)CCC4)cc3)nc2c1

4920 C=CC(=O)OC.O=C1C(=O)N(Cc2ccccc2)c2ccccc(Br)c21>>COC(=O)/C=C/c1cccc2c1C(=O)C(=O)N2C  
c1ccccc1  
4921 Br1ccccc1I.C=CC(=O)OCCSc1ccccc1>>O=C(/C=C/c1ccccc1Br)OCCSc1ccccc1  
4922 C=CC(=O)OC.Cc1noc(C)c1I>>COC(=O)/C=C/c1c(C)noc1C  
4923 C=Cc1ccccc1.Cn1c(-c2ccc(Br)cc2)nc2ccccc21>>Cn1c(-c2ccc(/C=C/c3ccccc3)cc2)nc2ccccc21  
C=Cc1cccc([N+](=O)[O-]  
4924 ])c1.COC(=O)c1cc2cc(Br)ccc2cc1OC(C)=O>>COC(=O)c1cc2cc(/C=C/c3cccc([N+](=O)[O-]  
])c3)ccc2cc1OC(C)=O  
4925 C=CCn1c(-c2cccc(OC)c2)nc2ccccc2c1=O.O=C(CN1C(=O)COc2ccccc21)c1ccc(Br)cc1>>COc1cccc(-  
c2nc3ccccc3c(=O)n2C/C=C/c2ccc(C(=O)CN3C(=O)COc4ccccc43)cc2)c1  
4926 C=Cc1ccc(OC)cc1.CC(Br)C(=O)Oc1ccccc1>>COc1ccc(/C=C/C(C)C(=O)Oc2ccccc2)cc1  
4927 C=CC(=O)OC.N#Cc1ccc(-c2nc3ncc(Br)cc3o2)cc1>>COC(=O)/C=C/c1cnc2nc(-c3ccc(C#N)cc3)oc2c1  
C=CC(=O)O.C[C@]12C[C@@]34C=C(Sc5ccc(I)cc5)C(=O)[C@@](C)(CCC(=O)Nc5c(O)ccc(C(=O)  
4928 O)c5O)[C@@H]3[C@H](C[C@@H]1C4)O2>>C[C@]12C[C@@]34C=C(Sc5ccc(/C=C/C(=O)O)cc5)  
C(=O)[C@@](C)(CCC(=O)Nc5c(O)ccc(C(=O)O)c5O)[C@@H]3[C@H](C[C@@H]1C4)O2  
4929 C=CC#N.CC(=O)Nc1ccc(I)cc1>>CC(=O)Nc1ccc(/C=C/C#N)cc1  
4930 C=Cc1ccccc1.CCCCCCCCCC(=O)Nc1ccc(Br)cc1>>CCCCCCCCCCCC(=O)Nc1ccc(/C=C/c2ccccc  
2)cc1  
4931 C=Cc1cc(OC)c(OC)c(OC)c1-  
c1ccc2ccccc2c1.COc1ccc(I)cc1>>COc1ccc(/C=C/c2cc(OC)c(OC)c(OC)c2-c2ccc3ccccc3c2)cc1  
4932 C=CC(C)(O)CCC=C(C)C.O=Cc1ccc(Br)cc1>>CC(C)=CCCC(C)(O)/C=C/c1ccc(C=O)cc1  
4933 C=CC(=O)OC.Cc1ccc(C2(/C=C/I)c3ccccc3)C(=O)N(C)c3ccccc32)cc1>>COC(=O)/C=C/C(=C/C1(c2  
ccc(C)cc2)C(=O)N(C)c2ccccc21)c1ccccc1  
4934 C=Cc1ccccc1.Fc1cccc(Br)c1>>Fc1cccc(/C=C/c2ccccc2)c1  
4935 C=CS(=O)c1ccccc1.O=C(c1ccccc1)c1ccc(Br)cc1>>O=C(c1ccccc1)c1ccc(/C=C/S(=O)c2ccccc2)cc1  
4936 C=Cc1cncn1.CCN(c1ccccc1)c1cccc(Br)n1>>CCN(c1ccccc1)c1cccc(/C=C/c2cncn2)n1  
C=Cc1cncn(C#N)c1Nc1ccc2[nH]ccc2c1C.Cc1cc(CN2CCN(C)CC2)ccc1I>>Cc1cc(CN2CCN(C)CC2)c  
4937 cc1/C=C/c1cncn(C#N)c1Nc1ccc2[nH]ccc2c1C  
4938 C=CC(=O)OC(C)(C)C.Nc1ccc(Br)c(F)c1>>CC(C)(C)OC(=O)/C=C/c1ccc(N)cc1F  
4939 C=CCOCCCCCCC#N.CC(C)N(CC[C@H](c1ccccc1)c1cc(Br)ccc1OCc1ccccc1)C(C)C>>CC(C)N(CC[C  
C@H](c1ccccc1)c1cc(/C=C/CCOCCCCCCC#N)ccc1OCc1ccccc1)C(C)C  
4940 C=CC(=O)OC(C)(C)C.Cc1ccc(Cl)cc1N1CCN(c2nnc3c2c(Br)nn3C2CCCCO2)CC1>>Cc1ccc(Cl)cc1  
N1CCN(c2nnc3c2c(/C=C/C(=O)OC(C)(C)C)nn3C2CCCCO2)CC1  
4941 C=CC(=O)OCC.Cc1nc2ccc(Cl)cc2c(=O)n1-c1ccccc1>>CCOC(=O)/C=C/c1ccc2nc(C)n(-  
c3ccccc3)c(=O)c2c1  
4942 C=CC(=O)OCC.C[Si](C)(C)CN(Cc1cc2c(c1I)OCO2)C[Si](C)(C)C>>CCOC(=O)/C=C/c1cc2c(cc1CN  
(C[Si](C)(C)C)C[Si](C)(C)C)OCO2  
4943 C=COCC.COc1ccc(I)cc1>>C=C(OCC)c1ccc(OC)cc1  
4944 C=COCCO.Fc1ccc(Br)cc1>>C=C(OCCO)c1ccc(F)cc1  
4945 C=CC(C)(C)O.COc1ccc2cc(Br)c(=O)oc2c1>>COc1ccc2cc(/C=C/C(C)(C)O)c(=O)oc2c1  
4946 C=CC(=O)OC(C)(C)C.Oc1cc(F)ccc1Br>>CC(C)(C)OC(=O)/C=C/c1ccc(F)cc1O  
4947 C=CC(C)=O.O=S(=O)(Oc1ccc2ccn(Cc3ccccc3)c2n1)C(F)(F)F>>CC(=O)/C=C/c1ccc2ccn(Cc3ccccc3)  
4948 C=Cc1cccn1.FC(F)(F)c1ccc(Br)cc1>>FC(F)(F)c1ccc(/C=C/c2cccn2)cc1  
C=CC(=O)OCCO.C[C@]12C[C@@]34C=C(Sc5ccc(I)c5)C(=O)[C@@](C)(CCC(=O)Nc5c(O)ccc(C(  
4949 =O)O)c5O)[C@@H]3[C@H](C[C@@H]1C4)O2>>C[C@]12C[C@@]34C=C(Sc5ccc(/C=C/C(=O)O  
CCO)c5)C(=O)[C@@](C)(CCC(=O)Nc5c(O)ccc(C(=O)O)c5O)[C@@H]3[C@H](C[C@@H]1C4)O2  
4950 C=CC(=O)OC.CC(=O)NC1CC2(CCN(Cc3ccccc3)CC2)Oc2ccc(Br)cc21>>COC(=O)/C=C/c1ccc2c(c1)  
C(NC(C)=O)CC1(CCN(Cc3ccccc3)CC1)O2  
4951 C=C(OC)C1=C(Br)CCCC1.C=CC(=O)OC(C)(C)C>>C=C(OC)C1=C(/C=C/C(=O)OC(C)(C)C)CCCC1  
4952 C=CC(=O)OCCCC.O=C(c1ccccc1)c1ccc(Br)cc1>>CCCCOC(=O)/C=C/c1ccc(C(=O)c2ccccc2)cc1  
4953 C=CN1C(=O)c2ccccc2C1=O.COC(=O)Cc1cccc(Br)c1>>COC(=O)Cc1cccc(/C=C/N2C(=O)c3ccccc3C  
2=O)c1  
4954 C=CC(=O)OCC.COC(=O)c1cc(I)ccc1N>>CCOC(=O)/C=C/c1ccc(N)c(C(=O)OC)c1  
4955 C=CC(=O)OC.CS(=O)(=O)Nc1ccc(I)cc1F>>COC(=O)/C=C/c1ccc(NS(C)(=O)=O)c(F)c1  
4956 C=C(NC(=O)OC(C)(C)C)C(=O)OC.CC(C)(C)OC(=O)Nc1ccc(I)cc1>>COC(=O)/C=C/c1ccc(NC(=O)  
OC(C)(C)C)cc1)NC(=O)OC(C)(C)C  
4957 C=CCCC(O)C=C(Br)c1ccccc1>>C=C1CCCC(O)C=C1c1ccccc1  
4958 C=C.N#Cc1ccc(I)cc1>>C=Cc1ccc(C#N)cc1  
C=CC(=O)OC(C)(C)C.CCCOc1ccc(Br)cc1-  
4959 c1nc2c(CCC)nn(C)c2c(=O)[nH]1>>CCCOc1ccc(/C=C/C(=O)OC(C)(C)C)cc1-  
c1nc2c(CCC)nn(C)c2c(=O)[nH]1

4960 C=CCCc1ccc2ccnc2n1.CCOC(=O)/C=C(\c1cnc(OC)nc1)c1nc(Br)cs1>>CCOC(=O)/C=C(\c1cnc(OC)nc1)c1nc(/C=C/Cc2ccc3ccnc3n2)cs1  
 4961 C=CC(=O)OCCCC.CC(C)(C)C(=O)Oc1ccc2ccccc2c1-c1c(O)ccc2cc(Br)ccc12>>CCCCOC(=O)/C=C/c1ccc2c(-C=CC(=O)OCC.CCOC(=O)/C=C/c1ccccc1Br>>CCOC(=O)/C=C/c1ccccc1/C=C/C(=O)OCC  
 4962 C=C[C@](C)(/C=C/c1ccc(O)cc1)CCC=C(C)C.Oc1ccc(I)cc1>>CC(C)=CCCC(C)/C=C/c1ccc(O)cc1)/C=C/c1ccc(O)cc1  
 4963 C=CC(=O)OC.Cc1ccc(S(=O)(=O)n2ccc3c(Br)cccc32)cc1>>COC(=O)/C=C/c1ccccc2c1ccn2S(=O)(=O)c1ccc(C)cc1  
 4964 Br1ccnc1.C=CCNC(=O)OC(C)(C)C>>CC(C)(C)OC(=O)NC/C=C/c1ccnc1  
 4965 C=CC(=O)OC.Cc1ccc(S(=O)(=O)n2cc(I)c(-c3ccccc3)c2)cc1>>COC(=O)/C=C/c1cn(S(=O)(=O)c2ccc(C)cc2)cc1-c1ccccc1  
 4966 C=CC(C)=O.CC(C)(C)[Si](C)(C)OC[C@H]1O[C@H](c2ccc(Br)cc2)C=C[C@H]1O[Si](C)(C)C(C)(C)C>>CC(=O)/C=C/c1ccc([C@H]2C=C[C@H](O[Si](C)(C)C(C)(C)C)[C@H](CO[Si](C)(C)C(C)(C)C)O2)cc1  
 4967 C=Cc1ccnc1.OCCCCCOc1ccc2cc(Br)ccc2c1>>OCCCCCOc1ccc2cc(/C=C/c3ccnc3)ccc2c1  
 4968 Br1ccsc1.C=Cc1ccccc1NS(=O)(=O)c1ccc(C)cc1>>Cc1ccc(S(=O)(=O)Nc2ccccc2/C=C/c2ccsc2)cc1  
 4969 C=CC(=O)OC.Cc1nn2c(-c3ccccc3)cc(-c3ccccc3)nc2c1I>>COC(=O)/C=C/c1c(C)nn2c(-c3ccccc3)cc(-c3ccccc3)nc12  
 4970 C=CC(=O)OC(C)(C)C.Ic1ccc2[nH]ccc2c1>>CC(C)(C)OC(=O)/C=C/c1ccc2[nH]ccc2c1  
 4971 C=CC(=O)O.Ic1ccsc1>>O=C(O)/C=C/c1ccsc1  
 4972 C=CC(=O)OCC.COc1ccc(-c2ccc([N+](=O)[O-])cc2Br)cc1>>CCOC(=O)/C=C/c1cc([N+](=O)[O-])ccc1-c1ccc(OC)cc1  
 4973 C=C[C@](C)(/C=C/c1ccc(O)cc1)CCC=C(C)C.Nc1ccc(I)cc1>>CC(C)=CCC[C@](C)(/C=C/c1ccc(N)cc1)/C=C/c1ccc(O)cc1  
 4974 C=CC(=O)OC(C)(C)C.Ic1ccnc1>>CC(C)(C)OC(=O)/C=C/c1ccnc1  
 4975 C=CC(=O)OC.CC(C)=CCc1c(I)ncn1C>>COC(=O)/C=C/c1ncn(C)c1CC=C(C)C  
 4976 C=Cc1ccc(OC)cc1.COc1ccc(Cl)cc1>>COc1ccc(/C=C/c2ccc(OC)cc2)cc1  
 4977 C=CC(=O)OC(C)(C)C.COc1c2occc2c(Br)c2ccc(=O)oc12>>COc1c2occc2c(/C=C/C(=O)OC(C)(C)C)c2ccc(=O)oc12  
 4978 C=CC(=O)OC(C)(C)C.COC(=O)C1Cc2cc(Br)cnc2NC1=O>>COC(=O)C1Cc2cc(/C=C/C(=O)OC(C)(C)C)cnc2NC1=O  
 4979 Br1cc2ccccc2c2ccccc12.C=Cc1ccccc1>>C(=C/c1cc2ccccc2c2ccccc12)\c1ccccc1  
 4980 C=Cc1ccc(OC)cc1.CC(C)(C)Br>>COc1ccc(/C=C/C(C)(C)C)cc1  
 4981 C=CC[C@](C)(CCc1ccccc1Br)N[S@](=O)(=O)C(C)(C)C>>C=C1C[C@](C)(N[S@](=O)C(C)(C)C)CCc2ccccc21  
 4982 BrC1=C(C2=CCCCO2)CCCC1.C=CC(=O)OC(C)(C)C>>CC(C)(C)OC(=O)/C=C/C1=C(C2=CCCCO2)CCCC1  
 4983 C=Cc1ccccc(Br)c1.CCOC(=O)C(F)I>>CCOC(=O)C(F)/C=C/c1ccccc(Br)c1  
 4984 Br1ccc2ccc3ccccc4ccc1c2c34.C=Cc1ccccc1>>C(=C/c1ccc2ccc3ccccc4ccc1c2c34)\c1ccccc1  
 4985 Br1ccccc1.C=Cc1nc2c(=O)[nH]c(N=CN(C)C)nc2n1[C@H]1C[C@H](O)[C@H](COC(c2ccccc2)(c2ccc(OC)cc2)c2ccc(OC)cc2)O1>>COc1ccc(C(OC[C@H]2O[C@H](n3c(/C=C/c4ccccc4)nc4c(=O)[nH]c(N=CN(C)C)nc43)C[C@H]2O)(c2ccccc2)c2ccc(OC)cc2)cc1  
 4986 C=CC(=O)Nc1ccccc1NC(=O)OC(C)(C)C.CCOC(=O)[C@H]1CN(CC(C)(C)O)C[C@H]1c1ccc(Br)c1>>CCOC(=O)[C@H]1CN(CC(C)(C)O)C[C@H]1c1ccc(/C=C/C(=O)Nc2ccccc2NC(=O)OC(C)(C)C=CC(=O)N(C)Cc1ccc(OC(F)(F)F)c1OCCC.CC1(C)NCc2cc(Br)cnc2NC1=O>>CCCOc1c(CN(C)C(C(=O)/C=C/c2cnc3c(c2)CNC(C)(C)C(=O)N3)cccc1OC(F)(F)F  
 4987 C=CCOCC1=C(Br)c2ccccc2CC1>>C=C1COCC2=C1c1ccccc1CC2  
 4988 Br1ccsc1.C=CC(=O)OC>>COC(=O)/C=C/c1ccsc1  
 4989 C=CSCC.Ic1ccccc1>>CCS/C=C/c1ccccc1  
 4990 C=Cc1ccc([N+](=O)[O-])c1.O=[N+](O-)]c1ccc(I)cc1>>O=[N+](O-)]c1ccc(/C=C/c2ccccc([N+](=O)[O-])c2)cc1  
 4991 C=CC(=O)OC.Oc1ccc(Br)cc1Cl>>COC(=O)/C=C/c1ccc(O)c(Cl)c1  
 4992 C=CCCN(c1ccccc1OC)S(=O)(=O)c1ccccc1Br>>C=C1CCN(c2ccccc2OC)S(=O)(=O)c2ccccc21  
 4993 C=CC(N)=O.Ic1ccsc1>>NC(=O)/C=C/c1ccsc1  
 4994 C=CC(N)=O.CCn1c(=O)n(COCC[Si](C)(C)C)c2ccccc(Oc3cc(Br)cc(C#N)c3)c21>>CCn1c(=O)n(COCC[Si](C)(C)C)c2ccccc(Oc3cc(C#N)cc(/C=C/C(N)=O)c3)c21  
 4995 C=Cc1ccc(C=O)cc1.CCc1cc(I)ccc1/N=N/N(CC)CC>>CCc1cc(/C=C/c2ccc(C=O)cc2)ccc1/N=N/N(CC  
 4996 C=Cc1ccccc1.CCCCOC(=O)/C=C/c1ccc(/C=C/C(=O)OCC)cc1Cl>>CCCCOC(=O)/C=C/c1ccc(/C=C/C(=O)OCC)cc1/C=C/c1ccccc1  
 4997 C=C(NC(C)=O)C(=O)OC.CC(=O)Oc1ccc(I)c(C)c1>>COC(=O)/C=C/c1ccc(OC(C)=O)cc1C)NC(C)=  
 4998  
 4999

5000 C=CC(=O)OC.O=C(c1cccc1)c1ccc(Br)cc1>>COC(=O)/C=C/c1ccc(C(=O)c2cccc2)cc1  
5001 C=CC(=O)OC.O=Cc1cc(Cl)ccc1Br>>COC(=O)/C=C/c1ccc(Cl)cc1C=O  
5002 C=CC#N.O=Cc1cccc(Br)c1>>N#C/C=C/c1cccc(C=O)c1  
5003 C=Cc1ccc(F)cc1.N[C@@H](Cc1c[nH]c2c(Br)cccc12)C(=O)O>>N[C@@H](Cc1c[nH]c2c(/C=C/c3cc  
c(F)cc3)cccc12)C(=O)O  
5004 C=CC(=O)OC(C)(C)C.COC(=O)/C=C/c1cccc(N(Cc2cccc(Br)c2)C(=O)C2CCCC2)c1>>COC(=O)/C  
=C/c1cccc(N(Cc2cccc(/C=C/C(=O)OC(C)(C)C)c2)C(=O)C2CCCC2)c1  
5005 C=CC(=O)OC(C)(C)C.O=S(=O)(c1ccc(Cl)cc1)n1ccc2cc(Br)cnc21>>CC(C)(C)OC(=O)/C=C/c1cnc2c(  
cen2S(=O)(=O)c2ccc(Cl)cc2)c1  
5006 C=CC(=O)OC.Cc1cc(C)cc(Br)c1>>COC(=O)/C=C/c1cc(C)cc(C)c1  
5007 C=CC(=O)OCC.CC(C)c1c[n+](([O-])c(C(C)C)c(Cl)n1>>CCOC(=O)/C=C/c1nc(C(C)C)c[n+](([O-  
C=CC(=O)OCCCCOc1ccc(C(c2ccc(C(C)(C)C)cc2)(c2ccc(C(C)(C)C)cc2)c2ccc(C(C)(C)C)cc2)cc1.CC(  
5008 C)(C)c1ccc(C(c2ccc(OCCCCOc3ccc(I)cc3)cc2)(c2ccc(C(C)(C)C)cc2)c2ccc(C(C)(C)C)cc2)cc1>>CC(C)  
(C)c1ccc(C(c2ccc(OCCCCOC(=O)/C=C/c3ccc(OCCCCOc4ccc(C(c5ccc(C(C)(C)C)cc5)(c5ccc(C(C)(C)C)  
cc5)c5ccc(C(C)(C)C)cc5)cc4)cc3)cc2)(c2ccc(C(C)(C)C)cc2)c2ccc(C(C)(C)C)cc2)cc1  
5009 C=Cc1cncnc1.O=[N+](([O-])c1cccc(I)c1>>O=[N+](([O-])c1cccc(/C=C/c2cncnc2)c1  
5010 C=Cc1c(F)c(F)c(F)c(F)c1F.Cc1ccc2c(-c3cccc3)c(Br)c(=O)oc2c1>>Cc1ccc2c(-  
c3cccc3)c(/C=C/c3c(F)c(F)c(F)c3F)c(=O)oc2c1  
5011 C=CC(=O)OC(C)C.O=S(=O)(c1ccc(Br)cc1)N1CCc2ccnc21>>CC(C)(C)OC(=O)/C=C/c1ccc(S(=O  
)=(O)N2CCc3ccnc32)cc1  
5012 C=CC(=O)OC.CC(C)(C)OC(=O)N1CCN(c2cccc3cc(I)cnc23)CC1>>COC(=O)/C=C/c1cnc2c(N3CCN(  
C(=O)OC(C)(C)C)CC3)cccc2c1  
5013 C=Cc1ccc(O)cc1.Oc1ccc(O)c(I)c1>>Oc1ccc(/C=C/c2cc(O)ccc2O)cc1  
5014 C=Cc1cccc1.Cc1cc2c(C)c(Nc3c(I)cnc3C#N)ccc2[nH]1>>Cc1cc2c(C)c(Nc3c(C#N)cnc3/C=C/c3ccc  
cc3)ccc2[nH]1  
5015 C=Cc1cccc1.CCCCCCNC(=O)CCl>>CCCCCNC(=O)C/C=C/c1cccc1  
5016 C=CC(=O)OCC.CCOC(=O)c1cc(-c2cccc2)n(-  
5017 c2ccc(I)cc2)c1C(=O)c1cccc1>>CCOC(=O)/C=C/c1ccc(-n2c(-  
C=CC(=O)OC.O=S(=O)(c1cccc1)n1cc(-c2ccc(F)cc2)c2cc(Br)cnc21>>COC(=O)/C=C/c1cnc2c(c1)c(-  
c1ccc(F)cc1)cn2S(=O)(=O)c1cccc1  
5018 Brc1ccc(I)cc1.C=C(F)C(=O)OC>>COC(=O)/C(F)=C/c1ccc(Br)cc1  
5019 C=Cc1ccc(N(c2cccc(C)c2)c2cccc(C)c2)cc1.Ic1cccc1>>Cc1cccc(N(c2ccc(/C=C/c3cccc3)cc2)c2cccc(  
C)c2)c1  
5020 C=CC(C)(C)O.CC(C)(C)OC(=O)NCCc1cc2c(cc1I)OCO2>>CC(C)(O)/C=C/c1cc2c(cc1CCNC(=O)OC  
(C)(C)C)OCO2  
5021 C=C1C(=O)O[C@H]2C3=C(C)CCC[C@]3(C)C(=O)C[C@H]12.COc1ccc(I)c(OC)c1>>COc1ccc(/C  
=C2/C(=O)O[C@H]3C4=C(C)CCC[C@]4(C)C(=O)C[C@H]23)c(OC)c1  
5022 C=CC(=O)OCC.COc1ccc2cccc(Br)c2n1>>CCOC(=O)/C=C/c1cccc2ccc(OC)nc12  
5023 C=C.N#Cc1cccc(Br)c1>>C=Cc1cccc(C#N)c1  
5024 C=Cc1ccc(CN2CCN(C(=O)OC(C)(C)C)CC2)cn1.Cc1c(Nc2c(I)cnc2C#N)ccc2[nH]ccc12>>Cc1c(Nc2  
c(C#N)cnc2/C=C/c2ccc(CN3CCN(C(=O)OC(C)(C)C)CC3)cn2)ccc2[nH]ccc12  
5025 C=C/C=C(/OCC)[Si](C)(C)C.Cc1cccc1I>>CCO/C=C/C=C/c1cccc1C)[Si](C)(C)C  
5026 C=CCc1cccc1.COC(=O)c1ccc(I)cc1Nc1ccc(F)cc1>>COC(=O)c1ccc(/C=C/Cc2cccc2)cc1Nc1ccc(F)c  
C=CCc1cc(OC)ccc1N(C(=O)c1cccc1I)S(=O)(=O)c1ccc(C)cc1>>C=C1Cc2cc(OC)ccc2N(S(=O)(=O)c  
5027 2ccc(C)cc2)C(=O)c2cccc21  
5028 C=CC(=O)OC(C)(C)C.N#CCc1cccc(Br)c1>>CC(C)(C)OC(=O)/C=C/c1cccc(CC#N)c1  
5029 C=Cc1cncnc1.CCCCOC(=O)/C=C/c1cccc1Cl>>CCCCOC(=O)/C=C/c1cccc1/C=C/c1cncnc1  
5030 C=CC1CCCCC1.CC(C)(C)c1ccc(Br)cc1>>C=C(c1ccc(C(C)(C)C)cc1)C1CCCCC1  
C=C[C@H]1O[C@H](OC)[C@H](OCc2cccc2)[C@H](OCc2cccc2)[C@H]1OCc1ccc2cccc2c1  
5031 .O=c1cc(-c2cccc2)oc2ccc(I)cc12>>CO[C@H]1O[C@H](/C=C/c2ccc3oc(-  
c4cccc4)cc(=O)c3c2)[C@H](OCc2ccc3cccc3c2)[C@H](OCc2cccc2)[C@H]1OCc1cccc1  
5032 C=CCC(O)CCCCC.Ic1cccc1>>CCCCC(O)C/C=C/c1cccc1  
5033 Brc1ccc2sccc2c1.C=CCN1C(=O)c2cccc2C1=O>>O=C1c2cccc2C(=O)N1C/C=C/c1ccc2sccc2c1  
5034 C=COCC.O=Cc1ccc(Br)cc1>>C=C(OC)c1ccc(C=O)cc1  
5035 C=CC(=O)OCCCC.Clc1ccc(Br)cc1>>CCCCOC(=O)/C=C/c1ccc(Cl)cc1  
5036 C=CC(=O)OC(C)(C)C.Nc1ccc(CO)cc1I>>CC(C)(C)OC(=O)/C=C/c1cc(CO)ccc1N  
5037 C=CC(=O)OC.CC(=O)O[C@H]1CC(=O)N(Cc2cc3c(cc2I)OCO3)[C@H]1[Se]c1cccc1>>COC(=O)  
/C=C/c1cc2c(cc1CN1C(=O)C[C@H](OC(C)=O)[C@H]1[Se]c1cccc1)OCO2  
5038 C=CC(=O)O.O=[N+](([O-]  
])c1ccc(S(=O)(=O)Nc2ccc(I)cc2)cc1>>O=C(O)/C=C/c1ccc(NS(=O)(=O)c2ccc([N+](=O)[O-])cc2)cc1

5039 C=C[C@@H](C)[C@@H](O)C/C=C/C(=O)OC.N#Cc1ccc(I)cc1>>COC(=O)/C=C/C[C@H](O)[C@H]  
](C)/C=C/c1ccc(C#N)cc1  
5040 C=CC(=O)OC.Fc1ccc(-c2ncc(I)nc2-c2ccc(F)cc2)cc1>>COC(=O)/C=C/c1cnc(-c2ccc(F)cc2)c(-  
c2ccc(F)cc2)n1  
5041 C=CC(=O)OC.Cc1cn(-c2cc(Br)cc([N+](=O)[O-])c2)cn1>>COC(=O)/C=C/c1cc(-  
n2cnc(C)c2)cc([N+](=O)[O-])c1  
5042 C=Cc1ccc(F)cc1.O=Cc1cn(C2CCCCO2)nc1I>>O=Cc1cn(C2CCCCO2)nc1/C=C/c1ccc(F)cc1  
5043 C=CC(=O)OC.N#Cc1c(Br)cncc1I>>COC(=O)/C=C/c1cncc(Br)c1C#N  
5044 C=CC(=O)O.Ic1cccc1>>O=C(O)/C=C/c1cccc1  
5045 C=CC(=O)OC.COc1cc2nnc(Nc3cccc(Cl)c3F)c2cc1OS(=O)(=O)C(F)(F)F>>COC(=O)/C=C/c1cc2c(N  
c3cccc(Cl)c3F)ncnc2cc1OC  
5046 C=CC(=O)OC.CCn1c(=O)c2c(C)n(C3CCCCO3)nc2c2cc(I)ccc21>>CCn1c(=O)c2c(C)n(C3CCCCO3)n  
c2c2cc(/C=C/C(=O)OC)ccc21  
5047 C=CC(=O)OC(C)(C)C.COc1cccc([IH2](OC(C)=O)OC(C)=O)c1>>COc1cccc(/C=C/C(=O)OC(C)(C)C)  
C=CC(F)(F)C(F)(F)C(F)(F)C(F)(F)C(F)(F)C(F)(F)F.Ic1ccc(OCc2cccc2)cc1>>FC(F)(F)C(F)(F)C(F)(F)  
5048 )C(F)(F)C(F)(F)C(F)(F)C(F)(F)/C=C/c1ccc(OCc2cccc2)cc1  
5049 C=CCC(C)O.COc1cncc(Br)c1>>COc1cncc(/C=C/CC(C)O)c1  
5050 C=CC(=O)OCC.O=C(O)c1cccc(Br)c1>>CCOC(=O)/C=C/c1cccc(C(=O)O)c1  
5051 C=Cc1cccc1C.COc1cccc(I)c1N>>COc1cccc(/C=C/c2cccc2C)c1N  
5052 C=CC(=O)OCC.O=c1[nH]c(=O)n([C@@H]2O[C@H](CO)[C@@H](O)[C@H]2O)cc1I>>CCOC(=O)  
/C=C/c1cn([C@@H]2O[C@H](CO)[C@@H](O)[C@H]2O)c(=O)[nH]c1=O  
5053 Brc1cccc1.C=C(NC(C)=O)C(=O)OC>>COC(=O)/C(=C/c1cccc1)NC(C)=O  
5054 C=CC(=O)OC(C)(C)C.O=C(CCc1cccc1)Nc1ccc(Br)cc1I>>CC(C)(C)OC(=O)/C=C/c1cc(Br)ccc1NC(  
=O)CCc1cccc1  
5055 C=COCCCC.O=c1cc(N2CCOCC2)oc2c(Br)esc12>>C=C(OCCCC)c1csc2c(=O)cc(N3CCOCC3)oc12  
5056 C=CCP(=O)(OCC)OCC.Ic1cccc1>>CCOP(=O)(C/C=C/c1cccc1)OCC  
5057 OCCOCCOCCOc1ccc(I)cn1.[2H]C([2H])([2H])N(C(=O)OC(C)(C)C)c1ccc(C=C)cc1>>[2H]C([2H])([  
2H])N(C(=O)OC(C)(C)C)c1ccc(/C=C/c2ccc(OCCOCCOCCO)nc2)cc1  
5058 C=CC(=O)OCCCC.CCCc1ccc(I)cc1>>CCCCOC(=O)/C=C/c1ccc(CCCC)cc1  
5059 Brc1cccc(I)c1.C=CC(=O)OCCCC>>CCCCOC(=O)/C=C/c1cccc(Br)c1  
5060 C=CC[C@H](N[S@](=O)C(C)(C)C)c1cccc1I>>C=C1C[C@H](N[S@](=O)C(C)(C)C)c2cccc21  
5061 C=Cc1cncc1.CCCc1cc(Br)c(F)c(C#N)c1>>CCCc1cc(C#N)c(F)c(/C=C/c2cncc2)c1  
5062 C=CCCOc1ccc(CCNC(=O)OC(C)(C)C)cc1.CC(C)N(CC[C@H](c1cccc1)c1cc(Br)ccc1OCc1cccc1)C  
(C)C>>CC(C)N(CC[C@H](c1cccc1)c1cc(/C=C/CCOc2ccc(CCNC(=O)OC(C)(C)C)cc2)ccc1OCc1ccc  
cc1)C(C)C  
5063 Brc1nc2cccc2c1.C=CCCN1C(=O)c2cccc2C1=O>>O=C1c2cccc2C(=O)N1CC/C=C/c1cnc2cccc2c  
5064 Brc1cccc1I.C=C(F)[Si](C)(c1cccc1)c1cccc1>>C[Si](/C(F)=C/c1cccc1Br)(c1cccc1)c1cccc1  
5065 C=COCCCC.Cc1cc(OS(=O)(=O)C(F)(F)F)c2cccc2n1>>C=C(OCCCC)c1cc(C)nc2cccc12  
5066 C=CC(=O)NCc1cccc(C(=O)OC(C)(C)C)c1.COc1ccc2[nH]cc(C3=C(Br)C(=O)NC3=O)c2c1>>COc1cc  
c2[nH]cc(C3=C(/C=C/C(=O)NCc4cccc(C(=O)OC(C)(C)C)c4)C(=O)NC3=O)c2c1  
5067 C=CC(C)(C)O.Ic1cccc2c1NCC2>>CC(C)(O)/C=C/c1cccc2c1NCC2  
5068 C=Cc1ccc([N+](=O)[O-])cc1.COc1ccc2c(=O)c(I)cc2c1>>COc1ccc2c(=O)c(/C=C/c3ccc([N+](=O)[O-]  
])cc3)cc2c1  
5069 C=CC(=O)Nc1cccc2ccnc12.CC(C)c1ccc(I)cc1>>CC(C)c1ccc(/C=C/C(=O)Nc2cccc3ccnc23)cc1  
C=C[C@@H](O[Si](C)(C)C(C)(C)C)[C@H](CCCC(=O)OC)O[Si](C)(C)C(C)(C)C.CCCCCC(=O)c1ccc  
5070 ncc1Br>>CCCCC(=O)c1cncc1/C=C/[C@@H](O[Si](C)(C)C(C)(C)C)[C@H](CCCC(=O)OC)O[Si](  
C)(C)C(C)(C)C  
C=C[C@@H]1C[C@@H](OCc2cccc2)[C@@H](O[Si](C)(C)C(C)(C)C)C[C@@H]1N(Cc1cc2c(cc1  
5071 Br)OCO2)C(C)=O>>C=C1c2cc3c(cc2CN(C(C)=O)[C@H]2C[C@H](O[Si](C)(C)C(C)(C)C)[C@H](O  
Cc4cccc4)C[C@@H]12)OCO3  
5072 C=Cc1ccc(OCC(OC)OC)cc1.O=[N+](=[O-])c1ccc(I)cc1CO>>COC(COc1ccc(/C=C/c2ccc([N+](=O)[O-]  
])c(CO)c2)cc1OC  
5073 C=CS(=O)(=O)N1CCC2(CC1)OCCO2.Cc1cc(N2C(=O)NC(=O)C2(C)C)cc(C)c1Br>>Cc1cc(N2C(=O)  
NC(=O)C2(C)C)cc(C)c1/C=C/S(=O)(=O)N1CCC2(CC1)OCCO2  
5074 C=Cc1ccc(C)cc1.O=Cc1cccc(Br)c1>>Cc1ccc(/C=C/c2cccc(C=O)c2)cc1  
5075 C=C(C(=O)OCC)c1cccc1COc1cccc1Br>>CCOC(=O)/C1=C/c2cccc2OCc2cccc21  
5076 C=Cc1ccc(C)cc1.CSc1ccc(Br)cc1>>CSc1ccc(/C=C/c2ccc(C)cc2)cc1  
5077 C=CC[C@H](C)N(C)C(=O)OC(C)(C)C.CC(C)Oc1cncc(Br)c1>>CC(C)Oc1cncc(/C=C/C[C@H](C)N(  
C)C(=O)OC(C)(C)C)c1  
5078 C=Cc1cccc1.Fc1ccc(I)cc1>>Fc1ccc(/C=C/c2cccc2)cc1  
5079 C=Cc1cccn1C(=O)OC(C)(C)C.O=Cc1ccc(I)cc1>>CC(C)(C)OC(=O)n1cccc1/C=C/c1ccc(C=O)cc1

C=CC[C@H](CC(=O)OC(C)(C)C(=O)N[C@H](C(=O)NC(c1cccc1)c1cccc1)C(C)(C)C.Fc1cc(Br)  
 5080 ccc1-c1cccc1>>CC(C)(C)OC(=O)C[C@@H](C/C=C/c1ccc(-  
 c2cccc2)c(F)c1)C(=O)N[C@H](C(=O)NC(c1cccc1)c1cccc1)C(C)(C)C  
 5081 Br1ccnc1.C=CC(=O)CCC>>CCCC(=O)/C=C/c1ccnc1  
 5082 C=Cc1cccc1.Cc1ccc(Br)nc1>>Cc1ccc(/C=C/c2cccc2)nc1  
 5083 C=Cc1ccc(N(CC)CC)cc1.CC(C)[Si](OCc1cc(=O)oc2cc(I)ccc12)(C(C)C)C(C)C>>CCN(CC)c1ccc(/C=  
 C/c2ccc3c(CO[Si](C(C)C)(C(C)C)C(C)C)cc(=O)oc3c2)cc1  
 5084 Br1cnc2cccc2c1.C=C[C@@H](CO[Si](C)(C)C(C)C)NC(=O)OCc1cccc1>>CC(C)(C)[Si](C)(C)  
 OC[C@H](/C=C/c1cnc2cccc2c1)NC(=O)OCc1cccc1  
 5085 C=Cc1ccc2cccc2c1.CCOC(=O)C(F)(F)I>>CCOC(=O)C(F)(F)/C=C/c1ccc2cccc2c1  
 5086 C=C(NC(=O)OC(C)(C)C(=O)OC.CN(C)c1ccc(I)cc1>>COC(=O)/C=C/c1ccc(N(C)C)cc1)NC(=O)O  
 C(C)(C)C  
 C=CC(=O)OC.CC(C)(C)OC(=O)NC1(c2ccc(-c3nc4c5cccc(Br)c5nn4ccc3-  
 5087 c3cccc3)cc2)CCC1>>COC(=O)/C=C/c1cccc2c1nn1cc(-c3cccc3)c(-  
 c3ccc(C4(NC(=O)OC(C)(C)C)CCC4)cc3)nc21  
 5088 C=CC(=O)OCC.CC(C)(C)Oc1ccc(Br)nc1C#N>>CCOC(=O)/C=C/c1ccc(OC(C)(C)C)c(C#N)n1  
 5089 C=CCN(CCI)S(=O)(=O)c1ccc(C=O)cc1>>C=C1CCN(S(=O)(=O)c2ccc(C=O)cc2)C1  
 5090 C=CC(N)=O.O=C1C(O)=C(I)C(=O)c2cccc21>>NC(=O)/C=C/C1=C(O)C(=O)c2cccc2C1=O  
 5091 C=CC(=O)OCC.CC(C)(C)OC(=O)NC1Cc2ccc(Br)cc2C1>>CCOC(=O)/C=C/c1ccc2c(c1)CC(NC(=O)  
 OC(C)(C)C)C2  
 C=CC(=O)N(Cc1ccc2nc(NC(=O)C(C)(C)C)[nH]c(=O)c2n1)c1ccc(C(=O)N[C@@H](CCC(=O)OCC)C  
 5092 (=O)OCC)cc1.CC(=O)OC[C@H]1O[C@@H](n2cnc(C(N)=O)c2I)[C@@H]2OC(C)(C)O[C@H]12>>  
 CCOC(=O)CC[C@H](NC(=O)c1ccc(N(Cc2ccc3nc(NC(=O)C(C)(C)C)[nH]c(=O)c3n2)C(=O)/C=C/c2c  
 (C(N)=O)ncn2)[C@@H]2O[C@H](COC(C)=O)[C@H]3OC(C)(C)O[C@H]32)cc1)C(=O)OCC  
 5093 Br1ccc2cc1CCc1cccc(c1)CC2.C=Cc1ccc2cc1CCc1cccc(c1)CC2>>C(=C/c1ccc2cc1CCc1cccc(c1)CC2  
 )\c1ccc2cc1CCc1cccc(c1)CC2  
 5094 C=CCN(CCc1cc(OC)c(OC)cc1Br)C(=O)c1cccc(OC)c1OC>>C=C1CN(C(=O)c2cccc(OC)c2OC)CCc2c  
 c(OC)c(OC)cc21  
 5095 C=Cc1cccc1.COc1ccc(/C=C/c2c(I)c(=O)c3cccc3n2C)cc1>>COc1ccc(/C=C/c2c(/C=C/c3cccc3)c(=O)  
 c3cccc3n2C)cc1  
 C=Cc1ccc([N+](=O)[O-  
 5096 ])cc1.C[C@@H]1CC(=O)Nc2cccc(Br)c2N1>>C[C@@H]1CC(=O)Nc2cccc(/C=C/c3ccc([N+](=O)[O-  
 ])cc3)c2N1  
 5097 C=Cc1cccc1.COC(=O)C(Cc1cccc1I)C(=O)OC>>COC(=O)C(Cc1cccc1/C=C/c1cccc1)C(=O)OC  
 5098 Br1ccnc1.C=Cc1cccc1OC>>COc1cccc1/C=C/c1ccnc1  
 5099 C=COCCCC.CNc1ccc(Br)cn1>>C=C(OCCCC)c1cnc(NC)nc1  
 5100 C=Cc1ccc2cccc2c1.CCOC(=O)C(F)I>>CCOC(=O)C(F)/C=C/c1ccc2cccc2c1  
 5101 COC[C@@H](/N=C(\c1cccc1)N1C=CCC[C@H]1C)C(C)C.Cc1cccc(I)c1>>COC[C@@H](/N=C(\c1  
 ccccc1)N1C=C(c2cccc(C)c2)CC[C@H]1C)C(C)C  
 5102 C=Cc1ncnc2c1ncn2C1CCCCO1.C[Si](C)(C)Oc1cccc1I>>C[Si](C)(C)Oc1cccc1/C=C/c1ncnc2c1ncn  
 2C1CCCCO1  
 5103 C=CCN(C(=O)OC(C)(C)C(=O)OC(C)(C)C.O=C1CCCc2ccc(Cl)cc21>>CC(C)(C)OC(=O)N(C/C=C/  
 c1ccc2c(c1)C(=O)CCC2)C(=O)OC(C)(C)C  
 5104 C=CC(=O)OC.O=c1[nH]c(=O)n([C@@H]2[C@H](CO)[C@H]2O)cc1I>>COC(=O)/C=C/c1cn([C@  
 @H]2[C@H](CO)[C@H]2O)c(=O)[nH]c1=O  
 5105 C=CC(=O)OC(C)(C)C.O=C(NCc1cccc(OC(F)(F)F)c1)c1cc(Br)cc(I)c1>>CC(C)(C)OC(=O)/C=C/c1cc(  
 Br)cc(C(=O)NCc2cccc(OC(F)(F)F)c2)c1  
 5106 C=Cc1ccc(O)cc1.COC(=O)Cn1c(=O)c(Cl)nc2ccnc21>>COC(=O)Cn1c(=O)c(/C=C/c2ccc(O)cc2)nc2c  
 ccnc21  
 5107 Br1ccsc1.C=Cc1cccc1N>>Nc1cccc1/C=C/c1ccsc1  
 5108 C=CC(=O)OC.COc1ccc(S(=O)(=O)N2CCc3cc(Br)cc(OCc4cccc4)c32)cc1>>COC(=O)/C=C/c1cc2c(c  
 (OCc3cccc3)c1)N(S(=O)(=O)c1ccc(OC)cc1)CC2  
 5109 C=CCOC(c1cccc1)c1c(Br)c(OC)c2cccc2c1OC>>C=C1COC(c2cccc2)c2c1c(OC)c1cccc1c2OC  
 5110 C=C(C(=O)OC)[C@@H]1CC[C@@]2(C)CCC[C@@](C)(OCOC)[C@@H]2C1.COC(=O)c1cccc1Br  
 >>COCO[C@]1(C)CCC[C@]2(C)CC[C@@H](/C=C\c3cccc3C(=O)OC)C(=O)OC[C@H]21  
 5111 C=CC(=O)OC(C)(C)C.COc1cccc1CCC(=O)Oc1ccc(I)cc1CC=C(C)C>>COc1cccc1CCC(=O)Oc1ccc  
 (/C=C/C(=O)OC(C)(C)C)cc1CC=C(C)C  
 5112 C=C(C)C(=O)OCCO.O=C1C(O)=C(I)C(=O)c2cccc21>>C/C=C\C1=C(O)C(=O)c2cccc2C1=O)C(=O)OCCO  
 C=CC(=O)OC.NC(=O)c1ccc(-  
 5113 c2cn(S(=O)(=O)c3cccc3)c3ncc(Br)cc23)cc1>>COC(=O)/C=C/c1cnc2c(c1)c(-  
 c1ccc(C(N)=O)cc1)cn2S(=O)(=O)c1cccc1

C=CCON=C1[C@H](C)[C@H]2OC(=O)O[C@]2(C)[C@@H](CC)OC(=O)[C@H](C)[C@@H](O)[C@H](C)[C@@H](O)[C@H]2O[C@H](C)C[C@H](N(C)C)[C@H]2OC(C)=O)[C@](C)(OC)C[C@H]1C.Nc1ccc(Br)cn1>>CC[C@H]1OC(=O)[C@H](C)[C@@H](O)[C@H](C)[C@@H](O)[C@H]2O[C@H](C)C[C@H](N(C)C)[C@H]2OC(C)=O)[C@](C)(OC)C[C@H](C)C(=NOC/C=C/c2ccc(N)nc2)[C@H](C)[C@H]2OC(=O)O[C@]112C  
 5114  
 C=CC(=O)NCCc1ccc(O)cc1.COc1cc(I)ccc1O>>COc1cc(/C=C/C(=O)NCCc2ccc(O)cc2)ccc1O  
 5115  
 C=CC(=O)O.CCOC(=O)/C=C/c1cc([Si](C)(C)C)cc2c1oc1c(I)cc([Si](C)(C)C)cc12>>CCOC(=O)/C=C/c1cc([Si](C)(C)C)cc2c1oc1c(/C=C/C(=O)O)cc([Si](C)(C)C)cc12  
 5116  
 C=CC(=O)OCC.Ic1cnn(CC2CC2)c1>>CCOC(=O)/C=C/c1cnn(CC2CC2)c1  
 5117  
 C/C(I)=C/[C@H](C)CO[Si](C)(C)C(C)(C)C.C=C/[C@H]1CC=C[C@H](OC(C)C)O1>>CC(=C/[C@H](C)CO[Si](C)(C)C(C)(C)C)/C=C/[C@H]1CC=C[C@H](OC(C)C)O1  
 5118  
 C=CCC1CCN(C(=O)c2ccccc2)CC1.FC(F)(F)c1cc(Br)c2cccc(C(F)(F)F)c2n1>>O=C(c1ccccc1)N1CCC(C/C=C/c2cc(C(F)(F)F)nc3c(C(F)(F)F)cccc23)CC1  
 5119  
 Bre1enc2ccccc2c1.C=CCO[C@@]1(C)C[C@H](C)C(=O)[C@H](C)[C@@H](O)[C@](C)(O)[C@H](CC)OC(=O)[C@H](C)C(=O)[C@H](C)[C@H]1O[C@H]1O[C@H](C)C[C@H](NC)[C@H]1O>>CC[C@H]1OC(=O)[C@H](C)C(=O)[C@H](C)[C@@H](O)[C@H]2O[C@H](C)C[C@H](NC)[C@H]2O)[C@@](C)(OC/C=C/c2cnc3ccccc3c2)C[C@H](C)C(=O)[C@H](C)[C@@H](O)[C@]11(C  
 5120  
 C=CCc1ccccc1.Cn1nc(Br)c2ccccc21>>Cn1nc(/C=C/Cc2ccccc2)c2ccccc21  
 5121  
 C=CC(=O)OCCCC.CC(=O)OC[C@H]1O[C@H](n2cnc3c(Cl)nc(I)nc32)[C@H](OC(C)=O)[C@@H]1OC(C)=O>>CCCCOC(=O)/C=C/c1nc(Cl)c2nnc([C@@H]3O[C@H](COC(C)=O)[C@@H](OC(C)=O)[C@H]3OC(C)=O)c2n1  
 5122  
 Bre1ccenc1.C=CC(F)(F)F>>FC(F)(F)/C=C/c1ccenc1  
 5123  
 C=CC(N)=O.O=C(O)c1cccc(I)c1>>NC(=O)/C=C/c1cccc(C(=O)O)c1  
 5124  
 C=Cc1ccccc1.COc1cc(I)cc(OC)c1OC>>COc1cc(/C=C/c2ccccc2)cc(OC)c1OC  
 5125  
 C=C.CC(=O)c1ccc(Br)cc1>>C=Cc1ccc(C(C)=O)cc1  
 5126  
 C=CC(=O)OC.COc1cccc(C#N)c1I>>COC(=O)/C=C/c1c(C#N)ccnc1OC  
 5127  
 C=C.O=C(CC(=O)c1ccc(Br)cc1)c1ccccc1>>C=Cc1ccc(C(=O)CC(=O)c2ccccc2)cc1  
 5128  
 C=C/C=C/C1CCCCN1S(=O)(=O)c1ccc(C)cc1.Cc1cccc(I)c1>>Cc1ccc(S(=O)(=O)N2CCCCC2/C=C/C=C/c2cccc(C)c2)cc1  
 5129  
 C=CP(C)(=O)c1ccccc1.Cc1ccc2ccccc2c1Br>>Cc1ccc2ccccc2c1/C=C/P(C)(=O)c1ccccc1  
 5130  
 C=CCN(Cc1ccc(F)cc1)Cc1cc2ccccc2nc1Cl>>C=C1CN(Cc2ccc(F)cc2)Cc2cc3ccccc3nc21  
 5131  
 C=CC(=O)N1CCOCC1.CC(=O)OCCc1cc2c3cc(Cl)ccc3nc3c4ccccc4n(C)c(c1)c23>>CC(=O)OCCc1cc2c3cc(/C=C/C(=O)N4CCOCC4)ccc3nc3c4ccccc4n(C)c(c1)c23  
 5132  
 C=CN1CCCC1=O.Fc1cccc(Br)c1>>C=C(c1cccc(F)c1)N1CCCC1=O  
 5133  
 Bre1ccsc1.C=CC(=O)OC(C)(C)C>>CC(C)(C)OC(=O)/C=C/c1ccsc1  
 5134  
 C=CC(=O)OCCCC.O=[N+](O-)[O-]c1ccccc1Br>>CCCCOC(=O)/C=C/c1ccccc1[N+](=O)[O-]  
 5135  
 C=CC(=O)OC.CC1(C)CC(=C(c2ccc(Br)cc2)c2ccc3c(cnn3C3CCCCO3)c2)CC(C)(C)O1>>COC(=O)/C=C/c1ccc(C=C2CC(C)(C)OC(C)(C)C2)c2ccc3c(cnn3C3CCCCO3)c2)cc1  
 5136  
 C=CC(C)=O.CC(=O)Nc1ccc(I)cc1>>CC(=O)/C=C/c1ccc(NC(C)=O)cc1  
 5137  
 C=CC(=O)OC(CC)CCCC.CC(=O)c1ccc(Cl)cc1>>CCCC(CC)OC(=O)/C=C/c1ccc(C(C)=O)cc1  
 5138  
 C=CC(=O)OC(C)(C)C.CN(C)c1ccc(CNc2ccc(Br)cn2)cc1>>CN(C)c1ccc(CNc2ccc(/C=C/C(=O)OC(C)(C)C)cn2)cc1  
 5139  
 C=Cc1ccccc1.Ic1cccc2ccccc12>>C(=C/c1cccc2ccccc12)\c1ccccc1  
 5140  
 C=C[Si](C)(C)c1cccn1.Cc1ccc(I)cc1>>Cc1ccc(/C=C/[Si](C)(C)c2cccn2)cc1  
 5141  
 C=CC(=O)N(C(C)C)C(C)C.CC(C)(C)OC(=O)c1ccccc1Br>>CC(C)N(C(=O)/C=C/c1ccccc1C(=O)OC(C)(C)C)C(C)C  
 5142  
 C=C1C(=O)O[C@@H]2C3=C(C)C(=O)C=C[C@]3(C)CC[C@@H]12.COC(=O)c1cccc(I)c1>>COC(=O)c1cccc(/C=C2/C(=O)O[C@@H]3C4=C(C)C(=O)C=C[C@]4(C)CC[C@@H]23)c1  
 5143  
 C=CCOc1ccccc1.FC(F)(F)c1cccc(Br)c1>>FC(F)(F)c1cccc(/C=C/COc2ccccc2)c1  
 5144  
 C=CC(=O)OC.CN1CCc2c(c3ccccc3n2Cc2ccc(Br)cc2)C1>>COC(=O)/C=C/c1ccc(Cn2c3c(c4ccccc42)CN(C)CC3)cc1  
 5145  
 C=Cc1ccc([Si](C)(OC)OC)cc1.CO[Si](C)(OC)c1ccc(Br)cc1>>CO[Si](C)(OC)c1ccc(/C=C/c2ccc([Si](C)(OC)OC)cc2)cc1  
 5146  
 C=CC(=O)OC(C)(C)C.CCCCc1cc(Cl)c2ccccc2n1>>CCCCc1cc(/C=C/C(=O)OC(C)(C)C)c2ccccc2n1  
 5147  
 C=CCN(C(=O)C(C)(C)C)[C@@H]1CCc2ccccc21.O=C1Nc2ncccc2[C@@]12Cc1cc(Br)enc1C2>>CC(C)(C)C(=O)N(C/C=C/c1enc2c(c1)C[C@@]1(C2)C(=O)Nc2ncccc21)[C@@H]1CCc2ccccc21  
 5148  
 C=CC(=O)CCC.Cc1ccccc1Br>>CCCC(=O)/C=C/c1ccccc1C  
 5149  
 C=COCCCC.O=S(=O)(OC1=CCCc2ccccc21)C(F)(F)F>>C=C(OCCCC)C1=CCCc2ccccc21  
 5150  
 C=CC(=O)OC(C)(C)C.CN(C)c1ccc(Br)cc1>>CN(C)c1ccc(/C=C/C(=O)OC(C)(C)C)cc1  
 5151  
 C=CC(=O)OCc1ccccc1.O=Cc1cc(Oc2ccc(F)cc2F)ccc1I>>O=Cc1cc(Oc2ccc(F)cc2F)ccc1/C=C/C(=O)OCc1ccccc1  
 5152



5153 Br1ccccc1.C=CS(N)(=O)=O>>NS(=O)(=O)/C=C/c1ccccc1  
5154 C=Cc1ccc(C)c(C)c1.COc1cc(I)cc(OC)c1OC>>COc1cc(/C=C/c2ccc(C)c(C)c2)cc(OC)c1OC  
5155 O=C(/C=C/c1cccs1)O/C(=C/I)c1ccc(Br)cc1>>O=C1OC(c2ccc(Br)cc2)=C/C1=C\c1cccs1  
5156 C=CC=O.O=[N+][O-]c1ccccc1I>>O=C/C=C/c1ccccc1[N+](=O)[O-]  
5157 C=CC(=O)c1ccccc1.Clc1ccc(I)cc1>>O=C(/C=C/c1ccc(Cl)cc1)c1ccccc1  
5158 C=C[C@H](O[Si](C)(C)C(C)(C)C)[C@H](CCCC(=O)OC)O[Si](C)(C)C(C)(C)C.CCCCCC(=O)c1ccc1Br>>CCCCC(=O)c1ccccc1/C=C/[C@H](O[Si](C)(C)C(C)(C)C)[C@H](CCCC(=O)OC)O[Si](C)(C)C(C)(C)C  
5159 C=CC[C@H]1C(=O)N(c2ccccc2)[C@H]1c1ccc(OC)cc1.COCOc1ccc(Br)cc1>>COCOc1ccc(/C=C/C[C@H]2C(=O)N(c3ccccc3)[C@H]2c2ccc(OC)cc2)cc1  
5160 C=CCN(C)c1ccccc1.COC(=O)[C@H](Cc1ccc(OS(=O)(=O)C(F)(F)F)cc1)n1ccccc1>>COC(=O)[C@H](Cc1ccc(/C=C/CN(C)c2ccccc2)cc1)n1ccccc1  
5161 C=CC(=O)OC(C)(C)C.O=S(=O)(c1ccccc(Br)c1)c1ccc2cc(Cl)ccc2n1>>CC(C)(C)OC(=O)/C=C/c1cccc(S(=O)(=O)c2ccc3cc(Cl)ccc3n2)c1  
5162 C=CN1C(=O)c2ccccc2C1=O.COC(=O)Cc1ccc(Br)cc1>>COC(=O)Cc1ccc(/C=C/N2C(=O)c3ccccc3C2=O)cc1  
5163 C=CC(F)(F)Oc1ccc2ccccc2c1Br>>C=C1c2c(ccc3ccccc23)OC1(F)F  
5164 C=Cc1ccccc1.Cc1cccc(C)c1Br>>Cc1cccc(C)c1/C=C/c1ccccc1  
5165 C=CC(=O)Nc1ccccc1NC(=O)OC(C)(C)C.CCN(CC)C1CCN(CC(C(=O)Nc2ccc(Cl)cc2)c2ccc(Br)cc2)C1>>CCN(CC)C1CCN(CC(C(=O)Nc2ccc(Cl)cc2)c2ccc(/C=C/C(=O)Nc3ccccc3NC(=O)OC(C)(C)C)cc2  
5166 Br1ccccc1.C=CC(=O)C(C)CC(=O)OC>>COC(=O)CC(C)C(=O)/C=C/c1ccccc1  
5167 C=CC(=O)OCC.Clc1ccc2ccccc2c1>>CCOC(=O)/C=C/c1ccc2ccccc2c1  
5168 C=Cc1ccccc1.CN1CCC[C@H]1COc1cncc(Br)c1>>CN1CCC[C@H]1COc1cncc(/C=C/c2ccccc2)c1  
5169 C=Cc1ccccc1.CCOC(=O)c1ccc(N)c(Br)c1>>CCOC(=O)c1ccc(N)c(/C=C/c2ccccc2)c1  
5170 C=Cc1ccccc1.CC(=O)c1ccc(Br)cc1>>CC(=O)c1ccc(/C=C/c2ccccc2)cc1  
5171 C=CCCN(c1ccccc1Br)S(=O)(=O)c1ccccc1>>C=C1CCN(S(=O)(=O)c2ccccc2)c2ccccc1  
5172 C=CC(=O)N1N=Cc2ccccc2C1c1ccccc1.COc1cc(Cc2cnc(N)nc2N)cc1OC>>COc1cc(Cc2cnc(N)nc2N)cc(/C=C/C(=O)N2N=Cc3ccccc3C2c2ccccc2)c1OC  
5173 Br1ccccc2cc[nH]c12.C=CC(=O)O>>O=C(O)/C=C/c1ccccc2cc[nH]c12  
5174 C=CC(=O)O.Clc1ccc(Br)cc1>>O=C(O)/C=C/c1ccc(Cl)cc1  
5175 C=Cc1ccc(N2CCN(C(C)=O)CC2)cc1.Fc1cc(Br)cc(Cn2ccnc2)c1>>CC(=O)N1CCN(c2ccc(/C=C/c3ccc(F)cc(Cn4ccnc4)c3)cc2)CC1  
5176 C=Cc1ccccc1.O=[N+][O-]c1ccc(Nc2ccc(Br)cc2)c([N+](=O)[O-])c1>>O=[N+][O-]c1ccc(Nc2ccc(/C=C/c3ccccc3)cc2)c([N+](=O)[O-])c1  
5177 C=CC[C@H](C)O.CC(C)Oc1cncc(Br)c1>>CC(C)Oc1cncc(/C=C/C[C@H](C)O)c1  
5178 C=CCN1C(=O)c2ccccc2C1=O.Oc1ccc(Br)cc1>>O=C1c2ccccc2C(=O)N1C/C=C/c1ccc(O)cc1  
5179 C=Cc1ccc(S(=O)(=O)c2ccccc2F)en1.Oc1cc(F)ccc1I>>O=S(=O)(c1ccc(/C=C/c2ccc(F)cc2O)nc1)c1ccc  
5180 C=Cc1ccccc1.O=Cc1cccc(Br)c1>>O=Cc1cccc(/C=C/c2ccccc2)c1  
5181 COC(=O)/C=C/Oc1ccccc1-c1ccccc1Br>>COC(=O)/C=C1/Oc2ccccc2-c2ccccc1  
5182 C=Cc1ccccc1.CC[C@](O)(C(=O)OC)c1cc2n(c(=O)c1OS(=O)(=O)C(F)(F)F)CCC2>>CC[C@](O)(OC)(C(=O)OC)c1cc2n(c(=O)c1/C=C/c1ccccc1)CCC2  
5183 Br1cnc2ccccc2c1.C=CCON=C1[C@H](C)[C@H]2OC(=O)O[C@]2(C)[C@H](CC)OC(=O)[C@H](C)C(=O)[C@H](C)[C@H](O[C@H]2O[C@H](C)C[C@H](N(C)C)[C@H]2OC(C)=O)[C@](C)(OC)C[C@H]1C>>CC[C@H]1OC(=O)[C@H](C)C(=O)[C@H](C)[C@H](O[C@H]2O[C@H](C)C[C@H](N(C)C)[C@H]2OC(C)=O)[C@](C)(OC)C[C@H]1C(=NOC/C=C/c2cnc3ccccc3c2)[C@H]1(C)C[C@H]2OC(=O)O[C@]2C  
5184 C=Cc1cc(OC)cc(OC)c1.CC(=O)Oc1ccc(I)cc1>>COc1cc(/C=C/c2ccc(OC(C)=O)cc2)cc(OC)c1  
5185 C=CC(=O)Nc1ccccc1NC(=O)OC(C)(C)C.CN1C[C@H](c2ccc(Br)cc2F)[C@H](C(=O)Nc2ccc(Cl)cc2)C1>>CN1C[C@H](c2ccc(/C=C/C(=O)Nc3ccccc3NC(=O)OC(C)(C)C)cc2F)[C@H](C(=O)Nc2ccc(Cl)cc2)C1  
5186 C=CC(N)=O.Fc1ccc(I)c(Cl)c1>>NC(=O)/C=C/c1ccc(F)cc1Cl  
5187 C=CC(=O)OC.COc1nc(C)c(I)c(OC)n1>>COC(=O)/C=C/c1c(C)nc(OC)nc1OC  
5188 C=Cc1ccccc1.Cc1cc(C)c([Cl]+c2ccccc2)c(C)c1>>C(=C/c1ccccc1)c1ccccc1  
5189 C=CC(=O)O.Cc1cc(C)cc(Br)c1>>Cc1cc(C)cc(/C=C/C(=O)O)c1  
5190 C=CCC(=O)OCC(C)C.COc1cc(Br)c(OC)c2ccccc12>>COc1cc(/C=C/C(=O)OCC(C)C)c(OC)c2ccccc  
5191 Br1ccccc(I)c1.C=CS(=O)(=O)F>>O=S(=O)(F)/C=C/c1cccc(Br)c1  
5192 C=CC(=O)CCC.CC(=O)c1ccc(Br)cc1>>CCCC(=O)/C=C/c1ccc(C(C)=O)cc1  
5193 C=CC(=O)OC.COC(=O)c1cccc(I)c1>>COC(=O)/C=C/c1cccc(C(=O)OC)c1  
5194 C=Cc1nc(C)c(OC(=O)C(C)(C)c2c1COC2OC.COc1ccc(I)cc1>>COc1ccc(/C=C/c2nc(C)c(OC(=O)C(C)(C)C)c3c2COC3OC)cc1

5195 C=C[C@H](CC)COc1ccccc1Br>>C=C1c2ccccc2OC[C@H]1CC  
5196 C=CC(=O)N(C)Cc1oc2ccccc2c1C.C[C@H]1CNc2ncc(Br)cc2CN1C(=O)OC(C)(C)C>>Cc1c(CN(C)C(=O)/C=C/c2cnc3c(c2)CN(C(=O)OC(C)(C)C)[C@@H](C)CN3)oc2ccccc12  
5197 C=CC(=O)OCCCC.C=Cc1ccc(Br)cc1>>C=Cc1ccc(/C=C/C(=O)OCCCC)cc1  
5198 Br1ccccc1.C=Cc1cc(-c2cc(C(C)(C)C)c(OC(C)=O)c(C(C)(C)C)c2)cc(-c2cc(C(C)(C)C)c(OC(C)=O)c(C(C)(C)C)c2)c1>>CC(=O)Oc1c(C(C)(C)C)cc(-c2cc(/C=C/c3ccccc3)cc(-c3cc(C(C)(C)C)c(OC(C)=O)c(C(C)(C)C)c3)c2)cc1C(C)(C)C  
5199 Br1coe2ccncc12.C=CC(=O)OCC>>CCOC(=O)/C=C/c1coe2ccncc12  
5200 C=CC(=O)OC(C)(C)C.OC/C=C/C1=C(Br)CCCC1>>CC(C)(C)OC(=O)/C=C/C1=C(/C=C/CO)CCCC1  
5201 Br1ccccc1.C=C(C)C(=O)OCCO>>C/C=C\c1ccccc1C(=O)OCCO  
5202 C=CCC(OCC(=C)Br)c1cccs1>>C=C1COC(c2cccs2)CC1=C  
5203 C=C1C(=O)O[C@H]2[C@H]1CC/C(C)=C/CC[C@@]1(C)O[C@H]21.Ic1cnnc1>>C/C1=C\CC[C@@]2(C)O[C@H]2[C@H]2OC(=O)/C(=C/c3cnnc3)[C@@H]2CC1  
5204 C=Cc1cccc(C)c1.Oc1ccccc1I>>Cc1cccc(/C=C/c2ccccc2O)c1  
5205 C=C(NC(=O)OC(C)(C)C)C(=O)OC.N#Cc1cccc(I)c1>>COC(=O)/C(=C/c1cccc(C#N)c1)NC(=O)OC(C)(C)C  
5206 C=COCCCC.O=S(=O)(Oc1ccc2c(c1)[nH]c1ccccc12)C(F)(F)F>>C=C(OCCCC)c1ccc2c(c1)[nH]c1ccccc12  
5207 C=CCc1ccc2ccccc2c1OS(=O)(=O)c1ccccc1Br>>C=C1Cc2ccc3ccccc3c2OS(=O)(=O)c2ccccc21  
5208 Br1ccc(N2c3ccccc3N(c3ccccc3)c3c2c2ccccc2c2ccccc32)cc1.C=Cc1ccccc1>>C(=C/c1ccccc1)\c1ccc(N2c3ccccc3N(c3ccccc3)c3c2c2ccccc2c2ccccc32)cc1  
5209 C=C.OCc1ccccc1I>>C=Cc1ccccc1CO  
5210 Br1coe2nccccc12.C=CC(=O)OCC>>CCOC(=O)/C=C/c1coe2nccccc12  
5211 C=Cc1ccc(N(c2ccccc2)c2ccccc2)cc1.CCOC(=O)C(F)(F)Br>>CCOC(=O)C(F)(F)/C=C/c1ccc(N(c2ccccc2)c2ccccc2)cc1  
5212 C=CCNC(=O)OC(C)(C)C.COC(=O)c1cccc(Br)c1>>C=C(CNC(=O)OC(C)(C)C)c1cccc(C(=O)OC)c1  
5213 C=CC(=O)OC.C=CC[C@@H](O)c1ccc(Br)cc1>>C=CC[C@@H](O)c1ccc(/C=C/C(=O)OC)cc1  
5214 C=CC(=O)OC.CO[C@@H]1[C@H](OC(C)=O)[C@@H](COC(C)=O)O[C@H]1n1cc(I)c(=O)[nH]c1=O>>COC(=O)/C=C/c1cn([C@@H]2O[C@H](COC(C)=O)[C@@H](OC(C)=O)[C@H]2OC)c(=O)[nH]C=CC(=O)OCC.CCc1ccc(-c2ccccc2Br)cc1>>CCOC(=O)/C=C/c1ccccc1-c1ccc(CC)cc1  
5215 C=C1CC(c2ccccc2)OC1=O.Nc1ccccc1I>>Nc1ccccc1/C=C1\CC(c2ccccc2)OC1=O  
5216 Br1cnc2ccccc2c1.C=CCO[C@]1(C)C[C@H](C)C(=O)[C@H](C)[C@H]2N(C)C(=O)O[C@]2(C)[C@@H](CC)OC(=O)[C@H](C)C(=O)[C@H](C)[C@H]1O[C@H]1O[C@H](C)C[C@H](N(C)C)[C@H]1O>>CC[C@H]1OC(=O)[C@H](C)C(=O)[C@H](C)[C@@H](O[C@@H]2O[C@H](C)C[C@H](N(C)C)[C@H]2O)[C@]1(C)(OC/C=C/c2cnc3ccccc3c2)C[C@@H](C)C(=O)[C@H](C)[C@H]2N(C)C(C=CC(C)(O)CCC=C(C)C.N#Cc1ccc(O)c(Br)c1>>CC(C)=CCCC(C)(O)/C=C/c1cc(C#N)ccc1O  
5217 C=CC(=O)OCC.Clc1ncc(I)c2nccccc12>>CCOC(=O)/C=C/c1ncc(Cl)c2ccccc12  
5218 C=Cc1nnc2c1nnc2C1CCCCO1.COc1ccc(I)cc1>>COc1ccc(/C=C/c2nnc3c2nnc3C2CCCCO2)cc1  
5219 \*CNCCCCOCCOCCOCCNC(=O)COc1ccc(C(Cc2cc(OC)cc(OC)c2)NC(=O)c2ccc(C=C)cc2)cc1.O=[N+](O-)]c1ccc(I)cc1>>\*CNCCCCOCCOCCOCCNC(=O)COc1ccc(C(Cc2cc(OC)cc(OC)c2)NC(=O)c2ccc(/C=C/C/c3ccc([N+]=[O-])O-)]cc3)cc2)cc1  
5220 C=C1C(=O)O[C@H]2/C=C\(\C)CC/C=C\CC[C@@H]12.Oc1ccccc1I>>C/C1=C\CC[C@H]2OC(=O)/C(=C/c3ccccc3O)[C@@H]2CC/C(C)=C/CC1  
5221 C=CCN(CCC1cc(Cl)ccc1I)C(=O)C(F)(F)F>>C=C1CN(C(=O)C(F)(F)F)CCc2cc(Cl)ccc21  
5222 C=CC(=O)OCC.N#Cc1ccc(Br)cc1F>>CCOC(=O)/C=C/c1ccc(C#N)c(F)c1  
5223 C=Cc1ccc(C(=O)OC)cc1.Cc1ccccc1Br>>COC(=O)c1ccc(/C=C/c2ccccc2C)cc1  
5224 C=CC(C)(C)O.Nc1ccc(Br)cc1>>CC(C)(O)/C=C/c1ccc(N)cc1  
5225 C=CCc1nc(-c2ccccc2)oc1C.CCOC(=O)C1(Oc2ccc(I)cc2)CCC1>>CCOC(=O)C1(Oc2ccc(/C=C/C/c3nc(-C=COCCCC.COc1ccc(OS(=O)(=O)C(F)(F)F)cc1>>C=C(OCCCC)c1ccc(OC)cc1  
5226 C=CCCCCCC.CCOC(=O)/C=C\Br>>CCCCC/C=C/C=CC(=O)OCC  
5227 C=CC(=O)OCC.CCc1ccc(I)cc1>>CCOC(=O)/C=C/c1ccc(CC)cc1  
5228 C=CC(=O)OC.O=[N+](O-)]c1cccc(Br)c1>>COC(=O)/C=C/c1cccc([N+](=O)[O-])c1  
5229 C=CC#N.COC(=O)c1ccc(I)cc1>>COC(=O)c1ccc(/C=C/C#N)cc1  
5230 C=CC(=O)OCC.COc1cccc(-c2ccccc2I)c1>>CCOC(=O)/C=C/c1ccccc1-c1cccc(OC)c1  
5231 C=Cc1ccc(OCc2ccccc2)c(-c2ccc(OC)cc2CO)c1.COc1ccc(I)cc1Oc1ccc(C=O)cc1>>COc1ccc(-c2cc(/C=C/c3ccc(OC)c(Oc4ccc(C=O)cc4)c3)ccc2OCc2ccccc2)c(CO)c1  
5232 C=CCN(C(=O)OC(C)(C)C)C(=O)OC(C)(C)C.CC(=O)c1ccc(Br)cc1>>CC(=O)c1ccc(/C=C/CN(C(=O)OC(C)(C)C)C(=O)OC(C)(C)C)cc1  
5233 C=C[C@](C)(C)(COCC[Si](C)(C)C)C(=O)O.CC(=O)O[C@H](C)c1ccc2ccc(Br)cc2n1>>CC(=O)O[C@H](C)c1ccc2ccc(/C=C/[C@](C)(COCC[Si](C)(C)C)C(=O)O)cc2n1

5237 C=CC(=O)OC.O=C(c1ccc(O)cc1)c1sc2cc(O)ccc2c1Oe1ccc(Br)cc1>>COC(=O)/C=C/c1ccc(Oc2c(C(=O)c3ccc(O)cc3)sc3cc(O)ccc23)cc1

5238 C=CCN(C(=O)OCC)c1cccc2ccccc12.CC(=O)c1ccc(Cl)cc1>>CCOC(=O)N(C/C=C/c1ccc(C(C)=O)cc1)c1cccc2ccccc12

5239 C=CC(=O)O.O=C(O)c1cccc(Br)c1>>O=C(O)/C=C/c1cccc(C(=O)O)c1

5240 C=CC(=O)c1ccc(OC)cc1.COc1ncc(I)c(OC)n1>>COc1ccc(C(=O)/C=C/c2cnc(OC)nc2OC)cc1  
C=CC(=O)OC.Cc1nc2cc(-c3ccccc3)c(-

5241 c3ccc(C4(NC(=O)OC(C)(C)C)CCC4)cc3)nn2c1Br>>COC(=O)/C=C/c1c(C)nc2cc(-c3ccccc3)c(-c3ccc(C4(NC(=O)OC(C)(C)C)CCC4)cc3)nn12

5242 C=Cc1ccncc1.O=[N+][O-]c1cccc(Br)c1>>O=[N+][O-]c1cccc(/C=C/c2ccncc2)c1

5243 C=CCCC(=O)O.Ic1cccs1>>O=C(O)CC/C=C/c1cccs1

5244 C=Cc1cc(OCc2ccccc2)c(OCc2ccccc2)nn1.Fc1cc(I)ccc1C(F)(F)F>>Fc1cc(/C=C/c2cc(OCc3ccccc3)c(O)Cc3ccccc3)nn2)ccc1C(F)(F)F

5245 C=CC(=O)OC.Nc1ccc(Br)cc1I>>COC(=O)/C=C/c1cc(Br)ccc1N

5246 C=Cc1ccc(F)c(F)c1.COc1ccc(CN2C(=O)C(=C(c3ccc(O)cc3)c3ccc(O)cc3)c3cc(Br)ccc32)cc1>>COc1ccc(CN2C(=O)C(=C(c3ccc(O)cc3)c3ccc(O)cc3)c3cc(/C=C/c4ccc(F)c(F)c4)ccc32)cc1

5247 C=CC(=O)OC(C)(C)C.FC(F)(F)c1cccc1Br>>CC(C)(C)OC(=O)/C=C/c1cccc1C(F)(F)F

5248 Br1ccncc1.C=CC(N)=O>>NC(=O)/C=C/c1ccncc1

5249 C=CC(O)c1cccc1Br.COc1ccc(I)c1>>COc1ccc(/C=C/C(O)c2ccccc2Br)c1

5250 C=Cc1ccc(OC)cc1.Cc1c(Br)c(=O)cc2ccccc12>>COc1ccc(/C=C/c2c(C)c3ccccc3oc2=O)cc1

5251 Br1cc(I)c2ccccc2n1.C=CC(=O)OC>>COC(=O)/C=C/c1cc(Br)nc2ccccc12

5252 Br1cccc(CNc2ccc3ccccc3c2)c1.C=CC(=O)OCC>>CCOC(=O)/C=C/c1cccc(CNc2ccc3ccccc3c2)c1

5253 C=CCCCC(=O)OC.CC(C)(C)c1cccc1OS(=O)(=O)C(F)(F)F>>C=C(CCCC(=O)OC)c1cccc1C(C)(C)

5254 C=Cc1cccc1C.Cc1ccc(Br)c(N)c1>>Cc1ccc(/C=C/c2ccccc2C)c(N)c1

5255 C=CC(O)c1cccc1Br.Ic1cccc1>>OC(/C=C/c1cccc1)c1cccc1Br

5256 C=CC(=O)OC.OCCc1ncccc1Br>>COC(=O)/C=C/c1ccncc1CCO

5257 C=CC(=O)OC.COc1ncc(Br)c(OC)n1>>COC(=O)/C=C/c1ncc(OC)nc1OC

5258 C=CC1=Cc2ccccc2CC1.CCOC(=O)C(F)Br>>CCOC(=O)C(F)/C=C/C1=Cc2ccccc2CC1

5259 C=Cc1cccc1.CC(=O)c1ccc(Br)c1>>CC(=O)c1ccc(/C=C/c2ccccc2)c1

5260 C=CC1(O)CCCCC1.O=C(NC[C@H](O)[C@H](O)c1ccc(Br)c1)C(F)(F)F>>O=C(NC[C@H](O)[C@H](O)[C@H](O)c1cccc(/C=C/C2(O)CCCC2)c1)C(F)(F)F

5261 C=CC(=O)OCC.O=c1c2ccccc2c(Br)c2n1CCC2>>CCOC(=O)/C=C/c1c2n(c(=O)c3ccccc13)CCC2

5262 C=CCP(=O)(OCC)OCC.COc1ccc(I)cc1>>CCOP(=O)(C/C=C/c1ccc(OC)cc1)OCC

5263 C=CC(=O)OC.COC(=O)c1ccc([N+](=O)[O-])c1I>>COC(=O)/C=C/c1c(C(=O)OC)cccc1[N+](=O)[O-]

5264 C=CC[Si](C)(C)C.Cc1ccc(Br)cc1>>C=C(C[Si](C)(C)C)c1ccc(C)cc1

5265 C=CCn1c(N(c2ccc(Br)cc2)S(=O)(=O)c2ccc(C)cc2)cc2cc(C)ccc21>>Cc1ccc(S(=O)(=O)N2c3ccc(Br)c3/C=C/Cn3c2cc2cc(C)ccc23)cc1

5266 C=CC(=O)Nc1ccncc1.Oc1ccc(Br)nc1>>O=C(/C=C/c1ccc(O)cn1)Nc1ccncc1

5267 C=CC(=O)OCCCC.CCOC(=O)/C=C/c1cc(Br)cncc1C(=O)N(CC)CC>>CCCCOC(=O)/C=C/c1ncc(C(=O)N(CC)CC)c(/C=C/C(=O)OCC)c1

5268 C=CS(=O)(=O)CC.O=C(OCc1cccc1)N1CCC[C@H]1Cc1c[nH]c2ccc(Br)cc12>>CCS(=O)(=O)/C=C/c1ccc2[nH]cc(C[C@H]3CCCN3C(=O)OCc3ccccc3)c2c1  
C=C(C)C(=O)OC.COc1cc(Br)c2c3c1O[C@H]1[C@@H](O[Si](C)(C)C(C)(C)C)C=C[C@H]4[C@H](C2)N(C)CC[C@H]341>>COC(=O)/C(C)=C/c1cc(OC)c2c3c1C[C@H]1[C@H]4C=C[C@H](O[Si](C)(C)C(C)(C)C)[C@H](O2)[C@H]34CCN1C

5270 C=C[C@H]1(CC)CCSc2ccccc21.Ic1cccc1>>CC[C@H]1(/C=C/c2ccccc2)CCSc2ccccc21

5271 C=COCCCC.Cc1cccc1Cl>>C=C(OCCCC)c1cccc1C

5272 C=CC(=O)OC.Cc1ccc(S(=O)(=O)N2CCC(I)=C2c2ccccc2NC(=O)OC(C)(C)C)cc1>>COC(=O)/C=C/C1=C(c2ccccc2NC(=O)OC(C)(C)C)N(S(=O)(=O)c2ccc(C)cc2)CC1

5273 C=CC(=O)OC(C)(C)C.OCc1ccc(Br)cc1>>CC(C)(C)OC(=O)/C=C/c1ccc(CO)cc1

5274 C=CC(=O)OC(C)(C)C.Clc1ccncc2ccccc12>>CC(C)(C)OC(=O)/C=C/c1ccncc2ccccc12

5275 Br1cnc2ccccc2c1.C=Cc1ccc2c(c1)c1cccc1n2CCCCC>>CCCCCn1c2ccccc2c2cc(/C=C/c3cnc4ccc(cc4c3)ccc21

5276 C=C(CP(=O)(OCC)OCC)C(=O)OCC.Oc1cccc1I>>CCOC(=O)/C=C/c1cccc1O)CP(=O)(OCC)OCC

5277 C=CC(=O)OC.COc1ncccc1Br>>COC(=O)/C=C/c1ccncc1OC

5278 C=CC(=O)OC.Cn1cnc2c(NCc3ccc(Br)cc3)nc(N3CCCCC3)nc21>>COC(=O)/C=C/c1ccc(CNc2nc(N3CCCC3)nc3c2ncn3C)cc1

5279 C=CS(=O)(=O)c1cccc1.OCc1cccc(I)c1>>O=S(=O)(/C=C/c1ccc(CO)c1)c1cccc1

5280 C=CC(=O)OCC.O=C1CCc2cc(Br)cncc2N1>>CCOC(=O)/C=C/c1cnc2c(c1)CCC(=O)N2

5281 C=C.COc1ccc(I)cc1OC>>C=Cc1ccc(OC)c(OC)c1

5282 C=CC(=O)OC.O=C1c2ccccc2C(=O)N1c1cccc(Br)c1F>>COC(=O)/C=C/c1cccc(N2C(=O)c3ccccc3C2=O)c1F

5283 C=Cc1ccccc1.COc1ccc(Br)c(C=O)c1>>COc1ccc(/C=C/c2ccccc2)c(C=O)c1

5284 C=Cc1ccc(OC)cc1.O=c1cc(-c2ccccc2)oc2ccc(Br)cc12>>COc1ccc(/C=C/c2ccc3oc(-c4ccccc4)cc(=O)c3c2)cc1

5285 C=Cc1ccccc1(OC)c1OC.O=c1ccc2ccc(OS(=O)(=O)C(F)(F)F)cc2o1>>COc1cccc(/C=C/c2ccc3ccc(=O)oc3c2)c1OC

5286 C=CP(=O)(OCC)OCC.O=[N+](O-)]c1cccc(Br)c1>>CCOP(=O)(/C=C/c1cccc([N+](=O)[O-])c1)OCC

5287 Br1ccc(I)cc1.C=CC(=O)OCC>>CCOC(=O)/C=C/c1ccc(Br)cc1

5288 C=CC(=O)OC.COC(=O)c1nc(N(Cc2ccccc2)Cc2ccccc2)ccc1Br>>COC(=O)/C=C/c1ccc(N(Cc2ccccc2)Cc2ccccc2)nc1C(=O)OC

5289 C=CC[C@H](NC(=O)OC(C)(C)C)C(=O)OC.COC(=O)c1cscc1Br>>COC(=O)c1cscc1/C=C/C[C@@H](NC(=O)OC(C)(C)C)C(=O)OC

5290 C=Cc1cccc(CN2CCN(C(C)=O)CC2)n1.Cc1c(Nc2c(I)cncc2C#N)ccc2[nH]ccc12>>CC(=O)N1CCN(Cc2ccccc2/C=C/c3cnccc(C#N)c3Nc3ccc4[nH]ccc4c3C)n2)CC1

5291 C=CC.CC1(c2ccccc2Br)CC(=O)C1>>C/C=C/c1cccc1C1(C)CC(=O)C1

5292 C=CC(=O)N1N=Cc2ccccc2C1CCC(F)(F)F.COc1cc(Cc2cnc(N)nc2N)cc(I)c1OC>>COc1cc(Cc2cnc(N)nc2N)cc(/C=C/C(=O)N2N=Cc3ccccc3C2CCC(F)(F)F)c1OC

5293 C=C1C(=O)O[C@H]2[C@H]1CCC(=C)[C@H]1C[C@H](OC(C)=O)C(=C)[C@H]21.O=[N+](O-)]c1ccccc1I>>C=C1CC[C@H]2/C(=C/c3ccccc3[N+](=O)[O-])C(=O)O[C@@H]2[C@H]2C(=C)[C@H]1(OC(C)=O)C[C@H]12

5294 C=CC(=O)O.O=S(=O)(Nc1ccc(I)cc1)c1ccc(OC(F)(F)F)cc1>>O=C(O)/C=C/c1ccc(NS(=O)(=O)c2ccc(OC(F)(F)F)cc2)cc1

5295 C=Cc1sc(C=O)c2c1OCCO2.CCN(CC)/N=N/c1ccc(I)cc1>>CCN(CC)/N=N/c1ccc(/C=C/c2sc(C=O)c3c2OCCO3)cc1

5296 C=CC(=O)OC.O=Cc1ccc(I)cc1>>COC(=O)/C=C/c1ccc(C=O)cc1

5297 C=CCC(C)C.ClCc1cccc(Oc2ccccc2)c1>>C=C(Cc1cccc(Oc2ccccc2)c1)CC(C)C

5298 C=CC(=O)OCC.N#Cc1ccc(Br)cc1>>CCOC(=O)/C=C/c1ccc(C#N)cc1

5299 C=CC(=O)Nc1cccc2ccnc12.CCc1ccc(I)cc1>>CCc1ccc(/C=C/C(=O)Nc2ccccc2ccnc23)cc1

5300 C=Cc1ccccc1.Cc1cc(N(c2ccc([N+](=O)[O-])cc2[N+](=O)[O-])c2ccc([N+](=O)[O-])cc2[N+](=O)[O-])ccc1Br>>Cc1cc(N(c2ccc([N+](=O)[O-])cc2[N+](=O)[O-])c2ccc([N+](=O)[O-])cc2[N+](=O)[O-])ccc1/C=C/c1ccccc1

5301 C=CC(=O)OCC.CC(=O)c1ccc(I)cc1>>CCOC(=O)/C=C/c1ccc(C(C)=O)cc1

5302 C=Cc1nc2c(N)ncnc2n1[C@H]1C[C@H](O[Si](C)(C)C(C)(C)C)[C@H](CO[Si](C)(C)C(C)(C)C)O1.Cc1ccc(Br)cc1>>Cc1ccc(/C=C/c2nc3c(N)ncnc3n2[C@H]2C[C@H](O[Si](C)(C)C(C)(C)C)[C@H](CO[Si](C)(C)C(C)(C)C)O2)cc1

5303 Br1ccc2ccccc2c1.C=Cc1ccc(C(=O)O)cc1>>O=C(O)c1ccc(/C=C/c2ccc3ccccc3c2)cc1

5304 C=C(F)[Si](C)(c1ccccc1)c1ccccc1.CC(=O)c1ccc(I)cc1>>CC(=O)c1ccc(/C=C(F)[Si](C)(c2ccccc2)c2ccccc2)cc1

5305 C=CC(C)(C)O.CC(=O)O[C@H]1C(Br)=C[C@H](O[Si](C)(C)C(C)(C)C)[C@H]2O[C@H]12>>CC(=O)O[C@H]1C(/C=C/C(C)(C)O)=C[C@H](O[Si](C)(C)C(C)(C)C)[C@H]2O[C@H]12

5306 C=Cc1ccc(F)cc1.N#Cc1ccc(Br)cc1>>N#Cc1ccc(/C=C/c2ccc(F)cc2)cc1

5307 C=CC(=O)CCCCC.O=C(c1ccccc1)c1ccc(Br)cc1>>CCCCC(=O)/C=C/c1ccc(C(=O)c2ccccc2)cc1

5308 C=Cc1ccccc1.O=c1ccoc2cc(Br)ccc12>>O=c1ccoc2cc(/C=C/c3ccccc3)ccc12

5309 C=CC(=O)OC(C)(C)C.CC(C)=CCc1cc(I)ccc1OC(=O)CCc1ccccc1>>CC(C)=CCc1cc(/C=C/C(=O)OC(C)(C)C)ccc1OC(=O)CCc1ccccc1

5310 C=Cc1ccccc1.CCCCOC(=O)/C=C/c1ccc(Br)cc1>>CCCCOC(=O)/C=C/c1ccc(/C=C/c2ccccc2)cc1

5311 C=CP(=O)(OCC)OCC.Clc1ccc(I)cc1>>CCOP(=O)(/C=C/c1ccc(Cl)cc1)OCC

5312 C=CN1C(=O)CCC1=O.Ic1ccc2c(c1)OCCOCCOCCOCCO2>>O=C1CCC(=O)N1/C=C/c1ccc2c(c1)OCCOCCOCCOCCO2

5313 C=Cc1ccccc1.O=C1C[C@H](c2ccc(Cl)cc2Br)CN1>>O=C1C[C@H](c2ccc(Cl)cc2/C=C/c2ccccc2)CN

5314 C=CCNC(=O)c1ccc(F)cc1NC(=O)c1ccc(OC)cc1.Ic1ccccc1>>COc1ccc(C(=O)Nc2cc(F)ccc2C(=O)NC/C=C/c2ccccc2)cc1

5315 C=CC(=O)OCC.COc1cc(Br)c(CC2CCC(=O)N(Cc3ccccc3)C2)cc1OC>>CCOC(=O)/C=C/c1cc(OC)c(OC)cc1CC1CCC(=O)N(Cc2ccccc2)C1

5316 C=CC(=O)OCC.COc1ccc(Br)cc1I>>CCOC(=O)/C=C/c1cc(Br)ccc1OC

5317 C=CC(=O)OC.COc1ccccc1c1NC(=O)C(C)(C)C>>COC(=O)/C=C/c1ccccc1OCc1NC(=O)C(C)(C)C

5318 C=CC(=O)Nc1cccc2ccnc12.O=[N+](O-)]c1cccc(I)c1>>O=C(/C=C/c1cccc([N+](=O)[O-])c1)Nc1cccc2ccnc12

5319 C/C=C/COc1cc(I)cc(C)c1OC(=O)C(C)(C)C.C=CCOC(=O)CC>>C/C=C/COc1cc(/C=C/COC(=O)CC)c(C)C)c1OC(=O)C(C)(C)C

5320 C=COCCCC.CNc1ccc(Br)cn1>>C=C(OCCCC)c1ccc(NC)nc1  
5321 C=CC(=O)OC.N#Cc1ccc(-  
5322 c2cn(S(=O)(=O)c3ccccc3)c3ncc(Br)cc23)cc1>>COC(=O)/C=C/c1cnc2c(c1)c(-  
5323 C=Cc1ccc(OC)cc1.O=C(Nc1ccccc1I)C1CCCCC1>>COc1ccc(/C=C/c2ccccc2NC(=O)C2CCCCC2)cc1  
5324 C=CC(=O)N1CCOCC1.O=C1Nc2ccc(Br)cc2C1=O>>O=C1Nc2ccc(/C=C/C(=O)N3CCOCC3)cc2C1=  
5325 C=CC(F)(F)C(F)(F)C(F)(F)C(F)(F)C(F)(F)C(F)(F)F.COc1ccc(Br)cc1>>COc1ccc(/C=C/C(F)(F)C(F)(F)  
5326 )C(F)(F)C(F)(F)C(F)(F)C(F)(F)F)cc1  
5327 C=C(NC(C)=O)C(=O)OC.Fc1cc(-c2ccccc2)ccc1Br>>COC(=O)/C(=C/c1ccc(-  
5328 C=Cc1ccccc1.O=c1ccoc2c(Br)c(OCc3ccccc3)ccc12>>O=c1ccoc2c(/C=C/c3ccccc3)c(OCc3ccccc3)ccc  
5329 C=CCCC#N.Cc1ccccc1OS(=O)(=O)C(F)(F)F>>C=C(CCCC#N)c1ccccc1C  
5330 Brc1cccn2nnnc12.C=Cc1ccccc1>>C(=C/c1cccn2nnnc12)\c1ccccc1  
5331 C=CC[C@H]1O[C@@H]2O[C@@]3(C)CC[C@H]4[C@H](C)CC[C@@H]([C@H]1C)[C@]42OO3.  
5332 Cc1ccccc(I)c1>>Cc1ccccc(/C=C/C[C@H]2O[C@@H]3O[C@@]4(C)CC[C@H]5[C@H](C)CC[C@@H  
5333 ]([C@H]2C)[C@]53OO4)c1  
5334 C=CC(=O)OC.COC(=O)/C=C/c1cc(Cl)cc2c(=O)cc(-  
5335 c3ccccc3)oc12>>COC(=O)/C=C/c1cc(/C=C/C(=O)OC)c2oc(-c3ccccc3)cc(=O)c2c1  
5336 C=COCCCC.O=C(c1ccccc1)c1ccc(Br)c1>>C=C(OCCCC)c1ccc(C(=O)c2ccccc2)c1  
5337 C=CC[C@H]1O[C@H](CNC(=O)OC(C)(C)C)[C@H]2OC(CC)(CC)O[C@@H]12.COc1ccc2[nH]cc  
5338 (C3=C(Br)C(=O)NC3=O)c2c1>>CCC1(CC)O[C@H]2[C@H](C/C=C/C3=C(c4c[nH]c5ccc(OC)cc45)  
5339 C(=O)NC3=O)O[C@H](CNC(=O)OC(C)(C)C)[C@H]2O1  
5340 C=CC(=O)OC(C)(C)C.O=C(O)c1ccc(Br)s1>>CC(C)(C)OC(=O)/C=C/c1ccc(C(=O)O)s1  
5341 C=CCn1c(=O)oc2cc(C=O)ccc21.O=C(O[C@H]1CN2CCC1CC2)C1(c2ccccc(Br)c2)CCCCC1>>O=Cc  
5342 1ccc2c(c1)oc(=O)n2CC/C=C/c1ccc(C2(C=O)O[C@H]3CN4CCC3CC4)CCCCC2)c1  
5343 C=Cc1nc(C)c(OC(=O)C(C)(C)C)c2c1COC2OC.COC(=O)c1ccc(I)cc1>>COC(=O)c1ccc(/C=C/c2nc(C)  
5344 c(OC(=O)C(C)(C)C)c3c2COC3OC)cc1  
5345 Brc1ccoc1.C=Cc1ccccc1NS(=O)(=O)c1ccc(C)cc1>>Cc1ccc(S(=O)(=O)Nc2ccccc2/C=C/c2ccoc2)cc1  
5346 C=CC(=O)OC(C)(C)C.CCCOc1ccc(Br)cc1-  
5347 c1nc2c(c(C)nn2CCC)c(=O)[nH]1>>CCCOc1ccc(/C=C/C(=O)OC(C)(C)C)cc1-  
5348 c1nc2c(c(C)nn2CCC)c(=O)[nH]1  
5349 C=Cc1ccccc1Cl.O=C1Nc2ccc(I)c2/C1=C/c1ccc[nH]1>>O=C1Nc2ccc(/C=C/c3ccccc3Cl)c2/C1=C/c1  
5350 ccc[nH]1  
5351 C=CC(=O)OCC.O=C(Nc1ccc(Cl)cc1)c1ccc(Br)c1>>CCOC(=O)/C=C/c1ccc(C(=O)Nc2ccc(Cl)cc2)c  
5352 C=CS(=O)(=O)F.O=S(=O)(F)Oc1ccc(I)cc1>>O=S(=O)(F)/C=C/c1ccc(OS(=O)(=O)F)cc1  
5353 C=CCN(c1ccc2c(ccc(=O)n2C)c1)S(=O)(=O)c1ccccc1Br>>C=C1CN(c2ccc3c(ccc(=O)n3C)c2)S(=O)(=  
5354 O)c2ccccc21  
5355 C=Cc1ccc(F)cc1.COc1ccc(I)cc1>>COc1ccc(/C=C/c2ccc(F)cc2)cc1  
5356 C=CC(=O)OCC.Clc1ccc2ccccc12>>CCOC(=O)/C=C/c1ccc2ccccc12  
5357 C=CC(=O)OCC.Cn1ccc(Br)cc1=O>>CCOC(=O)/C=C/c1ccn(C)c(=O)c1  
5358 Brc1ccc2c1cc(-c1ccc(I)cc1)n2-c1ncccn1.C=CC(=O)OC>>COC(=O)/C=C/c1ccc(-c2cc3c(Br)cccc3n2-  
5359 c2ncccn2)cc1  
5360 C=CC(=O)OCC.COc1ccc(-c2ccccc2Br)cc1>>CCOC(=O)/C=C/c1ccccc1-c1ccc(OC)cc1  
5361 C=Cc1ccc(C)cc1.O=S(=O)(c1ccccc1)C(F)(F)Br>>Cc1ccc(/C=C/C(F)(F)S(=O)(=O)c2ccccc2)cc1  
5362 C=C1C[C@H]2[C@@H]3CCc4cc(OC)ccc4[C@H]3CC[C@]2(C)C1=O.CC(=O)c1ccc(Br)cc1>>COc1  
5363 ccc2c(c1)CC[C@@H]1[C@@H]2CC[C@]2(C)C(=O)/C=C/c3ccc(C(C)=O)cc3)[C@H]12  
5364 C=Cc1ccc2cc(N(c3ccccc3)c3ccccc3)ccc2c1.CC(C)(C)c1ccc(N2C(=O)c3ccccc4c(Br)ccc(c34)C2=O)cc1  
5365 >>CC(C)(C)c1ccc(N2C(=O)c3ccccc4c(/C=C/c5ccccc6c(N(c7ccccc7)c7ccccc7)ccc6c5)ccc(c34)C2=O)cc  
5366 C=CC(=O)OCC.CC(C)(C)OC(=O)c1cc(Cn2cccn2)ccc1I>>CCOC(=O)/C=C/c1ccc(Cn2cccn2)cc1C(=O)  
5367 )OC(C)(C)C  
5368 C=Cc1ccc(Br)cc1.CCCCN(CCCC)c1ccc(I)cc1>>CCCN(CCCC)c1ccc(/C=C/c2ccc(Br)cc2)cc1  
5369 C=Cc1ccccc1.Cc1ccccc1Cl>>Cc1ccccc1/C=C/c1ccccc1  
5370 C=Cc1ccccc1OC.COC(=O)c1cc2cc(Br)ccc2cc1OC(C)=O>>COC(=O)c1cc2cc(/C=C/c3ccccc3OC)ccc2  
5371 cc1OC(C)=O  
5372 C=CC(COc1ccccc([N+](=O)[O-])c1I)NC(=O)OCc1ccccc1>>C=C1c2c(cccc2[N+](=O)[O-  
5373 ])OCC1NC(=O)OCc1ccccc1  
5374 C=CN1C(=O)CCC1=O.FC(F)(F)Oc1ccc(Br)cc1>>O=C1CCC(=O)N1/C=C/c1ccc(OC(F)(F)F)cc1  
5375 C=Cc1ccc(F)cc1.N[C@@H](Cc1c[nH]c2ccc(Br)cc12)C(=O)O>>N[C@@H](Cc1c[nH]c2ccc(/C=C/c3  
5376 ccc(F)cc3)cc12)C(=O)O  
5377 C=CC[C@H]1(NC(=O)OC(C)(C)C)C(=O)OC.COC(=O)c1ccccc1I>>COC(=O)c1ccccc1/C=C/C[C@  
5378 @H]1(NC(=O)OC(C)(C)C)C(=O)OC  
5379 C=Cc1ccccc1.COC(=O)c1ccccc1Cl>>COC(=O)c1ccccc1/C=C/c1ccccc1  
5380 C=CC(=O)O.COc1ccc(I)cc1>>COc1ccc(/C=C/C(=O)O)cc1

5360 C=CN1C(=O)c2ccccc2C1=O.Cc1ccc(S(=O)(=O)n2ccc3c(Br)cccc32)cc1>>Cc1ccc(S(=O)(=O)n2ccc3c  
/C=C/N4C(=O)c5ccccc5C4=O)cccc32)cc1  
5361 C=CB1OC(C)CC(C)(C)O1.Cc1ccc(I)cc1>>Cc1ccc(/C=C/B2OC(C)CC(C)(C)O2)cc1  
C=Cc1cn(COCC[Si](C)(C)C)nc1-  
5362 c1nc2ccc(OC)cc2n1COCC[Si](C)(C)C.COC(=O)c1nccc(Br)c1>>COC(=O)c1nccc(/C=C/c2cn(COCC[  
Si](C)(C)C)nc2-c2nc3ccc(OC)cc3n2COCC[Si](C)(C)C)c1  
5363 C=CC(=O)OC1CCCCC1.Ic1ccccc1>>O=C(/C=C/c1ccccc1)OC1CCCCC1  
5364 COC[C@H]/N=C(\c1ccccc1)N1C=CCC[C@H]1C)C(C)C.FC(F)(F)c1cccc(I)c1>>COC[C@H]/N  
=C(\c1ccccc1)N1C=C(c2cccc(C(F)(F)F)c2)CC[C@H]1C)C(C)C  
5365 C=CC(=O)OCC.C[Si](C)(C)c1cccc2c1oc1c(I)cccc12>>CCOC(=O)/C=C/c1cccc2c1oc1c([Si](C)(C)C)c  
ccc12  
5366 C=C.Fc1cc(Br)ccc1-c1ccccc1>>C=Cc1ccc(-c2ccccc2)c(F)c1  
5367 C=CC(=O)OCC.Clc1ccc(Oc2cccc(Br)c2)cc1>>CCOC(=O)/C=C/c1cccc(Oc2ccc(Cl)cc2)c1  
5368 C=Cc1cccs1.O=[N+]([O-])c1ccc(Br)cc1>>O=[N+]([O-])c1ccc(/C=C/c2cccs2)cc1  
5369 C=C[Si](C)(C)C.Cc1cc(C)c(I)c(C)c1>>Cc1cc(C)c(/C=C/[Si](C)(C)C)c(C)c1  
5370 C=CC(=O)N1N=Cc2ccccc2C1C(C)CC.COc1cc(Cc2cnc(N)nc2N)cc(I)c1OC>>CCC(C)C1c2ccccc2C=  
NN1C(=O)/C=C/c1cc(Cc2cnc(N)nc2N)cc(OC)c1OC  
5371 C=Cc1ccc(Br)cc1.ClCc1ccccc1>>BrC1ccc(/C=C/Cc2ccccc2)cc1  
5372 C=CC(C)(C)C(C(=O)NCc1ccccc1)c1ccccc1Br>>C=C1c2ccccc2C(C(=O)NCc2ccccc2)C1(C)C  
5373 C=CC(=O)OC.COc1cc2c3ccccc3nc3c4ccc(Cl)cc4n(C)c(c1)c23>>COC(=O)/C=C/c1ccc2c3nc4ccccc4c  
4cc(OC)cc(c43)n(C)c2c1  
5374 C=CCOCc1nnn(CCCCCC)c1I>>C=C1COCc2nnn(CCCCCC)c21  
5375 C=CCN(CC(C)C)C(=O)c1ccccc1Br>>C=C1CN(CC(C)C)C(=O)c2ccccc21  
5376 C=CCN(C(=O)OCC)c1cccc2ccccc12.Clc1ccccc1>>CCOC(=O)N(C/C=C/c1ccccc1)c1cccc2ccccc12  
C=CC(=O)NCCCCCCCCCN=[N+]=[N-  
5377 ].COC1=CC2[C@H]3Cc4c(I)cc(OC)c(O)c4[C@]2(CCN3C)CC1=O>>COC1=CC2[C@H]3Cc4c(/  
C=C/C(=O)NCCCCCCCCCN=[N+]=[N-])cc(OC)c(O)c4[C@]2(CCN3C)CC1=O  
5378 C=Cc1ccccc1Cl.O=C1CCC(c2ccc(Br)cc2)O1>>O=C1CCC(c2ccc(/C=C/c3ccccc3Cl)cc2)O1  
5379 C=CC(=O)OC(C)(C)C.O=C1CCc2cc(Br)enc2N1>>CC(C)(C)OC(=O)/C=C/c1enc2c(c1)CCC(=O)N2  
5380 C=CC(CC)n1nnc2ccccc21.Cc1ccc(I)cc1>>CCC(/C=C/c1ccc(C)cc1)n1nnc2ccccc21  
5381 C=CC(=O)OC.O=Cc1ccc(I)cc1O>>COC(=O)/C=C/c1ccc(C=O)c(O)c1  
5382 C=CC(=O)OCC.Nc1cc2ccc(Br)cc2cn1>>CCOC(=O)/C=C/c1ccc2cc(N)nc2c1  
5383 C=CP(=O)(O)O.COc1cc(OC)c(Br)c(OC)c1>>COc1cc(OC)c(/C=C/P(=O)(O)O)c(OC)c1  
5384 C=CNC(C)=O.O=S(=O)(Oc1ccc(Cl)cc1)C(F)(F)F>>C=C(NC(C)=O)c1ccc(Cl)cc1  
5385 C=C.COc1cc2c(cc1Br)NC(=O)c1ccc(Cl)cc1N2>>C=Cc1cc2c(cc1OC)Nc1cc(Cl)ccc1C(=O)N2  
5386 C=Cc1ccc(C)cc1.Cc1ccc2c(-c3ccccc3)c(Br)c(=O)oc2c1>>Cc1ccc(/C=C/c2c(-  
c3ccccc3)c3ccc(C)cc3oc2=O)cc1  
5387 C=Cc1ccc(F)cc1.Clc1ccc(I)cc1>>Fc1ccc(/C=C/c2ccc(Cl)cc2)cc1  
5388 C=CC(=O)OCC.COc1enc(Cl)c(NC2CCN(C(=O)OC(C)(C)C)CC2)n1>>CCOC(=O)/C=C/c1ncc(OC)nc  
1NC1CCN(C(=O)OC(C)(C)C)CC1  
5389 C=Cc1ccc(Cl)cc1.COC(=O)C(Cc1ccccc1I)C(=O)OC>>COC(=O)C(Cc1ccccc1/C=C/c1ccc(Cl)cc1)C(=  
O)OC  
5390 C=CC(=O)OC.FS(F)(F)(F)c1ccccc(I)c1>>COC(=O)/C=C/c1ccccc(S(F)(F)(F)(F)F)c1  
5391 C=CC(=O)OC.C=CC[C@H](O)c1ccccc(Br)c1>>C=CC[C@H](O)c1ccccc(/C=C/C(=O)OC)c1  
5392 C=Cc1cc(OC)cc(OC)c1.Fc1ccc(I)cc1>>COc1cc(/C=C/c2ccc(F)cc2)cc(OC)c1  
5393 C=CCCO.COCc1nccc(Br)c1>>COCc1nccc(/C=C/CCO)c1  
5394 C=CCC(C)(C)C.CC(C)(C)c1ccc(Br)cc1>>C=C(CC(C)(C)C)c1ccc(C(C)(C)C)cc1  
5395 C=CC(=O)OC.O=Cc1ccc(C(F)(F)F)cc1Br>>COC(=O)/C=C/c1cc(C(F)(F)F)ccc1C=O  
5396 C=CCOC(C)=O.Ic1cccc2ccccc12>>CC(=O)OC/C=C/c1cccc2ccccc12  
5397 C=CCn1c(N(c2ccc(Cl)cc2I)S(=O)(=O)c2ccc(C)cc2)cc2cc(C)ccc21>>Cc1ccc(S(=O)(=O)N2c3ccc(Cl)c  
c3/C=C/Cn3c2cc2cc(C)ccc23)cc1  
5398 BrC1nccc2ccccc12.C=CNC(C)=O>>C=C(NC(C)=O)c1nccc2ccccc12  
5399 C=CC(=O)OC.CCCCCOc1ccc(-c2ccc(Br)cc2)cc1>>CCCCCOc1ccc(-c2ccc(/C=C/C(=O)OC)cc2)cc1  
5400 C=C.COc1ccc2cc(Br)ccc2c1>>C=Cc1ccc2cc(OC)ccc2c1  
5401 C=Cc1cc(OCc2ccccc2)ccc1OCc1ccccc1.CCCCCCNC(=O)c1cc(I)ccc1O>>CCCCCNC(=O)c1cc(/C=  
C/c2cc(OCc3ccccc3)ccc2OCc2ccccc2)ccc1O  
5402 C=CCCCC(C(=O)OC)S(=O)(=O)c1ccccc1.Ic1ccccc1>>COC(=O)C(CCCC/C=C/c1ccccc1)S(=O)(=O  
 )c1ccccc1  
5403 C=CC(=O)OC(C)(C)C.O=S(=O)(c1ccc(Br)cc1)n1ncc2ccccc21>>CC(C)(C)OC(=O)/C=C/c1ccc(S(=O)(  
=O)n2ncc3ccccc32)cc1

5404 C=CC(=O)OC.O=Cc1c(F)cc(Br)cc1F>>COC(=O)/C=C/c1cc(F)c(C=O)c(F)c1  
5405 C=Cc1ccc(C)cc1.COC(=O)c1cc(OC)c(OC)cc1I>>COC(=O)c1cc(OC)c(OC)cc1/C=C/c1ccc(C)cc1  
5406 C=CC(=O)O.Cn1c(=O)oc2cc(Br)cnc21>>Cn1c(=O)oc2cc(/C=C/C(=O)O)cnc21  
5407 C=Cc1ccc(Cl)cc1.O=Cc1ccc(O)c(Br)c1>>O=Cc1ccc(O)c(/C=C/c2ccc(Cl)cc2)c1  
5408 C=CC(=O)OCC.Cc1ccc2cccc2c1Br>>CCOC(=O)/C=C/c1c(C)ccc2cccc12  
5409 C=CC(=O)N(C)Cc1cccc(OC)c1OCCC.O=C1Ne2ncc(Br)cc2CNC12CCCC2>>CCCCOc1c(CN(C)C(=O)  
/C=C/c2cnc3c(c2)CNC2(CCCC2)C(=O)N3)cccc1OC  
5410 C=Cc1cccc1.CS(=O)(=O)c1ccc(Br)cc1>>CS(=O)(=O)c1ccc(/C=C/c2cccc2)cc1  
5411 C=CC(=O)OC.CC1(C)Cc2c(Br)c(-c3cncnc3)nn2C1>>COC(=O)/C=C/c1c(-  
5412 C=CC[C@H](CCc1ccnc1Br)COCc1cccc1>>C=C1C[C@H](COCc2cccc2)CCc2ccnc21  
5413 C=Cc1cccc1.Cc1nc(C(C)C)nc1I>>Cc1nc(C(C)C)nc1/C=C/c1cccc1  
5414 C=Cc1cccc1.Nc1ncc(Cl)cc1Br>>Nc1ncc(Cl)cc1/C=C/c1cccc1  
C=CC(=O)OCC.COC(=O)c1c(-c2cccc2)c(-  
5415 c2cccc2)c2cccc2c1OS(=O)(=O)C(F)(F)F>>CCOC(=O)/C=C/c1c(C(=O)OC)c(-c2cccc2)c(-  
c2cccc2)c2cccc12  
5416 C=CC(=O)N(C)OC.COc1ccc(Br)cc1>>COc1ccc(/C=C/C(=O)N(C)OC)cc1  
5417 C=CCOc1cccc1.COC(=O)/C=C/c1cccc(N(Cc2ccc(Br)cc2)C(=O)C2CCCC2)c1>>COC(=O)/C=C/c1  
cccc(N(Cc2ccc(/C=C/COc3cccc3)cc2)C(=O)C2CCCC2)c1  
5418 C=CCc1c(N(CC)C(=O)Cc2cccc2I)ccc2oc(=O)ccc12>>C=C1Cc2c(ccc3oc(=O)ccc23)N(CC)C(=O)Cc  
2cccc21  
5419 C=CC(=O)OC(C)(C)C.Cc1nc(Cc2ccc(I)cc2)[nH]c1C(=O)c1cccc1>>Cc1nc(Cc2ccc(/C=C/C(=O)OC(  
C)(C)C)cc2)[nH]c1C(=O)c1cccc1  
5420 C=CC(C)(C)O.Cc1cc(C)c(Br)c(C)c1>>Cc1cc(C)c(/C=C/C(C)(C)O)c(C)c1  
C=CC(=O)OC(C)(C)C.C[C@]12C[C@@]34C=C(Sc5ccc(I)cc5)C(=O)[C@@](C)(CCC(=O)Nc5c(O)cc  
5421 c(C(=O)O)c5O)[C@@H]3[C@H](C[C@@H]1C4)O2>>CC(C)(C)OC(=O)/C=C/c1ccc(SC2=C[C@]34  
C[C@H]5C[C@H](O)[C@@]5(C)C3)[C@H]4[C@](C)(CCC(=O)Nc3c(O)ccc(C(=O)O)c3O)C2=O)cc1  
5422 C=CS(=O)(=O)F.Oc1cc(O)cc(I)c1>>O=S(=O)(F)/C=C/c1cc(O)cc(O)c1  
5423 C=CC(=O)OC(C)(C)C.COC(=O)c1cccc(Br)c1>>COC(=O)c1cccc(/C=C/C(=O)OC(C)(C)C)c1  
5424 C=CCN(CC1=C(Br)c2cccc2CC1)c1ccc(Cl)cc1>>C=C1CN(c2ccc(Cl)cc2)CC2=C1c1cccc1CC2  
5425 C=CC(=O)OC(C)(C)C.COC(=O)c1cc(C)c(OS(=O)(=O)C(F)(F)F)c(C)c1>>COC(=O)c1cc(C)c(/C=C/C  
(=O)OC(C)(C)C)c(C)c1  
5426 C=CC#N.CCn1cc(I)c(=O)c2ccc(C)nc21>>CCn1cc(/C=C/C#N)c(=O)c2ccc(C)nc21  
5427 C=Cc1ccc(OC)cc1.FC(F)(F)C(F)(F)C(F)(F)C(F)(F)C(F)(F)C(F)(F)Br>>COc1ccc(/C=C/C(F)(F  
)C(F)(F)C(F)(F)C(F)(F)C(F)(F)C(F)(F)F)cc1  
5428 C=CC(=O)N(C)C.COC(=O)/C=C/c1cccc(N(Cc2ccc(Br)cc2)C(=O)C2CCCC2)c1>>COC(=O)/C=C/c1  
cccc(N(Cc2ccc(/C=C/C(=O)N(C)C)cc2)C(=O)C2CCCC2)c1  
5429 C=Cc1cccc1.Cn1c2cccc2c2c(-c3cccc3)c(I)ccc21>>Cn1c2cccc2c2c(-  
5430 C=C(C(=O)OC)[C@@H]1CC[C@@]2(C)CCC[C@@](C)(OCOC)[C@@H]2C1.O=Cc1ccc(Br)cc1>>  
COCO[C@]1(C)CCC[C@]2(C)CC[C@@H](/C=C/c3ccc(C=O)cc3)C(=O)OC[C@H]21  
5431 Br1cccc1.C=CC1SC=NC1C>>CC1N=CSC1/C=C/c1cccc1  
5432 C=CC(=O)OCCCC.CC(C)(C)c1ccc(I)cc1>>CCCCOC(=O)/C=C/c1ccc(C(C)(C)C)cc1  
5433 Br1ccc2cccc2c1.C=Cc1ccnc1>>C=C/c1ccc2cccc2c1)\c1ccnc1  
5434 C=Cc1cncn1.CN(C(=O)c1cccc1)c1ccc2c(c1)[nH]c(=NC(=O)c1ccc(Br)s1)n2CCC(N)=O>>CN(C(=O  
)c1cccc1)c1ccc2c(c1)[nH]c(=NC(=O)c1ccc(/C=C/c3cncn3)s1)n2CCC(N)=O  
5435 C=CCOCc1ccc2ccc(OC)cc2c1Br>>C=C1CCOCc2ccc3ccc(OC)cc3c21  
5436 C=CC(=O)OCC.CCC(C)c1c[n+](O)c(C(C)CC)c(Cl)n1>>CCOC(=O)/C=C/c1nc(C(C)CC)c[n+](O-  
)c1C(C)CC  
5437 C=CC(=O)OC.Cc1cc(N(Cc2ccc(Br)cc2)CC(C)(C)C)nc(C)n1>>COC(=O)/C=C/c1ccc(CN(CC(C)(C)C)  
c2cc(C)nc(C)n2)cc1  
5438 C=Cc1ccc(N(C)C)cc1.CCCCC1=C(CCCC)P(=O)(c2cccc2)c2cc3cc(I)ccc3cc21>>CCCCC1=C(CCCC  
)P(=O)(c2cccc2)c2cc3cc(/C=C/c4ccc(N(C)C)cc4)ccc3cc21  
5439 CCC1(C)/C(=C\S(=O)(=O)c2ccc(C)cc2)C1(F)F.COc1ccc(I)cc1>>CCC1(C)/C(=C/c2ccc(OC)cc2)S(=O  
)c2ccc(C)cc2)C1(F)F  
C=CC(=O)OC(C)(C)C.Cc1cc2c(Cc3ccc(Br)cc3)c(-  
5440 c3ccc(OC(F)(F)F)cc3)c(=O)oc2cc1O>>Cc1cc2c(Cc3ccc(/C=C/C(=O)OC(C)(C)C)cc3)c(-  
c3ccc(OC(F)(F)F)cc3)c(=O)oc2cc1O  
5441 C=CC(=O)OC.Oc1cccc1I>>COC(=O)/C=C/c1cccc1O  
5442 C=CC(=O)OCC.CC(C)(C)OC(=O)NCCc1cc(Br)ccc1F>>CCOC(=O)/C=C/c1ccc(F)c(CCNC(=O)OC(C  
)C(C)C)c1

C=CC(C)(C)C(=O)NC(C)(C)CO.COc1cc(Br)ccc1Cc1cc([C@@H]2O[C@H](COC(C)=O)[C@@H](O  
5443 C(C)=O)[C@H](OC(C)=O)[C@H]2OC(C)=O)c(C)cc1C>>COc1cc(/C=C/C(C)(C)C(=O)NC(C)(C)CO  
ccc1Cc1cc([C@@H]2O[C@H](COC(C)=O)[C@@H](OC(C)=O)[C@H](OC(C)=O)[C@H]2OC(C)=O  
5444 C=CCCC(=O)O.COc1ccc(I)cc1>>COc1ccc(/C=C/CCC(=O)O)cc1  
5445 C=CC(=O)O.CC(C)c1cc(C(C)C)c(S(=O)(=O)Nc2ccc(I)cc2)cc1C(C)C>>CC(C)c1cc(C(C)C)c(S(=O)(=O)Nc2ccc(/C=C/C(=O)O)cc2)cc1C(C)C  
5446 C=CCc1cc(C)ccc1N(Cc1cc(OC)ccc1Br)S(=O)(=O)c1ccc(C)cc1>>C=C1Cc2cc(C)ccc2N(S(=O)(=O)c2  
ccc(C)cc2)Cc2cc(OC)ccc21  
5447 C=Cc1ccccc1.Cn1cc(C(CNC(=O)OC(C)(C)C)c2nccc(Br)c2)c2ccccc21>>Cn1cc(C(CNC(=O)OC(C)(C)  
C)c2nccc(/C=C/c3ccccc3)c2)c2ccccc21  
5448 C=CCN1C(=O)c2ccccc2C1=O.Nc1ccc(Br)cc1[N+](=O)[O-]  
5449 ]>>Nc1ccc(/C=C/CN2C(=O)c3ccccc3C2=O)cc1[N+](=O)[O-]  
C=Cc1ccccc1.Cc1cc(Nc2ccc([N+](=O)[O-])cc2N)ccc1Br>>Cc1cc(Nc2ccc([N+](=O)[O-]  
5450 ])cc2N)ccc1/C=C/c1ccccc1  
5451 C=CC(=O)OC.Oc1ccc(Br)cc1>>COC(=O)/C=C/c1ccc(O)cc1  
5452 C=CC(=O)OCCCC.Cc1nc(-c2ccc(Br)cc2)cs1>>CCCCOC(=O)/C=C/c1ccc(-c2ccc(C)n2)cc1  
5453 C=CC(=O)OC(C)(C)C.CC(C)(C)OC(=O)CCOCc1cc2c(cc1Br)OCO2>>CC(C)(C)OC(=O)/C=C/c1cc2c  
(cc1COCCC(=O)OC(C)(C)C)OCO2  
5454 C=CC(=O)OC(C)(C)C.COc1ccc(CNc2c(Br)cc(C)cc2)cc1>>COc1ccc(CNc2c(Br)cc(C)cc2/C=C/C(=O)  
)OC(C)(C)C)cc1  
5455 Bre1ccc2ccc3ccc4ccccc4c3c2c1.C=Cc1ccccc1>>C(=C/c1ccc2ccc3ccc4ccccc4c3c2c1)\c1ccccc1  
5456 C=Cc1ccccc1.Cn1cc(I)c(=O)c2ccccc21>>Cn1cc(/C=C/c2ccccc2)c(=O)c2ccccc21  
5457 C=Cc1ccc(N(C)C)cc1.COc1cc(C=O)c(OC)cc1Br>>COc1cc(/C=C/c2ccc(N(C)C)cc2)c(OC)cc1C=O  
5458 C=CC(=O)OCCCC.CC(C)(C)c1cc(Br)cc(C(C)(C)C)c1>>CCCCOC(=O)/C=C/c1cc(C(C)(C)C)cc(C(C)(  
C)C)c1  
5459 Bre1ccc(I)cc1.C=CC(=O)OCCCC>>CCCCOC(=O)/C=C/c1ccc(Br)cc1  
5460 C=CC(=O)OCC.Cc1ccc(I)cc1C>>CCOC(=O)/C=C/c1ccc(C)c(C)c1  
C=CCN1C(=O)C(C)(C)N(C(=O)OC(C)(C)C)[C@@]1(C)c1cc(F)cc(F)c1.C[Si](C)(C)CCOCN1C(=O)  
5461 )C2(Cc3ccc(Cl)cc3C2)c2ccccc21>>CC(C)(C)OC(=O)N1C[C@@](C)(c2cc(F)cc(F)c2)N(C/C=C/c2ccc  
c(cn2)CC2(C3)C(=O)N(COCC[Si](C)(C)C)c3ncccc32)C(=O)C1(C)C  
C=CCN(C(=O)c1ccc2ccccc2c1Br)C(C(=O)NC1CCCCC1)c1ccc(F)cc1>>C=C1CN(C(C(=O)NC2CCCC  
5462 CC2)c2ccc(F)cc2)C(=O)c2ccc3ccccc3c21  
5463 C=CC(=O)O.O=C(O)c1ccc(Br)cc1>>O=C(O)/C=C/c1ccc(C(=O)O)cc1  
5464 C=CC(=O)OCC.Cn1ccc(I)cc1=O>>CCOC(=O)/C=C/c1nn(C)c(=O)c1  
5465 C=CC(=O)OCCCC.Cn1nc(Br)c2c(Cl)ccccc21>>CCCCOC(=O)/C=C/c1nn(C)c2ccccc(Cl)c12  
5466 Bre1ccc2ccccc2c1.C=COCCO>>C=C(OCCO)c1ccc2ccccc2c1  
5467 C=CC(=O)OC.O=C1c2ccccc2C(=O)N1c1ccc(I)c1>>COC(=O)/C=C/c1cccc(N2C(=O)c3ccccc3C2=O)  
5468 C=CC(=O)OC.CCNC(=O)Nc1cc2c(Br)ccc(C)c2cn1>>CCNC(=O)Nc1cc2c(/C=C/C(=O)OC)ccc(C)c2c  
C=CC(C)=O.CCCCc1nnn(Cc2ccccc2)c1I>>CCCCc1nnn(Cc2ccccc2)c1/C=C/C(C)=O  
5469 C=C(NC(C)=O)C(=O)OC.Cc1cc(OCc2ccccc2)cc(C)c1I>>COC(=O)/C(=C/c1c(C)cc(OCc2ccccc2)cc1  
C)NC(C)=O  
5470 C=CC(=O)N(C)C.CCOC(=O)c1ccc(Br)cc1>>CCOC(=O)c1ccc(/C=C/C(=O)N(C)C)cc1  
5471 C=CC(N)=O.O=C/C1=C(\Br)CCCCC1>>NC(=O)/C=C/C1=C(\C=O)CCCCC1  
5472 C=Cc1ccccc1.O=c1oc2ccccc2c(-c2ccccc2)c1Br>>O=c1oc2ccccc2c(-c2ccccc2)c1/C=C/c1ccccc1  
5473 C=Cc1ccccc1.COc1ccc([C@H]2C[C@@H]2COc2nc(C)ccc2Br)nc1>>COc1ccc([C@H]2C[C@@H]2  
COc2nc(C)ccc2/C=C/c2ccccc2)nc1  
5474 C=CC(O)c1cc(OC)c(OC)cc1Br.Ic1ccccc1>>COc1cc(Br)c(C(O)/C=C/c2ccccc2)cc1OC  
5475 C=Cc1cc(C(O)(C(F)(F)F)C(F)(F)F)ccc1N(C)C(=O)c1ccccc1I>>C=C1c2ccccc2C(=O)N(C)c2ccc(C(O)  
(C(F)(F)F)C(F)(F)F)cc21  
5476 \*CN(Cc1ccccc1)N=Nc1ccccc1I.C=CC(=O)OC(C)(C)C>>\*CN(Cc1ccccc1)N=Nc1ccccc1/C=C/C(=O)O  
C(C)(C)C  
5477 C=Cc1ccccc1.CC(C)(C)OC(=O)NCC(c1ccccc1)c1nccc(Br)c1>>CC(C)(C)OC(=O)NCC(c1ccccc1)c1n  
cc(/C=C/c2ccccc2)c1  
5478 C=CC(=O)N(C)C.C[C@]12C[C@@]34C=C(Sc5ccc(I)cc5)C(=O)[C@@](C)(CCC(=O)Nc5c(O)ccc(C(  
=O)O)c5O)[C@@H]3[C@H](C[C@@H]1C4)O2>>CN(C)C(=O)/C=C/c1ccc(SC2=C[C@]34C[C@H]  
5C[C@H](O[C@@]5(C)C3)[C@H]4[C@](C)(CCC(=O)Nc3c(O)ccc(C(=O)O)c3O)C2=O)cc1  
5479 C=Cc1ccccc1.O=P(c1ccccc1)(c1ccccc1)c1ccc(/C=C/c2ccc3ccc4ccc(Br)cc4c3c2)cc1>>O=P(c1ccccc1)(  
c1ccccc1)c1ccc(/C=C/c2ccc3ccc4ccc(/C=C/c5ccccc5)cc4c3c2)cc1  
5480 C=CCCN1C(=O)c2ccccc2C1=O.Cc1ccc(I)c1>>Cc1ccc(/C=C/CCN2C(=O)c3ccccc3C2=O)c1  
5481 C=Cc1ccccc1.O=Cc1ccc(I)cc1>>O=Cc1ccc(/C=C/c2ccccc2)cc1



C=CCn1c(-c2ccc([N+](=O)[O-]  
 5482 ]cc2)nc2ccccc2c1=O.O=C(CN1C(=O)COc2ccccc21)c1ccc(Br)cc1>>O=C(CN1C(=O)COc2ccccc21)c  
 1ccc(/C=C/Cn2c(-c3ccc([N+](=O)[O-])cc3)nc3ccccc3c2=O)cc1  
 5483 C=CC(=O)N(C)Cc1cc2ccccc2n1C.CNc1n[nH]c2ncc(Br)cc12>>CNc1n[nH]c2ncc(/C=C/C(=O)N(C)Cc  
 3cc4ccccc4n3C)cc12  
 5484 Br1ccc2oc(-c3cc[nH]n3)cc2c1.C=CC(=O)OCCCC>>CCCCOC(=O)/C=C/c1ccc2oc(-  
 5485 C=COCCN(C)C.Cc1ccccc1Br>>C=C(OCCN(C)C)c1ccccc1C  
 5486 C=CC(=O)NCc1cccc(C(=O)OC(C)(C)C)c1.O=C1NC(=O)C(c2c[nH]c3ccccc23)=C1Br>>CC(C)(C)OC  
 (=O)c1cccc(CNC(=O)/C=C/C2=C(c3c[nH]c4ccccc34)C(=O)NC2=O)c1  
 5487 C=Cc1ccc(OC)cc1.CC(C)(C)c1ccc(Br)cc1>>COc1ccc(/C=C/c2ccc(C(C)(C)C)cc2)cc1  
 5488 C=CC(C)=O.O=C(Nc1ccc(OC(F)(F)F)cc1)c1cnc(N2CC[C@H](O)C2)c(Br)c1>>CC(=O)/C=C/c1cc(  
 C(=O)Nc2ccc(OC(F)(F)F)cc2)cn1N1CC[C@H](O)C1  
 C=C[C@H](C)[C@H]1CC[C@H]2[C@H]3C[C@H](OC(C)=O)[C@H]4C[C@H](OC(C)=O)C  
 5489 C[C@H]4(C)[C@H]3CC[C@H]21C.Ic1ccccc1>>CC(=O)O[C@H]1C[C@H]2[C@H](CC[C@H]3(C  
 )C[C@H]2CC[C@H]3[C@H](C)/C=C/c2ccccc2)[C@H]2(C)CC[C@H](OC(C)=O)C[C@H]12  
 C=Cc1ccccc1.C[Si](C)(C)c1cc2n(c(=O)c1I)CCC21OCCO1>>C[Si](C)(C)c1cc2n(c(=O)c1/C=C/c1cccc  
 5490 c1)CCC21OCCO1  
 5491 Br1ccc(I)cc1.C=CC(=O)OC1CCCCC1>>O=C(/C=C/c1ccc(Br)cc1)OC1CCCCC1  
 5492 C=Cc1ccc(OC)cc1.COC(=O)c1ccccc1I>>COC(=O)c1ccccc1/C=C/c1ccc(OC)cc1  
 5493 C=CC(=O)O.O=c1nc(O)c(I)cn1[C@H]1CC[C@H](CO)O1>>O=C(O)/C=C/c1cn([C@H]2CC[C@H]  
 H)(CO)O2)c(=O)nc1O  
 5494 C=CC(=O)OCC.Cc1cc(OCc2ccccc2)ccc1Br>>CCOC(=O)/C=C/c1ccc(OCc2ccccc2)cc1C  
 5495 C=C[Si](CC)(CC)CC.O=Cc1ccc(Br)cc1>>CC[Si](/C=C/c1ccc(C=O)cc1)(CC)CC  
 5496 Br1ccc2ccccc2c1.C=CN1CCCC1=O>>C=C(c1ccc2ccccc2c1)N1CCCC1=O  
 5497 C=Cc1ccccc1.O=c1oc2cc(C(F)(F)F)ccc2c(-c2ccccc2)c1Br>>O=c1oc2cc(C(F)(F)F)ccc2c(-  
 c2ccccc2)c1/C=C/c1ccccc1  
 5498 C=CC(C)OC(=O)NC.COc1cccc(I)c1>>CNC(=O)OC(C)/C=C/c1cccc(OC)c1  
 5499 C=Cc1cccc(O)c1.COc1cc(Br)cc(OC)c1F>>COc1cc(/C=C/c2cccc(O)c2)cc(OC)c1F  
 5500 C=C.COC(=O)c1ccc2cc(Br)ccc2c1>>C=Cc1ccc2cc(C(=O)OC)ccc2c1  
 5501 Br1ccccc1.C=Cc1ccccc1Cl>>Clc1ccccc1/C=C/c1ccccc1  
 5502 C=COCCCC.O=C(Cl)c1ccccc1>>CCCCO/C=C/C(=O)c1ccccc1  
 5503 C=CC(=O)OCC.COc1ccc(C#C/C=C/c2ccc(Br)cc2)cc1>>CCOC(=O)/C=C/c1ccc(/C=C/C#Cc2ccc(OC)  
 cc2)cc1  
 5504 C=CCCCCCC.COc1ccc(Br)cc1>>CCCCCC/C=C/c1ccc(OC)cc1  
 5505 C=CC(=O)OC.Fc1cc(Br)ccc1CN1CCCC(c2c[nH]c3ccccc23)C1>>COC(=O)/C=C/c1ccc(CN2CCCC(c  
 3c[nH]c4ccccc34)C2)c(F)c1  
 5506 C=CC(=O)OCC.CN1Cc2ccc(Br)cc2C1>>CCOC(=O)/C=C/c1ccc2c(c1)CN(C)C2  
 CC(=O)/C=C/CC(NS(=O)(=O)c1ccc(C)cc1)C1CCCCC1.Cc1ccc(Br)cc1>>CC(=O)/C=C(/CC(NS(=O)(  
 5507 =O)c1ccc(C)cc1)C1CCCCC1)c1ccc(C)cc1  
 5508 C=CC(=O)N1CCOCC1.Cc1onc(-c2ccccc2)c1I>>Cc1onc(-c2ccccc2)c1/C=C/C(=O)N1CCOCC1  
 5509 C=CC(=O)OCCCC.FC(F)(F)c1ccc(I)cc1>>CCCCOC(=O)/C=C/c1ccc(C(F)(F)F)cc1  
 5510 Br1cnenc1.C=Cc1ccccc1>>C(=C/c1cnenc1)c1ccccc1  
 5511 C=CC(=O)OCCCC.Fc1ccc(Br)cc1>>CCCCOC(=O)/C=C/c1ccc(F)cc1  
 C=CC(=O)OCC.CC[C@H](O)C[C@H]2CN(CCc3c([nH]c4ccc(I)cc34)[C@H](C(=O)OC)(c3cc4c(cc  
 3OC)N(C)[C@H]3[C@H](O)(C(=O)OC)[C@H](OC(C)=O)[C@H]5(CC)C=CCN6CC[C@H]43[C@H]  
 5512 65)C2)C1>>CCOC(=O)/C=C/c1ccc2[nH]c3c(c2c1)CCN1C[C@H](C[C@H](O)(CC)C1)C[C@H]3(C(  
 =O)OC)c1cc2c(cc1OC)N(C)[C@H]1[C@H](O)(C(=O)OC)[C@H](OC(C)=O)[C@H]3(CC)C=CCN4CC  
 [C@H]211[C@H]43  
 5513 C=Cc1ccc(N(C)S(C)(=O)=O)c(Nc2nc(Nc3cc(Br)c(N4CCN(C)CC4)cc3OC)nc2Cl)c1>>COc1cc(N2C  
 CN(C)CC2)c2cc1Nc1ncc(Cl)c(n1)Nc1ccc(N(C)S(C)(=O)=O)/C=C\2  
 5514 C=CCn1c(-c2ccc3ccccc3c2Br)nc2ccccc21>>C=C1Cn2c(nc3ccccc32)-c2ccc3ccccc3c21  
 5515 C=Cc1cc(OC)cc(OC)c1.COc1cc(I)cc(OC)c1OC>>COc1cc(/C=C/c2cc(OC)c(OC)c(OC)c2)cc(OC)c1  
 5516 C=CC(=O)OC(C)(C)C.Cc1ccc(Br)c(CO)c1>>Cc1ccc(/C=C/C(=O)OC(C)(C)C)c(CO)c1  
 5517 C[C@H]2[C@H](OC(=O)[C@H](C/C=C1\CCN(c2ccccc2)C1=O)Nc1cc(Cl)ccc1I)C(=O)OC(C)(C)C>>C[  
 C@H]2[C@H](OC(=O)[C@H]1C/C=C2\CCN(c3ccccc3)C2=O)c2ccc(Cl)cc2N1)C(=O)OC(C)(C)C  
 5518 C=CC(=O)OC.COCCOc1ccc(Br)cc1Cl>>COCCOc1ccc(/C=C/C(=O)OC)cc1Cl  
 5519 C=CC(=O)OCC.CCC(=C(c1ccc(O)cc1)c1ccc(O)cc1)c1ccccc(Br)c1>>CCOC(=O)/C=C/c1ccccc(C(CC)=  
 C(c2ccc(O)cc2)c2ccc(O)cc2)c1  
 5520 C=CC(N)=O.O=C(c1ccccc1)c1ccc(Cl)cc1I>>NC(=O)/C=C/c1cc(Cl)ccc1C(=O)c1ccccc1

C=C[C@H]1C[C@@H](CC(=O)OCC)OC(C)(C)O1.FC(F)(F)c1cccc(-c2c(Br)cnnc2-  
5521 c2ccnc(Nc3cccc4)n2)c1>>CCOC(=O)C[C@H]1C[C@@H](/C=C/c2cnn(-c3ccnc(Nc4cccc4)n3)c2-  
c2cccc(C(F)(F)F)c2)OC(C)(C)O1  
5522 C=C[Si](C)(C)c1ccccn1.Cc1cccc(I)c1>>Cc1cccc(/C=C/[Si](C)(C)c2ccccn2)c1  
5523 C=Cc1ccc(OC)c(OC)c1.COc1cc(Br)c(C=O)cc1OC>>COc1ccc(/C=C/c2cc(OC)c(OC)cc2C=O)cc1OC  
5524 C=C(C)C(=O)OCC.CCOC(=O)c1cc(=O)c2cc(Br)ccc2o1>>CCOC(=O)/C(C)=C/c1ccc2oc(C(=O)OCC)  
cc(=O)c2c1  
5525 C=CCC(NCc1ccc(F)cc1Br)C(=O)OC>>C=C1CC(C(=O)OC)NCc2ccc(F)cc21  
5526 C=CC(=O)OC.CC(C)c1ccc(I)cc1>>COC(=O)/C=C/c1ccc(C(C)C)cc1  
5527 C=CCNC1=NCCN1.COc1ccc(I)cc1>>COc1ccc(/C=C/CNC2=NCCN2)cc1  
5528 C=Cc1cccc1.CC1=C(OS(=O)(=O)C(F)(F)F)CCCC1>>C=C(C1=C(C)CCCC1)c1cccc1  
5529 C=Cc1ccc(OC)c(OC)c1.Cc1nc(Br)c2c(c1O)COC(C)(C)OC2>>COc1ccc(/C=C/c2nc(C)c(O)c3c2COC(  
C)(C)OC3)cc1OC  
5530 C=C.COC(=O)C=CBR>>C=CC=CC(=O)OC  
5531 C=C.Cc1ccc([C@H](C)CCO)c(Br)c1>>C=Cc1cc(C)ccc1[C@H](C)CCO  
5532 C=CC#N.CC(=O)Nc1cccc1Br>>CC(=O)Nc1cccc1/C=C/C#N  
5533 C=CC(CCCCCCCC(=O)OC)OC1CCCCO1.CCC1=C(I)CCC1=O>>CCC1=C(/C=C/C(CCCCCCCC(=  
O)OC)OC2CCCCO2)CCC1=O  
5534 C=CC(=O)OCC.CCCCCCCCCCCCc1cccc(Br)c1>>CCCCCCCCCCCCC1cccc(/C=C/C(=O)OCC)c1  
5535 C=CCN1C(=O)c2cccc2C1=O.Oc1ccc(Br)cc1>>O=C1c2cccc2C(=O)N1C/C=C/c1ccc(CO)cc1  
5536 C=CC(=O)OCC.COc1cc(Br)c(-c2cc3cccc(OC)c3o2)cc1OC>>CCOC(=O)/C=C/c1cc(OC)c(OC)cc1-  
c1cc2cccc(OC)c2o1  
5537 C=Cc1ccc(/C=C/c2ccc(N(C)C)cc2)cc1.O=c1ccc2c(-c3ccc(I)cc3S(=O)(=O)O)c3ccc(O)cc3oc-  
2c1>>CN(C)c1ccc(/C=C/c2ccc(/C=C/c3ccc(-c4c5ccc(=O)cc-  
5538 Brclcoc2enccc12.C=CC(=O)OCC>>CCOC(=O)/C=C/c1coc2enccc12  
5539 C=CC(=O)O.O=C1Nc2ccc(Br)cc2C1=O>>O=C(O)/C=C/c1ccc2c(c1)C(=O)C(=O)N2  
5540 C=C[C@H]1CC(C(=O)OC)(C(=O)OC)[C@H](c2ccc2)N(c2cccc2)O1>>C=C1c2cccc2N2O[C@  
H]1CC(C(=O)OC)(C(=O)OC)[C@H]2c1ccc21  
5541 C=Cc1cccc1.COc1ccc(/C=C/c2ccc3ccc4ccc(Br)cc4c3c2)cc1>>COc1ccc(/C=C/c2ccc3ccc4ccc(/C=C/c  
5ccc5c)cc4c3c2)cc1  
5542 C=CC(N)=O.CCOC(=O)c1ccc(Br)cc1>>CCOC(=O)c1ccc(/C=C/C(N)=O)cc1  
5543 C=CC(=O)OCC.FC(F)(F)c1cccc(Oc2cccc(Br)c2)c1>>CCOC(=O)/C=C/c1cccc(Oc2cccc(C(F)(F)F)c2)c  
5544 Brclccc2c(c1)Sc1cccc1N2.C=Cc1ccc(OC)cc1>>COc1ccc(/C=C/c2ccc3c(c2)Sc2cccc2N3)cc1  
5545 C=Cc1ccc(N(c2cccc2)c2cccc2)cc1.CCCCCCN1c2ccc(Br)cc2Se2cc(/C=C/c3ccc4c(c3)Sc3cc(C=O)cc  
c3N4CCCCC)ccc21>>CCCCCN1c2ccc(C=O)cc2Se2cc(/C=C/c3ccc4c(c3)Sc3cc(/C=C/c5ccc(N(c6c  
cccc6)c6cccc6)cc5)ccc3N4CCCCC)ccc21  
5546 C=Cc1ccc(CN2CCN(C)CC2)cn1.Cc1c(Nc2c(I)encc2C#N)cc(Cl)c2[nH]ccc12>>Cc1c(Nc2c(C#N)cncc  
2/C=C/c2ccc(CN3CCN(C)CC3)cn2)cc(Cl)c2[nH]ccc12  
5547 Brclccc2cccc2c1.C=CCO[C@H]1CC(=O)O[C@H](C)C/C=C/C=C/[C@H](O)[Si](C)(C)C(C)(C)C]  
C@H](C)C[C@H](CC(OC)OC)[C@H](O[C@H]2O[C@H](C)[C@H](O[C@H]3C[C@@](C)(O)[  
C@@H](OC(=O)CC)[C@H](C)O3)[C@H](N(C)C)[C@H]2OC(C)=O)[C@H]1OC>>CCC(=O)O[C@  
H]1[C@H](C)O[C@@H](O[C@H]2[C@H](N(C)C)[C@@H](OC(C)=O)[C@H](O[C@@H]3[C@  
H](OC)[C@H](OC/C=C/c4ccc5cccc5c4)CC(=O)O[C@H](C)C/C=C/C=C/[C@H](O)[Si](C)(C)C(C)(C)  
5548 )C)]C@H1(C)C]C@H13C(C)(C)OC)O[C@H]2(C)C]C@H1(C)O  
5549 C=Cn1enc2c(NC)nencc21.O=Cc1cccc(I)c1>>Cn1enc2c1nen2/C=C/c1cccc(C=O)c1  
5550 C=CC(=O)OCCCC.N#CCc1ccc(Br)cc1>>CCCCOC(=O)/C=C/c1ccc(CC#N)cc1  
5551 C=Cc1cccc1.Cc1cc(I)cc(C)c1O>>Cc1cc(/C=C/c2cccc2)cc(C)c1O  
5552 C=CC(=O)OCC.N#Cc1ccc(Cl)cc1>>CCOC(=O)/C=C/c1ccc(C#N)cc1  
5553 C=CC(=O)OC.Ic1cccc1>>C=C(C(=O)OC)c1cccc1  
5554 C=CC(=O)O.O=[N+][O-]c1cccc(I)c1>>O=C(O)/C=C/c1cccc([N+](=O)[O-])c1  
5555 C=CCN1C(=O)c2cccc2C1=O.Fc1ccc(I)cc1>>O=C1c2cccc2C(=O)N1C/C=C/c1ccc(F)cc1  
5556 C=Cc1cccc(OC)c1.COC(=O)c1cc2cc(Br)ccc2cc1OC(C)=O>>COC(=O)c1cc2cc(/C=C/c3cccc(OC)c3)c  
cc2cc1OC(C)=O  
5557 C=CC#N.COc1ccc2c(c1)CCC(C=O)=C2Br>>COc1ccc2c(c1)CCC(C=O)=C2/C=C/C#N  
5558 C=CCCCO.CC(C)(C)c1cccc1OS(=O)(=O)C(F)(F)F>>C=C(CCCO)c1cccc1C(C)(C)C  
5559 C=CC(C)=O.CC1=C(OS(=O)(=O)C(F)(F)F)C(C)([13CH3])CCC1>>CC(=O)/C=C/C1=C(C)CCCC1(C)  
[13CH3]  
5560 C=C[Si](C)(C)c1ccccn1.Ic1ccsc1>>C[Si](C)/C=C/c1ccsc1c1ccccn1  
5561 C=Cc1ccc(OC(C)=O)cc1.COC(=O)CCCN1cc(C(=O)OC)c2c(Br)ccc21>>COC(=O)CCCN1cc(C(=O)O  
C)c2c(/C=C/c3ccc(OC(C)=O)cc3)ccc21  
5562 C=CCNC(=O)OCc1cccc1.Clc1enc2cccc2c1>>C=C(CNC(=O)OCc1cccc1)c1enc2cccc2c1

5562 C=C(NC(C)=O)C(=O)OC.O=[N+](O-)]c1ccc(I)cc1>>COC(=O)/C(=C/c1ccc([N+](=O)[O-  
5563 C=CC(=O)OCC.Cc1cc(F)c(CCN(C)C)cc1Br>>CCOC(=O)/C=C/c1cc(CCN(C)C)c(F)cc1C  
5564 Br1cccc1I.C=CC(=O)N(C)OC>>CON(C)C(=O)/C=C/c1cccc1Br  
5565 C=CC(=O)OC(C)(C)C.Cn1c(=O)c2c(nc(Br)n2C)n(C)c1=O>>Cn1c(=O)c2c(nc(/C=C/C(=O)OC(C)(C)C)n2C)n(C)c1=O  
5566 C=CC(=O)OC.Cc1c(Br)cnc2c1nnn2C>>COC(=O)/C=C/c1cnc2c(nnn2C)c1C  
5567 C=Cc1cccc1.CCc1cc(/C=C/c2ccc(/C=C/c3ccc(/N=N/N(CC)CC)cc3)cc2)c(CC)cc1I>>CCc1cc(/C=C/c2ccc(/C=C/c3ccc(/N=N/N(CC)CC)cc3)cc2)c(CC)cc1/C=C/c1cccc1  
5568 C=CC(=O)OCCCC.COC(=O)c1ccc(Br)cc1>>CCCCOC(=O)/C=C/c1ccc(C(=O)OC)cc1  
5569 C=CC(O)c1cccc1OC.O=Cc1cccc1Br>>COc1cccc1C(O)/C=C/c1cccc1C=O  
5570 C=C1C(=O)O[C@H]2[C@H]1CC/C(C)=C/CC[C@@]1(C)O[C@H]21.CCc1ccc(I)cc1>>CCc1ccc(/C=C2/C(=O)O[C@H]3[C@H]2CC/C(C)=C/CC[C@@]2(C)O[C@H]32)cc1  
5571 C=CC(=O)OCC.Cc1c(Br)ccc2c1nnn2C>>CCOC(=O)/C=C/c1ccc2c(nnn2C)c1C  
5572 Br1ccc2[nH]ccc2c1.C=CC(C)=O>>CC(=O)/C=C/c1ccc2[nH]ccc2c1  
5573 C=CC(=O)OCC.Cc1ccc(-c2nc3ccc(/N=N/c4ccc([N+](=O)[O-])cc4)cc3c(-c3cccc3)c2I)cc1>>CCOC(=O)/C=C/c1c(-c2ccc(C)cc2)nc2ccc(/N=N/c3ccc([N+](=O)[O-])cc3)cc2c1-c1cccc1  
5574 C=Cc1ccc(C(=O)OC)cc1.CC1(C)NC(C)(C)c2cc(Br)ccc21>>COC(=O)c1ccc(/C=C/c2ccc3c(c2)C(C)(C)NC3(C)C)cc1  
5575 C=CC(=O)OC.CCCCOC(=O)/C=C/c1ccc(Cl)cc1>>CCCCOC(=O)/C=C/c1ccc(/C=C/C(=O)OC)cc1  
5576 C=CCC(=O)OC.O=S(=O)(Oc1ccc(C=C2C3CCCC2CCC3)c2ccc(O)cc2)cc1C(F)(F)F>>COC(=O)C/C=C/c1ccc(C(=C2C3CCCC2CCC3)c2ccc(O)cc2)cc1  
5577 C=CC(C)=O.O=C(O)c1ccc(CNC(=O)c2ccc(I)cc2)cc1>>CC(=O)/C=C/c1ccc(C(=O)NCc2ccc(C(=O)O)cc2)cc1  
5578 C=CC(=O)OC.FC(F)(F)c1cccc(C2CScc3cc(Br)ccc3O2)c1>>COC(=O)/C=C/c1ccc2c(c1)SCC(c1cccc(C(F)(F)F)c1)O2  
5579 C=CC(=O)NC(C)C.CCc1nc2cc(O)ccc2c(Oc2ccc(Br)cc2)c1-c1cccc1>>CCc1nc2cc(O)ccc2c(Oc2ccc(/C=C/C(=O)NC(C)C)cc2)c1-c1cccc1  
5580 Br1cccc1.C=Cc1cccc([N+](=O)[O-])c1>>O=[N+](O-)]c1cccc(/C=C/c2cccc2)c1  
5581 Br1cccs1.C=CN1C(=O)c2cccc2C1=O>>O=C1c2cccc2C(=O)N1/C=C/c1cccs1  
5582 C=CC(OCC)OCC.Fc1cccc(I)c1>>CCOC(/C=C/c1cccc(F)c1)OCC  
5583 C=C.Cc1cccc([N+](=O)[O-])c1Br>>C=Cc1c(C)cccc1[N+](=O)[O-]  
5584 C=CCN(Cc1ccc(F)cc1)Cc1cc2cccc(C)c2nc1Cl>>C=C1CN(Cc2ccc(F)cc2)Cc2cc3cccc(C)c3nc21  
5585 Br1ccc(SCCN(CCOC2CCCCO2)c2cccc2)cc1.C=Cc1ccc([N+](=O)[O-])cc1>>O=[N+](O-)]c1ccc(/C=C/c2ccc(SCCN(CCOC3CCCCO3)c3cccc3)cc2)cc1  
5586 C=Cc1cccc1.Cc1cc(C)c2oc(=O)c(Br)c(-c3cccc3)c2c1>>Cc1cc(C)c2oc(=O)c(/C=C/c3cccc3)c(-c3cccc3)c2c1  
5587 C=CC(=O)OCC.Clc1ccc(-n2cnnn2)c(I)c1>>CCOC(=O)/C=C/c1cc(Cl)ccc1-n1cnnn1  
5588 C=CC(=O)OC.O=[N+](O-)]c1cccn1Cl>>COC(=O)/C=C/c1cccc1[N+](=O)[O-]  
5589 C=CC(=O)OC.CC(C)(C)OC(=O)NCCc1ccc(Br)cc1>>COC(=O)/C=C/c1ccc(CCNC(=O)OC(C)(C)C)cc1  
5590 C=CC(=O)N(C)OC.Nc1ccc(I)cc1>>CON(C)C(=O)/C=C/c1ccc(N)cc1  
5591 C=CC(=O)OCC.COc1ccc(OC)c(Cc2ccc(Br)cc2)c1>>CCOC(=O)/C=C/c1ccc(Cc2cc(OC)ccc2OC)cc1  
5592 C=CC(=O)OC(C)(C)C.N#Cc1ccc(S(=O)(=O)N2CCc3cc(Br)cnc32)cc1>>CC(C)(C)OC(=O)/C=C/c1cnc2c(c1)CCN2S(=O)(=O)c1ccc(C#N)cc1  
5593 C=CC(=O)O.COc1ccc(S(=O)(=O)Nc2cccc(I)c2)cc1OC>>COc1ccc(S(=O)(=O)Nc2cccc(/C=C/C(=O)O)c2)cc1OC  
5594 C=CC(=O)OC.COC(=O)/C=C/c1cc2cc(Br)ccc2cc1OCc1cccc1>>COC(=O)/C=C/c1ccc2cc(OCc3cccc3)c(/C=C/C(=O)OC)cc2c1  
5595 C=COCCCC.CN(C)c1ncc(Br)cn1>>C=C(OCCCC)c1cnc(N(C)C)nc1  
5596 C=Cc1ccc(OC)cc1.COc1ccc(Br)cc1>>COc1ccc(/C=C/c2ccc(OC)cc2)cc1  
5597 C=Cc1cccn1.CC[C@H](COc1cnc(Cl)c(Br)c1)NC(=O)OC(C)(C)C>>CC[C@H](COc1cnc(Cl)c(/C=C/c2ccncc2)c1)NC(=O)OC(C)(C)C  
5598 C=CC(=O)OC.CCc1nc2ccnc2n1Cc1ccc(Br)cc1>>CCc1nc2ccnc2n1Cc1ccc(/C=C/C(=O)OC)cc1  
5599 C=C[Si](C)(C)c1cccn1.Ic1cccs1>>C[Si](C)(C)/C=C/c1cccs1)c1cccn1  
5600 C=CS(C)(=O)=O.C[C@H]1COc2nc3cnc4cc(Br)ccc4c3n21>>C[C@H]1COc2nc3cnc4cc(/C=C/S(C)(=O)=O)ccc4c3n21  
5601 C=CC(=O)Nc1cccc2ccnc12.Ic1ccccc1>>O=C(/C=C/c1ccccc1)Nc1cccc2ccnc12  
5602 C=CC=O.COC(=O)C1=Ne2cc(I)ccc2OC12CC2>>COC(=O)C1=Ne2cc(/C=C/C=O)ccc2OC12CC2  
5603 BrC1CCCCC1.C=Cc1cccc1>>C=C(C1CCCCC1)c1cccc1  
5604 C=C[C@H](C)COc1cccc1Br>>C=C1c2cccc2OC[C@H]1C  
5605 C=CCCCCCCCC.O=C(c1cccc1)c1ccc(Br)cc1>>CCCCCCCC/C=C/c1ccc(C(=O)c2cccc2)cc1

5606 C=CC(=O)N(C)C.CCN(c1ccccc1)c1cccc(Br)n1>>CCN(c1ccccc1)c1cccc(/C=C/C(=O)N(C)C)n1  
5607 C=CC(=O)OC.CCOC(=O)C1=CN(c2ccccc2OC)C=C(C(=O)OCC)C1c1cccc(Br)c1>>CCOC(=O)C1=C  
N(c2ccccc2OC)C=C(C(=O)OCC)C1c1cccc(/C=C/C(=O)OC)c1  
5608 C=COCCCC.CN(C)c1ccc(Br)cn1>>C=C(OCCCC)c1ccc(N(C)C)nc1  
5609 C=CC#N.N#Cc1ccc(I)cc1>>N#C/C=C/c1ccc(C#N)cc1  
5610 C=CSCC.CC(=O)c1ccc(Br)cc1>>CCS/C=C/c1ccc(C(C)=O)cc1  
5611 C=CC(C)(C)O.Nc1ccccc1Br>>CC(C)(O)/C=C/c1ccccc1N  
5612 C=CC(=O)N1C(=O)CC[C@H]1COC(c1ccccc1)(c1ccccc1)c1ccccc1.CCc1ccc(Br)c2[nH]ccc12>>CCc1  
ccc(/C=C/C(=O)N2C(=O)CC[C@H]2COC(c2ccccc2)(c2ccccc2)c2ccccc2)c2[nH]ccc12  
5613 C=Cc1ccccc1.C[Si](C)(C)I>>C[Si](C)(C)/C=C/c1ccccc1  
5614 C=CC(=O)OCCCC.Ic1ccc2ccccc2c1>>CCCCOC(=O)/C=C/c1ccc2ccccc2c1  
5615 C=CCCN1C(=O)c2ccccc2C1=O.Ic1ccc(C2(N3CCCCC3)CCCCC2)cc1>>O=C1c2ccccc2C(=O)N1CC/  
C=C/c1ccc(C2(N3CCCCC3)CCCCC2)cc1  
5616 C=CC(=O)OC.CC1(C)CC(=C(c2ccc(Br)cc2)c2ccc3c(cnn3C3CCCCO3)c2)CC(C)(C)C1>>COC(=O)/C  
=C/c1ccc(C(=C2CC(C)(C)CC(C)(C)C2)c2ccc3c(cnn3C3CCCCO3)c2)cc1  
5617 C=C(F)C(=O)OC.COc1cccc(I)c1>>COC(=O)/C(F)=C/c1cccc(OC)c1  
5618 C=COCCCC.O=C(O)c1ccc(Cl)cc1>>C=C(OCCCC)c1ccc(C(=O)O)cc1  
5619 C=CC(=O)N(C)OC.NC(=O)c1ccccc(I)c1>>CON(C)C(=O)/C=C/c1ccccc(C(N)=O)c1  
5620 C=CC#N.O=P(c1ccccc1)(c1ccccc1)c1ccc(Br)cc1>>N#C/C=C/c1ccc(P(=O)(c2ccccc2)c2ccccc2)cc1  
5621 C=CC(=O)OC.O=S(=O)(c1ccccc1)N1CCc2cc(Br)cnc21>>COC(=O)/C=C/c1cnc2c(c1)CCN2S(=O)(=O)c1ccccc1  
5622 C=Cc1ccc(C)cc1.CCCCC(Br)C(F)(F)F>>CCCCC(/C=C/c1ccc(C)cc1)C(F)(F)F  
5623 C=CC(=O)OC.CC(C)(C)OC(=O)NC1(C(=O)OC(C)(C)C)CCOC1c1ccc(Br)cc1>>COC(=O)/C=C/c1ccc  
(C2OCCCC2(NC(=O)OC(C)(C)C)C(=O)OC(C)(C)C)cc1  
5624 C=Cc1cccc(F)n1.CCOC(=O)c1ccc(I)cc1>>CCOC(=O)c1ccc(/C=C/c2cccc(F)n2)cc1  
5625 C=CC(=O)OC(C)(C)C.CC(=O)c1cc2cc(Br)ccc2o1>>CC(=O)c1cc2cc(/C=C/C(=O)OC(C)(C)C)ccc2o1  
5626 C=CC(=O)OC(C)(C)C.COC(=O)/C(Br)=C1\CCCCO1>>COC(=O)C(/C=C/C(=O)OC(C)(C)C)=C1\CCC  
5627 C=Cc1ccc(-c2ccccc2)cc1.COc1cc(C=O)c(Br)c(OC)c1OC>>COc1cc(C=O)c(/C=C/c2ccc(-  
c3ccccc3)cc2)c(OC)c1OC  
5628 C=Cc1ccccc1.O=[N+](=[O-])c1ccc(Br)cc1>>O=[N+](=[O-])c1ccc(/C=C/c2ccccc2)cc1  
5629 C=Cc1ccc(OC)c(OC)c1.CCOC(=O)C(F)I>>CCOC(=O)C(F)/C=C/c1ccc(OC)c(OC)c1  
5630 C=Cc1ccccc1.O=C1CCC(c2ccccc2)=C1OS(=O)(=O)C(F)(F)F>>O=C1CCC(c2ccccc2)=C1/C=C/c1ccc  
5631 C=CC(=O)N1N=Cc2ccccc2C1C1CCC1.COc1cc(Cc2cnc(N)nc2N)cc(I)c1OC>>COc1cc(Cc2cnc(N)nc2  
N)cc(/C=C/C(=O)N2N=Cc3ccccc3C2C2CCCC2)c1OC  
5632 Bre1cnc2nc(CCC3CCN(Cc4ccccc4)CC3)oc2c1.C=CC(=O)OC>>COC(=O)/C=C/c1cnc2nc(CCC3CCN  
(Cc4ccccc4)CC3)oc2c1  
5633 C=CC(=O)OC.O=Cc1cccc(Cl)c1>>COC(=O)/C=C/c1cccc(C=O)c1  
5634 C=C(C)C(=O)OC(C)(C)C.COc1ccc(I)cc1>>COc1ccc(/C=C(\C)C(=O)OC(C)(C)C)cc1  
5635 C=CC(=O)OC.CCn1cnc2c(NCc3cccc(Br)c3)nc(N3CCOCC3)nc21>>CCn1cnc2c(NCc3cccc(/C=C/C(=O)OC)c3)nc(N3CCOCC3)nc21  
5636 C=CCNC(=O)c1ccccc1NC(=O)c1ccccc1.Cc1ccc(I)cc1>>Cc1ccc(/C=C/CNC(=O)c2ccccc2NC(=O)c2c  
ccccc2)cc1  
5637 C=CC(=O)OC.Oc1ccc(I)cc1>>COC(=O)/C=C/c1ccc(O)cc1  
5638 C=CCN(CCI)S(=O)(=O)c1ccc(C#N)cc1>>C=C1CCN(S(=O)(=O)c2ccc(C#N)cc2)C1  
5639 C=CC(=O)OCC.CC(C)(C)OC(=O)c1cc([N+](=O)[O-])ccc1Br>>CCOC(=O)/C=C/c1ccc([N+](=O)[O-]  
])cc1C(=O)OC(C)(C)C  
5640 C=CC(=O)OC(C)(C)C.Fc1ccccc1I>>CC(C)(C)OC(=O)/C=C/c1ccccc1F  
5641 C=CC(=O)OC.O=c1oc2cc(Br)cnc2n1Cc1ccccc1>>COC(=O)/C=C/c1cnc2c(c1)oc(=O)n2Cc1ccccc1  
5642 C=CC(=O)OCC.COc1ncc(Br)c(N)n1>>CCOC(=O)/C=C/c1cnc(OC)nc1N  
5643 Bre1ccccc1.C=CC(C)(O)CCC=C(C)C>>CC(C)=CCCC(C)(O)/C=C/c1ccccc1  
5644 C=CC(CC)(CC)C(=O)Nc1ccc(OC)cc1Br>>C=C1c2cc(OC)ccc2NC(=O)C1(CC)CC  
5645 C=Cc1ccccc1.CCOC(=O)c1ccc(OS(=O)(=O)C(F)(F)F)cc1>>C=C(c1ccccc1)c1ccc(C(=O)OCC)cc1  
5646 C=CCC(C)C.ClCc1cccc(Br)c1>>C=C(Cc1cccc(Br)c1)CC(C)C  
5647 C=CC(=O)OC(C)(C)C.O=Cc1ccccc1Cl>>CC(C)(C)OC(=O)/C=C/c1ccccc1C=O  
5648 C=Cc1ccc(O)cc1.CN(C(=O)c1ccccc1)c1ccc2c(c1)[nH]c(=NC(=O)c1ccc(Br)s1)n2CCC(N)=O>>CN(C(=O)c1ccccc1)c1ccc2c(c1)[nH]c(=NC(=O)c1ccc(/C=C/c3ccc(O)cc3)s1)n2CCC(N)=O  
5649 C=Cc1ccccc1.COc1ccc(/N=N/c2ccc(I)cc2)cc1>>COc1ccc(/N=N/c2ccc(/C=C/c3ccccc3)cc2)cc1  
5650 C=CCN(C(=O)OC(C)(C)C)C(=O)OC(C)(C)C.O=C1CCc2cc(Cl)ccc21>>CC(C)(C)OC(=O)N(C/C=C/c1ccc2c(c1)CCC2=O)C(=O)OC(C)(C)C  
5651 C=Cc1ccccc1.O=C1CCC(c2ccc(Br)cc2)O1>>O=C1CCC(c2ccc(/C=C/c3ccccc3)cc2)O1

Bre1cccc1.C=Cc1ccc(C)cc1>>Cc1ccc(/C=C/c2ccccc2)cc1  
 C=CCc1cc(Cl)c2ccnc2c1OCc1ccc(OC)cc1Br>>C=C1Cc2cc(Cl)c3ccenc3c2OCc2ccc(OC)cc21  
 C=Cc1cccncl.Cl.Cc1c(Nc2c(I)cncc2C#N)ccc2[nH]ccc12>>Cc1c(Nc2c(C#N)cncc2/C=C/c2ccnc2Cl)cc  
 c2[nH]ccc12  
 C=CC(=O)OC(C)(C)C.CC(OCCCC(=O)OC(C)(C)C)c1cc2c(cc1Br)OCO2>>CC(OCCCC(=O)OC(C)(C)C)  
 c1cc2c(cc1/C=C/C(=O)OC(C)(C)C)OCO2  
 C=CC(C)=O.COCCOc1cc2oc(=O)ccc2cc1OS(=O)=(O)C(F)(F)F>>COCCOc1cc2oc(=O)ccc2cc1/C=C/C(  
 C=Cc1ccc(Cl)cc1.CC(=O)c1ccc(Br)cc1>>CC(=O)c1ccc(/C=C/c2ccc(Cl)cc2)cc1  
 Bre1cnncn1.C=CC1CCN(C(=O)OC(C)(C)C)C1>>CC(C)(C)OC(=O)N1CCC(/C=C/c2cnncn2)C1  
 C=CC(=O)OC.O=Cc1ccc2ccccc2c1Br>>COC(=O)/C=C/c1c(C=O)ccc2ccccc12  
 C=C[C@\_@H]1C[C@\_@H](OCc2ccccc2)[C@\_@H](O[Si](C)(C)C(C)(C)C)[C@\_@H]1NCc1cc2c(cc1B  
 r)OCO2>>C=C1c2cc3c(cc2CN[C@\_@H]2C[C@\_@H](O[Si](C)(C)C(C)(C)C)[C@\_@H](OCc4ccccc4)[C@\_@  
 H]12)OCO3  
 C=CC(=O)OC(C)(C)C.CC(C)OC(=O)c1ccsc1Br>>CC(C)OC(=O)c1ccsc1/C=C/C(=O)OC(C)(C)C  
 C=CC(=O)OC.C=CI>>C=C/C=C/C(=O)OC  
 C=Cc1cccc(O)c1.COc1ccc(OC)c(I)c1>>COc1ccc(OC)c(/C=C/c2ccccc(O)c2)c1  
 C=CC(=O)OC(C)(C)C.O=C(Nc1ccc(Cl)c(F)c1Br)C(F)(F)F>>CC(C)(C)OC(=O)/C=C/c1c(NC(=O)C(F  
 )(F)F)ccc(Cl)c1F  
 C=CC(=O)OC(C)(C)C.Cn1cc(I)cn1>>Cn1cc(/C=C/C(=O)OC(C)(C)C)cn1  
 C=Cc1cnncn1.COc1cc(Br)cc(OC)c1>>COc1cc(/C=C/c2cnncn2)cc(OC)c1  
 C=CC(O)(CF)CF.FC(F)(F)c1ccc(Cl)c(Br)c1>>OC(/C=C/c1cc(C(F)(F)F)ccc1Cl)(CF)CF  
 C=CC=O.CC(C)(C)OC(=O)COc1ccc(Cl)c(I)c1>>CC(C)(C)OC(=O)COc1ccc(Cl)c(/C=C/C(=O)c1  
 Bre1cccc2ccccc12.C=CCO[C@\_@H]1CC(=O)O[C@\_@H](C)C/C=C/C=C/[C@\_@H](O[Si](C)(C)C(C)(C)C)[  
 C@\_@H](C)C[C@\_@H](CC(OC)OC)[C@\_@H](O[C@\_@H]2O[C@\_@H](C)[C@\_@H](O[C@\_@H]3C[C@\_@](C)(O)[  
 C@\_@H](OC(=O)CC)[C@\_@H](C)O3)[C@\_@H](N(C)C)[C@\_@H]2OC(C)=O)[C@\_@H]1OC>>CCC(=O)O[C@\_  
 H]1[C@\_@H](C)O[C@\_@H](O[C@\_@H]2[C@\_@H](N(C)C)[C@\_@H](OC(C)=O)[C@\_@H](O[C@\_@H]3[C@\_@  
 H](OC)[C@\_@H](OC/C=C/c4cccc5ccccc45)CC(=O)O[C@\_@H](C)C/C=C/C=C/[C@\_@H](O[Si](C)(C)C(C)(C)  
 )C)[C@\_@H](C)C[F@@\_@H]1C[C@@\_@H]1C[C@@\_@H]1C[C@@\_@H]1C[C@@\_@H]1C[C@@\_@H]1C[C@@\_@H]1C[C@@\_@H]  
 C=CC(=O)OC(C)(C)C.CNc1c(C)cc(C)cc1I>>CNc1c(C)cc(C)cc1/C=C/C(=O)OC(C)(C)C  
 C=CC(=O)OC.CC(=O)Oc1ccc(OC(C)=O)c(Br)c1>>COC(=O)/C=C/c1cc(OC(C)=O)ccc1OC(C)=O  
 Bre1ccc2ccccc2c1.C=COCCCC>>C=C(OCCCC)c1ccc2ccccc2c1  
 C=CC(=O)OC.CC(=O)Oc1ccc(Br)c(OC(C)=O)c1>>COC(=O)/C=C/c1ccc(OC(C)=O)cc1OC(C)=O  
 C=CS(=O)(=O)NC.Nc1ncc(Cl)cc1Br>>CNS(=O)(=O)/C=C/c1cc(Cl)cn1N  
 C=Cc1ccc(F)cc1.CS(=O)(=O)c1ccc(Br)cc1>>CS(=O)(=O)c1ccc(/C=C/c2ccc(F)cc2)cc1  
 Bre1cnncn1.C=C>>C=Cc1cnncn1  
 C=CC(=O)OC(C)(C)C.CCOC(=O)c1nnc(Cc2ccccc(Br)c2)c2cc(OC)c(OC)cc12>>CCOC(=O)c1nnc(Cc2  
 cccc(/C=C/C(=O)OC(C)(C)C)c2)c2cc(OC)c(OC)cc12  
 Bre1ccc2cc[nH]c12.C=Cc1ccccc1>>C=(C/c1ccc2cc[nH]c12)c1ccccc1  
 C=CCC1(c2ccccc2Br)SCCCS1>>C=C1CC2(SCCCS2)c2ccccc21  
 C=CC(=O)OCC.Cc1nc(-c2ccccc2)nc(N)c1I>>CCOC(=O)/C=C/c1c(C)nc(-c2ccccc2)nc1N  
 C=Cc1ccc(OC(C)=O)cc1.COc1cc(I)cc(OC)c1OC>>COc1cc(/C=C/c2ccc(OC(C)=O)cc(OC)c1OC  
 C=CC(=O)Nc1ccc(C)cc1.COc1ccc2c(=O)c(I)coc2c1>>COc1ccc2c(=O)c(/C=C/C(=O)Nc3ccc(C)cc3)c  
 oc2c1  
 C=CC(=O)OCC.Cc1nc(N)nc(NC2CCOC2)c1I>>CCOC(=O)/C=C/c1c(C)nc(N)nc1NC1CCOC1  
 Bre1cncc(OCc2ccccc2)c1.C=CC(=O)OCCCC>>CCCCOC(=O)/C=C/c1cncc(OCc2ccccc2)c1  
 C=Cc1ccc(/C=C/c2ccccc2)cc1.CC1(C)c2cc(I)ccc2N2Cc3cc([N+](=O)[O-  
 ])ccc3OC21C>>CC1(C)c2cc(/C=C/c3ccc(/C=C/c4ccccc4)cc3)ccc2N2Cc3cc([N+](=O)[O-  
 C=C/C=C/C(=O)N(CCCC)CCCC.CC(=O)c1ccc(Br)cc1>>CCCCN(CCCC)C(=O)/C=C/C=C/c1ccc(C(C  
 ))=O)cc1  
 Bre1ccc(C(=C2CCCCC2)c2ccccc2)cc1.C=CC(N)=O>>NC(=O)/C=C/c1ccc(C(=C2CCCCC2)c2ccccc  
 c2)cc1  
 Bre1cccc1.C=CCN1cc([N+](=O)[O-])cn1>>O=[N+]([O-])c1enn(CC/C=C/c2ccccc2)c1  
 C=Cc1cccc1.COCC(=O)c1ccc(Cl)cc1>>COC(=O)c1ccc(/C=C/c2ccccc2)cc1  
 C=COCCCC.COc1cc(Br)cc(OC)c1OC>>C=C(OCCCC)c1cc(OC)c(OC)c(OC)c1  
 C=Cc1cnncn1.CCCCCCCC(S(=O)(=O)c1ccc(Br)cc1>>CCCCCCCC(S(=O)(=O)c1ccc(/C=C/c2cnncn2)c  
 C=Cc1cncc(C#N)c1Nc1ccc2[nH]ccc2c1C.ClCCOc1ccccc1Br>>Cc1c(Nc2c(C#N)cncc2/C=C/c2ccccc2  
 OCCCl)ccc2[nH]ccc12  
 C=CC#N.COCC(=O)c1sc2ccccc2c1Br>>COC(=O)c1sc2ccccc2c1/C=C/C#N  
 C=C1C(=O)O[C@\_@H]2[C@\_@H]1C[C@\_@H](O)/C(C)=C/CC[C@\_@]1(C)O[C@\_@H]21.Cc1ccc(I)cc1>>C  
 /C1=C\CC[C@\_@]2(C)O[C@\_@H]2[C@\_@H]2OC(=O)/C(=C/c3ccc(C)cc3)[C@\_@H]2[C@\_@H]1O

5695 C=Cc1ccc(C)cc1.CC(=O)NS(=O)(=O)c1ccc(Br)cc1>>CC(=O)NS(=O)(=O)c1ccc(/C=C/c2ccc(C)cc2)c  
5696 C=CC(=O)N(C)C.N#Cc1ccc(Br)cc1>>CN(C)C(=O)/C=C/c1ccc(C#N)cc1  
5697 C=C(NC(=O)OC(C)(C)C)C(=O)OC.COC(=O)c1ccc(N)c(I)c1>>COC(=O)/C(=C/c1cc(C(=O)OC)ccc1  
N)NC(=O)OC(C)(C)C  
C=CCO[C@]1(C)C[C@H](C)C(=O)[C@H](C)[C@@H](O)[C@](C)(O)[C@@H](CC)OC(=O)[C@  
5698 H](C)C(=O)[C@H](C)[C@H]1O[C@@H]1O[C@H](C)C[C@H](N(C)C)[C@H]1OC(=O)c1cccc1.Ic  
1cccc1>>CC[C@H]1OC(=O)[C@H](C)C(=O)[C@H](C)[C@@H](O)[C@@H]2O[C@H](C)C[C@H]  
(N(C)C)[C@H]2OC(=O)c2cccc2)[C@]1(C)(OC/C=C/c2cccc2)C[C@@H](C)C(=O)[C@H](C)[C@@  
C=CC(=O)N1N=Cc2cccc2C1c1cccc(F)c1.COc1cc(Cc2cnc(N)nc2N)cc(I)c1OC>>COc1cc(Cc2cnc(N)  
5699 nc2N)cc(/C=C/C(=O)N2N=Cc3cccc3C2c2cccc(F)c2)c1OC  
5700 C=Cc1ccc(Cl)cc1.O=C1C(O)=C(I)C(=O)c2cccc21>>O=C1C(O)=C(/C=C/c2ccc(Cl)cc2)C(=O)c2cccc  
C=CC(=O)N(CC)CC.CC(C)(C)c1ccc2[nH]c3c(c2c1)CC(=O)Nc1ccc(I)cc1-  
5701 3>>CCN(CC)C(=O)/C=C/c1ccc2c(c1)-c1[nH]c3ccc(C(C)(C)C)cc3c1CC(=O)N2  
5702 C=Cc1cccc1.Fc1cccc1Cl>>Fc1cccc1/C=C/c1cccc1  
5703 C=CC(=O)OCC.Cc1nc(Br)c(-c2cccc2)o1>>CCOC(=O)/C=C/c1nc(C)oc1-c1cccc1  
5704 C=Cc1cnc2cccc12.CCCCCCCCCCNc1ccc(Br)c(C(F)(F)F)c1>>CCCCCCCCCNc1ccc(/C=C/c2ccn  
c3cccc23)c(C(F)(F)F)c1  
5705 C=C(C)C=O.CC(C)(C)OC(=O)Nc1ccc(I)cc1>>C/C(C=O)=C\c1ccc(NC(=O)OC(C)(C)C)cc1  
5706 C=CC(=O)OC.CCCCCc1ccc(I)cc1>>CCCCC1ccc(/C=C/C(=O)OC)cc1  
5707 C=CC(=O)OC(C)(C)C.CC(=O)O[IH2](OC(C)=O)c1cccc1>>CC(C)(C)OC(=O)/C=C/c1cccc1  
5708 C=Cc1cccc1.CCn1cnc1-c1ccc(Br)cc1>>CCn1cnc1-c1ccc(/C=C/c2cccc2)cc1  
5709 C=CCCC.Cc1ccc(S(=O)(=O)Nc2cccc2I)cc1>>CCCC/C=C/c1cccc1NS(=O)(=O)c1ccc(C)cc1  
5710 Bre1cccc1.C=Cc1ccc(OC)cc1>>COc1ccc(/C=C/c2cccn2)cc1  
5711 C=CC(OCC)OCC.COc1cccc1I>>CCOC(/C=C/c1cccc1OC)OCC  
5712 C=Cc1cccc1.O=Cc1ccc2cccc2c1Br>>O=Cc1ccc2cccc2c1/C=C/c1cccc1  
5713 Bre1ccc2c(c1)OCCOCCOCCOCCO2.C=CC(=O)O>>O=C(O)/C=C/c1ccc2c(c1)OCCOCCOCCOCCO  
5714 C=CCN(CC1=C(Br)CCC1)c1cccc2cccc12>>C=C1CN(c2cccc3cccc23)CC2=C1CCC2  
5715 C=CC(=O)OC.Cc1ccc(C#N)c(Br)n1>>COC(=O)/C=C/c1nc(C)ccc1C#N  
5716 C=CC(=O)OC.COCCn1cc(I)cn1>>COCCn1cc(/C=C/C(=O)OC)cn1  
5717 C=CC(N)=O.COC(=O)c1cccc1I>>COC(=O)c1cccc1/C=C/C(N)=O  
5718 C=CC(=O)N(C)C.Nc1n[nH]c2c(Br)ccc(-c3ccc([N+](=O)[O-])cc3)c12>>CN(C)C(=O)/C=C/c1ccc(-  
c2ccc([N+](=O)[O-])cc2)c2c(N)n[nH]c12  
5719 C=Cc1ccc(C=C)cc1.N#CCc1ccc(Br)cc1>>C=Cc1ccc(/C=C/c2ccc(CC#N)cc2)cc1  
5720 C=C[Si](C)(C)C.Ic1ccoc1>>C[Si](C)(C)/C=C/c1ccoc1  
5721 C=CC#N.FC(F)(F)c1cc(Cl)cc(C(F)(F)F)c1>>N#C/C=C/c1cc(C(F)(F)F)cc(C(F)(F)F)c1  
5722 C=CC(C)(C)O.CC(=O)Oc1c(I)c(=O)n(C)c2cccc12>>CC(=O)Oc1c(/C=C/C(C)(C)O)c(=O)n(C)c2cccc  
5723 C=Cc1ccc(Cl)c1.O=C1CCC(c2ccc(Br)cc2)O1>>O=C1CCC(c2ccc(/C=C/c3cccc(Cl)c3)cc2)O1  
5724 C=C.COc1ccc(Br)cc1>>C=Cc1ccc(OC)cc1  
5725 C=Cc1ccc(OC)cc1.COC(=O)c1cc(OC)c(OC)cc1I>>COC(=O)c1cc(OC)c(OC)cc1/C=C/c1ccc(OC)cc1  
5726 Bre1enc2cccc2c1.C=OCCCC>>C=C(OCCCC)c1enc2cccc2c1  
5727 Bre1ccc2[nH]cc(CCc3cccc3)c2c1.C=CC(=O)OCC>>CCOC(=O)/C=C/c1ccc2[nH]cc(CCc3cccc3)c2c  
5728 C=C.Clc1ccc(Br)cc1>>C=Cc1ccc(Cl)cc1  
5729 C=CCOc1cccc1.Ic1cccc1>>C(=C/c1cccc1)\COc1cccc1  
5730 C=Cc1cnc(C#N)c1Nc1ccc2[nH]ccc2c1C.CN1CCN(Cc2cccc(Br)c2)CC1>>Cc1c(Nc2c(C#N)cncc2/C=  
C/c2cccc(CN3CCN(C)CC3)c2)ccc2[nH]ccc12  
5731 C=C(NC(=O)OCC[Si](C)(C)C)C(=O)OC.CC(C)(C)OC(=O)N[C@@H](Cc1ccc(I)cc1)C(=O)OCc1cccc  
c1>>COC(=O)/C(=C/c1ccc(C[C@H](NC(=O)OC(C)(C)C)C(=O)OCc2cccc2)cc1)NC(=O)OCC[Si](C)  
5732 C=CC(=O)OC.FC(F)(F)c1cccc1I>>COC(=O)/C=C/c1cccc1C(F)(F)F  
5733 C=CC(=O)OC.Cc1cc(OC(=O)OC(C)(C)C)cc(C)c1I>>COC(=O)/C=C/c1c(C)cc(OC(=O)OC(C)(C)C)cc  
5734 C=Cc1cccc1.O=S(=O)(Oc1cccc1)C(F)(F)F>>C=C(c1cccc1)c1cccc1  
5735 C=CC(=O)OC.COc1cc2oc(-c3cccc3)c(I)c(=O)c2cc1OC>>COC(=O)/C=C/c1c(-  
c2cccc2)oc2cc(OC)c(OC)cc2c1=O  
5736 C=CS(=O)(=O)F.Oc1cccc1I>>O=S(=O)(F)/C=C/c1cccc1O  
5737 Bre1ccc2c(c1)OCO2.C=Cc1cccc1N>>Nc1cccc1/C=C/c1ccc2c(c1)OCO2  
5738 C=Cc1cccc2cccc12.IC1CCCCC1>>C(=C/C1CCCCC1)\c1cccc2cccc12  
5739 C=Cc1cc(OC(=O)c2cccc2)cc(OC(=O)c2cccc2)c1.O=C(Oc1ccc(I)cc1)c1cccc1>>O=C(Oc1ccc(/C=C/  
/c2cc(OC(=O)c3cccc3)cc(OC(=O)c3cccc3)c2)cc1)c1cccc1  
5740 C=CC(N)=O.COc1ccc2sc(-c3cnc(Br)c3)nc2c1>>COc1ccc2sc(-c3cnc(/C=C/C(N)=O)c3)nc2c1  
5741 C=Cc1cncnc1.COc1ccc(Br)cc1F>>COc1ccc(/C=C/c2cncnc2)cc1F  
5742 Bre1ccnc1.C=CC(CCC)OCc1cccc1>>CCCC(/C=C/c1ccnc1)OCc1cccc1

C=CC(=O)N(C)C.O=Cc1cccc1I>>CN(C)C(=O)/C=C/c1cccc1NC=O  
C=C(F)[Si](C)(c1cccc1)c1cccc1.CCc1cccc1I>>CCc1cccc1/C=C(\F)[Si](C)(c1cccc1)c1cccc1  
C=CC(=O)OCC.COc1c(-c2cccc2Cl)cc2cnc(NC(C)C)nc2c1Br>>CCOC(=O)/C=C/c1c(OC)c(-  
c2cccc2Cl)cc2cnc(NC(C)C)nc12  
C=Cc1ccc(OCC)cc1.FC(F)(F)Oc1ccc(I)cc1>>CCOc1ccc(/C=C/c2ccc(OC(F)(F)F)cc2)cc1  
C=CC(=O)NC(C)c1cccc1.CCc1ccc(I)cc1>>CCc1ccc(/C=C/C(=O)NC(C)c2cccc2)cc1  
C=CC(=O)N(C)Cc1oc2cccc2c1C.C[C@@H]1CNc2ncc(Br)cc2CN1C(=O)OC(C)(C)C>>Cc1c(CN(C)  
C(=O)/C=C/c2cnc3c(c2)CN(C(=O)OC(C)(C)C)[C@H](C)CN3)oc2cccc12  
C=COCCCC.COC(=O)c1ccc(Cl)cc1>>C=C(OCCCC)c1ccc(C(=O)OC)cc1  
C=Cc1ccc(C(=O)OC)cc1.Clc1cccn1>>COC(=O)c1ccc(/C=C/c2cccn2)cc1  
C=CC(=O)NCc1ccc(C)cc1.O=c1c(I)coc2cc(O)ccc12>>Cc1ccc(CNC(=O)/C=C/c2coc3cc(O)ccc3c2=O  
C=CC(=O)OCC.C[Si](C)(C)c1coec1I>>CCOC(=O)/C=C/c1coec1[Si](C)(C)C  
C=C(C)[C@H](C(=O)OC)N1C(=O)c2cccc2C1=O.Ic1cccc1>>COC(=O)[C@H]/(C(C)=C/c1cccc  
1)N1C(=O)c2cccc2C1=O  
C=Cc1ccc(C(F)(F)F)cc1.Ic1cccc1>>FC(F)(F)c1ccc(/C=C/c2cccc2)cc1  
C=C[Si](CC)(CC)CC.N#Cc1ccc(Br)cc1>>CC[Si]/(C=C/c1ccc(C#N)cc1)(CC)CC  
C=CC(F)(F)C(F)(F)C(F)(F)C(F)(F)C(F)(F)C(F)(F)C(F)(F)F.CC(=O)c1ccc(Br)cc1>>CC(=O)c1  
ccc(/C=C/C(F)(F)C(F)(F)C(F)(F)C(F)(F)C(F)(F)C(F)(F)C(F)(F)C(F)(F)F)cc1  
C=CC1(c2ccc(Cl)cc2)CCN(C(=O)OC(C)(C)C)CC1.O=c1[nH]cnc2cc(Br)ccc12>>CC(C)(C)OC(=O)N1  
CCC(/C=C/c2ccc3c(=O)[nH]cnc3c2)(c2ccc(Cl)cc2)CC1  
C=CNC(C)=O.CC(=O)c1ccc(Br)cc1>>C=C(NC(C)=O)c1ccc(C(C)=O)cc1  
C=CC(OCC)OCC.Fc1cccc1I>>CCOC(/C=C/c1cccc1F)OCC  
C=COCCO.COc1ccc(Br)cc1>>C=C(OCCO)c1ccc(OC)cc1  
C=CCNC(=O)c1ccc(F)cc1NC(=O)c1ccc(C(F)(F)F)cc1.Ic1cccc1>>O=C(Nc1cc(F)ccc1C(=O)NC/C=C  
/c1cccc1)c1ccc(C(F)(F)F)cc1  
C=CCCO[Si](C)(C)C(C)(C)C.CC1(c2cccc2Br)CC(=O)C1>>CC1(c2cccc2/C=C/CCO[Si](C)(C)C(C)  
(C)C)CC(=O)C1  
Br1cccn1.C=C[C@H]1CCCN1C(=O)OC(C)(C)C>>CC(C)(C)OC(=O)N1CCC[C@H]1/C=C/c1ccc  
C=CCO[C@H]1[C@H](OCc2cccc2)[C@H](OCc2cccc2)[C@H](COc2cccc2)O[C@H]1  
Sc1cccc1Br>>C=C1CO[C@H]2[C@H](OCc3cccc3)[C@H](OCc3cccc3)[C@H](COc3cccc  
c3)O[C@H]2Sc2cccc21  
C=CCC(O)C1(Se2cccc2)CCCC1.Ic1cccc1>>OC(C/C=C/c1cccc1)C1(Se2cccc2)CCCC1  
C=CC(F)(F)C(F)(F)C(F)(F)C(F)(F)F.CC1=Nc2ccc(I)cc2C1(C)C>>CC1=Nc2ccc(/C=C/C(F)(F)C(F)(F)  
C(F)(F)C(F)(F)F)cc2C1(C)C  
C=CC(=O)OCCCC.CCOC(=O)c1cccc(-c2c(-  
c3cccc3)oc3ccc(Br)cc23)c1>>CCCCOC(=O)/C=C/c1ccc2oc(-c3cccc3)c(-  
C=CC(=O)OCCCC.Cc1ccc2c(Br)nn(C)c2c1>>CCCCOC(=O)/C=C/c1nn(C)c2cc(C)ccc12  
C=COCCCC.Fc1ccc(Cl)cc1>>C=C(OCCCC)c1ccc(F)cc1  
C=C(NC(=O)[C@H](Cc1cccc1)NC(=O)[C@H](Cc1cccc1)NC(=O)OC(C)(C)C(=O)OC.COC(=O)  
c1ccc(I)cc1>>COC(=O)/C=C/c1ccc(C(=O)OC)cc1NC(=O)[C@H](Cc1cccc1)NC(=O)[C@H](Cc1cc  
ccc1)NC(=O)OC(C)(C)C  
C=CC#N.CCOc1noc(C)c1I>>CCOc1noc(C)c1/C=C/C#N  
C=CCOCC1=C(Br)c2cccc(OC)c2CC1>>C=C1CCOCC2=C1c1cccc(OC)c1CC2  
C=CC(=O)OC.FC(F)(F)c1ccc(NCc2cccc2)c(Br)c1>>COC(=O)/C=C/c1cc(C(F)(F)F)ccc1NCc1cccc1  
C=CC(=O)OC(C)(C)C.CN1Cc2cc(Br)cnc2NCCC1=O>>CN1Cc2cc(/C=C/C(=O)OC(C)(C)C)cnc2NCC  
C1=O  
C=Cc1cccc1.Cc1cc(Br)c2nnnn2c1>>Cc1cc(/C=C/c2cccc2)c2nnnn2c1  
C=Cc1cccc1.Cc1ccc([N+](=O)[O-])cc1Br>>Cc1ccc([N+](=O)[O-])cc1/C=C/c1cccc1  
C=CC(CC)(CC)C(=O)Nc1ccc(F)cc1Br>>C=C1c2cc(F)ccc2NC(=O)C1(CC)CC  
C=CC(=O)N(C)Cc1sc2cccc2c1C.O=C1Ne2ncc(Br)cc2C12CCCC2>>Cc1c(CN(C)C(=O)/C=C/c2cnc3  
c(e2)C2(CCCC2)C(=O)N3)sc2cccc12  
C=CS(=O)(=O)F.O=[N+]([O-])c1cccc(I)c1>>O=[N+]([O-])c1cccc(/C=C/S(=O)(=O)F)c1  
C=Cc1n[nH]c2cc([C@H]3C[C@H]34C(=O)Nc3ccc(OC)cc34)ccc12.CN1CCN(C(=O)c2ccc(Br)cc2)  
CC1>>COc1ccc2c(c1)[C@H]1(C[C@H]1)c1ccc3c(/C=C/c4ccc(C(=O)N5CCN(C)CC5)cc4)n[nH]c3c1)C(  
C/C(I)=C/C#N.C=CC=O>>CC(=C/C#N)/C=C/C=O  
C=C(C)C(=O)OC.Clc1cccc1>>COC(=O)/C(C)=C/c1cccc1  
C=Cc1ccc(N(c2ccc(C)cc2)c2ccc(C)cc2)cc1.Cn1nc2c(Br)ccc(Nc3ncc(C4OCCO4)cn3)c2n1>>Cc1ccc(N  
(c2ccc(C)cc2)c2ccc(/C=C/c3ccc(Nc4ncc(C5OCCO5)cn4)c4nn(C)nc34)cc2)cc1  
CCCCCC/C(=C/I)OC(=O)/C=C/c1ccc(C)cc1>>CCCCCCC1=C/C(=C/c2ccc(C)cc2)C(=O)O1  
C=Cc1cenc1.CCN1c2ncc(I)cc2C(=O)N(C)c2cccn21>>CCN1c2ncc(/C=C/c3ccnc3)cc2C(=O)N(C)c  
2cccn21

5786 C=CC(=O)OC(C)(C)C.COc1cc(Br)cc(F)c1[C@]1(C)c2ccc3c(cnn3C3CCCCO3)c2C[C@@H](C)N1CC(C)(F)F>>COc1cc(/C=C/C(=O)OC(C)(C)C)cc(F)c1[C@]1(C)c2ccc3c(cnn3C3CCCCO3)c2C[C@@H](C)N1CC(C)(F)F  
 5787 C=CC(=O)OC(C)(C)C.Nc1ncc(Br)cc1I>>CC(C)(C)OC(=O)/C=C/c1cc(Br)enc1N  
 5788 C=CC(=O)OC.COCC(=O)[C@@H](Cc1ccc(OC)c(I)c1)NC(C)=O>>COC(=O)/C=C/c1cc(C[C@@H](N)C(C)=O)C(=O)OC)ccc1OC  
 5789 COC(=O)/C=C/Oc1c(C)cccc1-c1cc(C)c(C)cc1Br>>COC(=O)/C=C1/Oc2c(C)cccc2-c2cc(C)c(C)cc21  
 5790 C=C.O=Cc1cc(Br)ccc1[N+](=O)[O-]>>C=Cc1ccc([N+](=O)[O-])c(C=O)c1  
 5791 O=C(/C=C/c1cccs1)O/C(=C)Ic1cccc1>>O=C1OC(c2cccc2)=C/C1=C\c1cccs1  
 5792 C=Cc1ccc(CN(C)C)cc1.C[Si](C)(C)CCOCn1nc(I)c2ccc([C@@H]3C[C@@]34C(=O)Nc3cccc34)cc21>>CN(C)Cc1ccc(/C=C/c2nn(COCC[Si](C)(C)C)c3cc([C@@H]4C[C@@]45C(=O)Nc4cccc45)ccc23  
 5793 C=COCCCC.COCC(=O)Cc1cccc1Br>>C=C(OCCCC)c1cccc1CC(=O)OC  
 5794 C=CC(=O)N1N=Cc2cccc2C1C(CC)CC.COc1cc(Cc2enc(N)nc2N)cc(I)c1OC>>CCC(CC)C1c2cccc2C=NN1C(=O)/C=C/c1cc(Cc2enc(N)nc2N)cc(OC)c1OC  
 5795 C=CCC(c1cccc1I)N(CC(=O)OC)c1cccc1>>C=C1CC(N(CC(=O)OC)c2cccc2)c2cccc21  
 5796 C=CC(OCC)OCC.N#Cc1ccc(Br)cc1>>CCOC(/C=C/c1ccc(C#N)cc1)OCC  
 5797 C=Cc1cccc1.IC(=C1CCCC1)c1cccc1>>C(=C/c1cccc1)\C(=C1CCCC1)c1cccc1  
 5798 C=Cc1ccc(C(F)(F)F)cc1.IC1CCCCC1>>FC(F)(F)c1ccc(/C=C/C2CCCCC2)cc1  
 5799 C=Cc1ccc(OC)cc1.Oc1cc(Br)cc(O)c1F>>COc1ccc(/C=C/c2cc(O)c(F)c(O)c2)cc1  
 5800 C=CC(=O)OCC.CCC(=O)c1cccc(Br)c1>>CCOC(=O)/C=C/c1cccc(C(=O)CC)c1  
 5801 C=CCN(CCc1cc(OC)c(OC)cc1Br)C(=O)OC(C)(C)C>>C=C1CN(C(=O)OC(C)(C)C)CCc2cc(OC)c(OC)cc21  
 5802 C=CC(=O)OCCCC.Cc1cc2c(cc1N1Cc3c(C(F)(F)F)nc(Br)c3NC1=O)OC(c1ncccc1F)CC2>>CCCCOC(=O)/C=C/c1ncc(C(F)(F)F)c2c1NC(=O)N(c1cc3c(cc1C)CCC(c1ncccc1F)O3)C2  
 5803 C=CC(CCC)OCc1cccc1.CC(C)(C)c1ccc(Br)cc1>>CCCC(/C=C/c1ccc(C(C)(C)C)cc1)OCc1cccc1  
 5804 C=Cc1cccc(N)c1.CCN1c2ncc(I)cc2C(=O)N(C)c2ccc(Cl)nc21>>CCN1c2ncc(/C=C/c3cccc(N)c3)cc2C(=O)N(C)c2ccc(Cl)nc21  
 5805 C=CCOc1cccc1.Cc1ccc(I)cc1C>>Cc1ccc(/C=C/COc2cccc2)cc1C  
 5806 C=C(NC(=O)OC(C)(C)C)C(=O)OC.Cc1cc(N)ccc1I>>COC(=O)/C=C/c1ccc(N)cc1C)NC(=O)OC(C)(C=C.O=[N+](=[O-])c1ccc(I)cc1>>C=Cc1ccc([N+](=O)[O-])cc1  
 5807 C=CCCCCCC.COc1cccc(Br)c1[N+](=O)[O-]>>CCCCC/C=C/c1cccc(OC)c1[N+](=O)[O-]  
 5808 C=Cc1senc1C.C[Si](C)(C)CCOCn1nc(I)c2ccc(C=O)cc21>>Cc1nsc1/C=C/c1nn(COCC[Si](C)(C)C)c2cc(C=O)ccc12  
 5809 C=Cc1cccc1.IC1=C(c2cccc2)[Se]CC1>>C(=C/c1cccc1)\C1=C(c2cccc2)[Se]CC1  
 5810 Br1ccc(-c2cccc2)cc1.C=CC[C@H](CC(=O)OC(C)(C)C)C(=O)N[C@H](C(=O)N[C@H](C)c1cccc1)C(C)(C)C>>C[C@@H](NC(=O)[C@@H](NC(=O)[C@H](C/C=C/c1ccc(-c2cccc2)cc1)CC(=O)OC(C)(C)C)C(C)(C)C)c1cccc1  
 5811 C=CC(=O)OCCN(C)C.Cc1ccc(NC(=O)c2coc3ccc(Br)cc3c2=O)cc1>>Cc1ccc(NC(=O)c2coc3ccc(/C=C/C(=O)OCCN(C)C)cc3c2=O)cc1  
 5812 C=C1C(=O)O[C@H]2[C@H]1C[C@H](O)/C(C)=C/CC[C@]1(C)O[C@@H]21.Ic1cccc1>>C/C1=C[CC][C@]12[C@H]2[C@H]12OC(=O)/C(=C/c3cccc3)[C@@H]2[C@H]1O  
 5813 C=Cc1ccc(OC(C)=O)cc1.COc1cc(I)cc(OC)c1>>COc1cc(/C=C/c2ccc(OC(C)=O)cc2)cc(OC)c1  
 5814 C=C.CC(=O)Nc1cc(Cl)ccc1Br>>C=Cc1ccc(Cl)cc1NC(C)=O  
 5815 C=COCCCC.O=[N+](=[O-])c1ccc(Br)cc1>>C=C(OCCCC)c1ccc([N+](=O)[O-])cc1  
 5816 C=C[C@]@H](CCCCCCCC(=O)OC)O[Si](C)(C)C(C)C.CCC1=C(Br)CCC1=O>>CCC1=C(/C=C/[C@]@H](CCCCCCCC(=O)OC)O[Si](C)(C)C(C)C)CCC1=O  
 5817 C=Cc1cccc1C(=O)OC.COCC(=O)c1cc2cc(Br)ccc2cc1OC(C)=O>>COC(=O)c1cccc1/C=C/c1ccc2cc(OC(C)=O)c(C(=O)OC)cc2c1  
 5818 C=COCC(C)=O.Ic1cccc1>>CC(=O)O/C=C/c1cccc1  
 5819 COC[C@@H](/N=C(\c1cccc1)N1C=CCC[C@H]1C)C(C)C.Ic1cccs1>>COC[C@@H](/N=C(\c1cccc1)N1C=C(c2cccs2)CC[C@H]1C)C(C)C  
 5820 C=CC(=O)OC.CC(=O)Oc1ccc2c(I)cccc1-2>>COC(=O)/C=C/c1cccc2c(OC(C)=O)ccc1-2  
 5821 C=CCCCCCC.CC(C)(C)c1cccc1OS(=O)(=O)C(F)(F)F>>C=C(CCCCCC)c1cccc1C(C)(C)C  
 5822 C=Cc1cccn1.CC(C)(C)OC(=O)N1CCC[C@H]1COc1ncc(Cl)c(I)c1>>CC(C)(C)OC(=O)N1CCC[C@H]1COc1ncc(Cl)c(/C=C/c2ccnc2)c1  
 5823 C=Cc1cccc1.Oc1ccc(/N=N/c2ccc(Br)cc2)cc1>>Oc1ccc(/N=N/c2ccc(/C=C/c3cccc3)cc2)cc1  
 5824 C=CC(=O)OCC.CC(C)Oc1ccc(Br)cc1C=O>>CCOC(=O)/C=C/c1ccc(OC(C)C)c(C=O)c1  
 5825 C=Cc1ccc(F)cc1.CCCCC(I)C(F)(F)C(=O)OCC>>CCCCC(/C=C/c1ccc(F)cc1)C(F)(F)C(=O)OCC  
 5826 Br1cccc(SCc2sc(-c3cccc3)n2)c1.C=CC(=O)OC>>COC(=O)/C=C/c1cccc(SCc2sc(-c3cccc3)n2)c1  
 5827 C=CCCCCCC.Cc1nc2cc(Br)ccc2s1>>C=C(CCCCCC)c1ccc2sc(C)nc2c1  
 5828



5829 C=CC(=O)N(C)C.COc1ccccc1I>>COc1ccccc1/C=C/C(=O)N(C)C  
5830 C=CC(=O)OCC.Ic1ccccc1-c1ccoc2ccccc12>>CCOC(=O)/C=C/c1ccccc1-c1ccoc2ccccc12  
5831 C=CC(=O)OC(C)(C)C.CC(=O)Oc1ccc(I)cc1CC=C(C)C>>CC(=O)Oc1ccc(/C=C/C(=O)OC(C)(C)C)cc1CC=C(C)C  
5832 C=CC(=O)OC.CC1(C)CC(=C(c2ccc3c(cnn3C3CCCCO3)c2)c2c(F)cc(Br)cc2F)CC(C)(C)C1>>COC(=O)/C=C/c1cc(F)c(C(=C2CC(C)(C)CC(C)(C)C2)c2ccc3c(cnn3C3CCCCO3)c2)c(F)c1  
5833 Br1ccc(-c2nc3ccccc3n2)cc1.C=CCn1c(-c2cccc(OC)c2)nc2ccccc2c1=O>>COc1cccc(-c2nc3ccccc3c(=O)n2C/C=C/c2ccc(-c3nc4ccccc4n3)cc2)c1  
5834 Br1ccccc1.C=COCCCC>>C=C(OCCCC)c1ccccc1  
5835 C=CC(=O)OCC.COCCOc1ccc(I)c([N+](=O)[O-]  
5836 C=CC(=O)OC(C)(C)C.Cc1c[nH]c2cccc(Br)c12>>Cc1c[nH]c2cccc(/C=C/C(=O)OC(C)(C)C)c12  
5837 C=Cc1ccccc1.CN(C(=O)c1ncc2c(c1I)c1ccccc1n2S(=O)(=O)N(C)C)c1ccccc1>>CN(C(=O)c1ncc2c(c1/C=C/c1ccccc1)c1ccccc1n2S(=O)(=O)N(C)C)c1ccccc1  
5838 C=CC(=O)OC(C)(C)C.Cc1c(Br)ccc2c1nnn2C>>Cc1c(/C=C/C(=O)OC(C)(C)C)ccc2c1nnn2C  
5839 C=CC(=O)OC(C)(C)C.Cc1cc(C(=C2CCCCC2)c2ccc(O)cc2)ccc1Br>>Cc1cc(C(=C2CCCCC2)c2ccc(O)cc2)ccc1/C=C/C(=O)OC(C)(C)C  
5840 C=Cc1ccccc1OC.COc1ccc(I)c(OC)c1>>COc1ccc(/C=C/c2ccccc2OC)c(OC)c1  
5841 C=CC(=O)OCC.O=C[13c]1[13cH][13cH][13c](Br)[13cH][13cH]1>>CCOC(=O)/C=C/[13c]1[13cH][13cH][13c](C=O)[13cH][13cH]1  
5842 C=C[Si](C)(C)C.O=[N+](O-)]c1ccccc1I>>C[Si](C)(C)/C=C/c1ccccc1[N+](=O)[O-]  
5843 C=Cc1ccc(Cl)cc1.O=C(O)c1ccc(Br)cc1F>>O=C(O)c1ccc(/C=C/c2ccc(Cl)cc2)cc1F  
5844 C=CC#N.O=C(c1ccccc1F)c1cc(Cl)ccc1I>>N#C/C=C/c1ccc(Cl)cc1C(=O)c1ccccc1F  
5845 C=CCC(CCCl)c1ccc(OC)cc1>>C=C1CCC(c2ccc(OC)cc2)C1  
5846 C=C1C(=O)O[C@@H]2CC(C)=C([C@@H](C)CCCOC(C)=O)[C@@H](OC(C)=O)[C@H]12.COc1c(I)cc(OC)c1OC>>COc1cc(/C=C2/C(=O)O[C@@H]3CC(C)=C([C@@H](C)CCCOC(C)=O)[C@@H](OC(C)=O)[C@H]23)cc(OC)c1OC  
5847 C=Cc1ccccc1C.Cc1ccc(OS(=O)(=O)C(F)(F)F)cc1>>C=C(c1ccc(C)cc1)c1ccccc1C  
5848 C=CC(=O)N(C)Cc1oc2ccccc2c1C.CS(=O)(=O)N1CCNc2ncc(Br)cc2C1>>Cc1c(CN(C)C(=O)/C=C/c2cnc3c(c2)CN(S(C)(=O)=O)CCN3)oc2ccccc12  
5849 C=Cc1ccc(Br)cc1.CCOC(=O)C(F)I>>CCOC(=O)C(F)/C=C/c1ccc(Br)cc1  
5850 C=CC(O)c1cc(OC)c(OC)c(OC)c1Br.Ic1ccccc1>>COc1cc(C(O)/C=C/c2ccccc2)c(Br)c(OC)c1OC  
5851 C=CC(=O)OC.COc1ccc2c(c1)CCN(c1ccc(C3CCCC3)cc1)C2(C)c1ccc(Br)cc1>>COC(=O)/C=C/c1ccc(C2(C)c3ccc(OC)cc3CCN2c2ccc(C3CCCC3)cc2)cc1  
5852 C=COCCCC.O=S(=O)(Oc1ccccc1(C(F)(F)F)c1)C(F)(F)F>>C=C(OCCCC)c1ccccc1(C(F)(F)F)c1  
5853 C=Cc1ccccc1F)c1.N#Cc1ccc2cc(Br)ccc2c1>>N#Cc1ccc2cc(/C=C/c3ccccc1F)c3)ccc2c1  
5854 C=CC(=O)O.Nc1ccc(C(F)(F)F)cc1I>>Nc1ccc(C(F)(F)F)cc1/C=C/C(=O)O  
5855 C=CC(=O)OC(C)(C)C.CC(C)(C)OC(=O)CCOCc1cccc([N+](=O)[O-])c1Br>>CC(C)(C)OC(=O)/C=C/c1c(COCCCC(=O)OC(C)(C)C)cccc1[N+](=O)[O-]  
5856 C=Cc1ccc(OC)cc1.Cc1ccc(S(=O)(=O)N(Cc2ccccc2)c2cc3ccc(Br)cc3c(=O)o2)cc1>>COc1ccc(/C=C/c2ccc3cc(N(Cc4ccccc4)S(=O)(=O)c4ccc(C)cc4)oc(=O)c3c2)cc1  
5857 C=Cc1ccccc1O.Nc1cccc(Br)c1>>Nc1cccc(/C=C/c2ccccc2O)c1  
5858 C=CC(=O)O.COc1ccccc1Ic1>>COc1ccccc1/C=C/C(=O)O)c1  
5859 C=CC(=O)OC.Ic1cccs1>>COC(=O)/C=C/c1cccs1  
5860 C=Cc1cccn1.CC(C)(C)OC(=O)N1CCC[C@H]1COc1nc(Cl)c(I)c1>>CC(C)(C)OC(=O)N1CCC[C@H]1COc1nc(Cl)c(/C=C/c2cccn2)c1  
5861 C=Cc1cccn1.N#Cc1nc2cc(Br)sc2c1Nc1ccc(Oc2ccccc2)cc1>>N#Cc1nc2cc(/C=C/c3ccncc3)sc2c1Nc1ccc(Oc2ccccc2)cc1  
5862 C=Cc1ccccc1.Nc1cc(Cl)ccc1Br>>Nc1cc(Cl)ccc1/C=C/c1ccccc1  
5863 C=CC(=O)OCC.O=S(=O)(Oc1ccc(C(=C2CCCCC2)c2ccc(O)cc2)cc1)C(F)(F)F>>CCOC(=O)/C=C/c1ccc(cc(C(=C2CCCCC2)c2ccc(O)cc2)cc1  
5864 C=CC(=O)N1C(=O)OC[C@@H]1c1ccccc1.CC(C)(C)OP(=O)(Cc1ccccc1)Cc1ccc(Br)cc1>>CC(C)(C)OP(=O)(Cc1ccccc1)Cc1ccc(/C=C/C(=O)N2C(=O)OC[C@@H]2c2ccccc2)cc1  
5865 C=CC(=O)N(C)Cc1cc2ccccc2n1C.O=C1Cc2cc(Br)enc2N1>>CN(Cc1cc2ccccc2n1C)C(=O)/C=C/c1cnc2c(c1)CC(=O)N2  
5866 C=Cc1ccc(C(=O)OCC)cc1.C[Si](C)(C)I>>CCOC(=O)c1ccc(/C=C/[Si](C)(C)C)cc1  
5867 C=CC(=O)OC(C)(C)C.Nc1ncc(I)c2sc(Br)c12>>CC(C)(C)OC(=O)/C=C/c1nc(N)c2c(Br)sc12  
5868 Br1nn(C2CCCCO2)c2ccccc12.C=Cc1cccn1>>C(=C/c1nn(C2CCCCO2)c2ccccc12)\c1cccn1  
5869 C=CC(=O)Oc1ccccc1.COcn1nc(-c2ccccc2)c(Br)cc1=O>>COcn1nc(-c2ccccc2)c(/C=C/C(=O)Oc2ccccc2)cc1=O  
5870 Br1cccn1.C=Cc1cccn1>>C(=C/c1cccn1)\c1cccn1  
5871 C=COCCCC.Fc1ccccc1Cl>>C=C(OCCCC)c1ccccc1F

5872 C=CC(=O)N1N=Cc2ccccc2C1CC(=O)OC(C)(C)C.COc1cc(Cc2cnc(N)nc2N)cc(I)c1OC>>COc1cc(Cc2cnc(N)nc2N)cc(/C=C/C(=O)N2N=Cc3ccccc3C2CC(=O)OC(C)(C)C)c1OC  
5873 C=Cc1cccc([N+](=O)[O-])c1.NC(=O)c1cnc(Br)c1>>NC(=O)c1cnc(/C=C/c2cccc([N+](=O)[O-]C=CS(=O)(=O)N1CCC2(CC1)N=C(C1CCCCC1)NC2=O.Cc1cc(N2CCNC2=O)cc(C)c1Br>>Cc1cc(N2CCNC2=O)cc(C)c1/C=C/S(=O)(=O)N1CCC2(CC1)N=C(C1CCCCC1)NC2=O  
5874 C=CC(=O)CCC.O=C(c1cccc1)c1ccc(Br)cc1>>CCCC(=O)/C=C/c1ccc(C(=O)c2ccccc2)cc1  
5875 Br1ccccc1.C=CC(=O)OC(C)(C)C>>CC(C)(C)OC(=O)/C=C/c1ccccc1  
5876 C=CC(=O)OC.O=C1Nc2cccc(I)c2/C1=C/c1ccc[nH]1>>COC(=O)/C=C/c1cccc2c1/C(=C/c1ccc[nH]1)C(=O)N2  
5877 C=CCC(=O)O.Cc1cn(Cc2ccc(I)cc2)c(=O)[nH]c1=O>>Cc1cn(Cc2ccc(/C=C/CC(=O)O)cc2)c(=O)[nH]c  
5878 C=CC(C)=O.COC(=O)C1=Nc2cc(I)ccc2OC12CC2>>COC(=O)C1=Nc2cc(/C=C/C(C)=O)ccc2OC12C  
5879 C=CCN1C(=O)c2ccccc2C1=O.COc1ccc(Br)cc1>>COc1ccc(/C=C/CN2C(=O)c3ccccc3C2=O)cc1  
5880 C=CC(=O)OC.Nc1nc(=O)n([C@H]2C[C@H](O)[C@@H](CO)O2)cc1I>>COC(=O)/C=C/c1cn([C@H]2C[C@H](O)[C@@H](CO)O2)c(=O)nc1N  
5881 C=CC(=O)N1N=Cc2ccccc2C1CC.COc1cc(Cc2cnc(N)nc2N)cc(I)c1OC>>CCC1c2ccccc2C=NN1C(=O)/C=C/c1cc(Cc2cnc(N)nc2N)cc(OC)c1OC  
5882 C=C.COC(=O)c1ccc(Br)cc1>>C=Cc1ccc(C(=O)OC)cc1  
5883 C=CC(=O)OCCCC.O=[N+](O-)]c1cccc1I>>CCCCOC(=O)/C=C/c1cccc1[N+](=O)[O-]  
5884 C=CC(=O)OC.CC(=O)OC[C@H]1O[C@@H](Oc2ccc(I)cc2)[C@H](OC(C)=O)[C@@H](OC(C)=O)[C@H]1OC(C)=O>>COC(=O)/C=C/c1ccc(O[C@@H]2O[C@H](COC(C)=O)[C@H](OC(C)=O)[C@H]1(OC(C)=O)[C@H]2OC(C)=O)cc1  
5885 Br1ccc(Oc2ccccc2)cc1.C=Cc1cccc1>>C(=C/c1ccc(Oc2ccccc2)cc1)\c1cccc1  
5886 Br1cccc(N(c2ccccc2)c2ccccc2)n1.C=Cc1ccc(Cl)c1>>Clc1cccc(/C=C/c2cccc(N(c3ccccc3)c3ccccc3)n2)c1  
5887 C=Cc1cccc1O.COc1ccc(Br)cc1>>COc1ccc(/C=C/c2ccccc2O)cc1  
5888 C=Cc1ccc(Cl)cc1.CCn1c(Br)cc2c1c(=O)n(C)c(=O)n2C>>CCn1c(/C=C/c2ccc(Cl)cc2)cc2c1c(=O)n(C)c(=O)n2C  
5889 C=CCO1cccc1.CC(=O)c1ccc(Br)cc1>>CC(=O)c1ccc(/C=C/COc2ccccc2)cc1  
5890 C=CC(=O)OC.O=c1[nH]c(=O)n([C@H]2C[C@H](CO)[C@H](O)C2)cc1I>>COC(=O)/C=C/c1cn([C@H]2C[C@H](CO)[C@H](O)C2)c(=O)[nH]c1=O  
5891 C=CC(=O)OCCCC.O=[N+](O-)]c1ccc(I)cc1>>CCCCOC(=O)/C=C/c1ccc([N+](=O)[O-])cc1  
5892 Br1cnc2ccccc12.C=CC=O>>O=C/C=C/c1cnc2ccccc12  
5893 C=CC(=O)OC.CC(C)OC(=O)N1CC(I)=C(c2ccccc2)N1C(=O)OC(C)C>>COC(=O)/C=C/C1=C(c2ccccc2)N(C(=O)OC(C)C)N(C(=O)OC(C)C)C1  
5894 C=Cc1ccc(N)cc1.CCN1c2ncc(I)cc2C(=O)N(C)c2ccccc21>>CCN1c2ncc(/C=C/c3ccc(N)cc3)cc2C(=O)N(C)c2ccccc21  
5895 C=Cc1ccc2ccc3cccc4cccc1c2c34.O=Cc1ccc(Br)cc1>>O=Cc1ccc(/C=C/c2ccc3cccc4cccc5ccc2c3c45)cc1  
5896 O=C(/C=C/c1cccc1)O/C(=C/I)c1cccc1>>O=C1OC(c2ccccc2)=C/C1=C\c1cccc1  
5897 C=CC(C)=O.O=C1Cc2c([nH]c3ccccc23)-c2cc(I)ccc2N1>>CC(=O)/C=C/c1ccc2c(c1)-c1[nH]c3ccccc3c1CC(=O)N2  
5898 C=Cc1ccc2ccccc2c1.O=C1c2ccccc2C(=O)N1CCCC(Br)C(F)(F)F>>O=C1c2ccccc2C(=O)N1CCCC(/C=C/c1ccc2ccccc2c1)C(F)(F)F  
5899 C=CCO[C@]1(C)C[C@@H](C)C(=O)[C@H](C)[C@@H](O)[C@](C)(O)[C@@H](CC)OC(=O)[C@H](C)C(=O)[C@H](C)[C@H]1O[C@@H]1O[C@H](C)C[C@H](N(C)C)[C@H]1OC(=O)c1cccc1.C  
5900 Oc1ccc(I)cc1>>CC[C@H]1OC(=O)[C@H](C)C(=O)[C@H](C)[C@@H](O[C@@H]2O[C@H](C)C[C@H](N(C)C)[C@H]2OC(=O)c2ccccc2)[C@](C)(OC/C=C/c2ccc(OC)cc2)C[C@@H](C)C(=O)[C@H]1(C)[C@@H](O)C@11(C)O  
5901 C=COCC(C)C.O=S(=O)(Oc1ccc(-c2ccccc2)cc1)C(F)(F)F>>C=C(OCC(C)C)c1ccc(-c2ccccc2)cc1  
5902 C=CC(=O)OC(C)(C)C.C=CC1=C(Br)C(O[Si](C)(C)C(C)C)CCCC1>>C=CC1=C(/C=C/C(=O)OC(C)(C)C)C(O[Si](C)(C)C(C)C)CCCC1  
5903 C=Cc1cccc1.FC(F)(F)c1cccc1I>>FC(F)(F)c1cccc1/C=C/c1cccc1  
5904 C=Cc1cccc1.COc1cccc(OS(=O)(=O)C(F)(F)F)c1>>C=C(c1cccc1)c1cccc(OC)c1  
5905 C=CC(N)=O.CCOC(=O)c1cccc1Br>>CCOC(=O)c1cccc1/C=C/C(N)=O  
5906 CC(=O)Oc1ccc(/C=C/C(=O)O/C=C\I)c2ccc(OC(C)=O)c(OC(C)=O)c2)cc1OC(C)=O>>CC(=O)Oc1ccc(/C=C2\C=C(c3ccc(OC(C)=O)c(OC(C)=O)c3)OC2=O)cc1OC(C)=O  
5907 C=CC(OC(C)=O)c1cccc1.Ic1cccc1>>CC(=O)OC(/C=C/c1cccc1)c1cccc1  
5908 Br1ccccc1.C=Cc1ccc(/C=C/c2ccc(N(C)C)cc2)cc1>>CN(C)c1ccc(/C=C/c2ccc(/C=C/c3ccccc3)cc2)cc  
5909 C=CC(=O)Nc1ccc(Cl)cc1.CC(C)(C)c1ccc2[nH]c3c(c2c1)CC(=O)Nc1ccc(I)cc1-3>>CC(C)(C)c1ccc2[nH]c3c(c2c1)CC(=O)Nc1ccc(/C=C/C(=O)Nc2ccc(Cl)cc2)cc1-3  
5910 C=CC(=O)OC(C)(C)C.COc1ccc(NCc2ccc(Br)cc2)cc1>>COc1ccc(NCc2ccc(/C=C/C(=O)OC(C)(C)C)c2)cc1

5911 C=CC(C)(C)C(=O)Nc1ccc(C)ccl1Br>>C=C1c2cc(C)cjcc2NC(=O)Cl(C)CC  
 5912 C=CCc1ccc2ccc(C)nc2c1OCc1cccc1Br>>C=C1Cc2ccc3ccc(C)nc3c2OCc2cccc21  
 5913 C=CC(=O)OC.Cn1nc(I)c2cc(C#Cc3cccc3)cnc21>>COC(=O)/C=C/c1nn(C)c2ncc(C#Cc3cccc3)cc12  
 5914 C=CC(F)(F)C(F)(F)C(F)(F)C(F)(F)C(F)(F)F.Fc1ccc(Br)cc1>>Fc1ccc(/C=C/C(F)(F)C(F)(F)C(F)  
 )(F)C(F)(F)C(F)(F)C(F)(F)F)cc1  
 5915 C=C1C(=O)[C@H]2/C=C(\C)CC/C=C(\C)CC[C@H]12.COe1cccc1I>>COe1cccc1/C=C1/C(=  
 O)O[C@H]2/C=C(\C)CC/C=C(\C)CC[C@H]12  
 5916 C=C(NC(C)=O)C(=O)OC.CC(C)c1cc(Br)ccc1N>>COC(=O)/C=(C/c1ccc(N)c(C(C)C)c1)NC(C)=O  
 5917 C=CC(=O)N(C)Cc1oc2cccc2c1C.CC(C)(C)OC(=O)NCCC1Cc2cc(Br)cnc2NC1=O>>Cc1c(CN(C)C)=(  
 O)/C=C/c2cnc3c(c2)CC(CCNC(=O)OC(C)(C)C)C(=O)N3)oc2cccc12  
 5918 C=C(C(=O)OC)[C@H]1CC[C@@H]2(C)CC[C@H](OCOC)C(=C)[C@H]2C1.Cc1ccc(Br)cc1>>  
 5919 C=C1[C@H](OCOC)CC[C@H]2(C)CC[C@H](/C=C/c3ccc(C)cc3)C(=O)OC)C[C@H]12  
 5920 C=CC(=O)OC.Cc1ccc(C=O)c(Br)n1>>COC(=O)/C=C/c1nc(C)ccc1C=O  
 5921 C=CCC(C(=O)OCC)C(=O)OCC.CCOC(=O)c1ccc(I)cc1>>CCOC(=O)c1ccc(/C=C/CC(C(=O)OCC)C(  
 =O)OCC)cc1  
 5922 C=CC(=O)OCc1cccc1.Fc1cc(Br)ccc1N1CCOCC1>>O=C(/C=C/c1ccc(N2CCOCC2)c(F)c1)OCc1cccc  
 5923 C=CCn1cccc1C(=O)O.CC(C)(C)OC(=O)COc1cccc(I)c1>>CC(C)(C)OC(=O)COc1cccc(/C=C/Cn2cccc  
 2C(=O)O)c1  
 5924 C=Cc1cccc1.COe1ccc(-c2c(I)c(=O)c3cccc3n2C)cc1>>COc1ccc(-  
 c2c(/C=C/C/c3cccc3)c(=O)c3cccc3n2C)cc1  
 5925 C=CC(N)=O.CCc1nc2cc(O)ccc2c(Oc2ccc(Br)cc2)c1-  
 5926 c1cccc1>>CCc1nc2cc(O)ccc2c(Oc2ccc(/C=C/C(N)=O)cc2)c1-c1cccc1  
 5927 Br1cccn1.C=CC[C@H](C)O>>C[C@H](O)C/C=C/c1cccn1  
 5928 C=Cc1cccc1.Nc1ccc(F)cc1Br>>Nc1ccc(F)cc1/C=C/c1cccc1  
 5929 C=CC(=O)c1cccc1.COe1ccc(I)cc1>>COe1ccc(/C=C/C(=O)c2cccc2)cc1  
 5930 C=CCC(C)(C)C.CC(C)(C)c1cccc1OS(=O)(=O)C(F)(F)F>>C=C(CC(C)(C)C)c1cccc1C(C)(C)C  
 5931 Br1cnc2cccc2c1.C=Cc1cccc1>>C(=C/c1cnc2cccc2c1)\c1cccc1  
 5932 C=CC(=O)OCCCC.COc1ccc(I)cc1>>CCCCOC(=O)/C=C/c1ccc(OC)cc1  
 5933 C=COCCCC.CC(=O)c1ccc(Cl)cc1>>C=C(OCCCC)c1ccc(C(C)=O)cc1  
 5934 C=COCCCC.O=S(=O)(Oc1cccc1-c1cccc1)C(F)(F)F>>C=C(OCCCC)c1cccc1-c1cccc1  
 5935 C=CCOc1ccc(Br)cc1.COc1ccc(I)cc1>>COc1ccc(/C=C/COc2ccc(Br)cc2)cc1  
 5936 C=CCC(N=[N+]=[N-])c1cccc1.Ic1cccc1>>[N-]=[N+]=NC(C/C=C/c1cccc1)c1cccc1  
 5937 C=Cc1cncn1.CCCOc1ccc(I)cc1>>CCCOc1ccc(/C=C/c2cncn2)cc1  
 5938 C=CCN[C@H](C)c1cccc2cccc12.FC(F)(F)c1ccc(Br)c1>>C[C@H](NC/C=C/c1cccc(C(F)(F)F)c1)  
 5939 c1cccc2cccc12  
 5940 C=CCCC[C@H]1(C)C(OS(=O)(=O)C(F)(F)F)=CC[C@H]1C(C)C>>C=C1CCC[C@H]2(C)C1=CC  
 [C@H]2C(C)C  
 5941 C=Cc1ccc(Br)cc1.C=Cc1cccc1>>C=Cc1ccc(/C=C/c2cccc2)cc1  
 5942 C=CC(=O)OC.CC(=O)Oc1c(C)cc(I)cc1CC=C(C)C>>COC(=O)/C=C/c1cc(C)c(OC(C)=O)c(CC=C(C)  
 5943 C=CC(=O)OCc1cccc1.Ic1cccs1>>O=C(/C=C/c1cccs1)OCc1cccc1  
 5944 C=CC(=O)OC(C)(C)C.O=C(NC[C@H]1CCc2cc(I)ccc2O1)OCc1cccc1>>CC(C)(C)OC(=O)/C=C/c  
 1ccc2c(c1)CC[C@H](CNC(=O)OCc1cccc1)O2  
 5945 C=CC(=O)N(C)Cc1cc2cccc2n1C.O=c1[nH]c2ncc(Br)cc2n1C1CC1>>CN(Cc1cc2cccc2n1C)C(=O)/  
 5946 C=C/c1cnc2[nH]c(=O)n(C3CC3)c2c1  
 5947 C=CC(=O)OCC.COc1ccc2c(Oc3ccc(Br)cc3)c(-c3cccc3)c(-  
 5948 c3cccc3)nc2c1>>CCOC(=O)/C=C/c1ccc(Oc2c(-c3cccc3)c(-c3cccc3)nc3cc(OC)ccc23)cc1  
 5949 C=CC(=O)OCC.Clc1cccc1Br>>CCOC(=O)/C=C/c1cccc1Cl  
 5950 C=Cc1ccc(OC(C)=O)cc1.CC(=O)OC[C@H]1O[C@H](Oc2cc(I)cc(OC(C)=O)c2)[C@H](OC(C)=O)  
 5951 [C@H](OC(C)=O)[C@H]1OC(C)=O>>CC(=O)OC[C@H]1O[C@H](Oc2cc(/C=C/c3ccc(OC(C)  
 =O)cc3)cc(OC(C)=O)c2)[C@H](OC(C)=O)[C@H](OC(C)=O)[C@H]1OC(C)=O  
 5952 C=CC(C)=O.Cc1ccc2[nH]c3c(c2c1)CC(=O)Nc1ccc(I)cc1-3>>CC(=O)/C=C/c1ccc2c(c1)-  
 5953 c1[nH]c3ccc(C)cc3c1CC(=O)N2  
 5954 Br1cccs1.C=CS(N)(=O)=O>>NS(=O)(=O)/C=C/c1cccs1  
 5955 C=CC(=O)OC.Cc1nc2ccc(I)cc2s1>>COC(=O)/C=C/c1ccc2nc(C)sc2c1  
 5956 Br1c2cccc2cc2cccc12.C=CC(=O)OCCCC>>CCCCOC(=O)/C=C/c1c2cccc2cc2cccc12  
 5957 C=CC=O.Ic1ccc(-c2cccc2)cc1>>O=C/C=C/c1ccc(-c2cccc2)cc1  
 5958 C=Cc1ccc(OC)c(OC)c1.Nc1cccc1I>>COc1ccc(/C=C/c2cccc2N)cc1OC  
 5959 C=Cc1cccc1.CCCCOc1ccc2c(c1)cc(C#N)c1ccc(Br)cc12>>CCCCOc1ccc2c(c1)cc(C#N)c1ccc(/C=C/c  
 3cccc3)cc12  
 5960 C=CC(=O)OC.CCc1ccc(N)c(Br)c1>>CCc1ccc(N)c(/C=C/C(=O)OC)c1  
 5961 C=Cc1cccc1O.COc1ccc(Br)c1>>COc1ccc(/C=C/c2cccc2O)c1

[illegible]

5996 C=COCCO.CC(=O)c1ccc(I)cc1>>C=C(OCCO)c1ccc(C(C)=O)cc1  
5997 C=CC(C)=O.CCCCCCCCCCCCCCc1ccc(I)c(O)c1>>CCCCCCCCCCCCCc1ccc(/C=C/C(C)=O)c  
(O)c1  
5998 C=CCn1c(N(c2ccccc2)S(=O)(=O)c2cccs2)cc2ccccc21>>O=S(=O)(c1cccs1)N1c2ccccc2/C=C\Cn2c1c  
c1ccccc12  
5999 C=CCC(=O)O.Cc1n[nH]c2cc(Br)ccc12>>Cc1n[nH]c2cc(/C=C/CC(=O)O)ccc12  
6000 C=C[C@H](O[Si](C)(C)C(C)(C)C)[C@@H](C)[C@H](CC(I)=CCO)O[Si](C)(C)C(C)(C)C>>C=  
C1C(=CCO)C[C@H](O[Si](C)(C)C(C)(C)C)[C@H](C)[C@H]1O[Si](C)(C)C(C)(C)C  
6001 C=C.Ic1ccc2[nH]ccc2c1>>C=Cc1ccc2[nH]ccc2c1  
6002 C=Cc1ccc(C(C)=O)cc1.Cc1ccc(Br)cc1>>CC(=O)c1ccc(/C=C/c2ccc(C)cc2)cc1  
6003 C=CC(=O)OCC.COc1enc(Cl)c(N)n1>>CCOC(=O)/C=C/c1ncc(OC)nc1N  
C=CC(=O)Nc1ccc2ncn([C@H]3C[C@H](OC(=O)c4ccc(C)cc4)[C@H](COC(=O)c4ccc(C)cc4)O3)c  
6004 2c1.C[Si](C)(C)CCOCn1cc(I)c(=O)[nH]c1=O>>Cc1ccc(C(=O)OC[C@H]2O[C@H](n3enc4ccc(NC(  
=O)/C=C/c5cn(COCC[Si](C)(C)C)c(=O)[nH]c5=O)cc43)C[C@H]2OC(=O)c2ccc(C)cc2)cc1  
C=CCC[C@H]1C(OS(=O)(=O)C(F)(F)F)=C[C@H]2(C)C=C[C@H]1(C(C)C)O2>>C=C1CC[C@H]2C1  
6005 =C[C@H]1(C)C=C[C@H]2(C(C)C)O1  
C=Cc1ccc(C#N)cc1.[O-][N+](=Nc1ccc(Br)cc1)c1ccccc1>>N#Cc1ccc(/C=C/c2ccc(N=[N+])([O-  
6006 ])c3ccccc3)cc2)cc1  
6007 Br1cnc2ccccc2c1.C=CC(=O)N(C)C>>CN(C)C(=O)/C=C/c1cnc2ccccc2c1  
6008 C=COCC.N#Cc1ccc(Br)cc1>>C=C(OCC)c1ccc(C#N)cc1  
6009 C=Cc1ccccc1N.COc1cccc(OC)c1Br>>COc1cccc(OC)c1/C=C/c1ccccc1N  
6010 C=Cc1ccc(OC)c(O)c1.Oc1ccc(O)c(I)c1>>COc1ccc(/C=C/c2cc(O)ccc2O)cc1O  
6011 C=Cc1ccccc1O.Oc1cc(Br)cc(O)c1F>>Oc1ccccc1/C=C/c1cc(O)c(F)c(O)c1  
6012 C=Cc1ccc([N+](=O)[O-])cc1.COc1ccc(I)cc1>>COc1ccc(/C=C/c2ccc([N+](=O)[O-])cc2)cc1  
6013 C=CN(C)C(C)=O.Fc1ccccc1Br>>C=C(c1ccccc1F)N(C)C(C)=O  
6014 C=CC(=O)OC.CCOC(=O)C(C)(c1ccc(Cl)cc1)C(C#N)C#N>>CCOC(=O)C(C)(c1ccc(/C=C/C(=O)OC)c  
c1)C(C#N)C#N  
6015 C=CC(=O)OCc1ccccc1.CCOC(=O)/C=C/c1cccc2c1oc1c(I)cccc12>>CCOC(=O)/C=C/c1cccc2c1oc1c(/  
C=C/C(=O)OCc3ccccc3)cccc12  
6016 C=CC[C@H](N=C(c1ccccc1)c1ccccc1)c1ccccc1Br>>C=C1C[C@H](N=C(c2ccccc2)c2ccccc2)c2ccccc  
6017 C=Cc1ccccc1.CCC(C)c1cnc(C(C)CC)c(Cl)n1>>CCC(C)c1cnc(C(C)CC)c(/C=C/c2ccccc2)n1  
6018 C=CN1C(=O)c2ccccc2C1=O.COc1ccc2cccc(Br)c2n1>>COc1ccc2cccc(/C=C/N3C(=O)c4ccccc4C3=O  
)c2n1  
6019 C=CC(=O)OC.Nc1cccc(I)c1>>COC(=O)/C=C/c1cccc(N)c1  
6020 Br1ccccc1.C=CN1C(=O)c2ccccc2C1=O>>O=C1c2ccccc2C(=O)N1/C=C/c1ccccc1  
6021 C=CC(=O)OCC.CCCCOC(=O)/C=C/c1ccc(Br)cc1Cl>>CCCCOC(=O)/C=C/c1ccc(/C=C/C(=O)OCC)c  
6022 C=CC(OCC)OCC.Cc1ccccc1Br>>CCOC(/C=C/c1ccccc1C)OCC  
6023 C=CC(=O)OCCCCCCCCCCCCC.O=c1[nH]c(=O)n([C@H]2C[C@H](O)[C@H](CO)O2)cc1I>>CCC  
CCCCCCCCCOC(=O)/C=C/c1cn([C@H]2C[C@H](O)[C@H](CO)O2)c(=O)[nH]c1=O  
6024 C=CC(=O)OC(C)(C)C.COc1ccc(-c2sc3cc(OC)ccc3c2Oc2ccc(Br)cc2)cc1>>COc1ccc(-  
c2sc3cc(OC)ccc3c2Oc2ccc(/C=C/C(=O)OC(C)(C)C)cc2)cc1  
6025 C=CC(=O)OCC.COc1ccc(Oc2cccc(Br)c2)cc1>>CCOC(=O)/C=C/c1ccc(Oc2cccc(OC)cc2)c1  
6026 C=Cc1ccc(OC)cc1OC.CCOC(=O)C(C)Br>>CCOC(=O)C(C)/C=C/c1ccc(OC)cc1OC  
6027 C=C(NC(C)=O)C(=O)OC.CC(C)(C)OC(=O)NCCOc1cc(C#N)ccc1I>>COC(=O)/C=C/c1ccc(C#N)cc1  
OCCNC(=O)OC(C)(C)C)NC(C)=O  
6028 C=CC(=O)OC.CC(=O)Oc1ccc(I)cc1CC=C(C)C>>COC(=O)/C=C/c1ccc(OC(C)=O)c(CC=C(C)C)c1  
6029 C=CS(=O)(=O)F.Clc1ccc(I)cc1>>O=S(=O)(F)/C=C/c1ccc(Cl)cc1  
6030 C=CCCCCCCCC.FC(F)(F)c1cc(Br)cc(C(F)(F)F)c1>>CCCCCCCCC/C=C/c1cc(C(F)(F)F)cc(C(F)(F)F)c  
6031 C=Cc1ccc(OC)cc1.CCCCCNC(=O)CCl>>CCCCCNC(=O)C/C=C/c1ccc(OC)cc1  
6032 C=COCCCC.COC(=O)c1cc(OC)c(OC)cc1Br>>C=C(OCCCC)c1cc(OC)c(OC)cc1C(=O)OC  
6033 C=CC(O)c1cc(OC)c(OC)c(OC)c1Br.COc1cccc(I)c1>>COc1cccc(/C=C/C(O)c2cc(OC)c(OC)c(OC)c2B  
6034 C=Cc1ccccc1.Ic1ccc2cc3c(nc12)-c1c(ccc2ccccc12)CC3>>C=C(c1cccc2cc3c(nc12)-  
c1c(ccc2ccccc12)CC3)c1ccccc1  
6035 C=CCCCCCC.COC(=O)CCCCC1=C(I)CCC1=O>>CCCCC/C=C/C1=C(CCCCC(=O)OC)C(=O)CC1  
6036 C=CCCCCCC.ClCc1ccccc1>>C=C(CCCCCC)Cc1ccccc1  
6037 C=CC(OCC)OCC.Cc1ccc(Br)cc1>>CCOC(/C=C/c1ccc(C)cc1)OCC  
6038 C=CC(=O)OCCCC.O=Cc1ccc(Cl)cc1>>CCCCOC(=O)/C=C/c1ccc(C=O)cc1  
6039 C=CC(OCC)OCC.Cc1ncc(Br)cc1C#N>>CCOC(/C=C/c1cnc(C)c(C#N)c1)OCC  
6040 C=CC(=O)OCC.Clc1ncc(Br)cn1>>CCOC(=O)/C=C/c1cnc(Cl)nc1

6041 C=Cc1ccc(C(C)(C)C)cc1.C[Si](C)(OS(=O)(=O)C(F)(F)F)OS(=O)(=O)C(F)(F)F>>CC(C)(C)c1ccc(/C=C/[Si](C)(C)OS(=O)(=O)C(F)(F)F)cc1  
6042 C=CC(OCC(=C)Br)c1ccc(OC)cc1>>C=C1COC(c2ccc(OC)cc2)C1=C  
6043 C=CCN(C(=O)OC(C)(C)C)C(=O)OC(C)(C)C.Clc1cnc2ccccc2c1>>CC(C)(C)OC(=O)N(C/C=C/c1cnc2ccccc2c1)C(=O)OC(C)(C)C  
6044 C=Cc1ccc2c(c1)c1cccc1n2CCCC.O=Cc1ccc(Br)cc1>>CCCCn1c2ccccc2c2cc(/C=C/c3ccc(C=O)cc3)cc21  
6045 C=CC(=O)OCC.CC(C)(C)OC(=O)/C=C/c1ccc(CN(C(=O)C2CCCCC2)c2ccccc(Br)c2)cc1>>CCOC(=O)/C=C/c1cccc(N(Cc2ccc(/C=C/C(=O)OC(C)(C)C)cc2)C(=O)C2CCCCC2)c1  
6046 C=CCN(C(=O)OCc1ccccc1)C(=O)OC(C)(C)C.CC(=O)c1ccc(Br)cc1>>CC(=O)c1ccc(/C=C/CN(C(=O)OCc2ccccc2)C(=O)OC(C)(C)C)cc1  
6047 C=Cc1ccc(Cl)cc1.O=c1cc(-c2ccccc2)oc2cc(Br)ccc12>>O=c1cc(-c2ccccc2)oc2cc(/C=C/c3ccc(Cl)cc3)ccc12  
6048 C=C.O=C(CC(=O)c1ccccc(Br)c1)c1ccccc1>>C=Cc1cccc(C(=O)CC(=O)c2ccccc2)c1  
6049 C=COCCCC.Clc1ccccc1>>C=C(OCCCC)c1ccccc1  
6050 C=C[C@@H](C)[C@H](C/C=C/C(=O)OC(C)(C)C)O[Si](C)(C)C(C)(C)C.O=C(c1ccccc1)c1ccc(Br)cc1>>C[C@H](/C=C/c1ccc(C(=O)c2ccccc2)cc1)[C@H](C/C=C/C(=O)OC(C)(C)C)O[Si](C)(C)C(C)(C)C  
6051 C=Cc1ccccc1.FC(F)(F)C(=C(Br)c1ccccc1)N1CCOCC1>>FC(F)(F)C(=C(/C=C/c1ccccc1)c1ccccc1)N1CCOCC1  
6052 C=CC(=O)OC(C)(C)C.O=C1C[C@H](O)[C@@H]([Se]c2ccccc2)N1Cc1cc2c(cc1I)OCO2>>CC(C)(C)OC(=O)/C=C/c1cc2c(cc1CN1C(=O)C[C@H](O)[C@H]1[Se]c1ccccc1)OCO2  
6053 C=C1C(=O)O[C@H]2[C@H]1C[C@@H](O)/C(C)=C/CC[C@@]1(C)O[C@@H]21.Oc1ccc(I)cc1>>C/C1=C/CC[C@@]2(C)O[C@H]2[C@H]2OC(=O)/C(=C/c3ccc(O)cc3)[C@@H]2[C@H]1O  
6054 C=CC(=O)OC.Cc1ccc2c(c1OS(=O)(=O)C(F)(F)F)CCC=C2>>COC(=O)/C=C/c1c(C)ccc2c1CCC=C2  
6055 C=Cc1ccc2c(c1)c1ccccc1n2CCCCCCCC.N#CC(=C(c1ccccc1)c1ccccc1)c1ccc(Br)cc1>>CCCCCCCCn1c2ccccc2c2cc(/C=C/c3ccc(C(C#N)=C(c4ccccc4)c4ccccc4)cc3)ccc21  
6056 C=CC(=O)OC.OCCc1ccccc1Br>>COC(=O)/C=C/c1ccccc1CCCO  
6057 C=CC(=O)OC(C)(C)C.Nc1ccc(I)cc1>>CC(C)(C)OC(=O)/C=C/c1ccc(N)cc1  
6058 C=CC(=O)OC.Nc1cnc(Br)c1>>COC(=O)/C=C/c1cc(N)ccn1  
6059 C=CCNC(=O)c1ccccc1NC(=O)c1ccccc1.Ic1ccc2ccccc2c1>>O=C(Nc1ccccc1C(=O)NC/C=C/c1ccc2ccccc2c1)c1ccccc1  
6060 C=CC(=O)N(C)[C@H](C)c1oc2ccccc2c1C.CC1(C)COc2cc(Br)cnc2NC1=O>>Cc1c([C@@H](C)N(C)C(=O)/C=C/c2cnc3c(c2)OCC(C)(C)C(=O)N3)oc2ccccc12  
6061 C=CCCC(C)=O.Ic1ccccc1>>CC(=O)CC/C=C/c1ccccc1  
6062 C=CC(=O)OCC.COc1cc(C)c(Br)c(CC#N)c1>>CCOC(=O)/C=C/c1c(C)cc(OC)cc1CC#N  
6063 C=Cc1cccc(F)c1.Oc1ccccc1I>>Oc1ccccc1/C=C/c1cccc(F)c1  
6064 C=Cc1ccc(C(=O)N[C@@H](CCSC)C(=O)OC)c(-c2ccccc2C)c1.O=C(c1cncnc1Br)C12CC3CC(C(C3)C1)C2>>COC(=O)[C@H](CCSC)NC(=O)c1ccc(/C=C/c2cncnc2C(=O)C23CC4CC(C(C4)C2)C3)cc1-c1ccccc1C  
6065 C=C[Si](CC)(CC)CC.O=C(c1ccccc1)c1ccc(Br)cc1>>CC[Si](/C=C/c1ccc(C(=O)c2ccccc2)cc1)(CC)CC  
6066 C=COCCOC=C.Fc1ccc(Br)cc1>>C=COCCOC(=C)c1ccc(F)cc1  
6067 C=Cc1ccc(OC)c(OC)c1.COc1ccc(-c2cc(=O)c3c(OC)cc(OC)c(I)c3o2)cc1OC>>COc1ccc(/C=C/c2c(OC)cc(OC)c3c(=O)cc(-c4ccc(OC)c(OC)c4)oc23)cc1OC  
6068 C=Cc1ccccc1C.Cc1ccccc1c1N>>Cc1ccccc1/C=C/c1cccc(C)c1N  
6069 C=Cc1cccc(OC)c1.Nc1ccccc1Br>>COc1ccccc1/C=C/c2ccccc2N)c1  
6070 C=COCCOCCO.COC(=O)c1ccccc1I>>COC(=O)c1ccccc1/C=C/OCCOCCO  
6071 C=CC(=O)OC(C)(C)C.O=C1CN(CCN2CCOCC2)Cc2cc(Br)cnc2N1>>CC(C)(C)OC(=O)/C=C/c1cnc2c(c1)CN(CCN1CCOCC1)CC(=O)N2  
6072 C=Cc1ccc(C)nc1.COc1cc(I)c2c3c1O[C@@H]1[C@]34CCN(C)[C@H](C2)[C@]42C=C[C@@]1(OC)c1c(OC(C)=O)ccc(O)c12>>COc1cc(/C=C/c2ccc(C)nc2)c2c3c1O[C@@H]1[C@]34CCN(C)[C@H](C2)[C@]42C=C[C@@]1(OC)c1c(OC(C)=O)ccc(O)c12  
6073 C=CC(=O)OCC.CCOC(=O)c1ccccc1I>>CCOC(=O)/C=C/c1ccccc1C(=O)OCC  
6074 C=CC(=O)OCC.Cc1ccc(C=O)c(Br)c1>>CCOC(=O)/C=C/c1cc(C)ccc1C=O  
6075 C=CC(=O)OC.Ic1ccccc1>>COC(=O)/C=C/c1ccccc1  
6076 C=CC(CCC)OCc1ccccc1.Cc1ccccc1Br>>CCCC(/C=C/c1ccccc1C)OCc1ccccc1  
6077 C=Cc1ccccc1.CC(C)(C)c1ccc2c(-c3ccccc3)c(Br)c(=O)oc2c1>>CC(C)(C)c1ccc2c(-c3ccccc3)c(/C=C/c3ccccc3)c(=O)oc2c1  
6078 Cc1ccc(Br)cc1.Cc1ccc(S(=O)(=O)NC(C/C=C/C(=O)C2CCCC2)c2ccccc2)cc1>>Cc1ccc(/C=C/C(C(=O)C2CCCC2)CC(NS(=O)(=O)c2ccc(C)cc2)c2ccccc2)cc1

C=Cc1ccc([N+](=O)[O-]  
 6079 ]cc1.COC(=O)[C@H](Cc1ccc(O)c(I)c1)NC(=O)OC(C)(C)C>>COC(=O)[C@H](Cc1ccc(O)c(/C=C/c2  
 ccc([N+](=O)[O-])cc2)c1)NC(=O)OC(C)(C)C  
 6080 Br1cccc1.C=CCCC(C)=O>>CC(=O)CC/C=C/c1cccc1  
 6081 C=CC1(O)CCC1.COc1ccc(I)cc1>>COc1ccc(/C=C/C2(O)CCC2)cc1  
 6082 C=Cc1ccc(C)cc1.Cn1ccc1-c1cccc(Br)c1>>C1ccc(/C=C/c2cccc(-c3cccc3)c2)cc1  
 6083 C=CC(=O)OCC.CC(C)(C)OC(=O)N[C@@H](CCC(=O)OCc1cccc1)COc1cc(C#N)ccc1I>>CCOC(=O  
 )/C=C/c1ccc(C#N)cc1OC[C@H](CCC(=O)OCc1cccc1)NC(=O)OC(C)(C)C  
 6084 COC[C@H]/N=C(\c1cccc1)N1C=CCC[C@H]1C)C(C)C.Clc1cccc(I)c1>>COC[C@H]/N=C(\c1  
 ccccc1)N1C=C(c2cccc(Cl)c2)CC[C@H]1C)C(C)C  
 6085 C=CC(C)=O.COc1cc(OC)nc(Cl)n1>>COc1cc(OC)nc(/C=C/C(C)=O)n1  
 6086 C=Cc1ccc(OC(C)=O)cc1.Fc1cc(Br)cc(OCc2cccc2)c1>>CC(=O)Oc1ccc(/C=C/c2cc(F)cc(OCc3cccc3  
 )c2)cc1  
 6087 C=CCN(CC1=C(Br)CCCC1)c1ccc(Cl)cc1>>C=C1CN(c2ccc(Cl)cc2)CC2=C1CCCC2  
 6088 C=CS(C)(=O)=O.COc1cccc1Br>>COc1cccc1/C=C/S(C)(=O)=O  
 6089 C=CC(=O)OC.COc1ccc2c(c1)CCN(c1cccc1)C2(C)c1ccc(Br)cc1>>COC(=O)/C=C/c1ccc(C2(C)c3ccc  
 (OC)cc3CCN2c2cccc2)cc1  
 6090 C=C(NC(C)=O)C(=O)OC.O=[N+](O-)c1cc(Br)ccc1F>>COC(=O)/C=C/c1ccc(F)c([N+](=O)[O-  
 ])c1)NC(C)=O  
 6091 C=CC(C)=O.Cc1ccc(I)cc1>>CC(=O)/C=C/c1ccc(C)cc1  
 C=Cc1ccc(C=O)cc1.CCCN(Cc1ccc(CCC(F)(F)C(F)(F)C(F)(F)C(F)(F)C(F)(F)C(F)(F)C(F)(F)C(F)(F)cc1)/N=N/c1cc  
 6092 c(I)cc1>>CCCN(Cc1ccc(CCC(F)(F)C(F)(F)C(F)(F)C(F)(F)C(F)(F)C(F)(F)C(F)(F)C(F)(F)C(F)(F)cc1)/N=N/c1ccc(/C=C/c2  
 ccc(C=O)cc2)cc1  
 6093 C=CCOc1ccc(OC)cc1.Cc1ccc(I)cc1>>COc1ccc(OC/C=C/c2ccc(C)cc2)cc1  
 6094 Br1ccncl.C=CCS(N)(=O)=O>>NS(=O)(=O)C/C=C/c1ccncl  
 6095 Br1ccc2c(c1)CCC1(CCN(Cc3cccc3)CC1)O2.C=CC(=O)OC>>COC(=O)/C=C/c1ccc2c(c1)CCC1(CC  
 N(Cc3cccc3)CC1)O2  
 6096 Br1ccc(I)cc1.C=CC(=O)OC>>COC(=O)/C=C/c1ccc(Br)cc1  
 6097 C=CC(=O)OC.O=Cc1cc(I)ccc1O>>COC(=O)/C=C/c1ccc(O)c(C=O)c1  
 6098 C=Cc1ccc(OC)cc1.O=C(O)c1ccc(Br)cc1>>COc1ccc(/C=C/c2ccc(C(=O)O)cc2)cc1  
 6099 C=CCN(C(=O)OC(C)(C)C)C(=O)OC(C)(C)C.O=C1CCc2cc(Br)ccc21>>CC(C)(C)OC(=O)N(C/C=C/c  
 1ccc2c(c1)CCC2=O)C(=O)OC(C)(C)C  
 6100 C=CC(=O)OCC.Cc1nc(-c2cccc2)sc1Br>>CCOC(=O)/C=C/c1sc(-c2cccc2)nc1C  
 6101 C=Cc1ccc(C)cc1.O=c1c(Br)c(-c2cccc2)oc2cccc12>>Cc1ccc(/C=C/c2c(-  
 6102 Br1ccc(I)cc1.C=Cc1cccc(OC)c1>>COc1cccc(/C=C/c2ccc(Br)cc2)c1  
 6103 C=CC(=O)Nc1cccc1NC(=O)OC(C)(C)C.CCOC(=O)[C@H]1CN(c2cccc2)C[C@@H]1c1ccc(Br)cc1  
 >>CCOC(=O)[C@H]1CN(c2cccc2)C[C@@H]1c1ccc(/C=C/C(=O)Nc2cccc2NC(=O)OC(C)(C)C)cc  
 6104 C=CC(N)=O.FC(F)(F)c1cc(Cl)cc(C(F)(F)F)c1>>NC(=O)/C=C/c1cc(C(F)(F)F)cc(C(F)(F)F)c1  
 6105 C=CS(=O)(=O)c1cccc1.O=C(c1cccc1)c1ccc(Br)cc1>>O=C(c1cccc1)c1ccc(/C=C/S(=O)(=O)c2cccc  
 c2)cc1  
 6106 C=CCCCCCC.Cc1cccc(OS(=O)(=O)C(F)(F)F)c1>>C=C(CCCCCC)c1cccc(C)c1  
 6107 C=Cc1cccc1.COc1ccc(/C=C/C(=O)c2ccc(I)cc2)cc1OC>>COc1ccc(/C=C/C(=O)c2ccc(/C=C/c3cccc3  
 )cc2)cc1OC  
 6108 C=Cc1cccc1.O=Cc1cccc1Br>>O=Cc1cccc1/C=C/c1cccc1  
 6109 C=C(OC(C)=O)C(=O)OCC(F)(F)F.CC(C)=CCc1cc(I)ccc1OCc1cccc1>>CC(=O)O/C(=C\c1ccc(OCc2  
 ccccc2)c(CC=C(C)C)c1)C(=O)OCC(F)(F)F  
 6110 C=CCCN(C)C(=O)OC(C)(C)C.CCOc1cccc(Br)c1>>CCOc1cccc(/C=C/CCN(C)C(=O)OC(C)(C)C)c1  
 6111 C=C.O=C(CC(=O)C(F)(F)F)c1ccc(Br)s1>>C=Cc1ccc(C(=O)CC(=O)C(F)(F)F)s1  
 6112 COC[C@@H]/N=C(\c1cccc1)N1C=CCC[C@H]1C)C(C)C.Clc1cccc1>>COC[C@@H]/N=C(\c1cc  
 ccc1)N1C=C(c2cccc2)CC[C@H]1C)C(C)C  
 6113 C=CC(=O)OCC.O=Cc1cn(Cc2cccc2)c2ccc(Br)cc12>>CCOC(=O)/C=C/c1ccc2c(c1)c(C=O)cn2Cc1cc  
 6114 C=C[Si](CC)(CC)CC.COc1cccc1Br>>CC[Si](/C=C/c1cccc1OC)(CC)CC  
 6115 C=Cc1ccc2c(c1)Sc1cccc1N2CC.O=Cc1ccc(Br)cc1>>CCN1c2cccc2Sc2cc(/C=C/c3ccc(C=O)cc3)ccc  
 6116 C=Cc1cccc1.CC(=S)NS(=O)(=O)c1ccc(Br)cc1>>CC(=S)NS(=O)(=O)c1ccc(/C=C/c2cccc2)cc1  
 6117 C=CC(=O)OCC.COc1ccc(Cn2nc(I)c3ccnc32)cc1>>CCOC(=O)/C=C/c1nn(Cc2ccc(OC)cc2)c2ncccc12  
 6118 C=Cc1ccncc1.CCOc1ccc(Br)cc1F>>CCOc1ccc(/C=C/c2ccncc2)cc1F  
 6119 C=Cc1ccc(OCCO)cc1.CCN1CCN(c2nc(Br)cc3ccsc23)CC1>>CCN1CCN(c2nc(/C=C/c3ccc(OCCO)cc  
 3)cc3ccsc23)CC1  
 6120 Br1cccc2[nH]ccc12.C=COCCCC>>C=C(OCCCC)c1cccc2[nH]ccc12  
 6121 C=CC(=O)O.Cc1cccc(Br)c1>>Cc1cccc(/C=C/C(=O)O)c1

6122 C=Cc1ccc2c(c1)Sc1ccccc1N2CCCCCCCC.CCCCCCCCN1c2ccc(Br)cc2Sc2cc(C=O)ccc21>>CCCCC  
CCCN1c2ccccc2Sc2cc(/C=C/c3ccc4c(c3)Sc3cc(C=O)ccc3N4CCCCCCCC)ccc21  
6123 C=C.COC(=O)c1ccc(Br)c([N+](=O)[O-])c1>>C=Cc1ccc(C(=O)OC)cc1[N+](=O)[O-]  
6124 C=Cc1ccc(C)cc1.CCOC(=O)C(F)Br>>CCOC(=O)C(F)/C=C/c1ccc(C)cc1  
6125 C=CC(N)=O.CC[C@@]1(O)C(=O)OCc2c1cc1n(c2=O)Cc2cc3c(Br)cccc3nc2-  
1>>CC[C@@]1(O)C(=O)OCc2c1cc1n(c2=O)Cc2cc3c(/C=C/C(N)=O)cccc3nc2-1  
C=CC(=O)OCC.N#Cc1cccc(OC[C@H](Cc2ccc(OC3CCN(C(=O)OCc4cccc4)CC3)cc2)NS(=O)(=O)c  
6126 2ccc(I)cc2)c1>>CCOC(=O)/C=C/c1ccc(S(=O)(=O)N[C@H](COc2cccc(C#N)c2)Cc2ccc(OC3CCN(C(  
=O)OCc4cccc4)CC3)cc2)cc1  
C=CC(=O)OCc1ccccc1.COC(=O)CC1(CC(=O)OC)CC(c2cc(OCc3ccccc3)ccc2Br)=NO1>>COC(=O)C  
6127 C1(CC(=O)OC)CC(c2cc(OCc3ccccc3)ccc2/C=C/C(=O)OCc2ccccc2)=NO1  
6128 C=Cc1ccc(CC#N)cc1.CCOC(=O)C(F)Br>>CCOC(=O)C(F)/C=C/c1ccc(CC#N)cc1  
6129 C=Cc1c(OCc2ccccc2Br)ccc2ccccc12>>C1=C/c2c(ccc3ccccc23)OCc2ccccc2/1  
6130 C=COCCCC.CC(=O)c1ccc(Br)s1>>C=C(OCCCC)c1ccc(C(C)=O)s1  
6131 C=CC(=O)OC.Fc1cc(Br)c2[nH]c3c(c2c1)CCC3>>COC(=O)/C=C/c1cc(F)cc2c3c([nH]c12)CCC3  
6132 C=CC(OCC)OCC.CCOC(=O)c1ccc(I)cc1>>CCOC(=O)c1ccc(/C=C/C(OCC)OCC)cc1  
6133 C=Cc1ccccc1.Nc1ccc(C(F)(F)F)cc1Br>>Nc1ccc(C(F)(F)F)cc1/C=C/c1ccccc1  
6134 C=Cc1cc(OC(C)=O)cc(OC(C)=O)c1.O=[N+](O-  
]c1ccc(I)cc1>>CC(=O)Oc1cc(/C=C/c2ccc([N+](=O)[O-])cc2)cc(OC(C)=O)c1  
6135 C=CC(=O)OCC.NC(=O)c1cc(O)cc(I)c1>>CCOC(=O)/C=C/c1cc(O)cc(C(N)=O)c1  
6136 C=CC(=O)O.CC(C)(C)OC(=O)N[C@@H](Cc1ccccc1Br)C(=O)O>>CC(C)(C)OC(=O)N[C@@H](Cc1  
ccccc1/C=C/C(=O)O)C(=O)O  
6137 C=CCOC(C)=O.Cc1cccc(I)c1>>CC(=O)OC/C=C/c1cccc(C)c1  
6138 C=CC(=O)OC.C[C@H]1C[C@@H](n2c(Nc3ccc(C(F)(F)F)cc3)nc3cc(Br)ccc32)CC(C)(C)C1>>COC(  
=O)/C=C/c1ccc2c(c1)nc(Nc1ccc(C(F)(F)F)cc1)n2[C@@H]1C[C@H](C)CC(C)(C)C1  
6139 C=CC(C)=O.Fc1ccc(Br)cc1>>CC(=O)/C=C/c1ccc(F)cc1  
6140 C=CC(=O)OC.CC(C)(C)OC(=O)NCCc1ccc(Br)cc1CCNC(=O)OC(C)(C)C>>COC(=O)/C=C/c1ccc(CC  
NC(=O)OC(C)(C)C)c(CCNC(=O)OC(C)(C)C)c1  
6141 C=Cc1ccc(C#N)cc1.N#Cc1cc2sc3ccccc3c2c2cc(Br)ccc12>>N#Cc1ccc(/C=C/c2ccc3c(C#N)cc4sc5ccc  
cc5c4c3c2)cc1  
6142 C=Cc1ccccc1.COC(=O)[C@H](Cc1ccc(O)c(I)c1)NC(=O)OC(C)(C)C>>COC(=O)[C@H](Cc1ccc(O)c(  
/C=C/c2ccccc2)c1)NC(=O)OC(C)(C)C  
6143 C=CCN(C(=O)c1ccc2ccccc2c1Br)C(C(=O)NC1CCCC1)c1ccccc1>>C=C1CN(C(C(=O)NC2CCCC  
2)c2ccccc2)C(=O)c2ccc3ccccc3c21  
6144 Brc1ccccc1.C=CC(=O)N1CCOCC1>>O=C(/C=C/c1ccccc1)N1CCOCC1  
6145 C=CC(=O)OC.Cc1cn2ccc(Br)cc2n1>>COC(=O)/C=C/c1ccn2cc(C)nc2c1  
6146 C=C(NC(=O)OC(C)(C)C)C(=O)OC.Nc1cc(N)cc(I)c1>>COC(=O)/C=C/c1cc(N)cc(N)c1)NC(=O)OC(  
C)(C)C  
6147 C=CC(=O)CCCCC.CC(C)(C)c1ccc(Br)cc1>>CCCCC(=O)/C=C/c1ccc(C(C)(C)C)cc1  
6148 C=C(NC(=O)OCc1ccccc1)C(=O)OC.CC(=O)OCc1cc(C)ccc1I>>COC(=O)/C=C/c1ccc(C)cc1COC(C)  
=O)NC(=O)OCc1ccccc1  
6149 C=Cc1ccccc1C.Cc1ccc(N)c(Br)c1>>Cc1ccc(N)c(/C=C/c2ccccc2C)c1  
C=CCNC(=O)NC(C)(C)CO.Cc1cc(OCc2ccccc2)c([C@@H]2S[C@H](COCc3ccccc3)[C@@H](OCc3  
6150 cccc3)[C@H](OCc3ccccc3)[C@H]2OCc2ccccc2)cc1Cc1ccc(Br)cc1>>Cc1cc(OCc2ccccc2)c([C@@H  
]2S[C@H](COCc3ccccc3)[C@@H](OCc3ccccc3)[C@H](OCc3ccccc3)[C@H]2OCc2ccccc2)cc1Cc1cc  
c(/C=C/CNC(=O)NC(C)(C)CO)cc1  
6151 C=CC(=O)OC.CC(C)CN1CCc2c(ccc3[nH]ccc23)C1c1ccc(Br)cc1>>COC(=O)/C=C/c1ccc(C2c3ccc4[n  
H]ccc4c3CCN2CC(C)C)cc1  
6152 C=CC(=O)OCC.Cc1cccc([C@@H](C)OC[C@H]2CO2)c1Br>>CCOC(=O)/C=C/c1c(C)cccc1[C@@H  
(C)OC[C@H]1CO1  
6153 C=CC(=O)CC.COc1ccc(Br)cc1>>CCC(=O)/C=C/c1ccc(OC)cc1  
6154 C=COCCCCC.CC(=O)Nc1ccc(OS(=O)(=O)C(F)(F)F)cc1>>C=C(OCCCC)c1ccc(NC(C)=O)cc1  
6155 C=Cc1cccc(N)n1.Cn1c(=O)c2c(cc(Br)n2C)n(C)c1=O>>Nc1c(=O)c2c(cc(/C=C/c3cccc(N)n3)n2C)n(C)  
6156 C=CC(C)=O.COc1cccc(Cn2nc(I)c3ccccc32)c1>>COc1cccc(Cn2nc(/C=C/C(C)=O)c3ccccc32)c1  
6157 C=CC(=O)OCC.COc1nc2ccc(Br)cc2nc1OC>>CCOC(=O)/C=C/c1ccc2nc(OC)c(OC)nc2c1  
Cc1ccc(S(=O)(=O)/C=C2\C(C)(C)C2(F)F)cc1.Clc1ccc(I)cc1>>Cc1ccc(S(=O)(=O)/C=C2\C(C)(C)C2(  
6158 F)F)c2ccc(Cl)cc2)cc1  
C=CC#N.CCOC(=O)Nc1ccccc1C1=C(I)CCN1S(=O)(=O)c1ccc(C)cc1>>CCOC(=O)Nc1ccccc1C1=C(/  
6159 C=C/C#N)CCN1S(=O)(=O)c1ccc(C)cc1  
COc1ccc(I)cc1.Cc1ccc(S(=O)(=O)/C=C2\C(C)(C)C2(F)F)cc1>>COc1ccc(/C=C2/C(C)(C)C2(F)F)S(=  
6160 O)(=O)c2ccc(C)cc2)cc1



6161 C=Cc1ccc(N(c2ccccc2)c2cccc3ccccc23)cc1.O=Cc1ccc(Br)cc1>>O=Cc1ccc(/C=C/c2ccc(N(c3ccccc3)c3cccc4ccccc34)cc2)cc1  
6162 C=Cc1ccccc1.Cc1ccc2c(-c3ccccc3C)c(Br)c(=O)oc2c1>>Cc1ccc2c(-c3ccccc3C)c(/C=C/c3ccccc3)c(=O)oc2c1  
6163 C=CC(=O)OC(C)(C)C.O=S(=O)(c1cccc(Br)c1)c1ccc2cccc(Cl)c2n1>>CC(C)(C)OC(=O)/C=C/c1cccc(S(=O)(=O)c2ccc3cccc(Cl)c3n2)c1  
6164 C=CN1CCCC1=O.FC(F)(Br)c1nc2ccccc2o1>>O=C1CCCN1/C=C/C(F)(F)c1nc2ccccc2o1  
6165 C=CC(=O)NCO.C[C@]12C[C@@]34C=C(Sc5cccc(I)c5)C(=O)[C@@](C)(CCC(=O)Nc5c(O)ccc(C(=O)O)c5O)[C@@H]3[C@H](C[C@@H]1C4)O2>>C[C@]12C[C@@]34C=C(Sc5cccc(/C=C/C(=O)NC(O)c5)C(=O)[C@@](C)(CCC(=O)Nc5c(O)ccc(C(=O)O)c5O)[C@@H]3[C@H](C[C@@H]1C4)O2  
6166 C=CCC(CC(=C)Br)(C(=O)OCC)C(=O)OCC>>C=C1C=CCC(C(=O)OCC)(C(=O)OCC)C1  
6167 C=CC(OCC)OCC.O=[N+](=[O-])c1ccc(Br)cn1>>CCOC(/C=C/c1ccc([N+](=O)[O-])nc1)OCC  
6168 C=CC(=O)OCC.COc1ccc(I)c([N+](=O)[O-])c1>>CCOC(=O)/C=C/c1ccc(OC)cc1[N+](=O)[O-]  
6169 C=CCOc1ccccc1C.COc1ccc(I)cc1>>COc1ccc(/C=C/COc2ccccc2C)cc1  
6170 C=CC(=O)OC.O=C1C=CC2(C=C1)OC(=O)C(I)=C2c1ccccc1>>COC(=O)/C=C/C1=C(c2ccccc2)C2(C=CC(=O)C=C2)OC1=O  
6171 C=CS(=O)c1ccccc1.COc1ccc(Br)cc1>>COc1ccc(/C=C/S(=O)c2ccccc2)cc1  
6172 C=CC(=O)N1C(=O)OC[C@@H]1Cc1ccccc1.C[Si](C)(C)CN(Cc1cc2c(cc1)OCO2)C(CC1OCCO1)[Si](C)(C)C>>C[Si](C)(C)CN(Cc1cc2c(cc1/C=C/C(=O)N1C(=O)OC[C@@H]1Cc1ccccc1)OCO2)C(CC1OCCO1)[Si](C)(C)C  
6173 C=Cc1ccc2c(c1)CC2.C[Si](C)(OS(=O)(=O)C(F)(F)F)OS(=O)(=O)C(F)(F)F>>C[Si](C)(/C=C/c1ccc2c(c1)CC2)OS(=O)(=O)C(F)(F)F  
6174 C=CCc1cccc(F)c1N(Cc1ccccc1Br)S(=O)(=O)c1ccc(C)cc1>>C=C1Cc2cccc(F)c2N(S(=O)(=O)c2ccc(C)cc2)Cc2ccccc21  
6175 C=C(C)C.O=[N+](=[O-])c1cccc(Cl)c1>>CC(C)=Cc1cccc([N+](=O)[O-])c1  
6176 C=C(NC(C)=O)C(=O)OC.Nc1ccc(Br)cc1CCO>>COC(=O)/C=C/c1ccc(N)c(CCO)c1)NC(C)=O  
6177 C=Cc1ccc(OC)cc1.O=[N+](=[O-])c1ccc(Cl)cc1>>COc1ccc(/C=C/c2ccc([N+](=O)[O-])cc2)cc1  
6178 C=CCc1ccc(OC)cc1.Ic1ccccc1>>COc1ccc(C/C=C/c2ccccc2)cc1  
6179 C=Cc1ccccc1.FC(F)(F)c1cc(Br)cc(C(F)(F)F)c1>>FC(F)(F)c1cc(/C=C/c2ccccc2)cc(C(F)(F)F)c1  
6180 C=CC(=O)N(C)C.CCOC(=O)/C=C/c1ccccc1Br>>CCOC(=O)/C=C/c1ccccc1/C=C/C(=O)N(C)C  
6181 COC[C@@H](/N=C(\c1ccccc1)N1C=CCC[C@H]1C)C(C)C.Cc1ccccc1I>>COC[C@@H](/N=C(\c1ccccc1)N1C=C(c2ccccc2C)CC[C@H]1C)C(C)C  
6182 C=Cc1cccc(OC)c1.CC(C)(C)OC(=O)c1ccc(Br)cc1[N+](=O)[O-]>>COc1cccc(/C=C/c2ccc(C(=O)OC(C)(C)C)c([N+](=O)[O-])c2)c1  
6183 C=COCCCC.COc1cccc(Br)c1>>C=C(OCCCC)c1cccc(OC)c1  
6184 C=Cc1cncnc1.Cc1cc(N(c2ccc([N+](=O)[O-])cc2)c2ccc([N+](=O)[O-])cc2)ccc1Br>>Cc1cc(N(c2ccc([N+](=O)[O-])cc2)c2ccc([N+](=O)[O-])cc2)ccc1/C=C/c1cncnc1  
6185 C=CC(=O)OC.CCC1(CN2[C@H](C)Cc3c([nH]c4ccccc34)[C@H]2c2c(F)cc(Br)cc2F)CC1>>CCC1(CN2[C@H](C)Cc3c([nH]c4ccccc34)[C@H]2c2c(F)cc(/C=C/C(=O)OC)cc2F)CC1  
6186 CC(C)N(C(=O)/C=C/c1ccccc1)C(C)C.Cc1ccc(O)c(Br)c1>>Cc1ccc(O)c(/C=C/C(=O)N(C(C)C)C(C)C)c2ccccc2)c1  
6187 C=CC(=O)OC(C)(C)C.O=C1COCc2cc(Br)enc2N1>>CC(C)(C)OC(=O)/C=C/c1enc2c(c1)COCC(=O)N  
6188 Bre1enc2ccccc2c1.C=CC(=O)CCC>>CCCC(=O)/C=C/c1enc2ccccc2c1  
6189 Bre1cn(C2CCCCC2)c(-c2ccc(OCc3ccccc3)cc2)n1.C=CC(=O)OC(C)(C)C>>CC(C)(C)OC(=O)/C=C/c1cn(C2CCCCC2)c(-c2ccc(OCc3ccccc3)cc2)n1  
6190 C=CP(=O)(OCC)OCC.Ic1ccccc1>>CCOP(=O)(/C=C/c1ccccc1)OCC  
6191 C=C[Si](C)(C)C.COc1cc(CO[Si](C)(C)C)c(I)c(OC)c1OC>>COc1cc(CO[Si](C)(C)C)c(/C=C/[Si](C)(C)C)c(OC)c1OC  
6192 C=CC(=O)NC(C)(C)C.C[C@]12C[C@@]34C=C(Sc5cccc(I)cc5)C(=O)[C@@](C)(CCC(=O)Nc5c(O)ccc(C(=O)O)c5O)[C@@H]3[C@H](C[C@@H]1C4)O2>>CC(C)(C)NC(=O)/C=C/c1ccc(SC2=C[C@]34C[C@H]5C[C@H](O[C@@]5(C)C3)[C@H]4[C@](C)(CCC(=O)Nc3c(O)ccc(C(=O)O)c3O)C2=O)cc1  
6193 C=CC(=O)OCC.CC(C)(C)C(=O)Nc1ccccc1I>>CCOC(=O)/C=C/c1ccccc1NC(=O)C(C)(C)C  
6194 C=CC(=O)OCc1ccccc1.CCn1nnc2c(C)c(Br)cc(OC)c21>>CCn1nnc2c(C)c(/C=C/C(=O)OCc3ccccc3)cc(OC)c21  
6195 C=CC(=O)OCc1ccccc1.Fc1cccc(Cn2nc(I)c3ccccc32)c1>>O=C(/C=C/c1nn(Cc2cccc(F)c2)c2ccccc12)OCc1ccccc1  
6196 C=CC(C)=O.Ic1ccc2cc[nH]c2c1>>CC(=O)/C=C/c1ccc2cc[nH]c2c1  
6197 C=COCCCC.O=c1cc(Br)c2ccccc2o1>>CCCCO/C=C/c1cc(=O)oc2ccccc12  
6198 C=COCCCC.O=S(=O)(Oc1ccc(F)cc1)C(F)(F)F>>C=C(OCCCC)c1ccc(F)cc1

C=CCC(O)c1ccc(-  
 6199 c2ccnc(OC)c2)cc1F.COC(=O)[C@@H](C)[C@H](c1ccc(I)c(O)c1)C1CC1>>COC(=O)[C@@H](C)[C  
 @H](c1ccc(/C=C\CC(O)c2ccc(-c3ccnc(OC)c3)cc2F)c(O)c1)C1CC1  
 6200 C=C.NC(=O)c1cc(Cl)ccc1Br>>C=Cc1ccc(Cl)cc1C(N)=O  
 6201 C=Cc1cccc1.O=[N+](O-)]c1ccc(Cl)c1>>O=[N+](O-)]c1cccc(/C=C/c2ccccc2)c1  
 6202 C=COCCCC.Oc1cccc(Br)c1>>C=C(OCCCC)c1cccc(O)c1  
 6203 C=CC(=O)NCc1cccc1.CC(C)(C)c1ccc2[nH]c3c(c2c1)CC(=O)Nc1ccc(I)cc1-  
 3>>CC(C)(C)c1ccc2[nH]c3c(c2c1)CC(=O)Nc1ccc(/C=C/C(=O)NCc2ccccc2)cc1-3  
 6204 C=CC(=O)OC.COc1ccc2nc(-c3ccccc3)c(I)n2c1>>COC(=O)/C=C/c1c(-c2ccccc2)nc2ccc(OC)cn12  
 6205 C=CCC(OCC(=C)Br)c1ccc(OC)c(OC)c1>>C=C1COC(c2ccc(OC)c(OC)c2)CC1=C  
 6206 C=Cc1ccc2ccccc2c1.FC(F)(F)I>>FC(F)(F)/C=C/c1ccc2ccccc2c1  
 6207 Brc1nc2[nH]cnc2c1.C=CC(=O)N(C)Cc1ccc2ccccc2n1C>>CN(Cc1ccc2ccccc2n1C)C(=O)/C=C/c1cnc2[  
 nH]cnc2c1  
 6208 C=CN1CCCC1=O.CCCCC(Br)C(F)(F)F>>CCCCC(/C=C/N1CCCC1=O)C(F)(F)F  
 6209 Brc1cnc1.C=Cc1cccc(OC)c1>>COc1cccc(/C=C/c2ccnc2)c1  
 6210 C=Cc1ccc2ccccc2c1.CCOC(=O)C(F)(F)Br>>CCOC(=O)C(F)(F)/C=C/c1ccc2ccccc2c1  
 6211 C=CC(C)(C)C.O=C(c1cccc1)c1ccc(Br)cc1>>CC(C)(C)/C=C/c1ccc(C(=O)c2ccccc2)cc1  
 6212 Brc1c(-c2ccccc2)nc2cccn12.C=CC(=O)OC>>COC(=O)/C=C/c1c(-c2ccccc2)nc2cccn12  
 6213 C=CC(=O)Nc1cccc2ccnc12.Cc1cc(C)cc(I)c1>>Cc1cc(C)cc(/C=C\C(=O)Nc2ccccc2ccnc23)c1  
 6214 C=CC=O.Clc1ccc(I)cc1>>O=C/C=C/c1ccc(Cl)cc1  
 6215 C=C.O=C(CC(=O)C(F)(F)F)c1ccc(Br)c2ccccc12>>C=Cc1ccc(C(=O)CC(=O)C(F)(F)F)c2ccccc12  
 6216 C=Cc1cccc1.Cc1cccc(C)c1Cl>>Cc1cccc(C)c1/C=C/c1cccc1  
 6217 C=CC(=O)OC.O=C1C(=O)N(Cc2ccc(C(F)(F)F)cc2)c2cccc(Br)c21>>COC(=O)/C=C/c1ccc2c1C(=O)  
 C(=O)N2Cc1ccc(C(F)(F)F)cc1  
 6218 Brc1cnc2ccccc2c1.C=C[C@H]1COC(C)(C)N1C(=O)OC(C)(C)C>>CC(C)(C)OC(=O)N1[C@H](C=/  
 C/c2cnc3ccccc3c2)COC1(C)C  
 6219 C=CC(N)=O.Cc1nc(Br)c2c(c1O)COC(C)(C)OC2>>Cc1nc(/C=C/C(N)=O)c2c(c1O)COC(C)(C)OC2  
 6220 C=C.COC(=O)c1ccc(C)cc1Br>>C=Cc1cc(C)ccc1C(=O)OC  
 6221 C=C.Cc1ccc(C(N)=O)c(Br)c1>>C=Cc1cc(C)ccc1C(N)=O  
 6222 C=CCN1C(=O)c2ccccc2C1=O.Cc1ccc(I)cc1>>Cc1ccc(/C=C/CN2C(=O)c3ccccc3C2=O)cc1  
 6223 C=COCCCC.O=C(Cl)c1ccc2ccccc2c1>>CCCCO/C=C/C(=O)c1ccc2ccccc2c1  
 6224 C=COCCO.Cc1ccc(Br)cc1>>C=C(OCCO)c1ccc(C)cc1  
 6225 C=Cc1ccc(CC)cc1.CCOc1ccc(-n2cnc3cc(Br)enc32)cc1>>CCOc1ccc(-  
 n2cnc3cc(/C=C/c4ccc(CC)cc4)enc32)cc1  
 6226 C=C[Si](OCC)(OCC)OCC.COc1ccc(/C=C/c2ccc(I)cc2)cc1>>CCO[Si](C=C/c1ccc(/C=C/c2ccc(OC)cc  
 2)cc1)(OCC)OCC  
 6227 C=Cc1ccc(OC)cc1.COc1ccc2c(c1)cc(C#N)c1ccc(Br)cc12>>COc1ccc(/C=C/c2ccc3c(C#N)cc4cc(OC)c  
 cc4c3c2)cc1  
 6228 C=CS(C)(=O)=O.Cc1ccc(Br)cc1>>Cc1ccc(/C=C/S(C)(=O)=O)cc1  
 6229 C=C(NC(C)=O)C(=O)OCc1cccc1.CCc1cc(Br)ccc1N>>CCc1cc(/C=C/(NC(C)=O)C(=O)OCc2ccccc2)  
 ccc1N  
 6230 C=CCN(C(=O)C(C)(C)C)[C@H](C)c1cc(F)cc(F)c1.O=C1Nc2ncccc2[C@]12Cc1ccc(Br)cc1C2>>C[C  
 @H](c1cc(F)cc(F)c1)N(C/C=C/c1ccc2c(c1)C[C@@]1(C2)C(=O)Nc2ncccc21)C(=O)C(C)(C)C  
 6231 Brc1ccc(-c2cnc3ccccc3n2)cc1.C=CCn1c(-c2ccc(C(F)(F)F)cc2)nc2ccccc2c1=O>>O=c1c2ccccc2nc(-  
 c2ccc(C(F)(F)F)cc2)n1C/C=C/c1ccc(-c2cnc3ccccc3n2)cc1  
 6232 Brc1cccc1.C=Cc1nnn(-c2ccccc2)n1>>C(=C/c1nnn(-c2ccccc2)n1)\c1cccc1  
 6233 C=CC(=O)OCC.Cc1nc(N)nc(NC2CCC(OCCO)CC2)c1Br>>CCOC(=O)/C=C/c1c(C)nc(N)nc1NC1CC  
 C(OCCO)CC1  
 6234 C=CC(=O)OC.Nc1c(F)cccc1Br>>COC(=O)/C=C/c1cccc(F)c1N  
 6235 C=Cc1ccc(C)nc1.COC(=O)c1cc(I)ccc1NC(C)=O>>COC(=O)c1cc(/C=C/c2ccc(C)nc2)ccc1NC(C)=O  
 6236 C=CC(=O)OC(C)(C)C.[2H]C1([2H])CCc2cc(Br)ccc21>>[2H]C1([2H])CCc2cc(/C=C/C(=O)OC(C)(C)  
 C)ccc21  
 6237 C=Cc1ccc(OC)c(O)c1.COc1ccc(I)c(OC)c1>>COc1ccc(/C=C/c2ccc(OC)c(O)c2)c(OC)c1  
 6238 C=CC(C)OC(C)=O.CCOc1cnc(-c2ccc(Br)cc2)nc1>>CCOc1cnc(-c2ccc(/C=C/C(C)OC(C)=O)cc2)nc1  
 6239 C=CC(=O)OC(C)(C)C.CCc1cc(O)ccc1I>>CCc1cc(O)ccc1/C=C/C(=O)OC(C)(C)C  
 6240 C=CC(=O)OCC(CC)CCCC.COc1cccc(Cl)c1>>CCCC(CC)COC(=O)/C=C/c1cccc(OC)c1  
 6241 C=Cc1ccc(-c2ccccc2)cc1.CCOC(=O)C(F)I>>CCOC(=O)C(F)/C=C/c1ccc(-c2ccccc2)cc1  
 6242 C=C(C(=O)OC)C(O)c1cc2ccccc2n1Cc1cccc1I>>COC(=O)/C1=C/c2ccccc2Cn2c(cc3ccccc32)C1O  
 6243 C=CC(=O)OCC.Clc1cnc(C2CC2)c1>>CCOC(=O)/C=C/c1cnc(C2CC2)c1

6244 C=Cc1cccc2cccc12.O=P1(c2cccc2)C(Br)=Cc2cccc21>>O=P1(c2cccc2)C(/C=C/c2cccc3cccc23)=Cc2cccc21

6245 C=CN1CCCC1=O.O=S(=O)(Oc1ccc2cccc2c1Br)C(F)(F)F>>C=C(c1ccc2cccc2c1Br)N1CCCC1=O

6246 C=CC(=O)OC(C)(C)C.O=S(=O)(c1ccc(Br)cc1)n1ccc2ccnc21>>CC(C)(C)OC(=O)/C=C/c1ccc(S(=O)(=O)n2ccc3ccncc32)cc1

6247 C=CC(=O)NC(C)C.COc1cccc(OC)c1I>>COc1cccc(OC)c1/C=C/C(=O)NC(C)C

6248 C=Cc1ccc(-c2c(-c3ccc(OC)cc3)c(=O)c2=O)cc1.COc1ccc(I)cc1>>COc1ccc(/C=C/c2ccc(-c3c(-c4ccc(OC)cc4)c(=O)c3=O)cc2)cc1

6249 C=CC(=O)OC(C)(C)C.COc1ccc(S(=O)(=O)N2CCc3cc(Br)cnc32)cc1>>COc1ccc(S(=O)(=O)N2CCc3cc(C)/C=C/C(=O)OC(C)(C)C)cnc32)cc1

6250 C=CCOC(C)=O.OCc1cccc1I>>CC(=O)OC/C=C/c1cccc1CO

6251 C=Cc1cccc1.O=Cc1ccc(F)cc1Br>>O=Cc1ccc(F)cc1/C=C/c1cccc1

6252 C=CC#N.CC(=O)c1ccc(Br)cc1>>CC(=O)c1ccc(/C=C/C#N)cc1

6253 C=CC(=O)OC(C)(C)C.COc1cccc(NCc2ccc(Br)cc2)c1>>COc1cccc(NCc2ccc(/C=C/C(=O)OC(C)(C)C)cc2)c1

6254 Br1ccnc1.C=Cc1ccc(OC)cc1>>COc1ccc(/C=C/c2ccnc2)cc1  
C=CC(=O)NCc1ccc(F)c(-

6255 c2cccc(CN3CCN(C(=O)OC(C)(C)C)[C@@H](C)C3)c2)c1.CCc1nc2c(cnn2CC)c(NC2CCOCC2)c1I>>CCc1nc2c(cnn2CC)c(NC2CCOCC2)c1/C=C/C(=O)NCc1ccc(F)c(-  
c2cccc(CN3CCN(C(=O)OC(C)(C)C)[C@@H](C)C3)c2)c1  
\*CNCCCOCCOCCOCCNC(=O)COc1ccc(C(Cc2cc(OC)cc(OC)c2)NC(=O)c2ccc(C=C)cc2)cc1.COc1

6256 ccc(I)cc1>>\*CNCCCOCCOCCOCCNC(=O)COc1ccc(C(Cc2cc(OC)cc(OC)c2)NC(=O)c2ccc(/C=C/c3ccc(OC)cc3)cc2)cc1  
\*CNCCCOCCOCCOCCNC(=O)COc1ccc(C(Cc2cc(OC)cc(OC)c2)NC(=O)c2ccc(C=C)cc2)cc1.Fc1cc

6257 c(I)c(F)c1>>\*CNCCCOCCOCCOCCNC(=O)COc1ccc(C(Cc2cc(OC)cc(OC)c2)NC(=O)c2ccc(/C=C/c3ccc(F)cc3F)cc2)cc1

6258 C=CC(=O)N(C)C.CCN(CC)C(=O)C1CCCN(c2cccc(Br)n2)C1>>CCN(CC)C(=O)C1CCCN(c2cccc(/C=C/C(=O)N(C)C)n2)C1

6259 C=CC(=O)O.CN(c1cccc(I)c1)S(=O)(=O)c1ccc(-  
c2cccc2)cc1>>CN(c1cccc(/C=C/C(=O)O)c1)S(=O)(=O)c1ccc(-c2cccc2)cc1

6260 C=Cc1cccc1.O=C1CCC(c2ccc(Br)cc2)O1>>O=C1CCC(c2ccc(/C=C/c3cccc3)cc2)O1

6261 C=CC(=O)c1ccc(C)cc1.COc1ccc(I)c(OC)n1>>COc1ccc(/C=C/C(=O)c2ccc(C)cc2)c(OC)n1

6262 C=CS(N)(=O)=O.Cc1cccc(C)c1Br>>Cc1cccc(C)c1/C=C/S(N)(=O)=O

6263 C=CCOc1ccc(OC)cc1.Ic1ccc2cccc12>>COc1ccc(OC/C=C/c2cccc3cccc23)cc1

6264 C=CC(=O)OC.COc1ccc2c(c1)CCN(c1ccc(F)cc1)C2(C)c1ccc(Br)cc1>>COC(=O)/C=C/c1ccc(C2(C)c3ccc(OC)cc3CCN2c2ccc(F)cc2)cc1

6265 C=Cc1ccc(Br)cc1.Fc1ccc(I)cc1>>Fc1ccc(/C=C/c2ccc(Br)cc2)cc1

6266 C=CC(=O)O[C@@H]1C[C@@H]2CC[C@@]1(C)C2(C)C.O=Cc1cccc1Br>>CC1(C)[C@H]2CC[C@@]1(C)[C@H](OC(=O)/C=C/c1cccc1C=O)C2

6267 Br1ccc2[nH]ccc2c1.C=CC(=O)O>>O=C(O)/C=C/c1ccc2[nH]ccc2c1

6268 C=C[C@@H]1COC(C)(C)N1C(=O)OCc1cccc1.COc1ccc(I)cc1>>COc1ccc(/C=C/[C@@H]2COC(C)(C)N2C(=O)OCc2cccc2)cc1

6269 C=CCN(Cc1cc2ccc(C)cc2nc1Cl)c1ccc(C)cc1>>C=C1CN(c2ccc(C)cc2)Cc2cc3ccc(C)cc3nc21

6270 C=Cc1cccc1.CCc1nc(CC)c(Cl)n1>>CCc1nc(CC)c(/C=C/c2cccc2)n1

6271 C=CC(=O)OC.Cn1c2cccc2c2nc3ccc(Cl)cc3c3cccc1c32>>COC(=O)/C=C/c1ccc2nc3c4cccc4n(C)c4ccc(c2c1)c34

6272 C=Cc1cccc1.O=C(Oc1ccc(I)cc1)c1cccc1>>O=C(Oc1ccc(/C=C/c2cccc2)cc1)c1cccc1  
C=C1C(=O)O[C@H]2[C@H]1CCC(=C)[C@@H]1C[C@H](OC(C)=O)C(=C)[C@H]21.CC(=O)Nc1c

6273 cc(I)cc1C(F)(F)F>>C=C1CC[C@H]2/C(=C/c3ccc(NC(C)=O)c(C(F)(F)F)c3)C(=O)O[C@H]2[C@H]2C(=C)[C@@H](OC(C)=O)C[C@@H]12

6274 C=CCc1cccc1.Fc1ccc(CCl)c1>>C=C(Cc1cccc1)Cc1cccc(F)c1

6275 C=CC(C)(C)O.Nc1ncc(Br)c1I>>CC(C)(O)/C=C/c1c(N)cncc1Br

6276 C=Cc1cccc1.COCOc1cc2occc(=O)c2cc1Br>>COCOc1cc2occc(=O)c2cc1/C=C/c1cccc1

6277 C=Cc1cccn1.CC(=O)OCC1Cn2c3cccc3c3c4c(c5c6cc(Br)ccc6n(c5c32)C1)C(=O)N(C(C)=O)C4>>C  
C(=O)OCC1Cn2c3cccc3c3c4c(c5c6cc(/C=C/c7cccn7)ccc6n(c5c32)C1)C(=O)N(C(C)=O)C4  
C=CC(=O)N1N=Cc2cccc2C1c1nc2cccc2s1.COc1cc(Cc2cnc(N)nc2N)cc(I)c1OC>>COc1cc(Cc2cnc(N)nc2N)cc(/C=C/C(=O)N2N=Cc3cccc3C2c2nc3cccc3s2)c1OC

6279 C=CCc1cccc1.Cc1cccc1OS(=O)(=O)C(F)(F)F>>C=C(Cc1cccc1)c1cccc1C

6280 C=CC(=O)O.O=[N+][O-]c1ccc(I)cc1>>O=C(O)/C=C/c1ccc([N+](=O)[O-])cc1

6281 C=CC(=O)OC(C)(C)C.Fc1cccc1Oc1ncc2nc(-c3ccc(Br)cc3)oc2n1>>CC(C)(C)OC(=O)/C=C/c1ccc(-c2nc3cnc(Oc4cccc4F)nc3o2)cc1

C=Cc1ccc2c(c1)CC[C@H]1[C@@H]2CC[C@]2(C)[C@H](O[Si](C)(C)C(C)(C)C)CC[C@H]1  
 6282 2.[Si](C)(C)I>>CC(C)(C)[Si](C)(C)O[C@H]1CC[C@H]2[C@@H]3CCc4cc/C=C/[Si](C)(C)C)ccc4  
 [C@H]3CC[C@]12C  
 6283 C=CCc1ccc(OC)cc1.COc1cc(I)ccc1O>>COc1ccc(C/C=C/c2ccc(O)c(OC)c2)cc1  
 6284 C=C(NC(C)=O)C(=O)OC.COc1cc(C)c(I)c(C)c1>>COC(=O)/C=C/c1c(C)cc(OC)cc1C)NC(C)=O  
 6285 C=CCc1ccc2ccnc2c1OCc1cccc1Br>>C=C1Cc2ccc3ccnc3c2OCc2cccc21  
 6286 C=C[C@H]1O[C@@H]2OC(C)(C)O[C@@H]2[C@H]1OC.O=[N+](O-  
 )c1ccc(I)cc1>>CO[C@H]1[C@@H](/C=C/c2ccc([N+](=O)[O-  
 6287 Br)1cccc1.C=COCCN(C)C>>C=C(OCCN(C)C)c1cccc1  
 6288 C=CC(=O)OC.CC(C)(C)c1cc(Br)cc(C=O)c1O>>COC(=O)/C=C/c1cc(C=O)c(O)c(C(C)(C)C)c1  
 6289 C=CC(=O)OC(C)(C)C.Cc1cc(C)cc(Br)c1>>Cc1cc(C)cc/C=C/C(=O)OC(C)(C)C)c1  
 6290 C=CC(=O)OC.O=Cc1ccc(Br)cc1>>COC(=O)/C=C/c1ccc(C=O)cc1  
 C=CC(=O)OCC.Cc1nc(-  
 6291 n2c(C)ccc2C)cc(N[C@H]2CC[C@H](OCCO)CC2)c1Br>>CCOC(=O)/C=C/c1c(N[C@H]2CC[C@H](  
 OCCO)CC2)cc(-n2c(C)ccc2C)nc1C  
 6292 C=CC(=O)NC(C)C.Cc1ccc(Br)cc1>>Cc1ccc(/C=C/C(=O)NC(C)C)cc1  
 6293 C=CC(=O)OCC.N#Cc1ccc(I)cc1>>CCOC(=O)/C=C/c1ccc(C#N)cc1  
 6294 C=C[C@H]1O[C@@H]2OC(C)(C)O[C@@H]2[C@H]1O.O=C1CCOc2cc(Br)ccc21>>CC1(C)O[C@  
 H]2O[C@H](/C=C/c3ccc4c(c3)OCCC4=O)[C@H](O)[C@H]2O1  
 6295 C=CC(=O)OC.CC(=O)Cc1cccc(Br)c1>>COC(=O)/C=C/c1cccc(CC(C)=O)c1  
 6296 COc1ccc/C=C/C(=O)O/C(=C/I)c2cccc2)cc1>>COc1ccc(/C=C2/C=C(c3cccc3)OC2=O)cc1  
 6297 C=COCCCC.O=c1cc(Br)c2ccc3cccc3c2[nH]1>>CCCCO/C=C/c1cc(=O)[nH]c2c1cccc1cccc12  
 6298 C=CCCCCCC[Si](c1cccc1)(c1cccc1)C(C)(C)C.CC1(C)OC(=O)c2c(cccc2OS(=O)(=O)C(F)(F)F)O  
 1>>CC1(C)OC(=O)c2c(/C=C/CCCCCO[Si](c3cccc3)(c3cccc3)C(C)(C)C)cccc2O1  
 6299 C=CC(=O)OCC.CCn1ccc(Br)cc1O>>CCOC(=O)/C=C/c1ccn(CC)c(=O)c1  
 6300 C=CC(C)=O.O=[N+](O-)c1ccc(Cl)cc1>>CC(=O)/C=C/c1ccc([N+](=O)[O-])cc1  
 6301 C=CCCCNc1cccc1Cl>>C=C1CCCNc2cccc21  
 C=C.CCCCC(CC)COc1cc(/C=C/c2ccc(/C=C/c3ccc(/C=C/c4ccc(/C=C/c5ccc(I)cc5)cc4)cc3)cc2)c(OCC  
 6302 (CC)CCCC)cc1C>>C=Cc1ccc(/C=C/c2ccc(/C=C/c3ccc(/C=C/c4ccc(/C=C/c5ccc(OCC(CC)CCCC)c(C)c  
 c5OCC(CC)CCCC)cc4)cc3)cc2)cc1  
 6303 C=Cc1ccc2cccc2c1.COc1ccc(C)c(I)c1>>COc1ccc(C)c(/C=C/c2ccc3cccc3c2)c1  
 6304 C=Cc1cccc1.O=c1cc(-c2cccc2)oc2cc(Br)ccc12>>O=c1cc(-c2cccc2)oc2cc(/C=C/c3cccc3)ccc12  
 6305 C=C1C(=O)O[C@@H]2/C=C(\C)CC/C=C(\C)CC[C@@H]12.Nc1ccc(I)cn1>>C/C1=C[C@H]2OC(=  
 O)/C=C/c3ccc(N)nc3)[C@@H]2CC/C(C)=C/CC1  
 C=CC1(C(=O)O)COC(C)(C)CO1.CC(C)[C@H](O)C(=O)N[C@@H](C)C(=O)N1CCC[C@@H](C(=O  
 6306 )N[C@H](C)c2ccc3ccc(Br)cc3n2)N1>>CC(C)[C@H](O)C(=O)N[C@@H](C)C(=O)N1CCC[C@@H]  
 (C(=O)N[C@H](C)c2ccc3ccc(/C=C/C4(C(=O)O)COC(C)(C)CO4)cc3n2)N1  
 6307 C=CC(=O)O.COc1cccc1I>>COc1cccc1/C=C/C(=O)O  
 6308 Br)1ccc2cccc2c1.C=CC(OCC)OCC>>CCOC(/C=C/c1ccc2cccc2c1)OCC  
 C=CC(C)=O.CCN1C[C@]2(OC(=O)c3cc(I)ccc3NC(C)=O)CC[C@H](OC)[C@@]34[C@@H]2C[C@  
 6309 H]([C@@H]13)[C@@]1(O)C[C@H](OC)[C@H]2C[C@@H]4[C@]1(O)[C@H]2OC>>CCN1C[C@]  
 2(OC(=O)c3cc(/C=C/C(C)=O)ccc3NC(C)=O)CC[C@H](OC)[C@@]34[C@@H]2C[C@H]([C@@H]1  
 3)[C@@]1(O)C[C@H](OC)[C@H]2C[C@@H]4[C@]1(O)[C@H]2OC  
 6310 Br)1cccc1.C=Cc1ccc(C=O)cc1>>O=Cc1ccc(/C=C/c2cccc2)cc1  
 6311 Br)1ccc(I)cc1.C=CC(F)(F)C(F)(F)C(F)(F)C(F)(F)C(F)(F)F>>FC(F)(F)C(F)(F)C(F)(F)C(F)(F)  
 C(F)(F)C(F)(F)C=C/c1ccc(Br)cc1  
 6312 C=CCCC(C)=O.Fc1ccc(I)cc1>>CC(=O)CC/C=C/c1ccc(F)cc1  
 6313 C=Cc1cccc1.O=c1oc2cc(Oc3cccc3)ccc2c(-c2cccc2)c1Br>>O=c1oc2cc(Oc3cccc3)ccc2c(-  
 c2cccc2)c1/C=C/c1cccc1  
 6314 C=CC(=O)Nc1cccc1NC(=O)OC(C)(C)C.COC(=O)C(CC1CCN(C)CC1)c1ccc(Br)cc1>>COC(=O)C(C  
 C1CCN(C)CC1)c1ccc(/C=C/C(=O)Nc2cccc2NC(=O)OC(C)(C)C)cc1  
 C=C[C@H](Cn1c(Br)c(-  
 6315 c2ccc(C(=O)Nc3cccn3)cc2)c2c(N)ncnc21)NC(=O)OC(C)(C)C>>C=C1c2c(-  
 6316 C=Cc1c(OS(=O)(=O)c2cccc2Br)ccc2cccc12>>O=S1(=O)Oc2ccc3cccc3c2/C=C/c2cccc21  
 6317 C=CC(=O)OC.Ic1cccc1>>COC(=O)/C=C/c1cccc1  
 6318 C=Cc1cc(OC)c(OC)c(OC)c1-c1ccc(OC)cc1.COc1ccc(I)cc1>>COc1ccc(/C=C/c2cc(OC)c(OC)c(OC)c2-  
 c2ccc(OC)cc2)cc1  
 C=C[C@@]1(O)[C@@H]([C@H]2COC(C)(C)O2)O[C@@H]2OC(C)(C)O[C@@H]21.O=c1cc(-  
 6319 c2cccc2)oc2cc(Br)ccc12>>CC1(C)OC[C@H]([C@H]2O[C@H]3OC(C)(C)O[C@@H]3[C@@]2(O  
 )/C=C/c2ccc3c(=O)cc(-c4cccc4)oc3c2)O1  
 6320 C=CC(=O)OC.Clc1cccc1Br>>COC(=O)/C=C/c1cccc1Cl

6321 C=C(C)C(=O)OC.Cc1cc(-c2ccccc2)n2nc(C)c(I)c2n1>>COC(=O)/C(C)=C\c1c(C)nn2c(-  
6322 C=Cc1cccc1.Cc1ccc(Br)c(N)c1>>Cc1ccc(/C=C/c2ccccc2)c(N)c1  
6323 C=CC(=O)OC(C)(C)C.Cc1ccc(S(=O)(=O)Nc2c(C)cc(C)cc2I)cc1>>Cc1ccc(S(=O)(=O)Nc2c(C)cc(C)cc  
6324 2/C=C/C(=O)OC(C)(C)C)cc1  
6324 C=Cc1ccc(C(=O)OC)cc1.CC(C)(C)c1cc(Br)cc(C=O)c1O>>COC(=O)c1ccc(/C=C/c2cc(C=O)c(O)c(C(  
6325 C=Cc1cncn1.Cc1c(Nc2c(I)cncc2C#N)ccc2[nH]ccc12>>Cc1c(Nc2c(C#N)cncc2/C=C/c2cnccn2)ccc2[n  
6326 H]ccc12  
6326 C=CCO.Cc1ccc(Br)cc1>>Cc1ccc(/C=C/CO)cc1  
6327 C=CC#N.CC(=O)c1cc2cc(Br)ccc2o1>>CC(=O)c1cc2cc(/C=C/C#N)ccc2o1  
6328 C=CC(=O)OCC.O=C(c1cccc1)c1ccc(Br)cc1>>CCOC(=O)/C=C/c1ccc(C(=O)c2ccccc2)cc1  
6329 Br1cncn1.C=CCO[C@H]1[C@H](C)[C@H](O[C@@H]2O[C@H](C)[C@H](N(C)C)[C@H]2O  
6329 C(C)=O)[C@](C)(OC)C[C@H](C)/C(=N\OCc2ccccc2)[C@H](C)[C@H]2OC(=O)O[C@]2(C)[C@  
6329 @H](CC)OC(=O)[C@H]1C>>CC[C@H]1OC(=O)[C@H](C)[C@H](OC/C=C/c2cnccn2)[C@H](  
6329 C)[C@@H](O[C@H]2O[C@H](C)[C@H](N(C)C)[C@H]2OC(C)=O)[C@](C)(OC)C[C@H](C)  
6329 /C(=N\OCc2ccccc2)I[C@H](C)I[C@H]2OC(=O)O[C@]112C  
6330 C=Cc1ccc2ccccc2c1.CCOC(=O)c1cccc1Br>>CCOC(=O)c1cccc1/C=C/c1ccc2ccccc2c1  
6331 C=Cc1cccc1.FC(F)(F)c1ccc(Br)cc1>>FC(F)(F)c1ccc(/C=C/c2ccccc2)cc1  
6332 C=CCC(c1cccc1)P(=O)(OC)OC.Ic1cccc1>>COP(=O)(OC)C(C/C=C/c1cccc1)c1cccc1  
6333 COC(=O)/C=C/Oc1cccc1-c1cncn1Br>>COC(=O)/C=C1/Oc2ccccc2-c2cncn21  
6334 C=Cc1cccc1C(=O)O.FC(F)(F)c1cc(I)cc(C(F)(F)F)c1>>O=C(O)c1cccc1/C=C/c1cc(C(F)(F)F)cc(C(F)  
6335 (F)F)c1  
6335 Br1cnc2nc(-c3ccccc3)c(-c3ccccc3)nc2c1.C=CC#N>>N#C/C=C/c1cnc2nc(-c3ccccc3)c(-  
6336 C=Cc1ccc(C(C)(C)C)cc1.C[Si](C)(I)Cc1cccc1>>CC(C)(C)c1ccc(/C=C/[Si](C)(C)Cc2ccccc2)cc1  
6337 C=CC(=O)N(C)Cc1oc2ccccc2c1C.CC1(C)CNC2ncc(Br)cc2O1>>Cc1c(CN(C)C(=O)/C=C/c2cnc3c(c2)  
6338 OC(C)(C)CN3)oc2ccccc12  
6338 C=Cc1nc(C)c(OC(=O)C(C)(C)C)c2c1COC2OC.Ic1cccc1>>COC1OCc2c(/C=C/c3ccccc3)nc(C)c(OC(  
6339 =O)C(C)(C)C)c21  
6339 C=CC(=O)OC(C)(C)C.Clc1ccc(I)cc1>>CC(C)(C)OC(=O)/C=C/c1ccc(Cl)cc1  
6340 C=Cc1cccn1.Cc1ccc(Br)cc1>>Cc1ccc(/C=C/c2cccn2)cc1  
6341 C=Cc1ccc(Cl)cc1.Cc1ccc(S(=O)(=O)Oc2ccccc3c(Br)ccn23)cc1>>Cc1ccc(S(=O)(=O)Oc2ccccc3c(/C=C  
6342 /c4ccc(Cl)cc4)ccn23)cc1  
6342 C=CC(=O)OC(C)(C)C.CCn1nnc2c(C)c(Br)ccc21>>CCn1nnc2c(C)c(/C=C/C(=O)OC(C)(C)C)ccc21  
6343 Br1ccc2ccccc2c1.C=Cc1nc2c(=O)[nH]c(N=CN(C)C)nc2n1[C@H]1C[C@H](O)[C@H](COC(c2  
6344 ccccc2)(c2ccc(OC)cc2)c2ccc(OC)cc2)O1>>COc1ccc(C(OC[C@H]2O[C@H](n3c(/C=C/c4ccc5ccccc5  
6345 c4)nc4c(=O)[nH]c(N=CN(C)C)nc43)C[C@H]2O)(c2ccccc2)c2ccc(OC)cc2)cc1  
6345 C=Cc1cccc1.COc1cccc1Br>>COc1cccc1/C=C/c1cccc1  
6345 C=Cc1cc(OC(C)=O)cc(OC(C)=O)c1.CC(=O)Oc1ccc(Br)cc1OC(C)=O>>CC(=O)Oc1cc(/C=C/c2ccc(O  
6346 C(C)=O)c(OC(C)=O)c2)cc(OC(C)=O)c1  
6346 C=Cc1cccc1.Nc1ccc(O)cc1I>>Nc1ccc(O)cc1/C=C/c1cccc1  
6347 C=Cc1cccc1.Clc1ccc(I)c1>>Clc1ccc(/C=C/c2ccccc2)c1  
6348 C=CC(=O)OCCCC.Fc1ccc(I)cc1>>CCCCOC(=O)/C=C/c1ccc(F)cc1  
6349 C=CCCO.Cc1cc(Br)ccc1Cc1c(O[C@@H]2O[C@H](COC(=O)c3ccccc3)[C@@H](OC(=O)c3ccccc3)[  
6349 C@H](OC(=O)c3ccccc3)[C@H]2OC(=O)c2ccccc2)n[nH]c1C(C)C>>Cc1cc(/C=C/CCO)ccc1Cc1c(O[  
6349 C@@H]2O[C@H](COC(=O)c3ccccc3)[C@@H](OC(=O)c3ccccc3)[C@H](OC(=O)c3ccccc3)[C@H]2  
6349 OC(=O)c2ccccc2)n[nH]c1C(C)C  
6350 C=CCNC(=O)c1cc(C)on1.COc1ccc(I)cc1>>COc1ccc(/C=C/CNC(=O)c2cc(C)on2)cc1  
6351 C=CCO[Si](C)(C)C(C)(C)C.O=Cc1ccc(Br)cc1>>CC(C)(C)[Si](C)(C)OC/C=C/c1ccc(C=O)cc1  
6352 Br1cncn1.C=Cc1cccc1OC>>COc1cccc1/C=C/c1cncn1  
6353 C=CC(N)=O.CCOC(=O)C1=Cc2cc(Br)cc(Cl)c2OC1C(F)(F)F>>CCOC(=O)C1=Cc2cc(/C=C/C(N)=O)  
6354 cc(Cl)c2OC1C(F)(F)F  
6354 C=C(C)C(=O)OC.Cc1ccc(Br)cc1>>COC(=O)/C(C)=C/c1ccc(C)cc1  
6355 C=C1N=C(c2ccccc2)[C@H](C(C)C)N(C(=O)OC(C)(C)C)C1=O.COc1ccc(I)cc1>>COc1ccc(/C=C2\N=  
6356 C(c3ccccc3)[C@H](C(C)C)N(C(=O)OC(C)(C)C)C2=O)cc1  
6356 C=CCNC(=O)OC(C)(C)C.O=C(c1cccc1)c1ccc(Br)cc1>>C=C(CNC(=O)OC(C)(C)C)c1ccc(C(=O)c2c  
6357 cccc2)cc1  
6357 C=CC(=O)OCC.Cc1nc(N)nc(NCc2ccccc2)c1I>>CCOC(=O)/C=C/c1c(C)nc(N)nc1NCc1cccc1  
6358 C=C(NC(C)=O)C(=O)OC.CCc1cccc(C)c1I>>CCc1cccc(C)c1/C=C(\NC(C)=O)C(=O)OC  
6359 C=CC(=O)OC(C)(C)C.O=C(Cc1cccc1)c1ccc(Br)cc1>>CC(C)(C)OC(=O)/C=C/c1ccc(C(=O)Cc2ccccc  
6360 2)cc1  
6360 C=Cc1cccc1.Clc1cccn1>>C(=C/c1cccn1)\c1cccc1

6361 C=Cc1cccc1.CCCCCn1cc(C(=O)NC23CC4CC(CC(C4)C2)C3)c(=O)c2cc(I)ccc21>>CCCCCn1cc(C(=O)NC23CC4CC(CC(C4)C2)C3)c(=O)c2cc(/C=C/c3cccc3)ccc21

6362 C=CCc1c(N(CC)C(=O)c2cccc2I)ccc2c1ccc(=O)n2C>>C=C1Cc2c(ccc3c2ccc(=O)n3C)N(CC)C(=O)c2cccc21

6363 C=CC(=O)OC(C)(C)C.COc1ccc(CNc2ccc(C)cc2I)cc1>>COc1ccc(CNc2ccc(C)cc2/C=C/C(=O)OC(C)(C)C)cc1

6364 C=CC(=O)OCC.COc1ccc(Br)c(C=O)c1>>CCOC(=O)/C=C/c1ccc(OC)cc1C=O

6365 C=CC(=O)C(C)(C)CO[Si](C)(C)C(C)(C)C.O=[N+](Ic1ccc(I)cc1>>CC(C)(CO[Si](C)(C)C(C)(C)C)C(=O)/C=C/c1ccc([N+](=O)[O-])cc1

6366 C=CC(=O)OC.CCOC(=O)c1cccc(I)c1>>CCOC(=O)c1cccc(/C=C/C(=O)OC)c1

6367 Br1ccnc1.C=CCN(C(=O)OC(C)(C)C)C(=O)OC(C)(C)C>>CC(C)(C)OC(=O)N(C/C=C/c1ccnc1)C(=O)OC(C)(C)C

6368 Br1cccc(N(c2cccc2)c2cccc2)n1.C=Cc1ccc(OC)cc1>>COc1ccc(/C=C/c2cccc(N(c3cccc3)c3cccc3)n2)cc1

6369 C=CC(=O)OCC.O=C1CCc2cc(Br)ccc21>>CCOC(=O)/C=C/c1ccc2c(c1)CCC2=O

6370 C=CC(=O)OCC.Cc1cccc1I>>CCOC(=O)/C=C/c1cccc1C

6371 C=CC(N)=O.Cn1c2cccc2c2nc3ccc(Cl)cc3c3cccc1c32>>Cn1c2cccc2c2nc3ccc(/C=C/C(N)=O)cc3c3cccc1c32

6372 C=Cc1c(F)c(F)c(F)c(F)c1F.Ic1cc2cccc2s1>>Fc1c(F)c(F)c(/C=C/c2cc3cccc3s2)c(F)c1F

6373 C=CC(=O)OC.CC(C)(C)OC(=O)N1CCCC2(CC(=O)c3cc(Br)ccc3O2)C1>>COC(=O)/C=C/c1ccc2c(c1)C(=O)CC1(CCCN(C(=O)OC(C)(C)C)C1)O2

6374 C=Cc1ccnc1.O=C(NCc1cn(OCc2cccc2)nc1I)OCc1cccc1>>O=C(NCc1cn(OCc2cccc2)nc1/C=C/c1ccnc1)OCc1cccc1

6375 C=C(F)[Si](C)(c1cccc1)c1cccc1.Clc1cccc1I>>C[Si](/C(F)=C/c1cccc1Cl)(c1cccc1)c1cccc1

6376 C=CC(=O)OCC.CC(C)(CC1Cc2cccc2C1)NC[C@H](O)COc1cc(Br)ccc1F>>CCOC(=O)/C=C/c1ccc(F)c(OC[C@H](O)CNC(C)(C)CC2Cc3cccc3C2)c1

6377 C=CC[C@H]1CCc2cccc2N1C.COc1ccc(Br)cc1OC>>COc1ccc(/C=C/C[C@H]2CCc3cccc3N2C)cc1OC

6378 C=C(F)[Si](C)(c1cccc1)c1cccc1.O=[N+](Ic1ccc(I)cc1>>C[Si](/C(F)=C/c1ccc([N+](=O)[O-])cc1)(c1cccc1)c1cccc1

6379 C=CC(=O)OC.COC(=O)/C=C/c1cccc(N(Cc2ccc(Br)cc2)C(=O)C2CCCC2)c1>>COC(=O)/C=C/c1ccc(CN(C(=O)C2CCCC2)c2cccc(/C=C/C(=O)OC)c2)cc1

6380 C=CCCCC(O)C(=O)OC.Fc1ccc(Br)cn1>>COC(=O)C(O)CCCC/C=C/c1ccc(F)nc1

6381 C=Cc1ccnc1.CCOP(=O)(Cc1ccc(Br)cc1)OCC>>CCOP(=O)(Cc1ccc(/C=C/c2ccnc2)cc1)OCC

6382 Br1cccc1.C=C[Si](C)(C)Cl>>C[Si](C)(Cl)/C=C/c1cccc1

6383 C=Cc1cccc1Cl.Cn1nc(Br)c2cccc21>>Cn1nc(/C=C/c2cccc2Cl)c2cccc21

6384 C=CC(C)=O.COC(=O)c1cc2cc(I)c(OCc3cccc3)c(OC)c2c(=O)o1>>COC(=O)c1cc2cc(/C=C/C(C)=O)c(OCc3cccc3)c(OC)c2c(=O)o1

6385 C=CC(=O)OCC.COC(=O)c1ccc(I)cc1>>CCOC(=O)/C=C/c1ccc(C(=O)OC)cc1

6386 C=CCO[C@H]1[C@H](OCc2cccc2)[C@H](COCc2cccc2)O[C@H]1Sc1cccc1Br>>C=C1CO[C@H]2[C@H](OCc3cccc3)[C@H](COCc3cccc3)O[C@H]2Sc2cccc21

6387 C=Cc1cccc1.CC1=C(C)C(C)(C(=O)c2ccc(Br)cc2)C(C)=C1C>>CC1=C(C)C(C)(C(=O)c2ccc(/C=C/c3cccc3)cc2)C(C)=C1C

6388 C=CC(=O)OCC.Cn1nnc2c(C(F)(F)F)c(Br)ccc21>>CCOC(=O)/C=C/c1ccc2c(nnn2C)c1C(F)(F)F

6389 C=Cc1nc(Cl)nc2c1cn2COCC[Si](C)(C)C.CCN(c1ncccc1Br)S(C)(=O)=O>>CCN(c1ncccc1/C=C/c1nc(Cl)nc2c1cn2COCC[Si](C)(C)C)S(C)(=O)=O

6390 C=CC(=O)OC.CC(=O)Oc1c(C/C=C(\C)CCC=C(C)C)cc(I)cc1C/C=C(\C)CCC=C(C)C>>COC(=O)/C=C/c1cc(C/C=C(\C)CCC=C(C)C)c(OC(C)=O)c(C/C=C(\C)CCC=C(C)C)c1

6391 C=C(c1cccc1)[Si](C)(C)c1cccc1.Ic1ccsc1>>C[Si](C)(/C(=C/c1ccsc1)c1cccc1)c1cccc1

6392 C=Cc1ccc(CP(=O)(OC(C)(C)C)OC(C)(C)C)cc1.CC(C)O[Si](Cc1ccc(Br)cc1)(OC(C)C)OC(C)C>>CC(C)O[Si](Cc1ccc(/C=C/c2ccc(CP(=O)(OC(C)(C)C)OC(C)(C)C)cc2)cc1)(OC(C)C)OC(C)C

6393 Br1cncc(Oc2cccc2)c1.C=CCCO>>OCC/C=C/c1cncc(Oc2cccc2)c1

6394 C=C(C)C(=O)OC.Cc1cccc1Cl>>COC(=O)/C(C)=C/c1cccc1C

6395 C=CC(=O)OC.CC(C)(C)OC(=O)N1CCc2ccc(Br)cc2CC1>>COC(=O)/C=C/c1ccc2c(c1)CCN(C(=O)OC(C)(C)C)CC2

6396 C=COCCCC.Cc1cccc(Cl)c1C>>C=C(OCCCC)c1cccc(C)c1C

6397 Br1cc2ccc1CCc1ccc(cc1)CC2.C=CC(=O)OC>>COC(=O)/C=C/c1cc2ccc1CCc1ccc(cc1)CC2

6398 C=CCOC(C)=O.Cc1ccc(I)cc1>>CC(=O)OC/C=C/c1ccc(C)cc1

6399 C=CC(=O)OC.CN1c2nccc(I)c2N(C)c2c(C=O)ccnc21>>COC(=O)/C=C/c1ccnc2c1N(C)c1c(C=O)ccnc

6400 C=CC(=O)OCC.Cc1nc(C(C)C)nc(N)c1I>>CCOC(=O)/C=C/c1c(C)nc(C(C)C)nc1N

6401 C=Cc1ccncc1.CC(C)(C)OC(=O)N[C@H](COc1cncc(Br)c1)Cc1cccc(C#N)c1>>CC(C)(C)OC(=O)N[C@H](COc1cncc(/C=C/c2ccncc2)c1)Cc1cccc(C#N)c1  
 6402 C=C1C(=O)O[C@@H]2C3=C(C)C(=O)C=C[C@]3(C)CC[C@H]12.Fc1ccc(I)cc1>>CC1=C2[C@H]3OC(=O)/C(=C/c4ccc(F)cc4)[C@@H]3CC[C@@]2(C)C=CC1=O  
 6403 Br1ccccc1I.C=CC(=O)OC>>COC(=O)/C=C/c1ccccc1Br  
 6404 C=CCNC(=O)c1ccccc1NC(=O)c1ccccc1.COc1ccc(I)cc1>>COc1ccc(/C=C/CNC(=O)c2ccccc2NC(=O)c2ccccc2)cc1  
 6405 C=CC(=O)OC(C)(C)C.COC(=O)c1ncccc1Br>>COC(=O)c1ncccc1/C=C/C(=O)OC(C)(C)C  
 6406 C=Cc1ccc(C(=O)O)cc1.Oc1ccc(-c2oc3cc(O)cc(Br)c3c2-c2cc(O)cc(O)c2)cc1>>O=C(O)c1ccc(/C=C/c2cc(O)cc3oc(-c4ccc(O)cc4)c(-c4cc(O)cc(O)c4)c23)cc1  
 6407 C=C.COC(=O)c1ccc(Cl)cc1Br>>C=Cc1cc(Cl)ccc1C(=O)OC  
 6408 C=Cc1ccc(Cl)cc1.COC(=O)c1ccccc1I>>COC(=O)c1ccccc1/C=C/c1ccc(Cl)cc1  
 6409 C=CCCc1ccc2ccncc2n1.CCOC(=O)CC(c1ccc(OC)nc1)c1ncc(Br)n1C>>CCOC(=O)CC(c1ccc(OC)nc1)c1ncc(/C=C/CCc2ccc3ccncc3n2)n1C  
 6410 C=CC(C)=O.COc1ccc2cc(Br)ccc2c1>>COc1ccc2cc(/C=C/C(C)=O)ccc2c1  
 6411 C=CC(=O)OC.CN1C(=O)C(=O)c2ccc(Br)cc21>>COC(=O)/C=C/c1ccc2c(c1)N(C)C(=O)C2=O  
 6412 C=CC(=O)N(C)OC.Cc1ccc(Br)cc1>>CON(C)C(=O)/C=C/c1ccc(C)cc1  
 6413 C=CC(C)=O.Ic1ccccc1N(Cc1ccccc1)Cc1ccccc1>>CC(=O)/C=C/c1ccccc1N(Cc1ccccc1)Cc1ccccc1  
 6414 C=Cc1ccc(N(c2ccccc2)c2ccccc2)cc1.O=Cc1ccc(Br)cc1F>>O=Cc1ccc(/C=C/c2ccc(N(c3ccccc3)c3ccccc3)cc2)cc1F  
 6415 C=CS(=O)c1ccccc1.CC(=O)Nc1ccc(Br)cc1>>CC(=O)Nc1ccc(/C=C/S(=O)c2ccccc2)cc1  
 6416 C=CS(=O)(=O)F.Ic1coc2ccccc12>>O=S(=O)(F)/C=C/c1coc2ccccc12  
 6417 C=Cc1ncnc2c1ncn2[C@@H]1O[C@H](CO[Si](C)(C)C(C)(C)C)[C@@H](O[Si](C)(C)C(C)(C)C)[C@H]1O[Si](C)(C)C(C)(C)C.Ic1ccccc1>>CC(C)(C)[Si](C)(C)OC[C@H]1O[C@@H](n2cnc3c(/C=C/c4ccc4)ncnc32)[C@H](O[Si](C)(C)C(C)(C)C)[C@@H]1O[Si](C)(C)C(C)(C)C  
 6418 C=Cc1ccc(SC)cc1.Clc1c2cc(Br)ccc2nc2c1oc1ccccc12>>CSc1ccc(/C=C/c2ccc3nc4c(oc5ccccc54)c(Cl)c3c2)cc1  
 6419 C=CC(=O)OCCCC.FC(F)(F)c1ccccc1Br>>CCCCOC(=O)/C=C/c1ccccc1C(F)(F)F  
 6420 C=CCC(C)C.O=S(=O)(Oc1ccccc1)C(F)(F)F>>C=C(CC(C)C)c1ccccc1  
 6421 C=CC(=O)OC.O=[N+](=[O-])c1ccccc1Cl>>COC(=O)/C=C/c1ccccc1[N+](=O)[O-]  
 6422 C=Cc1cncc(C#N)c1Nc1ccc2[nH]ccc2c1C.Clc1cc(Br)ccn1>>Cc1c(Nc2c(C#N)cncc2/C=C/c2ccnc(Cl)c2)ccc2[nH]ccc12  
 6423 C=CC(=O)OC(C)(C)C.CCOC(=O)CN1Cc2cc(Br)enc2NC1=O>>CCOC(=O)CN1Cc2cc(/C=C/C(=O)OC(C)(C)C)nc2NC1=O  
 6424 C=CC(=O)OC(C)(C)C.O=C1CN(C(=O)OCc2ccccc2)Cc2cc(Br)enc2N1>>CC(C)(C)OC(=O)/C=C/c1cn c2c(c1)CN(C(=O)OCc1ccccc1)CC(=O)N2  
 6425 C=CC(OCC)OCC.Fc1cccc(Br)c1>>CCOC(/C=C/c1cccc(F)c1)OCC  
 6426 Br1ccccc1.C=Cc1ccc(F)cc1>>Fc1ccc(/C=C/c2ccccc2)cc1  
 6427 C=Cc1ccccc1.O=[N+](=[O-])c1cc(I)cc([N+](=O)[O-])c1>>O=[N+](=[O-])c1cc(/C=C/c2ccccc2)cc([N+](=O)[O-])c1  
 6428 Br1ccccc1.C=C1C[C@H]2[C@@H]3CCc4cc(OC)ccc4[C@H]3CC[C@]2(C)C1=O>>COc1ccc2c(c1)CC[C@@H]1[C@@H]2CC[C@]2(C)C(=O)/C(=C/c3ccccc3)C[C@@H]12  
 6429 C=CC(=O)C(O[Si](CC)(CC)CC)c1c(OCc2ccccc2)c(OC)c2c(OC)c(OC)cc(OC)c2c1OC.Ic1ccccc1OCc1ccccc1>>CC[Si](CC)(CC)OC(C(=O)/C=C/c1ccccc1OCc1ccccc1)c1c(OCc2ccccc2)c(OC)c2c(OC)c(OC)cc(OC)c2c1OC  
 6430 C=Cc1ccc(OC)cc1.CCOC(=O)CCCBBr>>CCOC(=O)CCC/C=C/c1ccc(OC)cc1  
 6431 C=Cl.C=C[Si](OCC)(OCC)OCC>>C=C/C=C/[Si](OCC)(OCC)OCC  
 6432 C=Cc1ccccc1.COc1ccc(C#Cc2ccc(Br)cc2)cc1>>COc1ccc(C#Cc2ccc(/C=C/c3ccccc3)cc2)cc1  
 6433 C=CC(=O)OC.Cn1cnc2c(NCc3ccccc(Br)c3)nc(N3CCCCC3)nc21>>COC(=O)/C=C/c1ccccc1CNc2nc(N3CCCCC3)nc3c2ncn3C)c1  
 6434 C=CC(=O)OCC.CC(=O)O[C@H]1CC[C@H]2[C@H]3[C@H](CC[C@]12C)c1ccc(O)cc1C[C@H]3Sc1ccc(Br)cc1>>CCOC(=O)/C=C/c1ccc(S[C@@H]2Cc3cc(O)ccc3[C@H]3CC[C@]4(C)[C@@H](OC(C)=O)CC[C@H]4[C@@H]32)cc1  
 6435 C=C(C)C(=O)OC.Cc1cccc(C)c1Cl>>COC(=O)/C(C)=C/c1c(C)cccc1C  
 6436 C=C1c2ccccc2C1(C#N)CC.Clc1ccc(Br)cc1>>CCC1(C#N)/C(=C/c2ccc(Cl)cc2)c2ccccc21  
 6437 C=CC(=O)OCC.CCOC(=O)c1cccc(Br)c1>>CCOC(=O)/C=C/c1cccc(C(=O)OCC)c1  
 6438 C=CC(=O)OCc1ccccc1.CC(C)(C)OC(=O)c1ccccc1Br>>CC(C)(C)OC(=O)c1ccccc1/C=C/C(=O)OCc1ccccc1  
 6439 C=Cc1scnc1C.FC(F)(F)C(F)(F)C(F)(F)C(F)(F)C(F)(F)C(F)(F)Br>>Cc1nsc1/C=C/C(F)(F)C(F)(F)C(F)(F)C(F)(F)C(F)(F)F  
 6440 C=CC(=O)OC.COc1ncc(I)c(OC)n1>>COC(=O)/C=C/c1ncc(OC)nc1OC

6441 C=CC(OCC)OCC.COCC(C)(OC)c1cccc1Br>>CCOC(/C=C/c1cccc1C(C)(OC)OCC  
Br1cnc2cccc2c1.C=CCO[C@]1(C)C[C@H](C)C(=O)[C@H](C)[C@H]2NC(=O)O[C@]2(CC)[C  
6442 @H](CC)OC(=O)[C@H](C)C(=O)[C@H](C)[C@H]1O[C@H]1O[C@H](C)C[C@H](N(C)C)[C  
@H]1OC(=O)c1cccc1>>CC[C@H]1OC(=O)[C@H](C)C(=O)[C@H](C)[C@H]1O[C@H]2O[C  
@H](C)C[C@H](N(C)C)[C@H]2OC(=O)c2cccc2[C@](C)(OC/C=C/c2cnc3cccc3c2)C[C@H](C)  
C(=O)F.C@H(C)F.C@H12NC(=O)O[C@]112CC  
6443 C=Cc1cccc(O)c1.Oc1cc(Br)cc(O)c1F>>Oc1cccc(/C=C/c2cc(O)c(F)c(O)c2)c1  
C=CC(=O)C(O[Si](CC)(CC)CC)c1c(OC)ccc(OC)c1OCc1cccc1.COc1c(OCc2cccc2)c(I)cc2c1C(=O)  
6444 OC2>>CC[Si](CC)(CC)OC(C(=O)/C=C/c1cc2c(c(OC)c1OCc1cccc1)C(=O)OC2)c1c(OC)ccc(OC)c1  
OCc1cccc1  
C=CCCc1ccc2ccnc2n1.CCOC(=O)CC(c1ccc(OC)c(F)c1)c1nc(Br)cn1C>>CCOC(=O)CC(c1ccc(OC)c  
6445 (F)c1)c1nc(/C=C/CCc2ccc3ccnc3n2)cn1C  
6446 C=CC(OCC)OCC.O=Cc1cc(F)ccc1Br>>CCOC(/C=C/c1ccc(F)cc1C=O)OCC  
6447 C=CC(=O)OCCCC.Clc1cccc2cccc12>>CCCCOC(=O)/C=C/c1cccc2cccc12  
6448 C=C(NC(C)=O)C(=O)OC.Ic1cccc1>>COC(=O)/C=C/c1cccc1)NC(C)=O  
C=Cc1ccc([Si](OC)(OC)OC)cc1.CC(C)(C)OP(=O)(Cc1ccc(/C=C/c2c3cccc3c(Br)c3cccc23)cc1)OC(  
6449 C)(C)C>>CO[Si](OC)(OC)c1ccc(/C=C/c2c3cccc3c(/C=C/c3ccc(CP(=O)(OC(C)(C)C)OC(C)(C)C)cc3  
)c3cccc23)cc1  
C=CC(C)(C)O.CN(C)C(=O)c1cccc2nc3c(Br)cccc3nc12>>CN(C)C(=O)c1cccc2nc3c(/C=C/C(C)(C)O)c  
6450 ccc3nc12  
C=CCn1c(N(c2ccc(C)cc2I)S(=O)(=O)c2cccs2)cc2cc(Cl)ccc21>>Cc1ccc2c(c1)/C=C/Cn1c(cc3cc(Cl)cc  
6451 c31)N2S(=O)(=O)c1cccs1  
6452 C=CCCCCCCCC.O=Cc1cc(Br)cc(C=O)c1O>>CCCCCCCCC/C=C/c1cc(C=O)c(O)c(C=O)c1  
6453 C=CCC(C)C(=O)OCC.CC(=O)c1ccc(Br)cc1>>CCOC(=O)C(C)C/C=C/c1ccc(C(C)=O)cc1  
C=Cc1cc(C(C)(C)C)c(O)c(C(C)(C)C)c1.Cc1cncc(C)c1-  
6454 c1c(C)cc(OS(=O)(=O)C(F)(F)F)cc1C>>Cc1cncc(C)c1-  
c1c(C)cc(/C=C/c2cc(C(C)(C)C)c(O)c(C(C)(C)C)c2)cc1C  
6455 C=CC(F)(F)Oc1ccc(C)cc1Br>>C=C1c2cc(C)ccc2OC1(F)F  
6456 C=CC(=O)O.CCCCC(CC)Cn1c2ccc(Br)cc2c2cc(C=O)ccc21>>CCCCC(CC)Cn1c2ccc(C=O)cc2c2cc(/  
C=C/C(=O)O)ccc21  
6457 C=Cc1cccc1.Ic1cccc1>>C(=C/c1cccc1)c1cccc1  
6458 C=CC(=O)OC(C)(C)C.COc1ccc(Br)c(C)c1>>COc1ccc(/C=C/C(=O)OC(C)(C)C)c(C)c1  
6459 C=C[C@H](C)CN(c1cccc1Br)S(=O)(=O)c1ccc(C)cc1>>C=C1c2cccc2N(S(=O)(=O)c2ccc(C)cc2)C[  
C@H]1C  
6460 CC(=O)/C=C/CC(NS(=O)(=O)c1ccc(C)cc1)c1ccc(C(F)(F)F)cc1.Cc1ccc(Br)cc1>>CC(=O)/C=C/CC(N  
S(=O)(=O)c1ccc(C)cc1)c1ccc(C(F)(F)F)cc1)c1ccc(C)cc1  
6461 Br1ccc2cenc(N3CCOCC3)c2c1.C=Cc1cncc1>>C(=C/c1ccc2cenc(N3CCOCC3)c2c1)c1cncc1  
6462 C=CC(C)=O.Cn1ccc2cc(Br)ccc21>>CC(=O)/C=C/c1ccc2c(cen2C)c1  
CC(=O)/C=C/CC(NS(=O)(=O)c1ccc(C)cc1)c1cccc1.CC(=O)c1cccc(Br)c1>>CC(=O)/C=C/CC(NS(=  
6463 O)(=O)c1ccc(C)cc1)c1cccc1)c1ccc(C(C)=O)c1  
6464 C=C(Br)CC.C=CC(=O)CCCC>>C=C(/C=C/C(=O)CCCC)CC  
6465 C=CCO.Ic1ccc2[nH]ccc2c1>>OC/C=C/c1ccc2[nH]ccc2c1  
6466 C=Cc1nn(C(c2cccc2)(c2cccc2)c2cccc2)c2cenc(OC3CCCC3)c12.Cn1cc(I)cn1>>Cn1cc(/C=C/c2nn  
(C(c3cccc3)(c3cccc3)c3cccc3)c3cenc(OC4CCCC4)c23)en1  
6467 C=CCC(OCC(=C)Br)c1cccc(Cl)c1>>C=C1COC(c2cccc(Cl)c2)CC1=C  
6468 C=COCCOCCO.COc1ccc(Br)cc1>>C=C(OCCOCCO)c1ccc(OC)cc1  
6469 Br1cccc1.C=CCOc1ccc(C)cc1>>Cc1ccc(OC/C=C/c2cccc2)cc1  
6470 C=CCOCc1nnn(Cc2ccc([N+](=O)[O-])cc2)c1I>>C=C1COCc2nnn(Cc3ccc([N+](=O)[O-])cc3)c21  
6471 C=CCC1CCCC1.Nc1ccc(Br)cc1F>>Nc1ccc(/C=C/CC2CCCC2)cc1F  
6472 C=Cc1cccc1.N#CCCCCCCCCl>>N#CCCCCCC/C=C/c1cccc1  
C=Cc1ccc(/C=C/c2ccc(N(C)C)cc2OC)cc1.O=c1cc2oc3cc(O)c(F)cc3c(-c3ccc(I)cc3S(=O)(=O)O)c-  
6473 2cc1F>>COc1cc(N(C)C)ccc1/C=C/c1ccc(/C=C/c2ccc(-c3c4cc(F)c(=O)cc-  
4oc4cc(O)c(F)cc34)c(S(=O)(=O)O)c2)cc1  
6474 C=CC(=O)OC.CC1(C)CC(=C(c2ccc(Br)cc2)c2ccc3c(c2)c(F)nn3C2CCCCO2)CC(C)(C)C1>>COC(=O  
)C=C/c1ccc(C(=C2CC(C)(C)CC(C)(C)C2)c2ccc3c(c2)c(F)nn3C2CCCCO2)cc1  
6475 C=CC(=O)OC(C)(C)C.N#Cc1ccc(Cl)cc1>>CC(C)(C)OC(=O)/C=C/c1ccc(C#N)cc1  
6476 C=CC(=O)OCC.Nc1cc(OC(F)(F)F)ccc1Br>>CCOC(=O)/C=C/c1ccc(OC(F)(F)F)cc1N  
6477 C=CC(=O)CCCCC.O=Cc1ccc(Br)cc1>>CCCCC(=O)/C=C/c1ccc(C=O)cc1  
6478 C=CC(=O)OC.CCCCc1c(I)c(OC(C)=O)c2ccccn1>>CCCCc1c(/C=C/C(=O)OC)c(OC(C)=O)c2ccccn1  
6479 C=CS(=O)c1cccc1.COC(=O)c1ccc(Br)cc1>>COC(=O)c1ccc(/C=C/S(=O)c2cccc2)cc1



6480 CCOC(=O)/C(F)=C\CCc1ccccc1.COC(=O)c1ccccc1I>>CCOC(=O)/C(F)=C(\CCc1ccccc1)c1ccccc1C(=O)OC

6481 C=CC(=O)OCC.Ic1c(-c2ccccc2)c2ccccc2c2ccccc12>>CCOC(=O)/C=C/c1c(-

6482 C=C(C(=O)OC)[C@@H]1CC[C@@]2(C)CCC[C@@](C)(OCOC)[C@@H]2C1.COc1ccc(I)cc1>>CO

CO[C@@]1(C)CCC[C@@]2(C)CC[C@@H]/(C=C\c3ccc(OC)cc3)C(=O)OC)C[C@H]21

6483 C=CC(=O)OC(C)(C)C.CC(C)(C)OC(=O)n1ccc2cc(I)ccc21>>CC(C)(C)OC(=O)/C=C/c1ccc2c(ccn2C(=O)OC(C)(C)C)c1

6484 C=C[Si](C)(C)C.COC(=O)c1cc(I)cc([N+](=O)[O-])c1>>COC(=O)c1cc(/C=C/[Si](C)(C)C)cc([N+](=O)[O-])c1

Br1cnc2ccccc2c1.C=CCO[C@@]1(C)C[C@@H](C)C(=O)[C@H](C)[C@H]2N(OC)C(=O)O[C@]2(C)

6485 [C@@H](CC)OC(=O)[C@H](C)C(=O)[C@H](C)[C@H]1O[C@@H]1O[C@H](C)C[C@H](N(C)C)[C@H]1O>>CC[C@H]1OC(=O)[C@H](C)C(=O)[C@H](C)[C@@H](O[C@@H]2O[C@H](C)C[C@H](N(C)C)[C@H]2O)[C@@H]1C(OC/C=C/c2cnc3ccccc3c2)C[C@@H](C)C(=O)[C@H](C)[C@H]2N(OC=Cc1ccccc1.CCN(c1ccc(C(=O)OC)cn1)c1cc(OCC(C)C)c(C(C)C)cc1I>>CCN(c1ccc(C(=O)OC)cn1)c1cc(OCC(C)C)c(C(C)C)cc1/C=C/c1ccccc1

6486 C=CC(C)OC(C)=O.Ic1ccccc1>>CC(=O)OC(C)/C=C/c1ccccc1

6487 C=C1C(=O)O[C@@H]2C[C@@H](C)C(=O)C/C=C(\C)CC[C@@H]12.CSc1ccccc1I>>CSc1ccccc1/C

6488 =C1/C(=O)O[C@@H]2C[C@@H](C)C(=O)C/C=C(\C)CC[C@@H]12

6489 C=Cc1ccccc1.Clc1ccccc1I>>Clc1ccccc1/C=C/c1ccccc1

6490 C=CC(=O)OC.Cn1ncc(I)cc1=O>>COC(=O)/C=C/c1cnn(C)c(=O)c1

6491 C=CC(=O)Nc1ccccc1NC(=O)OC(C)(C)C.CN1C[C@H](c2ccc(Br)cc2)[C@@H](C(=O)Nc2ccc(Cl)cc2)C1>>CN1C[C@H](c2ccc(/C=C/C(=O)Nc3ccccc3NC(=O)OC(C)(C)C)cc2)[C@@H](C(=O)Nc2ccc(Cl)C=C[Si](CC)(CC)CC.CC(=O)c1ccccc1Br>>CC[Si]/(C=C/c1ccccc1C(C)=O)(CC)CC

6492 Br1cnc2ccccc2c1.C=CC(C)(C)O>>CC(C)(O)/C=C/c1cnc2ccccc2c1

6493 C=Cc1cncnc1.CC(C)(C)OC(=O)N1CC[C@H]1COc1cnc(Cl)c(I)c1>>CC(C)(C)OC(=O)N1CC[C@H]1

6494 COc1cnc(Cl)c(/C=C/c2cncnc2)c1

6495 C=Cc1ccccc1.COC(=O)/C=C/c1ccccc1Cl>>COC(=O)/C=C/c1ccccc1/C=C/c1ccccc1

6496 C=Cc1ccc(OC)cc1OC.Nc1ccc(I)cc1>>COc1ccc(/C=C/c2ccc(N)cc2)c(OC)c1

6497 C=CCC(CCCl)(C(=O)OCC)C(=O)OCC>>C=C1CCC(C(=O)OCC)(C(=O)OCC)C1

6498 C=CC(=O)OC.Ic1[nH]c2ccccc2c1CCOC1CCCCO1>>COC(=O)/C=C/c1[nH]c2ccccc2c1CCOC1CCC

6499 C=C(F)C(=O)OC.O=[N+](O-)]c1ccccc(I)c1>>COC(=O)/C(F)=C/c1ccccc([N+](=O)[O-])c1

6500 C=CC[Si](C)(C)C.O=Cc1ccc(Br)cc1>>C=C(C[Si](C)(C)C)c1ccc(C=O)cc1

6501 C=CC(=O)OCC.COc1ccc(-c2cncnc2Br)cc1>>CCOC(=O)/C=C/c1cncnc1-c1ccc(OC)cc1

6502 C=CC(=O)OCC.Cc1cc(O)ccc1Br>>CCOC(=O)/C=C/c1ccc(O)cc1C

6503 C=CCCCCN1C(=O)c2ccccc2C1=O.FC(F)(F)c1ccc(Br)c2cccc(C(F)(F)F)c2n1>>O=C1c2ccccc2C(=O)N1CCCC/C=C/c1cc(C(F)(F)F)nc2c(C(F)(F)F)cccc12

6504 C=CC(=O)OC.CCOC(=O)Nc1ccccc1C1=C(I)CCN1S(=O)(=O)c1ccc(C)cc1>>CCOC(=O)Nc1ccccc1C1=C(/C=C/C(=O)OC)CCN1S(=O)(=O)c1ccc(C)cc1

6505 C=CCCCCCC.CC(C)[C@H]1C(=O)N[C@H](CO[Si](C)(C)C(C)(C)C)Cc2c[nH]c3c(Br)ccc(c23)N1C>>CCCCC/C=C/c1ccc2c3c(c[nH]c13)C[C@@H](CO[Si](C)(C)C(C)(C)C)NC(=O)[C@H](C(C)C)N2

6506 Br1ccc(-c2nc3ccccc3n3ccccc23)cc1.C=CC(=O)OCC>>CCOC(=O)/C=C/c1ccc(-

6507 C=CN(C)C(C)=O.Fc1ccc(Br)cc1>>C=C(c1ccc(F)cc1)N(C)C(C)=O

6508 C=CC(=O)OCCCC.Cn1nc(Br)c2cc([N+](=O)[O-])ccc21>>CCCCOC(=O)/C=C/c1nn(C)c2ccc([N+](=O)[O-])cc12

6509 C=Cc1ccccc1.CC/C=C(/Br)OC1CCCCC1>>CC/C=C(/C=C/c1ccccc1)OC1CCCCC1

6510 C=Cc1ccc(F)cc1.OCc1ccc(F)cc1Br>>OCc1ccc(F)cc1/C=C/c1ccc(F)cc1

6511 C=CC(=O)OCC.Cc1ccccc1Br>>CCOC(=O)/C=C/c1ccccc1C

6512 C=Cc1ccccc1.O=Cc1ccc2c(I)n[nH]c2c1>>O=Cc1ccc2c(/C=C/c3ccccc3)n[nH]c2c1

6513 Br/C(=C/[Te]c1ccccc1)c1ccccc1.C=Cc1ccccc1>>C(\[Te]c1ccccc1)=C(/C=C/c1ccccc1)c1ccccc1

6514 C=C[C@@H](O[Si](C)(C)C(C)(C)C)[C@@H](CCCC)[C@@H](CC(I)=CCO)O[Si](C)(C)C(C)(C)C>>C=C1C(=CCO)C[C@@H](O[Si](C)(C)C(C)(C)C)[C@H](CCCC)[C@@H]1O[Si](C)(C)C(C)(C)C

6515 C=CC(=O)OCC.Ic1cncnc1>>CCOC(=O)/C=C/c1cncnc1

6516 C=CC(=O)OCC.Cc1nc(C)c(I)c(=O)[nH]1>>CCOC(=O)/C=C/c1c(C)nc(C)[nH]c1=O

6517 C=CC(CCC)OCc1ccccc1.COc1ccc(Br)cc1>>CCCC/C=C/c1ccc(OC)cc1)OCc1ccccc1

6518 C=CC(=O)OCCO.O=C1Nc2ccc(Br)cc2C1=O>>O=C(/C=C/c1ccc2c(c1)C(=O)C(=O)N2)OCCO

6519 C=Cc1ccc(OC)c(OC)c1.CCn1c(=O)c2c(nc(I)n2C)n(CC)c1=O>>CCn1c(=O)c2c(nc(/C=C/c3ccc(OC)c(OC)c3)n2C)n(CC)c1=O

6520 C=CC(=O)OC.Cn1nc(-c2ccccc2)c(Br)cc1=O>>COC(=O)/C=C/c1cc(=O)n(C)nc1-c1ccccc1

6521 C=CC(=O)OC.CC(=O)Oc1ccc(I)cc1C/C=C(\C)CC/C=C(\C)CCC=C(C)C>>COC(=O)/C=C/c1ccc(OC(C)=O)c(C/C=C(\C)CC/C=C(\C)CCC=C(C)C)c1

6522 C=CCCOc1cc(=O)n(C)cc1-c1cc(NS(=O)(=O)CC)ccc1Oc1ccc(Cl)cc1I>>CCS(=O)(=O)Nc1ccc2c(c1)-  
c1cn(C)c(=O)cc1OCC/C=C/c1cc(Cl)ccc1O2  
6523 C=CS(=O)(=O)F.N#Cc1ccc(I)cc1>>N#Cc1ccc(/C=C/S(=O)(=O)F)cc1  
6524 C=CC(=O)N1CCOCC1.COc1cc2c3cc(Cl)ccc3nc3c4cccc4n(C)c(c1)c23>>COc1cc2c3cc(/C=C/C(=O)  
N4CCOCC4)ccc3nc3c4cccc4n(C)c(c1)c23  
6525 C=CC(=O)NCCc1ccc(F)cc1.O=c1c(I)c(-c2ccc(O)cc2)oc2cc(O)ccc12>>O=C(/C=C/c1c(-  
c2ccc(O)cc2)oc2cc(O)ccc2c1=O)NCCc1ccc(F)cc1  
6526 C=CC(=O)OC(C)(C)C.CC(=O)O[C@H]1CC(=O)N(Cc2cc3c(cc2I)OCO3)[C@@H]1[Se]c1cccc1>>C  
C(=O)O[C@H]1CC(=O)N(Cc2cc3c(cc2/C=C/C(=O)OC(C)(C)C)OCO3)[C@@H]1[Se]c1cccc1  
6527 C=CC(=O)OC.CCCCCCCCC(F)(F)C1CC(c2ccc(Br)cc2)=NN1C>>CCCCCCCCC(F)(F)C1CC(c2cc  
c(/C=C/C(=O)OC)cc2)=NN1C  
6528 C=CCC(=O)OCC(C)C.COc1c(Br)cc(OC)c2c(OC)cccc12>>COc1c(/C=C/CC(=O)OCC(C)C)cc(OC)c2c  
(OC)cccc12  
6529 C=Cc1ccc(C)cc1.Oc1cccc1I>>Cc1ccc(/C=C/c2cccc2O)cc1  
6530 C=CC(=O)NC(C)(C)C.COC(=O)/C=C/c1cccc(N(Cc2ccc(Br)cc2)C(=O)C2CCCC2)c1>>COC(=O)/C  
=C/c1cccc(N(Cc2ccc(/C=C/C(=O)NC(C)(C)C)cc2)C(=O)C2CCCC2)c1  
6531 C=CC(=O)OC.N#Cc1ccc(Br)c(F)c1>>COC(=O)/C=C/c1ccc(C#N)cc1F  
6532 C=CC(=O)OC.CCOc1ncc(Br)c2cccc12>>CCOc1ncc(/C=C/C(=O)OC)c2cccc12  
C=C(NC(=O)OCc1cccc1)C(=O)OC.CC(C)(C)[Si](C)(C)O[C@H]1Cc2c(Br)cc(OCc3cccc3)cc2N(S(=  
O)(=O)c2cccc2[N+](=O)[O-  
6533 ]C1>>COC(=O)/C=C/c1cc(OCc2cccc2)cc2c1C[C@H](O[Si](C)(C)C(C)(C)C)CN2S(=O)(=O)c1ccc  
cc1[N+](=O)[O-]NC(=O)OCc1cccc1  
6534 C=CC(=O)OC.CC(C)(C)/N=C/N1CCCC1CCc1cccc1I>>COC(=O)/C=C/c1cccc1CCC1CCCCN1/C  
=N/C(C)(C)C  
6535 C=Cc1ccc(OC)cc1.C[Si](C)(C)I>>COc1ccc(/C=C/[Si](C)(C)C)cc1  
6536 C=Cc1cc(C(C)C)ccc1N(C)C(=O)c1cccc1I>>C=C1c2cccc2C(=O)N(C)c2ccc(C(C)C)cc21  
6537 C=CC(=O)OCCCC.O=C1CCC(N2C(=O)c3ccc(Br)cc3C2=O)C(=O)N1>>CCCCOC(=O)/C=C/c1ccc2c  
(c1)C(=O)N(C1CCC(=O)NC1=O)C2=O  
6538 Brc1cccc1.C=Cc1nnn(C)n1>>Cn1nnc(/C=C/c2cccc2)n1  
6539 C=CC(=O)OC(C)(C)C.CC(C)(C)O[C@H]1CC[C@H]2C=C(C3=C(Br)CCCC3)CC[C@H]2C>>CC(C)  
(C)OC(=O)/C=C/C1=C(C2=C[C@H]3CC[C@H](OC(C)(C)C)[C@@H]3(C)CC2)CCCC1  
6540 C=CC(=O)OC.CCc1cccc1Br>>CCc1cccc1/C=C/C(=O)OC  
6541 C=CS(=O)(=O)F.COc1ccc(I)cc1>>COc1ccc(/C=C/S(=O)(=O)F)cc1  
6542 C=C[C@H](O)[C@@H](O)COCc1ccc(OC)cc1.Cc1cccc1I>>COc1ccc(COC[C@H](O)[C@@H](O)/  
C=C/c2cccc2C)cc1  
6543 C=CC(=O)OC(C)(C)C.CC(C)CN1[C@H](C)Cc2c(ccc3[nH]ncc23)[C@H]1c1ccc(Br)cc1>>CC(C)CN1  
[C@H](C)Cc2c(ccc3[nH]ncc23)[C@H]1c1ccc(/C=C/C(=O)OC(C)(C)C)cc1  
6544 C=CCn1c(-  
c2ccc(OC)cc2OC)nc2cccc2c1=O.O=C(CN1C(=O)COc2cccc21)c1ccc(Br)cc1>>COc1ccc(-  
6545 C=CS(=O)(=O)c1cccc1.Cn1ccc2cc(Br)ccc21>>Cn1ccc2cc(/C=C/S(=O)(=O)c3cccc3)ccc21  
C=C[C@@H](Cn1c(Br)c(-  
6546 c2ccc(Oc3ccc(OC(F)(F)F)cc3)cc2)c2c(N)ncnc21)NC(=O)OC(C)(C)C>>C=C1c2c(-  
c3ccc(Oc4ccc(OC(F)(F)F)cc4)cc3)c3c(N)ncnc3n2C[C@H]1NC(=O)OC(C)(C)C  
6547 COC(=O)/C=C/Oc1cccc1-c1cccc1I>>COC(=O)/C=C1/Oc2cccc2-c2cccc21  
6548 C=CS(=O)(=O)F.Fc1ccc(I)c(F)c1>>O=S(=O)(F)/C=C/c1ccc(F)cc1F  
6549 C=CC(=O)OC.CC(=O)n1nc(C)c(Br)c1C>>COC(=O)/C=C/c1c(C)nn(C(C)=O)c1C  
6550 C=CS(C)(=O)=O.O=Cc1cccc(Br)c1>>CS(=O)(=O)/C=C/c1cccc(C=O)c1  
6551 C=C/C=C/C(C)(C)C.CN1CCC[C@H]1COc1cncc(Br)c1>>CN1CCC[C@H]1COc1cncc(/C=C/C=C/C(C)  
(C)C)c1  
6552 CCOC(=O)c1ccc(I)cc1.OC/C=C/c1cccc1>>CCOC(=O)c1ccc(/C=C/c2cccc2)CO)cc1  
6553 C=Cc1cncc1.CC(C)(C)OC(=O)N[C@H](COc1ccc(Br)cn1)Cc1cccc1>>CC(C)(C)OC(=O)N[C@H](C  
Oc1ccc(/C=C/c2cncc2)cn1)Cc1cccc1  
6554 C=C[C@@H](C)OCc1c(Br)ccc(OCc2cccc2)c1OCc1cccc1>>C=C1c2ccc(OCc3cccc3)c(OCc3cccc  
3)c2CO[C@@H]1C  
6555 C=CC(=O)OC(C)(C)C.O=[N+][O-]c1ccc(I)cc1>>CC(C)(C)OC(=O)/C=C/c1cccc([N+](=O)[O-])cc1  
6556 C=Cc1cncc1.O=[N+][O-]c1ccc(Br)cc1>>O=[N+][O-]c1ccc(/C=C/c2cncc2)cc1  
6557 C=CC(=O)OC(C)(C)C.C=CC1=C(Br)C(O)CCC1>>C=CC1=C(/C=C/C(=O)OC(C)(C)C)C(O)CCC1  
6558 C=C1C(=O)O[C@H]2[C@H]1C[C@@H](O)/C(C)=C/CC[C@@H]1(C)O[C@@H]21.Fc1cccc1I>>C/  
C1=C/CC[C@@H]2(C)O[C@H]2[C@H]2OC(=O)/C=C/c3cccc3F)[C@@H]2[C@H]1O  
6559 C=CCNC(=O)OC(C)(C)C.FC(F)(F)c1cccc(Br)c1>>C=C(CNC(=O)OC(C)(C)C)c1cccc(C(F)(F)F)c1

C=CC(=O)N1C=Cc2ccccc2Clc1ccsc1.COc1cc(Cc2cnc(N)nc2N)cc(I)c1OC>>COc1cc(Cc2cnc(N)nc2  
 N)cc(/C=C/C(=O)N2N=Cc3ccccc3C2c2cccs2)c1OC  
 C=CC(=O)N1CCOCC1.Cn1c2cccc2c2nc3ccc(Cl)cc3c3cc(OS(=O)(=O)C(F)(F)F)cc1c32>>Cn1c2cccc  
 c2c2nc3ccc(Cl)cc3c3cc(/C=C/C(=O)N4CCOCC4)cc1c32  
 Brclccc2[nH]ccc2c1.C=COCCCC>>C=C(OCCCC)c1ccc2[nH]ccc2c1  
 C=C[C@H](CCCCCCCC)CC(OC)OC.COc1ccc(I)cc1>>CCCCCCCC[C@@H]/C=C/c1ccc(OC)cc1)C  
 C(OC)OC  
 C=Cc1ccc(N(c2ccccc2)c2ccccc2)cc1.FC(F)(F)C(F)(F)C(F)(F)C(F)(F)C(F)(F)C(F)(F)C(F)(F)Br>>FC(F)  
 )(F)C(F)(F)C(F)(F)C(F)(F)C(F)(F)C(F)(F)C(F)(F)/C=C/c1ccc(N(c2ccccc2)c2ccccc2)cc1  
 C=Cc1ccc(Cl)cc1.N#CCc1ccc(Br)cc1>>N#CCc1ccc(/C=C/c2ccc(Cl)cc2)cc1  
 C=CS(=O)(=O)Oc1ccccc1.N#Cc1ccc(Br)cc1>>N#Cc1ccc(/C=C/S(=O)(=O)Oc2ccccc2)cc1  
 C=CC(OCC)OCC.COc1cc(Br)c(C=O)cc1OC>>CCOC(/C=C/c1cc(OC)c(OC)cc1C=O)OCC  
 Brclcc2ccccc2c2ccccc12.C=Cc1nc2c(N)ncnc2n1[C@@H]1O[C@H](CO[Si](C)(C)C(C)(C)C)[C@@H]  
 ]([O][Si](C)(C)C(C)(C)C)[C@H]1O[Si](C)(C)C(C)(C)C>>CC(C)(C)[Si](C)(C)OC[C@H]1O[C@@H](n  
 2c(/C=C/c3cc4ccccc4c4ccccc34)nc3c(N)ncnc32)[C@H](O[Si](C)(C)C(C)(C)C)[C@@H]1O[Si](C)(C)  
 C=CCN1C(=O)c2ccccc2C1=O.COC(=O)c1ccc(Br)cc1>>COC(=O)c1ccc(/C=C/CN2C(=O)c3ccccc3C2  
 =O)cc1  
 C=C.COC(=O)Cc1c(C(=O)OC)c2n(c(=O)c1Br)CCC2O>>C=Cc1c(CC(=O)OC)c(C(=O)OC)c2n(c1=O)  
 CCC2O  
 C=CC(OCC)OCC.Fc1ccc(I)cc1>>CCOC(/C=C/c1ccc(F)cc1)OCC  
 C=Cc1cccc1.CCCCCCCCCBr>>CCCCCCCC/C=C/c1cccc1  
 C=COCCO.COc1ccc(I)cc1>>C=C(OCCO)c1ccc(OC)cc1  
 C=C/C=C/CCCCCC.Clc1ccc(I)cc1>>CCCCCC/C=C/C=C/c1ccc(Cl)cc1  
 C=CC(=O)OCCCC.OCc1ccc(I)c1>>CCCCOC(=O)/C=C/c1cccc(CO)c1  
 C=CC(=O)OCC.COc1ccc(Br)c(CC2CCC(=O)N(Cc3ccccc3)C2)c1>>CCOC(=O)/C=C\c1ccc(OC)cc1C  
 C1CCC(=O)N(Cc2ccccc2)C1  
 C=Cc1cncc1.CC(C)(C)OC(=O)N[C@H](COc1cccc(Br)n1)Cc1c[nH]c2ccccc12>>CC(C)(C)OC(=O)N  
 [C@H](COc1cccc(/C=C/c2cncc2)n1)Cc1c[nH]c2ccccc12  
 C=CC(=O)OC1CCCC1.Cc1ccc(I)cc1>>Cc1ccc(/C=C/C(=O)OC2CCCC2)cc1  
 Brclcnc2nc(CC3CCN(Cc4ccccc4)CC3)oc2c1.C=CC(=O)OC>>COC(=O)/C=C/c1cnc2nc(CC3CCN(Cc  
 4ccccc4)CC3)oc2c1  
 C=CCN1C(=O)c2ccccc2C1=O.CC(=O)c1cccc(Br)c1>>CC(=O)c1cccc(/C=C/CN2C(=O)c3ccccc3C2=  
 C=CC(=O)OC.CNc1cc(Cl)ccc1[N+](=O)[O-]>>CNc1cc(/C=C/C(=O)OC)ccc1[N+](=O)[O-]  
 C=CC(=O)OC.CCOC(=O)c1ccc(Cl)cc1>>CCOC(=O)c1ccc(/C=C/C(=O)OC)cc1  
 Brclcnc2[nH]c3ccccc3c2c1.C=CC(=O)N(C)Cc1cc2ccccc2n1C>>CN(Cc1cc2ccccc2n1C)C(=O)/C=C/c  
 1cnc2[nH]c3ccccc3c2c1  
 C=CCNC(=O)c1cc(C)on1.O=[N+]([O-])c1cccc(I)c1>>Cc1cc(C(=O)NC/C=C/c2cccc([N+](=O)[O-  
 C=Cc1cccc1.CC(C)(C)c1ccc(Br)cc1>>CC(C)(C)c1ccc(/C=C/c2ccccc2)cc1  
 C=CC(=O)OCC.CCNc1nc(N)nc(C)c1I>>CCNc1nc(N)nc(C)c1/C=C/C(=O)OCC  
 C=Cc1cccc1.[2H]C(=O)c1cccc1Br>>[2H]C(=O)c1cccc1/C=C/c1cccc1  
 C=CC(=O)OC(C)(C)C.COC(=O)Cc1ccc2oc(-c3ccc(Br)cc3)nc2c1>>COC(=O)Cc1ccc2oc(-  
 c3ccc(/C=C/C(=O)OC(C)(C)C)cc3)nc2c1  
 C=CC(=O)OCCCC.Fc1ccc(I)c1>>CCCCOC(=O)/C=C/c1cccc(F)c1  
 C=CC#N.CCCCc1nc2cc(Br)ccc2n1CCN(CC)CC>>CCCCc1nc2cc(/C=C/C#N)ccc2n1CCN(CC)CC  
 C=CC(=O)CC.O=[N+]([O-])c1ccc(Br)cc1>>CCC(=O)/C=C/c1ccc([N+](=O)[O-])cc1  
 C=CCCC.CCN(CC)C(=O)Oc1c(Br)cccc1OC>>CCC/C=C/c1cccc(OC)c1OC(=O)N(CC)CC  
 C=CC(=O)OC.Cn1nc(NC(=O)c2ccc3ccccc3c2)c2c(I)cccc21>>COC(=O)/C=C/c1cccc2c1c(NC(=O)c1c  
 cc3ccccc3c1)nn2C  
 C=CCCCO.CC(C)(C)c1ccc(Br)cc1>>C=C(CCCO)c1ccc(C(C)(C)C)cc1  
 C=Cc1cncc1.CCCCCCOc1ccc(Br)cc1F>>CCCCCOc1ccc(/C=C/c2cncc2)cc1F  
 C=CC(=O)OC.Cc1ccc(S(=O)(=O)n2cc(I)c3c(Br)cccc32)cc1>>COC(=O)/C=C/c1cn(S(=O)(=O)c2ccc(  
 C)cc2)c2cccc(Br)c12  
 Brclccc2ccccc2c1.C=Cc1cccc1>>C=C/c1ccc2ccccc2c1)\c1cccc1  
 Brclccc2ccccc12.C=CC(=O)N(C)OC>>CON(C)C(=O)/C=C/c1ccc2ccccc12  
 Brclccc1.C=C(C)C(=O)OC>>COC(=O)/C(C)=C/c1cccc1  
 C=CC(=O)OC.Cn1nnc2cc(Br)ccc21>>COC(=O)/C=C/c1ccc2c(c1)nnn2C  
 C=CCCCCCC.CC(C)[C@H]1C(=O)N[C@H](CO[Si](C)(C)C(C)(C)C)Cc2c[nH]c3cc(Br)cc(c23)N1C>  
 >CCCCC/C=C/c1cc2c3c(c[nH]c3c1)C[C@@H](CO[Si](C)(C)C(C)(C)C)NC(=O)[C@H](C(C)C)N2  
 C=CC(C)=O.CC(C)n1cnc2c(Cl)nc(I)nc21>>CC(=O)/C=C/c1nc(Cl)c2ncn(C(C)C)c2n1  
 C=Cc1cccc1.O=[N+]([O-])c1cccc(I)c1>>O=[N+]([O-])c1cccc(/C=C/c2ccccc2)c1

6604 C=CC(=O)OC.COC(=O)Cc1cc(Br)ccc1OCc1ccc(OCc2ccccc2)cc1>>COC(=O)/C=C/c1ccc(OCc2ccc(OCc3ccccc3)cc2)c(CC(=O)OC)c1  
6605 C=CCCCCCC.Cc1cc(C)cc(OS(=O)(=O)C(F)(F)F)c1>>C=C(CCCCCC)c1cc(C)cc(C)c1  
6606 C=CCN(CCc1cc(OC)ccc1I)C(=O)C(F)(F)F>>C=C1CN(C(=O)C(F)(F)F)CCc2cc(OC)ccc21  
6607 C=C(NC(C)=O)C(=O)OC.O=[N+](=[O-])c1ccc(Br)cc1>>COC(=O)/C=C/c1ccc([N+](=O)[O-])cc1)NC(C)=O  
6608 C=Cc1ccc(/C=C/c2ccc(N(c3ccccc3)c3ccccc3)cc2)cc1.O=Cc1ccc(Br)cc1>>O=Cc1ccc(/C=C/c2ccc(/C=C/c3ccc(N(c4ccccc4)c4ccccc4)cc3)cc2)cc1  
6609 C=CCOc1ccccc1C.Cc1ccc(I)cc1>>Cc1ccc(/C=C/COc2ccccc2C)cc1  
6610 C=CC(=O)N(C)C.COc1ccc(I)cc1>>COc1ccc(/C=C/C(=O)N(C)C)cc1  
6611 Brc1cccc2cc[nH]c12.C=C(C)C(=O)OC>>COC(=O)/C(C)=C/c1cccc2cc[nH]c12  
6612 C=CC(=O)OC(C)(C)C.COc1ccc(C(=O)c2ccc3c(ccn3Cc3ccc(Br)cc3)c2)cc1>>COc1ccc(C(=O)c2ccc3c(ccn3Cc3ccc(/C=C/C(=O)OC(C)(C)C)cc3)c2)cc1  
6613 C=CC(N)=O.Ic1ccc2c(c1)OCO2>>NC(=O)/C=C/c1ccc2c(c1)OCO2  
6614 C=CC(=O)OC.O=C1CCC(N2C(=O)c3ccccc(I)c3C2=O)C(=O)N1>>COC(=O)/C=C/c1cccc2c1C(=O)N(C1CCC(=O)NC1=O)C2=O  
6615 C=Cc1csc2c(N)ncnc12.CCOC(=O)c1ccc(C)c(I)c1>>CCOC(=O)c1ccc(C)c(/C=C/c2csc3c(N)ncnc23)c1  
6616 C=Cc1ccc(Cl)cc1.Cc1cc(C)c(/C=C/C(=O)O)c(Br)c1>>Cc1cc(C)c(/C=C/C(=O)O)c(/C=C/c2ccc(Cl)cc2  
6617 C=CCN.O=c1[nH]c(=O)n([C@@H]2O[C@H](CO)[C@@H](O)[C@H]2O)cc1I>>NC/C=C/c1cn([C@@H]2O[C@H](CO)[C@@H](O)[C@H]2O)c(=O)[nH]c1=O  
6618 C=CCCCCN1C(=O)c2ccccc2C1=O.FC(F)(F)c1cnc2c(Br)ccnc2c1>>O=C1c2ccccc2C(=O)N1CCCC/C=C/c1cnc2cc(C(F)(F)F)ccnc12  
6619 C=Cc1cccc(OC)c1.CCOC(=O)C(F)I>>CCOC(=O)C(F)/C=C/c1cccc(OC)c1  
6620 C=CSc1ccccc1.O=Cc1ccc(Br)cc1>>O=Cc1ccc(/C=C/Sc2ccccc2)cc1  
6621 C=CC(F)(F)F.COC(=O)c1enn2cc(Br)ccc12>>COC(=O)c1enn2cc(/C=C/C(F)(F)F)ccc12  
6622 C=CC(N)=O.CCOC(=O)/C=C/c1cc(Br)cc(C(O)c2ccc(F)cc2)c1>>CCOC(=O)/C=C/c1cc(/C=C/C(N)=O)cc(C(O)c2ccc(F)cc2)c1  
6623 C=C[C@H](O[Si](C)(C)C(C)(C)C)[C@H](CCCC(=O)OC)O[Si](C)(C)C(C)(C)C.CCCCCC(=O)c1nc(Br)cc2ccccc12>>CCCCC(=O)c1nc(/C=C/[C@@H](O[Si](C)(C)C(C)(C)C)[C@H](CCCC(=O)OC)O[Si](C)(C)C(C)(C)C)cc2ccccc12  
6624 C=CC(=O)OC.COc1ccc(/C=C/c2c(Br)ccc(OC)c2O)cc1OC>>COC(=O)/C=C/c1ccc(OC)c(O)c1/C=C/c1ccc(OC)c(OC)c1  
6625 C=Cc1ccc2c(c1)CC[C@@H]1[C@@H]2CC[C@]2(C)C(=O)CC[C@@H]12.CCOC(=O)C(F)(F)Br>>CCOC(=O)C(F)(F)/C=C/c1ccc2c(c1)CC[C@@H]1[C@@H]2CC[C@]2(C)C(=O)CC[C@@H]12  
6626 Brc1cccn1.C=CS(=O)(=O)c1ccccc1>>O=S(=O)/C=C/c1cccn1)c1ccccc1  
6627 C=CC(=O)OC(C)(C)C.Nc1ccc(Cl)cc1Br>>CC(C)(C)OC(=O)/C=C/c1cc(Cl)ccn1N  
6628 C=CS(C)(=O)=O.CC(=O)c1ccc(Br)cc1>>CC(=O)c1ccc(/C=C/S(C)(=O)=O)cc1  
6629 C=CCCCCCCCCCCCC.c1ccc([I+]c2ccccc2)cc1>>CCCCCCCCCCCCC/C=C/c1ccccc1  
6630 C=CC(=O)OC.O=c1[nH]c(=O)n([C@H]2C[C@H](O)[C@@H](CO)C2)cc1I>>COC(=O)/C=C/c1cn([C@H]2C[C@H](O)[C@@H](CO)C2)c(=O)[nH]c1=O  
6631 C=CC(OC)OC.CC(C)(C)c1ccc(I)cc1>>COC(/C=C/c1ccc(C(C)(C)C)cc1)OC  
6632 C=C.CCOC(=O)c1cc(Br)ccc1C>>C=Cc1ccc(C)c(C(=O)OCC)c1  
6633 C=CCOc1ccccc1C.Ic1ccccc1>>Cc1ccccc1OC/C=C/c1ccccc1  
6634 C=CCCC(=O)O.COc1ccc(I)c1>>COc1ccc(/C=C/CCC(=O)O)c1  
6635 Brc1ccccc1C#Cc1ccccc1.C=CC(=O)OC>>COC(=O)/C=C/c1ccccc1C#Cc1ccccc1  
6636 C=C[C@H](CC(OC)OC)c1ccccc1.COc1ccc(I)cc1>>COc1ccc(/C=C/[C@@H](CC(OC)OC)c2ccccc2  
6637 C=C1C(=O)O[C@H]2[C@H]1CC/C(C)=C/CC[C@@]1(C)O[C@H]21.Ic1ccccc1>>C/C1=C\CC[C@@]2(C)O[C@H]2[C@H]2OC(=O)/C=C/c3ccccc3)[C@@H]2CC1  
6638 C=Cc1ccc(F)cc1.O=Cc1ccc(I)o1>>O=Cc1ccc(/C=C/c2ccc(F)cc2)o1  
6639 Brc1ccsc1.C=CC(C)(O)CCC=C(C)C>>CC(C)=CCCC(C)(O)/C=C/c1ccsc1  
6640 C=Cc1ccc(C)cc1C.[Si](C)(C)OS(=O)(=O)C(F)(F)F>>Cc1ccc(/C=C/[Si](C)(C)C)c(C)c1  
6641 C=C(NC(C)=O)C(=O)O.COc1ccc(Br)cc1OC>>COc1ccc(/C=C(\NC(C)=O)C(=O)O)cc1OC  
6642 C=Cc1ccc(Cl)cc1.Cn1cc(I)c(=O)c2ccccc21>>Cn1cc(/C=C/c2ccc(Cl)cc2)c(=O)c2ccccc21  
6643 C=CC(=O)OC(C)(C)C.C=CI>>C=C/C=C/C(=O)OC(C)(C)C  
6644 C=CC(C)=O.COc1ccc2cc(I)ccc2c1>>COc1ccc2cc(/C=C/C(C)=O)ccc2c1  
6645 OCc1ccccc1I.[11CH2]=Cc1ccccc1>>OCc1ccccc1/[11CH]=C/c1ccccc1  
6646 C=CC(=O)N(C)Cc1oc2ccccc2c1C.CC(C)(C)OC(=O)N1CCN(c2cc3cc(Br)cc3[nH]c2=O)CC1>>Cc1c(CN(C)C(=O)/C=C/c2cnc3[nH]c(=O)c(N4CCN(C(=O)OC(C)(C)C)CC4)cc3c2)oc2ccccc12  
6647 Brc1ccc2ccnc(N3CCCCC3)c2c1.C=CC(=O)OC(C)(C)C>>CC(C)(C)OC(=O)/C=C/c1ccc2ccnc(N3CCCCC3)c2c1

6648 C=C[Si](C)(C)C.COc1cccc(I)c1>>COc1cccc(/C=C/[Si](C)(C)C)c1  
6649 C=CC(=O)OCC.O=[N+](O-)]c1cccc1Br>>CCOC(=O)/C=C/c1ccsc1[N+](=O)[O-]  
6650 C=Cc1ccc(OC)cc1.Oc1cc(O)cc(I)c1>>COc1ccc(/C=C/c2cc(O)cc(O)c2)cc1  
6651 C=CC(CCC)OCc1cccc1.Fc1ccc(Br)cc1>>CCCC(/C=C/c1ccc(F)cc1)OCc1cccc1  
6652 C=C(C(=O)OCC)c1cccc1COc1cccc1I>>CCOC(=O)/C1=C/c2cccc2OCc2cccc21  
6653 C=Cc1ccncc1.CNc1ccc(Br)cc1>>CNc1ccc(/C=C/c2ccncc2)cc1  
6654 C=C[C@@H](CCCC)O[Si](C)(C)C(C)(C)C.COCC(=O)CCC[C@H](O[Si](C)(C)C(C)(C)C)[C@@H](  
/C=C/c1cccc1Br)O[Si](C)(C)C(C)(C)C>>CCCC[C@H](/C=C/c1cccc1/C=C/[C@@H](O[Si](C)(C)  
C(C)(C)C)[C@H](CCCC(=O)OC)O[Si](C)(C)C(C)(C)C)O[Si](C)(C)C(C)(C)C  
6655 Brc1cccc1.C=CCOc1cccc1C(C)(C)C>>CC(C)(C)c1cccc1OC/C=C/c1cccc1  
6656 C=CC(=O)OCC.FC(F)(F)c1cc(Br)c2cccc(C(F)(F)F)c2n1>>CCOC(=O)/C=C/c1cc(C(F)(F)F)nc2c(C(F)  
(F)F)cccc12  
6657 C=CC(=O)OC(C)(C)C.Cc1cccc1Br>>Cc1cccc1/C=C/C(=O)OC(C)(C)C  
6658 C=Cc1ccc2cccc2c1.CCN1c2ncc(I)cc2C(=O)N(C)c2ccc(Cl)nc21>>CCN1c2ncc(/C=C/c3ccc4cccc4c3  
)cc2C(=O)N(C)c2ccc(Cl)nc21  
6659 C=CC(=O)OCC.CCOC(=O)CCOCc1cc2c(cc1Br)OCO2>>CCOC(=O)/C=C/c1cc2c(cc1COCCC(=O)O  
CC)OCO2  
6660 C=CC(=O)OCC.Fc1nc(Br)ccc1Cl>>CCOC(=O)/C=C/c1ccc(Cl)c(F)n1  
6661 C=CS(=O)(=O)F.CC(=O)c1ccc(I)cc1>>CC(=O)c1ccc(/C=C/S(=O)(=O)F)cc1  
6662 C=CCNC(=O)OC(C)(C)C.N#Cc1ccc(Cl)cc1>>C=C(CNC(=O)OC(C)(C)C)c1ccc(C#N)cc1  
6663 C=CCCCC.Oc1ccc(O)c(Br)c1>>CCCC/C=C/c1cc(O)ccc1O  
6664 C=CC(=O)OCC.Cc1cccc1-c1cccc1I>>CCOC(=O)/C=C/c1cccc1-c1cccc1C  
6665 C=CC(=O)OCCCC.CC(C)c1cccc1I>>CCCCOC(=O)/C=C/c1cccc1C(C)C  
6666 C=CC(=O)OC.COc1ccc2c(c1)c(I)nn2C(=O)OC(C)(C)C>>COC(=O)/C=C/c1nn(C(=O)OC(C)(C)C)c2c  
cc(OC)cc12  
6667 C=C(Br)CCO.C=CC(=O)CC>>C=C(/C=C/C(=O)CC)CCO  
6668 C=CC(=O)OCC.Clc1cccc(Oc2cccc(Br)c2)c1>>CCOC(=O)/C=C/c1cccc(Oc2cccc(Cl)c2)c1  
6669 Brc1ccc(I)cc1.C=Cc1ccc(C=O)cc1>>O=Cc1ccc(/C=C/c2ccc(Br)cc2)cc1  
6670 C=CC(=O)OC.COC(=O)c1c(C)nc(OC)c(C#N)c1-c1ccc(Br)cc1>>COC(=O)/C=C/c1ccc(-  
c2c(C#N)c(OC)nc(C)c2C(=O)OC)cc1  
6671 C=CC(=O)OCC.COc1cc(Br)cc(OC(F)(F)F)c1>>CCOC(=O)/C=C/c1cc(OC)cc(OC(F)(F)F)c1  
6672 C=CC(=O)OC(C)(C)C.CCCCCCCCc1ccc(C(=O)OC)c(Cl)c1>>CCCCCCCCc1ccc(C(=O)OC)c(/C=C/  
C(=O)OC(C)(C)C)c1  
6673 C=Cc1ccc(C=C)cc1.O=[N+](O-)]c1ccc(Br)cc1>>C=Cc1ccc(/C=C/c2ccc([N+](=O)[O-])cc2)cc1  
6674 C=COCCCC.COc1ccc(C(=O)Cl)cc1>>CCCCO/C=C/C(=O)c1ccc(OC)cc1  
6675 C=CC(=O)OC.OCc1ccc2cc(Br)ccc2c1>>COC(=O)/C=C/c1ccc2cc(CO)ccc2c1  
6676 C=CC(N)=O.O=C(Nc1ccc(I)cc1)Nc1cc(C(F)(F)F)ccc1F>>NC(=O)/C=C/c1ccc(NC(=O)Nc2cc(C(F)(F)  
F)ccc2F)cc1  
6677 Brc1ccncc1.C=CC(=O)OCC>>CCOC(=O)/C=C/c1ccncc1  
6678 C=Cc1ccncc1.CC(C)(C)OC(=O)N[C@@H](CCc1cccc1)COc1cncc(Br)c1>>CC(C)(C)OC(=O)N[C@  
@H](CCc1cccc1)COc1cncc(/C=C/c2ccncc2)c1  
6679 COC[C@@H](/N=C(\c1cccc1)N1C=CCC[C@H]1C)C(C)C.Ic1ccc2c(c1)OCO2>>COC[C@@H](/N=  
C(\c1cccc1)N1C=C(c2ccc3c(c2)OCO3)CC[C@H]1C)C(C)C  
6680 C=CC(=O)OC(C)(C)C.O=c1[nH]c(=O)c2cc(Br)cnec2[nH]1>>CC(C)(C)OC(=O)/C=C/c1cnec2[nH]c(=O)  
[nH]c(=O)c2c1  
6681 C=C(NC(C)=O)C(=O)OC.CC(C)(C)OC(=O)NCCOc1cc(C#N)ccc1I>>COC(=O)/C=C(\c1ccc(C#N)cc1  
OCCNC(=O)OC(C)(C)C)NC(C)=O  
6682 C=CCN(Cc1cc2cc(C)ccc2nc1Cl)c1cccc1>>C=C1CN(c2cccc2)Cc2cc3cc(C)ccc3nc21  
6683 C=CC(=O)OC.CON(C)C(=O)c1ccc(Br)cc1I>>COC(=O)/C=C/c1cc(Br)ccc1C(=O)N(C)OC  
6684 C=Cc1cccc1.O=S(=O)(Oc1cccc2ccncc12)C(F)(F)F>>C=C(c1cccc1)c1cccc2ccncc12  
6685 BrC1CCCCC1.C=Cc1ccc(C(=O)N(Cc2cccc2)Cc2cccc2)cc1>>O=C(c1ccc(/C=C/C2CCCCC2)cc1)N(  
Cc1cccc1)Cc1cccc1  
6686 Brc1ccc(CN2CCCC(c3c(-  
c4cccc4)[nH]c4cccc34)C2)cc1.C=CC(=O)OC>>COC(=O)/C=C/c1ccc(CN2CCCC(c3c(-  
c4cccc4)[nH]c4cccc34)C2)cc1  
6687 C=CC(=O)OC.IC1=CO[C@H](COCc2cccc2)[C@H](OCc2cccc2)[C@@H]1OCc1cccc1>>COC(=  
O)/C=C/C1=CO[C@H](COCc2cccc2)[C@H](OCc2cccc2)[C@@H]1OCc1cccc1  
6688 C=Cc1ccc(OC)cc1.CCCCC(Br)C(=O)OC>>CCCCC(/C=C/c1ccc(OC)cc1)C(=O)OC  
6689 C=Cc1ccc(F)cc1.COc1cc(C=O)c(Br)c(OC)c1OC>>COc1cc(C=O)c(/C=C/c2ccc(F)cc2)c(OC)c1OC  
6690 C=CC(C)(C)O.COc1ccc(C(C)=O)c(O)c1I>>COc1ccc(C(C)=O)c(O)c1/C=C/C(C)(C)O

6691 C=C(OC(C)=O)C(=O)OCC(F)(F)F.CC1(C)CCc2cc(I)ccc2O1>>CC(=O)O/C(=C/c1ccc2c(c1)CCC(C)(C)O2)C(=O)OCC(F)(F)F  
6692 C=CC(=O)OCC.COc1cccc1I>>CCOC(=O)/C=C/c1cccc1OC  
6693 C=Cc1cccn1.c1ccc([I+][c2ccccc2])cc1>>C(=C/c1cccn1)\c1cccc1  
6694 C=CNC(C)=O.CCOC(=O)c1ccc(Br)cc1>>C=C(NC(C)=O)c1ccc(C(=O)OCC)cc1  
6695 C=C(c1ccc(Cl)cc1)N(C)C(C)=O.CCOC(=O)CCCB>>CCOC(=O)CCC/C=C(\c1ccc(Cl)cc1)N(C)C(C)C  
6696 C=CC(=O)C(C)CC(=O)OC.C=CC(C)(C)OC(C)(C)[C@H]1COc2ccc(Br)cc2O1>>C=CC(C)(C)OC(C)(C)[C@H]1COc2ccc(/C=C/C(=O)C(C)CC(=O)OC)cc2O1  
6697 C=CC(=O)OC.CC(=O)Nc1cccc1I>>COC(=O)/C=C/c1cccc1NC(C)=O  
6698 C=CCc1cccc1.COC(=O)c1ccc2cc(Br)ccc2c1>>COC(=O)c1ccc2cc(/C=C/CCc3ccccc3)ccc2c1  
6699 C=CC(=O)OC.CN(C)c1nccc(N(Cc2ccc(Br)cc2)CC(C)(C)C)n1>>COC(=O)/C=C/c1ccc(CN(CC(C)(C)C)c2ccnc(N(C)C)n2)cc1  
6700 C=CC(OC)OC.COc1cccc1I>>COc1cccc1/C=C/C(OC)OC  
6701 C=CS(=O)(=O)NCCCCCCC.CC(C)(C)OC(=O)NCc1cc(F)ccc1Br>>CCCCCCCCNS(=O)(=O)/C=C/c1ccc(F)cc1CNC(=O)OC(C)(C)C  
6702 C=CS(=O)(=O)F.Ic1ccc2ccccc2c1>>O=S(=O)(F)/C=C/c1ccc2ccccc2c1  
6703 C=CC(=O)OC(C)(C)C.COc1cc(N(C)Cc2ccc(Br)cc2)cc(OC)c1OC>>COc1cc(N(C)Cc2ccc(/C=C/C(=O)OC(C)(C)C)cc2)cc(OC)c1OC  
6704 C=Cc1cccc1.COC1CCCC1I>>COC1CCCC1/C=C/c1cccc1  
6705 C=CC(=O)OC.O=C1c2ccc(OS(=O)(=O)C(F)(F)F)cc2C(=O)N1[C@H](COCc1cccc1)c1cccc1>>CO C(=O)/C=C/c1ccc2c(c1)C(=O)N([C@H](COCc1cccc1)c1cccc1)C2=O  
6706 C=Cc1ccc(OC)cc1.CC(C)(Br)CCOC(=O)c1ccc(F)cc1>>COc1ccc(/C=C/C(C)(C)CCOC(=O)c2ccc(F)cc2)cc1  
6707 C=CS(=O)(=O)F.FS(F)(F)(F)c1ccc(I)cc1>>O=S(=O)(F)/C=C/c1ccc(S(F)(F)(F)F)cc1  
6708 Br1cnc(OC2CCOCC2)c1.C=CC1CCN(C(=O)OC(C)(C)C)C1>>CC(C)(C)OC(=O)N1CCC(/C=C/C2cnc(OC3CCOCC3)c2)C1  
6709 C=CC(=O)OCC.O=Cc1ccc(Cl)cc1>>CCOC(=O)/C=C/c1ccc(C=O)cc1  
6710 C=C(Br)CC.C=CC(=O)CC>>C=C(/C=C/C(=O)CC)CC  
6711 C=Cc1ccc(C(F)(F)F)cc1.O=C(NCc1cccc(I)c1)[C@@H]1CCCN1S(=O)(=O)c1cc2ccccc2o1>>O=C(NC c1cccc(/C=C/c2ccc(C(F)(F)F)cc2)c1)[C@@H]1CCCN1S(=O)(=O)c1cc2ccccc2o1  
6712 C=CC(=O)OC.CCc1cccc1C(=O)c1sc2cc(O)ccc2c1Oc1ccc(Br)cc1>>CCc1cccc1C(=O)c1sc2cc(O)ccc 2c1Oc1ccc(/C=C/C(=O)OC)cc1  
6713 C=Cc1ccc(OC)cc1.COc1ccc(OC)c(I)c1>>COc1ccc(/C=C/c2cc(OC)ccc2OC)cc1  
6714 Br1c2ccccc2cc2ccccc12.C=Cc1nc2c(N)ncnc2n1[C@H]1C[C@H](O[Si](C)(C)C(C)(C)C)[C@@H](C O[Si](C)(C)C(C)(C)C)O1>>CC(C)(C)[Si](C)(C)OC[C@H]1O[C@@H](n2c(/C=C/c3c4ccccc4cc4ccc c34)nc3c(N)ncnc32)C[C@@H]1O[Si](C)(C)C(C)(C)C  
6715 C=CC(=O)OC(C)(C)C.FC(F)(F)c1ccc(Br)c(Cl)c1>>CC(C)(C)OC(=O)/C=C/c1ccc(C(F)(F)F)cc1Cl  
6716 C=CC(C)(C)O.COc1cc(Br)c(C=O)cc1OC>>COc1cc(C=O)c(/C=C/C(C)(C)O)cc1OC  
6717 C=Cc1cccc1C.Nc1ccc([N+](=O)[O-])cc1Br>>Cc1cccc1/C=C/c1cc([N+](=O)[O-])ccc1N  
6718 C=CC(=O)OC.O=C(c1cccc1)c1sc2cc(O)ccc2c1Oc1ccc(Br)cc1>>COC(=O)/C=C/c1ccc(Oc2c(C(=O)c 3ccccc3)sc3cc(O)ccc23)cc1  
6719 C=CC(=O)NCc1ccc(F)c(F)c1.O=c1c(I)coc2cc(O)ccc12>>O=C(/C=C/c1coc2cc(O)ccc2c1=O)NCc1ccc (F)c(F)c1  
6720 C=CC(=O)OCC.COc1cc(Br)c(C2OCCCC2)cc1OC>>CCOC(=O)/C=C/c1cc(OC)c(OC)cc1C1OCCCCO1  
6721 C=COCCN(C)C.CC(=O)c1ccc(Br)cc1>>C=C(OCCN(C)C)c1ccc(C(C)=O)cc1  
6722 C=C(F)C(=O)OC.O=Cc1ccc(I)o1>>COC(=O)/C(F)=C/c1ccc(C=O)o1  
6723 C=Cc1ccc2nc(OC)c(OC)nc2c1.COC(=O)c1cccc(Br)c1>>COC(=O)c1cccc(/C=C/c2ccc3nc(OC)c(OC)n c3c2)c1  
6724 C=CC(=O)OC.COc1ccc(C(=C(I)CCSc2ccccc2)c2ccc(OC)cc2)cc1>>COC(=O)/C=C/C(CCSc1cccc1)= C(c1ccc(OC)cc1)c1ccc(OC)cc1  
6725 C=CC(=O)OCC.Cc1nc(N)nc(N[C@H]2CC[C@H](OCCO)CC2)c1Br>>CCOC(=O)/C=C/c1c(C)nc(N)n c1N[C@H]1CC[C@H](OCCO)CC1  
6726 C=CCNC(=O)OC(C)(C)C.O=S(=O)(Oc1cc(F)ccc1Cl)C(F)(F)F>>C=C(CNC(=O)OC(C)(C)C)c1cc(F)c cc1Cl  
6727 C=CC(=O)OCC.O=Cc1ccc2occ(Br)c2c1>>CCOC(=O)/C=C/c1coc2ccc(C=O)cc12  
6728 C=CCN(CCc1c(Br)n(C(=O)OCc2ccccc2)c2ccccc12)C(=O)C(F)(F)F>>C=C1CN(C(=O)C(F)(F)F)CCc2 c1n(C(=O)OCc1cccc1)c1cccc21  
6729 C=Cc1cccc(C)c1.COc1cc(CC(=O)Nc2cccc(I)c2)ccc1OCCNC(=O)OC(C)(C)C>>COc1cc(CC(=O)Nc2c ccc(/C=C/c3cccc(C)c3)c2)ccc1OCCNC(=O)OC(C)(C)C  
6730 C=CS(=O)(=O)F.CCOC(=O)c1ccc(I)cc1>>CCOC(=O)c1ccc(/C=C/S(=O)(=O)F)cc1  
6731 C=CC(=O)OCCCC.CSc1ccc(I)cc1>>CCCCOC(=O)/C=C/c1ccc(SC)cc1

6732 \*NC(=O)c1ccc(C=C)cc1.FC(F)(F)c1cccc(I)c1>>\*NC(=O)c1ccc(/C=C/c2cccc(C(F)(F)F)c2)cc1  
6733 C=CC(=O)OC(C)(C)C.O=C1c2ccc(Br)cc2CCN1c1cc(F)ccc1Cl>>CC(C)(C)OC(=O)/C=C/c1ccc2c(c1)  
CCN(c1cc(F)ccc1Cl)C2=O  
C=CC[C@H]1O[C@@H]2O[C@@]3(C)CC[C@H]4[C@H](C)CC[C@@H]([C@H]1C)[C@]42OO3.  
6734 Cc1cccc1I>>Cc1cccc1/C=C/C[C@H]1O[C@@H]2O[C@@]3(C)CC[C@H]4[C@H](C)CC[C@@H]  
([C@H]1C)[C@]42OO3  
C=CC(=O)NCCCCCNC(=O)OCC1c2cccc2-  
6735 c2cccc21.O=c1[nH]c(=O)n([C@@H]2CO[C@H](CO)[C@@H](O)C2)cc1I>>O=C(/C=C/c1cn([C@  
H]2CO[C@H](CO)[C@@H](O)C2)c(=O)[nH]c1=O)NCCCCCNC(=O)OCC1c2cccc2-c2cccc21  
6736 C=Cc1ccc(O)c(OC)c1.COc1cc(Br)cc(OC)c1F>>COc1cc(/C=C/c2cc(OC)c(F)c(OC)c2)ccc1O  
C=Cc1ccc(CP(=O)(O)O)cc1.CC(C)SC(SC(C)C)C(=O)Nc1ccc(I)cc1>>CC(C)SC(SC(C)C)C(=O)Nc1cc  
6737 c(/C=C/c2ccc(CP(=O)(O)O)cc2)cc1  
6738 Brc1ccc(I)cc1.C=CCNC(=O)c1cc(C)on1>>Cc1cc(C(=O)NC/C=C/c2ccc(Br)cc2)no1  
6739 C=CCOC(C)=O.Cc1cccc(C)c1I>>CC(=O)OC/C=C/c1c(C)cccc1C  
C=CC(=O)OC.CC(=O)OC[C@H]1O[C@H](Oc2ccc(I)cc2)[C@H](OC(C)=O)[C@@H](OC(C)=O)[C  
6740 @@H]1OC(C)=O>>COC(=O)/C=C/c1ccc(O[C@H]2O[C@H](COC(C)=O)[C@@H](OC(C)=O)[C@  
H](OC(C)=O)[C@H]2OC(C)=O)cc1  
6741 C=CC(=O)OC.Nc1ccc(C(F)(F)F)cc1Br>>COC(=O)/C=C/c1cc(C(F)(F)F)ccc1N  
6742 C=CC(=O)OC.CC(=O)Oc1cc(I)c(O)c(C#N)c1C#N>>COC(=O)/C=C/c1cc(OC(C)=O)c(C#N)c(C#N)c1  
6743 C=CB1OC(C)CC(C)(C)O1.Clc1ccc(I)cc1>>CC1CC(C)(C)OB/C=C/c2ccc(Cl)cc2)O1  
6744 C=Cc1ccncc1.Nc1ccc(Br)cc1>>Nc1ccc(/C=C/c2ccncc2)cc1  
6745 C=CS(=O)(=O)F.Cc1ccc(S(=O)(=O)n2cc(I)cn2)cc1>>Cc1ccc(S(=O)(=O)n2cc(/C=C/S(=O)(=O)F)cn2)  
C=CC(=O)C(C)CC(=O)OC.C=CC(C)(C)OC(C)(C)[C@@H]1COc2ccc(Br)cc2O1>>C=CC(C)(C)OC(C  
6746 )(C)[C@@H]1COc2ccc(/C=C/C(=O)C(C)CC(=O)OC)cc2O1  
C=CCC(=O)O.CC(C)c1[nH]nc(O)[C@@H]2O[C@H](COC(=O)c3cccc3)[C@@H](F)[C@H](OC(=O)  
6747 c3cccc3)[C@H]2OC(=O)c2cccc2)c1Cc1ccc(Br)cc1>>CC(C)c1[nH]nc(O)[C@@H]2O[C@H](COC(=O)  
c3cccc3)[C@@H](F)[C@H](OC(=O)c3cccc3)[C@H]2OC(=O)c2cccc2)c1Cc1ccc(/C=C/CC(=O)  
6748 C=Cc1ccc2ccc(Cl)cc2n1.COC(=O)c1cccc1CCC(SCC1(CC(=O)O)CC1)c1ccc(Br)c1>>COC(=O)c1cc  
ccc1CCC(SCC1(CC(=O)O)CC1)c1cccc(/C=C/c2ccc3ccc(Cl)cc3n2)c1  
6749 C=CCOc1cccc1.CC(C)(C)OC(=O)/C=C/c1ccc(CN(C(=O)C2CCCC2)c2cccc(Br)c2)cc1>>CC(C)(C)  
OC(=O)/C=C/c1ccc(CN(C(=O)C2CCCC2)c2cccc(/C=C/COc3cccc3)c2)cc1  
6750 C=Cc1c(F)c(F)c(F)c1F.Ic1cccc1>>Fc1c(F)c(F)c(/C=C/c2cccc2)c(F)c1F  
6751 C=CC(=O)OCCCC.CCCCCc1cn(Cc2ccc(I)cc2)nn1>>CCCCCc1cn(Cc2ccc(/C=C/C(=O)OCCCC)cc  
2)nn1  
6752 C=CCO[Si](C)(C)C(C)(C)C.COc1ccc(Br)cc1>>COc1ccc(/C=C/CO[Si](C)(C)C(C)(C)C)cc1  
C=CC(C)(C)C(=O)NC(C)(C)C(=O)O.CC(=O)OC[C@H]1O[C@@H](c2cc(Cc3ccc(Br)cc3C)c(C(C)C)  
6753 cc2OC(C)=O)[C@H](OC(C)=O)[C@@H](OC(C)=O)[C@@H]1OC(C)=O>>CC(=O)OC[C@H]1O[C  
@@H](c2cc(Cc3ccc(/C=C/C(C)(C)C(=O)NC(C)(C)C(=O)O)cc3C)c(C(C)C)cc2OC(C)=O)[C@H](OC  
(C)=O)[C@@H](OC(C)=O)[C@@H]1OC(C)=O  
6754 C=Cc1cccc1.FC(F)(F)C(F)(F)C(F)(F)C(F)(F)C(F)(F)Br>>FC(F)(F)C(F)(F)C(F)(F)C(F)(F)C(F)  
(F)(F)C(F)(F)/C=C/c1cccc1  
6755 C=C(NC(C)=O)C(=O)OC.Cc1ccc(S(=O)(=O)n2ccc3c(Br)cccc32)cc1>>COC(=O)/C=C/c1cccc2c1cn  
2S(=O)(=O)c1ccc(C)cc1)NC(C)=O  
C=CC[C@H](CC(=O)OC(C)(C)C(=O)N[C@H](C(=O)N[C@H](C)c1cccc1)C(C)(C)C.COc1cc(Br)  
6756 ccc1-  
c1cccc1>>COc1cc(/C=C/C[C@H](CC(=O)OC(C)(C)C(=O)N[C@H](C(=O)N[C@H](C)c2cccc2)  
C(C)(C)C)ccc1-c1cccc1  
6757 C=Cc1cccc1.COc1ccc(CNc2c(C(=O)NCc3ccc(F)cc3F)c(=O)n(OCc3cccc3)c3ncc(Br)cc23)c(OC)c1>  
>COc1ccc(CNc2c(C(=O)NCc3ccc(F)cc3F)c(=O)n(OCc3cccc3)c3ncc(/C=C/c4cccc4)cc23)c(OC)c1  
6758 C=CS(=O)c1cccc1.N#Cc1ccc(Br)cc1>>N#Cc1ccc(/C=C/S(=O)c2cccc2)cc1  
C=CC(=O)N(C)Cc1oc2cccc2c1C.CC(C)(C)OC(=O)N1CCNc2ncc(Br)cc2C1>>Cc1c(CN(C)C(=O)/C=  
6759 C/c2enc3c(c2)CN(C(=O)OC(C)(C)CCN3)oc2cccc12  
6760 C=C.COc1ccc(Br)c(NC(C)=O)c1>>C=Cc1ccc(OC)cc1NC(C)=O  
6761 C=CC(N)=O.CCc1cccc(Br)c1>>CCc1cccc(/C=C/C(N)=O)c1  
C=CCC(O)c1enc(-  
6762 c2cc(OC)ncc2F)cn1.COC(=O)[C@@H](C)[C@H](c1ccc(I)c(O)c1)C1CC1>>COC(=O)[C@@H](C)[C  
@H](c1ccc(/C=C/CC(O)c2enc(-c3cc(OC)ncc3F)en2)c(O)c1)C1CC1  
6763 C=CCOc1cccc1.Cc1cccc(I)c1>>Cc1cccc(/C=C/COc2cccc2)c1  
6764 C=CC(C)(C)O.O=c1cc(-c2cccc2)oc2cc(Br)ccc12>>CC(C)(O)/C=C/c1ccc2c(=O)cc(-c3cccc3)oc2c1  
6765 C=Cc1cccc1.CCOC(=O)c1cc(=O)c2cccc(Br)c2o1>>CCOC(=O)c1cc(=O)c2cccc(/C=C/c3cccc3)c2o1

6766 C=CC(=O)OC(C)(C)C.[Si](C)(C)CCOCON1CCc2c(ncc3c2c(I)en3Cc2ccc(F)cc2)C1=O>>CC(C)(C)  
OC(=O)/C=C/c1en(Cc2ccc(F)cc2)c2cnc3c(c12)CCN(OCOCC[Si](C)(C)C)C3=O  
6767 C=C[C@H]1CCCCN1C(=O)OC(C)(C)C.CC(=O)Oc1ccc(I)cc1>>CC(=O)Oc1ccc(/C=C/[C@H]2C  
CCCN2C(=O)OC(C)(C)C)cc1  
6768 C=CC(=O)OCC.COc1ncc(I)c2ncccc12>>CCOC(=O)/C=C/c1cnc(OC)c2cccn12  
6769 C=CCC(Nc1cccc1Br)c1ccn(C)c1>>C=C1CC(c2ccn(C)c2)Nc2ccccc21  
6770 C=CC(=O)N1CCCC1.O=Cc1cc(OCc2ccccc2)ccc1Br>>O=Cc1cc(OCc2ccccc2)ccc1/C=C/C(=O)N1CC  
6771 C=Cc1ccc(OC)cc1.O=[N+](O-)]c1ccc(Br)cc1>>COc1ccc(/C=C/c2ccc([N+](=O)[O-])cc2)cc1  
6772 C=CC(=O)OC(C)(C)C.COc1ccc(Br)c(OC)c1>>COc1ccc(/C=C/C(=O)OC(C)(C)C)c(OC)c1  
6773 C=CC(=O)OCCCC.Cc1ccccc1Br>>CCCCOC(=O)/C=C/c1ccccc1C  
6774 C=CC(=O)OCCCC.Clc1cc(Br)ccc1I>>CCCCOC(=O)/C=C/c1ccc(Br)cc1C1  
C=CCCCO[C@H]1O[C@H](COC(C)=O)[C@H](OC(C)=O)[C@H](OC(C)=O)[C@H]1OC(C)=O.O  
6775 =C(OC[C@H]1O[C@H](n2cc(I)c(=O)[nH]c2=O)C[C@H]1OC(=O)c1ccccc1)c1ccccc1>>CC(=O)  
OC[C@H]1O[C@H](OCCC/C=C/c2cn([C@H]3C[C@H](OC(=O)c4ccccc4)[C@H](COC(=O)c4ccc  
cc4)O3)c(=O)[nH]c2=O)[C@H](OC(C)=O)[C@H](OC(C)=O)[C@H](OC(C)=O)[C@H]1OC(C)=O  
6776 C=CC(=O)N1CCCCC1.Cn1nc(Br)c2ccccc21>>Cn1nc(/C=C/C(=O)N2CCCCC2)c2ccccc21  
6777 C=CN1C(=O)c2ccccc2C1=O.Ic1ccc(C2(N3CCCCC3)CCCCC2)cc1>>O=C1c2ccccc2C(=O)N1/C=C/c  
1ccc(C2(N3CCCCC3)CCCCC2)cc1  
6778 C=C1C[C@H]2[C@H]3CCc4cc(OC)ccc4[C@H]3CC[C@]2(C)C1=O.O=[N+](O-  
)]c1ccc(Br)cc1>>COc1ccc2c(c1)CC[C@H]1[C@H]2CC[C@]2(C)C(=O)/C=C/c3ccc([N+](=O)[  
O-])cc3)C[C@H]12  
6779 Br1ccccc2ccccc12.C=CCN(C(=O)OC(C)(C)C)C(=O)OC(C)(C)C>>CC(C)(C)OC(=O)N(C/C=C/c1cccc  
2ccccc12)C(=O)OC(C)(C)C  
6780 C=CC(=O)OC(C)(C)C.Cc1ccc2c(Br)ccc(N(C)C)c2n1>>Cc1ccc2c(/C=C/C(=O)OC(C)(C)C)ccc(N(C)C  
 )c2n1  
6781 C=Cc1ccc(C)cc1.Cc1ccc(Br)cc1>>Cc1ccc(/C=C/c2ccc(C)cc2)cc1  
6782 C=CC(=O)OC(C)(C)C.CC(C)(C)[Si](C)(C)/C=C/C1=C(Br)CCCC1>>CC(C)(C)OC(=O)/C=C/C1=C(/  
C=C/[Si](C)(C)C(C)(C)C)CCCC1  
6783 C=CS(C)(=O)=O.CC(C)c1cc(C(C)C)c(Br)c(C(C)C)c1>>CC(C)c1cc(C(C)C)c(/C=C/S(C)(=O)=O)c(C(  
C)C)c1  
6784 C=Cc1ccc([N+](=O)[O-])cc1.Ic1ccccc1>>O=[N+](O-)]c1ccc(/C=C/c2ccccc2)cc1  
6785 C=CC(=O)OC(C)(C)C.CC(C)OC(=O)C[C@H](c1ccc(Br)cc1)N(Cc1ccccc1)[C@H](C)c1ccccc1>>C  
C(C)OC(=O)C[C@H](c1ccc(/C=C/C(=O)OC(C)(C)C)cc1)N(Cc1ccccc1)[C@H](C)c1ccccc1  
6786 C=CC(=O)OC(C)(C)C.O=Cc1ccsc1Br>>CC(C)(C)OC(=O)/C=C/c1scsc1C=O  
Br1cccn1.C=CCON=C1[C@H](C)[C@H]2OC(=O)O[C@]2(C)[C@H](CC)OC(=O)[C@H](C)C(=  
O)[C@H](C)[C@H](O[C@H]2O[C@H](C)C[C@H](N(C)C)[C@H]2OC(C)=O)[C@](C)(OC)C[C@  
H]1C>>CC[C@H]1OC(=O)[C@H](C)C(=O)[C@H](C)[C@H](O[C@H]2O[C@H](C)C[C@H]  
(N(C)C)[C@H]2OC(C)=O)[C@]1(C)(OC)C[C@H](C)C(=NOC/C=C/c2cccn2)Ic@H1(C)Ic@H12O  
6788 C=COC(CC)CCCC.COc1ccc(Br)cc1>>C=C(OC(CC)CCCC)c1ccc(OC)cc1  
6789 C=Cc1ccc2ccccc2c1.FC(F)(F)C(F)(F)C(F)(F)C(F)(F)C(F)(F)C(F)(F)Br>>FC(F)(F)C(F)(F)C(F)(F)C(F)  
(F)C(F)(F)C(F)(F)/C=C/c1ccc2ccccc2c1  
6790 C=Cc1cccc(OC)c1.Oc1ccc(O)c(I)c1>>COc1cccc(/C=C/c2ccc(O)ccc2O)c1  
6791 C=CCn1c(-c2ccc(OC)cc2F)nc2ccccc2c1=O.O=C(CN1C(=O)COc2ccccc21)c1ccc(Br)cc1>>COc1ccc(-  
c2nc3ccccc3c(=O)n2C/C=C/c2ccc(C(=O)CN3C(=O)COc4ccccc43)cc2)c(F)c1  
6792 C=CCc1ccccc1CCl>>C=C1Cc2ccccc2C1  
6793 C=Cc1ccc(C(=C(c2ccccc2)c2ccccc2)c2ccccc2)cc1.CCCCN1C(=O)c2cccc3c(Br)ccc(c23)C1=O>>CCC  
CN1C(=O)c2cccc3c(/C=C/c4ccc(C(=C(c5ccccc5)c5ccccc5)c5ccccc5)cc4)ccc(c23)C1=O  
C=CCCCOc1ccc(CCNC(=O)OC(C)(C)C)cc1.CC(C)N(CC[C@H](c1ccccc1)c1cc(Br)ccc1OCc1ccccc1)  
6794 C(C)C>>CC(C)N(CC[C@H](c1ccccc1)c1cc(/C=C/CCCOc2ccc(CCNC(=O)OC(C)(C)C)cc2)ccc1OCc1  
ccccc1)C(C)C  
6795 C=C[C@H](C)[C@H](O)C/C=C/C(=O)OC.FC(F)(F)c1ccc(I)cc1>>COC(=O)/C=C/C[C@H](O)[C  
@H](C)/C=C/c1ccc(C(F)(F)F)cc1  
6796 C=CC(=O)OCC.FC(F)(F)c1ccc(Cl)cc1>>CCOC(=O)/C=C/c1ccc(C(F)(F)F)cc1  
6797 C=CC(=O)O.O=[N+](O-)]c1ccc(Br)cc1>>O=C(O)/C=C/c1ccc([N+](=O)[O-])cc1  
6798 C=CC(=O)OC.CC(C)(C)OC(=O)N1CCC(Cc2nc3ncc(Br)cc3o2)CC1>>COC(=O)/C=C/c1cnc2nc(CCC  
CCN(C(=O)OC(C)(C)C)CC3)oc2c1  
6799 C=CCCCCCCCCO.COc1cc(OC)c(OCOC)c(Br)c1OCOC>>COCOc1cc(OC)c(OCOC)c(/C=C/CCC  
CCCCO)c1OCOC  
6800 C=Cc1ccc(O)cc1.COc1cc(Br)cc(OC)c1>>COc1cc(/C=C/c2ccc(O)cc2)cc(OC)c1  
6801 C=CC(=O)OCC.Cc1cc2c(cc1C(F)(F)F)NC(=O)CC(c1ccccc1Br)c1=N2>>CCOC(=O)/C=C/c1ccccc1C2=  
Nc3cc(C)c(C(F)(F)F)cc3NC(=O)C2)c1



6802 C=Cc1ccc(OC)c(OC)c1.Oc1ccccc1I>>COc1ccc(/C=C/c2ccccc2O)cc1OC  
 6803 C=CC(C)(C)C.O=Cc1ccccc1Br>>CC(C)(C)/C=C/c1ccccc1C=O  
 6804 C=CC(=O)OC(C)(C)C.COc1cc(CC(=O)Nc2ccc(I)cc2)ccc1NC(=O)Nc1ccccc1C>>COc1cc(CC(=O)Nc  
 2ccc(/C=C/C(=O)OC(C)(C)C)cc2)ccc1NC(=O)Nc1ccccc1C  
 6805 C=Cc1ccc(C#N)cc1.N[C@@H](Cc1c[nH]c2c(Br)cccc12)C(=O)O>>N#Cc1ccc(/C=C/c2cccc3c(C[C@  
 H](N)C(=O)O)c[nH]c23)cc1  
 6806 C=CC(=O)OC.CSc1ccccc1I>>COC(=O)/C=C/c1ccccc1SC  
 6807 C=CC(=O)O.N[C@@H](Cc1c[nH]c2ccc(Br)cc12)C(=O)O>>N[C@@H](Cc1c[nH]c2ccc(/C=C/C(=O)  
 O)cc12)C(=O)O  
 6808 C=Cc1ccc(O)c(O)c1.Oc1ccc(O)c(I)c1>>Oc1ccc(O)c(/C=C/c2ccc(O)c(O)c2)c1  
 6809 C=COCCCC.CC(=O)c1ccc(Br)c2ccccc12>>C=C(OCCCC)c1ccc(C(C)=O)c2ccccc12  
 6810 C=CC(=O)OC(C)(C)C.Cc1ccc(S(=O)(=O)n2ccc(C=O)c3c(Br)cccc32)cc1>>Cc1ccc(S(=O)(=O)n2cc(C=  
 O)c3c(/C=C/C(=O)OC(C)(C)C)cccc32)cc1  
 6811 C=CC(=O)OC(C)(C)C.COc1cc(OC)c(Br)c(OC)c1>>COc1cc(OC)c(/C=C/C(=O)OC(C)(C)C)c(OC)c1  
 6812 C=Cc1ccccc1.O=[N+][([O-])c1ccc(Cl)cc1>>O=[N+][([O-])c1ccc(/C=C/c2ccccc2)cc1  
 6813 C=CC(=O)OC.O=c1oc2cnc3ccc(Br)cc3c2n1-  
 c1ccccc(C(F)(F)F)c1>>COC(=O)/C=C/c1ccc2ncc3oc(=O)n(-c4ccccc(C(F)(F)F)c4)c3c2c1  
 6814 C=C(F)[Si](C)(c1ccccc1)c1ccccc1.FC(F)(F)c1ccc(I)cc1>>C[Si](/C(F)=C/c1ccc(C(F)(F)F)cc1)(c1ccccc  
 1)c1ccccc1  
 6815 C=CC(=O)O.FC(F)(F)c1ccc(I)cc1>>O=C(O)/C=C/c1ccc(C(F)(F)F)cc1  
 6816 C=CC(=O)OCC.CC(C)(C)OC(=O)Nc1csc(Br)c1NC(=O)OC(C)(C)C>>CCOC(=O)/C=C/c1sc(NC(=O)  
 )OC(C)(C)C)c1NC(=O)OC(C)(C)C  
 6817 C=CC1CCCCC1.Cc1ccc(Br)cc1>>Cc1ccc(/C=C/C2CCCCC2)cc1  
 6818 Brc1ccc(C2OCCO2)nc1.C=CC(=O)OCC>>CCOC(=O)/C=C/c1ccc(C2OCCO2)nc1  
 6819 C=CC(=O)O.O=C1CCc2cc(Br)ccc21>>O=C(O)/C=C/c1ccc2c(c1)CCC2=O  
 6820 C=Cc1ccccc1.O=c1c(I)c(/C=C/c2ccccc2)[nH]c2ccccc12>>O=c1c(/C=C/c2ccccc2)c(/C=C/c2ccccc2)[n  
 H]c2ccccc12  
 6821 Brc1ccc(N2CCOCC2)c2nsnc12.C=Cc1cncnc1>>C=C/c1ccc(N2CCOCC2)c2nsnc12)c1cncnc1  
 6822 C=CC(=O)N1N=Cc2ccccc2C1C1CC1.COc1cc(Cc2cnc(N)nc2N)cc(I)c1OC>>COc1cc(Cc2cnc(N)nc2N  
 )cc(/C=C/C(=O)N2N=Cc3ccccc3C2C2CC2)c1OC  
 6823 C=Cc1ccccc1.CCCCCCCC0c1ccc(/C=C/c2ccc(OC)cc2)c(OCCCCCCCC)cc1/C=C/c1ccc(Br)cc1>>CC  
 CCCCCC0c1cc(/C=C/c2ccc(OC)cc2)c(OCCCCCCCC)cc1/C=C/c1ccc(/C=C/c2ccccc2)cc1  
 6824 Brc1ccc2ccc3ccccc4ccc1c2c34.C=CC(=O)OCCCC>>CCCCOC(=O)/C=C/c1ccc2ccc3ccccc4ccc1c2c34  
 6825 C=CC(C)(O)CCC=C(C)C.COc1ccc(O)c(Br)c1>>COc1ccc(O)c(/C=C/C(C)(O)CCC=C(C)C)c1  
 6826 C=CC(C)=O.CCn1cc(I)c(=O)c2ccc(C)nc21>>CCn1cc(/C=C/C(C)=O)c(=O)c2ccc(C)nc21  
 6827 C=CCN(C(=O)C(C)(C)C)C1CCCCC1.O=C1Nc2ncccc2[C@@]12Cc1cc(Br)cnc1C2>>CC(C)(C)C(=  
 O)N(C/C=C/c1cnc2c(c1)C[C@@]1(C2)C(=O)Nc2ncccc21)C1CCCCC1  
 6828 C=CC(C)=O.O=Cc1ccc(Cl)cc1>>CC(=O)/C=C/c1ccc(C=O)cc1  
 6829 C=CC(=O)OC(C)(C)C.CCOC(=O)c1cc2cc(Br)ccc2[nH]1>>CCOC(=O)c1cc2cc(/C=C/C(=O)OC(C)(C)  
 C)ccc2[nH]1  
 6830 C=Cc1ccc(F)cc1.FC(F)(F)C(F)(F)C(F)(F)C(F)(F)C(F)(F)Br>>Fc1ccc(/C=C/C(F)(F)C(F)(F)C(F)(F)  
 )(F)C(F)(F)C(F)(F)C(F)(F)F)cc1  
 6831 C=Cc1ccccc1.O=[N+][([O-])c1ccc2c(I)nn(C3CCCCO3)c2c1>>O=[N+][([O-]  
 )c1ccc2c(/C=C/c3ccccc3)nn(C3CCCCO3)c2c1  
 6832 C=Cc1cncnc1.CCCCC0c1ccc(Br)cc1F>>CCCCC0c1ccc(/C=C/c2cncnc2)cc1F  
 6833 C=CC(=O)OC.CN(C)c1ccc2cc(Br)ccc2c1>>COC(=O)/C=C/c1ccc2cc(N(C)C)ccc2c1  
 6834 C=CC(=O)Nc1cccc(Cl)c1.COc1ccc2c(=O)c(I)coc2c1>>COc1ccc2c(=O)c(/C=C/C(=O)Nc3cccc(Cl)c3)  
 coc2c1  
 6835 C=C.Clc1ccccc1I>>C=Cc1ccccc1Cl  
 6836 Brc1ccc2c(c1)c(CCc1ccccc1)cn2Cc1ccccc1.C=CC(=O)OC>>COC(=O)/C=C/c1ccc2c(c1)c(CCc1ccccc  
 1)cn2Cc1ccccc1  
 6837 C=CC(=O)OCC.Cc1ncc(Br)c(N)c1I>>CCOC(=O)/C=C/c1c(C)ncc(Br)c1N  
 6838 C=CC(=O)OC.COC(=O)Cc1ccc(N)c(I)c1>>COC(=O)/C=C/c1cc(CC(=O)OC)ccc1N  
 6839 C=CCCN1C(=O)c2ccccc2C1=O.O=C(O)c1ccc(I)cc1O>>O=C(O)c1ccc(/C=C/CCN2C(=O)c3ccccc3C2  
 =O)cc1O  
 6840 C=CCO.COc1ccc2ncc(F)c(I)c2n1>>C=C(CO)c1c(F)cnc2ccc(OC)nc12  
 6841 C=CC(=O)OCC.CC(C)(C)OC(=O)c1ccccc1Br>>CCOC(=O)/C=C/c1ccccc1C(=O)OC(C)(C)C  
 6842 C=Cc1ccc([N+](=O)[O-]  
 ])cc1.O=C1C(O)=C(I)C(=O)c2ccccc21>>O=C1C(O)=C(/C=C/c2ccc([N+](=O)[O-]  
 C=CNC(C)=O.N#Cc1ccc(OS(=O)(=O)C(F)(F)F)cc1>>C=C(NC(C)=O)c1ccc(C#N)cc1  
 6844 C=Cc1ccccc1.Fc1c(F)c(F)c(Br)c(F)c1F>>Fc1c(F)c(F)c(/C=C/c2ccccc2)c(F)c1F

6845 C=CS1cccc1.O=C(c1cccc1)c1ccc(Br)cc1>>O=C(c1cccc1)c1ccc(/C=C/Sc2cccc2)cc1  
 6846 C=Cc1ccc(C=O)cc1.COc1ccc(I)cc1>>COc1ccc(/C=C/c2ccc(C=O)cc2)cc1  
 6847 C=Cc1ccc(C(=O)OCC)cc1.CC1(C)CCC(=C2CCCC2)c2cc(Br)ccc21>>CCOC(=O)c1ccc(/C=C/c2ccc3c(c2)C(=C2CCCC2)CCC3(C)C)cc1  
 6848 C=CC#N.O=Cc1ccc(Br)cc1>>N#C/C=C/c1ccc(C=O)cc1  
 6849 C=COCCCC.Clc1ccc(Br)cc1>>CCCCO/C=C/c1ccc(Cl)cc1  
 6850 C=C1C(=O)O[C@H]2[C@H]1CC/C(C)=C/CC[C@@]1(C)O[C@@H]21.FC(F)(F)c1cccc(I)c1>>C/C1=C\CC[C@@]2(C)O[C@H]2[C@H]2OC(=O)/C=C/c3cccc(C(F)(F)F)c3[C@@H]2CC1  
 6851 C=Cc1nnn(-c2cccc2)n1.Ic1cccc1>>C(=C/c1nnn(-c2cccc2)n1)\c1cccc1  
 6852 C=CC(=O)OC.CC(C)(C)OC(=O)N1CCC(CCc2nc3ncc(Br)cc3o2)CC1>>COC(=O)/C=C/c1cnc2nc(CC3CCN(C(=O)OC(C)(C)C)CC3)oc2c1  
 6853 COc1cc(Br)c(-c2cccc2O/C=C/C(=O)OCc2cccc2)cc1OC>>COc1cc2c(cc1OC)-c1cccc1O/C2=C/C(=O)OCc1cccc1  
 6854 C=CC(=O)OC.CC(C)n1cnc2c(NCc3ccc(Br)cc3)nc(N3CCOCC3)nc21>>COC(=O)/C=C/c1ccc(CNc2nc(N3CCOCC3)nc3c2nnc3C(C)C)cc1  
 6855 C=CS(=O)(=O)c1cccc1.Cc1ccc(S(=O)(=O)n2ccc3cc(Br)ccc32)cc1>>Cc1ccc(S(=O)(=O)n2ccc3cc(/C=S(=O)(=O)c4cccc4)ccc32)cc1  
 6856 C=CC(=O)OCCCC.Oc1cccc1I>>CCCCOC(=O)/C=C/c1cccc1O  
 6857 C=CCCN1Cc2cc(C=O)ccc2C1=O.O=C(O[C@H]1CN2CCC1CC2)C1(c2cccc(Br)c2)CCCCC1>>O=Cc1ccc2c(c1)CN(CC/C=C/c1cccc(C3(C(=O)O[C@H]4CN5CCC4CC5)CCCCC3)c1)C2=O  
 6858 C=CS(=O)(=O)NCc1ccc(OC)cc1.CC(C)(C)OC(=O)NCc1cccc1Br>>COc1ccc(CNS(=O)(=O)/C=C/c2cccc2CNC(=O)OC(C)(C)C)cc1  
 6859 C=CC(=O)OCCCC.Nc1nc2c(c(I)cn2[C@H]2[C@H](O)[C@@H](CO)O2)c(=O)[nH]1>>CCCCOC(=O)/C=C/c1cn([C@H]2[C@H](O)[C@@H](CO)O2)c2nc(N)[nH]c(=O)c12  
 6860 C=CCCN(CC(=O)OC)S(=O)(=O)c1cccc1Br>>C=C1CCN(CC(=O)OC)S(=O)(=O)c2cccc21  
 6861 COC(=O)/C=C/Oc1cccc1-c1ncccc1Br>>COC(=O)/C=C1/Oc2cccc2-c2ncccc21  
 6862 C=CCOc1cccc1.FC(F)(F)c1ccc(I)c1>>FC(F)(F)c1ccc(/C=C/COc2cccc2)c1  
 6863 C=Cc1ccc2c(c1)OCO2.COc1cc(C=O)c(Br)c(OC)c1OC>>COc1cc(C=O)c(/C=C/c2ccc3c(c2)OCO3)c(OC)c1OC  
 6864 C=Cc1cnc2cccc12.CCCCN(CCCCC)c1ccc(Br)c(Cl)c1>>CCCCCN(CCCCC)c1ccc(/C=C/c2cnc3cccc23)c(Cl)c1  
 6865 C=CC(C)(C)O.CC(C)(C)[Si](C)(C)O[C@@H]1C=C(Br)C2(OCCCC2)[C@H]2O[C@H]21>>CC(C)(O)/C=C/C1=C[C@@H](O[Si](C)(C)C(C)(C)C)[C@@H]2O[C@@H]2C12OCCCCO2  
 6866 C=CC(=O)OCC.CCn1nc2c(C)c(Br)ccc21>>CCOC(=O)/C=C/c1ccc2c(nnn2CC)c1C  
 6867 C=CCN(C(=O)OC(C)(C)C)C(=O)OC(C)(C)C.Cc1cccc(Cl)c1>>Cc1cccc(/C=C/CN(C(=O)OC(C)(C)C)C(=O)OC(C)(C)C)c1  
 6868 C=Cc1cnc1.O=Cc1ccc(N(c2ccc(Br)cc2)c2ccc(C=O)cc2)cc1>>O=Cc1ccc(N(c2ccc(C=O)cc2)c2ccc(/C=C/c3cnc3)cc2)cc1  
 6869 C=CC(=O)OCCCC.Oc1cccc(Br)c1>>CCCCOC(=O)/C=C/c1cccc(O)c1  
 6870 C=CC1CCCN1C(=O)C(c1cccc1Br)N(Cc1cccc1)C(=O)CC>>C=C1c2cccc2C(N(Cc2cccc2)C(=O)C)C(=O)N2CCCC12  
 6871 C=CC(=O)OC.COc1nc(SC)nc(C)c1I>>COC(=O)/C=C/c1c(C)nc(SC)nc1OC  
 6872 C=Cc1ccc(OC)cc1.COc1ccc(Br)c(N)c1>>COc1ccc(/C=C/c2ccc(OC)cc2N)cc1  
 6873 C=Cc1cccc1.O=c1c(Br)c(-c2ccc(Cl)cc2)oc2cccc12>>O=c1c(/C=C/c2cccc2)c(-c2ccc(Cl)cc2)oc2cccc12  
 6874 C=CC(=O)OCC.COc1cc(Br)cc2nnn(C)c12>>CCOC(=O)/C=C/c1cc(OC)c2c(c1)nnn2C  
 6875 C=CC(=O)OCC.O=c1c(Br)coc2cccc12>>CCOC(=O)/C=C/c1coc2cccc2c1=O  
 6876 C=CC(=O)OC(C)(C)C.OC/C=C/C=C/C1=C(Br)CCCC1>>CC(C)(C)OC(=O)/C=C/C1=C(/C=C/C=C/C)O)CCCC1  
 6877 C=Cc1cccc1.O=c1ccoc2c(Br)ccc12>>O=c1ccoc2c(/C=C/c3cccc3)cccc12  
 6878 C=Cc1cccc1.O=c1oc2cc(F)ccc2c(-c2cccc2)c1Br>>O=c1oc2cc(F)ccc2c(-c2cccc2)c1/C=C/c1cccc1  
 6879 C=CC(=O)O.N#Cc1ccc(Br)cc1>>N#Cc1ccc(/C=C/C(=O)O)cc1  
 6880 C=Cn1nnc(-c2ccc(C)cc2)n1.Fc1cccc1I>>Cc1ccc(-c2nnn(/C=C/c3cccc3F)n2)cc1  
 6881 C=CCCCCN1C(=O)c2cccc2C1=O.CC(C)(C)c1ccc(Br)cc1>>C=C(CCCCN1C(=O)c2cccc2C1=O)c1c cc(C)(C)(C)C)cc1  
 6882 C=[Si](CC)(CC)CC.Ic1cccc1>>CC[Si](/C=C/c1cccc1)(CC)CC  
 6883 C=CC(C)(C)O.CC(=O)c1ccc(Br)cc1>>CC(=O)c1ccc(/C=C/C(C)(C)O)cc1  
 6884 C=CCCN1C(=O)c2cccc2C1=O.Nc1cccc(Br)c1>>Nc1cccc(/C=C/CCN2C(=O)c3cccc3C2=O)c1  
 6885 C=Cc1cccc1.O=S(=O)(Oc1cccc2c1N(c1nccn1)CCC2)C(F)(F)F>>C(=C/c1cccc2c1N(c1nccn1)CCC2)\c1cccc1  
 6886 C=CCN(CC1=C(Br)CCC1)c1ccc(Cl)cc1>>C=C1CN(c2ccc(Cl)cc2)CC2=C1CCC2

6887 C=COCCO.O=C(c1cccc1)c1ccc(I)cc1>>C=C(OCCO)c1ccc(C(=O)c2cccc2)cc1  
6888 C=CC(=O)OC.O=Cc1cccc(I)c1>>COC(=O)/C=C/c1cccc(C=O)c1  
6889 C=C(C)C(=O)OCC.Cn1cccc1Cl>>CCOC(=O)/C(C)=C/c1cccn1C  
6890 C=C(C)C(=O)OC.Clc1cccc(Br)c1>>COC(=O)/C(C)=C/c1cccc(Cl)c1  
6891 C=CC(=O)OCC.Clc1ccc(C#C/C=C/c2cccc(Br)c2)cc1>>CCOC(=O)/C=C/c1cccc(/C=C/C#Cc2ccc(Cl)c2)c1  
6892 C=CC(=O)OCC.O=C1OC2(CCCCC2)OC=C1I>>CCOC(=O)/C=C/C1=COC2(CCCCC2)OC1=O  
6893 Brclcncc1.C=CC(=O)CC>>CCC(=O)/C=C/c1cncc1  
6894 C=C.CC(=O)Nc1ccc(I)cc1>>C=Cc1ccc(NC(C)=O)cc1  
6895 C=CCCC(=O)OCC.COc1cccc1I>>CCOC(=O)CC/C=C/c1cccc1OC  
6896 Brclcccc2cccc12.C=Cc1ccc(OC)cc1>>COc1ccc(/C=C/c2cccc3cccc23)cc1  
C=CCON=C1[C@H](C)[C@H]2OC(=O)O[C@]2(C)[C@@H](CC)OC(=O)[C@H](C)[C@@H](O)[C@H](C)[C@@H](O)[C@H]2O[C@H](C)C[C@H](N(C)C)[C@H]2OC(C)=O)[C@](C)(OC)C[C@H]1C.Nc1ncccc1Br>>CC[C@H]1OC(=O)[C@H](C)[C@@H](O)[C@H](C)[C@@H](O[C@@H]2O[C@H](C)C[C@H](N(C)C)[C@H]2OC(C)=O)[C@](C)(OC)C[C@@H](C)C(=NOC/C=C/c2ccnc2N)[C@H]1C)I(C)C@H12OC(=O)O[C@]112C  
6897 C=CC(=O)OCC.COc1ccc(Cl)cc1-c1c(Br)c(=O)n(C)c2ccc(C(F)(F)F)cc12>>CCOC(=O)/C=C/c1c(-c2cc(Cl)ccc2OC)c2cc(C(F)(F)F)ccc2n(C)c1=O  
6898 C=CCCC.CC(=O)c1ccc(Br)cc1>>CCC/C=C/c1ccc(C(C)=O)cc1  
6899 C=CC(=O)OC.O=C(O)Cc1cccc(Br)c1>>COC(=O)/C=C/c1cccc(CC(=O)O)c1  
6900 C=CC(=O)OCC.O=C(O)Cc1ccc(Br)cc1>>CCOC(=O)/C=C/c1ccc(CC(=O)O)cc1  
6901 Brclcccc1.C=C1C(C)=NN=C2C=C(c3cccc3)N(C(C)=O)N12>>CC(=O)N1C(c2cccc2)=CC2=NN=C(C)/C(=C/c3cccc3)N21  
6902 C=CN(C)C(C)=O.COc1ccc(Cl)cc1>>C=C(c1ccc(OC)cc1)N(C)C(C)=O  
6903 Brclccc2ccc3cccc4ccc1c2c34.C=CC(=O)OCCO>>O=C(/C=C/c1ccc2ccc3cccc4ccc1c2c34)OCCO  
6904 C=CC(=O)OC(C)(C)C.COc1cc(Br)c(COCCC(=O)OC(C)(C)C)cc1OC>>COc1cc(/C=C/C(=O)OC(C)(C)C)c(COCCC(=O)OC(C)(C)C)cc1OC  
6905 C=CC(C)=O.CC(C)(C)c1ccc(Br)cc1>>CC(=O)/C=C/c1ccc(C(C)(C)C)cc1  
6906 C=CC(=O)OC(C)(C)C.O=C1Nc2ncc(Br)cc2CN2CCC[C@@H]12>>CC(C)(C)OC(=O)/C=C/c1cnc2c(c1)CN1CCC[C@H]1C(=O)N2  
6907 C=Cc1cccc1.COC(=O)c1ccc(I)cc1>>COC(=O)c1ccc(/C=C/c2cccc2)cc1  
6908 C=CC(=O)OC.CC(=O)OC[C@H]1O[C@@H](Oc2ccc(I)cc2)[C@H](OC(C)=O)[C@@H](OC(C)=O)[C@@H]1OC(C)=O>>COC(=O)/C=C/c1ccc(O[C@@H]2O[C@H](COC(C)=O)[C@@H](OC(C)=O)[C@H](OC(C)=O)[C@H]2OC(C)=O)cc1  
6909 C=CC(=O)OC.Nc1c(I)cc(Br)c2c1C(=O)NC2=O>>COC(=O)/C=C/c1cc(Br)c2c(c1N)C(=O)NC2=O  
6910 C=CC(N)=O.O=[N+][O-]c1ccc(I)cc1>>NC(=O)/C=C/c1ccc([N+](=O)[O-])cc1  
6911 C=Cc1ccc(OC)cc1.C[Si](C)(OS(=O)(=O)C(F)(F)F)OS(=O)(=O)C(F)(F)F>>COc1ccc(/C=C/[Si](C)(C)OS(=O)(=O)C(F)(F)F)cc1  
6912 C=C(F)C(C)=O.FC(F)(F)c1cccc(I)c1>>CC(=O)/C(F)=C/c1cccc(C(F)(F)F)c1  
6913 C=CC(=O)OC(C)(C)C.Cc1cc(Br)ccc1-c1noc(-c2ccc(OC(C)C)c(C(F)(F)F)c2)n1>>Cc1cc(/C=C/C(=O)OC(C)(C)C)ccc1-c1noc(-c2ccc(OC(C)C)c(C(F)(F)F)c2)n1  
6914 C=CC(=O)OCCCC.OCc1ccc(OCc2cccc2)c(Br)n1>>CCCCOC(=O)/C=C/c1nc(CO)ccc1OCCc1ccccC=Cc1ccc2c(c1)C(CCCCCCCC)(CCCCCCCC)c1cc(/C=C/c3ccc4c(c3)C(CCCCCCCC)(CCCCCCCC)c3cccc3-4)ccc1-2.CCCCCCCCC1(CCCCCCCC)c2cc(Br)ccc2-c2ccc(C=O)cc21>>CCCCCCCCC1(CCCCCCCC)c2cccc2-c2ccc(/C=C/c3ccc4c(c3)C(CCCCCCCC)(CCCCCCCC)c3cc(/C=C/c5ccc6c(c5)C(CCCCCCCC)(CCCCCCCC)c5cc(C=O)ccc5-6)ccc3-4)cc21  
6915 C=CC(=O)OC(C)(C)C.O=C(c1cccc1)c1ccc(Br)cc1>>CC(C)(C)OC(=O)/C=C/c1ccc(C(=O)c2cccc2)c  
6916 C=C[C@@H](CO[Si](c1cccc1)(c1cccc1)C(C)(C)C)NS(C)(=O)=O.Oc1ccc(I)cc1>>CC(C)(C)[Si](O[C@H](C)[C@H](C)C)NS(C)(=O)=O(c1cccc1)c1cccc1  
6917 C=CC(=O)OC(C)(C)C.Cc1cc(Br)cn1N1CCN(C(=O)OC(C)(C)C)CC1>>Cc1cc(/C=C/C(=O)OC(C)(C)C)cn1N1CCN(C(=O)OC(C)(C)C)CC1  
6918 C=Cc1cccc1.CC(C)(C)OC(=O)N1CCC(Br)CC1>>CC(C)(C)OC(=O)N1CCC(/C=C/c2cccn2)CC1  
6919 C=Cc1ccc(OC)cc1.Cc1c(Br)c(=O)cc2cc(N)ccc12>>COc1ccc(/C=C/c2c(C)c3ccc(N)cc3oc2=O)cc1  
6920 C=Cc1cccc1.Cc1cccc(C(=O)Oc2cccc2-c2cccc2I)c1N>>Cc1cccc(C(=O)Oc2cccc2-c2cccc2/C=C/c2cccc2)c1N  
6921 C=CCO.CC(=O)Oc1ccc(I)cc1>>CC(=O)Oc1ccc(/C=C/CO)cc1  
6922 Brclccc(-c2nnc(-c3cccc4cccc34)o2)cc1.C=C>>C=Cc1ccc(-c2nnc(-c3cccc4cccc34)o2)cc1  
6923 C=Cc1cc([N+](=O)[O-])cn1C.COC(=O)c1cc(Br)cn1C>>COC(=O)c1cc(/C=C/c2cc([N+](=O)[O-])cn2C)cn1C

6926 C=CC(=O)OC(C)(C)C.COc1ccc(Br)c(COCCC(=O)OC(C)(C)C)c1>>COc1ccc(/C=C/C(=O)OC(C)(C)C)c(COCCC(=O)OC(C)(C)C)c1  
6927 C=CC#N.CCN1c2ncc(I)cc2C(=O)N(C)c2ccccc1>>CCN1c2ncc(/C=C/C#N)cc2C(=O)N(C)c2ccccc1  
6928 C=CC1CC(=O)N1.O=[N+](I)cc1cccc1I>>O=C1CC(/C=C/c2ccccc2[N+](=O)[O-])N1  
6929 C=CCn1cc(Br)enc1=O.Ic1cccc1>>O=c1ncc(Br)en1C/C=C/c1cccc1  
6930 C=CCN(c1ccc2c(c1)OCO2)S(=O)(=O)c1cccc1Br>>C=C1CN(c2ccc3c(c2)OCO3)S(=O)(=O)c2ccccc2  
6931 C=CC(=O)OC.Cc1ccc(S(=O)(=O)Nc2ccccc2Sc2ccc(I)s2)cc1>>COC(=O)/C=C/c1ccc(Sc2ccccc2NS(=O)(=O)c2ccc(C)cc2)s1  
6932 C=Cc1cc(C)ccc1C.CCOC(=O)C(F)Br>>CCOC(=O)C(F)/C=C/c1cc(C)ccc1C  
6933 C=CCNC(=O)C(F)(F)F.Nc1nc(=O)n([C@H]2C[C@H](O)[C@@H](CO)O2)cc1I>>Nc1nc(=O)n([C@H]2C[C@H](O)[C@@H](CO)O2)cc1/C=C/CNC(=O)C(F)(F)F  
6934 Brc1ccc(-c2nnc(-c3cccc4ccccc34)o2)cc1.C=CC[Si](OCC)(OCC)OCC>>CCO[Si](C/C=C/c1ccc(-c2nnc(-c3cccc4ccccc34)o2)cc1)(OCC)OCC  
6935 C=Cc1cccc1.CCCCCCCCCCCCCCc1ccc(I)c(O)c1>>CCCCCCCCCCCCCCCCc1ccc(/C=C/c2ccccc2)c(O)c1  
6936 C=Cc1c(OCc2cc(OC)ccc2Br)ccc2ccccc12>>COc1ccc2c(c1)COc1ccc3ccccc3c1/C=C\2  
6937 C=CC#N.Cc1cc(-c2ccccc2)n2nc(-c3ccccc3)c(I)c2n1>>Cc1cc(-c2ccccc2)n2nc(-c3ccccc3)c(I)c2n1>>CC(=O)/C=C/c1ccc2c(c1)-c1[nH]c3ccc(F)cc3c1CC(=O)N2  
6938 C=CC(=O)OC.Cc1cc(C)c(Br)c(C)c1>>COC(=O)/C=C/c1c(C)cc(C)cc1C  
6939 C=CC(=O)OCC.Cc1nc(-c2ccccc2)c(Br)o1>>CCOC(=O)/C=C/c1oc(C)nc1-c1cccc1  
6940 C=CC(N)=O.CCOC(=O)c1ccc(I)cc1>>CCOC(=O)c1ccc(/C=C/C(N)=O)cc1  
6941 C=Cc1cccc1[N+](=O)[O-].COC(=O)c1cc2cc(Br)ccc2cc1OC(C)=O>>COC(=O)c1cc2cc(/C=C/c3ccccc3[N+](=O)[O-])ccc2cc1OC(C)=O  
6942 C=CC(C)=O.CCCCCCCCCCCCCCc1cc(O)ccc1I>>CCCCCCCCCCCCCCCCc1cc(O)ccc1/C=C/C(C)  
6943 C=CCO.Fc1cccc(Br)c1>>C=C(CO)c1cccc(F)c1  
6944 C=CC(=O)O.Cc1ccc(C)n1-c1ccc(Br)cc1>>Cc1ccc(C)n1-c1ccc(/C=C/C(=O)O)cc1  
6945 C=CC(=O)OCC.Cc1cc(Br)ccc1I>>CCOC(=O)/C=C/c1ccc(Br)cc1C  
6946 C=CC(=O)CCCC.Cc1ccc(S(=O)(=O)Nc2ccccc2I)cc1>>CCCCC(=O)/C=C/c1cccc1NS(=O)(=O)c1ccc(C)cc1  
6947 C=CC(=O)OCC.CCOc1ccc(C(=O)CCC(=O)Nc2nc(-c3ccccc3)c(Cc3ccccc3)s2)cc1Br>>CCOC(=O)/C=C/c1cc(C(=O)CCC(=O)Nc2nc(-c3ccccc3)c(Cc3ccccc3)s2)cc1OCC  
6948 C=CC[C@H](N)[S@H](N)[S@H](=O)C(C)(C)C)c1cccc1Br>>C=C1C[C@H](N)[S@H](=O)C(C)(C)C)c2ccccc21  
6949 Brc1ccsc1.C=COCCO>>C=C(OCCO)c1ccsc1  
6950 C=CC(=O)N(C)C.CN1CCCN(c2cccc(Br)n2)CC1>>CN1CCCN(c2cccc(/C=C/C(=O)N(C)C)n2)CC1  
6951 C=Cc1cccc1F.N#Cc1ccc2cc(Br)ccc2c1>>N#Cc1ccc2cc(/C=C/c3ccccc3F)ccc2c1  
6952 Brc1ccc(-c2nc3ccccc3n2Cc2ccccc2)cc1.C=CC(=O)OC>>COC(=O)/C=C/c1ccc(-c2nc3ccccc3n2Cc2ccccc2)cc1  
6953 C=CCN(C(=O)OC(C)(C)C)C(=O)OC(C)(C)C.Fc1ccc(Cl)cc1>>CC(C)(C)OC(=O)N(C/C=C/c1ccc(F)cc1)C(=O)OC(C)(C)C  
6954 C=CS(=O)(=O)F.Cc1cc(C)cc(I)c1>>Cc1cc(C)cc(/C=C/S(=O)(=O)F)c1  
6955 C=Cc1cccc1.CC(C)=C(C)Br>>CC(C)=C(C)/C=C/c1cccc1  
6956 C=CS(=O)(=O)c1cccc1.Cn1cc(/C=C2\SC(=O)NC2=O)c2cc(Br)ccc21>>Cn1cc(/C=C2\SC(=O)NC2=O)c2cc(/C=C/S(=O)(=O)c3ccccc3)ccc21  
6957 C=CC(=O)OC.O=S(=O)(c1cccc1)n1cc(-c2ccccc2)c2cc(Br)enc21>>COC(=O)/C=C/c1cnc2c(c1)c(-c1ccccc1)cn2S(=O)(=O)c1ccccc1  
6958 C=CC(=O)C(C)COCc1cccc1.Ic1cccc1>>CC(COCc1cccc1)C(=O)/C=C/c1cccc1  
6959 C=CC(=O)OCC.CCOC(=O)c1cc(Br)enc1N>>CCOC(=O)/C=C/c1cnc(N)c(C(=O)OCC)c1  
6960 C=CC(C)(C)C.FC(F)(F)c1ccc(Br)cc1>>CC(C)(C)/C=C/c1ccc(C(F)(F)F)cc1  
6961 C=CC(=O)OC(C)(C)C.Oc1ccc(C(=C2CCCCC2)c2ccc(Br)cc2)cc1F>>CC(C)(C)OC(=O)/C=C/c1ccc(C(=C2CCCCC2)c2ccc(O)c(F)c2)cc1  
6962 C=CCN1C(=O)c2ccccc2C1=O.CC(C)(C)c1ccc(Br)cc1>>CC(C)(C)c1ccc(/C=C/CN2C(=O)c3ccccc3C2=O)cc1  
6963 Brc1cccc2[nH]ccc12.C=Cc1cccc1>>C(=C/c1cccc2[nH]ccc12)c1cccc1  
6964 C=Cc1cccc1.COC(=O)c1cc2ccc(=O)oc2cc1OS(=O)(=O)C(F)(F)F>>COC(=O)c1cc2ccc(=O)oc2cc1/C=C/c1cccc1  
6965 Brc1cccc1.C=Cc1cccc(C)c1>>Cc1cccc(/C=C/c2ccccc2)c1  
6966

[illegible]

C=CCO[C@H]1CC(=O)O[C@H](C)C/C=C/C=C/[C@H](O[Si](C)(C)C(C)(C)C)[C@H](C)C[C@H]  
 (CC(OC)OC)[C@H](O[C@H]2O[C@H](C)[C@H](O[C@H]3C[C@@](C)(O)[C@@H](OC(=O)  
 CC)[C@H](C)O3)[C@H](N(C)C)[C@H]2OC(C)=O)[C@H]1OC.COc1ccc(I)cc1>>CCCC(=O)O[C@H]  
 1[C@H](C)O[C@@H](O[C@H]2[C@H](N(C)C)[C@@H](OC(C)=O)[C@H](O[C@@H]3[C@@H](  
 OC)[C@H](OC/C=C/c4ccc(OC)cc4)CC(=O)O[C@H](C)C/C=C/C=C/[C@H](O[Si](C)(C)C(C)(C)C)[  
 C@H](C)C[C@@H]3CC(OC)OC)O[C@@H]2C[C@@H]1C  
 C=CS(=O)(=O)c1cccc1.Clc1ccc(I)cc1>>O=S(=O)/C=C/c1ccc(Cl)cc1)c1cccc1  
 C=CC(=O)OC.Oc1ccc(-c2ccc(Br)cc2)cc1>>COC(=O)/C=C/c1ccc(-c2ccc(O)cc2)cc1  
 C=CCN(Cc1cccc1)C1CCCCC1>>C=C1CN(C2CCCCC2)Cc2cccc21  
 C=Cc1ccc(SC)cc1.O=Cc1ccc(Br)cc1>>CSc1ccc(/C=C/c2ccc(C=O)cc2)cc1  
 C=Cc1ccc(/C=C/c2cc(OC)c(N(C)C)cc2OC)cc1.O=c1ccc2c(-c3ccc(I)cc3S(=O)(=O)O)c3ccc(O)cc3oc-  
 2c1>>COc1cc(N(C)C)c(OC)cc1/C=C/c1ccc(/C=C/c2ccc(-c3c4ccc(=O)cc-  
 4oc4cc(O)ccc34)c(S(=O)(=O)O)c2)cc1  
 C=Cc1ccc(OC)cc1.C[Si](C)(C)OS(=O)(=O)C(F)(F)F>>COc1ccc(/C=C/[Si](C)(C)C)cc1  
 C=Cc1cccc(Nc2nc(Nc3cc(Br)c(N4CCN(C)CC4)cc3OC)ncc2Cl)c1>>COc1cc(N2CCN(C)CC2)c2cc1N  
 c1ncc(Cl)c(n1)Nc1cccc(c1)/C=C2  
 C=CC(=O)OCCCC.COc1ccc(CN(Cc2ccc(OC)cc2)c2ccc(Br)cn2)cc1>>CCCCOC(=O)/C=C/c1ccc(N(C  
 c2ccc(OC)cc2)Cc2ccc(OC)cc2)nc1  
 C=CCCN1c2c(Br)cc([N+](=O)[O-  
 ])cc2C(=O)N2C1C(C)(C)OC2(C)C>>C=C1CCN2c3c1cc([N+](=O)[O-  
 C=CC(N)=O.CC[C@]12C=CCN3CC[C@]4(C=C(C(=O)OC)C1)Nc1ccc(I)cc14)[C@@H]32>>CC[C  
 @]12C=CCN3CC[C@]4(C=C(C(=O)OC)C1)Nc1ccc(/C=C/C(N)=O)cc14)[C@@H]32  
 C=Cc1cccc1.Oc1ccc(Br)cc1F>>Oc1ccc(/C=C/c2cccc2)cc1F  
 C=C[C@H](O[Si](C)(C)C(C)(C)C)[C@H](CCCC(=O)OCC)O[Si](C)(C)C(C)(C)C.O=Cc1ccc(Br)cc1>  
 >CCOC(=O)CCC[C@H](O[Si](C)(C)C(C)(C)C)[C@H]/C=C/c1ccc(C=O)cc1)O[Si](C)(C)C(C)(C)C  
 C=CC(CC)OC1CCCCO1.COC(=O)CCCCCCCC1=C(I)CCC1=O>>CCC(/C=C/C1=C(CCCCCCCC(=O  
 O)OC)C(=O)CC1)OC1CCCCO1  
 C=CC(=O)OCC.COc1ccc(Br)cn1>>CCOC(=O)/C=C/c1ccc(OC)nc1  
 C=CC(=O)N(C)Cc1oc2cccc2c1C.Nc1ncc(Br)cc1OCc1cccc1>>Cc1c(CN(C)C(=O)/C=C/c2cnc(N)c(  
 OCc3cccc3)c2)oc2cccc12  
 C=Cc1cccc1.COC(=O)[C@]1(NC(=O)OC(C)(C)C)CCc2cc(Br)ccc2C1>>COC(=O)[C@]1(NC(=O)O  
 C(C)(C)C)CCc2cc(/C=C/c3cccc3)ccc2C1  
 C=Cc1cccc1.O=C1OCc2cc(Br)ccc21>>O=C1OCc2cc(/C=C/c3cccc3)ccc21  
 C=CC(=O)OCC.O=c1[nH]c2cccc2c(Br)c1O>>CCOC(=O)/C=C/c1c(O)c(=O)[nH]c2cccc12  
 C=CCO[C@H]1[C@H](Sc2cccc2Br)O[C@H](COCc2cccc2)[C@@H]1OCc1cccc1>>C=C1CO[C  
 @H]2[C@@H](O[C@H](COCc3cccc3)[C@@H]2OCc2cccc2)Sc2cccc21  
 C=CC(F)(F)F.COc1ccc(I)cc1>>COc1ccc(/C=C/C(F)(F)F)cc1  
 C=CC1(O)CCC2(CC1)OCCO2.COC(=O)c1ccc(Br)o1>>COC(=O)c1ccc(/C=C/C2(O)CCC3(CC2)OCC  
 O3)o1  
 C=Cc1cccc(OC)c1OC.Nc1ccc(I)cc1>>COc1cccc(/C=C/c2ccc(N)cc2)c1OC  
 C=CC(=O)OC.Cc1c(/C=C/c2cccc2)c2cc(Br)ccc2n1-  
 c1cccc1>>COC(=O)/C=C/c1ccc2c(c1)c(/C=C/c1cccc1)c(C)n2-c1cccc1  
 C=CC#N.COcn1nc(-c2cccc2)c(Br)cc1=O>>COcn1nc(-c2cccc2)c(/C=C/C#N)cc1=O  
 C=CC(=O)OC(C)(C)C.O=S(=O)(c1ccc(Br)c1)n1ccc2ccnc21>>CC(C)(C)OC(=O)/C=C/c1cccc(S(=O  
 )(=O)n2ccc3ccnc32)c1  
 C=CCOc1cccc1.Ic1ccsc1>>C(=C/c1ccsc1)\COc1cccc1  
 C=Cc1cccc(O)c1.COc1cccc(Br)c1>>COc1cccc(/C=C/c2ccc(O)c2)c1  
 C=Cc1ccc(OC)cc1.CC(C)(C)c1ccc(Br)cc1>>C=C(c1ccc(OC)cc1)c1ccc(C(C)(C)C)cc1  
 Br1ccnc1.C=CCCC(=O)CC(=O)OC>>COC(=O)CC(=O)CC/C=C/c1ccnc1  
 C=CC(=O)N1CCOCC1.O=Cc1cccc1Br>>O=Cc1cccc1/C=C/C(=O)N1CCOCC1  
 C=CC[C@H]1CC2(OCCO2)[C@H](C)[C@@H](c2cccc2)N1C(=O)OCc1cccc1.COc1cc(Br)nc(OC)  
 n1>>COc1cc(/C=C/C[C@H]2CC3(OCCO3)[C@H](C)[C@@H](c3cccc3)N2C(=O)OCc2cccc2)nc(O  
 C=CC#N.CN(C)S(=O)(=O)n1cc(I)c([Si](C)(C)C)c1>>CN(C)S(=O)(=O)n1cc(/C=C/C#N)c([Si](C)(C)C  
 C=CC(C)=O.IC1CCCCC1>>CC(=O)/C=C/C1CCCCC1  
 C=CS(=O)(=O)F.Cc1ccc(I)c(C)c1>>Cc1ccc(/C=C/S(=O)(=O)F)c(C)c1  
 C=Cc1ccc(OC)cc1.CC(CC=O)CCCC(C)(C)Br>>COc1ccc(/C=C/C(C)(C)CCCC(C)CC=O)cc1  
 C=CC(=O)O.CN(c1cccc(I)c1)S(=O)(=O)c1cccs1>>CN(c1cccc(/C=C/C(=O)O)c1)S(=O)(=O)c1cccs1  
 C=CC(=O)NCCCN(CCCCN(C(=O)OC(C)(C)C)C(=O)OC(C)(C)C.COC(=O)N[C@H]1[C@@H](Oc2c  
 cc(I)cc2)O[C@H](C)[C@@H](OC(C)=O)[C@@H]1OC(C)=O>>COC(=O)N[C@H]1[C@@H](Oc2cc  
 c(/C=C/C(=O)NCCCN(CCCCN(C(=O)OC(C)(C)C)C(=O)OC(C)(C)C)cc2)O[C@H](C)[C@@H](OC(C  
 )=O)[C@@H]1OC(C)=O

7040 C=CC(=O)OCC.Fc1cccc1Br>>CCOC(=O)/C=C/c1cccc1F  
C=C[C@H](O[Si](C)(C)C(C)(C)C)[C@H](CCCC(=O)OC)O[Si](C)(C)C(C)(C)C.CCCCCC(=O)c1n  
7041 c2cccc2cc1Br>>CCCCC(=O)c1nc2cccc2cc1/C=C/[C@H](O[Si](C)(C)C(C)(C)C)[C@H](CCCC  
(=O)OC)O[Si](C)(C)C(C)(C)C  
7042 Br1ccnc1.C=Cc1nc2ccc(Nc3cc(C(C)C)cnn3)nc2c1>>CC(C)c1cnnc(Nc2ccc3ncc(/C=C/c4ccccc4)cc  
3n2)c1  
7043 C=CC(=O)OC.ClCc1cccc1>>COC(=O)/C=C/Cc1cccc1  
C=CC(=O)OCc1cc(OC)CCCCCCCCCCCCCCCCCCCCc(OC)CCCCCCCCCCCCCCCCCCCCc(OC)CCCCCCCC  
7044 CCCCCCCCCC)c1.CC(=O)c1ccc(I)cc1>>CCCCCCCCCCCCCCCCCCCCOc1cc(COC(=O)/C=C/c2ccc(C  
(C)=O)cc2)cc(OC)CCCCCCCCCCCCCCCCCCCCc1OCCCCCCCCCCCCCCCCCCCCC  
7045 C=CS(=O)(=O)F.Ic1cccc1>>O=S(=O)(F)/C=C/c1cccc1  
7046 C=Cc1ccc(N(C)C)cc1.FC(F)(F)c1cccc1I>>CN(C)c1ccc(/C=C/c2cccc2C(F)(F)F)cc1  
7047 C=CC(O)CN1CCN(c2ccc(CCC)cc2)CC1.O=c1ccc2cc(Br)ccc2[nH]1>>CCCc1ccc(N2CCN(CC(O)/C=  
C/c3ccc4[nH]c(O)ccc4c3)CC2)cc1  
7048 C=CC(N)=O.CC1(C)OC(=O)Nc2ccc(Br)cc21>>CC1(C)OC(=O)Nc2ccc(/C=C/C(N)=O)cc21  
C=CCNC(=O)OC(C)(C)C.CCOC(=O)CC(c1ccc(C)c(CN2CC(C)Cc3cc(Br)ccc3S2(=O)=O)c1)c1ccc(F)  
7049 cc1F>>CCOC(=O)CC(c1ccc(C)c(CN2CC(C)Cc3cc(/C=C/CNC(=O)OC(C)(C)C)ccc3S2(=O)=O)c1)c1c  
cc(F)cc1F  
7050 C=CC(=O)OCC.Cc1ccc(O)c(Br)c1>>CCOC(=O)/C=C/c1cc(C)ccc1O  
C=CCn1cccc1C(=O)c1ccc(C)cc1.COC(=O)C(C)(C)OCc1cccc(Br)c1>>COC(=O)C(C)(C)OCc1cccc(/C  
7051 =C/Cn2cccc2C(=O)c2ccc(C)cc2)c1  
C=Cc1ccc(C(C)(C)C)cc1.O=[N+](I)cc1>>CC(C)(C)c1ccc(/C=C/c2ccc([N+](=O)[O-  
7052 C=CC(C)=O.FC1(F)C(I)=C1c1ccc(Br)cc1>>CC(=O)/C=C/C1=C(c2ccc(Br)cc2)C1(F)F  
7053 C=CC(=O)N(C)C.OCc1cccc(I)c1>>CN(C)C(=O)/C=C/c1cccc(CO)c1  
7054 C=C.CC(=O)Nc1cc(C)ccc1Br>>C=Cc1ccc(C)cc1NC(C)=O  
7055 C=CCC1c2cc(OC)c(OC)cc2CCN1CC(=C)I>>C=C1CC2c3cc(OC)c(OC)cc3CCN2CC1=C  
7056 C=CCCCCCC.FC(F)(F)c1ccc(Br)cc1>>C=C(CCCCCC)c1ccc(C(F)(F)F)cc1  
7057 C=CC(=O)OC.CC1(C)C=C(c2oc3cccc3c2I)CC(C)(C)C1>>COC(=O)/C=C/c1c(C2=CC(C)(C)CC(C)(  
7058 C)C2)oc2cccc12  
C=CC(=O)OCC.O=Cc1c(F)cc(Br)cc1F>>CCOC(=O)/C=C/c1cc(F)c(C=O)c(F)c1  
7059 C=CC#N.O=C(C=P(c1cccc1)(c1cccc1)c1cccc1)c1ccc(I)cc1>>N#C/C=C/c1ccc(C(=O)C=P(c2cccc  
7060 2)(c2cccc2)c2cccc2)cc1  
C=Cc1cccc(Cl)c1.CCOC(=O)C(Cc1cccc1I)C(C)=O>>CCOC(=O)C(Cc1cccc1/C=C/c1cccc(Cl)c1)C(  
7061 C)=O  
C=CC(C)OC(C)=O.CCCCCCCCCCOc1nc(-c2ccc(Br)cc2)nc1>>CCCCCCCCCOc1nc(-  
7062 c2ccc(/C=C/C(C)OC(C)=O)cc2)nc1  
Br1ccc2c(c1)OCO2.C=Cc1cccc1>>C(=C/c1ccc2c(c1)OCO2)\c1cccc1  
7063 C=C1C(=O)O[C@H]2[C@H]1CC/C(C)=C/CC[C@H]1(C)O[C@H]21.Nc1cccc(I)c1>>C/C1=C\CC[  
7064 C@@H]2(C)O[C@H]2[C@H]2OC(=O)/C(=C/c3cccc(N)c3)[C@H]2CC1  
C=CN(C)C(=O).CCOC(=O)c1ccc(Cl)cc1>>C=C(NC(C)=O)c1ccc(C(=O)OCC)cc1  
7065 C=Cc1cncc1.CCCOc1ccc(Br)cc1F>>CCCOc1ccc(/C=C/c2cncc2)cc1F  
7066 Br1cccs1.C=CC(C)(O)CCC=C(C)C>>CC(C)=CCCC(C)(O)/C=C/c1cccs1  
7067 C=CC(=O)OCC.N#Cc1cccc(I)c1>>CCOC(=O)/C=C/c1cccc(C#N)c1  
7068 C=CC(=O)OC(C)(C)C.O=CNc1cccc1I>>CC(C)(C)OC(=O)/C=C/c1cccc1NC=O  
7069 C=C[C@H]1O[C@H](Se2cccc2)[C@H](OCc2cccc2)[C@H](OCc2cccc2)[C@H]1OCc1ccc(  
7070 OC)cc1.O=c1cc(-  
c2cccc2)oc2ccc(Br)cc12>>COc1ccc(CO[C@H]2[C@H](OCc3cccc3)[C@H](OCc3cccc3)[C@H]  
(Se3cccc3)O[C@H]2/C=C/c2ccc3oc(-c4cccc4)cc(=O)c3c2)cc1  
7071 C=C[C@H](OCc1ccc(OC)cc1)[C@H](CCCC)OC(=O)c1c(C)ccc1Oe1ccc2c(c1Br)COC(C)(C)O2  
>>CCCC[C@H]1OC(=O)c2c(C)ccc2Oe2ccc3c(c2/C=C/[C@H]1OCc1ccc(OC)cc1)COC(C)(C)O3  
7072 C=CC(=O)OCC(CC)CCCC.COc1ccc(Cl)cc1>>CCCC(CC)COC(=O)/C=C/c1ccc(OC)cc1  
C=Cc1cncc1.CCCCN1c2ccc(Br)cc2Se2cc(-c3nc4cccc4n3-  
7073 c3cccc3)ccc21>>CCCN1c2ccc(/C=C/c3cncc3)cc2Se2cc(-c3nc4cccc4n3-c3cccc3)ccc21  
7074 C=CC(=O)N(C)C.Cc1cccc1Br>>Cc1cccc1/C=C/C(=O)N(C)C  
C=Cc1nc2cc(C(C)(C)C)cc(C(C)(C)C)c2o1.O=C(OC[C@H]1O[C@@H](n2cc(I)c(=O)[nH]c2=O)C[C  
7075 @H]1OC(=O)c1cccc1)c1cccc1>>CC(C)(C)c1cc(C(C)(C)C)c2oc(/C=C/c3cn([C@H]4[C@H](OC  
(=O)c5cccc5)[C@@H](COC(=O)c5cccc5)O4)c(=O)[nH]c3=O)nc2c1  
7076 C=C(NC(C)=O)C(=O)OC.[Si](C)(C)CCOCn1nc(I)c2cc(Br)ccc21>>COC(=O)/C(=C/c1nn(COCC[Si]  
(C)(C)C)c2ccc(Br)cc12)NC(C)=O  
7077 C=CC(C)(O)CCC=C(C)C.FC(F)(F)c1cccc1Br>>CC(C)=CCCC(C)(O)/C=C/c1cccc1C(F)(F)F

7078 C=Cc1ccc(C(=O)O[C@H]2CC[C@H]3[C@@H]4CCC5=CC(=O)CC[C@]5(C)[C@H]4CC[C@]23C)c1.CC(C)(C)Br>>CC(C)(C)/C=C/c1ccc(C(=O)O[C@H]2CC[C@H]3[C@@H]4CCC5=CC(=O)CC[C@]5(C)[C@H]4CC[C@]23C)cc1  
 7079 C=Cc1nc2c(N)ncnc2n1[C@H]1C[C@H](O[Si](C)(C)C(C)(C)C)[C@@H](CO[Si](C)(C)C(C)(C)C)O1.COc1ccc(Br)cc1>>COc1ccc(/C=C/c2nc3c(N)ncnc3n2[C@H]2C[C@H](O[Si](C)(C)C(C)(C)C)[C@@H](CO[Si](C)(C)C(C)(C)C)O2)cc1  
 7080 C=CS(=O)(=O)NCc1cccc1.CC(C)(C)OC(=O)NCCc1cccc1Br>>CC(C)(C)OC(=O)NCCc1cccc1/C=C/S(=O)(=O)NCc1cccc1  
 7081 C=CC(=O)OCC.COc1ccc(-c2cccc2I)cc1>>CCOC(=O)/C=C/c1cccc1-c1ccc(OC)cc1  
 7082 C=CC(=O)O.c1ccc([I+][c2cccc2])cc1>>O=C(O)/C=C/c1cccc1  
 7083 C=C(NC(C)=O)C(=O)OC.CCc1cc(OC(C)=O)cc(CC)c1I>>CCc1cc(OC(C)=O)cc(CC)c1/C=C(\NC(C)=O)C(=O)OC  
 7084 C=CCC(=O)O.CC(=O)OC[C@H]1O[C@@H](Oc2cccc3occc(/C=C/c4ccc(Br)cc4)c23)[C@H](OC(C)=O)[C@@H](OC(C)=O)[C@@H]1OC(C)=O>>CC(=O)OC[C@H]1O[C@@H](Oc2cccc3occc(/C=C/c4ccc(/C=C/CC(=O)O)cc4)c23)[C@H](OC(C)=O)[C@@H](OC(C)=O)[C@@H]1OC(C)=O  
 7085 C=CC(C)=O.O=[N+][O-]c1ccc(Br)cc1>>CC(=O)/C=C/c1ccc([N+](=O)[O-])cc1  
 7086 C=Cc1ccc(CN(C)C)cn1.Cc1c(Nc2c(I)cncc2C#N)ccc2[nH]ccc12>>Cc1c(Nc2c(C#N)cncc2/C=C/c2ccc(CN(C)C)cn2)ccc2[nH]ccc12  
 7087 BrC1cccs1.C=CCN(C(=O)OC(C)(C)C(=O)OC(C)(C)C)>>CC(C)(C)OC(=O)N(C/C=C/c1cccs1)C(=O)OC(C)(C)C  
 7088 C=CC(=O)OC.CN(C)C(=O)c1cn(Cc2ccc(Br)cc2)c2cccc12>>COC(=O)/C=C/c1ccc(Cn2cc(C(=O)N(C)C)c3cccc32)cc1  
 7089 BrC1ccc2cccc2c1.C=CC[C@H]1CCCN(C)C[C@H](OC(C)=O)[C@H](C)C[C@H](CC(OC)OC)[C@H](O[C@@H]2O[C@H](C)[C@@H](O[C@H]3C[C@@](C)(O)[C@@H](OC(=O)CC)[C@H](C)O3)[C@H](N(C)C)[C@H]2OC(C)=O)[C@@H](OC)[C@H](OC(=O)CC)CC(=O)O1>>CCC(=O)O[C@H]1[C@H](C)O[C@@H](O[C@H]2[C@H](N(C)C)[C@@H](OC(C)=O)[C@H](O[C@@H]3[C@@H](OC)[C@H](OC(=O)CC)CC(=O)O[C@@H](C/C=C/c4ccc5cccc5c4)CCCN(C)C[C@H](OC(C)=O)[C@H](C)C[C@H]3C[C@@](OC)OC)[C@@H]2C)[C@@H]1(C)O  
 7090 C=CCOc1cccc1.COc1cccc1I>>COc1cccc1/C=C/COc1cccc1  
 7091 C=Cc1cccc(N)c1.CCCNc1nc(Nc2cccc(F)c2)nc1I>>CCCNc1nc(Nc2cccc(F)c2)nc1/C=C/c1cccc(N)c1  
 7092 C=Cc1cccc1.Cc1ccc2c(-c3ccc(F)cc3)c(Br)c(=O)oc2c1>>Cc1ccc2c(-c3ccc(F)cc3)c(/C=C/c3cccc3)c(=O)oc2c1  
 7093 C=CC(=O)OCC.Nc1nc(=O)n([C@@H]2O[C@H](CO)[C@@H](O)[C@@H]2F)cc1I>>CCOC(=O)/C=C/c1cn([C@@H]2O[C@H](CO)[C@@H](O)[C@@H]2F)c(=O)nc1N  
 7094 C=CCOc1cccc1C.CC(=O)c1ccc(I)cc1>>CC(=O)c1ccc(/C=C/COc2cccc2C)cc1  
 7095 C=CCc1cccc1.CC(C)(C)c1cccc1OS(=O)(=O)C(F)(F)F>>C=C(Cc1cccc1)c1cccc1C(C)(C)C  
 7096 C=CC(=O)OC.CC(C)c1cc(Br)c2c(c1)C1(C)CCCCC1=N2>>COC(=O)/C=C/c1cc(C(C)C)cc2c1N=C1CCCCC12C  
 7097 BrC1=C(C2=C[C@@H]3CCCC[C@H]3CC2)CCCC1.C=CC(=O)OC>>COC(=O)/C=C/C1=C(C2=C[C@@H]3CCCC[C@H]3CC2)CCCC1  
 7098 C=Cc1cncnc1.CCOCn1c2ccc(Br)cc2c2cc(C=O)ccc21>>CCOCn1c2ccc(C=O)cc2c2cc(/C=C/c3cncc3)ccc21  
 7099 C=CC(=O)N1N=Cc2cccc2C1CCCC.COc1cc(Cc2cnc(N)nc2N)cc(I)c1OC>>CCCCC1c2cccc2C=NN1C(=O)/C=C/c1cc(Cc2cnc(N)nc2N)cc(OC)c1OC  
 7100 C=CC(=O)OCC.Cc1c(Br)cccc1[N+](=O)[O-]>>CCOC(=O)/C=C/c1cccc([N+](=O)[O-])c1C  
 7101 C=CC(=O)OC.COc1ccc(N)c(I)c1>>COC(=O)/C=C/c1cc(OC)ccc1N  
 7102 C=CC(=O)N(C)C.C[C@@H](Nc1ncnc2sc(Br)cc12)c1cccc1>>C[C@@H](Nc1ncnc2sc(/C=C/C(=O)N(C)C)cc12)c1cccc1  
 7103 BrC1cccc2cccc12.C=C(NC(C)=O)C(=O)O>>CC(=O)N/C(=C/c1cccc2cccc12)C(=O)O  
 7104 BrC1cccc1.C=CCCCCCC>>C=C(CCCCCC)c1cccc1  
 7105 C=CC(=O)OC(C)(C)C.Ic1cccc2cccc12>>CC(C)(C)OC(=O)/C=C/c1cccc2cccc12  
 7106 C=CC(=O)OC(C)(C)C.O=S(=O)(c1cccc(Br)c1)n1ccc2cncc21>>CC(C)(C)OC(=O)/C=C/c1cccc(S(=O)(=O)n2ccc3cncc32)c1  
 7107 C=C1c2cccc2C1(C#N)CC.N#Cc1ccc(Br)cc1>>CCC1(C#N)/C(=C/c2ccc(C#N)cc2)c2cccc21  
 7108 C=CCc1cccc1.CC(C)(C)c1ccc(OS(=O)(=O)C(F)(F)F)cc1>>C=C(Cc1cccc1)c1ccc(C(C)(C)C)cc1  
 7109 C=Cc1ccc2cccc2c1.CCN1c2ncc(I)cc2C(=O)N(C)c2ccnc21>>CCN1c2ncc(/C=C/c3ccc4cccc4c3)cc2C(=O)N(C)c2ccnc21  
 7110 C=Cc1ccc(OC)cc1.Oc1cccc1I>>COc1ccc(/C=C/c2cccc2O)cc1  
 7111 C=CC(=O)OC.Nc1cc(Cl)ccc1I>>COC(=O)/C=C/c1ccc(Cl)cc1N  
 7112 C=CC(=O)OCC.CC1(C)CC(=O)C2=C(C1)N(c1ccc(I)cc1)C1=C(C(=O)CC(C)(C)C1)C2c1cccc(O)c1>>CCOC(=O)/C=C/c1ccc(N2C3=C(C(=O)CC(C)(C)C3)C(c3cccc(O)c3)C3=C2CC(C)(C)CC3=O)cc1



7113 C=COC[C@@H]1CCCN1C.COc1ccc2c(c1)CCC=C2OS(=O)(=O)C(F)(F)F>>COc1ccc2c(c1)CCC=C2  
/C=C/OC[C@@H]1CCCN1C  
 7114 C=CC(=O)Nc1cccc1.COc1cc2oc(-c3cccc3)c(I)c(=O)c2cc1OC>>COc1cc2oc(-  
c3cccc3)c(/C=C/C(=O)Nc3cccc3)c(=O)c2cc1OC  
\*CNCCCOCCOCCOCCNC(=O)COc1ccc(C(Cc2cc(OC)cc(OC)c2)NC(=O)c2cccc(C=C)c2)cc1.COc1  
 7115 ccc(I)c([N+](=O)[O-  
])c1>>\*CNCCCOCCOCCOCCNC(=O)COc1ccc(C(Cc2cc(OC)cc(OC)c2)NC(=O)c2cccc(/C=C/c3ccc  
(OC)cc3[N+](=O)[O-])c2)cc1  
 7116 C=C.O=Cc1cc(Br)ccc1O>>C=Cc1ccc(O)c(C=O)c1  
C=Cc1cn(C(c2cccc2)(c2cccc2)c2cccc2)cn1.CS(=O)(=O)N1CCC(C2c3ccc(Cl)cc3C=C(Br)c3cccn3  
 7117 2)CC1>>CS(=O)(=O)N1CCC(C2c3ccc(Cl)cc3C=C(/C=C/c3cn(C(c4cccc4)(c4cccc4)c4cccc4)cn3)c  
3cccn32)CC1  
 7118 C=Cc1cc(OC)c(O)c(OC)c1.CCCCCCCCOCc1ccc2c(C)c(Br)c(=O)oc2c1>>CCCCCCCCOCc1ccc2c(C)c(/  
C=C/c3cc(OC)c(O)c(OC)c3)c(=O)oc2c1  
 7119 C=CC(=O)NC[C@@H](OC)[C@H](OC)c1cccc1NC(=O)[C@H](C)NC(=O)c1cccc(Br)c1>>CO[C@  
@H]1CNC(=O)/C=C/c2cccc(c2)C(=O)N[C@@H](C)C(=O)Nc2cccc2[C@H]1OC  
 7120 C=Cc1ccc2cccc2c1.CC(C)(C)Br>>CC(C)(C)/C=C/c1ccc2cccc2c1  
 7121 C=C[Si](C)(C)C.O=c1oc2cccc2cc1Br>>C[Si](C)(C)/C=C/c1cc2cccc2oc1=O  
 7122 C=CB1OC(C)CC(C)(C)O1.Fc1ccc(I)cc1>>CC1CC(C)(C)OB(/C=C/c2ccc(F)cc2)O1  
 7123 C=Cc1cccc1.Clc1cccs1>>C(=C/c1cccs1)\c1cccc1  
 7124 C=CC(OC)OC.Nc1cccc1I>>COC(/C=C/c1ccncc1N)OC  
C=CC(=O)OC.COc1cc(Br)c2c3c1O[C@@H]1[C@]34CCN(C)[C@H](C2)[C@]42C=C[C@@]1(OC)[  
 7125 C@H]1[C@@H](O)N(c3cccc3)C(=O)[C@H]12>>COC(=O)/C=C/c1cc(OC)c2c3c1C[C@H]1N(C)C  
C[C@@]34[C@@H](O2)[C@@]2(OC)C=C[C@@]14[C@H]1C(=O)N(c3cccc3)[C@H](O)[C@@  
 7126 C=CCO.CCCCCCCCCOCc1cnc(-c2ccc(Br)cc2)nc1>>CCCCCCCCCOCc1cnc(-  
\*CNCCCOCCOCCOCCNC(=O)COc1ccc(C(Cc2cc(OC)cc(OC)c2)NC(=O)c2cccc(C=C)c2)cc1.O=C(  
 7127 Oc1ccc([N+](=O)[O-  
])cc1)c1cccc(I)c1>>\*CNCCCOCCOCCOCCNC(=O)COc1ccc(C(Cc2cc(OC)cc(OC)c2)NC(=O)c2cccc  
c(/C=C/c3cccc(C(=O)Oc4ccc([N+](=O)[O-])cc4)c3)c2)cc1  
 7128 C=CCC(=O)OC(C)(C)C.Nc1ccc(Br)cc1-c1cccc1>>CC(C)(C)OC(=O)/C=C/c1ccc(N)c(-c2cccc2)c1  
 7129 C=Cc1ccc(CCOC(C)=O)cc1.O=C(O)c1ccc(I)cc1>>CC(=O)OCCc1ccc(/C=C/c2ccc(C(=O)O)cc2)cc1  
 7130 C=CC(=O)OC(C)(C)C.Cc1ccc(NC=O)c(I)c1>>Cc1ccc(NC=O)c(/C=C/C(=O)OC(C)(C)C)c1  
 7131 Br1cccc1.C=C(CP(=O)(OCC)OCC)C(=O)OCC>>CCOC(=O)/C=C/c1cccc1)CP(=O)(OCC)OCC  
 7132 C=Cc1cc(OC)c(OC)c(OC)c1-c1ccc(Cl)cc1.COc1ccc(I)cc1>>COc1ccc(/C=C/c2cc(OC)c(OC)c(OC)c2-  
c2ccc(Cl)cc2)cc1  
 7133 C=Cc1ccc(OC)c(OC)c1C(=O)OC.CC(C)(C)OC(=O)NCCc1cc2c(cc1)OCO2>>COC(=O)c1c(/C=C/c2c  
c3c(cc2CCNC(=O)OC(C)(C)C)OCO3)ccc(OC)c1OC  
 7134 C=Cc1ccc2c(c1)Sc1cccc1N2CC.COC(=O)c1ccc(Br)cc1>>CCN1c2cccc2Sc2cc(/C=C/c3ccc(C(=O)O  
C)cc3)ccc21  
 7135 C=CC(=O)OCCCC.COC(c1cccc1)c1cnn2c(-c3cccc3)c(Br)c3cccc3c12>>CCCCOC(=O)/C=C/c1c(-  
c2cccc2)n2ncc(C(OC)c3cccc3)c2c2cccc12  
 7136 C=C.COC(=O)c1ccc(Br)c(NC(C)=O)c1>>C=Cc1ccc(C(=O)OC)cc1NC(C)=O  
 7137 C=CC(=O)OCC.CC[C@]12C=CCN3CC[C@]4(C(=C(C(=O)OC)C1)Nc1ccc(I)cc14)[C@@H]32>>CC  
OC(=O)/C=C/c1ccc2c(c1)[C@@]13CCN4CC=C[C@@](CC)(CC(C(=O)OC)=C1N2)[C@H]43  
 7138 CC=C(c1cccc1)c1c(OCc2cc(OC)ccc2Br)c(=O)n(C)c(=O)n1C>>COc1ccc2c(c1)COc1c(n(C)c(=O)n(C  
)c1=O)/C(c1cccc1)=C\2C  
 7139 C=CS(=O)(=O)NCCCCCCCC.Cc1ccc(CNC(=O)OC(C)(C)C)c(Br)c1>>CCCCCCCCNS(=O)(=O)/C=C  
/c1cc(C)ccc1CNC(=O)OC(C)(C)C  
 7140 C=Cc1ccc2c(c1)OCO2.Cn1c(=O)c2c(cc(Br)n2C)n(C)c1=O>>Cn1c(=O)c2c(cc(/C=C/c3ccc4c(c3)OCO  
4)n2C)n(C)c1=O  
 7141 Br1cccn1.C=CCO>>C=C(CO)c1cccn1  
 7142 C=CC(=O)OC.Cn1cc(I)c2cccc2c1=O>>COC(=O)/C=C/c1cn(C)c(=O)c2cccc12  
 7143 C=CC(=O)OC.CC(C)(C)OC(=O)N1CCC2(CC(=O)c3cc(Br)ccc3O2)C1>>COC(=O)/C=C/c1ccc2c(c1)  
C(=O)CC1(CCN(C(=O)OC(C)(C)C)C1)O2  
 7144 C=C(F)[Si](C)(c1cccc1)c1cccc1.Fc1cccc1I>>C[Si](/C(F)=C/c1cccc1F)(c1cccc1)c1cccc1  
 7145 C=CC(=O)OCC.O=c1oc(-c2cccc2)c(I)c2sc3c(c12)CCCC3>>CCOC(=O)/C=C/c1c(-  
c2cccc2)oc(=O)c2c3c(sc12)CCCC3  
 7146 C=C(C(=O)OC)[C@@H]1CC[C@@]2(C)CCC[C@@](C)(OCOC)[C@@H]2C1.Fc1ccc(Br)cc1>>CO  
CO[C@]1(C)CCC[C@]2(C)CC[C@@H](/C=C\C3ccc(F)cc3)C(=O)OC[C@H]21  
 7147 C=CC(N)=O.CC1CC(C=O)=C(Br)c2cccc21>>CC1CC(C=O)=C(/C=C/C(N)=O)c2cccc21  
 7148 C=CC(=O)N1CCCC1.O=C1Nc2ccc(Br)cc2C1=O>>O=C1Nc2ccc(/C=C/C(=O)N3CCCC3)cc2C1=O

7149 C=Cc1ccncc1.CCN(CC)c1ccc2c(c1)C(C)(C)c1cc(Br)ccc1-  
 2>>CCN(CC)c1ccc2c(c1)C(C)(C)c1cc(/C=C/c3ccncc3)ccc1-2  
 7150 C=Cc1cccc1C.COc1ccc(N)c(I)c1>>COc1ccc(N)c(/C=C/c2cccc2C)c1  
 7151 C=Cc1cccc1.O=[N+][([O-])c1cccc1Br>>O=[N+][([O-])c1cccc1/C=C/c1cccc1  
 7152 C=Cc1cccc1C.CCOC(=O)C(F)(F)I>>CCOC(=O)C(F)(F)/C=C/c1cccc1C  
 7153 C=Cc1ccc(O)c(C(=O)OCC(C)C)c1.Cc1ccncc1NS(=O)(=O)c1ccc(I)cc1>>Cc1ccncc1NS(=O)(=O)c1ccc  
 (/C=C/c2ccc(O)c(C(=O)OCC(C)C)c2)cc1  
 7154 C=CC(=O)OC(C)(C)C.O=C(O)Cc1cccc(Br)c1>>CC(C)(C)OC(=O)/C=C/c1cccc(CC(=O)O)c1  
 7155 C=CCN.COc1ccc2c(=O)c(I)coc2c1>>COc1ccc2c(=O)c(/C=C/CN)coc2c1  
 7156 C=CCC(C)C(=O)OCC.Cc1ccc(Br)cc1>>CCOC(=O)C(C)C/C=C/c1ccc(C)cc1  
 7157 C=CC(CCC1(C)OCCO1)C(Cc1cccc1Br)(C(=O)OC)C(=O)OC>>C=C1c2cccc2CC(C(=O)OC)(C(=O)  
 OC)C1CCC1(C)OCCO1  
 7158 C=Cc1cccc1O.COc1cccc1Br>>COc1cccc1/C=C/c1cccc1O  
 7159 C=C(NC(C)=O)C(=O)OC.COC1=C(I)CON(Cc2cccc2)[C@H]1[C@H]1COC(C)(C)O1>>COC(=O)/C  
 (=C/C1=C(OC)[C@H]([C@H]2COC(C)(C)O2)N(Cc2cccc2)OC1)NC(C)=O  
 7160 Brc1ccc(I)cc1.C=CCn1nnc2cccc21>>Brc1ccc(/C=C/Cn2nnc3cccc32)cc1  
 7161 C=CS(C)=O.O.FC(F)(F)c1ccc(Br)cc1>>CS(=O)(=O)/C=C/c1ccc(C(F)(F)F)cc1  
 7162 Brc1cccc1.C=CC(=O)N(C)OC>>CON(C)C(=O)/C=C/c1cccc1  
 7163 C=C.Cc1ccc(Cl)cc1>>C=Cc1ccc(C)cc1  
 7164 C=C1C(=O)O[C@H]2[C@H]1CCC(=C)[C@@H]1C[C@H](OC(C)=O)C(=C)[C@H]21.Clc1ccc(I)cc1  
 >>C=C1CC[C@H]2/C(=C/c3ccc(Cl)cc3)C(=O)O[C@@H]2[C@H]2C(=C)[C@@H](OC(C)=O)C[C@  
 C=Cc1encc2cccc12.CN1C(=O)CC[C@]2(C)c3ccc(Br)cc3CC[C@]12>>CN1C(=O)CC[C@]2(C)c  
 3ccc(/C=C/c4encc5cccc45)cc3CC[C@]12  
 7165 C=CCCC(=O)O.Fc1ccc(I)cc1>>O=C(O)CC/C=C/c1ccc(F)cc1  
 7166 C=CCCCCCC.c1ccc([I+](c2cccc2)cc1>>CCCCC/C=C/c1cccc1  
 7167 C=CC(=O)OCC.Cc1cc(C)cc(I)c1>>CCOC(=O)/C=C/c1cc(C)cc(C)c1  
 7168 C=CC(CCCCCCCC(=O)OC)O[Si](C)(C)C(C)(C)C.CCC1=C(Br)CCC1=O>>CCC1=C(/C=C/C(CCCC  
 CCCC(=O)OC)O[Si](C)(C)C(C)(C)C)CCC1=O  
 7169 C=Cc1ccc(OC)c(OC)c1.N#Cc1ccc(I)cc1>>COc1ccc(/C=C/c2ccc(C#N)cc2)cc1OC  
 7170 C=Cc1ccc(/C=C/c2ccc(N(c3cccc3)c3cccc4cccc34)cc2)cc1.O=Cc1ccc(Br)s1>>O=Cc1ccc(/C=C/c2cc  
 c(/C=C/c3ccc(N(c4cccc4)c4cccc5cccc45)cc3)cc2)s1  
 7171 C=CCN(C(=O)OC(C)(C)C)C(=O)OC(C)(C)C.COc1cc(Br)cc(OC)c1OC>>COc1cc(/C=C/CN(C(=O)O  
 C(C)(C)C)C(=O)OC(C)(C)C)cc(OC)c1OC  
 7172 C=CC(=C)C.COc1ccc(I)cc1>>C=C/C(C)=C/c1ccc(OC)cc1  
 7173 C=Cc1ccc(OC)cc1.O=c1c(I)c(/C=C/c2cccc2)[nH]c2cccc12>>COc1ccc(/C=C/c2c(/C=C/c3cccc3)[n  
 H]c3cccc3c2=O)cc1  
 7174 C=Cc1cc(C)ccc1N(C)C(=O)c1cccc1I>>C=C1c2cccc2C(=O)N(C)c2ccc(C)cc21  
 7175 C=CC(=O)OCC.COc1ccc(Br)c(C2OCCCCO2)c1>>CCOC(=O)/C=C/c1ccc(OC)cc1C1OCCCCO1  
 7176 C=CC(=O)OC(C)(C)C.CC(C)(C)OC(=O)N1CCC2(CC1)Cc1cc(Br)enc1NC2=O>>CC(C)(C)OC(=O)/C  
 =C/c1enc2c(c1)CC1(CCN(C(=O)OC(C)(C)C)CC1)C(=O)N2  
 7177 C=CC(=O)OC(C)(C)C.N#Cc1cccc(Br)c1>>CC(C)(C)OC(=O)/C=C/c1cccc(C#N)c1  
 7178 C=CC(=O)OC(C)(C)C.O=C(CN1CCOCC1)Nc1ccc(Br)en1>>CC(C)(C)OC(=O)/C=C/c1ccc(NC(=O)C  
 N2CCOCC2)nc1  
 7179 C=CC(=O)N(C)C.FC(F)(F)c1ccc(Cl)cc1>>CN(C)C(=O)/C=C/c1ccc(C(F)(F)F)cc1  
 7180 C=Cc1cc2cc(OC)c(OC)cc2oc1=O.O=[N+][([O-])c1ccc(I)cc1>>COc1cc2cc(/C=C/c3ccc([N+](=O)[O-  
 ])cc3)c(=O)oc2cc1OC  
 7181 C=Cc1ncnc2c1ncn2[C@@H]1O[C@H](COC(C)=O)[C@@H](O)[C@H]1O.Ic1cccc1>>CC(=O)OC[  
 C@H]1O[C@]@H](n2ncnc3c(/C=C/c4cccc4)ncnc32)[C@H](O)[C@]@H]1O  
 7182 C=CC(=O)OC.CC(C)(C)OC(=O)n1nc(I)c2cccc21>>COC(=O)/C=C/c1nn(C(=O)OC(C)(C)C)c2cccc1  
 7183 C=CC(=O)OCCN(C)C.O=C(Nc1cccc1)c1cc(=O)c2cc(Br)ccc2o1>>CN(C)CCOC(=O)/C=C/c1ccc2oc(  
 C(=O)Nc3cccc3)cc(=O)c2c1  
 7184 C=CCCCCCC.Cc1cc(C)c(OS(=O)(=O)C(F)(F)F)c(C)c1>>C=C(CCCCCC)c1c(C)cc(C)cc1C  
 7185 C=CCN(C(=O)OC(C)(C)C)C(=O)OC(C)(C)C.Cc1ccc(Br)cc1>>Cc1ccc(/C=C/CN(C(=O)OC(C)(C)C)C  
 (=O)OC(C)(C)C)cc1  
 7186 C=CC(=O)OC(C)(C)C.CC(C)=CCc1cc(I)ccc1OC(=O)CCc1ccc(F)cc1>>CC(C)=CCc1cc(/C=C/C(=O)  
 OC(C)(C)C)ccc1OC(=O)CCc1ccc(F)cc1  
 7187 C=CC(=O)OC.CC(C)(C)O[C@H]1CC[C@]@H]2C=C(C3=C(Br)CCCC3)CC[C@]12C>>COC(=O)/C=  
 C/C1=C(C2=C[C@H]3CC[C@H](OC(C)(C)C)[C@@]3(C)CC2)CCCC1  
 7188 C=Cc1nn[nH]1.CC(C)CN(CC(C)C)c1ccc(Br)cc1[N+](=O)[O-  
 7189 ]>>CC(C)CN(CC(C)C)c1ccc(/C=C/c2nn[nH]2)cc1[N+](=O)[O-]  
 7190 C=CCOC(O[Si](C)(C)C(C)(C)C(I)CCCCCCCC>>C=C1COC(O[Si](C)(C)C(C)(C)C)C1CCCCCCCC

7191 C=CC(=O)OCC.Clc1cccc(I)c1>>CCOC(=O)/C=C/c1cccc(Cl)c1  
7192 C=CC(=O)OCC.Oc1cccc(I)c1>>CCOC(=O)/C=C/c1cccc(O)c1  
7193 C=Cc1ccc(Br)cc1.CCCCCCN(CCCCCC)c1ccc(I)cc1>>CCCCCN(CCCCCC)c1ccc(/C=C/c2ccc(Br)c  
c2)cc1  
7194 C=CC(=O)Nc1cccc1.CC(C)(C)c1ccc2[nH]c3c(c2c1)CC(=O)Nc1ccc(I)cc1-  
3>>CC(C)(C)c1ccc2[nH]c3c(c2c1)CC(=O)Nc1ccc(/C=C/C(=O)Nc2cccc2)cc1-3  
7195 C=CC(=O)OCC(CC)CCCC.N#Cc1cccc1Cl>>CCCCC(CC)COC(=O)/C=C/c1cccc1C#N  
7196 Brc1ccc2c(c1)OCCOCCOCCOCCO2.C=CP(=O)(OCC)OCC>>CCOP(=O)/C=C/c1ccc2c(c1)OCCOC  
COCCOCCO2)OCC  
7197 Brc1ccc(C2=CCC3(CC2)OCCO3)cc1.C=CC1CCC(CCC)CC1>>CCCC1CCC(/C=C/c2ccc(C3=CCC4(  
CC3)OCCO4)cc2)CC1  
7198 C=Cc1ccc2c(c1)Sc1ccc(/C=C/c3ccc4c(c3)Sc3cccc3N4CCCCCCCC)ccc1N2CCCCCCCCC.O=Cc1ccc(I)  
cc1>>CCCCCCCCCN1c2cccc2Sc2cc(/C=C/c3ccc4c(c3)Sc3cc(/C=C/c5ccc(C=O)cc5)ccc3N4CCCCC  
CC)ccc21  
7199 C=CCN(C(=O)OC(C)(C)C)C(=O)OC(C)(C)C.Cc1ccc(Cl)cc1>>Cc1ccc(/C=C/CN(C(=O)OC(C)(C)C)  
(=O)OC(C)(C)C)cc1  
7200 C=CC(=O)O.N#Cc1cc(Br)ccc1F>>N#Cc1cc(/C=C/C(=O)O)ccc1F  
7201 C=CC(=O)OC.CC(C)(C)OC(=O)c1cc(F)ccc1Br>>COC(=O)/C=C/c1ccc(F)cc1C(=O)OC(C)(C)C  
7202 C=CC(=O)OC.CCc1cccc(C)c1>>CCc1cccc(C)c1/C=C/C(=O)OC  
7203 C=CNC(C)=O.COc1ccc2ccc(OS(=O)(=O)C(F)(F)F)cc2c1>>C=C(NC(C)=O)c1ccc2ccc(OC)cc2c1  
7204 C=CCP(=O)(OCC)OCC.O=C(O)c1cccc(I)c1>>CCOP(=O)(C/C=C/c1cccc(C(=O)O)c1)OCC  
7205 C=CC(=O)OCCCC.Cn1ccc2cc(Br)ccc21>>CCCCOC(=O)/C=C/c1ccc2c(cen2C)c1  
7206 C=CC(=O)OC(C)(C)C.Ic1ccc(OCc2cccc2)cn1>>CC(C)(C)OC(=O)/C=C/c1ccc(OCc2cccc2)cn1  
7207 C=C(C)C(=O)OC.COC(=O)c1cccc1Cl>>COC(=O)/C(C)=C/c1cccc1C(=O)OC  
7208 C=CC(=O)OC.Cc1[nH]c2cccc2c1CCN1CCCC1c1ccc(Br)cc1>>COC(=O)/C=C/c1ccc(C2CCCN2CCc  
2c(C)[nH]c3cccc23)cc1  
7209 C=Cc1ccc(F)cc1.C[Si](C)(OS(=O)(=O)C(F)(F)F)OS(=O)(=O)C(F)(F)F>>C[Si](C)(/C=C/c1ccc(F)cc1)  
OS(=O)(=O)C(F)(F)F  
7210 C=CC(C)c1c(OCc2cccc2Br)c(=O)oc2cccc12>>CC1/C=C/c2cccc2COc2c1c1cccc1oc2=O  
C=C[C@H](C)[C@H](C)[C@H]1CC[C@H]2[C@H]3CC(=O)[C@H]4C[C@H](O)CC[C@H]4(C)[C@H]3CC  
7211 [C@H]21C.O=[N+][O-]c1ccc(I)cc1>>C[C@H](/C=C/c1ccc([N+](=O)[O-]  
)cc1)[C@H]1CC[C@H]2[C@H]3CC(=O)[C@H]4C[C@H](O)CC[C@H]4(C)[C@H]3CC[C@H]21  
7212 C=CC(=O)OCC.O=C(O)c1ccc(Br)s1>>CCOC(=O)/C=C/c1ccc(C(=O)O)s1  
7213 C=C[C@H]1O[C@H]2OC(C)(C)O[C@H]2[C@H]1N(Cc1cc(OC)ccc1Br)C(=O)OC>>C=C1c2ccc  
(OC)cc2CN(C(=O)OC)[C@H]2[C@H]1O[C@H]1OC(C)(C)O[C@H]21  
7214 C=CC(=O)OC(C)(C)C.Fc1cc(C(F)(F)F)ccc1Br>>CC(C)(C)OC(=O)/C=C/c1ccc(C(F)(F)F)cc1F  
7215 C=CCCO.CC(=O)Nc1cccc1Br>>C=C(CCO)c1cccc1NC(C)=O  
7216 C=CC(=O)OCC.CC(C)Nc1ccc(Br)n(CC(=O)OC(C)(C)C)c1=O>>CCOC(=O)/C=C/c1ccc(NC(C)C)c(=O)  
n1CC(=O)OC(C)(C)C  
7217 C=Cc1ccc(NC)cc1.FCCOCCOCCOc1ccc(I)cc1Br>>CNc1ccc(/C=C/c2ccc(OCc1ccccc1)cc1)c  
C=CC(=O)OC(C)(C)C.Cc1ccc(C#N)cc2nc(-c3ccc(Br)cc3)oc12>>Cc1ccc(C#N)cc2nc(-  
c3ccc(/C=C/C(=O)OC(C)(C)C)cc3)oc12  
7219 C=Cc1cccc1.Cc1ccc(N)c(Br)c1>>Cc1ccc(N)c(/C=C/c2cccc2)c1  
7220 C=Cc1ccc2nc(OC)c(OC)nc2c1.COC(=O)c1ccoc1Br>>COC(=O)c1ccoc1/C=C/c1ccc2nc(OC)c(OC)nc2  
7221 C=Cc1cccnc1.O=Cc1cc(Br)ccc1O>>O=Cc1cc(/C=C/c2cccnc2)ccc1O  
7222 C=Cc1cccnc1.CC(C)(C)OC(=O)N1CC[C@H]1COc1ccc(Br)c1>>CC(C)(C)OC(=O)N1CC[C@H]1C  
Oc1ccc(/C=C/c2cccnc2)c1  
7223 C=Cc1ccc(OC)cc1.FC(F)(F)c1ccc(Cl)cc1>>COc1ccc(/C=C/c2ccc(C(F)(F)F)cc2)cc1  
7224 C=C(F)C(C)=O.Ic1ccc2[nH]ccc2c1>>CC(=O)/C(F)=C/c1ccc2[nH]ccc2c1  
7225 C=CC(=O)OC(C)(C)C.O=C(OCc1cccc1)c1cc(Br)cc(I)c1>>CC(C)(C)OC(=O)/C=C/c1cc(Br)cc(C(=O)  
O)OCCc2cccc2)c1  
7226 C=CCN(CCI)S(=O)(=O)c1cccnc1>>C=C1CCN(S(=O)(=O)c2cccnc2)C1  
7227 C=CC(=O)OCC.CC(C)(CC1Cc2cccc2C1)NCC(O)c1sccl1Br>>CCOC(=O)/C=C/c1ccsc1C(O)CNC(C  
)(C)CC1Cc2cccc2C1  
7228 C=COCCCC.COC(=O)c1cccc1Br>>C=C(OCCCC)c1cccc1C(=O)OC  
7229 C=CC(=O)N(C)Cc1oc2ccc(C)cc2c1C.O=C1Nc2ccc(Br)cc2C12CCC2>>Cc1ccc2oc(CN(C)C(=O)/C=C  
/c3ccc4c(c3)C3(CCC3)C(=O)N4)c(C)c2c1  
7230 C=CC(=O)OC.COc1cc(Br)ccc1C#N>>COC(=O)/C=C/c1ccc(C#N)c(OC)c1  
7231 C=Cc1ccc(OC)cc1OC.CCCCCCCCOCc1ccc2c(C)c(Br)c(=O)oc2c1>>CCCCCCCCOCc1ccc2c(C)c(/C=C/  
c3ccc(OC)cc3OC)c(=O)oc2c1  
7232 C=Cc1ccc(OC)cc1.C[Si](C)(C)Cl>>COc1ccc(/C=C/[Si](C)(C)C)cc1

7233 C=CCN(CCC1CCCCC1)C(=O)C(F)(F)F>>C=C1CN(C(=O)C(F)(F)F)CC2CCCCC21

7234 C=CC(=O)OC.O=C1c2ccc(OS(=O)(=O)C(F)(F)F)cc2C(=O)N1C(c1cccc1)c1cccc1>>COC(=O)/C=C/c1ccc2c(c1)C(=O)N(C(c1cccc1)c1cccc1)C2=O

7235 C=CC(=O)O.Cc1ccc(S(=O)(=O)Nc2ccc(I)cc2)cc1>>Cc1ccc(S(=O)(=O)Nc2ccc(/C=C/C(=O)O)cc2)cc1

7236 Br1cccn1.C=COCCO>>C=C(OCCO)c1cccn1

7237 C=CC1(C(=O)O)CCC(O[Si](C(C)C)(C(C)C)C(C)C)C1.C[C@H](NC(=O)[C@@H](O)C1CC1)C(=O)N1CCC[C@H](C(=O)N[C@H](C)c2ccc3ccc(Br)cc3n2)N1>>CC(C)[Si](OC1CCC(/C=C/c2ccc3ccc([C@H](C)NC(=O)[C@@H]4CCCN(C(=O)[C@H](C)NC(=O)[C@@H](O)C5CC5)N4)nc3c2)(C(=O)O)C1)(C(C)C)C(C)C

7238 C=CC(=O)OC.CCCc1oc([C@@H](Cc2ccccc2)NC(=O)OC(C)(C)C)cc1I>>CCCc1oc([C@@H](Cc2ccc2)NC(=O)OC(C)(C)C)cc1/C=C/C(=O)OC

7239 C=CC(=O)O.Fc1ccc(Br)cc1>>O=C(O)/C=C/c1ccc(F)cc1

7240 C=Cc1ccc(Br)cc1.FC(F)(F)Cl>>FC(F)(F)C/C=C/c1ccc(Br)cc1

7241 C=CC(=O)OC(C)(C)C.COc1ccc(S(=O)(=O)c2ccc3ccc(Br)cc3n2)cc1>>COc1ccc(S(=O)(=O)c2ccc3ccc(/C=C/C(=O)OC(C)(C)C)cc3n2)cc1

7242 Br1ccccc1.C=CCO>>C=C(CO)c1ccccc1

7243 C=CC(=O)OC.COc1cc2c(c(I)c1OC)CCN(C(=O)OC(C)(C)C)CC2c1ccccc1>>COC(=O)/C=C/c1c2c(cc(OC)c1OC)C(c1ccccc1)CN(C(=O)OC(C)(C)C)CC2

7244 C=C.Clc1cc(I)ccn1>>C=Cc1ccnc(Cl)c1

7245 C=CC(=O)OCCCC.O=C1Nc2ccc(Br)cc2C1=O>>CCCCOC(=O)/C=C/c1ccc2c(c1)C(=O)C(=O)N2

7246 C=C[Si](C)(C)c1ccc2ccccc2c1-c1c(Br)ccc2ccccc12>>C=C1c2ccc3ccccc3c2-

7247 C=Cn1nnc(CC)n1.Ic1ccccc1>>CCc1nnn(/C=C/c2ccccc2)n1

7248 C=Cc1cc(OC(C)=O)cc(OC(C)=O)c1.CC(=O)Oc1ccc(I)cc1>>CC(=O)Oc1ccc(/C=C/c2cc(OC(C)=O)cc(OC(C)=O)c2)cc1

7249 C=Cc1ccncc1.CCN(CCOc1ccc(OC(C)=O)cc1)c1ccc(I)cc1>>CCN(CCOc1ccc(OC(C)=O)cc1)c1ccc(/C=C/c2ccncc2)cc1

7250 Br1ccsc1.C=CCNC(=O)OC(C)(C)C>>CC(C)(C)OC(=O)NC/C=C/c1ccsc1

7251 C=C[C@H]1CCCCN1C(=O)OC(C)(C)C.COc1ccc(I)cc1>>COc1ccc(/C=C/[C@@H]2CCCCN2C(=O)OC(C)(C)C)cc1

7252 C=CC(=O)OCC(C)CCCC.COC(=O)c1ccc(Cl)cc1>>CCCCC(CC)COC(=O)/C=C/c1ccc(C(=O)OC)cc

7253 Br1ccccc1.C=Cc1ccc(C#N)cc1>>N#Cc1ccc(/C=C/c2ccccc2)cc1

7254 C=C(F)C(C)=O.COc1ccccc1I>>COc1ccccc1/C=C(\F)C(C)=O

7255 C=CC(C)=O.C=CCc1ccc2c1c(Br)cn2S(=O)(=O)c1ccc(C)cc1>>C=CCc1ccc2c1c(/C=C/C(C)=O)cn2S(=O)(=O)c1ccc(C)cc1

7256 C=CCOC(C)c1c(Br)c(OC)c2ccccc2c1OC>>C=C1COC(C)c2c1c(OC)c1ccccc1c2OC

7257 C=CC(=O)N(C)OC.Cc1ccccc1I>>CON(C)C(=O)/C=C/c1ccccc1C

7258 C=Cc1ccncc1.CCCCCCOc1ccc(Br)c(F)c1>>CCCCCOc1ccc(/C=C/c2ccncc2)c(F)c1

7259 C=CC(C)(C)O.COc1c(I)c(=O)n(C)c2ccccc12>>COc1c(/C=C/C(C)(C)O)c(=O)n(C)c2ccccc12

7260 Br1ccncc1.C=Cc1ccc(OC)cc1>>COc1ccc(/C=C/c2ccncc2)cc1

7261 C=CC(=O)O[C@H]1C(C)(C)[C@H]2CC[C@]1(C)C2.O=Cc1ccccc1Br>>CC1(C)[C@H]2CC[C@](C)(C2)[C@H]1OC(=O)/C=C/c1ccccc1C=O

7262 C=CC(=O)OC(C)(C)C.COc1ccc(CCC(=O)Oc2ccc(I)cc2CC=C(C)C)cc1>>COc1ccc(CCC(=O)Oc2ccc(/C=C/C(=O)OC(C)(C)C)cc2CC=C(C)C)cc1

7263 C=CCCC.COC(=O)CCCCCCCC1=C(I)CCC1=O>>CCC/C=C/C1=C(CCCCCCCC(=O)OC)C(=O)CC1

7264 C=C(CC(=O)OC)C(=O)OC.COc1ccc(I)cc1>>COC(=O)/C=C(Cc1ccc(OC)cc1)C(=O)OC

7265 C=CCC[C@H](O[Si](C)(C)C(C)(C)C)c1nnn(Cc2ccc(OC)cc2)c1I>>C=C1CC[C@H](O[Si](C)(C)C(C)(C)C)c2nnn(Cc3ccc(OC)cc3)c21

7266 C=CC(=O)OC.CCN(CC)c1ccccc1Br>>CCN(CC)c1ccccc1/C=C/C(=O)OC)c1

7267 C=CC(=O)OC.Cc1ccccc1C(=O)c1sc2cc(O)ccc2c1Oc1ccc(Br)cc1>>COC(=O)/C=C/c1ccc(Oc2c(C(=O)c3c(C)ccccc3)sc3cc(O)ccc23)cc1

7268 C=CC(=O)OC(C)(C)C.COc1cc(Br)cc(OC)c1OC>>COc1cc(/C=C/C(=O)OC(C)(C)C)cc(OC)c1OC

7269 C=CCC(NCc1cc(F)ccc1Br)(C(=O)OC)C(C)C>>C=C1CC(C(=O)OC)(C(C)C)NCc2cc(F)ccc21

7270 C=CC(=O)OCCCC.O=[N+](O-)]c1cnc2c(C3OCCO3)cc(Br)cc2c1>>CCCCOC(=O)/C=C/c1cc(C2OCCO2)c2ncc([N+](=O)[O-])cc2c1

7271 C=Cc1ccc(OC(C)=O)cc1.FC(F)(F)C(Br)CCc1ccccc1>>CC(=O)Oc1ccc(/C=C/C(Cc2ccccc2)C(F)(F)F)C=CC(=O)OC.Cc1nc2ccc(Br)cn2c1Cc1ccccc1OC(F)F>>COC(=O)/C=C/c1ccc2nc(C)c(Cc3ccccc3OC(F)F)n2c1

7272

7273 Br1ccccc1.C=CCS(N)(=O)=O>>NS(=O)(=O)C/C=C/c1ccccc1

7274 C=Cc1ccccc1.FC(F)(F)Oc1ccc(I)c(Br)c1>>FC(F)(F)Oc1ccc(/C=C/c2ccccc2)c(Br)c1

7275 C=C[Si](CC)(CC)CC.CN(C)c1ccc(Br)cc1>>CC[Si](/C=C/c1ccc(N(C)C)cc1)(CC)CC

7276 C=Cc1cccc(C=O)c1.COc1c(CN(C(=O)C2CC2)c2cccc(Br)c2)ccc2c1OC(C)(C)C=C2>>COc1c(CN(C(=O)C2CC2)c2cccc(/C=C/c3cccc(C=O)c3)c2)ccc2c1OC(C)(C)C=C2  
7277 C=CC(=O)OC.O=Cc1ccc(Br)cc1F>>COC(=O)/C=C/c1ccc(C=O)c(F)c1  
7278 C=CC(=O)O.O=C(O)c1cc(Br)ccc1O>>O=C(O)/C=C/c1ccc(O)c(C(=O)O)c1  
7279 C=CC(=O)C1=CN(CC(C)C)CCC1(C)C.Ic1cccc1>>CC(C)CN1C=C(C(=O)/C=C/c2cccc2)C(C)(C)C  
7280 C=CC(=O)OCC.CC1(C)C(=O)N(c2ccc(C#N)c(C(F)(F)F)c2)C(=S)N1c1ccc(I)c(F)c1>>CCOC(=O)/C=C/c1ccc(N2C(=S)N(c3ccc(C#N)c(C(F)(F)F)c3)C(=O)C2(C)C)cc1F  
7281 C=CC(=O)OC.O=c1[nH]c(=O)n([C@@H]2O[C@H](CO)[C@@H](O)[C@H]2O)cc1I>>COC(=O)/C=C/c1cn([C@@H]2O[C@H](CO)[C@@H](O)[C@H]2O)c(=O)[nH]c1=O  
7282 C=CC(=O)OC.COC(=O)c1cc(C)cc(I)c1>>COC(=O)/C=C/c1cc(C)cc(C(=O)OC)c1  
7283 C=CC(=O)OC(C)(C)C.CC(C)(C)OC(=O)CCOCc1cc([N+](=O)[O-])ccc1Br>>CC(C)(C)OC(=O)/C=C/c1ccc([N+](=O)[O-])cc1COCCC(=O)OC(C)(C)C  
7284 C=CC(=O)OC.COc1ccc(I)cc1>>COC(=O)/C=C/c1ccc(OC)cc1  
7285 C=CC(=O)N1C(=O)OC[C@@H]1c1cccc1.CC(C)(C)OP(=O)(Cc1ccc(Br)cc1)OC(C)(C)C>>CC(C)(C)OP(=O)(Cc1ccc(/C=C/C(=O)N2C(=O)OC[C@@H]2c2cccc2)cc1)OC(C)(C)C  
7286 C=Cc1cccc1.COC(=O)/C(Br)=C1\CCCO1>>C=C(/C(C(=O)OC)=C1/CCCO1)c1cccc1  
7287 C=CC(OC)OC.Ic1ccc(-c2cccc2)cc1>>COC(/C=C/c1ccc(-c2cccc2)cc1)OC  
7288 C=CC(=O)N1N=Cc2cccc2C1c1cc2cccc2n1C.COc1cc(Cc2cnc(N)nc2N)cc(I)c1OC>>COc1cc(Cc2cnc(N)nc2N)cc(/C=C/C(=O)N2N=Cc3cccc3C2c2cc3cccc3n2C)c1OC  
7289 C=CC(=O)OC(C)(C)C.CSc1nc(N(C)c2cccc2)n2ncc(I)c2n1>>CSc1nc(N(C)c2cccc2)n2ncc(/C=C/C(=O)OC(C)(C)C)c2n1  
7290 Br1cccc1I.C=C1CC(c2cccc2)OC1=O>>O=C1OC(c2cccc2)C/C1=C\c1cccc1Br  
7291 C=CC(=O)O.Cc1cccc1I>>Cc1cccc1/C=C/C(=O)O  
7292 C=CC(=O)OCC.Cn1cc(-c2cccc2I)c2cccc2I>>CCOC(=O)/C=C/c1cccc1-c1cn(C)c2cccc12  
7293 BrC1CCOCC1.C=Cc1cccc1>>C(=C/C1CCOCC1)\c1cccc1  
7294 C=CC(=O)NC[C@@H](OC)[C@H](OC)c1cccc1NC(=O)[C@H](Cc1cccc1)NC(=O)c1cccc(Br)c1>>CO[C@@H]1CNC(=O)/C=C/c2cccc(c2)C(=O)N[C@@H](Cc2cccc2)C(=O)Nc2cccc2[C@H]1OC  
7295 Br1cccc1.C=CCOc1ccc(OC)cc1>>COc1ccc(OC/C=C/c2cccc2)cc1  
7296 C=Cc1ccc(OC)cc1.CC(=O)NS(=O)(=O)c1ccc(Br)cc1>>COc1ccc(/C=C/c2ccc(S(=O)(=O)NC(C)=O)cc2)cc1  
7297 C=CC(=O)OCC.COc1ccc(-c2cc3c(Br)ccc(OC)c3o2)cc1OC>>CCOC(=O)/C=C/c1ccc(OC)c2oc(-c3ccc(OC)c(OC)c3)cc12  
7298 C=CCN(Cc1cccc1)Cc1cc2cccc(C)c2nc1Cl>>C=C1CN(Cc2cccc2)Cc2cc3cccc(C)c3nc21  
7299 C=CC(=O)NCCCCC(=O)OC.CC(=O)OC[C@@H]1C=C[C@H](n2cc(I)c(=O)[nH]c2=O)O1>>COC(=O)CCCCCNC(=O)/C=C/c1cn([C@H]2C=C[C@@H](COC(C)=O)O2)c(=O)[nH]c1=O  
7300 C=CC1CC(=O)N1.Nc1ccc(I)cc1>>Nc1ccc(/C=C/C2CC(=O)N2)cc1  
7301 C=Cc1ccc(N(CCCC)CCCC)cc1.CN(C)c1ccc(/C=C/c2nc3cc(Br)ccc3nc2-c2cccc2)cc1>>CCCCN(CCCC)c1ccc(/C=C/c2ccc3nc(-c4cccc4)c(/C=C/c4ccc(N(C)C)cc4)nc3c2)cc1  
7302 C=C.CCOC(=O)c1c[nH]c(=O)c(I)c1>>C=Cc1cc(C(=O)OCC)c[nH]c1=O  
7303 C=CC[C@H](NC(=O)OC(C)(C)C)C(=O)OC.Ic1cccc1>>COC(=O)[C@H](C/C=C/c1cccc1)NC(=O)OC(C)(C)C  
7304 C=CC(=O)OCCCC.Cc1ccc2cccc2c1Br>>CCCCOC(=O)/C=C/c1c(C)ccc2cccc12  
7305 C=CC(N)=O.CN1CCOC(c2cccc2)c2cc(Br)ccc2C1>>CN1CCOC(c2cccc2)c2cc(/C=C/C(N)=O)ccc2C  
7306 C=Cc1cc(OC(C)=O)cc(OC(C)=O)c1.CC(=O)OC[C@H]1O[C@@H](Oc2ccc(I)cc2)[C@H](OC(C)=O)[C@@H](OC(C)=O)[C@@H]1OC(C)=O>>CC(=O)OC[C@H]1O[C@@H](Oc2ccc(/C=C/c3cc(OC(C)=O)cc(OC(C)=O)c3)cc2)[C@H](OC(C)=O)[C@@H](OC(C)=O)[C@@H]1OC(C)=O  
7307 C=CC1(C(=O)O)COC(=O)OC1.CC(C)[C@H](O)C(=O)N[C@@H](C)C(=O)N1CCC[C@@H](C(=O)N[C@H](C)c2ccc3ccc(Br)cc3n2)N1>>CC(C)[C@H](O)C(=O)N[C@@H](C)C(=O)N1CCC[C@@H](C(=O)N[C@H](C)c2ccc3ccc(/C=C/C4(C(=O)O)COC(=O)OC4)cc3n2)N1  
7308 C=Cc1cccc1.CC[C@@]1(O)C(=O)OCc2c1cc1n(c2=O)Cc2cc3c(Br)cccc3nc2-1>>CC[C@@]1(O)C(=O)OCc2c1cc1n(c2=O)Cc2cc3c(/C=C/c4cccc4)cccc3nc2-1  
7309 C=Cc1cccc1.N#CCc1ccc(Cl)cc1>>N#CCc1ccc(/C=C/c2cccc2)cc1  
7310 Br1cnc2cccc2c1.C=CCO[C@]1(C)C[C@@H](C)C(=O)[C@H](C)[C@@H](O)[C@](C)(O)[C@@H](CC)OC(=O)[C@H](C)C(=O)[C@H](C)[C@H]1O[C@@H]1O[C@H](C)C[C@H](N(C)C)[C@H]1OC(=O)c1cccc1>>CC[C@H]1OC(=O)[C@H](C)C(=O)[C@H](C)[C@@H](O)[C@@H]2O[C@H](C)[C@H](N(C)C)[C@H]2OC(=O)c2cccc2[C@](C)(OC/C=C/c2cnc3cccc3c2)C[C@@H](C)C(=O)[C@H](C)C[C@@H](O)C[C@@H](O)C[C@@H](C)O  
7311 C=C.COC(=O)c1ccc(CCl)cc1>>C=CCc1ccc(C(=O)OC)cc1  
7312 C=Cc1cccc1.Clc1ccc2c(Br)ccnc2c1>>Clc1ccc2c(/C=C/c3cccc3)ccnc2c1  
7313 C=Cc1ccc(C)cc1.Cc1c(Br)c(=O)oc2cccc12>>Cc1ccc(/C=C/c2c(C)c3cccc3oc2=O)cc1  
7314 C=CCNC(=O)c1cccc1.COc1ccc(I)cc1>>COc1ccc(/C=C\CNC(=O)c2cccc2)cc1

7315 C=CCC(=O)OCC(C)C.COc1ccc(OC)c(Br)c1>>COc1ccc(OC)c(/C=C/CC(=O)OCC(C)C)c1  
7316 C=Cc1cccc(C=O)c1.CCOC(=O)C(F)(F)Br>>CCOC(=O)C(F)(F)/C=C/c1cccc(C=O)c1  
7317 C=Cc1ccc(OC)c(OC)c1.O=C(Nc1cccc1I)c1cccc2cccc12>>COc1ccc(/C=C/c2cccc2NC(=O)c2cccc3  
cccc23)cc1OC  
7318 C=CC#N.O=Cc1ccc(Cl)cc1>>N#C/C=C/c1ccc(C=O)cc1  
7319 C=Cc1cccc(SC)c1.CC(C)c1ccc2sc3ccc(Br)cc3c(=O)c2c1>>CSc1cccc(/C=C/c2ccc3sc4ccc(C(C)C)cc4c  
(=O)c3c2)c1  
7320 C=Cc1cccc1.Cc1cccc1I>>Cc1cccc1/C=C/c1cccc1  
7321 Brc1cccc(C2OCCO2)c1.C=CC(=O)OC>>COC(=O)/C=C/c1cccc(C2OCCO2)c1  
7322 C=CC(=O)OC.C[C@]12C[C@@]34C=C(Sc5ccc(I)cc5)C(=O)[C@@](C)(CCC(=O)Nc5c(O)ccc(C(=O)  
)O)c5O)[C@@H]3[C@H](C[C@@H]1C4)O2>>COC(=O)/C=C/c1ccc(SC2=C[C@]34C[C@H]5C[C  
@H](O)[C@@]5(C)C3)[C@H]4[C@](C)(CCC(=O)Nc3c(O)ccc(C(=O)O)c3O)C2=O)cc1  
7323 C=CC(=O)OCCCC.CC(C)c1cc(C(C)C)c(Br)c(C(C)C)c1>>CCCCOC(=O)/C=C/c1c(C(C)C)cc(C(C)C)c  
c1C(C)C  
7324 C=CC(=O)OC.O=c1[nH]c(=O)n([C@@H]2CO[C@H](CO)[C@@H](O)C2)cc1I>>COC(=O)/C=C/c1c  
n([C@@H]2CO[C@H](CO)[C@@H](O)C2)c(=O)[nH]c1=O  
7325 C=Cc1ccc(SC)cc1.CN(C)CCCN1ncc2cc(Br)ccc2c1=O>>CSc1ccc(/C=C/c2ccc3c(=O)n(CCCN(C)C)ncc  
3c2)cc1  
7326 C=C(OC)C1=C(Br)CCCC1.C=CC(=O)OC>>C=C(OC)C1=C(/C=C/C(=O)OC)CCCC1  
7327 C=CCN(c1cccc2cccc12)S(=O)(=O)c1cccc1Br>>C=C1CN(c2cccc3cccc23)S(=O)(=O)c2cccc21  
7328 C=CC(=O)OC.COCCOc1cc(C(C)C)ccc1I>>COCCOc1cc(C(C)C)ccc1/C=C/C(=O)OC  
7329 C=C[Si](OCC)(OCC)OCC.CCCCCCCCOc1ccc2cc(Br)ccc2c1>>CCCCCCCOc1ccc2cc(/C=C/[Si](O  
CC)(OCC)OCC)ccc2c1  
7330 C=Cc1ccc(C#N)cc1.FC(F)(F)c1nc(I)c2nccc12>>N#Cc1ccc(/C=C/c2nc(C(F)(F)F)n3ccccc23)cc1  
7331 CC(=O)/C=C/CC(NS(=O)(=O)c1ccc(C)cc1)c1cccc1.COc1ccc(Br)cc1>>COc1ccc(/C=C/C(C)=O)CC(  
NS(=O)(=O)c2ccc(C)cc2)c2cccc2)cc1  
7332 C=COCCCC.COc1cccc1Cl>>C=C(OCCCC)c1cccc1OC  
7333 C=CC#N.O=S(=O)(Oc1ccc2ccc(Br)cc12)C(F)(F)F>>N#C/C=C/c1ccc2ccc(Br)cc12  
7334 C=CN1CCCC1=O.FC(F)(F)C(F)(F)C(F)(F)C(F)(F)C(F)(F)C(F)(F)Br>>O=C1CCCN1/C=C/C(F)(F)C(  
F)(F)C(F)(F)C(F)(F)C(F)(F)C(F)(F)F  
7335 C=Cc1ccc(N(CCCCCCCCCCCC)CCCCCCCCCCCC)cc1.O=Cc1c2cccc2c(Br)c2cccc12>>CCCCC  
CCCCCN(CCCCCCCCCCCC)c1ccc(/C=C/c2c3cccc3c(C=O)c3cccc23)cc1  
7336 C=CC(=O)OCC.Nc1cc(Br)ncc1I>>CCOC(=O)/C=C/c1ncc(Br)cc1N  
7337 C=CC(F)(F)Oc1ccc(Cl)cc1Br>>C=C1c2cc(Cl)ccc2OC1(F)F  
7338 C=CS(=O)(=O)NCc1cccc1.COc1ccc(Br)c(CNC(=O)OC(C)(C)C)c1>>COc1ccc(/C=C/S(=O)(=O)NCc  
2cccc2)c(CNC(=O)OC(C)(C)C)c1  
7339 C=C(F)C(=O)OC.COC(=O)c1cccc1I>>COC(=O)/C(F)=C/c1cccc1C(=O)OC  
7340 C=CC(C)(O)CC/C=C/C(C)CC/C=C/C(C)CCC=C(C)C.Oc1ccc(OCc2cccc2)cc1Br>>CC(C)=CCC/C(C)=  
C/CC/C(C)=C/CCC(C)(O)/C=C/c1cc(OCc2cccc2)ccc1O  
7341 C=Cc1ccc2c(c1)CC2.C[Si](C)(C)OS(=O)(=O)C(F)(F)F>>C[Si](C)(C)/C=C/c1ccc2c(c1)CC2  
7342 C=Cc1ccc(OC)cc1.CCOC(=O)C1CCCN(c2cccc(Br)n2)C1>>CCOC(=O)C1CCCN(c2cccc(/C=C/c3ccc(  
OC)cc3)n2)C1  
7343 C=CC(=O)OCCN(C)C.Cc1ccc(NC(=O)c2cc(=O)c3cc(Br)ccc3o2)cc1C>>Cc1ccc(NC(=O)c2cc(=O)c3c  
c(/C=C/C(=O)OCCN(C)C)ccc3o2)cc1C  
7344 Brc1enc2cccc2c1.C=CCN1C(=O)c2cccc2C1=O>>O=C1c2cccc2C(=O)N1C/C=C/c1enc2cccc2c1  
7345 C=CC(=O)OC.CN1CCN(CCc2enn3cccc23)C(c2ccc(Br)cc2)C1>>COC(=O)/C=C/c1ccc(C2CN(C)CC  
N2CCc2enn3cccc23)cc1  
7346 C=CC(=O)OC.CCOC(=O)c1cn(CC)c2nc(C)c(Br)cc2c1=O>>CCOC(=O)c1cn(CC)c2nc(C)c(/C=C/C(=O)  
OC)cc2c1=O  
7347 C=CC(=O)OCCCC.Fc1cccc1Br>>CCCCOC(=O)/C=C/c1cccc1F  
7348 C=Cc1cccc([N+](=O)[O-]  
])c1.CN(C(=O)c1cccc1)c1ccc2c(c1)[nH]c(=NC(=O)c1ccc(Br)s1)n2CCC(N)=O>>CN(C(=O)c1cccc1  
)c1ccc2c(c1)[nH]c(=NC(=O)c1ccc(/C=C/c3cccc([N+](=O)[O-])c3)s1)n2CCC(N)=O  
7349 C=Cc1cccc1.CC(C)(C)c1ccc(I)cc1>>CC(C)(C)c1ccc(/C=C/c2cccc2)cc1  
7350 Brc1cccc2cc[nH]c12.C=CC(=O)N(C)C>>CN(C)C(=O)/C=C/c1cccc2cc[nH]c12  
7351 C=CC(=O)OC.COc1cc(C#N)ccc1Br>>COC(=O)/C=C/c1ccc(C#N)cc1OC  
7352 C=CC(=O)OC.COc1cc(Br)cc([N+](=O)[O-])c1>>COC(=O)/C=C/c1cc(OC)cc([N+](=O)[O-])c1  
7353 C=Cc1cccc(OC)c1.C[Si](C)(C)Cl>>COc1cccc(/C=C/[Si](C)(C)C)c1  
7354 Brc1ccc2c(c1)OCO2.C=CC(=O)OCCCC>>CCCCOC(=O)/C=C/c1ccc2c(c1)OCO2

C=Cc1ccc2c(c1)C(=O)N([C@H](CCC(=O)OCC)C(=O)OCC)C2.CC(C)(C)C(=O)Nc1nc2[nH]cc(I)c2  
 7355 c(=O)[nH]1>>CCOC(=O)CC[C@H](C(=O)OCC)N1Cc2ccc(/C=C/c3c[nH]c4nc(NC(=O)C(C)(C)C)[  
 nH]c(=O)c34)cc2C1=O  
 7356 C=Cc1cccc(CN2CCN(C)CC2)n1.Cc1ncc(C#N)c(Nc2ccc3[nH]ccc3c2C)c1Br>>Cc1ncc(C#N)c(Nc2ccc  
 3[nH]ccc3c2C)c1/C=C/c1cccc(CN2CCN(C)CC2)n1  
 7357 C=CC(=O)O.Clc1cccc(Br)c1>>O=C(O)/C=C/c1cccc(Cl)c1  
 7358 C=CC(=O)OC(C)(C)C.COc1ccc2c(C(=O)c3cc(OC)c(OC)c(OC)c3)cn(S(=O)(=O)c3ccc(Br)cc3)c2c1>>  
 COc1ccc2c(C(=O)c3cc(OC)c(OC)c(OC)c3)cn(S(=O)(=O)c3ccc(/C=C/C(=O)OC(C)(C)C)cc3)c2c1  
 7359 C=C(CC(=O)OC)C(=O)OC.Cc1cccc1I>>COC(=O)C/C(=C/c1cccc1C)C(=O)OC  
 7360 C=C1C(=O)O[C@H]2/C=C(C(C)CC/C=C(C)CC[C@H]12.Cc1cc(I)ccc1N>>C/C1=C/[C@H]2OC(  
 =O)/C(=C/c3ccc(N)c(C)c3)[C@H]2CC/C(C)=C/CC1  
 \*CNCCOCCOCCOCCOCCNC(=O)COc1ccc(C(Cc2cc(OC)cc(OC)c2)NC(=O)c2ccc(C=C)cc2)cc1.N#C  
 7361 cccc(I)cc1C#N>>\*CNCCOCCOCCOCCOCCNC(=O)COc1ccc(C(Cc2cc(OC)cc(OC)c2)NC(=O)c2ccc(/  
 C=C/c3ccc(C#N)c(C#N)c3)cc2)cc1  
 C=CC(C)(C)C(=O)NC(C)(C)C(=O)O.COc1cc(C(C)C)c(Cc2ccc(Br)cc2C)cc1[C@H]1O[C@H](COC  
 7362 (C)=O)[C@H](OC(C)=O)[C@H](OC(C)=O)[C@H]1OC(C)=O>>COc1cc(C(C)C)c(Cc2ccc(/C=C/C(  
 C)(C)C(=O)NC(C)(C)C(=O)O)cc2C)cc1[C@H]1O[C@H](COC(C)=O)[C@H](OC(C)=O)[C@H](  
 OC(C)=O)[C@H]1OC(C)=O  
 7363 C=CC(CN(c1cccc1)S(C)(=O)=O)NC(=O)OCc1cccc1>>C=C1c2cccc2N(S(C)(=O)=O)CC1NC(=O)  
 OCc1cccc1  
 7364 C=CC(=O)OC(C)(C)C.CC(C)=CCc1cc(I)ccc1OC(=O)CCc1cccc(F)c1>>CC(C)=CCc1cc(/C=C/C(=O)  
 OC(C)(C)C)ccc1OC(=O)CCc1cccc(F)c1  
 7365 C=CC(=O)O.Cc1c[nH]c2c(Br)cc(F)cc12>>Cc1c[nH]c2c(/C=C/C(=O)O)cc(F)cc12  
 7366 Brc1ccc2c(c1)OCO2.C=Cc1cccc1>>C(=C/c1cccc1)c1ccc2c(c1)OCO2  
 7367 C=CCN1Cc2cc3cccc3nc2C1=O.O=C(O)Cc1ccc(Br)cc1>>O=C(O)Cc1ccc(/C=C/CN2Cc3cc4cccc4nc  
 3C2=O)cc1  
 7368 Brc1ccc(-c2nc3cccc3[nH]2)cc1.C=CC(=O)OCC>>CCOC(=O)/C=C/c1ccc(-c2nc3cccc3[nH]2)cc1  
 7369 C=COCCCC.Cc1ccc(Br)c(C)n1>>C=C(OCCCC)c1ccc(C)nc1C  
 7370 C=Cc1cccc1.CC(C)c1enc(C(C)C)c(Cl)n1>>CC(C)c1enc(C(C)C)c(/C=C/c2cccc2)n1  
 Brc1cccc2cccc12.C=CC[C@H]1CCCN(C)C[C@H](OC(C)=O)[C@H](C)C[C@H](CC(OC)OC)[C@  
 7371 H](O[C@H]2O[C@H](C)[C@H](O[C@H]3C[C@H](C)(O)[C@H](OC(=O)CC)[C@H](C)O3)  
 [C@H](N(C)C)[C@H]2OC(C)=O)[C@H](OC)[C@H](OC(=O)CC)CC(=O)O1>>CCC(=O)O[C@H]  
 1[C@H](C)O[C@H](O[C@H]2[C@H](N(C)C)[C@H](OC(C)=O)[C@H](O[C@H]3[C@H](  
 OC)[C@H](OC(=O)CC)CC(=O)O[C@H](C/C=C/c4cccc5cccc45)CCCN(C)C[C@H](OC(C)=O)[C  
 @H](C)C[C@H]3CC(OC)OC)O[C@H]2C)C[C@H]1(C)O  
 7372 C=Cc1cccc1.O=[N+][O-]c1cccc1Cl>>O=[N+][O-]c1cccc1/C=C/c1cccc1  
 7373 C=CS(=O)(=O)NCC(C)C.COc1ccc(Br)c(CNC(=O)OC(C)(C)C)c1>>COc1ccc(/C=C/S(=O)(=O)NCC(  
 C)C)c(CNC(=O)OC(C)(C)C)c1  
 7374 C=CC(C)c1c(OS(=O)(=O)c2cccc2Br)ccc2cccc12>>C=C1c2cccc2S(=O)(=O)Oc2ccc3cccc3c2C1C  
 7375 C=CC(=O)OC.Cc1cc(C)c(C(=O)n2cc(I)cn2)c(C)c1>>COC(=O)/C=C/c1cnn(C(=O)c2c(C)cc(C)cc2C)c  
 7376 C=Cc1cncn1.Fc1ccc(Cl)cc1>>Fc1ccc(/C=C/c2cncn2)cc1  
 7377 C=CCC(C)C(=O)OCC.O=Cc1ccc(Br)cc1>>CCOC(=O)C(C)C/C=C/c1ccc(C=O)cc1  
 7378 C=C[C@H](O)[C@H](O)COCc1cccc1.c1ccc([I+]c2cccs2)cc1>>O[C@H](/C=C/c1cccs1)[C@  
 H](O)COCc1cccc1  
 7379 Brc1ccc(-c2nc3cccc3n3cccc23)cc1.C=CC(=O)OC>>COC(=O)/C=C/c1ccc(-  
 7380 C=CC(N)=O.FC(F)(F)Oc1cccc1I>>NC(=O)/C=C/c1cccc1OC(F)(F)F  
 7381 C=CC(=O)OC.Ic1ccc(-c2cccs2)s1>>COC(=O)/C=C/c1ccc(-c2cccs2)s1  
 7382 C=CC(=O)OCc1cccc1.CC(C)(C)OC(=O)NCc1cc2cccc2nc1Cl>>CC(C)(C)OC(=O)NCc1cc2cccc2nc  
 1/C=C/C(=O)OCc1cccc1  
 7383 C=Cc1ccc(CN(C)C)cc1.COC(=O)c1cccc1Br>>COC(=O)c1cccc1/C=C/c1ccc(CN(C)C)cc1  
 7384 C=C[C@H](OCc1ccc(OC)cc1)[C@H](CCCC)OC(=O)c1c(C)cccc1Oc1ccc2c(c1I)COC(C)(C)O2>>  
 CCCCC[C@H]1OC(=O)c2c(C)cccc2Oc2ccc3c(c2/C=C/[C@H]1OCc1ccc(OC)cc1)COC(C)(C)O3  
 7385 C=Cc1ccc(Cl)cc1.COc1ccc(I)cc1OC>>COc1ccc(/C=C/c2ccc(Cl)cc2)cc1OC  
 7386 C=CC(=O)OC.CCc1cc2c(C)nc(C)nc2n1Cc1ccc(Br)cc1>>CCc1cc2c(C)nc(C)nc2n1Cc1ccc(/C=C/C(=O)  
 )OC)cc1  
 7387 C=COCCCCO.COc1ccc(Br)cc1>>C=C(OCCCCO)c1ccc(OC)cc1  
 7388 C=Cc1ccc2cccc2c1.COC(=O)C(Cc1cccc1I)C(=O)OC>>COC(=O)C(Cc1cccc1/C=C/c1ccc2cccc2c  
 1)C(=O)OC  
 7389 COC[C@H](/N=C(\c1cccc1)N)C=CCC[C@H]1C(C)C.Ic1cc2cccc2o1>>COC[C@H](/N=C(\  
 c1cccc1)N)C=C(c2cc3cccc3o2)CC[C@H]1C(C)C  
 7390 C=CC[Si](C)(C)C.C[Si](C)(C)I>>C[Si](C)(C)/C=C/C[Si](C)(C)C

7391 Br1ccc(C(=C2C3CCCC2CCC3)c2ccc3c(cnn3C3CCCCO3)c2)cc1.C=CC(=O)OC>>COC(=O)/C=C/c1  
ccc(C(=C2C3CCCC2CCC3)c2ccc3c(cnn3C3CCCCO3)c2)cc1

7392 C=CC(C)O.Cc1cccc(I)c1>>Cc1cccc(/C=C/C(C)O)c1

7393 Br1cnc2[nH]c3ncccc3c2c1.C=CC(=O)N(C)Cc1cc2ccccc2n1C>>CN(Cc1cc2ccccc2n1C)C(=O)/C=C/c  
1cnc2[nH]c3ncccc3c2c1

7394 C=Cc1ccc(C)cc1.CC(=O)c1ccc(Br)cc1>>CC(=O)c1ccc(/C=C/c2ccc(C)cc2)cc1

7395 C=CC(=O)N1CCC(Cc2nnc(C)o2)CC1.Clc1ccc(Br)c(Cn2nccn2)c1>>Cc1nnc(CC2CCN(C(=O)/C=C/c3  
ccc(Cl)cc3Cn3nccn3)CC2)o1

7396 C=CCCCCCCCCCCCC.COC(=O)c1ccc(Br)cc1>>CCCCCCCCCCCCC/C=C/c1ccc(C(=O)OC)cc1

7397 C=CC(=O)OC.Fc1c(F)c(F)c(Br)c(F)c1F>>COC(=O)/C=C/c1c(F)c(F)c(F)c(F)c1F

7398 C=CP(=O)(O)O.FC(F)(F)c1ccc(Br)cc1>>O=P(O)(O)/C=C/c1ccc(C(F)(F)F)cc1

7399 C=CC(C)(C)O.O=c1ccoc2ccc(Br)cc12>>CC(C)(O)/C=C/c1ccc2occc(=O)c2c1  
C=CCN1c2c(Br)cc([N+](=O)[O-]  
7400 )cc2C(=O)N2C1C(C)(C)OC21CCCCC1>>C=C1CN2c3c1cc([N+](=O)[O-]  
7401 )cc3C(=O)N1C2C(C)(C)OC12CCCCC2  
C=Cc1ccc(C)cc1.COC(=O)c1ccc(I)cc1>>COC(=O)c1ccc(/C=C/c2ccc(C)cc2)cc1

7402 C=Cc1cccc1.CCOC(=O)c1ccc(Br)cc1C>>CCOC(=O)c1ccc(/C=C/c2ccccc2)cc1C  
C=CC(=O)OC.CC[C@H]1C[C@H](N(Cc2cc(C(F)(F)F)cc(C(F)(F)F)c2)c2ncc(Br)cn2)CN1C(=O)O  
7403 C(C)(C)C>>CC[C@H]1C[C@H](N(Cc2cc(C(F)(F)F)cc(C(F)(F)F)c2)c2ncc(/C=C/C(=O)OC)cn2)CN  
7404 1C(=O)OC(C)(C)C  
C=C(C)C(=O)OC.COc1cccc1I>>COC(=O)/C(C)=C/c1cccc1OC

7405 C=CCC(=O)OC.COc1c(Br)cc2c3c(cccc13)OC(C)(C)O2>>COC(=O)C/C=C/c1cc2c3c(cccc3c1OC)OC(  
7406 C)C)O2  
C=CS(=O)(=O)F.Oc1ccc(I)cc1>>O=S(=O)(F)/C=C/c1ccc(O)cc1

7407 C=Cc1ccc(C)cc1.O=[N+](O-)]c1ccc(Cl)cc1>>Cc1ccc(/C=C/c2ccc([N+](=O)[O-])cc2)cc1

7408 C=CC(=O)OC.Cc1ccc(-  
7409 c2c(Br)n(CCCO[Si](C)(C)C(C)(C)C)c3nnc(N)c23)cc1>>COC(=O)/C=C/c1c(-  
7410 C=CC(=O)OC(C)(C)C.CCOC(=O)c1sc(Br)cc1C>>CCOC(=O)c1sc(/C=C/C(=O)OC(C)(C)C)cc1C  
7411 C=Cc1ccc2ccccc2c1.Cc1cccc1Br>>Cc1cccc1/C=C/c1ccc2ccccc2c1  
7412 C=Cc1cccc1OCc1cc(OC)ccc1Br>>COc1ccc2c(c1)COc1cccc1/C=C\2  
7413 Br1ccc2c(c1)OCO2.C=CC1OCCO1>>C(=C/C1OCCO1)\c1ccc2c(c1)OCO2  
7414 C=Cc1ccc(C)nc1.CC(C)c1oc2cc3oc(=O)ccc3cc2c1OS(=O)(=O)C(F)(F)F>>Cc1ccc(/C=C/c2c(C(C)C)o  
7415 c3cc4oc(=O)ccc4cc23)cn1  
Br1ccc(-c2cnc3ccccc3n2)cc1.C=CCn1c(-c2ccc(Cl)cc2)nc2ccccc2c1=O>>O=c1c2ccccc2nc(-  
7416 c2ccc(Cl)cc2)n1C/C=C/c1ccc(-c2cnc3ccccc3n2)cc1  
C=CCNS(=O)(=O)c1ccc(C)cc1.Fc1ccc(I)cc1>>Cc1ccc(S(=O)(=O)NC/C=C/c2ccc(F)cc2)cc1

7417 C=CC(=O)OCC.Clc1cccs1>>CCOC(=O)/C=C/c1cccs1  
C=CC(=O)OC.COc1c(O)cc(-c2ccc(Br)cc2)cc1C12CC3CC(CC(C3)C1)C2>>COC(=O)/C=C/c1ccc(-  
7418 c2cc(O)c(OC)c(C34CC5CC(CC(C5)C3)C4)c2)cc1  
C=CC(=O)OC.CC(=O)OCc1cc(I)cc(COC(C)=O)c1OC(C)=O>>COC(=O)/C=C/c1cc(COC(C)=O)c(OC  
7419 (C)=O)c(COC(C)=O)c1  
C=CCC(=O)OC(C)(C)C.C[C@H](O)c1cnc2ccc(Br)cc2n1>>C[C@H](O)c1cnc2ccc(/C=C/CC(=O)  
7420 OC(C)(C)C)cc2n1  
C=COCCOC=C.O=Cc1ccc(Br)cc1>>C=COCCOC(=C)c1ccc(C=O)cc1

7421 C=CCn1c(N(c2ccc(Cl)cc2)S(=O)(=O)c2ccc(C)cc2)cc2ccccc21>>Cc1ccc(S(=O)(=O)N2c3ccc(Cl)cc3/  
7422 C=C\N3c2cc2ccccc23)cc1  
C=C1CC(c2ccc(C)cc2)OC1=O.Fc1cccc(I)c1>>Cc1ccc(C2C/C=C\c3cccc(F)c3)C(=O)O2)cc1

7423 Br1cccc2[nH]cc(Cc3ccc4ccccc4c3)c12.C=CC(=O)OC>>COC(=O)/C=C/c1cccc2[nH]cc(Cc3ccc4ccccc  
7424 c4c3)c12  
C=CC(=O)OC.Clc1noc(-c2ccccc2)c1I>>COC(=O)/C=C/c1c(Cl)noc1-c1ccccc1

7425 C=CC(=O)Nc1ccc(OCC)cc1.COc1ccc2c(=O)c(I)cc2c1>>CCOc1ccc(NC(=O)/C=C/c2cc3cc(OC)ccc  
7426 3c2=O)cc1  
C=CC(=O)OCC.CCn1c(-c2ccc(Br)cc2)nc2ccccc21>>CCOC(=O)/C=C/c1ccc(-c2nc3ccccc3n2CC)cc1

7427 C=Cc1ccc(OC)cc1.COc1ccc(Br)c([N+](=O)[O-])c1>>COc1ccc(/C=C/c2ccc(OC)cc2[N+](=O)[O-])cc1

7428 C=CC(OCC)OCC.CCN1c2ccccc2Sc2cc(Br)ccc21>>CCOC/C=C/c1ccc2c(c1)Sc1ccccc1N2CC)OCC

7429 C=CC(N)=O.COc1cc(Br)cc(C)c1N>>COc1cc(/C=C/C(N)=O)cc(C)c1N

7430 C=CC(=O)OCC.Cc1ccc(-c2ccccc2)c(I)c1>>CCOC(=O)/C=C/c1cc(C)ccc1-c1ccccc1

7431 C=CC(C)(C)O.CN(C)C(=O)c1cccc2nc3cccc(Br)c3nc12>>CN(C)C(=O)c1cccc2nc3cccc(/C=C/C(C)(C)  
7432 O)c3nc12  
C=CC(OCC)OCC.CN1c2ccccc2Sc2cc(Br)ccc21>>CCOC/C=C/c1ccc2c(c1)Sc1ccccc1N2C)OCC

7433 C=Cc1cccc(SC)c1.COc1ccc2cc(Br)c(=O)oc2c1>>COc1ccc2cc(/C=C/c3cccc(SC)c3)c(=O)oc2c1



7434 C=C(c1ccccc1)[Si](C)(C)c1ccccc1.Ic1ccccc1>>C[Si](C)(/C(=C/c1ccccc1)c1ccccc1)c1ccccc1  
7435 C=CC(=O)OC.O=S(=O)(c1ccccc1)n1c(I)cc2ccnc21>>COC(=O)/C=C/c1cc2ccnc2n1S(=O)(=O)c1cc  
7436 C=CC(=O)N(C)OC.Nc1ccccc1I>>CON(C)C(=O)/C=C/c1ccccc1N  
7437 C=CC(=O)OC(C)(C)C.O=Cc1c(Br)cccc1OCc1ccccc1>>CC(C)(C)OC(=O)/C=C/c1cccc(OCc2ccccc2)c  
1C=O  
7438 C=CC#N.CC(C)NCCCN1c(Sc2cc3c(cc2I)OCO3)nc2c(N)ncnc21>>CC(C)NCCCN1c(Sc2cc3c(cc2/C=C/  
C#N)OCO3)nc2c(N)ncnc21  
7439 C=CC(C)(CO)OC.O=Cc1c[nH]c2cccc(I)c12>>COC(C)(/C=C/c1cccc2[nH]cc(C=O)c12)CO  
7440 C=Cc1ccccc1.CCOC(=O)[C@H]1[C@@H]2C(Br)=C(C(=O)OC)O[C@H]12>>CCOC(=O)[C@@H]1[  
C@H]2OC(C(=O)OC)=C(/C=C/c3ccccc3)[C@H]21  
7441 C=CC(C)=O.CC(=O)O[IH2](OC(C)=O)c1ccccc1>>CC(=O)/C=C/c1ccccc1  
7442 C=CC(C)=O.CC(C)(C)OC(=O)Nc1csc(Br)c1NC(=O)OC(C)(C)C>>CC(=O)/C=C/c1scc(NC(=O)OC(C)  
(C)C)c1NC(=O)OC(C)(C)C  
7443 C=CC(=O)OC(C)(C)C.N#Cc1ccc(NC=O)c(I)c1>>CC(C)(C)OC(=O)/C=C/c1cc(C#N)ccc1NC=O  
7444 C=CC(=O)OCC.NC(=O)c1cccc(I)c1>>CCOC(=O)/C=C/c1cccc(C(N)=O)c1  
7445 C=CCC(O)c1cc2cc(Br)ccc2nc1Cl>>C=C1CC(O)c2cc3cc(Br)ccc3nc21  
7446 C=CC(=O)OC.CC1(C)N=NC(c2ccccc2)=C1I>>COC(=O)/C=C/C1=C(c2ccccc2)N=NC1(C)C  
7447 C=CC(OCC)OCC.COc1ccc(I)cc1>>CCOC(/C=C/c1ccc(OC)cc1)OCC  
7448 C=CC[C@H]1CC[C@H]2CC(=O)O[C@]12Cl>>C=C1C[C@H]2CC[C@H]3CC(=O)O[C@]23C1  
7449 C=CC(=O)O.Oc1cccc(I)c1>>O=C(O)/C=C/c1cccc(O)c1  
C=CCc1cccc([C@H]2O[C@H](COC(C)=O)[C@@H](OC(C)=O)[C@H](OC(C)=O)[C@@H]2OC(C)  
=O)c1.CNC(=O)c1cc(I)cc(C(=O)NC)c1>>CNC(=O)c1cc(/C=C/Cc2cccc([C@H]3O[C@H](COC(C)=O  
)[C@@H](OC(C)=O)[C@H](OC(C)=O)[C@@H]3OC(C)=O)c2)cc(C(=O)NC)c1  
7451 C=CC(=O)OCCCCC.CN1C(=O)c2ccc(Cl)cc2[C@@](C)(CC#N)[C@H]1c1ccccc1>>CCCCCOC(=O)  
/C=C/c1ccc2c(c1)[C@@](C)(CC#N)[C@@H](c1ccccc1)N(C)C2=O  
7452 C=CS(=O)(=O)NCCCCCCCC.COc1ccc(Br)c(CNC(=O)OC(C)(C)C)c1>>CCCCCCCCNS(=O)(=O)/C  
=C/c1ccc(OC)cc1CNC(=O)OC(C)(C)C  
7453 Brc1cnc2ccccc2c1.C=CC(=O)OC(C)(C)C>>CC(C)(C)OC(=O)/C=C/c1cnc2ccccc2c1  
C=Cc1nc2c(N)ncnc2n1[C@@H]1O[C@H](CO[Si](C)(C)C(C)(C)C)[C@@H](O[Si](C)(C)C(C)(C)C)[  
7454 C@H]1O[Si](C)(C)C(C)(C)C.Clc1ccccc1>>CC(C)(C)[Si](C)(C)OC[C@H]1O[C@@H](n2c(/C=C/c3c  
cccc3)nc3c(N)ncnc32)[C@H](O[Si](C)(C)C(C)(C)C)[C@@H]1O[Si](C)(C)C(C)(C)C  
7455 C=CCOC(C)=O.COc1ccc(I)cc1>>COc1ccc(/C=C/COC(C)=O)cc1  
7456 C=CC(=O)OC.Cc1cc(C(=O)c2ccc3c(c2)C(C)(C)CCC3(C)C)ccc1Br>>COC(=O)/C=C/c1ccc(C(=O)c2c  
cc3c(c2)C(C)(C)CCC3(C)C)cc1C  
7457 C=CC(=O)OCC.Cc1nc(N)nc(N[C@H]2CC[C@H](OCC(N)=O)CC2)c1Br>>CCOC(=O)/C=C/c1c(C  
)nc(N)nc1N[C@H]1CC[C@@H](OCC(N)=O)CC1  
C=CC(=O)OC.CC[C@]12C=CCN3CC[C@@]4(c5cc(Br)c(OC)cc5N(C)[C@H]4[C@@](O)(C(=O)OC  
7458 ))[C@@H]1OC(C)=O)[C@@H]32>>CC[C@]12C=CCN3CC[C@@]4(c5cc(/C=C/C(=O)OC)c(OC)cc5  
N(C)[C@H]4[C@@](O)(C(=O)OC)[C@@H]1OC(C)=O)[C@@H]32  
7459 C=CC(=O)OC.CSc1ccc(Br)cc1>>COC(=O)/C=C/c1ccc(SC)cc1  
C=Cc1nc2c(N)ncnc2n1[C@@H]1O[C@H](CO[Si](C)(C)C(C)(C)C)[C@@H](O[Si](C)(C)C(C)(C)C)[  
7460 C@H]1O[Si](C)(C)C(C)(C)C.O=[N+](O-  
)c1ccc(I)cc1>>CC(C)(C)[Si](C)(C)OC[C@H]1O[C@@H](n2c(/C=C/c3ccc([N+](=O)[O-  
]cc3)nc3c(N)ncnc32)[C@H](O[Si](C)(C)C(C)(C)C)[C@@H]1O[Si](C)(C)C(C)(C)C  
7461 C=Cc1ccccc1.N#Cc1ccc(I)cc1>>N#Cc1ccc(/C=C/c2ccccc2)cc1  
7462 C=Cc1ccccc1.CCOC(=O)C(F)Br>>CCOC(=O)C(F)/C=C/c1ccccc1C  
7463 C=CC(=O)OCC.Ic1c(-c2ccccc2)oc2nc3ccccc3nc12>>CCOC(=O)/C=C/c1c(-  
7464 C=CC(=O)N(C)OC.O=[N+](O-)]c1ccccc(I)c1>>CON(C)C(=O)/C=C/c1cccc([N+](=O)[O-])c1  
7465 C=CC#N.Cc1cc(I)ccn1>>Cc1cc(/C=C/C#N)ccn1  
7466 C=C.O=[N+](O-)]c1cc(Cl)ccc1Br>>C=Cc1ccc(Cl)cc1[N+](=O)[O-]  
C=C[C@@H](C)[C@H]1C/C=C/C(=O)N[C@H](Cc2ccc(OC)c(Cl)c2)C(=O)NCC(C)(C)C(=O)O[C  
7467 @H](CC(C)C)C(=O)O1.Ic1ccccc1>>COc1ccc(C[C@H]2NC(=O)/C=C/C[C@@H]([C@H](C)/C=C/  
c3ccccc3)OC(=O)[C@H](CC(C)C)OC(=O)C(C)(C)CNC2=O)cc1Cl  
7468 C=CC(=O)OCCCC.CC(=O)Nc1ccc2c(Br)nn(C)c2e1>>CCCCOC(=O)/C=C/c1nn(C)c2cc(NC(C)=O)cc  
7469 C=CC(=O)OCC.Nc1ccc(I)cc1>>CCOC(=O)/C=C/c1ccc(N)cc1  
7470 C=CCCO.CC(C)(C)c1ccccc1OS(=O)(=O)C(F)(F)F>>C=C(CCO)c1ccccc1C(C)(C)C  
7471 C=CC(=O)OC.FC(F)(F)CCCOc1ccc(C(F)(F)Oc2ccc(Br)cc2)cc1>>COC(=O)/C=C/c1ccc(OC(F)(F)c2c  
cc(OC(C)(F)(F)F)cc2)cc1  
7472 C=CP(=O)(O)O.N#Cc1ccc(Br)cc1>>N#Cc1ccc(/C=C/P(=O)(O)O)cc1  
7473 C=CC#N.Cc1cc(I)cc(C)n1>>Cc1cc(/C=C/C#N)cc(C)n1

7474 C=CC(=O)OC(C)(C)C.COc1ccc(S(=O)(=O)c2ccc3cc(Br)ccc3n2)cc1>>COc1ccc(S(=O)(=O)c2ccc3cc(/  
C=C/C(=O)OC(C)(C)C)ccc3n2)cc1  
7475 CC(=O)O[C@H]1CCC2C3C(CC[C@@]21C)c1ccc(O)cc1C[C@H]3Sc1ccc(Br)cc1.[C]C(=O)C=C>>[  
C]C(=O)/C=C/c1ccc(S[C@@H]2Cc3cc(O)ccc3C3CC[C@@]4(C)C(CC[C@@H]4OC(C)=O)C32)cc1  
7476 C=Cc1ccc(F)cc1.CC(C)(C)Cn1c(N)nc2ccc(Cl)nc21>>CC(C)(C)Cn1c(N)nc2ccc(/C=C/c3ccc(F)cc3)nc2  
7477 C=Cc1cccc1.N#Cc1ccc(/C=C/c2ccc(I)cc2)cc1>>N#Cc1ccc(/C=C/c2ccc(/C=C/c3ccccc3)cc2)cc1  
7478 C=CC(=O)OCC.Fc1ccc(Br)c(OCc2ccccc2)c1>>CCOC(=O)/C=C/c1cccc1COc1cc(F)ccc1Br  
7479 C=CC(=O)OC(C)(C)C.COC(=O)[C@H]1c2c(Br)ccc(OC)c2O[C@@H]1c1ccc(OC)c(OC)c1>>COC(=O)[C@H]1c2c(/C=C/C(=O)OC(C)(C)C)ccc(OC)c2O[C@@H]1c1ccc(OC)c(OC)c1  
7480 C=CC1CC(OC)=CC(=O)O1.COc1ccc(I)cc1>>COC1=CC(=O)OC(/C=C/c2ccc(OC)cc2)C1  
7481 C=CC(=O)OC.COC(=O)c1cccc2c1oc1ccc(-c3esc(-c4cccc(I)c4)n3)cc12>>COC(=O)/C=C/c1cccc(-  
c2nc(-c3ccc4oc5c(C(=O)OC)cccc5c4c3)es2)c1  
7482 C=Cc1cc(C)ccc1C.CCCCc1ccc(/C=C/c2ccc(I)cc2)cc1>>CCCCc1ccc(/C=C/c2ccc(/C=C/c3cc(C)ccc3C)  
cc2)cc1  
7483 C=CCNS(=O)(=O)c1ccc(C)cc1.COc1ccc(I)cc1>>COc1ccc(/C=C/CNS(=O)(=O)c2ccc(C)cc2)cc1  
7484 C=CCc1ccc(OCCNC(=O)OC(C)(C)c(OC)c1.O=C(O)/C=C/c1ccccc1Br>>COc1cc(C/C=C/c2ccccc2/  
C=C/C(=O)O)ccc1OCCNC(=O)OC(C)(C)C  
7485 C=COCCCC.O=c1cc(Br)c2ccc(F)cc2[nH]1>>CCCCO/C=C/c1cc(=O)[nH]c2cc(F)ccc12  
7486 C=CC(C)(C)C.Cc1c(Br)c(=O)oc2cc(N)ccc12>>Cc1c(/C=C/C(C)(C)C)c(=O)oc2cc(N)ccc12  
7487 C=C(C)c1cccc1.Cc1cc(C)cc(I)c1>>C/C(=C)c1cc(C)cc(C)c1c1cccc1  
7488 Br1ccccc1.C=C1C(=O)O[C@H]2C[C@@]3(C)CCCC(=C)[C@H]3C[C@H]12>>C=C1CCC[C@  
]2(C)C[C@H]3OC(=O)/C(=C/c4ccccc4)[C@H]3C[C@@H]12  
7489 C=CC(OCC)OCC.O=Cc1cc(Cl)ccc1Br>>CCOC(/C=C/c1ccc(Cl)cc1C=O)OCC  
7490 Br1ccccc1I.C=C1C(=O)O[C@H]2[C@H]1CC/C(C)=C/CC[C@@]1(C)O[C@H]21>>C/C1=C\CC[  
C@@]2(C)O[C@H]2[C@H]2OC(=O)/C(=C/c3ccccc3Br)[C@@H]2CC1  
7491 C=CCP(=O)(OCC)OCC.Cl1ccc(I)c1>>CCOP(=O)(C/C=C/c1cccc(Cl)c1)OCC  
7492 C=CC[C@H]1C(=O)N(c2ccccc2)[C@@H]1c1ccc(OC)cc1.OCc1ccc(Br)cc1>>COc1ccc([C@@H]2[C  
@@H]1(C/C=C/c3ccc(CO)cc3)C(=O)N2c2ccccc2)cc1  
7493 C=CC(=O)N1CCOCC1.Cn1c2ccccc2c2nc3ccc(Cl)cc3c3ccccc1c32>>Cn1c2ccccc2c2nc3ccc(/C=C/C(=  
O)N4CCOCC4)ccc3c3ccccc1c32  
7494 C=CC(=O)OC.[2H]C(=O)c1c(F)cc(Br)cc1F>>[2H]C(=O)c1c(F)cc(/C=C/C(=O)OC)cc1F  
7495 C=Cc1cccc1.COCOc1ccc(/C=C/c2ccc(I)cc2)cc1>>COCOc1ccc(/C=C/c2ccc(/C=C/c3ccccc3)cc2)cc1  
7496 C=CCOC(C)=O.Cl1ccc(I)c1>>CC(=O)OC/C=C/c1ccc(Cl)c1  
7497 C=CCOc1ccc(Cl)cc1.COc1ccc(I)cc1>>COc1ccc(/C=C/COCc2ccc(Cl)cc2)cc1  
7498 C=Cc1ccc2ccccc2n1.CN1C(=O)CC[C@]2(C)c3ccc(Br)cc3CC[C@@H]12>>CN1C(=O)CC[C@]2(C)c  
3ccc(/C=C/C4ccc5ccccc5n4)cc3CC[C@@H]12  
7499 Br1ccc2[nH]ccc2c1.C=CS(=O)(=O)c1cccc1>>O=S(=O)(/C=C/c1ccc2[nH]ccc2c1)c1cccc1  
7500 C=CC(=O)OC(C)(C)C.FC(F)(F)c1cc(Br)ccc1Cl>>CC(C)(C)OC(=O)/C=C/c1ccc(Cl)c(C(F)(F)F)c1  
7501 C=CCC(C(=O)OC)(C(=O)OC)C(c1cc(OC)c(OC)c(OC)c1)c1cc2c(cc1Br)OCO2>>C=C1CC(C(=O)OC)  
(C(=O)OC)C(c2cc(OC)c(OC)c(OC)c2)c2cc3c(cc21)OCO3  
C=CB1OC(=O)CN(C)CC(=O)O1.Cc1nn(C)c(=O)c(-  
7502 c2c(F)ccc(Cl)c2Br)c1OC(=O)C(C)C>>Cc1nn(C)c(=O)c(-  
c2c(F)ccc(Cl)c2/C=C/B2OC(=O)CN(C)CC(=O)O2)c1OC(=O)C(C)C  
C=Cc1ccc(C(=O)N[C@@H](CCSC)C(=O)OC)c(-  
7503 c2ccccc2C)c1.OC(c1cccc1)(c1cccc1)c1cnc1Br>>COC(=O)[C@H](CCSC)NC(=O)c1ccc(/C=C/c2c  
nccc2C(O)(c2ccccc2)c2ccccc2)cc1-c1cccc1C  
7504 C=Cc1cccc1.CC(Cl)c1cccc1>>CC(/C=C/c1cccc1)c1cccc1  
7505 C=CCNC(=O)OC(C)(C)C.CC(=O)c1cccc1I>>C=C(CNC(=O)OC(C)(C)C)c1cccc1C(C)=O  
7506 C=CC(=O)OCCCC.COc1cc([N+](=O)[O-])ccc1Br>>CCCCOC(=O)/C=C/c1ccc([N+](=O)[O-])cc1OC  
7507 C=Cc1ccc(/C=C/c2cccn2C)cc1.O=Cc1ccc(Br)cc1>>Cn1cccc1/C=C/c1ccc(/C=C/c2ccc(C=O)cc2)cc1  
C=CC(C)(C)C(=O)NC(C)(C)CO.CC(=O)OC[C@H]1O[C@@H](c2cc(Cc3ccc(Br)cc3C(C)C)c(C)cc2C  
) [C@H](OC(C)=O)[C@@H](OC(C)=O)[C@@H]1OC(C)=O>>CC(=O)OC[C@H]1O[C@@H](c2cc(  
Cc3ccc(/C=C/C(C)(C)C(=O)NC(C)(C)CO)cc3C(C)C)c(C)cc2C)[C@H](OC(C)=O)[C@@H](OC(C)=  
O)[C@@H]1OC(C)=O  
7509 C=CC(=O)OC(C)(C)C.O=Cc1cccc1Br>>CC(C)(C)OC(=O)/C=C/c1cccc1C=O  
7510 C=CC(=O)OC.FC(F)C(F)(F)Cn1nn(-c2ccccc2)c1I>>COC(=O)/C=C/c1c(-  
7511 C=CC(=O)OC.Nc1ccc(Br)cc1[N+](=O)[O-]>>COC(=O)/C=C/c1ccc(N)c([N+](=O)[O-])c1  
7512 C=CP(=O)(OCC)OCC.COC(=O)C1Cc2c(Br)cccc2CN1C(=O)OC>>CCOP(=O)(/C=C/c1cccc2c1CC(C(  
=O)OC)N(C(=O)OC)C2)OCC  
7513 C=Cc1cc(OC)c(OC)c(OC)c1-  
c1ccc(C(C)(C)C)cc1.COc1ccc(I)cc1>>COc1ccc(/C=C/c2cc(OC)c(OC)c(OC)c2-

7514 C=CNC(C)=O.Cc1ccc(Br)cc1>>C=C(NC(C)=O)c1ccc(C)cc1  
7515 C=CCOc1cccc1CC.Ic1cccc1>>CCc1cccc1OC/C=C/c1cccc1  
7516 C=CC(=O)OCCCC.Oc1ccc(I)cc1>>CCCCOC(=O)/C=C/c1ccc(O)cc1  
7517 C=Cc1ccc(C)cc1.COc1cc(C=O)c(Br)c(OC)c1OC>>COc1cc(C=O)c(/C=C/c2ccc(C)cc2)c(OC)c1OC  
C=Cc1ccc(OC)c(OC)c1.CC(=O)OC[C@H]1O[C@@H](Oc2ccc(I)cc2)[C@H](OC(C)=O)[C@@H](O  
7518 C(C)=O)[C@@H]1OC(C)=O>>COc1ccc(/C=C/c2ccc(O[C@@H]3O[C@H](COC(C)=O)[C@@H](O  
C(C)=O)[C@H](OC(C)=O)[C@H]3OC(C)=O)cc2)cc1OC  
7519 C=CCCCCCC.O=S(=O)(Oc1cccc2ccccc12)C(F)(F)F>>C=C(CCCCCC)c1cccc2ccccc12  
7520 C=C.CC(C)(C)OC(=O)n1c(CCl)cc2ccccc21>>C=CCc1cc2ccccc2n1C(=O)OC(C)(C)C  
7521 C=Cc1ccc(OC)cc1OC.CCOC(=O)C(C)(C)Br>>CCOC(=O)C(C)(C)/C=C/c1ccc(OC)cc1OC  
7522 C=CC(N)=O.Clc1nccc2occc12>>NC(=O)/C=C/c1nccc2occc12  
7523 C=CC(=O)OCC(CC)CCCC.COc1ccc(I)cc1>>CCCC(CC)COC(=O)/C=C/c1ccc(OC)cc1  
7524 C=Cc1ccncc1.COc1cccc1CNc1ccc2cc(Br)ccc2n1>>COc1cccc1CNc1ccc2cc(/C=C/c3ccncc3)ccc2n1  
7525 Brc1cccc1.C=C(CC(=O)OC)C(=O)OC>>COC(=O)C/C=C/c1cccc1C(=O)OC  
7526 C=CC1CCCCC1.OCc1ccc(I)cc1>>OCc1ccc(/C=C/C2CCCCC2)cc1  
7527 C=Cc1cccc1.COc1ccc(-c2oc3ccccc3c(=O)c2Br)cc1OC>>COc1ccc(-  
c2oc3ccccc3c(=O)c2/C=C/c2ccccc2)cc1OC  
7528 C=CC(=O)OC.C[C@H]1C[C@@H](n2c(Nc3ccc(OC(F)(F)F)cc3)nc3cc(Br)ccc32)CC(C)(C)C1>>COC  
(=O)/C=C/c1ccc2c(c1)nc(Nc1ccc(OC(F)(F)F)cc1)n2[C@@H]1C[C@H](C)CC(C)(C)C1  
7529 C=Cc1cccc1.CCOC(=O)c1cc(=O)c2cc(Br)ccc2o1>>CCOC(=O)c1cc(=O)c2cc(/C=C/c3ccccc3)ccc2o1  
7530 C=CC(=O)OC.CC(C)(C)OC(=O)N1Cc2ccc(Br)cc2C1>>COC(=O)/C=C/c1ccc2c(c1)CN(C(=O)OC(C)(  
C)C)C2  
7531 C=CC(C)=O.[13CH3]C1=C(OS(=O)(=O)C(F)(F)F)C([13CH3])([13CH3])CCC1>>CC(=O)/C=C/C1=C  
([13CH3])CCCC1([13CH3])[13CH3]  
7532 C=C(C)C(C)=O.Oc1cccc1I>>CC(=O)/C(C)=C/c1cccc1O  
7533 C=Cc1ccc2ccc(Cl)cc2n1.CC(C)(O)c1cccc1CC[C@@H](SCC1(CC(=O)O)CC1)c1ccc(Br)c1>>CC(C  
)(O)c1cccc1CC[C@@H](SCC1(CC(=O)O)CC1)c1cccc(/C=C/c2ccc3ccc(Cl)cc3n2)c1  
7534 C=Cc1cccc1.Ic1ccc2[nH]c3ccccc3e2c1>>C(=C/c1ccc2[nH]c3ccccc3e2c1)\c1cccc1  
7535 C=CC(=O)OC(C)(C)C.CCCc1ccc(Br)cc1>>CCCc1ccc(/C=C/C(=O)OC(C)(C)C)cc1  
7536 C=CCN(Cc1cc2ccccc2nc1Cl)c1ccc(OC)cc1>>C=C1CN(c2ccc(OC)cc2)Cc2cc3ccccc3nc21  
7537 C=Cc1ccc(O)cc1.Nc1cccc1Br>>Nc1cccc1/C=C/c1ccc(O)cc1  
7538 Brc1cccc1I.C=Cc1cccc1>>Brc1cccc1/C=C/c1cccc1  
7539 C=CCOCc1nnn(Cc2ccc(OC)cc2)c1I>>C=C1COCc2nnn(Cc3ccc(OC)cc3)c21  
7540 C=Cc1cccc1.COc1ccc(/C=C/c2ccc(I)cc2)cc1>>COc1ccc(/C=C/c2ccc(/C=C/c3ccccc3)cc2)cc1  
7541 C=Cc1cc(OC)cc(OC)c1.Nc1ccc(I)cc1>>COc1cc(/C=C/c2ccc(N)cc2)cc(OC)c1  
7542 C=CCOCc1nnn(Cc2ccsc2)c1I>>C=C1COCc2nnn(Cc3ccsc3)c21  
7543 C=CCNC(=O)C(F)(F)F.CC(C)CN(C=Nc1nc(=O)n([C@H]2C[C@H](O)[C@@H](CO)O2)cc1I)CC(C)  
C>>CC(C)CN(C=Nc1nc(=O)n([C@H]2C[C@H](O)[C@@H](CO)O2)cc1/C=C/CNC(=O)C(F)(F)F)C  
7544 C=CC(=O)C(O[Si](CC)(CC)CC)c1c(OC)ccc(OC)c1OCc1cccc1.COc1cccc(I)c1OCc1cccc1>>CC[Si]  
(CC)(CC)OC(C(=O)/C=C/c1cccc(OC)c1OCc1cccc1)c1c(OC)ccc(OC)c1OCc1cccc1  
7545 C=Cc1ccc(OC)cc1.CC(C)(C)C(=O)Nc1nc(NC(=O)C(C)(C)C)c2cc(Br)nc2n1>>COc1ccc(/C=C/c2enc  
3nc(NC(=O)C(C)(C)C)nc(NC(=O)C(C)(C)C)c3c2)cc1  
7546 C=CC#N.Cn1c(=O)oc2cc(Br)nc21>>Cn1c(=O)oc2cc(/C=C/C#N)nc21  
7547 C=CN1CCCCC1=O.O=S(=O)(Oc1ccc2ccccc2c1Br)C(F)(F)F>>C=C(c1ccc2ccccc2c1Br)N1CCCCC  
7548 C=CC(=O)OC(C)(C)C.Oc1ccc(C=C2CCCCC2)c2ccc(Br)cc2)cc1>>CC(C)(C)OC(=O)/C=C/c1ccc(C(  
=C2CCCCC2)c2ccc(O)cc2)cc1  
7549 C=CC(=O)OC.CC(C)Cn1c(=O)n(C)c(=O)c2c(Br)c(Cc3ccccc3C(F)(F)F)sc21>>COC(=O)/C=C/c1c(Cc  
2ccccc2C(F)(F)F)sc2c1c(=O)n(C)c(=O)n2CC(C)C  
7550 C=CC(=O)OCC.COc1ccc(-c2oc3ccc(OC)ccc3c(=O)c2I)cc1>>CCOC(=O)/C=C/c1c(-  
c2ccc(OC)cc2)oc2cc(OC)ccc2c1=O  
7551 C=Cc1ccc(OC)cc1.Cc1ccc(OC(=O)C(C)(C)Br)cc1>>COc1ccc(/C=C/C(C)(C)C(=O)Oc2ccc(C)cc2)cc1  
7552 Brc1cccc2ccccc12.C=CC(=O)C(C)CC(=O)OC>>COC(=O)CC(C)C(=O)/C=C/c1cccc2ccccc12  
7553 Brc1cccc1.C=Cc1ccc2ccccc2c1>>C(=C/c1ccc2ccccc2c1)\c1cccc1  
7554 C=Cc1cccc1[N+](=O)[O-]  
.O=C1C(O)=C(I)C(=O)c2ccccc21>>O=C1C(O)=C(/C=C/c2ccccc2[N+](=O)[O-])C(=O)c2ccccc21  
7555 C=Cc1cccc1.CC(=O)Oc1ccc(I)cc1>>CC(=O)Oc1ccc(/C=C/c2ccccc2)cc1  
7556 C=CC(=O)OC.COC(=O)c1ccc(C(F)(F)F)nc1Br>>COC(=O)/C=C/c1nc(C(F)(F)F)ccc1C(=O)OC  
7557 C=CC(=O)NC(C)C.Cc1cc(C)c(Br)c(C)c1>>Cc1cc(C)c(/C=C/C(=O)NC(C)C)c(C)c1  
7558 C=CC(=O)OCCCC.CC(C)(C)c1ccc(Br)cc1>>CCCCOC(=O)/C=C/c1ccc(C(C)(C)C)cc1

C=CC(=O)OC.O=C1CN=C(c2ccccc2)c2cccc(Br)cc2N1>>COC(=O)/C=C/c1ccc2c(c1)NC(=O)CN=C2c1ccccc1

C=CC(=O)NCc1ccccc1.COc1ccc2oc(-c3ccccc3)c(I)c(=O)c2cc1OC>>COc1ccc2oc(-c3ccccc3)c(/C=C/C(=O)NCc3ccccc3)c(=O)c2cc1OC

C=CC(=O)OC(C)(C)C.O=C1Ne2nccc(Br)cc2CN1CCN1CCOCC1>>CC(C)(C)OC(=O)/C=C/c1enc2c(c1)CN(CCN1CCOCC1)C(=O)N2

O=C(/C=C/Oc1ccccc1-c1ccccc1Br)OCc1ccccc1>>O=C(/C=C1/Oe2ccccc2-c2ccccc21)OCc1ccccc1

C=CC(=O)OC(C)(C)C.FC(F)Oc1ccc(Br)cn1>>CC(C)(C)OC(=O)/C=C/c1ccc(OC(F)F)nc1

C=CC(=O)OCCCC.Cc1ccc([N+](=O)[O-])ccc1Cl>>CCCCOC(=O)/C=C/c1ccc([N+](=O)[O-])cc1CBrclccccc1.C=CS(=O)CC>>CCS(=O)/C=C/c1ccccc1

C=CC(=O)OCC.COc1cccc([IH2])(OC(C)=O)OC(C)=O)c1>>CCOC(=O)/C=C/c1cccc(OC)c1

C=CCN(C(=O)C(C)C)[C@H](C)c1cc(F)cc(F)c1.O=C1Ne2ncccc2[C@]12Cc1ccc(Br)cc1C2>>CC(C)C(=O)N(C/C=C/c1ccc2c(c1)C[C@@]1(C2)C(=O)Ne2ncccc21)[C@H](C)c1cc(F)cc(F)c1

C=Cc1cccc(C)c1.COCC(=O)c1ccccc1I>>COC(=O)c1ccccc1/C=C/c1cccc(C)c1

C=CC(=O)O.N[C@@H](Cc1c[nH]c2c(I)cccc12)C(=O)O>>N[C@@H](Cc1c[nH]c2c(/C=C/C(=O)O)c ccc12)C(=O)O

C=CC(=O)OC.COc1nc(Br)c(-c2ccccc2)n(Cc2ccccc2)c1=O>>COC(=O)/C=C/c1nc(OC)c(=O)n(Cc2ccccc2)c1-c1ccccc1Brclccc2ncccc2c1.C=CC[C@H]1CCCN(C)C[C@H](OC(C)=O)[C@H](C)C[C@H](CC(OC)OC)[C@H](O[C@@H]2O[C@H](C)[C@H](O[C@H]3C[C@@](C)(O)[C@@H](OC(=O)CC)[C@H](C)O3)[C@H](N(C)C)[C@H]2OC(C)=O)[C@@H](OC)[C@H](OC(=O)CC)CC(=O)O1>>CCC(=O)O[C@H]1[C@H](C)O[C@@H](O[C@H]2[C@H](N(C)C)[C@@H](OC(C)=O)[C@H](O[C@@H]3[C@H](OC)[C@H](OC(=O)CC)CC(=O)O[C@@H](C/C=C/c4ccc5ncccc5c4)CCCN(C)C[C@H](OC(C)=O)[C@H]1C/C=C/c4ccc5ncccc5c4)

C=CC(=O)OC.CC=CCn1cc(I)c(=O)[nH]c1=O>>CC=CCn1cc(/C=C/C(=O)OC)c(=O)[nH]c1=O

C=CC(=O)OC.CC(C)n1enc2c(Nc3ccc(Br)cc3)nc(N3CCOCC3)nc21>>COC(=O)/C=C/c1ccc(Nc2nc(N3CCOCC3)nc3c2nen3C(C)C)cc1

C=Cc1ccccc1.O=C(/C=C/c1c[nH]c2ccc(Cl)cc12)c1ccc(I)cc1>>O=C(/C=C/c1c[nH]c2ccc(Cl)cc12)c1ccc(/C=C/C/e2ccccc2)cc1

C=CC(C)=O.O=C1Cc2c([nH]c3ccc(C(F)(F)F)cc23)-c2cc(I)ccc2N1>>CC(=O)/C=C/c1ccc2c(c1)-c1[nH]c3ccc(C(F)(F)F)cc3c1CC(=O)N2

C=Cc1ccccc1.O=c1ccc2cc(OCc3ccccc3)c(Br)cc12>>O=c1ccc2cc(OCc3ccccc3)c(/C=C/c3ccccc3)cc

C=Cc1ccc(Cl)cc1.Ic1cces1>>Cle1ccc(/C=C/e2cccs2)cc1

C=C[C@@H](O[Si](C)(C)C(C)(C)C)[C@H](C)[C@@H](C/C(I)=C/CO)O[Si](C)(C)C(C)(C)C>>C=C1/C=(C\CO)C[C@@H](O[Si](C)(C)C(C)(C)C)[C@@H](C)[C@@H]1O[Si](C)(C)C(C)(C)C

Cc1ccc(I)cc1.NC(=O)/C=C/c1ccccc1>>Cc1ccc(/C=C\C(N)=O)e2ccccc2)cc1

Brc1ccc2ccccc2c1.C=COC(CC)CCCC>>C=C(OC(CC)CCCC)c1ccc2ccccc2c1

C=CC(C)(O)CCC=C(C)C.Fc1ccc(Br)cc1>>CC(C)=CCCC(C)(O)/C=C/c1ccc(F)cc1

C=Cc1cc(OC(C)=O)cc(OC(C)=O)c1.CC(=O)Oc1ccc(Br)cc1>>CC(=O)Oc1ccc(/C=C/c2cc(OC(C)=O)c(OC(C)=O)c2)cc1

C=Cc1cccc([N+](=O)[O-])c1.CC(=O)Nc1ccc(Br)cn1>>CC(=O)Nc1ccc(/C=C/c2cccc([N+](=O)[O-C=CC(=O)OC.COc1c(CN(C(=O)e2ccccc2)e2cccc(Br)c2)ccc2c1OC(C)(C)[C@@H](O)[C@H]2O>>C OC(=O)/C=C/c1cccc(N(Cc2ccc3c(e2OC)OC(C)(C)[C@@H](O)[C@H]3O)C(=O)e2ccccc2)c1

C=CCOCc1ccc2ccccc2c1Br>>C=C1CCOCc2ccc3ccccc3e21

C=CCP(=O)(OCCCC)OCCCC.Ic1ccccc1>>CCCCOP(=O)(C/C=C/c1ccccc1)OCCCC

C=CS(=O)(=O)NC1CCCC1.Cc1ccc(CNC(=O)OC(C)(C)C)c(Br)c1>>Cc1ccc(CNC(=O)OC(C)(C)C)c(/ C=C/S(=O)(=O)NC2CCCC2)c1

Brc1ccccc1.C=CC(=O)CCCC>>CCCCCC(=O)/C=C/c1ccccc1

C=Cc1cn(COCC[Si](C)(C)C)nc1-

c1nc2ccc(OC)cc2n1COCC[Si](C)(C)C.COc1encc(Br)c1>>COc1encc(/C=C/c2cn(COCC[Si](C)(C)C)nc2-c2nc3ccc(OC)cc3n2COCC[Si](C)(C)C)c1

C=CCNC(=O)OC(C)(C)C.COc1ccc(Br)c(C=O)c1O>>COc1ccc(/C=C/CNC(=O)OC(C)(C)C)c(C=O)c1

C=CC(=O)OC.CCc1ccc(Br)cc1>>CCc1ccc(/C=C/C(=O)OC)cc1

C=Cc1cccc1.CCOC(=O)C1(C(C)=O)CCC(I)=C1C>>CCOC(=O)C1(C(C)=O)CCC(/C=C/c2ccccc2)=C=Cc1ccc2c(c1)C(CCCCCCCC)(CCCCCCC)c1cc(/C=C/c3ccc(N(c4ccccc4)c4ccccc4)cc3)ccc1-2.CCCCCCCCC1(CCCCCCCC)c2cc(Br)ccc2-

c2ccc(C=O)cc21>>CCCCCCCCC1(CCCCCCCC)c2cc(C=O)ccc2-

c2ccc(/C=C/c3ccc4c(c3)C(CCCCCCCC)(CCCCCCC)c3cc(/C=C/c5ccc(N(c6ccccc6)c6ccccc6)cc5)cc c3-4)cc21

C=Cc1cncnc1.CCNc1ccc(C(c2ccc(Br)cc2)c2ccc(NCC)cc2)cc1>>CCNc1ccc(C(c2ccc(/C=C/c3cenncc3)c2)c2ccc(NCC)cc2)cc1

7595 C=Cc1cccc1.CCCOC(=O)/C=C/c1ccc(Br)cc1Cl>>CCCO(=O)/C=C/c1ccc(/C=C/c2cccc2)cc1Cl

7596 C=CC(=O)OC.CC(C)(C)OC(=O)N1CCN2C(=O)c3c(Br)cccc3OCC2C1>>COC(=O)/C=C/c1cccc2c1C(=O)N1CCN(C(=O)OC(C)(C)C)CC1CO2

7597 BrC1cccc1.C=CCO>>C=C(CO)c1cccn1

7598 \*CN(Cc1cccc1)N=Nc1ccc(I)cc1.C=CC(=O)OC(C)(C)C>>\*CN(Cc1cccc1)N=Nc1ccc(/C=C/C(=O)OC(C)(C)C)cc1

7599 C=CC(=O)OC.O=c1[nH]c(=O)n(CC(O)CO)cc1I>>COC(=O)/C=C/c1cn(CC(O)CO)c(=O)[nH]c1=O

7600 C=Cc1cccn1.CCCCCC(=O)N1CCN(c2ccc(Br)cc2)CC1>>CCCCCCC(=O)N1CCN(c2ccc(/C=C/c3cccn3)cc2)CC1

7601 C=CC(=O)OCC.COnc(=O)c2cccc2c2cc(Br)ccc21>>CCOC(=O)/C=C/c1ccc2c(c1)c1cccc1c(=O)n2

7602 C=CC(=O)OC.CC(C)(C)OC(=O)CCc1ccc(CN(C(=O)C2CCCC2)c2ccc(Br)c2)cc1>>COC(=O)/C=C/c1cccc(N(Cc2ccc(CCC(=O)OC(C)(C)C)cc2)C(=O)C2CCCC2)c1

7603 C=Cc1ccc(OC)cc1.Cc1c(Br)c(=O)c2cccc2n1C>>COc1ccc(/C=C/c2c(C)n(C)c3cccc3c2=O)cc1

7604 C=CC(=O)N(C)OC.COc1ccc(I)cc1>>COc1ccc(/C=C/C(=O)N(C)OC)cc1

7605 C=C(OC(C)=O)C(=O)OCC.COc1ccc(I)cc1>>CCOC(=O)/C=C/c1ccc(OC)cc1OC(C)=O

7606 C=CC(N)=O.COc1ccc(I)cc1>>COc1ccc(/C=C/C(N)=O)cc1

7607 C=C(C)c1cccc1.Clc1ccc(Br)cc1>>C/C=C/c1ccc(Cl)cc1c1cccc1

7608 C=CC(=O)OCC.Cc1cc(C)c(Br)c(C)c1>>CCOC(=O)/C=C/c1c(C)cc(C)cc1C

7609 C=CCN(C(=O)OCc1cccc1)C(=O)OC(C)(C)C.N#Cc1ccc(Br)cc1>>CC(C)(C)OC(=O)N(C/C=C/c1cccc(C#N)cc1)C(=O)OCc1cccc1

7610 C=CC(=O)OC.O=Cc1cc(F)ccc1Br>>COC(=O)/C=C/c1ccc(F)cc1C=O

7611 C=C.Cc1cccc1I>>C=Cc1cccc1C

7612 C=CC(C)=O.COc1cc(Br)c2c3c1O[C@H]1[C@@H](O[Si](C)(C)C(C)(C)C)C=C[C@@H]4[C@@H](C2)N(C)CC[C@@]341>>COc1cc(/C=C/C(C)=O)c2c3c1O[C@H]1[C@@H](O[Si](C)(C)C(C)(C)C)C=C[C@@H]4[C@@H](C2)N(C)CC[C@@]341

7613 C=CC(=O)OC(C)(C)C.CCOC(=O)Cc1cccc1Br>>CCOC(=O)Cc1cccc1/C=C/C(=O)OC(C)(C)C

7614 C=Cc1ccc(C(=O)OC)cc1.CC1(C)c2ccc(Br)cc2C(C)(C)N1O>>COC(=O)c1ccc(/C=C/c2ccc3c(c2)C(C)(C)N([O])C3(C)C)cc1

7615 C=Cc1ccc(C)cc1.O=c1oc2cccc2c(-c2cccc2)c1Br>>Cc1ccc(/C=C/c2c(-c3cccc3)c3cccc3oc2=O)cc1

7616 C=Cc1cccc(O)c1.Oc1cccc(Br)c1>>Oc1cccc(/C=C/c2cccc(O)c2)c1

7617 C=Cc1ccc(C)cc1.Cc1ccc(S(=O)(=O)Oc2ccc3c(Br)ccnc23)cc1>>Cc1ccc(/C=C/c2ccnc3c(OS(=O)(=O)c4ccc(C)cc4)cccc23)cc1

7618 C=CCN1C(=O)c2cccc2C1=O.COCCOCOc1ccc(C#N)cc1Br>>COCCOCOc1ccc(C#N)cc1/C=C/CN1C(=O)c2cccc2C1=O

7619 BrC1cnnc1.C=CCO[C@H]1[C@H](C)[C@@H](O[C@@H]2O[C@H](C)C[C@H](N(C)C)[C@H]2O)[C@](C)(OC)C[C@H](C)/C(=N)O[C@H](C)[C@@H](O)[C@](C)(O)[C@@H](CC)OC(=O)[C@@H]1C>>CC[C@H]1OC(=O)[C@H](C)[C@@H](OC/C=C/c2cnnc2)[C@H](C)[C@@H](O[C@@H]2O[C@H](C)C[C@H](N(C)C)[C@H]2O)[C@](C)(OC)C[C@H](C)/C(=N)O[C@H](C)[C@@H](C)[C@@H](C=CC(=O)N(C)Cc1sc2cccc2c1C.CCOC(=O)c1cc2cc(Br)ccnc2[nH]c1=O>>CCOC(=O)c1cc2cc(/C=C/C(=O)N(C)Cc3sc4cccc4c3C)cn2[nH]c1=O

7620 C=CC(=O)OC.O=C(O)c1ccc(Br)s1>>COC(=O)/C=C/c1ccc(C(=O)O)s1

7621 C=C[Si](CC)(CC)CC.O=[N+](O-)[c1cccc1Br>>CC[Si](/C=C/c1cccc1[N+](=O)[O-])(CC)CC

7622 C=CC[C@H](CC/C(I)=C/CO)O[Si](C)(C)C(C)(C)C>>C=C1C[C@@H](O[Si](C)(C)C(C)(C)C)CC/C1=C/CO

7623 C=CCN(C(=O)[C@@H]1CCCN1C)[C@H](C)c1cc(F)cc(F)c1.O=C1Nc2ncccc2[C@]12Cc1ccc(Br)cc1C2>>C[C@H](c1cc(F)cc(F)c1)N(C/C=C/c1ccc2c(c1)C[C@@]1(C2)C(=O)Nc2ncccc21)C(=O)[C@@H]1CCCN1C

7624 C=C[C@@H](Cn1c(Br)c(-c2ccc(C(=O)N[C@@H](COC)c3cccc3)cc2)c2c(N)ncnc21)NC(=O)OC(C)(C)C>>C=C1c2c(-c3ccc(C(=O)N[C@@H](COC)c4cccc4)cc3)c3c(N)ncnc3n2[C@H]1NC(=O)OC(C)(C)C

7625 C=CC(=O)OC.COc1cc(Br)c(N)cc1C>>COC(=O)/C=C/c1cc(OC)c(C)cc1N

7626 C=CC(=O)OC(C)(C)C.Oc1ccc(C(=C2CCCC2)c2ccc(Br)cc2F)cc1>>CC(C)(C)OC(=O)/C=C/c1ccc(C(=C2CCCC2)c2ccc(O)cc2)c(F)c1

7627 C=CC(=O)OC.COc1cc(C)c(Br)cn1>>COC(=O)/C=C/c1nc(OC)cc1C

7628 BrC=Cc1cccc1.C=C>>C=CC=Cc1cccc1

7629 C=CC(OC(C)=O)C(=O)OCC.c1ccc([I+])c2cccc2)cc1>>CCOC(=O)C(/C=C/c1cccc1)OC(C)=O

7630 C=CC(=O)CCCC.COc1ccc(I)cc1>>CCCCC(=O)/C=C/c1ccc(OC)cc1

7631 C=CC(=O)OCC.COc1ccc(Cl)cc1>>CCOC(=O)/C=C/c1ccc(OC)cc1

7632 C=CC(=O)OC.Cc1nc(Br)c2c(c1O)COC(C)(C)OC2>>COC(=O)/C=C/c1nc(C)c(O)c2c1COC(C)(C)OC2

7633 C=CC(=O)N(C)Cc1cccc(OC)c1OCCC.CC1(C)COc2cc(Br)cn2NC1=O>>CCCOc1c(CN(C)C(=O)/C=C/c2cn3c(c2)OCC(C)(C)C(=O)N3)cccc1OC

7634

7635 C=CC(=O)OCCCC.COc1ccc2ccccc2c1Br>>CCCCOC(=O)/C=C/c1c(OC)ccc2ccccc12  
 7636 C=Cc1ccccc1C.Cc1ccc(I)cc1>>Cc1ccc(/C=C/c2ccccc2C)cc1  
 7637 C=C[C@H]1O[C@@H]2OC(C)(C)O[C@@H]2[C@@H]1N(Cc1ccccc1Br)C(=O)OC>>C=C1c2ccccc2CN(C(=O)OC)[C@@H]2[C@@H]1O[C@@H]1OC(C)(C)O[C@@H]12  
 7638 C=CC(=O)NC[C@@H](OC)[C@H](OC)c1ccccc1NC(=O)[C@@H](NC(=O)c1cccc(Br)c1)C(C)C>>C  
 7639 O[C@@H]1CNC(=O)/C=C/c2cccc(c2)C(=O)N[C@@H](C(C)C)C(=O)Nc2ccccc2[C@H]1OC  
 7639 Br1cnc(C2CC2)nc1.C=CC(=O)OCC>>CCOC(=O)/C=C/c1cnc(C2CC2)nc1  
 7640 C=CC(=O)O.O=Cc1ccc(Cl)cc1>>O=Cc1ccc(/C=C/C(=O)O)cc1  
 7641 C=CC(=O)OC.Ic1ncccc1OCc1ccccc1>>COC(=O)/C=C/c1ncccc1OCc1ccccc1  
 7642 C=CC(=O)CC.CC(C)c1cc(C(C)C)c(Br)c(C(C)C)c1>>CCC(=O)/C=C/c1c(C(C)C)cc(C(C)C)cc1C(C)C  
 7643 C=CC(=O)OCCCC.O=C(O)c1ccc(Br)cc1>>CCCCOC(=O)/C=C/c1ccc(C(=O)O)cc1  
 7644 C=C.COc1ccc2cc(Br)ccc2c1[N+](=O)[O-]>>C=Cc1ccc2c([N+](=O)[O-])c(OC)ccc2c1  
 7645 Br1ccc2c(c1)OCCOCCOCCOCCO2.C=CP(=O)(OC(C)C)OC(C)C>>CC(C)OP(=O)/(C=C/c1ccc2c(c1)OCCOCCOCCOCCO2)OC(C)C  
 7646 C=CSelccccc1.Fc1ccc(Br)cc1>>Fc1ccc(/C=C/Sc2ccccc2)cc1  
 7647 C=C/C=C/C(=O)N(CCCC)CCCC.CC(C)(C)c1ccc(Br)cc1>>CCCCN(CCCC)C(=O)/C=C/C=C/c1ccc(C(C)(C)C)cc1  
 7648 C=CCC(C)C.Cc1ccccc1OS(=O)(=O)C(F)(F)F>>C=C(CC(C)C)c1ccccc1C  
 7649 C=CC(=O)OC.Ic1cnc(C2CCCCO2)n1>>COC(=O)/C=C/c1cnc(C2CCCCO2)n1  
 7650 C=CC(=O)OC.COc1ccc2cc(Br)ccc2c1>>C=C(C(=O)OC)c1ccc2cc(OC)ccc2c1  
 7651 C=CCN1C(=O)c2ccccc2C1=O.Clc1ccc(I)cc1>>O=C1c2ccccc2C(=O)N1C/C=C/c1ccc(Cl)cc1  
 7652 C=CCc1c(OCc2ccccc2)ccc2c(=O)ccoc12.Ic1ccccc1>>O=c1ccoc2c(C/C=C/c3ccccc3)c(OCc3ccccc3)cc  
 7653 C=C(C)CC(OC(=C)Br)c1cccc(OC)c1>>C=C1C=C(C)CC(c2cccc(OC)c2)OC1  
 7654 C=C1C(=O)O[C@@H]2CC(C)=C([C@@H](C)CCCOC(C)=O)[C@@H](OC(C)=O)[C@H]12.COc1c  
 7654 cc(I)cc1>>COc1ccc(/C=C2/C(=O)O[C@@H]3CC(C)=C([C@@H](C)CCCOC(C)=O)[C@@H](OC(C)=O)[C@H]23)cc1  
 7655 C=CC(N)=O.N#Cc1c(-c2cccc(Br)c2)cc(-c2ccccc2)nc1N>>N#Cc1c(-c2cccc(/C=C/C(N)=O)c2)cc(-c2ccccc2)nc1N  
 7656 C=CC(=O)OC(C)(C)C.COC(=O)c1ccc(I)cc1OC(C)=O>>COC(=O)c1ccc(/C=C/C(=O)OC(C)(C)C)cc1OC(C)=O  
 7657 Br1ccccc2ccccc12.C=CC(=O)N1CCOCC1>>O=C(/C=C/c1ccccc2ccccc12)N1CCOCC1  
 7658 C=CS(=O)(=O)F.Ic1ccccc2c1oc1ccccc12>>O=S(=O)(F)/C=C/c1ccccc2c1oc1ccccc12  
 7659 C=CC(=O)N1N=Cc2ccccc2C1C1CCCCC1.COc1ccc(Cc2cnc(N)nc2N)cc(I)c1OC>>COc1cc(Cc2cnc(N)nc2N)cc(/C=C/C(=O)N2N=Cc3ccccc3C2C2CCCCC2)c1OC  
 7660 C=COCCCC.CC(=O)c1cccc(Cl)c1>>C=C(OCCCC)c1cccc(C(C)=O)c1  
 7661 C=Cc1ccccc(C(=O)OC)c1.Nc1cccc(I)c1>>COC(=O)c1cccc(/C=C/c2cccc(N)c2)c1  
 7662 C=CCS(=O)(=O)c1ccccc1.c1ccc([I+](c2ccccc2)cc1>>O=S(=O)(C/C=C/c1ccccc1)c1ccccc1  
 7663 Br1ccccc2c3c([nH]c12)C1CCN(CC1)C3.C=Cc1ccc(C)nc1>>Cc1ccc(/C=C/c2cccc3c4c([nH]c23)C2CCN(CC2)C4)cn1  
 7664 C=COC(CC)CCCCC.Ic1ccccc2ccccc12>>C=C(OC(CC)CCCCC)c1ccccc2ccccc12  
 7665 Br1cnc2ccccc2c1.C=CCC(C)C(=O)OCC>>CCOC(=O)C(C)C/C=C/c1cnc2ccccc2c1  
 7666 C=Cc1ccc(N(c2ccc(OC)cc2)c2ccc(OC)cc2)cc1.O=Cc1ccc(Br)cc1>>COc1ccc(N(c2ccc(/C=C/c3ccc(C=O)cc3)cc2)c2ccc(OC)cc2)cc1  
 7667 C=Cc1ccccc1C(=O)OC.COc1nc2ccc(Br)cc2nc1OC>>COC(=O)c1ccccc1/C=C/c1ccc2nc(OC)c(OC)nc2  
 7668 C=SCC.O=C(c1ccccc1)c1ccc(Br)cc1>>CCS/C=C/c1ccc(C(=O)c2ccccc2)cc1  
 7669 C=COCCCC.Fc1ccc(Br)c(F)c1>>C=C(OCCCC)c1ccc(F)cc1F  
 7670 C=Cc1ccccc1.CCOC(=O)c1ccc(I)cc1>>CCOC(=O)c1ccc(/C=C/c2ccccc2)cc1  
 7671 C=CC[C@H]1C[C@@H]([C@@H](O)c2ccc(OC)c(OC)c2)CO[C@@H]1c1ccc(OC)c(OC)c1.COc1ccc(Br)cc1OC>>COc1ccc(/C=C/C[C@H]2C[C@@H]([C@@H](O)c3ccc(OC)c(OC)c3)CO[C@@H]2c2c  
 7671 cc(OC)c(OC)c2)cc1OC  
 7672 C=CC(=O)OCC.COc1cc2oc(C(=O)c3cc(OC)c(OC)c(OC)c3)cc2cc1I>>CCOC(=O)/C=C/c1cc2cc(C(=O)c3cc(OC)c(OC)c(OC)c3)oc2cc1OC  
 7673 C=CC(=O)[C@@]1(O)C[C@H]2CC[C@]1(C)C2(C)C.Cc1ccc(I)cc1>>Cc1ccc(/C=C/C(=O)[C@@]2(O)C[C@H]3CC[C@]2(C)C3(C)C)cc1  
 7674 C=CCCC(=O)O.Ic1ccc2c(c1)OCO2>>O=C(O)CC/C=C/c1ccc2c(c1)OCO2  
 7675 C=Cc1ccc([Si](OCC)(OCC)OCC)cc1.CCOP(=O)(Cc1ccc(/C=C/c2ccc3c(c2)Cc2cc(Br)ccc2-3)cc1)OCC>>CCO[Si](OCC)(OCC)c1ccc(/C=C/c2ccc3c(c2)Cc2cc(/C=C/c4ccc(CP(=O)(OCC)OCC)cc4)ccc2-3)cc1  
 7676 C=Cc1ccccc1.O=Cc1ccc(Br)s1>>O=Cc1ccc(/C=C/c2ccccc2)s1  
 7677 C=CC(C)=O.Cc1cc(C)c(Br)cc1C>>CC(=O)/C=C/c1cc(C)c(C)cc1C

7678 C=Cc1ccc(C)cc1.Cc1ccc(Cl)cc1>>Cc1ccc(/C=C/c2ccc(C)cc2)cc1  
 7679 C=CC1(C)CCC(=O)C1.COC(=O)c1ccccc1/C=C\C=C>>COC(=O)c1ccccc1/C=C\C=C\C=C\C1(C)CC  
 7680 C(=O)C1  
 7681 C=CC(=O)OC(C)(C)C.CC(=O)Nc1ccc(Br)cc1>>CC(=O)Nc1ccc(/C=C/C(=O)OC(C)(C)C)cc1  
 7682 C=C1C(=O)O[C@H]2[C@H]1C[C@@H](O)/C(C)=C/CC[C@@]1(C)O[C@@H]21.COc1cccc(I)c1>>  
 7683 COc1cccc(/C=C2/C(=O)O[C@H]3[C@H]2C[C@@H](O)/C(C)=C/CC[C@@]2(C)O[C@@H]32)c1  
 7684 C=CCN(C(=O)OC(C)(C)C)C(=O)OC(C)(C)C.COC(=O)c1ccc(Br)cc1>>COC(=O)c1ccc(/C=C/CN(C(=O)OC(C)(C)C)C(=O)OC(C)(C)C)cc1  
 7685 C=C[C@H]1CC(C(=O)OC)(C(=O)OC)[C@@H](c2cn(S(=O)(=O)c3ccc(C)cc3)c3ccccc23)N(c2ccccc2  
 7686 I)O1>>C=C1c2ccccc2N2O[C@@H]1CC(C(=O)OC)(C(=O)OC)[C@H]2c1cn(S(=O)(=O)c2ccc(C)cc2)  
 7687 c2ccccc12  
 7688 COC[C@@H](/N=C(\c1ccccc1)N1C=CCC[C@H]1C)C(C)C.Ic1ccccc1>>COC[C@@H](/N=C(\c1ccc  
 7689 cc1)N1C=C(c2ccccc2)CC[C@H]1C)C(C)C  
 7690 C=Cc1ccc(OC)cc1.N#Cc1cc2sc3ccccc3c2c2cc(Br)ccc12>>COc1ccc(/C=C/c2ccc3c(C#N)cc4sc5ccccc5  
 7691 c4c3c2)cc1  
 7692 C=CC(=O)OC.COc1ccc(I)c([N+](=O)[O-])c1>>COC(=O)/C=C/c1ccc(OC)cc1[N+](=O)[O-]  
 7693 C=CC(=O)OC(C)(C)C.Ic1ccc2ccccc2c1>>CC(C)(C)OC(=O)/C=C/c1ccc2ccccc2c1  
 7694 Bre1ccc(-c2ccccc2)nc1.C=CC(=O)OCc1ccccc1>>O=C(/C=C/c1ccc(-c2ccccc2)nc1)OCc1ccccc1  
 7695 C=C1C(=O)O[C@H]2C[C@@]3(C)CCCC(=C)[C@H]3C[C@H]12.COc1ence(Br)c1>>C=C1CC  
 7696 C[C@]2(C)C[C@H]3OC(=O)/C=C/c4cncc(OC)c4)[C@H]3C[C@@H]12  
 7697 C=Cc1ccccc1.Ic1ccc(-c2ccccc2)cc1>>C=C/c1ccc(-c2ccccc2)cc1)\c1ccccc1  
 7698 C=CC(=O)OC(C)(C)C.COC(=O)c1ccccc1Br>>COC(=O)c1ccccc1/C=C/C(=O)OC(C)(C)C  
 7699 C=CCCN(c1ccccc1Br)S(=O)(=O)c1ccccc1>>C=C1CCCN(S(=O)(=O)c2ccccc2)c2ccccc21  
 7700 \*C(=O)C(=C)C.N#Cc1c(O)c(Cl)c(I)c(O)c1C#N>>\*C(=O)/C(C)=C/c1c(O)c(C#N)c(C#N)c(O)c1Cl  
 7701 C=CCC(CCBr)c1ccc2ccccc2c1>>C=C1CCC(c2ccc3ccccc3c2)C1  
 7702 C=CC(=O)OC.CC(C)(C)c1nn(Cc2ccccc2)cc1>>COC(=O)/C=C/c1cn(Cc2ccccc2)nc1C(C)(C)C  
 7703 C=COCCN(C)C.Clc1ccc(Br)cc1>>C=C(OCCN(C)C)c1ccc(Cl)cc1  
 7704 Bre1ccc2ccc3ccccc4ccc1c2c34.C=Cc1nc2c(N(C(=O)c3ccccc3)C(=O)c3ccccc3)ncnc2n1CC(=O)OCC>>  
 7705 CCOC(=O)Cn1c(/C=C/c2ccc3ccc4ccccc5ccc2c3c45)nc2c(N(C(=O)c3ccccc3)C(=O)c3ccccc3)ncnc21  
 7706 CC(=O)/C=C/CC(NS(=O)(=O)c1ccc(C)cc1)c1ccccc1.CCOC(=O)c1ccc(Br)cc1>>CCOC(=O)c1ccc(/C  
 7707 =C\C(C)=O)CC(NS(=O)(=O)c2ccc(C)cc2)c2ccccc2)cc1  
 7708 C=CC(=O)OCC.O=[N+](O-)]c1cc(Cl)ccc1Br>>CCOC(=O)/C=C/c1ccc(Cl)cc1[N+](=O)[O-]  
 7709 C=Cc1ccc([N+](=O)[O-])cc1.[O-][N+](=Nc1ccc(Br)cc1)c1ccccc1>>O=[N+](O-  
 7710 )c1ccc(/C=C/c2ccc(N=[N+](O-)]c3ccccc3)cc2)cc1  
 7711 C=CC(=O)OC.CC(=O)n1cc(I)cn1>>COC(=O)/C=C/c1cnn(C(C)=O)c1  
 7712 CC(=O)/C=C/CC(NS(=O)(=O)c1ccc(C)cc1)c1ccccc1.N#Cc1ccc(Br)cc1>>CC(=O)/C=C/CC(NS(=O)(  
 7713 =O)c1ccc(C)cc1)c1ccccc1)c1ccc(C#N)cc1  
 7714 Bre1ccc2c(c1)Cc1ccccc1-  
 7715 2.C=C[C@@H](CO[Si](C)(C)C(C)C)NC(=O)OCc1ccccc1>>CC(C)(C)[Si](C)(C)OC[C@H](/C=C/  
 7716 c1ccc2c(c1)Cc1ccccc1-2)NC(=O)OCc1ccccc1  
 7717 C=CCOc1ccccc1C(C)(C)C.Ic1ccccc1>>CC(C)(C)c1ccccc1OC/C=C/c1ccccc1  
 7718 C=CC(=O)OCC.CSc1nc(C)c(I)c(NC(C)C)n1>>CCOC(=O)/C=C/c1c(C)nc(SC)nc1NC(C)C  
 7719 C=Cc1ccccc1.O=C(c1ccc(Br)cc1)N1C(=O)c2ccccc2S1(=O)=O>>O=C(c1ccc(/C=C/c2ccccc2)cc1)N1C  
 7720 (=O)c2ccccc2S1(=O)=O  
 7721 C=Cc1ccccc1.CC(C)(C)OC(=O)N[C@H](COc1cc(Br)ccn1)Cc1c[nH]c2ccccc12>>CC(C)(C)OC(=O)N  
 7722 [C@H](COc1ccc(/C=C/c2ccccc2)ccn1)Cc1c[nH]c2ccccc12  
 7723 C=CCCCCCC.Cc1ccc(Cl)cc1>>CCCCC/C=C/c1ccc(C)cc1  
 7724 C=CC(=O)OC(C)(C)C.O=[N+](O-)]c1ccccc1Cl>>CC(C)(C)OC(=O)/C=C/c1ccccc1[N+](=O)[O-]  
 7725 C=COCCCC.O=Cc1ccc(I)cc1>>C=C(OCCCC)c1ccc(C=O)cc1  
 7726 C=CC#N.Cc1cc(Br)cc(C)c1Nc1ccnc(NC2CCN(c3ccccc(C(N)=O)c3)CC2)n1>>Cc1cc(/C=C/C#N)cc(C)  
 7727 c1Nc1ccnc(NC2CCN(c3ccccc(C(N)=O)c3)CC2)n1  
 7728 C=CC(=O)OC(C)(C)C.Clc1ccc(Sc2cn(C3CC3)nc2-c2ccc(Br)cc2)cc1>>CC(C)(C)OC(=O)/C=C/c1ccc(-  
 7729 c2nn(C3CC3)cc2Sc2ccc(Cl)cc2)cc1  
 7730 C=Cc1ccccc1(Nc2nc(Nc3ccc(N4CCOCC4)c(Br)c3)nc2Cl)c1>>Clc1enc2nc1Nc1ccccc1)/C=C\c1ccc(ccc  
 7731 1N1CCOCC1)N2  
 7732 C=Cc1ccccc1O)c1.COc1ccc(Br)cc1>>COc1ccc(/C=C/c2ccccc(O)c2)cc1  
 7733 C=CCC(C)N(C)C(=O)OC(C)(C)C.Cc1ccc(Br)ccn1N>>Cc1cc(/C=C/CC(C)N(C)C(=O)OC(C)(C)C)ccn1  
 7734 C=CC(=O)OCC.O=c1ccc2cc(Br)ccc12>>CCOC(=O)/C=C/c1ccc2c(=O)ccc2c1  
 7735 COC[C@@H](/N=C(\c1ccccc1)N1C=CCC[C@H]1c1ccccc1)C(C)C.Ic1ccccc1>>COC[C@@H](/N=C  
 7736 (\c1ccccc1)N1C=C(c2ccccc2)CC[C@H]1c1ccccc1)C(C)C

7718 C=CC(=O)NCc1ccc(OC)cc1.O=c1c(I)coc2cc(O)ccc12>>COc1ccc(CNC(=O)/C=C/c2coc3cc(O)ccc3c2=O)cc1

7719 C=CC(=O)N(C)C.Oc1ccc2c(c1)CCN(c1ccccc1)C2c1ccc(I)cc1>>CN(C)C(=O)/C=C/c1ccc(C2c3ccc(O)cc3CCN2c2ccccc2)cc1

7720 C=CC(=O)NCO.C[C@]12C[C@@]34C=C(Sc5ccc(I)cc5)C(=O)[C@@](C)(CCC(=O)Nc5c(O)ccc(C(=O)O)c5O)[C@@H]3[C@H](C[C@@H]1C4)O2>>C[C@]12C[C@@]34C=C(Sc5ccc(/C=C/C(=O)NC(O)cc5)C(=O)[C@@](C)(CCC(=O)Nc5c(O)ccc(C(=O)O)c5O)[C@@H]3[C@H](C[C@@H]1C4)O2

7721 C=CCOCc1ccc2cc(OC)ccc2c1Br>>C=C1CCOCc2ccc3cc(OC)ccc3c21

7722 C=CC#N.CC(=O)OC[C@H]1O[C@@H](n2cnc(C(N)=O)c2I)[C@H](OC(C)=O)[C@@H]1OC(C)=O>>CC(=O)OC[C@H]1O[C@@H](n2cnc(C(N)=O)c2/C=C/C#N)[C@H](OC(C)=O)[C@@H]1OC(C)=O

7723 C=CC(=O)OC.Ic1ccccc1N1CC=CC1>>COC(=O)/C=C/c1ccccc1N1CC=CC1

7724 C=C[Si](C)(C)c1ccccc1.O=C(c1ccccc1)c1ccc(Br)cc1>>C[Si](C)(/C=C/c1ccc(C(=O)c2ccccc2)cc1)c1ccccc1

7725 C=CC(=O)OCC.O=C(O)c1ccc(I)c1>>CCOC(=O)/C=C/c1ccc(C(=O)O)c1

7726 C=CC(=O)O.Cc1ccc(S(=O)(=O)Nc2ccccc(I)c2)cc1>>Cc1ccc(S(=O)(=O)Nc2ccccc(/C=C/C(=O)O)c2)cc1

7727 C=CC(=O)OCC.CCc1nc2cc(OC)ccc2c(Oc2ccc(Br)cc2)c1-c1ccc(C(F)(F)F)c1>>CCOC(=O)/C=C/c1ccc(Oc2c(-c3ccccc(C(F)(F)F)c3)c(CC)nc3cc(OC)ccc23)cc1

7728 C=CCC(C)C.CC(C)(C)c1ccc(OS(=O)(=O)C(F)(F)F)cc1>>C=C(CC(C)C)c1ccc(C(C)(C)C)cc1

7729 C=CS(=O)(=O)F.CC(C)[Si](Oc1ccc(I)cc1)(C(C)C)C(C)C>>CC(C)[Si](Oc1ccc(/C=C/S(=O)(=O)F)cc1)(C(C)C)C(C)C

7730 C=CCCC(=O)OCC.CCN(CC)C(=O)Oc1c(Br)cccc1OC>>CCOC(=O)CC/C=C/c1cccc(OC)c1OC(=O)N(CC)CC

7731 C=CC(=O)OC.Cc1ccc(I)c1>>COC(=O)/C=C/c1ccc(C)c1

7732 C=CC(=O)OC.COC1O[C@H](COC(C)=O)[C@@H](OC(C)=O)C=C1I>>COC(=O)/C=C/C1=C[C@H](OC(C)=O)[C@@H](COC(C)=O)OC1OC

7733 C=Cc1ccc(OC)cc1.COC(=O)/C(Br)=C1/CCCO1>>C=C/C(C(=O)OC)=C1/CCCO1)c1ccc(OC)cc1

7734 C=CC(=O)OCC.Cc1oc2ccccc2c(=O)c1Br>>CCOC(=O)/C=C/c1c(C)oc2ccccc2c1=O

7735 C=C(C(=O)OCC)c1ccccc1CS(=O)(=O)c1ccccc1Br>>CCOC(=O)/C1=C/c2ccccc2S(=O)(=O)Cc2ccccc

7736 C=Cc1ccc(OC)c1OC.O=C1C(O)=C(I)C(=O)c2ccccc21>>COc1ccc(/C=C/C2=C(O)C(=O)c3ccccc3C2=O)c1OC

7737 C=CC(=O)OCCOc1ccccc1.Ic1ccccc1>>O=C(/C=C/c1ccccc1)OCCOc1ccccc1

7738 C=CC(=O)OC(C)(C)C.CCC(C(=O)c1ccc(Br)cc1)c1ccc(F)cc1Cl>>CCC(C(=O)c1ccc(/C=C/C(=O)OC(C)(C)C)cc1)c1ccc(F)cc1Cl

7739 C=CS(=O)(=O)F.Ic1ccc2c1sc1ccccc12>>O=S(=O)(F)/C=C/c1ccc2c1sc1ccccc12

7740 C=Cc1ccc(OC)cc1.O=c1c(I)c(/C=C/c2ccc(Cl)cc2)[nH]c2ccccc12>>COc1ccc(/C=C/c2c(/C=C/c3ccc(Cl)cc3)[nH]c3ccccc3c2=O)cc1

7741 C=CC(=O)OC.Ic1c(-c2ccccc2)nn2c(-c3ccccc3)cc(-c3ccccc3)nc12>>COC(=O)/C=C/c1c(-c2ccccc2)nn2c(-c3ccccc3)cc(-c3ccccc3)nc12

7742 C=CC(=O)OC(C)(C)C.Clc1cc(-c2ccccc2)nc2ccccc12>>CC(C)(C)OC(=O)/C=C/c1cc(-c2ccccc2)nc2ccccc12

7743 C=CC(=O)OC.CC(C)(C)OC(=O)ON1CCc2c([nH]c3c(Br)cccc23)C1c1ccccc1>>COC(=O)/C=C/c1cccc2c3c([nH]c12)C(c1ccccc1)N(OC(=O)OC(C)(C)C)CC3

7744 C=C(C)C.C1C(c1ccccc1)c1ccccc1>>CC(C)=CC(c1ccccc1)c1ccccc1

7745 C=CC(=O)OC(C)(C)C.O=[N+][([O-])c1ccccc1I>>CC(C)(C)OC(=O)/C=C/c1ccccc1[N+](=O)[O-]Br1ccc2c(c1)Cc1ccccc1-

7746 2.C=CC[C@H](CC(=O)OC(C)(C)C(=O)N[C@H](C(=O)N[C@H](C)c1ccccc1)C(C)(C)C>>C[C@@H](NC(=O)[C@@H](NC(=O)[C@H](C/C=C/c1ccc2c(c1)Cc1ccccc1-2)CC(=O)OC(C)(C)C)C(C)C)c1ccccc1

7747 C=Cc1ccccc1.CCCc1ccc2cc(Br)ccc21>>CCc1ccc2cc(/C=C/c3ccccc3)ccc21

7748 C=CCN1[C@H](c2ccccc2)O[C@@H]2C[C@H](C)CC[C@H]2C1(C)C>>C=C1CN2[C@@H](O[C@@H]3C[C@H](C)CC[C@H]3C2(C)C)c2ccccc21

7749 C=Cc1ccc(OC(C)=O)cc1.FC(F)(F)c1cc(I)cc(C(F)(F)F)c1>>CC(=O)Oc1ccc(/C=C/c2cc(C(F)(F)F)cc(C(F)(F)F)c2)cc1

7750 Br1ccccc1.C=Cc1nn(Cc2ccccc2)(c2ccccc2)c2ccccc2)c2ccc(C#N)c(OC)c12>>COc1c(C#N)ccc2c1c(/C=C/c1ccccc1)nn2C(c1ccccc1)(c1ccccc1)c1ccccc1

7751 C=CCC(Cc1ccccc1)(NCc1ccccc1Br)C(=O)OC>>C=C1CC(Cc2ccccc2)(C(=O)OC)NCc2ccccc21

7752 C=Cc1ccccc1.COC(=O)c1cc2cc(Br)ccc2cc1OC(C)=O>>COC(=O)c1cc2cc(/C=C/c3ccccc3)ccc2cc1OC(C)=O

7753 C=Cc1ccccc1.COc1ccc(Br)cc1>>COc1ccc(/C=C/c2ccccc2)cc1

7754 C=CC(=O)N(C)OC.COc1ccccc1I>>COc1ccccc1/C=C/C(=O)N(C)OC



7755 C=CP(=O)(OCC)OCC.COP(=O)(OC)[C@]1(NC=O)C[C@@H]1c1ccc(Br)cc1>>CCOP(=O)/C=C/c1c  
cc([C@H]2C[C@@]2(NC=O)P(=O)(OC)OC)cc1)OCC  
7756 C=CC(=O)OC.Fc1ncccc1Br>>COC(=O)/C=C/c1cccn1F  
7757 Br1cccc(I)c1.C=CC(F)(F)C(F)(F)C(F)(F)C(F)(F)C(F)(F)C(F)(F)C(F)(F)F>>FC(F)(F)C(F)(F)  
C(F)(F)C(F)(F)C(F)(F)C(F)(F)C(F)(F)C(F)(F)/C=C/c1cccc(Br)c1  
7758 C=CC=O.Ic1cccc1>>O=C/C=C/c1cccc1  
7759 C=CC(=O)OC(C)(C)C.CC(=O)c1ccc(I)cc1>>CC(=O)c1ccc(/C=C/C(=O)OC(C)(C)C)cc1  
7760 C=CC(N)=O.CCOC(=O)c1cn(CC)c2ccc(I)cc2c1=O>>CCOC(=O)c1cn(CC)c2ccc(/C=C/C(N)=O)cc2c1  
C=C[C@](C)(COC(F)(F)F)C(=O)O.CC(C)[C@H](O)C(=O)N[C@@H](C)C(=O)N1CCC[C@@H](C  
7761 =O)N[C@H](C)c2ccc3ccc(Br)cc3n2)N1>>CC(C)[C@H](O)C(=O)N[C@@H](C)C(=O)N1CCC[C@@  
H](C(=O)N[C@H](C)c2ccc3ccc(/C=C/[C@](C)(COC(F)(F)F)C(=O)O)cc3n2)N1  
7762 C=CC(=O)O.O=[N+](I)c1c(I)ccc2c1C=CC1(CCCCC1)O2>>O=C(O)/C=C/c1ccc2c(c1[N+](=O)[O-  
])C=CC1(CCCCC1)O2  
7763 C=CC(=O)OC.IC1=CO[C@H](COCc2ccccc2)[C@@H](OCc2ccccc2)[C@@H]1OCc1cccc1>>COC(  
=O)/C=C/C1=CO[C@H](COCc2ccccc2)[C@@H](OCc2ccccc2)[C@@H]1OCc1cccc1  
7764 C=Cc1ccc(N(CCCC)CCCC)cc1.CN(C)c1ccc(/C=C/c2nc3ccc(Br)cc3nc2-  
c2ccccc2)cc1>>CCCCN(CCCC)c1ccc(/C=C/c2ccc3nc(/C=C/c4ccc(N(C)C)cc4)c(-c4ccccc4)nc3c2)cc1  
7765 C=CS(=O)(=O)F.Cc1ccc(S(=O)(=O)n2c3ccccc3c3cc(I)ccc32)cc1>>Cc1ccc(S(=O)(=O)n2c3ccccc3c3c  
c(/C=C/S(=O)(=O)F)ccc32)cc1  
7766 C=Cc1cccc(CO)n1.Cc1c(Nc2c(I)cncc2C#N)ccc2[nH]ccc12>>Cc1c(Nc2c(C#N)cncc2/C=C/c2cccc(CO)  
n2)ccc2[nH]ccc12  
7767 Br1ccc2[nH]ccc2c1.C=CC(=O)OC>>COC(=O)/C=C/c1ccc2[nH]ccc2c1  
7768 Br1cccc1.C=CS(=O)(=O)N1CCC2(CC1)N=C(C1CCCCC1)NC2=O>>O=C1NC(C2CCCCC2)=NC12  
CCN(S(=O)(=O)/C=C/c1cccc1)CC2  
7769 C=C.Cc1ccc(Br)c([N+](=O)[O-])c1>>C=Cc1ccc(C)cc1[N+](=O)[O-]  
7770 C=CC(=O)OC.Ic1ccoc1>>COC(=O)/C=C/c1ccoc1  
7771 C#CC=C.Ic1ccc2[nH]ccc2c1>>C#C/C=C/c1ccc2[nH]ccc2c1  
7772 C=CC(=O)OC.COc1ccc2c(c1)c(I)nn2Cc1cccc1>>COC(=O)/C=C/c1nn(Cc2ccccc2)c2ccc(OC)cc12  
7773 C=CC(=O)OCC.CCOC(=O)c1nc2cc(F)c(Br)cn2c1I>>CCOC(=O)/C=C/c1c(C(=O)OCC)nc2cc(F)c(Br)  
7774 C=Cc1ccc(F)cc1.Fc1cc(Br)cc(OCc2ccccc2)c1>>Fc1ccc(/C=C/c2cc(F)cc(OCc3ccccc3)c2)cc1  
7775 C=CC(=O)Oc1cccc1.O=Cc1cccc1Br>>O=Cc1cccc1/C=C/C(=O)Oc1cccc1  
7776 C=C[C@@H]1COC(C)(C)N1C(=O)OCc1cccc1.Ic1cccc1>>CC1(C)OC[C@@H](/C=C/c2ccccc2)N1  
C(=O)OCc1cccc1  
7777 Br1ccc2ncccc2c1.C=CC(=O)OCC>>CCOC(=O)/C=C/c1ccc2ncccc2c1  
7778 Cc1ccc(/C=C/C(=O)O/C(=C)I)c2ccccc2)cc1>>Cc1ccc(/C=C/C2(C=C(c3ccccc3)OC2=O)cc1  
7779 C=CC(=O)OCCCC.Ic1cccn1>>CCCCOC(=O)/C=C/c1cccn1  
7780 C=CC(=O)OCC.COc1ccc2c(Br)cc(F)c(O)c2n1>>CCOC(=O)/C=C/c1cc(F)c(O)c2nc(OC)ccc12  
7781 C=CC#N.COc1ccc(OC)c(Br)c1>>COc1ccc(OC)c(/C=C/C#N)c1  
7782 C=C1CC(c2ccc(Cl)cc2)OC1=O.Ic1cccc1-  
c1ccc2ccccc2c1>>O=C1OC(c2ccc(Cl)cc2)C/C1=C\C1cccc1-c1ccc2ccccc2c1  
7783 C=Cc1cccn1.CC(C)(C)OC(=O)N[C@@H](COc1nccc(Br)c1)Cc1c[nH]c2ccccc12>>CC(C)(C)OC(=O)  
N[C@@H](COc1nccc(/C=C/c2ccncc2)c1)Cc1c[nH]c2ccccc12  
7784 Br1ccc(N=N/c2ccccc2)cc1.C=Cc1ccc(C#N)cc1>>N#Cc1ccc(/C=C/c2ccc(N=N/c3ccccc3)cc2)cc1  
7785 C=C.COC(=O)c1cccc(Br)c1[N+](=O)[O-]>>C=Cc1cccc(C(=O)OC)c1[N+](=O)[O-]  
7786 C=CC(=O)OCc1cccc1.C[Si](C)(C)CCOC(=O)c1ccc(I)cc1>>C[Si](C)(C)CCOC(=O)c1ccc(/C=C/C(=O)  
OCc2ccccc2)cc1  
7787 Br1ccc2c(c1)OCO2.C=CC(OCC)OCC>>CCOC(/C=C/c1ccc2c(c1)OCO2)OCC  
7788 C=CC(=O)OCC.CC(C)(C)OC(=O)NCc1ccc(Br)cc1>>CCOC(=O)/C=C/c1ccc(CNC(=O)OC(C)(C)C)cc  
7789 C=C(CC(=O)OC)C(=O)OC.Fc1ccc(I)cc1>>COC(=O)C/C(=C/c1ccc(F)cc1)C(=O)OC  
7790 C=Cc1nnn(C)n1.CC(C)(C)c1ccc(I)cc1>>Cn1nnn(/C=C/c2ccc(C(C)(C)C)cc2)n1  
7791 C=CC(=O)OC.O=C(c1ccc(I)cc1)c1ccc(OCc2ccccc2)cc1>>COC(=O)/C=C/c1ccc(C(=O)c2ccc(OCc3ccccc  
3)cc2)cc1  
7792 C=CC(=O)NC(C)C.COc1ccc(I)cc1>>COc1ccc(/C=C/C(=O)NC(C)C)cc1  
7793 C=Cc1ccc2c(c1)OCO2.C[Si](C)(C)I>>C[Si](C)(C)/C=C/c1ccc2c(c1)OCO2  
7794 C=CC(=O)OC.IC(CC[Se]c1cccc1)=C(c1cccc1)c1cccc1>>COC(=O)/C=C/C(CC[Se]c1cccc1)=C(c1  
cccc1)c1cccc1  
7795 C=CC(=O)OC(C)(C)C.CC(=O)c1ccc(Cl)c(F)c1Br>>CC(=O)c1ccc(Cl)c(F)c1/C=C/C(=O)OC(C)(C)C  
\*CNCCOCCOCCOCCCN(C(=O)COc1ccc(C(Cc2cc(OC)cc(OC)c2)NC(=O)c2cccc(C=C)c2)cc1.Cc1cc  
7796 c(I)c(C)c1>>\*CNCCOCCOCCOCCCN(C(=O)COc1ccc(C(Cc2cc(OC)cc(OC)c2)NC(=O)c2cccc(/C=C  
/c3ccc(C)cc3C)c2)cc1

C=CC(=O)OCCCC.COc1ccc2ccccc([N+](=O)[O-])c2c1-  
 7797 c1c(OC(=O)C(C)(C)C)ccc2cc(Br)ccc12>>CCCCOC(=O)/C=C/c1ccc2c(-  
 c3c(OC)ccc4ccccc([N+](=O)[O-])c34)c(OC(=O)C(C)(C)C)ccc2c1  
 7798 Brc1cccc2ccccc12.C=C(C)C(=O)OC>>COC(=O)/C(C)=C/c1cccc2ccccc12  
 7799 C=Cc1nnn(C)n1.Fc1ccccc1I>>Cn1nncc(/C=C/c2ccccc2F)n1  
 7800 C=Cc1ccc(Cl)cc1.CCOC(=O)C(C)(C)Br>>CCOC(=O)C(C)(C)/C=C/c1ccc(Cl)cc1  
 7801 C=Cc1cccn1.Cc1c(Nc2c(I)cncc2C#N)cc(Cl)c2[nH]ccc12>>Cc1c(Nc2c(C#N)cncc2/C=C/c2cccn2)cc  
 (Cl)c2[nH]ccc12  
 7802 C=CC(=O)O.Ic1ccc2c(c1)OCCOCCOCCOCCO2>>O=C(O)/C=C/c1ccc2c(c1)OCCOCCOCCOCCO2  
 7803 C=Cc1cccn1.Cc1ccc(S(=O)(=O)Oc2cccc3c(Br)ccnc23)cc1>>Cc1ccc(S(=O)(=O)Oc2cccc3c(/C=C/c4c  
 ccnc4)ccnc23)cc1  
 7804 C=CC(=O)OC.O=CNc1ccccc1I>>COC(=O)/C=C/c1ccccc1NC=O  
 7805 C=CCOc1ccccc1.Clc1ccc(Br)c1>>Clc1ccc(/C=C/COc2ccccc2)c1  
 7806 C=CC(=O)OC(C)(C)C.COCOCc1ccc(Br)cc1C>>COCOCc1ccc(/C=C/C(=O)OC(C)(C)C)cc1C  
 7807 Brc1ccccc1.COC[C@@H](/N=C(\c1ccccc1)N1C=CCC[C@H]1C)C(C)C>>COC[C@@H](/N=C(\c1cc  
 ccc1)N1C=C(c2ccccc2)CC[C@H]1C)C(C)C  
 7808 C=CC(=O)OC.Cn1c(-c2ccc(Br)cc2)nc2ccccc21>>COC(=O)/C=C/c1ccc(-c2nc3ccccc3n2C)cc1  
 7809 C=CC[Si](C)(C)C.COC(=O)c1ccc(Br)cc1>>C=C(C[Si](C)(C)C)c1ccc(C(=O)OC)cc1  
 7810 C=C(NC(=O)OCC)C(=O)OC.CCOC(=O)c1[nH]c2ccccc2c1Br>>CCOC(=O)N/C(=C\c1c(C(=O)OCC)[  
 nH]c2ccccc12)C(=O)OC  
 7811 C=C(C)C1(O)CCC2(CC1)OCCO2.COc1ccc(Br)cc1O>>COc1ccc(/C=C(\C)C2(O)CCC3(CC2)OCCO3)  
 cc1O  
 7812 C=Cc1ccccc1.O=C(C=C(c1ccccc1)c1ccccc1)c1ccccc1Br>>O=C(C=C(c1ccccc1)c1ccccc1)c1ccccc1/C  
 =C/c1ccccc1  
 7813 C=Cc1nc2c(N)ncnc2n1[C@@H]1O[C@H](CO[Si](C)(C)C(C)(C)C)[C@@H](O[Si](C)(C)C(C)(C)C)[  
 C@H]1O[Si](C)(C)C(C)(C)C.CC(=O)c1ccc(Br)cc1>>CC(=O)c1ccc(/C=C/c2nc3c(N)ncnc3n2[C@@H  
 12O[C@H](CO[Si](C)(C)C(C)(C)C)[C@@H](O[Si](C)(C)C(C)(C)C)[C@H]2O[Si](C)(C)C(C)(C)C)cc  
 C=C(NC(C)=O)C(=O)OCc1ccccc1.CCOC(=O)COc1ccc(Br)cc1OCc1ccccc1>>CCOC(=O)COc1ccc(/C  
 =C(/NC(C)=O)C(=O)OCc2ccccc2)cc1OCc1ccccc1  
 7815 C=CC(=O)OC.Cc1cc(Br)cc(NC(=O)C2CCCC2)c1>>COC(=O)/C=C/c1cc(C)cc(NC(=O)C2CCCC2)  
 7816 C=Cc1ccccc1.Cn1cncc1-c1ccc(Br)o1>>Cn1cncc1-c1ccc(/C=C/c2ccccc2)o1  
 7817 C=C[C@H](C)[C@H]1CC[C@H](C)c2c1cc(C)oc2=O.CC(C)=Cl>>CC(C)=C/C=C/[C@H](C)[C@H]1  
 CC[C@H](C)c2c1cc(C)oc2=O  
 7818 C=Cc1ccccc1.O=C(O)c1ccc(Br)cc1>>O=C(O)c1ccc(/C=C/c2ccccc2)cc1  
 7819 C=CC(=O)OCCCC.O=c1[nH]c(=O)n([C@H]2C[C@H](O)[C@@H](CO)O2)cc1Br>>CCCCOC(=O)/  
 C=C/c1cn([C@H]2C[C@H](O)[C@@H](CO)O2)c(=O)[nH]c1=O  
 7820 C=CCCCCCCCC(=O)OC.CCC1=C(I)CCC1=O>>CCC1=C(/C=C/CCCCCCCCC(=O)OC)CCC1=O  
 7821 C=C[C@H](O[Si](C)(C)C(C)(C)C)[C@H](CCCC(=O)OCC)O[Si](C)(C)C(C)(C)C.O=Cc1ccc(Br)c1>  
 >CCOC(=O)CCC[C@H](O[Si](C)(C)C(C)(C)C)[C@H](/C=C/c1ccc(C=O)c1)O[Si](C)(C)C(C)(C)C  
 7822 C=CC#N.Cc1nn2c(-c3ccccc3)cc(-c3ccccc3)nc2c1I>>Cc1nn2c(-c3ccccc3)cc(-  
 7823 C=CC(=O)OC.COC(=O)c1c(Br)c(Cl)cc2nn(C)cc12>>COC(=O)/C=C/c1c(Cl)cc2nn(C)cc2c1C(=O)OC  
 7824 C=CC(O)c1cc(OC)c(OC)cc1Br.COc1ccc(I)c1>>COc1ccc(/C=C/C(O)c2cc(OC)c(OC)cc2Br)c1  
 7825 C=C[C@H]1CC(C(=O)OC)(C(=O)OC)[C@H](c2ccc3c(c2)OCO3)N(c2ccccc2I)O1>>C=C1c2ccccc  
 2N2O[C@H]1CC(C(=O)OC)(C(=O)OC)[C@@H]2c1ccc2c(c1)OCO2  
 7826 C=Cc1ccc(C(=C(c2ccccc2)c2ccccc2)c2ccccc2)cc1.CCCCN1C(=O)c2cccc3cc(Br)cc(c23)C1=O>>CCC  
 CN1C(=O)c2cccc3cc(/C=C/c4ccc(C(=C(c5ccccc5)c5ccccc5)c5ccccc5)cc4)cc(c23)C1=O  
 7827 Brc1cc(NC(c2ccccc2)(c2ccccc2)c2ccccc2)nc2c1nnn2C(c1ccccc1)(c1ccccc1)c1ccccc1.C=CC(=O)OC>  
 >COC(=O)/C=C/c1cc(NC(c2ccccc2)(c2ccccc2)c2ccccc2)nc2c1nnn2C(c1ccccc1)(c1ccccc1)c1ccccc1  
 7828 C=CC(=O)OCCCC.O=[N+](=[O-])c1ccccc1Cl>>CCCCOC(=O)/C=C/c1ccccc1[N+](=O)[O-]  
 7829 C=CC(=O)OCC.O=c1c(I)oc2cc(O)ccc12>>CCOC(=O)/C=C/c1oc2cc(O)ccc2c1=O  
 7830 C=CCc1c(OCc2ccccc2Br)c2ccnc2n(-c2ccccc2)c1=O>>C=C1Cc2c(c3ccnc3n(-  
 c3ccccc3)c2=O)OCc2ccccc21  
 7831 Brc1cncc1.C=CS(N)(=O)=O>>NS(=O)(=O)/C=C/c1cncc1  
 7832 CC(=O)/C=C/Oc1c(C)ccccc1-c1ccccc1Br>>CC(=O)/C=C1/Oc2c(C)ccccc2-c2ccccc21  
 7833 C=Cc1nnn(C)n1.O=[N+](=[O-])c1ccc(Br)cc1>>Cn1nncc(/C=C/c2ccc([N+](=O)[O-])cc2)n1  
 7834 C=CC(=O)OC(C)(C)C.O=[N+](=[O-])c1ccc(Cl)cc1>>CC(C)(C)OC(=O)/C=C/c1ccc([N+](=O)[O-])cc1  
 7835 C=Cc1ccccc1C.Nc1cc(Cl)ccc1I>>Cc1ccccc1/C=C/c1ccc(Cl)cc1N  
 7836 C=CCC(C)C(=O)OCC.COc1ccc(I)cc1>>CCOC(=O)C(C)C/C=C/c1ccc(OC)cc1  
 7837 C=Cc1scnc1C.Cc1ccc(Br)cc1>>Cc1ccc(/C=C/c2scnc2C)cc1  
 7838 C=Cc1ccc(OC(C)(C)C)cc1.FC(F)(F)C(F)(F)Br>>CC(C)(C)Oc1ccc(/C=C/C(F)(F)C(F)(F)C(F)(  
 F)F)cc1

7839 C=CCC(C1=C(OS(=O)(=O)C(F)(F)F)OCCC1)c1ccc(OC)cc1>>C=C1CC(c2ccc(OC)cc2)C2=C1OCCC  
7840 C=CC(=O)OC.CCOP(=O)(CCCN1c(=O)oc2cc(Br)enc21)OCC>>CCOP(=O)(CCCN1c(=O)oc2cc(/C=C/  
C(=O)OC)enc21)OCC  
7841 C=CC(=O)OC.COc1ccc(-c2nc3ccc(Br)cc3nc2-c2ccc(OC)cc2)cc1>>COC(=O)/C=C/c1ccc2nc(-  
c3ccc(OC)cc3)c(-c3ccc(OC)cc3)nc2c1  
7842 C=Cc1cccc1.Cn1c(-c2ccc([N+](=O)[O-])cc2)c(I)c(=O)c2cccc21>>Cn1c(-c2ccc([N+](=O)[O-]  
])cc2)c(/C=C/c2cccc2)c(=O)c2cccc21  
7843 C=C(C)C(=O)OC.CC(=O)NS(=O)(=O)c1ccc(Br)cc1>>COC(=O)/C(C)=C/c1ccc(S(=O)(=O)NC(C)=O)  
7844 C=CC(=O)OC(C)(C)C.CCCOc1ccc(Br)c(C(=O)OC)c1>>CCCOc1ccc(/C=C/C(=O)OC(C)(C)C)c(C(=O)  
)OC)c1  
7845 Br1ccc2c(c1)OCO2.C=C(NC(C)=O)C(=O)O>>CC(=O)N/C(=C\c1ccc2c(c1)OCO2)C(=O)O  
7846 C=CC(=O)OC.Cn1c2c(c3ccc(I)cc3c1=O)C(=O)c1cccc1-  
2>>COC(=O)/C=C/c1ccc2c3c(n(C)c(=O)c2c1)-c1cccc1C3=O  
7847 C=CC=O.Ic1enn(C(c2cccc2)(c2cccc2)c2cccc2)c1>>O=C/C=C/c1enn(C(c2cccc2)(c2cccc2)c2cccc  
c2)c1  
7848 C=CC(=O)OCC.COc1ccc(I)cc1>>CCOC(=O)/C=C/c1ccc(OC)cc1  
7849 C=C(C)C(=O)NC.Clc1cccc1>>CNC(=O)/C(C)=C/c1cccc1  
C=C[C@H](Cn1c(Br)c(-  
7850 c2ccc(C(=O)Nc3cc(C(F)(F)F)ccn3)cc2)c2c(N)ncnc21)NC(=O)OC(C)(C)C>>C=C1c2c(-  
c3ccc(C(=O)Nc4cc(C(F)(F)F)ccn4)cc3)c3c(N)ncnc3n2C[C@H]1NC(=O)OC(C)(C)C  
C=CC(=O)OCC.Cc1ccc(S(=O)(=O)n2cc(-  
7851 c3ccc(OC4CCOCC4)c(C#N)c3)c3cc(Br)enc32)cc1>>CCOC(=O)/C=C/c1cnc2c(c1)c(-  
c1ccc(OC3CCOCC3)c(C#N)c1)cn2S(=O)(=O)c1ccc(C)cc1  
7852 C=Cc1ccc(C(=O)O)cc1.CC(=O)c1ccc(Br)cc1>>CC(=O)c1ccc(/C=C/c2ccc(C(=O)O)cc2)cc1  
7853 Br1cccc(I)c1.C=Cc1cccc1>>Br1cccc(/C=C/c2cccc2)c1  
7854 C=Cc1cccc1.CCOC(=O)c1cccc1I>>CCOC(=O)c1cccc1/C=C/c1cccc1  
7855 C=Cc1cccc1.Cc1cc(C)cc(Br)c1>>Cc1cc(C)cc(/C=C/c2cccc2)c1  
7856 C=C(C)C(=O)OC.Oc1ccc(Br)c1>>COC(=O)/C(C)=C/c1ccc(O)c1  
C=Cc1ccc2cc(OC)ccc2c1.COc1ccc2c(ccc3ccc(Br)cc32)c1>>COc1ccc2cc(/C=C/c3ccc4ccc5cc(OC)ccc  
7857 5c4c3)ccc2c1  
7858 C=COCC.O=C(Cl)c1cccc1>>CCO/C=C/C(=O)c1cccc1  
7859 C=CC(=O)OCC.Fc1cc(Br)ccc1I>>CCOC(=O)/C=C/c1ccc(Br)cc1F  
7860 C=CC(=O)OC.COC(=O)c1c(Br)c(F)cc2nn(C)cc12>>COC(=O)/C=C/c1c(F)cc2nn(C)cc2c1C(=O)OC  
7861 Br1cccn1.C=CC(=O)OC>>COC(=O)/C=C/c1cccn1  
\*CNCCCOCCOCCOCCCN(C(=O)COc1ccc(C(Cc2cc(OC)cc(OC)c2)NC(=O)c2cccc(C=C)c2)cc1.FC(F)  
7862 (F)Oc1ccc(I)cc1>>\*CNCCCOCCOCCOCCCN(C(=O)COc1ccc(C(Cc2cc(OC)cc(OC)c2)NC(=O)c2cccc  
(/C=C/c3ccc(OC(F)(F)F)cc3)c2)cc1  
7863 C=Cc1cccn1.Oc1cccc1I>>Oc1cccc1/C=C/c1cccn1  
7864 C=Cc1cccc1.O=C(O)c1cccc(Br)c1>>O=C(O)c1cccc(/C=C/c2cccc2)c1  
C=C1C(=O)O[C@H]2[C@H]1CC/C(C)=C/CC[C@H]1(C)O[C@H]21.Nc1ccc(I)cc1>>C/C1=C\CC[  
7865 C@@]2(C)O[C@H]2[C@H]2OC(=O)/C(=C/c3ccc(N)cc3)[C@H]2CC1  
7866 C=CCC(C)C.COC(=O)c1ccc2cc(Br)ccc2c1>>COC(=O)c1ccc2cc(/C=C/CC(C)C)ccc2c1  
C=CC#N.CNC(=O)c1c(-c2ccc(F)cc2)oc2nc(N(C)S(C)(=O)=O)c(I)cc12>>CNC(=O)c1c(-  
7867 c2ccc(F)cc2)oc2nc(N(C)S(C)(=O)=O)c(/C=C/C#N)cc12  
C=CC(=O)NC(C)(C)C.O=C1C(O)=C(I)C(=O)c2cccc21>>CC(C)(C)NC(=O)/C=C/C1=C(O)C(=O)c2c  
7868 cccc2C1=O  
7869 Br1cccn1.C=Cc1ccc(C(=O)O)cc1>>O=C(O)c1ccc(/C=C/c2cccn2)cc1  
7870 C=CS(=O)(=O)F.Ic1ccc(Oc2cccc2)cc1>>O=S(=O)(F)/C=C/c1ccc(Oc2cccc2)cc1  
7871 C=Cc1cccc1.O=Cc1c(Br)ccc2cccc12>>O=Cc1c(/C=C/c2cccc2)ccc2cccc12  
7872 C=CC(=O)OC(C)(C)C.Cc1c(Br)cccc1[N+](=O)[O-]  
C=C[C@H](Cn1c(Br)c(-  
7873 c2ccc(Oc3ccc(C(C)(C)C)cc3)cc2)c2c(N)ncnc21)NC(=O)OC(C)(C)C>>C=C1c2c(-  
c3ccc(Oc4ccc(C(C)(C)C)cc4)cc3)c3c(N)ncnc3n2C[C@H]1NC(=O)OC(C)(C)C  
7874 C=Cc1cccc1.O=Cc1ccc(Br)cc1>>O=Cc1ccc(/C=C\c2cccc2)cc1  
7875 C=C(CC(=O)OC)C(=O)OC.FC(F)(F)c1ccc(I)cc1>>COC(=O)C/C(=C\c1ccc(C(F)(F)F)cc1)C(=O)OC  
C=CC(=O)O.Cc1cc(Br)c([N+](=O)[O-]  
7876 ])c(C)c1NC(=O)CC(C)(C)C>>Cc1cc(/C=C/C(=O)O)c([N+](=O)[O-])c(C)c1NC(=O)CC(C)(C)C  
C=Cc1ccc(/C=C/c2ccc(N)cc2)cc1.O=C(ON1C(=O)CCC1=O)c1ccc(I)cc1>>Nc1ccc(/C=C/c2ccc(/C=C/  
7877 c3ccc(C(=O)ON4C(=O)CCC4=O)cc3)cc2)cc1  
7878 C=CC(=O)OC(C)(C)C.CCCCc1ccc(C(=O)c(Br)n1>>CCCCc1ccc(C(=O)c(/C=C/C(=O)OC(C)(C)C)n1  
7879 C=CC(=O)OCC.O=Cc1ccc(Br)cc1>>CCOC(=O)/C=C/c1ccc(C=O)cc1

**C=CC#Cc1ccc(I)cc1>>COc1ccc(/C=C/c2cccc2)ccl**

**C=CC(=O)OC.CCN(CC)c1ccc2cc(Br)ccc2c1>>CCN(CC)c1ccc2cc(/C=C/C(=O)OC)ccc2c1**

**C=CCCCCCCCCCCCCC.c1ccc([I+](c2cccc2))cc1>>CCCCCCCCCCC/C=C/c1cccc1**

**C=CCOc1ccc(C)cc1.COc1ccc(I)cc1>>COc1ccc(/C=C/COe2ccc(C)cc2)cc1**

**C=CC(OCC)OCC.O=Cc1ccc2cccc2c1Br>>CCOC(/C=C/c1c(C=O)ccc2cccc12)OCC**

**C=CC(=O)OCC.Nc1ncc(C2CC2)cc1Br>>CCOC(=O)/C=C/c1cc(C2CC2)nnc1N**

**Br/C(=[Te])c1cccc1)c1cccc1.C=CC(=O)OCC>>CCOC(=O)/C=C/C(=[Te]c1cccc1)c1cccc1**

**C=CC(=O)OC(C)(C).Cc1ccc(S(=O)=O)Cc2cccc21)cc1>>Cc1ccc(S(=O)=O)Cc2cccc2/C=C/C(=O)**  
**)OC(C)(C)cc1**

**C=CCOc1cccc1C(C)C.Ic1cccc1>>CC(C)c1cccc1OC/C=C/c1cccc1**

**C=Cc1cccc1.CCCCCCclccsc1Br>>CCCCCc1ccsc1/C=C/c1cccc1**

**C=CC(=O)OC.O=c1oc2cc(Br)cnc2n1CCc1cccc1>>COC(=O)/C=C/clenc2(c1)oc(=O)n2CCc1cccc1**  
**C=Cc1cc(OC)c(OC)c(OC)c1-**

**c1ccc(F)c(F)c1.COc1ccc(I)cc1>>COc1ccc(/C=C/c2cc(OC)c(OC)c(OC)e2-e2ccc(F)c(F)c2)cc1**

**C=CC(=O)OC(C)(C).CCOC(=O)c1ccc(I)cc1>>CCOC(=O)c1ccc(/C=C/C(=O)OC(C)(C)cc1**

**C=CC#N.CC(=O)c1ccc(I)cc1>>CC(=O)c1ccc(/C=C/C#N)cc1**

**C=Cc1cc(OC)c(OC)c(OC)c1.O=Cc1ccc(Br)cc1>>COc1cc(/C=C/e2ccc(C=O)cc2)cc(OC)c1OC**

**C=Cc1cccc2cccc12.COC(=O)C(Cc1cccc11)C(=O)OC>>COC(=O)C(Cc1cccc1/C=C/c1cccc2cccc1**  
**2)C(=O)OC**

**C=Cc1ccc2cccc2c1.FC(F)(F)Cl>>FC(F)(F)C/C=C/c1ccc2cccc2c1**

**Brc1ccc(-c2nc(-c3cccc3)c(-c3cccc3)[nH]2)cc1.C=Cc1cncc1>>C(=C/c1ccc(-c2nc(-c3cccc3)c(-**  
**-c3cccc3)[nH]2)cc1)\c1cncc1**

**C=Cc1ccc(C(C)(C)C)cc1.Cc1ccc(Br)cc1>>Cc1ccc(/C=C/e2ccc(C(C)(C)C)cc2)cc1**

**C=CC(=O)OC(C)(C).COc1ccc(Br)en1>>COc1ccc(/C=C/C(=O)OC(C)(C)en1**

**C=CC(=O)OCCCC.Fc1cc(Br)ccc1I>>CCCCOC(=O)/C=C/c1ccc(Br)cc1F**

**C=Cc1cccc1.CCC(Br)CC>>CCC(/C=C/c1cccc1)CC**

**C=CCCC(O)C1=C(Br)CCC(C)C1>>C=C1CCCC(O)C2=C1CCC(C)C2**

**CC=C(c1cccc1)c1c(OCc2cccc2Br)c(=O)n(C)c(=O)n1C>>C/C1=C(\c2cccc2)c2c(c(=O)n(C)c(=O)n2**  
**C)OCc2cccc21**

**C=Cc1necc1O[Si](C)(C)C(C)C.N#Cc1ccc(Br)cc1>>CC(C)(C)[Si](C)(C)Oc1ecce1/C=C/c1ccc(C**  
**#N)cc1**

**C=CCS(=O)(=O)NCCNC(=O)OCc1cccc1.CC(=O)OC[C@H]1O[C@@H](Oc2n[nH]c(C(C)C)c2Cc2c**  
**cc(Br)cc2)[C@H](OC(C)=O)[C@@H](OC(C)=O)[C@@H]1OC(C)=O>>CC(=O)OC[C@H]1O[C@@**  
7905  
**H](Oc2n[nH]c(C(C)C)c2Cc2ccc(/C=C/CS(=O)(=O)NCCNC(=O)OCc3cccc3)cc2)[C@H](OC(C)=O)[**  
**C@@H](OC(C)=O)[C@@H]1OC(C)=O**

**C=CC(=O)OCC.O=[N+]([O-])c1cccc(Br)c1>>CCOC(=O)/C=C/c1cccc([N+](=O)[O-])c1**

**C=CC(=O)OCC.COc1cc(I)c2c3c1O[C@@H]1[C@]34CCN(C)[C@H](C2)[C@]42C=C[C@@]1(OC)[**  
7907  
**C@H]1C(=O)N(c3cccc3)C(=O)[C@H]12>>CCOC(=O)/C=C/c1cc(OC)c2c3c1[C@H]1N(C)CC[C@**  
**@]34[C@@H](O2)[C@@]2(OC)C=C[C@@]14[C@@@@H]1C(=O)N(c3cccc3)C(=O)[C@@H]12**

**C=Cc1cccc1.O=[N+]([O-])c1ccc(Cl)nc1>>O=[N+]([O-])c1ccc(/C=C/c2cccc2)nc1**

**C=COCCCC.O=c1cc(Br)c2ccc(F)cc2o1>>CCCCO/C=C/c1cc(=O)oc2cc(F)ccc12**

**C=Cc1cccc1.O=S(=O)(Oc1ccc(Cl)cc1)C(F)(F)F>>C=C(c1cccc1)c1ccc(Cl)cc1**

**Brc1cccc(N2CCCC2)n1.C=Cc1cccc1>>C(=C/c1cccc(N2CCCC2)n1)\c1cccc1**

**C=CCCN(Cc1ccnc1Br)S(=O)(=O)c1cccc1>>C=C1CCN(S(=O)(=O)c2cccc2)Ce2ccnc21**

**C=C.O=Cc1ccc(Br)cc1>>C=Cc1ccc(C=O)cc1**

**BrC1CCCC1.C=Cc1ccc(C(=O)N(Cc2cccc2)Ce2cccc2)c1>>O=C(c1cccc(/C=C/C2CCCC2)c1)N(**  
7914  
**Cc1cccc1)Cc1cccc1**

**C=CC(C)=O.Ic1ccc2[nH]ccc2c1>>CC(=O)/C=C/c1ccc2[nH]ccc2c1**

**CCOC(=O)[C@@H](C/C=C\CCN(c2cccc2)C1=O)Nc1cc(Cl)ccc1I>>CCOC(=O)[C@H]1C/C(=C2/  
7916  
**CCN(c3cccc3)C2=O)c2ccc(Cl)cc2N1****

**C=CC(=O)OCC.Cc1ccc(-**

**e2c(CNC(=O)OC(C)(C)C)c(CC(C)C)nc3ccc(OS(=O)(=O)C(F)(F)F)cc23)cc1>>CCOC(=O)/C=C/c1ccc**  
**2nc(CC(C)C)c(CNC(=O)OC(C)(C)C)c(-c3ccc(C)cc3)c2c1**

**C=CC(OCC)OCC.CC(C)(C)c1ccc(I)cc1>>CCOC(/C=C/c1ccc(C(C)(C)C)cc1)OCC**

**Brc1cccc2c3c([nH]c12)C1CCN(CC1)C3.C=Cc1ccnc1>>C(=C/c1cccc2c3c([nH]c12)C1CCN(CC1)C3**  
7919  
**)\c1ccnc1**

**C=CC(=O)CCCCC.Ic1cccc1>>CCCCC(=O)/C=C/c1cccc1**

**C=C/C=C/c1cccc1.FC(F)(F)C(F)(F)C(F)(F)C(F)(F)C(F)(F)Br>>FC(F)(F)C(F)(F)C(F)(F)C(F)(F)C(F)(F)**  
7921  
**F)C(F)(F)C(F)(F)C(F)(F)C/F=C/C=C/c1cccc1**

7922 \*CNCCCCOCCOCCOCCNC(=O)COc1ccc(C(Cc2cc(OC)cc(OC)c2)NC(=O)c2cccc(C=C)c2)cc1.N#C  
 Cc1cccc1I>>\*CNCCCCOCCOCCOCCNC(=O)COc1ccc(C(Cc2cc(OC)cc(OC)c2)NC(=O)c2cccc(/C=  
 C/c3cccc3CC#N)c2)cc1  
 7923 C=CC(=O)OC(C)(C)C.CC(C)(F)CN1[C@H](c2c(F)cc(Br)cc2F)c2ccc3c(cnn3C3CCCCO3)c2C[C@H]  
 1C(F)F>>CC(C)(F)CN1[C@H](c2c(F)cc(/C=C/C(=O)OC(C)(C)C)cc2F)c2ccc3c(cnn3C3CCCCO3)c2  
 C[C@H]1C(F)F  
 7924 C=Cc1ccc(C)cc1.O=c1cc(-c2cccc2)oc2cc(Br)ccc12>>Cc1ccc(/C=C/c2ccc3c(=O)cc(-  
 7925 C=CC(=O)O.O=[N+][O-]c1cccc1Br>>O=C(O)/C=C/c1cccc1[N+](=O)[O-]  
 7926 C=C[C@H](NC(=O)OCc1cccc1)C(=O)O.Ic1cccs1>>O=C(N[C@@H](/C=C/c1cccs1)C(=O)O)OCc1c  
 cccc1  
 7927 C=CCc1c(N(CC)C(=O)Cc2cccc2I)ccc2c1ccc(=O)n2C>>C=C1Cc2c(ccc3c2ccc(=O)n3C)N(CC)C(=O)  
 Cc2cccc21  
 7928 C=CCC(C)C.CCOC(=O)c1ccc(I)cc1>>CCOC(=O)c1ccc(/C=C/CC(C)C)cc1  
 7929 C=Cc1ccc(F)cc1.O=C(O)c1ccc(Br)cc1>>O=C(O)c1ccc(/C=C/c2ccc(F)cc2)cc1  
 7930 C=Cc1cc(OC)cc(OC)c1.NCc1ccc(I)cc1>>COc1cc(/C=C/c2ccc(CN)cc2)cc(OC)c1  
 7931 C=Cc1ccc(C)cc1.Cc1ccc(Br)c(C=O)c1>>Cc1ccc(/C=C/c2ccc(C)cc2C=O)cc1  
 7932 C=CC(=O)OC(C)(C)C.CC(=O)c1cn(-c2cccc2)nc1OS(=O)(=O)C(F)(F)F>>CC(=O)c1cn(-  
 c2cccc2)nc1/C=C/C(=O)OC(C)(C)C  
 7933 C=CC(=O)O.Cc1cccc2c([C@@H]3O[C@H](COCc4cccc4)[C@@H](OCc4cccc4)[C@H](OCc4cccc  
 c4)[C@H]3OCc3cccc3)cn(Cc3ccc(I)cc3)c12>>Cc1cccc2c([C@@H]3O[C@H](COCc4cccc4)[C@@H]  
 H)(OCc4cccc4)[C@H](OCc4cccc4)[C@H]3OCc3cccc3)cn(Cc3ccc(/C=C/C(=O)O)cc3)c12  
 7934 C=CC(=O)OCC.CCOC(=O)CCOCc1cc(OC)c(OC)c(OC)c1Br>>CCOC(=O)/C=C/c1c(COCCC(=O)OC  
 C)cc(OC)c(OC)c1OC  
 7935 C=CC(=O)OC(C)(C)C.Nc1ccc(Cl)cc1I>>CC(C)(C)OC(=O)/C=C/c1cc(Cl)ccc1N  
 7936 C=CC(=O)N1N=Cc2cccc2C1C=C(C)C.CCc1nc(N)nc(N)c1Cc1cc(I)c(OC)c(OC)c1>>CCc1nc(N)nc(N  
 )c1Cc1cc(/C=C/C(=O)N2N=Cc3cccc3C2C=C(C)C)c(OC)c(OC)c1  
 7937 C=CC(=O)OC.Cc1c(Br)ccc2c1nnn2C>>COC(=O)/C=C/c1ccc2c(nnn2C)c1C  
 7938 C=C(C)c1cccc1.O=[N+][O-]c1ccc(Cl)cc1>>C/C(=C/c1ccc([N+](=O)[O-])cc1)c1cccc1  
 7939 C=CC(F)(F)F.Ic1cccc1>>FC(F)(F)/C=C/c1cccc1  
 7940 Br1cccc1.C=CC=O>>O=C/C=C/c1cccc1  
 7941 C=Cc1cccc1.Oc1ccc(Br)c1>>Oc1ccc(/C=C/c2cccc2)c1  
 7942 C=CCNS(=O)(=O)c1ccc(C)cc1.Ic1cccc1>>Cc1ccc(S(=O)(=O)NC/C=C/c2cccc2)cc1  
 7943 C=CC(=O)OC.O=Cc1cccc(Br)n1>>COC(=O)/C=C/c1cccc(C=O)n1  
 7944 C=CC(=O)OCCCC.CCc1ccc(I)cc1>>CCCCOC(=O)/C=C/c1ccc(CC)cc1  
 7945 C=C.Fc1ccc(I)cn1>>C=Cc1ccc(F)nc1  
 7946 C=Cc1ccc(/C=C/c2ccc([N+](=O)[O-]  
 ])cc2)cc1.O=Cc1ccc(Br)cc1>>O=Cc1ccc(/C=C/c2ccc(/C=C/c3ccc([N+](=O)[O-])cc3)cc2)cc1  
 7947 C=CC(=O)OC(C)(C)C.COc1ccc(I)cc1N>>COc1ccc(/C=C/C(=O)OC(C)(C)C)cc1N  
 7948 C=CC(N)=O.CC(C)c1ccc(I)cc1>>CC(C)c1ccc(/C=C/C(N)=O)cc1  
 7949 Br1ccc2ccc3cccc4ccc1c2c34.C=Cc1ccc(C)cc1>>Cc1ccc(/C=C/c2ccc3ccc4cccc5ccc2c3c45)cc1  
 7950 Br1ccc(I)cc1.C=Cc1ccc(CP(=O)(OCC)OCC)cc1>>CCOP(=O)(Cc1ccc(/C=C/c2ccc(Br)cc2)cc1)OCC  
 7951 C=C/C=C/C(=O)N(CCCC)CCCC.Cc1ccc(Br)cc1>>CCCCN(CCCC)C(=O)/C=C/C=C/c1ccc(C)cc1  
 7952 Br1cccc1.C=Cc1cccn1>>C(=C/c1cccn1)c1cccc1  
 7953 C=CC(=O)OC.CC(C)(C)c1[nH]c2cccc2c1C1CCCN(Cc2ccc(Br)cc2F)C1>>COC(=O)/C=C/c1ccc(CN  
 2CCCC(c3c(C(C)(C)C)[nH]c4cccc34)C2)c(F)c1  
 7954 C=CC(=O)OC(C)(C)C.Clc1cccc1I>>CC(C)(C)OC(=O)/C=C/c1cccc1Cl  
 7955 C=Cc1ccc2cccc2c1.CCN1c2ncc(Br)cc2C(=O)N(C)c2ccc(F)nc21>>CCN1c2ncc(/C=C/c3ccc4cccc4c  
 3)cc2C(=O)N(C)c2ccc(F)nc21  
 7956 C=CC(=O)OC.OCc1cccc(-c2ncc(Br)en2)c1>>COC(=O)/C=C/c1ncc(-c2cccc(CO)c2)nc1  
 7957 C=CC(=O)OCC.OCc1c(-c2cccc2)nc2cc(Br)ccn12>>CCOC(=O)/C=C/c1ccn2c(CO)c(-c3cccc3)nc2c1  
 7958 C=CCn1cc(C(=O)OCC)c(=O)c2ccc(C)nc21.CCn1cc(I)c(=O)c2ccc(C)nc21>>CCOC(=O)c1cn(C/C=C/C/  
 2cn(CC)c3nc(C)ccc3c2=O)c2nc(C)ccc2c1=O  
 7959 C=Cc1cccc1.CC(C)(C)C(=O)Nc1nc2ncc(Cl)nc2c(=O)[nH]1>>CC(C)(C)C(=O)Nc1nc2ncc(/C=C/c3cc  
 ccc3)nc2c(=O)[nH]1  
 7960 BrC1CCCCC1.C=Cc1cccc1Cl>>Clc1cccc1/C=C/C1CCCCC1  
 7961 C=C.CC(=O)c1cccc1Br>>C=Cc1cccc1C(C)=O  
 7962 C=Cc1ccc2cccc2c1.O=C(OCCCC(Br)C(F)(F)F)c1cccc1>>O=C(OCCCC(/C=C/c1ccc2cccc2c1)C(F  
 )(F)F)c1cccc1  
 7963 C=CCOC(C)=O.Ic1cccs1>>CC(=O)OC/C=C/c1cccs1  
 7964 C=CC(C)(C)O.N#Cc1cccc2nc3cccc(Br)c3nc12>>CC(C)(O)/C=C/c1cccc2nc3cccc(C#N)c3nc12

7965 C=CC(=O)OC.O=Cc1cc(-c2ccc(Br)cc2)cc(C23CC4CC(CC(C4)C2)C3)c1O>>COC(=O)/C=C/c1ccc(-c2cc(C=O)c(O)c(C34CC5CC(CC(C5)C3)C4)c2)cc1

7966 C=CC(=O)O.Nc1ccccc1Br>>Nc1ccccc1/C=C/C(=O)O

7967 C=CC(=O)OCCCC.COc1ccc2cc(Br)ccc2c1-c1c(P(=O)(c2ccccc2)c2ccccc2)ccc2ccccc12>>CCCCOC(=O)/C=C/c1ccc2c(-c3c(P(=O)(c4ccccc4)c4ccccc4)ccc4ccccc34)c(OC)ccc2c1
