# Supplementary material for: Heck reaction prediction using a transformer model based on a transfer learning strategy
Source: Royal Society of Chemistry journal article supplement (doi:10.1039/d0cc02657c), 2020-01-01
Supplement: d0cc02657c1.zip [file d0cc02657c1.zip]

**Table S6B. Intramolecular Heck reaction dataset divided into training dataset in our research for transformer-baseline and transformer-transfer learning models (Dataset for training in experiment 1)**

| Reaction ID | Reaction SMILES                                                                                                                                                    |
|-------------|--------------------------------------------------------------------------------------------------------------------------------------------------------------------|
| 1           | <chem>C=CCc1cccc(F)c1N(C(=O)c1ccccc1)S(=O)(=O)c1ccc(C)cc1&gt;&gt;C=C1Cc2cccc(F)c2N(S(=O)(=O)c2ccc(C)cc2)C(=O)c2ccccc21</chem>                                      |
| 2           | <chem>O=C(/C=C/c1ccccc1)O/C(=C/I)c1ccc(Br)cc1&gt;&gt;O=C1OC(c2ccc(Br)cc2)=C/C1=C/c1ccccc1</chem>                                                                   |
| 3           | <chem>C=CCC1(C(=O)OC)CCN1Cc1ccccc1Br&gt;&gt;C=C1CC2(C(=O)OC)CCN2Cc2ccccc21</chem>                                                                                  |
| 4           | <chem>C=CCCCC(O)C1=C(Br)CCC1&gt;&gt;C=C1CCCC(O)C2=C1CCC2</chem>                                                                                                    |
| 5           | <chem>C=CC1CCCN1C(=O)C(c1ccccc1Br)N(Cc1ccccc1)C(=O)CC&gt;&gt;C=C1c2ccccc2C(N(Cc2ccccc2)C(=O)C)C(=O)N2CCCC12</chem>                                                 |
| 6           | <chem>C=CCC(O)c1cc2cc(Br)ccc2nc1Cl&gt;&gt;C=C1CC(O)c2cc3cc(Br)ccc3nc21</chem>                                                                                      |
| 7           | <chem>C=CCC(O)c1ccccc1C=Cl&gt;&gt;C=C1C=Cc2ccccc2C(O)C1</chem>                                                                                                     |
| 8           | <chem>C=CCC(CC(=C)Br)(C(=O)OCC)C(=O)OCC&gt;&gt;C=C1CC(C(=O)OCC)(C(=O)OCC)CC1=C</chem>                                                                              |
| 9           | <chem>C=CC[C@@H](N[S@@](=O)C(C)(C)C)c1ccccc1Br&gt;&gt;C=C1C[C@@H](N[S@@](=O)C(C)(C)C)c2ccc1ccc21</chem>                                                            |
| 10          | <chem>COc1ccc(/C=C/C(=O)Oc2ccccc2I)cc1&gt;&gt;COc1ccc(/C=C2/C(=O)Oc3ccccc32)cc1</chem>                                                                             |
| 11          | <chem>C=CCC(CCCl)c1ccc(OC)cc1&gt;&gt;C=C1CCC(c2ccc(OC)cc2)C1</chem>                                                                                                |
| 12          | <chem>CCCCC/C(=C/I)OC(=O)/C=C/c1ccc(C)cc1&gt;&gt;CCCCCCC1=C/C(=C/c2ccc(C)cc2)C(=O)O1</chem>                                                                        |
| 13          | <chem>C=CCCOc1cc(C)c2ccccc2c1Br&gt;&gt;C=C1CCOCc2cc(C)c3ccccc3c21</chem>                                                                                           |
| 14          | <chem>C=CCN(CCc1cc(Cl)ccc1I)C(=O)C(F)(F)F&gt;&gt;C=C1CN(C(=O)C(F)(F)F)CCc2cc(Cl)ccc21</chem>                                                                       |
| 15          | <chem>C=C(Br)CCN1C(=O)C[C@@H]2C=CCC[C@@]21/C=C/C(=O)OC&gt;&gt;C=C1CCN2C(=O)C[C@@H]3C=CCC[C@@]32/C1=C/C(=O)OC</chem>                                                |
| 16          | <chem>COC(=O)/C=C/Oc1ccccc1-c1ncccc1Br&gt;&gt;COC(=O)/C=C1/Oc2ccccc2-c2ncccc21</chem>                                                                              |
| 17          | <chem>C=CC(=O)OCCCCCCCCC(CCc1ccccc1)OC(=O)[C@@H]1CCCCN1C(=O)C(=O)c1ccccc1I&gt;&gt;O=C1/C=C/c2ccccc2C(=O)C(=O)N2CCCC[C@@H]2C(=O)OC(CCc2ccccc2)CCCCCCCCO1</chem>     |
| 18          | <chem>C=C[C@@H](NC(=O)OC(C)(C)C)[C@@H](O)[C@@H](C)C(=O)NCC(=O)N[C@@H](C)C(=O)Nc2cc(OCc3ccccc3)ccc2/C=C/[C@@H](NC(=O)OC(C)(C)C)[C@@H]1O</chem>                      |
| 19          | <chem>C=CC1(OCCI)CN(C(=O)OC(C)(C)C)C1&gt;&gt;C=C1CCOC12CN(C(=O)OC(C)(C)C)C2</chem>                                                                                 |
| 20          | <chem>C=CCN(C)Cc1ccccc1I&gt;&gt;C=C1CN(C)Cc2ccccc21</chem>                                                                                                         |
| 21          | <chem>C=CCCN(Cc1ccccc1)S(=O)(=O)c1ccccc1Br&gt;&gt;C=C1CCN(Cc2ccccc2)S(=O)(=O)c2ccccc21</chem>                                                                      |
| 22          | <chem>C=CCN(Cc1ccc(F)cc1)Cc1cc2cc(C)ccc2nc1Cl&gt;&gt;C=C1CN(Cc2ccc(F)cc2)Cc2cc3cc(C)ccc3nc21</chem>                                                                |
| 23          | <chem>C=CCN1CCc2c([nH]c3ccccc3)C1Cc1ccccc1Br&gt;&gt;C=C1CN2CCc3c([nH]c4ccccc4)C2Cc2ccccc21</chem>                                                                  |
| 24          | <chem>C=CCC(C1=C(OS(=O)(=O)C(F)(F)F)OCC1)c1ccc(OC)cc1&gt;&gt;C=C1CC(c2ccc(OC)cc2)C2=C1OCCC</chem>                                                                  |
| 25          | <chem>C=CCOCc1ccc2cc(OC)ccc2c1Br&gt;&gt;C=C1COCc2ccc3cc(OC)ccc3c21</chem>                                                                                          |
| 26          | <chem>C=CC(CC)(CC)C(=O)Nc1ccc(OC(F)(F)F)cc1Br&gt;&gt;C=C1c2cc(OC(F)(F)F)ccc2NC(=O)C1(CC)CC</chem>                                                                  |
| 27          | <chem>C=C[C@@H](C)COc1ccccc1Br&gt;&gt;C=C1c2ccccc2OC[C@@H]1C</chem>                                                                                                |
| 28          | <chem>C=CCOC(c1ccccc1)c1c(Br)c(OC)c2ccccc2c1OC&gt;&gt;C=C1COC(c2ccccc2)c2c1c(OC)c1ccccc1c2OC</chem>                                                                |
| 29          | <chem>C=CCC(c1ccccc1I)N(CC(=O)OC)c1ccccc1&gt;&gt;C=C1CC(N(CC(=O)OC)c2ccccc2)c2ccccc21</chem>                                                                       |
| 30          | <chem>C=CCCOc1ccccc1Br&gt;&gt;C=C1CCOc2ccccc21</chem>                                                                                                              |
| 31          | <chem>C=CCC1c2cc(OC)c(OC)cc2CCN1Cc1ccccc1Br&gt;&gt;C=C1CC2c3cc(OC)c(OC)cc3CCN2Cc2ccccc21</chem>                                                                    |
| 32          | <chem>C=CCC(NCc1cc(F)ccc1Br)(C(=O)OC)C(C)C&gt;&gt;C=C1CC(C(=O)OC)(C(C)C)NCc2cc(F)ccc21</chem>                                                                      |
| 33          | <chem>C=CCC(Nc1ccccc1Br)c1ccn(C)c1&gt;&gt;C=C1CC(c2ccn(C)c2)Nc2ccccc21</chem>                                                                                      |
| 34          | <chem>C=CCN(Cc1ccc(OC)cc1)Cc1cc2ccc(C)cc2nc1Cl&gt;&gt;C=C1CN(Cc2ccc(OC)cc2)Cc2cc3ccc(C)ccc3nc21</chem>                                                             |
| 35          | <chem>C=CCN(Cc1ccccc1)Cc1cc2cc(C)ccc2nc1Cl&gt;&gt;C=C1CN(Cc2ccccc2)Cc2cc3cc(C)ccc3nc21</chem>                                                                      |
| 36          | <chem>C=C[Si](C)(c1ccccc1)c1ccccc1-c1ccccc1Br&gt;&gt;C=C1c2ccccc2-c2ccccc2[Si]1(C)c1ccccc1</chem>                                                                  |
| 37          | <chem>C=CCc1c(OCc2ccccc2Br)c(=O)oc2ccccc12&gt;&gt;O=c1oc2ccccc2c2c1OCc1ccccc1/C=C/C2</chem>                                                                        |
| 38          | <chem>C=CCCN(c1ccccc1Br)S(=O)(=O)c1ccccc1&gt;&gt;C=C1CCCN(S(=O)(=O)c2ccccc2)c2ccccc21</chem>                                                                       |
| 39          | <chem>C=C[C@@H](C)CN(c1ccccc1Br)S(=O)(=O)c1ccc(C)cc1&gt;&gt;C=C1c2ccccc2N(S(=O)(=O)c2ccc(C)cc2)C[C@@H]1C</chem>                                                    |
| 40          | <chem>CC(=O)/C=C/Oc1c(C)cccc1-c1ccccc1Br&gt;&gt;CC(=O)/C=C1/Oc2c(C)cccc2-c2ccccc21</chem>                                                                          |
| 41          | <chem>C=CC(C)(C)C1CCC(=O)N1CC(=C)Br&gt;&gt;C=C1CN2C(=O)CCC2C(C)(C)C1=C</chem>                                                                                      |
| 42          | <chem>C=CCc1c(OCc2cc(OC)ccc2Br)c(=O)n(C)c(=O)n1C&gt;&gt;COc1ccc2c(c1)COc1c(n(C)c(=O)n(C)c1=O)C/C</chem>                                                            |
| 43          | <chem>C=CCOCC1=C(Br)c2ccc(OC)cc2CC1&gt;&gt;C=C1CCOCC2=C1c1ccc(OC)cc1CC2</chem>                                                                                     |
| 44          | <chem>C=CC[C@@H](C[C@@H](CC=C)O[Si](C)(C)C(C)(C)C)Oc1c(Br)ccc1C(=O)OC(C)(C)C&gt;&gt;C=CC[C@@H](C[C@@H]1CC(=C)c2cccc(C(=O)OC(C)(C)C)c2O1)O[Si](C)(C)C(C)(C)C</chem> |

45 C=C/C(Br)=C/[C@]1(C)C(=O)OC[C@]1(C)/C=C\C(=O)OC>>C=CC1=C[C@]2(C)C(=O)OC[C@]2(C)/C1=C/C(=O)OC  
 46 C=CCN(CC1=C(Br)CCC1)c1ccc(Cl)cc1>>C=C1CN(c2ccc(Cl)cc2)CC2=C1CCC2  
 47 C=CC[C@](C)(CCc1ccccc1Br)N[S@@](=O)C(C)(C)C>>C=C1C[C@@](C)(N[S@@](=O)C(C)(C)C)CCc2ccccc21  
 48 C=CCN(Cc1nnn(CCCCCC)c1I)S(=O)(=O)c1ccc(C)cc1>>C=C1CN(S(=O)(=O)c2ccc(C)cc2)Cc2nnn(CCCCCC)c21  
 49 C=CCCCC1=C(I)C(=O)C(C(C)C)CC1>>C=C1CCCC2=C1C(=O)C(C(C)C)CC2  
 50 C=C[C@H](Cn1c(Br)c(-c2ccc(C(=O)Nc3cc(C(F)(F)F)ccn3)cc2)c2c(N)ncnc21)NC(=O)OC(C)(C)C>>C=C1c2c(-c3ccc(C(=O)Nc4cc(C(F)(F)F)ccn4)cc3)c3c(N)ncnc3n2C[C@H]1NC(=O)OC(C)(C)C  
 51 C=Cc1cc(C)ccc1N(C)C(=O)c1ccccc1I>>C=C1c2ccccc2C(=O)N(C)c2ccc(C)cc21  
 52 C=CCC(C(=O)OC)N(C(=O)c1ccccc1I)C(C(=O)NCc1ccccc1)c1ccccc1>>C=C1CC(C(=O)OC)N(C(C(=O)NCc2ccccc2)c2ccccc2)C(=O)c2ccccc21  
 53 C=C[C@H]1O[C@H]2OC(C)(C)O[C@@H]2[C@H]1N(Cc1ccccc1Br)S(=O)(=O)c1ccc(C)cc1>>C=C1c2ccccc2CN(S(=O)(=O)c2ccc(C)cc2)[C@H]2[C@@H]1O[C@H]1OC(C)(C)O[C@H]21  
 54 C=CCN(Cc1ccccc1)C(=O)c1ccccc1Br>>C=C1CN(Cc2ccccc2)C(=O)c2ccccc21  
 55 C=Cc1ccccc1(Nc2nc(Nc3ccc(OCCN4CCCC4)c(Br)c3)nc2Cl)c1>>Clc1cnc2nc1Nc1ccccc1)/C=C\c1ccc(ccc1OCCN1CCCC1)N2  
 56 C=Cc1ccccc1OS(=O)(=O)c1ccccc1Br>>O=S1(=O)Oc2ccccc2/C=C\c2ccccc21  
 57 C=Cc1ccc(CCCCCCCCCC)ccc1N(C)C(=O)c1ccccc1I>>C=C1c2ccccc2C(=O)N(C)c2ccc(CCCCCC)cc21  
 58 C=C[Si](C)(C)c1ccccc1/C=C\c1ccc(C)cc1Br>>C=C1c2cc(C)ccc2/C=C\c2ccccc2[Si]1(C)C  
 59 C=C[C@H](O[Si](C)(C)C(C)(C)C)[C@@H](OCCCCO[Si](C)(C)C(C)(C)C)[C@H](C/I)=C/CO  
 60 O[Si](C)(C)C(C)(C)C>>C=C1/C=C\CO)C[C@@H](O[Si](C)(C)C(C)(C)C)[C@H](OCCCCO[Si](C)(C)C(C)(C)C)[C@H]1O[Si](C)(C)C(C)(C)C  
 61 C=CCC(OC=CC(=O)OCC)c1ccccc1CCl>>C=C1Cc2ccccc2C(OC=CC(=O)OCC)C1  
 62 C=CCCC(=O)c1nnn(Cc2ccc(OC)cc2)c1I>>C=C1CCC(=O)c2nnn(Cc3ccc(OC)cc3)c21  
 63 C=CC(F)(F)Oc1ccc(C)cc1Br>>C=C1c2cc(C)ccc2OC1(F)F  
 64 C=CCc1cc(Cl)c2ccccc2c1OCc1ccc(OC)cc1Br>>C=C1Cc2cc(Cl)c3ccccc3c2OCc2ccc(OC)cc21  
 65 C=Cc1ccccc1N(Cc1cc(Br)ccc1I)C(C)=O>>CC(=O)N1Cc2cc(Br)ccc2/C=C\c2ccccc21  
 66 C=CCN(Cc1ccc(F)cc1)Cc1cc2cc(OC)ccc2nc1Cl>>C=C1CN(Cc2ccc(F)cc2)Cc2cc3cc(OC)ccc3nc21  
 67 C=CCCC(O)C=C(Br)c1ccc2c(c1)OCO2>>C=C1CCCC(O)C=C1c1ccc2c(c1)OCO2  
 68 C=CS(=O)(=O)N(CC(=C)Br)[C@H](C(=O)OC)C(C)C>>C=C1C=CS(=O)(=O)N([C@H](C(=O)OC)C(C)C)C1  
 69 CCCCC/C=C/I)OC(=O)/C=C/c1cccs1>>CCCCCCC1=C/C(=C\c2cccs2)C(=O)O1  
 70 C=CCO[C@@H]1[C@@H](OCc2ccccc2)[C@@H](COCc2ccccc2)O[C@@H]1Sc1ccccc1Br>>C=C1CO[C@@H]2[C@@H](OCc3ccccc3)[C@@H](COCc3ccccc3)O[C@@H]2Sc2ccccc21  
 71 C=Cc1ccccc1(Nc2nc(Nc3cc(Br)c(N4CCN(C)CC4)cc3OC)nc2Cl)c1>>COc1cc(N2CCN(C)CC2)c2cc1Nc1ncc(Cl)c(n1)Nc1ccccc1)/C=C\2  
 72 C=CCc1c(OCc2cc(OC)ccc2Br)ccc2ccccc12>>C=C1Cc2c(ccc3ccccc23)OCc2cc(OC)ccc21  
 73 C=CCc1ccc(F)c1N(Cc1ccccc1Br)S(=O)(=O)c1ccc(C)cc1>>C=C1Cc2ccccc(F)c2N(S(=O)(=O)c2ccc(C)cc2)Cc2ccccc21  
 74 C=Cc1cc(Cl)ccc1OS(=O)(=O)c1ccccc1Br>>O=S1(=O)Oc2ccc(Cl)cc2/C=C\c2ccccc21  
 75 C=CCN(CC1=C(Br)CCC1)c1ccc2ccccc12>>C=C1CN(c2ccccc3ccccc23)CC2=C1CCC2  
 76 COC(=O)/C=C/Oc1ccccc1-c1ccccc1I>>COC(=O)/C=C1/Oc2ccccc2-c2ccccc21  
 77 C=CCc1c(OS(=O)(=O)c2ccccc2Br)ccc2ccccc12>>C=C1Cc2c(ccc3ccccc23)OS(=O)(=O)c2ccccc21  
 78 C=CCC(NCc1cc(F)ccc1Br)C(=O)OC>>C=C1CC(C(=O)OC)NCc2cc(F)ccc21  
 79 C=CCC(CCBrc1cc2ccccc2o1)>>C=C1CCC(c2cc3ccccc3o2)C1  
 80 C=Cc1ccccc(OC)c1C(=O)c1c(Br)c(OC)c(C)c2c1OC(C)(C)OC2>>C=C1c2ccccc(OC)c2C(=O)c2c3c(c(C)c(OC)c21)COC(C)(C)O3  
 81 C=CC(OCC(=C)Br)c1ccc(OC)cc1>>C=C1COC(c2ccc(OC)cc2)C1=C  
 82 C=C[C@H](C)OCc1c(Br)ccc(OCc2ccccc2)c1OCc1ccccc1>>C=C1c2ccc(OCc3ccccc3)c(OCc3ccccc3)c2CO[C@H]1C  
 83 Cc1cc(Br)c(-c2ccccc2O/C=C/C(=O)c2ccccc2)cc1C>>Cc1cc2c(cc1C)-  
 84 C=Cc1cc(OC)ccc1OCc1cc(OC)ccc1Br>>COc1ccc2c(c1)/C=C\c1ccc(OC)cc1CO2  
 85 C=C(C)CN1C(=O)[C@H](Oe2ccccc2)[C@@H]1[C@@H](CC(=C)Br)OC(C)=O>>C=C1/C=C(/C)CN2C(=O)[C@H](Oe3ccccc3)[C@@H]2[C@H](OC(C)=O)C1  
 86 C=CCC(NCc1cc(C)ccc1Br)(C(=O)OC)C(C)C>>C=C1CC(C(=O)OC)(C(C)C)NCc2cc(C)ccc21  
 87 C=C[Si](C)(C)c1ccccc1/C=C\c1ccccc1Br>>C=C1c2ccccc2/C=C\c2ccccc2[Si]1(C)C

87 C=C[C@H](OCc1ccc(OC)cc1)[C@H](CCCC)OC(=O)c1c(C)cccc1Oe1ccc2c(c1I)COC(C)(C)O2>>  
 88 CCCC[C@H]1OC(=O)c2c(C)cccc2Oc2ccc3c(c2/C=C/[C@H]1OCc1ccc(OC)cc1)COC(C)(C)O3  
 89 C=CCC(CCCl)(C(=O)OCC)C(=O)OCC>>C=C1CCC(C(=O)OCC)(C(=O)OCC)C1  
 90 C=CCC(O)c1cc(-c2ccccc2)cnc1Cl>>C=C1CC(O)c2cc(-c3ccccc3)cnc21  
 91 C=CCOc1cc2c(c1I)-c1c(cc(OC)c(OC)c1OC)CC[C@H]2NC(=O)CO>>C=C1COc2cc3c(cc21)-  
 92 c1c(cc(OC)c(OC)c1OC)CC[C@H]3NC(=O)CO  
 93 C=CCN(C(=O)c1ccc2ccccc2c1Br)C(C(=O)NC1CCCCC1)c1ccccc1>>C=C1CN(C(C(=O)NC2CCCC  
 94 2)c2ccccc2)C(=O)c2ccc3ccccc3c21  
 95 C=CCN(CCI)S(=O)(=O)c1ccnc1>>C=C1CCN(S(=O)(=O)c2ccnc2)C1  
 96 C=CC(COe1cccc([N+](=O)[O-])c1I)NC(=O)OCc1ccccc1>>C=C1c2c(cccc2[N+](=O)[O-  
 97 ]OCC1NC(=O)OCc1ccccc1  
 98 C=CCC(Oc1ccc(Cl)cc1Br)C(=O)OCC>>C=C1CC(C(=O)OCC)Oc2ccc(Cl)cc21  
 99 C=CCN(CCc1ccc(Cl)cc1I)C(=O)C(F)(F)F>>C=C1CN(C(=O)C(F)(F)F)CCc2ccc(Cl)cc21  
 100 C=CCN(C(=O)c1ccc2ccccc2c1Br)C(C(=O)NC(C)(C)C)c1ccccc1>>C=C1CN(C(C(=O)NC(C)(C)C)c2c  
 101 cccc2)C(=O)c2ccc3ccccc3c21  
 102 C=CCOCc1nnn(Cc2ccsc2)c1I>>C=C1COCc2nnn(Cc3ccsc3)c21  
 103 C=CCCC[C@H](C=C)COc1ccccc1Br>>C=CCCC[C@H]1COc2ccccc2C1=C  
 104 CC(=O)Oc1ccc(/C=C/C(=O)O/C(=C\I)c2ccc(OC(C)=O)c(OC(C)=O)c2)cc1OC(C)=O>>CC(=O)Oc1cc  
 105 c(/C=C2\C=C(C3ccc(OC(C)=O)c(OC(C)=O)c3)OC2=O)cc1OC(C)=O  
 106 C=CCCN(Cc1cc2c(cc1Br)OCO2)C(=O)OC(C)(C)C>>C=C1CCN(C(=O)OC(C)(C)C)Cc2cc3c(cc21)O  
 107 C=C[Si](C)(C)c1cc(C)c(C)cc1-c1cc(C)c(C)cc1Br>>C=C1c2cc(C)c(C)cc2-c2cc(C)c(C)cc2[Si]1(C)C  
 108 C=CCCN(C(=O)c1ccccc1)c1ccccc1I>>C=C1CCCN(C(=O)c2ccccc2)c2ccccc21  
 109 C=CC(=O)NC[C@H](OC)[C@H](OC)c1ccccc1NC(=O)[C@H](C)NC(=O)c1ccccc1Br>>CO[C@  
 110 @H]1CNC(=O)/C=C/c2ccc(c2)C(=O)N[C@H](C)C(=O)Nc2ccccc2[C@H]1OC  
 111 C=CCN(CC1=C(Br)CCCCC1)c1ccc(Cl)cc1>>C=C1CN(c2ccc(Cl)cc2)CC2=C1CCCCC2  
 112 C=CCOC(Cl)c1ccc(OC)cc1>>C=C1COC(c2ccc(OC)cc2)C1  
 113 C=CCOCC1=C(Br)c2ccccc2CC1>>C=C1CCOCC2=C1c1ccccc1CC2  
 114 C=CCc1c(OCc2cc(OC)ccc2Br)c(=O)n(C)c2ccccc12>>C=C1Cc2c(c(=O)n(C)c3ccccc23)OCc2cc(OC)c  
 115 C=CC(C)(C)C(C(=O)NCc1ccccc1)c1ccccc1Br>>C=C1c2ccccc2C(C(=O)NCc2ccccc2)C1(C)C  
 116 C=Cc1cc(CC)ccc1N(C)C(=O)c1cc(OC)ccc1I>>C=C1c2ccc(OC)cc2C(=O)N(C)c2ccc(CC)cc21  
 117 C=CCCCC(I)CCCCC>>C=C1CCCC1CCCCC  
 118 C=CCC[C@H]1C(OS(=O)(=O)C(F)(F)F)=C[C@H]2(C)C=C[C@H]1(C(C)C)O2>>C=C1CC[C@H]2C1  
 119 =C[C@H]1(C)C=C[C@H]2(C(C)C)O1  
 120 C=CCCC(O)C=C(Br)c1ccccc1>>C=C1CCCC(O)C=C1c1ccccc1  
 121 C=CCCOc1cc(=O)n(C)cc1-c1cc(NS(=O)(=O)CC)ccc1Oe1ccc(Cl)cc1I>>CCS(=O)(=O)Nc1ccc2c(c1)-  
 122 c1cn(C)c(=O)cc1OCC/C=C/c1cc(Cl)ccc1O2  
 123 C=CCC1c2cc(OC)c(OC)cc2CCN1CC(=C)I>>C=C1CC2c3cc(OC)c(OC)cc3CCN2CC1=C  
 124 C=CCn1c(-c2ccc3ccc(OC)cc3c2Br)nc2ccccc21>>C=C1Cn2c(nc3ccccc32)-c2ccc3ccc(OC)cc3c21  
 125 C=Cc1ccccc1(Nc2ncc(Cl)c(Nc3cc(Br)ccc3OC)n2)c1>>COc1ccc2cc1Nc1nc(nc1Cl)Nc1ccccc1/C=C\2  
 126 C=CCN(CCc1ccc(F)cc1I)C(=O)C(F)(F)F>>C=C1CN(C(=O)C(F)(F)F)CCc2ccc(F)cc21  
 127 O=C/C=C/c1ccccc1O/C(=C\I)c1ccccc1>>O=C1OC(c2ccccc2)=C/C1=C\c1ccccc1  
 128 C=CCc1ccc2ccccc2c1OCc1ccccc1Br>>C=C1Cc2ccc3ccccc3c2OCc2ccccc21  
 129 C=CCc1c(N(CC)C(=O)c2ccccc2I)ccc2c1ccc(=O)n2CC>>C=C1Cc2c(ccc3c2ccc(=O)n3CC)N(CC)C(=  
 130 O)c2ccccc21  
 131 C=CCN(C(=O)c1ccc2ccccc2c1Br)C(C(=O)NC1CCCCC1)c1ccc(OC)c(OC)c1>>C=C1CN(C(C(=O)NC  
 132 2CCCCC2)c2ccc(OC)c(OC)c2)C(=O)c2ccc3ccccc3c21  
 133 C=CCn1c(N(c2ccc(Br)cc2I)S(=O)(=O)c2ccc(C)cc2)cc2cc(C)ccc21>>Cc1ccc(S(=O)(=O)N2c3ccc(Br)c  
 134 c3/C=C\Cn3c2cc2cc(C)ccc23)cc1  
 135 C=CC(OCC(=C)Br)c1ccc2c(ccn2COCC[Si](C)(C)C)c1>>C=C1COC(c2ccc3c(ccn3COCC[Si](C)(C)C)  
 136 c2)C1=C  
 137 C=Cc1ccccc1(C(=O)O[C@H]2[C@H]3[C@H](C)(C(=O)[C@H](OC(C)=O)C4=C(C)[C@H](OC(=O)[C  
 138 @H](O[Si](C)(C)C)(C(C)C)C(C)C)[C@H](C=C(C)C)NC(=O)c5ccccc1)c5)C[C@H]2(O)C4(C)C)[C@H]  
 139 H](O[Si](CC)(CC)CC)C[C@H]2OC[C@H]23OC(C)=O)c1>>C=C1c2ccccc2)C(=O)N[C@H](C=C(C  
 140 )C)[C@H](O[Si](C)(C)C)(C(C)C)C(C)C)C(=O)O[C@H]2C[C@H]3(O)[C@H](OC(=O)c4ccccc1c4  
 141 ]C@H1I[C@H](C)(C(=O)I)C@H1(OC(C)=O)C(=C2C)C3(C)C)I[C@H](O[Si](CC)(CC)CC)C[C@H]2  
 142 C=CCCN([C@H](C)C(=O)OC)S(=O)(=O)c1ccccc1Br>>C=C1CCN([C@H](C)C(=O)OC)S(=O)(=  
 143 O)c2ccccc21  
 144 C=CCC(NC(C(=O)NCc1ccccc1)c1ccccc1Br)C(=O)OC>>C=C1CC(C(=O)OC)NC(C(=O)NCc2ccccc2)  
 145 c2ccccc21  
 146 C=Cc1ccc(C(C)(C)C)ccc1OCc1cc(OC)ccc1Br>>COc1ccc2c(c1)COc1ccc(C(C)(C)C)cc1/C=C\2  
 147 C=CCN(CC(C)C)C(=O)c1ccccc1Br>>C=C1CN(CC(C)C)C(=O)c2ccccc21

129 C=CCCN(CC(=O)OC)S(=O)(=O)c1ccccc1Br>>C=C1CCN(CC(=O)OC)S(=O)(=O)c2ccccc21  
130 C=CCc1c(OCc2ccccc2I)c(=O)oc2ccccc12>>C=C1Cc2c(c(=O)oc3ccccc23)OCc2ccccc21  
131 C=CCN(CC1=C(Br)CCCC1)c1ccc(Cl)cc1>>C=C1CN(c2ccc(Cl)cc2)CC2=C1CCCC2  
132 C=CCn1c(N(c2ccc(Cl)cc2I)S(C)(=O)=O)cc2cc([N+](=O)[O-]  
]ccc21>>CS(=O)(=O)N1c2ccc(Cl)cc2/C=C\Cn2c1cc1cc([N+](=O)[O-])ccc12  
133 C=C[C@H]1CC(C(=O)OC)(C(=O)OC)[C@H](c2cc(OC)c(OC)c(OC)c2)N(c2ccccc2I)O1>>C=C1c2  
ccccc2N2O[C@H]1CC(C(=O)OC)(C(=O)OC)[C@@H]2c1cc(OC)c(OC)c(OC)c1  
CC(C)COC(=O)[C@H](C)OC(=O)[C@@H](C/C=C1\CCN([14c]2[14cH][14cH][14cH][14cH][14c  
134 H]2)C1=O)Nc1cc(Cl)ccc1I>>CC(C)COC(=O)[C@H](C)OC(=O)[C@H]1C/C(=C2/CCN([14c]3[14c  
H][14cH][14cH][14cH][14cH]3)C2=O)c2ccc(Cl)cc2N1  
135 C=C[C@H]1O[C@H]2OC(C)(C)O[C@H]2[C@H]1N(Cc1ccccc1Br)C(=O)OC>>C=C1c2ccccc  
2CN(C(=O)OC)[C@H]2[C@H]1O[C@H]1OC(C)(C)O[C@H]12  
C=C[C@H]1C[C@H](OCc2ccccc2)[C@H](O[Si](C)(C)C(C)(C)C)[C@H]1N(Cc1cc2c(cc1  
136 Br)OCO2)C(C)=O>>C=C1c2cc3c(cc2CN(C(C)=O)[C@H]2C[C@H](O[Si](C)(C)C(C)(C)C)[C@H](O  
Cc4ccccc4)C[C@H]12)OCO3  
Cc1cc(Br)c(-c2ccccc2O/C=C/C(=O)OCc2ccccc2)cc1C>>Cc1cc2c(cc1C)-  
137 c1ccccc1O/C2=C/C(=O)OCc1ccccc1  
138 C=CC(C)(C)OC(Cl)OCCCC>>C=C1CC(OCCCC)OC1(C)C  
139 C=C[C@H](O[Si](C)(C)C(C)(C)C)[C@H](c1ccccc1)[C@H](CC(I)=CCO)O[Si](C)(C)C(C)(C)  
140 C>>C=C1C(=CCO)C[C@H](O[Si](C)(C)C(C)(C)C)[C@H](c2ccccc2)[C@H]1O[Si](C)(C)C(C)(C)  
C=Cc1cc(C)ccc1OCc1cc(OC)ccc1Br>>COc1ccc2c(c1)COc1ccc(C)cc1/C=C\2  
141 C=CC[C@H]1C(=O)N(c2ccc(OC)cc2)[C@H]1[C@H](CC(=C)Br)OC(C)=O>>C=C1/C=C\C[C@  
142 @H]2C(=O)N(c3ccc(OC)cc3)[C@H]2[C@H](OC(C)=O)C1  
C=CCC(OCC(=C)Br)c1ccc(Cl)cc1>>C=C1COC(c2ccc(Cl)cc2)CC1=C  
143 C=CC1CCC(=O)N1CCI>>C=C1CCN2C(=O)CCC12  
144 C=CCN(CCc1cc(OC)c(OC)cc1Br)C(=O)OC(C)(C)C>>C=C1CN(C(=O)OC(C)(C)C)CCc2cc(OC)c(OC  
)cc21  
145 C=CCCC[C@H](C=C)CN(c1ccccc1Br)S(=O)(=O)c1ccc(C)cc1>>C=CCCC[C@H]1CN(S(=O)(=O  
)c2ccc(C)cc2)c2ccccc2C1=C  
146 C=CCC(C1=C(OS(=O)(=O)C(F)(F)F)CCC1)c1ccc(OC)cc1>>C=C1CC(c2ccc(OC)cc2)C2=C1CCCC2  
147 C=CCC(CCBr)c1ccc2ccccc2c1>>C=C1CCC(c2ccc3ccccc3c2)C1  
148 C=CCN(CCI)S(=O)(=O)c1ccc(C=O)cc1>>C=C1CCN(S(=O)(=O)c2ccc(C=O)cc2)C1  
149 C=C[C@H]1COC(=O)[C@H]1[C@H](c1cc(OC)c(OC)c(OC)c1)c1cc2c(cc1OS(=O)(=O)C(F)(F)F)O  
CO2>>C=C1c2cc3c(cc2[C@H](c2cc(OC)c(OC)c(OC)c2)[C@H]2C(=O)OC[C@H]12)OCO3  
150 COC(=O)/C=C/Oc1ccccc1-c1ccccc1Cl>>COC(=O)/C=C1/Oc2ccccc2-c2ccccc21  
151 C=CC(C)c1c(OCc2cc(OC)ccc2Br)c(=O)oc2ccccc12>>COc1ccc2c(c1)COc1c(c3ccccc3oc1=O)C(C)/C  
152 C=CCn1c(N(c2ccc(F)cc2I)S(=O)(=O)c2ccc(C)cc2)cc2ccccc21>>Cc1ccc(S(=O)(=O)N2c3ccc(F)cc3/C  
=C\Cn3c2cc2ccccc23)cc1  
153 C=CCc1c(OCc2cc(OC)ccc2Br)c(=O)oc2ccccc12>>COc1ccc2c(c1)COc1c(c3ccccc3oc1=O)C/C=C\2  
154 C=CCc1cc(Cl)c2ccccc2c1OCc1ccc(F)cc1Br>>C=C1Cc2cc(Cl)c3ccccc3c2OCc2ccc(F)cc21  
155 C=C[C@H](O[Si](C)(C)C(C)(C)C)[C@H](C)[C@H](C/C(I)=C/CO)O[Si](C)(C)C(C)(C)C>>C=C  
1/C(=C\CO)C[C@H](O[Si](C)(C)C(C)(C)C)[C@H](C)[C@H]1O[Si](C)(C)C(C)(C)C  
156 C=CCN(Cc1ccccc1)Cc1cc2ccccc2nc1Cl>>C=C1CN(Cc2ccccc2)Cc2cc3ccccc3nc21  
157 C=CCC(O)c1cc2ccccc(CC)c2nc1Cl>>C=C1CC(O)c2cc3ccccc(CC)c3nc21  
158 C=Cc1c(OCc2ccccc2Br)ccc2ccccc12>>C1=C\c2c(ccc3ccccc23)OCc2ccccc2/1  
159 CCCCCC/C(=C/I)OC(=O)/C=C/c1ccccc1>>CCCCCCC1=C/C(=C\c2ccccc2)C(=O)O1  
160 C=CC(C)c1c(OC(=O)c2ccccc2I)c(=O)n(C)c(=O)n1C>>CC1/C=C\c2ccccc2C(=O)Oc2c1n(C)c(=O)n(C  
)c2=O  
161 C=CCN(CCI)S(=O)(=O)c1ccc(C)cc1>>C=C1CCN(S(=O)(=O)c2ccc(C)cc2)C1  
162 COc1cc(Br)c(-c2ccccc2O/C=C/C(C)=O)cc1OC>>COc1cc2c(cc1OC)-c1ccccc1O/C2=C/C(C)=O  
163 C=CCc1cc(C)ccc1N(Cc1cc(OC)ccc1Br)S(=O)(=O)c1ccc(C)cc1>>C=C1Cc2cc(C)ccc2N(S(=O)(=O)c2  
ccc(C)cc2)Cc2cc(OC)ccc21  
164 C=CCN(CCc1cc(OC)ccc1I)C(=O)C(F)(F)F>>C=C1CN(C(=O)C(F)(F)F)CCc2cc(OC)ccc21  
165 C=CCC(NCc1ccc(F)cc1Br)C(=O)OC>>C=C1CC(C(=O)OC)NCc2ccc(F)cc21  
C=C[C@H](Cn1c(Br)c(-  
166 c2ccc(C(=O)N[C@H](C)c3ccccc3)cc2)c2c(N)ncnc21)NC(=O)OC(C)(C)C>>C=C1c2c(-  
c3ccc(C(=O)N[C@H](C)c4ccccc4)cc3)c3c(N)ncnc3n2[C@H]1NC(=O)OC(C)(C)C  
167 C=Cc1cc(C(O)(C(F)(F)F)C(F)(F)F)ccc1N(C)C(=O)c1ccccc1I>>C=C1c2ccccc2C(=O)N(C)c2ccc(C(O  
(C(F)(F)F)C(F)(F)F)cc21  
168 C=Cc1ccc(N(C)S(C)(=O)=O)c(Nc2nc(Nc3cc(Br)c(N4CCN(C)CC4)cc3OC)nc2Cl)c1>>COc1cc(N2C  
CN(C)CC2)c2cc1Nc1ncc(Cl)c(n1)Nc1cc(ccc1N(C)S(C)(=O)=O)/C=C\2

169 C=Cc1cc(C(=O)OCC)ccc1N(C)C(=O)c1ccccc1I>>C=C1c2ccccc2C(=O)N(C)c2ccc(C(=O)OCC)cc21  
170 O=C(/C=C/Oc1ccccc1-c1ccccc1Br)OCc1ccccc1>>O=C(/C=C1/Oc2ccccc2-c2ccccc21)OCc1ccccc1  
171 C=CCN(C)CCc1ccc([N+](=O)[O-])cc1Br>>C=C1CN(C)CCc2ccc([N+](=O)[O-])cc21  
172 C=CCc1ccc2ccnc2c1OCc1ccccc1Br>>C=C1Cc2ccc3ccnc3c2OCc2ccccc21  
173 C=C[Si](C)(C)c1ccccc1-c1ccccc1Br>>C=C1c2ccccc2-c2ccccc2[Si]1(C)C  
174 C=CCN(c1ccc2c(ccc(=O)n2CC)c1)S(=O)(=O)c1ccccc1Br>>C=C1CN(c2ccc3c(ccc(=O)n3CC)c2)S(=O)(=O)c2ccccc21  
175 C=C[C@H](OCc1ccc(OC)cc1)[C@@H](CCCC)OC(=O)c1c(C)cccc1Oc1ccc2c(c1Br)COC(C)(C)O2  
>>CCCC[C@H]1OC(=O)c2c(C)cccc2Oc2ccc3c(c2/C=C/[C@@H]1OCc1ccc(OC)cc1)COC(C)(C)O3  
176 C=C(C)CC(OCC(=C)Br)c1cccc(OC)c1>>C=C1C=C(C)CC(c2cccc(OC)c2)OC1  
177 C=CCN(/C=C/c1ccccc1Br)C(C)=O>>C=C1CN(C(C)=O)C=Cc2ccccc21  
178 C=CCOCC1=C(Br)c2ccccc2CC1>>C=C1COCC2=C1c1ccccc1CC2  
179 C=Cc1c2c(cc(OC)c1C(OCc1ccccc1)c1cccc(OC)c1I)COC(C)(C)O2>>C=C1c2c(OC)cccc2C(OCc2cccc  
c2)c2c(OC)cc3c(c21)OC(C)(C)OC3  
180 C=C[C@H](O[Si](C)(C)C(C)(C)C)[C@H](CCCO[Si](c1ccccc1)(c1ccccc1)C(C)(C)C)[C@@H](C/C(I)  
=CCO)O[Si](C)(C)C(C)(C)C>>C=C1/C(=CCO)C[C@@H](O[Si](C)(C)C(C)(C)C)[C@@H](CCCO[  
Si](c2ccccc2)(c2ccccc2)C(C)(C)C)[C@H]1O[Si](C)(C)C(C)(C)C  
C=C[C@@H](O[Si](C)(C)C(C)(C)C)[C@@H](OCCCO[Si](C)(C)C(C)(C)C)[C@@H](CC(I)=CCO)O  
181 [Si](C)(C)C(C)(C)C>>C=C1C(=CCO)C[C@@H](O[Si](C)(C)C(C)(C)C)[C@H](OCCCO[Si](C)(C)C(C)  
C(C)(C)C)[C@@H]1O[Si](C)(C)C(C)(C)C  
182 C=CCC(NCc1ccc(F)cc1Br)(C(=O)OC)C(C)C>>C=C1CC(C(=O)OC)(C(C)C)NCc2ccc(F)cc21  
183 CC=C(c1ccccc1)c1c(OCc2ccccc2Br)c(=O)n(C)c(=O)n1C>>C/C1=C(c2ccccc2)c2c(c(=O)n(C)c(=O)n2  
C)OCc2ccccc21  
184 C=Cc1cc(OC)ccc1OCc1ccccc1Br>>COc1ccc2c(c1)/C=C/c1ccccc1CO2  
185 C=C[Si](C)(C)c1ccc2ccccc2c1-c1c(Br)ccc2ccccc12>>C=C1c2ccc3ccccc3c2-  
186 C=C[C@H]1O[C@@H]2OC(C)(C)O[C@@H]2[C@H]1N(Cc1cc(OC)ccc1Br)C(=O)OC>>C=C1c2ccc  
(OC)cc2CN(C(=O)OC)[C@H]2[C@@H]1O[C@@H]1OC(C)(C)O[C@H]21  
187 C=CCc1c(N(CC)C(=O)Cc2ccccc2I)ccc2c1ccc(=O)n2C>>C=C1Cc2c(ccc3c2ccc(=O)n3C)N(CC)C(=O)  
Cc2ccccc21  
188 COC(=O)/C=C/Oc1ccccc1-c1ccccc1Br>>COC(=O)/C=C1/Oc2ccccc2-c2ccccc21  
189 C=CCN(Cc1ccccc1I)C1CCCCC1>>C=C1CN(C2CCCCC2)Cc2ccccc21  
190 C=CC[C@H](N[S@](=O)C(C)(C)C)c1ccccc1I>>C=C1C[C@H](N[S@](=O)C(C)(C)C)c2ccccc21  
191 C=C[C@H](OCc1ccc(OC)cc1)[C@@H](CCCC)OC(=O)c1c(C)cccc1Oc1ccc2c(c1I)COC(C)(C)O2>>  
CCCC[C@H]1OC(=O)c2c(C)cccc2Oc2ccc3c(c2/C=C/[C@@H]1OCc1ccc(OC)cc1)COC(C)(C)O3  
192 C=C[C@H](NC(=O)OC(C)(C)C)[C@H](C)(C)O[C@H](C)O[C@H]1OC(C)(C)O[C@H]21  
C=CCc1c(N(CC)C(=O)Cc2ccccc2I)ccc2c1ccc(=O)n2C>>C=C1Cc2c(ccc3c2ccc(=O)n3C)N(CC)C(=O)  
Cc2ccccc21  
193 COC(=O)/C=C/Oc1ccccc1-c1ccccc1Br>>COC(=O)/C=C1/Oc2ccccc2-c2ccccc21  
194 C=CCN(Cc1ccc(Cl)cc1)S(=O)(=O)c1ccccc1Br>>C=C1CCN(c2ccc(Cl)cc2)S(=O)(=O)c2ccccc21  
195 C=CC(CCC1(C)OCCO1)C(Cc1ccccc1Br)(C(=O)OC)C(=O)OC>>C=C1c2ccccc2CC(C(=O)OC)(C(=O)  
OC)C1CCC1(C)OCCO1  
196 C=C(C)CC(OCC(=C)Br)c1ccc(-c2ccccc2)cc1>>C=C1C=C(C)CC(c2ccc(-c3ccccc3)cc2)OC1  
197 C=CCN(Cc1cc2ccccc2nc1Cl)c1ccc(OC)cc1>>C=C1CN(c2ccc(OC)cc2)Cc2cc3ccccc3nc21  
198 C=CC(F)(F)Oc1ccc2ccccc2c1Br>>C=C1c2c(ccc3ccccc23)OC1(F)F  
199 O=C(/C=C/c1ccccc1)O/C(=C/I)C1CC1>>O=C1OC(C2CC2)=C/C1=C/c1ccccc1  
C=CCN1c2c(Br)cc([N+](=O)[O-]  
200 ])cc2C(=O)N2C1C(C)(C)OC21CCCCC1>>C=C1CN2c3c1cc([N+](=O)[O-]  
])cc3C(=O)N1C2C(C)(C)OC12CCCCC2  
201 C=CCN(c1ccc2oc(=O)ccc2c1)S(=O)(=O)c1ccccc1Br>>C=C1CN(c2ccc3oc(=O)ccc3c2)S(=O)(=O)c2c  
ccccc21  
202 C=CCC(OCC(=C)Br)c1cccc(Cl)c1>>C=C1COC(c2cccc(Cl)c2)CC1=C  
203 C=CCn1c(N(c2ccc(C)cc2I)S(C)(=O)=O)cc2cc(Cl)ccc21>>Cc1ccc2c(c1)/C=C/Cn1c(cc3cc(Cl)ccc31)N  
2S(C)(=O)=O  
204 O=C(/C=C/Oc1ccccc1-c1cc(F)c(F)cc1Br)OCc1ccccc1>>O=C(/C=C1/Oc2ccccc2-  
c2cc(F)c(F)cc21)OCc1ccccc1  
205 COC(=O)/C=C/Oc1ccccc1-c1ccccc1Br>>COC(=O)/C=C1/Oc2ccccc2-c2ccccc21  
206 C=CCOCc1nnn(CCCCCC)c1I>>C=C1COCc2nnn(CCCCCC)c21  
207 C=CC(=O)NC[C@@H](OC)[C@H](OC)c1ccccc1NC(=O)[C@@H](NC(=O)c1cccc(Br)c1)[C@@H](  
C)CC>>CC[C@H](C)[C@@H]1NC(=O)c2ccccc2)/C=C/C(=O)NC[C@@H](OC)[C@H](OC)c2ccccc  
208 C=CCN(c1ccc2oc(=O)cc(OCC)c2c1)S(=O)(=O)c1ccccc1Br>>C=C1CN(c2ccc3oc(=O)cc(OCC)c3c2)S  
(=O)(=O)c2ccccc21

209 C=Cc1ccc(S(=O)(=O)C(C)C)c(Nc2nc(Nc3cc(Br)c(N4CCN(C)CC4)cc3OC)ncc2Cl)c1>>COc1cc(N2C  
CN(C)CC2)c2cc1Nc1ncc(Cl)c(n1)Nc1cc(ccc1S(=O)(=O)C(C)C)/C=C\2  
C=C[C@@H](O[Si](C)(C)C(C)(C)C)[C@@H](CCCO[Si](C)(C)C(C)(C)C)[C@@H](C/C(I)=C/CO)O[  
210 Si](C)(C)C(C)(C)C>>C=C1/C(=C\CO)C[C@@H](O[Si](C)(C)C(C)(C)C)[C@@H](CCCO[Si](C)(C)C(C  
)(C)C)[C@@H]1O[Si](C)(C)C(C)(C)C  
211 C=CCC(OCC(=C)Br)c1ccoc1>>C=C1COC(c2ccoc2)CC1=C  
212 C=Cc1c(OS(=O)(=O)c2ccccc2Br)ccc2ccccc12>>O=S1(=O)Oc2ccc3ccccc3c2/C=C\c2ccccc21  
213 C=CCN(c1ccc2c(c1)OCO2)S(=O)(=O)c1ccccc1Br>>C=C1CN(c2ccc3c(c2)OCO3)S(=O)(=O)c2ccccc2  
214 C=CCN(Cc1ccccc1I)C(=O)C(F)(F)F>>C=C1CN(C(=O)C(F)(F)F)Cc2ccccc21  
215 C=Cc1cc(OC)c(OC)cc1CC(Nc1ccccc1)c1cc2c(cc1Br)OCO2>>C=C1c2cc(OC)c(OC)cc2CC(Nc2ccccc  
2)c2cc3c(cc21)OCO3  
216 O=C(/C=C/c1cccs1)O/C(=C\I)c1ccccc1>>O=C1OC(c2ccccc2)=C/C1=C\c1cccs1  
217 C=Cc1cccc(O)c1C(=O)Oc1cccc(C(CCCCC)OC)c1I>>C=C1c2cccc(O)c2C(=O)Oc2cccc(C(CCCCC)O  
C)c21  
218 C=CCC1c2ccccc2CCN1CC(=C)I>>C=C1CC2c3ccccc3CCN2CC1=C  
219 C=CCCC[C@@@]1(C)C(OS(=O)(=O)C(F)(F)F)=CC[C@@H]1C(C)C>>C=C1CCC[C@@@]2(C)C1=CC  
[C@@H]2C(C)C  
220 C=CCN1CCc2ccccc2C1Cc1ccccc1Br>>C=C1CN2CCc3ccccc3C2Cc2ccccc21  
221 C=CC(C)c1c(OS(=O)(=O)c2ccccc2Br)ccc2ccccc12>>C=C1c2ccccc2S(=O)(=O)Oc2ccc3ccccc3c2C1C  
222 C=CC(OCC(=C)Br)c1ccccc1>>C=C1COC(c2ccccc2)C1=C  
223 C=CCN(C(=O)c1ccccc1Br)C(C)(C)C>>C=C1CN(C(C)(C)C)C(=O)c2ccccc21  
224 COC(=O)/C(=C\CCN(C(=O)OC(C)(C)C)C(=O)c1c(I)c2ccccc2n1C(=O)OC(C)(C)C)OCc1ccccc1>>CO  
C(=O)/C(OCc1ccccc1)=C1/CCN(C(=O)OC(C)(C)C)C(=O)c2c1c1ccccc1n2C(=O)OC(C)(C)C  
225 C=CCCN(c1ccccc1)S(=O)(=O)c1ccccc1Br>>C=C1CCN(c2ccccc2)S(=O)(=O)c2ccccc21  
226 C=C[C@@H](O[Si](C)(C)C(C)(C)C)[C@@H](CCCC)[C@@H](CC(I)=CCO)O[Si](C)(C)C(C)(C)C>  
>C=C1C(=CCO)C[C@@H](O[Si](C)(C)C(C)(C)C)[C@@H](CCCC)[C@@H]1O[Si](C)(C)C(C)(C)C  
227 C=CCn1c(N(c2ccc(C)cc2I)S(=O)(=O)c2cccs2)cc2cc(Cl)ccc21>>Cc1ccc2c(c1)/C=C\Cn1c(cc3cc(Cl)cc  
c31)N2S(=O)(=O)c1cccs1  
228 C=CCCN1c2c(Br)cc([N+](=O)[O-  
]cc2C(=O)N2C1C(C)(C)SC2(C)C>>C=C1CCN2c3c1cc([N+](=O)[O-  
229 C=CCCC[C@@H](C=C)COc1ccccc1Br>>C=CCCC[C@@H]1COc2ccccc2C1=C  
230 C=C[C@H]1O[C@@H]2OC(C)(C)O[C@@H]2[C@H]1N(Cc1cc2c(cc1Br)OCO2)C(=O)OC>>C=C1c  
2cc3c(cc2CN(C(=O)OC)[C@H]2[C@@H]1O[C@@H]1OC(C)(C)O[C@H]21)OCO3  
231 C=CC[C@@H](CCc1ccccc1Br)COCc1ccccc1>>C=C1C[C@H](COCc2ccccc2)CCc2ccccc21  
232 C=CCOC(C)c1c(Br)c(OC)c2ccccc2c1OC>>C=C1COC(C)c2c1c(OC)c1ccccc1c2OC  
233 C=CC(=O)NC[C@@H](OC)[C@H](OC)c1ccccc1NC(=O)[C@@H](NC(=O)c1cccc(Br)c1)C(C)C>>C  
O[C@@H]1CNC(=O)/C=C/c2cccc(c2)C(=O)N[C@@H](C(C)C)C(=O)Nc2ccccc2[C@H]1OC  
C=C[C@H]1CC(C(=O)OC)(C(=O)OC)[C@@H](c2cn(S(=O)(=O)c3ccc(C)cc3)c3ccccc23)N(c2ccccc2  
234 I)O1>>C=C1c2ccccc2N2O[C@@H]1CC(C(=O)OC)(C(=O)OC)[C@H]2c1cn(S(=O)(=O)c2ccc(C)cc2)  
c2ccccc12  
235 C=CCN(C(=O)c1ccc2ccccc2c1Br)C(C(=O)NC1CCCCC1)c1ccc(F)cc1>>C=C1CN(C(C(=O)NC2CCC  
CC2)c2ccc(F)cc2)C(=O)c2ccc3ccccc3c21  
236 C=CCOC(O[Si](C)(C)C(C)(C)C(I)CCCCCCCC>>C=C1COC(O[Si](C)(C)C(C)(C)C)C1CCCCCCCC  
237 C=CCC(CC(=C)Br)(C(=O)OCC)C(=O)OCC>>C=C1C=CCC(C(=O)OCC)(C(=O)OCC)C1  
238 C=CC(CC)(CC)C(=O)Nc1ccc(C)cc1Br>>C=C1c2cc(C)ccc2NC(=O)C1(CC)CC  
239 C=C[Si](C)(C)c1ccc(F)cc1/C=C\c1ccccc1Br>>C=C1c2ccccc2/C=C\c2cc(F)ccc2[Si]1(C)C  
240 C=CCc1ccc2ccc(C)nc2c1OCc1ccccc1Br>>C=C1Cc2ccc3ccc(C)nc3c2OCc2ccccc21  
241 CCCCCC/C(=C/I)OC(=O)/C=C/c1ccc(OC)cc1>>CCCCCCC1=C/C(=C\c2ccc(OC)cc2)C(=O)O1  
242 C=CCOC1O[C@H](COC(C)=O)[C@@H](OC(C)=O)C=C1I>>C=C1COC2O[C@H](COC(C)=O)[C@  
@H](OC(C)=O)C=C12  
243 C=CCO[C@H]1[C@@H]([C@H](O)CSc2ccccc2Br)O[C@@H]2OC(C)(C)O[C@H]12>>C=C1CO[C  
@H]2[C@H](O[C@@H]3OC(C)(C)O[C@H]23)[C@H](O)CSc2ccccc21  
244 C=CC(CN(c1ccccc1I)S(C)(=O)=O)NC(=O)OCc1ccccc1>>C=C1c2ccccc2N(S(C)(=O)=O)CC1NC(=O)  
OCc1ccccc1  
245 C=CCC1c2[nH]c3ccccc3c2CCN1Cc1ccccc1Br>>C=C1CC2c3[nH]c4ccccc4c3CCN2Cc2ccccc21  
246 C=CCc1cc2c(cc1C/C(I)=C/CO)c1cc(OC)c(OC)c(OC)c1OCO2>>C=C1Cc2cc3c(cc2C(c2cc(OC)c(OC  
)c(OC)c2)/C1=C/CO)OCO3  
247 C=CCCC[C@@H](C=C)CN(c1ccccc1Br)S(=O)(=O)c1ccc(C)cc1>>C=CCCC[C@@H]1CN(S(=O)(  
=O)c2ccc(C)cc2)c2ccccc2C1=C  
248 C=C[C@@H](O[Si](C)(C)C(C)(C)C)[C@@H](C)[C@@H](CC(I)=CCO)O[Si](C)(C)C(C)(C)C>>C=  
C1C(=CCO)C[C@@H](O[Si](C)(C)C(C)(C)C)[C@H](C)[C@@H]1O[Si](C)(C)C(C)(C)C

249 C=CCn1c(-c2ccc3ccccc3c2Br)nc2ccccc21>>C=C1Cn2c(nc3ccccc32)-c2ccc3ccccc3c21  
 250 C=CCc1c(N(C)C(=O)Cc2ccccc2I)ccc2oc(=O)ccc12>>C=C1Cc2c(ccc3oc(=O)ccc23)N(C)C(=O)Cc2cc  
 ccc21  
 251 C=Cc1cc([N+](=O)[O-])ccc1N(C)C(=O)c1ccccc1I>>C=C1c2ccccc2C(=O)N(C)c2ccc([N+](=O)[O-]  
 252 C=CC(CC)(CC)C(=O)Nc1ccc(OC)cc1Br>>C=C1c2cc(OC)ccc2NC(=O)C1(CC)CC  
 C=CCc1ccc2ccccc2c1N(C(=O)c1ccccc1I)S(=O)(=O)c1ccc(C)cc1>>C=C1Cc2ccc3ccccc3c2N(S(=O)(=O)c2ccc(C)cc2)C(=O)c2ccccc21  
 254 C=CCOCc1ccc2ccc(OC)cc2c1Br>>C=C1CCOCc2ccc3ccc(OC)cc3c21  
 255 C=CCN(c1ccc2c(ccc(=O)n2C)c1)S(=O)(=O)c1ccccc1Br>>C=C1CN(c2ccc3c(ccc(=O)n3C)c2)S(=O)(=O)c2ccccc21  
 256 C=CCCN(c1ccccc1Br)S(=O)(=O)c1ccccc1>>C=C1CCN(S(=O)(=O)c2ccccc2)c2ccccc21  
 257 C=CCOCc1nnn(Cc2ccc(OC)cc2)c1I>>C=C1COCc2nnn(Cc3ccc(OC)cc3)c21  
 258 C=CCOCc1ccc2cc(OC)ccc2c1Br>>C=C1CCOCc2ccc3cc(OC)ccc3c21  
 259 C=C[C@H](CC)CN(c1ccccc1Br)S(=O)(=O)c1ccc(C)cc1>>C=C1c2ccccc2N(S(=O)(=O)c2ccc(C)cc2)C[C@H]1CC  
 260 C=C[C@H](CC)COc1ccccc1Br>>C=C1c2ccccc2OC[C@H]1CC  
 261 C=CCC[C@@H](C=C)CN(c1ccccc1Br)S(=O)(=O)c1ccc(C)cc1>>C=CCC[C@@H]1CN(S(=O)(=O)c2ccc(C)cc2)c2ccccc2C1=C  
 262 C=CCC(Cc1nnn(CCCCCC)c1I)(C(=O)OCC)C(=O)OCC>>C=C1CC(C(=O)OCC)(C(=O)OCC)Cc2nnn(CCCCCC)c21  
 263 C=CCN(C(=O)c1ccccc1Br)C(C)C>>C=C1CN(C(C)C)C(=O)c2ccccc21  
 264 C=CCN(Cc1ccc(F)cc1)Cc1cc2ccc(C)cc2nc1Cl>>C=C1CN(Cc2ccc(F)cc2)Cc2cc3ccc(C)cc3nc21  
 265 C=CCC(c1ccccc1I)N(CC(=O)OC)Cc1ccccc1>>C=C1CC(N(CC(=O)OC)Cc2ccccc2)c2ccccc21  
 266 C=CCCN(Cc1cc2c(cc1Br)OCO2)C(=O)OC>>C=C1CCN(C(=O)OC)Cc2cc3c(cc21)OCO3  
 267 C=CCN(CCc1c(Br)n(C(=O)OC(C)(C)C)c2ccccc12)C(=O)C(F)(F)F>>C=C1CN(C(=O)C(F)(F)F)CCc2c1n(C(=O)OC(C)(C)C)c1ccccc1  
 268 C=CCCCC(O)C=C(Br)c1ccc2ccccc2c1>>C=C1CCCC(O)C=C1c1ccc2ccccc2c1  
 269 C=CCc1c(OC(=O)c2ccccc2I)c(=O)n(C)c(=O)n1C>>Cn1c2c(c(=O)n(C)c1=O)OC(=O)c1ccccc1/C=C\C  
 270 C=CCC(CCBr)(C(=O)OCC)C(=O)OCC>>C=C1CCC(C(=O)OCC)(C(=O)OCC)C1  
 271 C=CC[C@H]1CCCCN1Cc1ccccc1I>>C=C1C[C@H]2CCCCN2Cc2ccccc21  
 272 C=CCc1c(OCc2ccccc2Br)cc(C)n(C)c1=O>>C=C1Cc2c(cc(C)n(C)c2=O)OCc2ccccc21  
 273 C=CCCCC(O)C=C(Br)c1ccc(C)c1>>C=C1CCCC(O)C=C1c1ccc(C)c1  
 274 C=C[C@H]1C[C@@H](OCc2ccccc2)[C@H](O[Si](C)(C)C(C)C)C[C@H]1NCc1cc2c(cc1Br)OCO2>>C=C1c2cc3c(cc2CN[C@H]2C[C@H](O[Si](C)(C)C(C)C)C[C@H](OCc4ccccc4)C[C@H]12)OCO3  
 275 C=C(C)CC(OC(=C)Br)c1ccccc1>>C=C1C=C(C)CC(c2ccccc2)OC1  
 276 C=CCCCC1=C(I)C(=O)[C@H](C(C)C)CC1>>C=C1CCCC2=C1C(=O)[C@H](C(C)C)CC2  
 277 C=C[C@H](O)CC[C@H]1(C)OC(I)=C(C(=O)OC)[C@H]2[C@H]3[C@H]4[C@H]1C(C)=C[C@H]1[C@H](O[Si](C)(C)C)(C(C)C)C(C)C[C@H](C)[C@H](O[Si](C)(C)C)(C(C)C)C[C@H]13>  
 >C=C1C2=C(C(=O)OC)[C@H]3[C@H]4[C@H]5[C@H]1C(C)=C[C@H]1[C@H](O[Si](C)(C)C)(C(C)C)C(C)C[C@H]14  
 278 C=C[C@H](O[Si](C)(C)C)(C(C)C)C[C@H](Cc1ccccc1)[C@H](C/C(I)=C/CO)O[Si](C)(C)C(C)C(C)C>>C=C1/C=C\C(CO)C[C@H](O[Si](C)(C)C)(C(C)C)C[C@H](Cc2ccccc2)[C@H]1O[Si](C)(C)C(CO)c1cc(Br)c(-c2ccccc2O/C=C/C(=O)OCc2ccccc2)cc1OC>>COc1cc2c(cc1OC)-c1ccccc1O/C2=C/C(=O)OCc1ccccc1  
 280 C=C[C@H]1CC(C(=O)OC)(C(=O)OC)[C@H](c2ccccc2)N(c2ccccc2I)O1>>C=C1c2ccccc2N2O[C@H]1CC(C(=O)OC)(C(=O)OC)[C@H]2c1ccccc1  
 281 C=CCN(CC1=C(Br)CCCCC1)c1ccccc12>>C=C1CN(c2ccccc3ccccc23)CC2=C1CCCCC2  
 282 C=Cc1c(OCc2cc(OC)ccc2Br)ccc2ccccc12>>COc1ccc2c(c1)COc1ccc3ccccc3c1/C=C\2  
 283 C=CCc1c(OCc2ccccc2Br)c2ccccc2n(-c2ccccc2)c1=O>>C=C1Cc2c(c3ccccc3n(-c3ccccc3)c2=O)OCc2ccccc21  
 284 C=CCn1c(N(c2ccc(F)cc2I)S(=O)(=O)c2cccs2)cc2cc(Br)ccc21>>O=S(=O)(c1cccs1)N1c2ccc(F)cc2/C=C\Cn2c1cc1cc(Br)ccc12  
 285 C=Cc1ccccc1(Nc2ncc(Cl)c(Nc3ccccc3Br)c3)n2c1>>Clc1ene2nc1Nc1ccccc1/C=C\Cc1ccccc1N2  
 286 C=CCc1c(N(C)C(=O)c2ccccc2I)ccc2c1ccc(=O)n2CC>>C=C1Cc2c(ccc3c2ccc(=O)n3CC)N(C)C(=O)c2ccccc21  
 287 C=Cc1ccc(OC)c(Nc2nc(Nc3ccc(N4CCN(C)CC4)c(Br)c3)ncc2Cl)c1>>COc1ccc2cc1Nc1nc(ncc1Cl)Nc1ccc(N3CCN(C)CC3)c(c1)/C=C\2  
 288 C=CCc1cc(Cl)c2ccccc2c1OCc1ccccc1Br>>C=C1Cc2cc(Cl)c3ccccc3c2OCc2ccccc21  
 289 C=CC(=O)N(C)c1ccccc1I>>C=C1C(=O)N(C)c2ccccc21  
 290 C=CC(C)c1c(OCc2ccccc2Br)c(=O)oc2ccccc12>>CC1/C=C\Cc2ccccc2COc2c1c1ccccc1oc2=O

291 C=Cc1cc(C)ccc1OS(=O)(=O)c1ccccc1Br>>Cc1ccc2c(c1)/C=C\c1ccccc1S(=O)(=O)O2  
 292 C=Cc1cc(C(C)C)ccc1N(C)C(=O)c1ccccc1I>>C=C1c2ccccc2C(=O)N(C)c2ccc(C(C)C)cc21  
 293 C=CCCl(c2ccccc2Br)SCCCS1>>C=C1CC2(SCCCS2)c2ccccc21  
 294 COc1ccc(/C=C/C(=O)O/C(=C\I)c2ccc3ccccc3c2)cc1>>COc1ccc(/C=C2\C=C(c3ccc4ccccc4c3)OC2=O  
 295 C=CCN(CC=C)Cc1ccccc1I>>C=CCN1CC(=C)c2ccccc2C1  
 296 COC(=O)/C=C/Oc1c(C)cccc1-c1cc(C)c(C)cc1Br>>COC(=O)/C=C1/Oc2c(C)cccc2-c2cc(C)c(C)cc21  
 297 C=CCC[C@H]1C(OS(=O)(=O)C(F)F)=C[C@@]2(C(C)C)C=C[C@]1(C)O2>>C=C1CC[C@H]2C1  
 =C[C@@]1(C(C)C)C=C[C@]2(C)O1  
 298 C=CCN1[C@H](c2ccccc2)O[C@@H]2C[C@H](C)CC[C@H]2C1(C)C>>C=C1CN2[C@@H](O[C@  
 @H]3C[C@H](C)CC[C@H]3C2(C)C)c2ccccc21  
 299 C=C[C@@H]1[C@@H]2[C@H](CN1c1cc(C(=O)OC)cc(OCc3ccccc3)c1I)N2C(=O)OC(C)(C)C>>C=  
 C1c2c(OCc3ccccc3)cc(C(=O)OC)cc2N2C[C@H]3[C@@H]([C@@H]12)N3C(=O)OC(C)(C)C  
 300 C=CCN(Cc1ccc(F)cc1)Cc1cc2ccccc(C)c2nc1Cl>>C=C1CN(Cc2ccc(F)cc2)Cc2cc3ccccc(C)c3nc21  
 301 C=CCCCN(C(=O)c1ccccc1)c1ccccc1Br>>C=C1CCCN(C(=O)c2ccccc2)c2ccccc21  
 302 C=CCC(C(=O)OC)(C(=O)OC)C(c1cc(OC)c(OC)c(OC)c1)c1cc2c(cc1Br)OCO2>>C=C1CC(C(=O)OC)  
 (C(=O)OC)C(c2cc(OC)c(OC)c(OC)c2)c2cc3c(cc21)OCO3  
 303 C=CCCN(c1ccccc1N1CCOCC1)S(=O)(=O)c1ccccc1Br>>C=C1CCN(c2ccccc2N2CCOCC2)S(=O)(=O  
 )c2ccccc21  
 304 COC(=O)/C=C/Oc1ccc(F)cc1-c1ccccc1Br>>COC(=O)/C=C1/Oc2ccc(F)cc2-c2ccccc21  
 305 C=C(C(=O)OCC)C(O)c1cc2ccccc2n1Cc1ccccc1I>>CCOC(=O)/C1=C/c2ccccc2Cn2c(cc3ccccc32)C1O  
 C=C[C@@H](NC(=O)OC(C)(C)C)[C@H](O)[C@H](C)C(=O)NCC(=O)N[C@H](C)C(=O)Nc1cc(OC  
 306 c2ccccc2)ccc1I>>C[C@@H]1C(=O)NCC(=O)N[C@H](C)C(=O)Nc2cc(OCc3ccccc3)ccc2/C=C/[C@  
 @H](NC(=O)OC(C)(C)C)[C@@H]1O  
 307 C=CCC(OCC(=C)Br)c1ccc(OC)cc1>>C=C1COC(c2ccc(OC)cc2)CC1=C  
 308 C=CC[C@H]1CC[C@H]2CC(=O)O[C@]12CI>>C=C1C[C@H]2CC[C@H]3CC(=O)O[C@]23C1  
 309 C=CCO[C@H]1[C@H](Sc2ccccc2Br)O[C@H](COCc2ccccc2)[C@@H]1OCc1ccccc1>>C=C1CO[C  
 @H]2[C@@H](O[C@H](COCc3ccccc3)[C@@H]2OCc2ccccc2)Sc2ccccc21  
 310 C=CC(C)CCc1ccc(CC(C)(NC(=O)OC(C)(C)C)C(=O)OCc2cc(Cl)nc(N(C)S(C)(=O)=O)c2)c1>>CC1/  
 C=C/c2cc(cc(N(C)S(C)(=O)=O)n2)COC(=O)C(C)(NC(=O)OC(C)(C)C)Cc2ccccc2)CC1  
 311 C=CCCOc1ccc2ccccc2c1Br>>C=C1CCOCc2ccc3ccccc3c21  
 312 C=CCCN(c1ccccc1C(C)C)S(=O)(=O)c1ccccc1Br>>C=C1CCN(c2ccccc2C(C)C)S(=O)(=O)c2ccccc21  
 313 C=CCC(Nc1ccccc1)c1ccccc1>>C=C1CC(c2ccccc2)Nc2ccccc21  
 314 C=CCCOCC1=C(Br)c2ccc(OC)c2CC1>>C=C1CCOCC2=C1c1ccc(OC)c1CC2  
 315 O=C(/C=C/c1ccccc1)O/C(=C\I)c1ccc2ccccc2c1>>O=C1OC(c2ccc3ccccc3c2)=C/C1=C\c1ccccc1  
 316 C=C[C@H]1OC(C)(C)O[C@@H]1[C@@H](C/C(I)=C/CO)O[Si](C)(C)C(C)(C)C>>C=C1/C(=C\CO)  
 C[C@@H](O[Si](C)(C)C(C)(C)C)[C@H]2OC(C)(C)O[C@H]12  
 317 C=CC[C@H](CC/C(I)=C/CO)O[Si](C)(C)C(C)(C)C>>C=C1C[C@@H](O[Si](C)(C)C(C)(C)C)CC/C1  
 =C/CO  
 318 COC(=O)/C=C/Oc1ccccc1-c1cc(F)c(F)cc1Br>>COC(=O)/C=C1/Oc2ccccc2-c2cc(F)c(F)cc21  
 319 C=CC(F)(F)Oc1ccc(Cl)cc1Br>>C=C1c2cc(Cl)ccc2OC1(F)F  
 320 C=C(C(=O)OCC)c1ccccc1COc1ccccc1Br>>CCOC(=O)/C1=C/c2ccccc2OCc2ccccc21  
 321 C=C(C(=O)OCC)c1ccccc1CS(=O)(=O)c1ccccc1I>>CCOC(=O)/C1=C/c2ccccc2S(=O)(=O)Cc2ccccc21  
 322 C=CCC(O)c1cc2ccc(C)cc2nc1Cl>>C=C1CC(O)c2cc3ccc(C)cc3nc21  
 323 C=Cc1cc(C)ccc1OCc1ccccc1Br>>Cc1ccc2c(c1)/C=C\c1ccccc1CO2  
 324 C=CCn1c(N(c2ccc(Cl)cc2I)S(=O)(=O)c2ccc(C)cc2)cc2ccccc21>>Cc1ccc(S(=O)(=O)N2c3ccc(Cl)cc3/  
 C=C\N3c2cc2ccccc23)cc1  
 325 C=CCn1c(N(c2ccccc2I)S(=O)(=O)c2cccs2)cc2cc(C)ccc21>>Cc1ccc2c(c1)cc1n2C/C=C\c2ccccc2N1S(  
 =O)(=O)c1cccs1  
 326 C=CCc1ccccc1CCl>>C=C1Cc2ccccc2C1  
 327 O=C(/C=C/c1cccs1)O/C(=C\I)c1ccc(Br)cc1>>O=C1OC(c2ccc(Br)cc2)=C/C1=C\c1cccs1  
 328 C=CCCN1nnc(CCCC)c1I>>C=C1CCN2nnc(CCCC)c21  
 329 C=C(C(=O)OCC)C(O)c1cc2ccccc2n1Cc1ccccc1I>>COC(=O)/C1=C/c2ccccc2Cn2c(cc3ccccc32)C1O  
 330 C=CC(=O)NC[C@@H](OC)[C@H](OC)c1ccccc1NC(=O)[C@H](Cc1ccccc1)NC(=O)c1ccc(Br)c1>>  
 CO[C@@H]1CNC(=O)/C=C/c2ccccc2)C(=O)N[C@@H](Cc2ccccc2)C(=O)Nc2ccccc2[C@H]1OC  
 C=C[C@@H](Cn1c(Br)c(-  
 331 c2ccc(Oc3ccc(C(C)(C)C)cc3)cc2)c2c(N)ncnc21)NC(=O)OC(C)(C)C>>C=C1c2c(-  
 c3ccc(Oc4ccc(C(C)(C)C)cc4)cc3)c3c(N)ncnc3n2C[C@H]1NC(=O)OC(C)(C)C  
 332 C=C(C(=O)OCC)c1ccccc1CS(=O)(=O)c1ccccc1Br>>CCOC(=O)/C1=C/c2ccccc2S(=O)(=O)Cc2ccccc  
 333 C=CCOCC1=C(Br)c2ccc(OC)cc2CC1>>C=C1COCC2=C1c1ccc(OC)cc1CC2  
 334 C=C[C@@H](Cn1c(Br)c(-c2ccc(Oc3ccc(F)cc3)cc2)c2c(N)ncnc21)NC(=O)OC(C)(C)C>>C=C1c2c(-  
 c3ccc(Oc4ccc(F)cc4)cc3)c3c(N)ncnc3n2C[C@H]1NC(=O)OC(C)(C)C



335 C=Cc1cccc(Nc2nc(Nc3ccc(N4CCOCC4)c(Br)c3)ncc2Cl)c1>>Clc1cnc2nc1Nc1cccc(c1)/C=C\c1cc(ccc1N1CCOCC1)N2  
 336 C=CCn1c(N(c2ccc(F)cc2I)S(=O)(=O)c2ccc(C)cc2)cc2cc(Br)ccc21>>Cc1ccc(S(=O)(=O)N2c3ccc(F)cc3/C=C\c1cnc2cc2cc(Br)ccc23)cc1  
 337 C=Cc1cccc1OCc1cc(OC)ccc1Br>>COc1ccc2c(c1)COc1cccc1/C=C\2  
 338 CCOC(=O)[C@@H](C/C=C1\CCN(c2ccccc2)C1=O)Nc1cc(Cl)ccc1I>>CCOC(=O)[C@@H]1C/C(=C2/CCN(c3ccccc3)C2=O)c2ccc(Cl)cc2N1  
 339 C=CCc1c(N(CC)C(=O)Cc2ccccc2I)ccc2oc(=O)ccc12>>C=C1Cc2c(ccc3oc(=O)ccc23)N(CC)C(=O)Cc2ccccc21  
 340 C=CCn1c(N(c2ccc(Br)cc2I)S(=O)(=O)c2cccs2)cc2cc(C)ccc21>>Cc1ccc2c(c1)cc1n2C/C=C\c2cc(Br)cc2N1S(=O)(=O)c1cccs1  
 341 C=CCc1c(N(C)C(=O)c2ccccc2I)ccc2oc(=O)ccc12>>C=C1Cc2c(ccc3oc(=O)ccc23)N(C)C(=O)c2ccccc1  
 342 C=CCn1c(N(c2ccc(Cl)cc2I)S(=O)(=O)c2ccc(C)cc2)cc2cc(C)ccc21>>Cc1ccc(S(=O)(=O)N2c3ccc(Cl)cc3/C=C\c1cnc2cc2cc(C)ccc23)cc1  
 343 C=CCC(COCc1cccc1)N(C)c1ccccc1I>>C=C1CC(COCc2ccccc2)N(C)c2ccccc21  
 344 C=CCC(OCC(=C)Br)c1cccs1>>C=C1COC(c2cccs2)CC1=C  
 345 C=CCN(c1cccc2ccccc12)S(=O)(=O)c1ccccc1Br>>C=C1CN(c2cccc3ccccc23)S(=O)(=O)c2ccccc21  
 346 O=C(/C=C/Oc1cccc1-c1ccccc1Br)c1ccccc1>>O=C(/C=C1/Oc2ccccc2-c2ccccc21)c1ccccc1  
 347 CC=C(c1ccccc1)c1c(OCc2cc(OC)ccc2Br)c(=O)n(C)c(=O)n1C>>COc1ccc2c(c1)COc1c(n(C)c(=O)n(C)c1=O)/C(c1ccccc1)=C\2C  
 348 C=C[C@H](C[C@H](C/C(=C/CO)OS(=O)(=O)C(F)(F)F)O[Si](C)(C)C(C)(C)C)O[Si](C)(C)C(C)(C)C)>>C=C1/C(=C\CO)C[C@H](O[Si](C)(C)C(C)(C)C)C[C@H]1O[Si](C)(C)C(C)(C)C  
 349 C=CCN(CCI)S(=O)(=O)c1cccs1>>C=C1CCN(S(=O)(=O)c2cccs2)C1  
 350 C=CCc1ccc2ccccc2c1OCc1cc(OC)ccc1Br>>C=C1Cc2ccc3ccccc3c2OCc2cc(OC)ccc21  
 351 C=CCN(C(=O)c1ccc2ccccc2c1Br)C(C(=O)NC1CCCCC1)c1ccc(Cl)cc1>>C=C1CN(C(C(=O)NC2CCCCC2)c2ccc(Cl)cc2)C(=O)c2ccc3ccccc3c21  
 352 C=C[C@H](OCc1cccc1I)Oc1ccccc1>>C=C1c2ccccc2CO[C@H]1Oc1ccccc1  
 353 C=CCOCC1=C(Br)CCCCC1>>C=C1COCC2=C1CCCCC2  
 354 C=C[C@H]1O[C@H]2OC(C)(C)O[C@H]2[C@H]1N(Cc1ccccc1Br)C(=O)OC>>C=C1c2ccccc2CN(C(=O)OC)[C@H]2[C@H]1O[C@H]1OC(C)(C)O[C@H]21  
 355 C=Cc1cc(CC)ccc1N(C)C(=O)c1ccccc1I>>C=C1c2ccccc2C(=O)N(C)c2ccc(CC)cc21  
 356 C=CCC[C@H](O[Si](C)(C)C(C)(C)C)c1nnn(Cc2ccc(OC)cc2)c1I>>C=C1CC[C@H](O[Si](C)(C)C(C)(C)C)c2nnn(Cc3ccc(OC)cc3)c21  
 357 C=CCN(Cc1ccc(F)cc1)Cc1cc2ccccc2nc1Cl>>C=C1CN(Cc2ccc(F)cc2)Cc2cc3ccccc3nc21  
 358 CC(=O)/C=C/Oc1cccc1-c1ccccc1Br>>CC(=O)/C=C1/Oc2ccccc2-c2ccccc21  
 359 C=CC[C@H](N=C(c1ccccc1)c1ccccc1)c1ccccc1Br>>C=C1C[C@H](N=C(c2ccccc2)c2ccccc2)c2ccccc1  
 360 C=CCN(c1ccc2oc(=O)cc(OC)c2c1)S(=O)(=O)c1ccccc1Br>>C=C1CN(c2ccc3oc(=O)cc(OC)c3c2)S(=O)(=O)c2ccccc21  
 361 C=CCCCNc1ccccc1I>>C=C1CCCNc2ccccc21  
 362 C=CCOCC1=C(Br)CCc2ccccc21>>C=C1COCC2=C1CCc1ccccc12  
 363 C=CCC1c2ccccc2CCN1Cc1ccccc1Br>>C=C1CC2c3ccccc3CCN2Cc2ccccc21  
 364 C=CCc1c(OCc2ccccc2I)ccc2c1ccc(=O)n2C>>C=C1Cc2c(ccc3c2ccc(=O)n3C)OCc2ccccc21  
 365 C=CCC(O)c1cc2ccccc2nc1Cl>>C=C1CC(O)c2cc3ccccc3nc21  
 366 C=C[C@H]1CC(C(=O)OC)(C(=O)OC)[C@H](c2ccc3c(c2)OCO3)N(c2ccccc2I)O1>>C=C1c2ccccc2N2O[C@H]1CC(C(=O)OC)(C(=O)OC)[C@H]2c1ccc2c(c1)OCO2  
 367 C=CCOCc1nnn(Cc2ccccc2)c1I>>C=C1CCOCC2nnn(Cc3ccccc3)c21  
 368 C=CCCCC(O[Si](C)(C)C)(C(C)C)C(C)C)c1nc(-c2cn(S(=O)(=O)c3ccc(C)cc3)c3ccccc23)c(OC)nc1Br>>C=C1CCCC(O[Si](C)(C)C)(C(C)C)C(C)C)c2nc(-c3cn(S(=O)(=O)c4ccc(C)cc4)c4ccccc34)c(OC)nc21  
 369 C=CCC(C(=O)OCC)N(C)c1ccccc1Br>>C=C1CC(C(=O)OCC)N(C)c2ccccc21  
 370 C=CCC(OCC(=C)Br)c1ccc(OC)c(OC)c1>>C=C1COC(c2ccc(OC)c(OC)c2)CC1=C  
 371 C=CCN(Cc1ccccc1)Cc1cc2ccccc(C)c2nc1Cl>>C=C1CN(Cc2ccccc2)Cc2cc3ccccc(C)c3nc21  
 372 C=CCCC(CCI)CCCCCCCC>>C=C1CCC(CCCCCCCC)C1  
 373 C=CCn1c(N(c2ccc(C)cc2I)S(=O)(=O)c2cccs2)cc2cc(Br)ccc21>>Cc1ccc2c(c1)/C=C\c1cnc2cc2cc(Br)cc231)N2S(=O)(=O)c1cccs1  
 374 C=CCN(CC1=C(Br)c2ccccc2CC1)c1ccc(Cl)cc1>>C=C1CN(c2ccc(Cl)cc2)CC2=C1c1ccccc1CC2  
 375 O=C(/C=C/Oc1cccc1-c1ncccc1Br)OCc1ccccc1>>O=C(/C=C1/Oc2ccccc2-c2ncccc21)OCc1ccccc1  
 376 COC(=O)/C=C/Oc1ccccc1-c1cc(OC)c(OC)cc1Br>>COC(=O)/C=C1/Oc2ccccc2-c2cc(OC)c(OC)cc21  
 377 C=CCCN1c2c(Br)cc([N+](=O)[O-])cc2C(=O)N2C1C(C)(C)OC2(C)C>>C=C1CCN2c3c1cc([N+](=O)[O-])cc2C(=O)N2C1C(C)(C)OC2(C)C  
 378 C=CC[C@H](N[S@](=O)C(C)(C)C)c1c(F)cccc1I>>C=C1C[C@H](N[S@](=O)C(C)(C)C)c2c(F)cccc2

379 C=CCn1c(N(c2ccccc2)S(=O)(=O)c2cccs2)cc2ccccc21>>O=S(=O)(c1cccs1)N1c2ccccc2/C=C\Cn2c1c  
 380 c1ccccc12  
 381 C=CCCN(C)c1ccccc1I>>C=C1CCN(C)c2ccccc21  
 382 C=CCC(OC)C1=C(Br)c2cccc3cccc1c23>>C=C1CC(OC)C2=C1c1cccc3cccc2c13  
 383 C=CCc1cc(C)ccc1N(Cc1ccccc1Br)S(=O)(=O)c1ccc(C)cc1>>C=C1Cc2cc(C)ccc2N(S(=O)(=O)c2ccc(C  
 384 )cc2)Cc2ccccc21  
 385 C=CC(=O)N[C@@H](Cc1ccccc1)C(=O)N[C@@H](C)C(=O)N[C@@H](CC(C)C)C(=O)NCc1cccc(B  
 386 r)c1>>CC(C)C[C@@H]1NC(=O)[C@H](C)NC(=O)[C@H](Cc2ccccc2)NC(=O)/C=C/c2cccc(c2)CNC  
 387 C=CCN(CCI)S(=O)(=O)c1ccc(CO)cc1>>C=C1CCN(S(=O)(=O)c2ccc(CO)cc2)C1  
 388 C=CCOCc1nnn(Cc2ccc([N+](=O)[O-])cc2)c1I>>C=C1COCc2nnn(Cc3ccc([N+](=O)[O-])cc3)c21  
 389 C=CCC(CCBBr)CCCCCCCC>>C=C1CCC(CCCCCCCC)C1  
 390 C=CCC(Cc1ccccc1)(NCc1ccccc1Br)C(=O)OC>>C=C1CC(Cc2ccccc2)(C(=O)OC)NCc2ccccc21  
 391 Cc1ccc(/C=C/C(=O)O/C(=C)I)c2ccccc2)cc1>>Cc1ccc(/C=C2\C=C(c3ccccc3)OC2=O)cc1  
 392 C=CCN(Cc1cc2ccccc2nc1Cl)c1ccc(C)cc1>>C=C1CN(c2ccc(C)cc2)Cc2cc3ccccc3nc21  
 393 C=C[C@@H](Cn1c(Br)c(-  
 394 c2ccc(Oc3ccc(C(F)(F)F)cc3)cc2)c2c(N)ncnc21)NC(=O)OC(C)(C)C>>C=C1c2c(-  
 395 c3ccc(Oc4ccc(C(F)(F)F)cc4)cc3)c3c(N)ncnc3n2C[C@H]1NC(=O)OC(C)(C)C  
 396 C=CCCN(c1ccccc1OC)S(=O)(=O)c1ccccc1Br>>C=C1CCN(c2ccccc2OC)S(=O)(=O)c2ccccc21  
 397 C=C[C@@H](Cn1c(Br)c(-  
 398 c2ccc(C(=O)Nc3ccccc3)cc2)c2c(N)ncnc21)NC(=O)OC(C)(C)C>>C=C1c2c(-  
 399 O=C(/C=C/C1c1ccccc1)O/C(=C)I)C1CCCCC1>>O=C1OC(C2CCCCC2)=C/C1=C\c1ccccc1  
 400 C=C(C)CC(OC(=C)Br)c1ccc(Cl)cc1>>C=C1C=C(C)CC(c2ccc(Cl)cc2)OC1  
 401 CCOC(=O)/C=C/Oc1ccccc1-c1ccccc1Br>>CCOC(=O)/C=C1/Oc2ccccc2-c2ccccc21  
 402 C=CCN(CCc1ccccc1I)C(=O)C(F)(F)F>>C=C1CN(C(=O)C(F)(F)F)CCc2ccccc21  
 403 C[C@@H](OC(=O)[C@@H](C/C=C1\CCN(c2ccccc2)C1=O)Nc1cc(Cl)ccc1I)C(=O)OC(C)(C)C>>C[  
 404 C@@H](OC(=O)[C@H]1C/C(=C2/CCN(c3ccccc3)C2=O)c2ccc(Cl)cc2N1)C(=O)OC(C)(C)C  
 405 C=CCN(C)C(=O)c1ccccc1Br>>C=C1CN(C)C(=O)c2ccccc21  
 406 C=C(C(=O)OCC)c1ccccc1COc1ccccc1I>>CCOC(=O)/C1=C/c2ccccc2OCc2ccccc21  
 407 COc1ccc(/C=C/C(=O)O/C(=C)I)c2ccccc2)cc1>>COc1ccc(/C=C2\C=C(c3ccccc3)OC2=O)cc1  
 408 C=CCc1cc(OC)ccc1N(C(=O)c1ccccc1I)S(=O)(=O)c1ccc(C)cc1>>C=C1Cc2cc(OC)ccc2N(S(=O)(=O)c  
 409 2ccc(C)cc2)C(=O)c2ccccc21  
 410 C=CCN(CCc1c(Br)n(C(=O)OCc2ccccc2)c2ccccc12)C(=O)C(F)(F)F>>C=C1CN(C(=O)C(F)(F)F)CCc2  
 411 c1n(C(=O)OCc1ccccc1)c1ccccc21  
 412 C=C[C@@H](Cn1c(Br)c(-  
 413 c2ccc(Oc3ccc(OC(F)(F)F)cc3)cc2)c2c(N)ncnc21)NC(=O)OC(C)(C)C>>C=C1c2c(-  
 414 c3ccc(Oc4ccc(OC(F)(F)F)cc4)cc3)c3c(N)ncnc3n2C[C@H]1NC(=O)OC(C)(C)C  
 415 C=Cc1cc(Cl)c(C)cc1OCc1ccccc1Br>>Cc1cc2c(cc1Cl)/C=C\c1ccccc1CO2  
 416 C=CCC(C=C(C)C)c1cc(C)c(OC)cc1OS(=O)(=O)C(F)(F)F>>C=C1CC(C=C(C)C)c2cc(C)c(OC)cc21  
 417 C=CCN(Cc1ccccc1)Cc1cc2cc(OC)ccc2nc1Cl>>C=C1CN(Cc2ccccc2)Cc2cc3cc(OC)ccc3nc21  
 418 C=CCN(Cc1ccccc1)Cc1cc2ccc(C)cc2nc1Cl>>C=C1CN(Cc2ccccc2)Cc2cc3ccc(C)cc3nc21  
 419 C=C[C@@H]1CC(C(=O)OC)(C(=O)OC)[C@H](c2ccco2)N(c2ccccc2I)O1>>C=C1c2ccccc2N2O[C@  
 420 H]1CC(C(=O)OC)(C(=O)OC)[C@@H]2c1ccco1  
 421 C=C(C)CC(OC(=C)Br)c1ccc(OC)cc1>>C=C1C=C(C)CC(c2ccc(OC)cc2)OC1  
 422 C=CCN(C(=O)c1ccc2ccccc2c1Br)C(C(=O)NC(C)(C)C)c1ccc(OC)cc1>>C=C1CN(C(C(=O)NC(C)(C)  
 423 C)c2ccc(OC)cc2)C(=O)c2ccc3ccccc3c21  
 424 C=CCC(Nc1ccccc1Br)c1cccn1C>>C=C1CC(c2cccn2C)Nc2ccccc21  
 425 C=CCc1ccc2ccccc2c1OS(=O)(=O)c1ccccc1Br>>C=C1Cc2ccc3ccccc3c2OS(=O)(=O)c2ccccc21  
 426 C=C[C@@H](Cn1c(Br)c(-  
 427 c2ccc(C(=O)N[C@@H](COC)c3ccccc3)cc2)c2c(N)ncnc21)NC(=O)OC(C)(C)C>>C=C1c2c(-  
 428 c3ccc(C(=O)N[C@@H](COC)c4ccccc4)cc3)c3c(N)ncnc3n2C[C@H]1NC(=O)OC(C)(C)C  
 429 C=CCN(C(=O)c1ccc2ccccc2c1Br)C(C(=O)NC1CCCCC1)c1ccc2ccccc2c1>>C=C1CN(C(C(=O)NC2C  
 430 CCCC2)c2ccc3ccccc3c2)C(=O)c2ccc3ccccc3c21  
 431 C=CCN(CCI)S(=O)(=O)c1ccc(C#N)cc1>>C=C1CCN(S(=O)(=O)c2ccc(C#N)cc2)C1  
 432 C=CCN(Cc1cc2ccc(C)cc2nc1Cl)c1ccc(C)cc1>>C=C1CN(c2ccc(C)cc2)Cc2cc3ccc(C)cc3nc21  
 433 C=CCc1c(N(CC)C(=O)c2ccccc2I)ccc2c1ccc(=O)n2C>>C=C1Cc2c(ccc3c2ccc(=O)n3C)N(CC)C(=O)c  
 434 2ccccc21  
 435 C=C[C@@H]1CC(S(=O)(=O)c2ccccc2)(S(=O)(=O)c2ccccc2)C[C@H]1[C@@H](c1ccccc1)c1cc(OC)  
 436 c(OC)cc1Br>>C=C1c2cc(OC)c(OC)cc2[C@H](c2ccccc2)[C@@H]2CC(S(=O)(=O)c3ccccc3)(S(=O)(=  
 437 O)c3ccccc3)C[C@@H]12  
 438 C=C[Si](C)(C)OCc1ccccc1Br>>C=C1c2ccccc2CO[Si]1(C)C

420 C=C[C@H]1O[C@@H]2OC(C)(C)O[C@@H]2[C@H]1N(Cc1cc(OC)ccc1Br)S(=O)(=O)c1ccc(C)cc1  
>>C=C1c2ccc(OC)cc2CN(S(=O)(=O)c2ccc(C)cc2)[C@H]2[C@@H]1O[C@@H]1OC(C)(C)O[C@H]  
421 C=CCN(CCc1cc(OC)c(OC)cc1Br)C(=O)c1cccc(OC)c1OC>>C=C1CN(C(=O)c2cccc(OC)c2OC)CCc2c  
c(OC)c(OC)cc21  
422 C=CC(C)(C)[C@H](N[S@@](=O)C(C)(C)C)c1cccc1Br>>C=C1c2cccc2[C@H](N[S@@](=O)C(  
(C)C)C1(C)C  
CC(C)COC(=O)[C@@H](C)OC(=O)[C@@H](C/C=C1\CCN([13c]2[13cH][13cH][13cH][13cH][13c  
423 H]2)C1=O)Nc1cc(Cl)ccc1I>>CC(C)COC(=O)[C@@H](C)OC(=O)[C@H]1C/C(=C2/CCN([13c]3[13c  
H][13cH][13cH][13cH][13cH]3)C2=O)c2ccc(Cl)cc2N1  
424 C=CCCC(O)C1=C(Br)CCC(C)C1>>C=C1CCCC(O)C2=C1CCC(C)C2  
C=CCO[C@@H]1[C@@H](OCc2cccc2)[C@H](OCc2cccc2)[C@@H](COCc2cccc2)O[C@@H]1  
425 Sc1cccc1Br>>C=C1CO[C@@H]2[C@@H](OCc3cccc3)[C@H](OCc3cccc3)[C@@H](COCc3cccc  
c3)O[C@@H]2Sc2cccc21  
426 C=CCN(C)C(=O)C1(CC(=C)Br)CS/C(=C\c2cccc2)C1=O>>C=C1CN(C)C(=O)C2(CS/C(=C\c3cccc3  
)C2=O)CC1=C  
427 C=CC(CC)(CC)C(=O)Nc1ccc(F)cc1Br>>C=C1c2cc(F)ccc2NC(=O)C1(CC)CC  
428 C=CC[C@H]1CCCCN1Cc1cccc1I>>C=C1C[C@H]2CCCCN2Cc2cccc21  
429 C=CCCN(c1cccc2cccc12)S(=O)(=O)c1cccc1Br>>C=C1CCN(c2cccc3cccc23)S(=O)(=O)c2cccc21  
430 C=CC[C@H](N[S@](=O)C(C)(C)C)c1cc(C(F)(F)F)ccc1I>>C=C1C[C@H](N[S@](=O)C(C)(C)C)c2cc  
(C(F)(F)F)ccc21  
431 C=CC(C)OCc1c(Br)c(OC)c2cccc2c1OC>>C=C1c2c(c(OC)c3cccc3c2OC)COC1C  
432 C=CC(CC)(CC)C(=O)Nc1cccc1Br>>C=C1c2cccc2NC(=O)C1(CC)CC  
433 C=CCCNc1cccc1Cl>>C=C1CCCNc2cccc21  
434 C=CCN(Cc1cc2cc(C)ccc2nc1Cl)c1cccc1>>C=C1CN(c2cccc2)Cc2cc3cc(C)ccc3nc21  
435 COC(=O)/C=C/Oc1c(C)cccc1-c1cccc1Br>>COC(=O)/C=C1/Oc2c(C)cccc2-c2cccc21  
436 C=CCCC(CBr)CCCCCCCC>>C=C1CCC(CCCCCCCC)C1  
437 COC(=O)/C=C/Oc1cccc1-c1sccl1Br>>COC(=O)/C=C1/Oc2cccc2-c2sccl21  
438 C=C[C@H](O[Si](C)(C)C(C)(C)C)[C@H](C)[C@@H](C/C(I)=C/CO)O[Si](C)(C)C(C)(C)C>>C=C1/  
C(=C\CO)C[C@@H](O[Si](C)(C)C(C)(C)C)[C@@H](C)[C@H]1O[Si](C)(C)C(C)(C)C  
439 COc1cc(/C=C/C(=O)Oc2cccc2I)cc(OC)c1OC>>COc1cc(/C=C2/C(=O)Oc3cccc32)cc(OC)c1OC  
440 C=CC(=O)N(Cc1cccc1)C(C(=O)NCc1cccc1)c1cccc1Br>>C=C1C(=O)N(Cc2cccc2)C(C(=O)NCc2  
cccc2)c2cccc21  
441 C=CC[C@H]1C(C)(C)CCC[C@@]1(O)Cc1cc(OC)ccc1Br>>C=C1C[C@@H]2C(C)(C)CCC[C@@]  
2(O)Cc2cc(OC)ccc21  
442 C=CCN(Cc1cccc1I)C1CCCC1>>C=C1CN(C2CCCC2)Cc2cccc21  
443 C=CCCN(Cc1ccccc1Br)S(=O)(=O)c1cccc1>>C=C1CCN(S(=O)(=O)c2cccc2)Cc2ccccc21  
C=Cc1cccc(C(=O)N[C@@H](c2cccc2)[C@@H](O[Si](CC)(CC)CC)C(=O)O[C@H]2C[C@@]3(O)[  
C@@H](OC(=O)c4cccc(I)c4)[C@H]4[C@](C)(C(=O)[C@H](OC(C)=O)C(=C2C)C3(C)C)[C@@H](  
444 O[Si](CC)(CC)CC)C[C@H]2OC[C@]24OC(C)=O)c1>>CC[Si](CC)(CC)O[C@H]1C[C@H]2OC[C@  
@]2(OC(C)=O)[C@H]2[C@@H]3OC(=O)c4cccc(c4)/C=C\c4cccc(c4)C(=O)N[C@@H](c4cccc4)[C  
@@H]1(O[Si](CC)(CC)CC)C(=O)O[C@H]4C1C@13(O)C(C)(C)C(=C4C)C[C@@H](OC(C)=O)C(=O)I
