# Supplementary material for: Heck reaction prediction using a transformer model based on a transfer learning strategy
Source: Royal Society of Chemistry journal article supplement (doi:10.1039/d0cc02657c), 2020-01-01
Supplement: d0cc02657c1.zip [file d0cc02657c1.zip]

**Table S8C. Heck reaction database of disubstituted alkene as reactant**

| Reaction ID | Reaction SMILES                                                                                                                                                                                           |
|-------------|-----------------------------------------------------------------------------------------------------------------------------------------------------------------------------------------------------------|
| 1           | <chem>C=C(F)C(=O)OC.O=[N+](([O-])c1cccc(I)c1)&gt;&gt;COC(=O)/C(F)=C/c1cccc([N+](=O)[O-])c1</chem>                                                                                                         |
| 2           | <chem>C=C(NC(=O)OC(C)(C)C)C(=O)OCc1cccc1.CC(C)(C)OC(=O)N/C(=C\c1ccc(Br)cc1)C(=O)OCc1cccc1&gt;&gt;CC(C)(C)OC(=O)N/C(=C\c1ccc(/C=C(\NC(=O)OC(C)(C)C)C(=O)OCc2cccc2)cc1)C(=O)OCc1c</chem>                    |
| 3           | <chem>C=C(NC(C)=O)C(=O)OC.CCOC(=O)c1cc2c(Br)cccc2[nH]1&gt;&gt;CCOC(=O)c1cc2c(/C=C(\NC(C)=O)C(=O)OC)cccc2[nH]1</chem>                                                                                      |
| 4           | <chem>C=C(C)[C@H](C(=O)OC)N1C(=O)c2cccc2C1=O.Ic1cccc1&gt;&gt;COC(=O)[C@@H](/C(C)=C/c1cccc1)N1C(=O)c2cccc2C1=O</chem>                                                                                      |
| 5           | <chem>C=C1CC(c2cccc2)OC1=O.Clc1cccc(I)c1&gt;&gt;O=C1OC(c2cccc2)C/C1=C\c1cccc(Cl)c1</chem>                                                                                                                 |
| 6           | <chem>C=C1CN(C(=O)OCC)N1C(=O)OCC.Ic1cccc1&gt;&gt;CCOC(=O)N1C/C(=C\c2cccc2)N1C(=O)OCC</chem>                                                                                                               |
| 7           | <chem>C=C1CC(c2ccc(Cl)cc2)OC1=O.Cc1cccc(I)c1&gt;&gt;Cc1cccc(/C=C2\CC(c3ccc(Cl)cc3)OC2=O)c1</chem>                                                                                                         |
| 8           | <chem>BrC1CCCC1.C=C(C)C(=O)OC&gt;&gt;COC(=O)/C(C)=C/c1cccc1</chem>                                                                                                                                        |
| 9           | <chem>C=C(C)C(=O)OC.Cc1ccc(I)cc1&gt;&gt;COC(=O)/C(C)=C/c1ccc(C)cc1</chem>                                                                                                                                 |
| 10          | <chem>C=C(F)C(C)=O.COc1cccc1I&gt;&gt;COc1cccc1/C=C(\F)C(C)=O</chem>                                                                                                                                       |
| 11          | <chem>C=C(C)C(=O)OC.O=C(O)c1ccc(I)cc1&gt;&gt;COC(=O)/C(C)=C/c1ccc(C(=O)O)cc1</chem>                                                                                                                       |
| 12          | <chem>C=C1C(=O)O[C@H]2[C@H]1CCC(=C)[C@@H]1C[C@H](OC(C)=O)C(=C)[C@H]21.Cc1ccc(I)cc1[N+](=O)[O-]&gt;&gt;C=C1CC[C@H]2/C(=C\c3ccc(C)c([N+](=O)[O-])c3)C(=O)O[C@@H]2[C@H]2C(=C)[C@@H](OC(C)=O)C[C@@H]12</chem> |
| 13          | <chem>C=C(NC(C)=O)C(=O)OC.Ic1cccc1&gt;&gt;COC(=O)/C(=C/c1cccc1)NC(C)=O</chem>                                                                                                                             |
| 14          | <chem>C=C(CC(N=C(c1cccc1)c1cccc1)C(=O)OC)C(=O)OC.Ic1cccc1&gt;&gt;COC(=O)/C(=C/c1cccc1)CC(N=C(c1cccc1)c1cccc1)C(=O)OC</chem>                                                                               |
| 15          | <chem>C=C(C)C(=O)O.COc1ccc(I)cc1&gt;&gt;COc1ccc(/C=C(\C)C(=O)O)cc1</chem>                                                                                                                                 |
| 16          | <chem>C=C1C(=O)O[C@@H]2[C@@]3(C)CCCC(=C)[C@@H]3[C@H]12.COc1cncc(Br)c1&gt;&gt;C=C1CC[C@@H]2(C)C[C@H]3OC(=O)/C(=C/c4cncc(OC)c4)[C@H]3C[C@@H]12</chem>                                                       |
| 17          | <chem>C=C(C)C(=O)O.O=C1C(O)=C(I)C(=O)c2cccc21&gt;&gt;C/C(=C\C1=C(O)C(=O)c2cccc2C1=O)C(=O)O</chem>                                                                                                         |
| 18          | <chem>C=C(OC)C(=O)OC.Ic1cccc2cccc12&gt;&gt;COC(=O)/C(=C/c1cccc2cccc12)OC</chem>                                                                                                                           |
| 19          | <chem>C=C(NC(C)=O)C(=O)OC.CC(C)(C)OC(=O)N[C@@H](COc1cc(C#N)ccc1I)CC(=O)OCc1cccc1&gt;&gt;COC(=O)/C(=C/c1ccc(C#N)cc1OC[C@@H](CC(=O)OCc1cccc1)NC(=O)OC(C)(C)C)NC(C)=O</chem>                                 |
| 20          | <chem>C=C(NC(=O)OCc1cccc1)C(=O)OC.CC(=O)OCc1c(Br)ccc(NC(=O)OC(C)(C)C)c1C&gt;&gt;COC(=O)/C(=C/c1ccc(NC(=O)OC(C)(C)C)c(C)c1COC(C)=O)NC(=O)OCc1cccc1</chem>                                                  |
| 21          | <chem>C=C(NC(=O)OCc1cccc1)C(=O)OC.CC(=O)OCc1cc(NC(=O)OC(C)(C)C)c(C)cc1Br&gt;&gt;COC(=O)/C(=C/c1cc(C)c(NC(=O)OC(C)(C)C)cc1COC(C)=O)NC(=O)OCc1cccc1</chem>                                                  |
| 22          | <chem>C=C1C(=O)O[C@@H]2CC(C)=C([C@@H](C)CCCOC(C)=O)[C@@H](OC(C)=O)[C@H]12.COc1cc(I)cc(OC)c1OC&gt;&gt;COc1cc(/C=C2/C(=O)O[C@@H]3CC(C)=C([C@@H](C)CCCOC(C)=O)[C@@H](OC(C)=O)[C@H]23)cc(OC)c1OC</chem>       |
| 23          | <chem>C=C(NC(C)=O)C(=O)OC.COc1cccc(CN(Cc2ccc(OC)cc2)c2ncc(I)cn2)cc1&gt;&gt;COC(=O)/C(=C/c1cnc(N(Cc2ccc(OC)cc2)Cc2ccc(OC)cc2)nc1)NC(C)=O</chem>                                                            |
| 24          | <chem>C=C(CP(=O)(OCC)OCC)C(=O)OCC.Ic1cccc1&gt;&gt;CCOC(=O)/C(=C/c1cccc1)CP(=O)(OCC)OCC</chem>                                                                                                             |
| 25          | <chem>C=C(C)C(=O)Nc1cccc1.Clc1cccc1&gt;&gt;C/C(=C\c1cccc1)C(=O)Nc1cccc1</chem>                                                                                                                            |
| 26          | <chem>C=C1C(=O)O[C@@H]2/C=C(\C)CC/C=C(\C)CC[C@@H]12.Clc1ccc(I)cc1&gt;&gt;C/C1=C\C[C@H]2OC(=O)/C(=C/c3ccc(Cl)cc3)[C@@H]2CC/C(C)=C/CC1</chem>                                                               |
| 27          | <chem>C=C(OC(C)=O)C(=O)OCC(F)(F)F.COc1ccc(I)cc1CC=C(C)C&gt;&gt;COc1ccc(/C=C(\OC(C)=O)C(=O)OCC(F)(F)F)cc1CC=C(C)C</chem>                                                                                   |
| 28          | <chem>C=C1C(=O)O[C@H]2[C@H]1CC/C(C)=C/CC[C@@]1(C)O[C@@H]21.FC(F)(F)c1cccc1I&gt;&gt;C/C1=C\CC[C@@]2(C)O[C@H]2[C@H]2OC(=O)/C(=C/c3cccc3C(F)(F)F)[C@@H]2CC1</chem>                                           |
| 29          | <chem>C=C1CC(c2ccc(Cl)cc2)OC1=O.FC(F)(F)c1cccc1I&gt;&gt;O=C1OC(c2ccc(Cl)cc2)C/C1=C\c1cccc1C(F)(F)F</chem>                                                                                                 |
| 30          | <chem>C=C(NC(C)=O)C(=O)OC.Cc1cccc(C(C)C)c1I&gt;&gt;COC(=O)/C(=C/c1c(C)cccc1C(C)C)NC(C)=O</chem>                                                                                                           |
| 31          | <chem>C=C(NC(C)=O)C(=O)OC.CCOC(=O)c1[nH]c2cc3c(nc2c1Br)CCC(C(C)(C)C)C3&gt;&gt;CCOC(=O)c1[nH]c2cc3c(nc2c1/C=C(\NC(C)=O)C(=O)OC)CCC(C(C)(C)C)C3</chem>                                                      |
| 32          | <chem>C=C1C(=O)O[C@H]2[C@H]1CC/C(C)=C/CC[C@@]1(C)O[C@@H]21.Ic1cccs1&gt;&gt;C/C1=C\CC[C@@]2(C)O[C@H]2[C@H]2OC(=O)/C(=C/c3cccs3)[C@@H]2CC1</chem>                                                           |
| 33          | <chem>C=C(OC(C)=O)C(=O)OCC(F)(F)F.COc1ccc(I)cc1OC&gt;&gt;COc1ccc(/C=C(\OC(C)=O)C(=O)OCC(F)(F)F)cc1OC</chem>                                                                                               |
| 34          | <chem>C=C1CC(c2ccc(Cl)cc2)OC1=O.Nc1cccc1I&gt;&gt;Nc1cccc1/C=C1\CC(c2ccc(Cl)cc2)OC1=O</chem>                                                                                                               |
| 35          | <chem>C=C(NC(=O)OCc1cccc1)C(=O)OC.CC(=O)OCc1cc(C)ccc1I&gt;&gt;COC(=O)/C(=C/c1ccc(C)cc1COC(C)=O)NC(=O)OCc1cccc1</chem>                                                                                     |

C=C(NC(=O)[C@H](Cc1ccccc1)NC(=O)[C@H](Cc1ccccc1)NC(=O)OC(C)(C)C(=O)OC.COC(=O)  
36 c1ccc(I)cc1>>COC(=O)/C(=C/c1ccc(C(=O)OC)cc1)NC(=O)[C@H](Cc1ccccc1)NC(=O)[C@H](Cc1cc  
ccc1)NC(=O)OC(C)(C)C  
37 C=C1CC(c2ccc(C)cc2)OC1=O.Ic1ccccc1>>Cc1ccc(C2C/C(=C/c3ccccc3)C(=O)O2)cc1  
38 C=C(C(=O)OC)[C@@H]1CC[C@@]2(C)CCC[C@@](C)(OCOC)[C@@H]2C1.COC(=O)c1ccccc1Br  
39 >>COCO[C@]1(C)CCC[C@]2(C)CC[C@@H]/C(=C/c3ccccc3C(=O)OC)C(=O)OC[C@H]21  
40 C=C(F)C(=O)OC.CC(=O)c1ccc(I)cc1>>COC(=O)/C(F)=C/c1ccc(C(C)=O)cc1  
41 C=C(NC(=O)OC(C)(C)C(=O)OCc1ccccc1.CC(C)(C)OC(=O)C(C)(C)c1ccc(I)cc1>>CC(C)(C)OC(=O)  
N/C(=C/c1ccc(C(C)(C)C(=O)OC(C)(C)C)cc1)C(=O)OCc1ccccc1  
42 Br1ccccc1.C=C1C[C@H]2[C@@H]3CCc4cc(OC)ccc4[C@H]3CC[C@]2(C)C1=O>>COc1ccc2c(c1)  
43 CC[C@@H]1[C@@H]2CC[C@]2(C)C(=O)/C(=C/c3ccccc3)C[C@@H]12  
44 C=C1C(=O)O[C@@H]2/C=C(\C)CC/C=C(\C)CC[C@@H]12.Nc1ccc(I)cc1>>C/C1=C\C[C@H]2OC(=O)  
45 O)/C(=C/c3ccc(N)cc3)[C@@H]2CC/C(C)=C/CC1  
46 Br1ccc2c(c1)OCO2.C=C(NC(C)=O)C(=O)O>>CC(=O)N/C(=C/c1ccc2c(c1)OCO2)C(=O)O  
47 Br1ccccc1.C=C(CP(=O)(OCC)OCC)C(=O)OCC>>CCOC(=O)/C(=C/c1ccccc1)CP(=O)(OCC)OCC  
48 C=C(NC(C)=O)C(=O)OC.CC(=O)Oc1cc(C(C)C)c(I)c(C(C)C)c1>>COC(=O)/C(=C/c1c(C(C)C)cc(OC(  
49 C)=O)cc1C(C)C)NC(C)=O  
50 C=C(NC(=O)OC(C)(C)C)C(=O)OC.COc1ccc(C(=O)cc1Oc1ccc(I)cc1>>COC(=O)/C(=C/c1ccc(Oc2cc(  
51 C=O)ccc2OC)cc1)NC(=O)OC(C)(C)C  
52 C=C(NC(C)=O)C(=O)OC.Nc1ccc(Br)cc1N1CCCCC1>>COC(=O)/C(=C/c1ccc(N)c(N2CCCCC2)c1)N  
53 C(C)=O  
54 C=C(C)C=O.CN(C)c1ccc(I)cc1>>C/C(C=O)=C/c1ccc(N(C)C)cc1  
55 C=C(CC(=O)O)C(=O)O.COc1ccc(Br)c(CN(CC(F)(F)F)C(=O)OC(C)(C)C)c1>>COc1ccc(/C=C(\CC(=  
56 O)O)C(=O)O)c(CN(CC(F)(F)F)C(=O)OC(C)(C)C)c1  
57 C=C(C)C(=O)OC.Clc1ccc(Br)cc1>>COC(=O)/C(C)=C/c1ccc(Cl)cc1  
58 Br1ccccc1.C=C(C)C(=O)OCCO>>C/C(=C/c1ccccc1)C(=O)OCCO  
59 C=C1C(=O)O[C@@H]2CC(C)=C([C@@H](C)CCCOC(C)=O)[C@@H](OC(C)=O)[C@H]12.Ic1ccccc  
60 c1>>CC(=O)OCCC[C@H](C)C1=C(C)C[C@H]2OC(=O)/C(=C/c3ccccc3)[C@H]2[C@@H]1OC(C)=  
61 C=C1CCOC1=O.O=C(Nc1ccccc1)c1C(F)(F)F>>O=C1OCC/C1=C/c1ccc(NC(=O)C(F)(F)F)c1  
62 C=C1c2ccccc2C1(C#N)CC.COc1cc(Br)cc(OC)c1OC>>CCC1(C#N)/C(=C/c2cc(OC)c(OC)c(OC)c2)c2  
63 cccc21  
64 C=C(C)[C@@H](C(=O)OC)N1C(=O)c2ccccc2C1=O.Ic1ccccc1>>COC(=O)[C@H]/(C(C)=C/c1ccccc  
65 1)N1C(=O)c2ccccc2C1=O  
66 C=C1C[C@H]2[C@@H]3CCc4cc(OC)ccc4[C@H]3CC[C@]2(C)C1=O.FC(F)(F)c1ccc(Br)cc1>>COc  
67 1ccc2c(c1)CC[C@@H]1[C@@H]2CC[C@]2(C)C(=O)/C(=C/c3ccc(C(F)(F)F)cc3)C[C@@H]12  
68 C=C(F)C(C)=O.Cc1ccc(I)cc1>>CC(=O)/C(F)=C/c1ccc(C)cc1  
69 C=C1C(=O)O[C@H]2[C@H]1CCC(=C)[C@@H]1C[C@H](OC(C)=O)C(=C)[C@H]21.CC(=O)Nc1c  
70 cc(I)cc1C(F)(F)F>>C=C1CC[C@H]2/C(=C/c3ccc(NC(C)=O)c(C(F)(F)F)c3)C(=O)O[C@@H]2[C@H]  
71 2C(=C)[C@@H](OC(C)=O)C[C@@H]12  
72 C=C1C(=O)O[C@@H]2C[C@@H](C)C(=O)C/C=C(\C)CC[C@@H]12.Clc1ccc(I)cc1>>C/C1=C\C(C(  
73 =O)[C@H](C)C[C@H]2OC(=O)/C(=C/c3ccc(Cl)cc3)[C@@H]2CC1  
74 C=C(C)c1ccccc1.Ic1ccc2c(c1)OCCOCCOCCOCCO2>>C/C(=C/c1ccc2c(c1)OCCOCCOCCOCCO2)c1  
75 cccc1  
76 C=C(C)C(=O)OC(C)(C)C.COc1ccc(I)cc1>>COc1ccc(/C=C(\C)C(=O)OC(C)(C)C)cc1  
77 C=C1CC(c2ccc(C)cc2)OC1=O.CCOC1ccc(I)cc1>>CCOC1ccc(/C=C2\CC(c3ccc(C)cc3)OC2=O)cc1  
78 Br1ccccc1I.C=C(F)[Si](C)(c1ccccc1)c1ccccc1>>C[Si]/(C(F)=C/c1ccccc1Br)(c1ccccc1)c1ccccc1  
79 Br1ccccc1.C=C(C)C(=O)OC(C)(C)C>>C/C(=C/c1ccccc1)C(=O)OC(C)(C)C  
80 C=C(CC(=O)OC)C(=O)OC.FC(F)(F)Oc1ccc(I)cc1>>COC(=O)C/C(=C/c1ccc(OC(F)(F)F)cc1)C(=O)O  
81 C=C(CC(=O)OCC)C(=O)OCC.CC(=O)OCc1c(I)ccc(NC(=O)OC(C)(C)C)c1C>>CCOC(=O)C/C(=C/c1  
82 ccc(NC(=O)OC(C)(C)C)c(C)c1COC(C)=O)C(=O)OCC  
83 C=C(NC(=O)OC(C)(C)C)C(=O)OC.Cc1cc(I)ccc1N>>COC(=O)/C(=C/c1ccc(N)c(C)c1)NC(=O)OC(C)  
84 C=C(C)C(=O)OC(C)(C)C.Ic1ccccc1>>C/C(=C/c1ccccc1)C(=O)OC(C)(C)C  
85 C=C(F)C(C)=O.Ic1cc2ccccc2c2ccccc12>>CC(=O)/C(F)=C/c1cc2ccccc2c2ccccc12  
86 C=C1c2ccccc2C1(C#N)CC.COc1ccc(Br)cc1>>CCC1(C#N)/C(=C/c2ccc(OC)cc2)c2ccccc21  
87 C=C(F)[Si](C)(c1ccccc1)c1ccccc1.Fc1ccccc1I>>C[Si]/(C(F)=C/c1ccccc1F)(c1ccccc1)c1ccccc1  
88 C=C(C)C(F)(F)F.COC(=O)c1ccc(I)cc1>>COC(=O)c1ccc(/C=C(\C)C(F)(F)F)cc1  
89 C=C1C[C@H]2[C@@H]3CCc4cc(OC)ccc4[C@H]3CC[C@]2(C)C1=O.FC(F)(F)c1ccccc1Br>>COc1c  
90 cc2c(c1)CC[C@@H]1[C@@H]2CC[C@]2(C)C(=O)/C(=C/c3ccccc3C(F)(F)F)C[C@@H]12  
91 C=C1C(=O)O[C@@H]2C[C@@]3(C)CCCC(=C)[C@@H]3C[C@H]12.COc1ccc(Br)cn1>>C=C1CC  
92 C[C@]2(C)C[C@H]3OC(=O)/C(=C/c4ccc(OC)nc4)[C@H]3C[C@@H]12

75 C=C(NC(C)=O)C(=O)OCc1ccccc1.CCOC(=O)COc1ccc(Br)cc1OCc1ccccc1>>CCOC(=O)COc1ccc(/C  
=C(/NC(C)=O)C(=O)OCc2ccccc2)cc1OCc1ccccc1  
76 C=C(C)C(=O)OC.O=[N+][([O-])c1ccccc1I>>COC(=O)/C(C)=C/c1ccccc1[N+](=O)[O-]  
77 C=C(NC(=O)OC(C)(C)C)C(=O)OCc1ccccc1.CC(=O)OC1Cc2ccc(Br)cc2C1>>CC(=O)OC1Cc2ccc(/C  
=C(/NC(=O)OC(C)(C)C)C(=O)OCc3ccccc3)cc2C1  
78 C=C(F)C(=O)OC.COc1cccc(I)c1>>COC(=O)/C(F)=C/c1cccc(OC)c1  
79 C=C(F)[Si](C)(c1ccccc1)c1ccccc1.COc1ccc(I)cc1>>COc1ccc(/C=C(F)[Si](C)(c2ccccc2)c2ccccc2)cc1  
80 C=C(CC(=O)OC)C(=O)OC.COc1ccc(I)cc1>>COC(=O)/C/C(=C/c1ccc(OC)cc1)C(=O)OC  
81 C=C(NC(=O)OC(C)(C)C)C(=O)OC.COC(=O)c1ccc(N)c(I)c1>>COC(=O)/C(=C/c1ccc(C(=O)OC)ccc1  
N)NC(=O)OC(C)(C)C  
82 C=C1C(=O)O[C@H]2[C@H]1CC/C(C)=C/CC[C@@]1(C)O[C@@H]21.COC(=O)c1c(F)cccc1I>>CO  
C(=O)c1c(F)cccc1/C=C1/C(=O)O[C@H]2[C@H]1CC/C(C)=C/CC[C@@]1(C)O[C@@H]21  
83 C=C1CC(c2ccccc2)OC1=O.Nc1ccccc1I>>Nc1ccccc1/C=C1\CC(c2ccccc2)OC1=O  
84 C=C1CC(c2ccc(C)cc2)OC1=O.Nc1ccccc1I>>Cc1ccc(C2C/C(=C/c3ccccc3N)C(=O)O2)cc1  
85 Bre1ccccc1I.C=C1CC(c2ccc(Cl)cc2)OC1=O>>O=C1OC(c2ccc(Cl)cc2)C/C1=C/c1ccccc1Br  
86 C=C1CC(c2ccc(C)cc2)OC1=O.COc1cccc(I)c1>>COc1cccc(/C=C2\CC(c3ccc(C)cc3)OC2=O)c1  
87 C=C(C)C(=O)OCC.O=[N+][([O-])c1ccc(Cl)cc1>>CCOC(=O)/C(C)=C/c1ccc([N+](=O)[O-])cc1  
88 C=C1C(=O)O[C@@H]2C3=C(C)C(=O)C=C[C@]3(C)CC[C@@H]12.Fc1ccc(I)cc1>>CC1=C2[C@H]  
3OC(=O)/C(=C/c4ccc(F)cc4)[C@@H]3CC[C@@]2(C)C=CC1=O  
89 C=C(NC(=O)OC(C)(C)C)C(=O)OC.CC(C)(C)OC(=O)Nc1ccc(I)cc1>>COC(=O)/C(=C/c1ccc(NC(=O)  
OC(C)(C)C)cc1)NC(=O)OC(C)(C)C  
90 C=C(NC(=O)OC(C)(C)C)C(=O)OC.Nc1ccc(I)cc1>>COC(=O)/C(=C/c1ccc(N)cc1)NC(=O)OC(C)(C)C  
91 Bre1ccc(I)cc1.C=C(F)C(=O)OC>>COC(=O)/C(F)=C/c1ccc(Br)cc1  
92 C=C(C)C(=O)OC.Cc1cccc(C)c1Cl>>COC(=O)/C(C)=C/c1c(C)cccc1C  
93 C=C1C(=O)O[C@H]2[C@H]1CC/C(C)=C/CC[C@@]1(C)O[C@@H]21.Ic1cnenc1>>C/C1=C\CC[C  
@@]2(C)O[C@H]2[C@H]2OC(=O)/C(=C/c3cnenc3)[C@@H]2CC1  
94 C=C(F)[Si](C)(c1ccccc1)c1ccccc1.CCOC(=O)c1ccc(I)cc1>>CCOC(=O)c1ccc(/C=C(F)[Si](C)(c2cccc  
c2)c2ccccc2)cc1  
95 C=C(NC(C)=O)C(=O)OC.CC(=O)Oc1ccc(C)c(I)c(C(C)C)c1>>COC(=O)/C(=C/c1c(C)cc(OC(C)=O)cc1  
C(C)C)NC(C)=O  
96 C=C(F)[Si](C)(c1ccccc1)c1ccccc1.Cc1ccc(I)c(C)c1>>Cc1ccc(/C=C(F)[Si](C)(c2ccccc2)c2ccccc2)c(C  
97 C=C(C)C(=O)OC.O=Cc1ccc(Cl)cc1>>COC(=O)/C(C)=C/c1ccc(C=O)cc1  
98 C=C(NC(=O)OC(C)(C)C)C(=O)OC.Cc1cc(N)ccc1I>>COC(=O)/C(=C/c1ccc(N)cc1C)NC(=O)OC(C)(  
99 C=C1c2ccccc2C1(C#N)CC.COc1ccc(Br)cc1OC>>CCC1(C#N)/C(=C/c2ccc(OC)c(OC)c2)c2ccccc21  
C=C(C)C(=O)OC.COc1cc(Br)c2c3c1O[C@H]1[C@@H](O[Si](C)(C)C(C)(C)C)C=C[C@@H]4[C@  
100 @H](C2)N(C)CC[C@@]341>>COC(=O)/C(C)=C/c1cc(OC)c2c3c1C[C@@H]1[C@H]4C=C[C@H](  
O[Si](C)(C)C(C)(C)C)[C@H](O2)[C@]34CCN1C  
101 C=C1CC(c2ccccc2)OC1=O.COc1cccc(I)c1>>COc1cccc(/C=C2\CC(c3ccccc3)OC2=O)c1  
102 C=C(C)C(=O)OCC.O=c1cc(I)enn1Cc1ccccc1>>CCOC(=O)/C(C)=C/c1enn(Cc2ccccc2)c(=O)c1  
103 C=C(OC)C(=O)OC.COC(=O)c1cccc(I)c1>>COC(=O)/C(=C/c1cccc(C(=O)OC)c1)OC  
104 C=C(C)C=O.COc1ccc(I)cc1>>COc1cccc(/C=C(\C)C=O)cc1  
105 C=C(NC(=O)OCc1ccccc1)C(=O)OC.CC(=O)OCc1cc(NC(=O)OC(C)(C)C)c(C)cc1I>>COC(=O)/C(=C  
/c1cc(C)c(NC(=O)OC(C)(C)C)cc1COC(C)=O)NC(=O)OCc1ccccc1  
106 C=C(C)C(=O)OC(C)(C)C.N#Cc1ccc(Br)cc1N>>C/C(=C/c1ccc(C#N)c(N)c1)C(=O)OC(C)(C)C  
107 C=C(CC(=O)O)C(=O)O.O=C1N[C@@]2(CC[C@@H](c3ccc(Br)cc3)C2)CO1>>O=C(O)C/C(=C/c1cc  
c([C@@H]2CC[C@]3(COC(=O)N3)C2)cc1)C(=O)O  
108 Bre1ccccc1.C=C1C(C)=NN=C2C=C(c3ccccc3)N(C(C)=O)N12>>CC(=O)N1C(c2ccccc2)=CC2=NN=  
C(C)/C(=C/c3ccccc3)N21  
109 C=C1C[C@H]2[C@@H]3CCc4cc(OC)ccc4[C@H]3CC[C@]2(C)C1=O.CC(=O)c1ccc(Br)cc1>>COc1  
ccc2c(c1)CC[C@]2[C@@H]1[C@@H]2CC[C@]2(C)C(=O)/C(=C/c3ccc(C(C)=O)cc3)C[C@@H]12  
110 C=C(c1ccccc1)[Si](C)(C)c1ccccc1.Ic1ccsc1>>C[Si](C)(C)/C(=C/c1ccsc1)c1ccccc1c1ccccc1  
111 C=C(C)C(=O)OC.Cc1ccccc1Cl>>COC(=O)/C(C)=C/c1ccccc1C  
112 C=C1C[C@H]2[C@@H]3CCc4cc(OC)ccc4[C@H]3CC[C@]2(C)C1=O.COc1cccc(Br)c1>>COc1cccc  
(/C=C2[C@H]3[C@@H]4CCc5cc(OC)ccc5[C@H]4CC[C@]3(C)C2=O)c1  
113 C=C(C)C(=O)OC.Oc1cccc(Br)c1>>COC(=O)/C(C)=C/c1cccc(O)c1  
114 C=C(F)C(=O)OC.COC(=O)c1ccccc1I>>COC(=O)/C(F)=C/c1ccccc1C(=O)OC  
115 C=C(C#N)C(=O)N(CC)CC.COc1cc(I)ccc1O>>CCN(CC)C(=O)/C(C#N)=C/c1ccc(O)c(OC)c1  
116 C=C(NC(=O)OCc1ccccc1)C(=O)OC.CC(=O)OCc1cc(OCc2ccccc2)ccc1I>>COC(=O)/C(=C/c1ccc(OC  
c2ccccc2)cc1COC(C)=O)NC(=O)OCc1ccccc1  
117 C=C(CC(=O)OC)C(=O)OC.COc1cccc2c(OC)c(Br)ccc12>>COC(=O)/C/C(=C/c1ccc2c(OC)cccc2c1OC  
)C(=O)OC

118 C=C1CC(c2ccc(C)cc2)OC1=O.CC(C)(C)c1ccc(I)cc1>>Cc1ccc(C2C/C(=C\c3ccc(C(C)(C)C)cc3)C(=O)  
O2)cc1  
119 C=C(NC(C)=O)C(=O)OC.Ic1ccccc1C1OCCCCO1>>COC(=O)/C(=C/c1ccccc1C1OCCCCO1)NC(C)=O  
C=C(NC(=O)OCC[Si](C)(C)C)C(=O)OC.CC(C)(C)OC(=O)N/C(=C\c1ccc(-  
120 c2ccc(I)cc2)cc1)C(=O)OCc1ccccc1>>COC(=O)/C(=C/c1ccc(-  
c2ccc(/C(=C\NC(=O)OC(C)(C)C)C(=O)OCc3ccccc3)cc2)cc1)NC(=O)OCC[Si](C)(C)C  
121 C=C(C)C(=O)OC.COc1ccc(Cl)cc1>>COC(=O)/C(C)=C/c1ccc(OC)cc1  
122 C=C(C)C(=O)OC.O=C1C(O)=C(I)C(=O)c2ccccc21>>COC(=O)/C(C)=C/C1=C(O)C(=O)c2ccccc2C1=  
123 C=C1C(=O)O[C@@H]2/C=C(\C)CC/C=C(\C)CC[C@@H]12.Nc1ccc(I)cn1>>C/C1=C[C@H]2OC(=O)  
C(=O)/C(=C/c3ccc(N)nc3)[C@@H]2CC/C(C)=C/CC1  
124 C=C(C)C(=O)OCCO.O=C1C(O)=C(I)C(=O)c2ccccc21>>C/C(=C\C1=C(O)C(=O)c2ccccc2C1=O)C(=O)OCCO  
C=C1C(=O)O[C@@H]2/C=C(\C)CC/C=C(\C)CC[C@@H]12.Oc1ccccc1I>>C/C1=C[C@H]2OC(=O)  
125 /C(=C/c3ccccc3O)[C@@H]2CC/C(C)=C/CC1  
C=C1C(=O)O[C@H]2[C@H]1CCC(=C)[C@@H]1C[C@H](OC(C)=O)C(=C)[C@H]21.Clc1ccc(I)cc1  
126 >>C=C1CC[C@H]2/C(=C\c3ccc(Cl)cc3)C(=O)O[C@@H]2[C@H]2C(=C)[C@@H](OC(C)=O)C[C@H]2C  
127 C=C(CC(=O)OC)C(=O)OC.Fc1ccc(I)cc1>>COC(=O)C/C(=C\c1ccc(F)cc1)C(=O)OC  
128 C=C(CC)C(C)=O.Oc1ccccc1I>>CC/C(=C\c1ccccc1O)C(C)=O  
129 C=C1C(=O)O[C@H]2[C@H]1CC/C(C)=C/CC[C@@]1(C)O[C@@H]21.Fc1ccccc1I>>C/C1=C\CC[C@H]2C  
130 @ @]2(C)O[C@H]2[C@H]2OC(=O)/C(=C/c3ccccc3F)[C@@H]2CC1  
C=C1C(=O)N2C[C@H](O)C[C@@H]2[C@H]1O.Oc1ccc(I)cc1>>O=C1/C(=C\c2ccc(O)cc2)[C@H](O)  
131 [C@H]2C[C@@H](O)CN12  
C=C(NC(C)=O)C(=O)OCc1ccccc1.COC(=O)/C(=C/c1ccc(Br)cc1)NC(=O)OC(C)(C)C>>COC(=O)/C(=C/c1ccc(/C(=C\NC(C)=O)C(=O)OCc2ccccc2)cc1)NC(=O)OC(C)(C)C  
132 C=C(F)C(=O)OC.FC(F)(F)c1cc(I)cc(C(F)(F)F)c1>>COC(=O)/C(F)=C/c1cc(C(F)(F)F)cc(C(F)(F)F)c1  
133 C=C1C(=O)O[C@H]2[C@H]1C[C@@H](O)/C(C)=C/CC[C@@]1(C)O[C@@H]21.Fc1ccccc1I>>C/  
C1=C\CC[C@@]2(C)O[C@H]2[C@H]2OC(=O)/C(=C/c3ccccc3F)[C@@H]2C[C@H]1O  
134 C=C(C)C(=O)OC.O=[N+](=[O-])c1ccc(I)cc1>>COC(=O)/C(C)=C/c1ccc([N+](=O)[O-])cc1  
135 C=C1C(=O)O[C@@H]2CC(C)=C([C@@H](C)CCCOC(C)=O)[C@@H](OC(C)=O)[C@H]12.Fc1ccc(I)cc1>>CC(=O)OCCC[C@H](C)C1=C(C)C[C@H]2OC(=O)/C(=C/c3ccc(F)cc3)[C@H]2[C@@H]1O  
136 C=C(NC(C)=O)C(=O)OC.C[Si](C)(C)CCOCn1nc(I)c2cc(Br)ccc21>>COC(=O)/C(=C/c1nn(COCC[Si](C)(C)C)c2ccc(Br)cc12)NC(C)=O  
137 C=C1CC(c2ccccc2)OC1=O.Fc1ccccc1I>>O=C1OC(c2ccccc2)C/C1=C\c1ccccc1F  
138 C=C(CC(=O)OC)C(=O)OC.O=[N+](=[O-])c1ccc(I)cc1>>COC(=O)C/C(=C\c1ccc([N+](=O)[O-])cc1)C(=O)OC  
139 C=C(C)C(=O)OCC.COcn1nc(-c2ccccc2)c(Br)cc1=O>>CCOC(=O)/C(C)=C/c1cc(=O)n(COC)nc1-  
140 C=C(NC(=O)OC(C)(C)C)C(=O)OC.CC(=O)OCc1cc(OCc2ccccc2)ccc1I>>COC(=O)/C(=C/c1ccc(OCc2ccccc2)cc1COC(C)=O)NC(=O)OC(C)(C)C  
141 Brc1ccc2ccccc12.C=C1C[C@H]2[C@@H]3CCc4cc(OC)ccc4[C@H]3CC[C@]2(C)C1=O>>COc1ccc2c(c1)CC[C@@H]1[C@@H]2CC[C@]2(C)C(=O)/C(=C/c3cccc4ccccc34)C[C@@H]12  
142 C=C1OC(=O)OC1(C)C.Ic1ccc2ccccc12>>CC1(C)OC(=O)O/C1=C\c1ccc2ccccc12  
143 C=C1C(=O)O[C@@H]2C[C@@]3(C)CCCC(=C)[C@@H]3C[C@H]12.Cn1c(=O)c2c(nc(Br)n2C)n(C)c1=O>>C=C1CCC[C@]2(C)C[C@H]3OC(=O)/C(=C/c4nc5c(c(=O)n(C)c(=O)n5C)n4C)[C@H]3C[C@H]2C1  
144 C=C1C(=O)O[C@H]2[C@H]1CCC(=C)[C@@H]1C[C@H](OC(C)=O)C(=C)[C@H]21.O=[N+](=[O-])c1ccccc1I>>C=C1CC[C@H]2/C(=C\c3ccccc3[N+](=O)[O-])C(=O)O[C@@H]2[C@H]2C(=C)[C@@H](OC(C)=O)C[C@@H]12  
145 C=C(C(=O)OC)[C@@H]1CC[C@@]2(C)CCC[C@@]1(C)(OCOC)[C@@H]2C1.COc1ccc(I)cc1>>CO  
CO[C@]1(C)CCC[C@]2(C)CC[C@@H]1/C(=C\c3ccc(OC)cc3)C(=O)OC)C[C@H]21  
146 C=C(NC(=O)[C@@H](Cc1ccccc1)NC(=O)OC(C)(C)C)C(=O)OC.CC(C)[Si](Oc1ccc(I)cc1)(C(C)C)C(C)C>>COC(=O)/C(=C/c1ccc(O[Si](C(C)C)(C(C)C)C(C)C)cc1)NC(=O)[C@@H](Cc1ccccc1)NC(=O)OC(C)(C)C  
147 C=C(OC(C)=O)C(=O)OCC(F)(F)F.COc1ccc(I)cc1>>COc1ccc(/C(=C\OC(C)=O)C(=O)OCC(F)(F)F)cc  
148 C=C(F)C(C)=O.Ic1ccc2[nH]ccc2c1>>CC(=O)/C(F)=C/c1ccc2[nH]ccc2c1  
149 C=C(C)c1ccccc1.Fc1c(F)c(F)c(Br)c(F)c1F>>C/C(=C\c1c(F)c(F)c(F)c1F)c1ccccc1  
150 Brc1ccccc1I.C=C1CC(c2ccc(C)cc2)OC1=O>>Cc1ccc(C2C/C(=C\c3ccccc3Br)C(=O)O2)cc1  
151 C=C(NC(=O)OC(C)(C)C)C(=O)OCc1ccccc1.Cn1cc(I)cn1>>Cn1cc(/C(=C\NC(=O)OC(C)(C)C)C(=O)OCc2ccccc2)cn1  
152 C=C(C)C(=O)OC.Ic1ccccc1>>COC(=O)/C(C)=C/c1ccccc1  
153 C=C(C)C(=O)OC.CC(C)(N)c1ccc(Br)cc1>>COC(=O)/C(C)=C/c1ccc(C(C)(C)N)cc1  
154 C=C(NC(C)=O)C(=O)OC.CC(=O)Oc1ccc(I)c(C)c1>>COC(=O)/C(=C/c1ccc(OC(C)=O)cc1C)NC(C)=  
155 C=C(F)C(C)=O.FC(F)(F)c1ccccc1I>>CC(=O)/C(F)=C/c1ccc(C(F)(F)F)cc1

156 C=C(C)c1cccc1.Cc1cc(C)cc(I)c1>>C/C(=C\c1cc(C)cc(C)c1)c1cccc1  
157 C=C(NC(C)=O)C(=O)O.COc1ccc(Br)cc1>>COc1ccc(/C=C(\NC(C)=O)C(=O)O)cc1  
158 C=C(NC(=O)OCc1cccc1)C(=O)OC.CC(=O)OCc1c(I)ccc(NC(=O)OC(C)(C)C)c1C>>COC(=O)/C(=C  
/c1ccc(NC(=O)OC(C)(C)C)c(C)c1COC(C)=O)NC(=O)OCc1cccc1  
159 C=C(NC(C)=O)C(=O)OC.Cc1cccc1I>>COC(=O)/C(=C/c1cccc1C)NC(C)=O  
160 C=C(F)C(=O)OC.COc1ccc(I)cc1>>COC(=O)/C(F)=C/c1ccc(OC)cc1  
161 C=C(C(=O)OC)[C@@H]1CC[C@@]2(C)CCC[C@@](C)(OCOC)[C@@H]2C1.Cc1ccc(I)cc1>>COC  
O[C@]1(C)CCC[C@]2(C)CC[C@@H]/C(=C\c3ccc(C)cc3)C(=O)OC[C@H]21  
162 C=C1C(=O)O[C@H]2[C@H]1CC/C(C)=C/CC[C@@]1(C)O[C@@H]21.FC(F)(F)c1cccc(I)c1>>C/C1  
=C\CC[C@@]2(C)O[C@H]2[C@H]2OC(=O)/C(=C/c3cccc(C(F)(F)F)c3)[C@@H]2CC1  
163 C=C1CC(c2ccc(C)cc2)OC1=O.FC(F)(F)c1cccc1I>>Cc1ccc(C2C/C(=C\c3cccc3C(F)(F)F)C(=O)O2)c  
C=C1C(=O)O[C@H]2[C@H]1C[C@@H](O)/C(C)=C/CC[C@@]1(C)O[C@@H]21.COc1cccc1I>>C  
164 Oc1cccc1/C=C1/C(=O)O[C@H]2[C@H]1C[C@@H](O)/C(C)=C/CC[C@@]1(C)O[C@@H]21  
165 C=C(C)C(=O)OCC.Cn1ncc(I)cc1=O>>CCOC(=O)/C(C)=C/c1cnn(C)c(=O)c1  
166 C=C1C(=O)O[C@H]2[C@H]1CC/C(C)=C/CC[C@@]1(C)O[C@@H]21.Ic1ccsc1>>C/C1=C\CC[C@  
@]2(C)O[C@H]2[C@H]2OC(=O)/C(=C/c3ccsc3)[C@@H]2CC1  
167 C=C(C)C(=O)OCCCC.Clc1cccc1>>CCCCOC(=O)/C(C)=C/c1cccc1  
168 C=C1c2cccc2C1(C#N)CC.Clc1ccc(Br)cc1>>CCC1(C#N)/C(=C/c2ccc(Cl)cc2)c2cccc21  
169 C=C(C)c1cccc1.Clc1ccc(Br)cc1>>C/C(=C\c1ccc(Cl)cc1)c1cccc1  
170 Brc1cccc1.C=C(CC(=O)OC)C(=O)OC>>COC(=O)C/C(=C\c1cccc1)C(=O)OC  
171 C=C(NC(=O)OCC[Si](C)(C)C)C(=O)OC.CC(C)(C)OC(=O)N[C@H](Cc1ccc(I)cc1)C(=O)OCc1cccc1  
>>COC(=O)/C(=C/c1ccc(C[C@@H](NC(=O)OC(C)(C)C)C(=O)OCc2cccc2)cc1)NC(=O)OCC[Si](C)  
172 \*C(=O)C(=C)C.N#Cc1c(O)c(Cl)c(I)c(O)c1C#N>>\*C(=O)/C(C)=C/c1c(O)c(C#N)c(C#N)c(O)c1Cl  
173 C=C(C)C(=O)OCC.Fc1cccc(I)c1>>CCOC(=O)/C(C)=C/c1cccc(F)c1  
174 C=C1C[C@H]2[C@@H]3CCc4cc(OC)ccc4[C@H]3CC[C@]2(C)C1=O.Fc1ccc(Br)cc1>>COc1ccc2c(  
c1)CC[C@@H]1[C@@H]2CC[C@]2(C)C(=O)/C(=C/c3ccc(F)cc3)C[C@@H]12  
175 C=C(CC(=O)OCC)C(=O)OCC.COc1cccc2c(OC)c(Br)ccc12>>CCOC(=O)C/C(=C\c1ccc2c(OC)cccc2c  
1OC)C(=O)OCC  
176 Brc1ccc(-c2cccc2)cc1.C=C(NC(C)=O)C(=O)OC>>COC(=O)/C(=C/c1ccc(-c2cccc2)cc1)NC(C)=O  
177 C=C(NC(C)=O)C(=O)OC.CC[C@@]1(O)C(=O)OCc2c1cc1n(c2=O)Cc2cc3c(Br)cccc3nc2-  
1>>CC[C@@]1(O)C(=O)OCc2c1cc1n(c2=O)Cc2cc3c/C=C(\NC(C)=O)C(=O)OC)cccc3nc2-1  
178 C=CC(=C)C.COc1ccc(I)cc1>>C=C/C(C)=C/c1ccc(OC)cc1  
C=C(CO[C@@H]1CCC[C@H](OCc2nc(-  
179 c3cccc(C)c3)oc2C)C1)C(=O)OCC.Cc1cc(I)ccc1F>>CCOC(=O)/C(=C\c1ccc(F)c(C)c1)CO[C@@H]1C  
CC[C@H](OCc2nc(-c3cccc(C)c3)oc2C)C1  
180 C=C(OC(=O)c1cccc1)C(=O)OC.CC(=O)OCc1c(I)ccc(NC(=O)OC(C)(C)C)c1C>>COC(=O)/C(=C/c1  
ccc(NC(=O)OC(C)(C)C)c(C)c1COC(C)=O)OC(=O)c1cccc1  
181 C=C(NC(=O)OC(C)(C)C)C(=O)OC.N#Cc1cccc(I)c1>>COC(=O)/C(=C/c1cccc(C#N)c1)NC(=O)OC(C  
)C  
182 C=C(NC(=O)OCc1cccc1)C(=O)OC.CC(=O)OCc1cc(Br)ccc1I>>COC(=O)/C(=C/c1ccc(Br)cc1COC(  
C)=O)NC(=O)OCc1cccc1  
183 C=C(C)C(=O)OC.N#Cc1ccc(Br)cc1>>COC(=O)/C(C)=C/c1ccc(C#N)cc1  
184 C=C(NC(=O)OC(C)(C)C)C(=O)OC.CCOC(=O)c1[nH]c2cccc2c1Br>>CCOC(=O)c1[nH]c2cccc2c1/  
C=C(\NC(=O)OC(C)(C)C)C(=O)OC  
185 C=C(F)C(C)=O.Ic1cccc2cccc12>>CC(=O)/C(F)=C/c1cccc2cccc12  
186 C=C(C)C(=O)OC.CC(=O)c1ccc(Cl)cc1>>COC(=O)/C(C)=C/c1ccc(C(C)=O)cc1  
187 C=C(c1ccc(Cl)cc1)N(C)C(C)=O.CCOC(=O)CCCB>>CCOC(=O)CCC/C=C(\c1ccc(Cl)cc1)N(C)C(C)  
188 C=C1C(=O)O[C@H]2[C@H]1CCC(=C)[C@@H]1C[C@H](OC(C)=O)C(=C)[C@H]21.Ic1cccc1>>C  
=C1CC[C@H]2/C(=C\c3cccc3)C(=O)O[C@@H]2[C@H]2C(=C)[C@@H](OC(C)=O)C[C@@H]12  
189 C=C(F)[Si](C)(c1cccc1)c1cccc1.COC(=O)c1cccc1I>>COC(=O)c1cccc1/C=C(F)[Si](C)(c1cccc1  
)c1cccc1  
190 C=C(C(=O)OC)[C@@H]1CC[C@@]2(C)CC[C@@H](OCOC)C(=C)[C@@H]2C1.Cc1ccc(Br)cc1>>  
191 C=C1[C@H](OCOC)CC[C@]2(C)CC[C@@H]/C(=C\c3ccc(C)cc3)C(=O)OC[C@@H]12  
C=C(c1cccc1)N(C)C(C)=O.CCOC(=O)CCCB>>CCOC(=O)CCC/C=C(\c1cccc1)N(C)C(C)=O  
192 C=C1N=C(c2cccc2)[C@H](C(C)C)N(C(=O)OC(C)(C)C)C1=O.Ic1cccc2cccc12>>CC(C)[C@H]1C(  
c2cccc2)=N/C(=C\c2cccc3cccc23)C(=O)N1C(=O)OC(C)(C)C  
193 C=C(NC(=O)OC(C)(C)C)C(=O)OC.Ic1cccc1>>COC(=O)/C(=C/c1cccc1)NC(=O)OC(C)(C)C  
C=C(C(=O)OC)N1CC[C@H](NC(=O)OCc2cccc2)C1=O.Fc1c(Br)ccc2c(NC(c3cccc3)(c3cccc3)c3c  
194 cccc3)cccc12>>COC(=O)/C(=C/c1ccc2c(NC(c3cccc3)(c3cccc3)c3cccc3)cccc2c1F)N1CC[C@H](N  
C(=O)OCc2cccc2)C1=O

195 C=C(NC(C)=O)C(=O)OCc1cccc1.CCc1cc(Br)ccc1N>>CCc1cc(/C=C(/NC(C)=O)C(=O)OCc2cccc2)  
ccc1N  
196 C=C(NC(C)=O)C(=O)OC.O=[N+](O-)]c1ccc(Br)cc1>>COC(=O)/C(=C/c1ccc([N+](=O)[O-]  
]cc1)NC(C)=O  
197 C=C(C)C(=O)OCC(C)C.Ic1cccc1>>C/C(=C\c1cccc1)C(=O)OCC(C)C  
198 C=C1SCCCS1=O.Ic1cccc1>>O=S1CCCS/C1=C\c1cccc1  
199 C=C(C)C(=O)OCCCC.O=Cc1ccc(Cl)cc1>>CCCCOC(=O)/C(C)=C/c1ccc(C=O)cc1  
200 C=C(F)C(=O)OC.Ic1cccc1-c1cccc1>>COC(=O)/C(F)=C/c1cccc1-c1cccc1  
201 C=C(NC(=O)OC(C)(C)C)C(=O)OC.N#Cc1ccc(N)c(I)c1>>COC(=O)/C(=C/c1cc(C#N)ccc1N)NC(=O)  
OC(C)(C)C  
202 C=C(OC)C(=O)OC.COc1ccc(I)cc1>>COC(=O)/C(=C/c1ccc(OC)cc1)OC  
203 C=C1C(=O)O[C@H]2[C@H]1CC/C(C)=C/CC[C@@]1(C)O[C@@H]21.CCc1ccc(I)cc1>>CCc1ccc(/  
C=C2/C(=O)O[C@H]3[C@H]2CC/C(C)=C/CC[C@@]2(C)O[C@@H]32)cc1  
204 C=C(OC)C(=O)OC.CC(=O)Nc1ccc(I)cc1>>COC(=O)/C(=C/c1ccc(NC(C)=O)cc1)OC  
205 Brc1cccc1.C=C(NC(C)=O)C(=O)OC>>COC(=O)/C(=C/c1cccc1)NC(C)=O  
206 C=C1C(=O)O[C@@H]2/C=C(\C)CC/C=C(\C)CC[C@@H]12.Ic1cccc1>>C/C1=C\[C@H]2OC(=O)/  
C(=C/c3cccc3)[C@@H]2CC/C(C)=C/CC1  
207 C=C(CC(=O)OC)C(=O)OC.COc1cccc2c(OCc3cccc3)c(Br)ccc12>>COC(=O)/C(=C\c1ccc2c(OC)cc  
cc2c1OCc1cccc1)C(=O)OC  
208 C=C(C(=O)OCC)c1cccc1Br.Oc1cccc1I>>CCOC(=O)/C(=C/c1cccc1O)c1cccc1Br  
209 C=C1C(=O)O[C@H]2[C@H]1C[C@@H](O)/C(C)=C/CC[C@@]1(C)O[C@@H]21.Oc1ccc(I)cc1>>C  
/C1=C\CC[C@@]2(C)O[C@H]2[C@H]2OC(=O)/C(=C/c3ccc(O)cc3)[C@@H]2C[C@H]1O  
210 C=C1C(=O)O[C@@H]2[C@@]3(C)CCCC(=C)[C@@H]3C[C@H]12.Ic1ccccc1>>C=C1CCC[C@]  
2(C)C[C@H]3OC(=O)/C(=C/c4ccccc4)[C@H]3C[C@@H]12  
211 C=C1CC(c2ccc(C)cc2)OC1=O.Fc1cccc1I>>Cc1ccc(C2C/C(=C\c3cccc3F)C(=O)O2)cc1  
212 C=C(NC(C)=O)C(=O)OC.CCc1cc(Br)ccc1N>>CCc1cc(/C=C(/NC(C)=O)C(=O)OC)ccc1N  
213 C=C1CC(c2cccc2)OC1=O.CC(C)(C)c1ccc(I)cc1>>CC(C)(C)c1ccc(/C=C2\CC(c3cccc3)OC2=O)cc1  
214 C=C(F)C(C)=O.Clc1ccc(I)cc1>>CC(=O)/C(F)=C/c1ccc(Cl)cc1  
215 C=C1C(=O)O[C@H]2[C@H]1CCC(=C)[C@@H]1C[C@H](OC(C)=O)C(=C)[C@H]21.Cc1ccc(I)c([N  
+](=O)[O-])c1>>C=C1CC[C@H]2/C(=C\c3ccc(C)cc3[N+](=O)[O-]  
]C(=O)O[C@@H]2[C@H]2C(=C)[C@@H](OC(C)=O)C[C@@H]12  
216 C=C1C(=O)O[C@@H]2/C=C(\C)CC/C=C(\C)CC[C@@H]12.Cc1cc(I)ccc1N>>C/C1=C\[C@H]2OC(  
=O)/C(=C/c3ccc(N)c(C)c3)[C@@H]2CC/C(C)=C/CC1  
217 C=C1CC(c2ccc(Cl)cc2)OC1=O.Ic1cccc1>>O=C1OC(c2ccc(Cl)cc2)C/C1=C\c1cccc1  
218 C=C1C(=O)O[C@H]2[C@H]1C[C@@H](O)/C(C)=C/CC[C@@]1(C)O[C@@H]21.Cc1ccc(I)cc1>>C  
/C1=C\CC[C@@]2(C)O[C@H]2[C@H]2OC(=O)/C(=C/c3ccc(C)cc3)[C@@H]2C[C@H]1O  
219 C=C(C)C(=O)OCC.Ic1cccc1>>CCOC(=O)/C(C)=C/c1cccc1  
220 C=C1C(=O)O[C@@H]2C3=C(C)C(=O)C=C[C@@]3(C)CC[C@@H]12.Fc1cccc1I>>CC1=C2[C@H]3  
OC(=O)/C(=C/c4cccc4F)[C@@H]3CC[C@@]2(C)C=CC1=O  
221 C=C(C)C(=O)OC.COc1ccc(I)cc1>>COC(=O)/C(C)=C/c1ccc(OC)cc1  
222 C=C(F)C(C)=O.Ic1cccc1-c1cccc1>>CC(=O)/C(F)=C/c1cccc1-c1cccc1  
223 C=C(NC(C)=O)C(=O)OC.CCOC(=O)c1[nH]c2cccc2c1Br>>CCOC(=O)c1[nH]c2cccc2c1/C=C(\NC(  
C)=O)C(=O)OC  
224 C=C(NC(=O)OC(C)(C)C)C(=O)OCc1cccc1.Ic1cccc1C1OCCCCO1>>CC(C)(C)OC(=O)N/C(=C\c1cc  
ccc1C1OCCCCO1)C(=O)OCc1cccc1  
225 C=C(c1cccc1)[Si](C)(C)c1ccccc1.Ic1cccc1>>C[Si](C)/C(=C/c1cccc1)c1cccc1c1ccccc1  
226 C=C(CP(=O)(OCC)OCC)C(=O)OCC.Oc1cccc1I>>CCOC(=O)/C(=C/c1cccc1O)CP(=O)(OCC)OCC  
227 C=C(F)C(=O)OC.O=Cc1ccc(I)o1>>COC(=O)/C(F)=C/c1ccc(C=O)o1  
228 C=C1C(=O)O[C@@H]2/C=C(\C)CC/C=C(\C)CC[C@@H]12.Cc1ccc(I)cc1>>C/C1=C\[C@H]2OC(=O)  
/C(=C/c3ccc(C)cc3)[C@@H]2CC/C(C)=C/CC1  
229 Brc1cccc2cccc12.C=C(NC(C)=O)C(=O)O>>CC(=O)N/C(=C\c1cccc2cccc12)C(=O)O  
230 C=C1C(=O)O[C@H]2C3=C(C)CCC[C@@]3(C)C(=O)C[C@@H]12.COc1ccc(I)cc1OC>>COc1ccc(/C=  
C2/C(=O)O[C@H]3C4=C(C)CCC[C@@]4(C)C(=O)C[C@@H]23)cc1OC  
231 C=C1C(=O)O[C@H]2[C@H]1CCC(=C)[C@@H]1C[C@H](OC(C)=O)C(=C)[C@H]21.COC(=O)c1c  
cc(I)cc1>>C=C1CC[C@H]2/C(=C\c3ccc(C(=O)OC)cc3)C(=O)O[C@@H]2[C@H]2C(=C)[C@@H](O  
C(C)=O)C[C@@H]12  
232 C=C1C(=O)O[C@H]2[C@H]1CCC(=C)[C@@H]1C[C@H](OC(C)=O)C(=C)[C@H]21.FC(F)(F)c1cc  
cc(I)c1>>C=C1CC[C@H]2/C(=C\c3cccc(C(F)(F)F)c3)C(=O)O[C@@H]2[C@H]2C(=C)[C@@H](OC  
(C)=O)C[C@@H]12  
233 C=C(C)c1cccc1.O=[N+](O-)]c1ccc(Cl)cc1>>C/C(=C\c1ccc([N+](=O)[O-])cc1)c1cccc1  
234 C=C(C)C(=O)OC.Clc1cccc1>>COC(=O)/C(C)=C/c1cccc1

C=C(C(=O)OC)N1CC[C@H](NC(=O)OC(C)(C)C)C1=O.FC(F)(F)Oe1cc2c(NC(c3ccccc3)(c3ccccc3)c  
235 3ccccc3)nc2cc1Br>>COC(=O)/C(=C\C1cc2ccnc(NC(c3ccccc3)(c3ccccc3)c3ccccc3)e2cc1OC(F)(F)F  
)N1CC[C@H](NC(=O)OC(C)(C)C)C1=O  
236 C=C(C)C(=O)OC.Cc1ccsc1Br>>COC(=O)/C(C)=C/c1secc1C  
237 C=C(NC(C)=O)C(=O)OC.N#Cc1ccc(Br)cc1>>COC(=O)/C(=C/c1ccc(C#N)cc1)NC(C)=O  
238 C=C1C(=O)O[C@H]2[C@H]1CC/C(C)=C/CC[C@@]1(C)O[C@@H]21.Fc1ccc(I)cc1>>C/C1=C\C[C@H]  
C@@]2(C)O[C@H]2[C@H]2OC(=O)/C(=C/c3ccc(F)cc3)[C@@H]2CC1  
239 C=C1C(=O)O[C@@H]2/C=C(\C)CC/C=C(\C)CC[C@@H]12.FC(F)(F)c1cccc(I)c1>>C/C1=C\C[C@H]  
2OC(=O)/C(=C/c3cccc(C(F)(F)F)c3)[C@@H]2CC/C(C)=C/CC1  
240 C=C(NC(C)=O)C(=O)OC.Nc1ccc(Br)c2ccccc12>>COC(=O)/C(=C\C1ccc(N)c2ccccc12)NC(C)=O  
241 C=C(C)C(=O)OC.CC(=O)c1ccc(Br)cc1>>COC(=O)/C(C)=C/c1ccc(C(C)=O)cc1  
242 C=C1C(=O)O[C@H]2[C@H]1CCC(=C)[C@@H]1C[C@H](OC(C)=O)C(=C)[C@H]21.Cc1ccc(I)cc1  
>>C=C1CC[C@H]2/C(=C\C3ccc(C)cc3)C(=O)O[C@@H]2[C@H]2C(=C)[C@@H](OC(C)=O)C[C@  
243 C=C(C)C(C)=O.Oc1ccccc1I>>CC(=O)/C(C)=C/c1ccccc1O  
244 C=C(C)C(=O)OCCO.Ic1ccccc1>>C/C(=C\C1ccccc1)C(=O)OCCO  
245 C=C(NC(C)=O)C(=O)OC.CC(=O)Oc1cc(C)c(I)c(C)c1C>>COC(=O)/C(=C/c1c(C)cc(OC(C)=O)c(C)c1  
C)NC(C)=O  
246 C=C(NC(C)=O)C(=O)OC.CC(C)(C)OC(=O)NCCOc1cc(C#N)ccc1I>>COC(=O)/C(=C\C1ccc(C#N)cc1  
OCCNC(=O)OC(C)(C)NC(C)=O  
247 Br1cccn1.C=C1C[C@H]2[C@@H]3CCc4cc(OC)ccc4[C@H]3CC[C@]2(C)C1=O>>COc1ccc2c(c1)  
CC[C@@H]1[C@H]2CC[C@]2(C)C(=O)/C(=C/c3ccnc3)C[C@@H]12  
248 C=C(OC(C)=O)C(=O)OCC.COc1ccc(I)cc1>>CCOC(=O)/C(=C/c1ccc(OC)cc1)OC(C)=O  
249 C=C(CC(=O)OC)C(=O)OC.COc1ccc(Br)c(CN(CC(F)(F)F)C(=O)OC(C)(C)C)c1>>COC(=O)C/C(=C\C  
1ccc(OC)cc1CN(CC(F)(F)F)C(=O)OC(C)(C)C(=O)OC  
250 C=C(C)C(=O)NCc1ccccc1.Clc1ccccc1>>C/C(=C\C1ccccc1)C(=O)NCc1ccccc1  
251 C=C(NC(=O)OCc1ccccc1)C(=O)OC.CC(=O)OCc1cc(C)ccc1Br>>COC(=O)/C(=C/c1ccc(C)cc1COC(  
C)=O)NC(=O)OCc1ccccc1  
252 C=C(C)C(=O)OC.Cc1cc(-c2ccccc2)n2nc(C)c(I)c2n1>>COC(=O)/C(C)=C\C1c(C)nn2c(-  
253 C=C1CC(c2ccccc2)OC1=O.CCOc1ccc(I)cc1>>CCOc1ccc(/C=C2\CC(c3ccccc3)OC2=O)cc1  
254 C=C1C(=O)O[C@@H]2C3=C(C)C(=O)C=C[C@]3(C)CC[C@@H]12.COC(=O)c1cccc(I)c1>>COC(=  
O)c1cccc(/C=C2/C(=O)O[C@@H]3C4=C(C)C(=O)C=C[C@]4(C)CC[C@@H]23)c1  
255 C=C(CC(=O)OC)C(=O)OC.Cc1ccc(I)cc1>>COC(=O)C/C(=C\C1ccc(C)cc1)C(=O)OC  
256 C=C(CC(=O)OC)C(=O)OC.N#Cc1ccccc1I>>COC(=O)C/C(=C\C1ccccc1C#N)C(=O)OC  
257 C=C(COC(C)=O)C(=O)OC.CCOC(=O)c1ccc(I)cc1>>CCOC(=O)c1ccc(/C=C(\COC(C)=O)C(=O)OC)c  
258 C=C(C)C(=O)OC.CC1(C)CCC(C)(C)c2cc(C(=O)c3ccc(I)cc3)ccc21>>COC(=O)/C(C)=C/c1ccc(C(=O)  
c2ccc3c(c2)C(C)(C)CCC3(C)C)cc1  
259 C=C(NC(C)=O)C(=O)OC.O=C(c1ccccc1)c1ccc(Br)cc1>>COC(=O)/C(=C/c1ccc(C(=O)c2ccccc2)cc1)  
NC(C)=O  
260 C=C(C)C(=O)OCC.Cn1ccccc1Cl>>CCOC(=O)/C(C)=C/c1cccn1C  
Br1ccc(I)cc1.C=C1C(=O)O[C@@H]2CC(C)=C([C@@H](C)CCCOC(C)=O)[C@@H](OC(C)=O)[C  
261 @H]12>>CC(=O)OCCC[C@H](C)C1=C(C)C[C@H]2OC(=O)/C(=C/c3ccc(Br)cc3)[C@H]2[C@@H]  
1OC(C)=O  
262 C=C(F)C(=O)OC.Ic1ccsc1>>COC(=O)/C(F)=C/c1ccsc1  
263 C=C(OC(C)=O)C(=O)OCC(F)(F)F.CC(C)=CCc1cc(I)ccc1OCc1ccccc1>>CC(=O)O/C(=C\C1ccc(OCc2  
ccccc2)c(CC=C(C)C)c1)C(=O)OCC(F)(F)F  
264 C=C1N=C(c2ccccc2)[C@H](C(C)C)N(C(=O)OC(C)(C)C)C1=O.Cc1ccccc1I>>Cc1ccccc1/C=C1\N=C(  
c2ccccc2)[C@H](C(C)C)N(C(=O)OC(C)(C)C)C1=O  
265 C=C(C)C(=O)OC.Clc1cccn1>>COC(=O)/C(C)=C/c1cccn1  
266 C=C(F)[Si](C)(c1ccccc1)c1ccccc1.Ic1ccccc1>>C[Si](/C(F)=C/c1ccccc1)(c1ccccc1)c1ccccc1  
267 C=C(C(=O)OC)[C@@H]1CC[C@@]2(C)CCC[C@@](C)(OCOC)[C@@H]2C1.COc1ccc(I)c1>>CO  
CO[C@]1(C)CCC[C@]2(C)CC[C@@H](/C(=C\C3ccc(OC)c3)C(=O)OC)C[C@H]21  
268 C=C(C)C(=O)OC.COc1ccc(Br)cc1>>COC(=O)/C(C)=C/c1ccc(OC)cc1  
269 C=C1c2ccccc2C1(C#N)CC.CC(=O)c1ccc(Br)cc1>>CCC1(C#N)/C(=C/c2ccc(C(C)=O)cc2)c2ccccc21  
270 C=C1c2ccccc2C1(C#N)CC.CN(C)c1ccc(Br)cc1>>CCC1(C#N)/C(=C/c2ccc(N(C)C)cc2)c2ccccc21  
271 C=C(F)C(=O)OC.COc1ccc(C(c2ccc(I)cc2)=C2[C@H]3C[C@H]4C[C@H](C[C@H]2C4)C3)cc1>>CO  
C(=O)/C(F)=C/c1ccc(C(c2ccc(OC)cc2)=C2[C@H]3C[C@H]4C[C@H](C[C@H]2C4)C3)cc1  
272 C=C(F)[Si](C)(c1ccccc1)c1ccccc1.O=[N+](O-)c1ccc(I)cc1>>C[Si](/C(F)=C/c1ccc([N+](=O)[O-]  
)cc1)(c1ccccc1)c1ccccc1  
273 C=C(NC(C)=O)C(=O)OC.Fc1ccc(Br)cc1>>COC(=O)/C(=C/c1ccc(F)cc1)NC(C)=O  
274 C=C(NC(=O)OCC[Si](C)(C)C)C(=O)OC.CC(C)(C)OC(=O)N[C@@H](Cc1ccc(I)cc1)C(=O)OCc1ccccc  
c1>>COC(=O)/C(=C/c1ccc(C[C@H](NC(=O)OC(C)(C)C)C(=O)OCc2ccccc2)cc1)NC(=O)OCC[Si](C)

275 C=C(NC(C)=O)C(=O)OC.Nc1ccc(Br)cc1CCO>>COC(=O)/C(=C\c1ccc(N)c(CCO)c1)NC(C)=O  
276 C=C1C(=O)O[C@@H]2/C=C(\C)CC/C=C(\C)CC[C@@H]12.Ic1ccc2[nH]ccc2c1>>C/C1=C\C[C@H]2  
OC(=O)/C(=C/c3ccc4[nH]ccc4c3)[C@@H]2CC/C(C)=C/CC1  
277 Brc1cccs1.C=C1C[C@H]2[C@@H]3CCc4cc(OC)ccc4[C@H]3CC[C@]2(C)C1=O>>COc1ccc2c(c1)C  
C[C@@H]1[C@@H]2CC[C@]2(C)C(=O)/C(=C/c3cccs3)C[C@@H]12  
C=C1C(=O)O[C@@H]2CC(C)=C([C@@H](C)CCOC(C)=O)[C@@H](OC(C)=O)[C@H]12.COc1c  
278 cc(I)cc1>>COc1ccc(/C=C2/C(=O)O[C@@H]3CC(C)=C([C@@H](C)CCOC(C)=O)[C@@H](OC(C)  
=O)[C@H]23)cc1  
C=C(F)[Si](C)(c1ccccc1)c1ccccc1.FC(F)(F)c1ccc(I)cc1>>C[Si](/C(F)=C/c1ccc(C(F)(F)F)cc1)(c1ccccc  
279 1)c1ccccc1  
C=C(F)[Si](C)(c1ccccc1)c1ccccc1.COc1ccc(I)c1>>COc1ccc(/C=C(\F)[Si](C)(c2ccccc2)c2ccccc2)c1  
280 C=C1CC(c2ccccc2)OC1=O.Fc1ccc(I)c1>>O=C1OC(c2ccccc2)C/C1=C\c1ccc(F)c1  
281 C=C(C)C1(O)CCC2(CC1)OCCO2.COc1ccc(Br)cc1O>>COc1ccc(/C=C(\C)C2(O)CCC3(CC2)OCCO3)  
282 cc1O  
Brc1cccc2ccccc12.C=C(C)C(=O)OC>>COC(=O)/C(C)=C/c1ccc2ccccc12  
283 C=C(NC(=O)OCc1ccccc1)C(=O)OC.CC(=O)OCc1cc(F)c(F)cc1Br>>COC(=O)/C(=C/c1cc(F)c(F)cc1C  
284 OC(C)=O)NC(=O)OCc1ccccc1  
C=C(NC(=O)OC(C)(C)C(=O)OC.Nc1cc(N)cc(I)c1>>COC(=O)/C(=C/c1cc(N)cc(N)c1)NC(=O)OC(  
285 C)(C)C  
C=C(CC(F)(F)C(=O)OCC)c1ccc(C)cc1.CCOC(=O)C(F)(F)I>>CCOC(=O)C(F)(F)/C=C(\CC(F)(F)C(=O)OCC)c1ccc(C)cc1  
286 C=C1C(=O)O[C@H]2[C@H]1C[C@@H](O)/C(C)=C/CC[C@@]1(C)O[C@@H]21.COc1ccc(I)cc1>>  
287 COc1ccc(/C=C2/C(=O)O[C@H]3[C@H]2[C@@H](O)/C(C)=C/CC[C@@]2(C)O[C@@H]32)cc1  
288 C=C(F)F.CCCCCC/C(F)=C(\F)I>>CCCCC/C(F)=C(\F)C=C(F)F  
C=C1C(=O)O[C@H]2[C@H]1C[C@@H](O)/C(C)=C/CC[C@@]1(C)O[C@@H]21.COc1ccc(I)c1>>  
289 COc1ccc(/C=C2/C(=O)O[C@H]3[C@H]2[C@@H](O)/C(C)=C/CC[C@@]2(C)O[C@@H]32)c1  
C=C1C(=O)O[C@H]2[C@H]1CCC(=C)[C@@H]1C[C@H](OC(C)=O)C(=C)[C@H]21.COc1ccc([N  
290 +])(=O)[O-]c1>>C=C1CC[C@H]2/C(=C\c3c(OC)ccc3[N+])(=O)[O-  
])C(=O)O[C@@H]2[C@H]2C(=C)[C@@H](OC(C)=O)C[C@@H]12  
291 C=C(NC(C)=O)C(=O)OC.Fc1cc(Br)ccc1-c1ccccc1>>COC(=O)/C(=C/c1ccc(-  
292 C=C(F)C(=O)OC.O=S(=O)(c1ccccc1)n1cc(I)c2ccccc21>>COC(=O)/C(F)=C/c1cn(S(=O)(=O)c2ccccc2  
)c2ccccc12  
C=C(C)C(=O)OC.COc1ccccc1I>>COC(=O)/C(C)=C/c1ccccc1OC  
293 C=C(NC(=O)OC(C)(C)C(=O)OC.COc1ccc(I)cc1>>COC(=O)/C(=C/c1ccc(OC)cc1)NC(=O)OC(C)(  
294 C=C1C(=O)O[C@H]2[C@H]1CC/C(C)=C/CC[C@@]1(C)O[C@@H]21.FC(F)(F)c1ccc(I)cc1>>C/C1  
295 =C\CC[C@@]2(C)O[C@H]2[C@H]2OC(=O)/C(=C/c3ccc(C(F)(F)F)cc3)[C@@H]2CC1  
C=C(c1ccc(C)cc1)N(C)C(C)=O.CCOC(=O)CCBr>>CCOC(=O)CCC/C=C(\c1ccc(C)cc1)N(C)C(C)=  
296 C=C(NC(C)=O)C(=O)OC.CC(=O)c1ccc(Br)cc1>>COC(=O)/C(=C/c1ccc(C(C)=O)cc1)NC(C)=O  
297 C=C(C(=O)OCC)c1ccccc1Br.CC(C)(C)OC(=O)Nc1ccccc1I>>CCOC(=O)/C(=C/c1ccccc1NC(=O)OC(  
298 C)(C)C)c1ccccc1Br  
C=C(C)c1ccccc1.COC(=O)c1ccccc1I>>COC(=O)c1ccccc1/C=C(\C)c1ccccc1  
299 C=C(NC(=O)OCC)C(=O)OC.CCOC(=O)c1[nH]c2ccccc2c1Br>>CCOC(=O)N/C(=C\c1c(C(=O)OCC)[  
300 nH]c2ccccc12)C(=O)OC  
C=C(NC(C)=O)C(=O)OC.COC(=O)c1ccccc1I>>COC(=O)/C(=C/c1ccccc1C(=O)OC)NC(C)=O  
301 C=C(NC(C)=O)C(=O)OC.CCc1ccc(C)c1I>>CCc1ccc(C)c1/C=C(\NC(C)=O)C(=O)OC  
302 C=C(CC(=O)OCC)C(=O)OCC.Ic1ccccc1>>CCOC(=O)C/C(=C/c1ccccc1)C(=O)OCC  
303 C=C1CC(c2ccc(Cl)cc2)OC1=O.Ic1ccccc1-  
304 c1ccc2ccccc2c1>>O=C1OC(c2ccc(Cl)cc2)C/C1=C\c1ccccc1-c1ccc2ccccc2c1  
C=C(NC(C)=O)C(=O)OC.Cc1cc(C)c(I)c(C)c1>>COC(=O)/C(=C/c1c(C)cc(C)cc1)NC(C)=O  
305 C=C(NC(=O)OCC[Si](C)(C)C(=O)OC.COc1ccc(-  
306 c2ccc(OC)c/C=C(\NC(=O)OC(C)(C)C(=O)OCc3ccccc3)c2)cc1I>>COC(=O)/C(=C/c1cc(-  
c2ccc(OC)c/C=C(\NC(=O)OC(C)(C)C(=O)OCc3ccccc3)c2)ccc1OC)NC(=O)OCC[Si](C)(C)C  
307 C=C1C(=O)O[C@@H]2[C@@H](C)C(=O)C/C=C(\C)CC[C@@H]12.CSc1ccccc1I>>CSc1ccccc1/C  
=C1/C(=O)O[C@@H]2[C@@H](C)C(=O)C/C=C(\C)CC[C@@H]12  
C=C(NC(=O)OC(C)(C)C(=O)OCc1ccccc1.Ic1ccccc1>>CC(C)(C)OC(=O)N/C(=C\c1ccccc1)C(=O)  
308 OCc1ccccc1  
C=C(NC(=O)OC(C)(C)C(=O)OC.Ic1cnc(N(Cc2ccccc2)Cc2ccccc2)nc1>>COC(=O)/C(=C/c1cnc(N(  
309 Cc2ccccc2)Cc2ccccc2)nc1)NC(=O)OC(C)(C)C  
C=C(C)C(=O)OC.Clc1ccc(Br)c1>>COC(=O)/C(C)=C/c1ccc(Cl)c1  
310 C=C(NC(=O)OCc1ccccc1)C(=O)OC.CC(C)(C)[Si](C)(C)OC[C@@H]1CN(Cc2ccccc2)c2cc(OCc3cccc  
311 c3)cc(I)c21>>COC(=O)/C(=C/c1cc(OCc2ccccc2)cc2c1[C@H](CO[Si](C)(C)C(C)(C)CN2Cc1ccccc  
1)NC(=O)OCc1ccccc1



312 C=C(C)c1cccc1.O=[N+](I)cc1>>C/C(=C/c1ccc([N+](=O)[O-])cc1)c1cccc1  
313 C=C(NC(=O)OC(C)(C)C(=O)OC.Nc1cccc(I)c1>>COC(=O)/C(=C/c1cccc(N)c1)NC(=O)OC(C)(C)C  
314 C=C1C(=O)O[C@H]2C3=C(C)CCC[C@]3(C)C(=O)C[C@]2(C)C1.Fc1ccc(I)cc1>>CC1=C2[C@]3  
OC(=O)/C(=C/c4ccc(F)cc4)[C@]3CC(=O)[C@]2(C)CCC1  
315 C=C(NC(C)=O)C(=O)OC.O=[N+](I)cc1>>COC(=O)/C(=C/c1ccc([N+](=O)[O-]  
316 C=C(OC(C)=O)C(=O)OCC(F)(F)F.CC1(C)CCc2cc(I)ccc2O1>>CC(=O)O/C(=C/c1ccc2c(c1)CCC(C)(  
C)O2)C(=O)OCC(F)(F)F  
317 C=C(NC(C)=O)C(=O)O.COc1ccc(Br)cc1OC>>COc1ccc(/C(=C(\NC(C)=O)C(=O)O)cc1OC  
318 C=C(CC(=O)OC)C(=O)OC.Ic1cccc1>>COC(=O)/C(=C/c1cccc1)C(=O)OC  
319 C=C(OC(C)=O)C(=O)OCC(F)(F)F.Ic1cccc1>>CC(=O)O/C(=C/c1cccc1)C(=O)OCC(F)(F)F  
320 C=C1N=C(c2cccc2)[C@H](C(C)C)N(C(=O)OC(C)(C)C)C1=O.COc1ccc(I)cc1>>COc1ccc(/C=C2\N=  
C(c3cccc3)[C@H](C(C)C)N(C(=O)OC(C)(C)C)C2=O)cc1  
321 C=C1C(=O)O[C@]2/C=C(\C)CC/C=C(\C)CC[C@]12.COc1cccc1I>>COc1cccc1/C=C1/C(=  
O)O[C@]2/C=C(\C)CC/C=C(\C)CC[C@]12  
322 C=C1C(=O)O[C@H]2[C@H]1CC/C(C)=C/CC[C@]1(C)O[C@]21.Nc1ccc(I)cc1>>C/C1=C\CC[  
C@]2(C)O[C@H]2[C@H]2OC(=O)/C(=C/c3ccc(N)cc3)[C@]2CC1  
323 C=C(NC(=O)OCc1cccc1)C(=O)OC.CC(=O)OCc1cc(OCc2cccc2)ccc1Br>>COC(=O)/C(=C/c1ccc(O  
Cc2cccc2)cc1COC(C)=O)NC(=O)OCc1cccc1  
324 C=C(F)C(=O)OC.Fc1ccc(I)cc1>>COC(=O)/C(F)=C/c1ccc(F)cc1  
325 C=C(F)C(=O)OC.Cc1cccc1I>>COC(=O)/C(F)=C/c1cccc1C  
326 C=C(F)C(=O)OC.N#Cc1ccc(I)c1>>COC(=O)/C(F)=C/c1ccc(C#N)c1  
327 C=C(NC(=O)OC(C)(C)C(=O)OC.Nc1cc(C(F)(F)F)ccc1I>>COC(=O)/C(=C/c1ccc(C(F)(F)F)cc1N)N  
C(=O)OC(C)(C)C  
328 C=C(NC(C)=O)C(=O)OC.COC(=O)c1cccc(I)c1>>COC(=O)/C(=C/c1cccc(C(=O)OC)c1)NC(C)=O  
329 C=C(NC(=O)OCC[Si](C)(C)C(=O)OC.CC(C)(C)OC(=O)N/C(=C/c1ccc(Br)c1)C(=O)OCc1cccc1>  
>COC(=O)/C(=C/c1cccc(/C=C(\NC(=O)OC(C)(C)C)C(=O)OCc2cccc2)c1)NC(=O)OCC[Si](C)(C)C  
330 C=C(NC(C)=O)C(=O)OC.Fc1cc(-c2cccc2)ccc1Br>>COC(=O)/C(=C/c1ccc(-  
331 Brc1cccc1I.C=C1CC(c2cccc2)OC1=O>>O=C1OC(c2cccc2)C/C1=C\c1cccc1Br  
332 C=C(F)C(=O)OC.Ic1ccc2cccc2c1>>COC(=O)/C(F)=C/c1ccc2cccc2c1  
333 C=C(C)C(=O)OCC.Clc1ccc1>>CCOC(=O)/C(C)=C/c1ccc1  
334 Brc1cccc1.C=C(NC(=O)OC(C)(C)C(=O)OC>>COC(=O)/C(=C/c1cccc1)NC(=O)OC(C)(C)C  
335 C=C1CC(c2ccc(Cl)cc2)OC1=O.COc1ccc(I)c1>>COc1ccc(/C=C2\CC(c3ccc(Cl)cc3)OC2=O)c1  
336 C=C1C[C@H]2[C@]3CCc4cc(OC)ccc4[C@H]3CC[C@]2(C)C1=O.Cc1ccc(Br)c1>>COc1ccc2c(  
c1)CC[C@]1[C@]2CC[C@]2(C)C(=O)/C(=C/c3ccc(C)c3)C[C@]12  
337 Brc1cccc1.C=C1C(=O)O[C@]2[C@]3(C)CCCC(=C)[C@]3[C@H]12>>C=C1CCC[C@  
]2(C)C[C@H]3OC(=O)/C(=C/c4cccc4)[C@H]3[C@]12  
338 C=C1C(=O)O[C@H]2[C@H]1CC/C(C)=C/CC[C@]1(C)O[C@]21.Clc1ccc(I)cc1>>C/C1=C\CC  
[C@]2(C)O[C@H]2[C@H]2OC(=O)/C(=C/c3ccc(Cl)cc3)[C@]2CC1  
339 C=C1C(=O)O[C@H]2[C@H]1C[C@H](O)/C(C)=C/CC[C@]1(C)O[C@]21.Nc1ccc(I)cc1>>C  
/C1=C\CC[C@]2(C)O[C@H]2[C@H]2OC(=O)/C(=C/c3ccc(N)cc3)[C@]2[C@H]1O  
340 C=C(C)C(=O)CC(C)(C)OC(=O)Nc1ccc(I)cc1>>C/C(C)=C/c1ccc(NC(=O)OC(C)(C)C)cc1  
341 C=C(C)C(=O)OCC.CCOC(=O)c1cc(=O)c2cc(Br)ccc2o1>>CCOC(=O)/C(C)=C/c1ccc2oc(C(=O)OCC)  
cc(=O)c2c1  
342 C=C(C)C(=O)OCC.Cc1ccc(Cl)cc1>>CCOC(=O)/C(C)=C/c1ccc(C)cc1  
343 C=C1CC(c2cccc2)OC1=O.FC(F)(F)c1cccc1I>>O=C1OC(c2cccc2)C/C1=C\c1cccc1C(F)(F)F  
344 C=C(C)C(=O)OC.Cc1ccc(Br)cc1>>COC(=O)/C(C)=C/c1ccc(C)cc1  
345 C=C(C(=O)OC)[C@]1CC[C@]2(C)CCC[C@]1(C)(OCOC)[C@]2C1.Ic1cccc1>>COCO[  
C@]1(C)CCC[C@]2(C)CC[C@]1(C)/C(=C/c3cccc3)C(=O)OC[C@]12  
346 C=C(NC(C)=O)C(=O)OC.CC(C)(C)[Si](C)(C)OC[C@H]1O[C@H](c2ccc(Br)cc2)C=C[C@]1O[Si  
(C)(C)C(C)(C)C>>COC(=O)/C(=C/c1ccc([C@]2C=C[C@H](O[Si](C)(C)C(C)(C)C)[C@]1(C  
O[Si](C)(C)C(C)(C)O2)cc1)NC(C)=O  
347 C=C(F)[Si](C)(c1cccc1)c1cccc1.Clc1cccc1I>>C[Si](/C(F)=C/c1cccc1Cl)(c1cccc1)c1cccc1  
348 C=C1CC(c2ccc(Cl)cc2)OC1=O.Fc1ccc(I)c1>>O=C1OC(c2ccc(Cl)cc2)C/C1=C\c1ccc(F)c1  
349 C=C1C(=O)N2C[C@H](O)C[C@]2[C@H]1O.Ic1cccc1>>O=C1/C(=C/c2cccc2)[C@H](O)[C@  
H]2C[C@]1(O)CN12  
350 C=C1Oc2cc(OC)cc(C(=O)OC)c2NC1=O.O=[N+](I)cc1>>COC(=O)c1cc(OC)cc2c1NC(=O)/C(=C/c1ccc([N+](=O)[O-])cc1)O2  
351 C=C(NC(C)=O)C(=O)OC.CCc1cc(OC(C)=O)cc(C)c1I>>CCc1cc(OC(C)=O)cc(C)c1/C=C(\NC(C)=O)  
C(=O)OC  
352 C=C1C(=O)O[C@]2C3=C(C)C(=O)C=C[C@]3(C)CC[C@]12.Clc1ccc(I)cc1>>CC1=C2[C@H  
]3OC(=O)/C(=C/c4ccc(Cl)cc4)[C@]3CC[C@]2(C)C=CC1=O

353 C=C1C(=O)O[C@H]2[C@H]1CC/C(C)=C/CC[C@@]1(C)O[C@@H]21.Ic1cccc1>>C/C1=C\CC[C  
@@]2(C)O[C@H]2[C@H]2OC(=O)/C(=C/c3cccc3)[C@@H]2CC1  
354 C=C(F)[Si](C)(c1cccc1)c1cccc1.CC(=O)c1ccc(I)cc1>>CC(=O)c1ccc(/C=C(\F)[Si](C)(c2cccc2)c2c  
cccc2)cc1  
355 C=C1CC(c2ccc(Cl)cc2)OC1=O.Fc1cccc1I>>O=C1OC(c2ccc(Cl)cc2)/C1=C\c1cccc1F  
356 Br1cccc1I.C=C1C(=O)O[C@H]2[C@H]1CC/C(C)=C/CC[C@@]1(C)O[C@@H]21>>C/C1=C\CC[C  
C@@]2(C)O[C@H]2[C@H]2OC(=O)/C(=C/c3cccc3Br)[C@@H]2CC1  
357 C=C1CC(c2cccc2)OC1=O.Ic1cccc1>>O=C1OC(c2cccc2)/C1=C\c1cccc1  
358 C=C1C(=O)O[C@H]2[C@H]1CCC(=C)[C@@H]1C[C@H](OC(C)=O)C(=C)[C@H]21.Cc1cccc1I>>  
C=C1CC[C@H]2/C(=C\c3cccc3C)C(=O)O[C@@H]2[C@H]2C(=C)[C@@H](OC(C)=O)C[C@@H]  
359 C=C(C)C(=O)OC.CC(=O)c1cccc(Br)c1>>COC(=O)/C(C)=C/c1cccc(C(C)=O)c1  
360 C=C(NC(C)=O)C(=O)OC.CC(C)c1cc(Br)ccc1N>>COC(=O)/C(=C\c1ccc(N)c(C(C)C)c1)NC(C)=O  
361 C=C(F)C(C)=O.Ic1cccc1>>CC(=O)/C(F)=C/c1cccc1  
362 C=C(NC(C)=O)C(=O)OC.Fc1cccc1Br>>COC(=O)/C(=C/c1cccc1F)NC(C)=O  
363 C=C(NC(=O)OCC[Si](C)(C)C)C(=O)OC.CC(C)(C)OC(=O)N/C(=C\c1ccc(Br)cc1)C(=O)OCc1cccc1>  
>COC(=O)/C(=C/c1ccc(/C=C(\NC(=O)OC(C)(C)C)C(=O)OCc2cccc2)cc1)NC(=O)OCC[Si](C)(C)C  
364 C=C1CC(c2ccc(Cl)cc2)OC1=O.CCOc1ccc(I)cc1>>CCOc1ccc(/C=C2\CC(c3ccc(Cl)cc3)OC2=O)cc1  
365 C=C(C)c1cccc1.Cc1ccc(Br)cc1>>C/C(=C\c1ccc(C)cc1)c1cccc1  
366 C=C(NC(C)=O)C(=O)OC.CN(C)CCc1c[nH]c2ccc(Br)cc12>>COC(=O)/C(=C/c1ccc2[nH]cc(CCN(C)C  
)c2c1)NC(C)=O  
367 C=C(NC(C)=O)C(=O)OC.CCc1cc(OC(C)=O)cc(CC)c1I>>CCc1cc(OC(C)=O)cc(CC)c1/C=C(\NC(C)=  
O)C(=O)OC  
368 C=C(NC(C)=O)C(=O)OC.Ic1cnc(N(Cc2cccc2)Cc2cccc2)nc1>>COC(=O)/C(=C/c1cnc(N(Cc2cccc2  
)Cc2cccc2)nc1)NC(C)=O  
369 C=C(C)C(=O)OC.CN(C)c1ccc(Br)cc1>>COC(=O)/C(C)=C/c1ccc(N(C)C)cc1  
370 C=C(NC(C)=O)C(=O)OC.Cl1ccc(-c2cc(I)c3cccc3n2)cc1>>COC(=O)/C(=C/c1cc(-  
c2ccc(Cl)cc2)nc2cccc12)NC(C)=O  
371 C=C(CC(=O)OC)C(=O)OC.Cl1ccc(I)cc1>>COC(=O)C/C(=C\c1ccc(Cl)cc1)C(=O)OC  
372 C=C(NC(C)=O)C(=O)OC.Cc1cc(C)cc(I)c1>>COC(=O)/C(=C/c1cc(C)cc(C)c1)NC(C)=O  
373 C=C1C(=O)N2C[C@H](O)C[C@@H]2[C@H]1O.O=[N+](I[O-]  
c1ccc(I)cc1>>O=C1/C(=C\c2ccc([N+](=O)[O-])cc2)[C@H](O)[C@H]2C[C@@H](O)CN12  
374 C=C(C)c1cccc1.Cl1ccc(I)cc1>>C/C(=C\c1ccc(Cl)cc1)c1cccc1  
375 C=C(NC(C)=O)C(=O)OC.Cc1ccc(S(=O)(=O)n2ccc3c(Br)cccc32)cc1>>COC(=O)/C(=C/c1cccc2c1ccn  
2S(=O)(=O)c1ccc(C)cc1)NC(C)=O  
376 C=C1C(=O)O[C@H]2[C@H]1CC/C(C)=C/CC[C@@]1(C)O[C@@H]21.Nc1cccc(I)c1>>C/C1=C\CC[C  
C@@]2(C)O[C@H]2[C@H]2OC(=O)/C(=C/c3cccc(N)c3)[C@@H]2CC1  
377 C=C(C)C(=O)OC.CC(=O)NS(=O)(=O)c1ccc(Br)cc1>>COC(=O)/C(C)=C/c1ccc(S(=O)(=O)NC(C)=O)  
378 C=C1CC(c2cccc2)OC1=O.Cc1cccc(I)c1>>Cc1cccc(/C=C2\CC(c3cccc3)OC2=O)c1  
379 C=C(NC(=O)OC(C)(C)C)C(=O)OCc1cccc1.COC(=O)c1cccc(I)c1>>COC(=O)c1cccc(/C=C(/NC(=O)  
OC(C)(C)C)C(=O)OCc2cccc2)c1  
380 C=C1C(=O)O[C@H]2[C@H]1C[C@@H](O)/C(C)=C/CC[C@@]1(C)O[C@@H]21.Ic1cccc1>>C/C1  
=C\CC[C@@]2(C)O[C@H]2[C@H]2OC(=O)/C(=C/c3cccc3)[C@@H]2C[C@H]1O  
381 C=C(NC(C)=O)C(=O)OC.CC(=O)Oc1cc(C)c(I)c(C)c1>>COC(=O)/C(=C/c1c(C)cc(OC(C)=O)cc1C)N  
C(C)=O  
382 C=C(C(=O)OC)[C@@H]1CC[C@@]2(C)CC[C@@H](O)C(=C)[C@@H]2C1.Cc1ccc(I)cc1>>C=C1[  
C@H](O)CC[C@]2(C)CC[C@@H](/C(=C\c3ccc(C)cc3)C(=O)OC)C[C@@H]12  
383 C=C(F)C(=O)OC.Ic1cccc1>>COC(=O)/C(F)=C/c1cccc1  
384 C=C(NC(C)=O)C(=O)OC.COc1cc(C)c(I)c(C)c1>>COC(=O)/C(=C/c1c(C)cc(OC)cc1C)NC(C)=O  
385 C=C(NC(=O)OCc1cccc1)C(=O)OC.CC(=O)OCc1cc(Cl)ccc1I>>COC(=O)/C(=C/c1ccc(Cl)cc1COC(C  
)=O)NC(=O)OCc1cccc1  
386 Br1cccc1.C=C(C)c1cccc1>>C/C(=C\c1cccc1)c1cccc1  
387 C=C(CC(=O)OC)C(=O)OC.Cc1cccc1I>>COC(=O)C/C(=C\c1cccc1C)C(=O)OC  
C=C1C[C@H]2[C@@H]3CCc4cc(OC)ccc4[C@H]3CC[C@]2(C)C1=O.O=[N+](I[O-]  
388 c1ccc(Br)cc1>>COc1ccc2c(c1)CC[C@@H]1[C@@H]2CC[C@]2(C)C(=O)/C(=C/c3ccc([N+](=O)[  
O-])cc3)C[C@@H]12  
389 C=C(C)C(=O)OC.O=Cc1ccc(Br)cc1>>COC(=O)/C(C)=C/c1ccc(C=O)cc1  
390 Br1cccc1.C=C(NC(=O)OC(C)(C)C)C(=O)OCc1cccc1>>CC(C)(C)OC(=O)N/C(=C\c1cccc1)C(=O)  
OCc1cccc1  
391 C=C(NC(C)=O)C(=O)OC.Ic1ccc2c(c1)oc1cccc12>>COC(=O)/C(=C\c1ccc2c(c1)oc1cccc12)NC(C)=  
392 Br1cccc1.C=C1c2cccc2C1(C#N)CC>>CCC1(C#N)/C(=C/c2cccc2)c2cccc21

393 C=C(NC(=O)OC(C)(C)C(=O)OC.CN(C)c1ccc(I)cc1>>COC(=O)/C(=C/c1ccc(N(C)C)cc1)NC(=O)O  
 C(C)(C)C  
 C=C(CC(=O)OC)C(=O)OC.CC(C)(C)OC(=O)NCCCOCOCOCOCNC(Cc1cc(O[Si](c2ccccc2)(c2cccc  
 394 c2)C(C)(C)C)ccc1Br)C(=O)OCc1ccccc1>>COC(=O)/C(=C/c1ccc(O[Si](c2ccccc2)(c2ccccc2)C(C)(C  
 )C)cc1CN(CCCOCCOCCOCCCN(C(=O)OC(C)(C)C(=O)OCc1ccccc1)C(=O)OC  
 C=C1CC(c2ccccc2)OC1=O.Ic1ccccc1-c1ccc2ccccc2c1>>O=C1OC(c2ccccc2)C/C1=C/c1ccccc1-  
 395 c1ccc2ccccc2c1  
 C=C(CC(=O)OCC)C(=O)OCC.COc1ccccc2c(OCc3ccccc3)c(Br)ccc12>>CCOC(=O)/C(=C/c1ccc2c(O  
 396 C)ccccc2c1OCc1ccccc1)C(=O)OCC  
 C=C(C)C(=O)OCCCC.COc1ccc(I)cc1>>CCCCOC(=O)/C(C)=C/c1ccc(OC)cc1  
 397 C=C1CC(c2ccc(Cl)cc2)OC1=O.CC(C)(C)c1ccc(I)cc1>>CC(C)(C)c1ccc(/C=C2\CC(c3ccc(Cl)cc3)OC2  
 398 =O)cc1  
 Brc1ccc2ccc3ccccc4ccc1c2c34.C=C(CCO[Si](C)(C)C(C)(C)C(=O)OC>>COC(=O)/C(=C/c1ccc2ccc3  
 399 cccc4ccc1c2c34)CCO[Si](C)(C)C(C)(C)C  
 C=C(NC(=O)OC(C)(C)C(=O)OC.CC(C)(C)OC(=O)N(C(=O)OC(C)(C)C)c1ncc(I)cn1>>COC(=O)/C  
 400 (=C/c1ccc(N(C(=O)OC(C)(C)C(=O)OC(C)(C)C)nc1)NC(=O)OC(C)(C)C  
 C=C(OC(C)=O)C(=O)OCC(F)(F)F.COc1ccc(I)c(OC)c1>>COc1ccc(/C=C(\OC(C)=O)C(=O)OCC(F)(F  
 401 )F)c(OC)c1  
 C=C(NC(C)=O)C(=O)OC.CC(C)(C)OC(=O)NCCOCc1cc(C#N)ccc1I>>COC(=O)/C(=C/c1ccc(C#N)cc1  
 402 OCCNC(=O)OC(C)(C)C)NC(C)=O  
 C=C(NC(C)=O)C(=O)OC.Fc1ccccc(Br)c1>>COC(=O)/C(=C/c1ccccc(F)c1)NC(C)=O  
 403 C=C1CC(c2ccc(C)cc2)OC1=O.Cc1ccccc(I)c1>>Cc1ccc(C2C/C(=C/c3ccccc(C)c3)C(=O)O2)cc1  
 404 C=C1C(=O)O[C@H]2C[C@H](C)C(=O)C/C=C(\C)CC[C@H]12.Fc1ccc(I)cc1>>C/C1=C\CC(=  
 405 O)[C@H](C)C[C@H]2OC(=O)/C(=C/c3ccc(F)cc3)[C@H]2CC1  
 C=C1CC(c2ccc(C)cc2)OC1=O.Fc1ccccc(I)c1>>Cc1ccc(C2C/C(=C/c3ccccc(F)c3)C(=O)O2)cc1  
 406 C=C(C(=O)OC)[C@H]1CC[C@H]2(C)CCC[C@H](C)(OCOC)[C@H]2C1.Fc1ccc(Br)cc1>>CO  
 407 CO[C@H]1(C)CCC[C@H]2(C)CC[C@H](C)/C(=C/c3ccc(F)cc3)C(=O)OC[C@H]21  
 C=C(NC(C)=O)C(=O)OC.O=[N+][O-]c1cc(Br)ccc1F>>COC(=O)/C(=C/c1ccc(F)c([N+](=O)[O-  
 408 ])c1)NC(C)=O  
 C=C1CC(c2ccc(C)cc2)OC1=O.Ic1ccccc1-c1ccc2ccccc2c1>>Cc1ccc(C2C/C(=C/c3ccccc3-  
 409 c3ccc4ccccc4c3)C(=O)O2)cc1  
 C=C(CC(=O)OCC)C(=O)OCC.Cc1c(N)ccc(I)c1[N+](=O)[O-  
 410 ]>>CCOC(=O)/C(=C/c1ccc(N)c(C)c1[N+](=O)[O-])C(=O)OCC  
 C=C(NC(=O)[C@H](Cc1ccccc1)NC(=O)OC(C)(C)C(=O)OC.Ic1ccccc1>>COC(=O)/C(=C/c1ccccc1  
 411 )NC(=O)[C@H](Cc1ccccc1)NC(=O)OC(C)(C)C  
 Brc1ccccc2cc[nH]c12.C=C(C)C(=O)OC>>COC(=O)/C(C)=C/c1ccccc2cc[nH]c12  
 412 C=C(NC(=O)OCc1ccccc1)C(=O)OC.CC(C)(C)[Si](C)(C)O[C@H]1Cc2c(Br)cc(OCc3ccccc3)cc2N(S(=  
 413 O)(=O)c2ccccc2[N+](=O)[O-  
 ])C1>>COC(=O)/C(=C/c1cc(OCc2ccccc2)cc2c1C[C@H](O[Si](C)(C)C(C)(C)C)CN2S(=O)(=O)c1ccc  
 414 cc1[N+](=O)[O-])NC(=O)OCc1ccccc1  
 C=C(C)C(=O)OC.N#Cc1ccccc(Br)c1>>COC(=O)/C(C)=C/c1ccccc(C#N)c1  
 415 C=C(F)C(=O)OC.FC(F)(F)c1ccc(I)cc1>>COC(=O)/C(F)=C/c1ccc(C(F)(F)F)cc1  
 416 C=C(C)C(=O)NC.Clc1ccccc1>>CNC(=O)/C(C)=C/c1ccccc1  
 C=C(F)C(=O)OC.N#Cc1ccc(I)cc1>>COC(=O)/C(F)=C/c1ccc(C#N)cc1  
 417 C=C(C)C(=O)O.O=S(=O)(Nc1ccc(I)cc1)c1ccccc1>>C/C(=C/c1ccc(NS(=O)(=O)c2ccccc2)cc1)C(=O)O  
 418 C=C1C(=O)O[C@H]2[C@H]1CCC(=C)[C@H]1C[C@H](OC(C)=O)C(=C)[C@H]21.O=[N+][O-  
 419 ]c1cc(Cl)ccc1I>>C=C1CC[C@H]2/C(=C/c3ccc(Cl)cc3[N+](=O)[O-  
 ])C(=O)O[C@H]2[C@H]2C(=C)[C@H](OC(C)=O)C[C@H]12  
 C=C(F)[Si](C)(c1ccccc1)c1ccccc1.CCc1ccccc1I>>CCc1ccccc1/C=C(F)[Si](C)(c1ccccc1)c1ccccc1  
 420 C=C1c2ccccc2C1(C#N)CC.N#Cc1ccc(Br)cc1>>CCC1(C#N)/C(=C/c2ccc(C#N)cc2)c2ccccc21  
 C=C1C(=O)O[C@H]2C3=C(C)CCC[C@H]3(C)C(=O)C[C@H]12.COc1ccc(I)c(OC)c1>>COc1ccc(/C  
 422 =C2/C(=O)O[C@H]3C4=C(C)CCC[C@H]4(C)C(=O)C[C@H]23)c(OC)c1  
 C=C(NC(C)=O)C(=O)OC.Cc1cc(OCc2ccccc2)cc(C)c1I>>COC(=O)/C(=C/c1c(C)cc(OCc2ccccc2)cc1  
 423 C)NC(C)=O  
 C=C(C)c1ccccc1.Cc1ccc(I)cc1>>C/C(=C/c1ccc(C)cc1)c1ccccc1  
 424 C=C(C(=O)OC)[C@H]1CC[C@H]2(C)CCC[C@H](C)(OCOC)[C@H]2C1.O=Cc1ccc(Br)cc1>>  
 425 COCO[C@H]1(C)CCC[C@H]2(C)CC[C@H](C)/C(=C/c3ccc(C=O)cc3)C(=O)OC[C@H]21  
 C=C(C)C(=O)OC.CC(=S)NS(=O)(=O)c1ccc(Br)cc1>>COC(=O)/C(C)=C/c1ccc(S(=O)(=O)NC(C)=S)c  
 426 C=C(NC(C)=O)C(=O)OC.Clc1ccc(Br)cc1>>COC(=O)/C(=C/c1ccc(Cl)cc1)NC(C)=O  
 427 C=C(NC(C)=O)C(=O)OC.CC(C)(C)OC(=O)N[C@H](CCC(=O)OCc1ccccc1)COc1cc(C#N)ccc1I>>C  
 428 OC(=O)/C(=C/c1ccc(C#N)cc1OC[C@H](CCC(=O)OCc1ccccc1)NC(=O)OC(C)(C)C)NC(C)=O

429 C=C1C[C@H]2[C@@H]3CCc4cc(OC)ccc4[C@H]3CC[C@]2(C)C1=O.N#Cc1ccc(Br)cc1>>COc1ccc  
2c(c1)CC[C@H]1[C@@H]2CC[C@]2(C)C(=O)/C(=C/c3ccc(C#N)cc3)C[C@H]12  
430 C=C(C)C(=O)OC.COCC(=O)c1cccc1Cl>>COC(=O)/C(C)=C/c1cccc1C(=O)OC  
431 C=C1CC(c2ccc(C)cc2)OC1=O.Clc1cccc(I)c1>>Cc1ccc(C2C/C(=C/c3ccc(Cl)c3)C(=O)O2)cc1  
432 C=C(NC(C)=O)C(=O)OC.COCC1=C(I)CON(Cc2cccc2)[C@H]1[C@H]1COC(C)(C)O1>>COC(=O)/C  
(=C/C1=C(OC)[C@H]([C@H]2COC(C)(C)O2)N(Cc2cccc2)OC1)NC(C)=O  
433 C=C(C(=O)OC)[C@H]1CC[C@]2(C)CCC[C@](C)(OCOC)[C@@H]2C1.Cn1c(=O)oc2cc(Br)c  
nc21>>COCO[C@]1(C)CCC[C@]2(C)CC[C@H]1/C(=C/c3cnc4c(c3)oc(=O)n4C)C(=O)OC)C[C@H]  
434 C=C1C(=O)O[C@@H]2/C=C(\C)CC/C=C(\C)CC[C@H]12.COc1ccc(I)cc1>>COc1ccc(/C=C2/C(=O)O[C@@H]3/C=C(\C)CC/C=C(\C)CC[C@H]23)cc1  
435 C=C(CC(=O)OC)C(=O)OC.FC(F)(F)c1ccc(I)cc1>>COC(=O)C/C(=C/c1ccc(C(F)(F)F)cc1)C(=O)OC  
436 C=C(F)C(=O)OC.Cc1cc(C)c(I)c(C)c1>>COC(=O)/C(F)=C/c1c(C)cc(C)cc1C  
437 C=C1COC(c2cc(OC)cc(OC)c2)C1(C(=O)OCC)C(=O)OCC.COc1ccc(I)cc1>>CCOC(=O)C1(C(=O)OC  
C)/C(=C/c2ccc(OC)cc2)COC1c1cc(OC)cc(OC)c1  
438 C=C1C(=O)O[C@H]2/C=C(\C)CC/C=C(\C)CC[C@H]12.O=[N+](O-  
439 )c1cccc1I>>C/C1=C/[C@H]2OC(=O)/C(=C/c3cccc3[N+](=O)[O-])[C@@H]2CC/C(C)=C/CC1  
C=C(NC(=O)OC(C)(C)C(=O)OC.Oc1ccc(I)cc1>>COC(=O)/C(=C/c1ccc(O)cc1)NC(=O)OC(C)(C)C  
440 C=C(NC(C)=O)C(=O)OC.Cc1cccc(C)c1Br>>COC(=O)/C(=C/c1c(C)cccc1C)NC(C)=O  
441 C=C1CC(O)c2cc3cccc3nc21.Ic1cccc1>>OC1C/C(=C/c2cccc2)c2nc3cccc3cc21  
442 C=C(C)C(=O)OC.CC(C)n1cnc2c(Cl)nc(I)nc21>>COC(=O)/C(C)=C/c1nc(Cl)c2ncn(C(C)C)c2n1  
443 C=C(F)C(=O)OC.COc1cccc1I>>COC(=O)/C(F)=C/c1cccc1OC  
444 Cc1ccc(Br)cc1.Cc1ccc(S(=O)(=O)NC(C/C=C/C(=O)C2CCCC2)c2cccc2)cc1>>Cc1ccc(/C(=C/C(=O)  
C2CCCC2)CC(NS(=O)(=O)c2ccc(C)cc2)c2cccc2)cc1  
445 COC[C@H]/N=C(\c1cccc1)N1C=CCC[C@H]1C)C(C)C.Ic1cccc1>>COC[C@H]/N=C(\c1ccc  
cc1)N1C=C(c2cccc2)CC[C@H]1C)C(C)C  
446 COC[C@H]/N=C(\c1cccc1)N1C=CCC[C@H]1c1cccc1)C(C)C.FC(F)(F)c1ccc(I)c1>>COC[C@  
447 @H]/N=C(\c1cccc1)N1C=C(c2cccc(C(F)(F)F)c2)CC[C@H]1c1cccc1)C(C)C  
CC(=O)/C=C/CC(NS(=O)(=O)c1ccc(C)cc1)c1cccc1.Cn1ccc2cc(Br)ccc21>>CC(=O)/C=C(/CC(NS(=O)(=O)c1ccc(C)cc1)c1cccc1)c1ccc2c(cen2C)c1  
448 CC(=O)/C=C/CC(NS(=O)(=O)c1ccc(C)cc1)c1cccc1.CCOC(=O)c1ccc(Br)cc1>>CCOC(=O)c1ccc(/C(=C/C(C)=O)CC(NS(=O)(=O)c2ccc(C)cc2)c2cccc2)cc1  
449 COC[C@H]/N=C(\c1cccc1)N1C=CCC[C@H]1C)C(C)C.Cc1cccc1I>>COC[C@H]/N=C(\c1ccc  
cc1)N1C=C(c2cccc2C)CC[C@H]1C)C(C)C  
450 COC[C@H]/N=C(\c1cccc1)N1C=CCC[C@H]1C)C(C)C.Ic1ccc2c(c1)OCO2>>COC[C@H]/N=C(\c1cccc1)N1C=C(c2ccc3c(c2)OCO3)CC[C@H]1C)C(C)C  
451 COC[C@H]/N=C(\c1cccc1)N1C=CCC[C@H]1C)C(C)C.FC(F)(F)c1ccc(I)c1>>COC[C@H]/N=C(\c1cccc1)N1C=C(c2cccc(C(F)(F)F)c2)CC[C@H]1C)C(C)C  
452 COC[C@H]/N=C(\c1cccc1)N1C=CCC[C@H]1C)C(C)C.Clc1cccc1>>COC[C@H]/N=C(\c1ccc  
cc1)N1C=C(c2cccc2)CC[C@H]1C)C(C)C  
453 CC(=O)/C=C/CC(NS(=O)(=O)c1ccc(C)cc1)C1CCCCC1.Cc1ccc(Br)cc1>>CC(=O)/C=C(/CC(NS(=O)(=O)c1ccc(C)cc1)C1CCCCC1)c1ccc(C)cc1  
454 Cc1cccc(I)c1.NC(=O)/C=C/c1cccc1>>Cc1ccc(/C(=C/C(N)=O)c2cccc2)c1  
455 CC(C)N(C(=O)/C=C/c1cccc1)C(C)C.Cc1ccc(O)c(Br)c1>>Cc1ccc(O)c(/C(=C/C(=O)N(C(C)C)C(C)C)c2cccc2)c1  
456 CC(=O)/C=C/CC(NS(=O)(=O)c1ccc(C)cc1)c1cccc1.Cc1ccc(Br)cc1>>CC(=O)/C=C(/CC(NS(=O)(=O)c1ccc(C)cc1)c1cccc1)c1ccc(C)cc1  
457 COC[C@H]/N=C(\c1cccc1)N1C=CCC[C@H]1C)C(C)C.Ic1cccn1>>COC[C@H]/N=C(\c1ccc  
cc1)N1C=C(c2cccn2)CC[C@H]1C)C(C)C  
458 CC(=O)/C=C/CC(NS(=O)(=O)c1ccc(C)cc1)c1cccc1.CC(=O)c1ccc(Br)c1>>CC(=O)/C=C(/CC(NS(=O)(=O)c1ccc(C)cc1)c1cccc1)c1cccc(C(C)=O)c1  
459 CC(=O)/C=C/CC(NS(=O)(=O)c1ccc(C)cc1)c1cccc1.N#Cc1ccc(Br)cc1>>CC(=O)/C=C(/CC(NS(=O)(=O)c1ccc(C)cc1)c1cccc1)c1ccc(C#N)cc1  
460 Br1cccc2cccc12.CC(=O)/C=C/CC(NS(=O)(=O)c1ccc(C)cc1)c1cccc1>>CC(=O)/C=C(/CC(NS(=O)(=O)c1ccc(C)cc1)c1cccc1)c1cccc2cccc12  
461 COC[C@H]/N=C(\c1cccc1)N1C=CCC[C@H]1C)C(C)C.Ic1cccs1>>COC[C@H]/N=C(\c1cccc  
1)N1C=C(c2cccs2)CC[C@H]1C)C(C)C  
462 COC[C@H]/N=C(\c1cccc1)N1C=CCC[C@H]1C)C(C)C.Clc1cccc(I)c1>>COC[C@H]/N=C(\c1  
cccc1)N1C=C(c2cccc(Cl)c2)CC[C@H]1C)C(C)C  
463 CC(=O)/C=C/CC(NS(=O)(=O)c1ccc(C)cc1)c1ccc(C(F)(F)F)cc1.Cc1ccc(Br)cc1>>CC(=O)/C=C(/CC(N  
S(=O)(=O)c1ccc(C)cc1)c1ccc(C(F)(F)F)cc1)c1ccc(C)cc1  
464 Br1cccc1.COC[C@H]/N=C(\c1cccc1)N1C=CCC[C@H]1C)C(C)C>>COC[C@H]/N=C(\c1ccc  
cc1)N1C=C(c2cccc2)CC[C@H]1C)C(C)C

465 COC[C@@H]/N=C(\c1cccc1)N1C=CCC[C@H]1c1cccc1)C(C)C.COc1ccc(I)cc1>>COC[C@@H]/  
N=C(\c1cccc1)N1C=C(c2ccc(OC)cc2)CC[C@H]1c1cccc1)C(C)C  
466 COc1ccc(C(C/C=C/C(C)=O)NS(=O)(=O)c2ccc(C)cc2)cc1.Cc1ccc(Br)cc1>>COc1ccc(C(C/C=C/C(C)  
=O)c2ccc(C)cc2)NS(=O)(=O)c2ccc(C)cc2)cc1  
467 COC[C@H]/N=C(\c1cccc1)N1C=CCC[C@H]1C)C(C)C.Cc1cccc(I)c1>>COC[C@@H]/N=C(\c1  
cccc1)N1C=C(c2cccc(C)c2)CC[C@H]1C)C(C)C  
468 Cc1ccc(I)cc1C.NC(=O)/C=C/c1cccc1>>Cc1ccc(/C(=C\C(N)=O)c2cccc2)cc1C  
469 CC(=O)/C=C/CC(CCc1cccc1)NS(=O)(=O)c1ccc(C)cc1.Cc1ccc(Br)cc1>>CC(=O)/C=C/CC(CCc1ccc  
cc1)NS(=O)(=O)c1ccc(C)cc1)c1ccc(C)cc1  
470 CC(=O)/C=C/CC(NS(=O)(=O)c1ccc(C)cc1)c1ccc2cccc2c1.Cc1ccc(Br)cc1>>CC(=O)/C=C/CC(NS(=O)  
(=O)c1ccc(C)cc1)c1ccc2cccc2c1)c1ccc(C)cc1  
471 COC[C@@H]/N=C(\c1cccc1)N1C=CCC[C@H]1C)C(C)C.Ic1cccc2cccc12>>COC[C@@H]/N=C(  
\c1cccc1)N1C=C(c2cccc3cccc23)CC[C@H]1C)C(C)C  
472 CCC(=O)/C=C/CC(CCc1cccc1)NS(=O)(=O)c1ccc(C)cc1.Cc1ccc(Br)cc1>>CCC(=O)/C=C/CC(CCc1  
cccc1)NS(=O)(=O)c1ccc(C)cc1)c1ccc(C)cc1  
473 CC(=O)/C=C/CC(NS(=O)(=O)c1ccc(C)cc1)C1CC1.Cc1ccc(Br)cc1>>CC(=O)/C=C/CC(NS(=O)(=O)c  
1ccc(C)cc1)C1CC1)c1ccc(C)cc1  
474 COC[C@@H]/N=C(\c1cccc1)N1C=CCC[C@H]1c1cccc1)C(C)C.Ic1cccc1>>COC[C@@H]/N=C(  
\c1cccc1)N1C=C(c2cccc2)CC[C@H]1c1cccc1)C(C)C  
475 COC(=O)/C=C/C(=O)OC.Ic1cccc1>>COC(=O)/C=C/C(=O)OC)c1cccc1  
476 COC[C@@H]/N=C(\c1cccc1)N1C=CCC[C@H]1C)C(C)C.COc1ccc(I)cc1>>COC[C@@H]/N=C(\c  
1cccc1)N1C=C(c2ccc(OC)cc2)CC[C@H]1C)C(C)C  
477 COC[C@@H]/N=C(\c1cccc1)N1C=CCC[C@H]1C)C(C)C.Ic1cc2cccc2o1>>COC[C@@H]/N=C(\c  
1cccc1)N1C=C(c2cc3cccc3o2)CC[C@H]1C)C(C)C  
478 C/C=C/C(=O)OC.Ic1cccc1>>COC(=O)/C=C/C)c1cccc1  
479 Cc1ccc(I)cc1.NC(=O)/C=C/c1cccc1>>Cc1ccc(/C(=C\C(N)=O)c2cccc2)cc1  
480 CC(=O)/C=C/CC(NS(=O)(=O)c1ccc(C)cc1)c1cccc1.COc1ccc(Br)cc1>>COc1ccc(/C(=C\C(C)=O)CC(  
NS(=O)(=O)c2ccc(C)cc2)c2cccc2)cc1  
481 CC[C@@H]1CCC=CN1/C(=N/[C@H](COC)C(C)C)c1cccc1.Ic1cccc1>>CC[C@@H]1CCC(c2cccc  
c2)=CN1/C(=N/[C@H](COC)C(C)C)c1cccc1  
482 CCOC(=O)c1ccc(I)cc1.COC[C@@H]/N=C(\c1cccc1)N1C=CCC[C@H]1C)C(C)C>>CCOC(=O)c1c  
cc(C2=CN/C(=N/[C@H](COC)C(C)C)c3cccc3)[C@H](C)CC2)cc1  
483 N#C/C=C/c1cccc1.Oc1ccc(I)c1>>N#C/C=C/c1cccc1)c1ccc(O)c1  
484 CCOC(=O)/C=C/[C@H]1COC(C)(C)O1.Ic1cccc1>>CCOC(=O)/C=C(\c1cccc1)[C@H]1COC(C)(C)  
485 CC(=O)/C=C/CC(NS(=O)(=O)c1ccc(C)cc1)C(C)C.Cc1ccc(Br)cc1>>CC(=O)/C=C/CC(NS(=O)(=O)c1  
ccc(C)cc1)C(C)C)c1ccc(C)cc1  
486 COC[C@@H]/N=C(\c1cccc1)N1C=CCC[C@H]1C)C(C)C.Fc1ccc(I)cc1>>COC[C@@H]/N=C(\c1c  
cccc1)N1C=C(c2ccc(F)cc2)CC[C@H]1C)C(C)C  
487 CCOC(=O)c1ccc(I)cc1.OC/C=C/c1cccc1>>CCOC(=O)c1ccc(/C(=C\c2cccc2)CO)cc1  
488 COC[C@@H]/N=C(\c1cccc1)N1C=CCC[C@H]1c1cccc1)C(C)C.Ic1cccc1>>COC[C@@H]/N=C(\c  
1cccc1)N1C=C(c2cccc2)CC[C@H]1c1cccc1)C(C)C  
489 COC[C@@H]/N=C(\c1cccc1)N1C=CCC[C@H]1c1cccc1)C(C)C.Cc1cccc(I)c1>>COC[C@@H]/N  
=C(\c1cccc1)N1C=C(c2cccc(C)c2)CC[C@H]1c1cccc1)C(C)C  
490 Br1ccsc1.COC(=O)/C=C/c1cccc1>>COC(=O)/C=C(/c1cccc1)c1ccsc1  
491 COC(=O)C(C/C=C/C(C)=O)NS(=O)(=O)c1ccc(C)cc1.Cc1ccc(Br)cc1>>COC(=O)C(C/C(=C/C(C)=O)c  
1ccc(C)cc1)NS(=O)(=O)c1ccc(C)cc1  
492 CC(=O)/C=C/CCc1cccc1.Cc1ccc(Br)cc1>>CC(=O)/C=C/CCc1cccc1)c1ccc(C)cc1  
493 Br1cccc(I)c1.COC[C@@H]/N=C(\c1cccc1)N1C=CCC[C@H]1C)C(C)C>>COC[C@@H]/N=C(\c1  
cccc1)N1C=C(c2cccc(Br)c2)CC[C@H]1C)C(C)C  
494 C=C(C(=O)OCC)c1cccc1CN(C(=O)C(F)(F)F)c1cccc1Br>>CCOC(=O)/C1=C/c2cccc2N(C(=O)C(F  
(F)F)Cc2cccc21  
495 C=C(C)CN1C(=O)[C@H](Oc2cccc2)[C@@H]1[C@@H](CC(=C)Br)OC(C)=O>>C=C1/C=C(/C)CN  
2C(=O)[C@H](Oc3cccc3)[C@@H]2[C@H](OC(C)=O)C1  
496 C=C(C(=O)OCC)c1cccc1CS(=O)(=O)c1cccc1Br>>CCOC(=O)/C1=C/c2cccc2S(=O)(=O)Cc2cccc  
497 C=C(C)CC(OCC(=C)Br)c1ccc(-c2cccc2)cc1>>C=C1C=C(C)CC(c2ccc(-c3cccc3)cc2)OC1  
498 C=C(C(=O)OCC)c1cccc1CS(=O)(=O)c1cccc1I>>CCOC(=O)/C1=C/c2cccc2S(=O)(=O)Cc2cccc21  
499 C=C(C(=O)OC)C(O)c1cc2cccc2n1Cc1cccc1I>>COC(=O)/C1=C/c2cccc2Cn2c(cc3cccc32)C1O  
500 C=C(C)CC(OCC(=C)Br)c1ccc(OC)cc1>>C=C1C=C(C)CC(c2ccc(OC)cc2)OC1  
501 C=C(C(=O)OCC)c1cccc1COc1cccc1Br>>CCOC(=O)/C1=C/c2cccc2OCc2cccc21  
502 C=C(C(=O)OCC)c1cccc1CN(C(=O)C(F)(F)F)c1cccc1I>>CCOC(=O)/C1=C/c2cccc2N(C(=O)C(F)(  
F)F)Cc2cccc21  
503 C=C(C)CC(OCC(=C)Br)c1cccc1>>C=C1C=C(C)CC(c2cccc2)OC1

504 C=C(C)CC(OCC(=C)Br)c1ccc(Cl)cc1>>C=C1C=C(C)CC(c2ccc(Cl)cc2)OC1  
505 C=C(C(=O)OCC)C(O)c1cc2ccccc2n1Cc1ccccc1I>>CCOC(=O)/C1=C/c2ccccc2Cn2c(cc3ccccc32)C1O  
506 C=C(C(=O)OCC)c1ccccc1OCc1ccccc1I>>CCOC(=O)/C1=C/c2ccccc2OCc2ccccc21  
507 C=C(C)CC(OCC(=C)Br)c1ccc(OC)c1>>C=C1C=C(C)CC(c2ccc(OC)c2)OC1  
508 C=C(C(=O)OC)N(CCCCCc1ccccc1I)C(=O)OC(C)(C)C>>COC(=O)/C1=C/c2ccccc2CCCCCN1C(=O)  
OC(C)(C)C  
509 COC(=O)/C=C/Oc1c(C)cccc1-c1cc(C)c(C)cc1Br>>COC(=O)/C=C1/Oc2c(C)cccc2-c2cc(C)c(C)cc21  
510 O=C(/C=C/Oc1ccccc1-c1ncccc1Br)OCc1ccccc1>>O=C(/C=C1/Oc2ccccc2-c2ncccc21)OCc1ccccc1  
511 CCCCCC/C(=C/I)OC(=O)/C=C/c1ccccc1>>CCCCCCC1=C/C(=C\c2ccccc2)C(=O)O1  
512 COC(=O)/C=C/Oc1ccccc1-c1ccccc1Br>>COC(=O)/C=C1/Oc2ccccc2-c2ccccc21  
513 COC(=O)/C=C/Oc1ccccc1-c1cc(F)c(F)cc1Br>>COC(=O)/C=C1/Oc2ccccc2-c2cc(F)c(F)cc21  
514 Cc1ccc(/C=C/C(=O)O/C(=C/I)c2ccccc2)cc1>>Cc1ccc(/C=C2\C=C(c3ccccc3)OC2=O)cc1  
515 COc1cc(Br)c(-c2ccccc2O/C=C/C(=O)cc1OC)>>COc1cc2c(cc1OC)-c1ccccc1O/C2=C/C(=O)O  
516 COC(=O)/C=C/Oc1ccccc1-c1cc(C)c(C)cc1Br>>COC(=O)/C=C1/Oc2ccccc2-c2cc(C)c(C)cc21  
517 Cc1cc(Br)c(-c2ccccc2O/C=C/C(=O)c2ccccc2)cc1C>>Cc1cc2c(cc1C)-  
518 CCCCCC/C(=C/I)OC(=O)/C=C/c1ccc(OC)cc1>>CCCCCCC1=C/C(=C\c2ccc(OC)cc2)C(=O)O1  
519 O=C(/C=C/Oc1ccccc1-c1ccccc1Br)c1ccccc1>>O=C(/C=C1/Oc2ccccc2-c2ccccc21)c1ccccc1  
520 COC(=O)/C=C/Oc1ccccc1-c1ccccc1Br>>COC(=O)/C=C1/Oc2ccccc2-c2ccccc21  
521 COC(=O)/C=C/Oc1ccccc1-c1ccccc1Cl>>COC(=O)/C=C1/Oc2ccccc2-c2ccccc21  
522 COC(=O)/C=C/Oc1c(C)cccc1-c1ccccc1Br>>COC(=O)/C=C1/Oc2c(C)cccc2-c2ccccc21  
523 Cc1cc(Br)c(-c2ccccc2O/C=C/C(=O)OCc2ccccc2)cc1C>>Cc1cc2c(cc1C)-  
c1ccccc1O/C2=C/C(=O)OCc1ccccc1  
524 CCCCCC/C(=C/I)OC(=O)/C=C/c1cccs1>>CCCCCCC1=C/C(=C\c2cccs2)C(=O)O1  
525 COC(=O)/C=C/Oc1ccc(F)cc1-c1ccccc1Br>>COC(=O)/C=C1/Oc2ccc(F)cc2-c2ccccc21  
526 CC(=O)/C=C/Oc1ccccc1-c1ccccc1Br>>CC(=O)/C=C1/Oc2ccccc2-c2ccccc21  
527 COc1ccc(/C=C/C(=O)Oc2ccccc2I)cc1>>COc1ccc(/C=C2/C(=O)Oc3ccccc32)cc1  
528 COc1ccc(/C=C/C(=O)O/C(=C/I)c2ccc3ccccc3c2)cc1>>COc1ccc(/C=C2\C=C(c3ccc4ccccc4c3)OC2=O  
529 O=C(/C=C/c1cccs1)O/C(=C/I)c1ccccc1>>O=C1OC(c2ccccc2)=C/C1=C\c1cccs1  
COc1cc(Br)c(-c2ccccc2O/C=C/C(=O)OCc2ccccc2)cc1OC>>COc1cc2c(cc1OC)-  
530 c1ccccc1O/C2=C/C(=O)OCc1ccccc1  
531 COC(=O)/C=C/Oc1ccccc1-c1ccccc1I>>COC(=O)/C=C1/Oc2ccccc2-c2ccccc21  
532 COC(=O)/C=C/Oc1ccccc1-c1cc(OC)c(OC)cc1Br>>COC(=O)/C=C1/Oc2ccccc2-c2cc(OC)c(OC)cc21  
533 C=C(Br)CCN1C(=O)C[C@H]2C=CCC[C@H]21/C=C\C(=O)OC>>C=C1CCN2C(=O)C[C@H]3  
C=CCC[C@H]32/C1=C/C(=O)OC  
534 COC(=O)/C=C/Oc1ccccc1-c1ncccc1Br>>COC(=O)/C=C1/Oc2ccccc2-c2ncccc21  
535 COc1ccc(/C=C/C(=O)O/C(=C/I)c2ccccc2)cc1>>COc1ccc(/C=C2\C=C(c3ccccc3)OC2=O)cc1  
536 O=C(/C=C/c1ccccc1)O/C(=C/I)C1CC1>>O=C1OC(C2CC2)=C/C1=C\c1ccccc1  
537 CC(=O)/C=C/Oc1c(C)cccc1-c1ccccc1Br>>CC(=O)/C=C1/Oc2c(C)cccc2-c2ccccc21  
538 CC(=O)Oc1ccc(/C=C/C(=O)O/C(=C/I)c2ccc(OC(C)=O)c(OC(C)=O)c2)cc1OC(C)=O>>CC(=O)Oc1cc  
c(/C=C2\C=C(c3ccc(OC(C)=O)c(OC(C)=O)c3)OC2=O)cc1OC(C)=O  
539 O=C(/C=C/c1ccccc1)O/C(=C/I)c1ccc2ccccc2c1>>O=C1OC(c2ccc3ccccc3c2)=C/C1=C\c1ccccc1  
540 Cc1ccc(/C=C/C(=O)O/C(=C/I)C2CC2)cc1>>Cc1ccc(/C=C2\C=C(C3CC3)OC2=O)cc1  
541 CCOC(=O)/C=C/Oc1ccccc1-c1ccccc1Br>>CCOC(=O)/C=C1/Oc2ccccc2-c2ccccc21  
542 O=C(/C=C/Oc1ccccc1-c1cc(F)c(F)cc1Br)OCc1ccccc1>>O=C(/C=C1/Oc2ccccc2-  
c2cc(F)c(F)cc21)OCc1ccccc1  
543 O=C(/C=C/c1ccccc1)O/C(=C/I)C1CCCCC1>>O=C1OC(C2CCCCC2)=C/C1=C\c1ccccc1  
544 COC(=O)/C=C/Oc1ccccc1-c1sccl1Br>>COC(=O)/C=C1/Oc2ccccc2-c2sccl21  
545 COc1cc(/C=C/C(=O)Oc2ccccc2I)cc(OC)c1OC>>COc1cc(/C=C2/C(=O)Oc3ccccc32)cc(OC)c1OC  
546 O=C(/C=C/c1ccccc1)O/C(=C/I)c1ccc(Br)cc1>>O=C1OC(c2ccc(Br)cc2)=C/C1=C\c1ccccc1  
547 CCCCCC/C(=C/I)OC(=O)/C=C/c1ccc(C)cc1>>CCCCCCC1=C/C(=C\c2ccc(C)cc2)C(=O)O1  
548 O=C(/C=C/Oc1ccccc1-c1ccccc1Br)OCc1ccccc1>>O=C(/C=C1/Oc2ccccc2-c2ccccc21)OCc1ccccc1  
549 CC(=O)/C=C/Oc1ccccc1-c1ncccc1Br>>CC(=O)/C=C1/Oc2ccccc2-c2ncccc21  
550 C=C/C(Br)=C/[C@H]1(C)C(=O)OC[C@H]1(C)/C=C\C(=O)OC>>C=CC1=C[C@H]2(C)C(=O)OC[C@H]2(  
C)/C1=C/C(=O)OC  
551 O=C(/C=C/c1ccccc1)O/C(=C/I)c1ccccc1>>O=C1OC(c2ccccc2)=C/C1=C\c1ccccc1  
552 O=C(/C=C/c1cccs1)O/C(=C/I)c1ccc(Br)cc1>>O=C1OC(c2ccc(Br)cc2)=C/C1=C\c1cccs1  
553 C=C(C)C.O=[N+](O-)]c1cccc(Br)c1>>CC(C)=Cc1cccc([N+](=O)[O-])c1  
554 C=C(C)C.CC(C)(Cl)c1ccccc1>>CC(C)=CC(C)(C)c1ccccc1  
555 C=C(C)C.CC(Cl)c1ccccc1>>CC(C)=CC(C)c1ccccc1

556 C=C(C)C.CCCC(Cl)c1ccccc1>>CCCC(C=C(C)C)c1ccccc1  
557 C=C(C)C.CCCC(=O)/C=C/Cl>>CCCC(=O)/C=C/C=C(C)C  
558 C=C(C)C.CC(=O)/C=C/Cl>>CC(=O)/C=C/C=C(C)C  
559 C=C(C)C.O=[N+](O-)[O-]c1ccccc1>>CC(C)=Cc1ccccc1[N+](=O)[O-]  
560 C=C(C)C.ClC(c1ccccc1)c1ccccc1>>CC(C)=CC(c1ccccc1)c1ccccc1
