# Supplementary material for: Heck reaction prediction using a transformer model based on a transfer learning strategy
Source: Royal Society of Chemistry journal article supplement (doi:10.1039/d0cc02657c), 2020-01-01
Supplement: d0cc02657c1.zip [file d0cc02657c1.zip]

**Table S12. Dataset in our research where reactant contains multiple halogens of Heck reaction involving site-selectivity**

[illegible]

41 Br1ccc(I)cc1.C=CC(=O)N(C)OC>>CON(C)C(=O)/C=C/c1ccc(Br)cc1  
42 C=CC(=O)OCC.Nc1cc(F)c(Br)cc1I>>CCOC(=O)/C=C/c1cc(Br)c(F)cc1N  
43 C=CC(=O)N1CCN(C)CC1.Clc1nc(N2CCOCC2)c2oc3ncc(Br)cc3c2n1>>CN1CCN(C(=O)/C=C/c2cnc  
3oc4c(N5CCOCC5)nc(Cl)nc4c3c2)CC1  
44 C=Cc1ccncc1.Nc1nc(Cl)c(Br)c1>>Nc1nc(Cl)c(/C=C/c2ccncc2)c1  
45 C=CC(=O)OC.O=S(=O)(c1cccc(Cl)c1)N1CCc2cc(Br)cnc21>>COC(=O)/C=C/c1cnc2c(c1)CCN2S(=O  
) (=O)c1cccc(Cl)c1  
46 C=C(NC(=O)OCc1cccc1)C(=O)OC.CC(=O)OCc1cc(Br)ccc1I>>COC(=O)/C(=C/c1ccc(Br)cc1COC(  
C)=O)NC(=O)OCc1cccc1  
47 Br1ccccc1I.C=CC(=O)OCCCC>>CCCCOC(=O)/C=C/c1ccccc1Br  
48 C=CC(=O)OC(C)(C)C.Nc1ccc(I)cc1Br>>CC(C)(C)OC(=O)/C=C/c1ccc(N)c(Br)c1  
49 Br1ccccc1I.C=CC(=O)N(C)C>>CN(C)C(=O)/C=C/c1ccccc1Br  
50 Br1ccc(I)cc1.C=Cc1ccccc1>>Br1ccc(/C=C/c2ccccc2)cc1  
51 C=Cc1cnc(Br)c1.CC(C)(C)OC(=O)N1CCC[C@H]1COc1cnc(Cl)c(I)c1>>CC(C)(C)OC(=O)N1CCC[  
C@H]1COc1cnc(Cl)c(/C=C/c2ccncc(Br)c2)c1  
52 C=CCOc1cccc1.Clc1ccc(Br)cc1>>Clc1ccc(/C=C/COc2ccccc2)cc1  
53 C=Cc1ccc(C)cc1.Clc1cccc(Br)c1>>Cc1ccc(/C=C/c2cccc(Cl)c2)cc1  
54 C=CC[Si](C)(C)C.ClCc1cccc(Br)c1>>C=C(Cc1cccc(Br)c1)C[Si](C)(C)C  
55 C=CC(=O)OC(C)(C)C.COc1ccc(CCNC(=O)c2cc(Br)cc(I)c2)cc1>>COc1ccc(CCNC(=O)c2cc(Br)cc(/C  
=C/C(=O)OC(C)(C)C)c2)cc1  
56 C=Cc1ccc(N(C)C)cc1.OCCOc1ncc(I)cc1Br>>CN(C)c1ccc(/C=C/c2cnc(OCCO)c(Br)c2)cc1  
57 C=Cc1ccccc1.O=c1oc2cc(Cl)ccc2c(-c2ccccc2)c1Br>>O=c1oc2cc(Cl)ccc2c(-  
58 C=CC1CCCCC1.Nc1ncc(Cl)cc1Br>>Nc1ncc(Cl)cc1/C=C/C1CCCCC1  
59 C=Cc1nc2ccccc2s1.CCN(CC)S(=O)(=O)c1ccc(Br)cc1Cl>>CCN(CC)S(=O)(=O)c1ccc(/C=C/c2nc3cccc  
c3s2)cc1Cl  
60 Br1ccccc1I.C=CC(=O)O>>O=C(O)/C=C/c1ccccc1Br  
61 C=CC(=O)NCCc1ccc(O)cc1.COc1ccc(I)cc1Br>>COc1ccc(/C=C/C(=O)NCCc2ccc(O)cc2)cc1Br  
62 C=CC(=O)OC.CN(C)CCCOc1ccc(I)cc1Br>>COC(=O)/C=C/c1ccc(OCCCN(C)C)c(Br)c1  
63 C=Cc1ccccc1.Clc1cccc(Br)c1>>Clc1cccc(/C=C/c2ccccc2)c1  
64 C=Cc1cncnc1.COc1ccc(Cl)c(Nc2c(C#N)cnc3cc(Br)ccc23)c1>>COc1ccc(Cl)c(Nc2c(C#N)cnc3cc(/C=C/  
/c4ccncc4)ccc23)c1  
65 Br1ccc(I)cc1.C=CCP(=O)(OCC)OCC>>CCOP(=O)(C/C=C/c1ccc(Br)cc1)OCC  
66 C=Cc1cccc(Nc2ncc(Cl)c(Nc3cccc(Br)c3)n2)c1>>Clc1cnc2nc1Nc1cccc(c1)/C=C\c1cccc(c1)N2  
67 C=CC(=O)OC(C)(C)C.Nc1cc(I)ccc1Br>>CC(C)(C)OC(=O)/C=C/c1ccc(Br)c(N)c1  
68 C=Cc1ccccc1.Clc1ccccc1Br>>Clc1ccccc1/C=C/c1ccccc1  
69 C=C.COC(=O)c1cc(Cl)ccc1Br>>C=Cc1ccc(Cl)cc1C(=O)OC  
70 C=CC(=O)OC(C)(C)C.Clc1ccc(Br)cc1>>CC(C)(C)OC(=O)/C=C/c1ccc(Cl)cc1  
71 C=CC(=O)OC(C)(C)C.O=c1oc2cc(O)ccc2c(Cc2ccc(Br)cc2)c1Cl>>CC(C)(C)OC(=O)/C=C/c1ccc(Cc2  
c(Cl)c(O)oc3cc(O)ccc23)cc1  
72 Br1ccc(I)cc1.C=Cc1ccc(F)cc1>>Fc1ccc(/C=C/c2ccc(Br)cc2)cc1  
73 C=CN1C(=O)c2ccccc2C1=O.Cc1ccc(S(=O)(=O)n2cc(I)c3c(Br)cccc32)cc1>>Cc1ccc(S(=O)(=O)n2cc(/  
C=C/N3C(=O)c4ccccc4C3=O)c3c(Br)cccc32)cc1  
74 C=CC(=O)O.Fc1cc(Cl)c(Br)cc1F>>O=C(O)/C=C/c1cc(F)c(F)cc1Cl  
75 Br1ccc(I)cc1.C=CCN1C(=O)c2ccccc2C1=O>>O=C1c2ccccc2C(=O)N1C/C=C/c1ccc(Br)cc1  
CC(C)COC(=O)[C@H](C)OC(=O)[C@H](C/C=C1\CCN([14c]2[14cH][14cH][14cH][14cH][14c  
H]2)C1=O)Nc1cc(Cl)ccc1I>>CC(C)COC(=O)[C@H](C)OC(=O)[C@H]1C/C(=C2/CCN([14c]3[14c  
H][14cH][14cH][14cH][14cH]3)C2=O)c2ccc(Cl)cc2N1  
76 C=CC(=O)N(C)C.Clc1nc(N2CCOCC2)c2sc3ncc(Br)cc3c2n1>>CN(C)C(=O)/C=C/c1cnc2sc3c(N4CC  
OCC4)nc(Cl)nc3c2c1  
77 C=CC(=O)OCC.CS(=O)(=O)N1CCC(C2c3ccc(Cl)cc3C=C(Br)c3ccncc32)CC1>>CCOC(=O)/C=C/C1  
=Cc2cc(Cl)ccc2C(C2CCN(S(C)(=O)=O)CC2)c2ncccc21  
78 C=CC(=O)OCC.CC(=O)Nc1ccc(Br)cc1I>>CCOC(=O)/C=C/c1cc(Br)ccc1NC(C)=O  
79 C=Cc1cncnc1.C[C@H](COc1cnc(Cl)c(Br)c1)NC(=O)OC(C)(C)C>>C[C@H](COc1cnc(Cl)c(/C=C/c2c  
cncc2)c1)NC(=O)OC(C)(C)C  
80 C=CC(=O)OCC.COc1ccc(Cl)cc1Br>>CCOC(=O)/C=C/c1cc(Cl)ccc1OC  
81 C=Cc1ccc(C(F)(F)F)nc1.Cc1nn(C)c(=O)c(-c2c(F)ccc(Cl)c2Br)c1OC(=O)C(C)C>>Cc1nn(C)c(=O)c(-  
c2c(F)ccc(Cl)c2/C=C/c2ccc(C(F)(F)F)nc2)c1OC(=O)C(C)C  
82 C=CC(=O)OCCCC.Cc1cc(Br)ccc1I>>CCCCOC(=O)/C=C/c1ccc(Br)cc1C  
83 C=CC(=O)OCCCC.Clc1cccc(Br)c1>>CCCCOC(=O)/C=C/c1cccc(Cl)c1  
84 O=C(/C=C/c1ccccc1)O/C(=C/I)c1ccc(Br)cc1>>O=C1OC(c2ccc(Br)cc2)=C/C1=C\c1ccccc1  
85

86 Br1ccc(I)cc1.CCOC(=O)/C(F)=C\CCc1ccccc1>>CCOC(=O)/C(F)=C\CCc1ccccc1)c1ccc(Br)cc1  
87 C=CC(=O)OC.CC(C)N(C(=O)Cc1c(Br)cccc1I)C(C)C>>COC(=O)/C=C/c1cccc(Br)c1CC(=O)N(C(C)C)  
)C(C)C  
88 C=CC(=O)N(C)C.Clc1nc(N2CCOCC2)c2oc3ncc(Br)cc3c2n1>>CN(C)C(=O)/C=C/c1cnc2oc3c(N4CC  
OCC4)nc(Cl)nc3c2c1  
89 C=CCNS(=O)(=O)c1cc(C(F)(F)F)cc(C(F)(F)F)c1.Clc1ccc(Br)cc1>>O=S(=O)(NC/C=C/c1ccc(Cl)cc1)c  
1cc(C(F)(F)F)cc(C(F)(F)F)c1  
90 C=Cc1ccc(N(C)C)cc1.FCCOCCOCCOc1ncc(I)cc1Br>>CN(C)c1ccc(/C=C/c2cnc(OCCOCCOCCF)c(B  
r)c2)cc1  
91 C=Cc1ccccc1.O=Cc1ccc(Cl)cc1Br>>O=Cc1ccc(Cl)cc1/C=C/c1ccccc1  
92 C=CC#N.Fc1c(Cl)cccc1Br>>N#C/C=C/c1cccc(Cl)c1F  
93 C=CC(=O)OC(C)C.O=C(CCc1ccccc1)Nc1cc(Br)cc(I)c1>>CC(C)(C)OC(=O)/C=C/c1cc(Br)cc(NC(  
=O)CCc2ccccc2)c1  
94 Br1ccccc1I.C=Cc1ccc(C)cc1C>>Cc1ccc(/C=C/c2ccccc2Br)c(C)c1  
95 C=Cc1ccc2ccccc2c1.Cc1ccc(Br)cc1I>>Cc1ccc(Br)cc1/C=C/c1ccc2ccccc2c1  
96 C=CCn1c(N(c2ccc(F)cc2I)S(=O)(=O)c2cccs2)cc2cc(Br)ccc21>>O=S(=O)(c1cccs1)N1c2ccc(F)cc2/C=  
C\N2c1cc1cc(Br)ccc12  
97 C=CC(=O)OC(C)C.COC(=O)c1cc(Cl)ncc1Br>>COC(=O)c1cc(Cl)ncc1/C=C/C(=O)OC(C)(C)C  
98 C=CCC(Oc1ccc(Cl)cc1Br)C(=O)OCC>>C=C1CC(C(=O)OCC)Oc2ccc(Cl)cc21  
99 C=CC(=O)OC.O=S(=O)(c1ccc(Cl)cc1)N1CCc2cc(Br)ccc21>>COC(=O)/C=C/c1cnc2c(c1)CCN2S(=O  
)(=O)c1ccc(Cl)cc1  
100 C=CC(N)=O.CCc1cc(Br)ccc1Cl>>CCc1cc(/C=C/C(N)=O)ccc1Cl  
101 C=Cc1ccc(C(C)C)cc1.Cc1cc(Br)ccc1I>>Cc1cc(Br)ccc1/C=C/c1ccc(C(C)(C)C)cc1  
102 C=Cc1cnc(C#N)c1Nc1ccc2[nH]ccc2c1C.Clc1cccc(Br)n1>>Cc1c(Nc2c(C#N)cncc2/C=C/c2cccc(Cl)n  
2)ccc2[nH]ccc12  
103 Br1ccc(I)cc1.C=C[C@H](C)[C@H]1CC[C@H]2[C@@H]3CC(=O)[C@H]4C[C@H](O)CC[C@]4  
(C)[C@H]3CC[C@]21C>>C[C@H](/C=C/c1ccc(Br)cc1)[C@H]1CC[C@H]2[C@@H]3CC(=O)[C  
@H]4C[C@H](O)CC[C@]4(C)[C@H]3CC[C@]21C  
104 C=C(NC(C)=O)C(=O)OC.Clc1ccc(Br)cc1>>COC(=O)/C(=C/c1ccc(Cl)cc1)NC(C)=O  
105 C=C(C)C(=O)OC.Clc1ccc(Br)cc1>>COC(=O)/C(C)=C/c1ccc(Cl)cc1  
106 Br1ccccc(I)c1.COC[C@H](/N=C\c1ccccc1)N1C=CCC[C@H]1C)C(C)C>>COC[C@H](/N=C\c1  
ccccc1)N1C=C(c2cccc(Br)c2)CC[C@H]1C)C(C)C  
107 Br1ccc(C#Cc2ccccc(I)c2)cc1.C=CC(=O)OC>>COC(=O)/C=C/c1cccc(C#Cc2ccc(Br)cc2)c1  
108 C=Cc1cnc(C#N)c1.Cc1cc(Br)cc(C)c1I>>Cc1cc(Br)cc(C)c1/C=C/c1cnc(C#N)c1  
109 Br1ccc(I)cc1.C=CCOc1ccccc1>>Br1ccc(/C=C/COc2ccccc2)cc1  
110 C=Cc1cnc(C#N)c1Nc1ccc2[nH]ccc2c1C.Clc1ccc(Br)cn1>>Cc1c(Nc2c(C#N)cncc2/C=C/c2ccc(Cl)nc  
2)ccc2[nH]ccc12  
111 C=CC(=O)OCC.Clc1cc(Br)cc2c1NCCCC2>>CCOC(=O)/C=C/c1cc(Cl)c2c(c1)CCCN2  
112 C=Cc1ccc(OC)cc1.Nc1ncc(Cl)cc1Br>>COc1ccc(/C=C/c2cc(Cl)ccc2N)cc1  
113 Br1ccc(I)cc1.C=CC(N)=O>>NC(=O)/C=C/c1ccc(Br)cc1  
114 Br1ccccc2c1cc(-c1ccc(I)cc1)n2-c1nccn1.C=CC(=O)OCC>>CCOC(=O)/C=C/c1ccc(-  
c2cc3c(Br)cccc3n2-c2nccn2)cc1  
115 C=C[C@](C)(O)CO.Clc1ccccc1Br>>C[C@](O)(/C=C/c1ccccc1Cl)CO  
116 Br1ccc(I)cc1.C=C[Si](C)(C)C>>C[Si](C)(C)/C=C/c1ccc(Br)cc1  
117 C=Cc1ccc2c(ccc(=O)n2COCC[Si](C)(C)C)c1.FC(F)Oc1ccc(Nc2ncc(Br)cn2)cc1Cl>>C[Si](C)(C)CCO  
Cn1c(=O)ccc2cc(/C=C/c3cnc(Nc4ccc(OC(F)F)c(Cl)c4)nc3)ccc21  
118 C=CC(=O)OCC.O=C(Nc1ccccc1Cl)c1ccc(Br)o1>>CCOC(=O)/C=C/c1ccc(C(=O)Nc2ccccc2Cl)o1  
119 C=Cc1cccc(Nc2ncc(Cl)c(Nc3cc(Br)ccc3OC)n2)c1>>COc1ccc2cc1Nc1nc(ncc1Cl)Nc1cccc(c1)/C=C\2  
120 Br1ccc(I)cc1.C=Cc1ccc(S(C)(=O)=O)cc1>>CS(=O)(=O)c1ccc(/C=C/c2ccc(Br)cc2)cc1  
121 Br1ccc(-c2ccc(I)cc2)cc1.C=Cc1ccc(CP(=O)(OCC)OCC)cc1>>CCOP(=O)(Cc1ccc(/C=C/c2ccc(-  
c3ccc(Br)cc3)cc2)cc1)OCC  
122 C=Cc1ccc2c(cnn2C2CCCCO2)c1.FC(F)Oc1ccc(Nc2ncc(Br)cn2)cc1Cl>>FC(F)Oc1ccc(Nc2ncc(/C=C/c  
3ccc4c(cnn4C4CCCCO4)c3)cn2)cc1Cl  
123 C=C.ClCc1ccccc(Br)c1>>C=CCc1ccccc(Br)c1  
124 Br1ccc(I)cc1.C=Cc1c(F)c(F)c(F)c(F)c1F>>Fc1c(F)c(F)c(/C=C/c2ccc(Br)cc2)c(F)c1F  
125 Br1ccc(I)cc1.C=Cc1ccc(C(C)(C)C)cc1>>CC(C)(C)c1ccc(/C=C/c2ccc(Br)cc2)cc1  
126 C=CCn1c(N(c2ccc(F)cc2I)S(=O)(=O)c2ccc(C)cc2)cc2cc(Br)ccc21>>Cc1ccc(S(=O)(=O)N2c3ccc(F)cc  
3/C=C\N3c2cc2cc(Br)ccc23)cc1  
127 C=CC(=O)OCC.Cc1ccc(S(=O)(=O)n2c(I)cc3c(Br)cn(C)c(=O)c32)cc1>>CCOC(=O)/C=C/c1cc2c(Br)c  
n(C)c(=O)c2n1S(=O)(=O)c1ccc(C)cc1  
128 C=CC(=O)OCCCC.Cc1cc(I)ccc1Br>>CCCCOC(=O)/C=C/c1ccc(Br)c(C)c1

129 C=CC(=O)Nc1cccc1NC(=O)OC(C)(C)C.COC(=O)C(CCCCl)c1ccc(Br)cc1>>COC(=O)C(CCCCl)c1c  
cc(/C=C/C(=O)Nc2ccccc2NC(=O)OC(C)(C)C)cc1  
130 C=CP(=O)(OCC)OCC.Clc1cccc1Br>>CCOP(=O)(/C=C/c1cccc1Cl)OCC  
131 C=CCc1cc(Cl)c2ccenc2c1OCc1ccc(F)cc1Br>>C=C1Cc2cc(Cl)c3ccenc3c2OCc2ccc(F)cc21  
C=Cc1ccc(OC)c(Nc2nc(Nc3ccc(N4CCN(C)CC4)c(Br)c3)ncc2Cl)c1>>COc1ccc2cc1Nc1nc(ncc1Cl)Nc  
132 1ccc(N3CCN(C)CC3)c(c1)/C=C\2  
133 C=COCCCC.O=c1cc(Br)c2ccc(Cl)cc2o1>>CCCCO/C=C/c1cc(=O)oc2cc(Cl)ccc12  
134 C=CC(=O)OCC.O=Cc1cc(Cl)ccc1Br>>CCOC(=O)/C=C/c1ccc(Cl)cc1C=O  
135 C=CC(=O)OCC.Nc1ccc(Br)nc1I>>CCOC(=O)/C=C/c1nc(Br)ccc1N  
136 C=Cc1cccc1.Nc1ccc(Br)cc1I>>Nc1ccc(Br)cc1/C=C/c1cccc1  
137 C=CC(=O)OCC.Cc1[nH]cc2c(=O)n(-c3ccc(Cl)cc3)nc-2c1Br>>CCOC(=O)/C=C/c1c2nn(-  
c3ccc(Cl)cc3)c(=O)c-2c[nH]c1C  
138 Br1ccc(I)cc1.C=Cc1ccc(CP(=O)(OC(C)(C)C)OC(C)(C)C)cc1>>CC(C)(C)OP(=O)(Cc1ccc(/C=C/c2cc  
c(Br)cc2)cc1OC(C)(C)C  
139 C=CC(=O)OCCN(C)C.O=C(Nc1cccc(Cl)c1)c1cc(=O)c2cc(Br)ccc2o1>>CN(C)CCOC(=O)/C=C/c1ccc  
2oc(C(=O)Nc3cccc(Cl)c3)cc(=O)c2c1  
140 Br1ccc(I)cc1.C=Cc1ccc(Cl)cc1>>Clc1ccc(/C=C/c2ccc(Br)cc2)cc1  
CC(C)COC(=O)[C@H](C)OC(=O)[C@H](C/C=C1CCN([13c]2[13cH][13cH][13cH][13cH][13c  
141 H]2)C1=O)Nc1cc(Cl)ccc1I>>CC(C)COC(=O)[C@H](C)OC(=O)[C@H]1C/C=C2/CCN([13c]3[13c  
H][13cH][13cH][13cH][13cH]3)C2=O)c2ccc(Cl)cc2N1  
142 C=Cc1cc(Cl)c(C)cc1OCc1cccc1Br>>Cc1cc2c(cc1Cl)/C=C\c1cccc1CO2  
143 C=Cc1ccccc1.Nc1ccc(Cl)cc1Br>>Nc1ccc(Cl)cc1/C=C/c1ccccc1  
144 C=CC(=O)OC(C)(C)C.O=C(NCc1ccc(OC(F)(F)F)cc1)c1cc(Br)cc(I)c1>>CC(C)(C)OC(=O)/C=C/c1cc(  
Br)cc(C(=O)NCc2ccc(OC(F)(F)F)cc2)c1  
145 C=CC(=O)OC.O=Cc1cc(OCc2c(-c3ccc(Cl)cc3)nsc2C(F)(F)F)ccc1Br>>COC(=O)/C=C/c1ccc(OCc2c(-  
c3ccc(Cl)cc3)nsc2C(F)(F)F)cc1C=O  
146 C=Cc1ccnc(Br)c1.CC(C)(C)OC(=O)N1CC[C@H]1COc1cnc(Cl)c(I)c1>>CC(C)(C)OC(=O)N1CC[C@  
H]1COc1cnc(Cl)c(/C=C/c2ccnc(Br)c2)c1  
147 C=Cc1ccc(SC)cc1.Clc1c2cc(Br)ccc2nc2c1[nH]c1cccc12>>CSc1ccc(/C=C/c2ccc3nc4c([nH]c5cccc5  
4)c(Cl)c3c2)cc1  
148 C=CC(=O)OC(C)(C)C.O=C(NCCc1cccc1)c1cc(Br)cc(I)c1>>CC(C)(C)OC(=O)/C=C/c1cc(Br)cc(C(=  
O)NCCc2ccccc2)c1  
149 C=CC(=O)OC.N#Cc1ccc(Cl)c(F)c1Br>>COC(=O)/C=C/c1c(C#N)ccc(Cl)c1F  
150 C=Cc1cccc1.COC(=O)c1cc(Br)ccc1Cl>>COC(=O)c1cc(/C=C/c2ccccc2)ccc1Cl  
151 C=Cc1cnc(C#N)c1Nc1ccc2[nH]ccc2c1C.ClCCOc1cccc(Br)c1>>Cc1c(Nc2c(C#N)cncc2/C=C/c2cccc(  
OCCCl)c2)ccc2[nH]ccc12  
152 C=CCN(CC1=C(Br)CCCCC1)c1ccc(Cl)cc1>>C=C1CN(c2ccc(Cl)cc2)CC2=C1CCCCC2  
153 C=Cc1ccc(OC(C)=O)cc1.FCCOCCOCCOc1ncc(I)cc1Br>>CC(=O)Oc1ccc(/C=C/c2cnc(OCCOCCOC  
CF)c(Br)c2)cc1  
154 C=CC(=O)OC.CC(C)(C)c1[nH]c2ccccc2c1C1CCCN(Cc2ccc(Br)cc2Cl)C1>>COC(=O)/C=C/c1ccc(CN  
2CCCC(c3c(C(C)(C)C)[nH]c4ccccc34)C2)c(Cl)c1  
155 Br1ccccc1I.C=Cc1ccc(Cl)cc1>>Clc1ccc(/C=C/c2ccccc2Br)cc1  
156 C=CC(=O)OCC.Clc1ccc(Br)cn1>>CCOC(=O)/C=C/c1ccc(Cl)nc1  
157 C=CC(=O)OCC.Nc1c(I)nc(Cl)c1Br>>CCOC(=O)/C=C/c1nc(Cl)c(Br)c1N  
158 C=CC(=O)OC(C)(C)C.CC(=O)c1ccc(Cl)cc1Br>>CC(=O)c1ccc(Cl)cc1/C=C/C(=O)OC(C)(C)C  
159 C=CC(=O)OCC.CC1(C)CC(=C(c2ccc(Br)cc2)c2ccc(O)c(Cl)c2)CC(C)(C)O1>>CCOC(=O)/C=C/c1ccc  
(C(=C2CC(C)(C)OC(C)(C)C2)c2ccc(O)c(Cl)c2)cc1  
160 C=CCN(C(=O)c1ccc2ccccc2c1Br)C(C(=O)NC1CCCC1)c1ccc(Cl)cc1>>C=C1CN(C(C(=O)NC2CCC  
CC2)c2ccc(Cl)cc2)C(=O)c2ccc3ccccc3c21  
161 C=CC(=O)OC(C)(C)C.COc1ccc(CNC(=O)c2cc(Br)cc(I)c2)cc1>>COc1ccc(CNC(=O)c2cc(Br)cc(/C=C  
/C(=O)OC(C)(C)C)c2)cc1  
162 C=CC#N.COc1cc(Cl)ccc1Br>>COc1cc(Cl)ccc1/C=C/C#N  
163 Br1ccccc1I.C=C[Si](C)(C)C>>C[Si](C)(C)/C=C/c1ccccc1Br  
164 C=Cc1ccccc1.Clc1ccc(Br)cc1>>Clc1ccc(/C=C/c2ccccc2)cc1  
165 C=CC12CCC(NC(=O)OC(C)(C)C)(CC1)CO2.COc1ccc2ncc(Cl)c(Br)c2n1>>COc1ccc2ncc(Cl)c(/C=C/  
C34CCC(NC(=O)OC(C)(C)C)(CC3)CO4)c2n1  
166 C=Cc1cc(Cl)ccc1OS(=O)(=O)c1ccccc1Br>>OS1(=O)Oc2ccc(Cl)cc2/C=C\c2ccccc21  
167 C=CC(C)=O.CNC(=O)c1c2cc(C3CC3)c(I)cc2nn1-  
c1ccc(Br)cc1>>CNC(=O)c1c2cc(C3CC3)c(/C=C/C(C)=O)cc2nn1-c1ccc(Br)cc1  
168 C=CC(=O)OC.Clc1cccc(Br)c1>>COC(=O)/C=C/c1cccc(Cl)c1  
169 Br1ccccc1I.C=CC(=O)OC>>COC(=O)/C=C/c1cccc(Br)c1

170 C=CC(=O)OCC.CCOC(=O)c1cc(Cl)cc(Br)c1>>CCOC(=O)/C=C/c1cc(Cl)cc(C(=O)OCC)c1  
171 C=CC(=O)OC.COc1ccc(Cl)cc1Br>>COC(=O)/C=C/c1cc(Cl)ccc1OC  
172 C=CCN(CCc1ccc(Cl)cc1I)C(=O)C(F)(F)F>>C=C1CN(C(=O)C(F)(F)F)CCc2ccc(Cl)cc21  
173 C=Cc1cccc([N+](=O)[O-])c1.Clc1cccc(Br)c1>>O=[N+](O-)]c1cccc(/C=C/c2cccc(Cl)c2)c1  
174 C=CC(=O)OC(C)(C)C.Nc1ccc(Br)cc1I>>CC(C)(C)OC(=O)/C=C/c1cc(Br)ccc1N  
175 C=CC(=O)OCC.COc1ncc(Br)c(N)c1I>>CCOC(=O)/C=C/c1c(OC)ncc(Br)c1N  
176 C=Cc1ccc(C)cc1.Nc1ccc(Cl)cc1Br>>Cc1ccc(/C=C/c2cc(Cl)ccc2N)cc1  
177 C=CC(=O)OCC.Cc1nn(C)c(Oc2cc(Br)ccc2Cl)c1C=O>>CCOC(=O)/C=C/c1ccc(Cl)c(Oc2c(C=O)c(C)n  
n2C)c1  
178 C=Cc1cccc(Nc2nc(Nc3ccc(OCCN4CCCC4)c(Br)c3)ncc2Cl)c1>>Clc1cnc2nc1Nc1cccc(c1)/C=C\c1cc(  
ccc1OCCN1CCCC1)N2  
179 C=Cc1ccc(F)cc1.Cc1nn(C)c(=O)c(-c2c(F)ccc(Cl)c2Br)c1OC(=O)C(C)C>>Cc1nn(C)c(=O)c(-  
c2c(F)ccc(Cl)c2/C=C/c2ccc(F)cc2)c1OC(=O)C(C)C  
180 C=CC(=O)OC(C)(C)C.O=Cc1cc(Cl)ccc1Br>>CC(C)(C)OC(=O)/C=C/c1ccc(Cl)cc1C=O  
181 C=Cc1ccc(N2CCN(C(C)=O)CC2)cc1.Clc1cc(Br)cc(Cn2cnc2)c1>>CC(=O)N1CCN(c2ccc(/C=C/c3cc(  
Cl)cc(Cn4cnc4)c3)cc2)CC1  
182 C=CC(=O)OC(C)(C)C.CCOC(=O)Cc1ccc(Br)cc1Cl>>CCOC(=O)Cc1ccc(/C=C/C(=O)OC(C)(C)C)cc1  
183 C=CCn1c(N(c2ccc(C)cc2I)S(C)(=O)=O)cc2cc(Cl)ccc21>>Cc1ccc2c(c1)/C=C\Cn1c(cc3cc(Cl)ccc31)N  
2S(C)(=O)=O  
184 C=CCn1c(N(c2ccc(Cl)cc2I)S(C)(=O)=O)cc2cc([N+](=O)[O-  
])ccc21>>CS(=O)(=O)N1c2ccc(Cl)cc2/C=C\Cn2c1cc1cc([N+](=O)[O-])ccc12  
185 Br1cccc1I.C=C1CC(c2ccc(Cl)cc2)OC1=O>>O=C1OC(c2ccc(Cl)cc2)C/C1=C\c1cccc1Br  
186 C=Cc1ccnc1N(Cc1cc(Br)ccc1I)C(C)=O>>CC(=O)N1Cc2cc(Br)ccc2/C=C\c2ccnc21  
187 C=CC(=O)OCC.O=Cc1ccc(Cl)cc1Br>>CCOC(=O)/C=C/c1cc(Cl)ccc1C=O  
188 C=CC(=O)OCc1cccc1.Oc1ccc(Br)c(Cl)c1>>O=C(/C=C/c1ccc(O)cc1Cl)OCc1cccc1  
189 C=CC(=O)OCC.Nc1ccc(Cl)cc1Br>>CCOC(=O)/C=C/c1cc(Cl)ccc1N  
190 Br1cccc1I.C=CC(=O)OCCSc1cccc1>>O=C(/C=C/c1cccc1Br)OCCSc1cccc1  
191 C=CC(=O)OC(C)(C)C.Cc1ccc(Cl)cc1N1CCN(c2nnc3c2c(Br)nn3C2CCCCO2)CC1>>Cc1ccc(Cl)cc1  
N1CCN(c2nnc3c2c(/C=C/C(=O)OC(C)(C)C)nn3C2CCCCO2)CC1  
192 C=CC(=O)OC.Oc1ccc(Br)cc1Cl>>COC(=O)/C=C/c1ccc(O)c(Cl)c1  
193 C=CC(=O)OC.O=Cc1cc(Cl)ccc1Br>>COC(=O)/C=C/c1ccc(Cl)cc1C=O  
194 C=CC(=O)OC(C)(C)C.O=S(=O)(c1ccc(Cl)cc1)n1ccc2cc(Br)cnc21>>CC(C)(C)OC(=O)/C=C/c1cnc2c(  
ccn2S(=O)(=O)c2ccc(Cl)cc2)c1  
195 Br1ccc(I)cc1.C=C(F)C(=O)OC>>COC(=O)/C(F)=C/c1ccc(Br)cc1  
196 C=CC(=O)OCCCC.Clc1ccc(Br)cc1>>CCCCOC(=O)/C=C/c1ccc(Cl)cc1  
197 C=CC(=O)OC.N#Cc1c(Br)cnc1I>>COC(=O)/C=C/c1ncc(Br)c1C#N  
198 C=CC(=O)OC(C)(C)C.O=C(CCc1cccc1)Nc1ccc(Br)cc1I>>CC(C)(C)OC(=O)/C=C/c1cc(Br)ccc1NC(  
=O)CCc1cccc1  
199 Br1cccc(I)c1.C=CC(=O)OCCCC>>CCCCOC(=O)/C=C/c1cccc(Br)c1  
200 Br1cccc1I.C=C(F)[Si](C)(c1cccc1)c1cccc1>>C[Si](/C(F)=C/c1cccc1Br)(c1cccc1)c1cccc1  
201 C=CC(=O)OC(C)(C)C.O=C(NCc1cccc(OC(F)(F)F)c1)c1cc(Br)cc(I)c1>>CC(C)(C)OC(=O)/C=C/c1cc(  
Br)cc(C(=O)NCc2cccc(OC(F)(F)F)c2)c1  
202 O=C(/C=C/c1cccs1)O/C(=C\I)c1ccc(Br)cc1>>O=C1OC(c2ccc(Br)cc2)=C/C1=C\c1cccs1  
203 C=CC(=O)OC(C)(C)C.O=S(=O)(c1cccc(Br)c1)c1ccc2cc(Cl)ccc2n1>>CC(C)(C)OC(=O)/C=C/c1cccc(  
S(=O)(=O)c2ccc3cc(Cl)ccc3n2)c1  
204 C=CC(=O)Nc1cccc1NC(=O)OC(C)(C)C.CCN(CC)C1CCN(CC(C(=O)Nc2ccc(Cl)cc2)c2ccc(Br)cc2)C  
1>>CCN(CC)C1CCN(CC(C(=O)Nc2ccc(Cl)cc2)c2ccc(/C=C/C(=O)Nc3cccc3NC(=O)OC(C)(C)C)cc2  
205 C=CC(=O)O.Clc1ccc(Br)cc1>>O=C(O)/C=C/c1ccc(Cl)cc1  
206 C=CC(=O)Nc1cccc1NC(=O)OC(C)(C)C.CN1C[C@H](c2ccc(Br)cc2F)[C@H](C(=O)Nc2ccc(Cl)cc  
2)C1>>CN1C[C@H](c2ccc(/C=C/C(=O)Nc3cccc3NC(=O)OC(C)(C)C)cc2F)[C@H](C(=O)Nc2ccc  
(Cl)cc2)C1  
207 Br1cccc(I)c1.C=CS(=O)(=O)F>>O=S(=O)(F)/C=C/c1cccc(Br)c1  
208 C=CCN(CCc1cc(Cl)ccc1I)C(=O)C(F)(F)F>>C=C1CN(C(=O)C(F)(F)F)CCc2cc(Cl)ccc21  
209 C=CC(=O)OC.Nc1ccc(Br)cc1I>>COC(=O)/C=C/c1cc(Br)ccc1N  
210 Br1cc(I)c2cccc2n1.C=CC(=O)OC>>COC(=O)/C=C/c1cc(Br)nc2cccc12  
211 C=CCn1c(N(c2ccc(Br)cc2I)S(=O)(=O)c2ccc(C)cc2)cc2cc(C)ccc21>>Cc1ccc(S(=O)(=O)N2c3ccc(Br)c  
c3/C=C\Cn3c2cc2cc(C)ccc23)cc1  
212 Br1ccc(I)cc1.C=CC(=O)OCC>>CCOC(=O)/C=C/c1ccc(Br)cc1  
213 C=Cc1cccc1.O=C1C[C@H](c2ccc(Cl)cc2Br)CN1>>O=C1C[C@H](c2ccc(Cl)cc2/C=C/c2cccc2)CN  
214 C=CC(=O)OCC.COc1ccc(Br)cc1I>>CCOC(=O)/C=C/c1cc(Br)ccc1OC

215 C=CC(=O)OCC.O=C(Nc1ccc(Cl)cc1)c1cccc(Br)c1>>CCOC(=O)/C=C/c1cccc(C(=O)Nc2ccc(Cl)cc2)c  
 216 Br1cccc2c1cc(-c1ccc(I)cc1)n2-c1ncccn1.C=CC(=O)OC>>COC(=O)/C=C/c1ccc(-c2cc3c(Br)cccc3n2-  
 c2ncccn2)cc1  
 217 C=CC(=O)OCC.Clc1ccc(Oc2cccc(Br)c2)cc1>>CCOC(=O)/C=C/c1cccc(Oc2ccc(Cl)cc2)c1  
 218 C=C.COc1cc2c(cc1Br)NC(=O)c1ccc(Cl)cc1N2>>C=Cc1cc2c(cc1OC)Nc1cc(Cl)ccc1C(=O)N2  
 219 C=CCn1c(N(c2ccc(Cl)cc2)S(=O)(=O)c2ccc(C)cc2)cc2cc(C)ccc21>>Cc1ccc(S(=O)(=O)N2c3ccc(Cl)c  
 c3/C=C/Cn3c2cc2cc(C)ccc23)cc1  
 220 C=Cc1cccc1.Nc1ncc(Cl)cc1Br>>Nc1ncc(Cl)cc1/C=C/c1cccc1  
 221 C=CCN(CC1=C(Br)c2cccc2CC1)c1ccc(Cl)cc1>>C=C1CN(c2ccc(Cl)cc2)CC2=C1c1cccc1CC2  
 222 C=CC(=O)OC(C)(C)C.COc1ccc(CNc2c(Br)cc(C)cc2)cc1>>COc1ccc(CNc2c(Br)cc(C)cc2/C=C/C(=O)  
 )OC(C)(C)C)cc1  
 223 Br1ccc(I)cc1.C=CC(=O)OCCCC>>CCCCOC(=O)/C=C/c1ccc(Br)cc1  
 224 C=CC(=O)OCCCC.Cn1nc(Br)c2c(Cl)cccc21>>CCCCOC(=O)/C=C/c1nn(C)c2cccc(Cl)c12  
 225 Br1ccc(I)cc1.C=CC(=O)OC1CCCCC1>>O=C/C=C/c1ccc(Br)cc1)OC1CCCCC1  
 226 C=Cc1ccc(N(C)S(C)(=O)=O)c(Nc2nc(Nc3cc(Br)c(N4CCN(C)CC4)cc3OC)ncc2Cl)c1>>COc1cc(N2C  
 CN(C)CC2)c2cc1Nc1ncc(Cl)c(n1)Nc1cc(ccc1N(C)S(C)(=O)=O)/C=C\2  
 227 C[C@@H](OC(=O)[C@@H](C/C=C1\CCN(c2ccccc2)C1=O)Nc1cc(Cl)ccc1)C(=O)OC(C)(C)C>>C[  
 C@@H](OC(=O)[C@@H]1C/C=C2\CCN(c3ccccc3)C2=O)c2ccc(Cl)cc2N1)C(=O)OC(C)(C)C  
 228 C=CC(=O)OC.COc1ccc(Br)cc1Cl>>COc1ccc(/C=C/C(=O)OC)cc1Cl  
 229 Br1cccc1I.C=CC(=O)N(C)OC>>CON(C)C(=O)/C=C/c1cccc1Br  
 230 C=Cc1cncnc1.CC[C@@H](COc1nnc(Cl)c(Br)c1)NC(=O)OC(C)(C)C>>CC[C@@H](COc1nnc(Cl)c(/  
 C=C/c2cncnc2)c1)NC(=O)OC(C)(C)C  
 231 C=CCC(C)C.ClCc1cccc(Br)c1>>C=C(Cc1cccc(Br)c1)CC(C)C  
 232 C=CCc1cc(Cl)c2ccnnc2c1OCc1ccc(OC)cc1Br>>C=C1Cc2cc(Cl)c3ccnnc3c2OCc2ccc(OC)cc21  
 233 C=CC(=O)OC(C)(C)C.O=C(Nc1ccc(Cl)c(F)c1Br)C(F)(F)F>>CC(C)(C)OC(=O)/C=C/c1c(NC(=O)C(F)  
 )(F)F)ccc(Cl)c1F  
 234 C=CC(O)(CF)CF.FC(F)(F)c1ccc(Cl)c(Br)c1>>OC(/C=C/c1cc(C(F)(F)F)ccc1Cl)(CF)CF  
 235 C=CS(=O)(=O)NC.Nc1ncc(Cl)cc1Br>>CNS(=O)(=O)/C=C/c1cc(Cl)cnc1N  
 236 C=Cc1cncnc(C#N)c1Nc1ccc2[nH]ccc2c1C.ClCCOc1cccc1Br>>Cc1c(Nc2c(C#N)cncnc2/C=C/c2ccccc2  
 OCCCl)ccc2[nH]ccc12  
 237 C=C.Clc1ccc(Br)cc1>>C=Cc1ccc(Cl)cc1  
 238 C=CC(=O)OCC.COc1c(-c2ccccc2Cl)cc2cnc(NC(C)C)nc2c1Br>>CCOC(=O)/C=C/c1c(OC)c(-  
 c2ccccc2Cl)cc2cnc(NC(C)C)nc12  
 239 C=CC(=O)OC(C)(C)C.Nc1ncc(Br)cc1I>>CC(C)(C)OC(=O)/C=C/c1cc(Br)cnc1N  
 240 C=C.CC(=O)Nc1cc(Cl)ccc1Br>>C=Cc1ccc(Cl)cc1NC(C)=O  
 241 C=Cc1cccc1.Nc1cc(Cl)ccc1Br>>Nc1cc(Cl)ccc1/C=C/c1cccc1  
 242 C=CC(=O)OC(C)(C)C.Nc1ncc(I)c2scc(Br)c12>>CC(C)(C)OC(=O)/C=C/c1cnc(N)c2c(Br)csc12  
 243 C=CC(=O)OCC.Clc1cccc1Br>>CCOC(=O)/C=C/c1cccc1Cl  
 244 Br1ccc(I)cc1.C=CC(=O)CCCC>>CCCCC(=O)/C=C/c1ccc(Br)cc1  
 245 C=CC(OC)OCC.O=Cc1ccc(Cl)cc1Br>>CCOC(/C=C/c1cc(Cl)ccc1C=O)OCC  
 246 C=CC(=O)OCC.CCCCOC(=O)/C=C/c1ccc(Br)cc1Cl>>CCCCOC(=O)/C=C/c1ccc(/C=C/C(=O)OCC)c  
 247 C=CC(=O)OCC.Clc1ncc(Br)cn1>>CCOC(=O)/C=C/c1cnc(Cl)nc1  
 248 C=CCN(CC1=C(Br)CCCC1)c1ccc(Cl)cc1>>C=C1CN(c2ccc(Cl)cc2)CC2=C1CCCC2  
 249 Br1ccc(I)cc1.C=CC(=O)OC>>COC(=O)/C=C/c1ccc(Br)cc1  
 250 Br1ccc(I)cc1.C=Cc1cccc(OC)c1>>COc1cccc(/C=C/c2ccc(Br)cc2)c1  
 251 C=CC(=O)OC(C)(C)C.O=S(=O)(c1cccc(Br)c1)c1ccc2cccc(Cl)c2n1>>CC(C)(C)OC(=O)/C=C/c1cccc(  
 S(=O)(=O)c2ccc3cccc(Cl)c3n2)c1  
 252 C=C.NC(=O)c1cc(Cl)ccc1Br>>C=Cc1ccc(Cl)cc1C(N)=O  
 253 C=CC(C)(C)O.Nc1cnc(Br)c1I>>CC(C)(O)/C=C/c1c(N)cnc1Br  
 254 Br1ccc(I)cc1.C=CC(F)(F)C(F)(F)C(F)(F)C(F)(F)C(F)(F)F>>FC(F)(F)C(F)(F)C(F)(F)C(F)(F)  
 C(F)(F)C(F)(F)/C=C/c1ccc(Br)cc1  
 255 C=CC(=O)OC.Clc1cccc1Br>>COC(=O)/C=C/c1cccc1Cl  
 256 C=CC(N)=O.CCOC(=O)C1=Cc2cc(Br)cc(Cl)c2OC1C(F)(F)F>>CCOC(=O)C1=Cc2cc(/C=C/C(N)=O)  
 cc(Cl)c2OC1C(F)(F)F  
 257 Br1cccc1I.C=CC(=O)OC>>COC(=O)/C=C/c1cccc1Br  
 258 C=C.COC(=O)c1ccc(Cl)cc1Br>>C=Cc1cc(Cl)ccc1C(=O)OC  
 259 C=Cc1ccc(SC)cc1.Clc1c2cc(Br)ccc2nc2c1oc1cccc12>>CSc1ccc(/C=C/c2ccc3nc4c(oc5ccccc54)c(Cl)  
 c3c2)cc1  
 260 C=Cc1cncnc(C#N)c1Nc1ccc2[nH]ccc2c1C.Clc1cc(Br)ccn1>>Cc1c(Nc2c(C#N)cncnc2/C=C/c2cnc(Cl)c  
 2)ccc2[nH]ccc12

261 C=C1c2cccc2C1(C#N)CC.Clc1ccc(Br)cc1>>CCC1(C#N)/C(=C/c2ccc(Cl)cc2)c2cccc21  
 262 C=CCn1c(N(c2ccc(C)cc2I)S(=O)(=O)c2cccs2)cc2cc(Cl)ccc21>>Cc1ccc2c(c1)/C=C/Cn1c(cc3cc(Cl)ccc31)N2S(=O)(=O)c1cccs1  
 263 C=CCC(OCC(=C)Br)c1cccc(Cl)c1>>C=C1COC(c2cccc(Cl)c2)CC1=C  
 264 C=CC(=O)Nc1cccc1NC(=O)OC(C)(C)C.CN1C[C@H](c2ccc(Br)cc2)[C@@H](C(=O)Nc2ccc(Cl)cc2)C1>>CN1C[C@H](c2ccc(/C=C/C(=O)Nc3cccc3NC(=O)OC(C)(C)C)cc2)[C@@H](C(=O)Nc2ccc(Cl)C=CCCOc1cc(=O)n(C)cc1-c1cc(NS(=O)(=O)CC)ccc1Oc1ccc(Cl)cc1I>>CCS(=O)(=O)Nc1ccc2c(c1)-c1cn(C)c(=O)cc1OCC/C=C/c1cc(Cl)ccc1O2  
 265 C=CC(=O)OC.Cc1ccc(S(=O)(=O)n2cc(I)c3c(Br)cccc32)cc1>>COC(=O)/C=C/c1cn(S(=O)(=O)c2ccc(C)cc2)c2cccc(Br)c12  
 266 C=CC(=O)OC(C)(C)C.Nc1ncc(Cl)cc1Br>>CC(C)(C)OC(=O)/C=C/c1cc(Cl)enc1N  
 267 C=CC(=O)OCC.Fc1nc(Br)ccc1Cl>>CCOC(=O)/C=C/c1ccc(Cl)c(F)n1  
 268 C=CC(=O)OCC.Clc1cccc(Oc2cccc(Br)c2)c1>>CCOC(=O)/C=C/c1cccc(Oc2cccc(Cl)c2)c1  
 269 Br1ccc(I)cc1.C=Cc1ccc(C=O)cc1>>O=Cc1ccc(/C=C/c2ccc(Br)cc2)cc1  
 270 C=CC(=O)OC.CON(C)C(=O)c1ccc(Br)cc1I>>COC(=O)/C=C/c1cc(Br)ccc1C(=O)N(C)OC  
 271 C=CC(=O)OC(C)(C)C.FC(F)(F)c1ccc(Br)c(Cl)c1>>CC(C)(C)OC(=O)/C=C/c1ccc(C(F)(F)F)cc1Cl  
 272 C=CC(=O)OC(C)(C)C.O=C1c2ccc(Br)cc2CCN1c1cc(F)ccc1Cl>>CC(C)(C)OC(=O)/C=C/c1ccc2c(c1)CCN(c1cc(F)ccc1Cl)C2=O  
 273 Br1ccc(I)cc1.C=CCNC(=O)c1cc(C)on1>>Cc1cc(C(=O)NC/C=C/c2ccc(Br)cc2)no1  
 274 C=CC(=O)OCCCC.Clc1cc(Br)ccc1I>>CCCCOC(=O)/C=C/c1ccc(Br)cc1Cl  
 275 C=CC(=O)OCC.Cc1ncc(Br)c(N)c1I>>CCOC(=O)/C=C/c1c(C)ncc(Br)c1N  
 276 C=COCCCC.Clc1ccc(Br)cc1>>CCCCO/C=C/c1ccc(Cl)cc1  
 277 C=Cc1cenc2cccc12.CCCCCN(CCCCC)c1ccc(Br)c(Cl)c1>>CCCCCN(CCCCC)c1ccc(/C=C/c2ccnc3cccc23)c(Cl)c1  
 278 C=Cc1cccc1.O=c1c(Br)c(-c2ccc(Cl)cc2)oc2ccccc12>>O=c1c(/C=C/c2ccccc2)c(-c2ccc(Cl)cc2)oc2ccccc12  
 279 C=CCN(CC1=C(Br)CCC1)c1ccc(Cl)cc1>>C=C1CN(c2ccc(Cl)cc2)CC2=C1CCC2  
 280 C=C(C)C(=O)OC.Clc1cccc(Br)c1>>COC(=O)/C(C)=C/c1cccc(Cl)c1  
 281 C=CC(=O)OCC.Clc1ccc(C#C/C=C/c2cccc(Br)c2)cc1>>CCOC(=O)/C=C/c1cccc(/C=C/C#Cc2ccc(Cl)c2)c1  
 282 C=CC(=O)OCC.COc1ccc(Cl)cc1-c1c(Br)c(=O)n(C)c2ccc(C(F)(F)F)cc12>>CCOC(=O)/C=C/c1c(-c2cc(Cl)ccc2OC)c2cc(C(F)(F)F)ccc2n(C)c1=O  
 283 C=CC(=O)OC.Nc1c(I)cc(Br)c2c1C(=O)NC2=O>>COC(=O)/C=C/c1cc(Br)c2c(c1N)C(=O)NC2=O  
 284 C=CC(=O)OCC.Cc1cc(Br)ccc1I>>CCOC(=O)/C=C/c1ccc(Br)cc1C  
 285 C=CC(C)=O.Cc1ccc(I)c(Br)c1>>CC(=O)/C=C/c1ccc(C)cc1Br  
 286 C=Cc1cccc(Nc2nc(Nc3cc(Br)c(N4CCN(C)CC4)cc3OC)ncc2Cl)c1>>COc1cc(N2CCN(C)CC2)c2cc1Nc1ncc(Cl)c(n1)Nc1cccc(c1)/C=C2  
 287 C=CC(C)=O.FC1(F)C(I)=C1c1ccc(Br)cc1>>CC(=O)/C=C/C1=C(c2ccc(Br)cc2)C1(F)F  
 288 C=C(NC(C)=O)C(=O)OC.C[Si](C)(C)CCOCn1nc(I)c2cc(Br)ccc21>>COC(=O)/C(=C/c1nn(COCC[Si](C)(C)C)c2ccc(Br)cc12)NC(C)=O  
 289 C=Cc1cn(C(c2ccccc2)(c2ccccc2)c2ccccc2)cn1.CS(=O)(=O)N1CCC(C2c3ccc(Cl)cc3C=C(Br)c3ccnc32)CC1>>CS(=O)(=O)N1CCC(C2c3ccc(Cl)cc3C=C(/C=C/c3cn(C(c4ccccc4)(c4ccccc4)c4ccccc4)cn3)c3ccnc32)CC1  
 290 Br1ccc(I)cc1.C=CCn1nnc2ccccc21>>Br1ccc(/C=C/Cn2nnc3ccccc32)cc1  
 291 C=Cc1ccc(NC)cc1.FCCOCCOCCOc1ncc(I)cc1Br>>CNc1ccc(/C=C/c2cnc(OCCOCCOCCF)c(Br)c2)c  
 292 C=CC(=O)OC(C)(C)C.O=C(OCc1ccccc1)c1cc(Br)cc(I)c1>>CC(C)(C)OC(=O)/C=C/c1cc(Br)cc(C(=O)OCCc2ccccc2)c1  
 293 C=Cc1ccccc1.FC(F)(F)Oc1ccc(I)c(Br)c1>>FC(F)(F)Oc1ccc(/C=C/c2ccccc2)c(Br)c1  
 294 Br1ccccc1I.C=C1CC(c2ccccc2)OC1=O>>O=C1OC(c2ccccc2)C/C1=C/c1ccccc1Br  
 295 C=Cc1ccccc1.Clc1ccc2c(Br)ccnc2c1>>Clc1ccc2c(/C=C/c3ccccc3)ccnc2c1  
 296 C=CC(=O)OCC.Nc1cc(Br)ncc1I>>CCOC(=O)/C=C/c1cnc(Br)cc1N  
 297 C=CC(F)(F)Oc1ccc(Cl)cc1Br>>C=C1c2cc(Cl)ccc2OC1(F)F  
 298 C=CC(=O)O.Clc1cccc(Br)c1>>O=C(O)/C=C/c1cccc(Cl)c1  
 299 C=CC(=O)N1CCC(Cc2nnc(C)o2)CC1.Clc1ccc(Br)c(Cn2nccn2)c1>>Cc1nnc(CC2CCN(C(=O)/C=C/c3ccc(Cl)cc3Cn3nccn3)CC2)o1  
 300 C=CCn1c(N(c2ccc(Cl)cc2I)S(=O)(=O)c2ccc(C)cc2)cc2ccccc21>>Cc1ccc(S(=O)(=O)N2c3ccc(Cl)cc3/C=C/Cn3c2cc2ccccc23)cc1  
 301 C=CCC(O)c1cc2cc(Br)ccc2nc1Cl>>C=C1CC(O)c2cc3cc(Br)ccc3nc21  
 302 C=C.O=[N+][([O-])c1cc(Cl)ccc1Br>>C=Cc1ccc(Cl)cc1[N+](=O)[O-]  
 303 C=CC(=O)OCC.Fc1ccc(Br)c(OCc2ccccc2I)c1>>CCOC(=O)/C=C/c1ccccc1COc1cc(F)ccc1Br  
 304

C=CC(OCC)OCC.O=Cc1ccc(Cl)ccc1Br>>CCOC(/C=C/c1ccc(Cl)cc1C(=O)OCC  
Bre1cccc1I.C=C1C(=O)O[C@H]2[C@H]1CC/C(C)=C/CC[C@@]1(C)O[C@@H]21>>C/C1=C\CC[  
C@@]2(C)O[C@H]2[C@H]2OC(=O)/C(=C/c3cccc3Br)[C@@H]2CC1  
C=CC(=O)OC(C)(C)C.FC(F)(F)c1ccc(Br)ccc1Cl>>CC(C)(C)OC(=O)/C=C/c1ccc(Cl)c(C(F)(F)F)c1  
C=CB1OC(=O)CN(C)CC(=O)O1.Cc1nn(C)c(=O)c(-  
c2c(F)ccc(Cl)c2Br)c1OC(=O)C(C)C>>Cc1nn(C)c(=O)c(-  
c2c(F)ccc(Cl)c2/C=C/B2OC(=O)CN(C)CC(=O)O2)c1OC(=O)C(C)C  
Bre1cccc1I.C=Cc1cccc1>>Bre1cccc1/C=C/c1cccc1  
C=Cc1cccc1.CCCCOC(=O)/C=C/c1ccc(Br)cc1Cl>>CCCCOC(=O)/C=C/c1ccc(/C=C/c2cccc2)cc1Cl  
C=C(C)c1cccc1.Clc1ccc(Br)cc1>>C/C(=C\c1ccc(Cl)cc1)c1cccc1  
C=COCCN(C)C.Clc1ccc(Br)cc1>>C=C(OCCN(C)C)c1ccc(Cl)cc1  
C=CC(=O)OCC.O=[N+][([O-])c1ccc(Cl)ccc1Br>>CCOC(=O)/C=C/c1ccc(Cl)cc1[N+](=O)[O-]  
C=CC(=O)OC(C)(C)C.Clc1ccc(Sc2cn(C3CC3)nc2-c2ccc(Br)cc2)cc1>>CC(C)(C)OC(=O)/C=C/c1ccc(-  
c2nn(C3CC3)cc2Sc2ccc(Cl)cc2)cc1  
C=Cc1cccc(Nc2nc(Nc3ccc(N4CCOCC4)c(Br)c3)ncc2Cl)c1>>Clc1cnc2nc1Ne1cccc(c1)/C=C\c1cc(ccc  
1N1CCOCC1)N2  
C=CC(=O)OC(C)(C)C.CCC(C(=O)c1ccc(Br)cc1)c1ccc(F)cc1Cl>>CCC(C(=O)c1ccc(/C=C/C(=O)OC(  
C)(C)C)cc1)c1ccc(F)cc1Cl  
Bre1cccc(I)c1.C=CC(F)(F)C(F)(F)C(F)(F)C(F)(F)C(F)(F)C(F)(F)C(F)(F)F>>FC(F)(F)C(F)(F)  
C(F)(F)C(F)(F)C(F)(F)C(F)(F)C(F)(F)C(F)(F)C(F)(F)/C=C/c1cccc(Br)c1  
C=CC(=O)OCC.CCOC(=O)c1nc2cc(F)c(Br)cn2c1I>>CCOC(=O)/C=C/c1c(C(=O)OCC)nc2cc(F)c(Br)  
C=CC(=O)OC(C)(C)C.CC(=O)c1ccc(Cl)c(F)c1Br>>CC(=O)c1ccc(Cl)c(F)c1/C=C/C(=O)OC(C)(C)C  
C=CCOc1cccc1.Clc1cccc(Br)c1>>Clc1cccc(/C=C/COc2cccc2)c1  
C=CC(=O)OC.COCC(=O)c1c(Br)c(Cl)cc2nn(C)cc12>>COC(=O)/C=C/c1c(Cl)cc2nn(C)cc2c1C(=O)OC  
Bre1cccc(I)c1.C=Cc1cccc1>>Bre1cccc(/C=C/c2cccc2)c1  
C=CC(=O)OCC.Fc1cc(Br)ccc1I>>CCOC(=O)/C=C/c1ccc(Br)cc1F  
C=CC(=O)OCCCC.Fc1cc(Br)ccc1I>>CCCCOC(=O)/C=C/c1ccc(Br)cc1F  
CCOC(=O)[C@@H](C/C=C\C1\CCN(c2cccc2)C1=O)Nc1cc(Cl)ccc1I>>CCOC(=O)[C@@H]1C/C(=C2/  
CCN(c3cccc3)C2=O)c2ccc(Cl)cc2N1  
Bre1ccc(I)cc1.C=Cc1ccc(CP(=O)(OCC)OCC)cc1>>CCOP(=O)(Cc1ccc(/C=C/c2ccc(Br)cc2)cc1)OCC  
C=Cc1ccc(SC)cc1.Clc1c2ccc(Br)cc2nc2c1[nH]c1cccc12>>CSclccc(/C=C/c2ccc3c(Cl)c4[nH]c5cccc  
5c4nc3c2)cc1  
C=CC(=O)OC.CC(C)(C)OC(=O)N(CCc1c(Cl)ccnclBr)C(=O)OC(C)(C)C>>COC(=O)/C=C/c1nccc(Cl)  
c1CCN(C(=O)OC(C)(C)C)C(=O)OC(C)(C)C  
C=Cc1ccc(O)c(OC)c1.COCC(=O)Cn1c(=O)c(Cl)nc2cc(Br)cn21>>COC(=O)Cn1c(=O)c(/C=C/c2ccc(O  
)c(OC)c2)nc2cc(Br)cn21  
C=CC(=O)OCC.Oc1ccc(Br)c(Cl)c1>>CCOC(=O)/C=C/c1ccc(O)cc1Cl  
C=CC#N.Clc1ccc(Br)cc1>>N#C/C=C/c1ccc(Cl)cc1  
C=CC(=O)OCCCC.Cn1nc(Br)c2ccc(Cl)cc21>>CCCCOC(=O)/C=C/c1nn(C)c2cc(Cl)ccc12  
C=Cc1cccc1.Cc1ccc2c(-c3ccc(Cl)cc3)c(Br)c(=O)oc2c1>>Cc1ccc2c(-  
c3ccc(Cl)cc3)c(/C=C/c3cccc3)c(=O)oc2c1  
C=Cc1cccc1.Nc1ccc(Cl)cc1Br>>Nc1ccc(Cl)cc1/C=C/c1cccc1  
C=CC(=O)N1CCOCC1.O=C(/C=C/c1ccc(Sc2cccc2Br)c(Cl)c1)N1CCOCC1>>O=C(/C=C/c1ccc(Sc2c  
cccc2/C=C/C(=O)N2CCOCC2)c(Cl)c1)N1CCOCC1  
C=Cc1ence(C#N)c1Nc1ccc2[nH]ccc2c1C.ClCCOc1ccc(Br)cc1>>Cc1c(Nc2c(C#N)cncc2/C=C/c2ccc(  
OCCl)cc2)ccc2[nH]ccc12  
C=Cc1ccc(OC)cc1.Clc1ccc(Br)cc1>>COc1ccc(/C=C/c2ccc(Cl)cc2)cc1  
C=CP(=O)(OCC)OCC.Clc1ccc(Br)cc1>>CCOP(=O)/C=C/c1ccc(Cl)cc1OCC  
C=CC(=O)OCc1cccc1.CCn1nn2c(Cl)c(Br)ccc21>>CCn1nn2c(Cl)c(/C=C/C(=O)OCe3cccc3)ccc21  
Bre1ccc(I)cc1.C=Cc1cnccl1>>Bre1ccc(/C=C/c2cnccl2)cc1  
C=CC(=O)OC(C)(C)C.Oc1ccc(C(=C2CCCC2)c2ccc(Br)cc2Cl)cc1>>CC(C)(C)OC(=O)/C=C/c1ccc(  
C(=C2CCCC2)c2ccc(O)cc2)c(Cl)c1  
Bre1ccc(I)cc1.C=C1C(=O)O[C@@H]2CC(C)=C([C@@H](C)CCOC(C)=O)[C@@H](OC(C)=O)[C  
@H]12>>CC(=O)OCCC[C@H](C)C1=C(C)C[C@H]2OC(=O)/C(=C/c3ccc(Br)cc3)[C@H]2[C@@H]  
1OC(C)=O  
C=CC(=O)OC(C)(C)C.O=c1oc2cc(O)cc(F)c2c(Cc2ccc(Br)cc2)c1Cl>>CC(C)(C)OC(=O)/C=C/c1ccc(C  
c2c(Cl)c(=O)oc3cc(O)cc(F)c23)cc1  
C=C.NC(=O)c1ccc(Cl)cc1Br>>C=Cc1cc(Cl)cc1C(N)=O  
C=Cc1ccc(N(C)C(=O)OC(C)(C)C)cc1.FCCOCCOCCOc1ncc(I)cc1Br>>CN(C(=O)OC(C)(C)C)c1ccc/  
C=C/c2nc(OCOCCOCCCF)c(Br)c2)cc1  
C=CC(=O)OCC.O=Cc1c(F)cc(Br)cc1Cl>>CCOC(=O)/C=C/c1cc(F)c(C=O)c(Cl)c1



347 Br1cccc1I.C=Cc1cccc2cc1>>Br1cccc1/C=C/c1cccc2cc1  
348 C=CCN1C(=O)C(=O)c2cccc21.FC(F)(F)c1cc(Br)ccc1Cl>>O=C1C(=O)N(C/C=C/c2ccc(Cl)c(C(F)(F)  
349 F)c2)c2cccc21  
C=Cc1ccncc1.CC(C)(C)OC(=O)N[C@H](COc1cc(Br)cnc1Cl)Cc1c[nH]c2cccc12>>CC(C)(C)OC(=O)  
350 )N[C@H](COc1cc(/C=C/c2ccncc2)cnc1Cl)Cc1c[nH]c2cccc12  
351 C=CC(C)=O.Nc1cc(Br)ncc1I>>CC(=O)/C=C/c1cnc(Br)cc1N  
352 C=COCCCC.O=c1cc(Br)c2cc(Cl)ccc2o1>>CCCCO/C=C/c1cc(=O)oc2ccc(Cl)cc12  
353 C=CC(=O)OCC.FC(F)(F)c1cc(I)ccc1Br>>CCOC(=O)/C=C/c1ccc(Br)c(C(F)(F)F)c1  
354 C=CC(=O)OCC.Cc1nnc(Cc2cc(Cl)ccc2Br)o1>>CCOC(=O)/C=C/c1ccc(Cl)cc1Cc1nnc(C)o1  
355 C=CC(F)(F)F.Clc1cccc1Br>>FC(F)(F)/C=C/c1cccc1Cl  
C=CC(=O)OC(C)(C)C.CN(C)c1ccc(CNC(=O)c2cc(Br)cc(I)c2)cc1>>CN(C)c1ccc(CNC(=O)c2cc(Br)cc  
356 (/C=C/C(=O)OC(C)(C)C)c2)cc1  
C=Cc1ccc(N2CCN(C(=O)OC(C)(C)C)CC2)cc1.Clc1cc(Br)cc(-  
357 c2ccncc2)c1>>CC(C)(C)OC(=O)N1CCN(c2ccc(/C=C/c3cc(Cl)cc(-c4ccncc4)c3)cc2)CC1  
C=C/C=C/C(=O)N(CCCC)CCCC.Clc1ccc(Br)cc1>>CCCCN(CCCC)C(=O)/C=C/C=C/c1ccc(Cl)cc1  
358 C=CC(=O)OC.COc1ccc2c(c1)CCN(c1ccc(CCC(C)C)c(Cl)c1)C2(C)c1ccc(Br)cc1>>COC(=O)/C=C/c1  
ccc(C2(C)c3ccc(OC)cc3CCN2c2ccc(CCC(C)C)c(Cl)c2)cc1  
359 C=CCN1C(=O)c2cccc2C1=O.Clc1ccc(Br)cc1>>O=C1c2cccc2C(=O)N1C/C=C/c1ccc(Cl)cc1  
360 C=CC(=O)OC.COc1ccc(Br)cc1Cl>>COC(=O)/C=C/c1ccc(OC)c(Cl)c1  
361 Br1cccc1I.C=CP(=O)(OCC)OCC>>CCOP(=O)/C=C/c1cccc1Br)OCC  
362 C=CC(=O)OCC.CCOC(=O)N1CCc2cc(Br)c(N)c(Cl)c2CC1>>CCOC(=O)/C=C/c1cc2c(c(Cl)c1N)CCN  
(C(=O)OCC)CC2  
363 C=CC(=O)OCC.COc1ccc(Cl)cc1-c1c(Br)c(=O)[nH]c2ccc(C(F)(F)F)cc12>>CCOC(=O)/C=C/c1c(-  
c2cc(Cl)ccc2OC)c2cc(C(F)(F)F)ccc2[nH]c1=O  
364 C=CC(=O)OCC.Oc1ccc(C(=C2CCCCC2)c2ccc(Br)cc2)cc1Cl>>CCOC(=O)/C=C/c1ccc(C(=C2CCC  
CCC2)c2ccc(O)c(Cl)c2)cc1  
365 Br1ccc(I)cc1.C=Cc1ccc(OCC)cc1>>CCOc1ccc(/C=C/c2ccc(Br)cc2)cc1  
366 Br1ccc(I)cc1.C=CS(=O)(=O)F>>O=S(=O)(F)/C=C/c1ccc(Br)cc1  
C=CC(C)(C)C(=O)NC(C)(C)CO.CC(=O)OC[C@H]1O[C@@H](c2cc(Cc3ccc(Br)cc3Cl)c(C)cc2C)[C  
367 @H](OC(C)=O)[C@@H](OC(C)=O)[C@@H]1OC(C)=O>>CC(=O)OC[C@H]1O[C@@H](c2cc(Cc3  
ccc(/C=C/C(C)(C)C(=O)NC(C)(C)CO)cc3Cl)c(C)cc2C)[C@H](OC(C)=O)[C@@H](OC(C)=O)[C@@  
368 C=Cc1ccncc1.CC(C)(C)OC(=O)N[C@H](COc1cnc(Cl)c(Br)c1)Cc1cccc1>>CC(C)(C)OC(=O)N[C@  
H](COc1cnc(Cl)c(/C=C/c2ccncc2)c1)Cc1cccc1  
369 C=Cc1ccncc1.C[C@@H](COc1cnc(Cl)c(Br)c1)NC(=O)OC(C)(C)C>>C[C@@H](COc1cnc(Cl)c(/C=C/  
/c2ccncc2)c1)NC(=O)OC(C)(C)C  
370 C=CCN(CC1=C(Br)CCCC1)c1ccc(Cl)cc1>>C=C1CN(c2ccc(Cl)cc2)CC2=C1CCCCC2  
371 C=CCN(CCI)S(=O)(=O)c1cccc1Br>>C=C1CCN(S(=O)(=O)c2cccc2Br)C1  
372 Br1cccc1I.C=C1CC(c2ccc(C)cc2)OC1=O>>Cc1ccc(C2C/C(=C)c3ccccc3Br)C(=O)O2)cc1  
373 Br1ccc(I)cc1.C=Cc1ccc(C)cc1>>Cc1ccc(/C=C/c2ccc(Br)cc2)cc1  
374 C=C/C=C/C(=O)N(CCCC)CCCC.Clc1cccc(Br)c1>>CCCCN(CCCC)C(=O)/C=C/C=C/c1cccc(Cl)c1  
375 C=CC(=O)OC.Clc1ccc(Br)cc1>>COC(=O)/C=C/c1ccc(Cl)cc1  
376 C=CC(=O)OCC.O=c1c(Br)c(-c2ccc(Cl)cc2)oc2cccc12>>CCOC(=O)/C=C/c1c(-  
c2ccc(Cl)cc2)oc2cccc2c1=O  
377 C=Cc1ccc(NC)cc1.OCCOc1ncc(I)cc1Br>>CNc1ccc(/C=C/c2cnc(OCCO)c(Br)c2)cc1  
378 C=CC(OCC(=C)Br)c1cccc(Cl)c1>>C=C1COC(c2cccc(Cl)c2)C1=C  
379 Br1cccc(I)c1.C=CC(F)(F)C(F)(F)C(F)(F)C(F)(F)C(F)(F)F>>FC(F)(F)C(F)(F)C(F)(F)C(F)(F)  
C(F)(F)C(F)(F)/C=C/c1cccc(Br)c1  
380 C=CC(=O)OC(C)(C)C.Cc1ccc(CNC(=O)c2cc(Br)cc(I)c2)cc1>>Cc1ccc(CNC(=O)c2cc(Br)cc(/C=C/C(  
=O)OC(C)(C)C)c2)cc1  
381 Br1cccc1I.C=CC(N)=O>>NC(=O)/C=C/c1cccc1Br  
382 C=CC(=O)OCC.Cc1nnn(Cc2cc(Cl)ccc2Br)n1>>CCOC(=O)/C=C/c1ccc(Cl)cc1Cn1nnc(C)n1  
383 C=CC(=O)Nc1cccc1NC(=O)OC(C)(C)O=C(Nc1ccc(Cl)cc1)[C@H]1CN(CC(F)F)C[C@@H]1c1ccc  
(Br)cc1>>CC(C)(C)OC(=O)Nc1cccc1NC(=O)/C=C/c1ccc([C@H]2CN(CC(F)F)C[C@@H]2C(=O)Nc  
2ccc(Cl)cc2)cc1  
384 C=CC(=O)OC.O=Cc1c(F)cc(Br)cc1Cl>>COC(=O)/C=C/c1cc(F)c(C=O)c(Cl)c1  
385 C=CC(=O)OCC.Clc1cccc(Br)c1>>CCOC(=O)/C=C/c1cccc(Cl)c1  
386 C=CC(=O)OCCCC.Cn1nc(Br)c2cccc(Cl)c21>>CCCCOC(=O)/C=C/c1nn(C)c2c(Cl)cccc12  
C=CC(=O)OCCCC.O=C(Cc1c(-  
387 c2cccc(Br)c2)c2cc(CN3CCN(c4ccccc4)CC3)c(Cl)cc2oc1=O)Nc1ccc(F)cc1C(F)(F)F>>CCCCOC(=O)/  
C=C/c1cccc(-c2c(CC(=O)Nc3ccc(F)cc3C(F)(F)F)c(=O)oc3cc(Cl)c(CN4CCN(c5ccccc5)CC4)cc23)c1  
388 Br1cccc(I)c1.C=CC(=O)OCC>>CCOC(=O)/C=C/c1cccc(Br)c1

389 C=Cc1cccc(Nc2nc(Nc3ccc(N4CCN(C)CC4)c(Br)c3)ncc2Cl)c1>>CN1CCN(c2ccc3cc2/C=C\c2cccc(c2)Nc2nc(ncc2Cl)N3)CC1  
 390 C=Cc1cc(Nc2ncc(Cl)c(Nc3cc(Br)ccc3C(=O)OC)n2)ccc1N1CCN(C)CC1>>COC(=O)c1ccc2cc1Nc1nc(ncc1Cl)Nc1ccc(N3CCN(C)CC3)c(c1)/C=C\2  
 391 C=CCN(CC1=C(Br)CCc2ccccc21)c1ccc(Cl)cc1>>C=C1CN(c2ccc(Cl)cc2)CC2=C1CCc1ccccc12  
 392 C=Cc1cnccl.CC(C)(C)OC(=O)N[C@H](COc1enc(Cl)c(Br)c1)Cc1c[nH]c2ccccc12>>CC(C)(C)OC(=O)N[C@H](COc1enc(Cl)c(/C=C/c2cnccl2)c1)Cc1c[nH]c2ccccc12  
 393 C=Cc1ccc(OC)cc1.COC(=O)Cn1c(=O)c(Cl)nc2cc(Br)cnc21>>COC(=O)Cn1c(=O)c(/C=C/c2ccc(OC)c2)nc2cc(Br)cnc21  
 394 C=Cc1cccn1.Clc1ccc(COc2ccccc2)c(Br)c1>>Clc1ccc(COc2ccccc2)c(/C=C/c2cccn2)c1  
 395 C=CCCO.Clc1nc(Oc2ccccc2)c2cc(Br)cn2n1>>OCC/C=C/c1cc2c(Oc3ccccc3)nc(Cl)nn2c1  
 396 C=CC(=O)OCCCC.Clc1ccccc1Br>>CCCCOC(=O)/C=C/c1ccccc1Cl  
 397 C=CC(=O)O.FC(F)(F)c1ccc(I)c(Br)c1>>O=C(O)/C=C/c1ccc(C(F)(F)F)cc1Br  
 398 C=CC(=O)OC.Clc1cncc(Br)c1>>COC(=O)/C=C/c1cncc(Cl)c1  
 399 C=CN1C(=O)c2ccccc2C1=O.OC(c1ccc(Cl)cc1)c1ncccl1Br>>O=C1c2ccccc2C(=O)N1/C=C/c1cccnlC(O)c1ccc(Cl)cc1  
 400 C=Cc1ccc(OC)c(Nc2nc(Nc3ccc(N4CCOCC4)c(Br)c3)ncc2Cl)c1>>COc1ccc2cc1Nc1nc(ncc1Cl)Nc1cc(N3CCOCC3)c(c1)/C=C\2  
 401 C=CC(=O)OC.Nc1cc(Cl)ccc1Br>>COC(=O)/C=C/c1ccc(Cl)cc1N  
 402 C=CC(=O)OC.COc1ccc2cc(Br)ccc2c1Cl>>COC(=O)/C=C/c1ccc2c(Cl)c(OC)ccc2c1  
 403 C=CC(=O)OC.Cc1ccc(Cl)c(Br)c1>>COC(=O)/C=C/c1cc(C)ccc1Cl  
 404 C=COCCCC.O=C(Cl)c1ccc(Br)cc1>>CCCCO/C=C/C(=O)c1ccc(Br)cc1  
 405 C=CC(=O)OC.CCCc1ccc(N2CCc3cc(OC)ccc3C2(C)c2ccc(Br)cc2)cc1Cl>>CCCc1ccc(N2CCc3cc(OC)ccc3C2(C)c2ccc(/C=C/C(=O)OC)cc2)cc1Cl  
 406 C=CC[C@H](C)N(C)C(=O)OC(C)(C)C.O=C(CCC(F)(F)F)N1CC[C@H](Oc2cc(Br)cnc2Cl)C1>>C[C@H](C/C=C/c1cnc(Cl)c(O[C@H]2CCN(C(=O)CCC(F)(F)F)C2)c1)N(C)C(=O)OC(C)(C)C  
 407 C=Cc1ccc(-c2ccnc(N)n2)s1.Clc1cccc2sc(Br)nc12>>Nc1nccc(-c2ccc(/C=C/c3nc4c(Cl)cccc4s3)s2)n1  
 408 C=CC(C)(C)Nc1nc(Cl)ncc1Br>>C=C1c2cnc(Cl)nc2NC1(C)C
