# Supplementary material for: Heck reaction prediction using a transformer model based on a transfer learning strategy
Source: Royal Society of Chemistry journal article supplement (doi:10.1039/d0cc02657c), 2020-01-01
Supplement: d0cc02657c1.zip [file d0cc02657c1.zip]

**Table S5B. Intermolecular Heck reaction dataset divided into training dataset in our research for transformer-baseline and transformer-transfer learning models (Dataset for training in experiment 1)**

| Reaction ID | Reaction SMILES                                                                                                                                                                                                                                                                                                                    |
|-------------|------------------------------------------------------------------------------------------------------------------------------------------------------------------------------------------------------------------------------------------------------------------------------------------------------------------------------------|
| 1           | <chem>C=Cc1ccc(N(C)C)cc1.COc1cc(C=O)c(OC)cc1Br&gt;&gt;COc1cc(/C=C/c2ccc(N(C)C)cc2)c(OC)cc1C=O</chem>                                                                                                                                                                                                                               |
| 2           | <chem>C=CCCN1C(=O)c2ccccc2C1=O.FC(F)(F)c1cccc(CCl)c1&gt;&gt;C=C(CCN1C(=O)c2ccccc2C1=O)Cc1cccc(C(F)(F)F)c1</chem>                                                                                                                                                                                                                   |
| 3           | <chem>C=CC(=O)OCCCC.COC(=O)c1ccccc1I&gt;&gt;CCCCOC(=O)/C=C/c1ccccc1C(=O)OC</chem>                                                                                                                                                                                                                                                  |
| 4           | <chem>C=C[Si](C)(C)c1cccn1.CC(=O)c1ccc(/C=C/c2ccc(Br)cc2)cc1&gt;&gt;CC(=O)c1ccc(/C=C/c2ccc(/C=C/[Si](C)(C)c3cccn3)cc2)cc1</chem>                                                                                                                                                                                                   |
| 5           | <chem>C=CC(F)(F)F.Ic1ccccc1&gt;&gt;FC(F)(F)/C=C/c1ccccc1</chem>                                                                                                                                                                                                                                                                    |
| 6           | <chem>C=CC(=O)N(C(C)C)C(C)C.CC(C)(C)OC(=O)c1ccccc1Br&gt;&gt;CC(C)N(C(=O)/C=C/c1ccccc1C(=O)OC(C)(C)C(C)C</chem>                                                                                                                                                                                                                     |
| 7           | <chem>C=Cc1ccc(F)cc1.C[Si](C)(C)I&gt;&gt;C[Si](C)(C)/C=C/c1ccc(F)cc1</chem>                                                                                                                                                                                                                                                        |
| 8           | <chem>Br1ccsc1.C=CC(=O)OCC&gt;&gt;CCOC(=O)/C=C/c1ccsc1</chem>                                                                                                                                                                                                                                                                      |
| 9           | <chem>C=CC(C)=O.CC(C)(C)c1ccc(Br)cc1&gt;&gt;CC(=O)/C=C/c1ccc(C(C)(C)C)cc1</chem>                                                                                                                                                                                                                                                   |
| 10          | <chem>C=Cc1ccccc1.Fc1ccc(I)cc1&gt;&gt;Fc1ccc(/C=C/c2ccccc2)cc1</chem>                                                                                                                                                                                                                                                              |
| 11          | <chem>Br1cc2ccccc2c2ccccc12.C=CC(=O)OCCCC&gt;&gt;CCCCOC(=O)/C=C/c1cc2ccccc2c2ccccc12</chem>                                                                                                                                                                                                                                        |
| 12          | <chem>C=Cc1ccccc1.CCCCCCNC(=O)CCl&gt;&gt;CCCCCNC(=O)C/C=C/c1ccccc1</chem>                                                                                                                                                                                                                                                          |
| 13          | <chem>Br1ccc(SCCN(CCOC2CCCCO2)c2ccccc2)cc1.C=Cc1ccc([N+](=O)[O-])cc1&gt;&gt;O=[N+](O-)]c1ccc(/C=C/c2ccc(SCCN(CCOC3CCCCO3)c3ccccc3)cc2)cc1</chem>                                                                                                                                                                                   |
| 14          | <chem>C=Cc1ccncc1.CCCCCOC(=O)/C=C/c1ccccc1Cl&gt;&gt;CCCCOC(=O)/C=C/c1ccccc1/C=C/c1ccncc1</chem>                                                                                                                                                                                                                                    |
| 15          | <chem>*CNCCCOCCOCCOCCNC(=O)COc1ccc(C(Cc2cc(OC)cc(OC)c2)NC(=O)c2ccc(C=C)cc2)cc1.O=Cc1ccc(I)cc1&gt;&gt;*CNCCCOCCOCCOCCNC(=O)COc1ccc(C(Cc2cc(OC)cc(OC)c2)NC(=O)c2ccc(/C=C/c3ccc(C=O)cc3)cc2)cc1</chem>                                                                                                                                |
| 16          | <chem>*CNCCCOCCOCCOCCNC(=O)COc1ccc(C(Cc2cc(OC)cc(OC)c2)NC(=O)c2ccc(C=C)c2)cc1.Cc1ccc(I)cc1&gt;&gt;*CNCCCOCCOCCOCCNC(=O)COc1ccc(C(Cc2cc(OC)cc(OC)c2)NC(=O)c2ccc(/C=C/c3ccc(C)c(C)c3)c2)cc1</chem>                                                                                                                                   |
| 17          | <chem>C=C(F)C(=O)OC.COc1ccccc1I&gt;&gt;COC(=O)/C(F)=C/c1ccccc1OC)c1</chem>                                                                                                                                                                                                                                                         |
| 18          | <chem>C=Cc1ccc(C)cc1.O=c1c(Br)c(-c2ccccc2)oc2ccccc12&gt;&gt;Cc1ccc(/C=C/c2c(-</chem>                                                                                                                                                                                                                                               |
| 19          | <chem>C=CC(C)=O.O=Cc1ccc(Br)cc1&gt;&gt;CC(=O)/C=C/c1ccc(C=O)cc1</chem>                                                                                                                                                                                                                                                             |
| 20          | <chem>C=CC(=O)OC.Cn1cc(I)c2ccccc2c1=O&gt;&gt;COC(=O)/C=C/c1cn(C)c(=O)c2ccccc12</chem>                                                                                                                                                                                                                                              |
| 21          | <chem>C=C.Cc1c(Br)c(C(F)(F)F)nn1C&gt;&gt;C=Cc1c(C(F)(F)F)nn(C)c1C</chem>                                                                                                                                                                                                                                                           |
| 22          | <chem>C=CC(=O)OC.CC1(C)N=NC(c2ccccc2)=C1I&gt;&gt;COC(=O)/C=C/C1=C(c2ccccc2)N=NC1(C)C</chem>                                                                                                                                                                                                                                        |
| 23          | <chem>C=Cc1ccncc1.CCCCCCCCCCOc1ccc(I)cc1&gt;&gt;CCCCCCCCCOc1ccc(/C=C/c2ccncc2)cc1</chem>                                                                                                                                                                                                                                           |
| 24          | <chem>C=Cc1ccc(C#N)cc1.CCOC(=O)C(F)(F)Br&gt;&gt;CCOC(=O)C(F)(F)/C=C/c1ccc(C#N)cc1</chem>                                                                                                                                                                                                                                           |
| 25          | <chem>C=CC(=O)OCCCC.Fc1ccccc1Br&gt;&gt;CCCCOC(=O)/C=C/c1ccccc1F</chem>                                                                                                                                                                                                                                                             |
| 26          | <chem>C=CC(=O)OCC.Cc1ccccc1Br&gt;&gt;CCOC(=O)/C=C/c1ccccc1C</chem>                                                                                                                                                                                                                                                                 |
| 27          | <chem>C=CCN1C(=O)c2ccccc2C1=O.Ic1ccc2c(c1)OCCOCCOCCOCCO2&gt;&gt;O=C1c2ccccc2C(=O)N1/C=C/c1ccc2c(c1)OCCOCCOCCOCCO2</chem>                                                                                                                                                                                                           |
| 28          | <chem>C=Cc1cn(COCC[Si](C)(C)C)nc1-c1nc(C(F)(F)F)cn1COCC[Si](C)(C)C.O=Cc1cncc(Br)c1&gt;&gt;C[Si](C)(C)CCOCn1cc(/C=C/c2cncc(C=O)c2)c(-c2nc(C(F)(F)F)cn2COCC[Si](C)(C)C)n1</chem>                                                                                                                                                     |
| 29          | <chem>C=COCCCC.COc1cc(C(=O)Cl)cc(OC)c1OC&gt;&gt;CCCCO/C=C/C(=O)c1cc(OC)c(OC)c(OC)c1</chem>                                                                                                                                                                                                                                         |
| 30          | <chem>Br1enc2ccccc2c1.C=CCO[C@]1(C)C[C@H](C)C(=O)[C@H](C)[C@H]2N(N)C(=O)O[C@]2(C)[C@@H](CC)OC(=O)[C@H](C)C(=O)[C@H](C)[C@H]1O[C@@H]1O[C@H](C)C[C@H](N(C)C)[C@H]1O&gt;&gt;CC[C@H]1OC(=O)[C@H](C)C(=O)[C@H](C)[C@@H](O[C@@H]2O[C@H](C)C[C@H](N(C)C)[C@H]2O)[C@]1(C)(OC/C=C/c2cncc3ccccc3c2)C[C@@H](C)C(=O)[C@H](C)[C@H]2N(N)C</chem> |
| 31          | <chem>C=CC(N)=O.O=C(O)/C=C/c1ccccc1Br&gt;&gt;NC(=O)/C=C/c1ccccc1/C=C/C(=O)O)c1</chem>                                                                                                                                                                                                                                              |
| 32          | <chem>C=CCCC.COC(=O)CCn1c(=O)c2cc(I)ccc2n(Cc2en(C(=O)NC(C)(C)C)c3ccccc23)c1=O&gt;&gt;CCC/C=C/c1ccc2c(c1)c(=O)n(CCC(=O)OC)c(=O)n2Cc1en(C(=O)NC(C)(C)C)c2ccccc12</chem>                                                                                                                                                              |
| 33          | <chem>Br1cccn1.C=C/C=C/C(=O)N(CCCC)CCCC&gt;&gt;CCCCN(CCCC)C(=O)/C=C/C=C/c1cccn1</chem>                                                                                                                                                                                                                                             |
| 34          | <chem>C=CC(=O)OC.COC1OC(c2ccc(C)cc2)=C(I)c2nc3ccccc3cc21&gt;&gt;COC(=O)/C=C/C1=C(c2ccc(C)cc2)OC(C(OC)c2cc3ccccc3nc21</chem>                                                                                                                                                                                                        |
| 35          | <chem>C=CC(C)(O)CCC=C(C)C.Fc1ccccc1Br&gt;&gt;CC(C)=CCCC(C)(O)/C=C/c1ccccc1F</chem>                                                                                                                                                                                                                                                 |
| 36          | <chem>C=CC(=O)N(C)Cc1cn(C)c2ccccc12.O=C1Nc2ncc(Br)cc2C12CCC2&gt;&gt;CN(Cc1cn(C)c2ccccc12)C(=O)/C=C/c1enc2c(c1)C1(CCC1)C(=O)N2</chem>                                                                                                                                                                                               |
| 37          | <chem>C=CC(=O)Nc1ccc(OC)cc1.O=c1c(I)coc2cc(O)ccc12&gt;&gt;COc1ccc(NC(=O)/C=C/c2coc3cc(O)ccc3c2=O</chem>                                                                                                                                                                                                                            |

38 C=Cc1cccc1.N#CCc1ccc(Cl)cc1>>N#CCc1ccc(/C=C/c2cccc2)cc1  
C=CC[C@H]1C[C@H]([C@H](O)c2ccc(OC)c(OC)c2)CO[C@H]1c1ccc(OC)c(OC)c1.COc1ccc(Br)  
39 cc1OC>>COc1ccc(/C=C/C[C@H]2C[C@H]([C@H](O)c3ccc(OC)c(OC)c3)CO[C@H]2c2ccc(OC)c(  
OC)c2)cc1OC  
40 Br1cccc1.C=Cn1nnc(-c2ccc(C)cc2)n1>>Cc1ccc(-c2nnn(/C=C/c3cccc3)n2)cc1  
41 C=CC(=O)OC(C)(C)C.Cc1cc(C)cc(OS(=O)(=O)C(F)(F)F)c1>>Cc1cc(C)cc(/C=C/C(=O)OC(C)(C)C)c  
42 C=C(C)C(=O)OC.Cc1cc(-c2cccc2)n2nc(C)c(I)c2n1>>COC(=O)/C(C)=C\c1c(C)nn2c(-  
43 C=Cc1ccc(C=C)cc1.O=Cc1ccc(Br)cc1>>C=Cc1ccc(/C=C/c2ccc(C=O)cc2)cc1  
44 COC[C@H]/(N=C\c1cccc1)N1C=CCC[C@H]1C(C)C.Ic1cccc1>>COC[C@H]/(N=C\c1ccc  
cc1)N1C=C(c2cccc2)CC[C@H]1C(C)C  
45 C=CC(=O)OC(C)(C)C.COc1ccc(-c2sc3cc(OC)ccc3c2C(=O)c2ccc(Br)cc2)cc1>>COc1ccc(-  
c2sc3cc(OC)ccc3c2C(=O)c2ccc(/C=C/C(=O)OC(C)(C)C)cc2)cc1  
46 C=C.CC(=O)Nc1cc(C)ccc1Br>>C=Cc1ccc(C)cc1NC(C)=O  
47 C=Cc1ccc(OC)cc1.Cc1ccc(I)s1>>COc1ccc(/C=C/c2ccc(C)s2)cc1  
48 C=Cc1cccn1.FC(F)(F)c1ccc(Br)cc1>>FC(F)(F)c1ccc(/C=C/c2cccn2)cc1  
49 C=CCC(C)N(C)C(=O)OC(C)(C)C.Nc1ncc(Br)cn1>>CC(C/C=C/c1ncc(N)nc1)N(C)C(=O)OC(C)(C)C  
\*CNCCOCCOCCOCCNC(=O)COc1ccc(C(Cc2cc(OC)cc(OC)c2)NC(=O)c2cccc(C=C)c2)cc1.Ic1cc  
50 c2cccc2c1>>\*CNCCOCCOCCOCCNC(=O)COc1ccc(C(Cc2cc(OC)cc(OC)c2)NC(=O)c2cccc(/C=  
C/c3ccc4cccc4c3)c2)cc1  
51 C=CC(=O)OC.CC(=O)c1ccc(Cl)cc1>>COC(=O)/C=C/c1ccc(C(C)=O)cc1  
C=Cc1ccncc1.CCN1C[C@]2(OC(=O)c3cc(I)ccc3NC(C)=O)CC[C@H](OC)[C@@]34[C@@H]2C[C  
52 @H]([C@@H]13)[C@@]1(O)C[C@H](OC)[C@H]2C[C@@H]4[C@]1(O)[C@H]2OC>>CCN1C[C  
@]2(OC(=O)c3cc(/C=C/c4ccncc4)ccc3NC(C)=O)CC[C@H](OC)[C@@]34[C@@H]2C[C@H]([C@  
@H]13)[C@@]1(O)C[C@H](OC)[C@H]2C[C@@H]4[C@]1(O)[C@H]2OC  
53 C=C(C)C(=O)OC.Cc1cccc1Cl>>COC(=O)/C(C)=C/c1cccc1C  
C=CCC(=O)O.Cc1cc(OCc2cccc2)c([C@H]2S[C@H](COCc3cccc3)[C@H]  
54 )(OCc3cccc3)[C@H]2OCc2cccc2)cc1Cc1ccc(Br)cc1>>Cc1cc(OCc2cccc2)c([C@H]2S[C@H](C  
OCc3cccc3)[C@H](OCc3cccc3)[C@H](OCc3cccc3)[C@H]2OCc2cccc2)cc1Cc1ccc(/C=C/CC(  
55 C=CCNC(=O)c1cc(C)on1.O=[N+][([O-])c1cccc(I)c1>>Cc1cc(C(=O)NC/C=C/c2cccc([N+](=O)[O-]  
56 C=CS(=O)(=O)F.FS(F)(F)(F)c1ccc(I)cc1>>O=S(=O)(F)/C=C/c1ccc(S(F)(F)(F)F)cc1  
57 C=CC(=O)OC.O=C(Nc1cccc(Br)c1)C1CCCC1>>COC(=O)/C=C/c1cccc(NC(=O)C2CCCC2)c1  
58 C=CC(=O)OC(CC)CCCC.O=[N+][([O-])c1ccc(Cl)cc1>>CCCC(CC)OC(=O)/C=C/c1ccc([N+](=O)[O-]  
cc1  
59 C=CC#N.COc1cc(I)ccc1N>>COc1cc(/C=C/C#N)ccc1N  
60 C=Cc1cccc1C.Cc1ccc(OS(=O)(=O)C(F)(F)F)cc1>>C=C(c1ccc(C)cc1)c1cccc1C  
61 C=C.CC(C)Cc1ccc(Br)cc1>>C=Cc1ccc(CC(C)C)cc1  
62 C=Cc1ccc([N+](=O)[O-]  
cc1.Cc1cc(OCCO)c(C)cc1I>>Cc1cc(OCCO)c(C)cc1/C=C/c1ccc([N+](=O)[O-])cc1  
63 C=Cc1ccc(F)cc1.C[C@H](c1ccc(Br)cn1)[C@@](O)(Cn1cn1)c1ccc(F)cc1F>>C[C@H](c1ccc(/C=C/  
c2ccc(F)cc2)cn1)[C@@](O)(Cn1cn1)c1ccc(F)cc1F  
64 C=CC(=O)OCCCC.Cc1ccc2cccc2c1Br>>CCCCOC(=O)/C=C/c1c(C)ccc2cccc12  
65 C=CC(=O)OC.CCOC(=O)c1cc(Br)c2cc(Cc3ccc(F)cc3)cnc2c1OC>>CCOC(=O)c1cc(/C=C/C(=O)OC)c  
2cc(Cc3ccc(F)cc3)cnc2c1OC  
\*CNCCOCCOCCOCCNC(=O)COc1ccc(C(Cc2cc(OC)cc(OC)c2)NC(=O)c2cccc(C=C)c2)cc1.O=C(  
66 Oc1ccc([N+](=O)[O-]  
cc1)c1cccc(I)c1>>\*CNCCOCCOCCOCCNC(=O)COc1ccc(C(Cc2cc(OC)cc(OC)c2)NC(=O)c2cccc  
c(/C=C/c3cccc(C(=O)Oc4ccc([N+](=O)[O-])cc4)c3)c2)cc1  
67 C=CC#N.COc1ccc2c(c1)C(Br)=C(C=O)CC2>>COc1ccc2c(c1)C(/C=C/C#N)=C(C=O)CC2  
68 Br1ccoc1.C=Cc1cccc1NS(=O)(=O)c1ccc(C)cc1>>Cc1ccc(S(=O)(=O)Nc2cccc2/C=C/c2ccoc2)cc1  
69 C=CC(=O)OCC.CSc1nc(C)c(I)c(NC(C)C)n1>>CCOC(=O)/C=C/c1c(C)nc(SC)nc1NC(C)C  
70 C=CC(=O)N1N=Cc2cccc2C1CCCC.COc1cc(Cc2cnc(N)nc2N)cc(I)c1OC>>CCCCC1c2cccc2C=  
NN1C(=O)/C=C/c1cc(Cc2cnc(N)nc2N)cc(OC)c1OC  
71 C=C(NC(C)=O)C(=O)OC.Fc1cc(-c2cccc2)ccc1Br>>COC(=O)/C=C/c1ccc(-  
72 C=CC(=O)Nc1cccc1NC(=O)OC(C)(C)C.COC(=O)C(CCCCl)c1ccc(Br)cc1>>COC(=O)C(CCCCl)c1c  
cc(/C=C/C(=O)Nc2cccc2NC(=O)OC(C)(C)C)cc1  
73 C=CC#N.Cc1cc(I)ccn1>>Cc1cc(/C=C/C#N)ccn1  
74 C=CC(=O)OC(C)(C)C.O=C(CCc1cccc1)Nc1cc(Br)cc(I)c1>>CC(C)(C)OC(=O)/C=C/c1cc(Br)cc(NC(  
=O)CCc2cccc2)c1  
75 C=C[C@H](CO[Si](C)(C)C(C)C)NC(=O)OCc1cccc1.COc1ccc2cc(Br)ccc2c1>>COc1ccc2cc(/C  
=C/[C@H](CO[Si](C)(C)C(C)C)NC(=O)OCc3cccc3)ccc2c1  
76 C=CC(=O)OC.COc1ccc(Br)cc1Cl>>COCOc1ccc(/C=C/C(=O)OC)cc1Cl

[illegible]

117 C=CC(=O)OC.Cn1ccc(I)n1>>COC(=O)/C=C/c1ccn(C)n1  
118 C=CC(=O)OC.CC(C)(C)OC(=O)N1CCC2(CCN(c3ncnc3Oe3ccc(F)cc3Br)C2)C1>>COC(=O)/C=C/c1  
cc(F)ccc1Oe1enenc1N1CCC2(CCN(C(=O)OC(C)(C)C)C2)C1  
119 C=CC(=O)OC.Ie1cccs1>>COC(=O)/C=C/c1cccs1  
120 C=Ce1cccc1.O=Ce1ccoc2c(Br)cccc12>>O=Ce1ccoc2c(/C=C/c3cccc3)cccc12  
121 C=CCCCCCC.O=S(=O)(OC1=CCCCe2cccc21)C(F)(F)F>>C=C(CCCCCC)C1=CCCCe2cccc21  
122 C=CC(OCC)OCC.N#Cc1ccc(Br)cc1>>CCOC(/C=C/c1ccc(C#N)cc1)OCC  
123 C=COCCCC.COC(=O)c1cccc1Br>>C=C(OCCCC)c1cccc1C(=O)OC  
124 C=CC(N)=O.O=Cc1ccc(I)cc1>>NC(=O)/C=C/c1ccc(C=O)cc1  
125 C=CC[C@H](NC(=O)OCc1cccc1)C(=O)OC(C)(C)C.COc1ccc(I)cc1>>COc1ccc(/C=C/C[C@H](NC(=O)OCc2cccc2)C(=O)OC(C)(C)C)cc1  
126 C=CC(=O)OC.Clc1cccc(Br)c1>>COC(=O)/C=C/c1cccc(Cl)c1  
127 C=COCC.O=C(Cl)c1cccc1>>CCO/C=C/C(=O)c1cccc1  
128 C=CCCC.CCN(CC)C(=O)Oe1c(Br)cccc1OC>>CCC/C=C/c1cccc(OC)c1OC(=O)N(CC)CC  
129 C=Ce1ccc(/C=C/c2ccc(N(c3ccc(OCCCCC)cc3)c3ccc(OCCCCC)cc3)cc2)cc1.O=Ce1ccc(Br)cc1>>C  
CCCCCOe1ccc(N(c2ccc(/C=C/c3ccc(/C=C/c4ccc(C=O)cc4)cc3)cc2)c2ccc(OCCCCC)cc2)cc1  
130 C=Ce1cccc1.CCCCOC(=O)/C=C/c1ccc(Br)cc1Cl>>CCCCOC(=O)/C=C/c1ccc(/C=C/c2cccc2)cc1Cl  
131 C=CCCc1cccc1.COC(=O)c1ccc2cc(Br)ccc2c1>>COC(=O)c1ccc2cc(/C=C/CCc3cccc3)ccc2c1  
132 C=CCN(C(=O)OC(C)(C)C)C(=O)OC(C)(C)C.O=C(c1cccc1)c1ccc(Cl)cc1>>CC(C)(C)OC(=O)N(C/C  
=C/c1ccc(C(=O)c2cccc2)cc1)C(=O)OC(C)(C)C  
133 C=CC(=O)OCC.CCc1nc2c(N)nc3cc(Br)ccc3c2n1CC1CCOCC1>>CCOC(=O)/C=C/c1ccc2c(c1)nc(N)c  
1nc(CC)n(CC3CCOCC3)c12  
134 C=Ce1ccc(N(c2cccc2)c2cccc2)cc1.CCCCCCN1c2ccc(Br)cc2Sc2cc(C=O)ccc21>>CCCCCN1c2ccc  
(C=O)cc2Sc2cc(/C=C/c3ccc(N(c4cccc4)c4cccc4)cc3)ccc21  
135 Ce1ccc(I)cc1.NC(=O)/C=C/c1cccc1>>Ce1ccc(/C=C/C(N)=O)c2cccc2)cc1  
136 C=Cc1c(F)c(F)c(F)c(F)c1F.Ic1cc2cccc2s1>>Fc1c(F)c(F)c(/C=C/c2cc3cccc3s2)c(F)c1F  
137 C=CCCN(C)C(=O)c1cccc1.Ne1cccc(I)c1>>CN(CC/C=C/c1cccc(N)c1)C(=O)c1cccc1  
138 C=CCNC(=O)c1ccc(F)cc1NC(=O)c1ccc(OC)cc1.Ic1cccc1>>COc1ccc(C(=O)Nc2cc(F)ccc2C(=O)NC/  
C=C/c2cccc2)cc1  
139 C=CC(=O)OCCCC.CC(C)c1cc(C(C)C)c(Br)c(C(C)C)c1>>CCCCOC(=O)/C=C/c1c(C(C)C)cc(C(C)C)c  
c1C(C)C  
140 C=Ce1cccc(O)c1.Oe1cc(O)cc(I)c1>>Oe1cccc(/C=C/c2cc(O)cc(O)c2)c1  
141 C=C.O=C(CC(=O)C(F)(F)F)c1ccc(Br)c2cccc12>>C=Ce1ccc(C(=O)CC(=O)C(F)(F)F)c2cccc12  
142 C=CC(=O)OC(C)(C)C.CCCCc1ccc(C=O)c(Br)n1>>CCCCc1ccc(C=O)c(/C=C/C(=O)OC(C)(C)C)n1  
143 C=Ce1ccc(C)cc1.Ce1ccc(I)cc1>>Ce1ccc(/C=C/c2ccc(C)cc2)cc1  
144 C=CC(=O)OC(C)(C)C.CC(OCCCC(=O)OC(C)(C)C)c1cc2c(cc1Br)OCO2>>CC(OCCCC(=O)OC(C)(C)C)  
c1cc2c(cc1/C=C/C(=O)OC(C)(C)C)OCO2  
145 C=CC(=O)OCC.Cn1nnc2c(Cl)c(Br)ccc21>>CCOC(=O)/C=C/c1ccc2c(nnn2C)c1Cl  
146 C=CCC(=O)OCC(C)C.COc1c(Br)cc(OC)c2c(OC)cccc12>>COc1c(/C=C/CC(=O)OCC(C)C)cc(OC)c2c  
(OC)cccc12  
147 C/C(I)=C[C@@H](C)CO[Si](C)(C)C(C)C.C=CC[C@@H](C)CO>>CC(/C=C/C[C@@H](C)CO)=  
C[C@@H](C)CO[Si](C)(C)C(C)C  
148 C=CC(C)=O.COc1ccc2cc(Br)ccc2c1>>COc1ccc2cc(/C=C/C(C)=O)ccc2c1  
149 Bre1ccenc1.C=Ce1cccc(OC)c1>>COc1cccc(/C=C/c2ccenc2)c1  
150 C=C(NC(C)=O)C(=O)OC.COc1cc(C)c(I)c(C)c1>>COC(=O)/C=C/c1c(C)cc(OC)cc1C)NC(C)=O  
151 C=CC#N.Cc1nc(Br)c(-c2cccc2)o1>>Cc1nc(/C=C/C#N)c(-c2cccc2)o1  
152 C=CC(=O)NC(C)c1cccc1.CCc1ccc(I)cc1>>CCc1ccc(/C=C/C(=O)NC(C)c2cccc2)cc1  
153 C=CC(C)=O.CCn1cc(I)c(=O)c2ccc(C)nc21>>CCn1cc(/C=C/C(C)=O)c(=O)c2ccc(C)nc21  
154 C=COCCCC.O=Cc1cc(Br)c2cc(F)ccc2[nH]1>>CCCCO/C=C/c1cc(=O)[nH]c2ccc(F)cc12  
155 Bre1ccenc1.C=CS(=O)(=O)c1cccc1>>O=S(=O)(/C=C/c1ccenc1)c1cccc1  
C=C[C@H]1O[C@@H]2OC(C)(C)O[C@@H]2[C@H]1O.O=Cc1cc(-  
156 c2cccc2)oc2ccc(Br)cc12>>CC1(C)O[C@H]2O[C@H](/C=C/c3ccc4oc(-  
c5cccc5)cc(=O)c4c3)[C@H](O)[C@H]2O1  
157 C=Ce1cccc1.Cc1ccc2c(-c3ccc(F)cc3)c(Br)c(=O)oc2c1>>Cc1ccc2c(-  
c3ccc(F)cc3)c(/C=C/c3cccc3)c(=O)oc2c1  
158 C=CC(=O)OCC.COc1ncc(Br)c(N)c1I>>CCOC(=O)/C=C/c1c(OC)ncc(Br)c1N  
159 C=CC(=O)OC.CC(=O)Oe1ccc(Br)c(OC(C)=O)c1>>COC(=O)/C=C/c1ccc(OC(C)=O)cc1OC(C)=O  
160 C=CS(=O)(=O)c1cccc1.Ic1cccc1>>O=S(=O)(/C=C/c1cccc1)c1cccc1  
161 C=Ce1ccnc1.CC(C)(C)OC(=O)NCCCOc1ncc(Br)c1>>CC(C)(C)OC(=O)NCCCOc1ncc(/C=C/c2ccn  
cc2)c1

162 C=CS(=O)c1cccc1.N#Cc1ccc(Br)cc1>>N#Cc1ccc(/C=C/S(=O)c2cccc2)cc1  
C=Cc1ccc(C)nc1.CCN1C[C@]2(OC(=O)c3cc(I)ccc3NC(C)=O)CC[C@H](OC)[C@]34[C@@H]1[C@  
163 H](C[C@H]23)[C@@]1(O)C[C@H](OC)[C@H]2C[C@@H]4[C@]1(O)[C@H]2OC>>CCN1C[C@]2  
(OC(=O)c3cc(/C=C/c4ccc(C)nc4)ccc3NC(C)=O)CC[C@H](OC)[C@]34[C@@H]1[C@H](C[C@H]23  
)I[C@@]1(O)C[C@H](OC)I[C@H]2C[C@@H]4[C@]1(O)I[C@H]2OC  
164 Br1ccc2c(c1)OCO2.C=CC(=O)C(C)CC(=O)OC>>COC(=O)CC(C)C(=O)/C=C/c1ccc2c(c1)OCO2  
165 C=CC(=O)OC.Cc1ccc(Cl)cc1>>COC(=O)/C=C/c1ccc(C)cc1  
166 C=COCC.COc1ccc(I)cc1>>C=C(OCC)c1ccc(OC)cc1  
167 C=CC(=O)N(C)C.COc1cccc1I>>COc1cccc1/C=C/C(=O)N(C)C  
168 COc1ccc(I)cc1.Cc1ccc(S(=O)(=O)/C=C2/C(C)(C)C2(F)F)cc1>>COc1ccc(/C(=C2/C(C)(C)C2(F)F)S(=O)(=O)c2ccc(C)cc2)cc1  
C=C(NC(=O)OCc1cccc1)C(=O)OC.CC(C)(C)[Si](C)(C)OC[C@]1CN(Cc2cccc2)c2cc(OCc3cccc  
169 c3)cc(I)c21>>COC(=O)/C(=C/c1cc(OCc2cccc2)cc2c1[C@H](CO[Si](C)(C)C(C)(C)CN2Cc1cccc  
1)NC(=O)OCc1cccc1  
170 C=Cc1cccc1OC.Cc1ccc(OS(=O)(=O)C(F)(F)F)cc1>>C=C(c1ccc(C)cc1)c1cccc1OC  
C=C1C(=O)O[C@H]2[C@H]1CCC(=C)[C@@H]1C[C@H](OC(C)=O)C(=C)[C@H]21.CC(=O)Nc1c  
171 cc(I)cc1C(F)(F)F>>C=C1CC[C@H]2/C(=C/c3ccc(NC(C)=O)c(C(F)(F)F)c3)C(=O)O[C@@H]2[C@H]  
2C(=C)I[C@@H](OC(C)=O)C[C@@H]12  
172 C=COCCCC.CC(=O)Nc1ccc(Cl)cc1>>C=C(OCCCC)c1ccc(NC(C)=O)cc1  
173 C=Cc1ccc(OC)cc1.Nc1ccc(Br)c1>>COc1ccc(/C=C/c2cccc(N)c2)cc1  
174 C=Cc1ccc2cccc2c1.CCN1c2ncc(Br)cc2C(=O)N(C)c2ccc(F)nc21>>CCN1c2ncc(/C=C/c3ccc4cccc4c  
3)cc2C(=O)N(C)c2ccc(F)nc21  
175 C=Cc1ccncc1.Cc1ccc(Br)cc1>>Cc1ccc(/C=C/c2ccncc2)cc1  
176 C=CO[C@]1CCCC1C.O=S(=O)(OC1=CCCc2cccc21)C(F)(F)F>>CN1CCC[C@H]1CO/C=C/C  
1=CCCc2cccc21  
177 C=CCN(C(=O)C(C)C)[C@H](C)c1cc(F)cc(F)c1.O=C1Nc2ncccc2[C@]12Cc1ccc(Br)cc1C2>>CC(C)C  
(=O)N(C/C=C/c1ccc2c(c1)C[C@@]1(C2)C(=O)Nc2ncccc21)[C@H](C)c1cc(F)cc(F)c1  
178 C=Cc1cc(OC)c(O)c(OC)c1.COc1cc(I)cc(OC)c1>>COc1cc(/C=C/c2cc(OC)c(O)c(OC)c2)cc(OC)c1  
179 C=C[Si](CC)(CC)CC.FC(F)(F)c1ccc(Br)cc1>>CC[Si](/C=C/c1ccc(C(F)(F)F)cc1)(CC)CC  
180 Br1ccc2[nH]ccc2c1.C=CC(=O)OCCCC>>CCCCOC(=O)/C=C/c1ccc2[nH]ccc2c1  
181 C=CCOC(C)(C)CCCC(C)C=C.COc1cc(I)ccc1O>>C=CC(C)CCCC(C)(C)OC/C=C/c1ccc(O)c(OC)c1  
182 C=Cc1ccc(OC)cc1.N#Cc1ccc(/C=C/c2cc(Br)cc(/C=C/c3ccc(C#N)cc3)c2)cc1>>COc1ccc(/C=C/c2cc(/  
C=C/c3ccc(C#N)cc3)cc(/C=C/c3ccc(C#N)cc3)c2)cc1  
183 C=CC(=O)OC(C)C.COc1cc(CNc2ccc(Br)cn2)cc(OC)c1OC>>COc1cc(CNc2ccc(/C=C/C(=O)OC(C  
)C(C)cn2)cc(OC)c1OC  
184 C=CC(=O)OC.Fc1cc(-n2cnmn2)c(I)cc1Cl>>COC(=O)/C=C/c1cc(Cl)c(F)cc1-n1cnmn1  
185 C=CCC(C)(C)C.CC(C)(C)c1ccc(OS(=O)(=O)C(F)(F)F)cc1>>C=C(CC(C)(C)C)c1ccc(C(C)(C)C)cc1  
186 C=CC(=O)OCC.COnc1c(=O)c2cccc2c2cc(Br)ccc21>>CCOC(=O)/C=C/c1ccc2c(c1)c1cccc1c(=O)n2  
187 C=CC(=O)OC(C)(C)C.CC(=O)Cc1cccc1Br>>CC(=O)Cc1cccc1/C=C/C(=O)OC(C)(C)C  
188 C=CC(=O)OCC.COc1ccc(I)c([N+](=O)[O-])c1>>CCOC(=O)/C=C/c1ccc(OC)cc1[N+](=O)[O-]  
189 Br1ccc2ccc3cccc4ccc1c2c34.C=Cc1ccc(OC(C)=O)cc1>>CC(=O)Oc1ccc(/C=C/c2ccc3ccc4cccc5ccc2  
c3c45)cc1  
190 C=Cc1ccc(OC)c(OC)c1.COc1ccc(CN2C(=O)C(=C(c3ccc(O)cc3)c3ccc(O)cc3)c3cc(Br)ccc32)cc1>>C  
Oc1ccc(CN2C(=O)C(=C(c3ccc(O)cc3)c3ccc(O)cc3)c3cc(/C=C/c4ccc(OC)c(OC)c4)ccc32)cc1  
191 C=CC(=O)OC.Ic1cccc1C#CCOC1CCCCO1>>COC(=O)/C=C/c1cccc1C#CCOC1CCCCO1  
192 C=CC(=O)OCC.O=c1cc(I)cn1Cc1cccc1>>CCOC(=O)/C=C/c1cn1(Cc2cccc2)c(=O)c1  
193 Br1ccc(I)cc1.C=Cc1ccc(Cl)cc1>>Clc1ccc(/C=C/c2ccc(Br)cc2)cc1  
194 C=CC(=O)OC.COc1ccc2cccc2c1I>>COC(=O)/C=C/c1c(OC)ccc2cccc12  
195 C=Cc1cccc([N+](=O)[O-])c1.Ic1cccc1>>O=[N+](O-)]c1ccc(/C=C/c2cccc2)c1  
196 C=CC#N.COc1ccc(OC)c(Br)c1>>COc1ccc(OC)c(/C=C/C#N)c1  
197 C=CC(=O)OC.COC(=O)c1cccc1Br>>COC(=O)/C=C/c1cccc1C(=O)OC  
198 C=CC(=O)OCC.Clc1cnnc(C2CC2)c1>>CCOC(=O)/C=C/c1cnnc(C2CC2)c1  
C=C[C@H]1O[C@@H](Sc2cccc2)[C@H](OCc2cccc2)[C@@H](OCc2cccc2)[C@@H]1OCc1ccc(  
OC)cc1.O=c1cc(-  
199 c2cccc2)oc2cc(Br)ccc12>>COc1ccc(CO[C@H]2[C@H](OCc3cccc3)[C@@H](OCc3cccc3)[C@H]  
(Sc3cccc3)O[C@@H]2/C=C/c2ccc3c(=O)cc(-c4cccc4)oc3c2)cc1  
200 C=CC(=O)OCC.O=C1OC2(CCCCC2)OC=C1I>>CCOC(=O)/C=C/C1=CO2(CCCCC2)OC1=O  
201 C=CCN(C(=O)OC(C)(C)C)C(=O)OC(C)(C)C.Clc1cccc1>>CC(C)(C)OC(=O)N(C/C=C/c1cccc1)C(=  
O)OC(C)(C)C  
202 Br1cccc1.C=CCOc1ccc(C)c1>>Cc1ccc(OC/C=C/c2cccc2)c1

- 203 C=CC(=O)N(CC)CC.O=C1C=2c([nH]c3c(I)cccc23)-  
204 c2cccnc2N1>>CCN(CC)C(=O)/C=C/c1cccc2c3c([nH]c12)-c1cccnc1NC(=O)C3  
205 Br1ccc2c(c1)OCO2.C=Cc1ccc(C)cc1>>Cc1ccc(/C=C/c2ccc3c(c2)OCO3)cc1  
206 C=CC(=O)OCC.Nc1ccc(Br)nc1I>>CCOC(=O)/C=C/c1nc(Br)ccc1N  
207 C=Cc1cc(C(C)(C)C)c(OC(C)=O)c(C(C)(C)C)c1.CC1(C)c2ccc(I)cc2C(C)(C)N1[O]>>CC(=O)Oc1c(C(  
208 C)(C)C)cc(/C=C/c2ccc3c(c2)C(C)(C)N([O])C3(C)C)cc1C(C)(C)C  
209 C=Cc1cccc1O.COc1cccc(Br)c1>>COc1cccc(/C=C/c2cccc2O)c1  
210 C=CC(=O)OC.IC1=C(c2cccc2)[Se]CC1>>COC(=O)/C=C/C1=C(c2cccc2)[Se]CC1  
211 C=CC(=O)OCC.COc1ccc(Br)c(C=O)c1>>CCOC(=O)/C=C/c1ccc(OC)cc1C=O  
212 Br1cccc1NCc1cccc1.C=CC(=O)OC>>COC(=O)/C=C/c1cccc1NCc1cccc1  
213 C=C(F)[Si](C)(c1cccc1)c1cccc1.O=[N+][([O-])c1ccc(I)cc1>>C[Si](/C(F)=C/c1ccc([N+](=O)[O-]  
214 ]cc1)(c1cccc1)c1cccc1  
215 C=CC(N)=O.O=[N+][([O-])c1ccc(I)cc1>>NC(=O)/C=C/c1ccc([N+](=O)[O-])cc1  
216 C=Cc1nccc(C#N)c1Nc1ccc2[nH]ccc2c1C.COc1c(Br)cccc1CN1CCN(C)CC1>>COc1c(/C=C/c2nccc(C  
217 #N)c2Nc2ccc3[nH]ccc3c2C)cccc1CN1CCN(C)CC1  
218 C=CCc1cccc1.CC(C)(C)c1ccc(OS(=O)(=O)C(F)(F)F)cc1>>C=C(Cc1cccc1)c1ccc(C(C)(C)C)cc1  
219 Br1cnc2cccc2c1.C=CCO[C@]1(C)C[C@]H(C)C(=O)[C@H](C)[C@H]2NC(=O)O[C@]2(C)[C@  
220 @H](CC)OC(=O)[C@H](C)[C@]H(O[C@H]2C[C@]H(C)(OC)[C@]H(OC(C)=O)[C@H](C)O2)  
221 [C@H](C)[C@H]1O[C@]H1O[C@H](C)C[C@H](N(C)C)[C@H]1OC(C)=O>>CC[C@H]1OC(=O)  
222 [C@H](C)[C@]H(O[C@H]2C[C@]H(C)(OC)[C@]H(OC(C)=O)[C@H](C)O2)[C@H](C)[C@]  
223 H(O[C@]H2O[C@H](C)C[C@H](N(C)C)[C@H]2OC(C)=O)[C@](C)(OC/C=C/c2cnc3cccc3c2)C  
224 [C@]H1(C)C(=O)[C@H](C)[C@]H1?NC(=O)O[C@]11?C  
225 C=CC(=O)OCC.CCOC(=O)c1cccc1I>>CCOC(=O)/C=C/c1cccc1C(=O)OCC  
226 C=Cc1cccc1.O=c1ccoc2cc(OCc3cccc3)c(Br)cc12>>O=c1ccoc2cc(OCc3cccc3)c(/C=C/c3cccc3)cc  
227 C=Cc1ccc(C(C#N)C#N)cc1.Cc1nccc(C)c1-c1c(C)cc(I)cc1C>>Cc1nccc(C)c1-  
228 c1c(C)cc(/C=C/c2ccc(C(C#N)C#N)cc2)cc1C  
229 C=CCC(=O)OCCCC.Ic1cccc1>>CCCCOC(=O)C/C=C/c1cccc1  
230 C=CCNC(=O)OC(C)(C)C.Cc1cccc(Cl)c1>>C=C(CNC(=O)OC(C)(C)C)c1cccc(C)c1  
231 C=Cc1ccc(F)cc1.O=Cc1cn(C2CCCCO2)nc1I>>O=Cc1cn(C2CCCCO2)nc1/C=C/c1ccc(F)cc1  
232 C=CC(=O)OCC.Cc1cn(Cc2ccc(I)cc2)c(=O)[nH]c1=O>>CCOC(=O)/C=C/c1ccc(Cn2cc(C)c(=O)[nH]c  
233 2=O)cc1  
234 C=CCCCCCC.COc1cccc(OS(=O)(=O)C(F)(F)F)c1>>C=C(CCCCCC)c1cccc(OC)c1  
235 C=CC(=O)OC1CCCCC1.Ic1cccc2cccc12>>O=C(/C=C/c1cccc2cccc12)OC1CCCCC1  
236 C=Cc1ccc(C)cc1.CCOC(=O)C(C)(C)Br>>CCOC(=O)C(C)(C)/C=C/c1ccc(C)cc1  
237 C=CC(N)=O.Ic1ccc2c(c1)OCO2>>NC(=O)/C=C/c1ccc2c(c1)OCO2  
238 C=C1C(=O)O[C@]H2C[C@]3(C)CCCC(=C)[C@]H3C[C@H]12.Ic1ccnc1>>C=C1CCC[C@]  
239 2(C)C[C@H]3OC(=O)/C=C/c4ccnc4)[C@H]3C[C@]H12  
240 Br1cnc2cccc2c1.C=CC(=O)OC(C)(C)C>>CC(C)(C)OC(=O)/C=C/c1cnc2cccc2c1  
241 C=C[C@]H1C[C@H](CC(=O)OCC)OC(C)(C)O1.COc1nccc(-n2nc(C(C)C)c(Br)c2-  
242 c2cccc(C(F)(F)F)c2)n1>>CCOC(=O)C[C@H]1C[C@]H(/C=C/c2c(C(C)C)nn(-c3ccnc(OC)n3)c2-  
243 c2cccc(C(F)(F)F)c2)OC(C)(C)O1  
244 C=CC(=O)N1N=Cc2cccc2C1c1cc2cccc2s1.COc1cc(Cc2cnc(N)nc2N)cc(I)c1OC>>COc1cc(Cc2cnc(  
245 N)nc2N)cc(/C=C/C(=O)N2N=Cc3cccc3C2c2cc3cccc3s2)c1OC  
246 C=CC(=O)OCC.Clc1ccc(Br)cn1>>CCOC(=O)/C=C/c1ccc(Cl)nc1  
247 C=Cc1ccc(C)cc1.Cn1nccc1-c1cccc(Br)c1>>Cc1ccc(/C=C/c2cccc(-c3nnc3C)c2)cc1  
248 C=CC(=O)OCc1cccc1.O=C(O)c1ccc(Br)c2cccc12>>O=C(/C=C/c1ccc(C(=O)O)c2cccc12)OCc1ccc  
249 Br1ccc(NCCCc2cccc2)nc1.C=CC(=O)OC(C)(C)C>>CC(C)(C)OC(=O)/C=C/c1ccc(NCCCc2cccc2)  
250 C=C[C@H]1O[C@H](OC)[C@H](OCc2cccc2)[C@]H(OCc2cccc2)[C@]H1OCc1ccc2cccc2c1  
251 .O=c1ccoc2ccc(Br)cc12>>CO[C@H]1O[C@H](/C=C/c2ccc3occc(=O)c3c2)[C@]H(OCc2ccc3cccc  
252 3c2)[C@H](OCc2cccc2)[C@H]1OCc1cccc1  
253 C=Cc1cccc1.CCCCCCCCCCCCCI>>CCCCCCCCCCCCC/C=C/c1cccc1  
254 Br1cccc2[nH]ccc12.C=COCCCC>>C=C(OCCCC)c1cccc2[nH]ccc12  
255 C=CC(=O)OC.CSe1cccc1I>>COC(=O)/C=C/c1cccc1SC  
256 C=CCC(C)O.FC(F)(F)c1nccc(Cl)c1>>CC(O)C/C=C/c1nccc(C(F)(F)F)c1  
257 C=CC(=O)OC.OCc1cccc1Br>>COC(=O)/C=C/c1cccc1CO  
258 C=CC(=O)CCCCC.O=C(c1cccc1)c1ccc(Br)cc1>>CCCCCC(=O)/C=C/c1ccc(C(=O)c2cccc2)cc1  
259 CCC1(C)/C=C/C(S(=O)(=O)c2ccc(C)cc2)C1(F)F.COc1ccc(I)cc1>>CCC1(C)/C=C(/c2ccc(OC)cc2)S(=  
260 O)(=O)c2ccc(C)cc2)C1(F)F  
261 C=Cc1cccc1.IC1CCCCC1>>C=C(C1CCCCC1)c1cccc1  
262 C=CC(=O)OC.Cc1ccc(Br)c([N+](=O)[O-])c1>>COC(=O)/C=C/c1ccc(C)cc1[N+](=O)[O-]

C=CC(=O)OCCCC.CCOC(=O)Nc1ccc(C)cc1C1=C(I)CCN1S(=O)(=O)c1cccc(C)cc1>>CCCCOC(=O)/  
C=C/C1=C(c2cc(C)ccc2NC(=O)OCC)N(S(=O)=O)c2cccc(C)cc2)CC1  
C=CC(=O)Nc1cccc2cccnc12.Cc1cc(C)cc(I)c1>>Cc1cc(C)cc(/C=C\C(=O)Nc2cccc3cccnc23)c1  
C=CCc1ccc(OCCNC(=O)OC(C)(C)C)c(OC)c1.O=C(O)/C=C/c1cccc1Br>>COc1cc(C/C=C/c2cccc2/  
C=C/C(=O)O)ccc1OCCNC(=O)OC(C)(C)C  
C=CCNS(=O)(=O)c1cc(C(F)(F)F)cc(C(F)(F)F)c1.COc1ccc(Br)cc1>>COc1ccc(/C=C/CNS(=O)(=O)c2  
cc(C(F)(F)F)cc(C(F)(F)F)c2)cc1  
C=CCN(C(=O)OC(C)(C)C)C(=O)OC(C)(C)C.O=C1CCCc2ccc(Br)cc21>>CC(C)(C)OC(=O)N(C/C=C/  
c1ccc2c(c1)C(=O)CCC2)C(=O)OC(C)(C)C  
C=CC(=O)OC(C)(C)C.Oc1ccc(C(=C2CCCC2)c2ccc(Br)cc2F)cc1>>CC(C)(C)OC(=O)/C=C/c1ccc(C  
=C2CCCC2)c2ccc(O)cc2)c(F)c1  
C=Cc1cccc1.COc1ccc(-c2nc3cccc3c3cc4cc(Br)ccn4c23)cc1>>COc1ccc(-  
c2nc3cccc3c3cc4cc(/C=C/c5cccc5)ccn4c23)cc1  
C=CC(=O)N1CCOCC1.CCCCC(C)(Br)CC>>CCCCC(C)(/C=C/C(=O)N1CCOCC1)CC  
C=CC(=O)OC.CCCCCCCCC(=O)NCc1cc(OC)c(OCOCCOC)cc1I>>CCCCCCCCC(=O)NCc1cc(OC)c  
(OCOCCOC)cc1/C=C/C(=O)OC  
C=Cc1ccc(C(=O)N[C@@H](CCSC)C(=O)OC)c(-  
c2cccc2C)c1.OC(c1ccncc1Br)C12CC3CC(CC(C3)C1)C2>>COC(=O)[C@H](CCSC)NC(=O)c1ccc(/  
C=C/c2cnccc2C(O)C23CC4CC(CC(C4)C2)C3)cc1-c1cccc1C  
C=Cc1cccc1.Nc1cc(Cl)ccc1I>>Nc1cc(Cl)ccc1/C=C/c1cccc1  
C=Cc1cccc(O)c1.COc1cc(I)cc(OC)c1>>COc1cc(/C=C/c2cccc(O)c2)cc(OC)c1  
C=CC(=O)N(Cc1ccc2nc(NC(=O)C(C)(C)C)[nH]c(=O)c2n1)c1ccc(C(=O)N[C@@H](CCC(=O)OCC)C  
(=O)OCC)cc1.CC(=O)OC[C@H]1O[C@@H](n2cnc(C(N)=O)c2I)[C@@H]2OC(C)(C)O[C@H]12>>  
CCOC(=O)CC[C@H](NC(=O)c1ccc(N(Cc2ccc3nc(NC(=O)C(C)(C)C)[nH]c(=O)c3n2)C(=O)/C=C/c2c  
(C(N)=O)ncc2[C@@H]2O[C@H](COC(C)=O)[C@H]3OC(C)(C)O[C@H]32)cc1)C(=O)OCC  
C=C(NC(=O)OC(C)(C)C)C(=O)OC.Cc1cc(N)ccc1I>>COC(=O)/C=C/c1ccc(N)cc1C)NC(=O)OC(C)  
C=Cc1ccc(OC(C)=O)cc1.FC(F)(F)C(Br)CCc1cccc1>>CC(=O)Oc1ccc(/C=C/C(Cc2cccc2)C(F)(F)F  
C=Cc1ccc(OC2CCCCO2)cc1.O=[N+][[O-]]c1ccc(I)cc1CO>>O=[N+][[O-]  
])c1ccc(/C=C/c2ccc(OC3CCCCO3)cc2)cc1CO  
Br1enc2c(c1)CCCCN2.C=CC(=O)N(C)Cc1oc2cccc2c1C>>Cc1c(CN(C)C(=O)/C=C/c2enc3c(c2)CC  
CCN3)oc2cccc12  
C=CC(=O)OC1CCCCC1.CC(=O)c1ccc(I)cc1>>CC(=O)c1ccc(/C=C/C(=O)OC2CCCCC2)cc1  
C=C(C)C(=O)OC.COC(=O)c1cccc(I)c1>>COC(=O)/C=C/c1cccc(C(=O)OC)c1)OC  
\*CNCCOCCOCCOCCNC(=O)COc1ccc(C(Cc2cc(OC)cc(OC)c2)NC(=O)c2ccc(C=C)cc2)cc1.Oc1c  
cc(I)cc1>>\*CNCCOCCOCCOCCNC(=O)COc1ccc(C(Cc2cc(OC)cc(OC)c2)NC(=O)c2ccc(/C=C/c3  
ccc(O)cc3)cc2)cc1  
C=CC#N.Nc1cc(Br)cc(C(F)(F)F)c1>>N#C/C=C/c1cc(N)cc(C(F)(F)F)c1  
Br1cccc1.C=CCO>>C=C(CO)c1cccc1  
C=CC(=O)OC.CC1(C)CC(=C(c2ccc(Br)cc2)c2ccc3c(cnn3C3CCCCO3)c2)CC(C)(C)O1>>COC(=O)/C  
=C/c1ccc(C(=C2CC(C)(C)OC(C)(C)C2)c2ccc3c(cnn3C3CCCCO3)c2)cc1  
Br1ccncc1.C=CC(=O)OCC>>CCOC(=O)/C=C\c1ccncc1  
C=CC(=O)Nc1cccc1.COc1ccc(-c2oc3cc(OC)ccc3c(=O)c2I)cc1>>COc1ccc(-  
c2oc3cc(OC)ccc3c(=O)c2/C=C/C(=O)Nc2cccc2)cc1  
C=CC(=O)OC(C)(C)C.Ic1ccc(OCc2cccc2)cn1>>CC(C)(C)OC(=O)/C=C\c1ccc(OCc2cccc2)cn1  
C=CC(=O)OC(C)(C)C.FC(F)(F)Oc1ccc(CNc2ccc(Br)cc2)cc1>>CC(C)(C)OC(=O)/C=C/c1ccc(NC2ccc  
c(OC(F)(F)F)cc2)cc1  
C=CC(C)=O.N#Cc1ccc(Br)cc1>>CC(=O)/C=C/c1ccc(C#N)cc1  
C=Cc1ccc(OC)cc1.COc1cc(Br)cc(OC)c1OC>>COc1ccc(/C=C/c2cc(OC)c(OC)c(OC)c2)cc1  
C=CC(F)(F)C(F)(F)C(F)(F)C(F)(F)C(F)(F)C(F)(F)C(F)(F)C(F)(F)C(F)(F)C(F)(F)C(F)(F)F.COc1cncc(Br)c1>>COc1cncc(/C=  
C/C(F)(F)C(F)(F)C(F)(F)C(F)(F)C(F)(F)C(F)(F)C(F)(F)C(F)(F)C(F)(F)C(F)(F)F)c1  
C=CC(=O)OC(C)(C)C.O=c1ccc2cc(Br)enc2[nH]1>>CC(C)(C)OC(=O)/C=C/c1enc2[nH]c(=O)ccc2c1  
C=CS(=O)(=O)N1CCC2(CC1)N=C([C@H]1CC[C@H](C)CC1)NC2=O.CNc1cc(C)c(Br)c(C)c1>>CN  
c1cc(C)c(/C=C/S(=O)(=O)N2CCC3(CC2)N=C([C@H]2CC[C@H](C)CC2)NC3=O)c(C)c1  
C=CC(=O)OCC.N#Cc1cccc(I)c1>>CCOC(=O)/C=C/c1cccc(C#N)c1  
C=Cc1cccc1.FC(F)(F)c1ccc(I)cc1>>FC(F)(F)c1ccc(/C=C/c2cccc2)cc1  
C=Cc1cccc1.Nc1ccc(Br)cc1>>Nc1ccc(/C=C/c2cccc2)cc1  
C=CC(=O)OC.O=Cc1ccc2cccc2c1Br>>COC(=O)/C=C/c1c(C=O)ccc2cccc12

Brclenc2cccc2c1.C=CCO[C@]1(C)C[C@@H](C)C(=O)[C@H](C)[C@H]2NC(=O)O[C@]2(C)[C@  
 281 @H](CC)OC(=O)[C@H](C)C(=O)[C@H](C)[C@H]1O[C@@H]1O[C@H](C)C[C@H](N(C)C)[C@H]  
 1OC(C)=O>>CC[C@H]1OC(=O)[C@H](C)C(=O)[C@H](C)[C@@H](O[C@@H]2O[C@H](C)C[C@  
 @H](N(C)C)[C@H]2OC(C)=O)[C@](C)(OC/C=C/c2cnc3cccc3c2)C[C@@H](C)C(=O)[C@H](C)[C  
 @H]2NC(=O)O[C@]112C  
 282 C=CC(=O)OC(C)(C)C.O=C(O)Cc1ccc(Br)cc1>>CC(C)(C)OC(=O)/C=C/c1ccc(CC(=O)O)cc1  
 283 C=CC(N)=O.CC(=O)c1ccc(I)cc1>>CC(=O)c1ccc(/C=C/C(N)=O)cc1  
 C=CCc1nc(-  
 284 c2cccc2)oc1C.CCOC(=O)C1(Oc2ccc(I)cc2)CCC1>>CCOC(=O)C1(Oc2ccc(/C=C/Cc3nc(-  
 285 C=CC(=O)CCC.CC(C)(C)c1ccc(Br)cc1>>CCCC(=O)/C=C/c1ccc(C(C)(C)C)cc1  
 C=CC(=O)OCC[Si](C)(C)C.O=C(C(=O)N1CCCC[C@H]1C(=O)O)c1cccc(I)c1>>C[Si](C)(C)CCOC(=  
 286 O)/C=C/c1cccc(C(=O)C(=O)N2CCCC[C@H]2C(=O)O)c1  
 287 C=CCOC(C)=O.O=[N+][([O-])c1ccc(Br)cc1>>CC(=O)OC/C=C/c1ccc([N+](=O)[O-])cc1  
 288 C=Cc1cccc1.IC1CCCCC1>>C(=C/C1CCCCC1)\c1cccc1  
 289 C=Cc1cccc1.Fc1cccc1Cl>>Fc1cccc1/C=C/c1cccc1  
 290 C=CC#N.Cc1cc(I)c2cccc2n1>>Cc1cc(/C=C/C#N)c2cccc2n1  
 C=Cc1cccc1.COc1cc(Br)c2c3c1O[C@H]1[C@@H](O[Si](C)(C)C(C)(C)C)C=C[C@@H]4[C@@H](  
 291 C2)N(C)CC[C@@]341>>COc1cc(/C=C/c2cccc2)c2c3c1O[C@H]1[C@@H](O[Si](C)(C)C(C)(C)C)  
 =C[C@@H]4[C@@H](C2)N(C)CC[C@@]341  
 292 C=Cc1cccc1.O=c1cc(-c2cccc2)oc2ccc(Br)cc12>>O=c1cc(-c2cccc2)oc2ccc(/C=C/c3cccc3)cc12  
 293 C=CC(=O)OC.CCCCOC(=O)/C=C/c1ccc(Cl)cc1>>CCCCOC(=O)/C=C/c1ccc(/C=C/C(=O)OC)cc1  
 Brclccc(C(c2ccc3c(en3C3CCCCO3)c2)=C2[C@H]3C[C@@H]4C[C@@H](C[C@H]2C4)C3)cc1.C  
 294 =CC(=O)OC>>COC(=O)/C=C/c1ccc(C(c2ccc3c(en3C3CCCCO3)c2)=C2[C@H]3C[C@@H]4C[C@@H](C[C@  
 @H](C[C@H]2C4)C3)cc1  
 295 C=CC(C)(C)C.CC(C)(C)[Si](C)(C)O[C@@H]1C=C(Br)C2(OCCCCO2)[C@H]2O[C@H]21>>CC(C)(C  
 )/C=C/C1=C[C@@H](O[Si](C)(C)C(C)(C)C)[C@@H]2O[C@@H]2C12OCCCCO2  
 296 C=Cc1cc(C(C)(C)C)c(O)c(C(C)(C)C)c1.Cc1cncc(C)c1-c1c(C)cc(I)cc1C>>Cc1cncc(C)c1-  
 c1c(C)cc(/C=C/c2cc(C(C)(C)C)c(O)c(C(C)(C)C)c2)cc1C  
 297 Brclccc2cccc2c1.C=Cc1c(F)c(F)c(F)c1F>>Fc1c(F)c(F)c(/C=C/c2ccc3cccc3c2)c(F)c1F  
 298 C=CC(F)(F)C(F)(F)C(F)(F)C(F)(F)F.Ic1ccc(OCc2cccc2)cc1>>FC(F)(F)C(F)(F)C(F)(F)C(F)(F)/C=C/  
 c1ccc(OCc2cccc2)cc1  
 299 C=Cc1ccc(OC)cc1.COc1cc(I)cc(OC)c1>>COc1ccc(/C=C/c2cc(OC)cc(OC)c2)cc1  
 300 C=Cc1cc(OC)cc(OC)c1.Oc1ccc(-c2occc2-c2ccc(Br)cc2)cc1>>COc1cc(/C=C/c2ccc(-c3occc3-  
 c3ccc(O)cc3)cc2)cc(OC)c1  
 301 C=CC(=O)NC(C)C.C[C@]12C[C@@]34C=C(Sc5ccc(I)cc5)C(=O)[C@@](C)(CCC(=O)Nc5c(O)ccc(  
 C(=O)O)c5O)[C@@H]3[C@H](C[C@@H]1C4)O2>>CC(C)NC(=O)/C=C/c1ccc(SC2=C[C@]34C[C@  
 @H]5C[C@H](O[C@@]5(C)C3)[C@H]4[C@](C)(CCC(=O)Nc3c(O)ccc(C(=O)O)c3O)C2=O)cc1  
 302 C=CC[C@H](NC(=O)OC(C)(C)C(=O)OC.COC(=O)c1ccc(Br)cc1>>COC(=O)c1ccc(/C=C/C[C@H]  
 (NC(=O)OC(C)(C)C(=O)OC)cc1  
 303 C=CC(=O)OC.CC(C)(C)OC(=O)NCCOCc1nnn(CCO)c1I>>COC(=O)/C=C/c1c(COCCNC(=O)OC(C)(  
 C)C)nnn1CCO  
 304 Brclccc2oc(-c3cc[nH]n3)cc2c1.C=CC(=O)OCCCC>>CCCCOC(=O)/C=C/c1ccc2oc(-  
 305 C=CC(=O)OC.COc1cncc(C)c1I>>COC(=O)/C=C/c1c(C)cncc1OC  
 306 C=CC(=O)OC.COC(=O)c1cccc1I>>COC(=O)/C=C/c1cccc1C(=O)OC  
 307 C=CC(=O)OC.Ic1c(-c2cccc2)nnn1Cc1cccc1>>COC(=O)/C=C/c1c(-c2cccc2)nnn1Cc1cccc1  
 308 C=Cc1ccc(N(c2cccc2)c2cccc3cccc23)cc1.O=Cc1ccc(Br)cc1F>>O=Cc1ccc(/C=C/c2ccc(N(c3cccc3)  
 c3cccc4cccc34)cc2)cc1F  
 309 Brclcccc(N(c2cccc2)c2cccc2)c1.C=Cc1ccc(C(=O)O)cc1>>O=C(O)c1ccc(/C=C/c2cccc(N(c3cccc3)  
 c3cccc3)c2)cc1  
 310 C=CCOCC.CC(C)(C)OC(=O)/C=C/c1ccc(CN(C(=O)C2CCCCC2)c2ccc(Br)c2)cc1>>CCOC/C=C/c1c  
 ccc(N(Cc2ccc(/C=C/C(=O)OC(C)(C)C)cc2)C(=O)C2CCCCC2)c1  
 311 Brclenc2nc(CC3CCN(Cc4cccc4)CC3)oc2c1.C=CC(=O)OC>>COC(=O)/C=C/c1enc2nc(CC3CCN(Cc  
 4cccc4)CC3)oc2c1  
 312 C=C[C@@H](CCCCCCCC(=O)OC)O[Si](C)(C)C(C)(C)C.CCC1=C(Br)CCC1=O>>CCC1=C(/C=C/[  
 C@@H](CCCCCCCC(=O)OC)O[Si](C)(C)C(C)(C)C)CCC1=O  
 313 C=CC(C)=O.c1ccc([I+](c2cccc2)cc1>>CC(=O)/C=C/c1cccc1  
 314 C=CC(=O)O.O=C(O)/C=C/c1cc(Br)cs1>>O=C(O)/C=C/c1sc(/C=C/C(=O)O)c1  
 315 C=Cc1ccc(C)cc1.O=c1oc2cccc2cc1Br>>Cc1ccc(/C=C/c2cc3cccc3oc2=O)cc1  
 C=Cc1ccc(C(=O)N[C@@H](CCSC)C(=O)OC)c(-  
 316 c2cccc2C)c1.O=C(c1cncc1Br)C12CC3CC(C(C3)C1)C2>>COC(=O)[C@H](CCSC)NC(=O)c1ccc(/  
 C=C/c2cnccc2C(=O)C23CC4CC(CC(C4)C2)C3)cc1-c1cccc1C



317 C=CC#N.O=C(C=P(c1ccccc1)(c1ccccc1)c1ccccc1)c1ccc(I)cc1>>N#C/C=C/c1ccc(C(=O)C=P(c2ccccc  
2)(c2ccccc2)c2ccccc2)cc1  
318 C=C(c1cc(OC)c(OC)c(OC)c1)c1oc2cc(OC)c(I)cc2c1C.C=CC(=O)OCC>>C=C(c1cc(OC)c(OC)c(OC)c  
1)c1oc2cc(OC)c(/C=C/C(=O)OCC)cc2c1C  
319 C=C(C)c1ccccc1.O=[N+][([O-])c1ccc(Cl)cc1]>>C/C(=C\c1ccc([N+](=O)[O-])cc1)c1ccccc1  
320 C=CC(=O)OCC.Cc1nc(N)nc(NC2CCC(OCCO)CC2)c1Br>>CCOC(=O)/C=C/c1c(C)nc(N)nc1NC1CC  
C(OCCO)CC1  
321 C=Cc1ccc(Cl)cc1.Cn1cc(I)c(=O)c2ccccc21>>Cn1cc(/C=C/c2ccc(Cl)cc2)c(=O)c2ccccc21  
322 C=CC(=O)OC(C)(C)C.COc1nc(Cl)ccc1[N+](=O)[O-]  
]>>COc1nc(/C=C/C(=O)OC(C)(C)C)ccc1[N+](=O)[O-]  
323 C=CC(=O)OC.O=[N+][([O-])c1cccc(Br)c1]>>COC(=O)/C=C/c1cccc([N+](=O)[O-])c1  
324 C=CC(=O)OC.COc1ccc(Br)c([N+](=O)[O-])c1>>COC(=O)/C=C/c1ccc(OC)cc1[N+](=O)[O-]  
325 C=CC(=O)OC(C)(C)C.COc1cccc(NCc2ccc(Br)cc2)c1>>COc1cccc(NCc2ccc(/C=C/C(=O)OC(C)(C)C  
cc2)c1  
326 C=COCC(C)CCCC.COc1ccc(Br)cc1>>C=C(OC(C)CCCC)c1ccc(OC)cc1  
327 C=Cc1cnc(C#N)c1Nc1ccc2[nH]ccc2c1C.ClCCOc1cccc(Br)c1>>Cc1c(Nc2c(C#N)cnc2/C=C/c2cccc(  
OCCCl)c2)ccc2[nH]ccc12  
328 C=CC(C)(C)O.Fc1ccc(Br)cc1>>CC(C)(O)/C=C/c1ccc(F)cc1  
329 C=Cc1cc2ccc(OC)cc2oc1=O.Ic1ccccc1>>COc1ccc2cc(/C=C/c3ccccc3)c(=O)oc2c1  
330 C=CCn1c(-c2cccc(OC)c2)nc2ccccc2c1=O.O=C(CN1C(=O)COc2ccccc21)c1ccc(Br)cc1>>COc1cccc(-  
c2nc3ccccc3c(=O)n2C/C=C/c2ccc(C(=O)CN3C(=O)COc4ccccc43)cc2)c1  
331 C=CC(=O)OCCCC.CCN(CC)c1ccc(Br)cc1>>CCCCOC(=O)/C=C/c1ccc(N(CC)CC)cc1  
332 C=Cn1cnc2c(NC)ncnc21.Cc1cccc(C)c1I>>CNc1ncnc2c1ncn2/C=C/c1c(C)cccc1C  
333 C=CC(=O)OCC.O=c1c(I)c(-c2ccc(O)cc2)oc2cc(O)ccc12>>CCOC(=O)/C=C/c1c(-  
c2ccc(O)cc2)oc2cc(O)ccc2c1=O  
334 C=Cc1ccncc1.Ic1ccccc1>>C(=C/c1ccncc1)\c1ccccc1  
335 C=Cc1ccc(OC)cc1.CCOC(=O)C(C)(C)Br>>CCOC(=O)C(C)(C)/C=C/c1ccc(OC)cc1  
336 C=CP(=O)(c1ccccc1)c1ccccc1.Cc1ccc2ccccc2c1Br>>Cc1ccc2ccccc2c1/C=C/P(=O)(c1ccccc1)c1ccccc  
337 Br1ccc2oc(-c3cc[nH]n3)cc2c1.C=CC(=O)OCC>>CCOC(=O)/C=C/c1ccc2oc(-c3cc[nH]n3)cc2c1  
338 C=Cc1ccncc1.COC(=O)CCNc1ccc(Br)cc1>>COC(=O)CCNc1ccc(/C=C/c2ccncc2)cc1  
339 C=CC(=O)OC(C)(C)C.Cc1nc(I)ccc1OCc1ccccc1>>Cc1nc(/C=C/C(=O)OC(C)(C)C)ccc1OCc1ccccc1  
340 C=Cc1ccc(OC)cc1.[O-][N+](=Nc1ccc(Br)cc1)c1ccccc1>>COc1ccc(/C=C/c2ccc(N=[N+])([O-]  
])c3ccccc3)cc2)cc1  
341 C=CC(=O)NC.[C@]12C[C@@]34C=C(Sc5ccc(I)cc5)C(=O)[C@@](C)(CCC(=O)Nc5c(O)ccc(C(=O)  
O)c5O)[C@@H]3[C@H]1[C@H]1C4)O2>>CNC(=O)/C=C/c1ccc(SC2=C[C@]34C[C@H]5C[C  
@H]1(O)C[C@@]5(C)C3)[C@H]4[C@H]1(C)(CCC(=O)Nc3c(O)ccc(C(=O)O)c3O)C2=O)cc1  
342 C=CN1C(=O)c2ccccc2C1=O.COc1ccc(I)cc1>>COc1ccc(/C=C/N2C(=O)c3ccccc3C2=O)cc1  
343 C=CB1OC(C)CC(C)(C)O1.O=[N+][([O-])c1ccc(I)cc1]>>CC1CC(C)(C)OB(/C=C/c2ccc([N+](=O)[O-]  
])cc2)O1  
344 C=C.COc1cc(I)cc(OC)c1>>C=Cc1cc(OC)cc(OC)c1  
345 C=Cc1ccc(OC(C)=O)cc1.CCOC(=O)C(F)(F)I>>CCOC(=O)C(F)(F)/C=C/c1ccc(OC(C)=O)cc1  
346 C=CCCC(=O)O.COc1ccc(I)cc1>>COc1ccc(/C=C/CCC(=O)O)cc1  
347 C=CC(=O)OCC.Nc1cc(F)c(Br)cc1I>>CCOC(=O)/C=C/c1cc(Br)c(F)cc1N  
348 C=CC(=O)Nc1ccccc1.O=C1Cc2c([nH]c3c(I)ccccc23)-c2ccncc2N1>>O=C(/C=C/c1cccc2c3c([nH]c12)-  
c1ccncc1NC(=O)C3)Nc1ccccc1  
349 C=CN1CCCC1=O.FC(F)(Br)c1nc2ccccc2o1>>O=C1CCCN1/C=C/C(F)(F)c1nc2ccccc2o1  
350 C=CC(=O)OC.CC(=O)Oc1ccc(I)cc1C/C=C(\C)CC/C=C(\C)CCC=C(C)C>>COC(=O)/C=C/c1ccc(OC(  
C)=O)c(C/C=C(\C)CC/C=C(\C)CCC=C(C)C)c1  
351 C=CC(N)=O.COc1cccc2c1CCC(C=O)=C2Br>>COc1cccc2c1CCC(C=O)=C2/C=C/C(N)=O  
352 C=CS(=O)(=O)N1CCC2(CC1)N=C(C1CCCCC1)NC2=O.Cc1cc(N2CCNC2=O)cc(C)c1Br>>Cc1cc(N  
2CCNC2=O)cc(C)c1/C=C/S(=O)(=O)N1CCC2(CC1)N=C(C1CCCCC1)NC2=O  
353 C=Cc1cccn1.COc1ccc(Br)cc1>>COc1ccc(/C=C/c2cccn2)cc1  
354 C=C[Si](CC)(CC)CC.Fc1ccccc1Br>>CC[Si](/C=C/c1ccccc1F)(CC)CC  
355 C=CC(=O)Nc1ccccc(OC)c1.COc1ccc2c(=O)c(I)ccc2c1>>COc1cccc(NC(=O)/C=C/c2ccc3cc(OC)ccc3c  
2=O)c1  
356 C=Cc1ccc(OC)cc1.FC(F)(F)C(F)(F)C(F)(F)C(F)(F)C(F)(F)C(F)(F)C(F)(F)C(F)(F)Br>>COc1ccc(/C=C/C(F)(F  
)C(F)(F)C(F)(F)C(F)(F)C(F)(F)C(F)(F)C(F)(F)C(F)(F)C(F)(F)cc1  
357 C=C1C(=O)O[C@H]2[C@H]1CCC(=C)[C@H]1C[C@H](OC(C)=O)C(=C)[C@H]21.COc1cccc([N  
+](=O)[O-])c1I>>C=C1CC[C@H]2/C(=C\c3c(OC)cccc3[N+](=O)[O-]  
)C(=O)O[C@@H]2[C@H]2C(=C)[C@H]1(OC(C)=O)C[C@H]12  
358 C=COCCCC.Cc1ccc(Cl)cc1>>C=C(OCCCC)c1ccc(C)cc1

359 C=CC(=O)OCC.CC(C)(C)OC(=O)Nc1csc(Br)c1NC(=O)OC(C)(C)C>>CCOC(=O)/C=C/c1ccc(NC(=O)  
 )OC(C)(C)C)c1NC(=O)OC(C)(C)C  
 360 C=CS(C)(=O)=O.CC(C)(C)OC(=O)NC(C(=O)OCc1ccccc1)c1ccc(Br)cc1>>CC(C)(C)OC(=O)NC(C(=O)  
 )OCc1ccccc1)c1ccc(/C=C/S(C)(=O)=O)cc1  
 361 C=CC(=O)OC(C)(C)C.COc1ccc(CCNC(=O)c2cc(Br)cc(I)c2)cc1>>COc1ccc(CCNC(=O)c2cc(Br)cc(/C  
 =C/C(=O)OC(C)(C)C)c2)cc1  
 362 C=CC[Si](C)(C)C.Fc1ccc(Br)cc1>>C=C(C[Si](C)(C)C)c1ccc(F)cc1  
 363 C=C(c1ccc(Cl)cc1)N(C)C(C)=O.CCOC(=O)CCCB>>CCOC(=O)CCC/C=C(\c1ccc(Cl)cc1)N(C)C(C)  
 C=CC#N.CC(C)(C)[Si](C)(C)OC[C@H]1O[C@H](c2ccc(Br)cc2)C=C[C@H]1O[Si](C)(C)C(C)(C)  
 364 C>>CC(C)(C)[Si](C)(C)OC[C@H]1O[C@H](c2ccc(/C=C/C#N)cc2)C=C[C@H]1O[Si](C)(C)C(C)(C)  
 C=CC(=O)OC.FC(F)(F)c1ccc(NCc2ccccc2)c(Br)c1>>COC(=O)/C=C/c1cc(C(F)(F)F)ccc1NCc1ccccc1  
 365 C=CCNC(=O)c1ccccc1NC(=O)c1ccccc1.Ic1ccccc1>>O=C(Nc1ccccc1C(=O)NC/C=C/c1ccccc1)c1ccccc  
 366 C=CC(C)O.COc1ccc2cc(Br)ccc2c1>>COc1ccc2cc(/C=C/C(C)O)ccc2c1  
 367 Cc1ccc(S(=O)(=O)/C=C2\C(C)(C)C2(F)F)cc1.Clc1ccc(I)cc1>>Cc1ccc(S(=O)(=O)/C(=C2\C(C)(C)C2(  
 F)F)c2ccc(Cl)cc2)cc1  
 368 C=C.CCOP(=O)(Cc1ccc(Br)cc1)OCC>>C=Cc1ccc(CP(=O)(OCC)OCC)cc1  
 369 C=CC(N)=O.CCc1ccccc1Br>>CCc1ccccc1/C=C/C(N)=O  
 370 Bre1cc2ccccc2[se]1.C=CC(=O)OC>>COC(=O)/C=C/c1cc2ccccc2[se]1  
 371 C=C(NC(=O)OC(C)(C)C)C(=O)OC.Nc1cc(N)cc(I)c1>>COC(=O)/C=C/c1cc(N)cc(N)c1)NC(=O)OC(  
 C)(C)C  
 372 C=CC(OC)OC.Ic1ccc2ccccc2c1>>COC(/C=C/c1ccc2ccccc2c1)OC  
 373 C=CC(=O)N(C)C.Oc1ccc2c(c1)CCN(c1ccccc1)C2c1ccc(I)cc1>>CN(C)C(=O)/C=C/c1ccc(C2c3ccc(O)  
 cc3CCN2c2ccccc2)cc1  
 374 C=Cc1ccccc1.CC(C)(C)C(=O)Nc1ccccc1Cl>>CC(C)(C)C(=O)Nc1ccccc1/C=C/c1ccccc1  
 375 C=CC(=O)OC.Cn1c2ccccc2c2nc3ccc(Cl)cc3c3ccccc1c32>>COC(=O)/C=C/c1ccc2nc3c4ccccc4n(C)c4c  
 376 ccc(c2c1)c34  
 C=C[C@H](C)[C@H](CCO[Si](C)(C)C(C)C)OC(=O)[C@H](CC(C)C)NC(=O)OC(C)(C)C.COC  
 377 OCc1ccc(I)cc1>>COCOCc1ccc(/C=C/[C@H](C)[C@H](CCO[Si](C)(C)C(C)C)OC(=O)[C@H](  
 CC(C)C)NC(=O)OC(C)(C)C)cc1  
 378 C=CC[C@H](NC(=O)OC(C)(C)C)C(=O)OC.COc1ccc(I)cc1>>COC(=O)[C@H](C/C=C/c1ccc(OC)cc1  
 )NC(=O)OC(C)(C)C  
 379 C=CS(=O)(=O)F.Oc1ccc(I)cc1>>O=S(=O)(F)/C=C/c1ccc(O)cc1  
 380 C=Cc1ccccc1.Cc1ccc(Br)nc1>>Cc1ccc(/C=C/c2ccccc2)nc1  
 381 C=CC(=O)OCC.Oc1ccc(Br)c(F)c1F>>CCOC(=O)/C=C/c1ccc(O)c(F)c1F  
 382 C=C1C[C@H]2[C@H]3CCc4cc(OC)ccc4[C@H]3CC[C@H]2(C)C1=O.FC(F)(F)c1ccccc1Br>>COc1c  
 cc2c(c1)CC[C@H]1[C@H]2CC[C@H]2(C)C(=O)/C(=C/c3ccccc3C(F)(F)F)C[C@H]12  
 383 C=C(NC(C)=O)C(=O)OC.CC(=O)c1ccc(Br)cc1>>COC(=O)/C(=C/c1ccc(C(C)=O)cc1)NC(C)=O  
 384 C=CCOc1ccccc1.CC(C)c1ccc(I)cc1>>CC(C)c1ccc(/C=C/COc2ccccc2)cc1  
 385 C=CC.O=C1CC(c2ccccc2)(c2ccccc2Br)C1>>C/C=C\c1ccccc1C1(c2ccccc2)CC(=O)C1  
 386 C=Cc1ccccc1Oc1.Nc1ccc(Br)c1>>Nc1ccc(/C=C/c2ccccc2)cc1  
 387 C=COCCO.CC(=O)c1ccc(Br)cc1>>C=C(OCCO)c1ccc(C(C)=O)cc1  
 388 C=CCC(C)C.CC(C)(C)c1ccc(OS(=O)(=O)C(F)(F)F)cc1>>C=C(CC(C)C)c1ccc(C(C)(C)C)cc1  
 389 C=CC(=O)OC.COc1ccc(Br)cn1>>COC(=O)/C=C/c1ccc(OC)nc1  
 390 C=C(C)C(=O)OC.CC(=O)NS(=O)(=O)c1ccc(Br)cc1>>COC(=O)/C(C)=C/c1ccc(S(=O)(=O)NC(C)=O)  
 391 C=CCCCN1C(=O)c2ccccc2C1=O.CC(C)(C)c1ccc(Br)cc1>>C=C(CCCCN1C(=O)c2ccccc2C1=O)c1c  
 cc(C(C)(C)C)cc1  
 392 C=CC(=O)OCC.Cc1cc(C)cc(I)c1>>CCOC(=O)/C=C/c1cc(C)cc(C)c1  
 393 C=C.COc1ccc(Br)cc1>>C=Cc1ccc(OC)cc1  
 394 C=CC(=O)OCC(CC)CCCC.COc1ccc(I)cc1>>CCCC(CC)COC(=O)/C=C/c1ccc(OC)cc1  
 C=CC(=O)OC.CCOC1=N[C@H](C(C)C)C(OCC)=N[C@H]1Cc1c(Br)n(C(=O)OC(C)(C)C)c2cc(OC)c  
 395 cc12>>CCOC1=N[C@H](C(C)C)C(OCC)=N[C@H]1Cc1c(/C=C/C(=O)OC)n(C(=O)OC(C)(C)C)c2cc(  
 OC)ccc12  
 396 C=Cc1ccc(OC)cc1.Cc1ccc(Cl)cc1>>COc1ccc(/C=C/c2ccc(C)cc2)cc1  
 397 C=CCCC(=O)OCc1ccccc1.N#Cc1ccc(I)cc1C#N>>N#Cc1ccc(/C=C/CCC(=O)OCc2ccccc2)cc1C#N  
 398 C=C1C(=O)O[C@H]2C[C@H](C)C(=O)C/C=C(\C)CC[C@H]12.CSc1ccccc1I>>CSc1ccccc1/C  
 =C1/C(=O)O[C@H]2C[C@H](C)C(=O)C/C=C(\C)CC[C@H]12  
 399 C=CCCC(=O)OCC.COc1ccccc1I>>CCOC(=O)CC/C=C/c1ccccc1OC  
 400 C=CC(=O)OC.CCc1cc2c(C)nc(C)nc2n1Cc1ccc(Br)cc1>>CCc1cc2c(C)nc(C)nc2n1Cc1ccc(/C=C/C(=O)  
 )OC)cc1  
 401 C=Cc1ccccc1O.Nc1ccccc1Br>>Nc1ccccc1/C=C/c1ccccc1O  
 402 Bre1ccccc1.C=C[Si](C)(C)Cl>>C[Si](C)(Cl)/C=C/c1ccccc1

403 C=CC(=O)OC(C)(C)C.CC(C)(C)OC(=O)n1cc(C=O)c2c(Br)cccc21>>CC(C)(C)OC(=O)/C=C/c1cccc2c  
1c(C=O)cn2C(=O)OC(C)(C)C  
404 C=CC(=O)OC.O=Cc1c(F)cc(Br)cc1F>>COC(=O)/C=C/c1cc(F)c(C=O)c(F)c1  
405 C=CC(=O)OCC.COc1cc(Br)cc2cc(-c3ccc4c(c3)OCO4)oc12>>CCOC(=O)/C=C/c1cc(OC)c2oc(-  
c3ccc4c(c3)OCO4)cc2c1  
406 Bre1ccc2c(c1)OCO2.C=Cc1ccccn1>>C(=C/c1ccccn1)\c1ccc2c(c1)OCO2  
407 Bre1ccc(-c2cccs2)s1.C=CC(=O)OCCCC>>CCCCOC(=O)/C=C/c1ccc(-c2cccs2)s1  
408 C=C(Br)CCO.C=Cc1cccc1>>C=C(/C=C/c1cccc1)CCO  
409 C=Cc1cccc1C.Nc1cc(Cl)ccc1I>>Cc1cccc1/C=C/c1ccc(Cl)cc1N  
410 C=Cc1cccc1.CCOC(=O)C(F)(F)Br>>CCOC(=O)C(F)(F)/C=C/c1cccc1  
411 C=Cc1ccc(/C=C/c2ccc(N(c3cccc3)c3cccc3)cc2)cc1.O=Cc1ccc(Br)cc1>>O=Cc1ccc(/C=C/c2ccc(/C=  
C/c3ccc(N(c4cccc4)c4cccc4)cc3)cc2)cc1  
412 C=Cc1ccncc1.Oc1cccc1Br>>Oc1cccc1/C=C/c1ccncc1  
413 C=CC(=O)OC.Ic1ccc1>>COC(=O)/C=C/c1ccc1  
414 C=COCCCC.CC(C)(C)c1ccc(OS(=O)(=O)C(F)(F)F)cc1>>C=C(OCCCC)c1ccc(C(C)(C)C)cc1  
415 C=CC(=O)N(CC)CC.O=C1Cc2c([nH]c3ccc(I)cc23)-  
c2ccncc2N1>>CCN(CC)C(=O)/C=C/c1ccc2[nH]c3c(c2c1)CC(=O)Nc1ncccc1-3  
C=CCC(=O)O.CC(=O)OC[C@H]1O[C@H](Oc2ccc3occc(/C=C/c4ccc(Br)cc4)c23)[C@H](OC(C)=  
416 O)[C@H](OC(C)=O)[C@H]1OC(C)=O>>CC(=O)OC[C@H]1O[C@H](Oc2ccc3occc(/C=C/c4c  
cc(/C=C/CC(=O)O)cc4)c23)[C@H](OC(C)=O)[C@H](OC(C)=O)[C@H]1OC(C)=O  
417 C=CCc1cccc1.Cn1nc(Br)c2cccc21>>Cn1nc(/C=C/Cc2cccc2)c2cccc21  
418 C=CC(=O)OCC.Nc1cc2ccc(Br)cc2cn1>>CCOC(=O)/C=C/c1ccc2cc(N)nc2c1  
419 C=CC(=O)OC.COC(=O)c1ccc(Br)cc1>>COC(=O)/C=C/c1ccc(C(=O)OC)cc1  
420 C=CCCC(C)=O.Oc1ccc(I)cc1>>CC(=O)CC/C=C/c1ccc(O)cc1  
421 C=CC(=O)O.COC(=O)c1ccc(I)cc1>>COC(=O)c1ccc(/C=C/C(=O)O)cc1  
422 Bre1ccc2c(c1)OCCOCCOCCOCCOCCO2.C=C>>C=Cc1ccc2c(c1)OCCOCCOCCOCCOCCO2  
423 C=CCCN1C(=O)c2cccc2C1=O.Ic1ccc(C2(N3CCCC3)CCCC2)cc1>>O=C1c2cccc2C(=O)N1CC/  
C=C/c1ccc(C2(N3CCCC3)CCCC2)cc1  
424 C=Cc1cccc1.C[Si](Cl)(c1cccc1)c1cccc1>>C[Si](/C=C/c1cccc1)(c1cccc1)c1cccc1  
425 C=CC1(O)CCC2(CC1)OCCO2.COC(=O)c1ccc(Br)o1>>COC(=O)c1ccc(/C=C/C2(O)CCC3(CC2)OCC  
O3)o1  
426 C=CC(=O)C(C)COCc1cccc1.Ic1cccc1>>CC(COCc1cccc1)C(=O)/C=C/c1cccc1  
427 C=CC#N.N#Cc1ccc(I)cc1>>N#C/C=C/c1ccc(C#N)cc1  
428 C=CN1CCCC1=O.O=S(=O)(Oc1ccc(-c2cccc2)cc1)C(F)(F)F>>C=C(c1ccc(-  
429 C=C(CC(=O)OCC)C(=O)OCC.COc1cccc2c(OCc3cccc3)c(Br)ccc12>>CCOC(=O)C/C(=C\c1ccc2c(O  
C)cccc2c1OCc1cccc1)C(=O)OCC  
430 C=COCCN(C)C.N#Cc1ccc(Br)cc1>>C=C(OCCN(C)C)c1ccc(C#N)cc1  
431 C=CC(=O)OC.Oc1ccc(Br)cc1>>COC(=O)/C=C/c1ccc(O)cc1  
432 C=Cc1ccc(C)cc1C.COc1ccc2cccc2c1I>>COc1ccc2cccc2c1/C=C/c1ccc(C)cc1C  
433 Bre1cccc2cccc12.C=CC(C)=O>>CC(=O)/C=C/c1cccc2cccc12  
434 C=C(OC(C)=O)C(=O)OCC(F)(F)F.COc1ccc(I)cc1CC=C(C)C>>COc1ccc(/C=C(\OC(C)=O)C(=O)OC  
C(F)(F)F)cc1CC=C(C)C  
435 C=CC(=O)OC.CN1CCN(CCc2enn3cccc23)C(c2ccc(Br)cc2)C1>>COC(=O)/C=C/c1ccc(C2CN(C)CC  
N2CCc2enn3cccc23)cc1  
436 C=C1C(=O)O[C@H]2[C@H]1CC/C(C)=C/CC[C@H]1(C)O[C@H]21.Clc1ccc(I)cc1>>C/C1=C\CC  
[C@H]2(C)O[C@H]2[C@H]2OC(=O)/C=C/c3ccc(Cl)cc3)[C@H]2CC1  
437 C=CC(=O)OC(C)(C)C.Ic1ccncc1>>CC(C)(C)OC(=O)/C=C/c1ccncc1  
438 C=CC(=O)OCC.CC(C)(C)OC(=O)c1cccc1I>>CCOC(=O)/C=C/c1cccc1C(=O)OC(C)(C)C  
439 C=Cc1ccc(Cl)cc1.Oc1ccc2cccc2c1Br>>Oc1ccc2cccc2c1/C=C/c1ccc(Cl)cc1  
440 C=CC(C)CC(=O)O.COc1ccc(I)cc1>>COc1ccc(/C=C/C(C)CC(=O)O)cc1  
441 Bre1ccc2[nH]ccc2c1.C=CC(=O)OC>>COC(=O)/C=C/c1ccc2[nH]ccc2c1  
442 Bre1ccc2ccnc(N3CCCC3)c2c1.C=CC(=O)OC(C)(C)C>>CC(C)(C)OC(=O)/C=C/c1ccc2ccnc(N3CCC  
CC3)c2c1  
443 C=CCN.Nc1nc(=O)n([C@H]2C[C@H](O)[C@H](COP(=O)(O)OP(=O)(O)OP(=O)(O)O)O2)cc1I>>  
NC/C=C/c1cn([C@H]2C[C@H](O)[C@H](COP(=O)(O)OP(=O)(O)OP(=O)(O)O)O2)c(=O)nc1N  
444 C=C(NC(C)=O)C(=O)OC.CCc1cccc(C)c1I>>CCc1cccc(C)c1/C=C(\NC(C)=O)C(=O)OC  
445 C=C1c2cccc2C1(C#N)CC.COc1ccc(Br)cc1>>CCC1(C#N)/C=C/c2ccc(OC)cc2)c2cccc21  
446 C=CC(=O)OCC.O=c1[nH]c(=O)n([C@H]2O[C@H](CO)[C@H](O)[C@H]2O)cc1I>>CCOC(=O)  
/C=C/c1cn([C@H]2O[C@H](CO)[C@H](O)[C@H]2O)c(=O)[nH]c1=O  
447 C=COCCO.COc1ccc(Br)cc1>>C=C(OCCO)c1ccc(OC)cc1

448 C=CS(=O)(=O)F.Ic1cccc2c1sc1cccc12>>O=S(=O)(F)/C=C/c1cccc2c1sc1cccc12  
449 C=Cc1ccc(OC(C)=O)cc1.COC(=O)CCCN1cc(C(=O)OC)c2c(Br)cccc21>>COC(=O)CCCN1cc(C(=O)O  
C)c2c(/C=C/c3ccc(OC(C)=O)cc3)cccc21  
450 C=Cc1ccc(Cl)cc1.O=C1C(O)=C(I)C(=O)c2cccc21>>O=C1C(O)=C(/C=C/c2ccc(Cl)cc2)C(=O)c2cccc  
451 C=Cc1cccc1.COc1ccc(Br)c(C=O)c1>>COc1ccc(/C=C/c2cccc2)c(C=O)c1  
452 C=C(NC(=O)OCc1cccc1)C(=O)OC.CC(=O)OCc1cc(OCc2cccc2)ccc1Br>>COC(=O)/C(=C/c1ccc(O  
Cc2cccc2)cc1COC(C)=O)NC(=O)OCc1cccc1  
453 C=Cc1ccc(C(=O)OC)cc1.Cc1cccc1Br>>COC(=O)c1ccc(/C=C/c2cccc2C)cc1  
454 C=CC(=O)OC.Cc1c(Br)cccc1[N+](=O)[O-]>>COC(=O)/C=C/c1cccc([N+](=O)[O-])c1C  
455 Brc1cccn1.C=CS(N)(=O)=O>>NS(=O)(=O)/C=C/c1cccn1  
456 C=CC(=O)N(C)C.OCc1cccc(I)c1>>CN(C)C(=O)/C=C/c1cccc(CO)c1  
457 C=CNC(C)=O.O=S(=O)(Oc1ccc2cccc2c1)C(F)(F)F>>C=C(NC(C)=O)c1ccc2cccc2c1  
C=CC(=O)OC.CC(=O)OC[C@H]1O[C@H](Oc2ccc(I)cc2)[C@H](OC(C)=O)[C@@H](OC(C)=O)[C  
458 @H]1OC(C)=O>>COC(=O)/C=C/c1ccc(O[C@H]2O[C@H](COC(C)=O)[C@H](OC(C)=O)[C@H](O  
C(C)=O)[C@H]2OC(C)=O)cc1  
459 Brc1cccn1.C=CC(N)=O>>NC(=O)/C=C/c1cccn1  
460 C=CC(=O)OC.Ic1cc2cccc2s1>>COC(=O)/C=C/c1cc2cccc2s1  
461 C=CC(=O)OC.CC(C)(C)c1[nH]c2cccc2c1C1CCCN(Cc2ccc(Br)cc2Cl)C1>>COC(=O)/C=C/c1ccc(CN  
2CCCC(c3c(C(C)(C)C)[nH]c4cccc34)C2)c(Cl)c1  
462 C=Cc1cc(OC(C)=O)cc(OC(C)=O)c1.Nc1ccc(I)cc1>>CC(=O)Oc1cc(/C=C/c2ccc(N)cc2)cc(OC(C)=O)c  
463 C=CC(=O)OC.O=c1[nH]c(=O)n([C@H]2C[C@H](O)[C@]3(CO)C[C@H]23)cc1I>>COC(=O)/C=C/c  
1cn([C@H]2C[C@H](O)[C@]3(CO)C[C@H]23)c(=O)[nH]c1=O  
464 C=CC(=O)OC.Cc1ccc(Br)c(C=O)c1>>COC(=O)/C=C/c1ccc(C)cc1C=O  
465 C=CC(=O)N(C)C.CN1CCCN(c2cccc(Br)n2)CC1>>CN1CCCN(c2cccc(/C=C/C(=O)N(C)C)n2)CC1  
466 C=Cc1cccc1.N#CCCCCCCCI>>N#CCCCCCCC/C=C/c1cccc1  
467 C=CC(=O)OC.Cc1cc(Br)cc(NC(=O)C2CCCC2)c1>>COC(=O)/C=C/c1cc(C)cc(NC(=O)C2CCCC2)  
468 C=CC(=O)OC(C)(C)C.Clc1cccc1I>>CC(C)(C)OC(=O)/C=C/c1cccc1Cl  
469 C=Cc1ccc(C#N)cc1.FC(F)(F)CI>>N#Cc1ccc(/C=C/CC(F)(F)F)cc1  
470 C=CC(=O)OCCCC.Clc1ccc(Br)cc1>>CCCCOC(=O)/C=C/c1ccc(Cl)cc1  
471 C=Cc1cccc1.Fc1c(F)c(F)c(Br)c(F)c1F>>Fc1c(F)c(F)c(/C=C/c2cccc2)c(F)c1F  
472 C=CC(=O)OC.COc1ccc(C=O)c(Br)c1OC>>COC(=O)/C=C/c1c(C=O)ccc(OC)c1OC  
473 C=CC(=O)OC.CCOc1c(C(C)n2nc(C)c3c(N)ncnc32)cc(Cl)c(C)c1I>>CCOc1c(C(C)n2nc(C)c3c(N)ncnc  
32)cc(Cl)c(C)c1/C=C/C(=O)OC  
474 C=Cc1cccc1OC.Cn1c(=O)c2c(cc(Br)n2C)n(C)c1=O>>COc1cccc1/C=C/c1cc2c(c(=O)n(C)c(=O)n2C  
475 C=Cc1ccc(OC)cc1.Clc1ccc(-c2nc3cccn23)cc1>>COc1ccc(/C=C/c2ccc(-c3nc4cccn34)cc2)cc1  
476 Brc1csc1.C=Cc1cccc1N>>Nc1cccc1/C=C/c1csc1  
477 C=CC(=O)OCC.CN1Cc2ccc(Br)cc2C1>>CCOC(=O)/C=C/c1ccc2c(c1)CN(C)C2  
478 C=CS(C)(=O)=O.FC(F)(F)c1ccc(Br)cc1>>CS(=O)(=O)/C=C/c1ccc(C(F)(F)F)cc1  
479 C=Cc1cccn1.CCCOc1ccc(Br)cc1F>>CCCOc1ccc(/C=C/c2ccnc2)cc1F  
480 C=CC(=O)OC(C)(C)C.CC(C)(C)OC(=O)n1ccc2cc(I)ccc21>>CC(C)(C)OC(=O)/C=C/c1ccc2c(ccn2C(=O)OC(C)(C)C)c1  
481 C=CC(=O)OCCCC.N#CCc1ccc(Br)cc1>>CCCCOC(=O)/C=C/c1ccc(CC#N)cc1  
482 C=CC(=O)OCCCC.Ic1cccc2cccc12>>CCCCOC(=O)/C=C/c1cccc2cccc12  
483 C=Cc1ccc(-n2ccc3ccncc32)nc1.Ic1cccc1>>C(=C/c1ccc(-n2ccc3ccncc32)nc1)c1cccc1  
484 C=CC(=O)OCCCC.CC(C)=C(C)Br>>CCCCC(=O)/C=C/C(C)=C(C)C  
485 C=CC(=O)OC.CCOC(=O)CSc1ccc(Br)cc1>>CCOC(=O)CSc1ccc(/C=C/C(=O)OC)cc1  
486 C=CC(=O)OCC.COc1cc(Br)cc(OC)c1>>CCOC(=O)/C=C/c1cc(OC)cc(OC)c1  
487 C=CC(=O)OC(C)(C)C.COc1cc(N(C)Cc2ccc(Br)cc2)cc(OC)c1OC>>COc1cc(N(C)Cc2ccc(/C=C/C(=O)OC(C)(C)C)cc2)cc(OC)c1OC  
488 C=CC[Si](C)(C)C.Cc1ccc(Br)cc1>>C=C(C[Si](C)(C)C)c1ccc(C)cc1  
C=Cc1cc(OC(C)=O)cc(OC(C)=O)c1.CC(=O)OC[C@H]1O[C@@H](Oc2ccc(I)cc2)[C@H](OC(C)=O)  
489 [C@@H](OC(C)=O)[C@@H]1OC(C)=O>>CC(=O)OC[C@H]1O[C@@H](Oc2ccc(/C=C/c3cc(OC(C)=O)cc(OC(C)=O)c3)cc2)[C@H](OC(C)=O)[C@@H](OC(C)=O)[C@@H]1OC(C)=O  
C=CC(=O)OC.Cc1[nH]c(-  
490 c2cccc2)c(Br)c1C(=O)C(=O)N1CCN(c2cccc(C(F)(F)F)c2)CC1>>COC(=O)/C=C/c1c(-  
c2cccc2)[nH]c(C)c1C(=O)C(=O)N1CCN(c2cccc(C(F)(F)F)c2)CC1  
491 C=CC(=O)OC.Cc1cc(-c2cccc2)n2nc(-c3cccc3)c(I)c2n1>>COC(=O)/C=C/c1c(-c2cccc2)nn2c(-  
c3cccc3)cc(C)nc12  
492 C=CCO.COc1ccc2cc(Br)ccc2c1>>C=C(CO)c1ccc2cc(OC)ccc2c1

493 C=CC(=O)OCC.COc1cc(Br)c(CCNC(=O)OC(C)(C)C)cc1OCc1cccc1>>CCOC(=O)/C=C/c1cc(OC)c(OCc2cccc2)cc1CCNC(=O)OC(C)(C)C  
 494 C=C[C@@H]1CCCCN1C(=O)OC(C)(C)C.Cc1ccc(I)cc1>>Cc1ccc(/C=C/[C@@H]2CCCCN2C(=O)OC(C)(C)C)cc1  
 495 C=C(NC(C)=O)C(=O)OC.O=C(c1cccc1)c1ccc(Br)cc1>>COC(=O)/C=C/c1ccc(C(=O)c2cccc2)cc1NC(C)=O  
 496 C=C[C@@](CO)(CCC)OCc1ccc(OC)cc1.Ic1cccc1>>CCC[C@@](/C=C/c1cccc1)(CO)OCc1ccc(OC  
 497 C=CC(=O)OC(C)(C)C.CC(=O)Nc1ccc(I)cc1>>CC(=O)Nc1ccc(/C=C/C(=O)OC(C)(C)C)cc1  
 498 C=CC(=O)OCC.O=S(=O)(Oc1cccc2c1CCO2)C(F)(F)F>>CCOC(=O)/C=C/c1cccc2c1CCO2  
 499 C=CC(CCC)OCc1cccc1.Cc1cccc1Br>>CCCC(/C=C/c1cccc1C)OCc1cccc1  
 500 C=CCC1CCCC1.COC(=O)c1ccc2cc(Br)ccc2c1>>COC(=O)c1ccc2cc(/C=C/CC3CCCC3)ccc2c1  
 501 C=Cc1ccc2cccc2c1.CC(C)(C)Br>>CC(C)(C)/C=C/c1ccc2cccc2c1  
 502 C=CC(O)c1cccc1Br.COc1cccc(I)c1>>COc1cccc(/C=C/C(O)c2cccc2Br)c1  
 503 C=CC(=O)OCCCC.Nc1nc2c(c(I)cn2[C@H]2[C@H](O)[C@@H](CO)O2)c(=O)[nH]1>>CCCCOC(=O)/C=C/c1cn([C@H]2[C@H](O)[C@@H](CO)O2)c2nc(N)[nH]c(=O)c12  
 504 C=CCC(C)C.CC(C)(C)c1cccc1OS(=O)(=O)C(F)(F)F>>C=C(CC(C)C)c1cccc1C(C)(C)C  
 505 C=CC#N.COc1cc(Cl)ccc1Br>>COc1cc(Cl)ccc1/C=C/C#N  
 506 C=CCCC(=C)C.Fc1ccc(CCl)c(F)c1>>C=C(C)CCC(=C)Cc1ccc(F)cc1F  
 507 BrC1=C(C2=C[C@@H]3CCCC[C@H]3CC2)CCCC1.C=CC(=O)OC>>COC(=O)/C=C/C1=C(C2=C[C@@H]3CCCC[C@H]3CC2)CCCC1  
 508 Br1ccc2[nH]ccc2c1.C=CS(=O)(=O)c1cccc1>>O=S(=O)/C=C/c1ccc2[nH]ccc2c1c1cccc1  
 509 C=C.Cc1cccc(C(N)=O)c1Br>>C=Cc1c(C)cccc1C(N)=O  
 510 C=CC(=O)OC.CC(C)(C)c1nn(Cc2cccc2)cc1I>>COC(=O)/C=C/c1cn(Cc2cccc2)nc1C(C)(C)C  
 511 Br1cccc1.C=CCN1C(=O)c2cccc2C1=O>>O=C1c2cccc2C(=O)N1C/C=C/c1cccc1  
 512 C=CC(=O)N1N=Cc2cccc2C1c1cccc1C.COc1cc(Cc2cnc(N)nc2N)cc(I)c1OC>>COc1cc(Cc2cnc(N)nc2N)cc(/C=C/C(=O)N2N=Cc3cccc3C2c2cccc2C)c1OC  
 513 C=Cc1cccc1.CCOCc1nc2c(N)nc3cc(Br)ccc3e2n1CCCOC>>CCOCc1nc2c(N)nc3cc(/C=C/c4ccccn4)c3e2n1CCCOC  
 514 C=CC(=O)OCC.CC(C)Cn1c(CNC(=O)OC(C)(C)C)c(-c2cccc2)c2cc(Br)ccc2c1=O>>CCOC(=O)/C=C/c1ccc2c(=O)n(CC(C)C)c(CNC(=O)OC(C)(C)C)c(-c3cccc3)c2c1  
 515 C=C.FC(F)(F)c1cccc(CCl)c1>>C=CCc1cccc(C(F)(F)F)c1  
 516 Br1cccc2cccc12.C=Cc1cc2ccc(OC)cc2oc1=O>>COc1ccc2cc(/C=C/c3cccc4cccc34)c(=O)oc2c1  
 517 C=CCCC(=O)O.Ic1ccc2c(c1)OCO2>>O=C(O)CC/C=C/c1ccc2c(c1)OCO2  
 518 C=CS(=O)(=O)CC.O=C(OCc1cccc1)N1CCC[C@@H]1Cc1c[nH]c2ccc(Br)cc12>>CCS(=O)(=O)/C=C/c1ccc2[nH]cc(C[C@H]3CCCN3C(=O)OCc3cccc3)c2c1  
 519 C=CC(=O)OC.COc1cc([C@H]2Oc3c(OC)cc(Br)cc3[C@@H]2COC(C)=O)ccc1OC(C)=O>>COC(=O)/C=C/c1cc(OC)c2c(c1)[C@H](COC(C)=O)[C@@H](c1ccc(OC(C)=O)c(OC)c1)O2  
 520 C=Cc1ccc2cccc2c1.COc1ccc(Br)cc1>>COc1ccc(/C=C/c2ccc3cccc3c2)cc1  
 521 C=Cc1nc2c(N)ncnc2n1[C@@H]1O[C@H](CO[Si](C)(C)C(C)(C)C)[C@@H](O[Si](C)(C)C(C)(C)C)[C@H]1O[Si](C)(C)C(C)(C)C.Clc1cccc1>>CC(C)(C)[Si](C)(C)OC[C@H]1O[C@@H](n2c(/C=C/c3cccc3)nc3c(N)ncnc32)[C@H](O[Si](C)(C)C(C)(C)C)[C@@H]1O[Si](C)(C)C(C)(C)C  
 522 C=CC(=O)O.CN(C)c1cccc2c(S(=O)(=O)Nc3ccc(I)ccc3)cccc12>>CN(C)c1cccc2c(S(=O)(=O)Nc3ccc(/C=C/C(=O)O)ccc3)cccc12  
 523 C=CC(=O)OCC.O=C(Nc1cccc1Cl)c1ccc(Br)oc1>>CCOC(=O)/C=C/c1ccc(C(=O)Nc2cccc2Cl)oc1  
 524 C=CC(=O)OC.CCn1cnc2c(NCc3cccc(Br)c3)nc(N3CCOCC3)nc21>>CCn1cnc2c(NCc3cccc(/C=C/C(=O)OC)c3)nc(N3CCOCC3)nc21  
 525 C=CC(=O)OC.COc1ccc2c(c1)CCN(c1cccc1)C2(C)c1ccc(Br)cc1>>COC(=O)/C=C/c1ccc(C2(C)c3ccc(OC)cc3CCN2c2cccc2)cc1  
 526 C=CCOc1cccc1.FC(F)(F)c1cccc(I)c1>>FC(F)(F)c1cccc(/C=C/COc2cccc2)c1  
 527 C=CC(=O)OC.CC(C)(C)OC(=O)N1CCC2(CC1)CC(=O)c1cc(Br)cc(F)c1O2>>COC(=O)/C=C/c1cc(F)c2c(c1)C(=O)CC1(CCN(C(=O)OC(C)(C)C)CC1)O2  
 528 C=C[C@]1(CC)CCSe2cccc21.Ic1cccc1>>CC[C@@]1(/C=C/c2cccc2)CCSe2cccc21  
 529 C=CC(C)(C)O.COc1c(I)c(=O)n(C)c2cccc12>>COc1c(/C=C/C(C)(C)O)c(=O)n(C)c2cccc12  
 530 C=CC(=O)OC.Nc1ccc(F)cc1I>>COC(=O)/C=C/c1cc(F)ccc1N  
 531 Br1cccc1.C=CCS(N)(=O)=O>>NS(=O)(=O)C/C=C/c1cccc1  
 532 C=C(NC(=O)OC(C)(C)C(=O)OC.COc1ccc(C=O)cc1Oc1ccc(I)cc1>>COC(=O)/C=C/c1ccc(OCc2cc(C=O)ccc2OC)cc1NC(=O)OC(C)(C)C  
 533 C=CCNS(=O)(=O)c1cccc1.O=S(=O)(Oc1cccc1Cl)C(F)(F)F>>C=C(CNS(=O)(=O)c1cccc1)c1cccc1  
 534 C=CC(=O)OCC.CN1Cc2cc(Br)ccc2C1=O>>CCOC(=O)/C=C/c1ccc2c(c1)CN(C)C2=O

535 C=CC(=O)C(C)CC(=O)OC.C=CC(C)(C)OC(C)(C)[C@@H]1COc2ccc(Br)cc2O1>>C=CC(C)(C)OC(C  
)C)[C@@H]1COc2ccc(/C=C/C(=O)C(C)CC(=O)OC)cc2O1  
536 C=CC(=O)OCc1ccccc1.Clc1ccccc1>>O=C(/C=C/c1ccccc1)OCc1ccccc1  
537 C=CC(=O)OCC.Cc1nc(-c2ccccc2)c(Br)o1>>CCOC(=O)/C=C/c1oc(C)nc1-c1ccccc1  
538 C=CC=O.COc1ccc(COCC/C=C(\C)I)cc1>>COc1ccc(COCC/C=C(C)/C=C/C=O)cc1  
539 C=CC(=O)OC(C)(C)C.COc1c2occc2c(Br)c2ccc(=O)oc12>>COc1c2occc2c(/C=C/C(=O)OC(C)(C)C)c  
2ccc(=O)oc12  
540 C=COCCCC.COC(=O)Cc1ccccc1Br>>C=C(OCCCC)c1ccccc1CC(=O)OC  
541 C=CC(=O)OCC.CC(C)c1nn(-c2nc3ccccc3s2)c(-c2ccc(F)cc2)c1Br>>CCOC(=O)/C=C/c1c(C(C)C)nn(-  
c2nc3ccccc3s2)c1-c1ccc(F)cc1  
542 C=C/C=C(/OCC)C(=O)OC.Ic1ccccc1>>CCO/C(=C/C=C/c1ccccc1)C(=O)OC  
543 Brc1ccccc1.C=CC(=O)CCCC>>CCCCC(=O)/C=C/c1ccccc1  
544 C=CC(=O)N1N=Cc2ccccc2C1c1ccccc1.COc1cc(Cc2cnc(N)nc2N)cc(I)c1OC>>COc1cc(Cc2cnc(N)nc2  
N)cc(/C=C/C(=O)N2N=Cc3ccccc3C2c2ccccc2)c1OC  
545 Brc1cnc(OCC2ccccc2)c1.C=CCCO>>OCC/C=C/c1cnc(OCC2ccccc2)c1  
546 C=CCCC.CC(=O)c1ccc(Br)cc1>>CCC/C=C/c1ccc(C(C)=O)cc1  
547 C=CC(=O)OC(C)(C)C.O=C1Nc2ccccc2O/C1=C\c1ccc(Br)o1>>CC(C)(C)OC(=O)/C=C/c1ccc(/C=C2\O  
c3ccccc3NC2=O)o1  
548 C=Cc1ncccc1O[Si](C)(C)C(C)(C)C.N#Cc1ccc(Br)cc1>>CC(C)(C)[Si](C)(C)Oc1ccccc1/C=C/c1ccc(C  
#N)cc1  
549 C=CC(=O)OC.O=Cc1ccc(Br)cc1F>>COC(=O)/C=C/c1ccc(C=O)c(F)c1  
C=CC(=O)CCCOc1ccc(C(c2ccc(C(C)(C)C)cc2)(c2ccc(C(C)(C)C)cc2)c2ccc(C(C)(C)C)cc2)cc1.CC(C)(  
C)c1ccc(C(c2ccc(OCCCOc3ccc(/C=C/C(=O)CCCOc4ccc(C(c5ccc(C(C)(C)C)cc5)(c5ccc(C(C)(C)C)cc5)c  
5ccc(C(C)(C)C)cc5)cc4)cc3)cc2)(c2ccc(C(C)(C)C)cc2)c2ccc(C(C)(C)C)cc2)cc1  
551 C=CC(O)c1ccc1C.O=Cc1ccccc1Br>>Cc1ccccc1C(O)/C=C/c1ccccc1C=O  
552 C=CC(C)=O.O=C1Cc2c([nH]c3ccccc23)-c2cc(I)ccc2N1>>CC(=O)/C=C/c1ccc2c(c1)-  
c1[nH]c3ccccc3c1CC(=O)N2  
553 C=CB1OC(C)CC(C)(C)O1.Cc1ccc(I)cc1>>Cc1ccc(/C=C/B2OC(C)CC(C)(C)O2)cc1  
554 C=Cc1ccccc1.CC1=C(OS(=O)(=O)C(F)(F)F)CCCC1>>C=C(C1=C(C)CCCC1)c1ccccc1  
555 C=CC(=O)OC.C[C@H]1C[C@H](n2c(Nc3ccc(C(F)(F)F)cc3)nc3cc(Br)ccc32)CC(C)(C)C1>>COC(  
=O)/C=C/c1ccc2c(c1)nc(Nc1ccc(C(F)(F)F)cc1)n2[C@H]1C[C@H](C)CC(C)(C)C1  
556 C=Cc1ccc(Cl)cc1.O=Cc1ccc(Br)cc1>>O=Cc1ccc(/C=C/c2ccc(Cl)cc2)cc1  
557 C=Cc1ccc([N+](=O)[O-])cc1.[O-][N+](=Nc1ccc(Br)cc1)c1ccccc1>>O=[N+](O-  
)c1ccc(/C=C/c2ccc(N=[N+](O-))c3ccccc3)cc2)cc1  
558 C=CC1CCN(C(=O)OC(C)C)CC1.CS(=O)(=O)N1CCN(c2ccc(Br)cn2)CC1>>CC(C)OC(=O)N1CCC(/C  
=C/c2ccc(N3CCN(S(C)(=O)=O)CC3)nc2)CC1  
559 C=Cc1ccccc1.CCOC(=O)c1cc(=O)c2cc(Br)ccc2o1>>CCOC(=O)c1cc(=O)c2cc(/C=C/c3ccccc3)ccc2o1  
560 C=CC(=O)OC.Cc1cccc(C)c1C(=O)c1sc2cc(O)ccc2c1Oc1ccc(Br)cc1>>COC(=O)/C=C/c1ccc(Oc2c(C(  
=O)c3c(C)ccccc3C)sc3cc(O)ccc23)cc1  
561 C=Cc1cccc2ccccc12.COC(=O)C(Cc1ccccc1I)C(=O)OC>>COC(=O)C(Cc1ccccc1/C=C/c1cccc2ccccc1  
2)C(=O)OC  
562 Brc1ccc2[nH]c3ncccc3c2c1.C=CC(=O)N(C)Cc1cc2ccccc2n1C>>CN(Cc1cc2ccccc2n1C)C(=O)/C=C/c  
1ccc2[nH]c3ncccc3c2c1  
563 C=CCCCCCC.O=S(=O)(Oc1cccc2ccccc12)C(F)(F)F>>C=C(CCCCCC)c1cccc2ccccc12  
564 C=CC(=O)OC.CCc1ccc(N)c(Br)c1>>CCc1ccc(N)c(/C=C/C(=O)OC)c1  
565 C=Cc1cc(OCC2ccccc2)ccc1OCc1ccccc1.O=C(NCCc1ccccc1)c1cc(I)ccc1O>>O=C(NCCc1ccccc1)c1cc  
(/C=C/c2cc(OCC3ccccc3)ccc2OCc2ccccc2)ccc1O  
566 C=CC(=O)OCC.CC(C)(C)OC(=O)/C=C/c1ccc(CN(C(=O)C2CCCCC2)c2ccccc(Br)c2)cc1>>CCOC(=O)  
/C=C/c1cccc(N(Cc2ccc(/C=C/C(=O)OC(C)(C)C)cc2)C(=O)C2CCCCC2)c1  
C=C[C@H](C)[C@H]1CC[C@H]2[C@H]3CC(=O)[C@H]4C[C@H](O)CC[C@H]4(C)[C@H]3CC  
567 [C@H]2[C@H]1C.O=[N+](O-))c1ccc(I)cc1>>C[C@H](/C=C/c1ccc([N+](=O)[O-]  
)cc1)[C@H]1CC[C@H]2[C@H]3CC(=O)[C@H]4C[C@H](O)CC[C@H]4(C)[C@H]3CC[C@H]21  
568 C=CC(=O)OCC.Cc1nc(-c2ccccc2)nc(N)c1I>>CCOC(=O)/C=C/c1c(C)nc(-c2ccccc2)nc1N  
569 C=CC(=O)OC.Oc1ccc2nc(Br)sc2c1>>COC(=O)/C=C/c1nc2ccc(O)cc2s1  
570 C=CC(=O)OC(C)(C)C.COc1cc(Br)cc(F)c1C1c2ccc3c(cnn3C3CCCCO3)c2CC(C)(C)N1C[C@H](C)CF  
>>COc1cc(/C=C/C(=O)OC(C)(C)C)cc(F)c1C1c2ccc3c(cnn3C3CCCCO3)c2CC(C)(C)N1C[C@H](C)C  
571 C=CC(N)=O.COc1ccc(Br)cc1OC>>COc1ccc(/C=C/C(N)=O)cc1OC  
572 C=CC(=O)OCC.Cc1cc(C)cc(-c2ccccc2I)c1>>CCOC(=O)/C=C/c1ccccc1-c1cc(C)cc(C)c1  
573 Brc1ccc2c(c1)OCO2.C=CC(=O)OCCCC>>CCCCOC(=O)/C=C/c1ccc2c(c1)OCO2  
574 C=Cc1ccccc1.COc1ccc(Br)cc1>>COc1ccc(/C=C/c2ccccc2)cc1

575 C=CC(=O)OC(C)(C)C.Clc1cc(-c2cccc2)nc2cccc12>>CC(C)(C)OC(=O)/C=C/c1cc(-  
c2cccc2)nc2cccc12  
576 C=CC#N.COc1ccc2c(c1)CCC(C=O)=C2Br>>COc1ccc2c(c1)CCC(C=O)=C2/C=C/C#N  
577 C=Cc1cccc(OC)c1.CC(C)(C)OC(=O)c1ccc(Br)cc1[N+](=O)[O-]  
>>COc1cccc(/C=C/c2ccc(C(=O)OC(C)(C)C)c([N+](=O)[O-])c2)c1  
578 C=Cc1ccc(O)cc1.Oc1cc(O)cc(I)c1>>Oc1ccc(/C=C/c2ccc(O)cc(O)c2)cc1  
C=C[C@@H](CCCCC)O[Si](C)(C)C(C)(C)C.COCC(=O)CCC[C@H](O[Si](C)(C)C(C)(C)C)[C@@H](  
579 /C=C/c1cccc1Br)O[Si](C)(C)C(C)(C)C>>CCCCC[C@H](/C=C/c1cccc1/C=C/[C@@H](O[Si](C)(C)  
C(C)(C)C)[C@H](CCCC(=O)OC)O[Si](C)(C)C(C)(C)C)O[Si](C)(C)C(C)(C)C  
580 C=Cc1ccc2c(c1)C1CCCC1N2c1ccc(C)cc1.Cn1nc2c(Br)ccc(Nc3ncc(C4OCCO4)cn3)c2n1>>Cc1ccc(N  
2c3ccc(/C=C/c4ccc(Nc5ncc(C6OCCO6)cn5)c5nn(C)nc45)cc3C3CCCC32)cc1  
581 C=CC(=O)OC(C)(C)C.O=Cc1cc(F)ccc1Br>>CC(C)(C)OC(=O)/C=C/c1ccc(F)cc1C=O  
582 Br1ccc2c(c1)c(CCc1cccc1)cn2-  
c1cccc1.C=CC(=O)OC>>COC(=O)/C=C/c1ccc2c(c1)c(CCc1cccc1)cn2-c1cccc1  
583 C=CC(=O)OCC.Cn1c(Br)cccc1=O>>CCOC(=O)/C=C/c1cccc(=O)n1C  
584 C=Cc1scnc1C.COc1ccc(Br)cc1>>COc1ccc(/C=C/c2scnc2C)cc1  
585 C=Cc1ccc(Cl)cc1.CCOC(=O)C(C)(C)Br>>CCOC(=O)C(C)(C)/C=C/c1ccc(Cl)cc1  
586 C=CC12CCC(NC(=O)OC(C)(C)C)(CC1)CO2.COc1ccc2ncc(F)c(Br)c2n1>>COc1ccc2ncc(F)c(/C=C/C  
34CCC(NC(=O)OC(C)(C)C)(CC3)CO4)c2n1  
587 Br1cccs1.C=CC(F)(F)F>>FC(F)(F)/C=C/c1cccs1  
588 C=CC(=O)Nc1ccc(C)cc1.CC(C)(C)c1ccc2[nH]c3c(c2c1)CC(=O)Nc1ccc(I)cc1-  
3>>Cc1ccc(NC(=O)/C=C/c2ccc3c(c2)-c2[nH]c4ccc(C(C)(C)C)cc4c2CC(=O)N3)cc1  
589 C=CC(C)(C)O.Nc1ccc(Br)cc1>>CC(C)(O)/C=C/c1ccc(N)cc1  
590 C=CC(=O)OCC.CCOC(=O)c1cc(Br)enc1N>>CCOC(=O)/C=C/c1enc(N)c(C(=O)OCC)c1  
591 C=Cc1cccc1.CCCCC(Br)C(F)(F)F>>CCCCC(/C=C/c1cccc1)C(F)(F)F  
592 C=CC(C)(C)O.COCC(=O)/C=C/c1cn(S(=O)(=O)c2ccc(C)cc2)c2cccc(Br)c12)NC(C)=O>>COC(=O)/C(  
=C/c1cn(S(=O)(=O)c2ccc(C)cc2)c2cccc(/C=C/C(C)(C)O)c12)NC(C)=O  
593 C=CC(=O)OC.CN1c2nccc(I)c2N(C)c2c(C=O)ccnc21>>COC(=O)/C=C/c1ccnc2c1N(C)c1c(C=O)ccnc  
594 C=CC(=O)OC(C)(C)C.CN1CCN(C(=O)/C=C/c2ccc(Br)cc2)CC1>>CN1CCN(C(=O)/C=C/c2ccc(/C=C/  
C(=O)OC(C)(C)C)cc2)CC1  
595 C=CC(=O)OC.O=[N+][O-]c1ccc2cc(Br)enc2c1>>COC(=O)/C=C/c1enc2cc([N+](=O)[O-])ccc2c1  
596 C=CB1OC(C)CC(C)(C)O1.Clc1ccc(I)cc1>>CC1CC(C)(C)OB(/C=C/c2ccc(Cl)ccc2)O1  
597 C=COCCCC.COc1ccc2c(Br)cc(=O)oc2c1>>CCCCO/C=C/c1cc(=O)oc2cc(OC)ccc12  
598 C=CC(N)=O.CCCCC1(CCCC)C(=O)C(C2=NS(=O)(=O)c3cc(I)ccc3N2)=C(O)c2cc(F)ccc21>>CCCC  
C1(CCCC)C(=O)C(C2=NS(=O)(=O)c3ccc(/C=C/C(N)=O)ccc3N2)=C(O)c2cc(F)ccc21  
599 C=CN1CCCC1=O.Fc1cccc(Br)c1>>C=C(c1cccc(F)c1)N1CCCC1=O  
600 C=CC(=O)OC(C)(C)C.CN(C)CCN1Cc2cc(Br)enc2NC1=O>>CN(C)CCN1Cc2cc(/C=C/C(=O)OC(C)(  
C)C)nc2NC1=O  
601 C=CC(=O)OC(C)(C)C.Oc1ccc(C(=C2CCCCC2)c2ccc(Br)cc2)cc1F>>CC(C)(C)OC(=O)/C=C/c1ccc(C(  
=C2CCCCC2)c2ccc(O)c(F)c2)cc1  
602 C=CC(=O)OC(C)(C)C.O=S(=O)(c1ccc(Cl)cc1)n1ccc2cc(Br)enc21>>CC(C)(C)OC(=O)/C=C/c1enc2c(  
ccn2S(=O)(=O)c2ccc(Cl)cc2)c1  
603 C=CC(=O)OC.CC(C)(C)OC(=O)N1CCCC2(CC1)CC(=O)c1cc(Br)ccc1O2>>COC(=O)/C=C/c1ccc2c(c  
1)C(=O)CC1(CCCN(C(=O)OC(C)(C)C)CC1)O2  
604 C=Cc1ccccn1.COc1c(C)cc(Br)cc1C>>COc1c(C)cc(/C=C/c2cccn2)cc1C  
605 C=Cc1cccc2cccc12.COC(=O)c1cccc1I>>COC(=O)c1cccc1/C=C/c1cccc2cccc12  
606 C=Cc1cccc(OC)c1.C[Si](C)(OS(=O)(=O)C(F)(F)F)OS(=O)(=O)C(F)(F)F>>COc1cccc(/C=C/[Si](C)(C)  
)OS(=O)(=O)C(F)(F)F)c1  
607 C=CCN1C(=O)[C@H]2COCCN2C[C@H]1c1cc(F)cc(F)c1.O=C1Nc2ncccc2[C@]12Cc1ccc(Br)cc1C2  
>>O=C1[C@H]2COCCN2C[C@H](c2cc(F)cc(F)c2)N1C/C=C/c1ccc2c(c1)C[C@@]1(C2)C(=O)Nc  
608 C=C(F)C(=O)OC.COc1ccc(C(c2ccc(I)cc2)=C2[C@H]3C[C@H]4[C@H](C[C@H]2C4)C3)cc1>>CO  
C(=O)/C(F)=C/c1ccc(C(c2ccc(OC)cc2)=C2[C@H]3C[C@H]4[C@H](C[C@H]2C4)C3)cc1  
609 C=CC(F)(F)C(F)(F)C(F)(F)C(F)(F)C(F)(F)C(F)(F)C(F)(F)C(F)(F)C(F)(F)C(F)(F)C(F)(F)cc1  
c1ccc(/C=C/C(F)(F)C(F)(F)C(F)(F)C(F)(F)C(F)(F)C(F)(F)C(F)(F)C(F)(F)C(F)(F)cc1  
610 C=CC(=O)NC(C)(C)C.CC(=O)Cc1cccc1Br>>CC(=O)Cc1cccc1/C=C/C(=O)NC(C)(C)C  
611 C=Cc1ccc(-c2ccnc(-c3cccc3)c2)cc1.OCCCCCOc1ccc(Br)cc1>>OCCCCCOc1ccc(/C=C/c2ccc(-  
c3ccnc(-c4cccc4)c3)cc2)cc1  
612 C=CC(C)=O.CC(C)(C)[Si](C)(C)OC[C@H]1O[C@H](c2ccc(Br)cc2)C=C[C@@H]1O[Si](C)(C)C(C)(  
C)C>>CC(=O)/C=C/c1ccc([C@@H]2C=C[C@H](O[Si](C)(C)C(C)(C)C)[C@@H](CO[Si](C)(C)C(C)  
(C)C)O2)cc1

613 Br1ccc(C(=C(c2ccccc2)c2ccccc2)c2ccccc2)cc1.C=Cc1ccc(-  
n2c3ccccc3c3ccccc32)cc1>>C(=C/c1ccc(-  
614 C=Cc1ccccc1.O=Cc1ccc(Br)cc1>>O=Cc1ccc(/C=C/c2ccccc2)cc1  
615 C=CCN1C(=O)c2ccccc2C1=O.Fc1cc(Br)cc(F)c1F>>O=C1c2ccccc2C(=O)N1C/C=C/c1cc(F)c(F)c(F)c  
616 C=Cc1ccccc(O)c1.Oc1cc(Br)cc(O)c1F>>Oc1ccccc(/C=C/c2cc(O)c(F)c(O)c2)c1  
617 C=CC(=O)OC.Nc1ccccc1Br>>COC(=O)/C=C/c1ccccc1N  
618 C=CCCCCCC.O=S(=O)(Oc1ccc(C(F)(F)F)cc1)C(F)(F)F>>C=C(CCCCCC)c1ccc(C(F)(F)F)cc1  
Br1cnc2ccccc2c1.C=CCO[C@]1(C)C[C@@H](C)C(=O)[C@H](C)[C@@H](O)[C@](C)(O)[C@@H]  
619 ](CC)OC(=O)[C@H](C)[C@@H](O[C@H]2C[C@@](C)(OC)[C@@H](O)[C@H](C)O2)[C@H](C)[  
C@H]1O[C@@H]1O[C@H](C)C[C@H](N(C)C)[C@H]1O>>CC[C@H]1OC(=O)[C@H](C)[C@@H]  
620 ](O[C@H]2C[C@@](C)(OC)[C@@H](O)[C@H](C)O2)[C@H](C)[C@@H](O[C@@H]2O[C@H](C  
)\C[C@H](N(C)C)\C@H12O)\C@1(C)(OC/C=C/c2cnc3ccccc3c2)C1C.[C@@H](C)C(=O)\C@H1(C)\C@  
621 C=CSCC.CC(=O)c1ccc(Br)cc1>>CCS/C=C/c1ccc(C(C)=O)cc1  
C=CCNC(=O)OC(C)(C)C.COc1ccc(OS(=O)(=O)C(F)(F)F)c(Cl)c1>>C=C(CNC(=O)OC(C)(C)C)c1ccc  
622 (OC)cc1Cl  
C=Cc1ccccc1.COC(=O)/C=C/c1ccccc1Cl>>COC(=O)/C=C/c1ccccc1/C=C/c1ccccc1  
623 C=CCC(C)N(C)C(=O)OC(C)(C)C.O=C1c2ccccc2C(=O)N1c1ccccc(Br)c1>>CC(C/C=C/c1ccccc(N2C(=  
O)c3ccccc3C2=O)c1)N(C)C(=O)OC(C)(C)C  
624 C=Cc1ccc(OC(C)(C)C)cc1.FC(F)(F)C(F)(F)C(F)(F)Br>>CC(C)(C)Oc1ccc(/C=C/C(F)(F)C(F)(F)C(F)(  
F)F)cc1  
625 C=COCCCC.COc1ccccc1Cl>>C=C(OCCCC)c1ccccc1OC  
626 C=CC(=O)OCC.Cc1ccc(O)c(Br)c1>>CCOC(=O)/C=C/c1cc(C)ccc1O  
627 C=CC(C)(C)O.Nc1ccccc1Br>>CC(C)(O)/C=C/c1ccccc1N  
628 C=CC(=O)OCc1ccccc1.Cc1noc(C)c1-c1cnc2c(I)cn(S(=O)(=O)c3ccccc3)c2c1>>Cc1noc(C)c1-  
c1cnc2c(/C=C/C(=O)OCc3ccccc3)cn(S(=O)(=O)c3ccccc3)c2c1  
629 C=CC(N)=O.Cc1cc(Br)c2nc(-c3ccc(C4(NC(=O)OC(C)(C)C)CCC4)cc3)c(-  
c3ccccc3)n2c1>>Cc1cc(/C=C/C(N)=O)c2nc(-c3ccc(C4(NC(=O)OC(C)(C)C)CCC4)cc3)c(-  
C=CC[C@H]1C[C@@H]([C@@H](O[Si](C(C)C)(C(C)C)C(C)C)c2ccc(OC)c(OC)c2)CO[C@H]1c1  
630 ccc(OC)c(OC)c1.COc1ccc(Br)cc1OC>>COc1ccc(/C=C/C[C@H]2C[C@@H]([C@@H](O[Si](C(C)  
C)(C(C)C)C(C)C)c3ccc(OC)c(OC)c3)CO[C@H]2c2ccc(OC)c(OC)c2)cc1OC  
C=Cc1nc2c(N)ncnc2n1[C@H]1C[C@H](O[Si](C)(C)C(C)(C)C)[C@@H](CO[Si](C)(C)C(C)(C)C)O1.  
631 Cc1ccc(I)cc1>>Cc1ccc(/C=C/c2nc3c(N)ncnc3n2[C@H]2C[C@H](O[Si](C)(C)C(C)(C)C)[C@@H](C  
O[Si](C)(C)C(C)(C)C)O2)cc1  
C=CC(=O)N(C)Cc1oc2ccccc2c1C.CC1(C)Oc2cc(Br)cn2NC1=O>>Cc1c(CN(C)C(=O)/C=C/c2cnc3c(  
632 c2)OC(C)(C)C(=O)N3)oc2ccccc12  
C=CC(=O)OC(C)(C)C.Cc1nc(Cc2ccc(I)cc2)[nH]c1C(=O)c1ccccc1>>Cc1nc(Cc2ccc(/C=C/C(=O)OC(  
633 C)(C)C)cc2)[nH]c1C(=O)c1ccccc1  
C=CC(=O)OCC.C[C@H](c1ccc2ccccc12)N(CC1CN(C)c2ccc(Br)cc2O1)C(=O)OC(C)(C)C>>CCOC(  
634 =O)/C=C/c1ccc2c(c1)OC(CN(C(=O)OC(C)(C)C)[C@H](C)c1ccc3ccccc13)CN2C  
C=CN1C(=O)c2ccccc2C1=O.CC(=O)c1ccc(Cl)cc1>>CC(=O)c1ccc(/C=C/N2C(=O)c3ccccc3C2=O)cc  
635 C=Cc1cc2cc(OC)c(OC)cc2oc1=O.O=[N+](O-)]c1ccc(Br)cc1>>COc1cc2cc(/C=C/c3ccc([N+](=O)[O-]  
636 ]cc3)c(=O)oc2cc1OC  
C=C.O=C(c1ccccc1)c1ccc(Br)c1>>C=Cc1ccc(C(=O)c2ccccc2)c1  
637 C=CC(=O)OCCCC.COc1cc([N+](=O)[O-])cc1Br>>CCCCOC(=O)/C=C/c1ccc([N+](=O)[O-])cc1OC  
C=Cc1ccc2c(c1)c1ccccc1n2CCCCCCCC.O=Cc1ccc(Br)cc1>>CCCCCCCCn1c2ccccc2c2cc(/C=C/c3cc  
638 c(C=O)cc3)ccc21  
C=CC(=O)OCC.COc1ccc(I)c1>>CCOC(=O)/C=C/c1ccc(OC)c1  
639 Br1cncnc1.C=CC[C@H]1C(=O)N(c2ccccc2)[C@@H]1c1ccc(OC)cc1>>COc1ccc([C@@H]2[C@@  
H](C/C=C/c3cncnc3)C(=O)N2c2ccccc2)cc1  
640 C=CC(=C)C.COc1ccc(I)cc1>>C=C/C(C)=C/c1ccc(OC)cc1  
641 C=CC(=O)OC.FC(F)C(F)(F)Cn1nnc(-c2ccccc2)c1I>>COC(=O)/C=C/c1c(-  
C=CCN(C(=O)C(C)(C)C)[C@H](C)c1ccccc1.O=C1Nc2ncccc2[C@@]12Cc1cc(Br)cn1C2>>C[C@H]  
642 (c1ccccc1)N(C/C=C/c1cnc2c(c1)C[C@@]1(C2)C(=O)Nc2ncccc21)C(=O)C(C)(C)C  
C=CC(=O)OC.CC(C)(C)c1ccc(N)c(Br)c1>>COC(=O)/C=C/c1cc(C(C)(C)C)ccc1N  
643 C=C.CC(C)(C)C1CC=C(Br)CC1>>C=CC1=CCC(C(C)(C)C)CC1  
644 \*COC(=O)/C=C/c1ccc(N(Cc2ccc(Br)cc2)C(=O)C2CCCCC2)c1.C=Cc1ccccc1>>\*COC(=O)/C=C/c1c  
ccc(N(Cc2ccc(/C=C/c3ccccc3)cc2)C(=O)C2CCCCC2)c1  
645 C=CCN1C(=O)c2ccccc2C1=O.Fc1ccc(I)cc1>>O=C1c2ccccc2C(=O)N1C/C=C/c1ccc(F)cc1  
646 C=COCCCC.Cc1cc(CO)ccc1I>>C=C(OCCCC)c1ccc(CO)cc1C  
C=C(OC(=O)c1ccccc1)C(=O)OC.CC(=O)OCc1c(I)ccc(NC(=O)OC(C)(C)C)c1C>>COC(=O)/C=C/c1  
647 ccc(NC(=O)OC(C)(C)C)c(C)c1COC(C)=O)OC(=O)c1ccccc1  
648 C=CCN1C(=O)c2ccccc2C1=O.Fc1ccc(I)cc1>>O=C1c2ccccc2C(=O)N1C/C=C/c1ccc(F)cc1  
649 C=COCCCC.Cc1cc(CO)ccc1I>>C=C(OCCCC)c1ccc(CO)cc1C  
C=C(OC(=O)c1ccccc1)C(=O)OC.CC(=O)OCc1c(I)ccc(NC(=O)OC(C)(C)C)c1C>>COC(=O)/C=C/c1  
650 ccc(NC(=O)OC(C)(C)C)c(C)c1COC(C)=O)OC(=O)c1ccccc1



651 C=CC(=O)OC(C)(C)C.O=S(=O)(c1cccc1)n1ccc2cc(Br)enc21>>CC(C)(C)OC(=O)/C=C/c1enc2c(ccn2  
S(=O)(=O)c2cccc2)c1  
652 Br1ccnc1.C=CC(=O)CC>>CCC(=O)/C=C/c1ccnc1  
653 C=CC(=O)OC.Cc1ccc2cc(Br)ccc2n1>>COC(=O)/C=C/c1ccc2nc(C)ccc2c1  
654 C=Cc1cccc(C=O)c1.CCOC(=O)C(F)(F)Br>>CCOC(=O)C(F)(F)/C=C/c1cccc(C=O)c1  
655 C=Cc1cccc1.C[Si](C)(C)Cl>>C[Si](C)(C)/C=C/c1cccc1  
656 C=CC(=O)c1ccc(OC)c(OC)c1.CC(=O)Oc1cccc1I>>COc1ccc(C(=O)/C=C/c2cccc2OC(C)=O)cc1OC  
657 C=CS(C)(=O)=O.O=Cc1cccc(Br)c1>>CS(=O)(=O)/C=C/c1cccc(C=O)c1  
658 C=CC(=O)OC.CC(C)[C@@H]1C=C(OS(=O)(=O)C(F)(F)F)[C@H](C)CC1>>COC(=O)/C=C/C1=C[C@@H](C(C)C)CC[C@H]1C  
659 C=CC(OCC)OCC.Fc1ccc(Br)cc1>>CCOC(/C=C/c1ccc(F)cc1)OCC  
660 C=Cc1cccc1.c1ccc([I+])c2cccc2)cc1>>C(=C/c1cccc1)\c1cccc1  
661 C=CC(=O)OC(C)(C)C.Oc1ccc(C=C2CCSCC2)c2ccc(Br)cc2)cc1>>CC(C)(C)OC(=O)/C=C/c1ccc(C(=  
C2CCSCC2)c2ccc(O)cc2)cc1  
662 C=C1N=C(c2cccc2)[C@H](C(C)C)N(C(=O)OC(C)(C)C)C1=O.Cc1cccc1I>>Cc1cccc1/C=C1\N=C(  
c2cccc2)[C@H](C(C)C)N(C(=O)OC(C)(C)C)C1=O  
663 C=Cc1ccc(Cl)cc1.Cc1ccc(O)c(I)c1>>Cc1ccc(O)c(/C=C/c2ccc(Cl)cc2)c1  
664 C=CCC(C(=O)OC)C(=O)OC.COc1cccc1Br>>COC(=O)C(C/C=C/c1cccc1OC)C(=O)OC  
665 C=CC(=O)OC.CC(C)(C)OC(=O)N1CCc2ccc(Br)cc2CC1>>COC(=O)/C=C/c1ccc2c(c1)CCN(C(=O)O  
C(C)(C)C)CC2  
666 C=CCNC(=O)OC(C)(C)C.N#Cc1ccc(Cl)cc1>>C=C(CNC(=O)OC(C)(C)C)c1ccc(C#N)cc1  
667 C=CS(=O)(=O)c1cccc1.FC(F)(F)c1ccc(Br)cc1>>O=S(=O)(/C=C/c1ccc(C(F)(F)F)cc1)c1cccc1  
668 C=C(C(=O)OC)C1C(I)=C(c2cccc2)C2(C=CC(=O)C=C2)N1S(C)(=O)=O.C=CC(=O)OC>>C=C(C(=O)  
)OC)C1C(/C=C/C(=O)OC)=C(c2cccc2)C2(C=CC(=O)C=C2)N1S(C)(=O)=O  
669 C=CCP(=O)(OCC)OCC.COc1nc2ccc(Br)cc2nc1OC>>CCOP(=O)(C/C=C/c1ccc2nc(OC)c(OC)nc2c1)  
670 C=COCCCC.COc1cccc2cc(Br)ccc12>>C=C(OCCCC)c1ccc2c(OC)cccc2c1  
671 Br1ccc(Cc2cccc2)cc1.C=CC(=O)OCC>>CCOC(=O)/C=C/c1ccc(Cc2cccc2)cc1  
672 C=CC(=O)OCCCC.CCN(c1cccc1)c1cccc(Br)n1>>CCCCOC(=O)/C=C/c1cccc(N(CC)c2cccc2)n1  
673 C=Cc1cc2cc(OC)c(OC)cc2oc1=O.O=[N+][([O-])c1ccc(I)cc1>>COc1cc2cc(/C=C/c3ccc([N+](=O)[O-]  
)cc3)c(=O)oc2cc1OC  
674 C=C(F)C(C)=O.FC(F)(F)c1cccc(I)c1>>CC(=O)/C(F)=C/c1cccc(C(F)(F)F)c1  
675 C=CC(=O)OC.FC(F)(F)c1cc(Cl)ccc1>>COC(=O)/C=C/c1ccc(Cl)cc1C(F)(F)F  
676 C=Cc1ccc(C(F)(F)F)cc1.IC1CCCCC1>>FC(F)(F)c1ccc(/C=C/C2CCCCC2)cc1  
677 C=CC(=O)O.O=C1Nc2ccc(Br)cc2C1=O>>O=C(O)/C=C/c1ccc2c(c1)C(=O)C(=O)N2  
678 C=C.Ic1ccc2[nH]ccc2c1>>C=Cc1ccc2[nH]ccc2c1  
679 C=C(C)C(=O)OC.COC(=O)c1cccc1Cl>>COC(=O)/C(C)=C/c1cccc1C(=O)OC  
680 C=CC(=O)OCC.COc1cc(Br)enc1[N+](=O)[O-]>>CCOC(=O)/C=C/c1cnc([N+](=O)[O-])c(OC)c1  
681 C=CC(=O)OCC.Fc1ccc(Br)c(OCc2cccc2I)c1>>CCOC(=O)/C=C/c1cccc1COc1cc(F)ccc1Br  
682 C=CC(=O)OC.CC(C)(C)OC(=O)NCc1ccc(Br)cc1>>COC(=O)/C=C/c1ccc(CNC(=O)OC(C)(C)C)cc1  
683 C=C/C=C(\CCCC)OCC.Cc1cccc1I>>CCCC/C=C\C=C\c1cccc1C)OCC  
684 C=CCCCCCC.CC(=O)c1ccc(Br)cc1>>C=C(CCCCCC)c1ccc(C(C)=O)cc1  
685 C=CC(=O)Nc1cccc1.O=C1Cc2c([nH])c3ccc(I)cc23)-  
c2cccnc2N1>>O=C(/C=C/c1ccc2[nH])c3c(c2c1)CC(=O)Nc1cccc1-3)Nc1cccc1  
686 C=C1C(=O)O[C@H]2C3=C(C)CCC[C@]3(C)C(=O)C[C@H]12.COc1ccc(I)cc1OC>>COc1ccc(/C=C  
C2/C(=O)O[C@H]3C4=C(C)CCC[C@]4(C)C(=O)C[C@H]23)cc1OC  
687 C=Cc1cccc1.CCCCCCCCCCCCCCBr>>CCCCCCCCCCCCC/C=C/c1cccc1  
688 C=C[C@H]1O[C@@H]2OC(C)(C)O[C@@H]2[C@H]1O.O=C1/C(=C/c2cccc2)Oc2ccc(Br)cc21>>C  
C1(C)O[C@H]2O[C@H](/C=C/c3ccc4c(c3)C(=O)/C(=C/c3cccc3)O4)[C@H](O)[C@H]2O1  
689 Br1ccnc1.C=CC(=O)OC>>COC(=O)/C=C/c1ccnc1  
690 C=CC(=O)OCC.Fc1ccc(Oc2nc(-c3ccc(Br)cc3)nc3ccsc23)c(F)c1>>CCOC(=O)/C=C/c1ccc(-  
c2nc(Oc3ccc(F)cc3F)c3cccc3n2)cc1  
691 C=C(NC(C)=O)C(=O)OC.Cc1cc(C)cc(I)c1>>COC(=O)/C(=C/c1cc(C)cc(C)c1)NC(C)=O  
692 C=CC(=O)OCCCCCCCCCCCCC.O=c1[nH]c(=O)n([C@H]2C[C@H](O)[C@@H](CO)O2)cc1I>>CCC  
CCCCCCCCCOC(=O)/C=C/c1cn([C@H]2C[C@H](O)[C@@H](CO)O2)c(=O)[nH]c1=O  
693 C=Cc1ccnc(F)c1.CC(C)(C)OC(=O)N1CC[C@H]1COc1cnc(Cl)c(I)c1>>CC(C)(C)OC(=O)N1CC[C@H  
1]COc1cnc(Cl)c(/C=C/c2ccnc(F)c2)c1  
694 C=CC(=O)OCC.CC(C)(C)OC(=O)c1cccc1Br>>CCOC(=O)/C=C/c1cccc1C(=O)OC(C)(C)C  
695 C=CCCCCCCCCCCCC.c1ccc([I+])c2cccc2)cc1>>CCCCCCCCCCCCC/C=C/c1cccc1  
696 C=CC(C)(C)C.COc1cc(Br)ccc1O>>COc1cc(/C=C/C(C)(C)C)ccc1O  
697 C=CCOc1cccc1CC.Ic1cccc1>>CCc1cccc1OC/C=C/c1cccc1

[illegible]

740 Br1cccc1.C=C(NC(C)=O)C(=O)OC>>COC(=O)/C(=C/c1cccc1)NC(C)=O  
741 C=CC(=O)OCC.COC(=O)c1cc(I)ccc1N>>CCOC(=O)/C=C/c1ccc(N)c(C(=O)OC)c1  
742 Br1cccc1I.C=C(F)[Si](C)(c1cccc1)c1cccc1>>C[Si](/C(F)=C/c1cccc1Br)(c1cccc1)c1cccc1  
743 C=CC#N.Cc1cc(Br)cc(C)c1Nc1ccnc(NC2CCN(C(=O)OC(C)(C)C)CC2)n1>>Cc1cc(/C=C/C#N)cc(C)c  
1Nc1ccnc(NC2CCN(C(=O)OC(C)(C)C)CC2)n1  
744 Br1ccc(CN2CC3CCC(C2)O3)cc1.C=CB1OC(C)CC(C)(C)O1>>CC1CC(C)(C)OB(/C=C/c2ccc(CN3C  
C4CCC(C3)O4)cc2)O1  
745 C=CC(=O)OC.COC(=O)c1cc(Br)c2cccc2n1>>COC(=O)/C=C/c1cc(C(=O)OC)nc2cccc12  
746 C=CC(=O)OC.N#Cc1ccc(Br)c(F)c1>>COC(=O)/C=C/c1ccc(C#N)cc1F  
747 C=C1C[C@H]2[C@@H]3CCc4cc(OC)ccc4[C@H]3CC[C@]2(C)C1=O.COc1cccc(Br)c1>>COc1cccc  
(/C=C2C[C@H]3[C@@H]4CCc5cc(OC)ccc5[C@H]4CC[C@]3(C)C2=O)c1  
748 C=Cc1ccc(O[Si](C)(C)C(C)(C)C)c(OC)c1.C[Si](C)(OS(=O)(=O)C(F)(F)F)OS(=O)(=O)C(F)(F)F>>CO  
c1cc(/C=C/[Si](C)(C)OS(=O)(=O)C(F)(F)F)ccc1O[Si](C)(C)C(C)(C)C  
749 C=CC(=O)OCC(CC)CCCC.CC(=O)c1ccc(Cl)cc1>>CCCC(CC)COC(=O)/C=C/c1ccc(C(C)=O)cc1  
750 C=CC(OCC)OCC.CCOC(=O)c1ccc(I)cc1>>CCOC(=O)c1ccc(/C=C/C(OCC)OCC)cc1  
751 C=CCN(C(=O)OC(C)(C)C)C(=O)OC(C)(C)C.CC(=O)c1cccc(Br)c1>>CC(=O)c1cccc(/C=C/CN(C(=O)  
OC(C)(C)C)C(=O)OC(C)(C)C)c1  
752 C=CCOc1cccc1.Clc1ccc(Br)cc1>>Clc1ccc(/C=C/COc2cccc2)cc1  
753 C=Cc1ccnc1.CC(C)(C)OC(=O)NCC(c1cccc1)c1cncc(Br)c1>>CC(C)(C)OC(=O)NCC(c1cccc1)c1cn  
cc(/C=C/c2ccnc2)c1  
754 Br1coc2ncccc12.C=CC(=O)OCC>>CCOC(=O)/C=C/c1coc2ncccc12  
755 Br1ccc(-c2nc3cccc3s2)cc1.C=Cc1ccc2c(c1)Sc1cccc1N2CC>>CCN1c2cccc2Sc2cc(/C=C/c3ccc(-  
c4nc5cccc5s4)cc3)ccc21  
756 C=C(CC(=O)OC)C(=O)OC.Ic1cccc1>>COC(=O)C/C(=C/c1cccc1)C(=O)OC  
757 C=CC(=O)OCCN(C)C.COc1ccc(NC(=O)c2ccc(=O)c3cc(Br)ccc3o2)cc1>>COc1ccc(NC(=O)c2cc(=O)c  
3cc(/C=C/C(=O)OCCN(C)C)ccc3o2)cc1  
758 Br1cccn1.C=Cc1ccc(OC)cc1>>COc1ccc(/C=C/c2cccn2)cc1  
759 C=C(NC(C)=O)C(=O)OC.Cc1cccc(C)c1Br>>COC(=O)/C(=C/c1c(C)cccc1C)NC(C)=O  
760 C=Cc1cccc1.COC(=O)c1ccc(Cl)cc1>>COC(=O)c1ccc(/C=C/c2cccc2)cc1  
761 C=CCNC(=O)C(F)(F)F.CN(C)C=Nc1nc(=O)n([C@H]2C[C@H](O)[C@@H](CO)O2)cc1I>>CN(C)C  
=Nc1nc(=O)n([C@H]2C[C@H](O)[C@@H](CO)O2)cc1/C=C/CNC(=O)C(F)(F)F  
762 Br1ccc(I)cc1.C=CC(=O)OCCCC>>CCCCOC(=O)/C=C/c1ccc(Br)cc1  
763 C=CC(=O)OC(C)(C)C.Oc1ccc(C=C2CCCC2)c2ccc(Br)cc2)cc1>>CC(C)(C)OC(=O)/C=C/c1ccc(C(=C  
C2CCCC2)c2ccc(O)cc2)cc1  
764 C=CC(=O)OCC.Cc1noc(C)c1I>>CCOC(=O)/C=C/c1c(C)noc1C  
765 C=C[C@H](C)[C@H](O)C/C=C/C(=O)OC.COc1ccc(I)cc1>>COC(=O)/C=C/C[C@H](O)[C@H](  
C)/C=C/c1ccc(OC)cc1  
766 C=CC(=O)OC(C)(C)C.FC(F)Cn1cc(I)cn1>>CC(C)(C)OC(=O)/C=C/c1cnn(CC(F)F)c1  
767 C=CC#N.CC(=O)c1ccc(Br)cc1>>CC(=O)c1ccc(/C=C/C#N)cc1  
768 C=COCCCC.N#Cc1cccc(Br)c1>>C=C(OCCCC)c1cccc(C#N)c1  
769 Br1cncc(-c2cccc2)c1.C=CCCO>>OCC/C=C/c1cncc(-c2cccc2)c1  
770 C=C[C@H]1CCCCN1C(=O)OC(C)(C)C.CC(=O)Oc1ccc(I)cc1>>CC(=O)Oc1ccc(/C=C/[C@H]2C  
CCCN2C(=O)OC(C)(C)C)cc1  
771 C=Cc1ccc(C)cc1.COc1cccc1Br>>COc1cccc1/C=C/c1ccc(C)cc1  
772 C=Cc1cccc1N.COc1ccc(Br)c(OC)c1>>COc1ccc(/C=C/c2cccc2N)c(OC)c1  
773 C=CC(C)(C)C.COC(=O)c1ccc(Br)cc1C>>COC(=O)c1ccc(/C=C/C(C)(C)C)cc1C  
774 C=Cc1cncc1.CCCCCCOc1ccc(Br)c(F)c1>>CCCCCOc1ccc(/C=C/c2cncc2)c(F)c1  
775 C=CCO[Si](CC)(CC)CC.COc1cccc(CCl)c1>>C=C(CO[Si](CC)(CC)CC)Cc1cccc(OC)c1  
776 C=C.N#CCc1cccc1I>>C=Cc1cccc1CC#N  
777 C=CC(=O)OCC.CS(=O)(=O)c1ccc(Br)cc1Cl>>CCOC(=O)/C=C/c1ccc(S(C)(=O)=O)c(Cl)c1  
778 C=Cc1ccc2cccc2c1.COc1ccc(C)c(I)c1>>COc1ccc(C)c(/C=C/c2ccc3cccc3c2)c1  
779 C=CC(=O)OC1CCCCC1.Ic1cccc1>>O=C(/C=C/c1cccc1)OC1CCCCC1  
780 C=CC(=O)OCc1cccc1.Ic1ccn(-c2cccc2)n1>>O=C(/C=C/c1ccn(-c2cccc2)n1)OCc1cccc1  
781 C=CC(=O)OC.Cc1ccc2nc3c(cc2c1)c(I)c(-c1cccc1)c1sc13>>COC(=O)/C=C/c1c(-  
c2cccc2)c2sc12nc3ccc(C)cc3cc12  
782 C=C[C@H](O)[C@@H](O)COCc1ccc(OC)cc1.Cc1cccc1I>>COc1ccc(COC[C@H](O)[C@@H](O)/  
C=C/c2cccc2C)cc1  
783 C=Cc1ccc(N(CCCC)CCCC)cc1.O=Cc1ccc(Br)s1>>CCCN(CCCC)c1ccc(/C=C/c2ccc(C=O)s2)cc1  
784 C=CC(=O)Nc1cccc2ccnc12.Fc1ccc(I)cc1>>O=C(/C=C/c1ccc(F)cc1)Nc1cccc2ccnc12

785 C=Cc1ence(C#N)c1Nc1ccc2[nH]ccc2c1C.ClCCOc1cccc1Br>>Cc1c(Nc2c(C#N)ence2/C=C/c2cccc2  
OCCCl)ccc2[nH]ccc12  
786 Bre1cenc2cccc12.C=CC(=O)OCCCC>>CCCCOC(=O)/C=C/c1cenc2cccc12  
787 C=CC(=O)OC.COCl=C(I)CON(Cc2cccc2)[C@H]1[C@H]1COC(C)(C)O1>>COC(=O)/C=C/C1=C(  
OC)[C@H]([C@H]2COC(C)(C)O2)N(Cc2cccc2)OC1  
788 C=Cc1ccc2c(c1)Sc1cccc1N2CCCCCCCC.CCCCCCCCN1c2ccc(Br)cc2Sc2cc(C=O)ccc21>>CCCC  
CCCN1c2cccc2Sc2cc(/C=C/c3ccc4c(c3)Sc3cc(C=O)ccc3N4CCCCCCCC)ccc21  
789 C=C(NC(C)=O)C(=O)O.COc1ccc(Br)cc1OC>>COc1ccc(/C=C(\NC(C)=O)C(=O)O)cc1OC  
790 C=CCNS(=O)(=O)c1ccc(C)cc1.Fc1ccc(I)cc1>>Cc1ccc(S(=O)(=O)NC/C=C/c2ccc(F)cc2)cc1  
791 C=CC#N.COc1ccc(Br)cc1OC>>COc1ccc(/C=C/C#N)cc1OC  
792 C=Cc1cccc1.O=c1c(Br)c(-c2cccc2)oc2cccc12>>O=c1c(/C=C/c2cccc2)c(-c2cccc2)oc2cccc12  
793 C=CC1CC(=O)N1.Nc1ccc(I)cc1>>Nc1ccc(/C=C/C2CC(=O)N2)cc1  
794 C=CC#N.COC(=C1C2CC3CC(C2)CC1C3)c1ccc(I)c(O)c1>>COC(=C1C2CC3CC(C2)CC1C3)c1ccc(/  
C=C/C#N)c(O)c1  
795 Bre1cenc1.C=Cc1ccc(OC)cc1>>COc1ccc(/C=C/c2cenc2)cc1  
C=CCC(=O)O.CC(=O)OC[C@H]1O[C@H](Oc2n[nH]c(C(C)C)c2Cc2ccc(Br)cc2)[C@H](OC(C)=O  
796 )[C@H](OC(C)=O)[C@H]1OC(C)=O>>CC(=O)OC[C@H]1O[C@H](Oc2n[nH]c(C(C)C)c2Cc  
2ccc(/C=C/CC(=O)O)cc2)[C@H](OC(C)=O)[C@H](OC(C)=O)[C@H]1OC(C)=O  
797 Bre1cces1.C=CCCCCCCC>>CCCCCCCC/C=C/c1cces1  
798 Bre1cccc1.C=Cc1cc2cccc2oc1=O>>O=c1oc2cccc2cc1/C=C/c1cccc1  
799 C=C[Si](CC)(CC)CC.CC(=O)c1cccc1Br>>CC[Si](/C=C/c1cccc1C(C)=O)(CC)CC  
800 C=CC(=O)OCC.O=c1cc(-c2cccc2)oc2ccc(Br)cc12>>CCOC(=O)/C=C/c1ccc2oc(-  
C=Cc1cc(OC(C)=O)cc(OC(C)=O)c1.CC(=O)Oc1ccc(Cl)cc1>>CC(=O)Oc1ccc(/C=C/c2cc(OC(C)=O)c  
801 c(OC(C)=O)c2)cc1  
802 C=CC(=O)OC.CC(C)c1ccc(I)cc1>>COC(=O)/C=C/c1ccc(C(C)C)cc1  
803 Bre1ccenc1.C=CCC(C)O>>CC(O)C/C=C/c1ccenc1  
804 Bre1ccc(-c2enc3cccc3n2)cc1.C=CCn1c(-c2ccc(OC)cc2)nc2cccc2c1=O>>CCOc1ccc(-  
c2nc3cccc3c(=O)n2C/C=C/c2ccc(-c3enc4cccc4n3)cc2)cc1  
805 C=CC(=O)OCC.COCCOc1ccc(I)c([N+](=O)[O-]  
806 C=Cc1cenc1.Cc1cc(N(c2ccc([N+](=O)[O-])cc2)c2ccc([N+](=O)[O-]  
])cc2)ccc1Br>>Cc1cc(N(c2ccc([N+](=O)[O-])cc2)c2ccc([N+](=O)[O-])cc2)ccc1/C=C/c1cenc1  
C=CC(=O)OC(C)(C)C.CCCOc1ccc(Br)cc1-  
807 c1nc2c(CCC)nn(C)c2c(=O)[nH]1>>CCCOc1ccc(/C=C/C(=O)OC(C)(C)C)cc1-  
c1nc2c(CCC)nn(C)c2c(=O)[nH]1  
808 C=COCCCC.Fc1cccc(Cl)c1>>C=C(OCCCC)c1cccc(F)c1  
809 C=Cc1ccc(Br)cc1.COc1ccc(CNc2c(C)cc(C)cc2)cc1>>COc1ccc(CNc2c(C)cc(C)cc2/C=C/c2ccc(Br)cc  
2)cc1  
810 C=CC(=O)OCC.NC(=O)c1cc(O)cc(I)c1>>CCOC(=O)/C=C/c1cc(O)cc(C(N)=O)c1  
811 C=Cc1ccc(/C=C/c2ccc(C(C)(C)C)cc2)cc1.Ic1ccc(C(c2cccc2)(c2cccc2)c2cccc2)cc1>>CC(C)(C)c1c  
cc(/C=C/c2ccc(/C=C/c3ccc(C(c4cccc4)(c4cccc4)c4cccc4)cc3)cc2)cc1  
812 Bre1cnc2cccc12.C=CCNC(=O)OC(C)(C)C>>C=C(CNC(=O)OC(C)(C)C)c1cnc2cccc12  
813 C=CC[C@H](NC(=O)OC(C)(C)C)C(=O)O.Ic1cnc1>>CC(C)(C)OC(=O)N[C@H](C/C=C/c1cnc1  
1)C(=O)O  
Bre1cccc2cccc12.C=CCO[C@H]1CC(=O)O[C@H](C)C/C=C/C=C/[C@H](O[Si](C)(C)C)(C)C)[  
C@H](C)C[C@H](CC(OC)OC)[C@H](O[C@H]2O[C@H](C)[C@H](O[C@H]3C[C@@](C)(O)[  
814 C@@H](OC(=O)CC)[C@H](C)O3)[C@H](N(C)C)[C@H]2OC(C)=O)[C@H]1OC>>CCC(=O)O[C@  
H]1[C@H](C)O[C@H](O[C@H]2[C@H](N(C)C)[C@H](OC(C)=O)[C@H](O[C@H]3[C@  
H](OC)[C@H](OC/C=C/c4cccc5cccc45)CC(=O)O[C@H](C)C/C=C/C=C/[C@H](O[Si](C)(C)C)(C)C)(C  
(C)[C@H](C)C)[C@H](O[C@H]2C(C)C)[C@H](O[C@H]1C)O  
815 C=CCCOc1cccc1.CC1(c2cccc2Br)CC(=O)C1>>CC1(c2cccc2/C=C/CCOCc2cccc2)CC(=O)C1  
816 C=Cc1ccc(-c2c(-c3ccc(C=C)cc3)c(=O)c2=O)cc1.COc1ccc(I)cc1>>C=Cc1ccc(-c2c(-  
c3ccc(/C=C/c4ccc(OC)cc4)cc3)c(=O)c2=O)cc1  
817 C=CC(=O)N(C)OC.Cc1cccc1I>>CON(C)C(=O)/C=C/c1cccc1C  
818 C=CCCCCCC.CC(C)(C)c1cccc(OS(=O)(=O)C(F)(F)F)c1>>C=C(CCCCCC)c1cccc(C(C)(C)C)c1  
819 C=CC(=O)OCC.C[Si](C)(C)CN(Cc1cc2c(c1I)OCO2)C(CC1OCCO1)[Si](C)(C)C>>CCOC(=O)/C=C/  
c1cc2c(cc1CN(C[Si](C)(C)C)C(CC1OCCO1)[Si](C)(C)C)OCO2  
820 C=CC(OC)OC.Fc1cc(C(F)(F)F)ccc1I>>COC(/C=C/c1ccc(C(F)(F)F)cc1F)OC  
821 C=Cc1ccc(OC(C)=O)cc1.COC(=O)c1cc(Br)ccc1OC(C)=O>>COC(=O)c1cc(/C=C/c2ccc(OC(C)=O)cc  
2)ccc1OC(C)=O  
822 C=Cc1cccc(OC)c1OC.O=c1ccc2ccc(OS(=O)(=O)C(F)(F)F)cc2o1>>COc1cccc(/C=C/c2ccc3ccc(=O)oc  
3c2)c1OC

823 C=C(Br)CC.C=CC(=O)OCCCC>>C=C(/C=C/C(=O)OCCCC)CC  
824 C=C/C=C/C1CCCCN1S(=O)(=O)c1ccc(C)cc1.Clc1ccc(I)cn1>>Cc1ccc(S(=O)(=O)N2CCCCC2/C=C/C(=O)c2ccc(Cl)nc2)cc1  
825 C=CC(=O)OC.COC(=O)c1cccc2c1oc1ccc(-c3csc(-c4cccc(I)c4)n3)cc12>>COC(=O)/C=C/c1cccc(-c2nc(-c3ccc4oc5c(C(=O)OC)cccc5c4c3)cs2)c1  
826 C=COCCO.N#Cc1ccc(Br)cc1>>C=C(OCCO)c1ccc(C#N)cc1  
827 C=CC(=O)OC(C)(C)C.Cc1cccc(Br)c1>>Cc1cccc(/C=C/C(=O)OC(C)(C)C)c1  
828 C=CCC(=O)OC.O=S(=O)(Oc1ccc(C(=C2C3CCCC2CCC3)c2ccc(O)cc2)cc1)C(F)(F)F>>COC(=O)C/C(=O)c1ccc(C(=C2C3CCCC2CCC3)c2ccc(O)cc2)cc1  
829 C=CC(=O)OC.Fc1cccc(I)c1>>COC(=O)/C=C/c1cccc(F)c1  
830 C=Cc1ccc(OC)cc1.COc1ccc(I)c(OC)c1>>COc1ccc(/C=C/c2ccc(OC)cc2OC)cc1  
831 C=CC(=O)OCC.Cc1cccc(Cn2nc(I)c3cccc32)c1>>CCOC(=O)/C=C/c1nn(Cc2cccc(C)c2)c2ccccc12  
832 C=CC(C)(C)O.Nc1ncc(Br)en1>>CC(C)(O)/C=C/c1ncc(N)nc1  
833 C=Cc1ccc(OC)c(OC)c1.O=C(Nc1cccc1I)c1cccc2ccccc12>>COc1ccc(/C=C/c2ccccc2NC(=O)c2ccccc3ccccc23)cc1OC  
834 Br1cccn1.C=CCON=C1[C@H](C)[C@H]2OC(=O)O[C@]2(C)[C@@H](CC)OC(=O)[C@H](C)C(=O)[C@H](C)[C@@H](O[C@@H]2O[C@H](C)C[C@H](N(C)C)[C@H]2OC(C)=O)[C@](C)(OC)C[C@H]1C>>CC[C@H]1OC(=O)[C@H](C)C(=O)[C@H](C)[C@@H](O[C@@H]2O[C@H](C)C[C@H](N(C)C)[C@H]2OC(C)=O)[C@](C)(OC)C[C@H]1C  
835 C=C1CC(c2ccc(C)cc2)OC1=O.Cc1cccc(I)c1>>Cc1ccc(C2C/C=C/c3cccc(C)c3)C(=O)O2)cc1  
836 C=CC(=O)OC(C)(C)C.O=C1N=c2cc(Br)enc2=N1>>CC(C)(C)OC(=O)/C=C/c1ncc2c(c1)=NC(=O)N=C  
837 C=CC(=O)OC.C=CC[C@H](O)c1ccc(Br)cc1>>C=CC[C@H](O)c1ccc(/C=C/C(=O)OC)cc1  
838 C=Cc1cccc2ccccc12.Oc1cccc1I>>Oc1cccc1/C=C/c1cccc2ccccc12  
839 C=Cc1ccc(F)cc1.C[Si](C)(C)Cl>>C[Si](C)(C)/C=C/c1ccc(F)cc1  
840 C=CC(=O)N(C)Cc1sc2ccccc2c1C.CC1(C)C(=O)Nc2ncc(Br)cc21>>Cc1c(CN(C)C(=O)/C=C/c2ncc3c(c2)C(C)(C)C(=O)N3)sc2ccccc12  
841 C=Cc1cccc1.O=C(O)c1ccc(Br)cc1>>O=C(O)c1ccc(/C=C/c2ccccc2)cc1  
842 C=C(NC(C)=O)C(=O)OC.Fc1ccc(Br)cc1>>COC(=O)/C=C/c1ccc(F)cc1)NC(C)=O  
843 C=Cc1ccc(C=C)cc1.N#CCc1ccc(Br)cc1>>C=Cc1ccc(/C=C/c2ccc(CC#N)cc2)cc1  
844 C=CCNC(=O)OC(C)(C)C.N#Cc1cccc1Br>>C=C(CNC(=O)OC(C)(C)C)c1cccc1C#N  
845 C=CCc1ccc(OC)cc1.COc1cc(I)ccc1O>>COc1ccc(C/C=C/c2ccc(O)c(OC)c2)cc1  
846 Br1cc2ccccc2c2ccccc12.C=CC(=O)OC>>COC(=O)/C=C/c1cc2ccccc2c2ccccc12  
847 C=Cc1cccc1.COc1ccc(-c2c(I)c(=O)c3cccc3n2C)cc1>>COc1ccc(-c2c(/C=C/c3cccc3)c(=O)c3cccc3n2C)cc1  
848 C=Cc1cccc1.Cc1cc(C)c(OS(=O)(=O)C(F)(F)F)c(C)c1>>C=C(c1cccc1)c1c(C)cc(C)cc1C  
849 Br1ccc2nccn2c1.C=CC(=O)OC>>COC(=O)/C=C/c1ccc2nccn2c1  
850 C=C[C@@H](C)[C@H](CCOCc1ccc(OC)cc1)O[Si](C)(C)C(C)(C)C.Ic1cccc1>>COc1ccc(COCC[C@H](O[Si](C)(C)C(C)(C)C)[C@H](C)/C=C/c2ccccc2)cc1  
851 C=CC(=O)OC.COc1nccc(N(Cc2ccc(Br)cc2)CC(C)(C)C)n1>>COC(=O)/C=C/c1ccc(CN(CC(C)(C)C)c2ccnc(OC)n2)cc1  
852 C=CC(=O)OCC.COc1cccc(-c2ccccc2)c1I>>CCOC(=O)/C=C/c1c(OC)cccc1-c1cccc1  
853 C=Cc1cccc1.Fc1ccc(I)cc1>>Fc1ccc(/C=C/c2ccccc2)cc1  
854 Br1ccsc1.C=CC(=O)OC(C)(C)C>>CC(C)(C)OC(=O)/C=C/c1ccsc1  
855 C=CC(=O)N1CCOCC1.CCOC(OCC)c1cccc(Br)c1>>CCOC(OCC)c1cccc(/C=C/C(=O)N2CCOCC2)c1  
856 C=CCCCO.CC(C)(C)c1ccc(Br)cc1>>C=C(CCCO)c1ccc(C(C)(C)C)cc1  
857 C=CCP(=O)(OCC)OCC.COc1ccc(I)cc1>>CCOP(=O)(C/C=C/c1ccc(OC)cc1)OCC  
858 C=CSc1nccn1.Ic1cccc1>>C(=C/c1cccc1)Sc1nccn1  
859 C=CCn1c(C)c(C(=O)c2ccc(C)cc2)c2cc(Cl)ccc21.C[C@@H](OCc1cccc(Br)c1)C(=O)N1CCOCC1>>Cc1ccc(C(=O)c2c(C)n(C/C=C/c3cccc(CO[C@H](C)C(=O)N4CCOCC4)c3)c3ccc(Cl)cc23)cc1  
860 Br1cnc2ccccc2c1.C=CC(C)=O>>CC(=O)/C=C/c1ncc2ccccc2c1  
861 C=Cc1ccc2ccccc2c1.CCN1c2ncc(I)cc2C(=O)N(C)c2ccnc21>>CCN1c2ncc(/C=C/c3ccc4ccccc4c3)cc2C(=O)N(C)c2ccnc21  
862 C=Cc1cccc1.COc1ccc(-c2oc3c(I)c(OC)cc(O)c3c(=O)c2OC)cc1OC>>COc1ccc(-c2oc3c(/C=C/c4ccccc4)c(OC)cc(O)c3c(=O)c2OC)cc1OC  
863 C=C1C(=O)O[C@@H]2/C=C(C)CC/C=C(C)CC[C@@H]12.Ic1ccc2[nH]ccc2c1>>C/C1=C/[C@H]2OC(=O)/C=C/c3ccc4[nH]ccc4c3)[C@@H]2CC/C(C)=C/CC1  
864 C=CC(=O)OC.COC(=O)Cc1ccc(N)c(I)c1>>COC(=O)/C=C/c1cc(Cc(=O)OC)ccc1N  
865 C=CN(C)C(C)=O.Cc1ccc(Br)cc1>>C=C(c1ccc(C)cc1)N(C)C(C)=O  
866 C=Cc1ccc2c(c1)CC[C@@H]1[C@@H]2CC[C@]2(C)C(=O)CC[C@@H]12.CCOC(=O)C(F)(F)Br>>CCOC(=O)C(F)(F)/C=C/c1ccc2c(c1)CC[C@@H]1[C@@H]2CC[C@]2(C)C(=O)CC[C@@H]12

867 C=COCC.Ic1cccc2cccc12>>C=C(OCC)c1cccc2cccc12  
868 C=Cc1ccc(OC)cc1.Cc1ccc(S(=O)(=O)N(Cc2cccc2)c2cc3ccc(Br)cc3c(=O)o2)cc1>>COc1ccc(/C=C/c2  
ccc3cc(N(Cc4cccc4)S(=O)(=O)c4ccc(C)cc4)oc(=O)c3c2)cc1  
869 C=CC(=O)OCCCC.CCOC(=O)Nc1cc(OC)ccc1C1=C(I)CCN1S(=O)(=O)c1ccc(C)cc1>>CCCCOC(=O)  
/C=C/C1=C(c2ccc(OC)cc2NC(=O)OCC)N(S(=O)(=O)c2ccc(C)cc2)CC1  
870 BrC1CCCCC1.C=Cc1ccc(Cl)cc1>>Clc1ccc(/C=C/C2CCCCC2)cc1  
871 C=Cc1cncn1.Fc1ccc(Cl)cc1>>Fc1ccc(/C=C/c2cncn2)cc1  
872 C=C(C)c1cccc1.Clc1ccc(I)cc1>>C/C(=C)\c1ccc(Cl)cc1)c1cccc1  
873 Bre1enc2cccc2c1.C=Cc1cccc([N+](=O)[O-])c1>>O=[N+](=[O-])c1cccc(/C=C/c2cnc3cccc3c2)c1  
874 C=Cc1ccc(Cl)cc1.O=c1c(Br)c(-c2cccc2)oc2cccc12>>O=c1c(/C=C/c2ccc(Cl)cc2)c(-  
c2cccc2)oc2cccc12  
875 C=CC(=O)OCC.CN1c2cccc2C(C)(C)C12C=Cc1cc(I)ccc1O2>>CCOC(=O)/C=C/c1ccc2c(c1)C=CC1(  
O2)N(C)c2cccc2C1(C)C  
876 C=CS(=O)(=O)F.Ic1cccc2c1oc1cccc12>>O=S(=O)(F)/C=C/c1cccc2c1oc1cccc12  
877 C=Cc1cccc1.Cc1cccc1I>>Cc1cccc1/C=C/c1cccc1  
878 C=CC(C)=O.O=[N+](=[O-])c1ccc(Cl)cc1>>CC(=O)/C=C/c1ccc([N+](=O)[O-])cc1  
879 C=Cc1cccc1C.O=Cc1cccc1Br>>Cc1cccc1/C=C/c1cccc1C=O  
880 C=CC(=O)O.Nc1cccc1Br>>Nc1cccc1/C=C/C(=O)O  
881 C=C[Si](C)(C)c1cccc1.O=C(c1cccc1)c1ccc(Br)cc1>>C[Si](C)(/C=C/c1ccc(C(=O)c2cccc2)cc1)c1c  
cccc1  
882 C=CC(=O)OC.O=Cc1ccc(Cl)cc1>>COC(=O)/C=C/c1ccc(C(=O)cc1  
883 C=Cc1cc(OC)c(OC)c(OC)c1.O=[N+](=[O-])c1ccc(I)cc1>>COc1cc(/C=C/c2ccc([N+](=O)[O-]  
)cc2)cc(OC)c1OC  
884 C=Cc1cccc(C)c1.O=C(ON1CCc2c(Br)cccc2C1)C(F)(F)F>>Cc1cccc(/C=C/c2cccc3c2CCN(OC(=O)C(  
F)(F)F)C3)c1  
885 Bre1cccc1.C=C1C(C)=NN=C2C=C(c3cccc3)N(C(C)=O)N12>>CC(=O)N1C(c2cccc2)=CC2=NN=  
C(C)/C(=C/c3cccc3)N21  
886 C=Cc1cccc(OC)c1.IC1CCCCC1>>COc1cccc(/C=C/C2CCCCC2)c1  
887 C=CC(=O)OC.Cc1cccc1C(=O)c1sc2cc(O)ccc2c1Oc1ccc(Br)cc1>>COC(=O)/C=C/c1ccc(Oc2c(C(=O)  
c3cccc3)sc3cc(O)ccc23)cc1  
888 C=Cc1cccc1.CC(C)[Si](c1ccc(Br)cc1)(c1nccn1)C(C)C>>CC(C)[Si](c1ccc(/C=C/c2cccc2)cc1)(c1nc  
ccn1)C(C)C  
889 C=CCNC(=O)OC(C)(C)C.CC1(C)OC(=O)c2c(cc(OCCN3CCOCC3)cc2OS(=O)(=O)C(F)(F)F)O1>>C  
C(C)(C)OC(=O)NC/C=C/c1cc(OCCN2CCOCC2)cc2c1C(=O)OC(C)(C)O2  
890 C=CC(=O)N1CCCC1.CC(C)(C)OC(=O)c1cccc1Br>>CC(C)(C)OC(=O)c1cccc1/C=C/C(=O)N1CCC  
891 C=CC(=O)OC.COc1ccc(I)nn1>>COC(=O)/C=C/c1ccc(OC)nn1  
892 C=Cc1ccc(C)cc1C.C[Si](C)(OS(=O)(=O)C(F)(F)F)OS(=O)(=O)C(F)(F)F>>Cc1ccc(/C=C/[Si](C)(C)O  
S(=O)(=O)C(F)(F)F)c(C)c1  
893 C=CN(C=O)c1ccc(C(=O)N[C@@H](CCC(=O)OCC)C(=O)OCC)cc1.CC(C)(C)C(=O)Nc1nc2ncc(Br)c  
c2c(=O)[nH]1>>CCOC(=O)CC[C@H](NC(=O)c1ccc(N(C=O)/C=C/c2nc3nc(NC(=O)C(C)(C)[nH]  
c(=O)c3c2)cc1)C(=O)OCC  
894 Bre1cccc1.C=CC(=O)CC>>CCC(=O)/C=C/c1cccc1  
895 C=CC(=O)OC.COc1cc(C)c(Br)cn1>>COC(=O)/C=C/c1cnc(OC)cc1C  
896 C=Cc1cccc1.C[Si](C)(C)OS(=O)(=O)C(F)(F)F>>C[Si](C)(C)/C=C/c1cccc1  
897 C=COCCCC.COc1cc(Br)cc(OC)c1>>C=C(OCCCC)c1cc(OC)cc(OC)c1  
898 C=Cc1ccc(C(C)(C)C)cc1.Cc1ccc2c(-c3cccc3)c(Br)c(=O)oc2c1>>Cc1ccc2c(-  
c3cccc3)c(/C=C/c3ccc(C(C)(C)C)cc3)c(=O)oc2c1  
899 C=CCCN1C(=O)c2cccc2C1=O.O=C(O)c1ccc(I)cc1O>>O=C(O)c1ccc(/C=C/CCN2C(=O)c3cccc3C2  
=O)cc1O  
900 C=CC(=O)OC.COCc1ccc(Cl)cc1>>COCc1ccc(/C=C/C(=O)OC)cc1  
901 C=CC(=O)O.COc1cccc(Br)c1>>COc1cccc(/C=C/C(=O)O)c1  
C=CCc1cccc([C@H]2O[C@H](COC(C)=O)[C@@H](OC(C)=O)[C@H](OC(C)=O)[C@@H]2OC(C)  
=O)c1.CNC(=O)c1cc(I)cc(C(=O)NC)c1>>CNC(=O)c1cc(/C=C/Cc2cccc([C@H]3O[C@H](COC(C)=O  
)[C@@H](OC(C)=O)[C@H](OC(C)=O)[C@@H]3OC(C)=O)c2)cc(C(=O)NC)c1  
903 Bre1ccc2sccc2c1.C=CCN1C(=O)c2cccc2C1=O>>O=C1c2cccc2C(=O)N1C/C=C/c1ccc2sccc2c1  
904 C=CC(=O)O.O=Cc1ccc(Br)cc1>>O=Cc1ccc(/C=C/C(=O)O)cc1  
905 C=CC(=O)OCC.COCc1nc(O)c(I)c(COC)n1>>CCOC(=O)/C=C/c1c(O)nc(COC)nc1COC  
906 C=Cc1cccc1.CCOC(=O)c1ccc(I)cc1>>CCOC(=O)c1ccc(/C=C/c2cccc2)cc1  
907 Bre1cnccl1.C=COCCCC>>C=C(OCCCC)c1cnccl1  
908 C=Cc1ccc(C)cc1.CS(=O)(=O)c1ccc(Br)cc1>>Cc1ccc(/C=C/c2ccc(S(C)(=O)=O)cc2)cc1  
909 C=Cc1cccc1C.Cc1ccc(Br)cc1>>Cc1ccc(/C=C/c2cccc2C)cc1

910 C=CC(=O)NCc1ccc(C)cc1.O=c1c(I)coc2cc(O)ccc12>>Cc1ccc(CNC(=O)/C=C/c2coc3cc(O)ccc3c2=O)  
911 C=Cc1cccc1.FC(F)(F)c1cccc(Cl)c1>>FC(F)(F)c1cccc(/C=C/c2cccc2)c1  
912 C=CC(=O)OC(C)(C)C.O=c1oc2cc(O)ccc2c(Cc2ccc(Br)cc2)c1Cl>>CC(C)(C)OC(=O)/C=C/c1ccc(Cc2  
c(Cl)c(=O)oc3cc(O)ccc23)cc1  
913 C=CC(=O)OC.O=C1C(=O)N(Cc2cccc2)c2cccc(Br)c21>>COC(=O)/C=C/c1cccc2c1C(=O)C(=O)N2C  
c1cccc1  
C=C[C@@H](C)[C@H]1CC[C@H]2[C@@H]3C[C@H](OC(C)=O)[C@@H]4C[C@H](OC(C)=O)C  
914 C[C@]4(C)[C@H]3CC[C@@]21C.Ic1cccc1>>CC(=O)O[C@H]1C[C@@H]2[C@H](CC[C@@]3(C  
)C[C@H]2CC[C@@H]3[C@H](C)/C=C/c2cccc2)[C@@]2(C)CC[C@@H](OC(C)=O)C[C@@H]12  
915 C=Cc1ccc(O)c1.COc1ccc(I)c(OC)c1>>COc1ccc(/C=C/c2cccc(O)c2)c(OC)c1  
916 C=CC(=O)OC(C)(C)C.Ic1ccsc1>>CC(C)(C)OC(=O)/C=C/c1ccsc1  
917 C=CC(=O)OCCCC.O=[N+][([O-])c1cccc1Br>>CCCCOC(=O)/C=C/c1cccc1[N+](=O)[O-]  
918 C=CC(=O)OCC.Cc1ccc(I)c([N+](=O)[O-])c1>>CCOC(=O)/C=C/c1ccc(C)cc1[N+](=O)[O-]  
919 C=Cc1ccc2c(c1)OCO2.CCCCCCCCOC1ccc2c(C)c(Br)c(=O)oc2c1>>CCCCCCCCOc1ccc2c(C)c(/C=C  
/c3ccc4c(c3)OCO4)c(=O)oc2c1  
920 C=C1CC(c2ccc(C)cc2)OC1=O.CCOc1ccc(I)cc1>>CCOc1ccc(/C=C2\CC(c3ccc(C)cc3)OC2=O)cc1  
921 C=C(CC(=O)OC)C(=O)OC.Fc1ccc(I)cc1>>COC(=O)C/C=C/c1ccc(F)cc1)C(=O)OC  
922 C=Cc1ccc(C)cc1.O=c1cc(-c2cccc2)oc2ccc(Br)cc12>>Cc1ccc(/C=C/c2ccc3oc(-  
C=Cc1cccc1.O=[N+][([O-])c1ccc(/C=C/c2ccc(I)cc2)cc1>>O=[N+][([O-]  
923 ])c1ccc(/C=C/c2ccc(/C=C/c3cccc3)cc2)cc1  
C=CC(=O)OCC.COc1cc(I)c2c3c1O[C@@H]1[C@]34CCN(C)[C@H](C2)[C@]42C=C[C@@]1(OC)c  
924 1c(O)cc(Cl)c(O)c12>>CCOC(=O)/C=C/c1cc(OC)c2c3c1C[C@H]1N(C)CC[C@@]34[C@@H](O2)[C  
@]2(OC)C=C[C@@]14c1c(O)c(Cl)cc(O)c12  
C=Cc1en(C(c2cccc2)(c2cccc2)c2cccc2)cn1.CS(=O)(=O)N1CCC(C2c3ccc(Cl)cc3C=C(Br)c3cccn3  
925 2)CC1>>CS(=O)(=O)N1CCC(C2c3ccc(Cl)cc3C=C(/C=C/c3cn(C(c4cccc4)(c4cccc4)c4cccc4)cn3)c  
3cccn32)CC1  
C=Cc1ccc(OC)c(OC)c(OC)c1-  
926 c1ccc(OC)c(OC)c1.COc1ccc(I)cc1>>COc1ccc(/C=C/c2cc(OC)c(OC)c(OC)c2-c2ccc(OC)c(OC)c2)cc1  
927 C=CC(=O)O.O=S(=O)(Nc1cccc(I)c1)c1ccsc1>>O=C(O)/C=C/c1cccc(NS(=O)(=O)c2cccs2)c1  
C=CC(=O)OC(C)(C)C.[C@]12C[C@@]34C=C(Sc5ccc(I)cc5)C(=O)[C@@](C)(CCC(=O)Nc5c(O)cc  
928 c(C(=O)O)c5O)[C@@H]3[C@H](C[C@@H]1C4)O2>>CC(C)(C)OC(=O)/C=C/c1ccc(SC2=C[C@@]34  
C[C@H]5C[C@H](O)[C@@]5(C)C3)[C@H]4[C@](C)(CCC(=O)Nc3c(O)ccc(C(=O)O)c3O)C2=O)cc1  
C=CC(=O)OCC.CC(C)(C)OC(=O)N[C@@H](Cc1cc(Br)ccc1[N+](=O)[O-  
929 ])C(=O)OC(C)(C)C>>CCOC(=O)/C=C/c1ccc([N+](=O)[O-  
])c(C[C@H](NC(=O)OC(C)(C)C)C(=O)OC(C)(C)C)c1  
930 Brc1ccsc1.C=CC(CCC)OCc1cccc1>>CCCC(/C=C/c1ccsc1)OCc1cccc1  
931 C=CC(=O)OC.COc1ccc2c(=O)c(I)coc2c1>>COC(=O)/C=C/c1coc2cc(OC)ccc2c1=O  
C=CC(C)(C)C(=O)NC(C)(C)CO.CC(=O)OC[C@H]1O[C@@H](c2cc(Cc3ccc(Br)cc3C)c(C)cc2C)[C  
932 @H](OC(C)=O)[C@@H](OC(C)=O)[C@@H]1OC(C)=O>>CC(=O)OC[C@H]1O[C@@H](c2cc(Cc3  
ccc(/C=C/C(C)(C)C(=O)NC(C)(C)CO)cc3C)c(C)cc2C)[C@H](OC(C)=O)[C@@H](OC(C)=O)[C@@  
933 C=Cc1ccc(OC)cc1.O=C(N1CCOCC1)C(F)(F)Br>>COc1ccc(/C=C/C(F)(F)C(=O)N2CCOCC2)cc1  
Brc1ccc(/C(=C2/CCc3cccc32)c2ccc3c(cnn3C3CCCCO3)c2)cc1.C=CC(=O)OC>>COC(=O)/C=C/c1  
934 ccc(/C(=C2/CCc3cccc32)c2ccc3c(cnn3C3CCCCO3)c2)cc1  
Brc1cccs1.C=CCN(C(=O)OC(C)(C)C)C(=O)OC(C)(C)C>>CC(C)(C)OC(=O)N(C/C=C/c1cccs1)C(=O)  
935 OC(C)(C)C  
936 C=CC(=O)OC(C)(C)C.Nc1ccc(Br)cc1I>>CC(C)(C)OC(=O)/C=C/c1cc(Br)ccc1N  
937 C=CC[C@H](C)O.CC(C)Oc1nccc(Br)c1>>CC(C)Oc1nccc(/C=C/C[C@H](C)O)c1  
938 C=CC(=O)OCC.COc1ccc(-c2cc3c(Br)ccc(OC)c3o2)cc1OC>>CCOC(=O)/C=C/c1ccc(OC)c2oc(-  
c3ccc(OC)c(OC)c3)cc12  
939 C=CC(=O)N(C)C.Cc1cccc1Br>>Cc1cccc1/C=C/C(=O)N(C)C  
940 C=Cc1ccc(Cl)cc1.N#CCc1ccc(Br)cc1>>N#CCc1ccc(/C=C/c2ccc(Cl)cc2)cc1  
941 C=COCCCC.Oc1ccc(Br)c(O)c1>>C=C(OCCCC)c1ccc(O)cc1O  
942 C=C(NC(C)=O)C(=O)OC.CC(=O)Oc1ccc(I)c(C)c1>>COC(=O)/C=C/c1ccc(OC(C)=O)cc1C)NC(C)=  
943 C=Cc1ccc(C=O)cc1.CCN(CC)/N=N/c1ccc(I)cc1>>CCN(CC)/N=N/c1ccc(/C=C/c2ccc(C=O)cc2)cc1  
944 C=C[C@H](CCCCCCCC)CC(OC)OC.COc1ccc(I)cc1>>CCCCCCCC[C@@H](/C=C/c1ccc(OC)cc1)C  
C(OC)OC  
945 C=CCN1C(=O)c2cccc2C1=O.Nc1ncc(Br)cn1>>Nc1ncc(/C=C/CN2C(=O)c3cccc3C2=O)cn1  
946 C=CC(=O)N1C(=O)OC[C@@H]1c1cccc1.CC(C)(C)OP(=O)(Cc1ccc(Br)cc1)OC(C)(C)C>>CC(C)(C)  
947 OP(=O)(Cc1ccc(/C=C/C(=O)N2C(=O)OC[C@@H]2c2cccc2)cc1)OC(C)(C)C  
C=Cc1ccc(OC)c(OC)c1.Nc1ccc(I)cc1>>COc1ccc(/C=C/c2ccc(N)cc2)cc1OC

948 C=CP(=O)(C1c1cccc1)c1cccc1.C[P@](=O)/C=C/c1cccc(Br)c1c1cccc1>>C[P@](=O)/C=C/c1cccc  
 949 Br1ccnc1.C=C[Si](CC)(CC)CC>>CC[Si]/C=C/c1ccnc1)(CC)CC  
 950 C=C1CC(c2cccc2)OC1=O.Nc1cccc1I>>Nc1cccc1/C=C1\CC(c2cccc2)OC1=O  
 951 COC[C@H]/N=C(\c1cccc1)N1C=CCC[C@H]1C)C(C)C.Clc1cccc1>>COC[C@H]/N=C(\c1cc  
 952 ccc1)N1C=C(c2cccc2)CC[C@H]1C)C(C)C  
 953 C=Cc1ccc(OC)cc1.COC(=O)Cn1c(=O)c(Cl)nc2ccnc21>>COC(=O)Cn1c(=O)c(/C=C/c2ccc(OC)cc2)n  
 954 c2ccnc21  
 955 C=CC(=O)OCc1cccc1.Ic1cccs1>>O=C(/C=C/c1cccs1)OCc1cccc1  
 956 C=C(C)C(=C)C.Cc1ccc(I)cc1>>C=C(C)C(C)=Cc1ccc(C)cc1  
 957 C=COCCCC.Clc1ccc2c(c1)OCO2>>C=C(OCCCC)c1ccc2c(c1)OCO2  
 958 C=CC(=O)OC.O=c1[nH]c(=O)n([C@H]2[C@H](CO)[C@H]2CO)cc1I>>COC(=O)/C=C/c1cn([C  
 959 @H]2[C@H](CO)[C@H]2CO)c(=O)[nH]c1=O  
 960 C=CC(=O)O.COC(=O)c1cccc1I>>COC(=O)c1cccc1/C=C/C(=O)O  
 961 C=CC(F)(F)C(F)(F)C(F)(F)C(F)(F)C(F)(F)F.COC(=O)c1ccc(I)cc1>>COC(=O)c1ccc(/C=C/C(F  
 962 )(F)C(F)(F)C(F)(F)C(F)(F)C(F)(F)C(F)(F)F)cc1  
 963 Br1ccnc1.C=CCS(N)(=O)=O>>NS(=O)(=O)C/C=C/c1ccnc1  
 964 C=CC(=O)OCC.O=[N+](=[O-])c1cccc(Cl)c1>>CCOC(=O)/C=C/c1cccc([N+](=O)[O-])c1  
 965 BrC1CCCCC1.C=Cc1cccc(C(=O)OC(C)(C)C)c1>>CC(C)(C)OC(=O)c1cccc(/C=C/C2CCCCC2)c1  
 966 C=CC(=O)OCC.CC(C)(C)C(=O)Nc1cccc1I>>CCOC(=O)/C=C/c1cccc1NC(=O)C(C)(C)C  
 967 C=CC(=O)OCC(CC)CCCC.COC(=O)c1ccc(Cl)cc1>>CCCC(CC)COC(=O)/C=C/c1ccc(C(=O)OC)cc  
 968 Br1cccc1.C=Cc1ccc(C(F)(F)F)cc1>>FC(F)(F)c1ccc(/C=C/c2cccc2)cc1  
 969 C=CC(=O)NCCCc1cccc1.CC(C)(C)OC(=O)C1CC(c2ccc(C(=O)C(=O)c3ccc(Br)cc3)cc2)=NO1>>CC  
 970 (C)(C)OC(=O)C1CC(c2ccc(C(=O)C(=O)c3ccc(/C=C/C(=O)NCCCc4cccc4)cc3)cc2)=NO1  
 971 Br1cccc1.C=Cc1ccc(F)cc1>>Fc1ccc(/C=C/c2cccc2)cc1  
 972 Br1cccc2c3c([nH]c12)C1CCN(CC1)C3.C=Cc1ccnc1>>C=C/c1cccc2c3c([nH]c12)C1CCN(CC1)C3  
 973 )c1ccnc1  
 974 C=Cc1cccc1Br.CCOC(=O)C(F)I>>CCOC(=O)C(F)/C=C/c1cccc1Br  
 975 C=CC(N)=O.COc1cccc1I>>COc1cccc1/C=C/C(N)=O  
 976 C=CP(=O)(O)O.COc1cc(OC)c(Br)c(OC)c1>>COc1cc(OC)c(/C=C/P(=O)(O)O)c(OC)c1  
 977 C=CS(C)(=O)=O.COc1ccc(Br)cc1>>COc1ccc(/C=C/S(C)(=O)=O)cc1  
 978 C=CC(=O)OC.O=c1oc2cccc2cc1-c1ccc(I)cc1>>COC(=O)/C=C/c1ccc(-c2cc3cccc3oc2=O)cc1  
 979 C=CC(=O)OCC(CC)CCCC.Clc1cccc1>>CCCC(CC)COC(=O)/C=C/c1cccc1  
 980 C=Cc1cccc(O)c1.Oc1cccc(Br)c1>>Oc1cccc(/C=C/c2cccc(O)c2)c1  
 981 C=CS(=O)(=O)F.O=S(=Nc1ccc(I)cc1)(Oc1cccc1)N1CCCC1>>O=S(=O)(F)/C=C/c1ccc(N=S(=O)(Oc  
 982 2cccc2)N2CCCC2)cc1  
 983 C=CC(=O)OCCCC.COc1ccc(Br)c(NC(=O)C(C)(C)C)n1>>CCCCOC(=O)/C=C/c1ccc(OC)nc1NC(=O)  
 984 C(C)(C)C  
 985 C=CC(=O)OC.O=c1c(I)c(-c2ccc(O)cc2)oc2cc(O)ccc12>>COC(=O)/C=C/c1c(-  
 986 c2ccc(O)cc2)oc2cc(O)ccc2c1=O  
 987 C=CC(=O)OC.O=S(=O)(c1cccc1)N1CCc2cc(Br)nc21>>COC(=O)/C=C/c1nc2c(c1)CCN2S(=O)(=  
 988 O)c1cccc1  
 989 C=CC(=O)OC.O=C1Nc2ccc(Br)cc2C1=O>>COC(=O)/C=C/c1ccc2c(c1)C(=O)C(=O)N2  
 990 C=CC(=O)OC.CC(C)CN1CCc2c(ccc3[nH]ccc23)C1c1ccc(Br)cc1>>COC(=O)/C=C/c1ccc(C2c3ccc4[n  
 991 H]ccc4c3CCN2CC(C)C)cc1  
 992 C=CC(=O)OC.CC(=O)c1cc2cc(Br)ccc2o1>>COC(=O)/C=C/c1ccc2oc(C(C)=O)cc2c1  
 993 C=Cc1cccc1.COc1ccc(Br)cc1OC>>COc1ccc(/C=C/c2cccc2)cc1OC  
 994 Br1cncc2cccc12.C=CCO[C@H]1CC(=O)O[C@H](C)C/C=C/C=C/[C@H](O[Si](C)(C)C(C)(C)C)  
 995 [C@H](C)C[C@H](CC(OC)OC)[C@H](O[C@H]2O[C@H](C)[C@H]2O[C@H]3C[C@@](C)(O)  
 996 [C@H]3O[C@H](OC(=O)CC)[C@H](C)O3)[C@H](N(C)C)[C@H]2OC(C)=O)[C@H]1OC>>CCC(=O)O[C@  
 997 H]1[C@H](C)O[C@H](O[C@H]2[C@H](N(C)C)[C@H]2OC(C)=O)[C@H](O[C@H]3[C@H]3[C@H]  
 998 [C@H](OC)[C@H](OC/C=C/c4cncc5cccc45)CC(=O)O[C@H](C)C/C=C/C=C/[C@H](O[Si](C)(C)C(C)(C)  
 999 )(C)C[C@H](C)C[C@H]3C(C)(C)OC(C)C[C@H]2C(C)C[C@H]1C)O  
 1000 C=Cc1cccn1.C[Si](C)(C)I>>C[Si](C)(C)/C=C/c1cccn1  
 1001 C=Cc1cc(OC)cc(OC)c1.Fc1ccc(I)cc1>>COc1cc(/C=C/c2ccc(F)cc2)cc(OC)c1  
 1002 C=CP(=O)(OCC)OCC.COP(=O)(OC)[C@H]1(NC=O)C[C@H]1c1ccc(Br)cc1>>CCOP(=O)/C=C/c1c  
 1003 cc([C@H]2C[C@@]2(NC=O)P(=O)(OC)OC)cc1)OCC  
 1004 C=CC(=O)OC.O=C1c2cccc2C(=O)c2ccc(Br)ccc21>>COC(=O)/C=C/c1ccc2c(c1)C(=O)c1cccc1C2=  
 1005 C=Cc1ccnc1.CCNc1ccc(C(c2ccc(Br)cc2)c2ccc(NCC)cc2)cc1>>CCNc1ccc(C(c2ccc(/C=C/c3cncc3)c  
 1006 c2)c2ccc(NCC)cc2)cc1  
 1007 C=Cc1cccc1.COCOc1cc2occc(=O)c2cc1Br>>COCOc1cc2occc(=O)c2cc1/C=C/c1cccc1



990 C=Cc1ccc1.CCc1ccc(Br)c1>>C=Cc1ccc(/C=C/c2cccc2)c1  
 991 C=CC(=O)N(C)Cc1oc2cccc2c1C.CC(C)(C)OC(=O)NCCn1c(=O)[nH]c2ncc(Br)cc2c1=O>>Cc1c(CN(C)C(=O)/C=C/c2cnc3[nH]c(=O)n(CCNC(=O)OC(C)(C)C)c(=O)c3c2)oc2cccc12  
 992 C=C.Oc1cccc(Br)c1>>C=Cc1cccc(O)c1  
 993 C=CC(=O)OCC.Cc1c(Br)enc2c1nnn2C>>CCOC(=O)/C=C/c1enc2c(nnn2C)c1C  
 994 C=C.CC(=O)Oc1cccc(I)c1>>C=Cc1cccc(OC(C)=O)c1  
 995 Brclenc2cccc12.C=CCN(C(=O)OC(C)(C)C)C(=O)OC(C)(C)C>>CC(C)(C)OC(=O)N(C/C=C/c1nccc2cccc12)C(=O)OC(C)(C)C  
 996 C=Cc1cenc2cccc12.CCCCCC(=O)N1CCN(c2ccc(Br)cc2)CC1>>CCCCCCC(=O)N1CCN(c2ccc(/C=C/c3cenc4cccc34)cc2)CC1  
 997 C=CS(=O)(=O)Nc1ccc(OC2CCN(C(=O)OC(C)(C)C)CC2)cc1.N#Cc1cccc(Br)c1>>CC(C)(C)OC(=O)N1CCC(Oc2ccc(NS(=O)(=O)/C=C/c3cccc(C#N)c3)cc2)CC1  
 998 C=CC(=O)N1CCOCC1.CC(=O)OCCc1cc2c3cc(Cl)ccc3nc3c4cccc4n(C)c(c1)c23>>CC(=O)OCCc1cc2c3cc(/C=C/C(=O)N4CCOCC4)ccc3nc3c4cccc4n(C)c(c1)c23  
 999 C=CC(=O)OC.COc1ccc(-c2ccc(CN(C(=O)CC(C)(C)C)c3nccc4cc(Br)ccc34)cc2)cc1C>>COC(=O)/C=C/c1ccc2c(N(Cc3ccc(-c4ccc(OC)c(C)c4)cc3)C(=O)CC(C)(C)C)nccc2c1  
 1000 C=CS(=O)(=O)NCc1cccc1.COc1ccc(Br)c(CNC(=O)OC(C)(C)C)c1>>COc1ccc(/C=C/S(=O)(=O)NCc2cccc2)c(CNC(=O)OC(C)(C)C)c1  
 1001 Brclccc2cccc2c1.C=COCCO>>C=C(OCCO)c1ccc2cccc2c1  
 1002 C=CC(=O)O.Cc1ccc(C)n1-c1ccc(Br)cc1>>Cc1ccc(C)n1-c1ccc(/C=C/C(=O)O)cc1  
 1003 Brclccncl1.C=Cc1nc2c(OCC[Si](C)(C)C)nc(N)nc2n1[C@H]1C[C@H](O[Si](C)(C)C(C)(C)C)[C@@H](CO[Si](C)(C)C(C)(C)C)O1>>CC(C)(C)[Si](C)(C)OC[C@H]1O[C@@H](n2c(/C=C/c3ccncc3)nc3c(OCC[Si](C)(C)C)nc(N)nc32)C[C@H]1O[Si](C)(C)C(C)(C)C  
 1004 C=Cc1ccc(OC)c2oc(CCCC)cc12.COc1ccc(Br)cn1>>CCCCc1cc2c(/C=C/c3ccc(OC)nc3)ccc(OC)c2o1  
 1005 C=CC(=O)OCc1cccc1.COC(=O)c1cc2c(Br)c(OC)ccc2[nH]1>>COC(=O)c1cc2c(/C=C/C(=O)OCc3ccc3)c(OC)ccc2[nH]1  
 1006 Brclcccc1.C=Cc1cccc([N+](=O)[O-])c1>>O=[N+](O-)]c1cccc(/C=C/c2cccc2)c1  
 1007 C=CC(=O)OC.CCCCOC(=O)/C=C/c1ccc(I)cc1>>CCCCOC(=O)/C=C/c1ccc(/C=C/C(=O)OC)cc1  
 1008 C=CCP(=O)(OCC)OCC.Clc1cccc(I)c1>>CCOP(=O)(C/C=C/c1cccc(Cl)c1)OCC  
 1009 C=Cc1cccc(C=O)c1.FC(F)(F)C(F)(F)C(F)(F)C(F)(F)C(F)(F)C(F)(F)Br>>O=Cc1cccc(/C=C/C(F)(F)C(F)(F)C(F)(F)C(F)(F)C(F)(F)C(F)(F)F)c1  
 1010 C=CC(=O)OCCCC.COc1cccc(Br)c1>>CCCCOC(=O)/C=C/c1cccc(OC)c1  
 1011 \*CNCCCOCCOCCOCCCN(C(=O)COc1ccc(C(Cc2cc(OC)cc(OC)c2)NC(=O)c2cccc(C=C)c2)cc1.FC(F)(F)Oc1cccc(I)c1>>\*CNCCCOCCOCCOCCCN(C(=O)COc1ccc(C(Cc2cc(OC)cc(OC)c2)NC(=O)c2cccc(/C=C/c3cccc(OC(F)(F)F)c3)c2)cc1  
 1012 C=Cc1ccc(C(=O)OC)cc1.O=C(N1CCOCC1)C(F)(F)Br>>COC(=O)c1ccc(/C=C/C(F)(F)C(=O)N2CCOCC2)cc1  
 1013 C=CCCCO.C[Si](C)(C)Oc1ccc(-c2ccc(Br)cc2)nc1>>C[Si](C)(C)Oc1ccc(-c2ccc(/C=C/CCCO)cc2)nc1  
 1014 C=Cc1cccc1C.COc1cccc(I)c1N>>COc1cccc(/C=C/c2cccc2C)c1N  
 1015 C=C/C=C/c1cccc1.FC(F)(F)I>>FC(F)(F)/C=C/C=C/c1cccc1  
 1016 C=C(NC(=O)OC(C)(C)C)C(=O)OCc1cccc1.Ic1cccc1C1OCCCCO1>>CC(C)(C)OC(=O)N/C(=C)c1ccc1C1OCCCCO1)C(=O)OCc1cccc1  
 1017 C=C.O=C(CC(=O)C(F)(F)F)c1ccc(Br)cc1>>C=Cc1ccc(C(=O)CC(=O)C(F)(F)F)cc1  
 1018 C=C[Si](CC)(CC)CC.O=Cc1cccc(Br)c1>>CC[Si](/C=C/c1cccc(C=O)c1)(CC)CC  
 1019 C=Cc1cccc1.Cn1ncc1-c1cccc(Br)c1>>Cn1ncc1-c1cccc(/C=C/c2cccc2)c1  
 1020 C=COCCCC.CC(C)(C)C(=O)Oc1ccc(OS(=O)(=O)C(F)(F)F)cc1>>C=C(OCCCC)c1ccc(OC(=O)C(C)(C)C)cc1  
 1021 C=CN(C(=O)OCCC.O=S(=O)(Oc1ccc2cccc2c1)C(F)(F)F>>C=CN(C(=O)OCCC)c1ccc2cccc2c1  
 1022 C=CC(=O)N(C)Cc1sc2cccc2c1C.O=C1Nc2ncc(Br)cc2C12CCC2>>Cc1c(CN(C)C(=O)/C=C/c2cnc3c(c2)C2(CCC2)C(=O)N3)sc2cccc12  
 1023 C=Cc1cccc1.COc1ccc(/C=C/C(=O)c2ccc(I)cc2)cc1OC>>COc1ccc(/C=C/C(=O)c2ccc(/C=C/c3cccc3)cc2)cc1OC  
 1024 C=CCC(C)O.CC(C)(C)c1ccc(OS(=O)(=O)C(F)(F)F)cc1>>C=C(CC(C)O)c1ccc(C(C)(C)C)cc1  
 1025 C=CC[C@H]1O[C@H](COC(=O)c2cccc2)[C@@H](OC(=O)c2cccc2)[C@H](OC(=O)c2cccc2)[C@@H]1OC(=O)c1cccc1.Ic1ccc(-c2cccc2)cc1>>O=C(OC[C@H]1O[C@H](C/C=C/c2ccc(-c3cccc3)cc2)[C@@H](OC(=O)c2cccc2)[C@@H](OC(=O)c2cccc2)[C@@H]1OC(=O)c1cccc1)c1cccc1  
 1026 Brclccsc1.C=Cc1cccc1NS(=O)(=O)c1ccc(C)cc1>>Cc1ccc(S(=O)(=O)Nc2cccc2/C=C/c2ccsc2)cc1  
 1027 C=CC(=O)OC.O=Cc1cc(Cl)ccc1OS(=O)(=O)C(F)(F)F>>COC(=O)/C=C/c1ccc(Cl)cc1C=O  
 1028 C=Cc1cccc1.CCCCOC(=O)/C=C/c1ccc(Br)cc1>>CCCCOC(=O)/C=C/c1ccc(/C=C/c2cccc2)cc1

1029 C=CC(=O)OC(C)(C)C.FC(F)Oc1ccc(Br)cn1>>CC(C)(C)OC(=O)/C=C/c1cccc(OC(F)F)nc1  
 1030 C=Cc1ccccc1.Cc1nc(Br)c(-c2ccccc2)n(Cc2ccccc2)c1=O>>Cc1nc(/C=C/c2ccccc2)c(-  
 c2ccccc2)n(Cc2ccccc2)c1=O  
 1031 C=CC(=O)OC.O=c1oc2enc3ccc(Br)cc3c2n1-  
 c1cccc(C(F)(F)F)c1>>COC(=O)/C=C/c1ccc2ncc3oc(=O)n(-c4cccc(C(F)(F)F)c4)c3c2c1  
 1032 C=COCCCC.COc1cccc(Br)c1>>C=C(OCCCC)c1cccc(OC)c1  
 1033 C=CC#N.O=c1oc2enc3ccc(Br)cc3c2n1-c1cccc(C(F)(F)F)c1>>N#C/C=C/c1ccc2ncc3oc(=O)n(-  
 c4cccc(C(F)(F)F)c4)c3c2c1  
 1034 C=CNC(C)=O.CCOC(=O)c1sc2nc(C)cc(C)c2c1Br>>CCOC(=O)c1sc2nc(C)cc(C)c2c1/C=C/N(C)=O  
 1035 C=Cc1ccc(Br)cc1.CC(C)(C)OC(=O)NCC(=O)Nc1ccc(I)cc1>>CC(C)(C)OC(=O)NCC(=O)Nc1ccc(/C=  
 C/c2ccc(Br)cc2)cc1  
 1036 C=Cc1ccncc1.COc1ccc(Cl)c(Nc2c(C#N)enc3cc(OS(=O)(=O)C(F)(F)F)c(OC)cc23)c1>>Co1ccc(Cl)c(  
 Nc2c(C#N)enc3cc(/C=C/c4ccncc4)c(OC)cc23)c1  
 1037 C=CC(=O)Nc1cccc(Cl)c1.COc1ccc2c(=O)c(I)cc2c1>>COc1ccc2c(=O)c(/C=C/C(=O)Nc3cccc(Cl)c3)  
 cc2c1  
 1038 C=C(C)c1ccccc1.O=[N+]( [O-] )c1ccc(I)cc1>>C/C(=C\c1ccc([N+](=O)[O-])cc1)c1ccccc1  
 1039 C=CS(=O)(=O)F.FC(F)(F)Oc1ccc(I)cc1>>O=S(=O)(F)/C=C/c1ccc(OC(F)(F)F)cc1  
 1040 C=CC(N)=O.CCOC(=O)c1ccccc1Br>>CCOC(=O)c1ccccc1/C=C/C(N)=O  
 1041 C=Cc1ccncc1.CC(C)(C)OC(=O)N[C@H](COc1cc(Br)ccn1)Cc1c[nH]c2ccccc12>>CC(C)(C)OC(=O)N  
 [C@H](COc1cc(/C=C/c2ccncc2)ccn1)Cc1c[nH]c2ccccc12  
 1042 Brclccc2c(c1)Sc1ccccc1N2.C=Cc1ccncc1>>C(=C/c1ccc2c(c1)Sc1ccccc1N2)\c1ccncc1  
 1043 C=CCN(Cc1cccc2ccccc12)C(=O)OCC.CC(=O)c1ccc(Br)cc1>>CCOC(=O)N(C/C=C/c1ccc(C(C)=O)cc  
 1)c1cccc2ccccc12  
 1044 C=CC(=O)OC.Cc1cc(Br)cc(C)c1N>>COC(=O)/C=C/c1cc(C)c(N)c(C)c1  
 C=CCO[C@ @H]1CC(=O)O[C@H](C)C/C=C/C=C/[C@H](O[Si](C)(C)C)(C)C)[C@H](C)C[C@H]  
 (CC(OC)OC)[C@H](O[C@ @H]2O[C@H](C)[C@ @H](O[C@H]3C[C@ @](C)(O)[C@ @H](OC(=O)  
 CC)[C@H](C)O3)[C@H](N(C)C)[C@H]2OC(C)=O)[C@H]1OC.COc1ccc(I)cc1>>CCC(=O)O[C@H]  
 1045 1[C@H](C)O[C@ @H](O[C@H]2[C@H](N(C)C)[C@ @H](OC(C)=O)[C@H](O[C@ @H]3[C@ @H](  
 OC)[C@H](OC/C=C/c4ccc(OC)cc4)CC(=O)O[C@H](C)C/C=C/C=C/[C@H](O[Si](C)(C)C)(C)C)[  
 C@H](C)C[C@ @H]13C/C(=O)C)C/C=C/C=C/C@H12C/C(F)C@ @H12C/C(F)C@ @H11/(C)N  
 C=CC(=O)OC(C)(C)C.O=C1CCC(N2C(=O)c3cccc(Br)c3C2=O)C(=O)N1>>CC(C)(C)OC(=O)/C=C/c  
 1046 1cccc2c1C(=O)N(C1CCC(=O)NC1=O)C2=O  
 1047 C=CP(=O)(OCC)OCC.Cc1ccc(Br)cc1>>CCOP(=O)(/C=C/c1ccc(C)cc1)OCC  
 1048 C=Cc1ccc(C(=O)OCC)cc1.CC1(C)CCC(=C2CCCC2)c2cc(Br)ccc21>>CCOC(=O)c1ccc(/C=C/c2ccc  
 3c(c2)C(=C2CCCC2)CCC3(C)C)cc1  
 1049 C=C1CC(c2ccc(C)cc2)OC1=O.Ic1ccccc1>>Cc1ccc(C2C/C(=C\c3ccccc3)C(=O)O2)cc1  
 1050 C=CN1C(=O)c2ccccc2C1=O.Ic1ccccc1>>O=C1c2ccccc2C(=O)N1/C=C/c1ccccc1  
 1051 C=Cc1cc(C)c(OCOCCOC)c(C)c1.Cc1c(Br)c(=O)oc2ccccc12>>COCCOCOc1c(C)cc(/C=C/c2c(C)c3cc  
 ccc3oc2=O)cc1C  
 1052 \*NC(=O)c1ccc(C=C)cc1.FC(F)(F)c1cccc(I)c1>>\*NC(=O)c1ccc(/C=C/c2cccc(C(F)(F)F)c2)cc1  
 1053 C=CC(=O)OC.COC(=O)c1cc2cc([N+](=O)[O-]  
 ])c(Br)cc2s1>>COC(=O)/C=C/c1cc2sc(C(=O)OC)cc2cc1[N+](=O)[O-]  
 1054 C=CC(=O)OCC.COC(=O)c1cc(Br)c2ccc(C)nc2c1OC>>CCOC(=O)/C=C/c1cc(C(=O)OC)c(OC)c2nc(C  
 )cc12  
 1055 C=CC(=O)OCCCC.CCCCCCc1cn(Cc2ccc(I)cc2)nn1>>CCCCCCc1cn(Cc2ccc(/C=C/C(=O)OCCCC)cc  
 2)nn1  
 1056 C=CC(=O)OC.COc1ncccc1Br>>COC(=O)/C=C/c1ccncc1OC  
 1057 Brclence2ccccc12.C=CCC(C)C(=O)OCC>>CCOC(=O)C(C)C/C=C/c1ence2ccccc12  
 1058 C=CC(=O)OC(C)(C)C.CC(C)=CCc1cc(I)ccc1OC(=O)CCc1ccc(F)cc1>>CC(C)=CCc1cc(/C=C/C(=O)  
 OC(C)(C)C)ccc1OC(=O)CCc1ccc(F)cc1  
 1059 C=CC(=O)OCCCC.CCc1ccc(I)cc1>>CCCCOC(=O)/C=C/c1ccc(CC)cc1  
 1060 C=CC(=O)OCC.Nc1cc(OC(F)(F)F)ccc1Br>>CCOC(=O)/C=C/c1ccc(OC(F)(F)F)cc1N  
 1061 C=Cc1ccccc1.O=Cc1ccccc1Br>>O=Cc1ccccc1/C=C/c1ccccc1  
 1062 C=COCCCC.Cc1cccc(Br)c1>>C=C(OCCCC)c1cccc(C)c1  
 1063 C=CS(=O)(=O)NCCCCCCCCC.CC(C)(C)OC(=O)Nc1cc(F)ccc1Br>>CCCCCCCCNS(=O)(=O)/C=C/c  
 1ccc(F)cc1CNC(=O)OC(C)(C)C  
 1064 C=Cc1ccc(OC)cc1.Oc1ccc2ccccc2c1Br>>Co1ccc(/C=C/c2c(O)ccc3ccccc23)cc1  
 1065 C=Cc1ccc(OC)c(OC)c1.Oc1ccccc1I>>Co1ccc(/C=C/c2ccccc2O)cc1OC  
 1066 C=Cc1cccn1.COc1ccc(C#Cc2ccc(Br)cc2)cc1>>Co1ccc(C#Cc2ccc(/C=C/c3cccn3)cc2)cc1  
 1067 C=CCN(C(=O)OC(C)(C)C)C(=O)OC(C)(C)C.COC(=O)c1ccc(Br)cc1>>COC(=O)c1ccc(/C=C/CN(C(=O)  
 O)OC(C)(C)C)C(=O)OC(C)(C)C)cc1

1068 C=Cc1c(C)cc(C)cc1C.FC(F)(F)c1ccc(Br)cc1>>Cc1cc(C)c(/C=C/c2ccc(C(F)(F)F)cc2)c(C)c1  
1069 C=C.Cc1ccc(S(=O)(=O)n2cccc2CCl)cc1>>C=CCc1cccn1S(=O)(=O)c1ccc(C)cc1  
1070 C=C.CCOc1ccc(Br)cc1>>C=Cc1ccc(OCC)cc1  
1071 C=Cc1ccc(F)cc1.COc1ccc(Br)cc1>>COc1ccc(/C=C/c2ccc(F)cc2)cc1  
1072 C=CC(=O)c1cccc1.Clc1ccc(I)cc1>>O=C(/C=C/c1ccc(Cl)cc1)c1cccc1  
1073 C=CC(=O)OC(C)(C)C.CC(C)=CCc1cc(I)cc2c1OC(C)(C)C=C2>>CC(C)=CCc1cc(/C=C/C(=O)OC(C)(C)C)cc2c1OC(C)(C)C=C2  
1074 C=CCOC(C)=O.COc1ccc([I+](c2ccc(OC)cc2)cc1>>COc1ccc(/C=C/COC(C)=O)cc1  
1075 C=CC(=O)OC.CC(C)(C)c1nn(-c2ccc(C(F)(F)F)cn2)cc1I>>COC(=O)/C=C/c1cn(-c2ccc(C(F)(F)F)cn2)nc1C(C)(C)C  
1076 C=Cc1cccc1.O=C(O)/C=C/c1cccc1Br>>O=C(O)/C=C/c1cccc1/C=C/c1cccc1  
1077 C=CC(=O)N(C)C.N#Cc1ccc(Br)cc1>>CN(C)C(=O)/C=C/c1ccc(C#N)cc1  
1078 C=Cc1cccn1.CC(C)(C)Br>>CC(C)(C)/C=C/c1cccn1  
1079 C=CC(=O)OCCCC.CCOC(=O)c1cccc(-c2c(-c3cccc3)oc3ccc(Br)cc23)c1>>CCCCOC(=O)/C=C/c1ccc2oc(-c3cccc3)c(-C=Cc1ccc(OC)cc1.N#Cc1ccc(Br)cc1>>COc1ccc(/C=C/c2ccc(C#N)cc2)cc1  
1080 C=Cc1cccn1.CCN(CC)c1ccc(Br)cc1>>CCN(CC)c1ccc(/C=C/c2ccncc2)cc1  
1081 C=CC(=O)OCC.CC(=O)O[C@H]1CC[C@H]2[C@H]3[C@H](CC[C@H]12C)c1ccc(O)cc1C[C@H]3Sc1ccc(Br)cc1>>CCOC(=O)/C=C/c1ccc(S[C@@H]2Cc3cc(O)ccc3[C@H]3CC[C@H]4(C)[C@@H](OC(C)=O)CC[C@H]4[C@@H]32)cc1  
1082 C=CC(=O)OC(C)(C)C.COc1ccc(S(=O)(=O)c2ccc3ccc(Br)cc3n2)cc1>>COc1ccc(S(=O)(=O)c2ccc3ccc(/C=C/C(=O)OC(C)(C)C)cc3n2)cc1  
1083 C=CC=O.FC1(F)C(I)=C1c1ccc(Br)cc1>>O=C/C=C/C1=C(c2ccc(Br)cc2)C1(F)F  
1084 C=CC(=O)OCC.COc1cc(F)c2nccc(Br)c2c1>>CCOC(=O)/C=C/c1ccnc2c(F)cc(OC)cc12  
1085 C=C.Cc1ccc([C@@H](C)CCO)c(Br)c1>>C=Cc1cc(C)ccc1[C@@H](C)CCO  
1086 C=CC(=O)OCC.COc1ccc2ccc(Br)cc2n1>>CCOC(=O)/C=C/c1ccc2ccc(OC)nc2c1  
1087 C=CC(=O)OC.O=C(c1ccc(Br)cc1)C1CC1>>COC(=O)/C=C/c1ccc(C(=O)C2CC2)cc1  
1088 C=CC(=O)OC.CO[C@@H]1[C@H](OC(C)=O)[C@@H](COC(C)=O)O[C@H]1n1cc(I)c(=O)[nH]c1=O>>COC(=O)/C=C/c1cn([C@@H]2O[C@H](COC(C)=O)[C@@H](OC(C)=O)[C@H]2OC)c(=O)[nH]  
1089 C=CC(F)(F)F.Fc1cccc(Br)c1>>Fc1cccc(/C=C/C(F)(F)F)c1  
1090 C=CC(=O)OCc1cccc1.Oc1ccc2cc(Br)ccc2c1>>O=C(/C=C/c1ccc2cc(O)ccc2c1)OCc1cccc1  
1091 C=Cc1cccc1O.COc1ccc(Br)cc1>>COc1ccc(/C=C/c2cccc2O)cc1  
1092 C=Cc1ccc(N(c2cccc2)c2cccc3cccc23)cc1.O=Cc1c(F)cc(Br)cc1F>>O=Cc1c(F)cc(/C=C/c2ccc(N(c3cccc3)c3cccc4cccc34)cc2)cc1F  
1093 C=CC(=O)OC.NS(=O)(=O)c1ccc(-c2cn(S(=O)(=O)c3cccc3)c3ncc(Br)cc23)cc1>>COC(=O)/C=C/c1enc2c(c1)c(-c1ccc(S(N)(=O)=O)cc1)cn2S(=O)(=O)c1cccc1  
1094 C=Cc1ccc(Cl)cc1.Oc1cccc1I>>Oc1cccc1/C=C/c1ccc(Cl)cc1  
1095 C=COCCO.COc1cccc1Br>>C=C(OCCO)c1cccc1OC  
1096 C=Cc1ccc(OC)cc1.O=c1cc(-c2cccc2)oc2ccc(Br)cc12>>COc1ccc(/C=C/c2ccc3oc(-c4cccc4)cc(=O)c3c2)cc1  
1097 Brc1cnc2cccc12.C=Cc1cccc1>>C(=C/c1cnc2cccc12)\c1cccc1  
1098 C=CC(=O)OCN1C(=O)c2cccc2C1=O.CCOC(=O)CSc1ccc(Br)cc1>>CCOC(=O)CSc1ccc(/C=C/C(=O)OCN2C(=O)c3cccc3C2=O)cc1  
1099 C=CC(=O)OC.Cc1cc(C)c(C(=O)c2sc3cc(O)ccc3c2Oc2ccc(Br)cc2)c(C)c1>>COC(=O)/C=C/c1ccc(Oc2c(C(=O)c3c(C)cc(C)cc3C)sc3cc(O)ccc23)cc1  
1100 Brc1ccc(-c2ccncc2)cc1.C=Cc1cccn1>>C(=C/c1cccn1)\c1ccc(-c2ccncc2)cc1  
1101 C=C[C@@H](C)[C@@H](O)C/C=C/C(=O)OC.Ic1cccc1>>COC(=O)/C=C/C[C@H](O)[C@H](C)/C=C/c1cccc1  
1102 C=CC(=O)NCc1ccc(F)c(F)c1.O=c1c(I)coc2cc(O)ccc12>>O=C(/C=C/c1coc2cc(O)ccc2c1=O)NCc1ccc(F)c(F)c1  
1103 C=CC(=O)O.N#Cc1ccc(Br)cc1>>N#Cc1ccc(/C=C/C(=O)O)cc1  
1104 C=CC=O.COC(=O)C1=Nc2cc(I)ccc2OC12CC2>>COC(=O)C1=Nc2cc(/C=C/C(=O)ccc2OC12CC2  
1105 C=CC(=O)CCC.O=C(c1cccc1)c1ccc(Br)cc1>>CCCC(=O)/C=C/c1ccc(C(=O)c2cccc2)cc1  
1106 C=Cc1cccn1.CCCCCCCC(=O)N1CCN(c2ccc(Br)cc2)CC1>>CCCCCCCC(=O)N1CCN(c2ccc(/C=C/c3cccn3)cc2)CC1  
1107 C=CCCCC(C(=O)OC)S(=O)(=O)c1cccc1.Ic1cccc1>>COC(=O)C(CCCC/C=C/c1cccc1)S(=O)(=O)c1cccc1  
1108 C=COCCCC.O=c1cc(Br)c2ccc(F)cc2[nH]1>>CCCCO/C=C/c1cc(=O)[nH]c2cc(F)ccc12  
1109 C=Cc1ccc(C)cc1.CC(=O)c1ccc(Br)cc1>>CC(=O)c1ccc(/C=C/c2ccc(C)cc2)cc1  
1110 C=Cc1ncnc2c1nnc2C1CCCCO1.Ic1cccs1>>C(=C/c1ncnc2c1nnc2C1CCCCO1)\c1cccs1

1112 C=Cc1ccc(Cl)cc1.Ic1cccs1>>Clc1ccc(/C=C/c2cccs2)cc1  
1113 C=Cc1ccccc1.O=c1oc2cc(Oc3ccccc3)ccc2c(-c2ccccc2)c1Br>>O=c1oc2cc(Oc3ccccc3)ccc2c(-  
c2ccccc2)c1/C=C/c1ccccc1  
1114 C=Cc1ccc(C(C)(C)C)cc1.CCOC(=O)C(F)(F)Br>>CCOC(=O)C(F)(F)/C=C/c1ccc(C(C)(C)C)cc1  
1115 C=CC(=O)OCCCC.Ic1ccccc1>>CCCCOC(=O)/C=C/c1ccccc1  
1116 C=CC(=O)O.FC(F)(F)c1ccc(I)cc1>>O=C(O)/C=C/c1ccc(C(F)(F)F)cc1  
1117 C=CCC(C)C.ClCc1cccc(Br)c1>>C=C(Cc1cccc(Br)c1)CC(C)C  
1118 C=CC(C)(O)CCC=C(C)C.CC(C)(C)c1ccc(Br)cc1>>CC(C)=CCCC(C)(O)/C=C/c1ccc(C(C)(C)C)cc1  
1119 Brc1ccc(-c2nc3ccccc3nc23)cc1.C=CC(=O)OC>>COC(=O)/C=C/c1ccc(-  
1120 C=CC(=O)OCC.CCc1cnc(CC)c(Cl)n1>>CCOC(=O)/C=C/c1nc(CC)cnc1CC  
C=CC(=O)OC.Cc1ccc(S(=O)(=O)n2cc(I)c(-  
1121 c3ccccc3)c2)cc1>>COC(=O)/C=C/c1cn(S(=O)(=O)c2ccc(C)cc2)cc1-c1ccccc1  
Brclenc2ccccc2e1.C=CC[C@H]1COC(C)(C)N1C(=O)OC(C)(C)C>>CC(C)(C)OC(=O)N1[C@@H](C  
1122 /C=C/c2cnc3ccccc3c2)COC1(C)C  
C=CC(=O)N1C(=O)OC[C@@H]1c1ccccc1.CC(C)(C)OC(=O)C(C(=O)OC(C)(C)C)c1ccc(Br)cc1>>C  
1123 C(C)(C)OC(=O)C(C(=O)OC(C)(C)C)c1ccc(/C=C/C(=O)N2C(=O)OC[C@@H]2c2ccccc2)cc1  
C=C[C@H]1O[C@@H]2OC(C)(C)O[C@@H]2[C@H]1OCc1ccccc1.Ic1ccccc1>>CC1(C)O[C@H]2O  
1124 [C@H]/C=C/c3ccccc3)[C@H](OCc3ccccc3)[C@H]2O1  
C=CCNC(=O)OCc1ccccc1.N#Cc1ccc(Cl)cc1>>C=C(CNC(=O)OCc1ccccc1)c1ccc(C#N)cc1  
1125 C=C1C(=O)O[C@H]2[C@H]1CCC(=C)[C@@H]1C[C@H](OC(C)=O)C(=C)[C@H]21.FC(F)(F)c1cc  
1126 cc(I)c1>>C=C1CC[C@H]2/C=C/c3cccc(C(F)(F)F)c3C(=O)O[C@@H]2[C@H]2C(=C)[C@@H](OC  
(C)=O)C[C@@H]12  
Brclccccc1I.C=CC(=O)OC>>COC(=O)/C=C/c1ccccc1Br  
1127  
1128 C=C.Nc1ccc(Br)cc1>>C=Cc1ccc(N)cc1  
C=Cc1nc(C)c(OC(=O)C(C)(C)C)c2c1COC2OC.COC(=O)c1ccc(I)cc1>>COC(=O)c1ccc(/C=C/c2nc(C)  
1129 c(OC(=O)C(C)(C)C)c3c2COC3OC)cc1  
C=CC(=O)N(C)Cc1cc2ccccc2n1C.CN(C)c1n[nH]c2ncc(Br)cc12>>CN(Cc1cc2ccccc2n1C)C(=O)/C=C/  
1130 c1cnc2[nH]nc(N(C)C)c2c1  
Brclccc(-c2nc3ccccc3[nH]2)cc1.C=CC(=O)OCC>>CCOC(=O)/C=C/c1ccc(-c2nc3ccccc3[nH]2)cc1  
1131  
1132 C=C(C)c1ccccc1.COC(=O)c1ccccc1I>>COC(=O)c1ccccc1/C=C(\C)c1ccccc1  
C=Cc1cc(C)c(OCOCCOC)c(C)c1.COc1ccc2oc(=O)c(Br)c(C)c2c1>>COCCOCOc1c(C)cc(/C=C/c2c(C  
1133 )c3cc(OC)ccc3oc2=O)cc1C  
C=Cc1ccc(F)cc1.CCOC(=O)C(F)I>>CCOC(=O)C(F)/C=C/c1ccc(F)cc1  
1134  
Brclcccc2ccccc12.C=C1C[C@H]2[C@@H]3CCc4cc(OC)ccc4[C@H]3CC[C@]2(C)C1=O>>COc1ccc  
1135 2c(c1)CC[C@]2[C@@H]1[C@@H]2CC[C@]2(C)C(=O)/C=C/c3cccc4ccccc34)[C@]2[C@@H]12  
C=Cc1ccc(C(C)(C)C)cc1.O=Cc1ccc(Br)cc1>>CC(C)(C)c1ccc(/C=C/c2ccc(C=O)cc2)cc1  
1136  
C=C1C(=O)O[C@H]2[C@H]1C[C@@H](O)/C(C)=C/CC[C@]1(C)O[C@@H]21.Nc1ccc(I)cc1>>C  
1137 /C1=C(CC[C@]2(C)O[C@H]2[C@H]2OC(=O)/C=C/c3ccc(N)cc3)[C@@H]2[C@H]1O  
C=Cc1ccc(CO)cn1.Cc1nccc(C#N)c(Nc2ccc3[nH]ccc3c2C)c1I>>Cc1nccc(C#N)c(Nc2ccc3[nH]ccc3c2C)c  
1138 1/C=C/c1ccc(CO)cn1  
C=CCN1C(=O)c2ccccc2C1=O.COC(=O)c1ccc(Br)o1>>COC(=O)c1ccc(/C=C/CN2C(=O)c3ccccc3C2  
1139 =O)o1  
C=CC1CC(=O)N1.Cc1ccc(I)cc1>>Cc1ccc(/C=C/C2CC(=O)N2)cc1  
1140  
C=C.C=CCCCCCC(C)OC(=O)c1c(OC)cc(OC)cc1OS(=O)(=O)C(F)(F)F>>C=CCCCCCC(C)OC(=O)c  
1141 1c(C=C)cc(OC)cc1OC  
C=CC(=O)OC(C)(C)C.Cc1c(Br)ccc2c1nnn2C>>Cc1c(/C=C/C(=O)OC(C)(C)C)ccc2c1nnn2C  
1142  
C=CC(=O)OC.Cc1c(CN(C)C)c2ccccc2n1Cc1ccc(Br)cc1>>COC(=O)/C=C/c1ccc(Cn2c(C)c(CN(C)C)c  
1143 3ccccc32)cc1  
C=CC(=O)OCC.CC(=O)O[IH2](OC(C)=O)c1c(C)cc(C)cc1C>>CCOC(=O)/C=C/c1c(C)cc(C)cc1C  
1144  
C=CCS(=O)(=O)c1ccccc1.c1ccc([I+])c2ccccc2)cc1>>O=S(=O)(C/C=C/c1ccccc1)c1ccccc1  
1145  
C=CC(=O)N(C)C.CCN(CC)C(=O)C1CCCN(c2ccccc(Br)n2)C1>>CCN(CC)C(=O)C1CCCN(c2ccccc(/C=  
1146 C/C(=O)N(C)C)n2)C1  
C=CC(=O)OC.COc1ccc(C(=C(I)CCSc2ccccc2)c2ccc(OC)cc2)cc1>>COC(=O)/C=C/C(CCSclccccc1)=  
1147 C(c1ccc(OC)cc1)c1ccc(OC)cc1  
C=CCOc1ccccc1.COc1ccc(Br)cc1>>COc1ccc(/C=C/COc2ccccc2)cc1  
1148  
C=Cc1ccccc1.COc1ccc(CCl)cc1>>COc1ccc(C/C=C/c2ccccc2)cc1  
1149  
C=CC(=O)OCC.Cc1ccccc(C)c1Cl>>CCOC(=O)/C=C/c1c(C)cccc1C  
1150  
C=C1c2ccccc2C1(C#N)CC.N#Cc1ccc(Br)cc1>>CCC1(C#N)/C=C/c2ccc(C#N)cc2)c2ccccc21  
1151  
C=CC(=O)OC.CC(=O)OC[C@H]1O[C@@H](Oc2ccc(I)cc2)[C@H](OC(C)=O)[C@@H](OC(C)=O)[  
1152 C@@H]1OC(C)=O>>COC(=O)/C=C/c1ccc(O[C@@H]2O[C@H](COC(C)=O)[C@@H](OC(C)=O)[  
C@H](OC(C)=O)[C@H]2OC(C)=O)cc1

1153 C=C.COC(=O)c1ccc(Br)c(NC(C)=O)c1>>C=Cc1ccc(C(=O)OC)cc1NC(C)=O  
1154 C=CS(=O)c1cccc1.COC(=O)c1ccc(Br)cc1>>COC(=O)c1ccc(/C=C/S(=O)c2ccccc2)cc1  
1155 C=C.O=C(CC(=O)c1ccc(Br)cc1)c1cccc1>>C=Cc1ccc(C(=O)CC(=O)c2ccccc2)cc1  
1156 C=CC#N.Cc1nn2c(-c3ccccc3)cc(-c3ccccc3)nc2c1I>>Cc1nn2c(-c3ccccc3)cc(-  
1157 C=Cc1cccc1.CC(=O)c1cn(C)c2c(Br)cccc12>>CC(=O)c1cn(C)c2c(/C=C/c3ccccc3)cccc12  
1158 C=C1C(=O)O[C@H]2[C@H]1CC/C(C)=C/CC[C@]1(C)O[C@H]21.Ic1cccc1>>C/C1=C\CC[C@  
@]2(C)O[C@H]2[C@H]2OC(=O)/C(=C/c3ccccc3)[C@H]2CC1  
1159 C=C(NC(C)=O)C(=O)OC.CCc1cc(OC(C)=O)cc(CC)c1I>>CCc1cc(OC(C)=O)cc(CC)c1/C=C\NC(C)=  
O)C(=O)OC  
1160 C=Cc1ccc(OC)c(OC)c1.O=C(Nc1cccc1I)C1CCCC1>>COc1ccc(/C=C/c2ccccc2NC(=O)C2CCCC2  
)cc1OC  
1161 C=CC(=O)CCCCC.CC(C)(C)c1ccc(Br)cc1>>CCCCC(=O)/C=C/c1ccc(C(C)(C)C)cc1  
1162 C=C1C(=O)O[C@H]2CC(C)=C([C@H](C)CCOC(C)=O)[C@H](OC(C)=O)[C@H]12.Fc1ccc(  
I)cc1>>CC(=O)OCCC[C@H](C)C1=C(C)C[C@H]2OC(=O)/C(=C/c3ccc(F)cc3)[C@H]2[C@H]1O  
C=CC[C@H]1O[C@H]2O[C@H]3(C)CC[C@H]4[C@H](C)CC[C@H]([C@H]1C)[C@H]42OO3.  
1163 Cc1cccc(I)c1>>Cc1cccc(/C=C/C[C@H]2O[C@H]3O[C@H]4(C)CC[C@H]5[C@H](C)CC[C@H]  
I([C@H]2C)[C@H]3OO4)c1  
1164 C=CC(=O)OC(C)(C)C.CC(=O)c1cccc1Br>>CC(=O)c1cccc1/C=C/C(=O)OC(C)(C)C  
1165 C=CC(=O)N1N=Cc2ccccc2C1C(C)CC.COc1cc(Cc2cnc(N)nc2N)cc(I)c1OC>>CCC(C)C1c2ccccc2C=  
NN1C(=O)C=C/c1cc(Cc2cnc(N)nc2N)cc(OC)c1OC  
1166 C=CC(=O)OC.COCOc1ccc(Br)c(COCCOCCOCCNC(=O)OC(C)(C)C)c1>>COCOc1ccc(/C=C/C(=O)  
OC)c(COCCOCCOCCNC(=O)OC(C)(C)C)c1  
1167 C=Cc1cccc(Cl)c1.O=C1CCC(c2ccc(Br)cc2)O1>>O=C1CCC(c2ccc(/C=C/c3cccc(Cl)c3)cc2)O1  
1168 C=CC(=O)N(C)Cc1cc2ccccc2n1C.O=C1Cc2cc(Br)enc2N1>>CN(Cc1cc2ccccc2n1C)C(=O)/C=C/c1cn  
c2c(c1)CC(=O)N2  
1169 C=CC(=O)N1N=Cc2ccccc2C1CCCC.COc1cc(Cc2cnc(N)nc2N)cc(I)c1OC>>CCCCC1c2ccccc2C=NN  
1C(=O)/C=C/c1cc(Cc2cnc(N)nc2N)cc(OC)c1OC  
1170 C=CC(=O)OC(C)(C)C.CC(C)(C)OC(=O)CCOCc1cc(OCc2ccccc2)ccc1Br>>CC(C)(C)OC(=O)/C=C/c1  
ccc(OCc2ccccc2)cc1COCCC(=O)OC(C)(C)C  
1171 C=CC(=O)OCC.CC(C)(C)OC(=O)N1CCC(=O)C(I)=C1c1cccc1>>CCOC(=O)/C=C/C1=C(c2ccccc2)  
N(C(=O)OC(C)(C)C)CCC1=O  
1172 C=CC(=O)OC(C)(C)C.Cc1cc(Br)cc(C)c1N>>Cc1cc(/C=C/C(=O)OC(C)(C)C)cc(C)c1N  
1173 C=Cc1ccc2c(c1)CC2.C[Si](C)(C)I>>C[Si](C)(C)/C=C/c1ccc2c(c1)CC2  
1174 C=C(F)C(=O)OC.Ic1ccc2ccccc2c1>>COC(=O)/C(F)=C/c1ccc2ccccc2c1  
1175 C=CC(=O)OC.Nc1cnc(F)cc1Br>>COC(=O)/C=C/c1cc(F)nc1N  
1176 C=CC(=O)OCC.O=[N+][O-]c1cc(Cl)ccc1Br>>CCOC(=O)/C=C/c1ccc(Cl)cc1[N+](=O)[O-]  
1177 C=C.Cc1cccc([N+](=O)[O-])c1Br>>C=Cc1c(C)cccc1[N+](=O)[O-]  
1178 C=CC(=O)OCC(CC)CCCC.Cc1ccc(Br)cc1>>CCCC(CC)COC(=O)/C=C/c1ccc(C)cc1  
1179 C=CNC(C)=O.N#Cc1ccc(OS(=O)(=O)C(F)(F)F)cc1>>C=C(NC(C)=O)c1ccc(C#N)cc1  
1180 C=Cc1cccc(N)c1.CCN1c2ncc(I)cc2C(=O)N(C)c2ccc(Cl)nc21>>CCN1c2ncc(/C=C/c3ccccc(N)c3)cc2C(  
=O)N(C)c2ccc(Cl)nc21  
1181 C=CC(=O)OCC.Cc1nc(-n2c(C)ccc2C)cc(NC(C)C)c1Br>>CCOC(=O)/C=C/c1c(NC(C)C)cc(-  
n2c(C)ccc2C)nc1C  
1182 Brc1ccc(-c2cnc3ccccc3n2)cc1.C=CCn1c(-c2ccc(Cl)cc2)nc2ccccc2c1=O>>O=c1c2ccccc2nc(-  
c2ccc(Cl)cc2)n1C/C=C/c1ccc(-c2cnc3ccccc3n2)cc1  
1183 C=CN1C(=O)[C@H]2CN(C(=O)OC(C)(C)C)CCN2C1=O.Clc1ccc(I)cc1>>CC(C)(C)OC(=O)N1CC  
N2C(=O)N(/C=C/c3ccc(Cl)cc3)C(=O)[C@H]2C1  
1184 C=CC[C@H]1C(=O)N(c2ccccc2)[C@H]1c1ccc(OC)cc1.OCc1cccc1Br>>COc1ccc([C@H]2[C@  
H](C/C=C/c3ccccc3CO)C(=O)N2c2ccccc2)cc1  
1185 C=C(Br)CO[Si](C)(C)C(C)(C)C.C=CC(=O)OC>>C=C(/C=C/C(=O)OC)CO[Si](C)(C)C(C)(C)C  
1186 C=CC(=O)O.Cc1cccc(Br)c1>>Cc1cccc(/C=C/C(=O)O)c1  
1187 C=CC(=O)N(C)C.Cc1ccc(Br)s1>>Cc1ccc(/C=C/C(=O)N(C)C)s1  
1188 Brc1cccs1.C=CS(N)(=O)=O>>NS(=O)(=O)/C=C/c1cccs1  
1189 C=CCOC(C)=O.Clc1cccc(I)c1>>CC(=O)OC/C=C/c1cccc(Cl)c1  
1190 C=C1CC(O)c2cc3ccccc3nc21.Ic1cccc1>>OC1C/C(=C/c2ccccc2)c2nc3ccccc3cc21  
1191 C=CC(=O)OCC.Cc1nn(C)c(Oc2cc(Br)ccc2Cl)c1C=O>>CCOC(=O)/C=C/c1ccc(Cl)c(Oc2c(C=O)c(C)n  
n2C)c1  
1192 Brc1cccc2[nH]cc(Cc3ccc4ccccc4c3)c12.C=CC(=O)OC>>COC(=O)/C=C/c1cccc2[nH]cc(Cc3ccc4ccccc  
4c3)c12  
1193 C=CC(COC(C)=O)OC(C)=O.c1ccc([I+])c2ccccc2cc1>>CC(=O)OCC(/C=C/c1cccc1)OC(C)=O  
1194 C=C[Si](C)(C)C.COc1cc(CO)c(I)c(OC)c1OC>>COc1cc(CO)c(/C=C/[Si](C)(C)C)c(OC)c1OC

1195 C=CC(=O)NC(C)(C)C.COC(=O)/C=C/c1cccc(N(Cc2ccc(Br)cc2)C(=O)C2CCCCC2)c1>>COC(=O)/C=C/c1cccc(N(Cc2ccc(/C=C/C(=O)NC(C)(C)C)cc2)C(=O)C2CCCCC2)c1  
1196 C=CCCCCCC.FC(F)(F)c1ccc(Br)cc1>>C=C(CCCCCC)c1ccc(C(F)(F)F)cc1  
C=CCS(=O)(=O)NCCNC(=O)OCc1ccccc1.CC(=O)OC[C@H]1O[C@@H](Oc2n[nH]c(C(C)C)c2Cc2cc(Br)cc2)[C@H](OC(C)=O)[C@@H](OC(C)=O)[C@@H]1OC(C)=O>>CC(=O)OC[C@H]1O[C@@H](Oc2n[nH]c(C(C)C)c2Cc2ccc(/C=C/CS(=O)(=O)NCCNC(=O)OCc3ccccc3)cc2)[C@H](OC(C)=O)[C@@H](OC(C)=O)[C@@H]1OC(C)=O  
1197 C=Cc1cc(OC)c(OC)c(OC)c1.Nc1ccc(I)cc1>>COc1cc(/C=C/c2ccc(N)cc2)cc(OC)c1OC  
1198 C=CCOc1ccccc1.CC(=O)c1ccc(I)cc1>>CC(=O)c1ccc(/C=C/COc2ccccc2)cc1  
1199 C=C[Si](C)(C)c1cccn1.Cc1cccc(I)c1>>Cc1cccc(/C=C/[Si](C)(C)c2cccn2)c1  
1200 C=CCCCCBr.ClCc1cccc(Oc2ccccc2)c1>>C=C(CCCCBBr)Cc1cccc(Oc2ccccc2)c1  
1201 C=Cc1ccc(F)cc1.N#Cc1ccc(Br)cc1>>N#Cc1ccc(/C=C/c2ccc(F)cc2)cc1  
1202 C=C.COc1ccc2cc(Br)ccc2c1[N+](=O)[O-]>>C=Cc1ccc2c([N+](=O)[O-])c(OC)ccc2c1  
1203 C=Cc1ccc2ccc(Cl)cc2n1.CC(C)(O)c1ccccc1CCC(=O)c1cccc(Br)c1>>CC(C)(O)c1ccccc1CCC(=O)c1cccc(/C=C/c2ccc3ccc(Cl)cc3n2)c1  
1204 C=CS(C)(=O)=O.C[C@H]1COCc2nc3cnc4cc(Br)ccc4c3n21>>C[C@H]1COCc2nc3cnc4cc(/C=C/S(C)(=O)=O)ccc4c3n21  
1205 C=Cc1cn(COCC[Si](C)(C)C)nc1-c1nc2ccc(OC)cc2n1COCC[Si](C)(C)C.Cc1ccncc1Br>>COc1ccc2nc(-C=Cc1c(F)c(F)c(F)c(F)c1F.IC1CCCCC1>>Fc1c(F)c(F)c(/C=C/C2CCCCC2)c(F)c1F  
1206 C=CC(=O)OC(C)(C)C.COC(=O)[C@@H]1c2cc(Br)ccc2O[C@H]1c1ccc(OC)c(OC)c1>>COC(=O)[C@@H]1c2cc(/C=C/C(=O)OC(C)(C)C)ccc2O[C@H]1c1ccc(OC)c(OC)c1  
1207 Br1ccc2c(c1)OCCOCCOCCOCCO2.C=CC(=O)O>>O=C(O)/C=C/c1ccc2c(c1)OCCOCCOCCOCCO  
1208 C=COC(CC)CCCC.N#Cc1ccc(Br)cc1>>C=C(OC(CC)CCCC)c1ccc(C#N)cc1  
1209 C=Cc1ccc(CP(=O)(OCC)OCC)cc1.CCCc1cc(C=O)c(CCC)cc1Br>>CCCc1cc(/C=C/c2ccc(CP(=O)(OCC)OCC)cc2)c(CCC)cc1C=O  
1210 C=CC(=O)OCC.CCOC(=O)CCOCc1cc2c(cc1Br)OCO2>>CCOC(=O)/C=C/c1cc2c(cc1COCCC(=O)OCC)OCO2  
1211 C=CCN(C(=O)OC(C)(C)C)C(=O)OC(C)(C)C.CC(=O)c1ccc(Cl)cc1>>CC(=O)c1ccc(/C=C/CN(C(=O)OC(C)(C)C)C(=O)OC(C)(C)C)cc1  
1212 C=C(C)C(=O)OCC.O=c1cc(I)enn1Cc1ccccc1>>CCOC(=O)/C(C)=C/c1enn(Cc2ccccc2)c(=O)c1  
1213 Br1ccc(N2CCOCC2)c2ccccc12.C=CC(=O)OCc1ccccc1>>O=C(/C=C/c1ccc(N2CCOCC2)c2ccccc12)OCc1ccccc1  
1214 C=CCCCCCC.Cc1nc2cc(Br)ccc2s1>>C=C(CCCCCC)c1ccc2sc(C)nc2c1  
1215 C=Cc1ccc(C(=O)OC)cc1.COc1cc[nH]c1/C=C1\C(=O)Ne2cccc(I)c21>>COC(=O)c1ccc(/C=C/c2ccccc3c2/C=C/c2[nH]ccc2OC)C(=O)N3)cc1  
1216 C=Cc1ccc(OC)cc1.Oc1cc(O)cc(I)c1>>COc1ccc(/C=C/c2cc(O)cc(O)c2)cc1  
1217 C=CC(=O)OC.COC(=O)c1ccc(C)nc1Br>>COC(=O)/C=C/c1nc(C)ccc1C(=O)OC  
1218 C=CC(C)=O.CNC(=O)c1c2cc(C3CC3)c(I)cc2nn1-c1ccc(Br)cc1>>CNC(=O)c1c2cc(C3CC3)c(/C=C/C(C)=O)cc2nn1-c1ccc(Br)cc1  
1219 C=CCCO.COCc1cncc(Br)c1>>COCc1cncc(/C=C/CCO)c1  
1220 C=CC(=O)OCCCC.O=[N+](O-)]c1cccc(I)c1>>CCCCOC(=O)/C=C/c1cccc([N+](=O)[O-])c1  
1221 C=CC(=O)OC(C)(C)C.CC(C)c1cc(C(C)C)c(Br)c(C(C)C)c1>>CC(C)c1cc(C(C)C)c(/C=C/C(=O)OC(C)(C)C)c(C(C)C)c1  
1222 C=CC(=O)OCC.CC(C)(C)OC(=O)c1cc(Cn2cccn2)ccc1I>>CCOC(=O)/C=C/c1ccc(Cn2cccn2)cc1C(=O)OC(C)(C)C  
1223 C=CC(=O)OCC.COc1cc(C)c(Br)cn1>>CCOC(=O)/C=C/c1nc(OC)cc1C  
1224 C=CC(=O)OC.Cc1cc(F)cc(C)c1C(=O)c1sc2cc(O)ccc2c1Oc1ccc(Br)cc1>>COC(=O)/C=C/c1ccc(Oc2c(C(=O)c3c(C)cc(F)cc3)sc3cc(O)ccc23)cc1  
1225 C=COCCN(C)C.Clc1ccc(Br)cc1>>C=C(OCCN(C)C)c1ccc(Cl)cc1  
1226 Br1cccn1.C=Cn1c(-c2ccccc2)c(-c2ccccc2)oc1=O>>O=c1oc(-c2ccccc2)c(-C=CC(=O)N(C)C.O=Cc1ccccc1Br>>CN(C)C(=O)/C=C/c1ccccc1C=O  
1227 C=Cc1ccccc1.COc1ccc(-c2oc3cc(OC)c(I)c(O)c3c(=O)c2OC)cc1OC>>COc1ccc(-c2oc3cc(OC)c(/C=C/c4ccccc4)c(O)c3c(=O)c2OC)cc1OC  
1228 C=CC(=O)NCc1ccc(OC)cc1.COc1ccc2c(=O)c(I)ccc2c1>>COc1ccc(CNC(=O)/C=C/c2oc3cc(OC)ccc3c2=O)cc1  
1229 C=Cc1cncc1.COCCOCCn1c2ccccc2c2cc(Br)ccc21>>COCCOCCn1c2ccccc2c2cc(/C=C/c3ccncc3)ccc  
1230 Br1enc2ccccc2c1.C=CC(=O)N(C)C>>CN(C)C(=O)/C=C/c1enc2ccccc2c1  
1231 C=Cc1ccccc1Cl.O=C1Ne2cccc(I)c2/C1=C/c1ccc[nH]1>>O=C1Ne2cccc(/C=C/c3ccccc3Cl)c2/C1=C/c1ccc[nH]1  
1232  
1233  
1234

C=CC(=O)OCC.COc1ccc(COC(=O)Cc2c(-  
 1235 c3cccc(Br)c3)c3cc(C)c(Cl)cc3oc2=O)cc1>>CCOC(=O)/C=C/c1cccc(-  
 c2c(CC(=O)OCc3ccc(OC)cc3)c(=O)oc3cc(Cl)c(C)cc23)c1  
 1236 C=Cc1cccc1.C[C@@H]1CC(=O)Nc2cccc(Br)c2N1>>C[C@@H]1CC(=O)Nc2cccc(/C=C/c3cccc3)c  
 1237 Br1cnc2cccc12.C=CNC(C)=O>>C=C(NC(C)=O)c1cnc2cccc12  
 1238 C=CC(=O)OC.O=c1cc(I)enn1Cc1cccc1>>COC(=O)/C=C/c1enn(Cc2cccc2)c(=O)c1  
 1239 C=CC(=O)OC.O=C(c1cccc1)c1ccc(Cl)cc1>>COC(=O)/C=C/c1ccc(C(=O)c2cccc2)cc1  
 1240 C=CC(=O)OCc1cccc1.O=[N+](=[O-])c1ccc(I)cc1>>O=C(/C=C/c1ccc([N+](=O)[O-])cc1)OCc1cccc1  
 1241 C=CC(=O)N(C)Cc1cccc(Cl)c1OCCC.CC1(C)NCc2cc(Br)enc2NC1=O>>CCCOc1c(Cl)cccc1CN(C)C(  
 =O)/C=C/c1enc2c(c1)CNC(C)(C)C(=O)N2  
 1242 Br1cnc2cccc2c1.C=Cc1cccc1>>C(=C/c1cnc2cccc2c1)\c1cccc1  
 1243 C=C[Si](CC)(CC)CC.Cc1ccc(Br)cc1>>CC[Si](/C=C/c1ccc(C)cc1)(CC)CC  
 1244 C=Cc1cccc2cccc12.CCOC(=O)C(F)I>>CCOC(=O)C(F)/C=C/c1cccc2cccc12  
 1245 C=Cc1scnc1C.CCOC(=O)C(F)(F)Br>>CCOC(=O)C(F)(F)/C=C/c1scnc1C  
 1246 C=CC(C)(C)O.CN(C)C(=O)c1cccc2nc3cccc(Br)c3nc12>>CN(C)C(=O)c1cccc2nc3cccc(/C=C/C(C)(C)  
 O)c3nc12  
 1247 C=CS(=O)(=O)c1cccc1.O=C1NC(=O)/C(=C/c2c[nH]c3ccc(Br)cc23)S1>>O=C1NC(=O)/C(=C/c2c[n  
 H]c3ccc(/C=C/S(=O)(=O)c4cccc4)cc23)S1  
 1248 C=CC(=O)OCCCC.CSc1ccc(I)cc1>>CCCCOC(=O)/C=C/c1ccc(SC)cc1  
 1249 C=CC(=O)OC(C)(C)C.O=C(NCc1ccc(OC(F)(F)F)cc1)c1cc(Br)cc(I)c1>>CC(C)(C)OC(=O)/C=C/c1cc(  
 Br)cc(C(=O)NCc2ccc(OC(F)(F)F)cc2)c1  
 1250 C=Cc1cccc1.O=C(Oc1ccc(I)cc1)c1cccc1>>O=C(Oc1ccc(/C=C/c2cccc2)cc1)c1cccc1  
 C=CC(=O)N(C)C.CC(=O)O[C@H]1CC[C@H]2[C@H]3[C@H](CC[C@]12C)c1ccc(O)cc1C[C@H]3  
 1251 Sc1ccc(Br)cc1>>CC(=O)O[C@H]1CC[C@H]2[C@H]3[C@H](CC[C@]12C)c1ccc(O)cc1C[C@H]3S  
 c1ccc(/C=C/C(=O)N(C)C)cc1  
 1252 C=CC(=O)OC.N#Cc1cccc1Br>>COC(=O)/C=C/c1cccc1C#N  
 Br1c2nc(c(-c3cccc3)c3ccc([nH]3)c(-c3cccc3)c3nc(c(-  
 1253 c4cccc4)c4ccc1[nH]4)C=C3)C=C2.C=Cc1cccc1>>C1=Cc2nc1c(/C=C/c1cccc1)c1ccc([nH]1)c(-  
 c1cccc1)c1nc(c(-c3cccc3)c3ccc([nH]3)c2-c2cccc2)C=C1  
 Br1cnc2cccc2c1.C=CCO[C@]1(C)C[C@H](C)C(=O)[C@H](C)[C@H]2NC(=O)O[C@]2(CC)[C  
 @H](CC)OC(=O)[C@H](C)C(=O)[C@H](C)[C@H]1O[C@H]1O[C@H](C)C[C@H](N(C)C)[C  
 1254 @H]1OC(=O)c1cccc1>>CC[C@H]1OC(=O)[C@H](C)C(=O)[C@H](C)[C@H](O[C@H]2O[C  
 @H](C)C[C@H](N(C)C)[C@H]2OC(=O)c2cccc2)[C@](C)(OC/C=C/c2cnc3cccc3c2)C[C@H](C)  
 C(=O)I[C@H](C)I[C@H]2NC(=O)O[C@]12CC  
 1255 C=OCCCC.Fc1ccc(Br)c(F)c1>>C=C(OCCCC)c1ccc(F)cc1F  
 C=CC(=O)N1CCOCC1.COc1cc2c3cc(Cl)ccc3nc3c4cccc4n(C)c(c1)c23>>COc1cc2c3cc(/C=C/C(=O)  
 1256 N4CCOCC4)ccc3nc3c4cccc4n(C)c(c1)c23  
 C=CC(=O)OC.Ic1ccc2c(c1)OCCOCCOCCOCCO2>>COC(=O)/C=C/c1ccc2c(c1)OCCOCCOCCOCC  
 1257 C=C(F)C(=O)OC.N#Cc1ccc(I)cc1>>COC(=O)/C(F)=C/c1ccc(C#N)cc1  
 1258 C=Cc1cc(OC)c(OC)c(OC)c1-c1ccc(Cl)cc1.COc1ccc(I)cc1>>COc1ccc(/C=C/c2cc(OC)c(OC)c(OC)c2-  
 c2ccc(Cl)cc2)cc1  
 1260 C=CC(=O)OCC.OCc1cccc(Br)n1>>CCOC(=O)/C=C/c1cccc(CO)n1  
 1261 C=Cc1ccc(Cl)cc1.COc1ccc(Br)cc1>>COc1ccc(/C=C/c2ccc(Cl)cc2)cc1  
 C=CCN(C(=O)C(C)(C)C)[C@H](C)c1cc(F)cc(F)c1.O=C1Nc2ncccc2[C@@]12Cc1cc(Br)enc1C2>>C[  
 1262 C@H](c1cc(F)cc(F)c1)N(C/C=C/c1cnc2c(c1)C[C@@]1(C2)C(=O)Nc2ncccc21)C(=O)C(C)(C)C  
 1263 C=Cc1ccc(Cl)cc1.COC(=O)c1ccc(I)cc1>>COC(=O)c1ccc(/C=C/c2ccc(Cl)cc2)cc1  
 C=CC(=O)OC(C)(C)C.Cc1ccc(S(=O)(=O)Nc2c(C)cc(C)cc2I)cc1>>Cc1ccc(S(=O)(=O)Nc2c(C)cc(C)cc  
 1264 2/C=C/C(=O)OC(C)(C)C)cc1  
 C=CC(=O)OCC.Cn1cc(-c2cccc2I)c2cccc21>>CCOC(=O)/C=C/c1cccc1-c1cn(C)c2cccc12  
 1265 C=Cc1cccc(Cl)c1.CC(C)(C)Br>>CC(C)(C)/C=C/c1cccc(Cl)c1  
 1266 C=Cc1ccc(OC)cc1.Nc1cccc1Br>>COc1ccc(/C=C/c2cccc2N)cc1  
 1267 C=CC(=O)OCC.Cc1ccc2cccc2c1Br>>CCOC(=O)/C=C/c1c(C)ccc2cccc12  
 1268 C=CC(=O)OCc1cccc1.CC(C)(C)OC(=O)N1CCCc2cc(Br)enc21>>CC(C)(C)OC(=O)N1CCCc2cc(/C=  
 1269 C/C(=O)OCc3cccc3)enc21  
 Br1cnc(Oc2cccc2)c1.C=CCO>>OCC/C=C/c1cnc(Oc2cccc2)c1  
 1270 C=C[C@H](C(=O)N1C(=O)OC(C)(C)[C@@H]1C(C)C)[C@H](O[Si](C)(C)C(C)(C)C)c1ccc(OS(=O)(  
 =O)c2ccc(C)cc2)cc1.Cc1ccc(S(=O)(=O)Oc2ccc(I)cc2)cc1>>Cc1ccc(S(=O)(=O)Oc2ccc(/C=C/[C@H](  
 1271 C(=O)N3C(=O)OC(C)(C)[C@@H]3C(C)C)[C@H](O[Si](C)(C)C(C)(C)C)c3ccc(OS(=O)(=O)c4ccc(C)  
 cc4)cc3)cc2)cc1  
 1272 Br1ccc(-c2cccc2)cc1.C=CC(=O)OCC>>CCOC(=O)/C=C/c1ccc(-c2cccc2)cc1  
 1273 C=CS(=O)(=O)F.Fc1cc(I)cc(F)n1>>O=S(=O)(F)/C=C/c1cc(F)nc(F)c1

1274 C=Cc1cccc1.C[C@]12CC[C@@H]3c4ccc(OS(=O)(=O)C(F)(F)F)cc4CC[C@H]3[C@@H]1CCC2=O  
 >>C=C(c1cccc1)c1ccc2c(c1)CC[C@H]1[C@@H]2CC[C@]2(C)C(=O)CC[C@H]12  
 1275 C=Cc1ccccc1.CCCCCCOc1ccc(Br)c(F)c1>>CCCCCCCCOc1ccc(/C=C/c2ccccc2)c(F)c1  
 1276 C=CC(=O)OC(C)(C)C.COc1ccc(Br)c(C)c1>>COc1ccc(/C=C/C(=O)OC(C)(C)C)c(C)c1  
C=CCON=C1[C@H](C)[C@H]2OC(=O)O[C@]2(C)[C@@H](CC)OC(=O)[C@H](C)[C@@H](O)[C@H](C)[C@@H](O)[C@H]2O[C@H](C)C[C@H](N(C)C)[C@H]2OC(C)=O[C@](C)(OC)C[C@H]1C.Nc1ccc(Br)cn1>>CC[C@H]1OC(=O)[C@H](C)[C@@H](O)[C@H](C)[C@@H](O)[C@@H]2O[C@H](C)C[C@H](N(C)C)[C@H]2OC(C)=O[C@](C)(OC)C[C@@H](C)C(=NOC/C=C/c2ccc(N)nc2)[C@H](C)[C@H]2OC(=O)O[C@]112C  
 1277  
 1278 C=CC(=O)OC.OCCc1cccc1Br>>COC(=O)/C=C/c1ccccc1CCO  
 1279 C=COCCO.COc1ccc(I)cc1>>C=C(OCCO)c1ccc(OC)cc1  
 1280 C=CSCC.N#Cc1ccc(Br)cc1>>CCS/C=C/c1ccc(C#N)cc1  
 1281 C=CC(=O)OC(C)(C)C.COc1ccc(Cl)cc1>>COc1ccc(/C=C/C(=O)OC(C)(C)C)cc1  
 1282 C=CSc1cccc1.O=[N+](=[O-])c1ccc(Br)cc1>>O=[N+](=[O-])c1ccc(/C=C/Sc2ccccc2)cc1  
 1283 C=CC(=O)OCCCC.CCOC(=O)/C=C/c1cc(Br)ccc1C(=O)N(CC)CC>>CCCCOC(=O)/C=C/c1ccc(C(=O)N(CC)CC)c(/C=C/C(=O)OCC)c1  
 1284 C=Cc1ccc(OC)c(O)c1.CC(=O)OC[C@H]1O[C@@H](Oc2ccc(I)cc2)[C@H](OC(C)=O)[C@@H]1OC(C)=O>>COc1ccc(/C=C/c2ccc(O[C@@H]3O[C@H](COC(C)=O)[C@@H](OC(C)=O)[C@H]3OC(C)=O)cc2)cc1O  
 1285 C=Cc1ccc(N(c2ccccc2)c2ccccc2)cc1.CCCCCCCCCCCCCCCCCc1c2ccc(I)cc2c2cc(C=O)ccc21>>CCCCCCCCCCCCCCCCc1c2ccc(C=O)cc2c2cc(/C=C/c3ccc(N(c4ccccc4)c4ccccc4)cc3)ccc21  
 1286 C=CCCC(=O)O.CC(C)(C)c1ccc(I)cc1>>CC(C)(C)c1ccc(/C=C/CCC(=O)O)cc1  
 1287 C=CC(=O)OCCCC.O=C1CCC(N2C(=O)c3ccc(Br)cc3C2=O)C(=O)N1>>CCCCOC(=O)/C=C/c1ccc2c(c1)C(=O)N(C1CCC(=O)NC1=O)C2=O  
 1288 C=CC.CC1(c2ccccc2Br)CC(=O)C1>>C/C=C/c1ccccc1C1(C)CC(=O)C1  
 1289 C=CCCCCCCCO[Si](c1ccccc1)(c1ccccc1)C(C)(C)C.CC1(C)OC(=O)c2c(cccc2OS(=O)(=O)C(F)(F)F)O1>>CC1(C)OC(=O)c2c(/C=C/CCCCCO[Si](c3ccccc3)(c3ccccc3)C(C)(C)C)cccc2O1  
 1290 CC(=O)/C=C/CC(NS(=O)(=O)c1ccc(C)cc1)c1ccccc1.Cc1ccc(Br)cc1>>CC(=O)/C=C(/CC(NS(=O)(=O)c1ccc(C)cc1)c1ccccc1)c1ccc(C)cc1  
 1291 C=CC(=O)OC.CC(C)(C)OC(=O)N1CCC(CN(C(=O)C2CCCCC2)c2ccccc(Br)c2)CC1>>COC(=O)/C=C/c1cccc(N(CC2CCN(C(=O)OC(C)(C)C)CC2)C(=O)C2CCCCC2)c1  
 1292 C=CC(=O)OCC.Fc1ccc(Br)cc1>>CCOC(=O)/C=C/c1ccc(F)cc1  
 1293 C=[Si](C)(C)C.COC(=O)c1cc(I)cc([N+](=O)[O-])c1>>COC(=O)c1cc(/C=C/[Si](C)(C)C)cc([N+](=O)[O-])c1  
 1294 C=CC(=O)N(C)C.Ic1ccccc1C#Cc1ccccc1>>CN(C)C(=O)/C=C/c1ccccc1C#Cc1ccccc1  
 1295 Br1cnc2ccccc12.C=CC=O>>O=C/C=C/c1cnc2ccccc12  
 1296 C=CCCCOc1ccc(CCNC(=O)OC(C)(C)C)cc1.CC(C)N(CC[C@H](c1ccccc1)c1cc(Br)ccc1OCc1ccccc1)C(C)C>>CC(C)N(CC[C@H](c1ccccc1)c1cc(/C=C/CCCOc2ccc(CCNC(=O)OC(C)(C)C)cc2)ccc1OCc1ccccc1)C(C)C  
 1297 C=CC(N)=O.CC(C)n1cc(-c2nc(Br)c(N)nc2-c2ccccc2)ccc1=O>>CC(C)n1cc(-c2nc(/C=C/C(N)=O)c(N)nc2-c2ccccc2)ccc1=O  
 1298 C=Cc1ccc([N+](=O)[O-])cc1.Cn1cc(I)c(=O)c2ccccc21>>Cn1cc(/C=C/c2ccc([N+](=O)[O-])cc2)c(=O)c2ccccc21  
 1299 C=CS(=O)(=O)F.Ic1cccs1>>O=S(=O)(F)/C=C/c1cccs1  
 1300 C=CC(=O)OCC.Cc1ccccc1Cl>>CCOC(=O)/C=C/c1ccccc1C  
 1301 \*CNCCCCOCCOCCOCCNC(=O)COc1ccc(C(Cc2cc(OC)cc(OC)c2)NC(=O)c2ccc(C=C)cc2)cc1.N#Cc1ccc(I)cc1C#N>>\*CNCCCCOCCOCCOCCNC(=O)COc1ccc(C(Cc2cc(OC)cc(OC)c2)NC(=O)c2ccc(/C=C/c3ccc(C#N)c(C#N)c3)cc2)cc1  
 1302 C=CC(=O)OCC.N#Cc1cc(Br)ccc1OCc1ccccc1>>CCOC(=O)/C=C/c1ccc(OCc2ccccc2)c(C#N)c1  
 1303 C=CC(=O)OC(C)(C)C.Oc1ccc(Br)cc1>>CC(C)(C)OC(=O)/C=C/c1ccc(O)cc1  
 1304 C=C1C(=O)O[C@@H]2/C=C(\C)CC/C=C(\C)CC[C@@H]12.Cc1ccc(I)cc1>>C/C1=C/[C@H]2OC(=O)/C(=C/c3ccc(C)cc3)[C@@H]2CC/C(C)=C/CC1  
 1305 C=CC(=O)OC(C)(C)C.COC(=O)c1cc2c(Oc3ccc(Br)cc3)cncc2s1>>COC(=O)c1cc2c(Oc3ccc(/C=C/C(=O)OC(C)(C)C)cc3)cncc2s1  
 1306 C=Cc1ccccc1.IC(=C1CCCC1)c1ccccc1>>C(=C/c1ccccc1)\C(=C1CCCC1)c1ccccc1  
 1307 C=CC(=O)OC.O=C(Cc1cccc(Br)c1)c1ccc(-c2ccccc2)o1>>COC(=O)/C=C/c1cccc(CC(=O)c2ccc(-c3ccccc3)o2)c1  
 1308 C=CC(=O)O[C@H]1C[C@@H](C)CC[C@@H]1C(C)C.COc1cc(Br)c(C=O)c(OC)c1>>COc1cc(/C=C/C(=O)O[C@H]2C[C@@H](C)CC[C@@H]2C(C)C)c(C=O)c(OC)c1  
 1309 C=CP(=O)(OCC)OCC.CN(C)c1ccc(Br)cc1>>CCOP(=O)/C=C/c1ccc(N(C)C)cc1OCC  
 1310 C=Cc1ccccc1.Nc1cc(F)c(F)cc1Br>>Nc1cc(F)c(F)cc1/C=C/c1ccccc1



1311 C=Cc1cccc1.CC(=O)NCCc1cccc1Br>>CC(=O)NCCc1cccc1/C=C/c1cccc1  
1312 C=C1CC(c2ccc(Cl)cc2)OC1=O.FC(F)(F)c1cccc1I>>O=C1OC(c2ccc(Cl)cc2)/C=C/c1cccc1C(F)(F)  
1313 C=CC(OC(C)=O)c1cccc1.Ic1cccc1>>CC(=O)OC/C=C/c1cccc1)c1cccc1  
1314 C=Cc1ccc(O)c(C(=O)OCC(C)C)c1.Cc1cccn1NS(=O)(=O)c1ccc(I)cc1>>Cc1cccn1NS(=O)(=O)c1ccc  
(/C=C/c2ccc(O)c(C(=O)OCC(C)C)c2)cc1  
1315 C=CC(=O)OC.Cc1ccc(S(=O)(=O)n2cc(I)c3c(Br)cccc32)cc1>>COC(=O)/C=C/c1cn(S(=O)(=O)c2ccc(  
C)cc2)c2cccc(Br)c12  
1316 C=CC(=O)OC(C)(C)C.N#Cc1ccc(NC=O)c(I)c1>>CC(C)(C)OC(=O)/C=C/c1cc(C#N)ccc1NC=O  
1317 C=CS(=O)(=O)F.Ic1ccc(Oc2cccc2)cc1>>O=S(=O)(F)/C=C/c1ccc(Oc2cccc2)cc1  
1318 C=Cc1cccn1.Cc1c(Nc2c(I)cncc2C#N)ccc2[nH]ccc12>>Cc1c(Nc2c(C#N)cncc2/C=C/c2cccn2)ccc2[n  
H]ccc12  
1319 C=CC(=O)OCCCC.O=[N+][O-]c1cccc1I>>CCCCOC(=O)/C=C/c1cccc1[N+](=O)[O-]  
1320 Bre1ccc2[nH]ccc2c1.C=COC(C)C>>C=C(OCCCC)c1ccc2[nH]ccc2c1  
1321 C=CC(=O)OC.COc1ccc(CN(C)S(=O)(=O)c2ccc(Br)cc2)cc1>>COC(=O)/C=C/c1ccc(S(=O)(=O)N(C)C  
c2ccc(OC)cc2)cc1  
1322 Bre1cccn1.C=Cc1ccc(C(=O)O)cc1>>O=C(O)c1ccc(/C=C/c2cccn2)cc1  
1323 C=CC(=O)OCC.Cc1nnn2cc(Br)ccc12>>CCOC(=O)/C=C/c1ccc2c(C)nnn2c1  
1324 C=Cc1cccn1.CN(C(=O)c1cccc1)c1ccc2c(c1)[nH]c(=NC(=O)c1ccc(Br)s1)n2CCC(N)=O>>CN(C(=O  
)c1cccc1)c1ccc2c(c1)[nH]c(=NC(=O)c1ccc(/C=C/c3cccn3)s1)n2CCC(N)=O  
1325 C=CC(=O)OC.COC(=O)c1ccc2cccc2c1Br>>COC(=O)/C=C/c1c(C(=O)OC)ccc2cccc12  
1326 C=CC(=O)OC(C)(C)C.CCOC(=O)c1cccc1I>>CCOC(=O)c1cccc1/C=C/C(=O)OC(C)(C)C  
1327 C=Cc1ccc(OC)cc1.CC(=O)c1ccc(Br)cc1>>COc1ccc(/C=C/c2ccc(C(C)=O)cc2)cc1  
1328 C=Cc1cc(OC(C)=O)cc(OC(C)=O)c1.CC(=O)Oc1ccc(Br)cc1OC(C)=O>>CC(=O)Oc1cc(/C=C/c2ccc(O  
C(C)=O)c(OC(C)=O)c2)cc(OC(C)=O)c1  
1329 C=CC(=O)OCCCC.COc1cccc(I)c1>>CCCCOC(=O)/C=C/c1cccc(OC)c1  
C=Cc1ccc(/C=C/c2ccc(N(C)C)cc2)cc1.CC1(C)C2=CC(=O)C=CC2=C(c2ccc(Br)cc2S(=O)(=O)O)c2cc  
1330 c(O)cc21>>CN(C)c1ccc(/C=C/c2ccc(/C=C/c3ccc(C4=C5C=CC(=O)C=C5C(C)(C)c5cc(O)ccc54)c(S(=O  
)(=O)O)c3)cc2)cc1  
1331 C=CC(=O)OCCCC.Fc1cccc(Br)c1>>CCCCOC(=O)/C=C/c1cccc(F)c1  
1332 C=CC(=O)OC.Cn1nc(I)c2cccn21>>COC(=O)/C=C/c1nn(C)c2ncccc12  
1333 Bre1ccc(I)cc1.C=Cc1ccc(F)cc1>>Fc1ccc(/C=C/c2ccc(Br)cc2)cc1  
Bre1cccc2cccc12.C=Cc1nc2c(N)nnc2n1[C@@H]1O[C@H](CO[Si](C)(C)C(C)(C)C)[C@@H](O[Si  
1334 ])(C)(C)C(C)(C)C)[C@H]1O[Si](C)(C)C(C)(C)C>>CC(C)(C)[Si](C)(C)OC[C@H]1O[C@H](n2c(/C  
=C/c3cccc4cccc34)nc3c(N)nnc32)[C@H](O[Si](C)(C)C(C)(C)C)[C@@H]1O[Si](C)(C)C(C)(C)C  
1335 C=CCC1c2cccc2C=NN1C(=O)C=C.COc1cc(Cc2cnc(N)nc2N)cc(I)c1OC>>C=CCC1c2cccc2C=NN1  
C(=O)/C=C/c1cc(Cc2cnc(N)nc2N)cc(OC)c1OC  
1336 Bre1cccc(-n2cnc3cccc32)c1.C=Cc1cc(OC)c(OC)c(OC)c1>>COc1cc(/C=C/c2cccc(-  
n3cnc4cccc43)c2)cc(OC)c1OC  
C=CC(=O)OC.Cc1c(/C=C/c2cccc2)c2cc(Br)ccc2n1-  
1337 c1cccc1>>COC(=O)/C=C/c1ccc2c(c1)c(/C=C/c1cccc1)c(C)n2-c1cccc1  
C=CC(=O)OC(C)(C)C.CC(=O)Oc1ccc(I)cc1CC=C(C)C>>CC(=O)Oc1ccc(/C=C/C(=O)OC(C)(C)C)cc  
1338 1CC=C(C)C  
C=CC(=O)OCC.COc1cccc(Br)c1CO[Si](C)(C)C(C)(C)C>>CCOC(=O)/C=C/c1cccc(OC)c1CO[Si](C)(  
1339 C)C(C)(C)C  
C=Cc1cccc1.CCN(c1ccc(C(=O)OC)cn1)c1cc(OC(C)C)c(C(C)C)cc1I>>CCN(c1ccc(C(=O)OC)cn1)c  
1340 1cc(OC(C)C)c(C(C)C)cc1/C=C/c1cccc1  
C=CC(=O)OCC.CC1(C)CC(=C(c2ccc(Br)cc2)c2ccc(O)c(F)c2)CC(C)(C)C1>>CCOC(=O)/C=C/c1ccc(  
1341 C(=C2CC(C)(C)CC(C)(C)C2)c2ccc(O)c(F)c2)cc1  
C=CCCC(=O)OCC.CC(C)(CC1Cc2cccc2C1)NC[C@@H](O)COc1c(Br)cccc1C#N>>CCOC(=O)CC/  
1342 C=C/c1cccc(C#N)c1OC[C@H](O)CNC(C)(C)CC1Cc2cccc2C1  
C=CC(OCC)OCC.O=[N+][O-]c1ccc(Br)c1>>CCOC(/C=C/c1cccc([N+](=O)[O-])c1)OCC  
1343 C=Cc1cccc1.Cc1cc(Br)ccc1N>>Cc1cc(/C=C/c2cccc2)ccc1N  
C=CCN(C(=O)[C@@H]1CCCN1C)[C@H](C)c1cc(F)cc(F)c1.O=C1Nc2ncccc2[C@]12Cc1ccc(Br)cc1  
1344 C2>>C[C@H](c1cc(F)cc(F)c1)N(C/C=C/c1ccc2c(c1)C[C@@]1(C2)C(=O)Nc2ncccc21)C(=O)[C@@  
H]1CCCN1C  
1345 C=Cc1cc2ccc(N(CC)CC)cc2oc1=O.O=Cc1ccc(Br)cc1>>CCN(CC)c1ccc2cc(/C=C/c3ccc(C=O)cc3)c(=  
1346 O)cc2c1  
C=CCCN1C(=O)c2cccc2C1=O.Cc1cccc(I)c1>>Cc1cccc(/C=C/CCN2C(=O)c3cccc3C2=O)c1  
1347 C=COC(CC)CCCC.Fc1ccc(Br)cc1>>C=C(OC(CC)CCCC)c1ccc(F)cc1  
1348 C=CC(=O)OC.O=C1c2cccc2C(=O)N1c1cccc1I>>COC(=O)/C=C/c1cccc1N1C(=O)c2cccc2C1=O  
1349 C=CC#N.Cc1cc(-c2cccc2)n2nc(-c3cccc3)c(I)c2n1>>Cc1cc(-c2cccc2)n2nc(-  
1350

1351 C=Cc1ccc(C#N)cc1.N#CCc1ccc(Br)cc1>>N#CCc1ccc(/C=C/c2ccc(C#N)cc2)cc1  
1352 C=Cc1ccc(C(F)(F)F)cc1.Ic1ccccc1>>FC(F)(F)c1ccc(/C=C/c2ccccc2)cc1  
1353 C=CC(=O)OCC.COc1ccc(-c2cc3cc(Br)cc(OC)c3o2)cc1OC>>CCOC(=O)/C=C/c1cc(OC)c2oc(-  
c3ccc(OC)c(OC)c3)cc2c1  
1354 C=CN(C)C(C)=O.CC(=O)c1ccc(Br)cc1>>C=C(c1ccc(C(C)=O)cc1)N(C)C(C)=O  
1355 C=Cc1ccncc1.Cc1cc(N(c2ccc([N+](=O)[O-])cc2[N+](=O)[O-])c2ccc([N+](=O)[O-])cc2[N+](=O)[O-]  
1356 C=CC(=O)N(C)C.COC(=O)/C=C/c1cccc(N(Cc2ccc(Br)cc2)C(=O)C2CCCC2)c1>>COC(=O)/C=C/c1  
cccc(N(Cc2ccc(/C=C/C(=O)N(C)C)cc2)C(=O)C2CCCC2)c1  
1357 C=CC(=O)N(C)Cc1oc2ccccc2c1C.CC1(C)NCc2cc(Br)cnc2NC1=O>>Cc1c(CN(C)C(=O)/C=C/c2cnc3  
c(c2)CNC(C)(C)C(=O)N3)oc2ccccc12  
1358 C=CC(=O)OCC.Cc1cc(C#N)ccc1-c1sccl1Br>>CCOC(=O)/C=C/c1sccl1-c1ccc(C#N)cc1C  
1359 C=CCc1ccccc1.CC(C)(C)c1ccc(Br)cc1>>C=C(Cc1ccccc1)c1ccc(C(C)(C)C)cc1  
1360 C=CC(=O)OC.CC(C)c1nn(Cc2ccccc2)cc1I>>COC(=O)/C=C/c1cn(Cc2ccccc2)nc1C(C)C  
1361 C=Cc1ccc(O)cc1.COc1ccccc1Br>>COc1ccccc1/C=C/c1ccc(O)cc1  
1362 C=Cc1cccc(CN2CCN(C)CC2)n1.Cc1ncc(C#N)c(Nc2ccc3[nH]ccc3c2C)c1Br>>Cc1ncc(C#N)c(Nc2ccc  
3[nH]ccc3c2C)c1/C=C/c1cccc(CN2CCN(C)CC2)n1  
1363 Br1cnc2ccccc2c1.C=CP(=O)(OCC)OCC>>CCOP(=O)/C=C/c1cnc2ccccc2c1)OCC  
1364 C=CCc1ccccc1.COC(=O)c1ccc(I)cc1Nc1ccc(F)cc1>>COC(=O)c1ccc(/C=C/Cc2ccccc2)cc1Nc1ccc(F)c  
1365 C=CC(=O)OC.COc1ccc2c(c1)c(I)nn2C(=O)OC(C)(C)C>>COC(=O)/C=C/c1nn(C(=O)OC(C)(C)C)c2c  
cc(OC)cc12  
1366 C=CSCC.O=C(c1ccccc1)c1ccc(Br)cc1>>CCS/C=C/c1ccc(C(=O)c2ccccc2)cc1  
1367 C=CC(=O)OC(C)(C)C.O=S(=O)(c1ccccc(Br)c1)c1ccc2cc(Cl)ccc2n1>>CC(C)(C)OC(=O)/C=C/c1cccc(  
S(=O)(=O)c2ccc3cc(Cl)ccc3n2)c1  
1368 C=Cc1cncc(C#N)c1.Cc1cc(Br)cc(C)c1I>>Cc1cc(Br)cc(C)c1/C=C/c1cncc(C#N)c1  
1369 C=COCCCC.Clc1ccccc1>>C=C(OCCCC)c1ccccc1  
1370 Br1ccc(C=C(c2ccccc2)c2ccccc2)cc1.C=Cc1ccc(-  
c2ccc3c(c2)c2ccccc2n3CC)cc1>>CCn1c2ccccc2c2cc(-  
1371 C=CC(=O)CC.COc1ccc2cc(Br)ccc2c1>>CCC(=O)/C=C/c1ccc2cc(OC)ccc2c1  
1372 C=Cc1ccccc1OC.COc1ccc(Br)cc1>>COc1ccc(/C=C/c2ccccc2OC)cc1  
1373 C=CC(=O)OC(C)(C)C.Ic1ccccc1>>CC(C)(C)OC(=O)/C=C/c1ccccc1  
1374 C=C.COC(=O)c1cc(OC)ccc1Br>>C=Cc1ccc(OC)cc1C(=O)OC  
1375 C=CCOc1ccc(C)cc1.Ic1cccs1>>Cc1ccc(OC/C=C/c2cccs2)cc1  
1376 C=Cc1ccccc1.CCOC(=O)CCc1cc(-c2ccc(Br)cc2)ccc1S(=O)(=O)c1ccccc1>>CCOC(=O)CCc1cc(-  
c2ccc(/C=C/c3ccccc3)cc2)ccc1S(=O)(=O)c1ccccc1  
1377 C=CCC.ClCc1ccccc1I>>C=C(CC)Cc1ccccc1I  
1378 C=Cc1ccc(C#N)cc1.[O-][N+](=Nc1ccc(Br)cc1)c1ccccc1>>N#Cc1ccc(/C=C/c2ccc(N=[N+])([O-]  
1379 C=Cc1ccc2ccccc2c1.CC(=O)c1ccc(Br)cc1>>CC(=O)c1ccc(/C=C/c2ccc3ccccc3c2)cc1  
C=CC(=O)C(O[Si](CC)(CC)CC)c1c(OCc2ccccc2)c(OC)c2c(OC)c(OC)cc(OC)c2c1OC.COC(=O)c1cc2  
1380 cc(I)c(OCc3ccccc3)c(OC)c2c(=O)o1>>CC[Si](CC)(CC)OC(C(=O)/C=C/c1cc2cc(C(=O)OC)oc(=O)c2  
c(OC)c1OCc1ccccc1)c1c(OCc2ccccc2)c(OC)c2c(OC)c(OC)cc(OC)c2c1OC  
1381 C=CC(=O)OC(C)(C)C.Cn1cc(I)cn1>>Cn1cc(/C=C/C(=O)OC(C)(C)C)cn1  
1382 C=CCCCCCC.Cc1ccccc1Br>>CCCCC/C=C/c1ccccc1C  
1383 C=CN1CCCC1=O.FC(F)(F)I>>O=C1CCCN1/C=C/C(F)(F)F  
1384 C=Cc1ccc(OC)c(OC)c1.COC(=O)Cn1c(=O)c(Cl)nc2ccccc21>>COC(=O)Cn1c(=O)c(/C=C/c2ccc(OC)  
c(OC)c2)nc2ccccc21  
Br1cnccn1.C=CCO[C@H]1[C@H](C)[C@@H](O[C@@H]2O[C@H](C)C[C@H](N(C)C)[C@H]2O  
1385 C(C)=O)[C@](C)(OC)C[C@@H](C)/C=N\OCc2ccccc2)[C@H](C)[C@H]2OC(=O)O[C@]2(C)[C@  
@H](CC)OC(=O)[C@@H]1C>>CC[C@H]1OC(=O)[C@H](C)[C@H](OC/C=C/c2cnccn2)[C@H](  
C)[C@H](O[C@H]2O[C@H](C)C[C@H](N(C)C)[C@H]2OC(C)=O)[C@](C)(OC)C[C@@H](C)  
/C(=N\OCc2ccccc2)I[C@H](C)I[C@H]2OC(=O)O[C@]112C  
1386 C=CCNC(=O)OC(C)(C)C.Clc1ccc2ccccc2c1>>C=C(CNC(=O)OC(C)(C)C)c1ccc2ccccc2c1  
1387 Br1ccc(-c2ccccc2)cc1.C=C(NC(C)=O)C(=O)OC>>COC(=O)/C=C/c1ccc(-c2ccccc2)cc1)NC(C)=O  
1388 Br1ccsc1.C=CCNC(=O)OC(C)(C)C>>CC(C)(C)OC(=O)NC/C=C/c1ccsc1  
1389 C=Cc1cc(OC)c(OC)c(OC)c1.O=Cc1ccc(Br)cc1>>COc1cc(/C=C/c2ccc(C=O)cc2)cc(OC)c1OC  
1390 C=CC(=O)N(C)Cc1oc2ccccc2c1C.CC(C)(C)OC(=O)N1CCNc2ncc(Br)cc2C1>>Cc1c(CN(C)C(=O)/C=  
C/c2cnc3c(c2)CN(C(=O)OC(C)(C)C)CCN3)oc2ccccc12  
1391 C=C.ClCc1cc2ccccc2s1>>C=CCc1cc2ccccc2s1

1392 C=CCC[C@H]1N[C@@H]1C(=O)c1cccc1.Ic1cccc1>>O=C(c1cccc1)[C@H]1N[C@@H]1CC/C=C  
/c1cccc1  
1393 C=C(F)[Si](C)(c1cccc1)c1cccc1.COC(=O)c1cccc1I>>COC(=O)c1cccc1/C=C(\F)[Si](C)(c1cccc1  
)c1cccc1  
1394 C=CCN1C(=O)c2cccc2C1=O.CN(C)c1ccc(Br)cc1>>CN(C)c1ccc(/C=C/CN2C(=O)c3cccc3C2=O)cc  
C=Cc1cccc1.FC(F)(F)C(=C(Br)c1cccc1)N1CCOCC1>>FC(F)(F)C(=C(/C=C/c1cccc1)c1cccc1)N1  
CCOCC1  
1396 C=Cc1cc(OC)cc(OC)c1.CC(=O)Oc1ccc(I)cc1>>COc1cc(/C=C/c2ccc(OC(C)=O)cc2)cc(OC)c1  
1397 C=Cc1nnn(C)n1.COC(=O)c1cccc(Br)c1>>COC(=O)c1cccc(/C=C/c2nnn(C)n2)c1  
1398 Brc1ccnc1.C=Cc1cccc1>>C(=C/c1cccc1)\c1ccnc1  
1399 C=CC(C)(C)O.COC(=O)N1c2cccc2[C@@]2(CCNC2=O)[C@]2(CCNC(=O)OC(C)(C)C)c3c(Br)cccc  
3N(C)[C@H]12>>COC(=O)N1c2cccc2[C@@]2(CCNC2=O)[C@]2(CCNC(=O)OC(C)(C)C)c3c(/C=  
C/C(C)(C)O)cccc3N(C)[C@H]12  
1400 C=Cc1cccc1.Ic1c(COCc2cccc2)nnn1Cc1cccc1>>C(=C/c1c(COCc2cccc2)nnn1Cc1cccc1)\c1cccc  
1401 C=Cc1cccc1.O=C1CCCCc2cc(Br)ccc21>>O=C1CCCCc2cc(/C=C/c3cccc3)ccc21  
1402 C=Cc1ccc(C)cc1.O=S(=O)(c1cccc1)C(F)(F)Br>>Cc1ccc(/C=C/C(F)(F)S(=O)(=O)c2cccc2)cc1  
C=Cc1cccc([N+](=O)[O-]  
1403 ]c1.CN(C(=O)c1cccc1)c1ccc2c(c1)[nH]c(=NC(=O)c1ccc(Br)s1)n2CCC(N)=O>>CN(C(=O)c1cccc1  
)c1ccc2c(c1)[nH]c(=NC(=O)c1ccc(/C=C/c3cccc([N+](=O)[O-])c3)s1)n2CCC(N)=O  
1404 C=CC(OC)OC.O=[N+](O-)]c1cccc1I>>COC(/C=C/c1cccc1[N+](=O)[O-])OC  
1405 C=C/C=C(\CCCC)OCC.CC(=O)c1ccc(Br)cc1>>CCCC/C(=C\C=C\c1ccc(C(C)=O)cc1)OCC  
1406 C=CC(=O)OCC.FC(F)(F)c1ccc(Br)cn1>>CCOC(=O)/C=C/c1ccc(C(F)(F)F)nc1  
1407 C=Cc1ccnc1.CCCCCCCC0c1ccc(I)cc1>>CCCCCCCC0c1ccc(/C=C/c2ccnc2)cc1  
1408 C=Cc1ccnc1.CC(C)(C)OC(=O)N1CC[C@H]1COc1cnc(Cl)c(I)c1>>CC(C)(C)OC(=O)N1CC[C@H]1  
COc1cnc(Cl)c(/C=C/c2ccnc2)c1  
1409 Brc1ccc2c(c1)c1cccc1n2-c1cccc1.C=Cc1ccc(N)cc1>>Nc1ccc(/C=C/c2ccc3c(c2)c2cccc2n3-  
c2cccc2)cc1  
1410 C=CC(=O)OCCN(C)C.Cc1ccc(NC(=O)c2ccc3ccc(Br)cc3c2=O)cc1>>Cc1ccc(NC(=O)c2ccc3ccc(/C=C  
/C(=O)OCCN(C)C)cc3c2=O)cc1  
1411 C=Cc1csc2cccc12.CCOC(=O)C(F)/C=C/c1csc2cccc12  
1412 C=CCCN1C(=O)c2cccc2C1=O.Clc1cccc(I)c1>>O=C1c2cccc2C(=O)N1CC/C=C/c1cccc(Cl)c1  
1413 C=CC(=O)OCC.Ic1ccc2c(c1)OCCOCCOCCOCCOCCO2>>CCOC(=O)/C=C/c1ccc2c(c1)OCCOCCO  
CCOCCOCCO2  
1414 C=CC(=O)OC(C)(C)C.CC(C)=CCc1cc(I)cc(CC=C(C)C)c1O>>CC(C)=CCc1cc(/C=C/C(=O)OC(C)(C)  
C)cc(CC=C(C)C)c1O  
1415 C=Cc1ccnc1.O=C1CCC(c2ccc(Br)cc2)O1>>O=C1CCC(c2ccc(/C=C/c3ccnc3)cc2)O1  
1416 C=CC(=O)OC.CC(=O)c1cccc(Br)c1>>COC(=O)/C=C/c1cccc(C(C)=O)c1  
1417 C=CC(N)=O.CCN1c2ncc(I)cc2C(=O)N(C)c2ccnc21>>CCN1c2ncc(/C=C/C(N)=O)cc2C(=O)N(C)c2c  
ccnc21  
1418 C=Cc1ccc(OC)cc1.CCN(CC)c1ccc2cc(C(=O)OCc3cc(I)ccc3[N+](=O)[O-  
])c(=O)cc2c1>>CCN(CC)c1ccc2cc(C(=O)OCc3cc(/C=C/c4ccc(OC)cc4)ccc3[N+](=O)[O-  
C=C[C@H](O[Si](C)(C)C(C)(C)C)[C@H](CCCC(=O)OC)O[Si](C)(C)C(C)(C)C.CCCCCC(=O)c1n  
1419 c(Br)cc2cccc12>>CCCCC(=O)c1nc(/C=C/[C@@H](O[Si](C)(C)C(C)(C)C)[C@H](CCCC(=O)OC)  
O[Si](C)(C)C(C)(C)C)cc2cccc12  
1420 C=CC(=O)OCCCC.CCCCc1ccc(Br)cc1>>CCCCOC(=O)/C=C/c1ccc(CCCC)cc1  
1421 C=CC(=O)OC.COc1ccc(-c2nc3ccc(Br)cc3nc2-c2ccc(OC)cc2)cc1>>COC(=O)/C=C/c1ccc2nc(-  
c3ccc(OC)cc3)c(-c3ccc(OC)cc3)nc2c1  
1422 C=CC(=O)O.COc1cc(/C=C/c2ccc(Br)cc2)cc(OC)c1O>>COc1cc(/C=C/c2ccc(/C=C/C(=O)O)cc2)cc(O  
C)c1O  
1423 C=CCCCCOC(C)=O.CC(C)(C)c1ccc(OS(=O)(=O)C(F)(F)F)cc1>>C=C(CCCCCOC(C)=O)c1ccc(C(C)(  
C)C)cc1  
1424 C=Cc1ccc(OC)c(O)c1.Oc1cc(Br)cc(O)c1F>>COc1ccc(/C=C/c2cc(O)c(F)c(O)c2)cc1O  
1425 C=CC(=O)OC(C)(C)C.CC(C)(C)O[C@H]1CCC[C@H]2C=C(C3=C(Br)CCCC3)CC[C@@]21C>>CC(  
C)(C)OC(=O)/C=C/C1=C(C2=C[C@H]3CCCC[C@H](OC(C)(C)C)[C@@]3(C)CC2)CCCC1  
1426 Brc1cccc1.C=CS(N)(=O)=O>>NS(=O)(=O)/C=C/c1cccc1  
1427 C=CNC(=O)Cc1cccc1.O=S(=O)(Oc1ccc2cccc2c1)C(F)(F)F>>C=C(NC(=O)Cc1cccc1)c1ccc2cccc  
1428 Brc1c2cccc2cc2cccc12.C=Cc1ccc(-c2ccc3nc(-c4cccn4)cc(-  
c4cccc4)c3c2)cc1>>C(=C/c1c2cccc2cc2cccc12)\c1ccc(-c2ccc3nc(-c4cccn4)cc(-c4cccc4)c3c2)cc1  
1429 C=CCNC(=O)[C@H](CC)NC(=O)OC(C)(C)C.CC(C)(C)OC(=O)n1cc(Br)c2cccc21>>CC[C@H](NC(  
=O)OC(C)(C)C)C(=O)NC/C=C/c1cn(C(=O)OC(C)(C)C)c2cccc12

C=C[C@H]1C[C@H](CC(=O)OCC)OC(C)(C)O1.CCC(C)c1c(Br)c(-c2ccc(F)cc2)nn1-  
 1430 c1ccnc(Nc2ccccc2)c1>>CCOC(=O)C[C@H]1C[C@H](/C=C/c2c(-c3ccc(F)cc3)nn(-  
 c3ccnc(Nc4ccccc4)c3)c2C(C)CC)OC(C)(C)O1  
 1431 C=CCO.Cc1ccc(Br)cc1>>C=C(CO)c1ccc(C)cc1  
 1432 C=Cc1ccc(C(=C(c2ccccc2)c2ccccc2)c2ccccc2)cc1.CCCCN1C(=O)c2cccc3c(Br)ccc(c23)C1=O>>CCC  
 CN1C(=O)c2cccc3c(/C=C/c4ccc(C(=C(c5ccccc5)c5ccccc5)c5ccccc5)cc4)ccc(c23)C1=O  
 1433 C=COCCCC.O=c1cc(Br)c2ccccc2[nH]1>>CCCCO/C=C/c1cc(=O)[nH]c2ccccc12  
 1434 C=CCCCCCCC.COc1ccc(I)cc1>>CCCCCCCC/C=C/c1ccc(OC)cc1  
 1435 C=C.NC(=O)c1cc(Cl)ccc1Br>>C=Cc1ccc(Cl)cc1C(N)=O  
 1436 C=CC#N.CCN1c2ncc(I)cc2C(=O)N(C)c2ccccc21>>CCN1c2ncc(/C=C/C#N)cc2C(=O)N(C)c2ccccc21  
 1437 C=CC(=O)OCC.COCC(=O)c1cc(I)ccc1NC(C)=O>>CCOC(=O)/C=C/c1ccc(NC(C)=O)c(C(=O)OC)c1  
 1438 C=Cc1ccccc1.CCCCCCN1c2ccc(I)cc2Sc2cc(C=O)ccc21>>CCCCCN1c2ccc(C=O)cc2Sc2cc(/C=C/c3  
 cccccc3)ccc21  
 1439 C=Cc1cc(OC(C)=O)cc(OC(C)=O)c1.CC(=O)Oc1ccc(Br)cc1>>CC(=O)Oc1ccc(/C=C/c2cc(OC(C)=O)c  
 c(OC(C)=O)c2)cc1  
 1440 C=CC(=O)OCC.COCC(=O)c1nc2cc(F)c(Br)cn2c1I>>CCOC(=O)/C=C/c1c(C(=O)OCC)nc2cc(F)c(Br)  
 1441 C=CC(=O)OC(C)(C)C.CC(C)OC(=O)c1ccsc1Br>>CC(C)OC(=O)c1ccsc1/C=C/C(=O)OC(C)(C)C  
 1442 C=CC(=O)O.CC(=O)Nc1ncc(Br)cc1C>>CC(=O)Nc1ncc(/C=C/C(=O)O)cc1C  
 1443 C=CC(C)=O.COc1ccc2ccc(=O)oc2c1I>>COc1ccc2ccc(=O)oc2c1/C=C/C(C)=O  
 1444 C=CC(=O)O.O=[N+](O-)]c1ccccc1Cl>>O=C(O)/C=C/c1ccccc1[N+](=O)[O-]  
 1445 Brc1ccc(CNc2ccccc2)cc1.C=CC(=O)OC(C)(C)C>>CC(C)(C)OC(=O)/C=C/c1ccc(CNc2ccccc2)cc1  
 1446 C=Cc1ccc(OC)cc1.FC(F)(F)Oc1ccc(I)cc1>>CCOc1ccc(/C=C/c2ccc(OC(F)(F)F)cc2)cc1  
 1447 C=Cc1ccc(C)cc1.COc1ccc(I)cc1>>COc1ccc(/C=C/c2ccc(C)cc2)cc1  
 1448 C=C1C(=O)O[C@H]2/C=C(\C)CC/C=C(\C)CC[C@H]12.Clc1ccc(I)cc1>>C/C1=C\C[C@H]2OC(=O)  
 C/C=C/c3ccc(Cl)cc3)[C@H]2CC/C(C)=C/CC1  
 1449 C=CC(=O)OC.CC1(C)Cc2ccccc(I)c2O1>>COC(=O)/C=C/c1ccccc2c1OC(C)(C)C2  
 1450 C=CC(C)=O.FC(F)(F)c1ccc(Br)cc1>>CC(=O)/C=C/c1ccc(C(F)(F)F)cc1  
 1451 C=CC(=O)OC.CCC(CC)(c1ccc(OCc2ccccc2)c(C)c1)c1c[nH]c2cc(Br)ccc12>>CCC(CC)(c1ccc(OCc2c  
 cccc2)c(C)c1)c1c[nH]c2cc(/C=C/C(=O)OC)ccc12  
 1452 C=CC(=O)O.COc1ccc(S(=O)(=O)Nc2ccccc(I)c2)cc1OC>>COc1ccc(S(=O)(=O)Nc2ccccc(/C=C/C(=O)O  
 )c2)cc1OC  
 1453 \*CNCCCOCCOCCOCCNC(=O)COc1ccc(C(Cc2cc(OC)cc(OC)c2)NC(=O)c2ccccc(C=C)c2)cc1.Fc1cc  
 c(F)c(I)c1>>\*CNCCCOCCOCCOCCNC(=O)COc1ccc(C(Cc2cc(OC)cc(OC)c2)NC(=O)c2ccccc(/C=C/  
 c3ccc(F)ccc3F)c2)cc1  
 1454 C=CS(C)(=O)=O.O=C1Nc2ccc(I)cc2/C1=C/c1ccc[nH]1>>CS(=O)(=O)/C=C/c1ccc2c(c1)/C(=C/c1ccc[  
 nH]1)C(=O)N2  
 1455 C=CC(=O)OCC.Clc1ccc(I)cn1>>CCOC(=O)/C=C/c1ccc(Cl)nc1  
 1456 C=CC(OCC)OCC.FC(F)(F)c1ccc(Br)cc1>>CCOC(/C=C/c1ccc(C(F)(F)F)cc1)OCC  
 1457 C=CC(N)=O.COc1cc(Br)cc(C)c1N>>COc1cc(/C=C/C(N)=O)cc(C)c1N  
 1458 Brc1ccccc(C2OCCO2)c1.C=CC(=O)OC>>COC(=O)/C=C/c1ccccc(C2OCCO2)c1  
 1459 C=Cc1cc(O)c(OC)cc1F.COc1cc(Br)cc(OC)c1F>>COc1cc(F)c(/C=C/c2cc(OC)c(F)c(OC)c2)cc1O  
 1460 Brc1ccccc(N2CCCC2)c1.C=CC(=O)OCCCC>>CCCCOC(=O)/C=C/c1ccccc(N2CCCC2)c1  
 1461 C=Cc1ccc2c(c1)Sc1ccccc1N2CC.O=Cc1ccc(Br)cc1>>CCN1c2ccccc2Sc2cc(/C=C/c3ccc(C=O)cc3)ccc  
 C=Cc1ccc(OC)cc1.CCCCOc1ccc2c(c1)cc(C#N)c1ccc(Br)cc12>>CCCCOc1ccc2c(c1)cc(C#N)c1ccc(/C  
 =C/c3ccc(OC)cc3)cc12  
 1463 C=CC(=O)OC.Nc1cc(F)ccc1Br>>COC(=O)/C=C/c1ccc(F)cc1N  
 1464 C=CC#N.Cc1cc(-c2ccccc2)n2nc(-c3ccc(Cl)cc3)c(I)c2n1>>Cc1cc(-c2ccccc2)n2nc(-  
 c3ccc(Cl)cc3)c(/C=C/C#N)c2n1  
 C=CCn1c(-  
 1465 c2ccc(OC)c(OC)c2OC)nc2ccccc2c1=O.O=C(CN1C(=O)COc2ccccc21)c1ccc(Br)cc1>>COc1ccc(-  
 c2nc3ccccc3c(=O)n2C/C=C/c2ccc(C(=O)CN3C(=O)COc4ccccc43)cc2)c(OC)c1OC  
 1466 C=Cc1ccc(C(F)(F)F)cc1.O=C(NCc1ccccc(I)c1)[C@@H]1CCCN1S(=O)(=O)c1cc2ccccc2o1>>O=C(NC  
 c1ccccc(/C=C/c2ccc(C(F)(F)F)cc2)c1)[C@@H]1CCCN1S(=O)(=O)c1cc2ccccc2o1  
 1467 C=CCOc1ccccc1C(C)C.Ic1cccs1>>CC(C)c1ccccc1OC/C=C/c1cccs1  
 1468 C=CC(=O)OC.Nc1ccc(Br)cc1I>>COC(=O)/C=C/c1cc(Br)ccc1N  
 1469 C=CC1CC=CCC1.Clc1ccc(I)cc1>>Clc1ccc(/C=C/C2CC=CCC2)cc1  
 1470 C=CC#N.CC(C)NCCCN1c(Sc2cc3c(cc2I)OCO3)nc2c(N)ncnc21>>CC(C)NCCCN1c(Sc2cc3c(cc2/C=C/  
 C#N)OCO3)nc2c(N)ncnc21  
 1471 C=CC(N)=O.CN1CCOC(c2ccccc2)c2cc(Br)ccc2C1>>CN1CCOC(c2ccccc2)c2cc(/C=C/C(N)=O)ccc2C  
 1472 C=CC(=O)OCC.COc1ncc(Br)c(N)n1>>CCOC(=O)/C=C/c1cnc(OC)nc1N

1473 C=CC(=O)OCC.Cc1nc(N)nc(N[C@H]2CC[C@H](OCCO)CC2)c1Br>>CCOC(=O)/C=C/c1c(C)nc(N)nc1N[C@H]1CC[C@H](OCCO)CC1  
1474 C=Cc1cccc1C.Oc1cccc1I>>Cc1cccc1/C=C/c1cccc1O  
1475 C=CC#N.Cc1c(Br)ccc2c1nnn2C>>Cc1c(/C=C/C#N)ccc2c1nnn2C  
1476 C=C(Br)CCO.C=CC(=O)CCCCC>>C=C(/C=C/C(=O)CCCCC)CCO  
1477 C=Cc1cc([N+](=O)[O-])ccc1OCOCC[Si](C)(C)C.COC(=O)c1ccc(I)cc1>>COC(=O)c1ccc(/C=C/c2cc([N+](=O)[O-])ccc2OCOCC[Si](C)(C)C)cc1  
1478 C=CC(=O)OCC(C)CCCC.COc1ccc(I)cc1>>CCCCC(C)COC(=O)/C=C/c1ccc(OC)cc1  
1479 Br1ccc2c(c1)OCO2.C=CC(=O)OCC>>CCOC(=O)/C=C/c1ccc2c(c1)OCO2  
1480 C=C/C=C/CCCCC.CC(=O)c1ccc(I)cc1>>CCCCC/C=C/C=C/c1ccc(C(C)=O)cc1  
1481 C=CCOC(C)=O.CC(C)(C)c1ccc(I)cc1>>CC(=O)OC/C=C/c1ccc(C(C)(C)C)cc1  
1482 C=Cc1cccc1.O=c1ccoc2ccc(Br)cc12>>O=c1ccoc2ccc(/C=C/c3cccc3)cc12  
1483 C=CCCCCCCCC.O=Cc1ccc(Br)cc1>>CCCCCCCCC/C=C/c1ccc(C=O)cc1  
1484 C=CC(=O)OCC.Oc1ccc(C(=C2CCCCC2)c2ccc(Br)cc2F)cc1>>CCOC(=O)/C=C/c1ccc(C(=C2CCCCC2)c2ccc(O)cc2)c(F)c1  
1485 C=Cc1ccc(C(=O)N[C@@H](CCSC)C(=O)OC)c(-c2cccc2C)c1.OC(c1cccc1)(c1cccc1)c1ccncc1Br>>COC(=O)[C@H](CCSC)NC(=O)c1ccc(/C=C/c2cncccc2C(O)(c2cccc2)c2cccc2)cc1-c1cccc1C  
1486 C=Cc1ccc(OC(C)=O)cc1.COc1cc(I)cc(OC)c1OC>>COc1cc(/C=C/c2ccc(OC(C)=O)cc2)cc(OC)c1OC  
1487 Br1ccc(I)cc1.C=CC(=O)OC(C)(C)C>>CC(C)(C)OC(=O)/C=C/c1ccc(Br)cc1  
1488 C=CC(=O)OCCCC.O=Cc1ccc(Br)cc1>>CCCCOC(=O)/C=C/c1ccc(C=O)cc1  
1489 C=CC(=O)OC.Fc1c(F)c(F)c(Br)c(F)c1F>>COC(=O)/C=C/c1c(F)c(F)c(F)c(F)c1F  
1490 C=CS(=O)(=O)c1cccc1.CC(=O)n1cc(C[C@H]2CCCN2C)c2cc(Br)ccc21>>CC(=O)n1cc(C[C@H]2CCCN2C)c2cc(/C=C/S(=O)(=O)c3cccc3)ccc21  
1491 Br1c2cccc2cc2cccc12.C=CC(OCC)OCC>>CCOC(/C=C/c1c2cccc2cc2cccc12)OCC  
1492 C=C(NC(=O)OCc1cccc1)C(=O)OC.CC(=O)OCc1cc(Cl)ccc1I>>COC(=O)/C=C/c1ccc(Cl)cc1COC(C)=O)NC(=O)OCc1cccc1  
1493 C=CC(=O)OCC.Ic1c(-c2cccc2)c2cccc2c2cccc12>>CCOC(=O)/C=C/c1c(-C=C(C)C.O=[N+](O-)]c1cccc(Br)c1>>CC(C)=Cc1cccc([N+](=O)[O-])c1  
1494 Br1c2cccc2cc2cccc12.C=CP(=O)(OCC)OCC>>CCOP(=O)/C=C/c1c2cccc2cc2cccc12)OCC  
1495 C=Cc1cccc1.CC(Cl)c1cccc1>>CC(/C=C/c1cccc1)c1cccc1  
1496 C=CC(=O)OC.CC(=O)NC1CC2(CCN(Cc3cccc3)CC2)Oc2ccc(Br)cc21>>COC(=O)/C=C/c1ccc2c(c1)C(NC(C)=O)CC1(CCN(Cc3cccc3)CC1)O2  
1497 C=CC(=O)OC.CCc1cccc1Br>>CCc1cccc1/C=C/C(=O)OC  
1498 C=CCNC1=NCCN1.Cc1cccc1I>>Cc1cccc1/C=C/CNC1=NCCN1  
1499 C=C(C(=O)OCC)c1cccc1Br.Oc1cccc1I>>CCOC(=O)/C=C/c1cccc1O)c1cccc1Br  
1500 C=CCN1C(=O)c2cccc2C1=O.Fc1cccc(Br)c1>>O=C1c2cccc2C(=O)N1C/C=C/c1cccc(F)c1  
1501 C=CCOc1cccc1.Ic1cccs1>>C(=C/c1cccs1)\COc1cccc1  
1502 C=CC(=O)OC.CN(C)C(=O)c1cn(Cc2ccc(Br)cc2)c2cccc12>>COC(=O)/C=C/c1ccc(Cn2cc(C(=O)N(C)C)c3cccc32)cc1  
1503 C=CC(=O)OC.Cn1cnc2c(NCc3cccc(Br)c3)nc(N3CCCCC3)nc21>>COC(=O)/C=C/c1cccc(CNc2nc(N3CCCCC3)nc3c2nnc3)cc1  
1504 C=Cc1cccc1.O=Cc1ccc(Br)c1>>O=Cc1cccc(/C=C/c2cccc2)c1  
1505 C=Cc1ccc2cc(F)c(F)cc2n1.OC1c2cc(Br)ccc2OCc2ccnc21>>OC1c2cc(/C=C/c3ccc4cc(F)c(F)cc4n3)cc2OCc2ccnc21  
1506 C=CC(=O)OC(C)(C)C.O=C(NCc1cccc(OC(F)(F)F)c1)c1cc(Br)cc(I)c1>>CC(C)(C)OC(=O)/C=C/c1cc(Br)cc(C(=O)NCc2cccc(OC(F)(F)F)c2)c1  
1507 C=CC(=O)OC(C)(C)C.CC1(C)C(=O)Nc2ncc(Br)cc2C1O>>CC(C)(C)OC(=O)/C=C/c1cnc2c(c1)C(O)C(C)(C)C(=O)N2  
1508 Br1ccc(-c2nnc(-c3cccc4cccc34)o2)cc1.C=C>>C=Cc1ccc(-c2nnc(-c3cccc4cccc34)o2)cc1  
1509 C=Cc1ccc(OC(C)=O)cc1.COc1cc(OC(C)=O)ccc1Br>>COc1cc(OC(C)=O)ccc1/C=C/c1ccc(OC(C)=O)Br1ccc2cccc2n1.C=Cc1cccn1>>C(=C/c1ccc2cccc2n1)]c1cccn1  
1510 C=CC(O)CCCCC.I/C=C/C=C/CCCCOCc1cccc1>>CCCCC(O)/C=C/C=C/C=C/CCCCOCc1cccc1  
1511 C=Cc1cccc(F)c1.N#Cc1ccc2cc(Br)ccc2e1>>N#Cc1ccc2cc(/C=C/c3cccc(F)c3)ccc2c1  
1512 C=C(CC)C(C)=O.Oc1cccc1I>>CC/C(=C\c1cccc1O)C(C)=O  
1513 C=CC(C)(C)O.COc1cc(C=O)c(Br)cc1OCc1cccc1>>COc1cc(C=O)c(/C=C/C(C)(C)O)cc1OCc1cccc1  
1514 C=Cc1ccc(F)cc1.Cc1ccc2c(-c3cccc3)c(Br)c(=O)oc2c1>>Cc1ccc2c(-c3cccc3)c(/C=C/c3ccc(F)cc3)c(=O)oc2c1  
1515 C=CC(=O)OC.CCCCCC#Cl>>CCCCC#C/C=C/C(=O)OC

1518 C=C(F)[Si](C)(c1cccc1)c1cccc1.FC(F)(F)c1ccc(I)cc1>>C[Si](/C(F)=C/c1ccc(C(F)(F)F)cc1)(c1cccc  
1)c1cccc1  
1519 C=CC(=O)OC(C)(C)C.COc1cc(COCCC(=O)OC(C)(C)C)c(Br)c(OC)c1OC>>COc1cc(COCCC(=O)OC  
(C)(C)C)c(/C=C/C(=O)OC(C)(C)C)c(OC)c1OC  
1520 C=C.Clc1ccc(Br)cc1>>C=Cc1ccc(Cl)cc1  
1521 C=CC#N.O=Cc1ccc(Br)cc1>>N#C/C=C/c1ccc(C=O)cc1  
1522 C=CC(=O)O.Cc1cc(Br)cc(C)c1N>>Cc1cc(/C=C/C(=O)O)cc(C)c1N  
1523 Bre1enc2cccc2c1.C=CCO>>C=C(CO)c1enc2cccc2c1  
C=CC(=O)OC.CC(C)(C)OC(=O)NC1(c2ccc(-c3nc4cc(Br)ccn4c3-  
1524 c3cccc3)cc2)CCC1>>COC(=O)/C=C/c1ccn2c(-c3cccc3)c(-  
c3ccc(C4(NC(=O)OC(C)(C)C)CCC4)cc3)nc2c1  
1525 C=CCOC(C)=O.CC(C)(C)OC(=O)n1cc(I)c2cccc21>>CC(=O)OC/C=C/c1cn(C(=O)OC(C)(C)C)c2ccc  
1526 C=CC(=O)OCCCC.O=Cc1ccc(I)cc1>>CCCCOC(=O)/C=C/c1ccc(C=O)cc1  
1527 C=C(C)C.CCCC(=O)/C=C/Cl>>CCCC(=O)/C=C/C=C(C)C  
1528 C=Cc1ccc(OC)cc1.Cc1c(Br)c(=O)oc2cc(N)ccc12>>COc1ccc(/C=C/c2c(C)c3ccc(N)cc3oc2=O)cc1  
1529 C=CC[Si](C)(C)C.Clc1cccc(Br)c1>>C=C(Cc1cccc(Br)c1)C[Si](C)(C)C  
C=Cc1cccc1.O=c1c(I)c(/C=C/c2cccc2)[nH]c2cccc12>>O=c1c(/C=C/c2cccc2)c(/C=C/c2cccc2)[n  
1530 H]c2cccc12  
1531 C=Cc1ccc2cccc2c1.Cc1ccc(Br)cc1I>>Cc1ccc(Br)cc1/C=C/c1ccc2cccc2c1  
1532 Bre1cc2cccc2c2cccc12.C=Cc1cccc1>>C(=C/c1cc2cccc2c2cccc12)\c1cccc1  
1533 C=CC(=O)OC.CC[C@@]1(O)C(=O)OCc2c1cc1n(c2=O)Cc2cc3c(Br)cccc3nc2-  
1>>CC[C@@]1(O)C(=O)OCc2c1cc1n(c2=O)Cc2cc3c(/C=C/C(=O)OC)cccc3nc2-1  
1534 C=CC(N)=O.O=[N+](O-)]c1cccc(Br)c1>>NC(=O)/C=C/c1cccc([N+](=O)[O-])c1  
1535 C=Cc1cccc1.O=S(=O)(Oc1ccnc1Cl)C(F)(F)F>>C=C(c1cccc1)c1ccnc1Cl  
1536 C=CCc1ccc2c(c1)OCO2.CS(=O)(=O)c1ccc(CCl)cc1>>C=C(Cc1ccc(S(C)(=O)=O)cc1)Cc1ccc2c(c1)O  
1537 Bre1ccc(/C=C/c2ccc(N(c3cccc3)c3cccc3)cc2)cc1.C=Cc1ccnc1>>C(=C/c1ccc(/C=C/c2ccc(N(c3ccc  
cc3)c3cccc3)cc2)cc1)\c1ccnc1  
1538 Bre1ccc2c(c1)OCO2.C=Cc1cccc1N>>Nc1cccc1/C=C/c1ccc2c(c1)OCO2  
1539 BrC1CCCCC1.C=Cc1cccc(Cl)c1>>Clc1cccc(/C=C/C2CCCCC2)c1  
1540 C=CS(=O)(=O)F.O=Cc1ccc(I)cc1>>O=Cc1ccc(/C=C/S(=O)(=O)F)cc1  
1541 C=COCCCC.O=c1cc(N2CCOCC2)oc2c(Br)esc12>>C=C(OCCCC)c1esc2c(=O)cc(N3CCOCC3)oc12  
1542 C=CC(=O)OC.Oc1ccc(Br)cc1F>>COC(=O)/C=C/c1ccc(O)c(F)c1  
1543 C=CC(=O)OC.COc1nc(C)enc1N(C(=O)OCC(C)C)S(=O)(=O)c1ccnc1-  
c1ccc(I)cc1>>COC(=O)/C=C/c1ccc(-c2ncccc2S(=O)(=O)N(C(=O)OCC(C)C)c2ncc(C)nc2OC)cc1  
1544 C=Cc1ccnc1.OCCCCCOCc1ccc2cc(Br)ccc2c1>>OCCCCCOCc1ccc2cc(/C=C/c3ccnc3)ccc2c1  
1545 C=Cc1cccc1.Ic1cnn2c(-c3cccc3)cc(-c3cccc3)nc12>>C(=C/c1cnn2c(-c3cccc3)cc(-  
c3cccc3)nc12)\c1cccc1  
1546 C=CNC(C)=O.O=S(=O)(Oc1cccc1Cl)C(F)(F)F>>C=C(NC(C)=O)c1cccc1Cl  
1547 C=C1C(=O)O[C@H]2[C@H]1C[C@@H](O)/C(C)=C/CC[C@@]1(C)O[C@@H]21.COc1cccc(I)c1>>  
COc1cccc(/C=C2/C(=O)O[C@H]3[C@H]2C[C@@H](O)/C(C)=C/CC[C@@]2(C)O[C@@H]32)c1  
1548 C=CS(=O)(=O)F.CCOC(=O)c1cccc1I>>CCOC(=O)c1cccc1/C=C/S(=O)(=O)F  
1549 C=Cc1ccc(C)cc1.IC1CCCCC1>>Cc1ccc(/C=C/C2CCCCC2)cc1  
1550 C=CC(=O)OCC.COc1cc(Br)cc(OC(F)(F)F)c1>>CCOC(=O)/C=C/c1cc(OC)cc(OC(F)(F)F)c1  
1551 C=Cc1cc(OC)c(OC)c(OC)c1-c1cccc1.Ic1cccc1>>COc1cc(/C=C/c2cccc2)c(-c2cccc2)c(OC)c1OC  
1552 C=CC(F)(F)C(F)(F)C(F)(F)C(F)(F)C(F)(F)F.COc1ccc(Br)cc1>>COc1ccc(/C=C/C(F)(F)C(F)(F)  
)C(F)(F)C(F)(F)C(F)(F)C(F)(F)F)cc1  
1553 C=CC(O)c1cccc1.I/C=C/C=C/CCCCOCc1cccc1>>OC(/C=C/C=C/C=C/CCCCOCc1cccc1)c1cccc1  
1554 C=C[C@H](CO[Si](c1cccc1)(c1cccc1)C(C)(C)C)NS(C)(=O)=O.Oc1ccc(I)cc1>>CC(C)(C)[Si](O  
C[C@H](/C=C/c1ccc(O)cc1)NS(C)(=O)=O)(c1cccc1)c1cccc1  
1555 C=C[C@H](CCCCCCCC)CC(OC)OC.Ic1cccc1>>CCCCCCCC[C@@H](/C=C/c1cccc1)CC(OC)OC  
1556 C=CC(=O)N(C)OC.Ic1ccc2c(c1)OCCO2>>CON(C)C(=O)/C=C/c1ccc2c(c1)OCCO2  
1557 Bre1ccc(I)cc1.C=CC(=O)CCCC>>CCCCC(=O)/C=C/c1ccc(Br)cc1  
1558 C=Cc1ccc(O)cc1.Oc1ccc(Br)cc1>>Oc1ccc(/C=C/c2ccc(O)cc2)cc1  
1559 C=CC(=O)OCC.O=C1NCc2c1c1c(c3c2c2cc(Br)ccc2n3CCCO)Cc2cccc2-  
1>>CCOC(=O)/C=C/c1ccc2c(c1)c1c3c(c4c(c1n2CCCO)Cc1cccc1-4)C(=O)NC3  
1560 C=CC(=O)OCC.COc1ccc(Br)c(C(F)(F)F)c1C>>CCOC(=O)/C=C/c1ccc(OC)c(C)c1C(F)(F)F  
1561 C=CC#N.Cc1ccc(Br)cc1>>Cc1ccc(/C=C/C#N)cc1  
1562 C=CC1CCCCC1.CC(C)(C)c1ccc(Br)cc1>>C=C(c1ccc(C(C)(C)C)cc1)C1CCCCC1  
1563 C=CC(=O)O.Cc1ccc(S(=O)(=O)n2c(Cc3ccc(I)cc3)nc3cccc32)cc1>>Cc1ccc(S(=O)(=O)n2c(Cc3ccc(/  
C=C/C(=O)O)cc3)nc3cccc32)cc1

1564 C=CC(=O)OC.Oc1ccc(I)cc1>>COC(=O)/C=C/c1ccc(O)cc1  
1565 BrC1=CCCc2ccccc21.C=CCCCCCC>>C=C(CCCCCC)C1=CCCc2ccccc21  
C=CC(=O)OC(C)(C)C.CC(C)(C)O[C@H]1CC[C@H]2C=C(C3=C(Br)CN(S(=O)(=O)c4ccccc4)CC3)C  
1566 C[C@@]21C>>CC(C)(C)OC(=O)/C=C/C1=C(C2=C[C@H]3CC[C@H](OC(C)(C)C)[C@@]3(C)C  
C2)CCN(S(=O)(=O)c2ccccc2)C1  
1567 C=CC(=O)OCCCC.Cc1nc(-c2ccc(Br)cc2)cs1>>CCCCOC(=O)/C=C/c1ccc(-c2ccc(C)n2)cc1  
1568 C=COCCCC.CC(=O)Nc1ccc(OS(=O)(=O)C(F)(F)F)cc1>>C=C(OCCCC)c1ccc(NC(C)=O)cc1  
1569 C=Cc1ccccc1.Clc1ccc(I)c(Nc2ccccc2)n1>>Clc1ccc(/C=C/c2ccccc2)c(Nc2ccccc2)n1  
1570 C=Cc1ccccc1.CN(Cc1ccccc1)c1ccc(Br)n1>>CN(Cc1ccccc1)c1ccc(/C=C/c2ccccc2)n1  
1571 C=CC(=O)OC.CC(C)(C)c1ccc(-c2ccc(Br)cc2)ccc1O>>COC(=O)/C=C/c1ccc(-  
1572 C=CC(=O)OCC.Clc1ccc(Oc2ccc(Br)c2)cc1>>CCOC(=O)/C=C/c1ccc(Oc2ccc(Cl)cc2)c1  
1573 C=CC(=O)OC.COc1cc[nH]c1/C=C\1C(=O)Nc2ccccc(I)c21>>COC(=O)/C=C/c1ccc2c1/C(=C/c1[nH]c  
cc1OC)C(=O)N2  
1574 C=CC(=O)OC.Nc1cc(Cl)ccc1I>>COC(=O)/C=C/c1ccc(Cl)cc1N  
1575 C=CC(=O)OCCCC.CC(=O)c1cc2cc(Br)ccc2o1>>CCCCOC(=O)/C=C/c1ccc2oc(C(C)=O)cc2c1  
1576 C=CB1OC(C)CC(C)(C)O1.Ic1ccccc1>>CC1CC(C)(C)OB(/C=C/c2ccccc2)O1  
1577 Bre1ccc2ccc3cccc4ccc1c2c34.C=C[C@H](CO[Si](C)(C)C(C)(C)C)NC(=O)OCc1ccccc1>>CC(C)(C  
)[Si](C)(C)OC[C@H](/C=C/c1ccc2ccc3cccc4ccc1c2c34)NC(=O)OCc1ccccc1  
1578 C=CCN1C(=O)c2ccccc2C1=O.FC(F)(F)c1cc(Br)cc(C(F)(F)F)c1>>O=C1c2ccccc2C(=O)N1C/C=C/c1c  
c(C(F)(F)F)cc(C(F)(F)F)c1  
1579 C=Cc1ccc([N+](=O)[O-])cc1.Oc1ccc(/N=N/c2ccc(Br)cc2)cc1>>O=[N+](O-  
)c1ccc(/C=C/c2ccc(/N=N/c3ccc(O)cc3)cc2)cc1  
1580 C=Cc1ccccc1.O=C1CCC(CI)O1>>O=C1CCC(C/C=C/c2ccccc2)O1  
1581 C=CC(=O)CC.CC(=O)c1ccccc1Br>>CCC(=O)/C=C/c1ccccc1C(C)=O  
1582 C=CC(=O)OC.COc1cccc(C#N)c1I>>COC(=O)/C=C/c1c(C#N)ccnc1OC  
1583 C=Cc1ccccc1.Cc1ccc(S(=O)(=O)Oc2ccccc3c(Br)ccnc23)cc1>>Cc1ccc(S(=O)(=O)Oc2ccccc3c(/C=C/c4c  
ccn4)ccnc23)cc1  
1584 C=CC(=O)OCCCC.N#Cc1cccc(Br)c1>>CCCCOC(=O)/C=C/c1cccc(C#N)c1  
1585 C=Cc1cccc(C#N)c1Nc1ccc2[nH]ccc2c1C.COc1ccc(CN2CCN(C)CC2)cc1I>>COc1ccc(CN2CCN(C)C  
C2)cc1/C=C/c1cccc(C#N)c1Nc1ccc2[nH]ccc2c1C  
1586 C=CC(=O)OC.Cc1ccsc1Br>>COC(=O)/C=C/c1scccc1C  
1587 C=Cc1ccc(CCOC(C)=O)cc1.O=C(O)c1ccc(I)cc1>>CC(=O)OCCc1ccc(/C=C/c2ccc(C(=O)O)cc2)cc1  
1588 C=CC(=O)OC.C[C@@H]1CC=C[C@H]2[C@H]1C(=O)N(Cc1ccccc1)[C@H]2c1ccc(Br)c1>>COC(  
=O)/C=C/c1ccc([C@H]2[C@H]3C=CC[C@H](C)[C@H]3C(=O)N2Cc2ccccc2)c1  
1589 Bre1ccccc1.C=CS(=O)c1ccccc1>>O=S(/C=C/c1ccccc1)c1ccccc1  
C=CCC(O)c1c(C)noc1-c1ccc(-  
1590 c2ccc(C3(C(=O)OCC)CC3)cc2)cc1.FC(F)(F)c1ccc(I)cc1>>CCOC(=O)C1(c2ccc(-c3ccc(-  
c4onc(C)c4C(O)C/C=C/c4ccc(C(F)(F)F)cc4)cc3)cc2)CC1  
1591 C=Cc1ccccc1.COC(=O)/C=C/c1ccc(Cl)cc1>>COC(=O)/C=C/c1ccc(/C=C/c2ccccc2)cc1  
1592 C=Cc1ccc(N(CCCC)CCCC)cc1.CCCn1c(=O)c(C)nc2ccc(Br)cc21>>CCCN(CCCC)c1ccc(/C=C/c2ccc  
3nc(C)c(=O)n(CCC)c3c2)cc1  
1593 Bre1ccccc1.C=Cc1ccccc1>>C(=C/c1ccccc1)\c1ccccc1  
1594 C=Cc1ccccc1.Nc1ccc(F)cc1Br>>Nc1ccc(F)cc1/C=C/c1ccccc1  
1595 C=C[C@H]1COC(C)(C)N1C(=O)OCc1ccccc1.Ic1ccccc1>>CC1(C)OC[C@H](/C=C/c2ccccc2)N1  
C(=O)OCc1ccccc1  
1596 C=CC(=O)OC.Cc1ccc(I)c(C)c1>>COC(=O)/C=C/c1ccc(C)cc1C  
1597 C=CCn1ccnc1.CCOC(=O)c1ccc(I)cc1Cl>>CCOC(=O)c1ccc(/C=C/Cn2ccnc2)cc1Cl  
1598 C=Cc1ccc(OC)cc1.Cc1ccc(S(=O)(=O)Oc2ccccc3c(Br)ccnc23)cc1>>COc1ccc(/C=C/c2ccnc3c(OS(=O)(  
=O)c4ccc(C)cc4)ccnc23)cc1  
1599 Bre1ccc(I)cc1.C=CCP(=O)(OCC)OCC>>CCOP(=O)(C/C=C/c1ccc(Br)cc1)OCC  
1600 C=Cc1ccccc(SC)c1.COc1ccc2cc(Br)c(=O)oc2c1>>COc1ccc2cc(/C=C/c3ccccc(SC)c3)c(=O)oc2c1  
1601 C=CC(OCC)OCC.COc1cc(Br)c(C=O)cc1OC>>CCOC(/C=C/c1cc(OC)c(OC)cc1C=O)OCC  
1602 C=CS(C)(=O)=O.O=C(c1ccccc1)c1ccc(Br)cc1>>CS(=O)(=O)/C=C/c1ccc(C(=O)c2ccccc2)cc1  
1603 C=Cc1ccccc1.COC(=O)/C(Br)=C1\CCCO1>>C=C/C(C(=O)OC)=C1/CCCO1)c1ccccc1  
1604 C=Cc1ccccc1.CC(C)(C)OC(=O)NCCOc1cccc(Br)c1>>CC(C)(C)OC(=O)NCCOc1cccc(/C=C/c2ccncc  
1605 C=CC(=O)OCC.CCNc1nc(N)nc(C)c1I>>CCNc1nc(N)nc(C)c1/C=C/C(=O)OCC  
1606 C=CC(O)CC.c1ccc([I+])c2cccs2)cc1>>CCC(O)/C=C/c1ccccc1  
C=CC[C@H](CC(=O)OC(C)(C)C)C(=O)N[C@H](C(=O)N[C@H](C)c1ccccc1)C(C)(C)C.Cc1cc(Br)cc  
1607 c1-  
c1ccccc1>>Cc1cc(/C=C/C[C@H](CC(=O)OC(C)(C)C)C(=O)N[C@H](C(=O)N[C@H](C)c2ccccc2)C(

Br1ccc(-  
 1608 c2cccc2)cc1.C=CC[C@H](CC(=O)OC(C)(C)C(=O)N[C@H](C(=O)N[C@H](C)c1cccc1)C(C)(C)  
 C>>C[C@H](NC(=O)[C@H](NC(=O)[C@H](C/C=C/c1ccc(-  
 c2cccc2)cc1)CC(=O)OC(C)(C)C(C)(C)c1cccc1  
 1609 C=Cc1ccc(C)nc1.COC(=O)c1cc2ccc(=O)oc2cc1OS(=O)(=O)C(F)(F)F>>COC(=O)c1cc2ccc(=O)oc2cc  
 1/C=C/c1ccc(C)nc1  
 C=CCO[C@H]1(C)C[C@H](C)C(=O)[C@H](C)[C@H](O)[C@H](C)(O)[C@H](CC)OC(=O)[C@  
 H](C)C(=O)[C@H](C)[C@H]1O[C@H]1O[C@H](C)C[C@H](N(C)C)[C@H]1OC(=O)c1cccc1.C  
 1610 Oc1ccc(I)cc1>>CC[C@H]1OC(=O)[C@H](C)C(=O)[C@H](C)[C@H](O[C@H]2O[C@H](C)C[  
 C@H](N(C)C)[C@H]2OC(=O)c2cccc2)[C@H](C)(OC/C=C/c2ccc(OC)cc2)C[C@H](C)C(=O)[C@H  
 1(C)1C[C@H](O)1C[C@H](O)1C  
 C=CCN1C(=O)C2(CCCC2)NC[C@H]1(C)c1cc(F)cc(F)c1.N#Cc1cc2c(cc1Br)C[C@H]1(C2)C(=O)Nc  
 1611 2ncccc21>>C[C@H]1(c2cc(F)cc(F)c2)CNC2(CCCC2)C(=O)N1C/C=C/c1cc2c(cc1C#N)C[C@H]1(C2)  
 C(=O)Nc2ncccc21  
 1612 C=C[Si](C)(C)C.O=[N+](O-)[C@H]1CCCC1C1>>C[Si](C)(C)/C=C/c1cccc([N+](=O)[O-])c1  
 1613 C=CC(=O)OCC.Cc1cccc1I>>CCOC(=O)/C=C/c1cccc1C  
 1614 C=CC(=O)OC.COc1ccc(Cl)cc1Br>>COC(=O)/C=C/c1cc(Cl)ccc1OC  
 1615 C=Cc1ccc(S(=O)(=O)c2cccc2F)cn1.N#Cc1cc(F)ccc1I>>N#Cc1cc(F)ccc1/C=C/c1ccc(S(=O)(=O)c2cc  
 ccc2F)cn1  
 1616 C=CC(=O)OC.Cc1ccc(S(=O)(=O)N2CCC(I)=C2c2cccc2NC(=O)OC(C)(C)C)cc1>>COC(=O)/C=C/C  
 1=C(c2cccc2NC(=O)OC(C)(C)C)N(S(=O)(=O)c2ccc(C)cc2)CC1  
 1617 C=Cc1ccc(C=O)cc1.COC(=O)c1cc(OC)c(OC)cc1I>>COC(=O)c1cc(OC)c(OC)cc1/C=C/c1ccc(C=O)cc  
 1618 C=Cc1ccc(F)cc1.Cc1ccc(I)cc1>>Cc1ccc(/C=C/c2ccc(F)cc2)cc1  
 1619 C=CCOc1cccc1C.Cc1ccc(I)cc1>>Cc1ccc(/C=C/COc2cccc2C)cc1  
 1620 C=CC(=O)OC.Nc1c(F)cccc1Br>>COC(=O)/C=C/c1cccc(F)c1N  
 1621 C=Cc1ccc(OC)cc1.COc1ccc(/C=C/c2c(I)c(=O)c3cccc3n2C)cc1>>COc1ccc(/C=C/c2c(/C=C/c3ccc(O  
 C)cc3)n(C)c3cccc3c2=O)cc1  
 1622 C=Cc1cccc1.O=Cc1ccc(F)cc1Br>>O=Cc1ccc(F)cc1/C=C/c1cccc1  
 1623 C=CCCCO.CC(C)(C)c1ccc(OS(=O)(=O)C(F)(F)F)cc1>>C=C(CCCO)c1ccc(C(C)(C)C)cc1  
 1624 Br/C=C/[Te]c1cccc1)c1cccc1.C=CC(=O)OCC>>CCOC(=O)/C=C/C=C/[Te]c1cccc1)c1cccc1  
 1625 C=CC(=O)C(C)CC(=O)OC.COc1ccc(Br)cc1>>COC(=O)CC(C)C(=O)/C=C/c1ccc(OC)cc1  
 1626 C=CC(N)=O.Ic1ccc2c(c1)OCCOCCOCCOCCO2>>NC(=O)/C=C/c1ccc2c(c1)OCCOCCOCCOCCO2  
 1627 C=Cc1ccc(OC)cc1.O=c1c(I)c(/C=C/c2ccc(Cl)cc2)[nH]c2cccc12>>COc1ccc(/C=C/c2c(/C=C/c3ccc(Cl  
 )cc3)[nH]c3cccc3c2=O)cc1  
 1628 C=CCO.Ic1ccc2[nH]ccc2c1>>OC/C=C/c1ccc2[nH]ccc2c1  
 1629 C=Cc1cccc1OC.COc1ccc(I)c(OC)c1>>COc1ccc(/C=C/c2cccc2OC)c(OC)c1  
 1630 C=Cc1ccc(N(c2cccc2)c2cccc2)cc1.O=Cc1ccc(Br)cc1F>>O=Cc1ccc(/C=C/c2ccc(N(c3cccc3)c3cccc  
 c3)cc2)cc1F  
 1631 C=CC#N.O=S(=O)(Nc1cccc1)c1ccc(Br)cc1>>N#C/C=C/c1cccc(S(=O)(=O)Nc2cccc2)c1  
 1632 C=CC(=O)OCCCC.CC(=O)O[IH2](OC(C)=O)c1c(C)cc(C)cc1C>>CCCCOC(=O)/C=C/c1c(C)cc(C)cc  
 1633 C=Cc1cccc1.CCOC(=O)[C@H]1[C@@H]2C(Br)=C(C(=O)OC)O[C@H]12>>CCOC(=O)[C@H]1[  
 C@H]2OC(C(=O)OC)=C(/C=C/c3cccc3)[C@H]21  
 1634 C=Cc1ccc(C)nc1.CN1C2CCC1c1c([nH]c3ccc(Br)cc13)C2>>Cc1ccc(/C=C/c2ccc3[nH]c4c(c3c2)C2CC  
 C(C4)N2C)cn1  
 1635 Br1ccc(OCc2cccc2)cc1.C=CCCC(=O)[C@H]1CCCN1C(=O)C(=O)C(C)(C)CC>>CCC(C)(C)C(=O)  
 C(=O)N1CCC[C@H]1C(=O)CC/C=C/c1ccc(OCc2cccc2)cc1  
 1636 C=CC(=O)OCC.O=Cc1cc2cccc2nc1I>>CCOC(=O)/C=C/c1nc2cccc2cc1C=O  
 1637 C=CC#N.Cc1cc(I)cc(C)n1>>Cc1cc(/C=C/C#N)cc(C)n1  
 1638 C=CC(F)=C1CCN(Cc2cccc2)CC1.Ic1cccc1>>FC(/C=C/c1cccc1)=C1CCN(Cc2cccc2)CC1  
 C=CCO[C@H]1CC(=O)O[C@H](C)C/C=C/C=C/[C@H](O[Si](C)(C)C(C)(C)[C@H](C)C)[C@H]  
 (CC(OC)OC)[C@H](O[C@H]2O[C@H](C)[C@H](O[C@H]3C[C@H](C)(O)[C@H](OC(=O)  
 1639 CC)[C@H](C)O3)[C@H](N(C)C)[C@H]2OC(C)=O)[C@H]1OC.Ic1cccc1>>CCC(=O)O[C@H]1[  
 C@H](C)O[C@H](O[C@H]2[C@H](N(C)C)[C@H](OC(C)=O)[C@H](O[C@H]3[C@H](OC)  
 [C@H](OC/C=C/c4cccc4)CC(=O)O[C@H](C)C/C=C/C=C/[C@H](O[Si](C)(C)C(C)(C)[C@H](C)  
 C)[C@H]3CC(OC)OC)O[C@H]2C)C[C@H](O)1C  
 1640 C=CC(=O)OC.Cc1ccc(Br)cc1>>COC(=O)/C=C/c1ccc(C)c1  
 1641 C=CC(=O)OC(C)(C)C.CS(=O)(=O)c1ccc(Br)cc1>>CC(C)(C)OC(=O)/C=C/c1ccc(S(C)(=O)=O)cc1  
 1642 C=Cc1cccc1.Oc1ccc(Br)cc1>>Oc1ccc(/C=C/c2ccccc2)c1  
 1643 C=Cc1ccc(OC)cc1.CN1CCCN(c2cccc(Br)n2)CC1>>COc1ccc(/C=C/c2cccc(N3CCCN(C)CC3)n2)cc1  
 1644 C=CC(=O)OC.CC(=O)Oc1ccc(OC(C)=O)c(Br)cc1>>COC(=O)/C=C/c1cc(OC(C)=O)ccc1OC(C)=O  
 1645 C=CC(=O)OC.Cc1cc(OCc2cccc2)ccc1Br>>COC(=O)/C=C/c1ccc(OCc2cccc2)cc1C



1646 Br1cccc2cc[nH]c12.C=CC(=O)N(C)C>>CN(C)C(=O)/C=C/c1cccc2cc[nH]c12  
1647 C=Cc1ccc(OC(C)=O)cc1.CC(=O)Oc1cc(Br)cc(OC(C)=O)c1>>CC(=O)Oc1ccc(/C=C/c2cc(OC(C)=O)c  
c(OC(C)=O)c2)cc1  
1648 C=Cc1cn(C(c2cccc2)(c2cccc2)c2cccc2)cn1.CC(=O)Oc1ccc2ccc(Cl)ccc1-  
2>>CC(=O)Oc1ccc2ccc(/C=C/c3cn(C(c4cccc4)(c4cccc4)c4cccc4)cn3)ccc1-2  
1649 C=C(C(C(F)(F)C(=O)OCC)c1ccc(C)cc1.CCOC(=O)C(F)(F)I>>CCOC(=O)C(F)(F)/C=C(\CC(F)(F)C(=O)OCC)c1ccc(C)cc1  
1650 Br1ccc([C@@H]2CCCCO2)cc1.C=CC(=O)OCC>>CCOC(=O)/C=C/c1ccc([C@@H]2CCCCO2)cc1  
1651 C=CC#N.Cc1cc(Br)cc(C)c1Nc1cnc(NC2CCN(c3cccc(C(N)=O)c3)CC2)n1>>Cc1cc(/C=C/C#N)cc(C)  
c1Nc1cnc(NC2CCN(c3cccc(C(N)=O)c3)CC2)n1  
1652 C=COCCCC.COC(=O)c1cc(OC)c(OC)cc1Br>>C=C(OCCCC)c1cc(OC)c(OC)cc1C(=O)OC  
1653 C=CS(=O)(=O)F.Ic1cc2cccc2o1>>O=S(=O)(F)/C=C/c1cc2cccc2o1  
1654 C=Cc1cnc2cccc12.CCCCCCCCCCNc1ccc(Br)c(C(F)(F)F)c1>>CCCCCCCCCNc1ccc(/C=C/c2ccn  
c3cccc23)c(C(F)(F)F)c1  
1655 C=CCC(=O)OC(C)(C)C.COc1cc(N(C)C(=O)OC(C)(C)C)c(Br)cn1>>COc1cc(N(C)C(=O)OC(C)(C)C)c  
(/C=C/CC(=O)OC(C)(C)C)cn1  
1656 C=CC(=O)N1CCOCC1.Cn1c2cccc2c2nc3ccc(Cl)cc3c3cc(OS(=O)(=O)C(F)(F)F)cc1c32>>Cn1c2cccc  
c2c2nc3ccc(Cl)cc3c3cc(/C=C/C(=O)N4CCOCC4)cc1c32  
1657 C=CC(=O)CC.CCc1cc(C)cc(CC)c1Br>>CCC(=O)/C=C/c1c(CC)cc(C)cc1CC  
1658 C=Cc1nc2cccc2s1.CCN(CC)S(=O)(=O)c1ccc(Br)cc1C>>CCN(CC)S(=O)(=O)c1ccc(/C=C/c2nc3cccc  
c3s2)cc1C  
1659 C=CC(=O)OCC.COC(=O)[C@]12CCC(C)(C)C[C@H]1C1=CC[C@H]3[C@@]4(C)C=C(I)C(=O)C(  
C)(C)[C@H]4CC[C@@]3(C)[C@]1(C)CC2>>CCOC(=O)/C=C/C1=C[C@@]2(C)[C@H](CC[C@  
@]3(C)[C@H]2CC=C2[C@H]4CC(C)(C)CC[C@]4(C(=O)OC)CC[C@]23(C)(C)C1=O  
1660 Br1enc2nc(-c3cccc3)c(-c3cccc3)nc2c1.C=CC#N>>N#C/C=C/c1enc2nc(-c3cccc3)c(-  
1661 C=Cc1ccc(Cl)cc1.CCn1c(=O)c2c(cc(Br)n2C)n(CC)c1=O>>CCn1c(=O)c2c(cc(/C=C/c3ccc(Cl)cc3)n2C  
)n(CC)c1=O  
1662 C=CCN(C(=O)OC(C)(C)C)C(=O)OC(C)(C)C.CC(=O)c1ccc(Br)cc1>>CC(=O)c1ccc(/C=C/CN(C(=O)  
OC(C)(C)C)C(=O)OC(C)(C)C)cc1  
1663 C=Cc1cc(OC(C)=O)cc(OC(C)=O)c1.CC(=O)Oc1ccc(I)cc1>>CC(=O)Oc1ccc(/C=C/c2cc(OC(C)=O)cc(  
OC(C)=O)c2)cc1  
1664 Br1ccc2cccc2c1.C=COC(CC)CCCC>>C=C(OC(CC)CCCC)c1ccc2cccc2c1  
1665 Br1ccc2ccc3cccc4ccc1c2c34.C=CC(=O)OC>>COC(=O)/C=C/c1ccc2ccc3cccc4ccc1c2c34  
1666 C=CC(=O)OC(C)(C)C.CN(C)c1ccc(Br)cc1>>CN(C)c1ccc(/C=C/C(=O)OC(C)(C)C)cc1  
1667 C=CCCCCCC.CC(C)(C)OC(=O)n1ccc2cc(Br)ccc21>>C=C(CCCCCC)c1ccc2c(ccn2C(=O)OC(C)(C)C  
C=Cc1ccc(-c2cccc2)cc1.COc1cc(C=O)c(Br)c(OC)c1OC>>COc1cc(C=O)c(/C=C/c2ccc(-  
1668 c3cccc3)cc2)c(OC)c1OC  
1669 C=C(OC)C1=C(Br)CCCC1.C=CC(=O)OC(C)(C)C>>C=C(OC)C1=C(/C=C/C(=O)OC(C)(C)C)CCCC1  
1670 Br1cccc1.C=CS(=O)(=O)CC>>CCS(=O)(=O)/C=C/c1cccc1  
1671 C=CC(=O)NCCCCCNC(=O)OC(C)(C)C.CC(=O)OC[C@H]1C=C[C@H](n2cc(I)c(=O)[nH]c2=O)  
O1>>CC(=O)OC[C@H]1C=C[C@H](n2cc(/C=C/C(=O)NCCCCCNC(=O)OC(C)(C)C)c(=O)[nH]c  
1672 Br1ccc2c(ccn2-c2ccnc2)c1.C=CC(=O)OCC>>CCOC(=O)/C=C/c1ccc2c(ccn2-c2ccnc2)c1  
C=CC(=O)OC(C)(C)C.Cc1cc2c(Cc3ccc(Br)cc3)c(-  
1673 c3ccc(OC(F)(F)F)cc3)c(=O)oc2cc1O>>Cc1cc2c(Cc3ccc(/C=C/C(=O)OC(C)(C)C)cc3)c(-  
c3ccc(OC(F)(F)F)cc3)c(=O)oc2cc1O  
1674 C=CC(=O)Nc1cccc1.COc1cc2oc(-c3cccc3)c(I)c(=O)c2cc1OC>>COc1cc2oc(-  
c3cccc3)c(/C=C/C(=O)Nc3cccc3)c(=O)c2cc1OC  
1675 C=CC(N)=O.O=C1C(O)=C(I)C(=O)c2cccc21>>NC(=O)/C=C/C1=C(O)C(=O)c2cccc2C1=O  
1676 C#CC=C.Ic1ccc2[nH]ccc2c1>>C#C/C=C/c1ccc2[nH]ccc2c1  
1677 C=CC(=O)OCC.COc1cc(Br)cc2cc(-c3cccc3)oc12>>CCOC(=O)/C=C/c1cc(OC)c2oc(-c3cccc3)cc2c1  
1678 COC[C@H](/N=C(\c1cccc1)N1C=CCC[C@H]1c1cccc1)C(C)C.Ic1cccc1>>COC[C@H](/N=C  
(\c1cccc1)N1C=C(c2cccc2)CC[C@H]1c1cccc1)C(C)C  
1679 C=CC(=O)O.CC(=O)c1ccc(Br)cc1>>CC(=O)c1ccc(/C=C/C(=O)O)cc1  
1680 C=C(F)C(=O)OC.O=S(=O)(c1cccc1)n1cc(I)c2cccc21>>COC(=O)/C(F)=C/c1cn(S(=O)(=O)c2cccc2  
)c2cccc12  
1681 C=Cc1cncnc1.CCCCCCCCCC(=O)N1CCN(c2ccc(Br)cc2)CC1>>CCCCCCCCC(=O)N1CCN(c2ccc(/  
C=C/c3cncnc3)cc2)CC1  
1682 C=C(C)C(=O)Nc1cccc1.Clc1cccc1>>C/C(=C\c1cccc1)C(=O)Nc1cccc1  
1683 C=CN1CCCC1=O.FC(F)(F)C(F)(F)C(F)(F)C(F)(F)C(F)(F)Br>>O=C1CCCN1/C=C/C(F)(F)C(  
F)(F)C(F)(F)C(F)(F)C(F)(F)C(F)(F)F  
1684 C=CC(=O)OC.Nc1cc(Br)ccn1>>COC(=O)/C=C/c1cnc(N)c1

[illegible]

1729 C=Cc1cccc1.Ic1cccc2cc3c(nc12)-c1cccc1CC3>>C(=C/c1cccc2cc3c(nc12)-c1cccc1CC3)\c1cccc1  
1730 C=CC(=O)OCCN(C)C.Ic1cnn2c(-c3cccc3)cc(-c3cccc3)nc12>>CN(C)CCOC(=O)/C=C/c1cnn2c(-  
1731 c3cccc3)cc(-c3cccc3)nc12  
1732 C=CCN1C(=O)c2cccc2C1=O.CCOC(=O)c1ccc(Br)cc1>>CCOC(=O)c1ccc(/C=C/CN2C(=O)c3cccc3  
1733 C2=O)cc1  
1734 C=CC(N)=O.O=C/C1=C(\Br)CCCCC1>>NC(=O)/C=C/C1=C(\C=O)CCCCC1  
1735 C=Cc1ccc(/C=C/c2ccc(/C=C/c3cc(OCCCCCCCCCCCC)cc(OCCCCCCCCCCCC)c3)cc2)cc1.O=Cc1cc  
1736 c(Br)cc1>>CCCCCCCCCCCCOc1cc(/C=C/c2ccc(/C=C/c3ccc(/C=C/c4ccc(C=O)cc4)cc3)cc2)cc(OCC  
1737 CCCCCCCCCCCC)c1  
1738 C=C.Clc1cccc(I)c1>>C=Cc1cccc(Cl)c1  
1739 C=CC(=O)OCCCC.Cc1cc([N+](=O)[O-])ccc1Cl>>CCCCOC(=O)/C=C/c1ccc([N+](=O)[O-])cc1C  
1740 C=CC(=O)OC.CC(C)(C)c1ccc(Cn2nnc(-c3cn(Cc4cccc4)nn3)c2I)cc1>>COC(=O)/C=C/c1c(-  
1741 c2cn(Cc3cccc3)nn2)nnn1Cc1ccc(C(C)(C)C)cc1  
1742 C=CC(=O)OC.FC(F)(F)c1cc(Cl)cc(C(F)(F)F)c1>>COC(=O)/C=C/c1cc(C(F)(F)F)cc(C(F)(F)F)c1  
1743 C=CC(=O)OC.COc1cccc1Sc1cc(C)c(I)cc1[N+](=O)[O-]>>COC(=O)/C=C/c1cc([N+](=O)[O-  
1744 ]c(Sc2cccc2OC)cc1C  
1745 C=Cc1ccc([N+](=O)[O-]  
1746 )cc1.O=C1C(O)=C(I)C(=O)c2cccc21>>O=C1C(O)=C(/C=C/c2ccc([N+](=O)[O-  
1747 C=CCCC(=O)O.Fc1ccc(I)cc1>>O=C(O)CC/C=C/c1ccc(F)cc1  
1748 C=CC(=O)OC(C)(C)C.CCC(=C(c1ccc(O)cc1)c1ccc(O)cc1)c1ccc(Br)cc1>>CCC(=C(c1ccc(O)cc1)c1cc  
1749 c(O)cc1)c1ccc(/C=C/C(=O)OC(C)(C)C)cc1  
1750 C=CC(=O)OCC.Cn1nc(-c2cccc2)c(Br)cc1=O>>CCOC(=O)/C=C/c1cc(=O)n(C)nc1-c1cccc1  
1751 C=CC(=O)NC1CCc2cccc21.Cc1cn(-c2ccc(Br)cc2C#N)cn1>>Cc1cn(-  
1752 c2ccc(/C=C/C(=O)NC3CCc4cccc43)cc2C#N)cn1  
1753 C=CC(=O)OCC.CC(C)(CC1Cc2cccc2C1)NCC(O)c1sc1Br>>CCOC(=O)/C=C/c1ccsc1C(O)CNC(C  
1754 )(C)CC1Cc2cccc2C1  
1755 C=CC(OCC)OCC.CN(C)c1ccc(Br)cc1>>CCOC(/C=C/c1ccc(N(C)C)cc1)OCC  
1756 C=Cc1cnc1.CC(C)(C)OC(=O)N1CCC[C@H]1COc1cncc(Br)c1>>CC(C)(C)OC(=O)N1CCC[C@H]1  
1757 COc1cncc(/C=C/c2cncc2)c1  
1758 C=CC(=O)O.O=C(O)c1cc(Br)ccc1O>>O=C(O)/C=C/c1ccc(O)c(C(=O)O)c1  
1759 C=CC(=O)O.Fc1ccc(Br)cc1>>O=C(O)/C=C/c1ccc(F)cc1  
1760 C=Cc1ccc2c(c1)OCO2.Ic1ccc(OCc2cccc2)cc1>>C(=C/c1ccc2c(c1)OCO2)\c1ccc(OCc2cccc2)cc1  
1761 C=C1C(=O)O[C@H]2[C@H]1CC/C(C)=C/CC[C@@]1(C)O[C@H]21.FC(F)(F)c1cccc(I)c1>>C/C1  
1762 =C\CC[C@@]2(C)O[C@H]2[C@H]2OC(=O)/C=C/c3cccc(C(F)(F)F)c3[C@@H]2CC1  
1763 C=CCCCCCCCC.Ic1cccc1>>CCCCCCCC/C=C/c1cccc1  
1764 C=CCOc1cccc1.FC(F)(F)c1ccc(I)cc1>>FC(F)(F)c1ccc(/C=C/COc2cccc2)cc1  
1765 C=CC(=O)OC.CCOCc1nc2c(N)nc3cc(Br)ccc3c2n1CCCCN1CCCS1(=O)=O>>CCOCc1nc2c(N)nc3cc(  
1766 /C=C/C(=O)OC)ccc3c2n1CCCCN1CCCS1(=O)=O  
1767 Br1ccc(I)cc1.C=CC(=O)OC1CCCCC1>>O=C(/C=C/c1ccc(Br)cc1)OC1CCCCC1  
1768 C=Cc1cccc1.O=C(C=P(c1cccc1)(c1cccc1)c1cccc1)c1ccc(I)cc1>>O=C(C=P(c1cccc1)(c1cccc1)c  
1769 1cccc1)c1ccc(/C=C/c2cccc2)cc1  
1770 C=Cc1nc2cccc2s1.CCN(CC)S(=O)(=O)c1ccc(Br)cc1Cl>>CCN(CC)S(=O)(=O)c1ccc(/C=C/c2nc3cccc  
1771 c3s2)cc1Cl  
1772 C=C(c1cc(OC)c(OC)c(OC)c1)c1ccc(OC)c(Br)n1.C=CC(=O)OC>>C=C(c1cc(OC)c(OC)c(OC)c1)c1ccc  
1773 (OC)c(/C=C/C(=O)OC)n1  
1774 C=CC(=O)O.CCOC(=O)CCc1cccc1-c1cccc(I)c1>>CCOC(=O)CCc1cccc1-c1cccc(/C=C/C(=O)O)c1  
1775 Br1ccc2cccc2c1.C=Cc1nc2c(N)ncnc2n1[C@@H]1O[C@H](CO[Si](C)(C)C(C)(C)[C@@H](O[Si  
1776 ](C)(C)C(C)(C)[C@H]1O[Si](C)(C)C(C)(C)C>>CC(C)(C)[Si](C)(C)OC[C@H]1O[C@@H](n2c(/C  
1777 =C/c3ccc4cccc4c3)nc3c(N)ncnc32)[C@H](O[Si](C)(C)C(C)(C)[C@@H]1O[Si](C)(C)C(C)(C)C  
1778 C=CC(=O)OCC.O=C(c1cccc1)N1CCc2c(cc(I)cc2[N+](=O)[O-  
1779 ]C1>>CCOC(=O)/C=C/c1cc2c(c([N+](=O)[O-])c1)CCN(C(=O)c1cccc1)C2  
1780 Br1c2cccc2cc2cccc12.C=CC(=O)CC>>CCC(=O)/C=C/c1c2cccc2cc2cccc12  
1781 C=CCC(C)C(=O)OCC.O=Cc1ccc(Br)cc1>>CCOC(=O)C(C)C/C=C/c1ccc(C=O)cc1  
1782 C=CC(OCC)OCC.Cc1ccc(Br)cc1>>CCOC(/C=C/c1ccc(C)cc1)OCC  
1783 C=CC(=O)OC(C)(C)C.COc1ccc(Br)cc1OC>>COc1ccc(/C=C/C(=O)OC(C)(C)C)cc1OC  
1784 C=C(NC(C)=O)C(=O)OC.COC1=C(I)CON(Cc2cccc2)[C@H]1[C@H]1COC(C)(C)O1>>COC(=O)/C  
1785 (=C/C1=C(OC)[C@H](C@H)2COC(C)(C)O2)N(Cc2cccc2)OC1)NC(C)=O  
1786 C=CCNS(=O)(=O)c1ccc(C)cc1.Cc1ccc(S(=O)(=O)n2cc(Br)c3cccc32)cc1>>Cc1ccc(S(=O)(=O)NC/C  
1787 =C/c2cn(S(=O)(=O)c3ccc(C)cc3)c3cccc23)cc1  
1788 C=CC=O.Ic1cccc1>>O=C/C=C/c1cccc1

1768 C=CC#N.Cn1c2c(c3ccc(I)cc3c1=O)C(=O)c1cccc1-  
 2>>Cn1c2c(c3ccc(/C=C/C#N)cc3c1=O)C(=O)c1cccc1-2  
 1769 C=CC(C)(C)O.O=c1ccc2ccc(OCc3cccc3)c(I)c2o1>>CC(C)(O)/C=C/c1c(OCc2cccc2)ccc2ccc(=O)oc  
 1770 C=Cc1ccc2c(c1)OCO2.FC1(F)Oc2ccc(Br)cc2OC1(F)F>>FC1(F)Oc2ccc(/C=C/c3ccc4c(c3)OCO4)cc2  
 OC1(F)F  
 1771 C=C(C)C(=O)O.COc1ccc(I)cc1>>COc1ccc(/C=C(\C)C(=O)O)cc1  
 1772 Br1ccc2ccc3cccc4ccc1c2c34.C=Cc1ccc(C)cc1>>C1ccc(/C=C/c2ccc3ccc4cccc5ccc2c3c45)cc1  
 1773 Br1ccc(I)cc1.C=C[Si](C)(C)C>>C[Si](C)(C)/C=C/c1ccc(Br)cc1  
 1774 C=CC(=O)OC.CC(=O)Cc1cccc(Br)c1>>COC(=O)/C=C/c1cccc(CC(C)=O)c1  
 1775 C=Cc1cccc1.COc1ccc(-c2oc3cccc3c(=O)c2Br)cc1OC>>COc1ccc(-  
 c2oc3cccc3c(=O)c2/C=C/c2cccc2)cc1OC  
 1776 C=CC(=O)OC.Cc1ccc(C(=O)NC2CC2)cc1-n1cnc2ccc(I)cc2c1=O>>COC(=O)/C=C/c1ccc2ncn(-  
 c3cc(C(=O)NC4CC4)ccc3C)c(=O)c2c1  
 1777 C=Cc1cncnc1.CCOc1ccc(I)cc1>>CCOc1ccc(/C=C/c2cncnc2)cc1  
 1778 C=CC#N.CN(C(=O)c1ncc2c(c1I)c1cccc1n2S(=O)(=O)N(C)C)c1cccc1>>CN(C(=O)c1ncc2c(c1/C=C  
 /C#N)c1cccc1n2S(=O)(=O)N(C)C)c1cccc1  
 1779 C=Cc1cccc1.Cc1cccc(Cl)c1>>Cc1cccc(/C=C/c2cccc2)c1  
 1780 C=C.O=C1Nc2ccc(I)cc2C1=O>>C=Cc1ccc2c(c1)C(=O)C(=O)N2  
 1781 C=Cc1ccc(OC)cc1.CCOC(=O)CCCB>>CCOC(=O)CCC/C=C/c1ccc(OC)cc1  
 1782 C=CC(C)(O)CCC=C(C)C.COc1ccc(O)c(Br)c1>>COc1ccc(O)c(/C=C/C(C)(O)CCC=C(C)C)c1  
 1783 C=CC(=O)OC.COc1c(CN(C(=O)c2cccc2)c2ccc(Br)c2)ccc2c1OC(C)(C)CC2>>COC(=O)/C=C/c1ccc  
 c(N(Cc2ccc3c(c2OC)OC(C)(C)CC3)C(=O)c2cccc2)c1  
 1784 C=Cc1ccc2ccc(Cl)cc2n1.N#CCCCC(c1ccc(Br)c1)n1ccc2cccc(OCC#N)c21>>N#CCCCC(c1cccc(/C=  
 C/c2ccc3ccc(Cl)cc3n2)c1n1ccc2cccc(OCC#N)c21  
 1785 C=C.NC(=O)c1[nH]c2ccc(Br)cc2c1S(=O)(=O)N1CCOCC1>>C=Cc1ccc2[nH]c(C(N)=O)c(S(=O)(=O)  
 N3CCOCC3)c2c1  
 1786 C=CC(=O)OCC.COc1ccc2c(Oc3ccc(Br)cc3)c(-c3cccc3)c(-  
 c3cccc3)nc2c1>>CCOC(=O)/C=C/c1ccc(Oc2c(-c3cccc3)c(-c3cccc3)nc3cc(OC)ccc23)cc1  
 1787 C=CC(=O)OCC.CCC(C)c1c[n+](O)c(C(C)CC)c(Cl)n1>>CCOC(=O)/C=C/c1nc(C(C)CC)c[n+](O-  
 )c1C(C)CC  
 1788 C=Cc1cnc2c(ccn2C(=O)OC(C)(C)C)c1OC.CCN1CCN(Cc2ccc(NC(=O)c3ccc(C)c(I)c3)cc2C(F)(F)F)C  
 C1>>CCN1CCN(Cc2ccc(NC(=O)c3ccc(C)c(/C=C/c4cnc5c(ccn5C(=O)OC(C)(C)C)c4OC)c3)cc2C(F)(  
 1789 C=CC(=O)OC.OC[C@H]1O[C@@H](Oc2ccc(I)cc2)C[C@@H]1O>>COC(=O)/C=C/c1ccc(O[C@H]2  
 C[C@H](O)[C@@H](CO)O2)cc1  
 1790 C=CCOC(C)=O.COC(=O)c1ccc(Br)cc1>>COC(=O)c1ccc(/C=C/COC(C)=O)cc1  
 1791 C=CC[C@@](C)(C=C)c1cccc1.Ic1cccc1>>C=C[C@](C)(C/C=C/c1cccc1)c1cccc1  
 1792 C=CC(=O)OCC.COc1cccc1Br>>CCOC(=O)/C=C/c1cccc1OC  
 Br1cncnc1.C=CCO[C@H]1[C@H](C)[C@@H](O[C@@H]2O[C@H](C)C[C@H](N(C)C)[C@H]2O  
 1793 )[C@](C)(OC)C[C@@H](C)/C(=N)O[C@H](C)[C@@H](O)[C@](C)(O)[C@@H](CC)OC(=O)[C@  
 @H]1C>>CC[C@H]1OC(=O)[C@H](C)[C@@H](OC/C=C/c2cncnc2)[C@H](C)[C@@H](O[C@@H  
 12O[C@H](C)C[C@H](N(C)C)[C@H]2O)[C@](C)(OC)C[C@@H](C)/C(=N)O[C@H](C)[C@@H](  
 1794 C=C[C@@H]1C[C@H]2CC[C@@H](C(=O)OC)N2C(=O)[C@@](Cc2cccc2)(NC(=O)OCc2cccc2)[  
 C@H]1OC(C)=O.O=[N+](O-  
 1795 )c1ccc(Br)cc1>>COC(=O)[C@@H]1CC[C@@H]2C[C@@H](/C=C/c3ccc([N+](=O)[O-  
 ])cc3)[C@H](OC(C)=O)[C@](Cc3cccc3)(NC(=O)OCc3cccc3)C(=O)N12  
 1796 C=CC(=O)OC(C)(C)C.Cc1c(Br)cccc1[N+](=O)[O-  
 C=CC(=O)OCC.C[Si](C)(C)c1cccc2c1oc1c(I)cccc12>>CCOC(=O)/C=C/c1cccc2c1oc1c([Si](C)(C)C)c  
 1797 ccc12  
 Br1ccc(N2c3cccc3N(c3cccc3)c3c2c2cccc2c2cccc32)cc1.C=Cc1cccc1>>C(=C/c1cccc1)\c1ccc(  
 1798 N2c3cccc3N(c3cccc3)c3c2c2cccc2c2cccc32)cc1  
 C=Cc1ccc(C)cc1.O=[N+](O-)c1cccc(I)c1>>C1ccc(/C=C/c2cccc([N+](=O)[O-])c2)cc1  
 1799 C=CC(C)=O.Cc1cccc(C)c1Br>>CC(=O)/C=C/c1c(C)cccc1C  
 1800 C=CC(=O)OC(C)(C)C.[2H]C1([2H])CCc2cc(Br)ccc21>>[2H]C1([2H])CCc2cc(/C=C/C(=O)OC(C)(C)  
 C)ccc21  
 1801 C=CC(=O)OC(C)(C)C.O=S(=O)(c1ccc(Br)cc1)n1ccc2cncnc21>>CC(C)(C)OC(=O)/C=C/c1ccc(S(=O)(  
 =O)n2ccc3cncnc32)cc1  
 1802 Br1cncnc12.C=CC(=O)OC(C)(C)C>>CC(C)(C)OC(=O)/C=C/c1cnc2cccc12  
 1803 C=CC(=O)CCC.Fc1ccc(Br)cc1>>CCCC(=O)/C=C/c1ccc(F)cc1  
 1804 C=Cc1ccc(C=O)cc1.CCc1cc(I)ccc1/N=N/N(CC)CC>>CCc1cc(/C=C/c2ccc(C=O)cc2)ccc1/N=N/N(CC  
 1805 C=CC(=O)OCC.CC(C)(CC1Cc2cccc2C1)NC[C@@H](O)COc1c(Br)cccc1C#N>>CCOC(=O)/C=C/c  
 1cccc(C#N)c1OC[C@H](O)CNC(C)(C)CC1Cc2cccc2C1

1806 C=Cc1ccc(S(=O)(=O)c2ccccc2F)cn1.Oc1cc(F)ccc1I>>O=S(=O)(c1ccc(/C=C/c2ccc(F)cc2O)nc1)c1ccc  
1807 C=CS(=O)(=O)c1ccccc1.Cc1ccc(S(=O)(=O)n2ccc3cc(Br)ccc32)cc1>>Cc1ccc(S(=O)(=O)n2ccc3cc(/C  
=C/S(=O)(=O)c4ccccc4)ccc32)cc1  
1808 Br1ccc(C(=C(c2ccccc2)c2ccccc2)c2ccccc2)cc1.C=Cc1cnccl1>>C(=C/c1ccc(C(=C(c2ccccc2)c2ccccc  
2)c2ccccc2)cc1)\c1cnccl1  
1809 Br1ccc2c(c1)Sc1ccccc1N2.C=Cc1ccc(OC)cc1>>COc1ccc(/C=C/c2ccc3c(c2)Sc2ccccc2N3)cc1  
1810 C=C.CCCCC(CC)COc1cc(/C=C/c2ccc(/C=C/c3ccc(/C=C/c4ccc(I)cc4)cc3)cc2)c(OCC(CC)CCCC)cc1  
C>>C=Cc1ccc(/C=C/c2ccc(/C=C/c3ccc(/C=C/c4cc(OCC(CC)CCCC)c(C)cc4OCC(CC)CCCC)cc3)cc2)  
1811 C=CCOC(C)=O.C=CCc1ccc(Br)cc1>>C=CCc1ccc(/C=C/COC(C)=O)cc1  
1812 C=CC(=O)OCC.Cc1cc2c(cc1C(F)(F)F)NC(=O)CC(c1cccc(Br)c1)=N2>>CCOC(=O)/C=C/c1cccc(C2=  
Nc3cc(C)c(C(F)(F)F)cc3NC(=O)C2)c1  
C=CS(=O)(=O)F.O=C(N[C@@H](Cc1ccc(I)cc1)C(=O)OCc1ccccc1)OCC1c2ccccc2-  
1813 c2ccccc21>>O=C(N[C@@H](Cc1ccc(/C=C/S(=O)(=O)F)cc1)C(=O)OCc1ccccc1)OCC1c2ccccc2-  
c2ccccc21  
1814 C=COCCN(C)C.CC(=O)c1ccc(Br)cc1>>C=C(OCCN(C)C)c1ccc(C(C)=O)cc1  
1815 C=Cc1cnccl1.O=S(=O)(c1ccc(Br)cc1)C(F)(F)C(F)(F)C(F)(F)C(F)(F)C(F)(F)C(F)(F)C(F)(F)C(F)(F)F  
1816 >O=S(=O)(c1ccc(/C=C/c2ccccc2)cc1)C(F)(F)C(F)(F)C(F)(F)C(F)(F)C(F)(F)C(F)(F)C(F)(F)C(F)(F)F  
C=Cc1ccc(OC)cc1.CCCCCCCCOCc1ccc2c(C)c(Br)c(=O)oc2c1>>CCCCCCCCOCc1ccc2c(C)c(/C=C/c3c  
cc(OC)cc3)c(=O)oc2c1  
1817 Br1ccc(I)cc1.C=Cc1c(F)c(F)c(F)c(F)c1F>>Fc1c(F)c(F)c(/C=C/c2ccc(Br)cc2)c(F)c1F  
1818 C=CC(N)=O.CC(C)(C)OC(=O)NC1(c2ccc(-c3nn4c(Br)cnc4cc3-  
1819 c3ccccc3)cc2)CCC1>>CC(C)(C)OC(=O)NC1(c2ccc(-c3nn4c(/C=C/C(N)=O)cnc4cc3-  
C=CC(=O)OCC.N#Cc1ccc(Br)cc1F>>CCOC(=O)/C=C/c1ccc(C#N)c(F)c1  
1820 C=COCCCC.COc1ccc(C(=O)Cl)cc1>>CCCCO/C=C/C(=O)c1ccc(OC)cc1  
1821 C=Cc1ccccc1.Cc1ccc2c(-c3ccccc3)c(Br)c(=O)oc2c1>>Cc1ccc2c(-  
1822 C=C(C)c1ccccc1.Cc1ccc(Br)cc1>>C/C(=C\c1ccc(C)cc1)c1ccccc1  
1823 C=C1c2ccccc2C1(C#N)CC.Clc1ccc(Br)cc1>>CCC1(C#N)/C(=C/c2ccc(Cl)cc2)c2ccccc21  
1824 C=Cc1ccccc1.CC(C)c1oc2cc3oc(=O)ccc3cc2c1OS(=O)(=O)C(F)(F)F>>CC(C)c1oc2cc3oc(=O)ccc3cc  
2c1/C=C/c1ccccc1  
1825 CC(=O)/C=C/CC(NS(=O)(=O)c1ccc(C)cc1)c1ccccc1.Cn1ccc2cc(Br)ccc21>>CC(=O)/C=C(/CC(NS(=O)(=O)c1ccc(C)cc1)c1ccccc1)c1ccc2c(cen2C)c1  
1826 C=Cc1ccccc1C.CCOC(=O)C(F)I>>CCOC(=O)C(F)/C=C/c1ccccc1C  
1827 C=CC(=O)O.COc1ccc(S(=O)(=O)Nc2ccc(I)cc2)cc1OC>>COc1ccc(S(=O)(=O)Nc2ccc(/C=C/C(=O)O)  
cc2)cc1OC  
C=Cc1ccc(/C=C/c2cc(CCCCCC)c(C=O)cc2CCCCC)cc1.CCCCCCc1cc(/C=C/c2ccc(C)cc2)c(CCCCC  
1828 C)cc1Br>>CCCCCCc1cc(/C=C/c2ccc(/C=C/c3cc(CCCCCC)c(/C=C/c4ccc(C)cc4)cc3CCCCC)cc2)c(  
CCCCC)cc1C=O  
1829 C=CC(C)(C)O.Clc1ccccc1>>CC(C)(O)/C=C/c1ccccc1  
1830 C=C(C(=O)OCC)c1ccccc1.Br.CC(C)(C)OC(=O)Nc1ccccc1I>>CCOC(=O)/C(=C/c1ccccc1NC(=O)OC(  
C)(C)C)c1ccccc1Br  
1831 C=Cc1ccc(OC)cc1.Cn1nc(Br)c2ccccc21>>COc1ccc(/C=C/c2nn(C)c3ccccc23)cc1  
1832 C=Cc1ccc(C)c1.Oc1ccccc1I>>Cc1ccc(/C=C/c2ccccc2O)c1  
1833 C=Cc1cnccl1.CCCCCOCc1ccc(I)cc1>>CCCCCOc1ccc(/C=C/c2ccccc2)cc1  
1834 Br1ccc2ccccc2c1.C=CN1CCCC1=O>>C=C(c1ccc2ccccc2c1)N1CCCC1=O  
1835 C=CC(=O)OCC.O=C(Nc1ccccc1I)c1ccc([N+](=O)[O-]  
1836 )cc1>>CCOC(=O)/C=C/c1ccccc1NC(=O)c1ccc([N+](=O)[O-])cc1  
Br1cncnc1.C=Cc1ccccc1OC>>COc1ccccc1/C=C/c1cncnc1  
1837 C=CCOC(C)=O.COC(=O)c1ccc(I)cc1>>COC(=O)c1ccc(/C=C/COC(C)=O)cc1  
1838 C=C(NC(C)=O)C(=O)OC.Cc1ccc(S(=O)(=O)n2ccc3c(Br)ccc32)cc1>>COC(=O)/C(=C/c1ccc2c1cen  
2S(=O)(=O)c1ccc(C)cc1)NC(C)=O  
1839 C=CC(N)=O.O=[N+](O-)]c1ccc(Br)cc1>>NC(=O)/C=C/c1ccc([N+](=O)[O-])cc1  
1840 C=[Si](CC)(CC)CC.CN(C)c1ccc(Br)cc1>>CC[Si](/C=C/c1ccc(N(C)C)cc1)(CC)CC  
1841 C=Cc1ccccc1.Nc1ccccc1I>>Nc1ccccc1/C=C/c1ccccc1  
1842 C=CC(N)=O.O=CC1=C(Br)CCC1>>NC(=O)/C=C/C1=C(C=O)CCC1  
1843 C=CC(=O)OCC.O=Cc1ccccc1Br>>CCOC(=O)/C=C/c1ccccc1C=O  
1844 C=CC(=O)CCCC.COc1ccc(I)cc1>>CCCCC(=O)/C=C/c1ccc(OC)cc1  
1845 C=CC(N)=O.CC[C@@]1(O)C(=O)OCc2c1cc1n(c2=O)Cc2cc3c(Br)ccc3nc2-  
1>>CC[C@@]1(O)C(=O)OCc2c1cc1n(c2=O)Cc2cc3c(/C=C/C(N)=O)ccc3nc2-1  
1846 C=Cc1ccccc1.CCOC(=O)COc1ccc(I)cc1>>CCOC(=O)COc1ccc(/C=C/c2ccccc2)cc1

C=CC(=O)OCc1cn(S(=O)(=O)c2ccccc2[N+](=O)[O-])c2ccc([N+](=O)[O-])cc12.Cc1ccc(I)cc1>>Cc1ccc(/C=C/C(=O)OCc2cn(S(=O)(=O)c3ccccc3[N+](=O)[O-])c3ccc([N+](=O)[O-])cc23)cc1  
1847  
1848 C=CCN1C(=O)c2ccccc2C1=O.O=Cc1ccc(Br)cc1>>O=Cc1ccc(/C=C/CN2C(=O)c3ccccc3C2=O)cc1  
1849 C=CC(=O)N1CCCC1.CC(C)(C)OC(=O)N1CCc2cc(Br)ccc2C1>>CC(C)(C)OC(=O)N1CCc2cc(/C=C/C(=O)N3CCCC3)ccc2C1  
1850 C=CC(=O)OC.Cc1cncc(Br)c1>>COC(=O)/C=C/c1cncc(C)c1  
1851 C=Cc1cccc(SC)c1.CC(C)c1ccc2sc3ccc(Br)cc3c(=O)c2c1>>CSc1cccc(/C=C/c2ccc3sc4ccc(C(C)C)cc4c(=O)c3c2)c1  
1852 C=Cc1cccc1.FC(F)(F)c1ccc(Br)cc1>>FC(F)(F)c1ccc(/C=C/c2ccccc2)cc1  
C=C[C@H]1OC2(CCCCC2)O[C@H]1CO[Si](C)(C)C(C)(C)C.CC1(C)OC(=O)c2c(cccc2OS(=O)(=O)C(F)(F)F)O1>>CC1(C)OC(=O)c2c(/C=C/[C@H]3OC4(CCCCC4)O[C@H]3CO[Si](C)(C)C(C)(C)C)cccc2O1  
1853  
1854 C=CC(OC)OC.FC(F)(F)c1ccc(Br)cn1>>COC(/C=C/c1ccc(C(F)(F)F)nc1)OC  
1855 C=CC(=O)OC.Fc1ccc(Br)cc1>>COC(=O)/C=C/c1ccc(F)cc1  
C=Cc1nc2c(N)ncnc2n1[C@H]1O[C@H](CO[Si](C)(C)C(C)(C)C)[C@H](O[Si](C)(C)C(C)(C)C)[C@H]1O[Si](C)(C)C(C)(C)C.CC(=O)c1ccc(Cl)cc1>>CC(=O)c1ccc(/C=C/c2nc3c(N)ncnc3n2[C@H]2O[C@H](CO[Si](C)(C)C(C)(C)C)[C@H](O[Si](C)(C)C(C)(C)C)[C@H]2O[Si](C)(C)C(C)(C)C)cc  
1856  
1857 C=COCCOC=C.COc1ccc(Br)cc1>>C=COCCOC(=C)c1ccc(OC)cc1  
1858 C=CC(=O)OC.CCOC(=O)C1(/C(C)=C(/I)c2ccccc2)CCCC1=O>>CCOC(=O)C1(/C(C)=C(/C=C/C(=O)OC)c2ccccc2)CCCC1=O  
1859 Brc1ccccc1.C=C/C=C/C(=O)N(CCCC)CCCC>>CCCCN(CCCC)C(=O)/C=C/C=C/c1ccccc1  
1860 C=Cc1cnc2ccccc12.CCCCCCCCCC(=O)N1CCN(c2ccc(Br)cc2)CC1>>CCCCCCCCC(=O)N1CCN(c2ccc(/C=C/c3cnc4ccccc34)cc2)CC1  
1861 C=Cc1ccc(OC)cc1.COc1ccc2c(=O)c(I)coc2c1>>CCOc1ccc(/C=C/c2coc3cc(OC)ccc3c2=O)cc1  
1862 C=CCCCCCCCCCCCC.COc1cccc(Br)c1[N+](=O)[O-]  
1863 ]>>CCCCCCCCCCCCC/C=C/c1cccc(OC)c1[N+](=O)[O-]  
1864 Brc1ccc(-c2enc(C3CC3)o2)cc1.C=CC(=O)OCC>>CCOC(=O)/C=C/c1ccc(-c2enc(C3CC3)o2)cc1  
1865 C=COCCCC.O=c1cc(Br)c2cc(F)ccc2o1>>CCCCO/C=C/c1cc(=O)oc2ccc(F)cc12  
C=Cc1cn(COCC[Si](C)(C)C)nc1-  
1866 c1nc2ccc(OC)cc2n1COCC[Si](C)(C)C.COc1cncc(Br)c1>>COc1cncc(/C=C/c2cn(COCC[Si](C)(C)C)nc2-c2nc3ccc(OC)cc3n2COCC[Si](C)(C)C)c1  
1867 C=CCOc1ccccc1.Ic1ccccc1>>C(=C/c1ccccc1)\COc1ccccc1  
1868 C=CC(=O)OC.CC(C)=CBr>>COC(=O)/C=C/C=C(C)C  
C=CC(=O)OCC.COc1ccc(C(=O)CCC(=O)Nc2cc(-  
1869 c3ccccc3)c(Cc3ccc(Br)cc3)s2)cc1OCC>>CCOC(=O)/C=C/c1ccc(Cc2sc(NC(=O)CCC(=O)c3ccc(OCC)c(OCC)c3)cc2-c2ccccc2)cc1  
1870 C=CC(=O)OC.O=Cc1cc(I)ccc1O>>COC(=O)/C=C/c1ccc(O)c(C=O)c1  
1871 C=CC(=O)OCC.Ic1ccccc1-c1coc2ccccc12>>CCOC(=O)/C=C/c1ccccc1-c1coc2ccccc12  
1872 C=CC(=O)N(C)OC.N#Cc1ccc(I)cc1>>CON(C)C(=O)/C=C/c1ccc(C#N)cc1  
1873 C=CC(=O)OCC.COc1nc(Br)cc2ccccc12>>CCOC(=O)/C=C/c1cc2ccccc2c(OC)n1  
1874 C=CC(N)=O.CCOC(=O)c1ccc(I)cc1>>CCOC(=O)c1ccc(/C=C/C(N)=O)cc1  
C=CC(=O)CC.CCC(CC)(c1ccc(O)cc1)c1ccc(Br)c(C)c1>>CCC(=O)/C=C/c1ccc(C(CC)(CC)c2ccc(O)cc2)cc1C  
1875 C=Cc1ccc(C(F)(F)F)cc1.CN(C(=O)c1ccccc1)c1ccc2c(c1)[nH]c(=NC(=O)c1ccc(Br)s1)n2CCC(N)=O>>CN(C(=O)c1ccccc1)c1ccc2c(c1)[nH]c(=NC(=O)c1ccc(/C=C/c3ccc(C(F)(F)F)cc3)s1)n2CCC(N)=O  
C=CC(C)=O.CCN1C[C@]2(OC(=O)c3cc(I)ccc3NC(C)=O)CC[C@H](OC)[C@@]34[C@@H]2C[C@H]([C@@H]13)[C@@]1(O)C[C@H](OC)[C@H]2C[C@@H]4[C@]1(O)[C@H]2OC>>CCN1C[C@]2(OC(=O)c3ccc(/C=C/C(C)=O)ccc3NC(C)=O)CC[C@H](OC)[C@@]34[C@@H]2C[C@H]([C@@H]13)[C@@]1(O)C[C@H](OC)[C@H]2C[C@@H]4[C@]1(O)[C@H]2OC  
1876  
1877 C=CC(OCC)OCC.COC(C)(OC)c1ccccc1Br>>CCOC(/C=C/c1ccccc1C(C)(OC)OC)OCC  
1878 C=Cc1ccc(O)cc1.CC(C)(C#N)c1cc(Br)cc(Cn2cnnc2)c1>>CC(C)(C#N)c1cc(/C=C/c2ccc(O)cc2)cc(Cn2cnnc2)c1  
1879 C=Cc1ccccc1.Nc1cc([N+](=O)[O-])ccc1Br>>Nc1cc([N+](=O)[O-])ccc1/C=C/c1ccccc1  
1880 C=CNC(C)=O.O=S(=O)(Oc1ccc(Cl)cc1)C(F)(F)F>>C=C(NC(C)=O)c1ccc(Cl)cc1  
1881 C=CC(=O)OCC.COc1ccc(-c2cncc2Br)cc1>>CCOC(=O)/C=C/c1cncc1-c1ccc(OC)cc1  
C=CC(=O)C(O[Si](CC)(CC)CC)c1c(OC)ccc(OC)c1OCc1ccccc1.COc1c(OCc2ccccc2)c(I)cc2c1C(=O)  
1882 OC2>>CC[Si](CC)(CC)OC(C(=O)/C=C/c1cc2c(c(OC)c1OCc1ccccc1)C(=O)OC2)c1c(OC)ccc(OC)c1OCc1ccccc1  
1883 C=CC(=O)OC.CC(C)c1cc(Br)c2c(c1)[C@]13CCCC[C@H]1CCCC3=N2>>COC(=O)/C=C/c1cc(C(C)C)cc2c1N=C1CCC[C@H]3CCCC[C@]123

1884 C=CCOC1cccc1.Ic1ccc2[nH]ccc2c1>>C(=C/c1ccc2[nH]ccc2c1)COCc1cccc1  
1885 C=CC(=O)OC.COc1ccc(C2=Cc3nc4cccc4cc3C(CC(C)=O)N2c2ccc(Br)cc2)cc1>>COC(=O)/C=C/c1c  
1886 cc(N2C(c3ccc(OC)cc3)=Cc3nc4cccc4cc3C2CC(C)=O)cc1  
1887 C=CC(=O)OCC.CC1(C)CC(=C(c2ccc(Br)cc2)c2ccc(O)c(Cl)c2)CC(C)(C)C1>>CCOC(=O)/C=C/c1ccc  
1888 (C(=C2CC(C)(C)CC(C)(C)C2)c2ccc(O)c(Cl)c2)cc1  
1889 C=Cc1cccc1.Nc1cc(Cl)ccc1Br>>Nc1cc(Cl)ccc1/C=C/c1cccc1  
1890 Brc1ccc2ccnc(N3CCCC3)c2c1.C=CC(=O)OC>>COC(=O)/C=C/c1ccc2ccnc(N3CCCC3)c2c1  
1891 C=CC(=O)O.Ic1ccc2c(c1)OCCOCCOCCOCCO2>>O=C(O)/C=C/c1ccc2c(c1)OCCOCCOCCOCCO2  
1892 C=CC(=O)OC.N#Cc1c(Br)encc1I>>COC(=O)/C=C/c1nccc(Br)c1C#N  
1893 C=Cc1cc(OC)cc(OC)c1.COc1cc(I)cc(OC)c1OC>>COc1cc(/C=C/c2cc(OC)c(OC)c(OC)c2)cc(OC)c1  
1894 \*CNCCOCCOCCOCCCN(C(=O)COc1ccc(C(Cc2cc(OC)cc(OC)c2)NC(=O)c2ccc(C=C)cc2)cc1.O=[N  
1895 +])([O-  
1896 ])c1ccc(I)cc1>>\*CNCCOCCOCCOCCCN(C(=O)COc1ccc(C(Cc2cc(OC)cc(OC)c2)NC(=O)c2ccc(/C=  
1897 C/c3ccc(I)N+I(=O)I(O-))cc3)cc2)cc1  
1898 Brc1ccc2cc[nH]c2n1.C=Cc1cccc1>>C(=C/c1ccc2cc[nH]c2n1)c1cccc1  
1899 C=CC(=O)c1ccc(OC)cc1OC.COc1ccc(I)c(OC)c1>>COc1ccc(/C=C/C(=O)c2ccc(OC)cc2OC)c(OC)c1  
1900 C=Cc1cccc(O)c1.COc1cccc(Br)c1>>COc1cccc(/C=C/c2cccc(O)c2)c1  
1901 Brc1ccc2c(cnn2C2CCCCO2)c1.C=CC(=O)OCC>>CCOC(=O)/C=C/c1ccc2c(cnn2C2CCCCO2)c1  
1902 C=Cc1cccn1.O=[N+])([O-])c1ccc(I)cc1>>O=[N+])([O-])c1ccc(/C=C/c2cccn2)cc1  
1903 C=Cc1cccc1.O=S(=O)(Oc1cccc2ccccc12)C(F)(F)F>>C=C(c1cccc1)c1cccc2ccccc12  
1904 C=CC(=O)OC(C)(C)C.COC(OC)c1cc2c(cc1Br)OCO2>>COC(OC)c1cc2c(cc1/C=C/C(=O)OC(C)(C)C  
1905 )OCO2  
1906 Brc1cccc(N(c2cccc2)c2cccc2)n1.C=Cc1ccc(OC)cc1>>COc1ccc(/C=C/c2cccc(N(c3cccc3)c3cccc3)  
1907 n2)cc1  
1908 C=CN1C(=O)c2cccc2C1=O.FC(F)(F)c1ccc(Br)cc1>>O=C1c2cccc2C(=O)N1/C=C/c1ccc(C(F)(F)F)c  
1909 Brc1cccc1.C=CC#N>>N#C/C=C/c1cccc1  
1910 C=CC#N.CC1Cc2cc(Br)ccc2O1>>CC1Cc2cc(/C=C/C#N)ccc2O1  
1911 C=Cc1cccc1.Ic1ccc(Cn2cc(-c3cccc3)nn2)cc1>>C(=C/c1ccc(Cn2cc(-c3cccc3)nn2)cc1)c1cccc1  
1912 C=CC(O)CC.Clc1ccc(I)cc1>>CCC(O)/C=C/c1ccc(Cl)cc1  
1913 C=Cc1cncc1.CC(=O)Oc1cncc(Br)c1>>CC(=O)Oc1cncc(/C=C/c2cncc2)c1  
1914 Brc1cccc2ccccc12.C=CC[C@H]1CCCN(C)C[C@H](OC(C)=O)[C@H](C)C[C@H](CC(OC)OC)[C@  
1915 H][O[C@@H]2O[C@H](C)[C@@H](O[C@H]3C[C@@](C)(O)[C@@H](OC(=O)CC)[C@H](C)O3)  
1916 [C@H](N(C)C)[C@H]2OC(C)=O)[C@@H](OC)[C@H](OC(=O)CC)CC(=O)O1>>CCC(=O)O[C@H]  
1917 1[C@H](C)O[C@H](O[C@H]2[C@H](N(C)C)[C@@H](OC(C)=O)[C@H](O[C@@H]3[C@@H](  
1918 OC)[C@H](OC(=O)CC)CC(=O)O[C@@H](C/C=C/c4cccc5ccccc45)CCCN(C)C[C@H](OC(C)=O)[C  
1919 @H](C)C[C@@H]3CC(OC)OC)O[C@@H]2C)O[C@@H]1C)O  
1920 Brc1cccc2ccccc12.C=CN1CCCC1=O>>C=C(c1cccc2ccccc12)N1CCCC1=O  
1921 C=CC(=O)CC.O=Cc1cccc1Br>>CCC(=O)/C=C/c1cccc1C=O  
1922 C=CC(=O)OC(C)(C)C.COC(=O)Cc1ccc2oc(-c3ccc(Br)cc3F)nc2c1>>COC(=O)Cc1ccc2oc(-  
1923 c3ccc(/C=C/C(=O)OC(C)(C)C)cc3F)nc2c1  
1924 C=CS(N)(=O)=O.CCc1cc(Br)cc(C(=O)c2cccc2)c1>>CCc1cc(/C=C/S(N)(=O)=O)cc(C(=O)c2cccc2)  
1925 CCOC(=O)/C=C/[C@H]1COC(C)(C)O1.Ic1cccc1>>CCOC(=O)/C=C(\c1cccc1)[C@H]1COC(C)(C)  
1926 C=CC(=O)OCCCC.Cn1nc(Cl)c2cccc21>>CCCCOC(=O)/C=C/c1nn(C)c2cccc12  
1927 C=Cc1ccc(OC)cc1.CCCCC(Br)C(=O)OC>>CCCCC(/C=C/c1ccc(OC)cc1)C(=O)OC  
1928 C=Cc1ccc2ccccc2c1.CCOC(=O)c1cccc1Br>>CCOC(=O)c1cccc1/C=C/c1ccc2ccccc2c1  
1929 C=CC(=O)OCc1cccc1.Fc1cc(Br)ccc1N1CCOCC1>>O=C(/C=C/c1ccc(N2CCOCC2)c(F)c1)OCc1cccc  
1930 C=C(OC(C)=O)C(=O)OCC(F)(F)F.Ic1cccc1>>CC(=O)O/C(=C/c1cccc1)C(=O)OCC(F)(F)F  
1931 C=CC(=O)O.CN(c1cccc(I)c1)S(=O)(=O)c1ccc(Cl)cc1>>CN(c1cccc(/C=C/C(=O)O)c1)S(=O)(=O)c1cc  
1932 c(Cl)cc1  
1933 C=CC(=O)OC(C)(C)C.Oc1ccc(Cl)cc1>>CC(C)(C)OC(=O)/C=C/c1ccc(O)cc1  
1934 C=CC(=O)OC.COc1cc(Br)c(N)cc1C>>COC(=O)/C=C/c1cc(OC)c(C)cc1N  
1935 C=Cc1cccc1.CC(C)Oc1nc(N)nc(Nc2ccc(I)cc2)n1>>CC(C)Oc1nc(N)nc(Nc2ccc(/C=C/c3cccc3)cc2)n  
1936 C=CCCCC.COC(=O)c1cccc1OS(=O)(=O)C(F)(F)F>>C=C(CCCCC)c1cccc1C(=O)OC  
1937 C=CC(=O)OC(C)(C)C.COc1ccc(C(=O)c2ccc3c(cen3Cc3ccc(Br)cc3)c2)cc1>>COc1ccc(C(=O)c2ccc3c  
1938 (cen3Cc3ccc(/C=C/C(=O)OC(C)(C)C)cc3)c2)cc1  
1939 C=CC(=O)OC(C)(C)C.CC(=O)O[IH2](OC(C)=O)c1c(C)cc(C)cc1C>>Cc1cc(C)c(/C=C/C(=O)OC(C)(  
1940 C)C)c(C)c1  
1941 C=CB1OC(C)CC(C)(C)O1.COC(=O)CC[C@H]1CN(S(=O)(=O)c2cccc(C(F)(F)F)c2)c2cc(Br)ccc2O1>  
1942 >COC(=O)CC[C@H]1CN(S(=O)(=O)c2cccc(C(F)(F)F)c2)c2cc(/C=C/B3OC(C)CC(C)(C)O3)ccc2O1  
1943 C=CC(=O)OC.CN(C)c1ccc2cc(Br)ccc2c1>>COC(=O)/C=C/c1ccc2cc(N(C)C)ccc2c1

1927 C=CC(=O)N1CCOCC1.C[C@H]1COCc2nc3c(N)nc4cc(Br)ccc4c3n21>>C[C@H]1COCc2nc3c(N)nc4  
cc(/C=C/C(=O)N5CCOCC5)ccc4c3n21  
1928 C=CC(=O)OCC.Cc1nc(N)nc(NCc2ccccc2)c1>>CCOC(=O)/C=C/c1c(C)nc(N)nc1NCc1ccccc1  
1929 C=CC(=O)N(C)OC.N#Cc1ccc2ccc(Br)cc2c1>>CON(C)C(=O)/C=C/c1ccc2ccc(C#N)cc2c1  
1930 C=CC(=O)OC.CC(C)(C)OC(=O)N1CCC[C@H]1c1ccc(Br)cc1>>COC(=O)/C=C/c1ccc([C@H]2CC  
CN2C(=O)OC(C)(C)C)cc1  
1931 C=CS(=O)(=O)F.Ic1coc2ccccc12>>O=S(=O)(F)/C=C/c1coc2ccccc12  
1932 C=CC(=O)OCC.O=C1Nc2ccc(Br)cc2C1=O>>CCOC(=O)/C=C/c1ccc2c(c1)C(=O)C(=O)N2  
1933 C=CC(=O)OCCCC.FC(F)(F)c1cc(Br)cc(C(F)(F)F)c1>>CCCCOC(=O)/C=C/c1cc(C(F)(F)F)cc(C(F)(F)  
1934 C=C.O=[N+][([O-])c1cc(Cl)ccc1Br>>C=Cc1ccc(Cl)cc1[N+](=O)[O-]  
1935 C=CC(=O)N(C)[C@H](C)c1oc2ccccc2c1C.CC1(C)COC2cc(Br)cnC2NC1=O>>Cc1c([C@H](C)N(C)  
C(=O)/C=C/c2cnc3c(c2)OCC(C)(C)C(=O)N3)oc2ccccc12  
1936 C=CC(=O)OCCCC.Oc1ccc(I)cc1>>CCCCOC(=O)/C=C/c1ccc(O)cc1  
1937 C=CC(=O)O.CC(=O)Nc1ccc(Br)cn1>>CC(=O)Nc1ccc(/C=C/C(=O)O)cn1  
1938 C=CCNS(=O)(=O)c1ccc(C)cc1.Cc1ccccc1OS(=O)(=O)C(F)(F)F>>C=C(CNS(=O)(=O)c1ccc(C)cc1)c1  
ccccc1C  
1939 C=CC(=O)OC.COC(=O)c1ccc(Br)o1>>COC(=O)/C=C/c1ccc(C(=O)OC)o1  
1940 C=CC(=O)OC.CCCCc1ccc(N2CCc3cc(OC)ccc3C2(C)c2ccc(Br)cc2)cc1>>CCCCc1ccc(N2CCc3cc(OC  
)ccc3C2(C)c2ccc(/C=C/C(=O)OC)cc2)cc1  
1941 C=CC(=O)OC.Cc1ccc(-  
c2c(Br)n(CCCO[Si](C)(C)C(C)(C)C)c3nnc(N)c23)cc1>>COC(=O)/C=C/c1c(-  
1942 C=Cc1ccccc1.COc1cc2cc(Br)c(=O)oc2cc1OC>>COc1cc2cc(/C=C/c3ccccc3)c(=O)oc2cc1OC  
1943 C=CS(=O)(=O)F.O=[N+][([O-])c1ccccc(I)c1>>O=[N+][([O-])c1ccccc(/C=C/S(=O)(=O)F)c1  
1944 C=CC(=O)OCC.O=C(O)c1ccc(Br)s1>>CCOC(=O)/C=C/c1ccc(C(=O)O)s1  
1945 C=CC(=O)N1N=Cc2ccccc2C1c1cc2ccccc2n1C.COc1cc(Cc2cnc(N)nc2N)cc(I)c1OC>>COc1cc(Cc2cn  
c(N)nc2N)cc(/C=C/C(=O)N2N=Cc3ccccc3C2c2cc3ccccc3n2C)c1OC  
1946 C=CC(=O)OC.Clc1ccccc1Br>>COC(=O)/C=C/c1ccccc1Cl  
1947 C=Cc1ccc(OC)cc1OC.CCCCCCCCOCc1ccc2c(C)c(Br)c(=O)oc2c1>>CCCCCCCCOCc1ccc2c(C)c(/C=C/  
c3ccc(OC)cc3OC)c(=O)oc2c1  
1948 C=Cc1ccccc1.CN1CC(c2ccc(Br)cc2)CCC1=O>>CN1CC(c2ccc(/C=C/c3ccccc3)cc2)CCC1=O  
1949 C=CC(=O)OCCCC.COc1ccc2cc(Br)ccc2c1>>CCCCOC(=O)/C=C/c1ccc2cc(OC)ccc2c1  
1950 C=C(NC(C)=O)C(=O)OCc1ccccc1.CCOC(=O)COc1ccc(Br)cc1OCc1ccccc1>>CCOC(=O)COc1ccc(/C  
=C(/NC(C)=O)C(=O)OCc2ccccc2)cc1OCc1ccccc1  
1951 C=CC(=O)OC.O=C(O)c1ccc(Br)s1>>COC(=O)/C=C/c1ccc(C(=O)O)s1  
1952 C=COCCCl.Cc1ccccc1-c1c(OS(=O)(=O)C(F)(F)F)ccc2ccccc12>>C=C(OCCL)c1ccc2ccccc2c1-  
c1nccccc1C  
1953 C=CC(=O)OC.O=C(c1ccc(O)cc1)c1sc2cc(O)ccc2c1Oc1ccc(Br)cc1>>COC(=O)/C=C/c1ccc(Oc2c(C(=O)  
c3ccc(O)cc3)sc3cc(O)ccc23)cc1  
1954 C=CC(=O)Nc1ccccc1NC(=O)OC(C)(C)C.CN1C[C@H](c2ccc(Br)cc2)[C@@H](C(=O)Nc2ccc(Cl)cc2  
)C1>>CN1C[C@H](c2ccc(/C=C/C(=O)Nc3ccccc3NC(=O)OC(C)(C)C)cc2)[C@@H](C(=O)Nc2ccc(Cl  
1955 C=CCCCCCC.CC(=O)c1ccc(Cl)cc1>>CCCCC/C=C/c1ccc(C(C)=O)cc1  
1956 C=CC(=O)OC.CCC1(CN2[C@H](C)Cc3c([nH]c4ccccc34)[C@H]2c2c(F)cc(Br)cc2F)CC1>>CCC1(C  
N2[C@H](C)Cc3c([nH]c4ccccc34)[C@H]2c2c(F)cc(/C=C/C(=O)OC)cc2F)CC1  
1957 C=C.CC(=O)Nc1ccc(I)cc1>>C=Cc1ccc(NC(C)=O)cc1  
1958 C=C[Si](C)(C)C.Cc1ccc(I)cc1>>Cc1ccc(/C=C/[Si](C)(C)C)cc1  
1959 C=CCC(C)C(=O)OCC.COc1ccc(Br)cc1>>CCOC(=O)C(C)C/C=C/c1ccc(OC)cc1  
1960 C=CC(N)=O.CCN(CC)c1ccc(NC(=O)C2(NC(=O)OCC(C)C)CCc3cc(Br)ccc3C2)cc1>>CCN(CC)c1ccc  
(NC(=O)C2(NC(=O)OCC(C)C)CCc3cc(/C=C/C(N)=O)ccc3C2)cc1  
1961 C=CC(=O)OC(CC)CCCC.CC(=O)c1ccc(Cl)cc1>>CCCCC(CC)OC(=O)/C=C/c1ccc(C(C)=O)cc1  
1962 C=COCCO.Cc1ccc(Br)cc1>>C=C(OCCO)c1ccc(C)cc1  
1963 C=Cc1ccc(OC)cc1.CC(Br)C(=O)Oc1ccccc1>>COc1ccc(/C=C/C(C)C(=O)Oc2ccccc2)cc1  
1964 C=CC(=O)OC.CC(=O)OCC(COC(C)=O)OCn1cc(I)c(=O)[nH]c1=O>>COC(=O)/C=C/c1cn(COC(COC  
(C)=O)COC(C)=O)c(=O)[nH]c1=O  
1965 C=Cc1ccccc1.O=Cc1ccc2c(I)n[nH]c2c1>>O=Cc1ccc2c(/C=C/c3ccccc3)n[nH]c2c1  
1966 C=C[C@H](C)/C=C/c1ccc(O)cc1)CCC=C(C)C.CCOc1ccc(I)cc1>>CCOc1ccc(C=C[C@H](C)/C=C/  
c2ccc(O)cc2)CCC=C(C)C)cc1  
1967 C=Cc1ccccc1.COc1ccc(OS(=O)(=O)C(F)(F)F)c1>>C=C(c1ccccc1)c1ccc(OC)c1  
1968 C=CC(=O)OCC.CC(C)(CC1Cc2ccccc2C1)NC[C@H](O)COc1c(Br)ccc(F)c1F>>CCOC(=O)/C=C/c1  
ccc(F)c(F)c1OC[C@H](O)CNC(C)(C)CC1Cc2ccccc2C1  
1969 C=CC(N)=O.COC(=O)c1ccc(I)cc1>>COC(=O)c1ccc(/C=C/C(N)=O)cc1  
1970 C=Cc1ccc(F)cc1.CS(=O)(=O)c1ccc(Br)cc1>>CS(=O)(=O)c1ccc(/C=C/c2ccc(F)cc2)cc1



1971 C=CC(=O)N(C)Cc1oc2cccc2c1C.Nc1ncc(Br)cc1OCc1cccc1>>Cc1c(CN(C)C(=O)/C=C/c2enc(N)c(OCe3cccc3)c2)oc2cccc12

1972 C=Cc1cccc1.COC(=O)CCc1ccc(OCc2cccc(Br)c2)cc1>>COC(=O)CCc1ccc(OCc2cccc(/C=C/c3cccc3)c2)cc1

1973 C=CCOc1cccc1.COc1cccc1I>>COc1cccc1/C=C/COc1cccc1

1974 C=CC(=O)O.C[C@]12C[C@@]34C=C(Sc5ccc(I)cc5)C(=O)[C@@](C)(CCC(=O)Nc5c(O)ccc(C(=O)O)c5O)[C@@H]3[C@H](C[C@@H]1C4)O2>>C[C@]12C[C@@]34C=C(Sc5ccc(/C=C/C(=O)O)cc5)C(=O)[C@@](C)(CCC(=O)Nc5c(O)ccc(C(=O)O)c5O)[C@@H]3[C@H](C[C@@H]1C4)O2

1975 C=CC(=O)OC.C=CC[C@H](O)c1cccc(Br)c1>>C=CC[C@H](O)c1cccc(/C=C/C(=O)OC)c1

1976 C=CC(=O)C(O[Si](CC)(CC)CC)c1c(OC)ccc(OC)c1OCc1cccc1.Ic1cccc1OCc1cccc1>>CC[Si](CC)(CC)OC(C(=O)/C=C/c1cccc1OCc1cccc1)c1c(OC)ccc(OC)c1OCc1cccc1

1977 C=Cc1cccc1.Clc1ccc(Br)cc1>>Clc1ccc(/C=C/c2cccc2)cc1

1978 C=CC(N)=O.O=CC1=C(Br)CCCC1>>NC(=O)/C=C/C1=C(C(=O)CCCC1

1979 C=COCCCC.COc1cccc(Cl)c1>>C=C(OCCCC)c1cccc(OC)c1

1980 C=CC(=O)C1=CN(C(C)(C)C)CCC1(C)C.Ic1cccc1>>CC1(C)CCN(C(C)(C)C)C=C1C(=O)/C=C/c1ccc

1981 C=CC(=O)OC(C)(C)C.Cc1cc(C)cc(Br)c1>>Cc1cc(C)cc(/C=C/C(=O)OC(C)(C)C)c1

1982 C=CCN(C(=O)OC(C)(C)C)C(=O)OC(C)(C)C.N#Cc1ccc(Br)cc1>>CC(C)(C)OC(=O)N(C/C=C/c1ccc(C#N)cc1)C(=O)OC(C)(C)C

1983 C=CC(=O)O.N[C@H](Cc1c[nH]c2c(Br)cccc12)C(=O)O>>N[C@H](Cc1c[nH]c2c(/C=C/C(=O)O)cccc12)C(=O)O

1984 C=C(NC(C)=O)C(=O)OC.CC(C)(C)OC(=O)NCCOc1cc(C#N)ccc1I>>COC(=O)/C=C/c1ccc(C#N)cc1

1985 OCCNC(=O)OC(C)(C)C)NC(C)=O

1986 C=CS(=O)(=O)F.O=S(=O)(F)/C=C/c1cccc(I)c1>>O=S(=O)(F)/C=C/c1cccc(/C=C/S(=O)(=O)F)c1

1987 C=CC(=O)N1CCN(C)CC1.CC(C)(C)c1ccc2[nH]c3c(c2c1)CC(=O)Nc1ccc(I)cc1-3>>CN1CCN(C(=O)/C=C/c2ccc3c(c2)-c2[nH]c4ccc(C(C)(C)C)cc4c2CC(=O)N3)CC1

1988 C=Cc1cccc1.CCOc1noc(C)c1I>>CCOc1noc(C)c1/C=C/c1cccc1

1989 C=CC(=O)OCc1cccc1.O=Cc1cc(OCc2ccc(F)cc2F)ccc1I>>O=Cc1cc(OCc2ccc(F)cc2F)ccc1/C=C/C(=O)OCc1cccc1

1990 C=Cc1cccc(O)c1.Nc1cccc1Br>>Nc1cccc1/C=C/c1cccc(O)c1

1991 CCOC(=O)c1ccc(I)cc1.OC/C=C/c1cccc1>>CCOC(=O)c1ccc(/C=C/c2cccc2)CO)cc1

1992 C=CC(=O)OCCCC.O=C1CCC(N2C(=O)c3cccc(I)c3C2=O)C(=O)N1>>CCCCOC(=O)/C=C/c1cccc2c1C(=O)N(C1CCC(=O)NC1=O)C2=O

1993 C=CN(C)C(C)=O.Fc1ccc(Br)cc1>>C=C(c1ccc(F)cc1)N(C)C(C)=O

1994 C=C[C@H]1O[C@H](Sc2cccc2)[C@H](OCc2cccc2)[C@H](OCc2cccc2)[C@H]1OCc1ccc(OC)cc1.O=c1cc(-c2cccc2)oc2ccc(I)cc12>>COc1ccc(CO[C@H]2[C@H](OCc3cccc3)[C@H](OCc3cccc3)[C@H](Sc3cccc3)O[C@@H]2/C=C/c2ccc3oc(-c4cccc4)cc(=O)c3c2)cc1

1995 C=CC(OCC)OCC.O=[N+](O-)[O-]c1ccc(Br)cn1>>CCOC(/C=C/c1ccc([N+](=O)[O-])nc1)OCC

1996 C=CC(=O)OCC.Ic1c(-c2cccc2)oc2nc3cccc3nc12>>CCOC(=O)/C=C/c1c(-C=CCc1ccc2ccnc2n1.CCOC(=O)CC(c1ccc(OC)c(F)c1)c1nc(Br)cn1C>>CCOC(=O)CC(c1ccc(OC)c(F)c1)c1nc(/C=C/CCc2ccc3ccnc3n2)cn1C

1997 C=CC(OCC)OCC.CN1c2cccc2Sc2cc(Br)ccc21>>CCOC(/C=C/c1ccc2c(c1)Sc1cccc1N2C)OCC

1998 \*CNCCCCOCCOCCOCCNC(=O)COc1ccc(C(Cc2cc(OC)cc(OC)c2)NC(=O)c2cccc(C=C)c2)cc1.COC(=O)c1cc(I)ccc1OC>>\*CNCCCCOCCOCCOCCNC(=O)COc1ccc(C(Cc2cc(OC)cc(OC)c2)NC(=O)c2ccc(/C=C/c3ccc(OC)c(C(=O)OC)c3)c2)cc1

1999 C=CC(=O)OC(C)(C)C.COc1cccc(CCC(=O)Oc2ccc(I)cc2CC=C(C)C)c1>>COc1cccc(CCC(=O)Oc2ccc(/C=C/C(=O)OC(C)(C)C)cc2CC=C(C)C)c1

2000 C=CC(OCC)OCC.CC(C)(C)c1ccc(I)cc1>>CCOC(/C=C/c1ccc(C(C)(C)C)cc1)OCC

2001 C=Cc1ccc(-c2cccc2)cc1.COC(=O)c1cc(C(=O)OC)c2cc(Br)ccc2n1>>COC(=O)c1cc(C(=O)OC)c2cc(/C=C/c3ccc(-c4cccc4)cc3)ccc2n1

2002 C=CS(=O)(=O)F.Ic1cnn(-c2cccc2)c1>>O=S(=O)(F)/C=C/c1cnn(-c2cccc2)c1

2003 C=Cc1ccc(OCc2cccc2)cc1.Nc1nc(N)c2cc(I)ccc2n1>>Nc1nc(N)c2cc(/C=C/c3ccc(OCc4cccc4)cc3)cc

2004 C=Cc1ccc(CN2CCN(C)CC2)cn1.Cc1c(Nc2c(I)nc2C#N)cc(Cl)c2[nH]ccc12>>Cc1c(Nc2c(C#N)cncc2/C=C/c2ccc(CN3CCN(C)CC3)cn2)cc(Cl)c2[nH]ccc12

2005 C=Cc1cnc1.CCCCOc1ccc2c(c1)cc(C#N)c1ccc(Br)cc12>>CCCCOc1ccc2c(c1)cc(C#N)c1ccc(/C=C/c3cnc3)cc12

2006 C=CCC[C@H]1CCC(=O)N1CCCc1ccc(C(=O)OC(C)C)s1.FC(F)(F)c1cccc(I)c1>>CC(C)OC(=O)c1ccc(CCCN2C(=O)CC[C@H]2CC/C=C/c2cccc(C(F)(F)F)c2)s1

2007 C=Cc1ccc(N)cc1.CCN1c2ncc(I)cc2C(=O)N(C)c2ccc(Cl)nc21>>CCN1c2ncc(/C=C/c3ccc(N)cc3)cc2C(=O)N(C)c2ccc(Cl)nc21

2008 C=C[C@](C)(/C=C/c1ccc(OC)cc1)CCC=C(C)C.Oc1ccc(I)cc1>>COc1ccc(/C=C/[C@](C)(/C=C/c2c  
cc(O)cc2)CCC=C(C)C)cc1

2009 C=CC(=O)OC.O=Cc1cccc(Br)n1>>COC(=O)/C=C/c1cccc(C=O)n1

2010 C=CC(C)(C)O.O=c1ccoc2ccc(Br)cc12>>CC(C)(O)/C=C/c1ccc2occc(=O)c2c1

2011 C=Cc1cccc1.Oc1cccc1I>>Oc1cccc1/C=C/c1cccc1

2012 C=Cc1cccc1.COC(=O)c1ccc(N)c(I)c1>>COC(=O)c1ccc(N)c(/C=C/c2ccccc2)c1

2013 C=CS(=O)(=O)F.Cc1ccc(I)c(C)c1>>Cc1ccc(/C=C/S(=O)(=O)F)c(C)c1

2014 C=CCNC(=O)c1cc(C)cc(Br)c1NC(=O)c1cccc1.Ic1cccc1>>Cc1cc(Br)c(NC(=O)c2ccccc2)c(C(=O)N  
C/C=C/c2ccccc2)c1

2015 C=CN1C(=O)c2ccccc2C1=O.CNC(=O)c1cc(Oc2cccc(I)c2)ccn1>>CNC(=O)c1cc(Oc2cccc(/C=C/N3C(  
=O)c4ccccc4C3=O)c2)ccn1

2016 C=CC(=O)O.CN(c1ccc(I)cc1)S(=O)(=O)c1ccc(-  
c2ccccc2)cc1>>CN(c1ccc(/C=C/C(=O)O)cc1)S(=O)(=O)c1ccc(-c2ccccc2)cc1

2017 C=C.O=[N+](O-)]c1cc(Br)cc([N+](=O)[O-])c1>>C=Cc1cc([N+](=O)[O-])cc([N+](=O)[O-])c1

2018 C=CC(=O)OC(C)(C)C.CCOC(=O)/C(Br)=C1\CCCCO1>>CCOC(=O)C(/C=C/C(=O)OC(C)(C)C)=C1\C  
CCO1

2019 C=Cc1ccc2ccccc2c1.FC(F)(F)c1cccc1I>>FC(F)(F)c1cccc1/C=C/c1ccc2ccccc2c1

2020 C=CC(=O)OC(C)(C)C.O=C1Nc2cccc2O/C1=C\c1cc(Br)co1>>CC(C)(C)OC(=O)/C=C/c1coc(/C=C2\  
Oc3ccccc3NC2=O)c1

2021 C=CC(=O)N(C)C.CCOC(=O)/C=C/c1cccc1Br>>CCOC(=O)/C=C/c1cccc1/C=C/C(=O)N(C)C

2022 C=C(C)C(=O)OC.COc1ccc(I)cc1>>COC(=O)/C(C)=C/c1ccc(OC)cc1

2023 C=Cc1cc([N+](=O)[O-]  
])ccc1OCOCC[Si](C)(C)C.COc1cccc(I)c1>>COc1cccc(/C=C/c2cc([N+](=O)[O-]  
C=CC1(O)CCCCC1.O=C(NCCC(O)c1cc(F)cc(Br)c1)C(F)(F)F>>O=C(NCCC(O)c1cc(F)cc(/C=C/C2(  
O)CCCCC2)c1)C(F)(F)F

2024 BrC=Cc1cccc1.C=CCCC(=O)OCC>>CCOC(=O)CC/C=C/C=C/c1cccc1

2025 C=CC(=O)OC.O=Cc1cc(Cl)ccc1Br>>COC(=O)/C=C/c1ccc(Cl)cc1C=O

2026 C=CC(=O)OC(C)(C)C.O=S(=O)(c1cccc(Br)c1)n1ccc2ccccc21>>CC(C)(C)OC(=O)/C=C/c1cccc(S(=O  
)=O)n2ncc3ccccc32)c1

2027 C=Cc1ccc2c(c1)c1cccc1n2CCCCCCCC.CCCCCCCn1c2ccc(I)cc2c2cc(C=O)ccc21>>CCCCCCCCn  
1c2ccccc2c2cc(/C=C/c3ccc4c(c3)c3cc(C=O)ccc3n4CCCCCCCC)ccc21

2028 Br1ccc2ccc3cccc4ccc1c2c34.C=CC(=O)OCCO>>O=C(/C=C/c1ccc2ccc3cccc4ccc1c2c34)OCCO

2029 C=Cc1cccc1.COc1ccc(/N=N/c2ccc(I)cc2)cc1>>COc1ccc(/N=N/c2ccc(/C=C/c3ccccc3)cc2)cc1

2030 C=Cc1ccc(OC)cc1.COC(=O)/C=C/c1cccc(N(Cc2ccc(Br)cc2)C(=O)C2CCCCC2)c1>>COC(=O)/C=C/c  
1cccc(N(Cc2ccc(/C=C/c3ccc(OC)cc3)cc2)C(=O)C2CCCCC2)c1

2031 C=CC(=O)OC.COCCn1cc(I)cn1>>COCCn1cc(/C=C/C(=O)OC)cn1

2032 C=CC(=O)OCC(CC)CCCC.N#Cc1cccc1Cl>>CCCC(CC)COC(=O)/C=C/c1cccc1C#N

2033 C=Cc1ccncc1.CCN(CC)c1ccc2c(c1)C(C)(C)c1cc(Br)ccc1-  
2>>CCN(CC)c1ccc2c(c1)C(C)(C)c1cc(/C=C/c3ccncc3)ccc1-2

2034 C=CC(=O)OCCCC.Cc1cccc(Br)c1>>CCCCOC(=O)/C=C/c1cccc(C)c1

2035 C=CC(C)(O)CCC=C(C)C.Fc1ccc(Br)cc1>>CC(C)=CCCC(C)(O)/C=C/c1ccc(F)cc1

2036 C=CC(C)(C)O.CC(=O)O[C@](H)1C(Br)=C[C@](H)(O[Si](C)(C)C(C)(C)C)[C@](H)2O[C@H]12>>  
CC(=O)O[C@](H)1C(/C=C/C(C)(C)O)=C[C@](H)(O[Si](C)(C)C(C)(C)C)[C@](H)2O[C@H]12

2037 C=CC1CCCCC1.CC(C)(C)c1cccc1OS(=O)(=O)C(F)(F)F>>C=C(c1cccc1C(C)(C)C)C1CCCCC1

2038 C=CC(=O)OC(C)(C)C.CCOC(=O)c1ccc(I)cc1>>CCOC(=O)c1ccc(/C=C/C(=O)OC(C)(C)C)cc1

2039 C=CC(=O)C(C)CC(=O)OC.COc1cccc(Br)c1>>COC(=O)CC(C)C(=O)/C=C/c1cccc(OC)c1

2040 C=Cc1cc(OC)c(OC)c(OC)c1.O=C(O)c1ccc(Br)cc1>>COc1cc(/C=C/c2ccc(C(=O)O)cc2)cc(OC)c1OC

2041 C=CC(C)=O.COc1cccc(Cn2nc(I)c3ccccc32)c1>>COc1cccc(Cn2nc(/C=C/C(C)=O)c3ccccc32)c1

2042 C=CC(=O)OC.CCCCCC1=C(I)C1(F)F>>CCCCC1=C(/C=C/C(=O)OC)C1(F)F

2043 Br1cccc2ccccc12.C=CC(F)(F)F>>FC(F)(F)/C=C/c1cccc2ccccc12

2044 Br1ccc2ccnc(N3CCOCC3)c2c1.C=Cc1ccncc1>>C(=C/c1ccc2ccnc(N3CCOCC3)c2c1)\c1ccncc1

2045 C=Cc1cccc1.Nc1cc(F)ccc1Br>>Nc1cc(F)ccc1/C=C/c1cccc1

2046 C=CC(=O)OC.CC(=O)c1ccc(I)cc1>>COC(=O)/C=C/c1ccc(C(C)=O)cc1

2047 C=Cc1ccnc(Br)c1.CC(C)(C)OC(=O)N1CCC[C@H]1COc1cnc(Cl)c(I)c1>>CC(C)(C)OC(=O)N1CCC[  
C@H]1COc1cnc(Cl)c(/C=C/c2ccnc(Br)c2)c1

2048 Br1ccc2ccccc2c1.C=CC(F)(F)F>>FC(F)(F)/C=C/c1ccc2ccccc2c1

2049 C=Cc1c2ccccc2cc2ccccc12.FC(F)(F)c1ccc(Br)cc1>>FC(F)(F)c1ccc(/C=C/c2c3ccccc3cc3ccccc23)cc1

2050 C=Cc1ccc(C)cc1.O=c1cc(-c2ccccc2)oc2cc(Br)ccc12>>Cc1ccc(/C=C/c2ccc3c(=O)cc(-  
C=C(NC(C)=O)c1ccc(Cl)cn1.C=CC(=O)NC(C)(C)C>>C=C(NC(C)=O)c1ccc(/C=C/C(=O)NC(C)(C)C)

2051

2052

2053 C=Cc1ccc(N(C)C)cc1.CCCCC1=C(CCCC)P(=O)(c2ccccc2)c2cc(I)ccc21>>CCCCC1=C(CCCC)P(=O)  
 (c2ccccc2)c2cc(/C=C/c3ccc(N(C)C)cc3)ccc21  
 2054 C=CC(=O)OC.N#Cc1ccc(NC=O)c(I)c1>>COC(=O)/C=C/c1cc(C#N)ccc1NC=O  
 2055 C=CCCCCCC.CCOC(=O)/C=C\Br>>CCCCC/C=C/C=CC(=O)OCC  
 C=C(NC(C)=O)C(=O)OC.O=[N+][([O-])c1cc(Br)ccc1F>>COC(=O)/C(=C/c1ccc(F)c([N+](=O)[O-]  
 2056 ]c1)NC(C)=O  
 C=CC(=O)OCC.Fc1cc(Br)ccc1I>>CCOC(=O)/C=C/c1ccc(Br)cc1F  
 2057 C=Cc1cccc1Cl.CCOC(=O)C(Cc1cccc1I)C(C)=O>>CCOC(=O)C(Cc1cccc1/C=C/c1cccc1Cl)C(C)=  
 Brclnc2ccccc2c1.C=CCOC1=C(C)C(=O)O[C@H](CC)[C@](C)(O)C=C(C)C(=O)[C@H](C)C[C@  
 2058 @](C)(OC)[C@H](O[C@H]2O[C@H](C)C[C@H](N(C)C)[C@H]2OC(C)=O)[C@H]1C>>CC[C@  
 H]1OC(=O)C(C)=C(OC/C=C/c2cnc3ccccc3c2)[C@H](C)[C@H](O[C@H]2O[C@H](C)C[C@H](  
 2059 N(C)C)[C@H]2OC(C)=O)[C@](C)(OC)C[C@H](C)C(=O)C(C)=C[C@]1(C)O  
 C=Cc1ccc(/C=C/c2ccc(N(C)C)cc2OC)cc1.O=c1cc2oc3cc(O)c(F)cc3c(-c3ccc(I)cc3S(=O)(=O)O)c-  
 2060 2cc1F>>COc1cc(N(C)C)ccc1/C=C/c1ccc(/C=C/c2ccc(-c3c4cc(F)c(=O)cc-  
 4oc4cc(O)c(F)cc34)c(S(=O)(=O)O)c2)cc1  
 2061 C=Cc1ccc(OC)cc1.COC(=O)c1cccc1I>>COC(=O)c1cccc1/C=C/c1ccc(OC)cc1  
 2062 C=CC(C)=O.Ic1cccc1N(Cc1cccc1)Cc1cccc1>>CC(=O)/C=C/c1cccc1N(Cc1cccc1)Cc1cccc1  
 C=CC(=O)OCC.CCOC(=O)CCOCc1cc(OC)c(OC)c(OC)c1Br>>CCOC(=O)/C=C/c1c(COCCCC(=O)OC  
 2063 C)cc(OC)c(OC)c1OC  
 C=C[Si](CC)(CC)CC.FC(F)(F)c1cccc(Br)c1>>CC[Si](/C=C/c1cccc(C(F)(F)F)c1)(CC)CC  
 2064 C=Cc1cccc1.Cc1cc(I)ccc1-c1cccc1>>Cc1cc(/C=C/c2ccccc2)ccc1-c1cccc1  
 2065 C=C/C=C/CCCCC.Clc1ccc(I)cc1>>CCCCC/C=C/C=C/c1ccc(Cl)cc1  
 C=CCNC(=O)C(F)(F)F.Cn1c2ccccc2c2nc3ccc(Cl)cc3c3cc(OS(=O)(=O)C(F)(F)F)cc1c32>>Cn1c2cccc  
 2066 c2c2nc3ccc(Cl)cc3c3cc(/C=C/CNC(=O)C(F)(F)F)cc1c32  
 C=CC(=O)OCC.Cc1nc2ccc(Cl)cc2c(=O)n1-c1cccc1>>CCOC(=O)/C=C/c1ccc2nc(C)n(-  
 2067 c3ccccc3)c(=O)c2c1  
 C=CC(=O)OC.C[Si](C)(C)/C=C/C1=C(Br)CCCC1>>COC(=O)/C=C/C1=C(/C=C/[Si](C)(C)C)CCCC1  
 2068 C=Cc1ccc(C)cc1.O=Cc1cc(F)ccc1Br>>Cc1ccc(/C=C/c2ccc(F)cc2C=O)cc1  
 C=CC(=O)OC.CS(=O)(=Nc1nc2ccccc2cc1Br)c1cccc1>>COC(=O)/C=C/c1cc2ccccc2nc1N=S(C)(=O)  
 2069 c1cccc1  
 C=C1C(=O)O[C@@H]2C[C@@]3(C)CCCC(=C)[C@@H]3C[C@H]12.Cn1c(=O)c2c(nc(Br)n2C)n(C)  
 2070 c1=O>>C=C1CCC[C@@]2(C)C[C@H]3OC(=O)/C(=C/c4nc5c(c(=O)n(C)c(=O)n5C)n4C)[C@H]3C[C  
 2071 C=CC(=O)OC.C=Cl>>C=C/C=C/C(=O)OC  
 C=CC(=O)OC(C)(C)C.CC(=O)c1ccc(I)cc1>>CC(=O)c1ccc(/C=C/C(=O)OC(C)(C)C)cc1  
 2072 C=CC(F)(F)C(F)(F)C(F)(F)C(F)(F)C(F)(F)C(F)(F)C(F)(F)C(F)(F)C(F)(F)C(F)(F)F.N#Cc1ccc(Br)cc1>>N#Cc1ccc(/C  
 =C/C(F)(F)C(F)(F)C(F)(F)C(F)(F)C(F)(F)C(F)(F)C(F)(F)C(F)(F)C(F)(F)F)cc1  
 2073 C=Cc1cccc1.COC(=O)c1cccc1I>>COC(=O)c1cccc1/C=C/c1cccc1  
 C=CCN(C(=O)c1cc(C)nn1C)[C@H](C)c1cc(F)cc(F)c1.O=C1Ne2ncccc2[C@]12Cc1ccc(Br)cc1C2>>C  
 2074 c1cc(C(=O)N(C)/C=C/c2ccc3c(c2)C[C@@]2(C3)C(=O)Ne3ncccc32)[C@H](C)c2cc(F)cc(F)c2)n(C)n1  
 2075 C=CC(=O)OCC.O=S(=O)(Oc1ccc2ccoc2c1)C(F)(F)F>>CCOC(=O)/C=C/c1ccc2ccoc2c1  
 C=CC(=O)OC(C)(C)C.Cc1cc(C#N)cc2nc(-c3ccc(Br)cc3)oc12>>Cc1cc(C#N)cc2nc(-  
 2076 c3ccc(/C=C/C(=O)OC(C)(C)C)cc3)oc12  
 C=COCCCC.O=S(=O)(Oc1ccc2c(c1)[nH]c1cccc12)C(F)(F)F>>C=C(OCCCC)c1ccc2c(c1)[nH]c1cccc  
 2077 C=CC1CC(=O)N1.COc1cccc1I>>COc1cccc1/C=C/C1CC(=O)N1  
 C=Cc1cccc1O.Oc1cccc1Br>>Oc1cccc1/C=C/c1cccc1O  
 2078 C=C[C@@H]1CCCCN1C(=O)OC(C)(C)C.COc1ccc(I)cc1>>COc1ccc(/C=C/[C@@H]2CCCCN2C(=  
 2079 O)OC(C)(C)C)cc1  
 C=CN1CCCC1=O.CCCCC(Br)C(F)(F)F>>CCCCC/C=C/N1CCCC1=O)C(F)(F)F  
 2080 C=CC(=O)OC.CC(C)(C)c1[nH]c2ccccc2c1C1CCCN(Cc2ccc(Br)cc2)C1>>COC(=O)/C=C/c1ccc(CN2  
 2081 CCCC(c3c(C(C)(C)C)[nH]c4ccccc34)C2)cc1  
 C=CC(=O)OC.CCCCCC(=O)c1nc(-c2ccccc2)n(-c2ccccc2)c1Br>>CCCCC(=O)c1nc(-c2ccccc2)n(-  
 2082 c2ccccc2)c1/C=C/C(=O)OC  
 C=CC(=O)N1CCCC1.O=Cc1cc(OCc2ccccc2)ccc1Br>>O=Cc1cc(OCc2ccccc2)ccc1/C=C/C(=O)N1CC  
 2083 C=CC(=O)OC(C)(C)C.O=C(NCCc1cccc1)c1cc(Br)cc(I)c1>>CC(C)(C)OC(=O)/C=C/c1cc(Br)cc(C(=  
 2084 O)NCCc2ccccc2)c1  
 C=CC(=O)OC(C)(C)C.CCCCc1cc(Cl)c2ccccc2n1>>CCCCc1cc(/C=C/C(=O)OC(C)(C)C)c2ccccc2n1  
 2085 C=Cc1ccc(C=C)cc1.CCCCCCCCOCc1cc(C=O)c(OCCCCCCCC)cc1I>>C=Cc1ccc(/C=C/c2cc(OCCCC  
 2086 CCCC)c(C=O)cc2OCCCCCCCC)cc1  
 C=Cc1cnccl.CC(=O)Nc1ccc(Br)cc1>>CC(=O)Nc1ccc(/C=C/c2cnccl)cc1  
 2087 C=CC(=O)OCC.CC(=O)c1cc2cc(Br)ccc2o1>>CCOC(=O)/C=C/c1ccc2oc(C(C)=O)cc2c1  
 2088 C=CC(=O)OCC.CC(=O)c1cc2cc(Br)ccc2o1>>CCOC(=O)/C=C/c1ccc2oc(C(C)=O)cc2c1  
 2089 C=CC(=O)OCC.CC(=O)c1cc2cc(Br)ccc2o1>>CCOC(=O)/C=C/c1ccc2oc(C(C)=O)cc2c1  
 2090 C=CC(=O)OCC.CC(=O)c1cc2cc(Br)ccc2o1>>CCOC(=O)/C=C/c1ccc2oc(C(C)=O)cc2c1  
 2091 C=CC(=O)OCC.CC(=O)c1cc2cc(Br)ccc2o1>>CCOC(=O)/C=C/c1ccc2oc(C(C)=O)cc2c1  
 2092 C=CC(=O)OCC.CC(=O)c1cc2cc(Br)ccc2o1>>CCOC(=O)/C=C/c1ccc2oc(C(C)=O)cc2c1

2093 C=CC(=O)OC.CC(C)(C)OC(=O)NCCc1c[nH]c2ccc(Br)cc12>>COC(=O)/C=C/c1ccc2[nH]cc(CCNC(=O)OC(C)(C)C)c2c1  
 2094 C=CC[C@H]1C[C@H]([C@H](O)c2ccc(OC)c(OC)c2)CO[C@H]1c1ccc(OC)c(OC)c1.COc1ccc(Br)cc1OC>>COc1ccc(/C=C/C[C@H]2C[C@H]([C@H](O)c3ccc(OC)c(OC)c3)CO[C@H]2c2c  
 2095 cc(OC)c(OC)c2)cc1OC  
 C=Cc1ccc2c(c1)Sc1cccc1N2CCCC.CCCCN1c2ccc(Br)cc2Sc2cc(-c3nc4cccc4n3-c3cccc3)ccc21>>CCCCN1c2cccc2Sc2cc(/C=C/c3ccc4c(c3)Sc3cc(-c5nc6cccc6n5-c5cccc5)ccc3N4CCCC)ccc21  
 2096 C=CC(=O)OCC.CSc1nc(C)c(I)c(NC2CCOC2)n1>>CCOC(=O)/C=C/c1c(C)nc(SC)nc1NC1CCOC1  
 2097 C=CC(=O)OCc1cccc1.CCOC(=O)/C=C/c1ccc2c1oc1c(I)cccc12>>CCOC(=O)/C=C/c1ccc2c1oc1c(/C=C/C(=O)OCc3cccc3)cccc12  
 2098 Brc1cccc1.C=Cn1nn(-c2cccc2C#N)n1>>N#Cc1cccc1-c1nnn(/C=C/c2cccc2)n1  
 2099 C=CC(=O)OCC.Nc1ccc(Br)cc1I>>CCOC(=O)/C=C/c1cc(Br)ccc1N  
 2100 Brc1cccc1C#Cc1cccc1.C=CC(=O)OC>>COC(=O)/C=C/c1cccc1C#Cc1cccc1  
 2101 C=CC(=O)OC(C)(C)C.O=C1CN(CCN2CCOCC2)Cc2cc(Br)nc2N1>>CC(C)(C)OC(=O)/C=C/c1nc2  
 2102 c(c1)CN(CCN1CCOCC1)CC(=O)N2  
 2103 C=CCOC(C)=O.Cc1ccc(I)c(C)c1>>CC(=O)OC/C=C/c1ccc(C)cc1C  
 2104 C=CC(=O)OC(C)(C)C.CC(=O)c1cn(-c2cccc2)nc1OS(=O)(=O)C(F)(F)F>>CC(=O)c1cn(-c2cccc2)nc1/C=C/C(=O)OC(C)(C)C  
 2105 C=C[Si](CC)(CC)CC.Ic1cccc1>>CC[Si](/C=C/c1cccc1)(CC)CC  
 C=CC(=O)OC.O=S(=O)(Oc1ccc2ccn(Cc3cccc3)c2n1)C(F)(F)F>>COC(=O)/C=C/c1ccc2ccn(Cc3cccc3)c2n1  
 2106 \*CNCCCOCCOCCOCCNC(=O)COc1ccc(C(Cc2cc(OC)cc(OC)c2)NC(=O)c2cccc(C=C)c2)cc1.FC(F)(F)Oc1ccc(I)cc1>>\*CNCCCOCCOCCOCCNC(=O)COc1ccc(C(Cc2cc(OC)cc(OC)c2)NC(=O)c2cccc(/C=C/c3ccc(OC(F)(F)F)cc3)c2)cc1  
 2107 C=CC(=O)OC(C)(C)C.CC(C)OC(=O)C[C@H](c1ccc(Br)cc1)N(Cc1cccc1)[C@H](C)c1cccc1>>C(C)(C)OC(=O)C[C@H](c1ccc(/C=C/C(=O)OC(C)(C)cc1)N(Cc1cccc1)[C@H](C)c1cccc1  
 2108 C=CC(=O)OCC.COc1ccc(Br)cc1F>>CCOC(=O)/C=C/c1ccc(OC)c(F)c1  
 2109 C=CC(=O)C(O)c1c(OC)ccc(OC)c1OCOC.COCOc1cccc1I>>COCOc1cccc1/C=C/C(=O)C(O)c1c(O)C)ccc(OC)c1OCOC  
 2110 C=C.CC(=O)c1ccc(I)cc1>>C=Cc1ccc(C(C)=O)cc1  
 2111 Brc1cc2ccc3cccc4ccc(c1)c2c34.C=CC(=O)OC>>COC(=O)/C=C/c1cc2ccc3cccc4ccc(c1)c2c34  
 2112 C=Cc1cccn1.Cc1c(Nc2c(I)cncc2C#N)cc(Cl)c2[nH]ccc12>>Cc1c(Nc2c(C#N)cncc2/C=C/c2cccn2)cc(Cl)c2[nH]ccc12  
 2113 C=CC(=O)OCCCC.CCOC(=O)c1ccc(I)cc1>>CCCCOC(=O)/C=C/c1ccc(C(=O)OCC)cc1  
 2114 C=Cc1ccncc1.CCCOc1ccc(Br)c(F)c1>>CCCOc1ccc(/C=C/c2ccncc2)c(F)c1  
 2115 C=Cc1ccc2c(c1)CC[C@H]1[C@H]2CC[C@H]2(C)[C@H](O[Si](C)(C)C(C)(C)C)CC[C@H]12.C[Si](C)(C)I>>CC(C)(C)[Si](C)(C)O[C@H]1CC[C@H]2[C@H]3CCc4cc(/C=C/[Si](C)(C)C)ccc4[C@H]3CC[C@H]2C  
 2116 C=Cc1ccncc1.CC(C)(C)OC(=O)N[C@H](COc1cncc(Br)c1)Cc1csc2cccc12>>CC(C)(C)OC(=O)N[C@H](COc1cncc(/C=C/c2ccncc2)c1)Cc1csc2cccc12  
 2117 Brc1ccc(C(=C2CCCC2)c2ccc3c(cnn3C3CCCCO3)c2)cc1.C=CC(=O)OC>>COC(=O)/C=C/c1ccc(C(=C2CCCC2)c2ccc3c(cnn3C3CCCCO3)c2)cc1  
 2118 C=CCOc1cccc1.CC(=O)c1ccc(Br)cc1>>CC(=O)c1ccc(/C=C/COc2cccc2)cc1  
 2119 C=CC(=O)OC.O=C1c2ccc(OS(=O)(=O)C(F)(F)F)cc2C(=O)N1CC(c1cccc1)c1cccc1>>COC(=O)/C=C/c1ccc2c(c1)C(=O)N(CC(c1cccc1)c1cccc1)C2=O  
 2120 C=C.Fc1cccc1I>>C=Cc1cccc1F  
 2121 Brc1cccs1.C=Cc1cccc1>>C(=C/c1cccs1)\c1cccc1  
 2122 C=CN1C(=O)c2cccc2C1=O.Cc1ccc(Br)cc1>>Cc1ccc(/C=C/N2C(=O)c3cccc3C2=O)cc1  
 2123 C=Cc1ccc(N(c2ccc(OC)cc2)c2ccc(OC)cc2)cc1.Cc1ccc(Br)c1>>COc1ccc(N(c2ccc(/C=C/c3cccc(C)c3)cc2)c2ccc(OC)cc2)cc1  
 2124 C=Cc1ccc2cccc2c1.CCOC(=O)C(F)(F)I>>CCOC(=O)C(F)(F)/C=C/c1ccc2cccc2c1  
 2125 C=CC#N.CCOC(=O)c1cccc(I)c1>>CCOC(=O)c1ccc(/C=C/C#N)c1  
 2126 C=CC(=O)OC.O=C(c1cccc1)c1cn(-c2cccc2)c2ccc(Br)cc12>>COC(=O)/C=C/c1ccc2c(c1)c(C(=O)c1cccc1)cn2-c1cccc1  
 2127 C=CCN1C(=O)c2cccc2C1=O.FC(F)(F)c1ccc(Br)c1>>O=C1c2cccc2C(=O)N1C/C=C/c1ccc(C(F)(F)F)c1  
 2128 C=CC(OCC)OCC.Fc1cccc(Br)c1>>CCOC(/C=C/c1cccc(F)c1)OCC  
 2129 C=CC(=O)OCC.CC[C@H]12C=CCN3CC[C@H]4(C(=C(C(=O)OC)C1)Nc1ccc(I)cc14)[C@H]32>>CCOC(=O)/C=C/c1ccc2c(c1)[C@H]13CCN4CC=C[C@H](CC)(CC(C(=O)OC)=C1N2)[C@H]43

2130 C=CCN(C(=O)OC(C)(C)C(=O)OC(C)(C)C.Clc1cccs1>>CC(C)(C)OC(=O)N(C/C=C/c1cccs1)C(=O)  
OC(C)(C)C  
2131 C=CC(=O)OC.CC(C)(C)OC(=O)NC1(C(=O)OC(C)(C)C)CCOC1c1ccc(Br)cc1>>COC(=O)/C=C/c1ccc  
(C2OCCCC2(NC(=O)OC(C)(C)C)C(=O)OC(C)(C)C)cc1  
2132 C=CCCCCCCCCCC.c1ccc([I+][c2ccccc2]cc1>>CCCCCCCCCCC/C=C/c1ccccc1  
2133 C=CC(=O)OC(C)(C)C.C=CI>>C=C/C=C/C(=O)OC(C)(C)C  
2134 C=CC(C)=O.CCCCc1nnn(CC(F)(F)C(F)F)c1I>>CCCCc1nnn(CC(F)(F)C(F)F)c1/C=C/C(C)=O  
2135 C=CC(=O)OC.CC(=O)O[C@H]1CC(=O)N(Cc2cc3c(cc2I)OCO3)[C@@H]1[Se]c1ccccc1>>COC(=O)  
/C=C/c1cc2c(cc1CN1C(=O)C[C@H](OC(C)=O)[C@H]1[Se]c1ccccc1)OCO2  
2136 C=CC(=O)O.O=[N+][([O-])c1c(I)ccc2c1C=CC1(CCCCC1)O2>>O=C(O)/C=C/c1ccc2c(c1[N+](=O)[O-]  
)C=CC1(CCCCC1)O2  
2137 C=C1CC(c2ccc(C)cc2)OC1=O.Nc1ccccc1I>>Cc1ccc(C2C/C(=C)c3ccccc3N)C(=O)O2)cc1  
2138 C=Cc1ccc(C(=O)OCC)cc1.C[Si](C)(C)I>>CCOC(=O)c1ccc(/C=C/[Si](C)(C)C)cc1  
Br1ccc2ccccc2c1.C=Cc1nc2c(=O)[nH]c(N=CN(C)C)nc2n1[C@@H]1C[C@H](O)[C@@H](COC(c2  
2139 cccc2)(c2ccc(OC)cc2)c2ccc(OC)cc2)O1>>COc1ccc(C(OC[C@H]2O[C@H](n3c(/C=C/c4ccc5ccccc5  
c4)nc4c(=O)[nH]c(N=CN(C)C)nc43)C[C@@H]2O)(c2ccccc2)c2ccc(OC)cc2)cc1  
2140 C=CC(=O)OC.CCCCc1c(I)c(OC(C)=O)c2cccn12>>CCCCc1c(/C=C/C(=O)OC)c(OC(C)=O)c2cccn1  
C=C[C@H](C)[C@H]1CC[C@H](C)c2c1cc(C)oc2=O.CC(C)=CI>>CC(C)=C/C=C/[C@H](C)[C@H]1  
2141 CC[C@H](C)c2c1cc(C)oc2=O  
2142 C=CC(=O)NCCc1ccc(O)cc1.Oc1ccc(I)cc1>>O=C(/C=C/c1ccc(O)cc1)NCCc1ccc(O)cc1  
2143 C=CC(=O)OCC.O=c1[nH]c2ccccc2c(Br)c1O>>CCOC(=O)/C=C/c1c(O)c(=O)[nH]c2ccccc12  
2144 C=CC(=O)OC(C)(C)C.CC1(C)Cc2cc(Br)nc2NC1=O>>CC(C)(C)OC(=O)/C=C/c1cnc2c(c1)CC(C)(C)  
(=O)N2  
2145 C=CC(=O)OC.Oc1nc(-c2ccnc2)nc2ccc(I)cc12>>COC(=O)/C=C/c1ccc2nc(-c3ccnc3)nc(O)c2c1  
2146 C=CC(=O)OCc1ccccc1.CC(C)(C)OC(=O)N1CCC2(CC1)Cc1cc(Br)nc1NC2=O>>CC(C)(C)OC(=O)N  
1CCC2(CC1)Cc1cc(/C=C/C(=O)OCc3ccccc3)nc1NC2=O  
2147 C=CC(=O)OC.Cc1ccc(S(=O)(=O)n2cc(I)cn2)cc1>>COC(=O)/C=C/c1cnn(S(=O)(=O)c2ccc(C)cc2)c1  
2148 C=CC(=O)OCC.O=Cc1cc2c(cc1Br)OCO2>>CCOC(=O)/C=C/c1cc2c(cc1C=O)OCO2  
2149 C=CC(=O)N(C)Cc1cccc(OC(F)(F)F)c1OCCC.CC1(C)NCc2cc(Br)nc2NC1=O>>CCCOc1c(CN(C)C(  
=O)/C=C/c2cnc3c(c2)CNC(C)(C)C(=O)N3)cccc1OC(F)(F)F  
2150 C=Cc1ccc(OC)cc1.COc1cc(Br)cc(OC)c1F>>COc1ccc(/C=C/c2cc(OC)c(F)c(OC)c2)cc1  
2151 C=CC(=O)OCCCC.O=[N+][([O-])c1ccccc([I+][c2ccccc([N+](=O)[O-]  
2152 )c2)c1>>CCCCOC(=O)/C=C/c1ccccc([N+](=O)[O-])c1  
C=CC(=O)NCc1cccc(C(=O)OC(C)(C)C)c1.COc1ccc2[nH]cc(C3=C(Br)C(=O)NC3=O)c2c1>>COc1cc  
2153 c2[nH]cc(C3=C(/C=C/C(=O)NCc4ccccc(C(=O)OC(C)(C)C)c4)C(=O)NC3=O)c2c1  
C=CCNS(=O)(=O)c1ccc(C)cc1.COc1ccc(I)cc1>>COc1ccc(/C=C/CNS(=O)(=O)c2ccc(C)cc2)cc1  
2154 C=C(NC(=O)OC(C)(C)C)C(=O)OC.CC(C)(C)OC(=O)N(C(=O)OC(C)(C)C)c1ncc(I)cn1>>COC(=O)/C  
(=C/c1cnc(N(C(=O)OC(C)(C)C)C(=O)OC(C)(C)C)nc1)NC(=O)OC(C)(C)C  
2155 C=CC(=O)OC.Cc1noc(C)c1I>>COC(=O)/C=C/c1c(C)noc1C  
2156 C=CC(=O)OCCCC.O=[N+][([O-])c1ccccc(Cl)c1>>CCCCOC(=O)/C=C/c1ccccc([N+](=O)[O-])c1  
C=CCO[C@H]1O[C@H](COC(C)=O)[C@@H](OC(C)=O)[C@H](OC(C)=O)[C@@H]1OC(C)=O.Ic  
2157 1ccc(-c2ccccc2)cc1>>CC(=O)OC[C@H]1O[C@H](OC/C=C/c2ccc(-  
c3ccccc3)cc2)[C@@H](OC(C)=O)[C@@H](OC(C)=O)[C@@H]1OC(C)=O  
2158 Br1ccccc1.C=CS(=O)c1ccccc1>>O=S(/C=C/c1ccccc1)c1ccccc1  
2159 C=CC(=O)OCC.Cc1ccc(S(=O)(=O)n2ccc3c(Br)cccc32)cc1>>CCOC(=O)/C=C/c1ccccc2c1ccn2S(=O)(=  
O)c1ccc(C)cc1  
2160 C=Cc1ccc2c(c1)Sc1ccccc1N2CC.COC(=O)c1ccc(Br)cc1>>CCN1c2ccccc2Sc2cc(/C=C/c3ccc(C(=O)O  
C)cc3)ccc21  
2161 C=CC(=O)OC.CC(C)(C)OC(=O)n1nc(I)c2cc(NS(=O)(=O)c3ccccc3S(C)(=O)=O)ccc21>>COC(=O)/C  
=C/c1nn(C(=O)OC(C)(C)C)c2ccc(NS(=O)(=O)c3ccccc3S(C)(=O)=O)cc12  
2162 C=CC(=O)OCC.Cn1c(=O)c(Br)c(-c2ccccc2)c2ccccc21>>CCOC(=O)/C=C/c1c(-  
c2ccccc2)c2ccccc2n(C)c1=O  
2163 Br1ccccc1.C=Cc1cnccl>>C(=C/c1cnccl)\c1ccccc1  
2164 C=CC(=O)OCC.COc1ccc2c(Br)cc(F)c(O)c2n1>>CCOC(=O)/C=C/c1cc(F)c(O)c2nc(OC)ccc12  
2165 C=CC(=O)OCC.Clc1ccccc1Br>>CCOC(=O)/C=C/c1ccccc1Cl  
2166 C=CC(=O)OC.Ic1cnn(C(c2ccccc2)(c2ccccc2)c2ccccc2)c1>>COC(=O)/C=C/c1cnn(C(c2ccccc2)(c2ccc  
cc2)c2ccccc2)c1  
2167 C=Cc1ccccc1.O=C1C[C@H](c2ccc(Cl)cc2Br)CN1>>O=C1C[C@H](c2ccc(Cl)cc2/C=C/c2ccccc2)CN  
2168 C=Cc1ccccc1.CN(C)c1ccc(I)c(C(F)(F)F)c1>>CN(C)c1ccc(/C=C/c2ccccc2)c(C(F)(F)F)c1  
2169 Br1ccc(-c2cnc3ccccc3n2)cc1.C=CCn1c(-c2ccccc2)nc2ccccc2c1=O>>O=c1c2ccccc2nc(-  
c2ccccc2)n1C/C=C/c1ccc(-c2cnc3ccccc3n2)cc1

2170 C=Cc1cccc1.CC(C)(C)C(=O)Nc1nc2ncc(Cl)nc2c(=O)[nH]1>>CC(C)(C)C(=O)Nc1nc2ncc(/C=C/c3ccc3)nc2c(=O)[nH]1  
 2171 C=CC(=O)OC.COc1ccc(I)cc(CC=C(C)C)c1OC(C)=O>>COC(=O)/C=C/c1cc(CC=C(C)C)c(OC(C)=O)c(OC)c1  
 2172 C=CC(=O)Oc1cccc1.N#Cc1ccc(Cl)cc1>>N#Cc1ccc(/C=C/C(=O)Oc2cccc2)cc1  
 2173 C=CC(=O)OC.OCCc1cncclBr>>COC(=O)/C=C/c1cncclCCO  
 2174 C=CC(=O)OC.CN1c2ccc(Br)cc2Sc2cc(CCN(C=O)OCc3cccc3)ccc21>>COC(=O)/C=C/c1ccc2c(c1)Sc1cc(CCN(C=O)OCc3cccc3)ccc1N2C  
 2175 C=CC(=O)OC.COc1ncc(I)cn1>>COC(=O)/C=C/c1ncc(OC)nc1  
 2176 C=CC(=O)OCCCC.COc1ccc(I)cc1OC>>CCCCOC(=O)/C=C/c1ccc(OC)c(OC)c1  
 2177 C=Cc1ccc(N(c2cccc2)c2cccc2)cc1.CCCCCCCCCC1(CCCCCCCCCC)c2cc(Br)ccc2-c2ccc(C=O)cc21>>CCCCCCCCCCCC1(CCCCCCCCCC)c2cc(C=O)ccc2-c2ccc(/C=C/c3ccc(N(c4cccc4)c4cccc4)cc3)cc21  
 2178 C=CC(=O)OCC.CCN1C[C@]2(OC(=O)c3cc(I)ccc3N)CC[C@H](OC)[C@]34[C@@H]1[C@H](C[C@H]23)[C@@]1(O)C[C@H](OC)[C@H]2C[C@H]4[C@]1(O)[C@H]2OC>>CCOC(=O)/C=C/c1ccc(N)c(N)c(C(=O)O[C@]23CC[C@H](OC)[C@]45[C@H]([C@H](C[C@H]24)[C@@]2(O)C[C@H](OC))I[C@H]4C[C@H]5[C@]12(O)I[C@H]4OC)N(CC)C3)c1  
 2179 C=CC(=O)OC.Cc1cc(I)ccc1[N+](=O)[O-]>>COC(=O)/C=C/c1ccc([N+](=O)[O-])c(C)c1  
 2180 C=CC(=O)OC.CC(=O)N1CCc2cc(I)ccc21>>COC(=O)/C=C/c1ccc2c(c1)CCN2C(C)=O  
 2181 C=COCCCC.O=C1CCCc2c(OS(=O)(=O)C(F)(F)F)cccc21>>C=C(OCCCC)c1cccc2c1CCCC2=O  
 2182 C=CCN1C(=O)c2cccc2C1=O.Nc1ccc(Br)cc1[N+](=O)[O-]>>Nc1ccc(/C=C/CN2C(=O)c3cccc3C2=O)cc1[N+](=O)[O-]  
 2183 C=CC(=O)OCCCC.Ic1ccc2cccc2c1>>CCCCOC(=O)/C=C/c1ccc2cccc2c1  
 2184 C=C[C@@](C)(/C=C/c1ccc(O)cc1)CCC=C(C)C.Nc1ccc(I)cc1>>CC(C)=CCC[C@@](C)(/C=C/c1ccc(N)cc1)/C=C/c1ccc(O)cc1  
 2185 C=CC(O)CN1CCN(c2ccc(CCC)cc2)CC1.O=c1ccc2cc(Br)ccc2[nH]1>>CCc1ccc(N2CCN(CC(O)/C=C/c3ccc4[nH]c(=O)ccc4c3)CC2)cc1  
 2186 C=Cc1ccc(OC)cc1.COc1ccc(Br)c(C=O)c1>>COc1ccc(/C=C/c2ccc(OC)cc2C=O)cc1  
 2187 CCOC(=O)/C(F)=C\CCc1cccc1.Ic1cccc1>>CCOC(=O)/C(F)=C\CCc1cccc1)c1cccc1  
 2188 C=CC(=O)OC.COc1cc2nnc(Nc3cccc(Cl)c3F)c2cc1OS(=O)(=O)C(F)(F)F>>COC(=O)/C=C/c1cc2c(Nc3cccc(Cl)c3F)ncnc2cc1OC  
 2189 C=CC(OCC)OCC.COc1ccc(C=O)c(Br)c1>>CCOC(/C=C/c1cc(OC)ccc1C=O)OCC  
 2190 C=CC(=O)OCCCC.COC(c1cccc1)c1cnn2c(-c3cccc3)c(Br)c3cccc3c12>>CCCCOC(=O)/C=C/c1c(-c2cccc2)n2ncc(C(OC)c3cccc3)c2c2cccc12  
 2191 C=CC(=O)OCC.Cc1c(Br)cccc1[N+](=O)[O-]>>CCOC(=O)/C=C/c1cccc([N+](=O)[O-])c1C  
 2192 C=C.COC(=O)c1cccc(NC(C)=O)c1Br>>C=Cc1c(NC(C)=O)cccc1C(=O)OC  
 2193 C=CCc1c(OCc2cccc2)ccc2c(=O)ccoc12.Ic1cccc1>>O=c1ccoc2c(C/C=C/c3cccc3)c(OCc3cccc3)cc  
 2194 C=CCN1C(=O)c2cccc2C1=O.COc1ccc(Br)cc1>>COc1ccc(/C=C/CN2C(=O)c3cccc3C2=O)cc1  
 2195 C=Cc1cccc(OC)c1OC.O=C1C(O)=C(I)C(=O)c2cccc21>>COc1cccc(/C=C/C2=C(O)C(=O)c3cccc3C2=O)c1OC  
 2196 C=C[C@](C)(C)(CC=C(C)C)CO[Si](c1cccc1)(c1cccc1)C(C)(C)C.COc1ccc(I)cc1>>COc1ccc(/C=C/[C@](C)(C)(CC=C(C)C)CO[Si](c2cccc2)(c2cccc2)C(C)(C)C)cc1  
 2197 C=CC(=O)OC.Ic1cccc2cccc12>>COC(=O)/C=C/c1cccc2cccc12  
 2198 C=Cc1ccc(OC)cc1.O=c1c2ccc(Br)cc2cnn1CCCN1CCNCC1>>COc1ccc(/C=C/c2ccc3c(=O)n(CCCN4CCNCC4)ccc3c2)cc1  
 2199 C=CC(=O)OC(C)(C)C.O=Cc1cccc1Br>>CC(C)(C)OC(=O)/C=C/c1cccc1C=O  
 2200 C=CC(=O)OC.CC(C)(C)OC(=O)N1CCC2(CC1)Oc1ccc(Br)cc1C2=O>>COC(=O)/C=C/c1ccc2c(c1)C(=O)C1(CCN(C(=O)OC(C)(C)CC1)O2  
 2201 C=CC(=O)OC.CC(C)(C)OC(=O)N1CCN2C(=O)c3c(Br)cccc3OCC2C1>>COC(=O)/C=C/c1ccc2c1C(=O)N1CCN(C(=O)OC(C)(C)CC1CO2  
 2202 C=CC(=O)OC.O=C1c2ccc(OS(=O)(=O)C(F)(F)F)cc2C(=O)N1C(c1cccc1)c1cccc1>>COC(=O)/C=C/c1ccc2c(c1)C(=O)N(C(c1cccc1)c1cccc1)C2=O  
 2203 C=C[Si](CC)(CC)CC.COc1cccc1Br>>CC[Si](/C=C/c1cccc1OC)(CC)CC  
 2204 C=Cc1cccc1.CC(C)c1ncc(C(C)C)c(Cl)n1>>CC(C)c1ncc(C(C)C)c(/C=C/c2cccc2)n1  
 2205 C=C(NC(C)=O)C(=O)OC.Ic1ncc(N(Cc2cccc2)Cc2cccc2)nc1>>COC(=O)/C=C/c1ncc(N(Cc2cccc2)Cc2cccc2)nc1)NC(C)=O  
 2206 C=Cc1cccc1.O=c1c(Br)c(-c2ccc([N+](=O)[O-])cc2)oc2cccc12>>O=c1c(/C=C/c2cccc2)c(-c2ccc([N+](=O)[O-])cc2)oc2cccc12  
 2207 C=CC(C)=O.Nc1ccc(Cl)cc1>>CC(=O)/C=C/c1ccc(N)cc1  
 2208 C=Cc1ccc(S(=O)(=O)c2cccc2F)cn1.Fc1ccc(I)c(Cl)c1>>O=S(=O)(c1ccc(/C=C/c2ccc(F)cc2Cl)nc1)c1cccc1F

[illegible]

[illegible]



C=Cc1cn(COCC[Si](C)(C)C)nc1-  
 2286 c1nc2ccc(OC)cc2n1COCC[Si](C)(C)C.O=Cc1cncc(Br)c1>>COc1ccc2nc(-  
 2287 c3nn(COCC[Si](C)(C)C)cc3/C=C/c3cncc(C=O)c3)n(COCC[Si](C)(C)C)c2c1  
 C=Cc1ccc(O)c(O)c1.Oc1ccc(O)c(I)c1>>Oc1ccc(O)c(/C=C/c2ccc(O)c(O)c2)c1  
 C=Cc1nn(C2CCCCO2)c2nc(-  
 2288 c3ccc(O)cc3)cc(C(=O)N3CCN(C(=O)OC(C)(C)C)CC3)c12.Fc1ccc(I)cc1>>CC(C)(C)OC(=O)N1CCN(  
 2289 C(=O)c2cc(-c3ccc(O)cc3)nc3c2c(/C=C/c2ccc(F)cc2)nn3C2CCCCO2)CC1  
 C=Cc1ccc(OC)cc1.CC(CC=O)CCCC(C)(C)Br>>COc1ccc(/C=C/C(C)(C)CCCC(C)CC=O)cc1  
 C=CC(=O)OC.CC(=O)c1ccc(-  
 2290 c2cn(S(=O)(=O)c3ccccc3)c3ncc(Br)cc23)cc1>>COC(=O)/C=C/c1cnc2c(c1)c(-  
 2291 c1ccc(C(C)=O)cc1)cn2S(=O)(=O)c1ccccc1  
 Br1ccsc1.C=Cc1ccccc1>>C(=C/c1ccsc1)\c1ccccc1  
 2292 C=Cc1ccc([N+](=O)[O-])cc1.O=Cc1ccc(Br)cc1>>O=Cc1ccc(/C=C/c2ccc([N+](=O)[O-])cc2)cc1  
 2293 C=CC(=O)N(C)OC.N#Cc1cccc2c(Br)cccc12>>CON(C)C(=O)/C=C/c1cccc2c(C#N)cccc12  
 2294 Br1ccccc(-c2cccn2)c1.C=Cc1ccccc1>>C(=C/c1ccccc(-c2cccn2)c1)\c1ccccc1  
 C=Cc1nn(C2CCCCO2)c2nc(-  
 2295 c3ccc(O)cc3)cc(C(=O)N3CCN(C(=O)OC(C)(C)C)CC3)c12.O=C1CCCN1c1cccc(I)c1>>CC(C)(C)OC(  
 2296 =O)N1CCN(C(=O)c2cc(-c3ccc(O)cc3)nc3c2c(/C=C/c2cccc(N4CCCC4=O)c2)nn3C2CCCCO2)CC1  
 C=CCN(C(=O)OC(C)(C)C(=O)OC(C)(C)C.Cc1ccc(Br)cc1>>Cc1ccc(/C=C/CN(C(=O)OC(C)(C)C)C)  
 (=O)OC(C)(C)C)cc1  
 2297 C=C(C)Cc1ccc(OS(=O)(=O)C(F)(F)F)c(C)c1.C=CC(=O)OCC>>C=C(C)Cc1ccc(/C=C/C(=O)OCC)c(C  
 C=CC(C)(C)[C@]1(OC)O[C@H](C[C@]@H](OCc2ccc(OC)cc2)[C@]@H](C)O[Si](C)(C)C(C)C)/  
 2298 C(=C\C(=O)OC)[C@]@H]1OC(C)=O.CC[Si](CC)(CC)O[C@]@H](CCO)Cc1cccc(Cc2cccc(Br)c2)c1>>  
 CC[Si](CC)(CC)O[C@]@H](CCO)Cc1cccc(Cc2cccc(/C=C/C(C)(C)[C@]3(OC)O[C@H](C[C@]@H](O  
 Cc4ccc(OC)cc4)[C@]@H](C)O[Si](C)(C)C(C)C)/C=C\C(=O)OC)[C@]@H]3OC(C)=O)c2)c1  
 2299 C=CCc1ccc2ccnnc2n1.CCOC(=O)CC(c1ccc(OC)nc1)c1ncc(Br)n1C>>CCOC(=O)CC(c1ccc(OC)nc1)  
 c1ncc(/C=C/Cc2ccc3ccnnc3n2)n1C  
 2300 C=CC(=O)OC.COc1ccc(N)c(I)c1>>COC(=O)/C=C/c1cc(OC)ccc1N  
 C=CCn1c(-c2ccc([N+](=O)[O-]  
 2301 ])cc2)nc2ccccc2c1=O.O=C(CN1C(=O)COc2ccccc21)c1ccc(Br)cc1>>O=C(CN1C(=O)COc2ccccc21)c  
 1ccc(/C=C/Cn2c(-c3ccc([N+](=O)[O-])cc3)nc3ccccc3c2=O)cc1  
 2302 C=CC(=O)N(C(C)C)C(C)C.Cc1ccc(I)s1>>Cc1ccc(/C=C/C(=O)N(C(C)C)C(C)C)s1  
 2303 C=CC(=O)OC(C)(C)C.O=S(=O)(c1cccc(Br)c1)N1CCc2ccnnc21>>CC(C)(C)OC(=O)/C=C/c1cccc(S(=O)  
 (=O)N2CCc3ccnnc32)c1  
 2304 C=CC(=O)OCCCC.Fc1ccc(Br)cc1>>CCCCOC(=O)/C=C/c1ccc(F)cc1  
 2305 C=Cc1ccc(OC(C)=O)cc1.Ic1ccccc1>>CC(=O)Oc1ccc(/C=C/c2ccccc2)cc1  
 2306 C=Cc1ccccc1.N#Cc1ccc(Br)cc1>>N#Cc1ccc(/C=C/c2ccccc2)cc1  
 2307 C=CC(=O)OCC.O=c1ccoc2cc(Br)ccc12>>CCOC(=O)/C=C/c1ccc2c(=O)ccoc2c1  
 2308 Br1ccc(I)cc1.C=CP(=O)(OCC)OCC>>CCOP(=O)(/C=C/c1ccc(Br)cc1)OCC  
 C=Cc1ccccc1.CN(C(=O)c1ncc2c(c1I)c1ccccc1n2S(=O)(=O)N(C)C)c1ccccc1>>CN(C(=O)c1ncc2c(c1/  
 2309 C=C/c1ccccc1)c1ccccc1n2S(=O)(=O)N(C)C)c1ccccc1  
 2310 C=CC(=O)OCCCC.O=C1Nc2ccc(Br)cc2C1=O>>CCCCOC(=O)/C=C/c1ccc2c(c1)C(=O)C(=O)N2  
 2311 C=CCCCC(=O)OC.O=S(=O)(Oc1ccc(C(=C2C3CCCC2CCC3)c2ccc(O)cc2)cc1)C(F)(F)F>>COC(=O)  
 CCC/C=C/c1ccc(C(=C2C3CCCC2CCC3)c2ccc(O)cc2)cc1  
 2312 C=CC(=O)OC.Ic1ccccc1N1CC=CC1>>COC(=O)/C=C/c1ccccc1N1CC=CC1  
 2313 C=C.OCc1ccc(I)cc1>>C=Cc1ccc(CO)cc1  
 2314 C=Cc1ccccc1OC.IC1CCCCC1>>COc1ccccc1/C=C/C1CCCCC1  
 2315 C=CC(C)(C)O.Cc1cc(C)c(Br)c(C)c1>>Cc1cc(C)c(/C=C/C(C)(C)O)c(C)c1  
 2316 C=CC(=O)OCC.CC(=O)c1ccc(Cl)cc1>>CCOC(=O)/C=C/c1ccc(C(C)=O)cc1  
 2317 C=CC(=O)OCC.CC(C)(C)[Si](C)(C)n1c(=O)n([Si](C)(C)C(C)C)c2nc3ccc(Br)cc3cc21>>CCOC(=O)  
 )/C=C/c1ccc2nc3c(cc2c1)n([Si](C)(C)C(C)C)c(=O)n3[Si](C)(C)C(C)C  
 2318 C=CC(=O)OC(C)(C)C.O=C(Nc1ccc(Cl)c(F)c1Br)C(F)(F)F>>CC(C)(C)OC(=O)/C=C/c1c(NC(=O)C(F)  
 )(F)F)ccc(Cl)c1F  
 2319 C=CC1CCCCC1.COc1ccc(Br)cc1>>COc1ccc(/C=C/C2CCCCC2)cc1  
 2320 C=Cc1ccccc1C.CCOC(=O)C(F)Br>>CCOC(=O)C(F)/C=C/c1ccccc1C  
 2321 C=CC(C)(C)O.COc1cc(Br)c(C=O)cc1OC>>COc1cc(C=O)c(/C=C/C(C)(C)O)cc1OC  
 2322 COC[C@]@H](/N=C(\c1ccccc1)N1C=CCC[C@H]1C)C(C)C.Ic1cc2ccccc2o1>>COC[C@]@H](/N=C(\  
 c1ccccc1)N1C=C(c2cc3ccccc3o2)CC[C@H]1C)C(C)C  
 2323 C=Cc1ccccc1.Clc1ccc(I)cc1>>Clc1ccc(/C=C/c2ccccc2)cc1  
 2324 C=CC(=O)OC(C)(C)C.Cc1nn(C)c(C)c1Br>>Cc1nn(C)c(C)c1/C=C/C(=O)OC(C)(C)C

2325 C=C[C@H]1CN2CC[C@H]1C[C@@H]2[C@H](O)c1ccnc2ccc(OC)cc12.FC(F)(F)c1ccc(Br)cc1>>CO  
c1ccc2ncccc([C@H](O)[C@H]3C[C@@H]4CCN3C[C@@H]4/C=C/c3ccc(C(F)(F)F)cc3)c2c1  
 2326 C=Cc1ccc(C)cc1.O=c1oc2ccccc2c(-c2ccccc2)c1Br>>Cc1ccc(/C=C/c2c(-c3ccccc3)c3ccccc3oc2=O)cc1  
C=CC(=O)OCC.O=C(NC1CCCCC1)c1cc(Br)cn(Cc2ccc(F)cc2)c1=O>>CCOC(=O)/C=C/c1cc(C(=O)  
 2327 NC2CCCCC2)c(=O)n(Cc2ccc(F)cc2)c1  
 2328 C=CC(=O)OC.COc1cc2c(cc1Br)[C@H]1CCCC[C@H]1N2C(=O)C(C)(C)C>>COC(=O)/C=C/c1cc2c(  
cc1OC)N(C(=O)C(C)(C)C)[C@H]1CCCC[C@H]21  
 2329 C=CC#N.Clc1ccccc1>>N#C/C=C/c1ccccc1  
 2330 C=CCn1c(=O)oc2cc(C=O)ccc21.O=C(O[C@H]1CN2CCC1CC2)C1(c2ccccc(Br)c2)CCCCC1>>O=Cc  
1ccc2c(c1)oc(=O)n2CC/C=C/c1cccc(C2(C(=O)O[C@H]3CN4CCC3CC4)CCCCC2)c1  
 2331 Br1ccc(/C=C/c2ccccc2)cc1.C=Cc1ccc(SCC[Si](C)(C)C)cc1>>C[Si](C)(C)CCSc1ccc(/C=C/c2ccc(/C=  
C/c3ccccc3)cc2)cc1  
C=CC[C@H]1O[C@H]2O[C@H]3(C)CC[C@H]4[C@H](C)CC[C@H]([C@H]1C)[C@H]42O03.  
 2332 Cc1ccccc1I>>Cc1ccccc1/C=C/C[C@H]1O[C@H]2O[C@H]3(C)CC[C@H]4[C@H](C)CC[C@H]([C@H]1C)[C@H]42O03  
([C@H]1C)[C@H]42O03  
 2333 C=CC(=O)NCc1ccc(F)cc1.O=c1c(I)coc2cc(O)ccc12>>O=C(/C=C/c1coc2cc(O)ccc2c1=O)NCc1ccc(F)  
 2334 C=CC(=O)OCC.Cc1ccc(S(=O)(=O)n2c(I)ccc3c(Br)cn(C)c(=O)c32)cc1>>CCOC(=O)/C=C/c1cc2c(Br)c  
n(C)c(=O)c2n1S(=O)(=O)c1ccc(C)cc1  
 2335 C=CC(=O)CCCCC.CC(=O)c1ccc(Br)cc1>>CCCCC(=O)/C=C/c1ccc(C(C)=O)cc1  
 2336 C=COC(CC)CCCCC.CC(=O)c1ccc(Br)cc1>>C=C(OC(CC)CCCCC)c1ccc(C(C)=O)cc1  
C=CC(=O)OC(C)(C)C.CC(C)(C)O[C@H]1CC[C@H]2C=C(C3=C(Br)CC(O[Si](C)(C)C(C)(C)C)C  
 2337 C3)CC[C@H]12C>>CC(C)(C)OC(=O)/C=C/C1=C(C2=C[C@H]3CC[C@H](OC(C)(C)C)[C@@]3(C)C  
C2)CCC(O[Si](C)(C)C(C)(C)C)C1  
 2338 C=CC(=O)OC(C)(C)C.Cn1c(-c2ccccc2)c(I)c2ccccc21>>Cn1c(-  
c2ccccc2)c(/C=C/C(=O)OC(C)(C)C)c2ccccc21  
 2339 Br1ccc(Oc2ccccc2)cc1.C=CC(=O)N1CCOCC1>>O=C(/C=C/c1ccc(Oc2ccccc2)cc1)N1CCOCC1  
 2340 C=CC(=O)OC(C)(C)C.C[C@H](c1ccccc1)N(Cc1ccccc1)[C@H](CC(=O)OC(C)(C)C)c1ccc(Br)cc1>  
>C[C@H](c1ccccc1)N(Cc1ccccc1)[C@H](CC(=O)OC(C)(C)C)c1ccc(/C=C/C(=O)OC(C)(C)C)cc1  
 2341 C=CCNS(=O)(=O)c1ccc(C)cc1.Cc1ccc(N)c1Br>>Cc1ccc(S(=O)(=O)NC/C=C/c2c(C)cccc2N)cc1  
 2342 C=Cc1ccccc1.COC(=O)c1cc(I)cc(C(=O)OC)c1>>COC(=O)c1cc(/C=C/c2ccccc2)cc(C(=O)OC)c1  
 2343 C=Cc1ccc(O[Si](C)(C)C(C)(C)C)c1.C[Si](C)(OS(=O)(=O)C(F)(F)F)OS(=O)(=O)C(F)(F)F>>CC(C)(  
C)[Si](C)(C)Oc1ccc(/C=C/[Si](C)(C)OS(=O)(=O)C(F)(F)F)c1  
 2344 C=Cc1ccc(Cl)cc1.O=Cc1ccc(O)c(Br)c1>>O=Cc1ccc(O)c(/C=C/c2ccc(Cl)cc2)c1  
 2345 C=CC(=O)OC(C)(C)C.CC(C)CN1CCc2c(ccc3[nH]ncc23)C1c1ccc(Br)cc1>>CC(C)CN1CCc2c(ccc3[n  
H]ncc23)C1c1ccc(/C=C/C(=O)OC(C)(C)C)cc1  
 2346 C=CC(C)(C)C(=O)NC(C)(C)CO.CC(=O)OC[C@H]1O[C@H](c2cc(Cc3ccc(Br)cc3C(C)C)c(C)cc2C  
)[C@H](OC(C)=O)[C@H](OC(C)=O)[C@H]1OC(C)=O>>CC(=O)OC[C@H]1O[C@H](c2cc(  
Cc3ccc(/C=C/C(C)(C)C(=O)NC(C)(C)CO)cc3C(C)C)c(C)cc2C)[C@H](OC(C)=O)[C@H](OC(C)=  
O)[C@H]1OC(C)=O  
 2347 C=CC(=O)N(C)Cc1sc2ccccc2c1C.O=C1Nc2ncc(Br)cc2C12CCCCC2>>Cc1c(CN(C)C(=O)/C=C/c2cnc  
3c(c2)C2(CCCCC2)C(=O)N3)sc2ccccc12  
 2348 C=CC(C)(C)O.Cc1ccc(N)c(Br)c1>>Cc1ccc(N)c(/C=C/C(C)(C)O)c1  
 2349 C=CC(=O)OC.O=C(c1ccccc1)c1ccc(Br)cc1>>COC(=O)/C=C/c1ccc(C(=O)c2ccccc2)cc1  
 2350 C=Cc1ccc(OC)cc1.CC(C)(C)Br>>COc1ccc(/C=C/C(C)(C)C)cc1  
 2351 C=Cc1ccccc1.O=c1ccoc2c(Br)c(OCc3ccccc3)ccc12>>O=c1ccoc2c(/C=C/c3ccccc3)c(OCc3ccccc3)ccc  
 2352 C=C1OC(=O)OC1(C)C.Ic1ccc2ccccc12>>CC1(C)OC(=O)O/C1=C\c1ccc2ccccc12  
 2353 C=COCCCC.CNc1ccc(Br)cn1>>C=C(OCCCC)c1ccc(NC)nc1  
 2354 C=CC(=O)OCC.Nc1nc(=O)n([C@H]2O[C@H](CO)[C@H](O)[C@H]2F)cc1I>>CCOC(=O)/C  
=C/c1cn([C@H]2O[C@H](CO)[C@H](O)[C@H]2F)c(=O)nc1N  
 2355 C=CCN1C(=O)C2(CCCC2)NC[C@@]1(C)c1cc(F)cc(F)c1.O=C1Nc2nccccc2[C@]12Cc1ccc(Br)cc1C2  
>>C[C@]1(c2cc(F)cc(F)c2)CNC2(CCCC2)C(=O)N1C/C=C/c1ccc2c(c1)C[C@]1(C2)C(=O)Nc2nc  
 2356 C=CC(N)=O.Clc1ccccc1I>>NC(=O)/C=C/c1ccccc1Cl  
 2357 C=C[Si](C)(C)c1cccn1.COc1ccc(I)c1>>COc1ccc(/C=C/[Si](C)(C)c2cccn2)c1  
 2358 C=CCC(C)C.O=S(=O)(Oc1ccccc1)C(F)(F)F>>C=C(CC(C)C)c1ccccc1  
C=CC(=O)OCC.COC(=O)c1c(-c2ccccc2)c(-  
 2359 c2ccccc2)c2ccccc2c1OS(=O)(=O)C(F)(F)F>>CCOC(=O)/C=C/c1c(C(=O)OC)c(-c2ccccc2)c(-  
c2ccccc2)c2ccccc12  
 2360 Br1ccccc1I.C=CC(=O)OCCSc1ccccc1>>O=C(/C=C/c1ccccc1Br)OCCSc1ccccc1  
 2361 C=CC(=O)OCC.Oc1ccc(I)c1>>CCOC(=O)/C=C/c1ccc(O)c1  
 2362 C=Cc1ccc(OC)c1OC.Nc1ccc(I)cc1>>COc1ccc(/C=C/c2ccc(N)cc2)c1OC

2363 C=CC(=O)OCC.COc1cc2nnc(Oc3ccc(I)cc3)c2cc1OC>>CCOC(=O)/C=C/c1ccc(Oc2nnc3cc(OC)c(O)C)cc23)cc1  
 2364 C=CC(=O)N(C)C.COc1ccc(Cl)cc1>>COc1ccc(/C=C/C(=O)N(C)C)cc1  
 2365 C=CC(=O)OC.CC(C)Oc1ccc(N2CCc3cc(O)ccc3C2(C)c2ccc(Br)cc2)cc1>>COC(=O)/C=C/c1ccc(C2(C)c3ccc(O)cc3CCN2c2ccc(OC(C)C)cc2)cc1  
 2366 C=CC(=O)OCC.O=C(NCc1ccc(Cl)cc1)c1cnc2c(F)cc(I)cc2c1O>>CCOC(=O)/C=C/c1cc(F)c2ncc(C(=O)N)Cc3ccc(Cl)cc3)c(O)c2c1  
 2367 C=CC(C)=O.CCCCCC1=C(I)C1(F)F>>CCCCC1=C(/C=C/C(C)=O)C1(F)F  
 2368 C=CC(=O)O.Cc1ccc(S(=O)(=O)N(C)c2ccc(I)cc2)cc1>>Cc1ccc(S(=O)(=O)N(C)c2ccc(/C=C/C(=O)O)c2)cc1  
 2369 C=Cc1cc(OC(C)=O)cc(OC(C)=O)c1.CC(C)(Oc1ccc(C(=O)c2ccc(Cl)cc2)cc1)C(=O)Oc1ccc(I)cc1>>C(C(=O)Oc1cc(/C=C/C2ccc(OC(=O)C(C)(C)Oc3ccc(C(=O)c4ccc(Cl)cc4)cc3)cc2)cc(OC(C)=O)c1  
 2370 C=CC(=O)N(C)OC.Nc1cccc(I)c1>>CON(C)C(=O)/C=C/c1cccc(N)c1  
 2371 C=C(NC(C)=O)C(=O)OC.O=[N+][O-]c1ccc(Br)cc1>>COC(=O)/C=C/c1ccc([N+](=O)[O-])cc1)NC(C)=O  
 2372 C=CCCCCCC.c1ccc([I+])c2cccc2)cc1>>CCCCC/C=C/c1cccc1  
 2373 C=CC(=O)OCC.COc1ccc2nccc(Br)c2c1>>CCOC(=O)/C=C/c1ccnc2ccc(OC)cc12  
 2374 C=Cn1cnc2c(NC)nnc21.O=Cc1cccc(I)c1>>CNc1nnc2c1nnc2/C=C/c1cccc(C=O)c1  
 2375 C=CC(=O)OC(C)(C)C.O=CNc1ccc(Cl)cc1I>>CC(C)(C)OC(=O)/C=C/c1cc(Cl)ccc1NC=O  
 2376 C=CC(=O)OC.Ic1ccnc1>>COC(=O)/C=C/c1ccnc1  
 2377 C=Cc1ccc(N(c2ccc(OC)cc2)c2ccc(OC)cc2)cc1.Cn1c2ccc(Br)cc2c2cc(C=O)ccc21>>COc1ccc(N(c2ccc(/C=C/c3ccc4c(c3)c3cc(C=O)ccc3n4C)cc2)c2ccc(OC)cc2)cc1  
 2378 C=CC(=O)O.Fc1ccc(I)cc1>>O=C(O)/C=C/c1ccc(F)cc1  
 2379 C=CC(=O)Nc1ccc(OCC)cc1.COc1ccc2c(=O)c(I)coc2c1>>CCOc1ccc(NC(=O)/C=C/c2coc3cc(OC)ccc3c2=O)cc1  
 2380 C=C(F)C(=O)OC.O=[N+][O-]c1cccc(I)c1>>COC(=O)/C(F)=C/c1cccc([N+](=O)[O-])c1  
 2381 C=Cc1cccc1.COC(=O)C(CCC(=O)C(C)C)Cc1cccc1I>>COC(=O)C(CCC(=O)C(C)C)Cc1cccc1/C=C/c1cccc1  
 2382 C=Cc1cccc1.O=P(c1cccc1)(c1cccc1)c1ccc(/C=C/c2ccc3ccc4ccc(Br)cc4c3c2)cc1>>O=P(c1cccc1)(c1cccc1)c1ccc(/C=C/c2ccc3ccc4ccc(/C=C/c5cccc5)cc4c3c2)cc1  
 2383 C=CC(=O)OC.Cc1cc(CCNC(=O)OC(C)(C)C)c(C)c(I)c1O>>COC(=O)/C=C/c1c(C)c(CCNC(=O)OC(C)(C)C)cc(C)c1O  
 2384 C=CCN1C(=O)c2ccccc2C1=O.Cc1ccc(I)cc1>>Cc1ccc(/C=C/CN2C(=O)c3ccccc3C2=O)cc1  
 2385 C=CC(=O)OCC.CCN1C[C@]2(OC(=O)c3cc(I)ccc3NC(C)=O)CC[C@H](OC)[C@]34[C@@H]1[C@H](C[C@H]23)[C@@]1(O)C[C@H](OC)[C@H]2C[C@@H]4[C@]1(O)[C@H]2OC>>CCOC(=O)/C=C/c1ccc(NC(C)=O)c(C(=O)O)[C@@]23CC[C@H](OC)[C@]45[C@H]1([C@H](C[C@H]24)[C@@]2(O)C[C@H](OC)[C@H]4C[C@@H]5[C@]2(O)[C@H]4OC)N(CC)C3)c1  
 2386 C=CC(=O)OC.COc1cc(Br)cc2cc(-c3ccc4c(c3)OCO4)oc12>>COC(=O)/C=C/c1cc(OC)c2oc(-c3ccc4c(c3)OCO4)cc2c1  
 2387 C=CC(=O)OC.Ic1ccc2ccccc2c1>>COC(=O)/C=C/c1ccc2ccccc2c1  
 2388 C=CC(=O)OCC.CC(C)(C)OC(=O)N1CCC2(CC1)Cc1cc(Br)cn1NC2=O>>CCOC(=O)/C=C/c1cnc2c(c1)CC1(CCN(C(=O)OC(C)(C)C)CC1)C(=O)N2  
 2389 \*CNCCCCOCCOCCOCCNC(=O)COc1ccc(C(Cc2cc(OC)cc(OC)c2)NC(=O)c2ccc(C=C)cc2)cc1.Ic1ccc1>>\*CNCCCCOCCOCCOCCNC(=O)COc1ccc(C(Cc2cc(OC)cc(OC)c2)NC(=O)c2ccc(/C=C/c3ccc(cc3)cc2)cc1  
 2390 C=Cc1ccc(N(c2ccccc2)c2ccccc2)cc1.O=Cc1ccc(Br)c2nc(-c3ccccc3)c(-c3ccccc3)nc12>>O=Cc1ccc(/C=C/c2ccc(N(c3ccccc3)c3ccccc3)cc2)c2nc(-c3ccccc3)c(-c3ccccc3)nc12  
 2391 CC(=O)/C=C/CC(NS(=O)(=O)c1ccc(C)cc1)c1cccc1.N#Cc1ccc(Br)cc1>>CC(=O)/C=C(/CC(NS(=O)(=O)c1ccc(C)cc1)c1cccc1)c1ccc(C#N)cc1  
 2392 C=CC(=O)OCC.COc1cc2oc(C(=O)c3cc(OC)c(OC)c(OC)c3)cc2cc1I>>CCOC(=O)/C=C/c1cc2cc(C(=O)c3cc(OC)c(OC)c(OC)c3)oc2cc1OC  
 2393 C=CC(=O)NCc1ccc(F)cc1.COc1ccc2c(=O)c(I)coc2c1>>COc1ccc2c(=O)c(/C=C/C(=O)NCc3ccc(F)cc3)coc2c1  
 2394 C=CC(C)(C)O.N#Cc1cccc2nc3cccc(Br)c3nc12>>CC(C)(O)/C=C/c1cccc2nc3cccc(C#N)c3nc12  
 2395 C=CC(=O)OC.Cc1ccc(I)cc1>>COC(=O)/C=C/c1ccc(C)cc1  
 2396 Br1ccc(Oc2ccccc2)cc1.C=CC(=O)NCCc1c(C)[nH]j2c(F)ccc(C)c12>>Cc1[nH]j2c(F)ccc(C)c2c1CCN(C(=O)/C=C/c1ccc(Oc2ccccc2)cc1  
 2397 C=Cc1cccc1.CCCCCCBr>>CCCCCCC/C=C/c1cccc1  
 2398 C=CCCCC.Cc1ccc(Br)cc1>>CCCCC/C=C/c1ccc(C)cc1  
 2399 C=Cc1ccc(C(C)(C)C)cc1.CC(C)(C)Br>>CC(C)(C)/C=C/c1ccc(C(C)(C)C)cc1  
 2400 C=CC(C)(C)O.O=c1cc(-c2ccccc2)oc2cc(Br)ccc12>>CC(C)(O)/C=C/c1ccc2c(=O)cc(-c3ccccc3)oc2c1

2401 BrC1=CCCCC12OCCO2.C=CC(=O)OC>>COC(=O)/C=C/C1=CCCCC12OCCO2  
 2402 C=Cc1cccc1.Cc1cccc(C)c1I>>Cc1cccc(C)c1/C=C/c1cccc1  
 2403 C=COCCCC.Clc1cccc2cccc12>>C=C(OCCCC)c1cccc2cccc12  
 2404 C=Cc1ccc(C)cc1.Clc1cccc(Br)c1>>Cc1ccc(/C=C/c2cccc(Cl)c2)cc1  
 2405 Br1cccc2c1cc(-c1ccc(I)cc1)n2-c1ncccn1.C=CC(=O)OCC>>CCOC(=O)/C=C/c1ccc(-  
c2ccc3c(Br)cccc3n2-c2ncccn2)cc1  
 2406 C=Cc1cc(OCc2cccc2)c(OCc2cccc2)nn1.Cc1cc(C(F)(F)F)ccc1Br>>Cc1cc(C(F)(F)F)ccc1/C=C/c1cc(  
OCc2cccc2)c(OCc2cccc2)nn1  
 2407 C=Cc1cccc1.O=Cc1cccc(Cl)c1>>O=Cc1cccc(/C=C/c2cccc2)c1  
 2408 C=Cc1ccc(OC)cc1.CCOC(=O)C(C)Br>>CCOC(=O)C(C)/C=C/c1ccc(OC)cc1  
 2409 C=CCOC(C)=O.Cc1ccc(I)cc1>>CC(=O)OC/C=C/c1ccc(C)cc1  
 2410 Br1cccc1.C=Cc1scnc1C>>Cc1nscn1/C=C/c1cccc1  
C=Cc1ccc2c(c1)c1cccc1n2CC.CCn1c2cccc2c2cc(-  
 2411 n3c(C)nc4ccc(Br)cc4c3=O)ccc21>>CCn1c2cccc2c2cc(/C=C/c3ccc4nc(C)n(-  
c5ccc6c(c5)c5cccc5n6CC)c(=O)c4c3)ccc21  
 2412 C=Cc1cccc1.Nc1c(Br)ccc2c1OCO2>>Nc1c(/C=C/c2cccc2)ccc2c1OCO2  
 2413 C=CC(=O)O.COc1ccc(S(=O)(=O)Nc2ccc(I)cc2)cc1>>COc1ccc(S(=O)(=O)Nc2ccc(/C=C/C(=O)O)cc2  
 2414 C=C1CC(c2cccc2)OC1=O.CC(C)(C)c1ccc(I)cc1>>CC(C)(C)c1ccc(/C=C2/CC(c3cccc3)OC2=O)cc1  
 2415 C=CC(=O)OCC.FC(F)(F)c1cc(Br)c2cccc(C(F)(F)F)c2n1>>CCOC(=O)/C=C/c1cc(C(F)(F)F)nc2c(C(F)  
(F)F)cccc12  
 2416 C=Cc1ccc(O)cc1.Oc1ccc(-c2oc3cc(O)cc(Br)c3c2-c2cc(O)cc(O)c2)cc1>>Oc1ccc(/C=C/c2cc(O)cc3oc(-  
c4ccc(O)cc4)c(-c4cc(O)cc(O)c4)c23)cc1  
 2417 C=CC(=O)N(C)C.O=[N+](O-)]c1ccc(I)cc1>>CN(C)C(=O)/C=C/c1ccc([N+](=O)[O-])cc1  
 2418 C=CC#N.CCOc1noc(C)c1I>>CCOc1noc(C)c1/C=C/C#N  
 2419 C=C1c2cccc2C1(C#N)CC.CC(=O)c1ccc(Br)cc1>>CCC1(C#N)/C(=C/c2ccc(C(C)=O)cc2)c2cccc21  
 2420 C=CC(=O)N1N=Cc2cccc2C1C=C.COc1cc(Cc2cnc(N)nc2N)cc(I)c1OC>>C=CC1c2cccc2C=NN1C(  
=O)/C=C/c1cc(Cc2cnc(N)nc2N)cc(OC)c1OC  
 2421 Br1ccc2cccc2c1.C=C>>C=Cc1ccc2cccc2c1  
 2422 C=CC(=O)OCCN(CC)CC.O=C(Nc1cccc1)c1cc(=O)c2cc(Br)ccc2o1>>CCN(CC)CCOC(=O)/C=C/c1c  
cc2oc(C(=O)Nc3cccc3)cc(=O)c2c1  
 2423 C=C(CC(=O)OC)C(=O)OC.CC(C)(C)OC(=O)NCCCCOCCOCCOCCCN(Cc1cc(O[Si](c2cccc2)(c2cccc  
c2)C(C)(C)C)ccc1Br)C(=O)OCc1cccc1>>COC(=O)C/C(=C/c1ccc(O[Si](c2cccc2)(c2cccc2)C(C)(C  
)C)cc1CN(CCCOCCOCCOCCCN(C(=O)OC(C)(C)C)C(=O)OCc1cccc1)C(=O)OC  
 2424 C=CC(=O)OC.Cc1nccc(N(Cc2ccc(Br)cc2)CC(C)(C)C)n1>>COC(=O)/C=C/c1ccc(CN(CC(C)(C)C)c2c  
cnc(C)n2)cc1  
 2425 C=Cc1nc(C(=O)OCC)co1.Ic1cccc1>>CCOC(=O)c1coc(/C=C/c2cccc2)n1  
 2426 C=Cc1cccc1.C[Si](C)(C)I>>C[Si](C)(C)/C=C/c1cccc1  
 2427 C=CC(=O)OCc1cccc1.Fc1cccc(Cn2nc(I)c3cccc32)c1>>O=C(/C=C/c1nn(Cc2cccc(F)c2)c2cccc12)O  
Cc1cccc1  
 2428 C=CC(=O)OC.O=S(=O)(c1cccc1)n1cc(-c2cccc2)c2cc(Br)cnc21>>COC(=O)/C=C/c1cnc2c(c1)c(-  
c1cccc1)cn2S(=O)(=O)c1cccc1  
 2429 C=CC=O.COC(=O)COc1cccc(I)c1>>COC(=O)COc1cccc(/C=C/C=O)c1  
 2430 Br1ccc2c(cen2-c2cccc2)c1.C=CC(=O)OC>>COC(=O)/C=C/c1ccc2c(cen2-c2cccc2)c1  
 2431 C=Cc1ccc(OC)c(OC)c1.Ic1ccc(OCc2cccc2)cc1>>COc1ccc(/C=C/c2ccc(OCc3cccc3)cc2)cc1OC  
 2432 C=C(NC(C)=O)C(=O)OC.C[Si](C)(C)CCOCn1nc(I)c2cc(Br)ccc21>>COC(=O)/C(=C/c1nn(COCC[Si]  
(C)(C)C)c2ccc(Br)cc12)NC(C)=O  
 2433 C=Cc1cccc1.Cc1cc(C)c(OC(=O)C#Cc2cccc2)c(Br)c1>>Cc1cc(C)c(OC(=O)C#Cc2cccc2)c(/C=C/c2  
cccc2)c1  
 2434 C=CC(=O)OC(C)(C)C.COC(=O)Cc1cc(OC(C)C)c(OC)c(OC)c1Br>>COC(=O)Cc1cc(OC(C)C)c(OC)c  
(OC)c1/C=C/C(=O)OC(C)(C)C  
 2435 C=Cc1ccc(C)cc1.COC(=O)c1cc(OC)c(OC)cc1I>>COC(=O)c1cc(OC)c(OC)cc1/C=C/c1ccc(C)cc1  
C=CCNC(=O)NC(C)(C)CO.Cc1cc(OCc2cccc2)c([C@@H]2S[C@H](COCc3cccc3)[C@@H](OCc3  
 2436 cccc3)[C@H](OCc3cccc3)[C@H]2OCc2cccc2)cc1Cc1ccc(Br)cc1>>Cc1cc(OCc2cccc2)c([C@@H  
]2S[C@H](COCc3cccc3)[C@@H](OCc3cccc3)[C@H](OCc3cccc3)[C@H]2OCc2cccc2)cc1Cc1cc  
c(/C=C/CNC(=O)NC(C)(C)CO)cc1  
 2437 C=CCOC(C)=O.Cc1cccc1I>>CC(=O)OC/C=C/c1cccc1C  
 2438 C=Cc1ccc(C)cc1.CSc1ccc(Br)cc1>>CSc1ccc(/C=C/c2ccc(C)cc2)cc1  
 2439 C=CC(=O)OC.Cc1cn(Cc2ccc3c(c2)OCCO3)c2c(Br)cc(F)cc12>>COC(=O)/C=C/c1cc(F)cc2c(C)cn(Cc  
3ccc4c(c3)OCCO4)c12  
 2440 C=Cc1ccc(C(C)(C)C)cc1.C[Si](C)(I)Cc1cccc1>>CC(C)(C)c1ccc(/C=C/[Si](C)(C)Cc2cccc2)cc1

2441 C=Cc1ccncc1.CC(C)(C)OC(=O)N[C@@H](COc1cncc(Br)c1)Cc1c[nH]c2ccccc12>>CC(C)(C)OC(=O)  
 N[C@@H](COc1cncc(/C=C/c2ccncc2)c1)Cc1c[nH]c2ccccc12  
 2442 C=C/C=C/C(=O)N(CCCC)CCCC.COc1cccc(Br)c1>>CCCN(CCCC)C(=O)/C=C/C=C/c1cccc(OC)c1  
 2443 C=CC(=O)OC(C)(C)C.CC(C)(C)OC(=O)CCOCc1cccc([N+](=O)[O-]  
 ]c1Br>>CC(C)(C)OC(=O)/C=C/c1c(COCCC(=O)OC(C)(C)C)cccc1[N+](=O)[O-]  
 2444 C=CS(C)(=O)=O.CC(C)(C)c1ccc(Br)cc1>>CC(C)(C)c1ccc(/C=C/S(C)(=O)=O)cc1  
 2445 C=Cc1ccnc(F)c1.CC(C)(C)OC(=O)N[C@H](COc1cncc(Br)c1)Cc1c[nH]c2ccccc12>>CC(C)(C)OC(=O)  
 N[C@H](COc1cncc(/C=C/c2ccnc(F)c2)c1)Cc1c[nH]c2ccccc12  
 2446 C=CCO[C@]1(C)C[C@@H](C)C(=O)[C@H](C)[C@@H](O)[C@](C)(O)[C@@H](CC)OC(=O)[C@  
 H](C)C(=O)[C@H](C)[C@H]1O[C@@H]1O[C@H](C)C[C@H](N(C)C)[C@H]1OC(=O)c1cccc1.Cl  
 c1ccc(I)cc1>>CC[C@H]1OC(=O)[C@H](C)C(=O)[C@H](C)[C@@H](O)[C@@H]2O[C@H](C)C[C  
 @H](N(C)C)[C@H]2OC(=O)c2ccccc2)[C@](C)(OC/C=C/c2ccc(Cl)cc2)C[C@@H](C)C(=O)[C@H](  
 C)FC@@H1(O)FC@11(C)O  
 2447 C=C.Cc1ncsc1I>>C=Cc1scnc1C  
 2448 C=Cc1cccc([N+](=O)[O-])c1.Cn1cc(I)c(=O)c2ccccc21>>Cn1cc(/C=C/c2cccc([N+](=O)[O-  
 ])c2)c(=O)c2ccccc21  
 2449 C=C(NC(=O)OCc1cccc1)C(=O)OC.CC(=O)OCc1c(I)ccc(NC(=O)OC(C)(C)C)c1C>>COC(=O)/C(=C  
 /c1ccc(NC(=O)OC(C)(C)C)c(C)c1COC(C)=O)NC(=O)OCc1cccc1  
 2450 C=CC(=O)OC.COC(=O)/C=C/c1cc(Cl)cc2c(=O)cc(-  
 c3ccccc3)oc12>>COC(=O)/C=C/c1cc(/C=C/C(=O)OC)c2oc(-c3ccccc3)cc(=O)c2c1  
 2451 C=CP(=O)(O)O.Fc1cc(Br)cc(F)c1C(F)(F)F>>O=P(O)(O)/C=C/c1cc(F)c(C(F)(F)F)c(F)c1  
 2452 C=Cc1cccc1OC.COC(=O)c1cc2cc(Br)ccc2cc1OC(C)=O>>COC(=O)c1cc2cc(/C=C/c3ccccc3OC)ccc2  
 cc1OC(C)=O  
 2453 C=CC(=O)O.COc1cccc(I)c1>>COc1cccc(/C=C/C(=O)O)c1  
 2454 C=CC(C)(C)C.FC(F)(F)c1ccc(Br)cc1>>CC(C)(C)/C=C/c1ccc(C(F)(F)F)cc1  
 2455 C=CC(=O)COCCCC.Cc1cccc1I>>CCCCOCC(=O)/C=C/c1cccc1C  
 2456 C=Cc1ccc(F)cc1.C[Si](C)(C)OS(=O)(=O)C(F)(F)F>>C[Si](C)(C)/C=C/c1ccc(F)cc1  
 2457 C=CC(=O)OC.CCCCc1nc2c(N)nc3cc(Br)ccc3c2n1CC(C)C>>CCCCc1nc2c(N)nc3cc(/C=C/C(=O)OC)  
 ccc3c2n1CC(C)C  
 2458 C=COCCCC.O=S(=O)(Oc1cccc2c1CCCC2)C(F)(F)F>>C=C(OCCCC)c1cccc2c1CCCC2  
 2459 C=CC(=O)CCC.COc1ccc2cc(Br)ccc2c1>>CCCC(=O)/C=C/c1ccc2cc(OC)ccc2c1  
 2460 C=CC(=O)OCC.COc1cc(I)c2c3c1O[C@@H]1[C@]34CCN(C)[C@H](C2)[C@]42C=C[C@@]1(OC)c  
 1c(O)ccc(O)c12>>CCOC(=O)/C=C/c1cc(OC)c2c3c1C[C@H]1N(C)CC[C@@]34[C@@H](O2)[C@@  
 12(OC)C=C[C@@]14c1c(O)ccc(O)c12  
 2461 C=C.CC(=O)CC(=O)c1ccc(Br)cc1>>C=Cc1ccc(C(=O)CC(C)=O)cc1  
 2462 C=CC(=O)OCC.COc1ccc(CCNC(=O)c2nn(Cc3ccccc3)c3ccc(Br)cc23)cc1OC>>CCOC(=O)/C=C/c1cc  
 c2c(c1)c(C(=O)NCCc1ccc(OC)c(OC)c1)nn2Cc1cccc1  
 2463 Brc1cccc2[nH]ccc12.C=Cc1cccc1>>C=C/c1cccc2[nH]ccc12)\c1cccc1  
 2464 C=CC(C)=O.O=c1oc(Br)cc2ccccc12>>CC(=O)/C=C/c1cc2ccccc2c(=O)o1  
 2465 Brc1ccncc1.C=CC(C)(C)O>>CC(C)(O)/C=C/c1ccncc1  
 2466 C=CP(=O)(O)O.COc1ccc(N(c2ccc(I)cc2)c2ccc(OC)cc2)cc1>>COc1ccc(N(c2ccc(/C=C/P(=O)(O)O)cc  
 2)c2ccc(OC)cc2)cc1  
 2467 C=CC(=O)OC(C)(C)C.C[Si](C)(C)CCOCON1CCc2c(ncc3c2c(I)en3Cc2ccc(F)cc2)C1=O>>CC(C)(C)  
 OC(=O)/C=C/c1en(Cc2ccc(F)cc2)c2cnc3c(c12)CCN(OCOCC[Si](C)(C)C)C3=O  
 2468 C=CCOC(C)=O.Cc1cc(C)c(I)c(C)c1>>CC(=O)OC/C=C/c1c(C)cc(C)cc1C  
 2469 C=CN1CCCC1=O.Clc1ccc2c(c1)OCO2>>C=C(c1ccc2c(c1)OCO2)N1CCCC1=O  
 2470 Brc1cccc1.C=COCCOC=C>>C=COCCOC(=C)c1cccc1  
 2471 C=Cc1cccc1.CC(C)(C)OC(=O)n1ccc2cc(OS(=O)(=O)C(F)(F)F)ccc21>>C=C(c1cccc1)c1ccc2c(ccn2  
 C(=O)OC(C)(C)C)c1  
 2472 C=CC=O.C[C@H](NC(=O)OC(C)(C)C)c1nc2cccc(Br)c2c(=O)n1-  
 c1cccc1>>C[C@H](NC(=O)OC(C)(C)C)c1nc2cccc(/C=C/C(=O)c2c(=O)n1-c1cccc1  
 2473 C=CC(C)=O.IC1=CO[C@H](COCc2ccccc2)[C@@H](OCc2ccccc2)[C@@H]1OCc1cccc1>>CC(=O)  
 /C=C/C1=CO[C@H](COCc2ccccc2)[C@@H](OCc2ccccc2)[C@@H]1OCc1cccc1  
 2474 C=Cc1cccn1.O=[N+](O-)]c1ccc2c(Br)nn(C3CCCCO3)c2c1>>O=[N+](O-  
 )]c1ccc2c(/C=C/c3cccn3)nn(C3CCCCO3)c2c1  
 2475 C=CC(=O)OCCOCCOCCOCCOC.CC(C)Oc1nc(N)nc(Nc2ccc(I)cc2)n1>>COCCOCCOCCOCCOC(=O)  
 O)/C=C/c1ccc(Nc2nc(N)nc(OC(C)C)n2)cc1  
 2476 C=CC(=O)OCC.CN(C[C@H](O)CNC(C)(C)CC1Cc2ccccc2C1)S(=O)(=O)c1cc(Br)cc(C(F)(F)F)c1>>  
 CCOC(=O)/C=C/c1cc(C(F)(F)F)cc(S(=O)(=O)N(C)C)[C@H](O)CNC(C)(C)CC2Cc3ccccc3C2)c1  
 2477 C=CC(=O)OC.Cc1c(Br)ccc2c1N(C)C(=O)C2=O>>COC(=O)/C=C/c1ccc2c(c1C)N(C)C(=O)C2=O  
 2478 C=CC(=O)OCCCC.Cc1ccc2c(Br)nn(C)c2c1>>CCCCOC(=O)/C=C/c1nn(C)c2cc(C)ccc12

2479 C=Cc1ccc([Si](OC)(OC)OC)cc1.CCOP(=O)(Cc1ccc(/C=C/c2c3cccc3c(Br)c3cccc23)cc1)OCC>>CC  
 2480 OP(=O)(Cc1ccc(/C=C/c2c3cccc3c(/C=C/c3ccc([Si](OC)(OC)OC)cc3)c3cccc23)cc1)OCC  
 2481 C=CC(CO)N1C(=O)c2cccc2C1=O.COc1ccc(Br)cc1>>COc1ccc(/C=C/C(CO)N2C(=O)c3cccc3C2=O  
 2482 Br1ence2cccc12.C=COCCCC>>C=C(OCCCC)c1ence2cccc12  
 2483 C=Cc1ccc(-c2cccs2)cc1.CC(C)(C)Br>>CC(C)(C)/C=C/c1ccc(-c2cccs2)cc1  
 2484 C=Cc1cccc1.Ic1cccc1>>C(=C/c1cccc1)c1cccc1  
 2485 C=Cc1ccc(OC)cc1.O=C(O)c1ccc(Br)cc1>>COc1ccc(/C=C/c2ccc(C(=O)O)cc2)cc1  
 2486 C=Cc1ccc2c(c1)c1cc(/C=C/c3ccc4c(c3)c3cccc3n4CCCCCCCC)ccc1n2CCCCCCCC.N#CC(=C(c1ccc  
 2487 cc1)c1cccc1)c1ccc(Br)cc1>>CCCCCCCCn1c2cccc2c2cc(/C=C/c3ccc4c(c3)c3cc(/C=C/c5ccc(C(C#N  
 2488 )=C(c6cccc6)c6cccc6)cc5)ccc3n4CCCCCCCC)ccc21  
 2489 Br1cccc(OC2ccc(OCc3cccc3)cc2)c1.C=CC(C)=O>>CC(=O)/C=C/c1cccc(OC2ccc(OCc3cccc3)cc2)c  
 2490 C=CC(=O)OCC.CC(C)(C)Oc1ccc(Br)nc1C#N>>CCOC(=O)/C=C/c1ccc(OC(C)(C)C)c(C#N)n1  
 2491 C=CC(=O)OC.COCl(OC)C(Br)=CCON(Cc2cccc2)[C@H]1[C@H]1COC(C)(C)O1>>COC(=O)/C  
 2492 =C/C1=CCON(Cc2cccc2)[C@H]([C@H]2COC(C)(C)O2)C1(OC)OC  
 2493 C=CC(=O)OC(C)(C)C.CC(C)=CCc1cc(I)ccc1O>>CC(C)=CCc1cc(/C=C/C(=O)OC(C)(C)C)ccc1O  
 2494 BrC1CCCCC1.C=Cc1cccc(C(=O)N(Cc2cccc2)Cc2cccc2)c1>>O=C(c1cccc(/C=C/C2CCCCC2)c1)N(  
 2495 Cc1cccc1)Cc1cccc1  
 2496 C=CP(=O)(c1cccc1)C(C)(C)C.Cc1ccc2cccc2c1Br>>Cc1ccc2cccc2c1/C=C/P(=O)(c1cccc1)C(C)(C  
 2497 C=Cc1ccc(C(C)(C)C)cc1.Cc1cc(Br)ccc1I>>Cc1cc(Br)ccc1/C=C/c1ccc(C(C)(C)C)cc1  
 2498 Br1cccs1.C=CCNS(=O)(=O)c1ccc(C)cc1>>Cc1ccc(S(=O)(=O)NC/C=C/c2cccs2)cc1  
 2499 C=CC(=O)OCC.Clc1cc(Br)cc2c1NCCCC2>>CCOC(=O)/C=C/c1cc(Cl)c2c(c1)CCCN2  
 2500 C=CC(=O)OC.COc1cccc(I)c1>>COC(=O)/C=C/c1cccc(OC)c1  
 2501 C=CC(=O)Nc1cccc1NC(=O)OC(C)(C)C.CN1C[C@H](c2ccc(Br)cc2F)[C@H](C(=O)Nc2ccc(Cl)cc  
 2502 2)C1>>CN1C[C@H](c2ccc(/C=C/C(=O)Nc3cccc3NC(=O)OC(C)(C)C)cc2F)[C@H](C(=O)Nc2ccc  
 2503 (Cl)cc2)C1  
 2504 C=CC(=O)OC.CC1(C)CCC(C)(C)c2cc(C(=O)c3cccc(I)c3)ccc21>>COC(=O)/C=C/c1cccc(C(=O)c2ccc  
 2505 3c(c2)C(C)(C)CCC3(C)C)c1  
 2506 C=COCCCC.CC(=O)c1ccc(Br)c2cccc12>>C=C(OCCCC)c1ccc(C(C)=O)c2cccc12  
 2507 C=Cc1cccn1.COC(=O)c1cc2ccc(=O)oc2cc1OS(=O)(=O)C(F)(F)F>>COC(=O)c1cc2ccc(=O)oc2cc1/C  
 2508 =C/c1cccn1  
 2509 C=CC(=O)OCC.O=c1oc(-c2cccc2)c(I)c2sc3c(c12)CCCCC3>>CCOC(=O)/C=C/c1c(-  
 2510 c2cccc2)oc(=O)c2c3c(sc12)CCCCC3  
 2511 C=CC(=O)OC(C)(C)C.COc1ccc(CNc2c(I)cccc2OC)cc1>>COc1ccc(CNc2c(/C=C/C(=O)OC(C)(C)C)c  
 2512 ccc2OC)cc1  
 2513 C=CCOC(C)=O.Cc1cccc(C)c1I>>CC(=O)OC/C=C/c1c(C)cccc1C  
 2514 C=CC(=O)OC.CC(C)Cn1c(=O)n(C)c(=O)c2c(Br)c(Cc3cccc3C(F)(F)F)sc21>>COC(=O)/C=C/c1c(Cc  
 2515 2cccc2C(F)(F)F)sc2c1c(=O)n(C)c(=O)n2CC(C)C  
 2516 C=C.Cc1ccc([N+](=O)[O-])c(Br)c1>>C=Cc1cc(C)ccc1[N+](=O)[O-]  
 2517 C=CC(=O)OC(C)(C)C.Ic1enn(CCOCCc2cccc2)c1>>CC(C)(C)OC(=O)/C=C/c1enn(CCOCCc2cccc2)c1  
 2518 C=Cc1ccc(Cl)cc1.N#Cc1ccc(Br)cc1>>N#Cc1ccc(/C=C/c2ccc(Cl)cc2)cc1  
 2519 C=CC(=O)OC(C)(C)C.Cc1cc(Br)sc1C=O>>Cc1cc(/C=C/C(=O)OC(C)(C)C)sc1C=O  
 2520 Br1cccs1.C=Cc1ccc2cccc2c1>>C(=C/c1cccs1)c1ccc2cccc2c1  
 2521 C=CCn1c(-  
 2522 c2ccc(C(F)(F)F)cc2)nc2cccc2c1=O.O=C(CN1C(=O)COc2cccc21)c1ccc(Br)cc1>>O=C(CN1C(=O)C  
 2523 Oc2cccc21)c1ccc(/C=C/Cn2c(-c3ccc(C(F)(F)F)cc3)nc3cccc3c2=O)cc1  
 2524 C=CC(=O)OC(C)(C)C.Nc1cccc1I>>CC(C)(C)OC(=O)/C=C/c1cccc1N  
 2525 C=CCCCC=C(C)C.ClCc1cccc1-c1cccc1>>C=C(CCCC=C(C)C)Cc1cccc1-c1cccc1  
 2526 C=Cc1nnn(C=C)n1.Fc1cccc1I>>C=Cn1nnn(/C=C/c2cccc2F)n1  
 2527 C=CC(=O)OCC.CC(C)(C)OC(=O)CSc1ccc(Br)cc1>>CCOC(=O)/C=C/c1ccc(SCC(=O)OC(C)(C)C)cc1  
 2528 C=Cc1cccc1.O=[N+](O-)]c1cccc(Cl)c1>>O=[N+](O-)]c1cccc(/C=C/c2cccc2)c1  
 2529 C=COCCCC.Cc1ccc(I)cc1>>C=C(OCCCC)c1ccc(C)cc1  
 2530 C=CC(=O)OCC.N#Cc1ccc(I)cc1>>CCOC(=O)/C=C/c1ccc(C#N)cc1  
 2531 C=CC(C)=O.COc1ccc(Cl)cc1>>COc1ccc(/C=C/C(C)=O)cc1  
 2532 C=CC(=O)OC.CC(C)(C)OC(=O)CCc1ccc(CN(C(=O)C2CCCCC2)c2ccc(Br)c2)cc1>>COC(=O)/C=C/  
 2533 c1cccc(N(Cc2ccc(CCC(=O)OC(C)(C)C)cc2)C(=O)C2CCCCC2)c1  
 2534 C=CC(=O)OCC.CC(C)(CC1Cc2cccc2C1)NC[C@H](O)COc1ccc(Br)c(F)c1F>>CCOC(=O)/C=C/c1  
 2535 ccc(OC[C@H](O)CNC(C)(C)CC2Cc3cccc3C2)c(F)c1F  
 2536 C=CC(=O)OCC.Nc1ccc(Cl)nc1I>>CCOC(=O)/C=C/c1nc(Cl)ccc1N  
 2537 C=CN1C(=O)c2cccc2C1=O.COc1ccc2cccc(Br)c2n1>>COc1ccc2cccc(/C=C/N3C(=O)c4cccc4C3=O  
 2538 )c2n1

2522 C=CC#N.Ic1ncnc2ncn(Cc3ccccc3)c12>>N#C/C=C/C/c1ncnc2ncn(Cc3ccccc3)c12  
 2523 C=CC(=O)OCC.CC(C)c1nn(-c2ncncn2)c(-c2ccc(F)cc2)c1Br>>CCOC(=O)/C=C/c1c(C(C)C)nn(-  
 c2ncncn2)c1-c1ccc(F)cc1  
 2524 C=CCC(=O)O.CC(C)c1[nH]nc(O[C@@H]2O[C@H](COC(=O)c3ccccc3)[C@@H](F)[C@H](OC(=O)  
 c3ccccc3)[C@H]2OC(=O)c2ccccc2)c1Cc1ccc(Br)cc1>>CC(C)c1[nH]nc(O[C@@H]2O[C@H](COC(=O)  
 c3ccccc3)[C@@H](F)[C@H](OC(=O)c3ccccc3)[C@H]2OC(=O)c2ccccc2)c1Cc1ccc(/C=C/CC(=O)  
 C=Cc1ccc(Cl)cc1.CCn1c(Br)cc2c1c(=O)n(C)c(=O)n2C>>CCn1c(/C=C/c2ccc(Cl)cc2)cc2c1c(=O)n(C)c  
 (=O)n2C  
 2526 C=Cc1ccccc1.OCc1ccc(Cl)cc1>>OCc1ccc(/C=C/c2ccccc2)cc1  
 2527 C=C(C)C(=O)OC.Clc1cccc(Br)c1>>COC(=O)/C(C)=C/c1cccc(Cl)c1  
 2528 C=CC(=O)OCC.Cc1c(Br)oc2ccc(Cl)c(Oc3cncnc3C(=O)N3CCN(C4CC4)c4ccccc43)c12>>CCOC(=O)/  
 C=C/c1oc2ccc(Cl)c(Oc3cncnc3C(=O)N3CCN(C4CC4)c4ccccc43)c2c1C  
 2529 C=C(CC(=O)OC)C(=O)OC.O=[N+][[O-]]c1ccc(I)cc1>>COC(=O)C/C(=C)c1ccc([N+](=O)[O-]  
 ])cc1)C(=O)OC  
 2530 C=Cc1cc(OCCCCCCCC)c(OCCCCCCCC)c(OCCCCCCCC)c1.O=Cc1ccc(Br)cc1>>CCCCCCCCOCc1c  
 c(/C=C/c2ccc(C=O)cc2)cc(OCCCCCCCC)c1OCCCCCCCC  
 2531 C=CC(=O)N1N=Cc2ccccc2C1CCC.Nc1ncc(Cc2cc(I)c3c(c2)OCO3)c(N)n1>>CCCC1c2ccccc2C=NN1  
 C(=O)/C=C/c1cc(Cc2cnc(N)nc2N)cc2c1OCO2  
 2532 C=CC(=O)NCc1cccc(C(=O)OC(C)(C)C)c1.O=C1NC(=O)C(c2c[nH]c3ccccc23)=C1Br>>CC(C)(C)OC  
 (=O)c1cccc(CNC(=O)/C=C/C2=C(c3c[nH]c4ccccc34)C(=O)NC2=O)c1  
 2533 C=Cc1ccc(C)nc1.CN1C2CCC1c1c([nH]c3c(Br)cccc13)C2>>Cc1ccc(/C=C/c2cccc3c4c([nH]c23)CC2C  
 CC4N2C)cn1  
 2534 C=CC(=O)OC.CCn1cnc2c(NCc3cccc(Br)c3)nc(N3CCC(C)CC3)nc21>>CCn1cnc2c(NCc3cccc(/C=C/C  
 (=O)OC)c3)nc(N3CCC(C)CC3)nc21  
 2535 Brc1cccc2ccccc12.C=Cc1ccc(C)cc1>>Cc1ccc(/C=C/c2cccc3ccccc23)cc1  
 2536 Brc1cccc1I.C=CC(=O)OCC>>CCOC(=O)/C=C/c1cccc1Br  
 2537 C=COCCCC.COc1ccc(OS(=O)(=O)C(F)(F)F)cc1>>C=C(OCCCC)c1ccc(OC)cc1  
 2538 C=CC(=O)OC.CC(=O)Oc1cc(I)c(O)c(C#N)c1C#N>>COC(=O)/C=C/c1cc(OC(C)=O)c(C#N)c(C#N)c1  
 2539 C=CC(=O)OC.COc1ccc2c(c1)CCN(c1ccc(CC(F)(F)F)cc1)C2(C)c1ccc(Br)cc1>>COC(=O)/C=C/c1ccc(  
 C2(C)c3ccc(OC)cc3CCN2c2ccc(CC(F)(F)F)cc2)cc1  
 2540 C=Cc1ccc(OC)cc1.Cc1ccccc1Br>>COc1ccc(/C=C/c2ccccc2C)cc1  
 2541 C=Cc1nnn(C)n1.Ic1ccccc1>>Cn1nnc(/C=C/c2ccccc2)n1  
 2542 C=Cc1cccc(C)c1.CCOC(=O)C(F)Br>>CCOC(=O)C(F)/C=C/c1cccc(C)c1  
 2543 C=CC(N)=O.FC(F)(F)c1cccc(I)c1>>NC(=O)/C=C/c1cccc(C(F)(F)F)c1  
 2544 C=CC(=O)OC.CC(C)(C)[Si](C)(C)OC[C@H]1O[C@H](c2ccc(Br)cc2)C=C[C@@H]1O[Si](C)(C)C(C  
 )(C)C>>COC(=O)/C=C/c1ccc([C@@H]2C=C[C@H](O[Si](C)(C)C(C)(C)C)[C@@H](CO[Si](C)(C)C  
 (C)(C)C)O2)cc1  
 2545 C=Cc1ccccc1.COC(=O)Cn1c(=O)c(Cl)nc2ccncn21>>COC(=O)Cn1c(=O)c(/C=C/c2ccccc2)nc2ccncn21  
 2546 CC(=O)/C=C/CC(NS(=O)(=O)c1ccc(C)cc1)c1ccccc1.COc1ccc(Br)cc1>>COc1ccc(/C(=C\C(C)=O)CC(  
 NS(=O)(=O)c2ccc(C)cc2)c2ccccc2)cc1  
 2547 C=CC(=O)OCC.CC(C)(C)[Si](C)(C)OCc1cc(=O)c(OS(=O)(=O)C(F)(F)F)co1>>CCOC(=O)/C=C/c1co  
 c(CO[Si](C)(C)C(C)(C)C)cc1=O  
 2548 BrC1=C(C2=COCCO2)CCCC1.C=CC(=O)OC(C)(C)C>>CC(C)(C)OC(=O)/C=C/C1=C(C2=COCCO2  
 )CCCC1  
 2549 C=CC#N.CC1(C)O[C@H]2CCC=C(Br)[C@H]2O1>>CC1(C)O[C@H]2CCC=C(/C=C/C#N)[C@H]2  
 2550 C=Cc1ccc(Br)cc1.Ic1ccccc1>>Brc1ccc(/C=C/c2ccccc2)cc1  
 2551 C=CP(=O)(OCC)OCC.CC(C)(C)OC(=O)Nc1ccccc1Br>>CCOP(=O)(/C=C/c1ccccc1NC(=O)OC(C)(C)  
 C)OCC  
 2552 C=Cc1ccccc1.O=S(=O)(Oc1cccc2ccnc12)C(F)(F)F>>C=C(c1ccccc1)c1cccc2ccnc12  
 2553 C=CC(F)(F)C(F)(F)C(F)(F)C(F)(F)C(F)(F)F.O=P(c1ccccc1)(c1ccccc1)c1ccc(Br)cc1>>O=P(c1  
 cccc1)(c1ccccc1)c1ccc(/C=C/C(F)(F)C(F)(F)C(F)(F)C(F)(F)C(F)(F)F)cc1  
 2554 C=CC(=O)OCC.COc1ccc(Br)nc1>>CCOC(=O)/C=C/c1ccc(OC)cn1  
 2555 C=CC(=O)OC(C)(C)C.N#Cc1cccc(Br)c1>>CC(C)(C)OC(=O)/C=C/c1cccc(C#N)c1  
 2556 C=Cc1ccc(CN(CC)CC)cc1.CCOC(=O)c1ccccc1Br>>CCOC(=O)c1ccccc1/C=C/c1ccc(CN(CC)CC)cc1  
 2557 C=CCOc1ccccc1C(C)C.Ic1ccccc1>>CC(C)c1ccccc1OC/C=C/c1ccccc1  
 2558 C=COCCCC.O=S(=O)(Oc1ccc(F)cc1)C(F)(F)F>>C=C(OCCCC)c1ccc(F)cc1  
 2559 C=CC#N.COc1c(CN(C(=O)C2CC2)c2cccc(Br)c2)ccc2c1OC(C)(C)C=C2>>COc1c(CN(C(=O)C2CC2)  
 c2cccc(/C=C/C#N)c2)ccc2c1OC(C)(C)C=C2  
 2560 C=CC(=O)OCCCC.COc1ccc(CN(Cc2ccc(OC)cc2)c2ccc(Br)cn2)cc1>>CCCCOC(=O)/C=C/c1ccc(N(C  
 c2ccc(OC)cc2)Cc2ccc(OC)cc2)nc1

2561 C=CC(=O)OC.CCN(CC)C(=O)n1c(Br)c(C)c2ccccc21>>CCN(CC)C(=O)n1c(/C=C/C(=O)OC)c(C)c2ccccc21  
 2562 C=CC(=O)OCC.Cc1cc(C)c(Br)c(C)c1>>CCOC(=O)/C=C/c1c(C)cc(C)cc1C  
 2563 C=CN1C(=O)c2ccccc2C1=O.CC(=O)c1ccc(Br)cc1>>CC(=O)c1ccc(/C=C/N2C(=O)c3ccccc3C2=O)cc  
 2564 C=Cc1ccccc1.O=S(=O)(Oc1ccccc1C(F)(F)F)C(F)(F)F>>C=C(c1ccccc1)c1ccccc1C(F)(F)F  
 2565 C=CC[C@]1(C)c2ccccc2N(C)[C@H]1c1ccccc1.Ic1ccccc1>>CN1c2ccccc2[C@@](C)(C/C=C/c2ccccc2)[C@@H]1c1ccccc1  
 2566 C=CC(C)(C)O.CCOCOc1ccc(C(C)=O)c(OC)c1I>>CCOCOc1ccc(C(C)=O)c(OC)c1/C=C/C(C)(C)O  
 2567 C=Cc1cc(O)c(OC)cc1F.Oc1ccc(O)c(I)c1>>COc1cc(F)c(/C=C/c2cc(O)ccc2O)cc1O  
 2568 C=CC(=O)N(CC)CC.CC(C)(C)c1ccc2[nH]c3c(c2c1)CC(=O)Nc1ccc(I)cc1-3>>CCN(CC)C(=O)/C=C/c1ccc2c(c1)-c1[nH]c3ccc(C(C)(C)C)cc3c1CC(=O)N2  
 2569 C=CC(N)=O.COc1cccc(I)c1>>COc1cccc(/C=C/C(N)=O)c1  
 2570 Br1ccccc1.C=CC1SC=NC1C>>CC1N=CSC1/C=C/c1ccccc1  
 2571 C=C[Si](C)(C)C.CC1(C)OC(=O)c2c(cccc2OS(=O)(=O)C(F)(F)F)O1>>CC1(C)OC(=O)c2c(/C=C/[Si](C)(C)C)cccc2O1  
 2572 C=Cc1cc(C(C)(C)C)c(O)c(C(C)(C)C)c1.Cc1cncc(C)c1-c1c(C)cc(Br)cc1C>>Cc1cncc(C)c1-c1c(C)cc(/C=C/c2cc(C(C)(C)C)c(O)c(C(C)(C)C)c2)cc1C  
 2573 C=CS(=O)(=O)F.Cc1ccc(S(=O)(=O)n2ccc3cc(I)ccc32)cc1>>Cc1ccc(S(=O)(=O)n2ccc3cc(/C=C/S(=O)(=O)F)ccc32)cc1  
 2574 C=CC(=O)OCCCC.CC(=O)O[IH2](OC(C)=O)c1ccccc1>>CCCCOC(=O)/C=C/c1ccccc1  
 2575 C=C1C(=O)O[C@H]2[C@H]1CC/C(C)=C/CC[C@]1(C)O[C@H]21.Ic1ccsc1>>C/C1=C\CC[C@]2(C)O[C@H]2[C@H]2OC(=O)/C=C/c3ccsc3)[C@H]2CC1  
 2576 C=Cc1cccc(C)c1.O=Cc1cccc(Br)c1>>Cc1cccc(/C=C/c2cccc(C=O)c2)c1  
 2577 C=CC(=O)OCCCC.COc1ccc2ccccc2c1Br>>CCCCOC(=O)/C=C/c1c(OC)ccc2ccccc12  
 2578 C=CC(N)=O.CCc1nc2cc(O)ccc2c(Oc2ccc(Br)cc2)c1-c1ccccc1>>CCc1nc2cc(O)ccc2c(Oc2ccc(/C=C/C(N)=O)cc2)c1-c1ccccc1  
 2579 C=CC(F)(F)F.O=[N+][O-]c1ccc(I)cc1>>O=[N+][O-]c1ccc(/C=C/C(F)(F)F)cc1  
 2580 C=Cc1ccc([Si](OC)(OC)OC)cc1.CC(C)(C)OP(=O)(Cc1ccc(/C=C/c2ccc(Br)cc2)cc1)OC(C)(C)C>>CO[Si](OC)(OC)c1ccc(/C=C/c2ccc(/C=C/c3ccc(CP(=O)(OC(C)(C)C)OC(C)(C)C)cc3)cc2)cc1  
 2581 C=Cc1ccccc1.COCn1nc(-c2ccccc2)c(Br)cc1=O>>COCn1nc(-c2ccccc2)c(/C=C/c2ccccc2)cc1=O  
 2582 C=CC(=O)OC.Cc1ccc(S(=O)(=O)n2cc(I)c([Si](C)(C)C)c2)cc1>>COC(=O)/C=C/c1cn(S(=O)(=O)c2cc(C)cc2)cc1[Si](C)(C)C  
 2583 C=CC1(C(=O)OCC)CCC(=O)CC1.C[C@H](NC(=O)OC(C)(C)C)c1ccc2ccc(Br)cc2n1>>CCOC(=O)C1(/C=C/c2ccc3ccc([C@H](C)NC(=O)OC(C)(C)C)nc3c2)CCC(=O)CC1  
 2584 C=CC(=O)CCCC.Cc1ccc(S(=O)(=O)Nc2ccccc2I)cc1>>CCCCC(=O)/C=C/c1ccccc1NS(=O)(=O)c1ccc(C)cc1  
 2585 C=Cc1ccc(SCC[Si](C)(C)C)cc1.O=[N+][O-]c1cc(/C=C/c2ccccc2)ccc1I>>C[Si](C)(C)CCSc1ccc(/C=C/c2ccc(/C=C/c3ccccc3)cc2[N+](=O)[O-]C=C1CC(c2ccc(Cl)cc2)OC1=O.Nc1ccccc1I>>Nc1ccccc1/C=C1\CC(c2ccc(Cl)cc2)OC1=O  
 2586 Br1cncc2ccccc12.C=CS(C)(=O)=O>>CS(=O)(=O)/C=C/c1cncc2ccccc12  
 2587 C=CC(=O)OC.CC(=O)Oc1ccc2c(I)ccccc1-2>>COC(=O)/C=C/c1ccccc2c(OC(C)=O)ccc1-2  
 2588 C=CC(=O)OC.COc1cc2c3ccccc3nc3c4ccc(Cl)cc4n(C)c(c1)c23>>COC(=O)/C=C/c1ccc2c3nc4ccccc4c4cc(OC)cc(c43)n(C)c2c1  
 2590 Br1ccccc2ccccc12.C=C(NC(C)=O)C(=O)O>>CC(=O)N/C=C\c1ccccc2ccccc12)C(=O)O  
 2591 Br1ccc(I)nc1.C=CCNC(=O)c1ccccn1>>O=C(NC/C=C\c1ccc(Br)cn1)c1ccccn1  
 2592 Br1ccccc1.C=CCOc1ccccc1CC>>CCc1ccccc1OC/C=C/c1ccccc1  
 2593 C=CC(=O)OC.O=C(c1ccc(I)cc1)c1ccc(Oc2ccccc2)cc1>>COC(=O)/C=C/c1ccc(C(=O)c2ccc(Oc3ccccc3)cc2)cc1  
 2594 C=Cc1ccc(C)cc1.O=Cc1cc(C(F)(F)F)ccc1Br>>Cc1ccc(/C=C/c2ccc(C(F)(F)F)cc2C=O)cc1  
 2595 C=C1CC(c2ccccc2)OC1=O.Fc1ccccc1I>>O=C1OC(c2ccccc2)C/C1=C\c1ccccc1F  
 2596 C=Cc1ccccc1.O=C(/C=C/c1cccc1)c1ccc(I)cc1>>O=C(/C=C/c1cccc1)c1ccc(/C=C/c2ccccc2)cc1  
 2597 C=Cc1c2ccccc2cc2ccccc12.Ic1ccc2c(c1)C1c3cccc4cccc(c34)C21>>C=C/c1c2ccccc2cc2ccccc12)\c1ccc2c(c1)C1c3cccc4cccc(c34)C21  
 2598 C=Cc1cncc1.CC(C)=CBr>>CC(C)=C/C=C/c1cncc1  
 2599 C=CC(=O)O.O=S(=O)(Nc1ccc(I)cc1)c1ccc(C(F)(F)F)c1>>O=C(O)/C=C/c1ccc(NS(=O)(=O)c2cccc(C(F)(F)F)c2)cc1  
 2600 C=Cc1ccccc1C.Nc1ccc(Cl)cc1Br>>Cc1ccccc1/C=C/c1cc(Cl)ccc1N  
 2601 C=Cc1ccc(Cl)cc1.O=CN(C=O)CCCC(Br)C(F)(F)F>>O=CN(C=O)CCCC(/C=C/c1ccc(Cl)cc1)C(F)(F)F  
 2602 C=COCCCC.O=S(=O)(Oc1ccccc2c1CCC=C2)C(F)(F)F>>C=C(OCCCC)c1ccccc2c1CCC=C2  
 2603 C=CC(=O)OCC.CCn1cc(Br)cn1>>CCOC(=O)/C=C/c1cnn(CC)c1



2604 Br1ccc(-c2nc3ccccc3n2)cc1.C=CCn1c(-c2ccc([N+](=O)[O-])cc2)nc2ccccc2c1=O>>O=c1c2ccccc2nc(-c2ccc([N+](=O)[O-])cc2)n1C/C=C/c1ccc(-  
 2605 C=CC(=O)OC(C)(C)C.COc1ccc2ccccc2c1Br>>COc1ccc2ccccc2c1/C=C/C(=O)OC(C)(C)C  
 2606 C=Cc1ccncc1.C[Si](C)(C)CCOCn1nc(I)c2ccc(C=O)cc21>>C[Si](C)(C)CCOCn1nc(/C=C/c2ccncc2)c2  
 2607 ccc(C=O)cc21  
 2608 C=CC(=O)OC(C)(C)C.Fc1ccc(I)cn1>>CC(C)(C)OC(=O)/C=C/c1ccc(F)nc1  
 2609 C=Cc1cccc(N)c1.CCN1c2ncc(I)cc2C(=O)N(C)c2cccncc21>>CCN1c2ncc(/C=C/c3cccc(N)c3)cc2C(=O)  
 2610 N(C)c2cccncc21  
 2611 C=Cc1ccc(OC)cc1.COc1ccc(Cl)cc1>>COc1ccc(/C=C/c2ccc(OC)cc2)cc1  
 2612 C=CC(=O)OCC.Cc1nc(N)nc(N[C@H]2CC[C@H](OCC(N)=O)CC2)c1Br>>CCOC(=O)/C=C/c1c(C  
 2613 nc(N)nc1N[C@H]1CC[C@H](OCC(N)=O)CC1  
 2614 C=CC(=O)NCCCCC(=O)OC.CC(=O)OC[C@H]1C=C[C@H](n2cc(I)c(=O)[nH]c2=O)O1>>COC(  
 2615 =O)CCCCCNC(=O)/C=C/c1cn([C@H]2C=C[C@H](COC(C)=O)O2)c(=O)[nH]c1=O  
 2616 C=Cc1ccc([Si](OC)(OC)OC)cc1.CCOP(=O)(Cc1ccc(Br)cc1)OCC>>CCOP(=O)(Cc1ccc(/C=C/c2ccc([  
 2617 Si](OC)(OC)OC)cc2)cc1)OCC  
 2618 C=Cc1cccc1.O=S(=O)(Oc1ccc2ncccc2c1)C(F)(F)F>>C=C(c1cccc1)c1ccc2ncccc2c1  
 2619 C=Cc1cccc1.CCOC(=O)C(C)(F)Br>>CCOC(=O)C(C)(F)/C=C/c1cccc1  
 2620 C=Cc1ccc(OC)c(OC)c1.COc1cc[nH]c1/C=C1\C(=O)Nc2cccc(I)c21>>COc1ccc(/C=C/c2cccc3c2/C(=C  
 2621 /c2[nH]ccc2OC)C(=O)N3)cc1OC  
 2622 C=CS(=O)(=O)F.CCc1ccc(I)cc1>>CCc1ccc(/C=C/S(=O)(=O)F)cc1  
 2623 C=Cc1cc(C(C)(C)C)c(O)c(C(C)(C)C)c1.Cc1cncc(C)c1-  
 2624 c1c(C)cc(OS(=O)(=O)C(F)(F)F)cc1C>>Cc1cncc(C)c1-  
 2625 c1c(C)cc(/C=C/c2cc(C(C)(C)C)c(O)c(C(C)(C)C)c2)cc1C  
 2626 C=CC(=O)OCC.CN1CCc2ccc(Br)cc2C1>>CCOC(=O)/C=C/c1ccc2c(c1)CN(C)CC2  
 2627 C=Cc1ccc(C#N)cc1.N[C@H](Cc1c[nH]c2ccc(Br)cc12)C(=O)O>>N#Cc1ccc(/C=C/c2ccc3[nH]cc(C[  
 2628 C@H](N)C(=O)O)c3c2)cc1  
 2629 C=CC(=O)Nc1ccc(OC)cc1.COc1ccc2c(=O)c(I)coc2c1>>COc1ccc(NC(=O)/C=C/c2coc3cc(OC)ccc3c2  
 2630 =O)cc1  
 2631 C=CC(=O)OC.OCc1cc(-c2ccc(Br)cc2)cc(C23CC4CC(CC(C4)C2)C3)c1O>>COC(=O)/C=C/c1ccc(-  
 2632 c2cc(CO)c(O)c(C34CC5CC(CC(C5)C3)C4)c2)cc1  
 2633 CC(=O)/C=C/CC(NS(=O)(=O)c1ccc(C)cc1)C1CC1.Cc1ccc(Br)cc1>>CC(=O)/C=C(/CC(NS(=O)(=O)c  
 2634 1ccc(C)cc1)C1CC1)c1ccc(C)cc1  
 2635 C=CC(=O)OC.Cc1ccc(S(=O)(=O)Nc2ccccc2Sc2ccc(I)s2)cc1>>COC(=O)/C=C/c1ccc(Sc2ccccc2NS(=  
 2636 O)(=O)c2ccc(C)cc2)s1  
 2637 \*CNCCCCOCCOCCOCCNC(=O)COc1ccc(C(Cc2cc(OC)cc(OC)c2)NC(=O)c2ccc(C=C)cc2)cc1.N#C  
 2638 Cc1ccc(I)cc1>>\*CNCCCCOCCOCCOCCNC(=O)COc1ccc(C(Cc2cc(OC)cc(OC)c2)NC(=O)c2ccc(/C=  
 2639 C/c3ccc(CC#N)cc3)cc2)cc1  
 2640 C=Cc1ccccn1.O=[N+](O-)c1ccc2c(I)nn(C3CCCCO3)c2c1>>O=[N+](O-  
 2641 )c1ccc2c(/C=C/c3ccccc3)nn(C3CCCCO3)c2c1  
 2642 C=CC(=O)OC.O=S(=O)(c1ccc(Cl)cc1)N1CCc2cc(Br)cncc21>>COC(=O)/C=C/c1cncc2c(c1)CCN2S(=O  
 2643 )(=O)c1ccc(Cl)cc1  
 2644 C=Cc1ccc2c(c1)CC[C@H]1[C@@H]2CC[C@]2(C)C(=O)CC[C@H]12.CCOC(=O)C(F)I>>CCO  
 2645 C(=O)C(F)/C=C/c1ccc2c(c1)CC[C@H]1[C@@H]2CC[C@]2(C)C(=O)CC[C@H]12  
 2646 C=CC(=O)OCC.Oc1ccc(Br)c(C(F)(F)F)c1>>CCOC(=O)/C=C/c1ccc(O)cc1C(F)(F)F  
 2647 C=Cc1cc2c(c(=O)n(C)c(=O)n2C)n1C.CC(=O)c1cccc(Br)c1>>CC(=O)c1cccc(/C=C/c2cc3c(c(=O)n(C)  
 2648 c(=O)n3C)n2C)c1  
 2649 C=CS(=O)(=O)F.Cc1cccc(I)c1>>Cc1cccc(/C=C/S(=O)(=O)F)c1  
 2650 C=Cc1cccc1.O=Cc1sc2ccccc2c1Br>>O=Cc1sc2ccccc2c1/C=C/c1cccc1  
 2651 Br1cccn1.C=CC(=O)OCCCC>>CCCCOC(=O)/C=C/c1cccn1  
 2652 C=CC(=O)OC.CC=CCn1cc(I)c(=O)[nH]c1=O>>CC=CCn1cc(/C=C/C(=O)OC)c(=O)[nH]c1=O  
 2653 C=CC(N)=O.Cc1nc(Br)c2c(c1O)COC(C)(C)OC2>>Cc1nc(/C=C/C(N)=O)c2c(c1O)COC(C)(C)OC2  
 2654 C=CC(C)CC.Fc1cccc(CCl)c1>>C=C(Cc1cccc(F)c1)C(C)CC  
 2655 Br1ccc(C(=C(c2ccccc2)c2ccccc2)c2ccccc2)cc1.C=Cc1ccc(-  
 2656 c2ccc3c(c2)c2ccccc2n3CC)cc1>>CCn1c2ccccc2c2cc(-  
 2657 c3ccc(/C=C/c4ccc(C(=C(c5ccccc5)c5ccccc5)c5ccccc5)cc4)cc3)ccc21  
 2658 C=CC(=O)OC.CC(=O)c1cc(Br)ccc1O>>COC(=O)/C=C/c1ccc(O)c(C(C)=O)c1  
 2659 Br1enc2ccccc2c1.C=COCCCC>>C=C(OCCCC)c1enc2ccccc2c1  
 2660 C=CCN1C(=O)c2ccccc2C1=O.COC(=O)c1ccc(Br)cc1>>COC(=O)c1ccc(/C=C/CN2C(=O)c3ccccc3C2  
 2661 =O)cc1  
 2662 C=CC(=O)OCC.CC(C)(C)[Si](C)(C)OCc1cc(Br)ccn1>>CCOC(=O)/C=C/c1ccncc(CO[Si](C)(C)C(C)(C  
 2663 )C)c1

2641 C=Cc1cccc1.Cn1c2cccc2c2c(-c3cccc3)c(I)ccc21>>Cn1c2cccc2c2c(-  
 2642 C=C[C@H](O)[C@H](O)COCc1cccc1.c1ccc([I+])c2cccs2)cc1>>O[C@@H](/C=C/c1cccs1)[C@@  
 H](O)COCc1cccc1  
 Br1cnc2cccc2c1.C=CCO[C@]1(C)C[C@H](C)C(=O)[C@H](C)[C@H]2N(C)C(=O)O[C@]2(C)[  
 2643 C@@H](CC)OC(=O)[C@H](C)C(=O)[C@H](C)[C@H]1O[C@@H]1O[C@H](C)C[C@H](N(C)C)[C  
 @H]1O>>CC[C@H]1OC(=O)[C@H](C)C(=O)[C@H](C)[C@H](O[C@@H]2O[C@H](C)C[C@H]  
 (N(C)C)[C@H]2O)[C@]1(C)(OC/C=C/c2cnc3cccc3c2)C[C@H](C)C(=O)[C@H](C)[C@H]2N(C)C(  
 2644 C=CC(OCC)OCC.O=Cc1cc(Cl)ccc1Br>>CCOC(/C=C/c1ccc(Cl)cc1C=O)OCC  
 C=Cc1ccc(/C=C/c2ccc(N)cc2)cc1.O=C(ON1C(=O)CCC1=O)c1ccc(I)cc1>>Nc1ccc(/C=C/c2ccc(/C=C/  
 2645 c3ccc(C(=O)ON4C(=O)CCC4=O)cc3)cc2)cc1  
 Br1cccc1I.C=Cc1cccc1>>Br1cccc1/C=C/c1cccc1  
 2646 C=Cc1ccc(F)cc1.Cc1nn(C)c(=O)c(-c2c(F)ccc(Cl)c2Br)c1OC(=O)C(C)C>>Cc1nn(C)c(=O)c(-  
 2647 c2c(F)ccc(Cl)c2/C=C/c2ccc(F)cc2)c1OC(=O)C(C)C  
 C=CC(=O)OCC.Oc1cc(Br)c(C2OCCCO2)cc1OC>>CCOC(=O)/C=C/c1cc(OC)c(OC)cc1C1OCCCO1  
 2648 C=Cc1ccc(OC)c(OC)c1.COc1cc(Br)c(C=O)cc1OC>>COc1ccc(/C=C/c2cc(OC)c(OC)cc2C=O)cc1OC  
 2649 C=CC(OC)OC.Nc1cccc1I>>COC(/C=C/c1cncnc1N)OC  
 2650 Br1cnc2cccc2c1.C=C[Si](CC)(CC)CC>>CC[Si](/C=C/c1cnc2cccc2c1)(CC)CC  
 2651 C=CCNC(=O)OC(C)(C)C.O=C1CCCc2ccc(Br)cc21>>C=C(CNC(=O)OC(C)(C)C)c1ccc2c(c1)C(=O)C  
 2652 C=CC(C)=O.COc1ccc(I)cc1>>COc1ccc(/C=C/C(C)=O)cc1  
 2653 C=COCCCC.CNc1ncc(Br)en1>>C=C(OCCCC)c1cnc(NC)nc1  
 2654 C=Cc1ccc(/C=C/c2ccc(N(C)C)cc2)cc1.O=c1ccc2c(-c3ccc(I)cc3S(=O)(=O)O)c3ccc(O)cc3oc-  
 2655 2c1>>CN(C)c1ccc(/C=C/c2ccc(/C=C/c3ccc(-c4c5ccc(=O)cc-  
 2656 C=C.COC(=O)C=CBr>>C=CC=CC(=O)OC  
 C=CB1OC(=O)CN(C)CC(=O)O1.Cc1nn(C)c(=O)c(-  
 2657 c2c(F)ccc(Cl)c2Br)c1OC(=O)C(C)C>>Cc1nn(C)c(=O)c(-  
 c2c(F)ccc(Cl)c2/C=C/B2OC(=O)CN(C)CC(=O)O2)c1OC(=O)C(C)C  
 2658 Br1cccc2cccc12.C=Cc1ccc(OC)cc1>>COc1ccc(/C=C/c2cccc3cccc23)cc1  
 2659 Br1cccc2cccc12.C=C(C)C(=O)OC>>COC(=O)/C(C)=C/c1cccc2cccc12  
 2660 C=CCOc1cccc1.Cc1ccc(I)cc1C>>Cc1ccc(/C=C/COc2cccc2)cc1C  
 2661 C=CNC(C)=O.CC(=O)c1ccc(OS(=O)(=O)C(F)(F)F)cc1>>C=C(NC(C)=O)c1ccc(C(C)=O)cc1  
 2662 Br1ccc(I)cc1.C=Cc1cccc(OC)c1>>COc1cccc(/C=C/c2ccc(Br)cc2)c1  
 2663 C=CC(=O)OC(C)(C)C.CC(=O)c1ccc(Br)cc1>>CC(=O)c1ccc(/C=C/C(=O)OC(C)(C)C)cc1  
 2664 C=CC(=O)OCC.Cc1ccc(N)c(I)c1>>CCOC(=O)/C=C/c1cc(C)ccc1N  
 2665 C=CC(C)O.Ic1cccc1>>CC(O)/C=C/c1cccc1  
 2666 C=Cc1cccc1.CC1c[n+][O-]c(CC)c(Cl)n1>>CCc1c[n+][O-]c(CC)c(/C=C/c2cccc2)n1  
 2667 C=CCN(C(=O)C(C)(C)C)C1CCCCC1.O=C1Nc2ncccc2[C@@]12Cc1cc(Br)nc1C2>>CC(C)(C)(=O)  
 N(C)/C=C/c1cnc2c(c1)C[C@@]1(C2)C(=O)Nc2ncccc21)C1CCCCC1  
 2668 C=CC(=O)OC.COc1c(CN(C(=O)c2cccc2)c2ccc(Br)c2)ccc2c1OC(C)(C)[C@H](O)[C@H]2N1CCCC  
 C1>>COC(=O)/C=C/c1cccc(N(Cc2ccc3c(c2OC)OC(C)(C)[C@H](O)[C@H]3N2CCCC2)C(=O)c2cc  
 C=CC(=O)OCC.Cc1cc2c(-  
 2669 c3cccc(Br)c3)c(CC(=O)Nc3ccc(F)cc3C(F)(F)F)c(=O)cc2cc1Cl>>CCOC(=O)/C=C/c1cccc(-  
 c2c(CC(=O)Nc3ccc(F)cc3C(F)(F)F)c(=O)cc3cc(Cl)c(C)cc23)c1  
 2670 C=CC(=O)OCC.N#Cc1c(-c2cccc(Br)c2)cc(-c2cccc2)nc1N>>CCOC(=O)/C=C/c1cccc(-c2cc(-  
 c3cccc3)nc(N)c2C#N)c1  
 2671 C=CC(=O)OC(C)(C)C.Cc1ccc(S(=O)(=O)n2cc(C=O)c3c(Br)cccc32)cc1>>Cc1ccc(S(=O)(=O)n2cc(C=  
 O)c3c(/C=C/C(=O)OC(C)(C)C)cccc32)cc1  
 2672 C=CC(=O)CCC.CC(=O)c1ccc(Br)cc1>>CCCC(=O)/C=C/c1ccc(C(C)=O)cc1  
 2673 C=CC(=O)OC.Cc1nc2ccc(Br)en2c1Cc1cccc1OC(F)F>>COC(=O)/C=C/c1ccc2nc(C)c(Cc3cccc3OC(  
 F)F)n2c1  
 2674 C=CC(CCCCCCCC(=O)OC)O[Si](C)(C)C(C)(C)C.CCC1=C(Br)CCC1=O>>CCC1=C(/C=C/C(CCCC  
 CCCC(=O)OC)O[Si](C)(C)C(C)(C)C)CCC1=O  
 C=Cc1ccc([N+](=O)[O-])cc1.O=[N+][O-]c1cc(I)cc([N+](=O)[O-])c1>>O=[N+][O-]  
 2675 ]c1ccc(/C=C/c2cc([N+](=O)[O-])cc([N+](=O)[O-])c2)cc1  
 2676 C=CC(=O)N(C)OC.Nc1ccc(I)cc1>>CON(C)C(=O)/C=C/c1ccc(N)cc1  
 2677 C=Cc1cccc1.Nc1ncn2c(C3CCC3)nc(I)c12>>Nc1ncn2c(C3CCC3)nc(/C=C/c3cccc3)c12  
 2678 C=CC(=O)OCC.Clc1cccc(I)c1>>CCOC(=O)/C=C/c1cccc(Cl)c1  
 2679 Br1cnc2[nH]ncc2c1.C=CC(=O)N(C)Cc1cc2cccc2n1C>>CN(Cc1cc2cccc2n1C)C(=O)/C=C/c1cnc2[  
 nH]ncc2c1  
 C=CC(=O)C(C)(C)CO[Si](C)(C)C(C)(C)C.O=[N+][O-]  
 2680 ]c1ccc(I)cc1>>CC(C)(CO[Si](C)(C)C(C)(C)C)C(=O)/C=C/c1ccc([N+](=O)[O-])cc1  
 2681 C=CC(C)=O.O=Cc1ccc(Cl)cc1>>CC(=O)/C=C/c1ccc(C=O)cc1

2682 C=CC(=O)OC.COc1ccc2cc(Br)ccc2c1>>C=C(C(=O)OC)c1ccc2cc(OC)ccc2c1  
 2683 Br1cccs1.C=CB1OC(C)CC(C)(C)O1>>CC1CC(C)(C)OB(/C=C/c2cccs2)O1  
 2684 C=CC(=O)OC(C)(C)C.CC(C)(C)OC(=O)CCOCc1cc2c(cc1Br)OCO2>>CC(C)(C)OC(=O)/C=C/c1cc2c(cc1COCCC(=O)OC(C)(C)C)OCO2  
 2685 C=COCCCC.O=S(=O)(Oc1cccc2ccccc12)C(F)(F)F>>C=C(OCCCC)c1cccc2ccccc12  
 2686 C=CCn1c(-c2ccc(OC)c2)nc2ccccc2c1=O.O=C(CN1C(=O)COc2ccccc21)c1ccc(Br)cc1>>CCOc1ccc(-C=Cc1ccc(C(C)(C)C)cc1.CCOC(=O)C(F)(F)I>>CCOC(=O)C(F)(F)/C=C/c1ccc(C(C)(C)C)cc1  
 2687 C=CC(=O)OCC.CC(C)(C)OC(=O)NC1(C(=O)Nc2ccc(I)cc2)CCC1>>CCOC(=O)/C=C/c1ccc(NC(=O)C2(NC(=O)OC(C)(C)C)CCC2)cc1  
 2688 C=CCCCCCC.CC(=O)c1ccc(Br)cc1>>CCCCCC/C=C/c1ccc(C(C)=O)cc1  
 2689 C=CC(=O)OC(C)(C)C.CNc1c(C)cc(C)cc1I>>CNc1c(C)cc(C)cc1/C=C/C(=O)OC(C)(C)C  
 2690 C=CC(=O)OC.Cc1c(Oc2cc(F)cc(C#N)c2)ccc(S(=O)(=O)C(F)(F)F)c1Br>>COC(=O)/C=C/c1c(S(=O)(=O)C(F)(F)F)ccc(Oc2cc(F)cc(C#N)c2)c1C  
 2691 C=Cc1ccc(CCl)cc1.Ic1ccccc1>>ClCc1ccc(/C=C/c2ccccc2)cc1  
 2692 Br1ccc2c(c1)c(CCc1ccccc1)en2Cc1ccccc1.C=CC(=O)OC>>COC(=O)/C=C/c1ccc2c(c1)c(CCc1ccccc1)en2Cc1ccccc1  
 2693 C=CC(=O)OC(C)(C)C.CCCOc1ccc(Br)c(C(=O)OC)c1>>CCCOc1ccc(/C=C/C(=O)OC(C)(C)C)c(C(=O)OC)c1  
 2694 C=Cc1ccc(C)cc1.Cc1ccc(Br)cc1>>Cc1ccc(/C=C/c2ccc(C)cc2)cc1  
 2695 C=CC#N.COC(=O)c1ccc(I)cc1>>COC(=O)c1ccc(/C=C/C#N)cc1  
 2696 C=CC(=O)OC.CS(=O)(=O)Nc1ccc(I)cc1F>>COC(=O)/C=C/c1ccc(NS(C)(=O)=O)c(F)c1  
 2697 C=Cc1ccc(N(c2ccc(OCCCCC)cc2)c2ccc(OCCCCC)cc2)cc1.O=Cc1ccc(Br)cc1>>CCCCCOc1ccc(N(c2ccc(/C=C/c3ccc(C=O)cc3)cc2)c2ccc(OCCCCC)cc2)cc1  
 2698 C=COCCN(C)C.Cc1ccccc1Br>>C=C(OCCN(C)C)c1ccccc1C  
 2699 C=Cc1ccccc1.Cc1ccc2c(-c3ccccc3C)c(Br)c(=O)oc2c1>>Cc1ccc2c(-c3ccccc3C)c(/C=C/c3ccccc3)c(=O)oc2c1  
 2700 C=CCN(C(=O)OCc1ccccc1)C(=O)OC(C)(C)C.COC(=O)c1ccc(Br)cc1>>COC(=O)c1ccc(/C=C/CN(C(=O)OCc2ccccc2)C(=O)OC(C)(C)C)cc1  
 2701 C=Cc1cncn1.C[Si](C)(C)CCOCn1nc(I)c2ccc(C=O)cc21>>C[Si](C)(C)CCOCn1nc(/C=C/c2cncn2)c2ccc(C=O)cc21  
 2702 C=CC(=O)N1C(=O)OC[C@H]1Cc1ccccc1.C[Si](C)(C)CN(Cc1cc2c(cc1I)OCO2)C(CC1OCCO1)[Si](C)(C)C>>C[Si](C)(C)CN(Cc1cc2c(cc1/C=C/C(=O)N1C(=O)OC[C@H]1Cc1ccccc1)OCO2)C(CC1OCCO1)[Si](C)(C)C  
 2703 C=CC(=O)OC(C)(C)C.COc1ccc(S(=O)(=O)c2ccc3ccccc(Br)c3n2)cc1>>COc1ccc(S(=O)(=O)c2ccc3ccccc(/C=C/C(=O)OC(C)(C)C)c3n2)cc1  
 2704 C=Cc1cccn1.CN(C)c1ccc(-c2ccc(CN(C(=O)C3CCCCC3)c3ccccc(I)c3)cc2)cc1>>CN(C)c1ccc(-c2ccc(CN(C(=O)C3CCCCC3)c3ccccc(/C=C/c4cccn4)c3)cc2)cc1  
 2705 C=CC(OCC)OCC.CC(=O)c1ccc(I)cc1>>CCOC(/C=C/c1ccc(C(C)=O)cc1)OCC  
 2706 C=Cc1ccccc1.N#Cc1cc2ccc(Br)cc2c1ccc1ccccc12>>N#Cc1cc2ccc(/C=C/c3ccccc3)cc2c1ccc1ccccc1  
 2707 C=C(NC(C)=O)C(=O)OCc1ccccc1.CCc1cc(Br)ccc1N>>CCc1cc(/C=C/(NC(C)=O)C(=O)OCc2ccccc2)ccc1N  
 2708 C=CC(=O)OC.Cc1ccc(C(=C(I)CC[Se]c2ccccc2)c2ccc(C)cc2)cc1>>COC(=O)/C=C/C(CC[Se]c1ccccc1)=C(c1ccc(C)cc1)c1ccc(C)cc1  
 2709 Br1ccc(N(c2ccccc2)c2ccccc2)cc1.C=Cc1ccc(C(=O)OC)c(OC)c1>>COC(=O)c1ccc(/C=C/c2ccc(N(c3ccccc3)c3ccccc3)cc2)cc1OC  
 2710 C=C/C=C(/OCC)C(=O)OC.COc1ccc(I)cc1>>CCO/C=C/C=C/c1ccc(OC)cc1)C(=O)OC  
 2711 Br1cccn1.C=CC(C)=O>>CC(=O)/C=C/c1cccn1  
 2712 C=Cc1nc2c(N)ncnc2n1[C@H]1O[C@H](CO[Si](C)(C)C(C)(C)C)[C@H](O[Si](C)(C)C(C)(C)C)[C@H]1O[Si](C)(C)C(C)(C)C.CC(=O)c1ccc(Br)cc1>>CC(=O)c1ccc(/C=C/c2nc3c(N)ncnc3n2[C@H]2O[C@H](CO[Si](C)(C)C(C)(C)C)[C@H](O[Si](C)(C)C(C)(C)C)[C@H]2O[Si](C)(C)C(C)(C)C)cc1C=CCC(O)c1nc(-c2cc(OC)nc2F)cn1.COC(=O)[C@H](C)[C@H](c1ccc(I)c(O)c1)C1CC1>>COC(=O)[C@H](C)[C@H](c1ccc(/C=C\CC(O)c2cnc(-c3cc(OC)nc3F)cn2)c(O)c1)C1CC1  
 2713 C=CC(C)=O.Cc1cc(C)c([I+])c2c(C)cc(C)cc2C)c(C)c1>>CC(=O)/C=C/c1c(C)cc(C)cc1C  
 2714 C=Cc1ccccc1.COC(=O)c1cc(S(C)(=O)=O)c(Br)cc1C>>COC(=O)c1cc(S(C)(=O)=O)c(/C=C/c2ccccc2)cc1C  
 2715 C=CC(=O)OCC.CCC(=O)c1cccc(Br)c1>>CCOC(=O)/C=C/c1cccc(C(=O)CC)c1  
 2716 C=CC(=O)OC.O=Cc1ccc(I)cc1O>>COC(=O)/C=C/c1ccc(C(=O)c(O)c1  
 2717 C=CCc1ccc(OC)c(OC)c1.COC(=O)c1cc(OC)c(OC)cc1Br>>COC(=O)c1cc(OC)c(OC)cc1/C=C/Cc1ccc(OC)c(OC)c1  
 2718  
 2719

2720 C=CC(=O)CCCCC.COc1ccc(Br)cc1>>CCCCC(=O)/C=C/c1ccc(OC)cc1  
 2721 C=Cc1ccc(/C=C/c2ccccc2)cc1.CC1(C)c2cc(I)ccc2N2Cc3cc([N+](=O)[O-]  
 2722 ]ccc3OC21C>>CC1(C)c2cc(/C=C/c3ccc(/C=C/c4ccccc4)cc3)ccc2N2Cc3cc([N+](=O)[O-]  
 2723 C=Cc1ccc(C(F)(F)F)cc1.Cc1ccc(Br)cc1>>Cc1ccc(/C=C/c2ccc(C(F)(F)F)cc2)cc1  
 2724 C=Cc1cccc(OC)c1.Oc1ccc(O)c(I)c1>>COc1cccc(/C=C/c2cc(O)ccc2O)c1  
 2725 C=CC(=O)OCC.Fc1ccc(-c2c(Br)c(C(F)(F)F)nn2-c2ccccc2)cc1>>CCOC(=O)/C=C/c1c(C(F)(F)F)nn(-  
 2726 c2ccccc2)c1-c1ccc(F)cc1  
 2727 Br1cccc1-c1cccc1.C=CC(=O)OCCCC>>CCCCOC(=O)/C=C/c1cccc1-c1cccc1  
 2728 Br1cnc2ccccc2c1.C=CC(=O)CCC>>CCCC(=O)/C=C/c1cnc2ccccc2c1  
 2729 C=CS(=O)(=O)NCC(C)C.COc1ccc(Br)c(CNC(=O)OC(C)(C)C)c1>>COc1ccc(/C=C/S(=O)(=O)NCC(  
 2730 C)C)c(CNC(=O)OC(C)(C)C)c1  
 2731 C=CCCC=C(C)C.ClCc1cccc(Oc2ccccc2)c1>>C=C(CCCC=C(C)C)Cc1cccc(Oc2ccccc2)c1  
 2732 C=CC(=O)OC.O=C(O)c1ccc(Br)o1>>COC(=O)/C=C/c1ccc(C(=O)O)o1  
 2733 C=CC(N)=O.COc1ncccc1I>>COc1ncccc1/C=C/C(N)=O  
 2734 Br1ccc(I)cc1.C=C(F)C(=O)OC>>COC(=O)/C(F)=C/c1ccc(Br)cc1  
 2735 C=CC(=O)O.CC(C)(C)OC(=O)Nc1ccc(Br)cc1>>CC(C)(C)OC(=O)Nc1ccc(/C=C/C(=O)O)cc1  
 2736 C=Cc1nc2c(N)nnc2n1[C@H]1C[C@H](O[Si](C)(C)C(C)(C)C)[C@@H](CO[Si](C)(C)C(C)(C)C)O1.  
 2737 COc1ccc(Br)cc1>>COc1ccc(/C=C/c2nc3c(N)nnc3n2[C@H]2C[C@H](O[Si](C)(C)C(C)(C)C)[C@@  
 2738 H](CO[Si](C)(C)C(C)(C)C)O2)cc1  
 2739 C=CCCCN.ClCc1ccc(-c2ccccc2)cc1>>C=C(CCCCN)Cc1ccc(-c2ccccc2)cc1  
 2740 Br1ccc2c(c1)-c1ncn1CCO2.C=CC(=O)OC(C)(C)C>>CC(C)(C)OC(=O)/C=C/c1ccc2c(c1)-  
 2741 BrC=Cc1cccc1.C=C>>C=CC=Cc1cccc1  
 2742 \*CNCCCOCCOCCOCCNC(=O)COc1ccc(C(Cc2cc(OC)cc(OC)c2)NC(=O)c2cccc(C=C)c2)cc1.Cc1cc  
 2743 ([N+](=O)[O-]  
 2744 ]ccc1I>>\*CNCCCOCCOCCOCCNC(=O)COc1ccc(C(Cc2cc(OC)cc(OC)c2)NC(=O)c2cccc(/C=C/c3  
 2745 ccc([N+](=O)[O-])cc3C)c2)cc1  
 2746 C=Cc1ccc(N(CCCC)CCCC)cc1.CCCn1c(=O)c(/C=C/c2ccc(N(C)C)cc2)nc2ccc(Br)cc21>>CCCCN(CC  
 2747 CC)c1ccc(/C=C/c2ccc3nc(/C=C/c4ccc(N(C)C)cc4)c(=O)n(CCC)c3c2)cc1  
 2748 C=CCCCCCC.CC(=O)c1cccc1Br>>CCCCC/C=C/c1cccc1C(C)=O  
 2749 C=CC(=O)OC(C)(C)C.CCOC(=O)Cc1cccc1Br>>CCOC(=O)Cc1cccc1/C=C/C(=O)OC(C)(C)C  
 2750 C=C.N#Cc1cccc(I)c1>>C=Cc1cccc(C#N)c1  
 2751 C=Cc1cccc1.O=[N+](O-)]c1cccc1Br>>O=[N+](O-)]c1cccc1/C=C/c1cccc1  
 2752 C=CS(=O)(=O)c1cccc1.CC(=O)c1ccc(Br)cc1>>CC(=O)c1ccc(/C=C/S(=O)(=O)c2ccccc2)cc1  
 2753 C=COCC.COc1ccc(I)cc1>>CCO/C=C/c1ccc(OC)cc1  
 2754 C=CC(C)O.c1ccc([I+])c2cccs2)cc1>>CC(O)/C=C/c1cccs1  
 2755 C=CC(=O)N(C)C.Clc1nc(N2CCOCC2)c2sc3ncc(Br)cc3c2n1>>CN(C)C(=O)/C=C/c1cnc2sc3c(N4CC  
 2756 OCC4)nc(Cl)nc3c2c1  
 2757 C=CS(=O)c1cccc1.CC(=O)Nc1ccc(Br)cc1>>CC(=O)Nc1ccc(/C=C/S(=O)c2ccccc2)cc1  
 2758 C=CC(=O)OCC.O=C1CCC(Cc2ccccc2Br)CN1Cc1cccc1>>CCOC(=O)/C=C/c1cccc1CC1CCC(=O)  
 2759 N(Cc2ccccc2)C1  
 2760 C=CC(=O)OC(C)(C)C.Cn1cnc1Br>>Cn1cnc1/C=C/C(=O)OC(C)(C)C  
 2761 C=Cc1ccc(N2CCN(C(C)=O)CC2)cc1.Clc1cc(Br)cc(Cn2cnc2)c1>>CC(=O)N1CCN(c2ccc(/C=C/c3ccc(  
 2762 Cl)cc(Cn4cnc4)c3)cc2)CC1  
 2763 C=Cc1cnc1.Nc1cccc(Br)c1>>Nc1cccc(/C=C/c2cnc1)c1  
 2764 C=CC(=O)OC(C)(C)C.CC(C)(C)OC(=O)N1CCN(c2nnc3c(Br)cccc23)CC1>>CC(C)(C)OC(=O)/C=C/  
 2765 c1cccc2c(N3CCN(C(=O)OC(C)(C)C)CC3)nnc12  
 2766 C=CC(=O)N(C)C.CC(=O)c1ccc(I)cc1>>CC(=O)c1ccc(/C=C/C(=O)N(C)C)cc1  
 2767 C=CCC(O)CCCCC.Ic1cccc1>>CCCCCCC(O)/C=C/c1cccc1  
 2768 C=CC(=O)OC.Nc1ccc(OC(F)(F)F)cc1Br>>COC(=O)/C=C/c1cc(OC(F)(F)F)ccc1N  
 2769 C=Cc1cnc1.O=Cc1cccc1Br>>O=Cc1cccc1/C=C/c1cnc1  
 2770 C=CC(=O)O.O=C1C(O)=C(I)C(=O)c2ccccc21>>O=C(O)/C=C/C1=C(O)C(=O)c2ccccc2C1=O  
 2771 C=CC(=O)OC.O=C1Nc2c(Br)cccc2C1(F)F>>COC(=O)/C=C/c1cccc2c1NC(=O)C2(F)F  
 2772 C=Cc1cccc1.O=C(OC[C@H]1O[C@@H](n2cc(I)c(=O)[nH]c2=O)C[C@@H]1OC(=O)c1cccc1)c1c  
 2773 cccc1>>O=C(OC[C@H]1O[C@@H](n2cc(/C=C/c3ccccc3)c(=O)[nH]c2=O)C[C@@H]1OC(=O)c1ccc  
 2774 cc1)c1cccc1  
 2775 C=CN1CCCC1=O.COc1ccc2c(c1)CCC=C2OS(=O)(=O)C(F)(F)F>>C=C(C1=CCCc2cc(OC)ccc21)N1  
 2776 CCCC1=O  
 2777 C=CC[C@H]1C(=O)N(c2ccccc2)[C@@H]1c1ccc(OC)cc1.FC(F)(F)c1ccc(Br)cc1>>COc1ccc([C@@H  
 2778 ]2[C@@H](C/C=C/c3ccc(C(F)(F)F)cc3)C(=O)N2c2ccccc2)cc1  
 2779 C=Cc1ccc(C(=O)OC)cc1.CC(C)(C)c1cc(Br)cc(C=O)c1O>>COC(=O)c1ccc(/C=C/c2cc(C=O)c(O)c(C(  
 2780 C)(C)C)c2)cc1

2763 C=C[C@](C)(/C=C/c1ccc(O)cc1)CCC=C(C)C.COc1cccc1I>>COc1cccc1/C=C/[C@](C)(/C=C/c1ccc(O)cc1)CCC=C(C)C  
C=C[C@H]1O[C@H]2OC(C)(C)O[C@H]2[C@H]1O.O=C1cc(-  
2764 c2cccc2)oc2cc(Br)ccc12>>CC1(C)O[C@H]2O[C@H](/C=C/c3ccc4c(=O)cc(-  
c5cccc5)oc4c3)[C@H](O)[C@H]2O1  
2765 C=Cc1cccc1.Cc1nc(Br)c(-c2cccc2)o1>>Cc1nc(/C=C/c2cccc2)c(-c2cccc2)o1  
2766 C=CC(=O)O.CC(C)=CCc1cc(I)cc(CC=C(C)C)c1O>>CC(C)=CCc1cc(/C=C/C(=O)O)cc(CC=C(C)C)c1  
2767 C=CC(=O)N(C)OC.N#Cc1ccc2c(Br)cccc2c1>>CON(C)C(=O)/C=C/c1cccc2cc(C#N)ccc12  
2768 C=C.O=Cc1cc(Br)ccc1[N+](=O)[O-]>>C=Cc1ccc([N+](=O)[O-])c(C=O)c1  
2769 C/C=C(/NC(=O)OC(C)(C)C(=O)OC.CN(C)c1ccc(I)cc1>>COC(=O)/C(NC(=O)OC(C)(C)C)=C(\C)c1ccc(N(C)C)cc1  
2770 Br1cccc2c(-c3cccc3)cccc12.C=CC(=O)OCC>>CCOC(=O)/C=C/c1cccc2c(-c3cccc3)cccc12  
2771 C=CCN(C(=O)OC(C)(C)C(=O)OC(C)(C)C.Cc1ccc(Oc2ccc(Nc3nnc4ccc(I)cc34)cc2C)cn1>>Cc1ccc(Oc2ccc(Nc3nnc4ccc(/C=C/CN(C(=O)OC(C)(C)C(=O)OC(C)(C)C)cc34)cc2C)cn1  
2772 Br1cccn1.C=Cc1c(C)n(Cc2cccc2)ccc1=O>>Cc1c(/C=C/c2cccn2)c(=O)ccn1Cc1cccc1  
2773 C=CC(=O)OCC.FC(F)(F)c1cccc(Br)c1>>CCOC(=O)/C=C/c1cccc(C(F)(F)F)c1  
2774 C=C1C(=O)O[C@H]2/C=C(\C)CC/C=C(\C)CC[C@H]12.COc1cccc1I>>COc1cccc1/C=C1/C(=O)O[C@H]2/C=C(\C)CC/C=C(\C)CC[C@H]12  
2775 C=CCNC(=O)OC(C)(C)C.O=C(c1cccc(Br)c1)C1CCCCC1>>C=C(CNC(=O)OC(C)(C)C)c1cccc(C(=O)C2CCCCC2)c1  
2776 C=COCCCCC.CC(C)(C)NC(=O)c1ccc(OS(=O)(=O)C(F)(F)F)cc1>>C=C(OCCCC)c1ccc(C(=O)NC(C)(C)C)cc1  
2777 C=CCC1CCCCC1.C[C@H](NC(=O)OC(C)(C)C)c1nc2cccc(Br)c2c(=O)n1-c1cccc1  
c1cccc1>>C[C@H](NC(=O)OC(C)(C)C)c1nc2cccc(/C=C/CC3CCCCC3)c2c(=O)n1-c1cccc1  
2778 C=Cc1ccc2ccc(Cl)cc2n1.CC(C)(O)c1cccc1CC[C@H](O)c1cccc(Br)c1>>CC(C)(O)c1cccc1CC[C@H](O)c1cccc(/C=C/c2ccc3ccc(Cl)cc3n2)c1  
2779 C=CC(=O)OCC.COc1ccc(-c2ccc([N+](=O)[O-])cc2Br)cc1>>CCOC(=O)/C=C/c1cc([N+](=O)[O-])ccc1-c1ccc(OC)cc1  
2780 C=CC(=O)OCC.O=Cc1c(Br)cc2cccc12>>CCOC(=O)/C=C/c1cc2cccc2c1=O  
C=Cc1ccc(P(=O)(OCC)OCC)cc1.CCC1(CC)c2cc(Br)ccc2-  
2781 c2ccc(N(c3cccc3)c3cccc3)cc21>>CCOP(=O)(OCC)c1ccc(/C=C/c2ccc3c(c2)C(CC)(CC)c2cc(N(c4ccc4)c4cccc4)ccc2-3)cc1  
2782 C=CC(=O)OC(C)(C)C.Oc1ccc(C(=C2CCCCC2)c2ccc(Br)cc2)cc1>>CC(C)(C)OC(=O)/C=C/c1ccc(C(=C2CCCCC2)c2ccc(O)cc2)cc1  
\*CNCCCOCCOCCOCCNC(=O)COc1ccc(C(Cc2cc(OC)cc(OC)c2)NC(=O)c2cccc(C=C)c2)cc1.Cc1cc  
2783 c(I)c(C)c1>>\*CNCCCOCCOCCOCCNC(=O)COc1ccc(C(Cc2cc(OC)cc(OC)c2)NC(=O)c2cccc(/C=C/c3ccc(C)cc3C)c2)cc1  
2784 Br1ccc(-c2nc3cccc3nc3)cc1.C=CC(=O)OCC>>CCOC(=O)/C=C/c1ccc(-  
2785 C=C(NC(=O)OC(C)(C)C(=O)OCc1cccc1.CC(C)(C)OC(=O)N/C=C(\c1ccc(Br)cc1)C(=O)OCc1cccc1>>CC(C)(C)OC(=O)N/C=C(\c1ccc(/C=C(\NC(=O)OC(C)(C)C(=O)OCc2cccc2)cc1)C(=O)OCc1c  
2786 C=Cc1ccc2c(cnn2C2CCCCO2)c1.Clc1cccn1>>C(=C/c1ccc2c(cnn2C2CCCCO2)c1)\c1cccn1  
2787 C=CC(=O)OC.O=C(c1cccc1)c1ccc(I)cc1>>COC(=O)/C=C/c1ccc(C(=O)c2cccc2)cc1  
2788 C=CC(=O)OC.Nc1ncnc2c1c(I)cn2[C@H]1C[C@H](O)[C@H](CO)O1>>COC(=O)/C=C/c1cn([C@H]2C[C@H](O)[C@@H](CO)O2)c2nnc(N)c12  
2789 C=CSc1cccc1.O=Cc1ccc(Br)cc1>>O=Cc1ccc(/C=C/Sc2cccc2)cc1  
2790 C=CC#N.CSc1nc(N)nc(-c2ccco2)c1I>>CSc1nc(N)nc(-c2ccco2)c1/C=C/C#N  
2791 C=CC(=O)OCc1cccc1.Ic1cccc1>>O=C(/C=C/c1cccc1)OCc1cccc1  
C=Cc1cccn1.CCCCCCCCCCCCCOc1cc(/C=C/c2ccc(I)cc2)cc(OCCCCCCCCCCCCC)c1OCCCCCCCCC  
2792 CCCC>>CCCCCCCCCCCCOc1cc(/C=C/c2ccc(/C=C/c3ccncc3)cc2)cc(OCCCCCCCCCCCCC)c1OCCCCCCCCCCCC  
2793 Br1cccn1.C=CCNS(=O)(=O)c1ccc(C)cc1>>Cc1ccc(S(=O)(=O)NC/C=C/c2ccncc2)cc1  
2794 C=CC(=O)OC(C)(C)C.CC(=O)Nc1ccc(Br)cc1>>CC(=O)Nc1ccc(/C=C/C(=O)OC(C)(C)C)cc1  
2795 C=CC#N.O=S(=O)(Oc1cc2cccc12)C(F)(F)F>>N#C/C=C/c1cc2cccc12  
2796 C=CC(=O)OC.CCNC(=O)Nc1cc2c(Br)ccc(C)c2cn1>>CCNC(=O)Nc1cc2c(/C=C/C(=O)OC)ccc(C)c2c  
2797 Br1cccs1.C=CCn1nnc2cccc21>>C(=C/c1cccs1)\Cn1nnc2cccc21  
2798 C=CC(=O)OC.N#Cc1ccc(Cl)c(F)c1Br>>COC(=O)/C=C/c1c(C#N)ccc(Cl)c1F  
2799 C=Cc1cccc1.O=Cc1ccc(Br)cc1>>C=C(c1cccc1)c1ccc(C=O)cc1  
C=C[C@H]1O[C@H](OC)[C@H](OCc2cccc2)[C@@H](OCc2cccc2)[C@H]1OCc1ccc2cccc2c1  
2800 .O=C1ccoc2cc(Br)ccc12>>CO[C@H]1O[C@H](/C=C/c2ccc3c(=O)ccoc3c2)[C@@H](OCc2ccc3cccc3c2)[C@H](OCc2cccc2)[C@H]1OCc1cccc1

2801 C=C(C)[C@@H](C(=O)OC)N1C(=O)c2ccccc2C1=O.Ic1ccccc1>>COC(=O)[C@H](/C(C)=C/c1ccccc1)N1C(=O)c2ccccc2C1=O  
 2802 C=C.COC(=O)c1ccc(Br)cc1>>C=Cc1ccc(C(=O)OC)cc1  
 2803 C=C[Si](OCC)(OCC)OCC.COc1ccc(/C=C/c2ccc(I)cc2)cc1>>CCO[Si](/C=C/c1ccc(/C=C/c2ccc(OC)cc2)cc1)(OCC)OCC  
 2804 C=Cc1ccc(OC)cc1.O=[N+][O-]c1ccc(Cl)cc1>>COc1ccc(/C=C/c2ccc([N+](=O)[O-])cc2)cc1  
 2805 C=CC(=O)OC.Fc1ccc(Br)nc1>>COC(=O)/C=C/c1ccc(F)cn1  
 2806 C=C[C@H]1O[C@@H](Sc2ccccc2)[C@H](OCc2ccccc2)[C@@H](OCc2ccccc2)[C@@H]1OCc1ccc(OC)cc1.O=c1cc(-c2ccccc2)oc2ccc(Br)cc12>>COc1ccc(CO[C@H]2[C@H](OCc3ccccc3)[C@@H](OCc3ccccc3)[C@H](Sc3ccccc3)O[C@@H]2/C=C/c2ccc3oc(-c4ccccc4)cc(=O)c3c2)cc1  
 2807 C=CC(=O)OC.Cc1cc(OC(=O)OC(C)(C)C)cc(C)c1I>>COC(=O)/C=C/c1c(C)cc(OC(=O)OC(C)(C)C)cc(C)=CC(=O)O.CN(c1ccc(I)c1)S(=O)(=O)c1ccc(-c2ccccc2)cc1  
 2808 C=CS(=O)(=O)F.CC(C)[Si](Oc1ccc(I)c1)(C(C)C)C(C)C>>CC(C)[Si](Oc1ccc(/C=C/S(=O)(=O)F)c1)(C(C)C)C(C)C  
 2809 BrC1CCCCC1.C=Cc1ccccc1>>C(=C/C1CCCCC1)\c1ccccc1  
 2810 C=CS(=O)(=O)NC.Nc1ccc(Cl)cc1Br>>CNS(=O)(=O)/C=C/c1cc(Cl)cn1N  
 2811 C=CC(=O)OCC.F/C(Br)=C/c1ccccc1>>CCOC(=O)/C=C/C(F)=C\c1ccccc1  
 2812 C=CCN(C(=O)OC(C)(C)C(=O)OC(C)(C)C.CC(=O)c1ccc(Cl)c1>>CC(=O)c1ccc(/C=C/CN(C(=O)OC(C)(C)C)C(=O)OC(C)(C)C)c1  
 2813 C=CC(=O)C(O[Si](CC)(CC)CC)c1c(OCc2ccccc2)c(OC)c2c(OC)c(OC)cc(OC)c2c1OC.Ic1ccccc1OCc1ccccc1>>CC[Si](CC)(CC)OC(C(=O)/C=C/c1ccccc1OCc1ccccc1)c1c(OCc2ccccc2)c(OC)c2c(OC)c(OC)cc(OC)c2c1OC  
 2814 C=CC(=O)OC.CC(C)n1cnc2c(NC3ccc(Br)cc3)nc(N3CCOCC3)nc21>>COC(=O)/C=C/c1ccc(CNc2nc(N3CCOCC3)nc3c2ncn3C(C)C)cc1  
 2815 BrC1cccs1.C=CN1C(=O)c2ccccc2C1=O>>O=C1c2ccccc2C(=O)N1/C=C/c1cccs1  
 2816 C=Cc1ccc(C)cc1.Cc1cc(I)cc(C)c1O>>Cc1ccc(/C=C/c2cc(C)c(O)c(C)c2)cc1  
 2817 C=CC(=O)OC.O=[N+][O-]c1ccc(Br)cc1>>COC(=O)/C=C/c1ccc([N+](=O)[O-])cc1  
 2818 C=Cc1ccc(N2CCN(C(=O)OC(C)(C)C)CC2)cc1.Fc1cc(Br)cc(-c2ccncc2)c1>>CC(C)(C)OC(=O)N1CCN(c2ccc(/C=C/c3ccc(F)cc(-c4ccncc4)c3)cc2)CC1  
 2819 C=Cc1nc2c(N)ncnc2n1[C@H]1C[C@H](O[Si](C)(C)C(C)(C)C)[C@@H](CO[Si](C)(C)C(C)(C)C)O1.Cc1ccc(Br)cc1>>Cc1ccc(/C=C/c2nc3c(N)ncnc3n2[C@H]2[C@H](O[Si](C)(C)C(C)(C)C)[C@@H](CO[Si](C)(C)C(C)(C)C)O2)cc1  
 2820 C=Cc1ccccc1.CC(=O)O[IH2](OC(C)=O)c1ccccc1>>C(=C/c1ccccc1)\c1ccccc1  
 2821 C=CC(F)(F)C(F)(F)C(F)(F)C(F)(F)C(F)(F)F.F.COC(=O)c1ccc(Br)cc1>>COC(=O)c1ccc(/C=C/C(F)(F)C(F)(F)C(F)(F)C(F)(F)C(F)(F)C(F)(F)F)cc1  
 2822 C=C1CC(c2ccccc2)OC1=O.Clc1ccc(I)c1>>O=C1OC(c2ccccc2)C/C1=C\c1ccc(Cl)c1  
 2823 BrC1ccccc1.C=CC1CCCCC1>>C(=C/C1CCCCC1)\c1ccccc1  
 2824 C=Cc1ccc(C)cc1.O=[N+][O-]c1ccc(Br)cc1>>Cc1ccc(/C=C/c2ccc([N+](=O)[O-])cc2)cc1  
 2825 C=CC(=O)OCC.Ic1cnn(C2CCCCO2)c1>>CCOC(=O)/C=C/c1cnn(C2CCCCO2)c1  
 2826 BrC1cncnc1.C=Cc1ccc(OC)c1>>COc1ccc(/C=C/c2cncnc2)c1  
 2827 C=CCO.Cc1ccc(Br)cc1>>Cc1ccc(/C=C/CO)cc1  
 2828 C/C(=N\O)c1ccc(Br)cc1.C=CC(=O)OC>>COC(=O)/C=C/c1ccc(/C(C)=N/O)cc1  
 2829 Cc1ccc(I)cc1.Cc1ccc(S(=O)(=O)/C=C2\C(C)(C)C2(F)F)cc1>>Cc1ccc(/C(=C2/C(C)(C)C2(F)F)S(=O)(=O)c2ccc(C)cc2)cc1  
 2830 C=CC(=O)OCCCC.OCc1ccc(I)cc1>>CCCCOC(=O)/C=C/c1ccc(CO)cc1  
 2831 C=CC(=O)OCC.COc1ccc(OC)c(Cc2ccc(I)cc2)c1>>CCOC(=O)/C=C/c1ccc(Cc2cc(OC)ccc2OC)cc1  
 2832 C=C(C)C.CC(C)(Cl)c1ccccc1>>CC(C)=CC(C)(C)c1ccccc1  
 2833 C=Cc1ccccc1.CC(C)(C)OC(=O)N[C@H](COc1cncnc(Br)c1)Cc1c[nH]c2ccccc12>>CC(C)(C)OC(=O)N[C@H](COc1cncnc(/C=C/c2ccccc2)c1)Cc1c[nH]c2ccccc12  
 2834 C=Cc1ccc(N(c2ccccc2)c2ccccc3ccccc23)cc1.O=Cc1ccc(Br)cc1>>O=Cc1ccc(/C=C/c2ccc(N(c3ccccc3)c3ccccc4ccccc34)cc2)cc1  
 2835 C=CC(=O)N1C(=O)OC[C@@H]1c1ccccc1.CC(C)(C)OP(=O)(Cc1ccccc1)Cc1ccc(Br)cc1>>CC(C)(C)OP(=O)(Cc1ccccc1)Cc1ccc(/C=C/C(=O)N2C(=O)OC[C@@H]2c2ccccc2)cc1  
 2836 C=CC(=O)OC(C)(C)C.COC(=O)c1ccc(I)cc1OC(C)=O>>COC(=O)c1ccc(/C=C/C(=O)OC(C)(C)C)cc1OC(C)=O  
 2837 BrC1ccc(OCc2ccccc2)c(OCc2ccccc2)c1.C=Cc1ccc(C=C)cc1>>C=Cc1ccc(/C=C/c2ccc(OCc3ccccc3)c(OCc3ccccc3)c2)cc1  
 2838 C=CSc1ccccc1.N#Cc1ccc(Br)cc1>>N#Cc1ccc(/C=C/Sc2ccccc2)cc1  
 2839 C=CC(=O)OCC.Cn1cnc2nc3ccc(Br)cc3c(Cl)c21>>CCOC(=O)/C=C/c1ccc2nc3cnn(C)c3c(Cl)c2c1  
 2840

2841 C=CC(=O)OCC.CN(C)Cc1cccc(Br)c1>>CCOC(=O)/C=C/c1cccc(CN(C)C)c1  
2842 C=C(NC(=O)OC(C)(C)C)C(=O)OC.Oc1ccc(I)cc1>>COC(=O)/C=C/c1ccc(O)cc1)NC(=O)OC(C)(C)C  
2843 C=CC(=O)OCC.O=c1ccoc2cc(OCc3ccccc3)c(Br)cc12>>CCOC(=O)/C=C/c1cc2c(=O)ccoc2cc1OCc1c  
2844 cccc1  
2844 Br1ccc(C(=C2CCCCC2)c2ccccc2)cc1.C=CC(N)=O>>NC(=O)/C=C/c1ccc(C(=C2CCCCC2)c2ccccc2)cc1  
2845 C=CS(=O)(=O)F.Cc1ccc(S(=O)(=O)n2cc(I)cn2)cc1>>Cc1ccc(S(=O)(=O)n2cc(/C=C/S(=O)(=O)F)cn2)  
2846 C=Cc1nnc2c1nnc2C1CCCCO1.Ic1ccc1>>C(=C/c1nnc2c1nnc2C1CCCCO1)c1ccc1  
2847 C=CC(=O)NCCc1ccc(F)cc1.COc1ccc2c(=O)c(I)coc2c1>>COc1ccc2c(=O)c(/C=C/C(=O)NCCc3ccc(F)cc3)coc2c1  
2848 C=CC(=O)OCC.Fc1cccc1Oc1cccc(Br)c1>>CCOC(=O)/C=C/c1cccc(Oc2ccccc2F)c1  
2849 C=C[C@H](C)[C@H](O)C/C=C(=O)OC.FC(F)(F)c1ccc(I)cc1>>COC(=O)/C=C/C[C@H](O)[C@H](C)/C=C/c1ccc(C(F)(F)F)cc1  
2850 C=Cc1ccc(C)cc1.Cc1ccc(OS(=O)(=O)C(F)(F)F)cc1>>C=C(c1ccc(C)cc1)c1ccc(C)cc1  
2851 C=Cc1ccc2ccccc2c1.Cc1cccc1I>>Cc1cccc1/C=C/c1ccc2ccccc2c1  
2852 C=CC(=O)OCC.O=Cc1ccc(I)cc1>>CCOC(=O)/C=C/c1ccc(C=O)cc1  
2853 Br1ccsc1.C=COCCO>>C=C(OCCO)c1ccsc1  
2854 C=CC(=O)OC.Ic1enn(Cc2ccccc2)c1>>COC(=O)/C=C/c1cnn(Cc2ccccc2)c1  
2855 C=Cc1cccc1.CC(=O)NS(=O)(=O)c1ccc(Br)cc1>>CC(=O)NS(=O)(=O)c1ccc(/C=C/c2ccccc2)cc1  
2856 C=Cc1cccc1.O=c1c(I)n[nH]c2ccccc12>>O=c1c(/C=C/c2ccccc2)n[nH]c2ccccc12  
2857 C=CC(=O)OCC.Cc1noc(-c2ccccc2)c1I>>CCOC(=O)/C=C/c1c(C)noc1-c1ccccc1  
2858 C=C(NC(=O)OC(C)(C)C)C(=O)OC.COC(=O)c1ccc(N)c(I)c1>>COC(=O)/C(=C/c1cc(C(=O)OC)ccc1N)NC(=O)OC(C)(C)C  
2859 C=CC(=O)OC.O=C(O)c1cccc1I>>COC(=O)/C=C/c1cccc1C(=O)O  
2860 Br1cncnc1.C=CS(C)(=O)=O>>CS(=O)(=O)/C=C/c1cncnc1  
2861 C=Cc1ccc(OC)cc1.Cn1c(/C=C/c2ccccc2)c(I)c(=O)c2ccccc21>>COc1ccc(/C=C/c2cc(/C=C/c3ccccc3)n(C)c3ccccc3c2=O)cc1  
2862 C=CC(=O)O.Oc1ccc(/C=C/c2ccc(Br)cc2)cc1O>>O=C(O)/C=C/c1ccc(/C=C/c2ccc(O)c(O)c2)cc1  
2863 C=CC(=O)OC.O=C(Cc1cccc1)c1cn(-c2ccccc2)c2cc(Br)ccc12>>COC(=O)/C=C/c1ccc2c(C(=O)Cc3ccccc3)cn(-c3ccccc3)c2c1  
2864 C=CC(=O)OC.COc1cc(C=O)c(Br)c(OC)c1>>COC(=O)/C=C/c1c(C=O)cc(OC)cc1OC  
2865 C=CC(=O)OCC.Cc1nc(Br)c(-c2ccccc2)o1>>CCOC(=O)/C=C/c1nc(C)oc1-c1ccccc1  
2866 C=Cc1cccc1.O=[N+][O-]c1ccc(C(O)c2ccccc2I)cc1>>O=[N+][O-]c1ccc(C(O)c2ccccc2/C=C/c2ccccc2)cc1  
2867 C=CC(=O)OC.COc1cccc1Cl>>COC(=O)/C=C/c1cccc1OC  
2868 C=Cc1cc(OC(=O)c2ccccc2)cc(OC(=O)c2ccccc2)c1.O=C(Oc1ccc(I)cc1)c1cccc1>>O=C(Oc1ccc(/C=C/c2cc(OC(=O)c3ccccc3)cc(OC(=O)c3ccccc3)c2)cc1)c1ccccc1  
2869 C=CC(C)(C)C.Ic1cccc1>>CC(C)(C)/C=C/c1ccccc1  
2870 C=Cc1ccc(F)cc1.C[Si](C)(OS(=O)(=O)C(F)(F)F)OS(=O)(=O)C(F)(F)F>>C[Si](C)(/C=C/c1ccc(F)cc1)OS(=O)(=O)C(F)(F)F  
2871 C=CC(=O)CC.CC(C)c1cc(C(C)C)c(Br)c(C(C)C)c1>>CCC(=O)/C=C/c1c(C(C)C)cc(C(C)C)cc1C(C)C  
2872 Br1enc2ccccc2c1.C=CCC(C)C(=O)OCC>>CCOC(=O)C(C)C/C=C/c1enc2ccccc2c1  
2873 C=CC(=O)OCC.Cc1enc2[nH]c3c(C)cc(Br)cc3c2c1>>CCOC(=O)/C=C/c1cc(C)c2[nH]c3ncc(C)cc3c2c  
2874 C=CC(=O)N1CCOCC1.C[C@]12C[C@]34C=C(Sc5cccc(I)c5)C(=O)[C@](C)(CCC(=O)Nc5c(O)ccc(C(=O)O)c5O)[C@H]3[C@H](C[C@H]1C4)O2>>C[C@]12C[C@]34C=C(Sc5cccc(/C=C/C(=O)N6CCOCC6)c5)C(=O)[C@](C)(CCC(=O)Nc5c(O)ccc(C(=O)O)c5O)[C@H]3[C@H](C[C@H]1C4)O2  
2875 C=Cc1ccc(F)cc1.CCOC(=O)C(C)(C)Br>>CCOC(=O)C(C)(C)/C=C/c1ccc(F)cc1  
2876 Br1cc(NC(c2ccccc2)(c2ccccc2)c2ccccc2)nc2c1nnn2C(c1ccccc1)(c1ccccc1)c1ccccc1.C=CC(=O)OC>>COC(=O)/C=C/c1cc(NC(c2ccccc2)(c2ccccc2)c2ccccc2)nc2c1nnn2C(c1ccccc1)(c1ccccc1)c1ccccc1  
2877 C=CC(=O)OC.CC(C)c1ccc(C(C)C)c(Br)c1>>COC(=O)/C=C/c1cc(C(C)C)ccc1C(C)C  
2878 C=CC(=O)OC.CCC(CC)(c1ccc(OC)c(C)c1)c1cc(C)c(Br)s1>>CCC(CC)(c1ccc(OC)c(C)c1)c1cc(C)c(/C=C/C(=O)OC)s1  
2879 C=C(NC(=O)[C@H](Cc1cccc1)NC(=O)[C@H](Cc1cccc1)NC(=O)OC(C)(C)C(=O)OC.COC(=O)c1ccc(I)cc1>>COC(=O)/C(=C/c1ccc(C(=O)OC)cc1)NC(=O)[C@H](Cc1cccc1)NC(=O)[C@H](Cc1ccccc1)NC(=O)OC(C)(C)C  
2880 C=Cc1ccc(N(c2ccccc2)c2ccccc2)cc1.Cc1ccc(Br)cc1>>Cc1ccc(/C=C/c2ccc(N(c3ccccc3)c3ccccc3)cc2)  
2881 C=Cc1ccc(C(C)=O)cc1.Cc1ccc(Br)cc1>>CC(=O)c1ccc(/C=C/c2ccc(C)cc2)cc1  
2882 Br1cncnc(-c2ccccc2)c1.C=CC(=O)OC>>COC(=O)/C=C/c1cncnc(-c2ccccc2)c1  
2883 C=CC(=O)OC.CC(C)=CCc1cc(I)ccc1O>>COC(=O)/C=C/c1ccc(O)c(CC=C(C)C)c1  
2884 C=Cc1ccc(C=C)cc1.O=[N+][O-]c1ccc(Br)cc1>>C=Cc1ccc(/C=C/c2ccc([N+](=O)[O-])cc2)cc1

2885 C=CC(=O)OCC.COc1cccc(Br)c1C>>CCOC(=O)/C=C/c1cccc(OC)c1C  
 2886 C=C.Fc1ccc(I)cc1>>C=Cc1ccc(F)cc1  
 2887 Brc1cccc(N2CCCC2)n1.C=CC(=O)OCCCC>>CCCCOC(=O)/C=C/c1cccc(N2CCCC2)n1  
 2888 C=CC(=O)OC(C)(C)C.COc1cc(Br)c(C(C)OCCCC(=O)OC(C)(C)C)cc1OC>>COc1cc(/C=C/C(=O)OC(C)(C)(C)c(C(C)OCCCC(=O)OC(C)(C)C)cc1OC  
 2889 C=Cc1ence(C#N)c1Nc1ccc2[nH]ccc2c1C.Clc1cccc(Br)n1>>Cc1c(Nc2c(C#N)ence2/C=C/c2cccc(Cl)n2)ccc2[nH]ccc12  
 2890 C=CCCCCCC.N#Cc1ccc(Br)cc1>>CCCCC/C=C/c1ccc(C#N)cc1  
 2891 C=CC(=O)CCCC.Cc1ccc(Br)cc1>>CCCCC(=O)/C=C/c1ccc(C)cc1  
 2892 C=Cc1ccc(-c2ccc(OC)cc2CO)c(OCc2cccc2)c1.COc1ccc(I)cc1Oc1ccc(C=O)cc1>>COc1ccc(-c2ccc(/C=C/c3ccc(OC)c(Oc4ccc(C=O)cc4)c3)cc2OCc2cccc2)c(CO)c1  
 2893 C=CC(=O)OCC.Cc1ncc(Br)c(N)c1I>>CCOC(=O)/C=C/c1c(C)ncc(Br)c1N  
 2894 C=CC#N.CC(=O)OC[C@H]1O[C@@H](n2enc(C(N)=O)c2I)[C@H](OC(C)=O)[C@@H]1OC(C)=O>>CC(=O)OC[C@H]1O[C@@H](n2enc(C(N)=O)c2/C=C/C#N)[C@H](OC(C)=O)[C@@H]1OC(C)=O  
 2895 C=Cc1cccc1Cl.Ic1cccc1>>Clc1cccc1/C=C/c1cccc1  
 2896 C=CC(=O)OCc1cccc1.CC(=O)O[C@H]1CC(=O)N(Cc2cc3c(cc2I)OCO3)[C@@H]1[Se]c1cccc1>>CC(=O)O[C@H]1CC(=O)N(Cc2cc3c(cc2/C=C/C(=O)OCc2cccc2)OCO3)[C@@H]1[Se]c1cccc1  
 2897 C=CC(=O)OCC.Clc1ccc(-n2cnmn2)c(I)c1>>CCOC(=O)/C=C/c1cc(Cl)ccc1-n1cnmn1  
 2898 C=CC(=O)NC(C)C.Cc1ccc(Br)cc1>>Cc1ccc(/C=C/C(=O)NC(C)C)cc1  
 2899 C=CC(=O)OC(C)(C)C.CCOC(=O)CN1Cc2cc(Br)enc2NC1=O>>CCOC(=O)CN1Cc2cc(/C=C/C(=O)OC(C)(C)C)enc2NC1=O  
 2900 C=Cc1ccc(C(=O)N[C@@H](CCSC)C(=O)OC)c(-c2cccc2C)c1.O=C(c1cccc1)c1cnccl1Br>>COC(=O)[C@H](CCSC)NC(=O)c1ccc(/C=C/c2cnccl2C(=O)c2cccc2)cc1-c1cccc1C  
 2901 C=CC(=O)Nc1cccc(C)c1.N#Cc1c(-c2cccc2)cc(-c2cccc2)nc1Cl>>Cc1cccc(NC(=O)/C=C/c2nc(-c3cccc3)cc(-c3cccc3)c2C#N)c1  
 2902 C=Cc1ccc([N+](=O)[O-])cc1.COc1ccc(I)cc1>>COc1ccc(/C=C/c2ccc([N+](=O)[O-])cc2)cc1  
 2903 C=Cc1ccc(N)cc1.CN(C(=O)c1cccc1)c1ccc2c(c1)[nH]c(=NC(=O)c1ccc(Br)s1)n2CCC(N)=O>>CN(C(=O)c1cccc1)c1ccc2c(c1)[nH]c(=NC(=O)c1ccc(/C=C/c3ccc(N)cc3)s1)n2CCC(N)=O  
 2904 CC(=O)/C=C/CC(NS(=O)(=O)c1ccc(C)cc1)c1cccc1.CC(=O)c1cccc(Br)c1>>CC(=O)/C=C/CC(NS(=O)(=O)c1ccc(C)cc1)c1cccc1c1cccc(C(C)=O)c1  
 2905 C=COCCCC.CC(=O)c1cccc(Br)c1>>C=C(OCCCC)c1cccc(C(C)=O)c1  
 2906 C=Cc1cccc1.O=Cc1c(F)cccc1Br>>O=Cc1c(F)cccc1/C=C/c1cccc1  
 2907 C=Cc1cccc1.CN(C)c1ccc(Br)cc1>>CN(C)c1ccc(/C=C/c2cccc2)cc1  
 2908 C=Cc1cccc1.O=P1(c2cccc2)C(Br)=Cc2cccc21>>O=P1(c2cccc2)C(/C=C/c2cccc2)=Cc2cccc21  
 2909 C=Cc1cccc1.CCn1cnc1-c1ccc(Br)cc1>>CCn1cnc1-c1ccc(/C=C/c2cccc2)cc1  
 2910 C=CCCCCCC.Cc1cccc1OS(=O)(=O)C(F)(F)F>>C=C(CCCCCC)c1cccc1C  
 2911 C=Cc1ence(C#N)c1Nc1ccc2[nH]ccc2c1C.Cc1cc(CN2CCN(C)CC2)ccc1I>>Cc1cc(CN2CCN(C)CC2)c1C/C=C/c1ence(C#N)c1Nc1ccc2[nH]ccc2c1C  
 2912 C=Cc1cnccl1.COc1ccc(Br)cc1F>>COc1ccc(/C=C/c2cnccl2)cc1F  
 2913 C=Cc1ccc(C(=O)OC)cc1.COC(=O)c1cc2cc(Br)ccc2cc1OC(C)=O>>COC(=O)c1ccc(/C=C/c2ccc3cc(O(C(C)=O)c(C(=O)OC)cc3c2)cc1  
 2914 C=Cc1ccc(F)cc1.O=c1oc2cccc2cc1Br>>O=c1oc2cccc2cc1/C=C/c1ccc(F)cc1  
 2915 C=CC(C)(C)O.Ic1cccc1>>CC(C)(O)/C=C/c1cccc1  
 2916 C=Cc1cccn1.Cc1ncc(C#N)c(Nc2ccc3[nH]ccc3c2C)c1I>>Cc1ncc(C#N)c(Nc2ccc3[nH]ccc3c2C)c1/C=C/c1cccn1  
 2917 C=CC(=O)OC.COC(=O)c1c(Br)c(F)cc2nn(C)cc12>>COC(=O)/C=C/c1c(F)cc2nn(C)cc2c1C(=O)OC  
 2918 C=CC(=O)N(C)C.Nc1n[nH]c2c(Br)ccc(-c3ccc([N+](=O)[O-])cc3)c12>>CN(C)C(=O)/C=C/c1ccc(-c2ccc([N+](=O)[O-])cc2)c2c(N)n[nH]c12  
 2919 C=CC(=O)N(C)C.COC(=O)c1cc(Br)cc2c1OC(c1cccc1)(c1cccc1)O2>>COC(=O)c1cc(/C=C/C(=O)N(C)C)cc2c1OC(c1cccc1)(c1cccc1)O2  
 2920 C=CCCCCCCCCN1C(=O)c2cccc2C1=O.O=S(=O)(Oc1ccc2cccc2c1)C(F)(F)F>>C=C(CCCCCCCC N1C(=O)c2cccc2C1=O)c1ccc2cccc2c1  
 2921 Brc1ence(OC2CCOCC2)c1.C=CC1CCN(C(=O)OC(C)(C)C)C1>>CC(C)(C)OC(=O)N1CCC(/C=C/c2c ncc(OC3CCOCC3)c2)C1  
 2922 C=CCc1cccc1.CN(C(=O)c1ncc2c(c1)c1cccc1n2S(=O)(=O)N(C)C)c1cccc1>>CN(C(=O)c1ncc2c(c1/C=C/Cc1cccc1)c1cccc1n2S(=O)(=O)N(C)C)c1cccc1  
 2923 C=CC(=O)N(C)c1cccc1.Clc1cccc1>>CN(C(=O)/C=C/c1cccc1)c1cccc1  
 2924 Brc1cccn1.C=C[P@](C)(=O)c1cccc1>>C[P@](=O)/C=C/c1cccn1)c1cccc1  
 2925 C=CC(=O)CCCC.Ic1cccc1>>CCCCC(=O)/C=C/c1cccc1  
 2926 Brc1cccc2[nH]ncc12.C=CC(N)=O>>NC(=O)/C=C/c1cccc2[nH]ncc12



2927 Br1cnc(C2CC2)nc1.C=CC(=O)OCC>>CCOC(=O)/C=C/c1cnc(C2CC2)nc1  
 2928 C=Cc1ccc(OC)cc1.Cn1c(=O)c2c(cc(Br)n2C)n(C)c1=O>>COc1ccc(/C=C/c2cc3c(c(=O)n(C)c(=O)n3C)n2C)cc1  
 C=Cc1ccc2c(c1)C(CCCCCCCC)(CCCCCCCC)c1cc(/C=C/c3ccc(N(c4cccc4)c4cccc4)cc3)ccc1-  
 2.CCCCCCCCC1(CCCCCCCC)c2cc(Br)ccc2-  
 2929 c2ccc(C=O)cc21>>CCCCCCCCC1(CCCCCCCC)c2cc(C=O)ccc2-  
 c2ccc(/C=C/c3ccc4c(c3)C(CCCCCCCC)(CCCCCCCC)c3cc(/C=C/c5ccc(N(c6cccc6)c6cccc6)cc5)cc  
 c3-4)cc21  
 2930 C=CC(=O)OCC.O=Cc1cn(Cc2cccc2)c2ccc(Br)cc12>>CCOC(=O)/C=C/c1ccc2c(c1)c(C=O)cn2Cc1cc  
 C=CC(=O)OC.Ic1c(C[Se]c2cccc2)c(-c2cccc2)c2cccc2c1-  
 2931 c1cccc1>>COC(=O)/C=C/c1c(C[Se]c2cccc2)c(-c2cccc2)c2cccc2c1-c1cccc1  
 2932 C=CC(=O)OC.FC(F)(F)c1cccc1I>>COC(=O)/C=C/c1cccc1C(F)(F)F  
 C=CCCN1C(=O)c2cccc2C1=O.CCOCc1nc2cnc3cc(Br)ccc3c2n1CCOC(C)C>>CCOCc1nc2cnc3cc(/  
 2933 C=C/CCN4C(=O)c5cccc5C4=O)ccc3c2n1CCOC(C)C  
 2934 C=C(F)C(=O)OC.Ic1cccc1>>COC(=O)/C(F)=C/c1cccc1  
 2935 C=CC(=O)OC.CC(=O)Oe1ccc(I)cc1C/C=C(\C)CCC=C(C)C>>COC(=O)/C=C/c1ccc(OC(C)=O)c(C/C  
 =C(\C)CCC=C(C)C)c1  
 2936 C=C1CN(C(=O)OCC)N1C(=O)OCC.Ic1cccc1>>CCOC(=O)N1C/C(=C/c2cccc2)N1C(=O)OCC  
 2937 Br1ccc(-c2cnc2)cc1.C=CCN1C(=O)c2cccc2C1=O>>O=C1c2cccc2C(=O)N1C/C=C/c1ccc(-  
 c2cnc2)cc1  
 2938 C=Cc1cnc1.CC(C)(C)OC(=O)N1CCC[C@H]1COc1cnc(Cl)c(I)c1>>CC(C)(C)OC(=O)N1CCC[C@  
 H]1COc1cnc(Cl)c(/C=C/c2cnc2)c1  
 2939 C=Cc1ccc(OC)cc1.Cc1ccc(OC(=O)C(C)(C)Br)cc1>>COc1ccc(/C=C/C(C)(C)C(=O)Oe2ccc(C)cc2)cc1  
 2940 C=CC(=O)NCc1cccc1.CC(C)(C)c1ccc2[nH]c3c(c2c1)CC(=O)Nc1ccc(I)cc1-  
 3>>CC(C)(C)c1ccc2[nH]c3c(c2c1)CC(=O)Nc1ccc(/C=C/C(=O)NCc2cccc2)cc1-3  
 2941 C=Cc1cccc(Cl)c1.CN1CCN(c2cccc(Br)n2)CC1>>CN1CCN(c2cccc(/C=C/c3cccc(Cl)c3)n2)CC1  
 C=Cc1nnc2c1n2n2[C@@H]1O[C@H](CO[Si](C)(C)C(C)(C)C)[C@@H](O[Si](C)(C)C(C)(C)C)[C@  
 2942 H]1O[Si](C)(C)C(C)(C)C.Ic1cccc1>>CC(C)(C)[Si](C)(C)OC[C@H]1O[C@@H](n2cnc3c(/C=C/c4cc  
 ccc4)nnc32)[C@H](O[Si](C)(C)C(C)(C)C)[C@@H]1O[Si](C)(C)C(C)(C)C  
 Br1cnc2cccc2c1.C=CCO[C@]1(C)C[C@@H](C)C(=O)[C@H](C)[C@@H](O)[C@](C)(O)[C@@H  
 2943 C(=O)c1cccc1>>CC[C@H]1OC(=O)[C@H](C)C(=O)[C@H](C)[C@@H](O)[C@@H]2O[C@H](C)C  
 [C@H](N(C)C)[C@H]2OC(=O)c2cccc2)[C@](C)(OC/C=C/c2cnc3cccc3c2)C[C@@H](C)C(=O)[C  
 @H](C)C[C@@H](O)C[C@@H](C)O  
 2944 C=CS(=O)(=O)c1cccc1.O=Cc1ccc(Br)cc1>>O=Cc1ccc(/C=C/S(=O)(=O)c2cccc2)cc1  
 2945 C=Cc1cc(OC)c(OC)c(OC)c1-  
 c1ccc2c(c1)OCO2.COc1ccc(I)cc1>>COc1ccc(/C=C/c2cc(OC)c(OC)c(OC)c2-c2ccc3c(c2)OCO3)cc1  
 2946 C=CC=O.FC1(F)C(I)=C1c1cccc1>>O=C/C=C/C1=C(c2cccc2)C1(F)F  
 2947 C=CC(=O)OC.CCn1cc(I)c(=O)c2ccc(C)nc21>>CCn1cc(/C=C/C(=O)OC)c(=O)c2ccc(C)nc21  
 2948 C=CC(=O)OCC.COc1cnc(C)c(Br)c1>>CCOC(=O)/C=C/c1cc(OC)cnc1C  
 2949 C=Cc1nnn(C)n1.N#Cc1ccc(Br)c1>>Cn1nnc(/C=C/c2cccc(C#N)c2)n1  
 2950 C=Cc1cccc1.COC(=O)c1ccc(I)cc1>>COC(=O)c1ccc(/C=C/c2cccc2)cc1  
 2951 Br1cccc2cccc12.C=CC(=O)OCC>>CCOC(=O)/C=C/c1cccc2cccc12  
 2952 C=Cc1ccc(OC)cc1.COc1cc(C=O)c(Br)c(OC)c1OC>>COc1ccc(/C=C/c2c(C=O)cc(OC)c(OC)c2OC)cc1  
 2953 C=CCCC.COc1ccc(Br)cc1>>CCC/C=C/c1ccc(OC)cc1  
 2954 C=CC(=O)Nc1ccc(Cl)c(C(F)(F)F)c1.Ic1ccc(Cc2cnc2)cc1>>O=C(/C=C/c1ccc(Cc2cnc2)cc1)Nc1cc  
 c(Cl)c(C(F)(F)F)c1  
 2955 C=Cc1ccc(C#N)cc1.CCOC(C)n1cc(I)cn1>>CCOC(C)n1cc(/C=C/c2ccc(C#N)cc2)cn1  
 2956 C=CCN(C(=O)C(C)(C)C)[C@H](C)c1ccc(C)c(F)c1.O=C1Nc2ncccc2[C@@]12Cc1cc(Br)enc1C2>>C  
 c1ccc([C@@H](C)N(C/C=C/c2cnc3c(c2)C[C@@]2(C3)C(=O)Nc3ncccc32)C(=O)C(C)(C)C)cc1F  
 2957 C=Cc1cccc(N)n1.Cn1c(=O)c2c(cc(Br)n2C)n(C)c1=O>>Cn1c(=O)c2c(cc(/C=C/c3cccc(N)n3)n2C)n(C)  
 2958 C=CC(=O)OC.O=Cc1ccnc1Br>>COC(=O)/C=C/c1ncccc1C=O  
 2959 C=CC=O.Fc1ccc(Br)cc1>>O=C/C=C/c1ccc(F)cc1  
 2960 C=CC(=O)OC.Cc1nc(Br)c2c(c1O)COC(C)(C)OC2>>COC(=O)/C=C/c1nc(C)c(O)c2c1COC(C)(C)OC2  
 2961 C=CC1CCCC1.Cc1cccc1Br>>Cc1cccc1/C=C/C1CCCC1  
 2962 C=CC(=O)OC(CC)CCCC.FC(F)(F)c1ccc(Cl)cc1>>CCCCC(CC)OC(=O)/C=C/c1ccc(C(F)(F)F)cc1  
 2963 C=CC(=O)Oe1cccc1.Ic1cccc1>>O=C(/C=C/c1cccc1)Oe1cccc1  
 2964 C=CC(=O)OC(C)(C)C.O=S(=O)(c1ccc(Br)cc1)N1CCc2ccnc21>>CC(C)(C)OC(=O)/C=C/c1ccc(S(=O  
 )(=O)N2CCc3ccnc32)cc1  
 2965 Br1cnc1.C=CC(=O)OCCCC>>CCCCOC(=O)/C=C/c1cnc1

2966 C/C(I)=C/[C@H](C)CO[Si](C)(C)C(C)(C)C.C=C[C@@H]1CC=C[C@@H](OC(C)C)O1>>CC(=C/[C  
 2967 @H](C)CO[Si](C)(C)C(C)(C)C)/C=C/[C@@H]1CC=C[C@@H](OC(C)C)O1  
 C=Cc1cccc1.CCCCCCCCCC(=O)Nc1ccc(Br)cc1>>CCCCCCCCC(=O)Nc1ccc(/C=C/c2cccc  
 2968 2)cc1  
 C=CC(=O)O.COc1ccc(S(=O)(=O)NCc2ccc(I)cc2)cc1OC>>COc1ccc(S(=O)(=O)NCc2ccc(/C=C/C(=O)  
 2969 O)cc2)cc1OC  
 C=CC(=O)OCCCC.OCc1cccc(I)c1>>CCCCOC(=O)/C=C/c1cccc(CO)c1  
 2970 C=CC(C)(C)O.Nc1cncc(Br)c1I>>CC(C)(O)/C=C/c1c(N)cncc1Br  
 2971 C=CC(=O)OC.O=S(=O)(c1cccc1)n1cc(-c2cccn2)c2cc(Br)cn21>>COC(=O)/C=C/c1cnc2c(c1)c(-  
 2972 c1cccn1)cn2S(=O)(=O)c1cccc1  
 C=Cc1cccc1C.Clc1cccc1>>Cc1cccc1/C=C/c1cccc1  
 2973 C=CCC(C)N(C)C(=O)OC(C)(C)C.Cc1cc(Br)cn1N>>Cc1cc(/C=C/CC(C)N(C)C(=O)OC(C)(C)C)cn1  
 2974 C=CC(=O)[C@@]1(O)C[C@H]2CC[C@]1(C)C2(C)C.Ic1cccc1>>CC1(C)[C@@H]2CC[C@@]1(C)  
 2975 [C@@](O)(C(=O)/C=C/c1cccc1)C2  
 C=Cc1cncc1.Nc1nc(Cl)c(Br)c1>>Nc1nc(Cl)c(/C=C/c2ccncc2)c1  
 2976 Br1ccsc1.C=CC(=O)CCC>>CCCC(=O)/C=C/c1ccsc1  
 2977 C=CC(=O)OCC.COc1cc(F)cc(Br)c1>>CCOC(=O)/C=C/c1cc(F)cc(OC)c1  
 2978 C=C/C=C/c1cccc1.CCOC(=O)C(F)(F)I>>CCOC(=O)C(F)(F)/C=C/C=C/c1cccc1  
 2979 C=C(Br)CC1(C)Cc2cccc2C1=O.C=CC(=O)OCC>>C=C(/C=C/C(=O)OCC)CC1(C)Cc2cccc2C1=O  
 2980 C=CC(=O)OCC.FC(F)(F)c1ccc(Br)cc1>>CCOC(=O)/C=C/c1ccc(C(F)(F)F)cc1  
 2981 CC(=O)/C=C/CC(NS(=O)(=O)c1ccc(C)cc1)c1ccc(C(F)(F)F)cc1.Cc1ccc(Br)cc1>>CC(=O)/C=C(/CC(N  
 2982 S(=O)(=O)c1ccc(C)cc1)c1ccc(C(F)(F)F)cc1)c1ccc(C)cc1  
 C=Cc1n[nH]c2cc([C@@H]3C[C@@]34C(=O)Nc3cccc34)ccc12.Cc1ccc(Br)cn1>>Cc1ccc(/C=C/c2n[  
 2983 nH]c3cc([C@@H]4C[C@@]45C(=O)Nc4cccc45)ccc23)cn1  
 C=Cc1ccc(SC)cc1.CN(C)CCCN1ncc2cc(Br)ccc2c1=O>>CSc1ccc(/C=C/c2ccc3c(=O)n(CCCN(C)C)ncc  
 2984 3c2)cc1  
 C=CC(=O)OCc1cccc1.CC(C)(C)OC(=O)NCc1cc2cccc2nc1Cl>>CC(C)(C)OC(=O)NCc1cc2cccc2nc  
 2985 1/C=C/C(=O)OCc1cccc1  
 C=Cc1cccc1.Nc1ccc([N+](=O)[O-])cc1Br>>Nc1ccc([N+](=O)[O-])cc1/C=C/c1cccc1  
 2986 C=CCON=C1[C@H](C)[C@H]2OC(=O)O[C@]2(C)[C@@H](CC)OC(=O)[C@H](C)[C@@H](O)[C  
 @H](C)[C@@H](O)[C@H]2O[C@H](C)C[C@H](N(C)C)[C@H]2OC(C)=O)[C@](C)(OC)C[C@H]  
 1C.Nc1ncccc1Br>>CC[C@H]1OC(=O)[C@H](C)[C@@H](O)[C@H](C)[C@@H](O)[C@H]2O[C  
 @H](C)C[C@H](N(C)C)[C@H]2OC(C)=O)[C@](C)(OC)C[C@H](C)C(=NOC/C=C/c2ccncc2N)[C  
 @H](C)I[C@@H]2OC(=O)O[C@]12C  
 2987 C=CCNC(=O)c1cccc1NC(=O)c1cccc1.Fc1ccc(I)cc1>>O=C(Nc1cccc1C(=O)NC/C=C/c1ccc(F)cc1)  
 c1cccc1  
 C=Cc1ccc(CN(C)C)cn1.Cc1c(Nc2c(I)cncc2C#N)ccc2[nH]ccc12>>Cc1c(Nc2c(C#N)cncc2/C=C/c2ccc(  
 2988 CN(C)C)cn2)ccc2[nH]ccc12  
 C=CC(=O)OCC.CC(C)(C)OC(=O)c1cc([N+](=O)[O-])ccc1Br>>CCOC(=O)/C=C/c1ccc([N+](=O)[O-]  
 2989 )cc1C(=O)OC(C)(C)C  
 C=CC(=O)OCC.O=c1ccoc2ccc(Br)cc12>>CCOC(=O)/C=C/c1ccc2occc(=O)c2c1  
 2990 C=CC#N.FC(F)(F)c1cc(Cl)cc(C(F)(F)F)c1>>N#C/C=C/c1cc(C(F)(F)F)cc(C(F)(F)F)c1  
 2991 C=CN1C(=O)c2cccc2C1=O.OC(c1ccc(C(F)(F)F)cc1)c1cncc1Br>>O=C1c2cccc2C(=O)N1/C=C/c1  
 2992 ccccc1C(O)c1ccc(C(F)(F)F)cc1  
 C=C[Si](CC)(CC)CC.FC(F)(F)c1cc(Br)cc(C(F)(F)F)c1>>CC[Si](/C=C/c1cc(C(F)(F)F)cc(C(F)(F)F)c1)  
 2993 (CC)CC  
 C=CC(=O)OCC.Fc1cccc(Br)c1>>CCOC(=O)/C=C/c1cccc(F)c1  
 2994 C=CC(=O)OC.CS(=O)(=O)Nc1cc2ccc(Br)cc2c(N2CCCC2)n1>>COC(=O)/C=C/c1ccc2cc(NS(C)(=O  
 2995 )=O)nc(N3CCCCC3)c2c1  
 C=CC(=O)OCC.CC(C)c1nn(-c2ccc3cccc3n2)c(-c2ccc(F)cc2)c1Br>>CCOC(=O)/C=C/c1c(C(C)C)nn(-  
 2996 c2ccc3cccc3n2)c1-c1ccc(F)cc1  
 C=CC(CCC)OCc1cccc1.COc1ccc(Br)cc1>>CCCC/C=C/c1ccc(OC)cc1)OCc1cccc1  
 2997 C=Cc1cccc1OC.CN(C(=O)c1cccc1)c1ccc2c(c1)[nH]c(=NC(=O)c1ccc(Br)s1)n2CCC(N)=O>>COc1c  
 2998 ccccc1/C=C/c1ccc(C(=O)N=c2[nH]c3cc(N(C)C(=O)c4cccc4)ccc3n2CCC(N)=O)s1  
 C=C(NC(=O)OC(C)(C)C)C(=O)OCc1cccc1.Cn1cc(I)cn1>>Cn1cc(/C=C/(NC(=O)OC(C)(C)C)C(=O)  
 2999 OCc2cccc2)cn1  
 C=C1CC(c2ccc(Cl)cc2)OC1=O.CCOc1ccc(I)cc1>>CCOc1ccc(/C=C2\CC(c3ccc(Cl)cc3)OC2=O)cc1  
 3000 C=C[Si](C)(C)c1cccn1.Ic1cccc1>>C[Si](C)(C)/C=C/c1cccc1)c1cccn1  
 3001 C=CC(=O)OC(C)(C)C.CC(C)(C)[Si](C)(C)/C=C/C1=C(Br)CCCC1>>CC(C)(C)OC(=O)/C=C/C1=C(/  
 3002 C=C/[Si](C)(C)C(C)(C)C)CCCC1

C=C(NC(=O)OCc1ccccc1)C(=O)OC.CC(C)(C)[Si](C)(C)O[C@H]1Cc2c(Br)cc(OCc3ccccc3)cc2N(S(=O)(=O)c2ccccc2[N+](=O)[O-])C1>>COC(=O)/C=C/c1cc(OCc2ccccc2)cc2c1C[C@H](O[Si](C)(C)C(C)(C)C)CN2S(=O)(=O)c1ccc  
3003 cc1[N+](=O)[O-]NC(=O)OCc1ccccc1  
C=CC(=O)OC(C)(C)C.COC(=O)c1ccc(I)cc1>>COC(=O)c1ccc(/C=C/C(=O)OC(C)(C)C)cc1  
3004 C=Cc1ccc(OC)cc1.C[Si](C)(C)OS(=O)(=O)C(F)(F)F>>COc1ccc(/C=C/[Si](C)(C)C)cc1  
3005 C=CC(=O)OCC.COc1ccc(I)cc1>>CCOC(=O)/C=C/c1ccc(OC)cc1  
3006 Brc1ccc2[nH]ccc2c1.C=CC(C)=O>>CC(=O)/C=C/c1ccc2[nH]ccc2c1  
3007 C=CC1(O)CCCCC1.O=C(NC[C@H](O)[C@@H](O)c1ccc(Br)c1)C(F)(F)F>>O=C(NC[C@H](O)[C@@H](O)c1ccc(/C=C/C2(O)CCCCC2)c1)C(F)(F)F  
3008 C=CC(=O)OC.CCc1ccc(-c2nc(C)c(Br)s2)cc1>>CCc1ccc(-c2nc(C)c(/C=C/C(=O)OC)s2)cc1  
3009 C=C(C(=O)OC)[C@@H]1CC[C@@]2(C)CCC[C@@](C)(OCOC)[C@@H]2C1.Fc1ccc(Br)cc1>>CO  
3010 CO[C@]1(C)CCC[C@]2(C)CC[C@@H](/C=C\c3ccc(F)cc3)C(=O)OC[C@H]21  
3011 C=CC(=O)OC.Ic1nn(C(c2ccccc2)(c2ccccc2)c2ccccc2)c2ccnc(OC3CCCCC3)c12>>COC(=O)/C=C/c1nn  
3012 n(C(c2ccccc2)(c2ccccc2)c2ccccc2)c2ccnc(OC3CCCCC3)c12  
C=Cc1ccc(O)c(OC)c1.O=c1ccc2ccc(OS(=O)(=O)C(F)(F)F)cc2o1>>COc1cc(/C=C/c2ccc3ccc(=O)oc3c  
3012 2)ccc1O  
C=CC(=O)N1N=Cc2ccccc2C1c1ccccc1.COc1cc(Cc2cnc(N)nc2N)cc(I)c1OC>>COc1cc(Cc2cnc(N)nc2  
3013 N)cc(/C=C/C(=O)N2N=Cc3ccccc3C2c2ccccc2)c1OC  
C=CC(=O)OC(C)(C)C.Nc1ncc(I)c2scc(-  
3014 c3ccc(Oc4ccccc4)cc3)c12>>CC(C)(C)OC(=O)/C=C/c1cnc(N)c2c(-c3ccc(Oc4ccccc4)cc3)csc12  
C=CC(=O)N(Cc1ccccc1)Cc1ccccc1.CC(C)(C)OC(=O)c1ccccc1Br>>CC(C)(C)OC(=O)c1ccccc1/C=C/  
3015 C(=O)N(Cc1ccccc1)Cc1ccccc1  
C=CC(=O)N(C)OC.NC(=O)c1ccc(I)c1>>CON(C)C(=O)/C=C/c1ccc(C(N)=O)c1  
3016 C=CC(=O)OC.CC(C)(C)c1[nH]c2ccccc2c1C1CCCN(Cc2ccc(Br)cc2F)C1>>COC(=O)/C=C/c1ccc(CN  
3017 2CCCC(c3c(C)(C)C)[nH]c4ccccc34)C2)c(F)c1  
C=C(F)[Si](C)(c1ccccc1)c1ccccc1.CC(=O)c1ccc(I)cc1>>CC(=O)c1ccc(/C=C(\F)[Si](C)(c2ccccc2)c2c  
3018 cccc2)cc1  
C=Cc1ccccc1N.COc1ccc(OC)c1Br>>COc1ccc(OC)c1/C=C/c1ccccc1N  
3019 C=Cc1ccc(OC)cc1.CC(Br)C(=O)N1CCCCC1>>COc1ccc(/C=C/C(C)C(=O)N2CCCCC2)cc1  
3020 C=CC(C)OC(C)=O.CCCCCCCCCCOc1cnc(-c2ccc(Br)cc2)nc1>>CCCCCCCCCOc1cnc(-  
3021 c2ccc(/C=C/C(C)OC(C)=O)cc2)nc1  
C=CC(=O)OCCCC.Clc1cc(Br)ccc1I>>CCCCOC(=O)/C=C/c1ccc(Br)cc1Cl  
3022 C=CC(=O)OCC.COc1ccc2c3c1O[C@@H]1[C@@]34CCN(C)[C@H](C2)[C@]42C=C[C@@]1(OC)[C  
3023 @H]1C(=O)N(c3ccc(Br)cc3)C(=O)[C@H]12>>CCOC(=O)/C=C/c1ccc(N2C(=O)[C@H]3[C@@H](C  
2=O)[C@@]424C=C[C@@]3(OC)[C@@H]3Oe5c(OC)ccc6c5[C@@]32CCN(C)[C@@H]4C6)cc1  
C=Cc1nc2c(N)ncnc2n1[C@@H]1O[C@H](CO[Si](C)(C)C(C)(C)C)[C@@H](O[Si](C)(C)C(C)(C)C)[  
3024 C@H]1O[Si](C)(C)C(C)(C)C.COc1ccc(Br)cc1>>COc1ccc(/C=C/c2nc3c(N)ncnc3n2[C@@H]2O[C@  
H](CO[Si](C)(C)C(C)(C)C)[C@@H](O[Si](C)(C)C(C)(C)C)[C@H]2O[Si](C)(C)C(C)(C)C)cc1  
3025 C=Cc1ccc(C)cc1.COc1ccc(/C=C/c2cc(Br)cc(/C=C/c3ccc(OC)cc3)c2)cc1>>COc1ccc(/C=C/c2cc(/C=C/  
c3ccc(C)cc3)cc(/C=C/c3ccc(OC)cc3)c2)cc1  
3026 C=Cc1ccc(OC)cc1.COC(=O)[C@H](Cc1ccc(O)c(I)c1)NC(=O)OC(C)(C)C>>COC(=O)[C@H](Cc1ccc  
3027 (O)c(/C=C/c2ccc(OC)cc2)c1)NC(=O)OC(C)(C)C  
C=CC1(O)CCC1.Ic1ccsc1>>OC1(/C=C/c2ccsc2)CCC1  
3028 C=CC(=O)OC.Cn1ccc2c(Br)cccc21>>COC(=O)/C=C/c1ccc2c1ccn2C  
3029 C=CCCCC(=O)OC.CC(C)(C)c1ccc(Br)cc1>>C=C(CCCCC(=O)OC)c1ccc(C(C)(C)C)cc1  
3030 C=CC(=O)OC.COc1ccc(OC)c(NC(=O)C(C)(C)C)c1I>>COC(=O)/C=C/c1c(OC)ccc(OC)c1NC(=O)C(  
C)(C)C  
C=C(NC(=O)OC(C)(C)C)C(=O)OC.N#Cc1ccc(N)c(I)c1>>COC(=O)/C=C/c1cc(C#N)ccc1N)NC(=O)  
3031 OC(C)(C)C  
C=CC#N.CCCCCc1nc2cc(Br)ccc2n1CCN(CC)CC>>CCCCc1nc2cc(/C=C/C#N)ccc2n1CCN(CC)CC  
3032 C=CC#N.O=[N+](O-)]c1ccc(Br)cc1>>N#C/C=C/c1ccc([N+](=O)[O-])cc1  
3033 C=CCO[Si](C)(C)C(C)(C)C.CC(=O)c1ccc(Br)cc1>>CC(=O)c1ccc(/C=C/CO[Si](C)(C)C(C)(C)C)cc1  
3034 C=Cc1ccc(OC(C)=O)cc1.O=Cc1ccc(N(c2ccccc2)c2ccc(Br)cc2)cc1>>CC(=O)Oc1ccc(/C=C/c2ccc(N(c  
3035 3ccccc3)c3ccc(C=O)cc3)cc2)cc1  
C=C(C)C1(O)CCC2(CC1)OCCO2.COc1ccc(Br)cc1O>>COc1ccc(/C=C(\C)C2(O)CCC3(CC2)OCCO3)  
3036 cc1O  
C=CC(=O)O.O=S(=O)(Nc1ccc(I)cc1)c1ccccc2ccnc12>>O=C(O)/C=C/c1ccc(NS(=O)(=O)c2ccccc3cccn  
3037 c23)cc1  
Brc1enc2ccccc2c1.C=CCCCCCC>>C=C(CCCCCC)c1enc2ccccc2c1  
3038 C=Cc1ccc(CP(=O)(O)O)cc1.CC(C)SC(SC(C)C)C(=O)Nc1ccc(I)cc1>>CC(C)SC(SC(C)C)C(=O)Nc1cc  
3039 c(/C=C/c2ccc(CP(=O)(O)O)cc2)cc1

3040 C=CCN(C(=O)OC(C)(C)C(=O)OC(C)(C)C.COC(=O)c1ccc(Cl)cc1>>COC(=O)c1ccc(/C=C/CN(C(=O)OC(C)(C)C)C(=O)OC(C)(C)C)cc1  
 3041 C=CC(=O)OC(C)(C)C.O=C(O)c1ccc(Br)s1>>CC(C)(C)OC(=O)/C=C/c1ccc(C(=O)O)s1  
 3042 C=CC(=O)OCC.COc1ccc(Br)c(CC2CCC(=O)N(Cc3ccccc3)C2)c1>>CCOC(=O)/C=C/c1ccc(OC)cc1C  
 3043 C1CCC(=O)N(Cc2ccccc2)C1  
 3044 Brc1ccc(I)cc1.C=CCOc1ccccc1>>Brc1ccc(/C=C/COc2ccccc2)cc1  
 3045 COC[C@H](/N=C(\c1ccccc1)N1C=CCC[C@H]1c1ccccc1)C(C)C.FC(F)(F)c1ccccc(I)c1>>COC[C@H](/N=C(\c1ccccc1)N1C=C(c2cccc(C(F)(F)F)c2)CC[C@H]1c1ccccc1)C(C)C  
 3046 C=CC(=O)OCCCC.CC(C)(C)C(=O)Oc1ccc2ccccc2c1-c1c(O)ccc2cc(Br)ccc12>>CCCCOC(=O)/C=C/c1ccc2c(-C=Cc1ccccc1.O=[N+](O-)]c1ccc(Br)cc1>>O=[N+](O-)]c1ccc(/C=C/c2ccccc2)cc1  
 3047 Brc1ccc(C=C(c2ccccc2)c2ccccc2)cc1.C=Cc1ccc(-c2ccc3c4ccccc4n(CC)c3c2)cc1>>CCn1c2ccccc2c2ccc(-BrC1CCCC1.C=Cc1ccccc1>>C(=C/C1CCCC1)\c1ccccc1  
 3048 C=CC(=O)OC(C)(C)C.Cc1ccc(NC=O)c(I)c1>>Cc1ccc(NC=O)c(/C=C/C(=O)OC(C)(C)C)c1  
 3049 C=CC(=O)OC.COc1cc(C#N)ccc1Br>>COC(=O)/C=C/c1ccc(C#N)cc1OC  
 3050 C=CC[C@H](CC(=O)OC(C)(C)C)C(=O)N[C@H](C(=O)NC)C(C)(C)C.Cc1cc(OS(=O)(=O)C(F)(F)F)ccc1-c1ccccc1>>CNC(=O)[C@H](NC(=O)[C@H](C/C=C/c1ccc(-c2ccccc2)c(C)c1)CC(=O)OC(C)(C)C)C(C)C  
 3051 C=Cc1ccc(C(C)(C)C)cc1.FC(F)(F)C(F)(F)C(F)(F)C(F)(F)C(F)(F)C(F)(F)Br>>CC(C)(C)c1ccc(/C=C/C(F)(F)C(F)(F)C(F)(F)C(F)(F)C(F)(F)C(F)(F)C(F)(F)F)cc1  
 3052 Brc1ccc(-c2cccs2)s1.C=CC(=O)OCC>>CCOC(=O)/C=C/c1ccc(-c2cccs2)s1  
 3053 Brc1ccc2c(cnn2C2CCCCO2)c1.C=Cc1ncc(N)cn1>>Nc1ncc(/C=C/c2ccc3c(cnn3C3CCCCO3)c2)nc1  
 3054 C=CC(=O)OC.OCc1ccccc(-c2ncc(Br)cn2)c1>>COC(=O)/C=C/c1ncc(-c2cccc(CO)c2)nc1  
 3055 C=C1[C@H]2[C@@H]3CCc4ccc(OC)ccc4[C@H]3CC[C@]2(C)C1=O.Cc1ccccc(Br)c1>>COc1ccc2c(c1)CC[C@@H]1[C@@H]2CC[C@]2(C)C(=O)/C=C/c3cccc(C)c3)C[C@@H]12  
 3056 C=CS(N)(=O)=O.Nc1cc(-c2ccccc(Br)c2)ncn1>>Nc1cc(-c2cccc(/C=C/S(N)(=O)=O)c2)ncn1  
 3057 C=CC(=O)OC.O=[N+](O-)]c1cc(Cl)cc(I)c1>>COC(=O)/C=C/c1cc(Cl)cc([N+](=O)[O-])c1  
 3058 C=CS(=O)(=O)NCc1ccc(F)cc1.CC(C)(C)OC(=O)NCc1ccccc1Br>>CC(C)(C)OC(=O)NCc1ccccc1/C=C/S(=O)(=O)NCc1ccc(F)cc1  
 3059 C=C.N#Cc1ccc(I)cc1>>C=Cc1ccc(C#N)cc1  
 3060 C=Cc1ccc2c(c1)Sc1cc(/C=C/c3ccc4c(c3)Sc3ccccc3N4CCCCCCCC)ccc1N2CCCCCCCC.O=Cc1ccc(I)cc1>>CCCCCCCCN1c2ccccc2Sc2cc(/C=C/c3ccc4c(c3)Sc3cc(/C=C/c5ccc(C=O)cc5)ccc3N4CCCCCCCC)ccc21  
 3061 C=CC(C)=O.C[Si](C)(C)CN(Cc1cc2c(cc1I)OCO2)C(CCOC(=O)c1ccccc1)[Si](C)(C)C>>CC(=O)/C=C/c1cc2c(cc1CN(C[Si](C)(C)C)C(CCOC(=O)c1ccccc1)[Si](C)(C)C)OCO2  
 3062 C=Cc1ccccc1.Cn1cncc1-c1ccc(Br)o1>>Cn1cncc1-c1ccc(/C=C/c2ccccc2)o1  
 3063 C=CC(C)(C)C.CC(=O)c1ccc(Br)cc1>>CC(=O)c1ccc(/C=C/C(C)(C)C)cc1  
 3064 C=CC(=O)OC.Cc1ccc(C=O)c(Br)n1>>COC(=O)/C=C/c1nc(C)ccc1C=O  
 3065 C=CC(=O)O.c1ccc([I+](c2ccccc2)cc1>>O=C(O)/C=C/c1ccccc1  
 3066 C=Cc1cc2ccccc2oc1=O.Ic1ccccc1>>O=c1oc2ccccc2cc1/C=C/c1ccccc1  
 3067 Brc1ccccc1.C=Cc1ccc(N(c2ccc(OC)cc2)c2ccc(OC)cc2)cc1>>COc1ccc(N(c2ccc(/C=C/c3ccccc3)cc2)c2ccc(OC)cc2)cc1  
 3068 C=CC(=O)O.O=C(O)c1ccccc(I)c1>>O=C(O)/C=C/c1ccccc(C(=O)O)c1  
 3069 C=CC(=O)OC.Cc1cn2ccc(Br)cc2n1>>COC(=O)/C=C/c1cn2ccc(C)nc2c1  
 3070 C=CC(=O)OCCCC.CC(C)n1cnc2c(Cl)nc(I)nc21>>CCCCOC(=O)/C=C/c1nc(Cl)c2ncn(C(C)C)c2n1  
 3071 C=C.Cc1ccc(Br)c([N+](=O)[O-])c1>>C=Cc1ccc(C)cc1[N+](=O)[O-]  
 3072 C=C(NC(C)=O)C(=O)OC.CCc1cc(Br)ccc1N>>CCc1cc(/C=C/(NC(C)=O)C(=O)OC)ccc1N  
 3073 C=CC(=O)OC.Cc1cc(-c2nn(C(c3ccccc3)(c3ccccc3)c3ccccc3)c3cc([N+](=O)[O-])c(Br)cc23)ccn1>>COC(=O)/C=C/c1cc2c(-c3ccnc(C)c3)nn(C(c3ccccc3)(c3ccccc3)c3ccccc3)c2cc1[N+](=O)[O-]  
 3074 C=CC(=O)N1CCCC1.COc1cc(Br)c(C(=O)OC(C)(C)C)cc1OC>>COc1cc(/C=C/C(=O)N2CCCC2)c(C(=O)OC(C)(C)C)cc1OC  
 3075 C=CCN1Cc2cc3ccccc3nc2C1=O.O=C(O)Cc1ccc(Br)cc1>>O=C(O)Cc1ccc(/C=C/CN2Cc3cc4ccccc4nc3C2=O)cc1  
 3076 C=CC#N.CCOC(=O)c1cn(CC)c2nc(C)c(Br)cc2c1=O>>CCOC(=O)c1cn(CC)c2nc(C)c(/C=C/C#N)cc2c  
 3077 C=CC(=O)OCC.Clc1ccc(C#C/C=C/c2cccc(Br)c2)cc1>>CCOC(=O)/C=C/c1cccc(/C=C/C#Cc2ccc(Cl)c2)c1  
 3078 C=CC(=O)O.Cc1cc(C)cc(Br)c1>>Cc1cc(C)cc(/C=C/C(=O)O)c1  
 3079 C=C(C)[C@H](C(=O)OC)N1C(=O)c2ccccc2C1=O.Ic1ccccc1>>COC(=O)[C@H](C(C)=C/c1ccccc1)N1C(=O)c2ccccc2C1=O  
 3080

3081 C=C.COc1cc(Br)cc(OC)c1>>C=Cc1cc(OC)cc(OC)c1  
3082 C=CC(=O)OC.CC(C)(C)OC(=O)N1C[C@H](F)C[C@H]1C(=O)Nc1cccc(Br)c1F>>COC(=O)/C=C/c1  
cccc(NC(=O)[C@@H]2C[C@@H](F)CN2C(=O)OC(C)(C)C)c1F  
3083 C=CC(=O)OCC.Oc1ccc(I)cc1>>CCOC(=O)/C=C/c1ccc(O)cc1  
3084 C=CC(=O)OCC.COc1enc(Cl)c(N)n1>>CCOC(=O)/C=C/c1ncc(OC)nc1N  
3085 C=COCCCC.Oc1cccc(Br)c1>>C=C(OCCCC)c1cccc(O)c1  
3086 C=Cc1cccc1.CN1C[C@H]2C[C@H](Cn3c2ccc(Br)c3=O)C1=O>>CN1C[C@H]2C[C@H](Cn3c2ccc(  
/C=C/c2cccc2)c3=O)C1=O  
3087 C=CC(=O)OC(C)(C)C.COc1ccc(Br)c(C=O)c1>>COc1ccc(/C=C/C(=O)OC(C)(C)C)c(C=O)c1  
C=CC1(C(=O)O)COCCOC1.CC(C)[C@H](O)C(=O)N[C@@H](C)C(=O)N1CCC[C@@H](C(=O)N[  
3088 C@H](C)c2ccc3ccc(Br)cc3n2)N1>>CC(C)[C@H](O)C(=O)N[C@@H](C)C(=O)N1CCC[C@@H](C(  
=O)N[C@H](C)c2ccc3ccc(/C=C/C4(C(=O)O)COCCOC4)cc3n2)N1  
C=CC(=O)N(C)C.Cc1ccc(C(=O)c2c(I)c(-  
3089 c3cccc3)n3c2c(C=O)cc2cccc23)cc1>>Cc1ccc(C(=O)c2c(/C=C/C(=O)N(C)C)c(-  
c3cccc3)n3c2c(C=O)cc2cccc23)cc1  
C=CC(=O)NCCCN(CCCNC(=O)OC(C)(C)C)C(=O)OC(C)(C)C.O=C(O)CC[C@@]12CCCC(=O)C[C  
3090 @H]1Oc1ccc(Br)cc12>>CC(C)(C)OC(=O)NCCCN(CCCNC(=O)/C=C/c1ccc2c(c1)[C@]1(CCC(=  
O)O)CCC(=O)C[C@@H]1O2)C(=O)OC(C)(C)C  
3091 C=Cn1nnc(-c2cccc2C#N)n1.Ic1cccc1>>N#Cc1cccc1-c1nnn(/C=C/c2cccc2)n1  
3092 C=C(F)[Si](C)(c1cccc1)c1cccc1.Clc1cccc1I>>C[Si](/C(F)=C/c1cccc1Cl)(c1cccc1)c1cccc1  
3093 C=CC(=O)OC.COC(=O)c1ccc(C(F)(F)F)nc1Br>>COC(=O)/C=C/c1nc(C(F)(F)F)ccc1C(=O)OC  
3094 C=CC(=O)OCC.Nc1cc(Br)nc1I>>CCOC(=O)/C=C/c1nc(Br)cc1N  
C=C[C@@H](O[Si](C)(C)C(C)(C)C)[C@H](CCCC(=O)OC)O[Si](C)(C)C(C)(C)C.CCCCCC(=O)c1cc  
3095 ccc1Br>>CCCCC(=O)c1cccc1/C=C/[C@@H](O[Si](C)(C)C(C)(C)C)[C@H](CCCC(=O)OC)O[Si](  
C)(C)C(C)(C)C  
3096 C=CC(=O)O.COc1ccc(I)cc1>>COc1ccc(/C=C/C(=O)O)cc1  
C=CC(=O)OC.O=[N+][O-]c1cccc([I+])c2cccc([N+](=O)[O-  
3097 ])c2)c1>>COC(=O)/C=C/c1cccc([N+](=O)[O-])c1  
3098 C=CS(=O)(=O)c1cccc1.O=[N+][O-]c1ccc(Br)cc1>>O=[N+][O-  
3099 Brc1ccc2ccc3ccc4cccc4c3c2c1.C=Cc1ccc(OC)cc1>>COc1ccc(/C=C/c2ccc3ccc4cccc5cccc5c4c3c2)cc  
C=CCCCCCC(=O)OC.CC1(C)C(=O)N(c2ccc(C#N)c(C(F)(F)F)c2)C(=S)N1c1ccc(Br)c(F)c1>>COC(=  
3100 O)CCCCC/C=C/c1ccc(N2C(=S)N(c3ccc(C#N)c(C(F)(F)F)c3)C(=O)C2(C)C)cc1F  
3101 C=Cc1ccncc1.Ic1ccc2c(c1)OCO2>>C=C/c1ccc2c(c1)OCO2)c1ccncc1  
3102 C=CC(=O)OC(C)(C)C.COC(=O)c1ccc(Br)c(F)c1>>COC(=O)c1ccc(/C=C/C(=O)OC(C)(C)C)c(F)c1  
3103 C=CC(=O)OCC.COc1cc(Nc2ncc(Br)c(Nc3cccn3)n2)cc(OC)c1OC>>CCOC(=O)/C=C/c1nc(Nc2cc(O  
C)c(OC)c(OC)c2)nc1Nc1cccn1  
3104 C=C.COCC(=O)c1cccc1Br>>C=Cc1cccc1C(=O)OC  
3105 C=CC(=O)OCC.Ic1cccc1>>CCOC(=O)/C=C/c1cccc1  
C=CC(C)(C)O.O=[N+][O-  
3106 ])CCC1c[nH]c2cccc(I)c12>>CC(C)(O)/C=C/c1cccc2[nH]cc(CC[N+](=O)[O-])c12  
3107 C=CC(OCC)OCC.CC(C)(C)c1cccc1OS(=O)(=O)C(F)(F)F>>C=C(c1cccc1C(C)(C)C(OCC)OCC  
C=Cc1cccc1.COC(=O)[C@]1(NC(=O)OC(C)(C)C)CCc2cc(Br)ccc2C1>>COC(=O)[C@]1(NC(=O)O  
3108 C(C)(C)C)CCc2cc(/C=C/c3cccc3)ccc2C1  
3109 C=CC(OC)OC.COc1ccc(I)cc1F>>COc1ccc(/C=C/C(OC)OC)cc1F  
3110 C=Cc1ccc(Br)cc1.Fc1ccc(I)cc1>>Fc1ccc(/C=C/c2ccc(Br)cc2)cc1  
3111 C=CCCCCCCCC(=O)O.Ic1ccc2c(c1)OCCOCCOCCOCCO2>>O=C(O)CCCCCCCCC/C=C/c1ccc2c(c  
1)OCCOCCOCCOCCO2  
3112 C=CC(=O)O.NS(=O)(=O)c1ccc(S(=O)(=O)Nc2ccc(I)cc2)cc1>>NS(=O)(=O)c1ccc(S(=O)(=O)Nc2ccc(  
/C=C/C(=O)O)cc2)cc1  
3113 C=CC#N.O=C1C2c([nH]c3ccc(C(F)(F)F)cc23)-c2cc(I)ccc2N1>>N#C/C=C/c1ccc2c(c1)-  
c1[nH]c3ccc(C(F)(F)F)cc3c1CC(=O)N2  
3114 C=Cc1ccc(/C=C/c2ccc([N+](=O)[O-  
])cc2)cc1.O=Cc1ccc(Br)cc1>>O=Cc1ccc(/C=C/c2ccc(/C=C/c3ccc([N+](=O)[O-])cc3)cc2)cc1  
C=C1C(=O)O[C@@H]2CC(C)=C([C@@H](C)CCCOC(C)=O)[C@@H](OC(C)=O)[C@H]12.COc1c  
3115 c(I)cc(OC)c1OC>>COc1cc(/C=C2/C(=O)O[C@@H]3CC(C)=C([C@@H](C)CCCOC(C)=O)[C@@H]  
(OC(C)=O)[C@H]23)cc(OC)c1OC  
3116 Brc1ccsc1.C=Cc1ccncc1>>C=C(c1ccsc1)c1ccncc1  
3117 C=CCC(=O)OC.Cc1ccc(CNc2ccc3c(Br)cccc3n2)o1>>COC(=O)C/C=C/c1cccc2nc(NCc3ccc(C)o3)ccc  
3118 C=Cc1cccc1.Cc1ccc(Br)c(N)c1>>Cc1ccc(/C=C/c2cccc2)c(N)c1  
3119 C=CC(=O)OC(C)(C)C.O=[N+][O-  
])c1ccc(CNc2ccc(Br)cc2)cc1>>CC(C)(C)OC(=O)/C=C/c1ccc(NCc2ccc([N+](=O)[O-])cc2)cc1

3120 C=C.ClCc1csc2ccccc12>>C=CCc1csc2ccccc12  
 3121 C=C1CC(c2ccc(Cl)cc2)OC1=O.Fc1ccccc1I>>O=C1OC(c2ccc(Cl)cc2)C/C1=C\c1ccccc1F  
 3122 C=CC=O.CC(C)(C)OC(=O)COc1ccc(Cl)c(I)c1>>CC(C)(C)OC(=O)COc1ccc(Cl)c(/C=C/C=O)c1  
 3123 Brc1cccn1.C=CC(C)(O)CCC=C(C)C>>CC(C)=CCCC(C)(O)/C=C/c1cccn1  
 3124 Brc1ccccc1I.C=C1CC(c2ccc(Cl)cc2)OC1=O>>O=C1OC(c2ccc(Cl)cc2)C/C1=C\c1ccccc1Br  
 3125 C=CC(=O)OC.Nc1ccnc(Br)c1>>COC(=O)/C=C/c1cc(N)ccn1  
 3126 C=CC(=O)OC.CC(=O)Nc1ccc(I)cc1>>COC(=O)/C=C/c1ccc(NC(C)=O)cc1  
 3127 C=CC(=O)N1CCOCC1.COc1cc2c3ccccc3nc3c4ccc(Cl)cc4n(C)c(c1)c23>>COc1cc2c3ccccc3nc3c4ccc  
 (/C=C/C(=O)N5CCOCC5)cc4n(C)c(c1)c23  
 3128 C=C(NC(C)=O)C(=O)OC.Nc1ccc(Br)c2ccccc12>>COC(=O)/C(=C\c1ccc(N)c2ccccc12)NC(C)=O  
 3129 C=C/C=C/C(=O)N(CCCC)CCCC.N#Cc1ccc(Br)cc1>>CCCN(CCCC)C(=O)/C=C/C=C/c1ccc(C#N)c  
 C=CC(C)=O.O=C1Nc2ccc(I)cc2/C1=C/c1ccc[nH]1>>CC(=O)/C=C/c1ccc2c(c1)/C(=C/c1ccc[nH]1)C(  
 =O)N2  
 3130 C=CC(=O)OC(C)(C)C.O=[N+](O-  
 3131 )c1ccc(S(=O)(=O)N2CCc3cc(Br)cn32)cc1>>CC(C)(C)OC(=O)/C=C/c1cnc2c(c1)CCN2S(=O)(=O)c1  
 ccc([N+](=O)[O-])cc1  
 3132 C=C(NC(C)=O)C(=O)OC.CC(C)c1cc(Br)ccc1N>>COC(=O)/C(=C\c1ccc(N)c(C(C)C)c1)NC(C)=O  
 3133 C=Cc1ccccc1.[O-][N+](=Nc1ccc(Br)cc1)c1ccccc1>>[O-][N+](=Nc1ccc(/C=C/c2ccccc2)cc1)c1ccccc1  
 3134 C=CC(=O)OC(C)(C)C.CC(C)(C)OC(=O)N1C[C@H](O)C[C@H]1c1ccc(Br)cc1>>CC(C)(C)OC(=O  
 )/C=C/c1ccc([C@H]2C[C@H](O)CN2C(=O)OC(C)(C)C)cc1  
 3135 C=Cc1ccc(F)cc1.CC(=O)NS(=O)(=O)c1ccc(Br)cc1>>CC(=O)NS(=O)(=O)c1ccc(/C=C/c2ccc(F)cc2)cc  
 3136 C=CCCN1C(=O)c2ccccc2C1=O.Cc1ccccc1I>>Cc1ccccc1/C=C/CCN1C(=O)c2ccccc2C1=O  
 3137 C=CN1CCCC1=O.Cc1ccc(OS(=O)(=O)C(F)(F)F)c(Br)c1>>C=C(c1ccc(C)cc1Br)N1CCCC1=O  
 3138 Brc1ccccc1.C=Cc1cc(-c2cc(C(C)(C)C)c(OC(C)=O)c(C(C)(C)C)c2)cc(-  
 c2cc(C(C)(C)C)c(OC(C)=O)c(C(C)(C)C)c2)c1>>CC(=O)Oc1c(C(C)(C)C)cc(-  
 c2cc(/C=C/c3ccccc3)cc(-c3cc(C(C)(C)C)c(OC(C)=O)c(C(C)(C)C)c3)c2)cc1C(C)(C)C  
 3139 C=Cc1ccc(F)cc1.Fc1cc(Br)cc(OCc2ccccc2)c1>>Fc1ccc(/C=C/c2cc(F)cc(OCc3ccccc3)c2)cc1  
 \*CNCCOCCOCCOCCNC(=O)COc1ccc(C(Cc2cc(OC)cc(OC)c2)NC(=O)c2ccccc(/C=C/c3ccc  
 ccc(I)c([N+](=O)[O-]  
 3140 )c1>>\*CNCCOCCOCCOCCNC(=O)COc1ccc(C(Cc2cc(OC)cc(OC)c2)NC(=O)c2ccccc(/C=C/c3ccc  
 (OC)cc3[N+](=O)[O-])c2)cc1  
 3141 C=Cc1ccccc1.Cc1ncc(I)c(C)n1>>Cc1ncc(/C=C/c2ccccc2)c(C)n1  
 3142 C=CC(=O)OCCCC.Nc1ccccc1I>>CCCCOC(=O)/C=C/c1ccccc1N  
 3143 C=CC(=O)OC.COc1cc(C#N)ccc1I>>COC(=O)/C=C/c1ccc(C#N)cc1OC  
 3144 C=C(F)C(C)=O.Clc1ccc(I)cc1>>CC(=O)/C(F)=C/c1ccc(Cl)cc1  
 3145 C=CC(=O)N(C)OC.Ic1ccc2ccccc2c1>>CON(C)C(=O)/C=C/c1ccc2ccccc2c1  
 3146 C=CC(=O)OCC.CC(=O)Nc1ccc(I)cc1>>CCOC(=O)/C=C/c1ccc(NC(C)=O)cc1  
 3147 C=Cc1ccccc([N+](=O)[O-])c1.NC(=O)c1cncc(Br)c1>>NC(=O)c1cncc(/C=C/c2ccccc([N+](=O)[O-]  
 3148 C=CC(=O)OCC.O=C(O)Cc1ccc(Br)cc1>>CCOC(=O)/C=C/c1ccc(CC(=O)O)cc1  
 3149 C=Cc1ccc(F)cc1.CC(C)(C)Cn1c(N)nc2ccc(Cl)nc21>>CC(C)(C)Cn1c(N)nc2ccc(/C=C/c3ccc(F)cc3)nc2  
 3150 C=CC(=O)OC.CSc1c2c(I)cccc2nn1C1CCCCO1>>COC(=O)/C=C/c1ccc2nn(C3CCCCO3)c(SC)c12  
 3151 C=CC(=O)OC.COc1ccc(Br)c(NCc2ccccc2)c1>>COC(=O)/C=C/c1ccc(OC)cc1NCc1ccccc1  
 3152 C=Cc1ccccc1.CN1CCC[C@H]1COc1cncc(Br)c1>>CN1CCC[C@H]1COc1cncc(/C=C/c2ccccc2)c1  
 3153 C=CC(=O)OC.COc1ccc(I)nc1>>COC(=O)/C=C/c1ccc(OC)cn1  
 3154 C=C[Si](C)(C)C.O=[N+](O-)c1ccc(I)cc1>>C[Si](C)(C)/C=C/c1ccc([N+](=O)[O-])cc1  
 3155 C=CC(=O)OC(C)(C)C.O=C(O)Cc1ccccc(Br)c1>>CC(C)(C)OC(=O)/C=C/c1ccccc(CC(=O)O)c1  
 3156 C=CC(=O)OCC.O=C[13c]1[13cH][13cH][13c](Br)[13cH][13cH]1>>CCOC(=O)/C=C/[13c]1[13cH][1  
 3cH][13c](C=O)[13cH][13cH]1  
 3157 C=Cc1ccc(OC)cc1OC.CCOC(=O)C(C)Br>>CCOC(=O)C(C)/C=C/c1ccc(OC)cc1OC  
 3158 C=CC(C)(O)CCC=C(C)C.Ic1ccccc1>>CC(C)=CCCC(C)(O)/C=C/c1ccccc1  
 3159 C=Cc1ccccc1.COC(=O)c1ccccc(I)c1>>COC(=O)c1ccccc(/C=C/c2ccccc2)c1  
 3160 C=CC(=O)OC(C)(C)C.COC(=O)/C=C/c1ccccc(N(Cc2ccccc(Br)c2)C(=O)C2CCCC2)c1>>COC(=O)/C  
 =C/c1ccccc(N(Cc2ccccc(/C=C/C(=O)OC(C)(C)C)c2)C(=O)C2CCCC2)c1  
 3161 C=COCCCC.CC=Cc1ccc(OS(=O)(=O)C(F)(F)F)c(OC)c1>>C=C(OCCCC)c1ccc(C=CC)cc1OC  
 3162 C=Cc1ccccc1C.Cc1ccc(N)c(Br)c1>>Cc1ccc(N)c(/C=C/c2ccccc2C)c1  
 3163 C=Cc1ccccc1.Clc1ccc(-c2ccccc2)cc1>>C=C/c1ccc(-c2ccccc2)cc1)c1ccccc1  
 3164 C=Cc1ccc(N(C)C)cc1.CCCn1c(=O)c(C)nc2ccc(Br)cc21>>CCN1c(=O)c(C)nc2ccc(/C=C/c3ccc(N(C)  
 C)cc3)cc21  
 3165 C=CC(=O)OC(C)(C)C.CCCc1ccc(Br)cc1>>CCCc1ccc(/C=C/C(=O)OC(C)(C)C)cc1  
 3166 C=CC(N)=O.FC(F)(F)Oc1ccccc(I)c1>>NC(=O)/C=C/c1ccc(OC(F)(F)F)c1

3167 C=CC(=O)OC(C)(C)C.FC(F)(F)c1cccc1I>>CC(C)(C)OC(=O)/C=C/c1cccc1C(F)(F)F  
3168 C=CC(=O)OC.CCc1cccc(CC)c1Br>>CCc1cccc(CC)c1/C=C/C(=O)OC  
3169 C=CC(=O)O.Cc1cc(Nc2nnc3ccc(I)cc23)ccc1Oe1cc2nnen2cn1>>Cc1cc(Nc2nnc3ccc(/C=C/C(=O)O)  
cc23)ccc1Oe1cc2nnen2cn1  
3170 C=CC(=O)OC.Cc1c[nH]c2c(Br)cccc12>>COC(=O)/C=C/c1cccc2c(C)c[nH]c12  
3171 C=CC(=O)OC(C)(C)C.CCC(C(=O)c1ccc(Br)cc1)c1ccc(F)cc1Cl>>CCC(C(=O)c1ccc(/C=C/C(=O)OC(  
C)(C)C)cc1)c1ccc(F)cc1Cl  
3172 C=COCCOCCO.COc1ccc(Br)cc1>>C=C(OCCOCCO)c1ccc(OC)cc1  
3173 C=CC(=O)OC.Ic1escc1-c1cccc1>>COC(=O)/C=C/c1escc1-c1cccc1  
3174 C=Cc1ccc(C(=O)O)cc1.CC(=O)c1ccc(Br)cc1>>CC(=O)c1ccc(/C=C/c2ccc(C(=O)O)cc2)cc1  
3175 C=CC(=O)N1N=Cc2cccc2C1C.COc1cc(Cc2enc(N)nc2N)cc(I)c1OC>>COc1cc(Cc2enc(N)nc2N)cc(/C  
=C/C(=O)N2N=Cc3cccc3C2C)c1OC  
3176 C=Cc1ccc(C)nc1.CN1CCc2[nH]c3c(Br)cccc3c2C1>>Cc1ccc(/C=C/c2cccc3c4c([nH]c23)CCN(C)C4)c  
3177 C=Cc1ccc(OCCCCCCCCCCCC)cc1.Oc1ccc(I)cc1>>CCCCCCCCCCCCCOc1ccc(/C=C/c2ccc(O)cc2)cc  
3178 C=CC(=O)OC(C)(C)C.COc1ccc2c(Oc3ccc(Br)cc3)csc2c1>>COc1ccc2c(Oc3ccc(/C=C/C(=O)OC(C)(C  
)C)cc3)csc2c1  
3179 C=CC(=O)O.Fc1ccc(Br)c(F)c1>>O=C(O)/C=C/c1ccc(F)cc1F  
3180 C=C(NC(C)=O)C(=O)OC.Fc1cccc(Br)c1>>COC(=O)/C=C/c1cccc(F)c1)NC(C)=O  
3181 C=CC(=O)OC.Cn1enc2c(Nc3ccc(Br)cc3)nc(N3CCCC3)nc21>>COC(=O)/C=C/c1ccc(Nc2nc(N3CCC  
CC3)nc3c2nn3C)cc1  
3182 C=CC(=O)OC(C)(C)C.COCOCc1ccc(Br)cc1C>>COCOCc1ccc(/C=C/C(=O)OC(C)(C)C)cc1C  
3183 C=Cc1ccc(OC)cc1.CCCCCCNC(=O)CCl>>CCCCCNC(=O)C/C=C/c1ccc(OC)cc1  
3184 C=Cc1cccc1O.Oc1ccc(O)c(I)c1>>Oc1ccc(O)c(/C=C/c2cccc2O)c1  
3185 C=CC(=O)OC.COc1ccc(CN2C(=O)C(=O)c3c(Br)cccc32)cc1>>COC(=O)/C=C/c1cccc2c1C(=O)C(=O  
)N2Cc1ccc(OC)cc1  
3186 Brc1cccs1.C=CC(=O)OCCSc1cccc1>>O=C(/C=C/c1cccs1)OCCSc1cccc1  
3187 C=Cc1cenc1.CCN1c2ncc(I)cc2C(=O)N(C)c2ccenc21>>CCN1c2ncc(/C=C/c3cenc3)cc2C(=O)N(C)c  
2ccenc21  
3188 C=Cc1cccc1.OC/C=C/C1=C(Br)CCCC1>>OC/C=C/C1=C(/C=C/c2cccc2)CCCC1  
3189 C=Cc1cccc1.Ic1ccc2c(c1)OCCOCCOCCOCCO2>>C=C/c1ccc2c(c1)OCCOCCOCCOCCO2)c1cccc  
3190 C=CC(=O)OC.CC(C)(O)Cn1enc2c(N)nc3cc(Br)ccc3c21>>COC(=O)/C=C/c1ccc2c(c1)nc(N)c1nn(CC  
(C)(C)O)c12  
3191 C=CC(=O)OCc1cccc1.COC(=O)CC1(CC(=O)OC)CC(c2cc(OCc3cccc3)ccc2Br)=NO1>>COC(=O)C  
C1(CC(=O)OC)CC(c2cc(OCc3cccc3)ccc2/C=C/C(=O)OCc2cccc2)=NO1  
3192 C=Cc1ccc(OC)c(O)c1.COc1ccc(I)c(OC)c1>>COc1ccc(/C=C/c2ccc(OC)c(O)c2)c(OC)c1  
3193 C=Cc1ccc(OCC)cc1.COc1ccc(I)cc1>>CCOc1ccc(/C=C/c2ccc(OC)cc2)cc1  
3194 C=CC(C)(C)O.CN(C)C(=O)c1cccc2nc3c(Br)cccc3nc12>>CN(C)C(=O)c1cccc2nc3c(/C=C/C(C)(C)O)c  
ccc3nc12  
3195 C=Cc1cccc1OC.COCO[C@@]1(Cc2cc(Cl)ccn2)C(=O)N(COC)[C@H]1CC(C)C>>COCO[C@@]1(C  
c2cc(/C=C/c3cccc3OC)ccn2)C(=O)N(COC)[C@H]1CC(C)C  
3196 C=CC(=O)N(C)OC.Oc1ccc(I)cc1>>CON(C)C(=O)/C=C/c1ccc(O)cc1  
3197 C=CSCC.Cc1cccc(Br)c1>>CCS/C=C/c1cccc(C)c1  
3198 C=Cc1ccc2cccc2c1.Ic1cccc1>>C=C/c1ccc2cccc2c1)c1cccc1  
Br1ccc2ccc3cccc4ccc1c2c34.C=Cc1nc2c(N)ncnc2n1[C@@H]1O[C@H](CO[Si](C)(C)C(C)(C)C)[C  
@@H](O[Si](C)(C)C(C)(C)C)[C@H]1O[Si](C)(C)C(C)(C)C>>CC(C)(C)[Si](C)(C)OC[C@H]1O[C@  
@H](n2c(/C=C/c3ccc4ccc5cccc6ccc3c4c56)nc3c(N)ncnc32)[C@H](O[Si](C)(C)C(C)(C)C)[C@H]1  
O[Si](C)(C)C(C)(C)C  
3199 C=Cc1cccc1.C[Si](C)(C)c1cc2n(c(=O)c1I)CCC21OCCO1>>C[Si](C)(C)c1cc2n(c(=O)c1/C=C/c1cccc  
c1)CCC21OCCO1  
3200 Br1c2cccc2cc2cccc12.C=CS(C)(=O)=O>>CS(=O)(=O)/C=C/c1c2cccc2cc2cccc12  
3201 C=Cc1ccc(N(c2cccc2)c2cccc2)cc1.CC(C)(C)OC(=O)CCCCCOCc1cc(Br)ccc1C=O>>CC(C)(C)OC  
(=O)CCCCCOCc1cc(/C=C/c2ccc(N(c3cccc3)c3cccc3)cc2)ccc1C=O  
3202 C=CC(=O)OCCCC.Clc1cccc(Br)c1>>CCCCOC(=O)/C=C/c1cccc(Cl)c1  
3203 C=Cc1ccc(C)cc1.Cn1enc1-c1ccc(Br)cc1>>Cc1ccc(/C=C/c2ccc(-c3ncn3C)cc2)cc1  
3204 C=Cc1ccc(OCc2cccc2)ccc1OCc1cccc1.CCCCCCNC(=O)c1cc(I)ccc1O>>CCCCCNC(=O)c1cc(/C=  
C/c2cc(OCc3cccc3)ccc2OCc2cccc2)ccc1O  
3205 C=C(C)C(=O)OCCO.O=C1C(O)=C(I)C(=O)c2cccc21>>C/C=C\C1=C(O)C(=O)c2cccc2C1=O)C(=O)OCCO  
3206 C=Cc1cccc(Cl)c1.Cc1ccc2c(-c3cccc3)c(Br)c(=O)cc2c1>>Cc1ccc2c(-  
3207 c3cccc3)c(/C=C/c3cccc(Cl)c3)c(=O)cc2c1

3208 C=Cc1nncn2c1nen2C1CCCCO1.C[Si](C)(C)Oe1cccc1I>>C[Si](C)(C)Oe1cccc1/C=C/c1nncn2c1nen2C1CCCCO1  
 3209 C=COCCCC.O=c1cc(Br)c2cccc2o1>>CCCCO/C=C/c1cc(=O)oc2cccc12  
 3210 C=CC(=O)OCC.O=C(O)c1cccc(I)c1>>CCOC(=O)/C=C/c1cccc(C(=O)O)c1  
 3211 C=C(OC)C(=O)OC.Ic1cccc2cccc12>>COC(=O)/C=C/c1cccc2cccc12)OC  
 3212 Br1ccc(I)cc1.C=CCNC(=O)c1cc(C)on1>>Cc1cc(C(=O)NC/C=C/c2ccc(Br)cc2)no1  
 3213 Br1ccc2ccc3cccc4ccc1c2c34.C=Cc1ccc(Cl)cc1>>Clc1ccc(/C=C/c2ccc3ccc4cccc5ccc2c3c45)cc1  
 3214 C=Cc1ccc(F)cc1.COC(=O)Cn1c(=O)c(Cl)nc2ccnc21>>COC(=O)Cn1c(=O)c(/C=C/c2ccc(F)cc2)nc2ccnc21  
 3215 C=C(C)C(=O)OC(C)(C)C.N#Cc1ccc(Br)cc1N>>C/C(=C\c1ccc(C#N)c(N)c1)C(=O)OC(C)(C)C  
 3216 C=CCNC(=O)OC(C)(C)C.CC(=O)c1cccc1I>>C=C(CNC(=O)OC(C)(C)C)c1cccc1C(C)=O  
 3217 Br1cccn1.C=COCCCC>>C=C(OCCCC)c1cccn1  
 3218 C=CC(=O)OC(C)(C)C.CN(C)c1ccc(CNc2ccc(Br)cn2)cc1>>CN(C)c1ccc(CNc2ccc(/C=C/C(=O)OC(C)(C)C)cn2)cc1  
 3219 C=Cc1cccc1Cl.Cn1nc(Br)c2cccc21>>Cn1nc(/C=C/c2cccc2Cl)c2cccc21  
 3220 C=CC(=O)OC(C)(C)C.Nc1ccc(F)cc1I>>CC(C)(C)OC(=O)/C=C/c1cc(F)ccc1N  
 3221 C=CC(=O)OCC.CN1C(c2cccc2)=C(I)c2ccsc2S1(=O)=O>>CCOC(=O)/C=C/C1=C(c2cccc2)N(C)S(=O)(=O)c2sccc21  
 3222 Br1cccc1.C=Cc1nc2c(=O)[nH]c(N=CN(C)C)nc2n1[C@@H]1C[C@H](O)[C@@H](COC(c2cccc2)(c2ccc(OC)cc2)c2ccc(OC)cc2)O1>>COc1ccc(C(OC[C@H]2O[C@H](n3c(/C=C/c4cccc4)nc4c(=O)[nH]c(N=CN(C)C)nc43)C[C@@H]2O)(c2cccc2)c2ccc(OC)cc2)cc1  
 3223 C=CC(=O)OCC.OCc1c(F)cc(Br)cc1F>>CCOC(=O)/C=C/c1cc(F)c(CO)c(F)c1  
 3224 Br1ccc2cccc2c1.C=CC=O>>O=C/C=C/c1ccc2cccc2c1  
 3225 C=CC(=O)OC.COc1ccc(Cn2nc(I)c3c(NC4CCOCC4)nc32)cc1>>COC(=O)/C=C/c1nn(Cc2ccc(OC)c2)c2ccnc(NC3CCOCC3)c12  
 3226 C=CC(=O)N[C@H](C)c1cccc2cccc12.FC(F)(F)c1cccc(Br)c1>>C[C@H](NC(=O)/C=C/c1cccc(C(F)(F)F)c1)c1cccc2cccc12  
 3227 C=CC(=O)O.Oc1cccc1I>>O=C(O)/C=C/c1cccc1O  
 3228 C=C(OC)C1=C(Br)CCCC1.C=CC(=O)OC>>C=C(OC)C1=C(/C=C/C(=O)OC)CCCC1  
 3229 C=Cc1cccc1.O=C1OC(O)c2cc(Br)ccc21>>O=C1OC(O)c2cc(/C=C/c3cccc3)ccc21  
 3230 Br1cccc1.C=CCCC(C)=O>>CC(=O)CC/C=C/c1cccc1  
 3231 C=Cc1cccc1.Nc1ccc(I)cc1[N+](=O)[O-]>>Nc1ccc(/C=C/c2cccc2)cc1[N+](=O)[O-]  
 3232 C=Cc1cccc1.CCOC(=C(Br)c1cccc1)C(F)(F)F>>CCOC(=C(/C=C/c1cccc1)c1cccc1)C(F)(F)F  
 3233 C=Cc1ccc(CO)cc1.IC1CCCCC1>>OCc1ccc(/C=C/C2CCCCC2)cc1  
 3234 C=Cc1nc2c(N)nnc2n1[C@@H]1O[C@H](CO[Si](C)(C)C(C)(C)C)[C@@H](O[Si](C)(C)C(C)(C)C)[C@H]1O[Si](C)(C)C(C)(C)C.O=[N+](O-)]c1ccc(I)cc1>>CC(C)(C)[Si](C)(C)OC[C@H]1O[C@@H](n2c(/C=C/c3ccc([N+](=O)[O-])cc3)nc3c(N)nnc32)[C@H]1(O[Si](C)(C)C(C)(C)C)[C@@H]1O[Si](C)(C)C(C)(C)C  
 3235 Br1cccn1.C=Cc1cccc1>>C(=C/c1cccn1)\c1cccc1  
 3236 C=Cc1ccc2c(c1)Sc1cc(/C=C/c3ccc4c(c3)Sc3cccc3N4CCCCCCCC)ccc1N2CCCCCCCC.CCCCCCCC  
 3237 N1c2ccc(Br)cc2Sc2cc(C=O)ccc21>>CCCCCCCCN1c2cccc2Sc2cc(/C=C/c3ccc4c(c3)Sc3cc(/C=C/c5ccc6c(c5)Sc5cc(C=O)ccc5N6CCCCCCCC)ccc3N4CCCCCCCC)ccc21  
 3238 C=CC(=O)c1ccc(C)cc1.COc1ncc(I)c(OC)n1>>COc1ncc(/C=C/C(=O)c2ccc(C)cc2)c(OC)n1  
 3239 C=CC(=O)OCC.COC1OC(c2cccc2)=C(I)c2cccc21>>CCOC(=O)/C=C/C1=C(c2cccc2)OC(OC)c2ccc21  
 3240 C=CC(=O)OC.COc1ccc2c(c1)CCN(c1cccc(F)c1)C2(C)c1ccc(Br)cc1>>COC(=O)/C=C/c1ccc(C2(C)c3ccc(OC)cc3CCN2c2cccc(F)c2)cc1  
 3241 C=C(NC(=O)OCC[Si](C)(C)C)C(=O)OC.CC(C)(C)OC(=O)N/C(=C\c1cccc(Br)c1)C(=O)OCc1cccc1>>COC(=O)/C(=C/c1cccc(/C=C\NC(=O)OC(C)(C)C)C(=O)OCc2cccc2c1)NC(=O)OCC[Si](C)(C)C  
 3242 C=CC(=O)OC(C)(C)C.O=C1CN(CCCN2CCOCC2)Cc2cc(Br)nc2N1>>CC(C)(C)OC(=O)/C=C/c1nnc2c(c1)CN(CCCN1CCOCC1)CC(=O)N2  
 3243 C=C1C(=O)O[C@H]2[C@H]1C[C@@H](O)/C(C)=C/CC[C@@]1(C)O[C@@H]21.Cc1ccc(I)cc1>>C/C1=C\CC[C@@]2(C)O[C@H]2[C@H]2OC(=O)/C(=C/c3ccc(C)cc3)[C@@H]2C[C@H]1O  
 3244 C=CC(=O)O.FC1(F)Oc2cccc(Br)c2O1>>O=C(O)/C=C/c1cccc2c1OC(F)(F)O2  
 3245 C=CC(=O)OCC.O=C1CCc2cc(Br)nc2N1>>CCOC(=O)/C=C/c1nnc2c(c1)CCC(=O)N2  
 3246 C=CC(=O)OC(C)(C)C.O=S(=O)(c1ccc(F)cc1)n1ccc2cc(Br)nc21>>CC(C)(C)OC(=O)/C=C/c1nnc2c(cn2S(=O)(=O)c2ccc(F)cc2)c1  
 3247 C=Cc1nccc(C#N)c1Nc1ccc2[nH]ccc2c1C.CN1CCN(Cc2cccc(Br)c2)CC1>>Cc1c(Nc2c(C#N)nc22/C=C/c2cccc(CN3CCN(C)CC3)c2)ccc2[nH]ccc12  
 3248 C=CC(=O)OC.IC1=CO[C@H](COCc2cccc2)[C@@H](OCc2cccc2)[C@@H]1OCc1cccc1>>COC(=O)/C=C/C1=CO[C@H](COCc2cccc2)[C@@H](OCc2cccc2)[C@@H]1OCc1cccc1



C=CC(=O)OC.CC1(C)O[C@H]2[C@H]([CO[Si](C)(C)C(C)(C)O[C@H](n3cnc(C(N)=O)c3I)]  
 3248 C@@H]2O1>>COC(=O)/C=C/c1c(C(N)=O)ncn1[C@@H]1O[C@H]([CO[Si](C)(C)C(C)(C)C)[C@H]  
 2OC(C)(C)O[C@H]21  
 3249 C=Cc1ccc(OC)cc1.Nc1ccc(Br)cc1>>COc1ccc(/C=C/c2ccc(N)cc2)cc1  
 3250 C=CS(=O)(=O)NCc1ccc(OC)cc1.CC(C)(C)OC(=O)NCc1cc(F)ccc1Br>>COc1ccc(CNS(=O)(=O)/C=C/  
 c2ccc(F)cc2CNC(=O)OC(C)(C)C)cc1  
 3251 C=CC[Si](C)(C)C.COc1ccc(I)cc1>>COc1ccc(/C=C/C[Si](C)(C)C)cc1  
 3252 C=CCCC.Ic1ccccc1>>CCS/C=C/c1ccccc1  
 3253 C=Cc1cccn1.CNC(=O)c1ccccc1Sc1ccc2c(I)nn(C3CCCCO3)c2c1>>CNC(=O)c1ccccc1Sc1ccc2c(/C=  
 C/c3cccn3)nn(C3CCCCO3)c2c1  
 3254 C=Cc1ccc(OC)c(OC)c1.N#Cc1ccc(I)cc1>>COc1ccc(/C=C/c2ccc(C#N)cc2)cc1OC  
 3255 C=Cc1ccccc1.COC(=O)c1cc(Br)ccc1Cl>>COC(=O)c1cc(/C=C/c2ccccc2)ccc1Cl  
 3256 C=C1CC(c2ccc(C)cc2)OC1=O.Fc1cccc(I)c1>>Cc1ccc(C2C/C(=C/c3cccc(F)c3)C(=O)O2)cc1  
 3257 C=CC(=O)OCc1ccccc1.CCn1nnc2c(C)c(Br)cc(OC)c21>>CCn1nnc2c(C)c(/C=C/C(=O)OCc3ccccc3)cc  
 (OC)c21  
 3258 C=Cc1ccccc1.CC(=O)c1cc2cc(Br)ccc2o1>>CC(=O)c1cc2ccc(/C=C/c3ccccc3)ccc2o1  
 3259 C=Cc1ccccc1.N#Cc1ccccc1Br>>N#Cc1ccccc1/C=C/c1ccccc1  
 3260 C=Cc1ccccc1.O=c1cc(Br)c2ccccc2o1>>O=c1cc(/C=C/c2ccccc2)c2ccccc2o1  
 3261 C=Cc1ccc(F)c(F)c1.COc1ccc(CN2C(=O)C(=C(c3ccc(O)cc3)c3ccc(O)cc3)c3cc(Br)ccc32)cc1>>COc1c  
 cc(CN2C(=O)C(=C(c3ccc(O)cc3)c3ccc(O)cc3)c3ccc(/C=C/c4ccc(F)c(F)c4)ccc32)cc1  
 3262 C=CC(=O)O.CCCCC(C)CN1c2ccc(Br)cc2Sc2cc(C=O)ccc21>>CCCCC(C)CN1c2ccc(C=O)cc2Sc2  
 cc(/C=C/C(=O)O)ccc21  
 3263 C=C/C=C/C(=O)N(CCCC)CCCC.CC(C)(C)c1ccc(Br)cc1>>CCCCN(CCCC)C(=O)/C=C/C=C/c1ccc(C  
 (C)(C)C)cc1  
 3264 C=Cc1cccc(F)c1.COc1ccc2c(=O)c(I)ccc2c1>>COc1ccc2c(=O)c(/C=C/c3cccc(F)c3)ccc2c1  
 3265 C=CC(=O)OC(C)(C)C.CC(C)(C)OC(=O)CCOCc1cc([N+])(=O)[O-  
 ]ccc1Br>>CC(C)(C)OC(=O)/C=C/c1ccc([N+])(=O)[O-]cc1COCCC(=O)OC(C)(C)C  
 3266 C=Cc1ccc(OC)cc1.COc1cc2cc(Br)c(=O)cc2cc1OC>>COc1ccc(/C=C/c2cc3cc(OC)c(OC)cc3oc2=O)cc  
 3267 C=C1CC(c2ccccc2)OC1=O.Ic1ccccc1-c1ccc2ccccc2c1>>O=C1OC(c2ccccc2)C/C1=C/c1ccccc1-  
 c1ccc2ccccc2c1  
 3268 C=CC(OC)OCC.O=Cc1ccc(F)cc1Br>>CCOC(/C=C/c1cc(F)ccc1C=O)OCC  
 3269 C=Cc1ccc(C(=O)OC)cc1.FC(F)(F)C(F)(F)C(F)(F)C(F)(F)C(F)(F)C(F)(F)Br>>COC(=O)c1ccc(/C=C/C  
 (F)(F)C(F)(F)C(F)(F)C(F)(F)C(F)(F)C(F)(F)C(F)(F)F)cc1  
 3270 C=CCN1C(=O)c2ccccc2C1=O.Nc1ccc(Br)cc1>>Nc1ccc(/C=C/CN2C(=O)c3ccccc3C2=O)cc1  
 3271 C=CC(=O)OC.COC(=O)c1ccc(I)cc1>>COC(=O)/C=C/c1ccc(C(=O)OC)cc1  
 3272 C=CC(OC)OC.O=[N+][O-]c1cccc(I)c1>>COC(/C=C/c1cccc([N+])(=O)[O-]c1)OC  
 3273 C=CC(N)=O.O=C(O)c1cccc(I)c1>>NC(=O)/C=C/c1cccc(C(=O)O)c1  
 3274 C=CC(=O)OCC.CN1C(=O)C(C)(C)c2cc(Br)ccc21>>CCOC(=O)/C=C/c1ccc2c(c1)C(C)(C)C(=O)N2C  
 3275 C=CC(=O)OCC.Ic1cccn1>>CCOC(=O)/C=C/c1cccn1  
 3276 C=Cc1ccccc1C(=O)O.FC(F)(F)c1cc(I)ccc(C(F)(F)F)c1>>O=C(O)c1ccccc1/C=C/c1cc(C(F)(F)F)cc(C(F)  
 (F)F)c1  
 3277 C=Cc1ccccc1.C[Si](C)(C)CCOCn1nc(I)c2ccc(C=O)cc21>>C[Si](C)(C)CCOCn1nc(/C=C/c2ccccc2)c2  
 ccc(C=O)cc21  
 3278 C=CC(=O)OC.Cc1nc2ccc(I)cc2s1>>COC(=O)/C=C/c1ccc2nc(C)sc2c1  
 3279 C=Cc1ccc2c(c1)OCCO2.CC(C)(C)OC(=O)c1ccc(Br)cc1[N+](=O)[O-  
 ]>>CC(C)(C)OC(=O)c1ccc(/C=C/c2ccc3c(c2)OCCO3)cc1[N+](=O)[O-]  
 3280 C=CS(=O)c1ccccc1.O=C(c1ccccc1)c1ccc(Br)cc1>>O=C(c1ccccc1)c1ccc(/C=C/S(=O)c2ccccc2)cc1  
 3281 C=CC(=O)OCC.COc1ccc(C#C/C=C/c2ccc(Br)cc2)cc1>>CCOC(=O)/C=C/c1ccc(/C=C/C#Cc2ccc(OC)  
 cc2)cc1  
 3282 C=CCN(C(=O)OC(C)(C)C)C(=O)OC(C)(C)C.O=C1CCc2cc(Br)ccc21>>CC(C)(C)OC(=O)N(C/C=C/c  
 1ccc2c(c1)CCC2=O)C(=O)OC(C)(C)C  
 3283 C=COCCO.Fc1ccc(Br)cc1>>C=C(OCCO)c1ccc(F)cc1  
 3284 C=C[C@H]1CCCCN1C(=O)OC(C)(C)C.CC(=O)c1ccc(I)cc1>>CC(=O)c1ccc(/C=C/[C@H]2CCCC  
 CN2C(=O)OC(C)(C)C)cc1  
 3285 C=CC(=O)OC.COC(=O)c1ccccc(Br)c1>>COC(=O)/C=C/c1ccccc(C(=O)OC)c1  
 3286 C=CC(=O)OC(C)(C)C.C[Si](C)(C)/C=C/C1=C(Br)CCCC1>>CC(C)(C)OC(=O)/C=C/C1=C(/C=C/[Si]  
 (C)(C)C)CCCC1  
 3287 C=CC(=O)OC.CC(=O)OC[C@H]1OC=C(I)[C@H](OC(C)=O)[C@H]1OC(C)=O>>COC(=O)/C=C/  
 C1=CO[C@H](COC(C)=O)[C@H](OC(C)=O)[C@H]1OC(C)=O

Brclnc2cccc2c1.C=CCO[C@]1(C)C[C@@H](C)CN(C)[C@H](C)[C@@H](O)[C@](C)(O)[C@@H]  
 3288 ](CC)OC(=O)[C@H](C)[C@@H](O)[C@H]2C[C@@](C)(OC)[C@H](O[Si](C)(C)C)[C@H](C)O2)  
 [C@H](C)[C@H]1O[C@@H]1O[C@H](C)C[C@H](N(C)C)[C@H]1O[Si](C)(C)C>>CC[C@H]1OC(  
 =O)[C@H](C)[C@@H](O)[C@H]2C[C@@](C)(OC)[C@H](O[Si](C)(C)C)[C@H](C)O2)[C@H](C)  
 [C@@H](O[C@H]2O[C@H](C)C[C@H](N(C)C)[C@H]2O[Si](C)(C)C)[C@](C)(OC/C=C/c2nc3c  
 cccc3c2)C[C@@H](C)CN(C)C[C@@H](C)C[C@@H](O)C[C@]1(C)O  
 3289 C=C1CC(c2cccc2)OC1=O.Cc1cccc(I)c1>>Cc1cccc(/C=C2\CC(c3cccc3)OC2=O)c1  
 C=CC(=O)OC(C)(C)C.Cc1cc(C(=C2CCCC2)c2ccc(O)cc2)ccc1Br>>Cc1cc(C(=C2CCCC2)c2ccc(O  
 3290 )cc2)ccc1/C=C/C(=O)OC(C)(C)C  
 C=CC(=O)O.Clc1cccc1>>O=C(O)/C=C/c1cccc1  
 3291 C=CC(C)O.Cc1cccc(I)c1>>Cc1cccc(/C=C/C(C)O)c1  
 3292 C=CC(=O)OC.O=c1c(Br)cc2cccc12>>COC(=O)/C=C/c1cc2cccc2c1=O  
 3293 C=CC(C)=O.Ic1ncnc2ncn(Cc3cccc3)c12>>CC(=O)/C=C/c1ncnc2ncn(Cc3cccc3)c12  
 3294 C=CC(=O)OC.O=[N+](O-)[O-]c1cccc1Br>>COC(=O)/C=C/c1cccc1[N+](=O)[O-]  
 3295 C=Cc1ccc(N(CCCC)CCCC)cc1.CN(C)c1ccc(/C=C/c2nc3ccc(Br)cc3nc2-  
 3296 c2cccc2)cc1>>CCCCN(CCCC)c1ccc(/C=C/c2ccc3nc(/C=C/c4ccc(N(C)C)cc4)c(-c4cccc4)nc3c2)cc1  
 3297 C=CC(=O)c1cccc1.Ic1cccc1>>O=C(/C=C/c1cccc1)c1cccc1  
 3298 C=CC(=O)OCC.COc1nc(Cl)c(NC2CCN(C(=O)OC(C)(C)C)CC2)n1>>CCOC(=O)/C=C/c1ncc(OC)nc  
 1NC1CCN(C(=O)OC(C)(C)C)CC1  
 3299 C=CCN(C(=O)OC(C)(C)C)C(=O)OC(C)(C)C.COc1cc(Br)cc(OC)c1OC>>COc1cc(/C=C/CN(C(=O)O  
 C(C)(C)C)C(=O)OC(C)(C)C)cc(OC)c1OC  
 C=C(NC(=O)OCC[Si](C)(C)C)C(=O)OC.COc1ccc(-  
 3300 c2ccc(OC)c(/C=C\NC(=O)OC(C)(C)C)C(=O)OCc3cccc3)c2)cc1I>>COC(=O)/C(=C/c1ccc(-  
 c2ccc(OC)c(/C=C\NC(=O)OC(C)(C)C)C(=O)OCc3cccc3)c2)ccc1OC)NC(=O)OCC[Si](C)(C)C  
 3301 C=CC(N)=O.N#Cc1ccc(I)cc1>>N#Cc1ccc(/C=C/C(N)=O)cc1  
 3302 C=CC(=O)OCCCC.Clc1ccc(I)cn1>>CCCCOC(=O)/C=C/c1ccc(Cl)nc1  
 3303 C=CC(=O)N(C)Cc1oc2cccc2c1C.CC(C)(C)OC(=O)NCC1Cc2cc(Br)nc2NC1=O>>Cc1c(CN(C)C(=O)  
 3304 /C=C/c2nc3c(c2)CC(CNC(=O)OC(C)(C)C)C(=O)N3)oc2cccc12  
 C=C[Si](C)(C)C.COc1cccc(I)c1>>COc1cccc(/C=C/[Si](C)(C)C)c1  
 3305 C=CC(C)(O)CCC=C(C)C.O=Cc1ccc(Br)cc1>>CC(C)=CCCC(C)(O)/C=C/c1ccc(C=O)cc1  
 3306 C=CS(C)(=O)=O.Ic1cccc1>>CS(=O)(=O)/C=C/c1cccc1  
 3307 C=CC(C)=O.Oc1ccc(Cl)cc1>>CC(=O)/C=C/c1ccc(O)cc1  
 3308 C=C.N#Cc1ccc(Br)cc1>>C=Cc1ccc(C#N)cc1  
 3309 C=CC(=O)O.CCc1nc2c(en2CC)c(NC2CCOCC2)c1I>>CCc1nc2c(en2CC)c(NC2CCOCC2)c1/C=C/  
 C(=O)O  
 C=CCC(=O)OC(C)(C)C.C[C@@H](O)c1nc2ccc(Br)cc2n1>>C[C@@H](O)c1nc2ccc(/C=C/CC(=O)  
 3310 OC(C)(C)C)cc2n1  
 C=CC(=O)CC.CCOc1ncc(Br)c2cccc12>>CCOc1ncc(/C=C/C(=O)CC)c2cccc12  
 3311 C=Cc1cccc1.Cc1ccc(-c2c(I)nc3sc4cccc4n23)cc1>>Cc1ccc(-  
 3312 C=CC(=O)CC.CC(C)=C(C)Br>>CCC(=O)/C=C/C(C)=C(C)C  
 C=CC(=O)OC.Cc1ccc([S@](=O)c2ccc(C)cc2Br)cc1>>COC(=O)/C=C/c1cc(C)ccc1[S@](=O)c1ccc(  
 3314 C)cc1  
 C=CCCCCCCCCCCCC.COC(=O)c1ccc(Br)cc1>>CCCCCCCCCCCCC/C=C/c1ccc(C(=O)OC)cc1  
 3315 C=CC(=O)OC(C)(C)C.CCCCCCCc1ccc(C(=O)OC)c(Cl)c1>>CCCCCCCc1ccc(C(=O)OC)c(/C=C/  
 3316 C(=O)OC(C)(C)C)c1  
 C=CCCC(=O)O.Ic1ccsc1>>O=C(O)CC/C=C/c1ccsc1  
 3317 C=Cc1scnc1C.C[Si](C)(C)CCOCn1nc(I)c2ccc(C=O)cc21>>Cc1nsc1/C=C/c1nn(COCC[Si](C)(C)C)c2  
 3318 cc(C=O)ccc12  
 C=CC(N)=O.O=C(Nc1ccc(I)cc1)Nc1cc(C(F)(F)F)ccc1F>>NC(=O)/C=C/c1ccc(NC(=O)Nc2cc(C(F)(F)  
 3319 F)ccc2F)cc1  
 C=CC(C)=O.COc1cc(OC)nc(Cl)n1>>COc1cc(OC)nc(/C=C/C(C)=O)n1  
 3320 Brclcccc(N2CCN(c3ncccn3)CC2)n1.C=CC(=O)OCCCC>>CCCCOC(=O)/C=C/c1cccc(N2CCN(c3ncc  
 3321 cn3)CC2)n1  
 C=CCC(=O)OC.Cc1nc2ccc(I)cc2s1>>COC(=O)C/C=C/c1ccc2nc(C)sc2c1  
 3322 C=CC(=O)OC(C)(C)C.Cc1cc(Br)ccc1C#N>>Cc1cc(/C=C/C(=O)OC(C)(C)C)ccc1C#N  
 3323 C=CC(O)C(F)(F)C(F)(F)C(F)(F)C(F)(F)C(F)(F)F.Ic1cccc1>>OC(/C=C/c1cccc1)C(F)(F)C(F)  
 3324 (F)C(F)(F)C(F)(F)C(F)(F)C(F)(F)F  
 C=CC(=O)OCC.C=CCn1nnc2c(C)c(Br)ccc21>>C=CCn1nnc2c(C)c(/C=C/C(=O)OCC)ccc21  
 3325 C=CCNC(=O)c1cc(C)on1.Ic1ccc2c(c1)OCCO2>>Cc1cc(C(=O)NC/C=C/c2ccc3c(c2)OCCO3)no1  
 3326 C=COCCCC.CCOC(=O)c1ccc(OS(=O)(=O)C(F)(F)F)cc1>>C=C(OCCCC)c1ccc(C(=O)OCC)cc1  
 3327 C=CC(=O)OC(C)(C)C.Cc1cccc(C=O)c1Br>>Cc1cccc(C=O)c1/C=C/C(=O)OC(C)(C)C  
 3328

3329 C=C(NC(=O)OC(C)(C)C(=O)OC.Nc1ccc(I)cc1>>COC(=O)/C(=C/c1ccc(N)cc1)NC(=O)OC(C)(C)C  
3330 C=C(C)C(=O)OC.O=[N+][[O-]]c1ccccc1I>>COC(=O)/C(C)=C/c1ccccc1[N+](=O)[O-]  
3331 C=CC(=O)OCC.O=C(Nc1ccccc1I)C(F)(F)C(F)(F)F>>CCOC(=O)/C=C/c1ccccc1NC(=O)C(F)(F)C(F)(F)C(F)(F)F  
3332 C=CS(=O)(=O)F.C[C@]12CC[C@@H]3c4ccc(OS(=O)(=O)Oc5ccc(I)cc5)cc4CC[C@H]3[C@@H]1C  
CC2=O>>C[C@]12CC[C@@H]3c4ccc(OS(=O)(=O)Oc5ccc(/C=C/S(=O)(=O)F)cc5)cc4CC[C@H]3[C@@H]1CCCC2=O  
3333 C=Cl.C=C[Si](OCC)(OCC)OCC>>C=C/C=C/[Si](OCC)(OCC)OCC  
3334 C=C.COC(=O)c1ccc2cc(Br)ccc2c1>>C=Cc1ccc2cc(C(=O)OC)ccc2c1  
3335 C=Cc1ccc(-c2c(-c3ccc(OC)cc3)c(=O)c2=O)cc1.COc1ccc(I)cc1>>COc1ccc(/C=C/c2ccc(-c3c(-c4ccc(OC)cc4)c(=O)c3=O)cc2)cc1  
3336 C=Cc1ccccc1.Cc1nc(C(C)C)ncc1I>>Cc1nc(C(C)C)ncc1/C=C/c1ccccc1  
3337 Nc1ccc(I)cc1.[11CH2]=Cc1ccccc1>>Nc1ccc(/[11CH]=C/c2ccccc2)cc1  
3338 C=Cc1cccc2ccccc12.CC(C)c1ccc(Br)cc1>>CC(C)c1ccc(/C=C/c2cccc3ccccc23)cc1  
C=C.CCCCC(CC)COc1cc(/C=C/c2ccc(/C=C/c3ccc(/C=C/c4ccc(/C=C/c5ccc(I)cc5)cc4)cc3)cc2)c(OCC(CC)CCCC)cc1C>>C=Cc1ccc(/C=C/c2ccc(/C=C/c3ccc(/C=C/c4ccc(/C=C/c5ccc(OCC(CC)CCCC)c(C)c5OCC(CC)CCCC)cc4)cc3)cc2)cc1  
3339 C=C(C)C(=O)OCC.Cc1ccc(Cl)cc1>>CCOC(=O)/C(C)=C/c1ccc(C)cc1  
3340 Br1ccc2ccccc2c1.C=COCCOC=C>>C=COCCOC(=C)c1ccc2ccccc2c1  
3341 C=CC(=O)OCC.Cc1ccc(C=O)c(Br)c1>>CCOC(=O)/C=C/c1cc(C)ccc1C=O  
3342 Br1ccccc1.C=C(CC(=O)OC)C(=O)OC>>COC(=O)C/C=C/c1ccccc1C(=O)OC  
3343 C=CP(=O)(OCC)OCC.Ic1ccccc1>>CCOP(=O)/C=C/c1ccccc1OCC  
3344 C=C(NC(=O)OC(C)(C)C(=O)OCc1ccccc1.CC(C)(C)OC(=O)C(C)(C)c1ccc(I)cc1>>CC(C)(C)OC(=O)N/C(=C/c1ccc(C(C)(C)C(=O)OC(C)(C)C)cc1)C(=O)OCc1ccccc1  
3345 C=CC(=O)OC(C)(C)C.Nc1ccc(Br)c(F)c1>>CC(C)(C)OC(=O)/C=C/c1ccc(N)cc1F  
3346 C=C[C@]12C.Ic1ccccc1>>C[C@H]1CC[C@H]2[C@@H]3CC(=O)[C@H]4C[C@H](O)CC[C@]4(C)[C@H]3CC[C@]12C.Ic1ccccc1>>C[C@H]1CC[C@H]2[C@@H]3CC(=O)[C@H]4C[C@H](O)CC[C@]4(C)[C@H]3CC[C@]12C  
3347 Br1ccc(I)cc1.C=Cc1ccc(CP(=O)(OCC)OCC)cc1>>CCOP(=O)(Cc1ccc(/C=C/c2ccc(Br)cc2)cc1)OCC  
3348 C=CC(=O)N(C)Cc1oc2ccccc2c1C.C[C@]12C.Nc2ncc(Br)cc2CN1C(=O)OC(C)(C)C>>Cc1c(CN(C)C(=O)/C=C/c2enc3c(c2)CN(C(=O)OC(C)(C)C)[C@H](C)CN3)oc2ccccc12  
3349 C=Cc1ccc(OC)c(OC)c1.CC(C)(C)C(=O)Nc1nc(NC(=O)C(C)(C)C)c2cc(Br)cnc2n1>>COc1ccc(/C=C/c2enc3nc(NC(=O)C(C)(C)C)nc(NC(=O)C(C)(C)C)c3c2)cc1OC  
3350 C=Cc1ccc(OC)cc1.COC(=O)c1cc(OC)c(OC)cc1I>>COC(=O)c1cc(OC)c(OC)cc1/C=C/c1ccc(OC)cc1  
3351 C=CC(C)=O.IC1=CO[C@H](COCc2ccccc2)[C@H](OCc2ccccc2)[C@]12C.Ic1ccccc1>>CC(=O)/C=C/C1=CO[C@H](COCc2ccccc2)[C@H](OCc2ccccc2)[C@]12C.Ic1ccccc1  
3352 Br1ccc(-c2ccc(OCCCN3CCCC3)cc2)cc1.C=CC(=O)OCC>>CCOC(=O)/C=C/c1ccc(-c2ccc(OCCCN3CCCC3)cc2)cc1  
3353 Br1csc2ccccc12.C=CC(=O)OC(C)(C)C>>CC(C)(C)OC(=O)/C=C/c1csc2ccccc12  
3354 C=CCC(O)c1ccc(-c2cc(OC)ncc2F)cc1.COC(=O)[C@@H](C)[C@H](c1ccc(I)c(O)c1)C1CC1>>COC(=O)[C@@H](C)[C@H](c1ccc(/C=C/CC(O)c2ccc(-c3cc(OC)ncc3F)cc2)c(O)c1)C1CC1  
3355 C=CC#N.CNC(=O)c1c(-c2ccc(F)cc2)oc2nc(N(C)S(C)(=O)=O)c(I)cc12>>CNC(=O)c1c(-c2ccc(F)cc2)oc2nc(N(C)S(C)(=O)=O)c(/C=C/C#N)cc12  
3356 C=CC(=O)N(C)Cc1cc2ccccc2n1C.O=c1[nH]c2ncc(Br)cc2n1C1CC1>>CN(Cc1cc2ccccc2n1C)C(=O)/C=C/c1cnc2[nH]c(=O)n(C3CC3)c2c1  
3357 C=CC(=O)OC(C)(C)C.COc1ccc(-c2ccc(Br)en2)cc1OC>>COc1ccc(-c2ccc(/C=C/C(=O)OC(C)(C)C)en2)cc1OC  
3358 C=CC(=O)OCCCC.C=Cc1ccc(Br)cc1>>C=Cc1ccc(/C=C/C(=O)OCCCC)cc1  
3359 C=CC(=O)OC(C)(C)C.O=Cc1ccccc1I>>CC(C)(C)OC(=O)/C=C/c1ccccc1C(=O)c1  
3360 C=Cc1ccccc1.O=S(=O)(Oc1ccc2c1N(c1ncccn1)CCC2)C(F)(F)F>>C(=C/c1ccc2c1N(c1ncccn1)CCC2)\c1ccccc1  
3361 C=Cc1ccccc1.CCCCCCc1ccsc1Br>>CCCCCc1ccsc1/C=C/c1ccccc1  
3362 Br1encc2ccccc12.C=CCN1C(=O)c2ccccc2C1=O>>O=C1c2ccccc2C(=O)N1C/C=C/c1cncc2ccccc12  
3363 C=CC(C)(C)O.O=c1oc2ccccc2cc1Br>>CC(C)(O)/C=C/c1cc2ccccc2oc1=O  
3364 C=Cc1ccc(/C=C/c2ccc(N(C)C)cc2)cc1.O=c1cc2oc3cc(O)c(F)cc3c(-c3ccc(I)cc3S(=O)(=O)O)c-2cc1F>>CN(C)c1ccc(/C=C/c2ccc(/C=C/c3ccc(-c4c5cc(F)c(=O)cc-5oc5cc(O)c(F)cc45)c(S(=O)(=O)O)c3)cc2)cc1  
3365 C=Cc1ccccc1.Cc1ccc2ccccc2c1Br>>Cc1ccc2ccccc2c1/C=C/c1ccccc1  
3366 C=CC(=O)OCC.Fc1ccc(-n2nnc3cnc(Nc4ccccc(Br)c4)nc32)c1>>CCOC(=O)/C=C/c1ccccc1(Nc2ncc3nnn(-c4ccccc(F)c4)c3n2)c1  
3367

3368 C=CC(=O)OC.CC(=O)Nc1ccc(Cl)cc1I>>COC(=O)/C=C/c1cc(Cl)ccc1NC(C)=O  
3369 C=CC(=O)OC(C)(C)C.Fc1ccc(I)cc1>>CC(C)(C)OC(=O)/C=C/c1ccc(F)cc1  
3370 C=CC(=O)OC.O=CC1=C(Br)CCCC1>>COC(=O)/C=C/C1=C(C=O)CCCC1  
3371 C=CC(=O)OCC.O=Cc1ccc(Cl)cc1>>CCOC(=O)/C=C/c1ccc(C=O)cc1  
3372 Br1cccc1C1OCCCCO1.C=CC(=O)OC>>COC(=O)/C=C/c1cccc1C1OCCCCO1  
3373 C=Cc1sc(C=O)c2c1OCCO2.CCN(CC)/N=N/c1ccc(I)cc1>>CCN(CC)/N=N/c1ccc(/C=C/c2sc(C=O)c3c2OCCO3)cc1  
3374 C=CC(=O)OCCCC.COC(CNc1Inccnc1Cl)OC>>CCCCOC(=O)/C=C/c1Inccnc1NCC(OC)OC  
3375 C=Cc1ccc(Br)cc1.Cn1cc(I)c(=O)c2cccc21>>Cn1cc(/C=C/c2ccc(Br)cc2)c(=O)c2cccc21  
3376 Br1enc2cccc2c1.C=CCO[C@H]1CC(=O)O[C@H](C)C/C=C/C=C/[C@H](O)[Si](C)(C)C(C)(C)C)[C@H](C)C[C@H](CC(OC)OC)[C@H](O[C@H]2O[C@H](C)[C@H](O[C@H]3C[C@H](C)(O)[C@H](OC(=O)CC)[C@H](C)O3)[C@H](N(C)C)[C@H]2OC(C)=O)[C@H]1OC>>CCC(=O)O[C@H]1[C@H](C)O[C@H](O[C@H]2[C@H](N(C)C)[C@H](OC(C)=O)[C@H](O[C@H]3[C@H](H)(OC)[C@H](OC/C=C/c4cnc5cccc5c4)CC(=O)O[C@H](C)C/C=C/C=C/[C@H](O)[Si](C)(C)C(C)(C)C)[C@H](C)C)[C@H](C)C)[C@H]1C@H13C(C)(OC)OC)[C@H]2C(C)C@H12C(C)C@H11(C)O  
3377 C=CS(C)=O).O.#Cc1cccc1Br>>CS(=O)(=O)/C=C/c1cccc1#N  
3378 C=CC(=O)OC.COC(=O)c1ccc(N)c(I)c1>>COC(=O)/C=C/c1cc(C(=O)OC)ccc1N  
3379 C=Cc1ccc(C#N)cc1.OCCCC(Br)C(F)(F)F>>N#Cc1ccc(/C=C/C(CCCO)C(F)(F)F)cc1  
3380 C=Cc1ccc2nc(OC)c(OC)nc2c1.COC(=O)c1cccc(Br)c1>>COC(=O)c1cccc(/C=C/c2ccc3nc(OC)c(OC)nc3c2)c1  
3381 C=COCCCC.O=c1cc(Br)c2ccc(F)cc2o1>>CCCCO/C=C/c1cc(=O)oc2cc(F)ccc12  
3382 C=CC(=O)OC.CO[C@H]1O[C@H](COC2O[C@H](COC(C)=O)[C@H](OC(C)=O)C=C2I)[C@H](OCc2cccc2)[C@H](OCc2cccc2)[C@H]1OCc1cccc1>>COC(=O)/C=C/C1=C[C@H](OC(C)=O)[C@H](COC(C)=O)OC1OC[C@H]1O[C@H](OC)[C@H](OCc2cccc2)[C@H](OCc2cccc2)[C@H]1OCc1cccc1  
3383 C=CC(=O)OC(C)(C)C.COCOc1ccc(I)nc1Cl>>COCOc1ccc(/C=C/C(=O)OC(C)(C)C)nc1Cl  
3384 C=COCCCC.O=Cc1cccc(Br)c1>>C=C(OCCCC)c1cccc(C=O)c1  
3385 C=CC(=O)OC.CCn1enc2c(NCc3cccc(Br)c3)nc(N3CCCC3)nc21>>CCn1enc2c(NCc3cccc(/C=C/C(=O)OC)c3)nc(N3CCCC3)nc21  
3386 C=Cc1cccc1.COC(C#N)c1cccc1Br>>COC(C#N)c1cccc1/C=C/c1cccc1  
3387 C=COCCOC=C.Ic1cccc2cccc12>>C=COCCOC(=C)c1cccc2cccc12  
3388 C=CC(=O)OCC.O=c1c2cccc2c(Br)c2n1CCC2>>CCOC(=O)/C=C/c1c2n(c(=O)c3cccc13)CCC2  
3389 C=CC(=O)OCCCC.CC(C)(C)c1ccc(Br)cc1>>CCCCOC(=O)/C=C/c1ccc(C(C)(C)C)cc1  
3390 C=C.COc1ccc(NC(C)=O)c(Br)c1>>C=Cc1cc(OC)ccc1NC(C)=O  
3391 C=Cc1ccc(C#N)cc1.CC(C)=C(C)Br>>CC(C)=C(C)/C=C/c1ccc(C#N)cc1  
3392 Br1enc2cccc2c1.C=CCCN1C(=O)c2cccc2C1=O>>O=C1c2cccc2C(=O)N1CC/C=C/c1enc2cccc2c1  
3393 C=CCO.Fc1cccc(Br)c1>>C=C(CO)c1cccc(F)c1  
3394 C=Cc1cc(OCc2cccc2)c(OCc2cccc2)nn1.FC(F)(F)c1ccc(Cl)cc1C(F)(F)F>>FC(F)(F)c1ccc(/C=C/c2cc(OCc3cccc3)c(OCc3cccc3)nn2)cc1C(F)(F)F  
3395 C=Cc1ccc(C)cc1.Oc1cccc1I>>Cc1ccc(/C=C/c2cccc2O)cc1  
3396 C=CCNC(=O)NC(C)(C)CO.Cc1cc(OCc2cccc2)c([C@H]2O[C@H](COCc3cccc3)[C@H](OCc3cccc3)[C@H](OCc3cccc3)[C@H]2OCc2cccc2)cc1Cc1ccc(Br)cc1>>Cc1cc(OCc2cccc2)c([C@H]2O[C@H](COCc3cccc3)[C@H](OCc3cccc3)[C@H](OCc3cccc3)[C@H]2OCc2cccc2)cc1Cc1ccc(/C=C/CNC(=O)NC(C)(C)CO)cc1  
3397 C=CC(=O)NCCCN(C)C.CC(=O)OCC1Cn2c3cccc3c3c4c(c5c6cc(Br)ccc6n(c5c32)C1)C(=O)N(C(C)=O)C4>>CC(=O)OCC1Cn2c3cccc3c3c4c(c5c6cc(/C=C/C(=O)NCCCN(C)C)ccc6n(c5c32)C1)C(=O)N(C(C)=O)C4  
3398 C=Cc1cccc1.Clc1ccc2c(Br)ccnc2c1>>Clc1ccc2c(/C=C/c3cccc3)ccnc2c1  
3399 C=CC(=O)OCC.CC(C)(C)OC(=O)N1CCCCc2ccc(Cl)nc21>>CCOC(=O)/C=C/c1ccc2c(n1)N(C(=O)O)C(C)(C)C)CCCC2  
3400 C=Cc1cc(OC)cc(OC)c1.Ic1ccc(OCc2cccc2)cc1>>COc1cc(/C=C/c2ccc(OCc3cccc3)cc2)cc(OC)c1  
3401 C=CC(=O)OCC.Cc1ccc(S(=O)(=O)n2cc(-c3ccc(OC4CCOCC4)c(C#N)c3)c3cc(Br)cnc32)cc1>>CCOC(=O)/C=C/c1enc2c(c1)c(-c1ccc(OC3CCOCC3)c(C#N)c1)cn2S(=O)(=O)c1ccc(C)cc1  
3402 C=C.O=Cc1cc(Br)ccc1O>>C=Cc1ccc(O)c(C=O)c1  
3403 C=Cc1ccc(OC(C)=O)cc1.CC(=O)OC[C@H]1O[C@H](Oc2ccc(I)cc2)[C@H](OC(C)=O)[C@H]1OC(C)=O>>CC(=O)OC[C@H]1O[C@H](Oc2ccc(/C=C/c3ccc(OC(C)=O)cc3)cc2)[C@H](OC(C)=O)[C@H]1OC(C)=O  
3404 C=Cc1cccc1.Nc1cccc1Br>>Nc1cccc1/C=C/c1cccc1

C=CC(=O)OC.O=C1[C@H](COCc2ccccc2)N(Cc2cn([C@H](CO)Cc3ccccc3)nn2)C(=O)[C@H](Cc2cc  
3405 c(Br)cc2)N1CCCCO>>COC(=O)/C=C/c1ccc(C[C@H]2C(=O)N(Cc3cn([C@H](CO)Cc4ccccc4)nn3)[C  
@ @H](COCc3ccccc3)C(=O)N2CCCCO)cc1  
3406 C=CC(=O)OC.CSc1ccc(Br)cc1>>COC(=O)/C=C/c1ccc(SC)cc1  
3407 C=CCC(=O)OC(C)(C)C.[C@H](O)c1ccc2ccc(Br)cc2n1>>C[C@H](O)c1ccc2ccc(/C=C/CC(=O)  
OC(C)(C)C)cc2n1  
3408 C/C(I)=C/C#N.C=CC=O>>CC(=C/C#N)/C=C/C=O  
3409 C=CCOc1ccc(Cl)cc1.COc1ccc(I)cc1>>COc1ccc(/C=C/COc2ccc(Cl)cc2)cc1  
\*CNCCCOCCOCCOCCCN(C(=O)COc1ccc(C(Cc2cc(OC)cc(OC)c2)NC(=O)c2ccc(C=C)cc2)cc1.CC(C  
3410 )(C)OC(=O)n1ccc2cc(I)ccc21>>\*CNCCCOCCOCCOCCCN(C(=O)COc1ccc(C(Cc2cc(OC)cc(OC)c2)N  
C(=O)c2ccc(/C=C/c3ccc4c(ccn4C(=O)OC(C)(C)C)c3)cc2)cc1  
3411 C=CS(=O)(=O)F.Fc1cccc(I)c1>>O=S(=O)(F)/C=C/c1cccc(F)c1  
3412 C=CC(=O)OC.CC(C)(C)OC(=O)N1CCC(CCc2nc3ncc(Br)cc3o2)CC1>>COC(=O)/C=C/c1cnc2nc(CC  
C3CCN(C(=O)OC(C)(C)C)CC3)oc2c1  
3413 C=CC(C)=O.N#Cc1ccc2[nH]c3c(c2c1)CC(=O)Nc1ccc(I)cc1-3>>CC(=O)/C=C/c1ccc2c(c1)-  
c1[nH]c3ccc(C#N)cc3c1CC(=O)N2  
3414 C=CC(=O)OC(C)(C)C.CCCCCC(=O)Oc1ccc(I)cc1CC=C(C)C>>CCCCCC(=O)Oc1ccc(/C=C/C(=O)O  
C(C)(C)C)cc1CC=C(C)C  
3415 C=CCNC(=O)c1ccc(F)cc1NC(=O)c1cccc1.Ic1cccc1>>O=C(Nc1cc(F)ccc1C(=O)NC/C=C/c1cccc1)  
c1cccc1  
3416 C=CCCCCCCC.FC(F)(F)c1ccc(Br)cc1>>CCCCCCCC/C=C/c1ccc(C(F)(F)F)cc1  
Br1ccc(CN2CCCC(c3c(-  
3417 c4ccccc4)[nH]c4ccccc34)C2)cc1.C=CC(=O)OC>>COC(=O)/C=C/c1ccc(CN2CCCC(c3c(-  
c4ccccc4)[nH]c4ccccc34)C2)cc1  
3418 C=CCN(C(=O)c1nccn1C)[C@H](C)c1cc(F)cc(F)c1.O=C1Nc2ncccc2[C@ @]12Cc1cc(Br)cnc1C2>>C[  
C@H](c1cc(F)cc(F)c1)N(C/C=C/c1cnc2c(c1)C[C@ @]1(C2)C(=O)Nc2ncccc21)C(=O)c1nccn1C  
3419 C=C1C(=O)O[C@H]2[C@H]1CC/C(C)=C/CC[C@ @]1(C)O[C@H]21.Nc1ccc(I)cc1>>C/C1=C\CC[  
C@ @]2(C)O[C@H]2[C@H]2OC(=O)/C(=C/c3ccc(N)cc3)[C@ @H]2CC1  
\*CNCCCOCCOCCOCCCN(C(=O)COc1ccc(C(Cc2cc(OC)cc(OC)c2)NC(=O)c2cccc(C=C)c2)cc1.N#C  
3420 Cc1cccc1I>>\*CNCCCOCCOCCOCCCN(C(=O)COc1ccc(C(Cc2cc(OC)cc(OC)c2)NC(=O)c2cccc(/C=  
C/c3ccccc3CC#N)c2)cc1  
3421 C=Cc1cccc1.Cc1nc(-c2ccc(Br)cc2)cs1>>Cc1nc(-c2ccc(/C=C/c3ccccc3)cc2)cs1  
3422 C=CCOC(C)=O.COc1ccc(I)cc1>>COc1ccc(/C=C/COc(C)=O)cc1  
\*CNCCCOCCOCCOCCCN(C(=O)COc1ccc(C(Cc2cc(OC)cc(OC)c2)NC(=O)c2ccc(C=C)cc2)cc1.O=[N  
3423 +][[O-  
]c1cccc1I>>\*CNCCCOCCOCCOCCCN(C(=O)COc1ccc(C(Cc2cc(OC)cc(OC)c2)NC(=O)c2ccc(/C=C  
/c3ccccc3[N+](=O)[O-])cc2)cc1  
3424 C=CC(=O)Nc1cccc1.CC(C)(C)c1ccc2[nH]c3c(c2c1)CC(=O)Nc1ccc(I)cc1-  
3>>CC(C)(C)c1ccc2[nH]c3c(c2c1)CC(=O)Nc1ccc(/C=C/C(=O)Nc2ccccc2)cc1-3  
\*CNCCCOCCOCCOCCCN(C(=O)COc1ccc(C(Cc2cc(OC)cc(OC)c2)NC(=O)c2cccc(C=C)c2)cc1.N#C  
3425 Cc1cccc(I)c1>>\*CNCCCOCCOCCOCCCN(C(=O)COc1ccc(C(Cc2cc(OC)cc(OC)c2)NC(=O)c2cccc(/C=  
=C/c3ccccc3CC#N)c3)c2)cc1  
3426 C=Cc1cc(OCCCC)c(C=O)cc1OCCCC.CCN(CC)/N=N/c1ccc(I)cc1>>CCCCOc1cc(/C=C/c2ccc(/N=N/  
N(CC)CC)cc2)c(OCCCC)cc1C=O  
3427 C=CC(=O)N1CCN(C(C)=O)CC1.COc1cc2c3ccccc3nc3c4ccc(Cl)cc4n(C)c(c1)c23>>COc1cc2c3ccccc3  
nc3c4ccc(/C=C/C(=O)N5CCN(C(C)=O)CC5)cc4n(C)c(c1)c23  
3428 C=Cc1cccc1.O=Cc1c(Br)ccc2ccccc12>>O=Cc1c(/C=C/c2ccccc2)ccc2ccccc12  
3429 Br1ccc(I)cc1.C=Cc1ccc(S(C)(=O)=O)cc1>>CS(=O)(=O)c1ccc(/C=C/c2ccc(Br)cc2)cc1  
3430 C=Cc1cccc1.COc1cc(C=O)c(Br)c(OC)c1OC>>COc1cc(C=O)c(/C=C/c2ccccc2)c(OC)c1OC  
3431 C=CC(=O)c1ccc(OC)cc1OC.COc1ccc(I)cc1OC>>COc1ccc(C(=O)/C=C/c2ccc(OC)c(OC)c2)c(OC)c1  
3432 C=Cc1cccc1.Cc1ccc(-c2oc3ccccc3c(=O)c2Br)cc1>>Cc1ccc(-c2oc3ccccc3c(=O)c2/C=C/c2ccccc2)cc1  
3433 C=Cc1ccc(OCC(OC)OC)cc1.O=[N+][[O-]c1ccc(I)cc1CO>>COC(COc1ccc(/C=C/c2ccc([N+](=O)[O-  
]c(CO)c2)cc1)OC  
3434 C=Cc1ccc2ccccc2c1.O=C1c2ccccc2C(=O)N1CCCC(Br)C(F)(F)F>>O=C1c2ccccc2C(=O)N1CCCC(/C  
=C/c1ccc2ccccc2c1)C(F)(F)F  
3435 Br1cccn1.C=CCCC(=O)OC>>COC(=O)CC/C=C/c1cccn1  
3436 C=CC(=O)OC(C)(C)C.O=C(c1ccc(I)cc1)c1cccn1Cl>>CC(C)(C)OC(=O)/C=C/c1ccc(C(=O)c2cccn2  
Cl)cc1  
3437 C=CC(=O)OC.O=CNc1ccc(Cl)cc1I>>COC(=O)/C=C/c1cc(Cl)ccc1NC=O  
3438 Br1cccn1.C=Cc1cccn1>>C(=C/c1cccn1)\c1cccn1  
3439 C=CC(=O)N1CCOCC1.CC(=O)Cc1cccc1Br>>CC(=O)Cc1cccc1/C=C/C(=O)N1CCOCC1

3440 C=CC(=O)NC(C)(C)C.COc1ccc(-c2oc3cc(OC)ccc3c(=O)c2I)cc1>>COc1ccc(-  
 3441 c2oc3cc(OC)ccc3c(=O)c2/C=C/C(=O)NC(C)(C)C)cc1  
 3442 C=CC(=O)OC.Ic1ccn(C2CCCCO2)n1>>COC(=O)/C=C/c1ccn(C2CCCCO2)n1  
 3443 COC[C@H](/N=C(\c1cccc1)N1C=CCC[C@H]1c1ccc1)C(C)C.Ic1cccc1>>COC[C@H](/N=C(\  
 3444 c1cccc1)N1C=C(c2cccc2)CC[C@H]1c1ccc1)C(C)C  
 3445 C=CC(=O)OCC.Cc1cc(I)nc(C)n1>>CCOC(=O)/C=C/c1cc(C)nc(C)n1  
 3446 C=CC(=O)OCC.COc1cc(Br)c(CC2CCC(=O)N(Cc3cccc3)C2)cc1OC>>CCOC(=O)/C=C\c1cc(OC)c(  
 3447 OC)cc1CC1CCC(=O)N(Cc2cccc2)C1  
 3448 C=CCNC(=O)OC(C)(C)C.CCOC(=O)CC(c1ccc(C)c(CN2CC(C)Cc3cc(Br)ccc3S2(=O)=O)c1)c1ccc(F)  
 3449 cc1F>>CCOC(=O)CC(c1ccc(C)c(CN2CC(C)Cc3cc(/C=C/CNC(=O)OC(C)(C)C)ccc3S2(=O)=O)c1)c1c  
 3450 cc(F)cc1F  
 3451 C=C(NC(=O)OCc1cccc1)C(=O)OC.CC(=O)OCc1cc(C)ccc1Br>>COC(=O)/C(=C/c1ccc(C)cc1COC(  
 3452 C)=O)NC(=O)OCc1cccc1  
 3453 Br1cccc1I.C=CC(=O)N(C)OC>>CON(C)C(=O)/C=C/c1cccc1Br  
 3454 C=Cc1cccc1.ClC12CC3CC(CC(C3)C1)C2>>C(=C/C12CC3CC(CC(C3)C1)C2)\c1cccc1  
 3455 C=CC(C)(C)O.CC(=O)Oc1ccc2ccc(=O)oc2c1I>>CC(=O)Oc1ccc2ccc(=O)oc2c1/C=C/C(C)(C)O  
 3456 C=CC(C)=O.COCOc1cc2oc(=O)ccc2cc1OS(=O)(=O)C(F)(F)F>>COCOc1cc2oc(=O)ccc2cc1/C=C/C(  
 3457 C=CCCCCCCCCCCCC.c1ccc([I+](c2cccc2)cc1>>CCCCCCCCCCCCC/C=C/c1cccc1  
 3458 C=Cc1cccc1.Clc1cccc2cccc12>>C(=C/c1cccc2cccc12)\c1cccc1  
 3459 C=CC(=O)NCCc1ccc(O)cc1.COc1cc(I)ccc1O>>COc1cc(/C=C/C(=O)NCCc2ccc(O)cc2)ccc1O  
 3460 C=Cc1cccc1.Oc1ccc(Br)cc1>>Oc1ccc(/C=C/c2cccc2)cc1  
 3461 C=CS(=O)(=O)F.Fc1ccc(I)c(F)c1>>O=S(=O)(F)/C=C/c1ccc(F)cc1F  
 3462 \*CN(Cc1cccc1)N=Nc1ccc(I)cc1.C=CC(=O)OC(C)(C)C>>\*CN(Cc1cccc1)N=Nc1ccc(/C=C/C(=O)O  
 3463 C(C)(C)C)cc1  
 3464 C=CC(=O)O.O=c1c2ccc(F)cc2n(Cc2ccc(Br)cc2)c(=O)n1CCc1cccc1>>O=C(O)/C=C/c1ccc(Cn2c(=O)  
 3465 n(Cc3cccc3)c(=O)c3ccc(F)cc32)cc1  
 3466 C=CC(=O)OC(C)(C)C.Oc1ccc(C=C2C3CCCC2CCC3)c2ccc(Br)cc2)cc1>>CC(C)(C)OC(=O)/C=C/c1  
 3467 ccc(C(=C2C3CCCC2CCC3)c2ccc(O)cc2)cc1  
 3468 C=C1ccc(C)cc1.Cc1ccc(S(=O)(=O)Oc2cccc3c(Br)ccnc23)cc1>>Cc1ccc(/C=C/c2ccnc3c(OS(=O)(=O)  
 3469 c4ccc(C)cc4)cccc23)cc1  
 3470 Br1ccc2c(c1)OCO2.C=Cc1cccc1>>C(=C/c1ccc2c(c1)OCO2)\c1cccc1  
 3471 C=CC(=O)OC.CC(=O)OC[C@H]1O[C@H](Oc2ccc(I)cc2)[C@H](OC(C)=O)[C@H](OC(C)=O)[  
 3472 C@H]1OC(C)=O>>COC(=O)/C=C/c1ccc(O[C@H]2O[C@H](COC(C)=O)[C@H](OC(C)=O)[C@H  
 3473 ](OC(C)=O)[C@H]2OC(C)=O)cc1  
 3474 C=CC(=O)OC.CC(=O)Oc1cccc1Br>>COC(=O)/C=C/c1cccc1OC(C)=O  
 3475 C=CCO.CC(=O)Oc1ccc(I)cc1>>CC(=O)Oc1ccc(/C=C/CO)cc1  
 3476 C=CC(=O)N(C)C.Cc1ccc(I)cc1>>Cc1ccc(/C=C/C(=O)N(C)C)cc1  
 3477 C=C(C)C(=O)OC.CC(=O)c1ccc(Cl)cc1>>COC(=O)/C(C)=C/c1ccc(C(C)=O)cc1  
 3478 C=Cc1ccc([N+](=O)[O-])cc([N+](=O)[O-])c1.COc1ccc(I)cc1>>COc1ccc(/C=C/c2cc([N+](=O)[O-  
 3479 ])cc([N+](=O)[O-])c2)cc1  
 3480 C=CC(=O)OC(C)(C)C.CCOC(=O)c1cc2cc(Br)ccc2[nH]1>>CCOC(=O)c1cc2cc(/C=C/C(=O)OC(C)(C)  
 3481 C)ccc2[nH]1  
 3482 C=Cc1cccc1.Cn1cc(I)c(=O)c2cccc21>>Cn1cc(/C=C/c2cccc2)c(=O)c2cccc21  
 3483 C=C1CC(c2ccc(Cl)cc2)OC1=O.COc1cccc(I)c1>>COc1cccc(/C=C2\CC(c3ccc(Cl)cc3)OC2=O)c1  
 3484 C=C(NC(C)=O)C(=O)OC.COc1ccc(CN(Cc2ccc(OC)cc2)c2ncc(I)cn2)cc1>>COC(=O)/C(=C/c1cnc(N(  
 3485 Cc2ccc(OC)cc2)Cc2ccc(OC)cc2)nc1)NC(C)=O  
 3486 C=CC(=O)N1CCOCC1.Oc1ccc2c(c1)CCN(c1cccc1)C2c1ccc(I)cc1>>O=C(/C=C/c1ccc(C2c3ccc(O)c  
 3487 c3CCN2c2cccc2)cc1)N1CCOCC1  
 3488 C=CC(=O)NC(C)C.Ic1cccc1>>CC(C)NC(=O)/C=C/c1cccc1  
 3489 C=Cc1ccc(O)cc1.Cn1nc(Br)c2cccc21>>Cn1nc(/C=C/c2ccc(O)cc2)c2cccc21  
 3490 C=C1CC(c2ccc(Cl)cc2)OC1=O.Fc1ccc(I)c1>>O=C1OC(c2ccc(Cl)cc2)C/C1=C\c1cccc(F)c1  
 3491 C=CC(=O)OC.Ic1ccc2nnc(Oc3cccc3)c2c1>>COC(=O)/C=C/c1ccc2nnc(Oc3cccc3)c2c1  
 3492 C=Cc1cc(OC)c(O)c(OC)c1.Oc1ccc(O)c(I)c1>>COc1cc(/C=C/c2cc(O)ccc2O)cc(OC)c1O  
 3493 C=Cc1ccc(C)cc1.CN(C)c1ccc(Cl)cc1>>Cc1ccc(/C=C/c2ccc(N(C)C)cc2)cc1  
 3494 C=Cc1ccc([N+](=O)[O-])cc1.O=Cc1cccc1Br>>O=Cc1cccc1/C=C/c1ccc([N+](=O)[O-])cc1  
 3495 C=CC(=O)N1N=Cc2cccc2C1C=C(C)C.CCOC1c(I)cc(Cc2cnc(N)nc2N)cc1OC>>CCOc1c(/C=C/C(=O)  
 3496 )N2N=Cc3cccc3C2C=C(C)C)cc(Cc2cnc(N)nc2N)cc1OC  
 3497 C=CC(=O)OC.CCOC(=O)c1ccc(I)cc1>>CCOC(=O)c1ccc(/C=C/C(=O)OC)cc1  
 3498 C=C(F)[Si](C)(c1cccc1)c1cccc1.COc1ccc(I)cc1>>COc1ccc(/C=C(\F)[Si](C)(c2cccc2)c2cccc2)cc1  
 3499 C=CN1CCCC1=O.O=S(=O)(Oc1cccc1Br)C(F)(F)F>>C=C(c1cccc1Br)N1CCCC1=O  
 3500 C=CC(=O)OC.CC(C)(C)OC(=O)Nc1cccc1Br>>COC(=O)/C=C/c1cccc1NC(=O)OC(C)(C)C

3484 C=Cc1cccc2cccc12.Clc1cccc2cccc12>>C(=C/c1cccc2cccc12)\c1cccc2cccc12  
Br1ccc2ccc3cccc4ccc1c2c34.C=Cc1nc2c(N)ncnc2n1[C@H]1C[C@H](O[Si](C)(C)C(C)(C)C)[C@@  
3485 H](CO[Si](C)(C)C(C)(C)C)O1>>CC(C)(C)[Si](C)(C)OC[C@H]1O[C@@H](n2c(/C=C/c3ccc4ccc5ccc  
c6ccc3c4c56)nc3c(N)ncnc32)C[C@@H]1O[Si](C)(C)C(C)(C)C  
3486 C=C[C@H](CO[Si](c1cccc1)(c1cccc1)C(C)(C)C)NS(C)(=O)=O.CC(=O)Oc1ccc(Br)cc1>>CC(=O  
)Oc1ccc(/C=C/[C@H](CO[Si](c2cccc2)(c2cccc2)C(C)(C)C)NS(C)(=O)=O)cc1  
3487 C=CCCCCCC.CC(=O)Nc1cccc1OS(=O)(=O)C(F)(F)F>>C=C(CCCCCC)c1cccc1NC(C)=O  
3488 C=CC(=O)OC(C)(C)C.CC1(C)CCC(=C(c2ccc(O)cc2)c2ccc(Br)cc2)CC1>>CC1(C)CCC(=C(c2ccc(O)c  
c2)c2ccc(/C=C/C(=O)OC(C)(C)C)cc2)CC1  
3489 C=CC(C)(C)O.CC(=O)Oc1c(I)c(=O)n(C)c2cccc12>>CC(=O)Oc1c(/C=C/C(C)(C)O)c(=O)n(C)c2cccc  
3490 C=CC(N)=O.N#Cc1c(-c2cccc(Br)c2)cc(-c2cccc2)nc1N>>N#Cc1c(-c2cccc(/C=C/C(N)=O)c2)cc(-  
c2cccc2)nc1N  
3491 C=CC(=O)OC.COC(=O)C1=Ne2cc(I)ccc2OC12CC2>>COC(=O)/C=C/c1ccc2c(c1)N=C(C(=O)OC)C1  
(CC1)O2  
3492 C=CP(=O)(O)O.Fc1cccc(F)c1I>>O=P(O)(O)/C=C/c1c(F)cccc1F  
3493 C=Cc1ccc(OC)cc1.CCOC(=O)C(F)(F)I>>CCOC(=O)C(F)(F)/C=C/c1ccc(OC)cc1  
3494 C=Cc1ccc(C)cc1.Ic1cccc1>>Cc1ccc(/C=C/c2cccc2)cc1  
3495 C=Cc1cncn1.Cc1c(Nc2c(I)cncc2C#N)ccc2[nH]ccc12>>Cc1c(Nc2c(C#N)cncc2/C=C/c2cncn2)ccc2[n  
H]ccc12  
3496 C=Cc1cccc1.Clc1ccc2c(c1)oc1cccc12>>C(=C/c1ccc2c(c1)oc1cccc12)\c1cccc1  
3497 C=COC[C@H]1CCCN1C.COc1ccc2c(c1)CCC=C2OS(=O)(=O)C(F)(F)F>>COc1ccc2c(c1)CCC=C2  
/C=C/OC[C@H]1CCCN1C  
3498 C=CC(=O)O.N[C@H](Cc1c[nH]c2ccc(Br)cc12)C(=O)O>>N[C@H](Cc1c[nH]c2ccc(/C=C/C(=O)  
O)cc12)C(=O)O  
3499 C=Cc1cc(C)c(OCOCCOC)c(C)c1.O=[N+](O-  
3500 )c1ccc2nc(Cl)ccc2c1>>COCCOCOc1c(C)cc(/C=C/c2ccc3cc([N+](=O)[O-])ccc3n2)cc1C  
C=CS(=O)(=O)NCC(C)C.CC(C)(C)OC(=O)NCCc1cccc1Br>>CC(C)CNS(=O)(=O)/C=C/c1cccc1CC  
NC(=O)OC(C)(C)C  
3501 Br1cccc(SCc2esc(-c3cccc3)n2)c1.C=CC(=O)OC>>COC(=O)/C=C/c1cccc(SCc2esc(-c3cccc3)n2)c1  
3502 C=CC(=O)N1N=Cc2cccc2C1c1nc2cccc2s1.COc1cc(Cc2enc(N)nc2N)cc(I)c1OC>>COc1cc(Cc2enc(  
N)nc2N)cc(/C=C/C(=O)N2N=Cc3cccc3C2c2nc3cccc3s2)c1OC  
3503 C=CC(=O)OC.Cc1cc2c(c(C)c1Br)CCC2>>COC(=O)/C=C/c1c(C)cc2c(c1C)CCC2  
3504 C=CC(=O)O.Oc1cccc(I)c1>>O=C(O)/C=C/c1cccc(O)c1  
3505 C=CC(=O)OC.Ic1ncccc1OCc1cccc1>>COC(=O)/C=C/c1ncccc1OCc1cccc1  
3506 C=CC(=O)OC(C)(C)C.Cc1cc(C)cc(I)c1>>Cc1cc(C)cc(/C=C/C(=O)OC(C)(C)C)c1  
3507 C=Cc1sc(C=O)c(CCCCCC)c1CCCCC.CN(CC1CO1)c1ccc(I)cc1>>CCCCCc1c(C=O)sc(/C=C/c2cc  
c(N(C)CC3CO3)cc2)c1CCCCC  
3508 C=CC1(c2ccc(Cl)cc2)CCN(C(=O)OC(C)(C)C)CC1.O=c1[nH]enc2cc(Br)ccc12>>CC(C)(C)OC(=O)N1  
CCC(/C=C/c2ccc3c(=O)[nH]cnc3c2)(c2ccc(Cl)cc2)CC1  
3509 C=CC(=O)OC.Ic1cnn2c(-c3cccc3)cc(-c3cccc3)nc12>>COC(=O)/C=C/c1cnn2c(-c3cccc3)cc(-  
c3cccc3)nc12  
3510 C=CC(=O)Nc1cccc1C(=O)OCc1cccc1.O=S(=O)(Oc1ccc2nc(Cl)ccc2c1)C(F)(F)F>>O=C(/C=C/c1cc  
c2nc(Cl)ccc2c1)Nc1cccc1C(=O)OCc1cccc1  
3511 C=CC(=O)OC(C)(C)C.C=CC1=C(Br)C(O[Si](C)(C)C(C)(C)C)CCC1>>C=CC1=C(/C=C/C(=O)OC(C)  
(C)C)C(O[Si](C)(C)C(C)(C)C)CCC1  
3512 C=CCCCCCC.COc1ccc(Cl)cc1>>C=C(CCCCCC)c1ccc(OC)cc1  
3513 C=Cc1cnccl.CC(C)=C(C)Br>>CC(C)=C(C)/C=C/c1cnccl  
3514 C=CCCCCCC.CC(C)[C@H]1C(=O)N[C@H](CO[Si](C)(C)C(C)(C)C)Cc2c[nH]c3c(Br)ccc(c23)N1C>  
>CCCCC/C=C/c1ccc2c3c(c[nH]c13)C[C@H](CO[Si](C)(C)C(C)(C)C)NC(=O)[C@H](C(C)C)N2  
3515 C=Cc1ccc(OC(C)=O)cc1.Fc1cc(Br)cc(OCc2cccc2)c1>>CC(=O)Oc1ccc(/C=C/c2cc(F)cc(OCc3cccc3  
)c2)cc1  
3516 C=CCCC.Cc1ccc(S(=O)(=O)Ne2cccc2I)cc1>>CCCC/C=C/c1cccc1NS(=O)(=O)c1ccc(C)cc1  
3517 C=CC(=O)OC.CC1(c2ccc(I)cc2)CC1>>COC(=O)/C=C/c1ccc(C2(C)CC2)cc1  
3518 Br1ccc(-c2cccc2)cc1.C=CC(=O)OC(C)(C)C>>CC(C)(C)OC(=O)/C=C/c1ccc(-c2cccc2)cc1  
3519 C=C.CC(=O)c1ccc(Br)cc1>>C=Cc1ccc(C(C)=O)cc1  
3520 C=CCP(=O)(OCC)OCC.Ic1cccc1>>CCOP(=O)(C/C=C/c1cccc1)OCC  
3521 C=Cc1cccc1.Cc1ccc(-c2c(Br)c(=O)oc3cc(C)ccc23)cc1>>Cc1ccc(-  
c2c(/C=C/c3cccc3)c(=O)oc3cc(C)ccc23)cc1  
3522 Br1cccc2cccc12.C=CC(=O)C(C)CC(=O)OC>>COC(=O)CC(C)C(=O)/C=C/c1cccc2cccc12  
3523 C=CC(=O)OCCCC.Cc1cc(C)c(Br)c(C)c1>>CCCCOC(=O)/C=C/c1c(C)cc(C)cc1C  
3524 C=Cc1cccc1.O=Cc1ccc(Cl)cc1>>O=Cc1ccc(/C=C/c2cccc2)cc1

3525 C=CC(=O)O.O=[N+](O-)[c]1c(I)ccc2c1C=CC1(CCCCC1)O2>>O=C(O)/C=C/c1ccc2c(c1)[N+](=O)[O-]  
 ]C=CC1(CCCCC1)O2  
 3526 C=C(C)C(=O)OC.Ic1ccccc1>>COC(=O)/C(C)=C/c1ccccc1  
 3527 C=CC(=O)OC.IC(CCS c1ccccc1)=C(c1ccccc1)c1ccccc1>>COC(=O)/C=C/C(CCS c1ccccc1)=C(c1ccccc  
 1)c1ccccc1  
 3528 C=Cc1ccccc1.Cc1cc(Br)c2nnnn2c1>>Cc1cc(/C=C/c2ccccc2)c2nnnn2c1  
 3529 C=CB1OC(C)CC(C)(C)O1.COC(=O)c1ccccc1I>>COC(=O)c1ccccc1/C=C/B1OC(C)CC(C)(C)O1  
 3530 C=Cc1ccc(C)cc1.FC(F)(F)c1ccccc1I>>Cc1ccc(/C=C/c2ccccc2C(F)(F)F)cc1  
 3531 C=Cc1cc(OC)cc(OC)c1.Nc1ccc(I)cc1>>COc1cc(/C=C/c2ccc(N)cc2)cc(OC)c1  
 3532 C=CC(=O)OC.N#Cc1ccccc1Br>>COC(=O)/C=C/c1ncccc1C#N  
 3533 Br c1ense1.C=CC(=O)OC(C)(C)C>>CC(C)(C)OC(=O)/C=C/c1ense1  
 3534 C=Cc1ccccc1.Cc1cccc(C)c1Br>>Cc1cccc(C)c1/C=C/c1ccccc1  
 3535 C=CC(=O)OCC.Nc1cccc(I)c1>>CCOC(=O)/C=C/c1cccc(N)c1  
 3536 C=CC(OCC)OCC.O=Cc1ccc2ccccc2c1Br>>CCOC(/C=C/c1c(C=O)ccc2ccccc12)OCC  
 3537 C=CC(=O)OC.Cc1c(Br)ccc2c1nnn2C>>COC(=O)/C=C/c1ccc2c(nnn2C)c1C  
 3538 C=Cc1ccc(OCOC)cc1.COCCOc1ccc(OS(=O)(=O)C(F)(F)F)cc(OCOC)c1C/C=C(C(C)CC/C=C(C(C)CCC=C(C  
 C)C>>COCOCc1ccc(/C=C/c2cc(OCOC)c(C/C=C(C(C)CC/C=C(C(C)CCC=C(C(C)C)c(OCOC)c2)cc1  
 3539 Br c1ccc2ccccc2c1.C=COCCCC>>C=C(OC CCC)c1ccc2ccccc2c1  
 3540 C=CC(=O)OCCCC.CCCCOC(=O)c1ccc(Br)cc1>>CCCCOC(=O)/C=C/c1ccc(C(=O)OCCCC)cc1  
 3541 C=CC(N)=O.COc1ccc(I)cc1>>COc1ccc(/C=C/C(N)=O)cc1  
 3542 C=CCOC(C)=O.OCc1ccccc1I>>CC(=O)OC/C=C/c1ccccc1CO  
 3543 C=CCc1c(OC CCC CCc2cccc(OC CCC(=O)OC)c2CCC(=O)OC)ccc2c1CCCC2=O.Ic1ccccc1>>COC(=  
 O)CCCOc1cccc(CCCCCCOc2ccc3c(c2C/C=C/c2ccccc2)CCCC3=O)c1CCC(=O)OC  
 3544 C=Cc1ccc2cc(OC)ccc2c1.COc1ccc2c(ccc3ccc(Br)cc32)c1>>COc1ccc2cc(/C=C/c3ccc4ccc5cc(OC)ccc  
 5c4c3)ccc2c1  
 3545 C=CC#N.CCn1cc(I)c(=O)c2ccc(C)nc21>>CCn1cc(/C=C/C#N)c(=O)c2ccc(C)nc21  
 3546 Br c1cccs1.C=C1C[C@H]2[C@@H]3CCc4cc(OC)ccc4[C@H]3CC[C@]2(C)C1=O>>COc1ccc2c(c1)C  
 C[C@@H]1[C@H]2CC[C@]2(C)C(=O)/C=C/c3cccs3C[C@H]12  
 3547 C=C.COc1ccc(Br)c(C(N)=O)c1>>C=Cc1ccc(OC)cc1C(N)=O  
 3548 C=CC(=O)O.FC1(F)Oc2cccc(I)c2O1>>O=C(O)/C=C/c1ccc2c1OC(F)(F)O2  
 3549 C=Cc1ccc(OC)cc1.CCOC(=O)C(F)I>>CCOC(=O)C(F)/C=C/c1ccc(OC)cc1  
 3550 C=CC(=O)OCC(CC)CCCC.FC(F)(F)c1ccc(Cl)cc1>>CCCC(CC)COC(=O)/C=C/c1ccc(C(F)(F)F)cc1  
 3551 C=Cc1ccccc1.CCOC(=O)c1c(OC)nn(C)c1I>>CCOC(=O)c1c(OC)nn(C)c1/C=C/c1ccccc1  
 3552 C=CC(=O)OC(C)(C)C.COc1ccc(Br)cn1>>COc1ccc(/C=C/C(=O)OC(C)(C)C)cn1  
 3553 C=CCNC(=O)OC(C)(C)C.COC(=O)c1ccccc(Br)c1>>C=C(CNC(=O)OC(C)(C)C)c1ccccc(C(=O)OC)c1  
 3554 Br c1cccc2c1cc(-c1ccc(I)cc1)n2-c1ncccn1.C=CC(=O)OC>>COC(=O)/C=C/c1ccc(-c2cc3c(Br)cccc3n2-  
 c2ncccn2)cc1  
 3555 C=CC(=O)OCC.Cc1ccc(-c2ccccc2I)cc1>>CCOC(=O)/C=C/c1ccccc1-c1ccc(C)cc1  
 3556 COC[C@H](N=C(C1c1ccccc1)N1C=CCC[C@H]1C)C(C)C.Fc1ccc(I)cc1>>COC[C@H](N=C(C1c1c  
 cccc1)N1C=C(c2ccc(F)cc2)CC[C@H]1C)C(C)C  
 3557 C=CP(=O)(OCC)OCC.COC(=O)C1Cc2c(Br)cccc2CN1C(=O)OC>>CCOP(=O)(/C=C/c1ccccc2c1CC(C(  
 =O)OC)N(C(=O)OC)C2)OCC  
 \*CNCCCOCCOCCOCCCN(C(=O)COc1ccc(C(Cc2cc(OC)cc(OC)c2)NC(=O)c2ccccc(C=C)c2)cc1.Cc1cc  
 3558 ccc1I>>\*CNCCCOCCOCCOCCCN(C(=O)COc1ccc(C(Cc2cc(OC)cc(OC)c2)NC(=O)c2ccccc(C=C)c3cc  
 ccc3C)c2)cc1  
 3559 C=Cc1ccccc1.Cn1nc(Br)c2ccccc21>>Cn1nc(/C=C/c2ccccc2)c2ccccc21  
 3560 C=CC(=O)O.O=c1[nH]ccc2c(I)cccc12>>O=C(O)/C=C/c1ccc2c(=O)[nH]ccc12  
 3561 C=CCOc1ccccc1.Cc1ccccc1I>>Cc1ccccc1/C=C/COc1ccccc1  
 3562 C=Cc1cccc(O)c1.COc1ccc(Br)cc1>>COc1ccc(/C=C/c2cccc(O)c2)cc1  
 3563 Br c1ccc2ccccc2c1.C=CC(=O)OC(C)(C)C>>CC(C)(C)OC(=O)/C=C/c1ccc2ccccc2c1  
 3564 C=CC(=O)OCC.CCC(=C(c1ccc(O)cc1)c1ccc(O)cc1)c1ccc(F)c(Br)c1>>CCOC(=O)/C=C/c1cc(C(CC)=  
 C(c2ccc(O)cc2)c2ccc(O)cc2)ccc1F  
 3565 C=CC(C)=O.Fc1ccc(Br)cc1>>CC(=O)/C=C/c1ccc(F)cc1  
 3566 C=CC(=O)OC.COc1c(I)c(NC(=O)C(C)(C)C)c(OC)c([Si](C)(C)C)c1OC>>COC(=O)/C=C/c1c(NC(=O)  
 C(C)(C)C)c(OC)c([Si](C)(C)C)c(OC)c1OC  
 3567 Br c1ccccc1.C=Cc1ccc2ccccc2c1>>C(=C/c1ccc2ccccc2c1)\c1ccccc1  
 3568 C=Cc1ccc(Br)cc1.FC(F)(F)CI>>FC(F)(F)C/C=C/c1ccc(Br)cc1  
 3569 C=CCNC(=O)OC(C)(C)C.O=Cc1ccccc(Br)c1>>C=C(CNC(=O)OC(C)(C)C)c1ccccc(C=O)c1  
 3570 C=CP(=O)(OCC)OCC.CC(=O)c1ccc(Br)cc1>>CCOP(=O)(/C=C/c1ccc(C(C)=O)cc1)OCC  
 3571 Br c1ccccc1I.C=Cc1ccc(Cl)cc1>>Clc1ccc(/C=C/c2ccccc2Br)cc1



[illegible]

3615 BrC1cccc2cccc12.C=C=CCC(C)C(=O)OCC>>CCOC(=O)C(C)C/C=C/c1cccc2cccc12  
3616 C=CC(=O)OCCSc1cccc1.O=[N+](O-)c1cccc(Br)c1>>O=C/C=C/c1cccc([N+](=O)[O-]  
3617 ]c1)OCCSc1cccc1  
3618 C=CCn1c(-c2ccc(OC)cc2)nc2cccc2c1=O.O=C(CN1C(=O)COc2cccc21)c1ccc(Br)cc1>>COc1ccc(-  
3619 c2nc3cccc3c(=O)n2C/C=C/c2ccc(C(=O)CN3C(=O)COc4cccc43)cc2)cc1  
3620 C=CS(=O)(=O)F.Cc1cc(I)ccc1Br>>Cc1cc(/C=C/S(=O)(=O)F)ccc1Br  
3621 C=CCCCCCC.COc1cccc1OS(=O)(=O)C(F)(F)F>>C=C(CCCCCC)c1cccc1OC  
3622 C=CC(=O)Nc1cccc1C.COc1ccc2c(=O)c(I)coc2c1>>COc1ccc2c(=O)c(/C=C/C(=O)Nc3cccc3C)coc2  
3623 C=Cc1cccc1.COC(=O)[C@]12Cc3cc4cc(Br)ccc4nc3C[C@H]1CCN(C(=O)OC(C)(C)C)C2>>COC(  
3624 =O)[C@]12Cc3cc4cc(/C=C/c5cccc5)ccc4nc3C[C@H]1CCN(C(=O)OC(C)(C)C)C2  
3625 C=CC(=O)OC.O=C1c2ccc(OS(=O)(=O)C(F)(F)F)cc2C(=O)N1[C@H](COc1cccc1)c1cccc1>>CO  
3626 C(=O)/C=C/c1ccc2c(c1)C(=O)N([C@H](COc1cccc1)c1cccc1)C2=O  
3627 C=Cc1ccc(N(c2cccc(C)c2)c2cccc(C)c2)cc1.Ic1cccc1>>Cc1cccc(N(c2ccc(/C=C/c3cccc3)cc2)c2cccc(  
3628 C)c2)c1  
3629 C=CC(=O)OC.C[C@H]1CC[C@H]2COCC2=C1Br>>COC(=O)/C=C/C1=C2COC[C@H]2CC[C@  
3630 @H]1C  
3631 C=CC(=O)OC.COC(=O)[C@H]1CCc2c(C(C)=O)cc(OS(=O)(=O)C(F)(F)F)c(=O)n21>>COC(=O)/C  
3632 =C/c1cc(C(C)=O)c2n(c1=O)[C@H](C(=O)OC)CC2  
3633 BrC1cccc1.C=Cc1cccc1Cl>>Clc1cccc1/C=C/c1cccc1  
3634 C=CC(=O)O.O=[N+](O-  
3635 )c1ccc(S(=O)(=O)Nc2ccc(I)cc2)cc1>>O=C(O)/C=C/c1ccc(NS(=O)(=O)c2ccc([N+](=O)[O-])cc2)cc1  
3636 C=CC(=O)OCC.N#Cc1cccc1Br>>CCOC(=O)/C=C/c1cccc1C#N  
3637 C=CC(=O)OC.Cn1cnc2c(NCc3ccc(Br)cc3)nc(N3CCCCC3)nc21>>COC(=O)/C=C/c1ccc(CNc2nc(N3C  
3638 CCCC3)nc3c2nnc3C)cc1  
3639 C=CC(=O)OC.COc1ccc(/C=C/c2c(Br)ccc(OC)c2O)cc1OC>>COC(=O)/C=C/c1ccc(OC)c(O)c1/C=C/c  
3640 1ccc(OC)c(OC)c1  
3641 C=CCN(C(=O)C(C)(C)C)[C@H](C)c1cc(F)cc(F)c1.O=C1Nc2ncccc2[C@]12Cc1ccc(Br)cc1C2>>C[C  
3642 @H](c1cc(F)cc(F)c1)N(C/C=C/c1ccc2c(c1)C[C@@]1(C2)C(=O)Nc2ncccc21)C(=O)C(C)(C)C  
3643 C=CCOc1cccc1.COc1ccc(I)cc1>>COc1ccc(/C=C/COc2cccc2)cc1  
3644 C=Cc1cccc1.Cc1cc(C)nc(I)n1>>Cc1cc(C)nc(/C=C/c2cccc2)n1  
3645 C=Cc1ccc(C=O)cc1.COc1ccc(I)cc1>>COc1ccc(/C=C/c2ccc(C=O)cc2)cc1  
3646 C=Cc1cccc1.O=C(c1cccc1)c1ccc(Br)cc1>>O=C(c1cccc1)c1ccc(/C=C/c2cccc2)cc1  
3647 BrC1cnc2cccc2c1.C=Cc1ccc2c(c1)c1cccc1n2CCCCC>>CCCCCn1c2cccc2c2cc(/C=C/c3cnc4ccc  
3648 cc4c3)ccc21  
3649 C=C.Clc1cccc1I>>C=Cc1cccc1Cl  
3650 C=CC(=O)OC(C)(C)C.O=S(=O)(c1cccc(Br)c1)n1ccc2cncc21>>CC(C)(C)OC(=O)/C=C/c1cccc(S(=O  
3651 )(=O)n2ccc3cncc32)c1  
3652 C=CC(=O)NCCc1cccc(F)c1.COc1ccc2c(=O)c(I)coc2c1>>COc1ccc2c(=O)c(/C=C/C(=O)NCCc3cccc(F  
3653 )c3)coc2c1  
3654 C=Cc1ccc(/C=C/c2ccc(C=O)cc2)cc1.COCCOCCOCCOCC(COCCOCCOCCOC)Oc1ccc(I)cc1>>COC  
3655 COCCOCCOCC(COCCOCCOCCOC)Oc1ccc(/C=C/c2ccc(/C=C/c3ccc(C=O)cc3)cc2)cc1  
3656 C=CCOc1cccc1C(C)(C)C.Ic1cccc1>>CC(C)(C)c1cccc1OC/C=C/c1cccc1  
3657 C=CC(=O)OC.CC(=O)c1cccc1I>>COC(=O)/C=C/c1cccc1C(C)=O  
3658 C=CC(=O)N1CCOCC1.Cc1onc(-c2cccc2)c1I>>Cc1onc(-c2cccc2)c1/C=C/C(=O)N1CCOCC1  
3659 C=CC(=O)OCC(CC)CCCC.CC(C)CCCC(C)CCCC(C)CCOc1ccc(I)cc1>>CCCC(CC)COC(=O)/C=C/  
3660 c1ccc(OCCC(C)CCCC(C)CCCC(C)C)cc1  
3661 C=CC(N)=O.Fc1ccc(I)c(Cl)c1>>NC(=O)/C=C/c1ccc(F)cc1Cl  
3662 C=CS(=O)(=O)c1cccc1.OCc1cccc(I)c1>>O=S(=O)(/C=C/c1cccc(CO)c1)c1cccc1  
3663 C=CC(N)=O.O=Cc1ccc(Br)cc1>>NC(=O)/C=C/c1ccc(C=O)cc1  
3664 C=CC(=O)OCC.Clc1ncc(Br)cn1>>CCOC(=O)/C=C/c1cnc(Cl)nc1  
3665 C=Cc1ccc(C#N)cc1.CCCCOc1ccc2c(c1)cc(C#N)c1ccc(Br)cc12>>CCCCOc1ccc2c(c1)cc(C#N)c1ccc(/  
3666 C=C/c3ccc(C#N)cc3)cc12  
3667 C=CC(=O)OC.FC1(F)C(I)=C1c1cccc1>>COC(=O)/C=C/C1=C(c2cccc2)C1(F)F  
3668 C=CCO[C@H]1O[C@H](COC(C)=O)[C@@H](OC(C)=O)[C@H](OC(C)=O)[C@@H]1OC(C)=O.Ic  
3669 1cccc2cccc12>>CC(=O)OC[C@H]1O[C@H](OC/C=C/c2cccc3cccc23)[C@@H](OC(C)=O)[C@@  
3670 H](OC(C)=O)[C@@H]1OC(C)=O  
3671 C=CC(=O)OC(C)(C)C.COc1ccc(CNc2ccc(C)cc2I)cc1>>COc1ccc(CNc2ccc(C)cc2/C=C/C(=O)OC(C)(  
3672 C)C)cc1  
3673 C=CC(=O)CC.Ic1csc1-c1cccc1>>CCC(=O)/C=C/c1csc1-c1cccc1

C=CC(=O)O.Cc1cccc2c([C@@H]3O[C@H](COCc4cccc4)[C@@H](OCc4cccc4)[C@H](OCc4cccc4)[C@H]3OCc3cccc3)en(Cc3ccc(I)cc3)c12>>Cc1cccc2c([C@@H]3O[C@H](COCc4cccc4)[C@@H](OCc4cccc4)[C@H](OCc4cccc4)[C@H]3OCc3cccc3)en(Cc3ccc(/C=C/C(=O)O)cc3)c12  
 3654  
 C=CC(=O)OCC.CC1(C)C(=O)N(c2ccc(C#N)c(C(F)(F)F)c2)C(=S)N1c1ccc(I)c(F)c1>>CCOC(=O)/C=C/c1ccc(N2C(=S)N(c3ccc(C#N)c(C(F)(F)F)c3)C(=O)C2(C)C)cc1F  
 3655  
 Br1ccc2c(c1)CCC1(CCN(Cc3cccc3)CC1)O2.C=CC(=O)OC>>COC(=O)/C=C/c1ccc2c(c1)CCC1(CC N(Cc3cccc3)CC1)O2  
 3656  
 C=CS(=O)(=O)Oc1cccc1.COc1ccc(Br)cc1>>COc1ccc(/C=C/S(=O)(=O)Oc2cccc2)cc1  
 3657  
 C=Cc1cccc1.Cl1ccccn1>>C(=C/c1ccccn1)c1cccc1  
 3658  
 C=CC(=O)OC.Cc1cc(O)ccc1Br>>COC(=O)/C=C/c1ccc(O)cc1C  
 3659  
 C=CC(=O)O.O=S(=O)(Nc1ccc(-c2cccc2)cc1)c1ccc(I)cc1>>O=C(O)/C=C/c1ccc(S(=O)(=O)Nc2ccc(-c3cccc3)cc2)cc1  
 3660  
 C=C(NC(=O)OC(C)(C)C)C(=O)OC.Ic1cnc(N(Cc2cccc2)Cc2cccc2)nc1>>COC(=O)/C(=C/c1cnc(N(Cc2cccc2)Cc2cccc2)nc1)NC(=O)OC(C)(C)C  
 3661  
 C=CC(=O)NC(C)C.Cc1ccc(I)cc1>>Cc1ccc(/C=C/C(=O)NC(C)C)cc1  
 3662  
 C=CS(=O)(=O)c1cccc1.Cl1ccc(I)cc1>>O=S(=O)/C=C/c1ccc(Cl)cc1)c1cccc1  
 3663  
 C=Cc1nc2c(=O)[nH]c(N=CN(C)C)nc2n1[C@H]1C[C@H](O)[C@@H](CO)O1.CC(=O)c1ccc(Br)cc1  
 3664  
 >>CC(=O)c1ccc(/C=C/c2nc3c(=O)[nH]c(N=CN(C)C)nc3n2[C@H]2C[C@H](O)[C@@H](CO)O2)cc1  
 3665  
 C=C(C)c1cccc1.Cl1ccc(Br)cc1>>C/C(=C/c1ccc(Cl)cc1)c1cccc1  
 3666  
 C=CCCc1cccc1.CC(C)(C)OC(=O)c1ccc(Br)cc1[N+](=O)[O-]  
 3667  
 ]>>CC(C)(C)OC(=O)c1ccc(/C=C/CCc2cccc2)cc1[N+](=O)[O-]  
 3668  
 C=CC(=O)OC.CC(=O)OCc1cc(I)cc(COC(C)=O)c1OC(C)=O>>COC(=O)/C=C/c1cc(COC(C)=O)c(OC(C)=O)c(COC(C)=O)c1  
 3669  
 C=CCCC.CS(=O)(=O)c1ccc(CCl)cc1>>C=C(CCCC)Cc1ccc(S(C)(=O)=O)cc1  
 3670  
 C=CS(=O)(=O)F.COc1ccc(I)cc1>>COc1ccc(/C=C/S(=O)(=O)F)cc1  
 3671  
 C=Cc1ccc(C(=O)N[C@@H](CCSC)C(=O)OC)c(-c2cccc2C)c1.OC(c1cccc1)c1cnc1Br>>COC(=O)[C@H](CCSC)NC(=O)c1ccc(/C=C/c2cnc2C(O)c2cccc2)cc1-c1cccc1C  
 3672  
 C=CCNC(=O)OC(C)(C)C.O=C(c1cccc1)c1ccc(Cl)cc1>>C=C(CNC(=O)OC(C)(C)C)c1ccc(C(=O)c2cccc2)cc1  
 3673  
 C=CC(=O)OC.CC(=O)c1cccc(I)c1>>COC(=O)/C=C/c1cccc(C(C)=O)c1  
 3674  
 C=C/C=C(/OCC)[Si](C)(C)C.Cc1cccc1I>>CCO/C(=C/C=C/c1cccc1C)[Si](C)(C)C  
 3675  
 C=CC(=O)OC.O=C1Cc2c(I)cccc2N1>>COC(=O)/C=C/c1cccc2c1CC(=O)N2  
 3676  
 C=C(CC(N=C(c1cccc1)c1cccc1)C(=O)OC)C(=O)OC.Ic1cccc1>>COC(=O)/C(=C/c1cccc1)CC(N=C(c1cccc1)c1cccc1)C(=O)OC  
 3677  
 C=CC(=O)OCC.O=Cc1c(F)cc(Br)cc1F>>CCOC(=O)/C=C/c1cc(F)c(C=O)c(F)c1  
 3678  
 C=Cc1cccc1.CCOC(=O)Cc1ccc(Br)cc1>>CCOC(=O)Cc1ccc(/C=C/c2cccc2)cc1  
 3679  
 C=Cc1cccc1.CC1=C(C)C(C)(C(=O)c2ccc(Br)cc2)C(C)=C1C>>CC1=C(C)C(C)(C(=O)c2ccc(/C=C/c3cccc3)cc2)C(C)=C1C  
 3680  
 C=C(F)C(C)=O.Ic1cccc1>>CC(=O)/C(F)=C/c1cccc1  
 3681  
 C=Cc1cccc1.O=C1CCC(c2ccc(Br)cc2)O1>>O=C1CCC(c2ccc(/C=C/c3cccc3)cc2)O1  
 3682  
 C=C1C(=O)O[C@H]2[C@H]1C[C@@H](O)/C(C)=C/CC[C@@]1(C)O[C@@H]21.Fc1cccc1I>>C/C1=C[CC[C@@]2(C)O[C@H]2[C@H]2OC(=O)/C(=C/c3cccc3F)[C@@H]2C[C@H]1O  
 3683  
 C=CCO.Fc1cccc1Br>>C=C(CO)c1cccc1F  
 3684  
 C=Cc1cccc([N+](=O)[O-])c1.COC(=O)c1cc2cc(Br)ccc2cc1OC(C)=O>>COC(=O)c1cc2cc(/C=C/c3cccc([N+](=O)[O-])c3)ccc2cc1OC(C)=O  
 3685  
 C=CC(=O)NCc1ccc(F)c(-c2cccc(CN3CCN(C(=O)OC(C)(C)C)[C@@H](C)C3)c2)c1.CCc1nc2c(cnn2CC)c(NC2CCOCC2)c1I>>CCc1nc2c(cnn2CC)c(NC2CCOCC2)c1/C=C/C(=O)NCc1ccc(F)c(-c2cccc(CN3CCN(C(=O)OC(C)(C)C)[C@@H](C)C3)c2)c1  
 3686  
 CC(C)N(C(=O)/C=C/c1cccc1)C(C)C.Cc1ccc(O)c(Br)c1>>Cc1ccc(O)c(/C(=C/C(=O)N(C(C)C)C(C)C)c2cccc2)c1  
 3687  
 C=Cc1cccc1O.Oc1cc(Br)cc(O)c1F>>Oc1cccc1/C=C/c1cc(O)c(F)c(O)c1  
 3688  
 Br1cnc2cccc12.C=CC(=O)N(C)C>>CN(C)C(=O)/C=C/c1cnc2cccc12  
 3689  
 C=Cc1ccc(Cl)cc1.Cl>>C/C=C/c1ccc(Cl)cc1  
 3690  
 C=CC(OCC)OCC.Cl1ccc(I)cc1>>CCOC(/C=C/c1ccc(Cl)cc1)OCC  
 3691  
 C=Cc1cccc1O.Nc1cccc(Br)c1>>Nc1cccc(/C=C/c2cccc2O)c1  
 C=CC(=O)N(C)Cc1nc2cccc2s1.CCn1c(=O)[nH]c2ncc(Br)cc21>>CCn1c(=O)[nH]c2ncc(/C=C/C(=O)N(C)Cc3nc4cccc4s3)cc21

C=C[C@@H](O[Si](C)(C)C(C)(C)C)[C@H](CCCC(=O)OC)O[Si](C)(C)C(C)(C)C.CCCCCC(=O)c1n  
 3692 cc(Br)c2ccccc12>>CCCCC(=O)c1ncc(/C=C/[C@@H](O[Si](C)(C)C(C)(C)C)[C@H](CCCC(=O)OC  
 )O[Si](C)(C)C(C)(C)C)c2ccccc12  
 3693 C=CC(=O)OC.CC(=O)Nc1ccccc1I>>COC(=O)/C=C/c1ccccc1NC(C)=O  
 3694 Brc1ccccc1.C=C(C)C(=O)OCCO>>C/C(=C/c1ccccc1)C(=O)OCCO  
 3695 C=Cc1ccccc1.ClCc1ccc(-c2ccccc2)cc1>>C(=C/c1ccccc1)\Cc1ccc(-c2ccccc2)cc1  
 3696 C=Cc1ccc(C#N)cc1.CCCCC(Br)C(F)(F)F>>CCCCC(/C=C/c1ccc(C#N)cc1)C(F)(F)F  
 3697 C=Cc1ccccc1.CCCCCC(C)Br>>CCCCCCC(C)/C=C/c1ccccc1  
 3698 C=CCN(C(=O)OC(C)(C)C)C(=O)OC(C)(C)C.Cc1cccc(Cl)c1>>Cc1cccc(/C=C/CN(C(=O)OC(C)(C)C)  
 C(=O)OC(C)(C)C)c1  
 3699 C=CC(=O)OC(C)(C)C.C=CC1=C(Br)CCCC1>>C=CC1=C(/C=C/C(=O)OC(C)(C)C)CCCC1  
 3700 C=Cc1nc2ccccc2s1.CCN(CC)S(=O)(=O)c1ccc(Br)cc1F>>CCN(CC)S(=O)(=O)c1ccc(/C=C/c2nc3cccc  
 c3s2)cc1F  
 3701 C=C(C)C(=O)OC.CC(C)n1cnc2c(Cl)nc(I)nc21>>COC(=O)/C(C)=C/c1nc(Cl)c2ncn(C(C)C)c2n1  
 3702 Brc1ccccc1.C=CCC(C)C(=O)OCC>>CCOC(=O)C(C)C/C=C/c1ccccc1  
 3703 C=CC(=O)OC.Oc1ccc(I)cc1O>>COC(=O)/C=C/c1ccc(O)c(O)c1  
 3704 C=CC(=O)CCC.O=Cc1ccc(Br)cc1>>CCCC(=O)/C=C/c1ccc(C=O)cc1  
 3705 C=CC(=O)O.O=C(O)c1ccccc1I>>O=C(O)/C=C/c1ccccc1C(=O)O  
 3706 C=CC(=O)OC.Nc1nc(=O)n([C@H]2C[C@H](O)[C@@H](CO)O2)cc1I>>COC(=O)/C=C/c1cn([C@H  
 ]2C[C@H](O)[C@@H](CO)O2)c(=O)nc1N  
 Brc1ccc(-  
 3707 c2nc3ccccc3s2)cc1.C=Cc1ccc(N(c2ccccc2)c2ccccc2)cc1>>C(=C/c1ccc(N(c2ccccc2)c2ccccc2)cc1)\c1c  
 cc(-c2nc3ccccc3s2)cc1  
 3708 C=Cc1ccc(OC)cc1.FC(F)(F)c1ccc(Cl)cc1>>COc1ccc(/C=C/c2ccc(C(F)(F)F)cc2)cc1  
 3709 C=COC(C)=O.Ic1ccccc1>>CC(=O)O/C=C/c1ccccc1  
 3710 C=CC(=O)OC.CC(C)(C)OC(=O)N1CCN(c2ccccc3cc(I)cnc23)CC1>>COC(=O)/C=C/c1cnc2c(N3CCN(  
 C(=O)OC(C)(C)C)CC3)cccc2c1  
 3711 C=CC(=O)OC.O=C1c2ccccc2C(=O)N1c1cccc(Br)c1F>>COC(=O)/C=C/c1cccc(N2C(=O)c3ccccc3C2  
 =O)c1F  
 3712 C=C(CC(=O)O)C(=O)O.COc1ccc(Br)c(CN(CC(F)(F)F)C(=O)OC(C)(C)C)c1>>COc1ccc(/C=C(\CC(=O)  
 O)O)C(=O)O)c(CN(CC(F)(F)F)C(=O)OC(C)(C)C)c1  
 3713 C=Cc1ccccc1.COc1cc(Br)c(C=O)c(OC)c1>>COc1ccc(/C=C/c2ccccc2)c(C=O)c(OC)c1  
 3714 C=Cc1ccc(O)c(OC)c1.COC(=O)Cn1c(=O)c(Cl)nc2ccccc21>>COC(=O)Cn1c(=O)c(/C=C/c2ccc(O)c(O  
 C)c2)nc2ccccc21  
 3715 C=CC(=O)N1N=Cc2ccccc2C1C(C)C.COc1cc(Cc2cnc(N)nc2N)cc(I)c1OC>>COc1cc(Cc2cnc(N)nc2N)  
 cc(/C=C/C(=O)N2N=Cc3ccccc3C2C(C)C)c1OC  
 3716 C=CC(CCCCCCCC(=O)OC)OC1CCCCO1.CCC1=C(I)CCC1=O>>CCC1=C(/C=C/C(CCCCCCCC(=O)  
 OC)OC)OC2CCCCO2)CCC1=O  
 3717 C=CC(=O)Nc1ccccc1NC(=O)OC(C)(C)C.COC(=O)C(CC1CCN(C)CC1)c1ccc(Br)cc1>>COC(=O)C(C  
 C1CCN(C)CC1)c1ccc(/C=C/C(=O)Nc2ccccc2NC(=O)OC(C)(C)C)cc1  
 3718 C=CC(C)(C)O.COc1cc2oc(=O)ccc2cc1Br>>COc1cc2oc(=O)ccc2cc1/C=C/C(C)(C)O  
 3719 C=Cc1ccc(C)c(C)c1.COc1ccc(CN2C(=O)C(=C(c3ccc(O)cc3)c3ccc(O)cc3)c3cc(Br)ccc32)cc1>>COc1  
 cccc(CN2C(=O)C(=C(c3ccc(O)cc3)c3ccc(O)cc3)c3ccc(/C=C/c4ccc(C)c(C)c4)ccc32)cc1  
 3720 Brc1ccc2cc[nH]c2c1.C=CC(=O)OC>>COC(=O)/C=C/c1ccc2cc[nH]c2c1  
 3721 C=CC(=O)OCCCC.CC(=O)OC[C@H]1O[C@@H](n2cnc3c(Cl)nc(I)nc32)[C@H](OC(C)=O)[C@@H  
 ]1OC(C)=O>>CCCCOC(=O)/C=C/c1nc(Cl)c2ncn([C@@H]3O[C@H](COC(C)=O)[C@@H](OC(C)=  
 O)[C@H]3OC(C)=O)c2n1  
 3722 C=CC(=O)OC.Cn1c(=O)n(CC2COC(C)(C)O2)c(=O)c2ccc(Br)cc21>>COC(=O)/C=C/c1ccc2c(=O)n(C  
 C3COC(C)(C)O3)c(=O)n(C)c2c1  
 3723 C=Cc1ccccc1Cl.O=C1CCC(c2ccc(Br)cc2)O1>>O=C1CCC(c2ccc(/C=C/c3ccccc3Cl)cc2)O1  
 3724 C=Cc1ccc(C(=O)O)cc1.Oc1ccc(-c2oc3cc(O)cc(Br)c3c2-  
 c2cc(O)cc(O)c2)cc1>>O=C(O)c1ccc(/C=C/c2cc(O)cc3oc(-c4ccc(O)cc4)c(-c4cc(O)cc(O)c4)c23)cc1  
 3725 C=Cc1cc2c(c(=O)n(C)c(=O)n2C)n1C.N#Cc1cccc(Br)c1>>Cn1c(=O)c2c(cc(/C=C/c3ccccc(C#N)c3)n2C  
 )n(C)c1=O  
 3726 C=CC(OC)OC.Ic1cccs1>>COC(/C=C/c1cccs1)OC  
 3727 C=Cc1ccccc1.Nc1ccc(Br)cn1>>Nc1ccc(/C=C/c2ccccc2)cn1  
 3728 C=CC(=O)OC.Cc1cccc(C)c1-  
 c1ccccc(C2CCc3cc(Br)ccc3O2)c1>>COC(=O)/C=C/c1ccc2c(c1)CCC(c1ccccc(-c3c(C)cccc3C)c1)O2  
 3729 C=Cc1ccccc2ccccc12.FC(F)(F)c1ccccc1I>>FC(F)(F)c1ccccc1/C=C/c1ccccc2ccccc12  
 3730 C=Cc1ccccc1.CC(C)(C)OC(=O)c1ccc(Br)cc1[N+](=O)[O-  
 ]>>CC(C)(C)OC(=O)c1ccc(/C=C/c2ccccc2)cc1[N+](=O)[O-]

3731 C=CC(=O)OC.COc1c(O)cc(-c2ccc(Br)cc2)cc1C12CC3CC(CC(C3)C1)C2>>COC(=O)/C=C/c1ccc(-c2ccc(O)c(OC)c(C34CC5CC(CC(C5)C3)C4)c2)cc1  
C=CC(=O)OC.O=c1c(Cc2ccccc2)c(-c2cccs2)oc2c(Cc3ccccc3)cc(Cl)cc12>>COC(=O)/C=C/c1cc(Cc2ccccc2)c2oc(-c3cccs3)c(Cc3ccccc3)c(=O)c2c1  
 3732  
 3733 C=Cc1ccc(OC(=O)OC(C)(C)C)cc1.O=S(=O)(c1ccc(Br)cc1)N(CCO)CCO>>CC(C)(C)OC(=O)Oc1ccc(/C=C/c2ccc(S(=O)(=O)N(CCO)CCO)cc2)cc1  
 3734 Br1ccnc1.C=CCO>>C=C(CO)c1ccnc1  
 3735 C=Cc1ccccc1.FC(F)(F)c1cc(Br)cc(C(F)(F)F)c1>>FC(F)(F)c1cc(/C=C/c2ccccc2)cc(C(F)(F)F)c1  
 3736 C=COCCOCCO.COC(=O)c1ccccc1I>>COC(=O)c1ccccc1/C=C/OCCOCCO  
C=Cc1cn(COCC[Si](C)(C)C)nc1-c1nc2ccc(OC)cc2n1COCC[Si](C)(C)C.COC(=O)c1nccc(Br)c1>>COC(=O)c1nccc(/C=C/c2cn(COCC[Si](C)(C)C)nc2-c2nc3ccc(OC)cc3n2COCC[Si](C)(C)C)c1  
 3737  
 3738 C=CCC(O)Cc1ccccc1.COC(=O)c1ccccc1I>>COC(=O)c1ccccc1/C=C/CC(O)Cc1ccccc1  
 3739 Br1ccc(-c2nc3ccccc3n2Cc2ccccc2)cc1.C=CC(=O)OC>>COC(=O)/C=C/c1ccc(-c2nc3ccccc3n2Cc2ccccc2)cc1  
 3740 C=Cc1ccnc1.CCCCN1c2ccc(Br)cc2Sc2cc(-c3nc4ccccc4n3-c3ccccc3)ccc21>>CCCN1c2ccc(/C=C/c3ccccc3)cc2Sc2cc(-c3nc4ccccc4n3-c3ccccc3)ccc21  
 3741 C=CC(=O)OC.Cc1cc(C)c(C(=O)n2cc(I)cn2)c(C)c1>>COC(=O)/C=C/c1cnn(C(=O)c2c(C)cc(C)cc2C)c  
 3742 C=Cc1ccccc1C.Cc1ccc(I)cc1>>Cc1ccc(/C=C/c2ccccc2C)cc1  
 3743 C=CC(=O)OC.O=c1[nH]c(=O)n([C@H]2C[C@@H](CO)[C@H](O)C2)cc1I>>COC(=O)/C=C/c1cn([C@H]2C[C@@H](CO)[C@H](O)C2)c(=O)[nH]c1=O  
 3744 C=Cc1ccnc1.CC(C)(C)OC(=O)N[C@H](COc1nccc1Br)Cc1ccccc1>>CC(C)(C)OC(=O)N[C@H](COc1nccc1/C=C/c1ccnc1)Cc1ccccc1  
 3745 C=Cc1ccccc1.Cn1c(-c2ccc(Br)cc2)nc2ccccc21>>Cn1c(-c2ccc(/C=C/c3ccccc3)cc2)nc2ccccc21  
 3746 C=CC(=O)OCC.CC1(C)CC(=C(c2ccc(Br)cc2)c2ccc(O)c(Cl)c2)CC(C)(C)O1>>CCOC(=O)/C=C/c1ccc(C(=C2CC(C)(C)OC(C)(C)C2)c2ccc(O)c(Cl)c2)cc1  
 3747 C=CC(=O)OC.Cn1c(=O)oc2cc(Br)cnc21>>COC(=O)/C=C/c1cnc2c(c1)oc(=O)n2C  
 3748 C=Cc1cc(OC)cc(OC)c1.N#Cc1ccc(I)cc1>>COc1cc(/C=C/c2ccc(C#N)cc2)cc(OC)c1  
 3749 C=CC(=O)OC.CC(C)(C)OC(=O)N1CC2(CC(=O)c3cc(Br)ccc3O2)C1>>COC(=O)/C=C/c1ccc2c(c1)C(=O)CC1(CN(C(=O)OC(C)(C)C)C1)O2  
 3750 C=CCN1C(=O)c2ccccc2C1=O.OCc1ccc(Br)cc1>>O=C1c2ccccc2C(=O)N1C/C=C/c1ccc(CO)cc1  
 3751 C=CC(=O)OC(C)(C)C.FC(F)(F)c1ccc(I)c(Cl)c1>>CC(C)(C)OC(=O)/C=C/c1ccc(C(F)(F)F)cc1Cl  
 3752 C=CC(=O)OC.CNc1ccccc1I>>CNc1ccccc1/C=C/C(=O)OC  
 3753 C=CC(=O)N(C)C.C[C@H]1C[C@@H](n2c(Nc3ccc(OC(F)(F)F)cc3)nc3cc(Br)ccc32)CC(C)(C)C1>>C[C@H]1C[C@@H](n2c(Nc3ccc(OC(F)(F)F)cc3)nc3cc(/C=C/C(=O)N(C)C)ccc32)CC(C)(C)C1  
 3754 C=CC(=O)OC.COc1c(CN(C(=O)C2CC2)c2ccccc(Br)c2)ccc2c1OC(C)(C)C=C2>>COC(=O)/C=C/c1ccc(c(N(Cc2ccc3c(c2OC)OC(C)(C)C=C3)C(=O)C2CC2)c1  
 3755 C=CC(C)=O.CN1c2ccccc2C(C)(C)C12C=Cc1cc(I)ccc1O2>>CC(=O)/C=C/c1ccc2c(c1)C=CC1(O2)N(C)c2ccccc2C1(C)C  
 3756 C=CC(=O)OC.Cc1cccc(Br)n1>>COC(=O)/C=C/c1cccc(C)n1  
C=C[C@@H]1C[C@H](CC(=O)OCC)OC(C)(C)O1.FC(F)(F)c1ccccc1(-c2c(Br)cnn2-c2ccnc(Nc3ccccc3)n2)c1>>CCOC(=O)C[C@H]1C[C@@H](/C=C/c2cnn(-c3ccnc(Nc4ccccc4)n3)c2-c2ccccc(C(F)(F)F)c2)OC(C)(C)O1  
 3757  
 3758 Br1ccoc1.C=CB1OC(C)CC(C)(C)O1>>CC1CC(C)(C)OB(/C=C/c2ccoc2)O1  
 3759 C=Cc1ccccc1.COc1ccccc1Br>>COc1ccccc1/C=C/c1ccccc1  
 3760 C=CC(=O)OCC.Cc1ccc(C(N)=O)cc1I>>CCOC(=O)/C=C/c1cc(C(N)=O)ccc1C  
 3761 C=CC(=O)OC(C)(C)C.CCOC(=O)Nc1ccccc1C1=C(I)CCN1S(=O)(=O)c1ccc(C)cc1>>CCOC(=O)Nc1ccccc1C1=C(/C=C/C(=O)OC(C)(C)C)CCN1S(=O)(=O)c1ccc(C)cc1  
 3762 C=CC(C)(C)O.COc1ccc2ccc(=O)oc2c1I>>COc1ccc2ccc(=O)oc2c1/C=C/C(C)(C)O  
 3763 C=CC(=O)N(C)C.FC(F)(F)c1ccc(Cl)cc1>>CN(C)C(=O)/C=C/c1ccc(C(F)(F)F)cc1  
 3764 C=CC(=O)OC.Oc1ccc(/C=C/c2ccc(Br)cc2)cc1O>>COC(=O)/C=C/c1ccc(/C=C/c2ccc(O)c(O)c2)cc1  
 3765 C=CC(=O)OC.COC(=O)c1ccccc(Br)n1>>COC(=O)/C=C/c1ccccc(C(=O)OC)n1  
 3766 C=Cc1ccccc1.CC(C)(Br)CCc1ccc2c(c1)OCO2>>CC(C)(/C=C/c1ccccc1)CCc1ccc2c(c1)OCO2  
 3767 C=Cc1cc([N+](=O)[O-])cn1C.COC(=O)c1cc(Br)cn1C>>COC(=O)c1cc(/C=C/c2cc([N+](=O)[O-])cn2C)cn1C  
 3768 C=C[Si](C)(C)C.Ic1ccoc1>>C[Si](C)(C)/C=C/c1ccoc1  
 3769 C=CC(=O)OCC.O=[N+](O)c1ccc(Br)cc1>>CCOC(=O)/C=C/c1ccc([N+](=O)[O-])cc1  
 3770 C=CC(=O)O.O=[N+](O)c1ccc(I)c1>>O=C(O)/C=C/c1ccccc1([N+](=O)[O-])c1  
 3771 C=CSelccccc1.O=C(c1ccccc1)c1ccc(Br)cc1>>O=C(c1ccccc1)c1ccc(/C=C/Sc2ccccc2)cc1  
 3772 C=Cc1ccccc1.Cc1ccc(I)cc1>>Cc1ccc(/C=C/c2ccccc2)cc1

3773 C=CC(=O)OCc1cccc1.Cc1ccc(-n2nc3c4cc(Br)ccc4[nH]c(=O)n3c2=O)cc1>>Cc1ccc(-n2nc3c4cc(/C=C/C(=O)OCc5cccc5)ccc4[nH]c(=O)n3c2=O)cc1  
3774 C=CC(O)C(F)(F)C(F)(F)F.Ic1cccc1>>OC(/C=C/c1cccc1)C(F)(F)C(F)(F)F  
3775 C=CC(=O)OC.CCCCCOc1ccc(-c2ccc(Br)cc2)cc1>>CCCCCOc1ccc(-c2ccc(/C=C/C(=O)OC)cc2)cc1  
3776 C=CC(=O)N1C(=O)CC[C@H]1COC(c1cccc1)(c1cccc1)c1cccc1.CCc1ccc(Br)c2[nH]ccc12>>CCc1ccc(/C=C/C(=O)N2C(=O)CC[C@H]2COC(c2cccc2)(c2cccc2)c2cccc2)c2[nH]ccc12  
3777 C=Cc1ccc(OC(C)=O)cc1.CCCCC(Br)C(F)(F)F>>CCCCC(/C=C/c1ccc(OC(C)=O)cc1)C(F)(F)F  
3778 Br1cccc1I.C=C[Si](C)(C)C>>C[Si](C)(C)/C=C/c1cccc1Br  
3779 C=Cc1ccc(C#N)cc1.Cn1nc(Br)c2cccc21>>Cn1nc(/C=C/c2ccc(C#N)cc2)c2cccc21  
3780 C=CCCC(=O)O.Ic1cccs1>>O=C(O)CC/C=C/c1cccs1  
3781 C=CC(=O)OC.Fc1ccc(Cl)cc1>>COC(=O)/C=C/c1ccc(F)cc1  
3782 C=Cc1ccc(F)cc1.OCc1ccc(F)cc1Br>>OCc1ccc(F)cc1/C=C/c1ccc(F)cc1  
3783 C=C[C@](C)(C)C(COCC[Si](C)(C)C)C(=O)O.CC(=O)O[C@H](C)c1ccc2ccc(Br)cc2n1>>CC(=O)O[C@H](C)c1ccc2ccc(/C=C/[C@](C)(C)C(COCC[Si](C)(C)C)C(=O)O)cc2n1  
3784 C=CC(=O)OC.CCc1ccc(Br)cc1>>CCc1ccc(/C=C/C(=O)OC)cc1  
3785 C=C(Br)CC.C=Cc1ccc(C#N)cc1>>C=C(/C=C/c1ccc(C#N)cc1)CC  
3786 C=Cc1cccc1.O=C(C=C(c1cccc1)c1cccc1)c1cccc1Br>>O=C(C=C(c1cccc1)c1cccc1)c1cccc1/C=C/c1cccc1  
3787 COC[C@H](/N=C(\c1cccc1)N1C=CCC[C@H]1C)C(C)C.FC(F)(F)c1cccc(I)c1>>COC[C@H](/N=C(\c1cccc1)N1C=C(c2cccc(C(F)(F)F)c2)CC[C@H]1C)C(C)C  
3788 C=CC(=O)N(C)Cc1sc2cccc2c1C.CCOC(=O)c1cc2cc(Br)enc2[nH]c1=O>>CCOC(=O)c1cc2cc(/C=C/C(=O)N(C)Cc3sc4cccc4c3C)enc2[nH]c1=O  
3789 C=COCCCC.COc1cc(Cl)cc(OC)c1>>C=C(OCCCC)c1cc(OC)cc(OC)c1  
3790 C=CC(=O)OC.FC(F)(F)c1cccc(Br)c1>>COC(=O)/C=C/c1cccc(C(F)(F)F)c1  
3791 C=Cc1ccc(F)cc1.O=Cc1ccc(I)o1>>O=Cc1ccc(/C=C/c2ccc(F)cc2)o1  
3792 C=CC(F)(F)C(F)(F)C(F)(F)C(F)(F)C(F)(F)C(F)(F)F.Cc1ccc(Br)cc1>>Cc1ccc(/C=C/C(F)(F)C(F)(F)C(F)(F)C(F)(F)C(F)(F)C(F)(F)F)cc1  
3793 C=Cc1ccc(CN2C(=O)c3cccc3C2=O)cc1.CC(C)(C)Br>>CC(C)(C)/C=C/c1ccc(CN2C(=O)c3cccc3C2=O)cc1  
3794 C=CC(=O)O.Cc1ccc(NS(=O)(=O)c2ccc(I)cc2)cc1>>Cc1ccc(NS(=O)(=O)c2ccc(/C=C/C(=O)O)cc2)cc1  
3795 C=Cc1ence(C#N)c1Nc1ccc2[nH]ccc2c1C.Clc1cc(Br)ccn1>>Cc1c(Nc2c(C#N)encc2/C=C/c2ccnc(Cl)c2)ccc2[nH]ccc12  
3796 C=CCCCCCC.COc1ccc(Br)cc1>>CCCCC/C=C/c1ccc(OC)cc1  
3797 C=Cc1nc2c(N)nenc2n1[C@H]1O[C@H](CO[Si](C)(C)C(C)(C)C)[C@H](O[Si](C)(C)C(C)(C)C)[C@H]1O[Si](C)(C)C(C)(C)C.O=[N+](O-)]c1ccc(Cl)cc1>>CC(C)(C)[Si](C)(C)OC[C@H]1O[C@H](n2c(/C=C/c3ccc([N+](=O)[O-])cc3)nc3c(N)nenc32)[C@H](O[Si](C)(C)C(C)(C)C)[C@H]1O[Si](C)(C)C(C)(C)C  
3798 Br1ccc2cc[nH]c2c1.C=CC(=O)O>>O=C(O)/C=C/c1ccc2cc[nH]c2c1  
3799 C=Cc1ccc(CP(=O)(OCC)OCC)cc1.CCCCCCcc1ccc(C=O)c(CCCCCC)cc1Br>>CCCCCCCCc1ccc(/C=C/c2ccc(CP(=O)(OCC)OCC)cc2)c(CCCCCC)cc1C=O  
3800 C=CN1C(=O)c2cccc2C1=O.COc1ccc2ccc(Br)cc2n1>>COc1ccc2ccc(/C=C/N3C(=O)c4cccc4C3=O)cc2n1  
3801 C=CCc1ccc(OC)c(OC)c1.O=C(O)c1ccc(CCl)cc1>>C=C(Cc1ccc(C(=O)O)cc1)Cc1ccc(OC)c(OC)c1  
3802 C=CCC(=O)O.Cc1cn(Cc2ccc(I)cc2)c(=O)[nH]c1=O>>Cc1cn(Cc2ccc(/C=C/CC(=O)O)cc2)c(=O)[nH]c1=O  
3803 C=CC[C@H](NC(=O)OC(C)(C)C)C(=O)OC.COC(=O)c1cccc1I>>COC(=O)c1cccc1/C=C/C[C@H](NC(=O)OC(C)(C)C)C(=O)OC  
3804 C=CCN(C)C(=O)OC(C)(C)C.Cc1ccc(Cl)cc1>>Cc1ccc(/C=C/CN(C)C(=O)OC(C)(C)C)cc1  
3805 C=CC(=O)OC.O=C(Oc1ccc(OC(=O)c2cccc2)c(I)c1)c1cccc1>>COC(=O)/C=C/c1cc(OC(=O)c2cccc2)ccc1OC(=O)c1cccc1  
3806 C=CC(=O)OC.CC(C)(C)OC(=O)NCCc1ccc(Br)cc1CCNC(=O)OC(C)(C)C>>COC(=O)/C=C/c1ccc(CCNC(=O)OC(C)(C)C)c(CCNC(=O)OC(C)(C)C)c1  
3807 C=C/C=C/C(=O)N(CCCC)CCCC.CCOC(=O)c1ccc(Br)cc1>>CCCCN(CCCC)C(=O)/C=C/C=C/c1ccc(C(=O)OCC)cc1  
3808 C=Cc1cccc1.O=Cc1cccc(F)c1Br>>O=Cc1cccc(F)c1/C=C/c1cccc1  
3809 C=C1C(=O)O[C@H]2C[C@H](C)C(=O)C/C=C(\C)CC[C@H]12.Clc1ccc(I)cc1>>C/C1=C\CC(=O)[C@H](C)C[C@H]2OC(=O)/C=C/c3ccc(Cl)cc3)[C@H]2CC1  
3810 C=CC(=O)OCC.COc1cccc1I>>CCOC(=O)/C=C/c1cccc1OC  
3811 C=CC(=O)OCC.Ic1cn(C(c2cccc2)(c2cccc2)c2cccc2)c(N=P(c2cccc2)(c2cccc2)c2cccc2)n1>>CCOC(=O)/C=C/c1cn(C(c2cccc2)(c2cccc2)c2cccc2)c(N=P(c2cccc2)(c2cccc2)c2cccc2)n1  
3812 Br1cccc2cc[nH]c12.C=C(C)C(=O)OC>>COC(=O)/C(C)=C/c1cccc2cc[nH]c12  
3813 C=CC(=O)c1cccc(C)c1.COc1ncc(I)c(OC)n1>>COc1ncc(/C=C/C(=O)c2cccc(C)c2)c(OC)n1

3814 C=CC(=O)OC.CC(C)(C)c1ccc(Cn2nc(I)c3ccccc32)cc1>>COC(=O)/C=C/c1nn(Cc2ccc(C(C)(C)C)cc2)  
c2ccccc12  
3815 C=Cc1ccc(Cl)cc1.CCCCC(Br)C(F)(F)F>>CCCCC(/C=C/c1ccc(Cl)cc1)C(F)(F)F  
3816 C=CCNC(=O)OC(C)(C)C.CC(=O)c1ccccc1Br>>C=C(CNC(=O)OC(C)(C)C)c1ccccc1C(C)=O  
3817 C=COC.CCOC(=O)C(=O)Cl>>CCOC(=O)C(=O)/C=C/OC  
3818 C=CC(=O)OC.Ic1c(-c2ccccc2)nn2c(-c3ccccc3)cc(-c3ccccc3)nc12>>COC(=O)/C=C/c1c(-  
c2ccccc2)nn2c(-c3ccccc3)cc(-c3ccccc3)nc12  
3819 C=Cc1ccccc1.Clc1ccc(-c2cnc3ccccc23)cc1>>C(=C/c1ccc(-c2cnc3ccccc23)cc1)\c1ccccc1  
3820 C=CCc1ccccc1.COC(=O)c1ccc(CCl)cc1>>C=C(Cc1ccccc1)Cc1ccc(C(=O)OC)cc1  
3821 C=CC(=O)OC(C)(C)C.COc1ccc(CCC(=O)O)c2ccc(I)cc2CC=C(C)C)cc1>>COc1ccc(CCC(=O)O)c2ccc(/  
C=C/C(=O)OC(C)(C)C)cc2CC=C(C)C)cc1  
3822 C=Cc1ccc2ccccc2c1.O=C(OCCCC(Br)C(F)(F)F)c1ccccc1>>O=C(OCCCC(/C=C/c1ccc2ccccc2c1)C(F  
)F)c1ccccc1  
3823 Brc1ccccc1.C=CC[C@H](C)O>>C[C@H](O)C/C=C/c1ccccc1  
3824 C=Cc1ccccc1.O=[N+](=[O-])c1ccc(-c2cnc3ccccc23)cc1>>O=[N+](=[O-])c1ccc(-  
3825 C=CC(=O)OCC.O=[N+](=[O-])c1ccc1Br>>CCOC(=O)/C=C/c1ccccc1[N+](=O)[O-]  
3826 C=CC(=O)OC(C)(C)C.CC(C)CN1[C@H](C)Cc2c(ccc3[nH]ncc23)[C@H]1c1ccc(Br)cc1>>CC(C)CN1  
[C@H](C)Cc2c(ccc3[nH]ncc23)[C@H]1c1ccc(/C=C/C(=O)OC(C)(C)C)cc1  
3827 C=CCNC(=O)c1ccccc1NC(=O)c1ccccc1.Ic1ccc2ccccc2c1>>O=C(Nc1ccccc1C(=O)NC/C=C/c1ccc2cc  
ccc2c1)c1ccccc1  
3828 C=Cc1ccccc1.Nc1ccc(Cl)cc1Br>>Nc1ccc(Cl)cc1/C=C/c1ccccc1  
3829 C=CC(=O)OC.COc1nc(C)c(I)c(OC)n1>>COC(=O)/C=C/c1c(C)nc(OC)nc1OC  
3830 C=C[C@H]1O[C@H]2OC(C)(C)O[C@H]2[C@H]1O.O=c1ccoc2cc(Br)ccc12>>CC1(C)O[C@H]  
2O[C@H](/C=C/c3ccc4c(=O)ccoc4c3)[C@H](O)[C@H]2O1  
3831 C=CC#N.COc1nc(-c2ccccc2)c(Br)cc1=O>>COCn1nc(-c2ccccc2)c(/C=C/C#N)cc1=O  
3832 C=CC(=O)OC.CC(C)(C)OC(=O)NC1(c2ccc(-c3nc4c5cccc(Br)c5nn4ccc3-  
c3ccccc3)cc2)CCC1>>COC(=O)/C=C/c1ccc2c1nn1cc(-c3ccccc3)c(-  
c3ccc(C4(NC(=O)OC(C)(C)C)CCC4)cc3)nc21  
3833 C=CS(C)(=O)=O.CC(=O)c1ccc(Br)cc1>>CC(=O)c1ccc(/C=C/S(C)(=O)=O)cc1  
3834 C=CP(C)(=O)c1ccccc1.CC(C)Oc1ccc2ccccc2c1Br>>CC(C)Oc1ccc2ccccc2c1/C=C/P(C)(=O)c1ccccc1  
3835 C=CC(O)c1cc(OC)c(OC)cc1Br.COc1cccc(I)c1>>COc1cccc(/C=C/C(O)c2cc(OC)c(OC)cc2Br)c1  
3836 C=CC(=O)N(C)OC.COc1ccccc1I>>COc1ccccc1/C=C/C(=O)N(C)OC  
3837 C=Cc1ccccc1.O=C1CCC(c2ccc(Br)cc2)O1>>O=C1CCC(c2ccc(/C=C/c3ccccc3)cc2)O1  
3838 C=CC(=O)OC(C)(C)C.CC(C)(C)[Si](C)(C)Oc1ccc(Br)c(CN2C(=O)c3ccccc3C2=O)c1>>CC(C)(C)OC  
(=O)/C=C/c1ccc(O[Si](C)(C)C(C)(C)C)cc1CN1C(=O)c2ccccc2C1=O  
3839 C=CCO.Fc1ccc(Br)cc1>>C=C(CO)c1ccc(F)cc1  
3840 C=Cc1ccccc1.Cc1ccc([N+](=O)[O-])cc1Cl>>Cc1ccc([N+](=O)[O-])cc1/C=C/c1ccccc1  
3841 C=CC(=O)OC.COc1ccc2c(I)nn(C(=O)OC(C)(C)C)c12>>COC(=O)/C=C/c1nn(C(=O)OC(C)(C)C)c2c  
(OC)cccc12  
3842 C=CC(=O)OC(C)(C)C.COc1cccc(Br)c1>>COc1cccc(/C=C/C(=O)OC(C)(C)C)c1  
3843 C=CC(=O)OC.Fc1ccc(C(=C(I)CC[Se]c2ccccc2)c2ccc(F)cc2)cc1>>COC(=O)/C=C/C(CC[Se]c1ccccc1)  
=C(c1ccc(F)cc1)c1ccc(F)cc1  
3844 C=CC(C)=O.O=S(=O)(Oc1ccc2ccn(Cc3ccccc3)c2n1)C(F)(F)F>>CC(=O)/C=C/c1ccc2ccn(Cc3ccccc3)  
3845 C=CC(=O)O.O=Cc1ccc(I)cc1>>O=Cc1ccc(/C=C/C(=O)O)cc1  
3846 C=CC(N)=O.COC(=O)c1ccccc1I>>COC(=O)c1ccccc1/C=C/C(N)=O  
3847 C=CCNC(=O)OC(C)(C)C.N#Cc1cccc(Br)c1>>C=C(CNC(=O)OC(C)(C)C)c1cccc(C#N)c1  
3848 C=CC(=O)N(C)Cc1cc2ccccc2n1C.O=c1[nH]c2ncc(Br)cc2o1>>CN(Cc1cc2ccccc2n1C)C(=O)/C=C/c1c  
nc2[nH]c(=O)cc2c1  
3849 C=CCN1CCN(C(=O)OC(C)(C)C)CC1=O.CCc1nn2c(C)cc(C)nc2c1Cc1ccc(Br)cc1>>CCc1nn2c(C)cc(  
C)nc2c1Cc1ccc(/C=C/CN2CCN(C(=O)OC(C)(C)C)CC2=O)cc1  
3850 C=Cc1ccc(C(C)=O)cc1.COc1ccc(Br)cc1>>COc1ccc(/C=C/c2ccc(C(C)=O)cc2)cc1  
3851 C=C(C)C(=O)OC.Clc1ccccc1>>COC(=O)/C(C)=C/c1ccccc1  
3852 C=CC#N.C[Si](C)(C)c1ccccc1>>C[Si](C)(C)c1ccccc1/C=C/C#N  
3853 C=CC(=O)OC.O=C1c2ccc(OS(=O)(=O)C(F)(F)F)cc2C(=O)N1CCc1ccccc1>>COC(=O)/C=C/c1ccc2c(  
c1)C(=O)N(CCc1ccccc1)C2=O  
3854 C=CC(=O)OC.CC(C)OC(=O)N1CC(I)=C(c2ccccc2)N1C(=O)OC(C)C>>COC(=O)/C=C/C1=C(c2ccccc  
c2)N(C(=O)OC(C)C)N(C(=O)OC(C)C)C1  
3855 Brc1ccc2ccc3ccc4ccccc4c3c2c1.C=Cc1ccccc1>>C(=C/c1ccc2ccc3ccc4ccccc4c3c2c1)\c1ccccc1  
3856 C=CC(=O)OC(C)(C)C.C=CC1=C(Br)C(O)CCC1>>C=CC1=C(/C=C/C(=O)OC(C)(C)C)C(O)CCC1  
3857 C=CC(=O)OCCCC.Nc1ccc(I)cc1>>CCCCOC(=O)/C=C/c1ccc(N)cc1

3858 Br1ccc2ccc3cccc4ccc1c2c34.C=Cc1ccc2c(c1)Sc1cccc1N2CC>>CCN1c2cccc2Sc2cc(/C=C/c3ccc4c  
 cc5cccc6ccc3c4c56)ccc21  
 3859 C=CC(=O)OC.Cc1cc(O)c(C23CC4CC(CC(C4)C2)C3)cc1-c1ncc(Br)s1>>COC(=O)/C=C/c1cnc(-  
 c2cc(C34CC5CC(CC(C5)C3)C4)c(O)cc2C)s1  
 3860 C=CC=O.Clc1ccc(I)cc1>>O=C/C=C/c1ccc(Cl)cc1  
 3861 Br1ccc2c(c1)CC2.C=C>>C=Cc1ccc2c(c1)CC2  
 3862 C=C[C@H](C)N1C(=O)c2cccc2C1=O.COC(=O)c1c(Br)ccn1C>>COC(=O)c1c(/C=C/[C@H](C)N2C  
 (=O)c3cccc3C2=O)ccn1C  
 3863 C=CC(=O)OCC.CCc1c[n+](([O-])c(CC)c(Cl)n1>>CCOC(=O)/C=C/c1nc(CC)c[n+](([O-])c1CC  
 3864 C=CC(=O)OC(C)(C)C.O=Cc1cccc(Br)c1>>CC(C)(C)OC(=O)/C=C/c1cccc(C=O)c1  
 3865 C=Cc1ccc(C)cc1.CCOC(=O)C(F)Br>>CCOC(=O)C(F)/C=C/c1ccc(C)cc1  
 3866 C=CC(=O)OC(C)(C)C.CC(C)=CCc1ccc1OC(=O)c1ccncc1>>CC(C)=CCc1cc(/C=C/C(=O)OC(C)(  
 C)C)ccc1OC(=O)c1ccncc1  
 3867 C=CC(=O)OC.Cc1ccc(Br)cc1CO>>COC(=O)/C=C/c1ccc(C)c(CO)c1  
 C=CC(C)(C)C(=O)NC(C)(C)C(=O)O.CC(=O)OC[C@H]1O[C@H](c2cc(Cc3ccc(Br)cc3C)c(C(C)C)  
 3868 cc2OC(C)=O)[C@H](OC(C)=O)[C@H](OC(C)=O)[C@H]1OC(C)=O>>CC(=O)OC[C@H]1O[C  
 @H](c2cc(Cc3ccc(/C=C/C(C)(C)C(=O)NC(C)(C)C(=O)O)cc3C)c(C(C)C)cc2OC(C)=O)[C@H](OC(  
 C)=O)[C@H](OC(C)=O)[C@H]1OC(C)=O  
 3869 C=CC(=O)OCC.O=Cc1cc([N+](=O)[O-])ccc1Br>>CCOC(=O)/C=C/c1ccc([N+](=O)[O-])cc1C=O  
 3870 C=Cc1ccncc1.Cc1cc(Cl)ccc1Br>>Cc1cc(Cl)ccc1/C=C/c1ccncc1  
 3871 C=CC(=O)OC.NCCc1cccc(Br)c1>>COC(=O)/C=C/c1cccc(CCN)c1  
 3872 C=CC#N.COc1ccc(I)cc1>>COc1ccc(/C=C/C#N)cc1  
 3873 C=COCCCC.COc1nccc(Br)c1>>C=C(OCCCC)c1nccc(OC)c1  
 3874 C=CC(=O)OC.COc1ccc(S(=O)(=O)N2CCc3cc(Br)cc([N+](=O)[O-]  
 ])c32)cc1>>COC(=O)/C=C/c1cc2c(c([N+](=O)[O-])c1)N(S(=O)(=O)c1ccc(OC)cc1)CC2  
 3875 C=CS(C)(=O)=O.CC(C)c1cc(C(C)C)c(Br)c(C(C)C)c1>>CC(C)c1cc(C(C)C)c(/C=C/S(C)(=O)=O)c(C(  
 C)C)c1  
 3876 C=CCC(C)C.COc1cccc1CCl>>C=C(Cc1cccc1OC)CC(C)C  
 C=CC(=O)O.O=[N+](O-  
 3877 )c1c(I)ccc2c1C=CC1(O2)C2CC3CC(C2)CC1C3>>O=C(O)/C=C/c1ccc2c(c1)[N+](=O)[O-  
 )C=CC1(O2)C2CC3CC(C2)CC1C3  
 3878 Br1ccc(-c2cccs2)cc1.C=CC(=O)OCCCC>>CCCCOC(=O)/C=C/c1ccc(-c2cccs2)cc1  
 3879 C=C[C@H](CC(C)C)NC(=O)OC(C)(C)C.CC1(C)OC(=O)c2c(cccc2OS(=O)(=O)C(F)(F)F)O1>>CC(C  
 )C[C@H](/C=C/c1cccc2c1C(=O)OC(C)(C)O2)NC(=O)OC(C)(C)C  
 3880 C=COCCCC.O=[N+](O-)]c1ccc(Br)cc1>>C=C(OCCCC)c1ccc([N+](=O)[O-])cc1  
 3881 C=C.COc1ccc(CCl)cc1>>C=CCc1ccc(OC)cc1  
 3882 C=COCCCC.Cn1c(=O)cc(Br)c2cccc21>>CCCCO/C=C/c1cc(=O)n(C)c2cccc12  
 3883 C=Cc1ccc([Si](OC)(OC)OC)cc1.CCOP(=O)(Cc1ccc(/C=C/c2ccc(Br)cc2)cc1)OCC>>CCOP(=O)(Cc1c  
 cc(/C=C/c2ccc(/C=C/c3ccc([Si](OC)(OC)OC)cc3)cc2)cc1)OCC  
 3884 C=CCC(c1cccc1)P(=O)(OC)OC.Ic1cccc1>>COP(=O)(OC)C/C=C/c1cccc1)c1cccc1  
 3885 C=CC(=O)N(C)C.C[C@H](Nc1ncnc2sc(Br)cc12)c1cccc1>>C[C@H](Nc1ncnc2sc(/C=C/C(=O)N  
 (C)C)cc12)c1cccc1  
 3886 C=CC(=O)OCC.CCc1nc2cc(OC)ccc2c(Oc2cccc(Br)c2)c1-c1cccc1>>CCOC(=O)/C=C/c1cccc(Oc2c(-  
 c3cccc3)c(CC)nc3cc(OC)ccc23)c1  
 3887 C=CC(=O)OC(C)(C)C.Cc1ccc(Br)c(CO)c1>>Cc1ccc(/C=C/C(=O)OC(C)(C)C)c(CO)c1  
 3888 C=Cc1cccc1.COc1ccc(C=O)c(Br)c1>>COc1ccc(C=O)c(/C=C/c2cccc2)c1  
 3889 C=Cc1cc(C)c(OCOCCOC)c(C)c1.COc1ccc2c(C)c(Br)c(=O)oc2c1>>COCCOCCOc1c(C)cc(/C=C/c2c(C  
 )c3ccc(OC)cc3oc2=O)cc1C  
 3890 C=CC(=O)OC.Cc1ccc(C#N)c(Br)n1>>COC(=O)/C=C/c1nc(C)ccc1C#N  
 3891 C=Cc1ccc(/C=C/c2ccc(N(c3cccc3)c3cccc4cccc34)cc2)cc1.O=Cc1ccc(Br)s1>>O=Cc1ccc(/C=C/c2cc  
 c(/C=C/c3ccc(N(c4cccc4)c4cccc5cccc45)cc3)cc2)s1  
 3892 C=CC(=O)OC.Cc1cc(N[C@H]2C[C@H](C)CC(C)(C)C2)c([N+](=O)[O-]  
 ])cc1Br>>COC(=O)/C=C/c1cc([N+](=O)[O-])c(N[C@H]2C[C@H](C)CC(C)(C)C2)cc1C  
 3893 C=Cc1ccc2c(c1)OCO2.C[Si](C)(C)I>>C[Si](C)(C)/C=C/c1ccc2c(c1)OCO2  
 3894 C=C(NC(=O)OCC[Si](C)(C)C)C(=O)OC.CC(C)(C)OC(=O)N[C@H](Cc1ccc(I)cc1)C(=O)OCc1cccc  
 c1>>COC(=O)/C=C/c1ccc(C[C@H](NC(=O)OC(C)(C)C)C(=O)OCc2cccc2)cc1)NC(=O)OCC[Si](C)  
 3895 C=Cc1ccc2c(c1)c1cccc1n2CCCC.O=Cc1ccc(Br)cc1>>CCCCn1c2cccc2c2cc(/C=C/c3ccc(C=O)cc3)c  
 cc21  
 C=CC(=O)NCCCCCNC(=O)OCC1c2cccc2-  
 3896 c2cccc21.O=c1[nH]c(=O)n([C@H]2CO[C@H](CO)[C@H](O)C2)cc1I>>O=C/C=C/c1cn([C@  
 @H]2CO[C@H](CO)[C@H](O)C2)c(=O)[nH]c1=O)NCCCCCNC(=O)OCC1c2cccc2-c2cccc21



3897 C=CS(=O)(=O)c1ccccc1.Cn1ccc2cc(Br)ccc21>>Cn1ccc2cc(/C=C/S(=O)(=O)c3ccccc3)ccc21  
3898 Br1ccc2ccnc(N3CCOCC3)c2c1.C=CC(=O)OCC>>CCOC(=O)/C=C/c1ccc2ccnc(N3CCOCC3)c2c1  
3899 C=CC(=O)OC.CCCCN1c(-c2ccc(Br)cc2)nc2ccccc21>>CCCN1c(-  
3900 C=C.COc1ccc(I)cc1>>C=Cc1ccc(OC)cc1  
3901 Br1cnc2[nH]ccc2c1.C=CC(=O)OC(C)(C)C>>CC(C)(C)OC(=O)/C=C/c1cnc2[nH]ccc2c1  
3902 Br1cnc2[nH]cnc2c1.C=CC(=O)N(C)Cc1cc2ccccc2n1C>>CN(Cc1cc2ccccc2n1C)C(=O)/C=C/c1cnc2[  
nH]cnc2c1  
3903 C=CC(=O)OC.NC(=O)c1ccccc(I)c1>>COC(=O)/C=C/c1ccccc(C(N)=O)c1  
3904 C=Cc1ccc(C(C)(C)C)cc1.CC[Si](CC)(OS(=O)(=O)C(F)(F)F)OS(=O)(=O)C(F)(F)F>>CC[Si](/C=C/c1c  
cc(C(C)(C)C)cc1)(CC)OS(=O)(=O)C(F)(F)F  
3905 C=Cc1ccc(C(=O)OCC)cc1.C[Si](C)(OS(=O)(=O)C(F)(F)F)OS(=O)(=O)C(F)(F)F>>CCOC(=O)c1ccc(/  
C=C/[Si](C)(C)OS(=O)(=O)C(F)(F)F)cc1  
3906 C=CC=O.Cc1ccc(-c2c(C#N)c(CC(C)C)nc3ccc(Br)cc23)cc1>>Cc1ccc(-  
c2c(C#N)c(CC(C)C)nc3ccc(/C=C/C=O)cc23)cc1  
3907 C=CC(=O)Nc1ccccc2ccnc12.COc1ccccc(I)c1>>COc1ccccc(/C=C/C(=O)Nc2ccccc3ccnc23)c1  
3908 C=CC(=O)OCCCC.O=C(c1ccc(Br)cc1)N1CCCC1>>CCCCOC(=O)/C=C/c1ccc(C(=O)N2CCCC2)cc1  
3909 C=CCN1C(=O)C2(CCCC2)NC[C@ @]1(C)c1cc(F)cc(F)c1.O=C1Nc2ncccc2[C@ @]12Cc1cc(Br)nc1  
C2>>C[C@ @]1(c2cc(F)cc(F)c2)CNC2(CCCC2)C(=O)N1C/C=C/c1cnc2c(c1)C[C@ @]1(C2)C(=O)Nc  
3910 C=Cc1cc2c(nn1)Oc1ccccc1O2.Fc1cc(F)cc(Br)c1>>Fc1cc(F)cc(/C=C/c2cc3c(nn2)Oc2ccccc2O3)c1  
3911 C=CC(OCC)OCC.Cc1ccc(C=O)c(Br)c1>>CCOC(/C=C/c1cc(C)ccc1C=O)OCC  
3912 C=CC(=O)OC.Ic1ccccc1>>C=C(C(=O)OC)c1ccccc1  
3913 C=C(C(=O)OC)[C@ @H]1CC[C@ @]2(C)CCC[C@ @](C)(OCOC)[C@ @H]2C1.COc1ccccc(I)c1>>CO  
CO[C@ @]1(C)CCC[C@ @]2(C)CC[C@ @H](/C=C/c3ccccc(OC)c3)C(=O)OC)[C@ @H]21  
3914 C=CC(=O)OC.OCCCc1ccccc1Br>>COC(=O)/C=C/c1ccccc1CCCO  
3915 C=CC12CCC(NC(=O)OC(C)(C)C)(CC1)CO2.COc1ccc2ncc(Cl)c(Br)c2n1>>COc1ccc2ncc(Cl)c(/C=C/  
C34CCC(NC(=O)OC(C)(C)C)(CC3)CO4)c2n1  
3916 C=C(NC(C)=O)C(=O)OC.CCOC(=O)c1[nH]c2ccccc2c1Br>>CCOC(=O)c1[nH]c2ccccc2c1/C=C(\NC(  
C)=O)C(=O)OC  
3917 C=CC(=O)N(C)Cc1oc2ccccc2c1C.O=C1Nc2ncc(Br)cc2CN2CCC[C@ @H]12>>Cc1c(CN(C)C(=O)/C  
=C/c2cnc3c(c2)CN2CCC[C@ @H]2C(=O)N3)oc2ccccc12  
3918 C=CC(OCC)OCC.Cc1ccccc1Br>>CCOC(/C=C/c1ccccc1C)OCC  
3919 C=C[Si](CC)(CC)CC.COC(=O)c1ccc(Br)cc1>>CC[Si](/C=C/c1ccc(C(=O)OC)cc1)(CC)CC  
3920 C=CCNC(=O)COC.Cc1ccc(Oc2ccc(Nc3nnc4ccc(I)cc34)cc2C)cn1>>COCC(=O)NC/C=C/c1ccc2nnc  
(Nc3ccc(Oc4ccc(C)nc4)c(C)c3)c2c1  
3921 C=Cc1ccc(Br)cc1.CCCCN(CCCC)c1ccc(I)cc1>>CCCN(CCCC)c1ccc(/C=C/c2ccc(Br)cc2)cc1  
3922 C=CC(=O)OCCCC.O=C(O)c1ccc(Br)cc1>>CCCCOC(=O)/C=C/c1ccc(C(=O)O)cc1  
3923 C=Cl.C=CP(=O)(OC)OC>>C=C/C=C/P(=O)(OC)OC  
3924 C=CC(=O)OC.Ic1[nH]c2ccccc2c1CCOC1CCCCO1>>COC(=O)/C=C/c1[nH]c2ccccc2c1CCOC1CCC  
3925 C=Cc1ccccc1.COC(=O)c1ccccc1Cl>>COC(=O)c1ccccc1/C=C/c1ccccc1  
3926 C=Cc1ccc(Cl)c1.COC(=O)c1ccccc1I>>COC(=O)c1ccccc1/C=C/c1ccc(Cl)c1  
3927 C=Cc1ccc(N(CCCC)CCCC)cc1.CN(C)c1ccc(/C=C/c2nc3cc(Br)ccc3nc2-  
c2ccccc2)cc1>>CCCN(CCCC)c1ccc(/C=C/c2ccc3nc(-c4ccccc4)c(/C=C/c4ccc(N(C)C)cc4)nc3c2)cc1  
3928 C=CC(=O)N(C)C.CC(=O)c1ccc(Br)cc1>>CC(=O)c1ccc(/C=C/C(=O)N(C)C)cc1  
3929 C=CCCCCCC.CC(C)(C)c1ccccc1OS(=O)(=O)C(F)(F)F>>C=C(CCCCCC)c1ccccc1C(C)(C)C  
3930 C=CC(=O)O.COc1ccc(Br)cc1>>COc1ccc(/C=C/C(=O)O)cc1  
3931 C=CC(=O)O.O=C(O)c1cc(Br)cs1>>O=C(O)/C=C/c1ccc(C(=O)O)c1  
3932 C=Cc1ccc(F)cc1.N#Cc1ccc2cc(Br)ccc2c1>>N#Cc1ccc2cc(/C=C/c3ccc(F)cc3)ccc2c1  
3933 Br1ccc2c(c1)Sc1ccccc1N2.C=Cc1ccc(N)cc1>>Nc1ccc(/C=C/c2ccc3c(c2)Sc2ccccc2N3)cc1  
3934 C=C[C@ @H](O[Si](C)(C)C(C)(C)C)[C@ @H](CCCC(=O)OCC)O[Si](C)(C)C(C)(C)C.O=Cc1ccc(Br)cc1>  
>CCOC(=O)CCC[C@ @H](O[Si](C)(C)C(C)(C)C)[C@ @H](/C=C/c1ccc(C=O)cc1)O[Si](C)(C)C(C)(C)C  
3935 C=Cc1ccccc1.FC(F)(F)Oc1ccc(Br)cc1>>FC(F)(F)Oc1ccc(/C=C/c2ccccc2)cc1  
3936 C=CCCP(=O)(OC)OC.Clc1ccc(I)cc1>>COP(=O)(CC/C=C/c1ccc(Cl)cc1)OC  
C=Cc1ccc(OC(C)=O)cc1.CC(=O)OC[C@ @H]1O[C@ @H](Oc2cc(I)cc(OC(C)=O)c2)[C@ @H](OC(C)=O)  
3937 [C@ @H](OC(C)=O)[C@ @H]1OC(C)=O>>CC(=O)OC[C@ @H]1O[C@ @H](Oc2cc(/C=C/c3ccc(OC(C)  
=O)cc3)cc(OC(C)=O)c2)[C@ @H](OC(C)=O)[C@ @H](OC(C)=O)[C@ @H]1OC(C)=O  
3938 C=CC(=O)OCc1ccccc1.Nc1ncc(Br)cn1>>Nc1ncc(/C=C/C(=O)OCc2ccccc2)cn1  
3939 C=CCCC(=O)OCC.CCN(CC)C(=O)Oc1c(Br)cccc1OC>>CCOC(=O)CC/C=C/c1ccccc(OC)c1OC(=O)N  
(CC)CC  
3940 C=CC(=O)N(C)Cc1ccccc(OC)c1OCCC.O=C1Nc2ncc(Br)cc2CNC12CCCC2>>CCCOc1c(CN(C)C(=O)  
/C=C/c2cnc3c(c2)CNC2(CCCC2)C(=O)N3)cccc1OC

3941 C=CCNC(=O)OC(C)(C)C.N#Cc1cccc1Cl>>C=C(CNC(=O)OC(C)(C)C)c1cccc1C#N  
3942 C=CC(C)(O)CCC=C(C)C.FC(F)(F)c1ccc(Br)cc1>>CC(C)=CCCC(C)(O)/C=C/c1ccc(C(F)(F)F)cc1  
3943 C=Cc1cccc1.N#CCCCCCCCBr>>N#CCCCCCCC/C=C/c1cccc1  
3944 C=Cc1c(F)c(F)c(F)c(F)c1F.CC(C)CCCC(C)(C)Br>>CC(C)CCCC(C)(C)/C=C/c1c(F)c(F)c(F)c(F)c1F  
3945 C=CC(=O)O.Cc1ccc(I)cc1>>Cc1ccc(/C=C/C(=O)O)cc1  
3946 C=Cc1ccc(C)cc1.CCOC(=O)C(C)Br>>CCOC(=O)C(C)/C=C/c1ccc(C)cc1  
3947 C=CC(C)OC(C)=O.CCCCCCCCOC1nnc(-c2ccc(Br)cc2)nc1>>CCCCCCCCOC1nnc(-  
c2ccc(/C=C/C(C)OC(C)=O)cc2)nc1  
3948 BrC1ccc2ccncc2c1.C=C[C@H]1C[C@@H](n2ccc3c(Cl)ncnc32)[C@@H]2OC(C)(C)O[C@@H]21>>  
CC1(C)O[C@@H]2[C@H](O1)[C@@H](/C=C/c1ccc3ccncc3c1)C[C@H]2n1ccc2c(Cl)ncnc21  
3949 C=CC#N.Cc1ncccc1Br>>Cc1ncccc1/C=C/C#N  
3950 C=CC(=O)OC.O=C1c2cccc2C(=O)N1c1ccc(I)cc1>>COC(=O)/C=C/c1ccc(N2C(=O)c3cccc3C2=O)c  
3951 C=CNC(C)=O.COC(=O)c1cccc(I)c1>>C=C(NC(C)=O)c1cccc(C(=O)OC)c1  
3952 C=Cc1cc2cc(OC)c(OC)cc2oc1=O.O=Cc1ccc(Br)cc1>>COc1cc2cc(/C=C/c3ccc(C=O)cc3)c(=O)oc2cc1  
3953 Ic1cccc1.[11CH2]=Cc1cccc1>>C=[11CH]/c1cccc1)c1cccc1  
3954 C=C/C=C/c1cccc1.FC(F)(F)C(F)(F)C(F)(F)C(F)(F)C(F)(F)C(F)(F)Br>>FC(F)(F)C(F)(F)C(F)(F)C(F)(  
F)C(F)(F)C(F)(F)/C=C/C=C/c1cccc1  
3955 C=CCCP(=O)(OC)OC.Ic1cccc1>>COP(=O)(CC/C=C/c1cccc1)OC  
3956 C=Cc1cccc1.COC(=O)c1ccc2c(c1)CCc1cc(Br)ccc1-  
2>>COC(=O)c1ccc2c(c1)CCc1cc(/C=C/c3cccc3)ccc1-2  
3957 C=Cc1cccc1.Cc1ccc(I)cc1[N+](=O)[O-]>>Cc1ccc(/C=C/c2cccc2)cc1[N+](=O)[O-]  
3958 C=CCCP(=O)(OC)OC.Fc1ccc(I)cc1>>COP(=O)(CC/C=C/c1ccc(F)cc1)OC  
3959 C=CCOC1cccc1.Cc1ccc(I)cc1>>Cc1ccc(/C=C/COc2cccc2)cc1  
C=Cc1ccncc1.C[C@H]1CC[C@H](Cn2cc(I)c3nc(C#N)nc(-  
3960 c4cncc(Cl)c4)c32)CC1>>C[C@H]1CC[C@H](Cn2cc(/C=C/c3ccncc3)c3nc(C#N)nc(-  
c4cncc(Cl)c4)c32)CC1  
3961 C=Cc1ccc(OC)cc1.CC(=O)NS(=O)(=O)c1ccc(Br)cc1>>COc1ccc(/C=C/c2ccc(S(=O)(=O)NC(C)=O)cc  
2)cc1  
3962 C=CCOC1cccc1C.COc1ccc(I)cc1>>COc1ccc(/C=C/COc2cccc2C)cc1  
C=CC(C)=O.COc1cc(Br)c2c3c1O[C@H]1[C@@H](O[Si](C)(C)C(C)(C)C)C=C[C@@H]4[C@@H](  
3963 C2)N(C)CC[C@@]341>>COc1cc(/C=C/C(C)=O)c2c3c1O[C@H]1[C@@H](O[Si](C)(C)C(C)(C)C)C  
=C[C@@H]4[C@@H](C2)N(C)CC[C@@]341  
C=C/C=C/c1cccc1.O=C(OCCCC(Br)C(F)(F)F)c1cccc1>>O=C(OCCCC(/C=C/C=C/c1cccc1)C(F)(F  
3964 )F)c1cccc1  
3965 C=C(NC(C)=O)C(=O)OC.Ic1ccc2c(c1)oc1cccc12>>COC(=O)/C=C/c1ccc2c(c1)oc1cccc12)NC(C)=  
3966 C=CC(=O)OC.CC(=O)Oc1c(CC=C(C)C)cc(I)cc1C/C=C(\C)CCC=C(C)C>>COC(=O)/C=C/c1cc(CC=  
C(C)C)c(OC(C)=O)c(C/C=C(\C)CCC=C(C)C)c1  
3967 C=Cc1ccc(OC)cc1.Cn1c(/C=C/c2ccc(Cl)cc2)c(I)c(=O)c2cccc21>>COc1ccc(/C=C/c2c(/C=C/c3ccc(Cl  
)cc3)n(C)c3cccc3c2=O)cc1  
3968 C=CC(C)(C)O.COC(=O)C(Cc1cn(S(=O)(=O)c2ccc(C)cc2)c2ccc(Br)c12)NC(C)=O>>COC(=O)C(Cc1  
cn(S(=O)(=O)c2ccc(C)cc2)c2ccc(/C=C/C(C)C)O)c12)NC(C)=O  
3969 C=C[Si](C)(C)C.O=c1oc2cccc2cc1Br>>C[Si](C)(C)/C=C/c1cc2cccc2oc1=O  
3970 C=CN1C(=O)c2cccc2C1=O.Cc1ccc(I)cc1>>Cc1ccc(/C=C/N2C(=O)c3cccc3C2=O)cc1  
3971 C=CC(=O)OC.Ic1nn(-c2cccc2)c2ncccc12>>COC(=O)/C=C/c1nn(-c2cccc2)c2ncccc12  
3972 C=CC(=O)OC.Cn1nc(NC(=O)c2ccc3cccc3c2)c2c(I)cccc21>>COC(=O)/C=C/c1cccc2c1c(NC(=O)c1c  
cc3cccc3c1)nn2C  
3973 C=CCCC(=O)O.Clc1ccc(I)cc1>>O=C(O)CC/C=C/c1ccc(Cl)cc1  
3974 C=C[C@@H]1COC(C)(C)N1C(=O)OC(C)(C)C.Ic1cccc1>>CC(C)(C)OC(=O)N1[C@H](/C=C/c2ccc  
cc2)COC1(C)C  
3975 BrC1cccc1.C=C1C[C@H]2[C@@H]3CCc4cc(OC)ccc4[C@H]3CC[C@]2(C)C1=O>>COc1ccc2c(c1)  
CC[C@@H]1[C@H]2CC[C@]2(C)C(=O)/C=C/c3cccc3C[C@@H]12  
3976 C=CCN1C(=O)c2cccc2C1=O.Ic1ccc(C2(N3CCCC3)CCCCC2)cc1>>O=C1c2cccc2C(=O)N1C/C=  
C/c1ccc(C2(N3CCCC3)CCCCC2)cc1  
3977 BrC1cccc1.C=CCOC1ccc(C)cc1>>Cc1ccc(OC/C=C/c2cccc2)cc1  
3978 C=CC(=O)OCC.O=S(=O)(Oc1ccc(C=C2CCCCC2)c2ccc(O)cc2)cc1C(F)(F)F>>CCOC(=O)/C=C/c1c  
cc(C=C2CCCCC2)c2ccc(O)cc2)cc1  
C=Cc1ccc([N+](=O)[O-]  
3979 )cc1.CCOC1ccc(/N=N/c2ccc(Br)cc2O)cc1>>CCOC1ccc(/N=N/c2ccc(/C=C/c3ccc([N+](=O)[O-  
])cc3)cc2O)cc1  
3980 C=CC=O.FC(F)c1ccc(Br)cn1>>O=C/C=C/c1ccc(C(F)F)nc1  
3981 C=C[Si](CC)(CC)CC.O=C(c1cccc1)c1ccc(Br)cc1>>CC[Si](/C=C/c1ccc(C(=O)c2cccc2)cc1)(CC)CC

3982 C=CCN1C(=O)c2ccccc2C1=O.Cc1ccc(Br)cc1>>Cc1ccc(/C=C/CN2C(=O)c3ccccc3C2=O)cc1  
 3983 Br1nn(Cc2ccccc2)c2ccccc12.C=CC(=O)OCCCC>>CCCCOC(=O)/C=C/c1nn(Cc2ccccc2)c2ccccc12  
 3984 C=Cc1ccc2c(c1)Sc1ccccc1N2CCCCC.CCCCCCN1c2ccc(Br)cc2Sc2cc(C=O)ccc21>>CCCCCN1c2ccccc2Sc2cc(/C=C/c3ccc4c(c3)Sc3cc(C=O)ccc3N4CCCCC)ccc21  
 3985 C=Cc1cc(OC)c(OC)c(OC)c1-c1ccc2ccccc2c1.COc1ccc(I)cc1>>COc1ccc(/C=C/c2cc(OC)c(OC)c(OC)c2-c2ccc3ccccc3c2)cc1  
 3986 C=CC(=O)OCCCC.COc1ccc(Br)c(CCNC(=O)OC(C)(C)C)c1C>>CCCCOC(=O)/C=C/c1ccc(OC)c(C)c1CCNC(=O)OC(C)(C)C  
 3987 C=CC(=O)OC(C)(C)C.Oc1ccc(C(=C2CCCCC2)c2ccc(Br)cc2)cc1>>CC(C)(C)OC(=O)/C=C/c1ccc(C(=C2CCCCC2)c2ccc(O)cc2)cc1  
 3988 C=Cc1ccc(C)cc1.CCOC(=O)C(F)I>>CCOC(=O)C(F)/C=C/c1ccc(C)cc1  
 3989 C=Cc1ccc2ccccc2n1.Cc1cc(N2CCCC2)nc(Cl)n1>>Cc1cc(N2CCCC2)nc(/C=C/c2ccc3ccccc3n2)n1  
 3990 C=CC(=O)OC.Cn1c(I)nc1Sc1ccccc1>>COC(=O)/C=C/c1nc(Sc2ccccc2)n1C  
 3991 Br1ccc2[nH]ccc2c1.C=CC(=O)N(C)OC>>CON(C)C(=O)/C=C/c1ccc2[nH]ccc2c1  
 3992 C=Cc1ccccc1.Fc1ccc(Br)cc1>>Fc1ccc(/C=C/c2ccccc2)cc1  
 3993 Br1enc(NCCc2ccccc2)c2ccccc12.C=CC(=O)OC(C)(C)C>>CC(C)(C)OC(=O)/C=C/c1enc(NCCc2ccccc2)c2ccccc12  
 3994 C=Cc1ccc(N(C)C(=O)OC(C)(C)C)cc1.OCCOCCOCCOc1ccc(I)cn1>>CN(C(=O)OC(C)(C)C)c1ccc(/C=C/c2ccc(OCCOCCOCCO)nc2)cc1  
 3995 C=CC(=O)OC(C)(C)C.CC(=O)Nc1cc(Cl)c(F)cc1Br>>CC(=O)Nc1cc(Cl)c(F)cc1/C=C/C(=O)OC(C)(C)C  
 3996 C=CC(OCC)OCC.CC(=O)c1ccc(Br)cc1>>CCOC(/C=C/c1ccc(C(C)=O)cc1)OCC  
 3997 C=CC(=O)Nc1ccccc1Cl.COc1ccc2c(=O)c(I)ccc2c1>>COc1ccc2c(=O)c(/C=C/C(=O)Nc3ccccc3Cl)ccc2c1  
 3998 C=CC(=O)OC(C)(C)C.OC/C=C/C=C/C1=C(Br)CCCC1>>CC(C)(C)OC(=O)/C=C/C1=C(/C=C/C=C/C(C)O)CCCC1  
 3999 C=CC(=O)OC(C)(C)C.CC(=O)c1ccc(Cl)c(F)c1Br>>CC(=O)c1ccc(Cl)c(F)c1/C=C/C(=O)OC(C)(C)C  
 4000 C=CCNC(=O)C(F)(F)F.O=c1[nH]c(=O)n([C@H]2C[C@H](O)[C@@H](CO)O2)cc1I>>O=C(NC/C=C/c1cn([C@H]2C[C@H](O)[C@@H](CO)O2)c(=O)[nH]c1=O)C(F)(F)F  
 4001 C=CC(=O)OC.CC(C)(C)OC(=O)N1Cc2c(O)ccc(Br)c2C1>>COC(=O)/C=C/c1ccc(O)c2c1CN(C(=O)OC(C)(C)C)C2  
 4002 C=CC(=O)OCC.O=Cc1ccc(Br)cc1>>CCOC(=O)/C=C/c1ccc(C=O)cc1  
 4003 C=Cc1ccccc1.CCCCCCOc1ccc(I)cc1>>CCCCCOc1ccc(/C=C/c2ccccc2)cc1  
 4004 C=CC(=O)N1CCOCC1.CSc1ccc(Br)cc1>>CSc1ccc(/C=C/C(=O)N2CCOCC2)cc1  
 4005 N#C/C=C/c1ccccc1.Oc1cccc(I)c1>>N#C/C=C(/c1ccccc1)c1cccc(O)c1  
 4006 C=C(CP(=O)(OCC)OCC)C(=O)OCC.Ic1ccccc1>>CCOC(=O)/C(=C/c1ccccc1)CP(=O)(OCC)OCC  
 4007 C=C1C[C@H]2[C@@H]3CCc4cc(OC)ccc4[C@H]3CC[C@]2(C)C1=O.O=[N+][I-]]c1ccc(Br)cc1>>COc1ccc2c(c1)CC[C@@H]1[C@@H]2CC[C@]2(C)C(=O)/C=C/c3ccc([N+](=O)[O-])cc3)C[C@@H]12  
 4008 C=C(CP(=O)(OCC)OCC)C(=O)OCC.Oc1ccccc1I>>CCOC(=O)/C(=C/c1ccccc1O)CP(=O)(OCC)OCC  
 4009 C=Cc1ccccc1.COC(=O)[C@H](Cc1ccc(O)c(I)c1)NC(=O)OC(C)(C)C>>COC(=O)[C@H](Cc1ccc(O)c(/C=C/c2ccccc2)c1)NC(=O)OC(C)(C)C  
 4010 Br1ccccc1.C=Cc1ccccc1OC>>COc1ccccc1/C=C/c1ccccc1  
 4011 C=Cc1ccccc1.FC(F)(F)c1ccccc1I>>FC(F)(F)c1ccccc1/C=C/c1ccccc1  
 4012 C=CC(=O)OC.COc1nc(SC)nc(C)c1I>>COC(=O)/C=C/c1c(C)nc(SC)nc1OC  
 4013 C=CC(=O)N(C)Cc1oc2ccccc2c1C.C[C@H]1CNc2ccc(Br)cc2CN1C(=O)OC(C)(C)C>>Cc1c(CN(C)C(=O)/C=C/c2ccc3c(c2)CN(C(=O)OC(C)(C)C)[C@@H](C)CN3)oc2ccccc12  
 4014 C=Cc1senc1C.CC(=O)OCC1Cn2c3ccccc3c3c4c(c5c6cc(Br)ccc6n(c5c32)C1)C(=O)N(C(C)=O)C4>>C  
 4015 C(=O)OCC1Cn2c3ccccc3c3c4c(c5c6cc(/C=C/c7senc7C)ccc6n(c5c32)C1)C(=O)N(C(C)=O)C4  
 4016 C=CC(N)=O.COc1ccc2sc(-c3nccc(Br)c3)nc2c1>>COc1ccc2sc(-c3nccc(/C=C/C(N)=O)c3)nc2c1  
 4017 C=CP(=O)(OCC)OCC.Cc1cccc(Br)c1>>CCOP(=O)(/C=C/c1cccc(C)c1)OCC  
 4018 Br1ccc2c(c1)OCCOCCOCCOCCO2.C=CP(=O)(OC(C)C)OC(C)C>>CC(C)OP(=O)(/C=C/c1ccc2c(c1)OCCOCCOCCOCCO2)OC(C)C  
 4019 C=CC(=O)OC(C)(C)C.CCOC(=O)c1cc(I)nn1COCC[Si](C)(C)C>>CCOC(=O)c1cc(/C=C/C(=O)OC(C)(C)C)nn1COCC[Si](C)(C)C  
 4020 C=CCC(CO[Si](C)(C)C(C)C)c1ccccc1[N+](=O)[O-]  
 4021 C=CC(=O)OCC.C[Si](C)(C)c1ccccc1Br>>CCOC(=O)/C=C/c1ccccc1[Si](C)(C)C  
 4022 C=CC(=O)NC(C)C.C[C@]12C[C@@]34C=C(Sc5ccccc5)C(=O)[C@@](C)(CCC(=O)Nc5c(O)ccc(C(=O)O)c5O)[C@@H]3[C@H](C[C@@H]1C4)O2>>CC(C)NC(=O)/C=C/c1cccc(SC2=C[C@]34C[C@H]5C[C@H](O)[C@@]5(C)C3)[C@H]4[C@](C)(CCC(=O)Nc3c(O)ccc(C(=O)O)c3O)C2=O)c1

4023 C=CC(=O)OC.Cc1cc(C(=O)c2ccc3c(c2)C(C)(C)CCC3(C)C)ccc1Br>>COC(=O)/C=C/c1ccc(C(=O)c2cc3c(c2)C(C)(C)CCC3(C)C)cc1C  
 4024 C=CC(OC)OCC.O=Cc1cc(F)ccc1Br>>CCOC(/C=C/c1ccc(F)cc1C=O)OCC  
 4025 C=CC(=O)OC.CCCc1cc2n(c(=O)c1I)CCC21OCCO1>>CCCc1cc2n(c(=O)c1/C=C/C(=O)OC)CCC21OCCO1  
 4026 C=CC(=O)OCCCC.CCCCc1ccc(I)cc1>>CCCCOC(=O)/C=C/c1ccc(CCCC)cc1  
 4027 Brclccnc1.C=CCCC(=O)CC(=O)OC>>COC(=O)CC(=O)CC/C=C/c1ccnc1  
 4028 C=Cc1ccc(F)cc1.Clc1ccc(I)cc1>>Fc1ccc(/C=C/c2ccc(Cl)cc2)cc1  
 4029 C=CC(N)=O.FC(F)(F)Oc1cccc1I>>NC(=O)/C=C/c1cccc1OC(F)(F)F  
 4030 C=Cc1ccc(N(C)C(=O)OC(C)(C)C)cc1.OCCOCCOCCOCCOc1ccc(I)cn1>>CN(C(=O)OC(C)(C)C)c1ccc(/C=C/c2ccc(OCCOCCOCCOCC)nc2)cc1  
 4031 C=CC(=O)OCC.COc1ccc(Br)c(C2OCCC2)c1>>CCOC(=O)/C=C/c1ccc(OC)cc1C1OCCCCO1Br1cnc2cccc2c1.C=CCC1CCN(C)C[C@H](OC(C)=O)[C@H](C)C[C@H](CC(OC)OC)[C@H](O[C@@H]2O[C@H](C)[C@@H](O[C@H]3C[C@@](C)(O)[C@@H](OC(=O)CC)[C@H](C)O3)[C@H](N(C)C)[C@H]2OC(C)=O)[C@@H](OC)[C@H](OC(=O)CC)CC(=O)N1>>CCC(=O)O[C@H]1[C@H](C)O[C@@H](O[C@H]2[C@H](N(C)C)[C@@H](OC(C)=O)[C@H](O[C@@H]3[C@@H](OC)[C@H](OC(=O)CC)CC(=O)NC(C/C=C/c4cnc5cccc5c4)CCN(C)C[C@H](OC(C)=O)[C@H](C)C[C@@H]3CC(OC)OC)C[C@@H]2C[C@H](C)C[C@@H]1C)O  
 4032 C=CC(=O)OCCCC.CC(C)=CBr>>CCCCOC(=O)/C=C/C=C(C)C  
 4033 C=Cc1ccc2c(c1)C(=O)c1cccc1C2=O.Ic1ccc2c(=C3SC=CS3)c3cccc3c(=C3SC=CS3)c2c1>>O=C1c2cccc2C(=O)c2cc(/C=C/c3ccc4c(=C5SC=CS5)c5cccc5c(=C5SC=CS5)c4c3)ccc21  
 4034 C=C(OC)C1=C(Br)CCCC1.C=CC(=O)N1[C@H]2C[C@H]3CC[C@]2(CS1(=O)=O)C3(C)C>>C=C(O)C)C1=C(/C=C/C(=O)N2[C@H]3C[C@H]4CC[C@]3(CS2(=O)=O)C4(C)C)CCCC1  
 4035 C=CC(=O)OC.COC(=O)c1cc(C#C[Si](C)(C)C)ccc1OS(=O)(=O)C(F)(F)F>>COC(=O)/C=C/c1ccc(C#C[Si](C)(C)C)cc1C(=O)OC  
 4036 C=C(CC(=O)OC)C(=O)OC.Cc1cccc1I>>COC(=O)C/C=C/c1cccc1C)C(=O)OC  
 4037 C=C/C=C(\CCCC)OCC.Ic1cccc1>>CCCC/C(=C/C=C/c1cccc1)OCC  
 4038 C=Cc1ccc(OC)c(OC)c1.Cc1nc(Br)c2c(c1O)COC(C)(C)OC2>>COc1ccc(/C=C/c2nc(C)c(O)c3c2COC(C)(C)OC3)cc1OC  
 4039 C=CC(=O)NCc1ccc(F)cc1F.O=c1c(I)coc2cc(O)ccc12>>O=C(/C=C/c1coc2cc(O)ccc2c1=O)NCc1ccc(F)cc1F  
 4040 C=CC(=O)[C@@]1(O)C[C@H]2CC[C@]1(C)C2(C)C.Clc1ccc(I)cc1>>CC1(C)[C@@H]2CC[C@@]1(C)[C@@](O)(C(=O)/C=C/c1ccc(Cl)cc1)C2  
 4041 C=Cc1ccc(N2CCN(C)CC2)nc1.C[Si](C)(C)CCOCn1nc(I)c2ccc(C=O)cc21>>CN1CCN(c2ccc(/C=C/c3nn(COCC[Si](C)(C)C)c4cc(C=O)ccc34)en2)CC1  
 4042 C=Cc1ccc(OC)cc1.O=C1CCC(c2ccc(Br)cc2)O1>>COc1ccc(/C=C/c2ccc(C3CCC(=O)O3)cc2)cc1  
 4043 C=CC(O)c1cc(OC)c(OC)c(OC)c1Br.Ic1cccc1>>COc1cc(C(O)/C=C/c2cccc2)c(Br)c(OC)c1OC  
 4044 C=Cc1cccc1.O=S(=O)(Oc1ccc(Cl)cc1)C(F)(F)F>>C=C(c1cccc1)c1ccc(Cl)cc1  
 4045 C=CC#N.Cn1c(=O)oc2cc(Br)cnc21>>Cn1c(=O)oc2cc(/C=C/C#N)cnc21  
 4046 C=Cc1cnc(Br)c1.CC(C)(C)OC(=O)N1CC[C@H]1COc1cnc(Cl)c(I)c1>>CC(C)(C)OC(=O)N1CC[C@H]1COc1cnc(Cl)c(/C=C/c2cnc(Br)c2)c1  
 4047 C=CC(=O)OCCCC.N#Cc1cccc(I)c1>>CCCCOC(=O)/C=C/c1cccc(C#N)c1  
 4048 C=CC(OC)OCC.O=Cc1ccc(Cl)cc1Br>>CCOC(/C=C/c1cc(Cl)ccc1C=O)OCC  
 4049 C=CC(=O)OCC.O=[N+][O-]c1ccc(-c2cnc2Br)cc1>>CCOC(=O)/C=C/c1cnc1-c1ccc([N+](=O)[O-])cc1  
 4050 BrC1=C(C2=CCCC2)CCCC1.C=CC(=O)OC>>COC(=O)/C=C/C1=C(C2=CCCC2)CCCC1  
 4051 C=Cc1ccc(-c2cc(C(C)(C)C)c(OC(C)=O)c(C(C)(C)C)c2)cc1Br.CC(=O)Oc1c(C(C)(C)C)cc(-c2ccc(C)c(I)c2)cc1C(C)(C)C>>CC(=O)Oc1c(C(C)(C)C)cc(-c2ccc(/C=C/c3ccc(-c4cc(C(C)(C)C)c(OC(C)=O)c(C(C)(C)C)c4)ccc3C)c(Br)c2)cc1C(C)(C)C  
 4052 C=Cc1ccc(C(=O)OC)cc1.COc1ccc(Cn2nc(I)c3c(NC4CCCC4)nc32)cc1>>COC(=O)c1ccc(/C=C/c2nn(Cc3ccc(OC)cc3)c3cnc(NC4CCCC4)c23)cc1  
 4053 C=CC(=O)OC.CCc1cccc(C)c1I>>CCc1cccc(C)c1/C=C/C(=O)OC  
 4054 C=Cc1ccc2c(c1)Sc1cccc1N2CC.CCN(c1cccc1)c1ccc(Br)cc1>>CCN(c1cccc1)c1ccc(/C=C/c2ccc3c(c2)Sc2cccc2N3CC)cc1  
 4055 C=CC(=O)OC.OCCc1cccc1Br>>COC(=O)/C=C/c1cccc1CCO  
 4056 C=CC(C)=O.O=[N+][O-]c1ccc(Br)cc1>>CC(=O)/C=C/c1ccc([N+](=O)[O-])cc1  
 4057 C=Cc1cccc1.CC(=O)c1ccc(Br)s1>>CC(=O)c1ccc(/C=C/c2cccc2)s1  
 4058 C=CC(=O)OC(C)(C)C.OCc1ccc(Br)cc1>>CC(C)(C)OC(=O)/C=C/c1ccc(CO)cc1  
 4059 C=Cc1ccc(OC)cc1.Cc1oc2cccc2c(=O)c1Br>>COc1ccc(/C=C/c2c(C)oc3cccc3c2=O)cc1  
 4060 C=CCn1nnc2cccc21.Cc1ccc(Br)c2cccc12>>Cc1ccc(/C=C/Cn2nnc3cccc32)c2cccc12  
 4061

4062 C=Cc1ccccc1.CC(C)(C)P(=O)(n1ccc2c(Br)cccc21)C(C)(C)C>>CC(C)(C)P(=O)(n1ccc2c(/C=C/c3cccc  
 c3)cccc21)C(C)(C)C  
 4063 C=CC(=O)OC.COc1cccc(Br)n1>>COC(=O)/C=C/c1cccc(OC)n1  
 4064 C=CCNC(=O)OC(C)(C)C.O=C(c1ccccc1)c1ccc(Br)cc1>>C=C(CNC(=O)OC(C)(C)C)c1ccc(C(=O)c2c  
 cccc2)cc1  
 4065 C=C.COC(=O)c1ccc(C)cc1Br>>C=Cc1cc(C)ccc1C(=O)OC  
 4066 Br1cnc2ccccc2c1.C=CCC[C@H]1COC(C)(C)N1C(=O)OC(C)(C)C>>CC(C)(C)OC(=O)N1[C@@H](  
 CC/C=C/c2cnc3ccccc3c2)COC1(C)C  
 4067 C=CN1CCCC1=O.O=S(=O)(Oc1cc(F)ccc1Br)C(F)(F)F>>C=C(c1cc(F)ccc1Br)N1CCCC1=O  
 4068 C=CC(=O)OCC.Clc1ccc2ccccc2c1>>CCOC(=O)/C=C/c1ccc2ccccc2c1  
 4069 C=CC(=O)OC(C)(C)C.O=[N+][([O-])c1ccccc1Cl]>>CC(C)(C)OC(=O)/C=C/c1ccccc1[N+](=O)[O-]  
 4070 Br1ccc2ccc3ccccc4ccc1c2c34.C=CC(=O)OCC(C)C>>CC(C)COC(=O)/C=C/c1ccc2ccc3ccccc4ccc1c2c3  
 C=Cc1cc(OCc2ccccc2)c(OCc2ccccc2)nn1.Fc1cc(Br)cc(F)c1C(F)(F)F>>Fc1cc(/C=C/c2cc(OCc3ccccc3  
 )c(OCc3ccccc3)nn2)cc(F)c1C(F)(F)F  
 4072 C=CCCC.COC(=O)c1ccc2cc(Br)ccc2c1>>CCC/C=C/c1ccc2cc(C(=O)OC)ccc2c1  
 4073 C=CC(=O)OC.Cn1nc(I)c2cc(C#Cc3ccccc3)cnc21>>COC(=O)/C=C/c1nn(C)c2ncc(C#Cc3ccccc3)cc12  
 4074 C=CNC(C)=O.COc1cc(Br)cc(OC)c1OC>>C=C(NC(C)=O)c1cc(OC)c(OC)c(OC)c1  
 4075 C=CC(=O)OCC.O=C(Nc1ccc(Cl)cc1)c1cccc(Br)c1>>CCOC(=O)/C=C/c1cccc(C(=O)Nc2ccc(Cl)cc2)c  
 C=CCC(=O)OC.O=S(=O)(c1ccccc1)n1cc(-c2ccccc2)c2cc(Br)cnc21>>COC(=O)C/C=C/c1cnc2c(c1)c(-  
 c1ccccc1)cn2S(=O)(=O)c1ccccc1  
 4077 C=CC(=O)Nc1ccccc1NC(=O)OC(C)(C)C.CCOC(=O)[C@H]1CN(C)C[C@@H]1c1ccc(Br)cc1>>CCO  
 C(=O)[C@H]1CN(C)C[C@@H]1c1ccc(/C=C/C(=O)Nc2ccccc2NC(=O)OC(C)(C)C)cc1  
 4078 C=Cc1cncnc1.CC(C)(C)OC(=O)N[C@H](COc1cnc(Br)c1)C(c1ccccc1)c1ccccc1>>CC(C)(C)OC(=O)  
 N[C@H](COc1cncnc1/C=C/c2cncnc2)c1)C(c1ccccc1)c1ccccc1  
 4079 C=CC(=O)OC.CC(C)n1cnc2c(NCc3ccccc(Br)c3)nc(N3CCCCC3)nc21>>COC(=O)/C=C/c1cccc(CNc2n  
 c(N3CCCCC3)nc3c2ncn3C(C)C)c1  
 4080 C=C(NC(C)=O)C(=O)OC.CCOC(=O)c1cc2c(Br)cccc2[nH]1>>CCOC(=O)c1cc2c(/C=C(\NC(C)=O)C(  
 =O)OC)cccc2[nH]1  
 4081 C=CC(=O)O.O=C1c2ccccc2CCc2ccc(Br)cc21>>O=C(O)/C=C/c1ccc2c(c1)C(=O)c1ccccc1CC2  
 4082 C=CC(=O)OC.O=c1[nH]c(=O)n([C@@H]2CO[C@H](CO)[C@@H](O)C2)cc1I>>COC(=O)/C=C/c1c  
 n([C@@H]2CO[C@H](CO)[C@@H](O)C2)c(=O)[nH]c1=O  
 4083 C=CS(=O)(=O)F.COc1cccc(I)c1>>COc1cccc(/C=C/S(=O)(=O)F)c1  
 4084 C=Cc1ccc(F)cc1.COc1ccc(I)cc1>>COc1ccc(/C=C/c2ccc(F)cc2)cc1  
 4085 C=CC(=O)O.Fc1cc(Cl)c(Br)cc1F>>O=C(O)/C=C/c1cc(F)c(F)cc1Cl  
 4086 C=CC(C)=O.Cn1ccc2cc(Br)ccc21>>CC(=O)/C=C/c1ccc2c(cen2C)c1  
 4087 CC(=O)O[C@H]1CCC2C3C(CC[C@ @]21C)c1ccc(O)cc1C[C@H]3Sc1ccc(Br)cc1.[C]C(=O)C=C>>[  
 C]C(=O)/C=C/c1ccc(S[C@ @H]2Cc3cc(O)ccc3CC[C@ @]4(C)C(CC[C@ @H]4OC(C)=O)C32)cc1  
 4088 C=C(C)C(=O)OC.Oc1cccc(Br)c1>>COC(=O)/C(C)=C/c1ccccc(O)c1  
 4089 C=CC(=O)OCC.CCOC(=O)Nc1ccccc1C1=C(I)CCN1S(=O)(=O)c1ccc(C)cc1>>CCOC(=O)/C=C/C1=  
 C(c2ccccc2NC(=O)OCC)N(S(=O)(=O)c2ccc(C)cc2)CC1  
 4090 C=CC(=O)OC.Nc1ccc(Br)cc1>>COC(=O)/C=C/c1ccc(N)cc1  
 4091 Br1cccc2ccccc12.C=Cc1nc2c(N)ncnc2n1[C@H]1C[C@H](O[Si](C)(C)C(C)(C)C)[C@@H](CO[Si](  
 C)(C)C(C)(C)C)O1>>CC(C)(C)[Si](C)(C)OC[C@H]1O[C@@H](n2c(/C=C/c3cccc4ccccc34)nc3c(N)n  
 enc32)C[C@@H]1O[Si](C)(C)C(C)(C)C  
 4092 C=Cc1ccccc1.O=c1oc2ccccc2c(-c2ccccc2)c1Br>>O=c1oc2ccccc2c(-c2ccccc2)c1/C=C/c1ccccc1  
 4093 C=Cc1ccccc1.O=Cc1ccc2c(I)nn(C3CCCCO3)c2c1>>O=Cc1ccc2c(/C=C/c3ccccc3)nn(C3CCCCO3)c2  
 4094 C=CCCCCO[Si](C)(C)C(C)(C)C.Clc1ccccc1>>C=C(CCCCCO[Si](C)(C)C(C)(C)C)c1ccccc1  
 4095 C=CC(C)=O.Ic1ccc2[nH]ccc2c1>>CC(=O)/C=C/c1ccc2[nH]ccc2c1  
 4096 C=CCN(C(=O)OC(C)(C)C)C(=O)OC(C)(C)C.FC(F)(F)c1cccc(Br)c1>>CC(C)(C)OC(=O)N(C/C=C/c1  
 cccc(C(F)(F)F)c1)C(=O)OC(C)(C)C  
 4097 C=CC(=O)OC(C)(C)C.Cc1c[nH]c2cccc(Br)c12>>Cc1c[nH]c2cccc(/C=C/C(=O)OC(C)(C)C)c12  
 4098 C=CC1(O)CCC1.Cc1ccccc1I>>Cc1ccccc1/C=C/C1(O)CCC1  
 4099 C=CC(OC)OC.IC1CCCCC1>>COC(/C=C/C1CCCCC1)OC  
 4100 C=CC(C)=O.FC(F)C(F)(F)Cn1nnc(-c2ccccc2)c1I>>CC(=O)/C=C/c1c(-c2ccccc2)nnn1CC(F)(F)C(F)F  
 4101 C=CC(=O)OC(C)(C)C.O=S(=O)(c1cccc(Br)c1)n1ccc2ccnc21>>CC(C)(C)OC(=O)/C=C/c1cccc(S(=O)  
 )(=O)n2ccc3ccnc32)c1  
 4102 C=Cc1ccc(N(c2ccc(OC)cc2)c2ccc(OC)cc2)cc1.O=Cc1ccc(Br)cc1>>COc1ccc(N(c2ccc(/C=C/c3ccc(C=  
 O)cc3)cc2)c2ccc(OC)cc2)cc1  
 4103 C=Cc1ccc(F)cc1.O=[N+][([O-])c1ccc(Br)cc1>>O=[N+][([O-])c1ccc(/C=C/c2ccc(F)cc2)cc1  
 4104 C=CC(=O)OC(C)(C)C.C[Si](C)(C)c1cccc(Br)n1>>CC(C)(C)OC(=O)/C=C/c1ccccc([Si](C)(C)C)n1  
 4105 C=Cc1ccccc1.O=c1cc(-c2ccccc2)oc2cc(Br)ccc12>>O=c1cc(-c2ccccc2)oc2cc(/C=C/c3ccccc3)ccc12

4106 C=CC(=O)OCC.COc1ccc(Oc2cccc(Br)c2)cc1>>CCOC(=O)/C=C/c1cccc(Oc2ccc(OC)cc2)c1  
4107 C=CCO.Clc1cccn1>>C=C(CO)c1cccn1  
4108 C=CC(=O)OC.Cc1cc(C)c(NCc2ccccc2)c(Br)c1>>COC(=O)/C=C/c1cc(C)cc(C)c1NCc1ccccc1  
4109 C=CC(C)=O.COc1ccc(Br)cc1>>COc1ccc(/C=C/C(C)=O)cc1  
4110 C=CCCCCCC.Clc1ccccc1>>CCCCC/C=C/c1ccccc1  
4111 C=CCn1ccccc1C(=O)c1ccc(C)cc1.COC(=O)C(C)(C)OCc1cccc(Br)c1>>COC(=O)C(C)(C)OCc1cccc(/C  
=C/Cn2cccc2C(=O)c2ccc(C)cc2)c1  
4112 Brc1ccccc1.C=C(NC(=O)OC(C)(C)C(=O)OCc1ccccc1>>CC(C)(C)OC(=O)N/C(=C/c1ccccc1)C(=O)  
OCc1ccccc1  
4113 C=CC(C)O.I/C=C/C=C/CCCCOCc1ccccc1>>CC(O)/C=C/C=C/C=C/CCCCOCc1ccccc1  
4114 C=CCOc1ccc(Cl)cc1.Ic1ccccc1>>Clc1ccc(OC/C=C/c2ccccc2)cc1  
4115 C=CCn1cccn1.CC(=O)OCC1Cn2c3ccccc3c3c4c(c5c6cc(Br)ccc6n(c5c32)C1)C(=O)N(C(C)=O)C4>>C  
C(=O)OCC1Cn2c3ccccc3c3c4c(c5c6cc(/C=C/Cn7ccnc7)ccc6n(c5c32)C1)C(=O)N(C(C)=O)C4  
4116 C=Cc1ccccc1C(=O)OC.COc1nc2ccc(Br)cc2nc1OC>>COC(=O)c1ccccc1/C=C/c1ccc2nc(OC)c(OC)nc2  
4117 C=CC(=O)OCC.Cc1oc2ccccc2c(=O)c1Br>>CCOC(=O)/C=C/c1c(C)oc2ccccc2c1=O  
4118 C=Cc1ccc(N(CC)CC)cc1.CC(C)[Si](OCc1cc(=O)oc2cc(I)ccc12)(C(C)C)C(C)C>>CCN(CC)c1ccc(/C=  
C/c2ccc3c(CO[Si](C(C)C)(C(C)C)C(C)C)cc(=O)oc3c2)cc1  
4119 C=Cc1ccccc1.O=P(c1ccccc1)(c1ccccc1)c1sc2ccccc2c1I>>O=P(c1ccccc1)(c1ccccc1)c1sc2ccccc2c1/C=  
C/c1ccccc1  
4120 C=CC(=O)OC(C)(C)C.CC(C)(C)O[C@H]1CC[C@@H]2C=C(C3=C(Br)CCCC3)CC[C@]12C>>CC(C  
)C(OC(=O)/C=C/C1=C(C2=C[C@H]3CC[C@H](OC(C)(C)C)[C@@]3(C)CC2)CCCC1  
4121 C=CCOC(C)=O.COC(=O)c1cc(Br)ccc1[N+](=O)[O-]  
>>COC(=O)c1cc(/C=C/COC(C)=O)ccc1[N+](=O)[O-]  
4122 C=Cc1ccccc1.CCCCOc1ccc2c(c1)cc(C#N)c1ccc(Br)cc12>>CCCOc1ccc2c(c1)cc(C#N)c1ccc(/C=C/c  
3ccccc3)cc12  
4123 Brc1cccn1.C=Cc1ccc(Cn2cc(C)c(=O)[nH]c2=O)cc1>>Cc1cn(Cc2ccc(/C=C/c3ccncc3)cc2)c(=O)[nH]  
4124 C=Cc1n[nH]c2cc([C@@H]3C[C@@]34C(=O)Nc3ccc(OC)cc34)ccc12.CN1CCN(c2ccc(Br)cc2)CC1>  
>COc1ccc2c(c1)[C@]1(C[C@H]1c1ccc3c(/C=C/c4ccc(N5CCN(C)CC5)cc4)n[nH]c3c1)C(=O)N2  
4125 C=CC(=O)N1CCCCC1.O=c1c(I)c(-c2ccc(O)cc2)oc2cc(O)ccc12>>O=C(/C=C/C/c1c(-  
c2ccc(O)cc2)oc2cc(O)ccc2c1=O)N1CCCCC1  
4126 C=CC(=O)C1CC1.OC/C=C/C1=C(Br)CCCC1>>O=C(/C=C/C1=C(/C=C/CO)CCCC1)C1CC1  
4127 C=CCNS(=O)(=O)c1cc(C(F)(F)F)cc(C(F)(F)F)c1.FC(F)(F)c1ccc(I)cc1>>O=S(=O)(NC/C=C/c1ccc(C  
(F)(F)F)cc1)c1cc(C(F)(F)F)cc(C(F)(F)F)c1  
4128 C=CC(=O)N1N=Cc2ccccc2C1CCC(F)(F)F.COc1cc(Cc2cnc(N)nc2N)cc(I)c1OC>>COc1cc(Cc2cnc(N)  
nc2N)cc(/C=C/C(=O)N2N=Cc3ccccc3C2CCC(F)(F)F)c1OC  
4129 C=CC(=O)OCC.Cc1nc(N)nc(NC2CCOC2)c1I>>CCOC(=O)/C=C/c1c(C)nc(N)nc1NC1CCOC1  
4130 C=Cc1ccc(O)c(OC)c1.COc1ccc(OC)c(I)c1>>COc1ccc(OC)c(/C=C/c2ccc(O)c(OC)c2)c1  
4131 C=CC(C)=O.Cc1cc(C)c(Br)cc1C>>CC(=O)/C=C/c1cc(C)c(C)cc1C  
4132 C=CC(=O)OC(C)(C)C.CCOC(=O)c1c(OS(=O)(=O)C(F)(F)F)c2ccccc2n1C>>CCOC(=O)c1c(/C=C/C(  
=O)OC(C)(C)C)c2ccccc2n1C  
4133 C=CC(=O)OCCCC.Cc1cc(I)ccc1Br>>CCCCOC(=O)/C=C/c1ccc(Br)c(C)c1  
4134 C=CCCN1C(=O)c2ccccc2C1=O.ClCc1cccc(Oc2ccccc2)c1>>C=C(CCN1C(=O)c2ccccc2C1=O)Cc1ccc  
c(Oc2ccccc2)c1  
4135 C=CN1C(=O)c2ccccc2C1=O.COC(=O)c1cc(OC(C)C)nc1Br>>COC(=O)c1cc(OC(C)C)nc1/C=C/N1  
C(=O)c2ccccc2C1=O  
4136 C=Cc1ccc(Cl)cc1.Cc1cc(C)c(/C=C/C(=O)O)c(Br)c1>>Cc1cc(C)c(/C=C/C(=O)O)c(/C=C/c2ccc(Cl)cc2  
4137 C=Cc1c(F)c(F)c(F)c1F.Ic1ccccc2ccccc12>>Fc1c(F)c(F)c(/C=C/c2cccc3ccccc23)c(F)c1F  
4138 C=C.ClCc1ccccc1>>C=CCc1ccccc1  
4139 C=CC(=O)OCC.CC1=NC[C@H](c2ccccc2Br)O1>>CCOC(=O)/C=C/c1ccccc1[C@H]1CN=C(C)O1  
4140 C=C(C)C(=O)OCC.Cn1ccccc1Cl>>CCOC(=O)/C(C)=C/c1cccn1C  
4141 Brc1cc(I)c2ccccc2n1.C=CC(=O)OC>>COC(=O)/C=C/c1cc(Br)nc2ccccc12  
4142 C=CC(OCC)OCC.O=Cc1cc2c(cc1Br)OCO2>>CCOC(/C=C/c1cc2c(cc1C=O)OCO2)OCC  
4143 C=CC(=O)OCC.Ic1cccs1>>CCOC(=O)/C=C/c1cccs1  
4144 C=C/C=C/C(=O)N(CCCC)CCCC.FC(F)(F)c1ccc(Br)cc1>>CCCN(CCCC)C(=O)/C=C/C=C/c1ccc(C  
(F)(F)F)cc1  
C=CC[C@H](CC(=O)OC(C)(C)C)C(=O)N[C@H](C(=O)N[C@H](C)c1ccccc1)C(C)(C)C.FC(F)(F)c1c  
4145 c(Br)ccc1-c1ccccc1>>C[C@@H](NC(=O)[C@@H](NC(=O)[C@H](C/C=C/c1ccc(-  
c2ccccc2)c(C(F)(F)F)c1)CC(=O)OC(C)(C)C(C)(C)C)c1ccccc1  
C=Cc1nc2c(N)ncnc2n1[C@@H]1O[C@H](CO[Si](C)(C)C(C)(C)C)[C@@H](O[Si](C)(C)C(C)(C)C)[  
4146 C@H]1O[Si](C)(C)C(C)(C)C.Cc1ccccc1Br>>Cc1ccccc1/C=C/c1nc2c(N)ncnc2n1[C@@H]1O[C@H](  
CO[Si](C)(C)C(C)(C)C)[C@@H](O[Si](C)(C)C(C)(C)C)[C@H]1O[Si](C)(C)C(C)(C)C

4147 C=Cc1ccc(C(=O)OC)cc1.O=[N+][O-]c1ccc(Br)cc1>>COC(=O)c1ccc(/C=C/c2ccc([N+](=O)[O-]  
4148 C=CC(=O)OC.O=c1[nH]c(=O)n([C@@H]2C=CC[C@H]2CO)cc1I>>COC(=O)/C=C/c1cn([C@@H]  
]2C=CC[C@H]2CO)c(=O)[nH]c1=O  
4149 C=CN1C(=O)c2cccc2C1=O.COc1ccc(Br)cc1>>COc1ccc(/C=C/N2C(=O)c3ccccc3C2=O)cc1  
4150 C=Cc1ccc(OC)cc1.CCOC(=O)c1ccc(Br)cc1>>CCOC(=O)c1ccc(/C=C/c2ccc(OC)cc2)cc1  
4151 C=CC(=O)OC.CN1C(=O)CN=C(c2ccccc2)c2ccc(Br)cc21>>COC(=O)/C=C/c1ccc2c(c1)N(C)C(=O)C  
N=C2c1ccccc1  
4152 C=CCN(C(=O)c1sccl1C)[C@H](C)c1cc(F)cc(F)c1.O=C1Nc2ncccc2[C@@]12Cc1cc(Br)enc1C2>>Cc  
1ccsc1C(=O)N(C/C=C/c1enc2c(c1)C[C@@]1(C2)C(=O)Nc2ncccc21)[C@H](C)c1cc(F)cc(F)c1  
4153 C=CC(=O)OC.COC(=O)c1cccc([N+](=O)[O-])c1I>>COC(=O)/C=C/c1c(C(=O)OC)cccc1[N+](=O)[O-]  
4154 C=CC(=O)OC.CCCc1nc2c(NCc3cccc(Br)c3)nc(N3CCN(C)CC3)nc21>>CCc1nc2c(NCc3cccc(/  
C=C/C(=O)OC)c3)nc(N3CCN(C)CC3)nc21  
4155 C=CC(=O)OC.O=Cc1cccc(I)c1>>COC(=O)/C=C/c1cccc(C=O)c1  
4156 C=CC(=O)OC.CC(C)=CCc1c(I)nen1C>>COC(=O)/C=C/c1nen(C)c1CC=C(C)C  
4157 C=CC(=O)OC(C)(C)C.O=C1CN(C(=O)OCc2cccc2)Cc2cc(Br)enc2N1>>CC(C)(C)OC(=O)/C=C/c1cn  
c2c(c1)CN(C(=O)OCc1ccccc1)CC(=O)N2  
4158 C=CC(=O)N(C)C.COc1ccc(I)cc1>>COc1ccc(/C=C/C(=O)N(C)C)cc1  
4159 C=C(NC(C)=O)C(=O)OC.CC(C)(C)OC(=O)NCCOc1cc(C#N)ccc1I>>COC(=O)/C=C/c1ccc(C#N)cc1  
OCCNC(=O)OC(C)(C)C)NC(C)=O  
4160 C=CCNC(=O)OC(C)(C)C.COc1ccc(Br)c(C=O)c1O>>COc1ccc(/C=C/CNC(=O)OC(C)(C)C)c(C=O)c1  
4161 C=CB1OC(C)CC(C)(C)O1.CCOc1nn(CC)cc1S(=O)(=O)N1C[C@H](CCC(=O)OC)Oc2ccc(Br)cc21>>  
CCOc1nn(CC)cc1S(=O)(=O)N1C[C@H](CCC(=O)OC)Oc2ccc(/C=C/B3OC(C)CC(C)(C)O3)cc21  
4162 C=CC(=O)OC.Nc1ccccc1Br>>COC(=O)/C=C/c1ncccc1N  
4163 C=CC(=O)OC(C)(C)C.COc1cc(NCc2ccc(Br)cn2)cc(OC)c1OC>>COc1cc(NCc2ccc(/C=C/C(=O)OC(C  
)C(C)cn2)cc(OC)c1OC  
Br1cc2cccc2c2ccccc12.C=Cc1nc2c(N)ncnc2n1[C@H]1C[C@H](O[Si](C)(C)C(C)(C)C)[C@@H](C  
4164 O[Si](C)(C)C(C)(C)C)O1>>CC(C)(C)[Si](C)(C)OC[C@H]1O[C@@H](n2c(/C=C/c3cc4ccccc4c4cccc  
c34)nc3c(N)ncnc32)C[C@@H]1O[Si](C)(C)C(C)(C)C  
4165 C=Cc1ccc([N+](=O)[O-])cc1.Oc1ccc(I)cc1>>O=[N+](O-)]c1ccc(/C=C/c2ccc(O)cc2)cc1  
4166 C=Cc1ccccc1.COC(=O)[C@@]1(NC(=O)OC(C)(C)C)CCc2cc(Br)ccc2C1>>COC(=O)[C@@]1(NC(=O)  
OC(C)(C)C)CCc2cc(/C=C/c3ccccc3)ccc2C1  
4167 C=Cc1nnn(C)n1.Cc1ccc(I)cc1>>Cc1ccc(/C=C/c2nnn(C)n2)cc1  
4168 C=CC(=O)OCC.Nc1ccc(Cl)cc1Br>>CCOC(=O)/C=C/c1cc(Cl)ccc1N  
4169 C=Cc1nnn(C)n1.O=[N+](O-)]c1ccc(Br)cc1>>Cn1nncc(/C=C/c2ccc([N+](=O)[O-])cc2)n1  
4170 C=Cc1ccccc1.O=[N+](O-)]c1cccc(Br)c1>>O=[N+](O-)]c1cccc(/C=C/c2ccncc2)c1  
4171 Br1ccc2ccccc2c1.C=CCO>>C=C(CO)c1ccc2ccccc2c1  
4172 C=CSc1ccccc1.Fc1ccc(Br)cc1>>Fc1ccc(/C=C/Sc2ccccc2)cc1  
4173 C=CC(=O)N1CCCCC1.CCc1nc2cc(O)ccc2c(Oc2ccc(Br)cc2)c1-  
c1ccccc1>>CCc1nc2cc(O)ccc2c(Oc2ccc(/C=C/C(=O)N3CCCCC3)cc2)c1-c1ccccc1  
4174 C=CCO.Cc1cccc(I)c1>>Cc1cccc(/C=C/CO)c1  
4175 C=Cc1ccc(F)cc1.Cc1nn(-c2ccc(C#N)c(Cl)c2)c(C)c1I>>Cc1nn(-  
c2ccc(C#N)c(Cl)c2)c(C)c1/C=C/c1ccc(F)cc1  
\*CN(Cc1ccccc1)N=Nc1ccccc1I.C=CC(=O)OC(C)(C)C>>\*CN(Cc1ccccc1)N=Nc1ccccc1/C=C/C(=O)O  
4176 C(C)(C)C  
4177 Br1ccccc2ccccc12.C=CC(=O)CC>>CCC(=O)/C=C/c1ccccc2ccccc12  
4178 C=CC1CCCCC1.OCc1ccc(I)cc1>>OCc1ccc(/C=C/C2CCCCC2)cc1  
4179 C=Cc1ccc2ccccc2c1.O=Cc1ccc(Br)cc1>>O=Cc1ccc(/C=C/c2ccc3ccccc3c2)cc1  
4180 C=C.CC(=O)Nc1ccccc1Br>>C=Cc1ccccc1NC(C)=O  
4181 C=CC(OC)OC.FC(F)(F)c1cccc(I)c1>>COC(/C=C/c1cccc(C(F)(F)F)c1)OC  
4182 C=CC(=O)OCCCC.O=C(/C=C/c1ccc(Br)cc1)c1ccc2sc3ccccc3c2c1>>CCCCOC(=O)/C=C/c1ccc(/C=C  
/C(=O)c2ccc3sc4ccccc4c3c2)cc1  
4183 Br1cnc2ccccc2c1.C=CC(=O)N(C)OC>>CON(C)C(=O)/C=C/c1cnc2ccccc2c1  
4184 C=Cc1ccccc1.COc1ccc(I)c1>>COc1ccc(/C=C/c2ccccc2)c1  
4185 C=CC(=O)OC.COc1cc(Br)ccc1-c1nc2c(C)nn(C3CCCCC3)c2c(=O)[nH]1>>COC(=O)/C=C/c1ccc(-  
c2nc3c(C)nn(C4CCCC4)c3c(=O)[nH]2)c(OC)c1  
4186 C=CC(=O)OCC.FC(F)(F)c1ccc(Br)c(C2OCCCO2)c1>>CCOC(=O)/C=C/c1ccc(C(F)(F)F)cc1C1OCCC  
C=Cc1c(F)c(F)c(F)c1F.Cc1ccc2c(-c3ccccc3)c(Br)c(=O)oc2c1>>Cc1ccc2c(-  
4187 c3ccccc3)c(/C=C/c3c(F)c(F)c(F)c3F)c(=O)oc2c1  
C=Cc1ccc(OC)cc1.CN(C(=O)c1ccccc1)c1ccc2c(c1)[nH]c(=NC(=O)c1ccc(Br)s1)n2CCC(N)=O>>COc  
4188 1ccc(/C=C/c2ccc(C(=O)N=c3[nH]c4cc(N(C)C(=O)c5ccccc5)ccc4n3CCC(N)=O)s2)cc1

4189 C=Cc1cccc1.Cn1c(/C=C/c2ccc(Cl)cc2)c(I)c(=O)c2ccccc21>>Cn1c(/C=C/c2ccc(Cl)cc2)c(/C=C/c2ccc  
cc2)c(=O)c2ccccc21  
4190 C=CC(=O)O.O=S(=O)(Nc1ccc(I)cc1)c1cccc2ccccc12>>O=C(O)/C=C/c1ccc(NS(=O)(=O)c2ccccc3ccccc  
c23)cc1  
4191 C=CC(O)CCCCC.c1ccc([I+](c2cccs2)cc1>>CCCCC(O)/C=C/c1cccs1  
4192 C=CC(=O)O.O=[N+](O-)]c1cccc([I+](c2ccccc([N+](=O)[O-]  
)]c2)c1>>O=C(O)/C=C/c1cccc([N+](=O)[O-])c1  
4193 C=CCCCCCC.N#Cc1cccc1OS(=O)(=O)C(F)(F)F>>C=C(CCCCCC)c1cccc1C#N  
4194 C=CC(=O)OC.Cc1cc(CCNc(=O)OC(C)(C)C)cc(I)c1O>>COC(=O)/C=C/c1cc(CCNc(=O)OC(C)(C)C  
cc(C)c1O  
4195 C=Cc1ccc(C)cc1.CCOC(=O)C1CCCN(c2ccccc(Br)n2)C1>>CCOC(=O)C1CCCN(c2ccccc(/C=C/c3ccc(C  
)cc3)n2)C1  
C=CC(=O)OC(C)(C)C.CCCOc1ccc(Br)cc1-  
4196 c1nc2c(c(C)nn2CCC)c(=O)[nH]1>>CCCOc1ccc(/C=C/C(=O)OC(C)(C)C)cc1-  
c1nc2c(c(C)nn2CCC)c(=O)[nH]1  
4197 C=CC(=O)OC.O=C1CCc2cc(Br)ccc21>>COC(=O)/C=C/c1ccc2c(c1)CCC2=O  
4198 C=CN1C(=O)c2ccccc2C1=O.COC(=O)Cc1cccc(Br)c1>>COC(=O)Cc1cccc(/C=C/N2C(=O)c3ccccc3C  
2=O)c1  
4199 C=Cc1cccc1.Cc1cccc(C)c1Cl>>Cc1cccc(C)c1/C=C/c1cccc1  
4200 C=Cc1cncnc1.COc1cc2c(Nc3cc(OC)c(OC)c(OC)c3)c(C#N)cnc2cc1OS(=O)(=O)C(F)(F)F>>COc1cc2c  
(Nc3cc(OC)c(OC)c(OC)c3)c(C#N)cnc2cc1/C=C/c1cncnc1  
4201 C=CCC(N=[N+]=[N-])c1cccc1.Ic1cccc1>>[N-]=[N+]=NC(C/C=C/c1cccc1)c1cccc1  
4202 C=Cc1cccc1Cl.COC(=O)c1cccc1I>>COC(=O)c1cccc1/C=C/c1cccc1Cl  
4203 C=CC(=O)OC(C)(C)C.[C@H](c1cccc1)N(Cc1cccc1)[C@H](CC(=O)OC(C)(C)C)c1cccc1I>>C  
[C@H](c1cccc1)N(Cc1cccc1)[C@H](CC(=O)OC(C)(C)C)c1cccc1/C=C/C(=O)OC(C)(C)C  
4204 C=Cc1ccc(OC)cc1.Oc1ccc(-c2nc3ccccc3c2-c2ccc(Br)cc2)cc1>>COc1ccc(/C=C/c2ccc(-c3c(-  
c4ccc(O)cc4)nc4ccccc34)cc2)cc1  
4205 BrC1ccsc1.C=CC(=O)OCCCC>>CCCCOC(=O)/C=C/c1ccsc1  
4206 C=CC(=O)O.CC(=O)c1ccc(I)cc1>>CC(=O)c1ccc(/C=C/C(=O)O)cc1  
4207 CC(=O)/C=C/CC(NS(=O)(=O)c1ccc(C)cc1)C(C)C.Cc1ccc(Br)cc1>>CC(=O)/C=C/CC(NS(=O)(=O)c1  
ccc(C)cc1)C(C)C)c1ccc(C)cc1  
4208 C=CC(=O)OC(C)(C)C.COC(=O)c1ccc(Br)c(C)c1>>COC(=O)c1ccc(/C=C/C(=O)OC(C)(C)C)c(C)c1  
4209 C=CC(=O)OC(C)(C)C.Nc1ccc(Cl)cc1I>>CC(C)(C)OC(=O)/C=C/c1cc(Cl)ccc1N  
4210 C=CC(=O)N1N=Cc2ccccc2C1c1cccs1.COc1cc(Cc2cnc(N)nc2N)cc(I)c1OC>>COc1cc(Cc2cnc(N)nc2  
N)cc(/C=C/C(=O)N2N=Cc3ccccc3C2c2cccs2)c1OC  
4211 C=CC(=O)OCCCC.FC(F)(F)c1ccc(Cl)cc1>>CCCCOC(=O)/C=C/c1ccc(C(F)(F)F)cc1  
C=CC(=O)OC.CC(=O)OC[C@H]1O[C@H](Oc2ccc(I)cc2)[C@H](OC(C)=O)[C@H](OC(C)=O)[C@  
4212 @H]1OC(C)=O>>COC(=O)/C=C/c1ccc(O[C@H]2O[C@H](COC(C)=O)[C@H](OC(C)=O)[C@  
H](OC(C)=O)[C@H]2OC(C)=O)cc1  
4213 C=C(F)C(=O)OC.COc1ccc(I)cc1>>COC(=O)/C(F)=C/c1ccc(OC)cc1  
4214 BrC1c2ccccc2c(-c2ccccc2)c2cc3ccccc3cc12.C=CC(=O)OCC>>CCOC(=O)/C=C/c1c2ccccc2c(-  
c2ccccc2)c2cc3ccccc3cc12  
4215 C=CC(=O)OC(C)(C)C.COC(=O)c1cc(Br)cc2ccccc12>>COC(=O)c1cc(/C=C/C(=O)OC(C)(C)C)cc2ccc  
cc12  
4216 C=CCNC(=O)OC(C)(C)C.FC(F)(F)c1cccc(Br)c1>>C=C(CNC(=O)OC(C)(C)C)c1cccc(C(F)(F)F)c1  
4217 C=CC(=O)OCC.COc1ccc(Cl)cc1-c1c(Br)c(=O)n(C)c2ccc(C(F)(F)F)cc12>>CCOC(=O)/C=C/c1c(-  
c2cc(Cl)ccc2OC)c2cc(C(F)(F)F)ccc2n(C)c1=O  
4218 C=CS(=O)(=O)c1cccc1.N#Cc1ccc(Br)cc1>>N#Cc1ccc(/C=C/S(=O)(=O)c2ccccc2)cc1  
4219 C=Cc1cc2cc(OC)c(OC)cc2oc1=O.O=Cc1ccc(I)cc1>>COc1cc2cc(/C=C/c3ccc(C=O)cc3)c(=O)oc2cc1O  
4220 C=CC(C)(C)O.Cc1ccc(-c2oc3ccccc3c(=O)c2Br)cc1>>Cc1ccc(-  
4221 C=CC(=O)OC(C)(C)C.O=S(=O)(c1ccc(Br)cc1)c1ccc2ccccc2n1>>CC(C)(C)OC(=O)/C=C/c1ccc(S(=O)  
(=O)c2ccc3ccccc3n2)cc1  
4222 C=CC(C)(C)O.CC(C)(C)OC(=O)NCCc1cc2c(cc1I)OCO2>>CC(C)(O)/C=C/c1cc2c(cc1CCNC(=O)OC  
(C)(C)C)OCO2  
4223 C=CCNC(=O)OC(C)(C)C.FC(F)(F)c1cccc(Cl)cc1>>C=C(CNC(=O)OC(C)(C)C)c1ccc(C(F)(F)F)cc1  
4224 C=C(CC(=O)OCC)C(=O)OCC.CC(=O)OCc1c(I)ccc(NC(=O)OC(C)(C)C)c1C>>CCOC(=O)C/C=C\C1  
ccc(NC(=O)OC(C)(C)C)c(C)c1COC(C)=O)C(=O)OCC  
4225 C=C1C(=O)O[C@H]2[C@H]1CCC(=C)[C@H]1C[C@H](OC(C)=O)C(=C)[C@H]21.Cc1ccc(I)cc1  
>>C=C1CC[C@H]2/C(=C\C3ccc(C)cc3)C(=O)O[C@@H]2[C@H]2C(=C)[C@H](OC(C)=O)C[C@  
4226 C=Cc1ccc(SC)cc1.Clc1c2cc(Br)ccc2nc2c1oc1ccccc12>>CSc1ccc(/C=C/c2ccc3nc4c(oc5ccccc54)c(Cl)  
c3c2)cc1



4227 C=CC#N.COc1cccc2c1CCC(C=O)=C2Br>>COc1cccc2c1CCC(C=O)=C2/C=C/C#N  
4228 C=Cc1ccc2cccc2c1.Cc1ccc(Br)cc1>>Cc1ccc(/C=C/c2ccc3cccc3c2)cc1  
4229 Brc1cccc1.C=CC[Si](C)(C)C>>C=C(C[Si](C)(C)C)c1cccc1  
4230 C=Cc1ccncc1.COc1cc(Br)cc(OC)c1>>COc1cc(/C=C/c2ccncc2)cc(OC)c1  
4231 C=CC(=O)OCC.Cn1cccc1Cl>>CCOC(=O)/C=C/c1cccn1C  
4232 C=CC(=O)N1CCOCC1.CC(=O)c1ccc(Br)cc1>>CC(=O)c1ccc(/C=C/C(=O)N2CCOCC2)cc1  
4233 Brc1ccc(Oc2cccc2)cc1.C=Cc1cccc1>>C(=C/c1ccc(Oc2cccc2)cc1)\c1cccc1  
4234 C=CC(=O)OCC.CCCOC(=O)/C=C/c1ccc(Br)cc1Cl>>CCCO(=O)/C=C/c1ccc(/C=C/C(=O)OCC)c  
4235 C=CC(=O)OCC.Cc1cc(O)ccc1Br>>CCOC(=O)/C=C/c1ccc(O)cc1C  
4236 C=COCCCC.O=C(Cl)c1ccsc1>>CCCCO/C=C/C(=O)c1ccsc1  
4237 C=Cc1cccc1.O=Cc1cccc1Cl>>O=Cc1cccc1/C=C/c1cccc1  
4238 COC[C@H](/N=C(\c1cccc1)N1C=CCC[C@H]1C)(C)C.Ic1ccc2c(c1)OCO2>>COC[C@H](/N=C  
C(\c1cccc1)N1C=C(c2ccc3c(c2)OCO3)CC[C@H]1C)(C)C  
C=CC1(C(=O)O)COC(C)(C)CO1.CC(C)[C@H](O)C(=O)N[C@@H](C)C(=O)N1CCC[C@H](C(=O)  
4239 )N[C@H](C)c2ccc3ccc(Br)cc3n2)N1>>CC(C)[C@H](O)C(=O)N[C@@H](C)C(=O)N1CCC[C@H]  
(C(=O)N[C@H](C)c2ccc3ccc(/C=C/C4(C(=O)O)COC(C)(C)CO4)cc3n2)N1  
C=CCO[C@H]1CC(=O)O[C@H](C)C/C=C/C=C/[C@H](O)Si(C)(C)C(C)C[C@H](C)C[C@H]  
(CC(OC)OC)[C@H](O)[C@@H]2O[C@H](C)[C@@H](O)[C@H]3C[C@@](C)(O)[C@@H](OC(=O)  
CC)[C@H](C)O3)[C@H](N(C)C)[C@H]2OC(C)=O)[C@H]1OC.O=[N+](O-  
4240 )c1ccc(I)cc1>>CCC(=O)O[C@H]1[C@H](C)O[C@@H](O[C@H]2[C@H](N(C)C)[C@@H](OC(C)  
=O)[C@H](O[C@@H]3[C@@H](OC)[C@H](OC/C=C/c4ccc([N+](=O)[O-  
)cc4)CC(=O)O[C@H](C)C/C=C/C=C/[C@H](O)Si(C)(C)C(C)(C)C)[C@H](C)C[C@@H]3CC(OC)  
OC)O[C@H]2C)C[C@@H]1(C)O  
C=CC(=O)OCC.CC[C@H]1(O)C[C@H]2CN(CCc3c([nH]c4ccc(I)cc34)[C@@](C(=O)OC)(c3cc4c(cc  
3OC)N(C)[C@H]3[C@@](O)(C(=O)OC)[C@H](OC(C)=O)[C@]5(CC)C=CCN6CC[C@]43[C@@H]  
4241 65)C2)C1>>CCOC(=O)/C=C/c1ccc2[nH]c3c(c2c1)CCN1C[C@H](C[C@@](O)(CC)C1)C[C@]3(C(  
=O)OC)c1cc2c(cc1OC)N(C)[C@H]1[C@@](O)(C(=O)OC)[C@H](OC(C)=O)[C@]3(CC)C=CCN4CC  
I[C@]2I1[C@@H]43  
4242 C=Cc1ccc(OC)cc1.Cc1ncc(-c2ccc(Cl)cc2)n1C>>COc1ccc(/C=C/c2ccc(-c3ccc(C)n3C)cc2)cc1  
4243 C=CCOC(C)=O.CC(=O)c1ccc(I)cc1>>CC(=O)OC/C=C/c1ccc(C(C)=O)cc1  
4244 Brc1cc2ccc1CCc1ccc(cc1)CC2.C=CC(=O)OC>>COC(=O)/C=C/c1cc2ccc1CCc1ccc(cc1)CC2  
4245 C=Cc1cccc1.Cn1nc(Cl)c2cccc21>>Cn1nc(/C=C/c2cccc2)c2cccc21  
4246 C=Cc1ccc(OC)cc1.O=C(Nc1cccc1I)C1CCCC1>>COc1ccc(/C=C/c2cccc2NC(=O)C2CCCC2)cc1  
4247 Brc1cccn1.C=CS(C)(=O)=O>>CS(=O)(=O)/C=C/c1cccn1  
4248 C=Cc1ccc(O)cc1.COC(=O)Cn1c(=O)c(Cl)nc2cccc21>>COC(=O)Cn1c(=O)c(/C=C/c2ccc(O)cc2)nc2c  
cccc21  
4249 C=CC(C)=O.Cc1ccc(I)c(Br)c1>>CC(=O)/C=C/c1ccc(C)cc1Br  
4250 Brc1ccc2cccc2c1.C=COCC>>C=C(OCC)c1ccc2cccc2c1  
4251 C=COCCCC.O=C(Cl)c1ccc2cccc2c1>>CCCCO/C=C/C(=O)c1ccc2cccc2c1  
4252 C=CC=O.O=[N+](O-)]c1cccc1I>>O=C/C=C/c1cccc1[N+](=O)[O-]  
4253 C=CCCCC(O)C(=O)OC.Fc1ccc(Br)cn1>>COC(=O)C(O)CCCC/C=C/c1ccc(F)nc1  
4254 C=CC(=O)OCCCC.Cc1cccc1Br>>CCCCOC(=O)/C=C/c1cccc1C  
4255 C=CC(=O)OC.Cc1ccc(NCc2cccc2)c(Br)c1>>COC(=O)/C=C/c1cc(C)ccc1NCc1cccc1  
4256 C=CCC(C)C.COC(=O)c1ccc2cc(Br)ccc2c1>>COC(=O)c1ccc2cc(/C=C/CC(C)C)ccc2c1  
4257 C=CC(C)(C)O.N#Cc1cccc1Br>>CC(C)(O)/C=C/c1cccc1C#N  
4258 C=CC(=O)OC(C)(C)C.CCOC(=O)c1nccc(Br)c1>>CCOC(=O)c1nccc(/C=C/C(=O)OC(C)(C)C)c1  
4259 C=CC(=O)OC.O=c1[nH]c(=O)n([C@H]2O[C@H](CO)[C@H](O)[C@H]2O)cc1I>>COC(=O)/C=C/  
c1cn([C@H]2O[C@H](CO)[C@H](O)[C@H]2O)c(=O)[nH]c1=O  
C=C(NC(=O)OCC)C(=O)OC.CCOC(=O)c1[nH]c2cccc2c1Br>>CCOC(=O)N/C(=C\c1c(C(=O)OCC)[  
4260 nH]c2cccc12)C(=O)OC  
4261 C=CC(=O)OCC.O=[N+](O-)]c1cccc1I>>CCOC(=O)/C=C/c1cccc1[N+](=O)[O-]  
C=CC(=O)OC.C[C@@H]1CCC[C@H](NC(=O)OC(C)(C)C)c2cc(ccn2)-  
4262 c2cc(I)c(N)cc2NC1=O>>COC(=O)/C=C/c1cc2c(cc1N)NC(=O)[C@H](C)CCC[C@H](NC(=O)OC(C)(  
C)C)c1cc-2ccn1  
C=Cc1cccn1.CC(C)(C)OC(=O)N[C@@H](CCc1cccc1)COc1cncc(Br)c1>>CC(C)(C)OC(=O)N[C@  
4263 @H](CCc1cccc1)COc1cncc(/C=C/c2ccncc2)c1  
4264 C=CC#N.CCOC(=O)/C=C/c1ccc(I)cc1C>>CCOC(=O)/C=C/c1ccc(/C=C/C#N)cc1C  
4265 C=CC(=O)OC.O=[N+](O-)]c1ccc(Br)c([N+](=O)[O-])c1>>COC(=O)/C=C/c1ccc([N+](=O)[O-  
)cc1[N+](=O)[O-]  
4266 C=CC(=O)O.O=C1CCc2cc(Br)ccc21>>O=C(O)/C=C/c1ccc2c(c1)CCC2=O

4267 C=Cc1enccc1Cl.COC(=O)[C@H](CCSC)NC(=O)c1ccc(I)cc1-  
c1cccc1C>>COC(=O)[C@H](CCSC)NC(=O)c1ccc(/C=C/c2cnccc2Cl)cc1-c1cccc1C  
 4268 C=CCOC(C)=O.Fc1cccc(I)c1>>CC(=O)OC/C=C/c1cccc(F)c1  
 4269 C=CS(=O)(=O)N1CCC2(CC1)OCCO2.Cc1cc(N2C(=O)NC(=O)C2(C)C)cc(C)c1Br>>Cc1cc(N2C(=O)NC(=O)C2(C)C)cc(C)c1/C=C/S(=O)(=O)N1CCC2(CC1)OCCO2  
 4270 C=Cc1ccc(Cl)cc1.COc1cc(OC)c(OC)cc1/C=C/C(=O)c1ccc(I)cc1>>COc1cc(OC)c(OC)cc1/C=C/C(=O)c1ccc(/C=C/c2ccc(Cl)cc2)cc1  
 4271 C=CC(C)=O.CCCCc1nnn(Cc2ccccc2)c1I>>CCCCc1nnn(Cc2ccccc2)c1/C=C/C(C)=O  
 4272 C=Cc1ccc2ccccc2c1.Cc1cccc1Br>>Cc1cccc1/C=C/c1ccc2ccccc2c1  
 4273 C=CC(=O)OCC.Cc1ccc(C2=C(I)c3cc(C)ccc3S(=O)(=O)N2C)cc1>>CCOC(=O)/C=C/C1=C(c2ccc(C)c2)N(C)S(=O)(=O)c2ccc(C)cc21  
 4274 C=Cc1ccc2c(c1)C(=O)N([C@H](CCC(=O)OCC)C(=O)OCC)C2.CC(C)(C)C(=O)Nc1nc2[nH]cc(I)c2c(=O)[nH]1>>CCOC(=O)CC[C@H](C(=O)OCC)N1Cc2ccc(/C=C/c3c[nH]c4nc(NC(=O)C(C)(C)C)[nH]c(=O)c34)cc2C1=O  
 4275 C=Cc1ccc(O)cc1.CN(C(=O)c1cccc1)c1ccc2c(c1)[nH]c(=NC(=O)c1ccc(Br)s1)n2CCC(N)=O>>CN(C(=O)c1cccc1)c1ccc2c(c1)[nH]c(=NC(=O)c1ccc(/C=C/c3ccc(O)cc3)s1)n2CCC(N)=O  
 4276 \*CNCCOCCOCCOCCNC(=O)COc1ccc(C(Cc2cc(OC)cc(OC)c2)NC(=O)c2ccc(C=C)cc2)cc1.COc1ccc(I)cc1>>\*CNCCOCCOCCOCCNC(=O)COc1ccc(C(Cc2cc(OC)cc(OC)c2)NC(=O)c2ccc(/C=C/c3ccc(OC)cc3)cc2)cc1  
 4277 C=CC(N)=O.O=C(c1cccc1)c1ccc(Cl)cc1I>>NC(=O)/C=C/c1cc(Cl)ccc1C(=O)c1cccc1  
 4278 C=Cc1ccc(OC(C)=O)cc1.CCn1c2ccc(Br)cc2c2cc(C=O)ccc21>>CCn1c2ccc(C=O)cc2c2cc(/C=C/c3ccc(OC(C)=O)cc3)ccc21  
 4279 C=Cc1ccc(OC)cc1.Cc1ccc(I)cc1>>COc1ccc(/C=C/c2ccc(C)cc2)cc1  
 4280 Br1ccc2ccc3ccccc4ccc1c2c34.C=CC(=O)OCC(CC)CCCC>>CCCC(CC)COC(=O)/C=C/c1ccc2ccc3ccccc4ccc1c2c34  
 4281 C=CC(=O)OCC.COc1ccc2c(=O)c(I)coc2c1>>CCOC(=O)/C=C/c1coc2cc(OC)ccc2c1=O  
 4282 C=CCCN1C(=O)c2ccccc2C1=O.Nc1cccc(Br)c1>>Nc1cccc(/C=C/CCN2C(=O)c3ccccc3C2=O)c1  
 4283 C=CCc1ccc(OC)cc1.Ic1cccc1>>COc1ccc(C/C=C/c2ccccc2)cc1  
 4284 C=Cc1ccc(OC)cc1.COc1cccc(Br)c1>>COc1ccc(/C=C/c2cccc(OC)c2)cc1  
 4285 BrC1CCCCC1.C=Cc1ccc(C)cc1>>Cc1ccc(/C=C/C2CCCCC2)cc1  
 4286 Br1encc2ccccc12.C=Cc1cn(COCC[Si](C)(C)C)nc1-c1nc2ccc(OC)cc2n1COCC[Si](C)(C)C>>COc1ccc2nc(-c3nn(COCC[Si](C)(C)C)cc3/C=C/c3encc4ccccc34)n(COCC[Si](C)(C)C)c2c1  
 4287 C=CC(=O)OC.COCo1ccc(Br)c(COCCOCCOCCOCCOCCNC(=O)OC(C)(C)C)c1>>COCo1ccc(/C=C/C(=O)OC)c(COCCOCCOCCOCCOCCNC(=O)OC(C)(C)C)c1  
 4288 C=CC(=O)NCO.C[C@]12C[C@@]34C=C(Sc5ccc(I)cc5)C(=O)[C@@](C)(CCC(=O)Nc5c(O)ccc(C(=O)O)c5O)[C@@H]3[C@H](C[C@@H]1C4)O2>>C[C@]12C[C@@]34C=C(Sc5ccc(/C=C/C(=O)NC(O)cc5)C(=O)[C@@](C)(CCC(=O)Nc5c(O)ccc(C(=O)O)c5O)[C@@H]3[C@H](C[C@@H]1C4)O2  
 4289 C=CCCCCCC.Cc1cc(C)c(OS(=O)(=O)C(F)(F)F)c(C)c1>>C=C(CCCCCC)c1c(C)cc(C)cc1C  
 4290 C=CC(=O)OC(C)(C)C.OCCc1cc(Br)ccc1O>>CC(C)(C)OC(=O)/C=C/c1ccc(O)c(CCO)c1  
 4291 C=CC(=O)N(C)C.O=CNc1cccc1I>>CN(C)C(=O)/C=C/c1cccc1NC=O  
 4292 C=CC(=O)OC.C[C@H]1[C@H](O)[C@@H](CO)O[C@H]1n1cc(I)c(=O)[nH]c1=O>>COC(=O)/C=C/c1cn([C@@H]2O[C@H](CO)[C@@H](O)[C@@H]2C)c(=O)[nH]c1=O  
 4293 C=CC(=O)O.O=S(=O)(Nc1ccc(I)cc1)c1ccc(-c2ccccc2)cc1>>O=C(O)/C=C/c1ccc(NS(=O)(=O)c2ccc(-c3ccccc3)cc2)cc1  
 4294 C=Cc1ccc(C(=O)O[C@H]2CC[C@H]3[C@@H]4CCCC5=CC(=O)CC[C@]5(C)[C@H]4CC[C@]23C)c1.CC(C)(C)Br>>CC(C)(C)/C=C/c1ccc(C(=O)O[C@H]2CC[C@H]3[C@@H]4CCCC5=CC(=O)CC[C@]5(C)[C@H]4CC[C@]23C)cc1  
 4295 C=CC(=O)O.CC(=O)Nc1ccc(F)cc1I>>CC(=O)Nc1ccc(F)cc1/C=C/C(=O)O  
 4296 C=C1C(=O)O[C@H]2[C@H]1CC/C(C)=C/CC[C@@]1(C)O[C@H]21.Ic1cnenc1>>C/C1=C\CC[C@@]2(C)O[C@H]2[C@H]2OC(=O)/C=C/c3cnenc3)[C@@H]2CC1  
 4297 C=CC1CCCCC1.Cc1cccc1OS(=O)(=O)C(F)(F)F>>C=C(c1cccc1C)C1CCCCC1  
 4298 Br1ccc2ccccc2c1.C=Cc1ccc(C(=O)O)cc1>>O=C(O)c1ccc(/C=C/c2ccc3ccccc3c2)cc1  
 4299 C=CC(=O)OC(C)(C)C.CC(=O)c1ccc(Cl)cc1Br>>CC(=O)c1ccc(Cl)cc1/C=C/C(=O)OC(C)(C)C  
 4300 C=C(C(=O)OC)N1CC[C@H](NC(=O)OC(C)(C)C)C1=O.FC(F)(F)Oc1cc2c(NC(c3ccccc3)(c3ccccc3)c3ccccc3)nc2cc1Br>>COC(=O)/C=C\c1cc2cnc(NC(c3ccccc3)(c3ccccc3)c3ccccc3)c2cc1OC(F)(F)F)N1CC[C@H](NC(=O)OC(C)(C)C)C1=O  
 4301 C=CC#N.O=S(=O)(Oc1coc2ccc(Br)cc12)C(F)(F)F>>N#C/C=C/c1coc2ccc(Br)cc12  
 4302 C=CC(=O)OC.CCOc1ncc(Br)c2ccccc12>>CCOc1ncc(/C=C/C(=O)OC)c2ccccc12  
 4303 C=Cc1ccc(N(c2ccccc2)c2ccccc2)cc1.CC(C)(C)Br>>CC(C)(C)/C=C/c1ccc(N(c2ccccc2)c2ccccc2)cc1  
 4304 C=Cc1ccc(OC)cc1.COc1ccc(N)c(Br)c1>>COc1ccc(/C=C/c2cc(OC)ccc2N)cc1

[illegible]

4346 Br1cccc1.C=CN1C(=O)c2cccc2C1=O>>O=C1c2cccc2C(=O)N1/C=C/c1cccc1  
 4347 Br1cccc2cccc12.C=CS(=O)(=O)c1cccc1>>O=S(=O)/(C=C/c1cccc2cccc12)c1cccc1  
 4348 C=CC(=O)OCCCC.O=Cc1cccc(Br)c1>>CCCCOC(=O)/C=C/c1cccc(C=O)c1  
 4349 C=CC(=O)OC.ClCc1cccc1>>COC(=O)/C=C/Cc1cccc1  
 4350 C=CCN(C(=O)OC(C)(C)C)C(=O)OC(C)(C)C.O=C(c1cccc(Br)c1)C1CCCCC1>>CC(C)(C)OC(=O)N(  
 C/C=C/c1cccc(C(=O)C2CCCCC2)c1)C(=O)OC(C)(C)C  
 4351 C=CCCC#N.Ic1cccc1>>N#CCC/C=C/c1cccc1  
 4352 C=Cc1cccc(C)c1.O=Cc1cccc1Br>>Cc1cccc(/C=C/c2cccc2C=O)c1  
 4353 C=CC1(C)CCc2c(C)c(OC)c(C)c(C)c2O1.COcn1c(C)c(I)c(C)c1C=O>>COcn1c(C)c(/C=C/C2(C)CCc3  
 c(C)c(OC)c(C)c(C)c3O2)c(C)c1C=O  
 4354 C=CC(=O)Nc1cccc1NC(=O)OC(C)(C)C.CCN(CC)C1CCN(CC(C(=O)Nc2ccc(Cl)cc2)c2ccc(Br)cc2)C  
 1>>CCN(CC)C1CCN(CC(C(=O)Nc2ccc(Cl)cc2)c2ccc(/C=C/C(=O)Nc3cccc3NC(=O)OC(C)(C)C)cc2  
 C=C(OC(C)=O)C(=O)OCC(F)(F)F.CC(C)=CCc1cc(I)ccc1OCc1cccc1>>CC(=O)O/C=C/c1ccc(OCc2  
 cccc2)c(CC=C(C)C)c1)C(=O)OCC(F)(F)F  
 4356 Br1cccs1.C=C[Si](CC)(CC)CC>>CC[Si](/C=C/c1cccs1)(CC)CC  
 4357 C=Cc1cccc1.O=Cc1ccc(Br)s1>>O=Cc1ccc(/C=C/c2cccc2)s1  
 4358 C=C.O=Cc1cccc(Br)c1>>C=Cc1cccc(C=O)c1  
 4359 C=CC(=O)OCC.CCC1=C(I)C2(CCCC2)C(=O)O1>>CCOC(=O)/C=C/C1=C(CC)OC(=O)C12CCCC2  
 4360 C=CC(=O)OC.Nc1cccc(I)c1>>COC(=O)/C=C/c1cccc(N)c1  
 4361 C=CC(=O)OCc1cccc1.COc1ccc(I)cc1>>COc1ccc(/C=C/C(=O)OCc2cccc2)cc1  
 4362 C=Cc1ccc(C(F)(F)F)cc1.O=Cc1ccc(Br)cc1>>O=Cc1ccc(/C=C/c2ccc(C(F)(F)F)cc2)cc1  
 4363 C=CC(=O)OCCCC.CC(C)(C)c1ccc(I)cc1>>CCCCOC(=O)/C=C/c1ccc(C(C)(C)C)cc1  
 4364 C=CC(=O)OC(C)(C)C.Cc1cc(O)ccc1Br>>Cc1cc(O)ccc1/C=C/C(=O)OC(C)(C)C  
 4365 C=CNC(=O)COC.O=S(=O)(Oc1ccc2cccc2c1)C(F)(F)F>>C=C(NC(=O)COC)c1ccc2cccc2c1  
 4366 C=Cc1cccc1Br.O=[N+](O-)]c1cccc1I>>O=[N+](O-)]c1cccc1/C=C/c1cccc1Br  
 4367 C=Cc1cccc1.Fc1ccc(Cl)cc1>>Fc1ccc(/C=C/c2cccc2)cc1  
 4368 C=CC(=O)OC.CC(=O)Oc1ccc(I)cc1>>COC(=O)/C=C/c1ccc(OC(C)=O)cc1  
 4369 Br1nn(C2CCCCO2)c2cccc12.C=CC(=O)OCCCC>>CCCCOC(=O)/C=C/c1nn(C2CCCCO2)c2cccc1  
 4370 C=CC(F)(F)C(F)(F)C(F)(F)C(F)(F)C(F)(F)F.Ic1ccc(OCc2cccc2)cc1>>FC(F)(F)C(F)(F)C(F)(F)  
 )C(F)(F)C(F)(F)C(F)(F)/C=C/c1ccc(OCc2cccc2)cc1  
 4371 C=CC(=O)OC.COC(=O)c1c(Br)c(Cl)cc2nn(C)cc12>>COC(=O)/C=C/c1c(Cl)cc2nn(C)cc2c1C(=O)OC  
 4372 C=CC(=O)OC.CC(=O)n1nc(C)c(Br)c1C>>COC(=O)/C=C/c1c(C)nn(C(C)=O)c1C  
 4373 C=C[Si](C)(C)C.O=[N+](O-)]c1cccc1I>>C[Si](C)(C)/C=C/c1cccc1[N+](=O)[O-]  
 4374 C=CC(=O)OC(C)(C)C.COC(=O)C1Cc2cc(Br)enc2NC1=O>>COC(=O)C1Cc2cc(/C=C/C(=O)OC(C)(C)  
 )C)enc2NC1=O  
 4375 Br1ccc2[nH]ccc2c1.C=CC[C@H]1C(=O)N(c2cccc2)[C@H]1c1ccc(OC)cc1>>COc1ccc([C@H]  
 2[C@@H](C/C=C/c3ccc4[nH]ccc4c3)C(=O)N2c2cccc2)cc1  
 4376 C=CC(=O)OC.CC1Nc2cccc2N1c1ccc(I)cc1>>COC(=O)/C=C/c1ccc(N2c3cccc3NC2C)cc1  
 4377 C=CC(=O)OC.C[C@H]1C[C@H](n2c(Nc3ccc(OC(F)(F)F)cc3)nc3cc(Br)ccc32)CC(C)(C)C1>>COC  
 (O)/C=C/c1ccc2c(c1)nc(Nc1ccc(OC(F)(F)F)cc1)n2[C@H]1C[C@H](C)CC(C)(C)C1  
 4378 C=Cc1ccc(C(=O)OC)cc1.COc1ccc(I)cc1>>COC(=O)c1ccc(/C=C/c2ccc(OC)cc2)cc1  
 4379 C=CCNC(=O)OC(C)(C)C.O=S(=O)(Oc1cc(F)ccc1Cl)C(F)(F)F>>C=C(CNC(=O)OC(C)(C)C)c1cc(F)c  
 cc1Cl  
 4380 C=C(CC(=O)OCC)C(=O)OCC.Ic1cccc1>>CCOC(=O)/C=C/c1cccc1C(=O)OCC  
 4381 C=CC(O)CCCC.Clc1ccc(I)cc1>>CCCCC(O)/C=C/c1ccc(Cl)cc1  
 C=CCn1c(-  
 4382 c2ccc(F)cc2)nc2cccc2c1=O.O=C(CN1C(=O)COc2cccc21)c1ccc(Br)cc1>>O=C(CN1C(=O)COc2ccc  
 cc21)c1ccc(/C=C/Cn2c(-c3ccc(F)cc3)nc3cccc3c2=O)cc1  
 4383 C=CC(=O)OC(C)(C)C.O=S(=O)(c1ccc(Br)cc1)n1ccc2ccenc21>>CC(C)(C)OC(=O)/C=C/c1ccc(S(=O)(  
 =O)n2ccc3ccenc32)cc1  
 4384 C=Cc1cccc1.Cc1cc2c(C)c(Nc3c(I)cncc3C#N)ccc2[nH]1>>Cc1cc2c(C)c(Nc3c(C#N)cncc3/C=C/c3ccc  
 cc3)ccc2[nH]1  
 4385 C=Cc1ccc2cccc2c1.FC(F)(F)I>>FC(F)(F)/C=C/c1ccc2cccc2c1  
 4386 C=CC(=O)OCC.O=Cc1ccc(Cl)cc1Br>>CCOC(=O)/C=C/c1cc(Cl)ccc1C=O  
 4387 C=Cc1ccc(N(c2cccc2)c2cccc2)cc1.N#CC(=C(c1cccc1)c1cccc1)c1ccc(Br)cc1>>N#CC(=C(c1cccc  
 1)c1cccc1)c1ccc(/C=C/c2ccc(N(c3cccc3)c3cccc3)cc2)cc1  
 4388 C=Cc1ccc(C(=O)OCC)cc1.CCOC(=O)C(F)Br>>CCOC(=O)c1ccc(/C=C/C(F)C(=O)OCC)cc1  
 4389 C=CC(=O)OC.CC(C)(C)OC(=O)N1CCC2(CC(=O)c3cc(Br)ccc3O2)C1>>COC(=O)/C=C/c1ccc2c(c1)  
 C(=O)CC1(CCN(C(=O)OC(C)(C)C)C1)O2  
 4390 C=CCNC(=O)OCc1cccc1.Clc1enc2cccc2c1>>C=C(CNC(=O)OCc1cccc1)c1enc2cccc2c1

4391 C=CC(=O)OC.C[C@@H](c1ccccc1)N1C(=O)c2ccc(OS(=O)(=O)C(F)(F)F)cc2C1=O>>COC(=O)/C=C/c1ccc2c(c1)C(=O)N([C@@H](C)c1ccccc1)C2=O  
 4392 C=Cc1cc(OC)cc(OC)c1.CCOC(=O)c1ccc(I)cc1>>CCOC(=O)c1ccc(/C=C/c2cc(OC)cc(OC)c2)cc1  
 4393 C=Cc1ccc(/C=C/c2cccs2)cc1.O=Cc1ccc(Br)cc1>>O=Cc1ccc(/C=C/c2ccc(/C=C/c3cccs3)cc2)cc1  
 4394 C=CC(=O)OC.O=C1Nc2c(Br)cccc2C12OCCO2>>COC(=O)/C=C/c1cccc2c1NC(=O)C21OCCO1  
 4395 C=CC(=O)O.COc1cc(I)ccc1O>>COc1cc(/C=C/C(=O)O)ccc1O  
 4396 C=CC(C)(C)O.COc1ccc(C(C)=O)c(O)c1I>>COc1ccc(C(C)=O)c(O)c1/C=C/C(C)(C)O  
 4397 C=Cc1ccc(Cl)cc1.COc1cc(C=O)c(Br)c(OC)c1OC>>COc1cc(C=O)c(/C=C/c2ccc(Cl)cc2)c(OC)c1OC  
 4398 C=CC(C)(C)O.CC(C)(C)OC(=O)NCC(=O)Nc1ccccc1I>>CC(C)(O)/C=C/c1ccccc1NC(=O)CNC(=O)O  
 4399 C(C)(C)C  
 4400 Br1ccccc2ccccc12.C=CC(OCC)OCC>>CCOC(/C=C/c1cccc2ccccc12)OCC  
 4401 C=CC(=O)OCCCC.O=C(c1ccccc1)c1ccc(Br)cc1>>CCCCOC(=O)/C=C/c1ccc(C(=O)c2ccccc2)cc1  
 4402 C=CC(C)(C)C.COc1nc(Br)ccc1C1CC1>>COc1nc(/C=C/C(C)(C)C)ccc1C1CC1  
 4403 Br1ccccc2ccccc12.C=CS(C)(=O)=O>>CS(=O)(=O)/C=C/c1cccc2ccccc12  
 4404 C=CNC(C)=O.CCOC(=O)c1ccc(Cl)cc1>>C=C(NC(C)=O)c1ccc(C(=O)OCC)cc1  
 4405 C=Cc1ccccc1.CS(=O)(=O)c1ccc(Br)cc1>>CS(=O)(=O)c1ccc(/C=C/c2ccccc2)cc1  
 4406 C=CC(=O)OC.Fc1ccccc1Br>>COC(=O)/C=C/c1ccccc1F  
 4407 C=C[C@H]1C[C@H](CC(=O)OC(C)(C)C)OC(C)(C)O1.CC(C)c1nc(N(C)S(C)(=O)=O)nc(-c2ccc(F)cc2)c1Br>>CC(C)c1nc(N(C)S(C)(=O)=O)nc(-c2ccc(F)cc2)c1/C=C/[C@H]1C[C@H](CC(=O)OC(C)(C)C)OC(C)(C)O1  
 4408 C=CC(=O)OCC.COCC(=O)c1cc(Br)ccc1OCc1ccccc1>>CCOC(=O)/C=C/c1ccc(OCc2ccccc2)c(C(=O)O  
 4409 C=Cc1ccccc1.O=C(Nc1cc(C(F)(F)F)cc(C(F)(F)F)c1)c1cc(I)ccc1O>>O=C(Nc1cc(C(F)(F)F)cc(C(F)(F)F)c1)c1cc(/C=C/c2ccccc2)ccc1O  
 4410 C=Cc1nnm(C)n1.Clc1ccc(I)cc1>>Cn1nnc(/C=C/c2ccc(Cl)cc2)n1  
 4411 C=Cc1ccc(Br)cc1.CCOC(=O)C(F)I>>CCOC(=O)C(F)/C=C/c1ccc(Br)cc1  
 4412 C=CC(=O)OC.CCn1cc(CC(=O)NC)c2c(OC)c(Br)cc(F)c21>>CCn1cc(CC(=O)NC)c2c(OC)c(/C=C/C(=O)OC)cc(F)c21  
 4413 C=CC(=O)Nc1ccccc1C(=O)OCC.CC(C)(C)OC(=O)Nc1nccc(Br)c1>>CCOC(=O)c1ccccc1NC(=O)/C=C/c1nccc(NC(=O)OC(C)(C)C)c1  
 4414 C=Cc1ccc2c(c1)OCO2.O=c1ccc2ccc(OS(=O)(=O)C(F)(F)F)cc2o1>>O=c1ccc2ccc(/C=C/c3ccc4c(c3)OCO4)cc2o1  
 4415 C=Cc1nc(C)c(OC(=O)C(C)(C)C)c2c1COC2OC.COc1ccc(I)cc1>>COc1ccc(/C=C/c2nc(C)c(OC(=O)C(C)(C)C)c3c2COC3OC)cc1  
 4416 C=CC(=O)OC(C)(C)C.Ic1cccc2ccccc12>>CC(C)(C)OC(=O)/C=C/c1cccc2ccccc12  
 4417 C=Cc1senc1C.Cc1ccc(Br)cc1>>Cc1ccc(/C=C/c2senc2C)cc1  
 4418 C=CC(=O)O.O=Cc1ccc(Cl)cc1>>O=Cc1ccc(/C=C/C(=O)O)cc1  
 4419 C=CC(=O)OC.Oc1ccccc1I>>COC(=O)/C=C/c1ccccc1O  
 4420 C=CC(=O)OC.CC12CCCC(Br)=C1N(Cc1ccc3ccccc3c1)C(=O)C2>>COC(=O)/C=C/C1=C2N(Cc3ccccc3)C(=O)CC2(C)CCC1  
 4421 C=COCCCC.N#Cc1ccc(Br)cc1>>C=C(OCCCC)c1ccc(C#N)cc1  
 4422 Br1ccc(-c2nc3ccccc3c3c[nH]cc23)cc1.C=CC(=O)OC>>COC(=O)/C=C/c1ccc(-c2nc3ccccc3c3c[nH]cc23)cc1  
 4423 C=CC(=O)OC.CC(=O)Oc1ccccc1-c1nnn(Cc2ccccc2)c1I>>COC(=O)/C=C/c1c(-c2ccccc2OC(C)=O)nnn1Cc1ccccc1  
 4424 C=CCN(C(=O)OC(C)(C)C)C(=O)OC(C)(C)C.Clc1enc2ccccc2c1>>CC(C)(C)OC(=O)N(C/C=C/c1enc2ccccc2c1)C(=O)OC(C)(C)C  
 4425 C=COCCO.CC(=O)c1ccc(I)cc1>>C=C(OCCO)c1ccc(C(C)=O)cc1  
 4426 C=CC[C@H](C)N(C)C(=O)OC(C)(C)C.CC(C)(C)CC(=O)N1CC[C@H](Oc2cncc(Br)c2)C1>>C[C@H](C/C=C/c1nccc(O[C@H]2CCN(C(=O)CC(C)(C)C)C2)c1)N(C)C(=O)OC(C)(C)C  
 4427 C=Cc1cccc(N)c1.CCCNc1nc(Nc2cccc(F)c2)ccc1I>>CCCNc1nc(Nc2cccc(F)c2)ccc1/C=C/c1cccc(N)c1  
 4428 Br1enc2ccccc2c1.C=Cc1cnc1>>C=C(c1enc2ccccc2c1)c1cnc1  
 4429 C=C[C@H]1O[C@H](OC)[C@H](OCc2ccccc2)[C@H](OCc2ccccc2)[C@H]1OCc1ccc2ccccc2c1.O=c1cc(-c2ccccc2)oc2ccc(Br)cc12>>CO[C@H]1O[C@H](/C=C/c2ccc3oc(-c4ccccc4)cc(=O)c3c2)[C@H](OCc2ccc3ccccc3c2)[C@H](OCc2ccccc2)[C@H]1OCc1ccccc1  
 4430 Br1cncnc1.C=CC(=O)CCCC>>CCCCC(=O)/C=C/c1cncnc1  
 4431 C=C(C)C(=O)OCCCC.O=Cc1ccc(Cl)cc1>>CCCCOC(=O)/C(C)=C/c1ccc(C(=O)cc1  
 4432 C=CN1CCCC1=O.CC(=O)c1ccc(Br)cc1>>C=C(c1ccc(C(C)=O)cc1)N1CCCC1=O  
 4433 C=CC(OC(C)=O)C(=O)OCC.c1ccc([I+])c2ccccc2cc1>>CCOC(=O)C(/C=C/c1ccccc1)OC(C)=O  
 4434 Br1cncnc2ncnc12.C=C>>C=Cc1cncnc2ncnc12  
 4435 C=CC(C)(C)O.COC(=O)c1cccc2nc3c(Br)cccc3nc12>>COC(=O)c1cccc2nc3c(/C=C/C(C)(C)O)cccc3n

4435 C=Cc1cccc1.FC(F)(F)c1ccc(Cl)cc1>>FC(F)(F)c1ccc(/C=C/c2cccc2)cc1  
 4436 BrC1=C(C2=C[C@H]3CCCC[C@H]3CC2)CCCC1.C=CC(=O)OC(C)(C)C>>CC(C)(C)OC(=O)/C=C/C1=C(C2=C[C@H]3CCCC[C@H]3CC2)CCCC1  
 4437 C=Cc1ccc(OC)cc1.O=[N+][O-]c1ccc(I)cc1CO>>COc1ccc(/C=C/c2ccc([N+](=O)[O-])c(CO)c2)cc1  
 4438 C=Cc1ccc2ccc3cccc4ccc1c2c34.O=Cc1ccc(Br)cc1>>O=Cc1ccc(/C=C/c2ccc3ccc4cccc5ccc2c3c45)cc1  
 4439 C=CC(=O)OC(C)(C)C.COc1cc(C(=O)c2cn(Cc3ccc(Br)cc3)c3cccc23)cc(OC)c1OC>>COc1cc(C(=O)c2cn(Cc3ccc(/C=C/C(=O)OC(C)(C)C)cc3)c3cccc23)cc(OC)c1OC  
 4440 C=Cc1ccc(OC)cc1OC.Nc1ccc(I)cc1>>COc1ccc(/C=C/c2ccc(N)cc2)c(OC)c1  
 4441 C=Cc1ccc(S(=O)(=O)c2cccc2F)cn1.Fc1cccc(I)c1>>O=S(=O)(c1ccc(/C=C/c2cccc(F)c2)nc1)c1cccc1  
 4442 C=CC(=O)OCC.CC1(C)CC(=C(c2ccc(O)cc2)c2ccc(Br)cc2)CC(C)(C)C1>>CCOC(=O)/C=C/c1ccc(C(=C2CC(C)(C)CC(C)(C)C2)c2ccc(O)cc2)cc1  
 4443 C=CC(=O)NCc1cccc1F.COc1ccc2c(=O)c(I)ccc2c1>>COc1ccc2c(=O)c(/C=C/C(=O)NCc3cccc3F)cc1  
 4444 C=CCN1C(=O)c2cccc2C1=O.Cn1c(=O)oc2cc(Br)cn2c1>>Cn1c(=O)oc2cc(/C=C/CN3C(=O)c4cccc4C3=O)cn2c1  
 4445 Br1cccc1.C=COCCN(C)C>>C=C(OCCN(C)C)c1cccc1  
 4446 C=Cc1cccc1F.N#Cc1ccc2cc(Br)ccc2c1>>N#Cc1ccc2cc(/C=C/c3cccc3F)ccc2c1  
 4447 C=CC[C@H](CC(=O)OC(C)(C)C(=O)N[C@H](C(=O)N[C@H](C)c1cccc1)C(C)(C)C.Fc1cc(Br)cc1-c1cccc1>>C[C@H](NC(=O)[C@H](NC(=O)[C@H](C/C=C/c1ccc(-c2cccc2)c(F)c1)CC(=O)OC(C)(C)C(C)(C)C)c1cccc1  
 4448 C=C.Oc1cccc(I)c1>>C=Cc1ccc(O)c1  
 4449 C=C(C)C(=O)OC(C)(C)C.Ic1cccc1>>C/C=C(c1cccc1)C(=O)OC(C)(C)C  
 4450 C=C.O=[N+][O-]c1ccc(I)cc1>>C=Cc1ccc([N+](=O)[O-])cc1  
 4451 C=C[C@H]1CCCCN1C(=O)OC(C)(C)C.Cc1cccc(C)c1I>>Cc1cccc(C)c1/C=C/[C@H]1CCCCN1C(=O)OC(C)(C)C  
 4452 C=CCCC#N.Cc1cccc1OS(=O)(=O)C(F)(F)F>>C=C(CCCC#N)c1cccc1C  
 4453 C=CC(=O)OC.COc1cc(Br)c(C(=O)c(OC)c1>>COC(=O)/C=C/c1cc(OC)cc(OC)c1C=O  
 4454 C=Cc1ccc(Cl)cc1.CCOC(=O)C(Cc1cccc1I)C(C)=O>>CCOC(=O)C(Cc1cccc1/C=C/c1ccc(Cl)cc1)C(C)=O  
 4455 C=CC(=O)OCC.Fc1cccc(Br)c1C1OCCCC1>>CCOC(=O)/C=C/c1cccc(F)c1C1OCCCC1  
 4456 C=Cc1cccc1.Cc1cccc1Cl>>Cc1cccc1/C=C/c1cccc1  
 4457 C=Cc1cccc1.Cc1ccc(S(=O)(=O)Oc2cccc3c(Br)cn2c3)cc1>>Cc1ccc(S(=O)(=O)Oc2cccc3c(/C=C/c4cccc4)cn2c3)cc1  
 4458 C=CC(=O)NC(C)C.Cc1cc(C)c(Br)c(C)c1>>Cc1cc(C)c(/C=C/C(=O)NC(C)C)c(C)c1  
 4459 C=CC(=O)O.O=[N+][O-]c1ccc(I)cc1>>O=C(O)/C=C/c1ccc([N+](=O)[O-])cc1  
 4460 C=CC(=O)OC(C)(C)C.Cc1c(-c2ccc(O)cc2)oc2ccc(Br)cc12>>Cc1c(-c2ccc(O)cc2)oc2ccc(/C=C/C(=O)OC(C)(C)C)cc12  
 4461 C=C(NC(C)=O)C(=O)OC.Fc1cccc1Br>>COC(=O)/C=C/c1cccc1F)NC(C)=O  
 4462 C=CC(N)=O.COc1ccc2c(c1)CCC(C(=O)=C2Br>>COc1ccc2c(c1)CCC(C(=O)=C2/C=C/C(N)=O  
 4463 C=Cc1cccc1.Cc1cc(C)c2oc(=O)c(Br)c(-c3cccc3)c2c1>>Cc1cc(C)c2oc(=O)c(/C=C/c3cccc3)c(-c3cccc3)c2c1  
 4464 C=CC(=O)OC.O=CNCc1cccc1I>>COC(=O)/C=C/c1cccc1NC=O  
 4465 C=CCO.Cc1cc(Br)ccc1Cc1c(O[C@H]2O[C@H](COC(=O)c3cccc3)[C@H](OC(=O)c3cccc3)[C@H](OC(=O)c3cccc3)[C@H]2OC(=O)c2cccc2)n[nH]c1C(C)C>>Cc1cc(/C=C/CCO)ccc1Cc1c(O[C@H]2O[C@H](COC(=O)c3cccc3)[C@H](OC(=O)c3cccc3)[C@H](OC(=O)c3cccc3)[C@H]2OC(=O)c2cccc2)n[nH]c1C(C)C  
 4466 C=CC(=O)OC.O=C(NC1ccc(F)cc1)c1nc(Br)c2ccnc2c1O>>COC(=O)/C=C/c1nc(C(=O)NCc2ccc(F)c2)c(O)c2ncccc12  
 4467 Br1ccnc1.C=CC(=O)OCC>>CCOC(=O)/C=C/c1ccnc1  
 4468 C=Cc1cccc1.CC(C)(C)OC(=O)N1C[C@H]2C[C@H](C1)c1cc(Br)cc(=O)n1C2>>CC(C)(C)OC(=O)N1C[C@H]2C[C@H](C1)c1cc(/C=C/c3cccc3)cc(=O)n1C2  
 4469 C=C(C)C(=O)OC.O=[N+][O-]c1ccc(I)cc1>>COC(=O)/C(C)=C/c1ccc([N+](=O)[O-])cc1  
 4470 C=CC(=O)O.CC1(C)C=Cc2cc(/C=C/C(=O)O)c([N+](=O)[O-])cc2O1  
 4471 C=CS(N)(=O)=O.CCc1cccc(CC)c1Br>>CCc1cccc(CC)c1/C=C/S(N)(=O)=O  
 4472 C=CC(=O)OC.COc1cc(C(=O)c2c(Br)oc3c(OC(C)=O)c(OC)ccc23)cc(OC)c1OC>>COC(=O)/C=C/c1oc2c(OC(C)=O)c(OC)ccc2c1C(=O)c1cc(OC)c(OC)c(OC)c1  
 4473 C=CC(C)=O.O=C(O)c1ccc(CNC(=O)c2ccc(I)cc2)cc1>>CC(=O)/C=C/c1ccc(C(=O)NCc2ccc(C(=O)O)cc2)cc1  
 4474 C=CC(=O)OC.COc1c(CN(C(=O)c2cccc2)c2cccc(Br)c2)ccc2c1OC(C)(C)[C@H](OC(C)=O)[C@H]2N1CCCCC1>>COC(=O)/C=C/c1cccc(N(Cc2ccc3c(c2OC)OC(C)(C)[C@H](OC(C)=O)[C@H]3N2CCC(C)C(=O)c2cccc2)c1

4475 BrC1ccc(-  
 n2ccnc2)cc1.C=CCO[C@H]1CC(=O)O[C@H](C)C/C=C/C=C/[C@H](O[Si](C)(C)C(C)(C)C)[C@H]  
 4476 ](C)C[C@H](CC(OC)OC)[C@H](O[C@H]2O[C@H](C)[C@H](O[C@H]3C[C@H](C)(O)[C@  
 4477 @H](OC(=O)CC)[C@H](C)O3)[C@H](N(C)C)[C@H]2OC(C)=O)[C@H]1OC>>CCC(=O)O[C@H]1[  
 4478 C@H](C)O[C@H](O[C@H]2[C@H](N(C)C)[C@H](OC(C)=O)[C@H](O[C@H]3[C@H](O  
 4479 C)[C@H](OC/C=C/c4ccc(-  
 n5ccnc5)cc4)CC(=O)O[C@H](C)C/C=C/C=C/[C@H](O[Si](C)(C)C(C)(C)C)[C@H](C)C[C@H]3C  
 4480 C/C(OC)OC)[C@H](OC)C1CC(=O)c1ccc(I)cc1>>CC(=O)c1ccc(/C=C/c2ccc(C)cc2)cc1  
 4481 C=CC(=O)OCC.Nc1ccccc1I>>CCOC(=O)/C=C/c1ccccc1N  
 4482 C=CC(=O)Nc1ccc(Cl)cc1.CC(C)(C)c1ccc2[nH]c3c(c2c1)CC(=O)Nc1ccc(I)cc1-  
 4483 3>>CC(C)(C)c1ccc2[nH]c3c(c2c1)CC(=O)Nc1ccc(/C=C/C(=O)Nc2ccc(Cl)cc2)cc1-3  
 4484 C=CC(=O)OC.CC(C)(C)OC(=O)n1c(Br)c(CCN2C(=O)c3ccccc3C2=O)c2ccccc21>>COC(=O)/C=C/c1  
 4485 c(CCN2C(=O)c3ccccc3C2=O)c2ccccc2n1C(=O)OC(C)(C)C  
 4486 C=CC(=O)OC.Cc1cn(-c2cc(Br)cc([N+](=O)[O-])c2)cn1>>COC(=O)/C=C/c1cc(-  
 4487 n2cnc(C)c2)cc([N+](=O)[O-])c1  
 4488 C=CC(=O)OCC.Fc1c(Br)ccc2cnc12>>CCOC(=O)/C=C/c1ccc2cnc12c1F  
 4489 C=CCN1C(=O)c2ccccc2C1=O.CC(=O)c1ccc(Br)c1>>CC(=O)c1ccc(/C=C/CN2C(=O)c3ccccc3C2=  
 4490 C=CC(N)=O.COc1ccc(I)c(OC)c1OC>>COc1ccc(/C=C/C(N)=O)c(OC)c1OC  
 4491 C=Cc1ccccc1.Oc1ccccc1I>>Oc1ccccc1/C=C/c1ccccc1  
 4492 C=Cc1ccccc1.CC(C)(C)c1nc(C(F)(F)F)cc2c(I)c(-  
 4493 c3ccccc3)oc12>>CC(C)(C)c1nc(C(F)(F)F)cc2c(/C=C/c3ccccc3)c(-c3ccccc3)oc12  
 4494 BrC1cccc(I)c1.C=CC(=O)OC>>COC(=O)/C=C/c1ccc(Br)c1  
 4495 C=CS(=O)(=O)F.CC(C)(C)c1ccc(I)cc1>>CC(C)(C)c1ccc(/C=C/S(=O)(=O)F)cc1  
 4496 C=CC(=O)N(C)Cc1cc2ccccc2n1C.CNc1n[nH]c2ncc(Br)cc12>>CNc1n[nH]c2ncc(/C=C/C(=O)N(C)Cc  
 4497 3cc4ccccc4n3C)cc12  
 4498 C=CC(C)(C)O.CCOC(Cc1cn(S(=O)(=O)c2ccc(C)cc2)c2ccccc(Br)c12)OCC>>CCOC(Cc1cn(S(=O)(=O)  
 4499 c2ccc(C)cc2)c2ccccc(/C=C/C(C)(C)O)c12)OCC  
 4500 C=CC(=O)OC(C)(C)C.FC(F)(F)c1cc(Br)ccc1Cl>>CC(C)(C)OC(=O)/C=C/c1ccc(Cl)c(C(F)(F)F)c1  
 4501 C=Cc1ccccc1.Oc1ccc(O)c(Br)c1>>Oc1ccc(O)c(/C=C/c2ccccc2)c1  
 4502 C=CS(=O)(=O)F.Oc1cc(O)cc(I)c1>>O=S(=O)(F)/C=C/c1cc(O)cc(O)c1  
 4503 C=CC(=O)N1C(=O)OC[C@H]1c1ccccc1.CC(C)(C)OP(C)(=O)Cc1ccc(Br)cc1>>CC(C)(C)OP(C)(=  
 4504 O)Cc1ccc(/C=C/C(=O)N2C(=O)OC[C@H]2c2ccccc2)cc1  
 4505 C=CC(C)=O.O=C(Nc1ccc(OC(F)(F)F)cc1)c1cnc(N2CC[C@H](O)C2)c(Br)c1>>CC(=O)/C=C/c1cc(  
 4506 C(=O)Nc2ccc(OC(F)(F)F)cc2)cnc1N1CC[C@H](O)C1  
 4507 BrC1ccccc1.C=Cc1ccc(Cl)cc1>>Clc1ccc(/C=C/c2ccccc2)cc1  
 4508 C=CCS(=O)(=O)NC(C)(C)C(=O)OCc1ccccc1.CC(=O)OC[C@H]1O[C@H](Oc2n[nH]c(C(C)C)c2C  
 4509 c2ccc(Br)cc2)[C@H](OC(C)=O)[C@H](OC(C)=O)[C@H]1OC(C)=O>>CC(=O)OC[C@H]1O[C@  
 4510 @H](Oc2n[nH]c(C(C)C)c2Cc2ccc(/C=C/CS(=O)(=O)NC(C)(C)C(=O)OCc3ccccc3)cc2)[C@H](OC(  
 4511 C)=O)[C@H](OC(C)=O)[C@H]1OC(C)=O  
 4512 C=CCNC(=O)C(F)(F)F.O=c1[nH]c(=O)n([C@H]2O[C@H](CO)[C@H](O)[C@H]2O)cc1I>>O=  
 4513 C(NC/C=C/c1cn([C@H]2O[C@H](CO)[C@H](O)[C@H]2O)c(=O)[nH]c1=O)C(F)(F)F  
 4514 C=C.Fc1ccc(I)cn1>>C=Cc1ccc(F)nc1  
 4515 C=CC(=O)OCC.COc1ccc(Br)cn1>>CCOC(=O)/C=C/c1ccc(OC)nc1  
 4516 C=CC(=O)OCC.Cc1cc(F)c(CCCN(C)C)cc1Br>>CCOC(=O)/C=C/c1cc(CCCN(C)C)c(F)cc1C  
 4517 C=CC(=O)OCC.CCCCOc1ccc(C(=O)Nc2ccccc2I)cc1>>CCCOc1ccc(C(=O)Nc2ccccc2/C=C/C(=O)O  
 4518 CC)cc1  
 4519 BrC1ccccc1.C=Cc1ccc(N(c2ccccc(OC)c2)c2ccccc(OC)c2)cc1>>COc1ccc(N(c2ccc(/C=C/c3ccccc3)cc2)  
 4520 c2ccccc(OC)c2)c1  
 4521 C=CC(=O)OC.COc1cc(Br)cc([N+](=O)[O-])c1>>COC(=O)/C=C/c1cc(OC)cc([N+](=O)[O-])c1  
 4522 C=CC(=O)OC.Nc1c(I)cc(Br)c2c1C(=O)NC2=O>>COC(=O)/C=C/c1cc(Br)c2c(c1N)C(=O)NC2=O  
 4523 C=CCCCCCC.O=S(=O)(Oc1ccccc1)C(F)(F)F>>C=C(CCCCCC)c1ccccc1  
 4524 C=Cc1ccc(Cl)cc1.CC(=O)c1ccc(Br)cc1>>CC(=O)c1ccc(/C=C/c2ccc(Cl)cc2)cc1  
 4525 C=CC(O)CC.OCc1ccccc(I)c1>>CCC(O)/C=C/c1ccccc(CO)c1  
 4526 C=CC(=O)OC(C)(C)C.CCC(=C(c1ccc(F)cc1)c1ccc(F)cc1)c1ccc(Br)cc1>>CCC(=C(c1ccc(F)cc1)c1ccc  
 4527 (F)cc1)c1ccc(/C=C/C(=O)OC(C)(C)C)cc1  
 4528 C=Cc1ccccc1.CC[C@H]1(O)C(=O)OCc2c1cc1n(c2=O)Cc2cc3c(Br)cccc3nc2-  
 4529 1>>CC[C@H]1(O)C(=O)OCc2c1cc1n(c2=O)Cc2cc3c(/C=C/c4ccccc4)cccc3nc2-1  
 4530 C=CC(C)(C)O.CC1(C)CC(Nc2nccc(-  
 4531 c3cn(COCC[Si](C)(C)C)c4cc(Cl)c(F)cc34)n2)CC(C)(C)N1>>CC(C)(O)/C=C/c1cc2c(cc1F)c(-  
 4532 c1ccnc(NC3CC(C)(C)NC(C)(C)C3)n1)cn2COCC[Si](C)(C)C

4511 C=CC(=O)OC(C)(C)C.COc1ccc(NCc2ccc(Br)cc2)cc1>>COc1ccc(NCc2ccc(/C=C/C(=O)OC(C)(C)C)c  
c2)cc1  
4512 C=COCC.CC(=O)c1ccc(Br)cc1>>C=C(OCC)c1ccc(C(C)=O)cc1  
4513 C=C[Si](C)(C)c1cccn1.Ic1cccs1>>C[Si](C)(/C=C/c1cccs1)c1cccn1  
4514 C=COCCCC.Fc1cccc(Br)c1>>C=C(OCCCC)c1cccc(F)c1  
4515 C=CC(=O)OCCCC.Nc1nnc2c1c(I)cn2[C@H]1C[C@H](O)[C@@H](CO)O1>>CCCCOC(=O)/C=C/c  
1cn([C@H]2C[C@H](O)[C@@H](CO)O2)c2nnc(N)c12  
4516 C=CC(=O)OC.CCCN(CCC)C1CCc2cc(Br)ccc2C1>>CCCN(CCC)C1CCc2cc(/C=C/C(=O)OC)ccc2C1  
4517 C=C.C=CCCCC(=O)CCCC(C)OC(=O)c1c(OC)cc(OC)cc1OS(=O)(=O)C(F)(F)F>>C=CCCCC(=O)CC  
CC(C)OC(=O)c1c(C=C)cc(OC)cc1OC  
4518 C=CC(=O)OCCCC.Ic1c(-c2ccccc2)c2ccccc2c2c1ncc1ccccc12>>CCCCOC(=O)/C=C/c1c(-  
c2ccccc2)c2ccccc2c2c1ncc1ccccc12  
4519 C=Cc1ccc2ccc(Cl)cc2n1.COC(=O)c1ccccc1CC[C@H](O)c1cccc(Br)c1>>COC(=O)c1ccccc1CC[C@H  
(O)c1cccc(/C=C/C2ccc3ccc(Cl)cc3n2)c1  
4520 C=Cc1ccc2ccccc12.IC1CCCCC1>>C(=C/C1CCCCC1)\c1cccc2ccccc12  
4521 C=CP(=O)(OCC)OCC.O=[N+][O-]c1cccc(Br)c1>>CCOP(=O)(/C=C/c1cccc([N+](=O)[O-])c1)OCC  
4522 C=C(NC(C)=O)C(=O)OC.Cc1cc(OCc2ccccc2)cc(C)c1I>>COC(=O)/C(=C/c1c(C)cc(OCc2ccccc2)cc1  
C)NC(C)=O  
4523 C=CC(=O)OC.COc1cc2oc(-c3ccccc3)c(I)c(=O)c2cc1OC>>COC(=O)/C=C/c1c(-  
c2ccccc2)oc2cc(OC)c(OC)cc2c1=O  
4524 C=C1C(=O)O[C@H]2/C=C(\C)CC/C=C(\C)CC[C@H]12.Nc1ccc(I)cc1>>C/C1=C[C@H]2OC(=O)  
C/C=C(/C3ccc(N)cc3)[C@H]2CC/C(C)=C/CC1  
4525 C=CC(=O)OCC.Cn1ncc(I)cc1=O>>CCOC(=O)/C=C/c1nn(C)c(=O)c1  
4526 C=CC(C)=O.COc1cc2c(cc1Br)[C@H]1CCCC[C@H]1N2C(=O)C(C)(C)C>>COc1cc2c(cc1/C=C/C(C)  
=O)[C@H]1CCCC[C@H]1N2C(=O)C(C)(C)C  
4527 C=Cc1ccccc1.CC(C)=CBr>>CC(C)=C/C=C/c1ccccc1  
4528 C=CC(=O)OCC.Cc1cc(Br)ccc1I>>CCOC(=O)/C=C/c1ccc(Br)cc1C  
4529 C=Cc1ccccc1.Clc1ccccc1Br>>Clc1ccccc1/C=C/c1ccccc1  
4530 C=CS(N)(=O)=O.COc1ccc(Br)cc1>>COc1ccc(/C=C/S(N)(=O)=O)cc1  
4531 C=CC(=O)OC.O=[N+][O-]c1ccccc1Cl>>COC(=O)/C=C/c1ccccc1[N+](=O)[O-]  
4532 C=CC(=O)OC.CCN(CC)C(=O)c1cc(OC)c(OC)cc1Br>>CCN(CC)C(=O)c1cc(OC)c(OC)cc1/C=C/C(=O)  
C=CC(=O)NCCc1ccccc1F.COc1ccc2c(=O)c(I)coc2c1>>COc1ccc2c(=O)c(/C=C/C(=O)NCCc3ccccc3F  
)coc2c1  
4534 C=CC#N.Oc1ccnc2ccc(Br)cc12>>N#C/C=C/c1ccc2nccc(O)c2c1  
4535 C=CNC(C)=O.CCOC(=O)/C=C(\C)OS(=O)(=O)C(F)(F)F>>C=C(NC(C)=O)/C(C)=C/C(=O)OCC  
4536 Brc1ccc(I)cc1.C=Cc1ccc(C=O)cc1>>O=Cc1ccc(/C=C/C2ccc(Br)cc2)cc1  
4537 C=CC(=O)OC.Cn1ncc(I)cc1=O>>COC(=O)/C=C/c1nn(C)c(=O)c1  
4538 C=CC(=O)OC(C)(C)C.CC(C)=CCc1cc(I)ccc1OC(=O)CCc1ccccc1>>CC(C)=CCc1cc(/C=C/C(=O)OC(C)  
(C)(C)ccc1OC(=O)CCc1ccccc1  
4539 C=Cc1ccccc1.Cc1cc(Nc2ccc([N+](=O)[O-])cc2N)ccc1Br>>Cc1cc(Nc2ccc([N+](=O)[O-]  
)cc2N)ccc1/C=C/c1ccccc1  
4540 C=CCNC(=O)C(F)(F)F.CC(C)CN(C=Nc1nc(=O)n([C@H]2C[C@H](O)[C@@H](CO)O2)cc1I)CC(C)  
C>>CC(C)CN(C=Nc1nc(=O)n([C@H]2C[C@H](O)[C@@H](CO)O2)cc1/C=C/CNC(=O)C(F)(F)F)C  
C=Cc1ccc(/C=C/C2ccc(N(C)C)cc2OC)cc1.O=c1ccc2c(-c3ccc(I)cc3S(=O)(=O)O)c3ccc(O)cc3oc-  
2c1>>COc1cc(N(C)C)ccc1/C=C/c1ccc(/C=C/C2ccc(-c3c4ccc(=O)cc-  
4oc4cc(O)ccc34)c(S(=O)(=O)O)c2)cc1  
4542 C=CC(=O)OCC.Cc1nnn(Cc2cc(OC(F)F)ccc2Br)n1>>CCOC(=O)/C=C/c1ccc(OC(F)F)cc1Cn1nnc(C)n  
4543 C=CCCO.CC(=O)Nc1ccccc1Br>>C=C(CCO)c1ccccc1NC(C)=O  
C=Cc1ccccc1.CCC1=C(C)c2cc3[nH]c(c(C)c3CO)c(Br)c3nc(c4c5[nH]c(cc1n2)c(C)c5C(=O)C4)[C@@  
4544 H](CCC(=O)OC)[C@H]3C>>CCC1=C(C)c2cc3[nH]c(c(C)c3CO)c(/C=C/C3ccccc3)c3nc(c4c5[nH]c(  
cc1n2)c(C)c5C(=O)C4)[C@@H](CCC(=O)OC)[C@@H]3C  
4545 C=CCCC(=O)OCC.O=S(=O)(Oc1ccc(C=C2C3CCCC2CCC3)c2ccc(O)cc2)cc1C(F)(F)F>>CCOC(=O)  
)CC/C=C/c1ccc(C=C2C3CCCC2CCC3)c2ccc(O)cc2)cc1  
C=CC(=O)OCCCCCCCCCCCCCCCCCCCCC.C[C@H]12C[C@@H]34C=C(Sc5cccc(I)c5)C(=O)[C@@H](C)(  
4546 CCC(=O)Nc5c(O)ccc(C(=O)O)c5O)[C@@H]3[C@H](C[C@@H]1C4)O2>>CCCCCCCCCCCCCCCC  
CCCCOC(=O)/C=C/c1cccc(SC2=C[C@H]34C[C@H]5C[C@H](O)[C@@H]5(C)C3)[C@H]4[C@H](C)(CCC  
(=O)Nc3c(O)ccc(C(=O)O)c3O)C2=O)c1  
4547 C=Cc1cccc(C)c1.IC1CCCCC1>>Cc1cccc(/C=C/C2CCCCC2)c1  
4548 C=Cc1cccn1.Ic1ccccc1>>C(=C/c1cccn1)\c1ccccc1  
4549 C=C(C)C.O=[N+][O-]c1cccc(Cl)c1>>CC(C)=Cc1cccc([N+](=O)[O-])c1



4550 C=CC(=O)NCc1ccc(C)cc1.COc1ccc2c(=O)c(I)coc2c1>>COc1ccc2c(=O)c(/C=C/C(=O)NCc3ccc(C)cc3)coc2c1

4551 C=CC(=O)OC.CC(C)(C)OC(=O)NCCCn1c2c(c3ccc(Br)cc3c1=O)C(=O)c1cccc1-2>>COC(=O)/C=C/c1ccc2c3c(n(CCCNC(=O)OC(C)(C)C)c(=O)c2c1)-c1cccc1C3=O

4552 C=CC(=O)OCCCC.O=C1Nc2cccc2CN1c1cc(OCc2ncccc2F)ccc1Br>>CCCCOC(=O)/C=C/c1ccc(OCc2ncccc2F)cc1N1Cc2cccc2NC1=O

4553 Br1coc2ccncc12.C=CC(=O)OCC>>CCOC(=O)/C=C/c1coc2ccncc12

4554 C=CC(=O)OC(C)(C)C.Oc1cc(F)ccc1Br>>CC(C)(C)OC(=O)/C=C/c1ccc(F)cc1O

4555 C=CC(=O)OCCCC.COc1ccc(Cl)cc1>>CCCCOC(=O)/C=C/c1ccc(OC)cc1

4556 C=CC(=O)OC.CON(C)C(=O)c1ccc(Br)cc1I>>COC(=O)/C=C/c1cc(Br)ccc1C(=O)N(C)OC

4557 C=CC(=O)OC.CCCCCCCCCC(F)(F)C1CC(c2ccc(Br)cc2)=NN1C>>CCCCCCCCC(F)(F)C1CC(c2ccc(/C=C/C(=O)OC)cc2)=NN1C

4558 C=Cc1cccc(C)c1.Cc1ccc(OS(=O)(=O)C(F)(F)F)cc1>>C=C(c1ccc(C)cc1)c1cccc(C)c1

4559 C=Cc1cnccl1.CCN1c2ncc(I)cc2C(=O)N(C)c2ccc(Cl)nc21>>CCN1c2ncc(/C=C/c3cnccl3)cc2C(=O)N(C)c2ccc(Cl)nc21

4560 C=C[C@H](C)[C@H](C)[C@H]1C/C=C/C(=O)N[C@H](Cc2ccc(OC)cc2)C(=O)NCCC(=O)O[C@H](CC(C)C)C(=O)O1.Ic1cccc1>>COc1ccc(C[C@H]2NC(=O)/C=C/C[C@H]([C@H](C)/C=C/c3cccc3)OC(=O)[C@H](CC(C)C)OC(=O)CCNC2=O)cc1

4561 Br1cnc2cccc2c1.C=CCNC(=O)OC(C)(C)C>>C=C(CNC(=O)OC(C)(C)C)c1cnc2cccc2c1

4562 Br1cnccl1.C=Cc1cc2c(c(=O)n(C)c(=O)n2C)n1C>>Cn1c(=O)c2c(cc(/C=C/c3cnccl3)n2C)n(C)c1=O

4563 C=CC(C)=O.CC(=O)Nc1ccc(I)cc1>>CC(=O)/C=C/c1ccc(NC(C)=O)cc1

4564 Br1cnc2cccc12.C=CCCN1C(=O)c2cccc2C1=O>>O=C1c2cccc2C(=O)N1CC/C=C/c1cnc2cccc1

4565 C=C(C)C(=O)O.O=C1C(O)=C(I)C(=O)c2cccc21>>C/C(=C)C1=C(O)C(=O)c2cccc2C1=O)C(=O)OC

4566 C=CC(=O)OC.CC(=O)OCCCN(CCCC[Si](c1cccc1)(c1cccc1)C(C)(C)C(=O)[C@H]1c2cc(Br)ccc2O[C@H]1c1ccc(OCc2cccc2)cc1>>COC(=O)/C=C/c1ccc2c(c1)[C@H](C(=O)N(CCCC[Si](c1cccc1)(c1cccc1)C(C)(C)C)CCCOC(C)=O)[C@H](c1ccc(OCc3cccc3)cc1)O2

4567 C=COCCCC.O=c1cc(Br)c2ccc(Cl)cc2o1>>CCCCO/C=C/c1cc(=O)oc2cc(Cl)ccc12

4568 C=C.COC(=O)c1cc(Cl)ccc1Br>>C=Cc1ccc(Cl)cc1C(=O)OC

4569 C=CC(=O)OCC.Fc1cccc(Cn2ncc3cc(Nc4ncccc4I)ccc32)c1>>CCOC(=O)/C=C/c1cncnc1Nc1ccc2c(cnn2Cc2cccc(F)c2)c1

4570 C=Cc1ccc([N+](=O)[O-])c(O)c1.Oc1ccc(-c2oc3cc(O)cc(Br)c3c2-c2cc(O)cc(O)c2)cc1>>O=[N+](O-)]c1ccc(/C=C/c2cc(O)cc3oc(-c4ccc(O)cc4)c(-c4cc(O)cc(O)c4)c23)cc1O

4571 C=Cc1cccc(F)c1.CCN1c2ncc(I)cc2C(=O)N(C)c2ccnc21>>CCN1c2ncc(/C=C/c3cccc(F)c3)cc2C(=O)N(C)c2ccnc21

4572 C=C(F)C(=O)OC.Cc1cccc1I>>COC(=O)/C(F)=C/c1cccc1C

4573 Br1ccsc1.COC(=O)/C=C/c1cccc1>>COC(=O)/C=C(/c1cccc1)c1ccsc1

4574 C=C1C(=O)O[C@H]2[C@H]1C[C@H](O)/C(C)=C/CC[C@H]1(C)O[C@H]21.COc1ccc(I)cc1>>COc1ccc(/C=C2/C(=O)O[C@H]3[C@H]2C[C@H](O)/C(C)=C/CC[C@H]2(C)O[C@H]32)cc1

4575 Br1ccc2ccc3cccc4ccc1c2c34.C=CC(=O)OCC>>CCOC(=O)/C=C/c1ccc2ccc3cccc4ccc1c2c34

4576 C=CC(=O)OCC.Nc1ccc(Br)cn1>>CCOC(=O)/C=C/c1ccc(N)cn1

4577 Br1cncnc1.C=Cc1cccc1>>C(=C/c1cncnc1)c1cccc1

4578 C=C(CC(=O)OC)C(=O)OC.COc1ccc(I)cc1>>COC(=O)C/C(=C)c1ccc(OC)cc1)C(=O)OC

4579 C=CCN1C(=O)c2cccc2C1=O.CC(C)(C)c1ccc(Br)cc1>>CC(C)(C)c1ccc(/C=C/CN2C(=O)c3cccc3C2=O)cc1

4580 C=CC(CC(=O)OC)[Si](C)(C)C.c1ccc([I+](c2cccc2)cc1>>COC(=O)CC(/C=C/c1cccc1)[Si](C)(C)C

4581 C=CC(=O)OC.CC1(C)CCC(C)(C)c2cc(C(=O)c3ccc(I)cc3)ccc21>>COC(=O)/C=C/c1ccc(C(=O)c2ccc3c(c2)C(C)(C)CCC3(C)C)cc1

4582 C=CC(=O)OC.COc1ccc(I)c([N+](=O)[O-])c1>>COC(=O)/C=C/c1ccc(OC)cc1[N+](=O)[O-]

4583 C=Cc1ccc(C(C)(C)C)cc1.O=Cc1cccc1Br>>CC(C)(C)c1ccc(/C=C/c2cccc2C=O)cc1

4584 C=Cc1cc2ccc(N(CC)CC)cc2oc1=O.Ic1cccc1>>CCN(CC)c1ccc2cc(/C=C/c3cccc3)c(=O)oc2c1

4585 Br1cnc2cccc12.C=CC(=O)CC>>CCC(=O)/C=C/c1cnc2cccc12

4586 C=Cc1ccc(OC)cc1.O=[N+](O-)]c1ccc(I)cc1CO>>CCOc1ccc(/C=C/c2ccc([N+](=O)[O-]

4587 C=CC(=O)OC.CCOC(=O)c1ccc(Cl)cc1>>CCOC(=O)c1ccc(/C=C/C(=O)OC)cc1

4588 BrC1=C(C2=CCCCO2)CCCC1.C=CC(=O)OC(C)(C)C>>CC(C)(C)OC(=O)/C=C/C1=C(C2=CCCCO2)CCCC1

4589 C=Cc1ccc(O)cc1.COc1cc(Br)cc(OC)c1>>COc1cc(/C=C/c2ccc(O)cc2)cc(OC)c1

4590 C=CCOC1CCCCO1.O=CNc1cccc1I>>O=CNc1cccc1/C=C/COC1CCCCO1

4591 C=CC[C@H](CC(=O)OC(C)(C)C)C(=O)N[C@H](C(=O)NC(C)(C)C.FC(F)(F)c1cc(Br)ccc1-c1cccc1>>CNC(=O)[C@H](NC(=O)[C@H](C/C=C/c1ccc(-c2cccc2)c(C(F)(F)F)c1)CC(=O)OC(C)(C)C)C(C)(C)C

4592 C=CC(=O)OCC.Cn1ccc(Br)cc1=O>>CCOC(=O)/C=C/c1cnc(C)c(=O)c1

4593 C=CC(=O)OC.CCC(C)c1ccc(N2CCc3cc(OC)ccc3C2(C)c2ccc(Br)cc2)cc1>>CCC(C)c1ccc(N2CCc3cc(OC)ccc3C2(C)c2ccc(/C=C/C(=O)OC)cc2)cc1  
4594 C=Cc1cccc1.COC(=O)c1ccc(Br)cc1NC(=O)c1cccc1>>COC(=O)c1ccc(/C=C/c2ccccc2)cc1NC(=O)c1cccc1  
4595 C=Cc1cccc1.Cc1cc(I)ccn1>>Cc1cc(/C=C/c2ccccc2)ccn1  
4596 C=Cc1cccc1.COc1ccc(/C=C/c2c(I)c(=O)c3ccccc3n2C)cc1>>COc1ccc(/C=C/c2c(/C=C/c3ccccc3)c(=O)c3ccccc3n2C)cc1  
4597 C=CC(=O)OCCCC.Clc1ccc(I)cc1>>CCCCOC(=O)/C=C/c1ccc(Cl)cc1  
4598 C=Cc1cccc1.CCc1cnc(CC)c(Cl)n1>>CCc1cnc(CC)c(/C=C/c2ccccc2)n1  
4599 C=CC(=O)O.O=[N+][O-]c1ccc(Br)cc1>>O=C(O)/C=C/c1ccc([N+](=O)[O-])cc1  
4600 C=CC(=O)OCCCC.COc1ccc2ccc(F)c(Br)c2n1>>CCCCOC(=O)/C=C/c1c(F)ccc2ccc(OC)nc12  
\*CNCCCOCCOCCOCCNC(=O)COc1ccc(C(Cc2cc(OC)cc(OC)c2)NC(=O)c2cccc(C=C)c2)cc1.Cc1cc  
4601 c(F)c(I)c1>>\*CNCCCOCCOCCOCCNC(=O)COc1ccc(C(Cc2cc(OC)cc(OC)c2)NC(=O)c2cccc(/C=C/c3cc(C)ccc3F)c2)cc1  
4602 C=CC(=O)OC(C)(C)C.COC(=O)c1cc2cc(I)c(OCc3ccccc3)c(OC)c2c(=O)o1>>COC(=O)c1cc2cc(/C=C/C(=O)OC(C)(C)C)c(OCc3ccccc3)c(OC)c2c(=O)o1  
4603 C=CC(=O)OC.CCCCc1ccc(I)cc1>>CCCCC1ccc(/C=C/C(=O)OC)cc1  
4604 C=CC(=O)OC.CC(C)(O)c1[nH]c2cccc2c1C1CCCN(Cc2ccc(Br)cc2F)C1>>COC(=O)/C=C/c1ccc(CN2CCCC(c3c(C(C)(C)O)[nH]c4ccccc34)C2)c(F)c1  
4605 C=CC(=O)OC(C)(C)C.Fc1ccc(CNc2ccc(Br)cn2)cc1>>CC(C)(C)OC(=O)/C=C/c1ccc(NCc2ccc(F)cc2)n  
C=Cc1ccc(F)cc1.COC(=O)[14c]1[14cH][14c]([N+](=O)[O-]  
4606 ][14cH][14cH][14c]1Br>>COC(=O)[14c]1[14cH][14c]([N+](=O)[O-]  
)[14cH][14cH][14c]1/C=C/c1ccc(F)cc1  
4607 C=CC(=O)OCCCC.O=C1c2cccc2C(=O)N1c1cccc(I)c1>>CCCCOC(=O)/C=C/c1cccc(N2C(=O)c3ccc  
cc3C2=O)c1  
4608 C=Cc1ccc(-c2ccccc2)cc1.CC(C)(C)Br>>CC(C)(C)/C=C/c1ccc(-c2ccccc2)cc1  
4609 Brc1ccc(C(=C2C3CCCC2CCC3)c2ccc3c(cnn3C3CCCCO3)c2)cc1.C=CC(=O)OC>>COC(=O)/C=C/c1  
ccc(C(=C2C3CCCC2CCC3)c2ccc3c(cnn3C3CCCCO3)c2)cc1  
C=CCn1c(=O)oc2cc(C=O)ccc21.O=C(Nc1cc(Br)ccc1-  
4610 c1cccc1)O[C@H]1CN2CCC1CC2>>O=Cc1ccc2c(c1)oc(=O)n2C/C=C/c1ccc(-  
c2ccccc2)c(NC(=O)O[C@H]2CN3CCCC2CC3)c1  
4611 C=CCCN(C)(C)C(=O)OC(C)(C)C.CCOc1cnc(Br)c1>>CCOc1cnc(/C=C/CCN(C)(C)C(=O)OC(C)(C)C)c1  
4612 C=CC(=O)OCC.Cc1nc(C)c(I)c(=O)[nH]1>>CCOC(=O)/C=C/c1c(C)nc(C)[nH]c1=O  
4613 C=CC.ClCc1cccc(Oc2ccccc2)c1>>C=C(C)Cc1cccc(Oc2ccccc2)c1  
4614 C=CC(=O)OC(C)(C)C.Ic1ccc2[nH]ccc2c1>>CC(C)(C)OC(=O)/C=C/c1ccc2[nH]ccc2c1  
4615 C=Cc1ccc(F)cc1.N[C@@H](Cc1c[nH]c2c(Br)cccc12)C(=O)O>>N[C@@H](Cc1c[nH]c2c(/C=C/c3cc  
c(F)cc3)cccc12)C(=O)O  
4616 Brc1cccc2ccccc12.C=C[Si](C)(C)c1cccc1>>C[Si](C)(C)/C=C/c1cccc2ccccc12)c1cccc1  
4617 C=CC(=O)OCCCC.COc1cccc1I>>CCCCOC(=O)/C=C/c1cccc1OC  
4618 C=Cc1cccc1.COc1ccc(/C=C/c2ccc(I)cc2)cc1>>COc1ccc(/C=C/c2ccc(/C=C/c3ccccc3)cc2)cc1  
4619 CC(=O)/C=C/CC(NS(=O)(=O)c1ccc(C)cc1)c1ccc2ccccc2c1.Cc1ccc(Br)cc1>>CC(=O)/C=C/CC(NS(=O)(=O)c1ccc(C)cc1)c1ccc2ccccc2c1)c1ccc(C)cc1  
4620 C=Cc1ccc(OC)c(OC)c1.Cc1oc2ccccc2c(=O)c1Br>>COc1ccc(/C=C/c2c(C)oc3ccccc3c2=O)cc1OC  
4621 C=CC(=O)OCC.CC(C)c1c[n+][O-]c(C(C)C)c(Cl)n1>>CCOC(=O)/C=C/c1nc(C(C)C)c[n+][O-]  
4622 C=Cc1ccc2ccccc2c1.CCOC(=O)C(F)I>>CCOC(=O)C(F)/C=C/c1ccc2ccccc2c1  
4623 C=Cc1ccc([N+](=O)[O-])cc1.Ic1cccc1>>O=[N+][O-]c1ccc(/C=C/c2ccccc2)cc1  
4624 C=CC(=O)OC.CC(C)(C)OC(=O)N1Cc2ccc(Br)cc2C1>>COC(=O)/C=C/c1ccc2c(c1)CN(C(=O)OC(C)(C)C)C2  
4625 C=COCCOC=C.Fc1ccc(Br)cc1>>C=COCCOC(=C)c1ccc(F)cc1  
4626 C=C[Si](C)(C)c1cccn1.CN(C)c1ccc(Br)cc1>>CN(C)c1ccc(/C=C/[Si](C)(C)c2cccn2)cc1  
4627 C=Cc1ccc(CC)cc1.CCOc1ccc(-n2cnc3cc(Br)cnc32)cc1>>CCOc1ccc(-  
n2cnc3cc(/C=C/c4ccc(CC)cc4)cnc32)cc1  
4628 C=CC(=O)OCCCC.CC(C)c1cccc1I>>CCCCOC(=O)/C=C/c1cccc1C(C)C  
4629 C=CCC(O)C1(Se2ccccc2)CCCC1.Ic1cccc1>>OC(C/C=C/c1cccc1)C1(Se2ccccc2)CCCC1  
4630 C=CC(=O)OCC.COc1ccc(C(c2ccc(Br)cc2F)=C2[C@H]3C[C@H]4C[C@H](C[C@H]2C4)C3)cc1>>C  
COC(=O)/C=C/c1ccc(C(c2ccc(OC)cc2)=C2[C@H]3C[C@H]4C[C@H](C[C@H]2C4)C3)c(F)c1  
4631 C=Cc1cncn1.CN(C)[C@H](COc1cnc(Br)c1)Cc1c[nH]c2ccccc12>>CN(C)[C@H](COc1cnc(/C=C/c  
2ccncc2)c1)Cc1c[nH]c2ccccc12  
4632 C=CC(=O)OC.IC(CC[Se]c1cccc1)=C(c1cccc1)c1cccc1>>COC(=O)/C=C/C(CC[Se]c1cccc1)=C(c1  
cccc1)c1cccc1

4633 C=CCNC(=O)OC(C)(C)C.COc1ccc(-c2csc3c(I)enc(N)c23)ccc1NC(=O)c1cc2cccc2n1C>>COc1cc(-  
 c2csc3c(/C=C/CNC(=O)OC(C)(C)C)enc(N)c23)ccc1NC(=O)c1cc2cccc2n1C  
 4634 C=CC(OCC)OCC.COc1ccc(Br)cc1>>CCOC(/C=C/c1ccc(OC)cc1)OCC  
 4635 C=CC(=O)OC(C)(C)C.O=Cc1ccc(Br)cc1>>CC(C)(C)OC(=O)/C=C/c1ccc(C=O)cc1  
 4636 Br1ccc(I)cc1.C=Cc1ccc(CP(=O)(OC(C)(C)C)OC(C)(C)C)cc1>>CC(C)(C)OP(=O)(Cc1ccc(/C=C/c2cc  
 c(Br)cc2)cc1)OC(C)(C)C  
 4637 C=CC(=O)OCC.Cc1ccc(-c2oc3cccc3c(=O)c2Br)cc1>>CCOC(=O)/C=C/c1c(-  
 c2ccc(C)cc2)oc2cccc2c1=O  
 4638 C=C(NC(C)=O)C(=O)OC.CC(=O)Oc1cc(C(C)C)c(I)c(C(C)C)c1>>COC(=O)/C=C/c1c(C(C)C)cc(OC(  
 C)=O)cc1C(C)C)NC(C)=O  
 4639 C=CCCC(=O)O.N#Cc1ccc(Br)cc1>>N#Cc1ccc(/C=C/CCC(=O)O)cc1  
 4640 C=C/C=C(\CCCC)OCC.Ic1cccc2cccc12>>CCCC/C(=C\C=C\c1cccc2cccc12)OCC  
 4641 C=CC(=O)OC(C)(C)C.O=S(=O)(c1ccc(Br)cc1)n1ccc2cccc21>>CC(C)(C)OC(=O)/C=C/c1ccc(S(=O)(  
 =O)n2ccc3cccc32)cc1  
 4642 C=Cc1ccc(O)cc1.Nc1cccc1Br>>Nc1cccc1/C=C/c1ccc(O)cc1  
 4643 C=CCCC1ccc2cccc2n1.CCOC(=O)/C=C(\c1cnc(OC)nc1)c1nc(Br)cs1>>CCOC(=O)/C=C(\c1cnc(OC)  
 nc1)c1nc(/C=C/C/Cc2ccc3ccnc3n2)cs1  
 4644 C=C1C(=O)O[C@H]2/C=C(\C)CC/C=C(\C)CC[C@H]12.Cc1cc(I)ccc1N>>C/C1=C[C@H]2OC(  
 =O)/C=C/C3ccc(N)c(C)c3)[C@H]2CC/C(C)=C/CC1  
 4645 C=C1C(=O)O[C@H]2[C@H]1CCC(=C)[C@H]1C[C@H](OC(C)=O)C(=C)[C@H]21.Clc1ccc(I)cc1  
 >>C=C1CC[C@H]2/C(=C\c3ccc(Cl)cc3)C(=O)O[C@H]2[C@H]2C(=C)[C@H](OC(C)=O)C[C@  
 4646 C=CC(=O)OC.COc1ccc2c(c1)CCN(c1ccc(C3CC3)cc1)C2(C)c1ccc(Br)cc1>>COC(=O)/C=C/c1ccc(C2  
 (C)c3ccc(OC)cc3CCN2c2ccc(C3CC3)cc2)cc1  
 C=Cc1cccn1.O=C(c1ccc(F)cc1)N1CCC(O)(Cn2cnc3c(cnn3-  
 4647 c3ccc(Br)cc3)c2=O)CC1>>O=C(c1ccc(F)cc1)N1CCC(O)(Cn2cnc3c(cnn3-  
 c3ccc(/C=C/c4cccn4)cc3)c2=O)CC1  
 4648 C=CC(=O)OC(C)(C)C.O=C(Cc1cccc1)c1ccc(Br)cc1>>CC(C)(C)OC(=O)/C=C/c1ccc(C(=O)Cc2cccc  
 2)cc1  
 4649 C=CS(=O)(=O)c1cccc1.Cc1ccc(Br)cc1>>Cc1ccc(/C=C/S(=O)(=O)c2cccc2)cc1  
 4650 Br1ccc2cccc2c1.C=CC(=O)OCCCC>>CCCCOC(=O)/C=C/c1ccc2cccc2c1  
 4651 C=Cc1cccc(C#N)c1.Nc1ccc(Cl)cc1Br>>N#Cc1cccc(/C=C/c2cc(Cl)enc2N)c1  
 4652 C=Cc1ccc(OC)cc1.Oc1ccc(I)cc1>>COc1ccc(/C=C/c2ccc(O)cc2)cc1  
 4653 C=CC(=O)OC.O=c1c(I)coc2cc(O)ccc12>>COC(=O)/C=C/c1coc2cc(O)ccc2c1=O  
 4654 C=CC(=O)OC.CC(=O)OC[C@H]1OC=C(I)[C@H](OC(C)=O)[C@H]1OC(C)=O>>COC(=O)/C=  
 C/C1=CO[C@H](COC(C)=O)[C@H](OC(C)=O)[C@H]1OC(C)=O  
 4655 C=CCCCCCC.COc1ccc(Br)c1[N+](=O)[O-]>>CCCCC/C=C/c1ccc(OC)c1[N+](=O)[O-]  
 4656 C=CC(CCC)OCc1cccc1.CC(C)(C)c1ccc(Br)cc1>>CCCC/C=C/c1ccc(C(C)(C)C)cc1)OCc1cccc1  
 4657 C=CC(=O)Nc1cccc2ccnc12.O=[N+](=[O-])c1ccc(I)c1>>O=C(/C=C/c1cccc([N+](=O)[O-  
 ])c1)Nc1cccc2ccnc12  
 4658 C=CCCCCCC.COc1ccc(Cl)cc1>>CCCCC/C=C/c1ccc(OC)cc1  
 4659 C=CC(=O)OC(C)(C)C.CC(C)(C)O[C@H]1CC[C@H]2C=C(C3=C(Br)CC4(CC3)OCCO4)CC[C@H]1  
 2C>>CC(C)(C)OC(=O)/C=C/C1=C(C2=C[C@H]3CC[C@H](OC(C)(C)C)[C@@]3(C)CC2)CCC2(C1)  
 4660 C=CC(OC)OC.Ic1ccc(-c2cccc2)cc1>>COC(/C=C/c1ccc(-c2cccc2)cc1)OC  
 4661 C=CC(=O)OC.COC(=O)[C@H](Cc1ccc(OC)c(I)c1)NC(C)=O>>COC(=O)/C=C/c1cc(C[C@H](N  
 C(C)=O)C(=O)OC)ccc1OC  
 C=C[C@H](O[Si](C)(C)C(C)(C)C)[C@H](CCCC(=O)OC)O[Si](C)(C)C(C)(C)C.CCCCCC(=O)c1n  
 4662 c2cccc2cc1Br>>CCCCC(=O)c1nc2cccc2cc1/C=C/[C@H](O[Si](C)(C)C(C)(C)C)[C@H](CCCC(  
 =O)OC)O[Si](C)(C)C(C)(C)C  
 4663 C=CCC1CCCC1.CC(C)(C)c1ccc(Br)cc1>>C=C(CC1CCCC1)c1ccc(C(C)(C)C)cc1  
 4664 C=CC(N)=O.CC[C@H]12C=CCN3CC[C@H]4(C(=C(C(=O)OC)C1)Nc1ccc(I)cc14)[C@@H]32>>CC[C  
 @H]12C=CCN3CC[C@H]4(C(=C(C(=O)OC)C1)Nc1ccc(/C=C/C(N)=O)cc14)[C@@H]32  
 4665 C=CC(=O)OC(C)(C)C.O=Cc1c(Br)cccc1OCc1cccc1>>CC(C)(C)OC(=O)/C=C/c1cccc(OCc2cccc2)c  
 1C=O  
 4666 C=Cc1cccc1.O=C1Nc2cccc(I)c2/C1=C/c1ccc[nH]1>>O=C1Nc2cccc(/C=C/c3cccc3)c2/C1=C/c1ccc[  
 nH]1  
 4667 C=CC(=O)N(C)Cc1cccc(OC)c1OCCC.CC(C)(C)OC(=O)N1CCNc2ccc(Br)cc2C1>>CCCOc1c(CN(C)  
 C(=O)/C=C/c2cnc3c(c2)CN(C(=O)OC(C)(C)CCN3)cccc1OC  
 4668 C=CC(=O)OC(C)(C)C.N#Cc1c(-c2cccc(Br)c2)cc(-c2cccc2)nc1N>>CC(C)(C)OC(=O)/C=C/c1cccc(-  
 c2cc(-c3cccc3)nc(N)c2C#N)c1  
 4669 C=CC(=O)OC.COc1cc(Br)c2c3c1O[C@H]1[C@@H](O[Si](C)(C)C(C)(C)C)C=C[C@@H]4[C@@H]  
 (C2)N(C)CC[C@@]341>>COC(=O)/C=C/c1cc(OC)c2c3c1C[C@@H]1[C@H]4C=C[C@H](O[Si](C)(  
 C)C(C)(C)C)[C@H](O2)[C@@]34CCN1C

4670 Br1cccc2[nH]ccc12.C=CC(=O)OC>>COC(=O)/C=C/c1cccc2[nH]ccc12  
4671 C=CN1C(=O)c2cccc2C1=O.Ic1ccc(C2(N3CCCCC3)CCCC2)cc1>>O=C1c2cccc2C(=O)N1/C=C/c  
1ccc(C2(N3CCCCC3)CCCC2)cc1  
4672 C=CC(=O)OCC.CC(C)(C)OC(=O)NCc1ccc(Br)cc1>>CCOC(=O)/C=C/c1ccc(CNC(=O)OC(C)(C)C)cc  
C=Cc1ccc(-  
4673 n2c3cccc3c3cccc32)cc1.CCCCC(CC)CN1C(=O)c2cccc3c(Br)ccc(c23)C1=O>>CCCC(CC)CN1C(=O)  
c2cccc3c(/C=C/c4ccc(-n5c6cccc6c6cccc65)cc4)ccc(c23)C1=O  
4674 Br1cccc1.C=Cc1cccc1>>C(=C/c1cccc1)\c1cccc1  
4675 C=CC(=O)C(C)CC(=O)OC.COc1ccc(Br)cc1OC>>COC(=O)CC(C)C(=O)/C=C/c1ccc(OC)c(OC)c1  
4676 C=CC(=O)N(C)C.Cc1cccc(C)c1Br>>Cc1cccc(C)c1/C=C/C(=O)N(C)C  
C=C(C)C(=O)OC.COc1cc(Br)c2c3c1O[C@H]1[C@@H](O[Si](C)(C)C(C)(C)C)C=C[C@@H]4[C@  
4677 @H](C2)N(C)CC[C@ @]341>>COC(=O)/C(C)=C/c1cc(OC)c2c3c1C[C@@H]1[C@H]4C=C[C@H](  
O[Si](C)(C)C(C)(C)C)[C@H](O2)[C@]34CCN1C  
4678 C=C(F)C(=O)OC.CC(=O)c1ccc(I)cc1>>COC(=O)/C(F)=C/c1ccc(C(C)=O)cc1  
4679 C=Cc1ccc(OC)c(OC)c1.CCn1c(=O)c2c(nc(I)n2C)n(CC)c1=O>>CCn1c(=O)c2c(nc(/C=C/c3ccc(OC)c(  
OC)c3)n2C)n(CC)c1=O  
4680 C=Cc1nnc2c1nnc2C1CCCCO1.Ic1ccsc1>>C(=C/c1nnc2c1nnc2C1CCCCO1)\c1ccsc1  
4681 C=Cc1cccs1.O=[N+](O-)]c1ccc(Br)cc1>>O=[N+](O-)]c1ccc(/C=C/c2cccs2)cc1  
4682 Br1cccc1.C=Cc1ccc(C#N)cc1>>N#Cc1ccc(/C=C/c2cccc2)cc1  
C=Cc1ccc(C(=O)N[C@@H](CCSC)C(=O)OC)c(-  
4683 c2cccc2C)c1.OC1(c2cnc2Br)CCCC1>>COC(=O)[C@H](CCSC)NC(=O)c1ccc(/C=C/c2cnc2C2  
(O)CCCC2)cc1-c1cccc1C  
4684 C=CN1C(=O)c2cccc2C1=O.FC(F)(F)Oc1ccc(Br)cc1OC(F)(F)F>>O=C1c2cccc2C(=O)N1/C=C/c1cc  
c(OC(F)(F)F)c(OC(F)(F)F)c1  
4685 C=CC(=O)N1CCOCC1.COc1cc(Cl)ccc1C1=CCN(C(=O)OC(C)(C)C)CC1>>COc1cc(/C=C/C(=O)N2C  
COCC2)ccc1C1=CCN(C(=O)OC(C)(C)C)CC1  
4686 C=CC(=O)N(C)OC.COc1ccc(Br)cc1>>COc1ccc(/C=C/C(=O)N(C)OC)cc1  
4687 C=Cc1ccc(S(=O)(=O)c2cccc2F)cn1.Oc1cccc1I>>O=S(=O)(c1ccc(/C=C/c2cccc2O)nc1)c1cccc1F  
4688 Br1csc2cccc12.C=CC=O>>O=C/C=C/c1csc2cccc12  
4689 Br/C(=C/[Te]c1cccc1)c1cccc1.C=Cc1cccc1>>C([Te]c1cccc1)=C(/C=C/c1cccc1)c1cccc1  
4690 Br1ccc(-c2ccc(I)cc2)cc1.C=Cc1ccc(CP(=O)(OCC)OCC)cc1>>CCOP(=O)(Cc1ccc(/C=C/c2ccc(-  
c3ccc(Br)cc3)cc2)cc1)OCC  
4691 C=CC(=O)OC.CN(C)S(=O)(=O)n1cc(I)c([Si](C)(C)C)c1>>COC(=O)/C=C/c1cn(S(=O)(=O)N(C)C)cc1  
[Si](C)(C)C  
4692 C=CP(=O)(c1cccc1)c1cccc1OC.C[P@](=O)(/C=C/c1cccc(Br)c1)c1cccc1>>COc1cccc1P(=O)(/C=  
C/c1cccc(/C=C/[P@](C)(=O)c2cccc2)c1)c1cccc1  
4693 C=CC(=O)OC.CC(C)(C)/N=C/N1CCCC1CCc1cccc1I>>COC(=O)/C=C/c1cccc1CCC1CCCCN1/C  
=N/C(C)(C)C  
4694 C=Cc1cccc1.Cc1ccc(S(=O)(=O)Cc2cccc2I)cc1>>Cc1ccc(S(=O)(=O)Cc2cccc2/C=C/c2cccc2)cc1  
4695 C=CC(C)(C)O.CC(=O)O[C@H]1C(Br)=C[C@@H](O[Si](C)(C)C(C)(C)C)[C@@H]2O[C@H]12>>C  
C(=O)O[C@H]1C(/C=C/C(C)(C)O)=C[C@@H](O[Si](C)(C)C(C)(C)C)[C@@H]2O[C@H]12  
4696 C=C[C@H]1OC(C)(C)O[C@H]1CCCC.CC(C)(C)OC(=O)CCCC(=O)c1cccc1Br>>CCCC[C@ @H  
]1OC(C)(C)O[C@ @H]1/C=C/c1cccc1C(=O)CCCC(=O)OC(C)(C)C  
4697 C=CC(=O)OC.O=C(O)Cc1cccc(Br)c1>>COC(=O)/C=C/c1cccc(CC(=O)O)c1  
4698 Br1ccc(-c2cccc(C34CC5CC(CC(C5)C3)C4)c2)cc1.C=CC(=O)OC>>COC(=O)/C=C/c1ccc(-  
c2cccc(C34CC5CC(CC(C5)C3)C4)c2)cc1  
4699 C=CN1C(=O)c2cccc2C1=O.CC(C)(C)OC(=O)Cc1ccc(Br)cc1>>CC(C)(C)OC(=O)Cc1ccc(/C=C/N2C  
(=O)c3cccc3C2=O)cc1  
4700 C=CC(C)=O.COC(=O)c1ccc(N)c(I)c1>>COC(=O)c1ccc(N)c(/C=C/C(C)=O)c1  
4701 C=CC(=O)O.O=S(=O)(Nc1cccc(I)c1)c1ccc(Cl)cc1>>O=C(O)/C=C/c1cccc(NS(=O)(=O)c2ccc(Cl)cc2)  
C=Cc1cccc1OC.Cc1c(Nc2c(I)cncc2C#N)ccc2[nH]ccc12>>COc1cccc1/C=C/c1cncc(C#N)c1Nc1ccc2  
4702 [nH]ccc2c1C  
4703 C=CC(=O)OC(C)(C)C.Nc1cc(I)ccc1Br>>CC(C)(C)OC(=O)/C=C/c1ccc(Br)c(N)c1  
4704 C=CC(=O)OCCCC.Cn1cc(I)c(=O)c2cccc21>>CCCCOC(=O)/C=C/c1cn(C)c2cccc2c1=O  
4705 C=Cc1cccc1.Oc1ccc(/N=N/c2ccc(Br)cc2)cc1>>Oc1ccc(/N=N/c2ccc(/C=C/c3cccc3)cc2)cc1  
4706 C=CC(C)=O.CC(C)(C)OC(=O)Nc1csc(Br)c1NC(=O)OC(C)(C)C>>CC(=O)/C=C/c1scc(NC(=O)OC(C)  
(C)C)c1NC(=O)OC(C)(C)C  
4707 C=CC(=O)OCC.OCc1c(-c2cccc2)nc2cc(Br)ccn12>>CCOC(=O)/C=C/c1cn2c(CO)c(-c3cccc3)nc2c1  
C=Cc1ccc([Si](OC)(OC)OC)cc1.CC(C)(C)OP(=O)(Cc1ccc(/C=C/c2c3cccc3c(Br)c3cccc23)cc1)OC(  
4708 C)(C)C>>CO[Si](OC)(OC)c1ccc(/C=C/c2c3cccc3c(/C=C/c3ccc(CP(=O)(OC(C)(C)C)OC(C)(C)C)cc3  
)c3cccc23)cc1

4709 C=CC(=O)c1ccc(OC)cc1OC.CC(=O)Oc1ccc(I)cc1>>COc1ccc(C(=O)/C=C/c2ccc(OC(C)=O)cc2)c(OC  
4710 C=CN1CCCCC1=O.O=S(=O)(Oc1ccc2ccccc2c1Br)C(F)(F)F>>C=C(c1ccc2ccccc2c1Br)N1CCCCC  
4711 C=CC#N.CN1C(c2ccccc2)=C(I)c2ccsc2S1(=O)=O>>CN1C(c2ccccc2)=C(/C=C/C#N)c2ccsc2S1(=O)=  
4712 C=Cc1cc(OC)c(OC)c(OC)c1-  
c1ccc(F)c(F)c1.COc1ccc(I)cc1>>COc1ccc(/C=C/c2cc(OC)c(OC)c(OC)c2-c2ccc(F)c(F)c2)cc1  
4713 C=CC(N)=O.CCc1cccc(Br)c1>>CCc1cccc(/C=C/C(N)=O)c1  
4714 C=CC(=O)OC.O=[N+](=[O-])c1cccnc1Cl>>COC(=O)/C=C/c1cccc1[N+](=O)[O-]  
4715 Br1cccc(I)c1.COC[C@@H](/N=C(\c1cccc1)N1C=CCC[C@H]1C)C(C)C>>COC[C@@H](/N=C(\c1  
cccc1)N1C=C(c2cccc(Br)c2)CC[C@H]1C)C(C)C  
Br1cnc2ccccc2c1.C=CCO[C@]1(C)C[C@H](C)C(=O)[C@H](C)[C@H]2NC(=O)O[C@@H]2[C@  
@H](CC)OC(=O)[C@H](C)C(=O)[C@H](C)[C@H]1O[C@@H]1O[C@H](C)C[C@H](N(C)C)[C@H]  
4716 ]1OC(=O)c1cccc1>>CC[C@H]1OC(=O)[C@H](C)C(=O)[C@H](C)[C@@H](O[C@@H]2O[C@H](  
C)C[C@H](N(C)C)[C@H]2OC(=O)c2ccccc2)[C@](C)(OC/C=C/c2cnc3ccccc3c2)C[C@@H](C)C(=O  
)\C@H1(C)\C@H2NC(=O)O\C@H12  
4717 C=CCC(C)C(=O)OCC.N#Cc1ccc(Br)cc1>>CCOC(=O)C(C)C/C=C/c1ccc(C#N)cc1  
4718 C=Cc1ccc(O)cc1.COc1cc(Br)cc(OC)c1F>>COc1cc(/C=C/c2ccc(O)cc2)cc(OC)c1F  
4719 C=Cc1ccc(OC)cc1.COc1cccc1Br>>COc1ccc(/C=C/c2ccccc2OC)cc1  
4720 C=C(C)C(=O)OC.Cc1cccc(C)c1Cl>>COC(=O)/C(C)=C/c1c(C)cccc1C  
4721 C=CC(=O)OC.O=c1[nH]c(=O)n([C@@H]2C[C@H](O)[C@H](CO)C2)cc1I>>COC(=O)/C=C/c1cn([  
C@@H]2C[C@H](O)[C@H](CO)C2)c(=O)[nH]c1=O  
4722 C=Cc1ccc(C)cc1.Cc1cccc(I)c1>>Cc1ccc(/C=C/c2cccc(C)c2)cc1  
4723 C=CC(=O)OCCCC.Oc1cccc(Br)c1>>CCCCOC(=O)/C=C/c1cccc(O)c1  
C=CC(=O)C(O[Si](CC)(CC)CC)c1c(OC)ccc(OC)c1OCc1cccc1.COC(=O)c1cc2cc(I)c(OCc3ccccc3)c(  
4724 OC)c2c(=O)o1>>CC[Si](CC)(CC)OC(C(=O)/C=C/c1cc2cc(C(=O)OC)oc(=O)c2c(OC)c1OCc1cccc1)  
c1c(OC)ccc(OC)c1OCc1cccc1  
4725 C=CC(C)=O.Cc1ccc(I)cc1>>CC(=O)/C=C/c1ccc(C)cc1  
\*CNCCOCCOCCOCCOCCNC(=O)COc1ccc(C(Cc2cc(OC)cc(OC)c2)NC(=O)c2ccc(C=C)cc2)cc1.FC(F)  
4726 (F)Oc1cccc1I>>\*CNCCOCCOCCOCCOCCNC(=O)COc1ccc(C(Cc2cc(OC)cc(OC)c2)NC(=O)c2ccc(/C  
=C/c3ccccc3OC(F)(F)F)cc2)cc1  
4727 C=CC(=O)OCCCC.Cc1ccc(S(=O)(=O)NCCc2c(Br)[nH]c3ccccc23)cc1>>CCCCOC(=O)/C=C/c1[nH]c  
2ccccc2c1CCNS(=O)(=O)c1ccc(C)cc1  
4728 C=Cc1ccc(F)cc1.COc1cc(C=O)c(Br)c(OC)c1OC>>COc1cc(C=O)c(/C=C/c2ccc(F)cc2)c(OC)c1OC  
4729 C=CS(C)=O.O=Cc1ccc(Br)cc1>>CS(=O)(=O)/C=C/c1ccc(C=O)cc1  
4730 C=CCC(C(=O)OCC)C(=O)OCC.CCOC(=O)c1ccc(I)cc1>>CCOC(=O)c1ccc(/C=C/CC(C(=O)OCC)C(  
=O)OCC)cc1  
4731 C=Cc1ccc(Br)cc1.ClCc1cccc1>>Br1ccc(/C=C/Cc2ccccc2)cc1  
4732 C=CC(=O)OC.O=Cc1ccc(C(F)(F)F)cc1Br>>COC(=O)/C=C/c1cc(C(F)(F)F)ccc1C=O  
4733 C=Cc1cncnc1.CCOC(=O)c1[nH]c(C(C)(C)C)nc1I>>CCOC(=O)c1[nH]c(C(C)(C)C)nc1/C=C/c1cncnc1  
C=CCOc1ccc(CCN(C(=O)OC(C)(C)C)cc1.CC(C)N(CC[C@H](c1cccc1)c1cc(Br)ccc1OCc1cccc1)C  
4734 (C)C>>CC(C)N(CC[C@H](c1cccc1)c1cc(/C=C/CCOc2ccc(CCN(C(=O)OC(C)(C)C)cc2)ccc1OCc1ccc  
cc1)C(C)C  
4735 C=CS(=O)(=O)F.Cc1cc(C)cc(I)c1>>Cc1cc(C)cc(/C=C/S(=O)(=O)F)c1  
4736 C=C(F)C(=O)OC.COC(=O)c1cccc1I>>COC(=O)/C(F)=C/c1cccc1C(=O)OC  
4737 C=Cc1cccn1.CN(C(=O)c1cccc1)c1ccc2c(c1)[nH]c(=NC(=O)c1ccc(Br)s1)n2CCC(N)=O>>CN(C(=O  
c1cccc1)c1ccc2c(c1)[nH]c(=NC(=O)c1ccc(/C=C/c3ccccc3)s1)n2CCC(N)=O  
C=CC(=O)NCCc1ccc(F)cc1.COc1ccc(-c2oc3cc(OC)ccc3c(=O)c2I)cc1>>COc1ccc(-  
4738 c2oc3cc(OC)ccc3c(=O)c2/C=C/C(=O)NCCc2ccc(F)cc2)cc1  
4739 C=C(CC(=O)OC)C(=O)OC.Clc1ccc(I)cc1>>COC(=O)C/C(=C\c1ccc(Cl)cc1)C(=O)OC  
4740 C=Cc1cccc1.O=S(=O)(OC1=CCCCC1)C(F)(F)F>>C=C(Cl1=CCCCC1)c1cccc1  
4741 C=CC(=O)OC.COC(=O)/C=C/c1cccc(N(Cc2ccc(Br)cc2)C(=O)C2CCCCC2)c1>>COC(=O)/C=C/c1ccc  
(CN(C(=O)C2CCCCC2)c2ccccc(/C=C/C(=O)OC)c2)cc1  
4742 C=CC(=O)OC(C)(C)C.CCOC(=O)Cc1ccc(Br)cc1Cl>>CCOC(=O)Cc1ccc(/C=C/C(=O)OC(C)(C)C)cc1  
4743 Br1ccc(N2CCCCC2)c2nsnc12.C=Cc1cncnc1>>C(=C/c1ccc(N2CCCCC2)c2nsnc12)\c1cncnc1  
4744 C=Cc1ccc2c(c1)Sc1cccc1N2CCCCCCCCCCCCCCCCC.CCCCCCCCCCCCCCCCCCn1c2ccc(I)cc2c2cc(  
C=O)ccc21>>CCCCCCCCCCCCCCCCCN1c2ccccc2Sc2cc(/C=C/c3ccc4c(c3)c3cc(C=O)ccc3n4CCCC  
CCCCCCCCCCCC)ccc21  
C=Cc1ccc(OC)c(OC)c1.COc1ccc(-  
4745 c2cc(=O)c3c(OC)cc(OC)c(I)c3o2)cc1OC>>COc1ccc(/C=C/c2c(OC)cc(OC)c3c(=O)cc(-  
c4ccc(OC)c(OC)c4)oc23)cc1OC  
4746 C=CS(=O)(=O)NCCCCCCCCC.COc1ccc(Br)c(CNC(=O)OC(C)(C)C)c1>>CCCCCCCCNS(=O)(=O)/C  
=C/c1ccc(OC)cc1CNC(=O)OC(C)(C)C

4747 C=CNC(C)=O.COc1ccc2ccc(OS(=O)(=O)C(F)(F)F)cc2c1>>C=C(CNC(C)=O)c1ccc2ccc(OC)cc2c1  
 4748 C=CC(=O)OCCCC.Ic1cccn1>>CCCCOC(=O)/C=C/c1cccn1  
 4749 C=Cc1ccc(F)cc1.FC(F)(F)C(F)(F)C(F)(F)C(F)(F)C(F)(F)C(F)(F)Br>>Fc1ccc(/C=C/C(F)(F)C(F)(F)C(F)(F)C(F)(F)C(F)(F)C(F)(F)F)cc1  
 4750 C=Cc1ccc(F)cc1.CCCCC(Br)C(F)(F)F>>CCCCC(/C=C/c1ccc(F)cc1)C(F)(F)F  
 4751 C=CC(=O)OCC.CC(=O)c1ccc(Br)cc1>>CCOC(=O)/C=C/c1ccc(C(C)=O)cc1  
 4752 C=CC(=O)N1N=Cc2ccccc2C1C=C(C)C.COc1cc(Cc2cnc(N)nc2N)cc(I)c1OC>>COc1cc(Cc2cnc(N)nc2N)cc(/C=C/C(=O)N2N=Cc3ccccc3C2C=C(C)C)c1OC  
 4753 C=C1c2ccccc2C1(C#N)CC.CN(C)c1ccc(Br)cc1>>CCC1(C#N)/C(=C/c2ccc(N(C)C)cc2)c2ccccc21  
 4754 Br1ccccc1.C=CN1CCCCC1=O>>C=C(c1ccccc1)N1CCCCC1=O  
 4755 C=Cc1ccccc1.Cc1ccc(S(=O)(=O)n2ccc3c(Br)cccc32)cc1>>Cc1ccc(S(=O)(=O)n2ccc3c(/C=C/c4ccccc4)cccc32)cc1  
 4756 C=CC(=O)OCC.COc1cc(I)c2c3c1O[C@@H]1[C@]134CCN(C)[C@H](C2)[C@]42C=C[C@@]1(OC)c1c(OC(C)=O)ccc(O)c12>>CCOC(=O)/C=C/c1cc(OC)c2c3c1C[C@H]1N(C)CC[C@@]34[C@@H](O2)[C@@]2(OC)C=C[C@@]14c1c(O)ccc(OC(C)=O)c12  
 4757 C=CC#N.O=P(c1ccccc1)(c1ccccc1)c1ccc(Br)cc1>>N#C/C=C/c1ccc(P(=O)(c2ccccc2)c2ccccc2)cc1  
 4758 C=CC(=O)OCC.N#Cc1cccc(Br)c1>>CCOC(=O)/C=C/c1cccc(C#N)c1  
 4759 C=Cc1ccc(SC)cc1.Clc1c2ccc(Br)cc2nc2c1oc1ccccc12>>CSc1ccc(/C=C/c2ccc3c(Cl)c4oc5ccccc5c4nc3c2)cc1  
 4760 C=CC(=O)OC(C)(C)C.COc1ccc2nc(S(=O)(=O)c3ccccc(Br)c3)ccc2c1>>COc1ccc2nc(S(=O)(=O)c3ccccc(/C=C/C(=O)OC(C)(C)C)c3)ccc2c1  
 4761 C=CC(=O)OC(C)(C)C.O=C(c1ccccc1)c1ccc(Cl)cc1>>CC(C)(C)OC(=O)/C=C/c1ccc(C(=O)c2ccccc2)c  
 4762 C=CC(C)=O.COc1ccc2cc(I)ccc2c1>>COc1ccc2cc(/C=C/C(C)=O)ccc2c1  
 4763 C=Cc1ccc(CP(=O)(OCC)OCC)cc1.CCCOc1cc(C=O)c(OCCC)cc1Br>>CCCOc1cc(/C=C/c2ccc(CP(=O)(OCC)OCC)cc2)c(OCCC)cc1C=O  
 4764 Br1ccccc1C1OCCCCO1.C=CC#N>>N#C/C=C/c1ccccc1C1OCCCCO1  
 4765 C=Cc1ccc(OC)cc1.Nc1ncc(Cl)cc1Br>>COc1ccc(/C=C/c2cc(Cl)cnc2N)cc1  
 4766 C=Cc1ccc(C#N)cc1.CC(C)=CBr>>CC(C)=C/C=C/c1ccc(C#N)cc1  
 4767 C=CC(=O)O.Fc1ccc(Br)cc1F>>O=C(O)/C=C/c1ccc(F)c(F)c1  
 4768 C=CCN(C(=O)OC(C)(C)C)C(=O)OC(C)(C)C.O=Cc1ccc(Br)cc1>>CC(C)(C)OC(=O)N(C/C=C/c1ccc(C=O)cc1)C(=O)OC(C)(C)C  
 4769 C=Cc1ccccc1.CCCCCCCCCCCC(=O)Nc1ccccc1Br>>CCCCCCCCCCCC(=O)Nc1ccccc1/C=C/c1ccccc  
 4770 C=CC(=O)OC.COCC(=O)Cc1cc(Br)ccc1OCc1ccc(OCc2ccccc2)cc1>>COC(=O)/C=C/c1ccc(OCc2ccc(OCc3ccccc3)cc2)c(CC(=O)OC)c1  
 4771 C=Cc1ccccc1.O=c1c(Br)c(-c2ccc(Cl)cc2)oc2ccccc12>>O=c1c(/C=C/c2ccccc2)c(-c2ccc(Cl)cc2)oc2ccccc12  
 4772 C=CC(=O)OCC.Clc1cccn1>>CCOC(=O)/C=C/c1cccn1  
 4773 C=C1N=C(c2ccccc2)[C@H](C(C)C)N(C(=O)OC(C)(C)C)C1=O.COc1ccc(I)cc1>>COc1ccc(/C=C2\N=C(C(c3ccccc3)[C@H](C(C)C)N(C(=O)OC(C)(C)C)C2=O)cc1  
 4774 C=CC(OCC)OCC.COc1ccc(I)cc1>>CCOC(/C=C/c1ccc(OC)cc1)OCC  
 4775 C=C(NC(C)=O)C(=O)OC.Ic1ccccc1C1OCCCCO1>>COC(=O)/C=C/c1ccccc1C1OCCCCO1)NC(C)=O  
 4776 C=Cc1ccccc1.Cc1cc(I)cc(C)c1O>>Cc1cc(/C=C/c2ccccc2)cc(C)c1O  
 4777 Br1ccccc(I)c1.C=CC(=O)OCCCC>>CCCCOC(=O)/C=C/c1cccc(Br)c1  
 4778 C=CC(=O)NC(C)C.COc1cccc(OC)c1I>>COc1cccc(OC)c1/C=C/C(=O)NC(C)C  
 4779 C=CC(=O)OCCCC.Clc1cccc(I)c1>>CCCCOC(=O)/C=C/c1cccc(Cl)c1  
 4780 C=Cc1ccccc1.COc1ccc(-c2c(Br)c(=O)oc3cc(C)ccc23)cc1>>COc1ccc(-c2c(/C=C/c3ccccc3)c(=O)oc3cc(C)ccc23)cc1  
 4781 C=CC(=O)OC(C)(C)C.COc1ccc(I)cc1N>>COc1ccc(/C=C/C(=O)OC(C)(C)C)cc1N  
 4782 C=Cc1ccccc1.Oc1ccc(-c2ccc2-c2ccc(Br)cc2)cc1>>Oc1ccc(-c2ccc2-c2ccc(/C=C/c3ccccc3)cc2)cc1  
 4783 C=C[C@H]1COC(C)(C)N1C(=O)OCc1ccccc1.CCCCCN1cc(Br)c2c([N+](=O)[O-])cccc21>>CCCCCN1cc(/C=C/[C@H]2COC(C)(C)N2C(=O)OCc2ccccc2)c2c([N+](=O)[O-])cccc21  
 4784 C=Cc1ccccc1.CC[C@]12C=CCN3CC[C@]4(C(=C(C(=O)OC)C1)Nc1ccc(I)cc14)[C@@H]32>>CC[C@]12C=CCN3CC[C@]4(C(=C(C(=O)OC)C1)Nc1ccc(/C=C/c5ccccc5)cc14)[C@@H]32  
 4785 BrC1CC2CCC1C2.C=Cc1ccccc1>>C=C/C1CC2CCC1C2)c1ccccc1  
 4786 C=CC(C)=O.IC1CCCCC1>>CC(=O)/C=C/C1CCCCC1  
 4787 C=CC(=O)O.CC(C)c1cc(C(C)C)c(S(=O)(=O)Nc2ccc(I)cc2)cc1C(C)C>>CC(C)c1cc(C(C)C)c(S(=O)(=O)Nc2ccc(/C=C/C(=O)O)cc2)cc1C(C)C  
 4788 Br1cccs1.C=CC(C)(O)CCC=C(C)C>>CC(C)=CCCC(C)(O)/C=C/c1cccs1  
 4789 C=Cc1cccc(S(=O)(=O)N(Cc2ccc(OC)cc2)Cc2ccc(OC)cc2)c1-c1nnn(Cc2ccc(OC)cc2)n1.CC(C)(C)OC(=O)Nc1ccc(Br)cn1>>COc1ccc(CN(Cc2ccc(OC)cc2)S(=O)(=O)c2ccccc(/C=C/c3ccc(NC(=O)OC(C)(C)C)nc3)c2-c2nnn(Cc3ccc(OC)cc3)n2)cc1

4790 OCc1cccc1I.[11CH2]=Cc1cccc1>>OCc1cccc1/[11CH]=C/c1cccc1  
 4791 C=CC(=O)OC.CCc1nc2c(C)cc(C)nn2c1Cc1ccc(Br)cc1>>CCc1nc2c(C)cc(C)nn2c1Cc1ccc(/C=C/C(=O)OC)cc1  
 4792 C=CCCCCCC.ClCc1cccc1>>C=C(CCCCCC)Cc1cccc1  
 4793 C=Cc1cccc1.Fc1ccc(Br)c(F)c1>>Fc1ccc(/C=C/c2cccc2)c(F)c1  
 4794 Brc1cccc1.C=CC(=C)C>>C=C(C)/C=C/c1cccc1  
 4795 C=CC(=O)OC(C)(C)C.COc1ccc(Br)c(OC)c1>>COc1ccc(/C=C/C(=O)OC(C)(C)C)c(OC)c1  
 4796 C=CC1(O)CCC1.Ic1cccc2cccc12>>OC1(/C=C/c2cccc3cccc23)CCC1  
 4797 C=Cc1ccc(CN2CCN(C(=O)OC(C)(C)C)CC2)cn1.Cc1c(Nc2c(I)encc2C#N)ccc2[nH]ccc12>>Cc1c(Nc2c(I)encc2C#N)encc2/C=C/c2ccc(CN3CCN(C(=O)OC(C)(C)C)CC3)cn2)ccc2[nH]ccc12  
 4798 C=CCN[C@H](C)c1cccc2cccc12.FC(F)(F)c1cccc(Br)c1>>C[C@H](NC/C=C/c1cccc(C(F)(F)F)c1)c1cccc2cccc12  
 4799 C=Cc1cccc1.CCOC(=O)c1cc(=O)c2cccc(Br)c2o1>>CCOC(=O)c1cc(=O)c2cccc(/C=C/c3cccc3)c2o1  
 4800 C=CC(=O)OCCO.C[C@H](Nc1ncnc2sc(Br)cc12)c1cccc1>>C[C@H](Nc1ncnc2sc(/C=C/C(=O)OCCO)cc12)c1cccc1  
 4801 C=Cc1ccc(O)c(OC)c1.CCCCCCCCOCc1ccc2c(C)c(Br)c(=O)oc2c1>>CCCCCCCCOCc1ccc2c(C)c(/C=C/c3ccc(O)c(OC)c3)c(=O)oc2c1  
 4802 C=CC(F)(F)C(F)(F)C(F)(F)C(F)(F)C(F)(F)F.O=Cc1ccc(Br)cc1>>O=Cc1ccc(/C=C/C(F)(F)C(F)(F)C(F)(F)C(F)(F)C(F)(F)F)cc1  
 4803 C=CC(C)(C)O.CC(C)(C)[Si](C)(C)O[C@H]1C=C(Br)C2(OCCCC2)[C@H]2O[C@H]21>>CC(C)(O)/C=C/C1=C[C@H](O[Si](C)(C)C(C)(C)C)[C@H]2O[C@H]2C12OCCCC2  
 4804 C=COCCCC.O=C(O)c1ccc(Cl)cc1>>C=C(OCCCC)c1ccc(C(=O)O)cc1  
 4805 C=CC(=O)OCC.Cc1cc(I)c2cccc2n1>>CCOC(=O)/C=C/c1cc(C)nc2cccc12  
 4806 Brc1ccc(Cn2c(-c3cccc3)nc3cccc32)cc1.C=Cc1cccc1>>C=C/c1ccc(Cn2c(-c3cccc3)nc3cccc32)cc1)c1cccc1  
 4807 C=C1C(=O)O[C@H]2C3=C(C)C(=O)C=C[C@H]3(C)CC[C@H]12.Fc1cccc1I>>CC1=C2[C@H]3OC(=O)/C=C/c4cccc4F[C@H]3CC[C@H]2(C)C=CC1=O  
 4808 C=Cc1cccc(O)c1.Nc1ccc(Br)cc1>>Nc1ccc(/C=C/c2cccc(O)c2)cc1  
 4809 C=CC(=O)O.O=[N+][O-]c1c(I)ccc2c1C=CC1(CCCCC1)O2>>O=C(O)/C=C/c1ccc2c(c1)[N+](=O)[O-]  
 4810 C=Cc1ccc(O)cc1.COC(=O)Cn1c(=O)c(Cl)nc2ccnc21>>COC(=O)Cn1c(=O)c(/C=C/c2ccc(O)cc2)nc2ccnc21  
 4811 C=CC(=O)OC(C)(C)C.COc1ccc(S(=O)(=O)c2ccc3cc(Br)ccc3n2)cc1>>COc1ccc(S(=O)(=O)c2ccc3cc(/C=C/C(=O)OC(C)(C)C)ccc3n2)cc1  
 4812 C=Cc1ccc2cccc2n1.CN1C(=O)CC[C@]2(C)c3ccc(Br)cc3CC[C@H]12>>CN1C(=O)CC[C@]2(C)c3ccc(/C=C/c4ccc5cccc5n4)cc3CC[C@H]12  
 4813 C=CC(=O)OC.Oc1cc(-c2ccc(Br)cc2)cc(C23CC4CC(CC(C4)C2)C3)c1>>COC(=O)/C=C/c1ccc(-c2cc(O)cc(C34CC5CC(CC(C5)C3)C4)c2)cc1  
 4814 C=Cc1ccc(OC)cc1.N#Cc1cccc(Br)c1>>COc1ccc(/C=C/c2cccc(C#N)c2)cc1  
 4815 C=Cc1ccc(CN(C)C)cc1.C[Si](C)(C)CCOCn1nc(I)c2ccc([C@H]3C[C@H]34C(=O)Nc3cccc34)cc21>>CN(C)Cc1ccc(/C=C/c2nn(COCC[Si](C)(C)C)c3cc([C@H]4C[C@H]45C(=O)Nc4cccc45)ccc23  
 4816 C=CC(=O)OC(C)(C)C.O=S(=O)(Oc1ccn(-c2cccc2)n1)C(F)(F)F>>CC(C)(C)OC(=O)/C=C/c1ccn(-c2cccc2)n1  
 4817 C=Cc1ccc(CC#N)cc1.CCOC(=O)C(F)Br>>CCOC(=O)C(F)/C=C/c1ccc(CC#N)cc1  
 4818 C=Cc1ccc(OC)c(O)c1.COc1cc(I)cc(OC)c1>>COc1cc(/C=C/c2ccc(OC)c(O)c2)cc(OC)c1  
 4819 C=C[Si](C)(C)c1cccn1.CCOC(=O)c1ccc(/C=C/c2ccc(Br)cc2)cc1>>CCOC(=O)c1ccc(/C=C/c2ccc(/C=C/C/[Si](C)(C)c3cccn3)cc2)cc1  
 4820 C=CC(=O)OC(C)(C)C.O=C1CCc2cc(Br)cn2N1>>CC(C)(C)OC(=O)/C=C/c1nc2c(c1)CCC(=O)N2  
 4821 Brc1ccc(I)cc1.C=CCn1nnc2cccc21>>Brc1ccc(/C=C/Cn2nnc3cccc32)cc1  
 4822 C=CC(C)(C)O.O=C(c1cccc1)c1ccc(Br)cc1>>CC(C)(O)/C=C/c1ccc(C(=O)c2cccc2)cc1  
 4823 C=COCCCC.O=Cc1ccc(I)cc1>>C=C(OCCCC)c1ccc(C(=O)cc1  
 4824 C=C1C(=O)O[C@H]2[C@H]1CCC(=C)[C@H]1C[C@H](OC(C)=O)C(=C)[C@H]21.O=[N+][O-]c1cc(Cl)ccc1I>>C=C1CC[C@H]2/C=C/Cc3ccc(Cl)cc3[N+](=O)[O-]  
 4825 C=Cc1ccc(OC)cc1.COc1ccc(Br)c([N+](=O)[O-])c1>>COc1ccc(/C=C/c2ccc(OC)cc2[N+](=O)[O-])cc1  
 4826 C=Cc1ccc(OC)cc1.CC(C)(Br)CCOC(=O)c1ccc(F)cc1>>COc1ccc(/C=C/C(C)(C)CCOC(=O)c2ccc(F)cc2)cc1  
 4827 C=CC(OCC)OCC.CCN1c2cccc2Sc2cc(Br)ccc21>>CCOC(/C=C/c1ccc2c(c1)Sc1cccc1N2CC)OCC  
 4828 C=CC(C)(C)C.COC(=O)c1ccc(Br)cc1>>COC(=O)c1ccc(/C=C/C(C)(C)C)cc1  
 4829 C=COCCCC.COc1cc(Br)cc(OC)c1OC>>C=C(OCCCC)c1cc(OC)c(OC)c(OC)c1

4830 C=C[C@@H]1CCCCN1C(=O)OC(C)(C)C.CCc1ccc(I)cc1>>CCc1ccc(/C=C/[C@@H]2CCCCN2C(=O)  
4831 =C(OC[C@H]1O[C@H](n2cc(I)c(=O)[nH]c2=O)C[C@H]1OC(=O)c1ccccc1)c1ccccc1>>CC(=O)  
OC[C@H]1O[C@H](OCCC/C=C/c2cn([C@H]3C[C@H](OC(=O)c4ccccc4)[C@H](COC(=O)c4ccc  
cc4)O3)c(=O)[nH]c2=O)[C@H](OC(C)=O)[C@H](OC(C)=O)[C@H]1OC(C)=O  
4832 C=CC(=O)OC.O=Cc1cc(OCc2c(-c3ccc(Cl)cc3)nsc2C(F)(F)F)ccc1Br>>COC(=O)/C=C/c1ccc(OCc2c(-  
c3ccc(Cl)cc3)nsc2C(F)(F)F)cc1C=O  
4833 C=CC(=O)NC(c1ccccc1)C(C(C)=O)C(C)=O.Ic1ccccc1>>CC(=O)C(C(C)=O)C(NC(=O)/C=C/c1ccccc  
1)c1ccccc1  
4834 C=CC(=O)OC(C)(C)C.CCOC(=O)CN1CC(=O)Nc2ncc(Br)cc2C1>>CCOC(=O)CN1CC(=O)Nc2ncc(/  
C=C/C(=O)OC(C)(C)C)cc2C1  
4835 C=CCC#N.CC(C)CCC[C@@H](C)[C@H]1CC[C@H]2C(OS(=O)(=O)C(F)(F)F)=CCC[C@@]21C>>  
CC(C)CCC[C@@H](C)[C@H]1CC[C@H]2C(/C=C/CC#N)=CCC[C@@]21C  
4836 C=CCCCNCc1ccccc1.Ic1ccccc1>>C=C/c1ccccc1)\CCCNc1ccccc1  
4837 C=Cc1ccccc1.C[Si](C)(C)[Si](C)(C)C1[Si](C)(C)[Si](C)(C)C(c2ccc(I)cc2)[Si](C)(C)[Si]1(C)C>>C[Si]  
(C)(C)[Si](C)(C)C1[Si](C)(C)[Si](C)(C)C(c2ccc(/C=C/c3ccccc3)cc2)[Si](C)(C)[Si]1(C)C  
4838 C=CC(=O)Nc1ccc(-c2ccc(C(=O)NCCN3CCCC3)c(NCC)n2)cc1F.Nc1ccc(Br)cn1>>CCNc1nc(-  
c2ccc(NC(=O)/C=C/c3ccc(N)nc3)c(F)c2)ccc1C(=O)NCCN1CCCC1  
4839 C=Cc1ccc(C(C)=O)cc1.IC1CCCCC1>>CC(=O)c1ccc(/C=C/C2CCCCC2)cc1  
4840 C=Cc1ccc2c(c1)Sc1ccccc1N2CCCCCCC.O=Cc1ccc(I)cc1>>CCCCCCCCN1c2ccccc2Sc2cc(/C=C/c3  
ccc(C=O)cc3)cc21  
4841 C=Cc1ccc(C=O)cc1.O=S(=O)(c1ccc(Br)cc1)C(F)(F)F>>O=Cc1ccc(/C=C/c2ccc(S(=O)(=O)C(F)(F)F)c  
c2)cc1  
4842 C=Cc1ccncc1.O=[N+](O-)]c1ccncc1Nc1ccccc1/C=C/c2cncc(Br)c2)c1>>O=[N+](O-  
)]c1ccncc1Nc1ccccc1/C=C/c2cncc(/C=C/c3cnccc3)c2)c1  
4843 C=CC(=O)N1N=Cc2ccccc2C1CCC.COc1cc(Cc2c(C)nc(N)nc2N)cc(I)c1OC>>CCCC1c2ccccc2C=NN  
1C(=O)/C=C/c1cc(Cc2c(C)nc(N)nc2N)cc(OC)c1OC  
4844 Brc1ccc(I)cc1.C=Cc1ccccc1>>Brc1ccc(/C=C/c2ccccc2)cc1  
4845 C=Cc1ccncc1.CCCCCCCCCOc1ccc(I)cc1>>CCCCCCCCCOc1ccc(/C=C/c2ccncc2)cc1  
4846 C=CC(=O)OCC.CCNc1nc(SC)nc(C)c1I>>CCNc1nc(SC)nc(C)c1/C=C/C(=O)OCC  
4847 C=Cc1ccccc1.CCC(C)c1nc(C(C)CC)c(Cl)n1>>CCC(C)c1nc(C(C)CC)c(/C=C/c2ccccc2)n1  
4848 Brc1ccncc1.C=CC(F)(F)F>>FC(F)(F)/C=C/c1ccncc1  
4849 C=COCCCC.O=C(Cl)c1ccoc1>>CCCCO/C=C/C(=O)c1ccoc1  
4850 C=C(NC(=O)OC(C)(C)C)C(=O)OC.N#Cc1cccc(I)c1>>COC(=O)/C=C/c1cccc(C#N)c1)NC(=O)OC(C  
)C(C)C  
4851 C=CC(=O)OC.Cc1cc(C)c(Br)c(C)c1>>COC(=O)/C=C/c1c(C)cc(C)cc1C  
4852 Brc1ccc(N2CCOCC2)c2nsnc12.C=Cc1ccncc1>>C=C/c1ccc(N2CCOCC2)c2nsnc12)\c1ccncc1  
4853 C=Cc1nnn(C)n1.CC(C)(C)c1ccc(I)cc1>>Cn1nncc(/C=C/c2ccc(C(C)(C)C)cc2)n1  
4854 C=CC(C)=O.C[Si](C)(C)c1ccoc1I>>CC(=O)/C=C/c1ccoc1[Si](C)(C)C  
4855 C=CC(=O)OC.N#Cc1ccc(-c2cc(I)cc(-c3ccc3)c2)cc1>>COC(=O)/C=C/c1cc(-c2ccc(C#N)cc2)cc(-  
c2ccc2)c1  
4856 Brc1ccc2c(c1)OCO2.C=CC1OCCO1>>C=C/C1OCCO1)\c1ccc2c(c1)OCO2  
4857 C=Cc1ccc(C)cc1.Cc1ccc(N)c(Br)c1>>Cc1ccc(/C=C/c2cc(C)ccc2N)cc1  
4858 C=C[Si](C)(C)C.COc1cc(CO[Si](C)(C)C)c(I)c(OC)c1OC>>COc1cc(CO[Si](C)(C)C)c(/C=C/[Si](C)(C  
)C)c(OC)c1OC  
4859 C=Cc1cccc([N+](=O)[O-]  
)]c1.O=C1C(O)=C(I)C(=O)c2ccccc21>>O=C1C(O)=C(/C=C/c2cccc([N+](=O)[O-]  
4860 C=CC(=O)OC.C[C@]12CC[C@@H]3c4cc(I)c(O)cc4CC[C@H]3[C@@H]1CC[C@@H]2O>>COC(=  
O)/C=C/c1cc2c(cc1O)CC[C@@H]1[C@@H]2CC[C@]2(C)[C@@H](O)CC[C@@H]12  
4861 C=CC(=O)OC.COc1cc2c(c(I)c1OC)CCN(C(=O)OC(C)(C)C)CC2c1ccccc1>>COC(=O)/C=C/c1c2c(cc(  
OC)c1OC)C(c1ccccc1)CN(C(=O)OC(C)(C)C)CC2  
4862 C=Cc1ccc(N(C)C)cc1.CC(C)c1cccc(C(C)C)c1N1C(=O)c2cccc3c(Br)ccc(c23)C1=O>>CC(C)c1cccc(C(  
C)C)c1N1C(=O)c2cccc3c(/C=C/c4ccc(N(C)C)cc4)ccc(c23)C1=O  
4863 C=COCCN(C)C.Cc1ccc(Br)cc1>>C=C(OCCN(C)C)c1ccc(C)cc1  
4864 C=Cc1cc(OC)c(OC)c(OC)c1-  
c1ccc(C(C)(C)C)cc1.COc1ccc(I)cc1>>COc1ccc(/C=C/c2cc(OC)c(OC)c(OC)c2-  
4865 C=CCn1nncc2ccccc21.COc1ccc(I)cc1>>COc1ccc(/C=C/Cn2nnc3ccccc32)cc1  
4866 C=CC(=O)OC(C)(C)C.O=C(CN1CCOCC1)Nc1ccc(Br)cn1>>CC(C)(C)OC(=O)/C=C/c1ccc(NC(=O)C  
N2CCOCC2)nc1  
4867 C=C1C[C@H]2[C@@H]3CCc4cc(OC)ccc4[C@H]3CC[C@]2(C)C1=O.FC(F)(F)c1ccc(Br)cc1>>COc  
1ccc2c(c1)CC[C@@H]1[C@@H]2CC[C@]2(C)C(=O)/C=C/c3ccc(C(F)(F)F)cc3)C[C@@H]12



4868 C=CC(=O)OCC.Fc1cccc1I>>CCOC(=O)/C=C/c1cccc1F  
 4869 C=CC(=O)N1N=Cc2cccc2C1CCC.CCc1nc(N)nc(N)c1Cc1cc(I)c(OC)c(OC)c1>>CCCC1c2cccc2C=NN1C(=O)/C=C/c1cc(Cc2c(N)nc(N)nc2CC)cc(OC)c1OC  
 4870 C=CC(=O)OC.O=[N+](O-)]c1cccc1I>>COC(=O)/C=C/c1cccc1[N+](=O)[O-]  
 4871 C=Cc1nnn(-c2cccc2)n1.Ic1cccc1>>C(=C/c1nnn(-c2cccc2)n1)\c1cccc1  
 4872 Brc1ccc(I)cc1.C=Cc1ccc(O)cc1>>Oc1ccc(/C=C/c2ccc(Br)cc2)cc1  
 4873 C=Cc1cccc1.O=Cc1ccc2cccc2c1Br>>O=Cc1ccc2cccc2c1/C=C/c1cccc1  
 4874 C=Cc1ccc(C)cc1.Cc1ccc(Br)c(C=O)c1>>Cc1ccc(/C=C/c2ccc(C)cc2C=O)cc1  
 4875 C=COCCCC.O=C(O)c1cccc(Cl)c1>>C=C(OCCCC)c1cccc(C(=O)O)c1  
 4876 C=CC(=O)OC.O=C1Nc2cccc(I)c2/C1=C/c1ccc[nH]1>>COC(=O)/C=C/c1cccc2c1/C(=C/c1ccc[nH]1)C(=O)N2  
 4877 C=Cc1cccc1.CCOC(=O)c1cccc1I>>CCOC(=O)c1cccc1/C=C/c1cccc1  
 4878 C=CN1CCCC1=O.Cc1ccc(Br)cc1>>C=C(c1ccc(C)cc1)N1CCCC1=O  
 4879 C=Cc1nnn[nH]1.CC(C)CN(CC(C)C)c1ccc(Br)cc1[N+](=O)[O-]>>CC(C)CN(CC(C)C)c1ccc(/C=C/c2nnn[nH]2)cc1[N+](=O)[O-]  
 4880 C=CC(=O)OC.Cc1[nH]c2cccc2c1C1CCCN1Cc1ccc(Br)cc1>>COC(=O)/C=C/c1ccc(CN2CCCC2c2c(C)[nH]c3cccc23)cc1  
 4881 C=CC(=O)OCC.CC(C)(C)OC(=O)NC1Cc2ccc(Br)cc2C1>>CCOC(=O)/C=C/c1ccc2c(c1)CC(NC(=O)OC(C)(C)C)C2  
 4882 Brc1ccc(I)cc1.C=Cc1ccc(C(C)(C)C)cc1>>CC(C)(C)c1ccc(/C=C/c2ccc(Br)cc2)cc1  
 4883 Brc1cnc2cccc2c1.C=CCO[C@]1(C)C[C@H](C)C(=O)[C@H](C)[C@]2(O)NC(=O)O[C@]2(C)[C@H](C)OC(=O)[C@H](C)[C@H](O[C@H]2C[C@](C)(OC)[C@H](O[Si](C)(C)C)[C@H](C)O2)[C@H](C)[C@H]1O[C@H]1O[C@H](C)C[C@H](N(C)C)[C@H]1O[Si](C)(C)C>>CC[C@H]1OC(=O)[C@H](C)[C@H](O[C@H]2C[C@](C)(OC)[C@H](O[Si](C)(C)C)[C@H](C)O2)[C@H](C)[C@H](O[C@H]2O[C@H](C)C[C@H](N(C)C)[C@H]2O[Si](C)(C)C)[C@](C)(OC/C=C/c2cnc3cccc3c2)C[C@H](C)C(=O)[C@H](C)C(=O)[C@]2(O)NC(=O)O[C@]2(C)[C@H](C)OC(=O)CC(C)(C)[Si](C)(C)OC(CCO)c1cccc2ccc(Br)cc12>>COC(=O)/C=C/c1ccc2cccc(C(CC O)[Si](C)(C)C(C)C)C2c1  
 4884 C=CC(=O)OC.CC(C)(C)[Si](C)(C)OC(CCO)c1cccc2ccc(Br)cc12>>COC(=O)/C=C/c1ccc2cccc(C(CC O)[Si](C)(C)C(C)C)C2c1  
 4885 C=C(OC(C)=O)C(=O)OCC(F)(F)F.CC1(C)CCc2cc(I)ccc2O1>>CC(=O)O/C(=C/c1ccc2c(c1)CCC(C)(C)O2)C(=O)OCC(F)(F)F  
 4886 C=Cc1ccc(OC)cc1.CC(C)(C)c1ccc(Br)cc1>>C=C(c1ccc(OC)cc1)c1ccc(C(C)(C)C)cc1  
 4887 C=CCN1C(=O)c2cccc2C1=O.Clc1ccc(I)cc1>>O=C1c2cccc2C(=O)N1C/C=C/c1ccc(Cl)cc1  
 4888 Brc1ccc(/C=C/c2ccncc2)c2nsnc12.C=Cc1ccc2c(c1)c1cccc1n2CCCC>>CCCCn1c2cccc2c2cc(/C=C/c3ccc(/C=C/c4ccncc4)c4nsnc34)ccc21  
 4889 C=Cc1cccc1.O=c1ccoc2cc(Br)ccc12>>O=c1ccoc2cc(/C=C/c3cccc3)ccc12  
 4890 C=CCN(C)c1cccn1.COC(=O)[C@H](Cc1ccc(OS(=O)(=O)C(F)(F)F)cc1)n1cccc1>>COC(=O)[C@H](Cc1ccc(/C=C/CN(C)c2cccn2)cc1)n1cccc1  
 4891 C=Cc1ccc(C)cc1.N#CCc1ccc(Br)cc1>>Cc1ccc(/C=C/c2ccc(CC#N)cc2)cc1  
 4892 C=Cc1ccc(OC)cc1.COC(=O)[C@H](Cc1cccc1)NC(=O)C(F)(F)Br>>COC(=O)[C@H](Cc1cccc1)NC(=O)C(F)(F)/C=C/c1ccc(OC)cc1  
 4893 C=CC(=O)OCC.Cc1nc(C)c(I)c(N)n1>>CCOC(=O)/C=C/c1c(C)nc(C)nc1N  
 4894 C=CC(=O)OC(C)(C)C.COc1ccc(S(=O)(=O)c2ccc3c(Br)ccc3n2)cc1>>COc1ccc(S(=O)(=O)c2ccc3c(/C=C/C(=O)OC(C)(C)C)ccc3n2)cc1  
 4895 C=Cc1ccc(C)cc1.COc1cccc(Br)c1>>COc1cccc(/C=C/c2ccc(C)cc2)c1  
 4896 Brc1ccc(-c2nc3cccc3n2)cc1.C=CCn1c(-c2ccc(OC)c2)nc2cccc2c1=O>>COc1cccc(-c2nc3cccc3c(=O)n2C/C=C/c2ccc(-c3cnc4cccc4n3)cc2)c1  
 4897 C=CC(N)=O.Cc1ccc(Br)cc1>>Cc1ccc(/C=C/C(N)=O)cc1  
 4898 C=CC(=O)OCC.Fc1cccc(Cn2nc(I)c3cccc32)c1>>CCOC(=O)/C=C/c1nn(Cc2cccc(F)c2)c2cccc12  
 4899 C=CC(=O)OCCCC.COc1ccc2ncc(F)c(Br)c2n1>>CCCCOC(=O)/C=C/c1c(F)cnc2ccc(OC)nc12  
 4900 C=CC(N)=O.Ic1cccs1>>NC(=O)/C=C/c1cccs1  
 4901 C=CC(=O)Nc1cccc1.O=c1c(I)c(-c2ccc(O)cc2)oc2cc(O)ccc12>>O=C(/C=C/c1c(-c2ccc(O)cc2)oc2cc(O)ccc2c1=O)Nc1cccc1  
 4902 C=Cc1ccc(C)cc1.CC(=O)NS(=O)(=O)c1ccc(Br)cc1>>CC(=O)NS(=O)(=O)c1ccc(/C=C/c2ccc(C)cc2)c  
 4903 C=COCCCC.Clc1cccs1>>C=C(OCCCC)c1cccs1  
 4904 C=Cc1cccc1.Ic1cccn1>>C(=C/c1cccn1)\c1cccc1  
 4905 C=CC(=O)N(C)C.C[C@]12C[C@]34C=C(Sc5ccc(I)cc5)C(=O)[C@@](C)(CCC(=O)Nc5c(O)ccc(C(=O)O)c5O)[C@H]3[C@H](C[C@H]1C4)O2>>CN(C)C(=O)/C=C/c1ccc(SC2=C[C@]34C[C@H]5C[C@H](O[C@@]5(C)C3)[C@H]4[C@](C)(CCC(=O)Nc3c(O)ccc(C(=O)O)c3O)C2=O)cc1  
 4906 C=COCCCC.COC(=O)c1ccc(Cl)cc1>>C=C(OCCCC)c1ccc(C(=O)OC)cc1

C=C1C(=O)O[C@H]2[C@H]1CCC(=C)[C@@H]1C[C@H](OC(C)=O)C(=C)[C@H]21.Cc1ccc(I)c([N  
 4907 +])(=O)[O-])c1>>C=C1CC[C@H]2/C=C/c3ccc(C)cc3[N+](=O)[O-  
 ]C(=O)O[C@H]2[C@H]2C(=C)[C@@H](OC(C)=O)C[C@H]12  
 4908 C=Cc1cncnc1.CCOCc1c2ccc(Br)cc2c2cc(C=O)ccc21>>CCOCc1c2ccc(C=O)cc2c2cc(/C=C/c3cnc  
 c3)ccc21  
 4909 C=Cc1cccc1.Ic1cccc2cccc12>>C(=C/c1cccc2cccc12)\c1cccc1  
 4910 C=CC(=O)N1N=Cc2cccc2C1C1CC1.COc1cc(Cc2cnc(N)nc2N)cc(I)c1OC>>COc1cc(Cc2cnc(N)nc2N  
 )cc(/C=C/C(=O)N2N=Cc3cccc3C2C2CC2)c1OC  
 4911 C=Cc1nc(C#N)c(C#N)n1CCCCC.CN(C)c1ccc(/C=C/c2ccc(N(c3ccc(I)cc3)c3ccc(/C=C/c4ccc(N(C)C)  
 cc4)cc3)cc2)cc1>>CCCCCn1c(/C=C/c2ccc(N(c3ccc(/C=C/c4ccc(N(C)C)cc4)cc3)c3ccc(/C=C/c4ccc(  
 N(C)C)cc4)cc3)cc2)nc(C#N)c1C#N  
 4912 C=CC(=O)OC.COc1nc(Br)c(-  
 c2cccc2)n(Cc2cccc2)c1=O>>COC(=O)/C=C/c1nc(OC)c(=O)n(Cc2cccc2)c1-c1cccc1  
 4913 Bre1cc2c(cc1C1OCCO1)OCO2.C=CC(=O)OC(C)(C)C>>CC(C)(C)OC(=O)/C=C/c1cc2c(cc1C1OCCO  
 1)OCO2  
 4914 C=CP(=O)(OCC)OCC.Cc1cccc1Br>>CCOP(=O)(/C=C/c1cccc1C)OCC  
 4915 C=CC(=O)OCCCC.Cc1cccc(C)c1Br>>CCCCOC(=O)/C=C/c1c(C)cccc1C  
 4916 C=CC(=O)O.O=S(=O)(Nc1ccc(I)cc1)c1cccc1>>O=C(O)/C=C/c1ccc(NS(=O)(=O)c2cccc2)cc1  
 4917 Bre1cccc1I.C=Cc1ccc(C)cc1C>>Cc1ccc(/C=C/c2cccc2Br)c(C)c1  
 4918 C=C[Si](CC)(CC)CC.N#Cc1ccc(Br)cc1>>CC[Si](/C=C/c1ccc(C#N)cc1)(CC)CC  
 4919 C=CS(C)(=O)=O.Cc1ccc(Br)cc1>>Cc1ccc(/C=C/S(C)(=O)=O)cc1  
 4920 C=OCCCCC.CN(C)c1ccc(Br)en1>>C=C(OCCCC)c1ccc(N(C)C)nc1  
 4921 C=Cc1ccc(F)cc1.CC(=O)c1ccc(Br)cc1>>CC(=O)c1ccc(/C=C/c2ccc(F)cc2)cc1  
 4922 C=C(NC(C)=O)C(=O)OC.CC(C)(C)[Si](C)(C)OC[C@H]1O[C@H](c2ccc(Br)cc2)C=C[C@H]1O[Si  
 4922 ](C)(C)C(C)(C)C>>COC(=O)/C=C/c1ccc([C@H]2C=C[C@H](O[Si](C)(C)C(C)(C)C)[C@H](C  
 O[Si](C)(C)C(C)(C)C)O2)cc1)NC(C)=O  
 4923 Bre1ncc2cccc12.C=CC(=O)OCCCC>>CCCCOC(=O)/C=C/c1cnc2cccc12  
 4924 C=CC(C)=O.[13CH3]C1=C(OS(=O)(=O)C(F)(F)F)C([13CH3])([13CH3])CCC1>>CC(=O)/C=C/C1=C  
 ([13CH3])CCCC1([13CH3])[13CH3]  
 4925 C=C.Cc1cccc1I>>C=Cc1cccc1C  
 4926 C=CC(=O)OC.O=Cc1ccc(Cl)cc1Br>>COC(=O)/C=C/c1cc(Cl)ccc1C=O  
 4927 C=CC(=O)OCCCC.COc1ccc2cccc([N+](=O)[O-])c2c1-  
 c1c(OC(=O)C(C)(C)C)ccc2cc(Br)ccc12>>CCCCOC(=O)/C=C/c1ccc2c(-  
 c3c(OC)ccc4cccc([N+](=O)[O-])c34)c(OC(=O)C(C)(C)C)ccc2c1  
 4928 C=Cc1cc(OC(C)=O)cc(OC(C)=O)c1.COc1ccc([C@H]2Oc3ccc(Br)cc3[C@H]2c2cc(OC)cc(OC)c2  
 )cc1>>COc1ccc([C@H]2Oc3ccc(/C=C/c4cc(OC(C)=O)cc(OC(C)=O)c4)cc3[C@H]2c2cc(OC)cc(  
 OC)c2)cc1  
 4929 C=Cc1cncnc1.O=[N+](O-)]c1ccc(Br)cc1>>O=[N+](O-)]c1ccc(/C=C/c2cncnc2)cc1  
 4930 C=CC(N)=O.O=C(O)c1ccc(I)cc1>>NC(=O)/C=C/c1ccc(C(=O)O)cc1  
 4931 C=Cc1ccc(C)cc1.Cc1ccc2c(-c3cccc3)c(Br)c(=O)cc2c1>>Cc1ccc(/C=C/c2c(-  
 c3cccc3)c3ccc(C)cc3oc2=O)cc1  
 4932 C=CC(=O)O.O=S(=O)(Nc1ccc(I)cc1)c1cccs1>>O=C(O)/C=C/c1ccc(NS(=O)(=O)c2cccs2)cc1  
 4933 C=CCC1(C)c2cccc2N(C)C1c1cccc1.COc1ccc(I)cc1>>COc1ccc(/C=C/CC2(C)c3cccc3N(C)C2c2cc  
 ccc2)cc1  
 4934 C=Cc1cncnc1.COc1ccc([C@H]2C[C@H]2COC2nc(C)nc2Br)nc1>>COc1ccc([C@H]2C[C@H]2  
 COc2nc(C)nc2/C=C/c2ccnc2)nc1  
 4935 C=Cc1cccc1.Nc1ccc(Cl)cc1I>>Nc1ccc(Cl)cc1/C=C/c1cccc1  
 4936 C=CC(=O)O.COC(=O)c1c(I)cc2c(c1OCc1cccc1)OCO2>>COC(=O)c1c(/C=C/C(=O)O)cc2c(c1OCc1  
 ccccc1)OCO2  
 4937 C=Cc1cccc1.CCCCCOC(=O)/C=C/c1ccc(Cl)cc1>>CCCCOC(=O)/C=C/c1ccc(/C=C/c2cccc2)cc1  
 4938 C=OCCCC.COc1ccc2cc(Br)ccc2c1>>C=C(OCCCC)c1ccc2cc(OC)ccc2c1  
 4939 C=CC(=O)O.O=S(=O)(Nc1ccc(I)cc1)c1ccc(OC(F)(F)F)cc1>>O=C(O)/C=C/c1ccc(NS(=O)(=O)c2ccc(  
 OC(F)(F)F)cc2)cc1  
 4940 C=CC(=O)C(C)C.COc1ccc2cc(Br)ccc2c1>>COc1ccc2cc(/C=C/C(=O)C(C)C)ccc2c1  
 4941 C=Cc1cccc1.CCCCCn1cc(C(=O)NC23CC4CC(CC(C4)C2)C3)c(=O)c2cc(I)ccc21>>CCCCCn1cc(C(=O)  
 NC23CC4CC(CC(C4)C2)C3)c(=O)c2cc(/C=C/c3cccc3)ccc21  
 4942 C=CC(=O)OCC.CCOC(=O)/C=C/c1cccc1Br>>CCOC(=O)/C=C/c1cccc1/C=C/C(=O)OCC  
 4943 C=CC(=O)OCCCC.COc1cccc([H2])(OC(C)=O)OC(C)=O)c1>>CCCCOC(=O)/C=C/c1cccc(OC)c1  
 4944 C=CC#N.COC(=O)c1ncccc1Br>>COC(=O)c1ncccc1/C=C/C#N  
 4945 C=Cc1csc2c(N)ncnc12.CCOC(=O)c1ccc(C)c(I)c1>>CCOC(=O)c1ccc(C)c(/C=C/c2csc3c(N)ncnc23)c1

4946 C=CS(=O)(=O)NC1CCCC1.Cc1ccc(CNC(=O)OC(C)(C)C)c(Br)c1>>Cc1ccc(CNC(=O)OC(C)(C)C)c(/  
 C=C/S(=O)(=O)NC2CCCC2)c1  
 4947 C=CC(OCC)OCC.FC(F)(F)c1cccc(Br)c1>>CCOC(/C=C/c1cccc(C(F)(F)F)c1)OCC  
 4948 C=CC(C)(C)O.Ic1cccc2c1NCC2>>CC(C)(O)/C=C/c1cccc2c1NCC2  
 4949 C=CC(=O)OCC.O=C(c1cccc1)c1ccc(Br)cc1>>CCOC(=O)/C=C/c1ccc(C(=O)c2cccc2)cc1  
 4950 C=Cc1cncnc1.CCCCN(CCCC)c1ccc(I)cc1>>CCCN(CCCC)c1ccc(/C=C/c2cncnc2)cc1  
 4951 C=CC(=O)OC.Cc1cc(C)c2nc(CC(C)C)n(Cc3ccc(Br)cc3)c2n1>>COC(=O)/C=C/c1ccc(Cn2c(CC(C)C)n  
 c3c(C)cc(C)nc32)cc1  
 Br1cccc1.C=CC[C@H]1CCCN(C)C[C@H](OC(C)=O)[C@H](C)C[C@H](CC(OC)OC)[C@H](O)[C  
 @H]2O[C@H](C)[C@H](O)[C@H]3C[C@H](C)(O)[C@H](OC(=O)CC)[C@H](C)O3[C@H](  
 N(C)C)[C@H]2OC(C)=O)[C@H](OC)[C@H](OC(=O)CC)CC(=O)O1>>CCC(=O)O[C@H]1[C@H]  
 4952 (C)O[C@H](O)[C@H]2[C@H](N(C)C)[C@H](OC(C)=O)[C@H](O[C@H]3[C@H](OC)[C@  
 H](OC(=O)CC)CC(=O)O[C@H](C/C=C/c4cccc4)CCCN(C)C[C@H](OC(C)=O)[C@H](C)C[C@  
 H]3CC(OC)OC)O[C@H]2C)C1C@H12C)C1C@H11(C)O  
 4953 C=CC(C)=O.CC(C)Oc1ccc(Oc2ncc(I)s2)cc1>>CC(=O)/C=C/c1cnc(Oc2ccc(OC(C)C)cc2)s1  
 C=CC(=O)OC(C)C.O=C(c1cnn(-  
 4954 c2cccc2)c1)c1cc(Br)ccc1O>>CC(C)(C)OC(=O)/C=C/c1ccc(O)c(C(=O)c2cnn(-c3cccc3)c2)c1  
 4955 C=Cc1cccc1.O=c1oc2cc(F)ccc2c(-c2cccc2)c1Br>>O=c1oc2cc(F)ccc2c(-c2cccc2)c1/C=C/c1cccc1  
 4956 Br1cccc1.C=CC(=O)OC(C)(C)C>>CC(C)(C)OC(=O)/C=C/c1cccc1  
 4957 C=CC(=O)OC.CC(C)(C)OC(=O)N1CCC2(CC1)CC(=O)c1cc(Br)ccc1O2>>COC(=O)/C=C/c1ccc2c(c1  
 )C(=O)CC1(CCN(C(=O)OC(C)C)CC1)O2  
 4958 C=CC(C)(C)O.O=c1c(Br)c(-c2cccc2)oc2cccc12>>CC(C)(O)/C=C/c1c(-c2cccc2)oc2cccc2c1=O  
 C=CC(=O)NC(C)(C)C.[C@H]12C[C@@H]34C=C(Se5ccc(I)cc5)C(=O)[C@@H](C)(CCC(=O)Nc5c(O)cc  
 4959 c(C(=O)O)c5O)[C@@H]3[C@H](C[C@@H]1C4)O2>>CC(C)(C)NC(=O)/C=C/c1ccc(SC2=C[C@H]34  
 C[C@H]5C[C@H](O)[C@@H]5(C)C3)[C@H]4[C@H](C)(CCC(=O)Nc3c(O)ccc(C(=O)O)c3O)C2=O)cc1  
 4960 C=CC(=O)NCCO.COc1ccc(CNc2c(C(=O)NCc3ccc(F)cc3F)c(=O)n(OCc3cccc3)c3ncc(Br)cc23)c(OC)  
 c1>>COc1ccc(CNc2c(C(=O)NCc3ccc(F)cc3F)c(=O)n(OCc3cccc3)c3ncc(/C=C/C(=O)NCCO)cc23)c(  
 4961 C=COCCCCO.COC(=O)c1ccc(I)cc1>>COC(=O)c1ccc(/C=C/OCCCCCO)cc1  
 4962 C=COCCCC.CC(=O)c1ccc(Cl)cc1>>C=C(OCCCC)c1ccc(C(C)=O)cc1  
 4963 C=Cc1ccc(N(C)C)cc1.FC(F)(F)c1cccc1I>>CN(C)c1ccc(/C=C/c2cccc2C(F)(F)F)cc1  
 4964 C=C(NC(C)=O)C(=O)OC.Cc1cccc1I>>COC(=O)/C=C/c1cccc1C)NC(C)=O  
 4965 C=Cc1ccc(C(C)(C)C)cc1.C[Si](C)(C)Cl>>CC(C)(C)c1ccc(/C=C/[Si](C)(C)C)cc1  
 4966 C=CCN(C(=O)OC(C)(C)C)C(=O)OC(C)(C)C.N#Cc1cccc1Cl>>CC(C)(C)OC(=O)N(C/C=C/c1cccc1  
 C#N)C(=O)OC(C)(C)C  
 4967 C=CC(=O)O.Clc1ccc(Br)c1>>O=C(O)/C=C/c1cccc(Cl)c1  
 4968 C=CC(=O)OC(C)(C)C.CCOC(=O)c1cnc(Cc2ccc(Br)c2)c2cc(OC)c(OC)cc12>>CCOC(=O)c1cnc(Cc2  
 cccc(/C=C/C(=O)OC(C)(C)C)c2)c2cc(OC)c(OC)cc12  
 4969 C=CC(F)(F)F.COc1ccc(I)cc1>>COc1ccc(/C=C/C(F)(F)F)cc1  
 4970 CC[C@@H]1CCC=CN1/C(=N/[C@H](COC)C(C)C)c1cccc1.Ic1cccc1>>CC[C@@H]1CCC(c2cccc  
 c2)=CN1/C(=N/[C@H](COC)C(C)C)c1cccc1  
 4971 C=Cc1cc(OC)c(O)c(OC)c1.COc1ccc(OC)c(I)c1>>COc1ccc(OC)c(/C=C/c2cc(OC)c(O)c(OC)c2)c1  
 4972 C=C[C@H](O)[Si](C)(C)C(C)(C)C[C@H](CCCC(=O)OCC)O[Si](C)(C)C(C)(C)C.O=Cc1cccc1Br>>  
 CCOC(=O)CCC[C@H](O)[Si](C)(C)C(C)(C)C[C@H](/C=C/c1cccc1C=O)O[Si](C)(C)C(C)(C)C  
 4973 C=CC(C)(C)O.CON=CCc1cn(S(=O)(=O)c2ccc(C)cc2)c2cccc(Br)c12>>CON=CCc1cn(S(=O)(=O)c2cc  
 c(C)cc2)c2cccc(/C=C/C(C)(C)O)c12  
 4974 C/N=C1/Ne2ncc(Br)cc2OC1(C)C.C=CC(=O)N(C)Cc1sc2cccc2c1C>>C/N=C1/Ne2ncc(/C=C/C(=O)N  
 (C)Cc3sc4cccc4c3C)cc2OC1(C)C  
 4975 C=CC(=O)CCCC.N#Cc1ccc(Br)cc1>>CCCCC(=O)/C=C/c1ccc(C#N)cc1  
 4976 \*C(=O)C(=C)C.N#Cc1c(O)c(Cl)c(I)c(O)c1C#N>>\*C(=O)/C(C)=C/c1c(O)c(C#N)c(C#N)c(O)c1Cl  
 4977 C=CC(=O)OC(C)(C)C.Fc1cccc1Oc1ncc2nc(-c3ccc(Br)cc3)oc2n1>>CC(C)(C)OC(=O)/C=C/c1ccc(-  
 c2nc3cnc(OC4cccc4F)nc3o2)cc1  
 4978 C=C(NC(C)=O)C(=O)OCc1cccc1.COC(=O)/C=C/c1ccc(Br)c1)NC(=O)OC(C)(C)C>>COC(=O)/C(  
 =C/c1cccc(/C=C(\NC(C)=O)C(=O)OCc2cccc2)c1)NC(=O)OC(C)(C)C  
 4979 C=Cc1cccc1.Ic1ccc2[nH]c3cccc3c2c1>>C=C/c1ccc2[nH]c3cccc3c2c1)c1cccc1  
 4980 Br1ccnc1.C=Cc1nn(Cc2cccc2)(c2cccc2)c2cccc2c2ccc(C#N)c(OC)c12>>COc1c(C#N)ccc2c1c(/  
 C=C/c1ccnc1)nn2C(c1cccc1)(c1cccc1)c1cccc1  
 4981 C=CC(=O)OC.Ic1ccoc1>>COC(=O)/C=C/c1ccoc1  
 4982 C=CC(=O)OCC.COc1ccc(-c2ccc(Br)s2)cc1>>CCOC(=O)/C=C/c1ccc(-c2ccc(OC)cc2)s1  
 4983 C=CC(=O)OCC.O=c1c(I)oc2cc(O)ccc12>>CCOC(=O)/C=C/c1oc2cc(O)ccc2c1=O  
 4984 C=CC(O)C1CCCCC1.I/C=C/C=C/CCCCOCc1cccc1>>OC(/C=C/C=C/C=C/C/CCCCOCc1cccc1)C1C  
 CCCC1

4985 C=CCN(C(=O)C(C)(C)C)[C@@H]1CCc2ccccc21.O=C1Ne2ncccc2[C@]12Cc1ccc(Br)cc1C2>>CC(C)(C)C(=O)N(C/C=C/c1ccc2c(c1)C[C@@]1(C2)C(=O)Nc2ncccc21)[C@@H]1CCc2ccccc21  
 4986 C=CC(=O)OC(C)(C)C.Nc1ncc(Br)cc1I>>CC(C)(C)OC(=O)/C=C/c1cc(Br)enc1N  
 4987 C=CB1OC(C)CC(C)(C)O1.COC(=O)/C=C(/C)I>>COC(=O)/C=C(C)\C=C\B1OC(C)CC(C)(C)O1  
 4988 C=CCNS(=O)(=O)c1ccc(C)cc1.Ic1ccccc1>>Cc1ccc(S(=O)(=O)NC/C=C/c2ccccc2)cc1  
 4989 C=CC(=O)N(C)C.COc1ccc(CNc2c(C(=O)NCc3ccc(F)cc3F)c(=O)n(OCc3ccccc3)c3ncc(Br)cc23)c(OC)c1>>COc1ccc(CNc2c(C(=O)NCc3ccc(F)cc3F)c(=O)n(OCc3ccccc3)c3ncc(/C=C/C(=O)N(C)C)cc23)c(Brc1c2ccccc2cc2ccccc12.C=Cc1nc2c(N)ncnc2n1[C@@H]1O[C@H](CO[Si](C)(C)C(C)(C)C)[C@@H](O[Si](C)(C)C(C)(C)C)[C@H]1O[Si](C)(C)C(C)(C)C)>>CC(C)(C)[Si](C)(C)OC[C@H]1O[C@H](n2c(/C=C/c3c4ccccc4cc4ccccc34)nc3c(N)ncnc32)[C@H](O[Si](C)(C)C(C)(C)C)[C@H]1O[Si](C)(C)C(=C(Br)CCO.C=CC(=O)OCCCC>>C=C(/C=C/C(=O)OCCCC)CCO  
 4992 C=C1CC(c2ccccc2)OC1=O.FC(F)(F)c1ccccc1I>>O=C1OC(c2ccccc2)C/C1=C/c1ccccc1C(F)(F)F  
 4993 C=CC(=O)OCC.Cc1ccc(I)cc1C>>CCOC(=O)/C=C/c1ccc(C)c(C)c1  
 4994 C=CCO[Si](C)(C)C(C)(C)C.FC(F)(F)c1ccc(Br)cc1>>CC(C)(C)[Si](C)(C)OC/C=C/c1ccc(C(F)(F)F)cc1  
 4995 C=CP(=O)(OCC)OCC.CC(=O)Nc1ccc(Br)cc1>>CCOP(=O)/C=C/c1ccc(NC(C)=O)cc1)OCC  
 4996 C=Cc1ccccc1.Clc1ccccc1I>>Clc1ccccc1/C=C/c1ccccc1  
 4997 C=COCCCC.Cc1ccccc1Cl>>C=C(OCCCC)c1ccccc1C  
 4998 C=Cc1ccccc1.CC(C)(C)C1CC=C(Cl)CC1>>CC(C)(C)C1CC=C(/C=C/c2ccccc2)CC1  
 4999 C=CC(=O)OC(C)(C)C.O=C1Ne2ccc(Br)cc2C(=O)N2C[C@H](O)C[C@H]12>>CC(C)(C)OC(=O)/C=C/c1ccc2c(c1)C(=O)N1C[C@H](O)C[C@H]1C(=O)N2  
 5000 C=CC(=O)OC.CCN(CC)c1ccccc(Br)c1>>CCN(CC)c1ccccc1/C=C/C(=O)OC)c1  
 5001 C=CC(N)=O.FC(F)(F)Oc1ccc(Br)cc1>>NC(=O)/C=C/c1ccc(OC(F)(F)F)cc1  
 5002 C=CC(=O)OC(C)(C)C.CC(C)(C)OC(=O)CC1(C(=O)OC(C)(C)C)CC(c2cc(Br)cc(OCc3ccccc3)c2)=NO1>>CC(C)(C)OC(=O)/C=C/c1cc(OCc2ccccc2)cc(C2=NOC(CC(=O)OC(C)(C)C)(C(=O)OC(C)(C)C)C  
 5003 C=Cc1ccc(OC)cc1.Cc1ccc(OS(=O)(=O)C(F)(F)F)cc1>>C=C(c1ccc(C)cc1)c1ccc(OC)cc1  
 5004 C=CC(=O)O.O=C1CCC(N2Cc3ccccc(Br)c3C2=O)C(=O)N1>>O=C(O)/C=C/c1ccccc2c1C(=O)N(C1CC(C(=O)NC1=O)C2  
 5005 C=Cc1ccc2ccc(Cl)cc2n1.COC(=O)c1ccccc1CCC(=O)c1ccccc(Br)c1>>COC(=O)c1ccccc1CCC(=O)c1ccc(/C=C/c2ccc3ccc(Cl)cc3n2)c1  
 5006 C=CC(=O)OCCCC.Oc1ccccc1I>>CCCCOC(=O)/C=C/c1ccccc1O  
 5007 C=CC(N)=O.Clc1ccc(I)cc1>>NC(=O)/C=C/c1ccc(Cl)cc1  
 5008 C=CCCCCCC.CC(C)[C@H]1C(=O)N[C@H](CO[Si](C)(C)C(C)(C)C)Cc2c[nH]c3cc(Br)cc(c23)N1C>>CCCCCCC/C=C/c1cc2c3c(c[nH]c3c1)C[C@@H](CO[Si](C)(C)C(C)(C)C)NC(=O)[C@H](C(C)C)N2  
 5009 C=CC(=O)Nc1ccccc2ccnc12.CCc1ccc(I)cc1>>CCc1ccc(/C=C/C(=O)Nc2ccccc3ccnc23)cc1  
 5010 C=Cc1ccccc1.CCC(Br)CC>>CCC(/C=C/c1ccccc1)CC  
 5011 C=Cc1ccc(OC)cc1.O=c1c(Br)c(-c2ccccc2)oc2ccccc12>>COc1ccc(/C=C/c2c(-c3ccccc3)oc3ccccc3c2=O)cc1  
 5012 C=C/C=C/C(=O)N(CCCC)CCCC.Cc1ccc(Br)cc1>>CCCCN(CCCC)C(=O)/C=C/C=C/c1ccc(C)cc1  
 5013 C=CC(=O)OCC.Nc1ncc(C2CC2)cc1Br>>CCOC(=O)/C=C/c1cc(C2CC2)enc1N  
 5014 Brc1ccccc2ccccc12.C=CP(=O)(c1ccccc1)C(C)(C)C>>CC(C)(C)P(=O)/C=C/c1ccccc2ccccc12)c1ccccc1  
 5015 C=CC(=O)N(C)Cc1oc2ccccc2c1C.CC(C)(C)OC(=O)NC1Cc2cc(Br)enc2NC1=O>>Cc1c(CN(C)C(=O)/C=C/c2enc3c(c2)CC(NC(=O)OC(C)(C)C(=O)N3)oc2ccccc12  
 5016 C=CC(=O)NCc1ccc(F)cc1F.COc1ccc2c(=O)c(I)cc2c1>>COc1ccc2c(=O)c(/C=C/C(=O)NCc3ccc(F)cc3F)cc2c1  
 5017 C=CC(=O)NCc1ccccc1.COc1cc2oc(-c3ccccc3)c(I)c(=O)c2cc1OC>>COc1cc2oc(-c3ccccc3)c(/C=C/C(=O)NCc3ccccc3)c(=O)c2cc1OC  
 5018 C=CC(N)=O.Cc1ccccc(I)c1>>Cc1ccccc1/C=C/C(N)=O)c1  
 5019 Brc1ccccc1.C=CC(N)=O>>NC(=O)/C=C/c1ccccc1  
 5020 C=CC(=O)OC.CCOC(=O)c1ccc(Br)cc1>>CCOC(=O)c1ccc(/C=C/C(=O)OC)cc1  
 5021 C=Cc1ccccc1.CCCCOC(=O)/C=C/c1ccc(/C=C/C(=O)OCC)cc1Cl>>CCCCOC(=O)/C=C/c1ccc(/C=C/C(=O)OCC)cc1/C=C/c1ccccc1  
 5022 C=CC(=O)OCc1ccccc1.C[Si](C)(C)CCOC(=O)c1ccccc(I)c1>>C[Si](C)(C)CCOC(=O)c1ccccc(/C=C/C(=O)OCc2ccccc2)c1  
 5023 C=CCC(=O)OC.COc1c(Br)cc2c3c(cccc13)OC(C)(C)O2>>COC(=O)C/C=C/c1cc2c3c(cccc3c1OC)OC(C)(C)O2  
 5024 C=CC(N)=O.CCOC(=O)/C=C/c1cc(Br)cc(C(O)c2ccc(F)cc2)c1>>CCOC(=O)/C=C/c1cc(/C=C/C(N)=O)cc(C(O)c2ccc(F)cc2)c1  
 5025 C=CC(=O)OC.O=C1C(=O)N(Cc2ccc(C(F)(F)F)cc2)c2ccccc(Br)c21>>COC(=O)/C=C/c1ccccc2c1C(=O)C(=O)N2Cc1ccc(C(F)(F)F)cc1  
 5026 C=Cc1ccccc1.CC(=O)c1ccc(Br)cc1>>CC(=O)c1ccc(/C=C/c2ccccc2)cc1

5027 C=CC(=O)NCc1ccc(OC)cc1.O=c1c(I)coc2cc(O)ccc12>>COc1ccc(CNC(=O)/C=C/c2coc3cc(O)ccc3c2=O)cc1  
 5028 C=Cc1cccc1.Cc1oc2cccc2c(=O)c1Br>>Cc1oc2cccc2c(=O)c1/C=C/c1cccc1  
 5029 C=Cc1cccc(Cl)c1.COC(=O)c1cc(OC)ccc1Br>>COC(=O)c1cc(OC)ccc1/C=C/c1cccc(Cl)c1  
 5030 C=C.NC(=O)c1cccc1Br>>C=Cc1cccc1C(N)=O  
 5031 C=Cc1cccc1.CC(C)(C)c1ccc(Br)cc1>>CC(C)(C)c1ccc(/C=C/c2cccc2)cc1  
 5032 C=Cc1cccc1C.CCOC(=O)C(F)(F)I>>CCOC(=O)C(F)(F)/C=C/c1cccc1C  
 5033 C=COCCCC.O=c1cc(Br)c2ccc(Cl)cc2[nH]1>>CCCCO/C=C/c1cc(=O)[nH]c2cc(Cl)ccc12  
 5034 C=CCNC(=O)OC(C)(C)C.O=C1CCc2cc(Br)ccc21>>C=C(CNC(=O)OC(C)(C)C)c1ccc2c(c1)CCC2=O  
 5035 C=CC(=O)OCC.CCOC(=O)CCOCc1cc(OC)ccc1Br>>CCOC(=O)/C=C/c1ccc(OC)cc1COCCCC(=O)OC  
 5036 C=Cc1cnc(C#N)c1Nc1ccc2[nH]ccc2c1C.Clc1ccc(Br)cn1>>Cc1c(Nc2c(C#N)ccc2/C=C/c2ccc(Cl)nc2)ccc2[nH]ccc12  
 5037 C=Cc1cccc1.Nc1ccc(Br)n1>>Nc1ccc(/C=C/c2cccc2)n1  
 5038 C=COCCCC.COc1ccc(Br)c(OC)n1>>C=C(OCCCC)c1ccc(OC)nc1OC  
 5039 C=CC(=O)OC(C)(C)C.O=C(NC[C@H]1CCc2cc(I)ccc2O1)OCc1cccc1>>CC(C)(C)OC(=O)/C=C/c1ccc2c(c1)CC[C@H](CNC(=O)OCc1cccc1)O2  
 5040 C=CCCO[Si](C)(C)C(C)(C)C.COc1ccc(CCl)c1>>C=C(CCO[Si](C)(C)C(C)(C)C)Cc1cccc(OC)c1  
 5041 C=CC(=O)N1N=Cc2cccc2C1c1ccc1.COc1cc(Cc2cnc(N)nc2N)cc(I)c1OC>>COc1cc(Cc2cnc(N)nc2N)cc(/C=C/C(=O)N2N=Cc3cccc3C2c2ccc2)c1OC  
 5042 Br1cc2cccc2c2cccc12.C=Cc1nc2c(N)ncnc2n1[C@@H]1O[C@H](CO[Si](C)(C)C(C)(C)C)[C@@H](O[Si](C)(C)C(C)(C)C)[C@H]1O[Si](C)(C)C(C)(C)C>>CC(C)(C)[Si](C)(C)OC[C@H]1O[C@H](n2c(/C=C/c3cc4cccc4c4cccc34)nc3c(N)ncnc32)[C@H](O[Si](C)(C)C(C)(C)C)[C@@H]1O[Si](C)(C)C(C)(C)C  
 5043 C=CCCCCCC.CC(C)(C)c1ccc(OS(=O)(=O)C(F)(F)F)cc1>>C=C(CCCCCC)c1ccc(C(C)(C)C)cc1  
 5044 C=Cc1ccc(OC(C)(C)C)cc1.FC(F)(F)C(F)(F)C(F)(F)C(F)(F)C(F)(F)C(F)(F)Br>>CC(C)(C)Oc1ccc(/C=C/C(F)(F)C(F)(F)C(F)(F)C(F)(F)C(F)(F)C(F)(F)C(F)(F)C(F)(F)C(F)(F)F)cc1  
 5045 C=CC(=O)N1N=Cc2cccc2C1CCCC1.COc1cc(Cc2cnc(N)nc2N)cc(I)c1OC>>COc1cc(Cc2cnc(N)nc2N)cc(/C=C/C(=O)N2N=Cc3cccc3C2C2CCC2)c1OC  
 5046 Br1cccc1.C=CC(=O)OCC(C)C>>CC(C)COC(=O)/C=C/c1cccc1  
 5047 C=Cc1cnc(C#N)c1Nc1ccc2[nH]ccc2c1C.COCCOc1ccc(Br)cc1OCCOC>>COCCOc1ccc(/C=C/c2cnc(C#N)c2Nc2ccc3[nH]ccc3c2C)cc1OCCOC  
 5048 C=Cc1ccc(OC)cc1OC.CCOC(=O)C(C)(C)Br>>CCOC(=O)C(C)(C)/C=C/c1ccc(OC)cc1OC  
 5049 C=CCNC(=O)OC(C)(C)C.Cc1ccc(OS(=O)(=O)C(F)(F)F)c(Cl)c1>>C=C(CNC(=O)OC(C)(C)C)c1ccc(C)cc1Cl  
 5050 C=CC(=O)OC.CC(C)(C)O[C@H]1CC[C@H]2C=C(C3=C(Br)CCCC3)CC[C@H]12C>>COC(=O)/C=C/C1=C(C2=C[C@H]3CC[C@H](OC(C)(C)C)[C@@H]3(C)CC2)CCCC1  
 5051 Br1ccc2c(c1)Cc1cccc1-2.C=CC[C@H](CC(=O)OC(C)(C)C)C(=O)N[C@H](C(=O)N[C@H](C)c1cccc1)C(C)(C)C>>C[C@@H](NC(=O)[C@@H](NC(=O)[C@H](C/C=C/c1ccc2c(c1)Cc1cccc1-2)CC(=O)OC(C)(C)C)C(C)(C)c1cccc1  
 5052 C=CC(C)(O)CCC=C(C)C.FC(F)(F)c1cccc1Br>>CC(C)=CCCC(C)(O)/C=C/c1cccc1C(F)(F)F  
 5053 C=CC(=O)OCC.CC(C)(C)OC(=O)NCCOc1cc(C#N)ccc1I>>CCOC(=O)/C=C/c1ccc(C#N)cc1OCCNC(=O)OC(C)(C)C  
 5054 C=COC(CC)CCCC.Ic1cccc2cccc12>>C=C(OC(CC)CCCC)c1cccc2cccc12  
 5055 C=Cc1cccc(CN2CCN(C(C)=O)CC2)n1.Cc1c(Nc2c(I)ncnc2C#N)ccc2[nH]ccc12>>CC(=O)N1CCN(Cc2cccc(/C=C/c3cnc(C#N)c3Nc3ccc4[nH]ccc4c3C)n2)CC1  
 5056 C=Cc1cc2cccc2o1.C[Si](C)(OS(=O)(=O)C(F)(F)F)OS(=O)(=O)C(F)(F)F>>C[Si](C)(/C=C/c1cc2cccc2o1)OS(=O)(=O)C(F)(F)F  
 5057 C=CC(=O)c1ccc(OC)cc1.COc1ncc(I)c(OC)n1>>COc1ccc(C(=O)/C=C/c2cnc(OC)nc2OC)cc1  
 5058 C=Cc1ccc(OC)cc1.COC(=O)c1cccc(Br)c1>>COC(=O)c1cccc(/C=C/c2ccc(OC)cc2)c1  
 5059 C=CC(=O)OCC(CC)CCCC.COc1ccc(Br)cc1>>CCCC(CC)COC(=O)/C=C/c1ccc(OC)cc1  
 5060 C=CC(=O)O.COC(=O)c1cccc1Br>>COC(=O)c1cccc1/C=C/C(=O)O  
 5061 C=Cc1ccc(OC)cc1.CSc1oc2ccc(Br)cc2c1-c1cccc1>>COc1ccc(/C=C/c2ccc3oc(SC)c(-C=CC(=O)OC.COc1ccc2c(c1)CCN(c1ccc(CC(C)C)c(C)c1)C2(C)c1ccc(Br)cc1>>COC(=O)/C=C/c1ccc(C2(C)c3ccc(OC)cc3CCN2c2ccc(CC(C)C)c(C)c2)cc1  
 5062 C=CC(=O)OC.C[C@H](Nc1ncnc2sc(Br)cc12)c1cccc1>>COC(=O)/C=C/c1cc2c(N[C@H](C)c3ccc(cc3)ncnc2s1  
 5063 Br1cccn1.C=CCn1nnc2cccc21>>C(=C/c1cccn1)\Cn1nnc2cccc21  
 5064 C=Cc1cccc1.CC(=O)c1cn(-c2cccc2)nc1OS(=O)(=O)C(F)(F)F>>CC(=O)c1cn(-c2cccc2)nc1/C=C/c1cccc1  
 5065 C=Cc1cccc1.CC(=O)c1cccc(OS(=O)(=O)C(F)(F)F)c1>>C=C(c1cccc1)c1cccc(C(C)=O)c1  
 5066 C=CC(=O)OC(C)(C)C.CC(=O)O[IH2](OC(C)=O)c1cccc1>>CC(C)(C)OC(=O)/C=C/c1cccc1  
 5067

5068 Br1ccc2[nH]ccc2c1.C=CC(=O)O>>O=C(O)/C=C/c1ccc2[nH]ccc2c1  
 5069 C=Cc1cccc1O.COc1cc(Br)cc(OC)c1F>>COc1cc(/C=C/c2cccc2O)cc(OC)c1F  
 C=C[C@](C)(COC(F)(F)F)C(=O)O.CC(C)[C@H](O)C(=O)N[C@@H](C)(C(=O)N1CCC[C@@H](C(=O)N[C@H](C)c2ccc3ccc(Br)cc3n2)N1>>CC(C)[C@H](O)C(=O)N[C@@H](C)(C(=O)N1CCC[C@@H](C(=O)N[C@H](C)c2ccc3ccc(/C=C/[C@](C)(COC(F)(F)F)C(=O)O)cc3n2)N1  
 5070 C=CC(=O)OCC.Ic1c(-c2cccc2)nc2cccc2c1-c1cccc1>>CCOC(=O)/C=C/c1c(-  
 5071 c2cccc2)nc2cccc2c1-c1cccc1  
 5072 C=Cc1cccc1C.CCCCC(Br)C(F)(F)F>>CCCCC(/C=C/c1cccc1C)C(F)(F)F  
 5073 C=C[P@](C)(=O)c1cccc1.Cc1ccc2cccc2c1Br>>Cc1ccc2cccc2c1/C=C/[P@](C)(=O)c1cccc1  
 5074 C=CC(=O)OC.CCCCN1c(C(=O)NC(C)(C)C)nc(Br)c1C(=O)NC(C)(C)C>>CCCN1c(C(=O)NC(C)(C)C)nc(/C=C/C(=O)OC)c1C(=O)NC(C)(C)C  
 5075 C=C[Si](C)(C)c1cccn1.Cc1ccc(I)cc1>>Cc1ccc(/C=C/[Si](C)(C)c2cccn2)cc1  
 5076 C=C.ClCc1cccc(Oc2cccc2)c1>>C=CCc1cccc(Oc2cccc2)c1  
 5077 Br1enc2cccc2c1.C=CS(C)(=O)=O>>CS(=O)(=O)/C=C/c1enc2cccc2c1  
 5078 C=CC(=O)OC(C)(C)C.COc1ccc(-c2c(C)noc2-  
 5079 c2cc(Br)c(OCc3cccc3)cc2OCc2cccc2)cc1>>COc1ccc(-c2c(C)noc2-  
 5079 Br1cccc1.C=C(NC(=O)OC(C)(C)C)C(=O)OC>>COC(=O)/C=C/c1cccc1)NC(=O)OC(C)(C)C  
 5080 C=CC(=O)OCC.C[C@H](NC(=O)OC(C)(C)C)c1ccc(Br)cc1>>CCOC(=O)/C=C/c1ccc([C@H](C)NC(=O)OC(C)(C)C)cc1  
 C=CC(=O)OC.C[C@]12C[C@@]34C=C(Sc5cccc(I)c5)C(=O)[C@@](C)(CCC(=O)Nc5c(O)ccc(C(=O)O)c5O)[C@@H]3[C@H](C[C@@H]1C4)O2>>COC(=O)/C=C/c1cccc(SC2=C[C@]34C[C@H]5C[C@H]1(O)[C@@]5(C)C3)[C@H]4[C@](C)(CCC(=O)Nc3c(O)ccc(C(=O)O)c3O)C2=O)c1  
 5081 Br1ccc(C2OCCO2)nc1.C=CC(=O)OCC>>CCOC(=O)/C=C/c1ccc(C2OCCO2)nc1  
 5082 C=CCCCCCC.Cc1ccc(Cl)cc1>>CCCCC/C=C/c1ccc(C)cc1  
 5083 C=CC(=O)OCC.Cc1cc(F)ccc1Br>>CCOC(=O)/C=C/c1ccc(F)cc1C  
 5084 Br1cccc1C1OCCCO1.C=CC(=O)OCC>>CCOC(=O)/C=C/c1cccc1C1OCCCO1  
 5085 C=CP(=O)(O)O.O=[N+][O-]c1ccc(Br)cc1>>O=[N+][O-]c1ccc(/C=C/P(=O)(O)O)cc1  
 5086 C=CCCCC1=NOC(CC(=O)OC)(C(=O)OC)C1.FC(F)(F)c1cc(Cl)ccc1I>>COC(=O)CC1(C(=O)OC)C(C(CCC/C=C/c2ccc(Cl)cc2C(F)(F)F)=NO1  
 5087 C=Cc1cccc1.COC(=O)c1cccc1Br>>COC(=O)c1cccc1/C=C/c1cccc1  
 5088 C=Cc1ccc(OC)cc1.N#CC(CCBrc1cccc1)c1cccc1>>COc1ccc(/C=C/CCC(C#N)(c2cccc2)c2cccc2  
 5089 C=CCOc1cccc1.Cc1cccc(I)c1>>Cc1cccc(/C=C/COc2cccc2)c1  
 5090 C=CC(=O)OCC.Cc1cccc1-c1cccc1I>>CCOC(=O)/C=C/c1cccc1-c1cccc1C  
 5091 C=CCC(C)C(=O)OCC.Cc1ccc(Br)cc1>>CCOC(=O)C(C)C/C=C/c1ccc(C)cc1  
 5092 Br1cccc1.C=C(C)C(=O)OC(C)(C)C>>C/C=C/c1cccc1C(=O)OC(C)(C)C  
 5093 C=Cc1ccc(OC)cc1.Cc1ccc2cc(Br)ccc2n1>>COc1ccc(/C=C/c2ccc3nc(C)ccc3c2)cc1  
 5094 C=CC(=O)O.O=[N+][O-]c1cccc1Br>>O=C(O)/C=C/c1cccc1[N+](=O)[O-]  
 5095 C=Cc1c(F)c(F)c(F)c1F.Ic1cccc1>>Fc1c(F)c(F)c(/C=C/c2cccc2)c(F)c1F  
 5096 C=CC(=O)Nc1ccc2ccnc12.CC(C)c1ccc(I)cc1>>CC(C)c1ccc(/C=C/C(=O)Nc2cccc3ccnc23)cc1  
 5097 C=CC(=O)N(C)Cc1oc2cccc2c1C.O=C1Ne2ncc(Br)cc2CNC12CCCC2>>Cc1c(CN(C)C(=O)/C=C/c2cnc3c2)CNC2(CCCC2)C(=O)N3)oc2cccc12  
 5098 C=CCO[Si](C)(C)C(C)(C)C.COc1ccc(Br)cc1>>COc1ccc(/C=C/CO[Si](C)(C)C(C)(C)C)cc1  
 5099 C=Cc1cccc1[N+](=O)[O-]  
 5100 ].O=C1C(O)=C(I)C(=O)c2cccc21>>O=C1C(O)=C(/C=C/c2cccc2[N+](=O)[O-])C(=O)c2cccc21  
 5101 C=CC(=O)OC.O=[N+][O-]  
 5101 ]c1cc(OCc2cccc2)ccc1I>>COC(=O)/C=C/c1ccc(OCc2cccc2)cc1[N+](=O)[O-]  
 5102 C=CC(=O)N(C)OC.Cc1ccc(I)cc1>>CON(C)C(=O)/C=C/c1ccc(C)cc1  
 5103 C=CCOC(C)=O.Ic1cccc2cccc12>>CC(=O)OC/C=C/c1cccc2cccc12  
 5104 C=Cc1cccc1.Cc1ccc(N)c(Br)c1>>Cc1ccc(N)c(/C=C/c2cccc2)c1  
 5105 C=CS(N)(=O)=O.CCc1ccc(Br)cc1>>CCc1ccc(/C=C/S(N)(=O)=O)cc1  
 5106 C=CCN1C(=O)c2cccc2C1=O.COc1ccc(I)cc1>>COc1ccc(/C=C/CN2C(=O)c3cccc3C2=O)cc1  
 5107 C=CC(=O)OC.COc1ccc(Cl)cc1>>COC(=O)/C=C/c1ccc(OC)cc1  
 5108 C=CC(=O)OC.CC(=O)Oc1ccc(I)cc1CC=C(C)C>>COC(=O)/C=C/c1ccc(OC(C)=O)c(CC=C(C)C)c1  
 5109 C=CC(=O)OC.OCc1ccc(Br)n1>>COC(=O)/C=C/c1ccc(CO)n1  
 5110 C=Cc1cc2cccc2oc1=O.O=[N+][O-]c1ccc(Br)cc1>>O=c1oc2cccc2cc1/C=C/c1ccc([N+](=O)[O-]  
 5111 C=CC(=O)OC.CC(C)=CCc1c(Br)ncn1C>>COC(=O)/C=C/c1ncn(C)c1CC=C(C)C  
 5112 C=CCn1c(C)c(C(=O)c2ccc(C)cc2)c2cc(OC)ccc21.C[C@H](OCc1ccc(I)cc1)C(=O)O>>COc1ccc2c(c1)c(C(=O)c1ccc(C)cc1)c(C)n2C/C=C/c1ccc(CO[C@H](C)C(=O)O)cc1  
 5113 C=CC(=O)O.CC(C)(C)OC(=O)N[C@@H](Cc1ccc(Br)cc1)C(=O)O>>CC(C)(C)OC(=O)N[C@@H](C  
 c1ccc(/C=C/C(=O)O)cc1)C(=O)O

5114 C=CC(=O)OC.CC(=O)Nc1ccc(Br)cc1>>COC(=O)/C=C/c1ccc(NC(C)=O)cc1  
5115 C=CC(=O)OC.OCc1cccc(Br)c1>>COC(=O)/C=C/c1cccc(CO)c1  
5116 C=CC(=O)OCC.CCOC(=O)c1cc(Cl)cc(Br)c1>>CCOC(=O)/C=C/c1cc(Cl)cc(C(=O)OCC)c1  
5117 C=CCCN1C(=O)c2ccccc2C1=O.Cc1cc(Cl)c2ccccc2n1>>Cc1cc(/C=C/CCN2C(=O)c3ccccc3C2=O)c2ccccc2n1  
5118 C=Cc1cccc1.CCCCN1c2ccc(Br)cc2Sc2cc(-c3nc4ccccc4n3-c3ccccc3)ccc21>>CCCN1c2ccc(/C=C/c3ccccc3)cc2Sc2cc(-c3nc4ccccc4n3-c3ccccc3)ccc21  
5119 C=CC(C)=O.COC(=O)c1c(OC)c(OC)cc2occ(I)c(=O)c12>>COC(=O)c1c(OC)c(OC)cc2occ(/C=C/C(C)=O)c(=O)c12  
5120 C=CCC(C)C.ClCc1cccc(Oc2ccccc2)c1>>C=C(Cc1cccc(Oc2ccccc2)c1)CC(C)C  
5121 C=CC(=O)N(C)OC.FC(F)(F)c1ccc(I)cc1>>CON(C)C(=O)/C=C/c1ccc(C(F)(F)F)cc1  
5122 C=Cc1ccc(OC)cc1.FC(F)(F)C(F)(F)C(F)(F)C(F)(F)C(F)(F)C(F)(F)C(F)(F)C(F)(F)C(F)(F)Br>>COc1ccc(/C=C/C(F)(F)C(F)(F)C(F)(F)C(F)(F)C(F)(F)C(F)(F)C(F)(F)C(F)(F)C(F)(F)C(F)(F)C(F)(F)C(F)(F)cc1  
5123 C=CC(=O)OC(C)(C)C.Cc1cc(Cl)c2ccccc2n1>>Cc1cc(/C=C/C(=O)OC(C)(C)C)c2ccccc2n1  
5124 C=C/C=C/c1cccc1.CCCCC(Br)C(F)(F)F>>CCCCC/C=C/C=C/c1cccc1C(F)(F)F  
5125 C=CC(C)=O.CC(=O)O[IH2](OC(C)=O)c1cccc1>>CC(=O)/C=C/c1cccc1  
5126 C=COCCCC.O=S(=O)(Oc1cccc1-c1cccc1)C(F)(F)F>>C=C(OCCCC)c1cccc1-c1cccc1  
5127 C=CS(=O)c1cccc1.CC(=O)c1ccc(Br)cc1>>CC(=O)c1ccc(/C=C/S(=O)c2ccccc2)cc1  
5128 C=CC(=O)OCCN(C)C.Cc1ccc(NC(=O)c2cc(=O)c3cc(Br)ccc3o2)cc1>>Cc1ccc(NC(=O)c2cc(=O)c3ccc(/C=C/C(=O)OCCN(C)C)ccc3o2)cc1  
5129 C=CC=O.Ic1enn(C(c2ccccc2)(c2ccccc2)c2ccccc2)c1>>O=C/C=C/c1enn(C(c2ccccc2)(c2ccccc2)c2ccccc2)c1  
5130 C=Cc1nn(C(c2ccccc2)(c2ccccc2)c2ccccc2)c2ccnc(OC3CCCCC3)c12.Cn1cc(I)cn1>>Cn1cc(/C=C/c2nn(C(c3ccccc3)(c3ccccc3)c3ccccc3)c3ccnc(OC4CCCC4)c23)cn1  
5131 C=COCCCCO.O=C(O)c1cc(Br)c2nc(N3CCOCC3)cc(=O)n2c1>>C=C(OCCCCO)c1cc(C(=O)O)cn2c(=O)cc(N3CCOCC3)nc12  
5132 C=C(NC(C)=O)C(=O)OC.CC(C)(C)OC(=O)N[C@H](CCC(=O)OCc1cccc1)COc1cc(C#N)ccc1I>>COC(=O)/C=C/c1ccc(C#N)cc1OC[C@H](CCC(=O)OCc1cccc1)NC(=O)OC(C)(C)C)NC(C)=O  
5133 C=C[C@H](C)[C@H](C/C=C/C(=O)OC(C)(C)C)O[Si](C)(C)C(C)(C)C.O=C(c1cccc1)c1ccc(Br)cc1>>C[C@H](/C=C/c1ccc(C(=O)c2ccccc2)cc1)[C@H](C/C=C/C(=O)OC(C)(C)C)O[Si](C)(C)C(C)(C)C  
5134 C=Cc1ccc(O)c(OC)c1.COc1cc(Br)cc(OC)c1F>>COc1cc(/C=C/c2cc(OC)c(F)c(OC)c2)ccc1O  
5135 C=Cc1cccc1.Cn1c(-c2ccccc2)c(I)c(=O)c2ccccc21>>Cn1c(-  
5136 C=CC(=O)OCC.FC(F)(F)c1cn2ccc(Br)cc2n1>>CCOC(=O)/C=C/c1cn2cc(C(F)(F)F)nc2c1  
5137 C=CCCN(C)C(=O)OC(C)(C)C.CC(C)COc1encc(Br)c1>>CC(C)COc1encc(/C=C/CCN(C)C(=O)OC(C)(C)C)c1  
5138 C=CC(=O)OCC.Clc1ccc2nc(-c3ccccc3)c(I)c(-c3ccccc3)c2c1>>CCOC(=O)/C=C/c1c(-c2ccccc2)nc2ccc(Cl)cc2c1-c1cccc1  
5139 C=C[Si](C)(C)c1cccn1.CC(=O)c1ccc(I)cc1>>CC(=O)c1ccc(/C=C/[Si](C)(C)c2cccn2)cc1  
5140 C=CCN(C(=O)OCc1cccc1)C(=O)OC(C)(C)C.CC(=O)c1ccc(Br)c1>>CC(=O)c1cccc(/C=C/CN(C(=O)OCc2ccccc2)C(=O)OC(C)(C)C)c1  
5141 C=CC(=O)NCCc1ccc(O)cc1.COc1ccc(I)cc1Br>>COc1ccc(/C=C/C(=O)NCCc2ccc(O)cc2)cc1Br  
5142 C=COCCCC.Ic1cccc1>>C=C(OCCCC)c1cccc1  
5143 Br1ccc(C2=CCC3(CC2)OCCO3)cc1.C=CC1CCC(CCC)CC1>>CCCC1CCC(/C=C/c2ccc(C3=CCC4(CC3)OCCO4)cc2)CC1  
5144 C=CC(=O)OC.CC(C)(C)OC(=O)c1cc(F)ccc1Br>>COC(=O)/C=C/c1ccc(F)cc1C(=O)OC(C)(C)C  
5145 C=CC(=O)OC.CCC(CC)(c1ccc(OCc2ccccc2)c(C)c1)c1en(C)c2cc(Br)ccc12>>CCC(CC)(c1ccc(OCc2ccccc2)c(C)c1)c1en(C)c2cc(/C=C/C(=O)OC)ccc12  
5146 C=CCO.N#Cc1cccc(Br)c1>>C=C(CO)c1cccc(C#N)c1  
5147 C=Cc1c(F)c(F)c(F)c(F)c1F.N#Cc1ccc(I)c2ccccc12>>N#Cc1ccc(/C=C/c2c(F)c(F)c(F)c(F)c2F)c2ccccc1  
5148 C=CC(=O)OC(C)(C)C.N#Cc1ccc(S(=O)(=O)N2CCc3cc(Br)enc32)cc1>>CC(C)(C)OC(=O)/C=C/c1cn2c(c1)CCN2S(=O)(=O)c1ccc(C#N)cc1  
5149 C=Cc1cccc1.Oc1cccc(Br)c1>>Oc1cccc(/C=C/c2ccccc2)c1  
5150 C=Cc1ccc(OC)cc1.Clc1ccc(/C=C/c2ccccc2)cc1>>COc1ccc(/C=C/c2ccc(/C=C/c3ccccc3)cc2)cc1  
5151 C=CC(=O)OC(C)(C)C.O=CNc1cccc1I>>CC(C)(C)OC(=O)/C=C/c1cccc1NC=O  
5152 C=CC(=O)OC.CC1(C)OC(=O)Nc2ccc(Br)cc21>>COC(=O)/C=C/c1ccc2c(c1)C(C)(C)OC(=O)N2  
5153 C=Cc1ccc(O)cc1.COc1ccc(OC)c(I)c1>>COc1ccc(OC)c(/C=C/c2ccc(O)cc2)c1  
5154 C=Cc1ccc(C#N)cc1.Oc1ccc(/N=N/c2ccc(Br)cc2)cc1>>N#Cc1ccc(/C=C/c2ccc(/N=N/c3ccc(O)cc3)cc2)Br1ccc(C(=C2Cc3ccccc3C2)c2ccc3c(cnn3C3CCCCO3)c2)cc1.C=CC(=O)OC>>COC(=O)/C=C/c1ccc(C(=C2Cc3ccccc3C2)c2ccc3c(cnn3C3CCCCO3)c2)cc1  
5155 Br1cccc1C1OCCO1.C=CC(=O)OC>>COC(=O)/C=C/c1cccc1C1OCCO1

5157 C=CC(=O)NCCCCC.COc1ccc(-c2oc3cc(OC)ccc3c(=O)c2I)cc1>>CCCCCNC(=O)/C=C/c1c(-  
c2ccc(OC)cc2)oc2cc(OC)ccc2c1=O  
5158 C=Cc1ccc(C)cc1.Oc1ccc(Br)cc1>>Cc1ccc(/C=C/c2ccc(O)cc2)cc1  
5159 C=C(C)C(=O)OCC.Cn1ccc(I)cc1=O>>CCOC(=O)/C(C)=C/c1cnn(C)c(=O)c1  
5160 C=CC(=O)OC.COc1cccc(OC)c1I>>COC(=O)/C=C/c1c(OC)cccc1OC  
5161 C=Cc1cc(OC)CCCCCCCCCCCCC)c(OC)CCCCCCCCCCCCC)c(OC)CCCCCCCCCCCCC)c1.Oc1ccc(I)cc1>>CC  
CCCCCCCCCCCCOc1cc(/C=C/c2ccc(O)cc2)cc(OC)CCCCCCCCCCCCC)c1OCCCCCCCCCCCCC  
5162 C=CC(=O)OCC.Cc1cc2cnccc2c(F)c1Br>>CCOC(=O)/C=C/c1c(C)cc2cnccc2c1F  
5163 C=C(NC(=O)OC(C)(C)C)C(=O)OC.CC(C)(C)OC(=O)Nc1ccc(I)cc1>>COC(=O)/C=C/c1ccc(NC(=O)  
OC(C)(C)C)cc1)NC(=O)OC(C)(C)C  
5164 C=Cc1ccc(C(=O)OCC)cc1.CCC(CC)=C1CCC(C)(C)c2ccc(Br)cc2I>>CCOC(=O)c1ccc(/C=C/c2ccc3c(  
c2)C=C(CC)CC)CCC3(C)C)cc1  
5165 C=CC(=O)N(C)C.COc1cccc(I)c1>>COc1cccc(/C=C/C(=O)N(C)C)c1  
5166 C=CC(=O)OC.Fc1ccc(-c2ncc(I)nc2-c2ccc(F)cc2)cc1>>COC(=O)/C=C/c1cnc(-c2ccc(F)cc2)c(-  
c2ccc(F)cc2)n1  
C=Cc1cccc1.Cc1ccc(I)c2c1[C@@]1(OC2)O[C@H](CO[Si](C)(C)C(C)(C)C)[C@H]2OC(C)(C)O[C  
5167 @H]2I>>Cc1ccc(/C=C/c2cccc2)c2c1[C@@]1(OC2)O[C@H](CO[Si](C)(C)C(C)(C)C)[C@H]2OC(C  
(C)O[C@H]2I  
5168 C=CC(=O)OC.Nc1ccc(C(F)(F)F)cc1Br>>COC(=O)/C=C/c1cc(C(F)(F)F)ccc1N  
5169 C=CC(=O)N(C(C)C)C(C)C.Clc1ccc(I)cc1>>CC(C)N(C(=O)/C=C/c1ccc(Cl)cc1)C(C)C  
5170 C=CCN(C(=O)OCc1cccc1)C(=O)OC(C)(C)C.CC(=O)c1ccc(Br)cc1>>CC(=O)c1ccc(/C=C/CN(C(=O)  
OCc2cccc2)C(=O)OC(C)(C)C)cc1  
5171 C=CB1OC(C)CC(C)(C)O1.Fc1ccc(I)cc1>>CC1CC(C)(C)OB(/C=C/c2ccc(F)cc2)O1  
5172 C=CC(=O)OC.Oc1cccc(Br)c1>>COC(=O)/C=C/c1cccc(O)c1  
5173 C=CC(=O)OC.Cc1c(Br)ccc(NS(=O)(=O)c2cccn2)c1C(=O)OCc1cccc1>>COC(=O)/C=C/c1ccc(NS(=  
O)(=O)c2cccn2)c(C(=O)OCc2cccc2)c1C  
5174 Brc1ccc(I)cc1.CCOC(=O)/C(F)=C(CCc1cccc1)>>CCOC(=O)/C(F)=C(\CCc1cccc1)c1ccc(Br)cc1  
5175 C=Cc1cccc1.Clc1cccn1>>C(=C/c1cccn1)c1cccc1  
5176 C=Cc1cccc1.C[Si](C)(C)CBr>>C[Si](C)(C)C/C=C/c1cccc1  
5177 C=CC(=O)OC.CCOC(=O)C(C)(c1ccc(Cl)cc1)C(C#N)C#N>>CCOC(=O)C(C)(c1ccc(/C=C/C(=O)OC)c  
c1)C(C#N)C#N  
5178 C=CCN(C(=O)OCc1cccc1)C(=O)OC(C)(C)C.N#Cc1ccc(Br)cc1>>CC(C)(C)OC(=O)N(C/C=C/c1ccc(  
C#N)cc1)C(=O)OCc1cccc1  
5179 C=CC(N)=O.CCc1cc(Br)ccc1Cl>>CCc1cc(/C=C/C(N)=O)ccc1Cl  
5180 C=CC(=O)OC.O=c1[nH]c(=O)n([C@H]2C=C[C@@H](CO)O2)cc1I>>COC(=O)/C=C/c1cn([C@H]2  
C=C[C@@H](CO)O2)c(=O)[nH]c1=O  
5181 C=CC(=O)OC.COC(=O)/C=C/c1cc2cc(Br)ccc2cc1OCc1cccc1>>COC(=O)/C=C/c1ccc2cc(OCc3cccc  
c3)c(/C=C/C(=O)OC)cc2c1  
5182 C=Cc1ccc2c(c1)c1cc(/C=C/c3ccc4c(c3)c3cccc3n4CCCCC)ccc1n2CCCCC.CCCCCCn1c2ccc(  
I)cc2c2cc(C=O)ccc2I>>CCCCCn1c2cccc2c2cc(/C=C/c3ccc4c(c3)c3cc(/C=C/c5ccc6c(c5)c5cc(C=  
O)ccc5n6CCCCC)ccc3n4CCCCC)ccc2I  
5183 C=Cc1ccc2cc(N(c3cccc3)c3cccc3)ccc2c1.CC(C)(C)c1ccc(N2C(=O)c3cccc4c(Br)ccc(c34)C2=O)cc1  
>>CC(C)(C)c1ccc(N2C(=O)c3cccc4c(/C=C/c5ccc6cc(N(c7cccc7)c7cccc7)ccc6c5)ccc(c34)C2=O)cc  
5184 C=CC(=O)OC.O=Cc1ccc(Br)cc1>>COC(=O)/C=C/c1ccc(C=O)cc1  
5185 C=CCCCCCCCCO.COc1cc(OC)c(OCOC)c(Br)c1OCOC>>COCOc1cc(OC)c(OCOC)c(/C=C/CCC  
CCCCCO)c1OCOC  
5186 Brc1nc2cccc2c1.C=C[C@@H](CO[Si](C)(C)C(C)(C)C)NC(=O)OCc1cccc1>>CC(C)(C)[Si](C)(C)  
OC[C@H](/C=C/c1cnc2cccc2c1)NC(=O)OCc1cccc1  
5187 C=Cc1cccc1.FC(F)(F)C(F)(F)C(F)(F)C(F)(F)C(F)(F)Br>>FC(F)(F)C(F)(F)C(F)(F)C(F)(F)C(F)  
(F)C(F)(F)/C=C/c1cccc1  
5188 C=CCc1cccc(OC)c1.COc1cccc(Br)c1>>COc1cccc(/C=C/CCc2cccc(OC)c2)c1  
C=Cc1ccc2c(c1)CC[C@@H]1[C@@H]2CC[C@]2(C)[C@@H](O[Si](C)(C)C(C)(C)C)CC[C@@H]1  
5189 2.C[Si](C)(C)OS(=O)(=O)C(F)(F)F>>CC(C)(C)[Si](C)(C)O[C@H]1CC[C@H]2[C@@H]3CCc4cc(/C  
=C/[Si](C)(C)C)ccc4[C@H]3CC[C@]12C  
5190 C=CC(=O)OC(C)(C)C.COC(=O)c1cccc1Br>>COC(=O)c1cccc1/C=C/C(=O)OC(C)(C)C  
Brc1cnnc1.C=CCO[C@@H]1CC(=O)O[C@H](C)C/C=C/C(=O)O[C@H](O[Si](C)(C)C(C)(C)C)[C@H]  
(C)C[C@H](CC(OC)OC)[C@H](O[C@@H]2O[C@H](C)[C@@H](O[C@H]3C[C@@](C)(O)[C@@  
H](OC(=O)CC)[C@H](C)O3)[C@H](N(C)C)[C@H]2OC(C)=O)[C@H]1OC>>CCC(=O)O[C@H]1[C  
5191 @H](C)O[C@@H](O[C@H]2[C@H](N(C)C)[C@@H](OC(C)=O)[C@H](O[C@@H]3[C@@H](OC)  
[C@H](OC/C=C/c4cnnc4)CC(=O)O[C@H](C)C/C=C/C=C/[C@H](O[Si](C)(C)C(C)(C)C)[C@H](C)  
C[C@@H]3CC(OC)OC)O[C@@H]2C)C[C@@H]1C)O



5192 C=CC(=O)O.N#Cc1cc(Br)ccc1F>>N#Cc1cc(/C=C/C(=O)O)ccc1F  
5193 C=CNC(C)=O.CCOC(=O)c1ccc(Br)cc1>>C=C(NC(C)=O)c1ccc(C(=O)OCC)cc1  
5194 Br1enc2cccc2c1.C=C[C@H]1COC(C)(C)N1C(=O)OC(C)(C)C>>CC(C)(C)OC(=O)N1[C@H]/C=C/C2cnc3cccc3c2)COC1(C)C  
5195 C=Cc1cccc(C(=O)OC)c1.Nc1cccc(I)c1>>COC(=O)c1cccc(/C=C/c2cccc(N)c2)c1  
5196 C=Cc1ccc(OC)cc1.O=C1Nc2cccc(I)c2/C1=C/c1ccc[nH]1>>COc1ccc(/C=C/c2cccc3c2/C(=C/c2ccc[nH]2)C(=O)N3)cc1  
5197 C=C(F)C(=O)OC.FC(F)(F)c1cc(I)cc(C(F)(F)F)c1>>COC(=O)/C(F)=C/c1cc(C(F)(F)F)cc(C(F)(F)F)c1  
5198 C=CC(C)(C)O.COC(=O)c1cccc2nc3cccc(Br)c3nc12>>COC(=O)c1cccc2nc3cccc(/C=C/C(C)(C)O)c3n  
5199 C=COCCOC=C.COc1cccc2cc(Br)ccc12>>C=COCCOC(=C)c1ccc2c(OC)cccc2c1  
5200 C=CC(=O)OC.CN(C)c1ccc(-c2ccc(CN(C(=O)C3CCOCC3)c3cc(Br)ccn3)cc2)cc1>>COC(=O)/C=C/c1ccnc(N(Cc2ccc(-c3ccc(N(C)C)cc3)cc2)C(=O)C2CCOCC2)c1  
5201 C=CS(=O)(=O)NCc1cccc1.CC(C)(C)OC(=O)NCCc1cccc1Br>>CC(C)(C)OC(=O)NCCc1cccc1/C=C/S(=O)(=O)NCc1cccc1  
5202 C=Cc1cccc(CO)n1.Cc1c(Nc2c(I)cncc2C#N)ccc2[nH]ccc12>>Cc1c(Nc2c(C#N)cncc2/C=C/c2cccc(CO)n2)ccc2[nH]ccc12  
5203 Br1enc2cccc12.C=CCOC1=C(C)C(=O)O[C@H](CC)[C@@](C)(O)C=C(C)C(=O)[C@H](C)C[C@](C)(OC)[C@H](O[C@@H]2O[C@H](C)C[C@H](N(C)C)[C@H]2OC(C)=O)[C@H]1C>>CC[C@H]1OC(=O)C(C)=C(OC/C=C/c2cncc3cccc23)[C@H](C)[C@@H](O[C@@H]2O[C@H](C)C[C@H](N(C)C)[C@H]2OC(C)=O)[C@H](C)OC[C@@H](C)C(=O)C(C)=C[C@H](C)O  
5204 C=CCCCC.Cc1cccc(OS(=O)(=O)C(F)(F)F)c1>>C=C(CCCCC)c1cccc(C)c1  
5205 C=Cc1cc([N+](=O)[O-])ccc1OCOCC[Si](C)(C)C.N#Cc1cccc1I>>C[Si](C)(C)CCOCOc1ccc([N+](=O)[O-])cc1/C=C/c1cccc1C#N  
5206 C=Cc1ccc(OC)c(OC)c1.COc1ccc(Br)cc(OC)c1F>>COc1ccc(/C=C/c2cc(OC)c(F)c(OC)c2)cc1OC  
5207 C=CN(C)C(C)=O.COc1ccc(Cl)cc1>>C=C(c1ccc(OC)cc1)N(C)C(C)=O  
5208 C=CC(=O)OC.Cc1ccc(C2(/C=C/I)c3cccc3)C(=O)N(C)c3cccc32)cc1>>COC(=O)/C=C/C(=C/C1(c2ccc(C)cc2)C(=O)N(C)c2cccc21)c1cccc1  
5209 C=CCCCC.Cc1cc(C)cc(OS(=O)(=O)C(F)(F)F)c1>>C=C(CCCCC)c1cc(C)cc(C)c1  
5210 C=Cc1cccc2cccc12.O=P1(c2cccc2)C(Br)=Cc2cccc21>>O=P1(c2cccc2)C(/C=C/c2cccc3cccc23)=Cc2cccc21  
5211 C=CC(=O)OC.Ic1nn(Cc2cccc2)c2cccc12>>COC(=O)/C=C/c1nn(Cc2cccc2)c2cccc12  
5212 Br1cccc1.C=CC(=O)N1CCOCC1>>O=C(/C=C/c1cccc1)N1CCOCC1  
5213 C=CCCP(=O)(OC)OC.Cc1ccc(I)cc1>>COP(=O)(CC/C=C/c1ccc(C)cc1)OC  
5214 C=C.COC(=O)c1ccc(Cl)cc1Br>>C=Cc1cc(Cl)ccc1C(=O)OC  
5215 C=CC(=O)OC.O=C(OCc1cccc1)N1OCC(I)=C1c1cccc1>>COC(=O)/C=C/C1=C(c2cccc2)N(C(=O)OCc2cccc2)OC1  
5216 C=Cc1ccc(OC)cc1.C[Si](C)(OS(=O)(=O)C(F)(F)F)OS(=O)(=O)C(F)(F)F>>COc1ccc(/C=C/[Si](C)(C)OS(=O)(=O)C(F)(F)F)cc1  
5217 C=CC(C)(C)O.Cc1cc(O[Si](C)(C)C(C)(C)c(I)cc1O[Si](C)(C)C(C)(C)C>>Cc1cc(O[Si](C)(C)C(C)(C)C)c(/C=C/C(C)(C)O)cc1O[Si](C)(C)C(C)(C)C  
5218 C=CC(=O)OCCCC.COc1ccc2cc(Br)ccc2c1-c1c(P(=O)(c2cccc2)c2cccc2)ccc2cccc12>>CCCCOC(=O)/C=C/c1ccc2c(-c3c(P(=O)(c4cccc4)c4cccc4)ccc4cccc34)c(OC)ccc2c1  
5219 C=CC(=O)Nc1cccc1NC(=O)OC(C)(C)C.CCOC(=O)[C@H]1CN(C(C)(C)C)C[C@H]1c1ccc(Br)cc1>>CCOC(=O)[C@H]1CN(C(C)(C)C)C[C@H]1c1ccc(/C=C/C(=O)Nc2cccc2NC(=O)OC(C)(C)C)cc1  
5220 C=CCCC(=O)N(C)CC(O)C(O)C(O)C(O)CO.CC(C)(C)[Si](C)(C)OC(CCC1C(=O)N(c2ccc(F)cc2)C1c1ccc(Br)cc1)c1ccc(F)cc1>>CN(CC(O)C(O)C(O)C(O)CO)C(=O)CCC/C=C/c1ccc(C2C(CCC(O[Si](C)(C)C(C)(C)(C)C3ccc(F)cc3)C(=O)N2c2ccc(F)cc2)cc1  
5221 C=C[Si](CC)(CC)CC.O=Cc1ccc(Br)cc1>>CC[Si]/C=C/c1ccc(C=O)cc1)(CC)CC  
5222 C=CC(=O)OCC.CCC(=C(c1ccc(O)cc1)c1ccc(O)cc1)c1ccc(Br)c1>>CCOC(=O)/C=C/c1cccc(C(CC)=C(c2ccc(O)cc2)c2ccc(O)cc2)c1  
5223 C=CC(=O)O.COc1ccc(NS(=O)(=O)c2ccc(I)cc2)cc1OC>>COc1ccc(NS(=O)(=O)c2ccc(/C=C/C(=O)O)cc2)cc1OC  
5224 C=Cc1ccc(N(c2ccc(OC)cc2)c2ccc(OC)cc2)cc1.Cc1ccc(Br)cc1>>COc1ccc(N(c2ccc(/C=C/c3ccc(C)cc3)cc2)c2ccc(OC)cc2)cc1  
5225 C=Cc1cccc1.O=[N+](O-)]c1cccc(I)c1>>O=[N+](O-)]c1cccc(/C=C/c2cccc2)c1  
5226 C=CC(=O)OCC.O=c1c(Br)c(-c2cccc2)oc2cccc12>>CCOC(=O)/C=C/c1c(-c2cccc2)oc2cccc2c1=O  
5227 C=Cc1cncc1.CCCc1cc(Br)c(F)c(C#N)c1>>CCCc1cc(C#N)c(F)c(/C=C/c2cncc2)c1  
5228 C=CC(=O)OC.O=c1[nH]c(=O)n(CC(O)CO)cc1I>>COC(=O)/C=C/c1cn(CC(O)CO)c(=O)[nH]c1=O

5229 Br1ccc(-c2nnc(-c3cccc4cccc34)o2)cc1.C=CC[Si](OCC)(OCC)OCC>>CCO[Si](C/C=C/c1ccc(-  
 c2nnc(-c3cccc4cccc34)o2)cc1)(OCC)OCC  
 5230 Br1enc(NCc2cccc2)c2cccc12.C=CC(=O)OCC>>CCOC(=O)/C=C/c1enc(NCc2cccc2)c2cccc12  
 5231 C=CC(O)c1cccc1OC.O=Cc1cccc1Br>>COc1cccc1C(O)/C=C/c1cccc1C=O  
 5232 C=Cc1cccc1.CCOC(=O)c1ccc(N)c(Br)c1>>CCOC(=O)c1ccc(N)c(/C=C/c2cccc2)c1  
 5233 C=Cc1cnc1.CCN(c1cccc1)c1cccc(Br)n1>>CCN(c1cccc1)c1cccc(/C=C/c2cnc2)n1  
 5234 C=CCC(=O)OCC(C)C.COc1cc(Br)c(OC)c2cccc12>>COc1cc(/C=C/CC(=O)OCC(C)C)c(OC)c2cccc  
 5235 C=CC(=O)N1CCC(Cc2nnc(C)o2)CC1.Clc1ccc(Br)c(Cn2cnc2)c1>>Cc1nnc(CC2CCN(C(=O)/C=C/c3  
 ccc(Cl)cc3Cn3ncn3)CC2)o1  
 5236 Br1ccc(C(=C(c2cccc2)c2cccc2)c2cccc2)cc1.C=Cc1ccc(-  
 c2ccc3c4cccc4n(CC)c3c2)cc1>>CCn1c2cccc2c2ccc(-  
 c3ccc(/C=C/c4ccc(C(=C(c5cccc5)c5cccc5)c5cccc5)cc4)cc3)cc21  
 5237 C=COCCCC.CNc1nc(C)c2cc(Br)c(=O)n(C3CCCC3)c2n1>>CCCCO/C=C/c1cc2c(C)nc(NC)nc2n(C2C  
 CCC2)c1=O  
 5238 C=Cc1ccc2cccc2c1.CCN1c2ncc(I)cc2C(=O)N(C)c2ccc(Cl)nc21>>CCN1c2ncc(/C=C/c3ccc4cccc4c3  
 )cc2C(=O)N(C)c2ccc(Cl)nc21  
 5239 C=CC(=O)OC(C)(C)C.CC(C)(C)OC(=O)/C=C/c1ccc(CN(C(=O)C2CCCC2)c2cccc(Br)c2)cc1>>CC(  
 C)(C)OC(=O)/C=C/c1ccc(CN(C(=O)C2CCCC2)c2cccc(/C=C/C(=O)OC(C)(C)C)c2)cc1  
 5240 C=CC(=O)OC.CC(C)N(C(=O)Cc1c(Br)cccc1I)C(C)C>>COC(=O)/C=C/c1cccc(Br)c1CC(=O)N(C(C)C  
 )C(C)C  
 5241 Br1ccc(C#Cc2cccc(I)c2)cc1.C=CC(=O)OC>>COC(=O)/C=C/c1cccc(C#Cc2ccc(Br)cc2)c1  
 5242 C=CC(=O)N(C)Cc1oc2cccc2c1C.CC(C)(C)OC(=O)NCCC1Cc2cc(Br)cnc2NC1=O>>Cc1c(CN(C)C(=  
 O)/C=C/c2cnc3c(c2)CC(CCNC(=O)OC(C)(C)C(=O)N3)oc2cccc12  
 5243 C=CC(=O)OC.Nc1ncc(Br)cn1>>COC(=O)/C=C/c1cnc(N)nc1  
 5244 C=CC(OCC)OCC.COc1ccc(Br)c(C=O)c1>>CCOC(/C=C/c1ccc(OC)cc1C=O)OCC  
 5245 C=CS(N)(=O)=O.Cc1cccc(Br)c1C>>Cc1cccc(/C=C/S(N)(=O)=O)c1C  
 5246 Br1ccc2cc1CCc1cccc(c1)CC2.C=Cc1ccc2cc1CCc1cccc(c1)CC2>>C(=C/c1ccc2cc1CCc1cccc(c1)CC2  
 )c1ccc2cc1CCc1cccc(c1)CC2  
 5247 C=CCOC(C)=O.CC(C)(C)OC(=O)NCCc1cc2c(cc1I)OCO2>>CC(=O)OC/C=C/c1cc2c(cc1CCNC(=O)  
 OC(C)(C)C)OCO2  
 5248 C=Cc1ccc(C)cc1.COC(=O)c1ccc(I)cc1>>COC(=O)c1ccc(/C=C/c2ccc(C)cc2)cc1  
 5249 C=CCN(C(=O)C(C)(C)C)[C@H](C)c1cccc1.O=C1Nc2ncccc2[C@]12Cc1ccc(Br)cc1C2>>C[C@H](c  
 1cccc1)N(C/C=C/c1ccc2c(c1)C[C@]1(C2)C(=O)Nc2ncccc21)C(=O)C(C)(C)C  
 5250 C=CCN1cc([N+](=O)[O-]  
 )cn1.CCOC(=O)c1ccc(Br)cc1>>CCOC(=O)c1ccc(/C=C/CCn2cc([N+](=O)[O-])cn2)cc1  
 5251 C=CC(CCC)OCc1cccc1.Fc1ccc(Br)cc1>>CCCC(/C=C/c1ccc(F)cc1)OCc1cccc1  
 5252 C=CC(C)(C)O.FC(F)(F)c1ccc(Br)cc1>>CC(C)(O)/C=C/c1ccc(C(F)(F)F)cc1  
 5253 C=CN(C)C(C)=O.Fc1cccc1Br>>C=C(c1cccc1F)N(C)C(C)=O  
 5254 C=CC(N)=O.O=C(c1cccc1)c1cccc1I>>NC(=O)/C=C/c1cccc1C(=O)c1cccc1  
 5255 C=CC(=O)OC.COc1ccc(I)c(C=O)c1>>COC(=O)/C=C/c1ccc(OC)cc1C=O  
 5256 C=C1CC(c2ccc(C)cc2)OC1=O.FC(F)(F)c1cccc1I>>Cc1ccc(C2C/C=C/c3cccc3C(F)(F)F)C(=O)O2)c  
 5257 C=CC(CCC)OCc1cccc1.CC(=O)c1ccc(Br)cc1>>CCCC(/C=C/c1ccc(C(C)=O)cc1)OCc1cccc1  
 5258 C=CC(=O)OC.Cc1c(COc2ccc(Br)cc2F)noc1-c1ccc(C(F)(F)F)cc1>>COC(=O)/C=C/c1ccc(OCc2noc(-  
 c3ccc(C(F)(F)F)cc3)c2C)c(F)c1  
 5259 C=CC(C)=O.CC(C)n1cnc2c(Cl)nc(I)nc21>>CC(=O)/C=C/c1nc(Cl)c2nnc(C(C)C)c2n1  
 5260 C=Cc1nc2cc(C(C)(C)C)cc(C(C)(C)C)c2o1.O=C(OC[C@H]1O[C@@H](n2cc(I)c(=O)[nH]c2=O)C[C  
 @H]1OC(=O)c1cccc1)c1cccc1>>CC(C)(C)c1cc(C(C)(C)C)c2oc(/C=C/c3cn([C@H]4C[C@H](OC  
 (=O)c5cccc5)[C@@H](COC(=O)c5cccc5)O4)c(=O)[nH]c3=O)nc2c1  
 5261 C=CP(=O)(OCC)OCC.O=[N+][O-]c1ccc(I)cc1>>CCOP(=O)/C=C/c1ccc([N+](=O)[O-])cc1)OCC  
 5262 C=Cc1ccc(C)cc1C.C[Si](C)(C)I>>Cc1ccc(/C=C/[Si](C)(C)C)c(C)c1  
 5263 C=CCCCCCC.COC(=O)CCCCC1=C(I)CCC1=O>>CCCCC/C=C/C1=C(CCCCC(=O)OC)C(=O)CC1  
 5264 C=Cc1cccc1.Clc1ccc(Br)c1>>Clc1ccc(/C=C/c2cccc2)c1  
 5265 C=Cc1nc(C)c(OC(=O)C(C)(C)C)c2c1COC2OC.Ic1cccc1>>COC1OCc2c(/C=C/c3cccc3)nc(C)c(OC(  
 =O)C(C)(C)C)c21  
 5266 C=CC(C)(C)CC(=O)OC.COc1ccc(I)cc1>>COC(=O)CC(C)(C)/C=C/c1ccc(OC)cc1  
 5267 C=CC#N.O=c1cc(I)cn1Cc1cccc1>>N#C/C=C/c1cnn(Cc2cccc2)c(=O)c1  
 5268 C=CCC(C)C(=O)OCC.COc1ccc(I)cc1>>CCOC(=O)C(C)C/C=C/c1ccc(OC)cc1  
 5269 C=CC(=O)O.O=C(c1cccc1)c1ccc(Br)cc1>>O=C(O)/C=C/c1ccc(C(=O)c2cccc2)cc1  
 5270 C=CC(=O)OCCCC.N#Cc1cccc1Br>>CCCCOC(=O)/C=C/c1cccc1C#N  
 5271 C=CCN.COc1ccc2c(=O)c(I)coc2c1>>COc1ccc2c(=O)c(/C=C/CN)coc2c1

5272 C=CS(=O)(=O)NC1CCCC1.CC(C)(C)OC(=O)NCc1cc(F)ccc1Br>>CC(C)(C)OC(=O)NCc1cc(F)ccc1/  
 C=C/S(=O)(=O)NC1CCCC1  
 5273 C=C.ClCc1cccc(Br)c1>>C=CCc1cccc(Br)c1  
 Brc1ccc2c(c1)Cc1ccccc1-  
 5274 2.C=Cc1nc2c(=O)[nH]c(N=CN(C)C)nc2n1[C@@H]1C[C@H](O)[C@@H](COC(c2ccccc2)(c2ccc(O  
 C)cc2)c2ccc(OC)cc2)O1>>COc1ccc(C(OC[C@H]2O[C@H](n3c(/C=C/c4ccc5c(c4)Cc4ccccc4-  
 5)nc4c(=O)[nH]c(N=CN(C)C)nc43)C[C@@H]2O)(c2ccccc2)c2ccc(OC)cc2)cc1  
 5275 Brc1ccc2cc[nH]c2c1.C=Cc1ccccc1>>C(=C/c1ccc2cc[nH]c2c1)\c1ccccc1  
 5276 C=Cc1ccc([Si](C)(OC)OC)cc1.CO[Si](C)(OC)c1ccc(Br)cc1>>CO[Si](C)(OC)c1ccc(/C=C/c2ccc([Si](  
 C)(OC)OC)cc2)cc1  
 5277 C=Cc1ccc(OCOC)c(OCOC)c1.COCOc1cc(OS(=O)(=O)C(F)(F)F)cc(OCOC)c1C/C=C(\C)CCC=C(C)O  
 >>COCOc1ccc(/C=C/c2cc(OCOC)c(C/C=C(\C)CCC=C(C)C)c(OCOC)c2)cc1OCOC  
 5278 C=C1C(=O)O[C@H]2C3=C(C)CCC[C@]3(C)C(=O)C[C@@H]12.COc1ccc(I)c(OC)c1>>COc1ccc(/C  
 =C2/C(=O)O[C@H]3C4=C(C)CCC[C@]4(C)C(=O)C[C@@H]23)c(OC)c1  
 5279 C=Cc1ccccc1.Cc1ncnc2c1c(I)cn2[C@@H]1O[C@H](CO)[C@@H](O)[C@@]1(C)F>>Cc1ncnc2c1c(/  
 C=C/c1ccccc1)cn2[C@@H]1O[C@H](CO)[C@@H](O)[C@@]1(C)F  
 5280 Brc1cccc(I)c1.C=Cc1ccccc1>>Brc1cccc(/C=C/c2ccccc2)c1  
 5281 C=C1C(=O)N2C[C@H](O)C[C@@H]2[C@H]1O.O=[N+](O-  
 )c1ccc(I)cc1>>O=C1/C(=C\c2ccc([N+](=O)[O-])cc2)[C@H](O)[C@H]2C[C@@H](O)CN12  
 5282 C=CC(=O)OCCCC.O=[N+](O-)c1ccccc1Cl>>CCCCOC(=O)/C=C/c1ccccc1[N+](=O)[O-]  
 5283 C=C(NC(=O)OCc1ccccc1)C(=O)OC.CC(=O)OCc1cc(F)c(F)cc1Br>>COC(=O)/C(=C/c1cc(F)c(F)cc1C  
 OC(C)=O)NC(=O)OCc1ccccc1  
 5284 C=C.FC(F)(F)c1ccc(I)cc1>>C=Cc1ccc(C(F)(F)F)cc1  
 5285 C=Cc1cc(C)ccc1C.CCCc1ccc(/C=C/c2ccc(I)cc2)cc1>>CCCCc1ccc(/C=C/c2ccc(/C=C/c3cc(C)ccc3C)  
 cc2)cc1  
 5286 C=C(F)[Si](C)(c1ccccc1)c1ccccc1.CCc1ccccc1I>>CCc1ccccc1/C=C(\F)[Si](C)(c1ccccc1)c1ccccc1  
 5287 C=CC(=O)OC.CC(C)(C)c1cc(Br)cc(C=O)c1O>>COC(=O)/C=C/c1cc(C=O)c(O)c(C(C)(C)C)c1  
 5288 C=CC(=O)OCC.FC(F)(F)c1ccccc1I>>CCOC(=O)/C=C/c1ccccc1C(F)(F)F  
 5289 C=Cc1ccccc1.O=[N+](O-)c1ccccc1I>>O=[N+](O-)c1ccccc1/C=C/c1ccccc1  
 5290 C=Cc1ccc(N(C)C)cc1.OCCOc1ncc(I)cc1Br>>CN(C)c1ccc(/C=C/c2ncc(OCCO)c(Br)c2)cc1  
 5291 C=Cc1ccccc1C(F)(F)F.CN(C(=O)c1ccccc1)c1ccc2c(c1)[nH]c(=NC(=O)c1ccc(Br)s1)n2CCC(N)=O>>  
 CN(C(=O)c1ccccc1)c1ccc2c(c1)[nH]c(=NC(=O)c1ccc(/C=C/c3ccccc3C(F)(F)F)s1)n2CCC(N)=O  
 5292 C=CC(=O)OC.CCc1ccc(I)cc1CO>>CCc1ccc(/C=C/C(=O)OC)cc1CO  
 5293 C=CCNC(=O)OC(C)(C)C.COC(=O)c1ccc(Cl)cc1>>C=C(CNC(=O)OC(C)(C)C)c1ccc(C(=O)OC)cc1  
 5294 C=CC(=O)OC1CCCCC1.Cc1ccc(I)cc1>>Cc1ccc(/C=C/C(=O)OC2CCCCC2)cc1  
 5295 C=CC(=O)OCC.Fc1ccccc1Br>>CCOC(=O)/C=C/c1ccccc1F  
 Brc1ccc2ccccc2c1.C=CCO[C@@H]1CC(=O)O[C@H](C)C/C=C/C=C/[C@H](O[Si](C)(C)C(C)(C)C)  
 C@H](C)C[C@H](CC(OC)OC)[C@H](O[C@@H]2O[C@H](C)[C@@H](O[C@H]3C[C@@](C)(O)[  
 5296 C@@H](OC(=O)CC)[C@H](C)O3)[C@H](N(C)C)[C@H]2OC(C)=O)[C@H]1OC>>CCC(=O)O[C@  
 H]1[C@H](C)O[C@@H](O[C@H]2[C@H](N(C)C)[C@@H](OC(C)=O)[C@H](O[C@@H]3[C@@  
 H](OC)[C@H](OC/C=C/c4ccc5ccccc5c4)CC(=O)O[C@H](C)C/C=C/C=C/[C@H](O[Si](C)(C)C(C)(C)  
 )C)C@H](C)C)C@H]1C  
 5297 C=CC(=O)OC.Cn1nnc2cc(Br)ccc21>>COC(=O)/C=C/c1ccc2c(c1)nnn2C  
 C=C1C(=O)O[C@H]2[C@H]1CCC(=C)[C@@H]1C[C@H](OC(C)=O)C(=C)[C@H]21.O=[N+](O-  
 5298 )c1ccccc1I>>C=C1CC[C@H]2/C(=C\c3ccccc3[N+](=O)[O-  
 ])C(=O)O[C@H]2[C@H]2C(=C)[C@@H](OC(C)=O)C[C@@H]12  
 C=CC(=O)[C@@]1(O)C[C@H]2CC[C@]1(C)C2(C)C.COc1ccc(I)cc1>>COc1ccc(/C=C/C(=O)[C@@  
 5299 ]2(O)C[C@H]3CC[C@]2(C)C3(C)C)cc1  
 5300 C=Cc1ccccc1.CCOC(=O)C1(C(C)=O)CCC(I)=C1C>>CCOC(=O)C1(C(C)=O)CCC(/C=C/c2ccccc2)=  
 5301 C=CC(=O)OCC.Clc1ccc(I)cc1>>CCOC(=O)/C=C/c1ccc(Cl)cc1  
 5302 C=CCNC(=O)OC(C)(C)C.COC(=O)c1ccc(Br)cc1>>C=C(CNC(=O)OC(C)(C)C)c1ccc(C(=O)OC)cc1  
 5303 C=CC(=O)OCCCC.O=[N+](O-)c1ccc(Br)cc1>>CCCCOC(=O)/C=C/c1ccc([N+](=O)[O-])cc1  
 5304 C=CC(=O)OCC.COC(=O)c1ccccc1I>>CCOC(=O)/C=C/c1ccccc1C(=O)OC  
 5305 C=Cc1ccncc1.CCN(CCOc1ccc(OC(C)=O)cc1)c1ccc(I)cc1>>CCN(CCOc1ccc(OC(C)=O)cc1)c1ccc(/C  
 =C/c2ccncc2)cc1  
 5306 C=CC(=O)OCC.CC(C)[C@H]1CC[C@]2(C)C[C@H]1c1c(c(Br)cc3c1[nH]c1ccccc13)O2>>CCOC(=O  
 )/C=C/c1cc2c([nH]c3ccccc32)c2c1O[C@]1(C)CC[C@H](C(C)C)[C@H]2C1  
 5307 C=CC(C)(O)CCC=C(C)C.CC(=O)c1ccc(Br)cc1>>CC(=O)c1ccc(/C=C/C(C)(O)CCC=C(C)C)cc1  
 5308 C=Cc1ccc(OC(C)=O)cc1.COc1cc(I)cc(OC)c1>>COc1cc(/C=C/c2ccc(OC(C)=O)cc2)cc(OC)c1  
 5309 C=CCc1ccccc1.Ic1ccccc1>>C(=C/c1ccccc1)\Cc1ccccc1  
 5310 C=Cc1ccc(F)cc1.CCOC(=O)C(F)(F)Br>>CCOC(=O)C(F)(F)/C=C/c1ccc(F)cc1

5311 C=Cc1cccnc1.Cc1ccc(S(=O)(=O)Oc2ccccc3c(Br)ccnc23)cc1>>Cc1ccc(S(=O)(=O)Oc2ccccc3c(/C=C/c4ccncc4)ccnc23)cc1  
 C=CC(=O)OC(C)(C)C.Cc1c(O)ccc2c(Cc3ccc(Br)cc3)c(-  
 5312 c3ccc(OC(F)(F)F)cc3)c(=O)oc12>>Cc1c(O)ccc2c(Cc3ccc(/C=C/C(=O)OC(C)(C)C)cc3)c(-  
 c3ccc(OC(F)(F)F)cc3)c(=O)oc12  
 5313 C=CC(F)(F)F.O=[N+][([O-])c1ccc(I)c(Cl)c1]>>O=[N+][([O-])c1ccc(/C=C/C(F)(F)F)c(Cl)c1  
 C=Cc1cccnc1.CC(C)(C)OC(=O)N1CCC[C@H]1COc1cnc(Cl)c(I)c1>>CC(C)(C)OC(=O)N1CCC[C@  
 5314 H]1COc1cnc(Cl)c(/C=C/c2ccccc2)c1  
 5315 C=COCCCC.FC(F)(F)c1ccc(Cl)cc1>>C=C(OCCCC)c1ccc(C(F)(F)F)cc1  
 5316 C=Cc1ccccc1.COC(=O)c1ccc(Br)cc1>>COC(=O)c1ccc(/C=C/c2ccccc2)cc1  
 5317 C=CC(N)=O.Nc1cccnc1Br>>NC(=O)/C=C/c1cccnc1N  
 5318 C=CC(O)C(F)(F)C(=O)OCC.Ic1ccccc1>>CCOC(=O)C(F)(F)C(O)/C=C/c1ccccc1  
 5319 C=CC(=O)OC(C)(C)C.Cn1cc(Br)nn1>>Cn1cc(/C=C/C(=O)OC(C)(C)C)nn1  
 C=C1C(=O)N2C[C@H](O)C[C@H]2[C@H]1O.Oc1ccc(I)cc1>>O=C1/C(=C/c2ccc(O)cc2)[C@H](  
 5320 O)[C@H]2C[C@H](O)CN12  
 C=Cc1ccc(C(F)(F)F)cc1.CCCCOC(=O)/C=C/c1ccc(Cl)cc1>>CCCCOC(=O)/C=C/c1ccc(/C=C/c2ccc(C  
 5321 (F)(F)F)cc2)cc1  
 5322 C=C(C)C(=O)OC.COc1ccccc1I>>COC(=O)/C(C)=C/c1ccccc1OC  
 5323 C=Cc1ccccc1.O=c1oc2cc(C(F)(F)F)ccc2c(-c2ccccc2)c1Br>>O=c1oc2cc(C(F)(F)F)ccc2c(-  
 c2ccccc2)c1/C=C/c1ccccc1  
 5324 C=C.N#Cc1cccc(Br)c1>>C=Cc1cccc(C#N)c1  
 5325 C=Cc1ccc(N(c2ccccc2)c2ccccc2)cc1.Cn1c2ccc(Br)cc2c2cc(C=O)ccc21>>Cn1c2ccc(C=O)cc2c2cc(/C=  
 C/c3ccc(N(c4ccccc4)c4ccccc4)cc3)ccc21  
 C=CCCN1C(=O)c2ccccc2C1=O.Ic1ccc(-c2ccccc2)cc1>>O=C1c2ccccc2C(=O)N1CC/C=C/c1ccc(-  
 5326 c2ccccc2)cc1  
 5327 C=CC#N.CC(=O)Nc1ccccc1Br>>CC(=O)Nc1ccccc1/C=C/C#N  
 Bre1ccc2ncccc2c1.C=CC[C@H]1CCCN(C)C[C@H](OC(C)=O)[C@H](C)C[C@H](CC(OC)OC)[C@  
 5328 H][O][C@H]2O[C@H](C)[C@H](O)[C@H]3C[C@H](C)(O)[C@H](OC(=O)CC)[C@H](C)O3)  
 [C@H](N(C)C)[C@H]2OC(C)=O)[C@H](OC)[C@H](OC(=O)CC)CC(=O)O1>>CCC(=O)O[C@H]  
 1[C@H](C)O[C@H](O)[C@H]2[C@H](N(C)C)[C@H](OC(C)=O)[C@H](O)[C@H]3[C@H](  
 OC)[C@H](OC(=O)CC)CC(=O)O[C@H](C/C=C/c4ccc5ncccc5c4)CCCN(C)C[C@H](OC(C)=O)[C  
 @H]1C[C@H](OC(=O)CC)CC(=O)O[C@H](C/C=C/c4ccc5ncccc5c4)CCCN(C)C[C@H](OC(C)=O)[C  
 5329 C=Cc1ccc2c(c1)OCO2.C[Si](C)(C)OS(=O)(=O)C(F)(F)F>>C[Si](C)(C)/C=C/c1ccc2c(c1)OCO2  
 5330 C=Cc1cccc(OC)c1.Nc1ccccc1Br>>COc1cccc(/C=C/c2ccccc2N)c1  
 5331 C=CC(=O)OCC.CC(=O)c1ccc(I)cc1>>CCOC(=O)/C=C/c1ccc(C(C)=O)cc1  
 5332 C=Cc1ccc2nc(OC)c(OC)nc2c1.COC(=O)c1ccoc1Br>>COC(=O)c1ccoc1/C=C/c1ccc2nc(OC)c(OC)nc2  
 5333 C=CC(=O)OC.COc1ccc2c(c1)CCN(c1ccc(F)cc1)C2(C)c1ccc(Br)c(C)c1>>COC(=O)/C=C/c1ccc(C2(C  
 )c3ccc(OC)cc3CCN2c2ccc(F)cc2)cc1C  
 5334 C=CCN(C(=O)C1CCOCC1)[C@H](C)c1cc(F)cc(F)c1.O=C1Nc2ncccc2[C@H]12Cc1ccc(Br)cc1C2>>C[C  
 @H](c1cc(F)cc(F)c1)N(C)C=C/C1ccc2c(c1)C[C@H]1(C2)C(=O)Nc2ncccc21)C(=O)C1CCOCC1  
 C=CS(=O)(=O)Nc1ccc(OC)cc1.CC(C)(C)OC(=O)Nc1ccccc1Br>>COc1ccc(CNS(=O)(=O)/C=C/c2  
 5335 cccc2CNC(=O)OC(C)(C)C)cc1  
 5336 C=CC(=O)OC.CCoc1noc(C)c1I>>CCOc1noc(C)c1/C=C/C(=O)OC  
 5337 Bre1cccc2ccccc12.C=CS(=O)(=O)Oc1ccccc1>>O=S(=O)/C=C/c1cccc2ccccc12)Oc1ccccc1  
 5338 C=CC(=O)OC.CC(C)c1cccc(Br)c1>>COC(=O)/C=C/c1cccc(C(C)C)c1  
 5339 C=CC(=O)OCc1ccccc1.Cc1ccc(I)cc1>>Cc1ccc(/C=C/C(=O)OCc2ccccc2)cc1  
 5340 C=CC(=O)OC.COc1ccc(I)cc1>>COC(=O)/C=C/c1ccc(OC)cc1  
 C=Cc1ccc(OC)c(O)c1.CC(=O)OC[C@H]1O[C@H]1O[C@H](Oc2ccc(I)cc2)[C@H](OC(C)=O)[C@H](OC(  
 5341 C)=O)[C@H]1OC(C)=O>>COc1ccc(/C=C/c2ccc(O)[C@H]3O[C@H](COC(C)=O)[C@H](OC(  
 C)=O)[C@H](OC(C)=O)[C@H]3OC(C)=O)cc2)cc1O  
 5342 C=CC(=O)OCC.C[Si](C)(C)c1ccccc1I>>CCOC(=O)/C=C/c1ccccc1[Si](C)(C)C  
 5343 C=Cc1cccc(O)c1.COc1ccccc1Br>>COc1ccccc1/C=C/c1cccc(O)c1  
 5344 C=CC(=O)OC.C=CC[C@H](O)c1cccc(Br)c1>>C=CC[C@H](O)c1cccc(/C=C/C(=O)OC)c1  
 5345 C=CC(=O)N1CCOCC1.CCc1nc2c(N)nc3cc(Br)ccc3c2n1CC1CCOCC1>>CCc1nc2c(N)nc3cc(/C=C/C(  
 =O)N4CCOCC4)ccc3c2n1CC1CCOCC1  
 5346 Bre1cccc2ccccc12.C=CC(=O)N(C)OC>>CON(C)C(=O)/C=C/c1cccc2ccccc12  
 5347 C=CC(=O)OC.CN1CCc2c(c3ccccc3n2Cc2ccc(Br)cc2)C1>>COC(=O)/C=C/c1ccc(Cn2c3c(c4ccccc42)  
 CN(C)CC3)cc1  
 5348 C=COCCCC.CC(=O)c1ccc(Cl)c1>>C=C(OCCCC)c1ccccc(C(C)=O)c1  
 5349 Bre1ccoc1.C=CS(=O)c1ccccc1>>O=S(/C=C/c1ccoc1)c1ccccc1  
 5350 C=Cc1ccc(Br)cc1.CC(C)(C)OCc1ccccc1I>>CC(C)(C)OCc1ccccc1/C=C/c2ccc(Br)cc2)c1

[illegible]

5390 C=Cc1cccc1.COc1cc[nH]c1/C=C1\C(=O)Nc2cccc(I)c21>>COc1cc[nH]c1/C=C1\C(=O)Nc2cccc(/C=C/c3cccc3)c21

5391 C=Cc1cccc1.COC1(OC)C(=O)c2ccc(Br)cc2C1=O>>COC1(OC)C(=O)c2ccc(/C=C/c3cccc3)cc2C1=

5392 C=CC(=O)OC.COCC(=O)c1c([Si](C)(C)C)c(I)cn1S(=O)(=O)N(C)C>>COC(=O)/C=C/c1cn(S(=O)(=O)N(C)C)c(C(=O)OC)c1[Si](C)(C)C

5393 C=COCCCC.O=S(=O)(Oc1ccc(-c2cccc2)cc1)C(F)(F)F>>C=C(OCCCC)c1ccc(-c2cccc2)cc1

5394 C=Cc1ccc(OC)cc1.C[Si](C)(C)Cl>>COc1ccc(/C=C/[Si](C)(C)C)cc1

5395 C=C.Cc1cc(C)c(I)c(C)c1>>C=Cc1c(C)cc(C)cc1C

5396 C=CC#N.COc1ccc2c(=O)c(I)coc2c1>>COc1ccc2c(=O)c(/C=C/C#N)coc2c1

5397 C=CC(=O)OCCCC.Fc1cc(Br)ccc1OC(F)(F)F>>CCCCOC(=O)/C=C/c1ccc(OC(F)(F)F)c(F)c1

5398 C=CCC(C)C(=O)O.COc1ccc(I)cc1>>COc1ccc(/C=C/CC(C)C(=O)O)cc1

5399 C=C[Si](CC)(CC)CC.Cc1cccc1Br>>CC[Si](/C=C/c1cccc1C)(CC)CC

5400 C=Cc1ccc2ccc(Cl)cc2n1.CC(C)(O)c1cccc1CC[C@H](SCC1(CC#N)CC1)c1cccc(Br)c1>>CC(C)(O)c1cccc1CC[C@H](SCC1(CC#N)CC1)c1cccc(/C=C/c2ccc3ccc(Cl)cc3n2)c1

5401 C=CC(=O)OCC.Oc1c(F)cc(Br)cc1F>>CCOC(=O)/C=C/c1cc(F)c(O)c(F)c1

5402 C=C(NC(C)=O)C(=O)OC.Nc1ccc(Br)cc1CCO>>COC(=O)/C(=C/c1ccc(N)c(CCO)c1)NC(C)=O

5403 C=Cc1cncnc1.CC(=O)Nc1ccc(I)cc1>>CC(=O)Nc1ccc(/C=C/c2cncnc2)cc1

5404 C=CC(=O)N1CCCCC1.Cn1nc(Br)c2cccc21>>Cn1nc(/C=C/C(=O)N2CCCCC2)c2cccc21

5405 C=CC#N.CC(=O)Nc1cccc1I>>CC(=O)Nc1cccc1/C=C/C#N

5406 C=Cc1ccc(OCCCCCCCCCCCC)c(OCCCCCCCCCCCC)c1.Oc1ccc(I)cc1>>CCCCCCCCCCCCCOc1ccc(/C=C/c2ccc(O)cc2)cc1OCCCCCCCCCCCC

5407 Br1ccc(CCN2CCOCC2)cc1.C=Cc1n[nH]c2cc([C@H]3C[C@@]34C(=O)Nc3ccc(OC)cc34)ccc12>>COc1ccc2c(c1)[C@H]1(C[C@H]1c1ccc3c(/C=C/c4ccc(CCN5CCOCC5)cc4)n[nH]c3c1)C(=O)N2

5408 C=Cc1cccc1.COc1ccc(CNc2c(C(=O)NCc3ccc(F)cc3F)c(=O)n(OCc3cccc3)c3ncc(Br)cc23)c(OC)c1>>COc1ccc(CNc2c(C(=O)NCc3ccc(F)cc3F)c(=O)n(OCc3cccc3)c3ncc(/C=C/c4cccc4)cc23)c(OC)c1

5409 C=Cc1cncnc1.Cc1cccc1Br>>Cc1cccc1/C=C/c1cncnc1

5410 C=CC(F)(F)C(F)(F)C(F)(F)C(F)(F)C(F)(F)C(F)(F)F.CC1=Nc2ccc(I)cc2C1(C)C>>CC1=Nc2ccc(/C=C/C(F)(F)C(F)(F)C(F)(F)C(F)(F)C(F)(F)C(F)(F)F)cc2C1(C)C

5411 C=CCP(=O)(OCCCC)OCCCC.Ic1cccc1>>CCCCOP(=O)(C/C=C/c1cccc1)OCCCC

5412 C=Cc1cccc1.COC(=O)c1cc(C(=O)OC)c2cc(Br)ccc2n1>>COC(=O)c1cc(C(=O)OC)c2cc(/C=C/c3cccc3)ccc2n1

5413 BrC1CCCCC1.C=Cc1ccc(C(=O)N(Cc2cccc2)Cc2cccc2)cc1>>O=C(c1ccc(/C=C/C2CCCCC2)cc1)N(Cc1cccc1)Cc1cccc1

5414 C=CC(OCC)OCC.Cc1cccc(I)c1>>CCOC(/C=C/c1cccc(C)c1)OCC

5415 C=Cc1nnc2c1nnc2C1CCCCO1.Ic1cccc1>>C(=C/c1nnc2c1nnc2C1CCCCO1)\c1cccc1

5416 C=CC(=O)OC(C)(C)C.COc1cc(CC(=O)Nc2ccc(I)cc2)ccc1NC(=O)Nc1cccc1C>>COc1cc(CC(=O)Nc2ccc(/C=C/C(=O)OC(C)(C)C)cc2)ccc1NC(=O)Nc1cccc1C

5417 C=CC(=O)N1N=Cc2cccc2C1CC(=O)OC(C)(C)C.COc1cc(Cc2cnc(N)nc2N)cc(I)c1OC>>COc1cc(Cc2cnc(N)nc2N)cc(/C=C/C(=O)N2N=Cc3cccc3C2CC(=O)OC(C)(C)C)c1OC

5418 Br1ccc2cnc(N3CCCC3)c2c1.C=CC(C)=O>>CC(=O)/C=C/c1ccc2cnc(N3CCCC3)c2c1

5419 C=Cc1ccc2c(c1)c1cccc1n2CCCCCCCC.N#CC(=C(c1cccc1)c1cccc1)c1ccc(Br)cc1>>CCCCCCCCN1c2cccc2c2cc(/C=C/c3ccc(C(C#N)=C(c4cccc4)c4cccc4)cc3)ccc21

5420 C=Cc1cccc1.CCOC(=O)c1ccc(OS(=O)(=O)C(F)(F)F)cc1>>C=C(c1cccc1)c1ccc(C(=O)OCC)cc1

5421 C=CS(=O)(=O)F.O=S(=O)(F)Oc1ccc(I)cc1>>O=S(=O)(F)/C=C/c1ccc(OS(=O)(=O)F)cc1

5422 Br1cnc2cccc2c1.C=CC(C)(C)O>>CC(C)(O)/C=C/c1cnc2cccc2c1

5423 Cc1ccc(I)cc1.[11CH2]=Cc1cccc1>>Cc1ccc(/[11CH]=C/c2cccc2)cc1

5424 C=CC(=O)OCCCC.O=[N+][O-]c1ccc(I)cc1>>CCCCOC(=O)/C=C/c1ccc([N+](=O)[O-])cc1

5425 C=CC(=O)OC(C)(C)C.COC(=O)Cc1ccc2oc(-c3ccc(Br)cc3)nc2c1>>COC(=O)Cc1ccc2oc(-c3ccc(/C=C/C(=O)OC(C)(C)C)cc3)nc2c1

5426 C=CC(=O)O.CC(C)(C)OC(=O)N[C@H](Cc1cccc1Br)C(=O)O>>CC(C)(C)OC(=O)N[C@H](Cc1cccc1/C=C/C(=O)O)C(=O)O

5427 C=C(NC(C)=O)C(=O)O.COc1ccc(Br)cc1>>COc1ccc(/C=C(\NC(C)=O)C(=O)O)cc1

5428 C=Cc1cccc1.CC(=O)c1ccc(Br)c1>>CC(=O)c1cccc(/C=C/c2cccc2)c1

5429 Br1ccnc1.C=CCNC(=O)OC(C)(C)C>>CC(C)(C)OC(=O)NC/C=C/c1ccnc1

5430 C=Cc1cc[n+](O-)]cc1.COc1cc(Nc2c(C#N)cnc3cc(Br)ccc23)cc(OC)c1OC>>COc1cc(Nc2c(C#N)cnc3cc(/C=C/c4cc[n+](O-)]cc4)ccc23)cc(OC)c1OC

5431 C=CC(=O)OCC.Cc1nc(C(C)C)nc1I>>CCOC(=O)/C=C/c1cnc(C(C)C)nc1C

5432 Br1cnc2cccc2c1.C=CC(=O)OCCCC>>CCCCOC(=O)/C=C/c1cnc2cccc2c1

5433 C=C[C@H](C)(/C=C/c1ccc(O)cc1)CCC=C(C)C.COc1ccc(I)cc1>>COc1ccc(/C=C/[C@H](C)(/C=C/c2ccc(O)cc2)CCC=C(C)C)cc1

5434 C=CNC(C)=O.O=S(=O)(Oc1ccccc1)C(F)(F)F>>C=C(NC(C)=O)c1ccccc1  
5435 C=CC(N)=O.Ic1ccsc1>>NC(=O)/C=C/c1ccsc1  
5436 C=CC(=O)N(C)Cc1sc2ccccc2c1C.CCC1(CC)C(=O)Nc2ncc(Br)cc21>>CCC1(CC)C(=O)Nc2ncc(/C=C  
/C(=O)N(C)Cc3sc4ccccc4c3C)cc21  
5437 C=CC(=O)OC.CNc1cc(Cl)ccc1[N+](=O)[O-]>>CNc1cc(/C=C/C(=O)OC)ccc1[N+](=O)[O-]  
5438 C=CC(=O)OCC.CCn1ccc(Br)cc1=O>>CCOC(=O)/C=C/c1ccn(CC)c(=O)c1  
5439 C=CC(=O)OC.O=Cc1cc(-c2ccc(Br)cc2)cc(C23CC4CC(CC(C4)C2)C3)c1O>>COC(=O)/C=C/c1ccc(-  
c2cc(C=O)c(O)c(C34CC5CC(CC(C5)C3)C4)c2)cc1  
5440 C=C.COc1ccc(Br)c(NC(C)=O)c1>>C=Cc1ccc(OC)cc1NC(C)=O  
5441 C=CC(=O)OC(C)(C)C.Ic1enn(C(c2ccccc2)(c2ccccc2)c2ccccc2)c1>>CC(C)(C)OC(=O)/C=C/c1enn(C(  
c2ccccc2)(c2ccccc2)c2ccccc2)c1  
5442 C=CCC(C)(C)C.CC(C)(C)c1ccccc1OS(=O)(=O)C(F)(F)F>>C=C(CC(C)(C)C)c1ccccc1C(C)(C)C  
5443 Brc1cccn1.C=CCNC(=O)OC(C)(C)C>>C=C(CNC(=O)OC(C)(C)C)c1cccn1  
5444 C=CP(=O)(O)O.COc1ccc(Br)cc1>>COc1ccc(/C=C/P(=O)(O)O)cc1  
5445 C=CS(=O)(=O)NCCCCCCCC.Cc1ccc(CNC(=O)OC(C)(C)C)c(Br)c1>>CCCCCCCCNS(=O)(=O)/C=C  
/c1cc(C)ccc1CNC(=O)OC(C)(C)C  
5446 C=CC(=O)OCC.Cc1ccc(CC2CCC(=O)N(Cc3ccccc3)C2)c(Br)c1>>CCOC(=O)/C=C/c1cc(C)ccc1CC1  
CCC(=O)N(Cc2ccccc2)C1  
5447 C=Cc1ccc(OC)cc1.Oc1cc(Br)cc(O)c1F>>COc1ccc(/C=C/c2cc(O)c(F)c(O)c2)cc1  
5448 C=CC(=O)OCC.CCOC(=O)CCOCc1cc(OCc2ccccc2)ccc1Br>>CCOC(=O)/C=C/c1ccc(OCc2ccccc2)cc  
1COCCC(=O)OCC  
5449 C=Cc1ccc(C)cc1.COc1cc(C=O)c(Br)c(OC)c1OC>>COc1cc(C=O)c(/C=C/c2ccc(C)cc2)c(OC)c1OC  
5450 C=Cc1cc(O[Si](C)(C)C(C)(C)C)cc(O[Si](C)(C)C(C)(C)C)c1.CC(=O)Oc1ccc(I)cc1>>CC(=O)Oc1ccc(/  
C=C/c2cc(O[Si](C)(C)C(C)(C)C)cc(O[Si](C)(C)C(C)(C)C)c2)cc1  
5451 C=CC(=O)OC.IC1=CO[C@H](COc2ccccc2)[C@H](OCc2ccccc2)[C@@H]1OCc1ccccc1>>COC(=O)/C=C/C1=CO[C@H](COc2ccccc2)[C@H](OCc2ccccc2)[C@@H]1OCc1ccccc1  
C=Cc1ccc(/C=C/c2ccc(N(C)C)cc2)cc1.Cc1cc2c(-c3ccc(I)cc3S(=O)(=O)O)c3cc(C)c(=O)cc-  
5452 3oc2cc1O>>Cc1cc2c(-  
c3ccc(/C=C/c4ccc(/C=C/c5ccc(N(C)C)cc5)cc4)cc3S(=O)(=O)O)c3cc(C)c(=O)cc-3oc2cc1O  
5453 C=C1C(=O)O[C@H]2[C@H]1CC/C(C)=C/CC[C@]1(C)O[C@H]21.Fc1ccc(I)cc1>>C/C1=C\CC[C@  
@@]2(C)O[C@H]2[C@H]2OC(=O)/C=C/c3ccc(F)cc3)[C@H]2CC1  
5454 C=CC(F)(F)F.COC(=O)c1ccc(I)cc1>>COC(=O)c1ccc(/C=C/C(F)(F)F)cc1  
5455 C=CC(=O)OC(C)(C)C.FC(F)(F)c1ccccc1Br>>CC(C)(C)OC(=O)/C=C/c1ccccc1C(F)(F)F  
5456 C=Cc1cccn1.c1ccc([I+](c2ccccc2)cc1)>>C(=C/c1cccn1)\c1ccccc1  
5457 C=CC(C)=O.COC(=O)C1(C(=O)OC)CC1Cc1cc(OC)ccc1I>>COC(=O)C1(C(=O)OC)CC1Cc1cc(OC)c  
cc1/C=C/C(C)=O  
5458 C=Cc1ccccc([N+](=O)[O-])c1.CC(=O)Nc1ccc(Br)cn1>>CC(=O)Nc1ccc(/C=C/c2ccccc([N+](=O)[O-]  
5459 C=Cc1ccccc1.CC(C)(C)Br>>CC(C)(C)/C=C/c1ccccc1  
5460 C=CC(C)=O.[2H]C([2H])([2H])C1=C(OS(=O)(=O)C(F)(F)F)C(C)(C)CCC1>>[2H]C([2H])([2H])C1=  
C(/C=C/C(C)=O)C(C)(C)CCC1  
5461 C=CCN1C(=O)c2ccccc2C1=O.COCCOCOc1ccc(C#N)cc1Br>>COCCOCOc1ccc(C#N)cc1/C=C/CN1  
C(=O)c2ccccc2C1=O  
5462 C=CC(=O)O.N[C@@H](Cc1c[nH]c2c(I)cccc12)C(=O)O>>N[C@@H](Cc1c[nH]c2c(/C=C/C(=O)O)c  
ccc12)C(=O)O  
5463 C=CC(=O)OCCCC.Cc1ccc(Br)c(C)c1>>CCCCOC(=O)/C=C/c1ccc(C)cc1C  
5464 C=CC(=O)OC(C)(C)C.CC(C)=CCc1cc(I)ccc1OC(=O)CCCc1ccccc1>>CC(C)=CCc1cc(/C=C/C(=O)O  
C(C)(C)C)ccc1OC(=O)CCCc1ccccc1  
5465 C=CC(=O)N(C)Cc1oc2ccc(C)cc2c1C.O=C1Nc2ncc(Br)cc2C12CCC2>>Cc1ccc2oc(CN(C)C(=O)/C=C  
/c3enc4c(c3)C3(CCC3)C(=O)N4)c(C)c2c1  
5466 C=CC(=O)OC.COc1ccc(S(=O)(=O)N2CCc3cc(Br)cc(OCc4ccccc4)c32)cc1>>COC(=O)/C=C/c1cc2c(c  
(OCc3ccccc3)c1)N(S(=O)(=O)c1ccc(OC)cc1)CC2  
5467 C=CN1C(=O)c2ccccc2C1=O.COc1cc(Br)cc(OC)c1OC>>COc1cc(/C=C/N2C(=O)c3ccccc3C2=O)cc(O  
C)c1OC  
5468 C=C[Si](C)(C)C.Cc1cc(C)c(I)c(C)c1>>Cc1cc(C)c(/C=C/[Si](C)(C)C)c(C)c1  
5469 C=CC(=O)OCCCC.Nc1ccc(F)cc1I>>CCCCOC(=O)/C=C/c1cc(F)ccc1N  
5470 C=CC(=O)OC(C)(C)C.COc1ccc2c(c1)CCN(c1ccc(C(C)C)s1)C2(C)c1ccc(Br)cc1>>COc1ccc2c(c1)CC  
N(c1ccc(C(C)C)s1)C2(C)c1ccc(/C=C/C(=O)OC(C)(C)C)cc1  
5471 Brc1sc2ccccc12.C=CC(=O)OC>>COC(=O)/C=C/c1sc2ccccc12  
5472 C=CC(=O)NCCCc1ccccc1.COC(=O)C1CC(c2ccc(C(=O)C(=O)c3ccc(Br)cc3)cc2)=NO1>>COC(=O)C  
1CC(c2ccc(C(=O)C(=O)c3ccc(/C=C/C(=O)NCCCc4ccccc4)cc3)cc2)=NO1  
5473 C=CC(=O)OC(C)(C)C.Nc1ccc(I)cc1Br>>CC(C)(C)OC(=O)/C=C/c1ccc(N)c(Br)c1

5474 C=Cc1cc(OC)c(OC)c(OC)c1-  
c1ccc(F)c(C)c1.COc1ccc(I)cc1>>COc1ccc(/C=C/c2cc(OC)c(OC)c(OC)c2-c2ccc(F)c(C)c2)cc1  
5475 C=CC[C@ @H]1CCc2ccccc2N1C.COc1ccc(Br)cc1OC>>COc1ccc(/C=C/C[C@ @H]2CCc3ccccc3N2C  
)cc1OC  
5476 C=CC(C)=O.FC1(F)C(I)=C1c1ccc(Br)cc1>>CC(=O)/C=C/C1=C(c2ccc(Br)cc2)C1(F)F  
5477 C=CC(=O)OCC.COc1nc2ccc(Br)cc2nc1OC>>CCOC(=O)/C=C/c1ccc2nc(OC)c(OC)nc2c1  
5478 C=CC(=O)OC.O=C1CCC(N2C(=O)c3ccccc(I)c3C2=O)C(=O)N1>>COC(=O)/C=C/c1cccc2c1C(=O)N(  
C1CCC(=O)NC1=O)C2=O  
5479 C=CC(=O)OC(C)(C)C.CC(C)(O)c1cc(Br)enc1N>>CC(C)(C)OC(=O)/C=C/c1enc(N)c(C)(C)O)c1  
5480 C=CC(=O)OC.Fc1cc(Br)c2[nH]c3c(c2c1)CCC3>>COC(=O)/C=C/c1cc(F)cc2c3c([nH]c12)CCC3  
5481 Brc1ccccc1.C=CC(=O)N(C)C>>CN(C)C(=O)/C=C/c1ccccc1  
5482 C=Cc1ccc(OC)cc1.O=[N+]( [O-] )c1cccc(Br)c1>>COc1ccc(/C=C/c2ccccc([N+](=O)[O-])c2)cc1  
5483 COC[C@ @H]/N=C(\c1ccccc1)N1C=CCC[C@H]1C)C(C)C.Ic1ccccc1>>COC[C@ @H]/N=C(\c1ccc  
cc1)N1C=C(c2ccccc2)CC[C@H]1C)C(C)C  
5484 C=Cc1ccccc1.Fc1cccc(I)c1>>Fc1cccc(/C=C/c2ccccc2)c1  
5485 C=CC(=O)OC(C)(C)C.COc1ccc(Br)cc1C=O>>COc1ccc(/C=C/C(=O)OC(C)(C)C)cc1C=O  
5486 C=CC(=O)OCC.Cc1cc(F)c(CN(C)C)cc1Br>>CCOC(=O)/C=C/c1cc(CN(C)C)c(F)cc1C  
5487 C=Cc1cccc(Cl)c1.CCOC(=O)C(Cc1ccccc1I)C(C)=O>>CCOC(=O)C(Cc1ccccc1/C=C/c1cccc(Cl)c1)C(  
C)=O  
5488 C=CC(C)OC(C)=O.CCOc1cnc(-c2ccc(Br)cc2)nc1>>CCOc1cnc(-c2ccc(/C=C/C(C)OC(C)=O)cc2)nc1  
5489 C=Cc1ccc(C(=O)OC)cc1.CC1(C)NC(C)(C)c2cc(Br)ccc21>>COC(=O)c1ccc(/C=C/c2ccc3c(c2)C(C)(C  
)NC3(C)C)cc1  
5490 C=Cc1ccccc1.Cc1cc(I)c2ccccc2n1>>Cc1cc(/C=C/c2ccccc2)c2ccccc2n1  
5491 C=Cc1cncnc1.CNc1ccc(Br)cc1>>CNc1ccc(/C=C/c2cncnc2)cc1  
5492 C=CC(=O)OCCCC.Cn1ccc2cc(Br)ccc21>>CCCCOC(=O)/C=C/c1ccc2c(cen2C)c1  
5493 C=CC(=O)OCC.COc1cc(I)c2c3c1O[C@ @H]1[C@ @]34CCN(C)[C@H](C2)[C@ @]42C=C[C@ @]1(OC)[  
C@H]1C(=O)N(c3ccccc3)C(=O)[C@H]12>>CCOC(=O)/C=C/c1cc(OC)c2c3c1C[C@H]1N(C)CC[C@  
@]34[C@ @H](O2)[C@ @]2(OC)C=C[C@ @]14[C@ @H]1C(=O)N(c3ccccc3)C(=O)[C@ @H]12  
5494 C=CC1CCCCC1.Cc1ccc(Br)cc1>>Cc1ccc(/C=C/C2CCCCC2)cc1  
5495 C=CC(=O)OC(C)(C)C.O=Cc1ccccc1Cl>>CC(C)(C)OC(=O)/C=C/c1ccccc1C=O  
5496 C=CC(=O)OC(C)(C)C.COc1ccc(S(=O)(=O)N2CCc3cc(Br)enc32)cc1>>COc1ccc(S(=O)(=O)N2CCc3c  
c(/C=C/C(=O)OC(C)(C)C)enc32)cc1  
5497 C=C[C@H](O[Si](C)(C)C(C)(C)C)[C@H](CCCC(=O)OCC)O[Si](C)(C)C(C)(C)C.O=Cc1cccc(Br)c1>  
>CCOC(=O)CCC[C@H](O[Si](C)(C)C(C)(C)C)[C@H]/C=C/c1cccc(C=O)c1O[Si](C)(C)C(C)(C)C  
5498 C=CC(=O)O.O=S(=O)(Nc1ccc(I)cc1)c1ccc(Cl)cc1>>O=C(O)/C=C/c1ccc(NS(=O)(=O)c2ccc(Cl)cc2)c  
5499 C=CC(=O)OC.O=Cc1ccc([N+](=O)[O-])cc1Br>>COC(=O)/C=C/c1cc([N+](=O)[O-])ccc1C=O  
5500 C=Cc1cncnc1.COC(=O)[C@H](Cc1ccc(O)c(I)c1)NC(=O)OC(C)(C)C>>COC(=O)[C@H](Cc1ccc(O)c  
(/C=C/c2cncnc2)c1)NC(=O)OC(C)(C)C  
5501 Brc1cccs1.C=CC(=O)OC>>COC(=O)/C=C/c1cccs1  
5502 C=CC(=O)OC.O=C1C=CC2(C=C1)OC(=O)C(I)=C2c1ccccc1>>COC(=O)/C=C/C1=C(c2ccccc2)C2(C  
=CC(=O)C=C2)OC1=O  
5503 C=Cc1ccc(C)cc1.FC(F)(F)Cl>>Cc1ccc(/C=C/CC(F)(F)F)cc1  
5504 C=CC(=O)OC.CCCCCCCCCC(F)(F)[C@H]1CC(c2ccc(Br)cc2)=N[C@ @H]1C(=O)OCC>>CCCCC  
CCCC(F)(F)[C@H]1CC(c2ccc(/C=C/C(=O)OC)cc2)=N[C@ @H]1C(=O)OCC  
5505 C=CC1(O)CCN(C(=O)OC(C)(C)C)CC1.CCc1nn2c(C)cc(C)nc2c1Cc1ccc(Br)cc1>>CCc1nn2c(C)cc(C)  
nc2c1Cc1ccc(/C=C/C2(O)CCN(C(=O)OC(C)(C)C)CC2)cc1  
5506 C=CC(=O)NCO.C[C@ @]12C[C@ @]34C=C(Sc5ccccc(I)c5)C(=O)[C@ @](C)(CCC(=O)Nc5c(O)ccc(C(=  
O)O)c5O)[C@ @H]3[C@H](C[C@ @H]1C4)O2>>C[C@ @]12C[C@ @]34C=C(Sc5ccccc(/C=C/C(=O)NC  
O)c5)C(=O)[C@ @]1(C)(CCC(=O)Nc5c(O)ccc(C(=O)O)c5O)[C@ @H]3[C@H](C[C@ @H]1C4)O2  
5507 C=CS(=O)(=O)F.CC(C)[Si](Oc1ccc(I)cc1)(C(C)C)C(C)C>>CC(C)[Si](Oc1ccc(/C=C/S(=O)(=O)F)cc1  
(C(C)C)C(C)C  
5508 C=CS(=O)(=O)c1ccccc1.Fc1ccc(Br)cc1>>O=S(=O)(/C=C/c1ccc(F)cc1)c1ccccc1  
5509 C=CC(=O)O.Clc1ccc(Br)cc1>>O=C(O)/C=C/c1ccc(Cl)cc1  
5510 Brc1ncccn1.C=Cc1ccc(OC)cc1>>COc1ccc(/C=C/c2ncccn2)cc1  
5511 C=CCCCCCC.COc1ccc(OS(=O)(=O)C(F)(F)F)cc1>>C=C(CCCCCC)c1ccc(OC)cc1  
5512 C=CC(C)(C)O.CC(C)(C)OC(=O)[C@H](Cc1cn(C(=O)OC(C)(C)C)c2ccccc(I)c12)N=C(c1ccccc1)c1ccc  
cc1>>CC(C)(O)/C=C/c1cccc2c1c(C[C@H](N=C(c1ccccc1)c1ccccc1)C(=O)OC(C)(C)C)cn2C(=O)OC(  
5513 C=CC(F)(F)F.O=C(O)c1ccc(I)cc1>>O=C(O)c1ccc(/C=C/C(F)(F)F)cc1  
5514 C=CC(=O)OC.CCc1nc2ccnc2n1Cc1ccc(Br)cc1>>CCc1nc2ccnc2n1Cc1ccc(/C=C/C(=O)OC)cc1  
5515 C=CC1CCCCC1.Nc1ccccc1Br>>Nc1ccccc1/C=C/C1CCCCC1



5516 C=CC(=O)OCC.Cc1cccc([C@@H](C)OC[C@H]2CO2)c1Br>>CCOC(=O)/C=C/c1c(C)cccc1[C@@H](C)OC[C@H]1CO1  
5517 C=Cc1cccc1.N#CCc1ccc(Br)cc1>>N#CCc1ccc(/C=C/c2cccc2)cc1  
5518 C=Cc1ccc(OC)c(OC)c1.COc1cc(I)cc(OC)c1>>COc1cc(/C=C/c2ccc(OC)c(OC)c2)cc(OC)c1  
5519 C=CC(=O)OCC.CC(C)Oc1ccc(Br)cc1C=O>>CCOC(=O)/C=C/c1ccc(OC(C)C)c(C=O)c1  
5520 C=CC(N)=O.CCc1ccc(I)cc1>>CCc1ccc(/C=C/C(N)=O)cc1  
5521 C=CC[C@H](CC(=O)OC(C)(C)C)C(=O)N[C@H](C(=O)N[C@H](C)c1cccc1)C(C)(C)C.COc1cc(Br)ccc1-c1cccc1>>COc1cc(/C=C/C[C@H](CC(=O)OC(C)(C)C)C(=O)N[C@H](C(=O)N[C@H](C)c2cccc2)C(C)(C)C)ccc1-c1cccc1  
5522 C=CC#N.COc1cccc2c(OS(=O)(=O)C(F)(F)F)coc12>>COc1cccc2c(/C=C/C#N)coc12  
5523 C=CC(=O)OCC.CC(C)Nc1ccc(Br)n(CC(=O)OC(C)(C)C)c1=O>>CCOC(=O)/C=C/c1cnc(NC(C)C)c(=O)n1CC(=O)OC(C)(C)C  
5524 C=CC(=O)OC(C)(C)C.O=[N+][O-]c1ccc(Oc2ccnc2I)c(F)c1>>CC(C)(C)OC(=O)/C=C/c1cnc1Oc1ccc([N+](=O)[O-])cc1F  
5525 C=CP(=O)(OCC)OCC.Clc1cccc1Br>>CCOP(=O)/C=C/c1cccc1Cl)OCC  
5526 C=CC(=O)OC.COc1ccc(Cl)cc1I>>COC(=O)/C=C/c1cc(Cl)ccc1OC  
5527 C=CS(=O)(=O)NCc1cccc1.CC(C)(C)OC(=O)NCc1cc(F)ccc1Br>>CC(C)(C)OC(=O)NCc1cc(F)ccc1/C=C/S(=O)(=O)NCc1cccc1  
5528 C=Cc1cccc1.CSc1ccc(Br)cc1>>CSc1ccc(/C=C/c2cccc2)cc1  
5529 Br1cccc(OCc2cccc2)c1.C=CC(OCC)OCC>>CCOC(/C=C/c1cccc(OCc2cccc2)c1)OCC  
5530 C=CCOc1cccc1.Clc1ccc(Br)c1>>Clc1ccc(/C=C/COc2cccc2)c1  
5531 C=CC(=O)OC.COc1ccc2c(c1)CCN(c1ccc(C(F)(F)F)cc1)C2(C)c1ccc(Br)cc1>>COC(=O)/C=C/c1ccc(C2(C)c3ccc(OC)cc3CCN2c2ccc(C(F)(F)F)cc2)cc1  
5532 C=CC[Si](C)(C)C.N#Cc1ccc(Br)cc1>>C=C(C[Si](C)(C)C)c1ccc(C#N)cc1  
5533 Br1cccn2nnnc12.C=Cc1ccc(C(C)(C)C)cc1>>CC(C)(C)c1ccc(/C=C/c2cccn3nnnc23)cc1  
5534 C=CC(=O)OCC.Ic1cccc1C#CCOC1CCCCO1>>CCOC(=O)/C=C/c1cccc1C#CCOC1CCCCO1  
5535 C=CC(=O)O.COc1ccc(S(=O)(=O)N(C)c2cccc(I)c2)cc1OC>>COc1ccc(S(=O)(=O)N(C)c2cccc(/C=C/C(=O)O)c2)cc1OC  
5536 C=CC(=O)OC.Cn1c(-c2ccc(Br)cc2)nc2cccc21>>COC(=O)/C=C/c1ccc(-c2nc3cccc3n2C)cc1  
5537 C=CC(C)(O)CCC=C(C)C.Cc1cccc1Br>>CC(C)=CCCC(C)(O)/C=C/c1cccc1C  
5538 C=Cc1ccc(OC)c1.CN(C(=O)c1cccc1)c1ccc2c(c1)[nH]c(=NC(=O)c1ccc(Br)s1)n2CCC(N)=O>>COc1cccc(/C=C/c2ccc(C(=O)N=c3[nH]c4cc(N(C)C(=O)c5cccc5)ccc4n3CCC(N)=O)s2)c1  
5539 C=CC(=O)OC.CC(C)(C)C(=O)Oc1ccc(Br)c(CO[Si](C)(C)C(C)(C)C)c1>>COC(=O)/C=C/c1ccc(OC(=O)C(C)(C)C)cc1CO[Si](C)(C)C(C)(C)C  
5540 Br1ccc2c(c1)c1cccc1n2-c1cccc1.C=Cc1ccc(C(=O)OC)cc1>>COC(=O)c1ccc(/C=C/c2ccc3c(c2)c2cccc2n3-c2cccc2)cc1  
5541 C=CCCCBr.COc1ccc(CCl)cc1>>C=C(CCCCBBr)Cc1ccc(OC)cc1  
5542 C=CCCc1ccc2ccnc2n1.CCOC(=O)CC(c1ccc(OC)c(F)c1)c1nc(/C=C/Cc2ccc3ccnc3n2)c(C)o1  
5543 C=CCc1c(C=O)cccc1OCc1cccc1.O=C(OCc1cccc1)c1ccc([N+](=O)[O-])cc1Br>>O=Cc1cccc(OCc2cccc2)c1C/C=C/c1cc([N+](=O)[O-])ccc1C(=O)OCc1cccc1  
5544 C=CC(=O)OCC.CC1(C)CC(=C(c2cccc2)c2ccc(Br)cc2)CC(C)(C)C1>>CCOC(=O)/C=C/c1ccc(C=C2CC(C)(C)CC(C)(C)C2)c2cccc2)cc1  
5545 C=CC(=O)c1ccc(OC)cc1OC.COc1ccc(I)cc1>>COc1ccc(/C=C/C(=O)c2ccc(OC)cc2OC)cc1  
5546 C=CC(=O)OCCO.C[C@]12C[C@@]34C=C(Sc5cccc(I)c5)C(=O)[C@@](C)(CCC(=O)Nc5c(O)ccc(C(=O)O)c5O)[C@@H]3[C@H](C[C@@H]1C4)O2>>C[C@]12C[C@@]34C=C(Sc5cccc(/C=C/C(=O)OCCO)c5)C(=O)[C@@](C)(CCC(=O)Nc5c(O)ccc(C(=O)O)c5O)[C@@H]3[C@H](C[C@@H]1C4)O2  
5547 C=Cc1ccc(C(C)(C)C)cc1.C[Si](C)(C)OS(=O)(=O)C(F)(F)F>>CC(C)(C)c1ccc(/C=C/[Si](C)(C)C)cc1  
5548 C=Cc1cccc1.IC1CCCC1>>C=C/C1CCCC1)c1cccc1  
5549 C=CC(=O)O.Nc1ccc(C(F)(F)F)cc1I>>Nc1ccc(C(F)(F)F)cc1/C=C/C(=O)O  
5550 C=CC(N)=O.CCn1c(=O)n(COCC[Si](C)(C)C)c2cccc(Oc3cc(Br)cc(C#N)c3)c21>>CCn1c(=O)n(COCC[Si](C)(C)C)c2cccc(Oc3cc(C#N)cc(/C=C/C(N)=O)c3)c21  
5551 C=C.OCc1cccc1I>>C=Cc1cccc1CO  
5552 C=CC[C@@H]1O[C@H](COC(C)=O)[C@H]2OC(CC)(CC)O[C@@H]12.CC(C)(C)[Si](C)(C)Oc1ccc2[nH]cc(C3=C(Br)C(=O)NC3=O)c2c1>>CCC1(CC)O[C@H]2[C@H](C/C=C/C3=C(c4c[nH]c5ccc(O[Si](C)(C)C(C)(C)C)cc45)C(=O)NC3=O)O[C@H](COC(C)=O)[C@H]2O1  
5553 Br1enenc1.C=CC1CCN(C(=O)OC(C)(C)C)C1>>CC(C)(C)OC(=O)N1CCC(/C=C/c2cncnc2)C1  
5554 Br1cccnc1.C=C>>C=Cc1cccnc1  
5555 C=CC(=O)OC.COC(=O)c1c(Br)ccc(NC(C)=O)c1[N+](=O)[O-]>>COC(=O)/C=C/c1ccc(NC(C)=O)c([N+](=O)[O-])c1C(=O)OC

5556 C=CC(=O)OC.FC(F)(F)c1cccc(C2CSc3cc(Br)ccc3O2)c1>>COC(=O)/C=C/c1ccc2c(c1)SCC(c1cccc(C(F)(F)F)c1)O2  
5557 C=Cc1cccc1.Nc1ccc(Cl)cc1Br>>Nc1ccc(Cl)cc1/C=C/c1cccc1  
5558 C=CC(=O)OCC.O=c1oc(-c2cccc2)c(I)c2sc3c(c12)CCCC3>>CCOC(=O)/C=C/c1c(-c2cccc2)oc(=O)c2c3c(sc12)CCCC3  
5559 C=CC(=O)OCC.CC1OCCC1Sc1c(I)cnc2cccc12>>CCOC(=O)/C=C/c1cnc2cccc2c1SC1CCOC1C  
5560 C=CCOc1ccc(OC)cc1.Ic1cccs1>>COc1ccc(OC/C=C/c2cccs2)cc1  
5561 C=CC(=O)NCCCCC.O=c1c(I)c(-c2ccc(O)cc2)oc2cc(O)ccc12>>CCCCCNC(=O)/C=C/c1c(-c2ccc(O)cc2)oc2cc(O)ccc2c1=O  
5562 C=CC(=O)OC.CC1(C)CC(=C(c2ccc(Br)cc2)c2ccc3c(c2)c(F)nn3C2CCCCO2)CC(C)(C)C1>>COC(=O)/C=C/c1ccc(C(=C2CC(C)(C)CC(C)(C)C2)c2ccc3c(c2)c(F)nn3C2CCCCO2)cc1  
5563 C=CC(=O)OC.CCN(CC)c1ccc(-c2oc3cc(Br)ccc3c(=O)c2O)cc1>>CCN(CC)c1ccc(-c2oc3cc(/C=C/C(=O)OC)ccc3c(=O)c2O)cc1  
C=Cc1cccc1[N+](=O)[O-]  
5564 ].COC(=O)c1cc2cc(Br)ccc2cc1OC(C)=O>>COC(=O)c1cc2cc(/C=C/c3cccc3[N+](=O)[O-])ccc2cc1OC(C)=O  
Br1ccc(-c2nc(-c3cccc3)c(-c3cccc3)[nH]2)cc1.C=Cc1ccncc1>>C(=C/c1ccc(-c2nc(-c3cccc3)c(-c3cccc3)[nH]2)cc1)\c1ccncc1  
5565 C=CC(=O)OC.O=C(C=P(c1cccc1)(c1cccc1)c1cccc1)c1ccc(I)cc1>>COC(=O)/C=C/c1ccc(C(=O)C=P(c2cccc2)(c2cccc2)c2cccc2)cc1  
5566 C=CC(=O)OC(C)(C)C.O=C1CNe2ncc(Br)cc2CN1>>CC(C)(C)OC(=O)/C=C/c1cnc2c(c1)CNC(=O)CN  
5567 C=Cc1cccc1.Nc1cccc1Br>>Nc1cccc1/C=C/c1cccc1  
5568 C=CS(=O)c1cccc1.Cc1cccc1Br>>Cc1cccc1/C=C/S(=O)c1cccc1  
5569 C=Cc1ccncc1.CCCCCC(=O)N1CCN(c2ccc(Br)cc2)CC1>>CCCCCCC(=O)N1CCN(c2ccc(/C=C/c3ccncc3)cc2)CC1  
5570 C=CC(=O)OCc1cccc1.CC(C)(C)OC(=O)CC1(C(=O)OC(C)(C)C)CC(c2cc(OCc3cccc3)ccc2Br)=NO1>>CC(C)(C)OC(=O)CC1(C(=O)OC(C)(C)C)CC(c2cc(OCc3cccc3)ccc2/C=C/C(=O)OCc2cccc2)=N  
5571 C=CC(=O)OCc1cn(S(=O)(=O)c2cccc2[N+](=O)[O-])c2ccc([N+](=O)[O-])cc12.Ic1ccc(CCCOC2CCCCO2)cc1>>O=C(/C=C/c1ccc(CCCOC2CCCCO2)cc1)OCc1cn(S(=O)(=O)c2cccc2[N+](=O)[O-])c2ccc([N+](=O)[O-])cc12  
5572 C=CC(=O)OCC.Cc1cccc(I)c1C>>CCOC(=O)/C=C/c1cccc(C)c1C  
5573 C=Cc1ccc(OC)c(O)c1.COc1ccc(OC)c(I)c1>>COc1ccc(OC)c(/C=C/c2ccc(OC)c(O)c2)c1  
5574 C=CC(=O)OC.COc1cc(I)c(CCNS(=O)(=O)c2ccc(C)cc2)cc1OC>>COC(=O)/C=C/c1cc(OC)c(OC)cc1C  
5575 CNS(=O)(=O)c1ccc(C)cc1  
5576 C=CC(=O)OCCCC.CC(=O)Nc1cccc(F)c1I>>CCCCOC(=O)/C=C/c1c(F)cccc1NC(C)=O  
5577 C=CC(=O)OCC.Nc1cccc1I>>CCOC(=O)/C=C/c1ccncc1N  
5578 C=CCNC(=O)OC(C)(C)C.COc1cc2c(c(OS(=O)(=O)C(F)(F)F)c1)C(=O)OC(C)(C)O2>>COc1cc(/C=C/CNC(=O)OC(C)(C)C)c2c(c1)OC(C)(C)OC2=O  
5579 C=Cc1cccc1.COc1ccc(/N=N/c2ccc(Br)cc2)cc1>>COc1ccc(/N=N/c2ccc(/C=C/c3cccc3)cc2)cc1  
5580 C=CC[C@H]1O[C@H](CNC(=O)OC(C)(C)C)[C@H]2OC(CC)(CC)O[C@H]12.COc1ccc2[nH]cc(C3=C(Br)C(=O)NC3=O)c2c1>>CCC1(CC)O[C@H]2[C@H](C/C=C/C3=C(c4c[nH]c5ccc(OC)cc45)C(=O)NC3=O)O[C@H](CNC(=O)OC(C)(C)C)[C@H]2O1  
5581 C=CC(=O)N1N=Cc2cccc2C1CC(=O)OC.COc1cc(Cc2cnc(N)nc2N)cc(I)c1OC>>COC(=O)CC1c2cccc2C=NN1C(=O)/C=C/c1cc(Cc2cnc(N)nc2N)cc(OC)c1OC  
5582 C=CC(=O)OC.CCCCCC(O)c1cccc2ccc(Br)cc12>>CCCCC(O)c1cccc2ccc(/C=C/C(=O)OC)cc12  
5583 C=Cc1cccc1C.Nc1ccc([N+](=O)[O-])cc1Br>>Cc1cccc1/C=C/c1cc([N+](=O)[O-])ccc1N  
5584 BrC1CCOCC1.C=Cc1cccc1>>C(=C/C1CCOCC1)\c1cccc1  
5585 C=CC(=O)OC(C)(C)C.COc1ccc(CNc2c(Br)cc(C)cc2I)cc1>>COc1ccc(CNc2c(Br)cc(C)cc2/C=C/C(=O)OC(C)(C)C)cc1  
5586 C=CC(=O)OC(C)(C)C.Fc1cccc(Br)c1>>CC(C)(C)OC(=O)/C=C/c1cccc(F)c1  
5587 C=CP(C)(=O)c1cccc1.Cc1ccc2cccc2c1Br>>Cc1ccc2cccc2c1/C=C/P(C)(=O)c1cccc1  
5588 Br1ccc(I)cc1.C=CCN1C(=O)c2cccc2C1=O>>O=C1c2cccc2C(=O)N1C/C=C/c1ccc(Br)cc1  
5589 C=C[C@H](O[Si](C)(C)C(C)(C)C)[C@H](CCCC(=O)OC)O[Si](C)(C)C(C)(C)C.CCCCCC(=O)c1ccncc1Br>>CCCCC(=O)c1ccncc1/C=C/[C@H](O[Si](C)(C)C(C)(C)C)[C@H](CCCC(=O)OC)O[Si](C)(C)C(C)(C)C  
5590 C=CC(=O)OC(C)(C)C.COc1ccc(-c2sc3cc(OC)ccc3c2Oc2ccc(Br)cc2)cc1>>COc1ccc(-c2sc3cc(OC)ccc3c2Oc2ccc(/C=C/C(=O)OC(C)(C)C)cc2)cc1  
5591 C=CC(=O)O.COC(=O)c1cc(Br)cs1>>COC(=O)c1cc(/C=C/C(=O)O)cs1  
5592 C=Cc1ccncc1.COc1cccc1CNc1ccc2cc(Br)ccc2n1>>COc1cccc1CNc1ccc2cc(/C=C/c3ccncc3)ccc2n1  
5593 C=Cc1ccc(N(C)C)cc1.FCCOCCOCCOc1ncc(I)cc1Br>>CN(C)c1ccc(/C=C/c2cnc(OCCOCCOCCF)c(Br)c2)cc1

C=Cc1ccccc1.O=Cc1ccc(Br)cc1>>O=Cc1ccc(/C=C/c2ccccc2)cc1  
 C=CC(=O)OC(C)(C)C.O=C(Cc1ccc(Br)cc1)OCc1cccc1>>CC(C)(C)OC(=O)/C=C/c1ccc(CC(=O)OCc1  
 2ccccc2)cc1  
 C=Cc1ccnc2ccccc12.CCCCCN(CCCCC)c1ccc(Br)c(C)c1>>CCCCCN(CCCCC)c1ccc(/C=C/c2ccnc3ccc  
 ccc23)c(C)c1  
 C=Cn1cnc2c(NC)nnc21.Cc1ccc(NC(=O)c2cccc(C(F)(F)F)c2)cc1I>>CNC1cnc2c1nnc2/C=C/c1cc(NC  
 (=O)c2cccc(C(F)(F)F)c2)ccc1C  
 C=CC(=O)OC(C)(C)C.O=C(CCc1cccc1)Nc1ccc(Br)cc1I>>CC(C)(C)OC(=O)/C=C/c1cc(Br)ccc1NC(  
 =O)CCc1cccc1  
 C=Cc1cccc1.CC(C)c1oc2cc3oc(=O)ccc3cc2c1OS(=O)(=O)C(F)(F)F>>CC(C)c1oc2cc3oc(=O)ccc3cc  
 2c1/C=C/c1cccc1  
 C=CS(C)(=O)=O.N#Cc1ccc(Br)cc1>>CS(=O)(=O)/C=C/c1ccc(C#N)cc1  
 C=Cc1cc(C)ccc1C.CCOC(=O)C(F)Br>>CCOC(=O)C(F)/C=C/c1cc(C)ccc1C  
 C=CC(OCC)OCC.Cc1cc(C)cc(Br)c1>>CCOC(/C=C/c1cc(C)cc(C)c1)OCC  
 C=Cc1ccc(N(c2ccccc2)c2ccccc2)cc1.FC(F)(F)C(F)(F)C(F)(F)C(F)(F)C(F)(F)Br>>FC(F)(F)C(F)  
 )(F)C(F)(F)C(F)(F)C(F)(F)C(F)(F)/C=C/c1ccc(N(c2ccccc2)c2ccccc2)cc1  
 C=CC(=O)OCC.COc1ccc(-c2ccccc2Br)cc1>>CCOC(=O)/C=C/c1cccc1-c1ccc(OC)cc1  
 C=CC(C)=O.IC(CC[Se]c1cccc1)=C(c1cccc1)c1cccc1>>CC(=O)/C=C/C(CC[Se]c1cccc1)=C(c1ccc  
 cc1)c1cccc1  
 C=CC(N)=O.Cc1cc(Br)ccc(C)c1O>>Cc1cc(/C=C/C(N)=O)cc(C)c1O  
 C=Cc1cccc1.O=C1OCc2cc(Br)ccc21>>O=C1OCc2cc(/C=C/c3ccccc3)ccc21  
 C=CCn1c(-c2ccc(OC)cc2F)nc2ccccc2c1=O.O=C(CN1C(=O)COc2ccccc21)c1ccc(Br)cc1>>COc1ccc(-  
 c2nc3ccccc3c(=O)n2C/C=C/c2ccc(C(=O)CN3C(=O)COc4ccccc43)cc2)c(F)c1  
 CCOC(=O)c1ccc(I)cc1.COC[C@H](/N=C(\c1cccc1)N1C=CCC[C@H]1C)C(C)C>>CCOC(=O)c1c  
 cc(C2=CN(/C=N/[C@H](COC)C(C)C)c3ccccc3)[C@H](C)CC2)cc1  
 C=CC(=O)NCCCN(CCCCN(C(=O)OC(C)(C)C(=O)OC(C)(C)C.COC(=O)N[C@H]1[C@@H](Oc2c  
 cc(I)cc2)O[C@H](C)[C@@H](OC(C)=O)[C@@H]1OC(C)=O>>COC(=O)N[C@H]1[C@@H](Oc2cc  
 c(/C=C/C(=O)NCCCN(CCCCN(C(=O)OC(C)(C)C(=O)OC(C)(C)C)cc2)O[C@H](C)[C@@H](OC(C  
 )=O)[C@@H]1OC(C)=O  
 C=CCNC(=O)OC(C)(C)C.CCOC(=O)CC(c1ccc(C)c(CN2CC(C)Cc3cc(Br)ccc3S2(=O)=O)c1)c1ccc2c(  
 c1)nnn2C>>CCOC(=O)CC(c1ccc(C)c(CN2CC(C)Cc3ccc(/C=C/CNC(=O)OC(C)(C)C)ccc3S2(=O)=O)c  
 1)c1ccc2c(c1)nnn2C  
 C=CC(C)(CO)OC.O=Cc1c[nH]c2cccc(I)c12>>COC(C)/(C=C/c1cccc2[nH]cc(C=O)c12)CO  
 C=Cc1cccc1.CC(C)=C(C)Br>>CC(C)=C(C)/C=C/c1cccc1  
 C=CC(=O)O.c1ccc([I+ ]c2cccs2)cc1>>O=C(O)/C=C/c1cccs1  
 C=CC(=O)OCC.CCn1nnc2c(C)c(Br)ccc21>>CCOC(=O)/C=C/c1ccc2c(nnn2CC)c1C  
 C=C(C(=O)OC)[C@H]1CC[C@@ ]2(C)CCC[C@ ](C)(OCOC)[C@H]2C1.COC(=O)c1cccc1Br  
 >>COCO[C@ ]1(C)CCC[C@ ]2(C)CC[C@H](/C=C/c3ccccc3C(=O)OC)C(=O)OC[C@H]21  
 Brc1cccs1.C=Cc1ccnc1>>C=(C/c1cccs1)\c1ccnc1  
 C=CC(=O)OC.CC1(C)NC(C)(C)c2cc(Br)ccc21>>COC(=O)/C=C/c1ccc2c(c1)C(C)(C)NC2(C)C  
 C=C(C)C(=O)OC.CC(C)(N)c1cccc(Br)c1>>COC(=O)/C(C)=C/c1cccc(C(C)(C)N)c1  
 C=CC(=O)N(C)C.O=Cc1cccc(Br)c1>>CN(C)C(=O)/C=C/c1cccc(C=O)c1  
 C=CC(=O)N1N=Cc2ccccc2C1C1CCCC1.COc1cc(Cc2cnc(N)nc2N)cc(I)c1OC>>COc1cc(Cc2cnc(N)  
 nc2N)cc(/C=C/C(=O)N2N=Cc3ccccc3C2C2CCCC2)c1OC  
 C=Cc1cccc(C(F)(F)F)c1.Cn1c(=O)c2c(cc(Br)n2C)n(C)c1=O>>Cn1c(=O)c2c(cc(/C=C/c3cccc(C(F)(F)  
 F)c3)n2C)n(C)c1=O  
 C=[C@H]1COC(C)(C)N1C(=O)OCc1cccc1.O=[N+]( [O-  
 ])c1cccc1I>>CC1(C)OC[C@H](/C=C/c2ccccc2[N+](=O)[O-])N1C(=O)OCc1cccc1  
 C=C/C=C/c1cccc1.Cc1cc(-c2ccccc2I)cc(C)c1O>>Cc1cc(-c2ccccc2/C=C/C=C/c2ccccc2)cc(C)c1O  
 C=CC(=O)OCC.COc1cccc(Cl)c1>>CCOC(=O)/C=C/c1cccc(OC)c1  
 C=CC=O.COC(=O)c1ccc(I)cc1OC>>COC(=O)c1ccc(/C=C/C=O)cc1OC  
 C=CC(=O)OC.OC/C=C/C1=C(Br)CCCC1>>COC(=O)/C=C/C1=C(/C=C/CO)CCCC1  
 C=C/C=C/c1cccc1.FC(F)(F)C(Br)CCc1cccc1>>FC(F)(F)C(/C=C/C=C/c1cccc1)CCc1cccc1  
 C=C.Cc1ccc(Cl)cc1>>C=Cc1ccc(C)cc1  
 C=CC(=O)OCC.Fe1cc2cnccc2cc1Br>>CCOC(=O)/C=C/c1cc2cnccc2cc1F  
 C=CC(=O)OC(C)(C)C.Cc1ccc(Br)cn1>>Cc1ccc(/C=C/C(=O)OC(C)(C)C)cn1  
 C=CCn1cc(C(=O)OCC)c(=O)c2ccc(C)nc21.CCn1cc(I)c(=O)c2ccc(C)nc21>>CCOC(=O)c1cn(C/C=C/C/  
 2cn(CC)c3nc(C)ccc3c2=O)c2nc(C)ccc2c1=O  
 C=Cc1ccccc1.O=Cc1cc(Br)ccc1O>>O=Cc1cc(/C=C/c2ccncc2)ccc1O  
 C=CC(=O)Nc1cccc1NC(=O)OC(C)(C)C.COC(=O)C(O)c1ccc(Br)cc1>>COC(=O)C(O)c1ccc(/C=C/C/  
 (=O)Nc2ccccc2NC(=O)OC(C)(C)C)cc1

5635 C=CCCCCCCCC.O=C(c1cccc1)c1ccc(Br)cc1>>CCCCCCCCC/C=C/c1ccc(C(=O)c2ccccc2)cc1  
5636 C=CC(=O)OC.CN(C)C1COc2c(Br)ccc3[nH]cc(c23)C1>>COC(=O)/C=C/c1ccc2[nH]cc3c2c1OCC(N(C)C)C3  
5637 C=Cc1cccc1.Ic1cccn1>>C(=C/c1cccn1)\c1cccc1  
5638 C=CNC(C)=O.O=S(=O)(Oc1ccc(-c2ccccc2)cc1)C(F)(F)F>>C=C(NC(C)=O)c1ccc(-c2ccccc2)cc1  
5639 C=CC(=O)OCC.CC(C)c1ccc(C(C)C)c(I)c(C(C)C)c1>>CCOC(=O)/C=C/c1c(C(C)C)cc(C(C)C)cc1C(C)  
5640 C=Cc1ccncc1.CCCCOc1ccc(Br)cc1F>>CCCCOc1ccc(/C=C/c2ccncc2)cc1F  
5641 Br1cccc1.C=CSCC>>CCS/C=C/c1cccc1  
5642 C=Cc1ccc(/C=C/c2cccn2C)cc1.O=Cc1ccc(Br)cc1>>Cn1cccc1/C=C/c1ccc(/C=C/c2ccc(C=O)cc2)cc1  
5643 C=CC(=O)OC.CN(C)c1ccc(I)cc1>>COC(=O)/C=C/c1ccc(N(C)C)cc1  
5644 C=Cc1cccc1O.Nc1ccc(Br)cc1>>Nc1ccc(/C=C/c2ccccc2O)cc1  
5645 C=CC(=O)OC(C)C.COC(=O)c1cc(C)c(OS(=O)(=O)C(F)(F)F)c(C)c1>>COC(=O)c1cc(C)c(/C=C/C(=O)OC(C)C)c(C)c1  
5646 C=Cc1cccc([N+](=[O])[O-])c1.Ic1sccl-c1cccc1>>O=[N+](=[O-])c1cccc(/C=C/c2cscc2-c2ccccc2)c1  
5647 C=Cc1cccc(C=O)c1.FC(F)(F)I>>O=Cc1cccc(/C=C/C(F)(F)F)c1  
5648 C=Cc1cccc(C=O)c1.CN1CCN(c2cc3c(cc2NS(C)=(O)=O)c(I)nn3C2CCCCO2)CC1>>CN1CCN(c2cc3c(cc2NS(C)=(O)=O)c(/C=C/c2cccc(C=O)c2)nn3C2CCCCO2)CC1  
5649 C=Cc1cc(OCc2ccccc2)c(OCc2ccccc2)nn1.Fc1cc(I)ccc1C(F)(F)F>>Fc1cc(/C=C/c2cc(OCc3ccccc3)c(O)Cc3ccccc3)nn2)ccc1C(F)(F)F  
5650 C=CC(=O)OC.COc1ccc2c(c1)CCN(c1ccc(CC(C)C)cc1)C2(C)c1ccc(Br)cc1>>COC(=O)/C=C/c1ccc(C2(C)c3ccc(OC)cc3CCN2c2ccc(CC(C)C)cc2)cc1  
5651 C=CC(=O)OCC.Clc1ncc(I)c2ncccc12>>CCOC(=O)/C=C/c1nc(Cl)c2cccn12  
5652 C=CCCCCCCCCCC.O=Cc1cc(Br)cc(C=O)c1O>>CCCCCCCCC/C=C\c1cc(C=O)c(O)c(C=O)c1  
5653 C=CC(=O)OC(C)(C)C.COC(=O)/C(Br)=C1\CCCCO1>>COC(=O)C(/C=C/C(=O)OC(C)(C)C)=C1\CCC  
5654 C=Cc1ccncc1.CCCCCCOc1ccc(Br)cc1F>>CCCCCCCOc1ccc(/C=C/c2ccncc2)cc1F  
5655 Br1ccc2ccccc2c1.C=CC(OCC)OCC>>CCOC(/C=C/c1ccc2ccccc2c1)OCC  
5656 C=CC(C)=O.Ic1cccc1>>CC(=O)/C=C/c1cccc1  
5657 C=CCN(C(=O)OCC)c1cccc2ccccc12.Clc1cccc1>>CCOC(=O)N(C/C=C/c1cccc1)c1cccc2ccccc12  
5658 C=CC(=O)OCC.Cc1nc(-c2ccccc2)sc1Br>>CCOC(=O)/C=C/c1sc(-c2ccccc2)nc1C  
5659 C=CC(=O)OC.O=c1[nH]c(=O)n([C@H]2[C@H](CO)[C@H]2O)cc1I>>COC(=O)/C=C/c1cn([C@H]2[C@H](CO)[C@H]2O)c(=O)[nH]c1=O  
5660 C=CCn1c(-c2ccc(CC)cc2)nc2ccccc2c1=O.O=C(CN1C(=O)COc2ccccc21)c1ccc(Br)cc1>>CCc1ccc(-c2nc3ccccc3c(=O)n2C/C=C/c2ccc(C(=O)CN3C(=O)COc4ccccc43)cc2)cc1  
5661 C=Cc1ccc2ccccc2c1.COC(=O)c1ccc(OCc2ccccc2)cc1OS(=O)(=O)C(F)(F)F>>COC(=O)c1ccc(OCc2ccccc2)cc1/C=C/c1ccc2ccccc2c1  
5662 C=CC(=O)n1c(C)ccc1C.Ic1cccc1>>Cc1ccc(C)n1C(=O)/C=C/c1cccc1  
5663 C=Cc1ccc(Cl)cc1.COc1cccc(I)c1>>COc1cccc(/C=C/c2ccc(Cl)cc2)c1  
5664 C=Cc1ccncc1.CCOc1ccc(Br)cc1F>>CCOc1ccc(/C=C/c2ccncc2)cc1F  
5665 C=CC(=O)OC.O=C(O)Cc1ccc(Br)cc1>>COC(=O)/C=C/c1ccc(CC(=O)O)cc1  
5666 C=Cc1cccc1.O=Cc1cc(F)ccc1Br>>O=Cc1cc(F)ccc1/C=C/c1cccc1  
5667 C=C(NC(C)=O)C(=O)OC.Cc1cc(C)c(I)c(C)c1>>COC(=O)/C=C/c1c(C)cc(C)cc1C)NC(C)=O  
5668 C=CC(=O)CC.O=[N+](=[O-])c1ccc(Br)cc1>>CCC(=O)/C=C/c1ccc([N+](=[O-])cc1  
5669 C=CC(=O)Nc1cccc1NC(=O)OC(C)(C)C.CCOC(=O)[C@H]1CN(c2nccn2)C[C@@H]1c1ccc(Br)cc1>>CCOC(=O)[C@H]1CN(c2nccn2)C[C@@H]1c1ccc(/C=C/C(=O)Nc2ccccc2NC(=O)OC(C)(C)C)cc1  
5670 C=Cc1cccn1C(=O)OC(C)(C)C.O=Cc1ccc(I)cc1>>CC(C)(C)OC(=O)n1cccc1/C=C/c1ccc(C=O)cc1  
5671 C=CC(=O)OC(C)(C)C.COc1cc(OC)c(Br)c(OC)c1>>COc1cc(OC)c(/C=C/C(=O)OC(C)(C)C)c(OC)c1  
5672 C=CC(=O)OC.COc1ccc2c(c1)CCN(c1ccc(CC(C)C)cc1)C2(c1ccc(Br)cc1)C(F)F>>COC(=O)/C=C/c1ccc(c(C2(C(F)F)c3ccc(OC)cc3CCN2c2ccc(CC(C)C)cc2)cc1  
5673 C=CC(N)=O.CCOC(=O)c1ccc(Br)cc1>>CCOC(=O)c1ccc(/C=C/C(N)=O)cc1  
5674 C=CC(=O)OCCCC.CC(C)(C)OC(=O)c1cccc1Br>>CCCCOC(=O)/C=C/c1cccc1C(=O)OC(C)(C)C  
5675 C=CC(=O)OC.Cc1cccc(I)c1>>COC(=O)/C=C/c1cccc(C)c1  
5676 C=CNC(C)=O.CCOC(=O)c1sc2nnc(C)c(C)c2c1Br>>CCOC(=O)c1sc2nnc(C)c(C)c2c1/C=C/NC(C)=O  
5677 C=CC(=O)OCC.Cc1c(Br)ccc2c1nnn2C>>CCOC(=O)/C=C/c1ccc2c(nnn2C)c1C  
5678 C=C(F)C(C)=O.Cc1ccc(I)cc1>>CC(=O)/C(F)=C/c1ccc(C)cc1  
5679 C=CC(=O)Nc1cccn1.Oc1ccc(Br)nc1>>O=C(/C=C/c1ccc(O)cn1)Nc1cccn1  
5680 C=CC(=O)N(C)Cc1oc2ccccc2c1C.CC1(C)CNc2ncc(Br)cc2O1>>Cc1c(CN(C)C(=O)/C=C/c2nc3c(c2)OC(C)(C)CN3)oc2ccccc12  
5681 C=C[Si](CC)(CC)CC.Fc1ccc(Br)cc1>>CC[Si](/C=C/c1ccc(F)cc1)(CC)CC  
5682 C=Cc1scncc1C.FC(F)(F)C(F)(F)C(F)(F)C(F)(F)C(F)(F)Br>>Cc1nsccl/C=C/C(F)(F)C(F)(F)C(F)(F)C(F)(F)C(F)(F)C(F)(F)C(F)(F)

5683 C=CS(=O)(=O)F.CCOC(=O)c1ccc(I)cc1>>CCOC(=O)c1ccc(/C=C/S(=O)(=O)F)cc1  
 5684 C=CC(=O)OC.COc1ccc2c(c1)CCN(c1ccc(F)cc1)C2(C)c1ccc(Br)cc1>>COC(=O)/C=C/c1ccc(C2(C)c3  
 5685 ccc(OC)cc3CCN2c2ccc(F)cc2)cc1  
 5686 C=CC(=O)OC.O=c1oc2cc(Br)cnc2n1Cc1cccc1>>COC(=O)/C=C/c1cnc2c(c1)oc(=O)n2Cc1cccc1  
 5687 C=CC(=O)OC(C)(C)C.CC(=O)O[C@H]1CC(=O)N(Cc2cc3c(cc2I)OCO3)[C@H]1[Se]c1cccc1>>C  
 5688 C(=O)O[C@H]1CC(=O)N(Cc2cc3c(cc2/C=C/C(=O)OC(C)(C)C)OCO3)[C@H]1[Se]c1cccc1  
 5689 C=Cc1cccc1.O=c1oc2cc(Cl)ccc2c(-c2cccc2)c1Br>>O=c1oc2cc(Cl)ccc2c(-  
 5690 C=C[C@H](C)[C@H]1CC[C@H]2[C@H]3CC(=O)[C@H]4C[C@H](O)CC[C@H]4(C)[C@H]3CC  
 5691 [C@H]21C.Clc1ccc(I)cc1>>C[C@H](/C=C/c1ccc(Cl)cc1)[C@H]1CC[C@H]2[C@H]3CC(=O)[C@H]4C[C@H](O)CC[C@H]4(C)[C@H]3CC[C@H]21C  
 5692 C=CC(=O)OC.Fc1ncccc1Br>>COC(=O)/C=C/c1cccn1F  
 5693 C=CC(=O)OC(C)(C)C.O=Cc1ccsc1Br>>CC(C)(C)OC(=O)/C=C/c1sccc1C=O  
 5694 C=CC[C@H](C(=O)OC(C)C)[C@H](O)C(=O)OC(C)C.CCOc1ccc(Br)cc1>>CCOc1ccc(/C=C/C[C@H](C(=O)OC(C)C)[C@H](O)C(=O)OC(C)C)cc1  
 5695 C=Cc1cc(OC)c(O)c(OC)c1.CCCCCCCCOCc1ccc2c(C)c(Br)c(=O)oc2c1>>CCCCCCCCOCc1ccc2c(C)c(/  
 5696 C=C/c3cc(OC)c(O)c(OC)c3)c(=O)oc2c1  
 5697 C=CC(=O)O.COC(=O)CN(CC(=O)OC)c1ccc(I)cc1>>COC(=O)CN(CC(=O)OC)c1ccc(/C=C/C(=O)O)  
 5698 C=CC(=O)OC.O=Cc1cccc1Br>>COC(=O)/C=C/c1cccc1C=O  
 5699 C=Cc1ccc(S(=O)(=O)c2cccc2F)cn1.Cc1cc(F)ccc1I>>Cc1cc(F)ccc1/C=C/c1ccc(S(=O)(=O)c2cccc2F)  
 5700 C=CC(N)=O.CCOC(=O)c1cccc(I)c1>>CCOC(=O)c1cccc(/C=C/C(N)=O)c1  
 5701 C=CC1CC(=O)N1.O=[N+](=[O-])c1cccc1I>>O=C1CC(/C=C/c2cccc2[N+](=O)[O-])N1  
 5702 C=CC(=O)OCC.Fc1cc(Br)cc2nnc12>>CCOC(=O)/C=C/c1cc(F)c2nnc2c1  
 5703 C=COCCCC.COC(=O)Cc1cc(OC)c(OC)cc1Br>>C=C(OCCCC)c1cc(OC)c(OC)cc1CC(=O)OC  
 5704 C=C[Si](C)(C)C.COC(=O)c1cccc1I>>COC(=O)c1cccc1/C=C/[Si](C)(C)C  
 5705 C=CC(=O)OCC.COc1c(-c2cccc2Cl)cc2cnc(NC(C)C)nc2c1Br>>CCOC(=O)/C=C/c1c(OC)c(-  
 5706 c2cccc2Cl)cc2cnc(NC(C)C)nc12  
 5707 C=Cc1ccc(OC)c(OC)c1.CC(=O)OC[C@H]1O[C@H](Oc2ccc(I)cc2)[C@H](OC(C)=O)[C@H](O  
 5708 C(C)=O)[C@H]1OC(C)=O>>COc1ccc(/C=C/c2ccc(O[C@H]3O[C@H](COC(C)=O)[C@H](O  
 5709 C(C)=O)[C@H](OC(C)=O)[C@H]3OC(C)=O)cc2)cc1OC  
 5710 C=C(F)C(C)=O.Ic1cc2cccc2c2cccc12>>CC(=O)/C(F)=C/c1cc2cccc2c2cccc12  
 5711 C=C(C(=O)OC)N1CC[C@H](NC(=O)OCc2cccc2)C1=O.Fc1c(Br)ccc2c(NC(c3cccc3)(c3cccc3)c3c  
 5712 cccc3)nc12>>COC(=O)/C=C/c1ccc2c(NC(c3cccc3)(c3cccc3)c3cccc3)nc2c1F)N1CC[C@H](N  
 5713 C(=O)OCc2cccc2)C1=O  
 5714 C=Cc1ccc([N+](=O)[O-]  
 5715 ])cc1.C[C@H]1CC(=O)Nc2cccc(Br)c2N1>>C[C@H]1CC(=O)Nc2cccc(/C=C/c3ccc([N+](=O)[O-]  
 5716 ])cc3)c2N1  
 5717 C=CC(=O)O.COc1cc(I)ccc1Br>>COc1cc(/C=C/C(=O)O)ccc1Br  
 5718 C=CC(=O)O.O=C(O)Cc1cccc1Br>>O=C(O)/C=C/c1cccc1CC(=O)O  
 5719 C=CC(=O)OCC.Ic1cccc1N(Cc1cccc1)Cc1cccc1>>CCOC(=O)/C=C/c1cccc1N(Cc1cccc1)Cc1ccc  
 5720 C=Cc1cccc1.COc1cc(Br)c(C=O)cc1OC>>COc1cc(C=O)c(/C=C/c2cccc2)cc1OC  
 5721 C=Cc1cnc1.CC(C)[C@H](COc1cnc(Br)c1)NC(=O)OC(C)(C)C>>CC(C)[C@H](COc1cnc(/C  
 5722 =C/c2cnc2)c1)NC(=O)OC(C)(C)C  
 5723 C=Cc1cccc1.CC(C)(C)c1ccc(I)cc1>>CC(C)(C)c1ccc(/C=C/c2cccc2)cc1  
 5724 C=CC(=O)N(C)OC.Nc1cccc1I>>CON(C)C(=O)/C=C/c1cccc1N  
 5725 Br1ccc2cnc2c1.C=CC(=O)OCC>>CCOC(=O)/C=C/c1ccc2cnc2c1  
 5726 C=CC(=O)N(C)Cc1oc2cccc2c1C.CCC1(CC)C(=O)Nc2ncc(Br)cc21>>CCC1(CC)C(=O)Nc2ncc(/C=C/  
 5727 /C(=O)N(C)Cc3oc4cccc4c3C)cc21  
 5728 C=Cc1ccc(Cl)cc1.O=[N+](=[O-])c1ccc(Br)cc1>>O=[N+](=[O-])c1ccc(/C=C/c2ccc(Cl)cc2)cc1  
 5729 C=CCCC1CCN(C(=O)OC(C)C)CC1.CS(=O)(=O)N1CCc2cc(Br)ccc2C1>>CC(C)OC(=O)N1CCC(CC/  
 5730 C=C/c2ccc3c(c2)CCN(S(C)(=O)=O)C3)CC1  
 5731 C=Cc1ccc2cccc2c1.Cc1ccc(Cl)cc1I>>Cc1ccc(Cl)cc1/C=C/c1ccc2cccc2c1  
 5732 C=C/C=C(/OCC)[Si](C)(C)C.COc1cccc1I>>CCO/C=C/C=C/c1cccc1OC)[Si](C)(C)C  
 5733 C=C(F)[Si](C)(c1cccc1)c1cccc1.Fc1cccc1I>>C[Si](/C(F)=C/c1cccc1F)(c1cccc1)c1cccc1  
 5734 Br1ccc(N2c3cccc3N(c3cccc3)c3c2c2cccc2c2cccc32)cc1.C=Cc1cnc1>>C(=C/c1ccc(N2c3cccc  
 5735 3N(c3cccc3)c3c2c2cccc2c2cccc32)cc1)\c1cnc1  
 5736 C=Cc1cccc1.N#Cc1ccc(Br)c1>>N#Cc1ccc(/C=C/c2cccc2)c1  
 5737 C=CCCCCCCCCCCCCCCCC.c1ccc([I+]c2cccc2)cc1>>CCCCCCCCCCCCCCCCC/C=C/c1cccc1  
 5738 C=CC(=O)OCC.Nc1cc(-n2ccc3cnc32)nc1Br>>CCOC(=O)/C=C/c1cnc(-n2ccc3cnc32)cc1N  
 5739 C=CC(N)=O.Ic1cccc1>>NC(=O)/C=C/c1cccc1  
 5740 C=CC(=O)O.CN(c1cccc(I)c1)S(=O)(=O)c1ccs1>>CN(c1cccc(/C=C/C(=O)O)c1)S(=O)(=O)c1ccs1

5726 C=CC(C)(C)O.CC(=O)c1ccc(Br)cc1>>CC(=O)c1ccc(/C=C/C(C)(C)O)cc1  
5727 C=Cc1cccc(N)c1.CN(C(=O)c1cccc1)c1ccc2c(c1)[nH]c(=NC(=O)c1ccc(Br)s1)n2CCC(N)=O>>CN(C(=O)c1cccc1)c1ccc2c(c1)[nH]c(=NC(=O)c1ccc(/C=C/c3cccc(N)c3)s1)n2CCC(N)=O  
5728 C=CS(=O)(=O)CC.CN1CCC(c2c[nH]c3ccc(Br)cc23)CC1>>CCS(=O)(=O)/C=C/c1ccc2[nH]cc(C3CCN(C)CC3)c2c1  
5729 C=Cc1cc(O)c(OC)cc1F.COc1ccc(I)c(OC)c1>>COc1ccc(/C=C/c2cc(O)c(OC)cc2F)c(OC)c1  
5730 C=CC(OC)OC.CC(C)(C)c1ccc(I)cc1>>COC(/C=C/c1ccc(C(C)(C)C)cc1)OC  
5731 C=CC#N.COc1cc(C#N)ccc1Oc1cccc(I)c1>>COc1cc(C#N)ccc1Oc1cccc(/C=C/C#N)c1  
5732 Br1ccc2ccc3cccc4ccc1c2c34.C=Cc1ccc(OC)cc1>>COc1ccc(/C=C/c2ccc3ccc4cccc5ccc2c3c45)cc1  
5733 C=Cc1c(C)cc(C)cc1C.CCOC(=O)C(F)Br>>CCOC(=O)C(F)/C=C/c1c(C)cc(C)cc1C  
5734 C=CC(=O)OC(C)(C)C.CCOC(=O)c1sc(Br)cc1C>>CCOC(=O)c1sc(/C=C/C(=O)OC(C)(C)C)cc1C  
5735 C=Cc1ccc(OC)c(OC)c1.CCOC(=O)C(F)I>>CCOC(=O)C(F)/C=C/c1ccc(OC)c(OC)c1  
5736 C=CC(=O)OC.COc1c(NC(=O)C(C)(C)C)c(I)c(OC)c(OC)c1NC(=O)C(C)(C)C>>COC(=O)/C=C/c1c(NC(=O)C(C)(C)C)c(OC)c(NC(=O)C(C)(C)C)c(OC)c1OC  
5737 C=Cc1ccc(OC)cc1.COc1ccc(/C=C/c2[nH]c3cccc3c(=O)c2I)cc1>>COc1ccc(/C=C/c2[nH]c3cccc3c(=O)c2/C=C/c2ccc(OC)cc2)cc1  
5738 C=CC(=O)OCCCC.Cc1cc2c(cc1N1Cc3c(C(F)(F)F)ncc(Br)c3NC1=O)OC(c1neccc1F)CC2>>CCCCOC(=O)/C=C/c1cnc(C(F)(F)F)c2c1NC(=O)N(c1cc3c(cc1C)CCC(c1neccc1F)O3)C2  
5739 C=CC(=O)OC(C)(C)C.Cc1ccc(S(=O)(=O)Cc2cccc2I)cc1>>Cc1ccc(S(=O)(=O)Cc2cccc2/C=C/C(=O)OC(C)(C)C)cc1  
5740 Br1ccc2cccc2c1.C=CCN(C(=O)OC(C)(C)C)C(=O)OC(C)(C)C>>CC(C)(C)OC(=O)N(C/C=C/c1ccc2cccc2c1)C(=O)OC(C)(C)C  
5741 Br1ccccc1.C=CC(=O)CCC>>CCCC(=O)/C=C/c1ccccc1  
5742 C=CC(=O)N1N=Cc2cccc2C1c1ccc(C)cc1.COc1cc(Cc2cnc(N)nc2N)cc(I)c1OC>>COc1cc(Cc2cnc(N)nc2N)cc(/C=C/C(=O)N2N=Cc3cccc3C2c2ccc(C)cc2)c1OC  
5743 C=CC(=O)OCC.CCc1cc(OCc2cccc2)ccc1Br>>CCOC(=O)/C=C/c1ccc(OCc2cccc2)cc1CC  
5744 C=CC#N.Cn1c(=O)c(I)cn([C@H]2C[C@H](O[Si](C)(C)C(C)(C)C)[C@@H](CO[Si](C)(C)C(C)(C)C)O2)c1=O>>Cn1c(=O)c(/C=C/C#N)cn([C@H]2C[C@H](O[Si](C)(C)C(C)(C)C)[C@@H](CO[Si](C)(C)C(C)(C)C)O2)c1=O  
5745 C=Cc1ccc(N(c2ccc(C)cc2)c2ccc(C)cc2)cc1.Cn1nc2c(Br)ccc(Nc3ncc(C4OCCO4)cn3)c2n1>>Cc1ccc(N(c2ccc(C)cc2)c2ccc(/C=C/c3ccc(Nc4ncc(C5OCCO5)cn4)c4nn(C)nc34)cc2)cc1  
5746 C=Cc1ccc(C)cc1.Nc1ccc(Cl)cc1Br>>Cc1ccc(/C=C/c2cc(Cl)ccc2N)cc1  
5747 C=CC(=O)OC.COc1ncc(Br)c(OC)n1>>COC(=O)/C=C/c1cnc(OC)nc1OC  
5748 C=CCN1C(=O)c2cccc2C1=O.COc1ccc2sc(CNc3nncc(-c4c(C)cc(Br)cc4C)n3)nc2c1>>COc1ccc2sc(CNc3nncc(-c4c(C)cc(/C=C/CN5C(=O)c6cccc6C5=O)cc4C)n3)nc2c1  
5749 C=CC(=O)OC(C)(C)C.Cc1ccc(N)c(I)c1>>Cc1ccc(N)c(/C=C/C(=O)OC(C)(C)C)c1  
5750 C=Cc1cccc(Br)c1.CCOC(=O)C(F)I>>CCOC(=O)C(F)/C=C/c1cccc(Br)c1  
5751 C=CC(OCC)OCC.CC(C)(C)c1ccc(OS(=O)(=O)C(F)(F)F)cc1>>C=C(c1ccc(C(C)(C)C)cc1)C(OCC)OC  
5752 C=Cc1cccc1.CCC(=O)Nc1ccc(Br)cc1C(=O)OC>>CCC(=O)Nc1ccc(/C=C/c2cccc2)cc1C(=O)OC  
5753 C=CC(OCC)OCC.Fc1ccccc1I>>CCOC(/C=C/c1ccccc1F)OCC  
5754 C=C(C)C(=O)OC.CC1(C)CCC(C)(C)c2cc(C(=O)c3ccc(I)cc3)ccc21>>COC(=O)/C(C)=C/c1ccc(C(=O)c2ccc3c(c2)C(C)(C)CCC3(C)C)cc1  
5755 C=CS(=O)(=O)F.Fc1ccc(I)cc1>>O=S(=O)(F)/C=C/c1ccc(F)cc1  
5756 C=Cc1ccc(F)cc1.O=C(O)c1ccc(Br)cc1>>O=C(O)c1ccc(/C=C/c2ccc(F)cc2)cc1  
5757 C=CC(=O)OC.Cc1cc(-c2cccc2)n2nc(-c3ccc(Cl)cc3)c(I)c2n1>>COC(=O)/C=C/c1c(-c2ccc(Cl)cc2)nn2c(-c3cccc3)cc(C)nc12  
5758 C=Cc1ccc(O)cc1.Nc1ccc(Br)cc1>>Nc1ccc(/C=C/c2ccc(O)cc2)cc1  
5759 C=CC#N.Cc1cc(Br)cc(C)c1N>>Cc1cc(/C=C/C#N)cc(C)c1N  
5760 C=CC(C)=O.CCc1ccc2c(c1)C(OS(=O)(=O)C(F)(F)F)=CC(C)(C)CO2>>CCc1ccc2c(c1)C(/C=C/C(C)=O)=CC(C)(C)CO2  
5761 C=CC(=O)O[C@H]1C(C)(C)[C@H]2CC[C@]1(C)C2.O=Cc1ccccc1Br>>CC1(C)[C@H]2CC[C@](C)(C2)[C@H]1OC(=O)/C=C/c1ccccc1C=O  
5762 C=CC(=O)OC.CC1(C)CC(=C(c2ccc(Br)cc2)c2ccc3c(c2)c(F)nn3C2CCCCO2)CC(C)(C)O1>>COC(=O)/C=C/c1ccc(C(=C2CC(C)(C)OC(C)(C)C2)c2ccc3c(c2)c(F)nn3C2CCCCO2)cc1  
5763 C=C1CC(c2cccc2)OC1=O.CCOc1ccc(I)cc1>>CCOc1ccc(/C=C2\CC(c3cccc3)OC2=O)cc1  
5764 C=Cc1nn(C2CC2)c2nnc(N)c12.Clc1cccc(I)c1>>Nc1nnc2c1c(/C=C/c1cccc(Cl)c1)nn2C1CC1  
5765 C=Cc1ccc(Br)cc1.CCOC(=O)c1ccc(I)cc1>>CCOC(=O)c1ccc(/C=C/c2ccc(Br)cc2)cc1  
5766 C=CC(C)(C)O.COc1ccc2cc(Br)c(=O)oc2c1>>COc1ccc2cc(/C=C/C(C)(C)O)c(=O)oc2c1  
5767 C=CC(=O)OCC.Cc1c[n+](l[O-])c(C)c(Cl)n1>>CCOC(=O)/C=C/c1nc(C)c[n+](l[O-])c1C

5768 C=Cc1ccncc1.O=C(NCc1cn(OCc2ccccc2)nc1I)OCc1ccccc1>>O=C(NCc1cn(OCc2ccccc2)nc1/C=C/c1ccncc1)OCc1ccccc1

5769 C=Cc1ccccc1O.COc1ccc(I)c(OC)c1>>COc1ccc(/C=C/c2ccccc2O)c(OC)c1  
C=CC(=O)OCCCCCCCCCCCCCCCCC.C[C@@]12C[C@@]34C=C(Sc5ccc(I)cc5)C(=O)[C@@](C)(CCC(=O)Nc5c(O)ccc(C(=O)O)c5O)[C@@H]3[C@H](C[C@@H]1C4)O2>>CCCCCCCCCCCCCCCC

5770 CCCCOC(=O)/C=C/c1ccc(SC2=C[C@]34C[C@H]5C[C@H](O[C@@]5(C)C3)[C@H]4[C@](C)(CCC(=O)Nc3c(O)ccc(C(=O)O)c3O)C2=O)cc1

5771 C=CS(=O)(=O)F.O=S(=O)(F)c1ccc(I)cc1>>O=S(=O)(F)/C=C/c1ccc(S(=O)(=O)F)cc1

5772 C=CC(=O)OC.O=Cc1secc1Br>>COC(=O)/C=C/c1ccsc1C=O

5773 C=CS(=O)(=O)F.Oc1ccccc1I>>O=S(=O)(F)/C=C/c1ccccc1O

5774 Br1ccc2ccc3ccccc4ccc1c2c34.C=CC(=O)OCCCCC>>CCCCCOC(=O)/C=C/c1ccc2ccc3ccccc4ccc1c  
C=CC(=O)OC(C)(C)C.CCOC(=O)/C=C/c1cc(Br)cc(Oc2ccncc2)c1>>CCOC(=O)/C=C/c1cc(/C=C/C(=O)OC(C)(C)C)cc(Oc2ccncc2)c1

5775 C=CC(=O)C(O[Si](CC)(CC)CC)c1c(OC)ccc(OC)c1OCc1ccccc1.COC(=O)C1Cc2cc(I)c(OCc3ccccc3)c  
(OC)c2C(=O)O1>>CC[Si](CC)(CC)OC(C(=O)/C=C/c1cc2c(c(OC)c1OCc1ccccc1)C(=O)OC(C(=O)O

5776 C)C2)c1c(OC)ccc(OC)c1OCc1ccccc1

5777 C=CC(N)=O.Fc1cccc(I)c1>>NC(=O)/C=C/c1cccc(F)c1

5778 C=CC(=O)CCCCC.O=Cc1ccc(Br)cc1>>CCCCC(=O)/C=C/c1ccc(C=O)cc1

5779 C=CC(=O)OC(C)(C)C.COc1cc(COCCC(=O)OC(C)(C)C)c(Br)cc1OCc1ccccc1>>COc1cc(COCCC(=O)  
)OC(C)(C)C)c(/C=C/C(=O)OC(C)(C)C)cc1OCc1ccccc1

5780 C=CC(=O)OCCCC.Fc1cc(Br)ccc1I>>CCCCOC(=O)/C=C/c1ccc(Br)cc1F

5781 C=CC(=O)OC.CC1(C)CC(Nc2ccc(Br)c(F)c2[N+](=O)[O-])CC(C)(C)C1>>COC(=O)/C=C/c1ccc(NC2CC(C)(C)CC(C)(C)C2)c([N+](=O)[O-])c1F

5782 C=CC(=O)OC.CC(=O)Oc1c(C/C=C(\C)CCC=C(C)C)cc(I)cc1C/C=C(\C)CCC=C(C)C>>COC(=O)/C=  
C/c1cc(C/C=C(\C)CCC=C(C)C)c(OC(C)=O)c(C/C=C(\C)CCC=C(C)C)c1

5783 C=Cc1ccc(OC)c(OC)c(OC)c1-c1ccc(OC)cc1.COc1ccc(I)cc1>>COc1ccc(/C=C/c2cc(OC)c(OC)c(OC)c2-  
c2ccc(OC)cc2)cc1

5784 Br1cnc2ccccc2c1.C=CCO[C@@]1(C)C[C@@H](C)C(=O)[C@H](C)[C@@H](O)[C@](C)(O)[C@@H](CC)OC(=O)[C@H](C)C(=O)[C@H](C)[C@H]1O[C@@H]1O[C@H](C)C[C@H](NC)[C@H]1  
O>>CC[C@H]1OC(=O)[C@H](C)C(=O)[C@H](C)[C@@H](O[C@@H]2O[C@H](C)C[C@H](NC)[

5785 C@H]2O)[C@@](C)(OC/C=C/c2cnc3ccccc3c2)C[C@@H](C)C(=O)[C@H](C)[C@@H](O)[C@]11(C

5786 C=CNC(C)=O.CC(=O)c1ccc(Br)cc1>>C=C(NC(C)=O)c1ccc(C(C)=O)cc1

5787 C=COCCCC.COc1cccc(C(=O)Cl)c1>>CCCCO/C=C/C(=O)c1cccc(OC)c1

5788 C=C[Si](CC)(CC)CC.Cc1ccc(C)c(Br)c(C)c1>>CC[Si](/C=C/c1c(C)cc(C)cc1C)(CC)CC

5789 C=CC(=O)O[C@H]1C[C@H]2C[C@@H]([C@@H]1C)C2(C)C.O=Cc1ccccc1Br>>C[C@@H]1[C@  
@H](OC(=O)/C=C/c2ccccc2C=O)C[C@H]2C[C@@H]1C2(C)C

5790 Br1ccc2cnc2c1.C=Cc1ccc(OC)cc1>>COc1ccc(/C=C/c2ccc3cnc2c3)cc1

5791 Br1ccc2ccc3ccccc4ccc1c2c34.C=CC=O>>O=C/C=C/c1ccc2ccc3ccccc4ccc1c2c34  
C=CC(=O)Oc1ccccc1.COCn1nc(-c2ccccc2)c(Br)cc1=O>>COCn1nc(-

5792 c2ccccc2)c(/C=C/C(=O)Oc2ccccc2)cc1=O

5793 C=C[C@@H](CC(OC)OC)c1ccccc1.COc1ccc(I)cc1>>COc1ccc(/C=C/[C@@H](CC(OC)OC)c2ccccc2

5794 Br1cccn2nnnc12.C=Cc1ccccc1>>C=C/c1cccn2nnnc12)c1ccccc1

5795 C=CC(=O)O.Cc1cc(C)cc(I)c1>>Cc1cc(C)cc(/C=C/C(=O)O)c1

5796 Br1cc2ccc1CCc1ccc(cc1)CC2.C=C>>C=Cc1cc2ccc1CCc1ccc(cc1)CC2

5797 C=Cc1ccccc1C.Cc1ccc(Br)c(N)c1>>Cc1ccc(/C=C/c2ccccc2C)c(N)c1

5798 C=CC(=O)OC.CC1(C)CC(=C(c2ccc3c(cnn3C3CCCCO3)c2)c2c(F)cc(Br)cc2F)CC(C)(C)O1>>COC(=  
O)/C=C/c1cc(F)c(C(=C2CC(C)(C)OC(C)(C)C2)c2ccc3c(cnn3C3CCCCO3)c2)c(F)c1

5799 C=Cc1ccccc1.COC(=O)Cn1c(=O)c(Cl)nc2ccccc21>>COC(=O)Cn1c(=O)c(/C=C/c2ccccc2)nc2ccccc21

5800 C=CC(C)(C)O.O=c1c(Br)cc2ccccc12>>CC(C)(O)/C=C/c1cc2ccccc2c1=O  
C=Cc1ccc(/C=C/c2cc(CCCCC)c(C=O)cc2CCCCC)cc1.CCCCCc1cc(/C=C/c2ccc(C(=O)OC)cc2)c

5801 (CCCCC)cc1Br>>CCCCCc1cc(/C=C/c2ccc(/C=C/c3cc(CCCCC)c(/C=C/c4ccc(C(=O)OC)cc4)cc3  
CCCCC)cc2)c(CCCCC)cc1C=O

5802 C=CC(=O)OC.Cn1cc(-c2cnc3ccc(OS(=O)(=O)C(F)(F)F)cc3c2)cn1>>COC(=O)/C=C/c1ccc2ncc(-  
c3cnn(C)c3)cc2c1

5803 C=Cc1ccc2c(ccc(=O)n2COCC[Si](C)(C)C)c1.FC(F)Oc1ccc(Nc2ncc(Br)cn2)cc1Cl>>C[Si](C)(C)CCO  
Cn1c(=O)ccc2cc(/C=C/c3cnc(Nc4ccc(OC(F)F)c(Cl)c4)nc3)ccc21

5804 C=CC(=O)OCC.Oc1ccc(Br)c(F)c1>>CCOC(=O)/C=C/c1ccc(O)cc1F

5805 C=CN1C(=O)c2ccccc2C1=O.COC(=O)Cc1ccc(Br)cc1>>COC(=O)Cc1ccc(/C=C/N2C(=O)c3ccccc3C2  
=O)cc1

5806 C=Cc1cnc2c1nnc2C1CCCCO1.COc1ccc(I)cc1>>COc1ccc(/C=C/c2cnc3c2nnc3C2CCCCO2)cc1

5807 C=CC(O)c1cc(OC)c(OC)c(OC)c1Br.COc1cccc(I)c1>>COc1cccc(/C=C/C(O)c2cc(OC)c(OC)c(OC)c2B

5807 C=CC(=O)CC.Cc1cccc1Br>>CCC(=O)/C=C/c1cccc1C  
5808 Br1cccc1.C=Cc1ncnc2c1ncn2C1CCCCO1>>C(=C/c1ncnc2c1ncn2C1CCCCO1)\c1cccc1  
5809 C=Cc1ccc2cccc2c1.CCOC(=O)C(F)Br>>CCOC(=O)C(F)/C=C/c1ccc2cccc2c1  
5810 C=CC(=O)OC.COc1ccc(Br)c(C=O)c1>>COC(=O)/C=C/c1ccc(OC)cc1C=O  
5811 C=CC(=O)OC.Nc1ccc(I)cc1>>COC(=O)/C=C/c1ccc(N)cc1  
5812 C=Cc1ccc(N(C)C)cc1.CCOC(=O)C(C)Br>>CCOC(=O)C(C)/C=C/c1ccc(N(C)C)cc1  
5813 C=CCOc1ccc(OC)cc1.Ic1cccc1>>COc1ccc(OC/C=C/c2cccc2)cc1  
5814 C=CC(=O)OC.Cc1c(Br)ccc2c1N(Cc1ccc(C(F)(F)F)cc1)C(=O)C2=O>>COC(=O)/C=C/c1ccc2c(c1C)N  
(Cc1ccc(C(F)(F)F)cc1)C(=O)C2=O  
5815 C=CC(=O)OC.COc1ccc(Br)c(C)c1>>COC(=O)/C=C/c1ccc(OC)cc1C  
5816 C=CC(=O)OC.Nc1ccc(Br)cc1[N+](=O)[O-]>>COC(=O)/C=C/c1ccc(N)c([N+](=O)[O-])c1  
5817 C=CC(=O)OC(C)(C)C.COCC(=O)[C@H]1c2c(Br)ccc(OC)c2O[C@H]1c1ccc(OC)c(OC)c1>>COC(=O)[C@H]1c2c(/C=C/C(=O)OC(C)(C)C)ccc(OC)c2O[C@H]1c1ccc(OC)c(OC)c1  
5818 C=CC(=O)OC.COc1ccc(Br)c1>>COC(=O)/C=C/c1ccc(OC)c1  
5819 C=C(NC(C)=O)C(=O)OC.Nc1ccc(Br)cc1N1CCCCC1>>COC(=O)/C=C/c1ccc(N)c(N2CCCCC2)c1)N  
C(C)=O  
5820 C=CC(=O)OC(C)(C)C.O=[N+](O-)\c1ccc(Cl)c([N+](=O)[O-])c1>>CC(C)(C)OC(=O)/C=C/c1ccc([N+](=O)[O-])cc1[N+](=O)[O-]  
5821 C=Cc1ccc1.CCCOc1ccc(I)cc1>>CCCOc1ccc(/C=C/c2ccc2)cc1  
5822 C=Cc1ccc1.COc1ccc(Br)cc1>>COc1ccc(/C=C/c2ccc2)cc1  
5823 C=Cc1cccc1.O=C1C(I)=C(c2cccc2)[C@]23c4cccc4C=C[C@H]2c2cccc2CN13>>O=C1C(/C=C/c2  
cccc2)=C(c2cccc2)[C@]23c4cccc4C=C[C@H]2c2cccc2CN13  
5824 C=C1C(=O)O[C@]2/C=C(\C)CC/C=C(\C)CC[C@]H12.Nc1ccc(I)cn1>>C/C1=C/[C@H]2OC(=O)/C=C/c3ccc(N)nc3)[C@]2CC/C(C)=C/CC1  
5825 C=CCNC(=O)OC(C)(C)C.CC(=O)c1cccc(Cl)c1>>C=C(CNC(=O)OC(C)(C)C)c1cccc(C(C)=O)c1  
5826 C=CC#N.Cc1cccc(NS(=O)(=O)c2ccc(Br)cc2)c1>>Cc1cccc(NS(=O)(=O)c2ccc(/C=C/C#N)cc2)c1  
5827 C=CCO[Si](C)(C)C(C)(C)C.CC(C)(C)c1ccc(Br)cc1>>CC(C)(C)c1ccc(/C=C/CO[Si](C)(C)C(C)(C)C)c  
5828 C=CC(=O)NC(C)C.COc1ccc(Cl)cc1>>COc1ccc(/C=C/C(=O)NC(C)C)cc1  
5829 CC(=O)/C=C/CC(CCc1cccc1)NS(=O)(=O)c1ccc(C)cc1.Cc1ccc(Br)cc1>>CC(=O)/C=C(/CC(CCc1ccc  
cc1)NS(=O)(=O)c1ccc(C)cc1)c1ccc(C)cc1  
5830 C=Cc1ccc(Cl)cc1.Cc1ccc(Br)cc1>>Cc1ccc(/C=C/c2ccc(Cl)cc2)cc1  
5831 C=CC(=O)N(C)Cc1cc2cccc2n1C.O=C1Nc2ccc(Br)cc2C12CCC2>>CN(Cc1cc2cccc2n1C)C(=O)/C=C  
C/c1ccc2c(c1)C1(CCC1)C(=O)N2  
5832 C=Cc1cccc1.CC(=O)Nc1cccc1Br>>CC(=O)Nc1cccc1/C=C/c1cccc1  
5833 C=CCc1c(O)c(/N=N/c2ccc(Br)cc2)cc2c(C)cc(=O)oc12.C=Cc1ccc1>>C=CCc1c(O)c(/N=N/c2ccc(/C  
=C/c3ccc3)cc2)cc2c(C)cc(=O)oc12  
5834 C=CCCC.COCC(=O)CCCCCCCC1=C(I)CCC1=O>>CCC/C=C/C1=C(CCCCCCCC(=O)OC)C(=O)CC1  
5835 C=C1C(=O)O[C@H]2[C@H]1CC/C(C)=C/CC[C@]1(C)O[C@]H21.FC(F)(F)c1cccc1I>>C/C1=C  
C\CC[C@]2(C)O[C@H]2[C@H]2OC(=O)/C=C/c3cccc3C(F)(F)F[C@]H2CC1  
5836 C=COC(CC)CCCC.O=Cc1ccc(Br)cc1>>C=C(OC(CC)CCCC)c1ccc(C=O)cc1  
5837 C=CC(=O)OCCCC.CC(=O)c1ccc(I)cc1>>CCCCOC(=O)/C=C/c1ccc(C(C)=O)cc1  
\*CNCCCOCCOCCOCCCN(C=O)COc1ccc(C(Cc2cc(OC)cc(OC)c2)NC(=O)c2ccc(C=C)cc2)cc1.CC(=O)c1ccc(I)cc1>>\*CNCCCOCCOCCOCCCN(C=O)COc1ccc(C(Cc2cc(OC)cc(OC)c2)NC(=O)c2ccc(/C  
=C/c3ccc(C(C)=O)cc3)cc2)cc1  
5839 C=CC(=O)OCC.COc1ccc(Cl)cc1>>CCOC(=O)/C=C/c1ccc(OC)cc1  
5840 C=CC(N)=O.CCOC(=O)c1cn(CC)c2ccc(I)cc2c1=O>>CCOC(=O)c1cn(CC)c2ccc(/C=C/C(N)=O)cc2c1  
5841 C=CCNC(=O)c1ccc(F)cc1NC(=O)c1ccc(C(F)(F)F)cc1.Ic1cccc1>>O=C(Nc1cc(F)ccc1C(=O)NC/C=C  
/c1cccc1)c1ccc(C(F)(F)F)cc1  
5842 C=CC(=O)OC.Cc1c[nH]c2c(Br)cc(F)cc12>>COC(=O)/C=C/c1cc(F)cc2c(C)c[nH]c12  
5843 C=COCCCC.CC(=O)Nc1ccc(Br)cn1>>C=C(OCCCC)c1ccc(NC(C)=O)nc1  
5844 C=CC(=O)OC(C)(C)C.COCC(=O)c1cccc1Br>>COC(=O)c1cccc1/C=C/C(=O)OC(C)(C)C  
5845 C=Cc1cccc1C.Nc1cccc1Br>>Cc1cccc1/C=C/c1cccc1N  
5846 C=CCN(C)C(=O)OC(C)(C)C.CC(=O)c1ccc(Cl)cc1>>CC(=O)c1ccc(/C=C/CN(C)C(=O)OC(C)(C)C)cc  
5847 C=CN1CCCC1=O.O=C1c2cccc2C(=O)N1c1cccc(I)c1>>O=C1CCCN1/C=C/c1cccc(N2C(=O)c3cccc  
3C2=O)c1  
5848 C=CP(=O)(O)O.N#Cc1ccc(Br)cc1>>N#Cc1ccc(/C=C/P(=O)(O)O)cc1  
5849 C=CC(=O)OC(C)(C)C.CCOC(=O)N1CCC2(CC1)CC(=O)c1cc(Br)ccc1O2>>CCOC(=O)N1CCC2(CC  
1)CC(=O)c1cc(/C=C/C(=O)OC(C)(C)C)ccc1O2  
5850 C=CC(=O)OC.CCOC(=O)c1cc(-c2cccc2)n(-c2ccc(I)cc2)c1C(=O)c1cccc1>>CCOC(=O)c1cc(-  
c2cccc2)n(-c2ccc(/C=C/C(=O)OC)cc2)c1C(=O)c1cccc1



5851 C=CC(C)=O.Ic1ccc2cc[nH]c2c1>>CC(=O)/C=C/c1ccc2cc[nH]c2c1  
 \*CNCCCCOCCOCCOCCNC(=O)COc1ccc(C(Cc2cc(OC)cc(OC)c2)NC(=O)c2ccc(C=C)cc2)cc1.Cc1cc  
 5852 (C)cc(I)c1>>\*CNCCCCOCCOCCOCCNC(=O)COc1ccc(C(Cc2cc(OC)cc(OC)c2)NC(=O)c2ccc(/C=C/  
 c3cc(C)cc(C)c3)cc2)cc1  
 5853 C=CC(C)=O.O=C1Cc2c([nH]c3ccc(F)cc23)-c2cc(I)ccc2N1>>CC(=O)/C=C/c1ccc2c(c1)-  
 c1[nH]c3ccc(F)cc3c1CC(=O)N2  
 5854 C=Cc1cc(CN2CCN(C)CC2)ccn1.Cc1c(Nc2c(I)cncc2C#N)ccc2[nH]ccc12>>Cc1c(Nc2c(C#N)cncc2/C=  
 C/c2cc(CN3CCN(C)CC3)ccn2)ccc2[nH]ccc12  
 5855 C=Cc1ccc(N(C)C)cc1.CCCn1c(=O)c(C)nc2cc(Br)ccc21>>CCn1c(=O)c(C)nc2cc(/C=C/c3ccc(N(C)C)  
 cc3)ccc21  
 5856 C=Cc1ccc(N)cc1.CCN1c2ncc(I)cc2C(=O)N(C)c2cccn1>>CCN1c2ncc(/C=C/c3ccc(N)cc3)cc2C(=O)  
 N(C)c2cccn1  
 5857 C=CCO[Si](C)(C)C(C)(C)C.O=Cc1ccc(Br)cc1>>CC(C)(C)[Si](C)(C)OC/C=C/c1ccc(C=O)cc1  
 5858 C=CC(=O)OC.CC(C)(C)OC(=O)/C=C/c1ccc(CN(C(=O)C2CCCC2)c2ccc(Br)c2)cc1>>COC(=O)/C  
 =C/c1cccc(N(Cc2ccc(/C=C/C(=O)OC(C)(C)C)cc2)C(=O)C2CCCC2)c1  
 5859 C=CC(=O)OC.O=C(C=P(c1cccc1)(c1cccc1)c1cccc1)c1ccc(Br)cc1>>COC(=O)/C=C/c1ccc(C(=O)C  
 =P(c2cccc2)(c2cccc2)c2cccc2)cc1  
 5860 C=Cc1cccn1.Cc1cc(Nc2ccc([N+](=O)[O-])cc2[N+](=O)[O-])ccc1Br>>Cc1cc(Nc2ccc([N+](=O)[O-  
 ])cc2[N+](=O)[O-])ccc1/C=C/c1cccn1  
 5861 C=CCC(C(=O)OCC)C(=O)OCC.Ic1cccc1>>CCOC(=O)C(C/C=C/c1cccc1)C(=O)OCC  
 5862 C=Cc1cccc1.COc1ccc(/C=C/c2ccc3ccc4ccc(Br)cc4c3c2)cc1>>COc1ccc(/C=C/c2ccc3ccc4ccc(/C=C/c  
 5cccc5)cc4c3c2)cc1  
 5863 C=CC(=O)OC(C)(C)C.CSc1nc(N(C)c2cccc2)n2ncc(I)c2n1>>CSc1nc(N(C)c2cccc2)n2ncc(/C=C/C(=  
 O)OC(C)(C)C)c2n1  
 5864 C=CC(=O)OCC.Fc1c(F)c(F)c(Cl)c(F)c1F>>CCOC(=O)/C=C/c1c(F)c(F)c(F)c(F)c1F  
 5865 C=CC(=O)OCC.Cc1ccc(-c2nc3ccc(/N=N/c4ccc([N+](=O)[O-])cc4)cc3c(-  
 c3cccc3)c2I)cc1>>CCOC(=O)/C=C/c1c(-c2ccc(C)cc2)nc2ccc(/N=N/c3ccc([N+](=O)[O-])cc3)cc2c1-  
 c1cccc1  
 5866 C=COCCCC.O=Cc1cccc(Cl)c1>>C=C(OCCCC)c1cccc(C=O)c1  
 5867 C=CC(=O)OC(C)(C)C.OC/C=C/C1=C(Br)CCCC1>>CC(C)(C)OC(=O)/C=C/C1=C(/C=C/CO)CCCC1  
 5868 C=Cc1ccc(N(c2cccc2)c2cccc2)cc1.CC(C)(C)OC(=O)CCCCCCCCCOc1cc(Br)ccc1C=O>>CC(C)(C)  
 OC(=O)CCCCCCCCCOc1cc(/C=C/c2ccc(N(c3cccc3)c3cccc3)cc2)ccc1C=O  
 5869 C=C[Si](C)(C)c1cccn1.COc1ccc(I)cc1>>COc1ccc(/C=C/[Si](C)(C)c2cccn2)cc1  
 5870 C=Cc1ccc(C(=O)OC)[nH]1.CC(C)(C)C(=O)Nc1nc(O)c2cc(Br)cn2n1>>COC(=O)c1ccc(/C=C/c2cnc3  
 nc(NC(=O)C(C)(C)C)nc(O)c3c2)[nH]1  
 5871 BrC1cccc2cc[nH]c12.C=Cc1cccc1>>C=C(c1cccc2cc[nH]c12)\c1cccc1  
 5872 C=Cc1ccc(/C=C/c2ccc(N(C)C)cc2OC)cc1.CN(C)c1ccc2c(c1)[Si](C)(C)C1=CC(=[N+](C)C)C=CC1=C  
 2c1ccc(Br)cc1S(=O)(=O)[O-]  
 ]>>COc1cc(N(C)C)ccc1/C=C/c1ccc(/C=C/c2ccc(C3=C4C=CC(=[N+](C)C)C=C4[Si](C)(C)c4cc(N(C)  
 C)ccc43)c(S(=O)(=O)[O-])c2)cc1  
 5873 C=C.O=S(=O)(Oc1ccc(I)cc1)C(F)(F)F>>C=Cc1ccc(OS(=O)(=O)C(F)(F)F)cc1  
 5874 C=CC(=O)OC(C)(C)C.CC(C)(F)CN1[C@H](c2c(F)cc(Br)cc2F)c2ccc3c(cnn3C3CCCCO3)c2C[C@H]  
 1C(F)F>>CC(C)(F)CN1[C@H](c2c(F)cc(/C=C/C(=O)OC(C)(C)C)cc2F)c2ccc3c(cnn3C3CCCCO3)c2  
 C[C@H]1C(F)F  
 5875 C=CC(=O)OC.CN(C)c1nccc(N(Cc2ccc(Br)cc2)CC(C)(C)C)n1>>COC(=O)/C=C/c1ccc(CN(CC(C)(C)  
 C)c2ccnc(N(C)C)n2)cc1  
 5876 C=Cc1cccc1.Cc1ccc(C(=O)Oc2cccc2-c2cccc2I)c1N>>Cc1ccc(C(=O)Oc2cccc2-  
 c2cccc2/C=C/c2cccc2)c1N  
 5877 C=CCCCCCC.O=S(=O)(Oc1cccc1Cl)C(F)(F)F>>C=C(CCCCCC)c1cccc1Cl  
 5878 C=C(Br)CC.C=CC(=O)CC>>C=C(/C=C/C(=O)CC)CC  
 C=CC(=O)OCc1cc(OCCCCCCCCCCCCCCCCCCCCC)c(OCCCCCCCCCCCCCCCCCCCCC)c(OCCCCCCCCC  
 5879 CCCCCCCCCC)c1.CC(=O)c1ccc(I)cc1>>CCCCCCCCCCCCCCCCCCCCCOc1cc(COC(=O)/C=C/c2ccc(C  
 (C)=O)cc2)cc(OCCCCCCCCCCCCCCCCCCCCC)c1OCCCCCCCCCCCCCCCCCCCCC  
 5880 C=CC(=O)OCCCC.CCN(CC)c1ccc(Br)c1>>CCCCOC(=O)/C=C/c1ccc(N(CC)CC)c1  
 5881 C=C(C(=O)OC)[C@@H]1CC[C@@]2(C)CCC[C@@](C)(OCOC)[C@@H]2C1.COc1ccc(I)cc1>>CO  
 CO[C@@]1(C)CCC[C@@]2(C)CC[C@@H]3(C)C3ccc(OC)cc3)C(=O)OC)C[C@@H]21  
 5882 C=CS(=O)(=O)c1cccc1.Cc1cccc1Br>>Cc1cccc1/C=C/S(=O)(=O)c1cccc1  
 5883 C=CC(N)=O.FC(F)(F)c1ccc(I)c(Cl)c1>>NC(=O)/C=C/c1ccc(C(F)(F)F)cc1Cl  
 5884 C=CC(=O)OC(C)(C)C.CCc1cc(O)ccc1I>>CCc1cc(O)ccc1/C=C/C(=O)OC(C)(C)C  
 5885 C=CC(=O)OC.O=C1CN=C(c2cccc2)c2ccc(Br)cc2N1>>COC(=O)/C=C/c1ccc2c(c1)NC(=O)CN=C2c  
 1cccc1  
 5886 \*NC(=O)c1ccc(C=C)cc1.Cc1ccc(C#N)cc1I>>\*NC(=O)c1ccc(/C=C/c2cc(C#N)ccc2C)cc1

5887 C=CC(C)n1nnc2cccc21.Cc1ccc(I)cc1>>Cc1ccc(/C=C/C(C)n2nnc3cccc32)cc1  
5888 C=CC(=O)OCCCC.Clc1cccc2cccc12>>CCCCOC(=O)/C=C/c1cccc2cccc12  
5889 C=CCOC(C)=O.Cc1ccc(S(=O)(=O)NCCc2cc3c(cc2I)OCO3)cc1>>CC(=O)OC/C=C/c1cc2c(cc1CCNS(=O)(=O)c1ccc(C)cc1)OCO2  
5890 C=CC(=O)Oe1cccc1.IC(CC[Se]c1cccc1)=C(c1cccc1)c1cccc1>>O=C(/C=C/C(CC[Se]c1cccc1)=C(c1cccc1)c1cccc1)Oe1cccc1  
5891 C=CC(C)=O.CC1=C(OS(=O)(=O)C(F)(F)F)C(C)(C)C[C@H](O[Si](C)(C)C(C)(C)C)C1>>CC(=O)/C=C/C/C1=C(C)C[C@H](O[Si](C)(C)C(C)(C)C)CC1(C)C  
5892 C=CC(=O)NC(C)C.COc1ccc(I)cc1>>COc1ccc(/C=C/C(=O)NC(C)C)cc1  
5893 Br1cccc1.C=COCCCC>>C=C(OCCCC)c1cccc1  
5894 C=Cc1cncnc1.N#Cc1cnc2cc(Br)sc2c1Nc1ccc(Oc2cccc2)cc1>>N#Cc1cnc2cc(/C=C/c3cncnc3)sc2c1Nc1ccc(Oc2cccc2)cc1  
5895 C=CC(=O)OCC.N#Cc1cccc(OC[C@H](Cc2ccc(OC3CCN(C(=O)OCc4cccc4)CC3)cc2)NS(=O)(=O)c2ccc(I)cc2)c1>>CCOC(=O)/C=C/c1ccc(S(=O)(=O)N[C@H](COc2cccc(C#N)c2)Cc2ccc(OC3CCN(C(=O)OCc4cccc4)CC3)cc2)cc1  
5896 C=CC(=O)OCCOC.C[C@H](Nc1cncnc2sc(Br)cc12)c1cccc1>>COCCOC(=O)/C=C/c1cc2c(N[C@H](C)c3cccc3)nnc2s1  
5897 Br1cccc2cccc12.CC(=O)/C=C/CC(NS(=O)(=O)c1ccc(C)cc1)c1cccc1>>CC(=O)/C=C/CC(NS(=O)(=O)c1ccc(C)cc1)c1cccc1)c1cccc2cccc12  
5898 C=Cc1cccc1C.COc1ccc(N)c(I)c1>>COc1ccc(N)c(/C=C/c2cccc2C)c1  
5899 C=CC(=O)OC(C)(C)C.CC(C)(C)OC(=O)Nc1ccc(C(=O)OCc2cccc2)c(CCCOc2c(OCc3cccc3)ccc(Br)c2C=O)c1>>CC(C)(C)OC(=O)/C=C/c1ccc(OCc2cccc2)c(OCc2cc(NC(=O)OC(C)(C)C)ccc2C(=O)OCc2cccc2)c1C=O  
5900 C=CC(=O)OCCCC.Cc1cc(C)cc(Br)c1>>CCCCOC(=O)/C=C/c1cc(C)cc(C)c1  
5901 C=CC(=O)OCC.Cc1nn(-c2cc(I)c(Cl)cc2F)c(=O)n1C(F)F>>CCOC(=O)/C=C/c1cc(-n2nc(C)n(C(F)F)c2=O)c(F)cc1Cl  
5902 C=Cc1cccc1.Cc1ccc(OS(=O)(=O)C(F)(F)F)cc1>>C=C(c1cccc1)c1ccc(C)cc1  
5903 C=CC(=O)OC(C)(C)C.N#CCc1cccc(Br)c1>>CC(C)(C)OC(=O)/C=C/c1cccc(CC#N)c1  
5904 C=CC(=O)OCCCCC.CN1C(=O)c2ccc(Cl)cc2[C@H](C)(CC#N)[C@H]1c1cccc1>>CCCCCOC(=O)/C=C/c1ccc2c(c1)[C@H](C)(CC#N)[C@H](c1cccc1)N(C)C2=O  
5905 C=CC(=O)OC.Cc1[nH]c2cccc2c1CCN1CCCC1c1ccc(Br)cc1>>COC(=O)/C=C/c1ccc(C2CCCN2CCc2c(C)[nH]c3cccc23)cc1  
5906 Br1cccc1I.C=Cc1cccc(C)c1>>Cc1cccc(/C=C/c2cccc2Br)c1  
5907 C=CC(=O)OC.COc1cc([N+](=O)[O-])ccc1I>>COC(=O)/C=C/c1ccc([N+](=O)[O-])cc1OC  
5908 Br1ccc2cccc2c1.C=Cc1cncnc1>>C=C(c1ccc2cccc2c1)\c1cccc1  
5909 C=Cc1cncnc1.CN(C)CCOc1cncnc(Br)c1>>CN(C)CCOc1cncnc(/C=C/c2cncnc2)c1  
5910 Br1cccc2cccc12.C=Cc1cccc1>>C=C(c1cccc2cccc12)\c1cccc1  
5911 C=CCCO.CC(C)(C)c1cccc1OS(=O)(=O)C(F)(F)F>>C=C(CCO)c1cccc1C(C)(C)C  
5912 C=CC(=O)OC.Fc1ccc(Br)cn1>>COC(=O)/C=C/c1ccc(F)nc1  
5913 C=Cc1ccc(OC)cc1.O=c1c(I)c(/C=C/c2cccc2)[nH]c2cccc12>>COc1ccc(/C=C/c2c(/C=C/c3cccc3)[nH]c3cccc3c2=O)cc1  
5914 C=CCN(C(=O)C(C)(C)C)[C@H]1CCc2cccc21.O=C1Nc2ncccc2[C@H]12Cc1cc(Br)cn1C2>>CC(C)(C)C(=O)N(C/C=C/c1cnc2c(c1)C[C@H]1(C2)C(=O)Nc2ncccc21)[C@H]1CCc2cccc21  
5915 C=Cc1ccc(C)cc1.Cc1c(Br)c(=O)oc2cccc12>>Cc1ccc(/C=C/c2c(C)c3cccc3oc2=O)cc1  
5916 C=CC(=O)N(C)Cc1oc2cccc2c1C.CC(C)(C)OC(=O)N1CCN(c2cc3cc(Br)cn3[nH]c2=O)CC1>>Cc1c(CN(C)C(=O)/C=C/c2cnc3[nH]c(=O)c(N4CCN(C(=O)OC(C)(C)C)CC4)cc3c2)oc2cccc12  
5917 Br1cnc2[nH]c3ncccc3c2c1.C=CC(=O)N(C)Cc1cc2cccc2n1C>>CN(Cc1cc2cccc2n1C)C(=O)/C=C/c1cnc2[nH]c3ncccc3c2c1  
5918 C=CC(=O)OCC.Cc1ccc(-c2c(CNC(=O)OC(C)(C)C)c(CC(C)C)nc3ccc(OS(=O)(=O)C(F)(F)F)cc23)cc1>>CCOC(=O)/C=C/c1ccc2nc(CC(C)C)c(CNC(=O)OC(C)(C)C)c(-c3ccc(C)cc3)c2c1  
5919 C=CC(=O)N(CC)CC.Cn1nc(Br)c2cccc21>>CCN(CC)C(=O)/C=C/c1nn(C)c2cccc12  
5920 C=CC(=O)OC.COc1ccc2c(c1)CCN(c1ccc(C3CCC3)cc1)C2(C)c1ccc(Br)cc1>>COC(=O)/C=C/c1ccc(C2(C)c3ccc(OC)cc3CCN2c2ccc(C3CCC3)cc2)cc1  
5921 C=CC(=O)Nc1cccc1NC(=O)OC(C)(C)C.CCNC(=O)N1C[C@H](c2ccc(Br)cc2)[C@H](C(=O)OCC)C1>>CCNC(=O)N1C[C@H](c2ccc(/C=C/C(=O)Nc3cccc3NC(=O)OC(C)(C)C)cc2)[C@H](C(=O)OCC)C1  
5922 C=CC1(C(=O)OC)CCOCC1.C[C@H](NC(=O)OC(C)(C)C)c1ccc2ccc(Br)cc2n1>>COC(=O)C1/C=C/C/c2ccc3ccc([C@H](C)NC(=O)OC(C)(C)C)nc3c2)CCOCC1  
5923 C=CC(=O)OCC.COc1ccc(Cn2c(=O)ccc3cc(Br)ccc32)cc1>>CCOC(=O)/C=C/c1ccc2c(ccc(=O)n2Cc2ccc(OC)cc2)c1

5924 C=Cc1ccncc1.C[C@H](COc1cnc(Cl)c(Br)c1)NC(=O)OC(C)(C)C>>C[C@H](COc1cnc(Cl)c(/C=C/c2ccncc2)c1)NC(=O)OC(C)(C)C  
 5925 C=Cc1ccc(C)cc1.Cc1c(Br)c(=O)oc2cc(N)ccc12>>Cc1ccc(/C=C/c2c(C)c3ccc(N)cc3oc2=O)cc1  
 5926 C=CC(=O)OC.Cc1cc(-c2ccccc2)n2nc(C)c(I)c2n1>>COC(=O)/C=C/c1c(C)nn2c(-c3ccccc3)cc(C)nc12  
 5927 C=Cc1ccc(OC)cc1.Cc1c(Br)c(=O)oc2ccccc12>>COc1ccc(/C=C/c2c(C)c3ccccc3oc2=O)cc1  
 5928 C=Cc1ccc(/C=C/c2cccn2C(=O)OC(C)(C)C)cc1.CCOC(=O)c1c(C)c(C)c(I)n1C(=O)OC(C)(C)C>>CCO  
 5929 C(=O)c1c(C)c(C)c(/C=C/c2ccc(/C=C/c3cccn3C(=O)OC(C)(C)C)cc2)n1C(=O)OC(C)(C)C  
 5930 C=CCNC(=O)OC(C)(C)C.CCOC(=O)c1cc(Cl)c(OS(=O)(=O)C(F)(F)F)c(OC)c1>>C=C(CNC(=O)OC(C)(C)C)c1c(Cl)cc(C(=O)OCC)cc1OC  
 5931 C=CC(=O)OC.COc1cc(I)c(-c2c(Cl)cccc2[N+](=O)[O-])c(OCc2ccccc2)c1>>COC(=O)/C=C/c1cc(OC)cc(OCc2ccccc2)c1-c1c(Cl)cccc1[N+](=O)[O-]  
 5932 C=CC(=O)OCC.C[C@H]1c2ccccc2CCN1C(=O)c1cc(-c2ccccc2)n2nc(-c3ccc(Br)cc3F)cc2n1>>CCOC(=O)/C=C/c1ccc(-c2cc3nc(C(=O)N4CCc5ccccc5[C@H]4C)cc(-c4ccccc4)n3n2)c(F)c1  
 5933 Brc1cnc2ccccc2c1.C=CCO[C@]1(C)C[C@@H](C)C(=NO)[C@H](C)[C@@H](O)[C@](C)(O)[C@@H](CC)OC(=O)[C@H](C)[C@@H](O)[C@H](C)[C@H]1O[C@@H]1O[C@H](C)C[C@H](N(C)C)[C@H]1O>>CC[C@H]1OC(=O)[C@H](C)[C@@H](O)[C@H](C)[C@@H](O)[C@@H]2O[C@H](C)C[C@H](N(C)C)[C@H]2O)[C@](C)(OC/C=C/c2cnc3ccccc3c2)C[C@@H](C)C(=NO)[C@H](C)[C@@H](O)[C@]11(C)O  
 5934 C=CC(CO)N1C(=O)c2ccccc2C1=O.Ic1ccccc1>>O=C1c2ccccc2C(=O)N1C(/C=C/c1ccccc1)CO  
 5935 C=CC(=O)N(C)C.N#Cc1ccccc1Cl>>CN(C)C(=O)/C=C/c1ccccc1C#N  
 5936 C=CC(=O)OC(C)(C)C.Fc1cc(F)cc(Br)c1>>CC(C)(C)OC(=O)/C=C/c1cc(F)cc(F)c1  
 5937 C=Cc1ccncc1.COc1ccc(I)cc1>>COc1ccc(/C=C/c2ccncc2)cc1  
 5938 C=Cc1ccc(OC)cc1.CCCc1c(C(=O)NC(C)(C)C)nc(Br)c1C(=O)NC(C)(C)C>>CCCCn1c(C(=O)NC(C)(C)C)nc(/C=C/c2ccc(OC)cc2)c1C(=O)NC(C)(C)C  
 5939 C=CC(=O)OCCCC.Nc1cc(F)cc([N+](=O)[O-])c1c(=O)OC.COc1c(I)c(CCNC(=O)OC(C)(C)C)cc2c1OCO2>>COC(=O)c1c(/C=C/c2c(CCNC(=O)OC(C)(C)C)cc3c(c2OC)OCO3)ccc(OC)c1OC  
 5940 C=CCCCC(=O)OC.CC(C)(C)c1ccc(OS(=O)(=O)C(F)(F)F)cc1>>C=C(CCCC(=O)OC)c1ccc(C(C)(C)C  
 5941 C=CC(=O)OC.CN(C)CCCOc1ccc(I)cc1Br>>COC(=O)/C=C/c1ccc(OCCCN(C)C)c(Br)c1  
 5942 C=CC(=O)OCC.Cc1ccc(I)cc1>>CCOC(=O)/C=C/c1ccc(C)cc1  
 5943 C=CC(=O)OC.CC(C)(C)c1[nH]c2ccccc2c1[C@H]1CCCN(Cc2ccc(Br)cc2)C1>>COC(=O)/C=C/c1ccc(CN2CCC[C@H](c3c(C(C)(C)C)[nH]c4ccccc34)C2)cc1  
 5944 C=Cc1ccccc1.CCOC(=O)NCCc1cc(OC)c(OC)cc1I>>CCOC(=O)NCCc1cc(OC)c(OC)cc1/C=C/c1ccccc1  
 5945 C=CC(=O)OC(C)(C)C.N#CCc1ccc(Br)cc1>>CC(C)(C)OC(=O)/C=C/c1ccc(CC#N)cc1  
 5946 Brc1ccc2oc(-c3cc[nH]n3)cc2c1.C=Cc1ccccc1>>C=C/c1ccc2oc(-c3cc[nH]n3)cc2c1)\c1ccccc1  
 5947 C=CC(=O)N1N=Cc2ccccc2C1CC.COc1cc(Cc2cnc(N)nc2N)cc(I)c1OC>>CCC1c2ccccc2C=NN1C(=O)/C=C/c1cc(Cc2cnc(N)nc2N)cc(OC)c1OC  
 5948 C=C(NC(C)=O)C(=O)OC.Ic1ccccc1>>COC(=O)/C=C/c1ccccc1)NC(C)=O  
 5949 C=CC(=O)N(C)OC.Cc1ccc(Br)cc1>>CON(C)C(=O)/C=C/c1ccc(C)cc1  
 5950 C=CP(=O)(OCC)OCC.CCOC(=O)CNc1ccccc(Br)c1>>CCOC(=O)CNc1ccccc(/C=C/P(=O)(OCC)OCC)c  
 5951 C=CC(=O)OC.Cc1cc(C)cc(Br)c1>>COC(=O)/C=C/c1cc(C)cc(C)c1  
 5952 C=CC(OCC)OCC.Fc1ccccc(I)c1>>CCOC(/C=C/c1ccccc(F)c1)OCC  
 5953 C=C[C@H]1O[C@@H]2OC(C)(C)O[C@@H]2[C@H]1OC.O=[N+](O-)]c1ccc(I)cc1>>CO[C@H]1[C@@H](/C=C/c2ccc([N+](=O)[O-])c1ccccc1)cc1  
 5954 C=CC(=O)OC.O=Cc1ccccc(Br)c1>>COC(=O)/C=C/c1ccccc(C=O)c1  
 5955 C=Cc1ccccc1.CC(=O)Nc1ccccc1I>>CC(=O)Nc1ccccc1/C=C/c1ccccc1  
 5956 C=CCOC(C)=O.Cc1ccc([I+](c2ccc(C)cc2)cc1>>CC(=O)OC/C=C/c1ccc(C)cc1  
 5957 C=CC(=O)OCC.O=C(c1ccccc1)C(F)(F)c1ccccc1I>>CCOC(=O)/C=C/c1ccccc1C(F)(F)C(=O)c1ccccc1  
 5958 C=CC(=O)N(C)OC.O=[N+](O-)]c1ccc(I)cc1>>CON(C)C(=O)/C=C/c1ccc([N+](=O)[O-])cc1  
 5959 C=CC(=O)OC(C)(C)C.Nc1ccc(CO)cc1I>>CC(C)(C)OC(=O)/C=C/c1cc(CO)ccc1N  
 5960 C=C.Ic1ccc(-c2ccccc2)cc1>>C=Cc1ccc(-c2ccccc2)cc1  
 5961 Brc1ccccc2ccccc12.C=COCCCC>>C=C(OCCCC)c1ccccc2ccccc12  
 5962 C=CCNC(=O)c1cc(C)on1.CCOC(=O)c1ccccc(I)c1>>CCOC(=O)c1ccccc(/C=C/CNC(=O)c2cc(C)on2)c1  
 5963 C=CC(=O)N1CCOCC1.CC(C)(C)c1ccc2[nH]c3c(c2c1)CC(=O)Nc1ccc(I)cc1-3>>CC(C)(C)c1ccc2[nH]c3c(c2c1)CC(=O)Nc1ccc(/C=C/C(=O)N2CCOCC2)cc1-3  
 5964 C=CC(=O)OCC.NC(=O)c1cc(I)cc(OCc2ccccc2)c1>>CCOC(=O)/C=C/c1cc(OCc2ccccc2)cc(C(N)=O)c  
 5965 C=CC#N.[2H]C([2H])([2H])c1cc(I)cc(C([2H])([2H])[2H])c1N>>[2H]C([2H])([2H])c1cc(/C=C/C#N)c  
 5966 c(C([2H])([2H])[2H])c1N

5967 C=Cc1cccc1.O=[N+](=[O-])c1ccc(Cl)nc1>>O=[N+](=[O-])c1ccc(/C=C/c2cccc2)nc1  
 5968 C=CC(F)(F)C(F)(F)C(F)(F)C(F)(F)F.CC1=Nc2ccc(I)cc2C1(C)C>>CC1=Nc2ccc(/C=C/C(F)(F)C(F)(F)C(F)(F)C(F)(F)F)cc2C1(C)C  
 5969 Brclcccnc1.C=C1C[C@H]2[C@@H]3CCc4ccc(OC)ccc4[C@H]3CC[C@]2(C)C1=O>>COc1ccc2c(c1)CC[C@@H]1[C@@H]2CC[C@]2(C)C(=O)/C=C/c3cccnc3)C[C@@H]12  
 5970 Brclc(-c2cccc2)nn(-c2cnc(Nc3cccc3)n2)c1-c1cccc1.C=C[C@H]1C[C@H](CC(=O)OCC)OC(C)(C)O1>>CCOC(=O)C[C@H]1C[C@H](/C=C/c2c(-c3cccc3)nn(-c3cnc(Nc4cccc4)n3)c2-c2cccc2)OC(C)(C)O1  
 5971 C=Cc1cccc(N)n1.CN(C(=O)c1cccc1)c1ccc2c(c1)[nH]c(=NC(=O)c1ccc(Br)s1)n2CCC(N)=O>>CN(C(=O)c1cccc1)c1ccc2c(c1)[nH]c(=NC(=O)c1ccc(/C=C/c3cccc(N)n3)s1)n2CCC(N)=O  
 5972 C=CC(=O)OC.Cn1nc(-c2cccc2)c(Br)cc1=O>>COC(=O)/C=C/c1cc(=O)n(C)nc1-c1cccc1  
 5973 C=CC(=O)OC.CC(C)c1cc(Br)c2c(c1)C1(C)CCCCC1=N2>>COC(=O)/C=C/c1cc(C(C)C)cc2c1N=C1CCCCC12C  
 5974 C=Cc1cccc1.Nc1ccc(C(F)(F)F)cc1Br>>Nc1ccc(C(F)(F)F)cc1/C=C/c1cccc1  
 5975 C=CC(=O)OCCCC.CN[13c]1[13cH][13c](Cl)[13cH][13cH][13c]1[N+](=O)[O-]>>CCCCOC(=O)/C=C/[13c]1[13cH][13cH][13c]([N+](=O)[O-])[13c](NC)[13cH]1  
 5976 Brclcccc1.COC[C@H](/N=C(\c1cccc1)N1C=CCC[C@H]1C(C)C)C>>COC[C@H](/N=C(\c1cccc1)N1C=C(c2cccc2)CC[C@H]1C(C)C)C  
 5977 C=CC(=O)OCC.CCOC(=O)c1cccc(Br)c1>>CCOC(=O)/C=C/c1cccc(C(=O)OCC)c1  
 5978 C=CC(=O)O.CC(C)(C)c1ccc(S(=O)(=O)Nc2ccc(I)cc2)cc1>>CC(C)(C)c1ccc(S(=O)(=O)Nc2ccc(/C=C/C(=O)O)cc2)cc1  
 5979 Brclccc2c(c1)OCO2.C=CCN1C(=O)c2cccc2C1=O>>O=C1c2cccc2C(=O)N1C/C=C/c1ccc2c(c1)OCC  
 5980 C=Cc1ccc(/C=C/c2ccc(N(C)C)cc2OC)cc1.Cc1ccc2c(-c3ccc(I)cc3S(=O)(=O)O)c3cc(C)c(=O)cc-3oc2cc1O>>COc1cc(N(C)C)ccc1/C=C/c1ccc(/C=C/c2ccc(-c3c4cc(C)c(=O)cc-4oc4cc(O)c(C)cc34)c(S(=O)(=O)O)c2)cc1  
 5981 C=Cc1cccc([N+](=O)[O-])c1.O=[N+](=[O-])c1ccc(I)cc1>>O=[N+](=[O-])c1ccc(/C=C/c2cccc([N+](=O)[O-])c2)cc1  
 5982 C=CC(=O)O.CCCCC(CC)Cn1c2ccc(Br)cc2c2cc(C=O)ccc21>>CCCCC(CC)Cn1c2ccc(C=O)cc2c2cc(/C=C/C(=O)O)ccc21  
 5983 C=Cc1ccc(N2CCN(C(C)=O)CC2)cc1.Fc1cc(Br)cc(Cn2ccnc2)c1>>CC(=O)N1CCN(c2ccc(/C=C/c3ccc(F)cc(Cn4ccnc4)c3)cc2)CC1  
 5984 C=CC(=O)OC.O=c1[nH]c(=O)n([C@H]2C[C@H](O)[C@@H](CO)O2)cc1I>>COC(=O)/C=C/c1cn([C@H]2C[C@H](O)[C@@H](CO)O2)c(=O)[nH]c1=O  
 5985 C=CC1CC(OC)=CC(=O)O1.Ic1ccc2c(c1)OCO2>>COC1=CC(=O)OC(/C=C/c2ccc3c(c2)OCO3)C1  
 5986 C=CC(=O)O.Ic1cccc2cccc12>>O=C(O)/C=C/c1cccc2cccc12  
 5987 C=CN(C)C(C)=O.Clc1ccc2c(c1)OCO2>>C=C(c1ccc2c(c1)OCO2)N(C)C(C)=O  
 5988 C=CC#N.Cc1noc(C)c1I>>Cc1noc(C)c1/C=C/C#N  
 5989 C=CC(=O)OC.Cc1cc2c(c(C)c1Br)CC(C)(C)C2>>COC(=O)/C=C/c1c(C)cc2c(c1C)CC(C)(C)C2  
 5990 C=CC(N)=O.O=C(c1cccc1)c1ccc(I)cc1>>NC(=O)/C=C/c1ccc(C(=O)c2cccc2)cc1  
 5991 C=Cc1ccc(SC)cc1.Clc1c2cc(Br)ccc2nc2c1[nH]c1cccc12>>CSc1ccc(/C=C/c2ccc3nc4c([nH]c5cccc54)c(Cl)c3c2)cc1  
 5992 C=CC(=O)OCC.Clc1cccc2cccc12>>CCOC(=O)/C=C/c1cccc2cccc12  
 5993 C=CP(=O)(OCC)OCC.O=P(/C=C/c1cccc(Br)c1)(c1cccc1)c1cccc1>>CCOP(=O)(/C=C/c1cccc(/C=C/P(=O)(c2cccc2)c2cccc2)c1)OCC  
 5994 C=Cc1ccc(N2CCN(C(=O)OC(C)(C)C)CC2)cc1.Fc1cc(Br)cc(Cn2ccnc2)c1>>CC(C)(C)OC(=O)N1CCN(c2ccc(/C=C/c3ccc(F)cc(Cn4ccnc4)c3)cc2)CC1  
 5995 C=CC(=O)OC.C[C@H]1CN(c2ncc(Br)cc2C(F)(F)F)CCN1C(=O)OC(C)(C)C>>COC(=O)/C=C/c1cn(c(N2CCN(C(=O)OC(C)(C)C)[C@H](C)C2)c(C(F)(F)F)c1  
 5996 C=Cc1ccc(N(c2ccc(C)cc2)c2ccc(C)cc2)cc1.N#Cc1cc([N+](=O)[O-])ccc1Br>>Cc1ccc(N(c2ccc(C)cc2)c2ccc(/C=C/c3ccc([N+](=O)[O-])cc3C#N)cc2)cc1  
 5997 Brclccc2ccc3ccc4cc1c2c34.C=Cc1cccc1>>C(=C/c1ccc2ccc3cccc4ccc1c2c34)c1cccc1  
 5998 C=Cc1ccc(F)cc1.COC(=O)c1cc([N+](=O)[O-])ccc1Cl>>COC(=O)c1cc([N+](=O)[O-])ccc1/C=C/c1ccc(F)cc1  
 5999 C=CS(=O)(=O)F.O=Cc1ccc(I)cc1>>O=Cc1ccc(/C=C/S(=O)(=O)F)cc1  
 6000 Brclcnc2cccc2c1.C=CC(=O)OC>>COC(=O)/C=C/c1cnc2cccc2c1  
 6001 C=CC(=O)N(C)Cc1cc2cccc2n1C.COc1ccc(Cn2nc(N)c3cc(Br)nc32)cc1>>COc1ccc(Cn2nc(N)c3cc(/C=C/C(=O)N(C)Cc4ccc5cccc5n4C)nc32)cc1  
 6002 C=CC(=O)N1N=Cc2cccc2C1C=C(C)C.CCc1nc(N)nc(N)c1Cc1cc(I)c(OC)c(OC)c1>>CCc1nc(N)nc(N)c1Cc1cc(/C=C/C(=O)N2N=Cc3cccc3C2C=C(C)C)c(OC)c(OC)c1  
 6003 C=C(CC(=O)OC)C(=O)OC.FC(F)(F)Oc1ccc(I)cc1>>COC(=O)C/C(=C\c1ccc(OC(F)(F)F)cc1)C(=O)O  
 6004 Brclcccs1.C=CC(=O)OCC>>CCOC(=O)/C=C/c1cccs1

6005 C=Cc1cc(OCCC)c(OCCC)c(OCCC)c1.O=C1c2ccccc2C(=O)N1c1ccc(I)cc1>>CCCOc1cc(/C=C/c2ccc(N3C(=O)c4ccccc4C3=O)cc2)cc(OCCC)c1OCCC  
6006 C=CC(=O)OC.O=Cc1ccc(I)cc1>>COC(=O)/C=C/c1ccc(C=O)cc1  
6007 C=CC(=O)OC.CC(=O)OC[C@H]1O[C@@H](n2cnc(C(N)=O)c2I)[C@H](OC(C)=O)[C@@H]1OC(C)=O>>COC(=O)/C=C/c1c(C(N)=O)nen1[C@@H]1O[C@H](COC(C)=O)[C@@H](OC(C)=O)[C@H]1O  
6008 Br1ccccc1.C=CCOc1ccccc1C(C)(C)C>>CC(C)(C)c1ccccc1OC/C=C/c1ccccc1  
6009 Br1cnc2ccccc12.C=CP(=O)(OCC)OCC>>CCOP(=O)/C=C/c1cnc2ccccc12)OCC  
6010 C=Cc1nc2c(N)ncnc2n1[C@@H]1O[C@H](CO[Si](C)(C)C(C)(C)C)[C@@H](O[Si](C)(C)C(C)(C)C)[C@H]1O[Si](C)(C)C(C)(C)C.Cc1ccccc1>>CC(C)(C)[Si](C)(C)OC[C@H]1O[C@@H](n2c(/C=C/c3ccccc3)nc3c(N)ncnc32)[C@H](O[Si](C)(C)C(C)(C)C)[C@@H]1O[Si](C)(C)C(C)(C)C  
6011 C=COCCN(C)C.O=S(=O)(Oc1cccc2ccccc12)C(F)(F)F>>C=C(OCCN(C)C)c1cccc2ccccc12  
6012 C=CC(=O)Nc1cccc2ccccc12.Ic1ccccc1>>O=C(/C=C/c1ccccc1)Nc1cccc2ccccc12  
6013 C=CC(=O)N1CCOCC1.O=Cc1ccccc1Br>>O=Cc1ccccc1/C=C/C(=O)N1CCOCC1  
6014 C=CC(=O)OC(C)(C)C.O=Cc1ccc(Cl)cc1>>CC(C)(C)OC(=O)/C=C/c1ccc(C=O)cc1  
6015 Br1ccc2cnc(N3CCCCC3)c2c1.C=CC(C)=O>>CC(=O)/C=C/c1ccc2cnc(N3CCCCC3)c2c1  
6016 Br1ccccc1.C=Cc1cccc(OC)c1>>COc1cccc(/C=C/c2ccccc2)c1  
6017 C=Cc1ccccc1.Ic1cccc2cc3c(nc12)-c1c(ccc2ccccc12)CC3>>C(=C/c1cccc2cc3c(nc12)-c1c(ccc2ccccc12)CC3)\c1ccccc1  
6018 C=CC(C)(C)O.COc1ccc(Br)cc1>>COc1ccc(/C=C/C(C)(C)O)cc1  
6019 C=Cc1cncnc1.CCCCCCOc1ccc(I)cc1>>CCCCCOc1ccc(/C=C/c2cncnc2)cc1  
6020 C=CC(C)(C)O.COnc1cc(C=O)c2c(I)ccccc21>>COn1cc(C=O)c2c(/C=C/C(C)(C)O)ccccc21  
6021 BrC1=C(C2=CCCCO2)CCCC1.C=Cc1ccccc1>>C1=C(C2=C(/C=C/c3ccccc3)CCCC2)OCCCC1  
6022 C=Cc1ccc(F)cc1.CCOC(=O)C(F)(F)I>>CCOC(=O)C(F)(F)/C=C/c1ccc(F)cc1  
6023 C=Cc1cncnc1.COc1ccc(N(c2ccc(Br)cc2)c2ccc(OC)cc2)cc1>>COc1ccc(N(c2ccc(/C=C/c3cncnc3)cc2)c2ccc(OC)cc2)cc1  
6024 C=CC(=O)OCC.COc1ccc(OC)c(Cc2ccc(Br)cc2)c1>>CCOC(=O)/C=C/c1ccc(Cc2cc(OC)ccc2OC)cc1  
6025 C=CC(=O)OC(C)(C)C.Fc1ccc(Br)cc1>>CC(C)(C)OC(=O)/C=C/c1ccc(F)cc1  
6026 Br1ccsc1.C=COCCCC>>C=C(OCCCC)c1ccsc1  
6027 C=CC(=O)OC.O=c1oc2ccccc2cc1Br>>COC(=O)/C=C/c1cc2ccccc2oc1=O  
6028 Br1ccccc1.C=COCC>>C=C(OCC)c1ccccc1  
6029 C=CC(=O)N(C)OC.O=[N+](I)[O-]c1cccc(I)c1>>CON(C)C(=O)/C=C/c1cccc([N+](=O)[O-])c1  
6030 C=CC(=O)N1CCCC1.COc1cc(Br)c(C=O)cc1OCc1ccccc1>>COc1cc(/C=C/C(=O)N2CCCC2)c(C=O)c1OCc1ccccc1  
6031 C=CC(=O)OC.COc1ncc(I)c(OC)n1>>COC(=O)/C=C/c1cnc(OC)nc1OC  
6032 Br1cnnc1.C=CCN1C(=O)c2ccccc2C1=O>>O=C1c2ccccc2C(=O)N1C/C=C/c1cnnc1  
6033 Br1ccc2ccccc2c1.C=Cc1ccccc1>>C(=C/c1ccc2ccccc2c1)\c1ccccc1  
6034 C=Cc1ccccc1.COc1ccc2c(-c3ccccc3)c(Br)c(=O)oc2c1>>COc1ccc2c(-c3ccccc3)c(/C=C/c3ccccc3)c(=O)oc2c1  
6035 C=Cc1ccc2c(c1)OCO2.COc1cc(C=O)c(Br)c(OC)c1OC>>COc1cc(C=O)c(/C=C/c2ccc3c(c2)OCO3)c(OC)c1OC  
6036 C=C1CC(c2ccc(C)cc2)OC1=O.Fc1ccccc1I>>Cc1ccc(C2C/C(=C/c3ccccc3F)C(=O)O2)cc1  
6037 C=CC(=O)OC(C)(C)C.COC(=O)c1cccc(Br)c1>>COC(=O)c1cccc(/C=C/C(=O)OC(C)(C)C)c1  
6038 C=C/C=C/C/CCCCC.COC(=O)c1ccc(I)cc1>>CCCCC/C=C/C=C/c1ccc(C(=O)OC)cc1  
6039 C=CS(=O)(=O)Nc1cccc(OC2CCN(C(=O)OC(C)(C)C)CC2)c1.N#Cc1cccc(Br)c1>>CC(C)(C)OC(=O)N1CCC(Oc2cccc(NS(=O)(=O)/C=C/c3cccc(C#N)c3)c2)CC1  
6040 C=CC#N.CC(C)n1cnc2c(Cl)nc(I)nc21>>CC(C)n1cnc2c(Cl)nc(/C=C/C#N)nc21  
6041 C=C(NC(=O)OC(C)(C)C)C(=O)OC.Cc1cc(I)ccc1N>>COC(=O)/C(=C/c1ccc(N)c(C)c1)NC(=O)OC(C)C=Cc1ccccc1.O=c1oc2c(ccc3ccccc32)c(-c2ccccc2)c1Br>>O=c1oc2c(ccc3ccccc32)c(-c2ccccc2)c1/C=C/c1ccccc1  
6043 C=Cc1ccccc1.CCOC(=O)C(F)I>>CCOC(=O)C(F)/C=C/c1ccccc1  
6044 C=Cc1ccccc1C.Cc1cccc(I)c1N>>Cc1ccccc1/C=C/c1cccc(C)c1N  
6045 C=CC(=O)OC.COc1ccc2c(c1)CCN(c1ccccc1C(C)C)C2(C)c1ccc(Br)cc1>>COC(=O)/C=C/c1ccc(C2(C)c3ccc(OC)cc3CCN2c2ccccc2C(C)C)cc1  
6046 C=Cc1cc(OC)cc(OC)c1.NCc1ccc(I)cc1>>COc1cc(/C=C/c2ccc(CN)cc2)cc(OC)c1  
6047 C=CC(=O)OC.O=S(=O)(c1ccc(F)cc1)N1CCc2cc(Br)nc21>>COC(=O)/C=C/c1cnc2c(c1)CCN2S(=O)(=O)c1ccc(F)cc1  
6048 C=CC(=O)OC.CCOC(=O)C(/C=C/C(=O)OC)=C(Cl)c1ccccc1>>CCOC(=O)C(/C=C/C(=O)OC)=C(Cl)=C(Cl(=O)OC)c1ccccc1  
6049 Br1cnc2c(c1)COCCN2.C=CC(=O)OC(C)(C)C>>CC(C)(C)OC(=O)/C=C/c1cnc2c(c1)COCCN2  
6050 C=CC#N.O=C(O)c1ccc(I)cc1>>N#C/C=C/c1ccc(C(=O)O)cc1

6051 C=CC(=O)OC.CCN1c2ncc(I)cc2C(=O)N(C)c2ccccc1>>CCN1c2ncc(/C=C/C(=O)OC)cc2C(=O)N(C)  
c2ccccc1  
6052 C=CC(=O)OC.O=Cc1ccc(Br)cn1>>COC(=O)/C=C/c1ccc(C=O)nc1  
6053 C=CC(=O)OCC.O=Cc1cccc(Br)c1>>CCOC(=O)/C=C/c1cccc(C=O)c1  
6054 C=C(C(=O)OC)[C@@H]1CC[C@@]2(C)CCC[C@@](C)(OCOC)[C@@H]2C1.O=Cc1ccc(Br)cc1>>  
COCO[C@@]1(C)CCC[C@@]2(C)CC[C@@H](/C(=C)c3ccc(C=O)cc3)C(=O)OC[C@@H]21  
6055 C=CC#N.CC(=O)Nc1ccc(I)cc1>>CC(=O)Nc1ccc(/C=C/C#N)cc1  
6056 C=C[C@H](C)CCC=C(C)C.O=S(=O)(Oc1ccccc1)C(F)(F)F>>C=C(c1ccccc1)[C@H](C)CCC=C(C)C  
6057 C=CCCCC.CC(=S)NS(=O)(=O)c1ccc(Br)cc1>>CCCC/C=C/c1ccc(S(=O)(=O)NC(C)=S)cc1  
6058 C=CS(=O)(=O)c1ccccc1.O=C(c1ccccc1)c1ccc(Br)cc1>>O=C(c1ccccc1)c1ccc(/C=C/S(=O)(=O)c2ccccc  
c2)cc1  
6059 CCOC(=O)/C(F)=C\CCc1ccccc1.COC(=O)c1ccccc1I>>CCOC(=O)/C(F)=C(\CCc1ccccc1)c1ccccc1C(  
=O)OC  
6060 C=CC(=O)OC.Cc1ccc2c(c1)OS(=O)(=O)C(F)(F)FCCC=C2>>COC(=O)/C=C/c1c(C)ccc2c1CCC=C2  
6061 C=CCN(C(=O)OC(C)(C)C)C(=O)OC(C)(C)C.Cc1ccc(Cl)cc1>>Cc1ccc(/C=C/CN(C(=O)OC(C)(C)C)C  
(=O)OC(C)(C)C)cc1  
6062 C=CCN(C(=O)OC(C)(C)C)C(=O)OC(C)(C)C.N#Cc1ccc(Cl)cc1>>CC(C)(C)OC(=O)N(C/C=C/c1ccc(  
C#N)cc1)C(=O)OC(C)(C)C  
6063 C=CC(=O)OCCCC.Fc1ccccc1I>>CCCCOC(=O)/C=C/c1ccccc1F  
6064 C=Cc1ccc(Br)cc1.CCOC(=O)C(F)(F)I>>CCOC(=O)C(F)(F)I>>CCOC(=O)/C=C/c1ccc(Br)cc1  
6065 C=Cc1ccc(OC)c(OC)c1C(=O)OC.CC(C)(C)OC(=O)NCCc1cc2c(cc1I)OCO2>>COC(=O)c1c(/C=C/c2c  
c3c(cc2CCNC(=O)OC(C)(C)C)OCO3)ccc(OC)c1OC  
6066 Brc1ccccc1.C=CCOc1ccc(OC)cc1>>COc1ccc(OC/C=C/c2ccccc2)cc1  
6067 C=CC(=O)OC.COc1cc(C2OCCO2)c(Br)c(OC)c1OC>>COC(=O)/C=C/c1c(C2OCCO2)cc(OC)c(OC)c  
6068 C=CC(C)(C)O.Nc1cccc(I)c1>>CC(C)(O)/C=C/c1cccc(N)c1  
6069 C=CCn1cccc1C(=O)c1ccc(C)cc1.CCOC(=O)c1ccccc(I)c1>>CCOC(=O)c1ccccc(/C=C/Cn2ccccc2C(=O)c  
2ccc(C)cc2)c1  
6070 C=CC(=O)OC(C)(C)C.O=C1COCc2cc(Br)cn2N1>>CC(C)(C)OC(=O)/C=C/c1cnc2c(c1)COCC(=O)N  
6071 C=CC(N)=O.CCOC(=O)C1=Cc2cc(Br)cc(Cl)c2OC1C(F)(F)F>>CCOC(=O)C1=Cc2cc(/C=C/C(N)=O)  
cc(Cl)c2OC1C(F)(F)F  
6072 C=Cc1ccc(OC)cc1.N#Cc1cc2sc3ccccc3c2c2cc(Br)ccc12>>COc1ccc(/C=C/c2ccc3c(C#N)cc4sc5ccccc5  
c4c3c2)cc1  
6073 C=Cc1cncnc1.O=[N+][O-]c1ccccc(I)c1>>O=[N+][O-]c1ccccc(/C=C/c2cncnc2)c1  
6074 Brc1cnc2c(c1)CNC1(CCCC1)CN2.C=CC(=O)OC(C)(C)C>>CC(C)(C)OC(=O)/C=C/c1cnc2c(c1)CNC  
1(CCCC1)CN2  
6075 C=CC(CC)OC1CCCCO1.COC(=O)CCCCCCCCC1=C(I)CCC1=O>>CCC(/C=C/C1=C(CCCCCCCC(=O)  
OC)C(=O)CC1)OC1CCCCO1  
6076 C=C1C(=O)O[C@@H]2C3=C(C)C(=O)C=C[C@]3(C)CC[C@@H]12.Fc1ccc(I)cc1>>CC1=C2[C@H]  
3OC(=O)/C=C/c4ccc(F)cc4)[C@@H]3CC[C@@]2(C)C=CC1=O  
6077 Brc1cnc2nc(-c3ccccc3)oc2c1.C=CC(=O)OC>>COC(=O)/C=C/c1cnc2nc(-c3ccccc3)oc2c1  
6078 C=Cc1cncnc1.CC(C)(C)OC(=O)N[C@H](COc1cncnc(Br)c1)C(=O)Nc1ccc2ccccc2c1>>CC(C)(C)OC(=O)  
N[C@H](COc1cncnc(/C=C/c2cncnc2)c1)C(=O)Nc1ccc2ccccc2c1  
6079 C=Cc1ccc(N(C)C)cc1.CCCCN1C(=O)C=C/C=C/c2ccc(I)cc2)C(=O)N(CCCC)C1=O>>CCCN1C(=O)  
)C(=C/C=C/c2ccc(/C=C/c3ccc(N(C)C)cc3)cc2)C(=O)N(CCCC)C1=O  
6080 C=Cc1cncnc1.Cn1cc(C[C@@H](COc2cncnc(Br)c2)NC(=O)OC(C)(C)C)c2ccccc21>>Cn1cc(C[C@@H]  
(COc2cncnc(/C=C/c3cncnc3)c2)NC(=O)OC(C)(C)C)c2ccccc21  
6081 C=CC(=O)OC.COc1cc(Br)c2c3c1O[C@@H]1[C@]34CCN(C)[C@H](C2)[C@]42C=C[C@@]1(OC)[  
C@H]1[C@@H](O)N(c3ccccc3)C(=O)[C@H]12>>COC(=O)/C=C/c1cc(OC)c2c3c1C[C@H]1N(C)C  
C[C@@]34[C@@H](O2)[C@@]2(OC)C=C[C@@]14[C@H]1C(=O)N(c3ccccc3)[C@H](O)[C@@  
6082 C=CC(=O)OCC.O=C(O)c1cccc(Br)c1>>CCOC(=O)/C=C/c1cccc(C(=O)O)c1  
6083 Brc1ccccc1.C=CCN1cc([N+](=O)[O-])cn1>>O=[N+][O-]c1cnn(CC/C=C/c2ccccc2)c1  
6084 Brc1ccnc1.C=CCN(C(=O)OC(C)(C)C)C(=O)OC(C)(C)C>>CC(C)(C)OC(=O)N(C/C=C/c1ccnc1)C(=  
O)OC(C)(C)C  
6085 C=C(C)C(=O)OC.Clc1ccc(Br)cc1>>COC(=O)/C(C)=C/c1ccc(Cl)cc1  
6086 C=CC(=O)OCCCC.CCOC(=O)Nc1ccccc1C1=C(I)CCN1S(=O)(=O)c1ccc(C)cc1>>CCCCOC(=O)/C=  
C/C1=C(c2ccccc2NC(=O)OCC)N(S(=O)(=O)c2ccc(C)cc2)CC1  
6087 C=CC(=O)OCC(CC)CCCC.COc1ccc(Cl)cc1>>CCCC(CC)COC(=O)/C=C/c1ccc(OC)cc1  
6088 C=CC(=O)OCC.Nc1cncnc1Br>>CCOC(=O)/C=C/c1cncnc1N  
6089 C=CCOc1ccccc1.FC(F)(F)c1cccc(Br)c1>>FC(F)(F)c1cccc(/C=C/COc2ccccc2)c1  
6090 C=CCNC(=O)OC(C)(C)C.N#Cc1cccc(Cl)c1>>C=C(CNC(=O)OC(C)(C)C)c1cccc(C#N)c1  
6091 C=CC(N)=O.Cc1cc(Cl)ccc1C(F)(F)F>>Cc1cc(/C=C/C(N)=O)ccc1C(F)(F)F

6092 Br1ccc(/C=C/c2ccncc2)c2nsnc12.C=Cc1ccc2c(c1)Sc1cccc1N2CCCC>>CCCCN1c2ccccc2Sc2cc(/C  
=C/c3ccc(/C=C/c4ccncc4)c4nsnc34)ccc21  
6093 C=Cc1ccncc1.N[C@@H](Cc1c[nH]c2c(Br)cccc12)C(=O)O>>N[C@@H](Cc1c[nH]c2c(/C=C/c3ccncc  
3)cccc12)C(=O)O  
6094 C=CC(=O)N(C)C.CC1(C)c2cc(C(O)(C(F)(F)F)C(F)(F)F)ccc2NC2c3cc(I)ccc3OCC21>>CN(C)C(=O)/  
C=C/c1ccc2c(c1)C1Nc3ccc(C(O)(C(F)(F)F)C(F)(F)F)cc3C(C)(C)C1CO2  
6095 C=CC(=O)OCCCC.O=Cc1ccc(Cl)cc1>>CCCCOC(=O)/C=C/c1ccc(C=O)cc1  
C=CC1=CC=C(/C=C/c2ccc(OC)cc2)C2=CC(C(C)C)=CC=C(C)C2=C1C(=O)OC.O=[N+](O-  
6096 )c1ccc(I)cc1>>COC(=O)C1=C2C(C)=CC=C(C(C)C)C=C2C(/C=C/c2ccc(OC)cc2)=CC=C1/C=C/c1cc  
c([N+](=O)[O-])cc1  
6097 C=CC(=O)OCc1cccc1.C[Si](C)(C)CCOC(=O)c1ccc(I)cc1>>C[Si](C)(C)CCOC(=O)c1ccc(/C=C/C(=O)  
OCc2ccccc2)cc1  
6098 C=CC(=O)OCC.Cc1cc(F)cc(CN(C)C)c1Br>>CCOC(=O)/C=C/c1c(C)cc(F)cc1CN(C)C  
6099 C=CC(=O)OC.CC(C)(C)OC(=O)ON1CCc2c([nH]c3c(Br)cccc23)C1c1ccccc1>>COC(=O)/C=C/c1cccc  
2c3c([nH]c12)C(c1ccccc1)N(OC(=O)OC(C)(C)C)CC3  
6100 C=CC(=O)OC(C)(C)C.Fc1cc(C(F)(F)F)ccc1Br>>CC(C)(C)OC(=O)/C=C/c1ccc(C(F)(F)F)cc1F  
6101 C=CC(=O)OC.[2H]C(=O)c1c(F)cc(Br)cc1F>>[2H]C(=O)c1c(F)cc(/C=C/C(=O)OC)cc1F  
C=CC(=O)OC(C)(C)C.CC(C)(C)O[C@H]1CC[C@H]2C=C(C3=C(Br)CC4(CC3)OCCO4)CC[C@ @]2  
6102 1C>>CC(C)(C)OC(=O)/C=C/C1=C(C2=C[C@ @H]3CC[C@H](OC(C)(C)C)[C@ @]3(C)CC2)CCC2(  
C1)OCCO2  
6103 C=CCOc1ccccc1.Cc1cc(C)cc(I)c1>>Cc1cc(C)cc(/C=C/COc2ccccc2)c1  
6104 Br1cnc2c(c1)OCCCN2.C=CC(=O)OCC>>CCOC(=O)/C=C/c1cnc2c(c1)OCCCN2  
6105 C=Cc1ccncc1.CCCCN(CCCC)c1ccc(/C=C/c2ccc(Br)cc2)cc1>>CCCN(CCCC)c1ccc(/C=C/c2ccc(/C=  
C/c3ccncc3)cc2)cc1  
6106 C=CC(=O)OC.CCc1ccccc1C(=O)c1sc2cc(O)ccc2c1Oe1ccc(Br)cc1>>CCc1ccccc1C(=O)c1sc2cc(O)ccc  
2c1Oe1ccc(/C=C/C(=O)OC)cc1  
6107 C=CC(=O)OC(C)(C)C.CCN(CC)c1ccc2c(CO[Si](C)(C)C(C)(C)C)c(Br)c(=O)oc2c1>>CCN(CC)c1ccc2  
c(CO[Si](C)(C)C(C)(C)C)c(/C=C/C(=O)OC(C)(C)C)c(=O)oc2c1  
6108 C=Cc1ccncc1.CC(C)(C)OC(=O)N[C@H](COc1cnc(Br)c1)Cc1cccc(C#N)c1>>CC(C)(C)OC(=O)N[C  
@H](COc1cnc(/C=C/c2ccncc2)c1)Cc1cccc(C#N)c1  
6109 C=CCCCCCCCC.COC(=O)c1ccc2cc(Br)ccc2c1>>CCCCCCCCC/C=C/c1ccc2cc(C(=O)OC)ccc2c  
6110 C=CC(=O)Oe1ccccc1.O=Cc1ccccc1Br>>O=Cc1ccccc1/C=C/C(=O)Oe1ccccc1  
6111 C=Cc1ccccc1F.CN(C(=O)c1ncc2c(c1I)c1ccccc1n2S(=O)(=O)N(C)C)c1ccccc1>>CN(C(=O)c1ncc2c(c  
1/C=C/c1ccccc1F)c1ccccc1n2S(=O)(=O)N(C)C)c1ccccc1  
6112 Br1cnc2nc(CCC3CCN(Cc4ccccc4)CC3)oc2c1.C=CC(=O)OC>>COC(=O)/C=C/c1cnc2nc(CCC3CCN  
(Cc4ccccc4)CC3)oc2c1  
6113 C=C[Si](C)(C)C.Clc1ccc(I)cc1>>C[Si](C)(C)/C=C/c1ccc(Cl)cc1  
\*CNCCCOCCOCCOCCCN(C(=O)COc1ccc(C(Cc2cc(OC)cc(OC)c2)NC(=O)c2ccc(C=C)cc2)cc1.Cc1cc  
6114 c(I)cc1>>\*CNCCCOCCOCCOCCCN(C(=O)COc1ccc(C(Cc2cc(OC)cc(OC)c2)NC(=O)c2ccc(/C=C/c3c  
cc(C)cc3)cc2)cc1  
6115 C=CCCCCCCCC.COc1ccc(Br)cc1>>CCCCCCCCC/C=C/c1ccc(OC)cc1  
6116 C=CC(=O)OCC.Cc1cc(Br)ccc1O>>CCOC(=O)/C=C/c1ccc(O)c(C)c1  
6117 C=C.COc1ccccc(CCl)c1>>C=CCc1ccccc(OC)c1  
6118 C=CC(O)(CF)CF.FC(F)(F)c1ccc(Cl)c(Br)c1>>OC(/C=C/c1cc(C(F)(F)F)ccc1Cl)(CF)CF  
6119 C=Cc1ccc(N(C)C)cc1.CCOC(=O)C(C)(C)Br>>CCOC(=O)C(C)(C)/C=C/c1ccc(N(C)C)cc1  
6120 C=CCNC1=NCCN1.COc1ccc(I)cc1>>COc1ccc(/C=C/CNC2=NCCN2)cc1  
C=Cc1ccc(OC)c(OC)c1.CC(=O)OC[C@H]1O[C@ @H](Oc2ccc(I)cc2)[C@H](OC(C)=O)[C@ @H]1O  
6121 C(C)=O>>COc1ccc(/C=C/c2ccc(O[C@ @H]3O[C@H](COC(C)=O)[C@ @H](OC(C)=O)[C@H]3OC(  
C)=O)cc2)cc1OC  
C=C[C@ @H](C)[C@ @H]1C/C=C(=O)N[C@H](Cc2ccc(OC)cc2)C(=O)NCCC(=O)N[C@ @H](CC(  
6122 C)C)C(=O)O1.COCOCc1ccc(I)cc1>>COCOCc1ccc(/C=C/[C@ @H](C)[C@ @H]2C/C=C(=O)N[C@  
H](Cc3ccc(OC)cc3)C(=O)NCCC(=O)N[C@ @H](CC(C)C)C(=O)O2)cc1  
6123 C=Cc1ccc2ccccc2c1.COC(=O)c1ccccc1>>COC(=O)c1ccccc1/C=C/c1ccc2ccccc2c1  
6124 C=CCCCCCCCC.FC(F)(F)c1cc(Br)cc(C(F)(F)F)c1>>CCCCCCCCC/C=C/c1cc(C(F)(F)F)cc(C(F)(F)F)c  
6125 C=Cc1ccccc(C=O)c1.COc1c(CN(C(=O)C2CC2)c2ccccc(Br)c2)ccc2c1OC(C)(C)C=C2>>COc1c(CN(C(=  
O)C2CC2)c2ccccc(/C=C/c3ccccc(C=O)c3)c2)ccc2c1OC(C)(C)C=C2  
6126 C=CCCN1C(=O)c2ccccc2C1=O.FC(F)(F)c1ccc(I)cc1>>O=C1c2ccccc2C(=O)N1CC/C=C/c1ccc(C(F)(  
F)F)cc1  
6127 C=Cc1ccncc1.CCCCOc1ccc(Br)c(F)c1>>CCCCOe1ccc(/C=C/c2ccncc2)c(F)c1  
6128 C=Cc1ccccc1N.CN(C(=O)c1ccccc1)c1ccc2c(c1)[nH]c(=NC(=O)c1ccc(Br)s1)n2CCC(N)=O>>CN(C(=  
O)c1ccccc1)c1ccc2c(c1)[nH]c(=NC(=O)c1ccc(/C=C/c3ccccc3N)s1)n2CCC(N)=O

6129 C=COCCCC.COCN(c1cccc(Br)c1F)S(=O)(=O)c1cc(F)ccc1F>>C=C(OCCCC)c1cccc(N(COC)S(=O)(=O)c2cc(F)ccc2F)c1F  
6130 C=Cc1cccc1.CC(=O)Oc1ccc(I)cc1>>CC(=O)Oc1ccc(/C=C/c2cccc2)cc1  
6131 C=CC#N.Fc1c(Cl)cccc1Br>>N#C/C=C/c1cccc(Cl)c1F  
6132 C=Cc1ccc(C(F)(F)F)cc1.COC(=O)c1cccc1I>>COC(=O)c1cccc1/C=C/c1ccc(C(F)(F)F)cc1  
6133 C=CN1CCCCC1=O.COc1ccc2c(c1)CCC=C2OS(=O)(=O)C(F)(F)F>>C=C(C1=CCCc2cc(OC)ccc21)N1CCCCC1=O  
6134 C=CC(=O)OC(C)(C)C.Cn1c(=O)c2c(nc(Br)n2C)n(C)c1=O>>Cn1c(=O)c2c(nc(/C=C/C(=O)OC(C)(C)C)n2C)n(C)c1=O  
6135 C=CC(=O)OCC.Cc1ccc(-c2cccc2)c(I)c1>>CCOC(=O)/C=C/c1cc(C)ccc1-c1cccc1  
6136 C=CC(=O)OC.CC1(C)Cc2c(Br)c(-c3ccccc3)nn2C1>>COC(=O)/C=C/c1c(-C=Cc1ccc(OC)cc1.CCCCOC(=O)/C=C/c1ccc(Cl)cc1>>CCCCOC(=O)/C=C/c1ccc(/C=C/c2ccc(OC)cc2)cc1  
6137 C=Cc1cccc1C(=O)OC.COC(=O)c1cc2cc(Br)ccc2cc1OC(C)=O>>COC(=O)c1cccc1/C=C/c1ccc2cc(OC(C)=O)c(C(=O)OC)cc2c1  
6138 C=CC(=O)OC(C)(C)C.CCN1C(=O)c2ccc(Br)cc2C1=O>>CCN1C(=O)c2ccc(/C=C/C(=O)OC(C)(C)C)cc2C1=O  
6139 C=Cc1ccc(N(CCCC)CCCC)cc1.CCCCCCCCCC1(CCCCCCCCCC)c2cc(Br)ccc2-c2ccc(C=O)cc21>>CCCCCCCCCCCC1(CCCCCCCCCC)c2cc(C=O)ccc2-c2ccc(/C=C/c3ccc(N(CCCC)CCCC)cc3)cc21  
6140 C=CC(=O)OCC.CCn1c(-c2ccc(Br)cc2)nc2cccc21>>CCOC(=O)/C=C/c1ccc(-c2nc3ccccc3n2CC)cc1  
6141 C=Cc1ccccc1.Cn1cc(C(CNC(=O)OC(C)(C)C)c2encc(Br)c2)c2cccc21>>Cn1cc(C(CNC(=O)OC(C)(C)C)c2encc(/C=C/c3ccccc3)c2)c2cccc21  
6142 C=Cc1cccc1.O=C(Oc1cccc1)c1ccc(Br)cc1>>O=C(Oc1cccc1)c1ccc(/C=C/c2cccc2)cc1  
6143 C=CC(=O)OCCO.O=C1Nc2ccc(Br)cc2C1=O>>O=C(/C=C/c1ccc2c(c1)C(=O)C(=O)N2)OCCO  
6144 C=CC(=O)OC.Clc1noc(-c2cccc2)c1I>>COC(=O)/C=C/c1c(Cl)noc1-c1cccc1  
6145 C=CC[C@H](C)N(C)C(=O)OC(C)(C)C.CC(C)Oc1cncc(Br)c1>>CC(C)Oc1cncc(/C=C/C[C@H](C)N(C)C(=O)OC(C)(C)C)c1  
6146 C=Cc1cccc1.[2H]C(=O)c1cccc1Br>>[2H]C(=O)c1cccc1/C=C/c1cccc1  
6147 C=Cc1ccc(C(F)(F)F)cc1.Clc1cccc(/C=C/c2cccc2)c1>>FC(F)(F)c1ccc(/C=C/c2cccc(/C=C/c3ccccc3)c2)cc1  
6148 C=Cc1cccc1.CCOC(=O)c1ccc(Br)cc1C>>CCOC(=O)c1ccc(/C=C/c2cccc2)cc1C  
6149 C=CC(=O)OCCCC.N#Cc1ccc(Cl)cc1>>CCCCOC(=O)/C=C/c1ccc(C#N)cc1  
6150 Brclcncc1.C=CC(=O)OC(C)(C)C>>CC(C)(C)OC(=O)/C=C/c1cncc1  
6151 Brclcccc1I.C=C1C(=O)O[C@H]2[C@H]1CC/C(C)=C/CC[C@@]1(C)O[C@@H]21>>C/C1=C\CC[C@@]2(C)O[C@H]2[C@H]2OC(=O)/C(=C/c3ccccc3Br)[C@@H]2CC1  
6152 C=CC(=O)OC.Cc1cc(C)n2nc(C)c(I)c2n1>>COC(=O)/C=C/c1c(C)nn2c(C)cc(C)nc12  
6153 C=Cc1ccc2cccc2c1.CCOC(=O)C(F)(F)Br>>CCOC(=O)C(F)(F)/C=C/c1ccc2cccc2c1  
6154 C=CN1CCCCC1=O.O=S(=O)(Oc1cccc1Br)C(F)(F)F>>C=C(c1cccc1Br)N1CCCCC1=O  
6155 C=Cc1ccc(C(=O)O[C@@H]2CC[C@@]3(C)C(CC[C@@H]4[C@@H]3CC[C@@]3(C)[C@H]4CC[C@@H]3[C@H](C)CC(C)C)C2)cc1.CCOC(=O)C(F)Br>>CCOC(=O)C(F)/C=C/c1ccc(C(=O)O[C@@H]2CC[C@@]3(C)C(CC[C@@H]4[C@@H]3CC[C@@]3(C)[C@H]4CC[C@@H]3[C@H](C)CC(C)C)C2)cc1  
6156 C=CC(=O)OCCCC.COc1cccc1Br>>CCCCOC(=O)/C=C/c1cccc1OC  
6157 C=CS(N)(=O)=O.Ic1cccc1>>NS(=O)(=O)/C=C/c1cccc1  
6158 C=CCO.COc1ccc2ncc(F)c(I)c2n1>>C=C(CO)c1c(F)nc2ccc(OC)nc12  
6159 C=CC(=O)OCC.COc1ccc(Br)cc1I>>CCOC(=O)/C=C/c1cc(Br)ccc1OC  
6160 C=Cc1ccc(N(c2cccc2)c2cccc2)cc1.CCOC(=O)C(F)(F)Br>>CCOC(=O)C(F)(F)/C=C/c1ccc(N(c2cccc2)c2cccc2)cc1  
6161 C=CCCO.CC(C)(C)c1ccc(OS(=O)(=O)C(F)(F)F)cc1>>C=C(CCO)c1ccc(C(C)(C)C)cc1  
6162 C=C[C@H]1O[C@H](OC)[C@H](OCc2cccc2)[C@@H](OCc2cccc2)[C@@H]1OCc1ccc2cccc2c1.O=c1cc(-c2cccc2)oc2ccc(I)cc12>>CO[C@H]1O[C@H](/C=C/c2ccc3oc(-c4ccccc4)cc(=O)c3c2)[C@@H](OCc2ccc3ccccc3c2)[C@H](OCc2cccc2)[C@H]1OCc1cccc1  
6163 Brclcccc(N2CCCC2)n1.C=Cc1cccc1>>C=C(/C=C/c1ccc(N2CCCC2)n1)\c1cccc1  
6164 C=C(C)C.CC(=O)/C=C/Cl>>CC(=O)/C=C/C=C(C)C  
6165 C=Cc1nnn(C)n1.Fc1cccc1I>>Cn1nnc(/C=C/c2cccc2F)n1  
6166 Brclcccc2cccc12.C=CC[C@H](NC(=O)OC(C)(C)C)C(=O)OC>>COC(=O)[C@H](C/C=C/c1ccc2ccc12)NC(=O)OC(C)(C)C  
6167



[illegible]

6202 C=CC(OCC)OCC.Cc1ncc(Br)cc1C#N>>CCOC(/C=C/c1enc(C)c(C#N)c1)OCC  
6203 C=CC(N)=O.Clc1nccc2occc12>>NC(=O)/C=C/c1nccc2occc12  
6204 C=CC(=O)OC.O=c1oc2cc(Br)cnc2n1CCc1cccc1>>COC(=O)/C=C/c1enc2c(c1)oc(=O)n2CCc1cccc1  
6205 C=C.O=Cc1ccc(Br)cc1>>C=Cc1ccc(C=O)cc1  
6206 C=Cc1ccc(-c2ccccc2)cc1.O=c1oc2ccccc2cc1Br>>O=c1oc2ccccc2cc1/C=C/c1ccc(-c2ccccc2)cc1  
6207 C=CC#N.Nc1ccc(I)cc1>>N#C/C=C/c1ccc(N)cc1  
6208 Br1cccc1.C=Cc1ccc(CCl)cc1>>ClC1ccc(/C=C/c2ccccc2)cc1  
6209 C=CC(=O)N(C)C.CCOC(=O)c1ccc(Br)cc1>>CCOC(=O)c1ccc(/C=C/C(=O)N(C)C)cc1  
6210 C=CC(=O)OC.CCCCCc1ccc(N2CCc3cc(OC)ccc3C2(C)c2ccc(Br)cc2)cc1>>CCCCCc1ccc(N2CCc3cc(OC)ccc3C2(C)c2ccc(/C=C/C(=O)OC)cc2)cc1  
6211 C=CC(=O)OC.CC1(C)CC(=C(c2ccc3c(cnn3C3CCCCO3)c2)c2c(F)cc(Br)cc2F)CC(C)(C)C1>>COC(=O)/C=C/c1cc(F)c(C(=C2CC(C)(C)CC(C)(C)C2)c2ccc3c(cnn3C3CCCCO3)c2)c(F)c1  
6212 C=CC(O)c1cc(OC)c(OC)cc1Br.Ic1cccc1>>COc1cc(Br)c(C(O)/C=C/c2ccccc2)cc1OC  
6213 C=Cc1ccc(OC)cc1.COc1ccc2c(c1)cc(C#N)c1ccc(Br)cc12>>COc1ccc(/C=C/c2ccc3c(C#N)cc4cc(OC)c4cc3c2)cc1  
6214 C=CC(=O)OC.CC[C@@H]1C[C@H](N(Cc2cc(C(F)(F)F)cc(C(F)(F)F)c2)c2ncc(Br)cn2)CN1C(=O)OC(C)(C)C>>CC[C@@H]1C[C@H](N(Cc2cc(C(F)(F)F)cc(C(F)(F)F)c2)c2ncc(/C=C/C(=O)OC)cn2)CN1C(=O)OC(C)(C)C  
6215 C=CC(=O)OC.CCCCN1enc2c(NCc3cccc(Br)c3)nc(N3CCOCC3)nc21>>CCCCN1enc2c(NCc3cccc(/C=C/C(=O)OC)c3)nc(N3CCOCC3)nc21  
6216 C=C[C@@H](C)[C@@H]1C/C=C(=O)N[C@H](Cc2ccc(OC)c(Cl)c2)C(=O)NCC(C)(C)C(=O)O[C@@H](CC(C)C)C(=O)O1.Ic1cccc1>>COc1ccc(C[C@H]2NC(=O)/C=C/C[C@@H]([C@H](C)/C=C/c3ccccc3)OC(=O)[C@H](CC(C)C)OC(=O)C(C)(C)CNC2=O)cc1Cl  
6217 C=C(OC)C1=C(Br)C(O[Si](C)(C)C(C)(C)CCCC1.C=CC(=O)OC(C)(C)C>>C=C(OC)C1=C(/C=C/C(=O)OC(C)(C)C)C(O[Si](C)(C)C(C)(C)C)CCCC1  
6218 C=C(Br)CC.C=CC(=O)CCCCC>>C=C/C=C/C(=O)CCCCC)CC  
6219 C=CC(=O)OC(C)(C)C.CCOC(=O)c1cc(-c2ccccc2)n(-c2ccc(I)cc2)c1C(=O)c1cccc1>>CCOC(=O)c1cc(-c2ccccc2)n(-c2ccc(I)cc2)c1C(=O)c1cccc1  
6220 C=CCOc1cccc1C.CC(=O)c1ccc(I)cc1>>CC(=O)c1ccc(/C=C/COc2ccccc2C)cc1  
6221 Br1esc2ccccc12.C=CP(=O)(OCC)OCC>>CCOP(=O)(/C=C/c1esc2ccccc12)OCC  
6222 Br1cccc1.C=C1C(=O)O[C@@H]2C[C@@]3(C)CCCC(=C)[C@@H]3C[C@H]12>>C=C1CCC[C@@]2(C)C[C@H]3OC(=O)/C(=C/c4ccccc4)[C@H]3C[C@@H]12  
6223 C=CC(C)(O)CCC=C(C)C.N#Cc1ccc(O)c(Br)c1>>CC(C)=CCCC(C)(O)/C=C/c1cc(C#N)ccc1O  
6224 C=CCN.O=c1[nH]c(=O)n([C@@H]2O[C@H](CO)[C@@H](O)[C@H]2O)cc1I>>NC/C=C/c1cn([C@@H]2O[C@H](CO)[C@@H](O)[C@H]2O)c(=O)[nH]c1=O  
6225 C=Cc1ccc(F)cc1.O=Cc1cccc1S(=O)(=O)c1ccc(Br)cc1>>O=Cc1cccc1S(=O)(=O)c1ccc(/C=C/c2ccc(F)cc2)cc1  
6226 Br1cccc(N(c2ccccc2)c2ccccc2)n1.C=Cc1cccc(Cl)c1>>Clc1cccc(/C=C/c2cccc(N(c3ccccc3)c3ccccc3)n2)c1  
6227 C=CC(C)(O)CC/C=C(\C)CC/C=C(\C)CCC=C(C)C.Oc1ccc(OCc2ccccc2)cc1Br>>CC(C)=CCC/C(C)=C/CC/C(C)=C/CCC(C)(O)/C=C/c1cc(OCc2ccccc2)ccc1O  
6228 C=CC(=O)OCCCC.CN(C)c1cccc(Cl)c1>>CCCCOC(=O)/C=C/c1cccc(N(C)C)c1  
6229 C=Cc1cncnc1.Nc1nccc(Br)c1>>Nc1cncnc(/C=C/c2cncnc2)c1  
6230 C=Cc1cc([N+](=O)[O-])ccc1OCOCC[Si](C)(C)C.COC(=O)c1cccc(I)c1>>COC(=O)c1cccc(/C=C/c2cc([N+](=O)[O-])ccc2OCOCC[Si](C)(C)C)c1  
6231 C=CC(=O)OC(C)(C)C.COc1cc2ccccc2c(Br)c1OC>>COc1cc2ccccc2c(/C=C/C(=O)OC(C)(C)C)c1OC  
6232 C=CCOc1cccc(C)c1.COc1ccc(I)cc1>>COc1ccc(/C=C/COc2cccc(C)c2)cc1  
6233 C=CC(OC)OC.COC(=O)c1ccc(I)cc1>>COC(=O)c1ccc(/C=C/C(OC)OC)cc1  
6234 C=C[Si](OCC)(OCC)OCC.CCCCCCCCoc1ccc2cc(Br)ccc2c1>>CCCCCCCCOc1ccc2cc(/C=C/[Si](OCC)(OCC)OCC)ccc2c1  
6235 C=CC(=O)OCC.CC(C)(C)C(=O)Nc1cccc1Br>>CCOC(=O)/C=C/c1cccc1NC(=O)C(C)(C)C  
6236 C=CC[C@H](NC(=O)OC(C)(C)C)C(=O)OC.Ic1cccc1>>COC(=O)[C@H](C/C=C/c1cccc1)NC(=O)OC(C)(C)C  
6237 C=CC(=O)O.Ic1cccc1>>O=C(O)/C=C/c1cccc1  
6238 C=C[C@@H](CCCC)OC1CCCCO1.COC(=O)CCCC1=C(I)CCC1=O>>CCCC[C@H](/C=C/C1=C(C)CCCC(=O)OC)C(=O)CC1)OC1CCCCO1  
6239 C=Cc1cccc1.O=[N+](O-)]c1cccc1Cl>>O=[N+](O-)]c1cccc1/C=C/c1cccc1  
6240 C=CC#N.O=Cc1ccc(Br)c1>>N#C/C=C/c1ccc(C=O)c1  
6241 C=CC(=O)Nc1cccc1NC(=O)OC(C)(C)C.CCOC(=O)[C@H]1CN(CCF)C[C@@H]1c1ccc(Br)cc1>>COC(=O)[C@H]1CN(CCF)C[C@@H]1c1ccc(/C=C/C(=O)Nc2ccccc2NC(=O)OC(C)(C)C)cc1

6242 C=Cc1cccc(Cl)c1.Oc1cccc1I>>Oc1cccc1/C=C/c1cccc(Cl)c1  
6243 Br1ccc(-c2cccc2)c2cccc12.C=CC(=O)OCC>>CCOC(=O)/C=C/c1ccc(-c2cccc2)c2cccc12  
6244 C=Cc1ccc2cccc2c1.FC(F)(F)C(Br)CCc1cccc1>>FC(F)(F)C(/C=C/c1ccc2cccc2c1)CCc1cccc1  
6245 C=CC(=O)OC.CC[C@]12C=CCN3CC[C@@]4(c5cc(Br)c(OC)cc5N(C)[C@H]4[C@@](O)(C(=O)OC  
6246 )[C@@H]1OC(C)=O)[C@@H]32>>CC[C@]12C=CCN3CC[C@@]4(c5cc(/C=C/C(=O)OC)c(OC)cc5  
6247 N(C)[C@H]4[C@@](O)(C(=O)OC)[C@@H]1OC(C)=O)[C@@H]32  
6248 C=CCS(=O)(=O)c1cccc1.CCOC(=O)/C=C/c1cc(Br)cc(Cc2ccnc2)c1>>CCOC(=O)/C=C/c1cc(/C=C/  
6249 CS(=O)(=O)c2cccc2)cc(Cc2ccnc2)c1  
6250 Br1cnenc1.C=C>>C=Cc1cnenc1  
6251 C=CC(=O)OC(C)(C)C.CC(=O)c1ccc(Cl)cc1>>CC(=O)c1ccc(/C=C/C(=O)OC(C)(C)C)cc1  
6252 Br1cc2cccc3ccc4cccc1c4c32.C=CC(=O)OCC>>CCOC(=O)/C=C/c1cc2cccc3ccc4cccc1c4c32  
6253 C=CC(C)=O.CC(C)(C)OC(=O)n1cc(I)c([Si](C)(C)C)c1>>CC(=O)/C=C/c1cn(C(=O)OC(C)(C)C)cc1[Si  
6254 ](C)(C)C  
6255 C=CC=C(C)C.Ic1cccc1>>CC(C)=C/C=C/c1cccc1  
6256 C=C[Si](C)(C)C.O=c1ccc2ccc(O)c(I)c2o1>>C[Si](C)(C)/C=C/c1c(O)ccc2ccc(=O)oc12  
6257 C=C.Cc1ccc(C(N)=O)c(Br)c1>>C=Cc1cc(C)ccc1C(N)=O  
6258 C=CCC(C(=O)OC)C(=O)OC.CC(C)(C)Oc1ccc(Br)cc1>>COC(=O)C(C/C=C/c1ccc(OC(C)(C)C)cc1)C(  
6259 =O)OC  
6260 Br1cccc1.C=CS(=O)(=O)N1CCC2(CC1)N=C(C1CCCCC1)NC2=O>>O=C1NC(C2CCCCC2)=NC12  
6261 CCN(S(=O)(=O)/C=C/c1cccc1)CC2  
6262 C=CC(=O)OC.CC(O)(CS1cccc2c(Br)cccc12)C(=O)Nc1ccc(C#N)c(C(F)(F)F)c1>>COC(=O)/C=C/c1c  
6263 ccc2c(SCC(C)(O)C(=O)Nc3ccc(C#N)c(C(F)(F)F)c3)cccc12  
6264 C=CC(=O)OCCOc1cccc1.Ic1cccc1>>O=C(/C=C/c1cccc1)OCCOc1cccc1  
6265 Br1ccenc1.C=CC(=O)OC(C)(C)C>>CC(C)(C)OC(=O)/C=C/c1ccenc1  
6266 C=CCC(=O)OC(C)(C)C.Nc1ccc(Br)cc1-c1cccc1>>CC(C)(C)OC(=O)C/C=C/c1ccc(N)c(-c2cccc2)c1  
6267 C=CC(=O)OC(C)(C)C.Clc1ccc(Sc2cn(C3CC3)nc2-c2ccc(Br)cc2)cc1>>CC(C)(C)OC(=O)/C=C/c1ccc(-  
6268 c2nn(C3CC3)cc2Sc2ccc(Cl)cc2)cc1  
6269 C=Cc1cc(OC)c(OC)c(OC)c1.CC(C)(C)C(=O)Nc1nc(NC(=O)C(C)(C)C)c2cc(Br)enc2n1>>COc1cc(/C=  
6270 C/c2enc3nc(NC(=O)C(C)(C)C)nc(NC(=O)C(C)(C)C)c3c2)cc(OC)c1OC  
6271 C=CCN(C)C)c1ccc2c(OS(=O)(=O)C(F)(F)F)cc(=O)[nH]c2c1.C=COCCCC>>C=CCN(CC=C)c1ccc2  
6272 c(C(=C)OCCCC)cc(=O)[nH]c2c1  
6273 C=C[C@H]1O[C@H]2OC(C)(C)O[C@H]2[C@H]1O.O=C1CCOc2cc(Br)ccc21>>CC1(C)O[C@  
6274 H]2O[C@H]1(/C=C/c3ccc4c(c3)OCCC4=O)[C@H]1(O)[C@H]2O1  
6275 C=CC(CC)n1nnc2cccc21.Cc1ccc(I)cc1>>CCC(/C=C/c1ccc(C)cc1)n1nnc2cccc21  
6276 Br1cncc(OCc2cccc2)c1.C=CC(=O)OCCCC>>CCCCOC(=O)/C=C/c1cncc(OCc2cccc2)c1  
6277 C=C[C@@]1(C)COC(C)(C)O1.CCOCOc1c(C)c(C)c(OCOC)c(I)c1>>CCOCOc1c(C)c(C)c(OCOC  
6278 C)c(/C=C/C[C@@]2(C)COC(C)(C)O2)c1C  
6279 C=CC(=O)OCCO.C[C@]12C[C@]34C=C(Sc5ccc(I)cc5)C(=O)[C@@](C)(CCC(=O)Nc5c(O)ccc(C(  
6280 =O)O)c5O)[C@H]3[C@H](C[C@H]1C4)O2>>C[C@]12C[C@]34C=C(Sc5ccc(/C=C/C(=O)O  
6281 CCO)cc5)C(=O)[C@@](C)(CCC(=O)Nc5c(O)ccc(C(=O)O)c5O)[C@H]3[C@H](C[C@H]1C4)O2  
6282 C=CC(=O)OCCCC.COc1ccc(Br)c(N(CC2COC(=O)O2)C(=O)C(C)(C)C)n1>>CCCCOC(=O)/C=C/c1c  
6283 cc(OC)nc1N(CC1COC(=O)O1)C(=O)C(C)(C)C  
6284 C=CC(=O)OC.FC(F)(F)CCCOc1ccc(C(F)(F)O)c2ccc(Br)cc2)cc1>>COC(=O)/C=C/c1ccc(OC(F)(F)O)c2  
6285 cc(OC(C)(F)(F)F)cc2)cc1  
6286 C=C(F)C(C)=O.Ic1cccc2cccc12>>CC(=O)/C(F)=C/c1cccc2cccc12  
6287 C=CCn1c(-  
6288 c2ccc(OC)cc2OC)nc2cccc2c1=O.O=C(CN1C(=O)COc2cccc21)c1ccc(Br)cc1>>COc1ccc(-  
6289 C=CC(=O)OCCCC.CCCc1ccc(I)cc1>>CCCCOC(=O)/C=C/c1ccc(CCC)cc1  
6290 C=CC(=O)OC.CCN(CC)c1ccc2cc(Br)ccc2c1>>CCN(CC)c1ccc2cc(/C=C/C(=O)OC)ccc2c1  
6291 C=Cc1cccc(C)c1.Cc1ccc(Br)cc1>>Cc1ccc(/C=C/c2cccc(C)c2)cc1  
6292 C=Cc1cccc1.Cn1c(-c2ccc([N+](=O)[O-])cc2)c(I)c(=O)c2cccc21>>Cn1c(-c2ccc([N+](=O)[O-  
6293 ])cc2)c(/C=C/c2cccc2)c(=O)c2cccc21  
6294 C=CC(=O)OCC.COc1cc(O)ccc1Br>>CCOC(=O)/C=C/c1ccc(O)cc1OC  
6295 C=CC(C)=O.Cc1ccc2[nH]c3c(c2c1)CC(=O)Nc1ccc(I)cc1-3>>CC(=O)/C=C/c1ccc2c(c1)-  
6296 c1[nH]c3ccc(C)cc3c1CC(=O)N2  
6297 C=CC(C)=O.COc1c(Br)cc(OC)c2c(OC)cccc12>>COc1c(/C=C/C(C)=O)cc(OC)c2c(OC)cccc12  
6298 C=CC(=O)OC.N#Cc1ccc(N)c(Br)c1>>COC(=O)/C=C/c1cc(C#N)ccc1N  
6299 C=CC#N.COC(=O)c1sc2cccc2c1Br>>COC(=O)c1sc2cccc2c1/C=C/C#N  
6300 Br1ccc2enccc2c1.C=Cc1cccc1>>C(C=C/c1ccc2enccc2c1)c1cccc1  
6301 C=CC(=O)OC.CC1(c2cc(-c3ccc(Br)cc3)ccc2O)CCCCC1>>COC(=O)/C=C/c1ccc(-  
6302 c2ccc(O)c(C3(C)CCCCC3)c2)cc1

6283 C=Cc1ccc(OC)c(OC)c1.COc1cc(Br)c(CCNC(C)=O)cc1OC>>COc1ccc(/C=C/c2cc(OC)c(OC)cc2CCN  
C(C)=O)cc1OC

6284 C=CC[C@H]1C(=O)N(c2ccccc2)[C@@H]1c1ccc(OC)cc1.COCOc1ccc(Br)cc1>>COCOc1ccc(/C=C/C  
[C@H]2C(=O)N(c3ccccc3)[C@@H]2c2ccc(OC)cc2)cc1

6285 C=CC(C)=O.C=CCc1cccc2c1c(Br)cn2S(=O)(=O)c1ccc(C)cc1>>C=CCc1cccc2c1c(/C=C/C(C)=O)cn2  
S(=O)(=O)c1ccc(C)cc1

6286 C=CC(C)=O.CCCCCCCCCCCCCCc1ccc(I)c(O)c1>>CCCCCCCCCCCCCCCCc1ccc(/C=C/C(C)=O)c  
(O)c1

6287 C=CC(=O)OCC.O=[N+](O-)[c1cccc(O)c1Br>>CCOC(=O)/C=C/c1c(O)cccc1[N+](=O)[O-]  
C=C/C=C/C(=O)N(CCCC)CCCC.CC(=O)c1ccc(Br)cc1>>CCCCN(CCCC)C(=O)/C=C/C=C/c1ccc(C(C  
)=O)cc1

6288 C=Cc1cnc(C#N)c1Nc1ccc2[nH]ccc2c1C.COc1cc(Br)ccc1CN1CCN(C)CC1>>COc1cc(/C=C/c2cnc(C  
C#N)c2Nc2ccc3[nH]ccc3c2C)ccc1CN1CCN(C)CC1

6289 C=CC(N)=O.CC1CC(C=O)=C(Br)c2ccccc21>>CC1CC(C=O)=C(/C=C/C(N)=O)c2ccccc21  
C=CCNC(=O)OC(C)(C)C.O=C(OC[C@H]1O[C@@H](n2cc(I)c(=O)[nH]c2=O)C[C@H]1OC(=O)c  
1cccc1)c1cccc1>>CC(C)(C)OC(=O)NC/C=C/c1cn([C@H]2C[C@H](OC(=O)c3ccccc3)[C@@H](C  
OC(=O)c3ccccc3)O2)c(=O)[nH]c1=O

6290 C=Cc1ccc(OC(C)=O)cc1.COc1c(Br)ccc2c(OC)c(/C=C/c3ccccc3)ccc12>>COc1c(/C=C/c2ccccc2)ccc2  
c(OC)c(/C=C/c3ccc(OC(C)=O)cc3)ccc12

6291 C=Cc1cc(OC)ccc1OC.CCCCCCCCc1ccc2c(C)c(Br)c(=O)oc2c1>>CCCCCCCCCoc1ccc2c(C)c(/C=C/  
c3cc(OC)ccc3OC)c(=O)oc2c1

6292 C=Cc1cccc1C.Cc1ccc(N)c1Br>>Cc1cccc1/C=C/c1c(C)cccc1N

6293 C=CS(=O)(=O)Oc1cccc1.N#Cc1ccc(Br)cc1>>N#Cc1ccc(/C=C/S(=O)(=O)Oc2ccccc2)cc1

6294 BrC1cccs1.C=CS(C)(=O)=O>>CS(=O)(=O)/C=C/c1cccs1  
C=CCO[C@H]1CC(=O)O[C@H](C)C/C=C/C=C/[C@H](O[Si](C)(C)C(C)(C)C)[C@H](C)C[C@H]  
(CC(OC)OC)[C@H](O[C@H]2O[C@H](C)[C@H](O[C@H]3C[C@@](C)(O)[C@@H](OC(=O)  
CC)[C@H](C)O3)[C@H](N(C)C)[C@H]2OC(C)=O)[C@H]1OC.FC(F)(F)c1ccc(I)cc1>>CCC(=O)O[  
C@H]1[C@H](C)O[C@H](O[C@H]2[C@H](N(C)C)[C@@H](OC(C)=O)[C@H](O[C@@H]3[C@  
@H](OC)[C@H](OC/C=C/c4ccc(C(F)(F)F)cc4)CC(=O)O[C@H](C)C/C=C/C=C/[C@H](O[Si](C)(C)  
C(C)(C)C)[C@H](C)C[C@H]1C[C@@H]3CC(OC)OC)O[C@@H]2C[C@@H]1(C)O  
C=CC(=O)CCC.CCC1=C[C@@H]2CN(C1)Cc1c([nH]c3ccc(I)cc13)[C@@](C(=O)OC)(c1cc3c(cc1O  
C)N(C)[C@H]1[C@@](O)(C(=O)OC)[C@H](OC(C)=O)[C@]4(CC)C=CCN5CC[C@]31[C@@H]54)  
C2>>CCCC(=O)/C=C/c1ccc2[nH]c3c(c2c1)CN1CC(CC)=C[C@H](C1)C[C@]3(C(=O)OC)c1cc2c(cc1  
OC)N(C)[C@H]1[C@@](O)(C(=O)OC)[C@H](OC(C)=O)[C@]3(CC)C=CCN4CC[C@]211[C@@H]4  
C=COCCCC.Fc1ccc(Cl)cc1>>C=C(OCCCC)c1ccc(F)cc1

6295 C=CC(=O)OC.CCOC(=O)c1cccc1I>>CCOC(=O)c1cccc1/C=C/C(=O)OC

6296 C=CC(=O)N(C)OC.COc1ccc(I)cc1>>COc1ccc(/C=C/C(=O)N(C)OC)cc1

6297 C=Cc1cnc1.Nc1ccc(Br)cc1>>Nc1ccc(/C=C/c2ccccc2)cc1

6298 C=CC(=O)OC(C)(C)C.CC(=O)c1cccc1I>>CC(=O)c1cccc1/C=C/C(=O)OC(C)(C)C  
C=C1C(=O)O[C@H]2[C@H]1C[C@@H](O)/C(C)=C/CC[C@@]1(C)O[C@@H]21.Oc1ccc(I)cc1>>C  
/C1=C/CC[C@@]2(C)O[C@H]2[C@H]2OC(=O)/C(=C/c3ccc(O)cc3)[C@@H]2C[C@H]1O  
C=CC(=O)OC.Cn1cnc2c(NCc3ccccc(Br)c3)nc(N3CCOCC3)nc21>>COC(=O)/C=C/c1cccc(CNc2nc(N3  
CCOCC3)nc3c2ncn3C)c1

6299 C=Cc1cccc1.Fc1ccc(Br)c1>>Fc1cccc(/C=C/c2ccccc2)c1

6300 C=Cn1nnc(CC)n1.Ic1cccc1>>CCc1nnn(/C=C/c2ccccc2)n1

6301 C=CC(=O)OC.O=C1c2ccc(OS(=O)(=O)C(F)(F)F)cc2C(=O)N1c1cccc1>>COC(=O)/C=C/c1ccc2c(c1)  
C(=O)N(c1cccc1)C2=O

6302 C=C.COC(=O)c1ccc(NC(C)=O)c(Br)c1>>C=Cc1cc(C(=O)OC)ccc1NC(C)=O

6303 C=Cc1ccc(OC)cc1.CCCCC(Br)C(F)(F)F>>CCCCC(/C=C/c1ccc(OC)cc1)C(F)(F)F  
C=Cc1ccc(/C=C/c2ccc(C(C)(C)C)cc2)cc1.CCCCCOCc1ccc2cc(Br)ccc2c1>>CCCCCOCc1ccc2cc(/C=  
C/c3ccc(/C=C/c4ccc(C(C)(C)C)cc4)cc3)ccc2c1

6304 C=CC(=O)OC(C)(C)C.Nc1ncc(Cl)cc1Br>>CC(C)(C)OC(=O)/C=C/c1cc(Cl)ccc1N

6305 C=Cc1ccc2c(c1)OC(F)(F)O2.CC(C)(C)Br>>CC(C)(C)/C=C/c1ccc2c(c1)OC(F)(F)O2

6306 C=CC(C)=O.COc1cc(Br)c(OC)c2ccccc12>>COc1cc(/C=C/C(C)=O)c(OC)c2ccccc12  
C=CCCN1C(=O)c2ccccc2C1=O.Cc1ccc2ncc(Br)cc2c1>>Cc1ccc2ncc(/C=C/CCN3C(=O)c4ccccc4C3=  
O)cc2c1

6307 C=CCNC(=O)OC(C)(C)C.N#Cc1ccc(Br)cc1>>C=C(CNC(=O)OC(C)(C)C)c1ccc(C#N)cc1

6308 BrC1cccc(-c2ccccc2)n1.C=CC(=O)OCc1cccc1>>O=C(/C=C/c1cccc(-c2ccccc2)n1)OCc1cccc1  
C=CC(=O)OC(C)(C)C.COc1cccc(S(=O)(=O)n2ccc3cc(Br)enc32)c1>>COc1cccc(S(=O)(=O)n2ccc3cc(  
/C=C/C(=O)OC(C)(C)C)enc32)c1

6309 C=COCCO.O=C(c1cccc1)c1ccc(I)cc1>>C=C(OCCO)c1ccc(C(=O)c2ccccc2)cc1

6320 C=C1C(=O)O[C@@H]2C3=C(C)C(=O)C=C[C@]3(C)CC[C@@H]12.COC(=O)c1cccc(I)c1>>COC(=O)c1cccc(/C=C2/C(=O)O[C@@H]3C4=C(C)C(=O)C=C[C@]4(C)CC[C@@H]23)c1  
6321 C=CC(C)=O.CC1=C(OS(=O)(=O)C(F)(F)F)C(C)([13CH3])CCC1>>CC(=O)/C=C/C1=C(C)CCCC1(C)[13CH3]  
6322 Br1ccccn1.C=CCO>>C=C(CO)c1ccccn1  
6323 C=CC#N.CN(C)S(=O)(=O)n1cc(I)c([Si](C)(C)C)c1>>CN(C)S(=O)(=O)n1cc(/C=C/C#N)c([Si](C)(C)C)C=CC(=O)OC(C)(C)C.COc1cc(Br)c(COCCC(=O)OC(C)(C)C)cc1OCc1cccc1>>COc1cc(/C=C/C(=O)OC(C)(C)C)c(COCCC(=O)OC(C)(C)C)cc1OCc1cccc1  
6324 C=CC(=O)OCC.Cc1cc(N)nc1Br>>CCOC(=O)/C=C/c1cnc(N)cc1C  
6325 Br1ccc2c(c1)OCO2.C=CC(=O)OC>>COC(=O)/C=C/c1ccc2c(c1)OCO2  
6326 C=CC(C)OC(C)=O.C[Si](C)(C)Oc1ccc(-c2ccc(Br)cc2)nc1>>CC(=O)OC(C)/C=C/c1ccc(-c2ccc(O[Si](C)(C)C)cn2)cc1  
6327 C=CC(=O)NC(C)(C)C.O=C1C(O)=C(I)C(=O)c2ccccc21>>CC(C)(C)NC(=O)/C=C/C1=C(O)C(=O)c2ccccc2C1=O  
6328 C=Cn1nnc(-c2ccc(C)cc2)n1.Fc1cccc1I>>Cc1ccc(-c2nnn(/C=C/c3ccccc3F)n2)cc1  
6329 C=CC(=O)OC.O=S(=O)(c1cccc1)n1c2ncccc2c2c(OS(=O)(=O)C(F)(F)F)nc3ccccc3c21>>COC(=O)/C=C/c1nc2ccccc2c2c1c1ccncln2S(=O)(=O)c1cccc1  
6330 C=COCCO.FC(F)(F)c1ccc(Br)cc1>>C=C(OCCO)c1ccc(C(F)(F)F)cc1  
6331 Br1cccc1I.C=CC(=O)OCCCC>>CCCCOC(=O)/C=C/c1cccc1Br  
6332 C=CC(C)(C)O.O=c1cc(-c2ccccc2)oc2ccc(Br)cc12>>CC(C)(O)/C=C/c1ccc2oc(-c3ccccc3)cc(=O)c2c1  
6333 C=Cc1ccc(N)cc1.COc1ccc(Br)cc1>>COc1ccc(/C=C/c2ccc(N)cc2)cc1  
6334 C=Cc1ccc(/C=C/c2ccc(N(C)C)cc2)cc1.CN(C)c1ccc2c(-c3ccc(Br)cc3C(=O)[O-])c3ccc(=[N+](C)C)cc-3oc2c1>>CN(C)c1ccc(/C=C/c2ccc(C=Cc3ccc(-c4c5ccc(=[N+](C)C)cc-5oc5cc(N(C)C)ccc45)c(C(=O)[O-])c3)cc2)cc1  
6335 C=CS(N)(=O)=O.Cc1cccc(C)c1Br>>Cc1cccc(C)c1/C=C/S(N)(=O)=O  
6336 C=Cc1cccc1C(=O)O.FC(F)(F)c1ccc(I)cc1>>O=C(O)c1cccc1/C=C/c1ccc(C(F)(F)F)cc1  
6337 C=CC(=O)Nc1cccc1NC(=O)OC(C)(C)C.O=C(Nc1ccc(C(F)(F)F)cc1)C(O)c1ccc(Br)cc1>>CC(C)(C)OC(=O)Nc1cccc1NC(=O)/C=C/c1ccc(C(O)C(=O)Nc2ccc(C(F)(F)F)cc2)cc1  
6338 Br1cccc2ccccc12.C=C[Si](CC)(CC)CC>>CC[Si](/C=C/c1cccc2ccccc12)(CC)CC  
6339 Br1ccc2c(c1)OCCOCCOCCOCCOCCO2.C=CC(=O)O>>O=C(O)/C=C/c1ccc2c(c1)OCCOCCOCCOCCOCCO2  
6340 C=CC(=O)C(O[Si](CC)(CC)CC)c1c(OC)ccc(OC)c1OCc1cccc1.COc1cccc(I)c1OCc1cccc1>>CC[Si](CC)(CC)OC(C(=O)/C=C/c1cccc(OC)c1OCc1cccc1)c1c(OC)ccc(OC)c1OCc1cccc1  
6341 C=CC(=O)OC.CC(C)c1cccc(OS(=O)(=O)C(F)(F)F)c1>>COC(=O)/C=C/c1cccc(C(C)C)c1  
6342 C=CC=O.O=[N+][O-]c1ccc(Br)cc1>>O=C/C=C/c1ccc([N+](=O)[O-])cc1  
6343 C=CC(=O)OC(C)(C)C.COC(=O)Cc1cc(Cl)ccc1Br>>COC(=O)Cc1cc(Cl)ccc1/C=C/C(=O)OC(C)(C)C  
6344 C=CC(=O)OCC.OCc1cccc(I)c1>>CCOC(=O)/C=C/c1cccc(CO)c1  
6345 C=CCOC.CC(C)(C)OC(=O)/C=C/c1ccc(CN(C(=O)C2CCCCC2)c2cccc(Br)c2)cc1>>COC/C=C/c1cccc(N(Cc2ccc(/C=C/C(=O)OC(C)(C)C)cc2)C(=O)C2CCCCC2)c1  
6346 Br1ccc2ccccc2c1.C=CN1CCCCC1=O>>C=C(c1ccc2ccccc2c1)N1CCCCC1=O  
6347 C=CC(=O)OCC.Cc1cc(I)cn1>>CCOC(=O)/C=C/c1cnc(C)c1  
6348 C=CCn1cc(Br)nc1=O.Ic1cccc1>>O=c1ncc(Br)cn1C/C=C/c1cccc1  
6349 C=Cc1ccc(OC(C)=O)cc1.FC(F)(F)c1cc(I)cc(C(F)(F)F)c1>>CC(=O)Oc1ccc(/C=C/c2cc(C(F)(F)F)cc(C(F)(F)F)c2)cc1  
6350 C=CC(=O)OCC.COc1cc(Br)cc2nnn(C)c12>>CCOC(=O)/C=C/c1cc(OC)c2c(c1)nnn2C  
6351 C=CC(=O)OC.CC(C)(C)[Si](C)(C)OCCc1ccc(NC(=O)CCCc2ccc(Br)cc2)cc1>>COC(=O)/C=C/c1ccc(CCCC(=O)Nc2ccc(CCO[Si](C)(C)C(C)C)cc2)cc1  
6352 C=CC(C)(C)C(=O)NC(C)(C)C(=O)O.COc1cc(C(C)C)c(Cc2ccc(Br)cc2)cc1[C@@H]1O[C@H](COC(C)=O)[C@@H](OC(C)=O)[C@H](OC(C)=O)[C@H]1OC(C)=O>>COc1cc(C(C)C)c(Cc2ccc(/C=C/C(C)(C)C(=O)NC(C)(C)C(=O)O)cc2)cc1[C@@H]1O[C@H](COC(C)=O)[C@@H](OC(C)=O)[C@H](OC(C)=O)[C@H]1OC(C)=O  
6353 C=C[C@@H](C)[C@@H](O)C/C=C/C(=O)OC.N#Cc1ccc(I)cc1>>COC(=O)/C=C/C[C@H](O)[C@H](C)/C=C/c1ccc(C#N)cc1  
6354 C=CN1CCCCC1=O.O=S(=O)(Oc1cc(F)ccc1Br)C(F)(F)F>>C=C(c1cc(F)ccc1Br)N1CCCCC1=O  
6355 C=Cc1ccncc1.O=[N+][O-]c1ccc(N(c2ccc(Br)cc2)c2ccc([N+](=O)[O-])cc2[N+](=O)[O-])c([N+](=O)[O-])c1>>O=[N+][O-]c1ccc(N(c2ccc(/C=C/c3ccncc3)cc2)c2ccc([N+](=O)[O-])cc2[N+](=O)[O-])c([N+](=O)[O-])c1  
6356 C=CC(=O)OC(C)(C)C.Cc1cc(Br)ccc1-c1noc(-c2ccc(OC(C)C)c(C(F)(F)F)c2)n1>>Cc1cc(/C=C/C(=O)OC(C)(C)C)ccc1-c1noc(-c2ccc(OC(C)C)c(C(F)(F)F)c2)n1  
6357

6358 C=CC(=O)OC.Cc1cc(F)ccc1C(=O)c1sc2cc(O)ccc2c1Oe1ccc(Br)cc1>>COC(=O)/C=C/c1ccc(Oc2c(C(=O)c3ccc(F)cc3C)sc3cc(O)ccc23)cc1  
 6359 C=Cc1cccc1.COC1CCCC1I>>COC1CCCC1/C=C/c1cccc1  
 6360 C=C(CC(=O)OC)C(=O)OC.FC(F)(F)c1ccc(I)cc1>>COC(=O)C/C(=C/c1ccc(C(F)(F)F)cc1)C(=O)OC  
 6361 C=Cc1cccc1.O=C(c1ccc(Br)cc1)N1C(=O)c2cccc2S1(=O)=O>>O=C(c1ccc(/C=C/c2cccc2)cc1)N1C(=O)c2cccc2S1(=O)=O  
 6362 C=Cc1ccc2c(c1)CC2.C[Si](C)(C)OS(=O)(=O)C(F)(F)F>>C[Si](C)(C)/C=C/c1ccc2c(c1)CC2  
 6363 C=CC1(O)CCC1.FC(F)(F)c1ccc(I)cc1>>OC1/C=C/c2ccc(C(F)(F)F)cc2)CCC1  
 6364 C=Cc1cccc1.Cc1cc(C)c([Cl+])c2cccc2)c(C)c1>>C(=C/c1cccc1)\c1cccc1  
 6365 C=CC(=O)OC.CN1C(=O)C(=O)c2c(Br)cccc21>>COC(=O)/C=C/c1cccc2c1C(=O)C(=O)N2C  
 6366 C=Cc1cccc(OC)c1.C[Si](C)(C)Cl>>COc1cccc(/C=C/[Si](C)(C)C)c1  
 6367 C=CC(=O)OC(C)(C)C.COc1cccc1NCc1ccc(Br)cc1>>COc1cccc1NCc1ccc(/C=C/C(=O)OC(C)(C)C)  
 6368 C=C[Si](C)(C)C.COc1cccc1I>>COc1cccc1/C=C/[Si](C)(C)C  
 6369 C=CC[Si](OCC)(OCC)OCC.CCCCC(CC)COc1cc(/C=C/c2ccc(/C=C/c3ccc(Br)cc3)cc2)c(OCC(CC)CC  
 6370 CC)cc1C>>CCCC(CC)COc1cc(/C=C/c2ccc(/C=C/c3ccc(/C=C/C[Si](OCC)(OCC)OCC)cc3)cc2)c(O  
 6371 CC(CC)CCCC)cc1C  
 6372 C=C[Si](C)(C)C.Ic1ccsc1>>C[Si](C)(C)/C=C/c1ccsc1  
 6373 C=Cc1ccc(OC)cc1.O=c1oc2cccc2cc1Br>>COc1ccc(/C=C/c2cc3cccc3oc2=O)cc1  
 6374 C=CC(=O)OCC.O=Cc1ccc(Br)nc1>>CCOC(=O)/C=C/c1ccc(C=O)cn1  
 6375 Br1c(-c2cccc2)nc2cccn12.C=CC(=O)OC>>COC(=O)/C=C/c1c(-c2cccc2)nc2cccn12  
 6376 C=Cc1cccc(Cl)c1.CCOC(=O)C(F)I>>CCOC(=O)C(F)/C=C/c1cccc(Cl)c1  
 6377 C=CC(=O)N1N=Cc2cccc2C1c1cccc(F)c1.COc1cc(Cc2cnc(N)nc2N)cc(I)c1OC>>COc1cc(Cc2cnc(N)nc2N)cc(/C=C/C(=O)N2N=Cc3cccc3C2c2cccc(F)c2)c1OC  
 6378 C=CC(=O)OC.CC(C)NCCCN1c(Se2cc3c(cc2I)OCO3)nc2c(N)ncnc21>>COC(=O)/C=C/c1cc2c(cc1Sc1nc3c(N)ncnc3n1CCCN(C)C)OCO2  
 6379 C=Cc1cccc1.CC[C@]12C=CCN3CC[C@]4(c5cc(Br)c(OC)cc5N(C)[C@H]4[C@@](O)(C(=O)OC)[C@]4[C@H]1OC(C)=O)[C@@H]32>>CC[C@]12C=CCN3CC[C@]4(c5cc(/C=C/c6cccc6)c(OC)cc5N(C)[C@H]4[C@]4[C@@](O)(C(=O)OC)[C@@H]1OC(C)=O)[C@@H]32  
 6380 C=CC(=O)OC(C)(C)C.FC(F)(F)c1ccc(I)cc1>>CC(C)(C)OC(=O)/C=C/c1ccc(C(F)(F)F)cc1  
 6381 \*CNCCOCCOCCOCCNC(=O)COc1ccc(C(Cc2cc(OC)cc(OC)c2)NC(=O)c2cccc(C=C)c2)cc1.CC(C  
 6382 (C)c1ccc(I)cc1>>\*CNCCOCCOCCOCCNC(=O)COc1ccc(C(Cc2cc(OC)cc(OC)c2)NC(=O)c2cccc(/C=C/c3ccc(C(C)(C)C)cc3)c2)cc1  
 6383 C=COCCCC.Cc1cccc(Cl)c1>>C=C(OCCCC)c1cccc(C)c1  
 6384 C=COCCCC.Cl1ccc(Br)cc1>>CCCCO/C=C/c1ccc(Cl)cc1  
 6385 C=CC(=O)OC.Cc1ccc(F)cc1C(=O)c1sc2cc(O)ccc2c1Oe1ccc(Br)cc1>>COC(=O)/C=C/c1ccc(Oc2c(C(=O)c3cc(F)ccc3C)sc3cc(O)ccc23)cc1  
 6386 C=Cc1cccc([N+](=O)[O-])c1.Cl1ccc(Br)c1>>O=[N+](O)c1cccc(/C=C/c2cccc(Cl)c2)c1  
 6387 C=CC(=O)OC.O=c1[nH]c(=O)n([C@H]2C[C@H](O)[C@@H](CO)C2)cc1I>>COC(=O)/C=C/c1cn([C@H]2C[C@H](O)[C@@H](CO)C2)c(=O)[nH]c1=O  
 6388 C=CC(=O)OC(C)(C)C.Cl1ccnc2cccc12>>CC(C)(C)OC(=O)/C=C/c1ccnc2cccc12  
 6389 C=CCC(=O)OC.CC(C)(CC1Cc2cccc2C1)NC[C@@H](O)COc1c(Br)cccc1C#N>>COC(=O)C/C=C/c1cccc(C#N)c1OC[C@H](O)CNC(C)(C)CC1Cc2cccc2C1  
 6390 C=CC(=O)OCCCC.OCc1ccc(OCCc2cccc2)c(Br)nc1>>CCCCOC(=O)/C=C/c1nc(CO)ccc1OCCc1cccc  
 6391 C=C[C@@H]1COC(C)(C)N1C(=O)OCc1cccc1.COC(=O)c1ccc(Br)cc1>>COC(=O)c1ccc(/C=C/[C@@H]2COC(C)(C)N2C(=O)OCc2cccc2)cc1  
 6392 C=CC(=O)OC.COC(=O)[C@@H]1C[C@H]2CCC(Br)=C[C@@H]2N1C(=O)OC(C)(C)C>>COC(=O)/C=C/C1=C[C@H]2[C@@H](CC1)C[C@@H](C(=O)OC)N2C(=O)OC(C)(C)C  
 6393 C=CC(=O)O.O=C(O)c1cccc(Br)c1>>O=C(O)/C=C/c1cccc(C(=O)O)c1  
 6394 C=CC(=O)OC.COc1cccc1Br>>COC(=O)/C=C/c1cccc1OC  
 6395 C=Cc1cccc1.Cn1nc(Br)c(=O)c2cccc21>>Cn1nc(/C=C/c2cccc2)c(=O)c2cccc21  
 6396 C=CC(=O)NCc1cccc1.O=c1c(I)coc2cc(O)ccc12>>O=C(/C=C/c1coc2cc(O)ccc2c1=O)NCc1cccc1  
 6397 C=CC(=O)Nc1cccc1.COc1ccc2c(=O)c(I)coc2c1>>COc1ccc2c(=O)c(/C=C/C(=O)Nc3cccc3)coc2c1  
 6398 Br1cccc1I.C=C1CC(c2cccc2)OC1=O>>O=C1OC(c2cccc2)C/C1=C\c1cccc1Br  
 6399 Br1cnc2cccc2c1.C=CCON=C1[C@H](C)[C@H]2OC(=O)O[C@]2(C)[C@H](CC)OC(=O)[C@@](C)(F)C(=O)[C@H](C)[C@@H](O[C@@H]2O[C@H](C)C[C@H](N(C)C)[C@H]2OC(C)=O)[C@](C)(OC)C[C@H]1C>>CC[C@H]1OC(=O)[C@@](C)(F)C(=O)[C@H](C)[C@@H](O[C@@H]2O[C@H](C)C[C@H](N(C)C)[C@H]2OC(C)=O)[C@](C)(OC)C[C@H](C)C(=NOC/C=C/c2cnc3cccc3c2)I[C@H]1(C)I[C@H]2OC(=O)O[C@]112C  
 6400 C=CC(C)(C)O.Nc1cc(Br)ccc1C(=O)O>>CC(C)(O)/C=C/c1ccc(C(=O)O)c(N)c1  
 6401 C=Cc1ccc(C)cc1.C[Si](C)(C)OS(=O)(=O)C(F)(F)F>>Cc1ccc(/C=C/[Si](C)(C)C)c(C)c1

6399 C=CC(C)(C)C(=O)NC(C)(C)CO.CC(=O)OC[C@H]1O[C@@H](c2cc(Cc3ccc(Br)cc3F)c(C)cc2C)[C@  
H](OC(C)=O)[C@@H](OC(C)=O)[C@H]1OC(C)=O>>CC(=O)OC[C@H]1O[C@@H](c2cc(Cc3cc  
6400 c(/C=C/C(C)(C)C(=O)NC(C)(C)CO)cc3F)c(C)cc2C)[C@H](OC(C)=O)[C@@H](OC(C)=O)[C@H]  
C=CC(=O)OCC.Fc1ccc(Oc2cccc(Br)c2)cc1>>CCOC(=O)/C=C/c1cccc(Oc2ccc(F)cc2)c1  
6401 C=CC(=O)OCC.FC(F)(F)c1ccc(I)cc1>>CCOC(=O)/C=C/c1ccc(C(F)(F)F)cc1  
C=Cc1nc2c(N)ncnc2n1[C@H]1C[C@H](O[Si](C)(C)C(C)(C)C)[C@H](CO[Si](C)(C)C(C)(C)C)O1.  
6402 O=[N+]([O-])c1ccc(I)cc1>>CC(C)(C)[Si](C)(C)OC[C@H]1O[C@@H](n2c(/C=C/c3ccc([N+](=O)[O-]  
)cc3)nc3c(N)ncnc32)C[C@@H]1O[Si](C)(C)C(C)(C)C  
6403 C=CC(=O)OC.O=S(=O)(c1cccc1)n1c(I)cc2ccnc21>>COC(=O)/C=C/c1cc2ccnc2n1S(=O)(=O)c1cc  
6404 C=Cc1ccc(OC)cc1.CC(C)(C)C(=O)Nc1nc(NC(=O)C(C)(C)C)c2cc(Br)ncn2n1>>COc1ccc(/C=C/c2cnc  
3nc(NC(=O)C(C)(C)C)nc(NC(=O)C(C)(C)C)c3c2)cc1  
6405 C=C(C)C(C)=O.Oc1cccc1I>>CC(=O)/C(C)=C/c1cccc1O  
6406 C=Cc1ccc(OC)cc1.Nc1ccc(I)cc1>>COc1ccc(/C=C/c2ccc(N)cc2)cc1  
6407 C=Cc1ccc(Cl)cc1.CS(=O)(=O)c1ccc(Br)cc1>>CS(=O)(=O)c1ccc(/C=C/c2ccc(Cl)cc2)cc1  
6408 C=CC(=O)OC(C)(C)C.COc1ccc(S(=O)(=O)c2nc3ccccc3cc2Br)cc1>>COc1ccc(S(=O)(=O)c2nc3ccccc  
3cc2/C=C/C(=O)OC(C)(C)C)cc1  
6409 C=C1C(=O)O[C@H]2/C=C(\C)CC/C=C(\C)CC[C@@H]12.Oc1cccc1I>>C/C1=C[C@H]2OC(=O)  
/C(=C/c3ccccc3O)[C@@H]2CC/C(C)=C/CC1  
6410 C=C.CCOC(=O)Cc1c(C(=O)OC)c2n(c(=O)c1Br)CCC2O>>C=Cc1c(CC(=O)OC)c(C(=O)OC)c2n(c1=O)  
CCC2O  
6411 C=Cc1ccc(OC)c(OC)c1.COc1ccc2c(c1)cc(C#N)c1ccc(Br)cc12>>COc1ccc2c(c1)cc(C#N)c1ccc(/C=C/c  
3ccc(OC)c(OC)c3)cc12  
6412 C=CC(=O)OC.COc1cccc(Br)c1>>COC(=O)/C=C/c1cccc(OC)c1  
6413 Brc1nc2ccccc2c1.C=Cc1ccnc1>>C(=C/c1nc2ccccc2c1)\c1ccnc1  
6414 C=Cc1cccc1.O=Cc1ccc(I)cc1>>O=Cc1ccc(/C=C/c2ccccc2)cc1  
6415 C=CC#N.CCOC(=O)Nc1cccc1C1=C(I)CCN1S(=O)(=O)c1ccc(C)cc1>>CCOC(=O)Nc1cccc1C1=C(/  
C=C/C#N)CCN1S(=O)(=O)c1ccc(C)cc1  
6416 C=Cc1cccc1.C[Si](C)(C)CCOCn1nc(I)c2cnc(Oc3ccc(F)cc3F)nc21>>C[Si](C)(C)CCOCn1nc(/C=C/c2  
ccccc2)c2cnc(Oc3ccc(F)cc3F)nc21  
6417 C=C(NC(C)=O)C(=O)OC.Clc1ccc(Br)cc1>>COC(=O)/C(=C/c1ccc(Cl)cc1)NC(C)=O  
6418 C=C.CC(C)(C)OC(=O)n1c(CCl)cc2ccccc21>>C=CCc1cc2ccccc2n1C(=O)OC(C)(C)C  
6419 C=Cc1ccc(C)cc1.Cc1ccc(-c2oc3ccccc3c(=O)c2Br)cc1>>Cc1ccc(/C=C/c2c(-  
c3ccc(C)cc3)oc3ccccc3c2=O)cc1  
6420 C=Cc1ccc(NC(=O)OC(C)(C)C)cc1.O=C(OC[C@H]1O[C@@H](n2cc(I)c(=O)[nH]c2=O)[C@H]1  
OC(=O)c1cccc1)c1cccc1>>CC(C)(C)OC(=O)Nc1ccc(/C=C/c2cn([C@H]3C[C@H](OC(=O)c4ccccc  
4)[C@@H](COC(=O)c4ccccc4)O3)c(=O)[nH]c2=O)cc1  
6421 C=CC(=O)OCC.Cc1ncnc(N)c1I>>CCOC(=O)/C=C/c1c(C)ncnc1N  
6422 C=Cc1ccc(OC)c(O)c1.COc1cc(Br)cc(OC)c1F>>COc1ccc(/C=C/c2cc(OC)c(F)c(OC)c2)cc1O  
6423 C=C(C)C(=O)OCC.COc1nc(-c2ccccc2)c(Br)cc1=O>>CCOC(=O)/C(C)=C/c1cc(=O)n(COC)nc1-  
6424 C=Cc1nc(Cl)nc2c1cn2COCC[Si](C)(C)C.CCN(c1cccc1Br)S(C)(=O)=O>>CCN(c1cccc1/C=C/c1nc  
(Cl)nc2c1cn2COCC[Si](C)(C)C)S(C)(=O)=O  
6425 C=CC(=O)OCCSc1cccc1.Ic1cccc1>>O=C(/C=C/c1cccc1)OCCSc1cccc1  
6426 C=COCC(C)C.O=S(=O)(Oc1ccc(-c2ccccc2)cc1)C(F)(F)F>>C=C(OCC(C)C)c1ccc(-c2ccccc2)cc1  
6427 C=Cc1cccc1.CNc1cccc1I>>CNc1cccc1/C=C/c1cccc1  
6428 C=CC(=O)OC.COc1ccc2c(c1)c(I)nn2Cc1cccc1>>COC(=O)/C=C/c1nn(Cc2ccccc2)c2ccc(OC)cc12  
6429 C=CC1=CC(C)(C)N([O])C(C)(C)C1.CC1(C)C=C(I)CC(C)(C)N1[O]>>CC1(C)C=C(/C=C/C2=CC(C)(  
C)N([O])C(C)(C)C2)CC(C)(C)N1[O]  
6430 C=CC(=O)OC(C)(C)C.CC1(C)COc2cc(Br)ncn2NC1=O>>CC(C)(C)OC(=O)/C=C/c1cnc2c(c1)OCC(C)  
(C)C(=O)N2  
6431 C=Cc1ccc(OC)cc1.CCOC(=O)C(F)(F)Br>>CCOC(=O)C(F)(F)/C=C/c1ccc(OC)cc1  
6432 C=CC(=O)OCC.O=Cc1cn(-c2ccccc2)nc1OS(=O)(=O)C(F)(F)F>>CCOC(=O)/C=C/c1nn(-  
6433 C=CC(=O)N(C)C.Clc1nc(N2CCOCC2)c2oc3ncc(Br)cc3c2n1>>CN(C)C(=O)/C=C/c1cnc2oc3c(N4CC  
OCC4)nc(Cl)nc3c2c1  
6434 C=CC(=O)OC.CC(C)n1cnc2c(NCc3ccc(Br)cc3)nc(N3CCN(C)CC3)nc21>>COC(=O)/C=C/c1ccc(CNc  
2nc(N3CCN(C)CC3)nc3c2ncn3C(C)C)cc1  
6435 C=CC(=O)OCC.O=[N+]([O-])c1ccc(I)cc1>>CCOC(=O)/C=C/c1ccc([N+](=O)[O-])cc1  
C=Cc1ccc(C=O)cc1.CCCN(Cc1ccc(CCC(F)(F)C(F)(F)C(F)(F)C(F)(F)C(F)(F)F)cc1)/N=N/c1cc  
6436 c(I)cc1>>CCCN(Cc1ccc(CCC(F)(F)C(F)(F)C(F)(F)C(F)(F)C(F)(F)F)cc1)/N=N/c1ccc(/C=C/c2  
ccc(C=O)cc2)cc1  
6437 C=CC(=O)O.Ic1ccc(CNc2cccc(-c3ccccc3)n2)cc1>>O=C(O)/C=C/c1ccc(CNc2cccc(-c3ccccc3)n2)cc1  
6438 C=CC(=O)OCCCC.COc1ccc(Br)c(OC)c1>>CCCCOC(=O)/C=C/c1ccc(OC)cc1OC

[illegible]



6479 Br1enc2nc(-c3ccccc3)c(-c3ccccc3)nc2c1.C=CC(=O)OC>>COC(=O)/C=C/c1enc2nc(-c3ccccc3)c(-c3ccccc3)nc2c1

6480 C=CN1CCCC1=O.O=S(=O)(Oc1ccc2ccccc2c1Br)C(F)(F)F>>C=C(c1ccc2ccccc2c1Br)N1CCCC1=O

6481 C=Cc1ccccc1C(F)(F)F.CCS(=O)(=O)c1ccc(Cl)nc1-c1nc2cc(C(F)(F)F)nc2n1C>>CCS(=O)(=O)c1ccc(/C=C/c2ccccc2C(F)(F)F)nc1-c1nc2cc(C(F)(F)F)nc2n1C

6482 C=CC(=O)OC(C)(C)C.CCn1ccc(-c2ccc(Br)cc2)n1>>CCn1ccc(-c2ccc(/C=C/C(=O)OC(C)(C)C)cc2)n1

6483 C=Cc1ccccc1.IC1=C(c2ccccc2)[Se]CC1>>C(=C/c1ccccc1)\C1=C(c2ccccc2)[Se]CC1

6484 C=CC(N)=O.Ic1cn(C(c2ccccc2)(c2ccccc2)c2ccccc2)c(N=P(c2ccccc2)(c2ccccc2)c2ccccc2)n1>>NC(=O)/C=C/c1cn(C(c2ccccc2)(c2ccccc2)c2ccccc2)c(N=P(c2ccccc2)(c2ccccc2)c2ccccc2)n1

6485 C=CC(OC(C)=O)OC(C)=O.O=C1c2ccc(Br)cc2CCN1CCCc1ccccc1>>CC(=O)OC(/C=C/c1ccc2c(c1)C(CN(CCCc1ccccc1)C2=O)OC(C)=O

6486 C=CC(=O)CCC.CN(C)c1ccc(Br)cc1>>CCCC(=O)/C=C/c1ccc(N(C)C)cc1

6487 C=CCN(C(=O)C(F)(F)F)c1ccccc1C#Cc1ccccc1.CC(=O)c1ccc(I)cc1>>CC(=O)c1ccc(/C=C/CN(C(=O)C(F)(F)F)c2ccccc2C#Cc2ccccc2)cc1

6488 C=CC(=O)OC.N#Cc1ccc(Cl)cc1>>COC(=O)/C=C/c1ccc(C#N)cc1

6489 C=CC(=O)OC(C)(C)C.COC(=O)c1cc(Cl)nc1Br>>COC(=O)c1cc(Cl)nc1/C=C/C(=O)OC(C)(C)C

6490 C=CC(=O)OC.COc1ccc(Br)cc1>>C=C(C(=O)OC)c1ccc(OC)cc1

6491 C=CC(=O)N(C)C.FC(F)(F)c1ccccc1Ic1>>CN(C)C(=O)/C=C/c1cccc(C(F)(F)F)c1

6492 C=CC(=O)OCCCC.COC(CNc1nc(SC)nc1Br)OC>>CCCCOC(=O)/C=C/c1cnc(SC)nc1NCC(OC)OC

6493 C=Cc1ccc(/C=C/c2ccccc2)cc1.CC1(C)c2cc(I)ccc2N2Cc3cc([N+](=O)[O-])ccc3OC21c1ccccc1>>CC1(C)c2cc(/C=C/c3ccc(/C=C/c4ccccc4)cc3)ccc2N2Cc3cc([N+](=O)[O-])ccc3OC21c1ccccc1

6494 Br1ccc2ccc3ccccc4ccc1c2c34.C=Cc1nc2c(N(C(=O)c3ccccc3)C(=O)c3ccccc3)ncnc2n1CC(=O)OCC>>CCOC(=O)Cn1c(/C=C/c2ccc3ccc4ccc5ccc2c3c45)nc2c(N(C(=O)c3ccccc3)C(=O)c3ccccc3)ncnc21

6495 C=CC(=O)O.O=c1nc(O)c(I)cn1[C@H]1CC[C@H](CO)O1>>O=C(O)/C=C/c1cn([C@H]2CC[C@H](CO)O2)c(=O)nc1O

6496 C=Cc1ccc(OC)cc1.CCOC(=O)C1CCCN(c2cccc(Br)n2)C1>>CCOC(=O)C1CCCN(c2cccc(/C=C/c3ccc(OC)cc3)n2)C1

6497 C=CC(=O)OC.Cc1cc(C)c(N)c(I)c1>>COC(=O)/C=C/c1cc(C)cc(C)c1N

6498 C=Cc1ccc(-c2ccccc2)cc1.CCOC(=O)C(F)I>>CCOC(=O)C(F)/C=C/c1ccc(-c2ccccc2)cc1

6499 C=Cc1ccc(C(C)(C)C)cc1.COC(=O)/C=C/c1cccc(N(Cc2ccc(Br)cc2)C(=O)C2CCCCC2)c1>>COC(=O)/C=C/c1cccc(N(Cc2ccc(/C=C/c3ccc(C(C)(C)C)cc3)cc2)C(=O)C2CCCCC2)c1

6500 C=CC(=O)OC(C)(C)C.COc1ccccc1CCC(=O)Oc1ccc(I)cc1CC=C(C)C>>COc1ccccc1CCC(=O)Oc1ccc(/C=C/C(=O)OC(C)(C)C)cc1CC=C(C)C

6501 C=Cc1ccccc1.COc1ccc(Br)c(C)c1>>COc1ccc(/C=C/c2ccccc2)c(C)c1

6502 C=CC(=O)OC(C)(C)C.O=C1Nc2ncc(Br)cc2CN1CCN1CCOCC1>>CC(C)(C)OC(=O)/C=C/c1enc2c(c1)CN(CCN1CCOCC1)C(=O)N2

6503 C=Cc1n[nH]c2cc([C@H]3C[C@@H]34C(=O)Nc3ccc(OC)cc34)ccc12.CN1CCN(C(=O)c2ccc(Br)cc2)CC1>>COc1ccc2c(c1)[C@H]1(C[C@H]1c1ccc3c(/C=C/c4ccc(C(=O)N5CCN(C)CC5)cc4)n[nH]c3c1)C(C=Cc1ccc2ccccc2c1.FC(F)(F)C(F)(F)C(F)(F)C(F)(F)C(F)(F)C(F)(F)Br>>FC(F)(F)C(F)(F)C(F)(F)C(F)(F)C(F)(F)C(F)(F)C(F)(F)C(F)(F)/C=C/c1ccc2ccccc2c1

6504 C=CC(OC)OC.COc1ccccc1I>>COc1ccccc1/C=C/C(OC)OC

6505 C=CC(=O)OC.Cc1ccc(Br)c(N)c1>>COC(=O)/C=C/c1ccc(C)cc1N

6506 C=CC(=O)OC(C)(C)C.Cc1cc(Br)enc1N>>Cc1cc(/C=C/C(=O)OC(C)(C)C)enc1N

6507 C=C.CC(=O)c1ccccc1Br>>C=Cc1ccccc1C(C)=O

6508 C=Cc1cncnc1.Cc1ccc(Nc2c(C#N)enc3ccc(Br)ccc23)c(C)c1>>Cc1ccc(Nc2c(C#N)enc3cc(/C=C/c4ccncc4)ccc23)c(C)c1

6509 C=CCCO.CCCCCCCCCCOc1cnc(-c2ccc(Br)cc2)nc1>>CCCCCCCCCOc1cnc(-c2ccc(Br)cc2)nc1

6510 C=CC(OC)OCC.FC(F)(F)c1ccccc1Ic1>>CCOC(/C=C/c1cccc(C(F)(F)F)c1)OCC

6511 C=CC(=O)CC.CC(=O)c1ccc(Br)cc1>>CCC(=O)/C=C/c1ccc(C(C)=O)cc1

6512 C=C(NC(=O)OC(C)(C)C)C(=O)OC.CN(C)c1ccc(I)cc1>>COC(=O)/C=C/c1ccc(N(C)C)cc1)NC(=O)OC(C)(C)C

6513 C=Cc1ccc(C#N)cc1.FC(F)(F)c1nc(I)c2ncccn12>>N#Cc1ccc(/C=C/c2nc(C(F)(F)F)n3cccncc23)cc1

6514 C=CC(=O)OC.Cn1c2c(c3ccc(I)cc3c1=O)C(=O)c1ccccc1-2>>COC(=O)/C=C/c1ccc2c3c(n(C)c(=O)c2c1)-c1ccccc1C3=O

6515 C=COCCCC.Fc1ccccc1Cl>>C=C(OCCCC)c1ccccc1F

6516 C=CCNC(=O)C(F)(F)F.Nc1nc(=O)n([C@H]2C[C@H](O)[C@H](CO)O2)cc1I>>Nc1nc(=O)n([C@H]2C[C@H](O)[C@H](CO)O2)cc1/C=C/CNC(=O)C(F)(F)F

6517 C=CC(=O)Nc1ccccc1C1.COc1ccc2c(=O)c(I)coc2c1>>COc1ccc2c(=O)c(/C=C/C(=O)Nc3ccccc3)c3c2c1

6518

6519 Br1ccc2c(c1)OCCOCCOCCOCCO2.C=CP(=O)(OCC)OCC>>CCOP(=O)/(C=C/c1ccc2c(c1)OCCOC  
 COCCOCCO2)OCC  
 6520 C=Cc1cccc1.COC(=O)c1cc2cc(Br)ccc2cc1OC(C)=O>>COC(=O)c1cc2cc(/C=C/c3ccccc3)ccc2cc1OC  
 (C)=O  
 6521 C=Cc1ccc(C)nc1.COC(=O)c1cc(I)ccc1NC(C)=O>>COC(=O)c1cc(/C=C/c2ccc(C)nc2)ccc1NC(C)=O  
 6522 C=Cc1cccc1OC.FC(F)(F)c1cccc1I>>COc1cccc1/C=C/c1cccc1C(F)(F)F  
 6523 C=CC(=O)OCC.CC(C)(C)OC(=O)c1cc(COc2ccccc2)ccc1I>>CCOC(=O)/C=C/c1ccc(COc2ccccc2)cc1  
 C(=O)OC(C)(C)C  
 6524 C=CC(=O)OCC.COc1cccc([IH2])(OC(C)=O)OC(C)=O)c1>>CCOC(=O)/C=C/c1cccc(OC)c1  
 6525 C=CN1C(=O)c2ccccc2C1=O.Cc1ccc(Cl)cc1>>Cc1ccc(/C=C/N2C(=O)c3ccccc3C2=O)cc1  
 6526 C=CC(=O)OCC.O=[N+](O-)]c1ccc(Br)c1>>CCOC(=O)/C=C/c1cccc([N+](=O)[O-])c1  
 6527 Br1c2ccccc2cc2ccccc12.C=CC(=O)OCCCC>>CCCCOC(=O)/C=C/c1c2ccccc2cc2ccccc12  
 6528 CCOC(=O)c1cccc(I)c1.[11CH2]=Cc1cccc1>>CCOC(=O)c1cccc(/[11CH]=C/c2ccccc2)c1  
 6529 C=CC(=O)OCC.Ic1ccc2c(c1)OCCOCCOCCOCCO2>>CCOC(=O)/C=C/c1ccc2c(c1)OCCOCCOCCO  
 C=CC(=O)OCCCC.COCCOc1ccc2cc(Br)ccc2c1-c1c(OC)ccc2ccccc12>>CCCCOC(=O)/C=C/c1ccc2c(-  
 c3c(OC)ccc4ccccc34)c(OCOC)ccc2c1  
 6531 C=CC(N)=O.N#Cc1cc(Cl)ccc1C(F)(F)F>>N#Cc1cc(/C=C/C(N)=O)ccc1C(F)(F)F  
 6532 C=CCn1nnc2ccccc21.Cc1ccc(I)cc1>>Cc1ccc(/C=C/Cn2nnc3ccccc32)cc1  
 6533 C=CC(=O)N1CCC(Cc2nnc(C)o2)CC1.Cc1nnn(Cc2cc(F)ccc2Br)n1>>Cc1nnn(Cc2cc(F)ccc2/C=C/C(=O)  
 N2CCC(Cc3nnc(C)o3)CC2)n1  
 6534 C=Cc1cccc1.CN(C)CCCC(=O)c1ccc(Br)c1>>CN(C)CCCC(=O)c1cccc(/C=C/c2ccccc2)c1  
 6535 C=CC(=O)OCC.NC(=O)c1ccc(I)c1>>CCOC(=O)/C=C/c1ccc(C(N)=O)c1  
 C=Cc1ccc2c(c1)c1ccc(/C=C/c3ccc(N(c4ccccc4)c4ccccc4)cc3)cc1n2CCCCCCCC.CCCCCCCn1c2ccc  
 6536 (I)cc2c2cc(C=O)ccc21>>CCCCCCCCn1c2ccc(C=O)cc2c2cc(/C=C/c3ccc4c(c3)c3ccc(/C=C/c5ccc(N(c  
 6ccccc6)c6ccccc6)cc5)cc3n4CCCCCCCC)ccc21  
 C=C[C@ @]1(O)[C@ @H]([C@H]2OC(C)(C)O2)O[C@ @H]2OC(C)(C)O[C@ @H]21.O=c1cc(-  
 6537 c2ccccc2)oc2cc(Br)ccc12>>CC1(C)OC[C@H]([C@H]2O[C@ @H]3OC(C)(C)O[C@ @H]3[C@ @]2(O  
 )/C=C/c2ccc3c(=O)cc(-c4ccccc4)oc3c2)O1  
 6538 Br1ccc(-c2nnc(-c3cccc4ccccc34)o2)cc1.C=C[Si](OCC)(OCC)OCC>>CCO[Si]/C=C/c1ccc(-c2nnc(-  
 c3cccc4ccccc34)o2)cc1)(OCC)OCC  
 C=CC1(C(=O)O)CCC(O[Si](C(C)C)(C(C)C)C(C)C)C1.C[C@H](NC(=O)[C@ @H](O)C1CC1)(C=O)  
 6539 N1CCC[C@ @H](C(=O)N[C@H](C)c2ccc3ccc(Br)cc3n2)N1>>CC(C)[Si](OC1CCC(/C=C/c2ccc3ccc(  
 [C@ @H](C)NC(=O)[C@ @H]4CCCN(C(=O)[C@H](C)NC(=O)[C@ @H](O)C5CC5)N4)nc3c2)(C(=O)  
 )O)C1)(C(C)C)C(C)C  
 6540 C=CC(=O)OC(C)(C)C.CCCCc1ccc(I)cc1>>CCCCc1ccc(/C=C/C(=O)OC(C)(C)C)cc1  
 6541 C=CC(=O)OC.O=c1c2ccccc2cc(Br)c2ccccc12>>COC(=O)/C=C/c1cc2ccccc2c(=O)c2ccccc12  
 6542 C=CC(=O)OC.CC(C)(C)OC(=O)N1CCC(C(=O)Nc2ccc(I)cc2C(=O)Nc2ccc(Cl)cn2)CC1>>COC(=O)/  
 C=C/c1ccc(NC(=O)C2CCN(C(=O)OC(C)(C)C)CC2)c(C(=O)Nc2ccc(Cl)cn2)c1  
 6543 Br1ccccc1.C=Cc1ccc(C=O)cc1>>O=Cc1ccc(/C=C/c2ccccc2)cc1  
 6544 C=Cc1cccc1.CC(=O)c1ccc(Br)cc1>>C=C(c1cccc1)c1ccc(C(C)=O)cc1  
 6545 C=CC(=O)OCC.COc1cccc(Oc2cccc(Br)c2)c1>>CCOC(=O)/C=C/c1cccc(Oc2cccc(OC)c2)c1  
 6546 C=CC(C)=O.CC1=C(I)C(C)(C)C[C@H](O[Si](C)(C)C(C)(C)C)C1>>CC(=O)/C=C/C1=C(C)C[C@ @  
 H](O[Si](C)(C)C(C)(C)C)CC1(C)C  
 6547 C=Cc1cccc1C(F)(F)F.O=C(O)c1cccc(Br)c1>>O=C(O)c1cccc(/C=C/c2ccccc2C(F)(F)F)c1  
 6548 C=CCC(C)O.CN(C)c1ccc(Br)c1>>CC(O)C/C=C/c1cccc(N(C)C)c1  
 6549 C=CC(=O)OCC.Cc1cccc1Br>>CCOC(=O)/C=C/c1cccc1C  
 C=CC(=O)OCc1cccc1.O=C1NCCCC[C@ @H]1N1C(=O)c2cccc(I)c2C1=O>>O=C(/C=C/c1cccc2c1C  
 6550 (O)N([C@H]1CCCCNC1=O)C2=O)OCc1cccc1  
 6551 Br1ccnc1.C=COCCO>>C=C(OCCO)c1ccnc1  
 6552 C=C(C)C(=O)OC.CC(=O)c1ccc(Br)c1>>COC(=O)/C(C)=C/c1cccc(C(C)=O)c1  
 C=CC(=O)OC.COc1ccc(-  
 6553 c2cn(S(=O)(=O)c3ccccc3)c3ncc(Br)cc23)cc1>>COC(=O)/C=C/c1cnc2c(c1)c(-  
 6554 C=Cc1ccc(OC)c(OC)c(OC)c1.COc1ccc(I)cc1>>COc1ccc(/C=C/c2cc(OC)c(OC)c(OC)c2)cc1  
 C=CC(=O)OC(C)(C)C.O=C(NC[C@H]1CCc2cc(I)ccc2O1)OCc1cccc1>>CC(C)(C)OC(=O)/C=C/c1c  
 6555 cc2c(c1)CC[C@H](CNC(=O)OCc1cccc1)O2  
 C=C(I)[C@H]1CC[C@H]2[C@ @H]3CC=C4C[C@ @H](OC(C)=O)CC[C@]4(C)[C@H]3CC[C@]12  
 6556 C.C=CC(=O)OC>>C=C/C=C/C(=O)OC[C@H]1CC[C@H]2[C@ @H]3CC=C4C[C@ @H](OC(C)=O  
 )CC[C@]4(C)[C@H]3CC[C@]12C  
 6557 C=CC(C)=O.Cn1c(=O)oc2cc(Br)cnc21>>CC(=O)/C=C/c1cnc2c(c1)oc(=O)n2C  
 6558 C=CC(=O)OCCCC.Cn1c(-c2ccccc2)c(I)c2ccccc21>>CCCCOC(=O)/C=C/c1c(-

[illegible]

6595 C=C/C=C/C1CCCCN1S(=O)(=O)c1ccc(C)cc1.Cc1cccc(I)c1>>Cc1ccc(S(=O)(=O)N2CCCCC2/C=C/C/C=C/c2cccc(C)c2)cc1

6596 C=CC(=O)OCC.CC(C)(C)OC(=O)N(Cc1cccc(Br)c1)c1nc(C(F)(F)F)co1>>CCOC(=O)/C=C/c1cccc(CN(C(=O)OC(C)(C)C)c2nc(C(F)(F)F)co2)c1

6597 C=C(OC(C)=O)C(=O)OCC.COc1cccc(I)cc1>>CCOC(=O)/C=(C/c1ccc(OC)cc1)OC(C)=O

6598 C=Cc1ccc(Cl)cc1.C=Cc1cccc1>>C=Cc1ccc(/C=C/c2cccc2)cc1

6599 C=CC(=O)Oc1cccc(OC)cc1.Ic1cccc1>>COc1ccc(OC(=O)/C=C/c2cccc2)cc1

6600 C=CC(=O)OC(C)(C)C.O=C1CCNc2cc(Br)enc2N1>>CC(C)(C)OC(=O)/C=C/c1cnc2c(c1)NCCC(=O)N

6601 C=CC(=O)OC.CC(C)n1cnc2c(NCc3cccc(Br)c3)nc(N3CCN(C)CC3)nc21>>COC(=O)/C=C/c1cccc(CNc2nc(N3CCN(C)CC3)nc3c2ncn3C(C)C)c1

6602 C=CC(=O)OC(C)(C)C.COC(=O)c1ccc(Br)o1>>COC(=O)c1ccc(/C=C/C(=O)OC(C)(C)C)o1

6603 C=Cc1cccc1OC.Nc1cccc(Br)c1>>COc1cccc1/C=C/c1cccc(N)c1

6604 C=Cc1cncnc1.CC(C)(C)c1ccc(N2Cc3cccc(Br)c3C2=O)cc1>>CC(C)(C)c1ccc(N2Cc3cccc(/C=C/c4cncnc4)c3C2=O)cc1

6605 C=CC(C)(O)CC/C=C(\C)CCC=C(C)C.Oc1ccc(OCc2cccc2)cc1Br>>CC(C)=CCC/C(C)=C/CCC(C)(O)/C=C/c1ccc(OCc2cccc2)cc1O

6606 C=Cc1cccc1.O=[N+](O-)c1ccc(OS(=O)(=O)C(F)(F)F)cc1>>C=C(c1cccc1)c1ccc([N+](=O)[O-]

6607 C=CC(C)OC(=O)NC.COc1cccc(I)c1>>CNC(=O)OC(C)/C=C/c1cccc(OC)c1

6608 C=CS(=O)(=O)F.Ic1ccsc1>>O=S(=O)(F)/C=C/c1ccsc1

6609 C=CC(=O)OC.O=C(c1cccc1)c1sc2cc(O)ccc2c1Oc1ccc(Br)cc1>>COC(=O)/C=C/c1ccc(Oc2c(C(=O)c3cccc3)sc3cc(O)ccc23)cc1

6610 C=Cc1ccccn1.CNC(=O)c1cccc1Sc1ccc2c(I)nn(C(C)=O)c2c1>>CNC(=O)c1cccc1Sc1ccc2c(/C=C/c3ccccn3)nn(C(C)=O)c2c1

6611 C=Cc1ccc(C)cc1.O=[N+](O-)c1ccc(Cl)cc1>>Cc1ccc(/C=C/c2ccc([N+](=O)[O-])cc2)cc1

6612 C=Cc1cccc1.O=S(=O)(Oc1cccc1)C(F)(F)F>>C=C(c1cccc1)c1cccc1

6613 C=Cc1ccc(S(=O)(=O)c2cccc2F)en1.Ic1cncnc1>>O=S(=O)(c1ccc(/C=C/c2cncnc2)nc1)c1cccc1F

6614 C=COCCCC.Cc1cc(OS(=O)(=O)C(F)(F)F)c2cccc2n1>>C=C(OCCCC)c1cc(C)nc2cccc12

6615 C=Cc1ccc(CN(C)C)cc1.COC(=O)c1cccc1Br>>COC(=O)c1cccc1/C=C/c1ccc(CN(C)C)cc1

6616 C=Cc1cccc([N+](=O)[O-])c1.Cc1ccc(Br)cc1>>Cc1ccc(/C=C/c2cccc([N+](=O)[O-])c2)cc1

6617 C=CCCN1C(=O)c2cccc2C1=O.Ic1cccc1>>O=C1c2cccc2C(=O)N1CC/C=C/c1cccc1

6618 C=Cc1cccc1C.Ic1cccc1>>Cc1cccc1/C=C/c1cccc1

6619 C=CC(=O)OCC.CCOC(=O)Cc1c(I)en(C)c1C=O>>CCOC(=O)/C=C/c1cn(C)c(C=O)c1CC(=O)OCC

6620 C=Cc1cncnc1.CCCCCCCCCCOc1ccc(I)cc1>>CCCCCCCCCOc1ccc(/C=C/c2cncnc2)cc1

6621 C=CC(C)(O)CCC=C(C)C.Oc1ccc(OCc2cccc2)cc1Br>>CC(C)=CCCC(C)(O)/C=C/c1cc(OCc2cccc2)cc1O

6622 C=Cc1ccc2c(c1)Sc1cccc1N2CC.CCn1c2cccc2c2cc(Br)ccc21>>CCN1c2cccc2Sc2cc(/C=C/c3ccc4c(c3)c3cccc3n4CC)ccc21

6623 C=CCCCCC.CC(C)(C)OC(=O)Nc1cccc(OS(=O)(=O)C(F)(F)F)c1>>C=C(CCCCCC)c1cccc(NC(=O)OC(C)(C)C)c1

6624 C=CCCO.CC(C)(C)c1cccc1OS(=O)(=O)C(F)(F)F>>C=C(CCCO)c1cccc1C(C)(C)C

6625 C=CC(=O)OC.Cc1nc(Br)c(-c2cccc2)n(Cc2cccc2)c1=O>>COC(=O)/C=C/c1nc(C)c(=O)n(Cc2cccc2)c1-c1cccc1

6626 C=COCCCC.CN(C)c1ncc(Br)cn1>>C=C(OCCCC)c1cnc(N(C)C)nc1

6627 C=CC(=O)Nc1ccc2ncn([C@H]3C[C@H](OC(=O)c4ccc(C)cc4)[C@@H](COC(=O)c4ccc(C)cc4)O3)c2c1.[C@H](C)(C)CCOCn1cc(I)c(=O)[nH]c1=O>>Cc1ccc(C(=O)OC[C@H]2O[C@H](n3cnc4ccc(NC(=O)/C=C/c5cn(COCC[Si](C)(C)C)c(=O)[nH]c5=O)cc43)C[C@@H]2OC(=O)c2ccc(C)cc2)cc1

6628 C=CC(=O)OCC.O=C1c2ccc(Br)cc2CN1CC(F)(F)F>>CCOC(=O)/C=C/c1ccc2c(c1)CN(CC(F)(F)F)C2

6629 C=CC(=O)OC.COC(=O)c1ccnc1Br>>COC(=O)/C=C/c1cccc1C(=O)OC

6630 Brc1ccc(I)cc1.C=CC(F)(F)C(F)(F)C(F)(F)C(F)(F)C(F)(F)C(F)(F)F>>FC(F)(F)C(F)(F)C(F)(F)C(F)(F)C(F)(F)C(F)(F)C(F)(F)/C=C/c1ccc(Br)cc1

6631 C=CCOc1cccc1.Fc1ccc(Br)cc1>>Fc1ccc(/C=C/COc2cccc2)cc1

6632 C=CC(=O)N1CCOCC1.[C@H]12C[C@@H]34C=C(Sc5ccc(I)cc5)C(=O)[C@@H](C)(CCC(=O)Nc5c(O)cc(C(=O)O)c5O)[C@@H]3[C@H](C)[C@@H]1C4)O2>>C[C@H]12C[C@@H]34C=C(Sc5ccc(/C=C/C(=O)N6CCOCC6)cc5)C(=O)[C@@H](C)(CCC(=O)Nc5c(O)ccc(C(=O)O)c5O)[C@@H]3[C@H](C)[C@@H]1C4)O2

6633 C=CC(=O)OCC.CCc1nc2cc(OC)ccc2c(Oc2ccc(Br)cc2)c1-c1cccc(C(F)(F)F)c1>>CCOC(=O)/C=C/c1ccc(Oc2c(-c3cccc(C(F)(F)F)c3)c(CC)nc3cc(OC)ccc23)cc1

6634 C=CC(=O)N(C)Cc1cc2cccc2n1C.CC1(C)C(=O)Nc2ncc(Br)cc21>>CN(Cc1cc2cccc2n1C)C(=O)/C=C/c1cnc2c(c1)C(C)(C)C(=O)N2

6635 C=CC(=O)OCCCC.N#Cc1ccc(Br)cc1F>>CCCCOC(=O)/C=C/c1ccc(C#N)c(F)c1

6636 C=CCN1C(=O)C(C)(C)N(C(=O)OC(C)(C)C)[C@@]1(C)c1cc(F)cc(F)c1.C[Si](C)(C)CCOCN1C(=O)  
 )C2(Cc3cnc(Cl)cc3C2)c2ccenc21>>CC(C)(C)OC(=O)N1C[C@@](C)(c2cc(F)cc(F)c2)N(C/C=C/c2cc3  
 c(en2)CC2(C3)C(=O)N(COCC[Si](C)(C)C)c3ncccc32)C(=O)C1(C)C  
 6637 C=C(C(=O)OC)[C@@H]1CC[C@@]2(C)CCC[C@@](C)(OCOC)[C@@H]2C1.Cc1ccc(I)cc1>>COC  
 O[C@]1(C)CCC[C@]2(C)CC[C@ @H]/(C=C\c3ccc(C)cc3)C(=O)OC)C[C@H]21  
 6638 Br1ccsc1.C=Cc1ccc(OC)cc1>>COc1ccc(/C=C/c2ccsc2)cc1  
 C=CC(=O)OCCCC.C[C@]12C[C@@]34C=C(Sc5ccc(I)cc5)C(=O)[C@@](C)(CCC(=O)Nc5c(O)ccc(  
 6639 C(=O)O)c5O)[C@@H]3[C@H](C[C@ @H]1C4)O2>>CCCCOC(=O)/C=C/c1ccc(SC2=C[C@]34C[C  
 @H]5C[C@H](O[C@ @]5(C)C3)[C@H]4[C@](C)(CCC(=O)Nc3c(O)ccc(C(=O)O)c3O)C2=O)cc1  
 6640 C=CC(=O)OC(C)(C)C.O=C(OCCc1ccccc1)c1cc(Br)cc(I)c1>>CC(C)(C)OC(=O)/C=C/c1cc(Br)cc(C(=  
 O)OCCc2ccccc2)c1  
 C=C[C@H]1C[C@H]2CC[C@ @H](C(=O)OC)N2C(=O)[C@@](Cc2ccccc2)(NC(=O)OCc2ccccc2)[C  
 @H]1OC(C)=O.O=[N+][O-  
 6641 ]c1ccc(Br)cc1>>COC(=O)[C@@H]1CC[C@@H]2C[C@H]/(C=C/c3ccc([N+](=O)[O-  
 ]cc3)[C@H](OC(C)=O)[C@](Cc3ccccc3)(NC(=O)OCc3ccccc3)C(=O)N12  
 6642 C=CC(=O)OCCCC.CC(C)(C)c1cc(Br)cc(C(C)(C)C)c1>>CCCCOC(=O)/C=C/c1cc(C(C)(C)C)cc(C(C)(  
 C)C)c1  
 6643 C=Cc1ccccc1.CC(C)N(C(=O)O)c1ccc(Br)cc1)C(C)C>>CC(C)N(C(=O)O)c1ccc(/C=C/c2ccccc2)cc1)C(  
 6644 C=Cc1ccccc1.Cc1cc(I)nc(C(C)C)n1>>Cc1cc(/C=C/c2ccccc2)nc(C(C)C)n1  
 C=CC(=O)O.Cc1cc(Br)c([N+](=O)[O-  
 6645 ]c(C)c1NC(=O)CC(C)(C)C>>Cc1cc(/C=C/C(=O)O)c([N+](=O)[O-])c(C)c1NC(=O)CC(C)(C)C  
 6646 C=CC(=O)OC(C)(C)C.O=c1[nH]c(=O)c2cc(Br)cnc2[nH]1>>CC(C)(C)OC(=O)/C=C/c1cnc2[nH]c(=O)  
 [nH]c(=O)c2c1  
 C=CCN(C(=O)C1(C(F)(F)F)CC1)[C@H](C)c1cc(F)cc(F)c1.O=C1Nc2ncccc2[C@@]12Cc1cc(Br)cnc1  
 6647 C2>>C[C@H](c1cc(F)cc(F)c1)N(C/C=C/c1cnc2c(c1)C[C@@]1(C2)C(=O)Nc2ncccc21)C(=O)C1(C(F  
 )(F)F)CC1  
 C=CC1COC2(CCCCC2)OC1.Cc1ccc(S(=O)(=O)n2cc(C=O)c3c(Br)cccc32)cc1>>Cc1ccc(S(=O)(=O)n  
 6648 2cc(C=O)c3c(/C=C/C4COC5(CCCCC5)OC4)cccc32)cc1  
 C=COCCCC.Cc1c(Br)c(=O)n(C2CCCC2)c2nc(Nc3ccc(N4CCN(C(=O)OC(C)(C)C)CC4)cn3)ncc12>>  
 6649 C=C(OCCCC)c1c(C)c2cnc(Nc3ccc(N4CCN(C(=O)OC(C)(C)C)CC4)cn3)nc2n(C2CCCC2)c1=O  
 C=CC(=O)CC.O=[N+][O-]c1ccc(I)cc1>>CCC(=O)/C=C/c1ccc([N+](=O)[O-])cc1  
 6650 C=CCC(C)C(=O)OCC.Cc1ccccc1Br>>CCOC(=O)C(C)C/C=C/c1ccccc1C  
 6651 C=CC(=O)OC.COC1O[C@H](COC(C)=O)[C@@H](OC(C)=O)C=C1I>>COC(=O)/C=C/C1=C[C@H  
 6652 ](OC(C)=O)[C@@H](COC(C)=O)OC1OC  
 C=Cc1ccc(F)cc1.N[C@@H](Cc1c[nH]c2ccc(Br)cc12)C(=O)O>>N[C@@H](Cc1c[nH]c2ccc(/C=C/c3  
 6653 ccc(F)cc3)cc12)C(=O)O  
 C=CC(=O)N1CCOCC1.CN(C(=O)CSCc1ccccc1)c1ccccc1Br>>CN(C(=O)CSCc1ccccc1)c1ccccc1/C=  
 6654 C/C(=O)N1CCOCC1  
 C=CC(=O)OC.CCOP(=O)(CCCN1c(=O)oc2cc(Br)cnc21)OCC>>CCOP(=O)(CCCN1c(=O)oc2cc(/C=C/  
 6655 C(=O)OC)enc21)OCC  
 C=COCCCC.O=S(=O)(OC1=CCc2ccccc21)C(F)(F)F>>C=C(OCCCC)C1=CCc2ccccc21  
 6656 C=CC(=O)OC(C)(C)C.O=C1Nc2ncc(Br)cc2CN2CCC[C@H]12>>CC(C)(C)OC(=O)/C=C/c1cnc2c(c1)  
 6657 CN1CCC[C@@H]1C(=O)N2  
 C=CC(=O)OCC.CC(=O)Nc1ccc(Br)cc1I>>CCOC(=O)/C=C/c1cc(Br)ccc1NC(C)=O  
 6658 C=CC(=O)OCC.O=S(=O)(Oc1ccccc1)C(F)(F)F>>CCOC(=O)/C=C/c1ccccc1  
 6659 C=CC(F)(F)C(F)(F)C(F)(F)C(F)(F)C(F)(F)C(F)(F)C(F)(F)C(F)(F)C(F)(F)C(F)(F)C(F)(F)F.CC(=O)c1ccc(Br)cc1>>CC(=O)c1  
 6660 ccc(/C=C/C(F)(F)C(F)(F)C(F)(F)C(F)(F)C(F)(F)C(F)(F)C(F)(F)C(F)(F)C(F)(F)C(F)(F)F)cc1  
 C=CC(=O)OCC.COc1cc(C)c(Br)c(CC#N)c1>>CCOC(=O)/C=C/c1c(C)cc(OC)cc1CC#N  
 6661 C=Cc1ccc(OC)cc1.COc1ccc(Br)c(N)c1>>COc1ccc(/C=C/c2ccc(OC)cc2N)cc1  
 6662 C=CC(C)(O)CCC=C(C)C.Cc1ccc(O)c(Br)c1>>CC(C)=CCCC(C)(O)/C=C/c1cc(C)ccc1O  
 6663 C=Cc1cccn1.O=[N+][O-]c1cccc(Br)c1>>O=[N+][O-]c1cccc(/C=C/c2cccn2)c1  
 6664 C=CC(=O)OC(C)(C)C.O=[N+][O-]c1ccc(I)cc1>>CC(C)(C)OC(=O)/C=C/c1ccc([N+](=O)[O-])cc1  
 6665 COC[C@@H]/(N=C\c1ccccc1)N1C=CCC[C@H]1C(C)C.Ic1cccs1>>COC[C@@H]/(N=C\c1ccccc  
 6666 1)N1C=C(c2cccs2)CC[C@H]1C(C)C  
 Br1ccc2c(c1)OCO2.C=C(NC(C)=O)C(=O)O>>CC(=O)N/C=C\c1ccc2c(c1)OCO2)C(=O)O  
 6667 C=CC(=O)OCC.Cc1nnn(Cc2cc(C#N)ccc2Br)n1>>CCOC(=O)/C=C/c1ccc(C#N)cc1Cn1nnc(C)n1  
 6668 C=Cc1ccc2[nH]c([C@@H]3CCCN3C(=O)OC(C)(C)C)nc2c1.CC(C)(C)OC(=O)N1CCC[C@H]1c1nc(-  
 6669 c2ccc(Br)s2)c[nH]1>>CC(C)(C)OC(=O)N1CCC[C@H]1c1nc(-  
 c2ccc(/C=C/c3ccc4[nH]c([C@@H]5CCCN5C(=O)OC(C)(C)C)nc4c3)s2)c[nH]1  
 6670 C=CC(=O)OCc1ccccc1.CCOC(=O)/C=C/c1ccc2ccc(Br)cc2c1>>CCOC(=O)/C=C/c1ccc2ccc(/C=C/C(=  
 O)OCc3ccccc3)cc2c1

6671 \*CNCCCCOCCOCCOCCNC(=O)COc1ccc(C(Cc2cc(OC)cc(OC)c2)NC(=O)c2ccc(C=C)cc2)cc1.Fc1cc  
 c(I)c(F)c1>>\*CNCCCCOCCOCCOCCNC(=O)COc1ccc(C(Cc2cc(OC)cc(OC)c2)NC(=O)c2ccc(/C=C/c  
 3ccc(F)cc3F)cc2)cc1  
 6672 C=Cc1cccc1.N#Cc1ccc(N)c(Br)c1>>N#Cc1ccc(N)c(/C=C/c2ccccc2)c1  
 6673 C=Cc1ccc(Cl)cc1.C[Si](C)(OS(=O)(=O)C(F)(F)F)OS(=O)(=O)C(F)(F)F>>C[Si](C)(/C=C/c1ccc(Cl)cc  
 1)OS(=O)(=O)C(F)(F)F  
 6674 C=CC(=O)OCC.COc1ccc(Oc2cc(Br)ccc2NC[C@@H]2CCCN2C(=O)OC(C)(C)C)cc1>>CCOC(=O)/C  
 =C/c1ccc(NC[C@@H]2CCCN2C(=O)OC(C)(C)C)c(Oc2ccc(OC)cc2)c1  
 6675 C=C[C@@](C)(/C=C/c1ccc(O)cc1)CCC=C(C)C.Oc1ccc(I)cc1>>CC(C)=CCCC(C)(/C=C/c1ccc(O)cc1  
 )/C=C/c1ccc(O)cc1  
 6676 C=CC(=O)OC(C)(C)C.O=C(c1cccc1)c1ccc(Br)cc1>>CC(C)(C)OC(=O)/C=C/c1ccc(C(=O)c2ccccc2)c  
 6677 C=CC(=O)OCC.Cc1ccc(C2OCCCO2)c(Br)c1>>CCOC(=O)/C=C/c1cc(C)ccc1C1OCCCO1  
 6678 C=CCNC(=O)c1cccc1NC(=O)c1cccc1.COc1ccc(I)cc1>>COc1ccc(/C=C/CNC(=O)c2ccccc2NC(=O)  
 c2ccccc2)cc1  
 6679 C=Cc1ccc2ccccc2c1.FC(F)(F)Cl>>FC(F)(F)C/C=C/c1ccc2ccccc2c1  
 6680 C=Cc1ccc(N(C)C)cc1.C[Si](C)(OS(=O)(=O)C(F)(F)F)OS(=O)(=O)C(F)(F)F>>CN(C)c1ccc(/C=C/[Si](  
 C)(C)OS(=O)(=O)C(F)(F)F)cc1  
 6681 C=Cn1nnc(SC)n1.Ic1cccc1>>CSc1nnn(/C=C/c2ccccc2)n1  
 C=Cc1nc2c(=O)[nH]c(NC(=O)C(C)C)nc2n1[C@@H]1O[C@H](CO[Si](C)(C)C(C)(C)C)[C@@H](O[  
 Si](C)(C)C(C)(C)C)[C@H]1O[Si](C)(C)C(C)(C)C.CC(C)(C)[Si](C)(C)OC[C@H]1O[C@@H](n2cc(I)  
 6682 c(N)nc2=O)[C@H](O[Si](C)(C)C(C)(C)C)[C@@H]1O[Si](C)(C)C(C)(C)C>>CC(C)C(=O)Nc1nc2c(n  
 c(/C=C/c3cn([C@@H]4O[C@H](CO[Si](C)(C)C(C)(C)C)[C@@H](O[Si](C)(C)C(C)(C)C)[C@H]4O[  
 Si](C)(C)C(C)(C)C)c(=O)nc3N)n2[C@@H]2O[C@H](CO[Si](C)(C)C(C)(C)C)[C@@H](O[Si](C)(C)  
 C(C)(C)C)[C@H]2O[Si](C)(C)C(C)(C)C)c(=O)[nH]1  
 6683 C=Cc1ccc2c(c1)OCO2.Cn1c(=O)c2c(cc(Br)n2C)n(C)c1=O>>Cn1c(=O)c2c(cc(/C=C/c3ccc4c(c3)OCO  
 4)n2C)n(C)c1=O  
 6684 C=CC(=O)OCC.Ic1cnn(CC2CC2)c1>>CCOC(=O)/C=C/c1cnn(CC2CC2)c1  
 6685 C=CCCO.CC(C)(C)c1ccc(Br)cc1>>C=C(CCO)c1ccc(C(C)(C)C)cc1  
 6686 C=CC(=O)OC(C)(C)C.Fc1cc(C(F)(F)F)cc(F)c1Br>>CC(C)(C)OC(=O)/C=C/c1c(F)cc(C(F)(F)F)cc1F  
 6687 C=CC(C)=O.Nc1c(Br)cncc1I>>CC(=O)/C=C/c1cncc(Br)c1N  
 6688 C=Cc1ccc(OC)cc1.FC(F)(F)Oc1cccc(I)c1>>COc1ccc(/C=C/c2cccc(OC(F)(F)F)c2)cc1  
 6689 C=Cc1ccc(OC)cc1.Oc1cccc1I>>COc1ccc(/C=C/c2ccccc2O)cc1  
 6690 C=C/C=C(\CCCC)OCC.COc1ccc(I)cc1>>CCCC/C=C\C=C\c1ccc(OC)cc1)OCC  
 6691 C=CP(=O)(OCC)OCC.FC(F)(F)c1ccc(Br)cc1>>CCOP(=O)(/C=C/c1ccc(C(F)(F)F)cc1)OCC  
 6692 C=CC(=O)OC.CCOC(=O)Nc1cccc1C1=C(I)CCN1S(=O)(=O)c1ccc(C)cc1>>CCOC(=O)Nc1cccc1C  
 1=C(/C=C/C(=O)OC)CCN1S(=O)(=O)c1ccc(C)cc1  
 6693 C=CCCCC#N.CC(C)(C)c1ccc(Br)cc1>>C=C(CCCC#N)c1ccc(C(C)(C)C)cc1  
 6694 C=CC(OCC)OCC.CCCN1c2ccccc2Sc2cc(Br)ccc21>>CCCN1c2ccccc2Sc2cc(/C=C/C(OCC)OCC)ccc2  
 6695 CC(=O)/C=C/CC(NS(=O)(=O)c1ccc(C)cc1)C1CCCCC1.Cc1ccc(Br)cc1>>CC(=O)/C=C(/CC(NS(=O)(  
 =O)c1ccc(C)cc1)C1CCCCC1)c1ccc(C)cc1  
 6696 C=C(c1ccc(C)cc1)N(C)C(C)=O.CCOC(=O)CCCB>>CCOC(=O)CCC/C=C(\c1ccc(C)cc1)N(C)C(C)=  
 6697 C=CC(=O)OCC.Cc1cc(C)nc(I)n1>>CCOC(=O)/C=C/c1nc(C)cc(C)n1  
 6698 C=CC(=O)N1CCCCC1.Nc1nc(Br)ccc1-c1cccc1>>Nc1nc(/C=C/C(=O)N2CCCCC2)ccc1-c1cccc1  
 6699 C=CCN1C(=O)c2ccccc2C1=O.FC(F)(F)c1ccc(Br)cc1>>O=C1c2ccccc2C(=O)N1C/C=C/c1ccc(C(F)(F)  
 F)cc1  
 6700 C=Cc1ccc(N2CCN(C(=O)OC(C)(C)C)CC2)cc1.Clc1cc(Br)cc(Cn2ccnc2)c1>>CC(C)(C)OC(=O)N1CC  
 N(c2ccc(/C=C/c3cc(Cl)cc(Cn4ccnc4)c3)cc2)CC1  
 6701 C=CC(=O)OCC.Nc1ccc(I)cc1>>CCOC(=O)/C=C/c1ccc(N)cc1  
 6702 C=CCCCCCC.Oc1cccc1Br>>CCCCC/C=C/c1cccc1CO  
 6703 C=CC(=O)OCCN(C)C.O=C(Nc1cccc(Cl)c1)c1cc(=O)c2cc(Br)ccc2o1>>CN(C)CCOC(=O)/C=C/c1ccc  
 2oc(C(=O)Nc3cccc(Cl)c3)cc(=O)c2c1  
 6704 C=CC(=O)OC.O=C1NCCN1c1ccc(Br)cc1F>>COC(=O)/C=C/c1ccc(N2CCNC2=O)c(F)c1  
 6705 C=CC(=O)OC.COc1ccc2nc(-c3ccccc3)c(I)n2c1>>COC(=O)/C=C/c1c(-c2ccccc2)nc2ccc(OC)cn12  
 6706 C=CC(=O)OC.COC(=O)c1cccc(I)c1>>COC(=O)/C=C/c1cccc(C(=O)OC)c1  
 6707 C=CC(=O)OC.COC(=O)c1cc(C)cc(I)c1>>COC(=O)/C=C/c1cc(C)cc(C(=O)OC)c1  
 6708 C=CC(=O)OCCCC.CNc1cc(Cl)ccc1[N+](=O)[O-]>>CCCCOC(=O)/C=C/c1ccc([N+](=O)[O-  
 6709 C=Cc1cccc1.Cc1cc(C)c(Br)c(C)c1>>Cc1cc(C)c(/C=C/c2ccccc2)c(C)c1  
 6710 C=C[C@@](C)(/C=C/c1ccc(O)cc1)CCC=C(C)C.COc1ccc(Br)cc1C=O>>COc1ccc(/C=C/[C@@](C)(/  
 C=C/c2ccc(O)cc2)CCC=C(C)C)cc1C=O  
 6711 C=CC(N)=O.COc1ccc(Br)cc1>>COc1ccc(/C=C/C(N)=O)cc1  
 6712 C=Cc1cccc1.Cn1c(=O)c2c(cc(Br)n2C)n(C)c1=O>>Cn1c(=O)c2c(cc(/C=C/c3ccccc3)n2C)n(C)c1=O

6713 C=COCCCC.N#Cc1ccc(Cl)cc1>>C=C(OCCCC)c1ccc(C#N)cc1  
6714 C=CC(=O)O.Cn1c(=O)oc2cc(Br)cnc21>>Cn1c(=O)oc2cc(/C=C/C(=O)O)cnc21  
6715 C=CC(=O)OC(C)(C)C.O=S(=O)(c1cccc(Br)c1)c1ccc2cccc(Cl)c2n1>>CC(C)(C)OC(=O)/C=C/c1cccc(S(=O)(=O)c2ccc3cccc(Cl)c3n2)c1  
6716 C=CC(=O)OC(C)(C)C.COC(=O)/C=C/c1cccc(N(Cc2ccc(Br)cc2)C(=O)C2CCCCC2)c1>>COC(=O)/C=C/c1cccc(N(Cc2ccc(/C=C/C(=O)OC(C)(C)C)cc2)C(=O)C2CCCCC2)c1  
6717 C=CC(=O)N1[C@@H]2C[C@H]3CC[C@]2(CS1(=O)=O)C3(C)C.Clc1ccc(I)cn1>>CC1(C)[C@@H]2CC[C@]13CS(=O)(=O)N(C(=O)/C=C/c1ccc(Cl)nc1)[C@@H]3C2  
6718 C=CC(=O)OC(C)(C)C.O=C(C=C(c1cccc1)c1cccc1)c1cccc1Br>>CC(C)(C)OC(=O)/C=C/c1cccc1C(=O)C=C(c1cccc1)c1cccc1  
6719 C=Cc1cccc([N+](=O)[O-])c1.COC(=O)c1cccc1I>>COC(=O)c1cccc1/C=C/c1cccc([N+](=O)[O-])c1  
6720 C=Cc1ccc([Si](OC)(OC)OC)cc1.CCOP(=O)(Cc1ccc(/C=C/c2ccc(-c3ccc(Br)cc3)cc2)cc1)OCC>>CCOP(=O)(Cc1ccc(/C=C/c2ccc(-c3ccc(/C=C/c4ccc([Si](OC)(OC)OC)cc4)cc3)cc2)cc1)OCC  
6721 C=Cc1ccc(C(C)(C)C)cc1.O=[N+](=[O-])c1ccc(I)cc1>>CC(C)(C)c1ccc(/C=C/c2ccc([N+](=O)[O-])cc2)cc1  
6722 C=Cc1cccc1.Cn1c2cccc2c2cc(I)cc21>>Cn1c2cccc2c2cc(/C=C/c3cccc3)cc21  
6723 C=CC(=O)OCC.Cc1nc(-n2c(C)ccc2C)cc(NC2CCCC2)c1Br>>CCOC(=O)/C=C/c1c(NC2CCCC2)cc(-n2c(C)ccc2C)nc1C  
6724 C=CC(=O)OCC.OCc1ccc(I)c(OCCc2ccc3cccc3e2)c1>>CCOC(=O)/C=C/c1ccc(CO)cc1OCCc1ccc2ccc2c1  
6725 C=CC(=O)OC(C)(C)C.COC1CCC(C2=C[C@@H]3CC[C@H](OC(C)(C)C)[C@@]3(C)CC2)=C(Br)C1>>COC1CCC(C2=C[C@@H]3CC[C@H](OC(C)(C)C)[C@@]3(C)CC2)=C(/C=C/C(=O)OC(C)(C)C)C=C[C@@H](CC(=O)OC(C)(C)C)NC(=O)c1cc(-c2c(OC)cccc2OC)n(C2CCCC2)n1.Fc1ccc(Br)cc1>>COc1cccc(OC)c1-c1cc(C(=O)N[C@@H](/C=C/c2ccc(F)cc2)CC(=O)OC(C)(C)C)nn1C1CCCC1  
6727 Br1ccc2ccc3cccc4ccc1c2c34.C=CP(=O)(OCC)OCC>>CCOP(=O)(/C=C/c1ccc2ccc3cccc4ccc1c2c34)  
6728 C=CCOC(C)=O.Cc1cccc(I)c1>>CC(=O)OC/C=C/c1cccc(C)c1  
6729 BrC1CCCCC1.C=Cc1ccc(OC)cc1>>COc1ccc(/C=C/C2CCCCC2)cc1  
6730 C=CCn1ccnc1.CC(=O)OCC1Cn2c3ccc(CO)cc3c3c4c(c5c6cc(Br)ccc6n(c5c32)C1)C(=O)N(C(C)=O)C4>>CC(=O)OCC1Cn2c3ccc(CO)cc3c3c4c(c5c6cc(/C=C/Cn7ccnc7)ccc6n(c5c32)C1)C(=O)N(C(C)=O)C  
6731 C=CC(=O)OCCCC.CC(C)=C(C)Br>>CCCCOC(=O)/C=C/C(C)=C(C)C  
6732 C=CC(=O)NCCN(CCCNC(=O)OC(C)(C)C)C(=O)OC(C)(C)C.COC(=O)N[C@H]1[C@@H](Oc2ccc(I)cc2)O[C@H](C)[C@@H](OC(C)=O)[C@@H]1OC(C)=O>>COC(=O)N[C@H]1[C@@H](Oc2ccc(/C=C/C(=O)NCCN(CCCNC(=O)OC(C)(C)C)C(=O)OC(C)(C)C)cc2)O[C@H](C)[C@@H](OC(C)=O)[C@@H]1OC(C)=O  
6733 C=CC(O)c1cccc1Br.COc1ccc(I)c(OC)c1OC>>COc1ccc(/C=C/C(O)c2cccc2Br)c(OC)c1OC  
6734 C=CC(=O)OC.Cc1cc([N+](=O)[O-])c(Cl)cc1I>>COC(=O)/C=C/c1cc(Cl)c([N+](=O)[O-])cc1C  
6735 Br1ccc2nccn2c1.C=CC(C)(C)O>>CC(C)(O)/C=C/c1ccc2nccn2c1  
6736 C=Cc1ccnc1.O=Cc1ccc(N(c2ccc(Br)cc2)c2ccc(C=O)cc2)cc1>>O=Cc1ccc(N(c2ccc(C=O)cc2)c2ccc(/C=C/c3ccncc3)cc2)cc1  
6737 C=CC(=O)OCCCC.Cc1cccc(I)c1>>CCCCOC(=O)/C=C/c1cccc(C)c1  
6738 C=CC(=O)OCC.Cc1nc(-n2c(C)ccc2C)cc(NC2CC2)c1Br>>CCOC(=O)/C=C/c1c(NC2CC2)cc(-n2c(C)ccc2C)nc1C  
6739 C=CC(=O)Oc1cccc1.COc1ccc(I)cc1>>COc1ccc(/C=C/C(=O)Oc2cccc2)cc1  
6740 Br1cccc1I.C=CC(=O)N(C)C>>CN(C)C(=O)/C=C/c1cccc1Br  
6741 Br1cc2c(cc1C1OCCO1)OCO2.C=CC(=O)OC>>COC(=O)/C=C/c1cc2c(cc1C1OCCO1)OCO2  
6742 C=CC(OC)OCC.O=Cc1ccc(Cl)cc1>>CCOC(/C=C/c1ccc(C=O)cc1)OCC  
6743 C=CCCCC.Oc1ccc(O)c(Br)c1>>CCCC/C=C/c1cc(O)ccc1O  
6744 C=CC(=O)OC(C)(C)C.COc1cc(Br)c(COCCC(=O)OC(C)(C)C)cc1OC>>COc1cc(/C=C/C(=O)OC(C)(C)C)c(COCCC(=O)OC(C)(C)C)cc1OC  
6745 C=C(F)C(=O)OC.Ic1ccsc1>>COC(=O)/C(F)=C/c1ccsc1  
6746 C=Cc1cccc1.O=C(/C=C/c1c[nH]c2ccc(Cl)cc12)c1ccc(I)cc1>>O=C(/C=C/c1c[nH]c2ccc(Cl)cc12)c1ccc(/C=C/c2cccc2)cc1  
6747 C=CB1OC(C)CC(C)(C)O1.COc1ccc(I)cc1>>COc1ccc(/C=C/B2OC(C)CC(C)(C)O2)cc1  
6748 C=C[13C](=O)N(Cc1cccc1)OC.CC1=C(OS(=O)(=O)C(F)(F)F)C(C)(C)CCC1>>CON(Cc1cccc1)[13C](=O)/C=C/C1=C(C)CCCC1(C)C  
6749 C=CC(=O)OCC.Oc1cccc1I>>CCOC(=O)/C=C/c1cccc1O  
6750 C=CC(=O)OC.NC(=O)c1ccc(-c2cn(S(=O)(=O)c3cccc3)c3ncc(Br)cc23)cc1>>COC(=O)/C=C/c1cnc2c(c1)c(-c1ccc(C(N)=O)cc1)cn2S(=O)(=O)c1cccc1  
6751 C=CC(=O)OCC.COC(=O)c1ccc(I)cc1>>CCOC(=O)/C=C/c1ccc(C(=O)OC)cc1

6752 C=CC(=O)OCC.CC(C)(C)OC(=O)NCCCCc1ccc(C#N)ccc1I>>CCOC(=O)/C=C/c1ccc(C#N)cc1OCCC  
 NC(=O)OC(C)(C)C  
 6753 C=CCOc1ccc(OC)cc1.Cc1ccc(I)cc1>>COc1ccc(OC/C=C/c2ccc(C)cc2)cc1  
 C=CCOc1cccc1.CC(C)(C)OC(=O)/C=C/c1ccc(CN(C(=O)C2CCCCC2)c2cccc(Br)c2)cc1>>CC(C)(C)  
 6754 OC(=O)/C=C/c1ccc(CN(C(=O)C2CCCCC2)c2cccc(/C=C/C/COc3cccc3)c2)cc1  
 6755 C=CCCCCCCCC.CC(=O)c1ccc(Br)cc1>>CCCCCCC/C=C/c1ccc(C(C)=O)cc1  
 6756 C=CC(=O)OC.FS(F)(F)(F)c1cccc(I)c1>>COC(=O)/C=C/c1cccc(S(F)(F)(F)F)c1  
 6757 C=CC(C)(C)C.O=C(c1cccc1)c1ccc(Br)cc1>>CC(C)(C)/C=C/c1ccc(C(=O)c2cccc2)cc1  
 6758 Brclccsc1.C=CS(N)(=O)=O>>NS(=O)(=O)/C=C/c1ccsc1  
 6759 C=Cc1ccc(OC)cc1.Fc1ccc(Br)cc1>>COc1ccc(/C=C/c2ccc(F)cc2)cc1  
 6760 C=C.CC(=O)Nc1cc(Cl)ccc1Br>>C=Cc1ccc(Cl)cc1NC(C)=O  
 6761 C=CC(=O)OCC.CCOC(=O)c1ccc(-c2cccc2I)cc1>>CCOC(=O)/C=C/c1cccc1-c1ccc(C(=O)OCC)cc1  
 6762 C=CCC(C)O.COc1nccc(Br)c1>>COc1nccc(/C=C/CC(C)O)c1  
 6763 C=Cc1ccc(Cl)cc1.O=c1cc(-c2cccc2)oc2cc(Br)ccc12>>O=c1cc(-  
 c2cccc2)oc2cc(/C=C/c3ccc(Cl)cc3)ccc12  
 6764 C=CC(F)(F)C(F)(F)C(F)(F)C(F)(F)C(F)(F)F.Fc1ccc(Br)cc1>>Fc1ccc(/C=C/C(F)(F)C(F)(F)C(F)  
 )(F)C(F)(F)C(F)(F)C(F)(F)F)cc1  
 C=CC(=O)NC(C)C.CCc1nc2cc(O)ccc2c(Oc2ccc(Br)cc2)c1-  
 6765 c1cccc1>>CCc1nc2cc(O)ccc2c(Oc2ccc(/C=C/C(=O)NC(C)C)cc2)c1-c1cccc1  
 6766 C=Cc1cccc1O.COc1cccc1Br>>COc1cccc1/C=C/c1cccc1O  
 6767 C=Cc1cccc1.O=C(Oc1cccc1)c1ccc(Br)cc1>>O=C(Oc1cccc1)c1ccc(/C=C/c2cccc2)cc1  
 6768 C=Cc1cc(OC)cc(OC)c1.O=C(O)c1ccc(Br)cc1>>COc1cc(/C=C/c2ccc(C(=O)O)cc2)cc(OC)c1  
 6769 C=CC(OCC)OCC.Fc1ccc(I)cc1>>CCOC(/C=C/c1ccc(F)cc1)OCC  
 6770 C=CC(=O)OC.Oc1ccc2cc(Br)ccc2c1>>COC(=O)/C=C/c1ccc2cc(CO)ccc2c1  
 6771 C=CC(=O)OC.CC1(C)CC(=C(c2ccc(Br)cc2)c2ccc3c(cnn3C3CCCCO3)c2)CC(C)(C)C1>>COC(=O)/C  
 =C/c1ccc(C(=C2CC(C)(C)CC(C)(C)C2)c2ccc3c(cnn3C3CCCCO3)c2)cc1  
 C=CCCO.CC(=O)OC[C@H]1O[C@H](Oc2n[nH]c(C(C)C)c2Cc2ccc(Br)cc2C)[C@H](OC(C)=O)[C  
 6772 @H](OC(C)=O)[C@H]1OC(C)=O>>CC(=O)OC[C@H]1O[C@H](Oc2n[nH]c(C(C)C)c2Cc2cc  
 c(/C=C/CCO)cc2C)[C@H](OC(C)=O)[C@H]1OC(C)=O[C@H](OC(C)=O)[C@H]1OC(C)=O  
 6773 C=Cc1cccc1.Fc1ccc(I)cc1F>>Fc1ccc(/C=C/c2cccc2)cc1F  
 6774 C=CC[C@H](NC(=O)OC(C)(C)C)C(=O)OC.COC(=O)c1ccsc1Br>>COC(=O)c1ccsc1/C=C/C[C@H]  
 (NC(=O)OC(C)(C)C)C(=O)OC  
 6775 Brclcccc1.C=CC(=O)N(C)OC>>CON(C)C(=O)/C=C/c1cccc1  
 Brclnc2cccc2c1.C=CCO/N=C1/[C@H](C)[C@H]2OC(=O)O[C@H]2(C)[C@H](CC)OC(=O)[C@H]  
 6776 (C)[C@H](O)[C@H](C)[C@H](O)[C@H]2O[C@H](C)C[C@H](N(C)C)[C@H]2OC(C)=O)[C@H]  
 (C)(OC)C[C@H]1C>>CC[C@H]1OC(=O)[C@H](C)[C@H](O)[C@H](C)[C@H](O)[C@H]2O[C  
 @H](C)C[C@H](N(C)C)[C@H]2OC(C)=O)[C@H](C)(OC)C[C@H](C)/C=N\OC/C=C/c2cnc3cccc  
 3c2)[C@H](C)[C@H]1OC(=O)O[C@H]12C  
 6777 C=CC(=O)OC.Ic1ccc(-c2ccsc2)s1>>COC(=O)/C=C/c1ccc(-c2ccsc2)s1  
 6778 Brclccsc1.C=COCCCC>>C=C(OCCCC)c1ccsc1  
 6779 C=CC(=O)N1[C@H]2C[C@H]3CC[C@H]2(CS1(=O)=O)C3(C)C.Ic1cccc1>>CC1(C)[C@H]2CC[C@H]  
 @H]13CS(=O)(=O)N(C(=O)/C=C/c1cccc1)[C@H]3C2  
 6780 C=Cc1cccn2nc(Cl)nc12.CN(c1cccc1Br)S(C)(=O)=O>>CN(c1cccc1/C=C/c1cccn2nc(Cl)nc12)S(C)=(  
 O)=O  
 6781 C=CCNC(=O)c1cccc1NC(=O)c1cccc1.Cc1ccc(I)cc1>>Cc1ccc(/C=C/CNC(=O)c2cccc2NC(=O)c2c  
 cccc2)cc1  
 6782 C=Cc1cccc1.Clc1ccsc1>>C(=C/c1ccsc1)\c1cccc1  
 C=C(NC(=O)OCC[Si](C)(C)C)C(=O)OC.CC(C)(C)OC(=O)N/C(=C/c1ccc(Br)cc1)C(=O)OCc1cccc1>  
 6783 >COC(=O)/C=C/c1ccc(/C=C\NC(=O)OC(C)(C)C(=O)OCc2cccc2)cc1)NC(=O)OCC[Si](C)(C)C  
 6784 Brclccc2cccc2c1.C=Cc1ccc(OC)cc1>>COc1ccc(/C=C/c2ccc3cccc3c2)cc1  
 C=CC(C)(C)C(=O)NC(C)(C)CO.COc1cc(Br)ccc1Cc1cc([C@H]2O[C@H](COC(C)=O)[C@H](O  
 6785 C(C)=O)[C@H](OC(C)=O)[C@H]2OC(C)=O)c(C)cc1C>>COc1cc(/C=C/C(C)(C)C(=O)NC(C)(C)CO)  
 ccc1Cc1cc([C@H]2O[C@H](COC(C)=O)[C@H](OC(C)=O)[C@H](OC(C)=O)[C@H]2OC(C)=O  
 6786 C=CC1CC(OC)=CC(=O)O1.COc1ccc(I)cc1>>COC1=CC(=O)OC(/C=C/c2ccc(OC)cc2)C1  
 6787 C=Cc1cccn1.Cn1ccc(Br)n1>>Cn1ccc(/C=C/c2cccn2)n1  
 6788 C=Cc1cccc(Cl)c1.O=S(=O)(c1cccc1)C(F)(F)Br>>O=S(=O)(c1cccc1)C(F)(F)/C=C/c1cccc(Cl)c1  
 6789 C=CC(=O)OCC.FC(F)(F)c1ccc(I)c(Cl)c1>>CCOC(=O)/C=C/c1ccc(C(F)(F)F)cc1Cl  
 6790 C=Cc1cccc1.O=C(O)c1ccc(Br)c1>>O=C(O)c1ccc(/C=C/c2cccc2)c1  
 6791 C=CC(=O)OC.Cc1ccc(N)c(I)c1>>COC(=O)/C=C/c1cc(C)ccc1N  
 6792 C=Cc1cccn1.CCOP(=O)(Cc1ccc(Br)cc1)OCC>>CCOP(=O)(Cc1ccc(/C=C/c2cccn2)cc1)OCC



6793 C=Cc1ccncc1.CCN1c2ncc(Br)cc2C(=O)N(C)c2ccc(F)nc21>>CCN1c2ncc(/C=C/c3ccncc3)cc2C(=O)N(C)c2ccc(F)nc21

6794 C=CS(N)(=O)=O.Cc1cc(C)c(Br)c(C)c1>>Cc1cc(C)c(/C=C/S(N)(=O)=O)c(C)c1

6795 C=CC(=O)OCC.COc1ccc(Cn2nc(I)c3ccncc32)cc1>>CCOC(=O)/C=C/c1nn(Cc2ccc(OC)cc2)c2ncccc12

6796 C=CCC(=O)O.Cc1cc(Cl)ccc1Cc1cc([C@@H]2S[C@H](COCc3ccccc3)[C@@H](OCc3ccccc3)[C@H](OCc3ccccc3)[C@H]2OCc2cccc2)c(OCc2cccc2)cc1C>>Cc1cc(/C=C/CC(=O)O)ccc1Cc1cc([C@@H]2S[C@H](COCc3ccccc3)[C@@H](OCc3ccccc3)[C@H](OCc3ccccc3)[C@H]2OCc2cccc2)c(OCc2cC=Cc1ccncc2cccc12.CCCCCN(CCCCC)c1ccc(Br)c(Cl)c1>>CCCCCN(CCCCC)c1ccc(/C=C/c2ccncc3cccc23)c(Cl)c1

6797

6798 C=Cc1ccc(OC)cc1.O=[N+][O-]c1ccc(Br)cc1>>COc1ccc(/C=C/c2ccc([N+](=O)[O-])cc2)cc1

6799 C=Cc1ccc(C)cc1.O=Cc1ccc(Cl)cc1>>Cc1ccc(/C=C/c2ccc(C=O)cc2)cc1

6800 C=CC(=O)OCCCC.COc1cc(Br)cc(OC)c1OC>>CCCCOC(=O)/C=C/c1cc(OC)c(OC)c(OC)c1

6801 OCCOCCOCCOc1ccc(I)cn1.[2H]C([2H])([2H])N(C(=O)OC(C)(C)C)c1ccc(C=C)cc1>>[2H]C([2H])([2H])N(C(=O)OC(C)(C)C)c1ccc(/C=C/c2ccc(OCCOCCOCCO)nc2)cc1

6802 C=C(C)C.ClC(c1cccc1)c1cccc1>>CC(C)=CC(c1cccc1)c1cccc1

6803 C=Cc1ccc(C)cc1.Clc1cccc1>>Cc1ccc(/C=C/c2cccc2)cc1

6804 C=CC(N)=O.Cc1cc(Br)cc(C)c1N>>Cc1cc(/C=C/C(N)=O)cc(C)c1N

6805 C=CC(=O)O.Cc1cccc(S(=O)(=O)Nc2ccc(I)cc2)c1>>Cc1cccc(S(=O)(=O)Nc2ccc(/C=C/C(=O)O)cc2)c1

6806 C=CS(=O)(=O)F.O=[N+][O-]c1ccc(I)cc1>>O=[N+][O-]c1ccc(/C=C/S(=O)(=O)F)cc1

6807 C=CC(=O)OC.Cc1cc2cc(Br)ccc2[nH]1>>COC(=O)/C=C/c1ccc2[nH]c(C)cc2c1

6808 C=CC(=O)OCCCC.FC(F)(F)c1ccc(I)cc1>>CCCCOC(=O)/C=C/c1ccc(C(F)(F)F)cc1

6809 C=Cc1ccc(C=C)cc1.Nc1ccc(I)cc1>>C=Cc1ccc(/C=C/c2ccc(N)cc2)cc1

6810 C=CC(C)=O.CCOC(=O)c1cn(CC)c2nc(C)c(Br)cc2c1=O>>CCOC(=O)c1cn(CC)c2nc(C)c(/C=C/C(C)=O)cc2c1=O

6811 C=CC(OC(C)=O)C(C)C.Ic1cccc1>>CC(=O)OC(/C=C/c1cccc1)C(C)C

6812 CC(=O)/C=C/CC(NS(=O)(=O)c1ccc(C)cc1)c1cccc1.CCOC(=O)c1ccc(Br)cc1>>CCOC(=O)c1ccc(/C=C/C(C)=O)CC(NS(=O)(=O)c2ccc(C)cc2)c2cccc2)cc1

6813 Br1ccc2c(c1)OCO2.C=Cc1ccc(OC(C)=O)cc1>>CC(=O)Oc1ccc(/C=C/c2ccc3c(c2)OCO3)cc1

6814 C=CC#N.COc1ccc(I)cc1CC(C)C>>COc1ccc(/C=C/C#N)cc1CC(C)C

6815 C=CC(=O)OC.Cc1ccc(NC(=O)OC(C)(C)C)c(Br)c1>>COC(=O)/C=C/c1cc(C)ccc1NC(=O)OC(C)(C)C

6816 C=Cl.C=C[Si](OC)(OC)OC>>C=C/C=C/[Si](OC)(OC)OC

6817 C=Cc1cccc1.COc1ccc(Br)c(N)c1>>COc1ccc(/C=C/c2cccc2)c(N)c1

6818 C=C[C@@H]1CCCCN1C(=O)OC(C)(C)C.Ic1cccc1>>CC(C)(C)OC(=O)N1CCCC[C@H]1/C=C/c1cc

6819 C=CN1CCCCC1=O.Cc1ccc(OS(=O)(=O)C(F)(F)F)c(Br)c1>>C=C(c1ccc(C)cc1Br)N1CCCCC1=O

6820 C=CC(=O)OC.O=c1oc2cc(Br)enc2n1CCc1ccncc1>>COC(=O)/C=C/c1cnc2c(c1)oc(=O)n2CCc1ccncc1

6821 C=CC(C)OC(C)=O.Ic1cccc1>>CC(=O)OC(C)/C=C/c1cccc1

6822 C=COCCCC.O=S(=O)(Oc1ccc2c(c1)OCO2)C(F)(F)F>>C=C(OCCCC)c1ccc2c(c1)OCO2

6823 C=CC(=O)OCC.CCOC(=O)CCOCc1cc(OCc2cccc2)c(OC)cc1Br>>CCOC(=O)/C=C/c1cc(OC)c(OCc2cccc2)cc1COCCC(=O)OCC

6824 C=C1CC(c2ccc(C)cc2)OC1=O.Clc1cccc(I)c1>>Cc1ccc(C2C/C(=C/c3cccc(Cl)c3)C(=O)O2)cc1

6825 C=CC(=O)OC(C)(C)C.Cc1ccc2c(Br)ccc(N(C)C)c2n1>>Cc1ccc2c(/C=C/C(=O)OC(C)(C)C)ccc(N(C)C)c2n1

6826 C=CC(=O)OC.O=c1[nH]c(=O)n([C@@H]2O[C@H](CO)[C@@H](O)[C@H]2O)cc1I>>COC(=O)/C=C/c1cn([C@@H]2O[C@H](CO)[C@@H](O)[C@H]2O)c(=O)[nH]c1=O

6827 C=CCOCCCCCCC#N.CC(C)N(CC[C@H](c1cccc1)c1cc(Br)ccc1OCc1cccc1)C(C)C>>CC(C)N(CC[C@H](c1cccc1)c1cc(/C=C/CCOCCCCCCC#N)ccc1OCc1cccc1)C(C)C

6828 C=CCc1cccc1.CC(C)(C)c1cccc1OS(=O)(=O)C(F)(F)F>>C=C(Cc1cccc1)c1cccc1C(C)(C)C

6829 C=CC(N)=O.CC1(C)OC(=O)Nc2ccc(Br)cc21>>CC1(C)OC(=O)Nc2ccc(/C=C/C(N)=O)cc21

6830 C=CC(=O)OC.Nc1ccc(C(=O)O)cc1I>>COC(=O)/C=C/c1cc(C(=O)O)ccc1N

6831 C=CP(=O)(OCC)OCC.CC1C[C@@H]2CC(N3[C@H]4CCC[C@@H]3C[C@H](n3c(=O)c(Cl)nc5cccc53)C4)C[C@H](Cl)C2>>CCOP(=O)(/C=C/c1nc2cccc2n([C@@H]2C[C@@H]3CCC[C@H](C2)N3C2C[C@H]3CC(C)C[C@@H](C2)C3)c1=O)OCC

6832 C=CCCCCCC.CCOC(=O)c1ccc(OS(=O)(=O)C(F)(F)F)cc1>>C=C(CCCCCC)c1ccc(C(=O)OCC)cc1

6833 C=CC(=O)OC(C)(C)C.COc1ccc2c(C(=O)c3cc(OC)c(OC)c(OC)c3)cn(S(=O)(=O)c3cccc(Br)c3)c2c1>>COc1ccc2c(C(=O)c3cc(OC)c(OC)c(OC)c3)cn(S(=O)(=O)c3cccc(/C=C/C(=O)OC(C)(C)C)c3)c2c1

6834 C=CC(=O)OCC.COC(=O)c1cccc(I)c1>>CCOC(=O)/C=C/c1cccc(C(=O)OC)c1

6835 C=Cc1ccc(Cl)cc1.Cc1ccc(S(=O)(=O)Oc2cccc3c(Br)ccnc23)cc1>>Cc1ccc(S(=O)(=O)Oc2cccc3c(/C=C/c4ccc(Cl)cc4)ccnc23)cc1

6836 C=CC(=O)OC.O=C1Cc2c([nH]c3ccc(C(F)(F)F)cc23)-c2cc(I)ccc2N1>>COC(=O)/C=C/c1ccc2c(c1)-c1[nH]c3ccc(C(F)(F)F)cc3c1CC(=O)N2

6837 C=C(C(=O)OC)[C@@H]1CC[C@@]2(C)CC[C@@H](OCOC)C(=C)[C@@H]2C1.Cc1ccc(Br)cc1>>  
6838 C=C1[C@H](OCOC)CC[C@]2(C)CC[C@H]1/C(=C)\c3ccc(C)cc3)C(=O)OC)C[C@@H]12  
6839 C=CC(=O)OC.CC(C)(C)OC(=O)NCc1ccccc1Br>>COC(=O)/C=C/c1ccccc1CNC(=O)OC(C)(C)C  
6840 C=CC(=O)OCc1ccc2ccc3ccccc4ccc1c2c34.O=C(O)c1ccc(I)cc1>>O=C(/C=C/c1ccc(C(=O)O)cc1)OCc1  
6841 ccc2ccc3ccccc4ccc1c2c34  
6842 C=Cc1ccccc1.FC(F)(F)c1ccccc(Br)c1>>FC(F)(F)c1ccccc(/C=C/c2ccccc2)c1  
6843 Br1ccccc1.C=CCC(C)C(=O)OCC>>CCOC(=O)C(C)C/C=C/c1ccccc1  
6844 C=CC(=O)OC(C)(C)C.Ic1ccc2ccccc2c1>>CC(C)(C)OC(=O)/C=C/c1ccc2ccccc2c1  
6845 Br1ccc(-c2nnc(-c3ccccc4ccccc34)o2)cc1.C=C[Si](C)(OCC)OCC>>CCO[Si](C)(/C=C/c1ccc(-c2nnc(-  
6846 c3ccccc4ccccc34)o2)cc1)OCC  
6847 C=CS(=O)(=O)F.FC(F)(F)c1ccccc(I)c1>>O=S(=O)(F)/C=C/c1ccccc(C(F)(F)F)c1  
6848 C=CC(=O)OCC.CCN1C[C@]2(OC(=O)c3cc(Br)ccc3NC(C)=O)CC[C@H](OC)[C@]34[C@@H]1[C  
6849 @H](C)[C@H]23)[C@@]1(O)C[C@H](OC)[C@H]2[C@]4[C@]1(O)[C@H]2OC>>CCOC(=O)/  
6850 C=C/c1ccc(NC(C)=O)c(C(=O)O)[C@@]23CC[C@H](OC)[C@]45[C@H]([C@H](C)[C@H]24)[C@@  
6851 2(O)C[C@H](OC)[C@H]4C[C@@H]5[C@]2(O)[C@H]4OC)N(CC)C3)c1  
6852 C=Cc1ccc(/C=C/c2ccc(/C=C/c3ccc(OCCCCCCCCCCCCC)c(OCCCCCCCCCCCCC  
6853 C)c3)cc2)cc1.CCCCOc1c(C)cc(I)cc1C>>CCCCCCCCCCCCCOc1cc(/C=C/c2ccc(/C=C/c3ccc(/C=C/c4c  
6854 c(C)c(OCCCC)c(C)c4)cc2)cc(OCCCCCCCCCCCCC)c1OCCCCCCCCCCCCC  
6855 C=COCC.O=Cc1ccc(Br)cc1>>C=C(OCC)c1ccc(C=O)cc1  
6856 C=CC(O)c1ccccc1Br.Ic1ccccc1>>OC(/C=C/c1ccccc1)c1ccccc1Br  
6857 C=CC(=O)OCC.COc1cc(Br)c(-c2cc3ccccc(OC)c3o2)cc1OC>>CCOC(=O)/C=C/c1cc(OC)c(OC)cc1-  
6858 c1cc2ccccc(OC)c2o1  
6859 C=CC(N)=O.Cc1nc2cc(-c3ccccc3)c(-c3ccc(C4(NC(=O)OC(C)(C)C)CCC4)cc3)nn2c1Br>>Cc1nc2cc(-  
6860 c3ccccc3)c(-c3ccc(C4(NC(=O)OC(C)(C)C)CCC4)cc3)nn2c1/C=C/C(N)=O  
6861 C=Cc1cncnc1.CC(C)(C)OC(=O)N[C@@H](COCc1ccccc1)COc1cnc(Br)c1>>CC(C)(C)OC(=O)N[C  
6862 @H](COCc1ccccc1)COc1cnc(/C=C/c2cncnc2)c1  
6863 C=C(C(=O)OC)[C@@H]1CC[C@@]2(C)CC[C@@H](O)C(=C)[C@@H]2C1.Cc1ccc(I)cc1>>C=C1[  
6864 C@H](O)CC[C@]2(C)CC[C@H]1/C(=C)\c3ccc(C)cc3)C(=O)OC)C[C@@H]12  
6865 C=CC(=O)OCCCC.CCOC(CCNc1nc(SC)nc1Br)OCC>>CCCCOC(=O)/C=C/c1cnc(SC)nc1NCCC(O  
6866 CC)OCC  
6867 C=C[C@@H](OCc1ccccc1)[C@@H](O)CCCCC.COCOc1ccccc(Br)c1>>CCCCC[C@H](O)[C@@H](/  
6868 C=C/c1ccccc(OCOC)c1)OCc1ccccc1  
6869 C=Cl.C=CS(C)(=O)=O>>C=C/C=C/S(C)(=O)=O  
6870 C=CC(=O)O.COc1ccccc1I>>COc1ccccc1/C=C/C(=O)O  
6871 C=C(F)C(C)=O.COc1ccccc1I>>COc1ccccc1/C=C(\F)C(C)=O  
6872 C=CC(=O)OC.Ic1ccccc1>>COC(=O)/C=C/c1ccccc1  
6873 C=Cc1ccc(/C=C/c2cc(OC)c(N(C)C)cc2OC)cc1.O=c1ccc2c(-c3ccc(I)cc3S(=O)(=O)O)c3ccc(O)cc3oc-  
6874 2c1>>COc1cc(N(C)C)c(OC)cc1/C=C/c1ccc(/C=C/c2ccc(-c3c4ccc(=O)cc-  
6875 4oc4cc(O)ccc34)c(S(=O)(=O)O)c2)cc1  
6876 C=Cc1cnc(F)c(Br)c1.CC(C)(C)OC(=O)N1CC[C@H]1COc1cnc(Cl)c(I)c1>>CC(C)(C)OC(=O)N1CC[  
6877 C@H]1COc1cnc(Cl)c(/C=C/c2cnc(F)c(Br)c2)c1  
6878 C=CC(CCCCC)OC1CCCCO1.COC(=O)CCCCC1=C(I)CCC1=O>>CCCCC(/C=C/C1=C(CCCCC(=  
6879 O)OC)C(=O)CC1)OC1CCCCO1  
6880 C=CC(=O)OC(C)(C)C.COC1=C(I)CON(Cc2ccccc2)[C@H]1[C@H]1COC(C)(C)O1>>COC1=C(/C=C  
6881 /C(=O)OC(C)(C)C)CON(Cc2ccccc2)[C@H]1[C@H]1COC(C)(C)O1  
6882 C=C[C@](C)(O)CO.Clc1ccccc1Br>>C[C@](O)(/C=C/c1ccccc1Cl)CO  
6883 C=Cc1cncnc1.CCCCCCOc1ccc(Br)cc1F>>CCCCCOc1ccc(/C=C/c2cncnc2)cc1F  
6884 Br1ccccc1.C=Cc1nnn(C)n1>>Cn1nnc(/C=C/c2ccccc2)n1  
6885 Br1ccccc1.C=Cc1cncnc1>>C(=C/c1ccccc1)\c1cncnc1  
6886 C=CC(=O)OC(C)(C)C.Nc1ccc(I)cc1>>CC(C)(C)OC(=O)/C=C/c1ccc(N)cc1  
6887 C=Cc1ccccc1.N#Cc1ccc2cc(Br)ccc2c1>>N#Cc1ccc2cc(/C=C/c3ccccc3)ccc2c1  
6888 Br1ccccc1.C=CC(=O)C(C)CC(=O)OC>>COC(=O)CC(C)C(=O)/C=C/c1ccccc1  
6889 C=COCCCC.Cc1cc(Br)c2nc(N3CCN(C)CC3)cc(=O)n2c1>>C=C(OCCCC)c1cc(C)cn2c(=O)cc(N3CC  
6890 N(C)CC3)nc12  
6891 C=C(F)C(=O)OC.O=Cc1ccc(I)o1>>COC(=O)/C(F)=C/c1ccc(C=O)o1  
6892 C=CC(=O)OC.Cc1cc(N(Cc2ccc(Br)cc2)CC(C)(C)C)nc(C)n1>>COC(=O)/C=C/c1ccc(CN(CC(C)(C)C)  
6893 c2cc(C)nc(C)n2)cc1  
6894 C=CC(=O)OC.CCCCCCCCN1C(=O)NC(c2ccccc2)(c2ccc(I)cc2)C1=O>>CCCCCCCCCN1C(=O)NC(c2  
6895 ccccc2)(c2ccc(/C=C/C(=O)OC)cc2)C1=O  
6896 C=C(c1ccccc1)[Si](C)(C)c1ccccc1.Ic1ccsc1>>C[Si](C)(/C=C/c1ccsc1)c1ccccc1)c1ccccc1  
6897 C=CC(=O)OCC.Cc1cc(C)c(I)c(C)c1>>CCOC(=O)/C=C/c1c(C)cc(C)cc1C

6876 C=C.O=C(CC(=O)C(F)(F)F)c1ccc(Br)s1>>C=Cc1ccc(C(=O)CC(=O)C(F)(F)F)s1  
6877 C=CC(=O)N(C)Cc1sc2sc(C)c2c1C.O=C1CCCc2cc(Br)enc2N1>>Cc1csc2sc(CN(C)C(=O)/C=C/c3cnc4c(c3)CCCC(=O)N4)c(C)c12  
6878 C=CC#N.Nc1ccc(Br)c2c1COC2>>N#C/C=C/c1ccc(N)c2c1COC2  
6879 C=CN(C)C(C)=O.COc1ccc2c(c1)CCC=C2OS(=O)(=O)C(F)(F)F>>C=C(C1=CCCc2cc(OC)ccc21)N(C)C(C)=O  
6880 Br1c2ccccc2cc2ccccc12.C=Cc1nc2c(N)ncnc2n1[C@H]1C[C@H](O[Si](C)(C)C(C)(C)C)[C@H](C)O[Si](C)(C)C(C)(C)C)O1>>CC(C)(C)[Si](C)(C)OC[C@H]1O[C@H](n2c(/C=C/c3c4ccccc4cc4cccc34)nc3c(N)ncnc32)C[C@H]1O[Si](C)(C)C(C)(C)C  
6881 C=Cc1ccc(/C=C/c2ccc(OC)CCCCCCCCCCCCC)cc2cc1.CCCCOc1c(C)cc(I)cc1C>>CCCCCCCCCCCCCOc1ccc(/C=C/c2ccc(/C=C/c3cc(C)c(OC)CC)c(C)c3)cc2)cc1  
6882 C=CC(C)=O.C=CI>>C=C/C=C/C(C)=O  
6883 C=CC(=O)OCC.Cc1nc(-n2c(C)ccc2C)cc(NC2CCOCC2)c1Br>>CCOC(=O)/C=C/c1c(NC2CCOCC2)cc(-n2c(C)ccc2C)nc1C  
6884 C=C.COC(=O)c1ccc(Br)c([N+](=O)[O-])c1>>C=Cc1ccc(C(=O)OC)cc1[N+](=O)[O-]  
6885 C=CC#N.CC(=O)c1cc2cc(Br)ccc2o1>>CC(=O)c1cc2cc(/C=C/C#N)ccc2o1  
6886 C=CC(=O)OCC(CC)CCCC.Ic1ccccc1>>CCCC(C)COC(=O)/C=C/c1ccccc1  
6887 C=CCOc1ccccc1C.Ic1ccccc1>>Cc1ccccc1OC/C=C/c1ccccc1  
6888 C=CS(=O)(=O)N1CCC2(CC1)N=C(C1CCCCC1)NC2=O.CC(=O)Nc1ccc(Br)c(C)c1>>CC(=O)Nc1ccc(/C=C/S(=O)(=O)N2CCC3(CC2)N=C(C2CCCCC2)NC3=O)c(C)c1  
6889 C=CC(=O)OCC.Fc1cccc(Oc2cccc(Br)c2)c1>>CCOC(=O)/C=C/c1cccc(Oc2cccc(F)c2)c1  
6890 C=CC(=O)OCC.CC(C)(C)OC(=O)NCCc1cc(Br)ccc1F>>CCOC(=O)/C=C/c1ccc(F)c(CCNC(=O)OC(C)(C)C)c1  
6891 C=CS(C)(=O)=O.COc1ccccc1Br>>COc1ccccc1/C=C/S(C)(=O)=O  
6892 C=CC(=O)N(C)C.COCc1nc(Nc2ccc(C#N)cc2)nc(Nc2c(C)cc(/C=C/C#N)cc2C)c1I>>COCc1nc(Nc2ccc(C#N)cc2)nc(Nc2c(C)cc(/C=C/C#N)cc2C)c1/C=C/C(=O)N(C)C  
6893 C=CC(=O)OC(C)(C)C.CC(C)=CCc1cc(I)ccc1OC(=O)CCc1cccc(F)c1>>CC(C)=CCc1cc(/C=C/C(=O)OC(C)(C)C)ccc1OC(=O)CCc1cccc(F)c1  
6894 C=Cc1ccc(C)cc1.O=Cc1ccc(Br)cc1>>Cc1ccc(/C=C/c2ccc(C=O)cc2)cc1  
6895 C=Cc1cccn1.CN(C(=O)c1ccccc1)c1ccc2c(c1)[nH]c(=NC(=O)c1ccc(Br)s1)n2CCC(N)=O>>CN(C(=O)c1ccccc1)c1ccc2c(c1)[nH]c(=NC(=O)c1ccc(/C=C/c3cccn3)s1)n2CCC(N)=O  
6896 C=Cc1ccc(C)cc1.Fc1ccc(Br)cc1>>Cc1ccc(/C=C/c2ccc(F)cc2)cc1  
6897 C=CC(=O)OC(C)(C)C.CN1Cc2cc(Br)enc2NCCC1=O>>CN1Cc2cc(/C=C/C(=O)OC(C)(C)C)enc2NCCC1=O  
6898 C=CC(=O)CC.Cc1cc(C)c(Br)c(C)c1>>CCC(=O)/C=C/c1c(C)cc(C)cc1C  
6899 C=CS(=O)(=O)F.Ic1ccccc1>>O=S(=O)(F)/C=C/c1ccccc1  
6900 C=CC(=O)OC.CC1CC(n2c(Nc3ccc(OC(F)(F)F)cc3)nc3cc(Br)ccc32)CC(C)(C)C1>>COC(=O)/C=C\c1ccc2c(c1)nc(Nc1ccc(OC(F)(F)F)cc1)n2C1CC(C)CC(C)(C)C1  
6901 C=CC(=O)OC.Oc1ccc2cc(Br)ccc2c1>>COC(=O)/C=C/c1ccc2cc(O)ccc2c1  
6902 C=CC(=O)OC.COc1cc(Br)ccc1C=O>>COC(=O)/C=C/c1ccc(C=O)c(OC)c1  
6903 C=CC(=O)OC.COC(=O)c1nc(N(Cc2ccccc2)Cc2ccccc2)ccc1Br>>COC(=O)/C=C/c1ccc(N(Cc2ccccc2)Cc2ccccc2)nc1C(=O)OC  
6904 C=Cc1ccc(OC(C)=O)cc1.CN1c2ccccc2Sc2cc(Br)ccc21>>CC(=O)Oc1ccc(/C=C/c2ccc3c(c2)Sc2ccccc2N3C)cc1  
6905 C=CC(=O)OC.Cc1ccc(S(=O)(=O)n2ccc3cc(I)ccc32)cc1>>COC(=O)/C=C/c1ccc2c(ccn2S(=O)(=O)c2cc(C)cc2)c1  
6906 C=Cc1cccn1.CC(=O)OCC1Cn2c3ccccc3c3c4c(c5c6cc(Br)ccc6n(c5c32)C1)C(=O)N(C(C)=O)C4>>C(C(=O)OCC1Cn2c3ccccc3c3c4c(c5c6cc(/C=C/c7cccn7)ccc6n(c5c32)C1)C(=O)N(C(C)=O)C4  
6907 C=C(C)C(=O)OC.CC(=S)NS(=O)(=O)c1ccc(Br)cc1>>COC(=O)/C(C)=C/c1ccc(S(=O)(=O)NC(C)=S)c  
6908 C=CC(=O)OCC.Cc1nc(N)nc(N[C@H]2CC[C@H](OCC(N)=O)CC2)c1Br>>CCOC(=O)/C=C/c1c(C)n c(N)nc1N[C@H]1CC[C@H](OCC(N)=O)CC1  
6909 C=CC(=O)OC.C=CC[C@H](O)c1ccc(Br)cc1>>C=CC[C@H](O)c1ccc(/C=C/C(=O)OC)cc1  
6910 C=CC(=O)OCC.CS(=O)(=O)N1CCC(C2c3ccc(Cl)cc3C=C(Br)c3cccn32)CC1>>CCOC(=O)/C=C/C1=Cc2cc(Cl)ccc2C(C2CCN(S(C)(=O)=O)CC2)c2ncc21  
6911 C=C(NC(=O)OCc1ccccc1)C(=O)OC.CC(=O)OCc1c(Br)ccc(NC(=O)OC(C)(C)C)c1C>>COC(=O)/C(=C/c1ccc(NC(=O)OC(C)(C)C)c(C)c1COC(C)=O)NC(=O)OCc1ccccc1  
6912 C=Cc1c(C)cc(C)cc1C.Cc1cc(C)c(Cl)c(C)c1>>Cc1cc(C)c(/C=C/c2c(C)cc(C)cc2C)c(C)c1  
6913 C=CC(=O)OC.Oc1cc(-c2ccc(Br)cc2)cc(C23CC4CC(CC(C4)C2)C3)c1O>>COC(=O)/C=C/c1ccc(-c2cc(O)c(O)c(C34CC5CC(CC(C5)C3)C4)c2)cc1  
6914 C=CCOCc1ccccc1.Cc1ccccc1OS(=O)(=O)C(F)(F)F>>C=C(CCOCCc1ccccc1)c1ccccc1C

6915 C=CCNC(=O)OC(C)(C)C.CCOC(=O)CC(c1ccc(C)c(CN2CC(C)Cc3cc(Br)ccc3S2(=O)=O)c1)c1ccc(F)  
cc1C>>CCOC(=O)CC(c1ccc(C)c(CN2CC(C)Cc3cc(C=C/CNC(=O)OC(C)(C)C)ccc3S2(=O)=O)c1)c1  
ccc(F)cc1C  
6916 C=CC(=O)OC.CN1CCC(Nc2ccccc2I)CC1>>COC(=O)/C=C/c1ccccc1NC1CCN(C)CC1  
6917 C=CC(=O)OC.COc1ccc2c(c1)CCN(c1ccc(C(C)C)c(F)c1)C2(C)c1ccc(Br)cc1>>COC(=O)/C=C/c1ccc(  
C2(C)c3ccc(OC)cc3CCN2c2ccc(C(C)C)c(F)c2)cc1  
6918 C=Cc1cc(OC)cc(OC)c1.Clc1ccc(I)cc1>>COc1cc(C=C/c2ccc(Cl)cc2)cc(OC)c1  
6919 C=CC(=O)OC.Cc1ccccc1C(=O)c1sc2cc(O)ccc2c1-c1ccc(Br)cc1>>COC(=O)/C=C/c1ccc(-  
c2c(C(=O)c3ccccc3C)sc3cc(O)ccc23)cc1  
6920 C=CC(=O)N1C(=O)OC[C@H]1c1ccccc1.Oc1ccccc2c(Br)cccc12>>O=C/C=C/c1ccccc2c(O)cccc12)N  
1C(=O)OC[C@H]1c1ccccc1  
6921 C=Cc1ccccc1.CC(C)(C)c1ccc2c(-c3ccccc3)c(Br)c(=O)oc2c1>>CC(C)(C)c1ccc2c(-  
c3ccccc3)c(C=C/c3ccccc3)c(=O)oc2c1  
6922 C=CC(=O)O.Ic1cccs1>>O=C(O)/C=C/c1cccs1  
6923 C=CC(=O)OCCCC.COc1ccc2c(c1)c(Br)nn2C>>CCCCOC(=O)/C=C/c1nn(C)c2ccc(OC)cc12  
6924 C=CC(=O)OC.CCOC(=O)Nc1ccccc1C1=C(I)CCO1>>CCOC(=O)Nc1ccccc1C1=C(/C=C/C(=O)OC)C  
C=Cc1nc2c(N)ncnc2n1[C@H]1O[C@H](CO[Si](C)(C)C(C)(C)C)[C@H](O[Si](C)(C)C(C)(C)C)[  
C@H]1O[Si](C)(C)C(C)(C)C.Cc1ccc(Br)cc1>>Cc1ccc(C=C/c2nc3c(N)ncnc3n2[C@H]2O[C@H](C  
O[Si](C)(C)C(C)(C)C)[C@H](O[Si](C)(C)C(C)(C)C)[C@H]2O[Si](C)(C)C(C)(C)C)cc1  
6925 C=Cc1ccccc1.CC(C)(C)C(=O)Nc1nc(NC(=O)C(C)(C)C)c2cc(Br)cn2c1>>CC(C)(C)C(=O)Nc1nc(NC(  
=O)C(C)(C)C)c2cc(C=C/c3ccccc3)cn2c1  
6926 BrC1CCCCC1.C=Cc1ccccc1>>C(=C/C1CCCCC1)\c1ccccc1  
6927 C=CC(=O)OC.COCOc1cccn1Br>>COCOc1cccn1/C=C/C(=O)OC  
6928 C=C.Cn1cc(I)cn1>>C=Cc1cnm(C)c1  
6929 C=Cc1cccs1.Cc1ncnc2c1c(I)cn2[C@H]1O[C@H](CO)[C@H](O)[C@@]1(C)F>>Cc1ncnc2c1c(/  
C=C/c1cccs1)cn2[C@H]1O[C@H](CO)[C@H](O)[C@@]1(C)F  
6930 C=CC(=O)OC.Oc1ccc(-c2ccc(Br)cc2)cc1>>COC(=O)/C=C/c1ccc(-c2ccc(O)cc2)cc1  
6931 C=Cc1cccn1.C[C@H](COc1cnc(Cl)c(I)c1)NC(=O)OC(C)(C)C>>C[C@H](COc1cnc(Cl)c(C=C/c2cc  
ncc2)c1)NC(=O)OC(C)(C)C  
6932 C=CC(=O)OC.CCN(CC)c1ccc2cc(-c3oc4cc(Br)ccc4c(=O)c3O)oc2c1>>CCN(CC)c1ccc2cc(-  
c3oc4cc(C=C/C(=O)OC)ccc4c(=O)c3O)oc2c1  
6933 Bre1ccc(C=C/c2ccc(-n3c4ccccc4c4ccccc43)cc2)cc1.C=Cc1cccn1>>C(=C/c1ccc(C=C/c2ccc(-  
n3c4ccccc4c4ccccc43)cc2)cc1)\c1cccn1  
6934 C=CC(=O)CCC.Cc1ccc(Br)cc1>>CCCC(=O)/C=C/c1ccc(C)cc1  
6935 C=CC(=O)OC(C)(C)C.Ic1ccc(Cc2ncc(-c3ccccc3)[nH]2)cc1>>CC(C)(C)OC(=O)/C=C/c1ccc(Cc2ncc(-  
c3ccccc3)[nH]2)cc1  
6936 C=CC(=O)OC.COC(=O)c1cc(OC)c(=O)c2c(OC)c(OC)cc(Br)c2c1>>COC(=O)/C=C/c1cc(OC)c(OC)c2  
c(=O)c(OC)cc(C(=O)OC)cc12  
6937 C=CC(=O)OC.N#Cc1c(-c2cccc(Br)c2)cc(-c2ccccc2)nc1N>>COC(=O)/C=C/c1cccc(-c2cc(-  
c3ccccc3)nc(N)c2C#N)c1  
6938 C=CC(OC)OC.Cc1ccccc1I>>COC(/C=C/c1ccccc1C)OC  
6939 C=Cc1ccc(OCc2ccccc2)c(-c2ccc(OC)cc2CO)c1.COc1ccc(I)cc1Oc1ccc(C=O)cc1>>COc1ccc(-  
c2cc(C=C/c3ccc(OC)c(Oc4ccc(C=O)cc4)c3)ccc2OCc2ccccc2)c(CO)c1  
6940 C=Cc1ccc(F)cc1.COC(=O)c1cc(Br)ccc1OS(=O)(=O)C(F)(F)F>>C=C(c1ccc(F)cc1)c1ccc(Br)cc1C(=O)  
6941 C=Cc1ccc(OC)cc1.COc1ccc(OC)c(I)c1>>COc1ccc(C=C/c2cc(OC)ccc2OC)cc1  
6942 Bre1ccc(-c2nc3ccccc3n2)cc1.C=CCn1c(-c2ccc(C(F)(F)F)cc2)nc2ccccc2c1=O>>O=c1c2ccccc2nc(-  
c2ccc(C(F)(F)F)cc2)n1C/C=C/c1ccc(-c2nc3ccccc3n2)cc1  
6943 C=CCN1C(=O)c2ccccc2C1=O.O=[N+][O-]  
6944 ]c1ccc(I)cc1>>O=C1c2ccccc2C(=O)N1C/C=C/c1ccc([N+](=O)[O-])cc1  
C=CC(=O)OC(C)(C)C.COc1ccc2c(C(=O)c3cc(OC)c(OC)c(OC)c3)cn(S(=O)(=O)c3ccc(Br)cc3)c2c1>>  
COc1ccc2c(C(=O)c3cc(OC)c(OC)c(OC)c3)cn(S(=O)(=O)c3ccc(C=C/C(=O)OC(C)(C)C)ccc3)c2c1  
6945 C=CC(C)=O.CCCCCCCCCCCCCCc1cc(O)ccc1I>>CCCCCCCCCCCCCc1cc(O)ccc1/C=C/C(C)  
6946 C=Cc1cn(COCC[Si](C)(C)C)nc1-  
6947 c1nc2ccc(OC)cc2n1COCC[Si](C)(C)C.N#Cc1cncc(Br)c1>>COc1ccc2nc(-  
c3nn(COCC[Si](C)(C)C)cc3/C=C/c3cncc(C#N)c3)nn(COCC[Si](C)(C)C)c2c1  
6948 C=CC(=O)OC.N#Cc1cc(Cl)ccc1C(F)(F)F>>COC(=O)/C=C/c1ccc(C(F)(F)F)c(C#N)c1  
6949 C=Cc1cnc(C)nc1OC[C@H]1C[C@H]1c1ccc(OC)cn1.Cc1ccc(Br)cn1>>COc1ccc([C@H]2C[C@H]  
]2COc2nc(C)nc2/C=C/c2ccc(C)nc2)nc1  
6950 C=CCN(C(=O)OC(C)(C)C)C(=O)OC(C)(C)C.O=C1CCCc2ccc(Cl)cc21>>CC(C)(C)OC(=O)N(C/C=C/  
c1ccc2c(c1)C(=O)CCC2)C(=O)OC(C)(C)C  
6951 C=CC(=O)OCCCC.CC(=O)Nc1ccc2c(Br)nn(C)c2c1>>CCCCOC(=O)/C=C/c1nn(C)c2cc(NC(C)=O)cc

6952 C=CCCCCCC.O=S(=O)(Oc1cccc2cccn12)C(F)(F)F>>C=C(CCCCCC)c1cccc2cccn12  
C=CCN.Nc1nc(=O)n([C@@H]2O[C@H](COP(=O)(O)OP(=O)(O)OP(=O)(O)O)[C@@H](O)[C@H]2  
6953 O)cc1I>>NC/C=C/c1cn([C@@H]2O[C@H](COP(=O)(O)OP(=O)(O)OP(=O)(O)O)[C@@H](O)[C@  
H]2O)c(=O)nc1N  
6954 C=CC(=O)OC.COc1ccc2c(c1)CCN(c1ccc(C(C)(C)C)cc1)C2(C)c1ccc(Br)cc1>>COC(=O)/C=C/c1ccc(  
C2(C)c3ccc(OC)cc3CCN2c2ccc(C(C)(C)C)cc2)cc1  
6955 Br1ccc(-c2cccs2)s1.C=CC(=O)OCCCCC>>CCCCCOC(=O)/C=C/c1ccc(-c2cccs2)s1  
6956 C=CCC1CCCCC1.Nc1ccc(Br)cc1F>>Nc1ccc(/C=C/CC2CCCCC2)cc1F  
6957 C=C(NC(C)=O)C(=O)OC.CC(=O)Oc1cc(C)c(I)c(C)c1>>COC(=O)/C=C/c1c(C)cc(OC(C)=O)cc1C)N  
C(C)=O  
6958 C=Cc1cccc1.COc1ccc(Br)c(OC)c1>>COc1ccc(/C=C/c2ccccc2)c(OC)c1  
6959 C=Cc1ccc(C(C)(C)C)cc1.COc1ccc(Br)cc1>>COc1ccc(/C=C/c2ccc(C(C)(C)C)cc2)cc1  
6960 C=Cc1ccc(OC)cc1.COc1ccc(Br)cc1>>COc1ccc(/C=C/c2ccc(OC)cc2)cc1  
Br1cnc2ccccc2c1.C=CCO[C@@H]1CC(=O)O[C@H](C)C/C=C/C=C/[C@H](O)[Si](C)(C)C(C)(C)C  
6961 [C@H](C)C[C@H](CC(OC)OC)[C@H](O)[C@@H]2O[C@H](C)[C@H](O)[C@H]3C[C@@](C)(O  
C(=O)CC)[C@@H](OC(=O)CCC)[C@H](C)O3[C@H](N(C)C)[C@H]2OC(C)=O)[C@H]1OC>>CC  
CC(=O)O[C@H]1[C@H](C)O[C@@H](O)[C@H]2[C@H](N(C)C)[C@@H](OC(C)=O)[C@H](O)[C@  
@H]3[C@@H](OC)[C@H](OC/C=C/c4cnc5ccccc5c4)CC(=O)O[C@H](C)C/C=C/C=C/[C@H](O)[Si](  
C)(C)C(C)(C)C[C@H](C)C[C@@H]1C[C@@H]3C(C)(OC)OC[C@H]2C[C@@H]1C[C@@H](C)C[C@@H](C)C  
6962 C=Cc1ccc(N(C)C)cc1.C[Si](C)(C)I>>CN(C)c1ccc(/C=C/[Si](C)(C)C)cc1  
6963 C=CS(=O)(=O)F.CC(=O)c1ccccc1I>>CC(=O)c1ccccc1/C=C/S(=O)(=O)F  
6964 BrC1=CCCCC1.C=C>>C=CC1=CCCCC1  
6965 Br1ccccc1.C=CC=O>>O=C/C=C/c1ccccc1  
6966 C=CCN1C(=O)c2ccccc2C1=O.O=C1NCCc2cc(Br)ccc2I>>O=C1NCCc2cc(/C=C/CN3C(=O)c4ccccc4  
C3=O)ccc21  
6967 Br1c2ccccc2c2ccccc12.C=C[C@@H](CO[Si](C)(C)C(C)(C)C)NC(=O)OCc1ccccc1>>CC(C)(C)[Si]  
(C)(C)OC[C@H](/C=C/c1c2ccccc2c2ccccc12)NC(=O)OCc1ccccc1  
6968 C=CS(=O)(=O)F.Ic1ccc2ccccc2c1>>O=S(=O)(F)/C=C/c1ccc2ccccc2c1  
6969 C=Cc1ccc(C#N)cc1.N[C@@H](Cc1c[nH]c2c(Br)ccc12)C(=O)O>>N#Cc1ccc(/C=C/c2cccc3c(C[C@  
H](N)C(=O)O)c[nH]c23)cc1  
6970 Br1ccccc2ccccc12.C=CCS(N)(=O)=O>>NS(=O)(=O)C/C=C/c1ccccc2ccccc12  
6971 C=CC(=O)OC.CC(C)(C)OC(=O)N1CCC2(CC1)CC(=O)c1ccc(Br)cc1O2>>COC(=O)/C=C/c1ccc2c(c1  
)OC1(CCN(C(=O)OC(C)(C)C)CC1)CC2=O  
6972 C=C(C)C(=O)OC.Cc1ccc(Br)cc1>>COC(=O)/C(C)=C/c1ccc(C)cc1  
6973 C=CC(=O)OCC.Cc1nc(C(C)C)nc(N)c1I>>CCOC(=O)/C=C/c1c(C)nc(C(C)C)nc1N  
6974 C=CC(OCC)OCC.CCCCC(CC)CN1c2ccccc2Sc2cc(Br)ccc2I>>CCCCC(CC)CN1c2ccccc2Sc2cc(/C=C  
/C(OCC)OCC)ccc21  
6975 C=C.COC(=O)c1ccc(I)cc1>>C=Cc1ccc(C(=O)OC)cc1  
6976 C=CC(=O)OC(C)(C)C.COc1ccc(NCc2ccc(Br)cc2)cc1OC>>COc1ccc(NCc2ccc(/C=C/C(=O)OC(C)(C)  
C)cc2)cc1OC  
6977 Br1ccccc1.C=CCCCC>>C=C(CCCCCC)c1ccccc1  
6978 C=CC1CC=CCC1.Fc1ccc(I)cc1>>Fc1ccc(/C=C/C2CC=CCC2)cc1  
C=Cc1ccc2c(c1)CC[C@@H]1[C@@H]2CC[C@]2(C)[C@H](O)[Si](C)(C)C(C)(C)C)CC[C@@H]1  
6979 2.C[Si](C)(OS(=O)(=O)C(F)(F)F)OS(=O)(=O)C(F)(F)F>>CC(C)(C)[Si](C)(C)O[C@H]1CC[C@H]2[  
C@@H]3CCc4ccc(/C=C/[Si](C)(C)OS(=O)(=O)C(F)(F)F)ccc4[C@H]3CC[C@]12C  
6980 C=CC(=O)OC(C)(C)C.Fc1ccc(Br)c(F)c1>>CC(C)(C)OC(=O)/C=C/c1ccc(F)cc1F  
6981 C=CC(=O)OC.CC(C)(C)OC(=O)N1CCC2(CC1)NC(=O)c1cc(Br)ccc1O2>>COC(=O)/C=C/c1ccc2c(c1  
)C(=O)NC1(CCN(C(=O)OC(C)(C)C)CC1)O2  
6982 C=CC(OCC)OCC.Cc1ccccc1I>>CCOC(/C=C/c1ccccc1C)OCC  
6983 C=CC(=O)N1C(=O)OC[C@@H]1Cc1ccccc1.CC(C)(C)OP(=O)(Cc1ccc(Br)cc1)OC(C)(C)C>>CC(C)(  
C)OP(=O)(Cc1ccc(/C=C/C(=O)N2C(=O)OC[C@@H]2Cc2ccccc2)cc1)OC(C)(C)C  
6984 C=CC1CCCCC1.O=Cc1ccc(Br)o1>>O=Cc1ccc(/C=C/C2CCCCC2)o1  
6985 Br1ccc2ccc3ccccc4ccc1c2c34.C=CC(=O)OCCCC>>CCCCOC(=O)/C=C/c1ccc2ccc3ccccc4ccc1c2c34  
6986 C=CC(=O)OC(C)(C)C.COc1cc(C(=O)c2cn(S(=O)(=O)c3ccccc(Br)c3)c3ccccc23)cc(OC)c1OC>>COc1c  
c(C(=O)c2cn(S(=O)(=O)c3ccccc(/C=C/C(=O)OC(C)(C)C)c3)c3ccccc23)cc(OC)c1OC  
6987 Br1ccc(I)cc1.C=CC(=O)OC>>COC(=O)/C=C/c1ccc(Br)cc1  
6988 C=CC(=O)COCCCC.CC(=O)c1ccc(I)cc1>>CCCCOCC(=O)/C=C/c1ccc(C(C)=O)cc1  
6989 Br1ccc2ccc3ccccc4ccc1c2c34.C=CC(=O)OCC(F)(F)F>>O=C(/C=C/c1ccc2ccc3ccccc4ccc1c2c34)OCC(  
F)(F)F  
6990 Br1ccccc(OCC2CCOCC2)c1.C=CCNC(=O)C(F)(F)F>>O=C(NC/C=C/c1ccccc(OCC2CCOCC2)c1)C(F)  
6991 C=CC(N)=O.Ic1cncnc1>>NC(=O)/C=C/c1cncnc1

6992 C=CCc1cccc1.Cc1cccc1OS(=O)(=O)C(F)(F)F>>C=C(Cc1cccc1)c1cccc1C  
6993 C=C[C@H](C)CCC=C(C)C.Clc1cccc1>>C=C(c1cccc1)[C@H](C)CCC=C(C)C  
6994 C=CCCCC(=O)O.N#Cc1ccc(Br)cc1>>N#Cc1ccc(/C=C/CCCC(=O)O)cc1  
C=Cc1ccc2c(c1)C(CCCCCCCC)(CCCCCCCC)c1cc(/C=C/c3ccc4c(c3)C(CCCCCCCC)(CCCCCCCC)c  
3cccc3-4)ccc1-2.CCCCCCCCC1(CCCCCCCC)c2cc(Br)ccc2-  
6995 c2ccc(C=O)cc21>>CCCCCCCCC1(CCCCCCCC)c2cccc2-  
c2ccc(/C=C/c3ccc4c(c3)C(CCCCCCCC)(CCCCCCCC)c3cc(/C=C/c5ccc6c(c5)C(CCCCCCCC)(CCCC  
CCCC)c5cc(C=O)ccc5-6)ccc3-4)cc21  
C=C[C@H]1O[C@H](COC(C)=O)[C@H](OC(C)=O)[C@H](OC(C)=O)[C@H]1OC(C)=O.Cc1cc  
6996 c(N2C(=O)[C@H](CC[C@H](O)c3ccc(F)cc3)[C@H]2c2ccc(Br)cc2O[Si](C)(C)C(C)(C)C)cc1>>CC(=O)OC[C@H]1O[C@H](/C=C/c2ccc([C@H]3[C@H](CC[C@H](O)c4ccc(F)cc4)C(=O)N3c3ccc(C)cc3)c(O[Si](C)(C)C(C)(C)C)c2)[C@H](OC(C)=O)[C@H](OC(C)=O)[C@H](OC(C)=O)[C@H]1OC(C)=O  
6997 C=C(Br)CCO.C=CC(=O)CC>>C=C(/C=C/C(=O)CC)CCO  
6998 C=Cc1ccccc1.Cc1nc(Br)c2c(c1O)COC(C)(C)OC2>>Cc1nc(/C=C/c2ccccc2)c2c(c1O)COC(C)(C)OC2  
6999 C=COCCCC.Fc1cccc1Br>>C=C(OCCCC)c1cccc1F  
7000 C=CC(=O)OC.CC(C)(C)OC(=O)N1CCc2ccc(Br)cc2C1>>COC(=O)/C=C/c1ccc2c(c1)CN(C(=O)OC(C)(C)C)CC2  
7001 COc1ccc(C(C/C=C/C(C)=O)NS(=O)(=O)c2ccc(C)cc2)cc1.Cc1ccc(Br)cc1>>COc1ccc(C(C/C=C/C(C)=O)c2ccc(C)cc2)NS(=O)(=O)c2ccc(C)cc2)cc1  
C=Cc1nc2c(N)ncnc2n1[C@H]1C[C@H](O[Si](C)(C)C(C)(C)C)[C@H](CO[Si](C)(C)C(C)(C)C)O1.  
7002 Cc1cccc1Br>>Cc1cccc1/C=C/c1nc2c(N)ncnc2n1[C@H]1C[C@H](O[Si](C)(C)C(C)(C)C)[C@H](CO[Si](C)(C)C(C)(C)C)O1  
C=Cc1ccc([N+](=O)[O-]  
7003 ])cc1.COC(=O)[C@H](Cc1ccc(O)c(I)c1)NC(=O)OC(C)(C)C>>COC(=O)[C@H](Cc1ccc(O)c(/C=C/c2ccc([N+](=O)[O-])cc2)c1)NC(=O)OC(C)(C)C  
7004 C=CC(=O)OC(C)(C)C.Oc1ccc(I)cc1>>CC(C)(C)OC(=O)/C=C/c1ccc(O)cc1  
7005 Brc1cccc1.C=CS(=O)CC>>CCS(=O)/C=C/c1cccc1  
7006 C=Cc1ccc(-c2ccccc2)cc1.COC(=O)c1cccc1I>>COC(=O)c1cccc1/C=C/c1ccc(-c2ccccc2)cc1  
7007 C=CN1C(=O)c2ccccc2C1=O.OC(c1ccc(C(F)(F)F)cc1)c1ncnc1Br>>O=C1c2ccccc2C(=O)N1/C=C/c1cncnc1C(O)c1ccc(C(F)(F)F)cc1  
7008 C=CC(=O)N1N=Cc2ccccc2C1Cc1cccc1.COc1cc(Cc2cnc(N)nc2N)cc(I)c1OC>>COc1cc(Cc2cnc(N)nc2N)cc(/C=C/C(=O)N2N=Cc3ccccc3C2Cc2ccccc2)c1OC  
7009 C=CC(=O)OCC.COC1CCC(Nc2nc(N)nc(C)c2Br)CC1>>CCOC(=O)/C=C/c1c(C)nc(N)nc1NC1CCC(O)C)CC1  
7010 C=CC(=O)OCC.COc1ccc(-c2ccccc2I)cc1>>CCOC(=O)/C=C/c1cccc1-c1ccc(OC)cc1  
7011 C=Cc1ccc(Cl)cc1.COC(=O)C(Cc1cccc1I)C(=O)OC>>COC(=O)C(Cc1cccc1/C=C/c1ccc(Cl)cc1)C(=O)OC  
7012 C=Cc1cccc1.CCOC(=O)C(C)(C)Br>>CCOC(=O)C(C)(C)/C=C/c1cccc1  
7013 C=Cc1ccc(C(=O)OC)cc1.CC1(C)c2ccc(Br)cc2C(C)(C)N1[O]>>COC(=O)c1ccc(/C=C/c2ccc3c(c2)C(C)(C)N([O])C3(C)C)cc1  
7014 C=CC(=O)OC.CC(C)(C)OC(=O)N(C1CCN(CC(O)COc2ccc(Br)cc2)CC1)[C@H]1C[C@H]1c1cccc1>>COC(=O)/C=C/c1ccc(OC(C)CN2CCC(N(C(=O)OC(C)(C)C)[C@H]3C[C@H]3c3ccccc3)CC2)  
7015 C=CC(=O)OC.Oc1ccc(Br)cc1Cl>>COC(=O)/C=C/c1ccc(O)c(Cl)c1  
7016 C=COCC.N#Cc1ccc(Br)cc1>>C=C(OCC)c1ccc(C#N)cc1  
7017 C=CC(=O)OC.N#Cc1ccc(-  
c2cn(S(=O)(=O)c3ccccc3)c3ncc(Br)cc23)cc1>>COC(=O)/C=C/c1cnc2c(c1)c(-  
7018 C=Cc1ccc([N+](=O)[O-])cc1.Oc1cc(Br)ccc1/N=N/c1cccc1>>O=[N+](O-  
])c1ccc(/C=C/c2ccc(/N=N/c3ccccc3)c(O)c2)cc1  
7019 C=Cc1cccc1.COC(=O)c1cc(C(=O)OC)c2c(Br)cccc2n1>>COC(=O)c1cc(C(=O)OC)c2c(/C=C/c3ccccc3)cccc2n1  
7020 C=CP(=O)(OCC)OCC.CC(=O)NC(C#N)c1cccc(Br)c1>>CCOP(=O)/C=C/c1cccc(C(C#N)NC(C)=O)c1OCC  
C=Cc1ccc(N(c2ccccc2)c2ccccc2)cc1.CCCCCCCCC1(CCCCCCCC)c2cc(Br)ccc2-  
7021 c2ccc(C=O)cc21>>CCCCCCCCC1(CCCCCCCC)c2cc(C=O)ccc2-  
c2ccc(/C=C/c3ccc(N(c4ccccc4)c4ccccc4)cc3)cc21  
7022 C=CC1CCCCC1.O=S(=O)(Oc1cccc1)C(F)(F)F>>C=C(c1cccc1)C1CCCCC1  
7023 C=CC(OCC)OCC.COc1cccc1I>>CCOC(/C=C/c1cccc1OC)OCC  
7024 C=CP(=O)(OCC)OCC.Clc1ccc(I)cc1>>CCOP(=O)/C=C/c1ccc(Cl)cc1OCC  
7025 C=Cc1ccc(O)cc1.COc1ccc(Br)cc1>>COc1ccc(/C=C/c2ccc(O)cc2)cc1  
7026 C=C.N#Cc1cccc1Br>>C=Cc1cccc1C#N  
7027 C=COCCO.Clc1ccc2ccccc2c1>>C=C(OCCO)c1ccc2ccccc2c1

7028 C=Cc1ccc(C(=O)OCC)cc1.CC1(C)CCC(=O)c2cc(Br)ccc21>>CCOC(=O)c1ccc(/C=C/c2ccc3c(c2)C(=O)CCC3(C)C)cc1  
 7029 C=C[C@H](O)[C@@H](O)COCc1ccc(OC)cc1.Ic1cccc1>>COc1ccc(COC[C@H](O)[C@@H](O)/C=C/c2cccc2)cc1  
 7030 C=CCCO.CC(C)Oc1cncc(Br)c1>>CC(C)Oc1cncc(/C=C/CCO)c1  
 7031 C=CC(=O)OC.Cn1cnc(Br)c1CC=C1CCCC1>>COC(=O)/C=C/c1nnc(C)c1CC=C1CCCC1  
 7032 C=Cc1cccc1.COC(=O)C(Cc1cccc1I)C(=O)OC>>COC(=O)C(Cc1cccc1/C=C/c1cccc1)C(=O)OC  
 7033 C=CC(=O)OC.CN1c2cccc2Sc2cc(Br)ccc21>>COC(=O)/C=C/c1ccc2c(c1)Sc1cccc1N2C  
 7034 C=CC(=O)OC.O=S(=O)(c1cccc1)n1cc(-c2ccc(F)cc2)c2cc(Br)cnc21>>COC(=O)/C=C/c1cnc2c(c1)c(-c1ccc(F)cc1)cn2S(=O)(=O)c1cccc1  
 7035 Br1cnenc1.C=Cc1ccc(OC)cc1>>COc1ccc(/C=C/c2cnenc2)cc1  
 7036 C=C.O=Cc1ccc(Br)cc1O>>C=Cc1ccc(C=O)c(O)c1  
 7037 C=CC(C)=O.O=[N+](I)cc1>>CC(=O)/C=C/c1ccc([N+](=O)[O-])cc1  
 7038 C=CC(=O)Nc1cn(Cc2cccc(C(F)(F)F)c2)cn1.COC(=O)c1ccc(Br)cn1>>COC(=O)c1ccc(/C=C/C(=O)Nc2cn(Cc3cccc(C(F)(F)F)c3)cn2)cn1  
 7039 C=Cc1ccc(OC)cc1.Cc1c(Br)c(=O)c2cccc2n1C>>COc1ccc(/C=C/c2c(C)n(C)c3cccc3c2=O)cc1  
 7040 C=CC(=O)OCC.Ic1ccc2[nH]ccc2c1>>CCOC(=O)/C=C/c1ccc2[nH]ccc2c1  
 7041 C=Cc1cccc1.O=C1CCC(c2cccc2)=C1OS(=O)(=O)C(F)(F)F>>O=C1CCC(c2cccc2)=C1/C=C/c1ccc  
 7042 C=Cc1ccc(Cl)cc1.Ic1cccc1>>Clc1ccc(/C=C/c2cccc2)cc1  
 7043 C=CC(C)(C)O.CC(C)(C)c1ccc(Br)cc1>>CC(C)(O)/C=C/c1ccc(C(C)(C)C)cc1  
 7044 C=CC(=O)OCCCOc1ccc(C(c2ccc(C(C)(C)C)cc2)(c2ccc(C(C)(C)C)cc2)c2ccc(C(C)(C)C)cc2)cc1.CC(C)(C)c1ccc(C(c2ccc(OCCCOc3ccc(I)cc3)cc2)(c2ccc(C(C)(C)C)cc2)c2ccc(C(C)(C)C)cc2)cc1>>CC(C)(C)c1ccc(C(c2ccc(OCCCOc3ccc(I)cc3)cc2)(c2ccc(C(C)(C)C)cc2)c2ccc(C(C)(C)C)cc2)cc1  
 7045 Br1ccc(I)cc1.C=C[C@H](C)[C@H]1CC[C@H]2[C@@H]3CC(=O)[C@H]4C[C@H](O)CC[C@]4(C)[C@H]3CC[C@]21C>>C[C@H](/C=C/c1ccc(Br)cc1)[C@H]1CC[C@H]2[C@@H]3CC(=O)[C@H]4C[C@H](O)CC[C@]4(C)[C@H]3CC[C@]21C  
 7046 C=Cc1ccc(C)nc1.COc1cc(I)c2c3c1O[C@@H]1[C@]34CCN(C)[C@H](C2)[C@]42C=C[C@@]1(OC)c1c(OC(C)=O)ccc(O)c12>>COc1cc(/C=C/c2ccc(C)nc2)c2c3c1O[C@@H]1[C@]34CCN(C)[C@H](C2)[C@]42C=C[C@@]1(OC)c1c(OC(C)=O)ccc(O)c12  
 7047 C=Cc1ccc(Sc2cccc2)cc1.CCCCCCCCCC1(CCCCCCCCCC)c2cc(/C=C/c3ccc(Sc4cccc4)cc3)ccc2-c2ccc([N+](=O)[O-])cc21  
 7048 C=CC(=O)C(C)CC(=O)OC.C=CC(C)(C)OC(C)(C)[C@H]1COc2ccc(Br)cc2O1>>C=CC(C)(C)OC(C)(C)[C@H]1COc2ccc(/C=C/C(=O)C(C)CC(=O)OC)cc2O1  
 7049 C=CC(=O)OCC.COc1ncc(I)c2ncccc12>>CCOC(=O)/C=C/c1cnc(OC)c2cccc12  
 7050 C=CC(=O)N(C)Cc1cccc(OC)c1OCCC.CC1(C)NCc2cc(Br)cnc2NC1=O>>CCCOc1c(CN(C)C(=O)/C=C/c2cnc3c(c2)CNC(C)(C)C(=O)N3)cccc1OC  
 7051 C=Cc1cccc1C.CCOC(=O)C(C)Br>>CCOC(=O)C(C)/C=C/c1cccc1C  
 7052 C=Cc1ccc(C#N)cc1.N#Cc1cc2sc3cccc3c2c2cc(Br)ccc12>>N#Cc1ccc(/C=C/c2ccc3c(C#N)cc4sc5ccc5c4c3c2)cc1  
 7053 C=CC(=O)O.CCOC(=O)/C=C/c1ccc([Si](C)(C)C)cc2c1oc1c(I)cc([Si](C)(C)C)cc12>>CCOC(=O)/C=C/c1ccc([Si](C)(C)C)cc2c1oc1c(/C=C/C(=O)O)cc([Si](C)(C)C)cc12  
 7054 C=CCCCCCC.O=S(=O)(Oc1cccc(Oc2cccc2)c1)C(F)(F)F>>C=C(CCCCCC)c1cccc(Oc2cccc2)c1  
 7055 C=Cc1ccc(C(=O)OC)cc1.CC1(C)CCC(=O)c2cc(Br)ccc21>>COC(=O)c1ccc(/C=C/c2ccc3c(c2)C(=O)C(C)C)cc1  
 7056 C=CC(=O)N(C)Cc1oc2cccc2c1C.CS(=O)(=O)N1CCNc2ncc(Br)cc2C1>>Cc1c(CN(C)C(=O)/C=C/c2cnc3c(c2)CN(S(C)(=O)=O)CCN3)oc2cccc12  
 7057 C=Cc1ccc(OC)cc1.CCCCC(I)C(F)(F)C(=O)OCC>>CCCCC(/C=C/c1ccc(OC)cc1)C(F)(F)C(=O)OCC  
 7058 Br1ccc2cccc2c1.C=Cc1nc2c(N)nnc2n1[C@H]1C[C@H](O[Si](C)(C)C(C)(C)C)[C@@H](CO[Si](C)(C)C(C)(C)C)O1>>CC(C)(C)[Si](C)(C)OC[C@H]1O[C@@H](n2c(/C=C/c3ccc4cccc4c3)nc3c(N)nnc32)C[C@@H]1O[Si](C)(C)C(C)(C)C  
 7059 C=CCOc1cccc1.Ic1ccsc1>>C=C(c1ccsc1)\COc1cccc1  
 7060 C=CC(=O)OC.Ic1cn2c(n1)[C@H](OCc1cccc1)[C@@H](OCc1cccc1)[C@H](OCc1cccc1)[C@H]2COc1cccc1  
 7061 Br1cnc2nc(-c3cccc3)c(-c3cccc3)nc2c1.C=CCN1C(=O)c2cccc2C1=O>>O=C1c2cccc2C(=O)N1C/C=C/c1cnc2nc(-c3cccc3)c(-c3cccc3)nc2c1  
 7062 C=CCN1C(=O)c2cccc2C1=O.Cc1cc(C)cc(Br)c1>>Cc1cc(C)cc(/C=C/CN2C(=O)c3cccc3C2=O)c1  
 7063 C=CCC(C)C(=O)OCC.CC(=O)c1ccc(Br)cc1>>CCOC(=O)C(C)C/C=C/c1ccc(C(C)=O)cc1

7064 C=C.Clc1cc(I)ccn1>>C=Cc1ccnc(Cl)c1  
7065 C=CC(=O)OC.CN1CC[C@]23CCCC[C@H]2[C@H]1Cc1cc(I)c(N)cc13>>COC(=O)/C=C/c1cc2c(cc1  
N)[C@]13CCCC[C@H]1[C@@H](C2)N(C)CC3  
7066 C=Cc1cccc1Cl.COCOc1c(OC)ccc(C)c1I>>COCOc1c(OC)ccc(C)c1/C=C/c1cccc1Cl  
7067 C=CCN(C(=O)OC(C)(C)C)C(=O)OC(C)(C)C.Fc1ccc(Cl)cc1>>CC(C)(C)OC(=O)N(C/C=C/c1ccc(F)cc  
1)C(=O)OC(C)(C)C  
7068 C=Cc1ccncc1.CC(C)(C)OC(=O)N[C@H](COc1cccc(Br)c1)Cc1c[nH]c2ccccc12>>CC(C)(C)OC(=O)N  
[C@H](COc1cccc(/C=C/c2ccncc2)c1)Cc1c[nH]c2ccccc12  
C=CC(=O)OCC(CC)CCCC.O=[N+](O-  
7069 )c1ccc(Cl)cc1>>CCCC(CC)COC(=O)/C=C/c1ccc([N+](=O)[O-])cc1  
7070 C=CC(=O)OC(C)(C)C.COc1cccc([IH2](OC(C)=O)OC(C)=O)c1>>COc1cccc(/C=C/C(=O)OC(C)(C)C)  
7071 C=Cc1cccc(OC)c1.CCOC(=O)C(F)I>>CCOC(=O)C(F)/C=C/c1cccc(OC)c1  
7072 C=C[Si](C)(C)c1cccc1.CC(C)(C)c1ccc(Br)cc1>>CC(C)(C)c1ccc(/C=C/[Si](C)(C)c2ccccc2)cc1  
7073 C=CC(=O)OCC.COc1ccc(CNc2nc(-n3c(C)ccc3C)nc(C)c2Br)cc1>>CCOC(=O)/C=C/c1c(C)nc(-  
n2c(C)ccc2C)nc1NCc1ccc(OC)cc1  
7074 C=Cc1cccc1.COc1cc(I)cc(OC)c1OC>>COc1cc(/C=C/c2ccccc2)cc(OC)c1OC  
7075 C=CC(=O)OC(C)(C)C.O=S(=O)(Oc1ccc(Br)cc1)C(F)(F)F>>CC(C)(C)OC(=O)/C=C/c1ccc(OS(=O)(=O)C(F)(F)F)cc1  
7076 C=CC(=O)N(C)C.Cc1ccc(-c2ccccc2Br)cc1>>Cc1ccc(-c2ccccc2/C=C/C(=O)N(C)C)cc1  
7077 C=CC#N.O=C1C=C(Br)CCC1>>N#C/C=C/C1=CC(=O)CCC1  
7078 C=Cc1n[nH]c2cc([C@]3[C@]4[C@]34C(=O)Nc3ccc(OC)cc34)ccc12.CN(C)Cc1c(F)cc(Br)cc1F>>C  
Oc1ccc2c(c1)[C@]1(C)[C@H]1c1ccc3c(/C=C/c4cc(F)c(CN(C)C)c(F)c4)n[nH]c3c1)C(=O)N2  
7079 C=CB1OC(C)CC(C)(C)O1.C=CI>>C=C/C=C/B1OC(C)CC(C)(C)O1  
7080 C=CCCCCN1C(=O)c2ccccc2C1=O.FC(F)(F)c1cnc2c(Br)ccncc2c1>>O=C1c2ccccc2C(=O)N1CCCC/C  
=C/c1ccncc2cc(C(F)(F)F)cc12  
7081 C=CC(=O)OCC.CC1(C)CC(=O)C2=C(C1)N(c1ccc(I)cc1)C1=C(C(=O)CC(C)(C)C1)C2c1cccc(O)c1>>  
CCOC(=O)/C=C/c1ccc(N2C3=C(C(=O)CC(C)(C)C3)C(c3cccc(O)c3)C3=C2CC(C)(C)CC3=O)cc1  
7082 C=CCCCC(=O)OC.CC(C)(C)c1cccc1OS(=O)(=O)C(F)(F)F>>C=C(CCCC(=O)OC)c1cccc1C(C)(C)  
7083 C=C(NC(=O)OC(C)(C)C)C(=O)OC.CC(=O)OCc1cc(OCc2ccccc2)ccc1I>>COC(=O)/C=C/c1ccc(OCc  
2ccccc2)cc1COC(C)=O)NC(=O)OC(C)(C)C  
7084 C=Cc1ccc(OC)c(OC)c1.O=c1c(Br)c(-c2ccccc2)oc2ccccc12>>COc1ccc(/C=C/c2c(-  
c3ccccc3)oc3ccccc3c2=O)cc1OC  
7085 C=C(NC(=O)OCc1cccc1)C(=O)OC.CC(=O)OCc1cc(C)ccc1I>>COC(=O)/C=C/c1ccc(C)cc1COC(C)  
=O)NC(=O)OCc1cccc1  
7086 Brc1cccc1.C=CC(C)C(C)O>>CC(O)C(C)/C=C/c1cccc1  
7087 C=CC(=O)OCC.CCOC(=O)CCOCc1cccc1Br>>CCOC(=O)/C=C/c1cccc1COCCC(=O)OCC  
7088 C=CC(=O)OC(C)(C)C.O=C1Nc2ncc(Br)cc2CN2CCC[C@]12>>CC(C)(C)OC(=O)/C=C/c1cnc2c(c  
1)CN1CCC[C@H]1C(=O)N2  
7089 C/C=C/COc1cc(I)cc(C)c1OC(=O)C(C)(C)C.C=CCOC(=O)CC>>C/C=C/COc1cc(/C=C/COc1cc(=O)CC)c  
c(C)c1OC(=O)C(C)(C)C  
7090 C=Cc1ccncc1.Cn1cc(-c2cnc(N)c(C(=O)N[C@]3CCN(C(=O)c4ccc(I)cc4)C3)c2)cn1>>Cn1cc(-  
c2cnc(N)c(C(=O)N[C@]3CCN(C(=O)c4ccc(/C=C/c5ccncc5)cc4)C3)c2)cn1  
7091 C=CC(=O)CCC.N#Cc1ccc(Br)cc1>>CCCC(=O)/C=C/c1ccc(C#N)cc1  
7092 C=CC1CCCC1.Cc1nc(-c2ccc(I)cc2)sc1-c1ccncc(N)n1>>Cc1nc(-c2ccc(/C=C/C3CCCC3)cc2)sc1-  
c1ccncc(N)n1  
7093 C=CCCC(C)=O.Ic1cccc1>>CC(=O)CC/C=C/c1cccc1  
7094 C=Cc1ccc(OC)cc1.C[Si](C)(C)I>>COc1ccc(/C=C/[Si](C)(C)C)cc1  
7095 C=CC(=O)OCC.O=C(N1CCc2cc(Br)c(F)cc2C1)C(F)(F)F>>CCOC(=O)/C=C/c1cc2c(cc1F)CN(C(=O)  
C(F)(F)F)CC2  
7096 C=CNC(=O)NCCCC.O=S(=O)(Oc1ccc2ccccc2c1)C(F)(F)F>>C=C(NC(=O)NCCCC)c1ccc2ccccc2c1  
7097 C=CC(=O)OC(C)(C)C.O=S(=O)(c1ccc(Br)c1)c1ccc2ccccc2n1>>CC(C)(C)OC(=O)/C=C/c1cccc(S(=O)  
(=O)c2ccc3ccccc3n2)c1  
7098 Brc1cccc(-c2cccn2)c1.C=CC(=O)OCCCC>>CCCCOC(=O)/C=C/c1cccc(-c2cccn2)c1  
7099 C=Cc1ccc(N(CC)CCO)cc1.CS(=O)(=O)c1ccc(/C=C/c2ccc(Br)cc2)cc1>>CCN(CCO)c1ccc(/C=C/c2ccc  
(/C=C/c3ccc(S(C)=O)=O)cc3)cc2)cc1  
7100 C=C[Si](C)(C)c1cccc1.Ic1ccsc1>>C[Si](C)(C)/C=C/c1ccsc1)c1cccc1  
7101 C=CC(N)=O.Fc1cc(Br)cc(C(F)(F)F)c1>>NC(=O)/C=C/c1cc(F)cc(C(F)(F)F)c1  
7102 Brc1cccc1.C=Cc1ccc(C)cc1>>Cc1ccc(/C=C/c2ccccc2)cc1  
7103 C=Cc1cccc1.Oc1ccc(Br)cc1F>>Oc1ccc(/C=C/c2ccccc2)cc1F  
7104 C=CC(=O)OC.CCS1cc(I)cn1-c1nc2cc(C(F)(F)F)cn2n1C>>CCSc1cc(/C=C/C(=O)OC)cn1-  
c1nc2cc(C(F)(F)F)cn2n1C



7105 C=Cc1cccc1.CCCOC(=O)/C=C/c1cccc(Cl)c1>>CCCCOC(=O)/C=C/c1cccc(/C=C/c2cccc2)c1  
7106 C=CC(=O)OC.COc1ccc(Br)c(CC(=O)N2CCCC2)c1OCc1cccc1>>COC(=O)/C=C/c1ccc(OC)c(OCc2cccc2)c1CC(=O)N1CCCC1  
7107 C=Cc1ccc([Si](OC)(OC)OC)cc1.CO[Si](OC)(OC)c1ccc(Br)cc1>>CO[Si](OC)(OC)c1ccc(/C=C/c2ccc([Si](OC)(OC)OC)cc2)cc1  
7108 C=CC(N)=O.COc1c2[nH]c3ccc(F)cc3c2c(Br)c2c1[nH]c1ccc(F)cc12>>COc1c2[nH]c3ccc(F)cc3c2c(/C=C/C(N)=O)c2c1[nH]c1ccc(F)cc12  
7109 Br1ccc(-c2cnco2)o1.C=Cc1ccc(C)cc1>>Cc1ccc(/C=C/c2ccc(-c3cnco3)o2)cc1  
7110 C=CC(=O)OC.CCn1c(-c2ccc(Br)cc2)nc2cccc21>>CCn1c(-c2ccc(/C=C/C(=O)OC)cc2)nc2cccc21  
7111 C=CC(=O)NC(c1cccc(C(F)(F)F)c1)C(F)(F)F.O=C(O)c1ccc(I)cc1C(F)(F)F>>O=C(/C=C/c1ccc(C(=O)O)c(C(F)(F)F)c1)NC(c1cccc(C(F)(F)F)c1)C(F)(F)F  
7112 C=CC(=O)OC(C)(C)C.N#Cc1ccc(I)cc1>>CC(C)(C)OC(=O)/C=C/c1ccc(C#N)cc1  
7113 Br1ccenc1.C=CC(=O)CC>>CCC(=O)/C=C/c1ccenc1  
7114 C=CC(=O)NCc1cccc1.CC(C)(C)OC(=O)c1cccc1Br>>CC(C)(C)OC(=O)c1cccc1/C=C/C(=O)NCc1cccc1  
7115 C=CC(=O)OC(C)(C)C.CCn1nnc2c(C)c(Br)ccc21>>CCn1nnc2c(C)c(/C=C/C(=O)OC(C)(C)C)ccc21  
7116 C=CC(=O)OC.O=S(=O)(c1cccc(Cl)c1)N1CCc2cc(Br)enc21>>COC(=O)/C=C/c1cnc2c(c1)CCN2S(=O)(=O)c1cccc(Cl)c1  
7117 C=Cc1en[nH]c1.CN(C(=O)c1cccc1)c1ccc2c(c1)[nH]c(=NC(=O)c1ccc(Br)s1)n2CCC(N)=O>>CN(C(=O)c1cccc1)c1ccc2c(c1)[nH]c(=NC(=O)c1ccc(/C=C/c3cn[nH]c3)s1)n2CCC(N)=O  
7118 C=C.COC(=O)c1cccc(Br)c1[N+](=O)[O-]>>C=Cc1ccc(C(=O)OC)c1[N+](=O)[O-]  
7119 Br1ccc2c(c1)CCc1cccc1N2.C=CC(=O)OC(C)(C)C>>CC(C)(C)OC(=O)/C=C/c1ccc2c(c1)CCc1cccc1  
7120 C=CC(=O)OCC.COc1cc(-c2cc3cc(Br)cc(OC)c3o2)ccc1OCc1cccc1>>CCOC(=O)/C=C/c1cc(OC)c2oc(-C=CS(=O)(=O)c1cccc1.COc1ccc(Br)cc1>>COc1ccc(/C=C/S(=O)(=O)c2cccc2)cc1  
7121 C=CN1C(=O)CCC1=O.FC(F)(F)Oc1ccc(Br)cc1>>O=C1CCC(=O)N1/C=C/c1ccc(OC(F)(F)F)cc1  
7122 Br1ccc(I)cc1.C=CC(N)=O>>NC(=O)/C=C/c1ccc(Br)cc1  
7123 C=CCC(=O)O.Cc1cc(OCc2cccc2)c([C@H]2O[C@H](COCc3cccc3)[C@H](OCc3cccc3)[C@H](OCc3cccc3)[C@H]2OCc2cccc2)cc1Cc1ccc(Br)cc1>>Cc1cc(OCc2cccc2)c([C@H]2O[C@H](COCc3cccc3)[C@H](OCc3cccc3)[C@H](OCc3cccc3)[C@H]2OCc2cccc2)cc1Cc1ccc(/C=C/CCc1cccc1.Ic1ccc2c(c1)C1c3cccc4cccc(c34)C21>>C=C/c1ccc2c(c1)C1c3cccc4cccc(c34)C21)\c1cccc1  
7124 C=Cc1ccc(Br)cc1.CCCCCCN(CCCCCC)c1ccc(I)cc1>>CCCCCN(CCCCCC)c1ccc(/C=C/c2ccc(Br)c2)cc1  
7125 Br1ccccc1I.C=CC(=O)O>>O=C(O)/C=C/c1ccccc1Br  
7126 C=CCNC(=O)OC(C)(C)C.CC1(C)OC(=O)c2cc(OCc3CCCC3)cc2OS(=O)(=O)C(F)(F)F.O1>>CC(C)(C)OC(=O)NC/C=C/c1cc(OCc3CCCC3)cc2c1C(=O)OC(C)(C)O2  
7127 C=CC(=O)OC.O=c1[nH]c(=O)n([C@H]2O[C@H](CO)[C@H](O)[C@H]2F)cc1I>>COC(=O)/C=C/c1cn([C@H]2O[C@H](CO)[C@H](O)[C@H]2F)c(=O)[nH]c1=O  
7128 C=Cc1ccccc1.Cc1ccc(Br)c2nnnn12>>Cc1ccc(/C=C/c2cccc2)c2nnnn12  
7129 C=CC(=O)OC1CCCCC1.CC(=O)c1ccc(Br)cc1>>CC(=O)c1ccc(/C=C/C(=O)OC2CCCCC2)cc1  
7130 C=C(C)C=O.CC(C)(C)OC(=O)Nc1ccc(I)cc1>>C/C(C=O)=C\c1ccc(NC(=O)OC(C)(C)C)cc1  
7131 C=CCN1C(=O)c2cccc2C1=O.Oc1ccc(Br)cc1>>O=C1c2cccc2C(=O)N1C/C=C/c1ccc(O)cc1  
7132 Br1ccenc1.C=CCCCCCCC>>CCCCCCCC/C=C/c1ccenc1  
7133 C=COCCCC.Cc1ccc(Br)c(C)n1>>C=C(OCCCC)c1ccc(C)nc1C  
7134 Br1ccc(-c2cnenc2)cc1.C=CC(N)=O>>NC(=O)/C=C/c1ccc(-c2cnenc2)cc1  
7135 C=CC(=O)OCC.CCc1ccc(I)cc1>>CCOC(=O)/C=C/c1ccc(CC)cc1  
7136 Cc1ccc(S(=O)(=O)/C=C2\C(C)(C)C2(F)F)cc1.Ic1ccccc1>>Cc1ccc(S(=O)(=O)/C=C2\C(C)(C)C2(F)F)c2cccc2)cc1  
7137 C=Cc1ccc2c(cnn2C2CCCCO2)c1.FC(F)Oc1ccc(Nc2ncc(Br)en2)cc1Cl>>FC(F)Oc1ccc(Nc2ncc(/C=C/c3ccc4c(cnn4C4CCCCO4)c3)en2)cc1Cl  
7138 C=CC(=O)OC.CO[C@H]1O[C@H](COC(C)=O)[C@H](OC(C)=O)C=C1I>>COC(=O)/C=C/C1=C[C@@H](OC(C)=O)[C@@H](COC(C)=O)O[C@@H]1OC  
7139 C=C.CCOC(=O)c1c[nH]c(=O)c(I)c1>>C=Cc1cc(C(=O)OCC)c[nH]c1=O  
7140 C=CC(=O)OC(C(F)(F)F)C(F)(F)F.Ic1ccccc1>>O=C(/C=C/c1ccccc1)OC(C(F)(F)F)C(F)(F)F  
7141 C=CC(=O)OCC.Cc1sc(NCc2cccc(Br)c2)n1>>CCOC(=O)/C=C/c1cccc(CNc2nc(C)cs2)c1  
7142 C=CC(=O)OC.CCn1cnc2c(NCc3cccc(Br)c3)nc(N3CCCCC3)nc21>>CCn1cnc2c(NCc3cccc(/C=C/C(=O)OC)c3)nc(N3CCCCC3)nc21  
7143 C=Cc1ccccc1.N#Cc1ccc(/C=C/c2ccc(I)cc2)cc1>>N#Cc1ccc(/C=C/c2ccc(/C=C/c3ccccc3)cc2)cc1  
7144

C=CCn1c(-  
 7146 c2ccc(Cl)cc2)nc2ccccc2c1=O.O=C(CN1C(=O)COc2ccccc21)c1ccc(Br)cc1>>O=C(CN1C(=O)COc2cc  
 ccc21)c1ccc(/C=C/Cn2c(-c3ccc(Cl)cc3)nc3ccccc3c2=O)cc1  
 7147 C=CC(=O)OC.CC(=O)c1ccc(OS(=O)(=O)C(F)(F)F)cc1>>COC(=O)/C=C/c1ccc(C(C)=O)cc1  
 7148 C=CC(=O)OC.N#Cc1ccc(-c2cncc3ccc(Br)cc23)c2ccccc12>>COC(=O)/C=C/c1ccc2cncc(-  
 c3ccc(C#N)c4ccccc34)c2c1  
 7149 C=Cc1cc(OC(C)=O)cc(OC(C)=O)c1.O=[N+](O-  
 )c1ccc(I)cc1>>CC(=O)Oc1cc(/C=C/c2ccc([N+](=O)[O-])cc2)cc(OC(C)=O)c1  
 7150 C=CC(=O)OCC.Clc1ccc(Br)cc1>>CCOC(=O)/C=C/c1ccc(Cl)cc1  
 7151 C=Cc1ccc(OC)c(OC)c1.CC(C)C(=O)Nc1ccccc1I>>COc1ccc(/C=C/c2ccccc2NC(=O)C(C)C)cc1OC  
 7152 C=CC(=O)OC.Oc1ccc2c(Cc3ccc(Br)cc3)nc2c1>>COC(=O)/C=C/c1ccc(Cc2nccc3cc(O)ccc23)cc1  
 7153 Br1ccccc2ccccc12.C=C[C@H]1CN2CC[C@H]1C[C@H]2[C@H](O)c1ccnc2ccc(OC)cc12>>COc1c  
 cc2nccc([C@H](O)[C@H]3C[C@H]4CCN3C[C@H]4/C=C/c3cccc4ccccc34)c2c1  
 7154 C=CC(=O)CCC.Cc1cc(C)c(Br)c(C)c1>>CCCC(=O)/C=C/c1c(C)cc(C)cc1C  
 7155 C=CC(N)=O.Cc1cc(F)ccc1Br>>Cc1cc(F)ccc1/C=C/C(N)=O  
 7156 Br1ccc(-c2cccs2)cc1.C=Cc1ccccc1>>C(=C/c1ccc(-c2cccs2)cc1)\c1ccccc1  
 7157 C=CC(=O)OCC.CC1ccc(-c2ccccc2Br)cc1>>CCOC(=O)/C=C/c1ccccc1-c1ccc(CC)cc1  
 7158 C=Cc1ccc(OC)c(OC)c1.Nc1ccccc1I>>COc1ccc(/C=C/c2ccccc2N)cc1OC  
 7159 C=CC(=O)OCC.O=C1CCc2cc(Br)ccc21>>CCOC(=O)/C=C/c1ccc2c(c1)CCC2=O  
 7160 C=CCNC(=O)OC(C)(C)C.CC1(C)OC(=O)c2cc(OCc3ccc(F)cc3)cc2OS(=O)(=O)C(F)(F)F)O1>>C  
 C(C)(C)OC(=O)NC/C=C/c1cc(OCc2ccc(F)cc2)cc2c1C(=O)OC(C)(C)O2  
 7161 C=Cc1ccccc1.CC(=O)Oc1ccc(Br)cc1>>CC(=O)Oc1ccc(/C=C/c2ccccc2)cc1  
 7162 C=Cc1ccc(CNC(=O)OC(C)(C)C)cc1.Cc1noc(-c2ccccc2)c1I>>Cc1noc(-  
 c2ccccc2)c1/C=C/c1ccc(CNC(=O)OC(C)(C)C)cc1  
 7163 C=Cc1ccc(OC)cc1.COc1ccc(C=O)c(Br)c1>>COc1ccc(/C=C/c2cc(OC)ccc2C=O)cc1  
 7164 C=CC1(C(=O)O)COC(=O)OC1.CC(C)[C@H](O)C(=O)N[C@H](C)C(=O)N1CCC[C@H](C(=O)  
 N[C@H](C)c2ccc3ccc(Br)cc3n2)N1>>CC(C)[C@H](O)C(=O)N[C@H](C)C(=O)N1CCC[C@H](C  
 (=O)N[C@H](C)c2ccc3ccc(/C=C/C4(C(=O)O)COC(=O)OC4)cc3n2)N1  
 7165 C=CC(=O)OCC.Fc1ccc(I)c1>>CCOC(=O)/C=C/c1ccc(F)c1  
 7166 C=Cc1ccc(N(CCCCCCCCCCCC)CCCCCCCCCCCC)cc1.O=Cc1c2ccccc2c(Br)c2ccccc12>>CCCCC  
 CCCCCCN(CCCCCCCCCCCC)c1ccc(/C=C/c2c3ccccc3c(C=O)c3ccccc23)cc1  
 7167 C=Cc1ccccc1.N#Cc1cc2ccc3ccccc3c2c2cc(Br)ccc12>>N#Cc1cc2ccc3ccccc3c2c2cc(/C=C/c3ccccc3)cc  
 7168 C=C(NC(C)=O)C(=O)OC.O=[N+](O-)]c1ccc(I)cc1>>COC(=O)/C(=C/c1ccc([N+](=O)[O-  
 C=C(NC(=O)OC(C)(C)C)C(=O)OCc1ccccc1.COC(=O)c1ccccc1c1>>COC(=O)c1ccc(/C=C/(NC(=O)  
 7169 OC(C)(C)C(=O)OCc2ccccc2)c1  
 7170 C=CC(=O)OC.O=[14CH]c1ccc(Br)cc1>>COC(=O)/C=C/c1ccc([14CH]=O)cc1  
 7171 C=CC(=O)OCC.O=C1CCc2c(Br)ccc(OCc3ccccc3)c21>>CCOC(=O)/C=C/c1ccc(OCc2ccccc2)c2c1CC  
 C2=O  
 7172 C=CC(=O)OCC.C[Si](C)(C)CN(Cc1cc2c(cc1I)OCO2)C[Si](C)(C)C>>CCOC(=O)/C=C/c1cc2c(cc1CN  
 (C[Si](C)(C)C)C[Si](C)(C)C)OCO2  
 7173 C=CC(=O)OC.COc1cc(Br)ccc1C#N>>COC(=O)/C=C/c1ccc(C#N)c(OC)c1  
 7174 C=CC(=O)OCC.COc1ccc(-c2ccccc2)c(I)c1>>CCOC(=O)/C=C/c1cc(OC)ccc1-c1ccccc1  
 7175 C=CC(C)NC(=O)OC(C)(C)C.Fc1ccc(-n2ccc3c(Br)ccc32)cc1>>CC(/C=C/c1ccc2c1cnn2-  
 c1ccc(F)cc1)NC(=O)OC(C)(C)C  
 7176 C=CC(OC)OC.COc1ccc(I)c(F)c1>>COc1ccc(/C=C/C(OC)OC)c(F)c1  
 7177 C=CC(=O)NC(C)(C)C.O=c1c(I)c(-c2ccc(O)cc2)oc2cc(O)ccc12>>CC(C)(C)NC(=O)/C=C/c1c(-  
 c2ccc(O)cc2)oc2cc(O)ccc2c1=O  
 7178 C=CC(=O)OCCCC.Fc1ccc(Br)cc1F>>CCCCOC(=O)/C=C/c1ccc(F)c(F)c1  
 7179 C=CC(C)O.CC(C)(C)OC(=O)NCCc1cc2c(cc1I)OCO2>>CC(O)/C=C/c1cc2c(cc1CCNC(=O)OC(C)(C)  
 C)OCO2  
 7180 C=CC(=O)OC.O=Cc1ccccc1c1>>COC(=O)/C=C/c1ccccc1(C=O)c1  
 7181 C=C(c1ccc(OC)c(Br)c1)c1cc(OC)c(OC)c(OC)c1.C=CC(=O)OC>>C=C(c1ccc(OC)c(/C=C/C(=O)OC)c  
 1)c1cc(OC)c(OC)c(OC)c1  
 7182 C=CCNC1=NCCN1C(=O)OCC.CC(=O)OCC1Cn2c3ccccc3c3c4c(c5c6cc(Br)ccc6n(c5c32)C1)C(=O)N  
 (C(C)=O)C4>>CCOC(=O)N1CCN=C1NC/C=C/c1ccc2c(c1)c1c3c(c4c5ccccc5n5c4c1n2CC(COC(C)=  
 O)C5)CN(C(C)=O)C3=O  
 7183 C=CC(=O)OCC.Cc1[nH]cc2c(=O)n(-c3ccc(Cl)cc3)nc-2c1Br>>CCOC(=O)/C=C/c1c2nn(-  
 c3ccc(Cl)cc3)c(=O)c-2c[nH]c1C  
 7184 Br1ccc2oc3ccc(N(c4ccccc4)c4ccccc4)cc3c2c1.C=Cc1ccncc1>>C(=C/c1ccc2oc3ccc(N(c4ccccc4)c4cc  
 ccc4)cc3c2c1)\c1ccncc1  
 7185 C=Cc1ccc(Cl)cc1.CC(=S)NS(=O)(=O)c1ccc(Br)cc1>>CC(=S)NS(=O)(=O)c1ccc(/C=C/c2ccc(Cl)cc2)c

7186 C=CC(=O)OC.Ic1cccc1NCc1cccc1>>COC(=O)/C=C/c1cccc1NCc1cccc1  
7187 C=Cc1ccc(OC)cc1.CC(C)(C)c1ccc(Br)cc1>>COc1ccc(/C=C/c2ccc(C(C)(C)C)cc2)cc1  
7188 C=CCP(=O)(OCC)OCC.Cc1ccc(I)cc1>>CCOP(=O)(C/C=C/c1ccc(C)cc1)OCC  
7189 C=CC(=O)OC(C)(C)C.Fc1cccc(I)c1>>CC(C)(C)OC(=O)/C=C/c1cccc(F)c1  
7190 C=CCC#N.CS[C@H]1O[C@@H](c2ccc(C)c(Cc3ccc(Cl)cc3)c2)[C@H](OC(C)=O)[C@@H](OC(C)=O)[C@H]1OC(C)=O>>CS[C@H]1O[C@@H](c2ccc(C)c(Cc3ccc(/C=C/CC#N)cc3)c2)[C@H](OC(C)=O)[C@@H](OC(C)=O)[C@@H]1OC(C)=O  
7191 C=CCOCC.COC(=O)/C=C/c1cccc(N(Cc2ccc(Br)cc2)C(=O)C2CCCC2)c1>>CCOC/C=C/c1ccc(CN(C(=O)C2CCCC2)c2cccc(/C=C/C(=O)OC)c2)cc1  
7192 C=CCCN1C(=O)c2cccc2C1=O.Cc1ccc(I)cc1>>Cc1ccc(/C=C/CCN2C(=O)c3cccc3C2=O)cc1  
7193 C=CC(=O)OCC.Cc1cc(I)nc(C(C)C)n1>>CCOC(=O)/C=C/c1cc(C)nc(C(C)C)n1  
7194 C=CCN(C(=O)OCC)c1cccc2cccc12.CC(=O)c1ccc(Cl)cc1>>CCOC(=O)N(C/C=C/c1ccc(C(C)=O)cc1)c1cccc2cccc12  
7195 C=CC1CC1.Nc1cccc1Br>>Nc1cccc1/C=C\C1CC1  
7196 C=CCCC(C)=O.Fc1ccc(I)cc1>>CC(=O)CC/C=C/c1ccc(F)cc1  
7197 C=CC(=O)OC(C)(C)C.Nc1ncc(I)c2scc(Br)c12>>CC(C)(C)OC(=O)/C=C/c1ncc(N)c2c(Br)csc12  
7198 C=C1C(=O)O[C@@H]2CC(C)=C([C@@H](C)CCCOC(C)=O)[C@@H](OC(C)=O)[C@H]12.Ic1cccc  
7199 c1>>CC(=O)OCCC[C@H](C)C1=C(C)C[C@H]2OC(=O)/C=C/c3cccc3[C@H]2[C@@H]1OC(C)=C=CC(=O)OC.Nc1ccc(F)nc1Br>>COC(=O)/C=C/c1nc(F)ccc1N  
7200 C=Cc1cncnc1.CC(C)(C)OC(=O)N[C@H](COc1nccc(Br)c1)Cc1c[nH]c2cccc12>>CC(C)(C)OC(=O)N[C@H](COc1nccc(/C=C/c2cncnc2)c1)Cc1c[nH]c2cccc12  
7201 C=CC(N)=O.O=Cc1ccc(Cl)cc1>>NC(=O)/C=C/c1ccc(C=O)cc1  
7202 C=Cc1ccc([N+](=O)[O-])cc1.CCC1(CC)c2cc(Br)ccc2-c2ccc(N(c3cccc3)c3cccc3)cc21>>CCC1(CC)c2cc(/C=C/c3ccc([N+](=O)[O-])cc3)ccc2-c2ccc(N(c3cccc3)c3cccc3)cc21  
7203 C=Cc1ccc(C)cc1.COC(=O)c1ccc(Br)cc1>>COC(=O)c1ccc(/C=C/c2ccc(C)cc2)cc1  
7204 C=CC(=O)OC.CC(=O)Oc1c(C)cc(I)cc1CC=C(C)C>>COC(=O)/C=C/c1cc(C)c(OC(C)=O)c(CC=C(C)C=CC(=O)OCCCC.Cc1cccc(C)c1I>>CCCCOC(=O)/C=C/c1c(C)cccc1C  
7205 C=C1CC(c2ccc(Cl)cc2)OC1=O.Ic1cccc1-c1ccc2cccc2c1>>O=C1OC(c2ccc(Cl)cc2)C/C1=C\C1cccc1-c1ccc2cccc2c1  
7206 Brc1cncnc1.C=CS(N)(=O)=O>>NS(=O)(=O)/C=C/c1cncnc1  
7207 C=CCCCC(C(=O)OC)C(=O)OC.Ic1cccc1>>COC(=O)C(CCCC/C=C/c1cccc1)C(=O)OC  
7208 C=C1C(=O)O[C@@H]2/C=C\C(C)CC/C=C\C(C)CC[C@H]12.FC(F)(F)c1cccc(I)c1>>C/C1=C[C@H]2OC(=O)/C=C/c3cccc(C(F)(F)F)c3[C@@H]2CC/C(C)=C/CC1  
7209 Cc1ccc(Br)cc1.Cc1ccc(S(=O)(=O)NC(C/C=C/C(=O)C2CCCC2)c2cccc2)cc1>>Cc1ccc(/C=C\C(C)=O)C2CCCC2)CC(NS(=O)(=O)c2ccc(C)cc2)c2cccc2)cc1  
7210 C=CC(=O)OC.CCn1cnc2ccc(Br)cc21>>CCn1cnc2ccc(/C=C/C(=O)OC)cc21  
7211 C=CC(=O)OCCCC.Fc1ccc(Br)c(F)c1>>CCCCOC(=O)/C=C/c1ccc(F)cc1F  
7212 C=COCCCC.Cc1cccc(Cl)c1C>>C=C(OCCCC)c1cccc(C)c1C  
7213 C=C[Si](C)(C)c1cccn1.Cc1cccc1I>>Cc1cccc1/C=C/[Si](C)(C)c1cccn1  
7214 C=CC(OCC)OCC.Cc1cccc(Br)c1>>CCOC(/C=C/c1cccc(C)c1)OCC  
7215 C=Cc1ccc(Cl)cc1.O=c1cc(-c2cccc2)oc2ccc(Br)cc12>>O=c1cc(-c2cccc2)oc2ccc(/C=C/c3ccc(Cl)cc3)cc12  
7216 C=CN1CCCC1=O.O=C1CCC(N2C(=O)c3cccc(I)c3C2=O)C(=O)N1>>O=C1CCC(N2C(=O)c3cccc(/C=C/N4CCCC4=O)c3C2=O)C(=O)N1  
7217 Brc1ccc2c(c1)Sc1cccc1N2.C=Cc1ccc(OC(C)=O)cc1>>CC(=O)Oc1ccc(/C=C/c2ccc3c(c2)Sc2cccc2N3)cc1  
7218 C=CC(=O)OCC.O=C(c1cccc1)c1ccc(Cl)cc1>>CCOC(=O)/C=C/c1ccc(C(=O)c2cccc2)cc1  
7219 C=Cc1cccc1.Nc1nc(N)c2cc(I)ccc2n1>>Nc1nc(N)c2cc(/C=C/c3cccc3)ccc2n1  
7220 C=C.Ic1cccn1>>C=Cc1cccn1  
7221 C=CC(=O)OC.Cc1c(Br)enc2c1nnn2C>>COC(=O)/C=C/c1enc2c(nnn2C)c1C  
7222 C=CCC(O)c1ccc(-c2cnc(OC)c2)cc1F.COC(=O)[C@@H](C)[C@H](c1ccc(I)c(O)c1)C1CC1>>COC(=O)[C@@H](C)[C@H](c1ccc(/C=C\C(C)O)c2ccc(-c3cnc(OC)c3)cc2F)c(O)c1)C1CC1  
7223 C=C1C(=O)O[C@H]2[C@H]1CC/C(C)=C/CC[C@H]1(C)O[C@H]21.CCc1ccc(I)cc1>>CCc1ccc(/C=C/C2/C(=O)O[C@H]3[C@H]2CC/C(C)=C/CC[C@H]2(C)O[C@H]32)cc1  
7224 C=CC(=O)OCC.Fc1ccc(Br)c(C2OCCCC2)c1>>CCOC(=O)/C=C/c1ccc(F)cc1C1OCCCCO1  
7225 C=Cc1cccc(F)c1.Oc1cccc1I>>Oc1cccc1/C=C/c1cccc(F)c1  
7226 C=C[Si](CC)(CC)CC.O=[N+](=[O-])c1cccc1Br>>CC[Si](/C=C/c1cccc1[N+](=O)[O-])(CC)CC

C=Cc1ccc([Si](OCC)(OCC)OCC)cc1.CCOP(=O)(Cc1ccc(/C=C/c2ccc3c(c2)Cc2cc(Br)ccc2-  
 7228 3)cc1)OCC>>CCO[Si](OCC)(OCC)c1ccc(/C=C/c2ccc3c(c2)Cc2cc(/C=C/c4ccc(CP(=O)(OCC)OCC)cc  
 4)ccc2-3)cc1  
 7229 C=Cc1ccnc1.COc1ccc2c(ccc3ccc4ccc(Br)cc4c32)c1>>COc1ccc2c(ccc3ccc4ccc(/C=C/c5ccnc5)cc4c  
 32)c1  
 7230 C=C1CC(c2ccc(C)cc2)OC1=O.COc1cccc(I)c1>>COc1cccc(/C=C2\CC(c3ccc(C)cc3)OC2=O)c1  
 C=C(NC(=O)OCC[Si](C)(C)C)C(=O)OC.CC(C)(C)OC(=O)N/C(=C)c1ccc(-  
 7231 c2ccc(I)cc2)cc1)C(=O)OCc1cccc1>>COC(=O)/C(=C/c1ccc(-  
 c2ccc(/C=C\NC(=O)OC(C)(C)C)C(=O)OCc3cccc3)cc2)cc1)NC(=O)OCC[Si](C)(C)C  
 7232 C=Cc1ccc2cccc2c1.COc1cc(C=O)c(Br)c(OC)c1OC>>COc1cc(C=O)c(/C=C/c2ccc3cccc3c2)c(OC)c1  
 7233 C=CC(=O)OC.COC(=O)c1ccc(Br)c(C(=O)OC)n1>>COC(=O)/C=C/c1ccc(C(=O)OC)nc1C(=O)OC  
 C=CC(=O)OC(C)(C)C.COc1cc(Br)cc(F)c1[C@]1(C)c2ccc3c(cnn3C3CCCCO3)c2C[C@H](C)N1CC  
 7234 (C)(F)F>>COc1cc(/C=C/C(=O)OC(C)(C)C)cc(F)c1[C@]1(C)c2ccc3c(cnn3C3CCCCO3)c2C[C@H](  
 C)N1CC(C)(F)F  
 7235 C=CC(=O)OC(C)(C)C.COc1ccc(Br)c(CC(C)=O)c1>>COc1ccc(/C=C/C(=O)OC(C)(C)C)c(CC(C)=O)c  
 7236 C=CC(=O)N(C)Cc1cc2cccc2n1C.Cn1c(=O)[nH]c2ncc(Br)cc21>>CN(Cc1cc2cccc2n1C)C(=O)/C=C/  
 c1cnc2[nH]c(=O)n(C)c2c1  
 7237 C=CC(=O)OC(C)(C)C.CC(C)(C)OC(=O)N1CCc2cc(Cl)cc3c2C1Cc1cccc1-  
 3>>CC(C)(C)OC(=O)/C=C/c1cc2c3c(c1)-c1cccc1CC3N(C(=O)OC(C)(C)C)CC2  
 7238 Brc1cccc1.C=C(CP(=O)(OCC)OCC)C(=O)OCC>>CCOC(=O)/C(=C/c1cccc1)CP(=O)(OCC)OCC  
 7239 C=CC(=O)N1CCc2cc(OC)c(OC)cc2C1.Cn1c(-  
 c2cccc2)c(I)c2ccnc21>>COc1cc2c(cc1OC)CN(C(=O)/C=C/c1c(-c3cccc3)n(C)c3ncccc13)CC2  
 7240 C=CC(=O)OCC.COc1c(C)c2c(c(C)c1I)C(c1cccc1)(c1cccc1)c1cccc1-  
 2>>CCOC(=O)/C=C/c1c(C)c2c(c(C)c1OC)-c1cccc1C2(c1cccc1)c1cccc1  
 7241 C=Cc1ccc(F)cc1.Cn1cc(I)c(=O)c2cccc21>>Cn1cc(/C=C/c2ccc(F)cc2)c(=O)c2cccc21  
 7242 C=CCC(C)(C)C.CC(C)(C)c1ccc(Br)cc1>>C=C(CC(C)(C)C)c1ccc(C(C)(C)C)cc1  
 7243 C=Cc1encc2cccc12.CN1C(=O)CC[C@]2(C)c3ccc(Br)cc3CC[C@H]12>>CN1C(=O)CC[C@]2(C)c  
 3ccc(/C=C/c4encc5cccc45)cc3CC[C@H]12  
 7244 C=Cc1ccc(CP(=O)(OC(C)(C)C)OC(C)(C)C)cc1.CC(C)O[Si](Cc1ccc(Br)cc1)(OC(C)C)OC(C)C>>CC(  
 C)O[Si](Cc1ccc(/C=C/c2ccc(CP(=O)(OC(C)(C)C)OC(C)(C)C)cc2)cc1)(OC(C)C)OC(C)C  
 7245 Brc1ccc2c(cen2/C(=C/c2cccc2)c2cccc2)c1.C=CC(=O)OC>>COC(=O)/C=C/c1ccc2c(cen2/C(=C/c2c  
 cccc2)c2cccc2)c1  
 7246 C=CC(=O)OC(C)(C)C.COc1ccc(Br)c(COCCC(=O)OC(C)(C)C)c1>>COc1ccc(/C=C/C(=O)OC(C)(C)C  
 )c(COCCC(=O)OC(C)(C)C)c1  
 7247 Brc1ccnc1.C=CCOC1=C(C)C(=O)O[C@H](CC)[C@](C)(O)C=C(C)C(=O)[C@H](C)C[C@](C)(  
 OC)[C@H](O[C@H]2O[C@H](C)C[C@H](N(C)C)[C@H]2OC(C)=O)[C@H]1C>>CC[C@H]1OC(  
 =O)C(C)=C(OC/C=C/c2ccnc2)[C@H](C)[C@H](O[C@H]2O[C@H](C)C[C@H](N(C)C)[C@H]  
 2OC(C)=O)[C@]1(C)(OC)C[C@H](C)C(=O)C(C)=C[C@]1(C)O  
 7248 C=Cc1ccc(Cl)cc1.COc1ccc(I)cc1>>COc1ccc(/C=C/c2ccc(Cl)cc2)cc1  
 7249 C=C(C)C(=O)NC.Clc1cccc1>>CNC(=O)/C(C)=C/c1cccc1  
 7250 C=CC(=O)O.COC(=O)c1ccc(Br)cc1>>COC(=O)c1ccc(/C=C/C(=O)O)cc1  
 7251 C=Cc1cccc1.Oc1ccc2cccc2c1Br>>Oc1ccc2cccc2c1/C=C/c1cccc1  
 7252 C=Cc1cccc1.CCc1cc(/C=C/c2ccc(/C=C/c3ccc(/N=N/N(CC)CC)cc3)cc2)c(CC)cc1I>>CCc1cc(/C=C/c  
 2ccc(/C=C/c3ccc(/N=N/N(CC)CC)cc3)cc2)c(CC)cc1/C=C/c1cccc1  
 7253 C=C(c1ccc(OC)c(I)c1)c1cc(OC)c(OC)c(OC)c1.C=CC(=O)OC>>C=C(c1ccc(OC)c(/C=C/C(=O)OC)c1)  
 c1cc(OC)c(OC)c(OC)c1  
 7254 C=Cc1ccc(S(=O)(=O)c2cccc2F)cn1.Fc1cccc1I>>O=S(=O)(c1ccc(/C=C/c2cccc2F)nc1)c1cccc1F  
 7255 C=CC(=O)OC.Cc1ccc(S(=O)(=O)n2cc(C=O)c3c(Br)cccc32)cc1>>COC(=O)/C=C/c1cccc2c1c(C=O)cn  
 2S(=O)(=O)c1ccc(C)cc1  
 7256 C=CC(=O)OCC.Nc1nenc2c1c(I)nn2C1Cc2cccc2C1>>CCOC(=O)/C=C/c1nn(C2Cc3cccc3C2)c2nenc  
 (N)c12  
 7257 Brc1ccnc1.C=Cc1enc2ccc(Nc3cc(C(C)C)cnn3)nc2c1>>CC(C)c1ennc(Nc2ccc3ncc(/C=C/c4ccnc4)cc  
 3n2)c1  
 7258 C=CC(=O)OCC.FC(F)(F)c1cc(-c2nccc(Br)n2)cc(C(F)(F)F)c1>>CCOC(=O)/C=C/c1ccnc(-  
 c2cc(C(F)(F)F)cc(C(F)(F)F)c2)n1  
 7259 C=CC(C)(C)O.COC(=O)[C@H](Cc1c(I)n(C(=O)OC(C)(C)C)c2cccc12)N(C(=O)OC(C)(C)C)C(=O)O  
 C(C)(C)C>>COC(=O)[C@H](Cc1c(/C=C/C(C)(C)O)n(C(=O)OC(C)(C)C)c2cccc12)N(C(=O)OC(C)(  
 C)C)C(=O)OC(C)(C)C  
 7260 C=CC(C)(C)O.Cc1ccc(S(=O)(=O)n2cc(CCO[Si](C)(C)C(C)(C)C)c3c(Br)cccc32)cc1>>Cc1ccc(S(=O)(  
 =O)n2cc(CCO[Si](C)(C)C(C)(C)C)c3c(/C=C/C(C)(C)O)cccc32)cc1  
 7261 BrC12CC3CC(CC(C3)C1)C2.C=Cc1cccc1>>C(=C/C12CC3CC(CC(C3)C1)C2)\c1cccc1

C=Cc1ccc(OC)c1.COc1ccc(-  
 7262 c2cc(=O)c3c(OC)cc(OC)c(I)c3o2)cc1>>COc1ccc(/C=C/c2c(OC)cc(OC)c3c(=O)cc(-  
 c4ccc(OC)cc4)oc23)cc1  
 7263 C=Cc1ccc(OC)c(OC)c1.Ic1ccc2ccccc12>>COc1ccc(/C=C/c2cccc3ccccc23)cc1OC  
 C=C[C@H]1C[C@@H](O[Si](C)(C)C(C)(C)C)CC[C@]1(C)C1CC[C@@]2(C)C(CCC23OCCO3)[C  
 7264 @H]1OC(C)=O.CCOc1ccc(Br)cc1>>CCOc1ccc(/C=C/[C@H]2C[C@@H](O[Si](C)(C)C(C)(C)C)C  
 C[C@]2(C)C2CC[C@@]3(C)C(CCC34OCCO4)[C@@H]2OC(C)=O)cc1  
 7265 C=C(CC(=O)OC)C(=O)OC.Cc1ccc(I)cc1>>COC(=O)C/C=C/c1ccc(C)cc1C(=O)OC  
 C/C1=C/CC[C@](C)(O[Si](C)(C)C(C)(C)C)[C@H]2C=C(OS(=O)(=O)C(F)(F)F)[C@@H](C1)O2.C=  
 7266 COCC>>C=C(OCC)C1=C[C@H]2O[C@@H]1C/C(C)=C/CC[C@]2(C)O[Si](C)(C)C(C)(C)C  
 C=C[C@H]1O[C@H](COC(C)=O)[C@@H](OC(C)=O)[C@H](OC(C)=O)[C@H]1OC(C)=O.CC(C)  
 7267 )(C)[Si](C)(C)Oc1cc(Br)ccc1[C@@H]1[C@@H](CC[C@H](O)c2ccc(F)cc2)C(=O)N1c1ccc(F)cc1>>  
 CC(=O)OC[C@H]1O[C@@H](/C=C/c2ccc([C@@H]3[C@@H](CC[C@H](O)c4ccc(F)cc4)C(=O)N3  
 c3ccc(F)cc3)c(O[Si](C)(C)C(C)(C)C)c2)I[C@H](OC(C)=O)I[C@@H](OC(C)=O)I[C@@H]1OC(C)=O  
 7268 C=CC(C)=O.N#Cc1c(-c2cccc(Br)c2)cc(-c2cccc2)nc1N>>CC(=O)/C=C/c1cccc(-c2cc(-  
 c3ccccc3)nc(N)c2C#N)c1  
 7269 Brc1cccc2cc[nH]c12.C=CC(=O)O>>O=C(O)/C=C/c1cccc2cc[nH]c12  
 7270 C=C.C=CCCCC1(CCC[C@H](C)OC(=O)c2c(OC)cc(OC)cc2OS(=O)(=O)C(F)(F)F)OCCO1>>C=CCC  
 CC1(CCC[C@H](C)OC(=O)c2c(C=C)cc(OC)cc2OC)OCCO1  
 7271 C=CS(=O)(=O)F.Cc1ccc(S(=O)(=O)n2c3ccccc3c3cc(I)ccc32)cc1>>Cc1ccc(S(=O)(=O)n2c3ccccc3c3c  
 c(/C=C/S(=O)(=O)F)ccc32)cc1  
 7272 C=CCCCCCC.Cc1cccc1Br>>C=C(CCCCCC)c1cccc1C  
 7273 C=COCCCC.CN1CCc2cc(Br)ccc21>>C=C(OCCCC)c1ccc2c(c1)CCN2C  
 Brc1cnc2ccccc2c1.C=CCO[C@]1(C)C[C@@H](C)C(=O)[C@H](C)[C@H]2N(OC)C(=O)O[C@]2(C)  
 7274 [C@@H](CC)OC(=O)[C@H](C)C(=O)[C@H](C)[C@H]1O[C@@H]1O[C@H](C)C[C@H](N(C)C)[  
 C@H]1O>>CC[C@H]1OC(=O)[C@H](C)C(=O)[C@H](C)[C@@H](O[C@@H]2O[C@H](C)C[C@  
 H](N(C)C)I[C@H]2O)I[C@](C)(OC/C=C/c2cnc3ccccc3c2)C[C@@H](C)C(=O)I[C@H](C)I[C@H]2N(O  
 7275 C=CCCCCCC.COc1ccc(I)cc1>>CCCCC/C=C/c1ccc(OC)cc1  
 C=CC(=O)NCCCCCCCCCN=[N+]=[N-  
 7276 ].COC1=CC2[C@@H]3Cc4c(I)cc(OC)c(O)c4[C@]2(CCN3C)CC1=O>>COC1=CC2[C@@H]3Cc4c(/  
 C=C/C(=O)NCCCCCCCCCN=[N+]=[N-])cc(OC)c(O)c4[C@]2(CCN3C)CC1=O  
 7277 C=CC(F)(F)C(F)(F)C(F)(F)C(F)(F)C(F)(F)C(F)(F)C(F)(F)C(F)(F)C(F)(F)C(F)(F)C(F)(F)cc1C  
 C=CN1C(=O)c2ccccc2C1=O.Cc1ccc(S(=O)(=O)n2ccc3c(Br)ccc32)cc1>>Cc1ccc(S(=O)(=O)n2ccc3c(  
 7278 /C=C/N4C(=O)c5ccccc5C4=O)ccc32)cc1  
 7279 C=CCC(=O)OCC(C)C.COc1ccc(OC)c(Br)c1>>COc1ccc(OC)c(/C=C/CC(=O)OCC(C)C)c1  
 7280 Brc1cccc1.C=Cc1cnn(-c2ccccc2)c1>>C=C/c1cnn(-c2ccccc2)c1)c1cccc1  
 7281 C=CC1(O)CCC1.CC(C)(C)c1ccc(I)cc1>>CC(C)(C)c1ccc(/C=C/C2(O)CCC2)cc1  
 7282 C=CC(C)=O.CC#Cc1cnc(Br)c1>>CC#Cc1cnc(/C=C/C(C)=O)c1  
 7283 C=Cc1cccc1.CCOc1ccc(Br)cc1>>CCOc1ccc(/C=C/c2ccccc2)cc1  
 7284 C=CC(=O)OCC.O=Cc1ccc2occ(Br)c2c1>>CCOC(=O)/C=C/c1ccoc2ccc(C=O)cc12  
 7285 C=CS(=O)(=O)F.N#Cc1ccc(I)cc1>>N#Cc1ccc(/C=C/S(=O)(=O)F)cc1  
 7286 C=CC[Si](C)(C)C.C[Si](C)(C)I>>C[Si](C)(C)/C=C/C[Si](C)(C)C  
 7287 C=Cc1cccc(O)c1.COc1ccc(OC)c(I)c1>>COc1ccc(OC)c(/C=C/c2cccc(O)c2)c1  
 7288 C=CCCc1ccc(CC)cc1.O=C1CCc2ccc(Br)cc21>>CCc1ccc(CC/C=C/c2ccc3c(c2)C(=O)CC3)cc1  
 7289 C=Cc1cccc(C)c1.COC(=O)c1cccc1I>>COC(=O)c1cccc1/C=C/c1cccc(C)c1  
 7290 Brc1cccc1.C=C[C@H]1CN2CC[C@H]1C[C@H]2[C@H](O)c1cnc2ccc(OC)cc12>>COc1ccc2ncc  
 c([C@H](O)[C@H]3C[C@H]4CCN3C[C@H]4/C=C/c3ccccc3)c2c1  
 7291 C=Cc1cccc1.O=c1c(I)c(-c2ccccc2)oc2ccccc12>>O=c1c(/C=C/c2ccccc2)c(-c2ccccc2)oc2ccccc12  
 7292 C=CC1(O)CCC1.COc1ccc(I)cc1>>COc1ccc(/C=C/C2(O)CCC2)cc1  
 7293 C=CC(=O)[C@@]1(O)C[C@H]2CC[C@]1(C)C2(C)C.Cc1ccc(I)cc1>>Cc1ccc(/C=C/C(=O)[C@@]2(  
 O)C[C@H]3CC[C@]2(C)C3(C)C)cc1  
 7294 C=CC(=O)OCC.Oc1ccc(Br)cc1>>CCOC(=O)/C=C/c1ccc(O)cc1  
 7295 C=CC(=O)N(C)Cc1sc2ccccc2c1C.O=C1Nc2ncc(Br)cc2C12CCCC2>>Cc1c(CN(C)C(=O)/C=C/c2cnc3  
 c(c2)C2(CCCC2)C(=O)N3)sc2ccccc12  
 7296 Brc1ccc2ccccc2c1.C=CS(N)(=O)=O>>NS(=O)(=O)/C=C/c1ccc2ccccc2c1  
 7297 C=C(C)c1cccc1.Ic1ccc2c(c1)OCCOCCOCCOCCO2>>C/C(=C/c1ccc2c(c1)OCCOCCOCCOCCO2)c1  
 cccc1  
 7298 C=C(NC(=O)OC(C)(C)C)C(=O)OC.Ic1cccc1>>COC(=O)/C=C/c1cccc1)NC(=O)OC(C)(C)C  
 7299 C=CC(=O)OC.CCOC(=O)c1cccc(I)c1>>CCOC(=O)c1cccc(/C=C/C(=O)OC)c1  
 7300 C=COCCCCO.COc1ccc(Br)cc1>>C=C(OCCCCO)c1ccc(OC)cc1

7301 C=Cc1cccc1.Cc1ccc(O)c(I)c1>>Cc1ccc(O)c(/C=C/c2cccc2)c1  
7302 C=Cc1cccc1O.Fc1cc(Br)cc(F)c1F>>Oc1cccc1/C=C/c1cc(F)c(F)c(F)c1  
7303 C=Cc1ccc([N+](=O)[O-])cc1.COc1ccc2c(=O)c(I)coc2c1>>COc1ccc2c(=O)c(/C=C/c3ccc([N+](=O)[O-])cc3)coc2c1  
7304 C=CC(=O)OC(C)(C)C.Cc1c(Br)ccc(OCc2cccc2)c1C>>Cc1c(/C=C/C(=O)OC(C)(C)C)ccc(OCc2cccc2)c1C  
7305 COC[C@H]/(N=C(\c1cccc1)N1C=CCC[C@H]1C)C(C)C.Cc1cccc(I)c1>>COC[C@H]/(N=C(\c1cccc1)N1C=C(c2cccc(C)c2)CC[C@H]1C)C(C)C  
7306 C=CC(=O)OC.Cc1nn2c(-c3cccc3)cc(-c3cccc3)nc2c1I>>COC(=O)/C=C/c1c(C)nn2c(-c3cccc3)cc(-c3cccc3)nc12  
7307 C=CC(=O)OC(C)(C)C.Cc1oc2c(C)c3oc(=O)cc(C)c3cc2c1Br>>Cc1oc2c(C)c3oc(=O)cc(C)c3cc2c1/C=C/C(=O)OC(C)(C)C  
7308 C=Cc1nc2c(N)ncnc2n1[C@H]1O[C@H](CO[Si](C)(C)C(C)(C)C)[C@H](O[Si](C)(C)C(C)(C)C)[C@H]1O[Si](C)(C)C(C)(C)C.N#Cc1ccc(Br)cc1>>CC(C)(C)[Si](C)(C)OC[C@H]1O[C@H](n2c(/C=C/c3ccc(C#N)cc3)nc3c(N)ncnc32)[C@H](O[Si](C)(C)C(C)(C)C)[C@H]1O[Si](C)(C)C(C)(C)C  
7309 C=CC(=O)OCC.N#Cc1ccc(Cl)cc1>>CCOC(=O)/C=C/c1ccc(C#N)cc1  
7310 C=CC(N)=O.CC(C)c1ccc(I)cc1>>CC(C)c1ccc(/C=C/C(N)=O)cc1  
7311 Brc1ccc(/N=N/c2cccc2)cc1.C=Cc1ccc(C#N)cc1>>N#Cc1ccc(/C=C/c2ccc(/N=N/c3cccc3)cc2)cc1  
7312 C=CC(=O)OC(C)(C)C.COc1ccc(CNC(=O)c2cc(Br)cc(I)c2)cc1>>COc1ccc(CNC(=O)c2cc(Br)cc(/C=C/C(=O)OC(C)(C)C)c2)cc1  
7313 C=CC1(C)CCC(=O)C1.COC(=O)c1cccc1/C=C\C=C>>COC(=O)c1cccc1/C=C\C=C\C=C\C1(C)CC(C(=O)C)1  
7314 C=CC(=O)OCC.CCc1nc2cc(OC)ccc2c(Oc2ccc(Br)cc2)c1-c1cccc1>>CCOC(=O)/C=C/c1ccc(Oc2c(-c3cccc3)c(CC)nc3cc(OC)ccc23)cc1  
7315 C=CCCO.CC(=O)OC[C@H]1O[C@H](n2cc(Cc3ccc(Br)cc3)c3c(C)cccc32)[C@H](OC(C)=O)[C@H](OC(C)=O)[C@H]1OC(C)=O>>CC(=O)OC[C@H]1O[C@H](n2cc(Cc3ccc(/C=C/CCO)cc3)c3c(C)cccc32)[C@H](OC(C)=O)[C@H](OC(C)=O)[C@H]1OC(C)=O  
7316 C=C/C=C/c1cccc1.COC(=O)c1ccc(Br)cc1>>COC(=O)c1ccc(/C=C/C=C/c2cccc2)cc1  
7317 C=CC(=O)OC.COc1c(CN(C(=O)C2CC2)c2ccc(Br)cc2)ccc2c1OC(C)(C)C=C2>>COC(=O)/C=C/c1ccc(N(Cc2ccc3c(c2OC)OC(C)(C)C=C3)C(=O)C2CC2)cc1  
7318 C=C1C(=O)O[C@H]2/C=C\C(C)CC/C=C\C(C)CC[C@H]12.COc1ccc(I)cc1>>COc1ccc(/C=C2/C(=O)O[C@H]3/C=C\C(C)CC/C=C\C(C)CC[C@H]23)cc1  
7319 C=CC=O.CC(C)(C)c1cc(/C=C/c2cc(I)cc(/C=C/c3ccc(C(C)(C)C)cc(C(C)(C)C)c3)c2)cc(C(C)(C)C)c1>>CC(C)(C)c1cc(/C=C/c2cc(/C=C/C=O)cc(/C=C/c3ccc(C(C)(C)C)cc(C(C)(C)C)c3)c2)cc(C(C)(C)C)c1  
7320 C=CC(=O)OCCCC.N#Cc1ccc(Br)cc1>>CCCCOC(=O)/C=C/c1ccc(C#N)cc1  
7321 C=CC(=O)OCC.CC(C)(C)OC(=O)N[C@H](CCC(=O)OCc1cccc1)COc1ccc(C#N)ccc1I>>CCOC(=O)/C=C/c1ccc(C#N)cc1OC[C@H](CCC(=O)OCc1cccc1)NC(=O)OC(C)(C)C  
7322 C=Cc1nc2c(N)ncnc2n1[C@H]1C[C@H](O[Si](C)(C)C(C)(C)C)[C@H](CO[Si](C)(C)C(C)(C)C)O1.N#Cc1ccc(Br)cc1>>CC(C)(C)[Si](C)(C)OC[C@H]1O[C@H](n2c(/C=C/c3ccc(C#N)cc3)nc3c(N)ncnc32)[C@H]1O[Si](C)(C)C(C)(C)C  
7323 C=CC#N.O=[N+](O-)]c1cccc(I)c1>>N#C/C=C/c1cccc([N+](=O)[O-])c1  
7324 C=CCOC(=O)/C=C/c1ccc(OC(C)=O)c(OC(C)=O)c1.Ic1cccc1>>CC(=O)Oc1ccc(/C=C/C(=O)OC/C=C/C2cccc2)cc1OC(C)=O  
7325 Brc1ccsc1.C=CC(=O)OC>>COC(=O)/C=C/c1ccsc1  
7326 C=CC(=O)OC.N#CCCN1c(=O)oc2cc(Br)nc21>>COC(=O)/C=C/c1nc2c(c1)oc(=O)n2CCC#N  
7327 C=CC(=O)OC.CCCc1nc2c(C)cc(C)nc2n1Cc1ccc(Br)cc1>>CCCc1nc2c(C)cc(C)nc2n1Cc1ccc(/C=C/C(=O)OC)cc1  
7328 C=CC(=O)OCC.CC[C@H](C)(Oc1cc(Br)ccc1OCc1cccc1)[C@H](COCOC)NC(=O)OC(C)(C)C>>CCOC(=O)/C=C/c1ccc(OCc2cccc2)c(O[C@H](C)(CC)[C@H](COCOC)NC(=O)OC(C)(C)C)c1  
7329 C=C(c1cccc1)[Si](C)(C)c1cccn1.Ic1cccc1>>C[Si](C)(/C=C/c1cccc1)c1cccc1c1cccn1  
7330 C=CC(=O)OC.COc1ccc2c(c1)CCN(c1ccc(C(C)C)cc1)C2(C)c1ccc(Br)cc1>>COC(=O)/C=C/c1ccc(C2(C)c3ccc(OC)cc3CCN2c2ccc(C(C)C)cc2)cc1  
7331 C=C.Fc1cc(Br)ccc1-c1cccc1>>C=Cc1ccc(-c2cccc2)c(F)c1  
7332 C=Cc1ncnc2c1ncn2[C@H]1O[C@H](COC(C)=O)[C@H](O)[C@H]1O.Ic1cccc1>>CC(=O)OC[C@H]1O[C@H](n2nc3c(/C=C/c4cccc4)ncnc32)[C@H](O)[C@H]1O  
7333 Brc1cccc2cccc12.C=CCN(C(=O)OC(C)(C)C(=O)OC(C)(C)C>>CC(C)(C)OC(=O)N(C/C=C/c1cccc2cccc12)C(=O)OC(C)(C)C  
7334 C=CC(N)=O.Clc1ccc(Br)cc1>>NC(=O)/C=C/c1ccc(Cl)cc1  
7335 C=C1C(=O)O[C@H]2CC(C)=C([C@H](C)CCCOC(C)=O)[C@H](OC(C)=O)[C@H]12.COc1ccc(I)cc1>>COc1ccc(/C=C2/C(=O)O[C@H]3CC(C)=C([C@H](C)CCCOC(C)=O)[C@H](OC(C)=O)[C@H]23)cc1  
7336 C=CC(=O)OCc1cccc1.CCN1nc2c(F)c(Br)ccc21>>CCN1nc2c(F)c(/C=C/C(=O)OCc3cccc3)ccc21

7337 C=Cc1cccc1.Cc1cc([N+](=O)[O-])ccc1I>>Cc1cc([N+](=O)[O-])ccc1/C=C/c1cccc1  
7338 C=C1C(=O)O[C@H]2[C@H]1CC/C(C)=C/CC[C@@]1(C)O[C@@H]21.Fc1cccc1I>>C/C1=C\CC[C@@]2(C)O[C@H]2[C@H]2OC(=O)/C(=C/c3cccc3F)[C@@H]2CC1  
7339 C=CN1C(=O)c2cccc2C1=O.Cc1ccc(S(=O)(=O)n2cc(I)c3c(Br)cccc32)cc1>>Cc1ccc(S(=O)(=O)n2cc(/C=C/N3C(=O)c4cccc4C3=O)c3c(Br)cccc32)cc1  
7340 C=CC(=O)OC.COc1c(CN(C(=O)c2cccc2)c2cccc(Br)c2)ccc2c1OC(C)(C)[C@@H](O)[C@H]2O>>COC(=O)/C=C/c1cccc(N(Cc2ccc3c(c2OC)OC(C)(C)[C@@H](O)[C@H]3O)C(=O)c2cccc2)c1  
7341 C=CC(=O)OC(C)(C).Oc1ccc(C(=C2CCOCC2)c2ccc(Br)cc2)cc1>>CC(C)(C)OC(=O)/C=C/c1ccc(C(=C2CCOCC2)c2ccc(O)cc2)cc1  
7342 C=C(C)C(=O)OCCO.Ic1cccc1>>C/C(=C\c1cccc1)C(=O)OCCO  
7343 C=CC(=O)O[C@@H]1C[C@H](C)CC[C@H]1C(C).O=Cc1cccc1Br>>CC(C)[C@@H]1CC[C@@H](C)C[C@H]1OC(=O)/C=C/c1cccc1C=O  
7344 C=COCCOC=C.O=Cc1ccc(Br)cc1>>C=COCCOC(=C)c1ccc(C=O)cc1  
7345 C=CC(F)(F)F.COC(=O)c1cnn2cc(Br)ccc12>>COC(=O)c1cnn2cc(/C=C/C(F)(F)F)ccc12  
7346 C=Cc1ccc(Cl)cc1.O=C(O)c1ccc(Br)cc1F>>O=C(O)c1ccc(/C=C/c2ccc(Cl)cc2)cc1F  
7347 C=CC(=O)CC.CC(C)(C)c1ccc(Br)cc1>>CCC(=O)/C=C/c1ccc(C(C)(C)C)cc1  
7348 C=Cc1cccc1.CC(=O)c1cccc1Cl>>CC(=O)c1cccc1/C=C/c1cccc1  
7349 C=Cc1cccc(C)c1.COc1cc(CC(=O)Nc2cccc(I)c2)ccc1OCCNC(=O)OC(C)(C)C>>COc1cc(CC(=O)Nc2cccc(/C=C/c3cccc(C)c3)c2)ccc1OCCNC(=O)OC(C)(C)C  
7350 C=CC(=O)OCC.COc1cc(-c2cc3cc(Br)cc(OC)c3o2)cc(OC)c1OC>>CCOC(=O)/C=C/c1cc(OC)c2oc(-c3cc(OC)c(OC)c3)cc2c1  
7351 C=CC(=O)OCC.COc1ccc(Cl)cc1Br>>CCOC(=O)/C=C/c1cc(Cl)ccc1OC  
7352 C=CC(=O)OC.Clc1cccc(I)c1>>COC(=O)/C=C/c1cccc(Cl)c1  
7353 C=CC(=O)N(CC)CC.O=Cc1ccc(Cl)cc1>>CCN(CC)C(=O)/C=C/c1ccc(C=O)cc1  
7354 C=C.O=[N+](=[O-])c1cc(I)cc([N+](=O)[O-])c1>>C=Cc1cc([N+](=O)[O-])cc([N+](=O)[O-])c1  
7355 C=C(C)c1cccc1.Cc1cc(C)cc(I)c1>>C/C(=C\c1cc(C)cc(C)c1)c1cccc1  
7356 Brc1ccc2oc(-c3cc[nH]n3)cc2c1.C=CC#N>>N#C/C=C/c1ccc2oc(-c3cc[nH]n3)cc2c1  
7357 C=CC(=O)OCCCC.FC(F)(F)c1cccc1Br>>CCCCOC(=O)/C=C/c1cccc1C(F)(F)F  
7358 C=CC(=O)OC.CCn1c(=O)c2c(C)n(C3CCCCO3)nc2c2cc(I)ccc21>>CCn1c(=O)c2c(C)n(C3CCCCO3)n2c2cc(/C=C/C(=O)OC)ccc21  
7359 C=CC(=O)OCCCC.COc1ccc(I)cc1>>CCCCOC(=O)/C=C/c1ccc(OC)cc1  
7360 C=CC(=O)OC.Cn1cnc(Br)c1CC=C1CCCCC1>>COC(=O)/C=C/c1cnc(C)c1CC=C1CCCCC1  
7361 C=C1C(=O)O[C@H]2[C@H]1C[C@@H](O)/C(C)=C/CC[C@@]1(C)O[C@@H]21.Ic1cccc1>>C/C1=C\CC[C@@]2(C)O[C@H]2[C@H]2OC(=O)/C(=C/c3cccc3)[C@@H]2C[C@H]1O  
7362 C=CC[C@H](CC(=O)OC(C)(C)C)C(=O)N[C@H](C(=O)N[C@H](C)c1cccc1)C(C)(C)C.O=S(=O)(O)c1ccc(-c2cccc2)c(Cl)c1)C(F)(F)F>>C[C@@H](NC(=O)[C@@H](NC(=O)[C@H](C/C=C/c1ccc(-c2cccc2)c(Cl)c1)CC(=O)OC(C)(C)C)C(C)C)c1cccc1  
7363 C=CC#N.O=Cc1ccc(Cl)cc1>>N#C/C=C/c1ccc(C=O)cc1  
7364 C=CS(C)(=O)=O.CC(C)CCn1nc(-c2cccs2)c(O)c(C2=NS(=O)(=O)c3cc(I)ccc3N2)c1=O>>CC(C)CCn1nc(-C=CC#N.CCOc1ccc(C(=O)CCC(=O)Nc2cc(-c3cccc3)c3ccc(Br)cc3n2)cc1OCC>>CCOc1ccc(C(=O)CCC(=O)Nc2cc(-c3cccc3)c3ccc(/C=C/C#N)cc3n2)cc1OCC  
7365 C=CC(=O)Nc1ccc(F)cc1.COc1ccc2c(=O)c(I)coc2c1>>COc1ccc2c(=O)c(/C=C/C(=O)Nc3ccc(F)cc3)co2c1  
7366 C=CS(=O)(=O)F.Clc1ccc(I)cc1>>O=S(=O)(F)/C=C/c1ccc(Cl)cc1  
7367 C=CC(=O)OCC.COc1ccc(-c2oc3cc(OC)ccc3c(=O)c2I)cc1>>CCOC(=O)/C=C/c1c(-c2ccc(OC)cc2)oc2cc(OC)ccc2c1=O  
7368 C=Cc1ccc(N(c2cccc2)c2cccc2)cc1.O=Cc1c(F)cc(Br)cc1F>>O=Cc1c(F)cc(/C=C/c2ccc(N(c3cccc3)c3cccc3)cc2)cc1F  
7369 C=CC(=O)OCC.O=C(Nc1cccc1I)C12CC3CC(CC(C3)C1)C2>>CCOC(=O)/C=C/c1cccc1NC(=O)C12CC3CC(CC(C3)C1)C2  
7370 C=Cc1cncnc1.Oc1ccc(Br)cc1>>Oc1ccc(/C=C/c2cncnc2)cc1  
7371 C=Cc1cncnc1.CCCCCCCS(=O)(=O)c1ccc(Br)cc1>>CCCCCCCCS(=O)(=O)c1ccc(/C=C/c2cncnc2)c1  
7372 C=C.Clc1ccc(I)cc1>>C=Cc1ccc(Cl)cc1  
7373 C=CC(=O)OCC.CC(C)(CC1Cc2cccc2C1)NC[C@@H](O)COc1cc(Br)ccc1F>>CCOC(=O)/C=C/c1ccc(-c(F)c(OC[C@H](O)CNC(C)(C)CC2Cc3cccc3C2)c1  
7374 C=CC(=O)OCC.CCN(CCC1OCCO1)C(=O)c1ccc(Br)cc1>>CCOC(=O)/C=C/c1ccc(C(=O)N(CC)CCC2OCCO2)cc1  
7375 C=CCOc1ccc(C)cc1.COc1ccc(I)cc1>>COc1ccc(/C=C/COc2ccc(C)cc2)cc1  
7376 C=CC(=O)OC.O=C(O)c1ccc(Br)c2cccc12>>COC(=O)/C=C/c1ccc(C(=O)O)c2cccc12  
7377

7378 C=CC(=O)OC.CN(C)S(=O)(=O)n1cc([Si](C)(C)C)c(Br)c1[Si](C)(C)C>>COC(=O)/C=C/c1c([Si](C)(C)  
)C)cn(S(=O)(=O)N(C)C)c1[Si](C)(C)C  
7379 C=CC(C)(C)O.COc1ccc(CCN(C)C)cc1I>>COc1ccc(CCN(C)C)cc1/C=C/C(C)(C)O  
7380 C=Cc1cccc1.O=c1oc2cccc2cc1Br>>O=c1oc2cccc2cc1/C=C/c1cccc1  
7381 C=CC(=O)OC.Cc1ccc(S(=O)(=O)n2ccc3c(Br)cccc32)cc1>>COC(=O)/C=C/c1cccc2c1ccn2S(=O)(=O)  
c1ccc(C)cc1  
7382 Br1cccn1.C=C[C@@H]1CCCN1C(=O)OC(C)(C)C>>CC(C)(C)OC(=O)N1CCC[C@H]1/C=C/c1ccc  
7383 C=CC#N.Ic1cccc1>>N#C/C=C/c1cccc1  
7384 C=CC(=O)OCC.O=Cc1cc(Cl)ccc1Br>>CCOC(=O)/C=C/c1ccc(Cl)cc1C=O  
7385 C=CC(=O)OCC.CCCCCCCCCCCCc1cccc(Br)c1>>CCCCCCCCCCCCc1cccc(/C=C/C(=O)OCC)c1  
7386 C=Cc1ccc2cccc2c1.COC(=O)c1ccc(Cl)cc1I>>COC(=O)c1ccc(Cl)cc1/C=C/c1ccc2cccc2c1  
7387 C=CC=O.CS(=O)(=O)Oc1ccc(I)c([N+](=O)[O-])c1>>CS(=O)(=O)Oc1ccc(/C=C/C=O)c([N+](=O)[O-]  
7388 C=C.CC(=O)c1cccc(Br)c1>>C=Cc1cccc(C(C)=O)c1  
7389 C=CS(=O)c1cccc1.O=[N+](=[O-])c1ccc(Br)cc1>>O=[N+](=[O-])c1ccc(/C=C/S(=O)c2cccc2)cc1  
7390 C=CC(=O)OC.COc1cccc(I)c1NC(=O)C(C)(C)C>>COC(=O)/C=C/c1cccc(OC)c1NC(=O)C(C)(C)C  
7391 C=CC(=O)OCC.Clc1ccs1>>CCOC(=O)/C=C/c1ccs1  
7392 C=CC(=O)OCC.Cn1nc2c(C(F)(F)F)c(Br)ccc21>>CCOC(=O)/C=C/c1ccc2c(nnn2C)c1C(F)(F)F  
7393 C=CC1(O)CCC1.Fc1ccc(I)cc1>>OC1(/C=C/c2ccc(F)cc2)CCC1  
7394 C=Cc1ccc(C)cc1.Cc1cccc1Br>>Cc1ccc(/C=C/c2cccc2C)cc1  
7395 Br1cccn1.C=CC(=O)OCC(CC)CCCC>>CCCC(CC)COC(=O)/C=C/c1cccn1  
7396 C=Cc1cccc1.Nc1ccc(Br)cc1I>>Nc1ccc(Br)cc1/C=C/c1cccc1  
7397 C=CC(CC)OC(C)=O.Ic1cccc1>>CCC(/C=C/c1cccc1)OC(C)=O  
7398 C=CC(=O)OCCCC.Cn1nc(Br)c2c(Cl)cccc21>>CCCCOC(=O)/C=C/c1nn(C)c2cccc(Cl)c12  
7399 C=CC(=O)OC.COc1nc(-c2cccc2)c(Br)cc1=O>>COc1nc(-c2cccc2)c(/C=C/C(=O)OC)cc1=O  
7400 C=CC(=O)OCC.CCNc1nc(C)c(I)c(NC2CCCC2)n1>>CCNc1nc(C)c(/C=C/C(=O)OCC)c(NC2CCCC  
7401 C=CC(=O)OC.CCOC(=O)C1=CN(c2cccc2OC)C=C(C(=O)OCC)C1c1cccc(Br)c1>>CCOC(=O)C1=C  
N(c2cccc2OC)C=C(C(=O)OCC)C1c1cccc(/C=C/C(=O)OC)c1  
7402 C=C[C@H](OC)[C@@H](C)[C@@H](OC)[C@@H](C)COCOC.Ic1cccc1>>COCOC[C@H](C)[C@  
H](OC)[C@H](C)[C@H](C)/C=C/c1cccc1)OC  
7403 C=CC(=O)N1CCCC1.O=C1Nc2ccc(Br)cc2C1=O>>O=C1Nc2ccc(/C=C/C(=O)N3CCCC3)cc2C1=O  
7404 C=CC(=O)O.CN(c1ccc(I)cc1)S(=O)(=O)c1ccs1>>CN(c1ccc(/C=C/C(=O)O)cc1)S(=O)(=O)c1ccs1  
7405 C=COCCCC.O=c1cc(Br)c2ccc3cccc3c2[nH]1>>CCCCO/C=C/c1cc(=O)[nH]c2c1ccc1cccc12  
7406 C=CC(=O)OC(C)(C)C.CC(C)(C)OC(=O)CCc1ccc(CN(C(=O)C2CCCC2)c2cccc(Br)c2)cc1>>CC(C)(  
C)OC(=O)/C=C/c1cccc(N(Cc2ccc(CCC(=O)OC(C)(C)C)cc2)C(=O)C2CCCC2)c1  
7407 C=CC(=O)OCC.O=C(O)c1ccc(Br)cc1>>CCOC(=O)/C=C/c1ccc(C(=O)O)cc1  
7408 C=CCCN(C)C(=O)OC(C)(C)C.CCSc1cncc(Br)c1>>CCSc1cncc(/C=C/CCN(C)C(=O)OC(C)(C)C)c1  
7409 C=CCC(C)N(C)C(=O)OC(C)(C)C.COc1ccc(Br)cn1>>COc1ccc(/C=C/CC(C)N(C)C(=O)OC(C)(C)C)c  
7410 Br1cccn1.C=C[C@@H]1COC(C)(C)N1C(=O)OCc1cccc1>>CC1(C)OC[C@@H](/C=C/c2cccc2)  
N1C(=O)OCc1cccc1  
7411 C=CC(=O)N(C)C.CCN(c1cccc1)c1cccc(Br)n1>>CCN(c1cccc1)c1cccc(/C=C/C(=O)N(C)C)n1  
7412 Br1cccn1.C=Cc1ccc(C(=O)OC(C)(C)C)c(Nc2ccc(F)cc2)c1>>CC(C)(C)OC(=O)c1ccc(/C=C/c2ccsc2)c  
c1Nc1ccc(F)cc1  
7413 C=CC(=O)O.Cc1c[nH]c2c(Br)cc(F)cc12>>Cc1c[nH]c2c(/C=C/C(=O)O)cc(F)cc12  
7414 C=CC(=O)OC.CN(C)c1cccc2c(S(=O)(=O)N3CCc4cc(Br)cn43)cccc12>>COC(=O)/C=C/c1cnc2c(c1)  
CCN2S(=O)(=O)c1cccc2c(N(C)C)cccc12  
7415 C=CC(=O)O.Cc1ccc(S(=O)(=O)Nc2cccc(I)c2)cc1>>Cc1ccc(S(=O)(=O)Nc2cccc(/C=C/C(=O)O)c2)cc1  
7416 C=CCCCCCC.CC1(C)OC(=O)c2c(cccc2OS(=O)(=O)C(F)(F)F)O1>>CCCCC/C=C/c1cccc2c1C(=O)  
OC(C)(C)O2  
7417 C=Cc1cccc(F)n1.CCOC(=O)c1ccc(I)cc1>>CCOC(=O)c1ccc(/C=C/c2cccc(F)n2)cc1  
7418 C=CC(=O)OCC.Nc1ccc(CO)cc1I>>CCOC(=O)/C=C/c1cc(CO)ccc1N  
7419 Br1cc2cccc2c2cccc12.C=Cc1cccn1>>C(=C/c1cc2cccc2c2cccc12)\c1cccn1  
7420 C=CCNC(=O)OC(C)(C)C.O=C1CCc2cc(Cl)ccc21>>C=C(CNC(=O)OC(C)(C)C)c1ccc2c(c1)CCC2=O  
7421 C=CC(=O)OC(C)(C)C.Fc1cnccc1I>>CC(C)(C)OC(=O)/C=C/c1cccn1F  
7422 C=CC(=O)OC.Cc1ccc(Br)c2c1N(Cc1ccc(C(F)(F)F)cc1)C(=O)C2=O>>COC(=O)/C=C/c1ccc(C)c2c1C  
(=O)C(=O)N2Cc1ccc(C(F)(F)F)cc1  
7423 C=CC(=O)OCC.Cc1ccc(S(=O)(=O)Cc2cccc2I)cc1>>CCOC(=O)/C=C/c1ccccc1CS(=O)(=O)c1ccc(C)  
7424 C=Cc1cccn1.CC(C)(C)OC(=O)N1CCC[C@H]1COc1nc(Cl)c(I)c1>>CC(C)(C)OC(=O)N1CCC[C@  
H]1COc1nc(Cl)c(/C=C/c2cccn2)c1  
7425 C=CC(=O)N1N=Cc2cccc2C1C=C(C)C.CCCc1nc(N)nc(N)c1Cc1cc(I)c(OC)c(OC)c1>>CCCc1nc(N)n  
c(N)c1Cc1cc(/C=C/C(=O)N2N=Cc3cccc3C2C=C(C)C)c(OC)c(OC)c1



7426 C=CC(=O)OC.COc1ccccc1I>>COC(=O)/C=C/c1ccccc1OC  
7427 C=CC(=O)N1CCOCC1.O=C1Nc2ccc(Br)cc2C1=O>>O=C1Nc2ccc(/C=C/C(=O)N3CCOCC3)cc2C1=  
7428 C=CC(=O)N1CCC(Cc2nnc(C)o2)CC1.Cc1nnn(Cc2cc(OC(F)(F)F)ccc2Br)n1>>Cc1nnn(Cc2cc(OC(F)(F)F)ccc2/C=C/C(=O)N2CCC(Cc3nnc(C)o3)CC2)n1  
7429 BrC1CCCCC1.C=Cc1ccccc1Cl>>Clc1ccccc1/C=C/C1CCCCC1  
7430 C=C1CC(c2ccccc2)OC1=O.Fc1cccc(I)c1>>O=C1OC(c2ccccc2)C/C1=C/c1cccc(F)c1  
7431 C=CC(=O)OC.CC(C)(C)CN(Cc1ccc(Br)cc1)c1ccnc(Cl)n1>>COC(=O)/C=C/c1ccc(CN(CC(C)(C)C)c2ccnc(Cl)n2)cc1  
7432 C=CNC(C)=O.COC(=O)c1cccc(OS(=O)(=O)C(F)(F)F)c1>>C=C(NC(C)=O)c1cccc(C(=O)OC)c1  
7433 C=C/C=C/C(C)(C)C.CN1CCC[C@H]1COc1cncc(Br)c1>>CN1CCC[C@H]1COc1cncc(/C=C/C=C/C(C)(C)C)c1  
7434 C=Cc1ccccc1.CCCCCCCC0c1cc(/C=C/c2ccc(OC)cc2)c(OCCCCCCCC)cc1/C=C/c1ccc(Br)cc1>>CC  
7435 CCCCC0c1cc(/C=C/c2ccc(OC)cc2)c(OCCCCCCCC)cc1/C=C/c1ccc(/C=C/c2ccccc2)cc1  
7436 C=CC=O.Ic1ccc(-c2ccccc2)cc1>>O=C/C=C/c1ccc(-c2ccccc2)cc1  
7437 C=Cc1ccc(OC)cc1.COc1ccc(I)cc1>>COc1ccc(/C=C/c2ccc(OC)cc2)cc1  
7438 C=CC(=O)OCC.Clc1cccc(Oc2cccc(Br)c2)c1>>CCOC(=O)/C=C/c1cccc(Oc2cccc(Cl)c2)c1  
7439 C=C(NC(=O)OC(C)(C)C)C(=O)OCc1ccccc1.Ic1ccccc1>>CC(C)(C)OC(=O)N/C(=C/c1ccccc1)C(=O)OCc1ccccc1  
7440 C=Cc1ccc(C(C)(C)C)cc1.Cc1ccc(Br)cc1>>Cc1ccc(/C=C/c2ccc(C(C)(C)C)cc2)cc1  
7441 C=Cc1ccc(C(=C(c2ccccc2)c2ccccc2)c2ccccc2)cc1.CCCCN1C(=O)c2cccc3cc(Br)cc(c23)C1=O>>CCC  
7442 CN1C(=O)c2cccc3cc(/C=C/c4ccc(C(=C(c5ccccc5)c5ccccc5)c5ccccc5)cc4)cc(c23)C1=O  
7443 C=Cc1cccn1.CCOC(=O)c1ccc(Br)cc1>>CCOC(=O)c1ccc(/C=C/c2cccn2)cc1  
7444 C=Cc1cnecn1.Fc1ccc(Br)cc1>>Fc1ccc(/C=C/c2cnecn2)cc1  
7445 C=C(C)C(=O)OC(C)(C)C.COc1ccc(I)cc1>>COc1ccc(/C=C(C)C(=O)OC(C)(C)C)cc1  
7446 C=Cc1ccccc1.CC/C=C(/Br)OC1CCCCC1>>CC/C=C(/C=C/c1ccccc1)OC1CCCCC1  
7447 C=Cc1ccccc1.FC(F)(F)Oc1ccc(I)c(Br)c1>>FC(F)(F)Oc1ccc(/C=C/c2ccccc2)c(Br)c1  
7448 C=Cc1ccc2c(c1)C1CCCC1N2c1ccc(C)cc1.N#Cc1cc([N+](=O)[O-])ccc1Br>>Cc1ccc(N2c3ccc(/C=C/c4ccc([N+](=O)[O-])cc4C#N)cc3C3CCCC32)cc1  
7449 C=Cc1ccc2c(c1)CC2.C[Si](C)(OS(=O)(=O)C(F)(F)F)OS(=O)(=O)C(F)(F)F>>C[Si](C)(/C=C/c1ccc2c(c1)CC2)OS(=O)(=O)C(F)(F)F  
7450 Br1cccc2ccccc12.C=CC(=O)N1CCOCC1>>O=C(/C=C/c1cccc2ccccc12)N1CCOCC1  
7451 C=Cc1ccc(Cl)cc1.COC(=O)c1ccccc1>>COC(=O)c1ccccc1/C=C/c1ccc(Cl)cc1  
7452 C=CC(=O)OCC.CCOC(=O)c1cc(-c2ccccc2)n(-c2ccc(I)cc2)c1C(=O)c1ccccc1>>CCOC(=O)/C=C/c1ccc(-n2c(-c2ccc(I)cc2)c1C(=O)c1ccccc1>>CCOC(=O)/C=C/c1ccc(-n2c(-c2ccc(I)cc2)c1C(=O)c1ccccc1>>CCCC(=O)/C=C/c1ccccc1  
7453 C=CC(=O)CC.O=Cc1ccc(Br)cc1>>CCC(=O)/C=C/c1ccc(C=O)cc1  
7454 C=CC(=O)OC.CNc1ncc(I)cc1C(=O)OC(C)(C)C>>CNc1ncc(/C=C/C(=O)OC)cc1C(=O)OC(C)(C)C  
7455 C=CNC(C)=O.Cc1ccc(Br)cc1>>C=C(NC(C)=O)c1ccc(C)cc1  
7456 C=CCCCCCCC.N#Cc1ccc(Br)cc1>>CCCCCCCC/C=C/c1ccc(C#N)cc1  
7457 C=Cc1ccc(Cl)cc1.COc1ccc(I)cc1OC>>COc1ccc(/C=C/c2ccc(Cl)cc2)cc1OC  
7458 C=C(C)C(=O)OC.Clc1ccccc1>>COC(=O)/C(C)=C/c1ccccc1  
7459 C=CC(=O)OC.Cc1nc2cc(-c3ccccc3)c(-c3ccc(C4(NC(=O)OC(C)(C)C)CCC4)cc3)nn2c1Br>>COC(=O)/C=C/c1c(C)nc2cc(-c3ccccc3)c(-c3ccc(C4(NC(=O)OC(C)(C)C)CCC4)cc3)nn12  
7460 C=CC1CCCCC1.Nc1ncc(Cl)cc1Br>>Nc1ncc(Cl)cc1/C=C/C1CCCCC1  
7461 C=Cc1ccccc1.O=[N+][O-]c1ccc(I)cc1>>O=[N+][O-]c1ccc(/C=C/c2ccccc2)cc1  
7462 C=CCC1CCN(C(=O)c2ccccc2)CC1.FC(F)(F)c1ccc(Br)c2cccc(C(F)(F)F)c2n1>>O=C(c1ccccc1)N1CCC(C/C=C/c2cc(C(F)(F)F)nc3c(C(F)(F)F)cccc23)CC1  
7463 Br1ccccc1.C=Cc1ccc(N(c2ccc(C)cc2)c2ccc(C)cc2)cc1>>Cc1ccc(N(c2ccc(C)cc2)c2ccc(/C=C/c3ccccc3)cc2)cc1  
7464 C=Cc1ccc(C(=O)OC)cc1.Clc1cccn1>>COC(=O)c1ccc(/C=C/c2cccn2)cc1  
7465 C=Cc1ccccc1.CC[C@](OC)(C(=O)OC)c1cc2n(c(=O)c1OS(=O)(=O)C(F)(F)F)CCC2>>CC[C@](OC)(C(=O)OC)c1cc2n(c(=O)c1/C=C/c1ccccc1)CCC2  
7466 C=CC(=O)OCC.CC(C)(C)OC(=O)N1CCCC2(C1)CN(C(=O)OCC[Si](C)(C)C)c1ccc(Br)cc12>>CCOC(=O)/C=C/c1ccc2c(c1)C1(CCN(C(=O)OC(C)(C)C)C1)CN2C(=O)OCC[Si](C)(C)C  
7467 C=C(C)C(=O)OCC.Clc1ccco1>>CCOC(=O)/C(C)=C/c1ccco1  
7468 C=Cc1ccccc1.Ic1ccc(-c2ccccc2)cc1>>C(=C/c1ccc(-c2ccccc2)cc1)\c1ccccc1  
7469 C=CC1CC(=O)N1.COc1cccc(I)c1>>COc1cccc(/C=C/C2CC(=O)N2)c1  
7470 C=CC(=O)CCC.CC(=O)c1cccc(Br)c1>>CCCC(=O)/C=C/c1cccc(C(C)=O)c1  
7471 C=Cc1ccccc1.CC(=S)NS(=O)(=O)c1ccc(Br)cc1>>CC(=S)NS(=O)(=O)c1ccc(/C=C/c2ccccc2)cc1

C=Cc1nc2c(N)ncnc2n1[C@H]1C[C@H](O[Si](C)(C)C(C)(C)C)[C@@H](CO[Si](C)(C)C(C)(C)C)O1.  
 7471 Ic1cccc1>>CC(C)(C)[Si](C)(C)OC[C@H]1O[C@@H](n2c/C=C/c3cccc3)nc3c(N)ncnc32)[C@@  
 H]1O[Si](C)(C)C(C)(C)C  
 7472 C=Cc1cc(OC)c(O)c(OC)c1.COc1cc(Br)cc(OC)c1F>>COc1cc(/C=C/c2cc(OC)c(F)c(OC)c2)cc(OC)c1O  
 7473 C=CC(=O)OC.O=[N+](O-)]c1ccc(Br)c(NCc2cccc2)c1>>COC(=O)/C=C/c1ccc([N+](=O)[O-  
 ])cc1NCc1cccc1  
 7474 C=CCC(=O)O.Cc1n[nH]c2cc(Br)ccc12>>Cc1n[nH]c2cc(/C=C/CC(=O)O)ccc12  
 7475 C=Cc1ccc(C)c(C)c1.COc1cc(I)cc(OC)c1OC>>COc1cc(/C=C/c2ccc(C)c(C)c2)cc(OC)c1OC  
 7476 C=CC(=O)OCCCC.COC(=O)c1ccc(Br)cc1>>CCCCOC(=O)/C=C/c1ccc(C(=O)OC)cc1  
 C=C[C@@H]1C[C@H]1B1O[C@@H](C(OC)(c2cccc2)c2cccc2)[C@H](C(OC)(c2cccc2)c2cccc2  
 7477 )O1.Ic1cccc1>>COC(c1cccc1)(c1cccc1)[C@@H]1OB([C@@H]2C[C@H]2/C=C/c2cccc2)O[C@  
 H]1C(OC)(c1cccc1)c1cccc1  
 7478 C=CC(OCC)OCC.O=Cc1cccc1Br>>CCOC(/C=C/c1cccc1C=O)OCC  
 7479 C=Cc1ccc(OC)cc1.Oc1ccc(O)c(I)c1>>COc1ccc(/C=C/c2cc(O)ccc2O)cc1  
 7480 C=Cc1ccc(OC)cc1.N#CCc1ccc(Br)cc1>>COc1ccc(/C=C/c2ccc(CC#N)cc2)cc1  
 7481 C=Cc1cccc1.O=[N+](O-)]c1cc(I)cc([N+](=O)[O-])c1>>O=[N+](O-]  
 ])c1cc(/C=C/c2cccc2)cc([N+](=O)[O-])c1  
 7482 C=CC(=O)O.Cc1ccc(Br)cc1>>Cc1ccc(/C=C/C(=O)O)cc1  
 7483 C=CC(=O)N(C)Cc1cccc(OC(F)(F)F)c1OCC.CC1(C)NCc2cc(Br)cnc2NC1=O>>CCOc1c(CN(C)C(=O)  
 /C=C/c2cnc3c(c2)CNC(C)(C)C(=O)N3)cccc1OC(F)(F)F  
 7484 C=Cc1cccc1.FC(F)(F)c1cccc(I)c1>>FC(F)(F)c1cccc(/C=C/c2cccc2)c1  
 7485 C=CC(=O)N1CCOCC1.CC(C)(C)OC(=O)c1cccc1Br>>CC(C)(C)OC(=O)c1cccc1/C=C/C(=O)N1CC  
 OCC1  
 7486 C=C(C)C(=O)OCC.Ic1cccc1>>CCOC(=O)/C(C)=C/c1cccc1  
 7487 C=Cc1cccn1.Cc1ccc(Br)cc1>>Cc1ccc(/C=C/c2cccn2)cc1  
 7488 C=C(F)C(=O)OC.N#Cc1ccc(I)c1>>COC(=O)/C(F)=C/c1cccc(C#N)c1  
 7489 C=CC(=O)N1CCN(C)CC1.Clc1nc(N2CCOCC2)c2oc3ncc(Br)cc3c2n1>>CN1CCN(C(=O)/C=C/c2cnc  
 3oc4c(N5CCOCC5)nc(Cl)nc4c3c2)CC1  
 7490 C=CC(=O)N(C)Cc1cccc(OC)c1OCC(C)C.CC1(C)NCc2cc(Br)cnc2NC1=O>>COc1cccc(CN(C)C(=O)/  
 C=C/c2cnc3c(c2)CNC(C)(C)C(=O)N3)c1OCC(C)C  
 C=CC(NC(=O)OC)C(=O)O.CC(=O)OC[C@H]1O[C@@H](n2cnc3c(=O)n4c(I)c(C)nc4n(C)c32)[C@H  
 7491 ](OC(C)=O)[C@@H]1OC(C)=O>>COC(=O)NC(/C=C/c1c(C)nc2n(C)c3c(ncn3[C@@H]3O[C@H](C  
 OC(C)=O)[C@@H](OC(C)=O)[C@H]3OC(C)=O)c(=O)n12)C(=O)O  
 7492 C=CC(=O)OC.FC1(F)C(I)=C1c1ccc(Br)cc1>>COC(=O)/C=C/C1=C(c2ccc(Br)cc2)C1(F)F  
 7493 C=CCCCCCC.COc1cc(Br)cc(OC)c1>>C=C(CCCCCC)c1cc(OC)cc(OC)c1  
 7494 C=C(F)C(=O)OC.Fc1ccc(I)cc1>>COC(=O)/C(F)=C/c1ccc(F)cc1  
 7495 C=Cc1ccc(OC)cc1.COc1cc(I)cc(OC)c1OC>>COc1ccc(/C=C/c2cc(OC)c(OC)c(OC)c2)cc1  
 7496 C=CC(=O)OC.N#Cc1ccc(I)cc1>>COC(=O)/C=C/c1ccc(C#N)cc1  
 7497 C=CC(=O)OC.CC1(C)C=C(c2oc3cccc3c2I)CC(C)(C)C1>>COC(=O)/C=C/c1c(C2=CC(C)(C)CC(C)(  
 C)C2)oc2cccc12  
 7498 C=Cc1ccc(NC)cc1.FCCOCCOCCOc1ncc(I)cc1Br>>CNc1ccc(/C=C/c2cnc(OCCOCCOCCF)c(Br)c2)c  
 C=C1C(=O)O[C@H]2[C@H]1CC/C(C)=C/CC[C@@]1(C)O[C@H]21.Nc1cccc(I)c1>>C/C1=C\CC[  
 7499 C@]2(C)O[C@H]2[C@H]2OC(=O)/C=C/c3cccc(N)c3)[C@@H]2CC1  
 C=CC(=O)N(C)Cc1cc2cccc2n1C.O=c1[nH]c2cc(Br)cnc2[nH]1>>CN(Cc1cc2cccc2n1C)C(=O)/C=C/  
 7500 c1cnc2[nH]c(=O)[nH]c2c1  
 C=CC(=O)Nc1cccc1NC(=O)OC(C)(C)C.CCOC(=O)[C@H]1CN(CC(C)(C)O)C[C@@H]1c1ccc(Br)c  
 7501 c1>>CCOC(=O)[C@H]1CN(CC(C)(C)O)C[C@@H]1c1ccc(/C=C/C(=O)Nc2cccc2NC(=O)OC(C)(C)  
 C=CC(=O)OC(C)(C)C.O=C1c2ccc(Br)cc2CCN1c1cc(F)ccc1Cl>>CC(C)(C)OC(=O)/C=C/c1ccc2c(c1)  
 7502 CCN(c1cc(F)ccc1Cl)C2=O  
 C=CC(=O)OC(C)(C)C.FC(F)(F)c1ccc(Br)c(Cl)c1>>CC(C)(C)OC(=O)/C=C/c1ccc(C(F)(F)F)cc1Cl  
 7503 C=CC(=O)OC(C)(C)C.Clc1ccc(Br)cc1>>CC(C)(C)OC(=O)/C=C/c1ccc(Cl)cc1  
 7504 C=Cc1cccc1.O=Cc1ccc(Cl)cc1Br>>O=Cc1ccc(Cl)cc1/C=C/c1cccc1  
 7505 C=Cc1cccc1.Cc1cc(C)cc(Br)c1>>Cc1cc(C)cc(/C=C/c2cccc2)c1  
 7506 Brclcccn1.C=CC(CCC)OCc1cccc1>>CCCC(/C=C/c1cccn1)OCc1cccc1  
 7507 C=Cc1cc2c(c(=O)n(C)c(=O)n2C)n1C.CC(=O)c1ccc(Br)cc1>>CC(=O)c1ccc(/C=C/c2cc3c(c(=O)n(C)c(  
 7508 =O)n3C)n2C)cc1  
 C=Cc1nccc(C#N)c1Nc1ccc2[nH]ccc2c1C.COc1cc(CN2CCN(C)CC2)ccc1I>>COc1cc(CN2CCN(C)CC  
 7509 2)ccc1/C=C/c1nccc(C#N)c1Nc1ccc2[nH]ccc2c1C  
 C=CC(=O)OCC.CC1(C)CC(=C(c2ccc(Br)cc2)c2ccc(O)c(F)c2)CC(C)(C)O1>>CCOC(=O)/C=C/c1ccc(  
 7510 C(=C2CC(C)(C)OC(C)(C)C2)c2ccc(O)c(F)c2)cc1

7511 C=Cc1ccc(C)nc1.CC(C)c1oc2cc3oc(=O)ccc3cc2c1OS(=O)(=O)C(F)(F)F>>Cc1ccc(/C=C/c2c(C(C)C)oc3cc4oc(=O)ccc4cc23)cn1  
 7512 C=Cc1ccc(C=C)cc1.Cc1ccc(Br)cc1>>C=Cc1ccc(/C=C/c2ccc(C)cc2)cc1  
 7513 C=CC(=O)OCC.Cc1nc(-n2c(C)ccc2C)cc(N[C@H]2CC[C@H](OCCO)CC2)c1Br>>CCOC(=O)/C=C/c1c(N[C@H]2CC[C@H](OCCO)CC2)cc(-n2c(C)ccc2C)nc1C  
 7514 C=Cc1cccc1.CCOC(=O)c1ccc(Br)cc1>>CCOC(=O)c1ccc(/C=C/c2ccccc2)cc1  
 7515 C=CC(N)=O.O=C(Nc1cccc(I)c1)Nc1cc(C(F)(F)F)ccc1F>>NC(=O)/C=C/c1cccc(NC(=O)Nc2cc(C(F)(F)F)ccc2F)c1  
 7516 C=CCNC(=O)OC(C)(C)C.CC(=O)c1ccc(Cl)cc1>>C=C(CNC(=O)OC(C)(C)C)c1ccc(C(C)=O)cc1  
 7517 C=Cc1ccc(O[Si](C)(C)C(C)(C)C)cc1.C[Si](C)(C)I>>CC(C)(C)[Si](C)(C)Oc1ccc(/C=C/[Si](C)(C)C)cc1  
 7518 C=C1C[C@H]2[C@@H]3CCc4cc(OC)ccc4[C@H]3CC[C@]2(C)C1=O.N#Cc1ccc(Br)cc1>>COc1ccc2c(c1)CC[C@]2[C@@H]1[C@@H]2CC[C@]2(C)C(=O)/C(=C/c3ccc(C#N)cc3)C[C@]2[C@@H]12  
 7519 C=CC(=O)Nc1ccc(C)cc1.COc1ccc2c(=O)c(I)coc2c1>>COc1ccc2c(=O)c(/C=C/C(=O)Nc3ccc(C)cc3)coc2c1  
 7520 C=CC(=O)OC.Ic1cn(C(c2ccccc2)(c2ccccc2)c2ccccc2)c(N=P(c2ccccc2)(c2ccccc2)c2ccccc2)n1>>COC(=O)/C=C/c1cn(C(c2ccccc2)(c2ccccc2)c2ccccc2)c(N=P(c2ccccc2)(c2ccccc2)c2ccccc2)n1  
 7521 C=CC(=O)OCCN(C)C.O=C(Nc1cccc1)c1cc(=O)c2cc(Br)ccc2o1>>CN(C)CCOC(=O)/C=C/c1ccc2oc(C(=O)Nc3ccccc3)cc(=O)c2c1  
 7522 Brcc1ccc(N2CCOCC2)nc1.C=CC(=O)OC>>COC(=O)/C=C/c1ccc(N2CCOCC2)nc1  
 7523 Brcc1cccc1.C=CN(C)C(C)=O>>C=C(c1cccc1)N(C)C(C)=O
