# Supplementary material for: Heck reaction prediction using a transformer model based on a transfer learning strategy
Source: Royal Society of Chemistry journal article supplement (doi:10.1039/d0cc02657c), 2020-01-01
Supplement: d0cc02657c1.zip [file d0cc02657c1.zip]

**Table S8B. Heck reaction database of monosubstituted alkene as reactant**

| Reaction ID | Reaction SMILES                                                                                                                                                   |
|-------------|-------------------------------------------------------------------------------------------------------------------------------------------------------------------|
| 1           | <chem>C=CCCCCCC.COc1cccc(OS(=O)(=O)C(F)(F)F)c1&gt;&gt;C=C(CCCCCC)c1cccc(OC)c1</chem>                                                                              |
| 2           | <chem>C=CCc1cccc1.Fc1cccc(CCl)c1&gt;&gt;C=C(Cc1cccc1)Cc1cccc(F)c1</chem>                                                                                          |
| 3           | <chem>C=COCCCC.CN(C)c1ccc(Br)cn1&gt;&gt;C=C(OCCCC)c1ccc(N(C)C)nc1</chem>                                                                                          |
| 4           | <chem>C=Cc1cccc1.O=S(=O)(Oc1cccc1)C(F)(F)F&gt;&gt;C=C(c1cccc1)c1cccc1</chem>                                                                                      |
| 5           | <chem>C=CC[Si](C)(C)C.Fc1ccc(Br)cc1&gt;&gt;C=C(C[Si](C)(C)C)c1ccc(F)cc1</chem>                                                                                    |
| 6           | <chem>C=CNC(=O)/C=C/c1cccc1.O=S(=O)(Oc1ccc2ccccc2c1)C(F)(F)F&gt;&gt;C=C(NC(=O)/C=C/c1cccc1)c1ccc2ccccc2c1</chem>                                                  |
| 7           | <chem>C=CCNC(=O)OC(C)(C)C.Clc1cnc2ccccc2c1&gt;&gt;C=C(CNC(=O)OC(C)(C)C)c1cnc2ccccc2c1</chem>                                                                      |
| 8           | <chem>Br1cccc1.C=CCO&gt;&gt;C=C(CO)c1cccc1</chem>                                                                                                                 |
| 9           | <chem>C=COCCO.COc1cccc1Br&gt;&gt;C=C(OCCO)c1cccc1OC</chem>                                                                                                        |
| 10          | <chem>Br1cnc2ccccc12.C=CCNC(=O)OC(C)(C)C&gt;&gt;C=C(CNC(=O)OC(C)(C)C)c1cnc2ccccc12</chem>                                                                         |
| 11          | <chem>C=COCCCCO.O=C(O)c1cc(Br)c2nc(N3CCOCC3)cc(=O)n2c1&gt;&gt;C=C(OCCCCO)c1cc(C(=O)O)cn2c(=O)cc(N3CCOCC3)nc12</chem>                                              |
| 12          | <chem>C=COCCCC.Cc1cccc1Cl&gt;&gt;C=C(OCCCC)c1cccc1C</chem>                                                                                                        |
| 13          | <chem>C=COCC.O=Cc1ccc(Br)cc1&gt;&gt;C=C(OCC)c1ccc(C=O)cc1</chem>                                                                                                  |
| 14          | <chem>C=COCCCC.COc1ccc(I)cc1&gt;&gt;C=C(OCCCC)c1ccc(OC)cc1</chem>                                                                                                 |
| 15          | <chem>C=CCCCO.CC(C)(C)c1cccc1OS(=O)(=O)C(F)(F)F&gt;&gt;C=C(CCCO)c1cccc1C(C)(C)C</chem>                                                                            |
| 16          | <chem>C=CCCCCCC.O=S(=O)(Oc1ccc(C(F)(F)F)cc1)C(F)(F)F&gt;&gt;C=C(CCCCCC)c1ccc(C(F)(F)F)cc1</chem>                                                                  |
| 17          | <chem>C=CNC(C)=O.CN(C)c1cccc(OS(=O)(=O)C(F)(F)F)c1&gt;&gt;C=C(NC(C)=O)c1cccc(N(C)C)c1</chem>                                                                      |
| 18          | <chem>C=CC[Si](C)(C)C.COC(=O)c1ccc(Br)cc1&gt;&gt;C=C(C[Si](C)(C)C)c1ccc(C(=O)OC)cc1</chem>                                                                        |
| 19          | <chem>C=COCCCC.COc1ccc(N(COC)S(=O)(=O)c2cc(F)ccc2F)c1F&gt;&gt;C=C(OCCCC)c1cccc(N(COC)S(=O)(=O)c2cc(F)ccc2F)c1F</chem>                                             |
| 20          | <chem>Br1ccc2ccccc2c1.C=COCC&gt;&gt;C=C(OCC)c1ccc2ccccc2c1</chem>                                                                                                 |
| 21          | <chem>C=COCCCC.COc1cccc1Br&gt;&gt;C=C(OCCCC)c1cccc1OC</chem>                                                                                                      |
| 22          | <chem>C=CCO[Si](CC)(CC)CC.COc1cccc(CCl)c1&gt;&gt;C=C(CO[Si](CC)(CC)CC)Cc1cccc(OC)c1</chem>                                                                        |
| 23          | <chem>C=Cc1cccc1.O=S(=O)(OC=C(c1cccc1)c1cccc1)C(F)(F)F&gt;&gt;C=C(C=C(c1cccc1)c1cccc1)c1cccc1</chem>                                                              |
| 24          | <chem>C=COCCCC.CC(C)(C)NC(=O)c1ccc(OS(=O)(=O)C(F)(F)F)cc1&gt;&gt;C=C(OCCCC)c1ccc(C(=O)NC(C)(C)C)cc1</chem>                                                        |
| 25          | <chem>C=COC(CC)CCCC.CC(=O)c1ccc(Br)cc1&gt;&gt;C=C(OC(CC)CCCC)c1ccc(C(C)=O)cc1</chem>                                                                              |
| 26          | <chem>C=CCC(C)C.O=S(=O)(Oc1cccc1)C(F)(F)F&gt;&gt;C=C(CC(C)C)c1cccc1</chem>                                                                                        |
| 27          | <chem>C=CCc1ccc(OC)c(OC)c1.O=C(O)c1ccc(CCl)cc1&gt;&gt;C=C(Cc1ccc(C(=O)O)cc1)Cc1ccc(OC)c(OC)c1</chem>                                                              |
| 28          | <chem>C=Cc1cccc1.C[C@]12CC[C@@H]3c4ccc(OS(=O)(=O)C(F)(F)F)cc4CC[C@H]3[C@@H]1CCC2=O&gt;&gt;C=C(c1cccc1)c1ccc2c(c1)CC[C@@H]1[C@@H]2CC[C@]2(C)C(=O)CC[C@@H]12</chem> |
| 29          | <chem>C=CCOCc1cccc1.Cc1cccc1OS(=O)(=O)C(F)(F)F&gt;&gt;C=C(CCOc1cccc1)c1cccc1C</chem>                                                                              |
| 30          | <chem>C=COC(CC)CCCC.Ic1cccc2ccccc12&gt;&gt;C=C(OC(CC)CCCC)c1cccc2ccccc12</chem>                                                                                   |
| 31          | <chem>C=COCCCC.O=Cc1ccc(Cl)c1&gt;&gt;C=C(OCCCC)c1ccc(C=O)c1</chem>                                                                                                |
| 32          | <chem>C=COCCCC.COc1cccc1/N=N/c1ccc(OS(=O)(=O)C(F)(F)F)cc1&gt;&gt;C=C(OCCCC)c1ccc(/N=N/c2ccccc2OC)cc1</chem>                                                       |
| 33          | <chem>C=COCCCC.O=S(=O)(Oc1cccc(C(F)(F)F)c1)C(F)(F)F&gt;&gt;C=C(OCCCC)c1cccc(C(F)(F)F)c1</chem>                                                                    |
| 34          | <chem>C=CCNC(=O)OC(C)(C)C.N#Cc1cccc1Cl&gt;&gt;C=C(CNC(=O)OC(C)(C)C)c1cccc1C#N</chem>                                                                              |
| 35          | <chem>C=CCNC(=O)OC(C)(C)C.O=Cc1cccc(Cl)c1&gt;&gt;C=C(CNC(=O)OC(C)(C)C)c1ccc(C=O)c1</chem>                                                                         |
| 36          | <chem>C=Cc1cccc1.O=S(=O)(Oc1cccc2ccnc12)C(F)(F)F&gt;&gt;C=C(c1cccc1)c1cccc2ccnc12</chem>                                                                          |
| 37          | <chem>C=CNC(C)=O.CCOC(=O)/C=C(\C)OS(=O)(=O)C(F)(F)F&gt;&gt;C=C(NC(C)=O)/C(C)=C/C(=O)OCC</chem>                                                                    |
| 38          | <chem>C=CCNC(=O)OC(C)(C)C.COC(=O)c1ccc(Br)cc1&gt;&gt;C=C(CNC(=O)OC(C)(C)C)c1ccc(C(=O)OC)cc1</chem>                                                                |
| 39          | <chem>C=COCCCC.O=C(O)c1ccc(Cl)cc1&gt;&gt;C=C(OCCCC)c1ccc(C(=O)O)cc1</chem>                                                                                        |
| 40          | <chem>C=COCCN(C)C.O=S(=O)(Oc1cccc1)C(F)(F)F&gt;&gt;C=C(OCCN(C)C)c1cccc1</chem>                                                                                    |
| 41          | <chem>C=Cc1cccc1.O=Cc1ccc(Br)cc1&gt;&gt;C=C(c1cccc1)c1ccc(C=O)cc1</chem>                                                                                          |
| 42          | <chem>Br1cnc2ccccc2c1.C=CCO&gt;&gt;C=C(CO)c1cnc2ccccc2c1</chem>                                                                                                   |
| 43          | <chem>C=CCCCCCC.COc1cc(Br)cc(OC)c1&gt;&gt;C=C(CCCCCC)c1cc(OC)cc(OC)c1</chem>                                                                                      |
| 44          | <chem>Br1cccs1.C=CCO&gt;&gt;C=C(CO)c1cccs1</chem>                                                                                                                 |
| 45          | <chem>Br1cccc1.C=COCCCC&gt;&gt;C=C(OCCCC)c1cccc1</chem>                                                                                                           |
| 46          | <chem>C=CCCc1cccc1.C=Cc1ccc(CCl)cc1&gt;&gt;C=Cc1ccc(CC(=C)CCc2ccccc2)cc1</chem>                                                                                   |
| 47          | <chem>C=CCCCO.CC(C)(C)c1ccc(Br)cc1&gt;&gt;C=C(CCCO)c1ccc(C(C)(C)C)cc1</chem>                                                                                      |

48 C=CCCCCCC.CC(=O)c1ccc(Br)cc1>>C=C(CCCCCC)c1ccc(C(C)=O)cc1  
49 C=CCNC(=O)OC(C)(C)C.CC(=O)c1ccccc1Br>>C=C(CNC(=O)OC(C)(C)C)c1ccccc1C(C)=O  
50 C=COCCCC.Cc1cccc(Br)c1>>C=C(OCCCC)c1cccc(C)c1  
51 C=COCCCC.Cc1cc(OS(=O)(=O)C(F)(F)F)c2ccccc2n1>>C=C(OCCCC)c1cc(C)nc2ccccc12  
52 C=COCCCC.O=Cc1ccc(I)cc1>>C=C(OCCCC)c1ccc(C=O)cc1  
53 C=COCC.COc1ccc(I)cc1>>C=C(OCC)c1ccc(OC)cc1  
54 C=CC[Si](C)(C)C.Cc1ccc(Br)cc1>>C=C(C[Si](C)(C)C)c1ccc(C)cc1  
55 C=CCCCCCCC.CC(C)(C)c1ccc(Br)cc1>>C=C(CCCCCC)c1ccc(C(C)(C)C)cc1  
56 C=COCCCC.COc1ccc(Br)cc1>>C=C(OCCCC)c1ccc(OC)cc1  
57 C=CCCCCCCC.CC(C)(C)OC(=O)n1ccc2cc(Br)ccc21>>C=C(CCCCCC)c1ccc2c(ccn2C(=O)OC(C)(C)C  
58 C=CN1CCCC1=O.CC(=O)c1ccc(Br)cc1>>C=C(c1ccc(C(C)=O)cc1)N1CCCC1=O  
59 C=CN(C)C(C)=O.COc1ccc(Cl)cc1>>C=C(c1ccc(OC)cc1)N(C)C(C)=O  
60 C=CC(=O)OC.Cc1ccc(I)cc1>>C=C(C(=O)OC)c1ccc(C)cc1  
61 Br1ccccc1.C=CC[Si](C)(C)C>>C=C(C[Si](C)(C)C)c1ccccc1  
62 C=COCCCC.CN(C)CCc1sc2ccccc2c1Br>>C=C(OCCCC)c1c(CCN(C)C)sc2ccccc12  
63 C=CCCCCCCC.Cc1ccccc1Br>>C=C(CCCCCC)c1ccccc1C  
64 C=Cc1cccc(C)c1.Cc1ccc(OS(=O)(=O)C(F)(F)F)cc1>>C=C(c1ccc(C)cc1)c1cccc(C)c1  
65 C=CC(=O)OC.COc1ccc(Br)cc1>>C=C(C(=O)OC)c1ccc(OC)cc1  
66 C=CC1CCCCC1.O=S(=O)(Oc1ccccc1)C(F)(F)F>>C=C(c1ccccc1)C1CCCCC1  
67 C=COCCO.N#Cc1ccc(Br)cc1>>C=C(OCCO)c1ccc(C#N)cc1  
68 C=CC.ClCc1cccc(Oc2ccccc2)c1>>C=C(C)Cc1cccc(Oc2ccccc2)c1  
69 Br1ccc2ccccc2c1.C=CN1CCCC1=O>>C=C(c1ccc2ccccc2c1)N1CCCC1=O  
70 C=COCCCC.O=S(=O)(Oc1cccc2ccccc12)C(F)(F)F>>C=C(OCCCC)c1cccc2ccccc12  
71 C=CNC(C)=O.COC(=O)c1cccc(OS(=O)(=O)C(F)(F)F)c1>>C=C(NC(C)=O)c1cccc(C(=O)OC)c1  
72 C=CCC(C)(C)C.CC(C)(C)c1ccccc1OS(=O)(=O)C(F)(F)F>>C=C(CC(C)(C)C)c1ccccc1C(C)(C)C  
73 C=Cc1ccccc1.O=S(=O)(Oc1cccc2ccccc12)C(F)(F)F>>C=C(c1ccccc1)c1cccc2ccccc12  
74 C=CNC(C)=O.Cc1ccccc1Br>>C=C(NC(C)=O)c1ccccc1C  
75 C=COCCCC.Fc1ccc(Br)cc1>>C=C(OCCCC)c1ccc(F)cc1  
76 C=CN1CCCC1=O.COc1ccc2c(c1)CCC=C2OS(=O)(=O)C(F)(F)F>>C=C(C1=CCc2cc(OC)ccc21)N1  
CCCC1=O  
77 C=CCCCCCCC.O=S(=O)(Oc1cccc2ccccc12)C(F)(F)F>>C=C(CCCCCC)c1cccc2ccccc12  
78 C=CCNC(=O)OC(C)(C)C.O=C1CCc2cc(Br)ccc21>>C=C(CNC(=O)OC(C)(C)C)c1ccc2c(c1)CCC2=O  
79 C=Cc1ccccc1.O=S(=O)(Oc1ccc2ncccc2c1)C(F)(F)F>>C=C(c1ccccc1)c1ccc2ncccc2c1  
80 C=COCCO.Clc1ccc2ccccc2c1>>C=C(OCCO)c1ccc2ccccc2c1  
81 C=CCO.COc1ccc2cc(Br)ccc2c1>>C=C(CO)c1ccc2cc(OC)ccc2c1  
82 C=Cc1ccccc1.CC(=O)c1cccc(OS(=O)(=O)C(F)(F)F)c1>>C=C(c1ccccc1)c1cccc(C(C)=O)c1  
83 C=Cc1ccc(OC)cc1.Cc1ccc(OS(=O)(=O)C(F)(F)F)cc1>>C=C(c1ccc(C)cc1)c1ccc(OC)cc1  
84 C=CN(C)C(C)=O.Fc1ccccc1Br>>C=C(c1ccccc1F)N(C)C(C)=O  
85 C=CCNC(=O)OC(C)(C)C.CC(=O)c1ccccc1I>>C=C(CNC(=O)OC(C)(C)C)c1ccccc1C(C)=O  
86 C=Cc1ccccc1.COc1cccc(OS(=O)(=O)C(F)(F)F)c1>>C=C(c1ccccc1)c1cccc(OC)c1  
87 C=COCCCC.Clc1ccccc1>>C=C(OCCCC)c1ccccc1  
88 C=CCNS(=O)(=O)c1ccc(C)cc1.Cc1ccccc1OS(=O)(=O)C(F)(F)F>>C=C(CNS(=O)(=O)c1ccc(C)cc1)c1  
ccccc1C  
89 C=COCC.Cc1ccc(I)cc1>>C=C(OCC)c1ccc(C)cc1  
90 C=CCNC(=O)OC(C)(C)C.FC(F)(F)c1ccc(Cl)cc1>>C=C(CNC(=O)OC(C)(C)C)c1ccc(C(F)(F)F)cc1  
91 C=Cc1ccccc1.O=S(=O)(Oc1ccc(CO)cc1)C(F)(F)F>>C=C(c1ccccc1)c1ccc(CO)cc1  
92 C=COCCCC.COC(=O)c1ccc(Cl)cc1>>C=C(OCCCC)c1ccc(C(=O)OC)cc1  
93 C=CCC(C)(C)C.CC(C)(C)c1ccc(OS(=O)(=O)C(F)(F)F)cc1>>C=C(CC(C)(C)C)c1ccc(C(C)(C)C)cc1  
94 C=COCCN(C)C.Cc1ccc(Br)cc1>>C=C(OCCN(C)C)c1ccc(C)cc1  
95 C=CCNC(=O)OC(C)(C)C.O=S(=O)(Oc1ccc(F)cc1Cl)C(F)(F)F>>C=C(CNC(=O)OC(C)(C)C)c1ccc(F)  
cc1Cl  
96 C=CCCCC(=O)OC.CC(C)(C)c1ccccc1OS(=O)(=O)C(F)(F)F>>C=C(CCCC(=O)OC)c1ccccc1C(C)(C)  
97 C=CCCO.CC(=O)Nc1ccccc1Br>>C=C(CCO)c1ccccc1NC(C)=O  
98 C=COCCCC.O=S(=O)(Oc1ccc2c(c1)OCO2)C(F)(F)F>>C=C(OCCCC)c1ccc2c(c1)OCO2  
99 C=CCCCCCCC.Cc1ccccc1OS(=O)(=O)C(F)(F)F>>C=C(CCCCCC)c1ccccc1C  
100 C=COCCCC.Cc1ccc(Cl)c1C>>C=C(OCCCC)c1ccc(C)c1C  
101 C=CCCCCCCC.Cc1nc2cc(Br)ccc2s1>>C=C(CCCCCC)c1ccc2sc(C)nc2c1  
102 C=COCCCC.COc1ccc(OS(=O)(=O)C(F)(F)F)cc1>>C=C(OCCCC)c1ccc(OC)cc1  
103 C=CCC(C)C.ClCc1cccc(Oc2ccccc2)c1>>C=C(Cc1cccc(Oc2ccccc2)c1)CC(C)C

104 C=CCCC(=C)C.Fc1ccc(CCl)c(F)c1>>C=C(C)CCC(=C)Cc1ccc(F)cc1F  
105 C=Cc1cccc1.CCOC(=O)c1ccc(OS(=O)(=O)C(F)(F)F)cc1>>C=C(c1cccc1)c1ccc(C(=O)OCC)cc1  
106 C=CNC(C)=O.COc1cc(Br)cc(OC)c1OC>>C=C(NC(C)=O)c1cc(OC)c(OC)c(OC)c1  
107 C=COCCCC.Ic1cccc2cccc12>>C=C(OCCCC)c1cccc2cccc12  
108 C=COCCCC.Cc1ccc(Br)cc1>>C=C(OCCCC)c1ccc(C)cc1  
109 C=CNC(C)=O.CCOC(=O)c1ccc(Cl)cc1>>C=C(NC(C)=O)c1ccc(C(=O)OCC)cc1  
110 C=CCc1cccc1.Cc1cccc1OS(=O)(=O)C(F)(F)F>>C=C(Cc1cccc1)c1cccc1C  
111 C=CCNC(=O)OC(C)(C)C.O=C(c1cccc1)c1ccc(Cl)cc1>>C=C(CNC(=O)OC(C)(C)C)c1ccc(C(=O)c2c  
cccc2)cc1  
112 C=CCO.Clc1cccn1>>C=C(CO)c1cccn1  
113 Brc1cccc2cccc12.C=CN1CCCC1=O>>C=C(c1cccc2cccc12)N1CCCC1=O  
114 C=CCCCCCC.ClCc1cccc1>>C=C(CCCCCC)Cc1cccc1  
115 C=COCCCC.Fc1cccc1Cl>>C=C(OCCCC)c1cccc1F  
116 C=COCCCC.COc1cccc1Cl>>C=C(OCCCC)c1cccc1OC  
117 Brc1cccc1.C=COCCO>>C=C(OCCO)c1cccc1  
118 C=COCCOC=C.O=Cc1ccc(Br)cc1>>C=COCCOC(=C)c1ccc(C=O)cc1  
119 C=Cc1cccc1OC.Cc1ccc(OS(=O)(=O)C(F)(F)F)cc1>>C=C(c1ccc(C)cc1)c1cccc1OC  
120 C=CCCCCCC.FC(F)(F)c1ccc(Br)cc1>>C=C(CCCCCC)c1ccc(C(F)(F)F)cc1  
121 C=CCO.Fc1ccc(Br)c1>>C=C(CO)c1cccc(F)c1  
122 C=CCCO.CC(C)(C)c1ccc(OS(=O)(=O)C(F)(F)F)cc1>>C=C(CCO)c1ccc(C(C)(C)C)cc1  
123 C=COCCN(C)C.Clc1ccc(Br)cc1>>C=C(OCCN(C)C)c1ccc(Cl)cc1  
124 C=CCCCCCC.COC(=O)c1cccc1OS(=O)(=O)C(F)(F)F>>C=C(CCCCCC)c1cccc1C(=O)OC  
125 C=CNC(C)=O.O=S(=O)(Oc1ccc(Cl)cc1)C(F)(F)F>>C=C(NC(C)=O)c1ccc(Cl)cc1  
126 C=CCCCCN1C(=O)c2cccc2C1=O.CC(C)(C)c1ccc(Br)cc1>>C=C(CCCCN1C(=O)c2cccc2C1=O)c1c  
cc(C(C)(C)C)cc1  
127 C=CCNC(=O)OC(C)(C)C.CC(=O)c1ccc(Cl)cc1>>C=C(CNC(=O)OC(C)(C)C)c1ccc(C(C)=O)cc1  
128 C=COCCCC.CNc1ccc(Br)cn1>>C=C(OCCCC)c1cnc(NC)nc1  
129 C=CN(C)C(C)=O.CC(=O)c1ccc(Br)cc1>>C=C(c1ccc(C(C)=O)cc1)N(C)C(C)=O  
130 C=COCCCC.CNc1ccc(Br)cn1>>C=C(OCCCC)c1ccc(NC)nc1  
131 C=Cc1cccc1.N#Cc1ccc(OS(=O)(=O)C(F)(F)F)cc1>>C=C(c1cccc1)c1ccc(C#N)cc1  
132 Brc1ccc2cccc2c1.C=COCCO>>C=C(OCCO)c1ccc2cccc2c1  
133 C=COCCCC.O=c1ccc2ccc(OS(=O)(=O)C(F)(F)F)cc2o1>>C=C(OCCCC)c1ccc2ccc(=O)oc2c1  
134 C=CCNC(=O)OC(C)(C)C.COc1ccc(OS(=O)(=O)C(F)(F)F)c(Cl)c1>>C=C(CNC(=O)OC(C)(C)C)c1ccc  
(OC)cc1Cl  
135 C=COCCCC.COc1cccc(Cl)c1>>C=C(OCCCC)c1cccc(OC)c1  
136 C=CCCCCCC.Fc1ccc(CCl)c(F)c1>>C=C(CCCCCC)Cc1ccc(F)cc1F  
137 C=CN1CCCC1=O.Cc1ccc(Br)cc1>>C=C(c1ccc(C)cc1)N1CCCC1=O  
138 C=COCCO.CC(=O)c1ccc(I)cc1>>C=C(OCCO)c1ccc(C(C)=O)cc1  
139 C=COCCN(C)C.Cc1cccc1OS(=O)(=O)C(F)(F)F>>C=C(OCCN(C)C)c1cccc1C  
140 C=CNC(C)=O.O=S(=O)(Oc1cccc1Cl)C(F)(F)F>>C=C(NC(C)=O)c1cccc1Cl  
141 C=COCCCC.O=S(=O)(Oc1cccc2c1CCCC2)C(F)(F)F>>C=C(OCCCC)c1cccc2c1CCCC2  
142 C=CNC(=O)OCCC.O=S(=O)(Oc1ccc2cccc2c1)C(F)(F)F>>C=C(NC(=O)OCCC)c1ccc2cccc2c1  
143 C=CCNC(=O)OC(C)(C)C.N#Cc1cccc(Cl)c1>>C=C(CNC(=O)OC(C)(C)C)c1cccc(C#N)c1  
144 C=CCCCCN1C(=O)c2cccc2C1=O.CC(C)(C)c1ccc(OS(=O)(=O)C(F)(F)F)cc1>>C=C(CCCCN1C(=O)  
c2cccc2C1=O)c1ccc(C(C)(C)C)cc1  
145 Brc1cccn1.C=CCO>>C=C(CO)c1cccn1  
146 Brc1cccn1.C=COCCCC>>C=C(OCCCC)c1cccn1  
147 BrC1=CCCc2cccc21.C=CCCCCCC>>C=C(CCCCCC)C1=CCCc2cccc21  
148 C=COCCCC.O=Cc1ccc(Br)cc1>>C=C(OCCCC)c1ccc(C=O)cc1  
149 C=COCCOC=C.Ic1cccc2cccc12>>C=COCCOC(=C)c1cccc2cccc12  
150 C=CCCCC#N.Cc1cccc1OS(=O)(=O)C(F)(F)F>>C=C(CCCC#N)c1cccc1C  
151 C=CCCCCCC.O=S(=O)(OC1=CCCc2cccc21)C(F)(F)F>>C=C(CCCCCC)C1=CCCc2cccc21  
152 C=CCNC(=O)OC(C)(C)C.Cc1ccc(OS(=O)(=O)C(F)(F)F)c(Cl)c1>>C=C(CNC(=O)OC(C)(C)C)c1ccc  
(C)cc1Cl  
153 C=CN1CCCC1=O.Fc1ccc(Br)c1>>C=C(c1cccc(F)c1)N1CCCC1=O  
154 C=COC(CC)CCCCC.O=Cc1ccc(Br)cc1>>C=C(OC(CC)CCCCC)c1ccc(C=O)cc1  
155 C=CCO.COc1ccc2ccc(F)c(I)c2n1>>C=C(CO)c1c(F)cnc2ccc(OC)nc12  
156 C=CCNC(=O)OC(C)(C)C.CC(=O)c1ccc(Br)cc1>>C=C(CNC(=O)OC(C)(C)C)c1ccc(C(C)=O)cc1  
157 C=Cc1ccc(OC)cc1.CC(C)(C)c1ccc(Br)cc1>>C=C(c1ccc(OC)cc1)c1ccc(C(C)(C)C)cc1

158 Br1enc2cccc2c1.C=CCNC(=O)OC(C)(C)C>>C=C(CNC(=O)OC(C)(C)C)c1enc2cccc2c1  
159 C=COCCCC.N#Cc1ccc(Br)cc1>>C=C(OCCCC)c1ccc(C#N)cc1  
160 Br1enc2cccc2c1.C=COCCCC>>C=C(OCCCC)c1enc2cccc2c1  
161 Br1ccc2[nH]ccc2c1.C=COCCCC>>C=C(OCCCC)c1ccc2[nH]ccc2c1  
162 C=COCCOC=C.Fc1ccc(Br)cc1>>C=COCCOC(=C)c1ccc(F)cc1  
163 Br1cccc1.C=COCC>>C=C(OCC)c1cccc1  
164 C=COCCCC.CC(=O)c1ccc(Br)c2cccc12>>C=C(OCCCC)c1ccc(C(C)=O)c2cccc12  
165 C=CC1CCCCC1.CC(C)(C)c1ccc(Br)cc1>>C=C(c1ccc(C(C)(C)C)cc1)C1CCCCC1  
166 C=CCNC(=O)OC(C)(C)C.COC(=O)c1cccc(Br)c1>>C=C(CNC(=O)OC(C)(C)C)c1cccc(C(=O)OC)c1  
167 C=COCCCC.CC(=O)c1ccc(I)cc1>>C=C(OCCCC)c1ccc(C(C)=O)cc1  
168 C=COCCCC.COc1ccc2cc(Br)ccc2c1>>C=C(OCCCC)c1ccc2cc(OC)ccc2c1  
169 C=COCC(C)CCCC.Fc1ccc(Br)cc1>>C=C(OC(C)CCCC)c1ccc(F)cc1  
170 C=CNC(C)=O.CCOC(=O)c1ccc(Br)cc1>>C=C(NC(C)=O)c1ccc(C(=O)OCC)cc1  
171 C=CCC(C)C.Cc1cccc1OS(=O)(=O)C(F)(F)F>>C=C(CC(C)C)c1cccc1C  
172 C=CCCC=C(C)C.ClCc1cccc1-c1cccc1>>C=C(CCCC=C(C)C)Cc1cccc1-c1cccc1  
173 C=COCCN(C)C.N#Cc1ccc(Br)cc1>>C=C(OCCN(C)C)c1ccc(C#N)cc1  
174 Br1enc2cccc12.C=COCCCC>>C=C(OCCCC)c1enc2cccc12  
175 C=CCO.Fc1cccc1Br>>C=C(CO)c1cccc1F  
176 C=CCCCCCC.COc1cccc1OS(=O)(=O)C(F)(F)F>>C=C(CCCCC)c1cccc1OC  
177 C=COCCCC.CC(=O)c1ccc(Cl)cc1>>C=C(OCCCC)c1ccc(C(C)=O)cc1  
178 C=COCCCC.CC(=O)N1CCc2cc(Br)ccc21>>C=C(OCCCC)c1ccc2c(c1)CCN2C(C)=O  
179 C=CCCCCCC.CC(C)(C)OC(=O)n1ccc2cc(OS(=O)(=O)C(F)(F)F)ccc21>>C=C(CCCCC)c1ccc2c(ccn2C(=O)OC(C)(C)C)c1  
180 Br1cccc2cccc12.C=CNC(C)=O>>C=C(NC(C)=O)c1cccc2cccc12  
181 C=COCCCC.CN1CCc2cc(Br)ccc21>>C=C(OCCCC)c1ccc2c(c1)CCN2C  
182 C=CC(=O)OC.CC1(CC(N(Cc2cc3c(cc2I)OCO3)C[Si](C)(C)C)[Si](C)(C)C)OCCO1>>C=C(C(=O)OC)c1cc2c(cc1CN(C[Si](C)(C)C)C(C)C)OCCO1)[Si](C)(C)C)OCO2  
183 C=CCCCCCC.FC(F)(F)c1ccc(Cl)cc1>>C=C(CCCCC)c1ccc(C(F)(F)F)cc1  
184 C=CN1CCCC1=O.O=S(=O)(Oc1cccc1Br)C(F)(F)F>>C=C(c1cccc1Br)N1CCCC1=O  
185 C=COCCCC.Clc1ccc2c(c1)OCO2>>C=C(OCCCC)c1ccc2c(c1)OCO2  
186 C=COCCO.O=C(c1cccc1)c1ccc(I)cc1>>C=C(OCCO)c1ccc(C(=O)c2cccc2)cc1  
187 C=CCC(C)C.CC(C)(C)c1ccc(OS(=O)(=O)C(F)(F)F)cc1>>C=C(CC(C)C)c1ccc(C(C)(C)C)cc1  
188 C=COCCCC.COc1cccc2cc(Br)ccc12>>C=C(OCCCC)c1ccc2c(OC)ccc2c1  
189 C=CNC(C)=O.O=S(=O)(Oc1cccc1)C(F)(F)F>>C=C(NC(C)=O)c1cccc1  
190 C=CCCO[Si](C)(C)C(C)(C)C.COc1cccc(CCl)c1>>C=C(CCO[Si](C)(C)C(C)(C)C)Cc1cccc(OC)c1  
191 C=CCCCCCC.O=S(=O)(Oc1cccc(Oc2cccc2)c1)C(F)(F)F>>C=C(CCCCC)c1cccc(Oc2cccc2)c1  
192 C=COCCCC.O=S(=O)(Oc1ccc2c(c1)[nH]c1cccc12)C(F)(F)F>>C=C(OCCCC)c1ccc2c(c1)[nH]c1cccc  
193 C=CCNC(=O)OC(C)(C)C.FC(F)(F)c1ccc(Br)c1>>C=C(CNC(=O)OC(C)(C)C)c1cccc(C(F)(F)F)c1  
194 C=CCc1ccc2c(c1)OCO2.CS(=O)(=O)c1ccc(CCl)cc1>>C=C(Cc1ccc(S(C)(=O)=O)cc1)Cc1ccc2c(c1)O  
195 C=COCCCC.COC(=O)c1cc(OC)c(OC)cc1Br>>C=C(OCCCC)c1cc(OC)c(OC)cc1C(=O)OC  
196 C=CCNC(=O)OC(C)(C)C.O=S(=O)(Oc1cccc1Cl)C(F)(F)F>>C=C(CNC(=O)OC(C)(C)C)c1cccc1Cl  
197 C=COCCCCCO.COc1ccc(Br)cc1>>C=C(OCCCCCO)c1ccc(OC)cc1  
198 Br1ccsc1.C=COCCO>>C=C(OCCO)c1ccsc1  
199 C=CCNC(=O)OC(C)(C)C.O=C(c1cccc(Br)c1)C1CCCCC1>>C=C(CNC(=O)OC(C)(C)C)c1cccc(C(=O)C2CCCCC2)c1  
200 C=CCC(C)C.CC(C)(C)c1cccc1OS(=O)(=O)C(F)(F)F>>C=C(CC(C)C)c1cccc1C(C)(C)C  
201 Br1ccc2cccc2c1.C=COCCOC=C>>C=COCCOC(=C)c1ccc2cccc2c1  
202 Br1ccc2cccc2c1.C=COCCCCO>>C=C(OCCCCO)c1ccc2cccc2c1  
203 C=COCCCC.COc1ccc2nccc(OS(=O)(=O)C(F)(F)F)c2n1>>C=C(OCCCC)c1ccnc2ccc(OC)nc12  
204 C=CCCCCCC.N#Cc1cccc1OS(=O)(=O)C(F)(F)F>>C=C(CCCCC)c1cccc1C#N  
205 C=CCC(C)(C)C.CC(C)(C)c1ccc(Br)cc1>>C=C(CC(C)(C)C)c1ccc(C(C)(C)C)cc1  
206 C=CCCN1C(=O)c2cccc2C1=O.FC(F)(F)c1cccc(CCl)c1>>C=C(CCN1C(=O)c2cccc2C1=O)Cc1cccc(C(F)(F)F)c1  
207 C=CCc1cccc1.COC(=O)c1ccc(CCl)cc1>>C=C(Cc1cccc1)Cc1ccc(C(=O)OC)cc1  
208 C=COCCCC.O=c1cc(N2CCOCC2)oc2c(Br)esc12>>C=C(OCCCC)c1esc2c(=O)cc(N3CCOCC3)oc12  
209 C=Cc1cccc1.O=S(=O)(OC1=CCCCC1)C(F)(F)F>>C=C(C1=CCCCC1)c1cccc1  
210 C=COCC.CCOC(=O)N1[C@@H]2CC=C(OS(=O)(=O)C(F)(F)F)[C@H]1CC2>>C=C(OCC)C1=CC[C@@H]2CC[C@H]1N2C(=O)OCC

211 C=CN(C)C(C)=O.COc1ccc2c(c1)CCC=C2OS(=O)(=O)C(F)(F)F>>C=C(C1=CCCc2cc(OC)ccc21)N(C)C(C)=O  
 212 C=CCCCCCC.O=S(=O)(Oc1ccccc1)C(F)(F)F>>C=C(CCCCCC)c1ccccc1  
 213 C=COCCCC.Fc1cccc(Br)c1>>C=C(OCCCC)c1cccc(F)c1  
 214 C=CCCCCBr.COc1ccc(CCl)cc1>>C=C(CCCCBBr)Cc1ccc(OC)cc1  
 215 C=COCCCC.Ic1ccccc1>>C=C(OCCCC)c1ccccc1  
 216 C=Cc1ccccc1.CC(C)(C)c1ccc(Br)cc1>>C=C(c1ccccc1)c1ccc(C(C)(C)C)cc1  
 217 C=CCCCCCC.CC(C)(C)c1cccc(OS(=O)(=O)C(F)(F)F)c1>>C=C(CCCCCC)c1cccc(C(C)(C)C)c1  
 218 C=COCCCC.CC(=O)Nc1ccc(OS(=O)(=O)C(F)(F)F)cc1>>C=C(OCCCC)c1ccc(NC(C)=O)cc1  
 219 Br1cccc2[nH]ccc12.C=COCCCC>>C=C(OCCCC)c1cccc2[nH]ccc12  
 220 C=COCCCO.Fc1ccc(Br)cc1>>C=C(OCCCO)c1ccc(F)cc1  
 221 C=COCCCC.Cc1cc(Br)c2nc(N3CCOCC3)cc(=O)n2c1>>C=C(OCCCC)c1cc(C)cn2c(=O)cc(N3CCOCC3)nc12  
 222 C=CCCCCCC.O=[N+][O-]c1ccccc1OS(=O)(=O)C(F)(F)F>>C=C(CCCCCC)c1ccccc1[N+](=O)[O-]  
 223 C=COCCCC.CC(=O)c1cccc(Cl)c1>>C=C(OCCCC)c1cccc(C(C)=O)c1  
 224 C=Cc1ccccc1C.Cc1ccc(OS(=O)(=O)C(F)(F)F)cc1>>C=C(c1ccc(C)cc1)c1ccccc1C  
 225 C=Cc1ccccc1.O=[N+][O-]c1ccc(OS(=O)(=O)C(F)(F)F)cc1>>C=C(c1ccccc1)c1ccc([N+](=O)[O-])cc1  
 226 C=COCCCC.O=S(=O)(Oc1cccc2c1CCC=C2)C(F)(F)F>>C=C(OCCCC)c1cccc2c1CCC=C2  
 227 C=COCC.N#Cc1ccc(Br)cc1>>C=C(OCC)c1ccc(C#N)cc1  
 228 C=CCNC(=O)OC(C)(C)C.O=S(=O)(Oc1cc(F)ccc1Cl)C(F)(F)F>>C=C(CNC(=O)OC(C)(C)C)c1cc(F)ccc1Cl  
 229 C=COCCCC.CC(C)(C)c1ccc(OS(=O)(=O)C(F)(F)F)cc1>>C=C(OCCCC)c1ccc(C(C)(C)C)cc1  
 230 C=CCNC(=O)OC(C)(C)C.O=C(c1ccccc1)c1ccc(Br)cc1>>C=C(CNC(=O)OC(C)(C)C)c1ccc(C(=O)c2ccccc2)cc1  
 231 C=COCCCC.O=S(=O)(Oc1ccc(F)cc1)C(F)(F)F>>C=C(OCCCC)c1ccc(F)cc1  
 232 C=CCCCCCCCCN1C(=O)c2ccccc2C1=O.O=S(=O)(Oc1ccc2ccccc2c1)C(F)(F)F>>C=C(CCCCCCCC)N1C(=O)c2ccccc2C1=O)c1ccc2ccccc2c1  
 233 C=COCC.CC(=O)c1ccc(Br)cc1>>C=C(OCC)c1ccc(C(C)=O)cc1  
 234 C=COCCCC.N#Cc1ccc(Cl)cc1>>C=C(OCCCC)c1ccc(C#N)cc1  
 235 C=CC(=O)OC.OC1CC2(CCN(Cc3ccccc3)CC2)Oc2ccc(Br)cc21>>C=C(C(=O)OC)c1ccc2c(c1)C(O)CC1(CCN(Cc3ccccc3)CC1)O2  
 236 C=CC1CCCCC1.CC(C)(C)c1ccccc1OS(=O)(=O)C(F)(F)F>>C=C(c1ccccc1C(C)(C)C)C1CCCCC1  
 237 C=CCCCC#N.CC(C)(C)c1ccc(Br)cc1>>C=C(CCCC#N)c1ccc(C(C)(C)C)cc1  
 238 C=CNC(C)=O.CC(=O)c1ccc(OS(=O)(=O)C(F)(F)F)cc1>>C=C(NC(C)=O)c1ccc(C(C)=O)cc1  
 239 C=COCCCC.CCOC(=O)c1ccc(OS(=O)(=O)C(F)(F)F)cc1>>C=C(OCCCC)c1ccc(C(=O)OCC)cc1  
 240 C=CN1CCCCC1=O.Cc1ccc(OS(=O)(=O)C(F)(F)F)c(Br)c1>>C=C(c1ccc(C)cc1Br)N1CCCCC1=O  
 241 C=COCCCC.Clc1cccc2ccccc12>>C=C(OCCCC)c1cccc2ccccc12  
 242 Br1cccc2ccccc12.C=CCCCCCC>>C=C(CCCCCC)c1cccc2ccccc12  
 243 C=CNC(C)=O.N#Cc1ccc(Br)cc1>>C=C(NC(C)=O)c1ccc(C#N)cc1  
 244 C=CC(C)CC.Fc1cccc(CCl)c1>>C=C(Cc1cccc(F)c1)C(C)CC  
 245 C=Cc1ccccc1.O=Cc1ccc(OS(=O)(=O)C(F)(F)F)c1>>C=C(c1ccccc1)c1cccc(C=O)c1  
 246 C=COC(C)(C)C.O=S(=O)(Oc1ccc(-c2ccccc2)cc1)C(F)(F)F>>C=C(OC(C)(C)C)c1ccc(-c2ccccc2)cc1  
 247 C=CC(=O)OC.Ic1ccccc1>>C=C(C(=O)OC)c1ccccc1  
 248 C=COCCCC.O=C1c2cccc(OS(=O)(=O)C(F)(F)F)c2C(=O)c2cccc(OCc3ccccc3)c21>>C=C(OCCCC)c1cccc2c1C(=O)c1ccc(OCc3ccccc3)c1C2=O  
 249 C=COCC(C)C.O=S(=O)(Oc1ccc(-c2ccccc2)cc1)C(F)(F)F>>C=C(OCC(C)C)c1ccc(-c2ccccc2)cc1  
 250 C=CCCCCCC.COc1ccc(Cl)cc1>>C=C(CCCCCC)c1ccc(OC)cc1  
 251 C=CCCCCCC.Clc1ccccc1>>C=C(CCCCCC)c1ccccc1  
 252 C=COCCOC=C.COc1cccc2cc(Br)ccc12>>C=COCCOC(=C)c1ccc2c(OC)cccc2c1  
 253 C=Cc1ccccc1.O=S(=O)(Oc1ccc(Cl)cc1)C(F)(F)F>>C=C(c1ccccc1)c1ccc(Cl)cc1  
 254 C=CC(OCC)OCC.CC(C)(C)c1ccccc1OS(=O)(=O)C(F)(F)F>>C=C(c1ccccc1C(C)(C)C)C(OCC)OCC  
 255 C=CCC.Clc1ccc1I>>C=C(CC)Cc1ccc1I  
 256 C=CCCCC(=O)OC.CC(C)(C)c1ccc(Br)cc1>>C=C(CCCC(=O)OC)c1ccc(C(C)(C)C)cc1  
 257 C=COCCOCCO.COc1ccc(Br)cc1>>C=C(OCCOCCO)c1ccc(OC)cc1  
 258 C=COCCCC.Cc1cc(CO)ccc1I>>C=C(OCCCC)c1ccc(CO)cc1C  
 259 C=COCCCC.CC(=O)Nc1ccc(Br)cn1>>C=C(OCCCC)c1ccc(NC(C)=O)nc1  
 260 Br1cccc2ccccc12.C=COCCCC>>C=C(OCCCC)c1cccc2ccccc12  
 261 C=CC1CCCCC1.Cc1ccccc1OS(=O)(=O)C(F)(F)F>>C=C(c1ccccc1C)C1CCCCC1  
 262 C=CCCCCCC.Cc1cc(C)cc(OS(=O)(=O)C(F)(F)F)c1>>C=C(CCCCCC)c1cc(C)cc(C)c1

263 C=COCCCC.COC(=O)c1cccc1Br>>C=C(OCCCC)c1cccc1C(=O)OC  
 264 C=CCCCCCC.Cc1ccc(OS(=O)(=O)C(F)(F)F)cc1>>C=C(CCCCC)c1ccc(C)cc1  
 265 C=COCCOC=C.CC(=O)c1ccc(Br)cc1>>C=COCCOC(=C)c1ccc(C(C)=O)cc1  
 266 C=COCCCC.O=S(=O)(OC1=CCc2ccccc21)C(F)(F)F>>C=C(OCCCC)C1=CCc2ccccc21  
 267 C=CNC(C)=O.O=S(=O)(Oc1ccc(-c2ccccc2)cc1)C(F)(F)F>>C=C(NC(C)=O)c1ccc(-c2ccccc2)cc1  
 268 C=CCO.Fc1ccc(Br)cc1>>C=C(CO)c1ccc(F)cc1  
 269 C=COCCCC.CC(=O)c1cccc(Br)c1>>C=C(OCCCC)c1cccc(C(C)=O)c1  
 270 C=CNC(C)=O.CCOC(=O)c1ccc(I)cc1>>C=C(NC(C)=O)c1ccc(C(=O)OCC)cc1  
 271 C=COCCCC.CC(=O)c1ccc(Br)s1>>C=C(OCCCC)c1ccc(C(C)=O)s1  
 272 C=CCCO.CC(C)(C)c1ccc(Br)cc1>>C=C(CCO)c1ccc(C(C)(C)C)cc1  
 273 C=COCCCC.O=[N+][O-]c1ccc(Br)cc1>>C=C(OCCCC)c1ccc([N+](=O)[O-])cc1  
 274 C=COCCCC.Cc1c(Br)c(=O)n(C2CCCC2)c2nc(Nc3ccc(N4CCN(C(=O)OC(C)(C)C)CC4)cn3)ncc12>>  
 C=C(OCCCC)c1c(C)c2enc(Nc3ccc(N4CCN(C(=O)OC(C)(C)C)CC4)cn3)nc2n(C2CCCC2)c1=O  
 275 C=COCCO.COc1ccc(Br)cc1>>C=C(OCCO)c1ccc(OC)cc1  
 276 C=CCC1CCCC1.CC(C)(C)c1ccc(Br)cc1>>C=C(CC1CCCC1)c1ccc(C(C)(C)C)cc1  
 277 Br1cccn1.C=CCNC(=O)OC(C)(C)C>>C=C(CNC(=O)OC(C)(C)C)c1cccn1  
 278 C=CC[Si](C)(C)C.N#Cc1ccc(Br)cc1>>C=C(C[Si](C)(C)C)c1ccc(C#N)cc1  
 279 C=CCCCCCC.CC(C)(C)OC(=O)Nc1cccc(OS(=O)(=O)C(F)(F)F)c1>>C=C(CCCCC)c1cccc(NC(=O)  
 OC(C)(C)C)c1  
 280 C=COCCCC.Oc1ccc(Br)c(O)c1>>C=C(OCCCC)c1ccc(O)cc1O  
 281 C=CN1CCCC1=O.O=S(=O)(Oc1ccc(-c2ccccc2)cc1)C(F)(F)F>>C=C(c1ccc(-  
 282 C=COCCN(C)C.COc1ccc(Br)cc1>>C=C(OCCN(C)C)c1ccc(OC)cc1  
 283 C=COCCCC.COC(=O)Cc1cccc1Br>>C=C(OCCCC)c1cccc1CC(=O)OC  
 284 C=COCCCC.CC(=O)c1encc(Br)c1>>C=C(OCCCC)c1encc(C(C)=O)c1  
 285 C=COCCN(C)C.CC(=O)c1ccc(Br)cc1>>C=C(OCCN(C)C)c1ccc(C(C)=O)cc1  
 286 C=CCCCCCC.CC(C)(C)c1cccc1OS(=O)(=O)C(F)(F)F>>C=C(CCCCC)c1cccc1C(C)(C)C  
 287 C=CNC(C)=O.COC(=O)c1cccc(I)c1>>C=C(NC(C)=O)c1cccc(C(=O)OC)c1  
 288 C=CCC(C)C.ClCc1cccc(Br)c1>>C=C(Cc1cccc(Br)c1)CC(C)C  
 289 C=COCCCC.COC(=O)c1ccc(Br)cc1>>C=C(OCCCC)c1ccc(C(=O)OC)cc1  
 290 C=COCCCC.Cc1ccc(Cl)cc1>>C=C(OCCCC)c1ccc(C)cc1  
 291 C=CCCN1C(=O)c2ccccc2C1=O.ClCc1cccc(Oc2ccccc2)c1>>C=C(CCN1C(=O)c2ccccc2C1=O)Cc1ccc  
 c(Oc2ccccc2)c1  
 292 C=CCCCCCC.Cc1cccc(OS(=O)(=O)C(F)(F)F)c1>>C=C(CCCCC)c1cccc(C)c1  
 293 C=CCCCC.CS(=O)(=O)c1ccc(CCl)cc1>>C=C(CCCC)Cc1ccc(S(C)(=O)=O)cc1  
 294 Br1csc2ccccc12.C=CCCCCCC>>C=C(CCCCC)c1csc2ccccc12  
 295 C=CCO.CC(=O)c1ccc(Br)cc1>>C=C(CO)c1ccc(C(C)=O)cc1  
 296 C=CCCCCCC.CC(=O)Nc1cccc1OS(=O)(=O)C(F)(F)F>>C=C(CCCCC)c1cccc1NC(C)=O  
 297 Br1cccc1.C=COCCN(C)C>>C=C(OCCN(C)C)c1cccc1  
 298 C=CCc1cccc1.CC(C)(C)c1cccc1OS(=O)(=O)C(F)(F)F>>C=C(Cc1cccc1)c1cccc1C(C)(C)C  
 299 C=CCNC(=O)OC(C)(C)C.N#Cc1cccc(Br)c1>>C=C(CNC(=O)OC(C)(C)C)c1cccc(C#N)c1  
 300 C=CCNC(=O)OC(C)(C)C.COC(=O)c1ccc(Cl)cc1>>C=C(CNC(=O)OC(C)(C)C)c1ccc(C(=O)OC)cc1  
 301 C=CCNC(=O)OC(C)(C)C.N#Cc1ccc(Br)cc1>>C=C(CNC(=O)OC(C)(C)C)c1ccc(C#N)cc1  
 302 C=COCCO.O=C(c1cccc1)c1ccc(Br)cc1>>C=C(OCCO)c1ccc(C(=O)c2ccccc2)cc1  
 303 C=COCCCC.O=C(c1cccc1)c1cccc(Br)c1>>C=C(OCCCC)c1cccc(C(=O)c2ccccc2)c1  
 304 C=COCCCl.Cc1cccn1-c1c(OS(=O)(=O)C(F)(F)F)ccc2ccccc12>>C=C(OCCCl)c1ccc2ccccc2c1-  
 c1ncccc1C  
 305 C=COCCCC.Fc1ccc(Cl)cc1>>C=C(OCCCC)c1ccc(F)cc1  
 306 C=CCc1cccc1.CC(C)(C)c1ccc(OS(=O)(=O)C(F)(F)F)cc1>>C=C(Cc1cccc1)c1ccc(C(C)(C)C)cc1  
 307 C=COCC.COc1ccc(Br)cc1>>C=C(OCC)c1ccc(OC)cc1  
 308 C=CCNC(=O)OC(C)(C)C.O=C1CCCc2ccc(Cl)cc21>>C=C(CNC(=O)OC(C)(C)C)c1ccc2c(c1)C(=O)C  
 309 C=CCCCCO[Si](C)(C)C(C)(C)C.Clc1cccc1>>C=C(CCCCCO[Si](C)(C)C(C)(C)C)c1cccc1  
 310 C=CCCCC(=O)OC.Cc1cccc1OS(=O)(=O)C(F)(F)F>>C=C(CCCC(=O)OC)c1cccc1C  
 311 C=CCCCCCC.CN(C)c1cccc1OS(=O)(=O)C(F)(F)F>>C=C(CCCCC)c1cccc1N(C)C  
 312 C=CCO.N#Cc1cccc(Br)c1>>C=C(CO)c1cccc(C#N)c1  
 313 C=CNC(C)=O.N#Cc1ccc(Cl)cc1>>C=C(NC(C)=O)c1ccc(C#N)cc1  
 314 Br1cccn1.C=CCO>>C=C(CO)c1cccn1  
 315 C=COCCCC.Clc1cccs1>>C=C(OCCCC)c1cccs1  
 316 C=Cc1ccc(F)cc1.COC(=O)c1cc(Br)ccc1OS(=O)(=O)C(F)(F)F>>C=C(c1ccc(F)cc1)c1ccc(Br)cc1C(=O)  
 317 C=CC[Si](C)(C)C.CC(=O)c1ccc(Br)cc1>>C=C(C[Si](C)(C)C)c1ccc(C(C)=O)cc1

318 C=CNC(=O)Cc1ccccc1.O=S(=O)(Oc1ccc2ccccc2c1)C(F)(F)F>>C=C(NC(=O)Cc1ccccc1)c1ccc2ccccc  
319 C=CCNC(=O)OC(C)(C)C.Cc1cccc(Cl)c1>>C=C(CNC(=O)OC(C)(C)C)c1cccc(C)c1  
320 C=CC[Si](C)(C)C.ClCc1cccc(Br)c1>>C=C(Cc1cccc(Br)c1)C[Si](C)(C)C  
321 C=CN1CCCCC1=O.O=S(=O)(Oc1ccccc1Br)C(F)(F)F>>C=C(c1ccccc1Br)N1CCCCC1=O  
322 Brc1ccc2ccccc2c1.C=COCC(C)CCCC>>C=C(OC(C)CCCC)c1ccc2ccccc2c1  
323 C=COCC.Fc1ccc(Br)cc1>>C=C(OC)c1ccc(F)cc1  
324 Brc1ccc2ccccc2c1.C=CN1CCCCC1=O>>C=C(c1ccc2ccccc2c1)N1CCCCC1=O  
325 C=COCCCC.Clc1ccc2ccccc2c1>>C=C(OCCCC)c1ccc2ccccc2c1  
326 C=Cc1ccc(OC)cc1.CC(C)OC(=O)/C(Br)=C1\CCCO1>>C=C(/C(C(=O)OC(C)C)=C1/CCCO1)c1ccc(O  
C)cc1  
327 C=COCCCC.O=S1(=O)CCCN1Cc1cc(Br)cc(Cc2ccccc2)c1>>C=C(OCCCC)c1cc(Cc2ccccc2)cc(CN2C  
CCS2(=O)=O)c1  
328 C=CCNC(=O)OC(C)(C)C.CCOC(=O)c1cc(Cl)c(OS(=O)(=O)C(F)(F)F)c(OC)c1>>C=C(CNC(=O)OC(  
C)(C)C)c1c(Cl)cc(C(=O)OCC)cc1OC  
329 C=CCc1ccccc1.CC(C)(C)c1ccc(Br)cc1>>C=C(Cc1ccccc1)c1ccc(C(C)(C)C)cc1  
330 Brc1cnc2ccccc12.C=CNC(C)=O>>C=C(NC(C)=O)c1cnc2ccccc12  
331 C=CN1CCCCC1=O.O=S(=O)(Oc1ccc2ccccc2c1Br)C(F)(F)F>>C=C(c1ccc2ccccc2c1Br)N1CCCCC1  
332 C=CCCCO.CC(C)(C)c1ccc(OS(=O)(=O)C(F)(F)F)cc1>>C=C(CCCO)c1ccc(C(C)(C)C)cc1  
333 C=COCCCC.COc1cc(Cl)cc(OC)c1>>C=C(OCCCC)c1cc(OC)cc(OC)c1  
334 C=CCCCCCC.COC(=O)c1ccc(Br)cc1>>C=C(CCCCC)c1ccc(C(=O)OC)cc1  
335 C=CC(OCC)OCC.CC(C)(C)c1ccc(OS(=O)(=O)C(F)(F)F)cc1>>C=C(c1ccc(C(C)(C)C)cc1)C(OCC)OC  
336 Brc1ccc2ccccc2c1.C=CN(C)C(C)=O>>C=C(c1ccc2ccccc2c1)N(C)C(C)=O  
337 C=CNC(C)=O.CC(=O)c1ccc(Br)cc1>>C=C(NC(C)=O)c1ccc(C(C)=O)cc1  
338 C=Cc1ccccc1.CC1=C(OS(=O)(=O)C(F)(F)F)CCCC1>>C=C(C1=C(C)CCCC1)c1ccccc1  
339 C=CCCCC(=O)OC.CC(C)(C)c1ccc(OS(=O)(=O)C(F)(F)F)cc1>>C=C(CCCC(=O)OC)c1ccc(C(C)(C)C  
340 C=COCCOC=C.N#Cc1ccc(Br)cc1>>C=COCCOC(=C)c1ccc(C#N)cc1  
341 C=COCCCC.Cc1cccc(Cl)c1>>C=C(OCCCC)c1cccc(C)c1  
342 C=COCCO.CC(=O)c1ccc(Br)cc1>>C=C(OCCO)c1ccc(C(C)=O)cc1  
343 C=CNC(C)=O.COC(=O)c1cccc(Br)c1>>C=C(NC(C)=O)c1cccc(C(=O)OC)c1  
344 C=COCCCC.CN(C)c1ncc(Br)cn1>>C=C(OCCCC)c1cnc(N(C)C)nc1  
345 Brc1cccs1.C=COCCCC>>C=C(OCCCC)c1cccs1  
346 C=C[C@H](C)CCC=C(C)C.Clc1ccccc1>>C=C(c1ccccc1)[C@H](C)CCC=C(C)C  
347 Brc1ccnc1.C=COCCO>>C=C(OCCO)c1ccnc1  
348 C=CNC(C)=O.Cc1ccc(Br)cc1>>C=C(NC(C)=O)c1ccc(C)cc1  
349 C=Cc1ccccc1.Cc1ccccc1OS(=O)(=O)C(F)(F)F>>C=C(c1ccccc1)c1ccccc1C  
350 Brc1ccccc1.C=CCCCCCC>>C=C(CCCCCC)c1ccccc1  
351 C=CN(C)C(C)=O.Clc1ccc2c(c1)OCO2>>C=C(c1ccc2c(c1)OCO2)N(C)C(C)=O  
352 C=COCCCC.Cc1ccc(I)cc1>>C=C(OCCCC)c1ccc(C)cc1  
353 C=CN(C)C(C)=O.Fc1ccc(Br)cc1>>C=C(c1ccc(F)cc1)N(C)C(C)=O  
354 C=COCCCC.COc1ccc(Br)c(OC)n1>>C=C(OCCCC)c1ccc(OC)nc1OC  
355 C=CCCCCCC.O=S(=O)(Oc1ccc2ccccc2c1)C(F)(F)F>>C=C(CCCCCC)c1ccc2ccccc2c1  
356 C=Cc1ccc(OC)cc1.COC(=O)/C(Br)=C1\CCCO1>>C=C(/C(C(=O)OC)=C1/CCCO1)c1ccc(OC)cc1  
357 C=COCCCC.CC=Cc1ccc(OS(=O)(=O)C(F)(F)F)c(OC)c1>>C=C(OCCCC)c1ccc(C=CC)cc1OC  
358 C=COCCCC.COc1cc(Br)cc(OC)c1OC>>C=C(OCCCC)c1cc(OC)c(OC)c(OC)c1  
359 C=CNC(C)=O.COc1ccc2ccc(OS(=O)(=O)C(F)(F)F)cc2c1>>C=C(NC(C)=O)c1ccc2ccc(OC)cc2c1  
360 C=CC[Si](C)(C)C.O=Cc1ccc(Br)cc1>>C=C(C[Si](C)(C)C)c1ccc(C=O)cc1  
361 C=COCCN(C)C.Cc1ccccc1Br>>C=C(OCCN(C)C)c1ccccc1C  
362 C=COCCO.FC(F)(F)c1ccc(Br)cc1>>C=C(OCCO)c1ccc(C(F)(F)F)cc1  
363 C=CCNC(=O)OC(C)(C)C.O=S(=O)(Oc1cccc(C(F)(F)F)c1Cl)C(F)(F)F>>C=C(CNC(=O)OC(C)(C)C)c  
1cccc(C(F)(F)F)c1Cl  
364 C=CCNC(=O)OCc1ccccc1.N#Cc1ccc(Cl)cc1>>C=C(CNC(=O)OCc1ccccc1)c1ccc(C#N)cc1  
365 C=CN1CCCC1=O.COc1ccc(Cl)cc1>>C=C(c1ccc(OC)cc1)N1CCCC1=O  
366 C=COCCCC.FC(F)(F)c1ccc(Br)c1>>C=C(OCCCC)c1cccc(C(F)(F)F)c1  
367 C=CCCCCO[Si](C)(C)C(C)(C)C.O=S(=O)(Oc1ccccc1)C(F)(F)F>>C=C(CCCCO[Si](C)(C)C(C)(C)C)  
c1ccccc1  
368 C=COCCCC.Fc1ccccc1Br>>C=C(OCCCC)c1ccccc1F  
369 C=COCCCC.N#Cc1ccc(Br)c1>>C=C(OCCCC)c1cccc(C#N)c1  
370 C=COCCCC.COc1encc(Br)c1>>C=C(OCCCC)c1encc(OC)c1  
371 Brc1ccsc1.C=COCCCC>>C=C(OCCCC)c1ccsc1

372 C=CCCCCN1C(=O)c2ccccc2C1=O.Cc1ccccc1OS(=O)(=O)C(F)(F)F>>C=C(CCCCN1C(=O)c2ccccc2  
 C1=O)c1ccccc1C  
 373 C=CCCCCCC.Cc1cc(C)c(OS(=O)(=O)C(F)(F)F)c(C)c1>>C=C(CCCCCC)c1c(C)cc(C)cc1C  
 374 C=CCNC(=O)OC(C)(C)C.Clc1ccc2ccccc2c1>>C=C(CNC(=O)OC(C)(C)C)c1ccc2ccccc2c1  
 375 C=CC(C)(C)C.Cc1ccccc1OS(=O)(=O)C(F)(F)F>>C=C(c1ccccc1C)C(C)(C)C  
 376 C=CCNC(=O)OCc1ccccc1.Clc1cnc2ccccc2c1>>C=C(CNC(=O)OCc1ccccc1)c1cnc2ccccc2c1  
 377 C=COCCO.COc1ccc(I)cc1>>C=C(OCCO)c1ccc(OC)cc1  
 378 C=CCNC(=O)OC(C)(C)C.Clc1ccccc1>>C=C(CNC(=O)OC(C)(C)C)c1ccccc1  
 379 C=COCCCC.COc1cccc(Br)c1>>C=C(OCCCC)c1cccc(OC)c1  
 380 C=CCCCC=C(C)C.ClCc1cccc(Oc2ccccc2)c1>>C=C(CCCC=C(C)C)Cc1cccc(Oc2ccccc2)c1  
 381 C=COCCCC.Cc1cc(Br)c2nc(N3CCN(C)CC3)cc(=O)n2c1>>C=C(OCCCC)c1cc(C)cn2c(=O)cc(N3CC  
 N(C)CC3)nc12  
 382 C=COCCCCO.COc1ccc(Br)cc1>>C=C(OCCCCO)c1ccc(OC)cc1  
 383 C=Cc1cc2c(cc1C)C(C)(C)CCC2(C)C.CCOC(=O)c1ccc(OS(=O)(=O)C(F)(F)F)cc1>>C=C(c1ccc(C(=O)  
 )OCC)cc1)c1cc2c(cc1C)C(C)(C)CCC2(C)C  
 384 C=COCC.Ic1cccc2ccccc12>>C=C(OCC)c1cccc2ccccc12  
 385 C=CCNC(=O)OC(C)(C)C.O=C1CCCc2ccc(Br)cc21>>C=C(CNC(=O)OC(C)(C)C)c1ccc2c(c1)C(=O)C  
 386 C=CCCCCOC(C)=O.CC(C)(C)c1ccc(OS(=O)(=O)C(F)(F)F)cc1>>C=C(CCCCCOC(C)=O)c1ccc(C(C)(  
 C)C)cc1  
 387 C=CCCO.CC(C)(C)c1ccccc1OS(=O)(=O)C(F)(F)F>>C=C(CCO)c1ccccc1C(C)(C)C  
 388 Brc1ccc2ccccc2c1.C=CCO>>C=C(CO)c1ccc2ccccc2c1  
 389 C=COCCOC=C.COc1ccc(Br)cc1>>C=C(OCCOC(=C)c1ccc(OC)cc1  
 390 C=COCCCC.O=S(=O)(Oc1ccccc1-c1ccccc1)C(F)(F)F>>C=C(OCCCC)c1ccccc1-c1ccccc1  
 391 C=CNC(=O)COC.O=S(=O)(Oc1ccc2ccccc2c1)C(F)(F)F>>C=C(NC(=O)COC)c1ccc2ccccc2c1  
 392 C=C[C@H](C)CCC=C(C)C.O=S(=O)(Oc1ccccc1)C(F)(F)F>>C=C(c1ccccc1)[C@H](C)CCC=C(C)C  
 393 C=CCCCCN.ClCc1ccc(-c2ccccc2)cc1>>C=C(CCCCN)Cc1ccc(-c2ccccc2)cc1  
 394 C=CCNC(=O)OC(C)(C)C.O=C1CCc2cc(Cl)ccc21>>C=C(CNC(=O)OC(C)(C)C)c1ccc2c(c1)CCC2=O  
 395 C=COCCCC.COC(=O)Cc1cc(OC)c(OC)cc1Br>>C=C(OCCCC)c1cc(OC)c(OC)cc1CC(=O)OC  
 396 C=CCN(CC=C)c1ccc2c(OS(=O)(=O)C(F)(F)F)cc(=O)[nH]c2c1.C=COCCCC>>C=C(CCN(CC=C)c1ccc2  
 c(C(=C)OCCCC)cc(=O)[nH]c2c1  
 397 C=COC(CC)CCCC.N#Cc1ccc(Br)cc1>>C=C(OC(CC)CCCC)c1ccc(C#N)cc1  
 398 C=CN1CCCCCCC1=O.COc1ccc2c(c1)CCC=C2OS(=O)(=O)C(F)(F)F>>C=C(C1=CCCc2cc(OC)ccc21)  
 N1CCCCCCC1=O  
 399 C=COCCCC.O=C(O)c1cccc(Cl)c1>>C=C(OCCCC)c1cccc(C(=O)O)c1  
 400 C=COCCCC.Oc1cccc(Br)c1>>C=C(OCCCC)c1cccc(O)c1  
 401 C=COCCCC.O=Cc1cccc(Br)c1>>C=C(OCCCC)c1cccc(C=O)c1  
 402 C=CCCCCCC.ClCc1ccc(-c2ccccc2)cc1>>C=C(CCCCCC)Cc1ccc(-c2ccccc2)cc1  
 403 C=CCNC(=O)OC(C)(C)C.Cc1cc(Cl)c(OS(=O)(=O)C(F)(F)F)cc1C>>C=C(CNC(=O)OC(C)(C)C)c1cc(  
 C)c(C)cc1Cl  
 404 C=Cc1ccccc1.CC(C)(C)c1cccc(OS(=O)(=O)C(F)(F)F)c1>>C=C(c1ccccc1)c1cccc(C(C)(C)C)c1  
 405 Brc1ccccc1.C=COCCCC>>C=C(OCCCC)c1ccccc1  
 406 C=COCCO.Cc1ccc(Br)cc1>>C=C(OCCO)c1ccc(C)cc1  
 407 C=CCC(C)O.CC(C)(C)c1ccc(OS(=O)(=O)C(F)(F)F)cc1>>C=C(CC(C)O)c1ccc(C(C)(C)C)cc1  
 408 Brc1cnc2ccccc2c1.C=CCCCCCC>>C=C(CCCCCC)c1cnc2ccccc2c1  
 409 C=CN(C)C(C)=O.Cc1ccc(Br)cc1>>C=C(c1ccc(C)cc1)N(C)C(C)=O  
 410 C=Cc1ccc(Cl)cc1.CC(C)(C)c1ccc(Br)cc1>>C=C(c1ccc(Cl)cc1)c1ccc(C(C)(C)C)cc1  
 411 C=CNC(C)=O.N#Cc1ccc(OS(=O)(=O)C(F)(F)F)cc1>>C=C(NC(C)=O)c1ccc(C#N)cc1  
 412 Brc1ccccc1.C=CN(C)C(C)=O>>C=C(c1ccccc1)N(C)C(C)=O  
 413 C=Cc1ccccc1.O=S(=O)(Oc1ccccc1C(F)(F)F)C(F)(F)F>>C=C(c1ccccc1)c1ccccc1C(F)(F)F  
 414 C=CCCCCCC.CC(C)(C)c1ccc(OS(=O)(=O)C(F)(F)F)cc1>>C=C(CCCCCC)c1ccc(C(C)(C)C)cc1  
 415 C=Cc1ccccc1.O=S(=O)(Oc1ccccc1Cl)C(F)(F)F>>C=C(c1ccccc1)c1ccccc1Cl  
 416 C=CN1CCCCCCC1=O.O=S(=O)(Oc1cc(F)ccc1Br)C(F)(F)F>>C=C(c1cc(F)ccc1Br)N1CCCCCCC1=O  
 417 C=Cc1ccccc1.COC(=O)/C(Br)=C1\CCCO1>>C=C(/C(C(=O)OC)=C1/CCCO1)c1ccccc1  
 418 C=Cc1ccc(C)cc1.Cc1ccc(OS(=O)(=O)C(F)(F)F)cc1>>C=C(c1ccc(C)cc1)c1ccc(C)cc1  
 419 Brc1ccccc1.C=CN1CCCCCCC1=O>>C=C(c1ccccc1)N1CCCCCCC1=O  
 420 C=Cc1ccccc1.Cc1cc(C)c(OS(=O)(=O)C(F)(F)F)c(C)c1>>C=C(c1ccccc1)c1c(C)cc(C)cc1C  
 421 C=Cc1ccccc1.CC(=O)c1ccc(Br)cc1>>C=C(c1ccccc1)c1ccc(C(C)=O)cc1  
 422 C=CCNC(=O)OC(C)(C)C.N#Cc1ccccc1Br>>C=C(CNC(=O)OC(C)(C)C)c1ccccc1C#N  
 423 C=CCCCCCC.Cc1ccc(C)c(OS(=O)(=O)C(F)(F)F)c1>>C=C(CCCCCC)c1cc(C)ccc1C



424 C=COCCCC.COC(=O)c1cncc(Br)c1>>C=C(OCCCC)c1cncc(C(=O)OC)c1  
 425 C=CCCCCCC.COc1ccc(OS(=O)(=O)C(F)(F)F)cc1>>C=C(CCCCC)c1ccc(OC)cc1  
 426 C=CN1CCCC1=O.O=S(=O)(Oc1cc(F)ccc1Br)C(F)(F)F>>C=C(c1cc(F)ccc1Br)N1CCCC1=O  
 427 C=CN1CCCC1=O.Cc1ccc(OS(=O)(=O)C(F)(F)F)c(Br)c1>>C=C(c1ccc(C)cc1Br)N1CCCC1=O  
 428 C=COCCCC.CC(=O)c1ccc(Br)cc1>>C=C(OCCCC)c1ccc(C(C)=O)cc1  
 429 C=CCC(C)C.COc1cccc1CCL>>C=C(Cc1cccc1OC)CC(C)C  
 430 C=CCNC(=O)OC(C)(C)C.O=Cc1cccc(Br)c1>>C=C(CNC(=O)OC(C)(C)C)c1cccc(C=O)c1  
 431 C=COCCCC.O=S(=O)(Oc1ccc2ccccc2c1)C(F)(F)F>>C=C(OCCCC)c1ccc2ccccc2c1  
 432 C=Cc1cccc1.CC(C)(C)OC(=O)n1ccc2cc(OS(=O)(=O)C(F)(F)F)ccc21>>C=C(c1cccc1)c1ccc2c(ccn2  
 C(=O)OC(C)(C)C)c1  
 433 C=CCCCCCC.O=S(=O)(Oc1cccc2ccccc12)C(F)(F)F>>C=C(CCCCC)c1cccc2ccccc12  
 434 C=COCCCC.FC(F)(F)c1ccc(Cl)cc1>>C=C(OCCCC)c1ccc(C(F)(F)F)cc1  
 435 C=COC(CC)CCCC.COc1ccc(Br)cc1>>C=C(OC(CC)CCCC)c1ccc(OC)cc1  
 436 C=COCCCC.N#Cc1ccc(OS(=O)(=O)C(F)(F)F)cc1>>C=C(OCCCC)c1ccc(C#N)cc1  
 437 C=COCCCC.O=S(=O)(Oc1ccc(-c2ccccc2)cc1)C(F)(F)F>>C=C(OCCCC)c1ccc(-c2ccccc2)cc1  
 438 C=Cc1cccc1.COc1ccc(OS(=O)(=O)C(F)(F)F)cc1>>C=C(c1cccc1)c1ccc(OC)cc1  
 439 C=CCNC(=O)OC(C)(C)C.CC(=O)c1cccc(Cl)c1>>C=C(CNC(=O)OC(C)(C)C)c1cccc(C(C)=O)c1  
 440 C=Cc1cccc1.Cc1ccc(OS(=O)(=O)C(F)(F)F)cc1>>C=C(c1cccc1)c1ccc(C)cc1  
 441 C=CCO.CC(C)(C)c1cccc1OS(=O)(=O)C(F)(F)F>>C=C(CO)c1cccc1C(C)(C)C  
 442 C=CC(=O)OC.COc1ccc2cc(Br)ccc2c1>>C=C(C(=O)OC)c1ccc2cc(OC)ccc2c1  
 443 C=COCCCC.COc1cc(Br)cc(OC)c1>>C=C(OCCCC)c1cc(OC)cc(OC)c1  
 444 C=CCNC(=O)OC(C)(C)C.N#Cc1ccc(Cl)cc1>>C=C(CNC(=O)OC(C)(C)C)c1ccc(C#N)cc1  
 445 C=CCCCCCC.COc1ccc2cc(Br)ccc2c1>>C=C(CCCCC)c1ccc2cc(OC)ccc2c1  
 446 C=COCCCC.CC(=O)Nc1ccc(Cl)cc1>>C=C(OCCCC)c1ccc(NC(C)=O)cc1  
 447 C=CCCCCBr.ClCc1cccc(Oc2ccccc2)c1>>C=C(CCCCBBr)Cc1cccc(Oc2ccccc2)c1  
 448 C=CCO.O=C(c1cccc1)c1ccc(Br)cc1>>C=C(CO)c1ccc(C(=O)c2ccccc2)cc1  
 449 C=CN1CCCC1=O.Clc1ccc2c(c1)OCO2>>C=C(c1ccc2c(c1)OCO2)N1CCCC1=O  
 450 C=CNC(=O)NCCCC.O=S(=O)(Oc1ccc2ccccc2c1)C(F)(F)F>>C=C(NC(=O)NCCCC)c1ccc2ccccc2c1  
 451 C=COCCCC.Fc1ccc(Br)c(F)c1>>C=C(OCCCC)c1ccc(F)cc1F  
 452 C=CCNS(=O)(=O)c1cccc1.O=S(=O)(Oc1cccc1Cl)C(F)(F)F>>C=C(CNS(=O)(=O)c1cccc1)c1cccc  
 453 C=CCCCCCC.COc1cccc1CBr>>C=C(CCCCC)Cc1cccc1OC  
 454 C=CCCCCCC.O=S(=O)(Oc1cccc1Cl)C(F)(F)F>>C=C(CCCCC)c1cccc1Cl  
 455 C/C1=C/CC[C@](C)(O[Si](C)(C)C)(C)C)[C@H]2C=C(OS(=O)(=O)C(F)(F)F)[C@@H](C1)O2.C=  
 COCC>>C=C(OC)C1=C[C@H]2O[C@@H]1C/C(C)=C\CC[C@]2(C)O[Si](C)(C)C)(C)C  
 456 Brc1ccc2ccccc2c1.C=COCCCC>>C=C(OCCCC)c1ccc2ccccc2c1  
 457 Brc1cccc1.C=COCCOC=C>>C=COCCOC(=C)c1cccc1  
 458 C=COCCCC.Fc1cccc(Cl)c1>>C=C(OCCCC)c1cccc(F)c1  
 459 C=CCCCCCC.CCOC(=O)c1ccc(OS(=O)(=O)C(F)(F)F)cc1>>C=C(CCCCC)c1ccc(C(=O)OCC)cc1  
 460 C=CN1CCCC1=O.O=S(=O)(Oc1ccc2ccccc2c1Br)C(F)(F)F>>C=C(c1ccc2ccccc2c1Br)N1CCCC1=O  
 461 C=CNC(C)=O.O=S(=O)(Oc1ccc2ccccc2c1)C(F)(F)F>>C=C(NC(C)=O)c1ccc2ccccc2c1  
 462 C=COCCCC.CC(C)(C)C(=O)Oc1ccc(OS(=O)(=O)C(F)(F)F)cc1>>C=C(OCCCC)c1ccc(OC(=O)C(C)(  
 C)C)cc1  
 463 C=COCCCC.Cc1ccc(Br)c(C)n1>>C=C(OCCCC)c1ccc(C)nc1C  
 464 C=CCO.COC(=O)c1ccc(Br)cc1>>C=C(CO)c1ccc(C(=O)OC)cc1  
 465 C=Cc1cccc1.O=S(=O)(Oc1cccc(C(F)(F)F)c1)C(F)(F)F>>C=C(c1cccc1)c1cccc(C(F)(F)F)c1  
 466 C=COCCCC.O=C1CCCc2c(OS(=O)(=O)C(F)(F)F)ccc21>>C=C(OCCCC)c1cccc2c1CCCC2=O  
 467 C=COCCN(C)C.O=S(=O)(Oc1cccc2ccccc12)C(F)(F)F>>C=C(OCCN(C)C)c1cccc2ccccc12  
 468 Brc1cccc1.C=COC(CC)CCCC>>C=C(OC(CC)CCCC)c1cccc1  
 469 C=CCO.Cc1ccc(Br)cc1>>C=C(CO)c1ccc(C)cc1  
 470 C=CN1CCCC1=O.Fc1ccc(Br)cc1>>C=C(c1ccc(F)cc1)N1CCCC1=O  
 471 Brc1cncnc1.C=COCCCC>>C=C(OCCCC)c1cncnc1  
 472 C=CC(=O)Nc1cccc2ccnc12.Ic1ccc2c(c1)OCCO2>>O=C/C=C\c1ccc2c(c1)OCCO2)Nc1cccc2ccnc1  
 473 C=CC(C)=O.COC(=O)c1c([Si](C)(C)C)c(I)cn1S(=O)(=O)N(C)C>>COC(=O)c1c([Si](C)(C)C)c(/C=C\  
 C(C)=O)cn1S(=O)(=O)N(C)C  
 474 C=CC.O=C1CC(c2ccccc2)(c2ccccc2Br)C1>>C/C=C\c1cccc1C1(c2ccccc2)CC(=O)C1  
 475 C=Cc1cccc1.Fc1ccc(I)cc1>>Fc1ccc(/C=C\c2ccccc2)cc1  
 476 C=CC(=O)Nc1cccc2ccnc12.Fc1ccc(I)cc1>>O=C(/C=C\c1ccc(F)cc1)Nc1cccc2ccnc12  
 477 C=CC#N.O=P(c1cccc1)(c1cccc1)c1ccc(Br)cc1>>N#C/C=C\c1ccc(P(=O)(c2ccccc2)c2ccccc2)cc1

478 C=CC(=O)OCC.Cc1ccc(CC2CCC(=O)N(Cc3ccccc3)C2)c(Br)c1>>CCOC(=O)/C=C\c1cc(C)ccc1CC1  
CCC(=O)N(Cc2ccccc2)C1  
479 C=CCCCCCCCCCC.O=Cc1cc(Br)cc(C=O)c1O>>CCCCCCCCCCC/C=C\c1cc(C=O)c(O)c(C=O)c1  
480 Brc1cccn1.C=CC(=O)OCC>>CCOC(=O)/C=C\c1cccn1  
481 C=CC(=O)Nc1cccc2cccn12.Ic1ccccc1>>O=C(/C=C\c1ccccc1)Nc1cccc2cccn12  
C=CCC(O)c1ccc(-  
482 c2cc(OC)ncc2F)cn1.COC(=O)[C@@H](C)[C@H](c1ccc(I)c(O)c1)C1CC1>>COC(=O)[C@@H](C)[C  
@H](c1ccc(/C=C\CC(O)c2ccc(-c3cc(OC)ncc3F)cn2)c(O)c1)C1CC1  
483 C=CCNC(=O)c1cccn1.COc1ccc(I)cc1>>COc1ccc(/C=C\CNC(=O)c2cccn2)cc1  
484 C=CC(=O)OC.Ic1ccc(OCc2ccccc2)en1>>COC(=O)/C=C\c1ccc(OCc2ccccc2)en1  
485 C=CC1CC1.Nc1ccccc1Br>>Nc1ccccc1/C=C\C1CC1  
486 C=CC(=O)OC(C)(C)C.Ic1ccc(OCc2ccccc2)cn1>>CC(C)(C)OC(=O)/C=C\c1ccc(OCc2ccccc2)cn1  
487 C=CC(=O)OCC.COc1nc(C)c(Br)c1>>CCOC(=O)/C=C\c1cc(OC)cn1C  
488 C=CCOC1CCCCO1.O=CNc1ccccc1I>>O=CNc1ccccc1/C=C\COC1CCCCO1  
489 C=CC(=O)OC.CC1CC(n2c(Nc3ccc(OC(F)(F)F)cc3)nc3cc(Br)ccc32)CC(C)(C)C1>>COC(=O)/C=C\c1  
ccc2c(c1)nc(Nc1ccc(OC(F)(F)F)cc1)n2C1CC(C)CC(C)(C)C1  
490 C=CC(=O)Nc1cccc2cccn12.Cc1cc(C)cc(I)c1>>Cc1cc(C)cc(/C=C\C(=O)Nc2ccccc3cccn23)c1  
C=CCC(O)c1nc(-  
491 c2cc(OC)ncc2F)cn1.COC(=O)[C@@H](C)[C@H](c1ccc(I)c(O)c1)C1CC1>>COC(=O)[C@@H](C)[C  
@H](c1ccc(/C=C\CC(O)c2ccc(-c3cc(OC)ncc3F)cn2)c(O)c1)C1CC1  
492 C=CC(=O)OCC.COc1cc(Br)c(CC2CCC(=O)N(Cc3ccccc3)C2)cc1OC>>CCOC(=O)/C=C\c1cc(OC)c(  
OC)cc1CC1CCC(=O)N(Cc2ccccc2)C1  
C=CCC(O)c1ccc(-  
493 c2ccnc(OC)c2)cc1F.COC(=O)[C@@H](C)[C@H](c1ccc(I)c(O)c1)C1CC1>>COC(=O)[C@@H](C)[C  
@H](c1ccc(/C=C\CC(O)c2ccc(-c3ccnc(OC)c3)cc2F)c(O)c1)C1CC1  
494 C=Cc1cccn1.CC(C)(C)OC(=O)N[C@H](COc1ccccc1Br)Cc1ccccc1>>CC(C)(C)OC(=O)N[C@H](C  
Oc1ccccc1/C=C\c1cccn1)Cc1ccccc1  
495 C=Cc1ccccc2ccccc12.CC(C)c1ccc(Br)cc1>>CC(C)c1ccc(/C=C\c2ccccc3ccccc23)cc1  
496 C=CC(=O)OCC.Oc1c(F)cc(Br)cc1F>>CCOC(=O)/C=C\c1cc(F)c(O)c(F)c1  
497 C=CC(=O)OCC.O=C1CCC(Cc2ccccc2Br)CN1Cc1ccccc1>>CCOC(=O)/C=C\c1ccccc1CC1CCC(=O)  
N(Cc2ccccc2)C1  
498 C=CC(=O)OC.Cc1cc(N[C@H]2C[C@@H](C)CC(C)(C)C2)c([N+](=O)[O-  
)cc1Br>>COC(=O)/C=C\c1cc([N+](=O)[O-])c(N[C@H]2C[C@@H](C)CC(C)(C)C2)cc1C  
499 C=CC(=O)Nc1cccc2cccn12.CC(C)c1ccc(I)cc1>>CC(C)c1ccc(/C=C\C(=O)Nc2ccccc3cccn23)cc1  
500 C=CC(C)(C)C.COc1nc(Br)ccc1C1CC1>>COc1nc(/C=C\C(C)(C)C)ccc1C1CC1  
501 C=CC(=O)Nc1cccc2cccn12.Cc1ccc(I)cc1C>>Cc1ccc(/C=C\C(=O)Nc2ccccc3cccn23)cc1C  
502 C=CC(=O)OCC.COc1ccc(Br)c(CC2CCC(=O)N(Cc3ccccc3)C2)c1>>CCOC(=O)/C=C\c1ccc(OC)cc1C  
C1CCC(=O)N(Cc2ccccc2)C1  
C=CCC(O)c1ccc(-  
503 c2cc(OC)ncc2F)cc1.COC(=O)[C@@H](C)[C@H](c1ccc(I)c(O)c1)C1CC1>>COC(=O)[C@@H](C)[C  
@H](c1ccc(/C=C\CC(O)c2ccc(-c3cc(OC)ncc3F)cc2)c(O)c1)C1CC1  
504 C=Cc1ccccc1.CN1C[C@H]2C[C@H](Cn3c2ccc(Br)c3=O)C1=O>>CN1C[C@H]2C[C@H](Cn3c2ccc(  
/C=C\c2ccccc2)c3=O)C1=O  
505 C=CC(=O)OCC.OCc1ccc(Br)cc1>>CCOC(=O)/C=C\c1ccc(CO)cc1  
506 Brc1ccc(I)nc1.C=CCNC(=O)c1cccn1>>O=C(NC/C=C\c1ccc(Br)cn1)c1cccn1  
507 C=Cc1ccccc1.O=Cc1ccc(Br)cc1>>O=Cc1ccc(/C=C\c2ccccc2)cc1  
508 C=CC(=O)N(C)Cc1cccc(OC)c1OCCC.CC(C)(C)OC(=O)N1CCNc2ncc(Br)cc2C1>>CCCOc1c(CN(C)  
C(=O)/C=C/c2enc3c(c2)CN(C(=O)OC(C)(C)CCN3)ccccc1OC  
509 C=CC(=O)OC(C)(C)C.Ic1ccc2ccccc2c1>>CC(C)(C)OC(=O)/C=C/c1ccc2ccccc2c1  
510 C=CCn1cccc1C(=O)O.CC(C)(C)OC(=O)COc1ccccc(I)c1>>CC(C)(C)OC(=O)COc1ccccc(/C=C/Cn2ccccc  
2C(=O)O)c1  
C=CCO[C@@H]1CC(=O)O[C@H](C)C/C=C/C=C/[C@H](O[Si](C)(C)C(C)(C)C)[C@H](C)C[C@H]  
(CC(OC)OC)[C@H](O[C@@H]2O[C@H](C)[C@@H](O[C@H]3C[C@@](C)(O)[C@@H](OC(=O)  
CC)[C@H](C)O3)[C@H](N(C)C)[C@H]2OC(C)=O)[C@H]1OC.Ic1ccccc1>>CCC(=O)O[C@H]1[C  
@H](C)O[C@@H](O[C@H]2[C@H](N(C)C)[C@@H](OC(C)=O)[C@H](O[C@@H]3[C@@H](OC)  
[C@H](OC/C=C/c4ccccc4)CC(=O)O[C@H](C)C/C=C/C=C/[C@H](O[Si](C)(C)C(C)(C)C)[C@H](C)  
C[C@@H]3CC(OC)OC)O[C@@H]2C)C[C@@H]1(C)O  
C=Cc1ccc([N+](=O)[O-  
511 ]cc1.COC(=O)c1cc2cc(Br)ccc2cc1OC(C)=O>>COC(=O)c1cc2cc(/C=C/c3ccc([N+](=O)[O-  
])cc3)ccc2cc1OC(C)=O

513 C=CC(=O)N1N=Cc2ccccc2C1C(C)C.COc1cc(Cc2cnc(N)nc2N)cc(I)c1OC>>COc1cc(Cc2cnc(N)nc2N)  
 cc(/C=C/C(=O)N2N=Cc3ccccc3C2C(C)C)c1OC  
 514 C=Cc1ccccc1.CCOC(=O)Cc1ccc(Br)cc1>>CCOC(=O)Cc1ccc(/C=C/c2ccccc2)cc1  
 515 C=CC(=O)OC.O=C(O)Cc1ccc(Br)cc1>>COC(=O)/C=C/c1ccc(CC(=O)O)cc1  
 516 C=CC(=O)OCC.Cc1nnc(Cc2cc(Cl)ccc2Br)o1>>CCOC(=O)/C=C/c1ccc(Cl)cc1Cc1nnc(C)o1  
 517 C=CC(=O)OCCCC.CC(=O)c1ccc(I)cc1>>CCCCOC(=O)/C=C/c1ccc(C(C)=O)cc1  
 518 C=CC(=O)OC(C)(C)C.O=C1c2ccc(Br)cc2CCN1c1cc(F)ccc1Cl>>CC(C)(C)OC(=O)/C=C/c1ccc2c(c1)  
 CCN(c1cc(F)ccc1Cl)C2=O  
 519 C=CC(=O)OC.COc1ccc2c(=O)c(I)ccc2c1>>COC(=O)/C=C/c1ccc2cc(OC)ccc2c1=O  
 520 C=CC(=O)N(CC)CC.Cn1nc(Br)c2ccccc21>>CCN(CC)C(=O)/C=C/c1nn(C)c2ccccc12  
 521 C=Cc1ccc(OC)c(OC)c1.O=C(Nc1ccccc1I)c1cccc2ccccc12>>COc1ccc(/C=C/c2ccccc2NC(=O)c2ccccc3  
 cccccc23)cc1OC  
 522 C=CC(=O)N1CCOCC1.O=Cc1ccccc1Br>>O=Cc1ccccc1/C=C/C(=O)N1CCOCC1  
 523 C=CC(=O)OC.O=C1c2ccc(OS(=O)(=O)C(F)F)cc2C(=O)N1CC(c1ccccc1)c1ccccc1>>COC(=O)/C=  
 C/c1ccc2c(c1)C(=O)N(CC(c1ccccc1)c1ccccc1)C2=O  
 524 C=CC(C)(C)O.Nc1cc(Br)ccc1C(=O)O>>CC(C)(O)/C=C/c1ccc(C(=O)O)c(N)c1  
 C=Cc1ccccc1C(F)(F)F.CCS(=O)(=O)c1ccc(Cl)nc1-  
 525 c1nc2cc(C(F)(F)F)nc2n1C>>CCS(=O)(=O)c1ccc(/C=C/c2ccccc2C(F)(F)F)nc1-  
 c1nc2cc(C(F)(F)F)nc2n1C  
 526 Br1ccccc1.C=Cc1nnn(-c2ccccc2)n1>>C(=C/c1nnn(-c2ccccc2)n1)\c1ccccc1  
 527 C=CC(N)=O.Fc1ccc(I)c(Cl)c1>>NC(=O)/C=C/c1ccc(F)cc1Cl  
 528 C=CCCCCCC.CC(=O)c1ccc(Cl)cc1>>CCCCC/C=C/c1ccc(C(C)=O)cc1  
 529 C=Cc1ccc(N(C)C)cc1.FC(F)(F)c1ccccc1I>>CN(C)c1ccc(/C=C/c2ccccc2C(F)(F)F)cc1  
 530 C=Cc1ccc(C(=O)OCC)cc1.CC1(C)CC=C(Sc2ccccc2)c2cc(Br)ccc21>>CCOC(=O)c1ccc(/C=C/c2ccc3c  
 (c2)C(Sc2ccccc2)=CCC3(C)C)cc1  
 531 C=CC(O)C(F)(F)C(=O)OCC.Ic1ccccc1>>CCOC(=O)C(F)(F)C(O)/C=C/c1ccccc1  
 532 Br1ccc2ccc3cccc4ccc1c2c34.C=CC(=O)OC>>COC(=O)/C=C/c1ccc2ccc3cccc4ccc1c2c34  
 533 C=CC(=O)OCC.Cc1cc2c(cc1C(F)(F)F)NC(=O)CC(c1cccc(Br)c1)=N2>>CCOC(=O)/C=C/c1cccc(C2=  
 Nc3cc(C)c(C(F)(F)F)cc3NC(=O)C2)c1  
 534 Br1ccccc1.C=Cc1ccc(Cl)cc1>>Clc1ccc(/C=C/c2ccccc2)cc1  
 535 Br1ccccc1.C=CCS(N)(=O)=O>>NS(=O)(=O)C/C=C/c1ccccc1  
 536 C=CC(=O)OC(C)(C)C.O=[N+](=[O-])c1ccc(Cl)c([N+](=O)[O-]  
 ])c1>>CC(C)(C)OC(=O)/C=C/c1ccc([N+](=O)[O-])cc1[N+](=O)[O-]  
 537 C=CC(=O)OC.CC(=O)Oc1ccccc1Br>>COC(=O)/C=C/c1ccccc1OC(C)=O  
 538 Br1ccc2ccc3cccc4ccc1c2c34.C=CC(=O)OCC(F)(F)F>>O=C(/C=C/c1ccc2ccc3cccc4ccc1c2c34)OCC(  
 F)(F)F  
 539 C=CC(=O)N(C)OC.COc1ccccc1I>>COc1ccccc1/C=C/C(=O)N(C)OC  
 540 C=CC(=O)O.COC(=O)c1cc2c(cc1Br)OCO2>>COC(=O)c1cc2c(cc1/C=C/C(=O)O)OCO2  
 541 C=CC(=O)OCCCC.O=C(O)c1ccc(Br)cc1>>CCCCOC(=O)/C=C/c1ccc(C(=O)O)cc1  
 542 C=CC(C)(C)O.CN(C)C(=O)c1cccc2nc3c(Br)cccc3nc12>>CN(C)C(=O)c1cccc2nc3c(/C=C/C(C)(C)O)c  
 ccc3nc12  
 543 Br1ccc2[nH]c3ncccc3c2c1.C=CC(=O)N(C)Cc1cc2ccccc2n1C>>CN(Cc1cc2ccccc2n1C)C(=O)/C=C/c  
 1ccc2[nH]c3ncccc3c2c1  
 544 C=Cc1ccnc(F)c1.CC(C)(C)OC(=O)N[C@H](COc1cnc(Br)c1)Cc1c[nH]c2ccccc12>>CC(C)(C)OC(=O  
 )N[C@H](COc1cnc(/C=C/c2ccnc(F)c2)c1)Cc1c[nH]c2ccccc12  
 545 C=CC#N.O=[N+](=[O-])c1ccc(I)cc1>>N#C/C=C/c1ccc([N+](=O)[O-])cc1  
 546 Br1ccccc1NCc1ccccc1.C=CC(=O)OC>>COC(=O)/C=C/c1ccccc1NCc1ccccc1  
 547 C=CC#N.CC(=O)Nc1ccccc1I>>CC(=O)Nc1ccccc1/C=C/C#N  
 548 C=CCN1C(=O)c2ccccc2C1=O.FC(F)(F)c1cc(Br)cc(C(F)(F)F)c1>>O=C1c2ccccc2C(=O)N1C/C=C/c1c  
 c(C(F)(F)F)cc(C(F)(F)F)c1  
 549 Br1ccc2ccccc2c1.C=Cc1ccccc1>>C(=C/c1ccc2ccccc2c1)\c1ccccc1  
 550 C=CC(=O)OC(C)(C)C.CC(C)=CCc1cc(I)cc(CC=C(C)C)c1O>>CC(C)=CCc1cc(/C=C/C(=O)OC(C)(C)  
 C)cc(CC=C(C)C)c1O  
 551 C=CC(=O)OC.CC(O)(CSc1ccccc2c(Br)cccc12)C(=O)Nc1ccc(C#N)c(C(F)(F)F)c1>>COC(=O)/C=C/c1c  
 ccc2c(SCC(C)(O)C(=O)Nc3ccc(C#N)c(C(F)(F)F)c3)cccc12  
 552 C=CC(=O)N(C)C.C[C@H]1C[C@H](n2c(Nc3ccc(OC(F)(F)F)cc3)nc3cc(Br)ccc32)CC(C)(C)C1>>C  
 [C@H]1C[C@H](n2c(Nc3ccc(OC(F)(F)F)cc3)nc3cc(/C=C/C(=O)N(C)C)ccc32)CC(C)(C)C1  
 553 C=CCOc1ccccc1.Clc1ccc(Br)cc1>>Clc1ccc(/C=C/COc2ccccc2)cc1  
 554 C=CC(=O)OC.CCc1nc2ccnc2n1Cc1ccc(Br)cc1>>CCc1nc2ccnc2n1Cc1ccc(/C=C/C(=O)OC)cc1  
 555 C=CC(=O)OC.COc1ccc2c(c1)CCN(c1ccc(CC(C)C)cc1)C2(C)c1ccc(Br)cc1>>COC(=O)/C=C/c1ccc(C  
 2(C)c3ccc(OC)cc3CCN2c2ccc(CC(C)C)cc2)cc1

556 C=C[Si](C)(C)c1cccc1.CC(=O)c1ccc(Br)cc1>>CC(=O)c1ccc(/C=C/[Si](C)(C)c2cccc2)cc1  
557 Br1enc2cccc2c1.C=Cc1ccc2c(c1)c1cccc1n2CCCCC>>CCCCCn1c2cccc2c2cc(/C=C/c3cnc4ccc  
558 C=CC(=O)OCC.O=[N+][O-]c1cccc(Br)c1>>CCOC(=O)/C=C/c1cccc([N+](=O)[O-])c1  
559 C=C/C=C/CCCCC.CC(=O)c1ccc(I)cc1>>CCCCC/C=C/C=C/c1ccc(C(C)=O)cc1  
560 C=C[C@](C)(C)(/C=C/c1ccc(O)cc1)CCC=C(C)C.COc1cccc1I>>COc1cccc1/C=C/[C@](C)(C)(/C=C/c  
561 1ccc(O)cc1)CCC=C(C)C  
562 C=Cc1ccc(/C=C/c2ccc(N(C)C)cc2OC)cc1.O=c1cc2oc3cc(O)c(F)cc3c(-c3ccc(I)cc3S(=O)(=O)O)c-  
563 2cc1F>>COc1cc(N(C)C)ccc1/C=C/c1ccc(/C=C/c2ccc(-c3c4cc(F)c(=O)cc-  
564 4oc4cc(O)c(F)cc34)c(S(=O)(=O)O)c2)cc1  
565 C=CC(=O)OCc1cccc1.COC(=O)c1cc2c(Br)c(OC)ccc2[nH]1>>COC(=O)c1cc2c(/C=C/C(=O)OCc3cc  
566 ccc3)c(OC)ccc2[nH]1  
567 C=C[Si](C)(C)c1cccc1.CC(=O)c1ccc(/C=C/c2ccc(Br)cc2)cc1>>CC(=O)c1ccc(/C=C/c2ccc(/C=C/[Si](  
568 C)(C)c3cccc3)cc2)cc1  
569 BrC1=CCCC2(C1)OCCO2.C=CC(=O)OC>>COC(=O)/C=C/C1=CCCC2(C1)OCCO2  
570 C=CC(=O)OC.Fc1ccc(Cl)cc1>>COC(=O)/C=C/c1ccc(F)cc1  
571 C=Cc1cccc1.COC(=O)c1cc(C(=O)OC)c2c(Br)cccc2n1>>COC(=O)c1cc(C(=O)OC)c2c(/C=C/c3cccc  
572 3)cccc2n1  
573 C=CCCN1C(=O)c2cccc2C1=O.Clc1ccc(I)c1>>O=C1c2cccc2C(=O)N1CC/C=C/c1ccc(Cl)c1  
574 Br1cccs1.C=CC(F)(F)F>>FC(F)(F)/C=C/c1cccs1  
575 C=CC(=O)OCCCC.COc1ccc(Br)c(NC(=O)C(C)(C)C)n1>>CCCCOC(=O)/C=C/c1ccc(OC)nc1NC(=O)  
576 C(C)(C)C  
577 C=CC(=O)OCC.CCc1nc2cc(OC)ccc2c(Oc2ccc(Br)cc2)c1-c1cccc1>>CCOC(=O)/C=C/c1ccc(Oc2c(-  
578 c3cccc3)c(CC)nc3cc(OC)ccc23)cc1  
579 C=Cc1cccc1.Clc1ccc(/C=C/c2cccc2)cc1>>C(=C/c1ccc(/C=C/c2cccc2)cc1)\c1cccc1  
580 C=Cc1cccc1OC.COc1ccc(I)c(OC)c1>>COc1ccc(/C=C/c2cccc2OC)c(OC)c1  
581 Br1cccs1.C=CC(=O)OCC>>CCOC(=O)/C=C/c1cccs1  
582 C=Cc1ccccc1.CCOC(=O)c1[nH]c(C(C)(C)C)nc1I>>CCOC(=O)c1[nH]c(C(C)(C)C)nc1/C=C/c1ccccc1  
583 C=CC(=O)O.O=[N+][O-]c1ccc(Br)cc1>>O=C(O)/C=C/c1ccc([N+](=O)[O-])cc1  
584 C=CC(=O)OC.CC(C)c1cccc(OS(=O)(=O)C(F)(F)F)c1>>COC(=O)/C=C/c1cccc(C(C)C)c1  
585 C=C[C@H](CCCCCCCC)CC(OC)OC.Clc1ccc(I)cc1>>CCCCCCCC[C@H](/C=C/c1ccc(Cl)cc1)CC(  
586 OC)OC  
587 C=CCC#N.CC(C)CCC[C@H](C)[C@H]1CC[C@H]2C(OS(=O)(=O)C(F)(F)F)=CCC[C@H]21C>>  
588 CC(C)CCC[C@H](C)[C@H]1CC[C@H]2C(/C=C/CC#N)=CCC[C@H]21C  
589 C=CC(=O)OC.Cc1cn2ccc(Br)cc2n1>>COC(=O)/C=C/c1cn2cc(C)nc2c1  
590 Br1ccc(-c2cccs2)s1.C=Cc1ccc(C=O)cc1>>O=Cc1ccc(/C=C/c2ccc(-c3cccs3)s2)cc1  
591 C=CC#N.CSc1nc(N)nc(-c2ccco2)c1I>>CSc1nc(N)nc(-c2ccco2)c1/C=C/C#N  
592 C=C[C@H](O[Si](C)(C)C(C)(C)C)[C@H](CCCC(=O)OC)O[Si](C)(C)C(C)(C)C.CCCCCC(=O)c1cc  
593 ccc1Br>>CCCCCC(=O)c1cccc1/C=C/[C@H](O[Si](C)(C)C(C)(C)C)[C@H](CCCC(=O)OC)O[Si](  
594 C)(C)C(C)C  
595 Br1cn(C2CCCCC2)c(-  
596 c2ccc(OCc3cccc3)cc2)n1.C=CC(=O)OC(C)(C)C>>CC(C)(C)OC(=O)/C=C/c1cn(C2CCCCC2)c(-  
597 c2ccc(OCc3cccc3)cc2)n1  
598 C=CCOc1cccc1.Ic1cccc1>>C(=C/c1cccc1)\COc1cccc1  
599 C=CC(=O)OC(C)(C)C.O=C(c1ccc(I)cc1)c1ccccc1Cl>>CC(C)(C)OC(=O)/C=C/c1ccc(C(=O)c2ccccc2  
600 Cl)cc1  
601 C=CC(=O)OCC.COnc1c(=O)c2cccc2c2cc(Br)ccc21>>CCOC(=O)/C=C/c1ccc2c(c1)c1cccc1c(=O)n2  
602 C=Cc1cc(O[Si](C)(C)C(C)(C)C)cc(O[Si](C)(C)C(C)(C)C)c1.CC(=O)Oc1ccc(I)cc1>>CC(=O)Oc1ccc(/  
603 C=C/c2cc(O[Si](C)(C)C(C)(C)C)cc(O[Si](C)(C)C(C)(C)C)c2)cc1  
604 C=CC(=O)OCCN(CC)CC.O=C(Nc1cccc1)c1cc(=O)c2cc(Br)ccc2o1>>CCN(CC)CCOC(=O)/C=C/c1c  
605 cc2oc(C(=O)Nc3cccc3)cc(=O)c2c1  
606 C=Cc1cccc1.COC(=O)c1ccc(Br)cc1>>COC(=O)c1ccc(/C=C/c2cccc2)cc1  
607 C=CCC(C)N(C)C(=O)OC(C)(C)C.Cc1cc(Br)cn1N>>Cc1cc(/C=C/CC(C)N(C)C(=O)OC(C)(C)C)cn1  
608 C=Cc1ccc2c(cnn2C2CCCCO2)c1.Clc1ccccc1>>C(=C/c1ccc2c(cnn2C2CCCCO2)c1)\c1ccccc1  
609 C=CC(=O)O.C[C@]12C[C@@]34C=C(Sc5cccc(I)c5)C(=O)[C@](C)(C)(CCC(=O)Nc5c(O)ccc(C(=O)  
610 O)c5O)[C@H]3[C@H](C)[C@H]1C4)O2>>C[C@]12C[C@@]34C=C(Sc5cccc(/C=C/C(=O)O)c5)  
611 C(=O)[C@](C)(C)(CCC(=O)Nc5c(O)ccc(C(=O)O)c5O)[C@H]3[C@H](C)[C@H]1C4)O2  
612 C=CN1C(=O)c2cccc2C1=O.COC(=O)Cc1ccc(Br)cc1>>COC(=O)Cc1ccc(/C=C/N2C(=O)c3cccc3C2  
613 =O)cc1  
614 C=CC(=O)OC.O=C1Nc2cccc(I)c2/C1=C/c1ccc[nH]1>>COC(=O)/C=C/c1cccc2c1/C(=C/c1ccc[nH]1)C  
615 (=O)N2

595 C=CC(=O)N(C)Cc1cc2ccccc2n1C.CN(C)c1n[nH]c2ncc(Br)cc12>>CN(Cc1cc2ccccc2n1C)C(=O)/C=C/  
c1cnc2[nH]nc(N(C)C)c2c1  
596 Br1ccc2ccc3cccc4ccc1c2c34.C=CC(=O)OC(C)(C)C>>CC(C)(C)OC(=O)/C=C/c1ccc2ccc3cccc4ccc1c  
2c34  
597 C=CC(C)=O.Cn1c(=O)oc2cc(Br)cnc21>>CC(=O)/C=C/c1cnc2c(c1)oc(=O)n2C  
Br1cnc2ccccc2c1.C=CCO[C@@]1(C)C[C@@H](C)C(=O)[C@H](C)[C@@H](O)[C@](C)(O)[C@  
598 @H](CC)OC(=O)[C@H](C)C(=O)[C@H](C)[C@H]1O[C@@H]1O[C@H](C)C[C@H](NC)[C@H]1  
O>>CC[C@H]1OC(=O)[C@H](C)C(=O)[C@H](C)[C@@H](O[C@@H]2O[C@H](C)C[C@H](NC)[  
C@H]2O)[C@@](C)(OC/C=C/c2cnc3ccccc3c2)C[C@@H](C)C(=O)[C@H](C)[C@@H](O)[C@]11(C  
599 C=CC(=O)OC.Cc1cc(C)c(I)c(C)c1>>COC(=O)/C=C/c1c(C)cc(C)cc1C  
C=Cc1ccncc1.COc1ccc(C)c(Nc2c(C#N)cnc3cc(Br)ccc23)c1>>COc1ccc(C)c(Nc2c(C#N)cnc3cc(C=C/  
600 c4ccncc4)ccc23)c1  
601 C=Cc1ccc(OC)cc1.IC1CCCCC1>>COc1ccc(C=C/C2CCCCC2)cc1  
602 C=CSCC.Ic1ccccc1>>CCS/C=C/c1ccccc1  
603 C=Cc1ccccc1.O=C(/C=C/c1ccccc1)c1ccc(I)cc1>>O=C(/C=C/c1ccccc1)c1ccc(C=C/c2ccccc2)cc1  
604 C=Cc1ccccc1.COc1ccc(C=O)c(Br)c1>>COc1ccc(C=O)c(/C=C/c2ccccc2)c1  
605 C=CC(=O)OC(C)(C)C.COC(=O)c1cc(C)c(OS(=O)(=O)C(F)(F)F)c(C)c1>>COC(=O)c1cc(C)c(/C=C/C  
(=O)OC(C)(C)C)c1  
C=CC(=O)OCCCC.O=C(Cc1c(-  
606 c2ccccc(Br)c2)c2cc(CN3CCN(c4ccccc4)CC3)c(Cl)cc2oc1=O)Nc1ccc(F)cc1C(F)(F)F>>CCCCOC(=O)/  
C=C/c1ccccc1-c2c(CC(=O)Nc3ccc(F)cc3C(F)(F)F)c(=O)oc3cc(Cl)c(CN4CCN(c5ccccc5)CC4)cc23)c1  
607 C=Cc1ccccc1.COC(=O)Cn1c(=O)c(Cl)nc2ccnc21>>COC(=O)Cn1c(=O)c(/C=C/c2ccccc2)nc2ccnc21  
608 C=Cc1ccncc1.O=[N+][O-]c1ccc(N(c2ccc(Br)cc2)c2ccc([N+](=O)[O-])cc2)cc1>>O=[N+][O-]  
c1ccc(N(c2ccc(C=C/c3ccncc3)cc2)c2ccc([N+](=O)[O-])cc2)cc1  
609 Br1cncnc1.C=CC[C@H]1C(=O)N(c2ccccc2)[C@@H]1c1ccc(OC)cc1>>COc1ccc([C@@H]2[C@@  
H](C/C=C/c3cncnc3)C(=O)N2c2ccccc2)cc1  
610 C=CC(=O)OC(C)(C)C.COc1c2occc2c(Br)c2ccc(=O)oc12>>COc1c2occc2c(C=C/C(=O)OC(C)(C)C)c  
2ccc(=O)oc12  
611 C=CC(=O)OCC.CC(=O)c1ccc(Cl)cc1>>CCOC(=O)/C=C/c1ccc(C(C)=O)cc1  
612 C=CC(=O)OCC.Cc1nc(C)c(I)c(N)n1>>CCOC(=O)/C=C/c1c(C)nc(C)nc1N  
613 C=CC(=O)OC.CC(C)(C)OC(=O)N1CCC[C@H]1c1ccc(Br)cc1>>COC(=O)/C=C/c1ccc([C@@H]2CC  
CN2C(=O)OC(C)(C)C)cc1  
614 C=CCCN1C(=O)c2ccccc2C1=O.FC(F)(F)c1ccc(I)cc1>>O=C1c2ccccc2C(=O)N1CC/C=C/c1ccc(C(F)(  
F)F)cc1  
615 C=CCCCCCCC.OCc1ccccc1Br>>CCCCCC/C=C/c1ccccc1CO  
616 C=Cc1ccccc1C.O=Cc1ccccc1Br>>Cc1ccccc1/C=C/c1ccccc1C=O  
617 C=CC(N)=O.O=[N+][O-]c1ccc(Br)c1>>NC(=O)/C=C/c1ccc([N+](=O)[O-])c1  
618 C=CC(=O)OCc1ccccc1.Oc1ccc(Br)c(Cl)c1>>O=C(/C=C/c1ccc(O)cc1Cl)OCc1ccccc1  
619 C=Cc1ccc(N(c2ccc(OC)cc2)c2ccc(OC)cc2)cc1.CC(C)(C)c1ccc(C=C/c2ccc(C=C/c3ccc(Br)cc3)cc2)cc  
1>>COc1ccc(N(c2ccc(C=C/c3ccc(C=C/c4ccc(C=C/c5ccc(C(C)(C)C)cc5)cc4)cc3)cc2)c2ccc(OC)cc2)  
620 C=CC(=O)OCC.FC(F)(F)c1ccccc(Br)c1>>CCOC(=O)/C=C/c1ccccc(C(F)(F)F)c1  
621 C=CC(C)=O.Clc1ccccc1>>CC(=O)/C=C/c1ccccc1  
622 C=CC=O.COC(=O)C1=Ne2cc(I)ccc2OC12CC2>>COC(=O)C1=Ne2cc(C=C/C=O)ccc2OC12CC2  
623 Br1cccs1.C=Cc1ccncc1>>C(C=C/c1cccs1)\c1ccncc1  
624 C=CC(=O)OCC.Cn1c(Br)ccccc1=O>>CCOC(=O)/C=C/c1ccccc(=O)n1C  
625 C=CCCC.COC(=O)c1ccc2cc(Br)ccc2c1>>CCC/C=C/c1ccc2cc(C(=O)OC)ccc2c1  
626 C=CC(=O)OC.O=CC1=C(Br)CCCC1>>COC(=O)/C=C/C1=C(C=O)CCCC1  
627 C=CC(=O)N1N=Cc2ccccc2C1CCC.CCCc1nc(N)nc(N)c1Cc1cc(I)c(OC)c(OC)c1>>CCc1nc(N)nc(N)  
c1Cc1cc(C=C/C(=O)N2N=Cc3ccccc3C2CCC)c(OC)c(OC)c1  
628 C=CC(OC)OC.O=[N+][O-]c1ccccc1I>>COC(/C=C/c1ccccc1[N+](=O)[O-])OC  
629 C=CC(=O)O.CC(C)(C)c1cc(I)c2c(c1)OCCOCCOCCOCCO2>>CC(C)(C)c1cc(C=C/C(=O)O)c2c(c1)  
OCCOCCOCCOCCO2  
630 C=CC(=O)OC.Cc1cc(C(=O)c2ccc3c(c2)C(C)(C)CCC3(C)C)ccc1Br>>COC(=O)/C=C/c1ccc(C(=O)c2c  
cc3c(c2)C(C)(C)CCC3(C)C)cc1C  
631 C=[Si](C)(C)C.COc1cc(CO[Si](C)(C)C)c(I)c(OC)c1OC>>COc1cc(CO[Si](C)(C)C)c(/C=C/[Si](C)(C)  
)C)c(OC)c1OC  
632 C=CC(=O)OC(C)(C)C.O=C1Nc2ncc(Br)cc2CN2CCC[C@@H]12>>CC(C)(C)OC(=O)/C=C/c1cnc2c(c  
1)CN1CCC[C@H]1C(=O)N2  
633 C=CC(=O)OCc1ccccc1.CCn1nnc2c(F)c(Br)ccc21>>CCn1nnc2c(F)c(/C=C/C(=O)OCc3ccccc3)ccc21

C=CC(=O)OC(F)(F)C(F)(F)C(F)(F)C(F)(F)C(F)(F)C(F)(F)C(F)(F)C[F@H]12C  
[C@@]34C=C(Sc5ccc(I)cc5)C(=O)[C@@](C)(CCC(=O)Nc5c(O)ccc(C(=O)O)c5O)[C@@H]3[C@H]  
634 (C[C@@H]1C4)O2>>C[C@]12C[C@@]34C=C(Sc5ccc(/C=C/C(=O)OC(F)(F)C(F)(F)C(F)(F)C(F)(F)  
C(F)(F)C(F)(F)C(F)(F)C(F)(F)C(F)(F)C(F)(F)Cc5)C(=O)[C@@](C)(CCC(=O)Nc5c(O)ccc(C(=O)O)  
c5O)f(C@@H13IC@@H1(ClC@@H11C4)O2  
635 C=Cc1cccc2cccc2c1.N#Cc1ccc(I)cc1>>N#Cc1ccc(/C=C/c2ccc3cccc3c2)cc1  
C=CC(=O)OC.Fc1cc(Br)ccc1CN1CCCC(c2c(-  
636 c3cccc3)[nH]c3cccc23)Cl>>COC(=O)/C=C/c1ccc(CN2CCCC(c3c(-  
637 C=Cc1cccc1.Ce1nc(C(C)C)ncc1I>>Ce1nc(C(C)C)ncc1/C=C/c1cccc1  
C=Cc1cccc2cccc12.O=P1(c2cccc2)C(Br)=Ce2cccc21>>O=P1(c2cccc2)C(/C=C/c2cccc3cccc23)=  
638 Ce2cccc21  
Brclccenc1.C=C/C=C/C(=O)N(CCCC)CCCC>>CCCCN(CCCC)C(=O)/C=C/C=C/c1cccnec1  
639 C=Cc1ccnec1.Ic1ccc2c(c1)OCO2>>C=(C/c1ccc2c(c1)OCO2)\c1ccnec1  
C=CC(=O)OC.CC(=O)OC[C@H]1O[C@@H](Oc2ccc(I)cc2)[C@H](OC(C)=O)[C@@H](OC(C)=O)[  
641 C@@H]1OC(C)=O>>COC(=O)/C=C/c1ccc(O[C@@H]2O[C@H](COC(C)=O)[C@@H](OC(C)=O)[  
C@H](OC(C)=O)[C@H]2OC(C)=O)cc1  
642 C=CC(N)=O.CCN1c2ncc(I)cc2C(=O)N(C)c2cccnec21>>CCN1c2ncc(/C=C/C(N)=O)cc2C(=O)N(C)c2c  
ccnec21  
643 C=CC(=O)OCCCC.CSc1ccc(I)cc1>>CCCCOC(=O)/C=C/c1ccc(SC)cc1  
C=CC(=O)OCCCC.COc1ccc2cc(Br)ccc2c1-  
644 clc(P(=O)(c2cccc2)c2cccc2)ccc2cccc12>>CCCCOC(=O)/C=C/c1ccc2c(-  
c3c(P(=O)(c4cccc4)c4cccc4)ccc4cccc34)c(OC)ccc2c1  
645 C=CC(=O)OC.Cc1cc2c(c(C)c1Br)C(=O)CC2>>COC(=O)/C=C/clc(C)cc2c(c1C)C(=O)CC2  
C=CC(=O)OC.COC1O[C@H](COC(C)=O)[C@@H](OC(C)=O)C=C1I>>COC(=O)/C=C/C1=C[C@H  
646 ](OC(C)=O)[C@@H](COC(C)=O)OC1OC  
C=CCN(C(=O)OC(C)(C)C)C(=O)OC(C)(C)C.Clclcnc2cccc2c1>>CC(C)(C)OC(=O)N(C/C=C/c1cnc2  
647 ccccc2c1)C(=O)OC(C)(C)C  
C=Cc1cccc1O.COc1cccc(Br)c1>>COc1cccc(/C=C/c2cccc2O)c1  
648 C=CC(=O)OC(C)(C)C.O=C1COCc2cc(Br)enec2N1>>CC(C)(C)OC(=O)/C=C/c1cnc2c(c1)COCC(=O)N  
649 C=CC(=O)Nc1cccc1C(=O)OCC.CC(C)(C)OC(=O)Nc1cncc(Br)c1>>CCOC(=O)c1cccc1NC(=O)/C=  
650 C/c1cncc(NC(=O)OC(C)(C)C)c1  
C=CC(=O)OC(C)(C)C.Cc1cc(C)cc(Br)c1>>Cc1cc(C)cc(/C=C/C(=O)OC(C)(C)C)c1  
651 C=CC(=O)OCC.CCOC(=O)CCOCc1cc(OCc2cccc2)ccc1Br>>CCOC(=O)/C=C/c1ccc(OCc2cccc2)cc  
652 1COCCC(=O)OCC  
C=CC(F)(F)C(F)(F)C(F)(F)C(F)(F)C(F)(F)C(F)(F)F.O=Cc1ccc(Br)cc1>>O=Cc1ccc(/C=C/C(F)(F)C(F)  
653 (F)C(F)(F)C(F)(F)C(F)(F)C(F)(F)Cc1  
Brclccc2[nH]ccc2c1.C=CC(=O)OC>>COC(=O)/C=C/c1ccc2[nH]ccc2c1  
654 C=C(C)Cc1ccc(OS(=O)=(O)C(F)(F)F)c(C)c1.C=CC(=O)OCC>>C=C(C)Cc1ccc(/C=C/C(=O)OCC)c(C  
655 C=CC[C@H]1C(=O)N(c2cccc2)[C@@H]1c1ccc(OC)cc1.FC(F)(F)c1ccc(Br)cc1>>COc1ccc([C@@H  
656 ]2[C@@H](C/C=C/c3ccc(C(F)(F)F)cc3)C(=O)N2c2cccc2)cc1  
C=CCC(c1cccc1)P(=O)(OC)OC.Ic1cccc1>>COP(=O)(OC)C(C/C=C/c1cccc1)c1cccc1  
657 C=CC(=O)O.COc1ccc(S(=O)=(O)N(C)c2cccc(I)c2)cc1OC>>COc1ccc(S(=O)=(O)N(C)c2cccc(/C=C/C  
658 (=O)O)c2cc1OC  
C=CC(=O)N(C)Cc1c(C)n(C)c2cccc12.O=C1Ne2ncc(Br)cc2C12CCC2>>Cc1c(CN(C)C(=O))/C=C/c2c  
659 nc3c(c2)C2(CCC2)C(=O)N3)c2cccc2n1C  
C=C/C=C/C1CCCCN1S(=O)=(O)c1ccc(C)cc1.Clclccc(I)cn1>>Cc1ccc(S(=O)=(O)N2CCCCC2/C=C/C  
660 =C/c2ccc(Cl)nc2)cc1  
C=CCC(C(C)=O)C(=O)OC(C)(C)C.COc1ccc(I)cc1OC>>COc1ccc(/C=C/CC(C(C)=O)C(=O)OC(C)(C)  
661 C)cc1OC  
C=CC(=O)OCC.O=Cc1cc(OCc2cccc2)ccc1Br>>CCOC(=O)/C=C/c1ccc(OCc2cccc2)cc1C=O  
662 C=Cc1ccc2c(c1)OCO2.O=c1ccc2ccc(OS(=O)=(O)C(F)(F)F)cc2o1>>O=c1ccc2ccc(/C=C/c3ccc4c(c3)O  
663 CO4)cc2o1  
C=CC(=O)OC(C)(C)C.FC(F)(F)c1cc(Br)ccc1Cl>>CC(C)(C)OC(=O)/C=C/c1ccc(Cl)c(C(F)(F)F)c1  
664 C=Cc1ccc(F)cc1.CC(=S)NS(=O)=(O)c1ccc(Br)cc1>>CC(=S)NS(=O)=(O)c1ccc(/C=C/c2ccc(F)cc2)cc1  
665 C=Cc1ccc(O)c(OC)c1.CCCCCCCCoc1ccc2c(C)c(Br)c(=O)oc2c1>>CCCCCCCCOc1ccc2c(C)c(/C=C/  
666 c3ccc(O)c(OC)c3)c(=O)oc2c1  
C=Cc1ccc(C(F)(F)F)cc1.CCOC(=O)C(F)I>>CCOC(=O)C(F)/C=C/c1ccc(C(F)(F)F)cc1  
667 C=CC(CC)O[Si](C)(C)C(C)(C)C.COc1cccc1Br>>CCC(/C=C/c1cccc1COC)O[Si](C)(C)C(C)(C)C  
668 C=Cc1cccc1.O=C(OC[C@H]1O[C@@H](n2cc(I)c(=O)[nH]c2=O)C[C@@H]1OC(=O)c1cccc1)c1c  
669 cccc1>>O=C(OC[C@H]1O[C@@H](n2cc(/C=C/c3cccc3)c(=O)[nH]c2=O)C[C@@H]1OC(=O)c1ccc  
cc1)c1cccc1

670 C=CCNC(=O)OC(C)(C)C.CC1(C)OC(=O)c2c(cc(OCCN3CCOCC3)cc2OS(=O)(=O)C(F)(F)F)O1>>C  
C(C)(C)OC(=O)NC/C=C/c1cc(OCCN2CCOCC2)cc2c1C(=O)OC(C)(C)O2  
671 Brclccs1.C=CC(=O)OC(C)(C)C>>CC(C)(C)OC(=O)/C=C/c1ccs1  
C=CCO[C@H]1O[C@H](COC(C)=O)[C@@H](OC(C)=O)[C@H](OC(C)=O)[C@@H]1OC(C)=O.lc  
672 lcccc2ccccc12>>CC(=O)OC[C@H]1O[C@H](OC/C=C/c2cccc3ccccc23)[C@@H](OC(C)=O)[C@@  
H](OC(C)=O)[C@H]1OC(C)=O  
C=C[C@]1(O)CC[C@H]2[C@@H]3CCc4cc(O[Si](C)(C)C(C)(C)C)ccc4[C@H]3CC[C@@]21C.Clc1  
673 ccc(I)cn1>>CC(C)(C)[Si](C)(C)Oc1ccc2c(c1)CC[C@@H]1[C@@H]2CC[C@@]2(C)[C@H]1CC[C@  
@]2(O)/C=C/c1ccc(Cl)nc1  
674 C=CC(OCC)OCC.COc1ccc(C=O)c(Br)c1>>CCOC(/C=C/c1cc(OC)ccc1C=O)OCC  
675 C=CC(N)=O.Oc1ccc2c(Cc3ccc(Br)cc3)nc2c1>>NC(=O)/C=C/c1ccc(Cc2nccc3cc(O)ccc23)cc1  
C=Cc1ccc2c(c1)c1cc(/C=C/c3ccc4c(c3)c3ccccc3n4CCCCCCC)ccc1n2CCCCCCC.CCCCCCn1c2ccc(  
676 l)cc2c2cc(C=O)ccc21>>CCCCCCCn1c2ccccc2c2cc(/C=C/c3ccc4c(c3)c3cc(/C=C/c5ccc6c(c5)c5cc(C=  
O)ccc5n6CCCCCCC)ccc3n4CCCCCCC)ccc21  
C=CS(=O)(=O)NCc1ccccc1.CC(C)(C)OC(=O)NCCc1ccccc1Br>>CC(C)(C)OC(=O)NCCc1ccccc1/C=  
677 C/S(=O)(=O)NCc1ccccc1  
678 C=CC(=O)OCC.O=Cc1cc(C(F)(F)F)ccc1Br>>CCOC(=O)/C=C/c1ccc(C(F)(F)F)cc1C=O  
679 C=Cc1cc(OC)c(OC)c(OC)c1.O=Cc1ccc(Br)cc1>>COc1cc(/C=C/c2ccc(C=O)cc2)cc(OC)c1OC  
680 C=CC(=O)OC(C)(C)C.N#Cc1ccc(Cl)cc1>>CC(C)(C)OC(=O)/C=C/c1ccc(C#N)cc1  
681 C=Cc1ccccc1.CN(C)c1ccc(I)c(C(F)(F)F)c1>>CN(C)c1ccc(/C=C/c2ccccc2)c(C(F)(F)F)c1  
682 C=Cc1ccccc1.CC1=C(C)C(C)(C=O)c2ccc(Br)cc2)C(C)=C1C>>CC1=C(C)C(C)(C=O)c2ccc(/C=C/c3  
ccccc3)cc2)C(C)=C1C  
683 C=CC(=O)N1C(=O)OC[C@@H]1c1ccccc1.CC(C)(C)OP(=O)(Cc1ccc(Br)cc1)OC(C)(C)C>>CC(C)(C)  
OP(=O)(Cc1ccc(/C=C/C(=O)N2C(=O)OC[C@@H]2c2ccccc2)cc1)OC(C)(C)C  
684 C=CC(=O)OC.O=[N+](O-)[O-]c1ccccc1Cl>>COC(=O)/C=C/c1ccccc1[N+](=O)[O-]  
685 C=CC(N)=O.CC(C)(C)OC(=O)NCc1ccccc1Br>>CC(C)(C)OC(=O)NCc1ccccc1/C=C/C(N)=O)c1  
686 C=Cc1ccc(CP(=O)(OCC)OCC)cc1.CCCCCCCCc1cc(C=O)c(CCCCCCCC)cc1Br>>CCCCCCCCc1cc(  
/C=C/c2ccc(CP(=O)(OCC)OCC)cc2)c(CCCCCCCC)cc1C=O  
687 C=CCOc1ccccc1.Cc1cc(C)cc(I)c1>>Cc1cc(C)cc(/C=C/COc2ccccc2)c1  
688 Brclccccc1-c1ccccc1.C=CC(=O)OCCCC>>CCCCOC(=O)/C=C/c1ccccc1-c1ccccc1  
689 Brclcncc1.C=C[Si](CC)(CC)CC>>CC[Si](/C=C/c1cncc1)(CC)CC  
690 C=CC(=O)N(C)Cc1cc2ccccc2n1C.O=C1Nc2ncc(Br)cc2C12CCC2>>CN(Cc1cc2ccccc2n1C)C(=O)/C=  
C/c1cncc2c(c1)C1(CCC1)C(=O)N2  
691 C=CC#N.CC(C)(C)c1ccc2[nH]c3c(c2c1)CC(=O)Nc1ccc(I)cc1-  
3>>CC(C)(C)c1ccc2[nH]c3c(c2c1)CC(=O)Nc1ccc(/C=C/C#N)cc1-3  
692 C=CC(=O)OC.N#Cc1ccc(-c2cc(I)cc(-c3ccco3)c2)cc1>>COC(=O)/C=C/c1cc(-c2ccc(C#N)cc2)cc(-  
c2ccco2)c1  
693 C=CC(=O)OC.Clc1ccc(Br)c1>>COC(=O)/C=C/c1ccccc1(Cl)c1  
694 C=Cc1csc2c(N)ncnc12.CCOC(=O)c1ccc(C)c(I)c1>>CCOC(=O)c1ccc(C)c(/C=C/c2csc3c(N)ncnc23)c1  
C=CCC(=O)O.Cc1cc(OCc2ccccc2)c([C@@H]2S[C@H](COCc3ccccc3)[C@@H](OCc3ccccc3)[C@H]  
695 )(OCc3ccccc3)[C@H]2OCc2ccccc2)cc1Cc1ccc(Br)cc1>>Cc1cc(OCc2ccccc2)c([C@@H]2S[C@H](C  
OCc3ccccc3)[C@@H](OCc3ccccc3)[C@H](OCc3ccccc3)[C@H]2OCc2ccccc2)cc1Cc1ccc(/C=C/CC(  
C=CCC(C)N(C)C(=O)OC(C)(C)C.CC(C)Oc1cncc(Br)c1>>CC(C)Oc1cncc(/C=C/CC(C)N(C)C(=O)OC  
696 (C)(C)C)c1  
C=CCC(=O)OC(C)(C)C.COc1cc(N(C)C(=O)OC(C)(C)C)c(Br)cn1>>COc1cc(N(C)C(=O)OC(C)(C)C)c  
(/C=C/CC(=O)OC(C)(C)C)cn1  
697 C=CC(=O)OCCCC.COc1ccc(Br)c(N(CC2COC(=O)O2)C(=O)C(C)(C)C)n1>>CCCCOC(=O)/C=C/c1c  
cc(OC)nc1N(CC1COC(=O)O1)C(=O)C(C)(C)C  
698 C=CC(=O)OCC.COc1ccc(-c2cncc2Br)cc1>>CCOC(=O)/C=C/c1cnccc1-c1ccc(OC)cc1  
700 C=Cc1cc(OC)cc(OC)c1.N#Cc1ccc(I)cc1>>COc1cc(/C=C/c2ccc(C#N)cc2)cc(OC)c1  
701 C=CC(=O)OC(C)(C)C.O=C1c2ccccc2CCc2cc(Br)ccc21>>CC(C)(C)OC(=O)/C=C/c1ccc2c(c1)CCc1cc  
ccc1C2=O  
702 C=Cc1ccc2ccccc2c1.FC(F)(F)C(Br)CCc1ccccc1>>FC(F)(F)C(/C=C/c1ccc2ccccc2c1)CCc1ccccc1  
703 C=Cc1cncc1.OCCCCCOc1ccc2cc(Br)ccc2c1>>OCCCCCOc1ccc2cc(/C=C/c3cnccc3)ccc2c1  
C=C(I)[C@H]1CC[C@H]2[C@@H]3CC=C4C[C@@H](OC(C)=O)CC[C@]4(C)[C@H]3CC[C@]12  
704 C.C=CC(=O)OC>>C=C/C=C/C(=O)OC)[C@H]1CC[C@H]2[C@@H]3CC=C4C[C@@H](OC(C)=O  
)CC[C@]4(C)[C@H]3CC[C@]12C  
C=CC(=O)OC.CN(C)c1ccc2c(S(=O)(=O)N3CCc4cc(Br)cn43)ccccc12>>COC(=O)/C=C/c1cncc2c(c1)  
705 CCN2S(=O)(=O)c1ccc2c(N(C)C)ccccc12  
706 C=CC(=O)OCC.Cc1nc(C(C)C)nc1I>>CCOC(=O)/C=C/c1cncc(C(C)C)nc1C  
707 C=CC(=O)OC.CC1(C)Cc2ccccc(I)c2O1>>COC(=O)/C=C/c1ccc2c1OC(C)(C)C2

708 C=CC(=O)OC.Cn1ccc2c(Br)cccc21>>COC(=O)/C=C/c1cccc2c1ccn2C  
709 C=C[Si](C)(C)C.Ic1cccc1>>C[Si](C)(C)/C=C/c1cccc1  
\*CNCCCOCCOCCOCCNC(=O)COc1ccc(C(Cc2cc(OC)cc(OC)c2)NC(=O)c2cccc(C=C)c2)cc1.Cc1cc  
710 cc(I)c1>>\*CNCCCOCCOCCOCCNC(=O)COc1ccc(C(Cc2cc(OC)cc(OC)c2)NC(=O)c2cccc(/C=C/c3  
cccc(C)c3)c2)cc1  
711 C=CS(=O)(=O)F.Ic1coe2cccc12>>O=S(=O)(F)/C=C/c1coe2cccc12  
712 C=CC(=O)c1cccc1.COc1ccc(I)cc1>>COc1ccc(/C=C/C(=O)c2cccc2)cc1  
C=C[C@H]1COC(C)(C)O1.CCOC(=O)[C@@H](Cc1cc(Br)ccc1OCc1ccnc(-  
713 c2cccc2OC)n1)OC(C)=O>>CCOC(=O)[C@@H](Cc1cc(/C=C/[C@H]2COC(C)(C)O2)ccc1OCc1ccnc  
(-c2cccc2OC)n1)OC(C)=O  
714 C=CC(=O)N(C)Cc1cccc(Cl)c1OCCC.CC1(C)NCc2cc(Br)cnc2NC1=O>>CCCOc1c(Cl)cccc1CN(C)C(  
=O)/C=C/c1cnc2c(c1)CNC(C)(C)C(=O)N2  
715 C=C[Si](CC)(CC)CC.COc1ccc2cc(Br)ccc2c1>>CC[Si](/C=C/c1ccc2cc(OC)ccc2c1)(CC)CC  
716 C=Cc1cccc(O)c1.COc1cc(I)cc(OC)c1>>COc1cc(/C=C/c2cccc(O)c2)cc(OC)c1  
C=Cc1cc(OC)c(OC)c(OC)c1-  
717 c1ccc(C(C)(C)C)cc1.COc1ccc(I)cc1>>COc1ccc(/C=C/c2cc(OC)c(OC)c(OC)c2-  
718 C=CC#N.COc1ccc2c(c1)CCC(C=O)=C2Br>>COc1ccc2c(c1)CCC(C=O)=C2/C=C/C#N  
719 C=CCC(C)O.CN(C)c1cccc(Br)c1>>CC(O)C/C=C/c1cccc(N(C)C)c1  
720 C=CC1(O)CCC1.Ic1ccsc1>>OC1(/C=C/c2ccsc2)CCC1  
721 C=CC(=O)OC.CCn1c(=O)c2c(C)n(C3CCCCO3)nc2c2cc(I)ccc21>>CCn1c(=O)c2c(C)n(C3CCCCO3)n  
c2c2cc(/C=C/C(=O)OC)ccc21  
722 C=CC(=O)OCC.Cc1ccc(O)c(Br)c1>>CCOC(=O)/C=C/c1cc(C)ccc1O  
723 C=CC(=O)OCCCC.Cc1ccc(I)cc1>>CCCCOC(=O)/C=C/c1ccc(C)cc1  
724 C=CCN(C(=O)OCC)c1cccc2cccc12.Clc1cccc1>>CCOC(=O)N(C/C=C/c1cccc1)c1cccc2cccc12  
C=CC(=O)OCc1cccc1.CCOC(=O)N1c2ccc(OC)nc2C(N(Cc2cc(C(F)(F)F)cc(C(F)(F)F)c2)c2ncc(Br)cn  
725 2)CC1CC>>CCOC(=O)N1c2ccc(OC)nc2C(N(Cc2cc(C(F)(F)F)cc(C(F)(F)F)c2)c2ncc(/C=C/C(=O)OCc  
3cccc3)cn2)CC1CC  
726 C=Cc1ccc(O)cc1.COc1cccc1Br>>COc1cccc1/C=C/c1ccc(O)cc1  
727 Br1ccc(-c2cnco2)o1.C=Cc1cccc1>>C(=C/c1ccc(-c2cnco2)o1)\c1cccc1  
728 C=CC(=O)N(C)C.FC(F)(F)c1cccc(I)c1>>CN(C)C(=O)/C=C/c1cccc(C(F)(F)F)c1  
729 C=CC(=O)OCC.O=c1oc(-c2cccc2)c(I)c2sc3c(c12)CCCCC3>>CCOC(=O)/C=C/c1c(-  
c2cccc2)oc(=O)c2c3c(sc12)CCCCC3  
730 C=CC(N)=O.CCc1ccc(I)cc1>>CCc1ccc(/C=C/C(N)=O)cc1  
731 C=Cc1ccc(OC(C)=O)cc1.O=Cc1ccc(N(c2cccc2)c2ccc(Br)cc2)cc1>>CC(=O)Oc1ccc(/C=C/c2ccc(N(c  
3cccc3)c3ccc(C=O)cc3)cc2)cc1  
732 C=Cc1ccc(OC(C)=O)cc1.CCn1c2ccc(Br)cc2c2cc(C=O)ccc21>>CCn1c2ccc(C=O)cc2c2cc(/C=C/c3ccc  
(OC(C)=O)cc3)ccc21  
733 C=CC(=O)OCCCC.Fc1cccc1I>>CCCCOC(=O)/C=C/c1cccc1F  
734 C=Cc1cccc1.FC(F)(F)c1cccc(Cl)c1>>FC(F)(F)c1cccc(/C=C/c2cccc2)c1  
735 C=CC(=O)O.Cc1cc(Br)cc(C)c1N>>Cc1cc(/C=C/C(=O)O)cc(C)c1N  
736 C=Cc1cccc(Br)c1.CCOC(=O)C(F)I>>CCOC(=O)C(F)/C=C/c1cccc(Br)c1  
737 C=CC(=O)N(C)Cc1oe2cccc2c1C.CC1(C)C(=O)Nc2ncc(Br)cc21>>Cc1c(CN(C)C(=O)/C=C/c2cnc3c(  
c2)C(C)(C)C(=O)N3)oc2cccc12  
738 C=CCc1c(OC)c(C)c2c(c1OC(C)=O)C(=O)OC2.COC(=O)c1cccc(C)c1Br>>COC(=O)c1cccc(C)c1/C=  
C/Cc1c(OC)c(C)c2c(c1OC(C)=O)C(=O)OC2  
739 C=Cc1cccc1.Ic1ccc2c(c1)C1c3cccc4cccc(c34)C21>>C(=C/c1ccc2c(c1)C1c3cccc4cccc(c34)C21)\c1c  
cccc1  
740 C=Cc1ccc(OC)cc1.CC(C)(C)c1ccc(Br)cc1>>COc1ccc(/C=C/c2ccc(C(C)(C)C)cc2)cc1  
741 C=Cc1cccc1.COc1ccc(Br)c1>>COc1cccc(/C=C/c2cccc2)c1  
742 C=CC(C)(C)O.COc1ccc2cc(Br)c(=O)oc2c1>>COc1ccc2cc(/C=C/C(C)(C)O)c(=O)oc2c1  
743 Br1cccc1.C=Cc1cccc1>>C(=C/c1cccc1)\c1cccc1  
744 C=CC(=O)OC.CC(C)(C)OC(=O)NCCn1c2c(c3ccc(Br)cc3c1=O)C(=O)c1cccc1-  
2>>COC(=O)/C=C/c1ccc2c3c(n(CCCNC(=O)OC(C)(C)C)c(=O)c2c1)-c1cccc1C3=O  
745 C=CC(=O)N(C)Cc1cc2cccc2n1C.Cn1c(=O)[nH]c2ncc(Br)cc21>>CN(Cc1cc2cccc2n1C)C(=O)/C=C/  
c1cnc2[nH]c(=O)n(C)c2c1  
746 C=CC(=O)N(C)C.COc1ccc(CNc2c(C(=O)NCc3ccc(F)cc3F)c(=O)n(OCc3cccc3)c3ncc(Br)cc23)c(OC)  
c1>>COc1ccc(CNc2c(C(=O)NCc3ccc(F)cc3F)c(=O)n(OCc3cccc3)c3ncc(/C=C/C(=O)N(C)C)cc23)c(  
747 C=CCCCCCCCC.FC(F)(F)c1ccc(Br)cc1>>CCCCCCCC/C=C/c1ccc(C(F)(F)F)cc1  
748 Br1cccc1I.C=CC(=O)OCC>>CCOC(=O)/C=C/c1cccc1Br  
749 C=CC(F)(F)F.O=C(O)c1ccc(I)cc1>>O=C(O)c1ccc(/C=C/C(F)(F)F)cc1



750 C=CC(=O)OC(C)(C)C.COC1=C(I)CON(Cc2ccccc2)[C@H]1[C@H]1COC(C)(C)O1>>COC1=C(/C=C  
/C(=O)OC(C)(C)C)CON(Cc2ccccc2)[C@H]1[C@H]1COC(C)(C)O1  
751 C=Cc1ccc(OC)cc1.O=Cc1oc2ccccc2cc1Br>>COc1ccc(/C=C/c2cc3ccccc3oc2=O)cc1  
\*CNCCCOCCOCCOCCNC(=O)COc1ccc(C(Cc2cc(OC)cc(OC)c2)NC(=O)c2ccccc(C=C)c2)cc1.Cc1cc  
752 (I)ccc1[N+](=O)[O-]  
]>>\*CNCCCOCCOCCOCCNC(=O)COc1ccc(C(Cc2cc(OC)cc(OC)c2)NC(=O)c2ccccc(/C=C/c3ccc([N  
+1(=O)[O-])c(C)c3)c2)cc1  
753 C=CC(=O)NC(C)(C)C.CC(=O)Cc1ccccc1Br>>CC(=O)Cc1ccccc1/C=C/C(=O)NC(C)(C)C  
754 C=C[Si](CC)(CC)CC.CC(=O)c1ccccc1Br>>CC[Si](/C=C/c1ccccc1C(C)=O)(CC)CC  
Br1ccc(N2CCOCC2)c2ccccc12.C=CC(=O)OCc1ccccc1>>O=C(/C=C/c1ccc(N2CCOCC2)c2ccccc12)  
755 OCc1ccccc1  
756 Br1ccc(C#Cc2ccccc(I)c2)cc1.C=CC(=O)OC>>COC(=O)/C=C/c1ccccc(C#Cc2ccc(Br)cc2)c1  
757 C=CC(=O)Nc1ccccc1NC(=O)OC(C)(C)C.CCNC(=O)N1C[C@H](c2ccc(Br)cc2)[C@@H](C(=O)OCC  
)C1>>CCNC(=O)N1C[C@H](c2ccc(/C=C/C(=O)Nc3ccccc3NC(=O)OC(C)(C)C)cc2)[C@@H](C(=O)  
758 C=Cc1ccc(N(c2ccccc2)c2ccccc2)cc1.CSc1ccc(Br)cc1>>CSc1ccc(/C=C/c2ccc(N(c3ccccc3)c3ccccc3)cc  
2)cc1  
759 C=CC(=O)OC1CCCCC1.O=[N+](=[O-])c1ccc(Br)cc1>>O=C(/C=C/c1ccc([N+](=O)[O-  
Br1ccccc1.C=C[C@H]1CN2CC[C@H]1C[C@H]2[C@H](O)c1ccnc2ccc(OC)cc12>>COc1ccc2ncc  
760 c([C@@H](O)[C@H]3C[C@H]4CCN3C[C@H]4/C=C/c3ccccc3)c2c1  
C=CC[C@H](C)CO.CCC(O[Si](C)(C)C(C)(C)C)[C@H](C)/C=C(\C)I>>CCC(O[Si](C)(C)C(C)(C)C  
761 )C[C@H](C)/C=C(C)/C=C/C[C@H](C)CO  
762 C=CC(=O)OC(C)(C)C.CC(=O)Nc1ccc(I)cc1>>CC(=O)Nc1ccc(/C=C/C(=O)OC(C)(C)C)cc1  
C=CC(=O)N(C)Cc1cc2ccccc2s1.CCn1c(=O)[nH]c2ncc(Br)cc21>>CCn1c(=O)[nH]c2ncc(/C=C/C(=O)  
763 N(C)Cc3cc4ccccc4s3)cc21  
764 C=CC(=O)O.Ic1cccs1>>O=C(O)/C=C/c1cccs1  
765 Br1csc2ccccc12.C=CC=O>>O=C/C=C/c1csc2ccccc12  
C=CC(=O)OC.COc1ccc(CN2C(=O)C(=O)c3c(Br)cccc32)cc1>>COC(=O)/C=C/c1ccccc2c1C(=O)C(=O  
766 )N2Cc1ccc(OC)cc1  
C=CC(=O)OC.CC(C)(C)OC(=O)N1CCC2(CCN(c3ncncc3Oc3ccc(F)cc3Br)C2)C1>>COC(=O)/C=C/c1  
767 cc(F)ccc1Oc1enenc1N1CCC2(CCN(C(=O)OC(C)(C)C)C2)C1  
C=Cc1ccccc1.Cc1cc(I)cc(C)c1O>>Cc1cc(/C=C/c2ccccc2)cc(C)c1O  
768 Br1enc2ccccc2c1.C=CCN(C(=O)OC(C)(C)C)C(=O)OC(C)(C)C>>CC(C)(C)OC(=O)N(C/C=C/c1enc2  
ccccc2c1)C(=O)OC(C)(C)C  
769 C=CC(=O)OCC.FC(F)(F)c1ccc(Cl)cc1>>CCOC(=O)/C=C/c1ccc(C(F)(F)F)cc1  
C=CC(=O)O.Oc1ccc(I)cc1F>>O=C(O)/C=C/c1ccc(O)c(F)c1  
770 C=Cc1ccc(C)cc1.O=Cc1ccccc(Br)c1>>Cc1ccc(/C=C/c2ccccc(C=O)c2)cc1  
Br1ccccc(I)c1.C=CC(F)(F)C(F)(F)C(F)(F)C(F)(F)C(F)(F)F>>FC(F)(F)C(F)(F)C(F)(F)C(F)(F)  
771 C(F)(F)C(F)(F)/C=C/c1ccccc(Br)c1  
C=CC(=O)OC.O=Cc1ccccc(Br)c1>>COC(=O)/C=C/c1ccccc(C=O)c1  
C=CC(=O)OCC.OCc1ccc(I)c(OCCc2ccc3ccccc3c2)c1>>CCOC(=O)/C=C/c1ccc(CO)cc1OCCc1ccc2cc  
772 ccc2c1  
C=Cc1ccc(OC)cc1.N#CC(CCBBr)(c1ccccc1)c1ccccc1>>COc1ccc(/C=C/CCC(C#N)(c2ccccc2)c2ccccc2  
C=COCCCC.O=C(Cl)c1ccc(Br)cc1>>CCCCO/C=C/C(=O)c1ccc(Br)cc1  
773 C=Cc1ccccc1.Nc1cc(Cl)ccc1I>>Nc1cc(Cl)ccc1/C=C/c1ccccc1  
C=Cc1ccc(C)nc1.COc1cc(I)c2c3c1O[C@@H]1[C@H]34CCN(C)[C@H](C2)[C@H]42C=C[C@@H]1(OC)  
774 c1c(O)ccc(O)c12>>COc1cc(/C=C/c2ccc(C)nc2)c2c3c1O[C@@H]1[C@H]34CCN(C)[C@H](C2)[C@H]4  
2C=C[C@@H]1(OC)c1c(O)ccc(O)c12  
\*CNCCCOCCOCCOCCNC(=O)COc1ccc(C(Cc2cc(OC)cc(OC)c2)NC(=O)c2ccccc(C=C)c2)cc1.COC(  
775 =O)c1cc(I)ccc1OC>>\*CNCCCOCCOCCOCCNC(=O)COc1ccc(C(Cc2cc(OC)cc(OC)c2)NC(=O)c2cc  
cc(/C=C/c3ccc(OC)c(C(=O)OC)c3)c2)cc1  
C=Cc1ccc(OC)cc1.Cn1c(=O)c2c(cc(Br)n2C)n(C)c1=O>>COc1ccc(/C=C/c2cc3c(c(=O)n(C)c(=O)n3C)  
776 n2C)cc1  
C=CC(=O)OC.O=Cc1c(I)c(-c2ccc(O)cc2)oc2cc(O)ccc12>>COC(=O)/C=C/c1c(-  
c2ccc(O)cc2)oc2cc(O)ccc2c1=O  
C=CC[C@H](C[C@H](NC(=O)OC(C)(C)C)C(=O)OC(C)(C)C)C(=O)OC(C)(C)C.CC(C)(C)OC(=O)c1  
777 ccc(NC(=O)c2ccc3c(c2)/N=N\c2cc(Br)ccc2CC3)cc1>>CC(C)(C)OC(=O)N[C@@H](C[C@@H](C/C=  
C/c1ccc2c(c1)/N=N\c1cc(C(=O)Nc3ccc(C(=O)OC(C)(C)C)cc3)ccc1CC2)C(=O)OC(C)(C)C)C(=O)OC  
778 C=CC(=O)OC(C)(C)C.O=Cc1ccc(Cl)cc1>>CC(C)(C)OC(=O)/C=C/c1ccc(C=O)cc1  
Br1cc2ccccc2c2ccccc12.C=Cc1nc2c(N)ncnc2n1[C@@H]1O[C@H](CO[Si](C)(C)C(C)(C)C)[C@@H  
779 ](O[Si](C)(C)C(C)(C)C)[C@H]1O[Si](C)(C)C(C)(C)C>>CC(C)(C)[Si](C)(C)OC[C@H]1O[C@@H](n  
2c(/C=C/c3cc4ccccc4c4ccccc34)nc3c(N)ncnc32)[C@H](O[Si](C)(C)C(C)(C)C)[C@@H]1O[Si](C)(C)  
780  
781  
782  
783  
784  
785

786 C=CC(=O)N1N=Cc2ccccc2C1C(C)CC.COc1cc(Cc2cnc(N)nc2N)cc(I)c1OC>>CCC(C)C1c2ccccc2C=  
NN1C(=O)/C=C/c1cc(Cc2cnc(N)nc2N)cc(OC)c1OC  
 787 Br1ccc(/C=C/c2ccccc2)cc1.C=C[Si](C)(C)c1ccccc1>>C[Si](C)(/C=C/c1ccc(/C=C/c2ccccc2)cc1)c1cc  
ccn1  
 788 C=Cc1ccccc1.COC(=O)c1cc(I)cc(C(=O)OC)c1>>COC(=O)c1cc(/C=C/c2ccccc2)cc(C(=O)OC)c1  
 789 C=CCN1C(=O)c2ccccc2C1=O.N#Cc1ccc(Br)cc1>>N#Cc1ccc(/C=C/CN2C(=O)c3ccccc3C2=O)cc1  
 790 C=CC(=O)N(C)C.COC(=O)/C=C/c1ccc(N(Cc2ccc(Br)cc2)C(=O)C2CCCCC2)c1>>COC(=O)/C=C/c1  
cccc(N(Cc2ccc(/C=C/C(=O)N(C)C)cc2)C(=O)C2CCCCC2)c1  
 791 C=CC(N)=O.Fc1cc(Br)cc(C(F)(F)F)c1>>NC(=O)/C=C/c1cc(F)cc(C(F)(F)F)c1  
 792 C=CC(=O)OCCCC.O=Cc1ccccc1I>>CCCCOC(=O)/C=C/c1ccccc1C=O  
 793 Br1ccccc1.C=CS(C)(=O)=O>>CS(=O)(=O)/C=C/c1ccccc1  
 794 C=Cc1ccccc1.N#Cc1ccc(Br)cc1>>N#Cc1ccc(/C=C/c2ccccc2)cc1  
 795 C=Cc1ccc(O)cc1.COc1ccc(Br)cc1>>COc1ccc(/C=C/c2ccc(O)cc2)cc1  
 796 C=C[C@H]1O[C@@H]2OC(C)(C)O[C@@H]2[C@H]1OCc1ccccc1.Ic1ccccc1>>CC1(C)O[C@H]2O  
[C@H](/C=C/c3ccccc3)[C@H](OCc3ccccc3)[C@H]2O1  
 797 C=Cc1ccc(OC(C)=O)cc1.COC(=O)CCc1cc(C(=O)OC)c2c(Br)cccc21>>COC(=O)CCc1cc(C(=O)O  
C)c2c(/C=C/c3ccc(OC(C)=O)cc3)cccc21  
 798 C=CC(=O)OC.COc1cc(Br)cc2cc(-c3ccc4c(c3)OCO4)oc12>>COC(=O)/C=C/c1cc(OC)c2oc(-  
c3ccc4c(c3)OCO4)cc2c1  
 799 C=CC(=O)OC(CC)CCCC.N#Cc1ccccc1Cl>>CCCCC(CC)OC(=O)/C=C/c1ccccc1C#N  
 800 Br1ccc(N2c3ccccc3N(c3ccccc3)c3c2c2ccccc2c2ccccc32)cc1.C=Cc1ccccc1>>C(=C/c1ccccc1)\c1ccc(  
N2c3ccccc3N(c3ccccc3)c3c2c2ccccc2c2ccccc32)cc1  
 801 C=CC(=O)OC.COc1ncc(Br)c(OC)n1>>COC(=O)/C=C/c1cnc(OC)nc1OC  
 802 C=CC(F)(F)C(F)(F)C(F)(F)C(F)(F)C(F)(F)C(F)(F)F.CC1=Nc2ccc(I)cc2C1(C)C>>CC1=Nc2cc  
c(/C=C/C(F)(F)C(F)(F)C(F)(F)C(F)(F)C(F)(F)C(F)(F)F)cc2C1(C)C  
 803 BrC1=C(C2=CCCO2)CCCC1.C=CC(=O)OC>>COC(=O)/C=C/C1=C(C2=CCCO2)CCCC1  
 804 C=CC(=O)C(C)CC(=O)OC.COc1ccc(Br)cc1OC>>COC(=O)CC(C)C(=O)/C=C/c1ccc(OC)c(OC)c1  
 805 C=CC(C)=O.COC(=O)C1=C(OS(=O)(=O)C(F)(F)F)C(C)(C)CCC1>>COC(=O)C1=C(/C=C/C(C)=O)C  
(C)(C)CCC1  
 806 C=CB1OC(C)CC(C)(C)O1.O=[N+](O-)\c1ccc(I)cc1>>CC1CC(C)(C)OB(/C=C/c2ccc([N+](=O)[O-  
)cc2)O1  
 807 C=CC(=O)CC.COc1ccc(Br)cc1>>CCC(=O)/C=C/c1ccc(OC)cc1  
 808 Br1ccc2ccnc2c1.C=CC(=O)OC>>COC(=O)/C=C/c1ccc2ccnc2c1  
 809 Br1cnc2ccccc12.C=CCCN1C(=O)c2ccccc2C1=O>>O=C1c2ccccc2C(=O)N1CC/C=C/c1cnc2ccccc1  
C=CC(=O)OCC.C[Si](C)(C)c1ccccc1oc1c(I)cccc12>>CCOC(=O)/C=C/c1ccc2c1oc1c([Si](C)(C)C)c  
 810 ccc12  
 811 C=Cc1ccc(OC)cc1.Cc1ncc(-c2ccc(Cl)cc2)n1C>>COc1ccc(/C=C/c2ccc(-c3cnc(C)n3C)cc2)cc1  
 812 C=CC(=O)OC.CC(=O)Oc1cc(I)c(O)c(C#N)c1C#N>>COC(=O)/C=C/c1cc(OC(C)=O)c(C#N)c(C#N)c1  
 813 C=CC(=O)OC.Cc1c[nH]c2c(Br)cccc12>>COC(=O)/C=C/c1ccc2c(C)c[nH]c12  
 814 C=CCOc1ccccc1C.Ic1ccccc1>>Cc1ccccc1OC/C=C/c1ccccc1  
 815 C=CCC(=O)OCC(C)C.COc1cc(Br)c(OC)c2ccccc12>>COc1cc(/C=C/CC(=O)OCC(C)C)c(OC)c2ccccc  
 816 C=CC(C)(C)O.Cc1ccc(N)c(Br)c1>>Cc1ccc(N)c(/C=C/C(C)(C)O)c1  
 817 C=Cc1cnc1.CCCOc1ccc(Br)cc1F>>CCCOc1ccc(/C=C/c2cnc2)cc1F  
 818 C=CCOc1ccc(C)cc1.Cc1ccc(I)cc1>>Cc1ccc(/C=C/COc2ccc(C)cc2)cc1  
 819 Br1cnc2c(c1)OCCCN2.C=CC(=O)OCC>>CCOC(=O)/C=C/c1cnc2c(c1)OCCCN2  
C=CC1(C(=O)O)COCOC1.CC(C)[C@H](O)C(=O)N[C@@H](C)(=O)N1CCC[C@@H](C)(=O)N[C  
 820 @H](C)c2ccc3ccc(Br)cc3n2)N1>>CC(C)[C@H](O)C(=O)N[C@@H](C)C(=O)N1CCC[C@@H](C)(=  
O)N[C@H](C)c2ccc3ccc(/C=C/C4(C(=O)O)COCOC4)cc3n2)N1  
C=C[C@H]1O[C@@H]2OC(C)(C)O[C@@H]2[C@H]1O.O=c1cc(-  
 821 c2ccccc2)oc2cc(Br)ccc12>>CC1(C)O[C@H]2O[C@H](/C=C/c3ccc4c(=O)cc(-  
c5ccccc5)oc4c3)[C@H](O)[C@H]2O1  
 822 Br1ccc2cc[nH]c2c1.C=CC(=O)O>>O=C(O)/C=C/c1ccc2cc[nH]c2c1  
\*CNCCOCCOCCOCCCN(C(=O)COc1ccc(C(Cc2cc(OC)cc(OC)c2)NC(=O)c2ccccc(C=C)c2)cc1.Cc1cc  
 823 ccc1I>>\*CNCCOCCOCCOCCCN(C(=O)COc1ccc(C(Cc2cc(OC)cc(OC)c2)NC(=O)c2ccccc(/C=C/c3ccc  
ccc3C)c2)cc1  
 824 C=CC(=O)OCC.Cc1ccccc1Br>>CCOC(=O)/C=C/c1ccccc1C  
 825 C=CC(=O)OC.CCC(C)c1ccc(N2CCc3cc(OC)ccc3C2(C)c2ccc(Br)cc2)cc1>>CCC(C)c1ccc(N2CCc3cc(  
OC)ccc3C2(C)c2ccc(/C=C/C(=O)OC)cc2)cc1  
 826 C=CC(=O)OC.CC(C)(C)N=C/N1CCCCC1CCc1ccccc1I>>COC(=O)/C=C/c1ccccc1CCC1CCCCN1/C  
=N/C(C)(C)C  
 827 C=CCNC1=NCCN1.Cc1ccccc1I>>Cc1ccccc1/C=C/CNC1=NCCN1

828 C=Cc1ccc(SC)cc1.Clc1c2ccc(Br)cc2nc2c1[nH]c1cccc12>>CSc1ccc(/C=C/c2ccc3c(Cl)c4[nH]c5cccc5c4nc3c2)cc1  
 829 C=CCN(C(=O)OC(C)(C)C(=O)OC(C)(C)C.Cc1cccc1Cl)>>Cc1cccc1/C=C/CN(C(=O)OC(C)(C)C(=O)OC(C)(C)C  
 830 C=CC(=O)OC.COC(=O)c1cc(I)cc(C(=O)OC)c1>>COC(=O)/C=C/c1cc(C(=O)OC)cc(C(=O)OC)c1  
 831 C=CC(=O)OC.COc1ncc(I)cn1>>COC(=O)/C=C/c1ncc(OC)nc1  
 832 C=CC(O)c1cc(OC)c(OC)cc1Br.Ic1cccc1>>COc1cc(Br)c(C(O)/C=C/c2cccc2)cc1OC  
 833 C=Cc1cc(C(=O)OCC)n[nH]1.CC(C)(C)C(=O)Nc1nc(O)c2cc(Br)nc2n1>>CCOC(=O)c1cc(/C=C/c2cnc3nc(NC(=O)C(C)(C)C)nc(O)c3c2)[nH]n1  
 834 C=CC(CCC)OCc1cccc1.Fc1ccc(Br)cc1>>CCCC(/C=C/c1ccc(F)cc1)OCc1cccc1  
 835 C=CC(C)(CO)OC.O=Cc1c[nH]c2cccc(I)c12>>COC(C)(/C=C/c1cccc2[nH]cc(C=O)c12)CO  
 836 Br1cccs1.C=CC(=O)OCCSc1cccc1>>O=C(/C=C/c1cccs1)OCCSc1cccc1  
 837 C=CC(=O)O.Ic1ccc(CNc2nccc(-c3ccnc3)n2)cc1>>O=C(O)/C=C/c1ccc(CNc2nccc(-c3ccnc3)n2)cc1  
 838 C=CC(=O)OC.CC(C)[C@@H]1C=C(OS(=O)(=O)C(F)(F)F)[C@H](C)CC1>>COC(=O)/C=C/C1=C[C@@H](C(C)C)CC[C@H]1C  
 839 C=CC(=O)OC.O=Cc1cc(-c2ccc(Br)cc2)cc(C23CC4CC(CC(C4)C2)C3)c1O>>COC(=O)/C=C/c1ccc(-c2cc(C=O)c(O)c(C34CC5CC(CC(C5)C3)C4)c2)cc1  
 840 C=Cc1cncnc1.CCCCCCCCCOc1ccc(I)cc1>>CCCCCCCCCOc1ccc(/C=C/c2cncnc2)cc1  
 841 C=CC(=O)OCC.Cc1cc(Br)ccn1>>CCOC(=O)/C=C/c1cnc(C)c1  
 842 C=Cc1ccc(O)c(OC)c1.O=c1ccc2ccc(OS(=O)(=O)C(F)(F)F)cc2o1>>COc1cc(/C=C/c2ccc3ccc(=O)oc3c2)ccc1O  
 843 C=CC(=O)OC.CSc1c2c(I)cccc2nn1C1CCCCO1>>COC(=O)/C=C/c1cccc2nn(C3CCCCO3)c(SC)c12  
 844 C=CC#N.CN1C(c2cccc2)=C(I)c2ccsc2S1(=O)=O>>CN1C(c2cccc2)=C(/C=C/C#N)c2ccsc2S1(=O)=  
 845 C=CC(=O)OCC.COC(=O)c1ccc(Cl)cc1>>CCOC(=O)/C=C/c1ccc(C(=O)OC)cc1  
 846 C=CC(CO)N1C(=O)c2cccc2C1=O.Ic1cccc1>>O=C1c2cccc2C(=O)N1C(/C=C/c1cccc1)CO  
 847 C=Cc1ccc(N(C)C(=O)OC(C)(C)C)cc1.OCCOCCOCCOCCOc1ccc(I)cn1>>CN(C(=O)OC(C)(C)C)c1c  
 848 C=CC(C)(C)O.CC(C)(C)c1ccc(Br)cc1>>CC(C)(O)/C=C/c1ccc(C(C)(C)C)cc1  
 849 C=CC(=O)O.O=C(O)Cc1cccc1Br>>O=C(O)/C=C/c1cccc1CC(=O)O  
 850 C=CCN(Cc1cccc2cccc12)C(=O)OCC.CC(=O)c1ccc(Br)cc1>>CCOC(=O)N(C/C=C/c1ccc(C(C)=O)cc1)Cc1cccc2cccc12  
 851 C=CC#N.Ic1cccc1>>N#C/C=C/c1cccc1  
 852 C=CC(=O)OCC.Fc1cccc(I)c1>>CCOC(=O)/C=C/c1cccc(F)c1  
 853 C=CC(=O)OCC.[2H]c1c([2H])c(C([2H])([2H])[2H])c([2H])c([2H])c1C(=O)c1cccc(Br)n1>>[2H]c1c([2H])c(C([2H])([2H])[2H])c([2H])c([2H])c1C(=O)c1cccc(/C=C/C(=O)OCC)n1  
 854 C=CC(=O)OCC.Cc1ccc(Br)cc1>>CCOC(=O)/C=C/c1ccc(C)cc1  
 855 C=Cc1ccc(C(=O)N[C@@H](CCSC)C(=O)OC)c(-c2cccc2C)c1.OC(c1cncnc1Br)C12CC3CC(CC(C3)C1)C2>>COC(=O)[C@H](CCSC)NC(=O)c1ccc(/C=C/c2cncnc2C(O)C23CC4CC(CC(C4)C2)C3)cc1-c1cccc1C  
 856 C=CCOC(C)=O.Ic1cccc1>>CC(=O)OC/C=C/c1cccc1  
 857 C=CC(=O)OC.O=C1C(=O)N(Cc2cccc2)c2cccc(Br)c21>>COC(=O)/C=C/c1cccc2c1C(=O)C(=O)N2C1cccc1  
 858 C=CC(=O)OC.CO[C@H]1O[C@H](COC2O[C@H](COC(C)=O)[C@@H](OC(C)=O)C=21)[C@@H](OCc2cccc2)[C@H](OCc2cccc2)[C@H]1OCc1cccc1>>COC(=O)/C=C/C1=C[C@H](OC(C)=O)[C@@H](COC(C)=O)OC1OC[C@H]1O[C@H](OC)[C@H](OCc2cccc2)[C@@H](OCc2cccc2)[C@H]1OCc1cccc1  
 859 Br1cncc2cccc12.C=CCN(C(=O)OC(C)(C)C(=O)OC(C)(C)C>>CC(C)(C)OC(=O)N(C/C=C/c1cncc2cccc12)C(=O)OC(C)(C)C  
 860 C=Cc1ccc(Cl)cc1.CC(C)(C)OC(=O)N(C(=O)OC(C)(C)C)C1=NC(C)(c2cccc(Br)c2)CCS1>>CC(C)(C)OC(=O)N(C(=O)OC(C)(C)C)C1=NC(C)(c2cccc(/C=C/c3ccc(Cl)cc3)c2)CCS1  
 861 \*COC(=O)/C=C/c1cccc(N(Cc2ccc(Br)cc2)C(=O)C2CCCCC2)c1.C=Cc1cccc1>>\*COC(=O)/C=C/c1cccc(N(Cc2ccc(/C=C/c3cccc3)cc2)C(=O)C2CCCCC2)c1  
 862 C=CC(=O)OC.CC1(C)CCC(C)(C)c2cc(C(=O)c3cccc(I)c3)ccc21>>COC(=O)/C=C/c1cccc(C(=O)c2ccc3c(c2)C(C)(C)CCC3(C)C)c1  
 863 C=CC(=O)OC.COC(=O)/C=C/c1cc2cc(Br)ccc2cc1OCc1cccc1>>COC(=O)/C=C/c1ccc2cc(OCc3cccc3)c(/C=C/C(=O)OC)cc2c1  
 864 C=CC(=O)OC.Cc1nc2ccc(I)cc2s1>>COC(=O)/C=C/c1ccc2nc(C)sc2c1  
 865 C=Cc1cncnc1.COc1ccc(Cl)c(Nc2c(C#N)nc3cc(OS(=O)(=O)C(F)(F)F)c(OC)cc23)c1>>COc1ccc(Cl)c(Nc2c(C#N)nc3cc(/C=C/c4cncc4)c(OC)cc23)c1  
 866 Br1cnc2cccc2c1.C=Cc1cncnc1>>C(=C/c1cnc2cccc2c1)\c1cncnc1

867 C=CC(=O)OCC.O=S(=O)(Oc1ccc(C(=C2C3CCCC2CCC3)c2ccc(O)cc2)cc1)C(F)(F)F>>CCOC(=O)/C  
=C/c1ccc(C(=C2C3CCCC2CCC3)c2ccc(O)cc2)cc1  
868 C=CC(=O)OC(C)(C)C.O=c1oc2cc(O)cc(F)c2c(Cc2ccc(Br)cc2)c1Cl>>CC(C)(C)OC(=O)/C=C/c1ccc(C  
c2c(Cl)c(=O)oc3cc(O)cc(F)c23)cc1  
869 C=CSel1ncccn1.lc1cccc1>>C(=C/c1cccc1)\Sel1ncccn1  
870 C=CCC1CCCCC1.C[C@H](NC(=O)OC(C)(C)C)c1nc2cccc(Br)c2c(=O)n1-  
c1cccc1>>C[C@H](NC(=O)OC(C)(C)C)c1nc2cccc(/C=C/CC3CCCCC3)c2c(=O)n1-c1cccc1  
871 Br1cccs1.C=CCNS(=O)(=O)c1ccc(C)cc1>>Cc1ccc(S(=O)(=O)NC/C=C/c2cccs2)cc1  
872 C=CC(=O)OCc1cccc1.O=C(O)c1ccc(Br)c2cccc12>>O=C(/C=C/c1ccc(C(=O)O)c2cccc12)OCc1ccc  
873 C=Cc1ccc([N+](=O)[O-])cc1.COc1ccc(I)cc1>>COc1ccc(/C=C/c2ccc([N+](=O)[O-])cc2)cc1  
874 C=CCCC(=O)OCC.CC(C)(CC1Cc2cccc2C1)NC[C@H](O)COc1c(Br)cccc1C#N>>CCOC(=O)CC/  
C=C/c1cccc(C#N)c1OC[C@H](O)CNC(C)(C)CC1Cc2cccc2C1  
875 C=CCCCC(=O)O.N#Cc1ccc(Br)cc1>>N#Cc1ccc(/C=C/CCCC(=O)O)cc1  
C=CCS(=O)(=O)NCCNC(=O)OCc1cccc1.CC(=O)OC[C@H]1O[C@H](Oc2n[nH]c(C(C)C)c2Cc2c  
876 cc(Br)cc2)[C@H](OC(C)=O)[C@H](OC(C)=O)[C@H]1OC(C)=O>>CC(=O)OC[C@H]1O[C@H]  
[C@H](Oc2n[nH]c(C(C)C)c2Cc2ccc(/C=C/CS(=O)(=O)NCCNC(=O)OCc3cccc3)cc2)[C@H](OC(C)=O)[  
C@H](OC(C)=O)[C@H]1OC(C)=O  
877 C=CC(=O)CC.CC(C)(C)c1ccc(Br)cc1>>CCC(=O)/C=C/c1ccc(C(C)(C)C)cc1  
878 Br1ccc(N2CCCCC2)c2nsnc12.C=Cc1ccncc1>>C(=C/c1ccc(N2CCCCC2)c2nsnc12)\c1ccncc1  
879 C=CC(=O)OCC.COc1ccc(Br)nc1>>CCOC(=O)/C=C/c1ccc(OC)cn1  
880 C=Cc1cccc1.COC(=O)c1ccc(N)c(I)c1>>COC(=O)c1ccc(N)c(/C=C/c2cccc2)c1  
881 C=CC(=O)N1N=Cc2cccc2C1c1cc2cccc2o1.COc1cc(Cc2cnc(N)nc2N)cc(I)c1OC>>COc1cc(Cc2cnc(  
N)nc2N)cc(/C=C/C(=O)N2N=Cc3cccc3C2c2cc3cccc3o2)c1OC  
882 C=Cc1cccc1.Cn1cncc1-c1ccc(Br)cc1>>Cn1cncc1-c1ccc(/C=C/c2cccc2)cc1  
883 C=C[C@H]1OC(C)(C)O[C@H]1CCCCC.CC(C)(C)OC(=O)CCCC(=O)c1cccc1Br>>CCCCC[C@H]  
11OC(C)(C)O[C@H]1/C=C/c1cccc1C(=O)CCCC(=O)OC(C)(C)C  
884 C=Cc1cncc1.CCCCOc1ccc(I)cc1>>CCCOc1ccc(/C=C/c2cncc2)cc1  
885 C=CC(=O)OC.COc1ccc(I)c(C=O)c1>>COC(=O)/C=C/c1ccc(OC)cc1C=O  
886 C=Cc1cccc1.CC(C)(C)c1ccc(Br)cc1>>CC(C)(C)c1ccc(/C=C/c2cccc2)cc1  
887 C=CCCC(=O)O.CCOC(=O)Nc1cccc(Br)c1C>>CCOC(=O)Nc1cccc(/C=C/CCC(=O)O)c1C  
888 C=C(c1cc(OC)c(OC)c(OC)c1)c1ccc(OC)c(Br)n1.C=CC(=O)OC>>C=C(c1cc(OC)c(OC)c(OC)c1)c1ccc  
(OC)c(/C=C/C(=O)OC)n1  
889 C=C[C@H](CCCCCCCC(=O)OC)O[Si](C)(C)C(C)(C)C.CCC1=C(Br)CCC1=O>>CCC1=C(/C=C/[  
C@H](CCCCCCCC(=O)OC)O[Si](C)(C)C(C)(C)C)CCC1=O  
890 C=CC(=O)OC.lc1ccn(C2CCCCO2)n1>>COC(=O)/C=C/c1ccn(C2CCCCO2)n1  
891 C=CC(=O)N(C)Cc1sc2cccc2c1C.O=C1Nc2ncc(Br)cc2C12CCCCC2>>Cc1c(CN(C)C(=O)/C=C/c2cnc  
3c(c2)C2(CCCCC2)C(=O)N3)sc2cccc12  
892 C=Cc1cccc(C)c1.CCN1c2ncc(I)cc2C(=O)N(C)c2ccncc21>>CCN1c2ncc(/C=C/c3cccc(C)c3)cc2C(=O)  
N(C)c2ccncc21  
893 C=CC(=O)OC.CC(C)(C)[Si](C)(C)OCc1c(I)nc(SC2CCCC2)n1-  
c1ccncc1>>COC(=O)/C=C/c1nc(SC2CCCC2)n(-c2ccncc2)c1CO[Si](C)(C)C(C)(C)C  
894 C=CC(=O)OC(C)(C)C.CC(C)=CCc1cc(I)ccc1O>>CC(C)=CCc1cc(/C=C/C(=O)OC(C)(C)C)ccc1O  
895 C=Cc1ccc(OC)cc1.FC(F)(F)c1ccc(Cl)cc1>>COc1ccc(/C=C/c2ccc(C(F)(F)F)cc2)cc1  
C=CC(=O)NCCCCCNC(=O)OCC1c2cccc2-  
896 c2cccc21.O=c1[nH]c(=O)n[C@H]2CO[C@H](CO)[C@H](O)C2)cc1I>>O=C(/C=C/c1cn([C@  
@H]2CO[C@H](CO)[C@H](O)C2)c(=O)[nH]c1=O)NCCCCCNC(=O)OCC1c2cccc2-c2cccc21  
897 C=CC(=O)OCCOCCOCCOCCOC.CC(C)Oe1nc(N)nc(Nc2ccc(I)cc2)n1>>COCCOCCOCCOCCOC(=  
O)/C=C/c1ccc(Nc2nc(N)nc(OC(C)C)n2)cc1  
898 C=Cc1cccc(O[Si](C)(C)C(C)(C)C)c1.C[Si](C)(OS(=O)(=O)C(F)(F)F)OS(=O)(=O)C(F)(F)F>>CC(C)(  
C)[Si](C)(C)Oe1cccc(/C=C/[Si](C)(C)OS(=O)(=O)C(F)(F)F)c1  
899 C=CC(=O)OC.O=Cc1ccc(F)cc1Br>>COC(=O)/C=C/c1cc(F)ccc1C=O  
900 C=CB1OC(C)CC(C)(C)O1.COc1ccc(I)cc1>>COc1ccc(/C=C/B2OC(C)CC(C)(C)O2)cc1  
901 C=CC(=O)OC(C)(C)C.COc1cc(C(=O)c2cn(S(=O)(=O)c3cccc(Br)c3)c3cccc23)cc(OC)c1OC>>COc1c  
c(C(=O)c2cn(S(=O)(=O)c3cccc(/C=C/C(=O)OC(C)(C)C)c3)c3cccc23)cc(OC)c1OC  
902 C=Cc1ccc(F)cc1.CC(C)(C)Cn1c(N)nc2ccc(Cl)nc21>>CC(C)(C)Cn1c(N)nc2ccc(/C=C/c3ccc(F)cc3)nc2  
903 C=Cc1ccc(O)cc1.Nc1cccc(Br)c1>>Nc1cccc(/C=C/c2ccc(O)cc2)c1  
904 C=Cc1ccc2cccc2c1.FC(F)(F)I>>FC(F)(F)/C=C/c1ccc2cccc2c1  
905 C=Cc1cc(OC)c(OC)c(OC)c1-  
c1ccc(F)c(F)c1.COc1ccc(I)cc1>>COc1ccc(/C=C/c2cc(OC)c(OC)c(OC)c2-c2ccc(F)c(F)c2)cc1  
906 C=CC(=O)OC.N#Cc1ccc(N)c(Br)c1>>COC(=O)/C=C/c1cc(C#N)ccc1N

Br1ccnc2ccccc12.C=CC[C@H]1CCCN(C)C[C@H](OC(C)=O)[C@H](C)C[C@H](CC(OC)OC)[C@  
H](O[C@@H]2O[C@H](C)[C@H](O[C@H]3C[C@H](C)(O)[C@@H](OC(=O)CC)[C@H](C)O3)  
907 [C@H](N(C)C)[C@H]2OC(C)=O)[C@@H](OC)[C@H](OC(=O)CC)CC(=O)O1>>CCC(=O)O[C@H]  
1[C@H](C)O[C@@H](O[C@H]2[C@H](N(C)C)[C@H](OC(C)=O)[C@H](O[C@@H]3[C@H](  
OC)[C@H](OC(=O)CC)CC(=O)O[C@@H](C/C=C/c4ccnc5ccccc45)CCCN(C)C[C@H](OC(C)=O)[C  
@H](C)C[C@@H]3CC(OC)OC)O[C@@H]2C)C[C@H]1  
908 C=Cc1ccccc1.Cc1cc(Br)ccc1C#N>>Cc1cc(/C=C/c2ccccc2)ccc1C#N  
C=Cc1cccc([N+](=O)[O-])c1.O=[N+](O-)]c1ccc(I)cc1>>O=[N+](O-  
909 )c1ccc(/C=C/c2cccc([N+](=O)[O-])c2)cc1  
C=CC(=O)OC(C)(C)C.Fc1cc(C(F)(F)F)ccc1Br>>CC(C)(C)OC(=O)/C=C/c1ccc(C(F)(F)F)cc1F  
910 C=Cc1ccc(F)cc1.CCOC(=O)C(F)I>>CCOC(=O)C(F)/C=C/c1ccc(F)cc1  
911 C=CC(=O)OC.Ic1c(-c2ccccc2)nn2c(-c3ccccc3)cc(-c3ccccc3)nc12>>COC(=O)/C=C/c1c(-  
912 c2ccccc2)nn2c(-c3ccccc3)cc(-c3ccccc3)nc12  
C=CS(=O)(=O)F.CC(=O)c1ccccc1I>>CC(=O)c1ccccc1/C=S(=O)(=O)F  
913 C=CC(=O)OCCCC.Clc1ccnc1>>CCCCOC(=O)/C=C/c1ccnc1  
914 C=CCCN1Cc2cc(C=O)ccc2C1=O.O=C(O[C@H]1CN2CCC1CC2)C1(c2cccc(Br)c2)CCCCC1>>O=Cc  
915 1ccc2c(c1)CN(CC/C=C/c1ccccc1C3(C(=O)O[C@H]4CN5CCC4CC5)CCCCC3)c1C2=O  
C=Cc1ccnc1.Cc1cc(Br)ccc1N>>Cc1cc(/C=C/c2ccccc2)ccc1N  
916 Br1ccc2c(c1)OCO2.C=CC(=O)OCC>>CCOC(=O)/C=C/c1ccc2c(c1)OCO2  
917 C=CC(=O)OCC.O=C(c1ccccc1)N1CCc2c(cc1)cc2[N+](=O)[O-]  
918 )C1>>CCOC(=O)/C=C/c1cc2c(c([N+](=O)[O-])c1)CCN(C(=O)c1ccccc1)C2  
C=Cc1cn(COCC[Si](C)(C)C)nc1-  
919 c1nc2ccc(OC)cc2n1COCC[Si](C)(C)C.Cc1ccnc1Br>>COc1ccc2nc(-  
920 C=Cc1ccc(OCCCCCCCC)c(OCCCCCCCC)c(OCCCCCCCC)c1.O=Cc1ccc(Br)cc1>>CCCCCCCCOc1c  
c(/C=C/c2ccc(C=O)cc2)cc(OCCCCCCCC)c1OCCCCCCCC  
921 C=CP(=O)(O)O.O=[N+](O-)]c1ccc(Br)cc1>>O=[N+](O-)]c1ccc(/C=C/P(=O)(O)O)cc1  
922 C=Cc1ccccc1.COC(=O)c1cc2cc(Br)ccc2cc1OC(C)=O>>COC(=O)c1cc2cc(/C=C/c3ccccc3)ccc2cc1OC  
(C)=O  
923 C=CC(=O)NCCc1ccccc1F.COc1ccc2c(=O)c(I)coc2c1>>COc1ccc2c(=O)c(/C=C/C(=O)NCCc3ccccc3F  
)coc2c1  
924 C=Cc1ccccc1.COC(=O)c1ccc2c(c1)CCc1cc(Br)ccc1-  
2>>COC(=O)c1ccc2c(c1)CCc1cc(/C=C/c3ccccc3)ccc1-2  
925 C=CC(=O)OCC.COc1cc(Br)c(-c2cc3ccccc(OC)c3o2)cc1OC>>CCOC(=O)/C=C/c1cc(OC)c(OC)cc1-  
c1cc2ccccc(OC)c2o1  
926 C=Cc1ccnc1.COc1ccc(Br)c(F)c1>>COc1ccc(/C=C/c2ccccc2)c(F)c1  
927 C=CC(=O)OC(C)(C)C.COc1ccc(S(=O)(=O)c2ccc3ccccc(Br)c3n2)cc1>>COc1ccc(S(=O)(=O)c2ccc3ccc  
c(/C=C/C(=O)OC(C)(C)C)c3n2)cc1  
928 Br1ccnc1.C=Cc1nc2c(OCC[Si](C)(C)C)nc(N)nc2n1[C@H]1C[C@H](O[Si](C)(C)C(C)(C)C)[C@@  
H](CO[Si](C)(C)C(C)(C)C)O1>>CC(C)(C)[Si](C)(C)OC[C@H]1O[C@@H](n2c(/C=C/c3ccccc3)nc3c  
(OCC[Si](C)(C)C)nc(N)nc32)C[C@@H]1O[Si](C)(C)C(C)(C)C  
929 C=CC(=O)OC(C)(C)C.COc1ccc2c(Oc3ccc(Br)cc3)csc2c1>>COc1ccc2c(Oc3ccc(/C=C/C(=O)OC(C)(C  
)C)cc3)esc2c1  
930 C=C/C=C/C(=O)N(CCCC)CCCC.N#Cc1ccc(Br)cc1>>CCCCN(CCCC)C(=O)/C=C/C=C/c1ccc(C#N)c  
931 C=CC(=O)OC.COc1ccccc1Sc1cc(C)c(I)cc1[N+](=O)[O-]>>COC(=O)/C=C/c1cc([N+](=O)[O-  
932 ]c(Sc2ccccc2OC)cc1C  
C=CS(N)(=O)=O.CCc1ccc(Br)cc1>>CCc1ccc(/C=C/S(N)(=O)=O)cc1  
933 C=CC(=O)OC(C)(C)C.O=C1Ne2ccc(Br)cc2CN2CCC[C@H]12>>CC(C)(C)OC(=O)/C=C/c1ccc2c(c1)  
CN1CCC[C@@H]1C(=O)N2  
934 C=Cc1nc(C(=O)OCC)co1.COc1ccc(I)cc1>>CCOC(=O)c1coc(/C=C/c2ccc(OC)cc2)n1  
935 C=CC(C)O.COc1c(C)c(C)c(OC)c(I)c1C>>COc1c(C)c(C)c(OC)c(/C=C/C(C)O)c1C  
936 C=CC(=O)O.Cc1ccccc(S(=O)(=O)N(C)c2ccc(I)cc2)c1>>Cc1ccccc(S(=O)(=O)N(C)c2ccc(/C=C/C(=O)O)  
cc2)c1  
937 C=CC1(C(=O)OCC)CCC(=O)CC1.C[C@@H](NC(=O)OC(C)(C)C)c1ccc2ccc(Br)cc2n1>>CCOC(=O)  
C1(/C=C/c2ccc3ccc([C@@H](C)NC(=O)OC(C)(C)C)nc3c2)CCC(=O)CC1  
938 C=CC(=O)OC(C)(C)C.COC(=O)c1cc(Br)cc2ccccc12>>COC(=O)c1cc(/C=C/C(=O)OC(C)(C)C)cc2ccc  
cc12  
939 C=Cc1ccc(C=O)cc1.CCc1cc(I)ccc1/N=N/N(CC)CC>>CCc1cc(/C=C/c2ccc(C=O)cc2)ccc1/N=N/N(CC  
940 C=CC(=O)OC.COc1ccc2c(c1)CCN(c1ccc(C3CC3)cc1)C2(C)c1ccc(Br)cc1>>COC(=O)/C=C/c1ccc(C2  
(C)c3ccc(OC)cc3CCN2c2ccc(C3CC3)cc2)cc1  
941 C=CC(N)=O.CC(=O)c1ccc(I)cc1>>CC(=O)c1ccc(/C=C/C(N)=O)cc1  
942 C=CC(=O)OCC.CC(C)(C)[Si](C)(C)OCc1cc(=O)c(OS(=O)(=O)C(F)(F)F)co1>>CCOC(=O)/C=C/c1co  
c(CO[Si](C)(C)C(C)(C)C)cc1=O

943 C=Cc1cccc1.COc1cc(C=O)c(Br)c(OC)c1OC>>COc1cc(C=O)c(/C=C/c2cccc2)c(OC)c1OC  
 944 C=Cc1ccc(OC)cc1.CC(CC=O)CCCC(C)(C)Br>>COc1ccc(/C=C/C(C)(C)CCCC(C)CC=O)cc1  
 945 C=Cc1ccc(Cl)cc1.O=S(=O)(c1cccc1)C(F)(F)Br>>O=S(=O)(c1cccc1)C(F)(F)/C=C/c1ccc(Cl)cc1  
 946 Br1cccc1C1OCCO1.C=CC(=O)c1cccc1>>O=C(/C=C/c1cccc1C1OCCO1)c1cccc1  
 947 C=CC(=O)OCC.COc1ccc2ccc(Br)cc2n1>>CCOC(=O)/C=C/c1ccc2ccc(OC)nc2c1  
 948 C=CC#N.Cc1noc(-c2cccc2)c1I>>Cc1noc(-c2cccc2)c1/C=C/C#N  
 Br1cnc2cccc12.C=CCOC1=C(C)C(=O)O[C@H](CC)[C@@](C)(O)C=C(C)C(=O)[C@H](C)C[C@  
 949 @](C)(OC)[C@H](O[C@@H]2O[C@H](C)C[C@H](N(C)C)[C@H]2OC(C)=O)[C@H]1C>>CC[C@  
 H]1OC(=O)C(C)=C(OC/C=C/c2cnc3cccc23)[C@H](C)[C@@H](O[C@@H]2O[C@H](C)C[C@H](  
 N(C)C)[C@H]2OC(C)=O)[C@](C)(OC)C[C@@H](C)C(=O)C(C)=C[C@]1(C)O  
 950 Br1ccc(I)cc1.C=CCP(=O)(OCC)OCC>>CCOP(=O)(C/C=C/c1ccc(Br)cc1)OCC  
 951 C=CCOc1cccc1.COc1ccc(I)cc1>>COc1ccc(/C=C/COc2cccc2)cc1  
 952 C=Cc1ccc(C)cc1.O=c1oc2cccc2cc1Br>>Cc1ccc(/C=C/c2cc3cccc3oc2=O)cc1  
 953 C=CC(=O)N1N=Cc2cccc2C1c1ccc(F)c1.COc1cc(Cc2cnc(N)nc2N)cc(I)c1OC>>COc1cc(Cc2cnc(N)  
 nc2N)cc(/C=C/C(=O)N2N=Cc3cccc3C2c2cccc(F)c2)c1OC  
 954 C=CC(=O)OC.O=C1c2cccc2C(=O)N1c1cccc1I>>COC(=O)/C=C/c1cccc1N1C(=O)c2cccc2C1=O  
 955 C=Cc1ccc(O)cc1.Oc1ccc(O)c(I)c1>>Oc1ccc(/C=C/c2cc(O)ccc2O)cc1  
 956 C=CS(C)(=O)=O.O=Cc1ccc(Br)cc1>>CS(=O)(=O)/C=C/c1ccc(C=O)cc1  
 957 C=C[C@H]1O[C@@H]2OC(C)(C)O[C@@H]2[C@H]1OC.Ic1cccc1>>CO[C@H]1[C@@H](/C=C/c  
 2cccc2)O[C@@H]2OC(C)(C)O[C@H]12  
 C=Cc1ccc(/C=C/c2ccc(N(C)C)cc2)cc1.O=c1cc2oc3cc(O)c(F)cc3c(-c3ccc(I)cc3S(=O)(=O)O)c-  
 958 2cc1F>>CN(C)c1ccc(/C=C/c2ccc(/C=C/c3ccc(-c4c5cc(F)c(=O)cc-  
 5oc5cc(O)c(F)cc45)c(S(=O)(=O)O)c3)cc2)cc1  
 959 C=CC(=O)OCC.CC(=O)c1cccc1Br>>CCOC(=O)/C=C/c1cccc1C(C)=O  
 960 C=CC(=O)OCC.O=c1oc(-c2cccc2)c(I)c2cccc12>>CCOC(=O)/C=C/c1c(-c2cccc2)oc(=O)c2cccc12  
 961 Br1ccc2c(c1)OCO2.C=CCN1C(=O)c2cccc2C1=O>>O=C1c2cccc2C(=O)N1C/C=C/c1ccc2c(c1)OC  
 962 C=CC(C)(O)CCC=C(C)C.FC(F)(F)c1ccc(Br)cc1>>CC(C)=CCCC(C)(O)/C=C/c1ccc(C(F)(F)F)cc1  
 963 C=CCP(=O)(OCC)OCC.COc1ccc(I)cc1>>CCOP(=O)(C/C=C/c1ccc(OC)cc1)OCC  
 964 C=CC(C)(C)C(=O)O.CC(=O)O[C@H](C)c1ccc2ccc(Br)cc2n1>>CC(=O)O[C@H](C)c1ccc2ccc(/C=C/  
 C(C)(C)C(=O)O)cc2n1  
 965 C=CC(=O)OCCCC.Fc1ccc(Br)c(F)c1>>CCCCOC(=O)/C=C/c1ccc(F)cc1F  
 966 C=CC(C)=O.O=Cc1ccc(Br)cc1>>CC(=O)/C=C/c1ccc(C=O)cc1  
 967 C=CCN.O=c1[nH]c(=O)n([C@H]2C[C@H](O)[C@@H](COP(=O)(O)OP(=O)(O)OP(=O)(O)O)O2)cc  
 1I>>NC/C=C/c1cn([C@H]2C[C@H](O)[C@@H](COP(=O)(O)OP(=O)(O)OP(=O)(O)O)O2)c(=O)[n  
 968 C=CC=O.Ic1enn(C(c2cccc2)(c2cccc2)c2cccc2)c1>>O=C/C=C/c1cnn(C(c2cccc2)(c2cccc2)c2cccc  
 c2)c1  
 969 C=CC(=O)OCC.Cc1nc(N)nc(NC2CCC(OCCO)CC2)c1Br>>CCOC(=O)/C=C/c1c(C)nc(N)nc1NC1CC  
 C(OCCO)CC1  
 970 C=CC(=O)OC.O=C(OCc1cccc1)N1OCC(I)=C1c1cccc1>>COC(=O)/C=C/C1=C(c2cccc2)N(C(=O)  
 OCc2cccc2)OC1  
 971 Br1cenc1.C=C/C=C/C(=O)N(CCCC)CCCC>>CCCCN(CCCC)C(=O)/C=C/C=C/c1cenc1  
 972 BrC1CCCCC1.C=Cc1ccc(OC)cc1>>COc1ccc(/C=C/C2CCCCC2)cc1  
 973 C=CC(CCCC)(CCCC)n1nnc2cccc21.Cc1ccc(I)cc1>>CCCCC(/C=C/c1ccc(C)cc1)(CCCC)n1nnc2cccc  
 974 C=CC(=O)N(C)OC.Ic1ccc2ccnc2c1>>CON(C)C(=O)/C=C/c1ccc2ccnc2c1  
 975 C=CC(=O)OC.CC(=O)Nc1ccc(I)cc1>>COC(=O)/C=C/c1ccc(NC(C)=O)cc1  
 976 C=Cc1nnn(C)n1.CC(C)(C)c1ccc(I)cc1>>Cn1nnc(/C=C/c2ccc(C(C)(C)C)cc2)n1  
 977 C=Cc1ccc(N(C)C)cc1.Cc1nc2cc(Br)ccc2nc1-c1cccc1>>Cc1nc2cc(/C=C/c3ccc(N(C)C)cc3)ccc2nc1-  
 c1cccc1  
 978 C=CS(=O)(=O)F.Ic1cnn(-c2cccc2)c1>>O=S(=O)(F)/C=C/c1cnn(-c2cccc2)c1  
 979 C=CC(=O)OCC.COc1cc2oc(C(=O)c3cc(OC)c(OC)c(OC)c3)cc2cc1I>>CCOC(=O)/C=C/c1cc2cc(C(=O)  
 )c3cc(OC)c(OC)c(OC)c3)oc2cc1OC  
 980 C=CC(=O)N(C)C.COc1cccc(I)c1>>COc1cccc(/C=C/C(=O)N(C)C)c1  
 981 C=CC(C)(C)O.COC(=O)c1cccc2nc3c(Br)cccc3nc12>>COC(=O)c1cccc2nc3c(/C=C/C(C)(C)O)cccc3n  
 982 C=CC(=O)OCCCC.Fc1cc(Br)ccc1I>>CCCCOC(=O)/C=C/c1ccc(Br)cc1F  
 983 C=CC(=O)OCC.Nc1cccc(I)c1>>CCOC(=O)/C=C/c1cccc(N)c1  
 984 C=CC(=O)OC(C)(C)C.COC(=O)c1cc(I)ccc1OC(C)=O>>COC(=O)c1cc(/C=C/C(=O)OC(C)(C)C)ccc1  
 OC(C)=O  
 985 C=CC(=O)OC(C)(C)C.COC(=O)c1cc(Br)sc1C>>COC(=O)c1cc(/C=C/C(=O)OC(C)(C)C)sc1C  
 986 C=CC(=O)OC.CC(C)=CCc1cc(I)cc(CC=C(C)C)c1O>>COC(=O)/C=C/c1cc(CC=C(C)C)c(O)c(CC=C(C)  
 C)C)c1

C=CC(=O)OC.CC(=O)OC[C@H]1O[C@H](Oc2ccc(I)cc2)[C@H](OC(C)=O)[C@@H](OC(C)=O)[C@H]1OC(C)=O>>COC(=O)/C=C/c1ccc(O[C@H]2O[C@H](COC(C)=O)[C@H](OC(C)=O)[C@H](OC(C)=O)[C@H]2OC(C)=O)cc1  
 987  
 C=CC(N)=O.O=C(O)c1ccc(I)cc1>>NC(=O)/C=C/c1ccc(C(=O)O)cc1  
 988  
 C=CC(=O)OC.COc1nc(C)cnc1N(C(=O)OCC(C)C)S(=O)(=O)c1cccnc1-  
 989  
 c1ccc(I)cc1>>COC(=O)/C=C/c1ccc(-c2ncccc2S(=O)(=O)N(C(=O)OCC(C)C)c2ncc(C)nc2OC)cc1  
 990  
 Br1cccn2nnnc12.C=Cc1ccc(C(C)(C)C)cc1>>CC(C)(C)c1ccc(/C=C/c2cccn3nnnc23)cc1  
 991  
 C=CC(=O)OC.CC(C)(C)c1cc(-c2ccc(Br)cc2)ccc1O>>COC(=O)/C=C/c1ccc(-  
 992  
 C=CC(=O)OC.CCn1cnc2c(NCc3cccc(Br)c3)nc(N3CCCCC3)nc21>>CCn1cnc2c(NCc3cccc(/C=C/C(=O)OC)c3)nc(N3CCCCC3)nc21  
 993  
 C=CC(=O)O.CCOC(=O)/C=C/c1cc([Si](C)(C)C)cc2c1oc1c(I)cc([Si](C)(C)C)cc12>>CCOC(=O)/C=C/c1cc([Si](C)(C)C)cc2c1oc1c(/C=C/C(=O)O)cc([Si](C)(C)C)cc12  
 994  
 Br1ccc(OCCN2CCCC2)cc1.C=Cc1cnc(C#N)c1Nc1ccc2[nH]ccc2c1C>>Cc1c(Nc2c(C#N)cncc2/C=C/c2ccc(OCCN3CCCC3)cc2)ccc2[nH]ccc12  
 995  
 C=CC(=O)OCC.Cc1csc(NCc2cccc(Br)c2)n1>>CCOC(=O)/C=C/c1cccc(CNc2nc(C)cs2)c1  
 996  
 C=CC#N.CN(C(=O)c1ncc2c(c1I)c1cccc1n2S(=O)(=O)N(C)C)c1cccc1>>CN(C(=O)c1ncc2c(c1/C=C/C#N)c1cccc1n2S(=O)(=O)N(C)C)c1cccc1  
 997  
 C=CC(=O)OC.COC(=O)c1cc(OC)c(=O)c2c(OC)c(OC)cc(Br)c2c1>>COC(=O)/C=C/c1cc(OC)c(OC)c2c(=O)c(OC)cc(C(=O)OC)cc12  
 998  
 C=CC(=O)OC(C)(C)C.OCc1cccc(Br)c1>>CC(C)(C)OC(=O)/C=C/c1cccc(CO)c1  
 999  
 C=Cc1cccc1.CC(=O)Nc1ccc(Br)c[n+1]1[O-]>>CC(=O)Nc1ccc(/C=C/c2cccc2)c[n+1]1[O-]  
 1000  
 C=CC(=O)OC.CC(C)(C)OC(=O)N1CCC2(CC(=O)c3cc(Br)ccc3O2)C1>>COC(=O)/C=C/c1ccc2c(c1)C(=O)CC1(CCN(C(=O)OC(C)(C)C)C1)O2  
 1001  
 C=Cc1cncnc1.CCOP(=O)(Cc1ccc(Br)cc1)OCC>>CCOP(=O)(Cc1ccc(/C=C/c2ccncc2)cc1)OCC  
 1002  
 C=CS(=O)(=O)F.CCOC(=O)c1ccc(I)cc1>>CCOC(=O)c1ccc(/C=C/S(=O)(=O)F)cc1  
 1003  
 C=CC(=O)N(C)Cc1sc2cccc2c1C.CCOC(=O)c1cc2cc(Br)cn2[nH]c1=O>>CCOC(=O)c1cc2cc(/C=C/C(=O)N(C)Cc3sc4cccc4c3C)cn2[nH]c1=O  
 1004  
 C=CS(=O)(=O)F.Oc1ccc(I)cc1>>O=S(=O)(F)/C=C/c1ccc(O)cc1  
 1005  
 C=CCc1cccc1.Ic1cccc1>>C(=C/c1cccc1)\Cc1cccc1  
 1006  
 C=Cc1cncnc1.CCCCOc1ccc(Br)cc1F>>CCCOc1ccc(/C=C/c2ccncc2)cc1F  
 1007  
 C=CC(=O)OC.O=c1[nH]c(=O)n([C@H]2O[C@H](CO)[C@H](O)[C@H]2O)cc1I>>COC(=O)/C=C/c1cn([C@H]2O[C@H](CO)[C@H](O)[C@H]2O)c(=O)[nH]c1=O  
 1008  
 C=Cc1ccc2cccc2c1.CCOC(=O)c1cccc1Br>>CCOC(=O)c1cccc1/C=C/c1ccc2cccc2c1  
 1009  
 C=Cc1ccc(OC(C)=O)cc1.FCCOCCOCCOc1ncc(I)cc1Br>>CC(=O)Oc1ccc(/C=C/c2ncc(OCCOCCOC CF)c(Br)c2)cc1  
 1010  
 C=CC(=O)OC.IC1=CO[C@H](COCc2cccc2)[C@@H](OCc2cccc2)[C@@H]1OCc1cccc1>>COC(=O)/C=C/C1=CO[C@H](COCc2cccc2)[C@@H](OCc2cccc2)[C@@H]1OCc1cccc1  
 \*CNCCCOCCOCCOCCNC(=O)COc1ccc(C(Cc2cc(OC)cc(OC)c2)NC(=O)c2cccc(C=C)c2)cc1.FC(F)  
 1011  
 (F)Oc1ccc(I)cc1>>\*CNCCCOCCOCCOCCNC(=O)COc1ccc(C(Cc2cc(OC)cc(OC)c2)NC(=O)c2cccc(/C=C/c3ccc(OC(F)(F)F)cc3)c2)cc1  
 1012  
 BrC1=C(C2=CCCCO2)CCCC1.C=CC(=O)OC(C)(C)C>>CC(C)(C)OC(=O)/C=C/C1=C(C2=CCCCO2)CCCC1  
 1013  
 C=CC(C)=O.CC(C)(C)OC(=O)n1cc(I)c([Si](C)(C)C)c1>>CC(=O)/C=C/c1cn(C(=O)OC(C)(C)C)cc1[Si](C)(C)C  
 C=CC(=O)OCC.Cc1ccc(-  
 1014  
 c2c(CNC(=O)OC(C)(C)C)c(CC(C)C)nc3ccc(OS(=O)(=O)C(F)(F)F)cc23)cc1>>CCOC(=O)/C=C/c1ccc2nc(CC(C)C)c(CNC(=O)OC(C)(C)C)c(-c3ccc(C)cc3)c2c1  
 1015  
 C=Cc1cncnc1.COc1ccc2c(c1)cc(C#N)c1ccc(Br)cc12>>COc1ccc2c(c1)cc(C#N)c1ccc(/C=C/c3ccncc3)c  
 1016  
 C=CC(=O)OCC.FC(F)(F)c1cccc(Oc2cccc(Br)c2)c1>>CCOC(=O)/C=C/c1cccc(Oc2cccc(C(F)(F)F)c2)c  
 1017  
 C=CC(=O)CCC.O=C(c1cccc1)c1ccc(Br)cc1>>CCCC(=O)/C=C/c1ccc(C(=O)c2cccc2)cc1  
 Br1cnc2cccc2c1.C=CCO[C@]1(C)C[C@H](C)C(=O)[C@H](C)[C@H]2NC(=O)O[C@]2(CC)[C@H](CC)OC(=O)[C@H](C)C(=O)[C@H](C)[C@H]1O[C@H]1O[C@H](C)C[C@H](N(C)C)[C@H]1OC(=O)c1cccc1>>CC[C@H]1OC(=O)[C@H](C)C(=O)[C@H](C)[C@@H](O[C@@H]2O[C@H](C)C[C@H](N(C)C)[C@H]2OC(=O)c2cccc2)[C@](C)(OC/C=C/c2ncc3cccc3c2)C[C@@H](C)C(=O)IC@H1(C)IC@H12NC(=O)OIC@112CC  
 1018  
 C=Cc1ccc(N(C)C)cc1.CCCn1c(=O)c(C)nc2ccc(Br)cc21>>CCN1c(=O)c(C)nc2ccc(/C=C/c3ccc(N(C)C)cc3)cc21  
 1019  
 C=CC(=O)OCC.Cc1nc(C)c(I)c(=O)[nH]1>>CCOC(=O)/C=C/c1c(C)nc(C)[nH]c1=O  
 1020  
 C=Cc1cccc(OC)c1.CCOC(=O)C(F)I>>CCOC(=O)C(F)/C=C/c1cccc(OC)c1  
 1021  
 C=Cc1cccc1.Cc1ccc(S(=O)(=O)Cc2cccc2I)cc1>>Cc1ccc(S(=O)(=O)Cc2cccc2/C=C/c2cccc2)cc1  
 1022

1023 C=CC(C)(C)C(=O)NC(C)(C)C(=O)O.COc1cc(C(C)C)c(Cc2ccc(Br)cc2)cc1[C@@H]1O[C@H](COC(C)=O)[C@@H](OC(C)=O)[C@H](OC(C)=O)[C@H]1OC(C)=O>>COc1cc(C(C)C)c(Cc2ccc(C=C/C(C)(C)C(=O)NC(C)(C)C(=O)O)cc2)cc1[C@@H]1O[C@H](COC(C)=O)[C@@H](OC(C)=O)[C@H](OC(C)=O)[C@H]1OC(C)=O  
 1024 Br1cccc2c1cc(-c1ccc(I)cc1)n2-c1ncccn1.C=CC(=O)OC>>COC(=O)/C=C/c1ccc(-c2cc3c(Br)cccc3n2-c2ncccn2)cc1  
 1025 C=CC(=O)OCCCC.O=C(c1cccc1)c1ccc(Br)cc1>>CCCCOC(=O)/C=C/c1ccc(C(=O)c2cccc2)cc1  
 1026 C=Cc1ccc2c(c1)Sc1cc(/C=C/c3ccc4c(c3)Sc3cccc3N4CCCCCCCC)ccc1N2CCCCCCCC.O=Cc1ccc(I)cc1>>CCCCCCCCN1c2cccc2Sc2cc(/C=C/c3ccc4c(c3)Sc3cc(/C=C/c5ccc(C=O)cc5)ccc3N4CCCCCCCC)ccc21  
 1027 C=CC(=O)OC.Nc1cc(Cl)ccc1Br>>COC(=O)/C=C/c1ccc(Cl)cc1N  
 1028 C=CC(N)=O.O=C(c1cccc1)c1ccc(Cl)cc1I>>NC(=O)/C=C/c1cc(Cl)ccc1C(=O)c1cccc1  
 1029 C=CCN(C(=O)OC(C)(C)C)C(=O)OC(C)(C)C.CC(=O)c1ccc(Br)cc1>>CC(=O)c1ccc(/C=C/CN(C(=O)OC(C)(C)C)C(=O)OC(C)(C)C)cc1  
 1030 C=CC(=O)OC.CC1(c2cc(-c3ccc(Br)cc3)ccc2O)CCCCC1>>COC(=O)/C=C/c1ccc(-c2ccc(O)c(C3(C)CCCCC3)c2)cc1  
 1031 C=CC(=O)OC.COC(=O)c1cc(C)cc(I)c1>>COC(=O)/C=C/c1cc(C)cc(C(=O)OC)c1  
 1032 C=CCN1c(=O)oc2cc(C=O)ccc21.O=C(O[C@H]1CN2CCC1CC2)C1(c2cccc(Br)c2)CCCCC1>>O=Cc1ccc2c(c1)oc(=O)n2CC/C=C/c1cccc(C2(C(=O)O[C@H]3CN4CCC3CC4)CCCCC2)c1  
 1033 C=CC(=O)OC.CCn1cc(I)c(=O)c2ccc(C)nc21>>CCn1cc(/C=C/C(=O)OC)c(=O)c2ccc(C)nc21  
 1034 C=Cc1cccc1.O=[N+][O-]c1cccc1Br>>O=[N+][O-]c1cccc1/C=C/c1cccc1  
 1035 C=Cc1ccc(OC)cc1.CCOC(=O)C(F)I>>CCOC(=O)C(F)/C=C/c1ccc(OC)cc1  
 1036 C=CCCCCCCC.COc1ccc(Br)cc1>>CCCCCCCC/C=C/c1ccc(OC)cc1  
 1037 C=CC(=O)OC.IC1=CO[C@H](COCc2ccccc2)[C@H](OCc2ccccc2)[C@@H]1OCc1cccc1>>COC(=O)/C=C/C1=CO[C@H](COCc2ccccc2)[C@H](OCc2ccccc2)[C@@H]1OCc1cccc1  
 1038 C=CC(=O)OCCCC.Cc1cc(C)c(Br)c(C)c1>>CCCCOC(=O)/C=C/c1c(C)cc(C)cc1C  
 1039 C=CC[C@H](CC(=O)OC(C)(C)C)C(=O)N[C@H](C(=O)N[C@H](C)c1cccc1)C(C)(C)C.FC(F)(F)c1c(Br)ccc1-c1cccc1>>C[C@@H](NC(=O)[C@@H](NC(=O)[C@H](C/C=C/c1ccc(-c2ccccc2)c(C(F)(F)F)c1)CC(=O)OC(C)(C)C(C)(C)C)c1cccc1  
 1040 C=Cc1cncnc1.COC(=O)CCNc1ccc(Br)cc1>>COC(=O)CCNc1ccc(/C=C/c2cncnc2)cc1  
 1041 C=Cc1cccc1.CCCCCCCC0c1cc(/C=C/c2ccc(OC)cc2)c(OCCCCCCCC)cc1/C=C/c1ccc(Br)cc1>>CCCCCCCC0c1cc(/C=C/c2ccc(OC)cc2)c(OCCCCCCCC)cc1/C=C/c1ccc(/C=C/c2ccccc2)cc1  
 1042 C=Cc1ccc([N+](=O)[O-])cc1.CCCCCCCC0c1cc(/C=C/c2ccc(Br)cc2)c(OCCCCCCCC)cc1C=O>>CCCCCCCC0c1cc(/C=C/c2ccc(/C=C/c3ccc([N+](=O)[O-])cc3)cc2)c(OCCCCCCCC)cc1C=O  
 1043 C=CC=O.O=[N+][O-]c1ccc(I)cc1>>O=C/C=C/c1ccc([N+](=O)[O-])cc1  
 1044 C=CC(=O)C(O[Si](CC)(CC)CC)c1c(OC)ccc(OC)c1OCc1cccc1.COC(=O)C1Cc2cc(I)c(OCc3ccccc3)c(OC)c2C(=O)O1>>CC[Si](CC)(CC)OC(C(=O)/C=C/c1cc2c(c(OC)c1OCc1cccc1)C(=O)OC(C(=O)OC)C2)c1c(OC)ccc(OC)c1OCc1cccc1  
 1045 C=CC(=O)OCc1ccc2ccc3cccc4ccc1c2c34.O=C(O)c1ccc(I)cc1>>O=C(/C=C/c1ccc(C(=O)O)cc1)OCc1ccc2ccc3cccc4ccc1c2c34  
 1046 C=CC(=O)N1CCc2cc(OC)c(OC)cc2C1.Cn1c(-c2ccccc2)c(I)c2ccnc21>>COc1cc2c(cc1OC)CN(C(=O)/C=C/c1c(-c3ccccc3)n(C)c3ncccc13)CC2  
 1047 C=CC(=O)O.Oc1cccc1I>>O=C(O)/C=C/c1cccc1O  
 1048 C=Cc1cccc1.COc1ccc(-c2oc3ccccc3c(=O)c2Br)cc1>>COc1ccc(-c2ccccc2)c(I)c2ccnc21>>COc1cc2c(cc1OC)CN(C(=O)/C=C/c1c(-c3ccccc3)n(C)c3ncccc13)CC2  
 1049 C=CC#N.O=Cc1ccc(Br)cc1>>N#C/C=C/c1ccc(C=O)cc1  
 1050 Br1ccc(-c2cccs2)s1.C=CC(=O)OC>>COC(=O)/C=C/c1ccc(-c2cccs2)s1  
 1051 C=CC(C)(O)CCC=C(C)C.Cc1ccc(O)c(Br)c1>>CC(C)=CCCC(C)(O)/C=C/c1cc(C)ccc1O  
 1052 C=CCCC.COC(=O)CCCCCCCC1=C(I)CCC1=O>>CCC/C=C/C1=C(CCCCCCCC(=O)OC)C(=O)CC1  
 1053 C=CC[C@@H]1C[C@@H]([C@@H](O[Si](C(C)C)(C(C)C)C(C)C)c2ccc(OC)c(OC)c2)CO[C@H]1c1ccc(OC)c(OC)c1.COc1ccc(Br)cc1OC>>COc1ccc(/C=C/C[C@@H]2C[C@@H]([C@@H](O[Si](C(C)C)(C(C)C)C(C)C)c3ccc(OC)c(OC)c3)CO[C@H]2c2ccc(OC)c(OC)c2)cc1OC  
 1054 C=CC(=O)OCC.Cc1c(Br)oc2ccc(Cl)c(Oc3cncnc3C(=O)N3CCN(C4CC4)c4cccc43)c12>>CCOC(=O)/C=C/c1oc2ccc(Cl)c(Oc3cncnc3C(=O)N3CCN(C4CC4)c4cccc43)c2c1C  
 1055 C=CC(C)=O.COC(=O)c1cc2cc(I)c(OCc3ccccc3)c(OC)c2c(=O)o1>>COC(=O)c1cc2cc(/C=C/C(C)=O)c(OCc3ccccc3)c(OC)c2c(=O)o1  
 1056 C=CC(C)=O.O=C(NCc1ccc(Cl)cc1)c1cnc2c(F)cc(I)cc2c1O>>CC(=O)/C=C/c1cc(F)c2ncc(C(=O)NCc3ccc(Cl)cc3)c(O)c2c1  
 1057 C=Cc1cccc1.CN(Cc1cccc1)c1cccc(Br)n1>>CN(Cc1cccc1)c1cccc(/C=C/c2ccccc2)n1  
 1058 C=CC(=O)OC.CCCCCCCCC(=O)NCc1cc(OC)c(OCOCCOC)cc1I>>CCCCCCCCC(=O)NCc1cc(OC)c(OCOCCOC)cc1/C=C/C(=O)OC



C=CC(=O)OCC.CC(C)(C)OC(=O)N1[C@H]2C[C@@H](C1)c1ccc(Br)cc(=O)n1C2>>CCOC(=O)/C=C/c1cc2n(c(=O)c1)C[C@H]1C[C@H]12CN(C(=O)OC(C)(C)C)C1

C=CC(=O)CCC.CC(C)(C)c1cccc(Br)cc1>>CCCC(=O)/C=C/c1cccc(C(C)(C)C)cc1  
C=CCNC(=O)OC(C)(C)C.O=C(OC[C@H]1O[C@@H](n2cc(I)c(=O)[nH]c2=O)C[C@@H]1OC(=O)c1cccc1)c1cccc1>>CC(C)(C)OC(=O)NC/C=C/c1cn([C@H]2C[C@H](OC(=O)c3cccc3)[C@@H](COC(=O)c3cccc3)O2)c(=O)[nH]c1=O  
C=Cc1ccc([N+](=O)[O-])cc1.COCC(=O)[C@H](Cc1ccc(O)c(I)c1)NC(=O)OC(C)(C)C>>COCC(=O)[C@H](Cc1ccc(O)c(/C=C/c2ccc([N+](=O)[O-])cc2)c1)NC(=O)OC(C)(C)C

C=CC(=O)OC.O=C1Cc2cc(Br)ccc2N1>>COC(=O)/C=C/c1ccc2c(c1)CC(=O)N2  
C=Cc1ccc(C)cc1.Nc1ccc(Cl)cc1Br>>Cc1ccc(/C=C/c2ccc(Cl)ccc2N)cc1  
Br1cccs1.C=CC(C)(O)CCC=C(C)C>>CC(C)=CCCC(C)(O)/C=C/c1cccs1  
C=CC(=O)OCCc1cccc1.Ic1cen(-c2cccc2)n1>>O=C(/C=C/c1cen(-c2cccc2)n1)OCc1cccc1  
C=CC(=O)OC.Cn1c(-c2ccc(Br)cc2)nc2cccc21>>COC(=O)/C=C/c1ccc(-c2nc3cccc3n2C)cc1  
C=Cc1cccc1.CC(C)c1enc(C(C)C)c(Cl)n1>>CC(C)c1enc(C(C)C)c(/C=C/c2cccc2)n1  
C=Cc1ccc(Cl)cc1.N#Cc1ccc(Br)ec1>>N#Cc1ccc(/C=C/c2ccc(Cl)cc2)cc1  
C=Cc1cenc1.Nc1enc(Cl)c(Br)c1>>Nc1enc(Cl)c(/C=C/c2cenc2)c1  
C=CC(N)=O.COc1cccc1I>>COe1cccc1/C=C/C(N)=O  
C=CC(=O)OCC.O=C1CCc2cc(Br)ene2N1>>CCOC(=O)/C=C/c1enc2c(c1)CCC(=O)N2  
C=CC(=O)OC(C)(C)C.O=C(NC[C@H]1CCc2cc(I)ccc2O1)OCc1cccc1>>CC(C)(C)OC(=O)/C=C/c1cc2c(c1)CC[C@H](CNC(=O)OCc1cccc1)O2  
C=Cc1ccc(-c2cc(C(C)(C)C)c(OC(C)=O)c(C(C)(C)C)e2)cc1Br.CC(=O)Oc1c(C(C)(C)C)cc(-  
c2ccc(C)c(I)e2)cc1C(C)(C)C>>CC(=O)Oc1c(C(C)(C)C)cc(-c2ccc(/C=C/c3ccc(  
c4cc(C(C)(C)C)c(OC(C)=O)c(C(C)(C)C)c4)ccc3C)c(Br)e2)cc1C(C)(C)C  
C=C[Si](CC)(CC)CC.Cc1cccc1Br>>CC[Si]/C=C/c1cccc1C)(CC)CC  
C=CC(=O)OCC.COc1cc(Br)cc(OC(F)(F)F)c1>>CCOC(=O)/C=C/c1cc(OC)cc(OC(F)(F)F)c1  
C=Cc1scnc1C.FC(F)(F)C(F)(F)C(F)(F)C(F)(F)C(F)(F)C(F)(F)Br>>Cc1nsc1/C=C/C(F)(F)C(F)(F)C(F)  
(F)C(F)(F)C(F)(F)C(F)(F)F  
C=Cc1ccc(F)cc1.Fc1cccc(I)c1>>Fc1ccc(/C=C/c2cccc(F)e2)cc1  
C=Cc1ccc([Si](OCC)(OCC)OCC)cc1.CCOP(=O)(Cc1ccc(/C=C/c2ccc(Br)e3cccc23)cc1)OCC>>CCO  
[Si](OCC)(OCC)c1ccc(/C=C/c2ccc(/C=C/c3ccc(CP(=O)(OCC)OCC)cc3)e3cccc23)cc1  
C=CC(=O)OCC.CNe1nc(C)c2cc(Br)c(=O)n(C3CCCC3)c2n1>>CCOC(=O)/C=C/c1cc2c(C)nc(NC)nc2  
n(C2CCCC2)c1=O  
C=Cc1cccc1.FC(F)(F)C(F)(F)C(F)(F)C(F)(F)C(F)(F)C(F)(F)Br>>FC(F)(F)C(F)(F)C(F)(F)C(F)(F)C(F)  
(F)C(F)(F)C(F)(F)C/F=C/c1cccc1  
C=CC(=O)OC.COc1ccc2c(c1)CCN(c1ccc(CCC(C)C)cc1)C2(C)c1ccc(Br)cc1>>COC(=O)/C=C/c1cccc(  
C2(C)c3ccc(OC)cc3CCN2c2ccc(CCC(C)C)cc2)cc1  
C=CC(=O)OC(C)(C)C.COCCc1ccc(I)nc1Cl>>COCCc1ccc(/C=C/C(=O)OC(C)(C)C)nc1Cl  
C=CC(=O)OCC.Nc1cc2ccc(Br)cc2en1>>CCOC(=O)/C=C/c1ccc2cc(N)nc2c1  
C=CCC(=O)O.CC(C)c1[nH]nc(O[C@@H]2O[C@H](COC(=O)c3cccc3)[C@@H](F)[C@H](OC(=O)  
c3cccc3)[C@H]2OC(=O)c2cccc2)c1Cc1ccc(Br)cc1>>CC(C)c1[nH]nc(O[C@@H]2O[C@H](COC(=  
O)c3cccc3)[C@@H](F)[C@H](OC(=O)c3cccc3)[C@H]2OC(=O)c2cccc2)c1Cc1ccc(/C=C/CC(=O)  
C=Cc1cccc(OC)c1.Oc1ccc(O)c(I)c1>>COc1cccc(/C=C/c2cc(O)ccc2O)c1  
C=CCCCCCCCC.COC(=O)c1ccc2cc(Br)ccc2c1>>CCCCCCCCC/C=C/c1ccc2cc(C(=O)OC)ccc2c  
C=Cc1ccc2cccc2c1.FC(F)(F)c1cccc1I>>FC(F)(F)c1cccc1/C=C/c1ccc2cccc2c1  
C=CN1C(=O)c2cccc2C1=O.Cc1ccc(CNC(=O)Cc2cccc(Br)e2)cc1C>>Cc1ccc(CNC(=O)Cc2cccc(/C=  
C/N3C(=O)c4cccc4C3=O)c2)cc1C  
C=Cc1cccc1.Ic1cccc2cc3c(nc12)-c1cccc1CC3>>C(=C/c1cccc2cc3c(nc12)-c1cccc1CC3)\c1cccc1  
Br1ccc(-  
c2cccc2)cc1.C=CC[C@H](CC(=O)OC(C)(C)C)C(=O)N[C@H](C(=O)N[C@H](C)c1cccc1)(C)(C)  
C>>C[C@H](NC(=O)[C@@H](NC(=O)[C@H](C/C=C/c1ccc(-  
c2cccc2)cc1)CC(=O)OC(C)(C)C)C(C)C)c1cccc1  
C=CC(=O)OC.O=c1c2cccc2cc(Br)c2cccc12>>COC(=O)/C=C/c1cc2cccc2c(=O)c2cccc12  
Br1cnc2cccc2c1.C=CCO[C@H]1(C)C[C@@H](C)C(=O)[C@H](C)[C@H]2N(N)C(=O)O[C@H]2(C)[  
C@@H](CC)OC(=O)[C@H](C)C(=O)[C@H](C)[C@H]1O[C@@H]1O[C@H](C)C[C@H](N(C)C)[C  
@H]1O>>CC[C@H]1OC(=O)[C@H](C)C(=O)[C@H](C)[C@@H](O[C@@H]2O[C@H](C)C[C@H]  
(N(C)C)[C@H]2O)[C@@H](C)(OC/C=C/c2cnc3cccc3c2)C[C@@H](C)C(=O)[C@H](C)[C@H]2N(N)C  
C=CC(C)=O.COCC(=O)c1cc(Br)cn1C(=O)OC(C)(C)C>>COC(=O)c1cc(/C=C/C(C)=O)cn1C(=O)OC(C)  
(C)C  
C=CC(=O)OC.Cc1cccc(C)c1Cn1nc(C)c2ccc(Br)cc21>>COC(=O)/C=C/c1ccc2c(C)nn(Cc3c(C)cccc3C)

1096 C=CCNS(=O)(=O)c1cc(C(F)(F)F)cc(C(F)(F)F)c1.COc1ccc(Br)cc1>>COc1ccc(/C=C/CNS(=O)(=O)c2  
cc(C(F)(F)F)cc(C(F)(F)F)c2)cc1  
1097 C=Cc1ccncc1.CC(C)(C)OC(=O)N[C@H](COc1cnc(Cl)c(Br)c1)Cc1ccccc1>>CC(C)(C)OC(=O)N[C@  
H](COc1cnc(Cl)c(/C=C/c2ccncc2)c1)Cc1ccccc1  
1098 C=Cc1ccc2ccccc2c1.Cc1ccccc1I>>Cc1ccccc1/C=C/c1ccc2ccccc2c1  
1099 C=Cc1cc(OC(=O)C)cc1OCCCC.CCN(CC)/N=N/c1ccc(I)cc1>>CCCCOc1cc(/C=C/c2ccc(/N=N/  
N(CC)CC)cc2)c(OC(=O)C)cc1C=O  
1100 C=CC(=O)OCC.Fc1ccc(Br)cc1>>CCOC(/C=C/c1ccc(F)cc1)OCC  
1101 C=CC(=O)OC(C)(C)C.O=[N+](O-)]c1ccccc1I>>CC(C)(C)OC(=O)/C=C/c1ccccc1[N+](=O)[O-]  
1102 C=CP(=O)(OCC)OCC.Cc1ccc(Br)cc1>>CCOP(=O)(/C=C/c1ccc(C)cc1)OCC  
1103 C=CC(=O)OC.CCC(CC)(c1ccc(OCc2ccccc2)c(C)c1)c1c[nH]c2cc(Br)ccc12>>CCC(CC)(c1ccc(OCc2c  
cccc2)c(C)c1)c1c[nH]c2cc(/C=C/C(=O)OC)ccc12  
1104 C=CC(=O)OCC.Fc1ccc(I)cc1>>CCOC(/C=C/c1ccc(F)cc1)OCC  
1105 C=Cc1ccccc1C.CCOC(=O)C(F)I>>CCOC(=O)C(F)/C=C/c1ccccc1C  
1106 C=Cc1ccc(OC)cc1.COc1cc(C=O)c(Br)c(OC)c1OC>>COc1ccc(/C=C/c2c(C=O)cc(OC)c(OC)c2OC)cc1  
1107 C=CC(=O)N1CCCC1.CC(C)(C)OC(=O)c1ccccc1Br>>CC(C)(C)OC(=O)c1ccccc1/C=C/C(=O)N1CCC  
Br1cccn1.C=CC(=O)OC(C)(C)C>>CC(C)(C)OC(=O)/C=C/c1ccccc1  
1108 C=Cc1ccc(F)cc1.O=Cc1ccccc1S(=O)(=O)c1ccc(Br)cc1>>O=Cc1ccccc1S(=O)(=O)c1ccc(/C=C/c2ccc(  
F)cc2)cc1  
1109 C=CC(=O)c1ccccc1.Ic1ccccc1>>O=C(/C=C/c1ccccc1)c1ccccc1  
1110 C=Cc1ccc(CO)n1.Cc1ncc(C#N)c(Nc2ccc3[nH]ccc3c2C)c1I>>Cc1ncc(C#N)c(Nc2ccc3[nH]ccc3c2C)c  
1/C=C/c1ccccc(CO)n1  
1111 C=Cc1ccc(N(c2ccc(OC)cc2)c2ccc(OC)cc2)cc1.O=Cc1ccc(Br)cc1>>COc1ccc(N(c2ccc(/C=C/c3ccc(C=  
O)cc3)cc2)c2ccc(OC)cc2)cc1  
1112 C=C(Br)CC.C=Cc1ccncc1>>C=C(/C=C/c1ccncc1)CC  
1113 C=Cc1cn(C)cn1.Oc1ccc(-c2sc3cc(O)ccc3c2Oc2ccc(Br)cc2)cc1>>Cn1cnc(/C=C/c2ccc(Oc3c(-  
c4ccc(O)cc4)sc4cc(O)ccc34)cc2)c1  
1114 C=CC(=O)OC(C)(C)C.O=C(OCc1ccccc1)c1cc(Br)cc(I)c1>>CC(C)(C)OC(=O)/C=C/c1cc(Br)cc(C(=O)  
OCc2ccccc2)c1  
1115 C=Cc1ccc(C(=O)OC)cc1.COc1ccc(I)cc1>>COC(=O)c1ccc(/C=C/c2ccc(OC)cc2)cc1  
1116 C=Cc1ccc2c(c1)C(=O)N([C@H](CCC(=O)OCC)C(=O)OCC)C2.CC(C)(C)C(=O)Nc1nc2[nH]cc(I)c2  
1117 c(=O)[nH]1>>CCOC(=O)CC[C@H](C(=O)OCC)N1Cc2ccc(/C=C/c3c[nH]c4nc(NC(=O)C(C)(C)C)[  
nH]c(=O)c34)cc2C1=O  
1118 C=CC(=O)OCc1ccccc1.Cc1ccc(-n2nc3c4cc(Br)ccc4[nH]c(=O)n3c2=O)cc1>>Cc1ccc(-  
n2nc3c4cc(/C=C/C(=O)OCc5ccccc5)ccc4[nH]c(=O)n3c2=O)cc1  
1119 C=Cc1ccccc1.Cc1cc(I)ccc1-c1ccccc1>>Cc1cc(/C=C/c2ccccc2)ccc1-c1ccccc1  
1120 C=CCC(N=[N+]=[N-])c1ccccc1.Ic1ccccc1>>[N-]=[N+]=NC(C/C=C/c1ccccc1)c1ccccc1  
1121 C=CP(=O)(O)O.COc1ccc(Br)cc1>>COc1ccc(/C=C/P(=O)(O)O)cc1  
1122 C=C[C@H]1O[C@H]2OC(C)(C)O[C@H]2[C@H]1O.O=c1ccc2cc(Br)ccc2o1>>CC1(C)O[C@H]  
2O[C@H](/C=C/c3ccc4oc(=O)ccc4c3)[C@H](O)[C@H]2O1  
1123 C=Cc1ccccc1.Fc1ccc(Br)cc1>>Fc1ccc(/C=C/c2ccccc2)c1  
1124 C=CC(=O)NCCc1ccc(O)cc1.COc1cc(I)ccc1O>>COc1cc(/C=C/C(=O)NCCc2ccc(O)cc2)ccc1O  
1125 C=CC(=O)OCCCC.CCOC(=O)Nc1cc(OC)ccc1C1=C(I)CCN1S(=O)(=O)c1ccc(C)cc1>>CCCCOC(=O)  
/C=C/C1=C(c2ccc(OC)cc2)NC(=O)OCC)N(S(=O)(=O)c2ccc(C)cc2)CC1  
1126 C=Cc1ccc(OC)cc1.O=c1c(I)c(/C=C/c2ccc(Cl)cc2)[nH]c2ccccc12>>COc1ccc(/C=C/c2c(/C=C/c3ccc(Cl)  
)cc3)[nH]c3ccccc3c2=O)cc1  
1127 C=CS(=O)(=O)F.Cc1cc(C)cc(I)c1>>Cc1cc(C)cc(/C=C/S(=O)(=O)F)c1  
1128 C=Cc1ccc(O)cc1.COc1cc(Br)cc(OC)c1>>COc1cc(/C=C/c2ccc(O)cc2)cc(OC)c1  
1129 C=Cc1ccccc1([N+](=O)[O-])c1.FC(F)(F)Oc1ccccc1Br>>O=[N+](O-)]  
c1ccccc1/C=C/c2ccc(OC(F)(F)F)c2)c1  
1130 C=CC(=O)OC.COc1ncc(I)c(OC)n1>>COC(=O)/C=C/c1cnc(OC)nc1OC  
1131 C=CC(=O)NCCCc1ccccc1.COC(=O)C1CC(c2ccc(C(=O)C(=O)c3ccc(Br)cc3)cc2)=NO1>>COC(=O)C  
1CC(c2ccc(C(=O)C(=O)c3ccc(/C=C/C(=O)NCCCc4ccccc4)cc3)cc2)=NO1  
1132 C=Cc1ccccc1(F)c1.CCOC(=O)C(F)Br>>CCOC(=O)C(F)/C=C/c1ccccc1(F)c1  
1133 C=Cc1cnc(Br)c1.CC(C)(C)OC(=O)N1CCC[C@H]1COc1cnc(Cl)c(I)c1>>CC(C)(C)OC(=O)N1CCC[  
C@H]1COc1cnc(Cl)c(/C=C/c2cnc(Br)c2)c1  
1134 C=CC(=O)OCC.N#Cc1ccccc1I>>CCOC(=O)/C=C/c1ccccc1(C#N)c1  
\*CNCCCOCOCOCOCOCNC(=O)COc1ccc(C(Cc2cc(OC)cc(OC)c2)NC(=O)c2ccc(C=C)cc2)cc1.O=[N  
+]([O-]  
1135 ]c1ccccc1I>>\*CNCCCOCOCOCOCOCNC(=O)COc1ccc(C(Cc2cc(OC)cc(OC)c2)NC(=O)c2ccc(/C=C  
/c3ccccc3[N+](=O)[O-])cc2)cc1

1136 C=Cc1ccc(F)cc1.COc1cc(C=O)c(Br)c(OC)c1OC>>COc1cc(C=O)c(/C=C/c2ccc(F)cc2)c(OC)c1OC  
1137 C=CCC(=O)O.Cc1n[nH]c2cc(Br)ccc12>>Cc1n[nH]c2cc(/C=C/CC(=O)O)ccc12  
1138 C=CC(=O)OCCOC.C[C@H](Nc1ncnc2sc(Br)cc12)c1cccc1>>COCCOC(=O)/C=C/c1cc2c(N[C@H](C)c3ccccc3)ncnc2s1  
1139 C=Cc1cccc(N)c1.CN(C(=O)c1cccc1)c1ccc2c(c1)[nH]c(=NC(=O)c1ccc(Br)s1)n2CCC(N)=O>>CN(C(=O)c1cccc1)c1ccc2c(c1)[nH]c(=NC(=O)c1ccc(/C=C/c3cccc(N)c3)s1)n2CCC(N)=O  
1140 Br1cncnc1.C=CS(=O)(=O)N1CCC2(CC1)N=C(C1CCCCC1)NC2=O>>O=C1NC(C2CCCCC2)=NC12CCN(S(=O)(=O)/C=C/c1cncnc1)CC2  
1141 C=CC(=O)OC.CC(C)(C)OC(=O)NCc1ccc(Br)cc1>>COC(=O)/C=C/c1ccc(CNC(=O)OC(C)(C)C)cc1  
1142 C=Cc1ccc(F)cc1.CCOC(=O)C(F)(F)Br>>CCOC(=O)C(F)(F)/C=C/c1ccc(F)cc1  
1143 Br1cncnc(-c2ccccc2)c1.C=CCCO>>OCC/C=C/c1cncnc(-c2ccccc2)c1  
1144 C=CC(=O)OCCCC.NC(=O)c1ccc(I)cc1>>CCCCOC(=O)/C=C/c1ccc(C(N)=O)cc1  
1145 C=Cc1cc(OC(C)=O)cc(OC(C)=O)c1.CC(=O)OC[C@H]1O[C@H](Oc2ccc(I)cc2)[C@H](OC(C)=O)[C@H](OC(C)=O)[C@H]1OC(C)=O>>CC(=O)OC[C@H]1O[C@H](Oc2ccc(/C=C/c3cc(OC(C)=O)cc(OC(C)=O)c3)cc2)[C@H](OC(C)=O)[C@H](OC(C)=O)[C@H]1OC(C)=O  
1146 C=Cc1cncnc1.C[Si](C)(C)CCOCn1nc(I)c2ccc(C=O)cc21>>C[Si](C)(C)CCOCn1nc(/C=C/c2cncnc2)c2ccc(C=O)cc21  
1147 C=CC(=O)OCC.Cc1cnc2[nH]c3c(C)cc(Br)cc3c2c1>>CCOC(=O)/C=C/c1cc(C)c2[nH]c3ncc(C)cc3c2c  
1148 C=CC(=O)OCC.CCc1ccc(-c2ccccc2Br)cc1>>CCOC(=O)/C=C/c1cccc1-c1ccc(CC)cc1  
1149 C=CC(=O)OC.Cc1cc([N+](=O)[O-])c(Cl)cc1>>COC(=O)/C=C/c1cc(Cl)c([N+](=O)[O-])cc1C  
1150 C=CC(=O)OC.Cc1ccc(C(=C(I)CC[Se]c2ccccc2)c2ccc(C)cc2)cc1>>COC(=O)/C=C/C(CC[Se]c1ccccc1)=C(c1ccc(C)cc1)c1ccc(C)cc1  
1151 C=Cc1ccc(C#N)cc1.Oc1ccc(/N=N/c2ccc(Br)cc2)cc1>>N#Cc1ccc(/C=C/c2ccc(/N=N/c3ccc(O)cc3)cc2)  
1152 C=CC(=O)OC(C)(C)C.O=Cc1cccc(Br)c1>>CC(C)(C)OC(=O)/C=C/c1cccc(C=O)c1  
1153 C=CC(=O)N(C(C)C)C(C)C.Cc1ccc(I)s1>>Cc1ccc(/C=C/C(=O)N(C(C)C)C(C)C)s1  
1154 C=CC(=O)OCC.CCOC(=O)CCOCc1cc2c(cc1Br)OCO2>>CCOC(=O)/C=C/c1cc2c(cc1COCCC(=O)O)CC)OCO2  
1155 C=CC(=O)N(C)Cc1c(C)c2ccccc2n1C.O=C1CN(c2ccccc2)Cc2cc(Br)cnc2N1>>Cc1c(CN(C)C(=O)/C=C/c2cnc3c(c2)CN(c2ccccc2)CC(=O)N3)n(C)c2ccccc12  
1156 C=CCC(=O)Nc1ccc(-c2ccc(C(=O)NCCN3CCCCC3)c(NCC)n2)cc1F.Nc1ccc(Br)cn1>>CCNc1nc(-c2ccc(NC(=O)/C=C/c3ccc(N)nc3)c(F)c2)ccc1C(=O)NCCN1CCCCC1  
1157 C=Cc1cncnc1.COC(=O)c1cc2ccc(=O)oc2cc1OS(=O)(=O)C(F)(F)F>>COC(=O)c1cc2ccc(=O)oc2cc1/C=C/c1cncnc1  
1158 Br1cncnc2ccccc12.C=CCC(C)C(=O)OCC>>CCOC(=O)C(C)C/C=C/c1cccc2ccccc12  
1159 C=Cc1ccc(/C=C/c2ccc(OCCCCCCCCCCCCC)cc2)cc1.CCCCOc1c(C)cc(I)cc1C>>CCCCCCCCCCCCCOc1ccc(/C=C/c2ccc(/C=C/c3cc(C)c(OCCCC)c(C)c3)cc2)cc1  
1160 C=CC(=O)Nc1ccc2nnc([C@H]3C[C@H](OC(=O)c4ccc(C)cc4)[C@H](COC(=O)c4ccc(C)cc4)O3)c2c1.C[Si](C)(C)CCOCn1cc(I)c(=O)[nH]c1=O>>Cc1ccc(C(=O)OC[C@H]2O[C@H](n3cnc4ccc(NC(=O)/C=C/c5cn(COCC[Si](C)(C)C)c(=O)[nH]c5=O)cc43)C[C@H]2OC(=O)c2ccc(C)cc2)cc1  
1161 C=CC(=O)OCc1ccccc1.Nc1ccc(Br)cn1>>Nc1ccc(/C=C/C(=O)OCc2ccccc2)cn1  
1162 C=CC(=O)Nc1ccc(Cl)c(C(F)(F)F)c1.Ic1ccc(Cc2cncnc2)cc1>>O=C(/C=C/c1ccc(Cc2cncnc2)cc1)Nc1cc(Cl)c(C(F)(F)F)c1  
1163 C=Cc1ccc(SC)cc1.Clc1c2cc(Br)ccc2nc2c1[nH]c1ccccc12>>CSc1ccc(/C=C/c2ccc3nc4c([nH]c5ccccc54)c(Cl)c3c2)cc1  
1164 C=Cc1ccc(C)cc1.Cc1c(Br)c(=O)oc2ccccc12>>Cc1ccc(/C=C/c2c(C)c3ccccc3oc2=O)cc1  
1165 C=Cc1snc1C.C[Si](C)(C)CCOCn1nc(I)c2ccc(C=O)cc21>>Cc1nsc1/C=C/c1nn(COCC[Si](C)(C)C)c2cc(C=O)ccc12  
1166 C=Cc1ccc(F)cc1.Cc1c(Br)c(=O)oc2ccccc12>>Cc1c(/C=C/c2ccc(F)cc2)c(=O)oc2ccccc12  
1167 C=CC(=O)OCC.Clc1ccccc(I)c1>>CCOC(=O)/C=C/c1cccc(Cl)c1  
1168 Br1cncnc1.C=C[C@H]1CCCN1C(=O)OC(C)(C)C>>CC(C)(C)OC(=O)N1CCC[C@H]1/C=C/c1ccc  
1169 C=CCC(C)N(C)C(=O)OC(C)(C)C.CCOc1cncnc(Br)c1>>CCOc1cncnc(/C=C/CC(C)N(C)C(=O)OC(C)(C)C  
1170 C=Cc1cccc(O)c1.Nc1ccccc1Br>>Nc1ccccc1/C=C/c1cccc(O)c1  
1171 C=CC(=O)OC(C)(C)C.COc1ccc(Cl)cc1>>COc1ccc(/C=C/C(=O)OC(C)(C)C)cc1  
1172 C=CC(=O)O.N[C@H](Cc1c[nH]c2c(Br)cccc12)C(=O)O>>N[C@H](Cc1c[nH]c2c(/C=C/C(=O)O)cccc12)C(=O)O  
1173 C=CC(=O)OC.CC1(C)NC(C)(C)c2cc(Br)ccc21>>COC(=O)/C=C/c1ccc2c(c1)C(C)(C)NC2(C)C  
1174 C=Cc1ccc(F)cc1.Cn1c(=O)c2c(cc(Br)n2C)n(C)c1=O>>Cn1c(=O)c2c(cc(/C=C/c3ccc(F)cc3)n2C)n(C)c  
1175 C=Cc1ccc(N(CCCC)CCCC)cc1.CN(C)c1ccc(/C=C/c2nc3cc(Br)ccc3nc2-c2ccccc2)cc1>>CCCCN(CCCC)c1ccc(/C=C/c2ccc3nc(-c4ccccc4)c(/C=C/c4ccc(N(C)C)cc4)nc3c2)cc1  
1176 C=CC(=O)OCC.O=Cc1cc(I)ccc1O>>CCOC(=O)/C=C/c1ccc(O)c(C=O)c1  
1177 C=CC(=O)OCCCC.COc1cc(Br)cc(OC)c1OC>>CCCCOC(=O)/C=C/c1cc(OC)c(OC)c(OC)c1

1178 C=Cc1c(F)c(F)c(F)c(F)c1F.IC1CCCCC1>>Fc1c(F)c(F)c(/C=C/C2CCCCC2)c(F)c1F  
1179 C=Cc1ccc(C)cc1.CCOC(=O)C1CCCN(c2cccc(Br)n2)C1>>CCOC(=O)C1CCCN(c2cccc(/C=C/c3ccc(C)cc3)n2)C1  
1180 C=Cc1cncnc1.CCCCCCCC(=O)N1CCN(c2ccc(Br)cc2)CC1>>CCCCCCCC(=O)N1CCN(c2ccc(/C=C/c3cncnc3)cc2)CC1  
1181 C=CC(=O)OC.O=c1[nH]c(=O)n([C@H]2C[C@@H](CO)[C@H](O)C2)cc1I>>COC(=O)/C=C/c1cn([C@H]2C[C@@H](CO)[C@H](O)C2)c(=O)[nH]c1=O  
1182 C=CC(OCC)OCC.CC(C)(C)c1ccc(I)cc1>>CCOC(/C=C/c1ccc(C(C)(C)C)cc1)OCC  
1183 C=Cc1cccc1.CC(=O)c1ccc(I)cc1>>CC(=O)c1ccc(/C=C/c2cccc2)cc1  
1184 C=Cc1ccc(N(C)C)cc1.Cc1nc2ccc(Br)cc2nc1-c1cccc1>>Cc1nc2ccc(/C=C/c3ccc(N(C)C)cc3)cc2nc1-c1cccc1  
1185 C=Cc1ccc([N+](=O)[O-])cc1.C[C@@H]1CC(=O)Nc2cccc(Br)c2N1>>C[C@@H]1CC(=O)Nc2cccc(/C=C/c3ccc([N+](=O)[O-])cc3)c2N1  
1186 Br1cnc1.C=CC(=O)OC(C)(C)C>>CC(C)(C)OC(=O)/C=C/c1cnc1  
1187 C=Cc1ccc(OC)cc1.Cc1oc2cccc2c(=O)c1Br>>COc1ccc(/C=C/c2c(C)oc3cccc3c2=O)cc1  
1188 C=CC(=O)N1N=Cc2cccc2C1Cc1ccc(C)cc1.COc1cc(Cc2cnc(N)nc2N)cc(I)c1OC>>COc1cc(Cc2cnc(N)nc2N)cc(/C=C/C(=O)N2N=Cc3cccc3C2c2ccc(C)cc2)c1OC  
1189 C=Cc1cncnc1.COc1ccc([C@H]2C[C@@H]2COc2nc(C)nc2Br)nc1>>COc1ccc([C@H]2C[C@@H]2COc2nc(C)nc2/C=C/c2cncnc2)nc1  
1190 C=CC(=O)OC.CSc1cccc1I>>COC(=O)/C=C/c1cccc1SC  
1191 C=CC(=O)OC.COC(=O)c1cncnc1Br>>COC(=O)/C=C/c1cncnc1C(=O)OC  
1192 C=CC#N.COC(=O)c1cncnc1Br>>COC(=O)c1cncnc1/C=C/C#N  
1193 C=CC(=O)N1N=Cc2cccc2C1c1cccn1.COc1cc(Cc2cnc(N)nc2N)cc(I)c1OC>>COc1cc(Cc2cnc(N)nc2N)cc(/C=C/C(=O)N2N=Cc3cccc3C2c2cccn2)c1OC  
1194 C=Cc1cccc1.CCCCCn1cc(C(=O)NC23CC4CC(CC(C4)C2)C3)c(=O)c2cc(I)ccc21>>CCCCCn1cc(C(=O)NC23CC4CC(CC(C4)C2)C3)c(=O)c2cc(/C=C/c3cccc3)ccc21  
1195 C=CS(=O)(=O)N1CCC2(CC1)N=C([C@H]1CC[C@H](C)CC1)NC2=O.CNc1cc(C)c(Br)c(C)c1>>CNc1cc(C)c(/C=C/S(=O)(=O)N2CCC3(CC2)N=C([C@H]2CC[C@H](C)CC2)NC3=O)c(C)c1  
1196 C=Cc1cccc1.COC(=O)[C@@]1(NC(=O)OC(C)(C)C)CCc2cc(Br)ccc2C1>>COC(=O)[C@@]1(NC(=O)OC(C)(C)C)CCc2cc(/C=C/c3cccc3)ccc2C1  
1197 C=CC(C)=O.Clc1ccc(I)cc1>>CC(=O)/C=C/c1ccc(Cl)cc1  
1198 C=CCOCc1cccc1.CC1(c2cccc2Br)CC(=O)C1>>CC1(c2cccc2/C=C/CCOCc2cccc2)CC(=O)C1  
1199 CCCC=[11CH2].Ic1cccc1>>CCC/C=[11CH]/c1cccc1  
1200 C=CCP(=O)(OCC)OCC.Clc1cccc(I)c1>>CCOP(=O)(C/C=C/c1cccc(Cl)c1)OCC  
1201 C=Cc1ccc(C)cc1.Oc1cccc1I>>Cc1ccc(/C=C/c2cccc2O)cc1  
1202 C=CC(N)=O.O=CC1=C(Br)CCC1>>NC(=O)/C=C/C1=C(C=O)CCC1  
1203 C=CC(=O)OC(C)(C)C.O=S(=O)(c1ccc(Br)cc1)N1CCc2ccnc21>>CC(C)(C)OC(=O)/C=C/c1ccc(S(=O)(=O)N2CCc3ccnc32)cc1  
1204 C=Cc1cncnc1.Cc1ccc(Br)cc1>>Cc1ccc(/C=C/c2cncnc2)cc1  
1205 C=CC(=O)OCCCC.CC(=O)O[IH2](OC(C)=O)c1cccc1>>CCCCOC(=O)/C=C/c1cccc1  
1206 C=Cc1cc(OC)c(OC)c(OC)c1.COc1ccc(I)cc1>>COc1ccc(/C=C/c2cc(OC)c(OC)c(OC)c2)cc1  
1207 C=CC(=O)OCCCC.CCCCc1ccc(Br)cc1>>CCCCOC(=O)/C=C/c1ccc(CCCC)cc1  
1208 C=C[Si](C)(C)C.O=[N+][O-]c1cccc(I)c1>>C[Si](C)(C)/C=C/c1cccc([N+](=O)[O-])c1  
1209 C=Cc1ccc([N+](=O)[O-])cc1.CCCCCCOc1cc(I)ccc1OCCO>>CCCCCCOc1cc(/C=C/c2ccc([N+](=O)[O-])cc2)ccc1OCCO  
1210 C=CC(=O)CCCC.COc1ccc(Br)cc1>>CCCCCC(=O)/C=C/c1ccc(OC)cc1  
1211 C=CC=O.O=[N+][O-]c1cccc1I>>O=C/C=C/c1cccc1[N+](=O)[O-]  
1212 C=CS(=O)(=O)c1cccc1.OCc1cccc(I)c1>>O=S(=O)(/C=C/c1cccc(CO)c1)c1cccc1  
1213 C=Cc1ccc(OC)cc1.COc1cc(Br)c(C=O)c(OC)c1>>COc1ccc(/C=C/c2cc(OC)cc(OC)c2C=O)cc1  
1214 C=Cc1ccc2cccc2c1.CC(C)(C)Br>>CC(C)(C)/C=C/c1ccc2cccc2c1  
1215 C=Cc1ccc(NC(=O)OC(C)(C)C)cc1.O=C(OC[C@H]1O[C@H](n2cc(I)c(=O)[nH]c2=O)C[C@@H]1OC(=O)c1cccc1)c1cccc1>>CC(C)(C)OC(=O)Nc1ccc(/C=C/c2cn([C@H]3C[C@H](OC(=O)c4cccc4)[C@@H](COC(=O)c4cccc4)O3)c(=O)[nH]c2=O)cc1  
1216 C=CC(=O)OC.N#Cc1ccc(-c2cc(I)cc(C=O)c2)cc1>>COC(=O)/C=C/c1cc(C=O)cc(-c2ccc(C#N)cc2)c1  
1217 Br1ccc(-c2cccc(C34CC5CC(CC(C5)C3)C4)c2)cc1.C=CC(=O)OC>>COC(=O)/C=C/c1ccc(-c2cccc(C34CC5CC(CC(C5)C3)C4)c2)cc1  
1218 C=CC(=O)OC.Cc1cc2cc(Br)ccc2[nH]1>>COC(=O)/C=C/c1ccc2[nH]c(C)cc2c1  
1219 C=Cc1ccc(C)cc1.COc1cc(C=O)c(Br)c(OC)c1OC>>COc1cc(C=O)c(/C=C/c2ccc(C)cc2)c(OC)c1OC  
1220 C=Cc1cncnc1.Cc1cccc1Br>>Cc1cccc1/C=C/c1cncnc1  
1221 C=Cc1cncnc1.CCN(c1cccc1)c1cccc(Br)n1>>CCN(c1cccc1)c1cccc(/C=C/c2cncnc2)n1

1222 C=Cc1ccc(OCCCCC)c(OCCCCC)c1.O=Cc1ccc(Br)cc1>>CCCCCOc1ccc(/C=C/c2ccc(C=O)cc2)c1OCCCCC  
1223 C=Cc1cccc(OCCO)c1.CCN1CCN(c2nc(Br)cc3ccsc23)CC1>>CCN1CCN(c2nc(/C=C/c3cccc(OCCO)c3)cc3ccsc23)CC1  
1224 C=Cc1cccc(OC)c1.CC(C)(C)OC(=O)c1ccc(Br)cc1[N+](=O)[O-]>>COc1cccc(/C=C/c2ccc(C(=O)OC(C)(C)C)c([N+](=O)[O-])c2)c1  
1225 C=Cc1cccc1.CC[C@]12C=CCN3CC[C@]4(C(=C(C(=O)OC)C1)Nc1ccc(I)cc14)[C@H]32>>CC[C@]12C=CCN3CC[C@]4(C(=C(C(=O)OC)C1)Nc1ccc(/C=C/c5cccc5)cc14)[C@H]32  
1226 C=CC(=O)OCC.Cc1[nH]cc2c(=O)n(-c3ccc(Cl)cc3)nc-2c1Br>>CCOC(=O)/C=C/c1c2nn(-c3ccc(Cl)cc3)c(=O)c-2c[nH]c1C  
1227 Br1ccc2c(c1)OCCOCCOCCOCCO2.C=CP(=O)(OCC)OCC>>CCOP(=O)/C=C/c1ccc2c(c1)OCCOCCOCCOCCO2)OCC  
1228 Br1ccc2[nH]ccc2c1.C=CC(=O)N(C)OC>>CON(C)C(=O)/C=C/c1ccc2[nH]ccc2c1  
1229 C=Cc1cccc1.Ic1ccc(CN2CCOCC2)cc1>>C=C/c1ccc(CN2CCOCC2)cc1\c1cccc1  
1230 C=Cc1cccc1.COc1ccc(/C=C/c2[nH]c3cccc3c(=O)c2I)cc1>>COc1ccc(/C=C/c2[nH]c3cccc3c(=O)c2/C=C/c2cccc2)cc1  
1231 C=Cc1ccc(OC)cc1.FC(F)(F)Oc1cccc(I)c1>>COc1ccc(/C=C/c2cccc(OC(F)(F)F)c2)cc1  
1232 C=CC(=O)OCC.C[Si](C)(C)CN(Cc1cc2c(cc1I)OCO2)C(CC1OCCO1)[Si](C)(C)C>>CCOC(=O)/C=C/c1cc2c(cc1CN(C[Si](C)(C)C)C(CC1OCCO1)[Si](C)(C)C)OCO2  
1233 C=CC(=O)OCCCC.N#Cc1cccc(Br)c1>>CCCCOC(=O)/C=C/c1cccc(C#N)c1  
1234 C=Cc1ccc(/C=C/c2ccc(/C=C/c3ccc(OCCCCCCCCCCCCC)c(OCCCCCCCCCCCCC)c(OCCCCCCCCCCCCC)C)c3)cc2)cc1.CCCCOc1c(C)cc(I)cc1C>>CCCCCCCCCCCCCOc1cc(/C=C/c2ccc(/C=C/c3ccc(/C=C/c4cc(C)c(OCCCC)c(C)c4)cc3)cc2)cc(OCCCCCCCCCCCCC)c1OCCCCCCCCCCCCC  
1235 C=CC(=O)OC.CC(C)n1enc2c(NCc3ccc(Br)cc3)nc(N3CCOCC3)nc21>>COC(=O)/C=C/c1ccc(CNc2nc(N3CCOCC3)nc3c2nen3C(C)C)cc1  
1236 C=CC(=O)OCC.COc1cc(Br)cc2cc(-c3cccc3)oc12>>CCOC(=O)/C=C/c1cc(OC)c2oc(-c3cccc3)cc2c1  
1237 C=CC(=O)O.O=c1c2ccc(F)cc2n(Cc2ccc(Br)cc2)c(=O)n1CCc1cccc1>>O=C(O)/C=C/c1ccc(Cn2c(=O)n(CCc3cccc3)c(=O)c3ccc(F)cc32)cc1  
1238 C=Cc1cccc(Cl)c1.CN1CCN(c2cccc(Br)n2)CC1>>CN1CCN(c2cccc(/C=C/c3cccc(Cl)c3)n2)CC1  
1239 Br1c2cccc2cc2cccc12.C=Cc1nc2c(N)ncnc2n1[C@H]1C[C@H](O[Si](C)(C)C(C)(C)C)[C@H](C)O[Si](C)(C)C(C)(C)C)O1>>CC(C)(C)[Si](C)(C)OC[C@H]1O[C@H](n2c(/C=C/c3c4cccc4cc4cccc34)nc3c(N)ncnc32)C[C@H]1O[Si](C)(C)C(C)(C)C  
1240 Br1ccc(Oc2cccc2)cc1.C=CC(=O)NCCc1c(C)[nH]c2c(F)ccc(C)c12>>Cc1[nH]c2c(F)ccc(C)c2c1CCN(C(=O)/C=C/c1ccc(Oc2cccc2)cc1  
1241 C=CC(=O)N1CC(c2oc3cccc3c2C)C1.O=C1CCNc2cc(Br)enc2N1>>Cc1c(C2CN(C(=O)/C=C/c3cnc4c(c3)NCCC(=O)N4)C2)oc2cccc12  
1242 Br1cnc2cccc2c1.C=CCO[C@]1(C)C[C@H](C)C(=O)[C@H](C)[C@H]2NC(=O)O[C@H]2[C@H](CC)OC(=O)[C@H](C)C(=O)[C@H](C)[C@H]1O[C@H]1O[C@H](C)C[C@H](N(C)C)[C@H]1OC(=O)c1cccc1>>CC[C@H]1OC(=O)[C@H](C)C(=O)[C@H](C)[C@H](O[C@H]2O[C@H](C)C[C@H](N(C)C)[C@H]2OC(=O)c2cccc2)[C@](C)(OC/C=C/c2cnc3cccc3c2)C[C@H](C)C(=O)[C@H](C)[C@H]2NC(=O)O[C@H]12  
1243 C=CC(C)(C)C(=O)NC(C)(C)CO.CC(=O)OC[C@H]1O[C@H](c2cc(Cc3ccc(Br)cc3)c(C)cc2C)[C@H](OC(C)=O)[C@H](OC(C)=O)[C@H]1OC(C)=O>>CC(=O)OC[C@H]1O[C@H](c2cc(Cc3ccc(C(/C=C/C(C)(C)C(=O)NC(C)(C)CO)cc3)c(C)cc2C)[C@H](OC(C)=O)[C@H](OC(C)=O)[C@H]1C=CC(C)(C)O.CC(=O)Oc1ccc2ccc(=O)oc2c1I>>CC(=O)Oc1ccc2ccc(=O)oc2c1/C=C/C(C)(C)O  
1244 C=Cc1cccc1.FC(F)(F)c1ccc(Cl)cc1>>FC(F)(F)c1ccc(/C=C/c2cccc2)cc1  
1245 C=CN1C(=O)c2cccc2C1=O.CNC(=O)c1cc(Oc2cccc(I)c2)ccn1>>CNC(=O)c1cc(Oc2cccc(/C=C/N3C(=O)c4cccc4C3=O)c2)ccn1  
1246 C=CC(=O)N1CC(c2oc3cccc3c2C)C1.CN1CC(=O)Nc2ncc(Br)cc2C1>>Cc1c(C2CN(C(=O)/C=C/c3cnc4c(c3)CN(C)CC(=O)N4)C2)oc2cccc12  
1247 C=CC(C)=O.CCCCc1nnn(Cc2cccc2)c1I>>CCCCc1nnn(Cc2cccc2)c1/C=C/C(C)=O  
1248 C=CC(=O)OC.O=C(C=P(c1cccc1)(c1cccc1)c1cccc1)c1ccc(I)cc1>>COC(=O)/C=C/c1ccc(C(=O)C=P(c2cccc2)(c2cccc2)c2cccc2)cc1  
1249 C=CS(C)(=O)=O.CC(=O)c1cccc(Br)c1>>CC(=O)c1cccc(/C=C/S(C)(=O)=O)c1  
1250 C=CC(=O)OCC.COC(=O)c1cc(I)ccc1N>>CCOC(=O)/C=C/c1ccc(N)c(C(=O)OC)c1  
1251 C=CC(=O)OC.CCCCc1ccc(N2CCc3cc(OC)ccc3C2(C)c2ccc(Br)cc2)cc1>>CCCCc1ccc(N2CCc3cc(OC)ccc3C2(C)c2ccc(/C=C/C(=O)OC)cc2)cc1  
1252 C=CC#N.COc1ccc(Br)cc1OC>>COc1ccc(/C=C/C#N)cc1OC  
1253 C=Cc1cccc1.COC(=O)/C=C/c1ccc(Br)cc1>>COC(=O)/C=C/c1ccc(/C=C/c2cccc2)cc1  
1254 C=CC(=O)N(C)OC.N#Cc1cc2ccc(Br)cc2cc1C#N>>CON(C)C(=O)/C=C/c1ccc2cc(C#N)c(C#N)cc2c1  
1255 C=Cc1ccc(N(CCCC)CCCC)cc1.CCOC(OCC)c1ccc(/C=C/c2ccc(I)cc2)cc1>>CCCN(CCCC)c1ccc(/C=C/c2ccc(/C=C/c3ccc(C(OCC)OCC)cc3)cc2)cc1

1257 C=CC(=O)OCCCC.COc1cccc(I)c1>>CCCCOC(=O)/C=C/c1cccc(OC)c1  
1258 C=C/C=C/C(=O)N(CCCC)CCCC.CC(=O)c1ccc(Br)cc1>>CCCCN(CCCC)C(=O)/C=C/C=C/c1ccc(C(C  
)=O)cc1  
1259 C=CC(=O)OC(C)(C)C.O=C(Nc1ccc(Cl)c(F)c1Br)C(F)(F)F>>CC(C)(C)OC(=O)/C=C/c1c(NC(=O)C(F  
)(F)F)ccc(Cl)c1F  
1260 Brc1ccc(N2CCOCC2)nc1.C=CC(=O)OC>>COC(=O)/C=C/c1ccc(N2CCOCC2)nc1  
1261 C=CC(=O)OC.COC(=O)[C@H](Cc1ccc(OC)c(I)c1)NC(C)=O>>COC(=O)/C=C/c1cc(C[C@H](N  
C(C)=O)C(=O)OC)ccc1OC  
1262 C=CC(=O)OC(C)(C)C.CCn1nnc2c(C)c(Br)ccc21>>CCn1nnc2c(C)c(/C=C/C(=O)OC(C)(C)C)ccc21  
1263 C=Cc1ccc(F)cc1.CCCCC(Br)C(F)(F)F>>CCCCC(/C=C/c1ccc(F)cc1)C(F)(F)F  
1264 C=Cc1ccc(O)cc1.Oc1ccc(Br)cc1>>Oc1ccc(/C=C/c2ccc(O)cc2)cc1  
1265 C=Cc1ccncc1.COc1ccc(I)cc1>>COc1ccc(/C=C/c2ccncc2)cc1  
1266 Brc1cccc1.C=Cc1cc2cccc2oc1=O>>O=c1oc2cccc2cc1/C=C/c1cccc1  
1267 C=CC[C@H](NC(=O)OC(C)(C)C)C(=O)O.Ic1ccncc1>>CC(C)(C)OC(=O)N[C@H](C/C=C/c1ccncc  
1)C(=O)O  
1268 Brc1ccncc1.C=CCn1nnc2cccc21>>C(=C/c1ccncc1)\Cn1nnc2cccc21  
1269 C=CC(N)=O.CCOC(=O)C1=Cc2cc(Br)cc(Cl)c2OC1C(F)(F)F>>CCOC(=O)C1=Cc2cc(/C=C/C(N)=O)  
cc(Cl)c2OC1C(F)(F)F  
1270 C=CC(=O)OCC.O=S(=O)(Oc1cccc2c1CCO2)C(F)(F)F>>CCOC(=O)/C=C/c1cccc2c1CCO2  
1271 C=CC(=O)OC(C)(C)C.O=Cc1cc(O)ccc1Br>>CC(C)(C)OC(=O)/C=C/c1ccc(O)cc1C=O  
1272 C=C[C@H](O[Si](C)(C)C(C)(C)C)[C@H](CCCC(=O)OCC)O[Si](C)(C)C(C)(C)C.O=Cc1cccc(Br)c1>  
>CCOC(=O)CCC[C@H](O[Si](C)(C)C(C)(C)C)[C@H](/C=C/c1cccc(C=O)c1)O[Si](C)(C)C(C)(C)C  
1273 C=Cc1ccc(Cl)cc1.O=Cc1cc(F)ccc1Br>>O=Cc1cc(F)ccc1/C=C/c1ccc(Cl)cc1  
1274 C=Cc1cccc1.COC(=O)C(CCC(=O)C(C)C)Cc1cccc1I>>COC(=O)C(CCC(=O)C(C)C)Cc1cccc1/C=  
C/c1cccc1  
1275 C=CC#N.Cc1c(Br)ccc2c1nnn2C>>Cc1c(/C=C/C#N)ccc2c1nnn2C  
1276 C=CC(=O)OC(C)(C)C.CC(=O)c1cccc1Br>>CC(=O)c1cccc1/C=C/C(=O)OC(C)(C)C  
1277 C=CC(=O)O.Oc1ccc(/C=C/c2ccc(Br)cc2)cc1O>>O=C(O)/C=C/c1ccc(/C=C/c2ccc(O)c(O)c2)cc1  
1278 C=C[Si](CC)(CC)CC.Ic1cccc1>>CC[Si](/C=C/c1cccc1)(CC)CC  
1279 C=CC(=O)OC.CCn1cnc2c(NCc3cccc(Br)c3)nc(N3CCOCC3)nc21>>CCn1cnc2c(NCc3cccc(/C=C/C(=  
O)OC)c3)nc(N3CCOCC3)nc21  
1280 C=CS(=O)c1cccc1.CC(=O)c1ccc(Br)cc1>>CC(=O)c1ccc(/C=C/S(=O)c2cccc2)cc1  
1281 C=CC(=O)OCC.COc1ccc(Cl)cc1-c1c(Br)c(=O)n(C)c2ccc(C(F)(F)F)cc12>>CCOC(=O)/C=C/c1c(-  
c2cc(Cl)ccc2OC)c2cc(C(F)(F)F)ccc2n(C)c1=O  
1282 C=CC(=O)OC(C)(C)C.FC(F)(F)c1ccc(Br)cc1>>CC(C)(C)OC(=O)/C=C/c1ccc(C(F)(F)F)cc1  
1283 C=CC(N)=O.O=C(O)/C=C/c1cccc(Br)c1>>NC(=O)/C=C/c1cccc(/C=C/C(=O)O)c1  
1284 C=CC(=O)N1N=Cc2cccc2C1C.COc1cc(Cc2cnc(N)nc2N)cc(I)c1OC>>COc1cc(Cc2cnc(N)nc2N)cc(/C  
=C/C(=O)N2N=Cc3cccc3C2C)c1OC  
1285 C=Cc1cccc1.Cc1nc(Br)c(-c2cccc2)n(Cc2cccc2)c1=O>>Cc1nc(/C=C/c2cccc2)c(-  
c2cccc2)n(Cc2cccc2)c1=O  
1286 C=CC(OCC)OCC.O=Cc1cccc1Br>>CCOC(/C=C/c1cccc1C=O)OCC  
1287 C=Cc1ccncc1.CC(C)(C)OC(=O)N1CCC[C@H]1COc1cncc(Br)c1>>CC(C)(C)OC(=O)N1CCC[C@H]1  
COc1cncc(/C=C/c2ccncc2)c1  
1288 C=COCC.COc1ccc(I)cc1>>CCO/C=C/c1ccc(OC)cc1  
1289 C=CC(=O)OC.O=c1oc2cc(Br)enc2n1Cc1cccc1>>COC(=O)/C=C/c1cnc2c(c1)oc(=O)n2Cc1cccc1  
1290 C=Cc1ccc(/C(=C(\c2cccc2)C2CCC2)c2ccc3c(c2)c(F)nn3C2CCCCO2)cc1.Ic1ccncc1>>Fc1nn(C2CCC  
CO2)c2ccc(/C(=C(/c3cccc3)C3CCC3)c3ccc(/C=C/c4ccncc4)cc3)cc12  
1291 C=CCCC#N.Ic1cccc1>>N#CCCC/C=C/c1cccc1  
1292 C=Cc1cccc1.COc1cccc1Br>>COc1cccc1/C=C/c1cccc1  
1293 C=Cc1ccc([N+](=O)[O-])cc1.Ic1cccc1>>O=[N+](O)c1ccc(/C=C/c2cccc2)cc1  
1294 C=CC[C@H]1C(=O)N(c2cccc2)[C@H]1c1ccc(OC)cc1.OCc1cccc1Br>>COc1ccc([C@H]2[C@  
@H](C/C=C/c3cccc3CO)C(=O)N2c2cccc2)cc1  
1295 C=CC(=O)OC(C)(C)C.CC(C)(C)[Si](C)(C)/C=C/C1=C(Br)CCCC1>>CC(C)(C)OC(=O)/C=C/C1=C(/  
C=C/[Si](C)(C)C(C)(C)C)CCCC1  
1296 C=Cc1ccc2cc(F)c(F)cc2n1.O=C1c2cc(Br)ccc2COc2cccc21>>O=C1c2cc(/C=C/c3ccc4cc(F)c(F)cc4n3  
)ccc2COc2cccc21  
1297 C=CC(=O)OCC.C[Si](C)(C)CN(Cc1cc2c(cc1I)OCO2)C[Si](C)(C)C>>CCOC(=O)/C=C/c1cc2c(cc1CN  
(C[Si](C)(C)C)C[Si](C)(C)C)OCO2  
1298 C=CC1(O)CCCCC1.O=C(NCCC(O)c1cc(F)cc(Br)c1)C(F)(F)F>>O=C(NCCC(O)c1cc(F)cc(/C=C/C2(  
O)CCCCC2)c1)C(F)(F)F

1299 C=CC(=O)OC(C)(C)C.Oc1ccc(C(=C2C3CCCC2CCC3)c2ccc(Br)cc2)cc1>>CC(C)(C)OC(=O)/C=C/c1ccc(C(=C2C3CCCC2CCC3)c2ccc(O)cc2)cc1  
 1300 C=CC(=O)OCC.COc1cccc(Br)c1C>>CCOC(=O)/C=C/c1cccc(OC)c1C  
 1301 C=Cc1nc2c(N)ncnc2n1[C@H]1C[C@H](O[Si](C)(C)C(C)(C)C)[C@@H](CO[Si](C)(C)C(C)(C)C)O1.Ic1cccc1>>CC(C)(C)[Si](C)(C)OC[C@H]1O[C@@H](n2c/C=C/c3cccc3)nc3c(N)ncnc32[C@@H]1O[Si](C)(C)C(C)(C)C  
 1302 C=CC(=O)OC.CN(C)CCCOc1ccc(I)cc1Cl>>COC(=O)/C=C/c1ccc(OCCCN(C)C)c(Cl)c1  
 1303 C=Cc1ccc2ccccc2c1.Fc1ccc(Br)cc1>>Fc1ccc(/C=C/c2ccc3ccccc3c2)cc1  
 1304 C=CC(=O)OC.COC(=O)c1cc(Br)c2ccccc2n1>>COC(=O)/C=C/c1cc(C(=O)OC)nc2ccccc12  
 1305 C=CC(C)(C)O.CC(C)(C)OC(=O)NCCc1cc2c(cc1I)OCO2>>CC(C)(O)/C=C/c1cc2c(cc1CCNC(=O)OC(C)(C)C)OCO2  
 1306 C=Cc1ccc(N(c2ccccc2)c2ccccc2)cc1.N#CC(=C(c1cccc1)c1cccc1)c1ccc(Br)cc1>>N#CC(=C(c1cccc1)c1cccc1)c1ccc(/C=C/c2ccc(N(c3ccccc3)c3ccccc3)cc2)cc1  
 1307 C=C[C@H]1CCCCN1C(=O)OC(C)(C)C.O=[N+](O-)]c1ccc(I)cc1>>CC(C)(C)OC(=O)N1CCCC[C@H]1/C=C/c1ccc([N+](=O)[O-])cc1  
 1308 C=Cc1cccc1.COc1ccc(Br)cc1F>>COc1ccc(/C=C/c2ccccc2)cc1F  
 1309 C=CC(=O)c1ccc(OC)cc1OC.Ic1cccc1>>COc1ccc(C(=O)/C=C/c2ccccc2)c(OC)c1  
 1310 C=CC(=O)OC(C)(C)C.Nc1ccc(Br)cc1CN1CCCCC1>>CC(C)(C)OC(=O)/C=C/c1nc(N)c(CN2CCCCC2)cc2  
 1311 C=Cc1ccc(OC(C)=O)cc1.COc1cc(OC(C)=O)ccc1Br>>COc1cc(OC(C)=O)ccc1/C=C/c1ccc(OC(C)=O)cc1  
 1312 C=CC(OC)OC.FC(F)(F)c1ccc(Br)cn1>>COC(/C=C/c1ccc(C(F)(F)F)nc1)OC  
 1313 \*CNCCOCCOCCOCCOCCNC(=O)COc1ccc(C(Cc2cc(OC)cc(OC)c2)NC(=O)c2ccc(C=C)cc2)cc1.COc1ccc(I)cc1>>\*CNCCOCCOCCOCCOCCNC(=O)COc1ccc(C(Cc2cc(OC)cc(OC)c2)NC(=O)c2ccc(/C=C/c3ccc(OC)cc3)cc2)cc1  
 1314 Br1cccc1.C=Cc1cccc1C>>Cc1cccc1/C=C/c1cccc1  
 1315 Br1ccc2c(c1)Cc1cccc1-2.C=Cc1nc2c(=O)[nH]c(N=CN(C)C)nc2n1[C@H]1C[C@H](O)[C@@H](COC(c2ccccc2)(c2ccc(OC)cc2)c2ccc(OC)cc2)O1>>COc1ccc(C(OC[C@H]2O[C@H](n3c/C=C/c4ccc5c(c4)Cc4ccccc4-5)nc4c(=O)[nH]c(N=CN(C)C)nc43)C[C@@H]2O)(c2ccccc2)c2ccc(OC)cc2)cc1  
 1316 C=Cc1cccc1.CC(C)=CBr>>CC(C)=C/C=C/c1cccc1  
 1317 C=C/C=C(\CCCC)OCC.COc1ccc(I)cc1>>CCCC/C=C\C=C/c1ccc(OC)cc1)OCC  
 1318 C=CC#N.COC(=C1C2CC3CC(C2)CC1C3)c1ccc(I)c(O)c1>>COC(=C1C2CC3CC(C2)CC1C3)c1ccc(/C=C/C#N)c(O)c1  
 1319 C=Cc1cccc([N+](=O)[O-])c1.COc1ccc2c(=O)c(I)coc2c1>>COc1ccc2c(=O)c(/C=C/c3cccc([N+](=O)[O-])c3)coc2c1  
 1320 C=CC(=O)OC.Ic1ccc(-c2cccs2)s1>>COC(=O)/C=C/c1ccc(-c2cccs2)s1  
 1321 C=CC(=O)O.Clc1ccc(Br)cc1>>O=C(O)/C=C/c1ccc(Cl)cc1  
 1322 C=Cc1cccc(Cl)c1.CCOC(=O)C(F)I>>CCOC(=O)C(F)/C=C/c1cccc(Cl)c1  
 1323 C=Cc1ccc(OC)cc1.COc1cccc1Br>>COc1ccc(/C=C/c2ccccc2OC)cc1  
 1324 C=CC(=O)O.CC1(C)C=Cc2cc(/C=C/C(=O)O)c([N+](=O)[O-])cc2O1>>CC1(C)C=Cc2cc(/C=C/C(=O)O)c([N+](=O)[O-])cc2O1  
 1325 C=CCC(C)C(=O)OCC.COc1ccc(Br)cc1>>CCOC(=O)C(C)C/C=C/c1ccc(OC)cc1  
 1326 C=CC(=O)OC.CC(=O)Oc1ccc2c(I)ccccc1-2>>COC(=O)/C=C/c1cccc2c(OC(C)=O)ccc1-2  
 1327 C=CC(=O)OC.Oc1ccc2c(Cc3ccc(Br)cc3)nc2c1>>COC(=O)/C=C/c1ccc(Cc2nccc3cc(O)ccc23)cc1  
 1328 C=CC(=O)OC(C)(C)C.Nc1cccc1I>>CC(C)(C)OC(=O)/C=C/c1cccc1N  
 1329 C=CC(=O)O.Cc1ccc(S(=O)(=O)N(C)c2ccccc(I)c2)cc1>>Cc1ccc(S(=O)(=O)N(C)c2ccccc(/C=C/C(=O)O)c2)cc1  
 1330 C=Cc1ccc(Br)cc1.Cc1c(Nc2c(I)nc2C#N)ccc2[nH]ccc12>>Cc1c(Nc2c(C#N)nc2/C=C/c2ccc(Br)cc2)ccc2[nH]ccc12  
 1331 C=CC(=O)OC(C)(C)C.O=Cc1ccc(Br)cc1>>CC(C)(C)OC(=O)/C=C/c1ccc(C=O)cc1  
 1332 C=CC(=O)O.O=C(O)c1ccc(Br)cc1>>O=C(O)/C=C/c1ccc(C(=O)O)cc1  
 1333 C=CCc1cccc1.Cn1nc(Br)c2ccccc21>>Cn1nc(/C=C/Cc2ccccc2)c2ccccc21  
 1334 C=Cc1ccc(OC)cc1.COc1cc(I)cc(OC)c1>>COc1ccc(/C=C/c2cc(OC)cc(OC)c2)cc1  
 1335 C=CC(C)(C)CC(=O)OC.COc1ccc(I)cc1>>COC(=O)CC(C)(C)/C=C/c1ccc(OC)cc1  
 1336 C=Cc1cccc1.Nc1cc(F)c(F)cc1Br>>Nc1cc(F)c(F)cc1/C=C/c1cccc1  
 1337 C=CS(=O)c1cccc1.Cc1cccc1Br>>Cc1cccc1/C=C/S(=O)c1cccc1  
 1338 C=CCCC(=O)O.COc1ccc(I)cc1>>COc1ccc(/C=C/CCC(=O)O)cc1  
 1339 C=CCC1CCCCC1.Nc1ccc(Br)cc1F>>Nc1ccc(/C=C/CC2CCCCC2)cc1F  
 1340 C=C[C@H](C)[C@H](C/C=C/C(=O)OC(C)(C)C)O[Si](C)(C)C(C)(C)C.O=C(c1cccc1)c1ccc(Br)cc1>>C[C@H](/C=C/c1ccc(C(=O)c2ccccc2)cc1)[C@H](C/C=C/C(=O)OC(C)(C)C)O[Si](C)(C)C(C)(C)C  
 1341 C=Cc1ccc(C(F)(F)F)cc1.CN(C(=O)c1cccc1)c1ccc2c(c1)[nH]c(=NC(=O)c1ccc(Br)s1)n2CCC(N)=O>>CN(C(=O)c1cccc1)c1ccc2c(c1)[nH]c(=NC(=O)c1ccc(/C=C/c3ccc(C(F)(F)F)cc3)s1)n2CCC(N)=O

1342 C=CC(=O)OC(C(F)(F)F)C(F)(F)F.Ic1cccc1>>O=C(/C=C/c1cccc1)OC(C(F)(F)F)C(F)(F)F  
1343 C=Cc1cccc1OC.Cc1c(Nc2c(I)encc2C#N)ccc2[nH]ccc12>>COc1cccc1/C=C/c1encc(C#N)c1Nc1ccc2  
1344 [nH]ccc2c1C  
1344 C=CC(=O)OCC.Ic1cccc1C#CCOC1CCCCO1>>CCOC(=O)/C=C/c1cccc1C#CCOC1CCCCO1  
1345 C=CC(=O)OC(C)(C)C.Nc1cccc(Br)c1F>>CC(C)(C)OC(=O)/C=C/c1cccc(N)c1F  
1346 C=CC=O.O=Cc1ccc(Br)cc1>>O=C/C=C/c1ccc(C=O)cc1  
1347 C=CC(=O)OC.Cn1c(=O)oc2cc(Br)cnc21>>COC(=O)/C=C/c1cnc2c(c1)oc(=O)n2C  
1348 C=Cc1ccc(Br)cc1.FC(F)(F)CI>>FC(F)(F)C/C=C/c1ccc(Br)cc1  
1349 C=Cc1ccnc1.CC(=O)c1ccc(Br)cc1>>CC(=O)c1ccc(/C=C/c2ccnc2)cc1  
1350 C=CC(=O)OC(C)(C)C.CC(C)(C)O[C@H]1CC[C@H]2C=C(C3=C(Br)CCCC3)CC[C@H]12C>>CC(C)  
1351 (C)OC(=O)/C=C/C1=C(C2=C[C@H]3CC[C@H](OC(C)(C)C)[C@@]3(C)CC2)CCCC1  
1351 Br1cccc2cccc12.C=CCN(C(=O)OC(C)(C)C)C(=O)OC(C)(C)C>>CC(C)(C)OC(=O)N(C/C=C/c1cccc  
1352 2cccc12)C(=O)OC(C)(C)C  
1352 C=Cc1ccc(Cl)cc1.O=c1c(Br)c(-c2cccc2)oc2cccc12>>O=c1c(/C=C/c2ccc(Cl)cc2)c(-  
1353 c2cccc2)oc2cccc12  
1353 C=CC(=O)OCCCC.CCOC(CCNc1nc(SC)ncc1Br)OCC>>CCCCOC(=O)/C=C/c1cnc(SC)nc1NCCC(O  
1354 CC)OCC  
1354 C=CC(=O)OC.COC(=O)/C=C/c1cccc(N(Cc2ccc(Br)cc2)C(=O)C2CCCC2)c1>>COC(=O)/C=C/c1ccc  
1355 (CN(C(=O)C2CCCC2)c2cccc(/C=C/C(=O)OC)c2)cc1  
1355 C=Cc1ccc(C=O)cc1.CCCN(Cc1ccc(CCC(F)(F)C(F)(F)C(F)(F)C(F)(F)C(F)(F)C(F)(F)C(F)(F)C(F)(F)cc1)/N=N/c1ccc  
1356 c(I)cc1>>CCCN(Cc1ccc(CCC(F)(F)C(F)(F)C(F)(F)C(F)(F)C(F)(F)C(F)(F)C(F)(F)C(F)(F)cc1)/N=N/c1ccc(/C=C/c2  
1357 ccc(C=O)cc2)cc1  
1357 C=CC(=O)OC.FC(F)(F)c1ncc(Br)cn1>>COC(=O)/C=C/c1cnc(C(F)(F)F)nc1  
1358 C=CC(F)(F)C(F)(F)C(F)(F)C(F)(F)C(F)(F)C(F)(F)C(F)(F)C(F)(F)C(F)(F)C(F)(F)C(F)(F)cc1  
1359 C=Cc1ccc(I)cc1>>Cc1ccc(/C=C/C(F)  
1360 (F)C(F)(F)C(F)(F)C(F)(F)C(F)(F)C(F)(F)C(F)(F)C(F)(F)C(F)(F)C(F)(F)cc1  
1361 C=CC(=O)OC.Cc1cc(OCc2cccc2)ccc1Br>>COC(=O)/C=C/c1ccc(OCc2cccc2)cc1C  
1362 Br1ccc(I)cc1.C=CC(=O)OC(C)(C)C>>CC(C)(C)OC(=O)/C=C/c1ccc(Br)cc1  
1363 C=Cc1cccc1.Cc1ccc(Br)nc1>>Cc1ccc(/C=C/c2cccc2)nc1  
1364 C=CC(=O)OC.CC(=O)Oc1ccc(I)cc1C/C=C(\C)CC/C=C(\C)CCC=C(C)C>>COC(=O)/C=C/c1ccc(OC(  
1365 C)O)c(C/C=C(\C)CC/C=C(\C)CCC=C(C)C)c1  
1366 C=Cc1cccc(C)c1.O=Cc1cccc(Br)c1>>Cc1cccc(/C=C/c2cccc(C=O)c2)c1  
1367 C=CCCCO[C@H]1O[C@H](COC(C)=O)[C@@H](OC(C)=O)[C@H](OC(C)=O)[C@H]1OC(C)=O.O  
1368 =C(OC[C@H]1O[C@H](n2cc(I)c(=O)[nH]c2=O)C[C@H]1OC(=O)c1cccc1)c1cccc1>>CC(=O)  
1369 OC[C@H]1O[C@H](OCCC/C=C/c2cn([C@H]3C[C@H](OC(=O)c4cccc4)[C@@H](COC(=O)c4ccc  
1370 cc4)O3)c(=O)[nH]c2=O)[C@H](OC(C)=O)[C@@H](OC(C)=O)[C@H]1OC(C)=O  
1371 C=CC(=O)N(C)C.CC(=O)c1ccc(I)cc1>>CC(=O)c1ccc(/C=C/C(=O)N(C)C)cc1  
1372 C=CCOc1cccc1C.COc1cccc1I>>COc1cccc1/C=C/COc1cccc1C  
1373 C=CC(=O)OC(C)(C)C.O=C(CN1CCOCC1)Nc1ccc(Br)cn1>>CC(C)(C)OC(=O)/C=C/c1ccc(NC(=O)C  
1374 N2CCOCC2)nc1  
1375 C=Cc1ccnc1.CC(C)(C)OC(=O)N1CC[C@H]1COc1cnc(Cl)c(I)c1>>CC(C)(C)OC(=O)N1CC[C@H]1  
1376 COc1cnc(Cl)c(/C=C/c2ccnc2)c1  
1377 C=CC(=O)OC.O=C1Nc2c(Br)cccc2C1=O>>COC(=O)/C=C/c1cccc2c1NC(=O)C2=O  
1378 C=CC(=O)OCCCC.O=Cc1ccc(Br)s1>>CCCCOC(=O)/C=C/c1ccc(C=O)s1  
1379 C=Cc1ccc(OC)ccc(OC)c1.NCc1ccc(I)cc1>>COc1ccc(/C=C/c2ccc(CN)cc2)cc(OC)c1  
1380 C=CC(=O)Nc1cccc1OC.COc1ccc2c(=O)c(I)coc2c1>>COc1ccc2c(=O)c(/C=C/C(=O)Nc3cccc3OC)c  
1381 oc2c1  
1382 C=CC(=O)N1N=Cc2cccc2C1c1ccc1.COc1cc(Cc2cnc(N)nc2N)cc(I)c1OC>>COc1cc(Cc2cnc(N)nc2  
1383 N)cc(/C=C/C(=O)N2N=Cc3cccc3C2c2ccc2)c1OC  
1384 C=CC(=O)O.Cc1ccc(S(=O)(=O)n2c(Cc3ccc(I)cc3)nc3cccc32)cc1>>Cc1ccc(S(=O)(=O)n2c(Cc3ccc(/  
1385 C=C/C(=O)O)cc3)nc3cccc32)cc1  
1386 C=CC(=O)OC(C)(C)C.COC(=O)c1ccc(Br)c(C)c1>>COC(=O)c1ccc(/C=C/C(=O)OC(C)(C)C)c(C)c1  
1387 C=CC(=O)OCC.Cc1nn(-c2cc(I)c(Cl)cc2F)c(=O)n1C(F)F>>CCOC(=O)/C=C/c1cc(-  
1388 n2nc(C)n(C(F)F)c2=O)c(F)cc1C1  
1389 C=CC(=O)OC(C)(C)C.COc1cccc1NCc1ccc(Br)cc1>>COc1cccc1NCc1ccc(/C=C/C(=O)OC(C)(C)C)  
1390 C=CC(=O)OC.COCCOc1ccc(Br)c(COCCOCCOCCNC(=O)OC(C)(C)C)c1>>COCCOc1ccc(/C=C/C(=O)  
1391 OC)c(COCCOCCOCCNC(=O)OC(C)(C)C)c1  
1392 C=CC(=O)OCC.Cc1noc(-c2cccc2)c1I>>CCOC(=O)/C=C/c1c(C)noc1-c1cccc1  
1393 C=Cc1ccc2c(c1)c1cccc1n2CC.CCn1c2cccc2c2cc(-  
1394 n3c(C)nc4ccc(Br)cc4c3=O)ccc21>>CCn1c2cccc2c2cc(/C=C/c3ccc4nc(C)n(-  
1395 c5ccc6c(c5)c5cccc5n6CC)c(=O)c4c3)ccc21  
1396 C=Cc1ccc(C(C)(C)C)cc1.O=Cc1cccc1Br>>CC(C)(C)c1ccc(/C=C/c2cccc2C=O)cc1



C=CC(C)(C)CC(=O)O.COc1ccc(I)cc1>>COe1ccc(/C=C/C(C)CC(=O)O)ccl  
Brclcccc(I)c1.C=CC(F)(F)C(F)(F)C(F)(F)C(F)(F)C(F)(F)C(F)(F)C(F)(F)F>>FC(F)(F)C(F)(F)  
C(F)(F)C(F)(F)C(F)(F)C(F)(F)C(F)(F)C(F)(F)/C=C/c1cccc(Br)c1  
Brclcccc1.C=CS(N)=(O)=O>>NS(O)=(O)/C=C/c1cccc1  
C=Cc1cccc1.COc1cc2cc(Br)c(=O)oc2cc1OC>>COe1cc2cc(/C=C/c3cccc3)c(=O)oc2cc1OC  
C=CC(=O)N1N=Cc2cccc2C1c1nc2cccc2s1.COc1cc(Cc2cnc(N)nc2N)cc(I)c1OC>>COe1cc(Cc2cnc(  
N)nc2N)cc(/C=C/C(=O)N2N=Cc3cccc3Cc2nc3cccc3s2)c1OC  
C=CC(=O)OC.CC1(C)C=C(c2oc3cccc3e2I)CC(C)(C)C1>>COC(=O)/C=C/c1c(C2=CC(C)(C)CC(C)(  
C)C2)oc2cccc12  
C=CC(=O)N1CCOCC1.COc1cc(Cl)ccc1C1=CCN(C(=O)OC(C)(C)C)CC1>>COe1cc(/C=C/C(=O)N2C  
COCC2)ccc1C1=CCN(C(=O)OC(C)(C)C)CC1  
C=Cc1ccc(C=C)cc1.Cc1ccc(Br)cc1>>C=Cc1ccc(/C=C/c2ccc(C)cc2)cc1  
C=CC(=O)OC.CN1C(=O)C(=O)c2c(Br)cccc21>>COC(=O)/C=C/c1cccc2c1C(=O)C(=O)N2C  
Brclccc(OCc2cccc2)c(OCc2cccc2)c1.C=Cc1ccc(C=C)cc1>>C=Cc1ccc(/C=C/c2ccc(OCc3cccc3)c(  
OCc3cccc3)c2)cc1  
C=CC(=O)OC.COc1ccc(CN(C)S(=O)(=O)c2ccc(Br)cc2)cc1>>COC(=O)/C=C/c1ccc(S(=O)(=O)N(C)C  
c2ccc(OC)cc2)cc1  
C=CC(C)=O.O=C1Cc2c([nH]c3ccc(F)cc23)-c2cc(I)ccc2N1>>CC(=O)/C=C/c1ccc2c(c1)-  
c1[nH]c3ccc(F)cc3c1CC(=O)N2  
C=Cc1ccc(F)cc1.O=Cc1cccc1Br>>O=Cc1cccc1/C=C/c1ccc(F)cc1  
Brclcccn1.C=CC(=O)OCCCC>>CCCCOC(=O)/C=C/c1cccn1  
C=CC(=O)OCCCC.Cn1nc(Br)c2ccc(Cl)cc21>>CCCCOC(=O)/C=C/c1nn(C)c2cc(Cl)ccc12  
C=Cc1ccc(C(F)(F)F)cc1.COC(=O)[C@H](Cc1ccc(O)c(I)c1)NC(=O)OC(C)(C)C>>COC(=O)[C@H](C  
c1ccc(O)c(/C=C/c2ccc(C(F)(F)F)cc2)c1)NC(=O)OC(C)(C)C  
C=CP(=O)(OCC)OCC.Clclccc(I)cc1>>CCOP(=O)(/C=C/c1ccc(Cl)cc1)OCC  
C=CC(C)=O.COCOc1cc2oc(=O)ccc2cc1OS(=O)(=O)C(F)(F)F>>COCOc1cc2oc(=O)ccc2cc1/C=C/C(  
C=CC(OCC)OCC.COC(OC)c1cc([N+](=O)[O-])ccc1Br>>CCOC(/C=C/c1ccc([N+](=O)[O-]  
)cc1C(OC)OC)OCC  
Brclcccc2cccc12.C=C[Si](C)(C)c1cccc1>>C[Si](C)(C)/C=C/c1cccc2cccc12)c1cccc1  
C=Cc1ccc(C(=O)OC)cc1.Cc1cccc1Br>>COC(=O)c1ccc(/C=C/c2cccc2C)cc1  
C=CC(=O)OC.Cc1nc2cc(-c3cccc3)c(-  
c3ccc(C4(NC(=O)OC(C)(C)C)CCC4)cc3)nn2c1Br>>COC(=O)/C=C/c1c(C)nc2cc(-c3cccc3)c(-  
c3ccc(C4(NC(=O)OC(C)(C)C)CCC4)cc3)nn12  
C=Cc1ncc(N)en1.CN(C(=O)c1cccc1)c1ccc2c(c1)[nH]c(=NC(=O)c1ccc(Br)s1)n2CCC(N)=O>>CN(C(  
=O)c1cccc1)c1ccc2c(c1)[nH]c(=NC(=O)c1ccc(/C=C/c3ncc(N)en3)s1)n2CCC(N)=O  
C=CC(=O)OC.CC(C)(C)CN(Cc1ccc(Br)cc1)c1cc(C(F)(F)F)nen1>>COC(=O)/C=C/c1ccc(CN(CC(C)(  
C)C)c2cc(C(F)(F)F)nen2)cc1  
C=CC(=O)OC.Cc1ccc2c(c1OS(=O)(=O)C(F)(F)F)CCC=C2>>COC(=O)/C=C/c1c(C)ccc2c1CCC=C2  
C=CC(=O)OC.CC1(c2ccc(I)cc2)CC1>>COC(=O)/C=C/c1ccc(C2(C)CC2)cc1  
C=CC(=O)OC(C)(C)C.O=S(=O)(Oc1ccc(I)cc1)C(F)(F)F>>CC(C)(C)OC(=O)/C=C/c1ccc(OS(=O)(=O)  
C(F)(F)F)cc1  
C=CC#N.COc1ccc(CNe2c(C)cc(C)cc2I)cc1>>COc1ccc(CNe2c(C)cc(C)cc2/C=C/C#N)cc1  
Brclcccc(SCc2esc(-c3cccc3)n2)c1.C=CC(=O)OC>>COC(=O)/C=C/c1cccc(SCc2esc(-c3cccc3)n2)c1  
C=CC(=O)NCc1cccc1.COc1ccc2c(=O)c(I)coc2c1>>COe1ccc2c(=O)c(/C=C/C(=O)NCc3cccc3)coc2  
C=CC(=O)OC.O=C1Ne2cccc(Br)c2C12OCCO2>>COC(=O)/C=C/c1cccc2c1C1(OCCO1)C(=O)N2  
C=CC(N)=O.Cc1cccc(I)c1>>Cc1cccc(/C=C/C(N)=O)c1  
C=CC(F)(F)C(F)(F)C(F)(F)C(F)(F)C(F)(F)C(F)(F)C(F)(F)C(F)(F)C(F)(F)C(F)(F)C(F)(F)F.O=Cc1ccc(Br)cc1>>O=Cc1ccc(/C  
=C/C(F)(F)C(F)(F)C(F)(F)C(F)(F)C(F)(F)C(F)(F)C(F)(F)C(F)(F)C(F)(F)F)cc1  
\*CNCCOCCOCCOCCCN(C(=O)COc1ccc(C(Cc2cc(OC)cc(OC)c2)NC(=O)e2ccc(C=C)cc2)cc1.N#C  
Cc1ccc(I)cc1>>\*CNCCOCCOCCOCCCN(C(=O)COc1ccc(C(Cc2cc(OC)cc(OC)c2)NC(=O)e2ccc(/C=  
C/c3ccc(CC#N)cc3)cc2)cc1  
C=CCOc1cccc1.Cc1ccc(I)cc1C>>Cc1ccc(/C=C/COc2cccc2)cc1C  
C=CCCCC.CC1(C)OC(=O)c2c(cccc2OS(=O)(=O)C(F)(F)F)O1>>CCCCC/C=C/c1cccc2c1C(=O)  
OC(C)(C)O2  
C=Cc1ccc(F)cc1.N#CCCS(=O)(=O)c1ccc(Br)cc1>>N#CCCS(=O)(=O)c1ccc(/C=C/c2ccc(F)cc2)cc1  
C=Cc1ccc(CN(C)C)cc1.CCOC(=O)c1cccn1Cl>>CCOC(=O)c1cccn1/C=C/c1ccc(CN(C)C)cc1  
C=Cc1ccc(OC)c(O)c1.COc1ccc(OC)c(I)c1>>COe1ccc(OC)c(/C=C/c2ccc(OC)c(O)c2)c1  
C=CC(=O)OC.Fc1ccc(Br)nc1>>COC(=O)/C=C/c1ccc(F)en1  
Brclccc(I)cc1.C=CC(=O)OC>>COC(=O)/C=C/c1ccc(Br)cc1  
C=CC(=O)O.COc1cccc(Br)c1>>COc1cccc(/C=C/C(=O)O)c1

1423 C=Cc1ccc(OC)cc1.COc1ccc(/C=C/c2[nH]c3ccccc3c(=O)c2I)cc1>>COc1ccc(/C=C/c2[nH]c3ccccc3c(=O)c2/C=C/c2ccc(OC)cc2)cc1  
1424 C=CC(=O)OC.CCn1cnc2ccc(Br)cc21>>CCn1cnc2ccc(/C=C/C(=O)OC)cc21  
1425 C=CC(N)=O.CCc1cc(Br)ccc1Cl>>CCc1cc(/C=C/C(N)=O)ccc1Cl  
1426 C=CC(=O)OCC.Cc1nc(Br)c(-c2ccccc2)o1>>CCOC(=O)/C=C/c1nc(C)oc1-c1ccccc1  
1427 C=CC(=O)OC(C)(C)C.N#Cc1cccc(I)c1>>CC(C)(C)OC(=O)/C=C/c1cccc(C#N)c1  
1428 C=Cc1ccccc1.CO[C@@H]1[C@H](OC(C)=O)[C@@H](COC(C)=O)O[C@H]1n1cc(I)c(=O)[nH]c1=O>>CO[C@@H]1[C@H](OC(C)=O)[C@@H](COC(C)=O)O[C@H]1n1cc(/C=C/c2ccccc2)c(=O)[nH]  
1429 C=CCc1ccccc1.COC(=O)c1ccc2cc(Br)ccc2c1>>COC(=O)c1ccc2cc(/C=C/CCc3ccccc3)ccc2c1  
C=CC(=O)O.Cc1cccc2c([C@@H]3O[C@H](COCc4ccccc4)[C@@H](OCc4ccccc4)[C@H](OCc4ccccc4)[C@H]3OCc3ccccc3)cn(Cc3ccc(I)cc3)c12>>Cc1cccc2c([C@@H]3O[C@H](COCc4ccccc4)[C@@H](OCc4ccccc4)[C@H](OCc4ccccc4)[C@H]3OCc3ccccc3)cn(Cc3ccc(/C=C/C(=O)O)cc3)c12  
1431 C=Cc1ccc(C(C)=O)cc1.Cc1ccc(Br)cc1>>CC(=O)c1ccc(/C=C/c2ccc(C)cc2)cc1  
1432 Brc1cccc(OCc2ccccc2)c1.C=CC(OCC)OCC>>CCOC(/C=C/c1cccc(OCc2ccccc2)c1)OCC  
1433 C=CC(C)=O.FC(F)(F)c1ccc(Br)cc1>>CC(=O)/C=C/c1ccc(C(F)(F)F)cc1  
1434 C=CC#N.CC(=O)c1ccc(Br)cc1>>CC(=O)c1ccc(/C=C/C#N)cc1  
1435 C=Cc1ccccc1.COC(=O)CCc1ccc(OCc2ccccc2)cc1>>COC(=O)CCc1ccc(OCc2ccccc2/C=C/c3ccccc3)c2)cc1  
1436 C=CC(=O)OCC.O=c1ccoc2cc(Br)ccc12>>CCOC(=O)/C=C/c1ccc2c(=O)ccoc2c1  
1437 C=CS(=O)(=O)F.CC(C)(C)c1ccc(I)cc1>>CC(C)(C)c1ccc(/C=C/S(=O)(=O)F)cc1  
1438 C=Cc1ccc(OC)c(O)c1.COc1ccc(I)c(OC)c1>>COc1ccc(/C=C/c2ccc(OC)c(O)c2)c(OC)c1  
1439 Brc1ccccc1.C=CCOc1ccccc1CC>>CCc1ccccc1OC/C=C/c1ccccc1  
1440 C=CCCN1C(=O)c2ccccc2C1=O.Cc1ccc(I)cc1>>Cc1ccc(/C=C/CCN2C(=O)c3ccccc3C2=O)cc1  
1441 C=Cc1ccccc1C.Nc1cc(Cl)ccc1I>>Cc1ccccc1/C=C/c1ccc(Cl)cc1N  
1442 C=Cc1ccc(O)cc1.COc1cc(I)cc(OC)c1>>COc1cc(/C=C/c2ccc(O)cc2)cc(OC)c1  
1443 C=CC(=O)OC.COc1c(CN(C(=O)c2ccccc2)c2cccc(Br)c2)ccc2c1OC(C)(C)C=C2C#N>>COC(=O)/C=C/c1ccccc1(N(Cc2ccc3c(c2OC)OC(C)(C)C=C3C#N)C(=O)c2ccccc2)c1  
1444 C=CC(=O)Oc1ccccc1.IC(CC[Se]c1ccccc1)=C(c1ccccc1)c1ccccc1>>O=C(/C=C/C(CC[Se]c1ccccc1)=C(c1ccccc1)c1ccccc1)Oc1ccccc1  
1445 C=CC(=O)OCC.Fc1nc(Br)ccc1Cl>>CCOC(=O)/C=C/c1ccc(Cl)c(F)n1  
1446 C=Cc1ccccc1.CN1C(=O)CC[C@H]1c1cncc(Br)c1>>CN1C(=O)CC[C@H]1c1cncc(/C=C/c2ccccc2)c1  
1447 C=CNC(C)=O.CCOC(=O)c1sc2nc(C)cc(C)c2c1Br>>CCOC(=O)c1sc2nc(C)cc(C)c2c1/C=C/NC(C)=O  
1448 C=CC(=O)OCC.COc1cc(Nc2ncc(Br)c(Nc3ccccc3)n2)cc(OC)c1OC>>CCOC(=O)/C=C/c1ncc(Nc2cc(O)c(OC)c(OC)c2)nc1Nc1ccccc1  
1449 C=Cc1ccccc1.COc1ccc(Br)cc1>>COc1ccc(/C=C/c2ccccc2)cc1  
1450 C=Cl.C=C[Si](OC)(OC)OC>>C=C/C=C/[Si](OC)(OC)OC  
1451 C=CS(=O)(=O)F.FC(F)(F)c1cccc(I)c1>>O=S(=O)(F)/C=C/c1cccc(C(F)(F)F)c1  
1452 C=Cc1ccccc1.CCCCN(CCCC)c1ccc(Br)cc1>>CCCN(CCCC)c1ccc(/C=C/c2ccccc2)cc1  
1453 Brc1ccccc1.C=Cc1ccc(OC)cc1>>COc1ccc(/C=C/c2ccccc2)cc1  
1454 C=CC(=O)OCC.O=Cc1c(F)cc(Br)cc1F>>CCOC(=O)/C=C/c1cc(F)c(C=O)c(F)c1  
1455 C=Cc1ccc2ccccc2c1.COc1ccc(Br)cc1>>COc1ccc(/C=C/c2ccc3ccccc3c2)cc1  
1456 C=CCCN1C(=O)c2ccccc2C1=O.Cc1ccc2ncc(Br)cc2c1>>Cc1ccc2ncc(/C=C/CCN3C(=O)c4ccccc4C3=O)cc2c1  
1457 C=CCCCC(O)C(=O)OC.Fc1ccc(Br)cn1>>COC(=O)C(O)CCCC/C=C/c1ccc(F)cn1  
1458 C=Cc1ccc(/C=C/c2ccc(/C=C/c3ccc(OCCCCC)cc(OCCCCC)c3)cc2)cc1.CCCCCCOc1ccc2cc(Br)ccc2c1>>CCCCCOc1cc(/C=C/c2ccc(/C=C/c3ccc(/C=C/c4ccc5cc(OCCCCC)ccc5c4)cc3)cc2)cc(OCCC  
1459 C=Cc1ccccc1.Clc1ccs1>>C(=C/c1ccs1)\c1ccccc1  
1460 C=C(c1cc(OC)c(OC)c(OC)c1)c1oc2cc(OC)c(I)cc2c1C.C=CC(=O)OCC>>C=C(c1cc(OC)c(OC)c(OC)c1)c1oc2cc(OC)c(/C=C/C(=O)OCC)cc2c1C  
1461 C=CCCC(=O)CCCC[Se]c1ccccc1.Ic1ccccc1>>O=C(CC/C=C/c1ccccc1)CCCC[Se]c1ccccc1  
1462 Brc1ccs1.C=CCn1nnc2ccccc21>>C(=C/c1ccs1)\Cn1nnc2ccccc21  
1463 C=CS(=O)(=O)F.COc1cccc(I)c1>>COc1cccc(/C=C/S(=O)(=O)F)c1  
1464 C=Cc1ccccc1.O=C1C(O)=C(I)C(=O)c2ccccc21>>O=C1C(O)=C(/C=C/c2ccccc2)C(=O)c2ccccc21  
1465 C=CC(=O)N(C)OC.Nc1ccccc1I>>CON(C)C(=O)/C=C/c1ccccc1N  
1466 C=Cc1ccc(C(=O)OCC)cc1.CC1(C)CCC(=O)c2cc(Br)ccc21>>CCOC(=O)c1ccc(/C=C/c2ccc3c(c2)C(=O)CCC3(C)C)cc1  
1467 C=CC(N)=O.Cc1cc(Br)cc(C)c1Nc1ccnc(Nc2ccc(C#N)cc2)n1>>Cc1cc(/C=C/C(N)=O)cc(C)c1Nc1ccnc(Nc2ccc(C#N)cc2)n1  
1468 Brc1cc2ccc3ccccc4ccc(c1)c2c34.C=CC(=O)OC>>COC(=O)/C=C/c1cc2ccc3ccccc4ccc(c1)c2c34  
1469 C=CC(=O)OC.FC(F)(F)c1ccc(Br)cc1>>COC(=O)/C=C/c1ccc(C(F)(F)F)cc1

1470 C=CC(=O)OC(C)(C)C.CC(C)(C)O[C@H]1CC[C@@H]2C=C(C3=C(Br)CC4(CC3)OCCO4)CC[C@]1  
2C>>CC(C)(C)OC(=O)/C=C/C1=C(C2=C[C@H]3CC[C@H](OC(C)(C)C)[C@@]3(C)CC2)CCC2(C1)  
1471 C=Cc1ccc(-c2ccccc2)cc1.CC(C)(C)Br>>CC(C)(C)/C=C/c1ccc(-c2ccccc2)cc1  
1472 C=Cc1ccc(Cl)cc1.COc1ccc(Br)cc1>>COc1ccc(/C=C/c2ccc(Cl)cc2)cc1  
1473 C=CC(=O)OC.CCOC(=O)Nc1cccc1C1=C(I)CCO1>>CCOC(=O)Nc1cccc1C1=C(/C=C/C(=O)OC)C  
1474 C=Cc1ncccc1O[Si](C)(C)C(C)(C)C.N#Cc1ccc(Br)cc1>>CC(C)(C)[Si](C)(C)Oc1cccn1/C=C/c1ccc(C  
#N)cc1  
1475 C=Cc1ccc(OC(C)=O)cc1.FC(F)(F)c1cc(I)cc(C(F)(F)F)c1>>CC(=O)Oc1ccc(/C=C/c2cc(C(F)(F)F)cc(C  
F)(F)F)c2)cc1  
1476 C=Cc1ccc(OC)cc1.COC(=O)[C@H](Cc1ccc(O)c(I)c1)NC(=O)OC(C)(C)C>>COC(=O)[C@H](Cc1ccc  
(O)c(/C=C/c2ccc(OC)cc2)c1)NC(=O)OC(C)(C)C  
1477 C=Cc1ccc(OC)cc1.Nc1ccc(I)cc1>>COc1ccc(/C=C/c2ccc(N)cc2)cc1  
1478 C=CCN1C(=O)c2ccccc2C1=O.Cn1c(=O)oc2cc(Br)cnc21>>Cn1c(=O)oc2cc(/C=C/CN3C(=O)c4ccccc4  
C3=O)cnc21  
1479 C=CC(=O)OCC.CC(C)(C)OC(=O)c1ccccc1>>CCOC(=O)/C=C/c1ccccc1C(=O)OC(C)(C)C  
1480 C=CC(=O)OCC.Cc1cc(C)c(Br)c(C)c1>>CCOC(=O)/C=C/c1c(C)cc(C)cc1C  
1481 C=CC(OCC)OCC.Clc1ccc(I)cc1>>CCOC(/C=C/c1ccc(Cl)cc1)OCC  
Br1ccc2c(Cl)Cc1ccccc1-  
1482 2.C=C[C@H](CO[Si](C)(C)C(C)(C)C)NC(=O)OCc1ccccc1>>CC(C)(C)[Si](C)(C)OC[C@H](/C=C/  
c1ccc2c(Cl)Cc1ccccc1-2)NC(=O)OCc1ccccc1  
1483 Br1ccccc1C1OCCCCO1.C=CC#N>>N#C/C=C/c1ccccc1C1OCCCCO1  
1484 C=CS(=O)(=O)F.O=S(=O)(F)c1ccc(I)cc1>>O=S(=O)(F)/C=C/c1ccc(S(=O)(=O)F)cc1  
1485 Br1cccc2ccccc12.C=CS(=O)(=O)Oc1ccccc1>>O=S(=O)(F)/C=C/c1cccc2ccccc12)Oc1ccccc1  
1486 C=CC(=O)OCC.Cc1cc(OCc2ccccc2)ccc1Br>>CCOC(=O)/C=C/c1ccc(OCc2ccccc2)cc1C  
1487 C=CC(=O)OCC.CCc1nc(CC)c(Cl)n1>>CCOC(=O)/C=C/c1nc(CC)cnc1CC  
1488 C=Cc1ccc(C(=O)OC)cc1.CC(C)(C)[Si](C)(C)Oc1cccn1Br>>COC(=O)c1ccc(/C=C/c2ncccc2O[Si](C)  
(C)C(C)(C)C)cc1  
1489 Br1ccc(-c2cccs2)s1.C=CC(=O)OCCCC>>CCCCOC(=O)/C=C/c1ccc(-c2cccs2)s1  
1490 Br1cccs1.C=CS(C)(=O)=O>>CS(=O)(=O)/C=C/c1cccs1  
1491 C=Cc1ccc2c(Cl)C(=O)c1ccccc1C2=O.Ic1ccc2c(=C3SC=CS3)c3ccccc3c(=C3SC=CS3)c2c1>>O=C1c2  
ccccc2C(=O)c2cc(/C=C/c3ccc4c(=C5SC=CS5)c5ccccc5c(=C5SC=CS5)c4c3)ccc21  
1492 C=CC(=O)OC.Cc1cc(Br)cc(NC(=O)C2CCCC2)c1>>COC(=O)/C=C/c1cc(C)cc(NC(=O)C2CCCC2)  
1493 C=CC#N.Nc1ccccc1I>>N#C/C=C/c1ccccc1N  
1494 C=CC(=O)OC(C)(C)C.CN1CCC2(CC1)CC(=O)c1cc(Br)ccc1O2>>CN1CCC2(CC1)CC(=O)c1cc(/C=C/  
/C(=O)OC(C)(C)C)ccc1O2  
1495 C=C[Si](CC)(CC)CC.COC(=O)c1ccc(Br)cc1>>CC[Si](/C=C/c1ccc(C(=O)OC)cc1)(CC)CC  
1496 C=CC(=O)OCCCC.Nc1ncnc2c1c(I)cn2[C@H]1C[C@H](O)[C@@H](CO)O1>>CCCCOC(=O)/C=C/c  
1cn([C@H]2C[C@H](O)[C@@H](CO)O2)c2ncnc(N)c12  
1497 C=CC(=O)OCC.Cc1cc(I)ccc1/C=C/C#N>>CCOC(=O)/C=C/c1ccc(/C=C/C#N)c(C)c1  
1498 C=Cc1ccccc1.Cc1ccc(S(=O)(=O)Nc2ccccc2Br)cc1>>Cc1ccc(S(=O)(=O)Nc2ccccc2/C=C/c2ccccc2)cc1  
1499 C=CC(=O)OCC.CCOC(=O)N1CCc2cc(Br)c(N)c(Cl)c2CC1>>CCOC(=O)/C=C/c1cc2c(Cl)c1N)CCN  
(C(=O)OCC)CC2  
1500 C=Cc1ccc(C(=O)OCC)cc1.CCC(CC)=C1CCC(C)(C)c2ccc(Br)cc21>>CCOC(=O)c1ccc(/C=C/c2ccc3c(  
c2)C(=C(CC)CC)CCC3(C)C)cc1  
1501 C=CC[C@H](NC(=O)OC(C)(C)C)C(=O)OC.COc1ccc(I)cc1>>COC(=O)[C@H](C/C=C/c1ccc(OC)cc1  
)NC(=O)OC(C)(C)C  
1502 Br1cnc2ccccc2c1.C=Cc1ccc(C(C)=O)cc1>>CC(=O)c1ccc(/C=C/c2cnc3ccccc3c2)cc1  
1503 C=CC(=O)OCC.Cc1cc2ncc(Br)cc2n1-c1ccc(C#N)cc1>>CCOC(=O)/C=C/c1cnc2cc(C)n(-  
c3ccc(C#N)cc3)c2c1  
1504 C=CC(=O)OC.Oc1cccc(Br)c1>>COC(=O)/C=C/c1cccc(O)c1  
1505 C=C[Si](C)(C)C.CC(C)N(C(=O)c1ccccc1I)C(C)C>>CC(C)N(C(=O)c1ccccc1/C=C/[Si](C)(C)C)C(C)C  
1506 C=Cc1cccn1.Cc1cc(N2CCCC2)nc(Cl)n1>>Cc1cc(N2CCCC2)nc(/C=C/c2cccn2)n1  
1507 C=CC(=O)OC.C[C@H]1C[C@H](n2c(Nc3ccc(C(F)(F)F)cc3)nc3cc(Br)ccc32)CC(C)(C)C1>>COC(  
=O)/C=C/c1ccc2c(Cl)nc(Nc1ccc(C(F)(F)F)cc1)n2[C@H]1C[C@H](C)CC(C)(C)C1  
1508 C=CC(=O)OC(C)(C)C.O=C1CN(CCN2CCOCC2)Cc2cc(Br)cnc2N1>>CC(C)(C)OC(=O)/C=C/c1cnc2  
c(Cl)CN(CCN1CCOCC1)CC(=O)N2  
1509 C=CCNC(=O)OC(C)(C)C.CC1(C)OC(=O)c2c(cc(OCc3ccc(F)cc3)cc2OS(=O)(=O)C(F)(F)F)O1>>C  
C(C)(C)OC(=O)NC/C=C/c1cc(OCCc2ccc(F)cc2)cc2c1C(=O)OC(C)(C)O2  
1510 C=Cc1ccccc1.CCCCN1c2ccc(Br)cc2Sc2cc(-c3nc4ccccc4n3-  
c3ccccc3)ccc21>>CCCCN1c2ccc(/C=C/c3ccccc3)cc2Sc2cc(-c3nc4ccccc4n3-c3ccccc3)ccc21

1511 C=CC1=CC(C)(C)N([O])C(C)(C)C1.CC1(C)C=C(I)CC(C)(C)N1[O]>>CC1(C)C=C(/C=C/C2=CC(C)(C)N([O])C(C)(C)C2)CC(C)(C)N1[O]  
1512 C=Cc1cccc1.O=c1ccoc2ccc(Br)cc12>>O=c1ccoc2ccc(/C=C/c3ccccc3)cc12  
1513 C=CC(=O)OCCCC.CCCCCc1cn(Cc2ccc(I)cc2)nn1>>CCCCCc1cn(Cc2ccc(/C=C/C(=O)OCCCC)cc2)nn1  
1514 C=CC(=O)OCC.Ic1c(-c2cccc2)oc2nc3ccccc3nc12>>CCOC(=O)/C=C/c1c(-  
1515 C=CC(=O)OCC.CCOC(=O)C1=C(C)N(c2ccc(C(F)(F)F)c2)C(=O)N(Cc2ccc(Br)c2)C1c1ccc(C#N)cc1>>CCOC(=O)/C=C/c1cccc(CN2C(=O)N(c3ccc(C(F)(F)F)c3)C(C)=C(C(=O)OCC)C2c2ccc(C#N)cc2  
1516 C=Cc1cccc(SC)c1.CC(C)c1ccc2sc3ccc(Br)cc3c(=O)c2c1>>CSc1cccc(/C=C/c2ccc3sc4ccc(C(C)C)cc4c(=O)c3c2)c1  
1517 C=CC(C)OC(C)=O.Ic1cccc1>>CC(=O)OC(C)/C=C/c1cccc1  
1518 Br1cccn1.C=CC(=O)OCC>>CCOC(=O)/C=C/c1cccn1  
1519 Br1ccccc1I.C=CC(=O)N(C)C>>CN(C)C(=O)/C=C/c1ccccc1Br  
1520 C=CC(=O)OC(C)(C)C.CCCCc1cc(Cl)c2ccccc2n1>>CCCCc1cc(/C=C/C(=O)OC(C)(C)C)c2ccccc2n1  
1521 C=CC(=O)OC.CCCCCC(O)c1cccc2ccc(Br)cc12>>CCCCC(O)c1cccc2ccc(/C=C/C(=O)OC)cc12  
1522 C=CC(=O)OCC.Clc1enne(C2CC2)c1>>CCOC(=O)/C=C/c1enne(C2CC2)c1  
1523 C=CCN(C(=O)C(C)(C)C)C1CCCCC1.O=C1Nc2ncccc2[C@@]12Cc1cc(Br)enc1C2>>CC(C)(C)C(=O)N(C/C=C/c1enc2c(c1)C[C@@]1(C2)C(=O)Nc2ncccc21)C1CCCCC1  
1524 C=CC#N.COc1ccc(I)cc1CC(C)C>>COc1ccc(/C=C/C#N)cc1CC(C)C  
1525 Br1cnc2ccccc2c1.C=CCO[C@@]1(C)C[C@@H](C)C(=O)[C@@H](C)[C@@H]1O[C@@H]1O[C@@H](C)C[C@@H](N(C)C)[C@@H]1OC(C)=O>>CC[C@@H]1OC(=O)[C@@H](C)C(=O)[C@@H](C)[C@@H](O[C@@H]2O[C@@H](C)C[C@@H](N(C)C)[C@@H]2OC(C)=O)[C@@](C)(OC/C=C/c2cnc3ccccc3c2)C[C@@H](C)C(=O)[C@@H](C)[C@@H]2NC(=O)O[C@@]12C  
1526 C=Cc1ccc(N(C)C(=O)OC(C)(C)C)cc1.FCCOCCOCCOc1ncc(I)cc1Br>>CN(C(=O)OC(C)(C)C)c1ccc(/C=C/c2cnc(OCCOCCOCCF)c(Br)c2)cc1  
1527 C=CC(=O)OC.N#Cc1c(-c2ccc(Br)c2)cc(-c2cccc2)nc1N>>COC(=O)/C=C/c1cccc(-c2cc(-c3ccccc3)nc(N)c2C#N)c1  
1528 C=CC(C)=O.COc1cc(OC)nc(Cl)n1>>COc1cc(OC)nc(/C=C/C(C)=O)n1  
1529 C=Cc1ccc(OC)c(O)c1.Oc1cc(O)cc(I)c1>>COc1ccc(/C=C/c2cc(O)cc(O)c2)cc1O  
1530 C=CC(=O)OCC.O=[N+](O)c1cccc(O)c1Br>>CCOC(=O)/C=C/c1c(O)cccc1[N+](=O)[O-]  
1531 C=CC(=O)OC.O=C1Nc2cccc(Br)c2C1=O>>COC(=O)/C=C/c1cccc2c1C(=O)C(=O)N2  
1532 C=CP(=O)(OCC)OCC.CCOC(=O)CNc1cccc(Br)c1>>CCOC(=O)CNc1cccc(/C=C/P(=O)(OCC)OCC)c  
1533 C=Cc1ccccc1.N#Cc1ccc(Cl)cc1>>N#Cc1ccc(/C=C/c2ccccc2)cc1  
1534 C=Cc1nc(C)c(OC(=O)C(C)(C)C)c2c1COC2OC.COc1ccc(I)cc1>>COc1ccc(/C=C/c2nc(C)c(OC(=O)C(C)(C)C)c3c2COC3OC)cc1  
1535 Br1cnc2[nH]ccc2c1.C=CC(=O)OC(C)(C)C>>CC(C)(C)OC(=O)/C=C/c1cnc2[nH]ccc2c1  
1536 C=CC(=O)OC(C)(C)C.COc1cc(N(C)Cc2ccc(Br)cc2)cc(OC)c1OC>>COc1cc(N(C)Cc2ccc(/C=C/C(=O)OC(C)(C)C)cc2)cc(OC)c1OC  
1537 Br1ccc2[nH]ccc2c1.C=CC(=O)OCC>>CCOC(=O)/C=C/c1ccc2[nH]ccc2c1  
1538 C=CC(C)(C)O.COC(=O)c1c(OC)cc(OC)c(I)c1OC>>COC(=O)c1c(OC)cc(OC)c(/C=C/C(C)(C)O)c1OC  
1539 Br1ccc2oc(-c3cc[nH]n3)cc2c1.C=CC(=O)OCC>>CCOC(=O)/C=C/c1ccc2oc(-c3cc[nH]n3)cc2c1  
1540 C=CCOc1ccccc1.Cc1ccc(I)cc1>>Cc1ccc(/C=C/COc2ccccc2)cc1  
1541 C=Cc1cccn1.O=[N+](O)c1ccc2c(Br)nn(C3CCCCO3)c2c1>>O=[N+](O)c1ccc2c(/C=C/c3cccn3)nn(C3CCCCO3)c2c1  
1542 C=Cc1cncnc1.CCCCCOc1ccc(Br)cc1F>>CCCCCOc1ccc(/C=C/c2cncnc2)cc1F  
1543 Br1cncnc(OCc2ccccc2)c1.C=CCCO>>OCC/C=C/c1cncnc(OCc2ccccc2)c1  
1544 C=CC(=O)OC.CN1c2ccccc2Sc2cc(Br)ccc21>>COC(=O)/C=C/c1ccc2c(c1)Sc1ccccc1N2C  
1545 C=CCc1ccccc1.CN(C(=O)c1ncc2c(c1I)c1ccccc1n2S(=O)(=O)N(C)C)c1ccccc1>>CN(C(=O)c1ncc2c(c1/C=C/Cc1ccccc1)c1ccccc1n2S(=O)(=O)N(C)C)c1ccccc1  
1546 C=Cc1nc2c(N)ncnc2n1[C@H]1C[C@H](O)[C@@H](CO)O1.CC(=O)c1ccc(Br)cc1>>CC(=O)c1ccc(/C=C/c2nc3c(N)ncnc3n2[C@H]2C[C@H](O)[C@@H](CO)O2)cc1  
1547 Br1ccc(-c2ccccc2)cc1.C=CC[C@H](CC(=O)OC(C)(C)C)C(=O)N[C@H](C(=O)NC(c1ccccc1)c1ccccc1)C(C)(C)C>>CC(C)(C)OC(=O)C[C@@H](C/C=C/c1ccc(-c2ccccc2)cc1)C(=O)N[C@H](C(=O)NC(c1ccccc1)c1ccccc1)C(C)(C)C  
1548 C=Cc1cccn1.CNC(=O)c1ccccc1Sc1ccc2c(I)n[nH]c2c1>>CNC(=O)c1ccccc1Sc1ccc2c(/C=C/c3cccn3)n[nH]c2c1  
1549 C=CS(=O)(=O)F.COc1ccccc1I>>COc1ccccc1/C=C/S(=O)(=O)F

C=CCO[C@]1(C)C[C@@H](C)C(=O)[C@H](C)[C@@H](O)[C@](C)(O)[C@@H](CC)OC(=O)[C@  
 H](C)C(=O)[C@H](C)[C@H]1O[C@@H]1O[C@H](C)C[C@H](N(C)C)[C@H]1OC(=O)c1cccc1.C  
 1550 Oc1ccc(I)cc1>>CC[C@H]1OC(=O)[C@H](C)C(=O)[C@H](C)[C@@H](O[C@@H]2O[C@H](C)C[  
 C@H](N(C)C)[C@H]2OC(=O)c2cccc2)[C@](C)(OC/C=C/c2ccc(OC)cc2)[C@@H](C)C(=O)[C@H  
 1(C)[C@@H](O)[C@1](C)O  
 1551 C=Cc1cccc1.Clc1ccc2c(c1)oc1cccc12>>C(=C/c1ccc2c(c1)oc1cccc12)\c1cccc1  
 1552 C=CC(=O)Nc1ccc(C)cc1.COc1ccc2c(=O)c(I)ccc2c1>>COc1ccc2c(=O)c(/C=C/C(=O)Nc3ccc(C)cc3)c  
 oc2c1  
 1553 C=Cc1cccc1C.Cc1cccc1Cl>>Cc1cccc1/C=C/c1cccc1C  
 1554 C=Cc1cccc1.CC(C)c1ccc(I)cc1>>CC(C)c1ccc(/C=C/c2cccc2)cc1  
 1555 C=CCP(=O)(OCC)OCC.Cc1ccc(I)cc1>>CCOP(=O)(C/C=C/c1ccc(C)cc1)OCC  
 1556 C=CC(C)(C)O.COc1cc2oc(=O)ccc2cc1Br>>COc1cc2oc(=O)ccc2cc1/C=C/C(C)(C)O  
 1557 C=C/C=C/C(=O)N(CCCC)CCCC.Clc1ccc(Br)cc1>>CCCCN(CCCC)C(=O)/C=C/C=C/c1ccc(Cl)cc1  
 1558 C=CC(=O)O.Cc1ccc(C)n1-c1ccc(Br)cc1>>Cc1ccc(C)n1-c1ccc(/C=C/C(=O)O)cc1  
 C=CC(=O)OC.Ic1cn2c(n1)[C@H](OCc1cccc1)[C@@H](OCc1cccc1)[C@H](OCc1cccc1)[C@H]2  
 1559 COCc1cccc1>>COC(=O)/C=C/c1cn2c(n1)[C@H](OCc1cccc1)[C@@H](OCc1cccc1)[C@H](OCc1  
 ccccc1)[C@H]2COCc1cccc1  
 1560 C=Cc1ccncc1.O=Cc1ccc(N(c2ccc(Br)cc2)c2ccc(C=O)cc2)cc1>>O=Cc1ccc(N(c2ccc(C=O)cc2)c2ccc(/  
 C=C/c3ccncc3)cc2)cc1  
 1561 C=CC(=O)OC.Nc1ccc(Cl)cc1I>>COC(=O)/C=C/c1cc(Cl)ccc1N  
 1562 C=CC(=O)OC.CC(C)(C)c1cc(Br)cc(C=O)c1O>>COC(=O)/C=C/c1cc(C=O)c(O)c(C(C)(C)C)c1  
 1563 C=CC(=O)OC(C)(C)C.COc1ccc(I)cc1N>>COc1ccc(/C=C/C(=O)OC(C)(C)C)cc1N  
 1564 C=CCc1ccc(OC)cc1.Ic1cccc1>>COc1ccc(C/C=C/c2cccc2)cc1  
 1565 C=CC(=O)OC.Oc1ccc(-c2ccc(Br)cc2)cc1>>COC(=O)/C=C/c1ccc(-c2ccc(O)cc2)cc1  
 1566 C=CCN(C(=O)OC(C)(C)C(=O)OC(C)(C)C.FC(F)(F)c1cccc(Br)c1>>CC(C)(C)OC(=O)N(C/C=C/c1  
 cccc(C(F)(F)F)c1)C(=O)OC(C)(C)C  
 1567 Bre1ccncc1.C=C[P@](C)(=O)c1cccc1>>C[P@](=O)(/C=C/c1ccncc1)c1cccc1  
 C=CC(C)=O.CC(C)(C)[Si](C)(C)OC[C@H]1O[C@H](c2ccc(Br)cc2)C=C[C@@H]1O[Si](C)(C)C(C)(  
 1568 C)C>>CC(=O)/C=C/c1ccc([C@@H]2C=C[C@H](O[Si](C)(C)C(C)(C)C)[C@@H](CO[Si](C)(C)C(C)  
 (C)C)O2)cc1  
 1569 C=Cc1ccncc1.CC[C@@H](COc1cnc(Cl)c(Br)c1)NC(=O)OC(C)(C)C>>CC[C@@H](COc1cnc(Cl)c(/  
 C=C/c2ccncc2)c1)NC(=O)OC(C)(C)C  
 C=CC(=O)OC.CC(C)(C)OC(=O)NC1(c2ccc(-c3nc4cc(Br)ccn4c3-  
 1570 c3cccc3)cc2)CCC1>>COC(=O)/C=C/c1cn2c(-c3cccc3)c(-  
 c3ccc(C4(NC(=O)OC(C)(C)C)CCC4)cc3)nc2c1  
 1571 C=Cc1ccc2cccc2c1.CC(=O)c1ccc(Br)cc1>>CC(=O)c1ccc(/C=C/c2ccc3cccc3e2)cc1  
 1572 Bre1cnc(NCCc2cccc2)c2cccc12.C=CC(=O)OCC>>CCOC(=O)/C=C/c1cnc(NCCc2cccc2)c2cccc1  
 C=CS(=O)(=O)F.O=C(N[C@@H](Cc1ccc(I)cc1)C(=O)OCc1cccc1)OCC1c2cccc2-  
 1573 c2cccc21>>O=C(N[C@@H](Cc1ccc(/C=C/S(=O)(=O)F)cc1)C(=O)OCc1cccc1)OCC1c2cccc2-  
 c2cccc21  
 1574 C=CC(=O)O.Cc1cccc1I>>Cc1cccc1/C=C/C(=O)O  
 1575 C=CC(=O)N(C)Cc1oc2cccc2c1C.CCC1(CC)C(=O)Nc2ncc(Br)cc21>>CCC1(CC)C(=O)Nc2ncc(/C=C  
 /C(=O)N(C)Cc3oc4cccc4e3C)cc21  
 C=CC1(C(=O)O)COC(C)(C)OC1.CC(C)[C@H](O)C(=O)N[C@@H](C)C(=O)N1CCC[C@@H](C(=O)  
 1576 )N[C@H](C)c2ccc3ccc(Br)cc3n2)N1>>CC(C)[C@H](O)C(=O)N[C@@H](C)C(=O)N1CCC[C@@H]  
 (C(=O)N[C@H](C)c2ccc3ccc(/C=C/C4(C(=O)O)COC(C)(C)OC4)cc3n2)N1  
 1577 C=Cc1ccc(OC)cc1.Cc1ccc(S(=O)(=O)Oc2cccc3c(Br)ccncc23)cc1>>COc1ccc(/C=C/c2ccncc3c(OS(=O)(  
 =O)c4ccc(C)cc4)cccc23)cc1  
 1578 C=Cc1ccc(C)cc1.COc1ccc(Br)c1>>COc1cccc(/C=C/c2ccc(C)cc2)c1  
 \*CNCCCOCCOCCOCCNC(=O)COc1ccc(C(Cc2cc(OC)cc(OC)c2)NC(=O)c2cccc(C=C)c2)cc1.COc1  
 1579 ccc(I)c([N+](=O)[O-]  
 ])c1>>\*CNCCCOCCOCCOCCNC(=O)COc1ccc(C(Cc2cc(OC)cc(OC)c2)NC(=O)c2cccc(/C=C/c3ccc  
 (OC)cc3[N+](=O)[O-])c2)cc1  
 1580 C=CC(N)=O.Oc1ccc2c(c1)CCN(c1cccc1)C2c1ccc(I)cc1>>NC(=O)/C=C/c1ccc(C2c3ccc(O)cc3CCN2  
 c2cccc2)cc1  
 1581 C=CS(=O)(=O)F.O=S(=O)(F)/C=C/c1cccc(I)c1>>O=S(=O)(F)/C=C/c1cccc(/C=C/S(=O)(=O)F)c1  
 1582 C=Cc1cccc1C.Cc1ccc(N)c(Br)c1>>Cc1ccc(N)c(/C=C/c2cccc2C)c1  
 1583 C=CC(=O)OCCCC.O=Cc1ccc(Cl)cc1>>CCCCOC(=O)/C=C/c1ccc(C=O)cc1  
 1584 C=CC(=O)N(C)C.CCOC(=O)c1ncsc1NS(=O)(=O)Cc1cccc1Br>>CCOC(=O)c1ncsc1NS(=O)(=O)Cc1  
 ccccc1/C=C/C(=O)N(C)C  
 1585 C=CC(=O)OC.Cn1c(Br)cn1Sc1cccc1>>COC(=O)/C=C/c1cnc(Sc2cccc2)n1C

1586 C=CC(=O)N(CC)CC.O=C1Cc2c([nH]c3c(I)cccc23)-  
c2cccnc2N1>>CCN(CC)C(=O)/C=C/c1cccc2c3c([nH]c12)-c1cccnc1NC(=O)C3  
\*CNCCCCOCCOCCOCCNC(=O)COc1ccc(C(Cc2cc(OC)cc(OC)c2)NC(=O)c2ccc(C=C)cc2)cc1.Cc1c(  
1587 F)cccc1I>>\*CNCCCCOCCOCCOCCNC(=O)COc1ccc(C(Cc2cc(OC)cc(OC)c2)NC(=O)c2ccc(/C=C/c3  
cccc(F)c3C)cc2)cc1  
1588 C=CC(=O)Nc1cccc1NC(=O)OC(C)(C)C.CCOC(=O)[C@H]1CN(C(C)(C)C)C[C@H]1c1ccc(Br)cc1  
>>CCOC(=O)[C@H]1CN(C(C)(C)C)C[C@H]1c1ccc(/C=C/C(=O)Nc2cccc2NC(=O)OC(C)(C)C)cc  
1589 C=CC(=O)OC.COc1ccc2c(c1)c(I)nn2C(=O)OC(C)(C)C>>COC(=O)/C=C/c1nn(C(=O)OC(C)(C)C)c2c  
cc(OC)cc12  
1590 C=CC(C)C(C)O.COc1ccc(Br)cc1>>COc1ccc(/C=C/C(C)C(C)O)cc1  
1591 C=CC(=O)O.COc1ccc(S(=O)(=O)Nc2cccc(I)c2)cc1OC>>COc1ccc(S(=O)(=O)Nc2cccc(/C=C/C(=O)O  
)c2)cc1OC  
1592 C=Cc1ccc(OC)c(OC)c1.COc1ccc(Br)cc(OC)c1F>>COc1ccc(/C=C/c2cc(OC)c(F)c(OC)c2)cc1OC  
1593 C=CC(=O)OCC.Cc1cc(O)ccc1Br>>CCOC(=O)/C=C/c1ccc(O)cc1C  
1594 C=CC1CCCCC1.O=Cc1ccc(Br)o1>>O=Cc1ccc(/C=C/C2CCCCC2)o1  
1595 C=CC(C)(O)CCC=C(C)C.Cc1cccc1Br>>CC(C)=CCCC(C)(O)/C=C/c1cccc1C  
1596 C=CC(=O)O.CCOC(=O)/C=C/c1cccc2c1Oc1c(I)cccc1C2(C)C>>CCOC(=O)/C=C/c1cccc2c1Oc1c(/C=  
C/C(=O)O)cccc1C2(C)C  
1597 C=CC#N.O=CC1=C(Br)c2cccc2CC1>>N#C/C=C/C1=C(C=O)CCc2cccc21  
1598 C=CCCCCCC.COC(=O)CCCCC1=C(I)CCC1=O>>CCCCC/C=C/C1=C(CCCCC(=O)OC)C(=O)CC1  
1599 C=CC(=O)OC.O=[N+](O-)]c1cccc(Br)c1>>COC(=O)/C=C/c1cccc([N+](=O)[O-])c1  
1600 C=Cc1ccc(C)cc1.CCCCC(Br)C(F)(F)F>>CCCCC(/C=C/c1ccc(C)cc1)C(F)(F)F  
1601 C=CC(=O)OCC.CCc1ccc(I)cc1>>CCOC(=O)/C=C/c1ccc(CC)cc1  
1602 C=CC#N.CC(=O)c1ccc(Cl)cc1>>CC(=O)c1ccc(/C=C/C#N)cc1  
1603 C=Cc1senc1C.O=C1CCC(c2ccc(Br)cc2)O1>>Cc1nsc1/C=C/c1ccc(C2CCC(=O)O2)cc1  
1604 C=Cc1cenc(Br)c1.CC(C)(C)OC(=O)N1CC[C@H]1COc1cnc(Cl)c(I)c1>>CC(C)(C)OC(=O)N1CC[C@  
H]1COc1cnc(Cl)c(/C=C/c2cenc(Br)c2)c1  
1605 C=CC(=O)OC.FS(F)(F)(F)c1cccc(I)c1>>COC(=O)/C=C/c1cccc(S(F)(F)(F)(F)F)c1  
C=CCCCOc1ccc(CCNC(=O)OC(C)(C)C)cc1.CC(C)N(CC[C@H](c1cccc1)c1cc(Br)ccc1OCc1cccc1)  
1606 C(C)C>>CC(C)N(CC[C@H](c1cccc1)c1cc(/C=C/CCCOc2ccc(CCNC(=O)OC(C)(C)C)cc2)ccc1OCc1  
cccc1)C(C)C  
1607 C=Cc1cccc1.C[C@H]1CC(=O)Nc2cccc(Br)c2N1>>C[C@H]1CC(=O)Nc2cccc(/C=C/c3cccc3)c  
1608 C=CC(=O)OC(C)(C)C.CCCCCC(=O)Oc1ccc(I)cc1CC=C(C)C>>CCCCC(=O)Oc1ccc(/C=C/C(=O)O  
C(C)(C)C)cc1CC=C(C)C  
1609 C=CC(=O)OC.FS(F)(F)(F)c1ccc(I)cc1>>COC(=O)/C=C/c1ccc(S(F)(F)(F)(F)F)cc1  
1610 C=CC(C)=O.COc1ccc2ccc(=O)oc2c1I>>COc1ccc2ccc(=O)oc2c1/C=C/C(C)=O  
1611 C=CC(=O)OCC.Cc1ccc(C(N)=O)cc1I>>CCOC(=O)/C=C/c1cc(C(N)=O)ccc1C  
1612 C=CC(=O)OC.O=c1oc2cccc2cc1-c1ccc(I)cc1>>COC(=O)/C=C/c1ccc(-c2cc3cccc3oc2=O)cc1  
1613 C=CCNC(=O)C(F)(F)F.CN(C)C=Nc1nc(=O)n([C@H]2C[C@H](O)[C@H](CO)O2)cc1I>>CN(C)C  
=Nc1nc(=O)n([C@H]2C[C@H](O)[C@H](CO)O2)cc1/C=C/CNC(=O)C(F)(F)F  
C=Cc1ccc(N(c2cccc2)c2cccc2)cc1.CCCCCCCC1(CCCCCC)c2cc(Br)ccc2-  
1614 c2ccc(C=O)cc21>>CCCCCCCCC1(CCCCCC)c2cc(C=O)ccc2-  
c2ccc(/C=C/c3ccc(N(c4cccc4)c4cccc4)cc3)cc21  
1615 C=CC(=O)OCC.O=C(N1CCc2cc(Br)c(F)cc2C1)C(F)(F)F>>CCOC(=O)/C=C/c1cc2c(cc1F)CN(C(=O)  
C(F)(F)F)CC2  
1616 C=CC(=O)O.Ic1cccc2cccc12>>O=C(O)/C=C/c1cccc2cccc12  
1617 C=CC(=O)OC.COC(=O)c1ccc2cccc2c1Br>>COC(=O)/C=C/c1c(C(=O)OC)ccc2cccc12  
1618 C=CC(=O)OC.Cc1ccc2cc(Br)ccc2n1>>COC(=O)/C=C/c1ccc2nc(C)ccc2c1  
1619 C=Cc1ccc2cccc2c1.CCOC(=O)C(F)Br>>CCOC(=O)C(F)/C=C/c1ccc2cccc2c1  
1620 C=CC1CCCCC1.OCc1ccc(I)cc1>>OCc1ccc(/C=C/C2CCCCC2)cc1  
1621 C=Cc1cccc1[N+](=O)[O-]  
].O=C1C(O)=C(I)C(=O)c2cccc21>>O=C1C(O)=C(/C=C/c2cccc2[N+](=O)[O-])C(=O)c2cccc21  
1622 C=CC(=O)OC(CC)CCCC.FC(F)(F)c1ccc(Cl)cc1>>CCCCC(CC)OC(=O)/C=C/c1ccc(C(F)(F)F)cc1  
1623 C=CC(NC(=O)OC(C)(C)C)C(C)C.COC(=O)c1c(Br)ccn1C>>COC(=O)c1c(/C=C/C(NC(=O)OC(C)(C)  
C)C(C)C)ccn1C  
1624 C=CC(=O)OCC.O=C(Nc1ccc(Cl)cc1)c1cccc(Br)c1>>CCOC(=O)/C=C/c1cccc(C(=O)Nc2ccc(Cl)cc2)c  
1625 C=CC(=O)OC.Oc1ccc(/C=C/c2ccc(Br)cc2)cc1O>>COC(=O)/C=C/c1ccc(/C=C/c2ccc(O)c(O)c2)cc1  
1626 C=Cc1ccc(OC(C)=O)cc1.Ic1cccc1>>CC(=O)Oc1ccc(/C=C/c2cccc2)cc1  
1627 C=CC(=O)Nc1ccc(F)cc1.O=c1c(I)coc2cc(O)ccc12>>O=C(/C=C/c1coc2cc(O)ccc2c1=O)Nc1ccc(F)  
1628 C=CC(=O)OCCCC.CC(C)(C)C(=O)Oc1ccc2cccc2c1-  
c1c(O)ccc2cc(Br)ccc12>>CCCCOC(=O)/C=C/c1ccc2c(-

1629 C=Cc1cccc1.O=C(Nc1cccc1)c1nccc(Cl)c1I>>O=C(Nc1cccc1)c1nccc(Cl)c1/C=C/c1cccc1  
1630 C=Cc1ccc(OCCCCCCCCCCCC)cc1.Oc1ccc(I)cc1>>CCCCCCCCCCCCOc1ccc(/C=C/c2ccc(O)cc2)cc  
1631 C=CC(=O)OC.Ic1csc1-c1cccc1>>COC(=O)/C=C/c1sc1-c1cccc1  
1632 C=CC(=O)OC.CCNC(=O)Nc1cc2c(Br)ccc(C)c2cn1>>CCNC(=O)Nc1cc2c(/C=C/C(=O)OC)ccc(C)c2c  
1633 C=CC(=O)OC.Cc1ccc(Br)c(N)c1>>COC(=O)/C=C/c1ccc(C)cc1N  
1634 C=CC(=O)OC.COc1cc(Br)c(C=O)cc1OC>>COC(=O)/C=C/c1cc(OC)c(OC)cc1C=O  
1635 C=CC(OC)OC.IC1CCCC1>>COC(/C=C/C1CCCC1)OC  
1636 C=CC(=O)OC.Clc1ccc(Br)cc1>>COC(=O)/C=C/c1ccc(Cl)cc1  
1637 C=CC#N.CCOc1noc(C)c1I>>CCOc1noc(C)c1/C=C/C#N  
1638 C=CC(=O)OC.Cc1c(Br)ccc2c1N(C)C(=O)C2=O>>COC(=O)/C=C/c1ccc2c(c1C)N(C)C(=O)C2=O  
C=C[C@H]1O[C@@H]2OC(C)(C)O[C@@H]2[C@H]1O.O=Cc1cc(-  
1639 c2cccc2)cc2ccc(Br)cc12>>CC1(C)O[C@H]2O[C@H](/C=C/c3ccc4oc(-  
c5cccc5)cc(=O)c4c3)[C@H](O)[C@H]2O1  
C=Cc1ccc(N(C)C)cc1.C[Si](C)(OS(=O)(=O)C(F)(F)F)OS(=O)(=O)C(F)(F)F>>CN(C)c1ccc(/C=C/[Si](  
1640 C)(C)OS(=O)(=O)C(F)(F)F)cc1  
C=Cn1nnn1CC.Ic1cccc1>>CCc1nnn1/C=C/c1cccc1  
1641 C=CC(=O)OC.Cn1cnc2c(Nc3ccc(Br)cc3)nc(N3CCCC3)nc21>>COC(=O)/C=C/c1ccc(Nc2nc(N3CCCC  
1642 CC3)nc3c2nnc3)cc1  
C=CC(=O)OC.O=C1c2cccc2C(=O)N1c1cccc(Br)c1F>>COC(=O)/C=C/c1cccc(N2C(=O)c3cccc3C2  
1643 =O)c1F  
C=Cc1cnc1.CC(C)(C)OC(=O)N[C@H](COc1cc(Br)nc1Cl)Cc1c[nH]c2cccc12>>CC(C)(C)OC(=O  
1644 )N[C@H](COc1cc(/C=C/c2cnc2)nc1Cl)Cc1c[nH]c2cccc12  
C=Cc1ccc2c(c1)c1cccc1n2CCCC.O=Cc1ccc(Br)cc1>>CCCCn1c2cccc2c2cc(/C=C/c3ccc(C=O)cc3)c  
1645 cc21  
C=CC(=O)N(C1CCCCC1)C1CCCCC1.CC(C)(C)OC(=O)c1cccc1Br>>CC(C)(C)OC(=O)c1cccc1/C=  
1646 C/C(=O)N(C1CCCCC1)C1CCCCC1  
C=Cc1cccc1.Nc1ccc(C(F)(F)F)cc1Br>>Nc1ccc(C(F)(F)F)cc1/C=C/c1cccc1  
1647 C=CS(=O)(=O)NCc1ccc(F)cc1.Cc1ccc(CNC(=O)OC(C)(C)C)c(Br)c1>>Cc1ccc(CNC(=O)OC(C)(C)C)  
1648 c(/C=C/S(=O)(=O)NCc2ccc(F)cc2)c1  
C=Cc1cnc1.O=Cc1cccc1Br>>O=Cc1cccc1/C=C/c1cnc1  
1649 C=CSc1cccc1.Fc1ccc(Br)cc1>>Fc1ccc(/C=C/Sc2cccc2)cc1  
1650 Bre1nc(NCc2cccc2)c2cccc12.C=CC(=O)OCC>>CCOC(=O)/C=C/c1cnc(NCc2cccc2)c2cccc12  
1651 Bre1ncc(OC2CCOCC2)c1.C=CC1CCN(C(=O)OC(C)(C)C)C1>>CC(C)(C)OC(=O)N1CCC(/C=C/c2c  
1652 ncc(OC3CCOCC3)c2)C1  
C=CC(=O)OC.COc1c(CNc2cccc(Br)c2)ccc2c1OC(C)(C)C=C2>>COC(=O)/C=C/c1cccc(NCc2ccc3c(c  
1653 2OC)OC(C)(C)C=C3)c1  
C=Cc1cccc2cccc12.CCOC(=O)C(F)I>>CCOC(=O)C(F)/C=C/c1cccc2cccc12  
1654 Bre1ccc(SCCN(CCO2CCCCO2)c2cccc2)cc1.C=Cc1ccc([N+](=O)[O-])cc1>>O=[N+](O-  
1655 )c1ccc(/C=C/c2ccc(SCCN(CCO3CCCCO3)c3cccc3)cc2)cc1  
C=C/C=C/C/CCCCC.COC(=O)c1ccc(I)cc1>>CCCCC/C=C/C/c1ccc(C(=O)OC)cc1  
1656 C=Cc1ccc(CN(C)C)cc1.C[Si](C)(C)CCOCn1nc(I)c2ccc(C=O)cc21>>CN(C)Cc1ccc(/C=C/c2nn(COCC  
1657 [Si](C)(C)C)c3cc(C=O)ccc23)cc1  
C=CC(=O)OCC.O=C(NCc1ccc(Cl)cc1)c1cnc2c(F)cc(I)cc2c1O>>CCOC(=O)/C=C/c1cc(F)c2ncc(C(=O  
1658 )NCc3ccc(Cl)cc3)c(O)c2c1  
C=CC(=O)O.COc1ccc(NS(=O)(=O)c2ccc(I)cc2)cc1OC>>COc1ccc(NS(=O)(=O)c2ccc(/C=C/C(=O)O)  
1659 cc2)cc1OC  
C=CC(=O)OC.CCOc1ncc(Br)c2cccc12>>CCOc1ncc(/C=C/C(=O)OC)c2cccc12  
1660 C=CC(=O)OC(C)(C)C.CC(C)(C)OC(=O)Nc1ccc(C(=O)OCc2cccc2)c(CCCOc2c(OCc3cccc3)ccc(Br)  
1661 c2C=O)c1>>CC(C)(C)OC(=O)/C=C/c1ccc(OCc2cccc2)c(OCc2cc(NC(=O)OC(C)(C)C)ccc2C(=O)  
OCc2cccc2)c1C=O  
C=Cc1cccc(N)c1.CCN1c2ncc(I)cc2C(=O)N(C)c2ccnc21>>CCN1c2ncc(/C=C/c3cccc(N)c3)cc2C(=O)  
1662 N(C)c2ccnc21  
C=Cc1cc(OC)c(O)c(OC)c1.Oc1cc(O)cc(I)c1>>COc1cc(/C=C/c2cc(O)cc(O)c2)cc(OC)c1O  
1663 C=CC(=O)OC.Ic1ccc1>>COC(=O)/C=C/c1ccc1  
1664 C=Cc1ccc(F)cc1.Cc1ccc(I)cc1>>Cc1ccc(/C=C/c2ccc(F)cc2)cc1  
1665 C=CC(=O)OCC.CC(C)(C)OC(=O)c1cc([N+](=O)[O-])ccc1Br>>CCOC(=O)/C=C/c1ccc([N+](=O)[O-]  
1666 )cc1C(=O)OC(C)(C)C  
C=CC(=O)N1N=Cc2cccc2C1C=C(C)C.COc1cc(Cc2c(C)nc(N)nc2N)cc(I)c1OC>>COc1cc(Cc2c(C)nc  
1667 (N)nc2N)cc(/C=C/C(=O)N2N=Cc3cccc3C2C=C(C)C)c1OC  
C=C[C@H]1O[C@@H]2OC(C)(C)O[C@@H]2[C@H]1O.O=C1/C=C/c2cccc2)Oc2ccc(Br)cc21>>C  
1668 C1(C)O[C@H]2O[C@H](/C=C/c3ccc4c(c3)C(=O)/C(=C/c3cccc3)O4)[C@H](O)[C@H]2O1

1669 C=CC(=O)NCCc1ccc(F)cc1.O=c1c(I)coc2cc(O)ccc12>>O=C(/C=C/c1coc2cc(O)ccc2c1=O)NCCc1ccc(F)cc1  
1670 C=CCCCCCCC.FC(F)(F)c1cc(Br)cc(C(F)(F)F)c1>>CCCCCCCC/C=C/c1cc(C(F)(F)F)cc(C(F)(F)F)c1  
1671 C=CC(=O)OC.COC(=O)c1cnc(-c2ccc(OC)cc2)c(I)c1>>COC(=O)/C=C/c1cc(C(=O)OC)cnc1-  
1672 C=CC(=O)OCCO.C[C@@H](Nc1nnc2sc(Br)cc12)c1cccc1>>C[C@@H](Nc1nnc2sc(/C=C/C(=O)OCCO)cc12)c1cccc1  
1673 C=CCN1C(=O)c2ccccc2C1=O.COCCOCOc1ccc(C#N)cc1Br>>COCCOCOc1ccc(C#N)cc1/C=C/CN1C(=O)c2ccccc2C1=O  
1674 C=Cc1cccc([N+](=O)[O-])c1.CC(=O)Nc1ccc(Br)cc1>>CC(=O)Nc1ccc(/C=C/c2cccc([N+](=O)[O-])c2)cc1  
1675 C=CC(=O)OC.Cc1c(Br)ccc2c1nnn2C>>COC(=O)/C=C/c1ccc2c(nnn2C)c1C  
1676 Br1cccc2ccccc12.C=CC(F)(F)F>>FC(F)(F)/C=C/c1cccc2ccccc12  
1677 C=CC(=O)OC.Cc1ccc(Br)c(C=O)c1>>COC(=O)/C=C/c1ccc(C)cc1C=O  
1678 C=Cc1ccc(C(F)(F)F)cc1.IC1CCCCC1>>FC(F)(F)c1ccc(/C=C/C2CCCCC2)cc1  
1679 C=CC(=O)OC.CC(=O)Nc1ccc(Cl)cc1I>>COC(=O)/C=C/c1cc(Cl)ccc1NC(C)=O  
1680 C=CC(=O)OC.Cn1c2c(c3ccc(I)cc3c1=O)C(=O)c1cccc1-2>>COC(=O)/C=C/c1ccc2c3c(n(C)c(=O)c2c1)-c1cccc1C3=O  
1681 C=Cc1nc2c(N)nnc2n1[C@@H]1O[C@H](CO[Si](C)(C)C(C)(C)C)[C@@H](O[Si](C)(C)C(C)(C)C)[C@H]1O[Si](C)(C)C(C)(C)C.COc1ccc(Br)cc1>>COc1ccc(/C=C/c2nc3c(N)nnc3n2[C@@H]2O[C@H](CO[Si](C)(C)C(C)(C)C)[C@@H](O[Si](C)(C)C(C)(C)C)[C@H]2O[Si](C)(C)C(C)(C)C)cc1  
1682 Br1ccc(-c2nc3ccccc3[nH]2)cc1.C=CC(=O)OC>>COC(=O)/C=C/c1ccc(-c2nc3ccccc3[nH]2)cc1  
1683 C=CC(=O)OC.Ic1ncccc1OCc1cccc1>>COC(=O)/C=C/c1ncccc1OCc1cccc1  
1684 C=CC#N.COc1cc(C(C)(C)C)c(OC)cc1Br>>COc1cc(C(C)(C)C)c(OC)cc1/C=C/C#N  
1685 Br1cccs1.C=Cc1ccc2ccccc2c1>>C=C/c1cccs1)c1ccc2ccccc2c1  
1686 C=CC(CCC)OCc1cccc1.CC(=O)c1ccc(Br)cc1>>CCCC(/C=C/c1ccc(C(C)=O)cc1)OCc1cccc1  
1687 C=CCCC(=O)O.Ic1cccs1>>O=C(O)CC/C=C/c1cccs1  
1688 Br1ccc(I)cc1.C=Cc1ccc(CP(=O)(OC(C)(C)C)OC(C)(C)C)cc1>>CC(C)(C)OP(=O)(Cc1ccc(/C=C/c2ccc(Br)cc2)cc1)OC(C)(C)C  
1689 C=Cc1cncnc1.CCN(CCOc1ccc(OC(C)=O)cc1)c1ccc(I)cc1>>CCN(CCOc1ccc(OC(C)=O)cc1)c1ccc(/C=C/c2ccncc2)cc1  
1690 C=CC(=O)O.O=C1CCc2cc(Br)ccc21>>O=C(O)/C=C/c1ccc2c(c1)CCC2=O  
1691 C=Cc1cccc(F)n1.CCOC(=O)c1ccc(I)cc1>>CCOC(=O)c1ccc(/C=C/c2cccc(F)n2)cc1  
1692 C=CC(=O)OCCCC.CCOC(=O)Nc1cccc1C1=C(I)CCN1S(=O)(=O)c1ccc(C)cc1>>CCCCOC(=O)/C=C/C1=C(c2ccccc2NC(=O)OCC)N(S(=O)(=O)c2ccc(C)cc2)CC1  
1693 C=CC(=O)OCC.CCOc1ccc(C(=O)CCC(=O)Nc2cc(-c3ccccc3)c(Cc3ccc(Br)cc3)s2)cc1OCC>>CCOC(=O)/C=C/c1ccc(Cc2sc(NC(=O)CCC(=O)c3ccc(OCC)c(OCC)c3)cc2-c2ccccc2)cc1  
1694 C=CC(=O)OCCCC.Clc1cccc1Br>>CCCCOC(=O)/C=C/c1cccc1Cl  
1695 Br1c2ccccc2cc2ccccc12.C=CC(=O)CC>>CCC(=O)/C=C/c1c2ccccc2cc2ccccc12  
1696 C=CCC(C)C(=O)OCC.O=C(c1cccc1)c1ccc(Br)cc1>>CCOC(=O)C(C)C/C=C/c1ccc(C(=O)c2ccccc2)c1  
1697 C=Cc1ccc(C(C)(C)C)cc1.C[Si](C)(C)I>>CC(C)(C)c1ccc(/C=C/[Si](C)(C)C)cc1  
1698 C=CC(=O)OCC.Nc1ccc(Br)cc1I>>CCOC(=O)/C=C/c1cc(Br)ccc1N  
1699 C=CC(=O)OC.O=Cc1ccc([N+](=O)[O-])cc1Br>>COC(=O)/C=C/c1cc([N+](=O)[O-])ccc1C=O  
1700 C=CC(=O)N(C)OC.Cc1cccc1I>>CON(C)C(=O)/C=C/c1cccc1C  
1701 C=CC(=O)OCCCC.O=C1Nc2ccc(Br)cc2C1=O>>CCCCOC(=O)/C=C/c1ccc2c(c1)C(=O)C(=O)N2  
1702 C=Cc1cccc1.O=[N+][O-]c1cccc1Cl>>O=[N+][O-]c1cccc1/C=C/c1cccc1  
1703 C=CS(=O)(=O)c1cccc1.O=C1NC(=O)/C=C/c2c[nH]c3ccc(Br)cc23)S1>>O=C1NC(=O)/C=C/c2c[nH]c3ccc(/C=C/S(=O)(=O)c4ccccc4)cc23)S1  
1704 C=Cc1ccc(Cl)cc1.Ic1cccc1>>Clc1ccc(/C=C/c2ccccc2)cc1  
1705 C=Cc1ccc(OC)c(OC)c1.COC(=O)Cn1c(=O)c(Cl)nc2ccccc21>>COC(=O)Cn1c(=O)c(/C=C/c2ccc(OC)c(OC)c2)nc2ccccc21  
1706 Br1csc2ccccc12.C=CC(=O)OC>>COC(=O)/C=C/c1csc2ccccc12  
1707 C=CC(=O)N(C)C.COc1cccc1I>>COc1cccc1/C=C/C(=O)N(C)C  
1708 C=Cc1cccc1.COc1ccc(Br)c(OC)c1>>COc1ccc(/C=C/c2ccccc2)c(OC)c1  
1709 C=Cc1ccc(C(C)=O)cc1.IC1CCCCC1>>CC(=O)c1ccc(/C=C/C2CCCCC2)cc1  
1710 C=CC(=O)OCC.O=Cc1cc2c(cc1Br)OCO2>>CCOC(=O)/C=C/c1cc2c(cc1C=O)OCO2  
1711 C=CC(=O)OC(C)(C)C.COc1ccc(Br)c(CC(C)=O)c1>>COc1ccc(/C=C/C(=O)OC(C)(C)C)c(CC(C)=O)c1  
1712 C=CC(=O)OCC.COc1cnc(Cl)c(NC2CCN(C(=O)OC(C)(C)C)CC2)n1>>CCOC(=O)/C=C/c1ncc(OC)nc1NC1CCN(C(=O)OC(C)(C)C)CC1  
1713 C=Cc1c(C)cc(C)cc1C.Cc1cc(C)c(Cl)c(C)c1>>Cc1cc(C)c(/C=C/c2c(C)cc(C)cc2C)c(C)c1



1714 C=Cc1ccc(OC(C)=O)cc1.COC(=O)c1cc(Br)ccc1OC(C)=O>>COC(=O)c1cc(/C=C/c2ccc(OC(C)=O)cc2)ccc1OC(C)=O  
1715 C=CC(=O)OCC.CC(C)(CC1Cc2ccccc2C1)NCC(O)c1sccl1Br>>CCOC(=O)/C=C/c1ccsc1C(O)CNC(C)(C)CC1Cc2ccccc2C1  
1716 C=CCCc1ccc2ccccc2n1.CCOC(=O)/C=C(\c1cnc(OC)nc1)c1nc(Br)cs1>>CCOC(=O)/C=C(\c1cnc(OC)nc1)c1nc(/C=C/Cc2ccc3ccccc3n2)cs1  
1717 C=Cc1ccccc1.CCOCc1nc2c(N)nc3cc(Br)ccc3c2n1CCCOC>>CCOCc1nc2c(N)nc3cc(/C=C/c4ccccc4)c4cc3c2n1CCCOC  
1718 C=CCn1ccccc1C(=O)c1ccc(C)cc1.CCOC(=O)c1ccccc(I)c1>>CCOC(=O)c1ccccc(/C=C/Cn2ccccc2C(=O)c2ccc(C)cc2)c1  
1719 C=CCCN1C(=O)c2ccccc2C1=O.Clc1ccc(I)cc1>>O=C1c2ccccc2C(=O)N1CC/C=C/c1ccc(Cl)cc1  
1720 C=CC(=O)OC.Nc1ccc(F)cc1I>>COC(=O)/C=C/c1cc(F)ccc1N  
1721 C=Cc1ccc(N(C)C)cc1.CCOC(=O)C(C)(C)Br>>CCOC(=O)C(C)(C)/C=C/c1ccc(N(C)C)cc1  
1722 C=Cc1ccc(OC)cc1.O=C(N1CCOCC1)C(F)(F)Br>>COc1ccc(/C=C/C(F)(F)C(=O)N2CCOCC2)cc1  
1723 C=CC(=O)O.COc1ccccc1I>>COc1ccccc1/C=C/C(=O)O  
1724 C=CC(C)=O.O=Cc1ccccc(Br)c1>>CC(=O)/C=C/c1ccccc(C=O)c1  
1725 Brclccc(I)cc1.C=Cc1ccc(F)cc1>>Fc1ccc(/C=C/c2ccc(Br)cc2)cc1  
1726 C=CC(=O)OCC.O=c1ccoc2ccc(Br)cc12>>CCOC(=O)/C=C/c1ccc2occc(=O)c2c1  
1727 C=CC(=O)OCC.CC1(C)CC(=C(c2ccc(Br)cc2)c2ccc(O)c(F)c2)CC(C)(C)O1>>CCOC(=O)/C=C/c1ccc(C(=C2CC(C)(C)OC(C)(C)C2)c2ccc(O)c(F)c2)cc1  
1728 C=CC(=O)OC(C)(C)C.O=Cc1c(Br)cccc1OCc1ccccc1>>CC(C)(C)OC(=O)/C=C/c1ccccc(OCc2ccccc2)c1C=O  
1729 C=CC(=O)O.Ic1ccc2c(c1)OCCOCCOCCOCCO2>>O=C(O)/C=C/c1ccc2c(c1)OCCOCCOCCOCCO2  
1730 C=CC(=O)O.Fc1ccc(Br)cc1F>>O=C(O)/C=C/c1ccc(F)c(F)c1  
1731 C=CC(=O)O.CC(=O)c1ccc(Br)cc1>>CC(=O)c1ccc(/C=C/C(=O)O)cc1  
1732 C=Cc1ccc([N+](=O)[O-])cc1.O=[N+](O)[O-]c1cc(I)cc([N+](=O)[O-])c1>>O=[N+](O)[O-]c1ccc(/C=C/c2cc([N+](=O)[O-])cc([N+](=O)[O-])c2)cc1  
1733 C=Cc1ccccc1.CCCCCCCCCC(=O)N1CCN(c2ccc(Br)cc2)CC1>>CCCCCCCCC(=O)N1CCN(c2ccc(/C=C/c3ccccc3)cc2)CC1  
1734 C=CS(=O)(=O)F.Cc1ccc(S(=O)(=O)n2cc(I)c3ccccc32)cc1>>Cc1ccc(S(=O)(=O)n2cc(/C=C/S(=O)(=O)F)c3ccccc32)cc1  
1735 C=C(I)C(C)(C)OCCc1ccccc1.C=CC(=O)OCC>>C=C(/C=C/C(=O)OCC)C(C)(C)OCCc1ccccc1  
1736 C=CC(=O)OCCCC.Cc1ccc2c(Br)nn(C)c2c1>>CCCCOC(=O)/C=C/c1nn(C)c2cc(C)ccc12  
1737 C=CC(=O)O.O=Cc1ccc(I)cc1>>O=Cc1ccc(/C=C/C(=O)O)cc1  
1738 C=CC(=O)OCCCC.COc1ccc2c(c1)c(Br)nn2C>>CCCCOC(=O)/C=C/c1nn(C)c2ccc(OC)cc12  
1739 C=CC(=O)OC(C)(C)C.CC(C)(C)[Si](C)(C)Oc1ccc(Br)c(CN2C(=O)c3ccccc3C2=O)c1>>CC(C)(C)OC(=O)/C=C/c1ccc(O[Si](C)(C)C(C)(C)C)cc1CN1C(=O)c2ccccc2C1=O  
1740 C=Cc1cc2cc(OC)c(OC)cc2oc1=O.O=Cc1ccc(I)cc1>>COc1cc2cc(/C=C/c3ccc(C=O)cc3)c(=O)oc2cc1O  
1741 C=CC(=O)OCC.CC(C)[C@H]1CC[C@]2(C)C[C@H]1c1c(c(Br)cc3c1[nH]c1ccccc13)O2>>CCOC(=O)/C=C/c1cc2c([nH]c3ccccc32)c2c1O[C@]1(C)CC[C@H](C(C)C)[C@H]2C1  
1742 C=CC(C)=O.O=Cc1ccccc1Br>>CC(=O)/C=C/c1ccccc1C=O  
1743 C=Cc1ccccc1.CCCCCCCCCCCCCC>>CCCCCCCCCCCCC/C=C/c1ccccc1  
1744 C=CC(=O)OC(C)(C)C.O=C1Nc2ccccc2O/C1=C\c1ccc(Br)s1>>CC(C)(C)OC(=O)/C=C/c1ccc(/C=C2\Oc3ccccc3NC2=O)s1  
1745 C=Cc1ccccc1.Nc1ccccc1Cl>>Nc1ccccc1/C=C/c1ccccc1  
1746 C=CC(=O)Nc1ccccc1.COc1cc2oc(-c3ccccc3)c(I)c(=O)c2cc1OC>>COc1cc2oc(-c3ccccc3)c(/C=C/C(=O)Nc3ccccc3)c(=O)c2cc1OC  
1747 C=C[C@]([O][Si](C)(C)C(C)(C)C)[C@H](CCCC(=O)OC)O[Si](C)(C)C(C)(C)C.CCCCCC(=O)c1nc2ccccc2cc1Br>>CCCCC(=O)c1nc2ccccc2cc1/C=C/[C@]([O][Si](C)(C)C(C)(C)C)[C@H](CCCC(=O)OC)O[Si](C)(C)C(C)(C)C  
1748 C=CC(=O)OC(C)(C)C.Oc1ccc(C(=C2CCCCC2)c2ccc(Br)cc2F)cc1>>CC(C)(C)OC(=O)/C=C/c1ccc(C(=C2CCCCC2)c2ccc(O)cc2)c(F)c1  
1749 C=CC(=O)OC.Clc1ccccc1Br>>COC(=O)/C=C/c1ccccc1Cl  
1750 C=Cc1ccc(C#N)cc1.FC(F)(F)CI>>N#Cc1ccc(/C=C/CC(F)(F)F)cc1  
1751 C=Cc1ccccc1.CCCCCCc1cc(-c2nc3c4ccccc4c4ccccc4c3[nH]2)sc1Br>>CCCCCCc1cc(-c2nc3c4ccccc4c4ccccc4c3[nH]2)sc1/C=C/c1ccccc1  
1752 C=Cc1ccccc1.CCOC(=O)C(C)(C)Br>>CCOC(=O)C(C)(C)/C=C/c1ccccc1  
1753 C=CC(=O)OCC.Fc1cc2enccc2cc1Br>>CCOC(=O)/C=C/c1cc2enccc2cc1F  
1754 C=Cc1ccc(OC)cc1.O=Cc1ccccc(Br)c1>>COc1ccc(/C=C/c2ccccc(C=O)c2)cc1  
1755 C=CCCc1ccccc(OC)c1.COc1ccccc(Br)c1>>COc1ccccc(/C=C/CCc2ccccc(OC)c2)c1  
1756 Brclccccc1.C=Cc1ccc(C#N)cc1>>N#Cc1ccc(/C=C/c2ccccc2)cc1

1757 C=CC(=O)OCC(CC)CCCC.CC(C)CCCC(C)CCCC(C)CCOc1ccc(I)cc1>>CCCCC(CC)COC(=O)/C=C/  
c1ccc(OCCC(C)CCCC(C)CCCC(C)C)cc1  
1758 C=CC(=O)N(C)C.Ic1ccccc1>>CN(C)C(=O)/C=C/c1ccccc1  
1759 C=CCNC(=O)OC(C)(C)C.COc1ccc2c(c(OS(=O)(=O)C(F)(F)F)c1)C(=O)OC(C)(C)O2>>COc1cc(/C=C/  
CNC(=O)OC(C)(C)C)c2c(c1)OC(C)(C)OC2=O  
1760 C=CC(=O)OCC.CC(C)c1nn(-c2ccc3ccccc3n2)c(-c2ccc(F)cc2)c1Br>>CCOC(=O)/C=C/c1c(C(C)C)nn(-  
c2ccc3ccccc3n2)c1-c1ccc(F)cc1  
1761 C=Cc1ccc(N)cc1.CCN1c2ncc(I)cc2C(=O)N(C)c2ccc(Cl)nc21>>CCN1c2ncc(/C=C/c3ccc(N)cc3)cc2C(  
=O)N(C)c2ccc(Cl)nc21  
1762 C=CC(=O)OCC.C=CCn1nnc2c(C)c(Br)ccc21>>C=CCn1nnc2c(C)c(/C=C/C(=O)OCC)ccc21  
1763 C=Cc1ccc2cc(N(c3ccccc3)c3ccccc3)ccc2c1.CC(C)(C)c1ccc(N2C(=O)c3cccc4c(Br)ccc(c34)C2=O)cc1  
1764 >>CC(C)(C)c1ccc(N2C(=O)c3cccc4c(/C=C/c5ccc6cc(N(c7ccccc7)c7ccccc7)ccc6c5)ccc(c34)C2=O)cc  
1765 C=CC(=O)OC(C)(C)C.O=[N+][O-]c1ccc(Br)c1>>CC(C)(C)OC(=O)/C=C/c1cccc([N+](=O)[O-])c1  
1766 C=Cc1ccccc1.CCCCCCCCOc1cc(/C=C/c2ccc([N+](=O)[O-]  
1767 ]cc2)c(OCCCCCCCC)cc1/C=C/c1ccc(Br)cc1>>CCCCCCCCOc1cc(/C=C/c2ccc([N+](=O)[O-]  
1768 ]cc2)c(OCCCCCCCC)cc1/C=C/c1ccc(/C=C/c2ccccc2)cc1  
1769 C=CC1CC(OC)=CC(=O)O1.Ic1ccccc1>>COC1=CC(=O)OC(/C=C/c2ccccc2)C1  
1770 C=CC(=O)OC.COc1ccc2ccccc2c1I>>COC(=O)/C=C/c1c(OC)ccc2ccccc12  
1771 C=CC#N.O=[N+][O-]c1ccc(Br)cc1>>N#C/C=C/c1ccc([N+](=O)[O-])cc1  
1772 C=Cc1ccc1.COC(=O)/C=C/c1ccc(Cl)cc1>>COC(=O)/C=C/c1ccc(/C=C/c2ccccc2)cc1  
1773 Br1ccccc1.C=Cn1nnc(-c2ccccc2C#N)n1>>N#Cc1ccccc1-c1nnn(/C=C/c2ccccc2)n1  
1774 C=CC(=O)CCC.CC(=O)c1ccc(Br)cc1>>CCCC(=O)/C=C/c1ccc(C(C)=O)cc1  
1775 C=CC(=O)OC(C)(C)C.Fc1cc(C(F)(F)F)cc(F)c1Br>>CC(C)(C)OC(=O)/C=C/c1c(F)cc(C(F)(F)F)cc1F  
1776 C=Cc1ccc(C(=O)OC[C@H]2O[C@@H]3OC(C)(C)O[C@@H]3[C@H]3OC(C)(C)O[C@H]32)cc1.CC  
1777 OC(=O)C(F)Br>>CCOC(=O)C(F)/C=C/c1ccc(C(=O)OC[C@H]2O[C@@H]3OC(C)(C)O[C@@H]3[C@  
1778 @H]3OC(C)(C)O[C@H]32)cc1  
1779 C=CC(=O)OC.Nc1ccnc(Br)c1>>COC(=O)/C=C/c1cc(N)ccn1  
1780 C=Cc1nc2c(=O)[nH]c(N=CN(C)C)nc2n1[C@H]1C[C@H](O)[C@@H](CO)O1.CC(=O)c1ccc(Br)cc1  
1781 >>CC(=O)c1ccc(/C=C/c2nc3c(=O)[nH]c(N=CN(C)C)nc3n2[C@H]2C[C@H](O)[C@@H](CO)O2)cc1  
1782 C=Cc1ccc(OC)c(OC)c1.CCN1c(=O)c2c(nc(I)n2C)n(CC)c1=O>>CCN1c(=O)c2c(nc(/C=C/c3ccc(OC)c(  
1783 OC)c3)n2C)n(CC)c1=O  
1784 C=Cc1ccccc1.O=Cc1ccccc1Br>>O=Cc1ccccc1/C=C/c1ccccc1  
1785 Br1ccc2[nH]cc(Cc3ccccc3)c2c1.C=CC(=O)OC>>COC(=O)/C=C/c1ccc2[nH]cc(Cc3ccccc3)c2c1  
1786 C=Cc1ccc1.CC(C)(C)OC(=O)N[C@H](COc1ccc(Br)c1)Cc1ccc2ccccc2c1>>CC(C)(C)OC(=O)N[C@  
1787 @H](COc1ccc(/C=C/c2ccccc2)c1)Cc1ccc2ccccc2c1  
1788 C=Cc1ccc(F)cc1.Clc1ccc(I)cc1>>Fc1ccc(/C=C/c2ccc(Cl)cc2)cc1  
1789 C=Cc1scnc1C.Cc1ccc(Br)cc1>>Cc1ccc(/C=C/c2scnc2C)cc1  
1790 C=CC(=O)OC(C)(C)C.O=C(O)Cc1ccc(Br)cc1>>CC(C)(C)OC(=O)/C=C/c1ccc(CC(=O)O)cc1  
1791 C=CS(=O)(=O)F.O=S(=Nc1ccc(I)cc1)(Oc1ccccc1)N1CCCC1>>O=S(=O)(F)/C=C/c1ccc(N=S(=O)(Oc  
1792 2ccccc2)N2CCCC2)cc1  
1793 C=CC[C@H](C[C@H](NC(=O)OC(C)(C)C)C(=O)OC(C)(C)C)C(=O)OC(C)(C)C.N#Cc1ccc2c(c1)/N=  
1794 N\c1cc(Br)ccc1CC2>>CC(C)(C)OC(=O)N[C@@H](C[C@@H](C/C=C/c1ccc2c(c1)/N=N\c1cc(C#N)c  
1795 cc1CC2)C(=O)OC(C)(C)C)C(=O)OC(C)(C)C  
1796 C=C[C@@H]1C[C@H]1B1O[C@@H](C(OC)(c2ccccc2)c2ccccc2)[C@H](C(OC)(c2ccccc2)c2ccccc2  
1797 )O1.Ic1ccccc1>>COC(c1ccccc1)(c1ccccc1)[C@@H]1OB([C@@H]2C[C@H]2/C=C/c2ccccc2)O[C@  
1798 H]1C(OC)(c1ccccc1)c1ccccc1  
1799 C=C[C@@H]1O[C@H](COC(C)=O)[C@@H](OC(C)=O)[C@H](OC(C)=O)[C@H]1OC(C)=O.CC(C  
1800 )(C)[Si](C)(C)Oc1cc(Br)ccc1[C@@H]1[C@@H](CC[C@H](O)c2ccc(F)cc2)C(=O)N1c1ccc(F)cc1>>  
1801 CC(=O)OC[C@H]1O[C@@H](/C=C/c2ccc([C@@H]3[C@@H](CC[C@H](O)c4ccc(F)cc4)C(=O)N3  
1802 c3ccc(F)cc3)c(O[Si](C)(C)C(C)(C)C)c2[C@H](OC(C)=O)[C@@H](OC(C)=O)[C@@H]1OC(C)=O  
1803 C=CC(=O)O.NS(=O)(=O)c1ccc(S(=O)(=O)Nc2ccc(I)cc2)cc1>>NS(=O)(=O)c1ccc(S(=O)(=O)Nc2ccc(  
1804 /C=C/C(=O)O)cc2)cc1  
1805 C=CCN(C(=O)OC(C)(C)C)C(=O)OC(C)(C)C.Cc1ccc(Br)cc1>>Cc1ccc(/C=C/CN(C(=O)OC(C)(C)C)C  
1806 (=O)OC(C)(C)C)cc1  
1807 C=CC(=O)N(C)C.O=CNc1ccccc1I>>CN(C)C(=O)/C=C/c1ccccc1NC=O  
1808 C=Cc1ccc(F)cc1.N[C@@H](Cc1c[nH]c2ccc(Br)cc12)C(=O)O>>N[C@@H](Cc1c[nH]c2ccc(/C=C/c3  
1809 ccc(F)cc3)cc12)C(=O)O  
1810 C=CC(C)=O.COC(=O)c1ccc(N)c(I)c1>>COC(=O)c1ccc(N)c(/C=C/C(C)=O)c1  
1811 C=CC(=O)OC(C)(C)C.COCC(=O)/C(Br)=C1\CCCC1>>COC(=O)C(/C=C/C(=O)OC(C)(C)C)=C1\CCC  
1812 C=Cc1ccccc1.O=C1OCc2cc(Br)ccc21>>O=C1OCc2cc(/C=C/c3ccccc3)ccc21  
1813 C=CC(=O)CC.Cc1cc(C)c(Br)c(C)c1>>CCC(=O)/C=C/c1c(C)cc(C)cc1C

1795 C=Cc1ccc(C)cc1C.[Si](C)(C)OS(=O)(=O)C(F)(F)F>>Cc1ccc(/C=C/[Si](C)(C)C)c(C)c1  
1796 C=CC(=O)OC(C)(C)C.CC1(C)CCC(=C(c2ccc(O)cc2)c2ccc(Br)cc2)CC1>>CC1(C)CCC(=C(c2ccc(O)c2)c2ccc(/C=C/C(=O)OC(C)(C)C)cc2)CC1  
1797 C=CC(=O)OC.COc1cc(Br)ccc1C#N>>COC(=O)/C=C/c1ccc(C#N)c(OC)c1  
1798 C=CC(=O)OC.CC(C)(C)c1nn(-c2ccc(C(F)(F)F)cn2)cc1I>>COC(=O)/C=C/c1cn(-c2ccc(C(F)(F)F)cn2)nc1C(C)(C)C  
1799 C=CC(=O)OC(C)(C)C.COC(=O)[C@@H]1c2cc(Br)ccc2O[C@H]1c1ccc(OC)c(OC)c1>>COC(=O)[C@@H]1c2cc(/C=C/C(=O)OC(C)(C)C)ccc2O[C@H]1c1ccc(OC)c(OC)c1  
1800 C=Cc1cccc(Cl)c1.N#Cc1ccc2cc(Br)ccc2c1>>N#Cc1ccc2cc(/C=C/c3cccc(Cl)c3)ccc2c1  
1801 C=Cc1ccc(C(=C(c2ccccc2)c2ccccc2)c2ccccc2)cc1.CCCCN1C(=O)c2cccc3c(Br)ccc(c23)C1=O>>CCC  
CN1C(=O)c2cccc3c(/C=C/c4ccc(C(=C(c5ccccc5)c5ccccc5)c5ccccc5)cc4)ccc(c23)C1=O  
1802 C=C[C@H](O)[Si](C)(C)C(C)(C)C)[C@H](CCCC(=O)OCC)O[Si](C)(C)C(C)(C)C.O=Cc1ccccc1Br>>  
CCOC(=O)CCC[C@H](O)[Si](C)(C)C(C)(C)C)[C@H](/C=C/c1ccccc1C=O)O[Si](C)(C)C(C)(C)C  
1803 C=CC(=O)OCCCC.Cc1nc(-c2ccc(Br)cc1)>>CCCCOC(=O)/C=C/c1ccc(-c2csc(C)n2)cc1  
1804 C=CC(=O)OC.COc1c(CN(C(=O)c2ccccc2)c2cccc(Br)c2)ccc2c1OC(C)(C)CC2>>COC(=O)/C=C/c1ccc  
c(N(Cc2ccc3c(c2OC)OC(C)(C)CC3)C(=O)c2ccccc2)c1  
1805 C=Cc1ccc(C(C)(C)C)cc1.COc1ccc(Br)cc1>>COc1ccc(/C=C/c2ccc(C(C)(C)C)cc2)cc1  
1806 C=CC(=O)OC(C)(C)C.Clc1cc(-c2ccccc2)nc2ccccc12>>CC(C)(C)OC(=O)/C=C/c1cc(-c2ccccc2)nc2ccccc12  
1807 C=Cc1ccc(OC)c(OC)c1.N#Cc1ccc(I)cc1>>COc1ccc(/C=C/c2ccc(C#N)cc2)cc1OC  
1808 Brc1ccc2ccccc2c1.C=CC(F)(F)F>>FC(F)(F)/C=C/c1ccc2ccccc2c1  
1809 Brc1cnc2ccccc2c1.C=CCC(C)C(=O)OCC>>CCOC(=O)C(C)C/C=C/c1cnc2ccccc2c1  
1810 C=CC(=O)OCC.Cn1cc(-c2ccccc2I)c2ccccc21>>CCOC(=O)/C=C/c1ccccc1-c1cn(C)c2ccccc12  
1811 C=Cc1ccc(OC)cc1OC.Nc1ccc(I)cc1>>COc1ccc(/C=C/c2ccc(N)cc2)c(OC)c1  
1812 C=CC[C@H]1C[C@H]([C@H](O)c2ccc(OC)c(OC)c2)CO[C@H]1c1ccc(OC)c(OC)c1.COc1ccc(Br)  
cc1OC>>COc1ccc(/C=C/C[C@H]2C[C@H]([C@H](O)c3ccc(OC)c(OC)c3)CO[C@H]2c2ccc(OC)c(OC)c2)cc1OC  
1813 C=Cc1ccc(C)c(C)c1.CCOC(=O)C(F)(F)Br>>CCOC(=O)C(F)(F)/C=C/c1ccc(C)c(C)c1  
1814 C=CCCCCCCCC.Cc1ccccc1Br>>CCCCCCCCC/C=C/c1ccccc1C  
1815 C=CCCCCCCC.Clc1ccccc1>>CCCCCCC/C=C/c1ccccc1  
1816 C=CC=O.Oc1ccccc1I>>O=C/C=C/c1ccccc1O  
1817 C=CC[C@H](C(=O)N1[C@H]2C[C@H]3CC[C@H]2(CS1(=O)=O)C3(C)C)[C@H](O)CCCCC.  
Cc1ccc(Br)cc1>>CCCCC[C@H](O)[C@H](C/C=C/c1ccc(C)cc1)C(=O)N1[C@H]2C[C@H]3  
CC[C@H]2(CS1(=O)=O)C3(C)C  
1818 C=Cc1ccccc1.Nc1ccc(O)cc1I>>Nc1ccc(O)cc1/C=C/c1ccccc1  
1819 C=CC(=O)OC(C)(C)C.COc1nc(Cl)ccc1[N+](=O)[O-]  
>>COc1nc(/C=C/C(=O)OC(C)(C)C)ccc1[N+](=O)[O-]  
1820 C=CC(=O)OC.O=Cc1ccc(Cl)cc1Br>>COC(=O)/C=C/c1cc(Cl)ccc1C=O  
1821 C=CS(=O)(=O)F.Cc1ccc(I)c(C)c1>>Cc1ccc(/C=C/S(=O)(=O)F)c(C)c1  
1822 C=Cc1cccn1.Cc1ccc(Br)cc1>>Cc1ccc(/C=C/c2cccn2)cc1  
1823 C=Cc1ccc(C)nc1.CN1C2CCC1c1c([nH]c3c(Br)cccc13)C2>>Cc1ccc(/C=C/c2cccc3c4c([nH]c23)CC2C  
CC4N2C)cn1  
1824 C=CC(=O)OCC.O=C(O)c1ccc(Br)o1>>CCOC(=O)/C=C/c1ccc(C(=O)O)o1  
1825 Brc1ccc2ccc3ccc4ccccc4c3c2c1.C=Cc1ccc(COC(C)=O)cc1>>CC(=O)OCc1ccc(/C=C/c2ccc3ccc4ccc5  
ccccc5c4c3c2)cc1  
1826 C=C[Si](CC)(CC)CC.COc1ccc(Br)cc1>>CC[Si](/C=C/c1ccc(OC)cc1)(CC)CC  
1827 C=CC(=O)OCCCC.COC(=O)c1ccc(I)cc1>>CCCCOC(=O)/C=C/c1ccc(C(=O)OC)cc1  
1828 C=Cc1ccc2c(c1)CC[C@H]1[C@@H]2CC[C@H]2(C)C(=O)CC[C@H]12.CCOC(=O)C(F)I>>CCO  
C(=O)C(F)/C=C/c1ccc2c(c1)CC[C@H]1[C@@H]2CC[C@H]2(C)C(=O)CC[C@H]12  
Brc1ccc2ccc3ccccc4ccc1c2c34.C=Cc1nc2c(N)ncnc2n1[C@@H]1O[C@H](CO[Si](C)(C)C(C)(C)C)[C  
1829 @H]1O[Si](C)(C)C(C)(C)C)[C@H]1O[Si](C)(C)C(C)(C)C>>CC(C)(C)[Si](C)(C)OC[C@H]1O[C@  
@H]1(n2c(/C=C/c3ccc4ccc5ccccc6ccc3c4c56)nc3c(N)ncnc32)[C@H](O[Si](C)(C)C(C)(C)C)[C@H]1  
O[Si](C)(C)C(C)(C)C  
1830 C=CC(=O)OC.OCCc1ccccc1Br>>COC(=O)/C=C/c1cccn1CCO  
1831 C=CC(=O)OC.COc1ccc2c(c1)CCN(c1ccc(C3CCC3)cc1)C2(C)c1ccc(Br)cc1>>COC(=O)/C=C/c1ccc(C  
2(C)c3ccc(OC)cc3CCN2c2ccc(C3CCC3)cc2)cc1  
1832 C=CC(=O)OC.CC(C)(C)OC(=O)/C=C/c1ccc(CN(C(=O)C2CCCC2)c2ccccc(Br)c2)cc1>>COC(=O)/C  
=C/c1ccccc(N(Cc2ccc(/C=C/C(=O)OC(C)(C)C)cc2)C(=O)C2CCCC2)c1  
1833 C=CC(=O)CC.O=[N+](O-)]c1ccc(I)cc1>>CCC(=O)/C=C/c1ccc([N+](=O)[O-])cc1  
1834 C=Cc1ccc(C(=O)OC)cc1.Cc1nn(-c2ccc(C#N)c(Cl)c2)c(C)c1I>>COC(=O)c1ccc(/C=C/c2c(C)nn(-  
c3ccc(C#N)c(Cl)c3)c2C)cc1

1835 C=Cc1ccnc2cccc12.CCCCN(CCCCC)c1ccc(Br)c(Cl)c1>>CCCN(CCCCC)c1ccc(/C=C/c2ccnc3cccc23)c(Cl)c1  
 1836 C=C[Si](C)(C)C.COC(=O)c1cc(I)cc([N+](=O)[O-])c1>>COC(=O)c1cc(/C=C/[Si](C)(C)C)cc([N+](=O)[O-])c1  
 1837 C=Cc1ccc(N(C)C)cc1.CCCn1c(=O)c(C)nc2cc(Br)ccc21>>CCN1c(=O)c(C)nc2cc(/C=C/c3ccc(N(C)C)cc3)ccc21  
 1838 Br1cc2cccc2c2cccc12.C=Cc1nc2c(N)ncnc2n1[C@H]1C[C@H](O[Si](C)(C)C(C)(C)C)[C@@H](C)O[Si](C)(C)C(C)(C)C)O1>>CC(C)(C)[Si](C)(C)OC[C@H]1O[C@@H](n2c(/C=C/c3cc4cccc4c4cccc34)nc3c(N)ncnc32)C[C@@H]1O[Si](C)(C)C(C)(C)C  
 1839 C=CC(=O)OCC.Cc1cccc(C#C/C=C/c2ccc(Br)cc2)c1>>CCOC(=O)/C=C/c1ccc(/C=C/C#Cc2cccc(C)c2C=CC(=O)OC.Cc1c(Br)ccc(NS(=O)(=O)c2cccn2)c1C(=O)OCc1cccc1>>COC(=O)/C=C/c1ccc(NS(=O)(=O)c2cccn2)c(C(=O)OCc2cccc2)c1C  
 1841 C=CC(=O)OC.CCCCCc1ccc(I)cc1>>CCCCC1ccc(/C=C/C(=O)OC)cc1  
 1842 C=CCN1C(=O)c2cccc2C1=O.Cc1ccc(Br)cc1>>Cc1ccc(/C=C/CN2C(=O)c3cccc3C2=O)cc1  
 1843 Br1ccc2c(c1)c(CCc1cccc1)cn2-c1cccc1.C=CC(=O)OC>>COC(=O)/C=C/c1ccc2c(c1)c(CCc1cccc1)cn2-c1cccc1  
 1844 C=CC(=O)OC.CC(C)n1nc2c(NCc3ccc(Br)cc3)nc(N3CCCC3)nc21>>COC(=O)/C=C/c1ccc(CNc2nc(N3CCCC3)nc3c2ncn3C(C)C)cc1  
 1845 C=CS(N)(=O)=O.Ic1cccc1>>NS(=O)(=O)/C=C/c1cccc1  
 1846 C=Cc1cccc1.O=C(O)c1ccc(Br)cc1>>O=C(O)c1ccc(/C=C/c2cccc2)cc1  
 1847 C=Cc1ccc(OC(C)=O)cc1.OCCCC(Br)C(F)(F)F>>CC(=O)Oc1ccc(/C=C/C(CCCO)C(F)(F)F)cc1  
 1848 C=CC(N)=O.Cc1ccc(I)cc1>>Cc1ccc(/C=C/C(N)=O)cc1  
 1849 C=COCCCC.O=C(Cl)c1ccoc1>>CCCCO/C=C/C(=O)c1ccoc1  
 1850 C=CC(O)c1cccc1Br.Ic1cccc1>>OC(/C=C/c1cccc1)c1cccc1Br  
 1851 C=CC(=O)OCC.FC(F)(F)c1ccc(Br)cc1>>CCOC(=O)/C=C/c1ccc(C(F)(F)F)cc1  
 1852 C=CC(=O)OC(C)(C)C.N#CCc1cccc(Br)c1>>CC(C)(C)OC(=O)/C=C/c1cccc(CC#N)c1  
 1853 C=CC(=O)OCCCC.COc1cc(N)c(Br)cn1>>CCCCOC(=O)/C=C/c1cnc(OC)cc1N  
 1854 C=CC(=O)OCCCC.Nc1cccc1I>>CCCCOC(=O)/C=C/c1cccc1N  
 1855 C=CC(=O)OC(C)(C)C.Cc1cc(C)cc(OS(=O)(=O)C(F)(F)F)c1>>Cc1cc(C)cc(/C=C/C(=O)OC(C)(C)C)c1  
 1856 C=CC(=O)Nc1cccc1.COc1ccc(-c2oc3cc(OC)ccc3c(=O)c2I)cc1>>COc1ccc(-c2oc3cc(OC)ccc3c(=O)c2/C=C/C(=O)Nc2cccc2)cc1  
 1857 Br1ccc(-c2nc3cccc3n3cccc23)cc1.C=CC(=O)OCC>>CCOC(=O)/C=C/c1ccc(-C=CC(=O)O.COC(=O)c1c(I)cc2c(c1OCc1cccc1)OCO2>>COC(=O)c1c(/C=C/C(=O)O)cc2c(c1OCc1cccc1)OCO2  
 1859 C=CC(OCC)OCC.O=Cc1ccc(Cl)cc1>>CCOC(/C=C/c1ccc(C=O)cc1)OCC  
 1860 C=CCC(C)C.CCOC(=O)c1ccc(I)cc1>>CCOC(=O)c1ccc(/C=C/CC(C)C)cc1  
 1861 C=CC(O)C1CCCCC1.I/C=C/C=C/CCCCOCc1cccc1>>OC(/C=C/C=C/C=C/CCCCOCc1cccc1)C1CCCCC1  
 1862 C=CC(C)(O)CC/C=C(\C)CC/C=C(\C)CCC=C(C)C.Oc1ccc(OCc2cccc2)cc1Br>>CC(C)=CCC/C(C)=C/CC(C)C=C/CCC(C)(O)/C=C/c1cc(OCc2cccc2)cc1O  
 1863 C=CC(=O)OC(C)(C)C.O=C1Nc2cccc2O/C1=C/c1ccc(Br)o1>>CC(C)(C)OC(=O)/C=C/c1ccc(/C=C2\Oc3cccc3NC2=O)o1  
 1864 Br1ccc2ccc3cccc4ccc1c2c34.C=CC(=O)OCC(CC)CCCC>>CCCCC(CC)COC(=O)/C=C/c1ccc2ccc3cccc4ccc1c2c34  
 1865 Br1ccncc1.C=Cc1ccc(Cn2cc(C)c(=O)[nH]c2=O)cc1>>Cc1cn(Cc2ccc(/C=C/c3ccncc3)cc2)c(=O)[nH]  
 1866 C=CC(=O)OC.O=C1c2ccc(OS(=O)(=O)C(F)(F)F)cc2C(=O)N1[C@@H](COCc1cccc1)c1cccc1>>COC(=O)/C=C/c1ccc2c(c1)C(=O)N([C@@H](COCc1cccc1)c1cccc1)C2=O  
 1867 C=Cc1ccc([Si](OC)(OC)OC)cc1.CC(C)(C)OP(=O)(Cc1ccc(/C=C/c2ccc(Br)cc2)cc1)OC(C)(C)C>>CO[Si](OC)(OC)c1ccc(/C=C/c2ccc(/C=C/c3ccc(CP(=O)(OC(C)(C)C)OC(C)(C)C)cc3)cc2)cc1  
 1868 C=CC(=O)OC(C)(C)C.Cc1ccc(CNC(=O)c2cc(Br)cc(I)c2)cc1>>Cc1ccc(CNC(=O)c2cc(Br)cc(/C=C/C(=O)OC(C)(C)C)c2)cc1  
 1869 C=CC(=O)OC.CC(C)(C)c1ccc(Cn2nnc(-c3cn(Cc4cccc4)nn3)c2I)cc1>>COC(=O)/C=C/c1c(-c2cn(Cc3cccc3)nn2)nnn1Cc1ccc(C(C)(C)C)cc1  
 1870 C=CC#N.O=C(C=P(c1cccc1)(c1cccc1)c1cccc1)c1ccc(I)cc1>>N#C/C=C/c1ccc(C(=O)C=P(c2cccc2)(c2cccc2)c2cccc2)cc1  
 1871 C=CCCCCCC.COc1ccc(Br)cc1>>CCCCC/C=C/c1ccc(OC)cc1  
 1872 C=CC(=O)OCC.CC(C)Nc1ccc(Br)nc(CC(=O)OC(C)(C)C)c1=O>>CCOC(=O)/C=C/c1cnc(NC(C)C)c(=O)n1CC(=O)OC(C)(C)C  
 1873 C=CC(=O)OCC.Cc1cc(C)nc(I)n1>>CCOC(=O)/C=C/c1nc(C)cc(C)n1  
 1874 C=CC(=O)OCC.Fc1cccc1Oc1cccc(Br)c1>>CCOC(=O)/C=C/c1cccc(Oc2cccc2F)c1

1875 C=Cc1cncnc1.C[Si](C)(C)CCOCn1nc(I)c2ccc(C=O)cc21>>C[Si](C)(C)CCOCn1nc(/C=C/c2cncnc2)c2ccc(C=O)cc21

1876 C=Cc1cccc1Cl.CCOC(=O)C(F)I>>CCOC(=O)C(F)/C=C/c1cccc1Cl

1877 C=CC(=O)NC(C)C.COc1ccc(Cl)cc1>>COc1ccc(/C=C/C(=O)NC(C)C)cc1

1878 C=CC#N.CC(=O)c1cc2cc(Br)ccc2o1>>CC(=O)c1cc2cc(/C=C/C#N)ccc2o1

1879 C=CN1C(=O)c2cccc2C1=O.FC(F)(F)Oc1ccc(Br)cc1OC(F)(F)F>>O=C1c2cccc2C(=O)N1/C=C/c1cc(OC(F)(F)F)c(OC(F)(F)F)c1

1880 C=CC(=O)NC(C)(C)C.Cc1cccc1Cl>>Cc1cccc1/C=C/C(=O)NC(C)(C)C

1881 C=Cc1cccc1.COc1ccc(/C=C/c2c(I)c(=O)c3cccc3n2C)cc1>>COc1ccc(/C=C/c2c(/C=C/c3cccc3)c(=O)c3cccc3n2C)cc1

1882 Br1cnc2cccc2c1.C=CCO[C@]1(C)C[C@@H](C)C(=O)[C@H](C)[C@H]2NC(=O)O[C@]2(C)[C@@H](CC)OC(=O)[C@H](C)C(=O)[C@H](C)[C@H]1O[C@@H]1O[C@H](C)C[C@H](N(C)C)[C@H]1OC(C)=O>>CC[C@H]1OC(=O)[C@H](C)C(=O)[C@H](C)[C@@H](O[C@@H]2O[C@H](C)C[C@H](N(C)C)[C@H]2OC(C)=O)[C@](C)(OC/C=C/c2cnc3cccc3c2)C[C@@H](C)C(=O)[C@H](C)[C@H]2NC(=O)O[C@]12C

1883 C=Cc1ccc(N(c2ccc(C)cc2)c2ccc(C)cc2)cc1.N#Cc1cc([N+](=O)[O-])ccc1Br>>Cc1ccc(N(c2ccc(C)cc2)c2ccc(/C=C/c3ccc([N+](=O)[O-])cc3C#N)cc2)cc1

1884 C=Cc1cccc1.CNC(=O)c1cccc1Sc1ccc2c(I)nn(C3CCCCO3)c2c1>>CNC(=O)c1cccc1Sc1ccc2c(/C=C/c3cccc3)nn(C3CCCCO3)c2c1

1885 C=CC(=O)OC(C)(C)C.C=CC1=C(Br)C(O)CCC1>>C=CC1=C(/C=C/C(=O)OC(C)(C)C(O)CCC1

1886 C=CC(=O)OC(C)(C)C.Cc1oc2c(C)c3oc(=O)cc(C)c3cc2c1Br>>Cc1oc2c(C)c3oc(=O)cc(C)c3cc2c1/C=C/C(=O)OC(C)(C)C

1887 C=Cc1ccc(OC)cc1.COc1cc(Br)cc(OC)c1OC>>COc1ccc(/C=C/c2cc(OC)c(OC)c(OC)c2)cc1

1888 C=CS(=O)(=O)c1cccc1.O=C(c1cccc1)c1ccc(Br)cc1>>O=C(c1cccc1)c1ccc(/C=C/S(=O)(=O)c2cccc2)cc1

1889 C=CC(=O)OC.Cn1c2cccc2c2nc3ccc(Cl)cc3c3cccc1c32>>COC(=O)/C=C/c1ccc2nc3c4cccc4n(C)c4ccc(c2c1)c34

1890 C=CC(=O)OCCN(C)C.COc1ccc(NC(=O)c2cc(=O)c3cc(Br)ccc3o2)cc1>>COc1ccc(NC(=O)c2cc(=O)c3cc(/C=C/C(=O)OCCN(C)C)ccc3o2)cc1

1891 C=CC(=O)OC.CNc1cccc1I>>CNc1cccc1/C=C/C(=O)OC

1892 Br1cccc(-c2cccc2)c1.C=CC(=O)OCC>>CCOC(=O)/C=C/c1cccc(-c2cccc2)c1

1893 C=CC(=O)OCC.FC(F)(F)c1cn2ccc(Br)cc2n1>>CCOC(=O)/C=C/c1cn2cc(C(F)(F)F)nc2c1

1894 C=Cc1cncnc1.Nc1cc([N+](=O)[O-])ccc1Nc1ccc(Br)cc1>>Nc1cc([N+](=O)[O-])ccc1Nc1ccc(/C=C/c2cncnc2)cc1

1895 C=CS(C)(=O)=O.COc1ccc(Br)cc1>>COc1ccc(/C=C/S(C)(=O)=O)cc1

1896 C=Cc1cccc1.CC(C)[Si](c1ccc(Br)cc1)(c1ncccn1)C(C)C>>CC(C)[Si](c1ccc(/C=C/c2cccc2)cc1)(c1ncccn1)C(C)C

1897 C=CC(=O)OC.Fc1c(F)c(F)c(Br)c(F)c1F>>COC(=O)/C=C/c1c(F)c(F)c(F)c(F)c1F

1898 C=CC(=O)Nc1cccc1NC(=O)OC(C)(C)C.CCOC(=O)C(CCO[Si](C)(C)C(C)(C)C)c1ccc(Br)cc1>>CCOC(=O)C(CCO[Si](C)(C)C(C)(C)C)c1ccc(/C=C/C(=O)Nc2cccc2NC(=O)OC(C)(C)C)cc1

1899 C=CC#N.Cc1cc(I)ccn1>>Cc1cc(/C=C/C#N)ccn1

1900 C=Cc1cccc1.COc1ccc(-c2oc3cc(OC)c(I)c(O)c3c(=O)c2OC)cc1OC>>COc1ccc(-c2oc3cc(OC)c(/C=C/c4cccc4)c(O)c3c(=O)c2OC)cc1OC

1901 C=Cc1ccc(Cl)cc1.Ic1cccs1>>Clc1ccc(/C=C/c2cccs2)cc1

1902 C=CC(=O)OCCO.O=C1Nc2ccc(Br)cc2C1=O>>O=C(/C=C/c1ccc2c(c1)C(=O)C(=O)N2)OCCO

1903 C=CC(=O)NCc1cccc1.O=C1Cc2c([nH]c3ccc(I)cc23)-c2cccn2N1>>O=C(/C=C/c1ccc2[nH]c3c(c2c1)CC(=O)Nc1ncccc1-3)NCc1cccc1

1904 C=CC(=O)OC.COCOc1ccc(Br)cc1Cl>>COCOc1ccc(/C=C/C(=O)OC)cc1Cl

1905 Br1ccc2c(c1)OCCOCCOCCOCCOCCO2.C=CC(=O)O>>O=C(O)/C=C/c1ccc2c(c1)OCCOCCOCCOCCOCCO2

1906 Br1cccc(N2CCN(c3ncccn3)CC2)n1.C=CC(=O)OCCCC>>CCCCOC(=O)/C=C/c1cccc(N2CCN(c3ncccn3)CC2)n1

1907 Br1cccc1.C=Cc1ccc(C(=O)O)cc1>>O=C(O)c1ccc(/C=C/c2cccc2)cc1

1908 C=Cc1ccc(OC)c(OC)c1.COc1ccc(CN2C(=O)C(=C(c3ccc(O)cc3)c3ccc(O)cc3)c3cc(Br)ccc32)cc1>>COc1ccc(CN2C(=O)C(=C(c3ccc(O)cc3)c3ccc(O)cc3)c3cc(/C=C/c4ccc(OC)c(OC)c4)ccc32)cc1

1909 C=CCC(C)C(=O)OCC.Fc1ccc(Br)cc1>>CCOC(=O)C(C)C/C=C/c1ccc(F)cc1

1910 C=CC(=O)OC(C)(C)C.Nc1ccc(F)cc1I>>CC(C)(C)OC(=O)/C=C/c1cc(F)ccc1N

1911 C=CC(=O)N1N=Cc2cccc2C1Cc1ccc(OC)cc1.COc1cc(Cc2cnc(N)nc2N)cc(I)c1OC>>COc1ccc(CC2c3cccc3C=NN2C(=O)/C=C/c2cc(Cc3cnc(N)nc3N)cc(OC)c2OC)cc1

1912 C=CC(=O)OC.CCCCCOC(=O)/C=C/c1ccc(Cl)cc1>>CCCCOC(=O)/C=C/c1ccc(/C=C/C(=O)OC)cc1

1913 C=CCNC(=O)c1cc(C)on1.COc1ccc(I)cc1>>COc1ccc(/C=C/CNC(=O)c2cc(C)on2)cc1

1914 C=CS(=O)(=O)F.N#Cc1ccc(I)cc1>>N#Cc1ccc(/C=C/S(=O)(=O)F)cc1  
 1915 C=CC(=O)OCc1cccc1.Ic1cccs1>>O=C(/C=C/c1cccs1)OCc1cccc1  
 1916 C=Cc1ccc(C(C)(C)C)cc1.O=Cc1ccc(Br)cc1>>CC(C)(C)c1ccc(/C=C/c2ccc(C=O)cc2)cc1  
 1917 Brc1ccc(I)cc1.C=Cc1ccc(Cl)cc1>>Clc1ccc(/C=C/c2ccc(Br)cc2)cc1  
 1918 C=CC(C)(C)O.Nc1cccc1Br>>CC(C)(O)/C=C/c1cccc1N  
 1919 C=CC(C)(C)O.COc1c(I)c(=O)n(C)c2cccc12>>COc1c(/C=C/C(C)(C)O)c(=O)n(C)c2cccc12  
 1920 C=CC(=O)OCC.Fc1c(Br)ccc2cnccc12>>CCOC(=O)/C=C/c1ccc2cnccc2c1F  
 1921 C=CCN1Cc2cc3cccc3nc2C1=O.O=C(O)Cc1ccc(Br)cc1>>O=C(O)Cc1ccc(/C=C/CN2Cc3cc4cccc4nc3C2=O)cc1  
 1922 C=Cc1ccncc1.CCCCOC(=O)/C=C/c1cccc1Cl>>CCCCOC(=O)/C=C/c1cccc1/C=C/c1ccncc1  
 1923 C=Cc1cncc(C#N)c1Nc1ccc2[nH]ccc2c1C.Clc1cc(Br)ccn1>>Cc1c(Nc2c(C#N)cncc2/C=C/c2ccnc(Cl)c2)ccc2[nH]ccc12  
 1924 C=CC(C)(O)CCC=C(C)C.Ic1cccc1>>CC(C)=CCCC(C)(O)/C=C/c1cccc1  
 1925 C=Cc1ccc2cccc2c1.FC(F)(F)CI>>FC(F)(F)C/C=C/c1ccc2cccc2c1  
 1926 C=Cc1cccc1.Nc1cc(Cl)ccc1Br>>Nc1cc(Cl)ccc1/C=C/c1cccc1  
 1927 C=CCN1C(=O)c2cccc2C1=O.COC(=O)c1ccc(Br)o1>>COC(=O)c1ccc(/C=C/CN2C(=O)c3cccc3C2=O)o1  
 1928 C=CC(=O)OC.O=C1[C@H](COCc2cccc2)N(Cc2cn([C@H](CO)Cc3cccc3)nn2)C(=O)[C@H](Cc2cc c(Br)cc2)N1CCCO>>COC(=O)/C=C/c1ccc(C[C@H]2C(=O)N(Cc3cn([C@H](CO)Cc4cccc4)nn3)[C @@H](COCc3cccc3)C(=O)N2CCCO)cc1  
 1929 C=CCOC(C)=O.Cc1cccc1I>>CC(=O)OC/C=C/c1cccc1C  
 1930 C=Cc1ccc(C=C)cc1.Nc1ccc(I)cc1>>C=Cc1ccc(/C=C/c2ccc(N)cc2)cc1  
 1931 C=CC.CC1(c2cccc2Br)CC(=O)C1>>C/C=C/c1cccc1C1(C)CC(=O)C1  
 1932 C=CC(=O)OCC.O=C(Nc1cccc1I)c1ccc([N+](=O)[O- ])cc1>>CCOC(=O)/C=C/c1cccc1NC(=O)c1ccc([N+](=O)[O-])cc1  
 1933 C=CC(=O)OCCN(C)C.O=C(Nc1cccc(Cl)c1)c1cc(=O)c2cc(Br)ccc2o1>>CN(C)CCOC(=O)/C=C/c1ccc 2oc(C(=O)Nc3cccc(Cl)c3)cc(=O)c2c1  
 1934 Brc1ccc(NCCCc2cccc2)nc1.C=CC(=O)OC(C)(C)C>>CC(C)(C)OC(=O)/C=C/c1ccc(NCCCc2cccc2)  
 1935 C=CC(=O)O.O=[N+](O-)]c1cccc([I+])c2cccc([N+](=O)[O- ])c2)c1>>O=C(O)/C=C/c1cccc([N+](=O)[O-])c1  
 1936 C=Cc1cc([N+](=O)[O- ])ccc1OCOCC[Si](C)(C)C.COc1cccc1I>>COc1cccc1/C=C/c1cc([N+](=O)[O- ])C=CC(=O)OC.O=C1c2cccc2NC12C(c1cccc1)=C(c1cccc1)c1ccc(Br)cc12>>COC(=O)/C=C/c1ccc2 c(c1)C1(Nc3cccc3C1=O)C(c1cccc1)=C2c1cccc1  
 1937 C=CC(=O)N(C)Cc1oc2cccc2c1C.Nc1ncc(Br)cc1OCc1cccc1>>Cc1c(CN(C)C(=O)/C=C/c2ncc(N)c( OCc3cccc3)c2)oc2cccc12  
 1938 C=C[Si](C)(C)C.Ic1ccsc1>>C[Si](C)(C)/C=C/c1ccsc1  
 1939 C=CC(=O)Nc1cccc1NC(=O)OC(C)(C)C.CCOC(=O)[C@H]1CN(C)C[C@@H]1c1ccc(Br)cn1>>CCO C(=O)[C@H]1CN(C)C[C@H]1c1ccc(/C=C/C(=O)Nc2cccc2NC(=O)OC(C)(C)C)cn1  
 1940 C=CC(C)=O.N#Cc1ccc(N)c(I)c1>>CC(=O)/C=C/c1cc(C#N)ccc1N  
 1941 Brc1ccc2ccc3cccc4ccc1c2c34.C=Cc1ccc(OC)cc1>>COc1ccc(/C=C/c2ccc3ccc4cccc5ccc2c3c45)cc1  
 1942 C=CS(=O)(=O)F.Ic1cccc2c1sc1cccc12>>O=S(=O)(F)/C=C/c1cccc2c1sc1cccc12  
 1943 C=CC(=O)OC.Cn1nnc(N(Cc2cc(C(F)(F)F)cc(C(F)(F)F)c2)Cc2cc(C(F)(F)F)cn2C1)n1>>COC(=O)/C=C /c1ncc(C(F)(F)F)cc1CN(Cc1cc(C(F)(F)F)cc(C(F)(F)F)c1)c1nnn(C)n1  
 1944 C=CC(=O)OC.Cc1cc(F)ccc1Br>>COC(=O)/C=C/c1ccc(F)cc1C  
 1945 C=Cc1ccc(OC)cc1.COC(=O)/C=C/c1cccc(N(Cc2ccc(Br)cc2)C(=O)C2CCCCC2)c1>>COC(=O)/C=C/c 1cccc(N(Cc2ccc(/C=C/c3ccc(OC)cc3)cc2)C(=O)C2CCCCC2)c1  
 1946 Brc1ccc2c(cnn2C2CCCCO2)c1.C=CC(=O)OCC>>CCOC(=O)/C=C/c1ccc2c(cnn2C2CCCCO2)c1  
 1947 C=Cn1nnc(-c2ccc(C)cc2)n1.Fc1cccc1I>>Cc1ccc(-c2nnn(/C=C/c3cccc3F)n2)cc1  
 1948 C=CC(=O)OCC.COc1cc(I)c2c3c1O[C@H]1[C@H]134CCN(C)[C@H](C2)[C@H]42C=C[C@@]1(OC)[ C@H]1C(=O)N(c3cccc3)C(=O)[C@H]12>>CCOC(=O)/C=C/c1cc(OC)c2c3c1C[C@H]1N(C)CC[C@ @]34[C@@H]1(O2)[C@@]2(OC)C=C[C@@]14[C@@H]1C(=O)N(c3cccc3)C(=O)[C@@H]12  
 1949 C=CC(=O)OCC.CC(C)(C)OC(=O)/C=C/c1ccc(CN(C(=O)C2CCCCC2)c2cccc(Br)c2)cc1>>CCOC(=O) /C=C/c1cccc(N(Cc2ccc(/C=C/C(=O)OC(C)(C)C)cc2)C(=O)C2CCCCC2)c1  
 1950 C=CN1C(=O)c2cccc2C1=O.OC(c1ccc(Cl)cc1)c1ncccc1Br>>O=C1c2cccc2C(=O)N1/C=C/c1ccccc1 C(O)c1ccc(Cl)cc1  
 1951 C=Cc1ccc([N+](=O)[O-])cc1.O=Cc1cccc1Br>>O=Cc1cccc1/C=C/c1ccc([N+](=O)[O-])cc1  
 1952 C=CC(=O)N1N=Cc2cccc2C1c1cc(C)cc(C)c1.COc1cc(Cc2ncc(N)nc2N)cc(I)c1OC>>COc1cc(Cc2ncc( N)nc2N)cc(/C=C/C(=O)N2N=Cc3cccc3C2c2cc(C)cc(C)c2)c1OC  
 1953 C=CN1C(=O)CCC1=O.Ic1ccc2c(c1)OCCOCCOCCOCCO2>>O=C1CCC(=O)N1/C=C/c1ccc2c(c1)OC COCCOCCOCCO2  
 1954

1955 C=CC(=O)OC.CCCCCC1=C(I)C1(F)F>>CCCCC1=C(/C=C/C(=O)OC)C1(F)F  
 1956 C=CC(=O)OC.N#CCn1c(=O)oc2cc(Br)cnc21>>COC(=O)/C=C/c1cnc2c(c1)oc(=O)n2CC#N  
 1957 C=CC(=O)O.c1ccc([I+])c2ccccc2)cc1>>O=C(O)/C=C/c1ccccc1  
 1958 C=CC(F)(F)F.Cc1ccc(I)cc1>>Cc1ccc(/C=C/C(F)(F)F)cc1  
C=Cc1ccc(N(c2ccccc2)c2ccccc2)cc1.CCCCCCN1c2ccc(Br)cc2Sc2cc(/C=C/c3ccc4c(c3)Sc3cc(C=O)cc  
 1959 c3N4CCCCC)ccc21>>CCCCCN1c2ccc(C=O)cc2Sc2cc(/C=C/c3ccc4c(c3)Sc3cc(/C=C/c5ccc(N(c6c  
cccc6)c6ccccc6)cc5)ccc3N4CCCCC)ccc21  
 1960 C=CC(=O)OC.Cc1ccc(Br)cc1>>COC(=O)/C=C/c1ccc(C)cc1  
 1961 C=C[Si](CC)(CC)CC.COC(=O)c1ccccc1Br>>CC[Si](/C=C/c1ccccc1C(=O)OC)(CC)CC  
 1962 C=CC(=O)OCC.O=Cc1cc([N+](=O)[O-])ccc1Br>>CCOC(=O)/C=C/c1ccc([N+](=O)[O-])cc1C=O  
 1963 C=C[C@@](C)(/C=C/c1ccc(O)cc1)CCC=C(C)C.Nc1ccc(I)cc1>>CC(C)=CCC[C@@](C)(/C=C/c1ccc(N)cc1)/C=C/c1ccc(O)cc1  
 1964 C=Cc1ccc(Cl)cc1.Oc1ccc(Br)cc1>>Oc1ccc(/C=C/c2ccc(Cl)cc2)cc1  
 1965 C=CC(C)=O.O=[N+](O-)]c1ccc(I)cc1>>CC(=O)/C=C/c1ccc([N+](=O)[O-])cc1  
 1966 C=CC(=O)OC.COc1ccc2c(c1)CCN(c1ccc(F)cc1)C2(C)c1ccc(Br)c(C)c1>>COC(=O)/C=C/c1ccc(C2(C  
)c3ccc(OC)cc3CCN2c2ccc(F)cc2)cc1C  
 1967 C=Cc1ccccc1NC(=O)C(F)(F)F.CC(C)(C)[Si](C)(C)OC[C@H]1O[C@@H](c2ccc(Br)cc2)[C@@H]1  
O[Si](C)(C)C(C)(C)C>>CC(C)(C)[Si](C)(C)OC[C@H]1O[C@@H](c2ccc(/C=C/c3ccccc3NC(=O)C(F  
)F)F)cc2)[C@@H]1O[Si](C)(C)C(C)(C)C  
 1968 Br1ccccc1.C=CC1CCCCC1>>C(=C/C1CCCCC1)\c1ccccc1  
 1969 C=Cc1ccc(Cl)cc1.COc1ccc(I)c1>>COc1ccc(/C=C/c2ccc(Cl)cc2)c1  
 1970 C=C/C=C/C(=O)N(CCCC)CCCC.CC(C)(C)c1ccc(Br)cc1>>CCCN(CCCC)C(=O)/C=C/C=C/c1ccc(C  
(C)(C)C)cc1  
 1971 C=CC(=O)OC.Cn1nc(I)c2ccnc21>>COC(=O)/C=C/c1nn(C)c2ncccc12  
 1972 C=CC(=O)OC.CO[C@H]1O[C@H](COC(C)=O)[C@H](OC(C)=O)C=C1I>>COC(=O)/C=C/C1=C[C  
@@H](OC(C)=O)[C@@H](COC(C)=O)O[C@@H]1OC  
 1973 C=COC(C)(C)C.O=S(=O)(c1ccccc1)C(F)(F)Br>>CC(C)(C)O/C=C/C(F)(F)S(=O)(=O)c1ccccc1  
 1974 C=CC[C@@H](C(=O)OC(C)C)[C@H](O)C(=O)OC(C)C.CCOc1ccc(Br)cc1>>CCOc1ccc(/C=C/C[C  
@@H](C(=O)OC(C)C)[C@H](O)C(=O)OC(C)C)cc1  
 1975 C=CC#N.Cc1ccc(I)cc1>>Cc1ccc(/C=C/C#N)cc1  
 1976 C=CC(=O)OCC.COc1ccc(-c2ccccc2)cc1>>CCOC(=O)/C=C/c1ccccc1-c1ccc(OC)cc1  
 1977 C=CC(=O)N(C)OC.O=[N+](O-)]c1ccc(I)c1>>CON(C)C(=O)/C=C/c1ccccc1([N+](=O)[O-])c1  
 1978 C=CCN1C(=O)c2ccccc2C1=O.Nc1ncc(Br)cn1>>Nc1ncc(/C=C/CN2C(=O)c3ccccc3C2=O)cn1  
 1979 C=CC(=O)N1N=Cc2ccccc2C1CCCC.COc1cc(Cc2nc(N)nc2N)cc(I)c1OC>>CCCCC1c2ccccc2C=NN  
1C(=O)/C=C/c1cc(Cc2nc(N)nc2N)cc(OC)c1OC  
 1980 C=Cc1ccc(OC)c(OC)c1.COc1ccc2c(c1)cc(C#N)c1ccc(Br)cc12>>COc1ccc2c(c1)cc(C#N)c1ccc(/C=C/c  
3ccc(OC)c(OC)c3)cc12  
 1981 Br1ccc(I)cc1.C=CC(=O)N(C)OC>>CON(C)C(=O)/C=C/c1ccc(Br)cc1  
 1982 C=CC(=O)OC(C)(C)C.FC(F)Oc1ccc(Br)cn1>>CC(C)(C)OC(=O)/C=C/c1ccc(OC(F)F)nc1  
 1983 C=C(c1ccc(OC)c(Br)c1)c1cc(OC)c(OC)c(OC)c1.C=CC(=O)OC>>C=C(c1ccc(OC)c(/C=C/C(=O)OC)c  
1)c1cc(OC)c(OC)c(OC)c1  
 1984 C=CC(=O)OC(C)(C)C.COc1ccc(Br)cc1C=O>>COc1ccc(/C=C/C(=O)OC(C)(C)C)cc1C=O  
 1985 C=CC(=O)OCc1ccccc1.Ic1ccccc1>>O=C(/C=C/c1ccccc1)OCc1ccccc1  
 1986 C=Cc1ccccc1.O=[N+](O-)]c1ccc(Br)cc1>>O=[N+](O-)]c1ccc(/C=C/c2ccccc2)cc1  
 1987 Br1cccs1.C=CCOc1ccccc1>>C(=C/c1cccs1)\COc1ccccc1  
 1988 C=CC(OCC)OCC.FC(F)(F)c1ccc(Cl)cc1>>CCOC(/C=C/c1ccc(C(F)(F)F)cc1)OCC  
 1989 C=CC(=O)OC(C)(C)C.Nc1ncc(Cl)cc1Br>>CC(C)(C)OC(=O)/C=C/c1cc(Cl)cn1N  
 1990 C=CC(=O)OCc1ccccc1.O=C1CO[C@@H]2Cc3ccc(Br)cc3[C@@H]2N1O>>O=C(/C=C/c1ccc2c(c1)[  
C@H]1[C@@H](C2)OCC(=O)N1O)OCc1ccccc1  
 1991 Br1cc2ccccc3ccc4ccccc1c4c32.C=CC(=O)OCC>>CCOC(=O)/C=C/c1cc2ccccc3ccc4ccccc1c4c32  
 1992 C=Cc1ccccc1C(=O)OC.COc1nc2ccc(Br)cc2nc1OC>>COC(=O)c1ccccc1/C=C/c1ccc2nc(OC)c(OC)nc2  
 1993 C=CC(=O)N(C)Cc1cc2ccccc2n1C.O=c1[nH]c2ncc(Br)cc2o1>>CN(Cc1cc2ccccc2n1C)C(=O)/C=C/c1c  
nc2[nH]c(=O)oc2c1  
 1994 Br1ccoc2ncccc12.C=CC(=O)OCC>>CCOC(=O)/C=C/c1ccoc2ncccc12  
 1995 C=CC(N)=O.CCN(CC)c1ccc(NC(=O)C2(NC(=O)OCC(C)C)CCc3cc(Br)ccc3C2)cc1>>CCN(CC)c1ccc  
(NC(=O)C2(NC(=O)OCC(C)C)CCc3cc(/C=C/C(N)=O)ccc3C2)cc1  
 1996 C=Cc1ccc(Br)cc1.CC(C)(C)OC(=O)NCC(=O)Nc1ccc(I)cc1>>CC(C)(C)OC(=O)NCC(=O)Nc1ccc(/C=  
C/c2ccc(Br)cc2)cc1  
 1997 C=CC(=O)OCC.O=c1[nH]c(=O)n([C@@H]2O[C@H](CO)[C@@H](O)[C@H]2O)cc1I>>CCOC(=O)  
/C=C/c1cn([C@@H]2O[C@H](CO)[C@@H](O)[C@H]2O)c(=O)[nH]c1=O  
 1998 C=CCNC1=NCCN1.Ic1ccccc1>>C(=C/c1ccccc1)\CNC1=NCCN1

1999 C=Cc1cccc1.O=P(c1cccc1)(c1cccc1)c1sc2cccc2c1I>>O=P(c1cccc1)(c1cccc1)c1sc2cccc2c1/C=C/c1cccc1

2000 C=CC(=O)OC(C)(C)C.COC(=O)/C=C/c1cccc(N(Cc2ccc(Br)cc2)C(=O)C2CCCCC2)c1>>COC(=O)/C=C/c1cccc(N(Cc2ccc(/C=C/C(=O)OC(C)(C)C)cc2)C(=O)C2CCCCC2)c1

2001 C=CC(=O)O.CC(C)c1cc(C(C)C)c(S(=O)(=O)Nc2ccc(I)cc2)cc1C(C)C>>CC(C)c1cc(C(C)C)c(S(=O)(=O)Nc2ccc(/C=C/C(=O)O)cc2)cc1C(C)C

2002 C=CC(=O)O.COC(=O)c1cc(Br)cs1>>COC(=O)c1cc(/C=C/C(=O)O)cs1

2003 C=CC(=O)N(C)C.Clc1nc(N2CCOCC2)c2oc3ncc(Br)cc3c2n1>>CN(C)C(=O)/C=C/c1nc2oc3c(N4CCOCC4)nc(Cl)nc3c2c1

2004 C=CC(=O)c1cccc(C)c1.COc1ncc(I)c(OC)n1>>COc1ncc(/C=C/C(=O)c2cccc(C)c2)c(OC)n1

2005 C=Cc1ccc(O)c(OC)c1.Oc1ccc(O)c(I)c1>>COc1cc(/C=C/c2cc(O)ccc2O)ccc1O

2006 C=Cc1cccc([N+](=O)[O-])c1.Ic1escc1-c1cccc1>>O=[N+](O)c1cccc(/C=C/c2escc2-c2cccc2)c1

2007 C=Cc1cncnc1.CCCCCCCCCCOC1ccc(I)cc1>>CCCCCCCCCOC1ccc(/C=C/c2cncnc2)cc1

2008 C=CC(=O)N1N=Cc2cccc2C1CC(=O)OCC.COc1cc(Cc2cnc(N)nc2N)cc(I)c1OC>>CCOC(=O)CC1c2cccc2C=NN1C(=O)/C=C/c1cc(Cc2cnc(N)nc2N)cc(OC)c1OC

2009 C=CCn1cnc1.CC(=O)OCC1Cn2c3ccc(CO)cc3c3c4c(c5c6cc(Br)ccc6n(c5c32)C1)C(=O)N(C(C)=O)C4>>CC(=O)OCC1Cn2c3ccc(CO)cc3c3c4c(c5c6cc(/C=C/Cn7cnc7)ccc6n(c5c32)C1)C(=O)N(C(C)=O)C

2010 C=CC=O.Ic1c(-c2cccc2)nnn1Cc1cccc1>>O=C/C=C/c1c(-c2cccc2)nnn1Cc1cccc1

2011 C=CC(=O)OCC.O=C1C(O)=C(I)C(=O)c2cccc21>>CCOC(=O)/C=C/C1=C(O)C(=O)c2cccc2C1=O

2012 C=Cc1cccc1.Nc1ccc(Cl)cc1Br>>Nc1ccc(Cl)cc1/C=C/c1cccc1

2013 C=CCCCCCCCCCC.c1ccc([I+](c2cccc2)cc1>>CCCCCCCCC/C=C/c1cccc1

2014 C=Cc1ccc(F)c(F)c1.COc1ccc(CN2C(=O)C(=C(c3ccc(O)cc3)c3ccc(O)cc3)c3cc(Br)ccc32)cc1>>COc1ccc(CN2C(=O)C(=C(c3ccc(O)cc3)c3ccc(O)cc3)c3cc(/C=C/c4ccc(F)c(F)c4)ccc32)cc1

2015 C=CC(=O)O.Oc1ccc(I)cc1Cl>>O=C(O)/C=C/c1ccc(O)c(Cl)c1

2016 Brc1nc2cccc2c1.C=CC(=O)OCCCC>>CCCCOC(=O)/C=C/c1nc2cccc2c1

2017 C=C[C@H](CO)NS(C)(=O)=O.Oc1ccc(I)cc1>>CS(=O)(=O)N[C@H](/C=C/c1ccc(O)cc1)CO

2018 C=CC(=O)OC(C)(C)C.O=C1C[C@H](O)[C@H]([Se]c2cccc2)N1Cc1cc2c(cc1I)OCO2>>CC(C)(C)OC(=O)/C=C/c1cc2c(cc1CN1C(=O)C[C@H](O)[C@H]1[Se]c1cccc1)OCO2

2019 Brc1ccc1.C=Cc1ncnc2c1ncn2C1CCCCO1>>C(=C/c1ncnc2c1ncn2C1CCCCO1)c1ccc1

2020 C=CCC(=O)OC.CC(C)(CC1Cc2cccc2C1)NC[C@H](O)COc1c(Br)cccc1C#N>>COC(=O)/C=C/C/c1cccc(C#N)c1OC[C@H](O)CNC(C)(C)CC1Cc2cccc2C1

2021 C=CC(C)=O.C[Si](C)(C)CN(Cc1cc2c(cc1I)OCO2)C(CCOC(=O)c1cccc1)[Si](C)(C)C>>CC(=O)/C=C/c1cc2c(cc1CN(C[Si](C)(C)C)C(CCOC(=O)c1cccc1)[Si](C)(C)C)OCO2

2022 C=CC(=O)OCCCC.CC(C)(C)c1ccc(Br)cc1>>CCCCOC(=O)/C=C/c1ccc(C(C)(C)C)cc1

2023 C=Cc1ccc(OC)cc1.Cn1c(/C=C/c2cccc2)c(I)c(=O)c2cccc21>>COc1ccc(/C=C/c2c(/C=C/c3cccc3)n(C)c3cccc3c2=O)cc1

2024 C=CC(N)=O.CC[C@@]1(O)C(=O)OCc2c1cc1n(c2=O)Cc2cc3c(Br)cccc3nc2-1>>CC[C@@]1(O)C(=O)OCc2c1cc1n(c2=O)Cc2cc3c(/C=C/C(N)=O)cccc3nc2-1

2025 C=Cc1cc(OC)cc(OC)c1.Oc1ccc(-c2occc2-c2ccc(Br)cc2)cc1>>COc1cc(/C=C/c2ccc(-c3occc3-c3ccc(O)cc3)cc2)cc(OC)c1

2026 C=CC(OC)OC.Nc1ncnc1I>>COC(/C=C/c1cncnc1N)OC

2027 C=Cc1cccc1.c1ccc([I+](c2cccc2)cc1>>C(=C/c1cccc1)c1cccc1

2028 C=CC#N.CC(=O)c1ccc(I)cc1>>CC(=O)c1ccc(/C=C/C#N)cc1

2029 C=CC(=O)OCC.N#Cc1cccc(OC[C@H](Cc2ccc(OC3CCN(C(=O)OCc4cccc4)CC3)cc2)NS(=O)(=O)c2ccc(I)cc2)c1>>CCOC(=O)/C=C/c1ccc(S(=O)(=O)N[C@H](COc2cccc(C#N)c2)Cc2ccc(OC3CCN(C(=O)OCc4cccc4)CC3)cc2)cc1

2030 C=CCN.Nc1nc(=O)n([C@@H]2O[C@H](COP(=O)(O)OP(=O)(O)OP(=O)(O)O)[C@@H](O)[C@H]2O)cc1I>>NC/C=C/c1cn([C@@H]2O[C@H](COP(=O)(O)OP(=O)(O)OP(=O)(O)O)[C@@H](O)[C@H]2O)c(=O)nc1N

2031 C=CC(N)=O.COc1cc(Nc2ncc3c(C)nc(-c4cccc(Br)c4)n3n2)cc(OC)c1OC>>COc1cc(Nc2ncc3c(C)nc(-c4cccc(/C=C/C(N)=O)c4)n3n2)cc(OC)c1OC

2032 C=CC(=O)OC(C)(C)C.COc1ccc(S(=O)(=O)n2ccc3cc(Br)cnc32)cc1OC>>COc1ccc(S(=O)(=O)n2ccc3cc(/C=C/C(=O)OC(C)(C)C)cnc32)cc1OC

2033 Brc1ccc(-c2cnc3cccc3n2)cc1.C=CCn1c(-c2ccc(OC)cc2)nc2cccc2c1=O>>COc1ccc(-c2nc3cccc3c(=O)n2C/C=C/c2ccc(-c3cnc4cccc4n3)cc2)cc1

2034 Br[C@H]1C[C@@H]2CC[C@H]1C2.C=Cc1ccc(OC)cc1>>COc1ccc(/C=C/[C@H]2C[C@@H]3CC[C@H]2C3)cc1

2035 C=Cc1cccc1.Cc1cccc(Br)c1O>>Cc1cccc(/C=C/c2cccc2)c1O

2036 Brc1cccc2[nH]ccc12.C=Cn1nc2c(Nc3ccc(P(C)(C)=O)cc3)ncnc21>>CP(C)(=O)c1ccc(Nc2ncnc3c2ncn3/C=C/c2cccc3[nH]ccc23)cc1



2037 C=CC(C)(C)O.CC(C)(C)OC(=O)NCC(=O)Nc1ccccc1I>>CC(C)(O)/C=C/c1ccccc1NC(=O)CNC(=O)O  
C(C)(C)C

2038 C=CS(=O)(=O)c1ccccc1.N#Cc1ccc(Br)cc1>>N#Cc1ccc(/C=C/S(=O)(=O)c2ccccc2)cc1

2039 C=CC(=O)N1CCOCC1.COc1cc2c3cc(Cl)ccc3nc3c4ccccc4n(C)c(c1)c23>>COc1cc2c3cc(/C=C/C(=O)  
N4CCOCC4)ccc3nc3c4ccccc4n(C)c(c1)c23

2040 C=CC(=O)OC.O=S(=O)(c1ccccc1)n1cc(-c2ccccc2)c2cc(Br)cnc21>>COC(=O)/C=C/c1cnc2c(c1)c(-  
c1ccccc1)cn2S(=O)(=O)c1ccccc1

2041 C=Cc1ccc(N(C)C)cc1.C[Si](C)(C)I>>CN(C)c1ccc(/C=C/[Si](C)(C)C)cc1

2042 C=CC(CO)N1C(=O)c2ccccc2C1=O.Cc1ccc(S(=O)(=O)Oc2ccc(Br)cc2)cc1>>Cc1ccc(S(=O)(=O)Oc2cc  
c(/C=C/C(CO)N3C(=O)c4ccccc4C3=O)cc2)cc1

2043 C=CC(=O)OC(C)(C)C.Cc1ccccc1Br>>Cc1ccccc1/C=C/C(=O)OC(C)(C)C

2044 C=CCCCCCCCCCCCC.COc1ccc(Br)c1[N+](=O)[O-  
]>>CCCCCCCCCCCCC/C=C/c1cccc(OC)c1[N+](=O)[O-]

2045 C=CC(=O)OC.O=S(=O)(c1ccccc1)n1cc(-c2ccccc2)c2cc(Br)cnc21>>COC(=O)/C=C/c1cnc2c(c1)c(-  
c1ccccc1)cn2S(=O)(=O)c1ccccc1

2046 C=CC(OCC)OCC.FC(F)(F)c1cccc(Br)c1>>CCOC(/C=C/c1cccc(C(F)(F)F)c1)OCC

2047 C=Cc1ccccc1.O=[N+][O-]c1cccc(Cl)c1>>O=[N+][O-]c1cccc(/C=C/c2ccccc2)c1

2048 C=CC=O.Cc1ccc(-c2c(C#N)c(CC(C)C)nc3ccc(Br)cc23)cc1>>Cc1ccc(-  
c2c(C#N)c(CC(C)C)nc3ccc(/C=C/C=O)cc23)cc1  
Br1cnc2ccccc2c1.C=CCO[C@]1(C)C[C@@H](C)C(=O)[C@H](C)[C@@H](O)[C@](C)(O)[C@@H  
](CC)OC(=O)[C@H](C)[C@@H](O)[C@H]2C[C@](C)(OC)[C@@H](O)[C@H](C)O2)[C@H](C)[  
C@H]1O[C@@H]1O[C@H](C)C[C@H](N(C)C)[C@H]1O>>CC[C@H]1OC(=O)[C@H](C)[C@@H  
](O[C@H]2C[C@](C)(OC)[C@@H](O)[C@H](C)O2)[C@H](C)[C@@H](O[C@@H]2O[C@H](C  
)C[C@H](N(C)C)[C@H]2O)[C@](C)(OC/C=C/c2cnc3ccccc3c2)C[C@@H](C)C(=O)[C@H](C)[C@  
\*NCCCCOCCOCCOCCNC(=O)COc1ccc(C(Cc2cc(OC)cc(OC)c2)NC(=O)c2cccc(C=C)c2)cc1.O=C(  
Oc1ccc([N+](=O)[O-  
)]cc1)c1cccc(I)c1>>\*NCCCCOCCOCCOCCNC(=O)COc1ccc(C(Cc2cc(OC)cc(OC)c2)NC(=O)c2cccc  
c(/C=C/c3ccccc3(C(=O)Oc4ccc([N+](=O)[O-])cc4)c3)c2)cc1

2051 C=CC(=O)OC(C)(C)C.COc1ccc2c(C(=O)c3cc(OC)c(OC)c(OC)c3)cn(S(=O)(=O)c3ccc(Br)cc3)c2c1>>  
COc1ccc2c(C(=O)c3cc(OC)c(OC)c(OC)c3)cn(S(=O)(=O)c3ccc(/C=C/C(=O)OC(C)(C)C)cc3)c2c1

2052 C=Cc1ccccc1.Cc1cccc(C)c1Br>>Cc1cccc(C)c1/C=C/c1ccccc1

2053 C=CC(=O)OC.COC(=O)c1c(C=O)cc(I)c(O)c1OC>>COC(=O)/C=C/c1cc(C=O)c(C(=O)OC)c(OC)c1O

2054 C=CC(=O)OCc1ccccc1.CC(C)(C)OC(=O)N1CCC2(CC1)Cc1cc(Br)cnc1NC2=O>>CC(C)(C)OC(=O)N  
1CCC2(CC1)Cc1cc(/C=C/C(=O)OCc3ccccc3)enc1NC2=O

2055 C=CCCc1ccccc1.CC(C)(C)OC(=O)c1ccc(Br)cc1[N+](=O)[O-  
]>>CC(C)(C)OC(=O)c1ccc(/C=C/CCc2ccccc2)cc1[N+](=O)[O-]

2056 C=CC(=O)OC.CCOC(=O)CSc1ccc(Br)cc1>>CCOC(=O)CSc1ccc(/C=C/C(=O)OC)cc1

2057 C=Cc1ccc(C)cc1C.COc1ccc2ccccc2c1I>>COc1ccc2ccccc2c1/C=C/c1ccc(C)cc1C

2058 C=Cc1ccccc1.FC(F)(F)Oc1ccc(I)c(Br)c1>>FC(F)(F)Oc1ccc(/C=C/c2ccccc2)c(Br)c1

2059 C=Cc1ccccc1O.Oc1ccc(O)c(I)c1>>Oc1ccc(O)c(/C=C/c2ccccc2O)c1

2060 C=CCOC(C)=O.Cc1cc(C)c(I)c(C)c1>>CC(=O)OC/C=C/c1c(C)cc(C)cc1C

2061 C=Cc1ccccc1.COc1cc(I)cc(OC)c1OC>>COc1cc(/C=C/c2ccccc2)cc(OC)c1OC

2062 C=CC(=O)OC.Cc1cc2c(c(C)c1Br)CC(C)(C)C2>>COC(=O)/C=C/c1c(C)cc2c(c1C)CC(C)(C)C2

2063 C=CC(=O)N1N=Cc2ccccc2C1CCC.Nc1ncc(Cc2cc(I)c3c(c2)OCO3)c(N)n1>>CCCC1c2ccccc2C=NN1  
C(=O)/C=C/c1cc(Cc2cnc(N)nc2N)cc2c1OCO2

2064 C=CC(=O)OC.Cc1ccc(S(=O)(=O)n2cc(I)c([Si](C)(C)C)c2)cc1>>COC(=O)/C=C/c1cn(S(=O)(=O)c2cc  
c(C)cc2)cc1[Si](C)(C)C

2065 C=CC(=O)OCc1ccccc1.O=C1NCCCC[C@@H]1N1Cc2c(I)ccccc2C1=O>>O=C(/C=C/c1ccccc2c1CN([C  
@H]1CCCCNC1=O)C2=O)OCc1ccccc1

2066 C=Cc1ccccc1.Oc1ccc(O)c(Br)c1>>Oc1ccc(O)c(/C=C/c2ccccc2)c1

2067 C=CC(=O)OCC.Cc1nc(N)nc(NC2CCC(O)CC2)c1Br>>CCOC(=O)/C=C/c1c(C)nc(N)nc1NC1CCC(O)

2068 C=CC(=O)c1ccc(OC)c(OC)c1.CC(=O)Oc1ccccc1I>>COc1ccc(C(=O)/C=C/c2ccccc2OC(C)=O)cc1OC

2069 C=CB1OC(C)CC(C)(C)O1.COC(=O)/C=C(/C)I>>COC(=O)/C=C(C)\C=C\B1OC(C)CC(C)(C)O1

2070 C=CC(=O)OC(C)(C)C.N#CCc1ccc(Br)cc1>>CC(C)(C)OC(=O)/C=C/c1ccc(CC#N)cc1

2071 C=Cc1cncnc1.CCN1c2ncc(I)cc2C(=O)N(C)c2ccccc21>>CCN1c2ncc(/C=C/c3ccccc3)cc2C(=O)N(C)c  
2ccccc21

2072 C=CCCCCN1C(=O)c2ccccc2C1=O.FC(F)(F)c1cnc2c(Br)ccnc2c1>>O=C1c2ccccc2C(=O)N1CCCC/C  
=C/c1cnc2cc(C(F)(F)F)enc12

2073 C=Cc1ccc(CO)cn1.Cc1ncc(C#N)c(Nc2ccc3[nH]ccc3c2C)c1I>>Cc1ncc(C#N)c(Nc2ccc3[nH]ccc3c2C)c  
1/C=C/c1ccc(CO)cn1

2074 Br1ccc(I)cc1.C=CC(N)=O>>NC(=O)/C=C/c1ccc(Br)cc1

2075 C=Cc1cccc1.O=c1[nH]c(=O)n([C@H]2C[C@H](O)[C@@H](CO)O2)cc1I>>O=c1[nH]c(=O)n([C@H]2C[C@H](O)[C@@H](CO)O2)cc1/C=C/c1cccc1

2076 C=Cc1cccc1C(=O)O.Cc1cc(C)cc(I)c1>>Cc1cc(C)cc(/C=C/c2cccc2C(=O)O)c1  
C=CC(=O)OC(C)(C)C.CCCOc1ccc(Br)cc1-

2077 c1nc2c(CCC)nn(C)c2c(=O)[nH]1>>CCCOc1ccc(/C=C/C(=O)OC(C)(C)C)cc1-  
c1nc2c(CCC)nn(C)c2c(=O)[nH]1  
C=CC(C)=O.CN1C(c2cccc2)=C(I)c2ccsc2S1(=O)=O>>CC(=O)/C=C/C1=C(c2cccc2)N(C)S(=O)(=O)c2sccc21

2078

2079 C=Cc1ccc(OC)c(O)c1.COc1cc(Br)cc(OC)c1F>>COc1ccc(/C=C/c2cc(OC)c(F)c(OC)c2)cc1O

2080 C=CC(=O)OC.COc1ccc(OC)c(Cc2ccc(I)cc2)c1>>COC(=O)/C=C/c1ccc(Cc2cc(OC)ccc2OC)cc1

2081 C=CC(=O)OC(C)(C)C.O=S(=O)(c1cccc(Br)c1)c1ccc2cccc(Cl)c2n1>>CC(C)(C)OC(=O)/C=C/c1cccc(S(=O)(=O)c2ccc3cccc(Cl)c3n2)c1

2082 C=CC(=O)OC.Cc1ccc(S(=O)(=O)N2CCC(I)=C2c2cccc2NC(=O)OC(C)(C)C)cc1>>COC(=O)/C=C/C1=C(c2cccc2NC(=O)OC(C)(C)C)N(S(=O)(=O)c2ccc(C)cc2)CC1

2083 C=Cc1cccc1.Clc1cccc(Br)c1>>Clc1cccc(/C=C/c2cccc2)c1

2084 Br1cccc(I)c1.C=CC(=O)OCCCC>>CCCCOC(=O)/C=C/c1cccc(Br)c1

2085 C=Cc1cncn1.CN(C(=O)c1cccc1)c1ccc2c(c1)[nH]c(=NC(=O)c1ccc(Br)s1)n2CCC(N)=O>>CN(C(=O)c1cccc1)c1ccc2c(c1)[nH]c(=NC(=O)c1ccc(/C=C/c3cncn3)s1)n2CCC(N)=O

2086 C=CC(=O)OC(C)(C)C.CCOC(=O)c1sc(Br)cc1C>>CCOC(=O)c1sc(/C=C/C(=O)OC(C)(C)C)cc1C

2087 C=CC(=O)OCC.Cc1nc(-n2c(C)ccc2C)cc(NC(C)C)c1Br>>CCOC(=O)/C=C/c1c(NC(C)C)cc(-n2c(C)ccc2C)nc1C

2088 Br1ccc2c(c1)CCC1(CCN(Cc3cccc3)CC1)O2.C=CC(=O)OC>>COC(=O)/C=C/c1ccc2c(c1)CCC1(CC N(Cc3cccc3)CC1)O2

2089 C=Cc1cccc1.Nc1ncc(Cl)cc1Br>>Nc1ncc(Cl)cc1/C=C/c1cccc1

2090 C=CC(=O)OCCCC.Cc1cccc(C)c1I>>CCCCOC(=O)/C=C/c1c(C)cccc1C

2091 C=CC(=O)OC(C)(C)C.O=C(CCc1cccc1)Nc1cc(Br)cc(I)c1>>CC(C)(C)OC(=O)/C=C/c1cc(Br)cc(NC(=O)CCc2cccc2)c1

2092 C=CB1OC(C)CC(C)(C)O1.Cc1ccc(I)cc1>>Cc1ccc(/C=C/B2OC(C)CC(C)(C)O2)cc1

2093 C=CCCCCCC.COc1ccc(Cl)cc1>>CCCCC/C=C/c1ccc(OC)cc1

2094 C=Cc1ccc(CN(C)C)cc1.C[Si](C)(C)CCOCn1nc(I)c2ccc([C@@H]3C[C@@]34C(=O)Nc3cccc34)cc21>>CN(C)Cc1ccc(/C=C/c2nn(COCC[Si](C)(C)C)c3cc([C@@H]4C[C@@]45C(=O)Nc4cccc45)ccc23

2095 C=CC(=O)O.O=c1nc(O)c(I)en1[C@H]1CC[C@@H](CO)O1>>O=C(O)/C=C/c1cn([C@H]2CC[C@@H](CO)O2)c(=O)nc1O

2096 Br1ccene1.C=Cc1enc2ccc(Nc3cc(C(C)C)enn3)nc2c1>>CC(C)c1enne(Nc2ccc3ncc(/C=C/c4ccenc4)cc3n2)c1

2097 C=Cc1ccc(OCOC)cc1.COCOc1cc(OS(=O)(=O)C(F)(F)F)cc(OCOC)c1C/C=C(\C)CC/C=C(\C)CCC=C(C)C>>COCOc1ccc(/C=C/c2cc(OCOC)c(C/C=C(\C)CC/C=C(\C)CCC=C(C)C)c(OCOC)c2)cc1

2098 C=C[Si](C)(C)C.O=c1oc2cccc2cc1Br>>C[Si](C)(C)/C=C/c1cc2cccc2oc1=O  
C=CCO[C@@H]1CC(=O)O[C@H](C)C/C=C/C=C/[C@H](O[Si](C)(C)C(C)(C)C)[C@H](C)C[C@H](CC(OC)OC)[C@H](O[C@@H]2O[C@H](C)[C@H](O[C@H]3C[C@@](C)(O)[C@@H](OC(=O)CC)[C@H](C)O3)[C@H](N(C)C)[C@H]2OC(C)=O)[C@H]1OC.FC(F)(F)c1ccc(I)cc1>>CCC(=O)O[C@H]1[C@H](C)O[C@@H](O[C@H]2[C@H](N(C)C)[C@@H](OC(C)=O)[C@H](O[C@@H]3[C@H](OC)[C@H](OC/C=C/c4ccc(C(F)(F)F)cc4)CC(=O)O[C@H](C)C/C=C/C=C/[C@H](O[Si](C)(C)C(C)(C)C)[C@H](C)C)[C@H]1C.[C@H]1C[C@@H]13C[C@@H]1OC1O[C@@H]12C[C@@H]1[C@@H]1(C)O

2099

2100 C=CCOc1cccc1C(C)(C)C.Ic1cccc1>>CC(C)(C)c1cccc1OC/C=C/c1cccc1

2101 C=CC(=O)OCCCC.CNC(=O)c1cccc(I)c1>>CCCCOC(=O)/C=C/c1cccc(C(=O)NC)c1

2102 C=C[C@H]1O[C@@H]2OC(C)(C)O[C@H]2[C@H]1O.O=C1CC(c2cccc2)Oc2cc(Br)ccc21>>CC1(C)O[C@H]2O[C@H](/C=C/c3ccc4c(c3)OC(c3cccc3)CC4=O)[C@H](O)[C@H]2O1

2103 C=Cc1cc(C)c(OCOCCOC)c(C)c1.O=[N+](O-)]c1ccc2nc(Cl)ccc2c1>>COCCOCOc1c(C)cc(/C=C/c2ccc3cc([N+](=O)[O-])ccc3n2)cc1C

2104 C=Cc1ccc(OC)cc1.Cc1c(Br)c(=O)c2cccc2n1C>>COc1ccc(/C=C/c2c(C)n(C)c3cccc3c2=O)cc1

2105 Br1ccc2[nH]ccc2c1.C=CC[C@H]1C(=O)N(c2cccc2)[C@@H]1c1ccc(OC)cc1>>COc1ccc([C@@H]2[C@@H](C/C=C/c3ccc4[nH]ccc4c3)C(=O)N2c2cccc2)cc1

2106 C=CS(=O)(=O)NC.Nc1ncc(Cl)cc1Br>>CNS(=O)(=O)/C=C/c1cc(Cl)enc1N

2107 C=Cc1cccc1.FC(F)(F)c1ccc(I)cc1>>FC(F)(F)c1ccc(/C=C/c2cccc2)cc1

2108 C=Cc1cccc1.COc1ccc(/C=C/c2ccc(I)cc2)cc1>>COc1ccc(/C=C/c2ccc(/C=C/c3cccc3)cc2)cc1

2109 Br1cccc1.C=C[Si](C)(C)Cl>>C[Si](C)(Cl)/C=C/c1cccc1

2110 C=CC(=O)Nc1cccc2ccnc12.COc1ccc(I)c1>>COc1ccc(/C=C/C(=O)Nc2cccc3ccnc23)c1

2111 C=Cc1ccc2cccc2n1.CN1C(=O)CC[C@]2(C)c3ccc(Br)cc3CC[C@H]12>>CN1C(=O)CC[C@]2(C)c3ccc(/C=C/c4ccc5cccc5n4)cc3CC[C@H]12

2112 C=CCCP(=O)(OC)OC.Ic1cccc1>>COP(=O)(CC/C=C/c1cccc1)OC

2113 C=CC(=O)OCC.Cc1nc(-c2ccccc2)sc1Br>>CCOC(=O)/C=C/c1sc(-c2ccccc2)nc1C  
 2114 C=CC(=O)OCC(CC)CCCC.N#Cc1ccccc1Cl>>CCCC(CC)COC(=O)/C=C/c1ccccc1C#N  
 2115 C=CC(=O)OC.COC(=O)c1ccccc1Br>>COC(=O)/C=C/c1ccccc1C(=O)OC  
 2116 C=Cn1nnnc1C.Ic1ccccc1>>Cc1nnnn1/C=C/c1ccccc1  
 2117 C=CC(=O)Nc1ccccc1NC(=O)OC(C)(C)C.CC(NCCN1CCOCC1)(C(=O)Nc1ccc(C(F)(F)F)cc1)c1ccc(Br)cc1>>CC(C)(C)OC(=O)Nc1ccccc1NC(=O)/C=C/c1ccc(C(C)(NCCN2CCOCC2)C(=O)Nc2ccc(C(F)(F)F)cc2)cc1  
 2118 C=Cc1ccc(OC(C)=O)cc1.FC(F)(F)C(Br)CCc1ccccc1>>CC(=O)Oc1ccc(/C=C/C(CCc2ccccc2)C(F)(F)F)cc1  
 2119 C=CC(=O)OCC.CCOC(=O)CCOCc1cc(OCc2ccccc2)c(OC)cc1Br>>CCOC(=O)/C=C/c1cc(OC)c(OCc2ccccc2)cc1COCCC(=O)OCC  
 2120 C=Cc1cc(OC)c(O)c(OC)c1.COc1cc(Br)cc(OC)c1F>>COc1cc(/C=C/c2cc(OC)c(F)c(OC)c2)cc(OC)c1O  
 2121 BrC1CCCCC1.C=Cc1ccccc(C(=O)OC(C)(C)C)c1>>CC(C)(C)OC(=O)c1ccccc1/C=C/C2CCCCC2)c1  
 2122 BrC1ccccc(CNc2ccc3ccccc3c2)c1.C=CC(=O)OCC>>CCOC(=O)/C=C/c1ccccc(CNc2ccc3ccccc3c2)c1  
 2123 C=CC(=O)CCCCC.Cc1ccc(Br)cc1>>CCCCCC(=O)/C=C/c1ccc(C)cc1  
 2124 C=Cc1ccc(OC)cc1.Clc1ccccc1>>COc1ccc(/C=C/c2ccccc2)cc1  
 2125 C=CC(=O)N(C)C.Cc1ccc(-c2ccccc2Br)cc1>>Cc1ccc(-c2ccccc2/C=C/C(=O)N(C)C)cc1  
 2126 C=CC(=O)OC(C)(C)C.COc1cc(Br)cc(OC)c1OC>>COc1cc(/C=C/C(=O)OC(C)(C)C)cc(OC)c1OC  
 2127 C=Cc1nnn(C)n1.Clc1ccc(I)cc1>>Cn1nnn(/C=C/c2ccc(Cl)cc2)n1  
 2128 \*CNCCCOCCOCCOCCCN(C(=O)COc1ccc(C(Cc2cc(OC)cc(OC)c2)NC(=O)c2ccccc(C=C)c2)cc1.Cc1cc(c(I)cc1F>>\*CNCCCOCCOCCOCCCN(C(=O)COc1ccc(C(Cc2cc(OC)cc(OC)c2)NC(=O)c2ccccc(C=C)c2)cc1  
 2129 C=CC(=O)OC(C)(C)C.CC(C)(C)OC(=O)N1CCN(c2nncnc3c(Br)ccccc23)CC1>>CC(C)(C)OC(=O)/C=C/c1ccccc2c(N3CCN(C(=O)OC(C)(C)C)CC3)nnc12  
 2130 C=CC(N)=O.COc1ccc(Br)cc1>>COc1ccc(/C=C/C(N)=O)cc1  
 2131 C=CC(=O)OC.CC(C)(C)C(=O)Oc1ccc2ccccc2c1-c1c(OC(=O)C(C)(C)C)ccc2cc(I)ccc12>>COC(=O)/C=C/c1ccc2c(-c3c(OC(=O)C(C)(C)C)ccc4ccccc34)c(OC(=O)C(C)(C)C)ccc2c1  
 2132 C=Cc1ccccc1.CS(=O)(=O)c1ccc(Br)cc1>>CS(=O)(=O)c1ccc(/C=C/c2ccccc2)cc1  
 2133 C=CC(=O)OCC.Cc1cc(I)ccc1/C=C/c1ccccc1>>CCOC(=O)/C=C/c1ccc(/C=C/c2ccccc2)c(C)c1  
 2134 BrC1ccc(Oc2ccccc2)cc1.C=CC(=O)N1CCOCC1>>O=C(/C=C/c1ccc(Oc2ccccc2)cc1)N1CCOCC1  
 2135 C=CC(=O)OC.CCOC(=O)C1=CN(c2ccccc2OC)C=C(C(=O)OCC)C1c1ccccc(Br)c1>>CCOC(=O)C1=C(N(c2ccccc2OC)C=C(C(=O)OCC)C1c1ccccc1/C=C/C(=O)OC)c1  
 2136 C=CC(C)=O.COc1ncc(Br)cn1>>COc1ncc(/C=C/C(C)=O)cn1  
 2137 C=Cc1c(C)cc(C)cc1C.FC(F)(F)c1ccc(Br)cc1>>Cc1cc(C)c(/C=C/c2ccc(C(F)(F)F)cc2)c(C)c1  
 2138 C=CC(=O)OC.COC(=O)c1ccc(C(F)(F)F)nc1Br>>COC(=O)/C=C/c1nc(C(F)(F)F)ccc1C(=O)OC  
 2139 C=CC(OCC)OCC.O=Cc1ccccc(F)c1Br>>CCOC(/C=C/c1c(F)ccccc1C=O)OCC  
 2140 C=CC(C)=O.IC1=CO[C@H](COCc2ccccc2)[C@H](OCc2ccccc2)[C@@H]1OCc1ccccc1>>CC(=O)/C=C/C1=CO[C@H](COCc2ccccc2)[C@H](OCc2ccccc2)[C@@H]1OCc1ccccc1  
 2141 C=CC(=O)N(C)Cc1oc2ccccc2c1C.CC1(C)NCc2cc(Br)enc2NC1=O>>Cc1c(CN(C)C(=O)/C=C/c2nnc3c(c2)CNC(C)(C)C(=O)N3)oc2ccccc12  
 2142 C=CC(=O)OCCCC.O=C1c2ccccc2C(=O)N1c1ccccc(I)c1>>CCCCOC(=O)/C=C/c1ccccc(N2C(=O)c3ccc(cc3C2=O)c1  
 2143 C=Cc1ccc2c(c1)c1cc(/C=C/c3ccc4c(c3)c3ccccc3n4CCCCCCCC)ccc1n2CCCCCCCC.N#CC(=C(c1ccc(cc1)c1ccccc1)c1ccc(Br)cc1>>CCCCCCCCn1c2ccccc2c2cc(/C=C/c3ccc4c(c3)c3ccc(/C=C/c5ccc(C(C#N)=C(c6ccccc6)c6ccccc6)cc5)ccc3n4CCCCCCCC)ccc21  
 2144 C=CC(=O)OC.C[C@H]1[C@H](O)[C@@H](CO)O[C@H]1n1cc(I)c(=O)[nH]c1=O>>COC(=O)/C=C/c1cn([C@@H]2O[C@H](CO)[C@@H](O)[C@@H]2C)c(=O)[nH]c1=O  
 2145 C=CCNC(=O)OC(C)(C)C.COc1ccc(Br)c(C=O)c1O>>COc1ccc(/C=C/CNC(=O)OC(C)(C)C)c(C=O)c1  
 2146 C=CC(=O)OC.O=[N+][O-]c1ccc(Cl)c([N+](=O)[O-])c1>>COC(=O)/C=C/c1ccc([N+](=O)[O-])cc1[N+](=O)[O-]  
 2147 C=CCN1C(=O)c2ccccc2C1=O.COc1ccc(Br)cc1>>COc1ccc(/C=C/CN2C(=O)c3ccccc3C2=O)cc1  
 2148 C=CCn1c(-c2ccc(Cl)cc2)nc2ccccc2c1=O.O=C(CN1C(=O)COc2ccccc21)c1ccc(Br)cc1>>O=C(CN1C(=O)COc2ccccc21)c1ccc(/C=C/Cn2c(-c3ccc(Cl)cc3)nc3ccccc3c2=O)cc1  
 2149 C=Cc1ccccc1.CCOC(=O)c1c(OC)nn(C)c1I>>CCOC(=O)c1c(OC)nn(C)c1/C=C/c1ccccc1  
 2150 C=Cc1ccc2ccccc2c1.CCCCC(Br)C(F)(F)F>>CCCCC(/C=C/c1ccc2ccccc2c1)C(F)(F)F  
 2151 C=Cc1ccccc1.CCN1C[C@]2(OC(=O)c3cc(I)ccc3NC(C)=O)CC[C@H](OC)[C@@]34[C@@@H]2C[C@H]([C@@@H]13)[C@@]1(O)C[C@H](OC)[C@H]2C[C@@@H]4[C@]1(O)[C@H]2OC>>CCN1C[C@]2(OC(=O)c3ccc(/C=C/c4ccccc4)ccc3NC(C)=O)CC[C@H](OC)[C@@]34[C@@@H]2C[C@H]([C@@@H]13)[C@@]1(O)C[C@H](OC)[C@H]2C[C@@@H]4[C@]1(O)[C@H]2OC  
 2152 C=CC=O.Ic1ccccc1>>O=C/C=C/c1ccccc1

2153 C=[Si](C)(C)C.Ic1ccc[se]1>>C[Si](C)(C)/C=C/c1ccc[se]1  
 2154 C=CC(=O)OCC.FC(F)(F)c1ccccc(I)c1>>CCOC(=O)/C=C/c1ccccc(C(F)(F)F)c1  
 2155 C=CC(=O)OC(C)(C)C.CC(C)(C)n1nnc(-c2ccc(Br)cc2)n1>>CC(C)(C)OC(=O)/C=C/c1ccc(-c2nnn(C(C)(C)C)n2)cc1  
 2156 C=CC(=O)N1N=Cc2ccccc2C1C1CCC1.COc1cc(Cc2cnc(N)nc2N)cc(I)c1OC>>COc1cc(Cc2cnc(N)nc2N)cc(/C=C/C(=O)N2N=Cc3ccccc3C2C2CCC2)c1OC  
 2157 C=CC(=O)OCC.Ic1ccccc1-c1coc2ccccc12>>CCOC(=O)/C=C/c1ccccc1-c1coc2ccccc12  
 2158 C=CC(=O)OCCCC.CCOC(=O)c1ccc(-c2nc(-c3cc(OC)cc(OC)c3)sc2Cl)cc1>>CCCCOC(=O)/C=C/c1sc(-c2cc(OC)cc(OC)c2)nc1-  
 2159 C=CC(=O)OC(C)(C)C.Cn1cc(I)cn1>>Cn1cc(/C=C/C(=O)OC(C)(C)C)cn1  
 2160 C=CC(=O)OC.CCc1ccccc(C)c1I>>CCc1ccccc(C)c1/C=C/C(=O)OC  
 2161 C=Cc1ccccc1.Cc1ncc(I)c(C)n1>>Cc1ncc(/C=C/c2ccccc2)c(C)n1  
 2162 C=CC[C@H](CC(=O)OC(C)(C)C)(=O)N[C@H](C(=O)N[C@H](C)c1ccccc1)C(C)(C)C.CCc1cc(Br)ccc1-c1ccccc1>>CCc1cc(/C=C/C[C@H](CC(=O)OC(C)(C)C)(=O)N[C@H](C(=O)N[C@H](C)c2ccccc2)C(C)(C)C)ccc1-c1ccccc1  
 2163 C=CC(=O)O.O=C(O)c1ccccc(I)c1>>O=C(O)/C=C/c1ccccc(C(=O)O)c1  
 2164 C=CCOc1ccccc1C(C)(C)C.Ic1cccs1>>CC(C)(C)c1ccccc1OC/C=C/c1cccs1  
 2165 C=Cc1ccc(Br)cc1.Fc1ccc(I)cc1>>Fc1ccc(/C=C/c2ccc(Br)cc2)cc1  
 2166 Br1cnc2ccccc2c1.C=Cc1ccccc1>>C(=C/c1cnc2ccccc2c1)c1ccccc1  
 2167 C=CCOC(C)=O.OCc1ccccc1I>>CC(=O)OC/C=C/c1ccccc1CO  
 2168 C=SCC.Cc1ccccc(Br)c1>>CCS/C=C/c1ccccc(C)c1  
 2169 C=CC(=O)OCC.O=c1cc(-c2ccccc2)oc2ccc(Br)cc12>>CCOC(=O)/C=C/c1ccc2oc(-c2ccccc2)c1  
 2170 C=Cc1ccccc1.CN(C)CCOc1cnc(Br)c1>>CN(C)CCOc1cnc(/C=C/c2ccccc2)c1  
 2171 C=CC(=O)O.N[C@@H](Cc1c[nH]c2ccc(Br)cc12)C(=O)O>>N[C@@H](Cc1c[nH]c2ccc(/C=C/C(=O)O)cc12)C(=O)O  
 2172 C=CC(=O)OC.CCCCc1c(I)c(OC(C)=O)c2ccccc12>>CCCCc1c(/C=C/C(=O)OC)c(OC(C)=O)c2ccccc1  
 2173 C=CN1CCCC1=O.O=C1c2ccccc2C(=O)N1c1ccccc(I)c1>>O=C1CCCN1/C=C/c1ccccc(N2C(=O)c3ccccc3C2=O)c1  
 2174 Br1cnc2ccccc12.C=Cc1ccccc1>>C(=C/c1cnc2ccccc12)c1ccccc1  
 2175 C=CC(=O)OCC.CC(Oc1ccc(Br)cc1)c1ccccc1>>CCOC(=O)/C=C/c1ccc(OC(C)c2ccccc2)cc1  
 2176 Br1cnc2c(c1)CNC1(CCCC1)CN2.C=CC(=O)OC(C)(C)C>>CC(C)(C)OC(=O)/C=C/c1cnc2c(c1)CNC1(CCCC1)CN2  
 2177 C=Cc1nc2cc(C(C)(C)C)cc(C(C)(C)C)c2o1.O=C(OC[C@H]1O[C@@H](n2cc(I)c(=O)[nH]c2=O)C[C@@H]1OC(=O)c1ccccc1)c1ccccc1>>CC(C)(C)c1cc(C(C)(C)C)c2oc(/C=C/c3cn([C@H]4C[C@H](OC(=O)c5ccccc5)[C@@H](COC(=O)c5ccccc5)O4)c(=O)[nH]c3=O)nc2c1  
 2178 C=CP(=O)(OCC)OCC.FC(F)(F)c1ccc(Br)cc1>>CCOP(=O)(/C=C/c1ccc(C(F)(F)F)cc1)OCC  
 2179 C=Cc1ccccc1.CCOC(=O)C1(C(C)=O)CCC(I)=C1C>>CCOC(=O)C1(C(C)=O)CCC(/C=C/c2ccccc2)=  
 2180 C=CC(=O)OCC.COc1ccccc(Cl)c1>>CCOC(=O)/C=C/c1ccccc(OC)c1  
 2181 C=CCN1C(=O)c2ccccc2C1=O.O=[N+](O-)]c1ccc(I)cc1>>O=C1c2ccccc2C(=O)N1C/C=C/c1ccc([N+](=O)[O-])cc1  
 2182 C=CC(=O)OCCCC.O=C1c2ccccc2C(=O)N1c1ccccc1I>>CCCCOC(=O)/C=C/c1ccccc1N1C(=O)c2ccc cc2C1=O  
 2183 C=CC(N)=O.O=C(O)c1ccccc(I)c1>>NC(=O)/C=C/c1ccccc(C(=O)O)c1  
 2184 C=Cc1ccc(F)cc1.Cc1nn(C)c(=O)c(-c2c(F)ccc(Cl)c2Br)c1OC(=O)C(C)C>>Cc1nn(C)c(=O)c(-c2c(F)ccc(Cl)c2/C=C/c2ccc(F)cc2)c1OC(=O)C(C)C  
 2185 C=CC(C)(C)O.Nc1ncc(Br)cn1>>CC(C)(O)/C=C/c1cnc(N)nc1  
 2186 C=CC(C)=O.O=C1Cc2c([nH]c3ccccc23)-c2cc(I)ccc2N1>>CC(=O)/C=C/c1ccc2c(c1)-c1[nH]c3ccccc3c1CC(=O)N2  
 2187 C=CC(=O)OC(C)(C)C.O=C(c1ccccc1)c1ccc(Br)cc1>>CC(C)(C)OC(=O)/C=C/c1ccc(C(=O)c2ccccc2)c  
 2188 C=CC(=O)OCCCC.Cc1ccc(C)c(Br)c1>>CCCCOC(=O)/C=C/c1cc(C)ccc1C  
 2189 \*CNCCCCOCCOCCOCCCN(C(=O)COc1ccc(C(Cc2cc(OC)cc(OC)c2)NC(=O)c2ccccc(C=C)c2)cc1.N#CCc1ccccc(I)c1>>\*CNCCCCOCCOCCOCCCN(C(=O)COc1ccc(C(Cc2cc(OC)cc(OC)c2)NC(=O)c2ccccc(/C=C/c3ccccc(CC#N)c3)c2)cc1  
 2190 Br1ccccc1.C=CCON=C1[C@H](C)[C@H]2OC(=O)O[C@]2(C)[C@@H](CC)OC(=O)[C@H](C)C(=O)[C@H](C)[C@@H](O[C@@H]2O[C@H](C)[C@H](N(C)C)[C@H]2OC(C)=O)[C@](C)(OC)C[C@@H]1C>>CC[C@H]1OC(=O)[C@H](C)C(=O)[C@H](C)[C@@H](O[C@@H]2O[C@H](C)C[C@H](N(C)C)[C@H]2OC(C)=O)[C@]1(C)(OC)C[C@@H](C)[C@H]2OC(C)=O)[C@]1(C)(OC)C[C@@H](C)C(=NOC/C=C/c2ccccc2)[C@H](C)[C@H]2OC  
 2191 C=CC(=O)OC(C)(C)C.CC(C)=CCc1cc(I)ccc1OC(=O)CCc1ccccc1F>>CC(C)=CCc1cc(/C=C/C(=O)O C(C)(C)C)ccc1OC(=O)CCc1ccccc1F  
 2192 Br1ccccc1.C=CC(=O)OC>>COC(=O)/C=C/c1ccccc1

2193 C=CC(C)(C)O.CO1n1cc(C=O)c2c(I)cccc21>>CO1n1cc(C=O)c2c(/C=C/C(C)(C)O)cccc21

2194 C=CC(=O)OCC.O=C1OC2(CCCCC2)OC=C1I>>CCOC(=O)/C=C/C1=COC2(CCCCC2)OC1=O

2195 Br1ccsc1.C=Cc1ccc(C(=O)OC(C)(C)C)c(Nc2ccc(F)cc2)c1>>CC(C)(C)OC(=O)c1ccc(/C=C/c2ccsc2)c1Nc1ccc(F)cc1

2196 C=Cc1nc(C)c(OC(=O)C(C)(C)C)c2c1COC2OC.Ic1cccc1>>COC1OCc2c(/C=C/c3cccc3)nc(C)c(OC(=O)C(C)(C)C)c21

2197 C=Cc1cccc1.Fc1cc(Br)cc(F)c1F>>Fc1cc(/C=C/c2cccc2)cc(F)c1F

2198 C=Cc1ccc(C)cc1.COc1ccc(/C=C/c2cc(Br)cc(/C=C/c3ccc(OC)cc3)c2)cc1>>COc1ccc(/C=C/c2cc(/C=C/c3ccc(C)cc3)cc(/C=C/c3ccc(OC)cc3)c2)cc1

2199 Br1ccc(-c2cccc2)cc1.C=CC(OCC)OCC>>CCOC(/C=C/c1ccc(-c2cccc2)cc1)OCC

2200 C=CC(=O)OC(C)(C)C.Cc1nn(C)c(C)c1Br>>Cc1nn(C)c(C)c1/C=C/C(=O)OC(C)(C)C

2201 C=Cc1cc(C(F)(F)F)cc(C(F)(F)F)c1.FC(F)(F)c1ccc(Br)cc1>>FC(F)(F)c1ccc(/C=C/c2cc(C(F)(F)F)cc(C(F)(F)F)c2)cc1

2202 C=CC(=O)OC(C)(C)C.FC(F)(F)c1ccc(I)cc1>>CC(C)(C)OC(=O)/C=C/c1ccc(C(F)(F)F)cc1

2203 C=Cc1ccc(OC)cc1.COC(=O)Cn1c(=O)c(Cl)nc2ccnc21>>COC(=O)Cn1c(=O)c(/C=C/c2ccc(OC)cc2)n2ccnc21

2204 C=Cc1ccc(O)cc1.CC(C)(C#N)c1cc(Br)cc(Cn2cnnc2)c1>>CC(C)(C#N)c1cc(/C=C/c2ccc(O)cc2)cc(Cn2cnnc2)c1

2205 Br1ccc2cccc2c1.C=CC(OCC)OCC>>CCOC(/C=C/c1ccc2cccc2c1)OCC

2206 C=CC(=O)OC(C)(C)C.O=S(=O)(c1cccc(Br)c1)c1ccc2cccc(F)c2n1>>CC(C)(C)OC(=O)/C=C/c1cccc(S(=O)(=O)c2ccc3cccc(F)c3n2)c1

2207 C=CC(=O)OCC.COc1cccc1Br>>CCOC(=O)/C=C/c1cccc1OC

2208 C=CC(=O)OCC(CC)CCCC.COc1cccc(Cl)c1>>CCCC(CC)COC(=O)/C=C/c1cccc(OC)c1

2209 C=CS(=O)(=O)F.Ic1ccc(Oc2cccc2)cc1>>O=S(=O)(F)/C=C/c1ccc(Oc2cccc2)cc1

2210 C=Cc1cncnc1.Nc1ccc(Br)cc1>>Nc1ccc(/C=C/c2cncnc2)cc1

2211 C=CC(=O)OC.CC(C)(C)OC(=O)n1cc(I)c([Si](C)(C)C)c1>>COC(=O)/C=C/c1cn(C(=O)OC(C)(C)C)cc1[Si](C)(C)C

2212 C=Cc1cccc1.Cc1ccc(N)c(Br)c1>>Cc1ccc(N)c(/C=C/c2cccc2)c1

2213 C=Cc1ccc2cccc2c1.CCN1c2ncc(I)cc2C(=O)N(C)c2ccc(Cl)nc21>>CCN1c2ncc(/C=C/c3ccc4cccc4c3)cc2C(=O)N(C)c2ccc(Cl)nc21

2214 C=CC(=O)OC.C[C@@H](OC[C@H]1CO1)c1cccc1Br>>COC(=O)/C=C/c1cccc1[C@@H](C)OC[C@H]1CO1

2215 C=CC(=O)OCC.CC(C)(C)OC(=O)c1cccc1Br>>CCOC(=O)/C=C/c1cccc1C(=O)OC(C)(C)C

2216 C=Cc1cccc1Cl.Cc1ccc(Br)cc1>>Cc1ccc(/C=C/c2cccc2Cl)cc1

2217 C=Cc1ccc2c(c1)CC2.C[Si](C)(C)I>>C[Si](C)(C)/C=C/c1ccc2c(c1)CC2

2218 C=CCCCCCCCCCCCC.c1ccc([I+](c2cccc2)cc1>>CCCCCCCCCCCCC/C=C/c1cccc1

2219 C=CC(=O)OCC.N#Cc1cccc(Br)c1>>CCOC(=O)/C=C/c1cccc(C#N)c1

2220 C=CC(=O)O.Nc1ccc(C(F)(F)F)cc1I>>Nc1ccc(C(F)(F)F)cc1/C=C/C(=O)O

2221 C=CC(=O)OCC.F/C(Br)=C/c1cccc1>>CCOC(=O)/C=C/C(F)=C\c1cccc1

2222 C=Cc1cccc1.FC(F)(F)c1cccc1I>>FC(F)(F)c1cccc1/C=C/c1cccc1

2223 C=CC(C)(C)O.CC(C)(C)OC(=O)N1CCC[C@H](Nc2ccc(C(F)(F)F)c(-c3cn(S(=O)(=O)c4cccc4)c4cc(Br)ccc34)n2)C1>>CC(C)(O)/C=C/c1ccc2c(-c3nc(N[C@H]4CCCN(C(=O)OC(C)(C)C)4)ccc3C(F)(F)F)cn(S(=O)(=O)c3cccc3)c2c1

2224 C=CC(=O)OCc1cccc1.CCOC(=O)c1cccc1Br>>CCOC(=O)c1cccc1/C=C/C(=O)OCc1cccc1

2225 C=CC(=O)O.CN(c1ccc(I)cc1)S(=O)(=O)c1ccc(-c2cccc2)cc1>>CN(c1ccc(/C=C/C(=O)O)cc1)S(=O)(=O)c1ccc(-c2cccc2)cc1

2226 C=CC(=O)Nc1cccc1NC(=O)OC(C)(C)C.COC(=O)C(CCCCl)c1ccc(Br)cc1>>COC(=O)C(CCCCl)c1ccc(/C=C/C(=O)Nc2cccc2NC(=O)OC(C)(C)C)cc1

2227 C=C[C@H](CCCCCCCC)CC(OC)OC.COc1ccc(I)cc1>>CCCCCCCC[C@@H](/C=C/c1ccc(OC)cc1)C(C(OC)OC

2228 Br1cc2cccc2c2cccc12.C=CC(=O)OCCCC>>CCCCOC(=O)/C=C/c1cc2cccc2c2cccc12

2229 C=Cc1ccc(OC)cc1.Oc1cccc1I>>COc1ccc(/C=C/c2cccc2O)cc1

2230 C=CCO[C@]1(C)C[C@@H](C)C(=O)[C@H](C)[C@@H](O)[C@](C)(O)[C@@H](CC)OC(=O)[C@H](C)C(=O)[C@H](C)[C@H]1O[C@@H]1O[C@H](C)C[C@H](N(C)C)[C@H]1OC(=O)c1cccc1.Ic1cccc1>>CC[C@H]1OC(=O)[C@H](C)C(=O)[C@H](C)[C@@H](O)[C@@H]2O[C@H](C)C[C@H](N(C)C)[C@H]2OC(=O)c2cccc2[C@]1(C)(OC/C=C/c2cccc2)[C@H](C)C(=O)[C@H](C)[C@@H]1C=CC(=O)OCC(CC)CCCC.COC(=O)c1ccc(Cl)cc1>>CCCC(CC)COC(=O)/C=C/c1ccc(C(=O)OC)cc1

2231 C=Cc1ccsc1.Cc1ncnc2c1c(I)cn2[C@@H]1O[C@H](CO)[C@@H](O)[C@@]1(C)F>>Cc1ncnc2c1c(/C=C/c1ccsc1)cn2[C@@H]1O[C@H](CO)[C@@H](O)[C@@]1(C)F

2232 C=CC(=O)N1N=Cc2cccc2C1C(C)(C)C.COc1cc(Cc2cnc(N)nc2N)cc(I)c1OC>>COc1cc(Cc2cnc(N)nc2N)cc(/C=C/C(=O)N2N=Cc3cccc3C2C(C)(C)C)c1OC

2233

2234 C=CC(=O)OC.CCCCCCCCN1C(=O)NC(c2ccccc2)(c2ccc(I)cc2)C1=O>>CCCCCCCCN1C(=O)NC(c2ccccc2)(c2ccc(/C=C/C(=O)OC)cc2)C1=O  
 2235 C=CC(=O)OCC.CC(C)(C)C(=O)Nc1ccccc1Br>>CCOC(=O)/C=C/c1ccccc1NC(=O)C(C)(C)C  
 2236 Br1ccc2ccc3ccccc4ccc1c2c34.C=CC(=O)OCCCC>>CCCCOC(=O)/C=C/c1ccc2ccc3ccccc4ccc1c2c34  
 2237 C=CC(=O)OC(C)(C)C.COc1cc(Br)c(COCCC(=O)OC(C)(C)C)cc1OC>>COc1cc(/C=C/C(=O)OC(C)(C)C)c(COCCC(=O)OC(C)(C)C)cc1OC  
 2238 C=CC(=O)OC(C)(C)C.COc1ccc(CCNC(=O)c2cc(Br)cc(I)c2)cc1>>COc1ccc(CCNC(=O)c2cc(Br)cc(/C=C/C(=O)OC(C)(C)C)c2)cc1  
 2239 C=CC(=O)OC.COc1cc(I)c(NC(=O)C(C)(C)C)c(OC)c1[Si](C)(C)C>>COC(=O)/C=C/c1cc(OC)c([Si](C)(C)C)c(OC)c1NC(=O)C(C)(C)C  
 2240 C=Cc1ccccc1.COCl(OC)C(=O)c2ccc(Br)cc2C1=O>>COC1(OC)C(=O)c2ccc(/C=C/c3ccccc3)cc2C1=  
 2241 C=CC(=O)OCCCC.O=Cc1ccc(Br)cc1>>CCCCOC(=O)/C=C/c1ccc(C=O)cc1  
 2242 C=Cc1ccc(N(CCCC)CCCC)cc1.CN(C)c1ccc(/C=C/c2nc3ccc(Br)cc3nc2-c2ccccc2)cc1>>CCCCN(CCCC)c1ccc(/C=C/c2ccc3nc(/C=C/c4ccc(N(C)C)cc4)c(-c4ccccc4)nc3c2)cc1  
 2243 C=CCO[C@H]1O[C@H](COC(C)=O)[C@@H](OC(C)=O)[C@H](OC(C)=O)[C@@H]1OC(C)=O.Ic1ccccc1-c1ccccc1>>CC(=O)OC[C@H]1O[C@H](OC/C=C/c2ccccc2-c2ccccc2)[C@@H](OC(C)=O)[C@@H](OC(C)=O)[C@H]1OC(C)=O  
 2244 C=Cc1ccc2cc(OC)ccc2c1.COc1ccc2c(ccc3ccc(Br)cc32)c1>>COc1ccc2cc(/C=C/c3ccc4ccc5cc(OC)ccc5c4c3)ccc2c1  
 2245 C=CC(=O)Nc1ccccc1NC(=O)OC(C)(C)C.COC(=O)C(O)c1ccc(Br)cc1>>COC(=O)C(O)c1ccc(/C=C/C(=O)Nc2ccccc2NC(=O)OC(C)(C)C)cc1  
 2246 C=Cc1cc(C(C)(C)C)c(OC(C)=O)c(C(C)(C)C)c1.CC1(C)c2ccc(I)cc2C(C)(C)N1[O]>>CC(=O)Oc1c(C(C)(C)C)cc(/C=C/c2ccc3c(c2)C(C)(C)N([O])C3(C)C)cc1C(C)(C)C  
 2247 C=CC(=O)N1C(=O)OC[C@H]1c1ccccc1.Oc1ccc2c(Br)cccc12>>O=C(/C=C/c1ccc2c(O)cccc12)N1C(=O)OC[C@H]1c1ccccc1  
 2248 C=Cc1ccc(C)cc1.Cc1ccc(Br)cc1>>Cc1ccc(/C=C/c2ccc(C)cc2)cc1  
 2249 Br1c2ccccc2cc2ccccc12.C=CS(C)(=O)=O>>CS(=O)(=O)/C=C/c1c2ccccc2cc2ccccc12  
 2250 C=Cc1ccccc1.Cn1ccc1-c1ccc(Br)o1>>Cn1ccc1-c1ccc(/C=C/c2ccccc2)o1  
 2251 C=CC(=O)OC(C)(C)C.COc1ccc(S(=O)(=O)c2ccc3ccc(Br)cc3n2)cc1>>COc1ccc(S(=O)(=O)c2ccc3ccc(/C=C/C(=O)OC(C)(C)C)cc3n2)cc1  
 2252 C=Cc1n[nH]c2cc([C@H]3C[C@@]34C(=O)Nc3ccc(OC)cc34)ccc12.CN1CCN(C(=O)c2ccc(Br)cc2)CC1>>COc1ccc2c(c1)[C@H]1(C[C@H]1c1ccc3c(/C=C/c4ccc(C(=O)N5CCN(C)CC5)cc4)n[nH]c3c1)C(C=CC(=O)Nc1ccccc1.O=C1Cc2c([nH]c3ccc(I)cc23)-c2ccccc2N1>>O=C(/C=C/c1ccc2[nH]c3c(c2c1)CC(=O)Nc1ccccc1-3)Nc1ccccc1  
 2254 C=Cc1ccc(C)cc1.CCOC(=O)C(C)Br>>CCOC(=O)C(C)/C=C/c1ccc(C)cc1  
 2255 C=Cc1cccc(OC)c1OC.Nc1ccc(I)cc1>>COc1cccc(/C=C/c2ccc(N)cc2)c1OC  
 2256 C=CC(=O)OCCCC.O=[N+][O-]c1ccccc1Br>>CCCCOC(=O)/C=C/c1ccccc1[N+](=O)[O-]  
 2257 C=CC(C)=O.CCCCCCCCCCCCCCCCc1ccc(I)c(O)c1>>CCCCCCCCCCCCCCCCc1ccc(/C=C/C(C)=O)c(O)c1  
 2258 C=Cc1ccc(Cl)cc1.O=Cc1ccccc1Br>>O=Cc1ccccc1/C=C/c1ccc(Cl)cc1  
 2259 C=CC(C)=O.CCOC(=O)c1cn(CC)c2nc(C)c(Br)cc2c1=O>>CCOC(=O)c1cn(CC)c2nc(C)c(/C=C/C(C)=O)cc2c1=O  
 2260 C=CC(C)(C)O.Cc1cc(C)c(Br)c(C)c1>>Cc1cc(C)c(/C=C/C(C)(C)O)c(C)c1  
 2261 C=CC(=O)OCC.N#Cc1ccc(Cl)cc1>>CCOC(=O)/C=C/c1ccc(C#N)cc1  
 2262 C=CC(=O)N1N=Cc2ccccc2C1c1cc2ccccc2n1C.COc1cc(Cc2cnc(N)nc2N)cc(I)c1OC>>COc1cc(Cc2cnc(N)nc2N)cc(/C=C/C(=O)N2N=Cc3ccccc3C2c2cc3ccccc3n2C)c1OC  
 2263 Br1ccccc1.C=Cc1ccccc1>>C(=C/c1ccccc1)\c1ccccc1  
 2264 C=CC(=O)OCC.Cc1nc2cc(Br)ccc2s1>>CCOC(=O)/C=C/c1ccc2sc(C)nc2c1  
 2265 C=CC(=O)OC(C)(C)C.CC(C)(C)OC(=O)CCc1ccc(CN(C(=O)C2CCCCC2)c2ccccc(Br)c2)cc1>>CC(C)(C)OC(=O)/C=C/c1ccc(N(Cc2ccc(CCC(=O)OC(C)(C)C)cc2)C(=O)C2CCCCC2)c1  
 2266 C=CC(C)(C)O.COc1cc(C=O)c(Br)cc1OCc1ccccc1>>COc1cc(C=O)c(/C=C/C(C)(C)O)cc1OCc1ccccc1  
 2267 C=CC[Si](C)(C)C.COc1ccc(I)cc1>>COc1ccc(/C=C/C[Si](C)(C)C)cc1  
 2268 C=CC(=O)OC(C)(C)C.O=CNc1ccc(Cl)cc1I>>CC(C)(C)OC(=O)/C=C/c1cc(Cl)ccc1NC=O  
 2269 C=CC(=O)OC.O=c1oc2nc3ccc(Br)cc3c2n1-c1ccccc(C(F)(F)F)c1>>COC(=O)/C=C/c1ccc2ncc3oc(=O)n(-c4ccccc(C(F)(F)F)c4)c3c2c1  
 2270 C=C[Si](C)(C)C.Cc1ccc(I)cc1>>Cc1ccc(/C=C/[Si](C)(C)C)cc1  
 2271 C=CC(=O)OCC.Cc1nnn(Cc2cc(C(F)(F)F)ccc2Br)n1>>CCOC(=O)/C=C/c1ccc(C(F)(F)F)cc1Cn1nnc(C  
 2272 C=CCO.Cc1ccccc1I>>Cc1ccccc1/C=C/CO)c1  
 2273 C=CC(=O)Oc1ccccc1.O=Cc1ccccc1Br>>O=Cc1ccccc1/C=C/C(=O)Oc1ccccc1

2274 C=C[C@@H](C)[C@H]1CC[C@H]2[C@@H]3CC(=O)[C@H]4C[C@H](O)CC[C@]4(C)[C@H]3CC[C@]21C.O=[N+](O-)[C@H]1CC[C@H]2[C@@H]3CC(=O)[C@H]4C[C@H](O)CC[C@]4(C)[C@H]3CC[C@]21  
 2275 Br1ccc2c(c1)Sc1cccc1N2.C=Cc1ccc(N)cc1>>Nc1ccc(/C=C/c2ccc3c(c2)Sc2cccc2N3)cc1  
 2276 C=Cc1ccc(OC)cc1.COc1ccc(Br)c([N+](=O)[O-])c1>>COc1ccc(/C=C/c2ccc(OC)cc2[N+](=O)[O-])cc1  
 2277 Br1ccc2cccc2c1.C=Cc1c(F)c(F)c(F)c(F)c1F>>Fc1c(F)c(F)c(/C=C/c2ccc3cccc3c2)c(F)c1F  
 2278 C=CC(=O)OC.Cc1nc2ccc(Br)cn2c1Cc1cccc1OC(F)F>>COC(=O)/C=C/c1ccc2nc(C)c(Cc3cccc3OC(F)F)n2c1  
 2279 C=CC(=O)OC.Cc1ccc(OS(=O)(=O)C(F)(F)F)c(Br)n1>>COC(=O)/C=C/c1nc(C)ccc1OS(=O)(=O)C(F)(C=Cc1ence(C#N)c1Nc1ccc2[nH]ccc2c1C.COc1c(Br)cccc1CN1CCN(C)CC1>>COc1c(/C=C/c2ence(C#N)c2Nc2ccc3[nH]ccc3c2C)cccc1CN1CCN(C)CC1  
 2281 C=CC(=O)OC.COc1ncc(Br)cn1>>COC(=O)/C=C/c1ncc(OC)nc1  
 2282 Br1cccn1.C=Cn1c(-c2cccc2)c(-c2cccc2)oc1=O>>O=c1oc(-c2cccc2)c(-C=CC1CC(=O)N1.COc1cccc1I>>COc1cccc1/C=C/C1CC(=O)N1  
 2283 C=CC#N.CC1(C)O[C@H]2CCC=C(Br)[C@H]2O1>>CC1(C)O[C@H]2CCC=C(/C=C/C#N)[C@H]2  
 2284 C=CC(=O)OCC.COc1cc2ncc(Oc3ccc(I)cc3)c2cc1OC>>CCOC(=O)/C=C/c1ccc(Oc2ncc3cc(OC)c(O)C)cc23)cc1  
 2285 C=CCC(O)Cc1cccc1.COC(=O)c1cccc1I>>COC(=O)c1cccc1/C=C/CC(O)Cc1cccc1  
 2286 C=CC(=O)OCC(CC)CCCC.COc1ccc(Cl)cc1>>CCCC(CC)COC(=O)/C=C/c1ccc(OC)cc1  
 2287 Br1ccc(C=C(c2cccc2)c2cccc2)c2cccc2)cc1.C=Cc1ccc(-n2c3cccc3c3cccc32)cc1>>C=C/c1ccc(-C=CC(=O)OC.CC(C)(C)OC(=O)NC1CCc2cc(Br)ccc21>>COC(=O)/C=C/c1ccc2c(c1)CCC2NC(=O)O  
 2288 C(C)(C)C  
 2289 C=CC(=O)OC.CCCn1cnc2c(NCc3cccc(Br)c3)nc(N3CCOCC3)nc21>>CCCN1cnc2c(NCc3cccc(/C=C/C(=O)OC)c3)nc(N3CCOCC3)nc21  
 2290 C=CC(F)(F)C(F)(F)C(F)(F)C(F)(F)F.CC1=Nc2ccc(I)cc2C1(C)C>>CC1=Nc2ccc(/C=C/C(F)(F)C(F)(F)C(F)(F)C(F)(F)C(F)(F)C)cc2C1(C)C  
 2291 C=CC(=O)OC.O=[N+](O-)[C@H]1CC[C@H]2[C@@H]3CC(=O)[C@H]4C[C@H](O)CC[C@]4(C)[C@H]3CC[C@]21  
 2292 C=Cc1cccc1.COC(=O)c1ccc(Br)cc1NC(=O)c1cccc1>>COC(=O)c1ccc(/C=C/c2cccc2)cc1NC(=O)c1cccc1  
 2293 Br1cnc2cccc2c1.C=CC[C@H]1COC(C)(C)N1C(=O)OC(C)(C)C>>CC(C)(C)OC(=O)N1[C@@H](C/C=C/c2cnc3cccc3c2)COC1(C)C  
 2294 C=CC(N)=O.CC1(C)OC(=O)Nc2ccc(Br)cc21>>CC1(C)OC(=O)Nc2ccc(/C=C/C(N)=O)cc21  
 2295 C=CC(=O)CC.CC(=O)c1ccc(Br)cc1>>CCC(=O)/C=C/c1ccc(C(C)=O)cc1  
 2296 C=CS(=O)(=O)N1CCC2(CC1)OCCO2.Cc1cc(N2C(=O)NC(=O)C2(C)C)cc(C)c1Br>>Cc1cc(N2C(=O)NC(=O)C2(C)C)cc(C)c1/C=C/S(=O)(=O)N1CCC2(CC1)OCCO2  
 2297 C=CCN(C(=O)OC(C)(C)C)C(=O)OC(C)(C)C.COc1cc(Cl)cc(OC)c1OC>>COc1cc(/C=C/CN(C(=O)OC(C)(C)C)C(=O)OC(C)(C)C)cc(OC)c1OC  
 2298 C=CC(=O)OC.COc1ccc(Br)c(C)c1>>COC(=O)/C=C/c1ccc(OC)cc1C  
 2299 Br1cccc1.C=Cc1ccc(F)cc1>>Fc1ccc(/C=C/c2cccc2)cc1  
 2300 C=C/C=C/C(=O)N(CCCC)CCCC.COc1ccc(Br)cc1>>CCCCN(CCCC)C(=O)/C=C/C=C/c1ccc(OC)cc1  
 2301 C=CC(=O)OCC.CCc1cc(OCc2cccc2)cc1Br>>CCOC(=O)/C=C/c1ccc(OCc2cccc2)cc1CC  
 2302 C=Cc1ccc(C)nc1.CCN1C[C@]2(OC(=O)c3cc(I)ccc3NC(C)=O)CC[C@H](OC)[C@]34[C@@H]1[C@H](C[C@H]23)[C@@]1(O)C[C@H](OC)[C@H]2C[C@]4[C@]1(O)[C@H]2OC>>CCN1C[C@]2(OC(=O)c3cc(/C=C/c4ccc(C)nc4)ccc3NC(C)=O)CC[C@H](OC)[C@]34[C@@H]1[C@H](C[C@H]23)[C@@]1(O)C[C@H](OC)[C@H]2C[C@]4[C@]1(O)[C@H]2OC  
 2303 Br1ccc(I)cc1.C=Cc1ccc(C)cc1>>Cc1ccc(/C=C/c2ccc(Br)cc2)cc1  
 2304 C=CC(=O)OC.Clc1ccc(I)cc1>>COC(=O)/C=C/c1ccc(Cl)cc1  
 2305 C=CN1CCCC1=O.O=C1CCC(N2C(=O)c3cccc(I)c3C2=O)C(=O)N1>>O=C1CCC(N2C(=O)c3cccc(/C=C/N4CCCC4=O)c3C2=O)C(=O)N1  
 2306 C=CC(=O)N1CCCCC1.CCc1nc2cc(O)ccc2c(Oc2ccc(Br)cc2)c1-c1cccc1>>CCc1nc2cc(O)ccc2c(Oc2ccc(/C=C/C(=O)N3CCCCC3)cc2)c1-c1cccc1  
 2307 Br1ccc2oc(-c3cc[nH]n3)cc2c1.C=CC(=O)OCCCC>>CCCCOC(=O)/C=C/c1ccc2oc(-C=CC(=O)OCCCC.CCN(CC)c1ccc(Br)cc1>>CCCCOC(=O)/C=C/c1ccc(N(CC)CC)cc1  
 2308 C=CCOC(C)=O.COC(=O)c1ccc(Br)cc1>>COC(=O)c1ccc(/C=C/COC(C)=O)cc1  
 2309 C=CC(=O)OCC.CC(=O)c1ccc(I)cc1>>CCOC(=O)/C=C/c1ccc(C(C)=O)cc1  
 2310 C=CCOC(C)=O.Cc1ccc(I)cc1>>CC(=O)OC/C=C/c1ccc(C)cc1  
 2311 C=CC(=O)NC(C)(C)C.C[C@]12C[C@@]34C=C(Sc5cccc(I)c5)C(=O)[C@@](C)(CCC(=O)Nc5c(O)cc(C(C(=O)O)c5O)[C@@H]3[C@H](C[C@@H]1C4)O2>>CC(C)(C)NC(=O)/C=C/c1cccc(SC2=C[C@]34C[C@H]5C[C@H](O[C@@]5(C)C3)[C@H]4[C@](C)(CCC(=O)Nc3c(O)ccc(C(=O)O)c3O)C2=O)c1  
 2312 C=CS(=O)(=O)F.O=[N+](O-)[C@H]1CC[C@H]2[C@@H]3CC(=O)[C@H]4C[C@H](O)CC[C@]4(C)[C@H]3CC[C@]21  
 2313 C=Cc1cccc1.COC(=O)c1ccc(Br)cc1>>COC(=O)c1ccc(/C=C/COC(C)=O)cc1  
 2314 C=CS(=O)(=O)F.O=[N+](O-)[C@H]1CC[C@H]2[C@@H]3CC(=O)[C@H]4C[C@H](O)CC[C@]4(C)[C@H]3CC[C@]21

2315 C=CC(=O)OC.O=S(=O)(c1ccc(Cl)cc1)N1CCc2cc(Br)enc21>>COC(=O)/C=C/c1enc2c(c1)CCN2S(=O)(=O)c1ccc(Cl)cc1  
2316 C=CC(F)(F)F.O=[N+][O-]c1ccc(I)cc1>>O=[N+][O-]c1ccc(/C=C/C(F)(F)F)cc1  
2317 C=Cc1ccc2ccccc2c1.CCOC(=O)C(F)I>>CCOC(=O)C(F)/C=C/c1ccc2ccccc2c1  
2318 C=CC(=O)OC.Oc1ccc(-c2ccc(Br)cc2)cc1C12CC3CC(CC(C3)C1)C2>>COC(=O)/C=C/c1ccc(-c2ccc(O)c(C34CC5CC(CC(C5)C3)C4)c2)cc1  
2319 C=CC#N.O=c1cc(I)enn1Cc1ccccc1>>N#C/C=C/c1enn(Cc2ccccc2)c(=O)c1  
2320 C=CS(=O)(=O)N1CCC2(CC1)N=C(C1CCCCC1)NC2=O.CNc1cc(C)c(Br)c(C)c1>>CNc1cc(C)c(/C=C/S(=O)(=O)N2CCC3(CC2)N=C(C2CCCCC2)NC3=O)c(C)c1  
2321 C=Cc1ccc(-c2ccnc(N)n2)s1.Clc1cccc2sc(Br)nc12>>Nc1cccc(-c2ccc(/C=C/c3nc4c(Cl)cccc4s3)s2)n1  
2322 C=CC(=O)N(C)C.Ic1ccccc1C#Cc1ccccc1>>CN(C)C(=O)/C=C/c1ccccc1C#Cc1ccccc1  
2323 C=CC(C)=O.C=CCc1ccc2c1c(Br)cn2S(=O)(=O)c1ccc(C)cc1>>C=CCc1ccc2c1c(/C=C/C(C)=O)cn2S(=O)(=O)c1ccc(C)cc1  
2324 C=CC(=O)OCC.Cn1nnc2cc(Br)enc21>>CCOC(=O)/C=C/c1enc2c(c1)nnn2C  
2325 C=CCCCCCCCCCCCC.CC1(C)OC(=O)c2c(cccc2OS(=O)(=O)C(F)(F)F)O1>>CCCCCCCCCCCCCCCC/C=C/c1ccc2c1C(=O)OC(C)(C)O2  
2326 C=CC(=O)OC(C)(C)C.CC(=O)c1ccc(I)cc1>>CC(=O)c1ccc(/C=C/C(=O)OC(C)(C)C)cc1  
2327 C=CC(=O)OC.COC(=O)c1ccc(-c2cc(C(C)(C)C)cc3c2Oc2c(Br)cc(C(C)(C)C)cc2C3(C)C)cc1>>COC(=O)/C=C/c1cc(C(C)(C)C)cc2c1Oc1c(-c3ccc(C(=O)OC)cc3)cc(C(C)(C)C)cc1C2(C)C  
2328 C=CCCCCCC.Cc1ccc(Br)cc1>>CCCCCC/C=C/c1ccc(C)cc1  
2329 Br1ccccc1.C=CCOC(C)=O>>CC(=O)OC/C=C/c1ccccc1  
2330 Br1ccc2c(c1)c(CCc1ccccc1)cn2Cc1ccccc1.C=CC(=O)OC>>COC(=O)/C=C/c1ccc2c(c1)c(CCc1ccccc1)cn2Cc1ccccc1  
2331 C=CC(=O)OCC.COc1ncc(Cl)c(N)n1>>CCOC(=O)/C=C/c1ncc(OC)nc1N  
2332 C=CC(=O)OC.CC(C)c1ccc(I)cc1>>COC(=O)/C=C/c1ccc(C(C)C)cc1  
2333 C=CC(=O)N(C)OC.N#Cc1ccc(I)cc1>>CON(C)C(=O)/C=C/c1ccc(C#N)cc1  
2334 C=CS(=O)(=O)F.CC(=O)c1ccc(I)cc1>>CC(=O)c1ccc(/C=C/S(=O)(=O)F)cc1  
2335 C=CC(=O)OCC.O=Cc1ccccc1Br>>CCOC(=O)/C=C/c1ccccc1C=O  
2336 C=CC(C)=O.CCN1C[C@]2(OC(=O)c3cc(I)ccc3NC(C)=O)CC[C@H](OC)[C@@]34[C@@H]2C[C@]H)[C@]13[C@@]1(O)C[C@H](OC)[C@H]2C[C@@]4[C@]1(O)[C@H]2OC>>CCN1C[C@]2(OC(=O)c3cc(/C=C/C(C)=O)ccc3NC(C)=O)CC[C@H](OC)[C@@]34[C@@H]2C[C@]H)[C@]13[C@@]1(O)C[C@H](OC)[C@H]2C[C@@]4[C@]1(O)[C@H]2OC  
2337 C=CC(C)(C)O.COC(=O)N1c2ccccc2[C@@]2(CCNC2=O)[C@]2(CCNC(=O)OC(C)(C)C)c3c(/C=C/C(C)(C)O)ccc3N(C)[C@H]12  
2338 C=Cc1ccccc1.O=c1oc2cc(Oc3ccccc3)ccc2c(-c2ccccc2)c1Br>>O=c1oc2cc(Oc3ccccc3)ccc2c(-c2ccccc2)c1/C=C/c1ccccc1  
2339 C=Cc1cncnc1.CCNc1ccc(Br)cc1>>CCNc1ccc(/C=C/c2ccncc2)cc1  
2340 C=CC(C)=O.IC1=CO[C@H](COCc2ccccc2)[C@@H](OCc2ccccc2)[C@@H]1OCc1ccccc1>>CC(=O)/C=C/C1=CO[C@H](COCc2ccccc2)[C@@H](OCc2ccccc2)[C@@H]1OCc1ccccc1  
2341 C=Cc1ccccc1.CCCCCCc1ccsc1Br>>CCCCCCc1ccsc1/C=C/c1ccccc1  
2342 C=CC(=O)OCCCC.Nc1ccc(I)cc1>>CCCCOC(=O)/C=C/c1ccc(N)cc1  
2343 C=CC(=O)OCC.CC(=O)Nc1ccccc1I>>CCOC(=O)/C=C/c1ccccc1NC(C)=O  
2344 C=CC(=O)OC.COc1cc(I)c(CCNS(=O)(=O)c2ccc(C)cc2)cc1OC>>COC(=O)/C=C/c1cc(OC)c(OC)cc1CNS(=O)(=O)c1ccc(C)cc1  
2345 C=CC(=O)OCC.COc1ncc(Br)c(N)n1>>CCOC(=O)/C=C/c1ncc(OC)nc1N  
2346 C=CC(=O)OCCCC.Ic1ccc2ccccc12>>CCCCOC(=O)/C=C/c1ccc2ccccc12  
2347 C/C(=N\O)c1ccc(Br)cc1.C=CC(=O)OC>>COC(=O)/C=C/c1ccc(/C(C)=N/O)cc1  
2348 C=CC(=O)OCC.COc1ccc(-c2oc3cc(OC)ccc3c(=O)c2I)cc1>>CCOC(=O)/C=C/c1c(-c2ccc(OC)cc2)oc2cc(OC)ccc2c1=O  
2349 C=Cc1ccc2c(c1)c1ccc(/C=C/c3ccc(N(c4ccccc4)c4ccccc4)cc3)cc1n2CCCCCCCC.CCCCCCCcn1c2ccc(I)cc2c2cc(C=O)ccc21>>CCCCCCCCcn1c2ccc(C=O)cc2c2cc(/C=C/c3ccc4c(c3)c3ccc(/C=C/c5ccc(N(c6ccccc6)c6ccccc6)cc5)cc3n4CCCCCCCC)ccc21  
2350 Br1ccc(C(=C(c2ccccc2)c2ccccc2)c2ccccc2)cc1.C=Cc1ccc(-c2ccc3c4ccccc4n(CC)c3c2)cc1>>CCn1c2ccccc2c2ccc(-c3ccc(/C=C/c4ccc(C(=C(c5ccccc5)c5ccccc5)c5ccccc5)cc4)cc3)cc21  
2351 C=Cc1ccc(Cl)cc1.Cc1ccc(I)cc1>>Cc1ccc(/C=C/c2ccc(Cl)cc2)cc1  
2352 C=Cc1ccccc1Cl.O=C1CCC(c2ccc(Br)cc2)O1>>O=C1CCC(c2ccc(/C=C/c3ccccc1Cl)c3)cc2)O1  
2353 C=CC(=O)OCCCC.Oc1ccccc1I>>CCCCOC(=O)/C=C/c1ccccc1O  
2354 C=CSc1ccccc1.N#Cc1ccc(Br)cc1>>N#Cc1ccc(/C=C/Sc2ccccc2)cc1



2355 C=CP(=O)(OCC)OCC.Clc1ccc(Br)cc1>>CCOP(=O)/(C=C/c1ccc(Cl)cc1)OCC  
 2356 C=CC(=O)OCC.CC1=NC[C@H](c2ccccc2Br)O1>>CCOC(=O)/C=C/c1ccccc1[C@H]1CN=C(C)O1  
 2357 C=Cc1c(OC)cc(OC)cc1OC.Cc1ccc(S(=O)(=O)Oc2ccc3c(Br)ccnc23)cc1>>COc1cc(OC)c(/C=C/c2ccn  
 c3c(OS(=O)(=O)c4ccc(C)cc4)cccc23)c(OC)c1  
 2358 C=CC(=O)OC.CCn1cnc2c(NCc3cccc(Br)c3)nc(N3CCCC3)nc21>>CCn1cnc2c(NCc3cccc(/C=C/C(=O)  
 OC)c3)nc(N3CCCC3)nc21  
 2359 C=CC(=O)OC(C)(C)C.CC(=O)O[IH2](OC(C)=O)c1c(C)cc(C)cc1C>>Cc1cc(C)c(/C=C/C(=O)OC(C)(  
 C)C)c(C)c1  
 2360 C=Cc1ccccc1.CC(C)(C)OC(=O)N[C@H](COc1cnc(Cl)c(Br)c1)Cc1c[nH]c2ccccc12>>CC(C)(C)OC(=O)  
 N[C@H](COc1cnc(Cl)c(/C=C/c2ccccc2)c1)Cc1c[nH]c2ccccc12  
 2361 C=CC(=O)O.OC[C@H]1O[C@H](n2c(NCc3cccc(Br)c3)nc3ccccc32)[C@H](O)[C@@H]1O>>O=C  
 (O)/C=C/c1ccc(CNc2nc3ccccc3n2[C@@H]2O[C@H](CO)[C@@H](O)[C@H]2O)c1  
 2362 C=CC(=O)OCCCC.Cn1nc(Br)c2c(Cl)cccc21>>CCCCOC(=O)/C=C/c1nn(C)c2cccc(Cl)c12  
 2363 C=CC(=O)OC.CC(C)(C)OC(=O)c1ccc(I)cc1>>COC(=O)/C=C/c1ccc(C(=O)OC(C)(C)C)cc1  
 2364 C=CC(=O)OCC.O=C(c1ccccc1)C(F)(F)c1ccccc1I>>CCOC(=O)/C=C/c1ccccc1C(F)(F)C(=O)c1ccccc1  
 2365 C=CC(=O)OC.COC(=O)c1ccc(C)nc1Br>>COC(=O)/C=C/c1nc(C)ccc1C(=O)OC  
 2366 C=CC(=O)OCC.Oc1ccc(C=C2CCCCC2)c2ccc(Br)cc2)cc1F>>CCOC(=O)/C=C/c1ccc(C=C2CCCC  
 CC2)c2ccc(O)c(F)c2)cc1  
 2367 C=CC(C)(O)CCC=C(C)C.Oc1ccc(OCc2ccccc2)cc1Br>>CC(C)=CCCC(C)(O)/C=C/c1cc(OCc2ccccc2)  
 ccc1O  
 2368 C=CC(=O)OC.COc1ccc(Br)c([N+](=O)[O-])c1>>COC(=O)/C=C/c1ccc(OC)cc1[N+](=O)[O-]  
 2369 C=Cc1ccc(O)c(OC)c1.COC(=O)Cn1c(=O)c(Cl)nc2ccccc21>>COC(=O)Cn1c(=O)c(/C=C/c2ccc(O)c(O  
 C)c2)nc2ccccc21  
 2370 C=CC(=O)OC.C=CC[C@H](O)c1ccc(Br)c1>>C=CC[C@H](O)c1ccc(/C=C/C(=O)OC)c1  
 2371 C=CC(=O)OCc1ccccc1.C[Si](C)(C)CCOC(=O)c1ccc(I)c1>>C[Si](C)(C)CCOC(=O)c1ccc(/C=C/C(=O)  
 OCc2ccccc2)c1  
 2372 C=CC(=O)OC.O=[14CH]c1ccc(Br)cc1>>COC(=O)/C=C/c1ccc([14CH]=O)cc1  
 2373 Brc1ccccc1.C=CC#N>>N#C/C=C/c1ccccc1  
 2374 C=Cc1ccccc1.CCC(Br)CC>>CCC(/C=C/c1ccccc1)CC  
 2375 Brc1ccccc1.C=CC(=O)OCCCC>>CCCCOC(=O)/C=C/c1ccccc1  
 2376 \*CN(Cc1ccccc1)N=Nc1ccccc1I.C=CC(=O)OC(C)(C)C>>\*CN(Cc1ccccc1)N=Nc1ccccc1/C=C/C(=O)O  
 C(C)(C)C  
 2377 C=Cc1ccc2ccccc2c1.N#Cc1ccc(Br)cc1>>N#Cc1ccc(/C=C/c2ccc3ccccc3c2)cc1  
 2378 C=CCCC(=O)CCCC[Se]c1ccccc1.Ic1ccccc1>>O=C(CC/C=C/c1ccccc1)CCCC[Se]c1ccccc1  
 2379 C=CC(=O)OC.CCOC(=O)c1ccccc1I>>CCOC(=O)c1ccccc1/C=C/C(=O)OC  
 2380 C=CCOC(C)=O.Fc1ccc(I)cc1>>CC(=O)OC/C=C/c1ccc(F)cc1  
 2381 C=CC(=O)N1C(=O)OC[C@H]1Cc1ccccc1.CC(C)(C)OP(=O)(Cc1ccc(Br)cc1)OC(C)(C)C>>CC(C)(  
 C)OP(=O)(Cc1ccc(/C=C/C(=O)N2C(=O)OC[C@H]2Cc2ccccc2)cc1)OC(C)(C)C  
 2382 C=CC(C)=O.O=[N+](O-)]c1ccc(Br)cc1>>CC(=O)/C=C/c1ccc([N+](=O)[O-])cc1  
 2383 C=CC(=O)OC.Nc1nc(=O)n([C@H]2C[C@H](O)[C@@H](CO)O2)cc1I>>COC(=O)/C=C/c1cn([C@H  
 ]2C[C@H](O)[C@@H](CO)O2)c(=O)nc1N  
 2384 C=Cc1ccc(OC)cc1.O=C1Nc2cccc(I)c2/C1=C/c1ccc[nH]1>>COc1ccc(/C=C/c2cccc3c2/C=C/c2ccc[nH  
 ]2)C(=O)N3)cc1  
 2385 C=CC(=O)OCC.CC(=O)Nc1ccc(Br)cc1I>>CCOC(=O)/C=C/c1cc(Br)cc1NC(C)=O  
 2386 C=CC(=O)OC.CC1(C)CC(=C(c2ccc(Br)cc2)c2ccc3c(cnn3C3CCCCO3)c2)CC(C)(C)O1>>COC(=O)/C  
 =C/c1ccc(C=C2CC(C)(C)OC(C)(C)C2)c2ccc3c(cnn3C3CCCCO3)c2)cc1  
 2387 C=CCCN1C(=O)c2ccccc2C1=O.Ic1ccc(-c2ccccc2)cc1>>O=C1c2ccccc2C(=O)N1CC/C=C/c1ccc(-  
 c2ccccc2)cc1  
 2388 C=CC(N)=O.CC(=O)c1ccc(Br)cc1>>CC(=O)c1ccc(/C=C/C(N)=O)cc1  
 2389 C=CC(=O)OCCN(C)C.O=C(Nc1ccccc1)c1cc(=O)c2cc(Br)ccc2o1>>CN(C)CCOC(=O)/C=C/c1ccc2oc(  
 C(=O)Nc3ccccc3)cc(=O)c2c1  
 2390 C=CC(=O)N(C)C.CC(=O)c1ccc(Cl)cc1>>CC(=O)c1ccc(/C=C/C(=O)N(C)C)cc1  
 2391 C=CC(=O)OCCCC.Clc1ccc(Br)c1>>CCCCOC(=O)/C=C/c1ccc(Cl)c1  
 2392 C=CCOC(C)=O.Ic1ccc(-c2ccccc2)cc1>>CC(=O)OC/C=C/c1ccc(-c2ccccc2)cc1  
 2393 C=CC(=O)N1C(=O)OC[C@H]1Cc1ccccc1.C[Si](C)(C)CN(Cc1cc2c(cc1I)OCO2)C(CC1OCCO1)[Si  
 ](C)(C)C>>C[Si](C)(C)CN(Cc1cc2c(cc1/C=C/C(=O)N1C(=O)OC[C@H]1Cc1ccccc1)OCO2)C(CC1  
 OCCO1)[Si](C)(C)C  
 2394 C=CC(=O)O.Nc1ccc(Br)cn1>>Nc1ccc(/C=C/C(=O)O)cn1  
 2395 C=CC(=O)OC.O=C1C(=O)N(Cc2ccc(C(F)(F)F)cc2)c2cccc(Br)c21>>COC(=O)/C=C/c1ccc2c1C(=O)  
 C(=O)N2Cc1ccc(C(F)(F)F)cc1

C=Cc1cccc1.COc1ccc(/C=C/C(=O)c2ccc(I)cc2)cc1OC>>COc1ccc(/C=C/C(=O)c2ccc(/C=C/c3ccccc3  
 )cc2)cc1OC  
 C=C[C@ @H](C)[C@H]1CC[C@H]2[C@ @H]3CC(=O)[C@H]4C[C@H](O)CC[C@ @]4(C)[C@H]3CC  
 [C@ @]21C.Clc1ccc(I)cc1>>[C@H](/C=C/c1ccc(Cl)cc1)[C@H]1CC[C@H]2[C@ @H]3CC(=O)[C@  
 H]4C[C@H](O)CC[C@ @]4(C)[C@H]3CC[C@ @]21C  
 C=CC(N)=O.O=C(Nc1ccc(I)cc1)Nc1cc(C(F)(F)F)ccc1F>>NC(=O)/C=C/c1ccc(NC(=O)Nc2cc(C(F)(F)  
 F)ccc2F)cc1  
 Brclcccc1I.C=Cc1ccc(Cl)cc1>>Clc1ccc(/C=C/c2ccccc2Br)cc1  
 C=Cc1nenc2c1nen2C1CCCCO1.[Si](C)(C)Oc1cccc1I>>[Si](C)(C)Oc1cccc1/C=C/c1nenc2c1nen  
 2C1CCCCO1  
 C=Cc1ccc(N(c2ccccc2)c2ccccc2)cc1.FC(F)(F)C(F)(F)C(F)(F)C(F)(F)C(F)(F)C(F)(F)C(F)(F)Br>>FC(F)  
 )(F)C(F)(F)C(F)(F)C(F)(F)C(F)(F)C(F)(F)C(F)(F)C(F)(F)C(F)(F)/C=C/c1ccc(N(c2ccccc2)c2ccccc2)cc1  
 C=CC(=O)OCCCC.O=Cc1ccc(Br)c1>>CCCCOC(=O)/C=C/c1cccc(C=O)c1  
 C=CC(=O)OC.COc1c(CN(C(=O)C2CC2)c2ccc(Br)cc2)ccc2c1OC(C)(C)C=C2>>COC(=O)/C=C/c1ccc  
 (N(Cc2ccc3c(c2OC)OC(C)(C)C=C3)C(=O)C2CC2)cc1  
 C=CC(C)=O.COC(=O)c1c(OC)c(OC)cc2occ(I)c(=O)c12>>COC(=O)c1c(OC)c(OC)cc2occ(/C=C/C(C)  
 =O)c(=O)c12  
 Brclcncc1.C=CS(N)=(O)=O>>NS(=O)(=O)/C=C/c1cncc1  
 C=Cc1cccc([N+](=O)[O-])c1.Oc1cccc1I>>O=[N+](O-)c1cccc(/C=C/c2ccccc2O)c1  
 C=CCOc1cccc1CC.Ic1cccc1>>CCc1cccc1OC/C=C/c1cccc1  
 C=CC(N)=O.COc1cccc2c1CCC(C=O)=C2Br>>COc1cccc2c1CCC(C=O)=C2/C=C/C(N)=O  
 C=CC(=O)OC.COc1ccc(S(=O))(=O)N2CCc3cc(Br)cc([N+](=O)[O-  
 ])c32)cc1>>COC(=O)/C=C/c1cc2c(c([N+](=O)[O-])c1)N(S(=O))(=O)c1ccc(OC)cc1)CC2  
 C=CCNS(=O)(=O)c1cc(C(F)(F)F)cc(C(F)(F)F)c1.FC(F)(F)c1ccc(I)cc1>>O=S(=O)(NC/C=C/c1ccc(C(  
 F)(F)F)cc1)c1cc(C(F)(F)F)cc(C(F)(F)F)c1  
 C=CC(CCCCCCCC(=O)OC)O[Si](C)(C)C(C)(C)C.CCC1=C(Br)CCC1=O>>CCC1=C(/C=C/C(C)CCCC  
 CCCC(=O)OC)O[Si](C)(C)C(C)(C)C)CCC1=O  
 C=CC(=O)OC.CC(=O)Oc1c(C)cc(I)cc1CC=C(C)C>>COC(=O)/C=C/c1cc(C)c(OC(C)=O)c(CC=C(C)  
 C=CC(=O)OC.COc1ccc2c(c1)CCN(c1ccc(C(C)C)cc1F)C2(C)c1ccc(Br)cc1>>COC(=O)/C=C/c1ccc(C  
 2(C)c3ccc(OC)cc3CCN2c2ccc(C(C)C)cc2F)cc1  
 C=C[C@ @](C)/(C=C/c1ccc(O)cc1)CCC=C(C)C.COc1ccc(I)cc1>>COc1ccc(/C=C/[C@ @](C)/(C=C/c  
 2ccc(O)cc2)CCC=C(C)C)cc1  
 C=CC(F)(F)C(F)(F)C(F)(F)C(F)(F)C(F)(F)C(F)(F)C(F)(F)F.CC(=O)c1ccc(Br)cc1>>CC(=O)c1  
 ccc(/C=C/C(F)(F)C(F)(F)C(F)(F)C(F)(F)C(F)(F)C(F)(F)C(F)(F)C(F)(F)C(F)(F)F)cc1  
 C=CCOCc1cccc1.Ic1ccc2[nH]ccc2c1>>C(=C/c1ccc2[nH]ccc2c1)COCc1cccc1  
 C=CC(=O)OC(C)(C)C.CC(C)CN1CCc2c(ccc3[nH]ncc23)C1c1ccc(Br)cc1>>CC(C)CN1CCc2c(ccc3[n  
 H]ncc23)C1c1ccc(/C=C/C(=O)OC(C)(C)C)cc1  
 C=Cc1c(F)C(F)c(F)c(F)c1F.CC(C)CCCC(C)(C)Br>>CC(C)CCCC(C)(C)/C=C/c1c(F)c(F)c(F)c(F)c1F  
 C=Cc1ccc(S(=O))(=O)c2ccccc2F)cn1.N#Cc1cc(F)ccc1I>>N#Cc1cc(F)ccc1/C=C/c1ccc(S(=O))(=O)c2cc  
 ccc2F)cn1  
 C=CC(=O)O.CN(c1ccc(I)cc1)S(=O)(=O)c1ccc(Cl)cc1>>CN(c1ccc(/C=C/C(=O)O)cc1)S(=O)(=O)c1cc  
 c(Cl)cc1  
 C=Cc1cccc(Cl)c1.COC(=O)c1cccc1I>>COC(=O)c1cccc1/C=C/c1cccc(Cl)c1  
 C=CC(=O)OCC.CCCCCCCCCCCCCc1ccc(Br)c1>>CCCCCCCCCCCCC1cccc(/C=C/C(=O)OCC)c1  
 C=Cc1cccc(F)c1.N[C@ @H](Cc1c[nH]c2c(Br)cccc12)C(=O)O>>N[C@ @H](Cc1c[nH]c2c(/C=C/c3cc  
 cc(F)c3)cccc12)C(=O)O  
 C=CC(=O)N(C)C.N#Cc1cccc1Cl>>CN(C)C(=O)/C=C/c1cccc1C#N  
 C=CC(=O)OCC.CCC(=O)c1ccc(Br)c1>>CCOC(=O)/C=C/c1cccc(C(=O)CC)c1  
 C=CC(C)=O.O=Cc1ccc(Cl)cc1>>CC(=O)/C=C/c1ccc(C=O)cc1  
 C=Cc1ccc2c(c1)C1CCCC1N2c1ccc(C)cc1.N#Cc1cc([N+](=O)[O-  
 ])ccc1Br>>Cc1ccc(N2c3ccc(/C=C/c4ccc([N+](=O)[O-])cc4C#N)cc3C3CCCC32)cc1  
 C=CC(=O)OCC.O=c1[nH]c2ccccc2c(Br)c1O>>CCOC(=O)/C=C/c1c(O)c(=O)[nH]c2ccccc12  
 Brclccc(-c2ccccc2)cc1.C=CP(=O)(OCC)OCC>>CCOP(=O)/C=C/c1ccc(-c2ccccc2)cc1)OCC  
 C=Cc1cccc1.Clccc(C(=O)c(Br)c1)>>Cc1ccc(C(=O)c(/C=C/c2ccccc2)c1  
 C=CC(=O)O.CN(c1cccc(I)c1)S(=O)(=O)c1cccs1>>CN(c1cccc(/C=C/C(=O)O)c1)S(=O)(=O)c1cccs1  
 C=Cc1ccc(OC)cc1.Cn1c(/C=C/c2ccc(Cl)cc2)c(I)c(=O)c2ccccc21>>COc1ccc(/C=C/c2c(/C=C/c3ccc(Cl  
 )cc3)n(C)c3ccccc3c2=O)cc1  
 C=Cc1cccc1.O=C(Oc1cccc1)c1ccc(Br)o1>>O=C(Oc1cccc1)c1ccc(/C=C/c2ccccc2)o1  
 C=CC(=O)OCC.COc1ccc(-c2ccccc2Br)cc1>>CCOC(=O)/C=C/c1cccc1-clccc(OC)cc1  
 C=CC(=O)OC.CC(C)(C)OC(=O)ON1CCc2c([nH]c3c(Br)cccc23)C1c1cccc1>>COC(=O)/C=C/c1cccc  
 2c3c([nH]c12)C(c1cccc1)N(OC(=O)OC(C)(C)C)CC3

2436 C=Cc1cccc1.C[Si](C)(C)CBr>>C[Si](C)(C)C/C=C/c1cccc1  
 2437 BrC1=C(C2=CCN(Cc3cccc3)CC2)CCCC1.C=CC(=O)OC(C)(C)C>>CC(C)(C)OC(=O)/C=C/C1=C(C  
 2438 2=CCN(Cc3cccc3)CC2)CCCC1  
 2438 C=CC(=O)OC.FC(F)(F)c1ccc(I)cc1>>COC(=O)/C=C/c1ccc(C(F)(F)F)cc1  
 2439 C=CC=O.C[C@H](NC(=O)OC(C)(C)C)c1nc2cccc(Br)c2c(=O)n1-  
 2440 c1cccc1>>C[C@H](NC(=O)OC(C)(C)C)c1nc2cccc(/C=C/C=O)c2c(=O)n1-c1cccc1  
 2440 C=CCOC(C)=O.COc1ccc([I+])c2ccc(OC)cc2cc1>>COc1ccc(/C=C/COC(C)=O)cc1  
 2441 C=CC(=O)OC(C)(C)C.O=C1CCc2cc(Br)enc2N1>>CC(C)(C)OC(=O)/C=C/c1nc2c(c1)CCC(=O)N2  
 2442 C=CCNS(=O)(=O)c1ccc(C)cc1.Fc1ccc(I)cc1>>Cc1ccc(S(=O)(=O)NC/C=C/c2ccc(F)cc2)cc1  
 2443 C=CC(=O)NCCCCCNC(=O)C(F)(F)F.CC(=O)OC[C@@H]1C=C[C@H](n2cc(I)c(=O)[nH]c2=O)O1  
 2443 >>CC(=O)OC[C@@H]1C=C[C@H](n2cc(/C=C/C(=O)NCCCCCNC(=O)C(F)(F)F)c(=O)[nH]c2=O)  
 2444 C=CC(OC)OC.Ic1ccc(-c2cccc2)cc1>>COC(/C=C/c1ccc(-c2cccc2)cc1)OC  
 2445 C=CC(=O)OC.Oc1nc(-c2cccn2)nc2ccc(I)cc12>>COC(=O)/C=C/c1ccc2nc(-c3cccn3)nc(O)c2c1  
 2446 C=CC(=O)OC(C)(C)C.COc1ccc(-c2ccc(Br)cn2)cc1OC>>COc1ccc(-  
 2447 c2ccc(/C=C/C(=O)OC(C)(C)C)cn2)cc1OC  
 2447 C=CC(=O)O.FC(F)(F)c1ccc(I)c(Cl)c1>>O=C(O)/C=C/c1ccc(C(F)(F)F)cc1Cl  
 2448 C=CC(N)=O.COc1ncccc1I>>COc1ncccc1/C=C/C(N)=O  
 2449 C=Cc1ccc(OC)cc1.O=c1c2ccc(Br)cc2cn1CCCN1CCNCC1>>COc1ccc(/C=C/c2ccc3c(=O)n(CCCN4  
 2450 CCNCC4)nccc3c2)cc1  
 2450 C=CC(=O)OCCCC.CC(=O)Nc1cccc(F)c1I>>CCCCOC(=O)/C=C/c1c(F)cccc1NC(C)=O  
 2451 C=CC(=O)OC.CC(C)(C)OC(=O)N1CCC2(CC1)CC(=O)c1cc(Br)ccc1O2>>COC(=O)/C=C/c1ccc2c(c1  
 2452 )C(=O)CC1(CCN(C(=O)OC(C)(C)C)CC1)O2  
 2452 C=CC(=O)OC.Cc1cc(O)c(C23CC4CC(C(C4)C2)C3)cc1-c1ncc(Br)s1>>COC(=O)/C=C/c1ncc(-  
 2453 c2cc(C34CC5CC(C(C5)C3)C4)c(O)cc2C)s1  
 2453 C=CC(=O)OC.CC(=O)Oc1ccc(OC(C)=O)c(Br)c1>>COC(=O)/C=C/c1cc(OC(C)=O)ccc1OC(C)=O  
 2454 C=Cc1nc(Cl)nc2c1cn2COCC[Si](C)(C)C.CCN(c1ncccc1Br)S(C)(=O)=O>>CCN(c1ncccc1/C=C/c1nc  
 2455 (Cl)nc2c1cn2COCC[Si](C)(C)C)S(C)(=O)=O  
 2455 C=Cc1cccc1.Cc1cccc(Cl)c1>>Cc1cccc(/C=C/c2cccc2)c1  
 2456 C=CC#N.CCOC(=O)c1cccc(I)c1>>CCOC(=O)c1cccc(/C=C/C#N)c1  
 2457 C=CC(=O)OC(C)(C)C.COC(=O)Cc1ccc2oc(-c3ccc(Br)cc3)nc2c1>>COC(=O)Cc1ccc2oc(-  
 2458 c3ccc(/C=C/C(=O)OC(C)(C)C)cc3)nc2c1  
 2458 C=C[C@@H]1COC(C)(C)N1C(=O)OCc1cccc1.COc1ccc(I)cc1>>COc1ccc(/C=C/[C@@H]2COC(C)  
 2459 (C)N2C(=O)OCc2cccc2)cc1  
 2459 C=CC(=O)OC.CC(C)Cn1c(=O)n(C)c(=O)c2c(Br)c(Cc3cccc3C(F)(F)F)sc21>>COC(=O)/C=C/c1c(Cc  
 2460 2cccc2C(F)(F)F)sc2c1c(=O)n(C)c(=O)n2CC(C)C  
 2460 C=Cc1ccc(OC)cc1.CC(=S)NS(=O)(=O)c1ccc(Br)cc1>>COc1ccc(/C=C/c2ccc(S(=O)(=O)NC(C)=S)cc2  
 2461 C=Cc1nn[nH]1.CC(C)CN(CC(C)C)c1ccc(Br)cc1[N+](=O)[O-  
 2462 ]>>CC(C)CN(CC(C)C)c1ccc(/C=C/c2nn[nH]2)cc1[N+](=O)[O-]  
 2462 C=CC(=O)OCC.CS(=O)(=O)c1ccc(Br)cc1Cl>>CCOC(=O)/C=C/c1ccc(S(C)(=O)=O)c(Cl)c1  
 2463 C=CC(=O)OC1CCCCC1.CC(=O)c1ccc(I)cc1>>CC(=O)c1ccc(/C=C/C(=O)OC2CCCCC2)cc1  
 2464 C=CC#N.O=S(=O)(Nc1cccc1)c1ccc(Br)c1>>N#C/C=C/c1cccc(S(=O)(=O)Nc2cccc2)c1  
 2465 Br1ccc(I)cc1.C=Cc1cncnc1>>Br1ccc(/C=C/c2cncnc2)cc1  
 2466 C=CC(=O)N1N=Cc2cccc2C1C(CC)CC.COc1cc(Cc2cnc(N)nc2N)cc(I)c1OC>>CCC(CC)C1c2cccc2  
 2467 C=NN1C(=O)/C=C/c1cc(Cc2cnc(N)nc2N)cc(OC)c1OC  
 2467 C=CC(=O)OC(C)(C)C.COc1cccc(Br)c1>>COc1cccc(/C=C/C(=O)OC(C)(C)C)c1  
 2468 C=Cc1ccc(C)nc1.CN1C2CCC1c1c([nH]c3ccc(Br)cc13)C2>>Cc1ccc(/C=C/c2ccc3[nH]c4c(c3c2)C2CC  
 2469 C(C4)N2C)cn1  
 2469 C=Cc1cccc1.COCOc1cc2occc(=O)c2cc1Br>>COCOc1cc2occc(=O)c2cc1/C=C/c1cccc1  
 2470 C=CC(C)=O.COc1ccc(I)cc1>>COc1ccc(/C=C/C(C)=O)cc1  
 2471 C=CC(=O)OCC.CC(C)(CC1Cc2cccc2C1)NC[C@@H](O)COc1c(Br)cccc1C#N>>CCOC(=O)/C=C/c  
 2472 1cccc(C#N)c1OC[C@H](O)CNC(C)(C)CC1Cc2cccc2C1  
 2472 C=CC(C)=O.CC(=O)OC[C@H]1O[C@H](n2cnc3c(Cl)nc(I)nc32)[C@H](OC(C)=O)[C@@H]1OC(  
 2473 C)=O>>CC(=O)/C=C/c1nc(Cl)c2ncn([C@@H]3O[C@H](COC(C)=O)[C@@H](OC(C)=O)[C@H]3O  
 2474 C(C)=O)c2n1  
 2474 C=CC(=O)N1CC(=Cc2nccs2)C1.CC(C)(C)OC(=O)N1CC(=O)Nc2ncc(Br)cc2C1>>CC(C)(C)OC(=O)  
 2475 N1CC(=O)Nc2ncc(/C=C/C(=O)N3CC(=Cc4nccs4)C3)cc2C1  
 2475 C=CC(=O)OC(C)(C)C.O=C1Nc2ccc(Br)cc2C1=O>>CC(C)(C)OC(=O)/C=C/c1ccc2c(c1)C(=O)C(=O)  
 2476 C=Cc1cccc1.Ic1ncnc2ncn(Cc3cccc3)c12>>C(=C/c1ncnc2ncn(Cc3cccc3)c12)\c1cccc1  
 2477 C=CC(=O)OCCCCCCCCC.Ic1cccc1>>CCCCCCCCCOC(=O)/C=C/c1cccc1  
 2478 C=Cn1nnc(-c2cccc2C#N)n1.Ic1cccc1>>N#Cc1cccc1-c1nnn(/C=C/c2cccc2)n1  
 2478 C=CC(N)=O.O=C1C(O)=C(I)C(=O)c2cccc21>>NC(=O)/C=C/C1=C(O)C(=O)c2cccc2C1=O

2479 C=CC(=O)CCC.O=[N+](O)c1ccc(Br)cc1>>CCCC(=O)/C=C/c1ccc([N+](=O)[O-])cc1  
2480 C=CCC(C)N(C)C(=O)OC(C)(C)C.Nc1ccc(Br)cn1>>CC(C/C=C/c1ccc(N)nc1)N(C)C(=O)OC(C)(C)C  
2481 Br1cccn1.C=CCCC(C(=O)OCC)C(=O)OCC>>CCOC(=O)C(CCC/C=C/c1cccn1)C(=O)OCC  
2482 C=Cc1cccc(N)c1.CCCNc1nc(Nc2cccc(F)c2)nc1I>>CCNc1nc(Nc2cccc(F)c2)nc1/C=C/c1cccc(N)c1  
2483 C=Cc1ccc(/C=C/c2ccc(N(C)C)cc2)cc1.O=c1ccc2c(-c3ccc(I)cc3S(=O)(=O)O)c3ccc(O)cc3oc-  
2c1>>CN(C)c1ccc(/C=C/c2ccc(/C=C/c3ccc(-c4c5ccc(=O)cc-  
2484 Br1cnnc1.C=Cc1cccc(OC)c1>>COc1cccc(/C=C/c2cnnc2)c1  
2485 C=CC1=Cc2ccccc2CC1.CCOC(=O)C(F)Br>>CCOC(=O)C(F)/C=C/C1=Cc2ccccc2CC1  
2486 Br1cnc2ccccc2c1.C=CCO[Si](C)(C)C(C)(C)C>>CC(C)(C)[Si](C)(C)OC/C=C/c1cnc2ccccc2c1  
2487 C=CC(=O)N(C)OC.Nc1cccc(I)c1>>CON(C)C(=O)/C=C/c1cccc(N)c1  
2488 C=CC(=O)CCC.Cc1ccc(Br)cc1>>CCCC(=O)/C=C/c1ccc(C)cc1  
C=Cc1ccc2c(c1)Sc1ccccc1N2CCCCCCCCCCCCCCCCC.CCCCCCCCCCCCCCCCCc1c2ccc(I)cc2c2cc(  
2489 C=O)ccc21>>CCCCCCCCCCCCCCCCCN1c2ccccc2Sc2cc(/C=C/c3ccc4c(c3)c3cc(C=O)ccc3n4CCCC  
CCCCCCCCCCCCC)ccc21  
2490 C=CC(=O)OCC.Cc1nc(N)nc(N[C@H]2CC[C@@H](OCC(N)=O)CC2)c1Br>>CCOC(=O)/C=C/c1c(C  
)nc(N)nc1N[C@H]1CC[C@@H](OCC(N)=O)CC1  
2491 BrC1CCCCC1.C=Cc1ccc(C(=O)N(Cc2ccccc2)Cc2ccccc2)cc1>>O=C(c1ccc(/C=C/C2CCCCC2)cc1)N(  
Cc1ccccc1)Cc1ccccc1  
2492 C=Cc1cccc([N+](=O)[O-])c1.NC(=O)c1ccc(Br)c1>>NC(=O)c1ccc(/C=C/c2cccc([N+](=O)[O-  
2493 C=CC(=O)OC.O=c1oc(Br)cc2ccccc12>>COC(=O)/C=C/c1cc2ccccc2c(=O)o1  
2494 C=Cc1ccccc1.Cn1c(-c2ccc([N+](=O)[O-])cc2)c(I)c(=O)c2ccccc21>>Cn1c(-c2ccc([N+](=O)[O-  
)cc2)c(/C=C/c2ccccc2)c(=O)c2ccccc21  
2495 Br1cccn1.C=CC(C)(C)O>>CC(C)(O)/C=C/c1cccn1  
2496 C=CC(=O)O.Cc1ccc(I)cc1>>Cc1ccc(/C=C/C(=O)O)cc1  
2497 C=Cc1cc2cc(OC)c(OC)cc2oc1=O.O=Cc1ccc(Br)cc1>>COc1cc2cc(/C=C/c3ccc(C=O)cc3)c(=O)oc2cc1  
2498 C=Cc1ccc(N(CCCC)CCCC)cc1.O=Cc1ccc(Br)s1>>CCCN(CCCC)c1ccc(/C=C/c2ccc(C=O)s2)cc1  
2499 C=CC(=O)OC(C)(C)C.COC(=O)c1cccc1Br>>COC(=O)c1cccc1/C=C/C(=O)OC(C)(C)C  
2500 C=CC(=O)OCCCC.COc1ccc2ccc(F)c(Br)c2n1>>CCCCOC(=O)/C=C/c1c(F)ccc2ccc(OC)nc12  
2501 C=Cc1ccccc1.CCOC(=O)c1cc(=O)c2cc(Br)ccc2o1>>CCOC(=O)c1cc(=O)c2cc(/C=C/c3ccccc3)ccc2o1  
2502 C=CCCO.Clc1nc(Oc2ccccc2)c2cc(Br)cn2n1>>OCC/C=C/c1cc2c(Oc3ccccc3)nc(Cl)nn2c1  
C=C[C@H]1C[C@@H](O[Si](C)(C)C(C)(C)C)CC[C@]1(C)C1CC[C@@]2(C)C(CCC23OCCO3)[C  
2503 @@H]1OC(C)=O.CCOc1ccc(Br)cc1>>CCOc1ccc(/C=C/[C@H]2C[C@@H](O[Si](C)(C)C(C)(C)C)C  
C[C@]2(C)C2CC[C@@]3(C)C(CCC34OCCO4)[C@@H]2OC(C)=O)cc1  
2504 C=CC(=O)OCC.COc1cc(-c2cc3cc(Br)cc(OC)c3o2)cc(OC)c1OC>>CCOC(=O)/C=C/c1cc(OC)c2oc(-  
c3cc(OC)c(OC)c(OC)c3)cc2c1  
2505 C=CC(C)=O.FC1(F)C(I)=C1c1ccc(Br)cc1>>CC(=O)/C=C/C1=C(c2ccc(Br)cc2)C1(F)F  
C=CCCCCCN(C(=O)OC(C)(C)C)C(=O)OC(C)(C)C.CC(C)N(CC[C@H](c1ccccc1)c1cc(Br)ccc1OCc  
2506 1ccccc1)C(C)C>>CC(C)N(CC[C@H](c1ccccc1)c1cc(/C=C/CCCCCN(C(=O)OC(C)(C)C)C(=O)OC(  
C)(C)C)ccc1OCc1ccccc1)C(C)C  
2507 C=CC(=O)OCCCC.COc1ccc2ccc(Br)ccc2c1>>CCCCOC(=O)/C=C/c1ccc2cc(OC)ccc2c1  
2508 Br1ccc(/C=C/c2ccc(-n3c4ccccc4c4ccccc43)cc2)cc1.C=Cc1cnccc1>>C(=C/c1ccc(/C=C/c2ccc(-  
n3c4ccccc4c4ccccc43)cc2)cc1)c1cnccc1  
2509 C=Cc1ccccc1.Cc1ccc(Br)c2nnnn12>>Cc1ccc(/C=C/c2ccccc2)c2nnnn12  
2510 C=CC(=O)OCC.O=C(Nc1ccccc1I)C(F)(F)C(F)(F)F>>CCOC(=O)/C=C/c1ccccc1NC(=O)C(F)(  
F)C(F)(F)C(F)(F)F  
2511 C=Cc1ccccc1.Cc1ccccc1I>>Cc1ccccc1/C=C/c1ccccc1  
2512 C=C/C=C(C\CCCC)OCC.CC(=O)c1ccc(Br)cc1>>CCCC/C(=C\C=C/c1ccc(C(C)=O)cc1)OCC  
2513 C=CC(=O)OCC.CCNc1nc(N)nc(C)c1I>>CCNc1nc(N)nc(C)c1/C=C/C(=O)OCC  
2514 C=Cc1ccc(OC(C)=O)cc1.COc1cc(I)cc(OC)c1OC>>COc1cc(/C=C/c2ccc(OC(C)=O)cc2)cc(OC)c1OC  
2515 C=Cc1ccc(S(=O)(=O)c2ccccc2F)cn1.Fc1ccc(I)c(Cl)c1>>O=S(=O)(c1ccc(/C=C/c2ccc(F)cc2Cl)nc1)c1c  
ccccc1F  
2516 C=CC(=O)O.O=C(O)c1ccc(Cl)cc1>>O=C(O)/C=C/c1ccc(C(=O)O)cc1  
2517 C=CCCCCCC(=O)OC.CC1(C)C(=O)N(c2ccc(C#N)c(C(F)(F)F)c2)C(=S)N1c1ccc(Br)c(F)c1>>COC(=  
O)CCCCC/C=C/c1ccc(N2C(=S)N(c3ccc(C#N)c(C(F)(F)F)c3)C(=O)C2(C)C)cc1F  
2518 C=C(Br)CC.C=CC(=O)CC>>C=C/C=C/C(=O)CC)CC  
2519 C=CC(=O)OCC.Cc1ccc(C=O)c(Br)c1>>CCOC(=O)/C=C/c1cc(C)ccc1C=O  
2520 Br1ccc(-c2ccccc2)c2ccccc12.C=CC(=O)OCC>>CCOC(=O)/C=C/c1ccc(-c2ccccc2)c2ccccc12  
2521 C=CC(=O)OCCCC.COC(=O)c1cc(Br)cc(C(=O)OC)n1>>CCCCOC(=O)/C=C/c1cc(C(=O)OC)nc(C(=O)  
)OC)c1  
2522 C=CP(=O)(O)O.Fc1cc(Br)cc(F)c1C(F)(F)F>>O=P(O)(O)/C=C/c1cc(F)c(C(F)(F)F)c(F)c1

2523 C=CC#N.COc1ccc2c(c1)C(Br)=C(C=O)CC2>>COc1ccc2c(c1)C(/C=C/C#N)=C(C=O)CC2  
 2524 C=CC(=O)OCCCC.CC(=O)O[IH2](OC(C)=O)c1c(C)cc(C)cc1C>>CCCCOC(=O)/C=C/c1c(C)cc(C)cc  
 2525 C=CC(C)(C)O.O=c1ccc2ccc(OCc3ccccc3)c(I)c2o1>>CC(C)(O)/C=C/c1c(OCc2ccccc2)ccc2ccc(=O)oc  
 2526 C=CC(F)=C1CCN(Cc2ccccc2)CC1.Ic1cccc1>>FC(/C=C/c1cccc1)=C1CCN(Cc2ccccc2)CC1  
 2527 C=Cc1cccn1.O=Cc1ccc2c(I)nn(C3CCCCO3)c2c1>>O=Cc1ccc2c(/C=C/c3ccccc3)nn(C3CCCCO3)c2  
 2528 C=C[C@H](C)[C@H]1CC[C@H](C)c2c1cc(C)oc2=O.CC(C)=Cl>>CC(C)=C/C=C/[C@H](C)[C@H]1  
 CC[C@H](C)c2c1cc(C)oc2=O  
 2529 C=CC(=O)OCC.COc1cccc([IH2](OC(C)=O)OC(C)=O)c1>>CCOC(=O)/C=C/c1cccc(OC)c1  
 2530 Br1cccc2ccccc12.C=CC(=O)N(C)OC>>CON(C)C(=O)/C=C/c1cccc2ccccc12  
 2531 C=Cc1ccc(F)cc1.Fc1cc(Br)cc(OCc2ccccc2)c1>>Fc1ccc(/C=C/c2cc(F)cc(OCc3ccccc3)c2)cc1  
 2532 Br/C=C/[Te]c1cccc1)c1cccc1.C=Cc1cccc1>>C([Te]c1cccc1)=C(/C=C/c1cccc1)c1cccc1  
 2533 C=Cc1cnc(C)nc1OC[C@H]1C[C@@H]1c1ccc(OC)cn1.Cc1ccc(Br)cn1>>COc1ccc([C@H]2C[C@@H]  
 ]2COc2nc(C)nc2/C=C/c2ccc(C)nc2)nc1  
 2534 C=CC(=O)OC.O=Cc1cc(C(F)(F)F)ccc1Br>>COC(=O)/C=C/c1ccc(C(F)(F)F)cc1C=O  
 2535 C=CC(=O)Nc1cccc2cccn12.CCc1ccc(I)cc1>>CCc1ccc(/C=C/C(=O)Nc2ccccc3cccn23)cc1  
 2536 C=CC(C)=O.Cc1cccc(I)c1>>CC(=O)/C=C/c1cccc(C)c1  
 2537 C=Cc1cccc1C(F)(F)F.CN(C(=O)c1cccc1)c1ccc2c(c1)[nH]c(=NC(=O)c1ccc(Br)s1)n2CCC(N)=O>>  
 CN(C(=O)c1cccc1)c1ccc2c(c1)[nH]c(=NC(=O)c1ccc(/C=C/c3ccccc3C(F)(F)F)s1)n2CCC(N)=O  
 2538 C=CCN1C(=O)c2ccccc2C1=O.OCc1ccc(Br)cc1>>O=C1c2ccccc2C(=O)N1C/C=C/c1ccc(CO)cc1  
 2539 C=CC[C@H](C)N(C)C(=O)OC(C)(C)C.O=C(CCC(F)(F)F)N1CC[C@@H](Oc2cc(Br)cn2C1)C1>>C[C@  
 H](C/C=C/c1cnc(Cl)c(O)[C@@H]2CCN(C(=O)CCC(F)(F)F)C2)c1)N(C)C(=O)OC(C)(C)C  
 C=C[C@H]1O[C@H](OC)[C@H](OCc2ccccc2)[C@@H](OCc2ccccc2)[C@@H]1OCc1ccc2ccccc2c1  
 2540 .O=c1cc(-c2ccccc2)oc2ccc(I)cc12>>CO[C@H]1O[C@H]/C=C/c2ccc3oc(-  
 c4ccccc4)cc(=O)c3c2)[C@@H](OCc2ccc3ccccc3c2)[C@H](OCc2ccccc2)[C@H]1OCc1cccc1  
 2541 C=CC(C)=O.Cc1ccc(I)c(Br)c1>>CC(=O)/C=C/c1ccc(C)cc1Br  
 2542 C=CC(=O)OCc1cn(S(=O)(=O)c2ccccc2[N+](=O)[O-])c2ccc([N+](=O)[O-]  
 ])cc12.CC(=O)OCCc1ccc(I)cc1>>CC(=O)OCCc1ccc(/C=C/C(=O)OCc2cn(S(=O)(=O)c3ccccc3[N+]  
 ](=O)[O-])c3ccc([N+](=O)[O-])cc23)cc1  
 2543 C=CC(=O)OCC.O=Cc1ccc2ccccc2c1Br>>CCOC(=O)/C=C/c1c(C=O)ccc2ccccc12  
 2544 C=Cc1ccc(/C=C/c2ccc(N(c3ccccc3)c3ccccc3)cc2)cc1.O=Cc1ccc(Br)cc1>>O=Cc1ccc(/C=C/c2ccc(/C=  
 C/c3ccc(N(c4ccccc4)c4ccccc4)cc3)cc2)cc1  
 2545 C=Cc1ccc(F)cc1.Cc1nn(-c2ccc(C#N)c(Cl)c2)c(C)c1I>>Cc1nn(-  
 c2ccc(C#N)c(Cl)c2)c(C)c1/C=C/c1ccc(F)cc1  
 2546 C=CC(=O)OCC.COc1ccc(-c2ccccc2)c(I)c1>>CCOC(=O)/C=C/c1cc(OC)ccc1-c1cccc1  
 2547 C=C(Br)CO[Si](C)(C)C(C)(C)C.C=CC(=O)OC>>C=C(/C=C/C(=O)OC)CO[Si](C)(C)C(C)(C)C  
 2548 Br1ccc(-c2nc3ccccc3s2)cc1.C=Cc1ccc2c(c1)Sc1cccc1N2CC>>CCN1c2ccccc2Sc2cc(/C=C/c3ccc(-  
 c4nc5ccccc5s4)cc3)ccc21  
 2549 C=CC(=O)O.Ic1cccc1>>O=C(O)/C=C/c1cccc1  
 2550 C=CC(=O)OC.CCCCCC(=O)c1nc(-c2ccccc2)n(-c2ccccc2)c1Br>>CCCCC(=O)c1nc(-c2ccccc2)n(-  
 c2ccccc2)c1/C=C/C(=O)OC  
 2551 C=CC(=O)OCC.COc1ccc(Br)c(C(=O)OC(C)(C)C)c1>>CCOC(=O)/C=C/c1ccc(OC)cc1C(=O)OC(C)(C)  
 2552 C=CC(=O)OC.CC(=O)Oc1ccc(Br)cc1OC(C)=O>>COC(=O)/C=C/c1ccc(OC(C)=O)c(OC(C)=O)c1  
 C=CCCCC(=O)N(C)CC(O)C(O)C(O)C(O)CO.CC(C)(C)[Si](C)(C)OC(CCC1C(=O)N(c2ccc(F)cc2)C1  
 2553 c1ccc(Br)cc1)c1ccc(F)cc1>>CN(CC(O)C(O)C(O)C(O)CO)C(=O)CCC/C=C/c1ccc(C2C(CCC(O)[Si](C)  
 (C)C(C)(C)C)c3ccc(F)cc3)C(=O)N2c2ccc(F)cc2)cc1  
 2554 C=CC(=O)Nc1cccc(OC)c1.COc1ccc2c(=O)c(I)coc2c1>>COc1cccc(NC(=O)/C=C/c2coc3cc(OC)ccc3c  
 2=O)c1  
 2555 C=CC(=O)OC.Ic1cccc1>>COC(=O)/C=C/c1cccc1  
 2556 C=CC[C@@H](C)O.CC(C)Oc1cncc(Br)c1>>CC(C)Oc1cncc(/C=C/C[C@@H](C)O)c1  
 C=CC[C@H]1C[C@H]([C@H](O[Si](C(C)C)(C(C)C)C(C)C)c2ccc(OC)c(OC)c2)CO[C@@H]1c1ccc(  
 2557 OC)c(OC)c1.COc1ccc(Br)cc1OC>>COc1ccc(/C=C/C[C@H]2C[C@H]([C@H](O[Si](C(C)C)(C(C)C)  
 C(C)C)c3ccc(OC)c(OC)c3)CO[C@@H]2c2ccc(OC)c(OC)c2)cc1OC  
 2558 Br1ccc2[nH]cc(CCc3ccccc3)c2c1.C=CC(=O)OCC>>CCOC(=O)/C=C/c1ccc2[nH]cc(CCc3ccccc3)c2c  
 2559 C=CC(=O)OC(C)(C)C.CC(C)=CCc1cc(I)cc2c1OC(C)(C)C=C2>>CC(C)=CCc1cc(/C=C/C(=O)OC(C)(  
 C)C)cc2c1OC(C)(C)C=C2  
 2560 C=Cc1ccc(Cl)cc1.CCn1c(Br)cc2c1c(=O)n(C)c(=O)n2C>>CCn1c(/C=C/c2ccc(Cl)cc2)cc2c1c(=O)n(C)c  
 (=O)n2C  
 2561 C=CC(=O)OCC(CC)CCCC.COc1ccc(Br)cc1>>CCCC(CC)COC(=O)/C=C/c1ccc(OC)cc1  
 2562 C=CS(=O)(=O)F.Fc1ccc(I)cc1>>O=S(=O)(F)/C=C/c1ccc(F)cc1

C=CCN1C(=O)C(C)(C)N(C(=O)OC(C)(C)C)[C@@]1(C)c1cc(F)cc(F)c1.C[Si](C)(C)CCOCN1C(=O)  
2563 )C2(Cc3cnc(Cl)cc3C2)c2ccnc21>>CC(C)(C)OC(=O)N1C[C@@](C)(c2cc(F)cc(F)c2)N(C/C=C/c2cc3  
c(en2)CC2(C3)C(=O)N(COCC[Si](C)(C)C)c3ncccc32)C(=O)C1(C)C  
2564 C=CC(=O)OCC.CCOC(=O)c1cc(Cl)cc(Br)c1>>CCOC(=O)/C=C/c1cc(Cl)cc(C(=O)OCC)c1  
2565 C=Cc1cccc1.N#Cc1ccc(N)c(Br)c1>>N#Cc1ccc(N)c(/C=C/c2cccc2)c1  
2566 C=Cc1ccc(NC)cc1.OCCOc1ncc(I)cc1Br>>CNc1ccc(/C=C/c2cnc(OCCO)c(Br)c2)cc1  
2567 C=Cc1ccnc1.O=C(NCc1cn(OCc2cccc2)nc1I)OCc1cccc1>>O=C(NCc1cn(OCc2cccc2)nc1/C=C/c1  
ccnc1)OCc1cccc1  
C=Cc1ccc(OC)c(OC)c1.CC(=O)OC[C@H]1O[C@H](Oc2ccc(I)cc2)[C@H](OC(C)=O)[C@@H](O  
2568 C(C)=O)[C@H]1OC(C)=O>>COc1ccc(/C=C/c2ccc(O[C@H]3O[C@H](COC(C)=O)[C@H](O  
C(C)=O)[C@H](OC(C)=O)[C@H]3OC(C)=O)cc2)cc1OC  
Br1ccc2ncccc2c1.C=CC[C@H]1CCCN(C)C1[C@H](OC(C)=O)[C@H](C)C1[C@H](CC(OC)OC)[C@  
H](O[C@H]2O[C@H](C)[C@H](O[C@H]3C[C@H](C)(O)[C@H](OC(=O)CC)[C@H](C)O3)  
2569 [C@H](N(C)C)[C@H]2OC(C)=O)[C@H](OC)[C@H](OC(=O)CC)CC(=O)O1>>CCC(=O)O[C@H]  
1[C@H](C)O[C@H](O[C@H]2[C@H](N(C)C)[C@H](OC(C)=O)[C@H](O[C@H]3[C@H](C)O3)  
OC)[C@H](OC(=O)CC)CC(=O)O[C@H](C/C=C/c4ccc5ncccc5c4)CCCN(C)C1[C@H](OC(C)=O)[C  
@H](C)C1[C@@H]3C(C)(C)OC(N)C1[C@@H]2C(C)C1[C@@H]1(C)O  
2570 C=CC(=O)OC(C)(C)C.COC(=O)c1ccc(Br)c(F)c1>>COC(=O)c1ccc(/C=C/C(=O)OC(C)(C)C)c(F)c1  
2571 C=CC(=O)OC(C)(C)C.COc1ccc(Br)cn1>>COc1ccc(/C=C/C(=O)OC(C)(C)C)cn1  
2572 C=CC(=O)OC.CC(C)n1nc2c(NCc3cccc(Br)c3)nc(N3CCOCC3)nc21>>COC(=O)/C=C/c1cccc(CNc2n  
c(N3CCOCC3)nc3c2ncn3C(C)C)c1  
2573 C=CC(=O)OCC.Fc1cccc(Oc2cccc(Br)c2)c1>>CCOC(=O)/C=C/c1cccc(Oc2cccc(F)c2)c1  
2574 C=CC=O.Fc1nccc(Br)c1>>O=C/C=C/c1nccc(F)c1  
2575 C=CC(=O)OCC.N#Cc1ccc(Br)cc1>>CCOC(=O)/C=C/c1ccc(C#N)cc1  
2576 C=CC(=O)Nc1cccc1C.O=c1c(I)coc2cc(O)ccc12>>Cc1cccc1NC(=O)/C=C/c1coc2cc(O)ccc2c1=O  
2577 C=CCOC.COC(=O)/C=C/c1cccc(N(Cc2ccc(Br)cc2)C(=O)C2CCCCC2)c1>>COC/C=C/c1ccc(CN(C(=O)  
C2CCCCC2)c2cccc(/C=C/C(=O)OC)c2)cc1  
2578 C=CC(=O)OC.Cc1ccc(I)cc1>>COC(=O)/C=C/c1ccc(C)cc1  
C=CC(C)=O.COc1cc(Br)c2c3c1O[C@H]1[C@@H](O[Si](C)(C)C(C)(C)C)C=C[C@@H]4[C@@H](  
2579 C2)N(C)CC[C@@]341>>COc1cc(/C=C/C(C)=O)c2c3c1O[C@H]1[C@@H](O[Si](C)(C)C(C)(C)C)C  
=C[C@@H]4[C@@H](C2)N(C)CC[C@@]341  
C=CC(=O)N(C)Cc1cc2cccc2n1C.O=C1Cc2cc(Br)cn2N1>>CN(Cc1cc2cccc2n1C)C(=O)/C=C/c1cn  
2580 c2c(c1)CC(=O)N2  
Br1ccc2ccc3cccc4ccc1c2c34.C=Cc1nc2c(N(C(=O)c3cccc3)C(=O)c3cccc3)nnc2n1CC(=O)OCC>>  
2581 CCOC(=O)Cn1c(/C=C/c2ccc3ccc4cccc5ccc2c3c45)nc2c(N(C(=O)c3cccc3)C(=O)c3cccc3)ncnc21  
2582 C=CC(C)OC(=O)NC.COc1cccc(I)c1>>CNC(=O)OC(C)/C=C/c1cccc(OC)c1  
2583 C=CC(=O)OC.CC1(C)CCC(C)(C)c2cc(C(=O)c3ccc(I)cc3)ccc21>>COC(=O)/C=C/c1ccc(C(=O)c2ccc3  
c(c2)C(C)(C)CCC3(C)C)cc1  
2584 C=Cc1cc(OCCCCCCCCCCCCC)c(OCCCCCCCCCCCCC)c(OCCCCCCCCCCCCC)c1.Oc1ccc(I)cc1>>CC  
CCCCCCCCCOc1cc(/C=C/c2ccc(O)cc2)cc(OCCCCCCCCCCCCC)c1OCCCCCCCCCCCCC  
2585 C=CC(=O)Nc1cccc1NC(=O)OC(C)(C)C.CCOC(=O)[C@H]1CN(Cc2cccc2)C[C@@H]1c1ccc(Br)cc  
1>>CCOC(=O)[C@H]1CN(Cc2cccc2)C[C@@H]1c1ccc(/C=C/C(=O)Nc2cccc2NC(=O)OC(C)(C)C)  
2586 C=CC(=O)OC.CC(C)(C)c1[nH]c2cccc2c1C1CCCN(Cc2ccc(Br)cc2)C1>>COC(=O)/C=C/c1ccc(CN2  
CCCC(c3c(C(C)(C)C)[nH]c4cccc34)C2)cc1  
2587 C=CC(=O)O.Nc1cccc1Br>>Nc1cccc1/C=C/C(=O)O  
2588 C=Cc1cccc1C.CCOC(=O)C(C)Br>>CCOC(=O)C(C)/C=C/c1cccc1C  
2589 C=Cc1ccc2ccc(Cl)cc2n1.COC(=O)c1cccc1CCC(SCC1(CC(=O)O)CC1)c1cccc(Br)c1>>COC(=O)c1cc  
ccc1CCC(SCC1(CC(=O)O)CC1)c1cccc(/C=C/c2ccc3ccc(Cl)cc3n2)c1  
2590 C=CC(=O)OCC.Cc1nnc(Nc2ccc3c(cnn3Cc3cccc(F)c3)c2)c1I>>CCOC(=O)/C=C/c1c(C)ncnc1Nc1ccc  
2c(cnn2Cc2cccc(F)c2)c1  
2591 C=CC(=O)OC.C=CC[C@@H](O)c1ccc(Br)cc1>>C=CC[C@@H](O)c1ccc(/C=C/C(=O)OC)cc1  
2592 C=Cc1ccc(OC)cc1.FC(F)(F)C(F)(F)C(F)(F)C(F)(F)C(F)(F)C(F)(F)C(F)(F)C(F)(F)C(F)(F)C(F)(F)Br>>COc1cc  
c(/C=C/C(F)(F)C(F)(F)C(F)(F)C(F)(F)C(F)(F)C(F)(F)C(F)(F)C(F)(F)C(F)(F)C(F)(F)C(F)(F)cc1  
2593 C=CC(=O)OC(C)(C)C.COc1cccc(S(=O)(=O)N2CCc3cc(Br)cn32)c1>>COc1cccc(S(=O)(=O)N2CCc3  
cc(/C=C/C(=O)OC(C)(C)C)cn32)c1  
2594 C=CC#N.N#Cc1c(-c2cccc(Br)c2)cc(-c2cccc2)nc1N>>N#C/C=C/c1cccc(-c2cc(-  
2595 C=CC(N)=O.CCc1nc2cc(O)ccc2c(Oc2ccc(Br)cc2)c1-  
c1cccc1>>CCc1nc2cc(O)ccc2c(Oc2ccc(/C=C/C(N)=O)cc2)c1-c1cccc1  
2596 C=CC#N.Nc1ccc(Br)c2c1COC2>>N#C/C=C/c1ccc(N)c2c1COC2  
C=C[C@@H](C)[C@@H]1C/C=C/C(=O)N[C@H](Cc2ccc(OC)cc2)C(=O)NCCC(=O)O[C@@H](CC(  
2597 C)C)C(=O)O1.Ic1cccc1>>COc1ccc(C[C@H]2NC(=O)/C=C/C[C@@H]([C@H](C)/C=C/c3cccc3)O  
C(=O)[C@H](CC(C)C)OC(=O)CCNC2=O)cc1

2598 C=Cc1ccc(OC)cc1.N#CCc1ccc(Br)cc1>>COc1ccc(/C=C/c2ccc(CC#N)cc2)cc1  
 2599 C=CC(OCC)OCC.Cc1ccc(I)cc1>>CCOC(/C=C/c1ccc(C)cc1)OCC  
 2600 C=Cc1ccc(F)cc1.N[C@@H](Cc1c[nH]c2c(Br)cccc12)C(=O)O>>N[C@@H](Cc1c[nH]c2c(/C=C/c3ccc(F)cc3)cccc12)C(=O)O  
 2601 C=CC(O)c1cc(OC)c(OC)c(OC)c1Br.Ic1cccc1>>COc1cc(C(O)/C=C/c2cccc2)c(Br)c(OC)c1OC  
 2602 C=Cn1cnc2c(NC)ncnc21.Cc1cccc(C)c1I>>Cn1cnc2c1ncn2/C=C/c1c(C)cccc1C  
 2603 C=Cc1cccc1.CCCCCCN1c2ccc(I)cc2Sc2cc(C=O)ccc21>>CCCCCN1c2ccc(C=O)cc2Sc2cc(/C=C/c3cccc3)ccc21  
 2604 C=CC(=O)Nc1cccc2ccnc12.COc1ccc(I)cc1>>COc1ccc(/C=C/C(=O)Nc2cccc3ccnc23)cc1  
 2605 C=CC(=O)OC(C)(C)C.Clc1ccc(Br)cc1>>CC(C)(C)OC(=O)/C=C/c1ccc(Cl)cc1  
 2606 C=CC(=O)N(C)C.O=Cc1cccc1Br>>CN(C)C(=O)/C=C/c1cccc1C=O  
 2607 C=CCOc1cccc1.Ic1ccsc1>>C(=C/c1ccsc1)\COc1cccc1  
 2608 C=CC(=O)OCCCC.Cn1nc(Cl)c2cccc21>>CCCCOC(=O)/C=C/c1nn(C)c2cccc12  
 2609 Br1ccc(C(=C(c2cccc2)c2cccc2)c2cccc2)cc1.C=Cc1cncnc1>>C(=C/c1ccc(C(=C(c2cccc2)c2cccc2)c2cccc2)cc1)\c1cncnc1  
 2610 C=CC(=O)OC(C)(C)C.COc1ccc(NCc2ccc(Br)cc2)cc1OC>>COc1ccc(NCc2ccc(/C=C/C(=O)OC(C)(C)C)cc2)cc1OC  
 2611 C=CC(C)(C)[C@]1(OC)O[C@H](C[C@@H](OCc2ccc(OC)cc2)[C@@H](C)O[Si](C)(C)C(C)(C)C)/C(=C\C(=O)OC)[C@@H]1OC(C)=O.CC[Si](CC)(CC)O[C@@H](CCO)Cc1cccc(Cc2ccc(Br)c2)c1>>CC[Si](CC)(CC)O[C@@H](CCO)Cc1cccc(Cc2ccc(/C=C/C(C)(C)[C@]3(OC)O[C@H](C[C@@H](OCc4ccc(OC)cc4)[C@@H](C)O[Si](C)(C)C(C)(C)C)/C(=C\C(=O)OC)[C@@H]3OC(C)=O)c2)c1  
 2612 Br1ccc(NCc2cccc2)nc1.C=CC(=O)OC(C)(C)C>>CC(C)(C)OC(=O)/C=C/c1ccc(NCc2cccc2)nc1  
 2613 C=CC(C)(C)C.O=c1oc2cccc2cc1Br>>CC(C)(C)/C=C/c1cc2cccc2oc1=O  
 2614 C=CC(=O)OCCCC.CCOC(=O)c1ccc(Br)cc1>>CCCCOC(=O)/C=C/c1ccc(C(=O)OCC)cc1  
 2615 C=Cc1ccc(CO)cn1.Cc1c(Nc2c(I)cncc2C#N)ccc2[nH]ccc12>>Cc1c(Nc2c(C#N)cncc2/C=C/c2ccc(CO)cn2)ccc2[nH]ccc12  
 2616 Br1ccc(C(c2cccc2)C23CC4CC(CC(C4)C2)C3)cc1.C=CC(=O)OCC>>CCOC(=O)/C=C/c1ccc(C(c2cccc2)C23CC4CC(CC(C4)C2)C3)cc1  
 2617 C=C[C@H](CO[Si](c1cccc1)(c1cccc1)C(C)(C)C)NS(C)(=O)=O.Oc1ccc(I)cc1>>CC(C)(C)[Si](O[C][C@H](/C=C/c1ccc(O)cc1)NS(C)(=O)=O)(c1cccc1)c1cccc1  
 2618 C=Cc1ccc2c(ccc(=O)n2COCC[Si](C)(C)C)c1.FC(F)Oc1ccc(Nc2ncc(Br)cn2)cc1Cl>>C[Si](C)(C)CCOCn1c(=O)ccc2ccc(/C=C/c3ncc(Nc4ccc(OC(F)F)c(Cl)c4)nc3)ccc21  
 2619 C=CCOc1cccc1.Cc1cccc1I>>Cc1cccc1/C=C/COc1cccc1  
 2620 C=Cc1cccc(Cl)c1.O=S(=O)(c1cccc1)C(F)(F)Br>>O=S(=O)(c1cccc1)C(F)(F)/C=C/c1cccc(Cl)c1  
 2621 Br1ccc(-c2cnc3cccc3n2)cc1.C=CCn1c(-c2cccc2)nc2cccc2c1=O>>O=c1c2cccc2nc(-c2cccc2)n1C/C=C/c1ccc(-c2cnc3cccc3n2)cc1  
 2622 C=CC(=O)OCCCC.Clc1ccc(Br)cc1>>CCCCOC(=O)/C=C/c1ccc(Cl)cc1  
 2623 C=CC(N)=O.CN1CCOC(c2cccc2)c2cc(Br)ccc2C1>>CN1CCOC(c2cccc2)c2cc(/C=C/C(N)=O)ccc2C  
 2624 C=Cc1ccc(OC)cc1.CCCCCCN(C(=O)CCl)>>CCCCCN(C(=O)C/C=C/c1ccc(OC)cc1  
 2625 C=Cc1ccc(OC)cc1OC.CCOC(=O)C(C)(C)Br>>CCOC(=O)C(C)(C)/C=C/c1ccc(OC)cc1OC  
 2626 C=CC(=O)OC.OCc1ccc2cc(Br)ccc2c1>>COC(=O)/C=C/c1ccc2cc(CO)ccc2c1  
 2627 C=CCOc1cccc1.CC(C)c1ccc(I)cc1>>CC(C)c1ccc(/C=C/COc2cccc2)cc1  
 2628 C=Cc1cncnc1.CC(C)=CBr>>CC(C)=C/C=C/c1cncnc1  
 2629 C=C[Si](C)(C)C.Cc1cc(C)c(I)c(C)c1>>Cc1cc(C)c(/C=C/[Si](C)(C)C)c(C)c1  
 2630 C=C[C@H]1O[C@@H]2OC3(CCCCC3)O[C@@H]2[C@@H]1C.Ic1cccc1>>C[C@@H]1[C@@H](/C=C/c2cccc2)O[C@@H]2OC3(CCCCC3)O[C@@H]21  
 2631 C=CC(=O)OCC.CC(C)(C)OC(=O)Nc1csc(Br)c1NC(=O)OC(C)(C)C>>CCOC(=O)/C=C/c1sc(NC(=O)OC(C)(C)C)c1NC(=O)OC(C)(C)C  
 2632 C=CC(=O)N1[C@H]2C[C@H]3CC[C@]2(CS1(=O)=O)C3(C)C.Clc1ccc(I)cn1>>CC1(C)[C@@H]2CC[C@]13CS(=O)(=O)N(C(=O)/C=C/c1ccc(Cl)nc1)[C@@H]3C2  
 2633 C=CS(=O)(=O)F.Clc1ccc(I)cc1>>O=S(=O)(F)/C=C/c1ccc(Cl)cc1  
 2634 C=C[Si](C)(C)c1cccc1.Ic1cccc1>>C[Si](C)(C)/C=C/c1cccc1)c1cccc1  
 2635 C=CC(=O)OCC.C[Si](C)(C)c1cocc1I>>CCOC(=O)/C=C/c1cocc1[Si](C)(C)C  
 2636 C=CC(OC(C)=O)C(=O)OCC.c1ccc([I+])c2cccc2cc1>>CCOC(=O)C(/C=C/c1cccc1)OC(C)=O  
 2637 C=CC(=O)OC(C)(C)C.O=C(c1cccc1)c1ccc(Cl)cc1>>CC(C)(C)OC(=O)/C=C/c1ccc(C(=O)c2cccc2)c  
 2638 C=CC(=O)N(C)Cc1oc2cccc2c1C.CC(C)(C)OC(=O)NCCn1c(=O)[nH]c2ncc(Br)cc2c1=O>>Cc1c(CN(C)C(=O)/C=C/c2cnc3[nH]c(=O)nc(CCNC(=O)OC(C)(C)C)c(=O)c3c2)oc2cccc12  
 2639 Br1ccc2c(c1)c(Cc1cccc1)cn2-c1cccc1.C=CC(=O)OC>>COC(=O)/C=C/c1ccc2c(c1)c(Cc1cccc1)cn2-c1cccc1  
 2640 C=C[C@@]1(C)COC(C)(C)O1.CCOCOc1c(C)c(C)c(OCOC)c1c1C>>CCOCOc1c(C)c(C)c(OCOC(C)c(/C=C/C[C@@]2(C)COC(C)(C)O2)c1C

2641 Br1cccc1.C=CCNC(=O)OC(C)(C)C>>CC(C)(C)OC(=O)NC/C=C/c1cccc1  
 2642 C=Cc1ccc(OC)c(OC)c1.COc1cc(I)cc(OC)c1>>COc1cc(/C=C/c2ccc(OC)c(OC)c2)cc(OC)c1  
 2643 C=CC(=O)OC.CN1c2cccc(I)c2N(C)c2c(C=O)cccc21>>COC(=O)/C=C/c1cccc2c1N(C)c1c(C=O)cccc  
 2644 C=Cc1cccc1.Ic1cccc2cc3c(nc12)-c1c(ccc2cccc12)CC3>>C(=C/c1cccc2cc3c(nc12)-  
 c1c(ccc2cccc12)CC3)\c1cccc1  
 2645 C=CC(=O)OC(C)(C)C.COC(=O)CCc1cccc(N(Cc2ccc(Br)cc2)C(=O)C2CCCCC2)c1>>COC(=O)CCc1  
 cccc(N(Cc2ccc(/C=C/C(=O)OC(C)(C)C)cc2)C(=O)C2CCCCC2)c1  
 2646 C=CCc1ccc(OCc2cccc2)c(OC)c1.O=C(O)/C=C/c1cccc1Br>>COc1cc(C/C=C/c2cccc2/C=C/C(=O)  
 O)ccc1OCc1cccc1  
 2647 C=Cc1nc2c(N)ncnc2n1[C@@H]1O[C@H](CO[Si](C)(C)C(C)(C)C)[C@@H](O[Si](C)(C)C(C)(C)C)[  
 C@H]1O[Si](C)(C)C(C)(C)C.N#Cc1ccc(Br)cc1>>CC(C)(C)[Si](C)(C)OC[C@H]1O[C@H](n2c(/C  
 =C/c3ccc(C#N)cc3)nc3c(N)ncnc32)[C@H](O[Si](C)(C)C(C)(C)C)[C@@H]1O[Si](C)(C)C(C)(C)C  
 2648 C=Cc1cccc1.O=Cc1ccc2c(I)n[nH]c2c1>>O=Cc1ccc2c(/C=C/c3cccn3)n[nH]c2c1  
 2649 C=Cc1ccc(Cl)cc1.COC(=O)C(Cc1cccc1)C(=O)OC>>COC(=O)C(Cc1cccc1/C=C/c1ccc(Cl)cc1)C(=O)OC  
 2650 C=CC(=O)NCCc1ccc(O)cc1.Oc1ccc(I)cc1>>O=C(/C=C/c1ccc(O)cc1)NCCc1ccc(O)cc1  
 2651 C=CCOc1ccc(C)cc1.Ic1cccc1>>Cc1ccc(OC/C=C/c2cccc2)cc1  
 C=CC(=O)OC(C)(C)C.O=[N+](O-  
 2652 )c1cccc(S(=O)(=O)N2CCc3cc(Br)ccc32)c1>>CC(C)(C)OC(=O)/C=C/c1ccc2c(c1)CCN2S(=O)(=O)c1  
 cccc([N+](=O)[O-])c1  
 2653 Br1ccc(-c2nc3cccc3n2)cc1.C=CCn1c(-c2ccc(OC)cc2OC)nc2cccc2c1=O>>COc1ccc(-  
 c2nc3cccc3c(=O)n2C/C=C/c2ccc(-c3nc4cccc4n3)cc2)c(OC)c1  
 2654 C=CC(=O)OC.CCS1cc(I)ccc1-c1nc2cc(C(F)(F)F)ccc2n1C>>CCS1cc(/C=C/C(=O)OC)ccc1-  
 c1nc2cc(C(F)(F)F)ccc2n1C  
 2655 C=CC(=O)N(C)C.CCN(c1cccc1)c1cccc(Br)n1>>CCN(c1cccc1)c1cccc(/C=C/C(=O)N(C)C)n1  
 2656 C=Cc1cccc(C)c1.Cc1ccc(Br)cc1>>Cc1ccc(/C=C/c2cccc(C)c2)cc1  
 2657 Br1cnc2nc(CCC3CCN(Cc4cccc4)CC3)oc2c1.C=CC(=O)OC>>COC(=O)/C=C/c1cnc2nc(CCC3CCN  
 (Cc4cccc4)CC3)oc2c1  
 2658 C=Cc1ccc(OC)c(OC)c1.Nc1ccc(I)cc1>>COc1ccc(/C=C/c2ccc(N)cc2)cc1OC  
 C=Cc1ccc(Sc2cccc2)cc1.CCCCCCCCCC1(CCCCCCCCCC)c2cc(I)ccc2-c2ccc([N+](=O)[O-  
 2659 ])cc21>>CCCCCCCCC1(CCCCCCCCCC)c2cc(/C=C/c3ccc(Sc4cccc4)cc3)ccc2-  
 c2ccc([N+](=O)[O-])cc21  
 2660 C=Cc1cccc1.CCN(CC)CC(=O)Nc1c(C)ccc(Br)c1C>>CCN(CC)CC(=O)Nc1c(C)ccc(/C=C/c2cccc2)c  
 2661 C=CC=O.Fc1ccc(Br)cc1>>O=C/C=C/c1ccc(F)cc1  
 2662 C=CC(=O)NCc1cccc1.O=c1c(I)coc2cc(O)ccc12>>O=C(/C=C/c1coc2cc(O)ccc2c1=O)NCc1cccc1  
 2663 C=CC(=O)N(C)Cc1oc2cccc2c1C.CS(=O)(=O)N1CCNc2ccc(Br)cc2C1>>Cc1c(CN(C)C(=O)/C=C/c2  
 cnc3c(c2)CN(S(C)(=O)=O)CCN3)oc2cccc12  
 2664 C=CN1C(=O)c2cccc2C1=O.Cc1ccc(S(=O)(=O)n2ccc3c(Br)cccc32)cc1>>Cc1ccc(S(=O)(=O)n2ccc3c(  
 /C=C/N4C(=O)c5cccc5C4=O)cccc32)cc1  
 2665 C=CC(=O)OCC.CCC(=C(c1ccc(O)cc1)c1ccc(O)cc1)c1cccc(Br)c1>>CCOC(=O)/C=C/c1cccc(C(CC)=  
 C(c2ccc(O)cc2)c2ccc(O)cc2)c1  
 2666 C=Cc1cccc1.CCCCCCCCS(=O)(=O)c1ccc(Br)cc1>>CCCCCCCS(=O)(=O)c1ccc(/C=C/c2ccncc2)c  
 2667 C=CC(=O)OCc1cccc1.O=C1NCCCC[C@H]1N1Cc2cc(Br)ccc2C1=O>>O=C(/C=C/c1ccc2c(c1)CN  
 ([C@H]1CCCCNC1=O)C2=O)OCc1cccc1  
 2668 C=CC(=O)OC.CC(C)(C)c1ccc(Cn2nc(I)c3cccc32)cc1>>COC(=O)/C=C/c1nn(Cc2ccc(C(C)(C)C)cc2)  
 c2cccc12  
 2669 C=CC(=O)O[C@H]1C(C)(C)[C@H]2CC[C@]1(C)C2.O=Cc1cccc1Br>>CC1(C)[C@H]2CC[C@](C)  
 (C2)[C@H]1OC(=O)/C=C/c1cccc1C=O  
 2670 C=CC(=O)OCC.Cc1cccc1I>>CCOC(=O)/C=C/c1cccc1C  
 2671 C=Cc1cccc1.Ic1c(COCc2cccc2)nnn1Cc1cccc1>>C(=C/c1c(COCc2cccc2)nnn1Cc1cccc1)\c1cccc  
 2672 Br1cccc1.C=CC(F)(F)F>>FC(F)(F)/C=C/c1cccc1  
 2673 C=CC(=O)OC(C)(C)C.CC(C)OC(=O)C[C@H](c1ccc(Br)cc1)N(Cc1cccc1)[C@H](C)c1cccc1>>C  
 C(C)OC(=O)C[C@H](c1ccc(/C=C/C(=O)OC(C)(C)C)cc1)N(Cc1cccc1)[C@H](C)c1cccc1  
 2674 C=CC(=O)Nc1cccc1NC(=O)OC(C)(C)C.CCOC(=O)[C@H]1CN(C(C)C)C[C@H]1c1ccc(Br)cc1>>  
 CCOC(=O)[C@H]1CN(C(C)C)C[C@H]1c1ccc(/C=C/C(=O)Nc2cccc2NC(=O)OC(C)(C)C)cc1  
 2675 C=Cc1ccc(OC)cc1.Cc1cccc1Br>>COc1ccc(/C=C/c2cccc2C)cc1  
 2676 C=CC(=O)OCC.O=C1CNc2c(Br)cccc2N1>>CCOC(=O)/C=C/c1cccc2c1NCC(=O)N2  
 2677 C=CCNC(=O)c1cccc1NC(=O)c1cccc1.Fc1ccc(I)cc1>>O=C(Nc1cccc1C(=O)NC/C=C/c1ccc(F)cc1)  
 c1cccc1  
 2678 C=CC(N)=O.FC(F)(F)Oc1ccc(Br)cc1>>NC(=O)/C=C/c1ccc(OC(F)(F)F)cc1



2679 C=CC(=O)N(C)C.Cc1ccc(NC(=O)OC(C)(C)C)c(Br)c1>>Cc1ccc(NC(=O)OC(C)(C)C)c(/C=C/C(=O)N(C)C)c1  
 2680 C=CC(=O)OC.CCCCCc1ccc(N2CCc3cc(OC)ccc3C2(C)c2ccc(Br)cc2)cc1>>CCCCCc1ccc(N2CCc3cc(OC)ccc3C2(C)c2ccc(/C=C/C(=O)OC)cc2)cc1  
 2681 \*CNCCCOCOCOCOCNC(=O)COc1ccc(C(Cc2cc(OC)cc(OC)c2)NC(=O)c2ccc(C=C)cc2)cc1.CC(=O)c1ccc(I)cc1>>\*CNCCCOCOCOCOCNC(=O)COc1ccc(C(Cc2cc(OC)cc(OC)c2)NC(=O)c2ccc(/C=C/C3ccc(C(C)=O)cc3)cc2)cc1  
 2682 C=CP(=O)(OCC)OCC.O=[N+][O-]c1cccc1Br>>CCOP(=O)(/C=C/c1cccc1[N+](=O)[O-])OCC  
 2683 C=CC(=O)OC.Cc1ccc(S(=O)(=O)n2ccc3cc(Br)ccc32)cc1>>COC(=O)/C=C/c1ccc2c(ccn2S(=O)(=O)c2ccc(C)cc2)c1  
 2684 C=Cc1cccc(C#N)c1.Nc1ncc(Cl)cc1Br>>N#Cc1cccc(/C=C/c2cc(Cl)enc2N)c1  
 2685 C=C[C@H](O[Si](C)(C)C(C)(C)C)[C@H](CCCC(=O)OC)O[Si](C)(C)C(C)(C)C.CCCCCC(=O)c1ncc(Br)c2cccc12>>CCCCC(=O)c1ncc(/C=C/[C@H](O[Si](C)(C)C(C)(C)C)[C@H](CCCC(=O)OC)O[Si](C)(C)C(C)(C)C)c2cccc12  
 2686 BrC1cc2cccc2[se]1.C=CC(=O)OC>>COC(=O)/C=C/c1cc2cccc2[se]1  
 2687 C=Cc1cccc1.COC(=O)/C=C/c1cccc(N(Cc2ccc(Br)cc2)C(=O)C2CCCCC2)c1>>COC(=O)/C=C/c1ccc(c(N(Cc2ccc(/C=C/c3cccc3)cc2)C(=O)C2CCCCC2)c1  
 2688 C=CC(OCC)OCC.O=Cc1ccc(Br)cc1>>CCOC(/C=C/c1ccc(C=O)cc1)OCC  
 2689 C=CC(=O)c1cccc1.Clc1ccc(I)cc1>>O=C(/C=C/c1ccc(Cl)cc1)c1cccc1  
 2690 C=Cc1ccc(OC)cc1.COc1ccc2c(c1)cc(C#N)c1ccc(Br)cc12>>COc1ccc(/C=C/c2ccc3c(C#N)cc4cc(OC)c4cc3c2)cc1  
 2691 C=CC(=O)N1CCOCC1.O=C(/C=C/c1ccc(Sc2ccccc2Br)c(Cl)c1)N1CCOCC1>>O=C(/C=C/c1ccc(Sc2ccccc2/C=C/C(=O)N2CCOCC2)c(Cl)c1)N1CCOCC1  
 2692 C=CC[C@H](C)O.CC(C)Oc1cncc(Br)c1>>CC(C)Oc1cncc(/C=C/C[C@H](C)O)c1  
 2693 C=Cc1cccc1.Nc1ccc([N+](=O)[O-])cc1Br>>Nc1ccc([N+](=O)[O-])cc1/C=C/c1cccc1  
 2694 C=Cc1ccc(C(C)(C)C)cc1.CCCCC(Br)C(F)(F)F>>CCCCC(/C=C/c1ccc(C(C)(C)C)cc1)C(F)(F)F  
 2695 C=CC(=O)OC.CC(C)n1nc2c(NC3ccc(Br)cc3)nc(N3CCN(C)CC3)nc21>>COC(=O)/C=C/c1ccc(CNc2nc(N3CCN(C)CC3)nc3c2nc3C(C)C)cc1  
 2696 C=CC(=O)OCC.O=[N+][O-]c1cccc1I>>CCOC(=O)/C=C/c1cccc1[N+](=O)[O-]  
 2697 C=C[Si](CC)(CC)CC.CN(C)c1ccc(Br)cc1>>CC[Si](/C=C/c1ccc(N(C)C)cc1)(CC)CC  
 2698 C=Cc1cccc(C(=O)OC)c1.COC(=O)c1cc2cc(Br)ccc2cc1OC(C)=O>>COC(=O)c1cccc(/C=C/c2ccc3cc(OC(C)=O)c(C(=O)OC)cc3c2)c1  
 2699 C=CC(=O)O.COc1cccc(I)c1>>COc1cccc(/C=C/C(=O)O)c1  
 2700 C=CCN(C(=O)OC(C)(C)C)C(=O)OC(C)(C)C.Clc1cccc1>>CC(C)(C)OC(=O)N(C/C=C/c1cccc1)C(=O)OC(C)(C)C  
 2701 C=CC[C@H]1O[C@H](CNC(=O)OC(C)(C)C)[C@H]2OC(CC)(CC)O[C@H]12.COc1ccc2[nH]cc(C3=C(Br)C(=O)NC3=O)c2c1>>CCC1(CC)O[C@H]2[C@H](C/C=C/C3=C(c4c[nH]c5ccc(OC)cc45)C(=O)NC3=O)O[C@H](CNC(=O)OC(C)(C)C)[C@H]2O1  
 2702 C=C[Si](CC)(CC)CC.FC(F)(F)c1cc(Br)cc(C(F)(F)F)c1>>CC[Si](/C=C/c1cc(C(F)(F)F)cc(C(F)(F)F)c1)(CC)CC  
 2703 Nc1ccc(I)cc1.[11CH2]=Cc1cccc1>>Nc1ccc(/[11CH]=C/c2cccc2)cc1  
 2704 BrC1cccc(-c2cccc2)c1.C=Cc1cccc1>>C(=C/c1cccc(-c2cccc2)c1)\c1cccc1  
 2705 BrC1cccc(N(c2cccc2)c2cccc2)n1.C=Cc1ccc(OC)cc1>>COc1ccc(/C=C/c2cccc(N(c3cccc3)c3cccc3)n2)cc1  
 2706 C=CC(=O)OC(C)(C)C.CN1CCN(C(=O)/C=C/c2ccc(Br)cc2)CC1>>CN1CCN(C(=O)/C=C/c2ccc(/C=C/C(=O)OC(C)(C)C)cc2)CC1  
 2707 C=CC(=O)OC.Ic1c(-c2cccc2)nnn1Cc1cccc1>>COC(=O)/C=C/c1c(-c2cccc2)nnn1Cc1cccc1  
 2708 C=Cc1ccc2c(c1)C(CCCCCC)(CCCCCCC)c1cccc1-2.CCCCCCCCC1(CCCCCC)c2cc(Br)ccc2-c2ccc(C=O)cc21>>CCCCCCCCC1(CCCCCC)c2cccc2-C  
 2709 C=CC(=O)N1C(=O)OC[C@H]1c1cccc1.CC(C)(C)OC(=O)C(C(=O)OC(C)(C)C)c1ccc(Br)cc1>>C(C)(C)OC(=O)C(C(=O)OC(C)(C)C)c1ccc(/C=C/C(=O)N2C(=O)OC[C@H]2c2cccc2)cc1  
 2710 C=CC(=O)OC(C)(C)C.CC(C)OC(=O)c1sccl1Br>>CC(C)OC(=O)c1sccl1/C=C/C(=O)OC(C)(C)C  
 2711 C=Cc1sc(C=O)c2c1OCCO2.CCN(CC)/N=N/c1ccc(I)cc1>>CCN(CC)/N=N/c1ccc(/C=C/c2sc(C=O)c3c2OCCO3)cc1  
 2712 C=CC(=O)N(C)C.Nc1n[nH]c2c(Br)ccc(-c3ccc([N+](=O)[O-])cc3)c12>>CN(C)C(=O)/C=C/c1ccc(-c2ccc([N+](=O)[O-])cc2)c2c(N)n[nH]c12  
 2713 C=CC(=O)N(C)Cc1oc2cccc2c1C.CC(C)(C)OC(=O)NC1Cc2cc(Br)enc2NC1=O>>Cc1c(CN(C)C(=O)/C=C/c2enc3c(c2)CC(NC(=O)OC(C)(C)C)C(=O)N3)oc2cccc12  
 2714 C=CCCC(=O)O.FC(F)(F)c1ccc(I)cc1>>O=C(O)CC/C=C/c1ccc(C(F)(F)F)cc1  
 2715 C=CCCCC.CC(=O)c1ccc(Br)cc1>>CCCCC/C=C/c1ccc(C(C)=O)cc1

2716 C=CC(=O)OC(C)(C)C.CC(C)(C)OC(=O)N1C[C@H](O)C[C@H]1c1ccc(Br)cc1>>CC(C)(C)OC(=O)/C=C/c1ccc([C@H]2C[C@H](O)CN2C(=O)OC(C)(C)C)cc1  
 2717 C=CC(=O)OCC.COc1ccc(-c2cc3ccc(Br)cc(OC)c3o2)cc1OC>>CCOC(=O)/C=C/c1cc(OC)c2oc(-c3ccc(OC)c(OC)c3)cc2c1  
 2718 C=Cc1ccc(OC(F)(F)F)cc1.Cn1nc(I)c2ccc(C=O)cc21>>Cn1nc(/C=C/c2ccc(OC(F)(F)F)cc2)c2ccc(C=O)cc21  
 2719 C=Cc1ccc(OC)cc1.O=[N+](O-)]c1ccc(Cl)cc1>>COc1ccc(/C=C/c2ccc([N+](=O)[O-])cc2)cc1  
 2720 C=CCOC.CC(C)(C)OC(=O)/C=C/c1ccc(CN(C(=O)C2CCCCC2)c2cccc(Br)c2)cc1>>COC/C=C/c1cccc(N(Cc2ccc(/C=C/C(=O)OC(C)(C)C)cc2)C(=O)C2CCCCC2)c1  
 2721 Br1cncnc1.C=Cc1cccc1OC>>COc1cccc1/C=C/c1cncnc1  
 2722 C=CC(=O)N(CC)CC.O=C1Cc2c([nH])c3ccc(I)cc23)-c2ccncn2N1>>CCN(CC)C(=O)/C=C/c1ccc2[nH]c3c(c2c1)CC(=O)Nc1cccc1-3  
 2723 C=CC(=O)OC.CC(C)(C)OC(=O)Nc1ccsc1Br>>COC(=O)/C=C/c1scnc1NC(=O)OC(C)(C)C  
 2724 C=CC(=O)OC(C)(C)C.COC(OC)c1cc2c(cc1Br)OCO2>>COC(OC)c1cc2c(cc1/C=C/C(=O)OC(C)(C)C)OCO2  
 2725 C=CC(=O)O.COC(=O)c1ccc(Br)cc1>>COC(=O)c1ccc(/C=C/C(=O)O)cc1  
 2726 C=CC#N.O=C1Cc2c([nH])c3ccc(C(F)(F)F)cc23)-c2cc(I)ccc2N1>>N#C/C=C/c1ccc2c(c1)-c1[nH]c3ccc(C(F)(F)F)cc3c1CC(=O)N2  
 2727 Br1ccc2c(c1)-c1ncnc1CCO2.C=CC(=O)OC(C)(C)C>>CC(C)(C)OC(=O)/C=C/c1ccc2c(c1)-C=C[C@H](O)[C@H](O)COCc1cccc1.c1ccc([I+])c2cccs2)cc1>>O[C@H](/C=C/c1cccs1)[C@@H](O)COCc1cccc1  
 2728 C=CC(=O)OCC.CCCCOc1ccc(C(=O)Nc2ccccc2I)cc1>>CCCOc1ccc(C(=O)Nc2ccccc2/C=C/C(=O)O)CC)cc1  
 2729 C=CC(=O)OC.COc1cc(-c2cc3ccc(Br)cc(OC)c3o2)ccc1OCc1cccc1>>COC(=O)/C=C/c1cc(OC)c2oc(-c3ccc(OCc4cccc4)c(OC)c3)cc2c1  
 2730 C=CCNC(=O)c1cccc1NC(=O)c1cccc1.Clc1cccc1I>>O=C(Nc1cccc1C(=O)NC/C=C/c1cccc1Cl)c1cccc1  
 2731 C=CC#N.O=S(=O)(Oc1coc2ccc(Br)cc12)C(F)(F)F>>N#C/C=C/c1coc2ccc(Br)cc12  
 2732 C=CCOc1cccc1.CC(=O)c1ccc(I)cc1>>CC(=O)c1ccc(/C=C/COc2ccccc2)cc1  
 2733 C=Cc1ccc(N(C)C)cc1.CCCCN1C(=O)C(=C/C=C/c2ccc(I)cc2)C(=O)N(CCCC)C1=O>>CCCN1C(=O)C(=C/C=C/c2ccc(/C=C/c3ccc(N(C)C)cc3)cc2)C(=O)N(CCCC)C1=O  
 2734 C=CC#N.O=C1C=C(Br)CCC1>>N#C/C=C/C1=CC(=O)CCC1  
 2735 Br1ccc(I)cc1.C=Cc1ccc(CP(=O)(OCC)OCC)cc1>>CCOP(=O)(Cc1ccc(/C=C/c2ccc(Br)cc2)cc1)OCC  
 2736 C=CC(=O)OCC.O=c1oc(-c2ccccc2)c(I)c2sc3c(c12)CCCC3>>CCOC(=O)/C=C/c1c(-c2ccccc2)oc(=O)c2c3c(sc12)CCCC3  
 2737 C=CC(=O)OC(C)(C)C.C[C@H](c1cccc1)N(Cc1cccc1)[C@H](CC(=O)OC(C)(C)C)c1ccc(Br)cc1>>C[C@H](c1cccc1)N(Cc1cccc1)[C@H](CC(=O)OC(C)(C)C)c1ccc(/C=C/C(=O)OC(C)(C)C)cc1  
 2738 C=CS(=O)(=O)F.Oc1cc(O)cc(I)c1>>O=S(=O)(F)/C=C/c1cc(O)cc(O)c1  
 2739 C=CC(=O)OC(C)(C)C.O=[N+](O-)]c1ccc(I)c1>>CC(C)(C)OC(=O)/C=C/c1cccc([N+](=O)[O-])c1  
 2740 C=CC(=O)OCC.CS(=O)(=O)c1ccc(Br)cc1C(F)(F)F>>CCOC(=O)/C=C/c1ccc(S(C)(=O)=O)c(C(F)(F)F)  
 2741 C=CC(=O)OCCCC.Oc1ccc(Br)cc1>>CCCCOC(=O)/C=C/c1ccc(O)cc1  
 2742 Br1cccc2ccccc12.C=Cc1cccn1>>C(=C/c1cccc2ccccc12)\c1cccn1  
 2743 C=Cc1cccn1.Cc1cc(N(c2ccc([N+](=O)[O-])cc2[N+](=O)[O-])c2ccc([N+](=O)[O-])cc2[N+](=O)[O-])ccc1Br>>Cc1cc(N(c2ccc([N+](=O)[O-])cc2[N+](=O)[O-])c2ccc([N+](=O)[O-])cc2[N+](=O)[O-])ccc1/C=C/c1cccn1  
 2744 Br1ccc(OCCN2CCCC2)cc1.C=Cc1c(C)ccc(C#N)c1Nc1ccc2[nH]ccc2c1C>>Cc1ccc(C#N)c(Nc2ccc3[nH]ccc3c2C)c1/C=C/c1ccc(OCCN2CCCC2)cc1  
 2745 C=CC(=O)OCCCC.CN(C)c1cccc(Cl)c1>>CCCCOC(=O)/C=C/c1cccc(N(C)C)c1  
 2746 C=CC(=O)N1C(=O)OC[C@H]1c1cccc1.CC(C)(C)OP(=O)(Cc1cccc1)Cc1ccc(Br)cc1>>CC(C)(C)OP(=O)(Cc1cccc1)Cc1ccc(/C=C/C(=O)N2C(=O)OC[C@H]2c2ccccc2)cc1  
 2747 C=CC(=O)OC.Nc1cc(C(F)(F)F)ccc1Br>>COC(=O)/C=C/c1ccc(C(F)(F)F)cc1N  
 2748 C=Cc1cccc1.CCCCCCCCBr>>CCCCCCCC/C=C/c1cccc1  
 2749 C=CC(=O)OC.O=C1c2ccccc2C(=O)c2cc(Br)ccc21>>COC(=O)/C=C/c1ccc2c(c1)C(=O)c1cccc1C2=C  
 2750 C=CC(=O)OC.O=C(O)c1ccc(I)cc1>>COC(=O)/C=C/c1ccc(C(=O)O)cc1  
 2751 C=C[C@H](CO[Si](C)(C)C(C)(C)C)NC(=O)OCc1cccc1.COc1ccc2cc(Br)ccc2c1>>COc1ccc2cc(/C=C/[C@H](CO[Si](C)(C)C(C)(C)C)NC(=O)OCc3ccccc3)ccc2c1  
 2752 C=CC(=O)OCC.Cc1cccc(Cn2nc(I)c3ccccc32)c1>>CCOC(=O)/C=C/c1nn(Cc2cccc(C)c2)c2ccccc12  
 2753 C=CC(=O)N1N=Cc2ccccc2C1C=C(C)C.COc1cc(C(=O)c2cnc(N)nc2N)cc(I)c1OC>>COc1cc(C(=O)c2cnc(N)nc2N)cc(/C=C/C(=O)N2N=Cc3ccccc3C2=C(C)C)c1OC  
 2754

c=CC(=O)OC.O=c1c(Cc2cccc2)c(-  
2755 c2ccc2)oc2c(Cc3ccccc3)cc(Cl)cc12>>COC(=O)/C=C/c1cc(Cc2cccc2)c2oc(-  
c3ccccc3)c(Cc3ccccc3)c(=O)c2c1  
2756 C=Cc1ccc(F)cc1.FC(F)(F)C(F)(F)C(F)(F)C(F)(F)C(F)(F)Br>>Fc1ccc(/C=C/C(F)(F)C(F)(F)C(F)  
(F)C(F)(F)C(F)(F)C(F)(F))cc1  
2757 C=Cc1ccc(OC)cc1.FC(F)(F)c1cccc(Br)c1>>COc1ccc(/C=C/c2cccc(C(F)(F)F)c2)cc1  
2758 C=Cc1cnccc1.COc1ccc(Br)cc1F>>COc1ccc(/C=C/c2cnccc2)cc1F  
2759 C=CC(=O)NCc1cccc1.O=c1c(I)c(-c2ccc(O)cc2)oc2cc(O)ccc12>>O=C(/C=C/c1c(-  
c2ccc(O)cc2)oc2cc(O)ccc2c1=O)NCc1cccc1  
2760 C=Cc1ccc2ccc(Cl)cc2n1.CC(C)(O)c1cccc1CC[C@H](O)c1cccc(Br)c1>>CC(C)(O)c1cccc1CC[C@H]  
(O)c1cccc(/C=C/c2ccc3ccc(Cl)cc3n2)c1  
2761 C=Cc1ccc([N+])(=O)[O-]cc1.FC(F)(F)Oc1cccc(I)c1>>O=[N+]([O-]  
)c1ccc(/C=C/c2cccc(OC(F)(F)F)c2)cc1  
2762 C=CCCCCCCC.N#Cc1ccc(Br)ec1>>CCCCCCCC/C=C/c1ccc(C#N)cc1  
2763 C=CC(=O)OC.O=C1Nc2ccc(Br)cc2C1=O>>COC(=O)/C=C/c1ccc2c(c1)C(=O)C(=O)N2  
2764 C=Cc1nn(C2CCCCO2)c2cc([N+])(=O)[O-]  
)ccc12.Cc1cc(C)nc(Br)c1>>Cc1cc(C)nc(/C=C/c2nn(C3CCCCO3)c3cc([N+])(=O)[O-])ccc23)c1  
2765 Brc1ccc2cccc2c1.C=CC(=O)OCCCC>>CCCCOC(=O)/C=C/c1ccc2cccc2c1  
2766 C=CN1C(=O)c2cccc2C1=O.Ic1ccc(C2(N3CCCCC3)CCCCC2)cc1>>O=C1c2cccc2C(=O)N1/C=C/c  
1ccc(C2(N3CCCCC3)CCCCC2)cc1  
2767 C=CC(=O)OCCCC.Cn1nc(Br)c2cc([N+])(=O)[O-]  
)ccc21>>CCCCOC(=O)/C=C/c1nn(C)c2ccc([N+])(=O)[O-]cc12  
2768 C=CC(=O)O.COc1ccc(S(=O)(=O)Nc2ccc(I)cc2)cc1>>COc1ccc(S(=O)(=O)Nc2ccc(/C=C/C(=O)O)cc2  
C=CC(=O)OC.Fc1ccc(-c2ncc(I)nc2-c2ccc(F)cc2)cc1>>COC(=O)/C=C/c1cnc(-c2ccc(F)cc2)c(-  
2769 c2ccc(F)cc2)n1  
2770 C=C[C@](C)(CCC=C(C)C)CO[Si](c1cccc1)(c1cccc1)C(C)(C)C.COc1ccc(I)cc1>>COc1ccc(/C=C/[C  
@](C)(CCC=C(C)C)CO[Si](c2cccc2)(c2cccc2)C(C)(C)C)cc1  
2771 C=Cc1cene2cccc12.CCCCCCCCCCNc1ccc(Br)c(C(F)(F)F)c1>>CCCCCCCCCNc1ccc(/C=C/c2cen  
c3ccccc23)c(C(F)(F)F)c1  
2772 C=CC(=O)OC.Cc1ccc2nc3c(cc2c1)c(I)c(-c1cccc1)c1sccl3>>COC(=O)/C=C/c1c(-  
c2cccc2)c2sccl2e2nc3ccc(C)cc3cc12  
2773 C=CC(=O)OCC.N#Cc1c(-c2cccc(Br)c2)cc(-c2cccc2)nc1N>>CCOC(=O)/C=C/c1cccc(-c2cc(-  
c3ccccc3)nc(N)c2C#N)c1  
2774 C=CC(=O)OCC.O=c1cc(I)enn1Cc1cccc1>>CCOC(=O)/C=C/c1enn(Cc2cccc2)c(=O)c1  
2775 C=CC(=O)OC.CC(C)(C)OC(=O)N1CCC2(CC1)Oc1ccc(Br)cc1C2=O>>COC(=O)/C=C/c1ccc2c(c1)C(  
=O)C1(CCN(C(=O)OC(C)(C)C)CC1)O2  
2776 C=C(Br)CC.C=CC(=O)OCCCC>>C=C(/C=C/C(=O)OCCCC)CC  
2777 C=CC(=O)OCCCC.Cn1nc(Br)c2ccc([N+])(=O)[O-]  
)cc21>>CCCCOC(=O)/C=C/c1nn(C)c2cc([N+])(=O)[O-]ccc12  
2778 C=CC(=O)OCC.Oc1ccc(Br)c(Cl)c1>>CCOC(=O)/C=C/c1ccc(O)cc1Cl  
2779 C=CC(=O)OC.OCc1cccc(Br)c1>>COC(=O)/C=C/c1cccc(CO)c1  
2780 C=Cc1ccc(OC)cc1.C[Si](C)(C)I>>COc1ccc(/C=C/[Si](C)(C)C)cc1  
2781 C=CC(=O)OCC.Ic1cccs1>>CCOC(=O)/C=C/c1cccs1  
2782 C=CC(=O)OCCCC.CCOC(=O)/C=C/c1cc(Br)enc1C(=O)N(CC)CC>>CCCCOC(=O)/C=C/c1cnc(C(=O)  
)N(CC)CC)c(/C=C/C(=O)OCC)c1  
2783 Brc1cccc(N2CCCC2)n1.C=Cc1cnccc1>>C(=C/c1cccc(N2CCCC2)n1)c1cnccc1  
2784 C=CC(=O)OCCCC.O=[N+]([O-]  
)c1enc2c(C3OCCO3)cc(Br)cc2c1>>CCCCOC(=O)/C=C/c1cc(C2OCCO2)c2ncc([N+])(=O)[O-])cc2c1  
2785 C=Cc1cccc(O)c1.Fc1cc(Br)cc(F)c1F>>Oc1cccc(/C=C/c2cc(F)c(F)c(F)c2)c1  
2786 C=CC(=O)OCCCC.CCCc1ccc(I)cc1>>CCCCOC(=O)/C=C/c1ccc(CCC)cc1  
2787 C=CC(=O)OCC.CCOC(=O)Cc1c(I)en(C)c1C=O>>CCOC(=O)/C=C/c1en(C)c(C=O)c1CC(=O)OCC  
2788 C=CC(=O)OCC.CN1Cc2ccc(Br)ccc2C1=O>>CCOC(=O)/C=C/c1ccc2c(c1)CN(C)C2=O  
2789 C=CC(=O)OCC.COc1cc(Br)cc2nnn(C)c12>>CCOC(=O)/C=C/c1cc(OC)c2c(c1)nnn2C  
2790 C=CC[C@]1(C)c2cccc2N(C)[C@H]1c1cccc1.Ic1cccc1>>CN1c2cccc2[C@@](C)(C/C=C/c2cccc  
2)[C@@H]1c1cccc1  
2791 Brc1cccc1I.C=Cc1cccc(C)c1>>Cc1cccc(/C=C/c2cccc2Br)c1  
2792 C=C/C=C/C/c1cccc1.FC(F)(F)C(F)(F)C(F)(F)C(F)(F)C(F)(F)Br>>FC(F)(F)C(F)(F)C(F)(F)C(F)(  
F)C(F)(F)C(F)(F)/C=C/C=C/c1cccc1  
2793 C=CB1OC(C)CC(C)(C)O1.C[C@H](c1ccc(Br)cc1)N1CCOCC1>>CC1CC(C)(C)OB(/C=C/c2ccc([C  
@H](C)N3CCOCC3)cc2)O1

2794 C=CC(C)(C)O.COC(=O)[C@H](Cc1c(I)n(C(=O)OC(C)(C)C)c2ccccc12)N(C(=O)OC(C)(C)C)(=O)O  
 C(C)(C)C>>COC(=O)[C@H](Cc1c(/C=C/C(C)(C)O)n(C(=O)OC(C)(C)C)c2ccccc12)N(C(=O)OC(C)(  
 C)C)C(=O)OC(C)(C)C  
 2795 C=CC(=O)OCC.CC1(C)OC=C(I)C(=O)O1>>CCOC(=O)/C=C/C1=COC(C)(C)OC1=O  
 2796 C=Cc1ccc(OC(C)=O)cc1.COc1cc(I)cc(OC)c1>>COc1cc(/C=C/c2ccc(OC(C)=O)cc2)cc(OC)c1  
 2797 C=CCC(=O)Nc1cccc2ccnc12.CCOC(=O)c1ccc(OS(=O)(=O)C(F)(F)F)cc1>>CCOC(=O)c1ccc(/C=C/  
 CC(=O)Nc2cccc3ccnc23)cc1  
 2798 C=Cc1ccc2nc(OC)c(OC)nc2c1.COC(=O)c1ccoc1Br>>COC(=O)c1ccoc1/C=C/c1ccc2nc(OC)c(OC)nc2  
 2799 C=CP(=O)(O)O.N#Cc1ccc(Br)cc1>>N#Cc1ccc(/C=C/P(=O)(O)O)cc1  
 2800 C=CC(=O)C(O[Si](CC)(CC)CC)c1c(OC)ccc(OC)c1OCc1cccc1.COc1cccc(I)c1OCc1cccc1>>CC[Si]  
 (CC)(CC)OC(C(=O)/C=C/c1cccc(OC)c1OCc1cccc1)c1c(OC)ccc(OC)c1OCc1cccc1  
 2801 C=CCCN1C(=O)c2ccccc2C1=O.Cc1cccc1I>>Cc1cccc1/C=C/CCN1C(=O)c2ccccc2C1=O  
 2802 C=CCOc1cccc1C(C)C.Ic1cccs1>>CC(C)c1cccc1OC/C=C/c1cccs1  
 2803 C=Cc1ccc(OC)cc1.N[C@@H](Cc1c[nH]c2c(Br)cccc12)C(=O)O>>COc1ccc(/C=C/c2cccc3c[C@H](  
 N)C(=O)O)c[nH]c23)cc1  
 2804 C=Cc1cccc1.Clc1cccc2ccccc12>>C(=C/c1cccc2ccccc12)\c1cccc1  
 2805 C=Cc1cccc1.CC(C)(C)OC(=O)c1ccc(Br)cc1[N+](=O)[O-]  
 ]>>CC(C)(C)OC(=O)c1ccc(/C=C/c2ccccc2)cc1[N+](=O)[O-]  
 Br1ccnc1.C=CCOC1=C(C)C(=O)O[C@H](CC)[C@@](C)(O)C=C(C)C(=O)[C@H](C)C[C@@](C)(  
 OC)[C@H](O[C@@H]2O[C@H](C)C[C@H](N(C)C)[C@H]2OC(C)=O)[C@H]1C>>CC[C@H]1OC(  
 =O)C(C)=C(OC/C=C/c2ccnc2)[C@H](C)[C@@H](O[C@@H]2O[C@H](C)C[C@H](N(C)C)[C@H]  
 2806 2OC(C)=O)[C@](C)(OC)C[C@@H](C)C(=O)C(C)=C[C@@]1(C)O  
 Br1ccnc1.C=CCO[C@@H]1CC(=O)O[C@H](C)C/C=C/C=C/[C@H](O[Si](C)(C)C(C)(C)C)[C@H]  
 (C)C[C@H](CC(OC)OC)[C@H](O[C@@H]2O[C@H](C)[C@@H](O[C@H]3C[C@@](C)(O)[C@@  
 H](OC(=O)CC)[C@H](C)O3)[C@H](N(C)C)[C@H]2OC(C)=O)[C@H]1OC>>CCC(=O)O[C@H]1[C  
 2807 @H](C)O[C@@H](O[C@H]2[C@H](N(C)C)[C@@H](OC(C)=O)[C@H](O[C@@H]3[C@@H](OC)  
 [C@H](OC/C=C/c4cnnc4)CC(=O)O[C@H](C)C/C=C/C=C/[C@H](O[Si](C)(C)C(C)(C)C)[C@H](C)  
 C[C@@H]3CC(OC)OC)O[C@@H]2C)C[C@@H]1C)O  
 2808 C=CC(=O)OC.O=Cc1ccc(Br)cn1>>COC(=O)/C=C/c1ccc(C=O)nc1  
 2809 C=CS(=O)(=O)c1cccc1.Cn1cc(C=O)c2cc(Br)ccc21>>Cn1cc(C=O)c2cc(/C=C/S(=O)(=O)c3ccccc3)cc  
 2810 C=Cc1cccc1.O=c1c(Br)c(-c2ccccc2)oc2ccccc12>>O=c1c(/C=C/c2ccccc2)c(-c2ccccc2)oc2ccccc12  
 2811 C=CC(=O)OCC.Fc1cccc1I>>CCOC(=O)/C=C/c1cccc1F  
 2812 C=CC(=O)OC.O=C(O)c1ccc(Br)s1>>COC(=O)/C=C/c1ccc(C(=O)O)s1  
 2813 C=CC(=O)OCCCC.COc1ccc(CN(Cc2ccc(OC)cc2)c2ccc(Br)cn2)cc1>>CCCCOC(=O)/C=C/c1ccc(N(C  
 c2ccc(OC)cc2)Cc2ccc(OC)cc2)nc1  
 2814 C=CCC(C)C.COC(=O)c1ccc2cc(Br)ccc2c1>>COC(=O)c1ccc2cc(/C=C/CC(C)C)ccc2c1  
 2815 C=CCCO.CC(C)Oc1ccc(Br)c1>>CC(C)Oc1ccnc(/C=C/CCO)c1  
 2816 C=CC(=O)OCC.Fc1ccc(Br)c(OCc2ccccc2I)c1>>CCOC(=O)/C=C/c1cccc1COc1cc(F)ccc1Br  
 2817 C=CC(=O)OC.O=CC1=C(Br)c2ccccc2CC1>>COC(=O)/C=C/C1=C(C=O)CCc2ccccc21  
 2818 C=CC(=O)N(C)OC.CCOC(=O)c1ccc(I)cc1>>CCOC(=O)c1ccc(/C=C/C(=O)N(C)OC)cc1  
 2819 C=CCN(C(=O)OC(C)(C)C)C(=O)OC(C)(C)C.Cc1ccc(Cl)cc1>>Cc1ccc(/C=C/CN(C(=O)OC(C)(C)C)C  
 (=O)OC(C)(C)C)cc1  
 2820 Br1ccsc1.C=CC(=O)OCC>>CCOC(=O)/C=C/c1ccsc1  
 2821 C=CC(=O)OCC.OCc1cccc(I)c1>>CCOC(=O)/C=C/c1cccc(CO)c1  
 2822 C=CC(=O)OC.Nc1cc(C(F)(F)F)cc(C(F)(F)F)c1Br>>COC(=O)/C=C/c1cc(N)cc(C(F)(F)F)cc1C(F)(F)F  
 2823 C=CCOC(C)=O.Ic1cccc2ccccc12>>CC(=O)OC/C=C/c1cccc2ccccc12  
 2824 C=CC(=O)OC.CCOc1c(C(C)n2nc(C)c3c(N)ncnc32)cc(Cl)c(C)c1I>>CCOc1c(C(C)n2nc(C)c3c(N)ncnc  
 32)cc(Cl)c(C)c1/C=C/C(=O)OC  
 2825 C=CC(N)=O.O=CC1=C(Br)CCCC1>>NC(=O)/C=C/C1=C(C=O)CCCC1  
 2826 C=Cc1cc(O)c(OC)cc1F.COc1ccc(I)c(OC)c1>>COc1ccc(/C=C/c2cc(O)c(OC)cc2F)c(OC)c1  
 2827 C=Cc1ccnc1.COC(=O)[C@H](Cc1ccc(O)c(I)c1)NC(=O)OC(C)(C)C>>COC(=O)[C@H](Cc1ccc(O)c  
 (/C=C/c2ccnc2)c1)NC(=O)OC(C)(C)C  
 2828 C=CC(=O)N(C)OC.FC(F)(F)c1ccc(I)cc1>>CON(C)C(=O)/C=C/c1ccc(C(F)(F)F)cc1  
 2829 C=CC(=O)OC(C)(C)C.CC(C)(O)c1cc(Br)enc1N>>CC(C)(C)OC(=O)/C=C/c1cnc(N)c(C(C)(C)O)c1  
 2830 C=CC(=O)CC.Fc1ccc(Br)cc1>>CCC(=O)/C=C/c1ccc(F)cc1  
 2831 C=CC(=O)OCC.O=C(Nc1cccc1Cl)c1ccc(Br)o1>>CCOC(=O)/C=C/c1ccc(C(=O)Nc2ccccc2Cl)o1  
 2832 C=C[C@@H]1COC(C)(C)N1C(=O)OCc1cccc1.Ic1cccc1>>CC1(C)OC[C@@H](/C=C/c2ccccc2)N1  
 C(=O)OCc1cccc1  
 2833 C=Cc1ccnc1.N[C@@H](Cc1c[nH]c2c(Br)cccc12)C(=O)O>>N[C@@H](Cc1c[nH]c2c(/C=C/c3ccnc  
 3)cccc12)C(=O)O  
 2834 C=CC(=O)OCC.N#Cc1cc(Br)ccc1OCc1cccc1>>CCOC(=O)/C=C/c1ccc(OCc2ccccc2)c(C#N)c1

2835 C=CCN(C(=O)OC(C)(C)C(=O)OC(C)(C)C.N#Cc1ccccc1Br>>CC(C)(C)OC(=O)N(C/C=C/c1ccccc1C#N)C(=O)OC(C)(C)C

2836 C=CC(C)(C)O.O=S(=O)(c1ccccc1)n1ccc2ccc(Br)cc21>>CC(C)(O)/C=C/c1ccc2ccn(S(=O)(=O)c3cccc3)c2c1

2837 Br1ccncc1.C=CCC(C)C(=O)OCC>>CCOC(=O)C(C)C/C=C/c1ccncc1

2838 C=CC(=O)OCCCC.COc1ccc(Br)c(CCNC(=O)OC(C)(C)C)c1C>>CCCCOC(=O)/C=C/c1ccc(OC)c(C)c1CCNC(=O)OC(C)(C)C

2839 C=CC(F)(F)F.COCC(=O)c1ccc(I)cc1>>COC(=O)c1ccc(/C=C/C(F)(F)F)cc1

2840 C=CC(=O)OCC.Cc1nnn(Cc2cc(C(F)F)ccc2Br)n1>>CCOC(=O)/C=C/c1ccc(C(F)F)cc1Cn1nnc(C)n1

2841 C=CC(=O)OCC.Clc1ncc(Br)cn1>>CCOC(=O)/C=C/c1cnc(Cl)nc1

2842 C=CC(=O)OC.CC1(C)CC(=C(c2ccc3c(cnn3C3CCCCO3)c2)c2c(F)cc(Br)cc2F)CC(C)(C)O1>>COC(=O)/C=C/c1cc(F)c(C(=C2CC(C)(C)OC(C)(C)C2)c2ccc3c(cnn3C3CCCCO3)c2)c(F)c1

2843 C=Cc1ccncc1.CCCCCOc1ccc(I)cc1>>CCCCCOc1ccc(/C=C/c2ccncc2)cc1

2844 C=CC(=O)OC.COCC(=O)c1ccc([N+](=O)[O-])c1I>>COC(=O)/C=C/c1c(C(=O)OC)cccc1[N+](=O)[O-]

2845 C=CCC(C)C(=O)OCC.COc1ccccc1Br>>CCOC(=O)C(C)C/C=C/c1ccccc1OC

2846 C=CC(=O)OCC.COCCOc1ccc(I)c([N+](=O)[O-])Br1cc2ccccc2c2ccccc12.C=C[C@H](CO[Si](C)(C)C(C)C)NC(=O)OCc1ccccc1>>CC(C)(C)[Si](C)(C)OC[C@H](C=C/c1cc2ccccc2c2ccccc12)NC(=O)OCc1ccccc1

2847 C=C(Br)CC1(C)Cc2ccccc2C1=O.C=CC(=O)OCC>>C=C(/C=C/C(=O)OCC)CC1(C)Cc2ccccc2C1=O

2848 C=Cc1ccccc1.CCCCCCCCCCCCCI>>CCCCCCCCCCCCC/C=C/c1ccccc1

2849 C=CC(=O)OCCCC.O=c1[nH]c(=O)n([C@H]2C[C@H](O)[C@@H](CO)O2)cc1Br>>CCCCOC(=O)/C=C/c1cn([C@H]2C[C@H](O)[C@@H](CO)O2)c(=O)[nH]c1=O

2850 C=CC(OCC)OCC.Cc1ccc(Br)cc1>>CCOC(/C=C/c1ccc(C)cc1)OCC

2851 C=CP(=O)(OCC)OCC.COP(=O)(OC)[C@]1(NC=O)C[C@@H]1c1ccc(Br)cc1>>CCOP(=O)(/C=C/c1ccc([C@H]2C[C@@]2(NC=O)P(=O)(OC)OC)cc1)OCC

2852 C=Cc1ccccc1.O=Cc1ccc(Cl)c1>>O=Cc1ccc(/C=C/c2ccccc2)c1

2853 C=CC(=O)OC.Ic1c(-c2ccccc2)oc2ccccc12>>COC(=O)/C=C/c1c(-c2ccccc2)oc2ccccc12

2854 C=CC(=O)OC.CC(=O)OC[C@H]1OC=C(I)[C@@H](OC(C)=O)[C@@H]1OC(C)=O>>COC(=O)/C=C/C1=CO[C@H](COC(C)=O)[C@@H](OC(C)=O)[C@@H]1OC(C)=O

2855 \*CNCCOCCOCCOCCCN(C(=O)COc1ccc(C(Cc2cc(OC)cc(OC)c2)NC(=O)c2ccc(C=C)cc2)cc1.O=[N+])([O-])c1ccc(I)cc1>>\*CNCCOCCOCCOCCCN(C(=O)COc1ccc(C(Cc2cc(OC)cc(OC)c2)NC(=O)c2ccc(/C=C/c3ccc([N+](=O)[O-])cc3)cc2)cc1

2856 C=Cc1ccccc1.N#Cc1cc2ccc3ccccc3c2c2cc(Br)ccc12>>N#Cc1cc2ccc3ccccc3c2c2cc(/C=C/c3ccccc3)ccC=CC(C)(C)C(=O)NC(C)(C)C(=O)O.CC(=O)OC[C@H]1O[C@@H](c2cc(Cc3ccc(Br)cc3C)c(C(C)C)cc2OC(C)=O)[C@H](OC(C)=O)[C@@H](OC(C)=O)[C@@H]1OC(C)=O>>CC(=O)OC[C@H]1O[C@@H](c2cc(Cc3ccc(/C=C/C(C)(C)C(=O)NC(C)(C)C(=O)O)cc3C)c(C(C)C)cc2OC(C)=O)[C@H](OC(C)=O)[C@@H](OC(C)=O)[C@@H]1OC(C)=O

2857 C=CC(=O)OC.CC(=O)Oc1c(C/C=C(\C)CCC=C(C)C)cc(I)cc1C/C=C(\C)CCC=C(C)C>>COC(=O)/C=C/c1cc(C/C=C(\C)CCC=C(C)C)c(OC(C)=O)c(C/C=C(\C)CCC=C(C)C)c1

2858 C=Cc1ccncc1.CCN1c2ncc(I)cc2C(=O)N(C)c2ccc(Cl)nc21>>CCN1c2ncc(/C=C/c3ccncc3)cc2C(=O)N(C)c2ccc(Cl)nc21

2859 C=C[C@H]1O[C@@H]2OC(C)(C)O[C@@H]2[C@H]1OC.COCC(=O)[C@H](Cc1ccc(I)cc1)NC(=O)OC(C)(C)C>>COC(=O)[C@H](Cc1ccc(/C=C/[C@H]2O[C@@H]3OC(C)(C)O[C@@H]3[C@H]2OC)c1)NC(=O)OC(C)(C)C

2860 Br1ccc(Cn2c(-c3ccccc3)nc3ccccc32)cc1.C=Cc1ccccc1>>C(=C/c1ccc(Cn2c(-c3ccccc3)nc3ccccc32)cc1)c1ccccc1

2861 C=Cc1ccccc1.COc1ccc(Br)c2ccccc12>>COc1ccc(/C=C/c2ccccc2)c2ccccc12

2862 C=CC(=O)OCC.CC(C)(C)OC(=O)N[C@@H](Cc1cc(Br)ccc1[N+](=O)[O-])C(=O)OC(C)(C)C>>CCOC(=O)/C=C/c1ccc([N+](=O)[O-])c(C[C@H](NC(=O)OC(C)(C)C)C(=O)OC(C)(C)C)c1

2863 Br1cccs1.C=Cc1cccn1>>C(=C/c1cccs1)c1cccn1

2864 C=C[Si](C)(C)c1cccn1.Cc1ccccc1I>>Cc1ccccc1/C=C/[Si](C)(C)c1cccn1

2865 C=CC(=O)OCC.COc1ccc(Cn2nc(I)c3ccncc32)cc1>>CCOC(=O)/C=C/c1nn(Cc2ccc(OC)cc2)c2nccccc12

2866 C=Cc1ccc(O)cc1.COc1ccc(Br)c1>>COc1ccc(/C=C/c2ccc(O)cc2)c1

2867 C=Cc1ccncc1.CC(C)(C)OC(=O)N1CC[C@H]1COc1ncc(Br)c1>>CC(C)(C)OC(=O)N1CC[C@H]1COc1ncc(/C=C/c2ccncc2)c1

2868 C=CC(=O)OC.Nc1ccc(F)nc1Br>>COC(=O)/C=C/c1nc(F)ccc1N

2869 C=CC(=O)OCC.Cn1c(=O)c(Br)c(-c2ccccc2)c2ccccc21>>CCOC(=O)/C=C/c1c(-c2ccccc2)c2ccccc2n(C)c1=O

2870 C=CC(=O)OCC.COCC(=O)c1ccc(I)cc1>>CCOC(=O)/C=C/c1ccc(C(=O)OCC)cc1

2871

2872

2873 C=CC#N.Oc1ccnc2ccc(Br)cc12>>N#C/C=C/c1ccc2nccc(O)c2c1  
 2874 Br1ccsc1.C=Cc1cccc1NS(=O)(=O)c1ccc(C)cc1>>Cc1ccc(S(=O)(=O)Nc2ccccc2/C=C/c2ccsc2)cc1  
 2875 Br1ccc(C2=CCC3(CC2)OCCO3)cc1.C=CC1CCC(CCC)CC1>>CCCC1CCC(/C=C/c2ccc(C3=CCC4(CC3)OCCO4)cc2)CC1  
 2876 C=CC(=O)OC.NC(=O)c1ccc(-c2cn(S(=O)(=O)c3ccccc3)c3ncc(Br)cc23)cc1>>COC(=O)/C=C/c1cnc2c(c1)c(-c1ccc(C(N)=O)cc1)cn2S(=O)(=O)c1ccccc1  
 2877 Br1ccccc1.C=Cc1ccc(N(c2ccc(OC)cc2)c2ccc(OC)cc2)cc1>>COc1ccc(N(c2ccc(/C=C/c3ccccc3)cc2)c2ccc(OC)cc2)cc1  
 2878 C=CS(=O)(=O)Nc1cccc(OC2CCN(C(=O)OC(C)(C)C)CC2)c1.N#Cc1cccc(Br)c1>>CC(C)(C)OC(=O)N1CCC(Oc2ccccc2NS(=O)(=O)/C=C/c3ccccc(C#N)c3)c2)CC1  
 2879 C=Cc1cccc2ccccc12.Clc1cccc2ccccc12>>C(=C/c1cccc2ccccc12)\c1cccc2ccccc12  
 2880 C=CC(=O)NCc1ccc(C)cc1.O=c1c(I)coc2cc(O)ccc12>>Cc1ccc(CNC(=O)/C=C/c2coc3cc(O)ccc3c2=O)  
 2881 C=CC(N)=O.FC(F)(F)c1cccc(I)c1>>NC(=O)/C=C/c1cccc(C(F)(F)F)c1  
 2882 C=CC(=O)OC.O=[N+][O-]c1ccc2cc(Br)cn2c1>>COC(=O)/C=C/c1cnc2cc([N+](=O)[O-])ccc2c1  
 2883 C=Cc1ccc(Br)cc1.CCCCN(CCCC)c1ccc(I)cc1>>CCCN(CCCC)c1ccc(/C=C/c2ccc(Br)cc2)cc1  
 2884 C=Cc1cn[nH]c1.CN(C(=O)c1ccccc1)c1ccc2c(c1)[nH]c(=NC(=O)c1ccc(Br)s1)n2CCC(N)=O>>CN(C(=O)c1ccccc1)c1ccc2c(c1)[nH]c(=NC(=O)c1ccc(/C=C/c3cn[nH]c3)s1)n2CCC(N)=O  
 2885 C=Cc1ccccc1.COc1ccc(-c2nc3ccccc3c3cc4cc(Br)ccn4c23)cc1>>COc1ccc(-c2nc3ccccc3c3cc4cc(/C=C/c5ccccc5)ccn4c23)cc1  
 2886 C=Cc1ccccc1.CCCCN1c2ccc(Br)cc2Sc2cc(-c3nc4ccccc4n3-c3ccccc3)ccc21>>CCCN1c2ccc(/C=C/c3ccccc3)cc2Sc2cc(-c3nc4ccccc4n3-c3ccccc3)ccc21  
 2887 C=CC(=O)OCC.CC(=O)c1ccc(Br)cc1>>CCOC(=O)/C=C/c1ccc(C(C)=O)cc1  
 2888 C=CC(=O)OCC.COc1cccc(-c2ccccc2)c1I>>CCOC(=O)/C=C/c1c(OC)cccc1-c1ccccc1  
 2889 C=CC(C)=O.CCCCCc1c(OS(=O)(=O)C(F)(F)F)c(C)c(C)c2c(C)c(C#Cc3ccccc3)cn2>>CCCCCc1c(/C=C/C(C)=O)c(C)c(C)c2c(C)c(C#Cc3ccccc3)cn2  
 2890 C=CC(=O)OC.O=Cc1ccc(Br)cc1F>>COC(=O)/C=C/c1ccc(C(=O)c(F)c1  
 2891 Ic1ccccc1.[11CH2]=Cc1ccccc1>>C(=[11CH]/c1ccccc1)c1ccccc1  
 2892 C=CC(=O)OC(C)(C)C.Oc1ccc(C(=C2CCSCC2)c2ccc(Br)cc2)cc1>>CC(C)(C)OC(=O)/C=C/c1ccc(C(=C2CCSCC2)c2ccc(O)cc2)cc1  
 2893 C=Cc1ccc(OC)cc1.Cc1ccc(S(=O)(=O)N(Cc2ccccc2)c2cc3ccc(Br)cc3c(=O)o2)cc1>>COc1ccc(/C=C/c2ccc3cc(N(Cc4ccccc4)S(=O)(=O)c4ccc(C)cc4)oc(=O)c3c2)cc1  
 2894 C=CC[C@H](CC(=O)OC(C)(C)C)C(=O)N[C@H](C(=O)NC)C(C)(C)C.FC(F)(F)c1cc(Br)ccc1-c1ccccc1>>CNC(=O)[C@@H](NC(=O)[C@H](C/C=C/c1ccc(-c2ccccc2)c(C(F)(F)F)c1)CC(=O)OC(C)(C)C)C(C)(C)C  
 2895 C=CC(C)(C)C(=O)NC(C)(C)C(=O)O.COc1cc(C(C)C)c(Cc2ccc(Br)cc2C)cc1[C@@H]1O[C@H](COC(C)=O)[C@@H](OC(C)=O)[C@H](OC(C)=O)[C@H]1OC(C)=O>>COc1cc(C(C)C)c(Cc2ccc(/C=C/C(C)(C)C(=O)NC(C)(C)C(=O)O)cc2C)cc1[C@@H]1O[C@H](COC(C)=O)[C@@H](OC(C)=O)[C@H](OC(C)=O)[C@H]1OC(C)=O  
 2896 C=CC(=O)OCCCC.Fc1ccc(Br)cc1F>>CCCCOC(=O)/C=C/c1ccc(F)c(F)c1  
 2897 C=Cc1cc2c(c(=O)n(C)c(=O)n2C)n1C.CC(=O)c1cccc(Br)c1>>CC(=O)c1cccc(/C=C/c2cc3c(c(=O)n(C)c(=O)n3C)n2C)c1  
 2898 C=CC(C)(C)O.Nc1ccc(Br)cc1>>CC(C)(O)/C=C/c1ccc(N)cc1  
 2899 C=CC(=O)OC(C)(C)C.CC(=O)N(c1c(C)cc(C)cc1I)C1C=CCCC1>>CC(=O)N(c1c(C)cc(C)cc1/C=C/C(=O)OC(C)(C)C)C1C=CCCC1  
 2900 C=CC(=O)N(C)Cc1cccc(OC)c1OCCC.O=C1Nc2ncc(Br)cc2CNC12CCCC2>>CCCCOc1c(CN(C)C(=O)/C=C/c2cnc3c(c2)CNC2(CCCC2)C(=O)N3)cccc1OC  
 2901 C=Cc1ccc(OC)cc1.Cc1ccc(I)s1>>COc1ccc(/C=C/c2ccc(C)s2)cc1  
 2902 C=CC(=O)OC(C)(C)C.N#Cc1c(-c2cccc(Br)c2)cc(-c2ccccc2)nc1N>>CC(C)(C)OC(=O)/C=C/c1cccc(-c2cc(-c3ccccc3)nc(N)c2C#N)c1  
 2903 C=CC(=O)[C@H](CCNC(=O)OC(C)(C)C)O[Si](C)(C)C(C)(C)C.COC(=O)n1c(Br)c(CCO[Si](C)(C)C(C)(C)C)c2ccccc21>>COC(=O)n1c(/C=C/C(=O)[C@H](CCNC(=O)OC(C)(C)C)O[Si](C)(C)C(C)(C)C)c(CCO[Si](C)(C)C(C)(C)C)c2ccccc21  
 2904 C=COCCCC.O=C(Cl)c1ccc2ccccc2c1>>CCCCO/C=C/C(=O)c1ccc2ccccc2c1  
 2905 C=Cc1ccccc1.COc1ccc(I)cc1>>COc1ccc(/C=C/c2ccccc2)cc1  
 2906 C=CS(=O)(=O)Oc1ccccc1.COc1ccc(Br)cc1>>COc1ccc(/C=C/S(=O)(=O)Oc2ccccc2)cc1  
 2907 C=CC(=O)O.O=S(=O)(Nc1ccc(-c2ccccc2)cc1)c1ccc(I)cc1>>O=C(O)/C=C/c1ccc(S(=O)(=O)Nc2ccc(-c3ccccc3)cc2)cc1  
 2908 C=Cc1cc2c(c(=O)n(C)c(=O)n2C)n1C.N#Cc1cccc(Br)c1>>Cn1c(=O)c2c(cc(/C=C/c3cccc(C#N)c3)n2C)n(C)c1=O  
 2909 Br1cc2ccc1CCc1ccc(cc1)CC2.C=CC(=O)OC>>COC(=O)/C=C/c1cc2ccc1CCc1ccc(cc1)CC2

2910 C=CCOc1ccccc1.COc1ccccc1I>>COc1ccccc1/C=C/COc1ccccc1  
 2911 C=COCCCC.O=c1cc(Br)c2ccccc2[nH]1>>CCCCO/C=C/c1cc(=O)[nH]c2ccccc12  
 2912 C=CC(=O)OC(C)(C)C.COC1CCC(C2=C[C@H]3CC[C@H](OC(C)(C)C)[C@@]3(C)CC2)=C(Br)C1>  
 >COC1CCC(C2=C[C@H]3CC[C@H](OC(C)(C)C)[C@@]3(C)CC2)=C/C=C/C(=O)OC(C)(C)C1  
 2913 C=Cc1ccc(C(=O)OC)cc1.CC1(C)c2ccc(Br)cc2C(C)(C)N1[O]>>COC(=O)c1ccc(/C=C/c2ccc3c(c2)C(C)  
 )(C)N([O])C3(C)C)cc1  
 2914 C=CCO.Cc1ccc(Br)cc1>>Cc1ccc(/C=C/CO)cc1  
 2915 C=CC(=O)OCC.CC(C)(C)OC(=O)CSc1ccc(Br)cc1>>CCOC(=O)/C=C/c1ccc(SCC(=O)OC(C)(C)C)cc1  
 2916 C=CC(=O)OC.CC1CC(C=O)=C(Br)c2ccccc21>>COC(=O)/C=C/C1=C(C=O)CC(C)c2ccccc21  
 2917 C=Cc1ccccc1.O=c1c(Br)c(-c2ccc([N+](=O)[O-])cc2)oc2ccccc12>>O=c1c(/C=C/c2ccccc2)c(-  
 c2ccc([N+](=O)[O-])cc2)oc2ccccc12  
 2918 Brc1ccc(-c2nc3ccccc3c[nH]cc23)cc1.C=CC(=O)OC>>COC(=O)/C=C/c1ccc(-  
 c2nc3ccccc3c[nH]cc23)cc1  
 2919 C=Cc1ccc(-c2c(-c3ccc(OC)cc3)c(=O)c2=O)cc1.COc1ccc(I)cc1>>COc1ccc(/C=C/c2ccc(-c3c(-  
 c4ccc(OC)cc4)c(=O)c3=O)cc2)cc1  
 2920 C=CC(=O)OC.CCCCN1c(-c2ccc(Br)cc2)nc2ccccc21>>CCCN1c(-  
 2921 C=CCOC(C)(C)CCCC(C)C=C.COc1cc(I)ccc1O>>C=CC(C)CCCC(C)(C)OC/C=C/c1ccc(O)c(OC)c1  
 2922 C=CC(=O)OC.CCOCc1nc2c(N)nc3cc(Br)ccc3c2n1CCCCN1CCCS1(=O)=O>>CCOCc1nc2c(N)nc3cc(  
 /C=C/C(=O)OC)ccc3c2n1CCCCN1CCCS1(=O)=O  
 2923 C=CC(=O)OCC.Cc1nnc(N)c1I>>CCOC(=O)/C=C/c1c(C)ncnc1N  
 C=CC(=O)NCCCCCCCCCN=[N+]=[N-]  
 2924 ].COC1=CC2[C@@H]3Cc4c(I)cc(OC)c(O)c4[C@]2(CCN3C)CC1=O>>COC1=CC2[C@@H]3Cc4c(/  
 C=C/C(=O)NCCCCCCCCCN=[N+]=[N-])cc(OC)c(O)c4[C@]2(CCN3C)CC1=O  
 2925 C=CC(=O)OC(C)(C)C.Ic1ccc(-c2ccccc2)cc1>>CC(C)(C)OC(=O)/C=C/c1ccc(-c2ccccc2)cc1  
 2926 C=CC(C)=O.COc1ccc(I)c(N)c1>>COc1ccc(/C=C/C(C)=O)c(N)c1  
 2927 C=CCOc1ccc(Cl)cc1.Ic1ccccc1>>Clc1ccc(OC/C=C/c2ccccc2)cc1  
 2928 C=C[C@H]1CCCCN1C(=O)OC(C)(C)C.COc1ccc(I)cc1>>COc1ccc(/C=C/[C@H]2CCCCN2C(=O)  
 OC(C)(C)C)cc1  
 2929 C=CCCCCCC.COc1ccc(Br)c1[N+](=O)[O-]>>CCCCC/C=C/c1ccc(OC)c1[N+](=O)[O-]  
 2930 C=CC(=O)N1CCOCC1.CC(=O)Cc1ccccc1Br>>CC(=O)Cc1ccccc1/C=C/C(=O)N1CCOCC1  
 2931 C=CC(N)=O.O=C(c1ccccc1)c1ccccc1I>>NC(=O)/C=C/c1ccccc1C(=O)c1ccccc1  
 2932 C=CC(=O)OC.Cc1ccc(I)c(C)c1>>COC(=O)/C=C/c1ccc(C)cc1C  
 2933 C=CC(=O)OC.CC(=O)c1ccccc1Br>>COC(=O)/C=C/c1ccccc1C(C)=O  
 2934 Brc1ccc(-c2nc3ccccc3n2Cc2ccccc2)cc1.C=CC(=O)OC>>COC(=O)/C=C/c1ccc(-  
 c2nc3ccccc3n2Cc2ccccc2)cc1  
 2935 C=Cc1ccc(C#N)cc1.[O-][N+](=Nc1ccc(Br)cc1)c1ccccc1>>N#Cc1ccc(/C=C/c2ccc(N=[N+])([O-]  
 )c3ccccc3)cc2)cc1  
 2936 C=CC(C)(C)C.Ic1ccccc1>>CC(C)(C)/C=C/c1ccccc1  
 2937 C=CC(=O)OC.Cc1cc2c(c(C)c1Br)C(=O)C(C)(C)C2>>COC(=O)/C=C/c1c(C)cc2c(c1C)C(=O)C(C)(C)  
 2938 C=CC(=O)OC.Cc1cc(C)c(C(=O)n2cc(I)cn2)c(C)c1>>COC(=O)/C=C/c1enn(C(=O)c2c(C)cc(C)cc2C)c  
 2939 C=CC(N)=O.CCOC(=O)c1ccccc1Br>>CCOC(=O)c1ccccc1/C=C/C(N)=O  
 2940 C=CC(=O)OC.CC(C)N(C(=O)Cc1c(Br)cccc1I)C(C)C>>COC(=O)/C=C/c1cccc(Br)c1CC(=O)N(C(C)C)  
 )(C)C  
 2941 C=Cc1cc(OC)c(O)c(OC)c1.Oc1ccc(O)c(I)c1>>COc1cc(/C=C/c2cc(O)ccc2O)cc(OC)c1O  
 2942 C=CC(=O)OCCN(C)C.Cc1ccc(NC(=O)c2coc3ccc(Br)cc3c2=O)cc1>>Cc1ccc(NC(=O)c2coc3ccc(/C=C/  
 /C(=O)OCCN(C)C)cc3c2=O)cc1  
 2943 C=Cc1ccc(C)cc1.CC(=S)NS(=O)(=O)c1ccc(Br)cc1>>CC(=S)NS(=O)(=O)c1ccc(/C=C/c2ccc(C)cc2)cc  
 2944 C=CC(C)=O.Nc1cc(Br)nc1I>>CC(=O)/C=C/c1nc(Br)cc1N  
 2945 C=CC(=O)OCC.O=Cc1ccc(Br)cc1>>CCOC(=O)/C=C/c1ccc(C=O)cc1  
 2946 C=CC(=O)OC.Cc1ccc(S(=O)(=O)NCCc2ccccc2Br)cc1>>COC(=O)/C=C/c1ccccc1CCNS(=O)(=O)c1c  
 cc(C)cc1  
 2947 C=CC(=O)N(C)C.CC(=O)c1ccc(Br)cc1>>CC(=O)c1ccc(/C=C/C(=O)N(C)C)cc1  
 2948 C=CC(N)=O.Cc1ccccc1I>>Cc1ccccc1/C=C/C(N)=O  
 2949 C=Cc1ccccc1.COc1ccc2c(=O)c(I)coc2c1>>COc1ccc2c(=O)c(/C=C/c3ccccc3)coc2c1  
 2950 C=CC(=O)OCC.CCOC(=O)Nc1ccccc1C1=C(I)CCN1S(=O)(=O)c1ccc(C)cc1>>CCOC(=O)/C=C/C1=  
 C(c2ccccc2NC(=O)OCC)N(S(=O)(=O)c2ccc(C)cc2)CC1  
 2951 C=CC(=O)OC.O=[N+](O-)]c1cc(Cl)cc(I)c1>>COC(=O)/C=C/c1cc(Cl)cc([N+](=O)[O-])c1  
 2952 C=CC(=O)CCCCC.O=Cc1ccc(Br)cc1>>CCCCC(=O)/C=C/c1ccc(C=O)cc1  
 2953 C=CCP(=O)(OCCCC)OCCCC.Ic1ccccc1>>CCCCOP(=O)(C/C=C/c1ccccc1)OCCCC  
 2954 C=CC(=O)OC.COc1nccc(C#N)c1I>>COC(=O)/C=C/c1c(C#N)ccnc1OC

2955 C=CC(=O)OCC.CCOC(=O)c1cccc1I>>CCOC(=O)/C=C/c1cccc1C(=O)OCC  
2956 C=CC(=O)N(C)Cc1oc2cccc2c1C.O=C1Nc2ncc(Br)cc2CNC12CCCC2>>Cc1c(CN(C)C(=O)/C=C/c2cnc3c(c2)CNC2(CCCC2)C(=O)N3)oc2cccc12  
2957 C=CC(C)=O.FC1(F)C(I)=C1c1cccc1>>CC(=O)/C=C/C1=C(c2cccc2)C1(F)F  
2958 C=Cc1ccc(F)cc1.C[Si](C)(C)I>>C[Si](C)(C)/C=C/c1ccc(F)cc1  
2959 Brc1ccc2cc[nH]c2n1.C=Cc1cccc1>>C(=C/c1ccc2cc[nH]c2n1)\c1cccc1  
2960 C=CC(=O)OCc1cccc1.C[Si](C)(C)CCOC(=O)c1ccc(I)cc1>>C[Si](C)(C)CCOC(=O)c1ccc(/C=C/C(=O)OCc2cccc2)cc1  
2961 C=Cc1ccc(C=C)cc1.N#CCc1ccc(Br)cc1>>C=Cc1ccc(/C=C/c2ccc(CC#N)cc2)cc1  
2962 C=C(NC(C)=O)c1ccc(Cl)cn1.C=CC(=O)OCCCC>>C=C(NC(C)=O)c1ccc(/C=C/C(=O)OCCCC)cn1  
2963 C=Cc1ccc([Si](OC)(OC)OC)cc1.CO[Si](OC)(OC)c1ccc(Br)cc1>>CO[Si](OC)(OC)c1ccc(/C=C/c2ccc([Si](OC)(OC)OC)cc2)cc1  
2964 C=CC(C)(C)O.FC(F)(F)c1ccc(Br)cc1>>CC(C)(O)/C=C/c1ccc(C(F)(F)F)cc1  
2965 C=C[C@H](C)[C@H]1CC[C@H]2[C@H]3CC(=O)[C@H]4C[C@H](O)CC[C@H]4(C)[C@H]3CC[C@H]21C.Ic1cccc1>>C[C@H]/(C=C/c1cccc1)[C@H]1CC[C@H]2[C@H]3CC(=O)[C@H]4C[C@H](O)CC[C@H]4(C)[C@H]3CC[C@H]21C  
2966 C=CO[C@H]1CCCN1C.COc1ccc2c(c1)CCC=C2OS(=O)(=O)C(F)(F)F>>COc1ccc2c(c1)CCC=C2/C=C/OC[C@H]1CCCN1C  
2967 C=CC(=O)OC(C)(C)C.COc1cc(Br)cc(F)c1C1c2ccc3c(cnn3C3CCCCO3)c2CC(C)(C)N1C[C@H](C)CF>>COc1cc(/C=C/C(=O)OC(C)(C)C)cc(F)c1C1c2ccc3c(cnn3C3CCCCO3)c2CC(C)(C)N1C[C@H](C)C  
2968 C=Cc1cccc1.C[Si](C)(C)CI>>C[Si](C)(C)C/C=C/c1cccc1  
2969 C=Cc1ccc(C)nc1.COc1cc(I)c2c3c1O[C@H]1[C@H]34CCN(C)[C@H](C2)[C@H]42C=C[C@H]1(OC)c1c(OC(C)=O)ccc(O)c12>>COc1cc(/C=C/c2ccc(C)nc2)c2c3c1O[C@H]1[C@H]34CCN(C)[C@H](C2)[C@H]42C=C[C@H]1(OC)c1c(OC(C)=O)ccc(O)c12  
2970 C=Cc1ccc(/C=C/c2ccc(C(C)(C)C)cc2)cc1.Ic1ccc(C(c2cccc2)(c2cccc2)c2cccc2)cc1>>CC(C)(C)c1ccc(/C=C/c2ccc(/C=C/c3ccc(C(c4cccc4)(c4cccc4)c4cccc4)cc3)cc2)cc1  
2971 C=CC#N.CNC(=O)c1c(-c2ccc(F)cc2)oc2nc(N(C)S(C)(=O)=O)c(I)cc12>>CNC(=O)c1c(-c2ccc(F)cc2)oc2nc(N(C)S(C)(=O)=O)c(/C=C/C#N)cc12  
2972 C=Cc1cccc(C=O)c1.FC(F)(F)I>>O=Cc1cccc(/C=C/C(F)(F)F)c1  
2973 C=Cc1cccc1N.CN(C(=O)c1cccc1)c1ccc2c(c1)[nH]c(=NC(=O)c1ccc(Br)s1)n2CCC(N)=O>>CN(C(=O)c1cccc1)c1ccc2c(c1)[nH]c(=NC(=O)c1ccc(/C=C/c3cccc3N)s1)n2CCC(N)=O  
2974 C=CC(=O)Nc1cccc2ccnc12.O=[N+](I)O)c1ccc(I)c1>>O=C(/C=C/c1cccc([N+](=O)[O-])c1)Nc1cccc2ccnc12  
2975 C=CC(=O)OC(C)(C)C.CCCOc1ccc(Br)cc1-c1nc2c(c(C)nn2CCC)c(=O)[nH]1>>CCCOc1ccc(/C=C/C(=O)OC(C)(C)C)cc1-c1nc2c(c(C)nn2CCC)c(=O)[nH]1  
2976 C=CC(C)=O.COc1ccc2cc(I)ccc2c1>>COc1ccc2cc(/C=C/C(C)=O)ccc2c1  
2977 Brc1cccc1.C=Cc1ccc(C(F)(F)F)cc1>>FC(F)(F)c1ccc(/C=C/c2cccc2)cc1  
2978 C=CC(=O)N1CCOCC1.CC(=O)OCCc1cc2c3cc(Cl)ccc3nc3c4cccc4n(C)c(c1)c23>>CC(=O)OCCc1cc2c3cc(/C=C/C(=O)N4CCOCC4)ccc3nc3c4cccc4n(C)c(c1)c23  
2979 C=CC(N)=O.N#Cc1c(-c2cccc(Br)c2)cc(-c2cccc2)nc1N>>N#Cc1c(-c2cccc(/C=C/C(N)=O)c2)cc(-c2cccc2)nc1N  
2980 C=CCP(=O)(OCC)OCC.COc1nc2ccc(Br)cc2nc1OC>>CCOP(=O)(C/C=C/c1ccc2nc(OC)c(OC)nc2c1)  
2981 Brc1cccs1.C=CB1OC(C)CC(C)(C)O1>>CC1CC(C)(C)OB(/C=C/c2cccs2)O1  
2982 C=Cc1cc2c(cc1Cn1cccn1)C(C)(C)CCC2(C)C.CCOC(=O)c1ccc(Br)cc1>>CCOC(=O)c1ccc(/C=C/c2cc3c(cc2Cn2cccn2)C(C)(C)CCC3(C)C)cc1  
2983 C=CC(=O)OCC.NC(=O)c1cccc(I)c1>>CCOC(=O)/C=C/c1cccc(C(N)=O)c1  
2984 C=C[Si](C)(C)c1cccc1.O=C(c1cccc1)c1ccc(Br)cc1>>C[Si](C)(C)/C=C/c1ccc(C(=O)c2cccc2)cc1)c1cccc1  
2985 C=CC(=O)OC.CC(C)(C)OC(=O)Cn1c(Br)cncc(NC2CCC2)c1=O>>COC(=O)/C=C/c1cncc(NC2CCC2)c(=O)n1CC(=O)OC(C)(C)C  
2986 C=Cc1cccc1.Cc1cc(C)cc(Br)c1>>Cc1cc(C)cc(/C=C/c2cccc2)c1  
2987 C=Cc1ccncc1.Cn1cc(C(CNC(=O)OC(C)(C)C)c2cncc(Br)c2)c2cccc21>>Cn1cc(C(CNC(=O)OC(C)(C)C)c2cncc(/C=C/c3ccncc3)c2)c2cccc21  
2988 C=CC(=O)OCC.COc1ccc(Br)cc1F>>CCOC(=O)/C=C/c1ccc(OC)c(F)c1  
2989 C=CC(=O)OC.Cc1ccc(S(=O)(=O)n2ccc3c(Br)cccc32)cc1>>COC(=O)/C=C/c1cccc2c1ccn2S(=O)(=O)c1ccc(C)cc1  
2990 C=Cc1cccc(O)c1.COc1ccc(Br)cc1>>COc1ccc(/C=C/c2cccc(O)c2)cc1  
2991 C=Cc1ccncc1.CCOc1ccc(I)cc1>>CCOc1ccc(/C=C/c2ccncc2)cc1  
2992 C=Cc1ccc(N)cc1.CCN1c2ncc(I)cc2C(=O)N(C)c2ccncc21>>CCN1c2ncc(/C=C/c3ccc(N)cc3)cc2C(=O)N(C)c2ccncc21



2993 Br1ccc2c(c1)OCO2.C=Cc1cccc1N>>Nc1cccc1/C=C/c1ccc2c(c1)OCO2  
2994 C=CC#N.Nc1nc(N)c2c(I)cn([C@H]3C[C@H](O)[C@@H](CO)O3)c2n1>>N#C/C=C/c1cn([C@H]2C[C@H](O)[C@@H](CO)O2)c2nc(N)nc(N)c12  
2995 C=CC(=O)OC(C)(C)C.O=C(NC[C@@H]1CCc2cc(I)ccc2O1)OCc1cccc1>>CC(C)(C)OC(=O)/C=C/c1ccc2c(c1)CC[C@@H](CNC(=O)OCc1cccc1)O2  
2996 C=Cc1cccc(OC)c1.Cn1c(=O)c2c(cc(Br)n2C)n(C)c1=O>>COc1cccc(/C=C/c2cc3c(c(=O)n(C)c(=O)n3C)n2C)c1  
2997 C=CS(=O)(=O)c1cccc1.O=Cc1ccc(Br)cc1>>O=Cc1ccc(/C=C/S(=O)(=O)c2cccc2)cc1  
2998 C=CC(=O)OCC.COc1ccc2c(Br)cc(F)c(O)c2n1>>CCOC(=O)/C=C/c1cc(F)c(O)c2nc(OC)ccc12  
2999 C=CC(=O)OC.CC(C)(C)OC(=O)Nc1cccc1Br>>COC(=O)/C=C/c1cccc1NC(=O)OC(C)(C)C  
3000 C=CC(=O)OC.COc1c(CN(C(=O)c2cccc2)c2cccc(Br)c2)ccc2c1OC(C)(C)[C@@H](O)[C@H]2O>>COC(=O)/C=C/c1cccc(N(Cc2ccc3c(c2OC)OC(C)(C)[C@@H](O)[C@H]3O)C(=O)c2cccc2)c1  
3001 C=CC(=O)OC.Ic1[nH]c2cccc2c1CCOC1CCCCO1>>COC(=O)/C=C/c1[nH]c2cccc2c1CCOC1CCC  
3002 C=Cc1ccc(Cl)cc1.CCn1c(=O)c2c(cc(Br)n2C)n(CC)c1=O>>CCn1c(=O)c2c(cc(/C=C/c3ccc(Cl)cc3)n2C)n(CC)c1=O  
3003 C=Cc1ccc(OC)cc1.Cc1ccc(Cl)cc1>>COc1ccc(/C=C/c2ccc(C)cc2)cc1  
3004 C=Cc1ccc(OC)cc1.COc1cccc(Br)c1>>COc1ccc(/C=C/c2cccc(OC)c2)cc1  
3005 C=Cc1cnc(C#N)c1Nc1ccc2[nH]ccc2c1C.ClCCOc1cccc(Br)c1>>Cc1c(Nc2c(C#N)cnc2/C=C/c2cccc(OCCCl)c2)ccc2[nH]ccc12  
3006 C=Cc1cccc1C.Cc1ccc(Br)c(N)c1>>Cc1ccc(/C=C/c2cccc2C)c(N)c1  
3007 C=Cc1cncnc1.COc1ccc(Br)cc1>>COc1ccc(/C=C/c2cncnc2)cc1  
3008 Br1ccc2ccc3cccc4ccc1c2c34.C=CP(=O)(OCC)OCC>>CCOP(=O)(/C=C/c1ccc2ccc3cccc4ccc1c2c34)  
3009 C=Cc1ccc(OC)c(OC)c1.CC(C)(C)C(=O)Nc1nc(NC(=O)C(C)(C)C)c2cc(Br)cnc2n1>>COc1ccc(/C=C/c2cnc3nc(NC(=O)C(C)(C)C)nc(NC(=O)C(C)(C)C)c3c2)cc1OC  
3010 C=Cc1ccc(OC)cc1.CN(C(=O)c1cccc1)c1ccc2c(c1)[nH]c(=NC(=O)c1ccc(Br)s1)n2CCC(N)=O>>COc1ccc(/C=C/c2ccc(C(=O)N=c3[nH]c4cc(N(C)C(=O)c5cccc5)ccc4n3CCC(N)=O)s2)cc1  
3011 C=CS(=O)(=O)CC.O=C(OCc1cccc1)N1CCC[C@H]1Cc1c[nH]c2ccc(Br)cc12>>CCS(=O)(=O)/C=C/c1ccc2[nH]cc(C[C@H]3CCCN3C(=O)OCc3cccc3)c2c1  
3012 C=CC#N.Cc1cc(-c2cccc2)n2nc(-c3cccc3)c(I)c2n1>>Cc1cc(-c2cccc2)n2nc(-  
3013 C=Cc1cccc(CN2CCN(C)CC2)n1.Cc1c(Nc2c(I)cncc2C#N)cc(Cl)c2[nH]ccc12>>Cc1c(Nc2c(C#N)cnc2/C=C/c2cccc(CN3CCN(C)CC3)n2)cc(Cl)c2[nH]ccc12  
3014 C=CCC(C)N(C)C(=O)OC(C)(C)C.O=C1c2cccc2C(=O)N1c1cccc(Br)c1>>CC(C/C=C/c1cccc(N2C(=O)c3cccc3C2=O)c1)N(C)C(=O)OC(C)(C)C  
3015 C=CC(=O)OCCCC.Cc1cccc(Br)c1>>CCCCOC(=O)/C=C/c1cccc(C)c1  
3016 C=Cc1cncnc1.Cc1nc(Br)c2c(c1O)COC(C)(C)OC2>>Cc1nc(/C=C/c2cncnc2)c2c(c1O)COC(C)(C)OC2  
3017 Br1cccc1.C=CC=O>>O=C/C=C/c1cccc1  
3018 C=CCOc1cccc1.Ic1cccs1>>C(=C/c1cccs1)COc1cccc1  
3019 C=CC(=O)OCCO.C[C@]12C[C@@]34C=C(Sc5cccc(I)c5)C(=O)[C@@](C)(CCC(=O)Nc5c(O)ccc(C(=O)O)c5O)[C@@H]3[C@H](C[C@H]1C4)O2>>C[C@]12C[C@@]34C=C(Sc5cccc(/C=C/C(=O)OCCO)c5)C(=O)[C@@](C)(CCC(=O)Nc5c(O)ccc(C(=O)O)c5O)[C@@H]3[C@H](C[C@H]1C4)O2  
\*CNCCOCCOCCOCCNC(=O)COc1ccc(C(Cc2cc(OC)cc(OC)c2)NC(=O)c2cccc(C=C)c2)cc1.O=[N+](I)O-]c1ccc(I)c([N+](=O)[O-])c1>>\*CNCCOCCOCCOCCNC(=O)COc1ccc(C(Cc2cc(OC)cc(OC)c2)NC(=O)c2cccc(/C=C/c3ccc(I)N+I(=O)I)cc3I)N+I(=O)I)cc1  
3020 C=Cc1ccc(/C=C/c2ccc(C=O)cc2)cc1.COCCOCCOCCOCC(COCCOCCOCCOCC)Oc1ccc(I)cc1>>COC  
3021 COCCOCCOCC(COCCOCCOCCOCC)Oc1ccc(/C=C/c2ccc(/C=C/c3ccc(C=O)cc3)cc2)cc1  
3022 C=Cc1cccc1.CC(=O)NCCc1cccc1Br>>CC(=O)NCCc1cccc1/C=C/c1cccc1  
3023 C=CC(=O)OC.CC(C)(C)OC(=O)NC1(c2ccc(-c3nc4c5cccc(Br)c5nn4cc3-c3cccc3)cc2)CCC1>>COC(=O)/C=C/c1cccc2c1nn1cc(-c3cccc3)c(-  
3024 C=CC#N.Cn1ncc(I)cc1=O>>Cn1ncc(/C=C/C#N)cc1=O  
3025 C=CC(=O)OCC.Fc1ccc(Oc2cccc(Br)c2)cc1>>CCOC(=O)/C=C/c1cccc(Oc2ccc(F)cc2)c1  
3026 Br1cnc2cccc2c1.C=Cc1ccc([N+](=O)[O-])c1>>O=[N+](I)O-]c1ccc(/C=C/c2cnc3cccc3c2)c1  
3027 C=Cc1cncnc1.CCCCCCCCCCCCCOc1cc(/C=C/c2ccc(I)cc2)cc(OCCCCCCCCCCCCC)c1OCCCCCCCC  
3028 C=CC>>CCCCCCCCCCCCCOc1cc(/C=C/c2ccc(/C=C/c3cncnc3)cc2)cc(OCCCCCCCCCCCCC)c1OCCCCCCCCCCCCC  
3029 C=Cc1cccc1.Ic1cccc2cccc12>>C(=C/c1cccc2cccc12)\c1cccc1  
3030 C=Cc1cccc1.C[Si](C)(C)[Si](C)(C)C1[Si](C)(C)[Si](C)(C)C(c2ccc(I)cc2)[Si](C)(C)[Si]1(C)C>>C[Si](C)(C)[Si](C)(C)C1[Si](C)(C)[Si](C)(C)C(c2ccc(/C=C/c3cccc3)cc2)[Si](C)(C)[Si]1(C)C  
C=CN1C(=O)c2cccc2C1=O.FC(F)(F)c1ccc(Cl)cc1>>O=C1c2cccc2C(=O)N1/C=C/c1ccc(C(F)(F)F)c

3031 C=Cc1ccc(C(=O)OC)cc1.CC(C)(C)C(=O)Nc1nc2ncc(Br)cc2c(=O)[nH]1>>COC(=O)c1ccc(/C=C/c2nc  
c3nc(NC(=O)C(C)(C)C)[nH]c(=O)c3c2)cc1  
3032 C=CC(=O)N(C)OC.Ic1ccc2c(c1)OCCO2>>CON(C)C(=O)/C=C/c1ccc2c(c1)OCCO2  
3033 C=CC(=O)O.Fc1ccc(Br)c(F)c1>>O=C(O)/C=C/c1ccc(F)cc1F  
3034 C=Cc1cccc([N+](=O)[O-])c1.Cc1ccc(Br)cc1>>Cc1ccc(/C=C/c2cccc([N+](=O)[O-])c2)cc1  
3035 C=CC(=O)OCCCC.Cc1ccc(C)c1Br>>CCCCOC(=O)/C=C/c1c(C)cccc1C  
3036 C=Cc1ccc(F)cc1.C[Si](C)(C)Cl>>C[Si](C)(C)/C=C/c1ccc(F)cc1  
3037 C=CC(=O)OC.O=C(O)c1ccc(Br)c2ccccc12>>COC(=O)/C=C/c1ccc(C(=O)O)c2ccccc12  
3038 C=CC(=O)O.CC(C)(C)OC(=O)N[C@@H](Cc1ccccc1Br)C(=O)O>>CC(C)(C)OC(=O)N[C@@H](Cc1  
ccccc1/C=C/C(=O)O)C(=O)O  
3039 C=CC(=O)OC(C)(C)C.O=[N+](O-  
)]c1ccc(CNc2ccc(Br)cc2)cc1>>CC(C)(C)OC(=O)/C=C/c1ccc(NCc2ccc([N+](=O)[O-])cc2)cc1  
3040 C=CCC(O)CCCCC.Ic1ccccc1>>CCCCCCC(O)C/C=C/c1ccccc1  
3041 C=C[C@@H]1CCCCN1C(=O)OC(C)(C)C.FC(F)(F)c1ccc(I)cc1>>CC(C)(C)OC(=O)N1CCCC[C@H]  
1/C=C/c1ccc(C(F)(F)F)cc1  
3042 Brc1cccn1.C=CC(=O)CC>>CCC(=O)/C=C/c1cccn1  
3043 C=CC(C)=O.O=C1Cc2c([nH]c3ccc(C(F)(F)F)cc23)-c2cc(I)ccc2N1>>CC(=O)/C=C/c1ccc2c(c1)-  
c1[nH]c3ccc(C(F)(F)F)cc3c1CC(=O)N2  
3044 C=CC[C@H]1O[C@@H]2O[C@@]3(C)CC[C@H]4[C@H](C)CC[C@@H]([C@H]1C)[C@]42OO3.  
Cc1ccc(I)c1>>Cc1ccc(/C=C/C[C@H]2O[C@@H]3O[C@@]4(C)CC[C@H]5[C@H](C)CC[C@@H]  
1([C@H]2C)[C@]53OO4)c1  
3045 C=Cc1ccc(OC)c(OC)c1.CCOC(=O)C(F)I>>CCOC(=O)C(F)/C=C/c1ccc(OC)c(OC)c1  
3046 C=C[C@H](O)[C@@H](O)COCc1ccc(OC)cc1.Ic1ccccc1>>COc1ccc(COC[C@H](O)[C@@H](O)/C  
=C/c2ccccc2)cc1  
3047 C=Cc1cccn1.Clc1ccc(COc2ccccc2)c(Br)c1>>Clc1ccc(COc2ccccc2)c(/C=C/c2cccn2)c1  
3048 C=CC(N)=O.Clc1ccc(I)cc1>>NC(=O)/C=C/c1ccc(Cl)cc1  
3049 C=CCOc1ccccc1.FC(F)(F)c1ccc(I)cc1>>FC(F)(F)c1ccc(/C=C/COc2ccccc2)cc1  
3050 C=Cc1ccc(Cl)cc1.Oc1ccccc1I>>Oc1ccccc1/C=C/c1ccc(Cl)cc1  
3051 Brc1nn(C2CCCCO2)c2ccccc12.C=CC(=O)OCCCC>>CCCCOC(=O)/C=C/c1nn(C2CCCCO2)c2ccccc1  
3052 C=Cc1cccn1.CC(C)(C)OC(=O)N1CCC[C@H]1COc1nc(Cl)c(I)c1>>CC(C)(C)OC(=O)N1CCC[C@  
H]1COc1nc(Cl)c(/C=C/c2cccn2)c1  
3053 C=Cc1ccccc1.CC(=O)OC[C@H]1O[C@@H](n2cnc3c(Cl)nc(I)nc32)[C@H](OC(C)=O)[C@@H]1OC(  
C)=O>>CC(=O)OC[C@H]1O[C@@H](n2cnc3c(Cl)nc(/C=C/c4ccccc4)nc32)[C@H](OC(C)=O)[C@  
@H]1OC(C)=O  
3054 C=CC(OC)OCC.O=Cc1ccc(F)cc1Br>>CCOC(/C=C/c1cc(F)ccc1C=O)OCC  
C=CC(=O)N(C)C.C[C@]12C[C@@]34C=C(Sc5ccc(I)cc5)C(=O)[C@@](C)(CCC(=O)Nc5c(O)ccc(C(  
=O)O)c5O)[C@@H]3[C@H](C[C@@H]1C4)O2>>CN(C)C(=O)/C=C/c1ccc(SC2=C[C@]34C[C@H]  
5C[C@H](O[C@@]5(C)C3)[C@H]4[C@]1(C)(CCC(=O)Nc3c(O)ccc(C(=O)O)c3O)C2=O)cc1  
3055 C=C[C@](CO)(CCC=C(C)C)OCc1ccc(OC)cc1.COc1ccc(OC(C)=O)cc1Br>>COc1ccc(CO[C@@](/C=  
C/c2cc(OC(C)=O)ccc2OC)(CO)CCC=C(C)C)cc1  
3056 Brc1ccccc1.C=CC(=O)CC>>CCC(=O)/C=C/c1ccccc1  
3057 C=Cc1ccc2ccccc2c1.Cc1ccc(Br)cc1>>Cc1ccc(/C=C/c2ccc3ccccc3c2)cc1  
3058 C=Cc1ccc(C#N)cc1.CCOC(=O)C(F)(F)Br>>CCOC(=O)C(F)(F)/C=C/c1ccc(C#N)cc1  
3059 C=CC(=O)OC(C)(C)C.Ic1cnn(CCOc2ccccc2)c1>>CC(C)(C)OC(=O)/C=C/c1cnn(CCOc2ccccc2)c1  
3060 C=Cc1ccc(N)cc1.COc1ccc(Br)cc1>>COc1ccc(/C=C/c2ccc(N)cc2)cc1  
3061 C=CC(=O)OCC.CC(C)(C)OC(=O)NCCOc1cc(C#N)ccc1I>>CCOC(=O)/C=C/c1ccc(C#N)cc1OCCNC(  
=O)OC(C)(C)C  
3062 Brc1ccccc1.C=CS(=O)(=O)c1ccccc1>>O=S(=O)/C=C/c1ccccc1c1ccccc1  
3063 C=CC(=O)OCC[Si](C)(C)C.O=C(C(=O)N1CCCC[C@H]1C(=O)O)c1ccc(I)c1>>C[Si](C)(C)CCOC(=  
O)/C=C/c1ccc(C(=O)C(=O)N2CCCC[C@H]2C(=O)O)c1  
3064 C=CC(=O)OC(C)(C)C.O=S(=O)(Oc1ccn(-c2ccccc2)n1)C(F)(F)F>>CC(C)(C)OC(=O)/C=C/c1ccn(-  
c2ccccc2)n1  
3065 C=Cc1ccccc1.Ic1ccccc1>>C(/C=C/c1ccccc1)c1ccccc1  
3066 C=Cc1ccc(/C=C/c2ccc(N(C)C)cc2)cc1.CC1(C)C2=CC(=O)C(F)=CC2=C(c2ccc(Br)cc2S(=O)(=O)O)c2  
cc(F)c(O)cc21>>CN(C)c1ccc(/C=C/c2ccc(/C=C/c3ccc(C4=C5C=C(F)C(=O)C=C5C(C)(C)c5cc(O)c(F)  
cc54)c(S(=O)(=O)O)c3)cc2)cc1  
3067 \*CNCCCOCCOCCOCCNC(=O)COc1ccc(C(Cc2cc(OC)cc(OC)c2)NC(=O)c2ccc(C=C)cc2)cc1.CC(C  
(C)OC(=O)n1ccc2cc(I)ccc21>>\*CNCCCOCCOCCOCCNC(=O)COc1ccc(C(Cc2cc(OC)cc(OC)c2)N  
C(=O)c2ccc(/C=C/c3ccc4c(ccn4C(=O)OC(C)(C)C)c3)cc2)cc1  
3068 C=CC(=O)O.Ic1ccc2[nH]ccc2c1>>O=C(O)/C=C/c1ccc2[nH]ccc2c1

3070 C=CCOCC.COC(=O)/C=C/c1cccc(N(Cc2ccc(Br)cc2)C(=O)C2CCCC2)c1>>CCOC/C=C/c1ccc(CN(  
C(=O)C2CCCC2)c2cccc(/C=C/C(=O)OC)c2)cc1  
3071 C=CC(=O)OCC.COc1nc(Br)cc2cccc12>>CCOC(=O)/C=C/c1cc2cccc2c(OC)n1  
C=CC(=O)NC.C[C@]12C[C@@]34C=C(Sc5ccc(I)cc5)C(=O)[C@@](C)(CCC(=O)Nc5c(O)ccc(C(=O)  
3072 )O)c5O)[C@@H]3[C@H](C[C@@H]1C4)O2>>CNC(=O)/C=C/c1ccc(SC2=C[C@]34C[C@H]5C[C  
@H](O)[C@@]5(C)C3)[C@H]4[C@]1(C)(CCC(=O)Nc3c(O)ccc(C(=O)O)c3O)C2=O)cc1  
C=CC(=O)OCC.COc1cc(-  
3073 c2cc3cc(Br)cc(OC)c3o2)ccc1OCc1cccc1>>CCOC(=O)/C=C/c1cc(OC)c2oc(-  
3074 C=Cc1ccc(C(=O)OC)cc1.O=[N+](O-)]c1ccc(Br)cc1>>COC(=O)c1ccc(/C=C/c2ccc([N+](=O)[O-  
C=CC(=O)OCC.CC(C)(C)OC(=O)c1cc(COc2cccc2)ccc1I>>CCOC(=O)/C=C/c1ccc(COc2cccc2)cc1  
3075 C(=O)OC(C)(C)C  
C=CC(=O)OC.Ic1cn2c(n1)[C@@H](OCc1cccc1)[C@@H](OCc1cccc1)[C@H](OCc1cccc1)[C@H]  
3076 ]2COCc1cccc1>>COC(=O)/C=C/c1cn2c(n1)[C@@H](OCc1cccc1)[C@@H](OCc1cccc1)[C@H](  
OCc1cccc1)[C@H]2COCc1cccc1  
3077 C=CC(C)=O.Cc1cc(C)c([I+])c2cc(C)cc(C)cc2C)c(C)c1>>CC(=O)/C=C/c1c(C)cc(C)cc1C  
3078 C=CC(=O)O.c1ccc([I+])c2cccs2)cc1>>O=C(O)/C=C/c1cccs1  
3079 C=CC(=O)OC.COC(=O)[C@@H]1c2cc(Br)ccc2O[C@@H]1c1ccc(OCc2cccc2)cc1>>COC(=O)/C=C  
/c1ccc2c(c1)[C@@H](C(=O)OC)[C@@H](c1ccc(OCc3cccc3)cc1)O2  
3080 C=Cc1ccc(/C=C/c2cccs2)cc1.O=Cc1ccc(Br)cc1>>O=Cc1ccc(/C=C/c2ccc(/C=C/c3cccs3)cc2)cc1  
Br1cccc1.C=Cc1nc2c(=O)[nH]c(N=CN(C)C)nc2n1[C@@H]1C[C@H](O)[C@@H](COC(c2cccc2)  
3081 (c2ccc(OC)cc2)c2ccc(OC)cc2)O1>>COc1ccc(C(OC[C@H]2O[C@H](n3c(/C=C/c4cccc4)nc4c(=O)[n  
H]c(N=CN(C)C)nc43)C[C@@H]2O)(c2cccc2)c2ccc(OC)cc2)cc1  
3082 C=CC(=O)Nc1ccc(OC)cc1.CC(C)(C)c1ccc2[nH]c3c(c2c1)CC(=O)Nc1ccc(I)cc1-  
3>>COc1ccc(NC(=O)/C=C/c2ccc3c(c2)-c2[nH]c4ccc(C(C)(C)C)cc4c2CC(=O)N3)cc1  
3083 C=CC(=O)OCCCC.COc1ccc(I)cc1OC>>CCCCOC(=O)/C=C/c1ccc(OC)c(OC)c1  
3084 C=Cc1ccc2c(c1)CC2.C[Si](C)(OS(=O)(=O)C(F)(F)F)OS(=O)(=O)C(F)(F)F>>C[Si](C)(/C=C/c1ccc2c(  
c1)CC2)OS(=O)(=O)C(F)(F)F  
3085 C=Cc1ccc(F)cc1.Cn1cc(I)c(=O)c2cccc21>>Cn1cc(/C=C/c2ccc(F)cc2)c(=O)c2cccc21  
3086 C=Cc1cccc1.Clc1cccc(I)c1>>Clc1cccc(/C=C/c2cccc2)c1  
3087 C=Cc1cncnc1.CC(=O)c1ccc(Br)cc1>>CC(=O)c1ccc(/C=C/c2cncnc2)cc1  
3088 C=Cc1cccc1.Cc1ccc(-c2c(I)nc3sc4cccc4n23)cc1>>Cc1ccc(-  
3089 Br1cccc1.C=CS(=O)c1cccc1>>O=S(/C=C/c1cccc1)c1cccc1  
3090 C=CC(=O)OCC.FC(F)(F)c1cc(Br)c2cccc(C(F)(F)F)c2n1>>CCOC(=O)/C=C/c1cc(C(F)(F)F)nc2c(C(F)  
(F)F)cccc12  
3091 C=Cc1c2cccc2cc2cccc12.Ic1ccc2c(c1)C1c3cccc4cccc(c34)C21>>C(=C/c1c2cccc2cc2cccc12)\c1c  
cc2c(c1)C1c3cccc4cccc(c34)C21  
3092 C=CC(=O)N(C)Cc1cccc(OC)c1OCC(C)C.CC1(C)NCc2cc(Br)enc2NC1=O>>COc1cccc(CN(C)C(=O)/  
C=C/c2enc3c(c2)CNC(C)(C)C(=O)N3)c1OCC(C)C  
3093 C=CS(=O)(=O)c1cccc1.Cn1cc(/C=C2\SC(=O)NC2=O)c2cc(Br)ccc21>>Cn1cc(/C=C2\SC(=O)NC2=  
O)c2cc(/C=C/S(=O)(=O)c3cccc3)ccc21  
3094 C=CC(N)=O.Cc1cc(Br)c2nc(-c3ccc(C4(NC(=O)OC(C)(C)C)CCC4)cc3)c(-  
c3cccc3)n2c1>>Cc1cc(/C=C/C(N)=O)c2nc(-c3ccc(C4(NC(=O)OC(C)(C)C)CCC4)cc3)c(-  
3095 C=CS(=O)(=O)F.Ic1cc2cccc2o1>>O=S(=O)(F)/C=C/c1cc2cccc2o1  
3096 C=CC(OC(C)=O)OC(C)=O.O=C1c2ccc(Br)cc2CCN1CCCc1cccc1>>CC(=O)OC(/C=C/c1ccc2c(c1)C  
CN(CCCc1cccc1)C2=O)OC(C)=O  
3097 C=CCc1ccc(OC)cc1.COc1cc(I)ccc1O>>COc1ccc(C/C=C/c2ccc(O)c(OC)c2)cc1  
C=C[C@@H](C)[C@H](CCO[Si](C)(C)C(C)C)OC(=O)[C@H](CC(C)C)NC(=O)OC(C)(C)C.COC  
3098 OCc1ccc(I)cc1>>COCOCc1ccc(/C=C/[C@@H](C)[C@H](CCO[Si](C)(C)C(C)C)OC(=O)[C@H](  
CC(C)C)NC(=O)OC(C)(C)C)cc1  
3099 C=CC(=O)OC.CC1(C)Cc2c(Br)c(-c3cncnc3)nn2C1>>COC(=O)/C=C/c1c(-  
3100 C=Cc1ccc(C(=O)OCC)cc1.C[Si](C)(OS(=O)(=O)C(F)(F)F)OS(=O)(=O)C(F)(F)F>>CCOC(=O)c1ccc(/  
C=C/[Si](C)(C)OS(=O)(=O)C(F)(F)F)cc1  
3101 C=CC(F)(F)C(F)(F)C(F)(F)C(F)(F)C(F)(F)C(F)(F)F.N#Cc1ccc(Br)cc1>>N#Cc1ccc(/C=C/C(F)(F)C(F)  
(F)C(F)(F)C(F)(F)C(F)(F)C(F)(F)F)cc1  
3102 C=CC(=O)OC.COc1ccc2c(c1)CCN(c1ccc(C)c(F)c1)C2(C)c1ccc(Br)cc1>>COC(=O)/C=C/c1ccc(C2(C  
)c3ccc(OC)cc3CCN2c2ccc(C)c(F)c2)cc1  
3103 C=CC(=O)OC.CCn1cc(CC(=O)NC)c2c(OC)c(Br)cc(F)c21>>CCn1cc(CC(=O)NC)c2c(OC)c(/C=C/C(=  
O)OC)cc(F)c21  
3104 C=Cc1cccc1.N#Cc1cncc(Br)c1>>N#Cc1cncc(/C=C/c2cccc2)c1  
3105 C=Cc1ccc(OC)cc1.Oc1cc(Br)cc(O)c1F>>COc1ccc(/C=C/c2cc(O)c(F)c(O)c2)cc1

C=CC(=O)OCc1cc(OC)CCCCCCCCCCCCCCCCCCCCC)c(OC)CCCCCCCCCCCCCCCCCCCCC)c(OC)CCCCCCCC  
3106 CCCCCCCCCC)c1.CC(=O)c1ccc(I)cc1>>CCCCCCCCCCCCCCCCCCCCCOCc1cc(COC(=O)/C=C/c2ccc(C  
(C)=O)cc2)cc(OC)CCCCCCCCCCCCCCCCCCCCC)c1OC)CCCCCCCCCCCCCCCCCCCCC  
3107 C=CC(=O)OCC.CCCCCc1ccc(-c2ccc(I)cc2OCCO)cc1>>CCCCCc1ccc(-  
c2ccc(/C=C/C(=O)OCC)cc2OCCO)cc1  
3108 C=Cc1cccc(N)n1.CN(C(=O)c1cccc1)c1ccc2c(c1)[nH]c(=NC(=O)c1ccc(Br)s1)n2CCC(N)=O>>CN(C(  
=O)c1cccc1)c1ccc2c(c1)[nH]c(=NC(=O)c1ccc(/C=C/c3cccc(N)n3)s1)n2CCC(N)=O  
3109 C=Cc1ccc2c(c1)CC[C@@H]1[C@@H]2CC[C@]2(C)[C@@H](O[Si](C)(C)C(C)(C)C)CC[C@@H]1  
2.C[Si](C)(C)I>>CC(C)(C)[Si](C)(C)O[C@H]1CC[C@H]2[C@@H]3CCc4cc(/C=C/[Si](C)(C)C)ccc4  
[C@H]3CC[C@]12C  
3110 C=Cc1cccc1.Ic1cnn2c(-c3cccc3)cc(-c3cccc3)nc12>>C(=C/c1cnn2c(-c3cccc3)cc(-  
c3cccc3)nc12)\c1cccc1  
3111 C=Cc1ccc(OC(=O)OCC)cc1.Oc1ccc(-c2oc3cc(O)cc(Br)c3c2-  
c2cc(O)cc(O)c2)cc1>>CCOC(=O)COc1ccc(/C=C/c2cc(O)cc3oc(-c4ccc(O)cc4)c(-  
3112 C=CC(OC)OCC.Fc1cccc1I>>CCOC(/C=C/c1cccc1F)OCC  
C=CCN(C(=O)C(C)(C)C)[C@H](C)c1ccc(Cl)cc1.O=C1Nc2ncccc2[C@@]12Cc1cc(Br)enc1C2>>C[C  
3113 @H](c1ccc(Cl)cc1)N(C/C=C/c1cnc2c(c1)C[C@@]1(C2)C(=O)Nc2ncccc21)C(=O)C(C)(C)C  
3114 C=CCC(C)O.FC(F)(F)c1cccc(Cl)c1>>CC(O)C/C=C/c1cnc(C(F)(F)F)c1  
3115 C=Cc1ccc(C(C)(C)C)cc1.FC(F)(F)C(F)(F)C(F)(F)C(F)(F)C(F)(F)Br>>CC(C)(C)c1ccc(/C=C/C  
(F)(F)C(F)(F)C(F)(F)C(F)(F)C(F)(F)C(F)(F)F)cc1  
3116 C=CC=O.FC1(F)C(I)=C1c1ccc(Br)cc1>>O=C/C=C/C1=C(c2ccc(Br)cc2)C1(F)F  
3117 C=CCOc1cccc(C)c1.COc1ccc(I)cc1>>COc1ccc(/C=C/COc2cccc(C)c2)cc1  
3118 C=CC(C)=O.Ic1c(-c2cccc2)nnn1Cc1cccc1>>CC(=O)/C=C/c1c(-c2cccc2)nnn1Cc1cccc1  
3119 C=CC(=O)Nc1cccc1NC(=O)OC(C)(C)C.COCC(=O)[C@H]1CN(CCF)C[C@@H]1c1ccc(Br)cc1>>C  
COC(=O)[C@H]1CN(CCF)C[C@@H]1c1ccc(/C=C/C(=O)Nc2cccc2NC(=O)OC(C)(C)C)cc1  
3120 Bre1c2cccc2cc2cccc12.C=CCn1nnc2cccc21>>C(=C/c1c2cccc2cc2cccc12)\Cn1nnc2cccc21  
3121 C=CC(=O)N(C)Cc1cc2cccc2s1.CC1(C)C(=O)Nc2ncc(Br)cc21>>CN(Cc1cc2cccc2s1)C(=O)/C=C/c1  
cnc2c(c1)C(C)(C)C(=O)N2  
3122 Bre1cnc(NCc2cccc2)c2cccc12.C=CC(C)=O>>CC(=O)/C=C/c1cnc(NCc2cccc2)c2cccc12  
3123 C=CC(=O)OC.COC(=O)c1c(C)nc(OC)c(C#N)c1-c1ccc(Br)cc1>>COC(=O)/C=C/c1ccc(-  
c2c(C#N)c(OC)nc(C)c2C(=O)OC)cc1  
3124 C=Cc1cc(C)ccc1C.O=Cc1cccc1Br>>Cc1ccc(C)c(/C=C/c2cccc2C=O)c1  
3125 C=CC1CC(=O)N1.Cc1cccc(I)c1>>Cc1cccc(/C=C/C2CC(=O)N2)c1  
3126 C=CC(=O)OC.COc1ccc(NC(=O)C(C)(C)C)c(I)c1OC>>COC(=O)/C=C/c1c(NC(=O)C(C)(C)C)ccc(OC  
)c1OC  
3127 C=CCn1c(-c2ccc(OC)cc2F)nc2cccc2c1=O.O=C(CN1C(=O)COc2cccc21)c1ccc(Br)cc1>>COc1ccc(-  
c2nc3cccc3c(=O)n2C/C=C/c2ccc(C(=O)CN3C(=O)COc4cccc43)cc2)c(F)c1  
3128 C=CC(=O)OC.O=Cc1cc(Cl)ccc1Br>>COC(=O)/C=C/c1ccc(Cl)cc1C=O  
3129 C=Cc1ccc(N(C)CCCCCCCCCCCCCCCCCCCCCCCCC)cc1.O=Cc1c2cccc2c(Br)c2cccc12>>CCCCC  
CCCCCN(C)CCCCCCCCCCCCCCCCCCCCCCCCC)c1ccc(/C=C/c2c3cccc3c(C=O)c3cccc23)cc1  
3130 C=Cc1ccc(Cl)cc1.O=Cc1ccc(O)c(Br)c1>>O=Cc1ccc(O)c(/C=C/c2ccc(Cl)cc2)c1  
3131 C=CCC1(O)CCN(C(=O)OC(C)(C)C)CC1.CCc1nn2c(C)cc(C)nc2c1Cc1ccc(Br)cc1>>CCc1nn2c(C)cc(  
C)nc2c1Cc1ccc(/C=C/CC2(O)CCN(C(=O)OC(C)(C)C)CC2)cc1  
3132 C=CC(=O)OC.Ic1ccc2cccc2c1>>COC(=O)/C=C/c1ccc2cccc2c1  
3133 C=CC(OC)OC.Fc1cc(C(F)(F)F)ccc1I>>COC(/C=C/c1ccc(C(F)(F)F)cc1F)OC  
3134 C=CC(=O)OC.O=CNc1ccc(Cl)cc1I>>COC(=O)/C=C/c1cc(Cl)ccc1NC=O  
3135 C=CC(=O)N1CCOCC1.O=C1Nc2ccc(Br)cc2C1=O>>O=C1Nc2ccc(/C=C/C(=O)N3CCOCC3)cc2C1=  
C=Cc1cccc(C(F)(F)F)c1.CN(C(=O)c1cccc1)c1ccc2c(c1)[nH]c(=NC(=O)c1ccc(Br)s1)n2CCC(N)=O>  
3136 >CN(C(=O)c1cccc1)c1ccc2c(c1)[nH]c(=NC(=O)c1ccc(/C=C/c3cccc(C(F)(F)F)c3)s1)n2CCC(N)=O  
C=CP(=O)(c1cccc1)c1cccc1OC.C[P@](=O)(/C=C/c1ccc(Br)c1)c1cccc1>>COc1cccc1P(=O)(/C=  
3137 C/c1cccc(/C=C/[P@](C)(=O)c2cccc2)c1)c1cccc1  
3138 C=Cc1cnc(C#N)c1.Cc1cc(Br)cc(C)c1I>>Cc1cc(Br)cc(C)c1/C=C/c1cnc(C#N)c1  
3139 C=CC(OC)OCC.O=Cc1cc(Cl)ccc1Br>>CCOC(/C=C/c1ccc(Cl)cc1C=O)OCC  
3140 C=CCCc1ccc2ccnc2n1.CCOC(=O)CC(c1ccc(OC)c(F)c1)c1nc(Br)en1C>>CCOC(=O)CC(c1ccc(OC)c  
(F)c1)c1nc(/C=C/CCc2ccc3ccnc3n2)en1C  
3141 C=Cc1ccc(C)cc1.Cn1cnc1-c1ccc(Br)cc1>>Cc1ccc(/C=C/c2ccc(-c3cncn3C)cc2)cc1  
3142 C=CC(=O)OC.CC(=O)OC[C@H]1OC=C(I)[C@@H](OC(C)=O)[C@H]1OC(C)=O>>COC(=O)/C=C/  
C1=CO[C@H](COC(C)=O)[C@H](OC(C)=O)[C@@H]1OC(C)=O  
3143 C=CC(=O)OC.Ic1nn(C(c2cccc2)(c2cccc2)c2cccc2)c2cnc(OC3CCCCC3)c12>>COC(=O)/C=C/c1n  
n(C(c2cccc2)(c2cccc2)c2cccc2)c2cnc(OC3CCCCC3)c12  
3144 BrC1CCCCC1.C=Cc1ccc(Cl)cc1>>Clc1ccc(/C=C/C2CCCCC2)cc1

C=CS(=O)c1cccc1.COc1ccc(Br)cc1>>COc1ccc(/C=C/S(=O)c2cccc2)cc1  
 C=CC(=O)OC.CC1(C)c2cccc2-c2ccc(I)cc21>>COC(=O)/C=C/c1ccc2c(c1)C(C)(C)c1cccc1-2  
 Br1ccc2cc[nH]c2c1.C=Cc1cccc1>>C(=C/c1ccc2cc[nH]c2c1)\c1cccc1  
 Br1cccc(OCC2CCOCC2)c1.C=CCNC(=O)C(F)(F)F>>O=C(NC/C=C/c1cccc(OCC2CCOCC2)c1)C(F)  
 C=CC(=O)OC(C)(C)C.O=C(Cc1cccc1)c1ccc(Br)cc1>>CC(C)(C)OC(=O)/C=C/c1ccc(C(=O)Cc2cccc  
 2)cc1  
 C=CC(=O)OC.Cc1cc2c(c(C)c1Br)CCC2>>COC(=O)/C=C/c1c(C)cc2c(c1C)CCC2  
 C=Cc1cc(OC)c(OC)c(OC)c1.COc1cc(C=O)c(Br)c(OC)c1OC>>COc1cc(/C=C/c2c(C=O)cc(OC)c(OC)c  
 2OC)cc(OC)c1OC  
 C=Cc1ccc(C)cc1.O=Cc1cc(C(F)(F)F)ccc1Br>>Cc1ccc(/C=C/c2ccc(C(F)(F)F)cc2C=O)cc1  
 C=CC(=O)OC.CN1C(=O)C(=O)c2ccc(Br)cc21>>COC(=O)/C=C/c1ccc2c(c1)N(C)C(=O)C2=O  
 C=Cc1cccc1.ClC1CCCCC1>>C(=C/C1CCCCC1)\c1cccc1  
 C=CS(C)(=O)=O.N#Cc1ccc(Br)cc1>>CS(=O)(=O)/C=C/c1ccc(C#N)cc1  
 C=CC(=O)OCCCC.Oc1ccc(I)cc1>>CCCCOC(=O)/C=C/c1ccc(O)cc1  
 C=CC(=O)OC.CC(C)(C)c1ccc(I)c(O)c1>>COC(=O)/C=C/c1ccc(C(C)(C)C)cc1O  
 C=Cc1ccc(Cl)cc1.FC(F)(F)C(Br)CCc1cccc1>>FC(F)(F)C(/C=C/c1ccc(Cl)cc1)CCc1cccc1  
 C=CC(OCC)OCC.CCN1c2cccc2Sc2cc(Br)ccc21>>CCOC(/C=C/c1ccc2c(c1)Sc1cccc1N2CC)OCC  
 C=CC(=O)OC.O=c1[nH]c(=O)n([C@H]2C[C@H](O)[C@@H](CO)C2)cc1>>COC(=O)/C=C/c1cn([  
 C@H]2C[C@H](O)[C@@H](CO)C2)c(=O)[nH]c1=O  
 C=CC(=O)OCCOc1cccc1.Ic1cccc1>>O=C(/C=C/c1cccc1)OCCOc1cccc1  
 C=Cc1cccc1.Cc1ccc(-c2c(Br)c(=O)oc3cc(C)ccc23)cc1>>Cc1ccc(-  
 c2c(/C=C/c3cccc3)c(=O)oc3cc(C)ccc23)cc1  
 C=Cc1cenc1.Cc1cc(Nc2ccc([N+](=O)[O-])cc2[N+](=O)[O-])ccc1Br>>Cc1cc(Nc2ccc([N+](=O)[O-]  
 ])cc2[N+](=O)[O-])ccc1C=C/c1cenc1  
 Br1cccc2cccc12.C=CCO[C@@H]1CC(=O)O[C@H](C)C/C=C/C=C/[C@H](O[Si](C)(C)C(C)(C)C)]  
 C@H](C)C[C@H](CC(OC)OC)[C@H](O[C@@H]2O[C@H](C)[C@@H](O[C@H]3C[C@@](C)(O)[  
 C@@H](OC(=O)CC)[C@H](C)O3)[C@H](N(C)C)[C@H]2OC(C)=O)[C@H]1OC>>CCC(=O)O[C@  
 H]1[C@H](C)O[C@@H](O[C@H]2[C@H](N(C)C)[C@@H](OC(C)=O)[C@H](O[C@@H]3[C@@  
 H](OC)[C@H](OC/C=C/c4cccc5cccc45)CC(=O)O[C@H](C)C/C=C/C=C/[C@H](O[Si](C)(C)C(C)(C)  
 )C)[C@H](C)C[C@H](OC)C@H13CC(OC)OC)C@H12C)C[C@@H](C)C@H11(C)O  
 C=Cc1ccc2cccc2c1.Ic1cccc1>>C(=C/c1ccc2cccc2c1)\c1cccc1  
 C=Cc1ccc2c(c1)C1CCCC1N2c1ccc(C)cc1.Cn1nc2c(Br)ccc(Nc3ncc(C4OCCO4)cn3)c2n1>>Cc1ccc(N  
 2c3ccc(/C=C/c4ccc(Nc5ncc(C6OCCO6)cn5)c5nn(C)nc45)cc3C3CCCC32)cc1  
 C=CC(=O)OCc1cccc1.O=C1CO[C@H]2Cc3ccc(Br)cc3[C@H]2N1O>>O=C(/C=C/c1ccc2c(c1)[C@  
 @H]1[C@H](C2)OCC(=O)N1O)OCc1cccc1  
 C=CC#N.CCN1c2ncc(I)cc2C(=O)N(C)c2cccnc21>>CCN1c2ncc(/C=C/C#N)cc2C(=O)N(C)c2cccnc21  
 C=CC(=O)OC.Ic1ccoc1>>COC(=O)/C=C/c1ccoc1  
 C=C[C@H]1O[C@@H]2OC(C)(C)O[C@@H]2[C@H]1O.O=c1ccoc2cc(Br)ccc12>>CC1(C)O[C@H]  
 2O[C@H](/C=C/c3ccc4c(=O)ccoc4c3)[C@H](O)[C@H]2O1  
 C=CC(=O)OCCCC.O=C1c2cccc2C(=O)N1c1ccc(I)cc1>>CCCCOC(=O)/C=C/c1ccc(N2C(=O)c3cccc  
 c3C2=O)cc1  
 C=Cc1ccc(N(C)C)cc1.CCCCN1C(=O)C(=Cc2ccc(I)cc2)C(=O)N(CCCC)C1=O>>CCCCN1C(=O)C(=  
 Cc2ccc(/C=C/c3ccc(N(C)C)cc3)cc2)C(=O)N(CCCC)C1=O  
 C=CCNC1=NCCN1.Oc1ccc(I)cc1>>Oc1ccc(/C=C/CNC2=NCCN2)cc1  
 C=CC(C)(C)O.O=S(=O)(c1cccc1)n1c2c(c3cc(Br)ccc31)CCC2>>CC(C)(O)/C=C/c1ccc2c(c1)c1c(n2S(  
 =O))(=O)c2cccc2)CCC1  
 C=CC(=O)OC.CC(C)(C)O[C@H]1CC[C@@H]2C=C(C3=C(Br)CCCC3)CC[C@]12C>>COC(=O)/C=  
 C/C1=C(C2=C[C@H]3CC[C@H](OC(C)(C)C)[C@@]3(C)CC2)CCCC1  
 C=Cc1cccc1OC.FC(F)(F)c1cccc1I>>COc1cccc1/C=C/c1cccc1C(F)(F)F  
 C=CC(=O)OCC.O=C(O)c1ccc(Br)c1>>CCOC(=O)/C=C/c1ccc(C(=O)O)c1  
 C=CC(=O)N1CCOCC1.CC(C)(C)OC(=O)c1cccc1Br>>CC(C)(C)OC(=O)c1cccc1/C=C/C(=O)N1CC  
 OCC1  
 C=CC(=O)OC.CC(C)(C)OC(=O)c1cc(F)ccc1Br>>COC(=O)/C=C/c1ccc(F)cc1C(=O)OC(C)(C)C  
 C=CC(=O)OCC.CC(C)(C)OC(=O)NC1(C(=O)Nc2ccc(I)cc2)CCC1>>CCOC(=O)/C=C/c1ccc(NC(=O)  
 C2(NC(=O)OC(C)(C)C)CCC2)cc1  
 Br1cccc2[nH]ccc12.C=CC(=O)OC>>COC(=O)/C=C/c1cccc2[nH]ccc12  
 Br1cccc1.C=Cc1nnn(C)n1>>Cn1nnn(/C=C/c2cccc2)n1  
 C=CC(=O)OCCCC.Fc1cccc1Br>>CCCCOC(=O)/C=C/c1cccc1F  
 C=Cc1ccc(Br)cc1.CC(C)(C)OCc1cccc(I)c1>>CC(C)(C)OCc1cccc(/C=C/c2ccc(Br)cc2)c1  
 C=Cc1cccc1.Cc1cccc(NC(=O)c2cccc(I)c2)n1>>Cc1cccc(NC(=O)c2cccc(/C=C/c3cccc3)c2)n1  
 C=CN1CCCC1=O.FC(F)(F)I>>O=C1CCCN1/C=C/C(F)(F)F

3187 C=Cc1ccc(C(=O)OCC)cc1.CCSC1=CCC(C)(C)c2ccc(Br)cc21>>CCOC(=O)c1ccc(/C=C/c2ccc3c(c2)C(SCC)=CCC3(C)C)cc1  
 3188 C=CS1cccc1.COc1ccc(Br)cc1>>COc1ccc(/C=C/Sc2ccccc2)cc1  
 3189 Br1ccc(I)cc1.C=Cc1cccc(OC)c1>>COc1cccc(/C=C/c2ccc(Br)cc2)c1  
 3190 C=CCCCC.CC(=S)NS(=O)(=O)c1ccc(Br)cc1>>CCCC/C=C/c1ccc(S(=O)(=O)NC(C)=S)cc1  
 3191 C=CC(=O)OCC.N#Cc1ccc(I)cc1>>CCOC(=O)/C=C/c1ccc(C#N)cc1  
 3192 C=Cc1cncn1.Fc1ccc(Cl)cc1>>Fc1ccc(/C=C/c2cncn2)cc1  
 3193 C=Cc1cccc1.O=[N+][O-]c1sccc1Br>>O=[N+][O-]c1sccc1/C=C/c1cccc1  
 3194 C=Cc1ccc(C)cc1.IC1CCCCC1>>Cc1ccc(/C=C/C2CCCCC2)cc1  
 3195 C=CC(=O)OC(C)(C)C.COc1ccc(Br)c(COCCC(=O)OC(C)(C)C)c1>>COc1ccc(/C=C/C(=O)OC(C)(C)C)c(COCCC(=O)OC(C)(C)C)c1  
 3196 C=CCCC(=O)O.CC(C)(C)c1ccc(I)cc1>>CC(C)(C)c1ccc(/C=C/CCC(=O)O)cc1  
 3197 C=Cc1cccc1.Oc1cccc1I>>Oc1cccc1/C=C/c1cccc1  
 3198 C=CC(=O)NCCc1ccc(F)cc1.COc1cc2oc(-c3ccccc3)c(I)c(=O)c2cc1OC>>COc1cc2oc(-c3ccccc3)c(/C=C/C(=O)NCCc3ccc(F)cc3)c(=O)c2cc1OC  
 3199 C=CC(=O)OCC.CC(C)(C)OC(=O)N1CCc2ccc(Br)cc2CC1>>CCOC(=O)/C=C/c1ccc2c(c1)CCN(C(=O)OC(C)(C)C)CC2  
 3200 C=CCOc1ccc(C)cc1.COc1ccc(I)cc1>>COc1ccc(/C=C/COc2ccc(C)cc2)cc1  
 3201 C=CCC(C)N(C)C(=O)OC(C)(C)C.Oc1cnc(Br)c1>>CC(C/C=C/c1cnc(O)c1)N(C)C(=O)OC(C)(C)C  
 3202 C=Cc1ccc(OC)c(OC)c1C(=O)OC.COc1c(I)c(CCNC(=O)OC(C)(C)C)cc2c1OCO2>>COC(=O)c1c(/C=C/c2c(CCNC(=O)OC(C)(C)C)cc3c(c2OC)OCO3)ccc(OC)c1OC  
 3203 C=CC(=O)OC.CC(=O)Oc1ccc(I)cc1CC=C(C)C>>COC(=O)/C=C/c1ccc(OC(C)=O)c(CC=C(C)C)c1  
 3204 C=CCN1C(=O)c2ccccc2C1=O.COc1ccc(I)cc1>>COc1ccc(/C=C/CN2C(=O)c3ccccc3C2=O)cc1  
 3205 C=CC(=O)OCC.COc1ccc(OC)c(Cc2ccc(I)cc2)c1>>CCOC(=O)/C=C/c1ccc(Cc2cc(OC)ccc2OC)cc1  
 3206 C=Cc1cccc1.CC(=O)Nc1cccc1I>>CC(=O)Nc1cccc1/C=C/c1cccc1  
 3207 C=CC(=O)OC.Ic1ccsc1>>COC(=O)/C=C/c1ccsc1  
 3208 C=Cc1ccc(N2CCN(C(=O)OC(C)(C)C)CC2)cc1.Clc1cc(Br)cc(-c2ccncc2)c1>>CC(C)(C)OC(=O)N1CCN(c2ccc(/C=C/c3cc(Cl)cc(-c4ccncc4)c3)cc2)CC1  
 3209 C=CC(F)(F)C(F)(F)C(F)(F)C(F)(F)C(F)(F)C(F)(F)F.COC(=O)c1ccc(Br)cc1>>COC(=O)c1ccc(/C=C/C(F)(F)C(F)(F)C(F)(F)C(F)(F)C(F)(F)C(F)(F)F)cc1  
 3210 C=CC(N)=O.Ic1ccc2c(c1)OCO2>>NC(=O)/C=C/c1ccc2c(c1)OCO2  
 3211 C=Cc1ccc(O)cc1.Nc1cccc1Br>>Nc1cccc1/C=C/c1ccc(O)cc1  
 3212 C=CC(=O)OC(C)(C)C.CN1CCN(C(=O)CN2CC(=O)Nc3ncc(Br)cc3C2)CC1>>CN1CCN(C(=O)CN2CC(=O)Nc3ncc(/C=C/C(=O)OC(C)(C)C)cc3C2)CC1  
 3213 C=Cc1cncn1.Cc1c(Nc2c(I)cncc2C#N)ccc2[nH]ccc12>>Cc1c(Nc2c(C#N)cncc2/C=C/c2cncn2)ccc2[nH]ccc12  
 3214 C=CC(=O)N(C)Cc1nc2ccccc2s1.CCn1c(=O)[nH]c2ncc(Br)cc21>>CCn1c(=O)[nH]c2ncc(/C=C/C(=O)N(C)Cc3nc4ccccc4s3)cc21  
 3215 C=CCN1CCP(C)(=O)CC1.Fc1cccc(COc2ccc(Nc3cncc4ccc(I)cc34)cc2Cl)c1>>CP1(=O)CCN(C/C=C/c2ccc3ncc(Nc4ccc(OCc5ccccc(F)c5)c(Cl)c4)c3c2)CC1  
 3216 C=CC(=O)OC(C)(C)C.O=c1oc(Br)cc2ccccc12>>CC(C)(C)OC(=O)/C=C/c1cc2ccccc2c(=O)o1  
 3217 C=CC(=O)OCCN(C)C.Cc1ccc(NC(=O)c2cc(=O)c3cc(Br)ccc3o2)cc1>>Cc1ccc(NC(=O)c2cc(=O)c3cc(/C=C/C(=O)OCCN(C)C)ccc3o2)cc1  
 3218 C=Cc1cccc1.COC(=O)c1cc(Br)ccc1Cl>>COC(=O)c1cc(/C=C/c2ccccc2)ccc1Cl  
 3219 C=Cc1cn(COCC[Si](C)(C)C)nc1- c1nc2ccc(OC)cc2n1COCC[Si](C)(C)C.COc1cnc(Br)c1>>COc1cnc(/C=C/c2cn(COCC[Si](C)(C)C)nc2-c2nc3ccc(OC)cc3n2COCC[Si](C)(C)C)c1  
 3220 C=Cc1ccc(/C=C/c2cc(CCCCC)c(C=O)cc2CCCCC)cc1.CCCCCc1cc(/C=C/c2ccc(C)cc2)c(CCCCCC)cc1Br>>CCCCCcc1cc(/C=C/c2ccc(/C=C/c3cc(CCCCC)c(/C=C/c4ccc(C)cc4)cc3CCCCC)cc2)c(CCCCCC)cc1C=O  
 3221 C=CC(C)=O.CC(=O)Nc1ccc(I)cc1>>CC(=O)/C=C/c1ccc(NC(C)=O)cc1  
 3222 C=Cc1cc(OC)cc(OC)c1.O=C(O)c1ccc(Br)cc1>>COc1cc(/C=C/c2ccc(C(=O)O)cc2)cc(OC)c1  
 3223 C=CC(=O)OCC.Cc1nnn(Cc2cc(C#N)ccc2Br)n1>>CCOC(=O)/C=C/c1ccc(C#N)cc1Cn1nnn(C)n1  
 3224 C=CC(=O)OC1CCCCC1.Ic1ccc(OC2CCCCO2)cc1>>O=C/C=C/c1ccc(OC2CCCCO2)cc1OC1CCCC  
 3225 C=CC(=O)CC.O=[N+][O-]c1ccc(Br)cc1>>CCC(=O)/C=C/c1ccc([N+](=O)[O-])cc1  
 3226 C=CC(=O)OC.OC[C@H]1O[C@@H](Oc2ccc(I)cc2)C[C@@H]1O>>COC(=O)/C=C/c1ccc(O[C@H]2C[C@H](O)[C@@H](CO)O2)cc1  
 3227 C=CCCN1C(=O)c2ccccc2C1=O.Ic1ccc(C2OCCO2)cc1>>O=C1c2ccccc2C(=O)N1CC/C=C/c1ccc(C2OCCO2)cc1  
 3228 C=Cc1cccc1.CC(C)(C)OC(=O)N1CCC2(CC1)Oc1ccc(Br)cc1C2=O>>CC(C)(C)OC(=O)N1CCC2(CC1)Oc1ccc(/C=C/c3ccccc3)cc1C2=O

3229 C=CC(=O)OC.O=c1[nH]c(=O)n([C@@H]2O[C@H](CO)[C@@H](O)[C@H]2O)cc1I>>COC(=O)/C=C/c1cn([C@@H]2O[C@H](CO)[C@@H](O)[C@H]2O)c(=O)[nH]c1=O  
 3230 C=CC(=O)OCC.O=S(=O)(Nc1cccc1)c1cccc(Br)c1>>CCOC(=O)/C=C/c1cccc(S(=O)(=O)Nc2ccccc2)  
 3231 C=Cc1ccc(S(=O)(=O)c2ccccc2F)cn1.Ic1ccncc1>>O=S(=O)(c1ccc(/C=C/c2ccncc2)nc1)c1cccc1F  
 3232 C=CC(C)OC(C)=O.CCCCCCCCOC1cnc(-c2ccc(Br)cc2)nc1>>CCCCCCCCOC1cnc(-c2ccc(/C=C/C(C)OC(C)=O)cc2)nc1  
 3233 C=Cc1cccc1Cl.O=C1Nc2cccc(I)c2/C1=C/c1ccc[nH]1>>O=C1Nc2cccc(/C=C/c3ccccc3Cl)c2/C1=C/c1ccc[nH]1  
 3234 C=CC(=O)OC.COc1ccc2c(c1)c(I)nn2Cc1cccc1>>COC(=O)/C=C/c1nn(Cc2ccccc2)c2ccc(OC)cc12  
 3235 C=CCC(C)C(=O)OCC.Cc1cccc1Br>>CCOC(=O)C(C)C/C=C/c1cccc1C  
 3236 C=Cc1ccc2c(c1)Sc1cccc1N2CC.COC(=O)c1ccc(Br)cc1>>CCN1c2ccccc2Sc2cc(/C=C/c3ccc(C(=O)O)C)cc3)cc21  
 3237 C=CC#N.Cc1ncccc1Br>>Cc1ncccc1/C=C/C#N  
 3238 C=Cc1nnc2c1nnc2C1CCCCO1.Ic1cccc1>>C(=C/c1nnc2c1nnc2C1CCCCO1)\c1cccc1  
 3239 C=CC(=O)OCC.Fc1cccc(Cn2nc(I)c3ccccc32)c1>>CCOC(=O)/C=C/c1nn(Cc2cccc(F)c2)c2ccccc12  
 3240 C=CC(=O)N(C)OC.Oc1ccc(I)cc1>>CON(C)C(=O)/C=C/c1ccc(O)cc1  
 3241 C=CC(OC(C)=O)c1cccc1.O=[N+](=[O-])c1ccc(I)cc1>>CC(=O)OC(/C=C/c1ccc([N+](=O)[O-])cc1)c1cccc1  
 3242 Br1ccc(-c2cccs2)cc1.C=CC(=O)OCCCC>>CCCCOC(=O)/C=C/c1ccc(-c2cccs2)cc1  
 3243 C=Cc1ccc(O)c(C(=O)OCC(C)C)c1.Cc1ccncc1NS(=O)(=O)c1ccc(I)cc1>>Cc1ccncc1NS(=O)(=O)c1ccc(/C=C/c2ccc(O)c(C(=O)OCC(C)C)c2)cc1  
 3244 C=CC(=O)OC.CCc1nc2c(C)cc(C)nc2n1Cc1ccc(Br)cc1>>CCc1nc2c(C)cc(C)nc2n1Cc1ccc(/C=C/C(=O)OC)cc1  
 3245 C=CC(=O)OCC.O=c1oc2ccccc2cc1Br>>CCOC(=O)/C=C/c1cc2ccccc2oc1=O  
 3246 C=C[C@@](C)(/C=C/c1ccc(O)cc1)CCC=C(C)C.COc1ccc(Br)cc1C=O>>COc1ccc(/C=C/[C@@](C)(/C=C/c2ccc(O)cc2)CCC=C(C)C)cc1C=O  
 3247 C=Cc1ccc(OC)cc1.COc1ccc(Oc2ccc(Cl)ccc2NC[C@@H]2CCCN2C(=O)OC(C)(C)C)cc1>>COc1ccc(/C=C/c2ccc(NC[C@@H]3CCCN3C(=O)OC(C)(C)C)c(Oc3cccc(OC)cc3)c2)cc1  
 3248 C=C/C=C/C(=O)N(CCCC)CCCC.Cc1ccc(Br)cc1>>CCCN(CCCC)C(=O)/C=C/C=C/c1ccc(C)cc1  
 3249 C=CC(=O)CCC.Cc1cccc1Br>>CCCC(=O)/C=C/c1cccc1C  
 3250 C=CC(OC)OCC.Cc1ccc(C=O)c(Br)c1>>CCOC(/C=C/c1cc(C)ccc1C=O)OCC  
 3251 C=CC(=O)OC.CC(C)(C)OC(=O)N1Cc2c(O)ccc(Br)c2C1>>COC(=O)/C=C/c1ccc(O)c2c1CN(C(=O)O)C(C)(C)C2  
 3252 Br1cnc(C2CC2)nc1.C=CC(=O)OCC>>CCOC(=O)/C=C/c1cnc(C2CC2)nc1  
 3253 C=Cc1ccc(C)cc1.O=c1cc(-c2ccccc2)oc2cc(Br)ccc12>>Cc1ccc(/C=C/c2ccc3c(=O)cc(-c4ccccc4)cc3)cc1  
 3254 C=Cc1ccc(F)cc1.Oc1ccc(F)cc1Br>>OCc1ccc(F)cc1/C=C/c1ccc(F)cc1  
 3255 C=CC=O.O=[N+](=[O-])c1ccc(C2=C(I)C2(F)F)cc1>>O=C/C=C/C1=C(c2ccc([N+](=O)[O-])cc2)cc1  
 3256 C=Cc1ccn2nc(Cl)nc12.CN(c1cccc1Br)S(C)(=O)=O>>CN(c1cccc1/C=C/c1ccn2nc(Cl)nc12)S(C)(=O)=O  
 3257 C=Cc1ccc(OC)cc1OC.CCOC(=O)C(C)Br>>CCOC(=O)C(C)/C=C/c1ccc(OC)cc1OC  
 3258 C=Cc1cccc1C.COc1ccc(I)c1N>>COc1ccc(/C=C/c2ccccc2C)c1N  
 3259 C=Cc1ccc(F)c1.COc1ccc2c(=O)c(I)coc2c1>>COc1ccc2c(=O)c(/C=C/c3ccccc(F)c3)coc2c1  
 3260 C=CC(OC)OCC.CC(=O)c1ccc(I)cc1>>CCOC(/C=C/c1ccc(C(C)=O)cc1)OCC  
 3261 Br1ccc2ccc3cccc4ccc1c2c34.C=Cc1cccc1>>C(=C/c1ccc2ccc3cccc4ccc1c2c34)\c1cccc1  
 3262 C=CC(=O)OCC.CCN1C[C@]2(OC(=O)c3cc(Br)ccc3NC(C)=O)CC[C@H](OC)[C@]34[C@@H]1[C@H](C[C@H]23)[C@@]1(O)C[C@H](OC)[C@H]2C[C@@H]4[C@]1(O)[C@H]2OC>>CCOC(=O)/C=C/c1ccc(NC(C)=O)c(C(=O)O[C@@]23CC[C@H](OC)[C@]45[C@H]([C@H](C[C@H]24)[C@@]2(O)C[C@H](OC)[C@H]4C[C@@H]5[C@]2(O)[C@H]4OC)N(CC)C3)c1  
 3263 C=COCCCC.COc1ccc2c(Br)cc(=O)oc2c1>>CCCCO/C=C/c1cc(=O)oc2cc(OC)ccc12  
 3264 C=CC#N.COC(=O)c1ccc(I)cc1>>COC(=O)c1ccc(/C=C/C#N)cc1  
 3265 C=Cc1cccc1.Ic1cnc2ccccc2c1-c1cccc1>>C(=C/c1cnc2ccccc2c1-c1cccc1)\c1cccc1  
 3266 C=Cc1ccc(P(=O)(OCC)OCC)cc1.CCC1(CC)c2cc(Br)ccc2-c2ccc(N(c3ccccc3)c3ccccc3)cc21>>CCOP(=O)(OCC)c1ccc(/C=C/c2ccc3c(c2)C(CC)(CC)c2cc(N(c4ccccc4)c4ccccc4)ccc2-3)cc1  
 3267 C=CCNS(=O)(=O)c1ccc(C)cc1.Cc1ccc(Br)cc1>>Cc1ccc(/C=C/CNS(=O)(=O)c2ccc(C)cc2)cc1  
 3268 C=Cc1ccc(N(CC)CCO)cc1.CS(=O)(=O)c1ccc(/C=C/c2ccc(Br)cc2)cc1>>CCN(CCO)c1ccc(/C=C/c2ccc(/C=C/c3ccc(S(C)(=O)=O)cc3)cc2)cc1  
 3269 C=C[C@@H](CC(OC)OC)c1cccc1.COc1ccc(I)cc1>>COc1ccc(/C=C/[C@@H](CC(OC)OC)c2ccccc2  
 3270 C=CC#N.Cn1c(=O)oc2cc(Br)cnc21>>Cn1c(=O)oc2cc(/C=C/C#N)cnc21  
 3271 C=CC(=O)OC(C)(C)C.Clc1cnc2ccccc12>>CC(C)(C)OC(=O)/C=C/c1cnc2ccccc12

3272 C=Cc1ccc(F)cc1.O=Cc1cn(C2CCCCO2)nc1I>>O=Cc1cn(C2CCCCO2)nc1/C=C/c1ccc(F)cc1  
3273 C=CC(=O)OCCCC.CCOC(=O)c1ccc(I)cc1>>CCCCOC(=O)/C=C/c1ccc(C(=O)OCC)cc1  
3274 C=Cc1ccc(OC)cc1.CC(=O)c1ccc(Cl)cc1>>COc1ccc(/C=C/c2ccc(C(C)=O)cc2)cc1  
3275 C=Cc1ccc(SC)cc1.Clc1c2ccc(Br)cc2nc2c1oc1cccc12>>CSc1ccc(/C=C/c2ccc3c(Cl)c4oc5ccccc5c4nc3c2)cc1  
3276 C=CS(=O)(=O)F.O=Cc1cccc1I>>O=Cc1cccc1/C=C/S(=O)(=O)F  
3277 C=Cc1ccc(C)cc1.O=Cc1ccc(Cl)cc1>>Cc1ccc(/C=C/c2ccc(C=O)cc2)cc1  
3278 C=CC(=O)NC(C)C.C[C@]12C[C@@]34C=C(Sc5ccc(I)cc5)C(=O)[C@@](C)(CCC(=O)Nc5c(O)ccc(C(=O)O)c5O)[C@@H]3[C@H](C[C@@H]1C4)O2>>CC(C)NC(=O)/C=C/c1ccc(SC2=C[C@]34C[C@H]5C[C@H](O)[C@@]5(C)C3)[C@H]4[C@](C)(CCC(=O)Nc3c(O)ccc(C(=O)O)c3O)C2=O)cc1  
3279 C=CC(=O)NC(C)(C)C.COc1cc2oc(-c3cccc3)c(I)c(=O)c2cc1OC>>COc1cc2oc(-c3cccc3)c(/C=C/C(=O)NC(C)(C)C)c(=O)c2cc1OC  
3280 C=CC[C@H](NC(=O)OC(C)(C)C)C(=O)OC.COC(=O)c1cscc1Br>>COC(=O)c1cscc1/C=C/C[C@H](NC(=O)OC(C)(C)C)C(=O)OC  
3281 C=CC(N)=O.CC1(C)Cc2c(CN3CCC4(CC3)CCN(C(=O)c3ccncc3Br)CC4)cccc2O1>>CC1(C)Cc2c(CN3CCC4(CC3)CCN(C(=O)c3ccncc3/C=C/C(N)=O)CC4)cccc2O1  
3282 Brclcccc2c1cn2Cc1cccc1.C=CC(=O)OC>>COC(=O)/C=C/c1cccc2c1cn2Cc1cccc1  
3283 C=Cc1ccc(OC)c1.IC1CCCCC1>>COc1ccc(/C=C/C2CCCCC2)c1  
3284 C=Cc1cccc1C.CCOC(=O)C(F)(F)I>>CCOC(=O)C(F)(F)/C=C/c1cccc1C  
3285 C=CC(=O)OC.O=Cc1cccc1-c1cc(Cl)ccc1C=O>>COC(=O)/C=C/c1ccc(C=O)c(-c2cccc2C=O)c1  
3286 C=CC(=O)OC(C)(C)C.Cn1c(=O)c2c(nc(Br)n2C)n(C)c1=O>>Cn1c(=O)c2c(nc(/C=C/C(=O)OC(C)(C)C)n2C)n(C)c1=O  
3287 C=Cc1cccc1.Nc1ncn2c(C3CCC3)nc(I)c12>>Nc1ncn2c(C3CCC3)nc(/C=C/c3cccc3)c12  
3288 C=CC(=O)OCC.FC(F)(F)c1cn2c(Br)cccc2n1>>CCOC(=O)/C=C/c1cccc2nc(C(F)(F)F)cn12  
3289 C=CC(=O)OC(C)(C)C.Cc1ccc(Cl)cc1N1CCN(c2nnc3c2c(Br)nn3C2CCCCO2)CC1>>Cc1ccc(Cl)cc1N1CCN(c2nnc3c2c(/C=C/C(=O)OC(C)(C)C)nn3C2CCCCO2)CC1  
3290 C=CC(=O)OC.COCOc1ccnc1Br>>COCOc1ccnc1/C=C/C(=O)OC  
3291 C=CC(=O)OC(C)(C)C.COC(=O)Cc1ccc2oc(-c3ccc(Br)cc3F)nc2c1>>COC(=O)Cc1ccc2oc(-c3ccc(/C=C/C(=O)OC(C)(C)C)cc3F)nc2c1  
3292 C=CC(=O)OCC.COc1ccc(C#C/C=C/c2ccc(Br)cc2)cc1>>CCOC(=O)/C=C/c1ccc(/C=C/C#Cc2ccc(OC)cc2)cc1  
3293 C=Cc1cccc1F.O=S(=O)(c1ccc(Br)cc1)c1cccc1CN1CCCC(F)C1>>O=S(=O)(c1ccc(/C=C/c2cccc2F)cc1)c1cccc1CN1CCCC(F)C1  
3294 C=CC(=O)OC.Cc1noc(C)c1I>>COC(=O)/C=C/c1c(C)noc1C  
3295 C=CC(=O)OC.CN(C)c1ccc2cc(Br)ccc2c1>>COC(=O)/C=C/c1ccc2cc(N(C)C)ccc2c1  
3296 C=CC(=O)OCC.N#Cc1ccc(Br)cc1F>>CCOC(=O)/C=C/c1ccc(C#N)c(F)c1  
3297 C=C(Br)CCO.C=CC(=O)CCCC>>C=C/C=C/C(=O)CCCC)CCO  
3298 C=CC(=O)OC.COc1ccc2c(c1)CCN(c1ccc(C(C)C)c(F)c1)C2(C)c1ccc(Br)cc1>>COC(=O)/C=C/c1ccc(C2(C)c3ccc(OC)cc3CCN2c2ccc(C(C)C)c(F)c2)cc1  
3299 C=CC(C)=O.Ic1cccc2[nH]ccc12>>CC(=O)/C=C/c1cccc2[nH]ccc12  
3300 C=CC(=O)O.O=S(=O)(Nc1ccc(I)cc1)c1cccc2ccnc12>>O=C(O)/C=C/c1ccc(NS(=O)(=O)c2cccc3cccn c23)cc1  
3301 C=CC(C)=O.COC(=O)C1=Nc2cc(I)ccc2OC12CC2>>COC(=O)C1=Nc2cc(/C=C/C(C)=O)ccc2OC12C  
3302 C=CCCNc1cccc1.Ic1cccc1>>C(=C/c1cccc1)\CCCNc1cccc1  
3303 C=CC(=O)OCCCC.Ic1ccnc1>>CCCCOC(=O)/C=C/c1ccnc1  
3304 C=Cc1cccc1.CC(C)(C)c1ccc(I)cc1>>CC(C)(C)c1ccc(/C=C/c2cccc2)cc1  
3305 C=CC1(O)CCC1.Fc1ccc(I)cc1>>OC1(/C=C/c2ccc(F)cc2)CCC1  
3306 C=CC(=O)OCC.O=C(O)Cc1ccc(Br)cc1>>CCOC(=O)/C=C/c1ccc(CC(=O)O)cc1  
3307 C=CC(OC)OC.Cc1cccc1I>>COC(/C=C/c1cccc1C)OC  
3308 C=Cc1cccc1.CC(C)(C)C(=O)Nc1nc2ncc(Cl)nc2c(=O)[nH]1>>CC(C)(C)C(=O)Nc1nc2ncc(/C=C/c3ccccc3)nc2c(=O)[nH]1  
3309 C=CC(=O)OC(C)(C)C.Fc1ccc(CNc2ccc(Br)en2)cc1>>CC(C)(C)OC(=O)/C=C/c1ccc(NC2ccc(F)cc2)n  
3310 C=CC(=O)OCC.CN1C(c2cccc2)=C(I)c2ccsc2S1(=O)=O>>CCOC(=O)/C=C/C1=C(c2cccc2)N(C)S(=O)(=O)c2sccc21  
3311 C=CC(=O)NCCN(CCCNC(=O)OC(C)(C)C)C(=O)OC(C)(C)C.COC(=O)N[C@H]1[C@@H](Oc2ccc(I)cc2)O[C@H](C)[C@@H](OC(C)=O)[C@@H]1OC(C)=O>>COC(=O)N[C@H]1[C@@H](Oc2ccc(/C=C/C(=O)NCCN(CCCNC(=O)OC(C)(C)C)C(=O)OC(C)(C)C)cc2)O[C@H](C)[C@@H](OC(C)=O)[C@@H]1OC(C)=O  
3312 C=CC(=O)c1cccc1.Cc1ccc(Br)cc1>>Cc1ccc(/C=C/C(=O)c2cccc2)cc1  
3313 C=CC(=O)OC(C)(C)C.Cn1cc(Br)nn1>>Cn1cc(/C=C/C(=O)OC(C)(C)C)nn1  
3314 C=CC(=O)OCC.CCOC(=O)CCOCc1cc(OC)ccc1Br>>CCOC(=O)/C=C/c1ccc(OC)cc1COCCC(=O)OC



3315 C=CC(=O)NC(C)C.Ic1cccc1>>CC(C)NC(=O)/C=C/c1cccc1  
3316 C=CP(=O)(OCC)OCC.Cc1cccc(Br)c1>>CCOP(=O)/(C=C/c1cccc(C)c1)OCC  
3317 C=CC(=O)Nc1ccc(OC)cc1.COc1ccc2c(=O)c(C)coc2c1>>COc1ccc(NC(=O)/C=C/c2coc3cc(OC)ccc3c2=O)cc1  
3318 C=CCOC(C)=O.Clc1cccc(I)c1>>CC(=O)OC/C=C/c1cccc(Cl)c1  
3319 C=CC(=O)OC.CCOP(=O)(CCCN1c(=O)oc2cc(Br)enc21)OCC>>CCOP(=O)(CCCN1c(=O)oc2cc(/C=C/C(=O)OC)enc21)OCC  
3320 C=CC(=O)N(C)Cc1oc2cccc2c1C.C[C@@H]1CNc2ncc(Br)cc2CN1C(=O)OC(C)(C)C>>Cc1c(CN(C)C(=O)/C=C/c2enc3c(c2)CN(C(=O)OC(C)(C)C)[C@H](C)CN3)oc2cccc12  
3321 C=CC(=O)OC(C)(C)C.O=S(=O)(c1cccc1)n1ccc2cc(Br)enc21>>CC(C)(C)OC(=O)/C=C/c1enc2c(ccn2S(=O)(=O)c2cccc2)c1  
3322 C=Cc1ccc(N(c2ccc(C)cc2)c2ccc(C)cc2)cc1.Cn1nc2c(Br)ccc(Nc3ncc(C4OCCO4)cn3)c2n1>>Cc1ccc(N(c2ccc(C)cc2)c2ccc(/C=C/c3ccc(Nc4ncc(C5OCCO5)cn4)c4nn(C)nc34)cc2)cc1  
3323 C=CS(=O)(=O)F.Cc1ccc(S(=O)(=O)n2ccc3cc(I)ccc32)cc1>>Cc1ccc(S(=O)(=O)n2ccc3cc(/C=C/S(=O)(=O)F)ccc32)cc1  
3324 C=CCCC#N.Ic1cccc1>>N#CCC/C=C/c1cccc1  
3325 Brc1cccc(I)c1.C=CC(=O)OC>>COC(=O)/C=C/c1cccc(Br)c1  
3326 C=CC(=O)OC(C)(C)C.CCN(CC)c1cc2oc(=O)c(C(=O)O)cc2cc1I>>CCN(CC)c1cc2oc(=O)c(C(=O)O)c2cc1/C=C/C(=O)OC(C)(C)C  
3327 C=CC(=O)OC.O=C(O)c1ccc(Br)o1>>COC(=O)/C=C/c1ccc(C(=O)O)o1  
3328 C=Cc1cccc1.CC(=O)NS(=O)(=O)c1ccc(Br)cc1>>CC(=O)NS(=O)(=O)c1ccc(/C=C/c2cccc2)cc1  
3329 C/C(I)=C/[C@@H](C)CO[Si](C)(C)C(C)(C)C.C=CC[C@@H](C)CO>>CC(/C=C/C[C@@H](C)CO)=C/[C@@H](C)CO[Si](C)(C)C(C)(C)C  
3330 Brc1ccc(-c2nc(-c3cccc3)c(-c3cccc3)[nH]2)cc1.C=Cc1cncnc1>>C(=C/c1ccc(-c2nc(-c3cccc3)c(-c3cccc3)[nH]2)cc1)c1cncnc1  
3331 C=CC(=O)NC(C)c1cccc1.CCc1ccc(I)cc1>>CCc1ccc(/C=C/C(=O)NC(C)c2cccc2)cc1  
3332 C=C[C@@H](C)[C@H]1CC[C@H]2[C@@H]3[C@H](OC(C)=O)[C@@H]4[C@H](OC(C)=O)C[C@H]4(C)[C@H]3CC[C@H]21C.Ic1cccc1>>CC(=O)O[C@H]1C[C@@H]2[C@H](CC[C@@H]3(C)[C@H]2CC[C@H]3[C@H](C)/C=C/c2cccc2)[C@@H]2(C)CC[C@H](OC(C)=O)[C@H]12  
3333 Brc1ccc2cccc2c1.C=Cc1ccc(C(=O)O)cc1>>O=C(O)c1ccc(/C=C/c2ccc3cccc3c2)cc1  
3334 C=CS(=O)(=O)NCc1ccc(F)cc1.CC(C)(C)OC(=O)NCc1cccc1Br>>CC(C)(C)OC(=O)NCc1cccc1/C=C/S(=O)(=O)NCc1ccc(F)cc1  
3335 C=CC(=O)OC.O=c1c(I)coc2cc(O)ccc12>>COC(=O)/C=C/c1coc2cc(O)ccc2c1=O  
3336 C=CC(=O)Nc1cccc1C(=O)OCc1cccc1.O=S(=O)(Oc1ccc2nc(Cl)ccc2c1)C(F)(F)F>>O=C(/C=C/c1cc2nc(Cl)ccc2c1)Nc1cccc1C(=O)OCc1cccc1  
3337 C=C[C@H]1O[C@@H]2OC(C)(C)O[C@@H]2[C@H]1OC.COc1ccc(I)cc1>>COc1ccc(/C=C/[C@H]2O[C@@H]3OC(C)(C)O[C@@H]3[C@H]2OC)cc1  
3338 C=CC(=O)OC(C)(C)C.Cc1c(Br)ccc2c1nnn2C>>Cc1c(/C=C/C(=O)OC(C)(C)C)ccc2c1nnn2C  
3339 C=Cc1cccc1.O=C1C[C@H](c2ccc(Cl)cc2Br)CN1>>O=C1C[C@H](c2ccc(Cl)cc2/C=C/c2cccc2)CN  
3340 Brc1cncnc1.C=CC(=O)CCCC>>CCCCC(=O)/C=C/c1cncnc1  
3341 C=CC(=O)OCC.CC(=O)c1cn(-c2cccc2)nc1OS(=O)(=O)C(F)(F)F>>CCOC(=O)/C=C/c1nn(-c2cccc2)cc1C(C)=O  
3342 C=CC(=O)OC.COc1ccc(I)cc1>>COC(=O)/C=C/c1ccc(OC)cc1  
3343 C=CC(N)=O.CC(C)(C)OC(=O)NC1(c2ccc(-c3nc4c5cccc(Br)c5nn4cc3-c3cccc3)cc2)CCC1>>CC(C)(C)OC(=O)NC1(c2ccc(-c3nc4c5cccc(/C=C/C(N)=O)c5nn4cc3-c3cccc3)cc2)CCC1  
3344 C=CNC(C)=O.CCOC(=O)c1sc2nnc(C)c(C)c2c1Br>>CCOC(=O)c1sc2nnc(C)c(C)c2c1/C=C/NC(C)=O  
3345 C=Cc1ccc(OC)cc1.[O-][N+](=Nc1ccc(Br)cc1)c1cccc1>>COc1ccc(/C=C/c2ccc(N=[N+])([O-])c3cccc3)cc2)cc1  
3346 C=CC(=O)OC.O=C(Cc1cccc1)c1cn(-c2cccc2)c2cc(Br)ccc12>>COC(=O)/C=C/c1ccc2c(C(=O)Cc3cccc3)cn(-c3cccc3)c2c1  
3347 C=CC(=O)OCC.Fc1cc(Br)cc2nonc12>>CCOC(=O)/C=C/c1cc(F)c2nonc2c1  
3348 C=CCN1C(=O)c2cccc2C1=O.Oc1ccc(Br)cc1>>O=C1c2cccc2C(=O)N1C/C=C/c1ccc(O)cc1  
3349 C=Cc1ccc2c(c1)Sc1cccc1N2CCCCCCCC.CCCCCCCCN1c2ccc(Br)cc2Sc2cc(C=O)ccc21>>CCCCCCCCCN1c2cccc2Sc2cc(/C=C/c3ccc4c(c3)Sc3cc(C=O)ccc3N4CCCCCCCC)ccc21  
3350 C=CC(=O)OC(C)(C)C.Cc1cc(C#N)cc2nc(-c3ccc(Br)cc3)oc12>>Cc1cc(C#N)cc2nc(-c3ccc(/C=C/C(=O)OC(C)(C)C)cc3)oc12  
3351 C=Cc1cncnc1.CC(C)(C)OC(=O)N[C@H](COc1cncnc(Br)c1)C(c1cccc1)c1cccc1>>CC(C)(C)OC(=O)N[C@H](COc1cncnc(/C=C/c2ccnc2)c1)C(c1cccc1)c1cccc1

BrC1cnc2ccccc2c1.C=CCOC1=C(C)C(=O)O[C@H](CC)[C@@](C)(O)C=C(C)C(=O)[C@H](C)C[C@  
 3352 @](C)(OC)[C@H](O[C@@H]2O[C@H](C)C[C@H](N(C)C)[C@H]2OC(C)=O)[C@H]1C>>CC[C@  
 H]1OC(=O)C(C)=C(OC/C=C/c2cnc3ccccc3c2)[C@H](C)[C@@H](O[C@@H]2O[C@H](C)C[C@H](  
 3353 N(C)C)[C@H]2OC(C)=O)[C@](C)(OC)C[C@@H](C)C(=O)C(C)=C[C@]1(C)O  
 C=Cc1ccccc1.COc1cc(Br)c(C=O)cc1OC>>COc1cc(C=O)c(/C=C/c2ccccc2)cc1OC  
 3354 BrC1cccc(-c2ccccc2)n1.C=CC(=O)OCc1ccccc1>>O=C(/C=C/c1cccc(-c2ccccc2)n1)OCc1ccccc1  
 BrC1cnc2nc(-c3ccccc3)c(-  
 3355 c3ccccc3)nc2c1.C=CCN1C(=O)c2ccccc2C1=O>>O=C1c2ccccc2C(=O)N1C/C=C/c1cnc2nc(-  
 c3ccccc3)c(-c3ccccc3)nc2c1  
 3356 C=Cc1ccccc1.COC(=O)c1cc(OC)c(OC)cc1I>>COC(=O)c1cc(OC)c(OC)cc1/C=C/c1ccccc1  
 3357 C=CC=O.COc1ccc(-c2ccc(CN(C(=O)CC(C)(C)C)c3nccc4cc(Br)ccc34)cc2)cc1C>>COc1ccc(-  
 c2ccc(CN(C(=O)CC(C)(C)C)c3nccc4cc(/C=C/C=O)ccc34)cc2)cc1C  
 3358 C=CC(=O)OC.CC(=O)Cc1cccc(Br)c1>>COC(=O)/C=C/c1cccc(CC(C)=O)c1  
 3359 C=CC(=O)OCC.CCc1nc2cc(OC)ccc2c(Oc2ccc(Br)cc2)c1-  
 c1cccc(C(F)(F)F)c1>>CCOC(=O)/C=C/c1ccc(Oc2c(-c3cccc(C(F)(F)F)c3)c(CC)nc3cc(OC)ccc23)cc1  
 3360 C=Cc1cc(OC)cc(OC)c1.COc1cc(I)cc(OC)c1OC>>COc1cc(/C=C/c2cc(OC)c(OC)c(OC)c2)cc(OC)c1  
 3361 BrC1cccc2ccccc12.C=CC(=O)C(C)CC(=O)OC>>COC(=O)CC(C)C(=O)/C=C/c1cccc2ccccc12  
 3362 BrC1cccc2ccccc12.C=CC(=O)N1CCOCC1>>O=C(/C=C/c1cccc2ccccc12)N1CCOCC1  
 3363 C=Cc1ccc(OC)cc1.COC(=O)c1cc(OC)ccc1Br>>COC(=O)c1cc(OC)ccc1/C=C/c1ccc(OC)cc1  
 3364 C=Cc1ccc(OC)cc1.COc1cc[nH]c1/C=C1\C(=O)Nc2cccc(I)c21>>COc1ccc(/C=C/c2cccc3c2/C(=C/c2[n  
 H]ccc2OC)C(=O)N3)cc1  
 3365 C=Cc1cnc(F)c1.CC(C)(C)OC(=O)N1CCC[C@H]1COc1cnc(Cl)c(I)c1>>CC(C)(C)OC(=O)N1CCC[C  
 @H]1COc1cnc(Cl)c(/C=C/c2ccnc(F)c2)c1  
 3366 C=CC(=O)OC1CCCCC1.Ic1ccc(OCc2ccccc2)cc1>>O=C(/C=C/c1ccc(OCc2ccccc2)cc1)OC1CCCCC1  
 3367 C=Cc1ccccc1.Cc1cc(Br)ccc1N>>Cc1cc(/C=C/c2ccccc2)ccc1N  
 3368 C=CCn1nnc2ccccc21.Cc1ccc(Br)c2ccccc12>>Cc1ccc(/C=C/Cn2nnc3ccccc32)c2ccccc12  
 3369 C=CN1C(=O)c2ccccc2C1=O.COc1ccc2cccc(Br)c2n1>>COc1ccc2cccc(/C=C/N3C(=O)c4ccccc4C3=O  
 )c2n1  
 3370 BrC1ccc(-c2cnc3ccccc3n2)cc1.C=CCn1c(-c2cc(OC)ccc2OC)nc2ccccc2c1=O>>COc1ccc(OC)c(-  
 c2nc3ccccc3c(=O)n2C/C=C/c2ccc(-c3cnc4ccccc4n3)cc2)c1  
 3371 C=Cc1senc1C.CCOC(=O)C(F)(F)Br>>CCOC(=O)C(F)(F)/C=C/c1senc1C  
 3372 C=CC(=O)OCC.COc1ccc2cccc(Br)c2n1>>CCOC(=O)/C=C/c1cccc2ccc(OC)nc12  
 3373 C=CC(C)=O.N#Cc1ccc(Br)cc1>>CC(=O)/C=C/c1ccc(C#N)cc1  
 3374 C=CC(C)=O.N#Cc1c(-c2cccc(Br)c2)cc(-c2ccccc2)nc1N>>CC(=O)/C=C/c1cccc(-c2cc(-  
 c3ccccc3)nc(N)c2C#N)c1  
 3375 C=Cc1ccccc1.CCN1C[C@@]2(OC(=O)c3cc(I)ccc3NC(C)=O)CC[C@H](OC)[C@@]34[C@@H]2[C  
 @H]([C@@H]13)[C@@]1(O)C[C@H](OC)[C@H]2[C@@H]4[C@@]1(O)[C@H]2OC>>CCN1C[C  
 @]2(OC(=O)c3cc(/C=C/c4ccccc4)ccc3NC(C)=O)CC[C@H](OC)[C@@]34[C@@H]2[C@H]([C@  
 @H]13)[C@@]1(O)C[C@H](OC)[C@H]2[C@@H]4[C@@]1(O)[C@H]2OC  
 3376 C=CC(=O)OC.Cc1ccc(S(=O)(=O)n2cc(I)c3c(Br)ccc32)cc1>>COC(=O)/C=C/c1cn(S(=O)(=O)c2ccc(  
 C)cc2)c2ccccc(Br)c12  
 3377 C=CCNC(=O)c1ccccc1NC(=O)c1ccccc1.COc1ccc(I)cc1>>COc1ccc(/C=C/CNC(=O)c2ccccc2NC(=O)  
 c2ccccc2)cc1  
 3378 BrC1ccccc1.C=Cc1cc(-c2cc(C(C)(C)C)c(OC(C)=O)c(C(C)(C)C)c2)cc(-  
 c2cc(C(C)(C)C)c(OC(C)=O)c(C(C)(C)C)c2)c1>>CC(=O)Oc1c(C(C)(C)C)cc(-  
 c2cc(/C=C/c3ccccc3)cc(-c3cc(C(C)(C)C)c(OC(C)=O)c(C(C)(C)C)c3)c2)cc1C(C)(C)C  
 3379 C=CC(=O)OC(C)(C)C.N#Cc1ccc(NC=O)c(I)c1>>CC(C)(C)OC(=O)/C=C/c1cc(C#N)ccc1NC=O  
 3380 C=CC(=O)OCC.C[C@@H]1CN(C(=O)OC(C)(C)C)[C@H]2Cc3ccc(Br)nc3N12>>CCOC(=O)/C=C/c  
 1ccc2c(n1)N1[C@H](C)CN(C(=O)OC(C)(C)C)[C@H]1C2  
 3381 C=Cc1cccc(OC)c1.Nc1ccccc1Br>>COc1ccc(/C=C/c2ccccc2N)c1  
 3382 BrC1ccc2c(c1)Sc1ccccc1N2.C=Cc1cncnc1>>C(=C/c1ccc2c(c1)Sc1ccccc1N2)\c1cncnc1  
 3383 C=Cc1cncnc1.COc1cc(Nc2c(C#N)enc3ccc(Br)cc23)cc(OC)c1OC>>COc1cc(Nc2c(C#N)enc3ccc(/C=C  
 /c4cncnc4)cc23)cc(OC)c1OC  
 3384 C=CC(=O)OC(C)(C)C.COc1cccc(CCC(=O)Oc2ccc(I)cc2CC=C(C)C)c1>>COc1cccc(CCC(=O)Oc2ccc  
 (/C=C/C(=O)OC(C)(C)C)cc2CC=C(C)C)c1  
 3385 C=CC(=O)OC.Cn1cc(I)c2ccccc2c1=O>>COC(=O)/C=C/c1cn(C)c(=O)c2ccccc12  
 3386 C=CC(N)=O.O=Cc1ccc(Cl)cc1>>NC(=O)/C=C/c1ccc(C=O)cc1  
 3387 C=CCN1C(=O)c2ccccc2C1=O.CN(C)c1ccc(Br)cc1>>CN(C)c1ccc(/C=C/CN2C(=O)c3ccccc3C2=O)cc  
 3388 C=CC(=O)OC.Cc1cc(N(Cc2ccc(Br)cc2)CC(C)(C)C)nc(C)n1>>COC(=O)/C=C/c1ccc(CN(CC(C)(C)C)  
 c2cc(C)nc(C)n2)cc1  
 3389 C=CS(=O)(=O)F.CC(=O)c1cccc(I)c1>>CC(=O)c1cccc(/C=C/S(=O)(=O)F)c1

3390 C=Cc1ccccc1.CCCCCCCCOC1ccc(Br)c(F)c1>>CCCCCCCCOC1ccc(/C=C/c2ccccc2)c(F)c1  
3391 C=C[Si](C)(C)c1ccccc1.Ic1ccccc1>>C[Si](C)(C)/C=C/c1ccccc1)c1ccccc1  
3392 C=Cc1ccc(OC)cc1.COc1ccc(C=O)c(Br)c1>>COc1ccc(/C=C/c2cc(OC)ccc2C=O)cc1  
3393 C=Cc1ccccc1.O=Cc1ccc(Cl)cc1Br>>O=Cc1ccc(Cl)cc1/C=C/c1ccccc1  
3394 BrC1CCCCC1.C=Cc1cccc(Cl)c1>>Clc1cccc(/C=C/C2CCCCC2)c1  
3395 C=Cc1ccccc1.O=C(c1ccccc1)c1ccc(Cl)cc1>>O=C(c1ccccc1)c1ccc(/C=C/c2ccccc2)cc1  
3396 C=Cc1ccc(SCC[Si](C)(C)C)cc1.O=[N+][O-  
3397 ]c1cc(/C=C/c2ccccc2)ccc1I>>C[Si](C)(C)CCSc1ccc(/C=C/c2ccc(/C=C/c3ccccc3)cc2[N+](=O)[O-  
3398 BrC1=C(C2=CCCCO2)CCCC1.C=Cc1ccccc1>>C1=C(C2=C(/C=C/c3ccccc3)CCCC2)OCCCC1  
3399 C=Cc1ccc(C)cc1.O=Cc1ccc(Br)cc1>>Cc1ccc(/C=C/c2ccc(C=O)cc2)cc1  
3400 C=C[Si](C)(C)CC.FC(F)(F)c1ccccc(Br)c1>>CC[Si](/C=C/c1ccccc(C(F)(F)F)c1)(CC)CC  
3401 C=CC(C)(C)O.C[C@H]1N[C@H](CO[Si](C)(C)C(C)(C)C)Cc2c(Br)ccccc21>>C[C@H]1N[C@  
3402 @H](CO[Si](C)(C)C(C)(C)C)Cc2c(/C=C/C(C)(C)O)ccccc21  
3403 C=CC(=O)OC.Fc1cc(Br)c2[nH]c3c(c2c1)CCC3>>COC(=O)/C=C/c1cc(F)cc2c3c([nH]c12)CCC3  
3404 C=CC(=O)OCCCC.O=Cc1ccc(I)cc1>>CCCCOC(=O)/C=C/c1ccc(C=O)cc1  
3405 C=CC(=O)OC.Fc1ccc(I)cc1F>>COC(=O)/C=C/c1ccc(F)c(F)c1  
3406 C=CC(=O)O.COc1ccc(S(=O)(=O)Nc2ccc(I)cc2)cc1OC>>COc1ccc(S(=O)(=O)Nc2ccc(/C=C/C(=O)O)  
3407 cc2)cc1OC  
3408 C=Cc1ccccc1.Nc1ccc(F)cc1Br>>Nc1ccc(F)cc1/C=C/c1ccccc1  
3409 C=CC(=O)OC.FC(F)(F)Oc1ccc(-  
3410 c2ccc3c(Br)nc(C(F)(F)F)n3c2)cc1>>COC(=O)/C=C/c1nc(C(F)(F)F)n2cc(-c3ccc(OC(F)(F)F)cc3)ccc12  
3411 C=CC(=O)OC.O=[N+][O-  
3412 ]c1cc(OCc2ccccc2)ccc1I>>COC(=O)/C=C/c1ccc(OCc2ccccc2)cc1[N+](=O)[O-]  
3413 C=Cc1ccc2c(c1)OCO2.Ic1ccc(OCc2ccccc2)cc1>>C(=C/c1ccc2c(c1)OCO2)\c1ccc(OCc2ccccc2)cc1  
3414 C=Cc1ccccc(O)c1.Oc1cc(O)cc(I)c1>>Oc1ccccc(/C=C/c2cc(O)cc(O)c2)c1  
3415 C=Cc1ccc(/C=C/c2ccccc2)cc1.CC1(C)c2cc(I)ccc2N2Cc3cc([N+](=O)[O-  
3416 ]ccc3OC21C>>CC1(C)c2cc(/C=C/c3ccc(/C=C/c4ccccc4)ccc3)ccc2N2Cc3cc([N+](=O)[O-  
3417 C=CC(F)(F)F.COc1ccc(I)cc1>>COc1ccc(/C=C/C(F)(F)F)cc1  
3418 C=CCOc1ccccc(C)c1.Ic1ccccc1>>Cc1cccc(OC/C=C/c2ccccc2)c1  
3419 C=CC(=O)OCCCC.Cc1cc(C)cc(Br)c1>>CCCCOC(=O)/C=C/c1cc(C)cc(C)c1  
3420 C=Cc1cccc(Cl)c1.CCOC(=O)C(Cc1ccccc1)C(C)=O>>CCOC(=O)C(Cc1ccccc1/C=C/c1cccc(Cl)c1)C(  
3421 C)=O  
3422 C=Cc1ccccc1C.Clc1ccccc1>>Cc1ccccc1/C=C/c1ccccc1  
3423 C=CC(C)(C)O.CCNC(=O)C[C@H]1N=C(c2ccc(Br)cc2)c2cc(OC)ccc2-  
3424 n2c(C)nnc21>>CCNC(=O)C[C@H]1N=C(c2ccc(/C=C/C(C)(C)O)cc2)c2cc(OC)ccc2-n2c(C)nnc21  
3425 C=CC(=O)N1N=Cc2ccccc2C1CCC.CCc1nc(N)nc(N)c1Cc1cc(I)c(OC)c(OC)c1>>CCCC1c2ccccc2C=  
3426 NN1C(=O)/C=C/c1cc(Cc2c(N)nc(N)nc2CC)cc(OC)c1OC  
3427 C=CC(=O)O.Cn1c(=O)oc2cc(Br)cnc21>>Cn1c(=O)oc2cc(/C=C/C(=O)O)cnc21  
3428 C=CC(=O)OCC.COc1ccc(Br)c(C2OCCCCO2)c1>>CCOC(=O)/C=C/c1ccc(OC)cc1C1OCCCCO1  
3429 C=CC(=O)OC.Cc1cc(C)c(Br)c(C)c1>>COC(=O)/C=C/c1cc(C)cc(C)cc1C  
3430 C=CC(=O)C(O[Si](CC)(CC)CC)c1c(OCc2ccccc2)c(OC)c2c(OC)c(OC)cc(OC)c2e1OC.Ic1ccccc1OCc1  
3431 cccccc1>>CC[Si](CC)(CC)OC(C(=O)/C=C/c1ccccc1OCc1ccccc1)c1c(OCc2ccccc2)c(OC)c2c(OC)c(OC  
3432 )cc(OC)c2e1OC  
3433 Brclenc2c(c1)COCCN2.C=CC(=O)OC(C)(C)C>>CC(C)(C)OC(=O)/C=C/c1enc2c(c1)COCCN2  
3434 Brclccc(I)cc1.C=CCN1C(=O)c2ccccc2C1=O>>O=C1c2ccccc2C(=O)N1C/C=C/c1ccc(Br)cc1  
3435 C=Cc1ccc(F)cc1.COc1ccc(Br)cc1>>COc1ccc(/C=C/c2ccc(F)cc2)cc1  
3436 C=CC(=O)OCC.COc1ccc(Cl)cc1Br>>CCOC(=O)/C=C/c1cc(Cl)ccc1OC  
3437 C=Cc1ccc(OC)cc1.CC(C)(C)Br>>COc1ccc(/C=C/C(C)(C)C)cc1  
3438 C=Cc1ccc(OC)cc1.Fc1ccc(Br)cc1>>COc1ccc(/C=C/c2ccc(F)cc2)cc1  
3439 C=Cc1ccccc1.O=P(c1ccccc1)(c1ccccc1)c1ccc(/C=C/c2ccc3ccc4ccc(Br)cc4c3c2)cc1>>O=P(c1ccccc1)(  
3440 c1ccccc1)c1ccc(/C=C/c2ccc3ccc4ccc(/C=C/c5ccccc5)cc4c3c2)cc1  
3441 C=CCC(=O)O.Cc1cc(OCc2ccccc2)c([C@H]2O[C@H](COCc3ccccc3)[C@H](OCc3ccccc3)[C@  
3442 H](OCc3ccccc3)[C@H]2OCc2ccccc2)cc1Cc1ccc(Br)cc1>>Cc1cc(OCc2ccccc2)c([C@H]2O[C@H](  
3443 COCc3ccccc3)[C@H](OCc3ccccc3)[C@H](OCc3ccccc3)[C@H]2OCc2ccccc2)cc1Cc1ccc(/C=C/CC  
3444 C=Cc1ccccc1Cl.O=C1CCC(c2ccc(Br)cc2)O1>>O=C1CCC(c2ccc(/C=C/c3ccccc3Cl)cc2)O1  
3445 C=CC(=O)OC.Cn1enc2c(NCc3cccc(Br)c3)nc(N3CCCCC3)nc21>>COC(=O)/C=C/c1ccccc(CNc2nc(N3  
3446 CCCCC3)nc3c2ncn3C)c1  
3447 C=Cc1ccccc1.COc1ccc(Cl)c(Nc2c(C#N)cnc3cc(Br)ccc23)c1>>COc1ccc(Cl)c(Nc2c(C#N)cnc3cc(/C=C/  
3448 /c4ccccc4)ccc23)c1  
3449 C=CC(=O)OC(C)(C)C.COc1ccc2c(C(=O)c3cc(OC)c(OC)c(OC)c3)cn(Cc3ccc(Br)cc3)c2c1>>COc1ccc  
3450 2c(C(=O)c3cc(OC)c(OC)c(OC)c3)cn(Cc3ccc(/C=C/C(=O)OC(C)(C)C)cc3)c2c1

3434 C=Cc1cccc1.O=[N+](O-)[c1cccc1I]>>O=[N+](O-)[c1cccc1/C=C/c1cccc1  
 3435 C=CC(=O)OC(C)(C)C.COc1ccc(S(=O)(=O)c2nc3cccc3cc2Br)cc1>>COc1ccc(S(=O)(=O)c2nc3cccc  
 3cc2/C=C/C(=O)OC(C)(C)C)cc1  
 3436 C=Cc1ccc(F)cc1.C[Si](C)(OS(=O)(=O)C(F)(F)F)OS(=O)(=O)C(F)(F)F>>C[Si](C)(/C=C/c1ccc(F)cc1)  
 OS(=O)(=O)C(F)(F)F  
 3437 C=Cc1ccc(C)cc1.Cc1ccc(I)cc1>>Cc1ccc(/C=C/c2ccc(C)cc2)cc1  
 3438 C=CC(=O)OC.Cc1cc(O)ccc1Br>>COC(=O)/C=C/c1ccc(O)cc1C  
 3439 C=CC(=O)OC.N#Cc1ccc(I)cc1>>COC(=O)/C=C/c1ccc(C#N)cc1  
 3440 C=Cc1ccc(/C=C/c2cccn2C(=O)OC(C)(C)C)cc1.CCOC(=O)c1c(C)c(C)c(I)n1C(=O)OC(C)(C)C>>CCO  
 C(=O)c1c(C)c(C)c(/C=C/c2ccc(/C=C/c3cccn3C(=O)OC(C)(C)C)cc2)n1C(=O)OC(C)(C)C  
 3441 Brc1ncccn1.C=Cc1cccc(OC)c1>>COc1cccc(/C=C/c2ncccn2)c1  
 C=CC(=O)OC(C)(C)C.CC(C)(C)O[C@H]1CC[C@@H]2C=C(C3=C(Br)CC(O[Si](C)(C)C(C)(C)C  
 3442 C3)CC[C@]12C>>CC(C)(C)OC(=O)/C=C/C1=C(C2=C[C@H]3CC[C@H](OC(C)(C)C)[C@@]3(C)C  
 C2)CCC(O[Si](C)(C)C(C)(C)C)C1  
 3443 C=CCOc1cccc1C(C)C.Ic1cccc1>>CC(C)c1cccc1OC/C=C/c1cccc1  
 3444 C=CCNS(=O)(=O)c1ccc(C)cc1.FC(F)(F)c1ccc(Br)cc1>>Cc1ccc(S(=O)(=O)NC/C=C/c2ccc(C(F)(F)F)c  
 c2)cc1  
 3445 C=Cc1cccc1.O=C1C=CC(=O)c2c(I)cccc21>>O=C1C=CC(=O)c2c(/C=C/c3cccc3)cccc21  
 3446 Brc1cccn2nnnc12.C=CC(=O)OC>>COC(=O)/C=C/c1cccn2nnnc12  
 3447 C=Cc1ccc(N)cc1.Oc1ccc(-c2oc3cc(O)cc(Br)c3c2-c2cc(O)cc(O)c2)cc1>>Nc1ccc(/C=C/c2cc(O)cc3oc(-  
 c4ccc(O)cc4)c(-c4cc(O)cc(O)c4)c23)cc1  
 3448 C=C[C@H]1C[C@H](CC(=O)OCC)OC(C)(C)O1.CCC(C)c1c(Br)c(-c2ccc(F)cc2)nn1-  
 c1ccnc(Nc2cccc2)c1>>CCOC(=O)C[C@H]1C[C@@H](/C=C/c2c(-c3ccc(F)cc3)nn(-  
 c3ccnc(Nc4cccc4)c3)c2C(C)CC)OC(C)(C)O1  
 3449 C=CC(=O)OC(C)(C)C.CC(OC(=O)OC(C)(C)C)c1cc2c(cc1Br)OCO2>>CC(OC(=O)OC(C)(C)C)  
 c1cc2c(cc1/C=C/C(=O)OC(C)(C)C)OCO2  
 3450 C=CC(=O)OCCCC.Cn1ccc2cc(Br)ccc21>>CCCCOC(=O)/C=C/c1ccc2c(ccn2C)c1  
 3451 C=CC(=O)OC.CC(C)(C)OC(=O)NCCc1ccc(Br)cc1>>COC(=O)/C=C/c1ccc(CCNC(=O)OC(C)(C)C)cc  
 3452 C=Cc1ccc2c(c1)OCO2.FC1(F)Oc2ccc(Br)cc2OC1(F)F>>FC1(F)Oc2ccc(/C=C/c3ccc4c(c3)OCO4)cc2  
 OC1(F)F  
 3453 C=CC(=O)OC.COc1cccc1Br>>COC(=O)/C=C/c1cccc1OC  
 3454 C=CC(=O)O.N#Cc1cc(Br)ccc1F>>N#Cc1cc(/C=C/C(=O)O)ccc1F  
 3455 C=Cc1ccc(C(=O)OCC)cc1.CCOC(=O)C(F)Br>>CCOC(=O)c1ccc(/C=C/C(F)C(=O)OCC)cc1  
 3456 C=CC(=O)OCC.COc1ccc(Br)cc1I>>CCOC(=O)/C=C/c1cc(Br)ccc1OC  
 3457 Brc1ccc2cnccc2c1.C=Cc1ccc(OC)cc1>>COc1ccc(/C=C/c2ccc3cnccc3c2)cc1  
 3458 C=CP(=O)(O)O.COc1ccc(N(c2ccc(I)cc2)c2ccc(OC)cc2)cc1>>COc1ccc(N(c2ccc(/C=C/P(=O)(O)O)cc  
 2)c2ccc(OC)cc2)cc1  
 3459 C=Cc1cccc1.O=c1oc2cc(Cl)ccc2c(-c2cccc2)c1Br>>O=c1oc2cc(Cl)ccc2c(-  
 C=CC(CO)N1C(=O)c2cccc2C1=O.COc1ccc(OC)c(Br)c1>>COc1ccc(OC)c(/C=C/C(CO)N2C(=O)c3c  
 3460 cccc3C2=O)c1  
 Brc1enc2cccc2c1.C=CCO[C@]1(C)C[C@@H](C)C(=O)[C@H](C)[C@@]2(O)NC(=O)O[C@]2(C)[  
 C@@H](CC)OC(=O)[C@H](C)[C@@H](O[C@H]2C[C@@](C)(OC)[C@@H](O[Si](C)(C)C)[C@H]  
 3461 )(C)O2)[C@H](C)[C@H]1O[C@@H]1O[C@H](C)C[C@H](N(C)C)[C@H]1O[Si](C)(C)C>>CC[C@  
 H]1OC(=O)[C@H](C)[C@@H](O[C@H]2C[C@@](C)(OC)[C@@H](O[Si](C)(C)C)[C@H](C)O2)[C  
 @H](C)[C@@H](O[C@@H]2O[C@H](C)C[C@H](N(C)C)[C@H]2O[Si](C)(C)C)[C@](C)(OC/C=C/  
 c2enc3cccc3c2)C[C@@H](C)C(=O)[C@H](C)[C@@]2(O)NC(=O)O[C@]2(C)[C@@H](CC)OC(=O)  
 3462 C=CC(=O)OC.CC(C)(C)OC(=O)n1nc(I)c2cccc21>>COC(=O)/C=C/c1nn(C(=O)OC(C)(C)C)c2cccc1  
 3463 Brc1cccn1.C=Cc1cccc1>>C(=C/c1cccn1)\c1cccn1  
 3464 C=Cc1ccc(C(F)(F)F)cc1.O=Cc1ccc(Br)cc1>>O=Cc1ccc(/C=C/c2ccc(C(F)(F)F)cc2)cc1  
 3465 C=Cc1cccn1.COc1cc(Br)cc(OC)c1>>COc1cc(/C=C/c2ccncc2)cc(OC)c1  
 3466 C=CC(=O)OCC.COc1cc(Br)c(-c2cc3cccc3o2)cc1OC>>CCOC(=O)/C=C/c1cc(OC)c(OC)cc1-  
 c1cc2cccc2o1  
 3467 C=CC(=O)N(C)C.C[C@@H](Nc1nccn2sc(Br)cc12)c1cccc1>>C[C@@H](Nc1nccn2sc(/C=C/C(=O)N  
 (C)C)cc12)c1cccc1  
 3468 C=CC(=O)OCC.Cc1ccc(I)cc1C>>CCOC(=O)/C=C/c1ccc(C)c(C)c1  
 3469 C=Cc1ccc(OC)cc1.C[Si](C)(C)Cl>>COc1ccc(/C=C/[Si](C)(C)C)cc1  
 3470 C=CC(=O)OCC.Cc1c[n+](O-)[c(C)c(Cl)n1>>CCOC(=O)/C=C/c1nc(C)c[n+](O-)]c1C  
 3471 C=Cc1ccc(C)cc1.CC(=O)c1ccc(I)cc1>>CC(=O)c1ccc(/C=C/c2ccc(C)cc2)cc1  
 3472 C=CSc1cccc1.O=Cc1ccc(Br)cc1>>O=Cc1ccc(/C=C/Sc2cccc2)cc1  
 3473 C=COCCCC.COc1cc(C(=O)Cl)cc(OC)c1OC>>CCCCO/C=C/C(=O)c1cc(OC)c(OC)c(OC)c1

3474 C=CS(=O)(=O)NCCc1ccccc1.CC(C)(C)OC(=O)NCc1ccccc1Br>>CC(C)(C)OC(=O)NCc1ccccc1/C=C/  
 S(=O)(=O)NCCc1ccccc1  
 3475 C=CC(=O)OC.COc1ccc(N)c(I)c1>>COC(=O)/C=C/c1cc(OC)ccc1N  
 3476 C=CC(=O)OC(C)(C)C.COc1cccc([IH2](OC(C)=O)OC(C)=O)c1>>COc1cccc(/C=C/C(=O)OC(C)(C)C)  
 3477 C=CC(=O)OCC.COc1ccc(I)c([N+](=O)[O-])c1>>CCOC(=O)/C=C/c1ccc(OC)cc1[N+](=O)[O-]  
 3478 C=CCCCCCCC.COc1ccc(I)cc1>>CCCCCCCC/C=C/c1ccc(OC)cc1  
 3479 C=Cc1ccccc1.O=C1CCCCc2cc(Br)ccc21>>O=C1CCCCc2cc(/C=C/c3ccccc3)ccc21  
 3480 C=CC(=O)OC.CC(=O)OCc1cc(I)cc(COC(C)=O)c1OC(C)=O>>COC(=O)/C=C/c1cc(COC(C)=O)c(OC  
 (C)=O)c(COC(C)=O)c1  
 3481 C=CC(N)=O.COc1ccc2c(c1)CCC(C=O)=C2Br>>COc1ccc2c(c1)CCC(C=O)=C2/C=C/C(N)=O  
 3482 C=CC(C)=O.Cn1ccc2cc(Br)ccc21>>CC(=O)/C=C/c1ccc2c(cen2C)c1  
 C=CCC(O)c1c(C)noc1-c1ccc(-  
 3483 c2ccc(C3(C(=O)OCC)CC3)cc2)cc1.FC(F)(F)c1ccc(I)cc1>>CCOC(=O)C1(c2ccc(-c3ccc(-  
 c4onc(C)c4C(O)C/C=C/c4ccc(C(F)(F)F)cc4)cc3)cc2)CC1  
 3484 C=C[C@H](C)[C@H](O)C/C=C/C(=O)OC.N#Cc1ccc(I)cc1>>COC(=O)/C=C/C[C@H](O)[C@H  
 ](C)/C=C/c1ccc(C#N)cc1  
 3485 C=Cc1cc(OC)c(OC)c(OC)c1-  
 c1ccc(F)c(C)c1.COc1ccc(I)cc1>>COc1ccc(/C=C/c2cc(OC)c(OC)c(OC)c2-c2ccc(F)c(C)c2)cc1  
 3486 C=Cc1cc2ccccc2oc1=O.Ic1ccccc1>>O=c1oc2ccccc2cc1/C=C/c1ccccc1  
 3487 Brc1ccccc1.C=CCOc1cccc(C)c1>>Cc1cccc(OC/C=C/c2ccccc2)c1  
 3488 C=CC(=O)OC(C)(C)C.CC1(C)COc2cc(Br)cn2NC1=O>>CC(C)(C)OC(=O)/C=C/c1cnc2c(c1)OCC(C)  
 (C)C(=O)N2  
 3489 C=C[Si](C)(C)C.Ic1cccs1>>C[Si](C)(C)/C=C/c1cccs1  
 3490 C=C[Si](CC)(CC)CC.N#Cc1ccccc1Br>>CC[Si](/C=C/c1ccccc1C#N)(CC)CC  
 3491 C=CC(C)(O)CCC=C(C)C.CC(C)(C)c1ccc(Br)cc1>>CC(C)=CCCC(C)(O)/C=C/c1ccc(C(C)(C)C)cc1  
 3492 Brc1ccc2ncn2c1.C=CC(C)(C)O>>CC(C)(O)/C=C/c1ccc2ncn2c1  
 3493 C=CC(C)=O.Cc1cccc(C)c1Br>>CC(=O)/C=C/c1c(C)cccc1C  
 3494 C=CCCC.Cc1ccc(Br)cc1>>CCCC/C=C/c1ccc(C)cc1  
 3495 C=CC(F)(F)F.O=[N+](O-)]c1ccc(I)c(Cl)c1>>O=[N+](O-)]c1ccc(/C=C/C(F)(F)F)c(Cl)c1  
 3496 Brc1ccc2c(cnn2C2CCCCO2)c1.C=Cc1ncc(N)cn1>>Nc1cnc(/C=C/c2ccc3c(cnn3C3CCCCO3)c2)nc1  
 3497 C=CC(=O)OCCCC.CC(C)c1cc(C(C)C)c(Br)c(C(C)C)c1>>CCCCOC(=O)/C=C/c1c(C(C)C)cc(C(C)C)c  
 c1C(C)C  
 3498 C=CC(N)=O.FC(F)(F)Oc1ccc(I)cc1>>NC(=O)/C=C/c1ccc(OC(F)(F)F)cc1  
 3499 C=CCC(=O)O.Cc1cn(Cc2ccc(I)cc2)c(=O)[nH]c1=O>>Cc1cn(Cc2ccc(/C=C/CC(=O)O)cc2)c(=O)[nH]c  
 C=CC(C)O.CC(C)(C)OC(=O)NCCc1cc2c(cc1I)OCO2>>CC(O)/C=C/c1cc2c(cc1CCNC(=O)OC(C)(C)  
 C)OCO2  
 3501 C=CC(=O)OCC.COc1cc(F)cc(Br)c1>>CCOC(=O)/C=C/c1cc(F)cc(OC)c1  
 3502 C=CC(=O)OC(C)(C)C.CC(C)(C)OC(=O)n1cc(C=O)c2c(Br)cccc21>>CC(C)(C)OC(=O)/C=C/c1cccc2c  
 1c(C=O)en2C(=O)OC(C)(C)C  
 3503 OCc1ccccc1I.[11CH2]=Cc1ccccc1>>OCc1ccccc1/[11CH]=C/c1ccccc1  
 3504 C=C[Si](C)(C)C.COc1cc(CC(C(=O)OC(C)(C)C)C(=O)OC(C)(C)C)c(I)c(OC)c1OC>>COc1cc(CC(C(=O)  
 OC(C)(C)C)C(=O)OC(C)(C)C)c(/C=C/[Si](C)(C)C)c(OC)c1OC  
 3505 C=CC(=O)Nc1ccccc1.CC(C)(C)c1ccc2[nH]c3c(c2c1)CC(=O)Nc1ccc(I)cc1-  
 3>>CC(C)(C)c1ccc2[nH]c3c(c2c1)CC(=O)Nc1ccc(/C=C/C(=O)Nc2ccccc2)cc1-3  
 3506 Brc1cccc(CNc2nc(N3CCOCC3)nc3c2nen3C2CCCC2)c1.C=CC(=O)OC>>COC(=O)/C=C/c1cccc(CNc  
 2nc(N3CCOCC3)nc3c2nen3C2CCCC2)c1  
 Brc1cnc2ccccc2c1.C=CCO[C@]1(C)C[C@H](C)C(=NO)[C@H](C)[C@H](O)[C@](C)(O)[C@  
 H](CC)OC(=O)[C@H](C)[C@H](O)[C@H](C)[C@H](C)[C@H]1O[C@H]1O[C@H](C)[C@H](N(C)C)[  
 3507 C@H]1O>>CC[C@H]1OC(=O)[C@H](C)[C@H](O)[C@H](C)[C@H](O)[C@H]2O[C@H](C)  
 C[C@H](N(C)C)[C@H]2O)[C@](C)(OC/C=C/c2cnc3ccccc3c2)C[C@H](C)C(=NO)[C@H](C)[C@  
 H]1O)[C@H](C)O  
 3508 C=CC(=O)OCCCC.N#CCc1ccc(Br)cc1>>CCCCOC(=O)/C=C/c1ccc(CC#N)cc1  
 3509 C=CC(=O)OC(C)(C)C.COC(=O)/C=C/c1cccc(N(Cc2cccc(Br)c2)C(=O)C2CCCC2)c1>>COC(=O)/C  
 =C/c1cccc(N(Cc2cccc(/C=C/C(=O)OC(C)(C)C)c2)C(=O)C2CCCC2)c1  
 3510 C=CC(=O)O.Fc1ccc(Br)cc1>>O=C(O)/C=C/c1ccc(F)cc1  
 3511 C=Cc1ccccc1.COc1cc(OC)c(OC)cc1/C=C/C(=O)c1ccc(I)cc1>>COc1cc(OC)c(OC)cc1/C=C/C(=O)c1c  
 cc(/C=C/c2ccccc2)cc1  
 3512 C=CC(=O)OCCCC.O=C(c1ccccc1)c1ccc(Cl)cc1>>CCCCOC(=O)/C=C/c1ccc(C(=O)c2ccccc2)cc1  
 3513 C=CC(=O)OC(C)(C)C.CC(C)(C)OC(=O)CCOCc1cccc([N+](=O)[O-]  
 ])c1Br>>CC(C)(C)OC(=O)/C=C/c1c(COCCCC(=O)OC(C)(C)C)cccc1[N+](=O)[O-]  
 3514 C=CC(=O)c1ccc(OC)cc1OC.COc1ccc(I)c(OC)c1>>COc1ccc(/C=C/C(=O)c2ccc(OC)cc2OC)c(OC)c1

3515 Br1cccc1.C=Cc1cccc1Cl>>Clc1cccc1/C=C/c1cccc1  
3516 C=Cc1ccc(O)cc1.Oc1cc(Br)cc(O)c1F>>Oc1ccc(/C=C/c2ccc(O)c(F)c(O)c2)cc1  
3517 C=CCC(C)C(=O)OCC.COCC(=O)c1ccc2cc(Br)ccc2c1>>CCOC(=O)C(C)C/C=C/c1ccc2cc(C(=O)OC)cc  
3518 C=CC(=O)OCC.Cc1cc(Br)ccc1O>>CCOC(=O)/C=C/c1ccc(O)c(C)c1  
3519 C=Cc1cccc1.Cn1c(/C=C/c2cccc2)c(I)c(=O)c2cccc21>>Cn1c(/C=C/c2cccc2)c(/C=C/c2cccc2)c(=O)c2cccc21  
3520 C=CC(=O)OCC.COCC(=O)c1cc(I)c2c(c1)C[C@]1(O2)[C@H](C)CC[C@H](OC(C)=O)C1(C)C>>CCO  
C(=O)/C=C/c1cc(C(=O)OC)cc2c1O[C@@]1(C2)[C@H](C)CC[C@H](OC(C)=O)C1(C)C  
3521 C=CC(=O)OC.COc1cccc1Cl>>COC(=O)/C=C/c1cccc1OC  
3522 C=CC(F)(F)C(F)(F)C(F)(F)C(F)(F)C(F)(F)F.COc1ccc(Br)cc1>>COc1ccc(/C=C/C(F)(F)C(F)(F)  
)C(F)(F)C(F)(F)C(F)(F)C(F)(F)F)cc1  
3523 C=CC(=O)OCC.Cn1nnc2c(Cl)c(Br)ccc21>>CCOC(=O)/C=C/c1ccc2c(nnn2C)c1Cl  
3524 C=Cc1ccc(C#N)cc1.CC(C)=C(C)Br>>CC(C)=C(C)/C=C/c1ccc(C#N)cc1  
3525 C=Cc1cccc1.CCOC(=O)C(F)I>>CCOC(=O)C(F)/C=C/c1cccc1  
C=CC1(C(=O)O)COCCOC1.CC(C)[C@H](O)C(=O)N[C@@H](C)C(=O)N1CCC[C@@H](C(=O)N[  
3526 C@H](C)c2ccc3ccc(Br)cc3n2)N1>>CC(C)[C@H](O)C(=O)N[C@@H](C)C(=O)N1CCC[C@@H](C(  
=O)N[C@H](C)c2ccc3ccc(/C=C/C4(C(=O)O)COCCOC4)cc3n2)N1  
3527 C=Cc1cccc1.O=c1c(Br)coc2cccc12>>O=c1c(/C=C/c2cccc2)coc2cccc12  
3528 C=Cc1ccc(Cl)cc1.COc1ccc(I)cc1OC>>COc1ccc(/C=C/c2ccc(Cl)cc2)cc1OC  
3529 C=CC(=O)OC(C)(C)C.COCC(=O)[C@H]1c2c(Br)ccc(OC)c2O[C@@H]1c1ccc(OC)c(OC)c1>>COC(=  
O)[C@H]1c2c(/C=C/C(=O)OC(C)(C)C)ccc(OC)c2O[C@@H]1c1ccc(OC)c(OC)c1  
3530 C=Cc1cccc1.CCCCOC(=O)/C=C/c1ccc(Br)cc1>>CCCCOC(=O)/C=C/c1ccc(/C=C/c2cccc2)cc1  
3531 C=CC(=O)OC.Cn1nc(-c2cccc2)c(Br)cc1O>>COC(=O)/C=C/c1cc(=O)n(C)nc1-c1cccc1  
3532 C=CC(N)=O.COc1ccc(Br)cc1OC>>COc1ccc(/C=C/C(N)=O)cc1OC  
3533 Br1ccsc1.C=C/C=C/C(=O)N(CCCC)CCCC>>CCCCN(CCCC)C(=O)/C=C/C=C/c1ccsc1  
3534 C=CC(=O)OC(C)(C)C.COc1cc(COCCC(=O)OC(C)(C)C)c(Br)c(OC)c1OC>>COc1cc(COCCC(=O)OC  
(C)(C)C)c(/C=C/C(=O)OC(C)(C)C)c(OC)c1OC  
3535 C=CC(=O)OC.CCc1cc2c(C)nc(C)nc2n1Cc1ccc(Br)cc1>>CCc1cc2c(C)nc(C)nc2n1Cc1ccc(/C=C/C(=O)  
)OC)cc1  
3536 C=CC(=O)OC.N#CCCN1c(=O)oc2cc(Br)enc21>>COC(=O)/C=C/c1enc2c(c1)oc(=O)n2CCC#N  
3537 C=CC(=O)OC(C)(C)C.CC(C)=CCc1cc(I)ccc1OC(=O)CC1CCCCC1>>CC(C)=CCc1cc(/C=C/C(=O)O  
C(C)(C)C)ccc1OC(=O)CC1CCCCC1  
3538 C=CC(=O)OC.CC(C)(C)OC(=O)N1CCc2ccc(Br)cc2C1>>COC(=O)/C=C/c1ccc2c(c1)CN(C(=O)OC(C  
)C)CC2  
3539 C=CC(=O)NC(C)(C)C.COCC(=O)/C=C/c1cccc(N(Cc2ccc(Br)cc2)C(=O)C2CCCCC2)c1>>COC(=O)/C  
=C/c1cccc(N(Cc2ccc(/C=C/C(=O)NC(C)(C)C)cc2)C(=O)C2CCCCC2)c1  
C=Cc1ccc([Si](OC)(OC)OC)cc1.CC(C)(C)OP(=O)(Cc1ccc(/C=C/c2c3cccc3c(Br)e3cccc23)cc1)OC(  
3540 C)(C)C>>CO[Si](OC)(OC)c1ccc(/C=C/c2c3cccc3c(/C=C/c3ccc(CP(=O)(OC(C)(C)C)OC(C)(C)C)cc3  
)c3cccc23)cc1  
3541 C=CC(=O)O.CC(C)(C)OC(=O)Nc1ccc(Br)cc1>>CC(C)(C)OC(=O)Nc1ccc(/C=C/C(=O)O)cc1  
3542 C=CC(=O)OCCCC.Ic1ccc(-c2cccc2)cc1>>CCCCOC(=O)/C=C/c1ccc(-c2cccc2)cc1  
3543 C=CC(=O)OC.COc1cccc(I)c1NC(=O)C(C)(C)C>>COC(=O)/C=C/c1cccc(OC)c1NC(=O)C(C)(C)C  
C=CC(C)(C)O.CC(=O)O[C@@H]1C(Br)=C[C@@H](O[Si](C)(C)C(C)(C)C)[C@@H]2O[C@H]12>>  
3544 CC(=O)O[C@@H]1C(/C=C/C(C)C)O=C[C@@H](O[Si](C)(C)C(C)(C)C)[C@@H]2O[C@H]12  
3545 C=Cc1ccc(OC)cc1.Nc1ccc(Br)cc1>>COc1ccc(/C=C/c2ccc(N)cc2)cc1  
3546 C=CCn1ccnc1.CCOC(=O)c1ccc(I)cc1Cl>>CCOC(=O)c1ccc(/C=C/Cn2ccnc2)cc1Cl  
C=CC(=O)N(C)C.C[C@]12C[C@@]34C=C(Sc5cccc(I)c5)C(=O)[C@@](C)(CCC(=O)Nc5c(O)ccc(C(  
3547 =O)c5O)[C@@H]3[C@H](C[C@H]1C4)O2>>CN(C)C(=O)/C=C/c1cccc(SC2=C[C@]34C[C@H  
]5C[C@H](O[C@@]5(C)C3)[C@H]4[C@@](C)(CCC(=O)Nc3c(O)ccc(C(=O)O)c3O)C2=O)c1  
C=Cc1ccncc1.C[C@H](COc1cnc(Cl)c(Br)c1)NC(=O)OC(C)(C)C>>C[C@H](COc1cnc(Cl)c(/C=C/c2c  
3548 encc2)c1)NC(=O)OC(C)(C)C  
C=Cc1en(C(c2cccc2)(c2cccc2)c2cccc2)en1.CC(=O)Oc1cc(C=O)c2ccc(Cl)ccc1-  
3549 2>>CC(=O)Oc1cc(C=O)c2ccc(/C=C/c3en(C(c4cccc4)(c4cccc4)c4cccc4)cn3)ccc1-2  
C=CC(=O)OCC.CCN1C[C@]2(OC(=O)c3cc(I)ccc3N)CC[C@H](OC)[C@]34[C@@H]1[C@H](C[C  
3550 @H]23)[C@@]1(O)C[C@H](OC)[C@H]2C[C@@H]4[C@]1(O)[C@H]2OC>>CCOC(=O)/C=C/c1cc  
c(N)c(C(=O)O)[C@@]23CC[C@H](OC)[C@]45[C@H]([C@H](C[C@H]24)[C@@]2(O)C[C@H](OC  
)C@H14C[C@@H]5[C@]2(O)[C@H]4OC)N(CC)C3)c1  
3551 C=CC(=O)OC(C)(C)C.O=C(C=C(c1cccc1)c1cccc1)c1cccc1Br>>CC(C)(C)OC(=O)/C=C/c1cccc1  
C(=O)C=C(c1cccc1)c1cccc1  
3552 C=Cc1cccc1.Clc1cccc1I>>Clc1cccc1/C=C/c1cccc1

3553 C=Cc1ccc(OC)cc1OC.CCCCCCCCOC1ccc2c(C)c(Br)c(=O)oc2c1>>CCCCCCCCOC1ccc2c(C)c(/C=C/c3ccc(OC)cc3OC)c(=O)oc2c1  
 3554 C=CS(=O)(=O)N1CCC2(CC1)N=C(C1CCCCC1)NC2=O.Cc1cc(N2CCNC2=O)cc(C)c1Br>>Cc1cc(N2CCNC2=O)cc(C)c1/C=C/S(=O)(=O)N1CCC2(CC1)N=C(C1CCCCC1)NC2=O  
 3555 Br1ccc([C@@H]2CCCCO2)cc1.C=CC(=O)OCC>>CCOC(=O)/C=C/c1ccc([C@@H]2CCCCO2)cc1  
 3556 C=CC(=O)OCC.Ic1nn(Cc2ccccc2)c2ccccc12>>CCOC(=O)/C=C/c1nn(Cc2ccccc2)c2ccccc12  
 3557 C=Cc1ccc(C)cc1.O=Cc1cc(F)ccc1Br>>Cc1ccc(/C=C/c2ccc(F)cc2C=O)cc1  
 3558 C=CC(=O)OC(C)(C)C.COc1ccc(C(=O)c2ccc3c(ccn3Cc3ccc(Br)cc3)c2)cc1>>COc1ccc(C(=O)c2ccc3c(ccn3Cc3ccc(/C=C/C(=O)OC(C)(C)C)cc3)c2)cc1  
 3559 C=Cc1ccc(COC(C)=O)cc1.COc1ccc2c(c1)cc(C#N)c1ccc(Br)cc12>>COc1ccc2c(c1)cc(C#N)c1ccc(/C=C/c3ccc(COC(C)=O)cc3)cc12  
 3560 C=C[C@H]1O[C@H](Sc2ccccc2)[C@H](OCc2ccccc2)[C@@H](OCc2ccccc2)[C@@H]1OCc1ccc(OC)cc1.O=c1cc(-c2ccccc2)oc2ccc(Br)cc12>>COc1ccc(CO[C@H]2[C@H](OCc3ccccc3)[C@@H](OCc3ccccc3)[C@H](Sc3ccccc3)O[C@H]2/C=C/c2ccc3oc(-c4ccccc4)cc(=O)c3c2)cc1  
 3561 Br1cc2ccccc2c2ccccc12.C=CC(=O)OC>>COC(=O)/C=C/c1cc2ccccc2c2ccccc12  
 3562 C=C[Si](CC)(CC)CC.O=C(c1ccccc1)c1ccc(Br)cc1>>CC[Si](/C=C/c1ccc(C(=O)c2ccccc2)cc1)(CC)CC  
 3563 C=CC(=O)OCC.O=[N+](O-)[O-]c1ccc(-c2nccc2Br)cc1>>CCOC(=O)/C=C/c1ccncc1-c1ccc([N+](=O)[O-])cc1  
 3564 C=CC(=O)OCC.COc1cc(Br)cc2cc(-c3ccc4c(c3)OCO4)oc12>>CCOC(=O)/C=C/c1cc(OC)c2oc(-c3ccc4c(c3)OCO4)cc2c1  
 3565 C=CC(=O)OCCCC.CCOC(=O)Nc1ccc(C)cc1C1=C(I)CCN1S(=O)(=O)c1ccc(C)cc1>>CCCCOC(=O)/C=C/C1=C(c2cc(C)ccc2NC(=O)OCC)N(S(=O)(=O)c2ccc(C)cc2)CC1  
 3566 C=CCOc1ccc(OC)cc1.Ic1ccc2ccccc12>>COc1ccc(OC/C=C/c2ccccc3ccccc23)cc1  
 3567 C=CS(=O)(=O)F.COc1ccc(I)cc1>>COc1ccc(/C=C/S(=O)(=O)F)cc1  
 3568 C=Cc1ccc(OC)cc1.COC(=O)c1cc2cc(Br)ccc2cc1OC(C)=O>>COC(=O)c1cc2cc(/C=C/c3ccc(OC)cc3)cc2cc1OC(C)=O  
 3569 C=CC(=O)N(C)CCN(C)C.C[Si](C)(C)CCOCn1nc(I)c2ccc(C=O)cc21>>CN(C)CCN(C)C(=O)/C=C/c1nn(COCC[Si](C)(C)C)c2cc(C=O)ccc12  
 3570 Br1coc2ccncc12.C=CC(=O)OCC>>CCOC(=O)/C=C/c1coc2ccncc12  
 3571 C=Cc1ccc(OC)cc1.COc1ccc(C(=O)c2cn(C)c(C3=NCCO3)c2-c2c(Br)ccc3ccccc23)cc1>>COc1ccc(/C=C/c2ccc3ccccc3c2-c2c(C(=O)c3ccc(OC)cc3)cn(C)c2C2=NCCO2)cc1  
 3572 C=CC(=O)OC.COCCn1cc(I)cn1>>COCCn1cc(/C=C/C(=O)OC)cn1  
 3573 C=CC(=O)OCC.Cn1nnc2c(C(F)(F)F)c(Br)ccc21>>CCOC(=O)/C=C/c1ccc2c(nnn2C)c1C(F)(F)F  
 3574 C=CC(=O)OCCCC.N#Cc1ccc(I)cc1>>CCCCOC(=O)/C=C/c1ccc(C#N)cc1  
 3575 C=CCCCC(=O)OCC.O=S(=O)(Oc1ccc(C(=C2C3CCCC2CCC3)c2ccc(O)cc2)cc1)C(F)(F)F>>CCOC(=O)CCCC/C=C/c1ccc(C(=C2C3CCCC2CCC3)c2ccc(O)cc2)cc1  
 3576 C=C[Si](OCC)(OCC)OCC.COc1ccc(/C=C/c2ccc(I)cc2)cc1>>CCO[Si](/C=C/c1ccc(/C=C/c2ccc(OC)cc2)cc1)(OCC)OCC  
 3577 C=Cc1ccc(C)cc1.Cc1ccc(S(=O)(=O)Oc2ccccc3c(Br)ccncc23)cc1>>Cc1ccc(/C=C/c2ccncc3c(OS(=O)(=O)c4ccc(C)cc4)ccccc23)cc1  
 3578 C=C/C=C/C/c1ccccc1.O=C(OCCCC(Br)C(F)(F)F)c1ccccc1>>O=C(OCCCC/C=C/C=C/c1ccccc1)C(F)(F)F)c1ccccc1  
 3579 C=Cc1ccccc1.CC(C)(Br)CCc1ccc2c(c1)OCO2>>CC(C)(/C=C/c1ccccc1)CCc1ccc2c(c1)OCO2  
 3580 C=Cc1nc2c(N)ncnc2n1[C@@H]1O[C@H](CO[Si](C)(C)C(C)(C)C)[C@@H](O[Si](C)(C)C(C)(C)C)[C@H]1O[Si](C)(C)C(C)(C)C.Ic1ccccc1>>CC(C)(C)[Si](C)(C)OC[C@H]1O[C@H](n2c(/C=C/c3ccccc3)nc3c(N)ncnc32)[C@H](O[Si](C)(C)C(C)(C)C)[C@H]1O[Si](C)(C)C(C)(C)C  
 3581 C=CC(=O)N(C)Cc1oc2ccccc2c1C.CC(C)(C)OC(=O)N1CCNc2ncc(Br)cc2C1>>Cc1c(CN(C)C(=O)/C=C/C/2cnc3c(c2)CN(C(=O)OC(C)(C)C)CCN3)oc2ccccc12  
 3582 Br1ncccn1.C=Cc1ccccc1OC>>COc1ccccc1/C=C/c1ncccn1  
 3583 C=CC(=O)NCc1ccc(C)cc1.COc1ccc2c(=O)c(I)coc2c1>>COc1ccc2c(=O)c(/C=C/C(=O)NCc3ccc(C)cc3)coc2c1  
 3584 C=CC(=O)N1CCOCC1.C[C@]12C[C@@]34C=C(Sc5ccc(I)cc5)C(=O)[C@@](C)(CCC(=O)Nc5c(O)c(C(=O)O)c5O)[C@@H]3[C@H](C[C@@H]1C4)O2>>C[C@]12C[C@@]34C=C(Sc5ccc(/C=C/C(=O)N6CCOCC6)cc5)C(=O)[C@@](C)(CCC(=O)Nc5c(O)ccc(C(=O)O)c5O)[C@@H]3[C@H](C[C@@]1C=Cc1ccncc1.CCCCCCCCCCCCCOC1ccc(I)cc1>>CCCCCCCCCCCCOC1ccc(/C=C/c2ccncc2)cc1  
 3585 C=Cc1ccncc1.CN(C(=O)c1ccccc1)c1ccc2c(c1)[nH]c(=NC(=O)c1ccc(Br)s1)n2CCC(N)=O>>CN(C(=O)c1ccccc1)c1ccc2c(c1)[nH]c(=NC(=O)c1ccc(/C=C/c3cccn3)s1)n2CCC(N)=O  
 3586 C=Cc1ccc(Cl)cc1.O=c1cc(-c2ccccc2)oc2cc(Br)ccc12>>O=c1cc(-c2ccccc2)oc2cc(/C=C/c3ccc(Cl)cc3)ccc12  
 3587

3588 C=CC(=O)OC.COC(=O)c1c([Si](C)(C)C)c(I)cn1S(=O)(=O)N(C)C>>COC(=O)/C=C/c1cn(S(=O)(=O)  
N(C)C)c(C(=O)OC)c1[Si](C)(C)C  
3589 C=Cc1ccc(OC)cc1.COc1ccc(Cl)cc1>>COc1ccc(/C=C/c2ccc(OC)cc2)cc1  
3590 C=CC(=O)OCCCC.Cn1nc(Br)c2ccc(C#N)cc21>>CCCCOC(=O)/C=C/c1nn(C)c2cc(C#N)ccc12  
3591 C=C[C@H](O[Si](C)(C)C(C)(C)C)[C@H](CCCC(=O)OCC)O[Si](C)(C)C(C)(C)C.O=Cc1ccc(Br)cc1>  
>CCOC(=O)CCC[C@H](O[Si](C)(C)C(C)(C)C)[C@H]/C=C/c1ccc(C=O)cc1O[Si](C)(C)C(C)(C)C  
3592 C=CC(=O)OCC.O=c1oc(-c2ccccc2)c(I)c2sc3c(c12)CCC3>>CCOC(=O)/C=C/c1c(-  
c2ccccc2)oc(=O)c2c3c(sc12)CCC3  
3593 C=CC(=O)N(C)Cc1cccc(OC)c1OCCCC.CC1(C)COc2cc(Br)cnc2NC1=O>>CCCOc1c(CN(C)C(=O)/C=  
C/c2cnc3c(c2)OCC(C)(C)C(=O)N3)cccc1OC  
3594 C=CC(=O)OC.COC(=O)c1cc(C#C[Si](C)(C)C)ccc1OS(=O)(=O)C(F)(F)F>>COC(=O)/C=C/c1ccc(C#  
C[Si](C)(C)C)cc1C(=O)OC  
3595 C=CC(=O)OC.CC(=O)c1cccc1I>>COC(=O)/C=C/c1cccc1C(C)=O  
C=CC(=O)OC.CCCCCC1(CCCCCC)c2ccccc2-c2c1c1c(c3c2C(CCCCCC)(CCCCC)c2cc(I)ccc2-  
3596 3)C(CCCCCC)(CCCCC)c2ccccc2-1>>CCCCCCC1(CCCCCC)c2ccccc2-  
c2c1c1c(c3c2C(CCCCCC)(CCCCC)c2cc(/C=C/C(=O)OC)ccc2-3)C(CCCCCC)(CCCCC)c2ccccc2-  
3597 C=CP(=O)(O)O.Fc1cccc(F)c1I>>O=P(O)(O)/C=C/c1c(F)cccc1F  
C=CC(=O)OC(C)(C)C.Oc1ccc(C(=C2CCOCC2)c2ccc(Br)cc2)cc1>>CC(C)(C)OC(=O)/C=C/c1ccc(C(  
3598 =C2CCOCC2)c2ccc(O)cc2)cc1  
C=CC(C)=O.CC(C)n1cnc2c(Cl)nc(I)nc21>>CC(=O)/C=C/c1nc(Cl)c2ncn(C(C)C)c2n1  
3599 C=Cc1ccc(OC)cc1.COc1ccc(N)c(Br)c1>>COc1ccc(/C=C/c2cc(OC)ccc2N)cc1  
3600 C=CS(=O)(=O)F.FS(F)(F)(F)c1ccc(I)cc1>>O=S(=O)(F)/C=C/c1ccc(S(F)(F)(F)F)cc1  
3601 C=CC#N.Nc1cc(Br)ccc(C(F)(F)F)c1>>N#C/C=C/c1cc(N)ccc(C(F)(F)F)c1  
3602 C=CS(=O)(=O)NC1CCCC1.Cc1ccc(CNC(=O)OC(C)(C)C)c(Br)c1>>Cc1ccc(CNC(=O)OC(C)(C)C)c(/  
3603 C=C/S(=O)(=O)NC2CCCC2)c1  
C=CCNC(N)=O.O=c1oc2cnc3ccc(Br)cc3c2n1-  
3604 c1cccc(C(F)(F)F)c1>>NC(=O)NC/C=C/c1ccc2ncc3oc(=O)n(-c4cccc(C(F)(F)F)c4)c3c2c1  
Br1ccc(-  
c2ccccc2)cc1.C=CCO[C@H]1CC(=O)O[C@H](C)C/C=C/C/[C@H](O[Si](C)(C)C(C)(C)C)[C@  
3605 H](C)C[C@H](CC(OC)OC)[C@H](O[C@H]2O[C@H](C)[C@H](O[C@H]3C[C@H](O)[C@  
@H](OC(=O)CC)[C@H](C)O3)[C@H](N(C)C)[C@H]2OC(C)=O)[C@H]1OC>>CCC(=O)O[C@H]1[  
C@H](C)O[C@H]2[C@H](N(C)C)[C@H](OC(C)=O)[C@H](O[C@H]3[C@H](O  
C)[C@H](OC/C=C/c4ccc(-  
c5ccccc5)cc4)CC(=O)O[C@H](C)C/C=C/C/[C@H](O[Si](C)(C)C(C)(C)C)[C@H](C)C[C@H]3C  
C/C=C/C/[C@H](O[C@H]12C[C@H](O)C1)C12  
3606 C=Cc1ccc(OC)cc1.N#Cc1ccc(/C=C/c2cc(Br)cc(/C=C/c3ccc(C#N)cc3)c2)cc1>>COc1ccc(/C=C/c2cc(/  
C=C/c3ccc(C#N)cc3)cc(/C=C/c3ccc(C#N)cc3)c2)cc1  
3607 C=CN1C(=O)c2ccccc2C1=O.COc1ccc2ccc(Br)cc2n1>>COc1ccc2ccc(/C=C/N3C(=O)c4ccccc4C3=O)  
cc2n1  
Br1cc(NC(c2ccccc2)(c2ccccc2)c2ccccc2)nc2c1nnn2C(c1ccccc1)(c1ccccc1)c1ccccc1.C=CC(=O)OC>  
3608 >COC(=O)/C=C/c1cc(NC(c2ccccc2)(c2ccccc2)c2ccccc2)nc2c1nnn2C(c1ccccc1)(c1ccccc1)c1ccccc1  
3609 C=CC(=O)OCC(CC)CCCC.CC(=O)c1ccc(Cl)cc1>>CCCC(CC)COC(=O)/C=C/c1ccc(C(C)=O)cc1  
3610 C=CC(=O)OC(C)(C)C.CCCc1nc(N(C)c2ccccc2)n2ncc(I)c2n1>>CCCc1nc(N(C)c2ccccc2)n2ncc(/C=C/  
C(=O)OC(C)(C)C)c2n1  
3611 C=CS(C)(=O)=O.CC(C)(C)OC(=O)NC(C(=O)OCc1ccccc1)c1ccc(Br)cc1>>CC(C)(C)OC(=O)NC(C(=  
O)OCc1ccccc1)c1ccc(/C=C/S(C)(=O)=O)cc1  
3612 C=Cc1ccc2c(c1)c1ccccc1n2CCCCCCC.CCCCCCn1c2ccc(I)cc2c2cc(C=O)ccc21>>CCCCCCn1c2c  
cccc2c2cc(/C=C/c3ccc4c(c3)c3cc(C=O)ccc3n4CCCCCCC)ccc21  
3613 C=CCCO.CC(=O)OC[C@H]1O[C@H](Oc2n[nH]c(C(C)C)c2Cc2ccc(Br)cc2C)[C@H](OC(C)=O)[C  
@H](OC(C)=O)[C@H]1OC(C)=O>>CC(=O)OC[C@H]1O[C@H](Oc2n[nH]c(C(C)C)c2Cc2cc  
c(/C=C/CCO)cc2C)[C@H](OC(C)=O)[C@H](OC(C)=O)[C@H]1OC(C)=O  
3614 C=CC(N)=O.N#Cc1ccc(I)cc1>>N#Cc1ccc(/C=C/C(N)=O)cc1  
C=C[C@H]1O[C@H](OC)[C@H](OCc2ccccc2)[C@H](OCc2ccccc2)[C@H]1OCc1ccc2ccccc2c1  
3615 .O=c1ccoc2cc(Br)ccc12>>CO[C@H]1O[C@H](/C=C/c2ccc3c(=O)ccoc3c2)[C@H](OCc2ccc3ccccc  
3c2)[C@H](OCc2ccccc2)[C@H]1OCc1ccccc1  
3616 C=CC(N)=O.CCOC(=O)c1cn(CC)c2ccc(I)cc2c1=O>>CCOC(=O)c1cn(CC)c2ccc(/C=C/C(N)=O)cc2c1  
3617 C=CC(=O)N1CCOCC1.COc1cc2c3ccccc3nc3c4ccc(Cl)cc4n(C)c(c1)c23>>COc1cc2c3ccccc3nc3c4ccc  
(/C=C/C(=O)N5CCOCC5)cc4n(C)c(c1)c23  
3618 Br1ccsc1.C=Cc1cccn1>>C(=C/c1cccn1)\c1ccsc1  
3619 C=Cc1cc(OC)c(OC)c(OC)c1.CC(C)(C)C(=O)Nc1nc(NC(=O)C(C)(C)C)c2cc(Br)cnc2n1>>COc1cc(/C=  
C/c2cnc3nc(NC(=O)C(C)(C)C)nc(NC(=O)C(C)(C)C)c3c2)cc(OC)c1OC



3620 BrC1=C(C2=C[C@@H]3CCCC[C@H]3CC2)CCCC1.C=CC(=O)OC>>COC(=O)/C=C/C1=C(C2=C[C@@H]3CCCC[C@H]3CC2)CCCC1  
 3621 C=CC(=O)OC(C)(C)C.CCN1C(=O)c2ccc(Br)cc2C1=O>>CCN1C(=O)c2ccc(/C=C/C(=O)OC(C)(C)C)cc2C1=O  
 3622 C=CC(=O)N1CCN(C)CC1.CC(C)(C)c1ccc2[nH]c3c(c2c1)CC(=O)Nc1ccc(I)cc1-3>>CN1CCN(C(=O)/C=C/c2ccc3c(c2)-c2[nH]c4ccc(C(C)(C)C)cc4c2CC(=O)N3)CC1  
 3623 C=CC(=O)NCO.C[C@]12C[C@@]34C=C(Sc5ccc(I)cc5)C(=O)[C@@](C)(CCC(=O)Nc5c(O)ccc(C(=O)O)c5O)[C@@H]3[C@H](C[C@@H]1C4)O2>>C[C@]12C[C@@]34C=C(Sc5ccc(/C=C/C(=O)NC)cc5)C(=O)[C@@](C)(CCC(=O)Nc5c(O)ccc(C(=O)O)c5O)[C@@H]3[C@H](C[C@@H]1C4)O2  
 3624 C=CCCCCCC.Cc1ccc(Cl)cc1>>CCCCC/C=C/c1ccc(C)cc1  
 3625 C=Cc1cccc1.Oc1ccc(I)c1>>Oc1cccc(/C=C/c2cccc2)c1  
 3626 C=C[C@H]1C[C@H](CC(=O)OC(C)(C)C)OC(C)(C)O1.CC(C)c1nc(N(C)S(C)(=O)=O)nc(-c2ccc(F)cc2)c1Br>>CC(C)c1nc(N(C)S(C)(=O)=O)nc(-c2ccc(F)cc2)c1/C=C/[C@@H]1C[C@H](CC(=O)OC(C)(C)C)OC(C)(C)O1  
 3627 C=CC(=O)O.O=C(O)c1cccc(Br)c1>>O=C(O)/C=C/c1cccc(C(=O)O)c1  
 3628 C=CC(OC)OC.COc1ccc(I)cc1F>>COc1ccc(/C=C/C(OC)OC)cc1F  
 3629 C=CS(=O)(=O)F.Ic1ccc(-c2cccc2)cc1>>O=S(=O)(F)/C=C/c1ccc(-c2cccc2)cc1  
 3630 C=CC(=O)OC(C)(C)C.Ic1cnn(C(c2cccc2)(c2cccc2)c2cccc2)c1>>CC(C)(C)OC(=O)/C=C/c1cnn(C(c2cccc2)(c2cccc2)c2cccc2)c1  
 3631 C=CC(=O)OCCCC.CCN(CC)c1cccc(Br)c1>>CCCCOC(=O)/C=C/c1cccc(N(CC)CC)c1  
 3632 C=CC(=O)OC.COC1=C(I)CON(Cc2cccc2)[C@H]1[C@H]1COC(C)(C)O1>>COC(=O)/C=C/C1=C(OC)[C@H]([C@H]2COC(C)(C)O2)N(Cc2cccc2)OC1  
 3633 C=C[C@H]1O[C@@H]2OC(C)(C)O[C@@H]2[C@H]1O.O=c1cc(-c2cccc2)oc2cc(Br)c(O)cc12>>CC1(C)O[C@H]2O[C@H](/C=C/c3cc4oc(-c5cccc5)cc(=O)c4cc3O)[C@H](O)[C@H]2O1  
 3634 C=Cc1ccc(OC)cc1.CCCCOc1ccc2c(c1)cc(C#N)c1ccc(Br)cc12>>CCCCOc1ccc2c(c1)cc(C#N)c1ccc(/C=C/c3ccc(OC)cc3)cc12  
 3635 C=CC(=O)OC(C)(C)C.O=[N+][O-]c1cccc1Cl>>CC(C)(C)OC(=O)/C=C/c1cccc1[N+](=O)[O-]  
 3636 C=Cc1cccc1.Cc1cc(C)c([Cl+]c2cccc2)c(C)c1>>C(=C/c1cccc1)\c1cccc1  
 3637 C=CC(=O)OCC.COc1cc(Br)c2c3c1O[C@@H]1[C@]34CCN(C)[C@H](C2)[C@]42C=C[C@@]1(OC)c1c(OC(C)=O)ccc(O)c12>>CCOC(=O)/C=C/c1cc(OC)c2c3c1C[C@H]1N(C)CC[C@@]34[C@@H](O2)[C@@]2(OC)C=C[C@@]14c1c(O)ccc(OC(C)=O)c12  
 3638 C=CC(C)(C)O.O=c1c(Br)c(-c2cccc2)oc2cccc12>>CC(C)(O)/C=C/c1c(-c2cccc2)oc2cccc2c1=O  
 3639 C=Cc1cccc1.O=P1(c2cccc2)C(Br)=Cc2cccc21>>O=P1(c2cccc2)C(/C=C/c2cccc2)=Cc2cccc21  
 3640 BrC1CCCCC1.C=Cc1cccc1>>C(=C/C1CCCCC1)\c1cccc1  
 3641 C=CC(=O)OC.O=C(c1cccc1C(F)(F)F)c1sc2cc(O)ccc2c1Oc1ccc(Br)cc1>>COC(=O)/C=C/c1ccc(Oc2c(C(=O)c3cccc3C(F)(F)F)sc3cc(O)ccc23)cc1  
 3642 C=Cc1cccc1.N#CCc1ccc(Br)cc1>>N#CCc1ccc(/C=C/c2cccc2)cc1  
 3643 CCCC=[11CH2].Nc1ccc(I)cc1>>CCC/C=[11CH]/c1ccc(N)cc1  
 3644 C=Cc1ccc(C)cc1.Cc1ccc(I)c1>>Cc1ccc(/C=C/c2cccc2)cc1  
 3645 C=CCCc1ccc(CC)cc1.O=C1CCc2ccc(Br)cc21>>CCc1ccc(CC/C=C/c2ccc3c(c2)C(=O)CC3)cc1  
 3646 C=CC(=O)OC.CN1C(=O)CN=C(c2cccc2)c2ccc(Br)cc21>>COC(=O)/C=C/c1ccc2c(c1)N(C)C(=O)CN=C2c1cccc1  
 3647 C=CCn1c(-c2ccc([N+](=O)[O-])cc2)nc2cccc2c1=O.O=C(CN1C(=O)COc2cccc21)c1ccc(Br)cc1>>O=C(CN1C(=O)COc2cccc21)c1ccc(/C=C/Cn2c(-c3ccc([N+](=O)[O-])cc3)nc3cccc3c2=O)cc1  
 3648 Br1cnc2cccc12.C=CC(=O)N(C)C>>CN(C)C(=O)/C=C/c1cnc2cccc12  
 3649 C=Cc1cnc1.O=[N+][O-]c1cccc(I)c1>>O=[N+][O-]c1cccc(/C=C/c2cnc2)c1  
 3650 C=C[Si](CC)(CC)CC.O=[N+][O-]c1cccc1Br>>CC[Si](/C=C/c1cccc1[N+](=O)[O-])(CC)CC  
 3651 C=CC(=O)OC(C)(C)C.CCOC(=O)/C(Br)=C1\CCCC1>>CCOC(=O)C(/C=C/C(=O)OC(C)(C)C)=C1\CCCC1  
 3652 C=CC(=O)O.Cc1ccc(S(=O)(=O)N(C)c2ccc(I)cc2)cc1>>Cc1ccc(S(=O)(=O)N(C)c2ccc(/C=C/C(=O)O)c2)cc1  
 3653 C=Cc1cccc1.CCCCCOc1ccc2cc(Br)ccc2c1>>CCCCCOc1ccc2cc(/C=C/c3cccc3)ccc2c1  
 3654 C=CC(=O)OCC.COC1CCC(Nc2nc(N)nc(C)c2Br)CC1>>CCOC(=O)/C=C/c1c(C)nc(N)c1NC1CCC(O)CC1  
 3655 C=Cc1ccc(OC)cc1.FC(F)(F)C(F)(F)C(F)(F)C(F)(F)C(F)(F)C(F)(F)Br>>COc1ccc(/C=C/C(F)(F)C(F)(F)C(F)(F)C(F)(F)C(F)(F)F)cc1  
 3656 C=CC(=O)OC.CC(C)(C)OC(=O)NC1(c2ccc(-c3nc4c5cc(Br)ccc5nn4cc3-c3cccc3)cc2)CCC1>>COC(=O)/C=C/c1ccc2nn3cc(-c4cccc4)c(-c4ccc(C5(NC(=O)OC(C)(C)C)CCC5)cc4)nc3c2c1

3657 C=CC(=O)N(C)Cc1cc2cccc2n1C.CCn1c(=O)[nH]c2ncc(Br)cc21>>CCn1c(=O)[nH]c2ncc(/C=C/C(=O)N(C)Cc3cc4cccc4n3C)cc21

3658 C=CC(=O)OCC.Oc1cccc1I>>CCOC(=O)/C=C/c1cccc1O

3659 Br1ccc2ccnc(N3CCOCC3)c2c1.C=CC(=O)OCC>>CCOC(=O)/C=C/c1ccc2ccnc(N3CCOCC3)c2c1

3660 C=CC(=O)NC(c1cccc1)C(C(C)=O)C(C)=O.Ic1cccc1>>CC(=O)C(C(C)=O)C(NC(=O)/C=C/c1cccc1)c1cccc1

3661 C=CC(=O)N1CCOCC1.Cc1onc(-c2cccc2)c1I>>Cc1onc(-c2cccc2)c1/C=C/C(=O)N1CCOCC1

3662 C=Cc1cenc1.Cn1cc(C[C@H](COc2cncc(Br)c2)NC(=O)OC(C)(C)C)c2cccc21>>Cn1cc(C[C@H](COc2cncc(/C=C/c3cenc3)c2)NC(=O)OC(C)(C)C)c2cccc21

3663 C=CC(C)(C)O.COc1ccc2ccc(=O)oc2c1I>>COc1ccc2ccc(=O)oc2c1/C=C/C(C)(C)O

3664 Br1ccc(-c2cnco2)o1.C=Cc1ccc(C)cc1>>Cc1ccc(/C=C/c2ccc(-c3cnco3)o2)cc1

3665 C=CC#N.Cc1cc(I)cc(C)n1>>Cc1cc(/C=C/C#N)cc(C)n1

3666 C=Cc1ccc(N(C)C)cc1.FCCOCCOCCOc1ncc(I)cc1Br>>CN(C)c1ccc(/C=C/c2cnc(OCCOCCOCCF)c(Br)c2)cc1

3667 C=Cc1cc(O)c(OC)cc1F.COc1ccc(OC)c(I)c1>>COc1ccc(OC)c(/C=C/c2cc(O)c(OC)cc2F)c1

3668 C=Cc1ccc(C#N)cc1.CCCCOc1ccc2c(c1)cc(C#N)c1ccc(Br)cc12>>CCCOc1ccc2c(c1)cc(C#N)c1ccc(/C=C/c3ccc(C#N)cc3)cc12

3669 C=Cc1ccc([N+](=O)[O-])cc1.CCC1(CC)c2cc(Br)ccc2-c2ccc(N(c3cccc3)c3cccc3)cc21>>CCC1(CC)c2cc(/C=C/c3ccc([N+](=O)[O-])cc3)ccc2-c2ccc(N(c3cccc3)c3cccc3)cc21

3670 Br1cnc2cccc2c1.C=CC(=O)N(C)C>>CN(C)C(=O)/C=C/c1cnc2cccc2c1

3671 C=CP(=O)(OCC)OCC.O=[N+](O-)c1cccc(Br)c1>>CCOP(=O)(/C=C/c1cccc([N+](=O)[O-])c1)OCC

3672 C=CC#N.COc1ccc(I)cc1>>COc1ccc(/C=C/C#N)cc1

3673 C=COCCCC.O=c1cc(Br)c2ccc3cccc3c2[nH]1>>CCCCO/C=C/c1cc(=O)[nH]c2c1ccc1cccc12

3674 C=CC(=O)NCc1cccc1.COc1cc2oc(-c3cccc3)c(I)c(=O)c2cc1OC>>COc1cc2oc(-c3cccc3)c(/C=C/C(=O)NCc3cccc3)c(=O)c2cc1OC

3675 C=CC(=O)OCC.Ic1ccenc1>>CCOC(=O)/C=C/c1ccenc1

3676 Br1cnc2cccc2c1.C=CCO[C@H]1(C)C[C@H](C)C(=O)[C@H](C)[C@H]2NC(=O)O[C@H]2(C)[C@H](C)[C@H](CC)OC(=O)[C@H](C)[C@H](O[C@H]2C[C@H](C)OC)[C@H](OC(C)=O)[C@H](C)O2)[C@H](C)[C@H]1O[C@H]1O[C@H](C)C[C@H](N(C)C)[C@H]1OC(C)=O>>CC[C@H]1OC(=O)[C@H](C)[C@H](O[C@H]2C[C@H](C)OC)[C@H](OC(C)=O)[C@H](C)O2)[C@H](C)[C@H](O[C@H]2O[C@H](C)C[C@H](N(C)C)[C@H]2OC(C)=O)[C@H](C)OC/C=C/c2cnc3cccc3c2)C1C[C@H]1(C)C(=O)O[C@H]1(C)C[C@H]2NC(=O)O[C@H]21

3677 C=Cc1ccc(OC)cc1.O=c1c(Br)c(-c2cccc2)oc2cccc12>>COc1ccc(/C=C/c2c(-c3cccc3)oc3cccc3c2=O)cc1

3678 C=CC(=O)OC.CC(C)=CCc1cc(I)ccc1O>>COC(=O)/C=C/c1ccc(O)c(CC=C(C)C)c1

3679 C=CCC(C)C(=O)OCC.Cc1ccc(Br)cc1>>CCOC(=O)C(C)C/C=C/c1ccc(C)cc1

3680 C=Cc1c(C)cc(C)cc1C.CCOC(=O)C(F)Br>>CCOC(=O)C(F)/C=C/c1c(C)cc(C)cc1C

3681 C=Cc1ccc(OC)c(OC)c1.CC(=O)Oc1ccc(I)cc1>>COc1ccc(/C=C/c2ccc(OC(C)=O)cc2)cc1OC

3682 C=CC1(O)CCC1.Cc1cccc(I)c1>>Cc1cccc(/C=C/C2(O)CCC2)c1

3683 C=CC(=O)OC(C)(C)C.CC(C)=CCc1cc(I)ccc1OC(=O)CCCc1cccc1>>CC(C)=CCc1cc(/C=C/C(=O)OC(C)(C)C)ccc1OC(=O)CCCc1cccc1

3684 C=CC(=O)OCc1cc(OCCCCCCCCCCCCCCCCC)c(OCCCCCCCCCCCCCCCCC)c(OCCCCCCCCCCCCCCCCC)c1.COc1ccc(I)cc1>>CCCCCCCCCCCCCCCCCOc1cc(COC(=O)/C=C/c2ccc(OC)cc2)cc(OCCCCCCCCCCCCCCCCC)c1OCCCCCCCCCCCCCCCCC

3685 C=CC(=O)OC.FC(F)(F)c1cc(Cl)cc(C(F)(F)F)c1>>COC(=O)/C=C/c1cc(C(F)(F)F)cc(C(F)(F)F)c1

3686 C=CC(=O)OC(C)(C)C.COc1cc(C)=O)c2cn(Cc3ccc(Br)cc3)c3cccc23)cc(OC)c1OC>>COc1cc(C(=O)c2cn(Cc3ccc(/C=C/C(=O)OC(C)(C)cc3)c3cccc23)cc(OC)c1OC

3687 C=CCOC(=O)/C=C/c1ccc(OC(C)=O)c(OC(C)=O)c1.Ic1cccc1>>CC(=O)Oc1ccc(/C=C/C(=O)OC/C=C/c2cccc2)cc1OC(C)=O

3688 C=CC(=O)CC.O=Cc1ccc(Br)cc1>>CCC(=O)/C=C/c1ccc(C=O)cc1

3689 C=Cn1nnc(C)n1.Fc1cccc1I>>Cc1nnn(/C=C/c2cccc2F)n1

3690 C=Cc1ccc(C=C)cc1.COc1ccc(Br)cc1>>C=Cc1ccc(/C=C/c2ccc(OC)cc2)cc1

3691 C=CC(N)=O.Cc1nccc2occc12>>NC(=O)/C=C/c1nccc2occc12

3692 C=CSCC.CC(=O)c1ccc(Br)cc1>>CCS/C=C/c1ccc(C(C)=O)cc1

3693 C=CC(=O)OC.COc1c(CN(C(=O)c2cccc2)c2cccc(Br)c2)ccc2c1OC(C)(C)[C@H](O)[C@H]2O>>CO C(=O)/C=C/c1cccc(N(Cc2ccc3c(c2OC)OC(C)(C)[C@H](O)[C@H]3O)C(=O)c2cccc2)c1

3694 C=CC(=O)OC.Clc1cccc(I)c1>>COC(=O)/C=C/c1cccc(Cl)c1

3695 C=Cc1nc2c(N)ncnc2n1[C@H]1C[C@H](O[Si](C)(C)C(C)(C)C)[C@H](CO[Si](C)(C)C(C)(C)C)O1.Cc1cccc1Br>>Cc1cccc1/C=C/c1nc2c(N)ncnc2n1[C@H]1C[C@H](O[Si](C)(C)C(C)(C)C)[C@H](CO[Si](C)(C)C(C)(C)C)O1

[illegible]

3730 C=CC(N)=O.O=C/C1=C(\Br)CCCCCCC1>>NC(=O)/C=C/C1=C(\C=O)CCCCCCC1  
3731 C=Cc1cc(C(C)(C)C)c(O)c(C(C)(C)C)c1.Cc1cncc(C)c1-c1c(C)cc(I)cc1C>>Cc1cncc(C)c1-  
3732 c1c(C)cc(/C=C/c2cc(C(C)(C)C)c(O)c(C(C)(C)C)c2)cc1C  
3733 C=CC(=O)OC(C)(C)C.Nc1cc(I)ccc1Br>>CC(C)(C)OC(=O)/C=C/c1ccc(Br)c(N)c1  
3734 C=CC(=O)OC(C)(C)C.O=C(NCCc1cccc1)c1cc(Br)cc(I)c1>>CC(C)(C)OC(=O)/C=C/c1cc(Br)cc(C(=O)NCCc2ccccc2)c1  
3735 C=CC(=O)OC.Cc1cc(C)cc(Br)c1>>COC(=O)/C=C/c1cc(C)cc(C)c1  
3736 Br1cccc(I)c1.C=CS(=O)(=O)F>>O=S(=O)(F)/C=C/c1cccc(Br)c1  
3737 C=CC(N)=O.O=C(c1cccc1)c1ccc(I)cc1>>NC(=O)/C=C/c1ccc(C(=O)c2cccc2)cc1  
3738 C=Cc1ccc(C(=O)N[C@H](CCSC)C(=O)OC)c(-  
3739 c2ccccc2C)c1.OC(c1cccc1)(c1cccc1)c1cncc1Br>>COC(=O)[C@H](CCSC)NC(=O)c1ccc(/C=C/c2cc  
3740 nccc2C(O)(c2ccccc2)c2ccccc2)cc1-c1cccc1C  
3741 C=CC(=O)OC.CCOC(=O)c1cc(-c2ccccc2)n(-c2ccc(I)cc2)c1C(=O)c1cccc1>>CCOC(=O)c1cc(-  
3742 c2ccccc2)n(-c2ccc(/C=C/C(=O)OC)cc2)c1C(=O)c1cccc1  
3743 C=CC(OC)OC.CCOc1ccc(I)cc1>>CCOc1ccc(/C=C/C(OC)OC)cc1  
3744 C=CC(=O)OC(C)(C)C.Nc1ccc(Br)c(F)c1>>CC(C)(C)OC(=O)/C=C/c1ccc(N)cc1F  
3745 Br1ccc2ccccc2c1.C=CC(=O)OC>>COC(=O)/C=C/c1ccc2ccccc2c1  
3746 C=Cc1cc(OC)c(O)c(OC)c1.O=c1ccc2ccc(OS(=O)(=O)C(F)(F)F)cc2o1>>COc1cc(/C=C/c2ccc3ccc(=O)  
3747 )oc3c2)cc(OC)c1O  
3748 Br1cc2c(cc1C1OCCO1)OCO2.C=CC(=O)OC(C)(C)C>>CC(C)(C)OC(=O)/C=C/c1cc2c(cc1C1OCCO  
3749 1)OCO2  
3750 C=C[Si](OCC)(OCC)OCC.CCCCCCCC0c1ccc2cc(Br)ccc2c1>>CCCCCCCC0c1ccc2cc(/C=C/[Si](O  
3751 CC)(OCC)OCC)ccc2c1  
3752 C=CC(=O)OC.CC(C)(C)OC(=O)N1CCN2C(=O)c3c(Br)cccc3OCC2C1>>COC(=O)/C=C/c1ccc2c1C(  
3753 =O)N1CCN(C(=O)OC(C)(C)C)CC1CO2  
3754 C=CC(=O)OC.CCOC(=O)c1ccc(Cl)cc1>>CCOC(=O)c1ccc(/C=C/C(=O)OC)cc1  
3755 Br1cnnc1.C=CC(=O)OC(C)(C)C>>CC(C)(C)OC(=O)/C=C/c1cnnc1  
3756 C=CC(=O)OCCCC.Clc1ccc(I)cn1>>CCCCOC(=O)/C=C/c1ccc(Cl)cn1  
3757 Br1cccc1.C=CC(=O)N1CCOCC1>>O=C(/C=C/c1cccc1)N1CCOCC1  
3758 C=Cc1ccc(OC)cc1.CCCCC(Br)C(=O)OC>>CCCCC(/C=C/c1ccc(OC)cc1)C(=O)OC  
3759 C=Cc1cccc1OC.CCOC(=O)C(F)I>>CCOC(=O)C(F)/C=C/c1cccc1OC  
3760 Br1ccc2c(ccn2-c2ccnc2)c1.C=CC(=O)OCC>>CCOC(=O)/C=C/c1ccc2c(ccn2-c2ccnc2)c1  
3761 C=CC(=O)OC.Oc1ccc2nc(Br)sc2c1>>COC(=O)/C=C/c1nc2ccc(O)cc2s1  
3762 C=Cc1snc1C.CC(=O)OCC1Cn2c3ccccc3c3c4c(c5c6cc(Br)ccc6n(c5c32)C1)C(=O)N(C(C)=O)C4>>C  
3763 C(=O)OCC1Cn2c3ccccc3c3c4c(c5c6cc(/C=C/c7senc7C)ccc6n(c5c32)C1)C(=O)N(C(C)=O)C4  
3764 C=Cc1ccc(OC(C)=O)cc1.CC(=O)OC[C@H]1O[C@H](Oc2ccc(I)cc2)[C@H](OC(C)=O)[C@H](  
3765 OC(C)=O)[C@H]1OC(C)=O>>CC(=O)OC[C@H]1O[C@H](Oc2ccc(/C=C/c3ccc(OC(C)=O)cc3)c  
3766 2)[C@H](OC(C)=O)[C@H](OC(C)=O)[C@H](OC(C)=O)[C@H]1OC(C)=O  
3767 Br1cscc1.C=Cc1cccc1N>>Nc1cccc1/C=C/c1cscc1  
3768 C=Cc1cc(OC)cc(OC)c1.CC(=O)Oc1ccc(I)cc1>>COc1cc(/C=C/c2ccc(OC(C)=O)cc2)cc(OC)c1  
3769 C=CC(=O)OC.CCc1cccc1Br>>CCc1cccc1/C=C/C(=O)OC  
3770 C=CC(=O)OC(C)(C)C.FC(F)(F)c1cccc1I>>CC(C)(C)OC(=O)/C=C/c1cccc1C(F)(F)F  
3771 C=Cc1ccc(OC)cc1.COc1cc(I)cc(OC)c1OC>>COc1ccc(/C=C/c2cc(OC)c(OC)c(OC)c2)cc1  
3772 C=C[C@H]1C[C@H]2CC[C@H](C(=O)OC)N2C(=O)[C@@](Cc2cccc2)(NC(=O)OCc2ccccc2)[C  
3773 @H]1OC(C)=O.O=[N+][O-  
3774 ]c1ccc(Br)cc1>>COC(=O)[C@@H]1CC[C@H]2C[C@H](/C=C/c3ccc([N+](=O)[O-  
3775 ]cc3)I[C@H](OC(C)=O)I[C@H](Cc3ccccc3)(NC(=O)OCc3ccccc3)C(=O)N12  
3776 C=Cc1cccc1.CCOc1ccc(Br)cc1>>CCOc1ccc(/C=C/c2ccccc2)cc1  
3777 C=Cc1cccc1.O=Cc1ccc(I)cc1>>O=Cc1ccc(/C=C/c2ccccc2)cc1  
3778 C=Cc1cccc1.CCOC(=O)c1cccc1I>>CCOC(=O)c1cccc1/C=C/c1cccc1  
3779 C=Cc1ccc(C(=O)OC)cc1.CC(C)(C)c1cc(Br)cc(C=O)c1O>>COC(=O)c1ccc(/C=C/c2cc(C=O)c(O)c(C  
3780 C)(C)C)c2)cc1  
3781 Br1ccc2[nH]ccc2c1.C=CC(=O)O>>O=C(O)/C=C/c1ccc2[nH]ccc2c1  
3782 C=CC(=O)N(C)C.CC(=O)O[C@H]1CC[C@H]2[C@H]3[C@H](CC[C@]12C)c1ccc(O)cc1C[C@H]3  
3783 Sc1ccc(Br)cc1>>CC(=O)O[C@H]1CC[C@H]2[C@H]3[C@H](CC[C@]12C)c1ccc(O)cc1C[C@H]3S  
3784 c1ccc(/C=C/C(=O)N(C)C)cc1  
3785 C=CC(=O)OCCCC.CCOC(=O)c1cccc(-c2c(-  
3786 c3ccccc3)oc3ccc(Br)cc23)c1>>CCCCOC(=O)/C=C/c1ccc2oc(-c3ccccc3)c(-  
3787 C=CC(=O)NCCCCCNC(=O)OC(C)(C)C.CC(=O)OC[C@H]1C=C[C@H](n2cc(I)c(=O)[nH]c2=O)  
3788 O1>>CC(=O)OC[C@H]1C=C[C@H](n2cc(/C=C/C(=O)NCCCCCNC(=O)OC(C)(C)C)c(=O)[nH]c  
3789 C=CCC1(C(=O)OC)CCCC1.COc1ccc(I)cc1>>COC(=O)C1(C/C=C/c2ccc(OC)cc2)CCCCC1

3771 C=CC(=O)OC(C)(C)C.COc1ccc(CNc2c(Br)cc(C)cc2I)cc1>>COc1ccc(CNc2c(Br)cc(C)cc2/C=C/C(=O)  
3772 )OC(C)(C)C)cc1  
3773 C=CC(N)=O.CCc1cccc1Br>>CCc1cccc1/C=C/C(N)=O  
3774 C=Cc1ccc(C(=O)OC)cc1.Clc1cccn1>>COC(=O)c1ccc(/C=C/c2cccn2)cc1  
3775 C=CS(N)(=O)=O.Cc1ccc(C)c(Br)c1>>Cc1ccc(C)c(/C=C/S(N)(=O)=O)c1  
3776 C=CC(=O)OC.O=[N+](O-)c1ccc(Br)c(NC2ccccc2)c1>>COC(=O)/C=C/c1ccc([N+](=O)[O-]  
3777 ])cc1NCc1cccc1  
3778 C=Cc1cccc([N+](=O)[O-]  
3779 ])c1.CN(C(=O)c1cccc1)c1ccc2c(c1)[nH]c(=NC(=O)c1ccc(Br)s1)n2CCC(N)=O>>CN(C(=O)c1cccc1  
3780 )c1ccc2c(c1)[nH]c(=NC(=O)c1ccc(/C=C/c3cccc([N+](=O)[O-])c3)s1)n2CCC(N)=O  
3781 C=CC(=O)OC(C)(C)C.O=S(=O)(c1ccc(Br)cc1)c1ccc2ccccc2n1>>CC(C)(C)OC(=O)/C=C/c1ccc(S(=O)  
3782 (=O)c2ccc3ccccc3n2)cc1  
3783 C=CC(=O)OC(C)(C)C.CNc1c(C)cc(C)cc1I>>CNc1c(C)cc(C)cc1/C=C/C(=O)OC(C)(C)C  
3784 C=CC(=O)OCC.NC(=O)c1cc(I)cc(OCc2ccccc2)c1>>CCOC(=O)/C=C/c1cc(OCc2ccccc2)cc(C(N)=O)c  
3785 C=CCCO.CC(=O)OC[C@H]1O[C@H](n2cc(Cc3ccc(Br)cc3)c3c(C)cccc32)[C@H](OC(C)=O)[C@  
3786 @H](OC(C)=O)[C@H]1OC(C)=O>>CC(=O)OC[C@H]1O[C@H](n2cc(Cc3ccc(/C=C/CCO)cc3)c  
3787 3c(C)cccc32)[C@H](OC(C)=O)[C@H](OC(C)=O)[C@H](OC(C)=O)[C@H]1OC(C)=O  
3788 C=CC(=O)OCC.Cc1cccc(Oc2ccc(Br)c2)c1>>CCOC(=O)/C=C/c1cccc(Oc2ccc(C)c2)c1  
3789 C=CC(N)=O.Cc1ccc(S(=O)(=O)n2cc(I)c3c(OC(C)C)cncc32)cc1>>Cc1ccc(S(=O)(=O)n2cc(/C=C/C(  
3790 N)=O)c3c(OC(C)C)cncc32)cc1  
3791 C=Cc1ccncc1.CCCCCCOc1ccc(Br)cc1F>>CCCCCCOc1ccc(/C=C/c2ccncc2)cc1F  
3792 C=CC(=O)OCC.Fc1ccc(Cl)cc1>>CCOC(=O)/C=C/c1ccc(F)cc1  
3793 C=CC(C)(C)O.Cc1ccc(S(=O)(=O)n2cc(CCO[Si](C)(C)C(C)(C)C)c3c(Br)cccc32)cc1>>Cc1ccc(S(=O)(  
3794 =O)n2cc(CCO[Si](C)(C)C(C)(C)C)c3c(/C=C/C(C)(C)O)cccc32)cc1  
3795 C=Cc1ccc(OC)c(O)c1.Oc1ccc(O)c(I)c1>>COc1ccc(/C=C/c2cc(O)ccc2O)cc1O  
3796 C=C[C@H]1(O)[C@H]([C@H]2COC(C)(C)O2)O[C@H]2OC(C)(C)O[C@@H]21.O=c1cc(-  
3797 c2ccccc2)oc2cc(Br)ccc12>>CC1(C)OC[C@H]([C@H]2O[C@H]3OC(C)(C)O[C@H]3[C@@]2(O  
3798 )/C=C/c2ccc3c(=O)cc(-c4ccccc4)oc3c2)O1  
3799 C=CC(=O)OC.O=C(Oc1ccc(OC(=O)c2ccccc2)c(I)c1)c1cccc1>>COC(=O)/C=C/c1cc(OC(=O)c2ccccc  
3800 2)ccc1OC(=O)c1cccc1  
3801 C=CC(=O)OCC.CCCCC(=C(c1ccc(O)cc1)c1ccc(O)cc1)c1ccc(Br)cc1>>CCCCC(=C(c1ccc(O)cc1)c1cc  
3802 c(O)cc1)c1ccc(/C=C/C(=O)OCC)cc1  
3803 C=CC(C)=O.CCCCCC1=C(I)C1(F)F>>CCCCC1=C(/C=C/C(C)=O)C1(F)F  
3804 C=Cc1ccc(OC)cc1.COC(=O)[C@H](Cc1ccccc1)NC(=O)C(F)(F)Br>>COC(=O)[C@H](Cc1ccccc1)NC  
3805 (=O)C(F)(F)/C=C/c1ccc(OC)cc1  
3806 C=C[C@H](CCCCCCCC)CC(OC)OC.Ic1ccccc1>>CCCCCCCC[C@H](/C=C/c1ccccc1)CC(OC)OC  
3807 C=CC(=O)OCC.Cc1nc(N)nc(NCc2ccccc2)c1I>>CCOC(=O)/C=C/c1c(C)nc(N)nc1NCc1ccccc1  
3808 C=Cc1ccc(C=C)cc1.CCCCCCCCOc1cc(C=O)c(OCCCCCCCC)cc1I>>C=Cc1ccc(/C=C/c2cc(OCCCC  
3809 CCCC)c(C=O)cc2OCCCCCCCC)cc1  
3810 Brclnc2ccccc2c1.C=CCO[C@H]1CC(=O)O[C@H](C)C/C=C/C=C/[C@H](O[Si](C)(C)C(C)(C)C)  
3811 [C@H](C)C[C@H](CC(OC)OC)[C@H](O[C@@H]2O[C@H](C)[C@@H](O[C@H]3C[C@@](C)(O  
3812 C(=O)CC)[C@@H](OC(=O)CCC)[C@H](C)O3)[C@H](N(C)C)[C@H]2OC(C)=O)[C@H]1OC>>CC  
3813 CC(=O)O[C@H]1[C@H](C)O[C@@H](O[C@H]2[C@H](N(C)C)[C@@H](OC(C)=O)[C@H](O[C@  
3814 @H]3[C@@H](OC)[C@H](OC/C=C/c4nc5ccccc5c4)CC(=O)O[C@H](C)C/C=C/C=C/[C@H](O[Si](  
3815 C)(C)C(C)(C)C)@H1C(C)C(C)@H13C(C)(C)C(C)O[C@H]2C(C)C(C)@H11(C)O(C)=O)CC  
3816 C=CS(=O)(=O)NC1CCCC1.CC(C)(C)OC(=O)NCc1cc(F)ccc1Br>>CC(C)(C)OC(=O)NCc1cc(F)ccc1/  
3817 C=C/S(=O)(=O)NC1CCCC1  
3818 C=CC(=O)OC(C)(C)C.CC1(C)C(=O)Nc2ncc(Br)cc2C1O>>CC(C)(C)OC(=O)/C=C/c1cnc2c(c1)C(O)C  
3819 (C)(C)C(=O)N2  
3820 C=Cc1cccc1C(=O)O.FC(F)(F)c1cc(I)ccc(C(F)(F)F)c1>>O=C(O)c1cccc1/C=C/c1cc(C(F)(F)F)cc(C(F)  
3821 (F)F)c1  
3822 C=CC(=O)OCC.Cc1c(Br)cccc1[N+](=O)[O-]>>CCOC(=O)/C=C/c1cccc([N+](=O)[O-])c1C  
3823 C=Cc1ccc(C)cc1.CC(=O)c1ccc(Br)cc1>>CC(=O)c1ccc(/C=C/c2ccc(C)cc2)cc1  
3824 C=Cc1ccc(C#N)cc1.CCOC(C)n1cc(I)cn1>>CCOC(C)n1cc(/C=C/c2ccc(C#N)cc2)cn1  
3825 C=CC(=O)OC.COC(=O)c1c(Br)ccc2nn(C)c(C)c12>>COC(=O)/C=C/c1ccc2nn(C)c(C)c2c1C(=O)OC  
3826 C=CCCCCCCCC.CC(=O)c1ccc(Br)cc1>>CCCCCCCC/C=C/c1ccc(C(C)=O)cc1  
3827 C=CS(=O)(=O)F.Ic1ccsc1>>O=S(=O)(F)/C=C/c1ccsc1  
3828 C=Cc1ccc(OC)cc1.Clc1ccc(-c2cnc3cccn23)cc1>>COc1ccc(/C=C/c2ccc(-c3cnc4cccn34)cc2)cc1  
3829 C=CC(=O)OCc1ccccc1.O=C1CO[C@@H]2Cc3ccc(Br)cc3[C@H]2N1OCc1ccccc1>>O=C(/C=C/C/c1  
3830 ccc2c(c1)[C@H]1[C@@H](C2)OCC(=O)N1OCc1ccccc1)OCc1ccccc1  
3831 Brclccccc2cc[nH]c12.C=CC(=O)N(C)C>>CN(C)C(=O)/C=C/c1ccccc2cc[nH]c12

3808 C=CCOC(C)=O.COc1ccc(I)cc1>>COc1ccc(/C=C/COC(C)=O)cc1  
3809 C=CC(N)=O.COc1ccc(I)cc1>>COc1ccc(/C=C/C(N)=O)cc1  
3810 C=CCNC(=O)C(F)(F)F.CC(C)CN(C=Nc1nc(=O)n([C@H]2C[C@H](O)[C@@H](CO)O2)cc1I)CC(C)  
C>>CC(C)CN(C=Nc1nc(=O)n([C@H]2C[C@H](O)[C@@H](CO)O2)cc1/C=C/CNC(=O)C(F)(F)F)C  
3811 C=CCOC(C)=O.COC(=O)c1cc(Br)ccc1[N+](=O)[O-]  
]>>COC(=O)c1cc(/C=C/COC(C)=O)ccc1[N+](=O)[O-]  
3812 C=CC(=O)OC(C)(C)C.COc1ccc2ccccc2c1Br>>COc1ccc2ccccc2c1/C=C/C(=O)OC(C)(C)C  
3813 Brc1ccc2ccccc12.C=CS(C)(=O)=O>>CS(=O)(=O)/C=C/c1ccc2ccccc12  
3814 C=CCCCc1ccc(OC)c1.COc1ccc(Br)c1>>COc1ccc(/C=C/CCCc2ccccc(OC)c2)c1  
3815 C=Cc1cc(OC)cc(OC)c1.COc1cc(C=O)c(Br)c(OC)c1OC>>COc1cc(/C=C/c2c(C=O)cc(OC)c(OC)c2OC  
)cc(OC)c1  
C=CC(=O)Nc1ccccc1NC(=O)OC(C)(C)C.O=C(Nc1ccc(Cl)cc1)[C@H]1CN(CC(F)F)C[C@@H]1c1ccc  
3816 (Br)cc1>>CC(C)(C)OC(=O)Nc1ccccc1NC(=O)/C=C/c1ccc([C@H]2CN(CC(F)F)C[C@@H]2C(=O)Nc  
2ccc(Cl)cc2)cc1  
3817 C=CCC(O)C1(Sc2ccccc2)CCCCC1.Ic1ccccc1>>OC(C/C=C/c1ccccc1)C1(Sc2ccccc2)CCCCC1  
3818 C=CC(=O)OC.CC(=O)c1ccc(Cl)cc1>>COC(=O)/C=C/c1ccc(C(C)=O)cc1  
3819 C=CC(CCC)OCc1ccccc1.COc1ccc(Br)cc1>>CCCC(/C=C/c1ccc(OC)cc1)OCc1ccccc1  
3820 C=CC(=O)OC.COc1ccc(Br)n1>>COC(=O)/C=C/c1ccc(OC)n1  
3821 C=CCC(NCc1ccc(OC)cc1)c1ccccc1.Ic1ccccc1>>COc1ccc(CNC(C/C=C/c2ccccc2)c2ccccc2)cc1  
3822 C=CC(=O)OCC.CC(C)(CC1Cc2ccccc2C1)NC[C@@H](O)COc1c(Br)ccc(F)c1F>>CCOC(=O)/C=C/c1  
ccc(F)c(F)c1OC[C@H](O)CNC(C)(C)CC1Cc2ccccc2C1  
3823 C=CC(=O)OC(C)(C)C.FC(F)(F)c1ccc(Br)cn1>>CC(C)(C)OC(=O)/C=C/c1ccc(C(F)(F)F)nc1  
3824 C=CCN(C(=O)C1CCOCC1)[C@H](C)c1cc(F)cc(F)c1.O=C1Nc2ncccc2[C@]12Cc1ccc(Br)cc1C2>>C[  
C@H](c1cc(F)cc(F)c1)N(C/C=C/c1ccc2c(c1)C[C@@]1(C2)C(=O)Nc2ncccc21)C(=O)C1CCOCC1  
3825 C=CC(=O)Nc1ccccc1NC(=O)OC(C)(C)C.CCOC(=O)[C@H]1CN(c2ncccn2)C[C@@H]1c1ccc(Br)cc1  
>>CCOC(=O)[C@H]1CN(c2ncccn2)C[C@@H]1c1ccc(/C=C/C(=O)Nc2ccccc2NC(=O)OC(C)(C)C)cc  
3826 C=Cc1ccc(C(=O)OC)cc1.COc1ccc(Cn2nc(I)c3c(NC4CCCCC4)nccc32)cc1>>COC(=O)c1ccc(/C=C/c2  
nn(Cc3ccc(OC)cc3)c3cnc(NC4CCCCC4)c23)cc1  
3827 C=C[C@H]1CCCCN1C(=O)OC(C)(C)C.CC(=O)c1ccc(I)cc1>>CC(=O)c1ccc(/C=C/[C@@H]2CCC  
CN2C(=O)OC(C)(C)C)cc1  
3828 C=Cc1cc(OC)c(O)c(OC)c1.COc1ccc(OC)c(I)c1>>COc1ccc(OC)c(/C=C/c2cc(OC)c(O)c(OC)c2)c1  
3829 C=CC(=O)OC(C)(C)C.Cc1ccc(Br)cn1>>Cc1ccc(/C=C/C(=O)OC(C)(C)C)cn1  
3830 C=CC(=O)OC.O=C(c1ccc(O)cc1)c1sc2cc(O)ccc2c1Oc1ccc(Br)cc1>>COC(=O)/C=C/c1ccc(Oc2c(C(=O)  
c3ccc(O)cc3)sc3cc(O)ccc23)cc1  
C=CC(=O)OC(C)(C)C.CC(C)(C)O[C@H]1CC[C@@H]2C=C(C3=C(Br)CN(Cc4ccccc4)CC3)CC[C@]  
3831 12C>>CC(C)(C)OC(=O)/C=C/C1=C(C2=C[C@H]3CC[C@H](OC(C)(C)C)[C@@]3(C)CC2)CCN(Cc  
2ccccc2)C1  
3832 C=Cc1cncnc1.Oc1ccccc(Br)c1>>Oc1ccccc(/C=C/c2cncnc2)c1  
3833 C=CCCCC(C(=O)OC)C(=O)OC.Ic1ccccc1>>COC(=O)C(CCCC/C=C/c1ccccc1)C(=O)OC  
3834 C=Cc1ccccc1.O=c1ccoc2c(Br)c(OCc3ccccc3)ccc12>>O=c1ccoc2c(/C=C/c3ccccc3)c(OCc3ccccc3)ccc  
3835 C=CC(=O)OC.Nc1cc(F)ccc1I>>COC(=O)/C=C/c1ccc(F)cc1N  
3836 C=Cc1ccc(F)cc1.CCOC(=O)C(F)Br>>CCOC(=O)C(F)/C=C/c1ccc(F)cc1  
3837 C=CC(=O)OCCCC.COC(CNc1nc(SC)nc1Br)OC>>CCCCOC(=O)/C=C/c1cnc(SC)nc1NCC(OC)OC  
3838 C=CC(=O)N1[C@H]2C[C@H]3CC[C@]2(CS1(=O)=O)C3(C)C.Ic1ccccc1>>CC1(C)[C@@H]2CC[C@  
@]13CS(=O)(=O)N(C(=O)/C=C/c1ccccc1)[C@H]3C2  
3839 C=CC(=O)OC(C)(C)C.CC1(C)C(=O)N(c2cccc(C#N)c(C(F)(F)F)c2)C(=S)N1c1ccc(Br)c(F)c1>>CC(C)(  
C)OC(=O)/C=C/c1ccc(N2C(=S)N(c3ccc(C#N)c(C(F)(F)F)c3)C(=O)C2(C)C)cc1F  
3840 C=CC(=O)OC(C)(C)C.CN(C)c1ccc(CNC(=O)c2cc(Br)cc(I)c2)cc1>>CN(C)c1ccc(CNC(=O)c2cc(Br)cc  
(/C=C/C(=O)OC(C)(C)C)c2)cc1  
3841 C=Cc1cncnc1.O=[N+](=[O-])c1ccccc1Nc1ccccc(/C=C/c2cncnc(Br)c2)c1>>O=[N+](=[O-]  
])c1ccccc1Nc1ccccc(/C=C/c2cncnc(/C=C/c3cncnc3)c2)c1  
3842 C=Cc1ccccc1OC.COC(=O)c1cc2cc(Br)ccc2cc1OC(C)=O>>COC(=O)c1cc2cc(/C=C/c3ccccc3OC)ccc2  
cc1OC(C)=O  
3843 BrC1CC2CCC1C2.C=Cc1ccccc1>>C(=C/C1CC2CCC1C2)\c1ccccc1  
3844 C=Cc1ccccc1.Oc1ccc(Br)cc1>>Oc1ccc(/C=C/c2ccccc2)cc1  
C=CC(=O)CCCOc1ccc(C(c2ccc(C(C)(C)C)cc2)(c2ccc(C(C)(C)C)cc2)c2ccc(C(C)(C)C)cc2)cc1.CC(C)(  
3845 C)c1ccc(C(c2ccc(OCOCO3ccc(I)cc3)cc2)(c2ccc(C(C)(C)C)cc2)c2ccc(C(C)(C)C)cc2)cc1>>CC(C)(C)  
c1ccc(C(c2ccc(OCOCO3ccc(/C=C/C(=O)CCCO4ccc(C(c5ccc(C(C)(C)C)cc5)(c5ccc(C(C)(C)C)cc5)  
5ccc(C(C)(C)C)cc5)cc4)cc3)cc2)(c2ccc(C(C)(C)C)cc2)c2ccc(C(C)(C)C)cc2)cc1  
3846 C=CC(=O)OC(C)(C)C.COc1c2ccoc2c(Br)c2oc(=O)ccc12>>COc1c2ccoc2c(/C=C/C(=O)OC(C)(C)C)c  
2oc(=O)ccc12

3847 C=CCP(=O)(OCC)OCC.CC(=O)Nc1cccc(Br)c1>>CCOP(=O)(C/C=C/c1cccc(NC(C)=O)c1)OCC  
3848 C=CC(=O)N(C)OC.N#Cc1ccc(Br)cc1>>CON(C)C(=O)/C=C/c1ccc(C#N)cc1  
3849 C=CC(=O)OCC.FC(F)(F)c1ccc(I)cc1>>CCOC(=O)/C=C/c1ccc(C(F)(F)F)cc1  
3850 C=CC(=O)Nc1cccc1NC(=O)OC(C)(C)C.COC(=O)C(CCC1CCCN1C)c1ccc(Br)cc1>>COC(=O)C(CC  
C1CCCN1C)c1ccc(/C=C/C(=O)Nc2ccccc2NC(=O)OC(C)(C)C)cc1  
3851 C=CC(=O)CC.CCc1cc(C)cc(CC)c1Br>>CCC(=O)/C=C/c1c(CC)cc(C)cc1CC  
3852 C=CC#N.Clc1ccc(Br)cc1>>N#C/C=C/c1ccc(Cl)cc1  
Br1ccc2ccccc2c1.C=CC[C@H]1CCCN(C)C[C@H](OC(C)=O)[C@H](C)C[C@H](CC(OC)OC)[C@  
H](O[C@@H]2O[C@H](C)[C@@H](O[C@H]3C[C@@](C)(O)[C@@H](OC(=O)CC)[C@H](C)O3)  
3853 [C@H](N(C)C)[C@H]2OC(C)=O)[C@@H](OC)[C@H](OC(=O)CC)CC(=O)O1>>CCC(=O)O[C@H]  
1[C@H](C)O[C@@H](O[C@H]2[C@H](N(C)C)[C@@H](OC(C)=O)[C@H](O[C@@H]3[C@@H](  
OC)[C@H](OC(=O)CC)CC(=O)O[C@@H](C/C=C/c4ccc5ccccc5c4)CCCN(C)C[C@H](OC(C)=O)[C  
@H](C)C[C@@H]3C(C)(OC)OC)C[C@@H]2C)C[C@@H]1(C)O  
3854 C=Cc1ccc(N(C)C)cc1.O=Cc1ccc(I)cc1>>CN(C)c1ccc(/C=C/c2ccc(C=O)cc2)cc1  
3855 C=Cc1ccc(CP(=O)(OC(C)(C)C)OC(C)(C)C)cc1.CC(C)O[Si](Cc1ccc(Br)cc1)(OC(C)C)OC(C)C>>CC(  
C)O[Si](Cc1ccc(/C=C/c2ccc(CP(=O)(OC(C)(C)C)OC(C)(C)C)cc2)cc1)(OC(C)C)OC(C)C  
3856 Br1ccccc1.C=CC(=O)C(C)CC(=O)OC>>COC(=O)CC(C)C(=O)/C=C/c1ccccc1  
3857 C=Cc1cncnc1.COc1cc2c(Nc3cc(OC)c(OC)c(OC)c3)c(C#N)cnc2cc1OS(=O)(=O)C(F)(F)F>>COc1cc2c  
(Nc3cc(OC)c(OC)c(OC)c3)c(C#N)cnc2cc1/C=C/c1cncnc1  
3858 C=Cc1ccccc1.Fc1cccc(I)c1>>Fc1cccc(/C=C/c2ccccc2)c1  
3859 Br1ccc2cnc(N3CCOCC3)c2c1.C=Cc1cncnc1>>C(=C/c1ccc2cnc(N3CCOCC3)c2c1)\c1cncnc1  
3860 C=CCc1c(OCc2ccccc2)ccc2c(=O)ccoc12.Ic1ccccc1>>O=c1ccoc2c(C/C=C/c3ccccc3)c(OCc3ccccc3)cc  
3861 C=CC(=O)OC.Fc1ccccc1Br>>COC(=O)/C=C/c1ccccc1F  
3862 C=CC(=O)OC(C)(C)C.COc1cc(OC)c(Br)c(OC)c1>>COc1cc(OC)c(/C=C/C(=O)OC(C)(C)C)c(OC)c1  
3863 C=CC(=O)OC(C)(C)C.O=C1CCC(N2C(=O)c3ccccc(Br)c3C2=O)C(=O)N1>>CC(C)(C)OC(=O)/C=C/c  
1ccccc2c1C(=O)N(C1CCC(=O)NC1=O)C2=O  
3864 C=Cc1cc(OC)c(O)c(OC)c1.CCCCCCCCOc1ccc2c(C)c(Br)c(=O)oc2c1>>CCCCCCCCOc1ccc2c(C)c(/  
C=C/c3cc(OC)c(O)c(OC)c3)c(=O)oc2c1  
3865 C=CC(=O)OC(C)(C)C.CSc1nc(N(C)c2ccccc2)n2ncc(I)c2n1>>CSc1nc(N(C)c2ccccc2)n2ncc(/C=C/C(=  
O)OC(C)(C)C)c2n1  
3866 C=CC(=O)OCCCC.Fc1cccc(Br)c1>>CCCCOC(=O)/C=C/c1cccc(F)c1  
3867 C=CC(=O)OCC.Ic1c(-c2ccccc2)nc2ccccc2c1-c1ccccc1>>CCOC(=O)/C=C/c1c(-  
c2ccccc2)nc2ccccc2c1-c1ccccc1  
3868 C=Cc1ccc(Cl)cc1.O=c1c(Br)c(-c2ccccc2)oc2ccccc12>>Cc1ccc(/C=C/c2c(-  
3869 C=CC(=O)OC.N#Cc1c(Br)cnc1I>>COC(=O)/C=C/c1cnc(Br)c1C#N  
C=CC(C)(C)O.CC1(C)CC(Nc2nccc(-  
3870 c3cn(COCC[Si](C)(C)C)c4cc(Cl)c(F)cc34)n2)CC(C)(C)N1>>CC(C)(O)/C=C/c1cc2c(cc1F)c(-  
c1ccnc(NC3CC(C)(C)NC(C)(C)C3)n1)cn2COCC[Si](C)(C)C  
3871 C=CC(=O)OCC.Cc1cc(F)c(CCCN(C)C)cc1Br>>CCOC(=O)/C=C/c1cc(CCCN(C)C)c(F)cc1C  
3872 C=CC(=O)O.CCOC(=O)Cn1cc(I)c(=O)[nH]c1=O>>CCOC(=O)Cn1cc(/C=C/C(=O)O)c(=O)[nH]c1=O  
C=CCO[C@]1(C)C[C@@H](C)C(=O)[C@H](C)[C@@H](O)[C@](C)(O)[C@@H](CC)OC(=O)[C@  
H](C)C(=O)[C@H](C)[C@H]1O[C@@H]1O[C@H](C)C[C@H](N(C)C)[C@H]1OC(=O)c1ccccc1.Cl  
3873 c1ccc(I)cc1>>CC[C@H]1OC(=O)[C@H](C)C(=O)[C@H](C)[C@@H](O[C@@H]2O[C@H](C)C[C  
@H](N(C)C)[C@H]2OC(=O)c2ccccc2)[C@](C)(OC/C=C/c2ccc(Cl)cc2)[C@H](C)C(=O)[C@H](  
C)[C@@H](O)[C@]1(C)O  
3874 Br1ccc2ccccc2c1.C=Cc1ccc(OC)cc1>>COc1ccc(/C=C/c2ccc3ccccc3c2)cc1  
3875 C=CCCN(C)C(=O)c1ccccc1.Nc1cccc(I)c1>>CN(CC/C=C/c1cccc(N)c1)C(=O)c1ccccc1  
3876 C=CC(=O)OC.C[C@H](c1ccccc1)N1C(=O)c2ccc(OS(=O)(=O)C(F)(F)F)cc2C1=O>>COC(=O)/C=C/c  
1ccc2c(c1)C(=O)N([C@H](C)c1ccccc1)C2=O  
3877 C=Cc1ccc(Cl)cc1.CC(=O)c1ccccc1Br>>CC(=O)c1ccccc1/C=C/c1ccc(Cl)cc1  
3878 C=CC(=O)OCC.O=C(O)c1ccc(Br)s1>>CCOC(=O)/C=C/c1ccc(C(=O)O)s1  
3879 C=Cc1c(F)c(F)c(F)c(F)c1F.Ic1cccc2ccccc12>>Fc1c(F)c(F)c(/C=C/c2ccccc3ccccc23)c(F)c1F  
3880 C=Cc1cc(OC)c(OC)c(OC)c1.O=C(O)c1ccc(Br)cc1>>COc1cc(/C=C/c2ccc(C(=O)O)cc2)cc(OC)c1OC  
3881 C=CC(N)=O.COC(=O)c1ccccc1I>>COC(=O)c1ccccc1/C=C/C(N)=O  
3882 C=CC(=O)OC.CCCCCOc1ccc(-c2ccc(Br)cc2)cc1>>CCCCCOc1ccc(-c2ccc(/C=C/C(=O)OC)cc2)cc1  
3883 C=CC(=O)OCC.O[C@@H]1CCCC[C@H]1Nc1nc2ccc(Cn3cnc4cc(I)ccc43)cc2s1>>CCOC(=O)/C=C/  
c1ccc2c(c1)ncn2Cc1ccc2nc(N[C@@H]3CCCC[C@H]3O)sc2c1  
3884 C=CC(=O)NCCc1ccc(F)cc1.COc1ccc(-c2oc3cc(OC)ccc3c(=O)c2I)cc1>>COc1ccc(-  
c2oc3cc(OC)ccc3c(=O)c2/C=C/C(=O)NCCc2ccc(F)cc2)cc1  
3885 C=CC(=O)OCC.COc1cc(F)c2nccc(Br)c2c1>>CCOC(=O)/C=C/c1ccnc2c(F)cc(OC)cc12  
3886 C=CC(C)(C)O.Nc1ccccc1I>>CC(C)(O)/C=C/c1ccccc1N

3887 Br/C(=C/[Te]c1cccc1)c1cccc1.C=CC#N>>N#C/C=C/C(=C/[Te]c1cccc1)c1cccc1  
C=CC(=O)OCC.Cc1ccc(-c2nc3ccc(/N=N/c4ccc([N+](=O)[O-])cc4)cc3c(-

3888 c3cccc3)c2I)cc1>>CCOC(=O)/C=C/c1c(-c2ccc(C)cc2)nc2ccc(/N=N/c3ccc([N+](=O)[O-])cc3)cc2c1-  
c1cccc1

3889 C=CC(=O)OCCCC.Clc1cccc2cccc12>>CCCCOC(=O)/C=C/c1cccc2cccc12

3890 C=CC(=O)OC(C)(C)C.CC(=O)O[C@H]1CC(=O)N(Cc2cc3c(cc2I)OCO3)[C@@H]1[Se]c1cccc1>>C  
C(=O)O[C@H]1CC(=O)N(Cc2cc3c(cc2/C=C/C(=O)OC(C)(C)C)OCO3)[C@@H]1[Se]c1cccc1

3891 C=Cc1cccc1.COC(=O)c1ccc(I)cc1>>COC(=O)c1ccc(/C=C/c2cccc2)cc1  
C=CCNC(=O)OC(C)(C)C.CCOC(=O)CC(c1ccc(C)c(CN2CC(C)Cc3cc(Br)ccc3S2(=O)=O)c1)c1ccc2c(

3892 c1)nnn2C>>CCOC(=O)CC(c1ccc(C)c(CN2CC(C)Cc3cc(/C=C/CNC(=O)OC(C)(C)C)ccc3S2(=O)=O)c  
1)c1ccc2c(c1)nnn2C

3893 C=CC(=O)OC.Cc1cc(C)c(NCc2cccc2)c(Br)c1>>COC(=O)/C=C/c1cc(C)cc(C)c1NCc1cccc1

3894 C=Cc1cccc(Cl)c1.Oc1cccc1I>>Oc1cccc1/C=C/c1cccc(Cl)c1  
C=Cc1ccc(/C=C/c2ccc(N(C)C)cc2OC)cc1.Cc1cc2c(-c3ccc(I)cc3S(=O)(=O)O)c3cc(C)c(=O)cc-

3895 3oc2cc1O>>COc1cc(N(C)C)ccc1/C=C/c1ccc(/C=C/c2ccc(-c3c4cc(C)c(=O)cc-  
4oc4cc(O)c(C)cc34)c(S(=O)(=O)O)c2)cc1

3896 C=CC(=O)Oc1ccc(OC)cc1.Ic1cccc1>>COc1ccc(OC(=O)/C=C/c2cccc2)cc1  
C=CC(=O)OC.Cl[C@]12[C@@]34C=C(Se5ccc(I)cc5)C(=O)[C@@](C)(CCC(=O)Nc5c(O)ccc(C(=O)

3897 )O)c5O)[C@@H]3[C@H](C[C@H]1C4)O2>>COC(=O)/C=C/c1ccc(SC2=C[C@]34[C@H]5C[C  
@H]1O[C@@]5(C)C3)[C@H]4[C@@]1(C)(CCC(=O)Nc3c(O)ccc(C(=O)O)c3O)C2=O)cc1

3898 C=Cc1ccc2cccc2c1.O=C(OCCCC(Br)C(F)(F)F)c1cccc1>>O=C(OCCCC(/C=C/c1ccc2cccc2c1)C(F  
(F)F)c1cccc1

3899 C=CC(=O)OCC.Cc1[nH]c2cccc2c1CCN(Cc1cccc(Br)c1)C(=O)OC(C)(C)C>>CCOC(=O)/C=C/c1ccc  
c(CN(CCc2c(C)[nH]c3cccc23)C(=O)OC(C)(C)C)c1

3900 C=Cc1cccc([N+](=O)[O-  
])c1.O=C1C(O)=C(I)C(=O)c2cccc21>>O=C1C(O)=C(/C=C/c2cccc([N+](=O)[O-  
C=CCN(C(=O)OC(C)(C)C)C(=O)OC(C)(C)C.CC(=O)c1cccc(Br)c1>>CC(=O)c1cccc(/C=C/CN(C(=O)

3901 OC(C)(C)C)C(=O)OC(C)(C)C)c1

3902 C=CC(=O)OC(C)(C)C.Nc1ccc(Br)cc1>>CC(C)(C)OC(=O)/C=C/c1ccc(N)cc1

3903 C=CC(=O)OC.COc1ccc2nc3c(cc2c1)C(OC)OC(c1cccc1)=C3I>>COC(=O)/C=C/C1=C(c2cccc2)OC(  
OC)c2cc3cc(OC)ccc3nc21

3904 C=Cc1cccc1C(=O)O.Clc1ccc(I)cc1>>O=C(O)c1cccc1/C=C/c1ccc(Cl)cc1

3905 C=CCN(C(=O)c1c(C)noc1C)[C@H](C)c1cc(F)cc(F)c1.O=C1Nc2ncccc2[C@@]12Cc1cc(Br)nc1C2>  
>Cc1noc(C)c1C(=O)N(C/C=C/c1cnc2c(c1)C[C@@]1(C2)C(=O)Nc2ncccc21)[C@H](C)c1cc(F)cc(F)c

3906 C=CC=O.Ic1ccc(-c2cccc2)cc1>>O=C/C=C/c1ccc(-c2cccc2)cc1

3907 C=CC(=O)OC.Cc1ccc(S(=O)(=O)n2cc(I)c(-  
c3cccc3)c2)cc1>>COC(=O)/C=C/c1cn(S(=O)(=O)c2ccc(C)cc2)cc1-c1cccc1

3908 Brc1ccnc1.C=CCC(CCCC#N)C(=O)OC>>COC(=O)C(C/C=C/c1ccnc1)CCCC#N

3909 Brc1ccc(I)cc1.C=CC(F)(F)C(F)(F)C(F)(F)C(F)(F)C(F)(F)F>>FC(F)(F)C(F)(F)C(F)(F)C(F)(F)  
C(F)(F)C(F)(F)/C=C/c1ccc(Br)cc1

3910 C=CC(=O)OCC.CC(C)(C)OC(=O)NC1Cc2ccc(Br)cc2C1>>CCOC(=O)/C=C/c1ccc2c(c1)CC(NC(=O)  
OC(C)(C)C)C2

3911 C=CCCCCCCCCO.COCOc1cc(OC)c(OCOC)c(Br)c1OCOC>>COCOc1cc(OC)c(OCOC)c(/C=C/CCC  
CCCCCO)c1OCOC

3912 C=CC(=O)OC.Cc1nc(Br)c(-  
c2cccc2)n(Cc2cccc2)c1=O>>COC(=O)/C=C/c1nc(C)c(=O)n(Cc2cccc2)c1-c1cccc1

3913 C=CC(=O)OC.CC(C)(O)c1[nH]c2cccc2c1C1CCCN(Cc2ccc(Br)cc2F)C1>>COC(=O)/C=C/c1ccc(CN  
2CCCC(c3c(C(C)(C)O)[nH]c4cccc34)C2)c(F)c1

3914 C=CC(=O)OC(C)(C)C.O=S(=O)(c1cccc(Br)c1)c1ccc2cc(Cl)ccc2n1>>CC(C)(C)OC(=O)/C=C/c1cccc(  
S(=O)(=O)c2ccc3cc(Cl)ccc3n2)c1

3915 C=Cc1ccc2cccc2c1.COC(=O)c1ccc(Cl)cc1I>>COC(=O)c1ccc(Cl)cc1/C=C/c1ccc2cccc2c1

3916 C=CC(C)=O.CCCCc1nnn(CC(F)(F)C(F)F)c1I>>CCCCc1nnn(CC(F)(F)C(F)F)c1/C=C/C(C)=O

3917 C=Cc1ccc(C(C)(C)C)cc1.CCOC(=O)C(F)(F)I>>CCOC(=O)C(F)(F)/C=C/c1ccc(C(C)(C)C)cc1

3918 C=CC(=O)OCC.Cc1nc(-c2cccc2)c(Br)o1>>CCOC(=O)/C=C/c1oc(C)nc1-c1cccc1

3919 \*CN(Cc1cccc1)N=Nc1ccc(I)cc1.C=CC(=O)OC(C)(C)C>>\*CN(Cc1cccc1)N=Nc1ccc(/C=C/C(=O)O  
C(C)(C)C)cc1

3920 C=CC(=O)OC.CC1(C)CC(=C(c2ccc(Br)cc2)c2ccc3c(c2)c(F)nn3C2CCCCO2)CC(C)(C)O1>>COC(=O  
)C=C/c1ccc(C=C2CC(C)(C)OC(C)(C)C2)c2ccc3c(c2)c(F)nn3C2CCCCO2)cc1

3921 C=CC1CC=CCC1.Clc1ccc(I)cc1>>Clc1ccc(/C=C/C2CC=CCC2)cc1

3922 C=CCCCCC(C(=O)OC)S(=O)(=O)c1cccc1.Ic1cccc1>>COC(=O)C(CCCC/C=C/c1cccc1)S(=O)(=O  
)c1cccc1

3923 C=CC(=O)OC(C)(C)C.CCOC(=O)Cc1cccc1Br>>CCOC(=O)Cc1cccc1/C=C/C(=O)OC(C)(C)C



3924 C=CC(=O)OC.CC(=O)OCC(COC(C)=O)OCn1cc(I)c(=O)[nH]c1=O>>COC(=O)/C=C/c1cn(COC(COC(C)=O)COC(C)=O)c(=O)[nH]c1=O  
3925 C=CC(=O)OC.N#Cc1ccc(I)cc1Cl>>COC(=O)/C=C/c1ccc(C#N)c(Cl)c1  
3926 C=CCCN1C(=O)c2ccccc2C1=O.Ic1ccc(C2(N3CCCCC3)CCCCC2)cc1>>O=C1c2ccccc2C(=O)N1CC/C=C/c1ccc(C2(N3CCCCC3)CCCCC2)cc1  
3927 Br1cnc2ccccc12.C=Cc1cn(COCC[Si](C)(C)C)nc1-c1nc(C(F)(F)F)cn1COCC[Si](C)(C)C>>C[Si](C)(C)CCOCn1cc(/C=C/c2cnc3ccccc23)c(-c2nc(C(F)(F)F)cn2COCC[Si](C)(C)C)n1  
3928 C=CC(=O)OCCCC.Cn1nc(Br)c2cccc(Cl)c21>>CCCCOC(=O)/C=C/c1nn(C)c2c(Cl)cccc12  
3929 C=Cc1cc(OC)c(OC)c1-c1ccc(Cl)cc1.COc1ccc(I)cc1>>COc1ccc(/C=C/c2cc(OC)c(OC)c(OC)c2-c2ccc(Cl)cc2)cc1  
3930 C=CC(=O)OCC.O=S(=O)(Oc1ccc2ccoc2c1)C(F)(F)F>>CCOC(=O)/C=C/c1ccc2ccoc2c1  
3931 C=CC(=O)N1CCOCC1.Cn1c2ccccc2c2nc3ccc(Cl)cc3c3cc(OS(=O)(=O)C(F)(F)F)cc1c32>>Cn1c2ccccc2c2nc3ccc(Cl)cc3c3cc(/C=C/C(=O)N4CCOCC4)cc1c32  
3932 C=CCN1C(=O)c2ccccc2C1=O.Fc1cc(Br)cc(F)c1F>>O=C1c2ccccc2C(=O)N1C/C=C/c1cc(F)c(F)c(F)c  
3933 C=CC(=O)OC.Cc1cc(OC(=O)OC(C)(C)C)cc(C)c1I>>COC(=O)/C=C/c1c(C)cc(OC(=O)OC(C)(C)C)cc  
3934 C=CC(=O)OC(C)(C)C.FC(F)(F)Oc1ccc(CNc2ccc(Br)cc2)cc1>>CC(C)(C)OC(=O)/C=C/c1ccc(NCc2cc  
3935 c(OC(F)(F)F)cc2)cc1  
3936 C=Cc1c(F)c(F)c(F)c1F.Ic1ccccc1>>Fc1c(F)c(F)c(/C=C/c2ccccc2)c(F)c1F  
3937 C=CC(=O)OC.N#Cc1cccc(Br)c1>>COC(=O)/C=C/c1cccc(C#N)c1  
3938 C=Cc1ccc(N(c2ccccc2)c2ccccc2)cc1.CC(C)(C)OC(=O)CCCCCCCCCOc1cc(Br)ccc1C=O>>CC(C)(C)OC(=O)CCCCCCCCCOc1cc(/C=C/c2ccc(N(c3ccccc3)c3ccccc3)cc2)ccc1C=O  
3939 C=Cc1cc(OC)c(OC)cc1F.Oc1cc(O)cc(I)c1>>COc1cc(F)c(/C=C/c2cc(O)cc(O)c2)cc1O  
3940 C=CC(=O)OC(C)(C)C.Cc1ccc(S(=O)(=O)Nc2c(C)cc(C)cc2I)cc1>>Cc1ccc(S(=O)(=O)Nc2c(C)cc(C)cc2/C=C/C(=O)OC(C)(C)C)cc1  
3941 C=CC[Si](C)(C)C.Cc1ccc(S(=O)(=O)Nc2ccccc2I)cc1>>Cc1ccc(S(=O)(=O)Nc2ccccc2/C=C/C[Si](C)(C)C)cc1  
3942 C=Cc1ccc(C)cc1.Ic1ccccc1>>Cc1ccc(/C=C/c2ccccc2)cc1  
3943 C=CC(C)(C)C.CC(=O)c1ccc(Br)cc1>>CC(=O)c1ccc(/C=C/C(C)(C)C)cc1  
3944 C=Cc1cnc1.CCCCCCCCCC(=O)N1CCN(c2ccc(Br)cc2)CC1>>CCCCCCCCC(=O)N1CCN(c2ccc(/C=C/c3cnc3)cc2)CC1  
3945 C=CC(=O)OC.COc1cc([C@H]2Oc3c(OC)cc(Br)cc3[C@@H]2COC(C)=O)ccc1OC(C)=O>>COC(=O)/C=C/c1cc(OC)c2c(c1)[C@H](COC(C)=O)[C@@H](c1ccc(OC(C)=O)c(OC)c1)O2  
3946 C=CCN(C(=O)OC(C)(C)C)C(=O)OC(C)(C)C.O=C(c1cccc(Br)c1)C1CCCCC1>>CC(C)(C)OC(=O)N(C/C=C/c1cccc(C(=O)C2CCCCC2)c1)C(=O)OC(C)(C)C  
3947 C=CC(=O)OCc1ccccc1.Cc1oc(-c2ccccc2)cc1CCOc1cnc2c(Cl)cccc12>>Cc1oc(-c2ccccc2)cc1CCOc1cnc2c(/C=C/C(=O)OCc3ccccc3)cccc12  
3948 Br1ccc2ccc3ccccc4ccc1c2c34.C=Cc1ccc(Cl)cc1>>Clc1ccc(/C=C/c2ccc3ccc4ccccc5ccc2c3c45)cc1  
3949 Br1ccccc1.C=Cc1cccn1>>C(=C/c1cccn1)\c1ccccc1  
3950 C=CC(=O)OCC.Oc1ccc(C(=C2CCCCC2)c2ccc(Br)cc2F)cc1>>CCOC(=O)/C=C/c1ccc(C(=C2CCCCC2)c2ccc(O)cc2)c(F)c1  
3951 C=Cc1ccccc1.O=c1oc2ccccc2c(-c2ccccc2)c1Br>>O=c1oc2ccccc2c(-c2ccccc2)c1/C=C/c1ccccc1  
3952 C=Cc1nn(C2CCCCO2)c2nc(-c3ccc(O)cc3)cc(C(=O)N3CCN(C(=O)OC(C)(C)C)CC3)c12.Fc1ccc(I)cc1>>CC(C)(C)OC(=O)N1CCN(C(=O)c2cc(-c3ccc(O)cc3)nc3c2c(/C=C/c2ccc(F)cc2)nn3C2CCCCO2)CC1  
3953 C=CC(N)=O.COc1ccc2sc(-c3nccc(Br)c3)nc2c1>>COc1ccc2sc(-c3nccc(/C=C/C(N)=O)c3)nc2c1  
3954 C=Cc1ccc(OC)cc1.O=[N+][O-]c1ccc(I)cc1CO>>CCOc1ccc(/C=C/c2ccc([N+](=O)[O-]C=CC(=O)OC.FC(F)(F)c1ccc(NCc2ccccc2)c(Br)c1>>COC(=O)/C=C/c1cc(C(F)(F)F)ccc1NCc1ccccc1  
3955 C=CC(=O)OC.O=S(=O)(c1ccccc1)n1c(I)cc2ccnc21>>COC(=O)/C=C/c1cc2ccnc2n1S(=O)(=O)c1cc  
3956 C=CC(C)OC(C)=O.CCOc1cnc(-c2ccc(Br)cc2)nc1>>CCOc1cnc(-c2ccc(/C=C/C(C)OC(C)=O)cc2)nc1  
3957 C=CC(=O)OCC.O=C(O)c1ccc(Br)cc1>>CCOC(=O)/C=C/c1ccc(C(=O)O)cc1  
3958 C=Cc1ccccc1.CCC1=C(C)c2cc3[nH]c(c(C)c3CO)c(Br)c3nc(c4c5[nH]c(cc1n2)c(C)c5C(=O)C4)[C@@H](CCC(=O)OC)[C@@H]3C>>CCC1=C(C)c2cc3[nH]c(c(C)c3CO)c(/C=C/c3ccccc3)c3nc(c4c5[nH]c(cc1n2)c(C)c5C(=O)C4)[C@@H](CCC(=O)OC)[C@@H]3C  
3959 C=CC(=O)OC(C)(C)C.Oc1ccc(C(=C2CCCCC2)c2ccc(Br)cc2)cc1F>>CC(C)(C)OC(=O)/C=C/c1ccc(C(=C2CCCCC2)c2ccc(O)c(F)c2)cc1  
3960 C=CC1(C(=O)O)CCC(O[Si](C(C)C)(C(C)C)C(C)C)C1.C[C@H](NC(=O)[C@@H](O)C1CC1)C(=O)N1CCC[C@@H](C(=O)N)[C@H](C)c2ccc3ccc(Br)cc3n2)N1>>CC(C)[Si](OC1CCC(/C=C/c2ccc3ccc([C@@H](C)NC(=O)[C@@H]4CCCN(C(=O)[C@H](C)NC(=O)[C@@H](O)C5CC5)N4)nc3c2)(C(=O)O)C1)(C(C)C)C(C)C

3961 C=Cc1ccncc1.CC(C)(C)OC(=O)N[C@H](COc1cc(Br)ccn1)Cc1c[nH]c2ccccc12>>CC(C)(C)OC(=O)N  
[C@H](COc1cc(/C=C/c2ccncc2)ccn1)Cc1c[nH]c2ccccc12  
 3962 C=CC(=O)O.Clc1cccc(Br)c1>>O=C(O)/C=C/c1cccc(Cl)c1  
 3963 Br1ccc(-c2nc3ccccc3n2)cc1.C=CCn1c(-c2ccc(C)cc2)nc2ccccc2c1=O>>Cc1ccc(-  
c2nc3ccccc3c(=O)n2C/C=C/c2ccc(-c3enc4ccccc4n3)cc2)cc1  
 3964 C=CC(=O)OC.CCc1nc2c(N)nc3cc(Br)ccc3c2n1CC(C)(C)O>>CCc1nc2c(N)nc3cc(/C=C/C(=O)OC)ccc  
3c2n1CC(C)(C)O  
 3965 C=Cc1ccc2c(c1)OCO2.CCCCCCCCOC1ccc2c(C)c(Br)c(=O)oc2c1>>CCCCCCCCOC1ccc2c(C)c(/C=C  
/c3ccc4c(c3)OCO4)c(=O)oc2c1  
 3966 C=CN1C(=O)c2ccccc2C1=O.OC(c1ccc(C(F)(F)F)cc1)c1ccncc1Br>>O=C1c2ccccc2C(=O)N1/C=C/c1  
enccc1C(O)c1ccc(C(F)(F)F)cc1  
 3967 C/C(=N)/c1c(C(C)C)cccc1C(C)C)n1nc2ccc(Br)cc21.C=CC(=O)OC>>COC(=O)/C=C/c1ccc2cnn(/C(C)  
=N/c3c(C(C)C)cccc3C(C)C)c2c1  
 3968 Br1cccc2ccccc12.C=CP(=O)(c1ccccc1)C(C)(C)C>>CC(C)(C)P(=O)/C=C/c1cccc2ccccc12)c1ccccc1  
 3969 C=CC(=O)c1ccc(OC)cc1OC.COc1ccc(I)cc1OC>>COc1ccc(C(=O)/C=C/c2ccc(OC)c(OC)c2)c(OC)c1  
 3970 C=Cc1cccn1.c1ccc([I+]c2ccccc2)cc1>>C(=C/c1cccn1)\c1ccccc1  
 3971 C=Cc1ccccc1.O=C(O)c1ccc(Br)c1>>O=C(O)c1ccc(/C=C/c2ccccc2)c1  
 3972 C=Cc1ccc(C(F)(F)F)nc1.Cc1nn(C)c(=O)c(-c2c(F)ccc(Cl)c2Br)c1OC(=O)C(C)C>>Cc1nn(C)c(=O)c(-  
c2c(F)ccc(Cl)c2/C=C/c2ccc(C(F)(F)F)nc2)c1OC(=O)C(C)C  
 3973 Br1ccc2oc(-c3cc[nH]n3)cc2c1.C=CC#N>>N#C/C=C/c1ccc2oc(-c3cc[nH]n3)cc2c1  
 3974 C=CC(=O)OC.COc1nc(C)c(I)c(OC)n1>>COC(=O)/C=C/c1c(C)nc(OC)nc1OC  
 3975 C=CC(=O)OCC.Cc1nn(C)c(Oc2cc(Br)ccc2Cl)c1C=O>>CCOC(=O)/C=C/c1ccc(Cl)c(Oc2c(C=O)c(C)n  
n2C)c1  
 3976 C=CC(=O)O.O=S(=O)(Nc1ccccc1)c1ccc(Cl)cc1>>O=C(O)/C=C/c1ccccc1(NS(=O)(=O)c2ccc(Cl)cc2)  
 3977 Br1ccc(C2OCCO2)nc1.C=CC(=O)OCC>>CCOC(=O)/C=C/c1ccc(C2OCCO2)nc1  
 3978 C=CC(=O)N(C)Cc1sc2ccc(C)c2c1C.O=C1CCCc2cc(Br)cnc2N1>>Cc1sc2sc(CN(C)C(=O)/C=C/c3cnc  
4c(c3)CCCC(=O)N4)c(C)c12  
 3979 C=CCOC.CCN(C)/C=N/c1cc2ccccc(Br)c2nc1C>>CCN(C)/C=N/c1cc2ccccc(/C=C/COC)c2nc1C  
 3980 C=Cc1ccc(N(c2ccccc2)c2ccccc3ccccc23)cc1.O=Cc1ccc(Br)cc1>>O=Cc1ccc(/C=C/c2ccc(N(c3ccccc3)c  
3ccccc4ccccc34)cc2)cc1  
 3981 C=CC(=O)OC.O=Cc1cc(F)ccc1Br>>COC(=O)/C=C/c1ccc(F)cc1C=O  
 3982 C=CC(=O)N(C)C.N#Cc1ccc(Br)cc1>>CN(C)C(=O)/C=C/c1ccc(C#N)cc1  
 3983 Br1cncc(Oc2ccccc2)c1.C=CCCO>>OCC/C=C/c1cncc(Oc2ccccc2)c1  
 3984 C=Cc1ccccc1.COc1ccc(-c2oc3ccccc3c(=O)c2Br)cc1OC>>COc1ccc(-  
c2oc3ccccc3c(=O)c2/C=C/c2ccccc2)cc1OC  
 3985 C=CC(O)C(F)(F)C(=O)OCC.COC(=O)c1ccccc1I>>CCOC(=O)C(F)(F)C(O)/C=C/c1ccccc1C(=O)OC  
 3986 C=Cc1ccccc1.Cc1ccc2c(-c3ccc(C(F)(F)F)cc3)c(Br)c(=O)oc2c1>>Cc1ccc2c(-  
c3ccc(C(F)(F)F)cc3)c(/C=C/c3ccccc3)c(=O)oc2c1  
 3987 Br1cccn1.C=CC(N)=O>>NC(=O)/C=C/c1cccn1  
 3988 C=CC(=O)OCC.COc1cc(Br)c(CCNC(=O)OC(C)(C)C)cc1OCc1ccccc1>>CCOC(=O)/C=C/c1cc(OC)c(  
OCc2ccccc2)cc1CCNC(=O)OC(C)(C)C  
 3989 C=Cc1cccn1.Oc1ccccc1I>>Oc1ccccc1/C=C/c1cccn1  
 3990 C=Cc1ccccc1.Cc1cc(C)nc(I)n1>>Cc1cc(C)nc(/C=C/c2ccccc2)n1  
 3991 C=CC(=O)OC(C)(C)C.CC1(C)Cc2cc(Br)cnc2NC1=O>>CC(C)(C)OC(=O)/C=C/c1cnc2c(c1)CC(C)(C)  
C(=O)N2  
 3992 C=CC(C)(O)CCC=C(C)C.N#Cc1ccc(O)c(Br)c1>>CC(C)=CCCC(C)(O)/C=C/c1cc(C#N)ccc1O  
 3993 C=Cc1ccc(C(F)(F)F)cc1.COC(=O)c1ccccc1I>>COC(=O)c1ccccc1/C=C/c1ccc(C(F)(F)F)cc1  
 3994 C=Cc1ccccc1.Fc1ccccc1I>>Fc1ccccc1/C=C/c1ccccc1  
 3995 Br1cccc2ccccc12.C=Cc1ccccc1>>C(=C/c1cccc2ccccc12)\c1ccccc1  
 3996 C=Cc1ccc2ccccc2c1.CCN1c2ncc(I)cc2C(=O)N(C)c2ccncc21>>CCN1c2ncc(/C=C/c3ccc4ccccc4c3)cc2  
C(=O)N(C)c2ccncc21  
 3997 C=CCON=C1[C@H](C)[C@H]2OC(=O)O[C@]2(C)[C@H](CC)OC(=O)[C@H](C)[C@H](O)[C@  
@H](C)[C@H](O)[C@H]2O[C@H](C)C[C@H](N(C)C)[C@H]2OC(C)=O)[C@](C)(OC)C[C@H]  
1C.Nc1nccccc1Br>>CC[C@H]1OC(=O)[C@H](C)[C@H](O)[C@H](C)[C@H](O)[C@H]2O[C@  
@H](C)C[C@H](N(C)C)[C@H]2OC(C)=O)[C@](C)(OC)C[C@H](C)C(=NOC/C=C/c2ccncc2N)[C  
@H](C)C[C@H]2OC(=O)O[C@]112C  
 3998 C=CC(=O)OC.CC(=O)c1ccccc1I>>COC(=O)/C=C/c1ccccc1C(=O)c1  
Br1cnc2ccccc2c1.C=CCO[C@]1(C)C[C@H](C)C(=O)[C@H](C)[C@H]2N(OC)C(=O)O[C@]2(C)  
 3999 [C@H](CC)OC(=O)[C@H](C)C(=O)[C@H](C)[C@H]1O[C@H]1O[C@H](C)C[C@H](N(C)C)[  
C@H]1O>>CC[C@H]1OC(=O)[C@H](C)C(=O)[C@H](C)[C@H](O)[C@H]2O[C@H](C)C[C@  
H1(N(C)C)C[C@H]2O)C@1(C)(OC/C=C/c2cnc3ccccc3c2)C1C@H1(C)C(=O)C@H1(C)C[C@H]2N(O

4000 C=CC(=O)N(C)Cc1sc2ccccc2c1C.CC1(C)NCc2cc(Br)enc2NC1=O>>Cc1c(CN(C)C(=O)/C=C/c2enc3c  
(c2)CNC(C)(C)C(=O)N3)sc2ccccc12  
4001 C=Cc1ccccc1.Nc1ccccc1I>>Nc1ccccc1/C=C/c1ccccc1  
4002 C=CC(N)=O.O=Cc1c(C2=NS(=O)(=O)c3cc(I)ccc3N2)c(O)c2cc(F)ccc2n1CCCC1CC1>>NC(=O)/C=C/c1  
ccc2c(c1)S(=O)(=O)N=C(c1c(O)c3cc(F)ccc3n(CCC3CC3)c1=O)N2  
4003 C=CC(=O)OCN1C(=O)c2ccccc2C1=O.CCOC(=O)CSc1ccc(Br)cc1>>CCOC(=O)CSc1ccc(/C=C/C(=O  
)OCN2C(=O)c3ccccc3C2=O)cc1  
4004 Br1cnc2ccccc2c1.C=CC(C)=O>>CC(=O)/C=C/c1cnc2ccccc2c1  
4005 C=Cc1ccccc1.CCCCCCCCCC(=O)Nc1ccc(Br)cc1>>CCCCCCCCC(=O)Nc1ccc(/C=C/c2ccccc  
2)cc1  
4006 C=Cc1ccc(Cl)cc1.CCCCC(Br)C(F)(F)F>>CCCCC(/C=C/c1ccc(Cl)cc1)C(F)(F)F  
4007 BrC1CCOCC1.C=Cc1ccccc1>>C(=C/C1CCOCC1)\c1ccccc1  
4008 C=CC(=O)OC(C)(C)C.CC(C)(C)OC(=O)N1CCc2cc(Cl)cc3c2C1Cc1ccccc1-  
3>>CC(C)(C)OC(=O)/C=C/c1cc2c3c(c1)-c1ccccc1CC3N(C(=O)OC(C)(C)C)CC2  
4009 C=Cc1ccc(C(=O)OC)cc1.O=C(N1CCOCC1)C(F)(F)Br>>COC(=O)c1ccc(/C=C/C(F)(F)C(=O)N2CCO  
CC2)cc1  
4010 Br1cccc2ccccc12.C=CC(C)=O>>CC(=O)/C=C/c1cccc2ccccc12  
4011 C=CC(C)=O.O=S(=O)(Oc1ccc2ccn(Cc3ccccc3)c2n1)C(F)(F)F>>CC(=O)/C=C/c1ccc2ccn(Cc3ccccc3)  
C=CC(=O)N(C)Cc1cn(C)c2ccccc12.O=C1Nc2ncc(Br)cc2C12CCC2>>CN(Cc1cn(C)c2ccccc12)C(=O)/  
4012 C=C/c1cnc2c(c1)C1(CCC1)C(=O)N2  
4013 C=Cn1nnc(CC)n1.Ic1ccccc1>>CCc1nnn(/C=C/c2ccccc2)n1  
4014 Br1ccccc1I.C=CC(=O)O>>O=C(O)/C=C/c1ccccc1Br  
4015 C=Cc1ccccc1.Cc1ccc(Br)c1N>>Cc1ccc(/C=C/c2ccccc2)c1N  
4016 C=CC(=O)OC.COc1ccc2c(c1)CCN(c1ccc(F)c1)C2(C)c1ccc(Br)cc1>>COC(=O)/C=C/c1ccc(C2(C)c3  
ccc(OC)cc3CCN2c2ccccc(F)c2)cc1  
C=Cc1ccc(C=C)cc1.CCCCCCc1cc(/C=C/c2ccc(/C=C/c3cc(CCCCCC)c(/C=C/c4ccc(/C=C/c5cc(CCCC  
CC)c(/C=C/c6ccc(C)cc6)cc5CCCCC)cc4)cc3CCCCC)cc2)c(CCCCCC)cc1Br>>C=Cc1ccc(/C=C/c2  
4017 cc(CCCCCC)c(/C=C/c3ccc(/C=C/c4cc(CCCCCC)c(/C=C/c5ccc(/C=C/c6cc(CCCCCC)c(/C=C/c7ccc(C  
)cc7)cc6CCCCC)cc5)cc4CCCCC)cc3)cc2CCCCC)cc1  
4018 C=CCCC(=O)O.Fc1ccc(I)cc1>>O=C(O)CC/C=C/c1ccc(F)cc1  
4019 C=Cc1ccc(F)cc1.CS(=O)(=O)c1ccc(Br)cc1>>CS(=O)(=O)c1ccc(/C=C/c2ccc(F)cc2)cc1  
4020 C=CC#N.Cc1cc(I)c2ccccc2n1>>Cc1cc(/C=C/C#N)c2ccccc2n1  
4021 Br1cncnc1.C=CS(C)(=O)=O>>CS(=O)(=O)/C=C/c1cncnc1  
4022 C=CC(=O)OC(C)(C)C.O=C(NCc1ccccc(OC(F)(F)F)c1)c1cc(Br)cc(I)c1>>CC(C)(C)OC(=O)/C=C/c1cc(  
Br)cc(C(=O)NCc2cccc(OC(F)(F)F)c2)c1  
4023 C=CC(O)c1ccccc1Br.COc1ccc(I)cc1OC>>COc1ccc(/C=C/C(O)c2ccccc2Br)cc1OC  
4024 C=CC(=O)OC.Cn1ccc(I)n1>>COC(=O)/C=C/c1cnc(C)n1  
4025 Br1cccs1.C=Cc1ccccc1>>C(=C/c1cccs1)\c1ccccc1  
4026 C=CC(=O)OC.Fc1cc(-n2cnnn2)c(I)cc1Cl>>COC(=O)/C=C/c1cc(Cl)c(F)cc1-n1cnnn1  
4027 C=Cc1ccc2ccc(Cl)cc2n1.COC(=O)c1ccccc1CCC(=O)c1ccccc(Br)c1>>COC(=O)c1ccccc1CCC(=O)c1cc  
cc(/C=C/c2ccc3ccc(Cl)cc3n2)c1  
4028 C=CC(=O)OC.CCOc1noc(C)c1I>>CCOc1noc(C)c1/C=C/C(=O)OC  
4029 C=CC(=O)OCCCC.O=C(/C=C/c1ccc(Br)cc1)c1ccc2sc3ccccc3c2c1>>CCCCOC(=O)/C=C/c1ccc(/C=C  
)C(=O)c2ccc3sc4ccccc4c3c2)cc1  
4030 Br1ccc2ccnc(N3CCCCC3)c2c1.C=CC(C)=O>>CC(=O)/C=C/c1ccc2ccnc(N3CCCCC3)c2c1  
4031 \*NC(=O)c1ccc(C=C)cc1.FC(F)(F)c1ccccc(I)c1>>\*NC(=O)c1ccc(/C=C/c2cccc(C(F)(F)F)c2)cc1  
4032 C=Cc1ccc(OC)c(OC)c1.O=C(Nc1ccccc1I)C1CCCC1>>COc1ccc(/C=C/c2ccccc2NC(=O)C2CCCCC2  
)cc1OC  
4033 C=CC(=O)O.Cc1cc(C)cc(Br)c1>>Cc1cc(C)cc(/C=C/C(=O)O)c1  
4034 C=CC(=O)OC.COc1ncccc1Br>>COC(=O)/C=C/c1ccccc1OC  
4035 C=Cc1ccccc1.COC(=O)c1cc(C)cc(I)c1>>COC(=O)c1cc(C)cc(/C=C/c2ccccc2)c1  
4036 C=Cc1ccc(OC(C)=O)cc1.CCCCC(Br)C(F)(F)F>>CCCCC(/C=C/c1ccc(OC(C)=O)cc1)C(F)(F)F  
4037 C=Cc1ccc(C)cc1.Cc1cc(I)cc(C)c1O>>Cc1ccc(/C=C/c2cc(C)c(O)c(C)c2)cc1  
4038 C=Cc1ccccc1.CN1CC(c2ccc(Br)cc2)CCC1=O>>CN1CC(c2ccc(/C=C/c3ccccc3)cc2)CCC1=O  
4039 C=Cc1ccc(OC)cc1.C[Si](C)(C)OS(=O)(=O)C(F)(F)F>>COc1ccc(/C=C/[Si](C)(C)C)cc1  
4040 C=CC=O.Cc1ccccc(I)c1>>Cc1ccccc(/C=C/C=O)c1  
4041 C=Cc1ccccc1.Cc1ccc(-c2oc3ccccc3c(=O)c2Br)cc1>>Cc1ccc(-c2oc3ccccc3c(=O)c2/C=C/c2ccccc2)cc1  
4042 C=CC(=O)OCC.Cc1ncc(-c2ccc(Br)cc2)o1>>CCOC(=O)/C=C/c1ccc(-c2enc(C)o2)cc1  
4043 C=CC#N.CCOC(=O)/C=C/c1ccc(I)cc1C>>CCOC(=O)/C=C/c1ccc(/C=C/C#N)cc1C  
4044 C=CCOc1ccccc1.Fc1ccc(Br)cc1>>Fc1ccc(/C=C/COc2ccccc2)cc1

4045 C=CC(=O)OCCCC.CC(C)=CBr>>CCCCOC(=O)/C=C/C=C(C)C  
4046 C=CC(=O)OC.O=C(c1cccc1)c1ccc(Br)cc1>>COC(=O)/C=C/c1ccc(C(=O)c2cccc2)cc1  
4047 C=CC(C)=O.CC(C)(C)OC(=O)Nc1ccsc1Br>>CC(=O)/C=C/c1scsc1NC(=O)OC(C)(C)C  
4048 C=CC[C@H](C)N(C)C(=O)OC(C)(C)C.CC(C)Oc1cnc(Br)c1>>CC(C)Oc1cnc(/C=C/C[C@H](C)N(C)C(=O)OC(C)(C)C)c1  
C=CC(=O)OCC.CC(C)Cn1c(CNC(=O)OC(C)(C)C)c(-  
4049 c2cccc2)c2cc(Br)ccc2c1=O>>CCOC(=O)/C=C/c1ccc2c(=O)n(CC(C)C)c(CNC(=O)OC(C)(C)C)c(-  
c3cccc3)c2c1  
C=CCN(C(=O)OC(C)(C)C)C(=O)OC(C)(C)C.Cc1ccc(Oc2ccc(Nc3ncnc4ccc(I)cc34)cc2C)cn1>>Cc1cc  
4050 c(Oc2ccc(Nc3ncnc4ccc(/C=C/CN(C(=O)OC(C)(C)C)C(=O)OC(C)(C)C)cc34)cc2C)cn1  
C=Cc1nn(C2CCCCO2)c2nc(Cl)cc(C(=O)N3CCN(C(=O)OC(C)(C)C)CC3)c12.CN(C)Cc1cccc(I)c1>>  
4051 CN(C)Cc1cccc(/C=C/c2nn(C3CCCCO3)c3nc(Cl)cc(C(=O)N4CCN(C(=O)OC(C)(C)C)CC4)c23)c1  
C=Cc1ccc(C(=O)OC)[nH]1.CC(C)(C)C(=O)Nc1nc(O)c2cc(Br)enc2n1>>COC(=O)c1ccc(/C=C/c2cnc3  
4052 nc(NC(=O)C(C)(C)C)nc(O)c3c2)[nH]1  
C=CC(=O)OC.O=c1[nH]c(=O)n([C@@H]2CO[C@H](CO)[C@H]2CO)cc1I>>COC(=O)/C=C/c1cn([  
4053 C@@H]2CO[C@H](CO)[C@H]2CO)c(=O)[nH]c1=O  
C=CC(=O)C(O[Si](CC)(CC)CC)c1c(OC)ccc(OC)c1OCc1cccc1.Ic1cccc1OCc1cccc1>>CC[Si](CC)(  
4054 CC)OC(C(=O)/C=C/c1cccc1OCc1cccc1)c1c(OC)ccc(OC)c1OCc1cccc1  
C=Cc1ccc(C)cc1.CCOC(=O)C(F)(F)I>>CCOC(=O)C(F)(F)/C=C/c1ccc(C)cc1  
4055 C=CC(=O)N1N=Cc2cccc2C1c1cc2cccc2s1.COc1cc(Cc2cnc(N)nc2N)cc(I)c1OC>>COc1cc(Cc2cnc(  
4056 N)nc2N)cc(/C=C/C(=O)N2N=Cc3cccc3C2c2cc3cccc3s2)c1OC  
C=Cc1ccc(C(C)(C)C)cc1.Cc1ccc([Si](C)(C)I)o1>>Cc1ccc([Si](C)(C)/C=C/c2ccc(C(C)(C)C)cc2)o1  
4057 C=CC(=O)OC.O=C(c1ccc(I)cc1)c1ccc(Oc2cccc2)cc1>>COC(=O)/C=C/c1ccc(C(=O)c2ccc(Oc3cccc  
4058 3)cc2)cc1  
C=CC(C)=O.c1ccc([I+](c2cccc2)cc1>>CC(=O)/C=C/c1cccc1  
4059 C=CCCCCCCCCO.COCCc1cc(Br)c(OCOC)c(OC)c1>>COCCc1cc(/C=C/CCCCCCCCO)c(OCOC)c(  
4060 OC)c1  
C=CC(C)(C)C.COc1cc(Br)ccc1O>>COc1cc(/C=C/C(C)(C)C)ccc1O  
4061 C=CC(=O)OC.N#Cc1ccc(NC=O)c(I)c1>>COC(=O)/C=C/c1cc(C#N)ccc1NC=O  
4062 C=CC(N)=O.O=CC1=C(Br)c2cccc2CC1>>NC(=O)/C=C/C1=C(C=O)CCc2cccc21  
4063 C=CS(C)(=O)=O.C[C@H]1COCc2nc3cnc4cc(Br)ccc4c3n21>>C[C@H]1COCc2nc3cnc4cc(/C=C/S(C)  
4064 (=O)=O)ccc4c3n21  
C=CC(=O)OC(C)(C)C.CN(C)c1ccc(Br)cc1>>CN(C)c1ccc(/C=C/C(=O)OC(C)(C)C)cc1  
4065 C=CC(=O)OCC.CCCCc1c(I)c(-c2cccc2)n(C(=O)OC(C)(C)C)c1-  
4066 c1cccc1>>CCCCc1c(/C=C/C(=O)OCC)c(-c2cccc2)n(C(=O)OC(C)(C)C)c1-c1cccc1  
C=CN1C(=O)c2cccc2C1=O.COC(=O)Cc1cccc(Br)c1>>COC(=O)Cc1cccc(/C=C/N2C(=O)c3cccc3C  
4067 2=O)c1  
C=CC(OCC)OCC.COc1cccc1I>>CCOC(/C=C/c1cccc1OC)OCC  
4068 C=Cc1cnc1.CCCCOc1ccc(Br)c(F)c1>>CCCCOc1ccc(/C=C/c2cnc2)c(F)c1  
4069 C=Cn1cnc2c(NC)nc21.Cc1ccc(NC(=O)c2cccc(C(F)(F)F)c2)cc1I>>CNc1cnc2c1ncn2/C=C/c1cc(NC  
4070 (=O)c2cccc(C(F)(F)F)c2)ccc1C  
C=Cc1cccc1.O=Cc1cc(F)ccc1Br>>O=Cc1cc(F)ccc1/C=C/c1cccc1  
4071 Br1cnc1.C=CC(F)(F)C(F)(F)C(F)(F)C(F)(F)C(F)(F)C(F)(F)C(F)(F)F>>FC(F)(F)C(F)(F)C(F)  
4072 (F)C(F)(F)C(F)(F)C(F)(F)C(F)(F)C(F)(F)C(F)(F)/C=C/c1cnc1  
C=CC(=O)OC.Cc1cc(CCNC(=O)OC(C)(C)C)c(C)c1I>>COC(=O)/C=C/c1c(C)c(CCNC(=O)OC(C)  
4073 (C)C)cc(C)c1O  
C=CN(C=O)c1ccc(C(=O)N[C@@H](CCC(=O)OCC)C(=O)OCC)cc1.CC(C)(C)C(=O)Nc1nc2ncc(Br)c  
4074 c2c(=O)[nH]1>>CCOC(=O)CC[C@H](NC(=O)c1ccc(N(C=O)/C=C/c2cnc3nc(NC(=O)C(C)(C)C)[nH]  
c(=O)c3c2)cc1)C(=O)OCC  
C=Cc1cccc1.Clc1ccc(I)cc1>>Clc1ccc(/C=C/c2cccc2)cc1  
4075 C=CC(N)=O.CC(C)n1cc(-c2nc(Br)c(N)nc2-c2cccc2)ccc1=O>>CC(C)n1cc(-  
4076 c2nc(/C=C/C(N)=O)c(N)nc2-c2cccc2)ccc1=O  
C=CC(=O)CCCC.CC(=O)c1ccc(Br)cc1>>CCCCC(=O)/C=C/c1ccc(C(=O))cc1  
4077 C=Cc1cccc1C.Nc1cccc1Br>>Cc1cccc1/C=C/c1cccc1N  
4078 C=CC(=O)OC(C)(C)C.O=Cc1ccsc1Br>>CC(C)(C)OC(=O)/C=C/c1scsc1C=O  
4079 C=Cc1ccc(Cl)cc1.O=CN(C=O)CCCC(Br)C(F)(F)F>>O=CN(C=O)CCCC(/C=C/c1ccc(Cl)cc1)C(F)(F)F  
4080 C=Cc1cccc1.Fc1ccc(I)cc1>>Fc1ccc(/C=C/c2cccc2)cc1  
4081 C=CC(=O)OC(C)(C)C.COc1ccc(CNc2c(I)cccc2OC)cc1>>COc1ccc(CNc2c(/C=C/C(=O)OC(C)(C)C)c  
4082 ccc2OC)cc1  
C=C[C@@](CO)(CCC)OCc1ccc(OC)cc1.Ic1cccc1>>CCC[C@@](/C=C/c1cccc1)(CO)OCc1ccc(OC  
4083 C=CC(=O)O.COC(=O)c1cccc1Br>>COC(=O)c1cccc1/C=C/C(=O)O  
4084

C=Cc1cccc1.N[C@H](Cc1c[nH]c2c(Br)ccccc12)(C=O)O>>N[C@@H](Cc1c[nH]c2c(/C=C/c3ccccc3)cccc12)(C=O)O  
C=Cc1cccc1.CCNlcnec1-clccc(Br)o1>>CCnlncec1-clccc(/C=C/c2ccccc2)o1  
C=Cc1cneccl.CC(C)(C)OC(=O)N[C@H](COelence(Br)c1)Cclsc2ccccc12>>CC(C)(C)OC(=O)N[C@H](COelence(/C=C/c2cnec2)c1)Cclsc2ccccc12  
C=Cc1cccc(C)c1.IC1CCCCC1>>Ce1cccc(/C=C/C2CCCCC2)c1  
Brelence2ccenc12.C=CC(=O)OCC>>CCOC(=O)/C=C/clence2ccenc12  
C=CS(=O)(=O)c1cccc1.O=[N+][([O-])c1ccc(Br)cc1]>>O=[N+][([O-C=CC(=O)OC.O=cloc2cc(Br)en2nlCCc1cccn1]>>COC(=O)/C=C/clnc2c(c1)oc(=O)n2CCc1cccn1  
C=Cc1cccc(F)c1.O=Cc1cccc(Br)c1>>O=Cc1cccc(/C=C/c2cccc(F)c2)c1  
C=Cc1ce2ccc(N(CC)CC)cc2oc1=O.O=Cc1ccc(Br)cc1>>CCN(CC)c1ccc2cc(/C=C/c3ccc(C=O)cc3)c(=O)oc2c1  
C=CCC(=O)OC.CS[C@H]1O[C@H](c2ccc(C)c(Ce3ccc(Cl)cc3)c2)[C@H](OC(C)=O)[C@H](OC(C)=O)[C@H]1OC(C)=O>>COC(=O)C/C=C/clccc(Ce2cc([C@H]3O[C@H](SC)[C@H](OC(C)=O)[C@H](OC(C)=O)[C@H]3OC(C)=O)ccc2C)cc1  
C=CC(=O)OCC.Celnoc(C)c1I>>CCOC(=O)/C=C/clc(C)noc1C  
C=CC(F)(F)C(F)(F)C(F)(F)C(F)(F)C(F)(F)C(F)(F)C(F)(F).O=[N+][([O-])c1cccc1Br>>O=[N+][([O-])c1cccc1/C=C/C(F)(F)C(F)(F)C(F)(F)C(F)(F)C(F)(F)C(F)(F)C(F)(F)  
C=CC(=O)OCCCC.CCc1ccc(I)cc1>>CCCCOC(=O)/C=C/clccc(CC)cc1  
C=CCCC(=O)O.Iclcccc1>>O=C(O)CC/C=C/clcccc1  
C=CCC(C)(C)O.CO C(=O)C[C@H]1COe2cc(O[C@H]3CCc4c(Oc5ccc(I)cn5)ccc(F)e43)ccc21>>  
COC(=O)C[C@H]1COe2cc(O[C@H]3CCc4c(Oc5ccc(/C=C/CC(C)(C)O)cn5)ccc(F)e43)ccc21  
C=CC(=O)OCCCC.Cclcc([N+] (=O)[O-])ccc1Cl>>CCCCOC(=O)/C=C/clccc([N+] (=O)[O-])cc1C  
BrC1CCCCC1.C=Cc1ccc(C)cc1>>Ce1cccc(/C=C/C2CCCCC2)cc1  
C=CC(OC)OC.Fclcc(I)cc1C(F)(F)>>COC(/C=C/clccc(C(F)(F))c(F)c1)OC  
C=CC(=O)N(C)Cc1cc2ccccc2n1C.O=c1[nH]c2cc(Br)enc2[nH]1>>CN(Cc1cc2ccccc2n1C)(C=O)/C=C/  
clnc2[nH]c(=O)[nH]c2c1  
C=CCO.Iclcccc1>>OC/C=C/clcccc1  
C=CC(=O)OCC.Fclcccc1Br>>CCOC(=O)/C=C/clcccc1F  
C=Cc1ccc2c(c1)Sc1cccc1N2CC.O=Cc1ccc(Br)cc1>>CCNlc2ccccc2Se2cc(/C=C/c3ccc(C=O)cc3)ccc  
C=Cc1ccc(OC)c(OC)c1C(=O)OC.CC(C)(C)OC(=O)NCCc1cc2c(cc1I)OCO2>>COC(=O)c1c(/C=C/c2cc  
c3c(cc2CCNC(=O)OC(C)(C)C)OCO3)ccc(OC)c1OC  
C=CC(=O)OC.O=c1[nH]c(=O)n(CC(O)CO)cc1I>>COC(=O)/C=C/clcn(CC(O)CO)c(=O)[nH]c1=O  
C=CCOC(C)=O.CO C(=O)c1ccc(I)cc1>>COC(=O)c1ccc(/C=C/COC(C)=O)cc1  
C=CC(=O)OC.Fclcccc1I>>COC(=O)/C=C/clcccc1F  
Brelccenc1.C=Cc1cccc(OC)c1>>COc1cccc(/C=C/c2ccenc2)c1  
C=Cc1cccc1.O=c1c(Br)c(-c2ccc(Cl)cc2)oc2ccccc12>>O=c1c(/C=C/c2ccccc2)c(-  
c2ccc(Cl)cc2)oc2ccccc12  
C=CC(C)=O.[2H]C([2H])([2H])C1=C(OS(=O)(=O)C(F)(F)C(C)(C)CCC1>>[2H]C([2H])([2H])C1=  
C(/C=C/C(C)=O)C(C)(C)CCC1  
C=CC(C)=O.C=CI>>C=C/C=C/C(C)=O  
C=Cc1ccc(Cl)cc1.CS(=O)(=O)c1ccc(Br)cc1>>CS(=O)(=O)c1ccc(/C=C/c2ccc(Cl)cc2)cc1  
C=CC(=O)OC(C)(C)C.CC(C)=CCc1cc(I)cc1OC(=O)CCc1cccc(F)c1>>CC(C)=CCc1cc(/C=C/C(=O)  
OC(C)(C)C)ccc1OC(=O)CCc1cccc(F)c1  
C=CC(=O)OC.CO C(=O)c1cccc(I)c1>>COC(=O)/C=C/clcccc(C(=O)OC)c1  
C=CC(=O)O.Cc1cccc(S(=O)(=O)Ne2cccc(I)c2)c1>>Cc1cccc(S(=O)(=O)Ne2cccc(/C=C/C(=O)O)c2)c1  
C=CC(C)(C)O.Cc1cccc1Br>>Cc1cccc1/C=C/C(C)(C)O  
C=CS(=O)(=O)Ne1ccc(OC2CCN(C(=O)OC(C)(C)C)CC2)cc1.N#Cc1cccc(Br)c1>>CC(C)(C)OC(=O)  
N1CCC(Oc2ccc(NS(=O)(=O)/C=C/c3ccccc(C#N)c3)cc2)CC1  
C=CC(=O)OC.CCC(CC)(c1ccc(OC)c(C)c1)c1cc(C)c(Br)s1>>CCC(CC)(c1ccc(OC)c(C)c1)c1cc(C)c(/C  
=C/C(=O)OC)s1  
C=CC(=O)OC.COelccc(Cl)cc1Br>>COC(=O)/C=C/clcc(Cl)cc1OC  
C=Cc1cccc1.COelccc(Br)cc1OC>>COelccc(/C=C/c2ccccc2)cc1OC  
C=CC(=O)OC.CC(C)(C)OC(=O)NCCOCc1nnn(CCO)c1I>>COC(=O)/C=C/clc(COCCNC(=O)OC(C)(  
C)C)nnn1CCO  
Brelcccc2ccccc12.C=CC(=O)CC>>CCC(=O)/C=C/clcccc2ccccc12  
C=CC(=O)OC.COelccc(C2OCCO2)c(Br)c(OC)c1OC>>COC(=O)/C=C/clc(C2OCCO2)cc(OC)c(OC)c  
C=CC(=O)NC(C)(C)C.O=c1c(I)c(-c2ccc(O)cc2)oc2cc(O)ccc12>>CC(C)(C)NC(=O)/C=C/clc(-  
c2ccc(O)cc2)oc2cc(O)ccc2c1=O  
C=CCC(=O)OCCCC.Iclcccc1>>CCCCOC(=O)C/C=C/clcccc1

4129 C=CC(=O)OC.OC/C=C/C1=C(Br)CCCC1>>COC(=O)/C=C/C1=C(/C=C/CO)CCCC1  
 4130 C=Cc1ccncc1.CN(C(=O)c1cccc1)c1ccc2c(c1)[nH]c(=NC(=O)c1ccc(Br)s1)n2CCC(N)=O>>CN(C(=O)c1cccc1)c1ccc2c(c1)[nH]c(=NC(=O)c1ccc(/C=C/c3ccncc3)s1)n2CCC(N)=O  
 4131 C=C[C@H]1O[C@H](OC)[C@H](OCc2ccccc2)[C@@H](OCc2ccccc2)[C@@H]1OCc1ccc2ccccc2c1.O=c1ccoc2ccc(Br)cc12>>CO[C@H]1O[C@H](/C=C/c2ccc3occc(=O)c3c2)[C@@H](OCc2ccc3ccccc3c2)[C@H](OCc2ccccc2)[C@H]1OCc1ccccc1  
 4132 C=Cc1cccc(C)c1.Oc1ccccc1I>>Cc1cccc(/C=C/c2ccccc2O)c1  
 4133 C=CC(C)=O.COc1c(Br)cc(OC)c2c(OC)cccc12>>COc1c(/C=C/C(C)=O)cc(OC)c2c(OC)cccc12  
 4134 C=CC(=O)OC.Cc1cc2oc(=O)c(CC(=O)Nc3ccc(F)cc3C(F)(F)F)c(-c3ccccc3)c2cc1Br>>COC(=O)/C=C/c1cc2c(-  
 4135 C=CC(=O)OC(C)(C)C.CCCc1ccc(Br)cc1>>CCCc1ccc(/C=C/C(=O)OC(C)(C)C)cc1  
 4136 C=C[C@H]1C[C@H](CC(=O)OCC)OC(C)(C)O1.COc1nccc(-n2nc(C(C)C)c(Br)c2-c2cccc(C(F)(F)F)c2)n1>>CCOC(=O)C[C@H]1C[C@H](/C=C/c2c(C(C)C)nn(-c3ccnc(OC)n3)c2-c2cccc(C(F)(F)F)c2)OC(C)(C)O1  
 4137 Br1ccc(-c2cccs2)s1.C=CC(=O)OCCCCC>>CCCCCOC(=O)/C=C/c1ccc(-c2cccs2)s1  
 4138 C=CC(=O)OC.CC1(C)OC(=O)Nc2ccc(Br)cc21>>COC(=O)/C=C/c1ccc2c(c1)C(C)(C)OC(=O)N2  
 4139 C=Cc1ccccc1.O=[N+](O-)]c1ccc(Cl)nc1>>O=[N+](O-)]c1ccc(/C=C/c2ccccc2)nc1  
 4140 Br1ccc2ccccc2c1.C=CC(=O)OCC>>CCOC(=O)/C=C/c1ccc2ccccc2c1  
 4141 C=Cc1ccc(C)cc1.COC(=O)c1ccc(I)cc1>>COC(=O)c1ccc(/C=C/c2ccc(C)cc2)cc1  
 4142 Br1enc2ccccc2c1.C=CC(=O)OCC>>CCOC(=O)/C=C/c1enc2ccccc2c1  
 4143 C=CCOC(C)=O.Cc1cccc(C)c1I>>CC(=O)OC/C=C/c1c(C)cccc1C  
 4144 C=CC(=O)OC.COc1cc(C#N)ccc1Br>>COC(=O)/C=C/c1ccc(C#N)cc1OC  
 4145 C=CC(=O)OC.CN1CCN(CCc2enn3ccccc23)C(c2ccc(Br)cc2)C1>>COC(=O)/C=C/c1ccc(C2CN(C)CCN2CCc2enn3ccccc23)cc1  
 4146 C=CC(=O)OCC.Fc1ccc(-c2c(Br)c(C(F)(F)F)nn2-c2cccn2)cc1>>CCOC(=O)/C=C/c1c(C(F)(F)F)nn(-c2cccn2)c1-c1ccc(F)cc1  
 4147 C=CCCCCCCCCCCCC.COC(=O)c1ccc(Br)cc1>>CCCCCCCCCCCCC/C=C/c1ccc(C(=O)OC)cc1  
 4148 C=CC(=O)N(C)Cc1oc2ccccc2c1C.O=C1Nc2ncc(Br)cc2C12CCC2>>Cc1c(CN(C)C(=O)/C=C/c2cnc3c(c2)C2(CCC2)C(=O)N3)oc2ccccc12  
 4149 C=CC(=O)OCC.COC(=O)/C=C/c1cccc(N(Cc2ccc(Br)cc2)C(=O)C2CCCC2)c1>>CCOC(=O)/C=C/c1ccc(CN(C(=O)C2CCCC2)c2cccc(/C=C/C(=O)OC)c2)cc1  
 4150 C=Cc1ccc(OC)cc1.O=C1CCC(c2ccc(Br)cc2)O1>>COc1ccc(/C=C/c2ccc(C3CCC(=O)O3)cc2)cc1  
 4151 C=CC(C)(O)CCC=C(C)C.O=Cc1ccc(Br)cc1>>CC(C)=CCCC(C)(O)/C=C/c1ccc(C=O)cc1  
 4152 Br1ccccc1.C=Cc1ccccc1>>C(=C/c1ccccc1)\c1ccccc1  
 4153 Br1ccsc1.C=CCN1C(=O)c2ccccc2C1=O>>O=C1c2ccccc2C(=O)N1C/C=C/c1ccsc1  
 4154 C=Cc1ccc(CP(=O)(OCC)OCC)cc1.CCCOc1cc(C=O)c(OCCC)cc1Br>>CCCOc1cc(/C=C/c2ccc(CP(=O)(OCC)OCC)cc2)c(OCCC)cc1C=O  
 4155 C=Cc1cc2cc(OC)c(OC)cc2oc1=O.Ic1ccccc1>>COc1cc2cc(/C=C/c3ccccc3)c(=O)oc2cc1OC  
 4156 C=CC=C(C)C.Ic1ccccc1>>CC(C)=C/C=C/c1ccccc1  
 4157 C=CC(=O)OC.COc1c(CN(C(=O)c2ccccc2)c2cccc(Br)c2)ccc2c1OC(C)(C)[C@H](O)[C@H]2Sc1ccccc1>>COC(=O)/C=C/c1cccc(N(Cc2ccc3c(c2OC)OC(C)(C)[C@H](O)[C@H]3Sc2ccccc2)C(=O)c2ccccc2  
 4158 C=CCC(=O)OC.COc1c(Br)cc2c3c(cccc13)OC(C)(C)O2>>COC(=O)C/C=C/c1cc2c3c(cccc3c1OC)OC(C)(C)O2  
 4159 C=CC(=O)OC(C)(C)C.Cc1cc(C(=C2CCCC2)c2ccc(O)cc2)ccc1Br>>Cc1cc(C(=C2CCCC2)c2ccc(O)cc2)ccc1/C=C/C(=O)OC(C)(C)C  
 4160 Cc1ccc(I)cc1.[11CH2]=Cc1ccccc1>>Cc1ccc(/[11CH]=C/c2ccccc2)cc1  
 4161 C=C(NC(C)=O)c1ccc(Cl)cn1.C=CC(=O)NC(C)(C)C>>C=C(NC(C)=O)c1ccc(/C=C/C(=O)NC(C)(C)C)  
 4162 Br1ccsc1.C=CC(CCC)OCc1ccccc1>>CCCC(/C=C/c1ccsc1)OCc1ccccc1  
 4163 C=Cc1ccccc1.COC(=O)c1ccccc1Br>>COC(=O)c1ccccc1/C=C/c1ccccc1  
 4164 C=CC(=O)OC(C)(C)C.CCN(CC)c1ccc2c(CO[Si](C)(C)C(C)(C)C)c(Br)c(=O)oc2c1>>CCN(CC)c1ccc2c(CO[Si](C)(C)C(C)(C)C)c(/C=C/C(=O)OC(C)(C)C)c(=O)oc2c1  
 4165 C=Cc1ccc2c(c1)OCO2.Cn1c(=O)c2c(cc(Br)n2C)n(C)c1=O>>Cn1c(=O)c2c(cc(/C=C/c3ccc4c(c3)OCO4)n2C)n(C)c1=O  
 4166 Br1ccccc1.C=CC(=O)CCCC>>CCCCC(=O)/C=C/c1ccccc1  
 4167 C=Cc1ccc(C(=O)OC)cc1.CCOC(=O)C(F)(F)Br>>CCOC(=O)C(F)(F)/C=C/c1ccc(C(=O)OC)cc1  
 4168 C=Cc1ccc2ccccc2c1.FC(F)(F)C(F)(F)C(F)(F)C(F)(F)C(F)(F)Br>>FC(F)(F)C(F)(F)C(F)(F)C(F)(F)C(F)(F)C(F)(F)/C=C/c1ccc2ccccc2c1  
 4169 Br1ccsc1.C=CC(=O)O>>O=C(O)/C=C/c1ccsc1  
 4170 C=Cc1cccc(O)c1.COc1ccc(OC)c(I)c1>>COc1ccc(OC)c(/C=C/c2cccc(O)c2)c1  
 4171 C=CC(=O)OCC.CN(C)Cc1cccc(Br)c1>>CCOC(=O)/C=C/c1cccc(CN(C)C)c1

4172 C=Cc1ccc(Cl)cc1.CCOC(=O)C(Cc1ccccc1I)C(C)=O>>CCOC(=O)C(Cc1ccccc1/C=C/c1ccc(Cl)cc1)C(C)=O  
 4173 Br1ccccc1.C=CC(=O)N(C)C>>CN(C)C(=O)/C=C/c1ccccc1  
 4174 C=CP(C)(=O)c1ccccc1.CC(C)Oc1ccc2ccccc2c1Br>>CC(C)Oc1ccc2ccccc2c1/C=C/P(C)(=O)c1ccccc1  
 4175 C=Cc1ccc(C)cc1.O=c1cc(-c2ccccc2)oc2ccc(Br)cc12>>Cc1ccc(/C=C/c2ccc3oc(-  
 4176 Br1ccc2ccccc2c1.C=CC(=O)C(C)CC(=O)OC>>COC(=O)CC(C)C(=O)/C=C/c1ccc2ccccc2c1  
 4177 C=CC(O)CCCCC.c1ccc([I+](c2cccs2)cc1>>CCCCC(O)/C=C/c1cccs1  
 4178 C=Cc1cnccc1.Cc1c(Nc2c(I)cncc2C#N)ccc(Cl)c2[nH]ccc12>>Cc1c(Nc2c(C#N)cncc2/C=C/c2cnccc2)cc(Cl)c2[nH]ccc12  
 4179 C=CC(=O)OCCCC.Fc1cccc(I)c1>>CCCCOC(=O)/C=C/c1cccc(F)c1  
 4180 C=CC(C)(C)O.Nc1cccc(Br)c1>>CC(C)(O)/C=C/c1cccc(N)c1  
 4181 C=CC(=O)OC.CN1CCC(Nc2ccccc2I)CC1>>COC(=O)/C=C/c1ccccc1NC1CCN(C)CC1  
 4182 C=Cc1ccc(OC)cc1.CCOC(=O)C(F)(F)Br>>CCOC(=O)C(F)(F)/C=C/c1ccc(OC)cc1  
 4183 C=Cc1ccccc1.O=Cc1c(Br)ccc2ccccc12>>O=Cc1c(/C=C/c2ccccc2)ccc2ccccc12  
 4184 C=CC(=O)C(C)CC(=O)OC.COc1cccc(Br)c1>>COC(=O)CC(C)C(=O)/C=C/c1cccc(OC)c1  
 4185 C=CC#N.O=Cc1ccc(Cl)cc1>>N#C/C=C/c1ccc(C=O)cc1  
 4186 Br1ccc(I)cc1.C=Cc1c(F)c(F)c(F)c(F)c1F>>Fc1c(F)c(F)c(/C=C/c2ccc(Br)cc2)c(F)c1F  
 4187 Br1ccc2ccccc2c1.C=CCN(C(=O)OC(C)(C)C)C(=O)OC(C)(C)C>>CC(C)(C)OC(=O)N(C/C=C/c1ccc2ccccc2c1)C(=O)OC(C)(C)C  
 4188 C=CC(=O)OC.Cc1cn(Cc2ccc3c(c2)OCCO3)c2c(Br)cc(F)cc12>>COC(=O)/C=C/c1cc(F)cc2c(C)cn(Cc3ccc4c(c3)OCCO4)c12  
 4189 C=Cl.C=CP(=O)(OC)OC>>C=C/C=C/P(=O)(OC)OC  
 4190 C=Cc1ccccc1.O=C(c1ccccc1)c1ccc(Br)cc1>>O=C(c1ccccc1)c1ccc(/C=C/c2ccccc2)cc1  
 4191 C=CC(=O)OC(C)(C)C.COc1ccc(Br)cc1OC>>COc1ccc(/C=C/C(=O)OC(C)(C)C)cc1OC  
 4192 Br1ccc(-c2cnccc2)cc1.C=CCN1C(=O)c2ccccc2C1=O>>O=C1c2ccccc2C(=O)N1C/C=C/c1ccc(-c2cnccc2)cc1  
 4193 C=Cc1ccccc1.O=c1oc2c(ccc3ccccc32)c(-c2ccccc2)c1Br>>O=c1oc2c(ccc3ccccc32)c(-c2ccccc2)c1/C=C/c1ccccc1  
 4194 C=CC(=O)OCC.COc1cc(Br)c(C2OCCCCO2)cc1OC>>CCOC(=O)/C=C/c1cc(OC)c(OC)cc1C1OCCCCO1  
 4195 C=Cc1ccccc1.FC(F)(F)c1cccc(Br)c1>>FC(F)(F)c1cccc(/C=C/c2ccccc2)c1  
 4196 C=Cc1ccc(N(CCCCC)CCCCC)cc1.O=Cc1cc2ccc1CCc1ccc(c(Br)c1)CC2>>CCCCCN(CCCCC)c1ccc(/C=C/c2cc3ccc2CCc2ccc(c(C=O)c2)CC3)cc1  
 4197 C=CC(=O)OC.Cc1cccc(C)c1C(=O)c1sc2cc(O)ccc2c1Oc1ccc(Br)cc1>>COC(=O)/C=C/c1ccc(Oc2c(C(=O)c3c(C)cccc3C)sc3cc(O)ccc23)cc1  
 4198 C=Cc1ccc(C)cc1.CCOC(=O)C(F)Br>>CCOC(=O)C(F)/C=C/c1ccc(C)cc1  
 4199 C=Cc1cccn1.Cc1ccc(S(=O)(=O)Oc2ccccc3c(Br)cncc23)cc1>>Cc1ccc(S(=O)(=O)Oc2ccccc3c(/C=C/c4ccccn4)cncc23)cc1  
 4200 C=CC(=O)OC(C)(C)C.COc1ccc(S(=O)(=O)N2CCc3cc(Br)cncc32)cc1OC>>COc1ccc(S(=O)(=O)N2CCc3cc(/C=C/C(=O)OC(C)(C)C)cncc32)cc1OC  
 4201 C=CC(N)=O.O=[N+](O-)]c1cccc(I)c1>>NC(=O)/C=C/c1cccc([N+](=O)[O-])c1  
 4202 Br1cncc2ccccc2c1.C=CP(=O)(OCC)OCC>>CCOP(=O)/C=C/c1cncc2ccccc2c1OCC  
 4203 C=CC(=O)OCC.O=[N+](O-)]c1cccc(I)c1>>CCOC(=O)/C=C/c1cccc([N+](=O)[O-])c1  
 4204 C=CC(=O)OCC.COc1cc(I)c2c3c1O[C@@H]1[C@H]34CCN(C)[C@H](C2)[C@H]42C=C[C@@]1(OC)c1c(O)cc(Cl)c(O)c12>>CCOC(=O)/C=C/c1cc(OC)c2c3c1C[C@H]1N(C)CC[C@@]34[C@@H](O2)[C@@]12(OC)C=C[C@@]14c1c(O)c(Cl)cc(O)c12  
 4205 Br1cncc2ccccc12.C=CC(=O)OC(C)(C)C>>CC(C)(C)OC(=O)/C=C/c1cncc2ccccc12  
 4206 Br1cncc2[nH]cncc2c1.C=CC(=O)N(C)Cc1cc2ccccc2n1C>>CN(Cc1cc2ccccc2n1C)C(=O)/C=C/c1cncc2[nH]cncc2c1  
 4207 \*CN(Cc1ccccc1)N=Nc1ccc(I)cc1.C=Cc1cccn1>>\*CN(Cc1ccccc1)N=Nc1ccc(/C=C/c2cccn2)cc1  
 4208 C=CC(C)OC(C)=O.CCCCCCCCCCOc1cncc(-c2ccc(Br)cc2)nc1>>CCCCCCCCCOc1cncc(-c2ccc(/C=C/C(C)OC(C)=O)cc2)nc1  
 4209 C=CCN1C(=O)C(=O)c2ccccc21.FC(F)(F)c1cc(Br)ccc1Cl>>O=C1C(=O)N(C/C=C/c2ccc(Cl)c(C(F)(F)F)c2)c2ccccc21  
 4210 C=Cc1ccc(C)cc1.CCOC(=O)C(F)I>>CCOC(=O)C(F)/C=C/c1ccc(C)cc1  
 4211 C=CC(=O)OC(C)(C)C.Cc1cc(C)cc(I)c1>>Cc1cc(C)cc(/C=C/C(=O)OC(C)(C)C)c1  
 4212 C=CC(=O)OC.COc1cc(Br)ccc1-c1nc2c(C)nn(C3CCCCC3)c2c(=O)[nH]1>>COC(=O)/C=C/c1ccc(-c2nc3c(C)nn(C4CCCCC4)c3c(=O)[nH]2)c(OC)c1  
 4213 C=CC(=O)OC.COc1cc(Br)c(N)cc1C>>COC(=O)/C=C/c1cc(OC)c(C)cc1N  
 4214 C=Cc1cnccc1.C[C@H](COc1cncc(Cl)c(I)c1)NC(=O)OC(C)(C)C>>C[C@H](COc1cncc(Cl)c(/C=C/c2ccncc2)c1)NC(=O)OC(C)(C)C  
 4215 Br1cccn1.C=CS(N)(=O)=O>>NS(=O)(=O)/C=C/c1cccn1

4216 C=CC(=O)OCC.Clc1ccc(I)cn1>>CCOC(=O)/C=C/c1ccc(Cl)nc1  
 4217 C=CC(=O)OC(C)(C)C.Cc1cccc(Br)c1>>Cc1cccc(/C=C/C(=O)OC(C)(C)C)c1  
 4218 C=Cc1cccc1C.Nc1cc([N+](=O)[O-])ccc1Br>>Cc1cccc1/C=C/c1ccc([N+](=O)[O-])cc1N  
 4219 C=CC(OCC)OCC.COCCOc1ccc(-c2cc(CC(C)C)n(-c3ccc(Br)cc3C(=O)OC)c2-c2ccc(OCOC)cc2)cc1>>CCOC(/C=C/c1ccc(-n2c(CC(C)C)cc(-c3ccc(OCOC)cc3)c2-c2ccc(OCOC)cc2)c(C(=O)OC)c1)OCC  
 4220 Br1ccc(N2CCOCC2)c2nsnc12.C=Cc1cccnc1>>C(=C/c1ccc(N2CCOCC2)c2nsnc12)\c1cccnc1  
 4221 C=CC(=O)OC.O=C1CN=C(c2cccc2)c2ccc(Br)cc2N1>>COC(=O)/C=C/c1ccc2c(c1)NC(=O)CN=C2c1cccc1  
 4222 Br1enc2nc(-c3cccc3)c(-c3cccc3)nc2c1.C=CC#N>>N#C/C=C/c1nc2nc(-c3cccc3)c(-C=CCN(C(=O)OC(C)(C)C)C(=O)OC(C)(C)C.O=Cc1ccc(Br)cc1>>CC(C)(C)OC(=O)N(C/C=C/c1ccc(C=O)cc1)C(=O)OC(C)(C)C  
 4223 C=CC(=O)OC(C)(C)C.CC(C)(C)OC(=O)n1ccc2cc(I)ccc21>>CC(C)(C)OC(=O)/C=C/c1ccc2c(ccn2C(=O)OC(C)(C)C)c1  
 4224 C=CC(=O)OCC.CC(C)(CC1Cc2cccc2C1)NC[C@H](O)COc1cc(Br)cc(F)c1F>>CCOC(=O)/C=C/c1cc(F)c(F)c(OC[C@H](O)CNC(C)(C)CC2Cc3cccc3C2)c1  
 4225 C=CC(=O)OCc1cccc1.Cc1ccc(I)cc1>>Cc1ccc(/C=C/C(=O)OCc2cccc2)cc1  
 4226 Br1cnc2cccc12.C=CC(=O)OC>>COC(=O)/C=C/c1cnc2cccc12  
 4227 C=Cc1ccc(OC(C)=O)cc1.CN1c2cccc2Sc2cc(Br)ccc21>>CC(=O)Oc1ccc(/C=C/c2ccc3c(c2)Sc2cccc2N3C)cc1  
 4228 C=CC(=O)OC.O=c1[nH]c(=O)n([C@H]2C[C@H](CO)[C@H]2CO)cc1I>>COC(=O)/C=C/c1cn([C@H]2C[C@H](CO)[C@H]2CO)c(=O)[nH]c1=O  
 4229 C=Cc1cccc1.CC(=O)c1cn(C)c2c(Br)cccc12>>CC(=O)c1cn(C)c2c(/C=C/c3cccc3)cccc12  
 4230 C=CC(N)=O.Ic1ccsc1>>NC(=O)/C=C/c1ccsc1  
 4231 C=CS(=O)(=O)F.FC(F)(F)c1ccc(I)cc1>>O=S(=O)(F)/C=C/c1ccc(C(F)(F)F)cc1  
 4232 Br1ccc(C2=CCCCc3cccc32)cc1.C=CC(=O)OC>>COC(=O)/C=C/c1ccc(C2=CCCCc3cccc32)cc1  
 4233 C=CC(=O)OC.CN(C)CCCOc1ccc(I)cc1>>COC(=O)/C=C/c1ccc(OCCCN(C)C)cc1  
 4234 C=Cc1ccc(OC)cc1.CCOC(=O)C(C)(C)Br>>CCOC(=O)C(C)(C)/C=C/c1ccc(OC)cc1  
 4235 C=CCC1(C)OC(=O)Nc2ccc(-c3cc(F)cc(Br)c3)cc21.COc1ccc(-c2oc3cccc3c(=O)c2I)cc1>>COc1ccc(-c2oc3cccc3c(=O)c2/C=C/CC2(C)OC(=O)Nc3ccc(-c4cc(F)cc(Br)c4)cc32)cc1  
 4236 C=CC(=O)NC(C)(C)C.COc1ccc(I)cc1>>COc1ccc(/C=C/C(=O)NC(C)(C)C)cc1  
 4237 C=CC(=O)Oc1cccc1.Cn1ncc(I)cc1=O>>Cn1ncc(/C=C/C(=O)Oc2cccc2)cc1=O  
 4238 Br1enc2cccc2c1.C=CS(C)(=O)=O>>CS(=O)(=O)/C=C/c1enc2cccc2c1  
 4239 C=CC(=O)OC(C)(C)C.CC(=O)c1ccc(Br)cc1>>CC(=O)c1ccc(/C=C/C(=O)OC(C)(C)C)cc1  
 4240 Br1cccnc1.C=CCCC(=O)CC(=O)OC>>COC(=O)CC(=O)CC/C=C/c1cccnc1  
 4241 \*CNCCCOCCOCCOCCNC(=O)COc1ccc(C(Cc2cc(OC)cc(OC)c2)NC(=O)c2ccc(C=C)cc2)cc1.O=Cc1ccc(I)cc1>>\*CNCCCOCCOCCOCCNC(=O)COc1ccc(C(Cc2cc(OC)cc(OC)c2)NC(=O)c2ccc(/C=C/c3ccc(C=O)cc3)cc2)cc1  
 4242 Br1ccc2ccc3cccc4ccc1c2c34.C=C[C@H](CO[Si](C)(C)C(C)(C)C)NC(=O)OCc1cccc1>>CC(C)(C)[Si](C)(C)OC[C@H](/C=C/c1ccc2ccc3cccc4ccc1c2c34)NC(=O)OCc1cccc1  
 4243 C=CC(=O)N(C)C.O=[N+](=[O-])c1ccc(Br)cc1>>CN(C)C(=O)/C=C/c1ccc([N+](=O)[O-])cc1  
 4244 C=CC(=O)OC.CC(C)=CCc1c(I)nen1C>>COC(=O)/C=C/c1ncc(C)c1CC=C(C)C  
 4245 C=CC(=O)O.Cc1cccc1Br>>Cc1cccc1/C=C/C(=O)O  
 4246 C=CC(=O)C(C)C.COc1ccc2cc(Br)ccc2c1>>COc1ccc2cc(/C=C/C(=O)C(C)C)ccc2c1  
 4247 C=Cc1cccc(C)c1.O=C(ON1CCc2c(Br)cccc2C1)C(F)(F)F>>Cc1cccc(/C=C/c2cccc3c2CCN(OC(=O)C(F)(F)F)C3)c1  
 4248 C=CC(=O)OC.Cc1c[nH]c2c(Br)cc(F)cc12>>COC(=O)/C=C/c1cc(F)cc2c(C)c[nH]c12  
 4249 Br1cccc(N2CCCC2)c1.C=CC(=O)OCCCC>>CCCCOC(=O)/C=C/c1cccc(N2CCCC2)c1  
 4250 C=CC(=O)N(C)Cc1oc2cccc2c1C.O=C1Nc2ncc(Br)cc2CN2CCC[C@H]12>>Cc1c(CN(C)C(=O)/C=C/c2cnc3c(c2)CN2CCC[C@H]2C(=O)N3)oc2cccc12  
 4251 C=CCC(C)C(=O)OCC.O=[N+](=[O-])c1ccc(Br)cc1>>CCOC(=O)C(C)C/C=C/c1ccc([N+](=O)[O-])cc1  
 4252 C=CC(=O)OC(C)(C)C.Cc1cc(Br)enc1N>>Cc1cc(/C=C/C(=O)OC(C)(C)C)enc1N  
 4253 C=CC(=O)OC.COc1cccc(Br)c1>>COC(=O)/C=C/c1cccc(OC)c1  
 4254 C=C[Si](CC)(CC)CC.Fc1cccc1Br>>CC[Si](/C=C/c1cccc1F)(CC)CC  
 4255 C=Cc1ccc2c(c1)C1c3cccc4cccc(c34)C21.N#Cc1ccc(I)cc1C#N>>N#Cc1ccc(/C=C/c2ccc3c(c2)C2c4cccc5cccc(c45)C32)cc1C#N  
 4256 C=CCCN1C(=O)c2cccc2C1=O.CCOCc1nc2enc3cc(Br)ccc3c2n1CCOC(C)C>>CCOCc1nc2enc3cc(/C=C/CCN4C(=O)c5cccc5C4=O)ccc3c2n1CCOC(C)C  
 4257 C=CC(=O)OC.COc1nc(SC)nc(C)c1I>>COC(=O)/C=C/c1c(C)nc(SC)nc1OC  
 4258 Br1enc2c(c1)CCCCN2.C=CC(=O)N(C)Cc1oc2cccc2c1C>>Cc1c(CN(C)C(=O)/C=C/c2cnc3c(c2)CCCN3)oc2cccc12  
 4259



4260 C=CC(=O)OCCCC.O=[N+][O-]c1cccc(Cl)c1>>CCCCOC(=O)/C=C/c1cccc([N+](=O)[O-])c1  
4261 C=CC(=O)c1cccc1.Nc1c(I)ccc2c1C(=O)c1cccc1C2=O>>Nc1c(/C=C/C(=O)c2cccc2)ccc2c1C(=O)c1cccc1C2=O  
4262 C=CC(=O)O.CC(C)(C)OC(=O)N[C@@H](Cc1ccc(Br)cc1)C(=O)O>>CC(C)(C)OC(=O)N[C@@H](Cc1ccc(/C=C/C(=O)O)cc1)C(=O)O  
4263 C=CC(=O)OCC.COc1cccc(I)c1>>CCOC(=O)/C=C/c1cccc(OC)c1  
4264 C=Cc1ccc(OC)cc1.O=C1cc(-c2cccc2)oc2ccc(Br)cc12>>COc1ccc(/C=C/c2ccc3oc(-c4cccc4)cc(=O)c3c2)cc1  
4265 C=CC(=O)OC(C)(C)C.COc1ccc(CNC(=O)c2cc(Br)cc(I)c2)cc1>>COc1ccc(CNC(=O)c2cc(Br)cc(/C=C/C(=O)OC(C)(C)C)c2)cc1  
4266 C=Cc1ccc(N(c2cccc2)c2cccc2)cc1.Cn1c2ccc(Br)cc2c2cc(C=O)ccc21>>Cn1c2ccc(C=O)cc2c2cc(/C=C/C/c3ccc(N(c4cccc4)c4cccc4)cc3)ccc21  
4267 C=Cc1ccncc1.O=C1c2cc(Br)ccc2-c2ccc(/C=C/c3ccncc3)ccc21>>O=C1c2cc(/C=C/c3ccncc3)ccc2-c2ccc(/C=C/c3ccncc3)ccc21  
4268 C=Cc1ccc(OC)c(OC)c1.Oc1ccc(O)c(I)c1>>COc1ccc(/C=C/c2cc(O)ccc2O)cc1OC  
4269 C=CC(=O)OC(C)(C)C.FC1(F)Oc2cccc(I)c2O1>>CC(C)(C)OC(=O)/C=C/c1cccc2c1OC(F)(F)O2  
4270 C=CC(=O)OCC.Cc1ccc(-c2cccc2I)cc1>>CCOC(=O)/C=C/c1cccc1-c1ccc(C)cc1  
4271 C=CC(=O)OC.CCc1nc2c(C)cc(C)nn2c1Cc1ccc(Br)cc1>>CCc1nc2c(C)cc(C)nn2c1Cc1ccc(/C=C/C(=O)OC)cc1  
4272 C=CC(=O)OC.CS(=O)(=O)Nc1cc2ccc(Br)cc2c(N2CCCCC2)n1>>COC(=O)/C=C/c1ccc2cc(NS(C)(=O)=O)nc(N3CCCCC3)c2c1  
4273 C=CC(=O)N1CCOCC1.CN(C(=O)CSCc1cccc1)c1cccc1Br>>CN(C(=O)CSCc1cccc1)c1cccc1/C=C/C(=O)N1CCOCC1  
4274 C=Cc1ccc(OC)cc1.COC(=O)c1cccc1I>>COC(=O)c1cccc1/C=C/c1ccc(OC)cc1  
4275 C=CC(=O)OC.Ic1cn(C(c2cccc2)(c2cccc2)c2cccc2)c(N=P(c2cccc2)(c2cccc2)c2cccc2)n1>>COC(=O)/C=C/c1cn(C(c2cccc2)(c2cccc2)c2cccc2)c(N=P(c2cccc2)(c2cccc2)c2cccc2)n1  
4276 C=C(Br)CCO.C=CC(=O)OCCCC>>C=C(/C=C/C(=O)OCCCC)CCO  
4277 C=Cc1ccc(C#N)cc1.OCCCC(Br)C(F)(F)F>>N#Cc1ccc(/C=C/C(CCCO)C(F)(F)F)cc1  
4278 C=CCCP(=O)(OC)OC.Clc1ccc(I)cc1>>COP(=O)(CC/C=C/c1ccc(Cl)cc1)OC  
4279 C=CC#N.Cc1ccc(Br)cc1>>Cc1ccc(/C=C/C#N)cc1  
4280 C=C/C=C/C1CCCCN1S(=O)(=O)c1ccc(C)cc1.Cc1cccc(I)c1>>Cc1ccc(S(=O)(=O)N2CCCCC2/C=C/C=C/c2cccc(C)c2)cc1  
4281 C=Cc1cccc1C.CCCCC(Br)C(F)(F)F>>CCCCC(/C=C/c1cccc1C)C(F)(F)F  
4282 C=Cc1ccncc1.CC(C)(C)c1ccc(N2Cc3cccc(Br)c3C2=O)cc1>>CC(C)(C)c1ccc(N2Cc3cccc(/C=C/c4ccncc4)c3C2=O)cc1  
4283 C=CC(=O)OCCCC.FC(F)(F)c1cccc(Br)c1>>CCCCOC(=O)/C=C/c1cccc(C(F)(F)F)c1  
4284 C=Cc1cccc1.COC(=O)c1cc2ccc(=O)oc2cc1OS(=O)(=O)C(F)(F)F>>COC(=O)c1cc2ccc(=O)oc2cc1/C=C/c1cccc1  
4285 Br1ccc2ccc3cccc4ccc1c2c34.C=CC(=O)OCCCCC>>CCCCCOC(=O)/C=C/c1ccc2ccc3cccc4ccc1c  
4286 C=CC(=O)OC.CC(=O)O[IH2](OC(C)=O)c1cccc1>>COC(=O)/C=C/c1cccc1  
4287 C=CCN.Nc1nc(=O)n([C@H]2C[C@H](O)[C@@H](COP(=O)(O)OP(=O)(O)OP(=O)(O)O2)cc1I>>NC/C=C/c1cn([C@H]2C[C@H](O)[C@@H](COP(=O)(O)OP(=O)(O)OP(=O)(O)O2)c(=O)nc1NBr1ccncc1.C=CC[C@H]1CCCN(C)C[C@H](OC(C)=O)[C@H](C)C[C@H](CC(OC)OC)[C@H](O)[C@@H]2O[C@H](C)[C@@H](O[C@H]3C[C@@](C)(O)[C@@H](OC(=O)CC)[C@H](C)O3)[C@H](N(C)C)[C@H]2OC(C)=O)[C@@H](OC)[C@H](OC(=O)CC)CC(=O)O1>>CCC(=O)O[C@H]1[C@H](C)O[C@@H](O[C@H]2[C@H](N(C)C)[C@@H](OC(C)=O)[C@H](O[C@@H]3[C@@H](OC)[C@H](OC(=O)CC)CC(=O)O[C@@H](C/C=C/c4ccncc4)CCCN(C)C[C@H](OC(C)=O)[C@H](C)C[C@@H]3CC(OC)OC)O[C@@H]2C)C1C@H1(C)O  
4288 Br1ccncc1.C=Cc1ccc(C(=O)O)cc1>>O=C(O)c1ccc(/C=C/c2ccncc2)cc1  
4289 C=CC(=O)OCC.Cc1nnn2cc(Br)ccc12>>CCOC(=O)/C=C/c1ccc2c(C)nnn2c1  
4290 C=CC(=O)O.COc1ccc([I+][c2cccc2)cc1>>COc1ccc(/C=C/C(=O)O)cc1  
4291 C=Cc1nc2cccc2s1.CCN(CC)S(=O)(=O)c1ccc(Br)cc1Cl>>CCN(CC)S(=O)(=O)c1ccc(/C=C/c2nc3cccc c3s2)cc1Cl  
4292 C=CC1OCCO1.CC1(C)Oc2ccc(Br)cc2O1>>CC1(C)Oc2ccc(/C=C/C3OCCO3)cc2O1  
4293 C=Cc1ccc(-c2ccncc(-c3cccc3)c2)cc1.OCCCCCOc1ccc(Br)cc1>>OCCCCCOc1ccc(/C=C/c2ccc(-c3ccncc(-c4cccc4)c3)cc2)cc1  
4294 C=CC(=O)OC(C)(C)C.Cc1ccc(C=O)c(Br)c1>>Cc1ccc(C=O)c(/C=C/C(=O)OC(C)(C)C)c1  
4295 C=CC(=O)OC.Oc1ccc2cc(Br)ccc2c1>>COC(=O)/C=C/c1ccc2cc(O)ccc2c1  
4296 C=Cc1ccc(CP(=O)(OCC)OCC)cc1.CCCc1cc(C=O)c(CCC)cc1Br>>CCCc1cc(/C=C/c2ccc(CP(=O)(OCC)OCC)cc2)c(CCC)cc1C=O  
4297 C=CC(OCC)OCC.CN(C)c1ccc(Br)cc1>>CCOC(/C=C/c1ccc(N(C)C)cc1)OCC  
4298

4299 C=Cc1ccc(/C=C/c2ccc([N+](=O)[O-])cc2)cc1.O=Cc1ccc(Br)cc1>>O=Cc1ccc(/C=C/c2ccc(/C=C/c3ccc([N+](=O)[O-])cc3)cc2)cc1  
 4300 C=Cc1cccc1.CCCCOc1ccc2c(c1)cc(C#N)c1ccc(Br)cc12>>CCCOc1ccc2c(c1)cc(C#N)c1ccc(/C=C/c3cccc3)cc12  
 4301 C=Cc1ccc(OC)cc1.C[Si](C)(OS(=O)(=O)C(F)(F)F)OS(=O)(=O)C(F)(F)F>>COc1ccc(/C=C/[Si](C)(C)OS(=O)(=O)C(F)(F)F)cc1  
 4302 C=CC(=O)OC.IC(CC[Se]c1cccc1)=C(c1cccc1)c1cccc1>>COC(=O)/C=C/C(CC[Se]c1cccc1)=C(c1cccc1)c1cccc1  
 4303 C=Cc1cccc1.COC(=O)c1cc(S(C)(=O)=O)c(Br)cc1C>>COC(=O)c1cc(S(C)(=O)=O)c(/C=C/c2cccc2)cc1C  
 4304 Br1cccn2nnnc12.C=Cc1cc(OC)c(OC)c(OC)c1>>COc1cc(/C=C/c2cccn3nnnc23)cc(OC)c1OC  
 4305 C=CC(C)=O.CC(=O)c1ccc(Br)cc1>>CC(=O)/C=C/c1ccc(C(C)=O)cc1  
 4306 C=CC(=O)OC.Cc1cc(C)c2nc(C(C)C)n(Cc3ccc(Br)cc3)c2n1>>COC(=O)/C=C/c1ccc(Cn2c(C(C)C)nc3c(C)cc(C)nc32)cc1  
 4307 C=CC(=O)OC.CC(C)(C)OC(=O)NCCc1ccc(Br)cc1CCNC(=O)OC(C)(C)C>>COC(=O)/C=C/c1ccc(CCNC(=O)OC(C)(C)C)c(CCNC(=O)OC(C)(C)C)c1  
 4308 C=CC(=O)OC.CC(=O)Oc1c(CC=C(C)C)cc1C/C=C(\C)CCC=C(C)C>>COC(=O)/C=C/c1cc(CC=C(C)C)c(OC(C)=O)c(C/C=C(\C)CCC=C(C)C)c1  
 4309 C=CC(=O)OC.Cc1cccc1Cl>>COC(=O)/C=C/c1cccc1C  
 4310 C=CC(=O)OC(C)(C)C.CC(C)(C)c1cc(Cl)c2cccc2n1>>CC(C)(C)OC(=O)/C=C/c1cc(C(C)(C)C)nc2cccc12  
 4311 C=CCCC.Cc1ccc(S(=O)(=O)Nc2cccc2I)cc1>>CCCC/C=C/c1cccc1NS(=O)(=O)c1ccc(C)cc1  
 4312 C=CC(=O)OC.CN(C)S(=O)(=O)n1cc([Si](C)(C)C)c(Br)c1[Si](C)(C)C>>COC(=O)/C=C/c1c([Si](C)(C)C)cn(S(=O)(=O)N(C)C)c1[Si](C)(C)C  
 4313 C=CCOC(C)=O.CC(=O)c1ccc(I)cc1>>CC(=O)OC/C=C/c1ccc(C(C)=O)cc1  
 4314 C=CC(=O)OC.COc1nc(Br)c-c2cccc2)n(Cc2cccc2)c1=O>>COC(=O)/C=C/c1nc(OC)c(=O)n(Cc2cccc2)c1-c1cccc1  
 4315 C=CC(=O)OC(C)(C)C.CC(C)CN1C(c2ccc(Br)cc2)c2ccc3c(cnn3C3CCCCO3)c2CC1(C)C>>CC(C)CN1C(c2ccc(/C=C/C(=O)OC(C)(C)C)cc2)c2ccc3c(cnn3C3CCCCO3)c2CC1(C)C  
 4316 C=CC1CC(=O)N1.Nc1ccc(I)cc1>>Nc1ccc(/C=C/C2CC(=O)N2)cc1  
 4317 C=CN1CCCC1=O.O=C1CCC(N2C(=O)c3ccc(Br)cc3C2=O)C(=O)N1>>O=C1CCC(N2C(=O)c3ccc(/C=C/N4CCCC4=O)cc3C2=O)C(=O)N1  
 4318 Br1cccc1I.C=Cc1ccc(C)cc1C>>Cc1ccc(/C=C/c2cccc2Br)c(C)c1  
 4319 C=CC(=O)OCC.Cc1cc(F)ccc1Br>>CCOC(=O)/C=C/c1ccc(F)cc1C  
 4320 C=Cc1cc(OC(C)=O)cc(OC(C)=O)c1.CC(=O)Oc1ccc(Cl)cc1>>CC(=O)Oc1ccc(/C=C/c2cc(OC(C)=O)c(OC(C)=O)c2)cc1  
 4321 C=CC(=O)OC(C)(C)C.COc1cc2cccc2c(Br)c1OC>>COc1cc2cccc2c(/C=C/C(=O)OC(C)(C)C)c1OC  
 4322 Br1ccc(I)cc1.C=Cc1ccc(S(C)(=O)=O)cc1>>CS(=O)(=O)c1ccc(/C=C/c2ccc(Br)cc2)cc1  
 4323 C=CC(=O)OCC.CC[C@@](C)(Oc1cc(Br)ccc1OCc1cccc1)[C@@H](COCOC)NC(=O)OC(C)(C)C>>CCOC(=O)/C=C/c1ccc(OCc2cccc2)c(O[C@](C)(CC)[C@@H](COCOC)NC(=O)OC(C)(C)C)c1  
 4324 C=Cc1cccc1.Cc1oc2cccc2c(=O)c1Br>>Cc1oc2cccc2c(=O)c1/C=C/c1cccc1  
 4325 C=CC(=O)OC(C)(C)C.Nc1ccc(CO)cc1I>>CC(C)(C)OC(=O)/C=C/c1cc(CO)ccc1N  
 4326 C=CC(=O)OC.CC(=O)c1ccc(Br)cc1>>COC(=O)/C=C/c1ccc(C(C)=O)cc1  
 4327 C=CC(=O)OC.FC(F)(F)c1ccc(Br)en1>>COC(=O)/C=C/c1ccc(C(F)(F)F)nc1  
 4328 C=CC(=O)OC.O=Cc1cc(I)ccc1O>>COC(=O)/C=C/c1ccc(O)c(C=O)c1  
 4329 C=CCOc1cccc1.COc1ccc(Br)cc1>>COc1ccc(/C=C/COc2cccc2)cc1  
 4330 C=Cc1cccc1.COc1cc(Br)c2c3c1O[C@H]1[C@@H](O[Si](C)(C)C(C)C)C=C[C@@H]4[C@@H](C2)N(C)CC[C@@]341>>COc1cc(/C=C/c2cccc2)c2c3c1O[C@H]1[C@@H](O[Si](C)(C)C(C)C)C=C[C@@H]4[C@@H](C2)N(C)CC[C@@]341  
 4331 C=Cc1cncnc1.Cc1cc(Cl)ccc1Br>>Cc1cc(Cl)ccc1/C=C/c1cncnc1  
 4332 C=CC(C)(C)O.O=[N+](O-)]CCc1c[nH]c2cccc(I)c12>>CC(C)(O)/C=C/c1cccc2[nH]cc(CC[N+](=O)[O-])c12  
 4333 C=Cc1ccc2cccc2c1.COC(=O)c1cccc1I>>COC(=O)c1cccc1/C=C/c1ccc2cccc2c1  
 4334 C=CS(=O)(=O)c1cccc1.Cn1ccc2cc(Br)ccc21>>Cn1ccc2cc(/C=C/S(=O)(=O)c3cccc3)ccc21  
 4335 C=CCC(=O)OC.O=c1ccn(Cc2ccc(I)cc2)c(=O)[nH]1>>COC(=O)C/C=C/c1ccc(Cn2ccc(=O)[nH]c2=O)C  
 4336 C=CC(=O)OC(C)(C)C.COc1cccc1CCC(=O)Oc1ccc(I)cc1CC=C(C)C>>COc1cccc1CCC(=O)Oc1ccc(/C=C/C(=O)OC(C)(C)C)cc1CC=C(C)C  
 4337 C=CCCN1C(=O)c2cccc2C1=O.Ic1cccc1>>O=C1c2cccc2C(=O)N1CC/C=C/c1cccc1  
 4338 Br1ccc2ccc3cccc4ccc1c2c34.C=Cc1ccc(C)cc1>>Cc1ccc(/C=C/c2ccc3ccc4cccc5ccc2c3c45)cc1  
 4339 C=CCN1C(=O)c2cccc2C1=O.Ic1cccc1>>O=C1c2cccc2C(=O)N1C/C=C/c1cccc1  
 4340 C=CS(=O)(=O)F.Cc1cccc1I>>Cc1cccc1/C=C/S(=O)(=O)F

4341 C=CS(=O)(=O)c1cccc1.CC(C)(C)OC(=O)N1CCC2(CC1)Oc1ccc(Br)cc1C2=O>>CC(C)(C)OC(=O)N1CCC2(CC1)Oc1ccc(/C=C/S(=O)(=O)c3cccc3)cc1C2=O  
 4342 C=Cc1ccc(OC)cc1.COc1ccc(I)c(OC)c1>>COc1ccc(/C=C/c2ccc(OC)cc2OC)cc1  
 4343 C=CC(C)=O.COc1cc(Br)c(OC)c2cccc12>>COc1cc(/C=C/C(C)=O)c(OC)c2cccc12  
 4344 C=Cc1ccc(CC(=O)OC(C)(C)C)cc1.COc1cc(/C=C/c2ccc(CNC(=O)OC(C)(C)C)cc2)c(OC)cc1I>>COc1cc(/C=C/c2ccc(CC(=O)OC(C)(C)C)cc2)c(OC)cc1/C=C/c1ccc(CNC(=O)OC(C)(C)C)cc1  
 4345 Br1c2cccc2cc2cccc12.C=CC(OC)OCC>>CCOC(/C=C/c1c2cccc2cc2cccc12)OCC  
 4346 C=CC(=O)OC.COC(=O)c1cccc(Br)c1>>COC(=O)/C=C/c1cccc(C(=O)OC)c1  
 4347 C=CC(=O)OCCCCCCCCCCCCCCCCC.C[C@]12C[C@@]34C=C(Sc5ccc(I)cc5)C(=O)[C@@](C)(CCC(=O)Nc5c(O)ccc(C(=O)O)c5O)[C@@H]3[C@H](C[C@@H]1C4)O2>>CCCCCCCCCCCCCCCCC  
 4348 CCCC(=O)/C=C/c1ccc(SC2=C[C@]34C[C@H]5C[C@H](O[C@@]5(C)C3)[C@H]4[C@](C)(CCC(=O)Nc3c(O)ccc(C(=O)O)c3O)C2=O)cc1  
 4349 Br1ccc2c(c1)c1cccc1n2-c1cccc1.C=Cc1ccc(N)cc1>>Nc1ccc(/C=C/c2ccc3c(c2)c2cccc2n3-c2cccc2)cc1  
 4350 C=Cc1nc2c(N)nnc2n1[C@H]1C[C@H](O[Si](C)(C)C(C)(C)C)[C@@H](CO[Si](C)(C)C(C)(C)C)O1.N#Cc1ccc(Br)cc1>>CC(C)(C)[Si](C)(C)OC[C@H]1O[C@@H](n2c(/C=C/c3ccc(C#N)cc3)nc3c(N)ncnc32)[C@]1O[Si](C)(C)C(C)(C)C  
 4351 C=Cc1cccc1.CCOc1noc(C)c1I>>CCOc1noc(C)c1/C=C/c1cccc1  
 4352 C=CC(=O)O.O=[N+](O-)]c1ccc(S(=O)(=O)Nc2ccc(I)cc2)cc1>>O=C(O)/C=C/c1ccc(NS(=O)(=O)c2ccc([N+](=O)[O-])cc2)cc1  
 4353 C=CC(=O)OCCCC.Clc1cccc(I)c1>>CCCCOC(=O)/C=C/c1cccc(Cl)c1  
 4354 C=CC(=O)OCc1cccc1.O=C1NCCCC[C@]1N1C(=O)c2ccc(I)c2C1=O>>O=C(/C=C/c1cccc2c1C(=O)N([C@H]1CCCCNC1=O)C2=O)OCc1cccc1  
 4355 Br1ccoc1.C=CCNS(=O)(=O)c1ccc(C)cc1>>Cc1ccc(S(=O)(=O)NC/C=C/c2ccoc2)cc1  
 4356 C=Cc1cccc1.CCC(=O)Nc1ccc(Br)cc1C(=O)OC>>CCC(=O)Nc1ccc(/C=C/c2cccc2)cc1C(=O)OC  
 4357 C=CC(F)(F)C(F)(F)C(F)(F)C(F)(F)C(F)(F)C(F)(F)C(F)(F)F.Fc1ccc(Br)cc1>>Fc1ccc(/C=C/C(F)(F)C(F)(F)C(F)(F)C(F)(F)C(F)(F)C(F)(F)C(F)(F)F)cc1  
 4358 C=CCCC(=O)O.Ic1ccsc1>>O=C(O)CC/C=C/c1ccsc1  
 4359 C=CC(=O)OCC(CC)CCCC.Cc1ccc(Br)cc1>>CCCC(CC)COC(=O)/C=C/c1ccc(C)cc1  
 4360 C=CC(=O)OCC.Clc1ccc(I)cc1>>CCOC(=O)/C=C/c1ccc(Cl)cc1  
 4361 C=Cc1ccc(/C=C/c2cccc2)cc1.CC1(C)c2cc(I)ccc2N2Cc3cc([N+](=O)[O-])ccc3OC21c1cccc1>>CC1(C)c2cc(/C=C/c3ccc(/C=C/c4cccc4)cc3)ccc2N2Cc3cc([N+](=O)[O-])ccc3OC21c1cccc1  
 4362 C=Cc1ccc(N2CCN(C(=O)OC(C)(C)C)CC2)cc1.Clc1cc(Br)cc(Cn2ccnc2)c1>>CC(C)(C)OC(=O)N1CCN(c2ccc(/C=C/c3cc(Cl)cc(Cn4ccnc4)c3)cc2)CC1  
 4363 Br1cnc2cccc2c1.C=CCON=C1[C@H](C)[C@H]2OC(=O)O[C@]2(C)[C@@H](CC)OC(=O)[C@@](C)(F)C(=O)[C@H](C)[C@@H](O[C@]2O[C@H](C)C[C@H](N(C)C)[C@H]2OC(C)=O)[C@](C)(OC)C[C@H]1C>>CC[C@H]1OC(=O)[C@@](C)(F)C(=O)[C@H](C)[C@@H](O[C@]2O[C@H](C)C[C@H](N(C)C)[C@H]2OC(C)=O)[C@](C)(OC)C[C@]1(C)C(=NOC/C=C/c2cnc3cccc3c2)I[C@H]1(C)I[C@H]2OC(=O)O[C@]12C  
 4364 C=CC(C)(C)O.Ic1cccc1>>CC(C)(O)/C=C/c1cccc1  
 4365 C=Cc1ccc(O)cc1.Nc1ccc(Br)cc1>>Nc1ccc(/C=C/c2ccc(O)cc2)cc1  
 4366 C=Cc1cccc1.Cn1c2cccc2c2cc(I)ccc21>>Cn1c2cccc2c2cc(/C=C/c3cccc3)ccc21  
 4367 C=CCN(C(=O)OC(C)(C)C)C(=O)OC(C)(C)C.CC(=O)c1cccc(Cl)c1>>CC(=O)c1cccc(/C=C/CN(C(=O)OC(C)(C)C)C(=O)OC(C)(C)C)c1  
 4368 C=CC(=O)OC.CCCc1ccc(N2CCc3cc(OC)ccc3C2(C)c2ccc(Br)cc2)cc1Cl>>CCCc1ccc(N2CCc3cc(OC)ccc3C2(C)c2ccc(/C=C/C(=O)OC)cc2)cc1Cl  
 4369 C=CC(=O)OCCSc1cccc1.Ic1cccc1>>O=C(/C=C/c1cccc1)OCCSc1cccc1  
 4370 C=Cc1nnn(C)n1.Cc1ccc(I)cc1>>Cc1ccc(/C=C/c2nnn(C)n2)cc1  
 4371 C=CC(=O)OCC.CCCn1ccc(Br)cc1=O>>CCCn1ccc(/C=C/C(=O)OCC)cc1=O  
 4372 C=CCN1C(=O)c2cccc2C1=O.O=Cc1ccc(Br)cc1>>O=Cc1ccc(/C=C/CN2C(=O)c3cccc3C2=O)cc1  
 4373 \*CNCCOCCOCCOCCOCCN(C(=O)COc1ccc(C(Cc2cc(OC)cc(OC)c2)NC(=O)c2cccc(C=C)c2)cc1.FC(F)(F)Oc1cccc(I)c1>>\*CNCCOCCOCCOCCOCCN(C(=O)COc1ccc(C(Cc2cc(OC)cc(OC)c2)NC(=O)c2cccc(/C=C/c3cccc(OC(F)(F)F)c3)c2)cc1  
 4374 C=CC(=O)OCC.O=S(=O)(Oc1cccc1)C(F)(F)F>>CCOC(=O)/C=C/c1cccc1  
 4375 \*CNCCOCCOCCOCCOCCN(C(=O)COc1ccc(C(Cc2cc(OC)cc(OC)c2)NC(=O)c2cccc(C=C)c2)cc1.FC(F)(F)c1ccc(I)cc1>>\*CNCCOCCOCCOCCOCCN(C(=O)COc1ccc(C(Cc2cc(OC)cc(OC)c2)NC(=O)c2cccc(/C=C/c3cccc(C(F)(F)F)c3)c2)cc1  
 4376 Br1ccc(I)cc1.C=CCNC(=O)c1cc(C)on1>>Cc1cc(C(=O)NC/C=C/c2ccc(Br)cc2)no1  
 4377 C=CC(=O)OC.CC(C)(O)Cn1cnc2c(N)nc3cc(Br)ccc3c21>>COC(=O)/C=C/c1ccc2c(c1)nc(N)c1nnc(C(C)(C)O)c12

[illegible]

4419 C=CC(=O)OC.O=c1[nH]c(=O)n([C@@H]2C=CC[C@@H]2CO)cc1I>>COC(=O)/C=C/c1cn([C@@H]  
]2C=CC[C@@H]2CO)c(=O)[nH]c1=O  
4420 C=CC(=O)OC.O=S(=O)(c1cccc1)n1c2cccc2c2c(OS(=O)(=O)C(F)(F)F)nc3cccc3c21>>COC(=O)/C  
=C/c1nc2cccc2c2c1c1ccnc1n2S(=O)(=O)c1cccc1  
4421 C=CC(=O)OC.O=Cc1cccc(I)c1>>COC(=O)/C=C/c1cccc(C=O)c1  
4422 C=CC(=O)N1CCN(C)CC1.Clc1nc(N2CCOCC2)c2oc3ncc(Br)cc3c2n1>>CN1CCN(C(=O)/C=C/c2cnc  
3oc4c(N5CCOCC5)nc(Cl)nc4c3c2)CC1  
4423 C=Cc1cccc1.CCOC(=O)c1cccc1Br>>CCOC(=O)c1cccc1/C=C/c1cccc1  
4424 C=Cc1cccc1.CN(C)c1ccc(Br)cc1>>CN(C)c1ccc(/C=C/c2cccc2)cc1  
4425 C=CC(=O)OCCCC.FC(F)(F)c1ccc(I)cc1>>CCCCOC(=O)/C=C/c1ccc(C(F)(F)F)cc1  
4426 C=CC(C)=O.CC#Cc1encc(Br)c1>>CC#Cc1encc(/C=C/C(C)=O)c1  
4427 C=CC(=O)OC.CCC1(CN2[C@H](C)Cc3c([nH]c4cccc34)[C@H]2c2c(F)cc(Br)cc2F)CC1>>CCC1(C  
N2[C@H](C)Cc3c([nH]c4cccc34)[C@H]2c2c(F)cc(/C=C/C(=O)OC)cc2F)CC1  
4428 C=CC(=O)OCCCC.O=[N+](O)c1cccc(I)c1>>CCCCOC(=O)/C=C/c1cccc([N+](=O)[O-])c1  
4429 C=Cc1ccc(C)cc1.O=[N+](O)c1cccc(I)c1>>Cc1ccc(/C=C/c2cccc([N+](=O)[O-])c2)cc1  
4430 C=CC(=O)OC(C)(C)C.Nc1ccc(I)cc1Br>>CC(C)(C)OC(=O)/C=C/c1ccc(N)c(Br)c1  
4431 C=Cc1cccc1.CC(C)N(C(=O)Oc1ccc(Br)cc1)C(C)C>>CC(C)N(C(=O)Oc1ccc(/C=C/c2cccc2)cc1)C(  
C=CC(=O)O.O=C(c1cccc1)c1ccc(Br)cc1>>O=C(O)/C=C/c1ccc(C(=O)c2cccc2)cc1  
4432 C=CC(=O)OC(C)(C)C.COc1cc(NCc2ccc(Br)cc2)cc(OC)c1OC>>COc1cc(NCc2ccc(/C=C/C(=O)OC(C)  
(C)C)cc2)cc(OC)c1OC  
4433 C=CC(=O)OC.CC(=O)n1nc(C)c(I)c1C>>COC(=O)/C=C/c1c(C)nn(C(C)=O)c1C  
4434 Br1cccn1.C=CCC(C)C(=O)OCC>>CCOC(=O)C(C)C/C=C/c1cccn1  
4435 C=CC(=O)OC.Nc1cccc(I)c1>>COC(=O)/C=C/c1cccc(N)c1  
4436 C=Cc1ccc2c(c1)c1cccc1n2CCCCCCCC.CCCCCCCn1c2ccc(I)cc2c2cc(C=O)ccc21>>CCCCCCCCn  
1c2cccc2c2cc(/C=C/c3ccc4c(c3)c3cc(C=O)ccc3n4CCCCCCCC)ccc21  
4437 C=CC(=O)N(C)Cc1cc2cccc2n1C.CC(C)(C)OC(=O)N1CC(=O)Nc2cc(Br)cnc21>>CN(Cc1cc2cccc2n  
1C)C(=O)/C=C/c1cnc2c(c1)NC(=O)CN2C(=O)OC(C)(C)C  
C=Cc1ccc(OC)c(O)c1.CC(=O)OC[C@H]1O[C@H](Oc2ccc(I)cc2)[C@H](OC(C)=O)[C@@H](OC(  
C)=O)[C@H]1OC(C)=O>>COc1ccc(/C=C/c2ccc(O[C@H]3O[C@H](COC(C)=O)[C@@H](OC(  
C)=O)[C@H](OC(C)=O)[C@H]3OC(C)=O)cc2)cc1O  
4438 C=CC(=O)OC(C)(C)C.CC(C)=CCc1ccc(I)ccc1OC(=O)CCc1cccc1>>CC(C)=CCc1cc(/C=C/C(=O)OC(  
C)(C)C)ccc1OC(=O)CCc1cccc1  
4439 C=CC(=O)OCC.Cc1cc(O)c(Br)cc1C#N>>CCOC(=O)/C=C/c1cc(C#N)c(C)cc1O  
4440 C=CCn1c(-c2ccc(CC)cc2)nc2cccc2c1=O.O=C(CN1C(=O)COc2cccc21)c1ccc(Br)cc1>>CCc1ccc(-  
c2nc3cccc3c(=O)n2C/C=C/c2ccc(C(=O)CN3C(=O)COc4cccc43)cc2)cc1  
C=Cc1ccc(C(=O)N[C@H](CCSC)C(=O)OC)c(-  
4441 c2cccc2C)c1.O=C(c1cccc1)c1ccnc1Br>>COC(=O)[C@H](CCSC)NC(=O)c1ccc(/C=C/c2cnc2C(  
=O)c2cccc2)cc1-c1cccc1C  
4442 C=Cc1cncnc1.CC(C)(C)OC(=O)N[C@@H](COc1encc(Br)c1)Cc1c[nH]c2cccc12>>CC(C)(C)OC(=O)  
N[C@@H](COc1encc(/C=C/c2cnc2)cc1)Cc1c[nH]c2cccc12  
4443 C=CC(OCC)OCC.COc1cccc(I)c1>>CCOC(/C=C/c1cccc(OC)c1)OCC  
4444 Br1ccc2ccc3cccc4ccc1c2c34.C=Cc1ccc(OC(C)(C)C)cc1>>CC(C)(C)Oc1ccc(/C=C/c2ccc3ccc4cccc5c  
cc2c3c45)cc1  
4445 Br1cccn1.C=Cc1cccc1OC>>COc1cccc1/C=C/c1cccn1  
4446 C=CC(=O)N(C)C.COC(=O)c1cc(Br)cc2c1OC(c1cccc1)(c1cccc1)O2>>COC(=O)c1cc(/C=C/C(=O)N  
(C)C)cc2c1OC(c1cccc1)(c1cccc1)O2  
4447 C=CCn1cc(C(=O)OCC)c(=O)c2ccc(C)nc21.CCn1cc(I)c(=O)c2ccc(C)nc21>>CCOC(=O)c1cn(C/C=C/c  
2cn(CC)c3nc(C)ccc3c2=O)c2nc(C)ccc2c1=O  
4448 C=C/C=C/C(OCC)[Si](C)(C)C.COc1cccc1I>>CCO/C=C/C=C/c1cccc1OC)[Si](C)(C)C  
4449 C=CC(=O)N(C)C.CCOC(=O)/C=C/c1cccc1Br>>CCOC(=O)/C=C/c1cccc1/C=C/C(=O)N(C)C  
Br1cnc2cccc2c1.C=CCO[C@]1(C)C[C@H](C)C(=O)[C@H](C)C2NC(=O)O[C@]2(CC)[C@H]  
(CC)OC(=O)/C(C)=C/[C@H](C)[C@H]1O[C@H]1O[C@H](C)C[C@H](N(C)C)[C@H]1OC(=O)c1  
4450 ccccc1>>CC[C@H]1OC(=O)/C(C)=C/[C@H](C)[C@H](O[C@H]2O[C@H](C)C[C@H](N(C)C)[  
C@H]2OC(=O)c2cccc2)[C@](C)(OC/C=C/c2cnc3cccc3c2)C[C@H](C)C(=O)[C@H](C)C2NC(=  
O)O[C@]121CC  
4451 Br1ccsc1.C=CC(=O)OC>>COC(=O)/C=C/c1ccsc1  
4452 C=CC(=O)OC(C)(C)C.OC/C=C/C=C/C1=C(Br)CCCC1>>CC(C)(C)OC(=O)/C=C/C1=C/C=C/C=C/C  
O)CCCC1  
4453 C=CC1(C(=O)O)COC(C)(C)CO1.CC(C)[C@H](O)C(=O)N[C@@H](C)C(=O)N1CCC[C@H](C(=O)  
)N[C@H](C)c2ccc3ccc(Br)cc3n2)N1>>CC(C)[C@H](O)C(=O)N[C@@H](C)C(=O)N1CCC[C@H]  
(C(=O)N[C@H](C)c2ccc3ccc(/C=C/C4(C(=O)O)COC(C)(C)CO4)cc3n2)N1

C=Cc1ccc(C(=O)O[C@H]2CC[C@H]3[C@@H]4CCC5=CC(=O)CC[C@]5(C)[C@H]4CC[C@]23C)c  
4456 c1.CC(C)(C)Br>>CC(C)(C)/C=C/c1ccc(C(=O)O[C@H]2CC[C@H]3[C@@H]4CCC5=CC(=O)CC[C@]  
@]5(C)[C@H]4CC[C@]23C)cc1  
4457 C=Cc1ccc(Cl)cc1.CC(=S)NS(=O)(=O)c1ccc(Br)cc1>>CC(=S)NS(=O)(=O)c1ccc(/C=C/c2ccc(Cl)cc2)c  
4458 C=Cc1ccc(N(c2ccccc2)c2ccccc2)cc1.O=Cc1ccc(Br)cc1F>>O=Cc1ccc(/C=C/c2ccc(N(c3ccccc3)c3ccc  
c3)cc2)cc1F  
4459 C=Cc1cnc(C#N)c1Nc1ccc2[nH]ccc2c1C.Clc1ccc(Br)cn1>>Cc1c(Nc2c(C#N)cncc2/C=C/c2ccc(Cl)nc  
2)ccc2[nH]ccc12  
4460 C=Cc1cc(OC)cc(OC)c1.COc1ccc(I)cc1>>COc1ccc(/C=C/c2cc(OC)cc(OC)c2)cc1  
4461 C=CC(=O)OC.Cc1cc(I)ccc1[N+](=O)[O-]>>COC(=O)/C=C/c1ccc([N+](=O)[O-])c(C)c1  
4462 C=CC(=O)OCC.O=Cc1c(F)cc(Br)cc1Cl>>CCOC(=O)/C=C/c1cc(F)c(C=O)c(Cl)c1  
4463 C=CC1CC(=O)N1.Cc1ccc(I)cc1>>Cc1ccc(/C=C/C2CC(=O)N2)cc1  
4464 C=CCCC.CC(=O)c1ccc(Br)cc1>>CCC/C=C/c1ccc(C(C)=O)cc1  
4465 C=CC(=O)OC.CCc1ccc(-c2nc(C)c(Br)s2)cc1>>CCc1ccc(-c2nc(C)c(/C=C/C(=O)OC)s2)cc1  
C=CC#N.CCOc1ccc(C(=O)CCC(=O)Nc2cc(-  
4466 c3ccccc3)c3ccc(Br)cc3n2)cc1OCC>>CCOc1ccc(C(=O)CCC(=O)Nc2cc(-  
c3ccccc3)c3ccc(/C=C/C#N)cc3n2)cc1OCC  
4467 C=Cc1cccc1.Cn1nc(NC(=O)C(C)(C)C)c2cc(I)cn21>>Cn1nc(NC(=O)C(C)(C)C)c2cc(/C=C/c3ccccc3  
)cn21  
C=CC(=O)NCCCN(C)C.CC(=O)OCC1Cn2c3ccccc3c3c4c(c5c6cc(Br)cccc6n(c5c32)C1)C(=O)N(C(C)=  
4468 O)C4>>CC(=O)OCC1Cn2c3ccccc3c3c4c(c5c6cc(/C=C/C(=O)NCCCN(C)C)ccc6n(c5c32)C1)C(=O)N(  
C(C)=O)C4  
4469 C=CC(=O)OC.Cc1cc2c(cc1Br)OCO2>>COC(=O)/C=C/c1cc2c(cc1C)OCO2  
4470 C=Cc1ccc2c(c1)Sc1ccccc1N2CC.CCn1c2ccccc2c2cc(Br)ccc21>>CCN1c2ccccc2Sc2cc(/C=C/c3ccc4c(  
c3)c3ccccc3n4CC)ccc21  
4471 C=CC(=O)CC.O=C(c1ccccc1)c1ccc(Br)cc1>>CCC(=O)/C=C/c1ccc(C(=O)c2ccccc2)cc1  
4472 C=CC(=O)O.COc1cc(/C=C/c2ccc(Br)cc2)cc(OC)c1O>>COc1cc(/C=C/c2ccc(/C=C/C(=O)O)cc2)cc(O  
C)c1O  
4473 C=Cc1ccc(OC)cc1.CS(=O)(=O)c1ccc(Br)cc1>>COc1ccc(/C=C/c2ccc(S(C)(=O)=O)cc2)cc1  
4474 C=CC(=O)OC(C)(C)C.COc1ccc(Br)c(C=O)c1>>COc1ccc(/C=C/C(=O)OC(C)(C)C)c(C=O)c1  
4475 Brclnc2ccccc2c1.C=CCC[C@H]1COC(C)(C)N1C(=O)OC(C)(C)C>>CC(C)(C)OC(=O)N1[C@@H](  
CC/C=C/c2cnc3ccccc3c2)COC1(C)C  
4476 C=CC(=O)OC.Clclnoc(-c2ccccc2)c1I>>COC(=O)/C=C/c1c(Cl)noc1-c1ccccc1  
4477 C=CP(=O)(OCC)OCC.CCOC(=O)NC(Cc1ccc2ccccc2c1Br)(C(=O)OCC)C(=O)OCC>>CCOC(=O)NC(  
Cc1ccc2ccccc2c1/C=C/P(=O)(OCC)OCC)(C(=O)OCC)C(=O)OCC  
4478 Brclc2ccccc2cc2ccccc12.C=CP(=O)(OCC)OCC>>CCOP(=O)/C=C/c1c2ccccc2cc2ccccc12)OCC  
4479 C=CC(N)=O.COc1c2[nH]c3ccc(F)cc3c2c(Br)c2c1[nH]c1ccc(F)cc12>>COc1c2[nH]c3ccc(F)cc3c2c(/C  
=C/C(N)=O)c2c1[nH]c1ccc(F)cc12  
C=Cc1nc2c(N)cn2c1[C@H]1C[C@H](O[Si](C)(C)C(C)(C)C)[C@@H](CO[Si](C)(C)C(C)(C)C)O1.  
4480 Cc1ccc(Br)cc1>>Cc1ccc(/C=C/c2nc3c(N)cn2c3n2[C@H]2[C@H](O[Si](C)(C)C(C)(C)C)[C@@H](  
CO[Si](C)(C)C(C)(C)C)O2)cc1  
C=Cc1ccc(OC)cc1.O=C(OCCCC(Br)C(F)(F)F)c1ccccc1>>COc1ccc(/C=C/C(CCCOC(=O)c2ccccc2)C(  
4481 F)(F)F)cc1  
C=C[Si](C)(C)C.O=[N+](=[O-])c1ccccc1I>>C[Si](C)(C)/C=C/c1ccccc1[N+](=O)[O-]  
4482 C=Cc1ccccc1.N#Cc1ccccc1Br>>N#Cc1ccccc1/C=C/c1ccccc1  
4483 Brclccsc1.C=CCNS(=O)(=O)c1ccc(C)cc1>>Cc1ccc(S(=O)(=O)NC/C=C/c2ccsc2)cc1  
4484 C=CC(=O)OC.CCN(CC)c1ccc(-c2oc3cc(Br)ccc3c(=O)c2O)cc1>>CCN(CC)c1ccc(-  
4485 c2oc3cc(/C=C/C(=O)OC)ccc3c(=O)c2O)cc1  
C=C[Si](C)(C)c1cccn1.CC(=O)c1ccc(I)cc1>>CC(=O)c1ccc(/C=C/[Si](C)(C)c2cccn2)cc1  
4486 C=CC(=O)OC.COC(=O)Cc1cc(Br)ccc1OCc1ccc(OCc2ccccc2)cc1>>COC(=O)/C=C/c1ccc(OCc2ccc(  
4487 OCc3ccccc3)cc2)c(CC(=O)OC)c1  
C=Cc1ccc(C#N)cc1.Cc1ccc(S(=O)(=O)Oc2ccccc3c(Br)cn23)cc1>>Cc1ccc(S(=O)(=O)Oc2ccccc3c(/C  
4488 =C/c4ccc(C#N)cc4)cn23)cc1  
C=Cc1ccc(N2CCN(C(=O)OC(C)(C)C)CC2)cc1.Fc1cc(Br)cc(-  
4489 c2ccncc2)c1>>CC(C)(C)OC(=O)N1CCN(c2ccc(/C=C/c3cc(F)cc(-c4ccncc4)c3)cc2)CC1  
C=CC(=O)OC.O=Cc1cc(OCc2c(-c3ccc(Cl)cc3)nsc2C(F)(F)F)ccc1Br>>COC(=O)/C=C/c1ccc(OCc2c(-  
4490 c3ccc(Cl)cc3)nsc2C(F)(F)F)cc1C=O  
C=CC(=O)OCC.CC(C)(C)[Si](C)(C)n1c(=O)n([Si](C)(C)C(C)(C)C)c2nc3ccc(Br)cc3cc21>>CCOC(=O  
4491 )/C=C/c1ccc2nc3c(cc2c1)n([Si](C)(C)C(C)(C)C)c(=O)n3[Si](C)(C)C(C)(C)C  
C=Cc1cc(OC)ccc1OC.Nc1ccc(I)cc1>>COc1ccc(OC)c(/C=C/c2ccc(N)cc2)c1  
4492 C=Cc1ccccc1.CCOC(=O)c1ccc(Br)cc1>>CCOC(=O)c1ccc(/C=C/c2ccccc2)cc1  
4493

4494 Br1ccc(CNc2ccccc2)cc1.C=CC(=O)OC(C)(C)C>>CC(C)(C)OC(=O)/C=C/c1ccc(CNc2ccccc2)cc1  
\*CNCCCCOCCOCCOCCNC(=O)COc1ccc(C(Cc2cc(OC)cc(OC)c2)NC(=O)c2ccc(C=C)cc2)cc1.N#Cc  
 4495 1ccc(I)cc1C#N>>\*CNCCCCOCCOCCOCCNC(=O)COc1ccc(C(Cc2cc(OC)cc(OC)c2)NC(=O)c2ccc(/  
C=C/c3ccc(C#N)c(C#N)c3)cc2)cc1  
 4496 C=Cc1ccc(C)nc1.COC(=O)c1cc(I)ccc1NC(C)=O>>COC(=O)c1cc(/C=C/c2ccc(C)nc2)ccc1NC(C)=O  
 4497 C=CC(=O)OCC.Cc1nc(C)c(I)c(Cl)n1>>CCOC(=O)/C=C/c1c(C)nc(C)nc1Cl  
 4498 C=Cc1cccc1.CSc1ccc(Br)cc1>>CSc1ccc(/C=C/c2ccccc2)cc1  
 4499 C=Cc1cccc1.COC(=O)c1ccc(Cl)cc1>>COC(=O)c1ccc(/C=C/c2ccccc2)cc1  
 4500 C=CC(=O)O.Fc1ccc(I)cc1>>O=C(O)/C=C/c1ccc(F)cc1  
 4501 C=Cc1ccc(F)cc1.CC(C)(C)Br>>CC(C)(C)/C=C/c1ccc(F)cc1  
 4502 C=CCNS(=O)(=O)c1ccc(C)cc1.Cc1cccc(N)c1Br>>Cc1ccc(S(=O)(=O)NC/C=C/c2c(C)cccc2N)cc1  
 4503 C=CS(N)(=O)=O.COc1ccc(Br)cc1>>COc1ccc(/C=C/S(N)(=O)=O)cc1  
 4504 C=CC(=O)OC.COc1cc(I)cc(CC=C(C)C)c1OC(C)=O>>COC(=O)/C=C/c1cc(CC=C(C)C)c(OC(C)=O)c  
(OC)c1  
 4505 C=CC(=O)OC.COc1cccc1I>>COC(=O)/C=C/c1cccc1OC  
 4506 C=CC(=O)OCC.Cc1nc(-  
n2c(C)ccc2C)cc(NC2CCOCC2)c1Br>>CCOC(=O)/C=C/c1c(NC2CCOCC2)cc(-n2c(C)ccc2C)nc1C  
 4507 C=Cc1cccc1.ClCc1cccc1>>C(=C/c1cccc1)Cc1cccc1  
 4508 C=C[Si](CC)(CC)CC.O=Cc1ccc(Br)cc1>>CC[Si](/C=C/c1ccc(C=O)cc1)(CC)CC  
 4509 C=Cc1ccc2ccccc2n1.O=Cc1ccc(Br)cc1>>O=Cc1ccc(/C=C/c2ccc3ccccc3n2)cc1  
 4510 Br1ccc2ccnc(N3CCCCC3)c2c1.C=CC(=O)OC(C)(C)C>>CC(C)(C)OC(=O)/C=C/c1ccc2ccnc(N3CCC  
CC3)c2c1  
 4511 C=CC(=O)OC(C)(C)C.O=C1Ne2ccccc2O/C1=C/c1cc(Br)co1>>CC(C)(C)OC(=O)/C=C/c1coc(/C=C2\  
Oc3ccccc3NC2=O)c1  
 4512 C=Cc1ccc(C(C)(C)C)cc1.CC[Si](CC)(OS(=O)(=O)C(F)(F)F)OS(=O)(=O)C(F)(F)F>>CC[Si](/C=C/c1c  
cc(C(C)(C)C)cc1)(CC)OS(=O)(=O)C(F)(F)F  
 4513 C=CCOCCCCC#N.CC(C)N(CC[C@H](c1cccc1)c1cc(Br)ccc1OCc1cccc1)C(C)C>>CC(C)N(CC[  
C@H](c1cccc1)c1cc(/C=C/CCOCCCCC#N)ccc1OCc1cccc1)C(C)C  
C=Cc1cc([N+](=O)[O-  
 4514 ]ccc1OCOCC[Si](C)(C)C.N#Cc1cccc1I>>C[Si](C)(C)CCOCOc1ccc([N+](=O)[O-  
]cc1/C=C/c1cccc1C#N  
Br1ccc2c(c1)c1cccc1n2-  
 4515 c1cccc1.C=Cc1ccc(C(=O)OC)cc1>>COC(=O)c1ccc(/C=C/c2ccc3c(c2)c2ccccc2n3-c2ccccc2)cc1  
 4516 Br1ccccc1.C=Cc1ccc(OC)cc1>>COc1ccc(/C=C/c2ccccc2)cc1  
 4517 C=Cc1cccc2ccccc12.FC(F)(F)c1cccc1I>>FC(F)(F)c1cccc1/C=C/c1cccc2ccccc12  
 4518 C=CC(=O)OC.COc1ccc2c(c1)CCN(c1cccc1)C2(C)c1ccc(Br)cc1>>COC(=O)/C=C/c1ccc(C2(C)c3ccc  
(OC)cc3CCN2c2ccccc2)cc1  
 4519 C=CC(=O)OCC(C)CCCC.COc1ccc(I)cc1>>CCCC(C)COC(=O)/C=C/c1ccc(OC)cc1  
 4520 C=CC(=O)OC(C)(C)C.COc1ccc(CNc2ccc(Br)en2)cc1>>COc1ccc(CNc2ccc(/C=C/C(=O)OC(C)(C)C)c  
n2)cc1  
 4521 C=C[Si](CC)(CC)CC.COc1cccc1Br>>CC[Si](/C=C/c1cccc1OC)(CC)CC  
 4522 C=CC(=O)OC(C)(C)C.O=c1oc2cc(O)ccc2c(Cc2ccc(Br)cc2)c1Cl>>CC(C)(C)OC(=O)/C=C/c1ccc(Cc2  
c(Cl)c(=O)oc3cc(O)ccc23)cc1  
 4523 C=CC(=O)OC(C)(C)C.Cc1ccc2c(Br)ccc(N(C)C)c2n1>>Cc1ccc2c(/C=C/C(=O)OC(C)(C)C)ccc(N(C)C  
)c2n1  
 4524 C=Cc1ccccc1.CN1CCC[C@H]1COc1cncc(Br)c1>>CN1CCC[C@H]1COc1cncc(/C=C/c2ccccc2)c1  
 4525 C=CC(=O)OC.Nc1ccccc1Br>>COC(=O)/C=C/c1ccccc1N  
 4526 C=CC(=O)OC.CCc1ccc(N)c(Br)c1>>CCc1ccc(N)c(/C=C/C(=O)OC)c1  
 4527 C=Cc1ccccc1.Fc1ccc(Br)cc1>>Fc1ccc(/C=C/c2ccccc2)cc1  
 4528 C=CC#N.Cn1c2ccccc2c2nc3ccc(Cl)cc3c3ccccc1c32>>Cn1c2ccccc2c2nc3ccc(/C=C/C#N)cc3c3ccccc1c3  
 4529 C=Cc1cccc1.O=[N+](O-)]c1ccc(Cl)cc1>>O=[N+](O-)]c1ccc(/C=C/c2ccccc2)cc1  
 4530 C=CC(=O)CCCC.COc1ccc(I)cc1>>CCCCC(=O)/C=C/c1ccc(OC)cc1  
C=CB1OC(=O)CN(C)CC(=O)O1.Cc1nn(C)c(=O)c(-  
 4531 c2c(F)ccc(Cl)c2Br)c1OC(=O)C(C)C>>Cc1nn(C)c(=O)c(-  
c2c(F)ccc(Cl)c2/C=C/B2OC(=O)CN(C)CC(=O)O2)c1OC(=O)C(C)C  
 4532 Br1ccc(/N=N/c2ccccc2)cc1.C=Cc1ccc(OC)cc1>>COc1ccc(/C=C/c2ccc(/N=N/c3ccccc3)cc2)cc1  
 4533 C=Cc1ccccc1.CNc1ccc(Br)cc1>>CNc1ccc(/C=C/c2ccccc2)cc1  
C=CC(=O)OC(C)(C)C.[C@]12C[C@@]134C=C(Sc5ccc(I)cc5)C(=O)[C@@](C)(CCC(=O)Nc5c(O)cc  
 4534 c(C(=O)O)c5O)[C@@H]3[C@H]4[C@@H]1C4O2>>CC(C)(C)OC(=O)/C=C/c1ccc(SC2=C[C@]134  
C[C@H]5C[C@H](O)[C@@]5(C)C3)[C@H]4[C@@](C)(CCC(=O)Nc3c(O)ccc(C(=O)O)c3O)C2=O)cc1  
 4535 C=CS(C)(=O)=O.COc1cccc1Br>>COc1cccc1/C=C/S(C)(=O)=O

C=CC(=O)OCC.COC(=O)c1cccc(I)c1>>CCOC(=O)/C=C/c1cccc(C(=O)OC)c1  
 C=CC(=O)OCC.CCOC(=O)c1cccc(-c2cccc2I)c1>>CCOC(=O)/C=C/c1cccc1-c1ccc(C(=O)OCC)cc1  
 C=CC(C)NC(=O)OC(C)(C)C.Fc1ccc(-n2ccc3c(Br)cccc32)cc1>>CC(/C=C/c1cccc2c1cnn2-  
 c1ccc(F)cc1)NC(=O)OC(C)(C)C  
 C=CB1OC(C)CC(C)(C)O1.Clc1ccc(I)cc1>>CC1CC(C)(C)OB(/C=C/c2ccc(Cl)cc2)O1  
 C=CC(=O)OC.Cc1ccc(Br)c([N+](=O)[O-])c1>>COC(=O)/C=C/c1ccc(C)cc1[N+](=O)[O-]  
 Br1cccc1.C=CC1CC2C=CC1C2>>C1=CC2CC1CC2/C=C/c1cccc1  
 C=CCN1C(=O)C2(CCCC)NC[C@@]1(C)c1cc(F)cc(F)c1.N#Cc1cc2c(cc1Br)C[C@@]1(C2)C(=O)Nc  
 2cccc21>>C[C@@]1(c2cc(F)cc(F)c2)CNC2(CCCC2)C(=O)N1C/C=C/c1cc2c(cc1C#N)C[C@]1(C2)  
 C(=O)Nc2cccc21  
 C=Cc1ccc(C=O)s1.CCCCCC(=O)Nc1cc(OCCN(CCOc2cc(NC(=O)CCCC)nc(NC(=O)CCCC)c2)c2  
 ccc(Br)cc2)cc(NC(=O)CCCC)n1>>CCCCC(=O)Nc1cc(OCCN(CCOc2cc(NC(=O)CCCC)nc(NC(=O)  
 O)CCCC)c2)c2ccc(/C=C/c3ccc(C=O)s3)cc2)cc(NC(=O)CCCC)n1  
 C=Cc1cccc1.O=c1ccoc2c(Br)cccc12>>O=c1ccoc2c(/C=C/c3ccccc3)cccc12  
 C=CC(=O)OCC.O=C(O)c1cc2cc(Br)ccc2[nH]1>>CCOC(=O)/C=C/c1cc2[nH]c(C(=O)O)cc2c1  
 C=CC(=O)OCC.O=c1ccoc2cc(OCc3ccccc3)c(Br)cc12>>CCOC(=O)/C=C/c1cc2c(=O)ccoc2cc1OCc1c  
 cccc1  
 C=Cc1cc2c(nn1)Oc1cccc1O2.Fc1cc(F)cc(Br)c1>>Fc1cc(F)cc(/C=C/c2cc3c(nn2)Oc2cccc2O3)c1  
 C=Cc1ccc(N(c2cccc2)c2cccc2)cc1.CC(C)(C)OC(=O)CCCCCCCCOc1cc(Br)ccc1C=O>>CC(C)(C)OC  
 (=O)CCCCCCCCOc1cc(/C=C/c2ccc(N(c3ccccc3)c3ccccc3)cc2)ccc1C=O  
 C=Cc1ccc(F)cc1.Ic1cccc1>>Fc1ccc(/C=C/c2cccc2)cc1  
 C#CC=C.Ic1ccc2[nH]ccc2c1>>C#C/C=C/c1ccc2[nH]ccc2c1  
 C=CC(=O)OC.O=S(=O)(c1cccc(Cl)c1)N1CCc2cc(Br)cnc21>>COC(=O)/C=C/c1cnc2c(c1)CCN2S(=O  
 )(=O)c1cccc(Cl)c1  
 C=CC(=O)OCC.CC(C)(C)Oc1ccc(Br)nc1C#N>>CCOC(=O)/C=C/c1ccc(OC(C)(C)C)c(C#N)n1  
 C=CC(=O)OCC.COC(=O)c1cccc(Cl)c1>>CCOC(=O)/C=C/c1cccc(C(=O)OC)c1  
 C=CC(=O)OCC.Cc1ncc(Br)c(N)c1I>>CCOC(=O)/C=C/c1c(C)ncc(Br)c1N  
 C=CC(C)=O.O=[N+](=[O-])c1ccc(C2=C(I)C2(F)F)cc1>>CC(=O)/C=C/C1=C(c2ccc([N+](=O)[O-]  
 ])cc2)C1(F)F  
 C=CC(=O)CC.CC(C)c1cc(C(C)C)c(Br)c(C(C)C)c1>>CCC(=O)/C=C/c1c(C(C)C)cc(C(C)C)cc1C(C)C  
 C=Cc1nc2c(N)nnc2n1[C@H]1C[C@H](O[Si](C)(C)C(C)(C)C)[C@@H](CO[Si](C)(C)C(C)(C)C)O1.  
 CC(=O)c1ccc(Br)cc1>>CC(=O)c1ccc(/C=C/c2nc3c(N)nnc3n2[C@H]2C[C@H](O[Si](C)(C)C(C)(C)  
 C)[C@@H](CO[Si](C)(C)C(C)(C)C)O2)cc1  
 Br1cccn1.C=CC(N)=O>>NC(=O)/C=C/c1cccn1  
 C=CC(C)(C)O.N#Cc1cccc1Br>>CC(C)(O)/C=C/c1cccc1C#N  
 C=CC(=O)O.COc1cc(I)ccc1Br>>COc1cc(/C=C/C(=O)O)ccc1Br  
 C=Cc1cccc1.Cc1cccc(Br)c1>>Cc1cccc(/C=C/c2cccc2)c1  
 C=CC(=O)OC.Ic1cnn2c(-c3ccccc3)cc(-c3ccccc3)nc12>>COC(=O)/C=C/c1cnn2c(-c3ccccc3)cc(-  
 c3ccccc3)nc12  
 C=CC[C@H](OCc1cccc1)[C@H](OCc1cccc1)[C@@H](/C=C/C[C@H](C)O[Si](C)(C)C(C)(C)O  
 COC.COc1cc2c(c(OS(=O)(=O)C(F)F)F)c1C(=O)OC(C)(C)O2>>COCO[C@H](/C=C/C[C@H](C)O[  
 Si](C)(C)C(C)(C)C)[C@@H](OCc1cccc1)[C@H](C/C=C/c1cc(OC)cc2c1C(=O)OC(C)(C)O2)OCc1c  
 C=CC(=O)OC.COc1cc(Br)c2c3c1O[C@@H]1[C@]34CCN(C)[C@H](C2)[C@]42C=C[C@@]1(OC)[  
 C@H]1C(=O)NC(=O)[C@H]12>>COC(=O)/C=C/c1cc(OC)c2c3c1C[C@H]1N(C)CC[C@@]34[C@  
 @H](O2)[C@@]2(OC)C=C[C@@]14[C@@H]1C(=O)NC(=O)[C@@H]12  
 C=CC(=O)OC(C)(C)C.C=CC1=C(Br)CCCC1>>C=CC1=C(/C=C/C(=O)OC(C)(C)C)CCCC1  
 C=CC(=O)OCC.Cn1nc(-c2cccc2)c(Br)cc1=O>>CCOC(=O)/C=C/c1cc(=O)n(C)nc1-c1cccc1  
 C=CC(N)=O.O=[N+](=[O-])c1ccc(Br)cc1>>NC(=O)/C=C/c1ccc([N+](=O)[O-])cc1  
 C=CC(=O)OCC.Cc1cn(Cc2ccc(I)cc2)c(=O)[nH]c1=O>>CCOC(=O)/C=C/c1ccc(Cn2cc(C)c(=O)[nH]c  
 2=O)cc1  
 C=CC(=O)N(C)OC.N#Cc1ccc2cc(Br)ccc2c1>>CON(C)C(=O)/C=C/c1ccc2cc(C#N)ccc2c1  
 C=CP(=O)(OCC)OCC.O=[N+](=[O-])c1ccc(I)cc1>>CCOP(=O)(/C=C/c1ccc([N+](=O)[O-])cc1)OCC  
 C=Cc1ccc(N(c2cccc2)c2cccc3ccccc23)cc1.O=Cc1ccc(Br)cc1F>>O=Cc1ccc(/C=C/c2ccc(N(c3ccccc3)  
 c3ccccc4ccccc34)cc2)cc1F  
 Br1cccc1I.C=CC(=O)OCCCC>>CCCCOC(=O)/C=C/c1cccc1Br  
 C=CC(=O)OC.CC(C)(F)CN1[C@H](C(F)F)Cc2c(ccc3c2cnn3C2CCCCO2)[C@@]1(C)c1c(F)cc(Br)cc  
 1F>>COC(=O)/C=C/c1cc(F)c([C@]2(C)c3ccc4c(cnn4C4CCCCO4)c3C[C@@H](C(F)F)N2CC(C)(C)F  
 C=CCO[Si](C)(C)C(C)(C)C.FC(F)(F)c1ccc(Br)cc1>>CC(C)(C)[Si](C)(C)OC/C=C/c1ccc(C(F)F)F)cc1  
 C=CC(=O)CCCC.N#Cc1ccc(Br)cc1>>CCCCC(=O)/C=C/c1ccc(C#N)cc1  
 C=Cc1ccc(F)cc1.O=Cc1ccc(Cl)cc1>>O=Cc1ccc(/C=C/c2ccc(F)cc2)cc1  
 C=Cc1cccc1.IC1=C(c2cccc2)[Se]CC1>>C(=C/c1cccc1)C1=C(c2cccc2)[Se]CC1



4578 C=CC(=O)OC.CC(C)c1ccc(Br)c2c(c1)[C@]13CCCC[C@@H]1CCCC3=N2>>COC(=O)/C=C/c1ccc(C(C)C)cc2c1N=C1CCCC[C@H]3CCCC[C@@H]123  
 4579 C=Cc1ccc(Br)cc1.ClC1cccc1>>Br1ccc/C=C/Cc2ccccc2)cc1  
 C=CCc1cc(OC)c(OC)cc1CC1c2cc(OC)c(OC)cc2CCN1C(=O)C(F)(F)F.COc1ccc(I)c(CC2c3cc(OC)c(O)C)cc3CCN2C(=O)C(F)(F)F)cc1OC>>COc1cc(/C=C/Cc2cc(OC)c(OC)cc2CC2c3cc(OC)c(OC)cc3CCN2C(=O)C(F)(F)F)c(CC2c3cc(OC)c(OC)cc3CCN2C(=O)C(F)(F)F)cc1OC  
 C=CC[C@H](CC(=O)OC(C)(C)C)(=O)N[C@H](C(=O)NC(c1cccc1)c1cccc1)C(C)(C)C.Fc1cc(Br)ccc1-c1cccc1>>CC(C)(C)OC(=O)C[C@@H](C/C=C/c1ccc(-c2ccccc2)c(F)c1)C(=O)N[C@H](C(=O)NC(c1cccc1)c1cccc1)C(C)(C)C  
 4582 C=CC(=O)OC.Cc1cncc(Br)c1>>COC(=O)/C=C/c1cncc(C)c1  
 4583 C=CC(=O)OCCCC.Nc1ccc(F)cc1I>>CCCCOC(=O)/C=C/c1cc(F)ccc1N  
 4584 C=Cc1cccc1.O=[N+](O-)[c1ccc(I)cc1>>O=[N+](O-)[c1ccc(/C=C/c2ccccc2)cc1  
 C=Cc1ccc(N(CCCC)CCCC)cc1.CCCCCCCCCC1(CCCCCCCCCC)c2cc(Br)ccc2-c2ccc(C=O)cc21>>CCCCCCCCCCCC1(CCCCCCCCCC)c2cc(C=O)ccc2-c2ccc(/C=C/c3ccc(N(CCCC)CCCC)cc3)cc21  
 C=CC(=O)OC.Cc1[nH]c2ccccc2c1CCN1CCCC1c1ccc(Br)cc1>>COC(=O)/C=C/c1ccc(C2CCCN2CCc2c(C)[nH]c3ccccc23)cc1  
 4587 C=Cc1ccc(O[Si](C)(C)C(C)(C)C)cc1.C[Si](C)(C)I>>CC(C)(C)[Si](C)(C)Oc1ccc(/C=C/[Si](C)(C)C)cc1C=Cc1ccc2c(c1)CC[C@H]1[C@@H]2CC[C@H]2(C)[C@H](O[Si](C)(C)C(C)(C)C)CC[C@H]12.C[Si](C)(C)OS(=O)(=O)C(F)(F)F>>CC(C)(C)[Si](C)(C)O[C@H]1CC[C@H]2[C@@H]3CCc4cc(/C=C/[Si](C)(C)C)ccc4[C@H]3CC[C@H]12C  
 4589 C=CCCCCCC.N#Cc1ccc(Br)cc1>>CCCCC/C=C/c1ccc(C#N)cc1  
 4590 C=CC(=O)OC.N#Cc1cccc1Br>>COC(=O)/C=C/c1cccc1C#N  
 4591 C=CC(=O)N(C)C.O=Cc1cccc(Br)c1>>CN(C)C(=O)/C=C/c1cccc(C=O)c1  
 4592 C=CC(=O)O.O=C1CCC(N2Cc3cccc(Br)c3C2=O)C(=O)N1>>O=C(O)/C=C/c1cccc2c1C(=O)N(C1CC(C(=O)NC1=O)C2  
 4593 C=CC#N.O=Cc1cccc1Br>>N#C/C=C/c1cccc1C=O  
 4594 C=CC(=O)OC(C)(C)C.Cc1nc(I)ccc1OCc1cccc1>>Cc1nc(/C=C/C(=O)OC(C)(C)C)ccc1OCc1cccc1  
 4595 C=CC(C)(C)O.O=c1c(Br)coc2ccccc12>>CC(C)(O)/C=C/c1coc2ccccc2c1=O  
 C=CC(=O)O[C@H]1C[C@H](C)CC[C@H]1C(C)C.O=Cc1cccc1Br>>CC(C)[C@H]1CC[C@H](C)C[C@H]1OC(=O)/C=C/c1cccc1C=O  
 4597 C=CC(=O)OCCCC.Cc1cccc(I)c1>>CCCCOC(=O)/C=C/c1cccc(C)c1  
 4598 C=Cc1cccc1.O=c1oc2cc(C(F)(F)F)ccc2c(-c2ccccc2)c1Br>>O=c1oc2cc(C(F)(F)F)ccc2c(-c2ccccc2)c1/C=C/c1cccc1  
 C=CC(=O)O.N[C@H](Cc1c[nH]c2c(I)cccc12)C(=O)O>>N[C@H](Cc1c[nH]c2c(/C=C/C(=O)O)ccc12)C(=O)O  
 4600 C=CS(=O)(=O)NCC(C)C.COc1ccc(Br)c(CNC(=O)OC(C)(C)C)c1>>COc1ccc(/C=C/S(=O)(=O)NCC(C)C)c(CNC(=O)OC(C)(C)C)c1  
 4601 C=CC(=O)OC.O=c1[nH]c2cc(Br)ccc2c2c1CCC2>>COC(=O)/C=C/c1ccc2c3c(c(=O)[nH]c2c1)CCC3C=C[C@H](CCCC)O[Si](C)(C)C(C)(C)C.COC(=O)CCC[C@H](O[Si](C)(C)C(C)(C)C)[C@H](/C=C/c1cccc1Br)O[Si](C)(C)C(C)(C)C>>CCCC[C@H](/C=C/c1cccc1/C=C/[C@H](O[Si](C)(C)C(C)(C)C)[C@H](CCCC(=O)OC)O[Si](C)(C)C(C)(C)C)O[Si](C)(C)C(C)(C)C  
 4602 Br1cccc2c1cc(-c1ccc(I)cc1)n2-c1nccn1.C=CC(=O)OCC>>CCOC(=O)/C=C/c1ccc(-c2cc3c(Br)cccc3n2-c2nccn2)cc1  
 4603 C=Cc1cccc1.FC(F)(F)c1cc(Br)cc(C(F)(F)F)c1>>FC(F)(F)c1cc(/C=C/c2ccccc2)cc(C(F)(F)F)c1  
 4604 C=CC=O.Clc1ccc(I)cc1>>O=C/C=C/c1ccc(Cl)cc1  
 4605 C=COCCCC.COc1cccc(C(=O)Cl)c1>>CCCCO/C=C/C(=O)c1cccc(OC)c1  
 4606 C=CC(=O)OC.Nc1cc(Br)ccn1>>COC(=O)/C=C/c1ccnc(N)c1  
 4607 C=CC(F)(F)C(F)(F)C(F)(F)C(F)(F)C(F)(F)C(F)(F)C(F)(F)C(F)(F)F.FC(F)(F)c1ccc(Br)cc1>>FC(F)(F)c1ccc(/C=C/C(F)(F)C(F)(F)C(F)(F)C(F)(F)C(F)(F)C(F)(F)C(F)(F)F)cc1  
 C=CC(=O)OC.CC(C)[C@H](F)C1C=C(OS(=O)(=O)C(F)(F)F)[C@H](C)CC1>>COC(=O)/C=C/C1=C[C@H](C)(C)C)CC[C@H]1C  
 C=CC(=O)CCC.CCC1=C[C@H]2CN(C1)Cc1c[nH]c3ccc(I)cc13[C@@H](C(=O)OC)(c1cc3cc(cc1O)C)N(C)[C@H]1[C@@H](O)C(=O)OC[C@H](OC(C)=O)[C@H]4(CC)C=CCN5CC[C@H]31[C@@H]54)C2>>CCCC(=O)/C=C/c1ccc2[nH]c3c(c2c1)CN1CC(CC)=C[C@H](C1)C[C@H]3(C(=O)OC)c1cc2c(cc1OC)N(C)[C@H]1[C@@H](O)C(=O)OC[C@H](OC(C)=O)[C@H]3(CC)C=CCN4CC[C@H]21[C@@H]4  
 4611 C=CCCCCCC.COc1ccc(I)cc1>>CCCCC/C=C/c1ccc(OC)cc1  
 4612 Br1ccc2ccccc2c1.C=CS(N)(=O)=O>>NS(=O)(=O)/C=C/c1ccc2ccccc2c1  
 4613 C=CCCCO.COCc1cncc(Br)c1>>COCc1cncc(/C=C/CCO)c1  
 4614 C=CC(=O)OCCCC.O=c1[nH]c(=O)n([C@H]2C[C@H](O)[C@@H](CO)O2)cc1I>>CCCCOC(=O)/C=C/c1cn([C@H]2C[C@H](O)[C@@H](CO)O2)c(=O)[nH]c1=O

4615 C=CC(=O)OCC.O=C1c(I)c(-c2ccc(O)cc2)oc2cc(O)c1>>CCOC(=O)/C=C/c1c(-  
c2ccc(O)cc2)oc2cc(O)ccc2c1=O  
4616 C=CC(=O)OC(C)(C)C.CCOC(=O)c1cc(I)nn1COCC[Si](C)(C)C>>CCOC(=O)c1cc(/C=C/C(=O)OC(C)  
(C)C)nn1COCC[Si](C)(C)C  
4617 C=CC(=O)OC.Cc1ccc(Cl)c(Br)c1>>COC(=O)/C=C/c1cc(C)ccc1Cl  
4618 C=CC(=O)OCC.O=[N+][O-]c1ccc(-c2ccncc2Br)cc1>>CCOC(=O)/C=C/c1cnccc1-  
c1ccc([N+](=O)[O-])cc1  
4619 C=CCN1C(=O)c2ccccc2C1=O.Fc1cccc(Br)c1>>O=C1c2ccccc2C(=O)N1C/C=C/c1cccc(F)c1  
4620 C=CC[C@@H](NC(=O)OC(C)(C)C)C(=O)OC.COC(=O)c1ccccc1I>>COC(=O)c1ccccc1/C=C/C[C@  
@H](NC(=O)OC(C)(C)C)C(=O)OC  
4621 C=Cc1cc(OC(C)=O)cc(OC(C)=O)c1.CC(=O)Oc1ccc(Br)cc1>>CC(=O)Oc1ccc(/C=C/c2cc(OC(C)=O)c  
c(OC(C)=O)c2)cc1  
4622 Brc1cnc2[nH]c3ncccc3c2c1.C=CC(=O)N(C)Cc1cc2ccccc2n1C>>CN(Cc1cc2ccccc2n1C)C(=O)/C=C/c  
1cnc2[nH]c3ncccc3c2c1  
4623 C=CC(=O)OCC.Cc1ccccc1Cl>>CCOC(=O)/C=C/c1ccccc1C  
4624 C=Cc1ccc([Si](OC)(OC)OC)cc1.CCOP(=O)(Cc1ccc(Br)cc1)OCC>>CCOP(=O)(Cc1ccc(/C=C/c2ccc([  
Si](OC)(OC)OC)cc2)cc1)OCC  
4625 C=CC(=O)C(O[Si](CC)(CC)CC)c1c(OCc2ccccc2)c(OC)c2c(OC)c(OC)cc(OC)c2c1OC.COC(=O)c1cc2  
cc(I)c(OCc3ccccc3)c(OC)c2c(=O)o1>>CC[Si](CC)(CC)OC(C(=O)/C=C/c1cc2cc(C(=O)OC)oc(=O)c2  
c(OC)c1OCc1ccccc1)c1c(OCc2ccccc2)c(OC)c2c(OC)c(OC)cc(OC)c2c1OC  
4626 C=CC(C)(C)C(=O)NC(C)(C)CO.CC(=O)OC[C@H]1O[C@@H](c2cc(Cc3ccc(Br)cc3C(C)C)c(C)cc2C  
)[C@H](OC(C)=O)[C@@H](OC(C)=O)[C@@H]1OC(C)=O>>CC(=O)OC[C@H]1O[C@@H](c2cc(  
Cc3ccc(/C=C/C(C)(C)C(=O)NC(C)(C)CO)cc3C(C)C)c(C)cc2C)[C@H](OC(C)=O)[C@@H](OC(C)=  
O)[C@@H]1OC(C)=O  
4627 C=Cc1ccccc1.COc1ccc(/N=N/c2ccc(Br)cc2)cc1>>COc1ccc(/N=N/c2ccc(/C=C/c3ccccc3)cc2)cc1  
4628 C=CC(=O)OC.O=CNc1ccccc1I>>COC(=O)/C=C/c1ccccc1NC=O  
4629 Brc1ccc2ccccc2c1.C=CC(=O)OC(C)(C)C>>CC(C)(C)OC(=O)/C=C/c1ccc2ccccc2c1  
4630 C=Cc1ccccc1.Ic1cccn1>>C(=C/c1cccn1)c1ccccc1  
4631 C=CC(F)(F)F.Fc1cccc(Br)c1>>Fc1cccc(/C=C/C(F)(F)F)c1  
4632 C=CC(=O)OCC.Fc1ccc(I)cc1>>CCOC(=O)/C=C/c1ccc(F)cc1  
4633 C=Cc1ccc(C(=O)OC(C)(C)C)cc1.COc1ccc(I)cc1>>COc1ccc(/C=C/c2ccc(C(=O)OC(C)(C)C)cc2)cc1  
4634 C=CC(=O)OCC.Nc1cc(OC(F)(F)F)ccc1Br>>CCOC(=O)/C=C/c1ccc(OC(F)(F)F)cc1N  
4635 C=CC(C)=O.CCc1ccc2c(c1)C(OS(=O)(=O)C(F)(F)F)=CC(C)(C)CO2>>CCc1ccc2c(c1)C(/C=C/C(C)=  
O)=CC(C)(C)CO2  
4636 C=CC(=O)OC.C[C@H]1CCC[C@H](NC(=O)OC(C)(C)C)c2cc(ccn2)-  
c2cc(I)c(N)cc2NC1=O>>COC(=O)/C=C/c1cc2c(cc1N)NC(=O)[C@H](C)CCC[C@H](NC(=O)OC(C)(  
C)C)c1cc-2ccn1  
4637 Brc1ccc(-c2cccs2)s1.C=CC(=O)OCC>>CCOC(=O)/C=C/c1ccc(-c2cccs2)s1  
4638 C=CC(O[Si](C)(C)C(C)(C)C(CCCCC)O[Si](C)(C)C(C)(C)C.O=Cc1ccc(Br)cc1>>CCCCC(O[Si](C)  
(C)C(C)(C)C)C(/C=C/c1ccc(C=O)cc1)O[Si](C)(C)C(C)(C)C  
4639 Br/C(=C/[Te]c1ccccc1)c1ccccc1.C=CC(=O)OCC>>CCOC(=O)/C=C/C(=C/[Te]c1ccccc1)c1ccccc1  
4640 C=CC(OCC)OCC.COc1cc(Br)c(C=O)cc1OC>>CCOC(/C=C/c1cc(OC)c(OC)cc1C=O)OCC  
4641 C=CCn1c(-c2ccc(OC)cc2)nc2ccccc2c1=O.O=C(CN1C(=O)COc2ccccc21)c1ccc(Br)cc1>>COc1ccc(-  
c2nc3ccccc3c(=O)n2C/C=C/c2ccc(C(=O)CN3C(=O)COc4ccccc43)cc2)cc1  
4642 C=CC(=O)OC.CN(C)c1ccc(Br)cc1>>COC(=O)/C=C/c1ccc(N(C)C)cc1  
4643 C=CC(=O)OC.CCOC(=O)Nc1ccccc1C1=C(I)CCN1S(=O)(=O)c1ccc(C)cc1>>CCOC(=O)Nc1ccccc1C  
1=C(/C=C/C(=O)OC)CCN1S(=O)(=O)c1ccc(C)cc1  
4644 C=Cc1ccc(C(C)(C)C)cc1.Cc1cc(Br)ccc1I>>Cc1cc(Br)ccc1/C=C/c1ccc(C(C)(C)C)cc1  
4645 C=CC(=O)C(C)CC(=O)OC.COc1ccc(Br)cc1>>COC(=O)CC(C)C(=O)/C=C/c1ccc(OC)cc1  
4646 Brc1ccc2ccc3ccccc4ccc1c2c34.C=CC=O>>O=C/C=C/c1ccc2ccc3ccccc4ccc1c2c34  
4647 Brc1ccc2c(c1)OCO2.C=CC(=O)C(C)CC(=O)OC>>COC(=O)CC(C)C(=O)/C=C/c1ccc2c(c1)OCO2  
4648 C=Cc1ccccc1.Clc1ccccc1Br>>Clc1ccccc1/C=C/c1ccccc1  
4649 C=CC(N)=O.O=C1Nc2ccc(Br)cc2C1=O>>NC(=O)/C=C/c1ccc2c(c1)C(=O)C(=O)N2  
4650 C=CC(=O)OC.Cc1ccc(C#N)c(Br)n1>>COC(=O)/C=C/c1nc(C)ccc1C#N  
4651 Brc1ccc(C(=C2CCCCC2)c2ccccc2)cc1.C=CC(N)=O>>NC(=O)/C=C/c1ccc(C(=C2CCCCC2)c2ccccc  
c2)cc1  
4652 C=CC#N.Cc1ccccc(NS(=O)(=O)c2ccc(Br)cc2)c1>>Cc1ccccc(NS(=O)(=O)c2ccc(/C=C/C#N)cc2)c1  
4653 Brc1ccsc1.C=CC(C)(O)CCC=C(C)C>>CC(C)=CCCC(C)(O)/C=C/c1ccsc1  
4654 Brc1ccccc1.C=CCCC(C)=O>>CC(=O)CC/C=C/c1ccccc1  
4655 C=CC(=O)OC.ClCc1ccccc1>>COC(=O)/C=C/Cc1ccccc1  
4656 Brc1cnc2ccccc2c1.C=Cc1ccccc1>>C(=C/c1cnc2ccccc2c1)c1ccccc1

4657 C=CC(=O)OCC.CCOC(=O)c1cnc2c(C)cc(OC)c2c1Br>>CCOC(=O)/C=C/c1c(C(=O)OCC)cnc2c(C)c  
c(OC)cc12

4658 C=CC(=O)OC.Ic1cccc1C[Se]c1cccc1>>COC(=O)/C=C/c1cccc1C[Se]c1cccc1

4659 C=CC(C)=O.CC1=C(OS(=O)(=O)C(F)(F)F)C(C)(C)C[C@H](O[Si](C)(C)C(C)(C)C)C1>>CC(=O)/C=  
C/C1=C(C)C[C@@H](O[Si](C)(C)C(C)(C)C)CC1(C)C

4660 Brclccnc1.C=CC(CCC)OCc1cccc1>>CCCC(/C=C/c1ccnc1)OCc1cccc1

4661 C=CC#N.COCn1nc(-c2cccc2)c(Br)cc1=O>>COCn1nc(-c2cccc2)c(/C=C/C#N)cc1=O

4662 C=Cc1ccc(OC)c(OC)c1.Oc1cccc1I>>COc1ccc(/C=C/c2cccc2O)cc1OC

4663 C=CC(=O)OC.COC(=O)/C=C/c1cc(Cl)cc2c(=O)cc(-  
c3cccc3)oc12>>COC(=O)/C=C/c1cc(/C=C/C(=O)OC)c2oc(-c3cccc3)cc(=O)c2c1

4664 C=CCN(C(=O)C(C)(C)C)[C@H](C)c1cc(F)cc(F)c1.O=C1Nc2ncccc2[C@@]12Cc1cc(Br)cnc1C2>>C[  
C@H](c1cc(F)cc(F)c1)N(C/C=C/c1cnc2c(c1)C[C@]1(C2)C(=O)Nc2ncccc21)C(=O)C(C)(C)C

4665 C=Cc1cccc1C(=O)OC.COC(=O)c1cc2cc(Br)ccc2cc1OC(C)=O>>COC(=O)c1cccc1/C=C/c1ccc2cc(  
OC(C)=O)c(C(=O)OC)cc2c1

4666 C=Cc1ccc(OC)cc1.Oc1ccc(-c2nc3cccn3c2-c2ccc(Br)cc2)cc1>>COc1ccc(/C=C/c2ccc(-c3c(-  
c4ccc(O)cc4)nc4cccn34)cc2)cc1

4667 Brclncc2cccc12.C=CC=O>>O=C/C=C/c1cnc2cccc12

4668 C=CC(=O)OC.Fc1ccc(Br)cc1>>COC(=O)/C=C/c1ccc(F)cc1

4669 Brclcccc(N(c2cccc2)c2cccc2)n1.C=Cc1ccc(Cl)c1>>Clc1ccc(/C=C/c2cccc(N(c3cccc3)c3cccc3)n  
2)c1

4670 C=Cc1cccc1.CC1(Br)CCN(C(=O)OC(C)(C)C)CC1>>CC1(/C=C/c2cccn2)CCN(C(=O)OC(C)(C)C)C  
C=CC(=O)OCCO.C[C@]12C[C@@]34C=C(Sc5ccc(I)cc5)C(=O)[C@@](C)(CCC(=O)Nc5c(O)ccc(C(  
=O)O)c5O)[C@@H]3[C@H](C[C@H]1C4)O2>>C[C@]12C[C@@]34C=C(Sc5ccc(/C=C/C(=O)O  
CCO)cc5)C(=O)[C@@](C)(CCC(=O)Nc5c(O)ccc(C(=O)O)c5O)[C@@H]3[C@H](C[C@H]1C4)O2

4672 C=CC(=O)OCC.COc1cc(Br)c(C)c2nnn(C)c12>>CCOC(=O)/C=C/c1cc(OC)c2c(nnn2C)c1C

4673 C=Cc1ccc(C)cc1.O=[N+](O-)c1ccc(Cl)cc1>>Cc1ccc(/C=C/c2ccc([N+](=O)[O-])cc2)cc1

4674 C=CC(=O)OC(C)(C)C.Ic1cccc2cccc12>>CC(C)(C)OC(=O)/C=C/c1cccc2cccc12

4675 C=CC(=O)OCC.Oc1ccc(I)cc1>>CCOC(=O)/C=C/c1ccc(O)cc1

4676 C=CC(=O)N(C)[C@H](C)c1oc2cccc2c1C.CC1(C)COc2cc(Br)cnc2NC1=O>>Cc1c([C@@H](C)N(C)  
C(=O)/C=C/c2cnc3c(c2)OCC(C)(C)C(=O)N3)oc2cccc12

4677 C=CC(=O)OC.O=C1c2ccc(OS(=O)(=O)C(F)(F)F)cc2C(=O)N1CCc1cccc1>>COC(=O)/C=C/c1ccc2c(  
c1)C(=O)N(CCc1cccc1)C2=O

4678 C=CC(=O)N(C)C.C[C@H]1COCc2nc3c(N)nc4cc(Br)ccc4c3n21>>C[C@H]1COCc2nc3c(N)nc4cc(/C  
=C/C(=O)N(C)C)ccc4c3n21

4679 C=CC(=O)OC(C)(C)C.COc1ccc(-c2sc3cc(OC)ccc3c2Oc2ccc(Br)cc2)cc1>>COc1ccc(-  
c2sc3cc(OC)ccc3c2Oc2ccc(/C=C/C(=O)OC(C)(C)C)cc2)cc1

4680 C=CC(=O)OC(C)(C)C.O=C(c1cnn(-  
c2cccc2)c1)c1cc(Br)ccc1O>>CC(C)(C)OC(=O)/C=C/c1ccc(O)c(C(=O)c2cnn(-c3cccc3)c2)c1

4681 C=Cc1ccc(N(CCCC)CCCC)cc1.CCCn1c(=O)c(C)nc2ccc(Br)cc21>>CCCCN(CCCC)c1ccc(/C=C/c2ccc  
3nc(C)c(=O)n(CCC)c3c2)cc1

4682 C=CC(OCC)OCC.COc1ccc(Br)c(C=O)c1>>CCOC(/C=C/c1ccc(OC)cc1C=O)OCC

4683 Brclc2cccc2cc2cccc12.C=Cc1nc2c(N)ncnc2n1[C@@H]1O[C@H](CO[Si](C)(C)C(C)(C)C)[C@@H]  
[O[Si](C)(C)C(C)(C)C)[C@H]1O[Si](C)(C)C(C)(C)C>>CC(C)(C)[Si](C)(C)OC[C@H]1O[C@@H](n  
2c(/C=C/c3c4cccc4cc4cccc34)nc3c(N)ncnc32)[C@H](O[Si](C)(C)C(C)(C)C)[C@H]1O[Si](C)(C)

4684 Brclccsc1.C=Cc1cccc1>>C(=C/c1ccsc1)\c1cccc1

4685 Brclcccc1.C=CP(=O)(OCC)OCC>>CCOP(=O)(/C=C/c1cccc1)OCC

4686 C=CC(=O)CC.COC(=O)c1ccc(Br)cc1>>CCC(=O)/C=C/c1ccc(C(=O)OC)cc1

4687 C=CC(=O)OCC.COc1ccc(-c2ccc(Br)s2)cc1>>CCOC(=O)/C=C/c1ccc(-c2ccc(OC)cc2)s1

4688 Brclccsc1.C=CS(N)(=O)=O>>NS(=O)(=O)/C=C/c1ccsc1

4689 C=CC(=O)N(C)OC.NC(=O)c1cccc(I)c1>>CON(C)C(=O)/C=C/c1cccc(C(N)=O)c1

4690 C=CC(=O)N1CCC(Cc2nnc(C)o2)CC1.Clc1ccc(Br)c(Cn2ccn2)c1>>Cc1nnc(CC2CCN(C(=O)/C=C/c3  
ccc(Cl)cc3Cn3ccn3)CC2)o1

4691 C=CC(C)(C)O.O=C1cc(-c2cccc2)oc2cc(Br)ccc12>>CC(C)(O)/C=C/c1ccc2c(=O)cc(-c3cccc3)oc2c1

4692 C=CC(=O)OC(C)(C)C.Nc1cccc1Br>>CC(C)(C)OC(=O)/C=C/c1cccc1N

4693 C=CC#N.CC(C)NCCCN1c(Sc2cc3c(cc2I)OCO3)nc2c(N)ncnc21>>CC(C)NCCCN1c(Sc2cc3c(cc2/C=C/  
C#N)OCO3)nc2c(N)ncnc21

4694 C=CC(=O)OCC.CN1C(=O)C(C)(C)c2cc(Br)ccc21>>CCOC(=O)/C=C/c1ccc2c(c1)C(C)(C)C(=O)N2C

4695 C=CC(=O)OC.O=C(NCc1ccc(F)cc1F)c1c(NCCO)c2cc(Br)cnc2n(OCc2cccc2)c1=O>>COC(=O)/C=C  
/c1cnc2c(c1)c(NCCO)c(C(=O)NCc1ccc(F)cc1F)c(=O)n2OCc1cccc1

4696 C=Cc1cccc(C=O)c1.FC(F)(F)C(F)(F)C(F)(F)C(F)(F)C(F)(F)C(F)(F)Br>>O=Cc1cccc(/C=C/C(F)(F)C(  
F)(F)C(F)(F)C(F)(F)C(F)(F)C(F)(F)F)c1

4697 Br1cccc2cccc12.C=CC(=O)OC(C)(C)C>>CC(C)(C)OC(=O)/C=C/c1cccc2cccc12  
4698 C=CC(=O)OCC.Nc1cnccc1I>>CCOC(=O)/C=C/c1cnccc1N  
4699 C=Cc1cnccc1.CC(C)(C)OC(=O)NCCCCOc1cnccc(Br)c1>>CC(C)(C)OC(=O)NCCCCOc1cnccc(/C=C/c2ccn  
cc2)c1  
4700 C=CCN(C(=O)OC(C)(C)C)C(=O)OC(C)(C)C.O=C1CCCc2ccc(Cl)cc21>>CC(C)(C)OC(=O)N(C/C=C/  
c1ccc2c(c1)C(=O)CCC2)C(=O)OC(C)(C)C  
4701 C=CCCC(=O)OCC.CC(C)(CC1Cc2cccc2C1)NC[C@@H](O)COc1cc(Br)cc(F)c1F>>CCOC(=O)CC/  
C=C/c1cc(F)c(F)c(OC[C@H](O)CNC(C)(C)CC2Cc3cccc3C2)c1  
4702 C=CC(=O)OC.Cc1cccc1C(=O)c1sc2cc(O)ccc2c1Oc1ccc(Br)cc1>>COC(=O)/C=C/c1ccc(Oc2c(C(=O)  
c3cccc3C)sc3cc(O)ccc23)cc1  
4703 C=CC(=O)OCc1cc(OCCCCCCCCCCCCCCCCC)c(OCCCCCCCCCCCCCCCCC)c(OCCCCCCCC  
CCCCCCCCCCCC)c1.Ic1cccc1>>CCCCCCCCCCCCCCCCCCCCOc1cc(COC(=O)/C=C/c2cccc2)cc(OCC  
CCCCCCCCCCCCCCCC)c1OCCCCCCCCCCCCCCCCCCCC  
4704 C=CP(=O)(OCC)OCC.Clc1cccc1Br>>CCOP(=O)(/C=C/c1cccc1Cl)OCC  
4705 C=Cc1cccc(OC)c1.Nc1ccc(Br)cc1>>COc1cccc(/C=C/c2ccc(N)cc2)c1  
4706 C=CC(=O)OCC.Cc1cn2c(Br)cccc2n1>>CCOC(=O)/C=C/c1cccc2nc(C)cn12  
4707 C=CC(=O)OC(C)(C)C.CCOC(=O)c1cc2cc(Br)ccc2[nH]1>>CCOC(=O)c1cc2cc(/C=C/C(=O)OC(C)(C)  
C)ccc2[nH]1  
4708 C=Cc1ccc2cccc2c1.COc1ccc(I)cc1>>COc1ccc(/C=C/c2ccc3cccc3c2)cc1  
4709 C=Cc1cnccc1.CCCCN(CCCC)c1ccc(/C=C/c2ccc(Br)cc2)cc1>>CCCN(CCCC)c1ccc(/C=C/c2ccc(/C=  
C/c3cnccc3)cc2)cc1  
4710 Br1ccc2c(c1)Sc1cccc1N2.C=Cc1ccc(OC)cc1>>COc1ccc(/C=C/c2ccc3c(c2)Sc2cccc2N3)cc1  
4711 C=CC(=O)OCC.COc1ccc(CCNC(=O)c2nn(Cc3cccc3)c3ccc(Br)cc23)cc1OC>>CCOC(=O)/C=C/c1cc  
c2c(c1)c(C(=O)NCCc1ccc(OC)c(OC)c1)nn2Cc1cccc1  
4712 C=Cc1ccc(Cl)cc1.O=C1C(O)=C(I)C(=O)c2cccc21>>O=C1C(O)=C(/C=C/c2ccc(Cl)cc2)C(=O)c2cccc  
4713 C=Cc1ccc(C)cc1.CCOC(=O)C(C)(C)Br>>CCOC(=O)C(C)(C)/C=C/c1ccc(C)cc1  
4714 C=Cc1ccc(Br)cc1.C=Cc1cccc1>>C=Cc1ccc(/C=C/c2cccc2)cc1  
4715 C=CC(=O)N(C)C.CCc1nc2cc(O)ccc2c(Oc2ccc(Br)cc2)c1-  
c1cccc1>>CCc1nc2cc(O)ccc2c(Oc2ccc(/C=C/C(=O)N(C)C)cc2)c1-c1cccc1  
4716 C=Cc1cnccc1.CCCCCCCCCCOc1ccc(I)cc1>>CCCCCCCCCCCCOc1ccc(/C=C/c2cnccc2)cc1  
4717 C=Cc1cccn1.O=[N+][O-]c1ccc(-c2cnccc2Br)cc1>>O=[N+][O-]c1ccc(-  
4718 C=CC(=O)OC.CC[C@ @]1(O)C(=O)OCc2c1cc1n(c2=O)Cc2cc3c(Br)cccc3nc2-  
1>>CC[C@ @]1(O)C(=O)OCc2c1cc1n(c2=O)Cc2cc3c(/C=C/C(=O)OC)cccc3nc2-1  
4719 C=CC(=O)OCC.Fc1c(F)c(F)c(Cl)c(F)c1F>>CCOC(=O)/C=C/c1c(F)c(F)c(F)c(F)c1F  
4720 C=CC(=O)O.O=[N+][O-]  
4721 )c1c(I)ccc2c1C=CC1(O2)C2CC3CC(C2)CC1C3>>O=C(O)/C=C/c1ccc2c(c1[N+])(=O)[O-  
4722 )C=CC1(O2)C2CC3CC(C2)CC1C3  
4723 C=CC(=O)OCC.COc1cc(Nc2c(Cc3cccc3)nc3ccc(Br)cn23)cc(OC)c1OC>>CCOC(=O)/C=C/c1ccc2n  
c(Cc3cccc3)c(Nc3cc(OC)c(OC)c(OC)c3)n2c1  
4724 C=Cc1cc([N+])(=O)[O-  
4725 )ccc1OCOCC[Si](C)(C)C.COC(=O)c1ccc(I)cc1>>COC(=O)c1ccc(/C=C/c2cc([N+])(=O)[O-  
4726 )ccc2OCOCC[Si](C)(C)C)cc1  
4727 C=Cc1enc2c(ccn2C(=O)OC(C)(C)C)c1OC.CCN1CCN(Cc2ccc(NC(=O)c3ccc(C)c(I)c3)cc2C(F)(F)F)C  
4728 C1>>CCN1CCN(Cc2ccc(NC(=O)c3ccc(C)c(/C=C/c4enc5c(ccn5C(=O)OC(C)(C)C)c4OC)c3)cc2C(F)(  
4729 C=CC(=O)OCC.Cc1sc2nc(COc3ccc(F)cc3)cc(=O)n2c1Br>>CCOC(=O)/C=C/c1c(C)sc2nc(COc3ccc(F)  
4730 )cc3)cc(=O)n12  
4731 C=Cc1ccc(OCCC)cc1.Cn1c(=O)c2c(cc(Br)n2C)n(C)c1=O>>CCCOc1ccc(/C=C/c2cc3c(c(=O)n(C)c(=O)  
4732 )n3C)n2C)cc1  
4733 C=CC(C)=O.COC(=O)C1(C(=O)OC)CC1Cc1cc(OC)ccc1I>>COC(=O)C1(C(=O)OC)CC1Cc1cc(OC)c  
4734 cc1/C=C/C(C)=O  
4735 C=Cc1ccc(OC)cc1.Cc1ccc2cc(Br)ccc2n1>>COc1ccc(/C=C/c2ccc3nc(C)ccc3c2)cc1  
4736 C=CC(=O)OC.COc1ccc2c(c1Br)CCC=C2c1cc(OC)c(OC)c(OC)c1>>COC(=O)/C=C/c1c(OC)ccc2c1C  
4737 CC=C2c1cc(OC)c(OC)c(OC)c1  
4738 C=CC(=O)Nc1cccc1.O=c1c(I)c(-c2ccc(O)cc2)oc2cc(O)ccc12>>O=C(/C=C/c1c(-  
4739 c2ccc(O)cc2)oc2cc(O)ccc2c1=O)Nc1cccc1  
4740 C=Cc1cccc1.Cc1ccc(I)cc1>>Cc1ccc(/C=C/c2cccc2)cc1  
4741 C=CC(=O)OCC.O=C1CCc2cc(Br)ccc21>>CCOC(=O)/C=C/c1ccc2c(c1)CCC2=O  
4742 C=Cc1cccc(OC)c1.Nc1cccc(Br)c1>>COc1cccc(/C=C/c2cccc(N)c2)c1  
4743 C=CC(=O)NCc1cccc1.CC(C)(C)c1ccc2[nH]c3c(c2c1)CC(=O)Nc1ccc(I)cc1-  
4744 3>>CC(C)(C)c1ccc2[nH]c3c(c2c1)CC(=O)Nc1ccc(/C=C/C(=O)NCc2cccc2)cc1-3  
4745 Br1ccc(I)cc1.C=Cc1ccc(O)cc1>>Oc1ccc(/C=C/c2ccc(Br)cc2)cc1

4735 C=Cc1cc(O)c(OC)cc1F.Oc1ccc(O)c(I)c1>>COc1cc(F)c(/C=C/c2cc(O)ccc2O)cc1O  
 4736 Br1cccc2cccc12.C=Cc1ccc(OC)cc1>>COc1ccc(/C=C/c2cccc3cccc23)cc1  
 4737 C=CC(=O)NCCCN(CCCNC(=O)OC(C)(C)C(=O)OC(C)(C)C.O=C(O)CC[C@@]12CCC(=O)C[C@@H]1Oc1ccc(Br)cc12>>CC(C)(C)OC(=O)NCCCN(CCCNC(=O)/C=C/c1ccc2c(c1)[C@]1(CCC(=O)O)CCC(=O)C[C@@H]1O2)C(=O)OC(C)(C)C  
 4738 C=Cc1ccc(C)cc1.Cc1ccc2c(-c3cccc3)c(Br)c(=O)oc2c1>>Cc1ccc(/C=C/c2c(-c3cccc3)c3ccc(C)cc3oc2=O)cc1  
 4739 C=Cc1cccc1.CCOC(=O)C(F)(F)Br>>CCOC(=O)C(F)(F)/C=C/c1cccc1  
 4740 C=Cc1cccc1.C[Si](C)(C)CCOCn1nc(I)c2ccc(C=O)cc21>>C[Si](C)(C)CCOCn1nc(/C=C/c2cccc2)c2ccc(C=O)cc21  
 4741 C=CC(=O)OC.COc1cc2oc(-c3cccc3)c(I)c(=O)c2cc1OC>>COC(=O)/C=C/c1c(-c2cccc2)oc2cc(OC)c(OC)cc2c1=O  
 4742 C=CC(=O)Nc1ccc(F)cc1.COc1ccc2c(=O)c(I)oc2c1>>COc1ccc2c(=O)c(/C=C/C(=O)Nc3ccc(F)cc3)co2c1  
 4743 C=CC(=O)NCc1cccc1.COc1ccc(-c2oc3cc(OC)ccc3c(=O)c2I)cc1>>COc1ccc(-c2oc3cc(OC)ccc3c(=O)c2/C=C/C(=O)NCc2cccc2)cc1  
 4744 C=Cc1ccc2c(c1)Sc1cccc1N2CCCCC.CCCCCCN1c2ccc(Br)cc2Sc2cc(C=O)ccc21>>CCCCCN1c2cccc2Sc2cc(/C=C/c3ccc4c(c3)Sc3cc(C=O)ccc3N4CCCCC)ccc21  
 4745 C=CC(=O)OC.Cc1ccc(Br)cc1CO>>COC(=O)/C=C/c1ccc(C)c(CO)c1  
 4746 C=CC(=O)OC.Cc1ccc(N)c(I)c1>>COC(=O)/C=C/c1cc(C)ccc1N  
 4747 C=CC(=O)OC.CN1c2ccc(Br)cc2Sc2cc(CCNC(=O)OCc3cccc3)ccc21>>COC(=O)/C=C/c1ccc2c(c1)Sc1cc(CCNC(=O)OCc3cccc3)ccc1N2C  
 4748 C=CC(=O)OC.Cn1nc(I)c2cc(C#Cc3cccc3)cnc21>>COC(=O)/C=C/c1nn(C)c2ncc(C#Cc3cccc3)cc12  
 4749 C=CC(=O)OC.COc1cc2c(cc1OC)Oc1c(cc(Br)cc1OC)C=C2>>COC(=O)/C=C/c1cc2c(c(OC)c1)Oc1cc(OC)c(OC)cc1C=C2  
 4750 C=C(Br)CC.C=Cc1ccc(C#N)cc1>>C=C(/C=C/c1ccc(C#N)cc1)CC  
 4751 C=CC(N)=O.Ic1cccs1>>NC(=O)/C=C/c1cccs1  
 4752 C=CC(=O)OC(C)(C)C.CN(C(=O)CSCc1cccc1)c1cccc1Br>>CN(C(=O)CSCc1cccc1)c1cccc1/C=C(/C(=O)OC(C)(C)C  
 4753 C=CC(=O)OC.CCOC(=O)c1cc(Br)c2cc(Cc3ccc(F)cc3)cnc2c1OC>>CCOC(=O)c1cc(/C=C/C(=O)OC)c2cc(Cc3ccc(F)cc3)cnc2c1OC  
 4754 Br1cccc1.C=CCN(C(=O)OC(C)(C)C)C(=O)OC(C)(C)C>>CC(C)(C)OC(=O)N(C/C=C/c1cccc1)C(=O)OC(C)(C)C  
 4755 C=CC(=O)OC(C)(C)C.COc1ccc(S(=O)(=O)N2CCc3cc(Br)cnc32)cc1>>COc1ccc(S(=O)(=O)N2CCc3cc3c(/C=C/C(=O)OC(C)(C)C)cnc32)cc1  
 4756 C=Cc1ncnc2c1nnc2C1CCCCO1.Ic1ccco1>>C(=C/c1ncnc2c1nnc2C1CCCCO1)c1ccco1  
 4757 C=CC(N)=O.Cc1cc(Br)cc(C)c1N>>Cc1cc(/C=C/C(N)=O)cc(C)c1N  
 4758 C=Cc1ccc(Cl)cc1.Oc1ccc2cccc2c1Br>>Oc1ccc2cccc2c1/C=C/c1ccc(Cl)cc1  
 4759 C=CC(=O)O.Oc1cccc(I)c1>>O=C(O)/C=C/c1cccc(O)c1  
 4760 C=CC(OC)OC.COC(=O)c1ccc(I)cc1>>COC(=O)c1ccc(/C=C/C(OC)OC)cc1  
 4761 C=Cc1cccc1.CCc1c[n+](O-)]c(CC)c(Cl)n1>>CCc1c[n+](O-)]c(CC)c(/C=C/c2cccc2)n1  
 4762 C=CC(=O)OCC.COc1c(-c2cccc2Cl)cc2cnc(NC(C)C)nc2c1Br>>CCOC(=O)/C=C/c1c(OC)c(-c2cccc2Cl)cc2cnc(NC(C)C)nc12  
 4763 C=CC(=O)OCC.Nc1ccc(Cl)cc1Br>>CCOC(=O)/C=C/c1cc(Cl)ccc1N  
 4764 C=CC(=O)O.Cc1ccc(NS(=O)(=O)c2ccc(I)cc2)cc1>>Cc1ccc(NS(=O)(=O)c2ccc(/C=C/C(=O)O)cc2)cc1  
 4765 C=CC(=O)OCCCC.COc1ccc(Br)c2cccc12>>CCCCOC(=O)/C=C/c1ccc(OC)c2cccc12  
 4766 C=Cc1ccc(C#N)c(C#N)c1.Ic1ccc2c(c1)C1c3cccc4cccc(c34)C21>>N#Cc1ccc(/C=C/c2ccc3c(c2)C2c4cccc5cccc(c45)C32)cc1C#N  
 4767 C=Cc1cc(OCCCCCCCCCCCC)cc(OCCCCCCCCCCCC)c1.Oc1ccc(I)cc1>>CCCCCCCCCCCCCOc1cc(/C=C/c2ccc(O)cc2)cc(OCCCCCCCCCCCC)c1  
 4768 C=Cc1cncnc1.CCN(CC)c1ccc2c(c1)C(C)(C)c1cc(Br)ccc1-2>>CCN(CC)c1ccc2c(c1)C(C)(C)c1cc(/C=C/c3cncnc3)ccc1-2  
 4769 C=CCC1(C)c2cccc2N(C)C1c1cccc1.COc1ccc(I)cc1>>COc1ccc(/C=C/CC2(C)c3cccc3N(C)C2c2ccccc2)cc1  
 4770 C=CC(N)=O.COc1ccc(I)c(OC)c1OC>>COc1ccc(/C=C/C(N)=O)c(OC)c1OC  
 4771 C=CC(=O)OC(C)(C)C.COc1cc(NCc2ccc(Br)cn2)cc(OC)c1OC>>COc1cc(NCc2ccc(/C=C/C(=O)OC(C)(C)C)cn2)cc(OC)c1OC  
 4772 C=C(Br)CC.C=Cc1cccc1>>C=C(/C=C/c1cccc1)CC  
 4773 C=Cc1cccc1O.Oc1cc(O)cc(I)c1>>Oc1cc(O)cc(/C=C/c2cccc2O)c1  
 4774 C=Cc1ccc(C#N)cc1.N#CCc1ccc(Br)cc1>>N#CCc1ccc(/C=C/c2ccc(C#N)cc2)cc1  
 4775 C=CC(=O)OCC.COCc1nc(O)c(I)c(COC)n1>>CCOC(=O)/C=C/c1c(O)nc(COC)nc1COC

4776 C=CC(=O)OC.OCCc1cccc1Br>>COC(=O)/C=C/c1cccc1CCCO  
4777 Br1cccc1.C=C/C=C/C(=O)N(CCCC)CCCC>>CCCCN(CCCC)C(=O)/C=C/C=C/c1cccc1  
4778 C=CC(=O)OC.Nc1ccc(C(F)(F)F)cc1Br>>COC(=O)/C=C/c1cc(C(F)(F)F)ccc1N  
4779 C=Cc1cccc1.ClC12CC3CC(CC(C3)C1)C2>>C(=C/C12CC3CC(CC(C3)C1)C2)\c1cccc1  
4780 C=Cc1cncnc1.CCOCc1c2ccc(Br)cc2c2cc(C=O)ccc21>>CCOCc1c2ccc(C=O)cc2c2cc(/C=C/c3cnc  
c3)ccc21  
4781 C=C[Si](C)(C)c1cccc1.CC(C)(C)c1ccc(Br)cc1>>CC(C)(C)c1ccc(/C=C/[Si](C)(C)c2cccc2)cc1  
4782 C=Cc1cccc1.Cc1cccc(I)c1>>Cc1cccc(/C=C/c2cccc2)c1  
4783 C=Cc1ccc(NC)cc1.FCCOCCOCCOc1ncc(I)cc1Br>>CNc1ccc(/C=C/c2cnc(OCCOCCOCCF)c(Br)c2)c  
4784 Br1cnc2cccc2c1.C=CCCCCCCC>>CCCCCCCC/C=C/c1cnc2cccc2c1  
4785 C=CC(=O)N(C)Cc1cccc(C(C)C)c1OCCC.O=C1CNc2cc(Br)cnc2N1>>CCCOc1c(CN(C)C(=O)/C=C/  
c2cnc3c(c2)CNCC(=O)N3)ccc1C(C)C  
4786 C=CC(N)=O.Cn1c2cccc2c2nc3ccc(Cl)cc3c3cccc1c32>>Cn1c2cccc2c2nc3ccc(/C=C/C(N)=O)cc3c3c  
ccc1c32  
4787 Br1ccnc1.C=Cc1nn(C(c2cccc2)(c2cccc2)c2cccc2)c2ccc(C#N)c(OC)c12>>COc1c(C#N)ccc2c1c(/  
C=C/c1ccnc1)nn2C(c1cccc1)(c1cccc1)c1cccc1  
4788 C=CC(C)(C)O.Nc1cccc(I)c1>>CC(C)(O)/C=C/c1cccc(N)c1  
4789 C=CC(=O)OC.C[C@H]1CC[C@H]2COCC2=C1Br>>COC(=O)/C=C/C1=C2COC[C@H]2CC[C@  
@H]1C  
4790 Br1cccc2cccc12.C=Cc1cc2ccc(OC)cc2oc1=O>>COc1ccc2cc(/C=C/c3cccc4cccc34)c(=O)oc2c1  
4791 C=Cc1ccc2cccc2c1.Cc1ccc(Br)cc1I>>Cc1ccc(Br)cc1/C=C/c1ccc2cccc2c1  
4792 Br1ccc(C(=C2C3CCCC2CCC3)c2ccc3c(cnn3C3CCCCO3)c2)cc1.C=CC(=O)OC>>COC(=O)/C=C/c1  
ccc(C(=C2C3CCCC2CCC3)c2ccc3c(cnn3C3CCCCO3)c2)cc1  
4793 C=CC(=O)NCCc1ccc(F)cc1.O=c1c(I)c(-c2ccc(O)cc2)oc2cc(O)ccc12>>O=C(/C=C/c1c(-  
c2ccc(O)cc2)oc2cc(O)ccc2c1=O)NCCc1ccc(F)cc1  
4794 C=CC(=O)OC.CCc1ccc(Br)cc1>>CCc1ccc(/C=C/C(=O)OC)cc1  
4795 C=CC(=O)OC(C)(C)C.COc1cc(COCCC(=O)OC(C)(C)C)c(Br)cc1OCc1cccc1>>COc1cc(COCCC(=O)  
)OC(C)(C)C)c(/C=C/C(=O)OC(C)(C)C)cc1OCc1cccc1  
C=C[C@](C)(C)(COC(F)F)C(=O)O.CC(C)[C@H](O)C(=O)N[C@@H](C)C(=O)N1CCC[C@H](C(=O)  
4796 N[C@H](C)c2ccc3ccc(Br)cc3n2)N1>>CC(C)[C@H](O)C(=O)N[C@@H](C)C(=O)N1CCC[C@H](  
C(=O)N[C@H](C)c2ccc3ccc(/C=C/[C@](C)(COC(F)F)C(=O)O)cc3n2)N1  
4797 C=CC(=O)OCC.O=c1c(Br)coc2cccc12>>CCOC(=O)/C=C/c1coc2cccc2c1=O  
4798 C=CC(=O)OCC.O=Cc1ccc(F)cc1Br>>CCOC(=O)/C=C/c1cc(F)ccc1C=O  
4799 C=Cc1cccc(C=O)c1.CCOC(=O)C(F)(F)Br>>CCOC(=O)C(F)(F)/C=C/c1cccc(C=O)c1  
4800 C=Cc1cccc1OC.COc1ccc(Br)cc1>>COc1ccc(/C=C/c2cccc2OC)cc1  
4801 C=Cc1cc(OC(C)=O)cc(OC(C)=O)c1.Nc1ccc(I)cc1>>CC(=O)Oc1cc(/C=C/c2ccc(N)cc2)cc(OC(C)=O)c  
4802 C=Cc1ccc(F)cc1.N#Cc1ccc2cc(Br)ccc2c1>>N#Cc1ccc2cc(/C=C/c3ccc(F)cc3)ccc2c1  
4803 C=CC(=O)OC(C)(C)C.C=CC1=C(Br)C(O[Si](C)(C)C(C)(C)C)CCC1>>C=CC1=C(/C=C/C(=O)OC(C)  
(C)C)C(O[Si](C)(C)C(C)(C)C)CCC1  
4804 C=CC(=O)OC.CC(C)(C)c1nn(Cc2cccc2)cc1I>>COC(=O)/C=C/c1cn(Cc2cccc2)nc1C(C)(C)C  
4805 C=CC(=O)OC.CSc1ccc(Br)cc1>>COC(=O)/C=C/c1ccc(SC)cc1  
4806 C=CCN(C(=O)OC(C)(C)C)C(=O)OC(C)(C)C.Fc1ccc(Cl)cc1>>CC(C)(C)OC(=O)N(C/C=C/c1ccc(F)cc  
1)C(=O)OC(C)(C)C  
4807 C=CC(=O)OC.CC(C)(C)c1[nH]c2cccc2c1C1CCCN(Cc2ccc(Br)cc2Cl)C1>>COC(=O)/C=C/c1ccc(CN  
2CCCC(c3c(C(C)(C)[nH]c4cccc34)C2)c(Cl)c1  
4808 C=Cc1ccc(C)nc1.CC(C)c1oc2cc3oc(=O)ccc3cc2c1OS(=O)(=O)C(F)(F)F>>Cc1ccc(/C=C/c2c(C(C)C)o  
c3cc4oc(=O)ccc4cc23)cn1  
C=Cc1cc(OC(C)=O)cc(OC(C)=O)c1.COc1ccc([C@@H]2Oc3ccc(Br)cc3[C@@H]2c2cc(OC)cc(OC)c2  
4809 )cc1>>COc1ccc([C@@H]2Oc3ccc(/C=C/c4cc(OC(C)=O)cc(OC(C)=O)c4)cc3[C@@H]2c2cc(OC)cc(  
OC)c2)cc1  
C=CC(F)(F)C(F)(F)C(F)(F)C(F)(F)C(F)(F)F.FOC(=O)c1ccc(I)cc1>>COC(=O)c1ccc(/C=C/C(F  
4810 )(F)C(F)(F)C(F)(F)C(F)(F)C(F)(F)C(F)(F)F)cc1  
C=CC(=O)OC.CS(=O)(=Nc1nc2cccc2cc1Br)c1cccc1>>COC(=O)/C=C/c1cc2cccc2nc1N=S(C)(=O)  
4811 c1cccc1  
C=Cc1ccc(C(=O)OC)cc1.CC1(C)CCC(=O)c2cc(Br)ccc21>>COC(=O)c1ccc(/C=C/c2ccc3c(c2)C(=O)C  
4812 CC3(C)C)cc1  
C=CC(=O)OC.CC(C)(C)[Si](C)(C)OC(CCO)c1cccc2ccc(Br)cc12>>COC(=O)/C=C/c1ccc2cccc(C(C  
4813 O)O[Si](C)(C)C(C)(C)C)c2c1  
C=CC(=O)OCC.O=Cc1ccc2occ(Br)c2c1>>CCOC(=O)/C=C/c1coc2ccc(C=O)cc12  
4814 Br1cnc2[nH]ncc2c1.C=CC(=O)N(C)Cc1cc2cccc2n1C>>CN(Cc1cc2cccc2n1C)C(=O)/C=C/c1cnc2[  
4815 nH]ncc2c1

4816 C=C[Si](C)(C)C.Ic1ccoc1>>C[Si](C)(C)/C=C/c1ccoc1  
 4817 C=Cc1cenccl.CCCCCCCC0c1ccc(I)cc1>>CCCCCCCC0c1ccc(/C=C/c2ccncc2)cc1  
 4818 C=Cc1cenccl.Cc1cc(Nc2ccc([N+](=O)[O-])cc2N)ccc1Br>>Cc1cc(Nc2ccc([N+](=O)[O-]  
 ])cc2N)ccc1/C=C/c1ccncc1  
 4819 C=Cc1cccc(Cl)c1.Cn1nc(Br)c2ccccc21>>Cn1nc(/C=C/c2cccc(Cl)c2)c2ccccc21  
 4820 C=CP(=O)(OCC)OCC.O=[N+](=[O-])c1ccc(Br)cc1>>CCOP(=O)/C=C/c1ccc([N+](=O)[O-])cc1)OCC  
 4821 C=Cc1ccccc1.O=C1c2ccccc2C(=O)N1CCc1ccc(Br)cc1>>O=C1c2ccccc2C(=O)N1CCc1ccc(/C=C/c2cc  
 ccc2)cc1  
 C=CC(=O)OC.NS(=O)(=O)c1ccc(-  
 4822 c2cn(S(=O)(=O)c3ccccc3)c3ncc(Br)cc23)cc1>>COC(=O)/C=C/c1enc2c(c1)c(-  
 c1ccc(S(N)(=O)=O)cc1)cn2S(=O)(=O)c1ccccc1  
 4823 C=Cc1ccccc1.CCc1enc(CC)c(Cl)n1>>CCc1enc(CC)c(/C=C/c2ccccc2)n1  
 4824 C=CCNC1=NCCN1.COc1ccc(I)cc1>>COc1ccc(/C=C/CNC2=NCCN2)cc1  
 Brc1enc2ccccc2c1.C=CCON=C1[C@H](C)[C@H]2OC(=O)O[C@]2(C)[C@@H](CC)OC(=O)[C@H]  
 (C)C(=O)[C@H](C)[C@@H](O[C@@H]2O[C@H](C)C[C@H](N(C)C)[C@H]2OC(=O)[C@](C)(  
 4825 OC)C[C@H]1C>>CC[C@H]1OC(=O)[C@H](C)C(=O)[C@H](C)[C@@H](O[C@@H]2O[C@H](C)  
 C[C@H](N(C)C)[C@H]2OC(=O)[C@](C)(OC)C[C@@H](C)C(=NOC/C=C/c2enc3ccccc3c2)[C@  
 H](C)C[C@H]2OC(=O)O[C@]112C  
 4826 C=CC(=O)OCCCC.Cn1nc(Br)c2ccccc21>>CCCCOC(=O)/C=C/c1nn(C)c2ccccc12  
 4827 C=CC#N.CC(=O)Nc1ccc(I)cc1>>CC(=O)Nc1ccc(/C=C/C#N)cc1  
 4828 C=CC(=O)OCC.CCNc1nc(SC)nc(C)c1I>>CCNc1nc(SC)nc(C)c1/C=C/C(=O)OCC  
 4829 C=Cc1cccc([N+](=O)[O-])c1.Ic1ccccc1>>O=[N+](=[O-])c1ccc(/C=C/c2ccccc2)c1  
 C=CC(=O)OC(C)(C)C.COc1ccc(-c2c(C)noc2-  
 4830 c2cc(Br)c(OCc3ccccc3)cc2OCc2ccccc2)cc1>>COc1ccc(-c2c(C)noc2-  
 C=CC(=O)OC.CC(C)(C)OC(=O)N1CCCC2(CC1)CC(=O)c1cc(Br)ccc1O2>>COC(=O)/C=C/c1ccc2c(c  
 4831 1)C(=O)CC1(CCCN(C(=O)OC(C)(C)C)CC1)O2  
 4832 C=CC(=O)CCC.COc1ccc2cc(Br)ccc2c1>>CCCC(=O)/C=C/c1ccc2cc(OC)ccc2c1  
 C=CC#N.N.CS(=O)(=O)c1ccc(I)c(C(=O)N2CCN(c3ccc(C#N)cc3)CC2)c1>>CS(=O)(=O)c1ccc(/C=C/C#  
 4833 N)c(C(=O)N2CCN(c3ccc(C#N)cc3)CC2)c1  
 C=Cc1ccc(OC)c(OC)c1-c1ccccc1.COc1ccc(I)cc1>>COc1ccc(/C=C/c2cc(OC)c(OC)c(OC)c2-  
 4834 c2ccccc2)cc1  
 4835 C=Cc1ccccc1.C[Si](C)(C)Cl>>C[Si](C)(C)/C=C/c1ccccc1  
 C=CC(=O)OCC.COc1ccc(-c2c(-  
 4836 c3ccc(OC)cc3)c3c(nc4cccn43)c3ccc(Br)cc23)cc1>>CCOC(=O)/C=C/c1ccc2c(c1)c(-c1ccc(OC)cc1)c(-  
 c1ccc(OC)cc1)c1c2nc2cccn21  
 4837 C=CC(C)O.COc1ccc2cc(Br)ccc2c1>>COc1ccc2cc(/C=C/C(C)O)ccc2c1  
 4838 C=CC(=O)N(C)Cc1cc2ccccc2n1C.CC1(C)NCc2cc(Br)enc2NC1=O>>CN(Cc1cc2ccccc2n1C)C(=O)/C  
 =C/c1enc2c(c1)CNC(C)(C)C(=O)N2  
 4839 C=CC(=O)N1CCN(C(C)=O)CC1.COc1cc2c3ccccc3nc3c4ccc(Cl)cc4n(C)c(c1)c23>>COc1cc2c3ccccc3  
 nc3c4ccc(/C=C/C(=O)N5CCN(C(C)=O)CC5)cc4n(C)c(c1)c23  
 4840 C=Cc1ccccc1.Cc1nc(-c2ccc(Br)cc2)cs1>>Cc1nc(-c2ccc(/C=C/c3ccccc3)cc2)cs1  
 4841 C=CC(=O)OCC.CCOC(=O)c1nc2cc(F)c(Br)cn2c1I>>CCOC(=O)/C=C/c1c(C(=O)OCC)nc2cc(F)c(Br)  
 4842 C=CC(=O)OC.CC(C)(C)OC(=O)N1CCC2(CC1)NC(=O)c1cc(Br)ccc1O2>>COC(=O)/C=C/c1ccc2c(c1  
 )C(=O)NC1(CCN(C(=O)OC(C)(C)C)CC1)O2  
 C=Cc1ccc(-  
 4843 n2c3ccccc3c3ccccc32)cc1.CCCCC(CC)CN1C(=O)c2ccccc3c(Br)ccc(c23)C1=O>>CCCCC(CC)CN1C(=  
 O)c2ccccc3c(/C=C/c4ccc(-n5c6ccccc6c6ccccc65)cc4)ccc(c23)C1=O  
 4844 C=Cc1ccccc1.CCOC(=O)[C@H]1[C@@H]2C(Br)=C(C(=O)OC)O[C@H]12>>CCOC(=O)[C@@H]1[  
 C@H]2OC(C(=O)OC)=C(/C=C/c3ccccc3)[C@H]21  
 4845 C=CC(=O)OCC.Clc1ccc01>>CCOC(=O)/C=C/c1ccc01  
 4846 C=CC(=O)OCC.COc1ccc(C(c2ccc(Br)cc2F)=C2[C@H]3C[C@H]4C[C@H](C[C@H]2C4)C3)cc1>>C  
 COC(=O)/C=C/c1ccc(C(c2ccc(OC)cc2)=C2[C@H]3C[C@H]4C[C@H](C[C@H]2C4)C3)c(F)c1  
 4847 C=CC(=O)Nc1ccccc1NC(=O)OC(C)(C)C.CN1C[C@H](c2ccc(Br)cc2)[C@@H](C(=O)Nc2ccc(Cl)cc2  
 )C1>>CN1C[C@H](c2ccc(/C=C/C(=O)Nc3ccccc3NC(=O)OC(C)(C)cc2)[C@@H](C(=O)Nc2ccc(Cl  
 4848 C=Cc1ccc(Cl)cc1.Cc1ccc(Br)cc1>>Cc1ccc(/C=C/c2ccc(Cl)cc2)cc1  
 C=CCNC(=O)C(F)(F)F.Cn1c2ccccc2c2nc3ccc(Cl)cc3c3cc(OS(=O)(=O)C(F)(F)F)cc1c32>>Cn1c2ccccc  
 4849 c2c2nc3ccc(Cl)cc3c3cc(/C=C/CNC(=O)C(F)(F)F)cc1c32  
 C=CC(=O)N(C)Cc1oc2ccc(C)cc2c1C.O=C1Ne2ncc(Br)cc2C12CCC2>>Cc1ccc2oc(CN(C)C(=O)/C=C  
 4850 /c3enc4c(c3)C3(CCC3)C(=O)N4)c(C)c2c1  
 C=CC1COC2(CCCCC2)OC1.Cc1ccc(S(=O)(=O)n2cc(C=O)c3c(Br)cccc32)cc1>>Cc1ccc(S(=O)(=O)n  
 4851 2cc(C=O)c3c(/C=C/C4COC5(CCCCC5)OC4)cccc32)cc1

4852 C=CC(=O)OC(C)(C)C.Oc1ccc(C(=C2CCCC2)c2ccc(Br)cc2)cc1>>CC(C)(C)OC(=O)/C=C/c1ccc(C(=C2CCCC2)c2ccc(O)cc2)cc1  
 4853 C=CC(=O)OC(C)(C)C.Nc1ccc(Br)cc1I>>CC(C)(C)OC(=O)/C=C/c1cc(Br)cnc1N  
 4854 C=CC(=O)OCC.CC1(C)CC(=C(c2ccc(Br)cc2)c2ccc(O)c(Cl)c2)CC(C)(C)O1>>CCOC(=O)/C=C/c1ccc(C(=C2CC(C)(C)OC(C)(C)C2)c2ccc(O)c(Cl)c2)cc1  
 4855 C=CC(=O)OC(C)(C)C.Cc1cc(Br)sc1C=O>>Cc1cc(/C=C/C(=O)OC(C)(C)C)sc1C=O  
 4856 C=CC(O)c1ccccc1Br.COc1cccc(I)c1>>COc1cccc(/C=C/C(O)c2ccccc2Br)c1  
 4857 C=CC(=O)OC.O=C(c1ccccc1)c1ccc(Cl)cc1>>COC(=O)/C=C/c1ccc(C(=O)c2ccccc2)cc1  
 4858 Br1ccc2c(c1)OCO2.C=CC(=O)OC>>COC(=O)/C=C/c1ccc2c(c1)OCO2  
 4859 C=CC(=O)OCCCC.N#Cc1ccccc1Cl>>CCCCOC(=O)/C=C/c1ccccc1C#N  
 4860 C=CC(=O)OCC.COc1nc(Cl)c(N)n1>>CCOC(=O)/C=C/c1ncc(OC)nc1N  
 4861 C=CS(C)(=O)=O.Fc1ccc(Br)cc1>>CS(=O)(=O)/C=C/c1ccc(F)cc1  
 4862 C=CC(=O)N(C)C.O=c1ccc(-c2nc(-c3ccc(OC(F)(F)F)cc3)no2)cn1Cc1cccc(Br)c1>>CN(C)C(=O)/C=C/c1cccc(Cn2cc(-c3nc(-c4ccc(OC(F)(F)F)cc4)no3)ccc2=O)c1  
 4863 C=CC(=O)OC.CC(=O)OC[C@H]1O[C@@H](Oc2ccc(I)cc2)[C@H](OC(C)=O)[C@@H](OC(C)=O)[C@H]1OC(C)=O>>COC(=O)/C=C/c1ccc(O[C@H]2O[C@H](COC(C)=O)[C@H](OC(C)=O)[C@H](OC(C)=O)[C@H]2OC(C)=O)cc1  
 4864 Br1ccc2c(c1)Cc1ccccc1-2.C=CC[C@H](CC(=O)OC(C)(C)C)C(=O)N[C@H](C(=O)N[C@H](C)c1ccccc1)C(C)(C)C>>C[C@@H](NC(=O)[C@H](NC(=O)[C@H](C/C=C/c1ccc2c(c1)Cc1ccccc1-2)CC(=O)OC(C)(C)C)C(C)(C)c1ccccc1  
 4865 C=CCN(C)C(=O)OC(C)(C)C.CC(=O)c1ccc(Cl)cc1>>CC(=O)c1ccc(/C=C/CN(C)C(=O)OC(C)(C)C)cc1  
 4866 C=Cc1ccc(OC)cc1.COc1ccc(Br)c(C=O)c1>>COc1ccc(/C=C/c2ccc(OC)cc2C=O)cc1  
 4867 C=CC1(O)CCC2(CC1)OCCO2.COC(=O)c1ccc(Br)o1>>COC(=O)c1ccc(/C=C/C2(O)CCC3(CC2)OCCO3)o1  
 4868 C=Cc1ccc(/C=C/c2ccc(C(C)(C)C)cc2)cc1.CCCCCOc1ccc2cc(Br)ccc2c1>>CCCCCOc1ccc2cc(/C=C/c3ccc(/C=C/c4ccc(C(C)(C)C)cc4)cc3)ccc2c1  
 4869 C=CC(=O)OC(C)(C)C.CN(c1ccccc1)c1ncnc2c(I)cnn12>>CN(c1ccccc1)c1ncnc2c(/C=C/C(=O)OC(C)(C)C)cnn12  
 4870 C=C/C=C/C(=O)N(CCCC)CCCC.COc1cc(Br)cc(OC)c1>>CCCCN(CCCC)C(=O)/C=C/C=C/c1cc(OC)cc(OC)c1  
 4871 C=CCC(=O)OC.Cc1nc2ccc(I)cc2s1>>COC(=O)C/C=C/c1ccc2nc(C)sc2c1  
 4872 C=Cc1ccccc1.Cc1ccc(/C=C/C(=O)c2ccc(Br)cc2)cc1>>Cc1ccc(/C=C/C(=O)c2ccc(/C=C/c3ccccc3)cc2)C=C[C@H]1C[C@H](CC(=O)OCC)OC(C)(C)O1.FC(F)(F)c1cccc(-c2c(Br)cnn2-c2ccnc(Nc3ccccc3)n2)c1>>CCOC(=O)C[C@H]1C[C@H](/C=C/c2cnn(-c3ccnc(Nc4ccccc4)n3)c2-c2ccccc(C(F)(F)F)c2)OC(C)(C)O1  
 4874 C=CCN(C(=O)C(F)(F)F)c1ccccc1C#Cc1ccccc1.CC(=O)c1ccc(I)cc1>>CC(=O)c1ccc(/C=C/CN(C(=O)C(F)(F)F)c2ccccc2C#Cc2ccccc2)cc1  
 4875 C=CC(=O)OC.Ic1ccc2c(c1)OCCOCCOCCOCCO2>>COC(=O)/C=C/c1ccc2c(c1)OCCOCCOCCOCC  
 4876 C=CC(=O)N(C)OC.O=[N+](O-)[O-]c1ccc(I)cc1>>CON(C)C(=O)/C=C/c1ccc([N+](=O)[O-])cc1  
 4877 C=CC(=O)OC.COC(=O)C1=Ne2cc(I)ccc2OC12CC2>>COC(=O)/C=C/c1ccc2c(c1)N=C(C(=O)OC)C1(CC1)O2  
 4878 C=Cc1ccccc1.CC(C)c1oc2cc3oc(=O)ccc3cc2c1OS(=O)(=O)C(F)(F)F>>CC(C)c1oc2cc3oc(=O)ccc3cc2c1/C=C/c1ccccc1  
 4879 C=CC(=O)OC.Cc1c(/C=C/c2ccccc2)c2cc(Br)ccc2n1-c1ccccc1>>COC(=O)/C=C/c1ccc2c(c1)c(/C=C/c1ccccc1)c(C)n2-c1ccccc1  
 4880 C=Cc1ccccc1.O=C1C(I)=C(c2ccccc2)[C@]23c4ccccc4C=C[C@H]2c2ccccc2CN13>>O=C1C(/C=C/c2ccccc2)=C(c2ccccc2)[C@]23c4ccccc4C=C[C@H]2c2ccccc2CN13  
 4881 C=Cc1ccccc1.CCOC(=O)c1ccc(Br)cc1C>>CCOC(=O)c1ccc(/C=C/c2ccccc2)cc1C  
 4882 C=CC(=O)N(C)OC.Cc1ccc(I)cc1>>CON(C)C(=O)/C=C/c1ccc(C)cc1  
 4883 C=Cc1ccc(OC)c(OC)c1.Ic1ccc(OCc2ccccc2)cc1>>COc1ccc(/C=C/c2ccc(OCc3ccccc3)cc2)cc1OC  
 4884 C=Cc1ccccc1.COc1ccc(-c2oc3c(I)c(OC)cc(O)c3c(=O)c2OC)cc1OC>>COc1ccc(-c2oc3c(/C=C/c4ccccc4)c(OC)cc(O)c3c(=O)c2OC)cc1OC  
 4885 C=CC(=O)OC.Ic1ccc2ncnc(Oc3ccccc3)c2c1>>COC(=O)/C=C/c1ccc2ncnc(Oc3ccccc3)c2c1  
 4886 C=CC(=O)NCCc1ccc(O)cc1.COc1ccc(I)cc1Br>>COc1ccc(/C=C/C(=O)NCCc2ccc(O)cc2)cc1Br  
 4887 C=Cc1ccnc(F)c1.CC(C)(C)OC(=O)N1CC[C@H]1COc1nc(Cl)c(I)c1>>CC(C)(C)OC(=O)N1CC[C@H]1COc1nc(Cl)c(/C=C/c2ccnc(F)c2)c1  
 4888 C=CC(=O)OC.Oc1ccc(Br)cc1>>COC(=O)/C=C/c1ccc(O)cc1  
 4889 C=Cc1ccc(OC)cc1.CCOC(=O)CCCB>>CCOC(=O)CCC/C=C/c1ccc(OC)cc1



4890 C=CC(=O)OC.COC(=O)c1c(Br)ccc(NC(C)=O)c1[N+](=O)[O-]  
 ]>>COC(=O)/C=C/c1ccc(NC(C)=O)c([N+](=O)[O-])c1C(=O)OC  
 4891 C=Cc1ccc(F)cc1.CC(=O)c1ccc(Br)cc1>>CC(=O)c1ccc(/C=C/c2ccc(F)cc2)cc1  
 4892 C=CC#N.CC(C)(C)[Si](C)(C)OC[C@H]1O[C@H](c2ccc(Br)cc2)C=C[C@H]1O[Si](C)(C)C(C)(C)  
 C>>CC(C)(C)[Si](C)(C)OC[C@H]1O[C@H](c2ccc(/C=C/C#N)cc2)C=C[C@H]1O[Si](C)(C)C(C)(C)  
 4893 C=CCOc1cccc1C.Cc1ccc(I)cc1>>Cc1ccc(/C=C/COc2ccccc2C)cc1  
 C=Cc1ccc(C(=O)N[C@@H](CCSC)C(=O)OC)c(-  
 4894 c2ccccc2C)c1.OC(c1cccc1)c1cncnc1Br>>COC(=O)[C@H](CCSC)NC(=O)c1ccc(/C=C/c2cncnc2C(O)  
 c2ccccc2)cc1-c1cccc1C  
 4895 C=CC(=O)OCC.COc1cccc(Br)c1CO[Si](C)(C)C(C)(C)C>>CCOC(=O)/C=C/c1cccc(OC)c1CO[Si](C)(C)  
 C(C)(C)C  
 4896 C=CC(C)(C)O.CC(C)(C)OC(=O)[C@H](Cc1cn(C(=O)OC(C)(C)C)c2ccc(I)c12)N=C(c1cccc1)c1ccc  
 cc1>>CC(C)(O)/C=C/c1cccc2c1c(C[C@H](N=C(c1cccc1)c1cccc1)C(=O)OC(C)(C)C)cn2C(=O)OC(  
 4897 C=CC(=O)N1CCCCC1.CC(C)(C)c1ccc([N+](=O)[O-])cc1Br>>CC(C)(C)c1ccc([N+](=O)[O-]  
 ])cc1/C=C/C(=O)N1CCCCC1  
 4898 C=CC(C)(C)C(=O)NC(C)(C)CO.COc1cc(Br)ccc1Cc1cc([C@@H]2O[C@H](COC(C)=O)[C@@H](O  
 C(C)=O)[C@H](OC(C)=O)[C@H]2OC(C)=O)c(C)cc1C>>COc1cc(/C=C/C(C)(C)C(=O)NC(C)(C)CO)  
 ccc1Cc1cc([C@@H]2O[C@H](COC(C)=O)[C@@H](OC(C)=O)[C@H](OC(C)=O)[C@H]2OC(C)=O  
 4899 C=Cc1nnc2c1nnc2C1CCCCO1.Clc1ccc(I)cc1>>Clc1ccc(/C=C/c2nnc3c2nnc3C2CCCCO2)cc1  
 C=Cc1ccc(OC(=O)OC(C)(C)C)cc1.O=S(=O)(c1ccc(Br)cc1)N(CCO)CCO>>CC(C)(C)OC(=O)Oc1ccc(  
 4900 /C=C/c2ccc(S(=O)(=O)N(CCO)CCO)cc2)cc1  
 4901 C=Cc1cccc1.O=c1cc(Br)c2ccccc2o1>>O=c1cc(/C=C/c2ccccc2)c2ccccc2o1  
 4902 C=CC(=O)Nc1cccc1NC(=O)OC(C)(C)C.CCOC(=O)[C@H]1CN(C)C[C@@H]1c1ccc(Br)cc1>>CCO  
 C(=O)[C@H]1CN(C)C[C@@H]1c1ccc(/C=C/C(=O)Nc2ccccc2NC(=O)OC(C)(C)C)cc1  
 4903 C=CC(=O)OCC.CC(C)(C)OC(=O)N1CCN(c2ccc(Br)cn2)CC1>>CCOC(=O)/C=C/c1ccc(N2CCN(C(=O)  
 OC(C)(C)C)CC2)nc1  
 4904 C=CC(=O)OC.COc1cc[nH]c1/C=C1/C(=O)Nc2cccc(I)c21>>COC(=O)/C=C/c1cccc2c1/C(=C/c1[nH]c  
 cc1OC)C(=O)N2  
 4905 C=Cc1cncnc1.Cc1cc(N(c2ccc([N+](=O)[O-])cc2)c2ccc([N+](=O)[O-]  
 ])cc2)ccc1Br>>Cc1cc(N(c2ccc([N+](=O)[O-])cc2)c2ccc([N+](=O)[O-])cc2)ccc1/C=C/c1cncnc1  
 4906 C=CCN(C(=O)OC(C)(C)C)C(=O)OC(C)(C)C.COC(=O)c1ccc(Br)cc1>>COC(=O)c1ccc(/C=C/CN(C(=O)  
 OC(C)(C)C)C(=O)OC(C)(C)C)cc1  
 4907 C=CC(=O)OC.CCN(CC)c1ccc2cc(-c3oc4cc(Br)ccc4c(=O)c3O)oc2c1>>CCN(CC)c1ccc2cc(-  
 c3oc4cc(/C=C/C(=O)OC)ccc4c(=O)c3O)oc2c1  
 4908 Bre1ccc(C=C(c2ccccc2)c2ccccc2)cc1.C=Cc1ccc(-  
 c2ccc3e4ccccc4n(CC)c3c2)cc1>>CCn1c2ccccc2c2ccc(-  
 4909 C=CC(=O)c1ccc(C)cc1.COc1ncc(I)c(OC)n1>>COc1ncc(/C=C/C(=O)c2ccc(C)cc2)c(OC)n1  
 4910 C=CC(=O)O.N#Cc1ccc(Br)cc1>>N#Cc1ccc(/C=C/C(=O)O)cc1  
 4911 C=Cc1cccc(O)c1.COc1cc(Br)cc(OC)c1F>>COc1cc(/C=C/c2cccc(O)c2)cc(OC)c1F  
 4912 Bre1ccc2ccc3cccc4ccc1c2c34.C=Cc1ccc(OC(C)=O)cc1>>CC(=O)Oc1ccc(/C=C/c2ccc3cccc4cccc5ccc2  
 c3c45)cc1  
 4913 C=CC(=O)OCC.COC(=O)c1cc(Br)ccc1OCc1cccc1>>CCOC(=O)/C=C/c1ccc(OCc2ccccc2)c(C(=O)O  
 4914 C=CC(=O)OC(C)(C)C.Ic1ccc(Cc2ncc(-c3ccccc3)[nH]2)cc1>>CC(C)(C)OC(=O)/C=C/c1ccc(Cc2ncc(-  
 c3ccccc3)[nH]2)cc1  
 4915 C=CCCC.COC(=O)CCn1c(=O)c2cc(I)ccc2n(Cc2cn(C(=O)NC(C)(C)C)c3ccccc23)c1=O>>CCC/C=C/c  
 1ccc2c(c1)c(=O)n(CCC(=O)OC)c(=O)n2Cc1cn(C(=O)NC(C)(C)C)c2ccccc12  
 4916 C=Cc1nnn(C)n1.Fc1ccccc1I>>Cn1nnc(/C=C/c2ccccc2F)n1  
 4917 C=CC=O.CC(C)(C)c1cc(/C=C/c2cc(I)cc(/C=C/c3cc(C(C)(C)C)cc(C(C)(C)C)c3)c2)cc(C(C)(C)C)c1>>  
 CC(C)(C)c1cc(/C=C/c2cc(/C=C/C(=O)cc(/C=C/c3cc(C(C)(C)C)cc(C(C)(C)C)c3)c2)cc(C(C)(C)C)c1  
 4918 C=CC(=O)OC.O=C1c2ccc(OS(=O)(=O)C(F)(F)F)cc2C(=O)N1C(c1cccc1)c1cccc1>>COC(=O)/C=C  
 /c1ccc2c(c1)C(=O)N(C(c1cccc1)c1cccc1)C2=O  
 4919 C=CC(=O)OCC.O=[N+](O-)]c1ccc(Br)cc1>>CCOC(=O)/C=C/c1ccc([N+](=O)[O-])cc1  
 4920 C=CC(=O)OCCCC.N#Cc1ccccc1Br>>CCCCOC(=O)/C=C/c1ccccc1C#N  
 4921 C=Cc1ccc(OC)c(OC)c1.Cn1cc(I)c(=O)c2ccccc21>>COc1ccc(/C=C/c2cn(C)c3ccccc3c2=O)cc1OC  
 4922 C=CC(=O)OC(C)(C)C.Oc1ccc(C(=C2CCCCC2)c2ccc(Br)cc2Cl)cc1>>CC(C)(C)OC(=O)/C=C/c1ccc(  
 C(=C2CCCCC2)c2ccc(O)cc2)c(Cl)c1  
 4923 Bre1cnc2ccccc2c1.C=CCN1C(=O)c2ccccc2C1=O>>O=C1c2ccccc2C(=O)N1C/C=C/c1cnc2ccccc2c1  
 4924 C=CC(=O)OC.COc1cc2c(c(I)c1OC)CCN(C(=O)OC(C)(C)C)CC2c1cccc1>>COC(=O)/C=C/c1c2c(cc(  
 OC)c1OC)C(c1cccc1)CN(C(=O)OC(C)(C)C)CC2  
 4925 C=CC1CC(OC)=CC(=O)O1.Fc1ccc(I)cc1>>COC1=CC(=O)OC(/C=C/c2ccc(F)cc2)C1  
 4926 C=CC(=O)OC(C)(C)C.FC(F)(F)Oc1ccc(CNc2ccc(Br)cn2)cc1>>CC(C)(C)OC(=O)/C=C/c1ccc(NCc2cc  
 c(OC(F)(F)F)cc2)nc1

C=CC(=O)N1cccc(C)cc1.CC(C)(C)c1cccc[nH]c3c(c2c1)CC(=O)N1cccc(I)cc1-  
 3>>Cc1cccc(NC(=O)/C=C/c2cccc3c(c2)-c2[nH]c4cccc(C(C)(C)C)cc4c2CC(=O)N3)cc1  
 C=CC(=O)OC.COC(=O)c1c(Br)c(Cl)cc2nn(C)cc12>>COC(=O)/C=C/c1c(Cl)cc2nn(C)cc2c1C(=O)OC  
 C=C[Si](CC)(CC)CC.FC(F)(F)c1cccc(Br)cc1>>CC[Si](/C=C/c1cccc(C(F)(F)F)cc1)(CC)CC  
 C=Cc1cccc1.CC(C)(C)OC(=O)N[C@H](COc1cncc(Br)c1)Cc1c[nH]c2cccc12>>CC(C)(C)OC(=O)N  
 [C@H](COc1cncc(/C=C/c2cccc2)c1)Cc1c[nH]c2cccc12  
 C=Cc1ccc(O[Si](C)(C)C(C)(C)C)c(OC)c1.C[Si](C)(OS(=O)(=O)C(F)(F)F)OS(=O)(=O)C(F)(F)F>>CO  
 c1cc(/C=C/[Si](C)(C)OS(=O)(=O)C(F)(F)F)ccc1O[Si](C)(C)C(C)(C)C  
 C=CC(=O)OC.CO[C@ @H]1[C@H](OC(C)=O)[C@ @H](COC(C)=O)O[C@H]1n1cc(I)c(=O)[nH]c1=  
 O>>COC(=O)/C=C/c1cn([C@ @H]2O[C@H](COC(C)=O)[C@ @H](OC(C)=O)[C@H]2OC)c(=O)[nH  
 C=CC(C)(C)O.COc1ccc(CCN(C)C)cc1I>>COc1ccc(CCN(C)C)cc1/C=C/C(C)(C)O  
 C=CS(=O)(=O)N1CCC2(CC1)N=C(C1CCCCC1)NC2=O.Cc1cccc1Br>>Cc1cccc1/C=C/S(=O)(=O)  
 N1CCC2(CC1)N=C(C1CCCCC1)NC2=O  
 C=CC(=O)OCC.COC(C#N)c1cccc1Br>>CCOC(=O)/C=C/c1cccc1C(C#N)OC  
 C=CS(=O)(=O)F.CC(C)(C)NC(=O)c1cc(I)ccn1>>CC(C)(C)NC(=O)c1cc(/C=C/S(=O)(=O)F)ccn1  
 C=CC(=O)OCCCC.Ic1cces1>>CCCCOC(=O)/C=C/c1cces1  
 C=CC(=O)OCC.CCN(Cc1cc(=O)n2c(Br)c(C)sc2n1)c1ccc(F)cc1>>CCOC(=O)/C=C/c1c(C)sc2nc(CN(  
 CC)c3ccc(F)cc3)cc(=O)n12  
 C=CC(=O)OC(C)(C)C.C[C@H]1[C@H](NS(=O)(=O)c2ccc(I)cc2)C[C@ @H]2C[C@H]1C2(C)C>>C[  
 C@H]1[C@H](NS(=O)(=O)c2ccc(/C=C/C(=O)OC(C)(C)C)cc2)C[C@ @H]2C[C@H]1C2(C)C  
 C=CS(=O)(=O)F.O=Cc1ccc(I)cc1>>O=Cc1ccc(/C=C/S(=O)(=O)F)cc1  
 C=CC(=O)OC.COc1cccc(OC)c1I>>COC(=O)/C=C/c1c(OC)cccc1OC  
 C=Cc1cncc(C#N)c1Nc1ccc2[nH]ccc2c1C.ClCCOc1cccc1Br>>Cc1c(Nc2c(C#N)cncc2/C=C/c2cccc2  
 OCCCl)ccc2[nH]ccc12  
 C=CC(=O)CCC.O=Cc1ccc(Br)cc1>>CCCC(=O)/C=C/c1ccc(C=O)cc1  
 C=CC(=O)OCC.Cn1c(I)c(-c2cccc2)c2cccc21>>CCOC(=O)/C=C/c1c(-c2cccc2)c2cccc2n1C  
 C=Cc1cccc1.FC(F)(F)c1ccc(Br)cc1>>FC(F)(F)c1ccc(/C=C/c2cccc2)cc1  
 C=CC(F)(F)C(F)(F)C(F)(F)C(F)(F)C(F)(F)C(F)(F)F.Ic1ccc(OCc2cccc2)cc1>>FC(F)(F)C(F)(F)C(F)(F)  
 )C(F)(F)C(F)(F)C(F)(F)/C=C/c1ccc(OCc2cccc2)cc1  
 C=CC(=O)OC.Cc1ccc(S(=O)(=O)n2cc(I)cn2)cc1>>COC(=O)/C=C/c1cn(S(=O)(=O)c2ccc(C)cc2)c1  
 C=CC(=O)OCCCC.COC(=O)c1ccc(Br)cc1>>CCCCOC(=O)/C=C/c1ccc(C(=O)OC)cc1  
 C=CC(N)=O.COc1ccc(I)cc1OC>>COc1ccc(/C=C/C(N)=O)cc1OC  
 C=CC1CC(=O)N1.COc1cccc(I)c1>>COc1cccc(/C=C/C2CC(=O)N2)c1  
 C=CCCc1ccc2ccnc2n1.CCOC(=O)CC(c1ccc(OC)c(F)c1)c1nc(Br)c(C)o1>>CCOC(=O)CC(c1ccc(OC)  
 c(F)c1)c1nc(/C=C/CCc2ccc3ccnc3n2)c(C)o1  
 C=CC(=O)OCC(CC)CCCC.O=[N+][[O-  
 ]c1ccc(Cl)cc1>>CCCC(CC)COC(=O)/C=C/c1ccc([N+](=O)[O-])cc1  
 C=CC(=O)OC.[2H]C(=O)c1c(F)cc(Br)cc1F>>[2H]C(=O)c1c(F)cc(/C=C/C(=O)OC)cc1F  
 C=CC(=O)OC.Cc1ccc(S(=O)(=O)NCCC(Br)=C(c2cccc2)c2cccc2)cc1>>COC(=O)/C=C/C(CCN(S(=O)(=O)c1ccc(C)cc1)=C(c1cccc1)c1cccc1  
 C=Cc1cccc1.Nc1cccc(Br)n1>>Nc1cccc(/C=C/c2cccc2)n1  
 C=CC#N.O=c1oc2enc3ccc(Br)cc3c2n1-c1cccc(C(F)(F)F)c1>>N#C/C=C/c1ccc2ncc3oc(=O)n(-  
 c4cccc(C(F)(F)F)c4)c3c2c1  
 C=CC(=O)N(C)Cc1sc2cccc2c1C.CCC1(CC)C(=O)Nc2ncc(Br)cc21>>CCC1(CC)C(=O)Nc2ncc(/C=C  
 /C(=O)N(C)Cc3sc4cccc4c3C)cc21  
 C=CC(=O)OC.O=C(O)Cc1cccc(Br)c1>>COC(=O)/C=C/c1cccc(CC(=O)O)c1  
 C=Cc1cc(OC(C)=O)cc(OC(C)=O)c1.CC(=O)Oc1ccc(I)cc1>>CC(=O)Oc1ccc(/C=C/c2cc(OC(C)=O)cc(  
 OC(C)=O)c2)cc1  
 C=Cc1ccc(F)cc1.COC(=O)Cn1c(=O)c(Cl)nc2cccc21>>COC(=O)Cn1c(=O)c(/C=C/c2ccc(F)cc2)nc2cc  
 cc21  
 Brc1ccc(C(=C(c2cccc2)c2cccc2)c2cccc2)cc1.C=Cc1cccn1>>C(=C/c1cccn1)c1ccc(C(=C(c2cccc  
 2)c2cccc2)c2cccc2)cc1  
 C=CC(=O)OC(C)(C)C.Fc1ncccc1I>>CC(C)(C)OC(=O)/C=C/c1cccn1F  
 C=CC(N)=O.O=Cc1ccc(I)o1>>NC(=O)/C=C/c1ccc(C=O)o1  
 Brc1cccc1.C=Cc1ccc(N(c2cccc(OC)c2)c2cccc(OC)c2)cc1>>COc1cccc(N(c2ccc(/C=C/c3cccc3)cc2)  
 c2cccc(OC)c2)c1  
 C=Cc1ccc(Br)cc1.CCOC(=O)C(F)I>>CCOC(=O)C(F)/C=C/c1ccc(Br)cc1  
 C=CC(=O)OC.Fc1ccc(Br)cn1>>COC(=O)/C=C/c1ccc(F)cn1  
 C=Cc1cc(C)c(OCOCCOC)c(C)c1.Cc1c(Br)c(=O)oc2cccc12>>COCCOCOc1c(C)cc(/C=C/c2c(C)c3cc  
 cc3oc2=O)cc1C  
 C=Cc1ccc2c(c1)CC2.C[Si](C)(C)OS(=O)(=O)C(F)(F)F>>C[Si](C)(C)/C=C/c1ccc2c(c1)CC2

4969 C=Cc1ccccc1.O=Cc1ccc(Br)cc1>>O=Cc1ccc(/C=C/c2ccccc2)cc1  
4970 Br1ccc2[nH]ccc2c1.C=CC(C)=O>>CC(=O)/C=C/c1ccc2[nH]ccc2c1  
4971 C=C[C@H]1O[C@@H]2OC(C)(C)O[C@@H]2[C@H]1O.O=c1ccoc2ccc(Br)cc12>>CC1(C)O[C@H]  
2O[C@H]/C=C/c3ccc4occc(=O)c4c3)[C@H](O)[C@H]2O1  
4972 Br1cnc2ccccc2c1.C=CC=O>>O=C/C=C/c1cnc2ccccc2c1  
4973 C=CN1C(=O)c2ccccc2C1=O.COc1cc(Br)cc(OC)c1OC>>COc1cc(/C=C/N2C(=O)c3ccccc3C2=O)cc(O  
C)c1OC  
4974 C=CC(=O)OC(C)(C)C.CCOC(=O)c1cc(-c2ccccc2)n(-  
c2ccc(I)cc2)c1C(=O)c1ccccc1>>CCOC(=O)c1cc(-c2ccccc2)n(-  
4975 C=CC(=O)OCC.COCC(=O)c1cc(I)ccc1NC(C)=O>>CCOC(=O)/C=C/c1ccc(NC(C)=O)c(C(=O)OC)c1  
4976 C=CC(=O)O[C@H]1C[C@@H](C)CC[C@@H]1C(C)C.COc1cc(Br)c(C=O)c(OC)c1>>COc1cc(/C=C/  
C(=O)O[C@H]2C[C@@H](C)CC[C@@H]2C(C)C)c(C=O)c(OC)c1  
C=CCC(CO[Si](C)(C)C(C)C)c1ccccc1[N+](=O)[O-]  
4977 ].O=c1c2ccccc2sc2ccc(I)cc12>>CC(C)(C)[Si](C)(C)OCC(C/C=C/c1ccc2sc3ccccc3c(=O)c2c1)c1ccccc  
1[N+](=O)[O-]  
4978 C=CC(C)=O.O=C1Nc2ccc(I)cc2/C1=C/c1ccc[nH]1>>CC(=O)/C=C/c1ccc2c(c1)/C(=C/c1ccc[nH]1)C(  
=O)N2  
4979 C=CC(=O)OC(C)(C)C.Ic1ccccc1>>CC(C)(C)OC(=O)/C=C/c1ccccc1  
4980 C=CCN1C(=O)c2ccccc2C1=O.CCOC(=O)c1ccc(Br)cc1>>CCOC(=O)c1ccc(/C=C/CN2C(=O)c3ccccc3  
C2=O)cc1  
4981 Br1cnc2ccccc2c1.C=CC(C)(C)O>>CC(C)(O)/C=C/c1cnc2ccccc2c1  
4982 C=Cc1cc([N+](=O)[O-])cn1C.COC(=O)c1cc(Br)cn1C>>COC(=O)c1cc(/C=C/c2cc([N+](=O)[O-]  
])cn2C)cn1C  
4983 C=CC(=O)OCc1ccccc1.CC(=O)O[C@H]1CC(=O)N(Cc2cc3c(cc2I)OCO3)[C@@H]1[Se]c1ccccc1>>  
CC(=O)O[C@H]1CC(=O)N(Cc2cc3c(cc2/C=C/C(=O)OCc2ccccc2)OCO3)[C@@H]1[Se]c1ccccc1  
4984 C=CC(C)(C)O.CCOC(Cc1cn(S(=O)(=O)c2ccc(C)cc2)c2ccccc(Br)c12)OCC>>CCOC(Cc1cn(S(=O)(=O)  
c2ccc(C)cc2)c2ccccc(/C=C/C(C)(C)O)c12)OCC  
4985 C=CC(=O)OCC.Nc1ccc(Br)c(F)c1>>CCOC(=O)/C=C/c1ccc(N)cc1F  
C=CC[C@H](O[Si](c1ccccc1)(c1ccccc1)C(C)(C)C)[C@H]1OC(=O)[C@H]2OC(C)(C)O[C@H]21.Ic1  
4986 cccc1>>CC1(C)O[C@@H]2C(=O)O[C@H]([C@H](C/C=C/c3ccccc3)O[Si](c3ccccc3)(c3ccccc3)C(C  
)C(C)[C@@H]2O1  
4987 C=Cc1ccc2ccccc2n1.Cc1cc(N2CCCC2)nc(Cl)n1>>Cc1cc(N2CCCC2)nc(/C=C/c2ccc3ccccc3n2)n1  
4988 C=CC#N.Cc1noc(C)c1I>>Cc1noc(C)c1/C=C/C#N  
4989 C=Cc1ccc([N+](=O)[O-])cc1.Cn1cc(I)c(=O)c2ccccc21>>Cn1cc(/C=C/c2ccc([N+](=O)[O-]  
])cc2)c(=O)c2ccccc21  
4990 C=COCCCC.O=C(Cl)c1ccsc1>>CCCCO/C=C/C(=O)c1ccsc1  
C=CC(=O)OC.COc1ccc(-  
4991 c2ccc(CN(C(=O)CC(C)(C)C)c3nccc4cc(Br)ccc34)cc2)cc1C>>COC(=O)/C=C/c1ccc2c(N(Cc3ccc(-  
c4ccc(OC)c(C)c4)cc3)C(=O)CC(C)(C)C)nc2c1  
4992 C=CC(=O)OC(C)(C)C.Fc1cccc(Br)c1>>CC(C)(C)OC(=O)/C=C/c1cccc(F)c1  
4993 C=CC(=O)OC.O=Cc1ccc(I)cc1O>>COC(=O)/C=C/c1ccc(C=O)c(O)c1  
4994 C=Cc1ccccc1.O=c1c(I)n[nH]c2ccccc12>>O=c1c(/C=C/c2ccccc2)n[nH]c2ccccc12  
4995 C=CC(=O)OC.O=Cc1ccc(C(F)(F)F)cc1Br>>COC(=O)/C=C/c1cc(C(F)(F)F)ccc1C=O  
C=Cc1cc2ccccc2o1.C[Si](C)(OS(=O)(=O)C(F)(F)F)OS(=O)(=O)C(F)(F)F>>C[Si](C)/C=C/c1cc2ccccc  
4996 c2o1)OS(=O)(=O)C(F)(F)F  
4997 C=Cc1cccc(OC)c1.C[Si](C)(C)OS(=O)(=O)C(F)(F)F>>COc1cccc(/C=C/[Si](C)(C)C)c1  
4998 C=CC(=O)OC.COCCc1ccc(C)nc1Br>>COCCc1ccc(C)nc1/C=C/C(=O)OC  
4999 C=Cc1ccccc1.Ic1ccc2[nH]c3ccccc3e2c1>>C(=C/c1ccc2[nH]c3ccccc3e2c1)\c1ccccc1  
5000 Br1ccccc2cc[nH]c12.C=CC(=O)O>>O=C(O)/C=C/c1cccc2cc[nH]c12  
5001 Br1ccc2cnc2c1.C=CC(=O)OCC>>CCOC(=O)/C=C/c1ccc2cnc2c1  
5002 C=Cc1ccccc1.CCOC(=O)c1ccc(Br)cc1>>CCOC(=O)c1ccc(/C=C/c2ccccc2)cc1  
5003 C=CC(=O)OCC.OCc1c(-c2ccccc2)nc2cc(Br)ccn12>>CCOC(=O)/C=C/c1ccn2c(CO)c(-c3ccccc3)nc2c1  
5004 C=Cc1cccc(C)c1.O=Cc1ccccc1Br>>Cc1cccc(/C=C/c2ccccc2C=O)c1  
5005 C=Cc1cnc1.COc1ccc(Br)cc1C=O>>COc1ccc(/C=C/c2ccccc2)cc1C=O  
5006 C=Cc1ccccc1.COCC(=O)/C=C/c1ccccc1Cl>>COC(=O)/C=C/c1ccccc1/C=C/c1ccccc1  
5007 C=CC(=O)OC.Oc1ccc(Br)cc1F>>COC(=O)/C=C/c1ccc(O)c(F)c1  
5008 C=CP(=O)(OCC)OCC.CC(=O)NC(C#N)c1cccc(Br)c1>>CCOP(=O)(/C=C/c1cccc(C(C#N)NC(C)=O)c  
1)OCC  
5009 C=CCCO.CCCCCCCCCCOc1cnc(-c2ccc(Br)cc2)nc1>>CCCCCCCCCOc1cnc(-  
5010 C=CC(=O)NC(C)C.Cc1ccc(I)cc1>>Cc1ccc(/C=C/C(=O)NC(C)C)cc1

5011 C=C[C@H](C(=O)N1C(=O)OC(C)(C)[C@@H]1C(C)C)[C@H](O[Si](C)(C)C(C)(C)C)c1ccc(OS(=O)(=O)c2ccc(C)cc2)cc1.Cc1ccc(S(=O)(=O)Oc2ccc(I)cc2)cc1>>Cc1ccc(S(=O)(=O)Oc2ccc(/C=C/[C@H](C(=O)N3C(=O)OC(C)(C)[C@@H]3C(C)C)[C@H](O[Si](C)(C)C(C)(C)C)c3ccc(OS(=O)(=O)c4ccc(C)cc4)cc3)cc2)cc1  
 5012 C=C[C@H]1C[C@H]2CC[C@@H](C(=O)OC)N2C(=O)[C@@](Cc2ccccc2)(NC(=O)OCc2ccccc2)[C@@H]1OC(C)=O.O=[N+][O-]  
 5013 ]c1ccc(Br)cc1>>COC(=O)[C@@H]1CC[C@@H]2C[C@H](/C=C/c3ccc([N+](=O)[O-])cc3)[C@@H](OC(C)=O)[C@](Cc3ccccc3)(NC(=O)OCc3ccccc3)C(=O)N12  
 5014 C=CC(=O)OC.Cc1ccc(F)cc1C(=O)c1sc2cc(O)ccc2c1Oc1ccc(Br)cc1>>COC(=O)/C=C/c1ccc(Oc2c(C(=O)c3cc(F)ccc3C)sc3cc(O)ccc23)cc1  
 5015 C=Cc1ccccc1.N#Cc1ccccc1-c1cc(Br)cn(-c2ccccc2)c1=O>>N#Cc1ccccc1-c1cc(/C=C/c2ccccc2)cn(-c2ccccc2)c1=O  
 5016 C=CC(=O)NCCc1ccc(F)cc1.COc1ccc2c(=O)c(I)coc2c1>>COc1ccc2c(=O)c(/C=C/C(=O)NCCc3ccc(F)cc3)coc2c1  
 5017 C=CS(=O)(=O)F.Ic1ccc2ccccc2c1>>O=S(=O)(F)/C=C/c1ccc2ccccc2c1  
 5018 C=Cc1ccc2ccc3ccccc4ccc1c2c34.O=Cc1ccc(Br)cc1>>O=Cc1ccc(/C=C/c2ccc3ccc4ccccc5ccc2c3c45)cc1  
 5019 C=CC(=O)OC(C)(C)C.Cc1ccc(S(=O)(=O)n2cc(C(=O)c3c(Br)ccccc32)cc1>>Cc1ccc(S(=O)(=O)n2cc(C(=O)c3c(/C=C/C(=O)OC(C)(C)C)ccccc32)cc1  
 5020 C=CC(=O)OC.O=C1c2ccccc2C(=O)N1c1ccc(I)cc1>>COC(=O)/C=C/c1ccc(N2C(=O)c3ccccc3C2=O)c  
 5021 C=Cc1ccccc1.CC(C)(C)Br>>CC(C)(C)/C=C/c1ccccc1  
 5022 C=CCCCCCC.O=Cc1ccc(Cl)cc1>>CCCCC/C=C/c1ccc(C=O)cc1  
 5023 C=CC(=O)OCCCC.CC(C)(C)OC(=O)c1ccccc1Br>>CCCCOC(=O)/C=C/c1ccccc1C(=O)OC(C)(C)C  
 5024 C=CS(=O)c1ccccc1.CC(=O)Nc1ccc(Br)cc1>>CC(=O)Nc1ccc(/C=C/S(=O)c2ccccc2)cc1  
 5025 C=CC(=O)OC.N#Cc1ccc(Cl)cc1>>COC(=O)/C=C/c1ccc(C#N)cc1  
 5026 C=CC(=O)OC.COC(=O)[C@@H]1CCc2c(C(C)=O)cc(OS(=O)(=O)C(F)(F)F)c(=O)n21>>COC(=O)/C=C/c1cc(C(C)=O)c2n(c1=O)[C@H](C(=O)OC)CC2  
 5027 C=Cc1ccccc1.Nc1ccccc1Br>>Nc1ccccc1/C=C/c1ccccc1  
 5028 C=CCC(c1ccccc1)P(=O)(OC)OC.Ic1ccc2ccccc12>>COP(=O)(OC)C(C/C=C/c1ccccc2ccccc12)c1ccccc  
 5029 C=CC(N)=O.Cc1ccc(Br)cc1>>Cc1ccc(/C=C/C(N)=O)cc1  
 5030 C=Cc1ccccc1.CCCCCC(C)I>>CCCCCCC(C)/C=C/c1ccccc1  
 5031 C=Cc1ccccc1.CCOC(=O)C(F)Br>>CCOC(=O)C(F)/C=C/c1ccccc1  
 5032 C=CCOc1ccccc1.FC(F)(F)c1ccc(Br)cc1>>FC(F)(F)c1ccc(/C=C/COc2ccccc2)cc1  
 5033 C=CC(=O)OCC.O=C(O)c1ccc(I)cc1>>CCOC(=O)/C=C/c1ccc(C(=O)O)cc1  
 5034 C=CC(=O)OC.C[Si](C)(C)/C=C/C1=C(Br)CCCC1>>COC(=O)/C=C/C1=C(/C=C/[Si](C)(C)C)CCCC1  
 5035 C=Cc1ccccc1.Cc1cc(C)c(Br)c(C)c1>>Cc1cc(C)c(/C=C/c2ccccc2)c(C)c1  
 5036 C=CC(=O)OC.Cc1c(C)c(C)c(I)c(C)c1C>>COC(=O)/C=C/c1c(C)c(C)c(C)c(C)c1C  
 5037 C=CP(=O)(OCC)OCC.COC(=O)C1Cc2c(Br)cccc2CN1C(=O)OC>>CCOP(=O)(/C=C/c1cccc2c1CC(C(=O)OC)N(C(=O)OC)C2)OCC  
 5038 C=Cc1n[nH]c2cc([C@@H]3C[C@@]34C(=O)Nc3ccc(OC)cc34)ccc12.CN1CCN(c2ccc(Br)cc2)CC1>>COc1ccc2c(c1)[C@]1(C[C@H]1c1ccc3c(/C=C/c4ccc(N5CCN(C)CC5)cc4)n[nH]c3c1)C(=O)N2  
 5039 C=Cc1ccc(OC)cc1.COc1ccc(Br)c(N)c1>>COc1ccc(/C=C/c2ccc(OC)cc2N)cc1  
 5040 C=CS(=O)(=O)F.C[C@]12CC[C@@H]3c4ccc(OS(=O)(=O)Oc5ccc(I)cc5)cc4CC[C@H]3[C@@H]1C  
 5041 CC2=O>>C[C@]12CC[C@@H]3c4ccc(OS(=O)(=O)Oc5ccc(/C=C/S(=O)(=O)F)cc5)cc4CC[C@H]3[C@@H]1CCCC=O  
 5042 C=CC(=O)OC(C)(C)C.C[Si](C)(C)CCOCON1CCc2c(ncc3c2c(I)cn3Cc2ccc(F)cc2)C1=O>>CC(C)(C)OC(=O)/C=C/c1cn(Cc2ccc(F)cc2)c2cnc3c(c12)CCN(OCOCC[Si](C)(C)C)C3=O  
 5043 C=Cc1ccc(N2CCN(C(C)=O)CC2)cc1.Fc1cc(Br)cc(Cn2ccnc2)c1>>CC(=O)N1CCN(c2ccc(/C=C/c3cc(F)cc(Cn4ccnc4)c3)cc2)CC1  
 5044 C=CC(OCC)OCC.Cc1cc(C)cc(Br)c1>>CCOC(/C=C/c1cc(C)cc(C)c1)OCC  
 5045 Br1ccc2ccccc2c1.C=CCO[C@@H]1CC(=O)O[C@H](C)C/C=C/C=C/[C@H](O[Si](C)(C)C(C)(C)C)[C@H](C)C[C@H](CC(OC)OC)[C@H](O[C@@H]2O[C@H](C)[C@@H](O[C@H]3C[C@@](C)(O)[C@@H](OC(=O)CC)[C@H](C)O3)[C@H](N(C)C)[C@H]2OC(C)=O)[C@H]1OC>>CCC(=O)O[C@H]1[C@H](C)O[C@@H](O[C@H]2[C@H](N(C)C)[C@@H](OC(C)=O)[C@H](O[C@@H]3[C@@H](OC)[C@H](OC/C=C/c4ccc5ccccc5c4)CC(=O)O[C@H](C)C/C=C/C=C/[C@H](O[Si](C)(C)C(C)(C)C)C(C)C)C1  
 5046 C=CCc1ccccc1.CC(C)(C)OC(=O)c1ccc(Br)cc1[N+](=O)[O-]  
 5047 ]>>CC(C)(C)OC(=O)c1ccc(/C=C/Cc2ccccc2)cc1[N+](=O)[O-]  
 5048 C=CC(=O)OC(C)(C)C.Oc1ccc(-  
 5049 c2ccc(Br)cc2)cc1C12CC3CC(CC(C3)C1)C2>>CC(C)(C)OC(=O)/C=C/c1ccc(-  
 5050 c2ccc(O)c(C34CC5CC(CC(C5)C3)C4)c2)cc1  
 5051 C=CC(=O)OC.Nc1ccc(Br)cn1>>COC(=O)/C=C/c1cnc(N)nc1

5047 C=Cc1ccc(OC)cc1.N#Cc1cc2sc3ccccc3c2c2cc(Br)ccc12>>COc1ccc(/C=C/c2ccc3c(C#N)cc4sc5ccccc5c4c3c2)cc1  
5048 C=Cc1ccncc1.CC(C)(C)OC(=O)N[C@H](COc1cncc(Br)c1)C(=O)O>>CC(C)(C)OC(=O)N[C@H](COc1cncc(/C=C/c2ccncc2)c1)C(=O)O  
5049 C=CC(F)(F)C(F)(F)C(F)(F)F.Ic1ccc(OCc2ccccc2)cc1>>FC(F)(F)C(F)(F)C(F)(F)C(F)(F)/C=C/c1ccc(OCc2ccccc2)cc1  
5050 C=Cc1ccc(C(C)(C)C)cc1.C[Si](C)(C)Cl>>CC(C)(C)c1ccc(/C=C/[Si](C)(C)C)cc1  
5051 C=CC(=O)OC.COc1ccc(I)c([N+](=O)[O-])c1>>COC(=O)/C=C/c1ccc(OC)cc1[N+](=O)[O-]  
5052 C=Cc1ccc(C(=O)OC)cc1.CC1(C)NC(C)(C)c2cc(Br)ccc21>>COC(=O)c1ccc(/C=C/c2ccc3c(c2)C(C)(C)NC3(C)C)cc1  
5053 C=CS(C)(=O)=O.N#Cc1ccccc1Br>>CS(=O)(=O)/C=C/c1ccccc1C#N  
5054 C=Cc1ccc(OC)c(OC)c1.CC(C)C(=O)Nc1ccccc1I>>COc1ccc(/C=C/c2ccccc2NC(=O)C(C)C)cc1OC  
5055 C=CC(=O)OCCCC.COC(CNc1cnccn1Cl)OC>>CCCCOC(=O)/C=C/c1cnccn1NCC(OC)OC  
5056 C=CC(=O)OC.CC(C)(C)OC(=O)NC1(C(=O)OC(C)(C)C)CCOC1c1ccc(Br)cc1>>COC(=O)/C=C/c1ccc(C2OCCC2(NC(=O)OC(C)(C)C)C(=O)OC(C)(C)C)cc1  
5057 Br1cnc2ccccc2c1.C=CC(=O)CCC>>CCCC(=O)/C=C/c1cnc2ccccc2c1  
5058 C=Cc1cccn1.O=[N+](O-)]c1ccc(I)cc1>>O=[N+](O-)]c1ccc(/C=C/c2cccn2)cc1  
5059 C=CC#N.O=[N+](O-)]c1ccc(I)c1>>N#C/C=C/c1ccc([N+](=O)[O-])c1  
5060 Br1ccc(C(c2ccc3c(cnn3C3CCCCO3)c2)=C2[C@H]3C[C@@H]4C[C@@H](C[C@H]2C4)C3)cc1.C=CC(=O)OC>>COC(=O)/C=C/c1ccc(C(c2ccc3c(cnn3C3CCCCO3)c2)=C2[C@H]3C[C@@H]4C[C@@H](C[C@H]2C4)C3)cc1  
5061 C=Cc1cnc2ccccc2c1.CN1C(=O)CC[C@]2(C)c3ccc(Br)cc3CC[C@]2(C)c3ccc(/C=C/c4cnc5ccccc5c4)cc3CC[C@]2(C)c3ccc(C)cc1.C[Si](C)(OS(=O)(=O)C(F)(F)OS(=O)(=O)C(F)(F)F>>C[Si](C)(/C=C/c1ccc(Cl)cc1)OS(=O)(=O)C(F)(F)F  
5062 C=CC(=O)OC(C)(C)C.Cc1ccc(S(=O)(=O)Cc2ccccc2I)cc1>>Cc1ccc(S(=O)(=O)Cc2ccccc2/C=C/C(=O)OC(C)(C)C)cc1  
5063 C=Cc1ccc(Cl)cc1.O=Cc1ccc(Br)cc1>>O=Cc1ccc(/C=C/c2ccc(Cl)cc2)cc1  
5064 C=CC(=O)NCc1ccccc(F)c1.COc1ccc2c(=O)c(I)coc2c1>>COc1ccc2c(=O)c(/C=C/C(=O)NCc3ccccc(F)c3)coc2c1  
5065 C=Cc1ccc(OC)cc1.CCCCCOC(=O)/C=C/c1ccc(Cl)cc1>>CCCCOC(=O)/C=C/c1ccc(/C=C/c2ccc(OC)cc2)cc1  
5066 C=CC(=O)OC.O=c1[nH]c(=O)n([C@H]2C[C@H](O)[C@@H](CO)O2)cc1I>>COC(=O)/C=C/c1cn([C@H]2C[C@H](O)[C@@H](CO)O2)c(=O)[nH]c1=O  
5067 C=CC(OCC)OCC.Fc1cccc(I)c1>>CCOC(/C=C/c1cccc(F)c1)OCC  
5068 C=Cc1ccccc1.CCCCCOC(=O)/C=C/c1ccc(/C=C/C(=O)OCC)cc1Cl>>CCCCOC(=O)/C=C/c1ccc(/C=C/C(=O)OCC)cc1/C=C/c1ccccc1  
5069 C=CB1OC(C)CC(C)(C)O1.CCOc1nn(CC)cc1S(=O)(=O)N1C[C@H](CCC(=O)OC)Oc2ccc(Br)cc21>>CCOc1nn(CC)cc1S(=O)(=O)N1C[C@H](CCC(=O)OC)Oc2ccc(/C=C/B3OC(C)CC(C)(C)O3)cc21  
5070 C=CC(=O)O.COc1cc(I)ccc1O>>COc1cc(/C=C/C(=O)O)ccc1O  
5071 C=CCN(C(=O)c1cc(C)nn1C)[C@H](C)c1cc(F)cc(F)c1.O=C1Nc2nccccc2[C@]12Cc1ccc(Br)cc1C2>>Cc1cc(C(=O)N(C/C=C/c2ccc3c(c2)C[C@@]2(C3)C(=O)Nc3nccccc32)[C@H](C)c2cc(F)cc(F)c2)n(C)n1  
5072 C=Cc1ccc(C)cc1.Cc1ccc(Cl)cc1>>Cc1ccc(/C=C/c2ccc(C)cc2)cc1  
5073 C=CC(=O)OCC.Nc1ccc(F)nc1Br>>CCOC(=O)/C=C/c1nc(F)ccc1N  
5074 C=Cc1ccc(Br)cc1.Cn1cc(I)c(=O)c2ccccc21>>Cn1cc(/C=C/c2ccc(Br)cc2)c(=O)c2ccccc21  
5075 C=CC(=O)OCCCC.N#Cc1ccc(Br)cc1>>CCCCOC(=O)/C=C/c1ccc(C#N)cc1  
5076 C=Cc1cccn1.CCCCCCCC(=O)N1CCN(c2ccc(Br)cc2)CC1>>CCCCCCCC(=O)N1CCN(c2ccc(/C=C/c3cccn3)cc2)CC1  
5077 C=CC[Si](C)(C)C.C[Si](C)(C)I>>C[Si](C)(C)/C=C/C[Si](C)(C)C  
5078 C=Cc1ccccc1O.Oc1cc(Br)cc(O)c1F>>Oc1ccccc1/C=C/c1cc(O)c(F)c(O)c1  
5079 C=CC(N)=O.CSc1nc2c(I)c(Cl)ccc2[nH]1>>CSc1nc2c(/C=C/C(N)=O)c(Cl)ccc2[nH]1  
5080 C=CCCCCCCCC.O=Cc1ccc(Br)cc1>>CCCCCCCCC/C=C/c1ccc(C=O)cc1  
5081 C=CC(C)(C)O.O=c1oc2ccccc2cc1Br>>CC(C)(O)/C=C/c1cc2ccccc2oc1=O  
5082 C=CC(=O)OC.CC1(C)O[C@@H]2[C@@H](CO[Si](C)(C)C(C)(C)O)[C@@H](n3cnc(C(N)=O)c3I)[C@@H]2O1>>COC(=O)/C=C/c1c(C(N)=O)ncn1[C@@H]1O[C@H](CO[Si](C)(C)C(C)(C)O)[C@H]2OC(C)(C)O[C@H]21  
5083 C=CC(=O)OC.CCOC(=O)C1(/C(C)=C(/I)c2ccccc2)CCCC1=O>>CCOC(=O)C1(/C(C)=C(/C=C/C(=O)OC)c2ccccc2)CCCC1=O  
5084 C=CC(=O)NC(C)(C)C.O=C1C(O)=C(I)C(=O)c2ccccc21>>CC(C)(C)NC(=O)/C=C/C1=C(O)C(=O)c2ccccc2C1=O  
5085

5086 C=CC(=O)OC.COc1ccc(CNc2c(C(=O)NCc3ccc(F)cc3F)c(=O)n(OCc3ccccc3)c3ncc(Br)cc23)c(OC)c1  
>>COC(=O)/C=C/c1enc2c(c1)c(NCc1ccc(OC)cc1OC)c(C(=O)NCc1ccc(F)cc1F)c(=O)n2OCc1ccccc1  
5087 C=CS(=O)(=O)c1ccccc1.Clc1ccc(I)cc1>>O=S(=O)/C=C/c1ccc(Cl)cc1)c1ccccc1  
5088 C=CC(=O)OCC.O=C[13c]1[13cH][13cH][13c](Br)[13cH][13cH]1>>CCOC(=O)/C=C/[13c]1[13cH][1  
3cH][13c](C=O)[13cH][13cH]1  
5089 C=Cc1ccccc1.C[Si](Cl)(c1ccccc1)c1ccccc1>>C[Si](/C=C/c1ccccc1)(c1ccccc1)c1ccccc1  
5090 C=CC(=O)N1N=Cc2ccccc2C1CCC.CCOc1cc(Cc2cnc(N)nc2N)cc(I)c1OCC>>CCCC1c2ccccc2C=NN  
1C(=O)/C=C/c1cc(Cc2cnc(N)nc2N)cc(OCC)c1OCC  
5091 C=C[13C](=O)N(Cc1ccccc1)OC.CC1=C(OS(=O)(=O)C(F)(F)F)C(C)(C)CCC1>>CON(Cc1ccccc1)[13  
C](=O)/C=C/C1=C(C)CCCC1(C)C  
5092 C=CS(C)(=O)=O.FC(F)(F)c1ccc(Br)cc1>>CS(=O)(=O)/C=C/c1ccc(C(F)(F)F)cc1  
5093 C=Cc1cc([N+](=O)[O-])cc([N+](=O)[O-])c1.COc1ccc(I)cc1>>COc1ccc(/C=C/c2cc([N+](=O)[O-  
)cc([N+](=O)[O-])c2)cc1  
5094 C=CC(=O)OCCCC.O=C(c1ccc(Br)cc1)N1CCCC1>>CCCCOC(=O)/C=C/c1ccc(C(=O)N2CCCC2)cc1  
5095 C=CCNS(=O)(=O)c1ccc(C)cc1.Nc1ccccc1I>>Cc1ccc(S(=O)(=O)NC/C=C/c2ccccc2N)cc1  
5096 C=CC(=O)NCc1ccc(F)c(F)c1.O=c1c(I)coc2cc(O)ccc12>>O=C(/C=C/c1coc2cc(O)ccc2c1=O)NCc1ccc  
(F)c(F)c1  
5097 C=CB1OC(C)CC(C)(C)O1.Ic1ccccc1>>CC1CC(C)(C)OB(/C=C/c2ccccc2)O1  
5098 Br1cnc2ccccc12.C=CCC(C)C(=O)OCC>>CCOC(=O)C(C)C/C=C/c1cnc2ccccc12  
5099 C=CC(=O)OCCCC.Ic1ccccc1>>CCCCOC(=O)/C=C/c1ccccc1  
5100 C=CCC(=O)OC(C)(C)C.C[C@@H](O)c1cnc2ccc(Br)cc2n1>>C[C@@H](O)c1cnc2ccc(/C=C/CC(=O)  
OC(C)(C)C)cc2n1  
5101 C=CC1(O)CCC1.Clc1ccc(I)cc1>>OC1(/C=C/c2ccc(Cl)cc2)CCC1  
5102 C=CCC(O)c1c(C)noc1-c1ccc(Br)cc1.Ic1ccccc1>>Cc1noc(-c2ccc(Br)cc2)c1C(O)C/C=C/c1ccccc1  
5103 C=CCNC(=O)c1ccccc1NC(=O)c1ccccc1.Cc1ccc(I)cc1>>Cc1ccc(/C=C/CNC(=O)c2ccccc2NC(=O)c2c  
cccc2)cc1  
5104 C=Cc1cnc1.Cc1ccc(Nc2c(C#N)cnc3cc(Br)ccc23)c(C)c1>>Cc1ccc(Nc2c(C#N)cnc3cc(/C=C/c4cncnc  
4)ccc23)c(C)c1  
5105 C=CC#N.Cc1cc(Br)cc(C)c1Nc1cnc(NC2CCN(c3ccccc(C(N)=O)c3)CC2)n1>>Cc1cc(/C=C/C#N)cc(C)  
c1Nc1cnc(NC2CCN(c3ccccc(C(N)=O)c3)CC2)n1  
5106 BrC1CCCCC1.C=Cc1ccccc1>>C(=C/C1CCCCC1)\c1ccccc1  
5107 C=CC(=O)OCc1ccccc1.Clc1ccccc1>>O=C(/C=C/c1ccccc1)OCc1ccccc1  
5108 C=Cc1ccc(CN(C)C)cc1.COC(=O)c1ccccc1Br>>COC(=O)c1ccccc1/C=C/c1ccc(CN(C)C)cc1  
5109 C=CC(=O)OC.COC(=O)Cc1cc(OC)c(OC)cc1>>COC(=O)/C=C/c1cc(OC)c(OC)cc1CC(=O)OC  
5110 C=Cc1cc(OC(C)=O)cc(OC(C)=O)c1.O=[N+][([O-  
)c1ccc(I)cc1>>CC(=O)Oc1cc(/C=C/c2ccc([N+](=O)[O-])cc2)cc(OC(C)=O)c1  
5111 C=Cc1ccc(O)cc1.Oc1ccc(-c2oc3cc(O)cc(Br)c3c2-c2cc(O)cc(O)c2)cc1>>Oc1ccc(/C=C/c2cc(O)cc3oc(-  
c4ccc(O)cc4)c(-c4cc(O)cc(O)c4)c23)cc1  
5112 C=Cc1ccccc1.Cc1ccc(I)c2c1[C@@]1(OC2)O[C@H](CO[Si](C)(C)C(C)(C)C)[C@H]2OC(C)(C)O[C  
@H]21>>Cc1ccc(/C=C/c2ccccc2)c2c1[C@@]1(OC2)O[C@H](CO[Si](C)(C)C(C)(C)C)[C@H]2OC(C  
)C)O[C@H]21  
5113 C=Cc1cc(C(C)(C)C)c(O)c(C(C)(C)C)c1.Cc1cnc(C)c1-  
c1c(C)cc(OS(=O)(=O)C(F)(F)F)cc1C>>Cc1cnc(C)c1-  
c1c(C)cc(/C=C/c2cc(C(C)(C)C)c(O)c(C(C)(C)C)c2)cc1C  
5114 C=CC(=O)OCC.O=Cc1cc2ccccc2nc1I>>CCOC(=O)/C=C/c1nc2ccccc2cc1C=O  
5115 C=CC(=O)OC.Cc1cc(CCNC(=O)OC(C)(C)C)cc(I)c1O>>COC(=O)/C=C/c1cc(CCNC(=O)OC(C)(C)C  
cc(C)c1O  
5116 C=CC(C)(C)O.Cc1cc(O[Si](C)(C)C(C)(C)C)c(I)cc1O[Si](C)(C)C(C)(C)C>>Cc1cc(O[Si](C)(C)C(C)(C)  
)C)c(/C=C/C(C)(C)O)cc1O[Si](C)(C)C(C)(C)C  
5117 C=CC(=O)OC(C)(C)C.Cc1c(-c2ccc(O)cc2)oc2ccc(Br)cc12>>Cc1c(-  
c2ccc(O)cc2)oc2ccc(/C=C/C(=O)OC(C)(C)C)cc12  
5118 C=CC(=O)OC.COc1ccc2c(c1)CCN(c1ccc(F)cc1)C2(C)c1ccc(Br)cc1>>COC(=O)/C=C/c1ccc(C2(C)c3  
ccc(OC)cc3CCN2c2ccc(F)cc2)cc1  
5119 C=CC(=O)OCC.Cc1nc(C(C)C)nc(N)c1I>>CCOC(=O)/C=C/c1c(C)nc(C(C)C)nc1N  
5120 C=Cc1ccc(F)cc1.O=c1oc2ccccc2cc1Br>>O=c1oc2ccccc2cc1/C=C/c1ccc(F)cc1  
5121 C=Cc1ccccc1.CCCCCCCCCCCCCCc1ccc(I)c(O)c1>>CCCCCCCCCCCCCCCCc1ccc(/C=C/c2ccccc2  
)c(O)c1  
5122 Br1cnc1.C=Cc1ccc(C)cc1>>Cc1ccc(/C=C/c2ccccc2)cc1  
5123 C=Cc1ccccc1.Nc1cc([N+](=O)[O-])ccc1Br>>Nc1cc([N+](=O)[O-])ccc1/C=C/c1ccccc1  
5124 C=Cc1ccc(Cl)cc1.COC(=O)c1ccccc1I>>COC(=O)c1ccccc1/C=C/c1ccc(Cl)cc1  
5125 Br1cncnc1.C=CC(=O)OCCCC>>CCCCOC(=O)/C=C/c1cncnc1

5126 C=Cc1ccncc1.O=Cc1cc(Br)ccc1O>>O=Cc1cc(/C=C/c2ccncc2)ccc1O  
 5127 C=CC(=O)OCC.Cc1ccc(S(=O)(=O)n2cc(C=O)c3c(Br)cccc32)cc1>>CCOC(=O)/C=C/c1cccc2c1c(C=O)  
 )cn2S(=O)(=O)c1ccc(C)cc1  
 5128 C=CC(C)=O.CC(C)(C)c1ccc2[nH]c3c(c2c1)CC(=O)Nc1ccc(I)cc1-3>>CC(=O)/C=C/c1ccc2c(c1)-  
 c1[nH]c3ccc(C(C)(C)C)cc3c1CC(=O)N2  
 C=Cc1cccc1[N+](=O)[O-  
 5129 ].COC(=O)c1cc2cc(Br)ccc2cc1OC(C)=O>>COC(=O)c1cc2cc(/C=C/c3cccc3[N+](=O)[O-  
 ])ccc2cc1OC(C)=O  
 5130 C=CC(=O)OCCCC.Nc1cccc1Br>>CCCCOC(=O)/C=C/c1cccc1N  
 5131 C=Cc1cccc1.Fc1ccc(Br)c(F)c1>>Fc1ccc(/C=C/c2cccc2)c(F)c1  
 5132 C=Cc1cccc1Cl.CCOC(=O)C(Cc1cccc1I)C(C)=O>>CCOC(=O)C(Cc1cccc1/C=C/c1cccc1Cl)C(C)=  
 C=Cc1cccc1F.CN(C(=O)c1ncc2c(c1I)c1cccc1n2S(=O)(=O)N(C)C)c1cccc1>>CN(C(=O)c1ncc2c(c  
 5133 1/C=C/c1cccc1F)c1cccc1n2S(=O)(=O)N(C)C)c1cccc1  
 5134 C=CCS(=O)(=O)c1cccc1.c1ccc([I+](c2cccc2)cc1>>O=S(=O)(C/C=C/c1cccc1)c1cccc1  
 5135 Brc1cccc(C2OCCO2)c1.C=CC(=O)OC>>COC(=O)/C=C/c1cccc(C2OCCO2)c1  
 5136 C=CC(=O)OC(C)(C)C.Cc1nc(Cc2ccc(I)cc2)[nH]c1C(=O)c1cccc1>>Cc1nc(Cc2ccc(/C=C/C(=O)OC(  
 C)(C)C)cc2)[nH]c1C(=O)c1cccc1  
 5137 C=Cc1cccc1OC.CN(C(=O)c1cccc1)c1ccc2c(c1)[nH]c(=NC(=O)c1ccc(Br)s1)n2CCC(N)=O>>COc1c  
 cccc1/C=C/c1ccc(C(=O)N=c2[nH]c3cc(N(C)C(=O)c4cccc4)ccc3n2CCC(N)=O)s1  
 5138 C=Cc1cc(OC(C)=O)cc(OC(C)=O)c1.CC(=O)Oc1ccc(Br)cc1OC(C)=O>>CC(=O)Oc1cc(/C=C/c2ccc(O  
 C(C)=O)c(OC(C)=O)c2)cc(OC(C)=O)c1  
 Brc1ncc2cccc12.C=Cc1cn(COCC[Si](C)(C)C)nc1-  
 5139 c1nc2ccc(OC)cc2n1COCC[Si](C)(C)C>>COc1ccc2nc(-  
 c3nn(COCC[Si](C)(C)C)cc3/C=C/c3ncc4cccc34)n(COCC[Si](C)(C)C)c2c1  
 \*CNCCOCCOCCOCCCN(C(=O)COc1ccc(C(Cc2cc(OC)cc(OC)c2)NC(=O)c2cccc(C=C)c2)cc1.Ic1cc  
 5140 c2cccc2c1>>\*CNCCOCCOCCOCCCN(C(=O)COc1ccc(C(Cc2cc(OC)cc(OC)c2)NC(=O)c2cccc(/C=  
 C/c3ccc4cccc4c3)c2)cc1  
 5141 C=CN1C(=O)c2cccc2C1=O.Cc1ccc(I)cc1>>Cc1ccc(/C=C/N2C(=O)c3cccc3C2=O)cc1  
 5142 C=CC(=O)OCC.O=C(O)c1cccc(I)c1>>CCOC(=O)/C=C/c1cccc(C(=O)O)c1  
 Brc1nc2cccc2c1.C=CCO[C@]1(C)C[C@H](C)C(=O)[C@H](C)[C@H]2N(C)C(=O)O[C@]2(C)[  
 5143 C@H](C)C(=O)[C@H](C)C(=O)[C@H](C)[C@H]1O[C@H]1O[C@H](C)C[C@H](N(C)C)[C  
 @H]1O>>CC[C@H]1OC(=O)[C@H](C)C(=O)[C@H](C)[C@H](O[C@H]2O[C@H](C)C[C@H]  
 (N(C)C)[C@H]2O)[C@H]1(C)OC/C=C/c2ncc3cccc3c2)C[C@H](C)C(=O)[C@H](C)[C@H]2N(C)C  
 5144 C=CC(=O)OC.COc1ccc(C2=Cc3nc4cccc4cc3C(CC(C)=O)N2c2ccc(Br)cc2)cc1>>COC(=O)/C=C/c1c  
 cc(N2C(c3ccc(OC)cc3)=Cc3nc4cccc4cc3C2CC(C)=O)cc1  
 C=CC(C)=O.CNC(=O)c1c2cc(C3CC3)c(I)cc2nn1-  
 5145 c1ccc(Br)cc1>>CNC(=O)c1c2cc(C3CC3)c(/C=C/C(C)=O)cc2nn1-c1ccc(Br)cc1  
 5146 C=C[C@]1(CC)CCSc2cccc21.Ic1cccc1>>CC[C@]1(/C=C/c2cccc2)CCSc2cccc21  
 5147 C=CC(=O)OCC.Clc1cccc(Br)c1>>CCOC(=O)/C=C/c1cccc(Cl)c1  
 5148 C=CC(=O)OC.Cc1n[nH]c2cc(Br)ccc12>>COC(=O)/C=C/c1ccc2c(C)n[nH]c2c1  
 5149 C=CC(=O)OCC.COc1ccc(I)cc1>>CCOC(=O)/C=C/c1ccc(OC)cc1  
 C=CC(=O)OC.CC(=O)OCCCN(CCCCO[Si](c1cccc1)(c1cccc1)C(C)(C)C(=O)[C@H]1c2cc(Br)  
 5150 ccc2O[C@H]1c1ccc(OCc2cccc2)cc1>>COC(=O)/C=C/c1ccc2c(c1)[C@H](C(=O)N(CCCCO[Si](c  
 1cccc1)(c1cccc1)C(C)(C)C)CCCOC(C)=O)[C@H](c1ccc(OCc3cccc3)cc1)O2  
 5151 C=CC(=O)OC.COc1ccc(-c2oc3cc(OC)ccc3c(=O)c2I)cc1>>COC(=O)/C=C/c1c(-  
 c2ccc(OC)cc2)oc2cc(OC)ccc2c1=O  
 5152 C=CC(=O)OC.O=Cc1cccc(Cl)c1>>COC(=O)/C=C/c1cccc(C=O)c1  
 5153 C=CC(=O)OC.Cc1ccsc1C(=O)c1sc2cc(OC)ccc2c1Oc1ccc(Br)cc1>>COC(=O)/C=C/c1ccc(Oc2c(C(=O)c  
 3seccc3)sc3cc(OC)ccc23)cc1  
 \*CNCCOCCOCCOCCCN(C(=O)COc1ccc(C(Cc2cc(OC)cc(OC)c2)NC(=O)c2ccc(C=C)cc2)cc1.FC(F)  
 5154 (F)Oc1cccc1I>>\*CNCCOCCOCCOCCCN(C(=O)COc1ccc(C(Cc2cc(OC)cc(OC)c2)NC(=O)c2ccc(/C=  
 C/c3cccc3OC(F)(F)F)cc2)cc1  
 5155 C=CC(=O)O.Cc1ccc(S(=O)(=O)Nc2ccc(I)cc2)cc1>>Cc1ccc(S(=O)(=O)Nc2ccc(/C=C/C(=O)O)cc2)cc1  
 C=CC(=O)OC.CC(C)(C)OC(=O)N1Cc2ccc(Br)cc2C1>>COC(=O)/C=C/c1ccc2c(c1)CN(C(=O)OC(C)(  
 5156 C)C)C2  
 5157 C=CC(=O)O.O=[N+](O-)c1ccc(Cl)cc1>>O=C(O)/C=C/c1ccc([N+](=O)[O-])cc1  
 C=Cc1ccc2cccc2c1.O=C1c2cccc2C(=O)N1CCCC(Br)C(F)(F)F>>O=C1c2cccc2C(=O)N1CCCC(/C  
 5158 =C/c1ccc2cccc2c1)C(F)(F)F  
 C=CC(=O)OC.CCOC(=O)C(/C=C/C(=O)OC)=C(Cl)c1cccc1>>CCOC(=O)C(/C=C/C(=O)OC)=C(Cl  
 5159 =C\C(=O)OC)c1cccc1  
 5160 C=CC(=O)OCC.O=[N+](O-)c1cccc(Cl)c1>>CCOC(=O)/C=C/c1cccc([N+](=O)[O-])c1

5161 C=Cc1cccc1.COc1ccc(/N=N/c2ccc(I)cc2)cc1>>COc1ccc(/N=N/c2ccc(/C=C/c3ccccc3)cc2)cc1  
 5162 C=CN1C(=O)c2ccccc2C1=O.OC(c1ccc(C(F)(F)F)cc1)c1ncccc1Br>>O=C1c2ccccc2C(=O)N1/C=C/c1cncnc1C(O)c1ccc(C(F)(F)F)cc1  
 5163 C=Cc1ccc(OC)cc1.CSc1oc2ccc(Br)cc2c1-c1ccccc1>>COc1ccc(/C=C/c2ccc3oc(SC)c(-C=CC(=O)OC(C)(C)C.O=S(=O)(Oc1ccc(Br)cc1)C(F)(F)F>>CC(C)(C)OC(=O)/C=C/c1ccc(OS(=O)(=O)C(F)(F)F)cc1  
 5165 C=CC(=O)OC.O=[N+](O-)[c1ccccc1Cl]>>COC(=O)/C=C/c1ccccc1[N+](=O)[O-]  
 5166 C=Cc1ccccc1.O=[N+](O-)[c1ccc(Br)cc1]>>O=[N+](O-)[c1ccccc1/C=C/c2ccccc2]c1  
 5167 Br1ccccc1.C=Cc1ccccc1OC>>COc1ccccc1/C=C/c1ccccc1  
 5168 C=CC(=O)N1N=Cc2ccccc2C1c1cccs1.COc1ccc(Cc2cnc(N)nc2N)cc(I)c1OC>>COc1cc(Cc2cnc(N)nc2N)cc(/C=C/C(=O)N2N=Cc3ccccc3C2c2cccs2)c1OC  
 5169 C=Cc1ccccc1.COC(=O)[C@H](Cc1ccc(O)c(I)c1)NC(=O)OC(C)(C)C>>COC(=O)[C@H](Cc1ccc(O)c(/C=C/c2ccccc2)c1)NC(=O)OC(C)(C)C  
 5170 Br1ccsc1.C=C[Si](CC)(CC)CC>>CC[Si](/C=C/c1ccsc1)(CC)CC  
 5171 C=Cc1ccccc1.Nc1ccc(Cl)cc1Br>>Nc1ccc(Cl)cc1/C=C/c1ccccc1  
 5172 Br1ccccc1.C=Cc1cc2c(c(=O)n(C)c(=O)n2C)n1C>>Cn1c(=O)c2c(cc(/C=C/c3ccccc3)n2C)n(C)c1=O  
 5173 C=CC(=O)OC.Nc1cc(F)ccc1Br>>COC(=O)/C=C/c1ccc(F)cc1N  
 5174 C=Cc1ccc(C)cc1.Oc1ccc(Br)cc1>>Cc1ccc(/C=C/c2ccc(O)cc2)cc1  
 5175 C=CC(=O)OCC.CC(C)c1nn(-c2nc3ccccc3s2)c(-c2ccc(F)cc2)c1Br>>CCOC(=O)/C=C/c1c(C(C)C)nn(-c2nc3ccccc3s2)c1-c1ccc(F)cc1  
 5176 Br1n[nH]c2ccccc12.C=CC(=O)OCCCC>>CCCCOC(=O)/C=C/c1n[nH]c2ccccc12  
 5177 C=CC(N)=O.O=C(Nc1ccccc(I)c1)Nc1cc(C(F)(F)F)ccc1F>>NC(=O)/C=C/c1ccccc1NC(=O)Nc2cc(C(F)(F)F)ccc2F)c1  
 5178 Br1nccn1.C=Cc1ccc(OC)cc1>>COc1ccc(/C=C/c2nccn2)cc1  
 5179 C=CC(=O)OC.COC(=O)c1ccccc(Br)n1>>COC(=O)/C=C/c1ccccc1C(=O)OCn1  
 5180 C=CC(N)=O.O=Cc1ccc(Br)cc1>>NC(=O)/C=C/c1ccc(C=O)cc1  
 5181 C=CC(=O)N1N=Cc2ccccc2C1c1ccccc1C.COc1ccc(Cc2cnc(N)nc2N)cc(I)c1OC>>COc1cc(Cc2cnc(N)nc2N)cc(/C=C/C(=O)N2N=Cc3ccccc3C2c2ccccc2C)c1OC  
 5182 BrC1=C(C2=COCCO2)CCCC1.C=CC(=O)OC(C)(C)C>>CC(C)(C)OC(=O)/C=C/C1=C(C2=COCCO2)CCCC1  
 5183 C=Cc1cccc(OC)c1.FC(F)(F)c1ccccc1I>>COc1ccc(/C=C/c2ccccc2C(F)(F)F)c1  
 5184 C=Cc1ccc(C(=O)OC)cc1.FC(F)(Br)c1ccc(-c2ccccc2)cc1>>COC(=O)c1ccc(/C=C/C(F)(F)c2ccc(-c3ccccc3)cc2)cc1  
 5185 C=Cc1c[nH]c2nc(NC(=O)C(C)(C)C)[nH]c(=O)c12.CCOC(=O)CC[C@H](C(=O)OCC)N1Cc2ccc(I)cc2C1=O>>CCOC(=O)CC[C@H](C(=O)OCC)N1Cc2ccc(/C=C/c3c[nH]c4nc(NC(=O)C(C)(C)C)[nH]lc(=O)c34)cc2C1=O  
 5186 C=CC(=O)OCCCC.COc1cccc([IH2](OC(C)=O)OC(C)=O)c1>>CCCCOC(=O)/C=C/c1cccc(OC)c1  
 5187 C=Cc1ccccc1.Cc1ccc2c(-c3ccccc3C)c(Br)c(=O)oc2c1>>Cc1ccc2c(-c3ccccc3C)c(/C=C/c3ccccc3)c(=O)oc2c1  
 5188 C=CC(=O)OC(C)(C)C.Cc1ccc(Br)c(CO)c1>>Cc1ccc(/C=C/C(=O)OC(C)(C)C)c(CO)c1  
 5189 Br1cccs1.C=Cc1ccc2cc(OC)ccc2c1>>COc1ccc2cc(/C=C/c3cccs3)ccc2c1  
 5190 C=Cc1cc(C)ccc1C.CCOC(=O)C(F)Br>>CCOC(=O)C(F)/C=C/c1cc(C)ccc1C  
 5191 C=Cc1ccccc1.CC(C)(C)OC(=O)N[C@H](COc1cnc(C#N)c1)Cc1ccccc1C#N>>CC(C)(C)OC(=O)N[C@H](COc1cnc(/C=C/c2cnc2)c1)Cc1ccccc1C#N)c1  
 5192 Br1ccccc1I.C=CP(=O)(OCC)OCC>>CCOP(=O)(/C=C/c1ccccc1Br)OCC  
 5193 C=CCOCC/C=C\CC.COc1cc(Br)ccc1O>>CC/C=C\CCOC/C=C/c1ccc(O)c(OC)c1  
 5194 C=CC(=O)NCc1ccccc1F.COc1ccc2c(=O)c(I)oc2c1>>COc1ccc2c(=O)c(/C=C/C(=O)NCc3ccccc3F)co  
 5195 C=Cc1ccccc1.N#CCCCCCCCCl>>N#CCCCCCCC/C=C/c1ccccc1  
 5196 Br1ccc(-c2cnc3ccccc3n2)cc1.C=CCn1c(-c2ccc(C(F)(F)F)cc2)nc2ccccc2c1=O>>O=c1c2ccccc2nc(-c2ccc(C(F)(F)F)cc2)n1C/C=C/c1ccc(-c2cnc3ccccc3n2)cc1  
 5197 C=CC(C)=O.Cc1ccccc1Br>>CC(=O)/C=C/c1ccccc1C  
 5198 C=CC(=O)OC.O=[N+](O-)[c1ccccc1Br]>>COC(=O)/C=C/c1ccccc1[N+](=O)[O-]  
 5199 C=CCOc1ccccc1C.COc1ccc(I)cc1>>COc1ccc(/C=C/COc2ccccc2C)cc1  
 5200 C=CC(=O)OCC.Cc1c(Br)cnc2c1nnn2C>>CCOC(=O)/C=C/c1cnc2c(nnn2C)c1C  
 5201 Br1ccc2c(c1)Cc1ccccc1-2.C=Cc1nc2c(=O)[nH]c(N)nc2n1[C@H]1C[C@H](O)[C@H](CO)O1>>Nc1nc2c(nc(/C=C/c3ccc4c(c3)Cc3ccccc3-4)n2[C@H]2C[C@H](O)[C@H](CO)O2)c(=O)[nH]1  
 5202 C=CC(=O)OC(C)(C)C.OCCc1cc(Br)ccc1O>>CC(C)(C)OC(=O)/C=C/c1ccc(O)c(CCO)c1  
 5203 C=Cc1ccc(C(=O)O)cc1.Oc1ccc(-c2oc3cc(O)cc(Br)c3c2-c2cc(O)cc(O)c2)cc1>>O=C(O)c1ccc(/C=C/c2cc(O)cc3oc(-c4ccc(O)cc4)c(-c4cc(O)cc(O)c4)c23)cc1



5204 C=CC(=O)N(C)Cc1cc2ccccc2n1C.CC1(C)C(=O)Nc2ncc(Br)cc21>>CN(Cc1cc2ccccc2n1C)C(=O)/C=C/c1cnc2c(c1)C(C)(C)C(=O)N2

5205 C=CC(=O)N1CCC(Cc2nnc(C)o2)CC1.Cc1nnn(Cc2cc(F)ccc2Br)n1>>Cc1nnn(Cc2cc(F)ccc2/C=C/C(=O)N2CCC(Cc3nnc(C)o3)CC2)n1

5206 C=CC(=O)OC.COc1c(NC(=O)C(C)(C)C)c(I)c(OC)c(OC)c1NC(=O)C(C)(C)C>>COC(=O)/C=C/c1c(NC(=O)C(C)(C)C)c(OC)c(NC(=O)C(C)(C)C)c(OC)c1OC

5207 C=CC(=O)OCC.Clc1ccccc1Br>>CCOC(=O)/C=C/c1ccccc1Cl

5208 C=CCOc1ccccc1.FC(F)(F)c1cccc(I)c1>>FC(F)(F)c1cccc(/C=C/COc2ccccc2)c1

5209 C=Cc1n[nH]c2cc([C@@H]3C[C@@H]34C(=O)Nc3ccc(OC)cc34)ccc12.CN(C)Cc1c(F)cc(Br)cc1F>>COc1ccc2c(c1)[C@]1(C[C@H]1c1ccc3c(/C=C/c4cc(F)c(CN(C)C)c(F)c4)n[nH]c3c1)C(=O)N2

5210 C=Cc1ccccc1.Clc1cn[nH]c1>>C(=C/c1cn[nH]c1)c1ccccc1

5211 C=CCN.O=c1[nH]c(=O)n([C@@H]2O[C@H](CO)[C@@H](O)[C@H]2O)cc1I>>NC/C=C/c1cn([C@@H]2O[C@H](CO)[C@@H](O)[C@H]2O)c(=O)[nH]c1=O

5212 Brclccnc1.C=CCC(C)O>>CC(O)C/C=C/c1ccnc1

5213 C=CC(N)=O.Cc1cc(Br)cc(C)c1O>>Cc1cc(/C=C/C(N)=O)cc(C)c1O

5214 C=CC(=O)O.COc1ccc(I)cc1>>COc1ccc(/C=C/C(=O)O)cc1

5215 C=CC(=O)OCC.O=c1c(Br)c(-c2ccc(Cl)cc2)oc2ccccc12>>CCOC(=O)/C=C/c1c(-c2ccc(Cl)cc2)oc2ccccc2c1=O

5216 C=CC(=O)N1N=Cc2ccccc2C1CCCC.COc1cc(Cc2cnc(N)nc2N)cc(I)c1OC>>CCCCCCC1c2ccccc2C=NN1C(=O)/C=C/c1cc(Cc2cnc(N)nc2N)cc(OC)c1OC

5217 C=CC(=O)OC.COC(=O)c1c(-c2ccccc2)ccc(OC)c1Br>>COC(=O)/C=C/c1c(OC)ccc(-Brclccnc1.C=CC(=O)CCC>>CCCC(=O)/C=C/c1ccnc1

5218 Brclccnc1.C=CC(=O)CCC>>CCCC(=O)/C=C/c1ccnc1

5219 C=CC#N.COc1ccc(OC)c(Br)c1>>COc1ccc(OC)c(/C=C/C#N)c1

5220 C=CC(C)(C)O.CC(=O)c1ccc(Br)cc1>>CC(=O)c1ccc(/C=C/C(C)(C)O)cc1

5221 C=CC(=O)NC(C)C.COc1ccc(OC)c1I>>COc1ccc(OC)c1/C=C/C(=O)NC(C)C

5222 C=Cc1cncnc1.CC(C)=C(C)Br>>CC(C)=C(C)/C=C/c1cncnc1

5223 C=Cc1cccc(SC)c1.COc1ccc2cc(Br)c(=O)oc2c1>>COc1ccc2cc(/C=C/c3cccc(SC)c3)c(=O)oc2c1

5224 C=CC(=O)OC.COc1c(CN(C(=O)c2ccccc2)c2ccc(Br)c2)ccc2c1OC(C)(C)[C@H](OC(C)=O)[C@H]2N1CCCCC1>>COC(=O)/C=C/c1ccc(N(Cc2ccc3c(c2OC)OC(C)(C)[C@H](OC(C)=O)[C@H]3N2CCC(C2)C(=O)c2ccccc2)c1

5225 C=Cc1ccccc1.Nc1ccc(Br)cc1I>>Nc1ccc(Br)cc1/C=C/c1ccccc1

5226 C=CC(=O)OCC.CCOC(=O)c1ccc(Br)cc1C>>CCOC(=O)/C=C/c1ccc(C(=O)OCC)c(C)c1

5227 C=CC(=O)OC.CC(=O)c1cccc(Br)c1>>COC(=O)/C=C/c1cccc(C(C)=O)c1

5228 C=Cc1ccc(-c2c(-c3ccc(C=C)cc3)c(=O)c2=O)cc1.COc1ccc(I)cc1>>C=Cc1ccc(-c2c(-c3ccc(/C=C/c4ccc(OC)cc4)cc3)c(=O)c2=O)cc1

5229 C=CC(=O)OC.C[C@@H]1CC=C[C@H]2[C@H]1C(=O)N(Cc1ccccc1)[C@H]2c1cccc(Br)c1>>COC(=O)/C=C/c1cccc([C@H]2[C@H]3C=CC[C@H](C)[C@H]3C(=O)N2Cc2ccccc2)c1

5230 C=CC(=O)OC(C)(C)C.COc1ccccc1Br>>COc1ccccc1/C=C/C(=O)OC(C)(C)C

5231 C=CC(=O)OC.COc1ccc(C(=C(I)CC[Se]c2ccccc2)c2ccc(OC)cc2)cc1>>COC(=O)/C=C/C(CC[Se]c1ccc(cc1)=C(c1ccc(OC)cc1)c1ccc(OC)cc1

5232 C=CN1C(=O)c2ccccc2C1=O.CC(=O)c1ccc(Br)cc1>>CC(=O)c1ccc(/C=C/N2C(=O)c3ccccc3C2=O)cc

5233 C=C[C@@](C)(C)(/C=C/c1ccc(OC)cc1)CCC=C(C)C.Oc1ccc(I)cc1>>COc1ccc(/C=C/[C@](C)(/C=C/c2cc(cc(O)cc2)CCC=C(C)C)cc1

5234 C=Cc1ccc(C)cc1.N#Cc1ccccc1Br>>Cc1ccc(/C=C/c2ccccc2C#N)cc1

5235 C=CC(=O)OCC.Cc1ccc(C2OCCCCO2)c(Br)c1>>CCOC(=O)/C=C/c1ccc(C)ccc1C1OCCCCO1

5236 C=CCC(C)C(=O)OCC.N#Cc1ccc(Br)cc1>>CCOC(=O)C(C)C/C=C/c1ccc(C#N)cc1

5237 C=CC(=O)OCCCC.COc1ccccc1Br>>CCCCOC(=O)/C=C/c1ccccc1OC

5238 C=CC(=O)OCC.Cc1nc2ccc(Cl)cc2c(=O)n1-c1ccccc1>>CCOC(=O)/C=C/c1ccc2nc(C)n(-c3ccccc3)c(=O)c2c1

5239 C=CC(=O)N(Cc1ccccc1)Cc1ccccc1.CC(C)(C)OC(=O)c1ccccc1Br>>CC(C)(C)OC(=O)c1ccccc1/C=C/C(=O)N(Cc1ccccc1)Cc1ccccc1

5240 C=CCN(C(=O)C1(C(F)(F)F)CC1)[C@H](C)c1cc(F)cc(F)c1.O=C1Nc2nccccc2[C@@]12Cc1cc(Br)cnclC2>>C[C@H](c1cc(F)cc(F)c1)N(C/C=C/c1cnc2c(c1)C[C@@]1(C2)C(=O)Nc2nccccc21)C(=O)C1(C(F)(F)F)CC1

5241 C=Cc1ccccc1C(F)(F)F.O=C(O)c1cccc(Br)c1>>O=C(O)c1cccc(/C=C/c2ccccc2C(F)(F)F)c1

5242 C=CC(=O)C1=CN(CC(C)C)CCC1(C)C.Ic1ccccc1>>CC(C)CN1C=C(C(=O)/C=C/c2ccccc2)C(C)(C)C

5243 C=CS(C)(=O)=O.COC(=O)c1ccc(Br)cc1>>COC(=O)c1ccc(/C=C/S(C)(=O)=O)cc1

5244 \*NCCCCOCCOCCOCCCN(C(=O)COc1ccc(C(Cc2cc(OC)cc(OC)c2)NC(=O)c2ccc(C=C)cc2)cc1.Oc1ccc(I)cc1>>\*NCCCCOCCOCCOCCCN(C(=O)COc1ccc(C(Cc2cc(OC)cc(OC)c2)NC(=O)c2ccc(/C=C/c3ccc(O)cc3)cc2)cc1

5245 C=CC(=O)OCC.Cc1ccc(S(=O)(=O)n2c(I)cc3c(Br)cn(C)c(=O)c32)cc1>>CCOC(=O)/C=C/c1cc2c(Br)c  
n(C)c(=O)c2n1S(=O)(=O)c1ccc(C)cc1  
5246 C=CC(=O)OC.Cc1cccc1I>>COC(=O)/C=C/c1cccc1C  
5247 C=Cc1ccc(C#N)cc1.FC(F)(F)c1nc(I)c2ncccn12>>N#Cc1ccc(/C=C/c2nc(C(F)(F)F)n3cccn23)cc1  
5248 C=Cc1cccn1.O=[N+](O-)]c1ccc2c(I)nn(C3CCCCO3)c2c1>>O=[N+](O-)]c1ccc2c(/C=C/c3cccn3)nn(C3CCCCO3)c2c1  
5249 C=C[C@H](CCCC)OC1CCCCO1.COC(=O)CCCCC1=C(I)CCC1=O>>CCCC[C@H](/C=C/C1=C(C)CCCC(=O)OC)C(=O)CC1)OC1CCCCO1  
5250 C=Cc1cccc1C.Oc1cccc1I>>Cc1cccc1/C=C/c1cccc1O  
5251 C=CC(=O)OC.Cc1c(Br)cccc1[N+](=O)[O-]>>COC(=O)/C=C/c1cccc([N+](=O)[O-])c1C  
5252 Br1cccn1.C=CC[C@H](C)O>>C[C@H](O)C/C=C/c1cccn1  
5253 C=Cc1ccc(C#N)cc1.CCCCC(Br)C(F)(F)F>>CCCCC(/C=C/c1ccc(C#N)cc1)C(F)(F)F  
5254 C=CC(=O)OC.COc1ccc(-c2nc3ccc(Br)cc3nc2-c2ccc(OC)cc2)cc1>>COC(=O)/C=C/c1ccc2nc(-c3ccc(OC)cc3)c(-c3ccc(OC)cc3)nc2c1  
5255 C=CC(=O)OCC.Cc1ccc2cccc2c1Br>>CCOC(=O)/C=C/c1c(C)ccc2cccc12  
5256 C=CC(=O)OC.COc1ccc(Br)c(OC)c1>>COC(=O)/C=C/c1ccc(OC)cc1OC  
5257 Br1cccs1.C=CC(=O)OCCCC>>CCCCOC(=O)/C=C/c1cccs1  
5258 C=Cc1cccc1.Fc1ccc(I)cc1F>>Fc1ccc(/C=C/c2cccc2)cc1F  
5259 C=C/C=C/C(=O)N(CCCC)CCCC.Clc1cccc(Br)c1>>CCCCN(CCCC)C(=O)/C=C/C=C/c1cccc(Cl)c1  
5260 C=CC(=O)CC.CCC(CC)(c1ccc(O)cc1)c1ccc(Br)c(C)c1>>CCC(=O)/C=C/c1ccc(C(CC)(CC)c2ccc(O)cc2)cc1C  
5261 C=CC(=O)OCCCCC.Ic1cccc1>>CCCCCOC(=O)/C=C/c1cccc1  
5262 C=CC(F)(F)C(F)(F)C(F)(F)C(F)(F)C(F)(F)C(F)(F)F.CC1=Ne2ccc(I)cc2C1(C)C>>CC1=Ne2ccc(/C=C/C(F)(F)C(F)(F)C(F)(F)C(F)(F)C(F)(F)C(F)(F)C(F)(F)C(F)(F)F)cc2C1(C)C  
5263 C=Cc1cc(OCc2cccc2)c(OCc2cccc2)nn1.Cc1cc(C(F)(F)F)ccc1Br>>Cc1cc(C(F)(F)F)ccc1/C=C/c1cc(OCc2cccc2)c(OCc2cccc2)nn1  
5264 C=CS(=O)(=O)N1CCC2(CC1)N=C(C1CCCCC1)NC2=O.CC(=O)Nc1cc(C)c(Br)c(C)c1>>CC(=O)Nc1cc(C)c(/C=C/S(=O)(=O)N2CCC3(CC2)N=C(C2CCCCC2)NC3=O)c(C)c1  
5265 C=Cc1cncc(C#N)c1Nc1ccc2[nH]ccc2c1C.COc1cc(CN2CCN(C)CC2)ccc1I>>COc1cc(CN2CCN(C)CC2)ccc1/C=C/c1cncc(C#N)c1Nc1ccc2[nH]ccc2c1C  
5266 C=Cc1cccc1.COc1ccc(/C=C/C(=O)c2ccc(I)cc2)cc1>>COc1ccc(/C=C/C(=O)c2ccc(/C=C/c3cccc3)cc2)cc1  
5267 C=CC(=O)O.O=S(=O)(Nc1ccc(I)cc1)c1ccc(OC(F)(F)F)cc1>>O=C(O)/C=C/c1ccc(NS(=O)(=O)c2ccc(OC(F)(F)F)cc2)cc1  
5268 C=CCCCCCCCC.O=C(c1cccc1)c1ccc(Br)cc1>>CCCCCCCCC/C=C/c1ccc(C(=O)c2cccc2)cc1  
5269 C=CCOc1cccc1.CC(C)(C)OC(=O)/C=C/c1ccc(CN(C(=O)C2CCCCC2)c2cccc(Br)c2)cc1>>CC(C)(C)OC(=O)/C=C/c1ccc(CN(C(=O)C2CCCCC2)c2cccc(/C=C/COc3cccc3)c2)cc1  
5270 Br1ccc2c(Nc3cccc3)ncnc2c1.C=CC(=O)OC>>COC(=O)/C=C/c1ccc2c(Nc3cccc3)ncnc2c1  
5271 C=Cc1ccc(OCCO)cc1.CCN1CCN(c2nc(Br)cc3ccsc23)CC1>>CCN1CCN(c2nc(/C=C/c3ccc(OCCO)cc3)cc3ccsc23)CC1  
5272 C=CC(=O)OC.O=C1Nc2c(Br)cccc2C12OCCO2>>COC(=O)/C=C/c1cccc2c1NC(=O)C21OCCO1  
5273 C=Cc1ccc(OC)cc1.Oc1ccc2cccc2c1Br>>COc1ccc(/C=C/c2c(O)ccc3cccc23)cc1  
5274 C=Cc1cncc1.CC(C)(C)OC(=O)N[C@H](COc1cncc(Br)c1)Cc1cccc2cccc12>>CC(C)(C)OC(=O)N[C@H](COc1cncc(/C=C/c2cncc2)c1)Cc1cccc2cccc12  
5275 C=Cc1ccc(N(C)C)cc1.CCOC(=O)C(C)Br>>CCOC(=O)C(C)/C=C/c1ccc(N(C)C)cc1  
5276 C=CC(=O)OC.COc1ccc(C=O)c(Br)c1OC>>COC(=O)/C=C/c1c(C=O)ccc(OC)c1OC  
5277 C=CC(=O)OC.OCCc1cccc1Br>>COC(=O)/C=C/c1cccc1CCO  
5278 C=Cc1ccc(OCC(OC)OC)cc1.O=[N+](O-)]c1ccc(I)cc1CO>>COC(COc1ccc(/C=C/c2ccc([N+](=O)[O-])c(CO)c2)cc1)OC  
5279 C=Cc1cccc1.Fc1ccc(Cl)cc1>>Fc1ccc(/C=C/c2cccc2)cc1  
5280 C=CC#N.COc1cc(I)ccc1N>>COc1cc(/C=C/C#N)ccc1N  
5281 C=CC(=O)C(O[Si](CC)(CC)CC)c1c(OC)ccc(OC)c1OCc1cccc1.COc1c(OCc2cccc2)c(I)cc2c1C(=O)OC2>>CC[Si](CC)(CC)OC(C(=O)/C=C/c1cc2c(c(OC)c1OCc1cccc1)C(=O)OC2)c1c(OC)ccc(OC)c1OCc1cccc1  
5282 C=CC(=O)OCCCC.CC(=O)c1ccc(Cl)cc1>>CCCCOC(=O)/C=C/c1ccc(C(C)=O)cc1  
5283 C=CC(C)=O.IC1CCCCC1>>CC(=O)/C=C/C1CCCCC1  
5284 C=CS(C)(=O)=O.O=C(c1cccc1)c1ccc(Br)cc1>>CS(=O)(=O)/C=C/c1ccc(C(=O)c2cccc2)cc1  
5285 Br1ccc(OCc2cccc2)cc1.C=CCCC(=O)[C@H]1CCCN1C(=O)C(=O)C(C)(C)CC>>CCCC(C)(C)C(=O)C(=O)N1CCC[C@H]1C(=O)CC/C=C/c1ccc(OCc2cccc2)cc1  
5286 C=Cc1cccc1.Cc1ccc2c(-c3ccc(F)cc3)c(Br)c(=O)oc2c1>>Cc1ccc2c(-c3ccc(F)cc3)c(/C=C/c3cccc3)c(=O)oc2c1

[illegible]

5328 C=CC(=O)OC.COc1ccc(Cn2nc(I)c3c(NC4CCOCC4)nc32)cc1>>COC(=O)/C=C/c1nn(Cc2ccc(OC)c2)c2ccnc(NC3CCOCC3)c12  
 5329 C=CC(=O)OC(C)(C)C.Cc1c[nH]c2cccc(Br)c12>>Cc1c[nH]c2cccc(/C=C/C(=O)OC(C)(C)C)c12  
 5330 C=CC(=O)OCCCC.Cc1cc2c(cc1N1Cc3c(C(F)(F)F)nc(Br)c3NC1=O)OC(c1cccc1F)CC2>>CCCCOC(=O)/C=C/c1enc(C(F)(F)F)c2c1NC(=O)N(c1cc3c(cc1C)CCC(c1cccc1F)O3)C2  
 5331 C=CC(=O)OC.COcn1nc(-c2cccc2)c(Br)cc1=O>>COcn1nc(-c2cccc2)c(/C=C/C(=O)OC)cc1=O  
 5332 C=C/C=C/C(=O)OC.COc1c(CN(C(=O)C2CC2)c2cccc(Br)c2)ccc2c1OC(C)(C)C=C2>>COC(=O)/C=C/C=C/c1cccc(N(Cc2ccc3c(c2OC)OC(C)(C)C=C3)C(=O)C2CC2)c1  
 5333 C=CSCC.O=C(c1cccc1)c1ccc(Br)cc1>>CCS/C=C/c1ccc(C(=O)c2cccc2)cc1  
 5334 C=Cc1nc2cccc2s1.C[C@H]1COCCOCCOC[C@H](C)OCc2cc(I)cc(n2)CO1>>C[C@H]1COCCOCCOC[C@H](C)OCc2cc(/C=C/c3nc4cccc4s3)cc(n2)CO1  
 5335 C=Cc1ccc(N(c2cccc2)c2cccc2)cc1.O=Cc1ccc(Br)c2nc(-c3cccc3)c(-c3cccc3)nc12>>O=Cc1ccc(/C=C/c2ccc(N(c3cccc3)c3cccc3)cc2)c2nc(-c3cccc3)c(-c3cccc3)nc12  
 5336 Br1cccc2c(-c3cccc3)cccc12.C=CC(=O)OCC>>CCOC(=O)/C=C/c1cccc2c(-c3cccc3)cccc12  
 5337 C=CC(C)(O)CCC=C(C)C.COc1ccc(Br)cc1>>COc1ccc(/C=C/C(C)(O)CCC=C(C)C)cc1  
 5338 C=Cc1cccc1.CC(C)(C)C(=O)Nc1nc2ccc(Br)cc2c(=O)[nH]1>>CC(C)(C)C(=O)Nc1nc2ccc(/C=C/c3cccc3)cc2c(=O)[nH]1  
 5339 Br1ccc2cccc2c1.C=Cc1nc2c(=O)[nH]c(N=CN(C)C)nc2n1[C@@H]1C[C@H](O)[C@@H](COC(c2cccc2)(c2ccc(OC)cc2)c2ccc(OC)cc2)O1>>COc1ccc(C(OC[C@H]2O[C@H](n3c(/C=C/c4ccc5cccc5c4)nc4c(=O)[nH]c(N=CN(C)C)nc43)C[C@@H]2O)(c2cccc2)c2ccc(OC)cc2)cc1  
 5340 C=Cc1ccc(C)cc1.Cc1ccc(-c2oc3cccc3c(=O)c2Br)cc1>>Cc1ccc(/C=C/c2c(-c3ccc(C)cc3)oc3cccc3c2=O)cc1  
 5341 C=CC[Si](OCC)(OCC)OCC.CCCCC(CC)COc1cc(/C=C/c2ccc(/C=C/c3ccc(Br)cc3)cc2)c(OCC(CC)CC)cc1C>>CCCCC(CC)COc1cc(/C=C/c2ccc(/C=C/c3ccc(/C=C/C[Si](OCC)(OCC)OCC)cc3)cc2)c(OCC(CC)CCCC)cc1C  
 5342 C=C[C@H](C)N1C(=O)c2cccc2C1=O.COC(=O)c1c(Br)ccn1C>>COC(=O)c1c(/C=C/[C@H](C)N2C(=O)c3cccc3C2=O)ccn1C  
 5343 C=CC(=O)OCCCC.O=[N+](O-)[c1cccc1Cl]>>CCCCOC(=O)/C=C/c1cccc1[N+](=O)[O-]  
 5344 C=CC(=O)OC.COC(=O)c1ccc(N)c(I)c1>>COC(=O)/C=C/c1cc(C(=O)OC)ccc1N  
 5345 C=CC(=O)OCC.Cc1ccc(-c2cccc2)c(I)c1>>CCOC(=O)/C=C/c1cc(C)ccc1-c1cccc1  
 5346 C=CC(CCCCCCCC(=O)OC)OC1CCCCO1.CCC1=C(I)CCC1=O>>CCC1=C(/C=C/C(CCCCCCCC(=O)OC)OC2CCCCO2)CCC1=O  
 5347 C=CC(=O)OC.CN(C)Cc1cn(Cc2ccc(Br)cc2)c2cccc12>>COC(=O)/C=C/c1ccc(Cn2cc(CN(C)C)c3cccc32)cc1  
 5348 C=CC(=O)N(C)Cc1cccc(OC(F)(F)F)c1OCCC.CC1(C)NCc2cc(Br)cnc2NC1=O>>CCCOc1c(CN(C)C(=O)/C=C/c2nc3c(c2)CNC(C)(C)C(=O)N3)cccc1OC(F)(F)F  
 5349 C=Cc1cc(O)c(OC)cc1F.COc1cc(Br)cc(OC)c1F>>COc1cc(F)c(/C=C/c2cc(OC)c(F)c(OC)c2)cc1O  
 5350 C=Cc1ccncc1.CN(C)c1ccc(Br)cc1>>CN(C)c1ccc(/C=C/c2ccncc2)cc1  
 5351 Br1cccs1.C=CS(N)(=O)=O>>NS(=O)(=O)/C=C/c1cccs1  
 5352 C=Cc1ccc(C(C)(C)C)cc1.C[Si](C)(C)OS(=O)(=O)C(F)(F)F>>CC(C)(C)c1ccc(/C=C/[Si](C)(C)C)cc1  
 5353 C=CC(=O)O.CC(C)(C)c1ccc(S(=O)(=O)Nc2ccc(I)cc2)cc1>>CC(C)(C)c1ccc(S(=O)(=O)Nc2ccc(/C=C/C(=O)O)cc2)cc1  
 5354 C=CC(=O)OCCCC.COc1cccc1I>>CCCCOC(=O)/C=C/c1cccc1OC  
 5355 C=CC(=O)OCC.CC(C)(C)C(=O)Nc1cccc1I>>CCOC(=O)/C=C/c1cccc1NC(=O)C(C)(C)C  
 5356 C=Cc1ccncc1.O=[N+](O-)[c1ccc(N(c2ccc(Br)cc2)c2ccc([N+](=O)[O-])cc2[N+](=O)[O-])c([N+](=O)[O-])c1>>O=[N+](O-)[c1ccc(N(c2ccc(/C=C/c3ccncc3)cc2)c2ccc([N+](=O)[O-])cc2[N+](=O)[O-])c([N+](=O)[O-])c1  
 5357 C=Cc1ncnc2c1ncn2C1CCCCO1.Ic1ccsc1>>C(=C/c1ncnc2c1ncn2C1CCCCO1)\c1ccsc1  
 5358 C=CCNC(=O)c1ccc(F)cc1NC(=O)c1cccc1.Ic1cccc1>>O=C(Nc1cc(F)ccc1C(=O)NC/C=C/c1cccc1)c1cccc1  
 5359 C=CC(=O)O[C@H]1C[C@H]2C[C@@H]([C@@H]1C)C2(C)C.O=Cc1cccc1Br>>C[C@@H]1[C@@H](OC(=O)/C=C/c2cccc2C=O)C[C@H]2C[C@@H]1C2(C)C  
 5360 C=CC(=O)OC.O=C1c2ccc(OS(=O)(=O)C(F)(F)F)cc2C(=O)N1c1cccc1>>COC(=O)/C=C/c1ccc2c(c1)C(=O)N(c1cccc1)C2=O  
 5361 C=Cc1ccc(C(F)(F)F)cc1.Clc1cccc(/C=C/c2cccc2)c1>>FC(F)(F)c1ccc(/C=C/c2cccc(/C=C/c3cccc3)c2)cc1  
 5362 C=CC(=O)OCCCC.COC(c1cccc1)c1enn2c(-c3cccc3)c(Br)c3cccc3c12>>CCCCOC(=O)/C=C/c1c(-c2cccc2)n2ncc(C(OC)c3cccc3)c2c2cccc12  
 5363 C=CC(=O)OC.OCc1cccc(-c2ncc(Br)en2)c1>>COC(=O)/C=C/c1enc(-c2cccc(CO)c2)nc1  
 5364 C=CC(=O)OCC.Cc1cc(F)c(CN(C)C)cc1Br>>CCOC(=O)/C=C/c1cc(CN(C)C)c(F)cc1C  
 5365 C=Cc1ccc(Cl)cc1.CCOC(=O)C(C)(C)Br>>CCOC(=O)C(C)(C)/C=C/c1ccc(Cl)cc1

5366 C=CC(OC)OC.FC(F)(F)c1ccccc1I>>COC(/C=C/c1ccccc1C(F)(F)F)OC

5367 C=Cc1ccc(C)cc1.Cc1ccc(Br)c(C=O)c1>>Cc1ccc(/C=C/c2ccc(C)cc2C=O)cc1  
C=CC(=O)OCCCCCCCCCCCCCCCCCCC.C[C@]12C[C@@]34C=C(Se5cccc(I)c5)C(=O)[C@@](C)(

5368 CCC(=O)Nc5c(O)ccc(C(=O)O)c5O[C@@H]3[C@H](C[C@@H]1C4)O2>>CCCCCCCCCCCCCCCC  
CCOC(=O)/C=C/c1cccc(SC2=C[C@]34C[C@H]5C[C@H](O[C@@]5(C)C3)[C@H]4[C@](C)(CCC  
(=O)Nc3c(O)ccc(C(=O)O)c3O)C2=O)c1

5369 Br1cnenc1.C=CCN1C(=O)c2ccccc2C1=O>>O=C1c2ccccc2C(=O)N1C/C=C/c1cnenc1

5370 C=CC(=O)OC(C)(C)C.FC(F)(F)c1ccc(Br)nc1>>CC(C)(C)OC(=O)/C=C/c1ccc(C(F)(F)F)cn1  
C=CCCOc1ccc(CCNC(=O)OC(C)(C)C)cc1.CC(C)N(CC[C@H](c1ccccc1)c1cc(Br)ccc1OCc1ccccc1)C

5371 (C)C>>CC(C)N(CC[C@H](c1ccccc1)c1cc(/C=C/CCOc2ccc(CCNC(=O)OC(C)(C)C)cc2)ccc1OCc1ccc  
cc1)C(C)C

5372 C=CC#N.Cc1nc(Br)c(-c2ccccc2)o1>>Cc1nc(/C=C/C#N)c(-c2ccccc2)o1

5373 Br1ccccc1C1OCCCO1.C=CC(=O)OC>>COC(=O)/C=C/c1ccccc1C1OCCCO1

5374 C=CC(=O)O.Fc1cc(Cl)c(Br)cc1F>>O=C(O)/C=C/c1cc(F)c(F)cc1Cl

5375 Br1ccc2ccc3ccc4ccccc4c3c2c1.C=Cc1ccc(OC)cc1>>COc1ccc(/C=C/c2ccc3ccc4ccc5ccccc5c4c3c2)cc

5376 C=CC(=O)OC.FC(F)C(F)(F)Cn1nnc(-c2ccccc2)c1I>>COC(=O)/C=C/c1c(-

5377 C=CC(=O)OC.O=c1cc(I)cnn1Cc1ccccc1>>COC(=O)/C=C/c1enn(Cc2ccccc2)c(=O)c1

5378 C=CC(=O)OC.CCCc1oc([C@@H](Cc2ccccc2)NC(=O)OC(C)(C)C)cc1I>>CCCc1oc([C@@H](Cc2cc  
ccc2)NC(=O)OC(C)(C)C)cc1/C=C/C(=O)OC  
Br1cnc2ccccc2c1.C=CCO[C@@H]1CC(=O)O[C@H](C)C/C=C/C=C/[C@H](O[Si](C)(C)C(C)(C)C)  
[C@H](C)C[C@H](CC(OC)OC)[C@H](O[C@@H]2O[C@H](C)[C@H](O[C@H]3C[C@@](C)(O)  
[C@@H](OC(=O)CC)[C@H](C)O3)[C@H](N(C)C)[C@H]2OC(C)=O)[C@H]1OC>>CCC(=O)O[C@  
H]1[C@H](C)O[C@@H](O[C@H]2[C@H](N(C)C)[C@@H](OC(C)=O)[C@H](O[C@@H]3[C@@  
H](OC)[C@H](OC/C=C/c4cnc5ccccc5c4)CC(=O)O[C@H](C)C/C=C/C=C/[C@H](O[Si](C)(C)C(C)(C)  
)C)[C@H](C)C[C@@H](C)C[C@@H]3C(C)(OC)N(C)O[C@@H]2C(C)C[C@@H]1(C)O

5380 C=CC(=O)OCC.Cc1ccc(Br)c(C=O)c1>>CCOC(=O)/C=C/c1ccc(C)cc1C=O

5381 C=CC(=O)OC.Cc1cc2c(c(C)c1Br)CCC2=O>>COC(=O)/C=C/c1c(C)cc2c(c1C)CCC2=O

5382 C=CC(C)(C)O.COC(=O)C(Cc1cn(S(=O)(=O)c2ccc(C)cc2)c2ccc(Br)c12)NC(C)=O>>COC(=O)C(Cc1  
cn(S(=O)(=O)c2ccc(C)cc2)c2ccc(/C=C/C(C)(C)O)c12)NC(C)=O

5383 C=CC(=O)OC.Nc1ccc(Br)cc1[N+](=O)[O-]>>COC(=O)/C=C/c1ccc(N)c([N+](=O)[O-])c1

5384 C=CCN(C(=O)OCC)c1ccccc2ccccc12.CC(=O)c1ccc(Cl)cc1>>CCOC(=O)N(C/C=C/c1ccc(C(C)=O)cc1)  
c1ccccc2ccccc12

5385 Br1ccc(-c2cnc3ccccc3n2)cc1.C=CCn1c(-c2ccc(OCC)cc2)nc2ccccc2c1=O>>CCOc1ccc(-  
c2nc3ccccc3c(=O)n2C/C=C/c2ccc(-c3cnc4ccccc4n3)cc2)cc1

5386 Br1ccc2c(c1)OCO2.C=Cc1cccn1>>C(=C/c1cccn1)c1ccc2c(c1)OCO2

5387 Br1ccccc1I.C=Cc1ccccc1>>Br1ccccc1/C=C/c1ccccc1

5388 C=CC(=O)OCC.CC1(C)CC(=O)C2=C(C1)N(c1ccc(I)cc1)C1=C(C(=O)CC(C)(C)C1)C2c1ccccc(O)c1>>  
CCOC(=O)/C=C/c1ccc(N2C3=C(C(=O)CC(C)(C)C3)C(c3ccccc(O)c3)C3=C2CC(C)(C)CC3=O)cc1  
C=CCN(C(=O)OC(C)(C)C)C(=O)OC(C)(C)C.COc1cccc(Br)c1>>COc1cccc(/C=C/CN(C(=O)OC(C)(C  
)C)C(=O)OC(C)(C)C)c1

5389 C=CC(N)=O.CCOC(=O)c1ccccc(I)c1>>CCOC(=O)c1ccccc(/C=C/C(N)=O)c1

5390 C=Cc1ccc(F)cc1.COc1ccc(I)cc1>>COc1ccc(/C=C/c2ccc(F)cc2)cc1

5391 C=CCOC(C)C.Fc1ccc(C2(C(F)(F)c3ccc(Br)cn3)CO2)c(F)c1>>CC(C)OC/C=C/c1ccc(C(F)(F)C2(c3ccc  
(F)cc3F)CO2)nc1

5392 C=CC(=O)N(C)Cc1oc2ccccc2c1C.CC1(C)CNe2ncc(Br)cc2O1>>Cc1c(CN(C)C(=O)/C=C/c2cnc3c(c2)  
OC(C)(C)CN3)oc2ccccc12

5393 C=CC(=O)OC.CCOC(=O)c1c2cccccc-2c(C(=O)OCC)c1Cl>>CCOC(=O)c1c2cccccc-  
2c(C(=O)OCC)c1/C=C/C(=O)OC

5394 C=Cc1ccc2c(c1)Sc1ccccc1N2CC.O=[N+](O-  
)c1ccc(Br)cc1>>CCN1c2ccccc2Se2cc(/C=C/c3ccc([N+](=O)[O-])cc3)ccc21

5395 C=COCCCC.CCN(CC)c1ccc2c(Br)cc(=O)oc2c1>>CCCCO/C=C/c1cc(=O)oc2cc(N(CC)CC)ccc12

5396 C=CC(=O)OC.O=C(NCc1ccc(F)cc1)c1nc(Br)c2ccnc2c1O>>COC(=O)/C=C/c1nc(C(=O)NCc2ccc(F)c  
c2)c(O)c2ncccc12

5397 C=Cc1ccc(C(C)(C)C)cc1.C[Si](C)(OS(=O)(=O)C(F)(F)F)OS(=O)(=O)C(F)(F)F>>CC(C)(C)c1ccc(/C=  
C/[Si](C)(C)OS(=O)(=O)C(F)(F)F)cc1

5398 C=CCOC(C)=O.Fc1cccc(I)c1>>CC(=O)OC/C=C/c1cccc(F)c1

5399 C=CC(=O)OCC.Clc1ccc2ccccc2c1>>CCOC(=O)/C=C/c1ccc2ccccc2c1

5400 Br1ccsc1.C=CCNC(=O)OC(C)(C)C>>CC(C)(C)OC(=O)NC/C=C/c1ccsc1

5401 C=CC(=O)OC(C)(C)C.CC(=O)c1ccc(Cl)cc1>>CC(=O)c1ccc(/C=C/C(=O)OC(C)(C)C)cc1

5402 C=Cc1ccc(N(c2ccccc2)c2ccccc2)cc1.Cc1ccc(Br)cc1>>Cc1ccc(/C=C/c2ccc(N(c3ccccc3)c3ccccc3)cc2)c

5403

5404 C=CC(N)=O.CC[C@]12C=CCN3CC[C@]4(C(=C(C(=O)OC)C1)Nc1ccc(I)cc14)[C@@H]32>>CC[C@]  
@]12C=CCN3CC[C@]4(C(=C(C(=O)OC)C1)Nc1ccc(/C=C/C(N)=O)cc14)[C@@H]32  
5405 C=Cc1ence(C#N)c1Nc1ccc2[nH]ccc2c1C.Cc1cc(CN2CCN(C)CC2)ccc1I>>Cc1cc(CN2CCN(C)CC2)c  
cc1/C=C/c1ence(C#N)c1Nc1ccc2[nH]ccc2c1C  
C=CC(=O)OCC.Cn1cc(C(=O)Nc2ccc(-  
5406 c3cccc3)c(C(F)(F)F)c2)c(=O)c2ccc(Br)cc21>>CCOC(=O)/C=C/c1ccc2c(=O)c(C(=O)Nc3ccc(-  
c4cccc4)c(C(F)(F)F)c3)cn(C)c2c1  
C=C[C@H](C)[C@H](C/C=C/C(=O)OC(C)(C)C)O[Si](C)(C)C(C)(C)C.Ic1cccc1>>C[C@H](/C=C  
5407 /c1cccc1)[C@H](C/C=C/C(=O)OC(C)(C)C)O[Si](C)(C)C(C)(C)C  
C=CC(=O)N(C)OC.N#Cc1cccc2c(Br)cccc12>>CON(C)C(=O)/C=C/c1cccc2c(C#N)cccc12  
5408 Brc1cccc1.C=Cc1cccc([N+](=O)[O-])c1>>O=[N+](O-)]c1cccc(/C=C/c2cccc2)c1  
5409 C=CS(=O)c1cccc1.O=C(O)c1ccc(Br)cc1>>O=C(O)c1ccc(/C=C/S(=O)c2cccc2)cc1  
5410 C=CC(=O)OCC.CCC(=C(c1ccc(O)cc1)c1ccc(O)cc1)c1ccc(F)c(Br)c1>>CCOC(=O)/C=C/c1cc(C(CC)=  
5411 C(c2ccc(O)cc2)c2ccc(O)cc2)ccc1F  
C=CS(=O)(=O)F.Fc1cccc(I)c1>>O=S(=O)(F)/C=C/c1cccc(F)c1  
5412 C=C[C@](C)(COC(F)(F)F)C(=O)O.CC(C)[C@H](O)C(=O)N[C@@H](C)C(=O)N1CCC[C@@H](C(  
5413 =O)N[C@@H](C)c2ccc3ccc(Br)cc3n2)N1>>CC(C)[C@H](O)C(=O)N[C@@H](C)C(=O)N1CCC[C@@  
H](C(=O)N[C@@H](C)c2ccc3ccc(/C=C/[C@](C)(COC(F)(F)F)C(=O)O)cc3n2)N1  
C=C[C@@H]1COC(C)(C)N1C(=O)OCc1cccc1.O=[N+](O-  
5414 )c1cccc1I>>CC1(C)OC[C@@H](/C=C/c2cccc2[N+](=O)[O-])N1C(=O)OCc1cccc1  
5415 C=Cc1cccc1.OCc1ccc(Cl)cc1>>OCc1ccc(/C=C/c2cccc2)cc1  
5416 Brc1ccc2c(c1)OCO2.C=CC(=O)OCCCC>>CCCCOC(=O)/C=C/c1ccc2c(c1)OCO2  
5417 C=CCCC(=O)OCC.CCN(CC)C(=O)Oc1c(Br)cccc1OC>>CCOC(=O)CC/C=C/c1cccc(OC)c1OC(=O)N  
(CC)CC  
5418 C=CC(=O)OC(C)(C)C.COc1ccc2nc(S(=O)(=O)c3cccc(Br)c3)ccc2c1>>COc1ccc2nc(S(=O)(=O)c3cccc  
(/C=C/C(=O)OC(C)(C)C)c3)ccc2c1  
5419 C=CC(=O)OCC.Cc1cc(I)c2cccc2n1>>CCOC(=O)/C=C/c1cc(C)nc2cccc12  
5420 C=CN1C(=O)c2cccc2C1=O.COC(=O)c1cc(OC(C)C)nc1Br>>COC(=O)c1cc(OC(C)C)nc1/C=C/N1  
C(=O)c2cccc2C1=O  
5421 C=CCC(C(=O)OC)C(=O)OC.COc1cccc1Br>>COC(=O)C(C/C=C/c1cccc1OC)C(=O)OC  
5422 C=CC(C)(C)O.COc1ccc(/C=C/C(=O)c2ccc(OC)c(I)c2OC)cc1>>COc1ccc(/C=C/C(=O)c2ccc(OC)c(/C  
=C/C(C)(C)O)c2OC)cc1  
5423 C=CC(=O)OC(C)(C)C.O=C(O)Cc1cccc(Br)c1>>CC(C)(C)OC(=O)/C=C/c1cccc(CC(=O)O)c1  
5424 C=Cc1cccc1.O=C1CCC(c2ccc(Br)cc2)O1>>O=C1CCC(c2ccc(/C=C/c3cccc3)cc2)O1  
5425 C=Cc1ccc(OC)cc1.O=[N+](O-)]c1ccc(-n2cc(I)cn2)cc1>>COc1ccc(/C=C/c2enn(-c3ccc([N+](=O)[O-]  
)cc3)c2)cc1  
5426 C=CC(=O)OC(C)(C)C.COC(=O)c1ccc(Br)o1>>COC(=O)c1ccc(/C=C/C(=O)OC(C)(C)C)o1  
5427 C=Cc1cccc1.Cn1c(=O)c2c(cc(Br)n2C)n(C)c1=O>>Cn1c(=O)c2c(cc(/C=C/c3cccc3)n2C)n(C)c1=O  
5428 C=CC(=O)OC(C)(C)C.CC(=O)c1cc2cc(Br)ccc2o1>>CC(=O)c1cc2cc(/C=C/C(=O)OC(C)(C)C)ccc2o1  
5429 C=CC(=O)OC(C)(C)C.COc1ccc2c(c1)CCN(c1ccc(C(C)C)s1)C2(C)c1ccc(Br)cc1>>COc1ccc2c(c1)CC  
N(c1ccc(C(C)C)s1)C2(C)c1ccc(/C=C/C(=O)OC(C)(C)C)cc1  
C=Cc1cccc(F)c1.CCN1c2ncc(I)cc2C(=O)N(C)c2cccn21>>CCN1c2ncc(/C=C/c3cccc(F)c3)cc2C(=O)  
5430 N(C)c2cccn21  
5431 C=CC(C)(C)O.CC(=O)Oc1c(I)c(=O)n(C)c2cccc12>>CC(=O)Oc1c(/C=C/C(C)(C)O)c(=O)n(C)c2cccc  
5432 C=CCC(C)O.COc1ncc(Br)c1>>COc1ncc(/C=C/CC(C)O)c1  
5433 C=CC(=O)O[C@@H]1C[C@@H]2CC[C@@]1(C)C2(C)C.O=Cc1cccc1Br>>CC1(C)[C@H]2CC[C@  
@]1(C)[C@H](OC(=O)/C=C/c1cccc1C=O)C2  
Br1ccc2ccc3cccc4ccc1c2c34.C=C[C@H](CO[Si](C)(C)C(C)(C)C)NC(=O)OCc1cccc1>>CC(C)(C  
5434 )[Si](C)(C)OC[C@H](/C=C/c1ccc2ccc3cccc4ccc1c2c34)NC(=O)OCc1cccc1  
5435 C=CC(=O)CC.Ic1sccl-c1cccc1>>CCC(=O)/C=C/c1sccl-c1cccc1  
5436 C=CC(=O)OCC.Cc1cccc(I)c1>>CCOC(=O)/C=C/c1cccc(C)c1  
5437 C=CC(=O)OC.COc1cc2ncc(Nc3cccc(Cl)c3F)c2cc1OS(=O)(=O)C(F)(F)F>>COC(=O)/C=C/c1cc2c(N  
c3cccc(Cl)c3F)ncn2cc1OC  
C=CC(=O)OC(C)(C)C.O=[N+](O-  
5438 )c1ccc(S(=O)(=O)N2CCc3cc(Br)cn32)cc1>>CC(C)(C)OC(=O)/C=C/c1ncc2c(c1)CCN2S(=O)(=O)c1  
ccc([N+](=O)[O-])cc1  
5439 C=CC(=O)OCc1cccc1.CC(C)(C)OC(=O)c1cccc1Br>>CC(C)(C)OC(=O)c1cccc1/C=C/C(=O)OCc1c  
cccc1  
5440 C=CC(=O)CC.O=Cc1cccc1Br>>CCC(=O)/C=C/c1cccc1C=O  
5441 C=C[Si](C)(C)C.Clc1ccc(I)cc1>>C[Si](C)(C)/C=C/c1ccc(Cl)cc1  
5442 C=CCOc1ccc(OC)cc1.Ic1cccc1>>COc1ccc(OC/C=C/c2cccc2)cc1

5443 C=CC(=O)OC.COc1ccc2c(c1)CCN(c1ccc(CC(C)C)cc1F)C2(C)c1ccc(Br)cc1>>COC(=O)/C=C/c1ccc(C2(C)c3ccc(OC)cc3CCN2c2ccc(CC(C)C)cc2F)cc1  
5444 C=Cc1ccccc1C.N#Cc1ccc(Cl)cc1>>Cc1ccccc1/C=C/c1ccc(C#N)cc1  
5445 C=CC(=O)OC.CN(C)c1ccc(-c2ccc(CN(C(=O)C3CCOCC3)c3cc(Br)ccn3)cc2)cc1>>COC(=O)/C=C/c1ccnc(N(Cc2ccc(-c3ccc(N(C)C)cc3)cc2)C(=O)C2CCOCC2)c1  
5446 C=CC(=O)OC(C)(C)C.COC(=O)c1c(N)c(Br)cc2c1CCCC2>>COC(=O)c1c(N)c(/C=C/C(=O)OC(C)(C)C)cc2c1CCCC2  
5447 C=CC(C)(C)C.FC(F)(F)c1ccc(Br)cc1>>CC(C)(C)/C=C/c1ccc(C(F)(F)F)cc1  
5448 C=CC(=O)CCC.COc1ccc(Br)cc1>>CCCC(=O)/C=C/c1ccc(OC)cc1  
5449 C=Cc1ccc(OC)cc1.Cc1c(Br)c(=O)oc2cc(N)ccc12>>COc1ccc(/C=C/c2c(C)c3ccc(N)cc3oc2=O)cc1  
5450 C=CC(=O)OCCCC.O=[N+][([O-])c1ccccc1I>>CCCCOC(=O)/C=C/c1ccccc1[N+](=O)[O-]  
5451 C=CCOC(=O)NC.COc1ccccc1I>>CNC(=O)OC/C=C/c1ccccc1OC  
5452 C=Cc1nc2c(N)ncnc2n1[C@H]1C[C@H](O[Si](C)(C)C(C)(C)C)[C@@H](CO[Si](C)(C)C(C)(C)C)O1.O=[N+][([O-])c1ccc(I)cc1>>CC(C)(C)[Si](C)(C)OC[C@H]1O[C@@H](n2c(/C=C/c3ccc([N+](=O)[O-])cc3)nc3c(N)ncnc32)C[C@@H]1O[Si](C)(C)C(C)(C)C  
5453 C=Cc1ccc(/C=C/c2ccc(N(c3ccc(OCCCCC)cc3)c3ccc(OCCCCC)cc3)cc2)cc1.O=Cc1ccc(Br)cc1>>CCCCCOc1ccc(N(c2ccc(/C=C/c3ccc(/C=C/c4ccc(C=O)cc4)cc3)cc2)c2ccc(OCCCCC)cc2)cc1  
5454 C=CC(=O)Oc1ccccc1.Nc1nc(N)c2cc(I)ccc2n1>>Nc1nc(N)c2cc(/C=C/C(=O)Oc3ccccc3)ccc2n1  
5455 C=CC(=O)N(C)Cc1oc2ccccc2c1C.CC(C)(C)OC(=O)NCCC1Cc2cc(Br)enc2NC1=O>>Cc1c(CN(C)C(=O)/C=C/c2enc3c(c2)CC(CCNC(=O)OC(C)C)C(=O)N3)oc2ccccc12  
5456 C=CC(=O)N1CCOCC1.CC(C)(C)c1ccc2[nH]c3c(c2c1)CC(=O)Nc1ccc(I)cc1-3>>CC(C)(C)c1ccc2[nH]c3c(c2c1)CC(=O)Nc1ccc(/C=C/C(=O)N2CCOCC2)cc1-3  
5457 C=CC(=O)OCCCC.C[C@]12C[C@@]34C=C(Sc5ccc(I)cc5)C(=O)[C@@](C)(CCC(=O)Nc5c(O)ccc(C(=O)O)c5O)[C@@H]3[C@H](C[C@@H](C[C@@H]1C4)O2>>CCCCOC(=O)/C=C/c1ccc(SC2=C[C@@]34C[C@@H]5C[C@H](O[C@@]5(C)C3)[C@H]4[C@](C)(CCC(=O)Nc3c(O)ccc(C(=O)O)c3O)C2=O)cc1  
5458 C=Cc1ccc(/C=C/c2cccn2C)cc1.O=Cc1ccc(Br)cc1>>Cn1ccccc1/C=C/c1ccc(/C=C/c2ccc(C=O)cc2)cc1  
5459 Br1cnc2ccccc2c1.C=CCC1CCN(C)C[C@H](OC(C)=O)[C@H](C)C[C@H](CC(OC)OC)[C@H](O)[C@@H]2O[C@H](C)[C@@H](O[C@H]3C[C@@](C)(O)[C@@H](OC(=O)CC)[C@H](C)O3)[C@H](N(C)C)[C@H]2OC(C)=O)[C@@H](OC)[C@H](OC(=O)CC)CC(=O)N1>>CCC(=O)O[C@H]1[C@H](C)O[C@@H](O[C@H]2[C@H](N(C)C)[C@@H](OC(C)=O)[C@H](O[C@@H]3[C@@H](OC)[C@H](OC(=O)CC)CC(=O)NC(C/C=C/c4cnc5ccccc5e4)CCN(C)C[C@H](OC(C)=O)[C@H](C)C[C@@H]13CC(OC)OC)O[C@@H]2C)C[C@@H]1(C)O  
5460 C=CCCCCCCCO[Si](c1ccccc1)(c1ccccc1)C(C)(C)C.CC1(C)OC(=O)c2c(cccc2OS(=O)(=O)C(F)(F)F)O1>>CC1(C)OC(=O)c2c(/C=C/CCCCCO[Si](c3ccccc3)(c3ccccc3)C(C)(C)C)cccc2O1  
5461 C=CC(=O)OCc1ccccc1.CC(C)(C)OC(=O)N1CCCc2cc(Br)enc21>>CC(C)(C)OC(=O)N1CCCc2cc(/C=C/C(=O)OCc3ccccc3)enc21  
5462 C=CC(=O)OCC.CCc1c[n+][([O-])c(CC)c(Cl)n1>>CCOC(=O)/C=C/c1nc(CC)c[n+][([O-])c1CC  
5463 C=Cc1ccccc1.O=Cc1ccc2ccccc2c1Br>>O=Cc1ccc2ccccc2c1/C=C/c1ccccc1  
5464 C=Cc1ccc(OC)cc1.FC(F)(F)c1ccc(Br)cc1>>COc1ccc(/C=C/c2ccc(C(F)(F)F)cc2)cc1  
5465 C=CC(=O)O.COc1ccc(S(=O)(=O)N(C)c2ccc(I)cc2)cc1OC>>COc1ccc(S(=O)(=O)N(C)c2ccc(/C=C/C(=O)O)cc2)cc1OC  
5466 Br1cnc2ccccc2c1.C=CC(=O)OC(C)(C)C>>CC(C)(C)OC(=O)/C=C/c1cnc2ccccc2c1  
5467 C=CC(=O)OCC.C[C@@H]1c2ccccc2CCN1C(=O)c1cc(-c2ccccc2)n2nc(-c3ccc(Br)cc3F)cc2n1>>CCOC(=O)/C=C/c1ccc(-c2cc3nc(C(=O)N4CCc5ccccc5[C@H]4C)cc(-c4ccccc4)n3n2)c(F)c1  
5468 C=CC(N)=O.Nc1ccccc1Br>>NC(=O)/C=C/c1ccnc1N  
5469 C=CC(=O)OC.CCN(CC)C(=O)n1c(Br)c(C)c2ccccc21>>CCN(CC)C(=O)n1c(/C=C/C(=O)OC)c(C)c2ccccc21  
5470 Br1ccc2oc3ccc(N(c4ccccc4)c4ccccc4)cc3e2c1.C=Cc1ccncc1>>C(=C/c1ccc2oc3ccc(N(c4ccccc4)c4ccccc4)cc3e2c1)\c1ccncc1  
5471 Br1ccncc1.C=Cc1ccc(Cn2cc(C)c(=O)n(C)c2=O)cc1>>Cc1en(Cc2ccc(/C=C/c3ccncc3)cc2)c(=O)n(C)c  
5472 C=CS(=O)(=O)F.Clc1ccccc(I)c1>>O=S(=O)(F)/C=C/c1ccccc(Cl)c1  
5473 C=CC(=O)OC.COc1ccc(Br)c(C=O)c1>>COC(=O)/C=C/c1ccc(OC)cc1C=O  
5474 C=CS(=O)(=O)F.Oc1ccccc1I>>O=S(=O)(F)/C=C/c1ccccc1O  
5475 Br1ccncc1.C=CS(N)(=O)=O>>NS(=O)(=O)/C=C/c1ccncc1  
5476 C=CC#N.CN(C)S(=O)(=O)n1cc(I)c([Si](C)(C)C)c1>>CN(C)S(=O)(=O)n1cc(/C=C/C#N)c([Si](C)(C)C)  
5477 C=CC(=O)O.Ic1ccc2cc[nH]c12>>O=C(O)/C=C/c1ccc2cc[nH]c12  
5478 C=Cc1ccccc1.IC1CCCCC1>>C(=C/C1CCCCC1)\c1ccccc1  
5479 C=CC(=O)OCC.Cn1cnc2nc3ccc(Br)cc3c(Cl)c21>>CCOC(=O)/C=C/c1ccc2nc3cnn(C)c3c(Cl)c2c1

5480 C=CC(=O)OCC.O=[N+](O-)[c1ccc(-c2cccc2)c(I)c1]>>CCOC(=O)/C=C/c1cc([N+](=O)[O-])ccc1-c1cccc1  
5481 C=CC(=O)OCCCC.N#Cc1cccc(I)c1>>CCCCOC(=O)/C=C/c1cccc(C#N)c1  
5482 C=CC(=O)OCC.CN1c2cccc2C(C)(C)C12C=Cc1cc(I)ccc1O2>>CCOC(=O)/C=C/c1ccc2c(c1)C=CC1(O2)N(C)c2cccc2C1(C)C  
5483 C=Cc1ccc(N2CCN(C(=O)OC(C)(C)C)CC2)cc1.Fc1cc(Br)cc(Cn2ccnc2)c1>>CC(C)(C)OC(=O)N1CCN(c2ccc(/C=C/c3cc(F)cc(Cn4ccnc4)c3)cc2)CC1  
5484 C=Cc1ccc(C)cc1.O=[N+](O-)[c1ccc(Br)cc1]>>Cc1ccc(/C=C/c2ccc([N+](=O)[O-])cc2)cc1  
5485 C=CC(=O)N(C)C.Cc1ccc(I)cc1>>Cc1ccc(/C=C/C(=O)N(C)C)cc1  
5486 C=CC(=O)N1C(=O)CC[C@H]1COC(c1cccc1)(c1cccc1)c1cccc1.CCc1ccc(Br)c2[nH]ccc12>>CCc1ccc(/C=C/C(=O)N2C(=O)CC[C@H]2COC(c2cccc2)(c2cccc2)c2[nH]ccc12  
5487 C=CC(=O)c1ccc(OC)cc1OC.CC(=O)Oc1ccc(I)cc1>>COc1ccc(C(=O)/C=C/c2ccc(OC(C)=O)cc2)c(OC  
5488 C=Cc1ccc(N(CCCCCCCCCCO)CCCCCCCCCCCCO)cc1.O=C(c1ccc(Br)cc1)C(F)(F)F>>O=C(c1ccc(/C=C/c2ccc(N(CCCCCCCCCCO)CCCCCCCCCCCCO)cc2)cc1)C(F)(F)F  
5489 C=CCN1C(=O)C2(CCCC2)NC[C@]1(C)c1cc(F)cc(F)c1.O=C1Nc2ncccc2[C@]12Cc1ccc(Br)cc1C2>>C[C@]1(C)c2cc(F)cc(F)c2)CNC2(CCCC2)C(=O)N1C/C=C/c1ccc2c(c1)C[C@]1(C2)C(=O)Nc2ncc1  
5490 C=Cc1ccc(C(F)(F)F)cc1.CCCOC(=O)/C=C/c1ccc(Cl)cc1>>CCCCOC(=O)/C=C/c1ccc(/C=C/c2ccc(C(F)(F)F)cc2)cc1  
5491 C=CC(=O)OCC.O=C1Nc2c1c1c(c3c2c2cc(Br)ccc2n3CCCCO)Cc2cccc2-1>>CCOC(=O)/C=C/c1ccc2c(c1)c1c3c(c4c(c1n2CCCCO)Cc1cccc1-4)C(=O)NC3  
5492 C=CC(=O)NCc1ccc(F)cc1F.O=c1c(I)coc2cc(O)ccc12>>O=C(/C=C/c1coc2cc(O)ccc2c1=O)NCc1ccc(F)cc1F  
5493 C=CC#N.Cc1cc(-c2cccc2)n2nc(-c3ccc(Cl)cc3)c(I)c2n1>>Cc1cc(-c2cccc2)n2nc(-c3ccc(Cl)cc3)c(/C=C/C#N)c2n1  
5494 C=Cc1ccc([N+](=O)[O-])cc1.COc1ccc2c(=O)c(I)coc2c1>>COc1ccc2c(=O)c(/C=C/c3ccc([N+](=O)[O-])cc3)coc2c1  
5495 C=CC(=O)OC.CCN(CC)S(=O)(=O)Oc1cccc1I>>CCN(CC)S(=O)(=O)Oc1cccc1/C=C/C(=O)OC  
5496 C=Cc1ccc(C(C)(C)C)cc1.CCOC(=O)C(F)(F)Br>>CCOC(=O)C(F)(F)/C=C/c1ccc(C(C)(C)C)cc1  
5497 BrC12CC3CC(CC(C3)C1)C2.C=Cc1cccc1>>C(=C/C12CC3CC(CC(C3)C1)C2)\c1cccc1  
5498 C=CC(=O)N1CCOCC1.Cn1c2cccc2c2nc3ccc(Cl)cc3c3cccc1c32>>Cn1c2cccc2c2nc3ccc(/C=C/C(=O)N4CCOCC4)cc3c3cccc1c32  
5499 C=CC(=O)OCCC.C[C@]12C[C@]34C=C(Sc5cccc(I)c5)C(=O)[C@@](C)(CCC(=O)Nc5c(O)ccc(C(=O)O)c5O)[C@@H]3[C@H](C[C@H]1C4)O2>>CCOC(=O)/C=C/c1cccc(SC2=C[C@]34C[C@H]15C[C@H](O)[C@@]5(C)C3)[C@H]4[C@]1(C)(CCC(=O)Nc3c(O)ccc(C(=O)O)c3O)C2=O)c1  
5500 \*CNCCCOCOCOCOCNC(=O)COc1ccc(C(Cc2cc(OC)cc(OC)c2)NC(=O)c2ccc(/C=C/c3ccc(CC)cc3)cc2)cc1  
5501 C=CC(=O)OC(C)(C)C.Clc1ccc(I)cc1>>CC(C)(C)OC(=O)/C=C/c1ccc(Cl)cc1  
5502 C=Cc1cccc1.CC(=O)c1cc2cc(Br)ccc2o1>>CC(=O)c1cc2cc(/C=C/c3cccc3)ccc2o1  
5503 C=CC(=O)OCC.Cc1cc(I)nc(C)n1>>CCOC(=O)/C=C/c1cc(C)nc(C)n1  
5504 C=CC(=O)OC(C)(C)C.Oc1nn(-c2cccc2)cc1Br>>CC(C)(C)OC(=O)/C=C/c1cn(-c2cccc2)nc1O  
5505 C=CC(=O)OC.Cc1cc(C)c2nc(CC(C)C)n(Cc3ccc(Br)cc3)c2n1>>COC(=O)/C=C/c1ccc(Cn2c(CC(C)C)n c3c(C)cc(C)nc32)cc1  
5506 C=CS(=O)(=O)F.Ic1cc2cccc2s1>>O=S(=O)(F)/C=C/c1cc2cccc2s1  
5507 Brclenc2nc(-c3cccc3)oc2c1.C=CC(=O)OC>>COC(=O)/C=C/c1enc2nc(-c3cccc3)oc2c1  
5508 Brclcccc2cccc12.C=Cc1nc2c(N)ncnc2n1[C@@H]1O[C@H](CO[Si](C)(C)C(C)(C)C)[C@@H](O[Si](C)(C)C(C)(C)C)[C@H]1O[Si](C)(C)C(C)(C)C>>CC(C)(C)[Si](C)(C)OC[C@H]1O[C@@H](n2c(/C=C/c3cccc4cccc34)nc3c(N)ncnc32)[C@H](O[Si](C)(C)C(C)(C)C)[C@@H]1O[Si](C)(C)C(C)(C)C  
5509 Brclccc(I)cc1.C=C[Si](C)(C)C>>C[Si](C)(C)/C=C/c1ccc(Br)cc1  
5510 C=Cc1ccc(N(C)C)cc1.CC(C)c1ccc(C(C)C)c1N1C(=O)c2cccc3c(Br)ccc(c23)C1=O>>CC(C)c1cccc(C(C)C)c1N1C(=O)c2cccc3c(/C=C/c4ccc(N(C)C)cc4)ccc(c23)C1=O  
5511 BrC1=C(C2=CCCCO2)CCCC1.C=CC(=O)OC>>COC(=O)/C=C/C1=C(C2=CCCCO2)CCCC1  
5512 C=CCON=C1[C@H](C)[C@H]2OC(=O)O[C@]2(C)[C@@H](CC)OC(=O)[C@H](C)[C@@H](O)[C@H](C)[C@@H](O)[C@H]2O[C@H](C)C[C@H](N(C)C)[C@H]2OC(C)=O)[C@](C)(OC)C[C@H]1C.Nc1ccc(Br)cn1>>CC[C@H]1OC(=O)[C@H](C)[C@@H](O)[C@H](C)[C@@H](O)[C@H]2O[C@H](C)C[C@H](N(C)C)[C@H]2OC(C)=O)[C@](C)(OC)C[C@@H](C)C(=NOC/C=C/c2ccc(N)nc2)[C@H](C)[C@H]2OC(=O)O[C@]12C  
5513 C=C(OC)C1=C(Br)CCCC1.C=CC(=O)N1[C@H]2C[C@H]3CC[C@]2(CS1(=O)=O)C3(C)C>>C=C(O)C1=C(/C=C/C(=O)N2[C@H]3C[C@H]4CC[C@]3(CS2(=O)=O)C4(C)C)CCCC1  
5514 C=Cc1cc(OC)c(OC)c(OC)c1-c1ccc(OC)cc1.COc1ccc(I)cc1>>COc1ccc(/C=C/c2cc(OC)c(OC)c(OC)c2- c2ccc(OC)cc2)cc1  
5515 C=CC(=O)NC(C)C.Cc1ccc(Br)cc1>>Cc1ccc(/C=C/C(=O)NC(C)C)cc1



C=CC(=O)OC(C)(C)C.COc1cc(Br)cc(F)c1[C@]1(C)c2ccc3c(cnn3C3CCCCO3)c2C[C@@H](C)N1CC  
 5516 (C)(F)F>>COc1cc(/C=C/C(=O)OC(C)(C)C)cc(F)c1[C@]1(C)c2ccc3c(cnn3C3CCCCO3)c2C[C@@H](C)N1CC(C)(F)F  
 5517 C=CC(N)=O.COC(=O)c1ccc(I)cc1>>COC(=O)c1ccc(/C=C/C(N)=O)cc1  
 5518 C=Cc1ccc(C)cc1.CC(=O)c1ccc(Cl)cc1>>CC(=O)c1ccc(/C=C/c2ccc(C)cc2)cc1  
 5519 C=CC(=O)OCC.COCC(=O)CN1C(=O)[C@H](N2C(=O)c3ccccc3C2=O)Cc2ccccc2C1c1ccc(Br)cc1  
 >>CCOC(=O)/C=C/c1ccc(C2c3ccccc3C[C@H](N3C(=O)c4ccccc4C3=O)C(=O)N2CC(=O)OCC)cc1  
 5520 C=Cc1cccc(O[Si](C)(C)C(C)(C)C)c1.C[Si](C)(C)OS(=O)(=O)C(F)(F)F>>CC(C)(C)[Si](C)(C)Oc1cccc  
 (/C=C/[Si](C)(C)C)c1  
 5521 C=CC(C)=O.COc1ccc(Cl)cc1>>COc1ccc(/C=C/C(C)=O)cc1  
 5522 C=CC(CC(=O)OC)[Si](C)(C)C.c1ccc([I+](c2ccccc2)cc1>>COC(=O)CC(/C=C/c1ccccc1)[Si](C)(C)C  
 5523 C=Cc1ccc(C)cc1.CCn1cnc1-c1ccc(Br)cc1>>CCn1cnc1-c1ccc(/C=C/c2ccc(C)cc2)cc1  
 C=CC(=O)OC(C)(C)C.Cc1c(O)ccc2c(Cc3ccc(Br)cc3)c(-  
 5524 c3ccc(OC(F)(F)F)cc3)c(=O)oc12>>Cc1c(O)ccc2c(Cc3ccc(/C=C/C(=O)OC(C)(C)C)cc3)c(-  
 c3ccc(OC(F)(F)F)cc3)c(=O)oc12  
 5525 C=Cc1ccccc1.O=C(/C=C/c1ccccc1)c1ccc(I)cc1>>O=C(/C=C/c1ccccc1)c1ccc(/C=C/c2ccccc2)cc1  
 5526 C=Cc1ccccc1N.COc1cc(OC)c(Br)c(OC)c1>>COc1cc(OC)c(/C=C/c2ccccc2N)c(OC)c1  
 5527 C=COCCCCO.COC(=O)c1ccc(I)cc1>>COC(=O)c1ccc(/C=C/OCCCCO)cc1  
 5528 C=CC(C)=O.CC1(C)OC=C(I)C(=O)O1>>CC(=O)/C=C/C1=COC(C)(C)OC1=O  
 5529 C=CC(=O)N1CCCCC1.O=c1c(I)c(-c2ccc(O)cc2)oc2cc(O)ccc12>>O=C(/C=C/c1c(-  
 c2ccc(O)cc2)oc2cc(O)ccc2c1=O)N1CCCCC1  
 5530 C=CC(=O)OCC.Nc1c(I)cnc(Cl)c1Br>>CCOC(=O)/C=C/c1cnc(Cl)c(Br)c1N  
 5531 C=Cc1cncnc1.CC(C)(C)OC(=O)N[C@H](COc1cccc(Br)c1)Cc1c[nH]c2ccccc12>>CC(C)(C)OC(=O)N  
 [C@H](COc1cccc(/C=C/c2cncnc2)c1)Cc1c[nH]c2ccccc12  
 5532 C=Cc1ccc(C)cc1.O=c1oc2ccccc2c(-c2ccccc2)c1Br>>Cc1ccc(/C=C/c2c(-c3ccccc3)c3ccccc3oc2=O)cc1  
 5533 C=CC(=O)OCC.Cc1nc(N)nc(NC2CCOC2)c1I>>CCOC(=O)/C=C/c1c(C)nc(N)nc1NC1CCOC1  
 C=CC(=O)OCC.COc1cc(I)c2c3c1O[C@H]1[C@H]34CCN(C)[C@H](C2)[C@H]42C=C[C@@]1(OC)c  
 5534 1c(O)ccc(O)c12>>CCOC(=O)/C=C/c1cc(OC)c2c3c1C[C@H]1N(C)CC[C@@]34[C@@H](O2)[C@@  
 12(OC)C=C[C@@]14c1c(O)ccc(O)c12  
 5535 C=CC(=O)OC(C)(C)C.COC(=O)c1ccccc1Br>>COC(=O)c1ccccc1/C=C/C(=O)OC(C)(C)C  
 5536 C=CC(=O)OCC.Ic1oc2ccccc2c1-c1ccccc1>>CCOC(=O)/C=C/c1oc2ccccc2c1-c1ccccc1  
 5537 C=CC(=O)OCC.CC(C)c1c[n+][([O-])c(C(C)C)c(Cl)n1>>CCOC(=O)/C=C/c1nc(C(C)C)c[n+][([O-  
 C=Cc1cncnc1.COc1cc(Nc2c(C#N)cnc3cc(Br)ccc23)cc(OC)c1OC>>COc1cc(Nc2c(C#N)cnc3cc(/C=C/  
 5538 c4cncnc4)ccc23)cc(OC)c1OC  
 5539 C=CN1C(=O)c2ccccc2C1=O.CC(=O)c1ccc(Cl)cc1>>CC(=O)c1ccc(/C=C/N2C(=O)c3ccccc3C2=O)cc  
 5540 C=Cc1ccccc1OC.Oc1ccc(O)c(I)c1>>COc1ccccc1/C=C/c1cc(O)ccc1O  
 5541 C=CCC(C)N(C)C(=O)OC(C)(C)C.COc1ccc(Br)en1>>COc1ccc(/C=C/CC(C)N(C)C(=O)OC(C)(C)C)c  
 5542 C=CC(=O)OCCSc1ccccc1.O=[N+][([O-])c1ccc(Br)c1>>O=C(/C=C/c1ccccc1[N+](=O)[O-  
 ])c1)OCCSc1ccccc1  
 5543 C=Cc1cc(C)ccc1C.CCCCc1ccc(/C=C/c2ccc(I)cc2)cc1>>CCCCc1ccc(/C=C/c2ccc(/C=C/c3cc(C)ccc3C)  
 cc2)cc1  
 5544 C=CC(=O)Nc1ccccc1NC(=O)OC(C)(C)C.CCOC(=O)[C@H]1CN(CC(C)(C)O)C[C@@H]1c1ccc(Br)c  
 c1>>CCOC(=O)[C@H]1CN(CC(C)(C)O)C[C@@H]1c1ccc(/C=C/C(=O)Nc2ccccc2NC(=O)OC(C)(C)  
 5545 C=CS(=O)(=O)c1ccccc1.Cc1ccccc1Br>>Cc1ccccc1/C=C/S(=O)(=O)c1ccccc1  
 C=CC(=O)OCCCC.O=[N+][([O-])c1ccc([I+](c2ccccc2)cc1>>COC(=O)/C=C/c1ccc(OC)c(OCc2c  
 5546 cccc2)c1CC(=O)N1CCCCC1  
 C=Cc1cncnc1.Cn1cc(-c2cnc(N)c(C(=O)N[C@H]3CCN(C(=O)c4ccc(I)cc4)C3)c2)cn1>>Cn1cc(-  
 5547 c2cnc(N)c(C(=O)N[C@H]3CCN(C(=O)c4ccc(/C=C/c5cncnc5)cc4)C3)c2)cn1  
 5548 C=CC(=O)OC.O=C1NCCN1c1ccc(Br)cc1F>>COC(=O)/C=C/c1ccc(N2CCNC2=O)c(F)c1  
 5549 Brc1ccc2cncnc2c1.C=Cc1ccccc1>>C=C/c1ccc2cncnc2c1\c1ccccc1  
 C=Cc1ccc(Cl)cc1.COc1cc(OC)c(OC)cc1/C=C/C(=O)c1ccc(I)cc1>>COc1cc(OC)c(OC)cc1/C=C/C(=O)  
 5550 c1ccc(/C=C/c2ccc(Cl)cc2)cc1  
 5551 C=Cc1ccccc1O.COc1ccc(I)c(OC)c1>>COc1ccc(/C=C/c2ccccc2O)c(OC)c1  
 5552 C=CC(=O)OC.O=Cc1ccc(Cl)cc1>>COC(=O)/C=C/c1ccc(C=O)cc1  
 5553 C=CC(=O)OCC.O=Cc1ccc(I)cc1>>CCOC(=O)/C=C/c1ccc(C=O)cc1  
 5554 C=CC(=O)OC.COc1ccc(Br)c(CC(=O)N2CCCC2)c1OCc1ccccc1>>COC(=O)/C=C/c1ccc(OC)c(OCc2c  
 cccc2)c1CC(=O)N1CCCCC1  
 C=Cc1cncnc1.Cn1cc(-c2cnc(N)c(C(=O)N[C@H]3CCN(C(=O)c4ccc(I)cc4)C3)c2)cn1>>Cn1cc(-  
 5555 c2cnc(N)c(C(=O)N[C@H]3CCN(C(=O)c4ccc(/C=C/c5cncnc5)cc4)C3)c2)cn1  
 5556 C=CCCCCCCCCCCCCCC.c1ccc([I+](c2ccccc2)cc1>>CCCCCCCCCCCCCCC/C=C/c1ccccc1

5557 C=Cc1ccc(C(=O)OC)cc1.FC(F)(F)C(F)(F)C(F)(F)C(F)(F)C(F)(F)C(F)(F)Br>>COC(=O)c1ccc(/C=C/C  
 (F)(F)C(F)(F)C(F)(F)C(F)(F)C(F)(F)C(F)(F)C(F)(F)cc1  
 5558 C=Cc1cncnc1.CN(C)[C@H](COc1cncnc(Br)c1)Cc1c[nH]c2ccccc12>>CN(C)[C@H](COc1cncnc(/C=C/c  
 2cncnc2)c1)Cc1c[nH]c2ccccc12  
 5559 C=CC(CO)N1C(=O)c2ccccc2C1=O.COc1cccc(Br)c1>>COc1cccc(/C=C/C(CO)N2C(=O)c3ccccc3C2=  
 5560 C=Cc1ccccc1OC.Nc1ccccc1Br>>COc1ccccc1/C=C/c1ccccc1N  
 5561 C=CC(=O)OCC.O=C(Nc1ccccc1I)C12CC3CC(CC(C3)C1)C2>>CCOC(=O)/C=C/c1ccccc1NC(=O)C1  
 2CC3CC(CC(C3)C1)C2  
 5562 C=CCC(C)C(=O)O.COc1ccc(I)cc1>>COc1ccc(/C=C/CC(C)C(=O)O)cc1  
 C=CC(=O)OC(C)(C)C.CC(C)(C)O[C@H]1CC[C@H]2C=C(C3=C(Br)CC4(CC3)OCCO4)CC[C@ @]2  
 5563 1C>>CC(C)(C)OC(=O)/C=C/C1=C(C2=C[C@ @H]3CC[C@H](OC(C)(C)C)[C@ @]3(C)CC2)CCC2(  
 C1)OCCO2  
 5564 C=CC(=O)OC.CC(C)(C)OC(=O)N1CC2(CC(=O)c3cc(Br)ccc3O2)C1>>COC(=O)/C=C/c1ccc2c(c1)C(  
 =O)CC1(CN(C(=O)OC(C)(C)C)C1)O2  
 C=CC(=O)OCC.CC1(C)CC(=O)C2=C(C1)Oc1c(I)c(-  
 5565 c3ccccc3)oc(=O)c1C2c1cccc(O)c1>>CCOC(=O)/C=C/c1c(-  
 c2ccccc2)oc(=O)c2c1OC1=C(C(=O)CC(C)(C)C1)C2c1cccc(O)c1  
 5566 C=CC(=O)OC(C)(C)C.CC(C)(C)OC(=O)/C=C/c1ccc(CN(C(=O)C2CCCCC2)c2cccc(Br)c2)cc1>>CC(  
 C)(C)OC(=O)/C=C/c1ccc(CN(C(=O)C2CCCCC2)c2cccc(/C=C/C(=O)OC(C)(C)C)c2)cc1  
 5567 C=CC(=O)N1N=Cc2ccccc2C1C=C(C)C.CCc1nc(N)nc(N)c1Cc1cc(I)c(OC)c(OC)c1>>CCc1nc(N)nc(N  
 )c1Cc1cc(/C=C/C(=O)N2N=Cc3ccccc3C2=C(C)C)c(OC)c(OC)c1  
 5568 C=CC(=O)OC(C)(C)C.Nc1ccc(I)cc1>>CC(C)(C)OC(=O)/C=C/c1ccc(N)cc1  
 5569 C=CC(=O)O.O=S(=O)(Nc1ccc(I)cc1)c1cccs1>>O=C(O)/C=C/c1ccc(NS(=O)(=O)c2cccs2)cc1  
 5570 C=CC(=O)OC(C)(C)C.CC(C)(C)OC(=O)CCOCc1ccccc1Br>>CC(C)(C)OC(=O)/C=C/c1ccccc1COCC  
 C(=O)OC(C)(C)C  
 5571 C=CC(=O)O.Oc1ccc(Br)cc1>>O=C(O)/C=C/c1ccc(O)cc1  
 5572 C=CC(=O)OC.CC=CCn1cc(I)c(=O)[nH]c1=O>>CC=CCn1cc(/C=C/C(=O)OC)c(=O)[nH]c1=O  
 5573 C=Cc1cncnc1.O=[N+][O-]c1cccc(Br)c1>>O=[N+][O-]c1cccc(/C=C/c2cncnc2)c1  
 5574 C=CC(=O)OCC.CCn1ccc(Br)cc1=O>>CCOC(=O)/C=C/c1ccn(CC)c(=O)c1  
 5575 C=CC(=O)OC.Cc1cc(-c2ccccc2)n2nc(-c3ccccc3)c(I)c2n1>>COC(=O)/C=C/c1c(-c2ccccc2)nn2c(-  
 c3ccccc3)cc(C)nc12  
 5576 C=CC(=O)OCC.COc1c(C)c2c(c(C)c1I)C(c1ccccc1)(c1ccccc1)c1ccccc1-  
 2>>CCOC(=O)/C=C/c1c(C)c2c(c(C)c1OC)-c1ccccc1C2(c1ccccc1)c1ccccc1  
 5577 C=CC(=O)N(C)C.Fc1ccc(I)c1>>CN(C)C(=O)/C=C/c1cccc(F)c1  
 5578 C=Cc1ccc2c(c1)OC(F)(F)O2.CC(C)(C)Br>>CC(C)(C)/C=C/c1ccc2c(c1)OC(F)(F)O2  
 5579 C=CC(O)CCCCC.I/C=C/C=C/CCCCOCc1ccccc1>>CCCCC(O)/C=C/C=C/C=C/CCCCOCc1ccccc1  
 5580 C=Cc1ccccc(O)c1.Oc1ccc(O)c(I)c1>>Oc1cccc(/C=C/c2cc(O)ccc2O)c1  
 5581 C=CS(N)(=O)=O.Cc1cc(C)c(Br)c(C)c1>>Cc1cc(C)c(/C=C/S(N)(=O)=O)c(C)c1  
 5582 C=CC#N.CCCCc1nc2cc(Br)ccc2n1CCN(CC)CC>>CCCCc1nc2cc(/C=C/C#N)ccc2n1CCN(CC)CC  
 5583 C=CC(=O)OC.Cc1cc(-c2ccccc2)n2nc(C)c(I)c2n1>>COC(=O)/C=C/c1c(C)nn2c(-c3ccccc3)cc(C)nc12  
 5584 C=CC(C)(C)O.COC(=O)c1ccccc2nc3cccc(Br)c3nc12>>COC(=O)c1ccccc2nc3cccc(/C=C/C(C)(C)O)c3n  
 5585 C=CC(=O)OCC.Cc1ccc(Br)c(Cn2nnc(C)n2)c1>>CCOC(=O)/C=C/c1ccc(C)cc1Cn1nnc(C)n1  
 5586 C=CC(=O)NCc1ccc(OC)cc1.COc1ccc2c(=O)c(I)coc2c1>>COc1ccc(CNC(=O)/C=C/c2coc3cc(OC)ccc  
 3c2=O)cc1  
 5587 Br1ccc(I)cc1.C=CP(=O)(OCC)OCC>>CCOP(=O)(/C=C/c1ccc(Br)cc1)OCC  
 5588 C=CC(=O)O.O=C(O)c1ccc(I)cc1>>O=C(O)/C=C/c1ccc(C(=O)O)cc1  
 5589 C=CS1ccccc1.O=[N+][O-]c1ccc(Br)cc1>>O=[N+][O-]c1ccc(/C=C/Sc2ccccc2)cc1  
 C=CC(C)(O)CCCCCCCCCN1C(=O)c2ccccc2C1=O.CC(C)(C)[Si](C)(C)O[C@H]1C=C(Br)[C@ @H](O  
 5590 )][C@ @H]2O[C@H]12>>CC(O)/C=C/C1=C[C@H](O[Si](C)(C)C(C)(C)C)[C@H]2O[C@H]2[C@ @  
 H]1O)CCCCCCCCCN1C(=O)c2ccccc2C1=O  
 5591 C=Cc1ccc(OC)cc1.FC(F)(F)Oc1ccc(I)cc1>>CCOc1ccc(/C=C/c2ccc(OC(F)(F)F)cc2)cc1  
 5592 C=CCC(C(=O)OC)C(=O)OC.CC(C)(C)Oc1ccc(Br)cc1>>COC(=O)C(C/C=C/c1ccc(OC(C)(C)C)cc1)C(  
 =O)OC  
 5593 C=CC(C)(C)O.COc1ccc(C(C)=O)c(O)c1I>>COc1ccc(C(C)=O)c(O)c1/C=C/C(C)(C)O  
 5594 Br1cc2ccccc2c2ccccc12.C=Cc1ccccc1>>C(=C/c1cc2ccccc2c2ccccc12)c1ccccc1  
 5595 Br1ccc2ccc3ccc4ccccc4c3c2c1.C=Cc1ccccc1>>C(=C/c1ccc2ccc3ccc4ccccc4c3c2c1)c1ccccc1  
 C=CC(=O)N1CCC(Cc2nnc(C)o2)CC1.Cc1nnn(Cc2cc(OC(F)(F)F)ccc2Br)n1>>Cc1nnn(Cc2cc(OC(F)(  
 5596 F)F)ccc2/C=C/C(=O)N2CCC(Cc3nnc(C)o3)CC2n1  
 C=CC(C)(C)C(=O)NC(C)(C)CO.CC(=O)OC[C@H]1O[C@ @H](c2cc(Cc3ccc(Br)cc3Cl)c(C)cc2C)[C  
 5597 @H](OC(C)=O)[C@ @H](OC(C)=O)[C@ @H]1OC(C)=O>>CC(=O)OC[C@H]1O[C@ @H](c2cc(Cc3  
 ccc(/C=C/C(C)(C)C(=O)NC(C)(C)CO)cc3Cl)c(C)cc2C)[C@H](OC(C)=O)[C@ @H](OC(C)=O)[C@ @

5598 C=CC(=O)OC(C)(C)C.CC(C)=CCc1cc(I)ccc1OC(=O)c1ccccc1>>CC(C)=CCc1cc(/C=C/C(=O)OC(C)(C)C)ccc1OC(=O)c1ccccc1  
 5599 C=CC(=O)OC(C)(C)C.COc1ccccc1I>>COc1ccccc1/C=C/C(=O)OC(C)(C)C  
 5600 C=CC(OCC)OCC.O=[N+](O-)]c1ccc(I)cc1>>CCOC(/C=C/c1ccc([N+](=O)[O-])cc1)OCC  
 5601 BrC1=C(C2=CCCCC2)CCCC1.C=CC(=O)OC>>COC(=O)/C=C/C1=C(C2=CCCCC2)CCCC1  
 C=Cc1ccc(/C=C/c2ccc(N(C)C)cc2)cc1.CC1(C)C2=CC(=O)C=CC2=C(c2ccc(Br)cc2S(=O)(=O)O)c2cc  
 5602 c(O)cc21>>CN(C)c1ccc(/C=C/c2ccc(/C=C/c3ccc(C4=C5C=CC(=O)C=C5C(C)(C)c5ccc(O)ccc54)c(S(=O)(=O)O)c3)cc2)cc1  
 5603 C=Cc1ccccc1.COC(=O)c1cccc(I)c1>>COC(=O)c1cccc(/C=C/c2ccccc2)c1  
 5604 C=CC(=O)OC(C)(C)C.CCOC(=O)c1ccccc1I>>CCOC(=O)c1ccccc1/C=C/C(=O)OC(C)(C)C  
 5605 C=CC(N)=O.O=[N+](O-)]c1ccc(I)cc1>>NC(=O)/C=C/c1ccc([N+](=O)[O-])cc1  
 C=Cc1ccccc1.COC(=O)[C@]12Cc3cc4cc(Br)ccc4nc3C[C@@H]1CCN(C(=O)OC(C)(C)C)C2>>COC(=O)[C@]12Cc3cc4cc(/C=C/c5ccccc5)ccc4nc3C[C@@H]1CCN(C(=O)OC(C)(C)C)C2  
 5607 C=CC(=O)O.O=[N+](O-)]c1cccc(I)c1>>O=C(O)/C=C/c1cccc([N+](=O)[O-])c1  
 5608 C=C[C@H]1O[C@@H]2OC(C)(C)O[C@@H]2[C@H]1OC.Cc1ccc(I)cc1>>CO[C@H]1[C@@H](/C=C/c2ccc(C)cc2)O[C@@H]2OC(C)(C)O[C@H]12  
 5609 Brc1ccc2ccccc2n1.C=Cc1ccccc1I>>C(=C/c1ccc2ccccc2n1)\c1ccccc1  
 5610 Brc1ccc(I)cc1.C=CCn1nnc2ccccc21>>Brc1ccc(/C=C/Cn2nnc3ccccc32)cc1  
 5611 C=CC(=O)OC.O=Cc1ccccc1Br>>COC(=O)/C=C/c1ccccc1C=O  
 5612 C=CC(=O)OC.COc1cc(I)c(-c2c(Cl)cccc2[N+](=O)[O-])c(OCc2ccccc2)c1>>COC(=O)/C=C/c1cc(OC)cc(OCc2ccccc2)c1-c1c(Cl)cccc1[N+](=O)[O-]  
 5613 C=CC(=O)OC(C)(C)C.CCOC(=O)c1encc(Br)c1>>CCOC(=O)c1encc(/C=C/C(=O)OC(C)(C)C)c1  
 5614 C=Cc1ccccc(O)c1.Oc1ccccc(Br)c1>>Oc1ccccc(/C=C/c2cccc(O)c2)c1  
 C=CC(=O)OCC.COC(=O)c1c(-c2ccccc2)c(-  
 5615 c2ccccc2)c2ccccc2c1OS(=O)(=O)C(F)(F)F>>CCOC(=O)/C=C/c1c(C(=O)OC)c(-c2ccccc2)c(-c2ccccc2)c2ccccc12  
 5616 C=CC(N)=O.CCc1ccccc(Br)c1>>CCc1ccccc(/C=C/C(N)=O)c1  
 5617 C=CC(=O)OC(C)(C)C.Ic1ccccc1>>CC(C)(C)OC(=O)/C=C/c1ccccc1  
 5618 C=Cc1ccc(C(C)(C)C)cc1.C[Si](C)(I)Cc1ccccc1>>CC(C)(C)c1ccc(/C=C/[Si](C)(C)Cc2ccccc2)cc1  
 5619 C=CC(=O)OCCCC.O=[N+](O-)]c1ccc(Br)cc1>>CCCCOC(=O)/C=C/c1ccc([N+](=O)[O-])cc1  
 5620 C=CC(=O)OC1CCCCC1.Cc1ccc(I)cc1>>Cc1ccc(/C=C/C(=O)OC2CCCCC2)cc1  
 5621 C=Cc1ccccc(C(F)(F)F)c1.Cn1c(=O)c2c(cc(Br)n2C)n(C)c1=O>>Cn1c(=O)c2c(cc(/C=C/c3ccccc(C(F)(F)F)c3)n2C)n(C)c1=O  
 5622 Brc1cnccc1.C=Cc1ccc(OC)cc1>>COc1ccc(/C=C/c2cnccc2)cc1  
 5623 Brc1enc2nc(-c3ccccc3)c(-c3ccccc3)nc2c1.C=CC(=O)OC>>COC(=O)/C=C/c1enc2nc(-c3ccccc3)c(-c3ccccc3)nc2c1  
 5624 Brc1ccc2[nH]ccc2c1.C=CS(=O)(=O)c1ccccc1>>O=S(=O)(/C=C/c1ccc2[nH]ccc2c1)c1ccccc1  
 5625 C=C[Si](C)(C)c1ccccc1.Cc1ccccc(I)c1>>Cc1ccccc(/C=C/[Si](C)(C)c2ccccc2)c1  
 5626 C=Cc1ccccc(Cl)c1.O=Cc1ccccc(Br)c1>>O=Cc1ccccc(/C=C/c2cccc(Cl)c2)c1  
 5627 C=Cc1ccc2c(c1)Sc1ccccc1N2CC.CCN(c1ccccc1)c1ccc(Br)cc1>>CCN(c1ccccc1)c1ccc(/C=C/c2ccc3c(c2)Sc2ccccc2N3CC)cc1  
 5628 C=C[Si](CC)(CC)CC.O=Cc1ccccc(Br)c1>>CC[Si](/C=C/c1ccccc(C=O)c1)(CC)CC  
 5629 C=Cc1ccccc1.Clc1ccc(Br)cc1>>Clc1ccc(/C=C/c2ccccc2)cc1  
 5630 Brc1ccccc1.C=Cc1enn(-c2ccccc2)c1>>C(=C/c1enn(-c2ccccc2)c1)\c1ccccc1  
 5631 C=CC(C)(C)O.COc1ccc(Br)cc1>>COc1ccc(/C=C/C(C)(C)O)cc1  
 5632 C=CC(=O)NCCc1ccccc(F)c1.COc1ccc2c(=O)c(I)coc2c1>>COc1ccc2c(=O)c(/C=C/C(=O)NCCc3ccccc(F)c3)coc2c1  
 5633 C=Cc1ccccc1.O=Cc1ccc(F)cc1Br>>O=Cc1ccc(F)cc1/C=C/c1ccccc1  
 5634 C=CC(=O)OC.NCCc1ccccc(Br)c1>>COC(=O)/C=C/c1ccccc(CCN)c1  
 5635 C=Cc1ccccc1.COc1ccc2c(-c3ccccc3)c(Br)c(=O)oc2c1>>COc1ccc2c(-c3ccccc3)c(/C=C/c3ccccc3)c(=O)oc2c1  
 5636 C=CC(=O)OC.CC(C)n1enc2c(Nc3ccc(Br)cc3)nc(N3CCOCC3)nc21>>COC(=O)/C=C/c1ccc(Nc2nc(N3CCOCC3)nc3c2ncn3C(C)C)cc1  
 5637 Brc1ccccc1.C=C[C@H]1COC(C)(C)N1C(=O)OCc1ccccc1>>CC1(C)OC[C@@H](/C=C/c2ccccc2)N1C(=O)OCc1ccccc1  
 5638 C=Cc1cc(OCc2ccccc2)ccc1OCc1ccccc1.CCCCCCNC(=O)c1cc(I)ccc1O>>CCCCCNC(=O)c1cc(/C=C/C/c2cc(OCc3ccccc3)ccc2OCc2ccccc2)ccc1O  
 5639 Brc1ccc(-c2coen2)cc1.C=CC(=O)OCC>>CCOC(=O)/C=C/c1ccc(-c2coen2)cc1  
 5640 C=Cc1ccc(OC)cc1.CCOC(=O)C(C)Br>>CCOC(=O)C(C)/C=C/c1ccc(OC)cc1  
 5641 C=CC(=O)O.O=S(=O)(Nc1ccccc1)c1ccc(Cl)cc1>>O=C(O)/C=C/c1ccc(NS(=O)(=O)c2ccc(Cl)cc2)c

[illegible]

5681 C=CS(=O)(=O)NCCCCCCCC.Cc1ccc(CNC(=O)OC(C)(C)C)c(Br)c1>>CCCCCCCCNS(=O)(=O)/C=C/c1cc(C)ccc1CNC(=O)OC(C)(C)C  
 5682 C=Cc1cccn1.O=[N+][O-]c1cccc(Br)c1>>O=[N+][O-]c1cccc(C=C/c2cccn2)c1  
 5683 C=Cc1cccn1.COc1ccc(Br)cc1>>COc1ccc(C=C/c2cccn2)cc1  
 5684 C=CS(=O)c1cccc1.COc1c(C)c(Br)c(OC)c2ccccc12>>COc1c(C)c(C=C/S(=O)c2ccccc2)c(OC)c2cccc  
 5685 C=CC(=O)OCC.OCc1cccc(Br)n1>>CCOC(=O)/C=C/c1cccc(CO)n1  
 5686 C=Cc1ccc(OC)cc1.COc1ccc(-c2cc(=O)c3c(OC)cc(OC)c(I)c3o2)cc1OC>>COc1ccc(C=C/c2c(OC)cc(OC)c3c(=O)cc(-c4ccc(OC)c(OC)c4)oc23)cc1  
 5687 C=CC(=O)OCC.FC(F)(F)c1ccc(Br)c(C2OCCCO2)c1>>CCOC(=O)/C=C/c1ccc(C(F)(F)F)cc1C1OCCC  
 5688 C=Cc1ccccc1.Fc1ccccc1Br>>Fc1ccccc1/C=C/c1ccccc1  
 5689 C=Cc1ccc(OC)c(O)c1.Oc1cc(Br)cc(O)c1F>>COc1ccc(C=C/c2cc(O)c(F)c(O)c2)cc1O  
 5690 C=CC(=O)OC.Cc1ccsc1Br>>COC(=O)/C=C/c1sccc1C  
 5691 C=CC(=O)OCC.Clc1cccc(Oc2ccccc(Br)c2)c1>>CCOC(=O)/C=C/c1cccc(Oc2ccccc(Cl)c2)c1  
 5692 C=Cc1ccccc1.CC(C)(C)C(=O)Nc1nc(NC(=O)C(C)(C)C)c2cc(Br)cnc2n1>>CC(C)(C)C(=O)Nc1nc(NC(=O)C(C)(C)C)c2cc(C=C/c3ccccc3)cnc2n1  
 5693 C=CC(=O)OCC.CC1(C)CC(=C(c2ccc(Br)cc2)c2ccc3c(cnn3C3CCCCO3)c2)CC(C)(C)C1>>COC(=O)/C=C/c1ccc(C(=C2CC(C)(C)CC(C)(C)C2)c2ccc3c(cnn3C3CCCCO3)c2)cc1  
 5694 C=Cc1ccccc1O.COc1ccc(Br)cc1>>COc1ccc(C=C/c2ccccc2O)cc1  
 5695 C=CC(=O)OC(C)(C)C.COc1ccc(CNc2ccc(C)cc2I)cc1>>COc1ccc(CNc2ccc(C)cc2/C=C/C(=O)OC(C)(C)C)cc1  
 5696 C=CC(=O)OC(C)(C)C.CC(=O)c1ccc(Cl)c(F)c1Br>>CC(=O)c1ccc(Cl)c(F)c1/C=C/C(=O)OC(C)(C)C  
 5697 C=CB1OC(C)CC(C)(C)O1.F[C@@H]1CCN(Cc2ccc(Br)cc2)C1>>CC1CC(C)(C)OB(/C=C/c2ccc(CN3CC[C@@H](F)C3)cc2)O1  
 5698 C=CCC(=O)O.CCOC(=O)c1ccc(I)cc1>>CCOC(=O)c1ccc(C=C/CC(=O)O)cc1  
 5699 C=CC(=O)OCCCC.Ic1nnc2nen(Cc3ccccc3)c12>>CCCCOC(=O)/C=C/c1nnc2nen(Cc3ccccc3)c12  
 5700 C=Cc1ccc(F)cc1.O=Cc1ccc(Br)cc1>>O=Cc1ccc(C=C/c2ccc(F)cc2)cc1  
 5701 C=CC(=O)OC(C)(C)C.Cc1cccc(C=O)c1Br>>Cc1cccc(C=O)c1/C=C/C(=O)OC(C)(C)C  
 5702 \*CNCCCOCCOCCOCCNC(=O)COc1ccc(C(Cc2cc(OC)cc(OC)c2)NC(=O)c2ccccc(C)c1ccc(I)cc1>>\*CNCCCOCCOCCOCCNC(=O)COc1ccc(C(Cc2cc(OC)cc(OC)c2)NC(=O)c2ccccc(C=C/c3ccc(C(C)(C)C)cc3)c2)cc1  
 5703 C=CC(=O)N1N=Cc2ccccc2C1c1ccc(C)cc1.COc1cc(Cc2cnc(N)nc2N)cc(I)c1OC>>COc1cc(Cc2cnc(N)nc2N)cc(C=C/C(=O)N2N=Cc3ccccc3C2c2ccc(C)cc2)c1OC  
 5704 C/C(I)=C/C#N.C=CC=O>>CC(=C/C#N)/C=C/C=O  
 5705 C=CC(F)(F)C(F)(F)C(F)(F)C(F)(F)C(F)(F)F.CC(=O)Nc1ccc(I)cc1>>CC(=O)Nc1ccc(C=C/C(F)(F)C(F)(F)C(F)(F)C(F)(F)C(F)(F)F)cc1  
 5706 C=CC(=O)OCC.Cc1nc(N)nc(N[C@H]2CC[C@H](OCC(N)=O)CC2)c1Br>>CCOC(=O)/C=C/c1c(C)nc(N)nc1N[C@H]1CC[C@H](OCC(N)=O)CC1  
 5707 C=CC(=O)OCC.CCOC(=O)c1ccc(-c2ccccc2)c(I)c1>>CCOC(=O)/C=C/c1cc(C(=O)OCC)ccc1-Cc1ccccc1.O=[N+][O-]c1ccc(C=C/c2ccc(I)cc2)cc1>>O=[N+][O-]c1ccc(C=C/c2ccc(C=C/c3ccccc3)cc2)cc1  
 5709 C=CC(=O)N1CCOCC1.CCC(C)(Br)CC>>CCCC(C)(C=C/C(=O)N1CCOCC1)CC  
 5710 C=CC(=O)OC.COc1cccc(N(Cc2ccc(Br)cc2)CC(C)(C)C)n1>>COC(=O)/C=C/c1ccc(CN(CC(C)(C)C)c2cnc(OC)n2)cc1  
 5711 C=Cc1ccc(C)cc1.Clc1cccc(Br)c1>>Cc1ccc(C=C/c2ccccc(Cl)c2)cc1  
 5712 C=CC(=O)NC(C)(C)C.C[C@]12C[C@@]34C=C(Sc5ccc(I)cc5)C(=O)[C@@](C)(CCC(=O)Nc5c(O)cc(C(=O)O)c5O)[C@@H]3[C@H](C[C@@H]1C4)O2>>CC(C)(C)NC(=O)/C=C/c1ccc(SC2=C[C@]34C[C@H]5C[C@H](O)[C@@]5(C)C3)[C@H]4[C@](C)(CCC(=O)Nc3c(O)ccc(C(=O)O)c3O)C2=O)cc1  
 5713 C=CC(=O)OC.COCc1ccc(Cl)cc1>>COCc1ccc(C=C/C(=O)OC)cc1  
 5714 C=Cc1ccccc1.Cc1cc(I)ccn1>>Cc1cc(C=C/c2ccccc2)ccn1  
 5715 BrC1ccccc1.C=CCN1C(=O)c2ccccc2C1=O>>O=C1c2ccccc2C(=O)N1C/C=C/c1ccccc1  
 5716 C=CC(=O)OC.COc1c(I)c(NC(=O)C(C)(C)C)c(OC)c([Si](C)(C)C)c1OC>>COC(=O)/C=C/c1c(NC(=O)C(C)(C)C)c(OC)c([Si](C)(C)C)c(OC)c1OC  
 5717 C=Cc1ccc2ccccc2c1.COc1ccc(C)c(I)c1>>COc1ccc(C)c(C=C/c2ccc3ccccc3c2)c1  
 5718 C=CC(=O)OCC.CC(=O)O[C@H]1CC[C@H]2[C@H]3[C@H](CC[C@]12C)c1ccc(O)cc1C[C@H]3Sc1ccc(Br)cc1>>CCOC(=O)/C=C/c1ccc(S[C@@H]2Cc3cc(O)ccc3[C@H]3CC[C@]4(C)[C@@H](OC(C)=O)CC[C@H]4[C@@H]32)cc1  
 5719 C=CC(=O)OC.CC(C)(C)c1[nH]c2ccccc2c1C1CCCN(Cc2ccc(Br)cc2F)C1>>COC(=O)/C=C/c1ccc(CN2CCCC(c3c(C(C)(C)C)[nH]c4ccccc34)C2)c(F)c1  
 5720 C=Cc1cc(OC)c(OC)c(OC)c1-c1ccc2ccccc2c1.COc1ccc(I)cc1>>COc1ccc(C=C/c2cc(OC)c(OC)c(OC)c2-c2ccc3ccccc3c2)cc1

5721 C=CC(=O)OC(C)(C)C.O=C(Cc1ccc(Br)cc1)OCc1cccc1>>CC(C)(C)OC(=O)/C=C/c1ccc(CC(=O)OCc2cccc2)cc1  
 5722 Br1ccc(-c2nc3cccc3n3cccc23)cc1.C=CC(=O)OC>>COC(=O)/C=C/c1ccc(-  
 5723 C=CC(=O)OC.Cc1ccc(C(=C(I)CCSc2cccc2)c2ccc(C)cc2)cc1>>COC(=O)/C=C/C(CCS1cccc1)=C(c1ccc(C)cc1)c1ccc(C)cc1  
 5724 C=CC(=O)OC.COc1ccc2c(c1)CCN(c1ccc(CC(C)C)cc1)C2(c1ccc(Br)cc1)C(F)F>>COC(=O)/C=C/c1ccc(C2(C(F)F)c3ccc(OC)cc3CCN2c2ccc(CC(C)C)cc2)cc1  
 5725 C=Cc1cccn1.Cc1c(Nc2c(I)cncc2C#N)cc(Cl)c2[nH]ccc12>>Cc1c(Nc2c(C#N)cncc2/C=C/c2cccn2)cc(Cl)c2[nH]ccc12  
 5726 C=CC(=O)OC(C)(C)C.CN(C)CCN1Cc2cc(Br)cnc2NC1=O>>CN(C)CCN1Cc2cc(/C=C/C(=O)OC(C)(C)C)cnc2NC1=O  
 5727 C=C[Si](CC)(CC)CC.Fc1ccc(Br)cc1>>CC[Si](/C=C/c1ccc(F)cc1)(CC)CC  
 5728 C=CC(=O)OCC.Nc1ccc(Br)cn1>>CCOC(=O)/C=C/c1ccc(N)nc1  
 5729 C=CC(=O)N(Cc1ccc2nc(NC(=O)C(C)(C)C)[nH]c(=O)c2n1)c1ccc(C(=O)N[C@@H](CCC(=O)OCC)C(=O)OCC)cc1.CC(=O)OC[C@H]1O[C@@H](n2cnc(C(N)=O)c2I)[C@@H]2OC(C)(C)O[C@H]12>>CCOC(=O)CC[C@H](NC(=O)c1ccc(N(Cc2ccc3nc(NC(=O)C(C)(C)C)[nH]c(=O)c3n2)C(=O)/C=C/c2c(C(N)=O)ncn2[C@@H]2O[C@H](COC(C)=O)[C@H]3OC(C)(C)O[C@H]32)cc1)C(=O)OCC  
 5730 C=CC(=O)OCC.COc1ccc(Cl)cc1>>CCOC(=O)/C=C/c1ccc(OC)cc1  
 5731 C=CC(=O)OC.Cc1ccc(S(=O)(=O)n2cc(C=O)c3c(Br)cccc32)cc1>>COC(=O)/C=C/c1cccc2c1c(C=O)en2S(=O)(=O)c1ccc(C)cc1  
 5732 C=CC(=O)OCC.CCN(CCC1OCCO1)C(=O)c1ccc(Br)cc1>>CCOC(=O)/C=C/c1ccc(C(=O)N(C)CCC2OCCO2)cc1  
 5733 C=Cc1ccc(C)cc1C.C[Si](C)(OS(=O)(=O)C(F)(F)F)OS(=O)(=O)C(F)(F)F>>Cc1ccc(/C=C/[Si](C)(C)OS(=O)(=O)C(F)(F)F)c(C)c1  
 5734 C=CC(=O)OC(C)(C)C.CCOC(=O)c1cnc(Cc2ccc(Br)c2)c2cc(OC)c(OC)cc12>>CCOC(=O)c1cnc(Cc2cccc(/C=C/C(=O)OC(C)(C)C)c2)c2cc(OC)c(OC)cc12  
 5735 C=CC(=O)OCC.COc1ccc(OC)c(Cc2ccc(Br)cc2)c1>>CCOC(=O)/C=C/c1ccc(Cc2cc(OC)ccc2OC)cc1  
 5736 C=CC(=O)O.O=S(=O)(Nc1ccc(I)cc1)c1ccc(-c2cccc2)cc1>>O=C(O)/C=C/c1ccc(NS(=O)(=O)c2ccc(-c3cccc3)cc2)cc1  
 5737 C=CC(=O)OC.COc1ccc2c(c1)CCN(c1ccc(C(C)C)cc1)C2(C)c1ccc(Br)cc1>>COC(=O)/C=C/c1ccc(C2(C)c3ccc(OC)cc3CCN2c2ccc(C(C)C)cc2)cc1  
 5738 C=CC(=O)N1CCC2(CC1)OCCO2.O=Cc1cccc1Br>>O=Cc1cccc1/C=C/C(=O)N1CCC2(CC1)OCCO2  
 5739 C=CC(=O)N(C)Cc1oc2cccc2c1C.CC(C)(C)OC(=O)NCCN1Cc2cc(Br)cnc2NC1=O>>Cc1c(CN(C)C(=O)/C=C/c2cnc3c(c2)CN(CCNC(=O)OC(C)(C)C)C(=O)N3)oc2cccc12  
 5740 C=CC(=O)OCC.COC(=O)c1ccc(I)cc1>>CCOC(=O)/C=C/c1ccc(C(=O)OC)cc1  
 5741 C=CC(=O)OC.CS(=O)(=O)N(Cc1cccc1)c1oc2cccc2c1I>>COC(=O)/C=C/c1c(N(Cc2cccc2)S(C)(=O)=O)oc2cccc12  
 5742 C=CC(=O)OC.CC(=O)c1ccc(I)cc1>>COC(=O)/C=C/c1ccc(C(C)=O)cc1  
 5743 C=CC(C)=O.CC1=C(I)C(C)(C)C[C@H](O[Si](C)(C)C(C)(C)C)C1>>CC(=O)/C=C/C1=C(C)C[C@H](O[Si](C)(C)C(C)(C)C)CC1(C)C  
 5744 C=Cc1ccc(Br)cc1.CCOC(=O)c1ccc(I)cc1>>CCOC(=O)c1ccc(/C=C/c2ccc(Br)cc2)cc1  
 5745 C=CC(=O)OC(C)(C)C.[2H]C1([2H])CCc2cc(Br)ccc21>>[2H]C1([2H])CCc2cc(/C=C/C(=O)OC(C)(C)C)ccc21  
 5746 C=Cc1ccc(Br)cc1.Ic1cccc1>>Br1ccc(/C=C/c2cccc2)cc1  
 5747 C=CC(=O)OCC.Cc1cc(Br)ccc1I>>CCOC(=O)/C=C/c1ccc(Br)cc1C  
 5748 C=CCOC(=O)OC.Ic1cccc1>>COC(=O)OC/C=C/c1cccc1  
 5749 C=COCCCC.Cn1c(=O)cc(Br)c2cccc21>>CCCCO/C=C/c1cc(=O)n(C)c2cccc12  
 5750 C=CS(=O)(=O)CC.CN1CCC(c2c[nH]c3ccc(Br)cc23)CC1>>CCS(=O)(=O)/C=C/c1ccc2[nH]cc(C3CCN(C)CC3)c2c1  
 5751 C=Cc1cccc1.Nc1ccc(I)cc1[N+](=O)[O-]>>Nc1ccc(/C=C/c2cccc2)cc1[N+](=O)[O-]  
 5752 C=CC(=O)OCCCC.CC(=O)OC[C@H]1O[C@@H](n2cnc3c(Cl)nc(I)nc32)[C@H](OC(C)=O)[C@@H]1OC(C)=O>>CCCCOC(=O)/C=C/c1nc(Cl)c2ncn([C@@H]3O[C@H](COC(C)=O)[C@@H](OC(C)=O)[C@H]3OC(C)=O)c2n1  
 5753 C=CC#N.Clc1cccc1>>N#C/C=C/c1cccc1  
 5754 C=CC(=O)OC.Nc1cc(Cl)nc(C2CC2)c1C=O>>COC(=O)/C=C/c1cc(N)c(C=O)c(C2CC2)n1  
 5755 C=Cc1cccn1.CC(C)c1cnn(Cc2ccc3ncc(Br)cc3n2)c1>>CC(C)c1cnn(Cc2ccc3ncc(/C=C/c4cccn4)cc3n2)c1  
 5756 C=CC(=O)OC.Nc1ccc(OC(F)(F)F)cc1Br>>COC(=O)/C=C/c1cc(OC(F)(F)F)ccc1N  
 5757 C=Cc1cccc1.CN(C(=O)c1ncc2c(c1I)c1cccc1n2S(=O)(=O)N(C)C)c1cccc1>>CN(C(=O)c1ncc2c(c1/C=C/c1cccc1)c1cccc1n2S(=O)(=O)N(C)C)c1cccc1

5758 C/C(I)=C/[C@H](C)CO[Si](C)(C)C(C)(C)C.C=C[C@@H]1CC=C[C@@H](OC(C)C)O1>>CC(=C/[C  
5759 @H](C)CO[Si](C)(C)C(C)(C)C)/C=C/[C@@H]1CC=C[C@@H](OC(C)C)O1  
C=Cc1cccc1.Ic1ccccc1>>C(=C/c1ccccc1)\c1ccccc1  
5760 C=Cc1ccc(C(C#N)C#N)cc1.Cc1cncc(C)c1-c1c(C)cc(I)cc1C>>Cc1cncc(C)c1-  
c1c(C)cc(/C=C/c2ccc(C(C#N)C#N)cc2)cc1C  
5761 C=CC(=O)OCc1cccc1.O=[N+][([O-])c1ccc(I)cc1>>O=C(/C=C/c1ccc([N+](=O)[O-])cc1)OCc1cccc1  
5762 C=CC(=O)N(C)c1cccc1.Clc1cccc1>>CN(C(=O)/C=C/c1cccc1)c1cccc1  
5763 C=Cc1ccc(OC)cc1.O=Cc1cccc1Br>>COc1ccc(/C=C/c2cccc2C=O)cc1  
5764 C=CC(=O)OCC.OCC.O=Cc1ccc(Cl)cc1Br>>CCOC(/C=C/c1cc(Cl)ccc1C=O)OCC  
5765 C=CC(=O)OCCCC.CC(C)c1cccc1I>>CCCCOC(=O)/C=C/c1cccc1C(C)C  
5766 C=CP(=O)(OCC)OCC.COc1nc2ccc(Br)cc2nc1OC>>CCOP(=O)/C=C/c1ccc2nc(OC)c(OC)nc2c1)OC  
5767 C=Cc1ccc(OC2CCCCO2)cc1.O=[N+][([O-])c1ccc(I)cc1CO>>O=[N+][([O-]  
])c1ccc(/C=C/c2ccc(OC3CCCCO3)cc2)cc1CO  
5768 C=C[C@@H]1COC(C)(C)N1C(=O)OC(C)(C)C.Ic1cccc1>>CC(C)(C)OC(=O)N1[C@H]/C=C/c2ccc  
cc2)COC1(C)C  
5769 C=CC(=O)COCCCC.CC(=O)c1ccc(I)cc1>>CCCCOCC(=O)/C=C/c1ccc(C(C)=O)cc1  
5770 C=CC(=O)OC(C)(C)C.O=S(=O)(c1ccc(Br)cc1)n1ccc2ccccc21>>CC(C)(C)OC(=O)/C=C/c1ccc(S(=O)(  
=O)n2ccc3ccccc32)cc1  
5771 C=CC(=O)OC.COc1ccc(Cl)cc1>>COC(=O)/C=C/c1ccc(OC)cc1  
5772 C=C/C=C/c1cccc1.FC(F)(F)I>>FC(F)(F)/C=C/C=C/c1cccc1  
5773 C=CCOC(C)=O.CC(C)(C)OC(=O)n1cc(I)c2ccccc21>>CC(=O)OC/C=C/c1cn(C(=O)OC(C)(C)C)c2ccc  
5774 C=CCN[C@H](C)c1cccc2ccccc12.FC(F)(F)c1ccc(Br)c1>>C[C@@H](NC/C=C/c1cccc(C(F)(F)F)c1)  
c1cccc2ccccc12  
5775 C=Cc1cccc1.Cc1cccc(C)c1Cl>>Cc1cccc(C)c1/C=C/c1cccc1  
5776 C=CC(=O)OC.COc1cc(C=O)c(Br)c(OC)c1>>COC(=O)/C=C/c1c(C=O)cc(OC)cc1OC  
5777 C=Cc1ccc(OC)cc1.CC(Br)C(=O)N1CCCC1>>COc1ccc(/C=C/C(C)C(=O)N2CCCCC2)cc1  
5778 C=CP(=O)(OCC)OCC.N#Cc1ccc(Br)cc1>>CCOP(=O)/C=C/c1ccc(C#N)cc1)OCC  
5779 C=CS(=O)(=O)F.Cc1cc(I)ccc1Br>>Cc1cc(/C=C/S(=O)(=O)F)ccc1Br  
5780 C=CC(=O)Nc1ccc(Cl)cc1.COc1ccc2c(=O)c(I)coc2c1>>COc1ccc2c(=O)c(/C=C/C(=O)Nc3ccc(Cl)cc3)  
coc2c1  
5781 C=Cc1cccc1.COc1ccc(Br)c(N)c1>>COc1ccc(/C=C/c2ccccc2)c(N)c1  
5782 C=Cc1cccc1.CC(=O)c1cccc1Cl>>CC(=O)c1cccc1/C=C/c1cccc1  
5783 C=CC(=O)N(C)C.CCN(CC)C(=O)C1CCCN(c2ccc(Br)n2)C1>>CCN(CC)C(=O)C1CCCN(c2cccc(/C=  
C/C(=O)N(C)C)n2)C1  
5784 C=Cc1cccc1.O=S1(=O)c2ccccc2C2(CN1Cc1ccc(Br)cc1)OCCO2>>O=S1(=O)c2ccccc2C2(CN1Cc1cc  
c(/C=C/c3ccccc3)cc1)OCCO2  
5785 C=CC(=O)C(C)CC(=O)OC.C=CC(C)(C)O[C@H]1COc2ccc(Br)cc2OC1(C)C>>C=CC(C)(C)O[C@H]  
1COc2ccc(/C=C/C(=O)C(C)CC(=O)OC)cc2OC1(C)C  
5786 C=Cc1cccc1.CC(C)n1nc2c(Cl)nc(I)nc21>>CC(C)n1nc2c(Cl)nc(/C=C/c3ccccc3)nc21  
5787 C=C[C@](C)(CC=C(C)C)CO[Si](c1cccc1)(c1cccc1)C(C)(C)C.COc1ccc(I)cc1>>COc1ccc(/C=C/[C  
@](C)(CC=C(C)C)CO[Si](c2ccccc2)(c2ccccc2)C(C)(C)C)cc1  
5788 C=Cc1cccc1.O=c1c(I)c(-c2ccccc2)oc2ccccc12>>O=c1c(/C=C/c2ccccc2)c(-c2ccccc2)oc2ccccc12  
5789 C=Cc1ccc(O)c(OC)c1.COc1ccc(OC)c(I)c1>>COc1ccc(OC)c(/C=C/c2ccc(O)c(OC)c2)c1  
5790 C=CC(=O)OC.COc1cccc(I)c1>>COC(=O)/C=C/c1cccc(OC)c1  
5791 C=CCCCC(=O)OC.O=S(=O)(Oc1ccc(C(=C2C3CCCC2CCC3)c2ccc(O)cc2)cc1)C(F)(F)F>>COC(=O)  
CCC/C=C/c1ccc(C(=C2C3CCCC2CCC3)c2ccc(O)cc2)cc1  
5792 C=Cc1cccc1C.Cc1cccc(N)c1Br>>Cc1cccc1/C=C/c1c(C)cccc1N  
5793 C=Cc1ccc2ccc(Cl)cc2n1.N#CCCCC(c1ccc(Br)c1)n1ccc2cccc(OCC#N)c21>>N#CCCCC(c1cccc(/C=  
C/c2ccc3ccc(Cl)cc3n2)c1)n1ccc2cccc(OCC#N)c21  
5794 C=Cc1cccc1.COc1ccc2cc(Br)ccc2c1>>COc1ccc2cc(/C=C/c3ccccc3)ccc2c1  
5795 C=CC(=O)OC(C)(C)C.O=S(=O)(c1cccc(Br)c1)n1ccc2ccccc21>>CC(C)(C)OC(=O)/C=C/c1cccc(S(=O)  
)(=O)n2ccc3ccccc32)c1  
5796 C=CC(=O)OCC.CCC(C)c1nc(C(C)CC)c(Cl)n1>>CCOC(=O)/C=C/c1nc(C(C)CC)nc1C(C)CC  
5797 C=CCNC(=O)c1cc(C)on1.CCOC(=O)c1cccc(I)c1>>CCOC(=O)c1cccc(/C=C/CNC(=O)c2cc(C)on2)c1  
C=CCc1cccc([C@H]2O[C@H](COC(C)=O)[C@@H](OC(C)=O)[C@H](OC(C)=O)[C@@H]2OC(C)  
=O)c1.CNC(=O)c1cc(I)cc(C(=O)NC)c1>>CNC(=O)c1cc(/C=C/Cc2cccc([C@H]3O[C@H](COC(C)=O  
)[C@@H](OC(C)=O)[C@H](OC(C)=O)[C@@H]3OC(C)=O)c2)cc(C(=O)NC)c1  
5799 C=CCN1C(=O)c2ccccc2C1=O.FC(F)(F)c1cccc1Br>>O=C1c2ccccc2C(=O)N1C/C=C/c1cccc1C(F)(F  
5800 C=Cc1ccc(CN(C)C)cn1.Cc1c(Nc2c(I)cncc2C#N)ccc2[nH]ccc12>>Cc1c(Nc2c(C#N)cncc2/C=C/c2ccc(  
CN(C)C)cn2)ccc2[nH]ccc12  
5801 C=Cc1cncc1.CC(=O)Nc1ccc(I)cc1>>CC(=O)Nc1ccc(/C=C/c2cncc2)cc1

5802 C=CC(=O)OC(C)(C)C.Oc1ccc(C(=C2CCCCC2)c2ccc(Br)cc2)cc1>>CC(C)(C)OC(=O)/C=C/c1ccc(C(=C2CCCCC2)c2ccc(O)cc2)cc1

5803 C=CC(=O)OC(C)(C)C.Fc1cccc(I)c1>>CC(C)(C)OC(=O)/C=C/c1cccc(F)c1

5804 C=CC(=O)O.C[Si](C)(C)CCOCn1cc(I)c(=O)[nH]c1=O>>C[Si](C)(C)CCOCn1cc(/C=C/C(=O)O)c(=O)[nH]c1=O

5805 C=Cc1ccc(C(=O)OC)cc1.Cn1cc(I)c(=O)c2ccccc21>>COC(=O)c1ccc(/C=C/c2cn(C)c3ccccc3c2=O)cc1

5806 C=Cc1ccccc1O.COc1ccccc1Br>>COc1ccccc1/C=C/c1ccccc1O

5807 C=CC(=O)OC.Cc1cccc(Br)n1>>COC(=O)/C=C/c1cccc(C)n1

5808 Br1encc2ccccc12.C=CS(C)(=O)=O>>CS(=O)(=O)/C=C/c1ncc2ccccc12

5809 C=C[C@@H](OCc1ccccc1)[C@@H](O)CCCC.COc1ccc(Br)c1>>CCCC[C@H](O)[C@@H](/C=C/c1cccc(OCOC)c1)OCc1ccccc1

5810 C=CC(=O)OC(C)(C)C.CCCCc1ccc(I)cc1>>CCCCc1ccc(/C=C/C(=O)OC(C)(C)C)cc1

5811 Br1ccccc1.C=CC(=O)N(C)OC>>CON(C)C(=O)/C=C/c1ccccc1

5812 C=CC(=O)NCc1ccc(OC)cc1.O=c1c(I)coc2cc(O)ccc12>>COc1ccc(CNC(=O)/C=C/c2coc3cc(O)ccc3c2=O)cc1

5813 C=CCN(C(=O)OC(C)(C)C)C(=O)OC(C)(C)C.O=C1CCc2cc(Cl)ccc21>>CC(C)(C)OC(=O)N(C/C=C/c1ccc2c(c1)CCC2=O)C(=O)OC(C)(C)C

5814 C=Cc1ccccc1.IC1CCCCC1>>C(=C/C1CCCCC1)\c1ccccc1

5815 C=CC(=O)O.O=S(=O)(Nc1ccc(I)cc1)c1ccccc1>>O=C(O)/C=C/c1ccc(NS(=O)(=O)c2ccccc2)cc1

5816 C=Cc1ccccc1.Cc1noc(C)c1I>>Cc1noc(C)c1/C=C/c1ccccc1

5817 C=CC(=O)O.Cc1cccc(Br)c1>>Cc1cccc(/C=C/C(=O)O)c1

5818 C=CC(C)(C)C.CC(C)(C)[Si](C)(C)O[C@@H]1C=C(Br)C2(OCCCC2)[C@H]2O[C@H]21>>CC(C)(C)/C=C/C1=C[C@@H](O[Si](C)(C)C(C)(C)C)[C@@H]2O[C@@H]2C12OCCCCO2

5819 C=CC(=O)OCC.COCC(=O)[C@]12CCC(C)(C)C[C@H]1C1=CC[C@@H]3[C@@]4(C)C=C(I)C(=O)C(C)(C)[C@@H]4CC[C@@]3(C)[C@]1(C)CC2>>CCOC(=O)/C=C/C1=C[C@@]2(C)[C@H](CC[C@@]3(C)[C@@H]2CC=C2[C@@H]4CC(C)(C)CC[C@]4(C(=O)OC)CC[C@]23C(C)(C)C1=O

5820 C=CC(=O)OC.CC(C)c1cccc(Br)c1>>COC(=O)/C=C/c1cccc(C(C)C)c1

5821 C=Cc1ccccc1.Cc1nc(Br)c2c(c1O)COC(C)(C)OC2>>Cc1nc(/C=C/c2ccccc2)c2c(c1O)COC(C)(C)OC2

5822 C=CC(=O)N(C)Cc1cc2ccccc2n1C.O=c1[nH]c2ncc(Br)cc2n1C1CC1>>CN(Cc1cc2ccccc2n1C)C(=O)/C=C/c1cnc2[nH]c(=O)n(C3CC3)c2c1

5823 C=CC(=O)OCC.Fc1cccc(Br)c1>>CCOC(=O)/C=C/c1cccc(F)c1

5824 Br1encc2ccccc12.C=CCN1C(=O)c2ccccc2C1=O>>O=C1c2ccccc2C(=O)N1C/C=C/c1encc2ccccc12

5825 C=CC(=O)OC(C)(C)C.Cc1ccc(N)c(I)c1>>Cc1ccc(N)c(/C=C/C(=O)OC(C)(C)C)c1

5826 C=CC(=O)OCc1ccccc1.CCn1nnc2c(Cl)c(Br)ccc21>>CCn1nnc2c(Cl)c(/C=C/C(=O)OCc3ccccc3)ccc21

5827 C=CC(=O)OCCCC.FC(F)(F)c1ccc(Cl)cc1>>CCCCOC(=O)/C=C/c1ccc(C(F)(F)F)cc1

5828 C=CS(C)(=O)=O.O=Cc1cccc(Br)c1>>CS(=O)(=O)/C=C/c1cccc(C=O)c1

5829 C=CC(=O)OCC.Fc1ccc(Br)cc1>>CCOC(=O)/C=C/c1ccc(F)cc1

5830 C=CS(=O)c1ccccc1.O=C(c1ccccc1)c1ccc(Br)cc1>>O=C(c1ccccc1)c1ccc(/C=C/S(=O)c2ccccc2)cc1

5831 C=CC(OC)OC.O=[N+](O-)]c1cccc(I)c1>>COC(/C=C/c1cccc([N+](=O)[O-])c1)OC

5832 C=C[C@H]1O[C@@H]2OC(C)(C)O[C@@H]2[C@H]1O.O=C1CCOc2cc(Br)ccc21>>CC1(C)O[C@H]2O[C@H](/C=C/c3ccc4c(c3)OCCC4=O)[C@H](O)[C@H]2O1

5833 C=CC(N)=O.CCOC(=O)c1ccc(I)cc1>>CCOC(=O)c1ccc(/C=C/C(N)=O)cc1

5834 C=CCCO[Si](C)(C)C(C)(C)C.CC1(c2ccccc2Br)CC(=O)C1>>CC1(c2ccccc2/C=C/CCO[Si](C)(C)C(C)(C)C)CC(=O)C1

5835 C=Cc1ccccc1.CC[C@@]1(O)C(=O)OCc2c1cc1n(c2=O)Cc2cc3c(Br)cccc3nc2-1>>CC[C@@]1(O)C(=O)OCc2c1cc1n(c2=O)Cc2cc3c(/C=C/c4ccccc4)cccc3nc2-1

5836 C=Cc1cc(OCc2ccccc2)ccc1OCc1ccccc1.O=C(NCCc1ccc(F)cc1)c1cc(I)ccc1O>>O=C(NCCc1ccc(F)cc1)c1cc(/C=C/c2cc(OCc3ccccc3)ccc2OCc2ccccc2)ccc1O

5837 C=C[C@@H](O[Si](C)(C)C(C)(C)C)[C@H](CCCC(=O)OC)O[Si](C)(C)C(C)(C)C.CCCCCC(=O)c1nc(Br)cc2ccccc12>>CCCCC(=O)c1nc(/C=C/[C@@H](O[Si](C)(C)C(C)(C)C)[C@H](CCCC(=O)OC)O[Si](C)(C)C(C)(C)C)cc2ccccc12

5838 C=Cc1ccc(OC)c(OC)c1.O=c1c(Br)c(-c2ccccc2)oc2ccccc12>>COc1ccc(/C=C/c2c(-c3ccccc3)oc3ccccc3c2=O)cc1OC

5839 C=C[Si](C)(C)c1ncccn1.Ic1ccccc1>>C[Si](C)(/C=C/c1ccccc1)c1ncccn1

5840 Br1cccc2ccccc12.C=CC(=O)OCCCC>>CCCCOC(=O)/C=C/c1cccc2ccccc12

5841 Br1ccccc1.C=CC(=O)OCC(C)C>>CC(C)COC(=O)/C=C/c1ccccc1

5842 C=C[Si](C)(C)C.O=c1ccc2ccc(O)c(I)c2o1>>C[Si](C)(C)/C=C/c1c(O)ccc2ccc(=O)oc12

5843 C=CC(=O)OC(C)(C)C.O=C1CCNc2cc(Br)enc2N1>>CC(C)(C)OC(=O)/C=C/c1enc2c(c1)NCCC(=O)N

5844 C=CCOC(C)=O.CC(C)(C)c1ccc(I)cc1>>CC(=O)OC/C=C/c1ccc(C(C)(C)C)cc1



C=Cc1nc2c(N)ncnc2n1[C@@H]1O[C@H](CO[Si](C)(C)C(C)(C)C)[C@@H](O[Si](C)(C)C(C)(C)C)[  
5845 C@H]1O[Si](C)(C)C(C)(C)C.CC(=O)c1ccc(Cl)cc1>>CC(=O)c1ccc(/C=C/c2nc3c(N)ncnc3n2[C@@H]  
2O[C@H](CO[Si](C)(C)C(C)(C)C)[C@@H](O[Si](C)(C)C(C)(C)C)[C@H]2O[Si](C)(C)C(C)(C)C)cc  
5846 C=Cc1ccc(Cl)cc1.COc1cc(C=O)c(Br)c(OC)c1OC>>COc1cc(C=O)c(/C=C/c2ccc(Cl)cc2)c(OC)c1OC  
5847 C=CC(OC)OC.COc1ccc(I)c(F)c1>>COc1ccc(/C=C/C(OC)OC)c(F)c1  
5848 C=CC(=O)NCc1ccc(F)cc1.COc1ccc2c(=O)c(I)coc2c1>>COc1ccc2c(=O)c(/C=C/C(=O)NCc3ccc(F)cc3  
)coc2c1  
5849 C=Cc1ccc(N(C)C)cc1.CCCCCCN1C(=O)c2cccc3c(Br)ccc(c23)C1=O>>CCCCCN1C(=O)c2cccc3c(/  
C=C/c4ccc(N(C)C)cc4)ccc(c23)C1=O  
5850 C=Cc1ccc(C(=O)O[C@@H]2CC[C@@@]3(C)C(CC[C@@H]4[C@@H]3CC[C@@@]3(C)[C@H]4CC[C@  
@H]3[C@H](C)CC(C)C)C2)cc1.CCOC(=O)C(F)Br>>CCOC(=O)C(F)/C=C/c1ccc(C(=O)O[C@@H  
12CC[C@@@]3(C)C(CC[C@@H]4[C@@H]3CC[C@@@]3(C)[C@H]4CC[C@@H]3[C@H](C)CC(C)C)  
5851 C=CC1CCCCC1.Cc1ccc(Br)cc1>>Cc1ccc(/C=C/C2CCCCC2)cc1  
5852 C=Cc1cccc1.Fc1cccc1Cl>>Fc1cccc1/C=C/c1cccc1  
5853 C=CCCc1cccc1.O=C(O)Cc1ccc(Br)cc1>>O=C(O)Cc1ccc(/C=C/CCc2cccc2)cc1  
5854 C=CC(=O)OC.COc1ccc(C(=C(I)CCSc2cccc2)c2ccc(OC)cc2)cc1>>COC(=O)/C=C/C(CCS c1cccc1)=  
C(c1ccc(OC)cc1)c1ccc(OC)cc1  
5855 C=CC(=O)OCc1cn(S(=O)(=O)c2cccc2[N+](=O)[O-])c2ccc([N+](=O)[O-  
])cc12.Cc1ccc(I)cc1>>Cc1ccc(/C=C/C(=O)OCc2cn(S(=O)(=O)c3cccc3[N+](=O)[O-  
])c3ccc([N+](=O)[O-])cc23)cc1  
5856 C=Cc1cccc1.CN1CCC[C@H]1COc1cncc(Br)c1>>CN1CCC[C@H]1COc1cncc(/C=C/c2cccc2)c1  
5857 C=CCC(=O)O.CC(=O)OC[C@H]1O[C@@H](Oc2cccc3occ(/C=C/c4ccc(Br)cc4)c23)[C@H](OC(C)=  
O)[C@@H](OC(C)=O)[C@@H]1OC(C)=O>>CC(=O)OC[C@H]1O[C@@H](Oc2cccc3occ(/C=C/c4c  
cc(/C=C/CC(=O)O)cc4)c23)[C@H](OC(C)=O)[C@@H](OC(C)=O)[C@@H]1OC(C)=O  
5858 C=CC(=O)CCCCC.CC(C)(C)c1ccc(Br)cc1>>CCCCC(=O)/C=C/c1ccc(C(C)(C)C)cc1  
5859 C=CC(C)(C)O.Nc1cncc(Br)c1I>>CC(C)(O)/C=C/c1c(N)cncc1Br  
5860 C=CC(=O)OC(C)(C)C.O=S(=O)(c1ccc(Br)cc1)n1ccc2cccc21>>CC(C)(C)OC(=O)/C=C/c1ccc(S(=O)(  
=O)n2ccc3cccc32)cc1  
5861 C=CC(=O)OCC.O=[N+](O-)]c1cc(Cl)ccc1Br>>CCOC(=O)/C=C/c1ccc(Cl)cc1[N+](=O)[O-]  
5862 C=Cc1ccc(Cl)cc1.CCOC(=O)C(F)(F)I>>CCOC(=O)C(F)(F)/C=C/c1ccc(Cl)cc1  
5863 C=CC(=O)OCC.Clc1ccc(C#C/C=C/c2ccc(Br)c2)cc1>>CCOC(=O)/C=C/c1cccc(/C=C/C#Cc2ccc(Cl)c  
c2)c1  
5864 C=Cc1cccc1Br.O=[N+](O-)]c1cccc1I>>O=[N+](O-)]c1cccc1/C=C/c1cccc1Br  
5865 C=Cc1cncc1Cl.COC(=O)[C@H](CCSC)NC(=O)c1ccc(I)cc1-  
c1cccc1C>>COC(=O)[C@H](CCSC)NC(=O)c1ccc(/C=C/c2cnccc2Cl)cc1-c1cccc1C  
5866 C=CC(=O)OC(C)(C)C.Cc1cc(Br)cn c1N1CCN(C(=O)OC(C)(C)C)CC1>>Cc1cc(/C=C/C(=O)OC(C)(C)  
C)cn c1N1CCN(C(=O)OC(C)(C)C)CC1  
5867 C=CC(=O)OCC.O=Cc1ccc(Cl)cc1Br>>CCOC(=O)/C=C/c1cc(Cl)ccc1C=O  
5868 C=C[Si](CC)(CC)CC.N#Cc1ccc(Br)cc1>>CC[Si](/C=C/c1ccc(C#N)cc1)(CC)CC  
5869 C=CCNC(=O)c1cccc1NC(=O)c1cccc1.Ic1cccc1>>O=C(Nc1cccc1C(=O)NC/C=C/c1cccc1)c1cccc  
5870 C=CC(=O)N(C)OC.Ic1ccc2cccc2c1>>CON(C)C(=O)/C=C/c1ccc2cccc2c1  
5871 Br c1cccc1.C=Cc1ccc(OC)cc1>>COc1ccc(/C=C/c2cccc2)cc1  
5872 C=CC(=O)C(C)COCc1cccc1.Ic1cccc1>>CC(COCc1cccc1)C(=O)/C=C/c1cccc1  
5873 C=CCCCCCCCC(=O)O.Ic1ccc2c(c1)OCCOCCOCCOCCO2>>O=C(O)CCCCCCCC/C=C/c1ccc2c(c  
1)OCCOCCOCCOCCO2  
5874 C=Cc1ccc2cccc2c1.CC(C)(C)c1ccc(Br)cc1>>CC(C)(C)c1ccc(/C=C/c2ccc3cccc3c2)cc1  
5875 C=CS(=O)(=O)NC1CCCC1.COc1ccc(Br)c(CNC(=O)OC(C)(C)C)c1>>COc1ccc(/C=C/S(=O)(=O)NC2  
CCCC2)c(CNC(=O)OC(C)(C)C)c1  
5876 C=CCC[C@H]1CCC(=O)N1CCCc1ccc(C(=O)OC(C)C)s1.FC(F)(F)c1cccc(I)c1>>CC(C)OC(=O)c1ccc  
(CCCN2C(=O)CC[C@@H]2CC/C=C/c2cccc(C(F)(F)F)c2)s1  
5877 Br c1ccsc1.C=CC(=O)OCCCC>>CCCCOC(=O)/C=C/c1ccsc1  
5878 C=CS(=O)(=O)NCCc1cccc1.CC(C)(C)OC(=O)NCCc1cccc1Br>>CC(C)(C)OC(=O)NCCc1cccc1/C  
=C/S(=O)(=O)NCCc1cccc1  
5879 C=Cc1nnn(-c2cccc2)n1.Ic1cccc1>>C(=C/c1nnn(-c2cccc2)n1)\c1cccc1  
5880 C=Cc1cccc1.CC(C)(C)c1ccc2c(-c3cccc3)c(Br)c(=O)oc2c1>>CC(C)(C)c1ccc2c(-  
c3cccc3)c(/C=C/c3cccc3)c(=O)oc2c1  
5881 C=CC(=O)OCC.CC[C@]12C=CCN3CC[C@]4(C(=C(C(=O)OC)C1)Nc1ccc(I)cc14)[C@@H]32>>CC  
OC(=O)/C=C/c1ccc2c(c1)[C@@]13CCN4CC=C[C@@](CC)(CC(C(=O)OC)=C1N2)[C@H]43  
5882 C=CC(=O)N1CCCC1.O=Cc1cc(OCc2cccc2)ccc1Br>>O=Cc1cc(OCc2cccc2)ccc1/C=C/C(=O)N1CC  
5883 C=Cc1cncc1.CCCc1cc(Br)c(F)c(C#N)c1>>CCCc1cc(C#N)c(F)c(/C=C/c2cncc2)c1  
5884 C=CS(=O)(=O)F.Cc1ccc(I)cc1>>Cc1ccc(/C=C/S(=O)(=O)F)cc1

5885 C=CC#N.O=C(c1cccc1F)c1cc(Cl)ccc1I>>N#C/C=C/c1ccc(Cl)cc1C(=O)c1cccc1F  
C=CC[C@H]1C[C@@H]([C@H](O)c2ccc(OC)c(OC)c2)CO[C@H]1c1ccc(OC)c(OC)c1.COc1ccc  
5886 (Br)cc1OC>>COc1ccc(/C=C/C[C@H]2C[C@H]([C@H](O)c3ccc(OC)c(OC)c3)CO[C@H]2c2c  
cc(OC)c(OC)c2)cc1OC  
5887 C=Cc1cccc1.O=c1c(I)c[nH]c2cccc12>>O=c1c(/C=C/c2cccc2)c[nH]c2cccc12  
5888 C=Cc1ccc(OC)cc1.COc1cc2cc(Br)c(=O)oc2cc1OC>>COc1ccc(/C=C/c2cc3cc(OC)c(OC)cc3oc2=O)cc  
5889 C=Cc1cccc(C=O)c1.CN1CCN(c2cc3c(cc2NS(C)(=O)=O)c(I)nn3C2CCCCO2)CC1>>CN1CCN(c2cc3c  
(cc2NS(C)(=O)=O)c(/C=C/c2cccc(C=O)c2)nn3C2CCCCO2)CC1  
5890 C=Cc1cccc(OC)c1.COC(=O)c1cc2cc(Br)ccc2cc1OC(C)=O>>COC(=O)c1cc2cc(/C=C/c3cccc(OC)c3)c  
cc2cc1OC(C)=O  
5891 C=Cc1ccc2cccc2c1.COc1cc(C=O)c(Br)c(OC)c1OC>>COc1cc(C=O)c(/C=C/c2ccc3cccc3c2)c(OC)c1  
5892 Br1ccc(-c2enc(C3CC3)o2)cc1.C=CC(=O)OCC>>CCOC(=O)/C=C/c1ccc(-c2enc(C3CC3)o2)cc1  
5893 C=Cc1cccc([N+](=O)[O-])c1.COC(=O)c1cccc1I>>COC(=O)c1cccc1/C=C/c1ccc([N+](=O)[O-])c1  
5894 Br1cccs1.C=Cc1cc(OC)cc(OC)c1>>COc1cc(/C=C/c2cccs2)cc(OC)c1  
5895 C=CCN1C(=O)c2cccc2C1=O.CC(=O)c1ccc(Br)cc1>>CC(=O)c1ccc(/C=C/CN2C(=O)c3cccc3C2=O  
5896 C=Cc1cccc1.O=c1cc(-c2cccc2)oc2cc(Br)ccc12>>O=c1cc(-c2cccc2)oc2cc(/C=C/c3cccc3)ccc12  
5897 C=CC(=O)OC(C)(C)C.O=C1Nc2ncc(Br)cc2CN1CCN1CCOCC1>>CC(C)(C)OC(=O)/C=C/c1cnc2c(c1  
)CN(CCN1CCOCC1)C(=O)N2  
5898 C=CC(=O)OC.O=[N+](O-)]c1ccc(I)cc1>>COC(=O)/C=C/c1ccc([N+](=O)[O-])cc1  
5899 C=CC(=O)OCC.CS(=O)(=O)N1CCC(C2c3ccc(Cl)cc3C=C(Br)c3ccenc32)CC1>>CCOC(=O)/C=C/C1  
=Cc2cc(Cl)ccc2C(C2CCN(S(C)(=O)=O)CC2)c2ncccc21  
5900 C=CC(=O)[C@@]1(O)C[C@H]2CC[C@]1(C)C2(C)C.Cc1ccc(I)cc1>>Cc1ccc(/C=C/C(=O)[C@@]2(  
O)C[C@H]3CC[C@]2(C)C3(C)C)cc1  
5901 C=CCc1ccc(OCCNC(=O)OC(C)(C)C)c(OC)c1.O=C(O)/C=C/c1cccc1Br>>COc1cc(C/C=C/c2cccc2/  
C=C/C(=O)O)ccc1OCCNC(=O)OC(C)(C)C  
5902 C=Cc1ccc2cccc2c1.COC(=O)c1ccc(OCc2cccc2)cc1OS(=O)(=O)C(F)(F)F>>COC(=O)c1ccc(OCc2cc  
ccc2)cc1/C=C/c1ccc2cccc2c1  
5903 C=CCN(C(=O)OC(C)(C)C)C(=O)OC(C)(C)C.O=C1CCCc2ccc(Br)cc21>>CC(C)(C)OC(=O)N(C/C=C/  
c1ccc2c(c1)C(=O)CCC2)C(=O)OC(C)(C)C  
5904 C=Cc1cccc1.COc1ccc(N)c(Br)c1>>COc1ccc(N)c(/C=C/c2cccc2)c1  
5905 C=CC(=O)OC.COc1c(CN(C(=O)c2cccc2)c2cccc(Br)c2)ccc2c1OC(C)(C)[C@H](O)[C@H]2N1CCCC  
C1>>COC(=O)/C=C/c1ccc(N(Cc2ccc3c(c2OC)OC(C)(C)[C@H](O)[C@H]3N2CCCCC2)C(=O)c2cc  
5906 C=CCO[Si](C)(C)C(C)(C)C.O=Cc1ccc(Br)cc1>>CC(C)(C)[Si](C)(C)OC/C=C/c1ccc(C=O)cc1  
5907 C=Cc1cccc1.C[Si](C)(Cl)c1cccc1>>C[Si](C)(/C=C/c1cccc1)c1cccc1  
5908 C=CCCP(=O)(OC)OC.COc1ccc(I)cc1>>COc1ccc(/C=C/CCP(=O)(OC)OC)cc1  
5909 C=CC(=O)OC.CS(=O)(=O)Nc1ccc(I)cc1F>>COC(=O)/C=C/c1ccc(NS(C)(=O)=O)c(F)c1  
5910 C=COCCCC.O=c1cc(Br)c2cc(Cl)ccc2o1>>CCCCO/C=C/c1cc(=O)oc2ccc(Cl)cc12  
5911 C=CC(=O)OC.CC(C)(C)[Si](C)(C)OC[C@H]1O[C@H](c2ccc(Br)cc2)C=C[C@H]1O[Si](C)(C)C(C  
)(C)C>>COC(=O)/C=C/c1ccc([C@H]2C=C[C@H](O[Si](C)(C)C(C)(C)C)[C@H](CO[Si](C)(C)C  
(C)(C)C)O2)cc1  
5912 C=Cc1ccc(C)cc1C.C[Si](C)(C)I>>Cc1ccc(/C=C/[Si](C)(C)C)c(C)c1  
5913 C=CC(=O)OCC.CC1(C)CC(=C(c2ccc(Br)cc2)c2ccc(O)c(F)c2)CC(C)(C)C1>>CCOC(=O)/C=C/c1ccc(  
C(=C2CC(C)(C)CC(C)(C)C2)c2ccc(O)c(F)c2)cc1  
5914 C=Cc1cccc1.Cn1cc(I)c(=O)c2cccc21>>Cn1cc(/C=C/c2cccc2)c(=O)c2cccc21  
5915 C=CCN(C(=O)C(F)(F)F)c1cccc1C#Cc1cccc1.COc1ccc(I)cc1>>COc1ccc(/C=C/CN(C(=O)C(F)(F)F  
c2cccc2C#Cc2cccc2)cc1  
5916 C=C(Br)CC.C=CC(=O)CCCC>>C=C(/C=C/C(=O)CCCC)CC  
5917 C=Cc1ccc2ccc(Cl)cc2n1.CC(C)(O)c1cccc1CC[C@H](SCC1(CC(=O)O)CC1)c1cccc(Br)c1>>CC(C  
)(O)c1cccc1CC[C@H](SCC1(CC(=O)O)CC1)c1cccc(/C=C/c2ccc3ccc(Cl)cc3n2)c1  
5918 C=CC(=O)OC.COc1ccc(S(=O)(=O)N(C)c2ccc(I)c3cnn(C)c23)cc1>>COC(=O)/C=C/c1ccc(N(C)S(=O)  
(=O)c2ccc(OC)cc2)c2c1cnn2C  
5919 C=Cc1ccc(C(=O)OC)cc1.CCCCC(Br)C(F)(F)F>>CCCCC(/C=C/c1ccc(C(=O)OC)cc1)C(F)(F)F  
5920 C=Cc1ccc(OC(C)=O)cc1.COc1c(Br)ccc2c(OC)c(/C=C/c3cenc3)ccc12>>COc1c(/C=C/c2cenc2)ccc2  
c(OC)c(/C=C/c3ccc(OC(C)=O)cc3)ccc12  
5921 C=CC(=O)NCCCCC.COc1ccc(-c2oc3cc(OC)ccc3c(=O)c2I)cc1>>CCCCCNC(=O)/C=C/c1c(-  
c2ccc(OC)cc2)oc2cc(OC)ccc2c1=O  
5922 C=CCOC(C)=O.O=[N+](O-)]c1cccc([I+])c2cccc([N+](=O)[O-]  
)]c2)c1>>CC(=O)OC/C=C/c1cccc([N+](=O)[O-])c1  
5923 C=Cc1cccc1Cl.COC(=O)c1cccc1I>>COC(=O)c1cccc1/C=C/c1cccc1Cl  
5924 C=Cc1ccc(/C=C/c2ccc(N(c3cccc3)c3cccc4cccc34)cc2)cc1.O=Cc1ccc(Br)s1>>O=Cc1ccc(/C=C/c2cc  
c(/C=C/c3ccc(N(c4cccc4)c4cccc5cccc45)cc3)cc2)s1

5925 C=Cc1ccc(OC)cc1.O=[N+](=[O-])c1ccc(Br)cc1>>COc1ccc(/C=C/c2ccc([N+](=O)[O-])cc2)cc1  
5926 C=Cc1ccc(CN2CCN(C)CC2)en1.Cc1c(Nc2c(I)encc2C#N)cc(Cl)c2[nH]ccc12>>Cc1c(Nc2c(C#N)encc2/C=C/c2ccc(CN3CCN(C)CC3)en2)cc(Cl)c2[nH]ccc12  
5927 C=CC(=O)OC.Ic1cccc2ccccc12>>COC(=O)/C=C/c1cccc2ccccc12  
5928 C=Cc1ccccc1.Nc1cccc(Br)c1>>Nc1cccc(/C=C/c2ccccc2)c1  
5929 C=CC(=O)OC.CCOC(=O)c1cn(CC)c2nc(C)c(Br)cc2c1=O>>CCOC(=O)c1cn(CC)c2nc(C)c(/C=C/C(=O)OC)cc2c1=O  
5930 C=CC(=O)N(C)Cc1oc2ccccc2c1C.CC(C)(C)OC(=O)N1CCN(c2cc3cc(Br)enc3[nH]c2=O)CC1>>Cc1c(CN(C)C(=O)/C=C/c2enc3[nH]c(=O)c(N4CCN(C(=O)OC(C)(C)C)CC4)cc3c2)oc2ccccc12  
5931 Br1ccccc1I.C=Cc1ccc2ccccc2c1>>Br1ccccc1/C=C/c1ccc2ccccc2c1  
5932 C=CC(N)=O.Cc1nc2cc(-c3ccccc3)c(-c3ccc(C4(NC(=O)OC(C)(C)C)CCC4)cc3)nn2c1Br>>Cc1nc2cc(-c3ccccc3)c(-c3ccc(C4(NC(=O)OC(C)(C)C)CCC4)cc3)nn2c1/C=C/C(N)=O  
5933 C=CC(=O)OCc1ccccc1.Fc1cc(Br)ccc1N1CCOCC1>>O=C(/C=C/c1ccc(N2CCOCC2)c(F)c1)OCc1ccccc1  
5934 C=COCCCC.O=c1cc(Br)c2ccc(Cl)cc2[nH]1>>CCCCO/C=C/c1cc(=O)[nH]c2cc(Cl)ccc12  
5935 C=Cc1cenc1.CCOc1ccc(Br)c(F)c1>>CCOc1ccc(/C=C/c2cenc2)c(F)c1  
5936 C=Cc1ccccc1.Cc1ccc2c(-c3ccc(Cl)cc3)c(Br)c(=O)oc2c1>>Cc1ccc2c(-c3ccc(Cl)cc3)c(/C=C/c3ccccc3)c(=O)oc2c1  
5937 C=C[C@H](COC(C)=O)NS(C)=O.O.CC(=O)Oc1ccc(I)cc1>>CC(=O)OC[C@H](/C=C/c1ccc(OC(C)=O)cc1)NS(C)=O  
5938 Br1ccccc1.C=CC[C@H]1CCCN(C)C[C@H](OC(C)=O)[C@H](C)C[C@H](CC(OC)OC)[C@H](O)[C@H]2O[C@H](C)[C@H](O[C@H]3C[C@H](C)(O)[C@H](OC(=O)CC)[C@H](C)O3)[C@H](N(C)C)[C@H]2OC(C)=O)[C@H](OC)[C@H](OC(=O)CC)CC(=O)O1>>CCC(=O)O[C@H]1[C@H](C)O[C@H](O[C@H]2[C@H](N(C)C)[C@H](OC(C)=O)[C@H](O[C@H]3[C@H](OC)[C@H](OC(=O)CC)CC(=O)O[C@H](C/C=C/c4ccccc4)CCCN(C)C[C@H](OC(C)=O)[C@H](C)C[C@H]3C[C@H](OC)N(C)O[C@H]2C[C@H](O[C@H]1C)O  
5939 C=CC(=O)OC(C)(C)C.Oc1ccc(C=C2CCCCC2)c2ccc(Br)c(F)c2)cc1>>CC(C)(C)OC(=O)/C=C/c1ccc(C=C2CCCCC2)c2ccc(O)cc2)cc1F  
5940 C=C(Br)CCO.C=Cc1ccccc1>>C=C(/C=C/c1ccccc1)CCO  
5941 Br1cccs1.C=Cc1ccc(C(=O)O)cc1>>O=C(O)c1ccc(/C=C/c2cccs2)cc1  
5942 C=Cc1ccc2c(c1)Sc1ccccc1N2CCCC.CCCCN1c2ccc(Br)cc2Sc2cc(-c3nc4ccccc4n3-c3ccccc3)ccc21>>CCCCN1c2ccccc2Sc2cc(/C=C/c3ccc4c(c3)Sc3cc(-c5nc6ccccc6n5-c5ccccc5)ccc3N4CCCC)ccc21  
5943 Br1ccccc1.C=CC(C)=O>>CC(=O)/C=C/c1ccccc1  
5944 C=CC1CCCCC1.Cc1nc(-c2ccc(I)cc2)sc1-c1cenc(N)n1>>Cc1nc(-c2ccc(/C=C/C3CCCCC3)cc2)sc1-c1cenc(N)n1  
5945 C=CC(C)=O.O=C(c1ccccc1)c1ccc(Br)cc1>>CC(=O)/C=C/c1ccc(C(=O)c2ccccc2)cc1  
5946 Br1c(-c2ccccc2)nc2cccn12.C=CC(=O)OC>>COC(=O)/C=C/c1c(-c2ccccc2)nc2cccn12  
5947 C=Cc1ccc(OCc2ccccc2)cc1.Nc1nc(N)c2cc(I)ccc2n1>>Nc1nc(N)c2cc(/C=C/c3ccc(OCc4ccccc4)cc3)cc1  
5948 C=CC(=O)OCCCC.COc1ccc2ncc(F)c(Br)c2n1>>CCCCOC(=O)/C=C/c1c(F)enc2ccc(OC)nc12  
5949 C=CC(=O)OC(C)(C)C.O=[N+](=[O-])c1ccc(I)cc1>>CC(C)(C)OC(=O)/C=C/c1ccc([N+](=O)[O-])cc1  
5950 C=C/C=C/c1ccccc1.COc1ccc(OC(C)=O)c(I)c1>>COc1ccc(OC(C)=O)c(/C=C/C=C/c2ccccc2)c1  
5951 C=CC(=O)OC(C)(C)C.COc1ccc(CCC(=O)Oc2ccc(I)cc2CC=C(C)C)cc1>>COc1ccc(CCC(=O)Oc2ccc(/C=C/C(=O)OC(C)(C)C)cc2CC=C(C)C)cc1  
5952 C=CCCCCCC(=O)OC.O=[N+](=[O-])c1ccc(Br)cc1>>COC(=O)CCCCC/C=C/c1ccc([N+](=O)[O-])cc1  
5953 C=CC[C@H]1CC2(OCCO2)[C@H](C)[C@H](c2ccccc2)N1C(=O)OCc1ccccc1.COc1cc(Br)nc(OC)n1>>COc1cc(/C=C/C[C@H]2CC3(OCCO3)[C@H](C)[C@H](c3ccccc3)N2C(=O)OCc2ccccc2)nc(O  
5954 C=CC(=O)OCC.N#Cc1ccccc1Br>>CCOC(=O)/C=C/c1ccccc1C#N  
5955 C=CC1CC(=O)N1.Cc1ccccc1I>>Cc1ccccc1/C=C/C1CC(=O)N1  
5956 C=Cc1cc(OC)cc(OC)c1.Ic1ccc(OCc2ccccc2)cc1>>COc1cc(/C=C/c2ccc(OCc3ccccc3)cc2)cc(OC)c1  
5957 C=CCCN1C(=O)c2ccccc2C1=O.O=C(O)c1ccc(I)cc1O>>O=C(O)c1ccc(/C=C/CCN2C(=O)c3ccccc3C2=O)cc1O  
5958 C=CC(=O)OC(C)(C)C.O=Cc1cc(F)ccc1Br>>CC(C)(C)OC(=O)/C=C/c1ccc(F)cc1C=O  
5959 C=CC(C)=O.COc1ccc(Br)cc1>>COc1ccc(/C=C/C(C)=O)cc1  
5960 C=CC(=O)OC(C)(C)C.CCC(C(=O)c1ccc(Br)cc1)c1ccc(F)cc1Cl>>CCC(C(=O)c1ccc(/C=C/C(=O)OC(C)(C)C)cc1)c1ccc(F)cc1Cl  
5961 Br1ccccc1.C=Cc1ccc(C=O)cc1>>O=Cc1ccc(/C=C/c2ccccc2)cc1  
5962 C=CCO[Si](C)(C)C(C)(C)C.CC(C)(C)c1ccc(Br)cc1>>CC(C)(C)c1ccc(/C=C/CO[Si](C)(C)C(C)(C)C)c  
5963 C=CC=O.Clc1ccccc1>>O=C/C=C/c1ccccc1  
5964 C=CC(=O)N1CCOCC1.O=C(C=P(c1ccccc1)(c1ccccc1)c1ccc(I)cc1>>O=C(C=P(c1ccccc1)(c1ccccc1)c1ccccc1)c1ccc(/C=C/C(=O)N2CCOCC2)cc1

5965 C=CC(=O)OC.CN1CCc2c(c3ccccc3n2Cc2ccc(Br)cc2)C1>>COC(=O)/C=C/c1ccc(Cn2c3c(c4ccccc42)CN(C)CC3)cc1

5966 C=CC(=O)OCC.CCOC(=O)c1cc(-c2ccccc2)n(-c2ccc(I)cc2)c1C(=O)c1ccccc1>>CCOC(=O)/C=C/c1ccc(-n2c(-C=CC(C)(C)O.Cc1ccc(Br)cc1>>Cc1ccc(/C=C/C(C)(C)O)cc1

5967 C=CC(=O)OCC.COCOCc1cccc(Br)c1>>CCOC(=O)/C=C/c1cccc(COCOC)c1

5968 C=CC(=O)OCC.CCOC(=O)c1ccc(Br)cc1>>CCOC(=O)/C=C/c1cccc(COCOC)c1

5969 C=CS(C)(=O)=O.CC(=O)c1ccc(Br)cc1>>CC(=O)c1ccc(/C=C/S(C)(=O)=O)cc1

5970 C=Cc1ccc(C#N)cc1.N[C@@H](Cc1c[nH]c2ccc(Br)cc12)C(=O)O>>N#Cc1ccc(/C=C/c2ccc3[nH]cc(C[C@@H](N)C(=O)O)c3c2)cc1

5971 C=CC(OC)OC.IC1CCCCC1>>COC(/C=C/C1CCCCC1)OC

5972 C=CC(N)=O.Cc1nc(Br)c2c(c1O)COC(C)(C)OC2>>Cc1nc(/C=C/C(N)=O)c2c(c1O)COC(C)(C)OC2

5973 Br1enc2ccccc2c1.C=CC(=O)CC>>CCC(=O)/C=C/c1enc2ccccc2c1

5974 CCOC(=O)c1cccc(I)c1.[11CH2]=Cc1ccccc1>>CCOC(=O)c1cccc(/[11CH]=C/c2ccccc2)c1

5975 C=CS(=O)(=O)c1ccccc1.CC(=O)c1ccc(Br)cc1>>CC(=O)c1ccc(/C=C/S(=O)(=O)c2ccccc2)cc1

5976 C=CC(=O)OC(C)(C)C.Ic1cccn1>>CC(C)(C)OC(=O)/C=C/c1cccn1

5977 C=Cc1cccn1.CCCCCCCC0c1ccc(Br)cc1F>>CCCCCCCC0c1ccc(/C=C/c2ccncc2)cc1F

5978 C=CC(OC)OC.N#Cc1ccc(I)cc1>>COC(/C=C/c1ccc(C#N)cc1)OC

5979 C=Cc1ccc(N)cc1.Cc1ccc(Br)cc1>>Cc1ccc(/C=C/c2ccc(N)cc2)cc1

5980 C=CC(N)=O.Ic1ccncc1>>NC(=O)/C=C/c1ccncc1

5981 C=CB1OC(C)CC(C)(C)O1.COC(=O)CC[C@H]1CN(S(=O)(=O)c2ccccc(C(F)(F)F)c2)c2cc(Br)ccc2O1>>COC(=O)CC[C@H]1CN(S(=O)(=O)c2ccccc(C(F)(F)F)c2)c2cc(/C=C/B3OC(C)CC(C)(C)O3)ccc2O1

5982 C=CC1CC(OC)=CC(=O)O1.COc1ccc(I)cc1>>COC1=CC(=O)OC(/C=C/c2ccc(OC)cc2)C1

5983 C=Cc1ccc(F)cc1.CCCCC(I)C(F)(F)C(=O)OCC>>CCCCC(/C=C/c1ccc(F)cc1)C(F)(F)C(=O)OCC

5984 C=CC(=O)OC.C[C@]12CC[C@H]3c4cc(I)c(O)cc4CC[C@H]3[C@@H]1CC[C@H]2O>>COC(=O)/C=C/c1cc2c(cc1O)CC[C@@H]1[C@@H]2CC[C@]2(C)[C@@H](O)CC[C@H]12

5985 Br1ccsc1.C=Cc1ccncc1>>C(=C/c1ccsc1)c1ccncc1

5986 C=CC(=O)OC.Ic1ccc2c(c1)Cc1ccccc1-2>>COC(=O)/C=C/c1ccc2c(c1)Cc1ccccc1-2

5987 Br1enc2ccccc2c1.C=CCO[C@]1(C)C[C@@H](C)C2=NCCN3C(=O)O[C@](C)([C@@H](CC)OC(=O)[C@H](C)C(=O)[C@H](C)[C@H]1O[C@@H]1O[C@H](C)C[C@H](N(C)C)[C@H]1O)[C@H]3[C@H]2C>>CC[C@H]1OC(=O)[C@H](C)C(=O)[C@H](C)[C@@H](O[C@@H]2O[C@H](C)C[C@H](N(C)C)[C@H]2O)[C@](C)(OC/C=C/c2enc3ccccc3c2)C[C@@H](C)C2=NCCN3C(=O)O[C@]1(C)C[C@@H]1O[C@H]1C

5988 C=CC(=O)OC.Ic1cccn1>>COC(=O)/C=C/c1cccn1

5989 C=CC(=O)OC.COc1ccc2c(c1)CCN(c1ccc(C(C)(C)C)cc1)C2(C)c1ccc(Br)cc1>>COC(=O)/C=C/c1ccc(C2(C)c3ccc(OC)cc3CCN2c2ccc(C(C)(C)C)cc2)cc1

5990 C=CC(=O)N(C)Cc1sc2ccccc2c1C.CC1(C)C(=O)Nc2ncc(Br)cc21>>Cc1c(CN(C)C(=O)/C=C/c2enc3c(c2)C(C)(C)C(=O)N3)sc2ccccc12

5991 C=Cc1cc(C)c(OCOCCOC)c(C)c1.COc1ccc2c(C)c(Br)c(=O)oc2c1>>COCCOCOc1c(C)cc(/C=C/c2c(C)c3ccc(OC)cc3oc2=O)cc1C

5992 C=CC(=O)OC(C)(C)C.CC(=O)Nc1cc(Cl)c(F)cc1Br>>CC(=O)Nc1cc(Cl)c(F)cc1/C=C/C(=O)OC(C)(C)C=CC(=O)OCCCC.O=C1Nc2ccccc2CN1c1cc(OCc2nccccc2F)ccc1Br>>CCCCOC(=O)/C=C/c1ccc(OCc2nccccc2F)cc1N1Cc2ccccc2NC1=O

5993 C=CC(=O)OCC.COc1cc(Br)cncc1[N+](=O)[O-]>>CCOC(=O)/C=C/c1cncc([N+](=O)[O-])c(OC)c1

5994 C=CCNC(=O)c1ccc(F)cc1NC(=O)c1ccc(OC)cc1.Ic1ccccc1>>COc1ccc(C(=O)Nc2cc(F)ccc2C(=O)NC/C=C/c2ccccc2)cc1

5995 C=CCN1C(=O)C2(CCCC2)NC[C@@]1(C)c1cc(F)cc(F)c1.O=C1Nc2nccccc2[C@@]12Cc1cc(Br)cncc1C2>>C[C@@]1(c2cc(F)cc(F)c2)CNC2(CCCC2)C(=O)N1C/C=C/c1enc2c(c1)C[C@@]1(C2)C(=O)NcC=CC(=O)OCCCC.OCc1cccc(I)c1>>CCCCOC(=O)/C=C/c1cccc(CO)c1

5996 C=Cc1ccc(Cl)cc1.O=C(O)c1ccc(Br)cc1F>>O=C(O)c1ccc(/C=C/c2ccc(Cl)cc2)cc1F

5997 C=CC(=O)OCC.Ic1cnm(C2CCCCO2)c1>>CCOC(=O)/C=C/c1cnm(C2CCCCO2)c1

5998 C=CC(=O)OCC.COCOCc1ccc2cc(Br)ccc2c1-c1c(OC)ccc2ccccc12>>CCCCOC(=O)/C=C/c1ccc2c(-c3c(OC)ccc4ccccc34)c(OCOC)ccc2c1

6000 BrC1=CCCCC12OCCO2.C=CC(=O)OC>>COC(=O)/C=C/C1=CCCCC12OCCO2

6001 C=Cc1cnccn1.Cc1cc2c(cc1[N+](=O)[O-])c(I)nn2C1CCCCO1>>Cc1cc2c(cc1[N+](=O)[O-])c(/C=C/c1cnccn1)nn2C1CCCCO1

6002 C=CC(=O)OCc1ccccc1.COC(=O)CC1(CC(=O)OC)CC(c2cc(OCc3ccccc3)ccc2Br)=NO1>>COC(=O)CC1(CC(=O)OC)CC(c2cc(OCc3ccccc3)ccc2/C=C/C(=O)OCc2ccccc2)=NO1

6003 C=CC(=O)OC(C)(C)C.COc1ccc(-c2sc3cc(OC)ccc3c2C(=O)c2ccc(Br)cc2)cc1>>COc1ccc(-c2sc3cc(OC)ccc3c2C(=O)c2ccc(/C=C/C(=O)OC(C)(C)C)cc2)cc1

6004 C=Cc1ccc(OC)cc1.CCCCC(Br)C(F)(F)F>>CCCCC/C=C/c1ccc(OC)cc1)C(F)(F)F

6005 C=CC(=O)OCC.O=C1Nc2ccc(Br)cc2C1=O>>CCOC(=O)/C=C/c1ccc2c(c1)C(=O)C(=O)N2

6006

6007 C=Cc1cccc(OC)c1.C[Si](C)(C)I>>COc1cccc(/C=C/[Si](C)(C)C)c1  
6008 C=Cc1ccc(C)cc1.CC(=O)NS(=O)(=O)c1ccc(Br)cc1>>CC(=O)NS(=O)(=O)c1ccc(/C=C/c2ccc(C)cc2)c  
6009 C=Cc1ccccn1.CC(=O)OCC1Cn2c3cccc3c3c4c(c5c6cc(Br)ccc6n(c5c32)C1)C(=O)N(C(C)=O)C4>>C  
6010 C(=O)OCC1Cn2c3cccc3c3c4c(c5c6cc(/C=C/c7ccccn7)ccc6n(c5c32)C1)C(=O)N(C(C)=O)C4  
6011 C=Cc1cccc1.[O-][N+](=Nc1ccc(Br)cc1)c1cccc1>>[O-][N+](=Nc1ccc(/C=C/c2cccc2)cc1)c1cccc1  
6012 C=CC(C)=O.O=c1oc(Br)cc2cccc12>>CC(=O)/C=C/c1cc2cccc2c(=O)o1  
6013 C=Cc1cc(OC)c(OC)c(OC)c1-  
6014 c1ccc2c(c1)OCO2.COc1ccc(I)cc1>>COc1ccc(/C=C/c2cc(OC)c(OC)c(OC)c2-c2ccc3c(c2)OCO3)cc1  
6015 C=CC(=O)OC.Oc1ccc(Br)cc1Cl>>COC(=O)/C=C/c1ccc(O)c(Cl)c1  
6016 C=Cc1ccc(N(c2ccc(OCCCCC)cc2)c2ccc(OCCCCC)cc2)cc1.O=Cc1ccc(Br)cc1>>CCCCCOc1ccc(  
6017 N(c2ccc(/C=C/c3ccc(C=O)cc3)cc2)c2ccc(OCCCCC)cc2)cc1  
6018 C=CC(=O)OCC.Clc1cccc2cccc12>>CCOC(=O)/C=C/c1cccc2cccc12  
6019 C=CC(=O)OC.CC(C)(C)OC(=O)N1CCC(Cc2nc3ncc(Br)cc3o2)CC1>>COC(=O)/C=C/c1cnc2nc(CC3  
6020 CCN(C(=O)OC(C)(C)C)CC3)oc2c1  
6021 Brc1ccc(I)cc1.C=CS(=O)(=O)F>>O=S(=O)(F)/C=C/c1ccc(Br)cc1  
6022 C=Cc1ccc(CN2CCN(C(=O)OC(C)(C)C)CC2)en1.Cc1c(Nc2c(I)cncc2C#N)ccc2[nH]ccc12>>Cc1c(Nc2  
6023 c(C#N)cncc2/C=C/c2ccc(CN3CCN(C(=O)OC(C)(C)C)CC3)en2)ccc2[nH]ccc12  
6024 C=Cc1cc(OC)c(OC)c(OC)c1.O=[N+](O-)]c1ccc(I)cc1>>COc1cc(/C=C/c2ccc([N+](=O)[O-  
6025 ])cc2)cc(OC)c1OC  
6026 C=CP(=O)(OCC)OCC.COc1cccc1Br>>CCOP(=O)(/C=C/c1cccc1OC)OCC  
6027 C=Cc1ccc(C)cc1.Clc1cccc1>>Cc1ccc(/C=C/c2cccc2)cc1  
6028 C=CC.O=[N+](O-)]c1ccc(Br)cc1>>C/C=C/c1ccc([N+](=O)[O-])cc1  
6029 C=CC(=O)OC.COc1ccc(S(=O)(=O)N2CCc3cc(Br)cc(OCc4cccc4)c32)cc1>>COC(=O)/C=C/c1cc2c(c  
6030 (OCc3cccc3)c1)N(S(=O)(=O)c1ccc(OC)cc1)CC2  
6031 C=CC(=O)OCC.COc1ccc(Oc2cccc(Br)c2)cc1>>CCOC(=O)/C=C/c1cccc(Oc2ccc(OC)cc2)c1  
6032 C=CC(=O)OC(C)(C)C.Nc1ncc(I)c2scc(Br)c12>>CC(C)(C)OC(=O)/C=C/c1cnc(N)c2c(Br)esc12  
6033 Brc1ccc2cccc2c1.C=Cc1nc2c(N)ncnc2n1[C@H]1C[C@H](O[Si](C)(C)C(C)(C)C)[C@H](CO[Si](  
6034 C)(C)C(C)(C)C)O1>>CC(C)(C)[Si](C)(C)OC[C@H]1O[C@H](n2c(/C=C/c3ccc4cccc4c3)nc3c(N)n  
6035 cnc32)C[C@H]1O[Si](C)(C)C(C)(C)C  
6036 C=CC(=O)OCC(CC)CCCC.Ic1cccc1>>CCCCC(CC)COC(=O)/C=C/c1cccc1  
6037 C=CC=O.FC1(F)C(I)=C1c1cccc1>>O=C/C=C/C1=C(c2cccc2)C1(F)F  
6038 C=COCC.Cc1ccc(I)cc1>>CCO/C=C/c1ccc(C)cc1  
6039 C=CC(=O)C1=CN(CC(C)C)CCC1(C)C.COc1ccc(Br)cc1>>COc1ccc(/C=C/C(=O)C2=CN(CC(C)C)CC  
6040 C2(C)C)cc1  
6041 C=CC(=O)OC(C)(C)C.O=CNc1cccc1I>>CC(C)(C)OC(=O)/C=C/c1cccc1NC=O  
6042 C=Cc1cccc1.Cc1cc2c(C)c(Nc3c(I)cncc3C#N)ccc2[nH]1>>Cc1cc2c(C)c(Nc3c(C#N)cncc3/C=C/c3ccc  
6043 cc3)ccc2[nH]1  
6044 C=CC(=O)OCC.FC(F)(F)c1cc(I)ccc1Br>>CCOC(=O)/C=C/c1ccc(Br)c(C(F)(F)F)c1  
6045 C=CC(=O)OCC.C[Si](C)(C)c1cncc1Br>>CCOC(=O)/C=C/c1cncc1[Si](C)(C)C  
6046 C=CC(C)(C)C(=O)NC(C)(C)CO.CC(=O)OC[C@H]1O[C@H](c2cc(Cc3ccc(Br)cc3C)c(C)cc2C)[C  
6047 @H](OC(C)=O)[C@H](OC(C)=O)[C@H]1OC(C)=O>>CC(=O)OC[C@H]1O[C@H](c2cc(Cc3  
6048 ccc(/C=C/C(C)(C)C(=O)NC(C)(C)CO)cc3C)c(C)cc2C)[C@H](OC(C)=O)[C@H](OC(C)=O)[C@H]  
6049 C=CN1C(=O)c2cccc2C1=O.Ic1ccc2c(c1)OCCOCCOCCOCCO2>>O=C1c2cccc2C(=O)N1/C=C/c1c  
6050 cc2c(c1)OCCOCCOCCOCCO2  
6051 C=CC(=O)CC.Cc1ccc(Br)cc1>>CCC(=O)/C=C/c1ccc(C)cc1  
6052 C=Cc1cccs1.O=[N+](O-)]c1ccc(Br)cc1>>O=[N+](O-)]c1ccc(/C=C/c2cccs2)cc1  
6053 C=CS(=O)(=O)c1cccc1.COc1ccc(Br)cc1>>COc1ccc(/C=C/S(=O)(=O)c2cccc2)cc1  
6054 C=CC(=O)O.O=c1[nH]ccc2c(I)ccc12>>O=C(O)/C=C/c1cccc2c(=O)[nH]ccc12  
6055 C=CC(OC(C)=O)c1cccc1.Ic1cccc1>>CC(=O)OC(/C=C/c1cccc1)c1cccc1  
6056 C=CC(=O)OC(C)(C)C.Oc1cc(F)ccc1Br>>CC(C)(C)OC(=O)/C=C/c1ccc(F)cc1O  
6057 C=Cc1cccc1.CCC(C)c1enc(C(C)CC)c(Cl)n1>>CCC(C)c1enc(C(C)CC)c(/C=C/c2cccc2)n1  
6058 C=CC(=O)OCC.CC(C)c1nn(-c2cncn2)c(-c2ccc(F)cc2)c1Br>>CCOC(=O)/C=C/c1c(C(C)C)nn(-  
6059 c2cncn2)c1-c1ccc(F)cc1  
6060 C=CC(=O)OC.O=[N+](O-)]c1ccc(C2=C(I)C2(F)F)cc1>>COC(=O)/C=C/C1=C(c2ccc([N+](=O)[O-  
6061 ])cc2)C1(F)F  
6062 Brc1sc2cccc12.C=CC(=O)OC(C)(C)C>>CC(C)(C)OC(=O)/C=C/c1sc2cccc12  
6063 C=Cc1ccc(C(C)(C)C)cc1.O=[N+](O-)]c1ccc(I)cc1>>CC(C)(C)c1ccc(/C=C/c2ccc([N+](=O)[O-  
6064 C=Cc1cccc1.CCCCCCCCCCCCBr>>CCCCCCCCCCCC/C=C/c1cccc1  
6065 C=CC(=O)OCC.Cc1cc(N)nc1Br>>CCOC(=O)/C=C/c1cnc(N)cc1C  
6066 Brc1ccc(-c2cccc2)cc1.C=CC(=O)OC>>COC(=O)/C=C/c1ccc(-c2cccc2)cc1

6051 C=CC=O.CS(=O)(=O)Oc1ccc(I)c([N+](=O)[O-])c1>>CS(=O)(=O)Oc1ccc(/C=C/C=O)c([N+](=O)[O-]  
6052 C=Cc1ccncc1.O=S(=O)(c1ccc(Br)cc1)C(F)(F)C(F)(F)C(F)(F)C(F)(F)C(F)(F)C(F)(F)C(F)(F)C(F)(F)F>  
>O=S(=O)(c1ccc(/C=C/c2ccncc2)cc1)C(F)(F)C(F)(F)C(F)(F)C(F)(F)C(F)(F)C(F)(F)C(F)(F)C(F)(F)F  
6053 C=CS(=O)c1cccc1.FC(F)(F)c1ccc(Br)cc1>>O=S(/C=C/c1ccc(C(F)(F)F)cc1)c1cccc1  
6054 C=CC(=O)OC.COC(=O)c1cccc2c1oc1ccc(-c3esc(-c4ccc(I)cc4)n3)cc12>>COC(=O)/C=C/c1ccc(-  
c2nc(-c3ccc4oc5c(C(=O)OC)cccc5c4c3)cs2)cc1  
6055 C=CC(=O)OC.CC(C)(C)OC(=O)n1cc(C=O)c2c(Br)cccc21>>COC(=O)/C=C/c1cccc2c1c(C=O)cn2C(=  
O)OC(C)(C)C  
6056 C=Cc1ccc(Br)cc1.COc1ccc(I)cc1>>COc1ccc(/C=C/c2ccc(Br)cc2)cc1  
6057 C=CCCCCCC.Cc1cccc1Br>>CCCCC/C=C/c1cccc1C  
6058 C=CC(=O)O.CN(c1cccc(I)c1)S(=O)(=O)c1ccc(-  
c2cccc2)cc1>>CN(c1cccc(/C=C/C(=O)O)c1)S(=O)(=O)c1ccc(-c2cccc2)cc1  
6059 C=CCN(C(=O)OC(C)(C)C(=O)OC(C)(C)C.O=C1CCc2cc(Br)ccc21>>CC(C)(C)OC(=O)N(C/C=C/c  
1ccc2c(c1)CCC2=O)C(=O)OC(C)(C)C  
6060 C=CC(COC(C)=O)OC(C)=O.c1ccc([H+]c2cccc2)cc1>>CC(=O)OCC(/C=C/c1cccc1)OC(C)=O  
6061 C=CCCCCCCCC(=O)OC.CCC1=C(I)CCC1=O>>CCC1=C(/C=C/CCCCCCCC(=O)OC)CCC1=O  
6062 C=Cc1cccc1.IC1CCCC1>>C(=C/C1CCCC1)\c1cccc1  
C=CCCO.Cc1cc(Br)ccc1Cc1c(O)[C@H]2O[C@H](COC(=O)c3cccc3)[C@H](OC(=O)c3cccc3)[  
6063 C@H](OC(=O)c3cccc3)[C@H]2OC(=O)c2cccc2n[nH]c1C(C)C>>Cc1cc(/C=C/CCO)ccc1Cc1c(O[  
C@H]2O[C@H](COC(=O)c3cccc3)[C@H](OC(=O)c3cccc3)[C@H](OC(=O)c3cccc3)[C@H]2  
OC(=O)c2cccc2n[nH]c1C(C)C  
6064 Brc1ccc2c(c1)OCO2.C=Cc1ccc(C)cc1>>Cc1ccc(/C=C/c2ccc3c(c2)OCO3)cc1  
6065 C=Cc1ccc(O)cc1.COc1cc(Br)cc(OC)c1F>>COc1cc(/C=C/c2ccc(O)cc2)cc(OC)c1F  
6066 C=Cc1cccc1.IC1CCCC12OCCO2>>C(=C/C1CCCC12OCCO2)\c1cccc1  
6067 C=CC(=O)OC.Fc1cc(Br)ccc1CN1CCCC(c2c[nH]c3cccc23)C1>>COC(=O)/C=C/c1ccc(CN2CCCC(c  
3c[nH]c4cccc34)C2)c(F)c1  
6068 C=Cc1ccc(CCl)cc1.Ic1cccc1>>ClCc1ccc(/C=C/c2cccc2)cc1  
6069 C=CP(=O)(OCC)OCC.FC(F)(F)c1cccc(Br)c1>>CCOP(=O)(/C=C/c1cccc(C(F)(F)F)c1)OCC  
6070 C=CC(=O)OC.C[C@H](NC(=O)OC(C)(C)C)c1nc(/C=C\Br)cs1>>COC(=O)/C=C/C=Cc1sc([C@  
H](C)NC(=O)OC(C)(C)C)n1  
6071 C=CC(=O)O.O=C1C(O)=C(I)C(=O)c2cccc21>>O=C(O)/C=C/C1=C(O)C(=O)c2cccc2C1=O  
6072 C=CC(=O)c1cccc1.COc1ncc(I)c(OC)n1>>COc1ncc(/C=C/C(=O)c2cccc2)c(OC)n1  
6073 C=CC(=O)OC.Oc1cc(-c2ccc(Br)cc2)cc(C23CC4CC(CC(C4)C2)C3)c1>>COC(=O)/C=C/c1ccc(-  
c2cc(O)cc(C34CC5CC(CC(C5)C3)C4)c2)cc1  
6074 C=CC(=O)O.Cc1ccc(Br)cc1>>Cc1ccc(/C=C/C(=O)O)cc1  
6075 C=Cc1ccc([N+](=O)[O-])cc1.Oc1cc(Br)ccc1/N=N/c1cccc1>>O=[N+](O-  
)c1ccc(/C=C/c2ccc(/N=N/c3cccc3)c(O)c2)cc1  
6076 C=C/C=C(/OCC)C(=O)OC.COc1ccc(I)cc1>>CCO/C=C/C=C/c1ccc(OC)cc1)C(=O)OC  
6077 C=CC(C)=O.COc1ccc2cc(Br)ccc2c1>>COc1ccc2cc(/C=C/C(C)=O)ccc2c1  
6078 C=C/C=C/c1cccc1.CCOC(=O)C(F)(F)I>>CCOC(=O)C(F)(F)/C=C/C=C/c1cccc1  
6079 C=Cc1ccncc1.O=C1CCC(c2ccc(Br)cc2)O1>>O=C1CCC(c2ccc(/C=C/c3ccncc3)cc2)O1  
6080 Brc1c2cccc2cc2cccc12.C=Cc1cccc1>>C(=C/c1c2cccc2cc2cccc12)\c1cccc1  
6081 C=Cc1ccncc1.Nc1cccc1Br>>Nc1cccc1/C=C/c1ccncc1  
6082 Brc1cccc1.C=CC(OCC)OCC>>CCOC(/C=C/c1cccc1)OCC  
6083 C=CCO[Si](C)(C)C(C)(C)C.CC(=O)c1ccc(Br)cc1>>CC(=O)c1ccc(/C=C/CO[Si](C)(C)C(C)(C)C)cc1  
6084 Brc1ccc2c(cen2-c2cccc2)c1.C=CC(=O)OC>>COC(=O)/C=C/c1ccc2c(cen2-c2cccc2)c1  
6085 C=CC(=O)N(C)OC.N#Cc1ccc2c(Br)cccc2c1>>CON(C)C(=O)/C=C/c1cccc2cc(C#N)ccc12  
C=CC(=O)OC.COc1cc(Br)c2c3c1O[C@H]1[C@H](O[Si](C)(C)C(C)(C)C)C=C[C@H]4[C@H]  
6086 (C2)N(C)CC[C@@]341>>COC(=O)/C=C/c1cc(OC)c2c3c1C[C@H]1[C@H]4C=C[C@H](O[Si](C)(  
C)C(C)(C)C)[C@H](O2)[C@]34CCN1C  
6087 C=CN1CCCC1=O.FC(F)(Br)c1nc2cccc2o1>>O=C1CCCN1/C=C/C(F)(F)c1nc2cccc2o1  
6088 C=CS(=O)(=O)c1cccc1.CC(=O)n1cc(C[C@H]2CCCN2C)c2cc(Br)ccc21>>CC(=O)n1cc(C[C@H]2C  
CCN2C)c2cc(/C=C/S(=O)(=O)c3cccc3)ccc21  
6089 C=CC(=O)OCC.CC1(C)CC(=C(c2cccc2)c2ccc(Br)cc2)CC(C)(C)C1>>CCOC(=O)/C=C/c1ccc(C=C2  
CC(C)(C)CC(C)(C)C2)c2cccc2)cc1  
6090 C=CC(=O)OC.O=Cc1cc(Cl)ccc1OS(=O)(=O)C(F)(F)F>>COC(=O)/C=C/c1ccc(Cl)cc1C=O  
6091 C=CC(C)O.COC(=O)c1ccc(I)cc1>>COC(=O)c1ccc(/C=C/C(C)O)cc1  
6092 C=CC(=O)OC.CN(C)C(=O)c1cn(Cc2ccc(Br)cc2)c2cccc12>>COC(=O)/C=C/c1ccc(Cn2cc(C(=O)N(C  
)C)c3cccc32)cc1  
6093 C=CC(=O)OCC.O=C(O)c1cccc1I>>CCOC(=O)/C=C/c1cccc1C(=O)O

6094 C=CCCC(=O)OCC.O=S(=O)(Oe1ccc(C=C2C3CCCC2CCC3)c2ccc(O)cc2)cc1C(F)(F)F>>CCOC(=O)  
CC/C=C/c1ccc(C=C2C3CCCC2CCC3)c2ccc(O)cc2)cc1  
C=CC[C@H]1O[C@H](COC(=O)c2ccccc2)[C@@H](OC(=O)c2ccccc2)[C@H](OC(=O)c2ccccc2)[C@H]1OC(=O)c1ccccc1.Ic1ccc(-c2ccccc2)cc1>>O=C(OC[C@H]1O[C@H](C/C=C/c2ccc(-  
6095 c3ccccc3)cc2)[C@@H](OC(=O)c2ccccc2)[C@@H](OC(=O)c2ccccc2)[C@@H]1OC(=O)c1ccccc1)c1  
ccccc1  
6096 C=CC(=O)OCC.Cn1ccc(Br)cc1=O>>CCOC(=O)/C=C/c1ccn(C)c(=O)c1  
6097 C=CC(=O)OC.O=C1CCc2cc(Br)ccc21>>COC(=O)/C=C/c1ccc2c(c1)CCC2=O  
6098 C=C(c1ccc(OC)c(I)c1)c1cc(OC)c(OC)c(OC)c1.C=CC(=O)OC>>C=C(c1ccc(OC)c(/C=C/C(=O)OC)c1)  
c1cc(OC)c(OC)c(OC)c1  
C=CCN1C(=O)c2ccccc2C1=O.COe1ccc2sc(CNc3nncc(-  
6099 c4c(C)cc(Br)cc4C)n3)nc2c1>>COc1ccc2sc(CNc3nncc(-  
c4c(C)cc(/C=C/CN5C(=O)c6ccccc6C5=O)cc4C)n3)nc2c1  
6100 C=CC(=O)OC.Cn1c(I)nc1Se1ccccc1>>COC(=O)/C=C/c1cnc(Se2ccccc2)n1C  
6101 C=CC(=O)OC(C)(C)C.COe1ccc(Br)c(C)c1>>COe1ccc(/C=C/C(=O)OC(C)(C)C)c(C)c1  
6102 C=Cc1ccccc1(C=O)c1.COe1c(CN(C(=O)C2CC2)c2ccccc(Br)c2)ccc2c1OC(C)(C)C=C2>>COe1c(CN(C(=O)  
C2CC2)c2ccccc(/C=C/c3ccccc(C=O)c3)c2)ccc2c1OC(C)(C)C=C2  
6103 Bre1ccc(-c2nnc(-c3ccccc4ccccc34)o2)cc1.C=C[Si](C)(OCC)OCC>>CCO[Si](C)(/C=C/c1ccc(-c2nnc(-  
c3ccccc4ccccc34)o2)cc1)OCC  
6104 C=CC(=O)OC(C)(C)C.CC(=O)c1ccc(Cl)cc1Br>>CC(=O)c1ccc(Cl)cc1/C=C/C(=O)OC(C)(C)C  
6105 C=Cc1ccccc1.COC(=O)c1cc(C(=O)OC)c2cc(Br)ccc2n1>>COC(=O)c1cc(C(=O)OC)c2cc(/C=C/c3ccccc  
c3)ccc2n1  
6106 C=CC(=O)OCC.CC(C)(C)OC(=O)N(Cc1ccccc(Br)c1)c1nc(C(F)(F)F)co1>>CCOC(=O)/C=C/c1ccccc(C  
N(C(=O)OC(C)(C)C)c2nc(C(F)(F)F)co2)c1  
6107 Bre1ccc(I)cc1.C=CCOc1ccccc1>>Bre1ccc(/C=C/COc2ccccc2)cc1  
6108 C=CCNC(=O)c1cc(C)cc(Br)c1NC(=O)c1ccccc1.Ic1ccccc1>>Cc1cc(Br)c(NC(=O)c2ccccc2)c(C(=O)N  
C/C=C/c2ccccc2)c1  
6109 C=CC(=O)NC(C)C.Cc1cc(C)c(Br)c(C)c1>>Cc1cc(C)c(/C=C/C(=O)NC(C)C)c(C)c1  
6110 C=CC(=O)OC.CN(C)S(=O)(=O)n1cc(I)c([Si](C)(C)C)c1>>COC(=O)/C=C/c1cn(S(=O)(=O)N(C)C)cc1  
[Si](C)(C)C  
6111 C=Cc1sc(C=O)c(CCCCCC)c1CCCCC.CN(CC1CO1)c1ccc(I)cc1>>CCCCCc1c(C=O)sc(/C=C/c2cc  
c(N(C)CC3CO3)cc2)c1CCCCC  
6112 C=CC(=O)OC(C)(C)C.CC(C)=CCc1cc(I)ccc1OC(=O)CCc1ccc(F)cc1>>CC(C)=CCc1cc(/C=C/C(=O)  
OC(C)(C)C)ccc1OC(=O)CCc1ccc(F)cc1  
6113 C=CC#N.Cn1c(=O)c(I)cn([C@H]2[C@H](O[Si](C)(C)C(C)(C)C)[C@@H](CO[Si](C)(C)C(C)(C)C)  
O2)c1=O>>Cn1c(=O)c(/C=C/C#N)cn([C@H]2[C@H](O[Si](C)(C)C(C)(C)C)[C@@H](CO[Si](C)(C)  
)C(C)(C)C)O2)c1=O  
6114 C=CC(=O)OCC.Cc1nnn(Cc2cc(Cl)ccc2Br)n1>>CCOC(=O)/C=C/c1ccc(Cl)cc1Cn1nnc(C)n1  
6115 C=CC(=O)OC.OCc1ccccc(Br)n1>>COC(=O)/C=C/c1ccccc(CO)n1  
6116 C=Cc1ccccc1.Fc1c(F)c(F)c(Br)c(F)c1F>>Fc1c(F)c(F)c(/C=C/c2ccccc2)c(F)c1F  
C=CCn1c(=O)oc2cc(C=O)ccc21.O=C(Nc1cc(Br)ccc1-  
6117 c1ccccc1O[C@H]1CN2CCC1CC2>>O=Cc1ccc2c(c1)oc(=O)n2C/C=C/c1ccc(-  
c2ccccc2)c(NC(=O)O[C@H]2CN3CCCC2CC3)c1  
6118 C=CC(=O)OC.CC(=O)OC[C@H]1O[C@H](Oc2ccc(I)cc2)[C@H](OC(C)=O)[C@@H](OC(C)=O)[C@  
@@H]1OC(C)=O>>COC(=O)/C=C/c1ccc(O[C@H]2O[C@H](COC(C)=O)[C@@H](OC(C)=O)[C@  
H](OC(C)=O)[C@H]2OC(C)=O)cc1  
6119 C=CC(=O)OC(C)(C)C.CC(C)OC(=O)c1ccsc1Br>>CC(C)OC(=O)c1ccsc1/C=C/C(=O)OC(C)(C)C  
C=CC(=O)OC.Cc1[nH]c(-  
6120 c2ccccc2)c(Br)c1C(=O)C(=O)N1CCN(c2ccccc(C(F)(F)F)c2)CC1>>COC(=O)/C=C/c1c(-  
c2ccccc2)[nH]c(C)c1C(=O)C(=O)N1CCN(c2ccccc(C(F)(F)F)c2)CC1  
6121 C=Cc1ccc(Cl)cc1.CCOC(=O)C(F)I>>CCOC(=O)C(F)/C=C/c1ccc(Cl)cc1  
6122 Bre1cc2ccc3ccccc3c2c1ccc1ccccc12.C=CC(=O)OC>>COC(=O)/C=C/c1cc2ccc3ccccc3c2c1ccc1c  
ccccc12  
6123 C=CCn1nnc2ccccc21.COe1ccc(I)cc1>>COe1ccc(/C=C/Cn2nnc3ccccc32)cc1  
C=Cc1ccccc1.CC(=O)Oc1c(C(C)(C)C)cc(-c2ccc(Br)c(-  
6124 c3cc(C(C)(C)C)c(OC(C)=O)c(C(C)(C)C)c3)c2)cc1C(C)(C)C>>CC(=O)Oc1c(C(C)(C)C)cc(-  
c2ccc(/C=C/c3ccccc3)c(-c3cc(C(C)(C)C)c(OC(C)=O)c(C(C)(C)C)c3)c2)cc1C(C)(C)C  
6125 C=CC(C)C(C)O.FC(F)(F)c1ccc(Br)cc1>>CC(O)C(C)/C=C/c1ccc(C(F)(F)F)cc1  
6126 C=CC(C)=O.Nc1c(Br)cncc1I>>CC(=O)/C=C/c1cncc(Br)c1N  
6127 C=Cc1ccccc1.Fc1ccc(Br)cc1>>Fc1ccc(/C=C/c2ccccc2)cc1  
6128 C=CC(=O)OCC.Nc1ccc(Br)nc1I>>CCOC(=O)/C=C/c1nc(Br)ccc1N

6129 C=CC(=O)CCCCC.Cc1ccc(S(=O)(=O)Nc2ccccc2I)cc1>>CCCCC(=O)/C=C/c1ccccc1NS(=O)(=O)c1ccc(C)cc1  
6130 C=CC(=O)OCC.COc1cc(/C=C/c2ccc(Br)cc2)cc(OC)c1OC>>CCOC(=O)/C=C/c1ccc(/C=C/c2cc(OC)c(OC)c(OC)c2)cc1  
6131 C=CC(=O)OCC.CN1CCc2ccc(Br)cc2C1>>CCOC(=O)/C=C/c1ccc2c(c1)CN(C)CC2  
6132 C=Cc1ccc(C(C)(C)C)cc1.CCOC(=O)C(F)I>>CCOC(=O)C(F)/C=C/c1ccc(C(C)(C)C)cc1  
6133 C=C(C(=O)OC)C1C(I)=C(c2ccccc2)C2(C=CC(=O)C=C2)N1S(C)(=O)=O.C=CC(=O)OC>>C=C(C(=O)OC)C1C(/C=C/C(=O)OC)=C(c2ccccc2)C2(C=CC(=O)C=C2)N1S(C)(=O)=O  
6134 C=Cc1ccccc1.COc1ccccc1I>>COc1ccccc1/C=C/c1ccccc1  
6135 C=Cc1ccccc1.O=C1CCC(c2ccccc2)=C1OS(=O)(=O)C(F)(F)F>>O=C1CCC(c2ccccc2)=C1/C=C/c1ccc  
6136 C=CC(=O)OC.Ic1cnn(C(c2ccccc2)(c2ccccc2)c2ccccc2)c1>>COC(=O)/C=C/c1cnn(C(c2ccccc2)(c2ccccc2)c2ccccc2)c1  
6137 C=Cc1ccc(C)cc1.Cc1ccc(N)c(Br)c1>>Cc1ccc(/C=C/c2cc(C)ccc2N)cc1  
6138 C=Cc1ccnc2ccccc12.CCCCCCCCCC(=O)N1CCN(c2ccc(Br)cc2)CC1>>CCCCCCCCC(=O)N1CCN(c2ccc(/C=C/c3ccnc4ccccc34)cc2)CC1  
6139 C=CC(=O)OC(C)(C)C.Cc1ccc(NC=O)c(I)c1>>Cc1ccc(NC=O)c(/C=C/C(=O)OC(C)(C)C)c1  
6140 C=CC12CCC(NC(=O)OC(C)(C)C)(CC1)CO2.COc1ccc2ncc(F)c(Br)c2n1>>COc1ccc2ncc(F)c(/C=C/C34CCC(NC(=O)OC(C)(C)C)(CC3)CO4)c2n1  
6141 C=CCN1CCN(C(=O)OC(C)(C)C)CC1=O.CCc1nn2c(C)cc(C)nc2c1Cc1ccc(Br)cc1>>CCc1nn2c(C)cc(C)nc2c1Cc1ccc(/C=C/CN2CCN(C(=O)OC(C)(C)C)CC2=O)cc1  
6142 C=CC1CCN(C(=O)OC(C)C)CC1.CS(=O)(=O)N1CCN(c2ccc(Br)cn2)CC1>>CC(C)OC(=O)N1CCC(/C=C/c2ccc(N3CCN(S(C)(=O)=O)CC3)nc2)CC1  
6143 C=Cc1ccccc2ccccc12.COC(=O)c1ccccc1I>>COC(=O)c1ccccc1/C=C/c1ccccc2ccccc12  
6144 C=CC(=O)OCC.Nc1ccc(CO)cc1I>>CCOC(=O)/C=C/c1cc(CO)ccc1N  
6145 C=CC(=O)OC.OCc1cc(-c2ccc(Br)cc2)cc(C23CC4CC(CC(C4)C2)C3)c1O>>COC(=O)/C=C/c1ccc(-c2cc(CO)c(O)c(C34CC5CC(CC(C5)C3)C4)c2)cc1  
6146 C=CC(=O)OCCCC.Ic1ccc2ccccc2c1>>CCCCOC(=O)/C=C/c1ccc2ccccc2c1  
6147 C=CC(=O)N(C)Cc1ccc(OC(F)(F)F)c1OCC.CC1(C)NCc2cc(Br)cn2NC1=O>>CCOc1c(CN(C)C(=O)/C=C/c2cnc3c(c2)CNC(C)(C)C(=O)N3)cccc1OC(F)(F)F  
6148 Br1ccc(I)cc1.C=Cc1ccc(C=O)cc1>>O=Cc1ccc(/C=C/c2ccc(Br)cc2)cc1  
6149 C=CC(=O)OCC.O=C(O)c1cc(Br)c1>>CCOC(=O)/C=C/c1cc(C(=O)O)co1  
6150 C=Cc1ccccc1.COc1ccc(I)cc1>>COc1ccc(/C=C/c2ccccc2)cc1  
6151 C=CC(=O)OCC.Oc1ccc(Br)c(F)c1>>CCOC(=O)/C=C/c1ccc(O)cc1F  
6152 C=CCN(C(=O)OCc1ccccc1)C(=O)OC(C)(C)C.CC(=O)c1ccc(Br)cc1>>CC(=O)c1ccc(/C=C/CN(C(=O)OCc2ccccc2)C(=O)OC(C)(C)C)cc1  
6153 C=Cc1ccc([N+](=O)[O-])cc1.[O-][N+](=Nc1ccc(Br)cc1)c1ccccc1>>O=[N+](O-)]c1ccc(/C=C/c2ccc(N=[N+](O-)]c3ccccc3)cc2)cc1  
6154 C=CC[C@H](C)N(C)C(=O)OC(C)(C)C.CC(C)(C)CC(=O)N1CC[C@H](Oc2cnc(Br)c2)C1>>C[C@@H](C/C=C/c1cnc(OC[C@H]2CCN(C(=O)CC(C)(C)C)C2)c1)N(C)C(=O)OC(C)(C)C  
6155 C=Cc1ccc(/C=C/c2ccc(N)cc2)cc1.O=C(ON1C(=O)CCC1=O)c1ccc(I)cc1>>Nc1ccc(/C=C/c2ccc(/C=C/c3ccc(C(=O)ON4C(=O)CCC4=O)cc3)cc2)cc1  
6156 Br1ccc2nccccc2c1.C=Cc1ccccc1>>C(=C/c1ccc2nccccc2c1)\c1ccccc1  
6157 C=Cc1ccc(OC)c(OC)c1.Cc1oc2ccccc2c(=O)c1Br>>COc1ccc(/C=C/c2c(C)oc3ccccc3c2=O)cc1OC  
6158 Br1cc2ccc1CCc1ccc(cc1)CC2.C=Cc1ccccc1>>C(=C/c1cc2ccc1CCc1ccc(cc1)CC2)\c1ccccc1  
6159 C=Cc1ccccc1OC.Nc1ccccc(Br)c1>>COc1ccccc1/C=C/c1ccccc(N)c1  
6160 C=Cc1ccccc1.O=Cc1c[nH]c2ccc(Br)cc12>>O=Cc1c[nH]c2ccc(/C=C/c3ccccc3)cc12  
6161 C=CC(=O)OCC.O=C(OCc1ccccc1)c1cc([N+](=O)[O-])cc1Br>>CCOC(=O)/C=C/c1ccc([N+](=O)[O-])cc1C(=O)OCc1ccccc1  
6162 C=Cc1ccccc1.Cn1nc(Cl)c2ccccc21>>Cn1nc(/C=C/c2ccccc2)c2ccccc21  
6163 C=CP(=O)(O)O.Fc1cc(F)cc(Br)c1>>O=P(O)(O)/C=C/c1cc(F)cc(F)c1  
6164 C=CCNC(=O)c1cc(C)on1.Cc1ccc(I)cc1>>Cc1ccc(/C=C/CNC(=O)c2cc(C)on2)cc1  
6165 C=Cc1ccc(COC(C)=O)cc1.CCCCOc1ccc2c(c1)cc(C#N)c1ccc(Br)cc12>>CCCCOc1ccc2c(c1)cc(C#N)c1ccc(/C=C/c3ccc(COC(C)=O)cc3)cc12  
6166 C=Cc1ccc(C(=O)OC)cc1.COC(=O)c1cc2cc(Br)ccc2cc1OC(C)=O>>COC(=O)c1ccc(/C=C/c2ccc3cc(O)C(C)=O)c(C(=O)OC)cc3c2)cc1  
6167 C=CC(=O)OC(C)(C)C.O=c1[nH]c(=O)c2cc(Br)cn2[nH]1>>CC(C)(C)OC(=O)/C=C/c1cnc2[nH]c(=O)[nH]c(=O)c2c1  
6168 C=CS(=O)(=O)F.CC(C)[Si](Oc1ccccc1)c1(C(C)C)C(C)C>>CC(C)[Si](Oc1ccccc1/C=C/S(=O)(=O)F)c1(C(C)C)C(C)C  
6169 C=CC(=O)OCC.Cc1cc(C)cc(-c2ccccc2I)c1>>CCOC(=O)/C=C/c1ccccc1-c1cc(C)cc(C)c1



6170 C=Cc1ccc(N(c2ccc(OC)cc2)c2ccc(OC)cc2)cc1.Cc1ccc(Br)cc1>>COc1ccc(N(c2ccc(/C=C/c3ccc(C)cc3)  
6171 )cc2)c2ccc(OC)cc2)cc1  
6172 C=CC(=O)OC.Ic1cccc1C#CCOC1CCCCO1>>COC(=O)/C=C/c1cccc1C#CCOC1CCCCO1  
6173 C=CCOC(C)=O.CC(C)(C)OC(=O)NCCc1cc2c(cc1I)OCO2>>CC(=O)OC/C=C/c1cc2c(cc1CCNC(=O)  
6174 OC(C)(C)C)OCO2  
6175 C=CC1(O)CCC1.COc1ccc(I)cc1>>COc1ccc(/C=C/C2(O)CCC2)cc1  
6176 C=Cc1cccc1.O=Cc1c(F)cccc1Br>>O=Cc1c(F)cccc1/C=C/c1cccc1  
6177 Brclenc2cccc2c1.C=CCO[C@]1(C)C[C@@H](C)CN(C)[C@H](C)[C@@H](O)[C@J](C)(O)[C@ @H  
6178 ](CC)OC(=O)[C@H](C)[C@@H](O[C@H]2C[C@@](C)(OC)[C@@H](O[Si](C)(C)C)[C@H](C)O2)  
6179 [C@H](C)[C@H]1O[C@@H]1O[C@H](C)C[C@H](N(C)C)[C@H]1O[Si](C)(C)C>>CC[C@H]1OC(  
=O)[C@H](C)[C@@H](O[C@H]2C[C@@](C)(OC)[C@@H](O[Si](C)(C)C)[C@H](C)O2)[C@H](C)  
[C@@H](O[C@@H]2O[C@H](C)C[C@H](N(C)C)[C@H]2O[Si](C)(C)C)[C@](C)(OC/C=C/c2nc3c  
cccc3c2)C[C@H](C)CN(C)C[C@H](C)C[C@H](N)C[C@H](O)C[C@H](O)C11(C)N  
6176 C=CC(=O)N(C)C.COCc1nc(Nc2ccc(C#N)cc2)nc(Nc2c(C)cc(/C=C/C#N)cc2C)c1I>>COCc1nc(Nc2ccc  
6177 (C#N)cc2)nc(Nc2c(C)cc(/C=C/C#N)cc2C)c1/C=C/C(=O)N(C)C  
6178 Brclccc(-c2cccs2)cc1.C=Cc1cccc1>>C(=C/c1ccc(-c2cccs2)cc1)\c1cccc1  
6179 C=CC(=O)OCC.CC(C)(C)OC(=O)NCc1cccc(Br)c1>>CCOC(=O)/C=C/c1cccc(CNC(=O)OC(C)(C)C)c  
6180 C=CC(=O)N(C)Cc1cc2ccccc2n1C.CCC1(CC)C(=O)Nc2ncc(Br)cc21>>CCC1(CC)C(=O)Nc2ncc(/C=C/  
6181 /C(=O)N(C)Cc3cc4ccccc4n3C)cc21  
6182 C=Cc1ccc(OC)cc1.Cc1ccc(OC(=O)C(C)(C)Br)cc1>>COc1ccc(/C=C/C(C)(C)C(=O)Oc2ccc(C)cc2)cc1  
6183 C=CC(=O)OC.Cc1cccc([N+](=O)[O-])c1Br>>COC(=O)/C=C/c1c(C)cccc1[N+](=O)[O-]  
6184 C=Cc1cccc1.CC(C)=C(C)Br>>CC(C)=C(C)/C=C/c1cccc1  
6185 C=CC(=O)OC(C)(C).O=C1C=CC23C(c4ccccc4)=C(Br)C(=O)N2Cc2ccccc2C3C1>>CC(C)(C)OC(=  
6186 O)/C=C/C1=C(c2ccccc2)C23C=CC(=O)CC2c2ccccc2CN3C1=O  
6187 C=CC(=O)OC.CCOC(=O)c1ccc(Br)cc1>>CCOC(=O)c1ccc(/C=C/C(=O)OC)cc1  
6188 C=CC(=O)OC.O=c1[nH]c(=O)n([C@H]2C=C[C@H](CO)O2)cc1I>>COC(=O)/C=C/c1cn([C@H]2  
6189 C=C[C@H](CO)O2)c(=O)[nH]c1=O  
6190 C=CC(=O)OC(C)(C).COc1ccc(S(=O)(=O)c2ccc3c(Br)cccc3n2)cc1>>COc1ccc(S(=O)(=O)c2ccc3c(/  
6191 C=C/C(=O)OC(C)(C)C)cccc3n2)cc1  
6192 C=CC(=O)OC(C)(C).O=S(=O)(c1cccc(Br)c1)c1ccccn1>>CC(C)(C)OC(=O)/C=C/c1cccc(S(=O)(=O)  
6193 c2cccn2)c1  
6194 C=CC(=O)OC.COC(=O)CCOCc1cc(OCc2ccccc2)c(OC)cc1Br>>COC(=O)/C=C/c1cc(OC)c(OCc2ccccc  
6195 c2)cc1COCCC(=O)OC  
6196 C=CC(=O)OC.CC(=O)Oc1cccc1-c1nnn(Cc2ccccc2)c1I>>COC(=O)/C=C/c1c(-  
6197 c2ccccc2OC(C)=O)nnn1Cc1cccc1  
6198 C=CC(=O)OCC.COc1ccc(-c2ccc([N+](=O)[O-])cc2Br)cc1>>CCOC(=O)/C=C/c1cc([N+](=O)[O-]  
6199 ])ccc1-c1ccc(OC)cc1  
6200 C=CC(=O)OCCCC.COc1cc(Br)cc(OC)c1>>CCCCOC(=O)/C=C/c1cc(OC)cc(OC)c1  
6201 C=CSe1cccc1.CC(=O)c1ccc(Br)cc1>>CC(=O)c1ccc(/C=C/Sc2ccccc2)cc1  
6202 C=CC(O)C(F)(F)C(F)(F)C(F)(F)C(F)(F)C(F)(F)C(F)(F)F.Ic1cccc1>>OC(/C=C/c1cccc1)C(F)(F)C(F)  
6203 (F)C(F)(F)C(F)(F)C(F)(F)C(F)(F)F  
6204 C=CC(=O)OCC.Cc1ccc(N)c(I)c1>>CCOC(=O)/C=C/c1cc(C)ccc1N  
6205 C=CC(=O)CCC.CC(=O)c1cccc(Br)c1>>CCCC(=O)/C=C/c1cccc(C(C)=O)c1  
6206 C=CCN(C(=O)Cc1cccc1)c1cccc1.FC(F)(F)c1ccc(I)cc1>>O=C(Cc1cccc1)N(C/C=C/c1ccc(C(F)(F)F  
6207 )cc1)c1cccc1  
6208 C=CC(OC(C)=O)C(C)C.Ic1cccc1>>CC(=O)OC(/C=C/c1cccc1)C(C)C  
6209 C=CC(=O)OC.Ic1cccc1N1CC=CC1>>COC(=O)/C=C/c1cccc1N1CC=CC1  
6210 C=CC(=O)OC.FC(F)(F)CCCOc1ccc(OC(F)(F)c2ccc(Br)cc2)cc1>>COC(=O)/C=C/c1ccc(C(F)(F)Oc2c  
6211 cc(OCCCC(F)(F)F)cc2)cc1  
6212 C=Cc1cc2ccc(OC)cc2oc1=O.Ic1cccc1>>COc1ccc2ccc(/C=C/c3ccccc3)c(=O)oc2c1  
6213 C=CC(F)(F)C(F)(F)C(F)(F)C(F)(F)C(F)(F)C(F)(F)C(F)(F)C(F)(F)F.CCCN(Cc1ccc(Br)cc1)C(=O)OC(  
6214 C)(C)C>>CCCN(Cc1ccc(/C=C/C(F)(F)C(F)(F)C(F)(F)C(F)(F)C(F)(F)C(F)(F)C(F)(F)C(F)(F)F)cc1)C(  
=O)OC(C)(C)C  
6215 C=CC(=O)OCC.COc1cc(Br)c(C=O)cc1OC>>CCOC(=O)/C=C/c1cc(OC)c(OC)cc1C=O  
6216 C=C[C@H](O)[C@@H](O)COCc1ccc(OC)cc1.Cc1cccc1I>>COc1ccc(COC[C@H](O)[C@@H](O)/  
6217 C=C/c2ccccc2C)cc1  
6218 C=Cc1nnn(C)n1.COc1ccc(I)cc1>>COc1ccc(/C=C/c2nnn(C)n2)cc1  
6219 C=CC(=O)OCC.FC(F)(F)c1cccc1I>>CCOC(=O)/C=C/c1cccc1C(F)(F)F  
6220 C=CC(=O)OC.Cc1nn2c(-c3ccccc3)cc(-c3ccccc3)nc2c1I>>COC(=O)/C=C/c1c(C)nn2c(-c3ccccc3)cc(-  
6221 c3ccccc3)nc12

6207 C=CC(=O)N1N=Cc2ccccc2C1CCC.COc1cc(C(=O)c2cnc(N)nc2N)cc(I)c1OC>>CCCC1c2ccccc2C=N  
N1C(=O)/C=C/c1cc(C(=O)c2cnc(N)nc2N)cc(OC)c1OC  
 6208 C=Cc1ccccc1.CC/C=C(/Br)OC1CCCCC1>>CC/C=C(/C=C/c1ccccc1)OC1CCCCC1  
 6209 C=CC(=O)OC.CC(C)(C)CN(Cc1ccc(Br)cc1)c1ccnc(Cl)n1>>COC(=O)/C=C/c1ccc(CN(CC(C)(C)C)c2  
cnc(Cl)n2)cc1  
 6210 C=CP(=O)(OCC)OCC.Ic1ccccc1>>CCOP(=O)(/C=C/c1ccccc1)OCC  
 6211 C=CC(=O)OC.CC1(C)CC(=C(c2ccc3c(cnn3C3CCCCO3)c2)c2c(F)cc(Br)cc2F)CC(C)(C)C1>>COC(=  
O)/C=C/c1cc(F)c(C(=C2CC(C)(C)CC(C)(C)C2)c2ccc3c(cnn3C3CCCCO3)c2)c(F)c1  
 6212 C=CC(=O)O.CCCCC(CC)Cn1c2ccc(Br)cc2c2cc(C=O)ccc21>>CCCCC(CC)Cn1c2ccc(C=O)cc2c2cc(/  
C=C/C(=O)O)ccc21  
 6213 C=CC(=O)OCC.Cc1cc(C)cc(I)c1>>CCOC(=O)/C=C/c1cc(C)cc(C)c1  
 6214 C=CCN(C(=O)OC(C)(C)C)C(=O)OC(C)(C)C.Clc1ccnc1>>CC(C)(C)OC(=O)N(C/C=C/c1ccnc1)C(=  
O)OC(C)(C)C  
 6215 C=CC(=O)OC.O=c1[nH]c(=O)n([C@H]2C[C@H](O)[C@]3(CO)C[C@H]23)cc1I>>COC(=O)/C=C/c  
1cn([C@H]2C[C@H](O)[C@]3(CO)C[C@H]23)c(=O)[nH]c1=O  
 6216 C=CC#N.CC1Cc2cc(Br)ccc2O1>>CC1Cc2cc(/C=C/C#N)ccc2O1  
 6217 C=CS(=O)(=O)NCc1ccccc1.COc1ccc(Br)c(CNC(=O)OC(C)(C)C)c1>>COc1ccc(/C=C/S(=O)(=O)NCc  
2ccccc2)c(CNC(=O)OC(C)(C)C)c1  
 6218 C=Cc1cc(OC)c(O)c(OC)c1.COc1cc(I)cc(OC)c1>>COc1cc(/C=C/c2cc(OC)c(O)c(OC)c2)cc(OC)c1  
 6219 C=CC(CC)OC(C)=O.Ic1ccccc1>>CCC(/C=C/c1ccccc1)OC(C)=O  
 6220 C=CC(=O)Nc1ccccc1NC(=O)OC(C)(C)C.O=C(Nc1ccc(C(F)(F)F)cc1)C(O)c1ccc(Br)cc1>>CC(C)(C)O  
C(=O)Nc1ccccc1NC(=O)/C=C/c1ccc(C(O)C(=O)Nc2ccc(C(F)(F)F)cc2)cc1  
 6221 C=CC(=O)OC(C)(C)C.O=Cc1ccc(I)cc1>>CC(C)(C)OC(=O)/C=C/c1ccc(C=O)cc1  
C=CCNC(=O)NC(C)(C)CO.Cc1cc(OCc2ccccc2)c([C@@H]2O[C@H](COCc3ccccc3)[C@@H](OCc3  
 6222 ccccc3)[C@H](OCc3ccccc3)[C@H]2OCc2ccccc2)cc1Cc1ccc(Br)cc1>>Cc1cc(OCc2ccccc2)c([C@@H  
]2O[C@H](COCc3ccccc3)[C@@H](OCc3ccccc3)[C@H](OCc3ccccc3)[C@H]2OCc2ccccc2)cc1Cc1c  
cc(/C=C/CNC(=O)NC(C)(C)CO)cc1  
 6223 C=CC=O.FC(F)c1ccc(Br)cn1>>O=C/C=C/c1ccc(C(F)F)nc1  
 6224 C=CCN1C(=O)c2ccccc2C1=O.Clc1ccc(I)cc1>>O=C1c2ccccc2C(=O)N1C/C=C/c1ccc(Cl)cc1  
 6225 C=CC(=O)O.O=[N+](O-  
)c1c(I)ccc2c1C=CC1(CCCCCC1)O2>>O=C(O)/C=C/c1ccc2c(c1[N+](=O)[O-  
 6226 C=CCCCCCCCCCCCCCCCC.c1ccc([I+])c2ccccc2)cc1>>CCCCCCCCCCCCCCCCC/C=C/c1ccccc1  
 6227 C=CC(=O)N(C)C.Cc1ccccc1Br>>Cc1ccccc1/C=C/C(=O)N(C)C  
 6228 C=CC(=O)OC.N#Cc1ccc(-  
c2cn(S(=O)(=O)c3ccccc3)c3ncc(Br)cc23)cc1>>COC(=O)/C=C/c1cnc2c(c1)c(-  
 6229 C=Cc1ccccc1.O=c1oc2ccccc2cc1Br>>O=c1oc2ccccc2cc1/C=C/c1ccccc1  
C=Cc1ccc(N(c2ccc(/C=C/c3ccc(S(=O)(=O)C(F)(F)F)cc3)cc2)c2ccc(/C=C/c3ccc(S(=O)(=O)C(F)(F)F)c  
 6230 c3)cc2)cc1.O=S(=O)(CCO)c1ccc(Br)cc1>>O=S(=O)(CCO)c1ccc(/C=C/c2ccc(N(c3ccc(/C=C/c4ccc(S(  
=O)(=O)C(F)(F)F)cc4)cc3)c3ccc(/C=C/c4ccc(S(=O)(=O)C(F)(F)F)cc4)cc3)cc2)cc1  
 6231 C=CC(=O)OC.Cc1ccc(S(=O)(=O)Nc2ccccc2Sc2ccc(I)s2)cc1>>COC(=O)/C=C/c1ccc(Sc2ccccc2NS(=  
O)(=O)c2ccc(C)cc2)s1  
C=CCn1c(-  
 6232 c2ccc(OC)c(OC)c2OC)nc2ccccc2c1=O.O=C(CN1C(=O)COc2ccccc21)c1ccc(Br)cc1>>COc1ccc(-  
c2nc3ccccc3c(=O)n2C/C=C/c2ccc(C(=O)CN3C(=O)COc4ccccc43)cc2)c(OC)c1OC  
 6233 C=CC(=O)OC.C=CC[C@@H](O)c1ccc(Br)c1>>C=CC[C@@H](O)c1ccc(/C=C/C(=O)OC)c1  
 6234 C=CCNC(=O)C(F)(F)F.O=c1[nH]c(=O)n([C@@H]2O[C@H](CO)[C@@H](O)[C@H]2O)cc1I>>O=  
C(NC/C=C/c1cn([C@@H]2O[C@H](CO)[C@@H](O)[C@H]2O)c(=O)[nH]c1=O)C(F)(F)F  
 6235 C=CC(=O)OCC.O=Cc1cc(F)ccc1Br>>CCOC(=O)/C=C/c1ccc(F)cc1C=O  
 6236 Br1ccc(I)cc1.C=CC(=O)OCC>>CCOC(=O)/C=C/c1ccc(Br)cc1  
 6237 C=Cc1ncnc2c1ncn2C1CCCCO1.Ic1cccs1>>C(=C/c1ncnc2c1ncn2C1CCCCO1)\c1cccs1  
 6238 Br1ccc2ccc3ccccc4ccc1c2c34.C=CC(=O)OCCO>>O=C(/C=C/c1ccc2ccc3ccccc4ccc1c2c34)OCCO  
 6239 C=CCCO[Si](C)(C)C(C)C.COc1cncc(Br)c1>>COc1cncc(/C=C/CCO[Si](C)(C)C(C)(C)C)c1  
C=Cc1cn(COCC[Si](C)(C)C)nc1-  
 6240 c1nc2ccc(OC)cc2n1COCC[Si](C)(C)C.N#Cc1cncc(Br)c1>>COc1ccc2nc(-  
c3nn(COCC[Si](C)(C)C)cc3/C=C/c3cncc(C#N)c3)nn(COCC[Si](C)(C)C)c2c1  
 6241 C=Cc1nnn(C=C)n1.Fc1ccccc1I>>C=Cn1nnn(/C=C/c2ccccc2F)n1  
 6242 C=CC(=O)OC.CC(C)(C)c1[nH]c2ccccc2c1[C@H]1CCCN(Cc2ccc(Br)cc2)C1>>COC(=O)/C=C/c1ccc(  
CN2CCC[C@H](c3c(C(C)(C)C)[nH]c4ccccc34)C2)cc1  
 6243 C=CC(=O)OCC.Cc1cc(F)cc(CN(C)C)c1Br>>CCOC(=O)/C=C/c1c(C)cc(F)cc1CN(C)C  
 6244 C=Cc1ccc(OC)cc1.COc1ccc(Br)cc1>>COc1ccc(/C=C/c2ccc(OC)cc2)cc1

C=CC(=O)OC(C)(C)C.CC(C)(F)CN1[C@H](c2c(F)cc(Br)cc2F)c2ccc3c(cnn3C3CCCCO3)c2C[C@H]  
 6245 1C(F)F>>CC(C)(F)CN1[C@H](c2c(F)cc(/C=C/C(=O)OC(C)(C)C)cc2F)c2ccc3c(cnn3C3CCCCO3)c2  
 C[C@H]1C(F)F  
 6246 C=CC(=O)OC.O=C(Nc1cc(Br)ccn1)C1CCCCC1>>COC(=O)/C=C/c1ccnc(NC(=O)C2CCCCC2)c1  
 6247 C=CC(=O)N(C)Cc1oc2ccccc2c1C.CC1(C)Oc2cc(Br)cnc2NC1=O>>Cc1c(CN(C)C(=O)/C=C/c2cnc3c(  
 c2)OC(C)(C)C(=O)N3)oc2ccccc12  
 6248 C=CC(CO)N1C(=O)c2ccccc2C1=O.COc1ccc(Br)cc1>>COc1ccc(/C=C/C(CO)N2C(=O)c3ccccc3C2=O  
 6249 C=CC(=O)OC(C)(C)C.CC(=O)Oc1ccc(I)cc1CC=C(C)C>>CC(=O)Oc1ccc(/C=C/C(=O)OC(C)(C)C)cc  
 1CC=C(C)C  
 C=CC(=O)OCC.COc1cc(I)c2c3c1O[C@@H]1[C@]34CCN(C)[C@H](C2)[C@]42C=C[C@@]1(OC)c  
 6250 1c(OC(C)=O)ccc(O)c12>>CCOC(=O)/C=C/c1cc(OC)c2c3c1C[C@H]1N(C)CC[C@@]34[C@@H](O  
 2)[C@@]2(OC)C=C[C@@]14c1c(O)ccc(OC(C)=O)c12  
 6251 C=CC(=O)OC(C)(C)C.CC(C)(C)OC(=O)N1CCC2(CC1)Cc1cc(Br)cnc1NC2=O>>CC(C)(C)OC(=O)/C  
 =C/c1cnc2c(c1)CC1(CCN(C(=O)OC(C)(C)C)CC1)C(=O)N2  
 6252 C=CC(=O)O.O=S(=O)(Nc1ccc(I)cc1)c1ccccc2ccccc12>>O=C(O)/C=C/c1ccc(NS(=O)(=O)c2ccccc3cccc  
 c23)cc1  
 6253 C=CC[C@H]1C(=O)N(c2ccccc2)[C@@H]1c1ccc(OC)cc1.OCc1ccc(Br)cc1>>COc1ccc([C@@H]2[C  
 @H](C/C=C/c3ccc(CO)cc3)C(=O)N2c2ccccc2)cc1  
 6254 C=CC(=O)OCC.CC1OCCCC1Sc1c(I)cnc2ccccc12>>CCOC(=O)/C=C/c1cnc2ccccc2c1SC1CCOC1C  
 6255 C=Cc1ccccc1.CCCCOC(=O)/C=C/c1ccc(Br)cc1Cl>>CCCCOC(=O)/C=C/c1ccc(/C=C/c2ccccc2)cc1Cl  
 6256 C=CS(=O)c1ccccc1.O=[N+](=[O-])c1ccc(Br)cc1>>O=[N+](=[O-])c1ccc(/C=C/S(=O)c2ccccc2)cc1  
 6257 C=CCNC(=O)C(F)(F)F.O=c1[nH]c(=O)n([C@H]2C[C@H](O)[C@@H](CO)O2)cc1I>>O=C(NC/C=C  
 /c1cn([C@H]2C[C@H](O)[C@@H](CO)O2)c(=O)[nH]c1=O)C(F)(F)F  
 6258 C=CC(=O)Nc1en(Cc2cccc(C(F)(F)F)c2)cn1.COC(=O)c1ccc(Br)cn1>>COC(=O)c1ccc(/C=C/C(=O)Nc  
 2cn(Cc3cccc(C(F)(F)F)c3)cn2)cn1  
 6259 C=CC(=O)OC.Ic1enn(Cc2ccccc2)c1>>COC(=O)/C=C/c1enn(Cc2ccccc2)c1  
 6260 Brc1ccc2c(c1)OCO2.C=Cc1ccccc1>>C(=C/c1ccc2c(c1)OCO2)\c1ccccc1  
 6261 C=CC(=O)OCCCC.CCN(c1ccccc1)c1ccc(Br)n1>>CCCCOC(=O)/C=C/c1ccccc1(N(CC)c2ccccc2)n1  
 6262 C=Cc1cncnc1.CCCCCOc1ccc(Br)c(F)c1>>CCCCCOc1ccc(/C=C/c2cncnc2)c(F)c1  
 6263 C=CC(O)CC.OCc1cccc(I)c1>>CCC(O)/C=C/c1cccc(CO)c1  
 6264 C=CC(=O)OCC.O=Cc1cn(-c2ccccc2)nc1OS(=O)(=O)C(F)(F)F>>CCOC(=O)/C=C/c1nn(-  
 6265 C=CC#N.Cn1c2c(c3ccc(I)cc3c1=O)C(=O)c1ccccc1-  
 2>>Cn1c2c(c3ccc(/C=C/C#N)cc3c1=O)C(=O)c1ccccc1-2  
 6266 C=CC(=O)N1N=Cc2ccccc2C1CC(C)C.COc1cc(Cc2cnc(N)nc2N)cc(I)c1OC>>COc1cc(Cc2cnc(N)nc2  
 N)cc(/C=C/C(=O)N2N=Cc3ccccc3C2CC(C)C)c1OC  
 6267 C=CC1(O)CCC1.FC(F)(F)c1ccc(I)cc1>>OC1/C=C/c2ccc(C(F)(F)F)cc2)CCC1  
 6268 C=Cc1ccc(N(C)C(=O)OC(C)(C)C)cc1.OCCOCCOCCOc1ccc(I)cn1>>CN(C(=O)OC(C)(C)C)c1ccc(/C  
 =C/c2ccc(OCCOCCOCCO)nc2)cc1  
 6269 C=CC(=O)OCC.CSc1nc(C)c(I)c(NC(C)C)n1>>CCOC(=O)/C=C/c1c(C)nc(SC)nc1NC(C)C  
 6270 Brc1ccc2ccc3ccccc4ccc1c2c34.C=CC(=O)OCC>>CCOC(=O)/C=C/c1ccc2ccc3ccccc4ccc1c2c34  
 6271 Brc1ccccc1I.C=CC(N)=O>>NC(=O)/C=C/c1ccccc1Br  
 C=CCNC(=O)NC(C)(C)CO.Cc1cc(OCc2ccccc2)c([C@@H]2S[C@H](COCc3ccccc3)[C@@H](OCc3  
 6272 cccc3)[C@H](OCc3ccccc3)[C@H]2OCc2ccccc2)cc1Cc1ccc(Br)cc1>>Cc1cc(OCc2ccccc2)c([C@@H  
 ]2S[C@H](COCc3ccccc3)[C@@H](OCc3ccccc3)[C@H](OCc3ccccc3)[C@H]2OCc2ccccc2)cc1Cc1cc  
 c(/C=C/CNC(=O)NC(C)(C)CO)cc1  
 6273 C=CC(=O)OCCCC.Cc1ccc(Br)c(C)c1>>CCCCOC(=O)/C=C/c1ccc(C)cc1C  
 6274 C=CC(=O)OCC.Cc1ccc(S(=O)(=O)Cc2ccccc2)cc1>>CCOC(=O)/C=C/c1ccccc1CS(=O)(=O)c1ccc(C)  
 6275 C=CC(=O)OCCN(C)C.Ic1enn2c(-c3ccccc3)cc(-c3ccccc3)nc12>>CN(C)CCOC(=O)/C=C/c1enn2c(-  
 c3ccccc3)cc(-c3ccccc3)nc12  
 6276 C=Cc1encc(C#N)c1Nc1ccc2[nH]ccc2c1C.ClCCOc1ccc(Br)cc1>>Cc1c(Nc2c(C#N)cncc2/C=C/c2ccc(  
 OCCCl)cc2)ccc2[nH]ccc12  
 6277 C=Cc1ccccc1.Nc1cc(F)ccc1Br>>Nc1cc(F)ccc1/C=C/c1ccccc1  
 6278 C=Cc1ccc([N+](=O)[O-])cc1.Oc1ccc(I)cc1>>O=[N+](=[O-])c1ccc(/C=C/c2ccc(O)cc2)cc1  
 C=CC(=O)OC.Cc1cc(-c2nn(C(c3ccccc3)(c3ccccc3)c3ccccc3)c3cc([N+](=O)[O-  
 6279 ])c(Br)cc23)ccn1>>COC(=O)/C=C/c1cc2c(-  
 c3cnc(C)c3)nn(C(c3ccccc3)(c3ccccc3)c3ccccc3)c2cc1[N+](=O)[O-]  
 6280 C=CC(=O)OC.CC(C)CN1CCc2c(ccc3[nH]ccc23)C1c1ccc(Br)cc1>>COC(=O)/C=C/c1ccc(C2c3ccc4[n  
 H]ccc4c3CCN2CC(C)C)cc1  
 6281 Brc1cncnc1.C=Cc1ccccc1OC>>COc1ccccc1/C=C/c1cncnc1  
 6282 C=CC(=O)OC(C)(C)C.CC(C)(C)OC(=O)N1CCNc2ccc(Br)cc2C1>>CC(C)(C)OC(=O)/C=C/c1ccc2c(c  
 1)CN(C(=O)OC(C)(C)C)CCN2

[illegible]

C=Cc1nc2c(N)ncnc2n1[C@@H]1O[C@H](CO[Si](C)(C)C(C)(C)C)[C@@H](O[Si](C)(C)C(C)(C)C)[C@H]1O[Si](C)(C)C(C)(C)C.Clc1ccccc1>>CC(C)(C)[Si](C)(C)OC[C@H]1O[C@H](n2c(/C=C/c3ccccc3)nc3c(N)ncnc32)[C@H](O[Si](C)(C)C(C)(C)C)[C@@H]1O[Si](C)(C)C(C)(C)C

6325 C=CCNS(=O)(=O)c1ccc(C)cc1.N#Cc1ccccc1Br>>Cc1ccc(S(=O)(=O)NC/C=C/c2ccccc2C#N)cc1

6326 C=Cc1ccccc1.COc1ccc(N(c2ccc(Br)cc2)c2ccc(OC)cc2)cc1>>COc1ccc(N(c2ccc(/C=C/c3ccccc3)cc2)c2ccc(OC)cc2)cc1

6327 C=CCC1CCCC1.COC(=O)c1ccc2cc(Br)ccc2c1>>COC(=O)c1ccc2cc(/C=C/CC3CCCC3)ccc2c1

6328 C=Cc1ccccc1.Cn1c(/C=C/c2ccc(Cl)cc2)c(I)c(=O)c2ccccc21>>Cn1c(/C=C/c2ccc(Cl)cc2)c(/C=C/c2ccc(Cl)cc2)c(=O)c2ccccc21

6329 C=CCOC(C)=O.Cc1ccc([I+](c2ccc(C)cc2)cc1)>>CC(=O)OC/C=C/c1ccc(C)cc1

6330 C=Cc1ccccc1.CC(C)(C)OC(=O)N[C@H](COc1ccccc1Br)c1Cc1c[nH]c2ccccc12>>CC(C)(C)OC(=O)N[C@H](COc1ccccc1Br)c1Cc1c[nH]c2ccccc12

6331 C=CC(=O)OCCCC.COc1ccc(Cl)cc1>>CCCCOC(=O)/C=C/c1ccc(OC)cc1

6332 C=Cc1ccc(OC(C)=O)cc(OC(C)=O)c1.CC(C)(O)c1ccc(C(=O)c2ccc(Cl)cc2)cc1C(=O)Oc1ccc(I)cc1>>C(C(=O)Oc1cc(/C=C/c2ccc(OC(=O)C(C)(C)Oc3ccc(C(=O)c4ccc(Cl)cc4)cc3)cc2)cc(OC(C)=O)c1C=CC(=O)OC.O=S(=O)(Oc1ccc2ccn(Cc3ccccc3)c2n1)C(F)(F)F)>>COC(=O)/C=C/c1ccc2ccn(Cc3ccccc3)c2n1

6333 Br1c2ccccc2cc2ccccc12.C=CC(=O)OCCCC>>CCCCOC(=O)/C=C/c1c2ccccc2cc2ccccc12

6334 C=CC(=O)n1c(C)ccc1C.Ic1ccccc1>>Cc1ccc(C)n1C(=O)/C=C/c1ccccc1

6335 C=Cc1ccc(OC(=O)c2ccccc2)cc(OC(=O)c2ccccc2)c1.O=C(Oc1ccc(I)cc1)c1ccccc1>>O=C(Oc1ccc(/C=C/c2cc(OC(=O)c3ccccc3)cc(OC(=O)c3ccccc3)c2)cc1)c1ccccc1

6336 C=CC(=O)Nc1ccccc(C)c1.COc1ccc2c(=O)c(I)coc2c1>>COc1ccc2c(=O)c(/C=C/C(=O)Nc3ccccc(C)c3)coc2c1

6337 C=Cc1ccccc1.C[Si](C)(C)c1cc2n(c(=O)c1I)CCC21OCCO1>>C[Si](C)(C)c1cc2n(c(=O)c1/C=C/c1ccccc1)CCC21OCCO1

6338 C=CS(C)(=O)=O.CC(C)(C)c1ccc(Br)cc1>>CC(C)(C)c1ccc(/C=C/S(C)(=O)=O)cc1

6339 C=CC(=O)OC(C)(C)C.Oc1ccc(Br)cc1>>CC(C)(C)OC(=O)/C=C/c1ccc(O)cc1

6340 \*CNCCCOCCOCCOCCNC(=O)COc1ccc(C(Cc2cc(OC)cc(OC)c2)NC(=O)c2ccccc(C=C)c2)cc1.Cc1ccc(I)cc1C>>\*CNCCCOCCOCCOCCNC(=O)COc1ccc(C(Cc2cc(OC)cc(OC)c2)NC(=O)c2ccccc(/C=C/c3ccc(C)c(C)c3)c2)cc1

6341 C=CC(=O)OCc1ccccc1.Oc1ccc2cc(Br)ccc2c1>>O=C(/C=C/c1ccc2cc(O)ccc2c1)OCc1ccccc1

6342 C=CC1(C(=O)O)CCS(=O)(=O)CC1.CC(C)[C@H](O)C(=O)N[C@@H](C)C(=O)N1CCC[C@H](C(=O)N[C@H](C)c2ccc3ccc(Br)cc3n2)N1>>CC(C)[C@H](O)C(=O)N[C@@H](C)C(=O)N1CCC[C@H](C(=O)N[C@H](C)c2ccc3ccc(/C=C/C4(C(=O)O)CCS(=O)(=O)CC4)cc3n2)N1

6343 C=Cc1ccccc1.O=[N+](=[O-])c1ccc(Cl)c([N+](=O)[O-])c1>>O=[N+](=[O-])c1ccc(/C=C/c2ccccc2)c([N+](=O)[O-])c1

6344 C=CC(=O)OCCCC.Clc1cc(Br)ccc1I>>CCCCOC(=O)/C=C/c1ccc(Br)cc1Cl

6345 C=CC(=O)OC.COC(=O)c1ccc(Br)c(C(=O)OC)n1>>COC(=O)/C=C/c1ccc(C(=O)OC)nc1C(=O)OC

6346 C=CC(=O)N1CCOCC1.Oc1ccc2c(c1)CCN(c1ccccc1)C2c1ccc(I)cc1>>O=C(/C=C/c1ccc(C2c3ccc(O)c3CCN2c2ccccc2)cc1)N1CCOCC1

6347 Br1ccc2nc(-c3ccccc3)c(-c3ccccc3)nc2c1.C=Cc1ccccc1>>C(=C/c1ccc2nc(-c3ccccc3)c(-c3ccccc3)nc2c1)c1ccccc1

6348 C=CC(=O)OC1CCCCCCCCCCCC1.Ic1ccccc1>>O=C(/C=C/c1ccccc1)OC1CCCCCCCCCCCC1

6349 C=Cc1nc2c(N)ncnc2n1[C@H]1C[C@H](O[Si](C)(C)C(C)(C)C)[C@@H](CO[Si](C)(C)C(C)(C)C)O1.COc1ccc(Br)cc1>>COc1ccc(/C=C/c2nc3c(N)ncnc3n2[C@H]2C[C@H](O[Si](C)(C)C(C)(C)C)[C@@H](CO[Si](C)(C)C(C)(C)C)O2)cc1

6350 C=C(OC)C1=C(Br)C(O[Si](C)(C)C(C)(C)C)CCC1.C=CC(=O)OC(C)(C)C>>C=C(OC)C1=C(/C=C/C(=O)OC(C)(C)C)C(O[Si](C)(C)C(C)(C)C)CCC1

6351 C=Cc1ccc(SC)cc1.CN(C)CCCN1ccc2cc(Br)ccc2c1=O>>CSc1ccc(/C=C/c2ccc3c(=O)n(CCCN(C)C)ccc3c2)cc1

6352 Br1ccccc1.C=Cc1ccc(/C=C/c2ccc(N(C)C)cc2)cc1>>CN(C)c1ccc(/C=C/c2ccc(/C=C/c3ccccc3)cc2)cc1

6353 C=CC(=O)O.CC(C)=CCc1cc(I)cc(CC=C(C)C)c1O>>CC(C)=CCc1cc(/C=C/C(=O)O)cc(CC=C(C)C)c1

6354 C=CC(=O)OC(C)(C)C.CN(C(=O)CSCc1ccccc1)c1c(F)cc(F)cc1Br>>CN(C(=O)CSCc1ccccc1)c1c(F)cc(F)cc1/C=C/C(=O)OC(C)(C)C

6355 C=CC(=O)OCC.Clc1ccc(Br)cn1>>CCOC(=O)/C=C/c1ccc(Cl)nc1

6356 C=Cc1ccc(Cl)cc1.CC(=O)c1ccc(Br)cc1>>CC(=O)c1ccc(/C=C/c2ccc(Cl)cc2)cc1

6357 C=CC(=O)OCC.COc1cc(C)(Br)cn1>>CCOC(=O)/C=C/c1ccc(OC)cc1C

6358 C=CS(=O)(=O)F.Ic1ccccc1>>O=S(=O)(F)/C=C/c1ccccc1

6359 C=CC(=O)N(C)Cc1cc2ccccc2n1C.CNc1n[nH]c2ncc(Br)cc12>>CNc1n[nH]c2ncc(/C=C/C(=O)N(C)Cc3cc4ccccc4n3C)cc12

6361

C=CC(=O)N(C)Cc1ccc(OC)c1OCCC.CC1(C)NCc2cc(Br)cnc2NC1=O>>CCCCOc1c(CN(C)C(=O)/C=C/c2cnc3c(c2)CNC(C)(C)C(=O)N3)cccc1OC  
C=CC(=O)OCC.Nc1ccc(Cl)nc1I>>CCOC(=O)/C=C/c1nc(Cl)ccc1N  
C=CC(O)c1cccc1.I/C=C/C=C/CCCCOCc1cccc1>>OC(/C=C/C=C/C=C/CCCCOCc1cccc1)c1cccc1  
C=CC(=O)OCC.O=Cc1ccc(Cl)cc1>>CCOC(=O)/C=C/c1ccc(C=O)cc1  
C=Cc1ccc(OC)cc1.Oc1ccc(O)c(I)c1>>COc1ccc(/C=C/c2cc(O)ccc2O)cc1  
C=Cc1ccc(Cl)cc1.Cc1ccc(O)c(I)c1>>Cc1ccc(O)c(/C=C/c2ccc(Cl)cc2)c1  
C=Cc1nnc2c1nnc2[C@@H]1O[C@H](COC(C)=O)[C@@H](O)[C@H]1O.Ic1cccc1>>CC(=O)OC[C@H]1O[C@@H](n2cnc3c(/C=C/c4cccc4)nnc32)[C@H](O)[C@@H]1O  
C=CC(F)(F)C(F)(F)C(F)(F)C(F)(F)C(F)(F)C(F)(F)F.COCC(=O)c1ccc(Br)cc1C>>COC(=O)c1ccc(/C=C/C(F)(F)C(F)(F)C(F)(F)C(F)(F)C(F)(F)C(F)(F)C(F)(F)F)cc1CBr  
n2cnc2)cc1.C=CCO[C@@H]1CC(=O)O[C@H](C)C/C=C/C=C/[C@H](O[Si](C)(C)C(C)(C)C)[C@H](C)C[C@H](CC(OC)OC)[C@H](O[C@@H]2O[C@H](C)[C@@H](O[C@H]3C[C@@](C)(O)[C@@H](OC(=O)CC)[C@H](C)O3)[C@H](N(C)C)[C@H]2OC(C)=O)[C@H]1OC>>CCC(=O)O[C@H]1[C@H](C)O[C@@H](O[C@H]2[C@H](N(C)C)[C@@H](OC(C)=O)[C@H](O[C@@H]3[C@@H](OC)[C@H](OC/C=C/c4ccc(-n5cnc5)cc4)CC(=O)O[C@H](C)C/C=C/C=C/[C@H](O[Si](C)(C)C(C)(C)C)[C@H](C)C[C@@H]3C(C)(C)C)O[C@@H]2C)O[C@H]1C)  
C=CC(=O)OC.COc1ccc(OC)c(NC(=O)C(C)(C)C)c1I>>COC(=O)/C=C/c1c(OC)ccc(OC)c1NC(=O)C(C)(C)C  
C=CC(=O)OCC.Cc1cccc([C@@H](C)OC[C@H]2CO2)c1Br>>CCOC(=O)/C=C/c1c(C)cccc1[C@@H](C)OC[C@H]1CO1  
C=CC(=O)OC(C)(C)C.Nc1ccc(Cl)cc1I>>CC(C)(C)OC(=O)/C=C/c1cc(Cl)ccc1N  
C=CC(=O)OC.O=C1Cc2c([nH]c3ccc(C(F)(F)F)cc23)-c2cc(I)ccc2N1>>COC(=O)/C=C/c1ccc2c(c1)-c1[nH]c3ccc(C(F)(F)F)cc3c1CC(=O)N2  
C=CC(=O)OC(C)(C)C.CC(C)CN1[C@H](C)Cc2c(ccc3[nH]ncc23)[C@H]1c1ccc(Br)cc1>>CC(C)CN1[C@H](C)Cc2c(ccc3[nH]ncc23)[C@H]1c1ccc(/C=C/C(=O)OC(C)(C)C)cc1  
C=CC(=O)N1N=Cc2cccc2C1CCC(F)(F)F.COc1cc(Cc2cnc(N)nc2N)cc(I)c1OC>>COc1cc(Cc2cnc(N)nc2N)cc(/C=C/C(=O)N2N=Cc3cccc3C2CCC(F)(F)F)c1OC  
C=Cc1ccc2c(c1)c1cccc1n2CCCCCCCC.O=Cc1ccc(Br)cc1>>CCCCCCCCn1c2cccc2c2cc(/C=C/c3ccc(C=O)cc3)ccc21  
Br1ccc(I)cc1.C=Cc1ccc(OC)cc1>>CCOc1ccc(/C=C/c2ccc(Br)cc2)cc1  
C=Cc1cccc1.O=[N+][O-]c1ccc(C(O)c2cccc2I)cc1>>O=[N+][O-]c1ccc(C(O)c2cccc2/C=C/c2cccc2)cc1  
C=CC(=O)Cl=CN(C(C)(C)C)CCC1(C)C.Ic1cccc1>>CC1(C)CCN(C(C)(C)C)C=C1C(=O)/C=C/c1cccBr1cccn1.C=Cc1ccc(C(=O)OC(C)(C)C)c(Nc2ccc(F)cc2)c1>>CC(C)(C)OC(=O)c1ccc(/C=C/c2ccnc2)cc1Nc1ccc(F)cc1  
C=Cc1cc(OCc2cccc2)ccc1OCc1cccc1.O=C(NCCc1cccc1)c1cc(I)ccc1O>>O=C(NCCc1cccc1)c1cc(/C=C/c2cc(OCc3cccc3)ccc2OCc2cccc2)ccc1O  
C=C[Si](C)(C)C.CC(=O)c1ccc(I)cc1>>CC(=O)c1ccc(/C=C/[Si](C)(C)C)cc1  
C=CC(C)=O.FC(F)C(F)(F)Cn1nnc(-c2cccc2)c1I>>CC(=O)/C=C/c1c(-c2cccc2)nnn1CC(F)(F)C(F)F  
C=CC(=O)OCC.CC(=O)O[IH2](OC(C)=O)c1cccc1>>CCOC(=O)/C=C/c1cccc1  
C=CS(=O)c1cccc1.N#Cc1ccc(Br)cc1>>N#Cc1ccc(/C=C/S(=O)c2cccc2)cc1  
C=Cc1ccc(C)cc1.Fc1ccc(Br)cc1>>Cc1ccc(/C=C/c2ccc(F)cc2)cc1  
C=Cc1cc(OC)c(OC)c(OC)c1-c1cccc1.Ic1cccc1>>COc1cc(/C=C/c2cccc2)c(-c2cccc2)c(OC)c1OC  
C=CC(=O)Nc1cccn1.O=c1c(I)c(-c2ccc(O)cc2)oc2cc(O)ccc12>>O=C(/C=C/c1c(-c2ccc(O)cc2)oc2cc(O)ccc2c1=O)Nc1cccn1  
C=CS(=O)(=O)F.O=[N+][O-]c1ccc(I)cc1>>O=[N+][O-]c1ccc(/C=C/S(=O)(=O)F)cc1  
C=CCCP(=O)(OC)OC.Fc1ccc(I)cc1>>COP(=O)(CC/C=C/c1ccc(F)cc1)OC  
C=CC(OCC)OCC.O=[N+][O-]c1ccc(Br)c1>>CCOC(/C=C/c1cccc([N+](=O)[O-])c1)OCC  
C=CC(CC)n1nnc2cccc21.Cc1ccc(I)cc1>>CCC(/C=C/c1ccc(C)cc1)n1nnc2cccc21  
C=CCCCO.C[Si](C)(C)Oc1ccc(-c2ccc(Br)cc2)nc1>>C[Si](C)(C)Oc1ccc(-c2ccc(/C=C/CCCCO)cc2)nc1  
C=Cc1ccc(OC)cc1.CCOC(=O)C(F)(F)I>>CCOC(=O)C(F)(F)/C=C/c1ccc(OC)cc1  
Br1ccc(C=C(c2cccc2)c2cccc2)cc1.C=Cc1ccc(-n2c3cccc3c3cccc32)cc1>>C(=C(c1cccc1)c1cccc1)c1ccc(/C=C/c2ccc(-C=CC(C)=O.CC(C)Oc1ccc(Oe2nce(I)s2)cc1>>CC(=O)/C=C/c1nnc(Oc2ccc(OC(C)C)cc2)s1  
C=COCCCC.O=C(Cl)c1cccc1>>CCCCO/C=C/C(=O)c1cccc1  
C=Cc1cccc1.O=Cc1ccc(Br)c1>>O=Cc1cccc(/C=C/c2cccc2)c1  
Br1ccc(NCCNe2cccc2)nc1.C=CC(=O)OC(C)(C)C>>CC(C)(C)OC(=O)/C=C/c1ccc(NCCNe2cccc2)

6401 C=Cc1ccc(OCCCCCCCCCCCC)c(OCCCCCCCCCCCC)c1.Oc1ccc(I)cc1>>CCCCCCCCCCCCCOc1ccc(/C=C/c2ccc(O)cc2)cc1OCCCCCCCCCCCC  
6402 C=Cc1ccc(OC)c(OC)c1.CC(=O)OC[C@H]1O[C@@H](Oc2ccc(I)cc2)[C@H](OC(C)=O)[C@@H]1O  
6403 C(C)=O>>COc1ccc(/C=C/c2ccc(O[C@@H]3O[C@H](COC(C)=O)[C@@H](OC(C)=O)[C@H]3OC(C)=O)cc2)cc1OC  
6404 C=CC(=O)OCCCC.Ic1ccncc1>>CCCCOC(=O)/C=C/c1ccncc1  
6405 C=Cc1ccc(N)cc1.O=C(O)c1ccc(I)cc1>>Nc1ccc(/C=C/c2ccc(C(=O)O)cc2)cc1  
6406 C=Cc1cccc(Cl)c1.CC(C)(C)Br>>CC(C)(C)/C=C/c1cccc(Cl)c1  
6407 C=CCN(C(=O)OC(C)(C)C(=O)OC(C)(C)C.CC(=O)c1ccc(Cl)cc1>>CC(=O)c1ccc(/C=C/CN(C(=O)OC(C)(C)C(=O)OC(C)(C)C)cc1  
6408 C=Cc1cc[n+](I)cc1.Oc1cc(Nc2c(C#N)cnc3cc(Br)ccc23)cc(OC)c1OC>>COc1cc(Nc2c(C#N)cnc3cc(/C=C/c4cc[n+](I)cc4)ccc23)cc(OC)c1OC  
6409 C=CCO[C@H]1O[C@H](COC(C)=O)[C@@H](OC(C)=O)[C@H](OC(C)=O)[C@@H]1OC(C)=O.Ic1cccc1>>CC(=O)OC[C@H]1O[C@H](OC/C=C/c2cccc2)[C@@H](OC(C)=O)[C@@H](OC(C)=O)[C@@H]1OC(C)=O  
6410 C=CC(=O)OC.Cc1c(CN(C)C)c2cccc2n1Cc1ccc(Br)cc1>>COC(=O)/C=C/c1ccc(Cn2c(C)c(CN(C)C)c3cccc32)cc1  
6411 C=Cc1ccc(S(=O)(=O)c2cccc2F)cn1.Cc1cc(F)ccc1I>>Cc1cc(F)ccc1/C=C/c1ccc(S(=O)(=O)c2cccc2F  
6412 C=CC(=O)OCC.COc1cccc(-c2cccc2I)c1>>CCOC(=O)/C=C/c1cccc1-c1cccc(OC)c1  
6413 C=CC(=O)OC.Cn1c(=O)n(CC2COC(C)(C)O2)c(=O)c2ccc(Br)cc21>>COC(=O)/C=C/c1ccc2c(=O)n(C3COC(C)(C)O3)c(=O)n(C)c2c1  
6414 Br1c2cccc2cc2cccc12.C=CC(=O)OC>>COC(=O)/C=C/c1c2cccc2cc2cccc12  
6415 C=CC(=O)CCC.Cc1cc(C)c(Br)c(C)c1>>CCCC(=O)/C=C/c1c(C)cc(C)cc1C  
6416 C=CC(=O)OC.COc1ccc(Br)c(NC2cccc2)c1>>COC(=O)/C=C/c1ccc(OC)cc1NCc1cccc1  
6417 C=CC(C)=O.Cc1cc(C)c(N)c(I)c1>>CC(=O)/C=C/c1cc(C)cc(C)c1N  
6418 C=Cc1ccncc1.C[C@H]1CC[C@H](Cn2cc(I)c3nc(C#N)nc(-c4cncc(Cl)c4)c32)CC1>>C[C@H]1CC[C@H](Cn2cc(/C=C/c3ccncc3)c3nc(C#N)nc(-c4cncc(Cl)c4)c32)CC1  
6419 C=CC(=O)OC(C)(C)C.Fc1cc(F)cc(Br)c1>>CC(C)(C)OC(=O)/C=C/c1cc(F)cc(F)c1  
6420 C=CC(C)=O.CCCCCCCCCCCCCCc1cc(O)ccc1I>>CCCCCCCCCCCCCCCCCc1cc(O)ccc1/C=C/C(C)C=Cc1ccc(F)cc1.COC(=O)[14c]1[14cH][14c]([N+](=O)[O-])[14cH][14cH][14c]1Br>>COC(=O)[14c]1[14cH][14c]([N+](=O)[O-])[14cH][14cH][14c]1/C=C/c1ccc(F)cc1  
6421 C=CC(=O)OCC.Clc1cccn1>>CCOC(=O)/C=C/c1cccn1  
6422 C=CC(C)=O.Cc1ccc(N)c(I)c1>>CC(=O)/C=C/c1cc(C)ccc1N  
6423 C=CC(C)=O.Cc1ccc2[nH]c3c(c2c1)CC(=O)Nc1ccc(I)cc1-3>>CC(=O)/C=C/c1ccc2c(c1)-c1[nH]c3ccc(C)cc3c1CC(=O)N2  
6424 C=CC#N.O=C(O)c1ccc(I)cc1>>N#C/C=C/c1ccc(C(=O)O)cc1  
6425 C=CC(=O)OC(C)(C)C.CCCOc1ccc(Br)c(C(=O)OC)c1>>CCCOc1ccc(/C=C/C(=O)OC(C)(C)C)c(C(=O)OC)c1  
6426 C=Cc1cccc(OC)c1.CN(C(=O)c1cccc1)c1ccc2c(c1)[nH]c(=NC(=O)c1ccc(Br)s1)n2CCC(N)=O>>COc1cccc(/C=C/c2ccc(C(=O)N=c3[nH]c4cc(N(C)C(=O)c5cccc5)ccc4n3CCC(N)=O)s2)c1  
6427 C=CC(=O)OC.O=C(O)c1cccc1I>>COC(=O)/C=C/c1cccc1C(=O)O  
6428 C=Cc1ccc2ccc(Cl)cc2n1.CC(C)(O)c1cccc1CCC(=O)c1ccc(Br)c1>>CC(C)(O)c1cccc1CCC(=O)c1ccc(/C=C/c2ccc3ccc(Cl)cc3n2)c1  
6429 C=Cc1ccc(C(C)(C)C)cc1.Cc1ccc(Br)cc1>>Cc1ccc(/C=C/c2ccc(C(C)(C)C)cc2)cc1  
6430 C=Cc1ccc(N(c2ccc(C)cc2)c2ccc(C)cc2)cc1.O=Cc1ccc(Br)cc1>>Cc1ccc(N(c2ccc(C)cc2)c2ccc(/C=C/c3ccc(C=O)cc3)cc2)cc1  
6431 C=CC(=O)OCC.O=c1c2cccc2c(Br)c2n1CCC2>>CCOC(=O)/C=C/c1c2n(c(=O)c3cccc13)CCC2  
6432 C=CC(=O)OC.FC(F)(F)c1cccc(Br)c1>>COC(=O)/C=C/c1cccc(C(F)(F)F)c1  
6433 C=Cc1ccc(Br)cc1.COc1ccc(CNc2c(C)cc(C)cc2I)cc1>>COc1ccc(CNc2c(C)cc(C)cc2/C=C/c2ccc(Br)cc2)cc1  
6434 C=CC(=O)OCC.CC(C)Oc1ccc(Br)cc1C=O>>CCOC(=O)/C=C/c1ccc(OC(C)C)c(C=O)c1  
6435 C=Cc1ccc(/C=C/c2ccc(N(c3ccc(OCCCCC)cc3)c3ccc(OCCCCC)cc3)cc2)cc1.O=Cc1ccc(Br)s1>>CCCCCOc1ccc(N(c2ccc(/C=C/c3ccc(/C=C/c4ccc(C=O)s4)cc3)cc2)c2ccc(OCCCCC)cc2)cc1  
6436 C=CC(=O)Nc1cccc1.O=c1c(I)coc2cc(O)ccc12>>O=C(/C=C/c1coc2cc(O)ccc2c1=O)Nc1cccc1  
6437 C=CC(=O)OC(C)C.CN(C)c1ccc(-c2ccc(CN(C(=O)C3CCCC3)c3cccc(Br)c3)cc2)cc1>>CC(C)OC(=O)/C=C/c1cccc(N(Cc2ccc(-c3ccc(N(C)C)cc3)cc2)C(=O)C2CCCC2)c1  
6438 C=CC(OCC)OCC.CCOC(=O)c1ccc(I)cc1>>CCOC(=O)c1ccc(/C=C/C(OCC)OCC)cc1

6439 C=Cc1ccc(OC)cc1.Nc1cccc(Br)c1>>COc1ccc(/C=C/c2cccc(N)c2)cc1  
6440 C=Cc1ccc(Cl)cc1.COc1ccc(I)cc1>>COc1ccc(/C=C/c2ccc(Cl)cc2)cc1  
6441 C=Cc1cncnc1.CC(C)(C)OC(=O)N[C@@H](CCc1ccccc1)COc1cncnc(Br)c1>>CC(C)(C)OC(=O)N[C@@H](CCc1ccccc1)COc1cncnc(/C=C/c2cncnc2)c1  
6442 Bre1enc2ccccc2c1.C=CCCN1C(=O)c2ccccc2C1=O>>O=C1c2ccccc2C(=O)N1CC/C=C/c1enc2ccccc2c  
6443 C=CCOc1ccccc1.FC(F)(F)c1cccc(Br)c1>>FC(F)(F)c1cccc(/C=C/COc2ccccc2)c1  
6444 Bre1cccc2c3c([nH]c12)C1CCN(CC1)C3.C=Cc1ccc(C)nc1>>Cc1ccc(/C=C/c2cccc3c4c([nH]c23)C2CCN(CC2)C4)cn1  
6445 C=CC(=O)OC.CCCN(CCC)C1CCc2cc(Br)ccc2C1>>CCCN(CCC)C1CCc2cc(/C=C/C(=O)OC)ccc2C1  
6446 C=CC(F)(F)F.FC(F)(F)c1cccc(Br)c1>>FC(F)(F)/C=C/c1cccc(C(F)(F)F)c1  
6447 C=CC(=O)OC.CC1(C)CC(=O)Ne2ccc(Br)cc21>>COC(=O)/C=C/c1ccc2c(c1)C(C)(C)CC(=O)N2  
6448 C=CC(=O)OC.O=Cc1ccc(I)cc1>>COC(=O)/C=C/c1ccc(C=O)cc1  
6449 C=Cc1ccc(O)c(OC)c1.COc1cc(Br)ccc(OC)c1F>>COc1cc(/C=C/c2cc(OC)c(F)c(OC)c2)ccc1O  
C=CC[C@H](CC(=O)OC(C)(C)C)C(=O)N[C@H](C(=O)N[C@H](C)c1ccccc1)C(C)(C)C.Cc1cc(Br)cc  
6450 c1-  
c1ccccc1>>Cc1cc(/C=C/C[C@H](CC(=O)OC(C)(C)C)C(=O)N[C@H](C(=O)N[C@H](C)c2ccccc2)C(Br1ccc(-c2ccccc2)cc1.C=CC(=O)OCC>>CCOC(=O)/C=C/c1ccc(-c2ccccc2)cc1  
6451 Bre1cccc1I.C=CC(=O)OC>>COC(=O)/C=C/c1ccccc1Br  
6452 C=CCNC(=O)[C@H](CC)NC(=O)OC(C)(C)C.CC(C)(C)OC(=O)n1cc(Br)c2ccccc21>>CC[C@H](NC(=O)OC(C)(C)C)C(=O)NC/C=C/c1cn(C(=O)OC(C)(C)C)c2ccccc12  
6453 C=CC1(C)OC(=O)Ne2ccc(-c3cc(F)cc(Br)c3)cc21.COc1ccc(-c2oc3ccccc3c(=O)c2I)cc1>>COc1ccc(-c2oc3ccccc3c(=O)c2/C=C/C2(C)OC(=O)Ne3ccc(-c4cc(F)cc(Br)c4)cc32)cc1  
6454 C=CC(=O)OCC.CCn1nnc2c(C)c(Br)ccc21>>CCOC(=O)/C=C/c1ccc2c(nnn2CC)c1C  
6455 C=CCOc1ccc(Cl)cc1.Ic1cccs1>>Clc1ccc(OC/C=C/c2cccs2)cc1  
6456 C=CC(=O)OC(C)(C)C.COc1ccc2c(C(=O)c3cc(OC)c(OC)c(OC)c3)cn(S(=O)(=O)c3ccccc(Br)c3)c2c1>>COc1ccc2c(C(=O)c3cc(OC)c(OC)c(OC)c3)cn(S(=O)(=O)c3ccccc(/C=C/C(=O)OC(C)(C)C)c3)c2c1  
6457 C=CC(=O)OCC.CC(C)(C)OC(=O)NCc1cc2ccccc2nc1Cl>>CCOC(=O)/C=C/c1nc2ccccc2cc1CNC(=O)OC(C)(C)C  
C=C[C@H]1OC2(CCCCC2)O[C@H]1CO[Si](C)(C)C(C)(C)C.CC1(C)OC(=O)c2c(cccc2OS(=O)(=O)C(F)(F)F)O1>>CC1(C)OC(=O)c2c(/C=C/[C@H]3OC4(CCCCC4)O[C@H]3CO[Si](C)(C)C(C)(C)C)cccc2O1  
6458 C=CC(=O)OC.Cc1nc(Br)c2c(c1O)COC(C)(C)OC2>>COC(=O)/C=C/c1nc(C)c(O)c2c1COC(C)(C)OC2  
C=CCn1c(C)c(C(=O)c2ccc(C)cc2)c2cc(OC)ccc21.C[C@H](OCc1ccc(I)cc1)C(=O)O>>COc1ccc2c(c1)c(C(=O)c1ccc(C)cc1)c(C)n2C/C=C/c1ccc(CO[C@H](C)C(=O)O)cc1  
6459 C=Cc1cncnc1.CC(C)[C@H](COc1cncnc(Br)c1)NC(=O)OC(C)(C)C>>CC(C)[C@H](COc1cncnc(/C=C/c2cncnc2)c1)NC(=O)OC(C)(C)C  
6460 C=Cc1ccc(N(c2ccccc2)c2ccccc2)cc1.CCCCC(CC)CN1C(=O)c2cccc3c(Br)ccc(c23)C1=O>>CCCCC(C)CN1C(=O)c2cccc3c(/C=C/c4ccc(N(c5ccccc5)c5ccccc5)cc4)ccc(c23)C1=O  
6461 C=Cc1cn(COCC[Si](C)(C)C)nc1-  
c1nc2ccc(OC)cc2n1COCC[Si](C)(C)C.COC(=O)c1cncnc(Br)c1>>COC(=O)c1cncnc(/C=C/c2cn(COCC[Si](C)(C)C)nc2-c2nc3ccc(OC)cc3n2COCC[Si](C)(C)C)c1  
6462 Bre1cc(I)c2ccccc2n1.C=CC(=O)OC>>COC(=O)/C=C/c1cc(Br)nc2ccccc12  
6463 C=CC(=O)OCC.Cc1nc(-n2c(C)ccc2C)cc(N[C@H]2CC[C@H](O)CC2)c1Br>>CCOC(=O)/C=C/c1c(N[C@H]2CC[C@H](O)CC2)cc(-n2c(C)ccc2C)nc1C  
6464 C=CCCC.Ic1ccccc1>>CCC/C=C/c1ccccc1  
6465 C=CC(=O)OC(C)(C)C.Cn1c(-c2ccccc2)c(I)c2ccccc21>>Cn1c(-c2ccccc2)c(/C=C/C(=O)OC(C)(C)C)c2ccccc21  
6466 C=CS(=O)(=O)F.Fc1ccc(I)c(F)c1>>O=S(=O)(F)/C=C/c1ccc(F)cc1F  
6467 C=CCN1C(=O)c2ccccc2C1=O.Ic1ccc(C2(N3CCCCC3)CCCCC2)cc1>>O=C1c2ccccc2C(=O)N1C/C=C/C/c1ccc(C2(N3CCCCC3)CCCCC2)cc1  
6468 C=C[Si](CC)(CC)CC.Cc1ccc(Br)cc1>>CC[Si](/C=C/c1ccc(C)cc1)(CC)CC  
6469 C=CC(=O)OC(C)(C)C.O=Cc1cc(Cl)ccc1Br>>CC(C)(C)OC(=O)/C=C/c1ccc(Cl)cc1C=O  
6470 Bre1ccc2ccc3cccc4ccc1c2c34.C=Cc1ccc(C(C)(C)C)cc1>>CC(C)(C)c1ccc(/C=C/c2ccc3ccc4cccc5ccc2c3c45)cc1  
6471 C=Cc1cc(CN2CCN(C)CC2)ccn1.Cc1c(Nc2c(I)cncc2C#N)ccc2[nH]ccc12>>Cc1c(Nc2c(C#N)cncc2/C=C/C/c2cc(CN3CCN(C)CC3)ccn2)ccc2[nH]ccc12  
6472 C=Cc1ccc(C)cc1.COC(=O)c1cc(OC)c(OC)cc1I>>COC(=O)c1cc(OC)c(OC)cc1/C=C/c1ccc(C)cc1  
6473 C=CC(C)=O.O=C(Nc1ccc(OC(F)(F)F)cc1)c1cnc(N2CC[C@H](O)C2)c(Br)c1>>CC(=O)/C=C/c1cc(C(=O)Ne2ccc(OC(F)(F)F)cc2)cn1N1CC[C@H](O)C1  
6474 Bre1cc2c(cc1C1OCCO1)OCO2.C=CC(=O)OC>>COC(=O)/C=C/c1cc2c(cc1C1OCCO1)OCO2



6478 C=CC(=O)OC.CC(=O)Oe1ccc(I)cc1>>COC(=O)/C=C/c1ccc(OC(C)=O)cc1  
6479 C=Cc1ccc(OC)cc1.O=C1OC(O)c2cc(Br)ccc21>>COc1ccc(/C=C/c2ccc3c(c2)C(O)OC3=O)cc1  
6480 C=CC(=O)OC(C)(C)C.O=[N+](O-  
6481 ]c1ccc(Oc2ccccc2)c(F)c1>>CC(C)(C)OC(=O)/C=C/c1cccc1Oe1ccc([N+](=O)[O-])cc1F  
6481 C=CC(=O)CC.COc1ccc(Br)c2ccccc12>>CCOc1ccc(/C=C/C(=O)CC)c2ccccc12  
6482 C=CS(=O)(=O)F.Cc1ccc(S(=O)(=O)n2c3ccccc3c3cc(I)ccc32)cc1>>Cc1ccc(S(=O)(=O)n2c3ccccc3c3c  
6483 c(/C=C/S(=O)(=O)F)ccc32)cc1  
C=CC(=O)OC(C)(C)C.CC(C)(C)O[C@H]1CC[C@H]2C=C(C3=C(Br)CN(S(=O)(=O)c4ccccc4)CC3)C  
6483 C[C@@]21C>>CC(C)(C)OC(=O)/C=C/C1=C(C2=C[C@H]3CC[C@H](OC(C)(C)C)[C@@]3(C)C  
C2)CCN(S(=O)(=O)c2ccccc2)C1  
6484 C=CC(=O)OC.COc1ccc2c(c1)CCN(c1ccc(C(C)C)cc1)C2(c1ccc(Br)cc1)C(F)(F)F>>COC(=O)/C=C/c1  
ccc(C2(C(F)(F)F)c3ccc(OC)cc3CCN2c2ccc(C(C)C)cc2)cc1  
6485 C=CC(=O)Nc1cccc1NC(=O)OC(C)(C)C.CN1C[C@H](c2ccc(Br)cc2F)[C@@H](C(=O)Nc2ccc(Cl)cc  
2)C1>>CN1C[C@H](c2ccc(/C=C/C(=O)Nc3ccccc3NC(=O)OC(C)(C)C)cc2F)[C@@H](C(=O)Nc2ccc  
(Cl)cc2)C1  
6486 C=Cc1cccn1.CC(C)(C)OC(=O)N1CCC(Br)CC1>>CC(C)(C)OC(=O)N1CCC(/C=C/c2cccn2)CC1  
6487 C=Cc1ccc(C(=O)N[C@@H](CCSC)C(=O)OC)c(-  
6487 c2ccccc2)C1.O=C(c1ccccc1Br)C12CC3CC(C(C3)C1)C2>>COC(=O)[C@H](CCSC)NC(=O)c1ccc(/  
C=C/c2ccccc2C(=O)C23CC4CC(C(C4)C2)C3)cc1-c1ccccc1C  
6488 C=CCNC(=O)c1ccccc1NC(=O)c1ccccc1.Ic1ccc2ccccc2c1>>O=C(Nc1ccccc1C(=O)NC/C=C/c1ccc2cc  
ccc2c1)c1ccccc1  
6489 C=CC(=O)OCCCC.Cn1c(-c2ccccc2)c(I)c2ccccc21>>CCCCOC(=O)/C=C/c1c(-  
6490 C=CC(=O)OCC.Nc1cc(-n2ccc3ccccc32)ccc1Br>>CCOC(=O)/C=C/c1ccc(-n2ccc3ccccc32)cc1N  
Br1c2nc(c(-c3ccccc3)c3ccc([nH]3)c(-c3ccccc3)c3nc(c(-  
6491 c4ccccc4)c4ccc1[nH]4)C=C3)C=C2.C=Cc1ccccc1>>C1=Cc2nc1c(/C=C/c1ccccc1)c1ccc([nH]1)c(-  
c1ccccc1)c1nc(c(-c3ccccc3)c3ccc([nH]3)c2-c2ccccc2)C=C1  
6492 C=Cc1ccc([N+](=O)[O-])c1.Clc1ccc(Br)c1>>O=[N+](O-)c1ccc(/C=C/c2ccc(Cl)c2)c1  
6493 C=CC(=O)OC(C)(C)C.COc1cc(CNc2ccc(Br)cn2)cc(OC)c1OC>>COc1cc(CNc2ccc(/C=C/C(=O)OC(C  
(C)C)cn2)cc(OC)c1OC  
6494 C=CN1C(=O)c2ccccc2C1=O.COc1cnc2cccc(Br)c2c1>>COc1cnc2cccc(/C=C/N3C(=O)c4ccccc4C3=O  
)c2c1  
6495 C=Cc1ccc(/C=C/c2ccc(/C=C/c3cc(OCCCCCCCCCCCC)cc(OCCCCCCCCCCCC)c3)cc2)cc1.O=Cc1cc  
c(Br)cc1>>CCCCCCCCCCCCCOc1cc(/C=C/c2ccc(/C=C/c3ccc(/C=C/c4ccc(C=O)cc4)cc3)cc2)cc(OCC  
CCCCCCCCC)c1  
6496 C=Cc1ccccc1.CNc1ccccc1I>>CNc1ccccc1/C=C/c1ccccc1  
6497 C=Cc1cc(OC)c(OC)c(OC)c1.Nc1ccc(I)cc1>>COc1cc(/C=C/c2ccc(N)cc2)cc(OC)c1OC  
6498 Br1cnc2ccccc12.C=CC(=O)CC>>CCC(=O)/C=C/c1cnc2ccccc12  
6499 C=CC(=O)OCC.Cc1cc(I)cn1>>CCOC(=O)/C=C/c1ccnc(C)c1  
6500 C=Cc1ccc(SC)cc1.Clc1c2cc(Br)ccc2nc1c1c1ccccc12>>CSc1ccc(/C=C/c2ccc3nc4c(oc5ccccc54)c(Cl)  
c3c2)cc1  
6501 C=CC(=O)OCCCC.CNc1cc(Cl)ccc1[N+](=O)[O-]>>CCCCOC(=O)/C=C/c1ccc([N+](=O)[O-  
6502 Br1ccccc1.C=CCOc1ccccc1C(C)(C)C>>CC(C)(C)c1ccccc1OC/C=C/c1ccccc1  
6503 Br1cncnc1.C=CC1CCN(C(=O)OC(C)(C)C)C1>>CC(C)(C)OC(=O)N1CCC(/C=C/c2cncnc2)C1  
6504 C=CC(OCC)OCC.Cc1ccccc1I>>CCOC(/C=C/c1ccccc1C)OCC  
6505 C=Cc1cc(OC)cc(OC)c1.Nc1ccc(I)cc1>>COc1cc(/C=C/c2ccc(N)cc2)cc(OC)c1  
6506 C=CC(=O)OC.O=Cc1ccc(Br)cc1>>COC(=O)/C=C/c1ccc(C=O)cc1  
6507 C=Cc1cccc(C)c1.COC(=O)c1ccccc1I>>COC(=O)c1ccccc1/C=C/c1ccc(C)c1  
6508 C=CC(C)=O.COc1cccc(Cn2nc(I)c3ccccc32)c1>>COc1cccc(Cn2nc(/C=C/C(C)=O)c3ccccc32)c1  
6509 C=Cc1ccc(C)cc1.CN(C)c1ccc(Cl)cc1>>Cc1ccc(/C=C/c2ccc(N(C)C)cc2)cc1  
6510 C=COCC.O=c1oc2ccccc2cc1Br>>CCO/C=C/c1cc2ccccc2oc1=O  
6511 C=Cc1cccc(O)c1.COc1ccccc1Br>>COc1ccccc1/C=C/c1ccc(O)c1  
6512 C=CC(N)=O.COc1ccc2c(c1)C(Br)=C(C=O)CC2>>COc1ccc2c(c1)C(/C=C/C(N)=O)=C(C=O)CC2  
6513 C=Cc1c(F)c(F)c(F)c(F)c1F.Cc1ccc2c(-c3ccccc3)c(Br)c(=O)oc2c1>>Cc1ccc2c(-  
c3ccccc3)c(/C=C/c3c(F)c(F)c(F)c3F)c(=O)oc2c1  
6514 C=CC(=O)N(C)Cc1cccc(OC)c1OCC(C)C.O=C1CCc2cc(Br)cn2N1>>COc1cccc(CN(C)C(=O)/C=C/c  
2cnc3c(c2)CCC(=O)N3)c1OCC(C)C  
6515 C=Cc1ccc(OC)cc1.CCCCC(I)C(F)(F)C(=O)OCC>>CCCCC(/C=C/c1ccc(OC)cc1)C(F)(F)C(=O)OCC  
6516 C=CC(=O)OC.COC1(OC)C(Br)=CCON(Cc2ccccc2)[C@@H]1[C@H]1COC(C)(C)O1>>COC(=O)/C  
=C/C1=CCON(Cc2ccccc2)[C@H]([C@H]2COC(C)(C)O2)C1(OC)OC  
6517 C=Cc1ccccc1.CN(C)CCCCC(=O)c1ccc(Br)c1>>CN(C)CCCCC(=O)c1ccc(/C=C/c2ccccc2)c1  
6518 Br1ccccc2[nH]ncc12.C=CC(N)=O>>NC(=O)/C=C/c1ccc2[nH]ncc12

[illegible]

6562 C=Cc1cccc1.O=C(Oc1cccc1)c1ccc(Br)cc1>>O=C(Oc1cccc1)c1ccc(/C=C/c2cccc2)cc1  
6563 Br1cccc2cccc12.C=Cc1ccc(C)cc1>>Cc1ccc(/C=C/c2cccc3cccc23)cc1  
6564 C=CC#N.Clc1ccc(I)cc1>>N#C/C=C/c1ccc(Cl)cc1  
6565 Br1cccn1.C=CCCCCCCC>>CCCCCCCC/C=C/c1cccn1  
6566 C=CC(=O)O.CC(C)(C)OC(=O)N[C@@H](Cc1c[nH]c2cccc(Br)c12)C(=O)O>>CC(C)(C)OC(=O)N[C@@H](Cc1c[nH]c2cccc(/C=C/C(=O)O)c12)C(=O)O  
6567 C=CC(CCCCC)OC1CCCCO1.COC(=O)CCCCC1=C(I)CCC1=O>>CCCCC(/C=C/C1=C(CCCCC(=O)OC)C(=O)CC1)OC1CCCCO1  
6568 C=CCN(C(=O)OC(C)(C)C)C(=O)OC(C)(C)C.N#Cc1ccc(Br)cc1>>CC(C)(C)OC(=O)N(C/C=C/c1ccc(C#N)cc1)C(=O)OC(C)(C)C  
6569 C=Cc1ccc(OC)cc1.CC(C)(Br)CCOC(=O)c1ccc(F)cc1>>COc1ccc(/C=C/C(C)(C)CCOC(=O)c2ccc(F)cc2)cc1  
6570 C=CC(=O)OC(C)(C)C.O=C1N=c2cc(Br)cnc2=N1>>CC(C)(C)OC(=O)/C=C/c1cnc2c(c1)=NC(=O)N=O  
6571 C=CS(C)(=O)=O.Cc1ccc(Br)cc1>>Cc1ccc(/C=C/S(C)(=O)=O)cc1  
6572 Br1ccc(N2c3cccc3N(c3cccc3)c3c2c2cccc2c2cccc32)cc1.C=Cc1cnc1>>C(=C/c1ccc(N2c3cccc3N(c3cccc3)c3c2c2cccc2c2cccc32)cc1)c1cnc1  
6573 C=Cc1cccc1.COCOc1ccc(/C=C/c2ccc(I)cc2)cc1>>COCOc1ccc(/C=C/c2ccc(/C=C/c3cccc3)cc2)cc1  
6574 Br1cccc1.C=Cc1scn1C>>Cc1nsc1/C=C/c1cccc1  
6575 C=Cc1cccc1.Nc1nc(N)c2cc(I)ccc2n1>>Nc1nc(N)c2cc(/C=C/c3cccc3)ccc2n1  
6576 C=Cc1cnc1.Nc1cccc(Br)c1>>Nc1cccc(/C=C/c2cnc2)c1  
6577 C=CC(N)=O.FC(F)(F)Oc1cccc(I)c1>>NC(=O)/C=C/c1cccc(OC(F)(F)F)c1  
6578 C=CC(=O)OC.CC(C)(C)OC(=O)NCCc1c[nH]c2ccc(Br)cc12>>COC(=O)/C=C/c1ccc2[nH]cc(CCNC(=O)OC(C)(C)C)c2c1  
6579 C=CC#N.Ic1cnnc2nnc(Cc3cccc3)c12>>N#C/C=C/c1cnnc2nnc(Cc3cccc3)c12  
6580 C=Cc1ccc(OC)cc1.Oc1cc(O)cc(I)c1>>COc1ccc(/C=C/c2cc(O)cc(O)c2)cc1  
6581 C=CS(=O)(=O)F.CC(C)c1ccc(I)cc1>>CC(C)c1ccc(/C=C/S(=O)(=O)F)cc1  
6582 C=Cc1ccc2c(c1)Sc1cccc1N2CCCCCCCC.O=Cc1ccc(I)cc1>>CCCCCCCCN1c2cccc2Sc2cc(/C=C/c3ccc(C=O)cc3)ccc21  
6583 C=CC(=O)OC(C)(C)C.CCOC(=O)/C=C/c1cc(Br)cc(Oc2ccnc2)c1>>CCOC(=O)/C=C/c1cc(/C=C/C(=O)OC(C)(C)C)cc(Oc2ccnc2)c1  
6584 C=CC(=O)Nc1ccc(OC)cc1.O=c1c(I)coc2cc(O)ccc12>>COc1ccc(NC(=O)/C=C/c2coc3cc(O)ccc3c2=O)cc1  
6585 C=CC(=O)CCCCC.O=C(c1cccc1)c1ccc(Br)cc1>>CCCCC(=O)/C=C/c1ccc(C(=O)c2cccc2)cc1  
6586 C=CC(=O)OCc1cccc1.CC(C)(C)OC(=O)NCCc1cc2cccc2nc1Cl>>CC(C)(C)OC(=O)NCCc1cc2cccc2nc1/C=C/C(=O)OCc1cccc1  
6587 C=CC(=O)O.N#Cc1ccc(I)cc1>>N#Cc1ccc(/C=C/C(=O)O)cc1  
6588 Br1cccn1.C=Cc1nn(C(c2cccc2)(c2cccc2)c2cccc2)c2c(F)cc(C#N)cc12>>N#Cc1cc(F)c2c(c1)c(/C=C/c1cccn1)nn2C(c1cccc1)(c1cccc1)c1cccc1  
6589 C=CCN(C(=O)OC(C)(C)C)C(=O)OC(C)(C)C.FC(F)(F)c1ccc(Cl)cc1>>CC(C)(C)OC(=O)N(C/C=C/c1ccc(C(F)(F)F)cc1)C(=O)OC(C)(C)C  
6590 C=Cc1ccc(OC)cc1.COc1cc(Br)cc(OC)c1F>>COc1ccc(/C=C/c2cc(OC)c(F)c(OC)c2)cc1  
6591 C=CC(=O)N(C)C.CCOC(=O)c1ccc(Br)cc1>>CCOC(=O)c1ccc(/C=C/C(=O)N(C)C)cc1  
6592 C=CCOc1cccc(C)c1.Ic1ccs1>>Cc1cccc(OC/C=C/c2ccs2)c1  
6593 C=CC(=O)OCCCCC.CN1C(=O)c2ccc(Cl)cc2[C@@](C)(CC#N)[C@H]1c1cccc1>>CCCCCOC(=O)/C=C/c1ccc2c(c1)[C@@](C)(CC#N)[C@@H](c1cccc1)N(C)C2=O  
6594 C=CC(=O)O.O=S(=O)(Nc1ccc(I)cc1)c1cccc(C(F)(F)F)c1>>O=C(O)/C=C/c1ccc(NS(=O)(=O)c2cccc(C(F)(F)F)c2)cc1  
6595 C=CC(=O)OC.Cc1ccc(-c2c(Br)n(CCCO[Si](C)(C)C(C)(C)C)c3ncnc(N)c23)cc1>>COC(=O)/C=C/c1c(-C=CC(=O)[C@@]1(O)C[C@H]2CC[C@]1(C)C2(C)C.Ic1cccc1>>CC1(C)[C@@H]2CC[C@@]1(C)[C@@](O)(C(=O)/C=C/c1cccc1)C2  
6596 C=Cc1ccc(-c2ccc(OC)cc2CO)c(OCc2cccc2)c1.COc1ccc(I)cc1Oc1ccc(C=O)cc1>>COc1ccc(-c2ccc(/C=C/c3ccc(OC)c(Oc4ccc(C=O)cc4)c3)cc2OCc2cccc2)c(CO)c1  
6597 C=Cc1cccc1.CC(C)(C)OC(=O)N1C[C@@H]2C[C@H](C1)c1cc(Br)cc(=O)n1C2>>CC(C)(C)OC(=O)N1C[C@@H]2C[C@H](C1)c1cc(/C=C/c3cccc3)cc(=O)n1C2  
6598 C=Cc1cccc1.O=C(Nc1cc(C(F)(F)F)cc(C(F)(F)F)c1)c1cc(I)ccc1O>>O=C(Nc1cc(C(F)(F)F)cc(C(F)(F)F)c1)c1cc(/C=C/c2cccc2)ccc1O  
6599 C=Cc1cccc1.COC(=O)c1cc(C#C[Si](C)(C)C)ccc1OS(=O)(=O)C(F)(F)F>>COC(=O)c1cc(C#C[Si](C)(C)C)ccc1/C=C/c1cccc1  
6600 C=Cc1ccc(OC)cc1.CN1CCCN(c2cccc(Br)n2)CC1>>COc1ccc(/C=C/c2cccc(N3CCCN(C)CC3)n2)cc1  
6601 C=CC(=O)OC(C)(C)C.O=C1CNc2ncc(Br)cc2CN1>>CC(C)(C)OC(=O)/C=C/c1cnc2c(c1)CNC(=O)CN  
6602 C=CC(N)=O.COc1cccc(I)c1>>COc1cccc(/C=C/C(N)=O)c1  
6603

C=CC(NC(=O)OC)C(=O)O.CC(=O)OC[C@H]1O[C@@H](n2cnc3c(=O)n4c(I)c(C)nc4n(C)c32)[C@H]  
6604 ](OC(C)=O)[C@@H]1OC(C)=O>>COC(=O)NC(/C=C/c1c(C)nc2n(C)c3c(ncn3[C@H]3O[C@H])(C  
OC(C)=O)[C@@H](OC(C)=O)[C@H]3OC(C)=O)c(=O)n12)C(=O)O  
6605 C=CC(=O)C(O)c1c(OC)ccc(OC)c1OCOC.COCOc1cccc1I>>COCOc1cccc1/C=C/C(=O)C(O)c1c(O  
C)ccc(OC)c1OCOC  
C=CC(=O)OCC.Cc1nc(-  
6606 n2c(C)ccc2C)cc(N[C@H]2CC[C@H](OCCO)CC2)c1Br>>CCOC(=O)/C=C/c1c(N[C@H]2CC[C@H](  
OCCO)CC2)cc(-n2c(C)ccc2C)nc1C  
6607 C=CC(C)(C)C.COC(=O)c1ccc(Br)cc1C>>COC(=O)c1ccc(/C=C/C(C)(C)C)cc1C  
6608 C=Cc1ccc(C(F)(F)F)cc1.O=C(NCc1cccc(I)c1)[C@@H]1CCCN1S(=O)(=O)c1cc2cccc2o1>>O=C(NC  
c1cccc(/C=C/c2ccc(C(F)(F)F)cc2)c1)[C@@H]1CCCN1S(=O)(=O)c1cc2cccc2o1  
6609 C=CC1CCCC1.Cc1nc(-c2ccc(I)cc2)sc1-c1cnc(N)n1>>Cc1nc(-c2ccc(/C=C/C3CCCC3)cc2)sc1-  
c1ccnc(N)n1  
6610 C=CC(=O)OCC.Cc1ccc(C2=C(I)c3cc(C)ccc3S(=O)(=O)N2C)cc1>>CCOC(=O)/C=C/C1=C(c2ccc(C)c  
c2)N(C)S(=O)(=O)c2ccc(C)cc21  
6611 C=C[C@@H](C)[C@@H](O)C/C=C(=O)OC.FC(F)(F)c1ccc(I)cc1>>COC(=O)/C=C/C[C@H](O)[C  
@H](C)/C=C/c1ccc(C(F)(F)F)cc1  
6612 C=CC(=O)OCC.O=Cc1cn(Cc2cccc2)c2ccc(Br)cc12>>CCOC(=O)/C=C/c1ccc2c(c1)c(C=O)en2Cc1cc  
6613 C=CCN1C(=O)c2cccc2C1=O.Nc1ccc(Br)cc1>>Nc1ccc(/C=C/CN2C(=O)c3cccc3C2=O)cc1  
6614 C=Cc1cncnc1.CCNc1ccc(C(c2ccc(Br)cc2)c2ccc(NCC)cc2)cc1>>CCNc1ccc(C(c2ccc(/C=C/c3cncnc3)  
c2)c2ccc(NCC)cc2)cc1  
6615 C=CCCCCCC.CC(C)[C@H]1C(=O)N[C@H](CO[Si](C)(C)C(C)(C)C)Cc2c[nH]c3c(Br)ccc(c23)N1C>  
>CCCCC/C=C/c1ccc2c3c(c[nH]c13)C[C@@H](CO[Si](C)(C)C(C)(C)C)NC(=O)[C@H](C(C)C)N2  
C=Cc1nc2c(N)ncnc2n1[C@@H]1O[C@H](CO[Si](C)(C)C(C)(C)C)[C@@H](O[Si](C)(C)C(C)(C)C)[  
6616 C@H]1O[Si](C)(C)C(C)(C)C.O=[N+](O-  
)]c1ccc(I)cc1>>CC(C)(C)[Si](C)(C)OC[C@H]1O[C@@H](n2c(/C=C/c3ccc([N+](=O)[O-  
]cc3)nc3c(N)ncnc32)FC@H](O[Si](C)(C)C(C)(C)C)FC@H]1O[Si](C)(C)C(C)(C)C  
6617 C=CC(=O)OC(C)(C)C.CC(C)OC(=O)c1sccc1Br>>CC(C)OC(=O)c1sccc1/C=C/C(=O)OC(C)(C)C  
6618 C=CC(=O)n1cccn1.O=c1c(I)c(-c2ccc(O)cc2)oc2cc(O)ccc12>>O=C(/C=C/c1c(-  
c2ccc(O)cc2)oc2cc(O)ccc2c1=O)n1cccn1  
6619 C=Cc1cccc1.CC(=O)c1cn(-c2cccc2)nc1OS(=O)(=O)C(F)(F)F>>CC(=O)c1cn(-  
c2cccc2)nc1/C=C/c1cccc1  
\*CNCCOCCOCCOCCNC(=O)COc1ccc(C(Cc2cc(OC)cc(OC)c2)NC(=O)c2cccc(C=C)c2)cc1.Fc1cc  
6620 c(F)c(I)c1>>\*CNCCOCCOCCOCCNC(=O)COc1ccc(C(Cc2cc(OC)cc(OC)c2)NC(=O)c2cccc(/C=C/  
c3cc(F)ccc3F)c2)cc1  
C=C[C@H]1O[C@H](OC)[C@H](OCc2cccc2)[C@@H](OCc2cccc2)[C@@H]1OCc1ccc2cccc2c1  
6621 .O=c1cc(-c2cccc2)oc2ccc(Br)cc12>>CO[C@H]1O[C@H](/C=C/c2ccc3oc(-  
c4cccc4)cc(=O)c3c2)[C@@H](OCc2ccc3cccc3c2)[C@H](OCc2cccc2)[C@H]1OCc1cccc1  
6622 C=Cc1cncnc1.CC(C)(C)OC(=O)N[C@H](COc1cnc(Br)c1)C(=O)Nc1ccc2cccc2c1>>CC(C)(C)OC(=  
O)N[C@H](COc1cnc(/C=C/c2cncnc2)c1)C(=O)Nc1ccc2cccc2c1  
6623 C=CC(=O)OC.O=C1c2ccc(OS(=O)(=O)C(F)(F)F)cc2C(=O)N1[C@H](COCc1cccc1)c1cccc1>>CO  
C(=O)C=C/c1ccc2c(c1)C(=O)N([C@H](COCc1cccc1)c1cccc1)C2=O  
6624 C=Cc1cncnc1.CC(=O)Nc1ccc(Br)cc1>>CC(=O)Nc1ccc(/C=C/c2cncnc2)cc1  
C=Cc1cc(OC)ccc1OC.CCCCCCOCc1ccc2c(C)c(Br)c(=O)oc2c1>>CCCCCCCCOc1ccc2c(C)c(/C=C/  
6625 c3cc(OC)ccc3OC)c(=O)oc2c1  
C=CC(=O)OC.CC(=O)c1cc2cc(Br)ccc2o1>>COC(=O)/C=C/c1ccc2oc(C(C)=O)cc2c1  
6626 C=CC(=O)OC.CN(C(=O)c1ncc2c(c1I)c1cccc1n2S(=O)(=O)N(C)C)c1cccc1>>COC(=O)/C=C/c1c(C  
(=O)N(C)c2cccc2)nc2c1c1cccc1n2S(=O)(=O)N(C)C  
6627 C=CCS(=O)(=O)c1cccc1.CCOC(=O)/C=C/c1cc(Br)cc(Cc2ccnc2)c1>>CCOC(=O)/C=C/c1cc(/C=C/  
CS(=O)(=O)c2cccc2)cc(Cc2ccnc2)c1  
6628 C=CCOc1cccc1.Cc1cccc(I)c1>>Cc1cccc(/C=C/COc2cccc2)c1  
6629 C=CCNS(=O)(=O)c1ccc(C)cc1.COc1ccc(I)cc1>>COc1ccc(/C=C/CNS(=O)(=O)c2ccc(C)cc2)cc1  
6630 C=CC(C)=O.Ic1ccc2cc[nH]c2c1>>CC(=O)/C=C/c1ccc2cc[nH]c2c1  
6631 C=Cc1cccn1.CC(C)c1oc2cc3oc(=O)ccc3cc2c1OS(=O)(=O)C(F)(F)F>>CC(C)c1oc2cc3oc(=O)ccc3cc  
6632 2c1/C=C/c1cccn1  
C=Cc1ccc(OC)c(OC)c1.Cc1ccc(I)c2ccc(N(C)C)cc12>>COc1ccc(/C=C/c2ccc(C)c3cc(N(C)C)ccc23)cc  
6633 Br1ccc(-c2ccc(I)cc2)cc1.C=Cc1ccc(CP(=O)(OCC)OCC)cc1>>CCOP(=O)(Cc1ccc(/C=C/c2ccc(-  
6634 c3ccc(Br)cc3)cc2)cc1)OCC  
C=CC(=O)OCC.O=C1c2ccc(Br)cc2CN1CC(F)(F)F>>CCOC(=O)/C=C/c1ccc2c(c1)CN(CC(F)(F)F)C2  
6635 C=CCCCCCC.CCOC(=O)/C=C\Br>>CCCCC/C=C/C=CC(=O)OCC  
6636 C=CC(=O)OC(C)(C)C.CN1CCC2(CC1)Cc1cc(Br)nc1NC2=O>>CN1CCC2(CC1)Cc1cc(/C=C/C(=O)  
6637 OC(C)(C)C)nc1NC2=O

6638 C=CCN(C(=O)OC(C)(C)C(=O)OC(C)(C)C.COc1cc(Br)cc(OC)c1OC>>COc1cc(/C=C/CN(C(=O)O  
C(C)(C)C)C(=O)OC(C)(C)C)cc(OC)c1OC  
6639 C=CC(=O)N1CCOCC1.CSc1ccc(Br)cc1>>CSc1ccc(/C=C/C(=O)N2CCOCC2)cc1  
6640 C=CC(C)OC(C)=O.C[Si](C)(C)Oc1ccc(-c2ccc(Br)cc2)nc1>>CC(=O)OC(C)/C=C/c1ccc(-  
c2ccc(O[Si](C)(C)C)en2)cc1  
6641 C=CC(=O)N(C)C.CN1CCCN(c2cccc(Br)n2)CC1>>CN1CCCN(c2cccc(/C=C/C(=O)N(C)C)n2)CC1  
6642 C=Cc1cccc1.COC(=O)[C@]1(NC(=O)OC(C)(C)C)CCc2cc(Br)ccc2C1>>COC(=O)[C@]1(NC(=O)O  
C(C)(C)C)CCc2cc(/C=C/c3ccccc3)ccc2C1  
6643 C=Cc1ccc(OC)cc1.CC(=O)c1ccc(Br)cc1>>COc1ccc(/C=C/c2ccc(C(C)=O)cc2)cc1  
6644 C=CC(=O)O.CC(=O)c1ccc(I)cc1>>CC(=O)c1ccc(/C=C/C(=O)O)cc1  
6645 C=Cc1cccc1.Cc1cc(I)cc(C)n1>>Cc1cc(/C=C/c2ccccc2)cc(C)n1  
6646 C=Cc1cccc1.CC(C)(C)Br>>CC(C)(C)/C=C/c1cccc1  
6647 C=CP(=O)(OCC)OCC.COc1ccc(Br)cc1>>CCOP(=O)(/C=C/c1ccc(OC)cc1)OCC  
6648 C=CC(C)=O.Ic1cccc1N(Cc1cccc1)Cc1cccc1>>CC(=O)/C=C/c1cccc1N(Cc1cccc1)Cc1cccc1  
6649 C=Cc1ccc(O)c(OC)c1.COC(=O)Cn1c(=O)c(Cl)nc2ccnc21>>COC(=O)Cn1c(=O)c(/C=C/c2ccc(O)c(O  
C)c2)nc2ccnc21  
6650 C=CC(=O)OC.CCCNC(=O)c1ccc(Br)cn1>>CCCN(C(=O)c1ccc(/C=C/C(=O)OC)cn1  
6651 C=Cc1ccc(O)c(O)c1.Oc1ccc(O)c(I)c1>>Oc1ccc(O)c(/C=C/c2ccc(O)c(O)c2)c1  
6652 C=CCOc1cccc1.Clc1cccc(Br)c1>>Clc1cccc(/C=C/COc2ccccc2)c1  
6653 C=CC(=O)OC(C)(C)C.COc1ncc(Br)c(OC)n1>>COc1ncc(/C=C/C(=O)OC(C)(C)C)c(OC)n1  
C=CC(=O)OC(C)(C)C.Cc1cc2c(Cc3ccc(Br)cc3)c(-  
6654 c3ccc(OC(F)(F)F)cc3)c(=O)oc2cc1O>>Cc1cc2c(Cc3ccc(/C=C/C(=O)OC(C)(C)C)cc3)c(-  
c3ccc(OC(F)(F)F)cc3)c(=O)oc2cc1O  
6655 Br1cccn1.C=CS(=O)c1cccc1>>O=S(/C=C/c1cccn1)c1cccc1  
C=Cc1cn(C(c2ccccc2)(c2ccccc2)c2ccccc2)en1.CS(=O)(=O)N1CCC(C2c3ccc(Cl)cc3C=C(Br)c3cccn3  
6656 2)CC1>>CS(=O)(=O)N1CCC(C2c3ccc(Cl)cc3C=C(/C=C/c3cn(C(c4ccccc4)(c4ccccc4)c4ccccc4)cn3)c  
3cccn32)CC1  
6657 C=CC(=O)OCC.COc1nc2ccc(Br)cc2nc1OC>>CCOC(=O)/C=C/c1ccc2nc(OC)c(OC)nc2c1  
6658 C=CC(=O)OCCCC.Cc1ccc2ccccc2c1Br>>CCCCOC(=O)/C=C/c1c(C)ccc2ccccc12  
6659 C=Cc1cccc1.C[Si](C)(OS(=O)(=O)C(F)(F)F)OS(=O)(=O)C(F)(F)F>>C[Si](C)(/C=C/c1cccc1)OS(=  
O)(=O)C(F)(F)F  
6660 C=Cc1ccc2c(c1)OCCO2.CC(C)(C)OC(=O)c1ccc(Br)cc1[N+](=O)[O-  
]>>CC(C)(C)OC(=O)c1ccc(/C=C/c2ccc3c(c2)OCCO3)cc1[N+](=O)[O-]  
6661 C=CC(=O)OC.Fc1cc(Br)c2[nH]ccc2c1>>COC(=O)/C=C/c1cc(F)cc2cc[nH]c12  
6662 C=CC(=O)N(C)Cc1cc2ccccc2n1C.COc1nn(C(=O)OC(C)(C)C)c2ncc(Br)cc12>>COc1nn(C(=O)OC(C)  
(C)C)c2ncc(/C=C/C(=O)N(C)Cc3cc4ccccc4n3C)cc12  
6663 C=CCn1c(-c2cccc(OC)c2)nc2ccccc2c1=O.O=C(CN1C(=O)COc2ccccc21)c1ccc(Br)cc1>>COc1cccc(-  
c2nc3ccccc3c(=O)n2C/C=C/c2ccc(C(=O)CN3C(=O)COc4ccccc43)cc2)c1  
6664 C=CC(=O)O.O=C(O)c1cc(Br)ccc1O>>O=C(O)/C=C/c1ccc(O)c(C(=O)O)c1  
6665 C=C[C@H]1COC(C)(C)N1C(=O)OCc1cccc1.COC(=O)c1ccc(Br)cc1>>COC(=O)c1ccc(/C=C/[C@  
H]2COC(C)(C)N2C(=O)OCc2ccccc2)cc1  
6666 C=CC=O.Cc1ccc(I)cc1>>Cc1ccc(/C=C/C=O)cc1  
C=CC(=O)OC.COc1c(CN(C(=O)c2ccccc2)c2cccc(Br)c2)ccc2c1OC(C)(C)[C@H](OC(C)=O)[C@H]  
6667 2OC(C)=O>>COC(=O)/C=C/c1cccc(N(Cc2ccc3c(c2OC)OC(C)(C)[C@H](OC(C)=O)[C@H]3OC(C  
)=O)C(=O)c2ccccc2)c1  
6668 C=Cc1ccc(N(c2ccc(OC)cc2)c2ccc(OC)cc2)cc1.Cn1c2ccc(Br)cc2c2cc(C=O)ccc21>>COc1ccc(N(c2ccc  
(/C=C/c3ccc4c(c3)c3cc(C=O)ccc3n4C)cc2)c2ccc(OC)cc2)cc1  
6669 C=CCn1nnc2ccccc21.Cc1ccc(I)cc1>>Cc1ccc(/C=C/Cn2nnc3ccccc32)cc1  
6670 C=Cc1cccc1.CCOC(=O)C(C)(F)Br>>CCOC(=O)C(C)(F)/C=C/c1cccc1  
6671 C=Cc1cc(OCc2ccccc2)c(OCc2ccccc2)nn1.Fc1cc(I)ccc1C(F)(F)F>>Fc1cc(/C=C/c2cc(OCc3ccccc3)c(O  
Cc3ccccc3)nn2)ccc1C(F)(F)F  
6672 C=CC(=O)OC(C)(C)C.COc1ccc(I)c([N+](=O)[O-  
])c1>>COc1ccc(/C=C/C(=O)OC(C)(C)C)c([N+](=O)[O-])c1  
Br1cnnc1.C=CCO[C@H]1[C@H](C)[C@H](O[C@H]2O[C@H](C)C[C@H](N(C)C)[C@H]2O  
6673 C(C)=O)[C@](C)(OC)C[C@H](C)/C=N\OCc2ccccc2)[C@H](C)[C@H]2OC(=O)O[C@]2(C)[C@  
@H](CC)OC(=O)[C@H]1C>>CC[C@H]1OC(=O)[C@H](C)[C@H](OC/C=C/c2cnnc2)[C@H](  
C)[C@H](O[C@H]2O[C@H](C)C[C@H](N(C)C)[C@H]2OC(C)=O)[C@](C)(OC)C[C@H](C)  
/C(=N\OCc2ccccc2)[C@H](C)[C@H]2OC(=O)O[C@]2C  
6674 C=CCN(C(=O)c1nccn1C)[C@H](C)c1cc(F)cc(F)c1.O=C1Nc2ncccc2[C@@]12Cc1cc(Br)cn1C2>>C[  
C@H](c1cc(F)cc(F)c1)N(C/C=C/c1cnc2c(c1)C[C@@]1(C2)C(=O)Nc2ncccc21)C(=O)c1nccn1C

Br1ccc(I)cc1.C=C[C@H](C)[C@H]1CC[C@H]2[C@@H]3CC(=O)[C@H]4C[C@H](O)CC[C@]4  
 6675 (C)[C@H]3CC[C@@]21C>>C[C@H]/(C=C/c1ccc(Br)cc1)[C@H]1CC[C@H]2[C@@H]3CC(=O)[C  
 @H]4C[C@H](O)CC[C@]4(C)[C@H]3CC[C@@]21C  
 6676 C=CC(=O)OC.COc1ccc(C#Cc2ccnc2Br)cc1>>COC(=O)/C=C/c1cccc1C#Cc1ccc(OC)cc1  
 6677 C=CC(=O)OC.O=C(Cc1cccc(Br)c1)c1ccc(-c2cccc2)o1>>COC(=O)/C=C/c1cccc(CC(=O)c2ccc(-  
 c3cccc3)o2)c1  
 6678 C=CC(F)(F)C(F)(F)C(F)(F)C(F)(F)F.O=Cc1ccc(Br)cc1>>O=Cc1ccc(/C=C/C(F)(F)C(F)(F)C(F)(F)C(F)  
 (F)F)cc1  
 6679 C=CC(=O)NCc1cccc1.CC(C)(C)OC(=O)c1cccc1Br>>CC(C)(C)OC(=O)c1cccc1/C=C/C(=O)NCc1c  
 ccc1  
 6680 C=Cc1ccc(C#N)cc1.Cn1nc(Br)c2cccc21>>Cn1nc(/C=C/c2ccc(C#N)cc2)c2cccc21  
 6681 C=CC(=O)OC(C)(C)C.O=C1CN(C(=O)OCc2cccc2)Cc2cc(Br)nc2N1>>CC(C)(C)OC(=O)/C=C/c1cn  
 c2c(c1)CN(C(=O)OCc1cccc1)CC(=O)N2  
 6682 C=Cc1ccc(S(=O)(=O)c2cccc2F)cn1.COc1cc(F)ccc1I>>COc1cc(F)ccc1/C=C/c1ccc(S(=O)(=O)c2cccc  
 c2F)cn1  
 6683 Br1ccnc1.C=Cc1ccc(Cn2cc(C)c(=O)[nH]c2=O)cc1>>Cc1cn(Cc2ccc(/C=C/c3ccnc3)cc2)c(=O)[nH]  
 6684 C=CC(=O)OC.Cn1ccc(I)cc1=O>>COC(=O)/C=C/c1cnn(C)c(=O)c1  
 6685 C=CC(=O)OC.CC(C)Oc1ccc(N2CCc3cc(O)ccc3C2(C)c2ccc(Br)cc2)cc1>>COC(=O)/C=C/c1ccc(C2(C  
 )c3ccc(O)cc3CCN2c2ccc(OC(C)C)cc2)cc1  
 6686 C=Cc1ccc(OC)cc1.COc1ccc(/C=C/c2c(I)c(=O)c3cccc3n2C)cc1>>COc1ccc(/C=C/c2c(/C=C/c3ccc(O  
 C)cc3)n(C)c3cccc3c2=O)cc1  
 6687 C=CC(=O)OC.Ic1nn(C(c2cccc2)(c2cccc2)c2cccc2)c2ccnc(OC3CCOCC3)c12>>COC(=O)/C=C/c1n  
 n(C(c2cccc2)(c2cccc2)c2cccc2)c2ccnc(OC3CCOCC3)c12  
 6688 C=CC(=O)OC.COC(=O)CCn1c(=O)oc2cc(Br)nc21>>COC(=O)/C=C/c1nc2c(c1)oc(=O)n2CCC(=O)  
 6689 C=CC(=O)OCC.COc1cc(O)ccc1Br>>CCOC(=O)/C=C/c1ccc(O)cc1OC  
 6690 C=CC(=O)OC(C)(C)C.[Si](C)(C)/C=C/C1=C(Br)CCCC1>>CC(C)(C)OC(=O)/C=C/C1=C(/C=C/[Si]  
 (C)(C)C)CCCC1  
 6691 C=CC(N)=O.Fc1ccc(I)c1>>NC(=O)/C=C/c1ccc(F)c1  
 6692 C=CC(=O)OC.COCCOc1cc(C(C)(C)C)ccc1I>>COCCOc1cc(C(C)(C)C)ccc1/C=C/C(=O)OC  
 6693 C=CC(=O)OCC.COc1ccc2c(Oc3ccc(Br)cc3)c(-c3cccc3)c(-  
 c3cccc3)nc2c1>>CCOC(=O)/C=C/c1ccc(Oc2c(-c3cccc3)c(-c3cccc3)nc3cc(OC)ccc23)cc1  
 6694 C=Cc1cccc(Cl)c1.COC(=O)c1cc(OC)ccc1Br>>COC(=O)c1cc(OC)ccc1/C=C/c1cccc(Cl)c1  
 6695 C=CC(C)(C)O.Clc1cccc1>>CC(C)(O)/C=C/c1cccc1  
 6696 C=CCOC(C)=O.Cc1ccc(I)c1>>CC(=O)OC/C=C/c1ccc(C)c1  
 6697 C=CCC1CCN(C(=O)c2cccc2)CC1.FC(F)(F)c1cc(Br)c2cccc(C(F)(F)F)c2n1>>O=C(c1cccc1)N1CCC  
 (C/C=C/c2cc(C(F)(F)F)nc3c(C(F)(F)F)cccc23)CC1  
 6698 C=CC(=O)N(C)C.Clc1cccc1>>CN(C)C(=O)/C=C/c1cccc1  
 6699 C=CC(O)CC.Clc1ccc(I)cc1>>CCC(O)/C=C/c1ccc(Cl)cc1  
 6700 C=CC(=O)OC(C)(C)C.O=Cc1cccc1Br>>CC(C)(C)OC(=O)/C=C/c1cccc1C=O  
 6701 C=CC(=O)OC(C)(C)C.COc1cc(CC(=O)Nc2ccc(I)cc2)ccc1NC(=O)Nc1cccc1C>>COc1cc(CC(=O)Nc  
 2ccc(/C=C/C(=O)OC(C)(C)C)cc2)ccc1NC(=O)Nc1cccc1C  
 6702 C=Cc1cccc1.COC(=O)CCC/C=C/C[C@H]1[C@H]2CC[C@H](C2)[C@H]1NS(=O)(=O)c1ccc(Br)  
 s1>>COC(=O)CCC/C=C/C[C@H]1[C@H]2CC[C@H](C2)[C@H]1NS(=O)(=O)c1ccc(/C=C/c2cccc  
 6703 C=CC(=O)N(C)C.CN(C)c1ccc2cc(Br)ccc2c1>>CN(C)C(=O)/C=C/c1ccc2cc(N(C)C)ccc2c1  
 6704 C=CC(=O)OC.CC(C)(C)OC(=O)N1CCC(CN(C(=O)C2CCCC2)c2cccc(Br)c2)CC1>>COC(=O)/C=C/  
 c1cccc(N(CC2CCN(C(=O)OC(C)(C)C)CC2)C(=O)C2CCCC2)c1  
 6705 C=CC(=O)N(C)C.COc1ccc(Cl)cc1>>COc1ccc(/C=C/C(=O)N(C)C)cc1  
 6706 C=CC(=O)N1N=Cc2cccc2C1CCC.COc1cc(Cc2enc(N)nc2N)cc(I)c1OCc1cccc1>>CCCC1c2cccc2C  
 =NN1C(=O)/C=C/c1cc(Cc2enc(N)nc2N)cc(OC)c1OCc1cccc1  
 6707 C=Cc1ccc(-c2cccc2)cc1.COC(=O)c1cccc1I>>COC(=O)c1cccc1/C=C/c1ccc(-c2cccc2)cc1  
 6708 C=Cc1ccc(C(=O)O)cc1.CC(=O)c1ccc(Br)cc1>>CC(=O)c1ccc(/C=C/c2ccc(C(=O)O)cc2)cc1  
 6709 C=CC(=O)OC(C)(C)C.COc1ccc(CNc2ccc(Br)cc2)cc1>>COc1ccc(CNc2ccc(/C=C/C(=O)OC(C)(C)C)c  
 c2)cc1  
 6710 C=Cc1ccc(C(=C(c2cccc2)c2cccc2)c2cccc2)cc1.CCCCN1C(=O)c2cccc3cc(Br)cc(c23)C1=O>>CCC  
 CN1C(=O)c2cccc3cc(/C=C/c4ccc(C(=C(c5cccc5)c5cccc5)c5cccc5)cc4)cc(c23)C1=O  
 6711 C=C[Si](CC)(CC)CC.FC(F)(F)c1cccc1Br>>CC[Si]/(C=C/c1cccc1C(F)(F)F)(CC)CC  
 6712 C=CC(=O)OC.O=S(=O)(c1ccc(F)c1)N1CCc2cc(Br)nc21>>COC(=O)/C=C/c1nc2c(c1)CCN2S(=O)(  
 =O)c1ccc(F)c1  
 6713 C=CC(N)=O.FC(F)(F)Oc1cccc1I>>NC(=O)/C=C/c1cccc1OC(F)(F)F  
 6714 C=CP(=O)(Cc1cccc1)c1cccc1.C[P@](=O)/(C=C/c1ccc(Br)c1)c1cccc1>>C[P@](=O)/(C=C/c1cccc  
 (/C=C/P(=O)(Cc2cccc2)c2cccc2)c1)c1cccc1

6715 C=CC(=O)OCC.COc1ncc(I)c2ncccc12>>CCOC(=O)/C=C/c1ncc(OC)c2cccc12

6716 C=CC(=O)N(C)C.COc1cc(Br)ccc1Cc1c(C)nc(N)nc1OS(=O)(=O)c1c(C(C)C)cc(C(C)C)cc1C(C)C>>C  
Oc1cc(/C=C/C(=O)N(C)C)ccc1Cc1c(C)nc(N)nc1OS(=O)(=O)c1c(C(C)C)cc(C(C)C)cc1C(C)C

6717 C=CCC(=O)OC.O=S(=O)(c1cccc1)n1cc(-c2cccc2)c2cc(Br)cnc21>>COC(=O)C/C=C/c1ncc2c(c1)c(-  
c1cccc1)cn2S(=O)(=O)c1cccc1

6718 C=Cc1cccc1.O=C(Oc1ccc(I)cc1)c1cccc1>>O=C(Oc1ccc(/C=C/c2cccc2)cc1)c1cccc1

6719 C=CC(=O)OC.O=C1Nc2cc(Br)ccc2C1=O>>COC(=O)/C=C/c1ccc2c(c1)NC(=O)C2=O

6720 Br1ccncc1.C=Cc1cccc(OC)c1>>COc1cccc(/C=C/c2ccncc2)c1  
C=CC(=O)N(C)C.Cc1ccc(C(=O)c2c(I)c(-

6721 c3cccc3)n3c2c(C=O)cc2cccc23)cc1>>Cc1ccc(C(=O)c2c(/C=C/C(=O)N(C)C)c(-  
c3cccc3)n3c2c(C=O)cc2cccc23)cc1

6722 C=CC(=O)OCC.COc1ccc(Br)c(C(F)(F)F)c1C>>CCOC(=O)/C=C/c1ccc(OC)c(C)c1C(F)(F)F

6723 C=CC(OC)OC.CC(C)(C)c1ccc(I)cc1>>COC(/C=C/c1ccc(C(C)(C)C)cc1)OC

6724 C=CCC1c2cccc2C=NN1C(=O)C=C.COc1cc(Cc2cnc(N)nc2N)cc(I)c1OC>>C=CCC1c2cccc2C=NN1  
C(=O)/C=C/c1cc(Cc2cnc(N)nc2N)cc(OC)c1OC

6725 C=Cc1cc2c(c(=O)n(C)c(=O)n2C)n1C.CC(=O)c1ccc(Br)cc1>>CC(=O)c1ccc(/C=C/c2cc3c(c(=O)n(C)c(  
=O)n3C)n2C)cc1

6726 C=CC(=O)N1CCCCC1.Cn1nc(Br)c2cccc21>>Cn1nc(/C=C/C(=O)N2CCCCC2)c2cccc21

6727 C=CC(=O)OCC.CCOC(=O)CCOC(C)c1cc(OC)c(OC)cc1Br>>CCOC(=O)/C=C/c1cc(OC)c(OC)cc1C(  
C)OCCC(=O)OCC

6728 C=CC(=O)N(C)C.Oc1ccc2c(c1)CCN(c1cccc1)C2c1ccc(I)cc1>>CN(C)C(=O)/C=C/c1ccc(C2c3ccc(O)  
cc3CCN2c2cccc2)cc1

6729 C=Cc1ccc(CO)cc1.IC1CCCCC1>>OCc1ccc(/C=C/C2CCCCC2)cc1

6730 C=Cc1cccc1.CCCCCCCCCCCC(=O)Nc1cccc1Br>>CCCCCCCCCCCC(=O)Nc1cccc1/C=C/c1cccc

6731 C=Cc1cccc1O.Fc1cc(Br)cc(F)c1F>>Oc1cccc1/C=C/c1cc(F)c(F)c1

6732 C=CC(=O)OC.Cc1cc(C)c(N)c(I)c1>>COC(=O)/C=C/c1cc(C)cc(C)c1N

6733 C=CCOc1ccc(Br)cc1.COc1ccc(I)cc1>>COc1ccc(/C=C/COc2ccc(Br)cc2)cc1

6734 Br1ccc2c(c1)OCCOCCOCCOCCO2.C=CP(=O)(OC(C)C)OC(C)C>>CC(C)OP(=O)(/C=C/c1ccc2c(c1  
)OCCOCCOCCOCCO2)OC(C)C

6735 C=CC(=O)OC(C)(C)C.Fc1ccc(I)cc1>>CC(C)(C)OC(=O)/C=C/c1ccc(F)cc1

6736 C=CC(=O)Nc1cccc(Cl)c1.COc1ccc2c(=O)c(I)coc2c1>>COc1ccc2c(=O)c(/C=C/C(=O)Nc3cccc(Cl)c3)  
coc2c1

6737 C=CCCC1CCN(C(=O)OC(C)C)CC1.CS(=O)(=O)N1CCc2cc(Br)ccc2C1>>CC(C)OC(=O)N1CCC(CC/  
C=C/c2ccc3c(c2)CCN(S(C)(=O)=O)C3)CC1

6738 C=CN1C(=O)c2cccc2C1=O.COc1ccc(Cl)cc1>>COc1ccc(/C=C/N2C(=O)c3cccc3C2=O)cc1

6739 C=Cc1cccn1.COc1ccc(C#Cc2ccc(Br)cc2)cc1>>COc1ccc(C#Cc2ccc(/C=C/c3cccn3)cc2)cc1

6740 C=Cc1cccc1Cl.Cn1nc(Br)c2cccc21>>Cn1nc(/C=C/c2cccc2Cl)c2cccc21

6741 C=CC(=O)OCC.Clc1cccc1I>>CCOC(=O)/C=C/c1cccc1Cl

6742 Br1ccncc1.C=CCCC(=O)OC>>COC(=O)CC/C=C/c1ccncc1

6743 C=CCO[Si](C)(C)C(C)(C)C.COc1ccc(Br)cc1>>COc1ccc(/C=C/CO[Si](C)(C)C(C)(C)C)cc1  
C=CCON=C1[C@H](C)[C@H]2OC(=O)O[C@]2(C)[C@H](CC)OC(=O)[C@](C)(F)C(=O)[C@H  
](C)[C@H](O)[C@H]2O[C@H](C)[C@H](N(C)C)[C@H]2OC(C)=O)[C@](C)(OC)C[C@H]1C.

6744 Nc1ncc(Br)c1>>CC[C@H]1OC(=O)[C@](C)(F)C(=O)[C@H](C)[C@H](O[C@H]2O[C@H](  
C)[C@H](N(C)C)[C@H]2OC(C)=O)[C@](C)(OC)C[C@H](C)C(=NOC/C=C/c2cncc(N)c2)[C@H  
1(C)[C@H]2OC(=O)O[C@]2112C

6745 C=CC(=O)OCC.Cc1oc2cccc2c(=O)c1Br>>CCOC(=O)/C=C/c1c(C)oc2cccc2c1=O

6746 C=CS(=O)(=O)c1cccc1.O=Cc1c[nH]c2ccc(Br)cc12>>O=Cc1c[nH]c2ccc(/C=C/S(=O)(=O)c3cccc3)c  
C=CC(=O)OCC.Ic1ccc2c(c1)OCCOCCOCCOCCOCCO2>>CCOC(=O)/C=C/c1ccc2c(c1)OCCOCCO

6747 CCOCCOCCO2  
C=CC[C@H]1O[C@@H]2O[C@@]3(C)CC[C@H]4[C@H](C)CC[C@@H]([C@H]1C)[C@]42OO3.

6748 Cc1ccc(I)cc1>>Cc1ccc(/C=C/C[C@H]2O[C@@H]3O[C@@]4(C)CC[C@H]5[C@H](C)CC[C@@H](  
[C@H]2C)[C@]53OO4)cc1

6749 C=CCCC(=O)O.N#Cc1ccc(Br)cc1>>N#Cc1ccc(/C=C/CCC(=O)O)cc1

6750 C=Cc1ccc(OC)c(OC)c1.COc1cc[nH]c1/C=C1\C(=O)Nc2cccc(I)c21>>COc1ccc(/C=C/c2cccc3c2/C(=C  
/c2[nH]ccc2OC)C(=O)N3)cc1OC

6751 C=C[C@@H](CO[Si](c1cccc1)(c1cccc1)C(C)(C)C)NS(C)(=O)=O.CC(=O)Oc1ccc(Br)cc1>>CC(=O  
)Oc1ccc(/C=C/[C@@H](CO[Si](c2cccc2)(c2cccc2)C(C)(C)C)NS(C)(=O)=O)cc1

6752 C=CC(=O)OC.CCOC(=O)c1cc(=O)c2cccc(Br)c2o1>>CCOC(=O)c1cc(=O)c2cccc(/C=C/C(=O)OC)c2

6753 C=CSelcccc1.Ic1cccc1>>C(=C/c1cccc1)Sc1cccc1

6754 C=CC(=O)OCC.COc1ccc(Cl)cc1-c1c(Br)c(=O)[nH]c2ccc(C(F)(F)F)cc12>>CCOC(=O)/C=C/c1c(-  
c2cc(Cl)ccc2OC)c2cc(C(F)(F)F)ccc2[nH]c1=O

6755 C=Cc1cccc1OCc1cccc1.O=C(O)/C=C/c1cccc1Br>>O=C(O)/C=C/c1cccc1/C=C/c1cccc1OCc1ccc  
6756 Br1cccn1.C=CC(F)(F)F>>FC(F)(F)/C=C/c1cccn1  
6757 C=CC(=O)OCC.CCCCOC(=O)/C=C/c1ccc(Br)cc1Cl>>CCCCOC(=O)/C=C/c1ccc(/C=C/C(=O)OCC)c  
6758 C=Cc1cc2ccc(N(CC)CC)cc2oc1=O.Ic1cccc1>>CCN(CC)c1ccc2cc(/C=C/c3ccccc3)c(=O)oc2c1  
6759 C=CC(=O)OC.COC1OC(c2ccc(C)cc2)=C(I)c2nc3ccccc3cc21>>COC(=O)/C=C/C1=C(c2ccc(C)cc2)O  
6760 C(OC)c2cc3ccccc3nc21  
6761 C=C/C=C(/OCC)[Si](C)(C)C.Cc1cccc1I>>CCO/C(=C/C=C/c1cccc1C)[Si](C)(C)C  
6762 C=CCOCC.CC(C)(C)OC(=O)/C=C/c1ccc(CN(C(=O)C2CCCCC2)c2ccc(Br)c2)cc1>>CCOC/C=C/c1c  
6763 ccc(N(Cc2ccc(/C=C/C(=O)OC(C)(C)C)cc2)C(=O)C2CCCCC2)c1  
6764 C=Cc1ccc2c(c1)CC[C@H]1[C@@H]2CC[C@]2(C)[C@H](O[Si](C)(C)C(C)(C)C)CC[C@H]1  
6765 2.C[Si](C)(OS(=O)(=O)C(F)(F)F)OS(=O)(=O)C(F)(F)F>>CC(C)(C)[Si](C)(C)O[C@H]1CC[C@H]2[  
6766 C@@H]3CCc4cc(/C=C/[Si](C)(C)OS(=O)(=O)C(F)(F)F)ccc4[C@H]3CC[C@]12C  
6767 C=CC(=O)OCCCC.Cc1cccc1Br>>CCCCOC(=O)/C=C/c1cccc1C  
6768 C=Cc1cccn1.FC(F)(F)c1ccc(Br)cc1>>FC(F)(F)c1ccc(/C=C/c2cccn2)cc1  
6769 C=CC(=O)OC.CCOC1=N[C@H](C(C)C)C(OCC)=N[C@H]1Cc1c(Br)n(C(=O)OC(C)(C)C)c2cc(OC)c  
6770 cc12>>CCOC1=N[C@H](C(C)C)C(OCC)=N[C@H]1Cc1c(/C=C/C(=O)OC)n(C(=O)OC(C)(C)C)c2cc(  
6771 OC)ccc12  
6772 C=Cc1cccc1.COc1cccc(I)c1>>COc1cccc(/C=C/c2ccccc2)c1  
6773 C=CC(=O)OC.COCOc1ccc(Br)c(COCCOCCOCCOCCOCCNC(=O)OC(C)(C)C)c1>>COCOc1ccc(/C  
6774 =C/C(=O)OC)c(COCCOCCOCCOCCOCCNC(=O)OC(C)(C)C)c1  
6775 C=Cc1cccc1OC.COCO[C@@]1(Cc2cc(Cl)ccn2)C(=O)N(COC)[C@H]1CC(C)C>>COCO[C@@]1(C  
6776 c2cc(/C=C/c3ccccc3OC)ccn2)C(=O)N(COC)[C@H]1CC(C)C  
6777 C=Cc1cccc1.Cn1c2ccccc2c2c(-c3ccccc3)c(I)ccc21>>Cn1c2ccccc2c2c(-  
6778 C=Cc1ccc(N(c2ccccc2)c2ccccc23)cc1.O=Cc1c(F)cc(Br)cc1F>>O=Cc1c(F)cc(/C=C/c2ccc(N(c3c  
6779 cccc3)c3cccc4ccccc34)cc2)cc1F  
6780 C=CC(=O)OC.Fc1ccc(C(=C(I)CC[Se])c2ccccc2)c2ccc(F)cc2)cc1>>COC(=O)/C=C/C(CC[Se]c1cccc1)  
6781 =C(c1ccc(F)cc1)c1ccc(F)cc1  
6782 C=CC(=O)Nc1cccc1C.COc1ccc2c(=O)c(I)cc2c1>>COc1ccc2c(=O)c(/C=C/C(=O)Nc3ccccc3C)cc2  
6783 C=CC(=O)NCCCc1cccc1.CC(C)(C)OC(=O)C1CC(c2ccc(C(=O)C(=O)c3ccc(Br)cc3)cc2)=NO1>>CC  
6784 (C)(C)OC(=O)C1CC(c2ccc(C(=O)C(=O)c3ccc(/C=C/C(=O)NCCCc4ccccc4)cc3)cc2)=NO1  
6785 C=CC(=O)OC.Ic1cccc1NCc1cccc1>>COC(=O)/C=C/c1cccc1NCc1cccc1  
6786 C=Cc1cccc1.Cc1ccc([N+](=O)[O-])cc1Cl>>Cc1ccc([N+](=O)[O-])cc1/C=C/c1cccc1  
6787 C=CC(=O)OC.COC(=O)c1ccc(I)cc1>>COC(=O)/C=C/c1ccc(C(=O)OC)cc1  
6788 C=CC(=O)OCC.Nc1cc(Br)nc1I>>CCOC(=O)/C=C/c1nc(Br)cc1N  
6789 \*NCCCCOCCOCCOCCNC(=O)COc1ccc(C(Cc2cc(OC)cc(OC)c2)NC(=O)c2ccc(C=C)cc2)cc1.Ic1cc  
6790 ccc1>>\*NCCCCOCCOCCOCCNC(=O)COc1ccc(C(Cc2cc(OC)cc(OC)c2)NC(=O)c2ccc(/C=C/c3ccc  
6791 cc3)cc2)cc1  
6792 C=CC(=O)OC(C)(C)C.COc1ccc(S(=O)(=O)n2ccc3cc(Br)nc32)cc1>>COc1ccc(S(=O)(=O)n2ccc3cc(/  
6793 C=C/C(=O)OC(C)(C)C)nc32)cc1  
6794 C=Cc1ccc(C=C)cc1.N#Cc1ccc(Br)cc1>>C=Cc1ccc(/C=C/c2ccc(C#N)cc2)cc1  
6795 C=CC(=O)OC.O=S(=O)(c1cccc1)n1cc(-c2ccc(F)cc2)c2cc(Br)nc21>>COC(=O)/C=C/c1nc2c(c1)c(-  
6796 c1ccc(F)cc1)cn2S(=O)(=O)c1cccc1  
6797 C=CC(=O)OCC.CC(C)(C)OC(=O)N1CCCC(CC1)Cc1cc(Br)nc1NC2=O>>CCOC(=O)/C=C/c1nc2c(  
6798 c1)CC1(CCN(C(=O)OC(C)(C)C)CC1)C(=O)N2  
6799 C=Cc1cccc1.O=Cc1ccc(Cl)cc1>>O=Cc1ccc(/C=C/c2ccccc2)cc1  
6800 C=CC(=O)O.Cc1ccc(S(=O)(=O)Nc2cccc(I)c2)cc1>>Cc1ccc(S(=O)(=O)Nc2cccc(/C=C/C(=O)O)c2)cc1  
6801 C=CC(=O)OCC.Nc1ncnc2c1c(I)nn2C1Cc2ccccc2C1>>CCOC(=O)/C=C/c1nn(C2Cc3ccccc3C2)c2ncnc  
6802 (N)c12  
6803 C=CC(=O)OC(C)(C)C.Cc1cc(Cl)c2ccccc2n1>>Cc1cc(/C=C/C(=O)OC(C)(C)C)c2ccccc2n1  
6804 C=Cc1cccn1Cl.Cc1c(Nc2c(I)nc2C#N)ccc2[nH]ccc12>>Cc1c(Nc2c(C#N)nc2/C=C/c2cccn2Cl)cc  
6805 c2[nH]ccc12  
6806 Br1cccc1C1OCCCCO1.C=CC(=O)OCC>>CCOC(=O)/C=C/c1cccc1C1OCCCCO1  
6807 C=Cc1ccc(OC)c(OC)c1.CCCCCCCCOCc1ccc2c(C)c(Br)c(=O)oc2c1>>CCCCCCCCOCc1ccc2c(C)c(/C=  
6808 C/c3ccc(OC)c(OC)c3)c(=O)oc2c1  
6809 C=Cc1cccc1.Nc1ccc(Br)cc1>>Nc1ccc(/C=C/c2ccccc2)cc1  
6810 C=Cc1cn(COCC[Si](C)(C)C)nc1-  
6811 c1nc(C(F)(F)F)en1COCC[Si](C)(C)C.O=Cc1ence(Br)c1>>C[Si](C)(C)CCOCn1cc(/C=C/c2nccc(C=O)  
6812 c2)c(-c2nc(C(F)(F)F)en2COCC[Si](C)(C)C)n1  
6813 Br1cccn1.C=CC(C)=O>>CC(=O)/C=C/c1cccn1  
6814 C=CCOc1ccc(C)cc1.Ic1cccs1>>Cc1ccc(OC/C=C/c2cccs2)cc1  
6815 C=CS(=O)(=O)F.O=S(=O)(F)Oc1ccc(I)cc1>>O=S(=O)(F)/C=C/c1ccc(OS(=O)(=O)F)cc1



6795 C=CC(C)(C)O.N#Cc1cccc2nc3cccc(Br)c3nc12>>CC(C)(O)/C=C/c1cccc2nc3cccc(C#N)c3nc12  
6796 C=CC(=O)OC.O=C(c1ccc(Br)cc1)C1CC1>>COC(=O)/C=C/c1ccc(C(=O)C2CC2)cc1  
6797 C=CC(=O)OC.CCn1c(-c2ccc(Br)cc2)nc2cccc21>>CCn1c(-c2ccc(/C=C/C(=O)OC)cc2)nc2cccc21  
6798 C=CC(=O)OC(C)(C)C.O=Cc1cccc1Cl>>CC(C)(C)OC(=O)/C=C/c1cccc1C=O  
6799 C=CC(=O)OC.CC(C)(C)OC(=O)N1CCC2(CC1)CC(=O)c1ccc(Br)cc1O2>>COC(=O)/C=C/c1ccc2c(c1)OC1(CCN(C(=O)OC(C)(C)C)CC1)CC2=O  
6800 C=CC(=O)OCC.O=C(NC1CCCCC1)c1cc(Br)cn(Cc2ccc(F)cc2)c1=O>>CCOC(=O)/C=C/c1cc(C(=O)NC2CCCCC2)c(=O)n(Cc2ccc(F)cc2)c1  
6801 C=Cc1cenccl.Cc1cccc(Br)c1>>Cc1cccc(/C=C/c2cenccl)c1  
6802 C=CC(=O)OC.N#Cc1ccc(Br)c(F)c1>>COC(=O)/C=C/c1ccc(C#N)cc1F  
6803 C=Cc1cccc1.Cc1ccc(S(=O)(=O)Oc2cccc3c(Br)ccnc23)cc1>>Cc1ccc(S(=O)(=O)Oc2cccc3c(/C=C/c4cccc4)ccnc23)cc1  
6804 \*CNCCOCCOCCOCCNC(=O)COc1ccc(C(Cc2cc(OC)cc(OC)c2)NC(=O)c2cccc(C=C)c2)cc1.N#Cc1cccc1I>>\*CNCCOCCOCCOCCNC(=O)COc1ccc(C(Cc2cc(OC)cc(OC)c2)NC(=O)c2cccc(/C=C/c3cccc3CC#N)c2)cc1  
6805 Br1ccocl.C=CS(=O)c1cccc1>>O=S(/C=C/c1ccocl)c1cccc1  
6806 C=CC(=O)OCC.CCOC(=O)CCOCc1cc(OC)c(OCc2cccc2)cc1Br>>CCOC(=O)/C=C/c1cc(OCc2cccc2)c(OC)cc1COCCC(=O)OCC  
6807 C=CC(=O)OCC.COc1ccc2c3c1O[C@@H]1[C@@]34CCN(C)[C@H](C2)[C@]42C=C[C@@]1(OC)[C@H]1C(=O)N(c3ccc(Br)cc3)C(=O)[C@H]12>>CCOC(=O)/C=C/c1ccc(N2C(=O)[C@H]3[C@H](C2=O)[C@]42C=C[C@@]3(OC)[C@H]3OC5c(OC)ccc6c5[C@@]32CCN(C)[C@H]4C6)cc1  
6808 C=Cc1cenccl.CC(C)(C)OC(=O)NCC(c1cccc1)c1cncc(Br)c1>>CC(C)(C)OC(=O)NCC(c1cccc1)c1cncc(/C=C/c2cenccl)c1  
6809 C=Cc1cenccl.CCCCCN(CCCCC)c1ccc2c(c1)C(CC)(CC)c1cc(Br)ccc1-2>>CCCCCN(CCCCC)c1ccc2c(c1)C(CC)(CC)c1cc(/C=C/c3cenccl3)ccc1-2  
6810 C=CC(=O)N1N=Cc2cccc2C1C1CC1.COc1cc(Cc2cnc(N)nc2N)cc(I)c1OC>>COc1cc(Cc2cnc(N)nc2N)cc(/C=C/C(=O)N2N=Cc3cccc3C2C2CC2)c1OC  
6811 C=CC(=O)OC.O=CC1=C(Br)CCCC1>>COC(=O)/C=C/C1=C(C=O)CCCCC1  
6812 C=Cc1ccc(OC)cc1.CCCn1c(C(=O)NC(C)(C)C)nc(Br)c1C(=O)NC(C)(C)C>>CCCN1c(C(=O)NC(C)(C)C)nc(/C=C/c2ccc(OC)cc2)c1C(=O)NC(C)(C)C  
6813 C=Cc1ccc(OC)cc1.Clc1ccc(/C=C/c2cccc2)cc1>>COc1ccc(/C=C/c2ccc(/C=C/c3cccc3)cc2)cc1  
6814 Br1ccc(I)cc1.C=CC(=O)OCCCC>>CCCCOC(=O)/C=C/c1ccc(Br)cc1  
6815 C=CC(O)(CO)CCC=C(C)C.COc1ccc(OC)c(Br)c1>>COc1ccc(OC)c(/C=C/C(O)(CO)CCC=C(C)C)c1  
6816 C=CC(=O)OC.Nc1c(I)cc(Br)c2c1C(=O)NC2=O>>COC(=O)/C=C/c1cc(Br)c2c(c1N)C(=O)NC2=O  
6817 C=CC(=O)OC.COC(=O)C1=Nc2cc(Br)ccc2OC12CC2>>COC(=O)/C=C/c1ccc2c(c1)N=C(C(=O)OC)C1(CC1)O2  
6818 C=Cc1ccc(S(=O)(=O)c2cccc2F)cn1.Fc1cccc1I>>O=S(=O)(c1ccc(/C=C/c2cccc2F)nc1)c1cccc1F  
6819 C=Cc1cccc1.O=c1c(I)c(/C=C/c2ccc(Cl)cc2)[nH]c2cccc12>>O=c1c(/C=C/c2cccc2)c(/C=C/c2ccc(Cl)cc2)[nH]c2cccc12  
6820 C=Cc1cn(COCC[Si](C)(C)C)nc1-c1nc2ccc(OC)cc2n1COCC[Si](C)(C)C.O=Cc1cncc(Br)c1>>COc1ccc2nc(-c3nn(COCC[Si](C)(C)C)cc3/C=C/c3cncc(C=O)c3)n(COCC[Si](C)(C)C)c2c1  
6821 C=CC(=O)OC(C)(C)C.COc1ccc(NCc2ccc(Br)cc2)cc1>>COc1ccc(NCc2ccc(/C=C/C(=O)OC(C)(C)C)c2)cc1  
6822 C=Cc1ccc(-c2cccc2)cc1.CCOC(=O)C(F)I>>CCOC(=O)C(F)/C=C/c1ccc(-c2cccc2)cc1  
6823 C=CC(=O)OC.CC(C)(C)[Si](C)(C)OCCc1ccc(NC(=O)CCCc2ccc(Br)cc2)cc1>>COC(=O)/C=C/c1ccc(CCCC(=O)Nc2ccc(CCO[Si](C)(C)C(C)(C)C)cc2)cc1  
6824 C=Cc1cccn1.CN(C)c1ccc(-c2ccc(CN(C(=O)C3CCCCC3)c3cccc(I)c3)cc2)cc1>>CN(C)c1ccc(-c2ccc(CN(C(=O)C3CCCCC3)c3cccc(/C=C/c4cccn4)c3)cc2)cc1  
6825 C=CC(=O)OC.CC(C)c1cc(Br)c2c(c1)C1(C)CCCCC1=N2>>COC(=O)/C=C/c1cc(C(C)C)cc2c1N=C1CCCC12C  
6826 C=CC(O)CCCC.Clc1ccc(I)cc1>>CCCCC(O)/C=C/c1ccc(Cl)cc1  
6827 C=CC(=O)N1N=Cc2cccc2C1CCC.CCOc1c(I)cc(Cc2cnc(N)nc2N)cc1OC>>CCCC1c2cccc2C=NN1C(=O)/C=C/c1cc(Cc2cnc(N)nc2N)cc(OC)c1OCC  
6828 C=Cc1cenc2cccc12.CCCCCN(CCCCC)c1ccc(Br)c(C)c1>>CCCCCN(CCCCC)c1ccc(/C=C/c2cenc3cccc23)c(C)c1  
6829 C=CCn1c(-c2ccc(C)cc2)nc2cccc2c1=O.O=C(CN1C(=O)COc2cccc21)c1ccc(Br)cc1>>Cc1ccc(-c2nc3cccc3c(=O)n2C/C=C/c2ccc(C(=O)CN3C(=O)COc4cccc43)cc2)cc1  
6830 C=CC(=O)OCCCC.CC(C)n1cnc2c(Cl)nc(I)nc21>>CCCCOC(=O)/C=C/c1nc(Cl)c2nnc(C(C)C)c2n1  
6831 C=CC(=O)OCC.CC(C)(C)OC(=O)N1CCCCc2ccc(Cl)nc21>>CCOC(=O)/C=C/c1ccc2c(n1)N(C(=O)OC(C)(C)C)CCCC2

BrC1nc2ccccc2c1.C=CCO[C@]1(C)C[C@@H](C)C(=O)[C@H](C)[C@@H](O)[C@](C)(O)[C@@H]  
 6832 ](CC)OC(=O)[C@H](C)C(=O)[C@H](C)[C@H]1O[C@@H]1O[C@H](C)C[C@H](N(C)C)[C@H]1O  
 C(=O)c1ccccc1>>CC[C@H]1OC(=O)[C@H](C)C(=O)[C@H](C)[C@@H](O)[C@@H]2O[C@H](C)C  
 [C@H](N(C)C)[C@H]2OC(=O)c2ccccc2[C@](C)(OC/C=C/c2nc3ccccc3c2)C[C@@H](C)C(=O)[C  
 6833 @H](C)C[C@@H](O)C[C@H](C)O  
 C=C/C=C/(OCC)C(=O)OC.Ic1ccccc1>>CCO/C(=C/C=C/c1ccccc1)C(=O)OC  
 6834 C=CCCCCCC.CC(C)[C@H]1C(=O)N[C@H](CO[Si](C)(C)C(C)C)C2c[nH]c3cc(Br)cc(c23)N1C>  
 >CCCCC/C=C/c1cc2c3c(c[nH]c3c1)C[C@@H](CO[Si](C)(C)C(C)C)NC(=O)[C@H](C(C)C)N2  
 6835 C=Cc1cc(OCc2ccccc2)c(OCc2ccccc2)nn1.Fc1cc(Br)cc(F)c1C(F)(F)F>>Fc1cc(/C=C/c2cc(OCc3ccccc3  
 )c(OCc3ccccc3)nn2)cc(F)c1C(F)(F)F  
 6836 C=Cc1ccc(OC)cc1.Cc1ccc2c(-c3ccccc3)c(Br)c(=O)oc2c1>>COc1ccc(/C=C/c2c(-  
 c3ccccc3)c3ccc(C)cc3oc2=O)cc1  
 6837 C=CC(=O)OC.COc1ccc2c(c1)CCN(c1ccc(C(F)(F)F)cc1)C2(C)c1ccc(Br)cc1>>COC(=O)/C=C/c1ccc(C  
 2(C)c3ccc(OC)cc3CCN2c2ccc(C(F)(F)F)cc2)cc1  
 6838 C=CC(=O)OC(C)(C)C.CC(=O)Nc1ccc(Br)cc1>>CC(=O)Nc1ccc(/C=C/C(=O)OC(C)(C)C)cc1  
 6839 C=CC(=O)OCC.Cc1cc(C)c(N)c(I)c1>>CCOC(=O)/C=C/c1cc(C)cc(C)c1N  
 6840 C=CC(=O)OC(C)(C)C.Fc1ccc(Br)c(F)c1>>CC(C)(C)OC(=O)/C=C/c1ccc(F)cc1F  
 6841 C=CC(=O)O.CCOC(=O)c1c[nH]c(Cc2ccc(I)cc2)n1>>CCOC(=O)c1c[nH]c(Cc2ccc(/C=C/C(=O)O)cc2  
 6842 BrC1nccc(OCc2ccccc2)c1.C=CC(=O)OCCCC>>CCCCOC(=O)/C=C/c1nccc(OCc2ccccc2)c1  
 6843 C=Cc1ccccc1.O=C1OC(O)c2cc(Br)cc21>>O=C1OC(O)c2cc(/C=C/c3ccccc3)ccc21  
 C=CCNC1=NCCN1C(=O)OCC.CC(=O)OCC1Cn2c3ccccc3c3c4c(c5c6cc(Br)ccc6n(c5c32)C1)C(=O)N  
 6844 (C(C)=O)C4>>CCOC(=O)N1CCN=C1NC/C=C/c1ccc2c(c1)c1c3c(c4c5ccccc5n5c4c1n2CC(COC(C)=  
 O)C5)CN(C(C)=O)C3=O  
 6845 C=Cc1cc(OC)cc(OC)c1.Cc1ccc(I)cc1>>COc1cc(/C=C/c2ccc(Cl)cc2)cc(OC)c1  
 6846 C=CC(=O)OC.COc1cc(Br)cc([N+](=O)[O-])c1>>COC(=O)/C=C/c1cc(OC)cc([N+](=O)[O-])c1  
 C=Cc1ccc(/C=C/c2ccc(N(C)C)cc2OC)cc1.O=c1ccc2c(-c3ccc(I)cc3S(=O)(=O)O)c3ccc(O)cc3oc-  
 6847 2c1>>COc1cc(N(C)C)ccc1/C=C/c1ccc(/C=C/c2ccc(-c3c4ccc(=O)cc-  
 4oc4cc(O)ccc34)c(S(=O)(=O)O)c2)cc1  
 6848 BrC1ccc(CCN2CCOCC2)cc1.C=Cc1n[nH]c2cc([C@@H]3C[C@@]34C(=O)Nc3ccc(OC)cc34)ccc12>  
 >COc1ccc2c(c1)[C@]1(C[C@H]1c1ccc3c(/C=C/c4ccc(CCN5CCOCC5)cc4)n[nH]c3c1)C(=O)N2  
 6849 C=CC(=O)OCC.Cc1ccc(-n2cnnn2)c(I)c1>>CCOC(=O)/C=C/c1cc(Cl)ccc1-n1cnnn1  
 6850 C=CC(OCC)OCC.FC(F)(F)c1ccccc(I)c1>>CCOC(/C=C/c1ccccc(C(F)(F)F)c1)OCC  
 6851 C=Cc1ccccc1.COC1CCCC1I>>COC1CCCC1/C=C/c1ccccc1  
 6852 BrC1ccccc1.C=CSc1ccccc1>>C(=C/c1ccccc1)\Se1ccccc1  
 6853 C=CCn1ccccc1C(=O)c1ccc(C)cc1.C[C@H](Oc1ccccc(I)c1)C(=O)N1CCOCC1>>Cc1ccc(C(=O)c2cccn2  
 C/C=C/c2ccccc(O[C@@H](C)C(=O)N3CCOCC3)c2)cc1  
 6854 C=CC(=O)OC(C)(C)C.FC(F)(F)c1ccccc1Br>>CC(C)(C)OC(=O)/C=C/c1ccccc1C(F)(F)F  
 6855 C=CC(=O)OCC.Cc1ncc(I)c2ncccc12>>CCOC(=O)/C=C/c1ncc(Cl)c2ccccc12  
 6856 C=CC(=O)OC.COc1cc([N+](=O)[O-])ccc1I>>COC(=O)/C=C/c1ccc([N+](=O)[O-])cc1OC  
 6857 C=CP(=O)(O)O.COc1cc(OC)c(Br)c(OC)c1>>COc1cc(OC)c(/C=C/P(=O)(O)O)c(OC)c1  
 6858 C=CC(=O)OCCCC.Fc1ccc(Br)cc1>>CCCCOC(=O)/C=C/c1ccc(F)cc1  
 6859 C=CCCC(C)=O.Oc1ccc(I)cc1>>CC(=O)CC/C=C/c1ccc(O)cc1  
 6860 C=C/C=C/(CCCC)OCC.Cc1ccccc1I>>CCCC/C=C/C=C/c1ccccc1C)OCC  
 6861 C=CC(=O)OC(C)(C)C.COC1CCC(C2=C[C@@H]3CC[C@H](OC(C)(C)C)[C@@]3(C)CC2)=C(Br)C  
 1>>COC1CCC(C2=C[C@@H]3CC[C@H](OC(C)(C)C)[C@@]3(C)CC2)=C(/C=C/C(=O)OC(C)(C)C)  
 C=CCn1c(-  
 6862 c2ccc(C(F)(F)F)cc2)nc2ccccc2c1=O.O=C(CN1C(=O)COc2ccccc21)c1ccc(Br)cc1>>O=C(CN1C(=O)C  
 Oc2ccccc21)c1ccc(/C=C/Cn2c(-c3ccc(C(F)(F)F)cc3)nc3ccccc3c2=O)cc1  
 6863 C=CC(=O)Oc1ccccc1.N#Cc1ccc(Cl)cc1>>N#Cc1ccc(/C=C/C(=O)Oc2ccccc2)cc1  
 6864 C=CC(=O)OC.Cc1c(Br)nc2c1nnn2C>>COC(=O)/C=C/c1ncc2c(nnn2C)c1C  
 6865 C=CC(=O)OC(C)(C)C.C[C@H](c1ccccc1)N(Cc1ccccc1)[C@H](CC(=O)OC(C)(C)C)c1ccccc1I>>C  
 [C@@H](c1ccccc1)N(Cc1ccccc1)[C@H](CC(=O)OC(C)(C)C)c1ccccc1/C=C/C(=O)OC(C)(C)C  
 6866 C=Cc1ccc(C=C)cc1.O=[N+](=[O-])c1ccc(Br)cc1>>C=Cc1ccc(/C=C/c2ccc([N+](=O)[O-])cc2)cc1  
 6867 C=CC(OC)OC.Ic1cccs1>>COC(/C=C/c1cccs1)OC  
 6868 C=CC(=O)OC.CC1(C)CC(Nc2ccc(Br)c(F)c2[N+](=O)[O-]  
 )CC(C)(C)C1>>COC(=O)/C=C/c1ccc(NC2CC(C)(C)CC(C)(C)C2)c([N+](=O)[O-])c1F  
 6869 C=CC(=O)OC.Cc1ccc(NCc2ccccc2)c(Br)c1>>COC(=O)/C=C/c1cc(C)ccc1NCc1ccccc1  
 C=Cc1ccccc1.Cc1ncc(C#N)c(Nc2cc(Cl)c3[nH]ccc3c2C)c1I>>Cc1ncc(C#N)c(Nc2cc(Cl)c3[nH]ccc3c2  
 6870 C)c1/C=C/c1ccccc1  
 C=Cc1ccccc1.Cc1ccc(C(=O)Oc2ccccc2-c2ccccc2I)c1N>>Cc1ccc(C(=O)Oc2ccccc2-  
 6871 c2ccccc2/C=C/c2ccccc2)c1N

6872 C=C(Br)CC.C=Cc1ccc(OC)cc1>>C=C(/C=C/c1ccc(OC)cc1)CC  
6873 Br1ccc2ccccc2c1.C=CC(=O)N(C)OC>>CON(C)C(=O)/C=C/c1ccc2ccccc2c1  
6874 C=CC(=O)OC.Cc1cc(Cl)ccc1C(F)(F)F>>COC(=O)/C=C/c1ccc(C(F)(F)F)c(C)c1  
6875 Br1cccc2ccccc12.C=C[Si](CC)(CC)CC>>CC[Si](/C=C/c1cccc2ccccc12)(CC)CC  
6876 Br1cccc(N2CCN(c3ncccn3)CC2)n1.C=Cc1ccccc1>>C(=C/c1cccc(N2CCN(c3ncccn3)CC2)n1)\c1cccc  
6877 C=Cc1cc(OCc2ccccc2)c(OCc2ccccc2)nn1.FC(F)(F)c1ccc(Cl)cc1C(F)(F)F>>FC(F)(F)c1ccc(/C=C/c2cc  
(Oc3ccccc3)c(OCc3ccccc3)nn2)cc1C(F)(F)F  
6878 C=Cc1ccc(CC)cc1.CCOc1ccc(-n2cnc3cc(Br)cnc32)cc1>>CCOc1ccc(-  
n2cnc3cc(/C=C/c4ccc(CC)cc4)cnc32)cc1  
6879 C=CCCC(=O)O.Cc1ccc(I)cc1>>Cc1ccc(/C=C/CCC(=O)O)cc1  
6880 C=CC(=O)OC.C[C@H]1CN(c2ncc(Br)cc2C(F)(F)F)CCN1C(=O)OC(C)(C)C>>COC(=O)/C=C/c1cn  
c(N2CCN(C(=O)OC(C)(C)C)[C@H](C)C2)c(C(F)(F)F)c1  
6881 C=CC(=O)c1ccccc1.O=C1C=C(Br)CCC1>>O=C1C=C(/C=C/C(=O)c2ccccc2)CCC1  
6882 C=C[Si](CC)(CC)CC.O=[N+](O-)]c1ccc(Br)cc1>>CC[Si](/C=C/c1ccc([N+](=O)[O-])cc1)(CC)CC  
6883 Br1cccc1.C=CC1SC=NC1C>>CC1N=CSC1/C=C/c1ccccc1  
6884 C=CC(=O)OC.O=Cc1c(F)cc(Br)cc1Cl>>COC(=O)/C=C/c1cc(F)c(C=O)c(Cl)c1  
6885 C=CCCC(=O)OCc1ccccc1.N#Cc1ccc(I)cc1C#N>>N#Cc1ccc(/C=C/CCC(=O)OCc2ccccc2)cc1C#N  
6886 \*NC(=O)c1ccc(C=C)cc1.Cc1ccc(C#N)cc1I>>\*NC(=O)c1ccc(/C=C/c2cc(C#N)ccc2C)cc1  
6887 C=CC(=O)OC.CC1(C)CC(=C(c2ccc(Br)cc2)c2ccc3c(c2)c(F)nn3C2CCCCO2)CC(C)(C)C1>>COC(=O  
)/C=C/c1ccc(C=C2CC(C)(C)CC(C)(C)C2)c2ccc3c(c2)c(F)nn3C2CCCCO2)cc1  
6888 C=Cc1ccc2ccc(Cl)cc2n1.CC(C)(O)c1ccccc1CC[C@H](SCC1(CC#N)CC1)c1ccccc(Br)c1>>CC(C)(O)  
c1ccccc1CC[C@H](SCC1(CC#N)CC1)c1ccccc(/C=C/c2ccc3ccc(Cl)cc3n2)c1  
6889 C=CS(=O)(=O)F.FC(F)(F)Oc1ccc(I)cc1>>O=S(=O)(F)/C=C/c1ccc(OC(F)(F)F)cc1  
6890 C=Cc1ccccc1.Ic1ccc(Cn2cc(-c3ccccc3)nn2)cc1>>C(=C/c1ccc(Cn2cc(-c3ccccc3)nn2)cc1)\c1ccccc1  
6891 C=Cc1ccccc1.Cc1ncc(C#N)c(Nc2ccc3[nH]ccc3c2C)c1I>>Cc1ncc(C#N)c(Nc2ccc3[nH]ccc3c2C)c1/C=  
C/c1ccccc1  
6892 C=CS(N)(=O)=O.Cc1ccc(Br)c(C)c1>>Cc1ccc(/C=C/S(N)(=O)=O)c(C)c1  
6893 C=CC(=O)OCC.CN(C)c1ccc(Br)cc1>>CCOC(=O)/C=C/c1ccc(N(C)C)cc1  
6894 C=CC(=O)OCC.Oc1ccc(Br)c(F)c1F>>CCOC(=O)/C=C/c1ccc(O)c(F)c1F  
6895 C=CC(=O)Nc1ccccc1Cl.COc1ccc2c(=O)c(I)coc2c1>>COc1ccc2c(=O)c(/C=C/C(=O)Nc3ccccc3Cl)coc  
6896 C=Cc1ccccc1(CN2CCN(C(C)=O)CC2)n1.Cc1c(Nc2c(I)cncc2C#N)ccc2[nH]ccc12>>CC(=O)N1CCN(Cc  
2ccccc(/C=C/c3nccc(C#N)c3Nc3ccc4[nH]ccc4c3C)n2)CC1  
6897 C=CC(=O)Nc1ccccc1NC(=O)OC(C)(C)C.CCN(CC)C1CCN(CC(C(=O)Nc2ccc(Cl)cc2)c2ccc(Br)cc2)C  
1>>CCN(CC)C1CCN(CC(C(=O)Nc2ccc(Cl)cc2)c2ccc(/C=C/C(=O)Nc3ccccc3NC(=O)OC(C)(C)C)cc2  
6898 C=CC(=O)OCC.Cc1ccc(I)c([N+](=O)[O-])c1>>CCOC(=O)/C=C/c1ccc(C)cc1[N+](=O)[O-]  
6899 C=CC(C)=O.Cc1ccc(C)c(Br)c1C>>CC(=O)/C=C/c1c(C)ccc(C)c1C  
6900 C=Cc1ccc(CN2C(=O)c3ccccc3C2=O)cc1.CC(C)(C)Br>>CC(C)(C)/C=C/c1ccc(CN2C(=O)c3ccccc3C2  
=O)cc1  
C=CC(=O)OCC.Cc1ccc(S(=O)(=O)n2cc(-  
6901 c3ccc(OC4CCOCC4)c(C#N)c3)c3cc(Br)cnc32)cc1>>CCOC(=O)/C=C/c1cnc2c(c1)c(-  
c1ccc(OC3CCOCC3)c(C#N)c1)cn2S(=O)(=O)c1ccc(C)cc1  
6902 C=CC(=O)OC(C)(C)C.COC(=O)Cc1cc(Cl)ccc1Br>>COC(=O)Cc1cc(Cl)ccc1/C=C/C(=O)OC(C)(C)C  
6903 Br1ccc2c(c1)Sc1ccccc1N2.C=Cc1ccc(OC(C)=O)cc1>>CC(=O)Oc1ccc(/C=C/c2ccc3c(c2)Sc2ccccc2N  
3)cc1  
6904 C=CC(=O)OCC.Nc1ccc(Br)cc1C(F)(F)F>>CCOC(=O)/C=C/c1ccc(N)c(C(F)(F)F)c1  
C=CC(=O)OC.CC(=O)c1ccc(-  
6905 c2cn(S(=O)(=O)c3ccccc3)c3ncc(Br)cc23)cc1>>COC(=O)/C=C/c1cnc2c(c1)c(-  
c1ccc(C(C)=O)cc1)cn2S(=O)(=O)c1ccccc1  
6906 C=Cc1ccccc1.Cn1nc(Br)c(=O)c2ccccc21>>Cn1nc(/C=C/c2ccccc2)c(=O)c2ccccc21  
6907 C=CC(=O)OCC.Ic1ccccc1>>CCOC(=O)/C=C/c1ccccc1  
6908 C=CC(=O)OCC.N#Cc1ccc(Oc2ccccc2Br)c1>>CCOC(=O)/C=C/c1ccccc(Oc2ccccc2C#N)c1  
6909 C=CCOC(C)=O.Ic1ccccc1>>CC(=O)OC/C=C/c1ccccc1  
6910 C=CC(=O)OC.CC(C)(C)C(=O)Oc1ccc(Br)c(CO[Si](C)(C)C(C)(C)C)c1>>COC(=O)/C=C/c1ccc(OC(=O)  
C(C)(C)C)cc1CO[Si](C)(C)C(C)(C)C  
6911 C=CC(=O)OCC.CC(C)(C)OC(=O)N1CCC(C#N)(c2ccccc2Br)CC1>>CCOC(=O)/C=C/c1ccccc1C1(C#  
N)CCN(C(=O)OC(C)(C)C)CC1  
6912 C=Cc1ccc(Cl)cc1.N#CCc1ccc(Br)cc1>>N#CCc1ccc(/C=C/c2ccc(Cl)cc2)cc1  
6913 C=Cc1ccc(OCC)cc1.COc1ccc(I)cc1>>CCOc1ccc(/C=C/c2ccc(OC)cc2)cc1  
6914 C=Cc1cc2ccccc2oc1=O.O=[N+](O-)]c1ccc(Br)cc1>>O=c1oc2ccccc2cc1/C=C/c1ccc([N+](=O)[O-]  
6915 C=CC(=O)O.O=C(O)c1ccccc1I>>O=C(O)/C=C/c1ccccc1C(=O)O

6916 C=Cc1ence(C#N)c1Nc1ccc2[nH]ccc2c1C.CN1CCN(Cc2cccc(Br)c2)CC1>>Cc1c(Nc2c(C#N)ence2/C=C/c2cccc(CN3CCN(C)CC3)c2)ccc2[nH]ccc12

6917 C=CC(=O)OC.CCCc1cc2n(c(=O)c1I)CCC21OCCO1>>CCCc1cc2n(c(=O)c1/C=C/C(=O)OC)CCC21OCCO1

6918 C=CC(=O)OC.O=C1C=CC2(C=C1)OC(=O)C(I)=C2c1cccc1>>COC(=O)/C=C/C1=C(c2cccc2)C2(C=CC(=O)C=C2)OC1=O

6919 C=Cc1ccccc1.CN(C(=O)c1cccc1)c1ccc2c(c1)[nH]c(=NC(=O)c1ccc(Br)s1)n2CCC(N)=O>>CN(C(=O)c1cccc1)c1ccc2c(c1)[nH]c(=NC(=O)c1ccc(C=C/c3ccccc3)s1)n2CCC(N)=O

6920 C=CS(=O)(=O)N1CCC2(CC1)N=C(C1CCCCC1)NC2=O.CC(=O)Nc1ccc(Br)c(C)c1>>CC(=O)Nc1ccc(C=C/S(=O)(=O)N2CCC3(CC2)N=C(C2CCCCC2)NC3=O)c(C)c1

6921 C=CC(=O)OC.CC(C)(C)OC(=O)N1CCC(CCc2nc3ccc(Br)cc3o2)CC1>>COC(=O)/C=C/c1ccc2nc(CC3CCN(C(=O)OC(C)(C)C)CC3)oc2c1

6922 C=Cc1cccc([N+](=O)[O-])c1.COC(=O)c1cc2cc(Br)ccc2cc1OC(C)=O>>COC(=O)c1cc2cc(C=C/c3cccc([N+](=O)[O-])c3)ccc2cc1OC(C)=O

6923 C=CC(=O)O.O=C1Nc2ccc(Br)cc2C1=O>>O=C(O)/C=C/c1ccc2c(c1)C(=O)C(=O)N2

6924 C=Cc1cccc1.Cc1cc(I)nc(C(C)C)n1>>Cc1cc(C=C/c2cccc2)nc(C(C)C)n1

6925 C=Cc1cccc1C.Cc1ccc(I)cc1>>Cc1ccc(C=C/c2cccc2C)cc1

6926 C=CC(=O)NC(C)C.CCc1nc2cc(O)ccc2c(Oc2ccc(Br)cc2)c1-c1cccc1>>CCc1nc2cc(O)ccc2c(Oc2ccc(C=C/C(=O)NC(C)C)cc2)c1-c1cccc1

6927 C=CCOC(C)=O.CC(C)(C)c1ccc([I+])c2ccc(C(C)(C)C)cc2cc1>>CC(=O)OC/C=C/c1ccc(C(C)(C)C)cc1

6928 C=CC(=O)OC.Nc1c(F)cccc1Br>>COC(=O)/C=C/c1ccc(F)c1N

6929 C=CC(=O)O.CC(=O)Nc1ccc(Br)cc1C>>CC(=O)Nc1ccc(C=C/C(=O)O)cc1C

6930 C=CC(=O)OCC.Oc1ccc(Br)cc1>>CCOC(=O)/C=C/c1ccc(O)cc1

6931 Br1cccc2[nH]ccc12.C=Cc1cccc1>>C(=C/c1cccc2[nH]ccc12)c1cccc1

6932 C=Cc1ence2cccc12.CN1C(=O)CC[C@]2(C)c3ccc(Br)cc3CC[C@]2(C)c3ccc(C=C/c4cccc5cccc45)cc3CC[C@]2(C)c3ccc(C(=O)OC(C)(C)C.O=Cc1cccc(I)c1>>CC(C)(C)OC(=O)/C=C/c1cccc(C=O)c1

6933 C=Cc1ccc(N2CCN(C(C)=O)CC2)cc1.Clc1cc(Br)cc(Cn2ccnc2)c1>>CC(=O)N1CCN(c2ccc(C=C/c3ccc(Cl)cc(Cn4ccnc4)c3)cc2)CC1

6934 C=Cc1ccc(C)cc1.CSc1ccc(Br)cc1>>CSc1ccc(C=C/c2ccc(C)cc2)cc1

6935 C=CC(=O)OCC.COc1ccc(CNc2nc(-n3c(C)ccc3C)nc(C)c2Br)cc1>>CCOC(=O)/C=C/c1c(C)nc(-n2c(C)ccc2C)nc1NCc1ccc(OC)cc1

6936 C=Cc1cccc([N+](=O)[O-])c1.O=Cc1ccc(Br)cc1>>O=Cc1ccc(C=C/c2cccc([N+](=O)[O-])c2)cc1

6937 C=CC(=O)OCC.COc1ccc(Br)c(C=O)c1>>CCOC(=O)/C=C/c1ccc(OC)cc1C=O

6938 C=CC12CCC(NC(=O)OC(C)(C)C)(CC1)CO2.COc1ccc2ncc(Cl)c(Br)c2n1>>COc1ccc2ncc(Cl)c(C=C/C34CCCC(NC(=O)OC(C)(C)C)(CC3)CO4)c2n1

6939 C=Cc1cccc1.CCCCCCNC(=O)CCl>>CCCCCNC(=O)C/C=C/c1cccc1

6940 C=Cc1ccc(OC)cc1.Cc1c(Br)c(=O)oc2cccc12>>COc1ccc(C=C/c2c(C)c3cccc3oc2=O)cc1

6941 C=CC(=O)OCC.CCN1C[C@]2(OC(=O)c3cc(I)ccc3NC(C)=O)CC[C@H](OC)[C@]34[C@@H]1[C@]H(C)[C@H]23)[C@@]1(O)C[C@H](OC)[C@H]2C[C@@H]4[C@]1(O)[C@H]2OC>>CCOC(=O)/C=C/c1ccc(NC(C)=O)c(C(=O)O)[C@@]23CC[C@H](OC)[C@]45[C@H]1([C@H](C)[C@H]24)[C@@]2(O)C[C@H](OC)[C@H]4C[C@@H]5[C@]2(O)[C@H]4OC)N(CC)C3)c1

6942 C=Cc1ccc(C#N)cc1.N[C@@H](Cc1c[nH]c2c(Br)cccc12)C(=O)O>>N#Cc1ccc(C=C/c2cccc3c(C[C@H](N)C(=O)O)c[nH]c23)cc1

6943 C=CC(=O)OC.CCOC(=O)c1cc(=O)c2cc(Br)ccc2o1>>CCOC(=O)c1cc(=O)c2cc(C=C/C(=O)OC)ccc2

6944 C=Cc1ccc(OC)cc1.O=C(Nc1cccc1I)C1CCCCC1>>COc1ccc(C=C/c2cccc2NC(=O)C2CCCCC2)cc1

6945 C=CC(N)=O.Clc1cccc1>>NC(=O)/C=C/c1cccc1

6946 C=Cc1ccc1.CC(C)(C)OC(=O)N[C@H](COc1ence(Br)c1)Cc1cccc1>>CC(C)(C)OC(=O)N[C@H](COc1ence(C=C/c2ccnc2)c1)Cc1cccc1

6947 C=CC(=O)OCC.Cc1nnn(Cc2cc(OC(F)F)ccc2Br)n1>>CCOC(=O)/C=C/c1ccc(OC(F)F)cc1Cn1nnc(C)nBr1ccc(-c2nc3cccc3[nH]2)cc1.C=CC(=O)OCC>>CCOC(=O)/C=C/c1ccc(-c2nc3cccc3[nH]2)cc1

6948 C=CC(=O)OCCCC.FC(F)(F)c1cc(Br)cc(C(F)(F)F)c1>>CCCCOC(=O)/C=C/c1cc(C(F)(F)F)cc(C(F)(F)C=CC(=O)OC(C)(C)C.O=Cc1c(Br)cccc1Oc1ccc(OC(F)(F)F)cc1>>CC(C)(C)OC(=O)/C=C/c1cccc(Oc2ccc(OC(F)(F)F)cc2)c1C=O

6949 C=CC(=O)OC.CCN(CC)C(=O)Oc1enccc1I>>CCN(CC)C(=O)Oc1enccc1/C=C/C(=O)OC

6950 C=Cc1cccc(Cl)c1.COc1ccc(Br)cc1>>COc1ccc(C=C/c2cccc(Cl)c2)cc1

6951 C=CC(=O)OC.COc1nccc(Br)c1>>COC(=O)/C=C/c1nccc(OC)c1

6952 C=Cc1ccc(F)cc1.O=[N+](O-)c1ccc(Br)cc1>>O=[N+](O-)c1ccc(C=C/c2ccc(F)cc2)cc1

6953 C=CC(=O)CCC.CN(C)c1ccc(Br)cc1>>CCCC(=O)/C=C/c1ccc(N(C)C)cc1

6954

6957 C=Cc1ccc(-c2cccc2)cc1.COc1cc(C=O)c(Br)c(OC)c1OC>>COc1cc(C=O)c(/C=C/c2ccc(-  
c3cccc3)cc2)c(OC)c1OC  
6958 C=CN1C(=O)c2cccc2C1=O.O=[N+](O-  
6959 )c1ccc(Br)cc1>>O=C1c2cccc2C(=O)N1/C=C/c1ccc([N+](=O)[O-])cc1  
6960 C=CC(C)(C)O.Cc1ccc(-c2oc3cccc3c(=O)c2Br)cc1>>Cc1ccc(-  
C=CC(=O)OCC.COc1ccc(-c2cc3c(Br)ccc(OC)c3o2)cc1OC>>CCOC(=O)/C=C/c1ccc(OC)c2oc(-  
c3ccc(OC)c(OC)c3)cc12  
6961 C=CC(=O)OC.CN(C)c1ccc(I)cc1>>COC(=O)/C=C/c1ccc(N(C)C)cc1  
6962 C=Cc1cenc1.CCCCCCOc1ccc(I)cc1>>CCCCCOc1ccc(/C=C/c2cenc2)cc1  
6963 C=CC(=O)OC(C)(C)C.Cc1c(Br)cccc1[N+](=O)[O-  
6964 C=CC(=O)OC(C)(C)C.O=C1Nc2cccc2O/C1=C\c1cc(Br)cs1>>CC(C)(C)OC(=O)/C=C/c1csc(/C=C2)  
Oc3cccc3NC2=O)c1  
6965 C=Cc1ccc(OC(C)(C)C)cc1.FC(F)(F)C(F)(F)C(F)(F)C(F)(F)C(F)(F)C(F)(F)Br>>CC(C)(C)Oc1ccc(/C=  
C/C(F)(F)C(F)(F)C(F)(F)C(F)(F)C(F)(F)C(F)(F)C(F)(F)F)cc1  
6966 C=CS(C)(=O)=O.Cc1cc(C)c(Br)c(C)c1>>Cc1cc(C)c(/C=C/S(C)(=O)=O)c(C)c1  
6967 C=CC(=O)OCC.CC(C)(C)OC(=O)NCCCOc1cc(C#N)ccc1I>>CCOC(=O)/C=C/c1ccc(C#N)cc1OCCC  
NC(=O)OC(C)(C)C  
6968 C=CC(=O)[C@ @]1(O)C[C@H]2CC[C@ ]1(C)C2(C)C.COc1ccc(I)cc1>>COc1ccc(/C=C/C(=O)[C@ @  
]2(O)C[C@H]3CC[C@ ]2(C)C3(C)C)cc1  
6969 C=CC(C)(C)C.COC(=O)c1ccc(Br)cc1>>COC(=O)c1ccc(/C=C/C(C)(C)C)cc1  
6970 C=Cc1cc(OC)cc(OC)c1.Fc1ccc(I)cc1>>COc1cc(/C=C/c2ccc(F)cc2)cc(OC)c1  
6971 C=CC(=O)OC.CC(=O)OC[C@H]1O[C@ @H](n2nc(C(N)=O)c2I)[C@H](OC(C)=O)[C@ @H]1OC(C  
)=O>>COC(=O)/C=C/c1c(C(N)=O)ncn1[C@ @H]1O[C@H](COC(C)=O)[C@ @H](OC(C)=O)[C@H]  
6972 C=CC(=O)Nc1cccc1NC(=O)OC(C)(C)C.COC(=O)C(CC1CCN(C)CC1)c1ccc(Br)cc1>>COC(=O)C(C  
C1CCN(C)CC1)c1ccc(/C=C/C(=O)Nc2cccc2NC(=O)OC(C)(C)C)cc1  
6973 C=CS(N)(=O)=O.Nc1cc(-c2cccc(Br)c2)ncn1>>Nc1cc(-c2cccc(/C=C/S(N)(=O)=O)c2)ncn1  
6974 C=Cc1cnc(F)c(Br)c1.CC(C)(C)OC(=O)N1CC[C@H]1COc1cnc(Cl)c(I)c1>>CC(C)(C)OC(=O)N1CC[  
C@H]1COc1cnc(Cl)c(/C=C/c2cnc(F)c(Br)c2)c1  
6975 C=Cc1cc(C(C)(C)C)c(O)c(C(C)(C)C)c1.Cc1cnc(C)c1-c1c(C)cc(Br)cc1C>>Cc1cnc(C)c1-  
c1c(C)cc(/C=C/c2cc(C(C)(C)C)c(O)c(C(C)(C)C)c2)cc1C  
C=Cc1ccc(OC)cc1.COc1ccc(-  
6976 c2cc(=O)c3c(OC)cc(OC)c(I)c3o2)cc1>>COc1ccc(/C=C/c2c(OC)cc(OC)c3c(=O)cc(-  
c4ccc(OC)cc4)oc23)cc1  
6977 C=CC(=O)OCC.CC(C)(C)OC(=O)N1CCC(=O)C(I)=C1c1cccc1>>CCOC(=O)/C=C/C1=C(c2cccc2)  
N(C(=O)OC(C)(C)C)CCC1=O  
6978 C=CC(=O)OC(C)(C)C.CCC(=C(c1ccc(O)cc1)c1ccc(O)cc1)c1ccc(Br)cc1>>CCC(=C(c1ccc(O)cc1)c1cc  
c(O)cc1)c1ccc(/C=C/C(=O)OC(C)(C)C)cc1  
6979 C=Cc1ccc(OC)cc1.CC(=O)NS(=O)(=O)c1ccc(Br)cc1>>COc1ccc(/C=C/c2ccc(S(=O)(=O)NC(C)=O)cc  
2)cc1  
6980 C=CC(OC)OCC.COc1ccc(I)cc1>>CCOC(/C=C/c1ccc(OC)cc1)OCC  
C=CC(=O)NC.C[C@ ]12C[C@ @]34C=C(Sc5cccc(I)c5)C(=O)[C@ @](C)(CCC(=O)Nc5c(O)ccc(C(=O)  
6981 )O)c5O)[C@ @H]3[C@H](C[C@ @H]1C4)O2>>CNC(=O)/C=C/c1cccc(SC2=C[C@ ]34C[C@H]5C[C  
@H](O)[C@ @]5(C)3)[C@H]4[C@ ](C)(CCC(=O)Nc3c(O)ccc(C(=O)O)c3O)C2=O)c1  
6982 C=CC(O)c1cccc1OC.O=Cc1cccc1Br>>COc1cccc1C(O)/C=C/c1cccc1C=O  
6983 C=CS(=O)(=O)c1cccc1.Cc1ccc(S(=O)(=O)n2ccc3cc(Br)ccc32)cc1>>Cc1ccc(S(=O)(=O)n2ccc3cc(/C  
=C/S(=O)(=O)c4cccc4)ccc32)cc1  
C=Cc1ccc(-  
6984 c2cccc2)cc1.COC(=O)c1cc(C(=O)OC)c2cc(Br)ccc2n1>>COC(=O)c1cc(C(=O)OC)c2cc(/C=C/c3ccc(-  
c4cccc4)cc3)ccc2n1  
6985 C=CC(=O)O.FC1(F)Oc2cccc(I)c2O1>>O=C(O)/C=C/c1cccc2c1OC(F)(F)O2  
6986 Brc1cccc2cccc12.C=CC(=O)OCC>>CCOC(=O)/C=C/c1cccc2cccc12  
6987 C=CB1OC(C)CC(C)(C)O1.Fc1ccc(I)cc1>>CC1CC(C)(C)OB(/C=C/c2ccc(F)cc2)O1  
6988 C=CC1(O)CCC1.CC(C)(C)c1ccc(I)cc1>>CC(C)(C)c1ccc(/C=C/C2(O)CCC2)cc1  
6989 C=Cc1ccc(C(F)(F)F)cc1.COC(=O)Cc1c(C)nn(Cc2ccc(Br)cc2)c1C>>COC(=O)Cc1c(C)nn(Cc2ccc(/C=  
C/c3ccc(C(F)(F)F)cc3)cc2)c1C  
6990 C=CC(=O)OC.CC1c2ccc(Br)cc2CCN1C(=O)OC(C)(C)C>>COC(=O)/C=C/c1ccc2c(c1)CCN(C(=O)O  
C(C)(C)C)C2C  
6991 C=CC(=O)OC.CC(C)=CCc1c(Br)ncn1C>>COC(=O)/C=C/c1ncn(C)c1CC=C(C)C  
6992 C=CC(N)=O.O=CC1=C(Br)CCCCC1>>NC(=O)/C=C/C1=C(C(=O)CCCCC1  
6993 C=CNC=O.COc1cc(Br)ccc1F>>COc1cc(/C=C/NC=O)ccc1F  
6994 C=Cc1ccc(C)nc1.CN1CCc2[nH]c3c(Br)cccc3c2C1>>Cc1ccc(/C=C/c2cccc3c4c([nH]c23)CCN(C)C4)>

6995 BrC1CCCC1.C=C[Si](CC)(CC)CC>>CC[Si](/C=C/c1cccc1)(CC)CC  
C=CCn1c(-

6996 c2cccc2)nc2cccc2c1=O.O=C(CN1C(=O)COc2cccc21)c1ccc(Br)cc1>>O=C(CN1C(=O)COc2cccc21)c1ccc(/C=C/Cn2c(-c3cccc3)nc3cccc3c2=O)cc1  
C=CCC(=O)OC(C)(C)C.[C@H](O)c1ccc2ccc(Br)cc2n1>>C[C@H](O)c1ccc2ccc(/C=C/CC(=O)OC(C)(C)C)cc2n1

6997 C=CC(=O)OC.CN(C)c1cccc(N(Cc2ccc(Br)cc2)CC(C)(C)C)n1>>COC(=O)/C=C/c1ccc(CN(CC(C)(C)C)c2ccnc(N(C)C)n2)cc1

6998 C=Cc1ccc(N(C)C)cc1.O=C/C=C/c1ccc(I)cc1>>CN(C)c1ccc(/C=C/c2ccc(/C=C/C=O)cc2)cc1  
C=Cc1cccc1.COc1ccc(CNc2c(C(=O)NCc3ccc(F)cc3F)c(=O)n(OCc3cccc3)c3ncc(Br)cc23)c(OC)c1>

6999 >COc1ccc(CNc2c(C(=O)NCc3ccc(F)cc3F)c(=O)n(OCc3cccc3)c3ncc(/C=C/c4cccc4)cc23)c(OC)c1

7000 C=CC(=O)OC.CC(=O)OCCCOnc1cc(I)c(=O)[nH]c1=O>>COC(=O)/C=C/c1cn(OCCOC(C)=O)c(=O)[nH]c1=O

7001 C=CC(=O)Nc1ccc(OCC)cc1.COc1ccc2c(=O)c(I)coc2c1>>CCOc1ccc(NC(=O)/C=C/c2coc3cc(OC)ccc3c2=O)cc1

7002 C=CC(=O)OCCCC.O=C(O)c1ccc(I)cc1>>CCCCOC(=O)/C=C/c1ccc(C(=O)O)cc1  
BrC1ccc(-

7003 c2nc3cccc3s2)cc1.C=Cc1ccc(N(c2cccc2)c2cccc2)cc1>>C(=C/c1ccc(N(c2cccc2)c2cccc2)cc1)\c1ccc(-c2nc3cccc3s2)cc1

7004 C=CC(=O)OCCCC.CN(C)c1ccc(Br)cc1>>CCCCOC(=O)/C=C/c1ccc(N(C)C)cc1  
C=CC(=O)OCc1cccc1.Cc1noc(C)c1-c1nc2c(I)cn(S(=O)(=O)c3cccc3)c2c1>>Cc1noc(C)c1-

7005 c1nc2c(/C=C/C(=O)OCc3cccc3)cn(S(=O)(=O)c3cccc3)c2c1

7006 C=CC(C)(C)O.Ic1cccc2c1NCC2>>CC(C)(O)/C=C/c1cccc2c1NCC2

7007 C=CCn1cccc1C(=O)c1ccc(C)cc1.COC(=O)C(C)(C)OCc1cccc(Br)c1>>COC(=O)C(C)(C)OCc1cccc(/C=C/Cn2cccc2C(=O)c2ccc(C)cc2)c1

7008 C=Cc1cccc1.CCCCCCOc1ccc(I)cc1>>CCCCCCCCOc1ccc(/C=C/c2cccc2)cc1

7009 C=CC(=O)OC(C)(C)C.O=S(=O)(c1ccc(F)cc1)n1ccc2cc(Br)cn21>>CC(C)(C)OC(=O)/C=C/c1nc2c(cn2S(=O)(=O)c2ccc(F)cc2)c1

7010 C=CC#N.COc1cc(Cl)ccc1Br>>COc1cc(Cl)ccc1/C=C/C#N  
C=CCN1CCNCC1.CC(C)c1[nH]nc(O[C@H]2O[C@H](COC(=O)c3cccc3)[C@H](F)[C@H](OC(=O)c3cccc3)[C@H]2OC(=O)c2cccc2)c1Cc1ccc(Br)cc1>>CC(C)c1[nH]nc(O[C@H]2O[C@H](COC(=O)c3cccc3)[C@H](F)[C@H](OC(=O)c3cccc3)[C@H]2OC(=O)c2cccc2)c1Cc1ccc(/C=C/CN2CCNCC2)cc1

7011 C=CC(=O)OC.CC(C)(C)C.O=C(S(=O)(=O)c1ccc(F)cc1)n1ccc2cc(Br)cn21>>CC(C)(C)OC(=O)/C=C/c1nc2c(cn2S(=O)(=O)c2ccc(F)cc2)c1

7012 C=CC#N.COc1cc(Cl)ccc1Br>>COc1cc(Cl)ccc1/C=C/C#N  
C=CCN1CCNCC1.CC(C)c1[nH]nc(O[C@H]2O[C@H](COC(=O)c3cccc3)[C@H](F)[C@H](OC(=O)c3cccc3)[C@H]2OC(=O)c2cccc2)c1Cc1ccc(Br)cc1>>CC(C)c1[nH]nc(O[C@H]2O[C@H](COC(=O)c3cccc3)[C@H](F)[C@H](OC(=O)c3cccc3)[C@H]2OC(=O)c2cccc2)c1Cc1ccc(/C=C/CN2CCNCC2)cc1

7013 C=CC(=O)OC.CC(C)(C)C.O=C(S(=O)(=O)c1ccc(F)cc1)n1ccc2cc(Br)cn21>>CC(C)(C)OC(=O)/C=C/c1nc2c(cn2S(=O)(=O)c2ccc(F)cc2)c1

7014 C=CC(=O)OC.CC(C)(C)C.O=C(S(=O)(=O)c1ccc(F)cc1)n1ccc2cc(Br)cn21>>CC(C)(C)OC(=O)/C=C/c1nc2c(cn2S(=O)(=O)c2ccc(F)cc2)c1

7015 C=CC(=O)OC.CC(C)(C)C.O=C(S(=O)(=O)c1ccc(F)cc1)n1ccc2cc(Br)cn21>>CC(C)(C)OC(=O)/C=C/c1nc2c(cn2S(=O)(=O)c2ccc(F)cc2)c1

7016 C=CC(=O)OC.CC(C)(C)C.O=C(S(=O)(=O)c1ccc(F)cc1)n1ccc2cc(Br)cn21>>CC(C)(C)OC(=O)/C=C/c1nc2c(cn2S(=O)(=O)c2ccc(F)cc2)c1

7017 C=CC(=O)OC.CC(C)(C)C.O=C(S(=O)(=O)c1ccc(F)cc1)n1ccc2cc(Br)cn21>>CC(C)(C)OC(=O)/C=C/c1nc2c(cn2S(=O)(=O)c2ccc(F)cc2)c1

7018 C=CC(=O)OC.CC(C)(C)C.O=C(S(=O)(=O)c1ccc(F)cc1)n1ccc2cc(Br)cn21>>CC(C)(C)OC(=O)/C=C/c1nc2c(cn2S(=O)(=O)c2ccc(F)cc2)c1

7019 C=CC(=O)OC.CC(C)(C)C.O=C(S(=O)(=O)c1ccc(F)cc1)n1ccc2cc(Br)cn21>>CC(C)(C)OC(=O)/C=C/c1nc2c(cn2S(=O)(=O)c2ccc(F)cc2)c1

7020 C=CC(=O)OC.CC(C)(C)C.O=C(S(=O)(=O)c1ccc(F)cc1)n1ccc2cc(Br)cn21>>CC(C)(C)OC(=O)/C=C/c1nc2c(cn2S(=O)(=O)c2ccc(F)cc2)c1

7021 C=CC(=O)OC.CC(C)(C)C.O=C(S(=O)(=O)c1ccc(F)cc1)n1ccc2cc(Br)cn21>>CC(C)(C)OC(=O)/C=C/c1nc2c(cn2S(=O)(=O)c2ccc(F)cc2)c1

7022 C=CC(=O)OC.CC(C)(C)C.O=C(S(=O)(=O)c1ccc(F)cc1)n1ccc2cc(Br)cn21>>CC(C)(C)OC(=O)/C=C/c1nc2c(cn2S(=O)(=O)c2ccc(F)cc2)c1

7023 C=CC(=O)OC.CC(C)(C)C.O=C(S(=O)(=O)c1ccc(F)cc1)n1ccc2cc(Br)cn21>>CC(C)(C)OC(=O)/C=C/c1nc2c(cn2S(=O)(=O)c2ccc(F)cc2)c1

7024 C=CC(=O)OC.CC(C)(C)C.O=C(S(=O)(=O)c1ccc(F)cc1)n1ccc2cc(Br)cn21>>CC(C)(C)OC(=O)/C=C/c1nc2c(cn2S(=O)(=O)c2ccc(F)cc2)c1

7025 C=CC(=O)OC.CC(C)(C)C.O=C(S(=O)(=O)c1ccc(F)cc1)n1ccc2cc(Br)cn21>>CC(C)(C)OC(=O)/C=C/c1nc2c(cn2S(=O)(=O)c2ccc(F)cc2)c1

7026 C=CC(=O)OC.CC(C)(C)C.O=C(S(=O)(=O)c1ccc(F)cc1)n1ccc2cc(Br)cn21>>CC(C)(C)OC(=O)/C=C/c1nc2c(cn2S(=O)(=O)c2ccc(F)cc2)c1

7027 C=CC(=O)OC.CC(C)(C)C.O=C(S(=O)(=O)c1ccc(F)cc1)n1ccc2cc(Br)cn21>>CC(C)(C)OC(=O)/C=C/c1nc2c(cn2S(=O)(=O)c2ccc(F)cc2)c1

7028 C=CC(=O)OC.CC(C)(C)C.O=C(S(=O)(=O)c1ccc(F)cc1)n1ccc2cc(Br)cn21>>CC(C)(C)OC(=O)/C=C/c1nc2c(cn2S(=O)(=O)c2ccc(F)cc2)c1

7029 C=CC(=O)OC.CC(C)(C)C.O=C(S(=O)(=O)c1ccc(F)cc1)n1ccc2cc(Br)cn21>>CC(C)(C)OC(=O)/C=C/c1nc2c(cn2S(=O)(=O)c2ccc(F)cc2)c1

7030 C=CC(=O)OC.CC(C)(C)C.O=C(S(=O)(=O)c1ccc(F)cc1)n1ccc2cc(Br)cn21>>CC(C)(C)OC(=O)/C=C/c1nc2c(cn2S(=O)(=O)c2ccc(F)cc2)c1

7031 C=CC(=O)OCC.CCNc1nc(C)c(I)c(NC2CCCC2)n1>>CCNc1nc(C)c(/C=C/C(=O)OCC)c(NC2CCCC  
7032 C=CC(CCCC)n1nnc2ccccc21.Cc1ccc(I)cc1>>CCCC(/C=C/C1ccc(C)cc1)n1nnc2ccccc21  
C=CCNC(=O)OC(C)(C)C.CCOC(=O)CC(c1ccc(C)c(CN2CC(C)Cc3ccc(Br)ccc3S2(=O)=O)c1)c1ccc(F)  
7033 cc1C>>CCOC(=O)CC(c1ccc(C)c(CN2CC(C)Cc3ccc(/C=C/CNC(=O)OC(C)(C)C)ccc3S2(=O)=O)c1)c1  
ccc(F)cc1C  
7034 C=Cc1ccc(Cl)cc1.Cc1cc(C)c(/C=C/C(=O)O)c(Br)c1>>Cc1cc(C)c(/C=C/C(=O)O)c(/C=C/c2ccc(Cl)cc2  
7035 Br1cccn1.C=Cc1ccc(OC)cc1>>COc1ccc(/C=C/c2cccn2)cc1  
7036 C=Cc1ccc(C)cc1.O=S(=O)(c1ccccc1)C(F)(F)Br>>Cc1ccc(/C=C/C(F)(F)S(=O)(=O)c2ccccc2)cc1  
7037 C=CC(=O)OC.COc1cccc2c(I)nn(C(=O)OC(C)(C)C)c12>>COC(=O)/C=C/c1nn(C(=O)OC(C)(C)C)c2c  
(OC)cccc12  
7038 C=CC(=O)O.FC(F)(F)C1(c2cccc(Br)c2)N=N1>>O=C(O)/C=C/c1cccc(C2(C(F)(F)F)N=N2)c1  
7039 C=CC(OCC)OCC.Cc1cccc(Br)c1>>CCOC(/C=C/c1cccc(C)c1)OCC  
7040 C=CC(=O)OC.O=c1[nH]c(=O)n([C@@H]2CO[C@H](CO)[C@@H](O)C2)cc1I>>COC(=O)/C=C/c1c  
n([C@@H]2CO[C@H](CO)[C@@H](O)C2)c(=O)[nH]c1=O  
7041 C=CC#N.CCOC(=O)Nc1cccc1C1=C(I)CCN1S(=O)(=O)c1ccc(C)cc1>>CCOC(=O)Nc1cccc1C1=C(/  
C=C/C#N)CCN1S(=O)(=O)c1ccc(C)cc1  
7042 Br1ccc2cn[nH]c2c1.C=CC(N)=O>>NC(=O)/C=C/c1ccc2cn[nH]c2c1  
7043 C=CC(=O)O.O=C1c2ccccc2CCc2ccc(Br)cc21>>O=C(O)/C=C/c1ccc2c(c1)C(=O)c1ccccc1CC2  
7044 C=Cc1ccc(C)cc1.Cn1cccc1-c1cccc(Br)c1>>Cc1ccc(/C=C/c2cccc(-c3cnnc3C)c2)cc1  
7045 Br1cccc2ccccc12.C=CCS(N)(=O)=O>>NS(=O)(=O)C/C=C/c1cccc2ccccc12  
7046 C=CC(=O)OCCCC.Cc1cc(Br)ccc1I>>CCCCOC(=O)/C=C/c1ccc(Br)cc1C  
7047 C=Cc1ccccc1OC.Cn1c(=O)c2c(cc(Br)n2C)n(C)c1=O>>COc1ccccc1/C=C/c1cc2c(c(=O)n(C)c(=O)n2C  
7048 C=Cc1cccn1.COc1ccc2c(ccc3ccc4ccc(Br)cc4c32)c1>>COc1ccc2c(ccc3ccc4ccc(/C=C/c5ccccc5)cc4c  
32)c1  
7049 C=Cc1ccc(O)c(OC)c1.COC(=O)Cn1c(=O)c(Cl)nc2cc(Br)cnc21>>COC(=O)Cn1c(=O)c(/C=C/c2ccc(O  
)c(OC)c2)nc2cc(Br)cnc21  
7050 C=Cc1cccc(CO)n1.Cc1c(Nc2c(I)cccc2C#N)ccc2[nH]ccc12>>Cc1c(Nc2c(C#N)cccc2/C=C/c2cccc(CO)  
n2)ccc2[nH]ccc12  
7051 C=CCOC(C)=O.C=CCc1ccc(Br)cc1>>C=CCc1ccc(/C=C/COC(C)=O)cc1  
7052 C=Cc1cc(OC)cc(OC)c1.CC1(C)C=C(I)CC(C)(C)N1[O]>>COc1cc(/C=C/C2=CC(C)(C)N([O])C(C)(C)  
C2)cc(OC)c1  
7053 C=Cc1ccccc1.Cc1cc(C)c2oc(=O)c(Br)c(-c3ccccc3)c2c1>>Cc1cc(C)c2oc(=O)c(/C=C/c3ccccc3)c(-  
c3ccccc3)c2c1  
7054 Br1ccc2[nH]ccc2c1.C=CCOC1=C(C)C(=O)O[C@H](CC)[C@@](C)(O)C=C(C)C(=O)[C@H](C)C[C@  
@](C)(OC)[C@H](O)[C@@H]2O[C@H](C)C[C@H](N(C)C)[C@H]2OC(C)=O[C@H]1C>>CC[C  
@H]1OC(=O)C(C)=C(OC/C=C/c2ccc3[nH]ccc3c2)[C@H](C)[C@@H](O)[C@@H]2O[C@H](C)C[C@  
@H](N(C)C)[C@H]2OC(C)=O)[C@@](C)(OC)C[C@@H](C)C(=O)C(C)=C[C@@]1(C)O  
7055 C=CC(OCC)OCC.O=[N+](O-)]c1ccc(Br)cn1>>CCOC(/C=C/c1ccc([N+](=O)[O-])nc1)OCC  
7056 C=CC(=O)CC.CC(C)=C(C)Br>>CCC(=O)/C=C/C(C)=C(C)C  
7057 C=CC(=O)OC.Cc1cc(F)ccc1C(=O)c1sc2cc(O)ccc2c1Oc1ccc(Br)cc1>>COC(=O)/C=C/c1ccc(Oc2c(C  
(=O)c3ccc(F)cc3C)sc3cc(O)ccc23)cc1  
7058 CC(=O)O[C@H]1CCC2C3C(CC[C@@]21C)c1ccc(O)cc1C[C@H]3Sc1ccc(Br)cc1.[C]C(=O)C=C>>[  
C]C(=O)/C=C/c1ccc(S[C@@H]2Cc3cc(O)ccc3CC[C@@]4(C)C(CC[C@@H]4OC(C)=O)C32)cc1  
7059 C=CCNC(=O)C(F)(F)F.Nc1nc(=O)n([C@H]2C[C@H](O)[C@@H](CO)O2)cc1I>>Nc1nc(=O)n([C@  
H]2C[C@H](O)[C@@H](CO)O2)cc1/C=C/CNC(=O)C(F)(F)F  
7060 C=Cc1ccccc1.Clc1ccc(I)c(Nc2ccccc2)n1>>Clc1ccc(/C=C/c2ccccc2)c(Nc2ccccc2)n1  
7061 C=CCC(C)C(=O)OCC.COc1ccc(I)cc1>>CCOC(=O)C(C)C/C=C/c1ccc(OC)cc1  
7062 C=CC(=O)OCC.COC(=O)c1ccccc1I>>CCOC(=O)/C=C/c1ccccc1C(=O)OC  
7063 C=Cc1ccccc1.COc1cccc(Cn2nc(I)c3ccccc32)c1>>COc1cccc(Cn2nc(/C=C/c3ccccc3)c3ccccc32)c1  
7064 C=CC(N)=O.CC(C)c1ccc(I)cc1>>CC(C)c1ccc(/C=C/C(N)=O)cc1  
7065 C=CC(=O)OC.Cc1cccc(C)c1-  
c1cccc(C2CCc3cc(Br)ccc3O2)c1>>COC(=O)/C=C/c1ccc2c(c1)CCC(c1cccc(-c3c(C)cccc3C)c1)O2  
7066 C=CC1CC(=O)N1.COc1ccc(I)cc1>>COc1ccc(/C=C/C2CC(=O)N2)cc1  
7067 C=CC(=O)OC(C)(C)C.CCCCCCCCc1ccc(C(=O)OC)c(Cl)c1>>CCCCCCCCc1ccc(C(=O)OC)c(/C=C/C  
C(=O)OC(C)(C)C)c1  
7068 C=CC(=O)OC.Ic1cccs1>>COC(=O)/C=C/c1cccs1  
C=CC(=O)C(O[Si](CC)(CC)CC)c1c(OC)ccc(OC)c1OCc1ccccc1.COC(=O)c1cc2cc(I)c(OCc3ccccc3)c  
7069 (OC)c2c(=O)o1>>CC[Si](CC)(CC)OC(C(=O)/C=C/c1cc2cc(C(=O)OC)oc(=O)c2c(OC)c1OCc1ccccc1)  
c1c(OC)ccc(OC)c1OCc1ccccc1  
7070 C=Cc1ccc(OC)cc1.O=[N+](O-)]c1ccc(I)cc1CO>>COc1ccc(/C=C/c2ccc([N+](=O)[O-])c(CO)c2)cc1  
7071 C=CC1CCCC1.Nc1ccc(Cl)cc1Br>>Nc1ccc(Cl)cc1/C=C/C1CCCC1

C=CC(=O)OCC.FC(F)(F)c1ccc(-c2cccc(Br)n2)cc(C(F)(F)F)c1>>CCOC(=O)/C=C/c1ccnc(-  
c2cc(C(F)(F)F)cc(C(F)(F)F)c2)n1  
C=CC(=O)OCC.O=c1c(Br)c(-c2cccc2)oc2cccc12>>CCOC(=O)/C=C/c1c(-c2cccc2)oc2cccc2c1=O  
C=Cc1ccc2cccc2c1.CCOC(=O)C(F)(F)Br>>CCOC(=O)C(F)(F)/C=C/c1ccc2cccc2c1  
C=Cc1cccc1.CC[C@ @](OC)(C(=O)OC)c1cc2n(c(=O)c1OS(=O)(=O)C(F)(F)F)CCC2>>CC[C@ @](  
OC)(C(=O)OC)c1cc2n(c(=O)c1/C=C/c1cccc1)CCC2  
C=Cc1c(F)c(F)c(F)c(F)c1F.N#Cc1ccc(I)c2cccc12>>N#Cc1ccc(/C=C/c2c(F)c(F)c(F)c(F)c2F)c2cccc  
C=Cc1nc2cccc2s1.CCN(CC)S(=O)(=O)c1ccc(Br)cc1C>>CCN(CC)S(=O)(=O)c1ccc(/C=C/c2nc3cccc  
c3s2)cc1C  
C=CC(OCC)OCC.O=Cc1ccc2cccc2c1Br>>CCOC(/C=C/c1c(C=O)ccc2cccc12)OCC  
C=CC(F)(F)C(F)(F)C(F)(F)C(F)(F)C(F)(F)C(F)(F)C(F)(F)C(F)(F).N#Cc1ccc(Br)cc1>>N#Cc1ccc(/C=  
=C/C(F)(F)C(F)(F)C(F)(F)C(F)(F)C(F)(F)C(F)(F)C(F)(F)C(F)(F)C(F)(F)cc1  
C=Cc1ccc(C=O)cc1.CCN(CC)/N=N/c1ccc(I)cc1>>CCN(CC)/N=N/c1ccc(/C=C/c2ccc(C=O)cc2)cc1  
C=CC(=O)OC.FC(F)(F)c1cccc1I>>COC(=O)/C=C/c1cccc1C(F)(F)F  
C=CC1=CC=C(/C=C/c2ccc(OC)cc2)C2=CC(C(C)C)=CC=C(C)C2=C1C(=O)OC.O=[N+][[O-]  
]c1ccc(I)cc1>>COC(=O)C1=C2C(C)=CC=C(C(C)C)C=C2C(/C=C/c2ccc(OC)cc2)=CC=C1/C=C/c1cc  
c([N+]=(=O)[O-])cc1  
C=Cc1cccc(OC)c1OC.O=c1ccc2ccc(OS(=O)(=O)C(F)(F)F)cc2o1>>COc1cccc(/C=C/c2ccc3ccc(=O)oc  
3c2)c1OC  
C=CC(=O)OC(C)(C)C.FC(F)(F)c1ccc(Br)c(Cl)c1>>CC(C)(C)OC(=O)/C=C/c1ccc(C(F)(F)F)cc1Cl  
C=CC(=O)OC.Cn1cnc2c(NCc3cccc(Br)c3)nc(N3CCOCC3)nc21>>COC(=O)/C=C/c1cccc(CNc2nc(N3  
CCOCC3)nc3c2ncn3C)c1  
C=Cc1cccc1.O=c1oc2cc(F)ccc2c(-c2cccc2)c1Br>>O=c1oc2cc(F)ccc2c(-c2cccc2)c1/C=C/c1cccc1  
C=Cc1ccc(C)cc1.CS(=O)(=O)c1ccc(Br)cc1>>Cc1ccc(/C=C/c2ccc(S(C)(=O)=O)cc2)cc1  
C=CC(=O)CCC.Fc1ccc(Br)cc1>>CCCC(=O)/C=C/c1ccc(F)cc1  
C=CC(=O)COCCCC.Cc1cccc1I>>CCCCOCC(=O)/C=C/c1cccc1C  
C=Cc1ccc(C(=O)OC)cc1.COc1cc[nH]c1/C=C1|C(=O)Nc2cccc(I)c21>>COC(=O)c1ccc(/C=C/c2cccc3  
c2/C=(C/c2[nH]ccc2OC)C(=O)N3)cc1  
C=Cc1cccc(C)n1.CC(C)C(C#N)(CCCN1CCN(CCOc2cccc2Br)CC1)c1cccc1>>Cc1cccc(/C=C/c2ccc  
cc2OCCN2CCN(CCCC(C#N)(c3cccc3)C(C)C)CC2)n1  
C=Cc1ccc(CC#N)cc1.CCOC(=O)C(F)Br>>CCOC(=O)C(F)/C=C/c1ccc(CC#N)cc1  
C=CC(=O)OC(C)(C)C.CCOC(=O)c1ccc(I)cc1>>CCOC(=O)c1ccc(/C=C/C(=O)OC(C)(C)C)cc1  
C=Cc1ccc(OC)cc1.O=c1c(I)c(/C=C/c2cccc2)[nH]c2cccc12>>COc1ccc(/C=C/c2c(/C=C/c3cccc3)[n  
H]c3cccc3c2=O)cc1  
C=CC(=O)OC.O=c1[nH]c(=O)n([C@ @H]2C[C@H](O)[C@H](CO)C2)cc1I>>COC(=O)/C=C/c1cn([  
C@ @H]2C[C@H](O)[C@H](CO)C2)c(=O)[nH]c1=O  
C=CC(=O)OCC.Clc1ccc2nc(-c3cccc3)c(I)c(-c3cccc3)c2c1>>CCOC(=O)/C=C/c1c(-  
c2cccc2)nc2ccc(Cl)cc2c1-c1cccc1  
C=CC(=O)OCCc1cccc1.CCOC(=O)/C=C/c1ccc2c1oc1c(I)cccc12>>CCOC(=O)/C=C/c1ccc2c1oc1c(/  
C=C/C(=O)OCc3cccc3)cccc12  
C=CC(=O)N1N=Ce2cccc2C1C=C(C)C.COc1cc(Ce2cnc(N)nc2N)cc(I)c1OC>>COc1cc(Ce2cnc(N)nc2  
N)cc(/C=C/C(=O)N2N=Ce3cccc3C2C=C(C)C)c1OC  
C=Cc1ccc(/C=C/c2ccc(N(C)C)cc2OC)cc1.CC1(C)C2=CC(=O)C(F)=CC2=C(c2ccc(Br)cc2S(=O)(=O)  
O)c2cc(F)c(O)cc21>>COc1cc(N(C)C)ccc1/C=C/c1ccc(/C=C/c2ccc(C3=C4C=C(F)C(=O)C=C4C(C)(C)  
)c4cc(O)c(F)cc43)c(S(=O)(=O)O)c2)cc1  
C=CC(=O)OC(C)(C)C.CN1CC(=O)Nc2ncc(Br)cc2C1>>CN1CC(=O)Nc2ncc(/C=C/C(=O)OC(C)(C)C)  
cc2C1  
C=CC(=O)OCC.C[C@H](NC(=O)OC(C)(C)C)c1ccc(Br)cc1>>CCOC(=O)/C=C/c1ccc([C@H](C)NC(  
=O)OC(C)(C)C)cc1  
C=CCN(C(=O)OCc1cccc1)C(=O)OC(C)(C)C.CC(=O)c1cccc(Br)c1>>CC(=O)c1cccc(/C=C/CN(C(=O)  
)OCc2cccc2)C(=O)OC(C)(C)C)c1  
C=Cc1cccc1[N+](=O)[O-].Nc1cccc1I>>Nc1cccc1/C=C/c1cccc1[N+](=O)[O-]  
C=CC#N.Cc1nn2c(-c3cccc3)cc(-c3cccc3)nc2c1I>>Cc1nn2c(-c3cccc3)cc(-  
C=Cc1cccc1.Nc1c(Br)ccc2c1OCO2>>Nc1c(/C=C/c2cccc2)ccc2c1OCO2  
C=CC(=O)OCC.Cc1ccc(C#C/C=C/c2ccc(Br)cc2)cc1>>CCOC(=O)/C=C/c1ccc(/C=C/C#Cc2ccc(C)cc2  
C=Cc1ccc(O)cc1.COc1ccc(OC)c(I)c1>>COc1ccc(OC)c(/C=C/c2ccc(O)cc2)c1  
C=CCN(C(=O)OC(C)(C)C)C(=O)OC(C)(C)C.COC(=O)c1ccc(Cl)cc1>>COC(=O)c1ccc(/C=C/CN(C(=O)  
O)OC(C)(C)C)C(=O)OC(C)(C)C)cc1  
Brc1ccc2[nH]ccc2c1.C#CC=C>>C#C/C=C/c1ccc2[nH]ccc2c1  
C=Cc1ccc(OC)cc1.Nc1ncc(Cl)cc1Br>>COc1ccc(/C=C/c2cc(Cl)nc2N)cc1



7111 C=Cc1ence(C#N)c1Nc1ccc2[nH]ccc2c1C.COc1ccc(CN2CCN(C)CC2)cc1I>>COc1ccc(CN2CCN(C)C  
C2)cc1/C=C/c1ence(C#N)c1Nc1ccc2[nH]ccc2c1C  
7112 C=CCN(C)c1cccc1.COC(=O)[C@H](Cc1ccc(OS(=O)(=O)C(F)(F)F)cc1)n1cccc1>>COC(=O)[C@H](  
Cc1ccc(/C=C/CN(C)c2ccccc2)cc1)n1cccc1  
7113 C=CC1(c2ccc(Cl)cc2)CCN(C(=O)OC(C)(C)C)C1.O=c1[nH]cnc2cc(Br)ccc12>>CC(C)(C)OC(=O)N1  
CCC(/C=C/c2ccc3c(=O)[nH]cnc3c2)(c2ccc(Cl)cc2)CC1  
7114 C=CS(N)(=O)=O.Cc1cccc(Br)c1C>>Cc1cccc(/C=C/S(N)(=O)=O)c1C  
Br1ccc(-c2cnc3ccccc3n2)cc1.C=CCn1c(-c2ccc([N+](=O)[O-]  
7115 ])cc2)nc2ccccc2c1=O>>O=c1c2ccccc2nc(-c2ccc([N+](=O)[O-])cc2)n1C/C=C/c1ccc(-  
Br1ccccc1.C=CS(=O)(=O)c1ccccc1>>O=S(=O)(/C=C/c1ccccc1)c1ccccc1  
7116 C=CC(=O)OC(C)(C)C.O=Cc1ccc(Br)s1>>CC(C)(C)OC(=O)/C=C/c1ccc(C=O)s1  
7117 C=Cc1ccccc1.CC(=O)Oc1ccc(I)cc1>>CC(=O)Oc1ccc(/C=C/c2ccccc2)cc1  
7118 Br1ccccc1.C=Cc1cccc(Nc2ncccc2[N+](=O)[O-])c1>>O=[N+](O-  
7119 C=CC(=O)OCC.O=c1oc2ccccc2c(OS(=O)(=O)C(F)(F)F)c1C(c1ccccc1)c1ccccc1>>CCOC(=O)/C=C/c  
7120 1c(C(c2ccccc2)c2ccccc2)c(=O)oc2ccccc12  
7121 C=Cc1ccc(OC)cc1.FC(F)(F)C(F)(F)C(F)(F)C(F)(F)C(F)(F)C(F)(F)Br>>COc1ccc(/C=C/C(F)(F)  
7122 )C(F)(F)C(F)(F)C(F)(F)C(F)(F)C(F)(F)C(F)(F)cc1  
7123 C=CS(=O)c1ccccc1.COC(=O)c1ccc(Br)cc1>>COC(=O)c1ccc(/C=C/S(=O)c2ccccc2)cc1  
7124 C=CCN(C(=O)OC(C)(C)C)C(=O)OC(C)(C)C.N#Cc1ccccc1Cl>>CC(C)(C)OC(=O)N(C/C=C/c1ccccc1  
7125 C#N)C(=O)OC(C)(C)C  
7126 Br1cncnc1.C=Cc1ccccc1>>C(=C/c1cncnc1)\c1ccccc1  
7127 C=CC1(O)CCC1.Cc1ccccc1I>>Cc1ccccc1/C=C/Cl(O)CCC1  
7128 C=CC#N.CC(=O)Nc1ccccc1Br>>CC(=O)Nc1ccccc1/C=C/C#N  
7129 C=CC(=O)OC.Oc1ccccc1I>>COC(=O)/C=C/c1ccccc1O  
7130 C=Cc1ence(C#N)c1Nc1ccc2[nH]ccc2c1C.COCCOc1ccc(Br)cc1OCCOC>>COCCOc1ccc(/C=C/c2cnc  
7131 c(C#N)c2Nc2ccc3[nH]ccc3c2C)cc1OCCOC  
7132 C=CC(=O)OCCCC.COc1ccc2cccc([N+](=O)[O-])c2c1-  
7133 c1c(OC(=O)C(C)(C)C)ccc2cc(Br)ccc12>>CCCCOC(=O)/C=C/c1ccc2c(-  
7134 c3c(OC)ccc4cccc([N+](=O)[O-])c34)c(OC(=O)C(C)(C)C)ccc2c1  
7135 Br1ccc2oc(-c3cc[nH]n3)cc2c1.C=Cc1ccccc1>>C(=C/c1ccc2oc(-c3cc[nH]n3)cc2c1)\c1ccccc1  
7136 C=Cc1ccccc1.COC(=O)c1ccccc1I>>COC(=O)c1ccccc1/C=C/c1ccccc1  
7137 C=CC#N.COc1c(CN(C(=O)C2CC2)c2ccccc(Br)c2)ccc2c1OC(C)(C)C=C2>>COc1c(CN(C(=O)C2CC2)  
7138 c2ccccc(/C=C/C#N)c2)ccc2c1OC(C)(C)C=C2  
7139 C=Cc1ccc(-c2cccs2)cc1.CC(C)(C)Br>>CC(C)(C)/C=C/c1ccc(-c2cccs2)cc1  
7140 C=CC(=O)O.O=[N+](O-)]c1ccc(Br)c1>>O=C(O)/C=C/c1ccc([N+](=O)[O-])c1  
7141 C=CCN1C(=O)c2ccccc2C1=O.Fc1ccc(I)cc1>>O=C1c2ccccc2C(=O)N1C/C=C/c1ccc(F)cc1  
7142 C=CS(=O)(=O)Nc1ccc(OC)cc1.CC(C)(C)OC(=O)Nc1cc(F)ccc1Br>>COc1ccc(CNS(=O)(=O)/C=C/  
7143 c2ccc(F)cc2CNC(=O)OC(C)(C)C)cc1  
7144 C=Cc1ccccc1.CCOC(=O)COc1ccc(I)cc1>>CCOC(=O)COc1ccc(/C=C/c2ccccc2)cc1  
7145 C=Cc1ccccc1.O=S(=O)(Oc1ccc2c1N(c1ncccn1)CCC2)C(F)(F)F>>C(=C/c1ccc2c1N(c1ncccn1)CCC  
7146 2)\c1ccccc1  
7147 C=CC(=O)OC.COc1ccc(Cl)cc1I>>COC(=O)/C=C/c1cc(Cl)ccc1OC  
7148 C=CP(=O)(OCC)OCC.CC(=O)c1ccc(Br)cc1>>CCOP(=O)(/C=C/c1ccc(C(C)=O)cc1)OCC  
7149 C=CC(=O)OCC.O=C(NCCc1ccccc1)OCc1ccccc1>>CCOC(=O)/C=C/c1cccc(CCNC(=O)OCc2ccc  
7150 cc2)c1  
7151 C=CC(=O)OC(C)(C)C.CCOC(=O)CN1CC(=O)Nc2ncc(Br)cc2C1>>CCOC(=O)CN1CC(=O)Nc2ncc(/  
7152 C=C/C(=O)OC(C)(C)C)cc2C1  
7153 C=CP(=O)(OCC)OCC.CN(C)c1ccc(Br)cc1>>CCOP(=O)(/C=C/c1ccc(N(C)C)cc1)OCC  
7154 C=CC(=O)OCC.Fc1ccc(Oc2nc(-c3ccc(Br)cc3)nc3ccsc23)c(F)c1>>CCOC(=O)/C=C/c1ccc(-  
7155 c2nc(Oc3ccc(F)cc3F)c3sccc3n2)cc1  
7156 C=CCN(C(=O)OC(C)(C)C)C(=O)OC(C)(C)C.Cc1cccc(Cl)c1>>Cc1cccc(/C=C/CN(C(=O)OC(C)(C)C)  
7157 C(=O)OC(C)(C)C)c1  
7158 C=Cc1ccccc1.CCn1cnc1-c1ccc(Br)cc1>>CCn1cnc1-c1ccc(/C=C/c2ccccc2)cc1  
7159 C=CCN(Cc1cc(F)cc(F)c1)C(=O)C(C)(C)C.O=C1Nc2ncccc2[C@ @]12Cc1cc(Br)enc1C2>>CC(C)(C)C  
7160 (=O)N(C/C=C/c1cnc2c(c1)C[C@ @]1(C2)C(=O)Nc2ncccc21)Cc1cc(F)cc(F)c1  
7161 C=CC(=O)OC.Cn1cc(-c2cnc3ccc(OS(=O)(=O)C(F)(F)F)cc3c2)cn1>>COC(=O)/C=C/c1ccc2ncc(-  
7162 c3cnn(C)c3)cc2c1  
7163 C=Cc1ccccc1.N#Cc1cc2ccc(Br)cc2c1ccc1ccccc12>>N#Cc1cc2ccc(/C=C/c3ccccc3)cc2c1ccc1ccccc  
7164 C=CC(=O)O.O=[N+](O-)]c1ccc(I)cc1>>O=C(O)/C=C/c1ccc([N+](=O)[O-])cc1  
7165 C=Cc1ccccc1.O=Cc1cc2c(cc1Br)OCO2>>O=Cc1cc2c(cc1/C=C/c1ccccc1)OCO2  
7166 C=CC(=O)OCC.CSc1nc(C)c(I)c(NC2CCOC2)n1>>CCOC(=O)/C=C/c1c(C)nc(SC)nc1NC1CCOC1

7153 C=Cc1cccc1.CCOC(=O)c1ccc(I)cc1>>CCOC(=O)c1ccc(/C=C/c2ccccc2)cc1  
7154 C=CCN(C(=O)C(C)(C)C)[C@@H]1CCc2ccccc21.O=C1Nc2ncccc2[C@]12Cc1ccc(Br)cc1C2>>CC(C)  
(C)C(=O)N(C/C=C/c1ccc2c(c1)C[C@@]1(C2)C(=O)Nc2ncccc21)[C@@H]1CCc2ccccc21  
7155 C=CC(=O)OC.COc1ccc2cc(Br)ccc2c1Cl>>COC(=O)/C=C/c1ccc2c(Cl)c(OC)ccc2c1  
7156 C=CCn1c(-  
c2ccc(OC)cc2)nc2ccccc2c1=O.O=C(CN1C(=O)COc2ccccc21)c1ccc(Br)cc1>>CCOc1ccc(-  
7157 Br1cnc2ccccc2c1.C=CC(=O)OC>>COC(=O)/C=C/c1cnc2ccccc2c1  
7158 Br1cccc(Oc2ccc(OCc3ccccc3)cc2)c1.C=CC(C)=O>>CC(=O)/C=C/c1cccc(Oc2ccc(OCc3ccccc3)cc2)c  
7159 C=Cc1cccc1.O=C(N1CCOCC1)C(F)(F)Br>>O=C(N1CCOCC1)C(F)(F)/C=C/c1cccc1  
7160 C=Cc1cncnc1.O=[N+](=[O-])c1ccc(Nc2ccc(Br)cc2)c([N+](=O)[O-])c1>>O=[N+](=[O-]  
])c1ccc(Nc2ccc(/C=C/c3cncnc3)cc2)c([N+](=O)[O-])c1  
7161 C=CCN(C(=O)OC(C)(C)C)C(=O)OC(C)(C)C.O=C(c1cccc1)c1ccc(Cl)cc1>>CC(C)(C)OC(=O)N(C/C  
=C/c1ccc(C(=O)c2ccccc2)cc1)C(=O)OC(C)(C)C  
7162 C=Cc1ccc(S(=O)(=O)c2ccccc2F)cn1.Fc1cccc(I)c1>>O=S(=O)(c1ccc(/C=C/c2cccc(F)c2)nc1)c1cccc1  
7163 C=CC(=O)OC(C)(C)C.O=C(NCc1ccc(OC(F)(F)F)cc1)c1cc(Br)cc(I)c1>>CC(C)(C)OC(=O)/C=C/c1cc(  
Br)cc(C(=O)NCc2ccc(OC(F)(F)F)cc2)c1  
7164 C=CC(=O)OC(C)(C)C.O=S(=O)(c1cccc(Br)c1)c1ccc2ccccc2n1>>CC(C)(C)OC(=O)/C=C/c1cccc(S(=  
O)(=O)c2ccc3ccccc3n2)c1  
7165 C=CC(=O)OC.Fc1cncnc(Br)c1>>COC(=O)/C=C/c1cncnc(F)c1  
7166 C=CC(=O)CCCCC.Ic1cccc1>>CCCCC(=O)/C=C/c1cccc1  
7167 C=CC#N.Cc1cc(Br)cc(C)c1Nc1cnc(NC2CCN(C(=O)OC(C)(C)C)CC2)n1>>Cc1cc(/C=C/C#N)cc(C)c  
1Nc1cnc(NC2CCN(C(=O)OC(C)(C)C)CC2)n1  
7168 C=CCO.CC(=O)Oc1ccc(I)cc1>>CC(=O)Oc1ccc(/C=C/CO)cc1  
7169 Br1ccc2c(ccn2/C=C/c2ccccc2)c2ccccc2c1.C=CC(=O)OC>>COC(=O)/C=C/c1ccc2c(ccn2/C=C/c2c  
ccccc2)c2ccccc2c1  
7170 C=Cc1cccc1.Cc1ccc2c(-c3ccccc3)c(Br)c(=O)oc2c1>>Cc1ccc2c(-  
7171 C=CC(=O)OC.O=C(C)c1cccc(Br)c1>>COC(=O)/C=C/c1cccc(C(=O)O)c1  
7172 Br1ccc(/C=C/C2/CCCc3ccccc32)c2ccc3c(cnn3C3CCCCO3)c2)cc1.C=CC(=O)OC>>COC(=O)/C=C/c1  
ccc(/C=C/C2/CCCc3ccccc32)c2ccc3c(cnn3C3CCCCO3)c2)cc1  
7173 C=C[C@H]1CCCCN1C(=O)OC(C)(C)C.CC(=O)Oc1ccc(I)cc1>>CC(=O)Oc1ccc(/C=C/[C@H]2C  
CCCN2C(=O)OC(C)(C)C)cc1  
7174 C=CC(=O)OC.CCCOC(=O)/C=C/c1ccc(I)cc1>>CCCCOC(=O)/C=C/c1ccc(/C=C/C(=O)OC)cc1  
7175 Br1ccc(-c2cncnc2)cc1.C=CC(N)=O>>NC(=O)/C=C/c1ccc(-c2cncnc2)cc1  
7176 C=CC(OC)OC.FC(F)c1ccc(I)cc1>>COC(/C=C/c1ccc(C(F)F)cc1)OC  
7177 C=Cc1cccc1C.Nc1ccc(Cl)cc1Br>>Cc1cccc1/C=C/c1cc(Cl)ccc1N  
7178 C=Cc1cccc(F)c1.N#Cc1ccc2cc(Br)ccc2c1>>N#Cc1ccc2cc(/C=C/c3cccc(F)c3)ccc2c1  
7179 Br1cccc1.C=CCOc1ccc(C)cc1>>Cc1ccc(OC/C=C/c2ccccc2)cc1  
7180 C=CCOc1cccc1.CC(=O)c1ccc(Br)cc1>>CC(=O)c1ccc(/C=C/COc2ccccc2)cc1  
7181 C=CC(=O)O.CN(c1cccc(I)c1)S(=O)(=O)c1ccc(Cl)cc1>>CN(c1cccc(/C=C/C(=O)O)c1)S(=O)(=O)c1cc  
c(Cl)cc1  
7182 C=CS(=O)(=O)NCCCCCCCCC.CC(C)(C)OC(=O)NCc1cc(F)ccc1Br>>CCCCCCCCNS(=O)(=O)/C=C/c  
1ccc(F)cc1CNC(=O)OC(C)(C)C  
7183 C=CCOC(C)=O.Cc1ccc(S(=O)(=O)NCCc2cc3c(cc2I)OCO3)cc1>>CC(=O)OC/C=C/c1cc2c(cc1CCNS(  
=O)(=O)c1ccc(C)cc1)OCO2  
7184 Br1cnc2nc(CC3CCN(Cc4ccccc4)CC3)oc2c1.C=CC(=O)OC>>COC(=O)/C=C/c1cnc2nc(CC3CCN(Cc  
4ccccc4)CC3)oc2c1  
7185 \*CN(Cc1cccc1)N=Nc1ccc(I)cc1.C=CC#N>>\*CN(Cc1cccc1)N=Nc1ccc(/C=C/C#N)cc1  
7186 C=CC(=O)OCCCC.COc1cc([N+](=O)[O-])ccc1Br>>CCCCOC(=O)/C=C/c1ccc([N+](=O)[O-])cc1OC  
7187 C=Cc1ccc(C)c(C)c1.COc1ccc(CN2C(=O)C(=C(c3ccc(O)cc3)c3ccc(O)cc3)c3ccc(Br)ccc32)cc1>>COc1  
ccc(CN2C(=O)C(=C(c3ccc(O)cc3)c3ccc(O)cc3)c3ccc(/C=C/c4ccc(C)c(C)c4)ccc32)cc1  
7188 C=Cc1cccc1.O=C(C=C(c1cccc1)c1cccc1)c1cccc1Br>>O=C(C=C(c1cccc1)c1cccc1)c1cccc1/C  
=C/c1cccc1  
7189 C=Cc1cccc1.FC(F)(F)C(=C(Br)c1cccc1)N1CCOCC1>>FC(F)(F)C(=C/C=C/c1cccc1)c1cccc1)N1  
CCOCC1  
7190 C=CCP(=O)(OCC)OCC.CCOC(=O)CNc1cccc(Br)c1>>CCOC(=O)CNc1cccc(/C=C/CP(=O)(OCC)OC  
7191 Br1c2ccccc2cc2ccccc12.C=C[C@H](CO[Si](C)(C)C(C)C)NC(=O)OCc1cccc1>>CC(C)(C)[Si]  
(C)(C)OC[C@H](/C=C/c1c2ccccc2cc2ccccc12)NC(=O)OCc1cccc1  
7192 C=CC(=O)OC.Cc1ccc(C=O)c(Br)n1>>COC(=O)/C=C/c1nc(C)ccc1C=O  
7193 C=Cc1cccc1O.Nc1ccc(Br)cc1>>Nc1ccc(/C=C/c2ccccc2O)cc1  
7194 C=CC1(O)CCCCC1.[2H]C(O)(CCNC(=O)C(F)(F)F)c1cccc(Br)c1>>[2H]C(O)(CCNC(=O)C(F)(F)F)c  
1cccc(/C=C/C2(O)CCCCC2)c1

7195 C=CC(=O)N1CCCC1.CC(C)(C)OC(=O)N1CCc2cc(Br)ccc2C1>>CC(C)(C)OC(=O)N1CCc2cc(/C=C/C(=O)N3CCCC3)ccc2C1

7196 C=CC(=O)OC(C)(C)C.Cc1ccc(I)cc1>>Cc1ccc(/C=C/C(=O)OC(C)(C)C)cc1

7197 C=CC(=O)OC.COc1ccc(I)nc1>>COC(=O)/C=C/c1ccc(OC)cn1

7198 C=Cc1ccncc1.CCN1c2ncc(Br)cc2C(=O)N(C)c2ccc(F)nc21>>CCN1c2ncc(/C=C/c3ccncc3)cc2C(=O)N(C)c2ccc(F)nc21

7199 C=Cc1ccc([Si](OC)(OC)OC)cc1.CCOP(=O)(Cc1ccc(/C=C/c2c3ccccc3c(Br)c3ccccc23)cc1)OCC>>CCOP(=O)(Cc1ccc(/C=C/c2c3ccccc3c(/C=C/c3ccc([Si](OC)(OC)OC)cc3)c3ccccc23)cc1)OCC

7200 C=CC(=O)OC(C)(C)C.O=C(O)c1ccc(Br)s1>>CC(C)(C)OC(=O)/C=C/c1ccc(C(=O)O)s1

7201 C=Cc1ccc(N2CCN(C)CC2)nc1.C[Si](C)(C)CCOCn1nc(I)c2ccc(C=O)cc21>>CN1CCN(c2ccc(/C=C/c3nn(COCC[Si](C)(C)C)c4cc(C=O)ccc34)cn2)CC1

7202 C=CC1CC(OC)=CC(=O)O1.Ic1ccc2c(c1)OCO2>>COC1=CC(=O)OC(/C=C/c2ccc3c(c2)OCO3)C1

7203 C=Cc1ccc2cc(F)c(F)cc2n1.OC1c2cc(Br)ccc2OCc2ncccc21>>OC1c2cc(/C=C/c3ccc4cc(F)c(F)cc4n3)ccc2OCc2ncccc21

7204 C=Cc1ccc([N+](=O)[O-])cc1.Oc1ccc(/N=N/c2ccc(Br)cc2)cc1>>O=[N+](O-)]c1ccc(/C=C/c2ccc(/N=N/c3ccc(O)cc3)cc2)cc1

7205 Br1ccc(-c2ccccc2)nc1.C=CC(=O)OCc1cccc1>>O=C(/C=C/c1ccc(-c2ccccc2)nc1)OCc1cccc1

7206 C=CC(=O)OCC.CN(C)c1ccc(-c2ccc(CN(C(=O)C3CCCCC3)c3ccccc(Br)c3)cc2)cc1>>CCOC(=O)/C=C/c1cccc(N(Cc2ccc(-c3ccc(N(C)C)cc3)cc2)C(=O)C2CCCCC2)c1

7207 C=CCS(=O)(=O)NC(C)(C)C(=O)OCc1cccc1.CC(=O)OC[C@H]1O[C@@H](Oc2n[nH]c(C(C)C)c2C2ccc(Br)cc2)[C@H](OC(C)=O)[C@@H](OC(C)=O)[C@@H]1OC(C)=O>>CC(=O)OC[C@H]1O[C@@H](Oc2n[nH]c(C(C)C)c2Cc2ccc(/C=C/CS(=O)(=O)NC(C)(C)C(=O)OCc3ccccc3)cc2)[C@H](OC(C)=O)[C@@H](OC(C)=O)[C@@H]1OC(C)=O

7208 C=CC(=O)OCC.CN(C)c1ccc(-c2ccccc2)c(I)c1>>CCOC(=O)/C=C/c1cc(N(C)C)ccc1-c1ccccc1

7209 C=CC(=O)OC.CN(C)C1COc2c(Br)ccc3[nH]cc(c23)C1>>COC(=O)/C=C/c1ccc2[nH]cc3c2c1OCC(N(C)C)C3

7210 C=CC(C)=O.Cc1ccc(I)cc1>>CC(=O)/C=C/c1ccc(C)cc1

7211 Br1ccc(-c2cnc3ccccc3n2)cc1.C=CCn1c(-c2ccc(Cl)cc2)nc2ccccc2c1=O>>O=c1c2ccccc2nc(-c2ccc(Cl)cc2)n1C/C=C/c1ccc(-c2cnc3ccccc3n2)cc1

7212 C=Cc1ccc(N(c2ccccc2)c2ccccc2)cc1.CCOC(=O)C(F)(F)Br>>CCOC(=O)C(F)(F)/C=C/c1ccc(N(c2ccccc2)c2c2ccccc2)cc1

7213 C=CC(=O)OC.CC(C)(C)c1ccc(N)c(Br)c1>>COC(=O)/C=C/c1cc(C(C)(C)C)ccc1N

7214 C=Cc1cccc1.O=Cc1c(Br)sc2ccccc12>>O=Cc1c(/C=C/c2ccccc2)sc2ccccc12

7215 C=CCNC(=O)c1ccc(F)cc1NC(=O)c1ccc(C(F)(F)F)cc1.Ic1ccccc1>>O=C(Nc1cc(F)ccc1C(=O)NC/C=C/c1ccccc1)c1ccc(C(F)(F)F)cc1

7216 C=Cc1c(F)c(F)c(F)c(F)c1F.N#Cc1c(F)c(F)c(Br)c(F)c1F>>N#Cc1c(F)c(F)c(/C=C/c2c(F)c(F)c(F)c(F)c2F)c(F)c1F

7217 C=CC(=O)OCC.CC(C)(CC1Cc2ccccc2C1)NC[C@@H](O)COc1ccc(Br)c(F)c1F>>CCOC(=O)/C=C/c1ccc(OC[C@H](O)CNC(C)(C)CC2Cc3ccccc3C2)c(F)c1F

7218 C=CC(=O)OCC(CC)CCCC.COc1ccc(I)cc1>>CCCCC(CC)COC(=O)/C=C/c1ccc(OC)cc1

7219 C=Cc1ccc(OC(C)=O)cc1.Fc1cc(Br)cc(OCc2ccccc2)c1>>CC(=O)Oc1ccc(/C=C/c2cc(F)cc(OCc3ccccc3)c2)cc1

7220 C=CC(=O)NC(C)(C)C.COc1ccc(-c2oc3cc(OC)ccc3c(=O)c2I)cc1>>COc1ccc(-c2oc3cc(OC)ccc3c(=O)c2/C=C/C(=O)NC(C)(C)C)cc1

7221 C=Cn1cnc2c(NC)ncnc21.O=Cc1cccc(I)c1>>CNc1ncnc2c1ncn2/C=C/c1cccc(C=O)c1

7222 C=CC(=O)OCC.Clc1cccs1>>CCOC(=O)/C=C/c1cccs1

7223 C=Cc1ccccc1.COc1ccc(/C=C/c2ccc3ccc4ccc(Br)cc4c3c2)cc1>>COc1ccc(/C=C/c2ccc3ccc4ccc(/C=C/c5ccccc5)cc4c3c2)cc1

7224 C=Cc1ccccc1.CC(=O)c1cccc(Br)c1>>CC(=O)c1cccc(/C=C/c2ccccc2)c1

7225 C=C[C@H](OC)[C@@H](C)[C@@H](OC)[C@@H](C)COCOC.Ic1ccccc1>>COCOC[C@H](C)[C@@H](OC)[C@H](C)[C@H](C)[C@H](C)/C=C/c1ccccc1)OC

7226 C=Cc1ccc(Br)cc1.CCCCCCN(CCCCCC)c1ccc(I)cc1>>CCCCCN(CCCCCC)c1ccc(/C=C/c2ccc(Br)c2)cc1

7227 C=CC(=O)OCC.CN(C)c1ccc(-c2ccccc2I)cc1>>CCOC(=O)/C=C/c1ccccc1-c1ccc(N(C)C)cc1

7228 C=Cc1ccc(OC)cc1.N#Cc1cccc(Br)c1>>COc1ccc(/C=C/c2cccc(C#N)c2)cc1

7229 C=Cc1ccc(OC)cc1.COc1cc(Br)c(C=O)cc1OC>>COc1ccc(/C=C/c2cc(OC)c(OC)cc2C=O)cc1

7230 C=CC(N)=O.O=Cc1ccc(I)cc1>>NC(=O)/C=C/c1ccc(C=O)cc1

7231 C=CC(=O)OC.CC(=O)Oc1ccc(Br)c(OC(C)=O)c1>>COC(=O)/C=C/c1ccc(OC(C)=O)cc1OC(C)=O

7232 Br1cnc2ccccc2c1.C=C[C@H](CO[Si](C)(C)C(C)(C)C)NC(=O)OCc1cccc1>>CC(C)(C)[Si](C)(C)OC[C@H](C)/C=C/c1cnc2ccccc2c1)NC(=O)OCc1cccc1

7233 C=CC(=O)OCC.CC(C)c1ccc(C(C)C)c(I)c(C(C)C)c1>>CCOC(=O)/C=C/c1c(C(C)C)cc(C(C)C)cc1C(C)  
7234 C=CCCN1cc([N+](=O)[O-]  
7235 C=CC(=O)OCC.COc1cccc(OC)c1I>>CCOC(=O)/C=C/c1c(OC)cccc1OC  
7236 C=CC(=O)OCCCC.Cc1ccc(S(=O)(=O)NCCc2c(Br)[nH]c3cccc23)cc1>>CCCCOC(=O)/C=C/c1[nH]c  
7237 C=CC(=O)OC(C)(C)C.CC(C)(C)O[C@H]1CC[C@@H]2C=C(C3=C(Br)CN(S(=O)(=O)c4cccc4)CC3  
7238 )CC[C@]12C>>CC(C)(C)OC(=O)/C=C/C1=C(C2=C[C@H]3CC[C@H](OC(C)(C)C)[C@@]3(C)CC2  
7239 )CCN(S(=O)(=O)c2cccc2)C1  
7240 C=Cc1cccc1.Cc1cc(C)c(OC(=O)C#Cc2cccc2)c(Br)c1>>Cc1cc(C)c(OC(=O)C#Cc2cccc2)c(/C=C/c2  
7241 ccccc2)c1  
7242 C=Cc1ccc2c(c1)OCO2.C[Si](C)(C)OS(=O)(=O)C(F)(F)F>>C[Si](C)(C)/C=C/c1ccc2c(c1)OCO2  
7243 C=CCCN1cnc2cc(C=O)ccc21.CC(C)(C)OC(=O)NC1CCC(OC(=O)Nc2cc(Br)ccc2-  
7244 c2cccc2)CC1>>CC(C)(C)OC(=O)NC1CCC(OC(=O)Nc2cc(/C=C/CCn3cnc4cc(C=O)ccc43)ccc2-  
7245 c2cccc2)CC1  
7246 C=CC(=O)OC.FC(F)(F)c1cccc(I)c1>>COC(=O)/C=C/c1cccc(C(F)(F)F)c1  
7247 C=CC(=O)O.CC1(C)C=Cc2c(ccc(I)c2[N+](=O)[O-]  
7248 )O1>>CC1(C)C=Cc2c(ccc(/C=C/C(=O)O)c2[N+](=O)[O-])O1  
7249 C=Cc1cccc1.COC(C#N)c1cccc1Br>>COC(C#N)c1cccc1/C=C/c1cccc1  
7250 C=CS(=O)(=O)F.Fc1cc(I)cc(F)n1>>O=S(=O)(F)/C=C/c1cc(F)nc(F)c1  
7251 C=CC(=O)OCC.Fc1ccc(Br)c(C2OCCCO2)c1>>CCOC(=O)/C=C/c1ccc(F)cc1C1OCCCO1  
7252 Brc1cccc2cccc12.C=CS(=O)(=O)c1cccc1>>O=S(=O)(/C=C/c1cccc2cccc12)c1cccc1  
7253 C=CC(=O)OC.CC(=O)n1cc(I)cn1>>COC(=O)/C=C/c1cnn(C(C)=O)c1  
7254 C=CC(=O)OC.N#Cc1ccc(-c2cncc3ccc(Br)cc23)c2cccc12>>COC(=O)/C=C/c1ccc2cncc(-  
7255 c3ccc(C#N)c4cccc34)c2c1  
7256 C=Cc1cccc1.Oc1ccc(Br)c1>>Oc1ccc(/C=C/c2cccc2)c1  
7257 C=CCCc1ccc(CC)cc1.O=C1CCOc2cc(Br)ccc21>>CCc1ccc(CC/C=C/c2ccc3c(c2)OCCC3=O)cc1  
7258 C=CC(=O)O.CCCCC(C)CN1c2ccc(Br)cc2Sc2cc(C=O)ccc21>>CCCC(C)CN1c2ccc(C=O)cc2Sc2  
7259 cc(/C=C/C(=O)O)ccc21  
7260 C=CC(=O)OC.Nc1ccc(I)cc1>>COC(=O)/C=C/c1ccc(N)cc1  
7261 C=Cc1cccc1.CC(C)(C)c1nc(C(F)(F)F)cc2c(I)c(-  
7262 c3cccc3)oc12>>CC(C)(C)c1nc(C(F)(F)F)cc2c(/C=C/c3cccc3)c(-c3cccc3)oc12  
7263 C=Cc1ccc(F)cc1.COC(=O)c1cc([N+](=O)[O-])ccc1Cl>>COC(=O)c1cc([N+](=O)[O-]  
7264 )ccc1/C=C/c1ccc(F)cc1  
7265 C=CC(=O)OC.CCCCCCCCCC(F)(F)C1CC(c2ccc(Br)cc2)=NN1C>>CCCCCCCCC(F)(F)C1CC(c2cc  
7266 c(/C=C/C(=O)OC)cc2)=NN1C  
7267 C=CC(=O)OC(C)(C)C.COc1ccc2cc(Br)ccc2c1>>COc1ccc2cc(/C=C/C(=O)OC(C)(C)C)ccc2c1  
7268 C/N=C1/Nc2ncc(Br)cc2OC1(C)C.C=CC(=O)N(C)Cc1sc2cccc2c1C>>C/N=C1/Nc2ncc(/C=C/C(=O)N  
7269 (C)Cc3sc4cccc4c3C)cc2OC1(C)C  
7270 C=C/C=C/CCCCC.Clc1ccc(I)cc1>>CCCCC/C=C/C=C/c1ccc(Cl)cc1  
7271 C=CC(=O)OCC.O=C(c1cccc1)c1ccc(Cl)cc1>>CCOC(=O)/C=C/c1ccc(C(=O)c2cccc2)cc1  
7272 C=CC(=O)OC(C)(C)C.CC(=O)O[IH2](OC(C)=O)c1cccc1>>CC(C)(C)OC(=O)/C=C/c1cccc1  
7273 C=Cl.C=CS(C)(=O)=O>>C=C/C=C/S(C)(=O)=O  
7274 C=CCn1cc(Br)cn1=O.Ic1cccc1>>O=c1ncc(Br)cn1C/C=C/c1cccc1  
7275 C=CC(=O)NC1CCCCC1.O=c1c(I)c(-c2ccc(O)cc2)oc2cc(O)ccc12>>O=C(/C=C/c1c(-  
7276 c2ccc(O)cc2)oc2cc(O)ccc2c1=O)NC1CCCCC1  
7277 C=CC(=O)OCC.Ic1cnn(CC2CC2)c1>>CCOC(=O)/C=C/c1cnn(CC2CC2)c1  
7278 C=CC(OCC)OCC.O=Cc1cc2c(cc1Br)OCO2>>CCOC(/C=C/c1cc2c(cc1C=O)OCO2)OCC  
7279 C=CC(=O)OC(C)(C)C.N#Cc1cccc(Br)c1>>CC(C)(C)OC(=O)/C=C/c1cccc(C#N)c1  
7280 Brc1cnc2cccc12.C=CC(=O)OCCCC>>CCCCOC(=O)/C=C/c1cnc2cccc12  
7281 C=Cc1nnn(C)n1.O=[N+](O-)]c1ccc(Br)cc1>>Cn1nnc(/C=C/c2ccc([N+](=O)[O-])cc2)n1  
7282 C=CC(=O)OCCCOc1ccc(C(c2ccc(C(C)(C)C)cc2)(c2ccc(C(C)(C)C)cc2)c2ccc(C(C)(C)C)cc2)cc1.CC(  
7283 C)(C)c1ccc(C(c2ccc(OCCCOc3ccc(I)cc3)cc2)(c2ccc(C(C)(C)C)cc2)c2ccc(C(C)(C)C)cc2)cc1>>CC(C)  
7284 (C)c1ccc(C(c2ccc(OCCCOc3ccc(I)cc3)cc2)(c2ccc(C(C)(C)C)cc2)c2ccc(C(C)(C)C)cc2)cc1  
7285 C=Cc1ccc2cccc2c1.Cc1ccc(Cl)cc1I>>Cc1ccc(Cl)cc1/C=C/c1ccc2cccc2c1  
7286 C=Cc1cnc1.CCOC(=O)c1c(I)c2cc(-c3ccc(C(F)(F)F)cc3)ccc2n1-  
7287 c1ccc(OC2CCCC2)cc1>>CCOC(=O)c1c(/C=C/c2cnc2)c2cc(-c3ccc(C(F)(F)F)cc3)ccc2n1-  
7288 c1ccc(OC2CCCC2)cc1  
7289 C=Cc1ccc(F)cc1.CC(=O)c1ccc(Cl)cc1>>CC(=O)c1ccc(/C=C/c2ccc(F)cc2)cc1

C=CCn1c(-  
 7273 c2ccc(F)cc2)nc2ccccc2c1=O.O=C(CN1C(=O)COc2ccccc21)c1ccc(Br)cc1>>O=C(CN1C(=O)COc2ccc  
 cc21)c1ccc(/C=C/Cn2c(-c3ccc(F)cc3)nc3ccccc3c2=O)cc1  
 7274 C=Cc1ccccc1.O=c1ccoc2cc(Br)ccc12>>O=c1ccoc2cc(/C=C/c3ccccc3)ccc12  
 7275 C=CC(=O)OCCCC.Nc1cc(F)cc([N+](=O)[O-]  
 7276 Bre1cccc2ccccc12.C=C[C@H]1CN2CC[C@H]1C[C@@H]2[C@H](O)c1ccnc2ccc(OC)cc12>>COc1c  
 cc2nccc([C@@H](O)[C@H]3C[C@@H]4CCN3C[C@@H]4/C=C/c3cccc4ccccc34)c2c1  
 7277 C=Cc1ccccc1.CCOC(=O)c1ccc(N)c(Br)c1>>CCOC(=O)c1ccc(N)c(/C=C/c2ccccc2)c1  
 7278 C=CCC(C)C(=O)OCC.O=Cc1ccc(Br)cc1>>CCOC(=O)C(C)C/C=C/c1ccc(C=O)cc1  
 7279 C=Cc1cc(OC)cc(OC)c1.CCOC(=O)c1ccc(I)cc1>>CCOC(=O)c1ccc(/C=C/c2cc(OC)cc(OC)c2)cc1  
 7280 Bre1ccc2c(c1)OCO2.C=CC(C)=O>>CC(=O)/C=C/c1ccc2c(c1)OCO2  
 7281 C=Cc1ccc(C(C)(C)C)cc1.Cc1ccc2c(-c3ccccc3)c(Br)c(=O)oc2c1>>Cc1ccc2c(-  
 c3ccccc3)c(/C=C/c3ccc(C(C)(C)C)cc3)c(=O)oc2c1  
 7282 C=Cc1cccc([N+](=O)[O-])c1.Nc1ccc(I)cc1>>Nc1ccc(/C=C/c2cccc([N+](=O)[O-])c2)cc1  
 7283 C=Cc1ccc(OC)cc1.Clc1ccc(Br)cc1>>COc1ccc(/C=C/c2ccc(Cl)cc2)cc1  
 7284 Bre1ccc2ccc3cccc4ccc1c2c34.C=CC(=O)OCC(C)C>>CC(C)COC(=O)/C=C/c1ccc2ccc3cccc4ccc1c2c3  
 7285 C=CC(=O)OCC.Clc1ccc(Br)cc1>>CCOC(=O)/C=C/c1ccc(Cl)cc1  
 7286 C=Cc1ccccc1.Clc1ccc2c(c1)c(I)nn2C1CCCCO1>>Clc1ccc2c(c1)c(/C=C/c1ccccc1)nn2C1CCCCO1  
 7287 C=CC(OCC)OCC.Cc1ncc(Br)cc1C#N>>CCOC(/C=C/c1cnc(C)c(C#N)c1)OCC  
 C=CC(=O)OC(C)(C)C.CC(C)(C)OC(=O)N1CCC(C2=C[C@H]3CC[C@H](OC(C)(C)C)[C@@]3(C)C  
 7288 C2)=C(Br)C1>>CC(C)(C)OC(=O)/C=C/C1=C(C2=C[C@H]3CC[C@H](OC(C)(C)C)[C@@]3(C)CC2  
 )CCN(C(=O)OC(C)(C)C)C1  
 7289 C=CB1OC(C)CC(C)(C)O1.COC(=O)c1ccccc1I>>COC(=O)c1ccccc1/C=C/B1OC(C)CC(C)(C)O1  
 7290 C=Cc1ccccc1.Cn1ccc(Br)n1>>Cn1ccc(/C=C/c2ccccc2)n1  
 7291 C=CS(=O)(=O)F.Cc1ccc(S(=O)(=O)n2cc(I)cn2)cc1>>Cc1ccc(S(=O)(=O)n2cc(/C=C/S(=O)(=O)F)cn2)  
 7292 C=CC(=O)OC.CON(C)C(=O)c1ccc(Br)cc1I>>COC(=O)/C=C/c1cc(Br)ccc1C(=O)N(C)OC  
 7293 C=CC(=O)OC(C)(C)C.Clc1ccccc1I>>CC(C)(C)OC(=O)/C=C/c1ccccc1Cl  
 7294 C=Cc1ccc2ccccc2c1.COc1ccc(Cl)c(I)c1>>COc1ccc(Cl)c(/C=C/c2ccc3ccccc3c2)c1  
 7295 C=CS(C)(=O)=O.O=C1Nc2ccc(I)cc2/C1=C/c1ccc[nH]1>>CS(=O)(=O)/C=C/c1ccc2c(c1)/C=C/c1ccc[  
 nH]1)C(=O)N2  
 C=CC(=O)OC.CC(C)(C)[Si](C)(C)OC[C@H]1O[C@@H](n2cnc(C(N)=O)c2I)[C@H](O[Si](C)(C)C(C  
 7296 C)(C)C)[C@@H]1O[Si](C)(C)C(C)(C)C>>COC(=O)/C=C/c1c(C(N)=O)ncn1[C@@H]1O[C@H](CO[  
 Si](C)(C)C(C)(C)C)[C@@H](O[Si](C)(C)C(C)(C)C)[C@H]1O[Si](C)(C)C(C)(C)C  
 C=Cc1ccccc1.CCOC(=O)CCc1cc(-c2ccc(Br)cc2)ccc1S(=O)(=O)c1ccccc1>>CCOC(=O)CCc1cc(-  
 7297 c2ccc(/C=C/c3ccccc3)cc2)ccc1S(=O)(=O)c1ccccc1  
 7298 C=CC(=O)c1ccc(OC)cc1.COc1ncc(I)c(OC)n1>>COc1ccc(C(=O)/C=C/c2cnc(OC)nc2OC)cc1  
 7299 C=CC(=O)N(C)OC.Nc1ccc(I)cc1>>CON(C)C(=O)/C=C/c1ccc(N)cc1  
 7300 C=CC(=O)OC(C)(C)C.[Si](C)(C)c1ccc(Br)n1>>CC(C)(C)OC(=O)/C=C/c1ccccc([Si](C)(C)C)n1  
 7301 C=Cc1ccc(O)cc1.COc1ccc(I)c(OC)c1>>COc1ccc(/C=C/c2ccc(O)cc2)c(OC)c1  
 7302 Bre1ccccc1.C=Cc1ccc(CCl)cc1>>Clc1ccc(/C=C/c2ccccc2)cc1  
 7303 Bre1ccccc1.C=CCn1cc([N+](=O)[O-])cn1>>O=[N+](O-)]c1enn(CC/C=C/c2ccccc2)c1  
 7304 C=CC(=O)OC.O=c1cc(Br)c2ccccc2o1>>COC(=O)/C=C/c1cc(=O)oc2ccccc12  
 7305 C=Cc1cncnc1.COCCOCCn1c2ccccc2c2cc(Br)ccc21>>COCCOCCn1c2ccccc2c2cc(/C=C/c3cncnc3)ccc  
 7306 Bre1ccc(/C=C/c2ccccc2)cc1.C=Cc1ccc(SCC[Si](C)(C)C)cc1>>C[Si](C)(C)CCSc1ccc(/C=C/c2ccc(/C=C/  
 C/c3ccccc3)cc2)cc1  
 7307 C=CCNC(=O)OC(C)(C)C.CC1(C)OC(=O)c2c(cc(OCCCN3CCOCC3)cc2OS(=O)(=O)C(F)(F)F)O1>>  
 CC(C)(C)OC(=O)NC/C=C/c1cc(OCCCN2CCOCC2)cc2c1C(=O)OC(C)(C)O2  
 7308 C=CC(C)(C)O.COC(=O)/C=C/c1cn(S(=O)(=O)c2ccc(C)cc2)c2ccccc(Br)c12)NC(C)=O>>COC(=O)/C(  
 =C/c1cn(S(=O)(=O)c2ccc(C)cc2)c2ccccc(/C=C/C(C)(C)O)c12)NC(C)=O  
 C=CC(=O)OC.C[C@@]12C[C@@]34C=C(Sc5cccc(I)c5)C(=O)[C@@](C)(CCC(=O)Nc5c(O)ccc(C(=O  
 7309 )O)c5O)[C@@H]3[C@H](C[C@@H]1C4)O2>>COC(=O)/C=C/c1ccccc(SC2=C[C@@]34C[C@H]5C[C  
 @H](O[C@@]5(C)C3)[C@H]4[C@](C)(CCC(=O)Nc3c(O)ccc(C(=O)O)c3O)C2=O)c1  
 7310 Bre1cncnc1.C=CC(=O)OC>>COC(=O)/C=C/c1cncnc1  
 7311 BrC1=C(C2=C[C@H]3CCCC[C@H]3CC2)CCCC1.C=CC(=O)OC(C)(C)C>>CC(C)(C)OC(=O)/C=C/  
 C/C1=C(C2=C[C@H]3CCCC[C@H]3CC2)CCCC1  
 7312 C=C[Si](C)(C)C.COc1ccc(I)cc1>>COc1ccc(/C=C/[Si](C)(C)C)cc1  
 7313 C=Cc1ccc([N+](=O)[O-])c(O)c1.Oc1ccc(-c2oc3cc(O)cc(Br)c3c2-c2cc(O)cc(O)c2)cc1>>O=[N+](O-]  
 c1ccc(/C=C/c2cc(O)cc3oc(-c4ccc(O)cc4)c(-c4cc(O)cc(O)c4)c23)cc1O  
 7314 C=CC(=O)OCc1ccccc1.FC(F)C1(c2ccccc2)Nc2ccc(Br)cc2O1>>O=C/C=C/c1ccc2c(c1)OC(c1ccccc  
 c1)(C(F)(F)F)N2)OCc1ccccc1

7315 C=CCc1ccc(OC)c(OC)c1.COC(=O)c1cc(OC)c(OC)cc1Br>>COC(=O)c1cc(OC)c(OC)cc1/C=C/Cc1ccc(OC)c(OC)c1  
7316 C=CC1(C(=O)O)COC(=O)OC1.CC(C)[C@H](O)C(=O)N[C@@H](C)C(=O)N1CCC[C@@H](C(=O)N[C@H](C)c2ccc3ccc(Br)cc3n2)N1>>CC(C)[C@H](O)C(=O)N[C@@H](C)C(=O)N1CCC[C@@H](C(=O)N[C@H](C)c2ccc3ccc(/C=C/C4(C(=O)O)COC(=O)OC4)cc3n2)N1  
7317 C=CP(=O)(OCC)OCC.O=P(/C=C/c1cccc(Br)c1)(c1cccc1)c1cccc1>>CCOP(=O)(/C=C/c1cccc(/C=C/P(=O)(c2cccc2)c2cccc2)c1)OCC  
7318 C=CC(=O)OCCCC.Nc1nc2c(c(I)cn2[C@H]2C[C@H](O)[C@@H](CO)O2)c(=O)[nH]1>>CCCCOC(=O)/C=C/c1cn([C@H]2C[C@H](O)[C@@H](CO)O2)c2nc(N)[nH]c(=O)c12  
7319 C=CC(=O)N1[C@@H]2C[C@H]3CC[C@]2(CS1(=O)=O)C3(C)C.Ic1cccc1>>CC1(C)[C@@H]2CC[C@]13CS(=O)(=O)N(C(=O)/C=C/c1cccc1)[C@@H]3C2  
7320 C=Cc1ccccn1.COC(=O)c1cc2ccc(=O)oc2cc1OS(=O)(=O)C(F)(F)F>>COC(=O)c1cc2ccc(=O)oc2cc1/C=C/c1ccccn1  
7321 C=CCN1C(=O)c2cccc2C1=O.Cc1cc(C)cc(Br)c1>>Cc1cc(C)cc(/C=C/CN2C(=O)c3cccc3C2=O)c1  
7322 C=CC(=O)[C@@]1(O)C[C@H]2CC[C@]1(C)C2(C)C.Clc1ccc(I)cc1>>CC1(C)[C@@H]2CC[C@@]1(C)[C@@](O)(C(=O)/C=C/c1ccc(Cl)cc1)C2  
7323 Br1ccc2cc1CCc1cccc(c1)CC2.C=Cc1ccc2cc1CCc1cccc(c1)CC2>>C(=C/c1ccc2cc1CCc1cccc(c1)CC2)c1ccc2cc1CCc1cccc(c1)CC2  
7324 C=CCC(=O)OC.O=S(=O)(Oc1ccc(C=C2C3CCCC2CCC3)c2ccc(O)cc2)cc1)C(F)(F)F>>COC(=O)/C=C/c1ccc(C=C2C3CCCC2CCC3)c2ccc(O)cc2)cc1  
7325 C=CCCC.CCN(CC)C(=O)Oc1c(Br)cccc1OC>>CCC/C=C/c1cccc(OC)c1OC(=O)N(CC)CC  
7326 C=CC(C)(C)O.COc1cc(Br)c(C=O)cc1OC>>COc1cc(C=O)c(/C=C/C(C)(C)O)cc1OC  
7327 C=Cc1ccc2c(cnn2C2CCCCO2)c1.FC(F)Oc1ccc(Nc2ncc(Br)cn2)cc1Cl>>FC(F)Oc1ccc(Nc2ncc(/C=C/c3ccc4c(cnn4C4CCCCO4)c3)cn2)cc1Cl  
7328 C=C/C=C/C(=O)N(CCCC)CCCC.FC(F)(F)c1ccc(Br)cc1>>CCCCN(CCCC)C(=O)/C=C/C=C/c1ccc(C(F)(F)F)cc1  
7329 C=CC(=O)OCC.COc1ccc(Nc2nc(NC3CCCCC3)nc(Oc3ccc(I)cc3)n2)cc1Cl>>CCOC(=O)/C=C/c1ccc(Oc2nc(Nc3ccc(OC)c(Cl)c3)nc(NC3CCCCC3)n2)cc1  
7330 C=Cc1cc2cc(OC)c(OC)cc2oc1=O.COc1ccc(I)cc1>>COc1ccc(/C=C/c2cc3cc(OC)c(OC)cc3oc2=O)cc1  
7331 C=CCN(C(=O)C(C)(C)C)[C@H](C)c1cccc1.O=C1Nc2ncccc2[C@@]12Cc1cc(Br)enc1C2>>C[C@H](c1cccc1)N(C/C=C/c1cnc2c(c1)C[C@@]1(C2)C(=O)Nc2ncccc21)C(=O)C(C)(C)C  
7332 C=CC(=O)OCC.OCc1c(F)cc(Br)cc1F>>CCOC(=O)/C=C/c1cc(F)c(CO)c(F)c1  
7333 C=CC(=O)OC(C)(C)C.O=S(=O)(c1cccc(Br)c1)N1CCc2cccnc21>>CC(C)(C)OC(=O)/C=C/c1cccc(S(=O)(=O)N2CCc3cccnc32)c1  
7334 C=CCN1C(=O)c2cccc2C1=O.COC(=O)c1ccc(Br)cc1>>COC(=O)c1ccc(/C=C/CN2C(=O)c3cccc3C2=O)cc1  
7335 C=Cc1cccc1.Cc1nc(-c2cccc2)c(Br)o1>>Cc1nc(-c2cccc2)c(/C=C/c2cccc2)o1  
7336 C=CC(C)(O)CC/C=C(C)CCC=C(C)C.Oc1ccc(OCc2cccc2)cc1Br>>CC(C)=CCC/C(C)=C/CCC(C)(O)/C=C/c1cc(OCc2cccc2)ccc1O  
7337 C=CC(=O)OC.O=c1[nH]c(=O)n([C@H]2O[C@@H](CO)[C@H](O)[C@H]2F)cc1I>>COC(=O)/C=C/c1cn([C@H]2O[C@@H](CO)[C@H](O)[C@H]2F)c(=O)[nH]c1=O  
7338 C=CCOC(=O)/C=C/c1ccc(OC(C)=O)c(OC(C)=O)c1.Fc1ccc(I)cc1>>CC(=O)Oc1ccc(/C=C/C(=O)OC/C=C/c2ccc(F)cc2)cc1OC(C)=O  
7339 C=CCc1c(C=O)cccc1OCc1cccc1.O=C(OCc1cccc1)c1ccc([N+](=O)[O-])cc1Br>>O=Cc1cccc(OCc2cccc2)c1C/C=C/c1cc([N+](=O)[O-])ccc1C(=O)OCc1cccc1  
7340 C=CC(=O)OC1CCCCC1.COc1ccc(I)cc1>>COc1ccc(/C=C/C(=O)OC2CCCCC2)cc1  
7341 C=CCn1c(=O)c(-c2ccc(OC)cc2)cc2cc(OC)c(OC)cc21.O=C(O)Cc1ccc(Br)cc1>>COc1ccc(-c2cc3cc(OC)c(OC)cc3n(C/C=C/c3ccc(CC(=O)O)cc3)c2=O)cc1  
7342 C=CC(=O)N1CCCCC1.Nc1nc(Br)ccc1-c1cccc1>>Nc1nc(/C=C/C(=O)N2CCCCC2)ccc1-c1cccc1  
7343 C=CC(=O)N(C)C.OCc1cccc(I)c1>>CN(C)C(=O)/C=C/c1cccc(CO)c1  
7344 C=CC(=O)OC(C)(C)C.O=C1Nc2cccc2O/C1=C/c1ccc(Br)cc1>>CC(C)(C)OC(=O)/C=C/c1ccc(/C=C2\Oc3cccc3NC2=O)cc1  
7345 C=CC(=O)OC.COC(=O)Cc1ccc(N)c(I)c1>>COC(=O)/C=C/c1cc(CC(=O)OC)ccc1N  
7346 C=CCCCC1=NOC(CC(=O)OC)(C(=O)OC)C1.FC(F)(F)c1cc(Cl)ccc1I>>COC(=O)CC1(C(=O)OC)C(C(CCC/C=C/c2ccc(Cl)cc2C(F)(F)F)=NO1  
7347 C=CC(=O)OCC.Nc1ccc(I)cc1>>CCOC(=O)/C=C/c1ccc(N)cc1  
7348 C=Cc1cnc(C#N)c1Nc1ccc2[nH]ccc2c1C.COc1cc(Br)ccc1CN1CCN(C)CC1>>COc1cc(/C=C/c2cnc(C#N)c2Nc2ccc3[nH]ccc3c2C)ccc1CN1CCN(C)CC1  
7349 C=CC(=O)OCC.Cc1nc(-c2cccc2)nc(N)c1>>CCOC(=O)/C=C/c1c(C)nc(-c2cccc2)nc1N  
7350 C=CC(=O)CCCC.CCc1cc(C)cc(CC)c1Br>>CCCCC(=O)/C=C/c1c(CC)cc(C)cc1CC  
7351 C=Cc1cccc1.ClCc1ccc(-c2cccc2)cc1>>C(=C/c1cccc1)\Cc1ccc(-c2cccc2)cc1  
7352 C=CC(=O)OCc1cccc1.COc1ccc(I)cc1>>COc1ccc(/C=C/C(=O)OCc2cccc2)cc1

7353 Br1cccc1.C=Cc1ccc(N(c2ccc(C)cc2)c2ccc(C)cc2)cc1>>Cc1ccc(N(c2ccc(C)cc2)c2ccc(/C=C/c3cccc3)cc2)cc1

7354 C=CCN(C(=O)c1cccc1C)[C@H](C)c1cc(F)cc(F)c1.O=C1Nc2ncccc2[C@@]12Cc1cc(Br)enc1C2>>Cc1ccsc1C(=O)N(C/C=C/c1enc2c(c1)C[C@@]1(C2)C(=O)Nc2ncccc21)[C@H](C)c1cc(F)cc(F)c1

7355 C=Cc1ccc(N(C)C)cc1.O=CC#Cc1ccc(I)cc1>>CN(C)c1ccc(/C=C/c2ccc(C#CC=O)cc2)cc1

7356 C=CC(=O)N(C)C.Cc1cccc(C)c1Br>>Cc1cccc(C)c1/C=C/C(=O)N(C)C

7357 C=Cc1cccn1.O=C1CCC(c2ccc(Br)cc2)O1>>O=C1CCC(c2ccc(/C=C/c3cccn3)cc2)O1

7358 C=Cc1cccc1.N#CCc1ccc(Cl)cc1>>N#CCc1ccc(/C=C/c2cccc2)cc1

7359 C=CC(=O)Oc1cccc1.COcn1nc(-c2cccc2)c(Br)cc1=O>>COcn1nc(-c2cccc2)c(/C=C/C(=O)Oc2cccc2)cc1=O

7360 C=CC(=O)OC.O=c1[nH]c(=O)n([C@@H]2C[C@H](CO)[C@H]2O)cc1I>>COC(=O)/C=C/c1cn([C@@H]2C[C@H](CO)[C@H]2O)c(=O)[nH]c1=O

7361 C=CC(=O)N1N=Cc2cccc2C1CCC.COc1cc(Cc2cnc(N)nc2N)cc(I)c1OC>>CCCC1c2cccc2C=NN1C(=O)/C=C/c1cc(Cc2cnc(N)nc2N)cc(OC)c1OC

7362 C=CC(=O)O.COC(=O)c1cccc1I>>COC(=O)c1cccc1/C=C/C(=O)O

7363 C=CC(=O)OC(C)(C)C.CCC(=C(c1ccc(F)cc1)c1ccc(F)cc1)c1ccc(Br)cc1>>CCC(=C(c1ccc(F)cc1)c1ccc(F)cc1)c1ccc(/C=C/C(=O)OC(C)(C)C)cc1

7364 C=Cc1cccc1O.COc1cc(Br)cc(OC)c1F>>COc1cc(/C=C/c2cccc2O)cc(OC)c1F

7365 C=CC(C)=O.CC(C)(C)OC(=O)Nc1sc(Br)c1NC(=O)OC(C)(C)C>>CC(=O)/C=C/c1sc(NC(=O)OC(C)(C)C)(C)C)c1NC(=O)OC(C)(C)C

7366 C=Cc1ccc(OC)cc1.Oc1ccc(I)cc1>>COc1ccc(/C=C/c2ccc(O)cc2)cc1

7367 C=CC(=O)OCCCC.C=Cc1ccc(Br)cc1>>C=Cc1ccc(/C=C/C(=O)OCCCC)cc1

7368 C=CCC(=O)O.Cc1cc(Cl)ccc1Cc1cc([C@@H]2S[C@H](COCc3cccc3)[C@@H](OCc3cccc3)[C@H](OCc3cccc3)[C@H]2OCc2cccc2)c(OCc2cccc2)cc1C>>Cc1cc(/C=C/CC(=O)O)ccc1Cc1cc([C@@H]2S[C@H](COCc3cccc3)[C@@H](OCc3cccc3)[C@H](OCc3cccc3)[C@H]2OCc2cccc2)c(OCc2C=Cc2C(=O)Nc1cccc1.O=C1Cc2c([nH]c3c(I)cccc23)-c2ccnc2N1>>O=C(/C=C/c1cccc2c3c([nH]c12)-c1ccnc1NC(=O)C3)Nc1cccc1

7369 C=Cc1ccc(F)cc1.C[C@H](c1ccc(Br)cn1)[C@@](O)(Cn1cn1)c1ccc(F)cc1F>>C[C@H](c1ccc(/C=C/c2ccc(F)cc2)cn1)[C@@](O)(Cn1cn1)c1ccc(F)cc1F

7370 C=CS(=O)(=O)F.Ic1cccc1>>O=S(=O)(F)/C=C/c1cccc1

7371 C=CC(=O)OCC.CC(C)c1nn(-c2cccn2)c(-c2ccc(F)cc2)c1Br>>CCOC(=O)/C=C/c1c(C(C)C)nn(-c2cccn2)c1-c1ccc(F)cc1

7372 C=Cc1ccc(OC(C)=O)cc1.COc1ccc(Br)c(S(C)(=O)=O)c1>>COc1ccc(/C=C/c2ccc(OC(C)=O)cc2)c(S(C)(=O)=O)c1

7373 C=CC(=O)OCC.Cc1cc(-n2cn1)cc(I)c1N>>CCOC(=O)/C=C/c1cc(-n2cn1)cc(C)c1N

7374 C=Cn1nnc(SC)n1.Ic1cccc1>>CS1nnn(/C=C/c2cccc2)n1

7375 C=CC(C)(C)C.Cc1c(Br)c(=O)oc2cc(N)ccc12>>Cc1c(/C=C/C(C)(C)C)c(=O)oc2cc(N)ccc12

7376 C=Cc1cccc1.COc1nc(Br)c(-c2cccc2)n(Cc2cccc2)c1=O>>COc1nc(/C=C/c2cccc2)c(-c2cccc2)n(Cc2cccc2)c1=O

7377 C=CC(=O)OC(C)(C)C.N#Cc1ccc(I)cc1>>CC(C)(C)OC(=O)/C=C/c1ccc(C#N)cc1

7378 C=Cc1cccc1.Cc1ccc(O)c(I)c1>>Cc1ccc(O)c(/C=C/c2cccc2)c1

7379 C=COCCOCCO.COC(=O)c1cccc1I>>COC(=O)c1cccc1/C=C/OCCOCCO

7380 C=Cc1cccc1.CC1ccc(I)cc1>>CC1ccc(/C=C/c2cccc2)cc1

7381 C=Cc1ccc(Cl)cc1.IC1CCCC1>>Clc1ccc(/C=C/C2CCCC2)cc1

7382 C=CC(OCC)OCC.CC(=O)c1ccc(Br)cc1>>CCOC(/C=C/c1ccc(C(C)=O)cc1)OCC

7383 C=CC(=O)OCC.Cc1ccc(-c2oc3cccc3c(=O)c2Br)cc1>>CCOC(=O)/C=C/c1c(-c2ccc(C)cc2)oc2cccc2c1=O

7384 C=CC(=O)OC(C)(C)C.COc1cc(Br)c(COCCC(=O)OC(C)(C)C)cc1OCc1cccc1>>COc1cc(/C=C/C(=O)OC(C)(C)C)c(COCCC(=O)OC(C)(C)C)cc1OCc1cccc1

7385 C=CC(N)=O.Cc1cc(Cl)ccc1C(F)(F)F>>Cc1cc(/C=C/C(N)=O)ccc1C(F)(F)F

7386 C=CC(=O)OC(C)(C)C.COc1cc(Br)c(C(C)OCCC(=O)OC(C)(C)C)cc1OC>>COc1cc(/C=C/C(=O)OC(C)(C)C)c(C(C)OCCC(=O)OC(C)(C)C)cc1OC

7387 C=CC(=O)OC(C)(C)C.O=C1Nc2cccc2O/C1=Cc1cccc1Br>>CC(C)(C)OC(=O)/C=C/c1cccc1/C=C1\Oc2cccc2NC1=O

7388 C=Cc1cccn1.IC1CCCC1>>C(=C/C1CCCC1)\c1cccn1

7389 C=CC(=O)OCCCC.N#Cc1ccc(Br)cc1F>>CCCCOC(=O)/C=C/c1ccc(C#N)c(F)c1

7390 C=CC=O.O=[N+](O-)]c1ccc(Br)cc1>>O=C/C=C/c1ccc([N+](=O)[O-])cc1

7391 C=CC(=O)OCCCC.Clc1ccc(I)cc1>>CCCCOC(=O)/C=C/c1ccc(Cl)cc1

7392 C=Cc1cccc([N+](=O)[O-])c1.CC(=O)Nc1ccc(Br)cn1>>CC(=O)Nc1ccc(/C=C/c2cccc([N+](=O)[O-])C=Cc1ccc2nc(OC)c(OC)nc2c1.COC(=O)c1cccc(Br)c1>>COC(=O)c1cccc(/C=C/c2ccc3nc(OC)c(OC)nc32)c1

7393

7394

7395 C=CC(=O)OC.Ic1cccc2cc[nH]c12>>COC(=O)/C=C/c1cccc2cc[nH]c12  
7396 C=CC(=O)O.O=S(=O)(Nc1ccc(I)cn1)c1ccc(-c2ccccc2)cc1>>O=C(O)/C=C/c1ccc(NS(=O)(=O)c2ccc(-  
c3ccccc3)cc2)nc1  
7397 C=CC(=O)OC.CC(=O)O[C@H]1CC(=O)N(Cc2cc3c(cc2I)OCO3)[C@@H]1[Se]c1cccc1>>COC(=O)  
/C=C/c1cc2c(cc1CN1C(=O)C[C@H](OC(C)=O)[C@H]1[Se]c1cccc1)OCO2  
7398 C=Cc1ccc(Cl)cc1.CC(=O)c1ccc(I)cc1>>CC(=O)c1ccc(/C=C/c2ccc(Cl)cc2)cc1  
7399 C=CCN.COc1ccc2c(=O)c(I)coc2c1>>COc1ccc2c(=O)c(/C=C/CN)coc2c1  
7400 C=Cc1ccc(OC)cc1.O=Cc1ccc(Br)cc1>>COc1ccc(/C=C/c2ccc(C=O)cc2)cc1  
7401 C=CC(=O)N[C@H](C)c1cccc2ccccc12.FC(F)(F)c1ccc(Br)c1>>C[C@@H](NC(=O)/C=C/c1cccc(C(F)  
(F)F)c1)c1cccc2ccccc12  
7402 C=C[C@]1(C(=O)O)CC[C@H](OC)CC1.C[C@@H](NC(=O)OC(C)(C)C)c1ccc2ccc(Br)cc2n1>>CO[  
C@H]1CC[C@]/C=C/c2ccc3ccc([C@@H](C)NC(=O)OC(C)(C)C)nc3c2)(C(=O)O)CC1  
7403 C=Cc1cccc1.CN(C(=O)c1cccc1)c1ccc2c(c1)[nH]c(=NC(=O)c1ccc(Br)s1)n2CCC(N)=O>>CN(C(=O)  
)c1cccc1)c1ccc2c(c1)[nH]c(=NC(=O)c1ccc(/C=C/c3ccccc3)s1)n2CCC(N)=O  
7404 C=CP(C)(=O)c1cccc1.Cc1ccc2ccccc2c1Br>>Cc1ccc2ccccc2c1/C=C/P(C)(=O)c1cccc1  
7405 C=CS(=O)(=O)Nc1ccc(OC2CCN(C(=O)OC(C)(C)C)CC2)cc1.N#Cc1ccc(Br)cc1>>CC(C)(C)OC(=O)  
N1CCC(OC2ccc(NS(=O)(=O)/C=C/c3ccc(C#N)cc3)cc2)CC1  
7406 C=CC(=O)OC.CC(=O)Nc1ccc(Br)cc1>>COC(=O)/C=C/c1ccc(NC(C)=O)cc1  
7407 C=Cc1ccc(C(F)(F)F)cc1.O=C1C(O)=C(I)C(=O)c2ccccc21>>O=C1C(O)=C(/C=C/c2ccc(C(F)(F)F)cc2)  
C(=O)c2ccccc21  
7408 C=CC(=O)OCCCC.FC(F)(F)c1cccc1Br>>CCCCOC(=O)/C=C/c1cccc1C(F)(F)F  
7409 C=CC(C)O.I/C=C/C=CCCCOCc1cccc1>>CC(O)/C=C/C=C/C=CCCCOCc1cccc1  
7410 C=CC=O.COC(=O)c1ccc(I)cc1OC>>COC(=O)c1ccc(/C=C/C=O)cc1OC  
7411 C=Cc1cccc1.Cc1ccc(NC(=O)OC(C)(C)C)c(Br)c1>>Cc1ccc(NC(=O)OC(C)(C)C)c(/C=C/c2ccccc2)c1  
7412 C=C[Si](C)(C)c1cccn1.CCOC(=O)c1ccc(/C=C/c2ccc(Br)cc2)cc1>>CCOC(=O)c1ccc(/C=C/c2ccc(/C=C/  
C/[Si](C)(C)c3cccn3)cc2)cc1  
7413 Brc1ccc2cc[nH]c2c1.C=CC(=O)OC>>COC(=O)/C=C/c1ccc2cc[nH]c2c1  
7414 C=Cc1ccncc1.CCN(CC)c1ccc(Br)cc1>>CCN(CC)c1ccc(/C=C/c2ccncc2)cc1  
7415 C=Cc1cccc1.CC(=O)c1ccc(Br)s1>>CC(=O)c1ccc(/C=C/c2ccccc2)s1  
7416 Brc1cccn1.C=Cc1cccc(OC)c1>>COc1cccc(/C=C/c2cccn2)c1  
7417 C=CC(=O)OCC.Nc1cccc1I>>CCOC(=O)/C=C/c1cccc1N  
7418 C=Cc1cccc1.Nc1ccc(Br)cn1>>Nc1ccc(/C=C/c2ccccc2)cn1  
7419 C=CC(=O)OCC.COc1ccc(-c2cnccc2Br)cc1>>CCOC(=O)/C=C/c1ccncc1-c1ccc(OC)cc1  
7420 C=C[C@H](C)[C@H]1C/C=C/C(=O)N[C@H](Cc2ccc(OC)c(Cl)c2)C(=O)NCC(C)(C)C(=O)O[C  
@@H](CC(C)C)C(=O)O1.Ic1cccc1>>COc1ccc(C[C@H]2NC(=O)/C=C/C[C@@H]([C@H](C)/C=C/  
c3ccccc3)OC(=O)[C@H](CC(C)C)OC(=O)C(C)(C)CNC2=O)cc1Cl  
7421 C=CC#N.Nc1ccc(I)cc1>>N#C/C=C/c1ccc(N)cc1  
7422 C=C/C=C/c1cccc1.Cc1cc(-c2ccccc2I)cc(C)c1O>>Cc1cc(-c2ccccc2/C=C/C=C/c2ccccc2)cc(C)c1O  
7423 C=Cc1cccc1.CCN(c1ccc(C(=O)OC)en1)c1cc(OCC(C)C)c(C(C)C)cc1I>>CCN(c1ccc(C(=O)OC)en1)c  
1cc(OCC(C)C)c(C(C)C)cc1/C=C/c1cccc1  
7424 C=Cc1cccc1.CC(C)Oc1nc(N)nc(Nc2ccc(I)cc2)n1>>CC(C)Oc1nc(N)nc(Nc2ccc(/C=C/c3ccccc3)cc2)n  
7425 C=CN1C(=O)c2ccccc2C1=O.COc1ccc(Br)cc1>>COc1ccc(/C=C/N2C(=O)c3ccccc3C2=O)cc1  
7426 C=CC(=O)OC(C)(C)C.CCc1cc(O)ccc1I>>CCc1cc(O)ccc1/C=C/C(=O)OC(C)(C)C  
7427 Brc1ccc2ccc3cccc4ccc1c2c34.C=Cc1ccc2c(c1)Sc1cccc1N2CC>>CCN1c2ccccc2Sc2cc(/C=C/c3ccc4c  
cc5cccc6ccc3c4c56)ccc21  
7428 C=Cc1nc2c(N)ncn2n1[C@@H]1O[C@H](CO[Si](C)(C)C(C)(C)C)[C@@H](O[Si](C)(C)C(C)(C)C)[  
C@H]1O[Si](C)(C)C(C)(C)C.Cc1cccc1Br>>Cc1cccc1/C=C/c1nc2c(N)ncn2n1[C@@H]1O[C@H](  
CO[Si](C)(C)C(C)(C)C)[C@@H](O[Si](C)(C)C(C)(C)C)[C@H]1O[Si](C)(C)C(C)(C)C  
7429 C=CS(=O)(=O)F.CCOC(=O)c1cccc1I>>CCOC(=O)c1cccc1/C=C/S(=O)(=O)F  
7430 C=C/C=C/c1cccc1.FC(F)(F)C(Br)CCc1cccc1>>FC(F)(F)C(/C=C/C=C/c1cccc1)CCc1cccc1  
7431 C=CCN1C(=O)c2ccccc2C1=O.FC(F)(F)c1ccc(Br)c1>>O=C1c2ccccc2C(=O)N1C/C=C/c1cccc(C(F)(F)  
)F)c1  
7432 C=CC(=O)OCC.COc1ccc2c(=O)c(I)coc2c1>>CCOC(=O)/C=C/c1coc2cc(OC)ccc2c1=O  
7433 C=CC(=O)OC.Ic1cccc2c1NCC2>>COC(=O)/C=C/c1cccc2c1NCC2  
7434 C=CCC(C)C(=O)OCC.N#Cc1cccc1Br>>CCOC(=O)C(C)C/C=C/c1cccc1C#N  
7435 C=CC(=O)OC.NC(=O)c1cccc(I)c1>>COC(=O)/C=C/c1cccc(C(N)=O)c1  
7436 C=CC(=O)OCCCC.Ic1ccc2[nH]ccc2c1>>CCCCOC(=O)/C=C/c1ccc2[nH]ccc2c1  
7437 C=Cc1ccncc1.CCCCN(CCCC)c1ccc2cc(Br)ccc2c1>>CCCN(CCCC)c1ccc2cc(/C=C/c3ccncc3)ccc2c1  
7438 C=CC(=O)O.O=C(O)c1cc(Br)cs1>>O=C(O)/C=C/c1sc(C(=O)O)c1  
7439 C=CC(=O)OCC.Cc1cccc(Br)c1>>CCOC(=O)/C=C/c1cccc(C)c1



[illegible]

7484 C=Cc1cccc1.CC(C)(C)C(=O)Nc1cccn1Cl>>CC(C)(C)C(=O)Nc1cccn1/C=C/c1cccc1  
7485 C=CC(=O)OCCCC.Fc1ccc(I)cc1>>CCCCOC(=O)/C=C/c1ccc(F)cc1  
7486 C=Cc1cccc1.COc1ccc(Br)c(C=O)c1>>COc1ccc(/C=C/c2cccc2)c(C=O)c1  
7487 C=CC(=O)OCC.COc1cc2nnc(Nc3ccc(I)cc3)c2cc1OC>>CCOC(=O)/C=C/c1ccc(Nc2nnc3cc(OC)c(O)C)cc23)cc1  
7488 C=CC(C)(C)O.Fc1ccc(Br)cc1>>CC(C)(O)/C=C/c1ccc(F)cc1  
7489 C=Cc1nnn(C)n1.COC(=O)c1cccc(Br)c1>>COC(=O)c1cccc(/C=C/c2nnn(C)n2)c1  
7490 C=CC(=O)OC.O=S(=O)(c1cccc1)N1CCc2cc(Br)cn21>>COC(=O)/C=C/c1cnc2c(c1)CCN2S(=O)(=O)c1cccc1  
7491 C=CC(F)(F)C(F)(F)C(F)(F)F.CCCN(Cc1ccc(Br)cc1)C(=O)OC(C)(C)C>>CCCN(Cc1ccc(/C=C/C(F)(F)C(F)(F)C(F)(F)C(F)(F)F)cc1)C(=O)OC(C)(C)C  
7492 C=Cc1ccc(OC)cc1.COc1ccc(I)cc1>>COc1ccc(/C=C/c2ccc(OC)cc2)cc1  
7493 C=CC(=O)OC.Cn1cnc2c(NCc3ccc(Br)cc3)nc(N3CCCC3)nc21>>COC(=O)/C=C/c1ccc(CNc2nc(N3CCCC3)nc3c2nnc3)cc1  
7494 C=CC(=O)NCc1ccc(OC)cc1.CN(C)CCc1c[nH]c2ccc(Br)cc12>>COc1ccc(CNC(=O)/C=C/c2ccc3[nH]c(c(CCN(C)C)c3c2)cc1  
7495 C=Cc1ccc(N(C)C)cc1.COc1cc(C=O)c(OC)cc1Br>>COc1cc(/C=C/c2ccc(N(C)C)cc2)c(OC)cc1C=O  
7496 C=CC(=O)N1N=Cc2cccc2C1C1CCCC1.COc1cc(Cc2cnc(N)nc2N)cc(I)c1OC>>COc1cc(Cc2cnc(N)nc2N)cc(/C=C/C(=O)N2N=Cc3cccc3C2C2CCCC2)c1OC  
7497 C=Cc1cc(OC)c(OC)c1.COc1ccc(I)cc1>>COc1ccc(/C=C/c2cc(OC)c(OC)c(OC)c2-c2ccc(OC)c(OC)c2)cc1  
7498 C=CC(=O)OC.Cc1ccc(Cl)cc1>>COC(=O)/C=C/c1ccc(C)cc1  
7499 C=Cc1cccc1.C[Si](C)(C)CCOCn1nc(I)c2cnc(Oc3ccc(F)cc3F)nc21>>C[Si](C)(C)CCOCn1nc(/C=C/c2cccc2)c2cnc(Oc3ccc(F)cc3F)nc21  
7500 C=Cc1cccc1.N#Cc1ccc(Br)c1>>N#Cc1cccc(/C=C/c2cccc2)c1  
7501 C=Cc1ccc([N+](=O)[O-])cc1.O=C1C(O)=C(I)C(=O)c2cccc21>>O=C1C(O)=C(/C=C/c2ccc([N+](=O)[O-]C=CC(=O)OC(C)(C)C.COc1ccc(CNc2c(I)cc(C)cc2[Si](C)(C)C)cc1>>COc1ccc(CNc2c(/C=C/C(=O)OC(C)(C)C)cc2[Si](C)(C)C)cc1  
7503 C=Cc1cncc1.Nc1cncc(Br)c1>>Nc1cncc(/C=C/c2cncc2)c1  
7504 C=Cc1cccc1.CCCCCC(C)Br>>CCCCCCC(C)/C=C/c1cccc1  
7505 C=CC(=O)OCCCC.Oc1cccc1Br>>CCCCOC(=O)/C=C/c1cccc1O  
7506 C=CS(=O)(=O)c1cccc1.Ic1cccc1>>O=S(=O)(/C=C/c1cccc1)c1cccc1  
7507 C=CCC[C@H]1N[C@@H]1C(=O)c1cccc1.Ic1cccc1>>O=C(c1cccc1)[C@H]1N[C@@H]1CC/C=C/c1cccc1  
7508 Br1cccc1.C=CC(=O)OCC(CC)CCCC>>CCCCC(CC)COC(=O)/C=C/c1cccc1  
7509 C=Cc1cccc(F)c1.CCNC(=O)c1cc(-c2cc(Br)c(OCc3cccc3)cc2OCc2cccc2)on1>>CCNC(=O)c1cc(-c2cc(/C=C/c3cccc(F)c3)c(OCc3cccc3)cc2OCc2cccc2)on1  
7510 C=Cc1cccc(O)c1.Oc1cc(Br)cc(O)c1F>>Oc1cccc(/C=C/c2cc(O)c(F)c(O)c2)c1  
7511 C=CC(=O)O.O=C(O)/C=C/c1cc(Br)cs1>>O=C(O)/C=C/c1esc(/C=C/C(=O)O)c1  
7512 C=CC#N.C[Si](C)(C)c1ccc1I>>C[Si](C)(C)c1ccc1/C=C/C#N  
7513 C=CC(=O)OC(C)(C)C.COC(=O)c1ccc(I)cc1>>COC(=O)c1ccc(/C=C/C(=O)OC(C)(C)C)cc1  
7514 C=CC(O)(CF)CF.FC(F)(F)c1ccc(Cl)c(Br)c1>>OC(/C=C/c1cc(C(F)(F)F)ccc1Cl)(CF)CF  
7515 C=Cc1cccc1.O=C1Nc2cccc(I)c2/C1=C/c1ccc[nH]1>>O=C1Nc2cccc(/C=C/c3cccc3)c2/C1=C/c1ccc[nH]1  
7516 C=Cc1cncc1.CCCCCCOc1ccc(Br)c(F)c1>>CCCCCOc1ccc(/C=C/c2cncc2)c(F)c1  
7517 C=CC(OC)OCC.N#Cc1ccc(Br)cc1>>CCOC(/C=C/c1ccc(C#N)cc1)OCC  
7518 C=CCNC(=O)COC.Cc1ccc(Oc2ccc(Nc3nnc4ccc(I)cc34)cc2C)cn1>>COCC(=O)NC/C=C/c1ccc2nnc(Nc3ccc(Oc4ccc(C)nc4)c(C)c3)c2c1  
7519 C=CC(=O)OC.C=CI>>C=C/C=C/C(=O)OC  
7520 Br1cccc1.C=Cc1nc2c(N)nnc2n1[C@@H]1O[C@H](CO[Si](C)(C)C(C)(C)C)[C@@H](O[Si](C)(C)C(C)(C)C)[C@H]1O[Si](C)(C)C(C)(C)C>>CC(C)(C)[Si](C)(C)OC[C@H]1O[C@@H](n2c(/C=C/c3ccc3)nc3c(N)nnc32)[C@H](O[Si](C)(C)C(C)(C)C)[C@@H]1O[Si](C)(C)C(C)(C)C  
7521 C=CC(=O)OC.Cc1cn(-c2cc(Br)cc([N+](=O)[O-])c2)cn1>>COC(=O)/C=C/c1cc(-n2cnc(C)c2)cc([N+](=O)[O-])c1  
7522 C=COCCCC.O=c1cc(Br)c2ccc(Cl)cc2o1>>CCCCO/C=C/c1cc(=O)oc2cc(Cl)cc12  
7523 Br1cccc1.C=CC(=O)OCc1cccc1>>O=C(/C=C/c1cccc1)OCc1cccc1  
7524 C=Cc1cccn1.O=[N+](O-)]c1cccc(I)c1>>O=[N+](O-)]c1cccc(/C=C/c2cccn2)c1  
7525 Br1ccc(/N=N/c2cccc2)cc1.C=Cc1ccc(C#N)cc1>>N#Cc1ccc(/C=C/c2ccc(/N=N/c3cccc3)cc2)cc1  
7526 C=Cc1cncc1.CCCCCOc1ccc(Br)cc1F>>CCCCCOc1ccc(/C=C/c2cncc2)cc1F

7527 C=Cc1ccc(N(c2ccccc2)c2ccccc2)cc1.CCCCCCCCCCCCCCCCCn1c2ccc(I)cc2c2cc(C=O)ccc21>>CCC  
CCCCCCCCCCCCCCCCn1c2ccc(C=O)cc2c2cc(/C=C/c3ccc(N(c4ccccc4)c4ccccc4)cc3)ccc21  
7528 C=Cc1ccc(OC)cc1.COc1ccc(OC)c(I)c1>>COc1ccc(/C=C/c2cc(OC)ccc2OC)cc1  
C=Cc1ccc(OC)cc1.CCCCCCCCCOc1ccc2c(C)c(Br)c(=O)oc2c1>>CCCCCCCCOc1ccc2c(C)c(/C=C/c3c  
7529 cc(OC)cc3)c(=O)oc2c1  
7530 C=CC(=O)OC.CC(C)(C)OC(=O)NCc1ccccc1Br>>COC(=O)/C=C/c1ccccc1CNC(=O)OC(C)(C)C  
7531 C=CC[C@H](NC(=O)OC(C)(C)C)C(=O)OC.COC(=O)c1ccc(Br)cc1>>COC(=O)c1ccc(/C=C/C[C@H]  
(NC(=O)OC(C)(C)C)C(=O)OC)cc1  
7532 C=CC(C)=O.Ic1ccccc1>>CC(=O)/C=C/c1ccccc1  
7533 C=CC(=O)OC.CN1CC[C@]23CCCC[C@H]2[C@H]1Cc1cc(I)c(N)cc13>>COC(=O)/C=C/c1cc2c(cc1  
N)[C@]113CCCC[C@H]1[C@]@H](C2)N(C)CC3  
7534 C=Cc1ccc2c(c1)CC[C@]1[C@]@H]2CC[C@]2(C)C(=O)CC[C@]12C.CCOC(=O)C(F)Br>>CC  
OC(=O)C(F)/C=C/c1ccc2c(c1)CC[C@]1[C@]@H]1[C@]@H]2CC[C@]2(C)C(=O)CC[C@]12C  
7535 C=CCO.Ic1ccc2[nH]ccc2c1>>OC/C=C/c1ccc2[nH]ccc2c1  
7536 C=CC(=O)OC(C)(C)C.COC(=O)CN(CC(=O)OC)C(=O)c1ccc(I)cc1>>COC(=O)CN(CC(=O)OC)C(=O  
)c1ccc(/C=C/C(=O)OC(C)(C)C)cc1  
7537 C=Cc1ccccc1.CC(C)(C)P(=O)(n1ccc2c(Br)ccccc21)C(C)(C)C>>CC(C)(C)P(=O)(n1ccc2c(/C=C/c3cccc  
c3)ccccc21)C(C)(C)C  
C=Cc1nc2c(N)ncnc2n1[C@H]1C[C@H](O[Si](C)(C)C(C)(C)C)[C@]@H](CO[Si](C)(C)C(C)(C)C)O1.  
7538 Cc1ccc(I)cc1>>Cc1ccc(/C=C/c2nc3c(N)ncnc3n2[C@H]2[C@H](O[Si](C)(C)C(C)(C)C)[C@]@H](C  
O[Si](C)(C)C(C)(C)C)O2)cc1  
7539 C=CC(=O)OC.COc1cc2c(cc1Br)[C@H]1CCCC[C@H]1N2C(=O)C(C)(C)C>>COC(=O)/C=C/c1cc2c(  
cc1OC)N(C(=O)C(C)(C)C)[C@]@H]1CCCC[C@H]121  
7540 Br1ccccc2cc[nH]c12.C=Cc1ccccc1>>C(=C/c1ccc2cc[nH]c12)\c1ccccc1  
7541 C=CC(=O)OCC.CNc1nc(-n2c(C)ccc2C)nc(C)c1Br>>CCOC(=O)/C=C/c1c(C)nc(-n2c(C)ccc2C)nc1NC  
7542 BrC1CCCC1.C=Cc1ccccc1>>C(=C/C1CCCC1)\c1ccccc1  
7543 C=Cc1cccc(Cl)c1.CC(=O)Nc1ccc(Br)cc1>>CC(=O)Nc1ccc(/C=C/c2cccc(Cl)c2)cc1  
7544 C=CC(=O)OC(C)(C)C.COC(=O)c1ccccc(Br)c1>>COC(=O)c1ccccc(/C=C/C(=O)OC(C)(C)C)c1  
7545 C=CC(=O)OC(C)(C)C.Cc1cc(Br)cc(C)c1N>>Cc1cc(/C=C/C(=O)OC(C)(C)C)cc(C)c1N  
7546 C=CCCCCCCCC.Ic1ccccc1>>CCCCCCCC/C=C/c1ccccc1  
C=Cc1ccc2c(c1)C(CCCCCCCC)(CCCCCCCC)c1cc(/C=C/c3ccc(N(c4ccccc4)c4ccccc4)cc3)ccc1-  
2.CCCCCCCCCC1(CCCCCCCC)c2cc(Br)ccc2-  
7547 c2ccc(C=O)cc21>>CCCCCCCCC1(CCCCCCCC)c2ccc(C=O)ccc2-  
c2ccc(/C=C/c3ccc4c(c3)C(CCCCCCCC)(CCCCCCCC)c3cc(/C=C/c5ccc(N(c6ccccc6)c6ccccc6)cc5)cc  
c3-4)cc21  
7548 C=CCN(C(=O)OCc1ccccc1)C(=O)OC(C)(C)C.COC(=O)c1ccc(Br)cc1>>COC(=O)c1ccc(/C=C/CN(C(  
=O)OCc2ccccc2)C(=O)OC(C)(C)C)cc1  
7549 C=Cc1cc(OC(C)=O)cc(OC(C)=O)c1.COc1ccc([C@H]2Oc3ccc(Br)cc3[C@H]2c2cc(OC)cc(OC)c2)cc1  
>>COc1ccc([C@H]2Oc3ccc(/C=C/c4cc(OC(C)=O)cc(OC(C)=O)c4)cc3[C@H]2c2cc(OC)cc(OC)c2)cc  
7550 C=Cc1ccccc1.O=C1OC2(C(I)=C(c3ccccc3)c3ccccc32)c2ccccc21>>O=C1OC2(C(/C=C/c3ccccc3)=C(c  
3ccccc3)c3ccccc32)c2ccccc21  
7551 C=Cc1ccc(C)cc1.COC(=O)c1ccc(Br)cc1>>COC(=O)c1ccc(/C=C/c2ccc(C)cc2)cc1  
7552 Br1ccc2sccc2c1.C=CCN1C(=O)c2ccccc2C1=O>>O=C1c2ccccc2C(=O)N1C/C=C/c1ccc2sccc2c1  
7553 C=CC(=O)OC.CC(=O)Oc1ccc(I)cc1C/C=C(\C)CCC=C(C)C>>COC(=O)/C=C/c1ccc(OC(C)=O)c(C/C  
=C(\C)CCC=C(C)C)c1  
7554 C=Cc1ccccc1.CC(=O)Nc1ccccc1Br>>CC(=O)Nc1ccccc1/C=C/c1ccccc1  
7555 Br1ccccc1.C=CC(=O)OCC>>CCOC(=O)/C=C/c1ccccc1  
7556 C=CC(=O)OCC.Cc1cc(C#N)ccc1-c1sccl1Br>>CCOC(=O)/C=C/c1sccl1-c1ccc(C#N)cc1C  
7557 C=Cc1ccc(OC)cc1.COC(=O)c1ccccc(Br)c1>>COC(=O)c1ccccc(/C=C/c2ccc(OC)cc2)c1  
7558 C=Cc1ccc(C(C)(C)C)cc1.CC(C)(C)Br>>CC(C)(C)/C=C/c1ccc(C(C)(C)C)cc1  
7559 C=CC(=O)OC(C)(C)C.FC(F)(F)c1ccc(I)c(Cl)c1>>CC(C)(C)OC(=O)/C=C/c1ccc(C(F)(F)F)cc1Cl  
7560 C=C/C=C(\CCCC)OCC.Ic1ccccc1>>CCCC/C=C\C=C\c1ccccc1)OCC  
7561 C=CC(=O)OCC.O=[N+][([O-])c1ccc(-c2ccccc2I)cc1>>CCOC(=O)/C=C/c1ccccc1-c1ccc([N+](=O)[O-  
7562 C=CC(=O)OCC(CC)CCCC.Cc1ccccc1Cl>>CCCC(CC)COC(=O)/C=C/c1ccccc1C  
C=Cc1ccc(N(c2ccc(OC)cc2)c2ccc(OC)cc2)cc1.Cc1ccccc(Br)c1>>COc1ccc(N(c2ccc(/C=C/c3cccc(C)c3  
7563 )cc2)c2ccc(OC)cc2)cc1  
7564 C=C[C@]@H]1CCCCN1C(=O)OC(C)(C)C.Cc1ccc(I)cc1>>Cc1ccc(/C=C/[C@]@H]2CCCCN2C(=O)O  
C(C)(C)C)cc1  
7565 C=CC(=O)N(C)OC.N#Cc1ccc2ccc(Br)cc2c1>>CON(C)C(=O)/C=C/c1ccc2ccc(C#N)cc2c1  
7566 C=CC(=O)OC.CC(C)c1ccc(C(C)C)c(Br)c1>>COC(=O)/C=C/c1cc(C(C)C)ccc1C(C)C  
7567 C=CC(=O)OCc1ccccc1.Nc1ncc(Br)cn1>>Nc1ncc(/C=C/C(=O)OCc2ccccc2)cn1

7568 C=CC(=O)OC.CC(C)c1nn(Cc2cccc2)cc1I>>COC(=O)/C=C/c1nn(Cc2cccc2)nc1C(C)C  
7569 C=Cc1cccc1.OC/C=C/C1=C(Br)CCCC1>>OC/C=C/C1=C(/C=C/c2cccc2)CCCC1  
7570 C=Cc1cccc(C)c1.CCOC(=O)C(Cc1cccc1I)C(C)=O>>CCOC(=O)C(Cc1cccc1/C=C/c1cccc(C)c1)C(C)  
7571 C=CCN(C(=O)OC(C)(C)C)C(=O)OC(C)(C)C.COc1ccc(Br)cc1>>COc1ccc(/C=C/CN(C(=O)OC(C)(C)  
C)C(=O)OC(C)(C)C)cc1  
7572 C=CC(=O)OCC.NC(=O)c1cc(O)cc(I)c1>>CCOC(=O)/C=C/c1cc(O)cc(C(N)=O)c1  
7573 C=CC(=O)OC.OCCCCCOCc1ccc2cc(Br)ccc2c1>>COC(=O)/C=C/c1ccc2cc(OCCCCCOC)ccc2c1  
7574 C=CC(=O)OC(C)(C)C.OC/C=C/C1=C(Br)CCCC1>>CC(C)(C)OC(=O)/C=C/C1=C(/C=C/CO)CCCC1  
7575 C=CC(C)=O.CC(C)(C)c1ccc(Br)cc1>>CC(=O)/C=C/c1ccc(C(C)(C)C)cc1  
7576 C=Cc1cccc(O)c1.COc1ccc(I)c(OC)c1>>COc1ccc(/C=C/c2cccc(O)c2)c(OC)c1  
7577 C=CC(=O)OCC.Cc1cccc1-c1cccc1I>>CCOC(=O)/C=C/c1cccc1-c1cccc1C  
7578 Br1cccc1.C=CCOc1cccc1C>>Cc1cccc1OC/C=C/c1cccc1  
7579 C=CC=O.CC(C)(C)OC(=O)COc1ccc(Cl)c(I)c1>>CC(C)(C)OC(=O)COc1ccc(Cl)c(/C=C/C=O)c1  
7580 C=CCn1cc(C(=O)O)c(OC)n1.CCn1cc(I)c(=O)c2ccc(C)nc21>>CCn1cc(/C=C/Cn2cc(C(=O)O)c(OC)n2  
)c(=O)c2ccc(C)nc21  
7581 C=CC(=O)O.O=[N+][([O-])c1c(I)ccc2c1C=CC1(CCCCC1)O2>>O=C(O)/C=C/c1ccc2c(c1[N+](=O)[O-  
])C=CC1(CCCCC1)O2  
7582 C=CC(=O)OCC.Cn1cccc1Cl>>CCOC(=O)/C=C/c1cccn1C  
7583 Br1ccc2ccc3cccc4ccc1c2c34.C=CC(=O)OCCCCC(C)C>>CC(C)CCCCCOC(=O)/C=C/c1ccc2ccc3c  
ccc4ccc1c2c34  
7584 C=CC(C)=O.CCn1cc(I)c(=O)c2ccc(C)nc21>>CCn1cc(/C=C/C(C)=O)c(=O)c2ccc(C)nc21  
7585 C=CCNC(=O)OC(C)(C)C.COc1cc(-c2esc3c(I)ene(N)c23)ccc1NC(=O)c1cc2cccc2n1C>>COc1cc(-  
c2esc3c(/C=C/CNC(=O)OC(C)(C)C)enc(N)c23)ccc1NC(=O)c1cc2cccc2n1C  
7586 C=Cc1ccc(OC)c(OC)c1.Cc1nc(Br)c2c(c1O)COC(C)(C)OC2>>COc1ccc(/C=C/c2nc(C)c(O)c3c2COC(  
C)(C)OC3)cc1OC  
7587 C=Cc1cccc1.Nc1ccc(Cl)cc1I>>Nc1ccc(Cl)cc1/C=C/c1cccc1  
7588 C=CC(=O)OC.CCOC(=O)C(C)(c1ccc(Cl)cc1)C(C#N)C#N>>CCOC(=O)C(C)(c1ccc(/C=C/C(=O)OC)c  
c1)C(C#N)C#N  
7589 C=CC(=O)Oc1cccc1.O=c1cc(I)enn1Cc1cccc1>>O=C(/C=C/c1enn(Cc2cccc2)c(=O)c1)Oc1cccc1  
7590 C=CC(=O)OCC.CC1(C)C(=O)N(c2ccc(C#N)c(C(F)(F)F)c2)C(=S)N1c1ccc(I)c(F)c1>>CCOC(=O)/C=  
C/c1ccc(N2C(=S)N(c3ccc(C#N)c(C(F)(F)F)c3)C(=O)C2(C)C)cc1F  
7591 C=Cc1ccc(CN(CC)CC)cc1.CCOC(=O)c1cccc1Br>>CCOC(=O)c1cccc1/C=C/c1ccc(CN(CC)CC)cc1  
C=Cc1nc2c(=O)[nH]c(NC(=O)C(C)C)nc2n1|C@ @H|1O|C@H|((CO|Si|(C)(C)C(C)(C)C)|C@ @H|(O|  
Si|(C)(C)C(C)(C)C)|C@H|1O|Si|(C)(C)C(C)(C)C.CC(C)(C)|Si|(C)(C)OC|C@H|1O|C@ @H|(n2cc(I)  
c(N)nc2=O)|C@H|(O|Si|(C)(C)C(C)(C)C)|C@ @H|1O|Si|(C)(C)C(C)(C)C>>CC(C)C(=O)Nc1nc2c(n  
c(/C=C/c3cn([C@ @H]4O|C@H|(CO|Si|(C)(C)C(C)(C)C)|C@ @H|(O|Si|(C)(C)C(C)(C)C)|C@H]4O|  
Si|(C)(C)C(C)(C)C)c(=O)nc3N)n2[C@ @H]2O|C@H|(CO|Si|(C)(C)C(C)(C)C)|C@ @H|(O|Si|(C)(C)C  
C(C)(C)C)|C@H]2O|Si|(C)(C)C(C)(C)C)c(=O)InH11  
7593 C=Cc1ccc(Cl)cc1.O=[N+][([O-])c1ccc(Br)cc1>>O=[N+][([O-])c1ccc(/C=C/c2ccc(Cl)cc2)cc1  
7594 C=Cc1sc2cccc12.CCOC(=O)C(F)I>>CCOC(=O)C(F)/C=C/c1sc2cccc12  
7595 Br1ccc2c(c1)CCc1cccc1N2.C=CC(=O)OC(C)(C)C>>CC(C)(C)OC(=O)/C=C/c1ccc2c(c1)CCc1cccc  
7596 C=Cc1cccc1.Cc1cccc(C)c1I>>Cc1cccc(C)c1/C=C/c1cccc1  
7597 C=Cc1cccc1.Oc1ccc(-c2ccc2-c2ccc(Br)cc2)cc1>>Oc1ccc(-c2ccc2-c2ccc(/C=C/c3cccc3)cc2)cc1  
7598 C=CC(C)(C)O.CON=CCc1cn(S(=O)(=O)c2ccc(C)cc2)c2cccc(Br)c12>>CON=CCc1cn(S(=O)(=O)c2cc  
c(C)cc2)c2cccc(/C=C/C(C)(C)O)c12  
7599 Br1ccc(/C=C/c2ccc(N(c3cccc3)c3cccc3)cc2)cc1.C=Cc1ccnce1>>C(=C/c1ccc(/C=C/c2ccc(N(c3ccc  
cc3)c3cccc3)cc2)cc1)|c1ccnce1  
7600 C=CC(C)(C)O.O=c1ccoc2ccc(Br)cc12>>CC(C)(O)/C=C/c1ccc2occc(=O)c2c1  
7601 C=CC(=O)OC.Ic1c(C[Se]c2cccc2)c(-c2cccc2)c2cccc2c1-  
c1cccc1>>COC(=O)/C=C/c1c(C[Se]c2cccc2)c(-c2cccc2)c2cccc2c1-c1cccc1  
7602 C=CC(=O)OCC.Nc1cc(F)c(Br)cc1I>>CCOC(=O)/C=C/c1cc(Br)c(F)cc1N  
7603 Br1cccc1.C=CC(=O)OC(C)(C)C>>CC(C)(C)OC(=O)/C=C/c1cccc1  
7604 C=CC(N)=O.FC(F)(F)c1cc(Cl)cc(C(F)(F)F)c1>>NC(=O)/C=C/c1cc(C(F)(F)F)cc(C(F)(F)F)c1  
7605 C=COC.CCOC(=O)C(=O)Cl>>CCOC(=O)C(=O)/C=C/OC  
C=Cc1ccc(/C=C/c2cc(OC)c(N(C)C)cc2OC)cc1.O=c1ccc2c(-c3ccc(I)ccc3S(=O)(=O)O)c3ccc(O)cc3oc-  
7606 2c1>>COc1cc(N(C)C)c(OC)cc1/C=C/c1ccc(/C=C/c2ccc(-c3c4ccc(=O)cc-  
4oc4cc(O)ccc34)c(S(=O)(=O)O)c2)cc1  
7607 C=CN1C(=O)[C@ @H]2CN(C(=O)OC(C)(C)C)CCN2C1=O.Clc1ccc(I)cc1>>CC(C)(C)OC(=O)N1CC  
N2C(=O)N/C=C/c3ccc(Cl)cc3)C(=O)[C@ @H]2C1  
7608 C=CC(=O)N1N=Cc2cccc2C1CC(=O)OC.COc1cc(Cc2cnc(N)nc2N)cc(I)c1OC>>COC(=O)CC1c2cccc  
c2C=NN1C(=O)/C=C/c1cc(Cc2cnc(N)nc2N)cc(OC)c1OC

7609 C=C[C@H]1CN(S(=O)(=O)c2ccc(C)cc2)[C@H](c2ccc(OC)cc2)N1OC.Ic1cccc1>>COc1ccc([C@@H  
7610 C=CC(=O)OC.C[C@H]1C[C@H](n2c(Nc3ccc(OC(F)(F)F)cc3)nc3cc(Br)ccc32)CC(C)(C)C1>>COC  
(=O)/C=C/c1ccc2c(c1)nc(Nc1ccc(OC(F)(F)F)cc1)n2[C@@H]1C[C@H](C)CC(C)(C)C1  
7611 C=CC(=O)OC.IC(CCSclcccc1)=C(c1cccc1)c1cccc1>>COC(=O)/C=C/C(CCSclcccc1)=C(c1cccc  
1)c1cccc1  
7612 C=CC(=O)OC.COc1cc(Br)cc(F)c1C=O>>COC(=O)/C=C/c1cc(F)c(C=O)c(OC)c1  
7613 C=CC(=O)OCC.C[C@H](c1cccc2cccc12)N(CC1CN(C)c2ccc(Br)cc2O1)C(=O)OC(C)(C)C>>CCOC(  
=O)/C=C/c1ccc2c(c1)OC(CN(C(=O)OC(C)(C)C)[C@H](C)c1cccc3cccc13)CN2C  
7614 Brclccc(-c2cccc2)cc1.C=CC(=O)OC(C)(C)C>>CC(C)(C)OC(=O)/C=C/c1ccc(-c2cccc2)cc1  
7615 C=CCNS(=O)(=O)c1cc(C(F)(F)F)cc(C(F)(F)F)c1.Clclccc(Br)cc1>>O=S(=O)(NC/C=C/c1ccc(Cl)cc1)c  
1cc(C(F)(F)F)cc(C(F)(F)F)c1  
7616 C=CC(=O)NCCO.COc1ccc(CNc2c(C(=O)NCc3ccc(F)cc3F)c(=O)n(OCc3cccc3)c3ncc(Br)cc23)c(OC)  
c1>>COc1ccc(CNc2c(C(=O)NCc3ccc(F)cc3F)c(=O)n(OCc3cccc3)c3ncc(C=C/C(=O)NCCO)cc23)c(  
7617 C=CC(OCC)OCC.O=[N+](O-)]c1ccc(Br)cc1>>CCOC(/C=C/c1ccc([N+](=O)[O-])cc1)OCC  
7618 C=CC(=O)N1C(=O)OC[C@H]1c1cccc1.FC(F)(F)c1cncc(Br)c1>>O=C(/C=C/c1cncc(C(F)(F)F)c1)N1  
C(=O)OC[C@H]1c1cccc1  
7619 C=COCCCC.O=c1cc(Br)c2ccc(F)cc2[nH]1>>CCCCO/C=C/c1cc(=O)[nH]c2cc(F)ccc12  
7620 C=COCCCC.O=c1cc(Br)c2cc(F)ccc2o1>>CCCCO/C=C/c1cc(=O)oc2ccc(F)cc12  
7621 C=CC(F)(F)F.Ic1ccc(OCc2cccc2)cc1>>FC(F)(F)/C=C/c1ccc(OCc2cccc2)cc1  
7622 Brclcccn2nnnc12.C=Cc1cccc1>>C(=C/c1cccn2nnnc12)\c1cccc1  
7623 C=CC(=O)N(C(C)C)C(C)C.CC(C)(C)OC(=O)c1cccc1Br>>CC(C)N(C(=O)/C=C/c1cccc1C(=O)OC(  
C)(C)C)C(C)C  
7624 C=CP(=O)(OCC)OCC.CC(=O)Nc1ccc(Br)cc1>>CCOP(=O)/C=C/c1ccc(NC(C)=O)cc1)OCC  
7625 C=Cc1cccc1.Cc1cnc(C)c(Cl)n1>>Cc1cnc(C)c(/C=C/c2cccc2)n1  
7626 C=CC(=O)N(C)Cc1sc2cccc2c1C.O=C1Nc2ncc(Br)cc2C12CCCC2>>Cc1c(CN(C)C(=O)/C=C/c2cnc3  
c(c2)C2(CCCC2)C(=O)N3)sc2cccc12  
7627 C=CC(=O)O.N#Cc1cccc(Br)c1>>N#Cc1cccc(/C=C/C(=O)O)c1  
7628 Brclccc2ccnc(N3CCCC3)c2c1.C=CC(C)=O>>CC(=O)/C=C/c1ccc2ccnc(N3CCCC3)c2c1  
7629 C=CC(=O)OC(C)(C)C.CCOC(=O)c1c(OS(=O)(=O)C(F)(F)F)c2cccc2n1C>>CCOC(=O)c1c(/C=C/C(  
=O)OC(C)(C)C)c2cccc2n1C  
7630 C=CC(C)(O)CCC=C(C)C.FC(F)(F)c1cccc1Br>>CC(C)=CCCC(C)(O)/C=C/c1cccc1C(F)(F)F  
7631 C=CC(=O)OC.Cc1[nH]c2cccc2c1C1CCCN1Cc1ccc(Br)cc1>>COC(=O)/C=C/c1ccc(CN2CCCC2c2c(  
C)[nH]c3cccc23)cc1  
7632 C=CC(C)=O.Nc1ccc(Cl)cc1>>CC(=O)/C=C/c1ccc(N)cc1  
7633 C=Cc1cncc1.C[Si](C)(C)CCOCn1nc(I)c2ccc([C@@H]3C[C@@]34C(=O)Nc3cccc34)cc21>>C[Si](  
C)(C)CCOCn1nc(/C=C/c2cncc2)c2ccc([C@@H]3C[C@@]34C(=O)Nc3cccc34)cc21  
7634 C=Cc1cncc1.Cc1ccc(S(=O)(=O)Oc2cccc3c(Br)ccnc23)cc1>>Cc1ccc(S(=O)(=O)Oc2cccc3c(/C=C/c4c  
cncc4)ccnc23)cc1  
7635 C=CP(=O)(c1cccc1)c1cccc1.Cc1ccc2cccc2c1Br>>Cc1ccc2cccc2c1/C=C/P(=O)(c1cccc1)c1cccc  
7636 C=CC(=O)OC.O=Cc1cc(Br)ccc1O>>COC(=O)/C=C/c1ccc(O)c(C=O)c1  
7637 C=CC(=O)OC.Cc1cc(F)cc(C)c1C(=O)c1sc2cc(O)ccc2c1Oc1ccc(Br)cc1>>COC(=O)/C=C/c1ccc(Oc2c(  
C(=O)c3c(C)cc(F)cc3C)sc3cc(O)ccc23)cc1  
7638 C=Cc1ccc(OC)cc1.O=[N+](O-)]c1cccc(Br)c1>>COc1ccc(/C=C/c2cccc([N+](=O)[O-])c2)cc1  
7639 C=Cc1cccc1.COC(=O)Cn1c(=O)c(Cl)nc2cccc21>>COC(=O)Cn1c(=O)c(/C=C/c2cccc2)nc2cccc21  
7640 C=CN1C(=O)c2cccc2C1=O.COC(=O)c1cc(OC)nc1Br>>COC(=O)c1cc(OC)nc1/C=C/N1C(=O)c2c  
cccc2C1=O  
7641 C=Cc1nn(C(c2cccc2)(c2cccc2)c2cccc2)c2ccnc(OC3CCCC3)c12.Cn1cc(I)cn1>>Cn1cc(/C=C/c2nn  
(C(c3cccc3)(c3cccc3)c3cccc3)c3ccnc(OC4CCCC4)c23)cn1  
7642 C=Cc1ccc(S(=O)(=O)c2cccc2F)cn1.Oc1cccc1I>>O=S(=O)(c1ccc(/C=C/c2cccc2O)nc1)c1cccc1F  
7643 C=Cc1ccc(SC)cc1.O=Cc1ccc(Br)cc1>>CSclccc(/C=C/c2ccc(C=O)cc2)cc1  
7644 C=CCOc1ccc(Cl)cc1.COc1ccc(I)cc1>>COc1ccc(/C=C/COc2ccc(Cl)cc2)cc1  
7645 C=CC(=O)O.Clclcccc1>>O=C(O)/C=C/c1cccc1  
7646 C=Cc1cccc1.Cc1ccc(I)cc1[N+](=O)[O-]>>Cc1ccc(/C=C/c2cccc2)cc1[N+](=O)[O-]  
7647 C=CC(N)=O.CCCCC1(CCCC)C(=O)C(C2=NS(=O)(=O)c3cc(I)ccc3N2)=C(O)c2cc(F)ccc21>>CCCC  
C1(CCCC)C(=O)C(C2=NS(=O)(=O)c3cc(/C=C/C(N)=O)ccc3N2)=C(O)c2cc(F)ccc21  
7648 Brclcccc1.C=Cn1nnc(-c2ccc(C)cc2)n1>>Cc1ccc(-c2nnn(/C=C/c3cccc3)n2)cc1  
7649 C=Cc1cncc1.CCCCN1ccc2cc(Br)ccc21>>CCCN1ccc2cc(/C=C/c3cncc3)ccc21  
7650 C=CC(=O)OCC.CN1CCc2cc(Br)ccc2C1>>CCOC(=O)/C=C/c1ccc2c(c1)CCN(C)C2  
7651 C=CC(=O)OCC(CC)CCCC.FC(F)(F)c1ccc(Cl)cc1>>CCCC(CC)COC(=O)/C=C/c1ccc(C(F)(F)F)cc1  
7652 C=CC(=O)OC.Fc1ccc(I)cc1>>COC(=O)/C=C/c1ccc(F)cc1

C=Cc1ccc2ncc(OC)c(C)C(C)C.COC(=O)c1c(Br)cccc1OC>>COC(=O)c1c(/C=C/c2ccc3nc(OC)c(C)C)n  
 c3c2)cccc1OC  
 C=CC(=O)OCCCC.COc1ccc2cc([N+](=O)[O-])ccc2c1-  
 c1c(OC(=O)C(C)(C)C)ccc2cc(Br)ccc12>>CCCCOC(=O)/C=C/c1ccc2c(-c3c(OC)ccc4cc([N+](=O)[O-]  
 ])ccc34)c(OC(=O)C(C)(C)C)ccc2c1  
 C=Cc1ccc2cccc2c1.Cc1cccc1Br>>Cc1cccc1/C=C/c1ccc2cccc2c1  
 C=Cc1cccc1.Cc1ccc([N+](=O)[O-])cc1Br>>Cc1ccc([N+](=O)[O-])cc1/C=C/c1cccc1  
 C=CC(=O)OC(C)(C)C.COC(=O)/C=C/c1cccc(N(Cc2cccc2Br)C(=O)C2CCCC2)c1>>COC(=O)/C=  
 C/c1cccc(N(Cc2cccc2/C=C/C(=O)OC(C)(C)C)C(=O)C2CCCC2)c1  
 C=Cc1ccc(C)cc1.COC(=O)c1cccc1I>>COC(=O)c1cccc1/C=C/c1ccc(C)cc1  
 C=Cc1cncc1.CC(=O)Oc1cncc(Br)c1>>CC(=O)Oc1cncc(/C=C/c2cncc2)c1  
 C=CC(=O)OC(CC)CCCC.O=[N+]([O-])c1ccc(Cl)cc1>>CCCC(CC)OC(=O)/C=C/c1ccc([N+](=O)[O-]  
 ])cc1  
 C=CC(=O)Oc1cccc1.COc1ccc(I)cc1>>COc1ccc(/C=C/C(=O)Oc2cccc2)cc1  
 C=CC(=O)OCCCC.OCc1ccc(I)cc1>>CCCCOC(=O)/C=C/c1ccc(CO)cc1  
 C=CS(=O)(=O)NCCCCCCCC.CC(C)(C)OC(=O)NCCc1cccc1Br>>CCCCCCCCNS(=O)(=O)/C=C/c1  
 ccccc1CCNC(=O)OC(C)(C)C  
 Br1cccn1.C=Cc1cn(COCC[Si](C)(C)C)nc1-c1nc2ccc(OC)cc2n1COCC[Si](C)(C)C>>COc1ccc2nc(-  
 c3nn(COCC[Si](C)(C)C)cc3/C=C/c3cccn3)n(COCC[Si](C)(C)C)e2c1  
 C=Cc1ccc(OC)cc1.Cc1ccc(Br)cc1>>COc1ccc(/C=C/c2ccc(C)cc2)cc1  
 C=Cc1cccc1.Cn1nc(Br)c2cccc21>>Cn1nc(/C=C/c2cccn2)c2cccc21  
 Br1cccc1C1OCCO1.C=CC(=O)OC>>COC(=O)/C=C/c1cccc1C1OCCO1  
 C=CC(=O)OCCCC.CC(=O)c1cc2cc(Br)ccc2o1>>CCCCOC(=O)/C=C/c1ccc2oc(C(C)=O)cc2c1  
 C=CC(=O)OCC.Cc1nc(Br)c([N+](=O)[O-])n1C>>CCOC(=O)/C=C/c1nc(C)n(C)c1[N+](=O)[O-]  
 C=Cc1ccc(Cl)cc1.Cn1cc(I)c(=O)c2cccc21>>Cn1cc(/C=C/c2ccc(Cl)cc2)c(=O)c2cccc21  
 C=Cc1ccc(OC)cc1OC.Nc1cccc(I)c1>>COc1ccc(/C=C/c2cccc(N)c2)c(OC)c1  
 C=Cc1nc2cccc2s1.CCN(CC)S(=O)(=O)c1ccc(Br)cc1F>>CCN(CC)S(=O)(=O)c1ccc(/C=C/c2nc3cccc  
 c3s2)cc1F  
 C=CCCCCCC.c1ccc([I+][c2cccc2]cc1>>CCCCC/C=C/c1cccc1  
 C=C[C@H]1C[C@H]2CC[C@H](C(=O)OC)N2C(=O)[C@@](Cc2cccc2)(NC(=O)OCc2cccc2)[  
 C@H]1OC(C)=O.O=[N+]([O-]  
 ])c1ccc(Br)cc1>>COC(=O)[C@@H]1CC[C@H]2C[C@H](/C=C/c3ccc([N+](=O)[O-]  
 ])cc3)[C@H]1(OC(C)=O)[C@@]1(Cc3cccc3)(NC(=O)OCc3cccc3)C(=O)N12  
 Br1cnc2cccc2c1.C=C[C@H]1COC(C)(C)N1C(=O)OC(C)(C)C>>CC(C)(C)OC(=O)N1[C@H](/C=  
 C/c2cnc3cccc3c2)COC1(C)C  
 C=Cc1nnc2c1nnc2C1CCCCO1.COc1ccc(I)cc1>>COc1ccc(/C=C/c2nnc3c2nnc3C2CCCCO2)cc1  
 C=CC(=O)OCC.O=c1c(I)coc2cc(O)ccc12>>CCOC(=O)/C=C/c1coc2cc(O)ccc2c1=O  
 C=Cc1cccc1.Cn1c(-c2cccc2)c(I)c(=O)c2cccc21>>Cn1c(-  
 Br1ccc(-c2nc3cccc3n2Cc2cccc2)cc1.C=CC(=O)OCC>>CCOC(=O)/C=C/c1ccc(-  
 c2nc3cccc3n2Cc2cccc2)cc1  
 C=CC#N.[2H]C([2H])([2H])c1cc(I)cc(C([2H])([2H])[2H])c1N>>[2H]C([2H])([2H])c1cc(/C=C/C#N)c  
 c(C([2H])([2H])[2H])c1N  
 C=CC(=O)OCCCC.FC(F)(F)c1ccc(Br)cc1>>CCCCC(=O)/C=C/c1ccc(C(F)(F)F)cc1  
 Br1cccc1I.C=CC(F)(F)C(F)(F)C(F)(F)C(F)(F)C(F)(F)C(F)(F)C(F)(F)C(F)(F)C(F)(F)C(F)(F)C(F)(F)C(F)(F)  
 F(F)(F)C(F)(F)/C=C/c1cccc1Br  
 C=Cc1ccc(C=O)cc1.COC(=O)c1cc(OC)c(OC)cc1I>>COC(=O)c1cc(OC)c(OC)cc1/C=C/c1ccc(C=O)cc  
 C=Cc1cccc1.CC(=O)Oc1ccc(Br)cc1>>CC(=O)Oc1ccc(/C=C/c2cccc2)cc1  
 C=CCC1C=Cc2cccn2N1C(=O)Oc1cccc1.CCOC(=O)CC(c1ccc(OC)nc1)c1nc(Br)cs1>>CCOC(=O)C  
 C(c1ccc(OC)nc1)c1nc(/C=C/CC2C=Cc3cccn3N2C(=O)Oc2cccc2)cs1  
 C=CC(=O)OCC.COC1OC(c2cccc2)=C(I)c2cccc21>>CCOC(=O)/C=C/C1=C(c2cccc2)OC(OC)c2cc  
 cc21  
 C=CC(=O)OCCN(C)C.Cc1ccc(NC(=O)c2cc(=O)c3cc(Br)ccc3o2)cc1C>>Cc1ccc(NC(=O)c2cc(=O)c3c  
 c(/C=C/C(=O)OCCN(C)C)ccc3o2)cc1C  
 C=C[C@H]1O[C@H](Sc2cccc2)[C@H](OCc2cccc2)[C@@H](OCc2cccc2)[C@@H]1OCc1ccc(  
 OC)cc1.O=c1cc(-  
 c2cccc2)oc2ccc(I)cc12>>COc1ccc(CO[C@H]2[C@H](OCc3cccc3)[C@@H](OCc3cccc3)[C@H](  
 Sc3cccc3)O[C@@H]2/C=C/c2ccc3oc(-c4cccc4)cc(=O)c3c2)cc1  
 C=CC(=O)OCC.Cc1ccc(S(=O)(=O)n2ccc3c(Br)cccc32)cc1>>CCOC(=O)/C=C/c1cccc2c1ccn2S(=O)(=O)  
 c1ccc(C)cc1  
 C=CC(=O)OCCCC.CC(C)(C)c1cc(Br)cc(C(C)(C)C)c1>>CCCCOC(=O)/C=C/c1cc(C(C)(C)C)cc(C(C)(  
 C)C)c1

C=Cc1nc2c(N)ncnc2n1[C@@H]1O[C@H](CO[Si](C)(C)C(C)(C)C)[C@@H](O[Si](C)(C)C(C)(C)C)[  
 7691 C@H]1O[Si](C)(C)C(C)(C)C.O=[N+](O-  
 )c1ccc(Cl)cc1>>CC(C)(C)[Si](C)(C)OC[C@H]1O[C@@H](n2c(/C=C/c3ccc([N+](=O)[O-  
 7692 l)cc3)nc3c(N)ncnc32)[C@H](O[Si](C)(C)C(C)(C)C)[C@@H]1O[Si](C)(C)C(C)(C)C  
 C=CC(=O)N1N=Cc2ccccc2C1CC(=O)OC(C)(C)C.COc1cc(Cc2cnc(N)nc2N)cc(I)c1OC>>COc1cc(Cc2  
 7693 cnc(N)nc2N)cc(/C=C/C(=O)N2N=Cc3ccccc3C2CC(=O)OC(C)(C)C)c1OC  
 C=CC#N.CC(=O)OC[C@H]1O[C@@H](n2cnc(C(N)=O)c2I)[C@H](OC(C)=O)[C@@H]1OC(C)=O>  
 7694 >CC(=O)OC[C@H]1O[C@@H](n2cnc(C(N)=O)c2/C=C/C#N)[C@H](OC(C)=O)[C@@H]1OC(C)=O  
 C=Cc1ccc(C)cc1.CC(=O)c1ccccc1Br>>CC(=O)c1ccccc1/C=C/c1ccc(C)cc1  
 7695 C=CC(=O)OC(C)(C)C.Nc1ccc(Br)cn1>>CC(C)(C)OC(=O)/C=C/c1ccc(N)nc1  
 C=C[C@@H]1O[C@H](COC(C)=O)[C@@H](OC(C)=O)[C@H](OC(C)=O)[C@H]1OC(C)=O.Cc1cc  
 7696 c(N2C(=O)[C@H](CC[C@H](O)c3ccc(F)cc3)[C@H]2c2ccc(Br)cc2O[Si](C)(C)C(C)(C)C)cc1>>CC(=O)  
 OC[C@H]1O[C@@H](/C=C/c2ccc([C@@H]3[C@@H](CC[C@H](O)c4ccc(F)cc4)C(=O)N3c3ccc  
 (C)cc3)c(O[Si](C)(C)C(C)(C)C)c2)[C@H](OC(C)=O)[C@@H](OC(C)=O)[C@@H]1OC(C)=O  
 7697 C=Cc1ccccc1.COc1cc[nH]c1/C=C1\C(=O)Nc2ccccc(I)c21>>COc1cc[nH]c1/C=C1\C(=O)Nc2ccccc(/C=  
 C/c3ccccc3)c21  
 7698 C=Cc1ccc(OC)c(OC)c1.Ic1ccccc2ccccc12>>COc1ccc(/C=C/c2ccccc3ccccc23)cc1OC  
 7699 Brc1ccc(Cc2ccccc2)cc1.C=CC(=O)OCC>>CCOC(=O)/C=C/c1ccc(Cc2ccccc2)cc1  
 C=CC[C@H](CC(=O)OC(C)(C)C(=O)N[C@H](C(=O)N[C@H](C)c1ccccc1)C(C)(C)C.Fc1cc(Br)cc  
 7700 c1-c1ccccc1>>C[C@@H](NC(=O)[C@@H](NC(=O)[C@H](C/C=C/c1ccc(-  
 c2ccccc2)c(F)c1)CC(=O)OC(C)(C)C(C)(C)C)c1ccccc1  
 7701 C=CN1C(=O)c2ccccc2C1=O.CC(C)(C)OC(=O)Cc1ccc(Br)cc1>>CC(C)(C)OC(=O)Cc1ccc(/C=C/N2C  
 (=O)c3ccccc3C2=O)cc1  
 7702 C=CC(OCC)OCC.COc1ccc(Br)cc1>>CCOC(/C=C/c1ccc(OC)cc1)OCC  
 7703 C=Cc1ccc(C)cc1.FC(F)(F)c1ccccc1I>>Cc1ccc(/C=C/c2ccccc2C(F)(F)F)cc1  
 7704 C=CC(=O)OC.COc1ccc2nc(-c3ccccc3)c(I)n2c1>>COC(=O)/C=C/c1c(-c2ccccc2)nc2ccc(OC)cn12  
 Brc1ccc(CN2CCCC(c3c(-  
 7705 c4ccccc4)[nH]c4ccccc34)C2)cc1.C=CC(=O)OC>>COC(=O)/C=C/c1ccc(CN2CCCC(c3c(-  
 c4ccccc4)[nH]c4ccccc34)C2)cc1  
 7706 Brc1ccc(CN2CC3CCC(C2)O3)cc1.C=CB1OC(C)CC(C)(C)O1>>CC1CC(C)(C)OB(/C=C/c2ccc(CN3C  
 C4CCC(C3)O4)cc2)O1  
 7707 Brc1ccc2c(c1)OCCOCCOCCOCCO2.C=CC(=O)O>>O=C(O)/C=C/c1ccc2c(c1)OCCOCCOCCOCCO  
 7708 C=CC(O)CN1CCN(c2ccc(CCC)cc2)CC1.O=c1ccc2cc(Br)ccc2[nH]1>>CCCc1ccc(N2CCN(CC(O)/C=  
 C/c3ccc4[nH]c(=O)ccc4c3)CC2)cc1  
 7709 C=CC(=O)OC.FC(F)(F)c1ccccc1C2Sc3cc(Br)ccc3O2)c1>>COC(=O)/C=C/c1ccc2c(c1)SCC(c1ccccc(C  
 (F)(F)F)c1)O2  
 7710 C=CC(=O)OC.COc1ccc2c(c1)CCN(c1ccc(C)cc1)C2(C)c1ccc(Br)cc1>>COC(=O)/C=C/c1ccc(C2(C)c3  
 ccc(OC)cc3CCN2c2ccc(C)cc2)cc1  
 7711 C=CC(=O)OCC.Ic1ccc2[nH]ccc2c1>>CCOC(=O)/C=C/c1ccc2[nH]ccc2c1  
 7712 C=CC(O)c1cc(OC)c(OC)cc1Br.COc1ccc(I)c1>>COc1ccc(/C=C/C(O)c2cc(OC)c(OC)cc2Br)c1  
 7713 C=Cc1ccc(C(=O)OCC)cc1.CC(C)=C1CCC(C)(C)c2ccc(Br)cc21>>CCOC(=O)c1ccc(/C=C/c2ccc3c(c2)  
 C(=C(C)C)CCC3(C)C)cc1  
 7714 C=CCN1C(=O)c2ccccc2C1=O.Clc1ccc(Br)cc1>>O=C1c2ccccc2C(=O)N1C/C=C/c1ccc(Cl)cc1  
 7715 C=CC(C)(C)O.CC(=O)O[C@H]1C(Br)=C[C@@H](O[Si](C)(C)C(C)(C)C)[C@@H]2O[C@H]12>>C  
 C(=O)O[C@H]1C(/C=C/C(C)(C)O)=C[C@@H](O[Si](C)(C)C(C)(C)C)[C@@H]2O[C@H]12  
 7716 C=Cc1cncnc1.CC(C)(C)OC(=O)NCCOc1cncc(Br)c1>>CC(C)(C)OC(=O)NCCOc1cncc(/C=C/c2cncnc  
 7717 C=CC(=O)OC(C)(C)C.CCOC(=O)Cc1ccc(Br)cc1Cl>>CCOC(=O)Cc1ccc(/C=C/C(=O)OC(C)(C)C)cc1  
 7718 C=CC(=O)OC.CCCCN1c(C(=O)NC(C)(C)nc(Br)c1C(=O)NC(C)(C)C>>CCCCN1c(C(=O)NC(C)(C)  
 C)nc(/C=C/C(=O)OC)c1C(=O)NC(C)(C)C  
 7719 C=CC=O.CC(=O)c1ccc(Br)cc1>>CC(=O)c1ccc(/C=C/C=O)cc1  
 Brc1enc2ccccc2c1.C=CCON=C1C(C)CNC(C)C(CC)OC(=O)[C@H](C)[C@H](O[C@H]2C[C@@](C)  
 (OC)[C@@H](O)[C@H](C)O2)[C@H](C)[C@@H](O[C@@H]2O[C@H](C)C[C@H](N(C)C)[C@H]  
 7720 2O)[C@@](C)(O)C[C@H]1C>>CCC1OC(=O)[C@H](C)[C@H](O[C@H]2C[C@@](C)(OC)[C@@H  
 ](O)[C@H](C)O2)[C@H](C)[C@@H](O[C@@H]2O[C@H](C)C[C@H](N(C)C)[C@H]2O)[C@@](  
 C)(O)C[C@@H](C)C(=NOC/C=C/c2cnc3ccccc3c2)C(C)CNC1C  
 7721 C=CC(=O)O.CC(=O)Nc1ccc(Br)cn1>>CC(=O)Nc1ccc(/C=C/C(=O)O)cn1  
 7722 C=CC(C)=O.Fc1ccc(Br)cc1>>CC(=O)/C=C/c1ccc(F)cc1  
 7723 C=CC(=O)OCCCC.Ic1c(-c2ccccc2)c2ccccc2c2c1ncc1ccccc12>>CCCCOC(=O)/C=C/c1c(-  
 c2ccccc2)c2ccccc2c2c1ncc1ccccc12  
 7724 C=Cc1nc2c(N)ncnc2n1[C@@H]1O[C@H](CO[Si](C)(C)C(C)(C)C)[C@@H](O[Si](C)(C)C(C)(C)C)[  
 C@H]1O[Si](C)(C)C(C)(C)C.Cc1ccc(Br)cc1>>Cc1ccc(/C=C/c2nc3c(N)ncnc3n2[C@@H]2O[C@H](C  
 O[Si](C)(C)C(C)(C)C)[C@@H](O[Si](C)(C)C(C)(C)C)[C@H]2O[Si](C)(C)C(C)(C)C)cc1

7725 Br1ccc(I)cc1.C=CC(=O)CCCCC>>CCCCC(=O)/C=C/c1ccc(Br)cc1  
7726 C=CC(=O)OC.COc1c([C@@H]2c3ccc4c(cnn4C4CCCCO4)c3C[C@@H](C)N2CC(C)(F)F)ccc(Br)c1  
F>>COC(=O)/C=C/c1ccc([C@@H]2c3ccc4c(cnn4C4CCCCO4)c3C[C@@H](C)N2CC(C)(F)F)c(OC)c  
7727 C=CC(=O)OCCCCCCCCCCCCC.O=c1[nH]c(=O)n([C@H]2C[C@H](O)[C@@H](CO)O2)cc1I>>CCC  
CCCCCCCCCOC(=O)/C=C/c1cn([C@H]2C[C@H](O)[C@@H](CO)O2)c(=O)[nH]c1=O  
C=CC(=O)N1CCOCC1.C[C@]12C[C@@]34C=C(Sc5cccc(I)c5)C(=O)[C@@](C)(CCC(=O)Nc5c(O)c  
7728 cc(C(=O)O)c5O)[C@@H]3[C@H](C[C@@H]1C4)O2>>C[C@]12C[C@@]34C=C(Sc5cccc(/C=C/C(  
=O)N6CCOCC6)c5)C(=O)[C@@](C)(CCC(=O)Nc5c(O)ccc(C(=O)O)c5O)[C@@H]3[C@H](C[C@@  
7729 C=CC(=O)OC(C)(C)C.Oc1ccc(I)cc1>>CC(C)(C)OC(=O)/C=C/c1ccc(O)cc1  
7730 C=Cc1cccc1.Oc1ccc(/N=N/c2ccc(Br)cc2)cc1>>Oc1ccc(/N=N/c2ccc(/C=C/c3cccc3)cc2)cc1  
7731 C=CCN1C(=O)c2cccc2C1=O.FC(F)(F)c1ccc(Br)cc1>>O=C1c2cccc2C(=O)N1C/C=C/c1ccc(C(F)(F)  
F)cc1  
7732 C=CC(=O)OC(C)(C)C.O=C1CN(CCCN2CCOCC2)Cc2cc(Br)cnc2N1>>CC(C)(C)OC(=O)/C=C/c1cnc  
2c(c1)CN(CCCN1CCOCC1)CC(=O)N2  
7733 Br1ccc2ccnc2c1.C=C[C@H]1C[C@@H](n2ccc3c(Cl)ncnc32)[C@@H]2OC(C)(C)O[C@@H]21>>  
CC1(C)O[C@@H]2[C@H](O1)[C@@H](/C=C/c1ccc3ccnc3c1)C[C@H]2n1ccc2c(Cl)ncnc21  
7734 C=CC(=O)O.O=S(=O)(Nc1cccc(I)c1)c1ccc(-c2cccc2)cc1>>O=C(O)/C=C/c1cccc(NS(=O)(=O)c2ccc(-  
c3cccc3)cc2)c1  
7735 C=CC(=O)OC.CCOC(=O)c1ccc(NC=O)c(I)c1>>CCOC(=O)c1ccc(NC=O)c(/C=C/C(=O)OC)c1  
7736 Br1ccc(NCc2cnc2)nc1.C=CC(=O)OC(C)(C)C>>CC(C)(C)OC(=O)/C=C/c1ccc(NCc2cnc2)nc1  
7737 C=C/C=C(\CCCC)OCC.Cc1cccc(I)c1>>CCCC/C(=C\C=C\C1cccc(C)c1)OCC  
7738 C=Cc1cn(C(c2cccc2)(c2cccc2)c2cccc2)cn1.CC(=O)Oc1ccc2ccc(Cl)ccc1-  
2>>CC(=O)Oc1ccc2ccc(/C=C/c3cn(C(c4cccc4)(c4cccc4)c4cccc4)cn3)ccc1-2  
7739 C=CC(=O)OC.FC(F)(F)CCCOc1ccc(C(F)(F)Oc2ccc(Br)cc2)cc1>>COC(=O)/C=C/c1ccc(OC(F)(F)c2c  
cc(OCCCC(F)(F)F)cc2)cc1  
7740 C=CCCCCCC.CC(=O)c1cccc1Br>>CCCCC/C=C/c1cccc1C(C)=O  
7741 C=CC(=O)N(C)Cc1sc2cccc2c1C.O=C1Nc2ncc(Br)cc2C12CCC2>>Cc1c(CN(C)C(=O)/C=C/c2cnc3c(  
c2)C2(CCC2)C(=O)N3)sc2cccc12  
7742 C=CC(=O)OCC(CC)CCCC.Clc1cccc1>>CCCCC(CC)COC(=O)/C=C/c1cccc1  
7743 C=Cc1cccc(C)n1.C[Si](C)(C)I>>Cc1cccc(/C=C/[Si](C)(C)C)n1  
7744 C=CC(OCC)OCC.CCCN1c2cccc2Sc2cc(Br)ccc21>>CCCN1c2cccc2Sc2cc(/C=C/C(OCC)OCC)ccc2  
7745 C=CC(=O)OCC.CC(C)(C)OC(=O)N[C@@H](CCC(=O)OCc1cccc1)COc1cc(C#N)ccc1I>>CCOC(=O  
)/C=C/c1ccc(C#N)cc1OC[C@H](CCC(=O)OCc1cccc1)NC(=O)OC(C)(C)C  
7746 C=C(OC)C1=C(Br)CCCC1.C=CC(=O)OC(C)(C)C>>C=C(OC)C1=C(/C=C/C(=O)OC(C)(C)C)CCCC1  
7747 C=CC(=O)OCc1cccc1.CCn1nnc2c(C)c(Br)cc(OC)c21>>CCn1nnc2c(C)c(/C=C/C(=O)OCc3cccc3)cc  
(OC)c21  
7748 Br1cccs1.C=CN1C(=O)c2cccc2C1=O>>O=C1c2cccc2C(=O)N1/C=C/c1cccs1  
7749 C=Cc1cncnc1.Oc1ccc(Br)cc1>>Oc1ccc(/C=C/c2cnc2)cc1  
7750 C=CC(C)=O.CC1=C(OS(=O)(=O)C(F)(F)F)C(C)([13CH3])CCC1>>CC(=O)/C=C/C1=C(C)CCCC1(C)  
[13CH3]  
7751 Br1c2cccc2c(-c2cccc2)c2cc3cccc3cc12.C=CC(=O)OCC>>CCOC(=O)/C=C/c1c2cccc2c(-  
c2cccc2)c2cc3cccc3cc12  
\*CNCCOCCOCCOCCNC(=O)COc1ccc(C(Cc2cc(OC)cc(OC)c2)NC(=O)c2cccc(C=C)c2)cc1.Cc1cc  
7752 ([N+](=O)[O-]  
])ccc1I>>\*CNCCOCCOCCOCCNC(=O)COc1ccc(C(Cc2cc(OC)cc(OC)c2)NC(=O)c2cccc(/C=C/c3  
ccc([N+](=O)[O-])cc3C)c2)cc1  
7753 C=CC(=O)O.Clc1ccc(I)cc1>>O=C(O)/C=C/c1ccc(Cl)cc1  
7754 C=CC(=O)OCC.Oc1ccc(C(=C2CCCCC2)c2ccc(Br)cc2)cc1Cl>>CCOC(=O)/C=C/c1ccc(C(=C2CCC  
CCC2)c2ccc(O)c(Cl)c2)cc1  
7755 C=Cc1ccc(OCC)cc1.COc1ccc2c(=O)c(I)coc2c1>>CCOc1ccc(/C=C/c2coc3cc(OC)ccc3c2=O)cc1  
7756 C=Cc1cccc1.CC(Cl)c1cccc1>>CC(/C=C/c1cccc1)c1cccc1  
7757 C=CC(=O)OC.COc1cc(C)c(Br)cn1>>COC(=O)/C=C/c1cnc(OC)cc1C  
7758 C=CC#N.COc1cccc2c1CCC(C=O)=C2Br>>COc1cccc2c1CCC(C=O)=C2/C=C/C#N  
7759 Br1cnc(NCCc2cccc2)c2cccc12.C=CC(=O)OC(C)(C)C>>CC(C)(C)OC(=O)/C=C/c1cnc(NCCc2cccc  
c2)c2cccc12  
7760 C=Cc1ccc(OC(C)=O)cc1.CCOC(=O)C(F)(F)I>>CCOC(=O)C(F)(F)/C=C/c1ccc(OC(C)=O)cc1  
7761 C=Cc1ccc(OCc2cccc2)c(-c2ccc(OC)cc2CO)c1.COc1ccc(I)cc1Oc1ccc(C=O)cc1>>COc1ccc(-  
c2cc(/C=C/c3ccc(OC)c(Oc4ccc(C=O)cc4)c3)ccc2OCc2cccc2)c(CO)c1  
7762 C=CC(=O)Oc1cccc1.Ic1cccc1>>O=C(/C=C/c1cccc1)Oc1cccc1  
7763 C=CS(N)(=O)=O.CCc1cccc(CC)c1Br>>CCc1cccc(CC)c1/C=C/S(N)(=O)=O



C=C[C@H]1O[C@@H](Sc2ccccc2)[C@H](OCc2ccccc2)[C@@H](OCc2ccccc2)[C@@H]1OCc1ccc(OC)cc1.O=c1cc(-  
 7764 c2ccccc2)oc2cc(Br)ccc12>>COc1ccc(CO[C@H]2[C@H](OCc3ccccc3)[C@@H](OCc3ccccc3)[C@H](Sc3ccccc3)O[C@@H]2/C=C/c2ccc3c(=O)ccc(-c4ccccc4)oc3c2)cc1  
 C=Cc1ccc(N2CC(=O)N(CC[Si](C)(C)C)S2(=O)=O)c(OCc2ccccc2)c1.COc1cccc(Br)n1>>COc1cccc(/  
 7765 C=C/c2ccc(N3CC(=O)N(CC[Si](C)(C)C)S3(=O)=O)c(OCc3ccccc3)c2)n1  
 C=CC(=O)O.Cc1cc(C)c([I+])c2c(C)cc(C)cc2C)c(C)c1>>Cc1cc(C)c(/C=C/C(=O)O)c(C)c1  
 7766 Br1cccc(I)c1.C=Cc1cccc1>>Br1cccc(/C=C/c2ccccc2)c1  
 7767 Br1ccc2nccn2c1.C=CC(=O)OC>>COC(=O)/C=C/c1ccc2nccn2c1  
 7768 C=C[Si](C)(C)C.COc1cc(CO)c(I)c(OC)c1OC>>COc1cc(CO)c(/C=C/[Si](C)(C)C)c(OC)c1OC  
 7769 C=CC#N.Cc1nc(C(C)C)ncc1I>>Cc1nc(C(C)C)ncc1/C=C/C#N  
 7770 C=CC(=O)OC(CC)CCCC.CC(=O)c1ccc(Cl)cc1>>CCCC(CC)OC(=O)/C=C/c1ccc(C(C)=O)cc1  
 7771 C=CC(=O)OC.O=C1Cc2c(I)cccc2N1>>COC(=O)/C=C/c1cccc2c1CC(=O)N2  
 7772 C=CC(=O)OC.COc1cc(C(=O)c2c(Br)oc3c(OC(C)=O)c(OC)ccc23)cc(OC)c1OC>>COC(=O)/C=C/c1o  
 7773 c2c(OC(C)=O)c(OC)ccc2c1C(=O)c1cc(OC)c(OC)c(OC)c1  
 C=CC[C@H](CC(=O)OC(C)(C)C)C(=O)N[C@H](C(=O)N[C@H](C)c1ccccc1)C(C)(C)C.O=S(=O)(O  
 7774 c1ccc(-c2ccccc2)c(Cl)c1)C(F)(F)F>>C[C@H](NC(=O)[C@H](NC(=O)[C@H](C/C=C/c1ccc(-  
 c2ccccc2)c(Cl)c1)CC(=O)OC(C)(C)C)C(C)C)c1ccccc1  
 7775 C=Cc1cccc1.Cc1nc(Br)c(-c2ccccc2)o1>>Cc1nc(/C=C/c2ccccc2)c(-c2ccccc2)o1  
 7776 C=Cc1cncnc1.CCCOc1ccc(Br)c(F)c1>>CCCOc1ccc(/C=C/c2cncnc2)c(F)c1  
 7777 C=CC(C)O.Cc1cccc(I)c1>>Cc1cccc(/C=C/C(C)O)c1  
 7778 C=CS(N)(=O)=O.CCc1cc(Br)cc(C(=O)c2ccccc2)c1>>CCc1cc(/C=C/S(N)(=O)=O)cc(C(=O)c2ccccc2)  
 7779 C=CC(=O)OCC.Cc1ccc2cncnc2c(F)c1Br>>CCOC(=O)/C=C/c1c(C)cc2cncnc2c1F  
 7780 C=CC(=O)OCC.Oc1ccc(I)c(C(F)(F)F)c1C(F)(F)F>>CCOC(=O)/C=C/c1ccc(O)c(C(F)(F)F)c1C(F)(F)F  
 7781 C=CC(=O)OC(C)(C)C.COC(=O)Cc1cc(OC(C)C)c(OC)c(OC)c1Br>>COC(=O)Cc1cc(OC(C)C)c(OC)c  
 (OC)c1/C=C/C(=O)OC(C)(C)C  
 7782 C=Cc1cncnc1.CC(C)(C)OC(=O)N[C@H](COc1ccc(Br)cn1)Cc1ccccc1>>CC(C)(C)OC(=O)N[C@H](C  
 Oc1ccc(/C=C/c2cncnc2)cn1)Cc1ccccc1  
 7783 C=CC(=O)OC.CCc1ccc(I)cc1CO>>CCc1ccc(/C=C/C(=O)OC)cc1CO  
 7784 C=Cc1cccn1.CNC(=O)c1ccccc1Sc1ccc2c(I)nn(C(C)=O)c2c1>>CNC(=O)c1ccccc1Sc1ccc2c(/C=C/c3  
 ccccn3)nn(C(C)=O)c2c1  
 7785 C=Cc1ccccc1.COc1ccccc1CNc1ccc2c(Br)cccc2n1>>COc1ccccc1CNc1ccc2c(/C=C/c3ccccc3)cccc2n1  
 7786 C=Cc1cccc(C)c1.CCOC(=O)C(F)Br>>CCOC(=O)C(F)/C=C/c1cccc(C)c1  
 7787 C=CC(C)=O.Oc1ccc(Cl)cc1>>CC(=O)/C=C/c1ccc(O)cc1  
 7788 C=CC(=O)N(C)Cc1oc2ccccc2c1C.CC(C)(C)OC(=O)NCC1Cc2cc(Br)enc2NC1=O>>Cc1c(CN(C)C(=O)/C=C/c2cnc3c(c2)CC(CNC(=O)OC(C)(C)C)C(=O)N3)oc2ccccc12  
 7789 C=CC(=O)OC.O=C1c2ccccc2C(=O)N1c1cccc(I)c1>>COC(=O)/C=C/c1cccc(N2C(=O)c3ccccc3C2=O)  
 7790 C=Cc1ccccc1Cl.Oc1ccccc1I>>Oc1ccccc1/C=C/c1ccccc1Cl  
 C=CC(=O)OCC.Cc1cc2c(-  
 7791 c3cccc(Br)c3)c(CC(=O)Nc3ccc(F)cc3C(F)(F)F)c(=O)oc2cc1Cl>>CCOC(=O)/C=C/c1cccc(-  
 c2c(CC(=O)Nc3ccc(F)cc3C(F)(F)F)c(=O)oc3cc(Cl)c(C)cc23)c1  
 7792 C=CC(=O)OCC(CC)CCCC.Ic1ccccc1>>CCCCC(CC)COC(=O)/C=C/c1ccccc1  
 7793 C=Cc1ccccc1.COc1cc(Br)c(C=O)c(OC)c1>>COc1cc(/C=C/c2ccccc2)c(C=O)c(OC)c1  
 7794 C=CC(=O)OCC.Oc1ccc(Br)c(C(F)(F)F)c1>>CCOC(=O)/C=C/c1ccc(O)cc1C(F)(F)F  
 7795 C=Cc1ccc(N(CCCC)CCCC)cc1.CCCn1c(=O)c(/C=C/c2ccc(N(C)C)cc2)nc2ccc(Br)cc21>>CCCCN(CC  
 CC)c1ccc(/C=C/c2ccc3nc(/C=C/c4ccc(N(C)C)cc4)c(=O)n(CCC)c3c2)cc1  
 7796 C=Cc1ccccc1.O=c1c(I)c(/C=C/c2ccccc2)[nH]c2ccccc12>>O=c1c(/C=C/c2ccccc2)c(/C=C/c2ccccc2)[n  
 H]c2ccccc12  
 Br1ccc2nccccc2c1.C=CCON=C1[C@H](C)[C@H]2OC(=O)O[C@]2(C)[C@@H](CC)OC(=O)[C@@]  
 (C)(F)C(=O)[C@H](C)[C@@H](O[C@H]2O[C@H](C)C[C@H](N(C)C)[C@H]2OC(C)=O)[C@](  
 7797 C)(OC)C[C@H]1C>>CC[C@H]1OC(=O)[C@@](C)(F)C(=O)[C@H](C)[C@@H](O[C@H]2O[C@H]  
 H)(C)C[C@H](N(C)C)[C@H]2OC(C)=O)[C@](C)(OC)C[C@H](C)C(=NOC/C=C/c2ccc3nccccc3c2)  
 I[C@H](C)I[C@H]2OC(=O)O[C@]2C  
 7798 C=Cc1cc2cc(OC)c(OC)cc2oc1=O.O=[N+][O-]c1ccc(I)cc1>>COc1cc2cc(/C=C/c3ccc([N+](=O)[O-]  
 ])cc3)c(=O)oc2cc1OC  
 C=C[C@](C)(COCC[Si](C)(C)C)C(=O)O.CC(=O)O[C@H](C)c1ccc2ccc(Br)cc2n1>>CC(=O)O[C@H]  
 7799 I(C)c1ccc2ccc(/C=C/[C@](C)(COCC[Si](C)(C)C)C(=O)O)cc2n1  
 \*CNCCCOCCOCCOCCOCCN(C(=O)COc1ccc(C(Cc2cc(OC)cc(OC)c2)NC(=O)c2ccc(C=C)cc2)cc1.Cc1cc  
 7800 (C)cc(I)c1>>\*CNCCCOCCOCCOCCOCCN(C(=O)COc1ccc(C(Cc2cc(OC)cc(OC)c2)NC(=O)c2ccc(/C=C/  
 c3ccc(C)cc(C)c3)cc2)cc1  
 7801 C=CC(=O)OCC.Oc1cccc(I)c1>>CCOC(=O)/C=C/c1cccc(O)c1

7802 C=Cc1ccc(N(C)C)cc1.CCCCC1=C(CCCC)P(=O)(c2ccccc2)c2cc3cc(I)ccc3cc21>>CCCCC1=C(CCCC)P(=O)(c2ccccc2)c2cc3cc(/C=C/c4ccc(N(C)C)cc4)ccc3cc21

7803 C=Cc1ccc(C(F)(F)F)cc1.Cc1ccc(Br)cc1>>Cc1ccc(/C=C/c2ccc(C(F)(F)F)cc2)cc1

7804 C=CC(=O)CC.Cc1ccccc1Br>>CCC(=O)/C=C/c1ccccc1C

7805 C=CCO[C@H](C)C(=O)N1CCOCC1.OCc1ccc(I)cc1>>C[C@@H](OC/C=C/c1ccc(CO)cc1)C(=O)N1CCOCC1

7806 C=C[C@H](CC(C)C)NC(=O)OC(C)(C)C.CC1(C)OC(=O)c2c(cccc2OS(=O)(=O)C(F)(F)F)O1>>CC(C)C[C@@H](/C=C/c1cccc2c1C(=O)OC(C)(C)O2)NC(=O)OC(C)(C)C

7807 C=CC(C)(O)CCC=C(C)C.CC(=O)c1ccc(Br)cc1>>CC(=O)c1ccc(/C=C/C(C)(O)CCC=C(C)C)cc1

7808 C=C[C@H]1O[C@H](COC(C)=O)[C@H](OC(C)=O)[C@H](OC(C)=O)[C@H]1OC(C)=O.CC(C)(C)[Si](C)(C)Oc1cc(Br)ccc1[C@@H]1[C@@H](CC[C@H](O)c2ccc(F)cc2)C(=O)N1c1ccccc1>>CC(=O)OC[C@H]1O[C@H](/C=C/c2ccc([C@@H]3[C@@H](CC[C@H](O)c4ccc(F)cc4)C(=O)N3c3ccccc3)c(O[Si](C)(C)C(C)(C)C)c2)C@H1(OC(C)=O)C@H(OC(C)=O)C@H1OC(C)=O

7809 C=C[C@H](NC(=O)OCc1ccccc1)C(=O)O.Ic1cccs1>>O=C(N[C@@H](/C=C/c1cccs1)C(=O)O)OCc1ccccc1

7810 C=CC(=O)N(C(C)C)C(C)C.Clc1ccc(I)cc1>>CC(C)N(C(=O)/C=C/c1ccc(Cl)cc1)C(C)C

7811 Brclccccc1.C=CCN(Cc1cccc2ccccc12)C(=O)OCC>>CCOC(=O)N(C/C=C/c1ccccc1)Cc1cccc2ccccc12

7812 C=CC#N.COCC(=O)/C(Br)=C1\CCCC1>>COC(=O)C/C=C/C#N=C1\CCCC1

7813 C=CC(=O)NCc1ccc(F)cc1F.COc1ccc2c(=O)c(I)coc2c1>>COc1ccc2c(=O)c(/C=C/C(=O)NCc3ccc(F)cc3F)coc2c1

7814 C=CC(=O)N1CCOCC1.CCc1nc2c(N)nc3cc(Br)ccc3c2n1CC1CCOCC1>>CCc1nc2c(N)nc3cc(/C=C/C(=O)N4CCOCC4)ccc3c2n1CC1CCOCC1

7815 C=C/C=C/C(C)(C)C.CN1CCC[C@H]1COc1cncc(Br)c1>>CN1CCC[C@H]1COc1cncc(/C=C/C=C/C(C)(C)C)c1

7816 C=Cc1ccccc1.IC(=C1CCCC1)c1ccccc1>>C(=C/c1ccccc1)\C(=C1CCCC1)c1ccccc1

7817 C=CC=O.COCC(=O)COc1ccc(I)c1>>COC(=O)COc1ccc(/C=C/C(=O)c1

7818 C=CC(=O)OCCCC.OCc1ccc(OCc2ccccc2)c(Br)n1>>CCCCOC(=O)/C=C/c1nc(CO)ccc1OCc1ccc

7819 C=CC(=O)O.O=S(=O)(Nc1ccc(I)cc1)c1ccc2oc3ccccc3c2c1>>O=C(O)/C=C/c1ccc(NS(=O)(=O)c2ccc3oc4ccccc4c3c2)cc1

7820 \*CNCCCOCCOCCOCCNC(=O)COc1ccc(C(Cc2cc(OC)cc(OC)c2)NC(=O)c2ccccc(C=C)c2)cc1.Cc1ccc(F)c(I)c1>>\*CNCCCOCCOCCOCCNC(=O)COc1ccc(C(Cc2cc(OC)cc(OC)c2)NC(=O)c2ccccc(/C=C/c3ccc(C)ccc3F)c2)cc1

7821 \*CNCCCOCCOCCOCCNC(=O)COc1ccc(C(Cc2cc(OC)cc(OC)c2)NC(=O)c2ccc(C=C)cc2)cc1.N#Cc1ccccc(I)c1>>\*CNCCCOCCOCCOCCNC(=O)COc1ccc(C(Cc2cc(OC)cc(OC)c2)NC(=O)c2ccc(/C=C/c3ccccc(C#N)c3)cc2)cc1

7822 C=CC(=O)OC.CC(C)(C)OC(=O)n1c(Br)c(CCN2C(=O)c3ccccc3C2=O)c2ccccc21>>COC(=O)/C=C/c1c(CCN2C(=O)c3ccccc3C2=O)c2ccccc2n1C(=O)OC(C)(C)C

7823 C=Cc1ccc(O)c1.CC(C)n1nc(I)c2c(N)ncnc21>>CC(C)n1nc(/C=C/c2ccc(O)c2)c2c(N)ncnc21

7824 C=CC(C)(C)O.O=Cc1ccc(Br)o1>>CC(C)(O)/C=C/c1ccc(C=O)o1

7825 C=CC(=O)OC.CCCCCCCCC(F)(F)[C@H]1CC(c2ccc(Br)cc2)=N[C@@H]1C(=O)OCC>>CCCCCCC(F)(F)[C@H]1CC(c2ccc(/C=C/C(=O)OC)cc2)=N[C@@H]1C(=O)OCC

7826 Brclncc2ncnc12.C=CC(=O)OCC>>CCOC(=O)/C=C/c1cncc2ncnc12

7827 C=CC(=O)OCC.Clc1ccc(Oc2cccc(Br)c2)cc1>>CCOC(=O)/C=C/c1ccc(Oc2ccc(Cl)cc2)c1

7828 C=Cc1ccccc1.C[Si](C)(C)OS(=O)(=O)C(F)(F)F>>C[Si](C)(C)/C=C/c1ccccc1

7829 C=CC(=O)OCC.CC(=O)Nc1ccc(I)cc1>>CCOC(=O)/C=C/c1ccc(NC(C)=O)cc1

7830 Brclnn(C2CCCCO2)c2ccccc12.C=Cc1ccccc1>>C(=C/c1nn(C2CCCCO2)c2ccccc12)\c1ccccc1

7831 C=CC(=O)OC.Oc1cc(-c2ccc(Br)cc2)cc(C23CC4CC(CC(C4)C2)C3)c1O>>COC(=O)/C=C/c1ccc(-c2cc(O)c(O)c(C34CC5CC(CC(C5)C3)C4)c2)cc1

7832 C=CCN1C(=O)c2ccccc2C1=O.Ic1ccccc1>>O=C1c2ccccc2C(=O)N1C/C=C/c1ccccc1

7833 C=CC1CCCCC1.Nc1ccccc1Br>>Nc1ccccc1/C=C/C1CCCCC1

7834 C=C[C@@](C)(/C=C/c1ccc(O)cc1)CCC=C(C)C.Oc1ccc(I)cc1>>CC(C)=CCCC(C)/C=C/c1ccc(O)cc1

7835 C=CC(=O)OC.CN(C)CCCOc1ccc(I)cc1Br>>COC(=O)/C=C/c1ccc(OCCCN(C)C)c(Br)c1

7836 C=CC(=O)OC.C[C@H](Nc1nnc2sc(Br)cc12)c1ccccc1>>COC(=O)/C=C/c1cc2c(N[C@H](C)c3ccccc3)ncnc2s1

7837 C=Cc1cc(C)c(OCOCCOC)c(C)c1.COc1ccc2oc(=O)c(Br)c(C)c2c1>>COCCOCC1c(C)cc(/C=C/c2c(C)c3cc(OC)ccc3oc2=O)cc1C

7838 C=CC(=O)OCC.Ic1cccc2ccccc12>>CCOC(=O)/C=C/c1cccc2ccccc12

7839 C=CC(=O)OCCCC.FC(F)(F)c1ccc(Br)cc1>>CCCCOC(=O)/C=C/c1ccc(C(F)(F)F)cc1

C=CCNC(=O)OC(C)(C)C.CCOC(=O)CC(c1ccc(C)c(CN2CC(C)Cc3cc(Br)ccc3S2(=O)=O)c1)c1ccc(F)  
 7840 cc1F>>CCOC(=O)CC(c1ccc(C)c(CN2CC(C)Cc3cc(/C=C/CNC(=O)OC(C)(C)C)ccc3S2(=O)=O)c1)c1c  
 cc(F)cc1F  
 7841 C=CC(OCC)OCC.CN1c2ccccc2Sc2cc(Br)ccc21>>CCOC(/C=C/c1ccc2c(c1)Sc1ccccc1N2C)OCC  
 7842 C=CC(=O)OCC.Ic1ccc2c(c1)OCCOCCOCCOCCO2>>CCOC(=O)/C=C/c1ccc2c(c1)OCCOCCOCCO  
 7843 C=CC(=O)O.Cc1cccc(S(=O)(=O)N(C)c2ccccc(I)c2)c1>>Cc1cccc(S(=O)(=O)N(C)c2ccccc(/C=C/C(=O)  
 O)c2)c1  
 7844 C=CC(=O)OCC.O=S(=O)(OC1=NCCCC1)C(F)(F)F>>CCOC(=O)/C=C/C1=NCCCC1  
 7845 C=Cc1ccc(CNC(=O)OC(C)(C)C)cc1.Cc1noc(-c2ccccc2)c1I>>Cc1noc(-  
 c2ccccc2)c1/C=C/c1ccc(CNC(=O)OC(C)(C)C)cc1  
 7846 C=CCCC(=O)OCC.COc1ccccc1I>>CCOC(=O)CC/C=C/c1ccccc1OC  
 7847 C=CCCP(=O)(OC)OC.Cc1ccc(I)cc1>>COP(=O)(CC/C=C/c1ccc(C)cc1)OC  
 7848 C=CC(=O)OCC.CC(=O)c1cc2cc(Br)ccc2o1>>CCOC(=O)/C=C/c1ccc2oc(C(C)=O)cc2c1  
 7849 C=Cc1ccc2cc(F)c(F)cc2n1.OC1c2cc(Br)ccc2OCc2ccccc21>>OC1c2cc(/C=C/c3ccc4cc(F)c(F)cc4n3)cc  
 c2OCc2ccccc21  
 7850 C=CC(=O)OC.IC1=C(c2ccccc2)[Se]CC1>>COC(=O)/C=C/C1=C(c2ccccc2)[Se]CC1  
 7851 C=CC(=O)NCc1cccc(C(=O)OC(C)(C)C)c1.COc1ccc2[nH]cc(C3=C(Br)C(=O)NC3=O)c2c1>>COc1cc  
 c2[nH]cc(C3=C(/C=C/C(=O)NCc4ccccc(C(=O)OC(C)(C)C)c4)C(=O)NC3=O)c2c1  
 7852 C=CC(=O)OC.COC(=O)c1ccc2c1oc1ccc(-c3ccc(-c4ccccc(I)c4)n3)cc12>>COC(=O)/C=C/c1cccc(-  
 c2nc(-c3ccc4oc5c(C(=O)OC)ccccc5c4c3)cs2)c1  
 7853 C=CC(=O)OC.COc1ccc(/C=C/c2c(Br)ccc(OC)c2O)cc1OC>>COC(=O)/C=C/c1ccc(OC)c(O)c1/C=C/c  
 1ccc(OC)c(OC)c1  
 7854 C=CC(=O)OCCCC.COc1ccc(I)cc1>>CCCCOC(=O)/C=C/c1ccc(OC)cc1  
 7855 C=CC(=O)OCC.Nc1ccc(C2CC2)cc1Br>>CCOC(=O)/C=C/c1cc(C2CC2)ccc1N  
 7856 C=CN1C(=O)c2ccccc2C1=O.Ic1ccccc1>>O=C1c2ccccc2C(=O)N1/C=C/c1ccccc1  
 7857 C=CC(=O)OCC.COc1cccc(Oc2ccccc(Br)c2)c1>>CCOC(=O)/C=C/c1cccc(Oc2ccccc(OC)c2)c1  
 7858 C=CC[C@H](NC(=O)OC(C)(C)C)C(=O)OC.Ic1ccccc1>>COC(=O)[C@H](C/C=C/c1ccccc1)NC(=O)  
 OC(C)(C)C  
 7859 C=CCc1c(OCCCCCc2cccc(OCCCC(=O)OC)c2CCC(=O)OC)ccc2c1CCCC2=O.Ic1ccccc1>>COC(=  
 O)CCCOc1cccc(CCCCCCOc2ccc3c(c2C/C=C/c2ccccc2)CCCC3=O)c1CCC(=O)OC  
 7860 C=Cc1ccccc1.Clc1ccc2ccccc2c1>>C(=C/c1ccc2ccccc2c1)\c1ccccc1  
 7861 C=CC(=O)OC.C=CC[C@H](O)c1ccc(Br)cc1>>C=CC[C@H](O)c1ccc(/C=C/C(=O)OC)cc1  
 7862 C=Cc1ccccc1.Cc1ccc2ccccc2c1Br>>Cc1ccc2ccccc2c1/C=C/c1ccccc1  
 7863 C=CC(=O)OC.CC(C)NCCCN1c(Sc2cc3c(cc2I)OCO3)nc2c(N)ncnc21>>COC(=O)/C=C/c1cc2c(cc1Sc1  
 nc3c(N)ncnc3n1CCCN(C)C)OCO2  
 7864 C=CC(=O)OC.O=[N+][O-]c1ccc(Br)c([N+](=O)[O-])c1>>COC(=O)/C=C/c1ccc([N+](=O)[O-]  
 )cc1[N+](=O)[O-]  
 7865 C=Cc1ccc([N+](=O)[O-]  
 )cc1.Cc1cc(OCO)c(C)cc1I>>Cc1cc(OCO)c(C)cc1/C=C/c1ccc([N+](=O)[O-])cc1  
 7866 C=Cc1ccccc1O.Nc1cccc(Br)c1>>Nc1cccc(/C=C/c2ccccc2O)c1  
 7867 C=CC(=O)OC.COC(=O)c1ccccc1I>>COC(=O)/C=C/c1ccccc1C(=O)OC  
 7868 C=Cc1ccccc1.CC(C)(C)OC(=O)N[C@H](COc1ccccc(Br)n1)Cc1c[nH]c2ccccc12>>CC(C)(C)OC(=O)N  
 [C@H](COc1ccccc(/C=C/c2ccccc2)n1)Cc1c[nH]c2ccccc12  
 7869 C=CC(=O)OCCOCC.Cc1[nH]c(=O)c2c(N)nn(C)c2c1Br>>CCOCCOC(=O)/C=C/c1c(C)[nH]c(=O)c2c(  
 N)nn(C)c12  
 7870 C=CC(=O)OC.COc1ccc2c(c1)CCN(c1ccccc1C(C)C)C2(C)c1ccc(Br)cc1>>COC(=O)/C=C/c1ccc(C2(C  
 )c3ccc(OC)cc3CCN2c2ccccc2C(C)C)cc1  
 7871 C=CC(=O)N(C)C.COc1ccc(I)cc1>>COc1ccc(/C=C/C(=O)N(C)C)cc1  
 7872 C=CC(=O)OC.CCn1cnc2c(NCc3ccccc(Br)c3)nc(N3CCN(C)CC3)nc21>>CCn1cnc2c(NCc3ccccc(/C=C/  
 C(=O)OC)c3)nc(N3CCN(C)CC3)nc21  
 7873 C=CC(C)(C)O.CCOCOc1ccc(C(C)=O)c(OC)c1I>>CCOCOc1ccc(C(C)=O)c(OC)c1/C=C/C(C)(C)O  
 7874 C=CC(=O)OC.O=c1oc2ccccc2cc1Br>>COC(=O)/C=C/c1cc2ccccc2oc1=O  
 7875 C=C[C@@H](C)[C@H](CCOCc1ccc(OC)cc1)O[Si](C)(C)C(C)(C)C.Ic1ccccc1>>COc1ccc(COCC[C  
 @H](O[Si](C)(C)C(C)(C)C)[C@H](C)/C=C/c2ccccc2)cc1  
 7876 C=CC(O)c1cc(OC)c(OC)c(OC)c1Br.COc1ccc(I)cc1OC>>COc1ccc(/C=C/C(O)c2cc(OC)c(OC)c(OC)c  
 2Br)cc1OC  
 7877 C=CC(=O)OC.CC(=O)Nc1ccccc1I>>COC(=O)/C=C/c1ccccc1NC(C)=O  
 7878 C=Cc1ccccc1Cl.Ic1ccccc1>>Clc1ccccc1/C=C/c1ccccc1  
 7879 C=CC(=O)O.Cc1cccc(S(=O)(=O)Nc2ccc(I)cc2)c1>>Cc1cccc(S(=O)(=O)Nc2ccc(/C=C/C(=O)O)cc2)c1  
 7880 C=CC(=O)OCCCC.O=C1CCC(N2C(=O)c3ccc(Br)cc3C2=O)C(=O)N1>>CCCCOC(=O)/C=C/c1ccc2c  
 (c1)C(=O)N(C1CCC(=O)NC1=O)C2=O

|      |                                                                                                                                                                                                                                                                     |
|------|---------------------------------------------------------------------------------------------------------------------------------------------------------------------------------------------------------------------------------------------------------------------|
| 7881 | C=CC(=O)OC(C)(C).CC.CC(=O)c1cccc1I>>CC(=O)c1cccc1/C=C/(=O)OC(C)(C)C<br>C=CCCCCN1C(=O)c2ccccc2C1=O.FC(F)(F)c1ccc(Br)c2cccc(C(F)(F)F)c2n1>>O=C1c2ccccc2C(=O)N                                                                                                         |
| 7882 | 1CCCC/C=C/c1cc(C(F)(F)F)nc2c(C(F)(F)F)cccc12<br>C=CCN1C(=O)c2ccccc2C1=O.O=C1NCCCc2cc(Br)ccc21>>O=C1NCCCc2cc(/C=C/CN3C(=O)c4cccc4                                                                                                                                    |
| 7883 | C3=O)ccc21<br>C=CC(=O)OC.CC[C@ @H]1C[C@H](N(Cc2cc(C(F)(F)F)cc(C(F)(F)F)c2)c2ncc(Br)cn2)CN1C(=O)O                                                                                                                                                                    |
| 7884 | C(C)(C)C>>CC[C@ @H]1C[C@H](N(Cc2cc(C(F)(F)F)cc(C(F)(F)F)c2)c2ncc(/C=C/C(=O)OC)cn2)CN<br>1C(=O)OC(C)(C)C                                                                                                                                                             |
| 7885 | C=CC(=O)OC(C)(C)C.C=C<I>>C=C/C=C/C(=O)OC(C)(C)C                                                                                                                                                                                                                     |
| 7886 | C=Cc1cccc1.Ic1cccc1>>C(=C/c1cccc1)\c1cccc1                                                                                                                                                                                                                          |
| 7887 | C=CC(=O)OC.CCc1cccc(CC)c1Br>>CCc1cccc(CC)c1/C=C/C(=O)OC                                                                                                                                                                                                             |
| 7888 | C=CC(=O)OCC.CC(C)(C)[Si](C)(C)OCc1cc(Br)cen1>>CCOC(=O)/C=C/c1ccnc(CO[Si](C)(C)C(C)(C)<br>)C)c1                                                                                                                                                                      |
| 7889 | C=CS(=O)c1cccc1.Ic1cccc1>>O=S(/C=C/c1cccc1)c1cccc1<br>C=Cc1nc2c(N)nenc2n1[C@ @H]1O[C@H](CO[Si](C)(C)C(C)(C)C)[C@ @H](O[Si](C)(C)C(C)(C)C)[                                                                                                                          |
| 7890 | C@H]1O[Si](C)(C)C(C)(C)C.CC(=O)c1ccc(Br)cc1>>CC(=O)c1ccc(/C=C/c2nc3c(N)nenc3n2[C@ @H]<br> 2O[C@H](CO[Si](C)(C)C(C)(C)C)[C@ @H](O[Si](C)(C)C(C)(C)C)[C@H]2O[Si](C)(C)C(C)(C)C)cc<br>C=Cc1ccc(/C=C/c2ccc(N(C)C)cc2)cc1.Cc1cc2c(-c3ccc(I)cc3S(=O)(=O)O)c3cc(C)c(=O)cc- |
| 7891 | 3oc2cc1O>>Cc1cc2c(-<br>c3ccc(/C=C/c4ccc(/C=C/c5ccc(N(C)C)cc5)cc4)cc3S(=O)(=O)O)c3cc(C)c(=O)cc-3oc2cc1O                                                                                                                                                              |
| 7892 | C=CC(=O)OCC.Cc1cccc(C)c1Cl>>CCOC(=O)/C=C/c1c(C)cccc1C<br>C=Cc1ccc([N+](=O)[O-]                                                                                                                                                                                      |
| 7893 | ]cc1.CCOc1ccc(/N=N/c2ccc(Br)cc2O)cc1>>CCOc1ccc(/N=N/c2ccc(/C=C/c3ccc([N+](=O)[O-]<br>])cc3)cc2O)cc1                                                                                                                                                                 |
| 7894 | C=CCN1C(=O)c2ccccc2C1=O.CC(C)(C)c1ccc(Br)cc1>>CC(C)(C)c1ccc(/C=C/CN2C(=O)c3ccccc3C2<br>=O)cc1                                                                                                                                                                       |
| 7895 | C=CC(=O)OC.Cn1nnc2cc(Br)ccc21>>COC(=O)/C=C/c1ccc2c(c1)nnn2C<br>C=Cc1ccc2[nH]c([C@ @H]3CCCN3C(=O)OC(C)(C)C)nc2c1.CC(C)(C)OC(=O)N1CCC[C@H]1c1nc(-                                                                                                                     |
| 7896 | c2ccc(Br)s2)c[nH]1>>CC(C)(C)OC(=O)N1CCC[C@H]1c1nc(-<br>c2ccc(/C=C/c3ccc4[nH]c( C@ @H]5CCCN5C(=O)OC(C)(C)C)nc4c3)s2)c[nH]1                                                                                                                                           |
| 7897 | C=Cc1cenncl.O=[N+]([O-])c1ccc(Br)cc1>>O=[N+]([O-])c1ccc(/C=C/c2cenncc2)cc1                                                                                                                                                                                          |
| 7898 | C=CC(=O)OC.CC(C)(C)OC(=O)CCc1ccc(CN(C(=O)C2CCCCC2)c2ccccc(Br)c2)cc1>>COC(=O)/C=C/<br>c1cccc(N(Cc2ccc(CCC(=O)OC(C)(C)C)cc2)C(=O)C2CCCCC2)c1                                                                                                                          |
| 7899 | C=CC(=O)OC.O=Cc1sccl1Br>>COC(=O)/C=C/c1ccsc1C=O                                                                                                                                                                                                                     |
| 7900 | C=CCc1cccc1.COC(=O)c1ccc(I)cc1Nc1ccc(F)cc1>>COC(=O)c1ccc(/C=C/Cc2ccccc2)cc1Nc1ccc(F)c                                                                                                                                                                               |
| 7901 | C=CCP(=O)(OCC)OCC.O=C(O)c1cccc(I)c1>>CCOP(=O)(C/C=C/c1cccc(C(=O)O)c1)OCC<br>C=CCn1c(-                                                                                                                                                                               |
| 7902 | c2ccc(OC)cc2OC)nc2ccccc2c1=O.O=C(CN1C(=O)COc2ccccc21)c1ccc(Br)cc1>>COc1ccc(-<br>C=CC(C)=O.Cn1c(I)enclSc1cccc1>>CC(=O)/C=C/c1cnc(Sc2ccccc2)n1C                                                                                                                       |
| 7903 | C=Cc1cccc1.COC(=O)C(Cc1cccc1I)C(=O)OC>>COC(=O)C(Cc1cccc1/C=C/c1cccc1)C(=O)OC                                                                                                                                                                                        |
| 7904 | C=CC(=O)OCC.Nc1cennclBr>>CCOC(=O)/C=C/c1cenncl1N                                                                                                                                                                                                                    |
| 7905 | C=CC(=O)O.FC(F)(F)c1ccc(I)cc1>>O=C(O)/C=C/c1ccc(C(F)(F)F)cc1                                                                                                                                                                                                        |
| 7906 | C=CC(=O)OC(C)(C)C.CS(=O)(=O)c1ccc(Br)cc1>>CC(C)(C)OC(=O)/C=C/c1ccc(S(C)(=O)=O)cc1                                                                                                                                                                                   |
| 7907 | C=CC(=O)N1N=Cc2ccccc2C1C1CCCCC1.COc1cc(Cc2enc(N)ne2N)cc(I)c1OC>>COc1cc(Cc2enc(N)                                                                                                                                                                                    |
| 7908 | ne2N)cc(/C=C/C(=O)N2N=Cc3ccccc3C2C2CCCCC2)c1OC<br>C=CC(=O)OCCSc1cccc1.Cc1ccc(Br)cc1>>Cc1ccc(/C=C/C(=O)OCCSc2ccccc2)cc1                                                                                                                                              |
| 7909 | C=Cc1cccc1OC.Nc1ccc(Br)cc1>>COe1cccc1/C=C/c1ccc(N)cc1                                                                                                                                                                                                               |
| 7910 | C=CCC(=O)O.C[C@ @H](O)c1ccc2ccc(Br)cc2c1>>C[C@ @H](O)c1ccc2ccc(/C=C/CC(=O)O)cc2c1                                                                                                                                                                                   |
| 7911 | BrC12CC3CC(C(C3)C1)C2.C=Cc1ccc(OC)cc1>>COe1ccc(/C=C/C23CC4CC(CC(C4)C2)C3)cc1                                                                                                                                                                                        |
| 7912 | C=CC(=O)OCCCC.COc1ccc2ccccc2c1Br>>CCCCOC(=O)/C=C/c1c(OC)ccc2ccccc12                                                                                                                                                                                                 |
| 7913 | C=CC(=O)OC(C)(C)C.Cc1cc(Br)ccc1-c1noc(-<br>c2ccc(OC(C)C)c(C(F)(F)F)c2)n1>>Cc1cc(/C=C/C(=O)OC(C)(C)C)ccc1-c1noc(-                                                                                                                                                    |
| 7914 | c2ccc(OC(C)C)c(C(F)(F)F)c2)n1<br>C=CCU[C@ @H]1CC(=O)U[C@H](U)C/U=C/U=C/U/[C@H](U[Si](C)(C)U(C)(C)U[U@H](C)U[U@H]<br>(CC(OC)OC)[C@H](O[C@ @H]2O[C@H](C)[C@ @H](O[C@H]3C[C@ @])(C)(O)[C@ @H](OC(=O)                                                                   |
| 7915 | CC)[C@H](C)O3)[C@H](N(C)C)[C@H]2OC(C)=O)[C@H]1OC.COc1ccc(I)cc1>>CCC(=O)O[C@H]<br>1[C@H](C)O[C@ @H](O[C@H]2[C@H](N(C)C)[C@ @H](OC(C)=O)[C@H](O[C@ @H]3[C@ @H](<br>OC)[C@H](OC/C=C/c4ccc(OC)cc4)CC(=O)O[C@H](C)C/C=C/C=C/[C@H](O[Si](C)(C)C(C)(C)C)[                  |
| 7916 | r@H]1(r)r1r@ @H13C(r)r1r1r1r@ @H12r1r1r@ @H11(r)r1r<br>C=Cc1cccc2ccccc12.IC1CCCCC1>>C=(C/C1CCCCC1)c1cccc2ccccc12                                                                                                                                                    |
| 7917 | C=CC#N.COC(=O)c1sc2ccccc2c1Br>>COC(=O)c1sc2ccccc2c1/C=C/C#N                                                                                                                                                                                                         |

7918 C=Cc1cccc1.C[Si](C)(C)I>>C[Si](C)(C)/C=C/c1cccc1  
 7919 C=CC(=O)OCCOc1ccc2c(C)cc(=O)oc2c1.COC(=O)c1ccc(Br)cc1>>COC(=O)c1ccc(/C=C/C(=O)OCC  
 7920 Oc2ccc3c(C)cc(=O)oc3c2)cc1  
 7921 C=Cc1ccc(Cl)cc1.CC(=O)NS(=O)(=O)c1ccc(Br)cc1>>CC(=O)NS(=O)(=O)c1ccc(/C=C/c2ccc(Cl)cc2)  
 7922 C=CC(=O)OC.CCn1cnc2c(NCc3cccc(Br)c3)nc(N3CCC(C)CC3)nc21>>CCn1cnc2c(NCc3cccc(/C=C/C  
 7923 (=O)OC)c3)nc(N3CCC(C)CC3)nc21  
 7924 Br1cccc2cccc12.C=CS(=O)c1cccc1>>O=S(/C=C/c1cccc2cccc12)c1cccc1  
 7925 C=CP(=O)(OCC)OCC.CCOC(=O)CNc1cccc1Br>>CCOC(=O)CNc1cccc1/C=C/P(=O)(OCC)OCC  
 7926 C=CCN1C(=O)c2cccc2C1=O.CC(=O)c1cccc(Br)c1>>CC(=O)c1cccc(/C=C/CN2C(=O)c3cccc3C2=  
 7927 C=CC(=O)OCC.CN(C[C@H](O)CNC(C)(C)CC1Cc2cccc2C1)S(=O)(=O)c1cc(Br)cc(C(F)(F)F)c1>>  
 7928 CCOC(=O)/C=C/c1cc(C(F)(F)F)cc(S(=O)(=O)N(C)C[C@H](O)CNC(C)(C)CC2Cc3cccc3C2)c1  
 7929 C=CC(CO)N1C(=O)c2cccc2C1=O.CC(=O)c1ccc(Br)cc1>>CC(=O)c1ccc(/C=C/C(CO)N2C(=O)c3ccc  
 7930 cc3C2=O)cc1  
 7931 C=CC(=O)OC.Nc1cnc2c1c(I)cn2[C@H]1C[C@H](O)[C@@H](CO)O1>>COC(=O)/C=C/c1cn([C@  
 7932 H]2C[C@H](O)[C@@H](CO)O2)c2nnc(N)c12  
 7933 C=CC(OCC)OCC.O=Cc1cccc(Br)c1>>CCOC(/C=C/c1cccc(C=O)c1)OCC  
 7934 C=Cc1cccc2cccc12.COC(=O)C(Cc1cccc1I)C(=O)OC>>COC(=O)C(Cc1cccc1/C=C/c1cccc2cccc1  
 7935 2)C(=O)OC  
 7936 C=Cc1ccc2cccc2c1.Clc1cccc1>>C(=C/c1ccc2cccc2c1)\c1cccc1  
 7937 C=CC(=O)OC(C)(C)C.Cc1ccc(Br)cc1>>Cc1ccc(/C=C/C(=O)OC(C)(C)C)cc1  
 7938 C=CC(N)=O.COc1cc(Br)cc(C)c1N>>COc1cc(/C=C/C(N)=O)cc(C)c1N  
 7939 Br/C(=C/[Te]c1cccc1)c1cccc1.C=CCCC>>CCCC/C=C/C(=C/[Te]c1cccc1)c1cccc1  
 7940 C=CC(=O)OCC.Cc1nc(-n2c(C)ccc2C)cc(NC2CC2)c1Br>>CCOC(=O)/C=C/c1c(NC2CC2)cc(-  
 7941 n2c(C)ccc2C)nc1C  
 7942 C=CC(=O)NCO.C[C@]12C[C@@]34C=C(Sc5cccc(I)c5)C(=O)[C@@](C)(CCC(=O)Nc5c(O)ccc(C(=  
 7943 O)c5O)[C@@H]3[C@H](C[C@H]1C4)O2>>C[C@]12C[C@@]34C=C(Sc5cccc(/C=C/C(=O)NC  
 7944 O)c5)C(=O)[C@@](C)(CCC(=O)Nc5c(O)ccc(C(=O)O)c5O)[C@@H]3[C@H](C[C@H]1C4)O2  
 7945 C=CC(=O)OCC.CCCCN(CCC)C1ccc(Br)cc1>>CCCN(CCC)C1ccc(/C=C/C(=O)OCC)cc1  
 7946 C=Cc1ccc(OC)c(OC)c1.COc1cc(Br)c(C=O)cc1OC>>COc1ccc(/C=C/c2cc(OC)c(OC)cc2C=O)cc1OC  
 7947 C=CC(=O)OCC.CC1(C)CC(=C(c2ccc(O)cc2)c2ccc(Br)cc2)CC(C)(C)C1>>CCOC(=O)/C=C/c1ccc(C(  
 7948 =C2CC(C)(C)CC(C)(C)C2)c2ccc(O)cc2)cc1  
 7949 C=CP(=O)(OCC)OCC.CC(C)(C)OC(=O)Nc1cccc1Br>>CCOP(=O)(/C=C/c1cccc1NC(=O)OC(C)(C)  
 7950 C)OCC  
 7951 C=SCC.N#Cc1ccc(Br)cc1>>CCS/C=C/c1ccc(C#N)cc1  
 7952 Br1ccsc1.C=CC(=O)OC(C)(C)C>>CC(C)(C)OC(=O)/C=C/c1ccsc1  
 7953 C=CC#N.IC(CC[Se]c1cccc1)=C(c1cccc1)c1cccc1>>N#C/C=C/C(CC[Se]c1cccc1)=C(c1cccc1)c1  
 7954 cccc1  
 7955 C=Cc1ccc(N)cc1.CN(C(=O)c1cccc1)c1ccc2c(c1)[nH]c(=NC(=O)c1ccc(Br)s1)n2CCC(N)=O>>CN(C(  
 7956 =O)c1cccc1)c1ccc2c(c1)[nH]c(=NC(=O)c1ccc(/C=C/c3ccc(N)cc3)s1)n2CCC(N)=O  
 7957 C=CCP(=O)(OCC)OCC.Ic1cccc1>>CCOP(=O)(C/C=C/c1cccc1)OCC  
 7958 C=CC(=O)OCC.O=Cc1cc(Cl)ccc1Br>>CCOC(=O)/C=C/c1ccc(Cl)cc1C=O  
 7959 C=CC(=O)O.CCc1nc2c(cnn2CC)c(NC2CCOCC2)c1I>>CCc1nc2c(cnn2CC)c(NC2CCOCC2)c1/C=C/  
 7960 C(=O)O  
 7961 C=Cc1cncnc1.CCCCCCOc1ccc(Br)c(F)c1>>CCCCCCOc1ccc(/C=C/c2cncnc2)c(F)c1  
 7962 Br1ccc(I)cc1.C=CC(=O)OC1CCCCC1>>O=C/C=C/c1ccc(Br)cc1)OC1CCCCC1  
 7963 C=COCCCC.Cc1ccc2c(Br)cc(=O)oc2c1>>CCCCO/C=C/c1cc(=O)oc2cc(C)ccc12  
 7964 C=Cc1ccc(CC(NC(=O)c2cccc2)C(=O)OCC)cc1.CCOC(=O)C(F)Br>>CCOC(=O)C(F)/C=C/c1ccc(CC  
 7965 (NC(=O)c2cccc2)C(=O)OCC)cc1  
 7966 C=Cc1ccc(OC)c(O[Si](C)(C)C(C)(C)C)c1.COc1cc(I)cc(OC)c1OC>>COc1ccc(/C=C/c2cc(OC)c(OC)c(  
 7967 OC)c2)cc1O[Si](C)(C)C(C)(C)C  
 7968 C=CC(=O)OCC.FC(F)(F)c1ccc(I)c(Cl)c1>>CCOC(=O)/C=C/c1ccc(C(F)(F)F)cc1Cl  
 7969 C=CC(=O)OC.Cc1cc(C)n2nc(C)c(I)c2n1>>COC(=O)/C=C/c1c(C)nn2c(C)cc(C)nc12  
 7970 C=Cc1ccc(C(C)(C)C)cc1.CC(=O)c1ccc(Br)cc1>>CC(=O)c1ccc(/C=C/c2ccc(C(C)(C)C)cc2)cc1  
 7971 Br1cncnc2cccc12.C=CP(=O)(OCC)OCC>>CCOP(=O)(/C=C/c1cncnc2cccc12)OCC  
 7972 Br1cccc(N2CCCC2)n1.C=Cc1cccc1>>C(=C/c1cccc(N2CCCC2)n1)\c1cccc1  
 7973 C=CC(=O)OC(C)(C)C.O=S(=O)(c1ccc(Cl)cc1)n1ccc2cc(Br)nc21>>CC(C)(C)OC(=O)/C=C/c1cnc2c(  
 7974 ccn2S(=O)(=O)c2ccc(Cl)cc2)c1  
 7975 C=CC[C@H](NC(=O)OCc1cccc1)C(=O)OC(C)(C)C.Clc1ccc(I)cc1>>CC(C)(C)OC(=O)[C@H](C/C=  
 7976 C/c1ccc(Cl)cc1)NC(=O)OCc1cccc1  
 7977 C=C[C@](C)(O)CO.Clc1cccc1Br>>C[C@](O)(/C=C/c1cccc1Cl)CO  
 7978 C=CC(=O)OCC.Cc1c(Br)ccc2c1nnn2C>>CCOC(=O)/C=C/c1ccc2c(nnn2C)c1C

7961 C=Cc1cc(OC)cc(OC)c1.CC(C)(Oc1ccc(C(=O)c2ccc(Cl)cc2)cc1)C(=O)Oc1ccc(I)cc1>>COc1cc(/C=C/c2ccc(OC(=O)C(C)C)Oc3ccc(C(=O)c4ccc(Cl)cc4)cc3)cc2)cc(OC)c1

7962 C=CC(C)=O.[13CH3]C1=C(OS(=O)(=O)C(F)(F)F)C([13CH3])([13CH3])CCC1>>CC(=O)/C=C/C1=C([13CH3])CCCC1([13CH3])[13CH3]

7963 C=CC(=O)OC.CC(C)(C)OC(=O)N(C1CCN(CC(O)COc2ccc(Br)cc2)CC1)[C@@H]1C[C@H]1c1cccc1>>COC(=O)/C=C/c1ccc(OCC(C)C)CN2CCC(N(C(=O)OC(C)C)[C@@H]3C[C@H]3c3cccc3)CC2)

7964 Br1cccs1.C=CCCCCCCCC>>CCCCCCCC/C=C/c1cccs1

7965 C=CN1C(=O)c2ccccc2C1=O.Cc1ccc(S(=O)(=O)n2cc(I)c3c(Br)cccc32)cc1>>Cc1ccc(S(=O)(=O)n2cc(/C=C/N3C(=O)c4ccccc4C3=O)c3c(Br)cccc32)cc1

7966 C=CCC(=O)OC.COC(=O)c1c(Br)ccc2[nH]ccc12>>COC(=O)C/C=C/c1ccc2[nH]ccc2c1C(=O)OC

7967 C=CC(=O)OCCCC.Fc1cc(Br)ccc1OC(F)(F)F>>CCCCOC(=O)/C=C/c1ccc(OC(F)(F)F)c(F)c1

7968 C=CC(=O)OCCCC.O=[N+](=[O-])c1ccc(I)cc1>>CCCCOC(=O)/C=C/c1ccc([N+](=O)[O-])cc1

7969 C=CC(O)C(F)(F)C(F)(F)F.Ic1ccccc1>>OC(/C=C/c1ccccc1)C(F)(F)C(F)(F)F

7970 C=CC(=O)OCC.COC(=O)c1cc(Br)c2ccc(C)nc2c1OC>>CCOC(=O)/C=C/c1cc(C(=O)OC)c(OC)c2nc(C)ccc12

7971 C=CC(=O)OC.Oc1ccc(I)cc1>>COC(=O)/C=C/c1ccc(O)cc1

7972 C=CCC(C)O.Cc1ccc(Br)cc1[N+](=O)[O-]>>Cc1ccc(/C=C/CC(C)O)cc1[N+](=O)[O-]

7973 C=CC(=O)O.O=[N+](=[O-])c1ccccc1Br>>O=C(O)/C=C/c1ccccc1[N+](=O)[O-]

7974 C=CC(=O)OC.COc1cc(Br)c(C=O)c(OC)c1>>COC(=O)/C=C/c1cc(OC)cc(OC)c1C=O

7975 C=CC(=O)N(C)Cc1oc2ccccc2c1C.O=C1NCCc2cc(Br)cnc2N1>>Cc1c(CN(C)C(=O)/C=C/c2cnc3c(c2)CNCC(=O)N3)oc2ccccc12

7976 Br1ccc(NCc2cncnc2)cc1.C=CC(=O)OC(C)(C)C>>CC(C)(C)OC(=O)/C=C/c1ccc(NCc2cncnc2)cc1

7977 C=CC[C@H](NC(=O)OCc1ccccc1)C(=O)OC(C)(C)C.COc1ccc(I)cc1>>COc1ccc(/C=C/C[C@H](NC(=O)OCc2ccccc2)C(=O)OC(C)(C)C)cc1

7978 C=Cc1ccccc1.CCN1C[C@]2(OC(=O)c3cc(I)ccc3NC(C)=O)CC[C@H](OC)[C@@]34[C@@@H]2C[C@H]([C@]34)[C@]13)[C@@]1(O)C[C@H](OC)[C@H]2C[C@]4[C@@]1(O)[C@H]2OC>>CCN1C[C@]2(OC(=O)c3cc(/C=C/c4ccccc4)ccc3NC(C)=O)CC[C@H](OC)[C@@]34[C@@@H]2C[C@H]([C@]34)[C@]13)[C@@]1(O)C[C@H](OC)[C@H]2C[C@]4[C@@]1(O)[C@H]2OC

7979 C=CC(=O)OC(C)(C)C.COc1ccc(Br)c(OC)c1>>COc1ccc(/C=C/C(=O)OC(C)C)c(OC)c1

7980 C=Cc1ccc(OC(C)(C)C)cc1.FC(F)(F)C(F)(F)C(F)(F)Br>>CC(C)(C)Oc1ccc(/C=C/C(F)(F)C(F)(F)C(F)(F)F)cc1

7981 C=CC(C)=O.CN1c2ccccc2C(C)(C)C12C=Cc1cc(I)ccc1O2>>CC(=O)/C=C/c1ccc2c(c1)C=CC1(O2)N(C)c2ccccc2C1(C)C

7982 C=Cc1ccc(C)nc1.COC(=O)c1cc2ccc(=O)oc2cc1OS(=O)(=O)C(F)(F)F>>COC(=O)c1cc2ccc(=O)oc2cc1/C=C/c1ccc(C)nc1

7983 C=CC(=O)N(C)C.Cc1cc(Br)cc(C)c1O>>Cc1cc(/C=C/C(=O)N(C)C)cc(C)c1O

7984 C=Cc1ccc(O)cc1.Oc1cc(O)cc(I)c1>>Oc1ccc(/C=C/c2cc(O)cc(O)c2)cc1

7985 C=CC(=O)OC(C)(C)C.COc1ccc(CNc2c(C)cc(C)cc2I)cc1>>COc1ccc(CNc2c(C)cc(C)cc2/C=C/C(=O)OC(C)(C)C)cc1

7986 C=CC(=O)OC.Cc1cc(C)cc(I)c1>>COC(=O)/C=C/c1cc(C)cc(C)c1

7987 C=C[C@H](CC(=O)OC)[C@@H](COC(C)=O)NC(=O)OC(C)(C)C.Ic1ccccc1>>COC(=O)C[C@@H](/C=C/c1ccccc1)[C@@H](COC(C)=O)NC(=O)OC(C)(C)C

7988 C=CC(=O)N1N=Cc2ccccc2C1C=C(C)C.CCOc1cc(Cc2cnc(N)nc2N)cc(I)c1OCC>>CCOc1cc(Cc2cnc(N)nc2N)cc(/C=C/C(=O)N2N=Cc3ccccc3C2C=C(C)C)c1OCC

7989 C=CC(=O)OCC.Cc1cncnc1Br>>CCOC(=O)/C=C/c1cncnc1C

7990 C=CC(=O)O.CCOC(=O)CCc1ccccc1-c1cccc(I)c1>>CCOC(=O)CCc1ccccc1-c1cccc(/C=C/C(=O)O)c1

7991 C=C[C@H]1COC(C)(C)N1C(=O)OCc1ccccc1.CCCCCn1cc(Br)c2c([N+](=O)[O-])ccccc21>>CCCCCCn1cc(/C=C/[C@H]2COC(C)(C)N2C(=O)OCc2ccccc2)c2c([N+](=O)[O-])ccccc21

7992 C=CC(=O)OC.O=C1c2ccc(OS(=O)(=O)C(F)(F)F)cc2C(=O)N1Cc1ccccc1>>COC(=O)/C=C/c1ccc2c(c1)C(=O)N(Cc1ccccc1)C2=O

7993 C=CC(=O)OCC.O=Cc1ccc(Br)nc1>>CCOC(=O)/C=C/c1ccc(C=O)cn1

7994 C=Cc1ccccc1.O=C(c1ccc(Br)cc1)N1C(=O)c2ccccc2S1(=O)=O>>O=C(c1ccc(/C=C/c2ccccc2)cc1)N1C(=O)c2ccccc2S1(=O)=O

7995 C=CC1(O)CCC2(CC1)OCCO2.CCOC(=O)c1cccc(I)c1>>CCOC(=O)c1cccc(/C=C/C2(O)CCC3(CC2)OCCO3)c1

7996 Br1enc2ccccc2c1.C=CCO/N=C1/[C@H](C)[C@H]2OC(=O)O[C@]2(C)[C@@H](CC)OC(=O)[C@H](C)[C@@H](O)[C@H](C)[C@@H](O[C@H]2O[C@H](C)C[C@H](N(C)C)[C@H]2OC(C)=O)[C@](C)(OC)C[C@H]1C>>CC[C@H]1OC(=O)[C@H](C)[C@@H](O)[C@H](C)[C@@H](O[C@H]2O[C@H](C)C[C@H](N(C)C)[C@H]2OC(C)=O)[C@](C)(OC)C[C@@H](C)/C=N\OC/C=C/c2cnc3ccccc3c2)[C@H]1(C)[C@H]2OC(=O)O[C@]112C

7997 C=CC(CC)OC1CCCCO1.COC(=O)CCCCCCCC1=C(I)CCC1=O>>CCC(/C=C/C1=C(CCCCCCCC(=O)OC)C(=O)CC1)OC1CCCCO1

7998 C=Cc1ccc(N(c2cccc2)c2cccc2)cc1.CCCCCCN1c2ccc(Br)cc2Sc2cc(C=O)ccc21>>CCCCCN1c2ccc(C=O)cc2Sc2cc(/C=C/c3ccc(N(c4cccc4)c4cccc4)cc3)ccc21

7999 C=CC(=O)O.O=[N+][O-]c1cccc1Cl>>O=C(O)/C=C/c1cccc1[N+](=O)[O-]

8000 C=CCN(C)C(=O)OC(C)(C)C.CCSc1nccc(Br)c1>>CCSc1nccc(/C=C/CCN(C)C(=O)OC(C)(C)C)c1

8001 C=Cc1cc(OC)c(OC)c(OC)c1-c1cccc1.Cc1ccc(I)cc1>>COc1cc(/C=C/c2ccc(C)cc2)c(-c2cccc2)c(OC)c1OC

8002 C=Cc1ccc(C(C)(C)C)cc1.COC(=O)/C=C/c1cccc(N(Cc2ccc(Br)cc2)C(=O)C2CCCC2)c1>>COC(=O)/C=C/c1cccc(N(Cc2ccc(/C=C/c3ccc(C(C)(C)C)cc3)cc2)C(=O)C2CCCC2)c1

8003 C=CC#N.CCOC(=O)/C=C/c1ccc(Br)cc1>>CCOC(=O)/C=C/c1ccc(/C=C/C#N)cc1

8004 C=CC(=O)OC(C)(C)C.Oc1ccc(Cl)cc1>>CC(C)(C)OC(=O)/C=C/c1ccc(O)cc1

8005 C=CC(N)=O.CCOC(=O)/C=C/c1cc(Br)cc(C(O)c2ccc(F)cc2)c1>>CCOC(=O)/C=C/c1cc(/C=C/C(N)=O)cc(C(O)c2ccc(F)cc2)c1

8006 C=CC(=O)OC.O=c1oc2cc(Br)cn2n1CCc1cccc1>>COC(=O)/C=C/c1cnc2c(c1)oc(=O)n2CCc1cccc1

8007 C=Cc1ccc([Si](C)(OC)OC)cc1.CO[Si](C)(OC)c1ccc(Br)cc1>>CO[Si](C)(OC)c1ccc(/C=C/c2ccc([Si](C)(OC)OC)cc2)cc1

8008 C=Cc1cccc1.CCOC(=O)C(F)(F)I>>CCOC(=O)C(F)(F)/C=C/c1cccc1

8009 C=CC(=O)OC.O=Cc1cccc(Br)n1>>COC(=O)/C=C/c1cccc(C=O)n1

8010 C=Cc1ccc(Cl)cc1.C=Cc1cccc1>>C=Cc1ccc(/C=C/c2cccc2)cc1

8011 C=CN1CCCC1=O.CCCCC(Br)C(F)(F)F>>CCCCC(/C=C/N1CCCC1=O)C(F)(F)F

8012 Br1cccc1.C=Cc1cccc(C)c1>>Cc1cccc(/C=C/c2cccc2)c1

8013 Br1cnc2cnc12.C=CC(=O)OCC>>CCOC(=O)/C=C/c1cnc2cnc12

8014 C=Cc1ccc2c(c1)c1cccc1n2CCCCCCCC.N#CC(=C(c1cccc1)c1cccc1)c1ccc(Br)cc1>>CCCCCCCCn1c2cccc2c2cc(/C=C/c3ccc(C(C#N)=C(c4cccc4)c4cccc4)cc3)ccc21

8015 C=CC(=O)OCC.COc1ccc(COC(=O)Cc2c(-c3cccc(Br)c3)c3cc(C)c(Cl)cc3oc2=O)cc1>>CCOC(=O)/C=C/c1cccc(-c2c(CC(=O)OCc3ccc(OC)cc3)c(=O)oc3cc(Cl)c(C)cc23)c1

8016 C(=O)OC(C)(C)C.O=C1Nc2ccc(Br)cc2C(=O)N2C[C@H](O)C[C@H]12>>CC(C)(C)OC(=O)/C=C/c1ccc2c(c1)C(=O)N1C[C@H](O)C[C@H]1C(=O)N2

8017 C=CC(=O)OC.Clc1nccc(Br)c1>>COC(=O)/C=C/c1nccc(Cl)c1

8018 Br1cccs1.C=CCN(C(=O)OC(C)(C)C(=O)OC(C)(C)C>>CC(C)(C)OC(=O)N(C/C=C/c1cccs1)C(=O)OC(C)(C)C

8019 C=CC(=O)OCCCC.Cn1cc(I)c(=O)c2cccc21>>CCCCOC(=O)/C=C/c1cn(C)c2cccc2c1=O

8020 C=CN1C(=O)CCC1=O.FC(F)(F)Oc1ccc(Br)cc1>>O=C1CCC(=O)N1/C=C/c1ccc(OC(F)(F)F)cc1

8021 C=CC(=O)O.COC(=O)CN(CC(=O)OC)c1ccc(I)cc1>>COC(=O)CN(CC(=O)OC)c1ccc(/C=C/C(=O)O)C=CC(=O)OCc1cccc1.CCOC(=O)/C=C/c1ccc2ccc(Br)cc2c1>>CCOC(=O)/C=C/c1ccc2ccc(/C=C/C(=O)OCc3cccc3)cc2c1

8022 C=CC(=O)NC(C)C.C[C@]12C[C@@]34C=C(Sc5cccc(I)c5)C(=O)[C@@](C)(CCC(=O)Nc5c(O)ccc(C(=O)O)c5O)[C@@H]3[C@H](C[C@@H]1C4)O2>>CC(C)NC(=O)/C=C/c1cccc(SC2=C[C@]34C[C@H]5C[C@H](O)[C@@]5(C)C3)[C@H]4[C@](C)(CCC(=O)Nc3c(O)ccc(C(=O)O)c3O)C2=O)c1

8023 C=CC(=O)OC.Cc1cccc(I)c1>>COC(=O)/C=C/c1cccc(C)c1

8024 C=CC(=O)OC.Cc1c(Oc2cc(F)cc(C#N)c2)ccc(S(=O)(=O)C(F)(F)F)c1Br>>COC(=O)/C=C/c1c(S(=O)(=O)C(F)(F)F)ccc(Oc2cc(F)cc(C#N)c2)c1C

8025 C=CC(=O)OCC.CC(C)(CC1Cc2cccc2C1)NC[C@H](O)COc1cc(Br)ccc1F>>CCOC(=O)/C=C/c1ccc(c(F)c(OC[C@H](O)CNC(C)(C)CC2Cc3cccc3C2)c1

8026 C=CC(=O)OC.CCN(CC)c1cccc(Br)c1>>CCN(CC)c1cccc(/C=C/C(=O)OC)c1

8027 C=CC(=O)OC.CC(C)(C)OC(=O)N1CCC2(CC1)CC(=O)c1cc(Br)cc(F)c1O2>>COC(=O)/C=C/c1cc(F)c2c(c1)C(=O)CC1(CCN(C(=O)OC(C)(C)C)CC1)O2

8028 C=CC(=O)OC.CCCCc1nc2c(N)nc3cc(Br)ccc3c2n1CC(C)C>>CCCCc1nc2c(N)nc3cc(/C=C/C(=O)OC)ccc3c2n1CC(C)C

8029 C=Cc1cncc1.CCCCOc1ccc2c(c1)cc(C#N)c1ccc(Br)cc12>>CCCCOc1ccc2c(c1)cc(C#N)c1ccc(/C=C/c3cncc3)cc12

8030 C=CC(=O)N1CCOCC1.O=c1n(Cc2nc3cc(Cl)ccn3c2I)c2cnc2n1C1CC1>>O=C(/C=C/c1c(Cn2c(=O)n(C3CC3)c3cncc32)nc2cc(Cl)ccn12)N1CCOCC1

8031 C=CC(=O)OC(C)(C)C.O=[N+][O-]c1ccc(Br)cc1>>CC(C)(C)OC(=O)/C=C/c1ccc([N+](=O)[O-])cc1

8032 C=CC(=O)OC.CCN(CC)c1ccc2cc(Br)ccc2c1>>CCN(CC)c1ccc2cc(/C=C/C(=O)OC)ccc2c1

8033 C=Cc1cccc1.N#CCCCCCCCBr>>N#CCCCCCC/C=C/c1cccc1

8034 C=Cc1ccc(N(CC)CC)cc1.CC(C)[Si](OCc1cc(=O)oc2cc(I)ccc12)(C(C)C)C(C)C>>CCN(CC)c1ccc(/C=C/c2ccc3c(CO[Si](C(C)C)(C(C)C)C(C)C)cc(=O)oc3c2)cc1

8035 Br1ccc2[nH]ccc2c1.C=CC(=O)OCCCC>>CCCCOC(=O)/C=C/c1ccc2[nH]ccc2c1

8037 C=CC(=O)OC.CCN1c2ncc(I)cc2C(=O)N(C)c2cccn21>>CCN1c2ncc(/C=C/C(=O)OC)cc2C(=O)N(C)c2cccn21  
 8038 C=CC(=O)OC.Oc1ccc(I)cc1O>>COC(=O)/C=C/c1ccc(O)c(O)c1  
 8039 C=Cc1ccc(C)cc1.N#CCc1ccc(Br)cc1>>Cc1ccc(/C=C/c2ccc(CC#N)cc2)cc1  
 8040 C=CCCC(=O)O.Ic1ccc2c(c1)OCO2>>O=C(O)CC/C=C/c1ccc2c(c1)OCO2  
 8041 Br1cccc2ccccc12.C=CC(OCC)OCC>>CCOC(/C=C/c1cccc2ccccc12)OCC  
 8042 C=CS(=O)(=O)c1ccccc1.Fc1ccc(Br)cc1>>O=S(=O)/C=C/c1ccc(F)cc1)c1ccccc1  
 8043 C=Cc1ccccc1.COc1ccc(Br)c(C)c1>>COc1ccc(/C=C/c2ccccc2)c(C)c1  
 8044 C=CS(=O)(=O)F.CCc1ccc(I)cc1>>CCc1ccc(/C=C/S(=O)(=O)F)cc1  
 8045 C=CC(=O)OC(C)(C)C.CC(C)(C)OC(=O)CCOCc1cc([N+](=O)[O-])ccc1Br>>CC(C)(C)OC(=O)/C=C/c1ccc([N+](=O)[O-])cc1COCCC(=O)OC(C)(C)C  
 8046 C=CC(=O)OCC.Cc1ncc(I)c(C)n1>>CCOC(=O)/C=C/c1ncc(C)nc1C  
 8047 C=CC(=O)OCC.CC1(C)CC(=C(c2ccc(Br)cc2)c2ccc(O)c(Cl)c2)CC(C)(C)C1>>CCOC(=O)/C=C/c1ccc(C(=C2CC(C)(C)CC(C)(C)C2)c2ccc(O)c(Cl)c2)cc1  
 8048 C=C[C@H](CC(=O)OC(C)(C)C)NC(=O)c1cc(-c2c(OC)ccccc2OC)n(C2CCCC2)n1.Fc1ccc(Br)cc1>>COc1cccc(OC)c1-c1cc(C(=O)N[C@H](/C=C/c2ccc(F)cc2)CC(=O)OC(C)(C)C)nn1C1CCCC1  
 8049 C=Cc1ccccc1.O=S(=O)(c1ccccc1)C(F)(F)Br>>O=S(=O)(c1ccccc1)C(F)(F)/C=C/c1ccccc1  
 8050 C=CC(C)(C)O.COc1cc(OC)c2ccc(=O)oc2c1>>COc1cc(OC)c2ccc(=O)oc2c1/C=C/C(C)(C)O  
 8051 Br1cnc(-c2ccccc2)c1.C=CC(=O)OC>>COC(=O)/C=C/c1cnc(-c2ccccc2)c1  
 8052 C=Cc1cnc1.O=C(c1ccccc1)c1ccc(Br)cc1>>O=C(c1ccccc1)c1ccc(/C=C/c2cnc12)cc1  
 8053 C=CC#N.N#Cc1ccc(I)cc1>>N#C/C=C/c1ccc(C#N)cc1  
 8054 C=Cc1ccc(N(c2cccc(C)c2)c2cccc(C)c2)cc1.Ic1ccccc1>>Cc1cccc(N(c2ccc(/C=C/c3ccccc3)cc2)c2cccc(C)c2)c1  
 8055 C=CC(=O)OC.FC1(F)C(I)=C1c1ccccc1>>COC(=O)/C=C/C1=C(c2ccccc2)C1(F)F  
 8056 C=Cc1cc(OC)cc(OC)cc(OC)c1.O=C1c2ccccc2C(=O)N1c1ccc(I)cc1>>CCCOc1cc(/C=C/c2ccc(N3C(=O)c4ccccc4C3=O)cc2)cc(OC)cc1OCCC  
 8057 C=Cc1ccc(OC)cc1.O=P1(c2ccccc2)C(Br)=Cc2ccccc21>>COc1ccc(/C=C/C2=Cc3ccccc3P2(=O)c2ccccc2)cc1  
 8058 C=C[P@](C)(=O)c1ccccc1.Cc1ccc2ccccc2c1Br>>Cc1ccc2ccccc2c1/C=C/[P@](C)(=O)c1ccccc1  
 8059 C=Cc1ccc(F)cc1.O=Cc1ccc(I)o1>>O=Cc1ccc(/C=C/c2ccc(F)cc2)o1  
 8060 C=CC(=O)OC.CC[C@]12C=CCN3CC[C@]4(c5cc(Br)c(OC)cc5N(C)[C@H]4[C@@](O)(C(=O)OC)[C@@H]1OC(C)=O)[C@@H]32>>CC[C@]12C=CCN3CC[C@]4(c5cc(/C=C/C(=O)OC)c(OC)cc5N(C)[C@H]4[C@@](O)(C(=O)OC)[C@@H]1OC(C)=O)[C@@H]32  
 8061 C=CC(=O)N(C)C.O=[N+](O-)[c1ccc(I)cc1>>CN(C)C(=O)/C=C/c1ccc([N+](=O)[O-])cc1  
 8062 C=CC(=O)OCC.CCc1nc2cc(OC)ccc2c(Oc2cccc(Br)c2)c1-c1ccccc1>>CCOC(=O)/C=C/c1cccc(Oc2c(-c3ccccc3)c(CC)nc3cc(OC)ccc23)c1  
 8063 C=CCC(C)C(=O)OCC.CC(=O)c1ccc(Br)cc1>>CCOC(=O)C(C)C/C=C/c1ccc(C(C)=O)cc1  
 8064 C=CC(=O)OCc1ccccc1.CC(=O)c1ccccc1Br>>CC(=O)c1ccccc1/C=C/C(=O)OCc1ccccc1  
 8065 C=Cc1cccn1.C[Si](C)(C)I>>C[Si](C)(C)/C=C/c1cccn1  
 8066 C=C[C@H]1O[C@@H]2OC(C)(C)O[C@@H]2[C@H]1OC.O=[N+](O-)[c1ccc(I)cc1>>CO[C@H]1[C@@H](/C=C/c2ccc([N+](=O)[O-])O-)  
 8067 C=CC(=O)OCC.CC(C)(C)OC(=O)c1cc(Cn2cccn2)ccc1I>>CCOC(=O)/C=C/c1ccc(Cn2cccn2)cc1C(=O)OC(C)(C)C  
 8068 C=CC(=O)OC.CC(C)(C)OC(=O)N(CCc1c(Cl)ccnc1Br)C(=O)OC(C)(C)C>>COC(=O)/C=C/c1nccc(Cl)c1CCN(C(=O)OC(C)(C)C)C(=O)OC(C)(C)C  
 8069 C=CC#N.FC(F)(F)c1cc(Cl)cc(C(F)(F)F)c1>>N#C/C=C/c1cc(C(F)(F)F)cc(C(F)(F)F)c1  
 8070 C=CC(=O)NC(C)C.COc1ccc(I)cc1>>COc1ccc(/C=C/C(=O)NC(C)C)cc1  
 8071 Br1csc2ccccc12.C=CP(=O)(OCC)OCC>>CCOP(=O)/C=C/c1csc2ccccc12)OCC  
 8072 C=CC(=O)OCCCC.CC(=O)Nc1ccc2c(Br)nn(C)c2c1>>CCCCOC(=O)/C=C/c1nn(C)c2cc(NC(C)=O)cc  
 8073 C=COCC.O=C(Cl)c1ccccc1>>CCO/C=C/C(=O)c1ccccc1  
 8074 C=Cc1ccccc1F.N#Cc1ccc2cc(Br)ccc2c1>>N#Cc1ccc2cc(/C=C/c3ccccc3F)ccc2c1  
 8075 C=CCN(C(=O)OC(C)(C)C)C(=O)OC(C)(C)C.Clc1cccs1>>CC(C)(C)OC(=O)N(C/C=C/c1cccs1)C(=O)OC(C)(C)C  
 8076 Br1cccs1.C=CCS(N)(=O)=O>>NS(=O)(=O)C/C=C/c1cccs1  
 8077 C=CC(=O)O.COc1ccc(S(=O)(=O)NCc2ccc(I)cc2)cc1OC>>COc1ccc(S(=O)(=O)NCc2ccc(/C=C/C(=O)O)cc2)cc1OC  
 8078 C=CC(=O)OCC.O=[N+](O-)[c1ccc(I)cc1>>CCOC(=O)/C=C/c1ccc([N+](=O)[O-])cc1  
 8079 C=CC(F)(F)C(F)(F)C(F)(F)C(F)(F)C(F)(F)F.Cc1ccc(Br)cc1>>Cc1ccc(/C=C/C(F)(F)C(F)(F)C(F)(F)C(F)(F)C(F)(F)F)cc1  
 8080 C=CC(=O)OC.Nc1ccc(Br)cc1I>>COC(=O)/C=C/c1cc(Br)ccc1N



8081 Br1cccc(-c2cccn2)c1.C=CC(=O)OCCCC>>CCCCOC(=O)/C=C/c1cccc(-c2cccn2)c1  
8082 C=CS(=O)(=O)Oc1cccc1.N#Cc1ccc(Br)cc1>>N#Cc1ccc(/C=C/S(=O)(=O)Oc2ccccc2)cc1  
8083 C=CC(=O)OC.Nc1cccc1Br>>COC(=O)/C=C/c1cccc1N  
8084 C=CC(=O)OC(C)(C)C.CN(C)c1ccc(CNc2ccc(Br)cn2)cc1>>CN(C)c1ccc(CNc2ccc(/C=C/C(=O)OC(C)(C)C)cn2)cc1  
8085 C=Cc1cccc1.CCOC(=O)NCCc1cc(OC)c(OC)cc1I>>CCOC(=O)NCCc1cc(OC)c(OC)cc1/C=C/c1cccc  
8086 C=CC#N.CC(C)N(CC[C@H])(c1cccc1)c1cc(Br)ccc1OCc1cccc1(C)(C)C>>CC(C)N(CC[C@H])(c1cccc1)c1cc(/C=C/C#N)ccc1OCc1cccc1(C)(C)C  
8087 C=Cc1ccc(OC)cc1.CCOC(=O)C1CCCN(c2cccc(Br)n2)C1>>CCOC(=O)C1CCCN(c2cccc(/C=C/c3ccc(OC)cc3)n2)C1  
8088 C=Cc1cccc1.N#Cc1ccc2cc(Br)ccc2c1>>N#Cc1ccc2cc(/C=C/c3ccccc3)ccc2c1  
8089 Br1ccc(I)cc1.C=Cc1ccc(C(C)(C)C)cc1>>CC(C)(C)c1ccc(/C=C/c2ccc(Br)cc2)cc1  
8090 C=CC(C)=O.CC(=O)O[IH2](OC(C)=O)c1cccc1>>CC(=O)/C=C/c1cccc1  
8091 C=CC1CC=CCC1.Fc1ccc(I)cc1>>Fc1ccc(/C=C/C2CC=CCC2)cc1  
8092 C=CC(=O)OC.CCOCc1nc2c(N)nc3cc(Br)ccc3c2n1CC(C)(C)O>>CCOCc1nc2c(N)nc3cc(/C=C/C(=O)OC)ccc3c2n1CC(C)(C)O  
8093 C=CC#N.CC(C)n1cnc2c(Cl)nc(I)nc21>>CC(C)n1cnc2c(Cl)nc(/C=C/C#N)nc21  
8094 C=CCN.O=c1[nH]c(=O)n([C@@H]2O[C@H](COP(=O)(O)OP(=O)(O)OP(=O)(O)O)[C@@H](O)[C@H]2O)cc1I>>NC/C=C/c1cn([C@@H]2O[C@H](COP(=O)(O)OP(=O)(O)OP(=O)(O)O)[C@@H](O)[C@H]2O)c(=O)[nH]c1=O  
8095 C=CC(=O)OC.O=S(=O)(c1ccc(F)cc1)N1CCc2cc(Br)cnc21>>COC(=O)/C=C/c1cnc2c(c1)CCN2S(=O)(=O)c1ccc(F)cc1  
8096 C=CC(C)(O)CCC=C(C)C.COc1ccc(O)c(Br)c1>>COc1ccc(O)c(/C=C/C(C)(O)CCC=C(C)C)c1  
8097 C=CC(=O)OC.O=[N+](=[O-])c1cccc(I)c1>>COC(=O)/C=C/c1cccc([N+](=O)[O-])c1  
8098 C=CC(=O)N1CCOCC1.CCOC(OCC)c1cccc(Br)c1>>CCOC(OCC)c1cccc(/C=C/C(=O)N2CCOCC2)c1  
8099 C=CC(=O)OCC.CC(C)(C)OC(=O)N1CCC2(C1)CN(C(=O)OCC[Si](C)(C)C)c1ccc(Br)cc12>>CCOC(=O)/C=C/c1ccc2c(c1)C1(CCN(C(=O)OC(C)(C)C)C1)CN2C(=O)OCC[Si](C)(C)C  
8100 Br1cccc2ccccc12.C=CC(=O)OC>>COC(=O)/C=C/c1cccc2ccccc12  
8101 C=Cc1cccc1.Ic1ccc(-c2ccccc2)cc1>>C(=C/c1ccc(-c2ccccc2)cc1)c1cccc1  
8102 C=CC(=O)OCC.CC(=O)O[IH2](OC(C)=O)c1c(C)cc(C)cc1C>>CCOC(=O)/C=C/c1c(C)cc(C)cc1C  
8103 C=CC(=O)OC.CC(C)n1cnc2c(NCc3cccc(Br)c3)nc(N3CCN(C)CC3)nc21>>COC(=O)/C=C/c1cccc(CNc2nc(N3CCN(C)CC3)nc3c2ncn3C(C)C)c1  
8104 C=Cc1cncnc1.COc1cccc1CNc1ccc2cc(Br)ccc2n1>>COc1cccc1CNc1ccc2cc(/C=C/c3ccncc3)ccc2n1  
8105 Br1cccc2[nH]cc(Cc3ccc4ccccc4c3)c12.C=CC(=O)OC>>COC(=O)/C=C/c1cccc2[nH]cc(Cc3ccc4ccccc4c3)c12  
8106 C=C[C@ @H](C)[C@H]1CC[C@H]2[C@ @H]3CC(=O)[C@H]4C[C@H](O)CC[C@]4(C)[C@H]3CC[C@ @]21C.Ic1cccc2ccccc12>>C[C@H](/C=C/c1cccc2ccccc12)[C@H]1CC[C@H]2[C@ @H]3CC(=O)[C@H]4C[C@H](O)CC[C@]4(C)[C@H]3CC[C@ @]21C  
8107 C=CC1CCCCC1.COc1ccc(Br)cc1>>COc1ccc(/C=C/C2CCCCC2)cc1  
8108 C=Cc1ccc(O)cc1.COC(=O)Cn1c(=O)c(Cl)nc2ccccc21>>COC(=O)Cn1c(=O)c(/C=C/c2ccc(O)cc2)nc2ccccc21  
8109 C=CC1CCCCC1.Cc1cccc1Br>>Cc1cccc1/C=C/C1CCCCC1  
8110 C=CCC#N.CS[C@H]1O[C@@H](c2ccc(C)c(Cc3ccc(Cl)cc3)c2)[C@H](OC(C)=O)[C@@H](OC(C)=O)[C@@H]1OC(C)=O>>CS[C@H]1O[C@@H](c2ccc(C)c(Cc3ccc(/C=C/CC#N)cc3)c2)[C@H](OC(C)=O)[C@@H](OC(C)=O)[C@@H]1OC(C)=O  
8111 C=CC(=O)OC.Cc1cc2c(c(C)c1Br)CC(C)(C)C2=O>>COC(=O)/C=C/c1c(C)cc2c(c1C)CC(C)(C)C2=O  
8112 C=CC(=O)OC.CC(C)n1cnc2c(NCc3cccc(Br)c3)nc(N3CCCC3)nc21>>COC(=O)/C=C/c1cccc(CNc2nc(N3CCCC3)nc3c2ncn3C(C)C)c1  
8113 C=CP(=O)(c1cccc1)C(C)(C)C.Cc1ccc2ccccc2c1Br>>Cc1ccc2ccccc2c1/C=C/P(=O)(c1cccc1)C(C)(C)C  
8114 C=CC(=O)OCC.COc1ccc(Cn2c(=O)ccc3cc(Br)ccc32)cc1>>CCOC(=O)/C=C/c1ccc2c(ccc(=O)n2Cc2c(cc(OC)cc2)c1  
8115 Br1cccc2c3c([nH]c12)C1CCN(CC1)C3.C=Cc1cccn1>>C(=C/c1cccc2c3c([nH]c12)C1CCN(CC1)C3)c1cccn1  
8116 C=Cc1cccc1.Cc1cc(C)cc(I)c1>>Cc1cc(C)cc(/C=C/c2ccccc2)c1  
8117 Br1ccc(I)cc1.C=Cc1cccc1>>Br1ccc(/C=C/c2ccccc2)cc1  
8118 C=CC(=O)OC.Fc1ncccc1Br>>COC(=O)/C=C/c1cccn1F  
8119 C=CC(=O)N1N=Cc2ccccc2C1C=C(C)C.CCCc1nc(N)nc(N)c1Cc1cc(I)c(OC)c(OC)c1>>CCCc1nc(N)nc(N)c1Cc1cc(/C=C/C(=O)N2N=Cc3ccccc3C2C=C(C)C)c(OC)c(OC)c1  
8120 Br1ccc(-c2cncnc2)cc1.C=Cc1cccn1>>C(=C/c1cccn1)c1ccc(-c2cncnc2)cc1  
8121 C=CC(=O)OC.OCc1cccc1Br>>COC(=O)/C=C/c1cccc1CO

8122 C=CC(=O)OC.CC(C)(C)OC(=O)N1CCc2ccc(Br)cc2CC1>>COC(=O)/C=C/c1ccc2c(c1)CCN(C(=O)O  
C(C)(C)C)CC2  
 8123 C=Cc1ccc2ccccc2c1.CCOC(=O)C(F)(F)I>>CCOC(=O)C(F)(F)/C=C/c1ccc2ccccc2c1  
 8124 C=C[C@H](C)[C@H](O)C/C=C/C(=O)OC.Ic1ccccc1>>COC(=O)/C=C/C[C@H](O)[C@H](C)/C  
=C/c1ccccc1  
 8125 C=CC(=O)NCCCN(CCCCNC(=O)OC(C)(C)C(=O)OC(C)(C)C.COC(=O)N[C@H]1[C@@H](Oc2c  
cc(I)cc2)O[C@H](C)[C@H](OC(C)=O)[C@H]1OC(C)=O>>COC(=O)N[C@H]1[C@@H](Oc2cc  
c(/C=C/C(=O)NCCCN(CCCCNC(=O)OC(C)(C)C(=O)OC(C)(C)C)cc2)O[C@H](C)[C@H](OC(C  
)=O)[C@H]1OC(C)=O  
 8126 C=CC(=O)OC(C)(C)C.CCn1ccc(-c2ccc(Br)cc2)n1>>CCn1ccc(-c2ccc(/C=C/C(=O)OC(C)(C)C)cc2)n1  
 8127 C=Cc1ccc(F)c1.Oc1ccccc1I>>Oc1ccccc1/C=C/c1ccc(F)c1  
 8128 C=CCN1C(=O)c2ccccc2C1=O.CS(=O)(=O)c1ccc(Br)cc1>>CS(=O)(=O)c1ccc(/C=C/CN2C(=O)c3ccccc  
c3C2=O)cc1  
 8129 C=CC(=O)N(C)Cc1cc2ccccc2n1C.COc1ccc(Cn2nc(N)c3cc(Br)enc32)cc1>>COc1ccc(Cn2nc(N)c3cc(/  
C=C/C(=O)N(C)Cc4cc5ccccc5n4C)enc32)cc1  
 8130 C=CCC(=O)OC(C)(C)C.Nc1ccc(Br)cc1-c1ccccc1>>CC(C)(C)OC(=O)C/C=C/c1ccc(N)c(-c2ccccc2)c1  
 8131 C=C[C@H]1CN2CC[C@H]1C[C@@H]2[C@H](O)c1ccnc2ccc(OC)cc12.FC(F)(F)c1ccc(Br)cc1>>CO  
c1ccc2nccc([C@H](O)[C@H]3C[C@H]4CCN3C[C@H]4/C=C/c3ccc(C(F)(F)F)cc3)c2c1  
 8132 C=CC(=O)OC.O=C(c1ccccc1)c1cn(-  
c2ccccc2)c2ccc(Br)cc12>>COC(=O)/C=C/c1ccc2c(c1)c(C(=O)c1ccccc1)cn2-c1ccccc1  
 8133 C=Cc1ccccc1.O=c1ccoc2cc(OCc3ccccc3)c(Br)cc12>>O=c1ccoc2cc(OCc3ccccc3)c(/C=C/c3ccccc3)cc  
 8134 C=CC(N)=O.Clc1ccc(Br)cc1>>NC(=O)/C=C/c1ccc(Cl)cc1  
 8135 C=CC(=O)OCC.COc1ccc(Br)cn1>>CCOC(=O)/C=C/c1ccc(OC)nc1  
 8136 C=CC(=O)OC.O=C(c1ccccc1)c1sc2cc(O)ccc2c1Oc1ccc(Br)cc1>>COC(=O)/C=C/c1ccc(Oc2c(C(=O)c  
3ccccc3)sc3cc(O)ccc23)cc1  
 8137 C=CC(=O)OCCCC.CC(C)(C)c1ccc(I)cc1>>CCCCOC(=O)/C=C/c1ccc(C(C)(C)C)cc1  
 8138 C=CC(N)=O.FC(F)(F)c1ccc(I)c(Cl)c1>>NC(=O)/C=C/c1ccc(C(F)(F)F)cc1Cl  
 8139 C=CC(=O)N1N=Cc2ccccc2C1C=C.COc1cc(Cc2nc(N)nc2N)cc(I)c1OC>>C=CC1c2ccccc2C=NN1C(  
=O)/C=C/c1cc(Cc2nc(N)nc2N)cc(OC)c1OC  
 8140 Br1ccc(-c2cc(-c3ccccc3)nc(-c3ccccc3)c2)cc1.C=Cc1ccccc1>>C(=C/c1ccc(-c2cc(-c3ccccc3)nc(-  
c3ccccc3)c2)cc1)\c1ccccc1  
 8141 C=CC(=O)OCC.O=C(O)c1ccc2c(Br)cccc12>>CCOC(=O)/C=C/c1ccc2c(C(=O)O)cccc12  
 8142 Br1ccc(-c2ccc(OCCCN3CCCCC3)cc2)cc1.C=CC(=O)OCC>>CCOC(=O)/C=C/c1ccc(-  
c2ccc(OCCCN3CCCCC3)cc2)cc1  
 8143 C=CC(=O)OC(C)(C)C.COC(=O)C1Cc2cc(Br)enc2NC1=O>>COC(=O)C1Cc2cc(/C=C/C(=O)OC(C)(C  
)C)enc2NC1=O  
 8144 C=CC(=O)N1CCCC1.COc1cc(Br)c(C=O)cc1OCc1ccccc1>>COc1cc(/C=C/C(=O)N2CCCC2)c(C=O)c  
c1OCc1ccccc1  
 8145 C=CC(=O)OCC.CCn1cc(Br)cn1>>CCOC(=O)/C=C/c1cnn(CC)c1  
 8146 C=CS(=O)(=O)F.Cc1ccc(I)c1>>Cc1ccc(/C=C/S(=O)(=O)F)c1  
 8147 C=CC(C)=O.O=C(O)c1ccc(CNC(=O)c2ccc(I)cc2)cc1>>CC(=O)/C=C/c1ccc(C(=O)NCc2ccc(C(=O)O)  
cc2)cc1  
 8148 C=CC(=O)OC.CCCc1nc2c(C)cc(C)nc2n1Cc1ccc(Br)cc1>>CCCc1nc2c(C)cc(C)nc2n1Cc1ccc(/C=C/C(  
=O)OC)cc1  
 8149 Br1cnc2[nH]c3ccccc3c2c1.C=CC(=O)N(C)Cc1cc2ccccc2n1C>>CN(Cc1cc2ccccc2n1C)(C(=O)/C=C/c  
1cnc2[nH]c3ccccc3c2c1  
 8150 C=CC(=O)OC(C)(C)C.Cc1c(Br)ccc(OCc2ccccc2)c1C>>Cc1c(/C=C/C(=O)OC(C)(C)C)ccc(OCc2ccccc  
2)c1C  
 8151 C=Cc1ccc2ccccc2c1.CCN1c2ncc(Br)cc2C(=O)N(C)c2ccc(F)nc21>>CCN1c2ncc(/C=C/c3ccc4ccccc4c  
3)cc2C(=O)N(C)c2ccc(F)nc21  
 8152 C=CC(=O)OC.CC(C)(C)OC(=O)n1nc(I)c2cc(NS(=O)(=O)c3ccccc3S(C)(=O)=O)ccc21>>COC(=O)/C  
=C/c1nn(C(=O)OC(C)(C)C)c2ccc(NS(=O)(=O)c3ccccc3S(C)(=O)=O)cc12  
 8153 C=CCCCCN1C(=O)c2ccccc2C1=O.FC(F)(F)c1ccc2c(Br)ccnc2c1>>O=C1c2ccccc2C(=O)N1CCCC/C  
=C/c1ccnc2cc(C(F)(F)F)ccc12  
 8154 C=CC(=O)OCC.Ic1ccccc1N(Cc1ccccc1)Cc1ccccc1>>CCOC(=O)/C=C/c1ccccc1N(Cc1ccccc1)Cc1ccc  
 8155 C=Cc1ccc(OC)cc1.CCOC(=O)c1ccc(Br)cc1>>CCOC(=O)c1ccc(/C=C/c2ccc(OC)cc2)cc1  
 8156 C=CC(=O)O.CC(=O)Nc1ccc(F)cc1I>>CC(=O)Nc1ccc(F)cc1/C=C/C(=O)O  
C=CC(=O)OC.COc1c(CN(C(=O)c2ccccc2)c2ccc(Br)c2)ccc2c1OC(C)(C)[C@H](OC(C)=O)[C@H]2S  
 8157 c1ccccc1>>COC(=O)/C=C/c1ccc(N(Cc2ccc3c(c2OC)OC(C)(C)[C@H](OC(C)=O)[C@H]3Sc2ccccc2  
)C(=O)c2ccccc2)c1  
 8158 C=Cc1ccccc1.CC(C)(C)C1CC=C(Cl)CC1>>CC(C)(C)C1CC=C(/C=C/c2ccccc2)CC1

8159 C=Cc1ccnc2cccc12.CCCCCCCC(=O)N1CCN(c2ccc(Br)cc2)CC1>>CCCCCCCC(=O)N1CCN(c2ccc  
/C=C/c3ccnc4cccc34)cc2)CC1  
8160 C=CCCC(=O)O.Clclccc(I)cc1>>O=C(O)CC/C=C/c1ccc(Cl)cc1  
8161 C=CC(=O)OCCCC.CCCCc1ccc(I)cc1>>CCCCOC(=O)/C=C/c1ccc(CCCC)cc1  
8162 Brclccnc1.C=CC(C)(O)CCC=C(C)C>>CC(C)=CCCC(C)(O)/C=C/c1ccnc1  
8163 Brclccc2cccc2c1.C=CC=O>>O=C/C=C/c1ccc2cccc2c1  
C=CCC(=O)O.CC(=O)OC[C@H]1O[C@@H](Oc2n[nH]c(C(C)C)c2Cc2ccc(Br)cc2)[C@H](OC(C)=O  
8164 )[C@@H](OC(C)=O)[C@@H]1OC(C)=O>>CC(=O)OC[C@H]1O[C@@H](Oc2n[nH]c(C(C)C)c2Cc  
2ccc(/C=C/CC(=O)O)cc2)[C@H](OC(C)=O)[C@@H](OC(C)=O)[C@@H]1OC(C)=O  
8165 C=CC(=O)O.FC(F)(F)c1ccc(I)c(Br)c1>>O=C(O)/C=C/c1ccc(C(F)(F)F)cc1Br  
C=CCO[C@H]1CC(=O)O[C@H](C)C/C=C/C=C/[C@H](O)[Si](C)(C)C(C)(C)C)[C@H](C)C[C@H]1  
(CC(OC)OC)[C@H](O[C@H]2O[C@H](C)[C@@H](O[C@H]3C[C@@](C)(O)[C@@H](OC(=O)  
CC)[C@H](C)O3)[C@H](N(C)C)[C@H]2OC(C)=O)[C@H]1OC.O=[N+](O-  
8166 )c1ccc(I)cc1>>CCC(=O)O[C@H]1[C@H](C)O[C@@H](O[C@H]2[C@H](N(C)C)[C@@H](OC(C)  
=O)[C@H](O[C@H]3[C@@H](OC)[C@H](OC/C=C/c4ccc([N+](=O)[O-  
)cc4)CC(=O)O[C@H](C)C/C=C/C=C/[C@H](O)[Si](C)(C)C(C)(C)C)[C@H](C)C[C@H]3CC(OC)  
N(C)N(C)[C@@H]2C(C)C[C@@H]1C(C)C  
8167 C=Cc1cccc1.Clclccc2c(Br)ccnc2c1>>Clclccc2c(/C=C/c3cccc3)ccnc2c1  
8168 C=CC(=O)OC.O=Cc1ccnc1Br>>COC(=O)/C=C/c1cccc1C=O  
C=Cc1ccc(OC)cc1.CCN(CC)c1ccc2cc(C(=O)OCc3cc(I)ccc3[N+](=O)[O-  
8169 ])c(=O)cc2c1>>CCN(CC)c1ccc2cc(C(=O)OCc3cc(/C=C/c4ccc(OC)cc4)ccc3[N+](=O)[O-  
8170 Brclccc2cccc12.C=CC(=O)OCCCC>>CCCCOC(=O)/C=C/c1ccc2cccc12  
C=Cc1cccc1.CCC(OC)(C(=O)OC)c1cc2n(c(=O)c1OS(=O)(=O)C(F)(F)F)CCC2>>CCC(OC)(C(=O)O  
8171 C)c1cc2n(c(=O)c1/C=C/c1cccc1)CCC2  
C=CC#N.COc1ccc2c(c1)CCN(c1ccc(F)cc1)C2(C)c1ccc(Br)cc1>>COc1ccc2c(c1)CCN(c1ccc(F)cc1)C  
8172 2(C)c1ccc(/C=C/C#N)cc1  
8173 C=Cc1ccc2c(c1)OCO2.C[Si](C)(C)I>>C[Si](C)(C)/C=C/c1ccc2c(c1)OCO2  
8174 C=C[Si](C)(C)C.CC1(C)OC(=O)c2c(cccc2OS(=O)(=O)C(F)(F)F)O1>>CC1(C)OC(=O)c2c(/C=C/[Si](  
C)(C)C)cccc2O1  
8175 C=CC(=O)OC.COc1ccc2c(Oc3ccc(Br)cc3)csc2c1>>COC(=O)/C=C/c1ccc(Oc2csc3ccc(OC)ccc23)cc1  
8176 C=CC(=O)OC(C)(C)C.O=S(=O)(c1cccc(Br)c1)n1ccc2ccnc21>>CC(C)(C)OC(=O)/C=C/c1cccc(S(=O)  
)c(=O)n2ccc3ccnc32)c1  
8177 C=CC(C)=O.C[Si](C)(C)c1ccc1I>>CC(=O)/C=C/c1ccc1[Si](C)(C)C  
8178 C=CC(N)=O.CCOC(=O)c1ccc(Br)cc1>>CCOC(=O)c1ccc(/C=C/C(N)=O)cc1  
8179 C=CC#N.Fc1c(Cl)cccc1Br>>N#C/C=C/c1cccc(Cl)c1F  
8180 C=CCN(C(=O)C(C)C)[C@H](C)c1cc(F)cc(F)c1.O=C1Nc2ncccc2[C@]12Cc1ccc(Br)cc1C2>>CC(C)C  
(=O)N(C/C=C/c1ccc2c(c1)C[C@@]1(C2)C(=O)Nc2ncccc21)[C@H](C)c1cc(F)cc(F)c1  
8181 C=C/C=C/C(=O)N(CCCC)CCCC.CCOC(=O)c1ccc(Br)cc1>>CCCCN(CCCC)C(=O)/C=C/C=C/c1ccc(  
C(=O)OCC)cc1  
8182 Brclccnc1.C=CCN(C(=O)OC(C)(C)C(=O)OC(C)(C)C>>CC(C)(C)OC(=O)N(C/C=C/c1ccnc1)C(=  
O)OC(C)(C)C  
8183 C=CC(=O)OC.COcn1c(C=O)c(I)c2cccc21>>COcn1c(C=O)c(/C=C/C(=O)OC)c2cccc21  
C=Cc1cccc1.CC[C@]12C=CCN3CC[C@@]4(c5cc(Br)c(OC)cc5N(C)[C@H]4[C@@](O)(C(=O)OC)  
8184 [C@@H]1OC(C)=O)[C@@H]32>>CC[C@]12C=CCN3CC[C@@]4(c5cc(/C=C/c6cccc6)c(OC)cc5N  
(C)[C@H]4[C@@](O)(C(=O)OC)[C@@H]1OC(C)=O)[C@@H]32  
8185 C=CB1OC(C)CC(C)(C)O1.C=CI>>C=C/C=C/B1OC(C)CC(C)(C)O1  
C=CC(=O)OCc1cccc1.CC(C)(C)OC(=O)CC1(C(=O)OC(C)(C)C)CC(c2cc(OCc3cccc3)ccc2Br)=NO  
8186 1>>CC(C)(C)OC(=O)CC1(C(=O)OC(C)(C)C)CC(c2cc(OCc3cccc3)ccc2/C=C/C(=O)OCc2cccc2)=N  
8187 C=CC(=O)OCCCC.N#Cc1ccc(Cl)cc1>>CCCCOC(=O)/C=C/c1ccc(C#N)cc1  
8188 C=Cc1ccc(OC)cc1.COC(=O)Cn1c(=O)c(Cl)nc2cc(Br)ccnc21>>COC(=O)Cn1c(=O)c(/C=C/c2ccc(OC)c  
c2)nc2cc(Br)ccnc21  
8189 C=CC(C)(C)O.O=C(c1cccc1)c1ccc(Br)cc1>>CC(C)(O)/C=C/c1ccc(C(=O)c2cccc2)cc1  
8190 C=CC(=O)O.CN(c1ccc(I)cc1)S(=O)(=O)c1ccs1>>CN(c1ccc(/C=C/C(=O)O)cc1)S(=O)(=O)c1ccs1  
8191 C=Cc1cccc1.CCCCCCCCOC1cc(/C=C/c2ccc(Br)cc2)c(OCCCCCCCC)cc1/C=C/c1cccc1>>CCCC  
CCCOc1cc(/C=C/c2ccc(/C=C/c3cccc3)cc2)c(OCCCCCCCC)cc1/C=C/c1cccc1  
8192 C=Cc1cccc1.CCc1cc(/C=C/c2ccc(/C=C/c3ccc(/N=N/C(C)CC)cc3)cc2)c(CC)cc1I>>CCc1cc(/C=C/c  
2ccc(/C=C/c3ccc(/N=N/C(C)CC)cc3)cc2)c(CC)cc1  
8193 C=CC(=O)OC(C)(C)C.COc1ccc(Br)c(C(C)OCCC(=O)OC(C)(C)C)c1>>COc1ccc(/C=C/C(=O)OC(C)(  
C)C)c(C(C)OCCC(=O)OC(C)(C)C)c1  
8194 Brcl2cccc2cc2cccc12.C=Cc1ccc(-c2ccc3nc(-c4ccccn4)cc(-  
c4cccc4)c3c2)cc1>>C=C(c1c2cccc2cc2cccc12)c1ccc(-c2ccc3nc(-c4ccccn4)cc(-c4cccc4)c3c2)cc1

C=C[C@@H](C)[C@@H]1C/C=C/C(=O)N[C@H](Cc2ccc(OC)cc2)C(=O)NCCC(=O)N[C@@H](CC(C)C)C(=O)O1.COCOCc1ccc(I)cc1>>COCOCc1ccc(/C=C/[C@@H](C)[C@@H]2C/C=C/C(=O)N[C@H](Cc3ccc(OC)cc3)C(=O)NCCC(=O)N[C@@H](CC(C)C)C(=O)O2)cc1  
 8195  
 C=Cc1cccc1.Cc1cccc(N)c1Br>>Cc1cccc(N)c1/C=C/c1cccc1  
 8196  
 C=CC(=O)OCCCC.Nc1ccc(Br)cc1>>CCCCOC(=O)/C=C/c1ccc(N)cc1  
 8197  
 Br1cccc1.C=C[S@@](=O)c1ccc(C)cc1>>Cc1ccc([S@](=O)/C=C/c2ccccc2)cc1  
 8198  
 C=CC(=O)OCc1cccc1.Fc1cccc(Cn2nc(I)c3ccccc32)c1>>O=C(/C=C/c1nn(Cc2cccc(F)c2)c2ccccc12)OCc1cccc1  
 8199  
 OCCOCCOCCOCc1ccc(I)cn1.[2H]C([2H])([2H])N(C(=O)OC(C)(C)C)c1ccc(C=C)cc1>>[2H]C([2H])([2H])N(C(=O)OC(C)(C)C)c1ccc(/C=C/c2ccc(OCCOCCOCCO)nc2)cc1  
 8200  
 C=Cc1ccc(C)cc1.Cn1nc(Br)c2ccccc21>>Cc1ccc(/C=C/c2nn(C)c3ccccc23)cc1  
 8201  
 BrC1CCCCC1.C=Cc1cccc(C(=O)N(Cc2ccccc2)Cc2ccccc2)c1>>O=C(c1cccc(/C=C/C2CCCCC2)c1)N(Cc1cccc1)Cc1cccc1  
 8202  
 C=Cc1cccc1.O=[N+](O-)]c1cccc(I)c1>>O=[N+](O-)]c1cccc(/C=C/c2ccccc2)c1  
 8203  
 C=CC(=O)OCC.CCn1c(-c2ccc(Br)cc2)nc2ccccc21>>CCOC(=O)/C=C/c1ccc(-c2nc3ccccc3n2CC)cc1  
 8204  
 C=Cc1cccc1.CCCCOC(=O)/C=C/c1cccc(Cl)c1>>CCCCOC(=O)/C=C/c1cccc(/C=C/c2ccccc2)c1  
 8205  
 C=CC(=O)NCCCCC.O=c1c(I)c(-c2ccc(O)cc2)oc2cc(O)ccc12>>CCCCCNC(=O)/C=C/c1c(-c2ccc(O)cc2)oc2cc(O)ccc2c1=O  
 8206  
 C=CCNS(=O)(=O)c1ccc(C)cc1.FC(F)(F)c1ccc(I)cc1>>Cc1ccc(S(=O)(=O)NC/C=C/c2ccc(C(F)(F)F)cc2)cc1  
 8207  
 C=Cc1cccc1.Ic1ccc2c(c1)OCCOCCOCCOCCO2>>C(=C/c1ccc2c(c1)OCCOCCOCCOCCO2)\c1ccccC=CCC(C(=O)OCC)C(=O)OCC.CCOC(=O)c1ccc(I)cc1>>CCOC(=O)c1ccc(/C=C/CC(C(=O)OCC)C(=O)OCC)cc1  
 8209  
 C=Cc1ccc2c(c1)OCO2.COc1cc(C=O)c(Br)c(OC)c1OC>>COc1cc(C=O)c(/C=C/c2ccc3c(c2)OCO3)c(OC)c1OC  
 8210  
 C=CC(=O)OC(C)(C)C.Fc1ccc(I)cn1>>CC(C)(C)OC(=O)/C=C/c1ccc(F)nc1  
 8211  
 C=CC(C)CC(=O)O.COc1ccc(I)cc1>>COc1ccc(/C=C/C(C)CC(=O)O)cc1  
 8212  
 C=CC(CCC)OCc1cccc1.Cc1cccc1Br>>CCCC(/C=C/c1cccc1C)OCc1cccc1  
 8213  
 C=CC(=O)OC.COc1cc(C#N)ccc1I>>COC(=O)/C=C/c1ccc(C#N)cc1OC  
 8214  
 C=CC(OCC)OCC.FC(F)(F)c1ccc(Br)cc1>>CCOC(/C=C/c1ccc(C(F)(F)F)cc1)OCC  
 8215  
 C=Cc1ccc(C(=O)OCC)cc1.C[Si](C)(C)I>>CCOC(=O)c1ccc(/C=C/[Si](C)(C)C)cc1  
 8216  
 C=CC(=O)OC.CC(=O)c1cc(Br)ccc1O>>COC(=O)/C=C/c1ccc(O)c(C(C)=O)c1  
 8217  
 Br1ccnc(C2CC2)c1.C=CC(=O)OCC>>CCOC(=O)/C=C/c1ccnc(C2CC2)c1  
 8218  
 C=Cc1cccc([N+](=O)[O-])c1.N[C@@H](Cc1c[nH]c2c(Br)cccc12)C(=O)O>>N[C@@H](Cc1c[nH]c2c(/C=C/c3cccc([N+](=O)[O-])c3)cccc12)C(=O)O  
 8219  
 C=CC(O)c1cccc1C.O=Cc1cccc1Br>>Cc1cccc1C(O)/C=C/c1cccc1C=O  
 8220  
 C=Cc1ccncc1.Cc1cc(N2CCCC2)nc(Cl)n1>>Cc1cc(N2CCCC2)nc(/C=C/c2ccncc2)n1  
 8221  
 C=CCN(C(=O)C(C)(C)C)[C@H](C)c1cc(F)cc(F)c1.O=C1Nc2ncccc2[C@]12Cc1ccc(Br)cc1C2>>C[C@H](c1cc(F)cc(F)c1)N(C/C=C/c1ccc2c(c1)C[C@]1(C2)C(=O)Nc2ncccc21)C(=O)C(C)(C)C  
 8222  
 C=CC#N.O=S(=O)(Oc1coc2ccccc12)C(F)(F)F>>N#C/C=C/c1coc2ccccc12  
 8223  
 C=CC(=O)OC(C)(C)C.CCOC(=O)CN1Cc2cc(Br)enc2NC1=O>>CCOC(=O)CN1Cc2cc(/C=C/C(=O)OC(C)(C)C)enc2NC1=O  
 8224  
 Br1cccc1.C=CC(N)=O>>NC(=O)/C=C/c1cccc1  
 8225  
 C=C[Si](C)(C)C.COC(=O)c1cccc1I>>COC(=O)c1cccc1/C=C/[Si](C)(C)C  
 8226  
 Br1ccc(C=C(c2ccccc2)c2ccccc2)cc1.C=Cc1ccc(-c2ccc3c(c2)c2ccccc2n3CC)cc1>>CCn1c2ccccc2c2cc(-C=C[Si](CC)(CC)CC.Cc1cc(C)c(Br)c(C)c1>>CC[Si](/C=C/c1c(C)cc(C)cc1C)(CC)CC  
 8227  
 C=CC(=O)OC(C)(C)C.Nc1ncc(I)c2sc(-c3ccc(Oc4ccccc4)cc3)c12>>CC(C)(C)OC(=O)/C=C/c1ncc(N)c2c(-c3ccc(Oc4ccccc4)cc3)csc12  
 8228  
 C=Cc1ccncc1.CCCOc1ccc(I)cc1>>CCCOc1ccc(/C=C/c2ccncc2)cc1  
 8229  
 C=CN1CCCC1=O.FC(F)(F)C(F)(F)C(F)(F)C(F)(F)C(F)(F)Br>>O=C1CCCN1/C=C/C(F)(F)C(F)(F)C(F)(F)C(F)(F)C(F)(F)F  
 8230  
 C=C[Si](C)(C)c1cccn1.Ic1cccs1>>C[Si](C)(/C=C/c1cccs1)c1cccn1  
 8231  
 C=CP(=O)(OCC)OCC.CS(=O)(=O)c1ccc([C@@H](CC2CCCC2)C(=O)Nc2ccc(Br)cn2)cc1>>CCOP(=O)(/C=C/c1ccc(NC(=O)[C@H](CC2CCCC2)c2ccc(S(C)(=O)O)cc2)nc1)OCC  
 8232  
 C=CC(=O)OCC.Nc1nc(=O)n([C@@H]2O[C@H](CO)[C@@H](O)[C@@H]2F)cc1I>>CCOC(=O)/C=C/c1cn([C@@H]2O[C@H](CO)[C@@H](O)[C@@H]2F)c(=O)nc1N  
 8233  
 C=COCCCC.O=c1cc(Br)c2cc(F)ccc2[nH]1>>CCCCO/C=C/c1cc(=O)[nH]c2ccc(F)cc12  
 8234  
 C=Cc1cccc1.COc1ccc(-c2c(I)c(=O)c3ccccc3n2C)cc1>>COc1ccc(-c2c(/C=C/c3ccccc3)c(=O)c3ccccc3n2C)cc1  
 8235  
 8236

8237 C=CC(=O)OC.Cc1ccc(Br)c2c1N(Cc1ccc(C(F)(F)F)cc1)C(=O)C2=O>>COC(=O)/C=C/c1ccc(C)c2c1C(=O)C(=O)N2Cc1ccc(C(F)(F)F)cc1

8238 Br1cccc(N2CCCC2)n1.C=CC(=O)OCCCC>>CCCCOC(=O)/C=C/c1cccc(N2CCCC2)n1

8239 C=CC(C)=O.O=C(O)c1ccc(Cl)cc1>>CC(=O)/C=C/c1ccc(C(=O)O)cc1

8240 C=Cc1cccc1.O=Cc1ccc(Br)s1>>O=Cc1ccc(/C=C/c2cccc2)s1

8241 C=CC(=O)OCC.CCOC(=O)CCOCc1cc(OC)c(OC)c(OC)c1Br>>CCOC(=O)/C=C/c1c(COCCC(=O)OC)cc(OC)c(OC)c1OC  
C=Cc1cc([N+](=O)[O-])ccc1OCOCC[Si](C)(C)C.COC(=O)c1cccc(I)c1>>COC(=O)c1cccc(/C=C/c2cc([N+](=O)[O-])ccc2OCOCC[Si](C)(C)C)c1

8242 C=CC#N.COc1cccc2c(OS(=O)(=O)C(F)(F)F)coc12>>COc1cccc2c(/C=C/C#N)coc12

8243 C=CC(=O)O.COc1ccc(Br)cc1>>COc1ccc(/C=C/C(=O)O)cc1

8244 C=Cc1cccc1.CCCCOC(=O)/C=C/c1ccc(Cl)cc1>>CCCCOC(=O)/C=C/c1ccc(/C=C/c2cccc2)cc1

8245 C=CC(=O)C1CC1.OC/C=C/C1=C(Br)CCCC1>>O=C(/C=C/C1=C(/C=C/CO)CCCC1)C1CC1

8246 C=CC(=O)OC.Cc1ccc(C2/C=C(/I)c3cccc3)C(=O)N(C)c3cccc32)cc1>>COC(=O)/C=C/C(=C/C1(c2ccc(C)cc2)C(=O)N(C)c2cccc21)c1cccc1

8247 C=CCOc1ccc(OC)cc1.Cc1ccc(I)cc1>>COc1ccc(OC/C=C/c2ccc(C)cc2)cc1

8248 Br1cccc1.C=Cn1nnc(-c2ccc(C(F)(F)F)cc2)n1>>FC(F)(F)c1ccc(-c2nnn(/C=C/c3cccc3)n2)cc1

8249 C=Cc1cccc2cccc12.Oc1cccc1I>>Oc1cccc1/C=C/c1cccc2cccc12

8250 C=COCCCC.CNc1nc(C)c2cc(Br)c(=O)n(C3CCCC3)c2n1>>CCCCO/C=C/c1cc2c(C)nc(NC)nc2n(C2CCCC2)c1=O

8251 C=CC(=O)OCC.Ic1cn(C(c2cccc2)(c2cccc2)c2cccc2)c(N=P(c2cccc2)(c2cccc2)c2cccc2)n1>>CCOC(=O)/C=C/c1cn(C(c2cccc2)(c2cccc2)c2cccc2)c(N=P(c2cccc2)(c2cccc2)c2cccc2)n1

8252 C=CC(=O)N(C)C.Clc1nc(N2CCOCC2)c2sc3ncc(Br)cc3c2n1>>CN(C)C(=O)/C=C/c1cnc2sc3c(N4CCOCC4)nc(Cl)nc3c2c1

8253 C=Cc1nnc2c1nnc2[C@H]1O[C@H](CO[Si](C)(C)C(C)(C)C)[C@H](O[Si](C)(C)C(C)(C)C)[C@H]1O[Si](C)(C)C(C)(C)C.Ic1cccc1>>CC(C)(C)[Si](C)(C)OC[C@H]1O[C@H](n2cnc3c(/C=C/c4ccc4)ncnc32)[C@H](O[Si](C)(C)C(C)(C)C)[C@H]1O[Si](C)(C)C(C)(C)C

8254 C=CC(=O)OC(C)C.N#Cc1ccc(Br)cc1>>CC(C)(C)OC(=O)/C=C/c1ccc(C#N)cc1

8255 C=Cc1ccc(OC)cc1.O=C(O)c1ccc(Br)cc1>>COc1ccc(/C=C/c2ccc(C(=O)O)cc2)cc1

8256 \*CNCCCOCCOCCOCCCN(C(=O)COc1ccc(C(Cc2cc(OC)cc(OC)c2)NC(=O)c2ccc(C=C)cc2)cc1.CCOc1ccc(I)cc1>>\*CNCCCOCCOCCOCCCN(C(=O)COc1ccc(C(Cc2cc(OC)cc(OC)c2)NC(=O)c2ccc(/C=C/c3ccc(OCC)cc3)cc2)cc1

8257 C=CC(=O)O.Cc1cc(C)cc(I)c1>>Cc1cc(C)cc(/C=C/C(=O)O)c1

8258 C=CC(=O)N1CCOCC1.C[C@H]1COCc2nc3c(N)nc4cc(Br)ccc4c3n21>>C[C@H]1COCc2nc3c(N)nc4cc(/C=C/C(=O)N5CCOCC5)ccc4c3n21

8259 C=CC(=O)OC.Cn1nc(NC(=O)c2ccc3cccc3c2)c2c(I)cccc21>>COC(=O)/C=C/c1cccc2c1c(NC(=O)c1ccc3cccc3c1)nn2C

8260 C=CC(=O)OC.Oc1ccc(-c2ncc(Br)s2)cc1C12CC3CC(CC(C3)C1)C2>>COC(=O)/C=C/c1cnc(-c2ccc(O)c(C34CC5CC(CC(C5)C3)C4)c2)s1

8261 C=CC(=O)OCCCC.O=C1CCC(N2C(=O)c3cccc(I)c3C2=O)C(=O)N1>>CCCCOC(=O)/C=C/c1cccc2c1C(=O)N(C1CCC(=O)NC1=O)C2=O

8262 C=Cc1cncnc1.CC(C)(C)OC(=O)N[C@H](COc1cnc(Br)c1)Cc1cccc(O)c1>>CC(C)(C)OC(=O)N[C@H](COc1cnc(/C=C/c2cnc2)c1)Cc1cccc(O)c1

8263 Br1ccc2c(c1)OCO2.C=CC1OCCO1>>C(=C/C1OCCO1)\c1ccc2c(c1)OCO2

8264 C=CC(=O)N1N=Cc2cccc2C1C=C(C)C.CCOc1c(I)cc(Cc2cnc(N)nc2N)cc1OC>>CCOc1c(/C=C/C(=O)N2N=Cc3cccc3C2C=C(C)C)cc(Cc2cnc(N)nc2N)cc1OC

8265 C=CC(=O)C(C)CC(=O)OC.C=CC(C)(C)OC(C)(C)[C@H]1COc2ccc(Br)cc2O1>>C=CC(C)(C)OC(C)(C)[C@H]1COc2ccc(/C=C/C(=O)C(C)CC(=O)OC)cc2O1

8266 C=CC(=O)OC.O=C(c1cccc1)c1ccc(I)cc1>>COC(=O)/C=C/c1ccc(C(=O)c2cccc2)cc1

8267 C=CC(=O)OC.CC(=O)n1nc(C)c(Br)c1C>>COC(=O)/C=C/c1c(C)nn(C(C)=O)c1C

8268 C=CC(OC)OC.FC(F)(F)c1cccc(I)c1>>COC(/C=C/c1cccc(C(F)(F)F)c1)OC

8269 C=Cc1cccc1.N#Cc1ccc(/C=C/c2ccc(I)cc2)cc1>>N#Cc1ccc(/C=C/c2ccc(/C=C/c3cccc3)cc2)cc1

8270 C=CC(=O)OC(C)(C)C.Cc1cccc1I>>Cc1cccc1/C=C/C(=O)OC(C)(C)C

8271 C=CC(=O)CCCCC.CC(C)=C(C)Br>>CCCCCC(=O)/C=C/C(C)=C(C)C

8272 C=CC(=O)OCC.CCC1=C(I)C2(CCCC2)C(=O)O1>>CCOC(=O)/C=C/C1=C(CC)OC(=O)C12CCCC2

8273 Br1cccc1C#Cc1cccc1.C=CC(=O)OC>>COC(=O)/C=C/c1cccc1C#Cc1cccc1

8274 C=CC(=O)OC.CC(=O)NC1CC2(CCN(Cc3cccc3)CC2)Oc2ccc(Br)cc21>>COC(=O)/C=C/c1ccc2c(c1)C(NC(C)=O)CC1(CCN(Cc3cccc3)CC1)O2

8275 Br1cnc2cccc2c1.C=CCN(C(=O)OCc1cccc1)C(=O)OC(C)(C)C>>CC(C)(C)OC(=O)N(C/C=C/c1cnc2cccc2c1)C(=O)OCc1cccc1

8276

8277 C=CC(=O)OC.CCOC(=O)c1ccc(I)cc1>>CCOC(=O)c1ccc(/C=C/C(=O)OC)cc1  
8278 C=CCOC(C)=O.O=[N+](O-)]c1ccc(Br)cc1>>CC(=O)OC/C=C/c1ccc([N+](=O)[O-])cc1  
8279 C=Cc1cccc1.O=Cc1cccc1Cl>>O=Cc1cccc1/C=C/c1cccc1  
8280 C=CC#N.COc1cc(C#N)ccc1Oc1cccc(I)c1>>COc1cc(C#N)ccc1Oc1cccc(/C=C/C#N)c1  
8281 Brc1ccoc1.C=Cc1cccc1NS(=O)(=O)c1ccc(C)cc1>>Cc1ccc(S(=O)(=O)Nc2cccc2/C=C/c2ccoc2)cc1  
8282 C=CC(=O)OC(C)(C)C.CCOC(=O)N1CCC2(CC1)CC(=O)c1cc(Br)ccc1O2>>CCOC(=O)N1CCC2(CC1)CC(=O)c1cc(/C=C/C(=O)OC(C)(C)C)ccc1O2  
8283 C=CC(=O)OC.O=C(Nc1cccc(Br)c1)C1CCCC1>>COC(=O)/C=C/c1cccc(NC(=O)C2CCCC2)c1  
8284 C=Cc1ccccc1.C[Si](C)(C)CCOCn1nc(I)c2cc(C=O)ccc21>>C[Si](C)(C)CCOCn1nc(/C=C/c2ccccc2)c2cc(C=O)ccc21  
8285 C=Cc1cccc1.Cc1cc(I)c2cccc2n1>>Cc1cc(/C=C/c2cccc2)c2cccc2n1  
8286 C=CC(=O)OCC.CCOC(=O)c1cc(Br)enc1N>>CCOC(=O)/C=C/c1enc(N)c(C(=O)OCC)c1  
8287 C=Cc1cccc1.O=c1cc(-c2cccc2)oc2ccc(Br)cc12>>O=c1cc(-c2cccc2)oc2ccc(/C=C/c3cccc3)cc12  
8288 C=Cc1cccc1.CC(=S)NS(=O)(=O)c1ccc(Br)cc1>>CC(=S)NS(=O)(=O)c1ccc(/C=C/c2cccc2)cc1  
8289 C=Cc1ccc(C)cc1.COc1cccc1Br>>COc1cccc1/C=C/c1ccc(C)cc1  
8290 C=CC(=O)OC.COc1c(O)cc(-c2ccc(Br)cc2)cc1C12CC3CC(CC(C3)C1)C2>>COC(=O)/C=C/c1ccc(-c2cc(O)c(OC)c(C34CC5CC(CC(C5)C3)C4)c2)cc1  
8291 C=Cc1cccc(C)c1.COc1cc(CC(=O)Nc2cccc(I)c2)ccc1OCCNC(=O)OC(C)(C)C>>COc1cc(CC(=O)Nc2cccc(/C=C/c3cccc(C)c3)c2)ccc1OCCNC(=O)OC(C)(C)C  
8292 C=COC[C@@H]1CCCN1C.O=S(=O)(OC1=CCCc2cccc21)C(F)(F)F>>CN1CCC[C@H]1CO/C=C/C1=CCCc2cccc21  
8293 C=Cc1cccc1C.Cc1ccc2c(-c3cccc3)c(Br)c(=O)oc2c1>>Cc1ccc2c(-c3cccc3)c(/C=C/c3cccc3C)c(=O)oc2c1  
8294 C=CC(=O)OCC.O=c1cc(-c2cccc2)oc2cc(Br)ccc12>>CCOC(=O)/C=C/c1ccc2c(=O)cc(-C=CC(=O)OCC.COc1cc(Br)cc(OC)c1>>CCOC(=O)/C=C/c1cc(OC)cc(OC)c1  
8295 C=CC(=O)OCC.COc1cc(Br)cc(OC)c1>>CCOC(=O)/C=C/c1cc(OC)cc(OC)c1  
8296 C=Cc1ccc(F)cc1.C[Si](C)(C)OS(=O)(=O)C(F)(F)F>>C[Si](C)(C)/C=C/c1ccc(F)cc1  
8297 C=CC(=O)OCC.CCOC(=O)c1cccc(Br)c1>>CCOC(=O)/C=C/c1cccc(C(=O)OCC)c1  
8298 C=CC(=O)OC.COc1ccc2c(c1)CCN(c1cccc(C(C)C)c1)C2(C)c1ccc(Br)cc1>>COC(=O)/C=C/c1ccc(C2(C)c3ccc(OC)cc3CCN2c2cccc(C(C)C)c2)cc1  
8299 C=Cc1ccc(Cl)cc1.C[Si](C)(C)I>>C[Si](C)(C)/C=C/c1ccc(Cl)cc1  
8300 C=CC(=O)OC.CCN(CC)C(=O)c1cc(OC)c(OC)cc1Br>>CCN(CC)C(=O)c1cc(OC)c(OC)cc1/C=C/C(=C=CC(=O)OCC.COc1ccc(C(=O)CCC(=O)Nc2nc(-c3cccc3)c(Cc3cccc3)s2)cc1Br>>CCOC(=O)/C=C/c1cc(C(=O)CCC(=O)Nc2nc(-c3cccc3)c(Cc3cccc3)s2)ccc1OCC  
8301 c3cccc3)c(Cc3cccc3)s2)ccc1OCC  
8302 C=CC=O.COc1ccc(COCC/C=C(I)I)cc1>>COc1ccc(COCC/C=C(C)/C=C/C=O)cc1  
8303 C=CC(=O)OC(C)(C)C.O=[N+](O-)]c1ccc(Cl)cc1>>CC(C)(C)OC(=O)/C=C/c1ccc([N+](=O)[O-])cc1  
8304 C=CC(=O)OC.Cc1cc(-c2ccc(Cl)cc2)n2nc(-c3cccc3)c(I)c2n1>>COC(=O)/C=C/c1c(-c2cccc2)nn2c(-c3ccc(Cl)cc3)cc(C)nc12  
8305 C=C[Si](C)(C)C.COc1cccc1I>>COc1cccc1/C=C/[Si](C)(C)C  
8306 C=Cc1ccc(C(=O)OCC)cc1.CC1(C)CCC(=C2CCCC2)c2cc(Br)ccc21>>CCOC(=O)c1ccc(/C=C/c2ccc3c(c2)C(=C2CCCC2)CCC3(C)C)cc1  
8307 C=CC(=O)N1N=Cc2cccc2C1CC.COc1cc(Cc2enc(N)nc2N)cc(I)c1OC>>CCC1c2cccc2C=NN1C(=O)/C=C/c1cc(Cc2enc(N)nc2N)cc(OC)c1OC  
8308 C=CC(=O)OCC.Fc1cccc(-n2nnc3enc(Nc4cccc(Br)c4)nc32)c1>>CCOC(=O)/C=C/c1cccc(Nc2ncc3nnn(-c4cccc(F)c4)c3n2)c1  
8309 C=Cc1ccc(N(c2cccc2)c2cccc2)cc1.CC(C)(C)Br>>CC(C)(C)/C=C/c1ccc(N(c2cccc2)c2cccc2)cc1  
8310 C=COCCCC.O=c1cc(Br)c2cccc2o1>>CCCCO/C=C/c1cc(=O)oc2cccc12  
8311 C=CP(=O)(OCC)OCC.CC1C[C@@H]2CC(N3[C@H]4CCC[C@H]3C[C@H](n3c(=O)c(Cl)nc5cccc53)C4)C[C@H](C1)C2>>CCOP(=O)/C=C/c1nc2cccc2n([C@@H]2C[C@H]3CCC[C@H](C2)N3C2C[C@H]3CC(C)C[C@H](C2)C3)c1=O)OCC  
8312 C=CC(=O)OCCCC.COc1ccc(Br)c(OC)c1>>CCCCOC(=O)/C=C/c1ccc(OC)cc1OC  
8313 C=CC(=O)OCC.COcn1nc(-c2cccc2)c(Br)cc1=O>>CCOC(=O)/C=C/c1cc(=O)n(COC)nc1-c1cccc1  
8314 C=CC(=O)Nc1ccc(Cl)cc1.CC(C)(C)c1ccc2[nH]c3c(c2c1)CC(=O)Nc1ccc(I)cc1-3>>CC(C)(C)c1ccc2[nH]c3c(c2c1)CC(=O)Nc1ccc(/C=C/C(=O)Nc2ccc(Cl)cc2)cc1-3  
8315 C=CC(C)=O.Ic1ccc2[nH]ccc2c1>>CC(=O)/C=C/c1ccc2[nH]ccc2c1  
8316 C=CC(=O)OCC.COc1cc(C)c(Br)c(CC#N)c1>>CCOC(=O)/C=C/c1c(C)cc(OC)cc1CC#N  
8317 C=Cc1cccc1.CC(=O)c1cccc(Cl)c1>>CC(=O)c1cccc(/C=C/c2cccc2)c1  
8318 C=CC(=O)OCC.Cc1nc(N)nc(N[C@H]2CC[C@H](OCCO)CC2)c1Br>>CCOC(=O)/C=C/c1c(C)nc(N)nc1N[C@H]1CC[C@H](OCCO)CC1  
8319 C=CN1C(=O)c2cccc2C1=O.Cc1ccc(Cl)cc1>>Cc1ccc(/C=C/N2C(=O)c3cccc3C2=O)cc1  
8320 C=CC(=O)OCCCC.COc1ccc(Br)c1>>CCCCOC(=O)/C=C/c1ccc(OC)c1

8321 C=CC(=O)OCC.Oc1ccc(F)cc1Br>>CCOC(=O)/C=C/c1cc(F)ccc1O  
8322 C=CC(=O)OC(C)(C)C.CC(C)c1cc(C(C)C)c(Br)c(C(C)C)c1>>CC(C)c1cc(C(C)C)c(/C=C/C(=O)OC(C)(C)C)c(C(C)C)c1  
8323 C=Cc1cccc1O.Nc1cccc1Br>>Nc1cccc1/C=C/c1cccc1O  
8324 C=CC(=O)OC(C)(C)C.O=C(O)c1ccc(I)cc1>>CC(C)(C)OC(=O)/C=C/c1ccc(C(=O)O)cc1  
8325 C=CCN(C)C(=O)OC(C)(C)C.Cc1ccc(Cl)cc1>>Cc1ccc(/C=C/CN(C)C(=O)OC(C)(C)C)cc1  
8326 C=CC(=O)OC(C)(C)C.COc1cccc(NCc2ccc(Br)cc2)c1>>COc1cccc(NCc2ccc(/C=C/C(=O)OC(C)(C)C)cc2)c1  
8327 C=CC(=O)OC.Cc1ccc(C(=O)NC2CC2)cc1-n1cnc2ccc(I)cc2c1=O>>COC(=O)/C=C/c1ccc2ncn(-c3cc(C(=O)NC4CC4)ccc3C)c(=O)c2c1  
8328 C=CC(=O)OC.Cc1cccc(N(Cc2ccc(Br)cc2)CC(C)(C)C)n1>>COC(=O)/C=C/c1ccc(CN(CC(C)(C)C)c2cnc(C)n2)cc1  
8329 C=CCc1c(O)c(/N=N/c2ccc(Br)cc2)cc2c(C)cc(=O)oc12.C=Cc1ccncc1>>C=CCc1c(O)c(/N=N/c2ccc(/C=C/c3ccncc3)cc2)cc2c(C)cc(=O)oc12  
8330 C=Cc1ccc(Cl)cc1.COC(=O)c1ccc(I)cc1>>COC(=O)c1ccc(/C=C/c2ccc(Cl)cc2)cc1  
8331 Br1cccc1.C=CN1C(=O)c2cccc2C1=O>>O=C1c2cccc2C(=O)N1/C=C/c1cccc1  
8332 C=CC(=O)OC(C)(C)C.Ic1ccc2[nH]ccc2c1>>CC(C)(C)OC(=O)/C=C/c1ccc2[nH]ccc2c1  
8333 Br1cnc2c(c1)NCCCN2.C=CC(=O)N(C)Cc1oc2cccc2c1C>>Cc1c(CN(C)C(=O)/C=C/c2cnc3c(c2)NCCN3)oc2cccc12  
8334 C=CC(N)=O.Cc1cc(F)ccc1Br>>Cc1cc(F)ccc1/C=C/C(N)=O  
8335 C=CC(=O)OC(C)(C)C.COc1ccc(S(=O)(=O)c2ccc3cc(Br)ccc3n2)cc1>>COc1ccc(S(=O)(=O)c2ccc3cc(/C=C/C(=O)OC(C)(C)C)ccc3n2)cc1  
8336 C=C1ccc(O)cc1.CN(C(=O)c1cccc1)c1ccc2c(c1)[nH]c(=NC(=O)c1ccc(Br)s1)n2CCC(N)=O>>CN(C(=O)c1cccc1)c1ccc2c(c1)[nH]c(=NC(=O)c1ccc(/C=C/c3ccc(O)cc3)s1)n2CCC(N)=O  
8337 C=Cc1cccc1C.Nc1ccc([N+](=O)[O-])cc1Br>>Cc1cccc1/C=C/c1cc([N+](=O)[O-])ccc1N  
8338 C=CC(=O)OCCCC.Cc1cc(I)ccc1Br>>CCCCOC(=O)/C=C/c1ccc(Br)c(C)c1  
8339 C=Cc1ccc(OC(C)=O)cc1.CC(=O)Oc1cc(Br)cc(OC(C)=O)c1>>CC(=O)Oc1ccc(/C=C/c2cc(OC(C)=O)c(OC(C)=O)c2)cc1  
8340 Br1cccc1.C=CCOc1ccc(OC)cc1>>COc1ccc(OC/C=C/c2cccc2)cc1  
8341 C=CC(=O)OC(C)(C)C.Fc1cccc1Oc1ncc2nc(-c3ccc(Br)cc3)oc2n1>>CC(C)(C)OC(=O)/C=C/c1ccc(-c2nc3cnc(Oc4cccc4F)nc3o2)cc1  
8342 C=CC#N.O=c1[nH]c(=O)n([C@H]2C[C@H](O)[C@@H](CO)O2)cc1I>>N#C/C=C/c1cn([C@H]2C[C@H](O)[C@@H](CO)O2)c(=O)[nH]c1=O  
8343 C=CP(=O)(O)O.FC(F)(F)c1ccc(Br)cc1>>O=P(O)(O)/C=C/c1ccc(C(F)(F)F)cc1  
8344 C=Cc1cccc1.CCCCC(C)(Br)CC>>CCCCC(C)/C=C/c1cccc1CC  
8345 C=Cc1ccc(-c2cccc2)cc1.O=c1oc2cccc2cc1Br>>O=c1oc2cccc2cc1/C=C/c1ccc(-c2cccc2)cc1  
8346 C=COCCCC.COc1ccc(C(=O)Cl)cc1>>CCCCO/C=C/C(=O)c1ccc(OC)cc1  
8347 C=C[Si](C)(C)c1cccn1.Ic1ccsc1>>C[Si](C)(C)/C=C/c1ccsc1c1cccn1  
8348 C=CC(=O)OC.CCC(CC)(c1ccc(OCc2cccc2)c(C)c1)c1cn(C)c2cc(Br)ccc12>>CCC(CC)(c1ccc(OCc2cccc2)c(C)c1)c1cn(C)c2cc(/C=C/C(=O)OC)ccc12  
8349 C=CC1(C(=O)OC)CCOCC1.C[C@@H](NC(=O)OC(C)(C)C)c1ccc2ccc(Br)cc2n1>>COC(=O)C1(/C=C/C/c2ccc3ccc([C@@H](C)NC(=O)OC(C)(C)C)nc3c2)CCOCC1  
8350 C=Cc1cccc1.Clc1ccc(-c2cnc3ccccn23)cc1>>C=C/c1ccc(-c2cnc3ccccn23)cc1)c1cccc1  
8351 C=Cc1ccc(OC)c(OC)c1.COc1ccc(-c2cc(=O)c3c(OC)cc(OC)c(I)c3o2)cc1OC>>COc1ccc(/C=C/c2c(OC)cc(OC)c3c(=O)cc(-c4ccc(OC)c(OC)c4)oc23)cc1OC  
8352 C=CC(=O)OC(C)(C)C.CC(=O)Cc1cc2c(cc1Br)OCO2>>CC(=O)Cc1cc2c(cc1/C=C/C(=O)OC(C)(C)C)OCO2  
8353 C=Cc1cccc1.COc1ccc(/C=C/C(=O)c2ccc(Br)cc2)cc1>>COc1ccc(/C=C/C(=O)c2ccc(/C=C/c3cccc3)c2)cc1  
8354 C=CC(=O)OC.CC1(C)N=NC(c2cccc2)=C1I>>COC(=O)/C=C/C1=C(c2cccc2)N=NC1(C)C  
8355 C=CC(=O)OC(C)(C)C.CCCCc1ccc(C(=O)c(Br)n1>>CCCCc1ccc(C(=O)c(/C=C/C(=O)OC(C)(C)C)n1  
8356 C=CCOc1cccc1.Cc1ccc(Br)cc1>>Cc1ccc(/C=C/COc2cccc2)cc1  
8357 C=CS(C)(=O)=O.COC(=O)c1cc(-c2cccc2)cc2c(I)en(COCC[Si](C)(C)C)c12>>COC(=O)c1cc(-c2cccc2)cc2c(/C=C/S(C)(=O)=O)en(COCC[Si](C)(C)C)c12  
8358 C=CC(=O)CC.COc1ccc2cc(Br)ccc2c1>>CCC(=O)/C=C/c1ccc2cc(OC)ccc2c1  
8359 C=CC(=O)OC(C)(C)C.CC(=O)Cc1cccc1Br>>CC(=O)Cc1cccc1/C=C/C(=O)OC(C)(C)C  
8360 C=CCN1C(=O)c2cccc2C1=O.Cc1ccc(I)cc1>>Cc1ccc(/C=C/CN2C(=O)c3cccc3C2=O)cc1  
8361 C=CC(C)=O.Ic1nnc2ncn(Cc3cccc3)c12>>CC(=O)/C=C/c1nnc2ncn(Cc3cccc3)c12  
8362 C=CCCCC.Oc1ccc(O)c(Br)c1>>CCCC/C=C/c1cc(O)ccc1O  
8363 C=CC(=O)OCC.Clc1cc(Br)cc2c1NCCC2>>CCOC(=O)/C=C/c1cc(Cl)c2c(c1)CCCN2

8364 C=Cc1cccc(OC)c1OC.O=C1C(O)=C(I)C(=O)c2ccccc21>>COc1cccc(/C=C/C2=C(O)C(=O)c3ccccc3C2=O)c1OC  
C=Cc1ccc2c(c1)Sc1cc(/C=C/c3ccc4c(c3)Sc3ccccc3N4CCCCCCCC)ccc1N2CCCCCCCC.CCCCCCCC

8365 N1c2ccc(Br)cc2Sc2cc(C=O)ccc21>>CCCCCCCCN1c2ccccc2Sc2cc(/C=C/c3ccc4c(c3)Sc3cc(/C=C/c5ccc6c(c5)Sc5cc(C=O)ccc5N6CCCCCCCC)ccc3N4CCCCCCCC)ccc21

8366 Br1cnc2ccccc2c1.C=CC(=O)N(C)OC>>CON(C)C(=O)/C=C/c1cnc2ccccc2c1

8367 C=Cc1ccc(C)cc1.COc1ccc(I)cc1>>COc1ccc(/C=C/c2ccc(C)cc2)cc1

8368 Br1ccc(/C=C/c2ccncc2)c2nsnc12.C=Cc1ccc2c(c1)c1ccccc1n2CCCC>>CCCCn1c2ccccc2c2cc(/C=C/c3ccc(/C=C/c4ccncc4)c4nsnc34)ccc21

8369 C=Cc1ccc(N(C)C)cc1.CCCCC1=C(C(CCC)P(=O)(c2ccccc2)c2cc(I)ccc21>>CCCCC1=C(C(CCC)P(=O)(c2ccccc2)c2cc(/C=C/c3ccc(N(C)C)cc3)ccc21

8370 C=Cc1ccccc1.Cc1ccc(Br)c(N)c1>>Cc1ccc(/C=C/c2ccccc2)c(N)c1  
C=Cc1ccccc1.O=C(c1ccc(F)cc1)N1CCC(O)(Cn2cnc3c(cnn3-

8371 c3ccc(Br)cc3)c2=O)CC1>>O=C(c1ccc(F)cc1)N1CCC(O)(Cn2cnc3c(cnn3-c3ccc(/C=C/c4ccccc4)cc3)c2=O)CC1

8372 C=CC(OC)OC.COc1ccc(I)c1>>COc1cccc(/C=C/C(OC)OC)c1

8373 Br1cncnc1.C=Cc1ccccc1>>C(=C/c1cncnc1)\c1ccccc1

8374 C=CC(=O)OC.Ic1cnn(C2CCCCO2)c1>>COC(=O)/C=C/c1cnn(C2CCCCO2)c1

8375 C=Cc1ccccc1Cl.COCOc1c(OC)ccc(C)c1I>>COCOc1c(OC)ccc(C)c1/C=C/c1ccccc1Cl

8376 C=CS(=O)(=O)F.Oc1ccc(I)c1>>O=S(=O)(F)/C=C/c1ccc(O)c1

8377 C=CCC(=O)OC.FC(F)(F)c1ccc(I)cc1>>COC(=O)C/C=C/c1ccc(C(F)(F)F)cc1

8378 C=CC(C)O.Ic1ccccc1>>CC(O)/C=C/c1ccccc1

8379 Br1cccc(N(c2ccccc2)c2ccccc2)c1.C=Cc1ccc(C(=O)O)cc1>>O=C(O)c1ccc(/C=C/c2cccc(N(c3ccccc3)c3ccccc3)c2)cc1

8380 C=Cc1cccn1C(=O)OC(C)(C)C.O=Cc1ccc(I)cc1>>CC(C)(C)OC(=O)n1ccccc1/C=C/c1ccc(C(=O)O)cc1

8381 C=CC(=O)OC.CC(C)(C)OC(=O)c1ccccc1Br>>COC(=O)/C=C/c1ccccc1C(=O)OC(C)(C)C

8382 C=CC(=O)NCCCCC(=O)OC.CC(=O)OC[C@H]1C=C[C@H](n2cc(I)c(=O)[nH]c2=O)O1>>COC(=O)CCCCCNC(=O)/C=C/c1cn([C@H]2C=C[C@H](COC(C)=O)O2)c(=O)[nH]c1=O  
C=CC(=O)OC.COc1ccc(-

8383 c2cn(S(=O)(=O)c3ccccc3)c3ncc(Br)cc23)cc1>>COC(=O)/C=C/c1cnc2c(c1)c(-C=CC(=O)OC.O=C1CCC(N2C(=O)c3ccc(Br)cc3C2=O)C(=O)N1>>COC(=O)/C=C/c1ccc2c(c1)C(=O)N(C1CCC(=O)NC1=O)C2=O

8384 Br1cncnc1.C=CCO[C@H]1[C@H](C)[C@@H](O[C@@H]2O[C@H](C)C[C@H](N(C)C)[C@H]2O)[C@](C)(OC)C[C@@H](C)/C(=N)O)[C@H](C)[C@@H](O)[C@](C)(O)[C@@H](CC)OC(=O)[C@@H]1C>>CC[C@H]1OC(=O)[C@H](C)[C@@H](OC/C=C/c2cncnc2)[C@H](C)[C@@H](O[C@@H]2O[C@H](C)C[C@H](N(C)C)[C@H]2O)[C@](C)(OC)C[C@@H](C)/C(=N)O)[C@H](C)[C@@H](C)C@@H(C)C=CC(=O)OC(C)(C)C.Oc1ccccc(I)c1>>CC(C)(C)OC(=O)/C=C/c1ccccc(CO)c1

8385 C=Cc1ccc([N+](=O)[O-])cc1.COC(=O)c1ccc(Br)cc1>>COC(=O)c1ccc(/C=C/c2ccc([N+](=O)[O-]Br1ccccc2ccccc12.C=CC[C@H]1CCCN(C)C[C@H](OC(C)=O)[C@H](C)C[C@H](CC(OC)OC)[C@H](O[C@@H]2O[C@H](C)[C@@H](O[C@H]3C[C@@](C)(O)[C@@H](OC(=O)CC)[C@H](C)O3)[C@H](N(C)C)[C@H]2OC(C)=O)[C@@H](OC)[C@H](OC(=O)CC)CC(=O)O1>>CCC(=O)O[C@H]1[C@H](C)O[C@@H](O[C@H]2[C@H](N(C)C)[C@@H](OC(C)=O)[C@H](O[C@@H]3[C@@H](OC)[C@H](OC(=O)CC)CC(=O)O[C@@H](C/C=C/c4ccccc5ccccc45)CCCN(C)C[C@H](OC(C)=O)[C@@H](C)C[C@@H]3C(C)(OC)N1C@H12C)\C1C@H11(C)N

8386 C=Cc1ccccc1C(=O)O.FC(F)(F)c1ccc(I)cc1>>O=C(O)c1ccccc1/C=C/c1ccc(C(F)(F)F)cc1

8387 Br1ccc2ccccc2c1.C=CC[C@H]1CCCN(C)C[C@H](OC(C)=O)[C@H](C)C[C@H](CC(OC)OC)[C@H](O[C@@H]2O[C@H](C)[C@@H](O[C@H]3C[C@@](C)(O)[C@@H](OC(=O)CC)[C@H](C)O3)[C@H](N(C)C)[C@H]2OC(C)=O)[C@@H](OC)[C@H](OC(=O)CC)CC(=O)O1>>CCC(=O)O[C@H]1[C@H](C)O[C@@H](O[C@H]2[C@H](N(C)C)[C@@H](OC(C)=O)[C@H](O[C@@H]3[C@@H](OC)[C@H](OC(=O)CC)CC(=O)O[C@@H](C/C=C/c4ccccc5ccccc45)CCCN(C)C[C@H](OC(C)=O)[C@@H](C)C[C@@H]3C(C)(OC)N1C@H12C)\C1C@H11(C)N

8388 C=Cc1ccccc1C(=O)O.FC(F)(F)c1ccc(I)cc1>>O=C(O)c1ccccc1/C=C/c1ccc(C(F)(F)F)cc1

8389 Br1ccc2c(cnn2C2CCCCO2)c1.C=Cc1cccn1>>C=C/c1ccc2c(cnn2C2CCCCO2)c1)\c1cccn1

8390 C=CC(=O)OC(C)(C)C.Fc1ccc(Br)cc1>>CC(C)(C)OC(=O)/C=C/c1ccc(F)cc1

8391 C=CC(OC)OCC.Cc1ccccc(I)c1>>CCOC(/C=C/c1ccccc(C)c1)OCC

8392 C=CC(F)(F)C(F)(F)C(F)(F)C(F)(F)C(F)(F)F.O=P(c1ccccc1)(c1ccccc1)c1ccc(Br)cc1>>O=P(c1ccccc1)(c1ccccc1)c1ccc(/C=C/C(F)(F)C(F)(F)C(F)(F)C(F)(F)C(F)(F)F)cc1

8393 C=CC(=O)NCc1ccccc1C(=O)OC(C)(C)C.c1.O=C1NC(=O)C(c2c[nH]c3ccccc23)=C1Br>>CC(C)(C)OC(=O)c1ccccc1CNC(=O)/C=C/C2=C(c3c[nH]c4ccccc34)C(=O)NC2=O)c1

8394 C=Cc1ccc(OC)c(O)c1.CC(=O)OC[C@H]1O[C@@H](Oc2ccc(I)cc2)[C@H](OC(C)=O)[C@@H]1OC(C)=O>>COc1ccc(/C=C/c2ccc(O[C@@H]3O[C@H](COC(C)=O)[C@@H](OC(C)=O)[C@H]3OC(C)=O)cc2)cc1O

8395 C=CC(=O)Nc1ccccc2ccnc12.CC(C)c1ccc(I)cc1>>CC(C)c1ccc(/C=C/C(=O)Nc2ccccc3ccnc23)cc1

8396 C=Cc1cncnc1.N#Cc1cnc2cc(Br)sc2c1Nc1ccc(Oc2ccccc2)cc1>>N#Cc1cnc2cc(/C=C/c3ccncc3)sc2c1Nc1ccc(Oc2ccccc2)cc1

8397 C=CC(=O)OC(C)(C)C.CC(C)(C)OC(=O)CCOCc1cc2c(cc1Br)OCO2>>CC(C)(C)OC(=O)/C=C/c1cc2c(cc1COCCC(=O)OC(C)(C)C)OCO2

8398 C=CC(=O)OC.CC(=O)c1ccc(OS(=O)(=O)C(F)(F)F)cc1>>COC(=O)/C=C/c1ccc(C(C)=O)cc1

8399



Brc1ccc(C(=C2Cc3ccccc3C2)c2ccc3c(cnn3C3CCCCO3)c2)cc1.C=CC(=O)OC>>COC(=O)/C=C/c1cccc  
 (C(=C2Cc3ccccc3C2)c2ccc3c(cnn3C3CCCCO3)c2)cc1  
 C=Cc1ccc(OC)c(OC)c1.COc1cc(Br)c(CCNC(C)=O)cc1OC>>COc1ccc(/C=C/c2cc(OC)c(OC)cc2CCN  
 C(C)=O)cc1OC  
 C=CC(=O)OC(F)(F)C(F)(F)C(F)(F)C(F)(F)C(F)(F)C(F)(F)C(F)(F)C(F)(F)C(F)(F)C(F)(F)C(F)(F)F.C[C@]12C  
 [C@@]34C=C(Sc5cccc(I)c5)C(=O)[C@@](C)(CCC(=O)Nc5c(O)ccc(C(=O)O)c5O)[C@@H]3[C@H]  
 (C[C@@H]1C4)O2>>C[C@]12C[C@@]34C=C(Sc5cccc(/C=C/C(=O)OC(F)(F)C(F)(F)C(F)(F)C(F)(F)  
 )C(F)(F)C(F)(F)C(F)(F)C(F)(F)C(F)(F)C(F)(F)F)c5)C(=O)[C@@](C)(CCC(=O)Nc5c(O)ccc(C(=O)O)  
 c5O)I[C@@H]3[C@H]1C4)O2  
 C=CCN(C(=O)C(C)(C)C)[C@@H]1CCc2ccccc21.O=C1Ne2ncccc2[C@@]12Cc1cc(Br)cn1C2>>CC(C)  
 C(C)C(=O)N(C/C=C/c1nc2c(c1)C[C@@]1(C2)C(=O)Nc2ncccc21)[C@@H]1CCc2ccccc21  
 C=C/C=C(\CCCC)OCC.Ic1cccc2ccccc12>>CCCC/C(=C\C=C\c1cccc2ccccc12)OCC  
 C=Cc1ccc(OC(C)=O)cc1.CC(=O)OC[C@H]1O[C@@H](Oc2ccc(I)cc2)[C@H](OC(C)=O)[C@@H]1  
 OC(C)=O>>CC(=O)OC[C@H]1O[C@@H](Oc2ccc(/C=C/c3ccc(OC(C)=O)cc3)cc2)[C@H](OC(C)=O  
 )[C@@H]1OC(C)=O  
 C=CCn1cnnn1.OC(Cn1cnnn1)(c1ccc(F)cc1F)C(F)(F)c1ccc(Br)cn1>>OC(Cn1cnnn1)(c1ccc(F)cc1F)C(  
 F)(F)c1ccc(/C=C/Cn2cnnn2)cn1  
 C=CC(=O)OC(C)(C)C.FC(F)Cn1cc(I)cn1>>CC(C)(C)OC(=O)/C=C/c1enn(CC(F)F)c1  
 C=CC(=O)O.Ic1ccc2c(c1)OCCOCCOCCOCCOCCO2>>O=C(O)/C=C/c1ccc2c(c1)OCCOCCOCCOCC  
 COCCO2  
 C=Cc1cc2cc(OC)c(OC)cc2oc1=O.O=[N+][O-]c1ccc(Br)cc1>>COc1cc2cc(/C=C/c3ccc([N+](=O)[O-]  
 ])cc3)c(=O)oc2cc1OC  
 C=Cc1ccc2c(c1)CC[C@]1[C@@H]2CC[C@]2(C)C(=O)CC[C@]1H12.CCOC(=O)C(F)(F)Br>>  
 CCOC(=O)C(F)(F)/C=C/c1ccc2c(c1)CC[C@]1H1[C@@H]2CC[C@]2(C)C(=O)CC[C@]1H12  
 C=CC(=O)OC.CCn1nnc2c(C)c(Br)ccc21>>CCn1nnc2c(C)c(/C=C/C(=O)OC)ccc21  
 C=CS(=O)(=O)NCc1cccc1.CC(C)(C)OC(=O)NCc1cc(F)ccc1Br>>CC(C)(C)OC(=O)NCc1cc(F)ccc1/  
 C=C/S(=O)(=O)NCc1cccc1  
 C=CC(=O)c1ccc(OC)cc1OC.COc1cc(OC)c(OC)cc1I>>COc1ccc(C(=O)/C=C/c2cc(OC)c(OC)cc2OC)c  
 (OC)c1  
 C=CC(=O)OC.N#Cc1ccc(Cl)c(F)c1Br>>COC(=O)/C=C/c1c(C#N)ccc(Cl)c1F  
 C=Cc1cenc1.Fc1ccc(I)c(F)c1>>Fc1ccc(/C=C/c2ccncc2)c(F)c1  
 C=CC(C)(C)C(=O)NC(C)(C)CO.CC(=O)OC[C@H]1O[C@@H](c2cc(Cc3ccc(Br)cc3F)c(C)cc2C)[C@  
 H](OC(C)=O)[C@@H](OC(C)=O)[C@@H]1OC(C)=O>>CC(=O)OC[C@H]1O[C@@H](c2cc(Cc3cc  
 c(/C=C/C(C)(C)C(=O)NC(C)(C)CO)cc3F)c(C)cc2C)[C@H](OC(C)=O)[C@@H](OC(C)=O)[C@@H]  
 C=CC(=O)OCCCC.COc1c(C)cc(Br)cc1C>>CCCCOC(=O)/C=C/c1cc(C)c(OC)c(C)c1  
 C=CS(=O)(=O)c1cccc1.FC(F)(F)c1ccc(Br)cc1>>O=S(=O)/C=C/c1ccc(C(F)(F)F)cc1)c1cccc1  
 C=Cc1cccc1F.CCOC(=O)C(F)Br>>CCOC(=O)C(F)/C=C/c1cccc1F  
 C=CC(=O)N(C)OC.COc1ccc(I)cc1>>COc1ccc(/C=C/C(=O)N(C)OC)cc1  
 C=Cc1ccc([N+](=O)[O-])cc1.O=Cc1ccc(Br)cc1>>O=Cc1ccc(/C=C/c2ccc([N+](=O)[O-])cc2)cc1  
 C=Cc1ccc2ccccc2c1.O=Cc1ccc(Br)cc1>>O=Cc1ccc(/C=C/c2ccc3ccccc3c2)cc1  
 C=Cc1ccc(C)cc1.Cc1c(Br)c(=O)oc2cc(N)ccc12>>Cc1ccc(/C=C/c2c(C)c3ccc(N)cc3oc2=O)cc1  
 Brc1cccn1.C=CC(=O)CCCC>>CCCCC(=O)/C=C/c1cccn1  
 C=Cc1ccc2ccccc2c1.COC(=O)C(Cc1ccccc1)C(=O)OC>>COC(=O)C(Cc1ccccc1/C=C/c1ccc2ccccc2  
 1)C(=O)OC  
 C=CC(C)=O.Cc1cc(C)c(Br)cc1C>>CC(=O)/C=C/c1cc(C)c(C)cc1C  
 C=Cc1cccc1.COc1ccc(-c2c(Br)c(=O)oc3cc(C)ccc23)cc1>>COc1ccc(-  
 c2c(/C=C/c3ccccc3)c(=O)oc3cc(C)ccc23)cc1  
 C=Cc1ccc(-n2ccc3ccccc32)nc1.Ic1cccc1>>C=C/c1ccc(-n2ccc3ccccc32)nc1)c1cccc1  
 C=CCCN(C)C(=O)OC(C)(C)C.CCOc1encc(Br)c1>>CCOc1encc(/C=C/CCN(C)C(=O)OC(C)(C)C)c1  
 C=CC(=O)OCCCC.COC(=O)c1cccc1I>>CCCCOC(=O)/C=C/c1cccc1C(=O)OC  
 Brc1ccc2ccccc2c1.C=CP(=O)(OCC)OCC>>CCOP(=O)/C=C/c1ccc2ccccc2c1)OCC  
 C=CC(=O)OC.COC(=O)c1ccc(Br)cc1>>COC(=O)/C=C/c1ccc(C(=O)OC)cc1  
 C=Cc1ccc(OC)c(OC)c1.Nc1ccccc1I>>COc1ccc(/C=C/c2ccccc2N)cc1OC  
 C=CC(=O)OCc1cn(S(=O)(=O)c2ccccc2[N+](=O)[O-])c2ccc([N+](=O)[O-]  
 ])cc12.Ic1ccc(CCCOC2CCCCO2)cc1>>O=C(/C=C/c1ccc(CCCOC2CCCCO2)cc1)OCc1cn(S(=O)(=O)  
 c2ccccc2[N+](=O)[O-])c2ccc([N+](=O)[O-])cc12  
 C=CC(=O)OC.COc1ccc(I)nn1>>COC(=O)/C=C/c1ccc(OC)nn1  
 C=CC(=O)OC.CNc1cc(Cl)ccc1[N+](=O)[O-]>>CNc1cc(/C=C/C(=O)OC)ccc1[N+](=O)[O-]  
 C=C[Si](C)(C)C.COc1cccc(I)c1>>COc1cccc(/C=C/[Si](C)(C)C)c1  
 C=CC(=O)OC.COc1cc2c3ccccc3nc3c4ccc(Cl)cc4n(C)c(c1)c23>>COC(=O)/C=C/c1ccc2c3nc4ccccc4c  
 4cc(OC)cc(c43)n(C)c2c1

8439 C=CCCN1C(=O)c2ccccc2C1=O.Cc1cc(Cl)c2ccccc2n1>>Cc1cc(/C=C/CCN2C(=O)c3ccccc3C2=O)c2ccccc2n1  
8440 Br1ccenc1.C=CC(=O)N1C(=O)N(C)[C@H](C)[C@@H]1c1ccccc1>>C[C@@H]1[C@H](c2ccccc2)N(C(=O)/C=C/c2ccccc2)C(=O)N1C  
8441 Br1ccc2c(c1)OCO2.C=Cc1ccc(OC(C)=O)cc1>>CC(=O)Oc1ccc(/C=C/c2ccc3c(c2)OCO3)cc1  
8442 C=Cc1ccenc1.Ic1ccccc1>>C(=C/c1ccenc1)\c1ccccc1  
8443 C=CC(=O)O.Cc1cc(Nc2ncnc3ccc(I)cc23)ccc1Oc1cc2nnen2en1>>Cc1cc(Nc2ncnc3ccc(/C=C/C(=O)O)cc23)ccc1Oc1cc2nnen2en1  
8444 C=CC(C)(C)C.O=C(c1ccccc1)c1ccc(Br)cc1>>CC(C)(C)/C=C/c1ccc(C(=O)c2ccccc2)cc1  
8445 C=CC(=O)OCCCC.CN[13c]1[13cH][13c](Cl)[13cH][13cH][13c]1[N+](=O)[O-]>>CCCCOC(=O)/C=C/[13c]1[13cH][13cH][13c]([N+](=O)[O-])[13c](NC)[13cH]1  
8446 C=CC(=O)OCC.COc1ccc(Br)cc1CC(=O)Nc1ccnc(C(=O)NC(C)(C)C)c1>>CCOC(=O)/C=C/c1ccc(OC)c(CC(=O)Nc2ccnc(C(=O)NC(C)(C)C)c2)c1  
8447 C=CC(OC)OCC.COCC(C)(OC)c1ccccc1Br>>CCOC(/C=C/c1ccccc1C(C)(OC)OC)OCC  
8448 C=CC(=O)OC.Ic1cc2ccccc2s1>>COC(=O)/C=C/c1cc2ccccc2s1  
8449 C=Cc1ccc(F)cc1.COC(=O)Cn1c(=O)c(Cl)nc2ccnc21>>COC(=O)Cn1c(=O)c(/C=C/c2ccc(F)cc2)nc2ccnc21  
8450 C=Cc1ccccc1.Cc1cc(Br)c2nnnn2c1>>Cc1cc(/C=C/c2ccccc2)c2nnnn2c1  
8451 C=CC(=O)OCC.O=C1CCc2c(Br)ccc(OCc3ccccc3)c21>>CCOC(=O)/C=C/c1ccc(OCc2ccccc2)c2c1CCC2=O  
8452 Br1ccccc1.C=CCS(N)(=O)=O>>NS(=O)(=O)C/C=C/c1ccccc1  
8453 C=CC(=O)OCCCC.CN(C)c1ccc(I)cc1>>CCCCOC(=O)/C=C/c1ccc(N(C)C)cc1  
8454 C=CC(=O)N(C)C.FC(F)(F)c1ccc(Cl)cc1>>CN(C)C(=O)/C=C/c1ccc(C(F)(F)F)cc1  
8455 C=CC(=O)OC.CC(C)(C)OC(=O)N1CCCC2(CC(=O)c3cc(Br)ccc3O2)C1>>COC(=O)/C=C/c1ccc2c(c1)C(=O)CC1(CCCN(C(=O)OC(C)(C)C)C1)O2  
8456 C=Cc1ccccc1Br.CCOC(=O)C(F)I>>CCOC(=O)C(F)/C=C/c1ccccc1Br  
8457 \*CNCCCOCCOCCOCCNC(=O)COc1ccc(C(Cc2cc(OC)cc(OC)c2)NC(=O)c2ccc(C=C)cc2)cc1.Fc1ccc(I)c(F)c1>>\*CNCCCOCCOCCOCCNC(=O)COc1ccc(C(Cc2cc(OC)cc(OC)c2)NC(=O)c2ccc(/C=C/c3ccc(F)cc3F)cc2)cc1  
8458 C=CC(=O)OCC.CC(C)(C)OC(=O)NCc1ccc(Br)cc1>>CCOC(=O)/C=C/c1ccc(CNC(=O)OC(C)(C)C)cc1  
8459 C=CC(=O)OCC.CCc1nc2c(N)nc3cc(Br)ccc3c2n1CC1CCOCC1>>CCOC(=O)/C=C/c1ccc2c(c1)nc(N)c1nc(CC)n(CC3CCOCC3)c12  
8460 Br1ccc(-c2enc3ccccc3n2)cc1.C=CCn1c(-c2ccc(OC)cc2F)nc2ccccc2c1=O>>COc1ccc(-c2nc3ccccc3c(=O)n2C/C=C/c2ccc(-c3enc4ccccc4n3)cc2)c(F)c1  
8461 C=Cc1ccccc(C(=O)OC)c1.Nc1ccccc(I)c1>>COC(=O)c1ccccc(/C=C/c2ccccc(N)c2)c1  
8462 C=CC(=O)OC.O=c1[nH]c(=O)n([C@H]2O[C@@H](CO)[C@H](O)[C@@H]2F)cc1I>>COC(=O)/C=C/c1en([C@H]2O[C@@H](CO)[C@H](O)[C@@H]2F)c(=O)[nH]c1=O  
8463 C=Cc1ccc(N(c2ccccc2)c2ccccc2)cc1.O=Cc1c(F)cc(Br)cc1F>>O=Cc1c(F)cc(/C=C/c2ccc(N(c3ccccc3)c3ccccc3)cc2)cc1F  
8464 C=CC(=O)OC.Cc1ccc(NC(=O)OC(C)(C)C)c(Br)c1>>COC(=O)/C=C/c1cc(C)ccc1NC(=O)OC(C)(C)C  
8465 C=Cc1ccc(O)cc1.Cn1nc(Br)c2ccccc21>>Cn1nc(/C=C/c2ccc(O)cc2)c2ccccc21  
8466 C=C[C@@H]1CCCCN1C(=O)OC(C)(C)C.CCc1ccc(I)cc1>>CCc1ccc(/C=C/[C@@H]2CCCCN2C(=O)OC(C)(C)C)cc1  
8467 C=CC(=O)OC(C)(C)C.Oc1ccc(C(=C2CCCCC2)c2ccc(Br)cc2)cc1>>CC(C)(C)OC(=O)/C=C/c1ccc(C(=C2CCCCC2)c2ccc(O)cc2)cc1  
8468 C=CC#N.CN1c2ccccc2C(C)(C)C12C=Cc1cc(I)ccc1O2>>CN1c2ccccc2C(C)(C)C12C=Cc1cc(/C=C/C#N)ccc1O2  
8469 C=CC(=O)OC(C)(C)C.Nc1cc(Cl)ccc1I>>CC(C)(C)OC(=O)/C=C/c1ccc(Cl)cc1N  
8470 C=CC(F)(F)C(F)(F)C(F)(F)C(F)(F)C(F)(F)C(F)(F)F.CC(=O)c1ccc(Br)cc1>>CC(=O)c1ccc(/C=C/C(F)(F)C(F)(F)C(F)(F)C(F)(F)C(F)(F)F)cc1  
8471 C=CS(=O)(=O)F.CC(C)[Si](Oc1ccc(I)cc1)(C(C)C)C(C)C>>CC(C)[Si](Oc1ccc(/C=C/S(=O)(=O)F)cc1)(C(C)C)C(C)C  
8472 C=CC(=O)OC.Cc1cc(C)c(C(=O)c2sc3cc(O)ccc3c2Oc2ccc(Br)cc2)c(C)c1>>COC(=O)/C=C/c1ccc(Oc2c(C(=O)c3c(C)cc(C)cc3C)sc3cc(O)ccc23)cc1  
8473 C=CC(=O)OC(C)(C)C.CC(C)(C)OC(=O)CCOCc1cc(OCc2ccccc2)ccc1Br>>CC(C)(C)OC(=O)/C=C/c1ccc(OCc2ccccc2)cc1COCCC(=O)OC(C)(C)C  
8474 C=CC(=O)OC.CC(C)=CBr>>COC(=O)/C=C/C=C(C)C  
8475 C=CC(=O)Nc1ccenc1.Oc1ccc(Br)nc1>>O=C(/C=C/c1ccc(O)en1)Nc1ccenc1  
8476 C=CC#N.CCN1cc(I)c(=O)c2ccc(C)nc21>>CCN1cc(/C=C/C#N)c(=O)c2ccc(C)nc21  
8477 C=CC(=O)Nc1ccccc1.COc1ccc2c(=O)c(I)coc2c1>>COc1ccc2c(=O)c(/C=C/C(=O)Nc3ccccc3)coc2c1

8478 C=Cc1cccc(CN2CCN(C)CC2)n1.Cc1nccc(C#N)c(Nc2ccc3[nH]ccc3c2C)c1Br>>Cc1nccc(C#N)c(Nc2ccc  
 3[nH]ccc3c2C)c1/C=C/c1cccc(CN2CCN(C)CC2)n1  
 8479 C=Cc1cccc(O)c1.Nc1cccc(Br)c1>>Nc1cccc(/C=C/c2cccc(O)c2)c1  
 8480 C=Cc1ccc(Cl)cc1.Cc1ccc(S(=O)(=O)Oc2cccc3c(Br)ccnc23)cc1>>Cc1ccc(S(=O)(=O)Oc2cccc3c(/C=C  
 /c4ccc(Cl)cc4)ccnc23)cc1  
 C=Cc1ccc2c(c1)C(CCCCCCCC)(CCCCCCCC)c1cc(/C=C/c3ccc4c(c3)C(CCCCCCCC)(CCCCCCCC)c  
 3ccccc3-4)ccc1-2.CCCCCCCCC1(CCCCCCCC)c2cc(Br)ccc2-  
 8481 c2ccc(C=O)cc21>>CCCCCCCCC1(CCCCCCCC)c2ccccc2-  
 c2ccc(/C=C/c3ccc4c(c3)C(CCCCCCCC)(CCCCCCCC)c3cc(/C=C/c5ccc6c(c5)C(CCCCCCCC)(CCCC  
 CCCC)c5cc(C=O)ccc5-6)ccc3-4)cc21  
 C=CCN(C(=O)C(C)(C)CCl)[C@@H]1CCc2ccccc21.O=C1Nc2ncccc2[C@@]12Cc1cc(I)ccc1C2>>CC  
 8482 (C)(CCl)C(=O)N(C/C=C/c1cnc2c(c1)C[C@@]1(C2)C(=O)Nc2ncccc21)[C@@H]1CCc2ccccc21  
 8483 Brc1ccccc1I.C=CC(=O)OCCSc1ccccc1>>O=C(/C=C/c1ccccc1Br)OCCSc1ccccc1  
 8484 C=C[C@@H]1CCCCN1C(=O)OC(C)(C)C.Cc1cccc(C)c1I>>Cc1cccc(C)c1/C=C/[C@@H]1CCCCN1  
 C(=O)OC(C)(C)C  
 8485 C=CC(=O)OCC.CC1(C)Cc2cc(Br)ccc2C1=O>>CCOC(=O)/C=C/c1ccc2c(c1)CC(C)(C)C2=O  
 8486 Brc1cccc(-n2cnc3ccccc32)c1.C=Cc1cc(OC)c(OC)c(OC)c1>>COc1cc(/C=C/c2cccc(-  
 n3cnc4ccccc43)c2)cc(OC)c1OC  
 8487 C=CC(=O)OC.Nc1ccc(Br)cc1>>COC(=O)/C=C/c1ccc(N)cc1  
 8488 C=CC(=O)OC.COC(=O)c1ccccc1Br>>COC(=O)/C=C/c1ncccc1C(=O)OC  
 8489 C=Cc1ccc(C)c(C)c1.COc1cc(I)cc(OC)c1OC>>COc1cc(/C=C/c2ccc(C)c(C)c2)cc(OC)c1OC  
 8490 C=CS(C)(=O)=O.FC(F)(F)c1cc(Br)cc(C(F)(F)F)c1>>CS(=O)(=O)/C=C/c1cc(C(F)(F)F)cc(C(F)(F)F)c1  
 8491 C=CS(=O)(=O)c1ccccc1.Cc1ccc(Br)cc1>>Cc1ccc(/C=C/S(=O)(=O)c2ccccc2)cc1  
 8492 C=CC(=O)N(CC)CC.CC(C)(C)c1ccc2[nH]c3c(c2c1)CC(=O)Nc1ccc(I)cc1-  
 3>>CCN(CC)C(=O)/C=C/c1ccc2c(c1)-c1[nH]c3ccc(C(C)(C)C)cc3c1CC(=O)N2  
 8493 C=CC(O)c1ccccc1Br.COc1ccc(I)c(OC)c1OC>>COc1ccc(/C=C/C(O)c2ccccc2Br)c(OC)c1OC  
 8494 C=CC(=O)O.Cc1cc(Br)c([N+](=O)[O-]  
 ])c(C)c1NC(=O)CC(C)(C)C>>Cc1cc(/C=C/C(=O)O)c([N+](=O)[O-])c(C)c1NC(=O)CC(C)(C)C  
 8495 C=CC(=O)OCC.CC(C)(C)OC(=O)NCCc1cc(Br)ccc1F>>CCOC(=O)/C=C/c1ccc(F)c(CCNC(=O)OC(C)  
 )(C)C)c1  
 8496 C=CC(C)=O.N#Cc1ccc2[nH]c3c(c2c1)CC(=O)Nc1ccc(I)cc1-3>>CC(=O)/C=C/c1ccc2c(c1)-  
 c1[nH]c3ccc(C#N)cc3c1CC(=O)N2  
 C=Cc1ccc(C(=O)N[C@@H](CCSC)C(=O)OC)c(-  
 8497 c2ccccc2C)c1.OC1(c2cnc2Br)CCCC1>>COC(=O)[C@@H](CCSC)NC(=O)c1ccc(/C=C/c2ncccc2C2  
 (O)CCCC2)cc1-c1ccccc1C  
 8498 C=CC(O)c1cc(OC)c(OC)c(OC)c1Br.COc1cccc(I)c1>>COc1cccc(/C=C/C(O)c2cc(OC)c(OC)c(OC)c2B  
 C=Cc1ccccc1.COc1cc(I)c2c3c1O[C@@H]1[C@@]34CCN(C)[C@@H](C2)[C@@]42C=C[C@@]1(OC)c1c  
 8499 (OC(C)=O)ccc(O)c12>>COc1cc(/C=C/c2ccccc2)c2c3c1O[C@@H]1[C@@]34CCN(C)[C@@H](C2)[C@@]  
 42C=C[C@@]1(OC)c1c(OC(C)=O)ccc(O)c12  
 8500 Brc1ccc2cnc(N3CCCC3)c2c1.C=CC(=O)OC>>COC(=O)/C=C/c1ccc2cnc(N3CCCC3)c2c1  
 C=CC(=O)OC.COC(=O)[C@@H]1C[C@@H]2CCC(Br)=C[C@@H]2N1C(=O)OC(C)(C)C>>COC(=O)  
 8501 /C=C/C1=C[C@@H]2[C@@H](CC1)C[C@@H](C(=O)OC)N2C(=O)OC(C)(C)C  
 8502 C=Cc1cccc1.Cc1ccccc1Cl>>Cc1cccc1/C=C/c1cccc1  
 8503 C=Cc1ccc([Si](OC)(OC)OC)cc1.CCOP(=O)(Cc1ccc(/C=C/c2ccc(Br)cc2)cc1)OCC>>CCOP(=O)(Cc1c  
 cc(/C=C/c2ccc(/C=C/c3ccc([Si](OC)(OC)OC)cc3)cc2)cc1)OCC  
 8504 Brc1ccc(-c2nnc(-c3cccc4ccccc34)o2)cc1.C=C[Si](OCC)(OCC)OCC>>CCO[Si](/C=C/c1ccc(-c2nnc(-  
 c3cccc4ccccc34)o2)cc1)(OCC)OCC  
 8505 C=CC(=O)OC1CCCC1.CC(=O)c1ccc(Br)cc1>>CC(=O)c1ccc(/C=C/C(=O)OC2CCCC2)cc1  
 8506 C=CC(=O)OC.Nc1cc(Cl)ccc1I>>COC(=O)/C=C/c1ccc(Cl)cc1N  
 8507 C=CC(=O)OC.C[Si](C)(C)c1cc2n(c(=O)c1I)CCC21OCCO1>>COC(=O)/C=C/c1c([Si](C)(C)C)cc2n(c  
 1=O)CCC21OCCO1  
 8508 C=Cl.C=C[Si](OCC)(OCC)OCC>>C=C/C=C/[Si](OCC)(OCC)OCC  
 8509 Brc1ccccc1.C=CS(=O)(=O)N1CCC2(CC1)N=C(C1CCCC1)NC2=O>>O=C1NC(C2CCCC2)=NC12  
 CCN(S(=O)(=O)/C=C/c1ccccc1)CC2  
 8510 C=CC(=O)OC.COC(=O)Cn1c(=O)oc2cc(Br)enc21>>COC(=O)/C=C/c1cnc2c(c1)oc(=O)n2CC(=O)OC  
 8511 C=CC(C)=O.O=[N+](=[O-])c1ccc(Cl)cc1>>CC(=O)/C=C/c1ccc([N+](=O)[O-])cc1  
 8512 C=Cc1ccc(C(C)=O)cc1.COc1ccc(Br)cc1>>COc1ccc(/C=C/c2ccc(C(C)=O)cc2)cc1  
 8513 C=CC(=O)O.FC1(F)Oc2cccc(Br)c2O1>>O=C(O)/C=C/c1ccccc2c1OC(F)(F)O2  
 8514 C=CC(=O)OC(C)(C)C.Nc1ccc(I)cn1>>CC(C)(C)OC(=O)/C=C/c1cnc(N)nc1  
 8515 Brc1ccc(OCc2ccccc2)cc1.C=CC(=O)OC(C)(C)C>>CC(C)(C)OC(=O)/C=C/c1ccc(OCc2ccccc2)cc1  
 8516 C=Cc1c(F)c(F)c(F)c(F)c1F.Ic1cc2ccccc2s1>>Fc1c(F)c(F)c(/C=C/c2cc3ccccc3s2)c(F)c1F

8517 C=CC(=O)OC.Nc1ccc(C(=O)O)cc1I>>COC(=O)/C=C/c1cc(C(=O)O)ccc1N  
8518 Br1ccc(N(c2ccccc2)c2ccccc2)cc1.C=Cc1ccc(C(=O)OC)c(OC)c1>>COC(=O)c1ccc(/C=C/c2ccc(N(c3ccccc3)c3ccccc3)cc2)cc1OC  
8519 Br1cccc1.C=CC(C)C(C)O>>CC(O)C(C)/C=C/c1cccc1  
8520 C=Cc1cccc1.O=C(C=P(c1cccc1)(c1cccc1)c1cccc1)c1ccc(I)cc1>>O=C(C=P(c1cccc1)(c1cccc1)c1cccc1)c1ccc(/C=C/c2ccccc2)cc1  
8521 C=CC(=O)N(C)OC.Cc1ccc(Br)cc1>>CON(C)C(=O)/C=C/c1ccc(C)cc1  
8522 C=Cc1cccc1.N#Cc1cccc1Cl>>N#Cc1cccc1/C=C/c1cccc1  
8523 C=Cc1ccc(Cl)cc1.N#Cc1ccc2cc(Br)ccc2c1>>N#Cc1ccc2cc(/C=C/c3ccc(Cl)cc3)ccc2c1  
8524 C=CC(F)(F)F.Ic1cccc1>>FC(F)(F)/C=C/c1cccc1  
8525 C=Cc1nc(C#N)c(C#N)n1CCCCC.CN(C)c1ccc(/C=C/c2ccc(N(c3ccc(I)cc3)c3ccc(/C=C/c4ccc(N(C)C)cc4)cc3)cc2)cc1>>CCCCCn1c(/C=C/c2ccc(N(c3ccc(/C=C/c4ccc(N(C)C)cc4)cc3)c3ccc(/C=C/c4ccc(N(C)C)cc4)cc3)cc2)nc(C#N)c1C#N  
8526 C=CC(OCC)OCC.Cc1cccc1Br>>CCOC(/C=C/c1cccc1C)OCC  
8527 Br1ccc(-c2nc3ccccc3n2)cc1.C=CCn1c(-c2cccc(OC)c2)nc2ccccc2c1=O>>COc1cccc(-c2nc3ccccc3c(=O)n2C/C=C/c2ccc(-c3cnc4ccccc4n3)cc2)c1  
8528 C=CP(=O)(OCC)OCC.O=[N+][O-]c1cc(-c2ccccc2)cc1>>CCOP(=O)(/C=C/c1ccc2cc([N+](=O)[O-])cc(-c3ccccc3)cc2)cc1OCC  
8529 C=Cc1cccc(OC)c1.C[Si](C)(OS(=O)(=O)C(F)(F)F)OS(=O)(=O)C(F)(F)F>>COc1cccc(/C=C/[Si](C)(C)OS(=O)(=O)C(F)(F)F)c1  
8530 C=CC(C)(O)CCC=C(C)C.Fc1ccc(Br)cc1>>CC(C)=CCCC(C)(O)/C=C/c1ccc(F)cc1  
8531 C=CCNS(=O)(=O)c1ccc(C)cc1.Ic1cccc1>>Cc1ccc(S(=O)(=O)NC/C=C/c2ccccc2)cc1  
8532 C=CC#N.Cc1cc(Br)cc(C)c1N>>Cc1cc(/C=C/C#N)cc(C)c1N  
8533 Br1cnc2ccccc12.C=Cc1cccc1>>C(=C/c1cnc2ccccc12)c1cccc1  
8534 C=Cc1cccc1.COcn1nc(-c2ccccc2)c(Br)cc1=O>>COcn1nc(-c2ccccc2)c(/C=C/c2ccccc2)cc1=O  
8535 C=CC(=O)OC.C[C@H](c1cccc1)N1C(=O)c2ccc(OS(=O)(=O)C(F)(F)F)cc2C1=O>>COC(=O)/C=C/c1ccc2c(c1)C(=O)N([C@H](C)c1cccc1)C2=O  
8536 C=CC(=O)OCC.Cn1ccc(I)cc1=O>>CCOC(=O)/C=C/c1cnn(C)c(=O)c1  
8537 C=Cc1ccc(/C=C/c2ccc(N(c3ccccc3)c3ccccc3)cc2)cc1.O=Cc1ccc(Br)cc1>>O=Cc1ccc(/C=C/c2ccc(/C=C/c3ccc(N(c4ccccc4)c4ccccc4)cc3)cc2)cc1  
8538 BrC1CCCCC1.C=Cc1cccc1Cl>>Clc1cccc1/C=C/C1CCCCC1  
8539 C=CCCN1C(=O)c2ccccc2C1=O.Nc1cccc(Br)c1>>Nc1cccc(/C=C/CCN2C(=O)c3ccccc3C2=O)c1  
8540 C=CC(OC)OC.Ic1ccc2ccccc2c1>>COC(/C=C/c1ccc2ccccc2c1)OC  
8541 C=CC(C)=O.IC(CC[Se]c1cccc1)=C(c1cccc1)c1cccc1>>CC(=O)/C=C/C(CC[Se]c1cccc1)=C(c1cccc1)c1cccc1  
8542 C=CC(N)=O.CCn1c(=O)n(COCC[Si](C)(C)C)c2cccc(Oc3cc(Br)cc(C#N)c3)c21>>CCn1c(=O)n(COCC[Si](C)(C)C)c2cccc(Oc3cc(C#N)cc(/C=C/C(N)=O)c3)c21  
8543 C=CC1(C)CCC(=O)C1.COC(=O)c1cccc1/C=C\C=C\Cl>>COC(=O)c1cccc1/C=C\C=C\C=C\C1(C)CC(C(=O)C1  
8544 C=Cc1cccc1.Cn1cnc1-c1cccc(Br)c1>>Cn1cnc1-c1cccc(/C=C/c2ccccc2)c1  
8545 C=CS(=O)(=O)NCc1ccc(OC)cc1.CC(C)(C)OC(=O)NCc1cccc1Br>>COc1ccc(CNS(=O)(=O)/C=C/c2ccccc2CNC(=O)OC(C)(C)C)cc1  
8546 C=CS(=O)(=O)F.O=Cc1ccc(I)o1>>O=Cc1ccc(/C=C/S(=O)(=O)F)o1  
8547 C=CCNS(=O)(=O)c1ccc(C)cc1.Cc1ccc(S(=O)(=O)n2cc(Br)c3ccccc32)cc1>>Cc1ccc(S(=O)(=O)NC/C=C/c2cn(S(=O)(=O)c3ccc(C)cc3)c3ccccc23)cc1  
8548 C=CC(N)=O.CC(C)(C)OC(=O)NC1(c2ccc(-c3nn4c(Br)cnc4cc3-c3ccccc3)cc2)CCC1>>CC(C)(C)OC(=O)NC1(c2ccc(-c3nn4c(/C=C/C(N)=O)cnc4cc3-c3ccccc3)cc2)CCC1  
8549 C=Cc1cccc1.O=Cc1cccc(F)c1Br>>O=Cc1cccc(F)c1/C=C/c1cccc1  
8550 C=CC(=O)OC.Cc1c(COc2ccc(Br)cc2F)noc1-c1ccc(C(F)(F)F)cc1>>COC(=O)/C=C/c1ccc(OCc2noc(-c3ccc(C(F)(F)F)cc3)c2C)c(F)c1  
8551 C=CC(F)(F)C(F)(F)C(F)(F)C(F)(F)C(F)(F)F.CC(C)c1cc(I)cc(C(C)C)c1N>>CC(C)c1cc(/C=C/C(F)(F)C(F)(F)C(F)(F)C(F)(F)C(F)(F)C(F)(F)F)cc(C(C)C)c1N  
8552 C=CC(=O)OC(C)(C)C.O=Cc1cccc(Br)n1>>CC(C)(C)OC(=O)/C=C/c1cccc(C=O)n1  
8553 C=CC(=O)NC(C)C.COc1ccc(Br)cc1>>COc1ccc(/C=C/C(=O)NC(C)C)cc1  
8554 C=CC(=O)OC.O=C(C=P(c1cccc1)(c1cccc1)c1cccc1)c1ccc(Br)cc1>>COC(=O)/C=C/c1ccc(C(=O)C=P(c2ccccc2)(c2ccccc2)c2ccccc2)cc1  
8555 C=CCN1C(=O)c2ccccc2C1=O.CSc1ccc(Br)cc1>>CSc1ccc(/C=C/CN2C(=O)c3ccccc3C2=O)cc1  
8556 C=CC(=O)N1CCCC1.O=C1Nc2ccc(Br)cc2C1=O>>O=C1Nc2ccc(/C=C/C(=O)N3CCCC3)cc2C1=O  
8557 C=CC(=O)OCC.CCOC(=O)C1(c2cccc(Br)c2)CC1>>CCOC(=O)/C=C/c1cccc(C2(C(=O)OCC)CC2)c1

C=CCO[C@H]1O[C@H](COC(C)=O)[C@@H](OC(C)=O)[C@H](OC(C)=O)[C@@H]1OC(C)=O.Ic  
8558 1ccc(-c2ccccc2)cc1>>CC(=O)OC[C@H]1O[C@H](OC/C=C/c2ccc(-  
c3ccccc3)cc2)[C@@H](OC(C)=O)[C@@H](OC(C)=O)[C@@H]1OC(C)=O  
8559 C=Cc1ccc(Cl)cc1.O=P1(c2ccccc2)C(Br)=Cc2ccccc21>>O=P1(c2ccccc2)C(/C=C/c2ccc(Cl)cc2)=Cc2cc  
ccc21  
8560 C=CC(=O)OC.COc1ccc(Br)ccc1C=O>>COC(=O)/C=C/c1ccc(C=O)c(OC)c1  
8561 C=CC(=O)OC.CC(C)c1oc2cc3oc(=O)ccc3cc2c1OS(=O)(=O)C(F)(F)F>>COC(=O)/C=C/c1c(C(C)C)oc  
2cc3oc(=O)ccc3cc12  
8562 C=CC(=O)OC.O=[N+](O-)[O-]c1ccccc1I>>COC(=O)/C=C/c1ccccc1[N+](=O)[O-]  
8563 C=CC(=O)OCC.COc1ccccc1I>>CCOC(=O)/C=C/c1ccccc1OC  
8564 C=Cc1ccc(Cl)cc1.Cl>>C/C=C/c1ccc(Cl)cc1  
C=Cc1cccc(S(=O)(=O)N(Cc2ccc(OC)cc2)Cc2ccc(OC)cc2)c1-  
8565 c1nnn(Cc2ccc(OC)cc2)n1.CC(C)(C)OC(=O)Nc1ccc(Br)cn1>>COc1ccc(CN(Cc2ccc(OC)cc2)S(=O)(=O)  
O)c2cccc(/C=C/c3ccc(NC(=O)OC(C)(C)C)nc3)c2-c2nnn(Cc3ccc(OC)cc3)n2)cc1  
8566 C=CC(=O)OC.N#Cc1ccc(-c2nc3ncc(Br)cc3o2)cc1>>COC(=O)/C=C/c1cnc2nc(-c3ccc(C#N)cc3)oc2c1  
8567 C=CC(CCC)OCc1ccccc1.CC(C)(C)c1ccc(Br)cc1>>CCCC(/C=C/c1ccc(C(C)(C)C)cc1)OCc1ccccc1  
8568 Brc1ccccc1.C=CS(=O)(=O)CC>>CCS(=O)(=O)/C=C/c1ccccc1  
C=CC(=O)OC.COc1cccc2c(-  
8569 c3cc(I)c4c(c3OCc3ccccc3)[C@@H](C)N(Cc3ccccc3)[C@H](C)C4)c(C)cc(OC)c12>>COC(=O)/C=C/  
c1cc(-c2c(C)cc(OC)c3c(OC)ccccc23)c(OCc2ccccc2)c2c1C[C@H](C)N(Cc1ccccc1)[C@@H]2C  
C=CCN(C(=O)C(C)C)[C@H](C)c1ccccc1.O=C1Nc2ncccc2[C@]12Cc1ccc(Br)cc1C2>>C[C@H](c  
8570 1ccccc1)N(C/C=C/c1ccc2c(c1)C[C@@]1(C2)C(=O)Nc2ncccc21)C(=O)C(C)(C)C  
8571 Brc1ccccc1.C=CC(=O)OC(C)(C)C>>CC(C)(C)OC(=O)/C=C/c1ccccc1  
8572 C=CC(=O)N(C)C.CC1(C)c2cc(C(O)(C(F)(F)F)C(F)(F)F)ccc2NC2c3cc(I)ccc3OCC21>>CN(C)C(=O)/  
C=C/c1ccc2c(c1)C1Nc3ccc(C(O)(C(F)(F)F)C(F)(F)F)cc3C(C)(C)C1CO2  
8573 C=CC(=O)OC(C)(C)C.COc1cccc(S(=O)(=O)n2ccc3cc(Br)cnc32)c1>>COc1cccc(S(=O)(=O)n2ccc3cc(  
/C=C/C(=O)OC(C)(C)C)enc32)c1  
8574 C=CC1(O)CCCCC1.O=C(NC[C@H](O)[C@@H](O)c1cccc(Br)c1)C(F)(F)F>>O=C(NC[C@H](O)[C  
@@H](O)c1cccc(/C=C/C2(O)CCCCC2)c1)C(F)(F)F  
8575 Brc1ccc2c(c1)OCO2.C=CC(OCC)OCC>>CCOC(/C=C/c1ccc2c(c1)OCO2)OCC  
8576 C=CC(=O)OC.COc1ccc2c(c1)CCN(c1ccc(CCC(C)C)c(Cl)c1)C2(C)c1ccc(Br)cc1>>COC(=O)/C=C/c1  
ccc(C2(C)c3ccc(OC)cc3CCN2c2ccc(CCC(C)C)c(Cl)c2)cc1  
8577 C=CC(=O)C(C)(C)CO[Si](C)(C)C(C)(C)C.O=[N+](O-  
)]c1ccc(I)cc1>>CC(C)(CO[Si](C)(C)C(C)(C)C)C(=O)/C=C/c1ccc([N+](=O)[O-])cc1  
8578 C=Cc1ccc(F)cc1.O=S(=O)(c1ccccc1)C(F)(F)Br>>O=S(=O)(c1ccccc1)C(F)(F)/C=C/c1ccc(F)cc1  
8579 C=CC(=O)OC.N#Cc1ccccc1Br>>COC(=O)/C=C/c1ncccc1C#N  
8580 C=CC(OC)OC.COc1ccccc1I>>COc1ccccc1/C=C/C(OC)OC  
8581 C=Cc1ccccc1.CC(C)(C)OC(=O)N1CCC[C@H]1COc1cnc(Cl)c(I)c1>>CC(C)(C)OC(=O)N1CCC[C@  
H]1COc1cnc(Cl)c(/C=C/c2ccccc2)c1  
8582 C=CC(C)(C)O.CN(C)C(=O)c1cccc2nc3ccccc(Br)c3nc12>>CN(C)C(=O)c1cccc2nc3ccccc(/C=C/C(C)(C)  
O)c3nc12  
8583 C=CC(=O)OCC.O=S(=O)(Oc1ccc(C=C2CCCCC2)c2ccc(O)cc2)cc1)C(F)(F)F>>CCOC(=O)/C=C/c1c  
cc(C(=C2CCCCC2)c2ccc(O)cc2)cc1  
8584 C=Cc1ccc(OC)cc1.CC(Br)C(=O)Oc1ccccc1>>COc1ccc(/C=C/C(C)C(=O)Oc2ccccc2)cc1  
8585 C=COCCCC.Clc1ccc(Br)cc1>>CCCCO/C=C/c1ccc(Cl)cc1  
8586 C=CC(=O)OC(C)(C)C.CC(=O)c1cn(-c2ccccc2)nc1OS(=O)(=O)C(F)(F)F>>CC(=O)c1cn(-  
c2ccccc2)nc1/C=C/C(=O)OC(C)(C)C  
8587 C=CC(=O)OCC.CC(C)(C)OC(=O)N1CCc2c(ccc(Br)c2F)C1>>CCOC(=O)/C=C/c1ccc2c(c1F)CCN(C(  
=O)OC(C)(C)C)C2  
8588 C=CC(=O)OCC.CC(C)(C)[Si](C)(C)n1ccc2c(I)ccnc21>>CCOC(=O)/C=C/c1ccnc2c1ccn2[Si](C)(C)C(  
C)(C)C  
8589 C=CC(=O)OCC.Fc1cccc(Cn2ncc3cc(Nc4ncccc4I)ccc32)c1>>CCOC(=O)/C=C/c1ccnc1Nc1ccc2c(cnn  
2Cc2ccccc(F)c2)c1  
8590 C=CC(=O)OC(C)(C)C.N#Cc1ccc(S(=O)(=O)N2CCc3cc(Br)cnc32)cc1>>CC(C)(C)OC(=O)/C=C/c1cn  
c2c(c1)CCN2S(=O)(=O)c1ccc(C#N)cc1  
C=Cc1ccc(/C=C/c2ccc(N(C)C)cc2OC)cc1.CN(C)c1ccc2c(c1)[Si](C)(C)C1=CC(=[N+](C)C)C=CC1=C  
8591 2c1ccc(Br)cc1S(=O)(=O)[O-]  
>>COc1cc(N(C)C)ccc1/C=C/c1ccc(/C=C/c2ccc(C3=C4C=CC(=[N+](C)C)C=C4[Si](C)(C)c4cc(N(C)  
C)ccc43)c(S(=O)(=O)[O-])c2)cc1  
8592 C=CC(C)(C)O.CC(C)(C)[Si](C)(C)O[C@@H]1C=C(Br)C2(OCCCC2)[C@H]2O[C@H]21>>CC(C)(O  
)/C=C/C1=C[C@@H](O[Si](C)(C)C(C)(C)C)[C@@H]2O[C@H]2C12OCCCCO2

8593 C=CC[C@H]1C(=O)N(c2ccccc2)[C@@H]1c1ccc(OC)cc1.COCOc1ccc(Br)cc1>>COCOc1ccc(/C=C/[C@H]2C(=O)N(c3ccccc3)[C@@H]2c2ccc(OC)cc2)cc1  
C=Cc1ccc(/C=C/c2cc(CCCCCC)c(C=O)cc2CCCCC)cc1.CCCCCC1cc(/C=C/c2ccc(C(=O)OC)cc2)c(CCCCCC)cc1Br>>CCCCC1cc(/C=C/c2ccc(/C=C/c3cc(CCCCCC)c(/C=C/c4ccc(C(=O)OC)cc4)cc3CCCCC)cc2)c(CCCCCC)cc1C=O  
8594  
8595 C=COC(C)=O.Ic1ccccc1>>CC(=O)O/C=C/c1ccccc1  
8596 Br1ccc(OCc2ccccc2)cc1.C=Cc1cccc([N+](=O)[O-])c1>>O=[N+](O-)]c1ccc(/C=C/c2ccc(OCc3ccccc3)cc2)c1  
8597 C=CC(=O)O.Oc1ccc(I)cc1>>O=C(O)/C=C/c1ccc(O)cc1  
C=Cc1ccc([Si](OCC)(OCC)OCC)cc1.CCOP(=O)(Cc1ccc(/C=C/c2ccc3c(c2)Cc2cc(Br)ccc2-3)cc1)OCC>>CCO[Si](OCC)(OCC)c1ccc(/C=C/c2ccc3c(c2)Cc2cc(/C=C/c4ccc(CP(=O)(OCC)OCC)cc4)ccc2-3)cc1  
8598  
8599 C=CC(=O)OCC.CC(=O)c1cn(Cc2ccc(F)cc2)c2ccc(Br)cc2c1=O>>CCOC(=O)/C=C/c1ccc2c(c1)c(=O)c(C(C)=O)cn2Cc1ccc(F)cc1  
8600 C=CC(=O)OC.CC(C)N(CCc1c(C(C)(C)O)[nH]c2ccccc12)Cc1ccc(Br)cc1>>COC(=O)/C=C/c1ccc(CN(CCc2c(C(C)(C)O)[nH]c3ccccc23)C(C)C)cc1  
8601 Br1ccc2ccc3ccccc4ccc1c2c34.C=Cc1nc2c(N)ncnc2n1[C@H]1C[C@H](O[Si](C)(C)C(C)(C)C)[C@@H](CO[Si](C)(C)C(C)(C)C)O1>>CC(C)(C)[Si](C)(C)OC[C@H]1O[C@@H](n2c(/C=C/c3ccc4ccc5ccc6ccc3c4c56)nc3c(N)ncnc32)C[C@@H]1O[Si](C)(C)C(C)(C)C  
8602 C=Cc1ccccc1.Cc1ccc(I)cc1C>>Cc1ccc(/C=C/c2ccccc2)cc1C  
8603 C=Cc1ccc(Cl)cc1.Cn1nc(Br)c2ccccc21>>Cn1nc(/C=C/c2ccc(Cl)cc2)c2ccccc21  
8604 C=Cc1n[nH]c2cc([C@@H]3C[C@@]34C(=O)Nc3ccccc34)ccc12.Cc1ccc(Br)en1>>Cc1ccc(/C=C/c2n[nH]c3cc([C@@H]4C[C@@]45C(=O)Nc4ccccc45)ccc23)en1  
8605 C=CC(=O)OCC.CCOC(=O)CCOCc1ccccc1Br>>CCOC(=O)/C=C/c1ccccc1COCCC(=O)OCC  
8606 C=CC(O)CC.c1ccc([I+](c2cccs2)cc1>>CCC(O)/C=C/c1cccs1  
C=Cc1ccc(C(=O)N[C@@H](CCSC)C(=O)OC)c(-c2ccccc2C)c1.OC(c1cncnc1Br)C1CCCCC1>>COC(=O)[C@H](CCSC)NC(=O)c1ccc(/C=C/c2cncnc2C(O)C2CCCC2)cc1-c1ccccc1C  
8607  
8608 C=CC(=O)OC.COc1ccc(Br)cc1Cl>>COC(=O)/C=C/c1ccc(OC)c(Cl)c1  
8609 C=CC(N)=O.CCCCCNC(=O)[C@H](Cc1ccc(Nc2ccccc2C(=O)O)c(I)c1)NS(C)(=O)=O>>CCCCCNC(=O)[C@H](Cc1ccc(Nc2ccccc2C(=O)O)c(/C=C/C(N)=O)c1)NS(C)(=O)=O  
8610 Br1cccc(I)c1.C=CC(=O)OCC>>CCOC(=O)/C=C/c1cccc(Br)c1  
8611 C=Cc1ccccc1N.COc1ccc(Br)c(OC)c1>>COc1ccc(/C=C/c2ccccc2N)c(OC)c1  
8612 C=Cc1ccc(O)c1.Nc1ccc(Br)cc1>>Nc1ccc(/C=C/c2cccc(O)c2)cc1  
8613 Br1ccc2ccccc2c1.C=Cc1nc2c(N)ncnc2n1[C@@H]1O[C@H](CO[Si](C)(C)C(C)(C)C)[C@@H](O[Si](C)(C)C(C)(C)C)[C@H]1O[Si](C)(C)C(C)(C)C>>CC(C)(C)[Si](C)(C)OC[C@H]1O[C@@H](n2c(/C=C/c3ccc4ccccc4c3)nc3c(N)ncnc32)[C@H](O[Si](C)(C)C(C)(C)C)[C@@H]1O[Si](C)(C)C(C)(C)C  
C=Cc1ccc([Si](OC)(OC)OC)cc1.CCOP(=O)(Cc1ccc(/C=C/c2ccc(-c3ccc(Br)cc3)cc2)cc1)OCC>>CCOP(=O)(Cc1ccc(/C=C/c2ccc(-c3ccc(/C=C/c4ccc([Si](OC)(OC)OC)cc4)cc3)cc2)cc1)OCC  
8614  
8615 C=CC(=O)OC(C)(C)C.Cc1cc(Br)ccc1C#N>>Cc1cc(/C=C/C(=O)OC(C)(C)C)ccc1C#N  
8616 C=CC(=O)O.O=Cc1ccc(Br)cc1>>O=Cc1ccc(/C=C/C(=O)O)cc1  
8617 C=CC(=O)C(C)CC(=O)OC.C=CC(C)(C)OC(C)(C)[C@@H]1COc2ccc(Br)cc2O1>>C=CC(C)(C)OC(C)(C)[C@@H]1COc2ccc(/C=C/C(=O)C(C)CC(=O)OC)cc2O1  
8618 Br1ccc2ccccc2c1.C=Cc1ccccc1>>C(=C/c1ccc2ccccc2c1)\c1ccccc1  
8619 C=CC(=O)OCC.Fc1cc(Br)ccc1I>>CCOC(=O)/C=C/c1ccc(Br)cc1F  
8620 C=Cc1ccc(C=O)cc1.COc1ccc(I)cc1>>COc1ccc(/C=C/c2ccc(C=O)cc2)cc1  
8621 C=C[Si](C)(C)c1cccn1.Cc1ccc(I)cc1>>Cc1ccc(/C=C/[Si](C)(C)c2cccn2)cc1  
8622 C=CC#N.COc1ccc2c(=O)c(I)coc2c1>>COc1ccc2c(=O)c(/C=C/C#N)coc2c1  
8623 C=CSe1ccccc1.O=C(c1ccccc1)c1ccc(Br)cc1>>O=C(c1ccccc1)c1ccc(/C=C/Sc2ccccc2)cc1  
8624 C=CC(=O)OCC.O=Cc1cccc(Br)c1>>CCOC(=O)/C=C/c1cccc(C=O)c1  
8625 C=CC(=O)OCC.Ic1c(-c2ccccc2)c2ccccc2c2ccccc12>>CCOC(=O)/C=C/c1c(-C=CC(=O)OC.Fc1ccccc1)c1>>COC(=O)/C=C/c1ccccc1F  
8626  
8627 C=Cc1cncnc1.C[C@@H](COc1cnc(Cl)c(Br)c1)NC(=O)OC(C)(C)C>>C[C@@H](COc1cnc(Cl)c(/C=C/c2ccncc2)c1)NC(=O)OC(C)(C)C  
8628 C=CC(=O)OC.Cc1ccc([S@](=O)c2ccc(C)cc2Br)cc1>>COC(=O)/C=C/c1cc(C)ccc1[S@](=O)c1ccc(C)cc1  
8629 C=CCN(C(=O)C(C)(C)C)[C@H](C)c1ccc(C)c(F)c1.O=C1Nc2nccccc2[C@@]12Cc1cc(Br)enc1C2>>Cc1ccc([C@@H](C)N(C/C=C/c2cnc3c(c2)C[C@@]2(C3)C(=O)Nc3nccccc32)C(=O)C(C)(C)C)cc1F  
8630 C=Cc1ccccc1.COc1ccc(CCl)cc1>>COc1ccc(C/C=C/c2ccccc2)cc1  
8631 C=CC(N)=O.Clc1ccccc1I>>NC(=O)/C=C/c1ccccc1Cl

8632 C=CC(=O)OC.Cc1cc(-c2ccccc2)n2nc(-c3ccc(Cl)cc3)c(I)c2n1>>COC(=O)/C=C/c1c(-c2ccc(Cl)cc2)nn2c(-c3ccccc3)cc(C)nc12  
 8633 C=Cc1nnn(C)n1.N#Cc1cccc(Br)c1>>Cn1nnc(/C=C/c2cccc(C#N)c2)n1  
 8634 C=Cc1cccc1C.Cc1cccc(I)c1N>>Cc1cccc1/C=C/c1cccc(C)c1N  
 8635 C=CC(=O)OC(C)(C)C.COC(=O)c1ccc(I)cc1OC(C)=O>>COC(=O)c1ccc(/C=C/C(=O)OC(C)(C)C)cc1OC(C)=O  
 8636 C=CC(=O)OCC.COc1ccc2nccc(Br)c2c1>>CCOC(=O)/C=C/c1ccnc2ccc(OC)cc12  
 8637 C=CC(=O)OC.CC(C)(C)OC(=O)N1CCN(c2cccc3cc(I)cnc23)CC1>>COC(=O)/C=C/c1cnc2c(N3CCN(C(=O)OC(C)(C)C)CC3)cccc2c1  
 8638 C=CC(=O)O.C[C@]12C[C@@]34C=C(Sc5ccc(I)cc5)C(=O)[C@@](C)(CCC(=O)Nc5c(O)ccc(C(=O)O)c5O)[C@@H]3[C@H](C[C@@H]1C4)O2>>C[C@]12C[C@@]34C=C(Sc5ccc(/C=C/C(=O)O)cc5)C(=O)[C@@](C)(CCC(=O)Nc5c(O)ccc(C(=O)O)c5O)[C@@H]3[C@H](C[C@@H]1C4)O2  
 8639 C=Cc1ccc(O)cc1.Fc1cc(Br)cc(F)c1F>>Oc1ccc(/C=C/c2cc(F)c(F)c(F)c2)cc1  
 8640 C=Cc1ccccc1.Clc1ccnc1>>C(=C/c1ccnc1)\c1ccccc1  
 8641 C=Cc1ccnc1.CCOc1ccc(Br)cc1F>>CCOc1ccc(/C=C/c2ccnc2)cc1F  
 8642 C=CCC(=O)OCC(C)C.COc1ccc(OC)c(Br)c1>>COc1ccc(OC)c(/C=C/CC(=O)OCC(C)C)c1  
 8643 C=Cc1ccccc1.Oc1ccc(Br)cc1F>>Oc1ccc(/C=C/c2ccccc2)cc1F  
 8644 C=CC(=O)NC(c1cccc(C(F)(F)F)c1)C(F)(F)F.O=C(O)c1ccc(I)cc1C(F)(F)F>>O=C(/C=C/c1ccc(C(=O)O)c(C(F)(F)F)c1)NC(c1cccc(C(F)(F)F)c1)C(F)(F)F  
 8645 Br1cccc2cccc12.C=CC[C@H](NC(=O)OC(C)(C)C)C(=O)OC>>COC(=O)[C@H](C/C=C/c1cccc2ccc12)NC(=O)OC(C)(C)C  
 8646 C=C[Si](C)(C)c1cccn1.CN(C)c1ccc(Br)cc1>>CN(C)c1ccc(/C=C/[Si](C)(C)c2cccn2)cc1  
 8647 C=CC1(C)CCc2c(C)c(OC)c(C)c(C)c2O1.COcn1c(C)c(I)c(C)c1C=O>>COcn1c(C)c(/C=C/C2(C)CCc3c(C)c(OC)c(C)c(C)c3O2)c(C)c1C=O  
 8648 C=Cc1ccccc1.Cl1c(=O)c2c(cc(Br)n2C)n(C)c1=O>>Cn1c(=O)c2c(cc(/C=C/c3cccc(Cl)c3)n2C)n(C)c1=O  
 8649 C=CC(=O)O[C@@H]1C[C@H](C)CC[C@H]1C(C)C.O=Cc1ccccc1Br>>CC(C)[C@@H]1CC[C@@H](C)C[C@H]1OC(=O)/C=C/c1ccccc1C=O  
 8650 C=Cc1ccccc(N)c1.CCN1c2ncc(I)cc2C(=O)N(C)c2ccc(Cl)nc21>>CCN1c2ncc(/C=C/c3cccc(N)c3)cc2C(=O)N(C)c2ccc(Cl)nc21  
 8651 C=CC(=O)NCc1ccc(F)c(-c2cccc(CN3CCN(C(=O)OC(C)(C)C)[C@@H](C)C3)c2)c1.CCc1nc2c(cnn2CC)c(NC2CCOCC2)c1I>>CCc1nc2c(cnn2CC)c(NC2CCOCC2)c1/C=C/C(=O)NCc1ccc(F)c(-c2cccc(CN3CCN(C(=O)OC(C)(C)C)[C@@H](C)C3)c2)c1  
 8652 C=Cc1ccccc1.O=C1CCC(Cl)O1>>O=C1CCC(C/C=C/c2ccccc2)O1  
 8653 Br1ccc(/C=C/c2ccnc2)c2nsnc12.C=Cc1ccc2c(c1)Sc1ccccc1N2CCCC>>CCCCN1c2ccccc2Sc2cc(/C=C/c3ccc(/C=C/c4ccnc4)c4nsnc34)ccc21  
 8654 C=Cc1ccccc1.N#Cc1ccc(I)cc1>>N#Cc1ccc(/C=C/c2ccccc2)cc1  
 8655 C=Cc1ccc(N(c2ccccc2)c2ccccc2)cc1.CCCCCCCCCC1(CCCCCCCCCC)c2cc(Br)ccc2-c2ccc(C=O)cc21>>CCCCCCCCCCCC1(CCCCCCCCCC)c2cc(C=O)ccc2-c2ccc(/C=C/c3ccc(N(c4ccccc4)c4ccccc4)cc3)cc21  
 8656 C=Cc1ccc(Br)cc1.CCOC(=O)C(F)(F)I>>CCOC(=O)C(F)(F)/C=C/c1ccc(Br)cc1  
 8657 C=Cc1ccccc1.Ic1c(-c2ccccc2)nnn1Cc1ccccc1>>C(=C/c1c(-c2ccccc2)nnn1Cc1ccccc1)\c1ccccc1  
 8658 C=Cc1ccc(OC)c(O)c1.COc1cc(I)cc(OC)c1>>COc1cc(/C=C/c2ccc(OC)c(O)c2)cc(OC)c1  
 8659 C=Cc1ccc(C=O)cc1.O=S(=O)(c1ccc(Br)cc1)C(F)(F)F>>O=Cc1ccc(/C=C/c2ccc(S(=O)(=O)C(F)(F)F)c2)cc1  
 8660 C=Cc1ccccc1.Cc1cc([N+](=O)[O-])ccc1I>>Cc1cc([N+](=O)[O-])ccc1/C=C/c1ccccc1  
 8661 Br1ccc(C(=C2CCCC2)c2ccc3c(cnn3C3CCCCO3)c2)cc1.C=CC(=O)OC>>COC(=O)/C=C/c1ccc(C(=C2CCCC2)c2ccc3c(cnn3C3CCCCO3)c2)cc1  
 8662 C=CC(=O)OC.CCCN1cnc2c(NCc3cccc(Br)c3)nc(N3CCN(C)CC3)nc21>>CCCN1cnc2c(NCc3cccc(/C=C/C(=O)OC)c3)nc(N3CCN(C)CC3)nc21  
 8663 C=Cc1ccc(C)cc1.FC(F)(F)CI>>Cc1ccc(/C=C/CC(F)(F)F)cc1  
 8664 C=CS(=O)(=O)NCCCC.CC(C)(C)OC(=O)NCc1ccccc1Br>>CCCCNS(=O)(=O)/C=C/c1ccccc1CNC(=O)OC(C)(C)C  
 8665 Br1ccc(Oc2ccccc2)cc1.C=Cc1ccccc1>>C(=C/c1ccc(Oc2ccccc2)cc1)\c1ccccc1  
 8666 C=Cc1ccc(OC)cc1.Cc1ccc(I)cc1>>COc1ccc(/C=C/c2ccc(C)cc2)cc1  
 8667 C=CC(=O)OC.FC1(F)C(I)=C1c1ccc(Br)cc1>>COC(=O)/C=C/C1=C(c2ccc(Br)cc2)C1(F)F  
 8668 C=CC(=O)OCC.Cc1ccc(I)cc1>>CCOC(=O)/C=C/c1ccc(C)cc1  
 8669 C=Cc1nn(C2CC2)c2nnc(N)c12.Clc1ccc(I)c1>>Nc1nnc2c1c(/C=C/c1cccc(Cl)c1)nn2C1CC1  
 8670 C=Cc1ccccc1.O=C(/C=C/c1c[nH]c2ccc(Cl)cc12)c1ccc(I)cc1>>O=C(/C=C/c1c[nH]c2ccc(Cl)cc12)c1ccc(/C=C/c2ccccc2)cc1

8671 Br1cccc1.C=Cc1ccc(C(C)=O)cc1>>CC(=O)c1ccc(/C=C/c2ccccc2)cc1  
8672 C=CC(=O)OC(C)(C)C.COC(=O)c1cc2cc(I)c(OCc3ccccc3)c(OC)c2c(=O)o1>>COC(=O)c1cc2cc(/C=C  
/C(=O)OC(C)(C)C)c(OCc3ccccc3)c(OC)c2c(=O)o1  
8673 C=CC(=O)N1CCC2(CC1)OCCO2.CC(C)(C)OC(=O)c1cccc1Br>>CC(C)(C)OC(=O)c1cccc1/C=C/C(  
=O)N1CCC2(CC1)OCCO2  
8674 C=CC(=O)OC(C)(C)C.COC(=O)c1cc2c(Oc3ccc(Br)cc3)cncc2s1>>COC(=O)c1cc2c(Oc3ccc(/C=C/C(=O)  
OC(C)(C)C)cc3)cncc2s1  
8675 C=CS(=O)(=O)NCCCCCCCC.COc1ccc(Br)c(CNC(=O)OC(C)(C)C)c1>>CCCCCCCCNS(=O)(=O)/C  
=C/c1ccc(OC)cc1CNC(=O)OC(C)(C)C  
8676 C=CC1(O)CCN(C(=O)OC(C)(C)C)CC1.CCc1nn2c(C)cc(C)nc2c1Cc1ccc(Br)cc1>>CCc1nn2c(C)cc(C)  
nc2c1Cc1ccc(/C=C/C2(O)CCN(C(=O)OC(C)(C)C)CC2)cc1  
8677 C=CC(=O)OC.COc1ccc(Br)cc1OC>>COC(=O)/C=C/c1ccc(OC)c(OC)c1  
8678 C=CC(=O)OC.Nc1nc(N)c2c(I)cn([C@H]3C[C@H](O)[C@H](CO)O3)c2n1>>COC(=O)/C=C/c1cn(  
[C@H]2C[C@H](O)[C@H](CO)O2)c2nc(N)nc(N)c12  
8679 C=Cc1cccc1.Cc1ccsc1Br>>Cc1ccsc1/C=C/c1cccc1  
8680 C=CC(=O)OCC.Cc1nc(-n2c(C)ccc2C)cc(NC2CCCC2)c1Br>>CCOC(=O)/C=C/c1c(NC2CCCC2)cc(-  
n2c(C)ccc2C)nc1C  
8681 Br1cnc2ccccc2c1.C=C[Si](CC)(CC)CC>>CC[Si](/C=C/c1cnc2ccccc2c1)(CC)CC  
8682 C=C(OC)C1=C(Br)CCCC1.C=CC(=O)OC>>C=C(OC)C1=C(/C=C/C(=O)OC)CCCC1  
8683 Br1cccc1I.C=C[Si](C)(C)C>>C[Si](C)(C)/C=C/c1cccc1Br  
8684 C=CC(=O)OC.CC1Nc2ccccc2N1c1ccc(I)cc1>>COC(=O)/C=C/c1ccc(N2c3ccccc3NC2C)cc1  
8685 C=CCN(C(=O)OC(C)(C)C)C(=O)OC(C)(C)C.Cc1cc(Nc2nnc3ccc(I)cc23)ccc1Oc1cc2nnn2cn1>>Cc1  
cc(Nc2nnc3ccc(/C=C/CN(C(=O)OC(C)(C)C)C(=O)OC(C)(C)C)cc23)ccc1Oc1cc2nnn2cn1  
8686 C=CC(=O)OCC.COc1ncc(Br)c(N)c1I>>CCOC(=O)/C=C/c1c(OC)ncc(Br)c1N  
8687 C=Cc1c2ccccc2cc2ccccc12.FC(F)(F)c1ccc(Br)cc1>>FC(F)(F)c1ccc(/C=C/c2c3ccccc3cc3ccccc23)cc1  
8688 C=Cc1cccc1.COc1cc(Br)cc(OC)c1OC>>COc1cc(/C=C/c2ccccc2)cc(OC)c1OC  
8689 C=Cc1ccc(C(C)(C)C)cc1.C[Si](C)(I)c1cccc1>>CC(C)(C)c1ccc(/C=C/[Si](C)(C)c2ccccc2)cc1  
8690 C=CN1C(=O)c2ccccc2C1=O.Cc1ccc(Br)cc1>>Cc1ccc(/C=C/N2C(=O)c3ccccc3C2=O)cc1  
8691 C=CC(=O)OCC(C)CCCC.COc1ccc(Br)cc1>>CCCC(C)COC(=O)/C=C/c1ccc(OC)cc1  
8692 C=CC(=O)OCC.Cc1cc(C)c(I)c(C)c1>>CCOC(=O)/C=C/c1c(C)cc(C)cc1C  
8693 C=CC(=O)OC.CCc1nn2c(C)cc(C)nc2c1Cc1ccc(Br)cc1>>CCc1nn2c(C)cc(C)nc2c1Cc1ccc(/C=C/C(=O)  
)OC)cc1  
8694 C=CC(=O)OC.FC(F)(F)c1cc(Cl)ccc1I>>COC(=O)/C=C/c1ccc(Cl)cc1C(F)(F)F  
8695 C=CC(=O)OC(C)(C)C.Clc1ccc(Sc2cn(C3CC3)nc2-c2ccc(Br)cc2)cc1>>CC(C)(C)OC(=O)/C=C/c1ccc(-  
c2nn(C3CC3)cc2Sc2ccc(Cl)cc2)cc1  
8696 C=Cc1cccc1C.CCOC(=O)C(F)Br>>CCOC(=O)C(F)/C=C/c1cccc1C  
8697 C=CC(=O)OC.COC(=O)c1ccc(Br)o1>>COC(=O)/C=C/c1ccc(C(=O)OC)o1  
8698 C=CCOc1cccc1C.CC(=O)c1ccc(I)cc1>>CC(=O)c1ccc(/C=C/COc2ccccc2C)cc1  
8699 C=Cc1cc([N+](=O)[O-]  
)ccc1OCOCC[Si](C)(C)C.COc1cccc(I)c1>>COc1cccc(/C=C/c2cc([N+](=O)[O-]  
8700 C=CC(=O)OCC.O=C(c1cccc1)c1ccc(Br)cc1>>CCOC(=O)/C=C/c1ccc(C(=O)c2ccccc2)cc1  
8701 C=CS(=O)(=O)F.Ic1cccc2c1oc1cccc12>>O=S(=O)(F)/C=C/c1cccc2c1oc1cccc12  
8702 Br1cccs1.C=CC(=O)OC>>COC(=O)/C=C/c1cccs1  
8703 C=Cc1cccc1.CCOC(=O)c1cc(=O)c2cccc(Br)c2o1>>CCOC(=O)c1cc(=O)c2cccc(/C=C/c3ccccc3)c2o1  
8704 C=CCN(C(=O)OC(C)(C)C)C(=O)OC(C)(C)C.N#Cc1ccc(Cl)cc1>>CC(C)(C)OC(=O)N(C/C=C/c1ccc(  
C#N)cc1)C(=O)OC(C)(C)C  
8705 C=Cc1nnn(C)n1.Ic1cccc1>>Cn1nnn(/C=C/c2ccccc2)n1  
8706 C=CC(=O)OC.CC(=O)Oc1ccc(Br)cc1CC=C(C)C>>COC(=O)/C=C/c1ccc(OC(C)=O)c(CC=C(C)C)c1  
8707 C=CC(=O)N1N=Cc2ccccc2C1Cc1cccc1.COc1cc(Cc2nnc(N)nc2N)cc(I)c1OC>>COc1cc(Cc2nnc(N)nc  
2N)cc(/C=C/C(=O)N2N=Cc3ccccc3C2Cc2ccccc2)c1OC  
8708 C=CS(C)(=O)=O.CC(C)c1cc(C(C)C)c(Br)c(C(C)C)c1>>CC(C)c1cc(C(C)C)c(/C=C/S(C)(=O)=O)c(C(  
C)C)c1  
8709 C=Cc1ccc(N(c2ccc3ccccc3c2)c2ccc3ccccc3c2)cc1.COc1cc(C=O)c(OC)cc1I>>COc1cc(/C=C/c2ccc(N(  
c3ccc4ccccc4c3)c3ccc4ccccc4c3)cc2)c(OC)cc1C=O  
8710 C=Cc1cccc1.[2H]C(=O)c1cccc1Br>>[2H]C(=O)c1cccc1/C=C/c1cccc1  
8711 C=CC=O.CC(C)(C)CN(Cc1ccc(I)cc1)c1ccnc(C#N)n1>>CC(C)(C)CN(Cc1ccc(/C=C/C=O)cc1)c1ccnc(  
C#N)n1  
8712 C=CC(=O)OC.CC12CCCC(Br)=C1N(Cc1ccc3ccccc3c1)C(=O)C2>>COC(=O)/C=C/C1=C2N(Cc3cccc4  
ccccc4c3)C(=O)CC2(C)CCC1  
8713 C=CCOC(C)=O.Cc1ccc(I)c(C)c1>>CC(=O)OC/C=C/c1ccc(C)cc1C



C=Cc1ccc(OC(C)=O)cc1.CC(=O)OC[C@H]1O[C@@H](Oc2cc(I)cc(OC(C)=O)c2)[C@H](OC(C)=O)  
 8714 [C@@H](OC(C)=O)[C@@H]1OC(C)=O>>CC(=O)OC[C@H]1O[C@@H](Oc2cc(/C=C/c3ccc(OC(C)=O)cc3)cc(OC(C)=O)c2)[C@H](OC(C)=O)[C@@H](OC(C)=O)[C@@H]1OC(C)=O  
 8715 C=CC(=O)OC.CNc1ncc(I)cc1C(=O)OC(C)(C)C>>CNc1ncc(/C=C/C(=O)OC)cc1C(=O)OC(C)(C)C  
 8716 C=Cc1cccc1.Cc1ncc2c1c(I)cn2[C@@H]1O[C@H](CO)[C@@H](O)[C@@]1(C)F>>Cc1ncc2c1c(/C=C/c1cccc1)cn2[C@@H]1O[C@H](CO)[C@@H](O)[C@@]1(C)F  
 8717 C=Cc1ccncc1.Oc1cccc1Br>>Oc1cccc1/C=C/c1ccncc1  
 8718 C=CC(=O)OC.Ic1nn(Cc2cccc2)c2cccc12>>COC(=O)/C=C/c1nn(Cc2cccc2)c2cccc12  
 C=CC[C@H](CC(=O)OC(C)(C)C(=O)N[C@H](C(=O)NC)C(C)(C)C.Cc1cc(OS(=O)(=O)C(F)(F)F)  
 8719 ccc1-c1cccc1>>CNC(=O)[C@@H](NC(=O)[C@H](C/C=C/c1ccc(-c2cccc2)c(C)c1)CC(=O)OC(C)(C)C(C)(C)C  
 8720 C=CC(=O)OC(C)(C)C.Cc1cc(O)ccc1Br>>Cc1cc(O)ccc1/C=C/C(=O)OC(C)(C)C  
 \*CNCCOCCOCCOCCNC(=O)COc1ccc(C(Cc2cc(OC)cc(OC)c2)NC(=O)c2cccc(C=C)c2)cc1.Cc1cc  
 8721 c(I)c(C)c1>>\*CNCCOCCOCCOCCNC(=O)COc1ccc(C(Cc2cc(OC)cc(OC)c2)NC(=O)c2cccc(/C=C/c3ccc(C)cc3C)c2)cc1  
 8722 C=Cc1ccc(N(C)C)cc1.OCCOc1ncc(I)cc1Br>>CN(C)c1ccc(/C=C/c2ncc(OCCO)c(Br)c2)cc1  
 8723 Brc1ccc(C(=C2CCCCC2)c2cccc2)cc1.C=CC(=O)OC(C)(C)C>>CC(C)(C)OC(=O)/C=C/c1ccc(C(=C2CCCCC2)c2cccc2)cc1  
 8724 C=CC(C)=O.COc1cc2c(cc1Br)[C@H]1CCCC[C@H]1N2C(=O)C(C)(C)C>>COc1cc2c(cc1/C=C/C(C)=O)[C@H]1CCCC[C@H]1N2C(=O)C(C)(C)C  
 8725 C=CC(=O)OC.O=S(=O)(c1cccc2cccc12)N1CCc2cc(Br)cnc21>>COC(=O)/C=C/c1ncc2c(c1)CCN2S(=O)(=O)c1cccc2cccc12  
 8726 C=CC#N.CCOC(=O)c1cn(CC)c2nc(C)c(Br)cc2c1=O>>CCOC(=O)c1cn(CC)c2nc(C)c(/C=C/C#N)cc2c  
 8727 C=Cc1ccc(F)cc1.CCOC(=O)C(F)(F)I>>CCOC(=O)C(F)(F)/C=C/c1ccc(F)cc1  
 8728 C=CCc1ccc2ccnc2n1.CCOC(=O)CC(c1ccc(OC)nc1)c1ncc(Br)n1C>>CCOC(=O)CC(c1ccc(OC)nc1)c1ncc(/C=C/Cc2ccc3ccnc3n2)n1C  
 8729 C=CCc1c(Br)cncc1C1=N[C@H](c2cccc2)CO1>>C=C1CCc2c1cncc2C1=N[C@H](c2cccc2)CO1  
 8730 C=C[C@@H](Cn1c(Br)c(-c2ccc(Oc3ccc(F)cc3)cc2)c2c(N)ncnc21)NC(=O)OC(C)(C)C>>C=C1c2c(-c3ccc(Oc4ccc(F)cc4)cc3)c3c(N)ncnc3n2C[C@H]1NC(=O)OC(C)(C)C  
 C=C[C@@H](Cn1c(Br)c(-c2ccc(Oc3ccc(OC(F)(F)F)cc3)cc2)c2c(N)ncnc21)NC(=O)OC(C)(C)C>>C=C1c2c(-c3ccc(Oc4ccc(OC(F)(F)F)cc4)cc3)c3c(N)ncnc3n2C[C@H]1NC(=O)OC(C)(C)C  
 8731 c2ccc(Oc3ccc(OC(F)(F)F)cc3)cc2)c2c(N)ncnc21)NC(=O)OC(C)(C)C>>C=C1c2c(-c3ccc(Oc4ccc(OC(F)(F)F)cc4)cc3)c3c(N)ncnc3n2C[C@H]1NC(=O)OC(C)(C)C  
 8732 C=CC(C)(C)Nc1nc(Cl)ccc1Br>>C=C1c2ncc(Cl)nc2NC1(C)C  
 8733 C=CCN(Cc1cccc1I)S(=O)(=O)c1ccc(C)cc1>>C=C1CN(S(=O)(=O)c2ccc(C)cc2)Cc2cccc21  
 8734 C=CCc1cc(Cl)c2ccncc2c1OCc1ccc(OC)cc1Br>>C=C1Cc2cc(Cl)c3ccncc3c2OCc2ccc(OC)cc21  
 8735 C=CCN(Cc1cc2cc(C)ccc2nc1Cl)c1cccc1>>C=C1CN(c2cccc2)Cc2cc3cc(C)ccc3nc21  
 C=C[C@@H](O[Si](C)(C)C(C)(C)C)[C@@H](OCCCCO[Si](C)(C)C(C)(C)C)[C@@H](CC(I)=CCO)O  
 8736 [Si](C)(C)C(C)(C)C>>C=C1C(=CCO)C[C@@H](O[Si](C)(C)C(C)(C)C)[C@@H](OCCCCO[Si](C)(C)C(C)(C)C)[C@@H]1O[Si](C)(C)C(C)(C)C  
 8737 C=CCN(Cc1cccc1I)C1CCCC1>>C=C1CN(C2CCCC2)Cc2cccc21  
 C=C[C@@H](O[Si](C)(C)C(C)(C)C)[C@@H](OCCCCO[Si](c1cccc1)(c1cccc1)C(C)(C)C)[C@@H](C/C(I)=C/CO)O[Si](C)(C)C(C)(C)C>>C=C1/C(=C\CO)C[C@@H](O[Si](C)(C)C(C)(C)C)[C@@H](OCCCCO[Si](c2cccc2)(c2cccc2)C(C)(C)C)[C@@H]1O[Si](C)(C)C(C)(C)C  
 8738 I)=C/CO)O[Si](C)(C)C(C)(C)C>>C=C1/C(=C\CO)C[C@@H](O[Si](C)(C)C(C)(C)C)[C@@H](OCCCCO[Si](c2cccc2)(c2cccc2)C(C)(C)C)[C@@H]1O[Si](C)(C)C(C)(C)C  
 8739 C=CCOCc1c(Br)c(OC)c2cccc2c1OC>>C=C1COCc2c1c(OC)c1cccc1c2OC  
 8740 C=Cc1cccc(OC)c1C(=O)c1c(Br)c(OC)c(C)c2c1OC(C)(C)OC2>>C=C1c2cccc(OC)c2C(=O)c2c3c(c(C)c(OC)c21)COC(C)(C)O3  
 8741 C=CCN(Cc1cc2cccc2nc1Cl)c1ccc(OC)cc1>>C=C1CN(c2ccc(OC)cc2)Cc2cc3cccc3nc21  
 8742 C=CCCN(Cc1cc2c(cc1Br)OCO2)C(=O)OC>>C=C1CCN(C(=O)OC)Cc2cc3c(cc21)OCO3  
 8743 C=CC[C@H](N[S@](=O)C(C)(C)C)c1c(F)cccc1I>>C=C1C[C@H](N[S@](=O)C(C)(C)C)c2c(F)cccc2  
 8744 C=CCN1c2c(Br)cc([N+](=O)[O-])cc2C(=O)N2C1C(C)(C)SC2(C)C>>C=C1CN2c3c1cc([N+](=O)[O-])cc3C(=O)N1C2C(C)(C)SC1(C)C  
 8745 C=C[Si](C)(C)OCc1cccc1Br>>C=C1c2cccc2CO[Si]1(C)C  
 8746 C=CCN(C)C(=O)C1(CC(=C)Br)CS/C(=C)c2cccc2C1=O>>C=C1CN(C)C(=O)C2(CS/C(=C)c3cccc3)C2=O)CC1=C  
 8747 C=CCC(OC(=C)Br)c1ccc(OC)cc1>>C=C1COC(c2ccc(OC)cc2)CC1=C  
 8748 C=CCc1c(OCc2cccc2I)ccc2c1ccc(=O)n2C>>C=C1Cc2c(ccc3c2ccc(=O)n3C)OCc2cccc21  
 8749 C=C[C@@H](O[Si](C)(C)C(C)(C)C)[C@@H](C)[C@@H](C/C(I)=C/CO)O[Si](C)(C)C(C)(C)C>>C=C1/C(=C\CO)C[C@@H](O[Si](C)(C)C(C)(C)C)[C@@H](C)[C@@H]1O[Si](C)(C)C(C)(C)C  
 8750 C=CC[C@@H]1C(C)(C)CCC[C@@]1(O)Cc1cc(OC)ccc1Br>>C=C1C[C@@H]2C(C)(C)CCC[C@@]2(O)Cc2cc(OC)ccc21  
 8751 C=CCCC(O)C=C(Br)c1ccc2c(c1)OCO2>>C=C1CCCC(O)C=C1c1ccc2c(c1)OCO2

8752 C=C[C@@H](O[Si](C)(C)C(C)(C)C)[C@H](C)[C@@H](C/C(I)=C/CO)O[Si](C)(C)C(C)(C)C>>C=C1/C(=C\CO)C[C@@H](O[Si](C)(C)C(C)(C)C)[C@@H](C)[C@@H]1O[Si](C)(C)C(C)(C)C  
C=CCN1c2c(Br)cc([N+](=O)[O-])cc2C(=O)N2C1C(C)(C)OC21CCCCC1>>C=C1CN2c3c1cc([N+](=O)[O-])cc3C(=O)N1C2C(C)(C)OC12CCCCC2  
8753  
8754 C=CC[C@@H](CCc1ccnc1Br)COCc1cccc1>>C=C1C[C@H](COCc2ccccc2)CCc2ccnc21  
C=C[C@H](O[Si](C)(C)C(C)(C)C)[C@H](CCCO[Si](c1cccc1)(c1cccc1)C(C)(C)C)[C@@H](C/C(I)=C/CO)O[Si](C)(C)C(C)(C)C>>C=C1/C(=C\CO)C[C@@H](O[Si](C)(C)C(C)(C)C)[C@@H](CCCO[Si](c2ccccc2)(c2ccccc2)C(C)(C)C)[C@H]1O[Si](C)(C)C(C)(C)C  
8755  
8756 C=CCOCc1cc(C)c2ccccc2c1Br>>C=C1CCOCc2cc(C)c3ccccc3c21  
C=CCc1c(N(CC)C(=O)c2ccccc2I)ccc2c1ccc(=O)n2C>>C=C1Cc2c(ccc3c2ccc(=O)n3C)N(CC)C(=O)c2ccccc21  
8757  
8758 C=CCC1c2cc(OC)c(OC)cc2CCN1Cc1cccc1Br>>C=C1CC2c3cc(OC)c(OC)cc3CCN2Cc2ccccc21  
8759 C=CCN(C(=O)c1cccc1Br)C(C)C>>C=C1CN(C(C)C)C(=O)c2ccccc21  
8760 C=CCOCC1=C(Br)CCCCC1>>C=C1COCC2=C1CCCCC2  
8761 C=CCc1ccc2ccccc2c1N(C(=O)c1cccc1I)S(=O)(=O)c1ccc(C)cc1>>C=C1Cc2ccc3ccccc3c2N(S(=O))(=O)c2ccc(C)cc21  
C=CC[C@H](CC/C(I)=C/CO)O[Si](C)(C)C(C)(C)C>>C=C1C[C@H](O[Si](C)(C)C(C)(C)C)CC/C1=C/CO  
8762  
8763 C=CCC(CCBr)c1ccc2ccccc2c1>>C=C1CCC(c2ccc3ccccc3c2)C1  
8764 C=CCc1c(OCc2ccccc2Br)c(=O)n(C)c2ccccc12>>C=C1Cc2c(c(=O)n(C)c3ccccc23)OCc2ccccc21  
8765 C=CCN(CC1=C(Br)CCCC1)c1ccc(C)cc1>>C=C1CN(c2ccc(C)cc2)CC2=C1CCCC2  
8766 C=CCc1cc2c(cc1C/C(I)=C/CO)c1cc(OC)c(OC)c(OC)c1)OCO2>>C=C1Cc2cc3c(cc2C(c2cc(OC)c(OC)c(OC)c2)/C1=C/CO)OCO3  
C=CCc1cc(C)ccc1N(Cc1cccc1Br)S(=O)(=O)c1ccc(C)cc1>>C=C1Cc2cc(C)ccc2N(S(=O))(=O)c2ccc(C)cc21  
8767  
8768 C=CCC(O)c1cc2ccc(OC)cc2nc1Cl>>C=C1CC(O)c2cc3ccc(OC)cc3nc21  
8769 C=C[C@H]1O[C@@H]2OC(C)(C)O[C@@H]2[C@H]1N(Cc1cc(OC)ccc1Br)S(=O)(=O)c1ccc(C)cc1>>C=C1c2ccc(OC)cc2CN(S(=O))(=O)c2ccc(C)cc21  
8770 C=CCN(Cc1cc2ccccc2nc1Cl)c1ccc(C)cc1>>C=C1CN(c2ccc(C)cc2)Cc2cc3ccccc3nc21  
8771 C=CC[C@](C)(CCc1cccc1Br)N[S@@](=O)C(C)(C)C>>C=C1C[C@@](C)(N[S@@](=O)C(C)(C)C)CCc2ccccc21  
8772 C=CC[C@H](N[S@@](=O)C(C)(C)C)c1cc(C(F)(F)F)ccc1I>>C=C1C[C@H](N[S@@](=O)C(C)(C)C)c2cc(C(F)(F)F)ccc21  
8773 C=CCCN(CC(=O)OC)S(=O)(=O)c1cccc1Br>>C=C1CCN(CC(=O)OC)S(=O)(=O)c2ccccc21  
8774 C=CCC1c2cc(OC)c(OC)cc2CCN1CC(=C)I>>C=C1CC2c3cc(OC)c(OC)cc3CCN2CC1=C  
8775 C=CC[C@@H](N[S@@](=O)C(C)(C)C)c1cccc1Br>>C=C1C[C@@H](N[S@@](=O)C(C)(C)C)c2ccc1  
8776 C=CCCC[C@@H](C=C)COc1cccc1Br>>C=CCCC[C@@H]1COc2ccccc2C1=C  
8777 C=CCCN(C)c1cccc1I>>C=C1CCN(C)c2ccccc21  
8778 C=CCC1c2ccccc2CCN1Cc1cccc1Br>>C=C1CC2c3ccccc3CCN2Cc2ccccc21  
8779 C=Cc1cc(C(C)(C)C)ccc1N(C)C(=O)c1cccc1I>>C=C1c2ccccc2C(=O)N(C)c2ccc(C(C)(C)C)cc21  
8780 C=CC(C)(C)[C@@H](N[S@@](=O)C(C)(C)C)c1cccc1Br>>C=C1c2ccccc2[C@H](N[S@@](=O)C(C)(C)C)C1(C)C  
8781 C=CC(COc1cccc1I)NC(=O)OCc1cccc1>>C=C1c2ccccc2OCC1NC(=O)OCc1cccc1  
8782 C=CCN(CCc1cc(Cl)ccc1I)C(=O)C(F)(F)F>>C=C1CN(C(=O)C(F)(F)F)CCc2cc(Cl)ccc21  
8783 C=C[Si](C)(C)c1cccc1/C=C\c1ccc(C)cc1Br>>C=C1c2cc(C)ccc2/C=C\c2ccccc2[Si]1(C)C  
8784 C=CCC[C@H]1C(OS(=O)(=O)C(F)(F)F)=C[C@@]2(C)C=C[C@]1(C(C)C)O2>>C=C1CC[C@H]2C1=C[C@@]1(C)C=C[C@]2(C(C)C)O1  
8785 C=C[C@H]1COC(=O)[C@@H]1[C@H](c1cc(OC)c(OC)c(OC)c1)c1cc2c(cc1OS(=O))(=O)C(F)(F)FOCO2>>C=C1c2cc3c(cc2[C@@H](c2cc(OC)c(OC)c(OC)c2)[C@H]2C(=O)OC[C@H]12)OCO3  
8786 C=CCN(CC1=C(Br)c2ccccc2CC1)c1ccc(C)cc1>>C=C1CN(c2ccc(C)cc2)CC2=C1c1cccc1CC2  
8787 C=Cc1cc(CC)ccc1N(C)C(=O)c1cccc1I>>C=C1c2ccccc2C(=O)N(C)c2ccc(CC)cc21  
8788 C=CCC(C=C(C)C)c1cc(C)c(OC)cc1OS(=O)(=O)C(F)(F)F>>C=C1CC(C=C(C)C)c2cc(C)c(OC)cc21  
8789 C=CC(COc1cccc([N+](=O)[O-])c1I)NC(=O)OCc1cccc1>>C=C1c2c(cccc2[N+](=O)[O-])OCC1NC(=O)OCc1cccc1  
8790 C=CCc1cc(Cl)c2ccccc2c1OCc1cccc1Br>>C=C1Cc2cc(Cl)c3ccccc3c2OCc2ccccc21  
8791 C=CCN(/C=C\c1cccc1Br)C(C)=O>>C=C1CN(C(C)=O)C=Cc2ccccc21  
8792 C=CCC(O)c1cc2cc(Br)ccc2nc1Cl>>C=C1CC(O)c2cc3cc(Br)ccc3nc21  
8793 C=CCCCC1=C(I)C(=O)[C@H](C(C)C)CC1>>C=C1CCCC2=C1C(=O)[C@H](C(C)C)CC2  
8794 C=CC(CC)(CC)C(=O)Nc1ccc(OC)cc1Br>>C=C1c2cc(OC)ccc2NC(=O)C1(CC)CC

8795 C=CCC(Nc1cccc1I)c1cccc1>>C=C1CC(c2cccc2)Nc2cccc21  
8796 C=C[C@H](C)CN(c1cccc1Br)S(=O)(=O)c1ccc(C)cc1>>C=C1c2cccc2N(S(=O)(=O)c2ccc(C)cc2)C[C@H]1C  
8797 C=CCC(CCBr)c1ccc(C(F)(F)F)cc1>>C=C1CCC(c2ccc(C(F)(F)F)cc2)C1  
8798 C=CCC[C@H]1C(OS(=O)(=O)C(F)(F)F)=C[C@H]2(C(C)C)C=C[C@H]1(C)O2>>C=C1CC[C@H]2C1=C[C@H]1(C(C)C)C=C[C@H]2(C)O1  
8799 C=CC(CC)(CC)C(=O)Nc1cccc1Br>>C=C1c2cccc2NC(=O)C1(CC)CC  
8800 C=CCN(CC1=C(Br)CCCC1)c1ccc(Cl)cc1>>C=C1CN(c2ccc(Cl)cc2)CC2=C1CCCCC2  
8801 C=CCCC(O)C1=C(Br)CCC1>>C=C1CCCC(O)C2=C1CCC2  
8802 C=CCCC(O)C=C(Br)c1ccc2cccc2c1>>C=C1CCCC(O)C=C1c1ccc2cccc2c1  
8803 C=C[C@H](CC)COc1cccc1Br>>C=C1c2cccc2OC[C@H]1CC  
8804 C=C[C@@H](O[Si](C)(C)C(C)(C)C)[C@@H](CCCO[Si](C)(C)C(C)(C)C)[C@@H](CC(I)=CCO)O[S  
8805 i](C)(C)C(C)(C)C>>C=C1C(=CCO)C[C@@H](O[Si](C)(C)C(C)(C)C)[C@H](CCCO[Si](C)(C)C(C)(C)C)[C@@H]1O[Si](C)(C)C(C)(C)C  
8806 C=CCCC(=O)N(Cc1cccc1)c1cccc1I>>C=C1CCC(=O)N(Cc2cccc2)c2cccc21  
8807 C=CCc1ccc2ccc(C)nc2c1OCc1cccc1Br>>C=C1Cc2ccc3ccc(C)nc3c2OCc2cccc21  
8808 C=C[C@@H](Cn1c(Br)c(-  
8809 c2ccc(C(=O)Nc3cc(C(F)(F)F)ccn3)cc2)c2c(N)ncnc21)NC(=O)OC(C)(C)C>>C=C1c2c(-  
8810 c3ccc(C(=O)Nc4cc(C(F)(F)F)ccn4)cc3)c3c(N)ncnc3n2C[C@H]1NC(=O)OC(C)(C)C  
8811 C=CC[C@H](N[S@](=O)C(C)(C)C)c1cccc1Br>>C=C1C[C@H](N[S@](=O)C(C)(C)C)c2cccc21  
8812 C=CCN(Cc1ccc(OC)cc1)Cc1cc2cccc2nc1Cl>>C=C1CN(Cc2ccc(OC)cc2)Cc2cc3cccc3nc21  
8813 C=CCc1cccc1CCl>>C=C1Cc2cccc2C1  
8814 C=CC(C)(C)C(C(=O)NCc1cccc1)c1cccc1Br>>C=C1c2cccc2C(C(=O)NCc2cccc2)C1(C)C  
8815 C=CC[C@@H]1CCCCN1Cc1cccc1I>>C=C1C[C@@H]2CCCCN2Cc2cccc21  
8816 C=CCn1c(-c2ccc3cc(OC)ccc3c2Br)nc2cccc21>>C=C1Cn2c(nc3cccc32)-c2ccc3cc(OC)ccc3c21  
8817 C=CCN(C)C(=O)C1(CC(=C)Br)CC/C(=C\c2cccc2)C1=O>>C=C1CN(C)C(=O)C2(CC/C(=C\c3cccc3)C2=O)CC1=C  
8818 C=CCCC[C@@H](C=C)CN(c1cccc1Br)S(=O)(=O)c1ccc(C)cc1>>C=CCCC[C@@H]1CN(S(=O)(=O)c2ccc(C)cc2)c2cccc2C1=C  
8819 C=CCOCc1nnn(Cc2ccc(C)cc2)c1I>>C=C1COCc2nnn(Cc3ccc(C)cc3)c21  
8820 C=CCN(CCc1ccc(C(F)(F)F)cc1I)C(=O)C(F)(F)F>>C=C1CN(C(=O)C(F)(F)F)CCc2ccc(C(F)(F)F)cc21  
8821 C=CCCCN(C(=O)c1cccc1)c1cccc1Br>>C=C1CCCN(C(=O)c2cccc2)c2cccc21  
8822 C=CCC(O)c1ccncc1Br>>C=C1CC(O)c2ccncc21  
8823 C=CCC(O)c1cccc1C=Cl>>C=C1C=Cc2cccc2C(O)C1  
8824 C=C[C@@H](O[Si](C)(C)C(C)(C)C)[C@@H](Cc1cccc1)[C@@H](CC(I)=CCO)O[Si](C)(C)C(C)(C)C>>C=C1C(=CCO)C[C@@H](O[Si](C)(C)C(C)(C)C)[C@H](Cc2cccc2)[C@@H]1O[Si](C)(C)C(C)(C)C  
8825 C=CCN(C(=O)c1ccc2cccc2c1Br)C(C(=O)NC1CCCC1)c1ccc(F)cc1>>C=C1CN(C(C(=O)NC2CCC  
8826 CC2)c2ccc(F)cc2)C(=O)c2ccc3cccc3c21  
8827 C=CCCN(c1cccc1C(C)C)S(=O)(=O)c1cccc1Br>>C=C1CCN(c2cccc2C(C)C)S(=O)(=O)c2cccc21  
8828 C=CCN(C(=O)c1ccc2cccc2c1Br)C(C(=O)NC(C)(C)C)c1ccc(C)cc1>>C=C1CN(C(C(=O)NC(C)(C)C)c2ccc(C)cc2)C(=O)c2ccc3cccc3c21  
8829 C=Cc1cccc(O)c1C(=O)Oc1cccc(C(CCCC)OC)c1I>>C=C1c2cccc(O)c2C(=O)Oc2cccc(C(CCCC)O  
8830 C)c21  
8831 C=C[C@H]1O[C@@H]2OC(C)(C)O[C@@H]2[C@H]1N(Cc1cccc1Br)C(=O)OC>>C=C1c2cccc2C  
8832 N(C(=O)OC)[C@H]2[C@@H]1O[C@@H]1OC(C)(C)O[C@H]21  
8833 C=CC(CCC1(C)OCCO1)C(Cc1cccc1Br)(C(=O)OC)C(=O)OC>>C=C1c2cccc2CC(C(=O)OC)(C(=O)OC)C1CCC1(C)OCCO1  
8834 C=CC(CC)(CC)C(=O)Nc1ccc(C)cc1Br>>C=C1c2cc(C)ccc2NC(=O)C1(CC)CC  
8835 C=CCCC(O)C1=C(Br)CCCC1>>C=C1CCCC(O)C2=C1CCCCC2  
8836 C=Cc1cc(CCCCCCCCCCCC)ccc1N(C)C(=O)c1cccc1I>>C=C1c2cccc2C(=O)N(C)c2ccc(CCCCCCCCCCCC)cc21  
8837 C=CCC(O)c1cc(-c2cccc2)nc1Cl>>C=C1CC(O)c2cc(-c3cccc3)nc21  
8838 C=CCOCC1=C(Br)c2cccc2CC1>>C=C1COCC2=C1c1cccc1CC2  
8839 C=CCc1cc(OC)ccc1N(C(=O)c1cccc1I)S(=O)(=O)c1ccc(C)cc1>>C=C1Cc2cc(OC)ccc2N(S(=O)(=O)c2ccc(C)cc2)C(=O)c2cccc21  
8840 C=CCc1cc(C)ccc1N(Cc1cc(OC)ccc1Br)S(=O)(=O)c1ccc(C)cc1>>C=C1Cc2cc(C)ccc2N(S(=O)(=O)c2ccc(C)cc2)Cc2cc(OC)ccc21  
8841 C=CCn1c(-c2ccc3cccc3c2Br)nc2cccc21>>C=C1Cn2c(nc3cccc32)-c2ccc3cccc3c21  
8842 C=CCCC(O[Si](C)(C)C)(C(C)C)C(C)C)c1nc(-  
8843 c2cn(S(=O)(=O)c3ccc(C)cc3)c3cccc23)c(OC)nc1Br>>C=C1CCCC(O[Si](C)(C)C)(C(C)C)C(C)C)c2nc(-c3cn(S(=O)(=O)c4ccc(C)cc4)c4cccc34)c(OC)nc21

8837 C=CCCN(c1ccccc1[N+](=O)[O-])S(=O)(=O)c1ccccc1Br>>C=C1CCN(c2ccccc2[N+](=O)[O-])S(=O)(=O)c2ccccc21  
 8838 C=C[Si](C)(c1ccccc1)c1ccccc1-c1ccccc1Br>>C=C1c2ccccc2-c2ccccc2[Si]1(C)c1ccccc1  
 8839 C=CCc1ccccc(F)c1N(C(=O)c1ccccc1)S(=O)(=O)c1ccc(C)cc1>>C=C1Cc2cccc(F)c2N(S(=O)(=O)c2ccc(C)cc2)C(=O)c2ccccc21  
 8840 C=CCCN([C@H](C)C(=O)OC)S(=O)(=O)c1ccccc1Br>>C=C1CCN([C@H](C)C(=O)OC)S(=O)(=O)c2ccccc21  
 8841 C=CCC(CCBBr)CCCCCCCC>>C=C1CCC(CCCCCCCC)C1  
 8842 C=CCN(Cc1ccc(F)cc1)Cc1cc2cc(OC)ccc2nc1Cl>>C=C1CN(Cc2ccc(F)cc2)Cc2cc3cc(OC)ccc3nc21  
 8843 C=CCCCC(O)C=C(Br)c1ccccc(C)c1>>C=C1CCCC(O)C=C1c1ccccc(C)c1  
 8844 C=CC(OCC(=C)Br)c1ccc2c(ccn2COCC[Si](C)(C)C)c1>>C=C1COC(c2ccc3c(ccn3COCC[Si](C)(C)C)c2)C1=C  
 8845 C=CC[C@H]1CCCCN1Cc1ccccc1I>>C=C1C[C@H]2CCCCN2Cc2ccccc21  
 8846 C=CC(OCC(=C)Br)c1ccccc1>>C=C1COC(c2ccccc2)C1=C  
 8847 C=C[C@H]1CC(C(=O)OC)(C(=O)OC)[C@H](c2ccco2)N(c2ccccc2)O1>>C=C1c2ccccc2N2O[C@H]1CC(C(=O)OC)(C(=O)OC)[C@H]2c1ccco1  
 8848 C=CC(CN(c1ccccc1)S(C)(=O)=O)NC(=O)OCc1ccccc1>>C=C1c2ccccc2N(S(C)(=O)=O)CC1NC(=O)OCc1ccccc1  
 8849 C=CCN(CC1=C(Br)CCC1)c1ccc(Cl)cc1>>C=C1CN(c2ccc(Cl)cc2)CC2=C1CCC2  
 8850 C=CC(C)OCc1c(Br)c(OC)c2ccccc2c1OC>>C=C1c2c(c(OC)c3ccccc3c2OC)COC1C  
 8851 C=CCCCNc1ccccc1Br>>C=C1CCCNc2ccccc21  
 8852 C=CCOCC1=C(Br)c2cc(OC)ccc2CC1>>C=C1CCOCC2=C1c1cc(OC)ccc1CC2  
 8853 C=CC1CCCN1C(=O)C(c1ccccc1Br)N(Cc1ccccc1)C(=O)CC>>C=C1c2ccccc2C(N(Cc2ccccc2)C(=O)C)C(=O)N2CCCC12  
 8854 C=C[C@H](Cn1c(Br)c(-c2ccc(C(=O)NCC3ccccc3)cc2)c2c(N)ncnc21)NC(=O)OC(C)(C)C>>C=C1c2c(-C=CCN(CCC1ccc(Cl)cc1)C(=O)C(F)(F)F>>C=C1CN(C(=O)C(F)(F)F)CCc2ccc(Cl)cc21  
 8855 C=CCCCC(O)C1=C(Br)CCC(C)C1>>C=C1CCCC(O)C2=C1CCC(C)C2  
 8856 C=CCC(c1ccccc1)N(CC(=O)OC)Cc1ccccc1>>C=C1CC(N(CC(=O)OC)Cc2ccccc2)c2ccccc21  
 8857 C=CCc1ccccc1N(C(=O)c1ccccc1)S(=O)(=O)c1ccc(C)cc1>>C=C1Cc2ccccc2N(S(=O)(=O)c2ccc(C)cc2)C(=O)c2ccccc21  
 8858 C=CCN(CC=C)Cc1ccccc1I>>C=CCN1CC(=C)c2ccccc2C1  
 8859 C=CCN(C(=O)c1ccccc1Br)C(C)(C)C>>C=C1CN(C(C)(C)C)C(=O)c2ccccc21  
 8860 C=CCc1c(OCc2cc(OC)ccc2Br)ccc2ccccc12>>C=C1Cc2c(ccc3ccccc23)OCc2cc(OC)ccc21  
 8861 C=C[C@H]1O[C@H]2OC(C)(C)O[C@H]2[C@H]1N(Cc1cc(OC)ccc1Br)C(=O)OC>>C=C1c2ccc(OC)cc2CN(C(=O)OC)[C@H]2[C@H]1O[C@H]1OC(C)(C)O[C@H]21  
 8862 C=CCc1cc(Cl)c2ccccc2c1OCc1ccc(F)cc1Br>>C=C1Cc2cc(Cl)c3ccccc3c2OCc2ccc(F)cc21  
 8863 C=CCN(c1ccc2oc(=O)cc(OCC)c2c1)S(=O)(=O)c1ccccc1Br>>C=C1CN(c2ccc3oc(=O)cc(OCC)c3c2)S(=O)(=O)c2ccccc21  
 8864 C=CCCN1c2c(Br)cc([N+](=O)[O-])cc2C(=O)N2C1C(C)(C)SC2(C)C>>C=C1CCN2c3c1cc([N+](=O)[O-])C=CCC(OCC(=C)Br)c1ccoc1>>C=C1COC(c2ccoc2)CC1=C  
 8865 C=CCC(NC(C(=O)NCc1ccccc1)c1ccccc1Br)C(=O)OC>>C=C1CC(C(=O)OC)NC(C(=O)NCc2ccccc2)c2ccccc21  
 8866 C=CCC(O)c1cc2cc(C)ccc2nc1Cl>>C=C1CC(O)c2cc3cc(C)ccc3nc21  
 8867 C=CCN(c1ccc2c(c1)OCO2)S(=O)(=O)c1ccccc1Br>>C=C1CN(c2ccc3c(c2)OCO3)S(=O)(=O)c2ccccc2  
 8868 C=CCC(O)c1cc2ccccc2nc1Cl>>C=C1CC(O)c2cc3ccccc3nc21  
 8869 C=CCC(OCC(=C)Br)c1ccc(Cl)cc1>>C=C1COC(c2ccc(Cl)cc2)CC1=C  
 8870 C=CCc1c(OCc2cc(OC)ccc2Br)cc(C)n(C)c1=O>>C=C1Cc2c(cc(C)n(C)c2=O)OCc2cc(OC)ccc21  
 8871 C=CC[C@H]1CC[C@H]2CC(=O)O[C@H]12Cl>>C=C1C[C@H]2CC[C@H]3CC(=O)O[C@H]23C1  
 8872 C=CCc1c(N(CC)C(=O)Cc2ccccc2)Iccc2c1ccc(=O)n2C>>C=C1Cc2c(ccc3c2ccc(=O)n3C)N(CC)C(=O)Cc2ccccc21  
 8873 C=Cc1cc(C(C)=O)ccc1N(C)C(=O)c1ccccc1I>>C=C1c2ccccc2C(=O)N(C)c2ccc(C(C)=O)cc21  
 8874 C=CCC(Cc1ccccc1)(NCc1ccccc1Br)C(=O)OC>>C=C1CC(Cc2ccccc2)(C(=O)OC)NCc2ccccc21  
 8875 C=CCN(CCI)S(=O)(=O)c1ccccc1>>C=C1CCN(S(=O)(=O)c2ccccc2)C1  
 8876 C=CCCCOc1ccccc1Br>>C=C1CCCOc2ccccc21  
 8877 C=CCC(OC=CC(=O)OCC)c1ccccc1CC1>>C=C1Cc2ccccc2C(OC=CC(=O)OCC)C1  
 8878 C=C[C@H](C)OCc1c(Br)ccc(OCc2ccccc2)c1OCc1ccccc1>>C=C1c2ccc(OCc3ccccc3)c(OCc3ccccc3)c2CO[C@H]1C  
 8879 C=CC(OCC(=C)Br)c1ccc(OC)cc1>>C=C1COC(c2ccc(OC)cc2)C1=C  
 8880  
 8881

8882 C=CCOC(c1cccc1)c1c(Br)c(OC)c2cccc2c1OC>>C=C1COC(c2cccc2)c2c1c(OC)c1cccc1c2OC  
8883 C=CCc1c(OCc2cccc2I)c(=O)oc2cccc12>>C=C1Cc2c(c(=O)oc3cccc23)OCc2cccc21  
8884 C=CCN(C(=O)c1ccc2cccc2c1Br)C(C(=O)NC1CCCC1)c1ccc(OC)c(OC)c1>>C=C1CN(C(C(=O)NC2CCCC2)c2ccc(OC)c(OC)c2)C(=O)c2ccc3cccc3c21  
8885 C=CCN(CCI)S(=O)(=O)c1ccc(C)cc1>>C=C1CCN(S(=O)(=O)c2ccc(C)cc2)C1  
8886 C=C[C@H](Cn1c(Br)c(-c2ccc(C(=O)N[C@H](C)c3cccn3)cc2)c2c(N)ncnc21)NC(=O)OC(C)(C)C>>C=C1c2c(-c3ccc(C(=O)N[C@H](C)c4cccn4)cc3)c3c(N)ncnc3n2C[C@H]1NC(=O)OC(C)(C)C  
8887 C=C[Si](C)(C)c1cc(C)c(C)cc1-c1cc(C)c(C)cc1Br>>C=C1c2cc(C)c(C)cc2-c2cc(C)c(C)cc2[Si]1(C)C  
8888 C=CCC(OCC(=C)Br)c1cccc1>>C=C1COC(c2cccc2)CC1=C  
8889 C=CCO[C@H]1[C@@H](OCc2cccc2)[C@H](COCc2cccc2)O[C@H]1Sc1cccc1Br>>C=C1CO[C@H]2[C@@H](OCc3cccc3)[C@H](COCc3cccc3)O[C@H]2Sc2cccc21  
8890 C=CCCOCC1=C(Br)c2cccc2C(C)C1>>C=C1CCOCC2=C1c1cccc1C(C)C2  
8891 C=CCN(CC1=C(Br)CCCC1)c1cccc2cccc12>>C=C1CN(c2cccc3cccc23)CC2=C1CCCCC2  
8892 C=CCc1cc2c(C)cc(=O)oc2c(C)c1OCc1cccc1I>>C=C1Cc2cc3c(C)cc(=O)oc3c(C)c2OCc2cccc21  
8893 C=C[C@H](C)COc1cccc1Br>>C=C1c2cccc2OC[C@H]1C  
8894 C=C[C@H](O[Si](C)(C)C(C)(C)C)[C@H](c1cccc1)[C@H](CC(I)=CCO)O[Si](C)(C)C(C)(C)C>>C=C1C(=CCO)C[C@H](O[Si](C)(C)C(C)(C)C)[C@H](c2cccc2)[C@H]1O[Si](C)(C)C(C)(C)C  
8895 C=C[Si](C)(C)c1cc(OC)c(OC)cc1-c1cc(OC)c(OC)cc1Br>>C=C1c2cc(OC)c(OC)cc2-c2cc(OC)c(OC)cc2[Si]1(C)C  
8896 C=CCN(Cc1cc2ccc(C)cc2nc1Cl)c1ccc(C)cc1>>C=C1CN(c2ccc(C)cc2)Cc2cc3ccc(C)cc3nc21  
8897 C=CCc1ccc2cccc2c1OS(=O)(=O)c1cccc1Br>>C=C1Cc2ccc3cccc3c2OS(=O)(=O)c2cccc21  
8898 C=CCCOCC1ccc2ccc(OC)cc2c1Br>>C=C1CCOCC2ccc3ccc(OC)cc3c21  
8899 C=CCc1c(OCc2cccc2Br)c2ccnc2n(-c2cccc2)c1=O>>C=C1Cc2c(c3ccnc3n(-c3cccc3)c2=O)OCc2cccc21  
8900 C=Cc1cc(C(O)(C(F)(F)F)C(F)(F)F)ccc1N(C)C(=O)c1cccc1I>>C=C1c2cccc2C(=O)N(C)c2ccc(C(O)(C(F)(F)F)C(F)(F)F)cc21  
8901 C=C[Si](C)(C)c1ccc(F)cc1/C=C\c1cccc1Br>>C=C1c2cccc2/C=C\c2cc(F)ccc2[Si]1(C)C  
8902 C=CCc1c(N(CC)C(=O)c2cccc2I)ccc2oc(=O)ccc12>>C=C1Cc2c(ccc3oc(=O)ccc23)N(CC)C(=O)c2ccc21  
8903 C=CCN(CCI)S(=O)(=O)c1cccc1Br>>C=C1CCN(S(=O)(=O)c2cccc2Br)C1  
8904 C=CCCCC1=C(I)C(=O)C(C(C)C)CC1>>C=C1CCCC2=C1C(=O)C(C(C)C)CC2  
8905 C=CC1CCC(=O)N1CCI>>C=C1CCN2C(=O)CCC12  
8906 C=CCCCC(O)C=C(Br)c1cccc1>>C=C1CCCC(O)C=C1c1cccc1  
8907 C=CCO[C@H]1[C@@H](OCc2cccc2)[C@H](OCc2cccc2)[C@H](COCc2cccc2)O[C@H]1Sc1cccc1Br>>C=C1CO[C@H]2[C@@H](OCc3cccc3)[C@H](OCc3cccc3)[C@H](COCc3cccc3)O[C@H]2Sc2cccc21  
8908 C=CCc1c(OS(=O)(=O)c2cccc2Br)ccc2cccc12>>C=C1Cc2c(ccc3cccc23)OS(=O)(=O)c2cccc21  
8909 C=CC(=O)N(C)c1cccc1I>>C=C1C(=O)N(C)c2cccc21  
8910 C=CCC[C@H](C=C)COc1cccc1Br>>C=CCC[C@H]1COc2cccc2C1=C  
8911 C=CC(C)(C)OC(CI)OCCCC>>C=C1CC(OCCCC)OC1(C)C  
8912 C=CCc1c(OCc2cccc2Br)cc(C)n(C)c1=O>>C=C1Cc2c(cc(C)n(C)c2=O)OCc2cccc21  
8913 C=C[C@H](O[Si](C)(C)C(C)(C)C)[C@H](c1cccc1)[C@H](C/C(I)=C/CO)O[Si](C)(C)C(C)(C)C>>C=C1/C(=C/CO)C[C@H](O[Si](C)(C)C(C)(C)C)[C@H](c2cccc2)[C@H]1O[Si](C)(C)C(C)(C)C  
8914 C=CCN(Cc1cccc1I)C1CCCCC1>>C=C1CN(C2CCCCC2)Cc2cccc21  
8915 C=CCC[C@H](C=C)CN(c1cccc1Br)S(=O)(=O)c1ccc(C)cc1>>C=CCC[C@H]1CN(S(=O)(=O)c2ccc(C)cc2)c2cccc2C1=C  
8916 C=C[C@H](CC)CN(c1cccc1Br)S(=O)(=O)c1ccc(C)cc1>>C=C1c2cccc2N(S(=O)(=O)c2ccc(C)cc2)C[C@H]1CC  
8917 C=CC[C@H](C[C@H](CC=C)O[Si](C)(C)C(C)(C)C)Oc1c(Br)cccc1C(=O)OC(C)(C)C>>C=CC[C@H](C[C@H]1CC(=C)c2cccc(C(=O)OC(C)(C)C)c2O1)O[Si](C)(C)C(C)(C)C  
8918 C=CCCN(Cc1cccc1)S(=O)(=O)c1cccc1Br>>C=C1CCN(Cc2cccc2)S(=O)(=O)c2cccc21  
8919 C=CC[C@H](N[S@@](=O)C(C)(C)C)c1c(F)cccc1Br>>C=C1C[C@H](N[S@@](=O)C(C)(C)C)c2c(F)cccc21  
8920 C=C[C@H](O[Si](C)(C)C(C)(C)C)[C@H](OCCCCO[Si](c1cccc1)(c1cccc1)C(C)(C)C)[C@H](C/C(I)=C/CO)O[Si](C)(C)C(C)(C)C>>C=C1/C(=C/CO)C[C@H](O[Si](C)(C)C(C)(C)C)[C@H](OC CCO[Si](c2cccc2)(c2cccc2)C(C)(C)C)[C@H]1O[Si](C)(C)C(C)(C)C  
8921 C=CCC(C(=O)OC)N(C(=O)c1cccc1I)C(C(=O)NCc1cccc1)c1cccc1>>C=C1CC(C(=O)OC)N(C(C(=O)N)NCc2cccc2)c2cccc2)C(=O)c2cccc21  
8922 C=CC(CC)(CC)C(=O)Nc1ccc(F)cc1Br>>C=C1c2cc(F)ccc2NC(=O)C1(CC)CC  
8923 C=CCN(CCc1cccc1I)C(=O)C(F)(F)F>>C=C1CN(C(=O)C(F)(F)F)CCc2cccc21

8924 C=CCc1c(N(C)C(=O)c2ccccc2I)ccc2oc(=O)ccc12>>C=C1Cc2c(ccc3oc(=O)ccc23)N(C)C(=O)c2ccccc  
 8925 C=CCC1(c2ccccc2Br)SCCCS1>>C=C1CC2(SCCCS2)c2ccccc21  
 8926 C=CCCOc1ccc2ccccc2c1Br>>C=C1CCOCc2ccc3ccccc3c21  
 8927 C=CCN(C(=O)c1ccc2ccccc2c1Br)C(C(=O)NC1CCCCC1)c1ccc(Cl)cc1>>C=C1CN(C(C(=O)NC2CCC  
 8928 CC2)c2ccc(Cl)cc2)C(=O)c2ccc3ccccc3c21  
 8928 C=CC(F)(F)Oc1ccc(C)cc1Br>>C=C1c2cc(C)ccc2OC1(F)F  
 8929 C=CCC(O)c1cc2ccccc(CC)c2nc1Cl>>C=C1CC(O)c2ccc3ccccc(CC)c3nc21  
 8930 C=C[C@H](O[Si](C)(C)C(C)(C)C)[C@H](C)[C@@H](C/C(I)=C/CO)O[Si](C)(C)C(C)(C)C>>C=C1/  
 8931 C(=C\CO)C[C@@H](O[Si](C)(C)C(C)(C)C)[C@@H](C)[C@H]1O[Si](C)(C)C(C)(C)C  
 8932 C=CCN(CC1=C(Br)CCC1)c1cccc2ccccc12>>C=C1CN(c2ccccc3ccccc23)CC2=C1CCC2  
 8933 C=CCN(Cc1ccccc1I)C(=O)C(F)(F)F>>C=C1CN(C(=O)C(F)(F)F)Cc2ccccc21  
 8934 C=CC(C)c1c(OS(=O)(=O)c2ccccc2Br)ccc2ccccc12>>C=C1c2ccccc2S(=O)(=O)Oc2ccc3ccccc3c2C1C  
 8935 C=CCOCc1nnn(CCCCCC)c1I>>C=C1COCc2nnn(CCCCCC)c21  
 8936 C=C[C@H](Cn1c(Br)c(-  
 8937 c2ccc(C(=O)N[C@@H](COC)c3ccccc3)cc2)c2c(N)ncnc21)NC(=O)OC(C)(C)C>>C=C1c2c(-  
 8938 c3ccc(C(=O)N[C@@H](COC)c4ccccc4)cc3)c3c(N)ncnc3n2C[C@H]1NC(=O)OC(C)(C)C  
 8939 C=CCC(c1ccccc1I)N(CC(=O)OC)c1ccccc1>>C=C1CC(N(CC(=O)OC)c2ccccc2)c2ccccc21  
 8940 C=CCCC(CCl)CCCCCCCC>>C=C1CCCC(CCCCCCCC)C1  
 8941 C=CCN(Cc1ccc(F)cc1)Cc1cc2cc(C)ccc2nc1Cl>>C=C1CN(Cc2ccc(F)cc2)Cc2cc3cc(C)ccc3nc21  
 8942 C=CCOCC1=C(Br)c2ccccc2CC1>>C=C1CCOCC2=C1c1ccccc1CC2  
 8943 C=CC(OCC(=C)Br)c1cccc(Cl)c1>>C=C1COC(c2ccccc(Cl)c2)C1=C  
 8944 C=CCCN(c1cccc2ccccc12)S(=O)(=O)c1ccccc1Br>>C=C1CCN(c2ccccc3ccccc23)S(=O)(=O)c2ccccc21  
 8945 C=CCC(CBr)(C(=O)OCC)C(=O)OCC>>C=C1CCC(C(=O)OCC)(C(=O)OCC)C1  
 8946 C=CCCN(c1ccc(Cl)cc1)S(=O)(=O)c1ccccc1Br>>C=C1CCN(c2ccc(Cl)cc2)S(=O)(=O)c2ccccc21  
 8947 C=CC(F)(F)Oc1ccc(C#N)cc1Br>>C=C1c2cc(C#N)ccc2OC1(F)F  
 8948 C=Cc1ccccc1N(C)C(=O)c1ccccc1I>>C=C1c2ccccc2C(=O)N(C)c2ccccc21  
 8949 C=CC[C@H](N[S@](=O)C(C)(C)C)c1ccccc1I>>C=C1C[C@H](N[S@](=O)C(C)(C)C)c2ccccc21  
 8950 C=CCN(Cc1ccccc1)Cc1cc2ccccc(C)c2nc1Cl>>C=C1CN(Cc2ccccc2)Cc2cc3ccccc(C)c3nc21  
 8951 C=Cc1cc(O)ccc1N(C)C(=O)c1ccccc1I>>C=C1c2ccccc2C(=O)N(C)c2ccc(O)cc21  
 8952 C=CCOCC1=C(Br)c2ccccc(OC)c2CC1>>C=C1CCOCC2=C1c1ccccc(OC)c1CC2  
 8953 C=C[C@@H](O[Si](C)(C)C(C)(C)C)[C@H](C)[C@@H](CC(I)=CCO)O[Si](C)(C)C(C)(C)C>>C=  
 8954 C1C(=CCO)C[C@@H](O[Si](C)(C)C(C)(C)C)[C@H](C)[C@@H]1O[Si](C)(C)C(C)(C)C  
 8955 C=CCC(NCc1cc(F)ccc1Br)(C(=O)OC)C(C)C>>C=C1CC(C(=O)OC)(C(C)C)NCc2ccc(F)ccc21  
 8956 C=CCN(CCc1c(Br)n(C(=O)OCc2ccccc2)c2ccccc12)C(=O)C(F)(F)F>>C=C1CN(C(=O)C(F)(F)F)CCc2  
 8957 c1n(C(=O)OCc1ccccc1)c1ccccc21  
 8958 C=Cc1cc(C)ccc1N(C)C(=O)c1ccccc1I>>C=C1c2ccccc2C(=O)N(C)c2ccc(C)cc21  
 8959 C=Cc1cc(C(=O)OCC)ccc1N(C)C(=O)c1ccccc1I>>C=C1c2ccccc2C(=O)N(C)c2ccc(C(=O)OCC)cc21  
 8960 C=CC(OCC(=C)Br)c1cccc(OC)c1>>C=C1COC(c2ccccc(OC)c2)C1=C  
 8961 C=C[C@H]1CC(C(=O)OC)(C(=O)OC)[C@H](c2ccc3c(c2)OCO3)N(c2ccccc2I)O1>>C=C1c2ccccc  
 8962 2N2O[C@H]1CC(C(=O)OC)(C(=O)OC)[C@@H]2c1ccc2c(c1)OCO2  
 8963 C=CCC(NCc1ccc(F)cc1Br)(C(=O)OC)C(C)C>>C=C1CC(C(=O)OC)(C(C)C)NCc2ccc(F)cc21  
 8964 C=CCOCC1=C(Br)CCc2ccccc21>>C=C1COCC2=C1CCc1ccccc12  
 8965 C=CCN(c1ccc2c(ccc(=O)n2CC)c1)S(=O)(=O)c1ccccc1Br>>C=C1CN(c2ccc3c(ccc(=O)n3CC)c2)S(=O  
 8966 (=O)c2ccccc21  
 8967 C=CCN(Cc1ccccc1)Cc1cc2cc(OC)ccc2nc1Cl>>C=C1CN(Cc2ccccc2)Cc2cc3cc(OC)ccc3nc21  
 8968 C=Cc1cc(CC)ccc1N(C)C(=O)c1cc(OC)ccc1I>>C=C1c2ccc(OC)cc2C(=O)N(C)c2ccc(CC)cc21  
 8969 C=CCC1c2ccccc2CCN1CC(=C)I>>C=C1CC2c3ccccc3CCN2CC1=C  
 8970 C=CCN(CCc1c(Br)n(C(=O)OC(C)(C)C)c2ccccc12)C(=O)C(F)(F)F>>C=C1CN(C(=O)C(F)(F)F)CCc2  
 8971 c1n(C(=O)OC(C)(C)C)c1ccccc21  
 8972 C=CC[C@H](N[S@@](=O)C(C)(C)C)c1cc(F)ccc1Br>>C=C1C[C@H](N[S@@](=O)C(C)(C)C)c  
 8973 2cc(F)ccc21  
 8974 C=CCOCc1nnn(Cc2ccsc2)c1I>>C=C1COCc2nnn(Cc3ccsc3)c21  
 8975 C=CCC(COCc1ccccc1)N(C)c1ccccc1I>>C=C1CC(COCc2ccccc2)N(C)c2ccccc21  
 8976 C=CCN(Cc1ccc(F)cc1)Cc1cc2ccccc2nc1Cl>>C=C1CN(Cc2ccc(F)cc2)Cc2cc3ccccc3nc21  
 8977 C=CCN(Cc1ccccc1)Cc1cc2cc(C)ccc2nc1Cl>>C=C1CN(Cc2ccccc2)Cc2cc3cc(C)ccc3nc21  
 8978 C=CCN(c1ccc2oc(=O)ccc2c1)S(=O)(=O)c1ccccc1Br>>C=C1CN(c2ccc3oc(=O)ccc3c2)S(=O)(=O)c2c  
 8979 ccccc21  
 8980 C=CC(CC)(CC)C(=O)Nc1ccc(OC(F)(F)F)cc1Br>>C=C1c2cc(OC(F)(F)F)ccc2NC(=O)C1(CC)CC  
 8981 C=C[C@@H]1CC(C(=O)OC)(C(=O)OC)[C@H](c2ccccc2)N(c2ccccc2I)O1>>C=C1c2ccccc2N2O[C  
 8982 @H]1CC(C(=O)OC)(C(=O)OC)[C@@H]2c1ccccc1

8972 C=CCN(C)CCc1ccc([N+])(=O)[O-]c1Br>>C=C1CN(C)CCc2ccc([N+])(=O)[O-]cc21  
 8973 C=Cc1cc(C(C)C)ccc1N(C)C(=O)c1ccccc1I>>C=C1c2ccccc2C(=O)N(C)c2ccc(C(C)C)cc21  
 C=C[C@H]1C[C@H](OCc2ccccc2)[C@H](O[Si](C)(C)C(C)C)C[C@H]1NCc1cc2c(cc1Br)  
 8974 r)OCO2>>C=C1c2cc3c(cc2CN[C@H]2C[C@H](O[Si](C)(C)C(C)C)C[C@H](OCc4ccccc4)C[C@H]12)OCO3  
 C=C[C@H](O[Si](C)(C)C(C)C)C[C@H](CCCC)[C@H](CC(I)=CCO)O[Si](C)(C)C(C)C(C)>  
 8975 >C=C1C(=CCO)C[C@H](O[Si](C)(C)C(C)C)C[C@H](CCCC)[C@H]1O[Si](C)(C)C(C)C  
 C=Cc1cccc(C(=O)O)[C@H]2[C@H]3[C@H](C)(C(=O)[C@H](OC(C)=O)C4=C(C)[C@H](OC(=O)[C  
 8976 @H](O[Si](CC)(CC)CC)[C@H](NC(=O)c5cccc(I)c5)c5ccccc5)C[C@H]2(O)C4(C)C)[C@H](O[Si]  
 (CC)(CC)CC)C[C@H]2OC[C@H]23OC(C)=O)c1>>C=C1c2cccc(c2)C(=O)N[C@H](c2ccccc2)[C@  
 @H](O[Si](CC)(CC)CC)C(=O)O[C@H]2C[C@H]3(O)[C@H](OC(=O)c4cccc1c4)[C@H]1[C@H](C)  
 (C(=O)I)C@H1(OC(C)=O)C(=C2C)C3(C)C)I)C@H1(O[Si](CC)(CC)CC)C1C@H12OC1C@121OC(C)  
 8977 C=CCN(Cc1ccc(OC)cc1)Cc1cc2ccc(C)cc2nc1Cl>>C=C1CN(Cc2ccc(OC)cc2)Cc2cc3ccc(C)cc3nc21  
 C=C[C@H]1CC(C(=O)OC)(C(=O)OC)[C@H](c2cc(OC)c(OC)c(OC)c2)N(c2ccccc2)O1>>C=C1c2  
 8978 ccccc2N2O[C@H]1CC(C(=O)OC)(C(=O)OC)[C@H]2c1cc(OC)c(OC)c(OC)c1  
 C=CCOCc1nnn(Cc2ccccc2)c1I>>C=C1COCc2nnn(Cc3ccccc3)c21  
 8979 C=Cc1cc(CCCCC)ccc1N(C)C(=O)c1ccccc1I>>C=C1c2ccccc2C(=O)N(C)c2ccc(CCCCC)cc21  
 8980 C=CCN(Cc1ccc(F)cc1)Cc1cc2ccc(C)cc2nc1Cl>>C=C1CN(Cc2ccc(F)cc2)Cc2cc3ccc(C)cc3nc21  
 8981 C=CCOCC1=C(Br)c2ccc(OC)cc2CC1>>C=C1COCC2=C1c1ccc(OC)cc1CC2  
 8982 C=CCN(Cc1nnn(CCCCC)c1)S(=O)(=O)c1ccc(C)cc1>>C=C1CN(S(=O)(=O)c2ccc(C)cc2)Cc2nnn(C  
 8983 CCCCC)c21  
 C=CCc1ccccc1N(Cc1cc(OC)ccc1Br)S(=O)(=O)c1ccc(C)cc1>>C=C1Cc2ccccc2N(S(=O)(=O)c2ccc(C)  
 8984 cc2)Cc2cc(OC)ccc21  
 C=CC(=O)N(Cc1ccccc1)C(C(=O)NCc1ccccc1)c1ccccc1Br>>C=C1C(=O)N(Cc2ccccc2)C(C(=O)NCc2  
 8985 ccccc2)c2ccccc21  
 C=CCC(C1=C(OS(=O)(=O)C(F)(F)F)OCCC1)c1ccc(OC)cc1>>C=C1CC(c2ccc(OC)cc2)C2=C1OCCC  
 8986 C=CCN(Cc1cc2ccc(C)cc2nc1Cl)c1ccc(OC)cc1>>C=C1CN(c2ccc(OC)cc2)Cc2cc3ccc(C)cc3nc21  
 8987 C=CCCCC(=O)N(Cc1ccccc1)c1ccccc1I>>C=C1CCCC(=O)N(Cc2ccccc2)c2ccccc21  
 8988 C=CCN(C)Cc1ccccc1I>>C=C1CN(C)Cc2ccccc21  
 8989 C=CCc1c(N(CC)C(=O)c2ccccc2I)ccc2c1ccc(=O)n2CC>>C=C1Cc2c(ccc3c2ccc(=O)n3CC)N(CC)C(=O)  
 8990 c2ccccc21  
 C=CCO[C@H]1[C@H](Sc2ccccc2Br)O[C@H](COCc2ccccc2)[C@H](OCc2ccccc2)[C@H]1OCc  
 8991 1ccccc1>>C=C1CO[C@H]2[C@H](O[C@H](COCc3ccccc3)[C@H](OCc3ccccc3)[C@H]2OCc  
 2ccccc2)Sc2ccccc21  
 8992 C=CCc1c(N(C)C(=O)Cc2ccccc2I)ccc2oc(=O)ccc12>>C=C1Cc2c(ccc3oc(=O)ccc23)N(C)C(=O)Cc2cc  
 ccc21  
 C=C[Si](C)(C)c1ccccc1-c1ccccc1Br>>C=C1c2ccccc2-c2ccccc2[Si]1(C)C  
 8993 C=CCN(Cc1ccccc1)Cc1cc2ccccc2nc1Cl>>C=C1CN(Cc2ccccc2)Cc2cc3ccccc3nc21  
 8994 C=CCC(C(=O)OCC)N(C)c1ccccc1Br>>C=C1CC(C(=O)OCC)N(C)c2ccccc21  
 8995 C=Cc1cc([N+])(=O)[O-]ccc1N(C)C(=O)c1ccccc1I>>C=C1c2ccccc2C(=O)N(C)c2ccc([N+])(=O)[O-]  
 8996 C=CCN(CCc1cc(OC)c(OC)cc1Br)C(=O)c1cccc(OC)c1OC>>C=C1CN(C(=O)c2cccc(OC)c2OC)CCc2c  
 8997 c(OC)c(OC)cc21  
 C=CCCN(Cc1ccccc1Br)S(=O)(=O)c1ccccc1>>C=C1CCN(S(=O)(=O)c2ccccc2)Cc2ccccc21  
 8998 C=CCN(C(=O)c1ccc2ccccc2c1Br)C(C(=O)NC1CCCC1)c1ccc2ccccc2c1>>C=C1CN(C(C(=O)NC2C  
 8999 CCCC2)c2ccc3ccccc3c2)C(=O)c2ccc3ccccc3c21  
 9000 C=CCOC(Cl)c1ccc(OC)cc1>>C=C1COC(c2ccc(OC)cc2)C1  
 9001 C=CCCN([C@H](CC(C)C)C(=O)OC)S(=O)(=O)c1ccccc1Br>>C=C1CCN([C@H](CC(C)C)C(=O)  
 )OC)S(=O)(=O)c2ccccc21  
 9002 C=CCC(C(=O)OC)(C(=O)OC)C(c1cc(OC)c(OC)c(OC)c1)c1cc2c(cc1Br)OCO2>>C=C1CC(C(=O)OC)  
 (C(=O)OC)C(c2cc(OC)c(OC)c(OC)c2)c2cc3c(cc21)OCO3  
 9003 C=CCOCc1ccc2cc(OC)ccc2c1Br>>C=C1COCc2ccc3cc(OC)ccc3c21  
 9004 C=CCc1c(N(CC)C(=O)Cc2ccccc2I)ccc2oc(=O)ccc12>>C=C1Cc2c(ccc3oc(=O)ccc23)N(CC)C(=O)Cc  
 2ccccc21  
 C=CCN(Cc1ccccc1)Cc1cc2ccc(C)cc2nc1Cl>>C=C1CN(Cc2ccccc2)Cc2cc3ccc(C)cc3nc21  
 9005 C=CC1CCCN1Cc1ccccc1I>>C=C1c2ccccc2CN2CCCC12  
 9006 C=Cc1cccc(C(=O)O)[C@H]2[C@H]3[C@H](C)(C(=O)[C@H](OC(C)=O)C4=C(C)[C@H](OC(=O)[C  
 @H](O[Si](C)(C)C)(C(C)C)C(C)C)[C@H](C=C(C)C)NC(=O)c5cccc(I)c5)C[C@H]2(O)C4(C)C)[C@  
 9007 H](O[Si](CC)(CC)CC)C[C@H]2OC[C@H]23OC(C)=O)c1>>C=C1c2cccc(c2)C(=O)N[C@H](C=C(C  
 )C)[C@H](O[Si](C)(C)C)(C(C)C)C(C)C)C(=O)O[C@H]2C[C@H]3(O)[C@H](OC(=O)c4cccc1c4  
 )I)C@H11C@1(C)C(=O)I)C@H1(OC(C)=O)C(=C2C)C3(C)C)I)C@H1(O[Si](CC)(CC)CC)C1C@H12  
 9008 C=CCCC(=O)c1nnn(Cc2ccc(OC)cc2)c1I>>C=C1CCC(=O)c2nnn(Cc3ccc(OC)cc3)c21

9009 C=CCN(CC1=C(Br)c2ccccc2CC1)c1ccc(Cl)cc1>>C=C1CN(c2ccc(Cl)cc2)CC2=C1c1ccccc1CC2  
 9010 C=CCCN(c1ccccc1Br)S(=O)(=O)c1ccccc1>>C=C1CCN(S(=O)(=O)c2ccccc2)c2ccccc21  
 9011 C=CCN(C(=O)c1ccc2ccccc2c1Br)C(C(=O)NC(C)(C)C)c1ccccc1>>C=C1CN(C(C(=O)NC(C)(C)C)c2ccccc2)C(=O)c2ccc3ccccc3c21  
 9012 C=CCCN(c1ccccc1Br)S(=O)(=O)c1ccccc1>>C=C1CCCN(S(=O)(=O)c2ccccc2)c2ccccc21  
 9013 C=CCc1ccc2ccccc2c1OCc1ccccc1Br>>C=C1Cc2ccc3ccccc3c2OCc2ccccc21  
 9014 C=CCC(c1ccccc1)N(C)c1ccccc1I>>C=C1CC(c2ccccc2)N(C)c2ccccc21  
 9015 C=CCN(CC1=C(Br)CCCCC1)c1ccc(Cl)cc1>>C=C1CN(c2ccc(Cl)cc2)CC2=C1CCCCC2  
 9016 C=CCC(NCc1cc(C)ccc1Br)(C(=O)OC)C(C)C>>C=C1CC(C(=O)OC)(C(C)C)NCc2cc(C)ccc21  
 9017 C=C[C@H]1OC(C)(C)O[C@H]1[C@H](C/C(I)=C/CO)O[Si](C)(C)C(C)(C)C>>C=C1/C(=C\CO)C[C@H](O[Si](C)(C)C(C)(C)C)[C@H]2OC(C)(C)O[C@H]12  
 9018 C=CCN(CCc1cc(OC)c(OC)cc1Br)C(=O)OC(C)(C)C>>C=C1CN(C(=O)OC(C)(C)C)CCc2cc(OC)c(OC)cc21  
 9019 C=CCN(CCI)S(=O)(=O)c1ccc(C=O)cc1>>C=C1CCN(S(=O)(=O)c2ccc(C=O)cc2)C1  
 9020 C=CCCN(c1ccccc1)S(=O)(=O)c1ccccc1Br>>C=C1CCN(c2ccccc2)S(=O)(=O)c2ccccc21  
 9021 C=Cc1cc(OC)c(OC)cc1CC(Nc1ccccc1)c1cc2c(cc1Br)OCO2>>C=C1c2cc(OC)c(OC)cc2CC(Nc2ccccc2)c2cc3c(cc21)OCO3  
 9022 C=CCc1cc(C)ccc1N(C(=O)c1ccccc1I)S(=O)(=O)c1ccc(C)cc1>>C=C1Cc2cc(C)ccc2N(S(=O)(=O)c2ccc(C)cc2)C(=O)c2ccccc21  
 9023 C=CCCN1nnc(CCCC)c1I>>C=C1CCN2nnc(CCCC)c21  
 9024 C=C[C@H]1C[C@H](OCc2ccccc2)[C@H](O[Si](C)(C)C(C)(C)C)[C@H]1N(Cc1cc2c(cc1Br)OCO2)C(C)=O>>C=C1c2cc3c(cc2CN(C(C)=O)[C@H]2C[C@H](O[Si](C)(C)C(C)(C)C)[C@H](OCc4ccccc4)C[C@H]12)OCO3  
 9025 C=CCN1CCc2ccccc2C1Cc1ccccc1Br>>C=C1CN2CCc3ccccc3C2Cc2ccccc21  
 9026 C=CCN(CCI)S(=O)(=O)c1ccc(CO)cc1>>C=C1CCN(S(=O)(=O)c2ccc(CO)cc2)C1  
 9027 C=C[C@H](O)CC[C@H]1(C)OC(I)=C(C(=O)OC)[C@H]2[C@H]3[C@H](C[C@H]21)C(C)=C[C@H]1[C@H](O[Si](C)(C)C)(C(C)C)C(C)C[C@H](C)[C@H](O[Si](C)(C)C(C)(C)C)[C@H]13>>C=C1C2=C(C(=O)OC)[C@H]3[C@H]4[C@H](C[C@H]3[C@H](C)(CC[C@H]1O)O2)C(C)=C[C@H]1[C@H](O[Si](C)(C)C)(C(C)C)C(C)C[C@H](C)[C@H](O[Si](C)(C)C(C)(C)C)[C@H]14  
 9028 C=CCOC(O[Si](C)(C)C(C)(C)C(I)CCCCCCCC>>C=C1COC(O[Si](C)(C)C(C)(C)C)C1CCCCCCCC  
 9029 C=CCc1ccc2ccccc2c1OCc1cc(OC)ccc1Br>>C=C1Cc2ccc3ccccc3c2OCc2cc(OC)ccc21  
 9030 C=CC(F)(F)Oc1ccc(OC)cc1Br>>C=C1c2cc(OC)ccc2OC1(F)F  
 9031 C=CCOc1cc2c(cc1I)-c1c(cc(OC)c(OC)c1OC)CC[C@H]2NC(=O)CO>>C=C1COc2cc3c(cc21)-c1c(cc(OC)c(OC)c1OC)CC[C@H]3NC(=O)CO  
 9032 C=CCC(CBr)c1ccccc1>>C=C1CCC(c2ccccc2)C1  
 9033 C=CCN1[C@H](c2ccccc2)O[C@H]2C[C@H](C)CC[C@H]2C1(C)C>>C=C1CN2[C@H](O[C@H]3C[C@H](C)CC[C@H]3C2(C)C)c2ccccc21  
 9034 C=CCC(CBr)c1cc2ccccc2o1>>C=C1CCC(c2cc3ccccc3o2)C1  
 9035 C=CCOCC1=C(Br)c2ccc(OC)cc2CC1>>C=C1CCOCC2=C1c1ccc(OC)cc1CC2  
 9036 C=CCCN(c1ccccc1OC)S(=O)(=O)c1ccccc1Br>>C=C1CCN(c2ccccc2OC)S(=O)(=O)c2ccccc21  
 9037 C=CCN(Cc1ccccc1)C(=O)c1ccccc1Br>>C=C1CN(Cc2ccccc2)C(=O)c2ccccc21  
 9038 C=CC(F)(F)Oc1ccccc1Br>>C=C1c2ccccc2OC1(F)F  
 9039 C=CCOCc1ccc2ccccc2c1Br>>C=C1COCc2ccc3ccccc3c21  
 9040 C=CCCC(CBr)CCCCCCCC>>C=C1CCCC(CCCCCCCC)C1  
 9041 C=CCC(OC)c1cc2ccccc2nc1Cl>>C=C1CC(OC)c2cc3ccccc3nc21  
 9042 C=CC(C)(C)C1CCC(=O)N1CC(=C)Br>>C=C1CN2C(=O)CCC2C(C)(C)C1=C  
 9043 C=CCN(CCc1cc(OC)ccc1I)C(=O)C(F)(F)F>>C=C1CN(C(=O)C(F)(F)F)CCc2cc(OC)ccc21  
 9044 C=CCCC(O)C=C(Br)c1ccc(C)cc1>>C=C1CCCC(O)C=C1c1ccc(C)cc1  
 9045 C=C[C@H]1CC(S(=O)(=O)c2ccccc2)(S(=O)(=O)c2ccccc2)C[C@H]1[C@H](c1ccccc1)c1cc(OC)c(OC)cc1Br>>C=C1c2cc(OC)c(OC)cc2[C@H](c2ccccc2)[C@H]2CC(S(=O)(=O)c3ccccc3)(S(=O)(=O)c3ccccc3)C[C@H]12  
 9046 C=CCOCc1nnn(Cc2ccc([N+](=O)[O-])cc2)c1I>>C=C1COCc2nnn(Cc3ccc([N+](=O)[O-])cc3)c21  
 9047 C=CCN(CCI)S(=O)(=O)c1ccccc1>>C=C1CCN(S(=O)(=O)c2ccccc2)C1  
 9048 C=C[Si](C)(C)c1ccccc1/C=C\c1ccccc1Br>>C=C1c2ccccc2/C=C\c2ccccc2[Si]1(C)C  
 9049 C=CCCNc1ccccc1Cl>>C=C1CCCNc2ccccc21  
 9050 C=CCN(c1ccc2ccccc12)S(=O)(=O)c1ccccc1Br>>C=C1CN(c2cccc3ccccc23)S(=O)(=O)c2ccccc21  
 9051 C=CCc1c(N(C)C(=O)c2ccccc2I)ccc2c1ccc(=O)n2CC>>C=C1Cc2c(ccc3c2ccc(=O)n3CC)N(C)C(=O)c2ccccc21  
 9052 C=CCCCC(I)CCCCC>>C=C1CCCCC1CCCCC  
 9053 C=CCCOc1ccccc1Br>>C=C1CCOc2ccccc21



9054 C=CCc1cccc(F)c1N(Cc1ccccc1Br)S(=O)(=O)c1ccc(C)cc1>>C=C1Cc2cccc(F)c2N(S(=O)(=O)c2ccc(C)cc2)Cc2ccccc21

9055 C=C[C@H]1O[C@@H]2OC(C)(C)O[C@@H]2[C@@H]1N(Cc1ccccc1Br)C(=O)OC>>C=C1c2ccccc2CN(C(=O)OC)[C@@H]2[C@@H]1O[C@@H]1OC(C)(C)O[C@@H]12

9056 C=CCOC1O[C@H](COC(C)=O)[C@@H](OC(C)=O)C=C1I>>C=C1COC2O[C@H](COC(C)=O)[C@@H](OC(C)=O)C=C12

9057 C=CCC(OCC(=C)Br)c1cccs1>>C=C1COC(c2cccs2)CC1=C

9058 C=C[C@H](Cn1c(Br)c(-c2ccc(C(=O)Nc3cccn3)cc2)c2c(N)ncnc21)NC(=O)OC(C)(C)C>>C=C1c2c(-C=CCc1cccc(F)c1N(Cc1cc(OC)ccc1Br)S(=O)(=O)c1ccc(C)cc1>>C=C1Cc2cccc(F)c2N(S(=O)(=O)c2cc(C)cc2)Cc2cc(OC)ccc21

9059 C=CC1(OCCI)CN(C(=O)OC(C)(C)C)C1>>C=C1CCOC12CN(C(=O)OC(C)(C)C)C2

9061 C=CCN(CCl)S(=O)(=O)c1ccc(C#N)cc1>>C=C1CCN(S(=O)(=O)c2ccc(C#N)cc2)C1

9062 C=CCC(CCCl)c1ccc(OC)cc1>>C=C1CCC(c2ccc(OC)cc2)C1

9063 C=C[C@H](Cn1c(Br)c(-c2ccc(Oc3ccc(C(C)(C)C)cc3)cc2)c2c(N)ncnc21)NC(=O)OC(C)(C)C>>C=C1c2c(-c3ccc(Oc4ccc(C(C)(C)C)cc4)cc3)c3c(N)ncnc3n2C[C@H]1NC(=O)OC(C)(C)C

9064 C=C[Si](C)(C)c1ccc2ccccc2c1-c1c(Br)ccc2ccccc12>>C=C1c2ccc3ccccc3c2-C=CCC(CC(=C)Br)(C(=O)OCC)C(=O)OCC>>C=C1CC(C(=O)OCC)(C(=O)OCC)CC1=C

9065 C=CCCN(Cc1cc2c(cc1Br)OCO2)C(=O)OC(C)(C)C>>C=C1CCN(C(=O)OC(C)(C)C)Cc2cc3c(cc21)O

9066 C=CCC1c2[nH]c3ccccc3c2CCN1Cc1ccccc1Br>>C=C1CC2c3[nH]c4ccccc4c3CCN2Cc2ccccc21

9067 C=CCCOc1ccc2cc(OC)ccc2c1Br>>C=C1CCOCc2ccc3cc(OC)ccc3c21

9069 C=CCOCc1nnn(Cc2ccc(OC)cc2)c1I>>C=C1COCc2nnn(Cc3ccc(OC)cc3)c21

9070 C=C[C@H]1CC(C(=O)OC)(C(=O)OC)[C@@H](c2cn(S(=O)(=O)c3ccc(C)cc3)c3ccccc23)N(c2ccccc2)I)O1>>C=C1c2ccccc2N2O[C@@H]1CC(C(=O)OC)(C(=O)OC)[C@H]2c1cn(S(=O)(=O)c2ccc(C)cc2)c2ccccc12

9071 C=CCCOCC1=C(Br)CCc2ccccc21>>C=C1CCOCC2=C1CCc1ccccc12

9072 C=C[C@H](O[Si](C)(C)C(C)(C)C)[C@@H](Cc1ccccc1)[C@@H](C(C(I)=C/CO)O[Si](C)(C)C(C)(C)C)C>>C=C1/C(=C/CO)C[C@@H](O[Si](C)(C)C(C)(C)C)[C@H](Cc2ccccc2)[C@@H]1O[Si](C)(C)C

9073 C=CCc1c(OCc2cc(OC)ccc2Br)c(=O)n(C)c2ccccc12>>C=C1Cc2c(c(=O)n(C)c3ccccc23)OCc2cc(OC)c

9074 C=CCOc1ccc(C(NC(=O)c2ccccc2)C(=O)OC)cc1I>>C=C1COCc2ccc(C(NC(=O)c3ccccc3)C(=O)OC)cc

9075 C=CC(F)(F)Oc1ccc2ccccc2c1Br>>C=C1c2c(ccc3ccccc23)OC1(F)F

9076 C=CCC(CBr)c1ccc(OC)cc1>>C=C1CCC(c2ccc(OC)cc2)C1

9077 C=C[C@H](Cn1c(Br)c(-c2ccc(Oc3ccc(C(F)(F)F)cc3)cc2)c2c(N)ncnc21)NC(=O)OC(C)(C)C>>C=C1c2c(-c3ccc(Oc4ccc(C(F)(F)F)cc4)cc3)c3c(N)ncnc3n2C[C@H]1NC(=O)OC(C)(C)C

9078 C=CCC(CCCl)(C(=O)OCC)C(=O)OCC>>C=C1CCC(C(=O)OCC)(C(=O)OCC)C1

9079 C=CCCC[C@@]1(C)C(OS(=O)(=O)C(F)(F)F)=CC[C@H]1C(C)C>>C=C1CCC[C@@]2(C)C1=CC[C@H]2C(C)C

9080 C=CCC(Nc1ccccc1Br)c1ccn(C)c1>>C=C1CC(c2ccn(C)c2)Nc2ccccc21

9081 C=CCN(C(=O)c1ccc2ccccc2c1Br)C(C(=O)NC(C)(C)C)c1ccc(OC)cc1>>C=C1CN(C(C(=O)NC(C)(C)C)c2ccc(OC)cc2)C(=O)c2ccc3ccccc3c21

9082 C=CC(C)c1ccc2ccccc2c1OS(=O)(=O)c1ccccc1Br>>C=C1c2ccccc2S(=O)(=O)Oc2c(ccc3ccccc23)C1C

9083 C=CCN(CC1=C(Br)CCc2ccccc21)c1ccc(Cl)cc1>>C=C1CN(c2ccc(Cl)cc2)CC2=C1CCc1ccccc12

9084 C=C[C@H]1[C@@H]2[C@H](CN1c1cc(C(=O)OC)cc(OCc3ccccc3)c1I)N2C(=O)OC(C)(C)C>>C=C1c2c(OCc3ccccc3)cc(C(=O)OC)cc2N2C[C@H]3[C@@H]([C@H]12)N3C(=O)OC(C)(C)C

9085 C=CCC(O)c1cc2ccccc(C)c2nc1Cl>>C=C1CC(O)c2cc3ccccc(C)c3nc21

9086 C=CCCCN(C(=O)c1ccccc1)c1ccccc1I>>C=C1CCCN(C(=O)c2ccccc2)c2ccccc21

9087 C=CCCN(c1ccccc1N1CCOCC1)S(=O)(=O)c1ccccc1Br>>C=C1CCN(c2ccccc2N2CCOCC2)S(=O)(=O)c2ccccc21

9088 C=CCC[C@H](O[Si](C)(C)C(C)(C)C)c1nnn(Cc2ccc(OC)cc2)c1I>>C=C1CC[C@H](O[Si](C)(C)C(C)(C)C)c2nnn(Cc3ccc(OC)cc3)c21

9089 C=C[C@H](O[Si](C)(C)C(C)(C)C)[C@@H](CCCC)[C@H](C(C(I)=C/CO)O[Si](C)(C)C(C)(C)C)C>>C=C1/C(=C/CO)C[C@@H](O[Si](C)(C)C(C)(C)C)[C@H](CCCC)[C@@H]1O[Si](C)(C)C(C)(C)C

9090 C=CC(Cn1c(Br)c(-c2ccc(Oc3ccccc3)cc2)c2c(N)ncnc21)NC(=O)OC(C)(C)C>>C=C1c2c(-c3ccc(Oc4ccccc4)cc3)c3c(N)ncnc3n2CC1NC(=O)OC(C)(C)C

9091 C=CCCCNc1ccccc1I>>C=C1CCCNc2ccccc21

9092 C=CCc1c(N(C)C(=O)Cc2ccccc2I)ccc2c1ccc(=O)n2C>>C=C1Cc2c(ccc3c2ccc(=O)n3C)N(C)C(=O)Cc2ccccc21

9093 C=Cc1c2c(cc(OC)c1C(OCc1ccccc1)c1ccccc(OC)c1I)COC(C)(C)O2>>C=C1c2c(OC)cccc2C(OCc2ccccc2)c2c(OC)cc3c(c21)OC(C)(C)OC3

9094 C=C[C@@H](C[C@H](C/C(=C/CO)OS(=O)(=O)C(F)(F)F)O[Si](C)(C)C(C)(C)C)O[Si](C)(C)C(C)(C)C)>>C=C1/C(=C\CO)C[C@H](O[Si](C)(C)C(C)(C)C)C[C@H]1O[Si](C)(C)C(C)(C)C

9095 C=CCC(Nc1cccc1Br)c1cccn1C>>C=C1CC(c2cccn2C)Nc2ccccc21

9096 C=CCC1(C(=O)OC)CCN1Cc1cccc1Br>>C=C1CC2(C(=O)OC)CCN2Cc2ccccc21

9097 C=CCN(CCc1ccc(F)cc1I)C(=O)C(F)(F)F>>C=C1CN(C(=O)C(F)(F)F)CCc2ccc(F)cc21

9098 C=CCC(Oc1ccc(Cl)cc1Br)C(=O)OCC>>C=C1CC(C(=O)OCC)Oc2ccc(Cl)cc21

9099 C=CCOC(C)c1c(Br)c(OC)c2ccccc2c1OC>>C=C1COC(C)c2c1c(OC)c1ccccc1c2OC

9100 C=CCC(OC)C1=C(Br)c2cccc3cccc1c23>>C=C1CC(OC)C2=C1c1cccc3cccc2c13

9101 C=CCO[C@H]1[C@H](Sc2ccccc2Br)O[C@H](COCc2ccccc2)[C@@H]1OCc1cccc1>>C=C1CO[C@H]2[C@@H](O[C@H](COCc3ccccc3)[C@@H]2OCc2ccccc2)Sc2ccccc21

9102 C=CCCN1c2c(Br)cc([N+](=O)[O-])cc2C(=O)N2C1C(C)(C)OC2(C)C>>C=C1CCN2c3c1cc([N+](=O)[O-])C=Cc1cccc(C)c1N(C(=O)c1ccccc1I)S(=O)(=O)c1ccc(C)cc1>>C=C1Cc2cccc(C)c2N(S(=O)(=O)c2ccc(C)cc2)C(=O)c2ccccc21

9103 C=CCN(c1ccc2c(ccc(=O)n2C)c1)S(=O)(=O)c1ccccc1Br>>C=C1CN(c2ccc3c(ccc(=O)n3C)c2)S(=O)(=O)c2ccccc21

9104 C=CCN(C)C(=O)c1ccccc1Br>>C=C1CN(C)C(=O)c2ccccc21

9105 C=CCN(c1ccc2oc(=O)cc(OC)c2c1)S(=O)(=O)c1ccccc1Br>>C=C1CN(c2ccc3oc(=O)cc(OC)c3c2)S(=O)(=O)c2ccccc21

9106 C=CCC(O)c1cc2ccc(C)cc2nc1Cl>>C=C1CC(O)c2cc3ccc(C)cc3nc21

9107 C=CCC(Cc1nnn(CCCCCC)c1I)(C(=O)OCC)C(=O)OCC>>C=C1CC(C(=O)OCC)(C(=O)OCC)Cc2nnn(CCCCCC)c21

9108 C=CCc1ccc2ccccc2c1OCc1ccccc1Br>>C=C1Cc2ccc3ccccc3c2OCc2ccccc21

9109 C=CCN(C(=O)c1ccc2ccccc2c1Br)C(C(=O)NC1CCCC1)c1ccccc1>>C=C1CN(C(C(=O)NC2CCCC2)c2ccccc2)C(=O)c2ccc3ccccc3c21

9110 C=CCC(NCc1ccc(C)cc1Br)(C(=O)OC)C(C)C>>C=C1CC(C(=O)OC)(C(C)C)NCc2ccc(C)cc21

9111 C=CCC(C1=C(OS(=O)(=O)C(F)(F)F)CCC1)c1ccc(OC)cc1>>C=C1CC(c2ccc(OC)cc2)C2=C1CCC2

9112 C=C[C@@H](OCc1ccccc1I)Oc1ccccc1>>C=C1c2ccccc2CO[C@H]1Oc1ccccc1

9113 C=CCO[C@H]1[C@@H]([C@H](O)CSc2ccccc2Br)O[C@H]2OC(C)(C)O[C@H]12>>C=C1CO[C@H]2[C@H]([C@@H](O[C@H]3OC(C)(C)O[C@H]23)[C@H](O)CSc2ccccc21

9114 C=C[C@H](O[Si](C)(C)C(C)(C)C)[C@@H](OCCCCO[Si](C)(C)C(C)(C)C)[C@@H](C(C)I)=C(CO)O[Si](C)(C)C(C)(C)C>>C=C1/C(=C\CO)C[C@H](O[Si](C)(C)C(C)(C)C)[C@H](OCCCCO[Si](C)(C)C(C)(C)C)[C@@H]1O[Si](C)(C)C(C)(C)C

9115 C=C[C@@H]1[C@@H]2[C@H](CN1c1cc(C(=O)OC)cc(OCc3ccccc3)c1I)N2C(=O)OC(C)(C)C>>C=C1c2c(OCc3ccccc3)cc(C(=O)OC)cc2N2C[C@H]3[C@@H]([C@@H]12)N3C(=O)OC(C)(C)C

9116 C=CCN(Cc1ccc(F)cc1)Cc1cc2cccc(C)c2nc1Cl>>C=C1CN(Cc2ccc(F)cc2)Cc2cc3cccc(C)c3nc21

9117 C=CCN1CCc2c([nH]c3ccccc23)C1Cc1ccccc1Br>>C=C1CN2CCc3c([nH]c4ccccc34)C2Cc2ccccc21

9118 C=CCC(OCC(=C)Br)c1ccc(OC)c(OC)c1>>C=C1COC(c2ccc(OC)c(OC)c2)CC1=C

9119 C=C[C@H]1O[C@@H]2OC(C)(C)O[C@@H]2[C@@H]1N(Cc1ccccc1Br)S(=O)(=O)c1ccc(C)cc1>>C=C1c2ccccc2CN(S(=O)(=O)c2ccc(C)cc2)[C@@H]2[C@@H]1O[C@@H]1OC(C)(C)O[C@@H]12

9120 C=CC(=O)N(C)[C@@H](CO)Cc1ccc(OC)cc1Br>>C=C1C(=O)N(C)[C@@H](CO)Cc2ccc(OC)cc21

9121 C=CC(F)(F)Oc1ccc(Cl)cc1Br>>C=C1c2cc(Cl)ccc2OC1(F)F

9122 C=C[C@H]1O[C@@H]2OC(C)(C)O[C@@H]2[C@H]1N(Cc1ccccc1Br)S(=O)(=O)c1ccc(C)cc1>>C=C1c2ccccc2CN(S(=O)(=O)c2ccc(C)cc2)[C@H]2[C@@H]1O[C@@H]1OC(C)(C)O[C@H]21

9123 C=C[C@@H](O[Si](C)(C)C(C)(C)C)[C@@H](CCCCO[Si](C)(C)C(C)(C)C)[C@@H](C(C)I)=C(CO)O[Si](C)(C)C(C)(C)C>>C=C1/C(=C\CO)C[C@H](O[Si](C)(C)C(C)(C)C)[C@H](CCCCO[Si](C)(C)C(C)(C)C)[C@@H]1O[Si](C)(C)C(C)(C)C

9124 C=CCCC[C@@H](C=C)CN(c1ccccc1Br)S(=O)(=O)c1ccc(C)cc1>>C=CCCC[C@@H]1CN(S(=O)(=O)c2ccc(C)cc2)c2ccccc2C1=C

9125 C=C[C@H]1O[C@@H]2OC(C)(C)O[C@@H]2[C@H]1N(Cc1cc2c(cc1Br)OCO2)C(=O)OC>>C=C1c2cc3c(cc2CN(C(=O)OC)[C@H]2[C@@H]1O[C@@H]1OC(C)(C)O[C@H]21)OCO3

9126 C=CC(CC)(CC)C(=O)Nc1ccc(C(F)(F)F)cc1Br>>C=C1c2cc(C(F)(F)F)ccc2NC(=O)C1(CC)CC

9127 C=CCC(OCC(=C)Br)c1cccc(Cl)c1>>C=C1COC(c2cccc(Cl)c2)CC1=C

9128 C=CCC(NCc1ccc(F)cc1Br)C(=O)OC>>C=C1CC(C(=O)OC)NCc2ccc(F)cc21

9129 C=CCO[C@H](CSc1ccccc1Br)[C@H]1O[C@@H]2OC(C)(C)O[C@@H]2[C@H]1OCc1ccccc1>>C=C1CO[C@H]([C@H]2O[C@@H]3OC(C)(C)O[C@@H]3[C@H]2OCc2ccccc2)CSc2ccccc21

9130 C=CCn1c(-c2ccc3ccc(OC)cc3c2Br)nc2ccccc21>>C=C1Cn2c(nc3ccccc32)-c2ccc3ccc(OC)cc3c21

9131 C=CCC(CCCl)CCCCCCCC>>C=C1CCC(CCCCCCCC)C1

9132 C=CCCC[C@@H](C=C)COc1ccccc1Br>>C=CCCC[C@@H]1COc2ccccc2C1=C

9133 C=COC(=O)c1ccccc1Br>>C=C1OC(=O)c2ccccc21

9134 C=CCN(CC(C)C)C(=O)c1ccccc1Br>>C=C1CN(CC(C)C)C(=O)c2ccccc21

9136 C=CCC(NCc1cc(F)ccc1Br)C(=O)OC>>C=C1CC(C(=O)OC)NCc2cc(F)ccc21  
 9137 C=CCN(CC1=C(Br)CCCC1)c1ccc(Cl)cc1>>C=C1CN(c2ccc(Cl)cc2)CC2=C1CCCC2  
 9138 C=CCC1c2[nH]c3ccccc3c2CCN1CC(=C)I>>C=C1CC2c3[nH]c4ccccc4c3CCN2CC1=C  
 9139 C=CC[C@H](N=C(c1ccccc1)c1ccccc1)c1ccccc1Br>>C=C1C[C@H](N=C(c2ccccc2)c2ccccc2)c2ccccc2  
 9140 C=CCc1c(N(C)C(=O)c2ccccc2I)ccc2c1ccc(=O)n2C>>C=C1Cc2c(ccc3c2ccc(=O)n3C)N(C)C(=O)c2ccc21  
 9141 C=CC(C)c1c(OCc2cc(OC)ccc2Br)c(=O)oc2ccccc12>>COc1ccc2c(c1)COc1c(c3ccccc3oc1=O)C(C)/C  
 9142 C=CCc1c(OC(=O)c2ccccc2I)c(=O)n(C)c(=O)n1C>>Cn1c2c(c(=O)n(C)c1=O)OC(=O)c1ccccc1/C=C\C  
 9143 C=Cc1cccc(Nc2nc(Nc3ccc(N4CCOCC4)c(Br)c3)ncc2Cl)c1>>Clc1cnc2nc1Nc1cccc(c1)/C=C\c1cc(ccc1N1CCOCC1)N2  
 9144 C=Cc1c(OS(=O)(=O)c2ccccc2Br)ccc2ccccc12>>O=S1(=O)Oc2ccc3ccccc3c2/C=C\c2ccccc21  
 9145 C=CS(=O)(=O)N(CC(=C)Br)Cc1ccccc1>>C=C1C=CS(=O)(=O)N(Cc2ccccc2)C1  
 9146 C=CCn1c(N(c2ccc(Br)cc2I)S(=O)(=O)c2ccc(C)cc2)cc2cc(C)ccc21>>Cc1ccc(S(=O)(=O)N2c3ccc(Br)cc3/C=C\Cn3c2cc2cc(C)ccc23)cc1  
 9147 C=Cc1ccc(OC)c(Nc2nc(Nc3ccc(N4CCOCC4)c(Br)c3)ncc2Cl)c1>>COc1ccc2cc1Nc1nc(ncc1Cl)Nc1ccc(N3CCOCC3)c(c1)/C=C\2  
 9148 C=Cc1cc(C)ccc1OS(=O)(=O)c1ccccc1Br>>Cc1ccc2c(c1)/C=C\c1ccccc1S(=O)(=O)O2  
 9149 C=Cc1cc(Cl)c(C)cc1OCc1ccccc1Br>>Cc1cc2c(cc1Cl)/C=C\c1ccccc1CO2  
 9150 C=CC[C@H]1C(=O)N(c2ccc(OC)cc2)[C@H]1[C@H](CC(=C)Br)OC(C)=O>>C=C1/C=C\C[C@H]2C(=O)N(c3ccc(OC)cc3)[C@H]2[C@H](OC(C)=O)C1  
 9151 C=CCn1c(N(c2ccccc2I)S(=O)(=O)c2cccs2)cc2ccccc21>>O=S(=O)(c1cccs1)N1c2ccccc2/C=C\Cn2c1cc1ccccc12  
 9152 C=Cc1cc(Cl)ccc1OS(=O)(=O)c1ccccc1Br>>O=S1(=O)Oc2ccc(Cl)cc2/C=C\c2ccccc21  
 9153 C=CCC(CC(=C)Br)(C(=O)OCC)C(=O)OCC>>C=C1C=CCC(C(=O)OCC)(C(=O)OCC)C1  
 9154 C=CS(=O)(=O)N(CC(=C)Br)[C@H](C(=O)OC)C(C)C>>C=C1C=CS(=O)(=O)N([C@H](C(=O)OC)C(C)C)C1  
 9155 C=Cc1ccc(OC)c(Nc2nc(Nc3ccc(N4CCN(C)CC4)c(Br)c3)ncc2Cl)c1>>COc1ccc2cc1Nc1nc(ncc1Cl)Nc1ccc(N3CCN(C)CC3)c(c1)/C=C\2  
 9156 C=Cc1cccc(Nc2nc(Nc3ccc(OCCN4CCCC4)c(Br)c3)ncc2Cl)c1>>Clc1cnc2nc1Nc1cccc(c1)/C=C\c1cc(ccc1OCCN1CCCC1)N2  
 9157 C=Cc1cccc(C(=O)N[C@H](c2ccccc2)[C@H](O[Si](CC)(CC)CC)C(=O)O[C@H]2C[C@@]3(O)[C@@H](OC(=O)c4ccccc(I)c4)[C@H]4[C@](C)(C(=O)[C@H](OC(C)=O)C(=C2C)C3(C)C)[C@H](O[Si](CC)(CC)CC)C[C@H]2OC[C@]24OC(C)=O)c1>>CC[Si](CC)(CC)O[C@H]1C[C@H]2OC[C@@]2(OC(C)=O)[C@H]2[C@@H]3OC(=O)c4ccccc(c4)/C=C\c4ccccc(c4)C(=O)N[C@H](c4ccccc4)[C@@H](O[Si](CC)(CC)CC)C(C)C(C(=O)O[C@H]14C[C@]13(O)C(C)C(C(=C4C)I[C@H](OC(C)=O)C(=O)I)C=Cc1cccc(Nc2nc(Nc3cc(Br)c(N4CCN(C)CC4)cc3OC)ncc2Cl)c1>>COc1cc(N2CCN(C)CC2)c2cc1Nc1ncc(Cl)c(n1)Nc1cccc(c1)/C=C\2  
 9158 C=Cc1cccc1CO[Si](Cl)(C(C)C)C(C)C>>CC(C)[Si]1(C(C)C)C/C=C\c2ccccc2CO1  
 9159 C=CCn1c(N(c2ccc(C)cc2I)S(=O)(=O)c2cccs2)cc2cc(Cl)ccc21>>Cc1ccc2c(c1)/C=C\Cn1c(cc3cc(Cl)ccc31)N2S(=O)(=O)c1cccs1  
 9160 C=Cc1ccc(S(=O)(=O)C(C)C)c(Nc2nc(Nc3cc(Br)c(N4CCN(C)CC4)cc3OC)ncc2Cl)c1>>COc1cc(N2CCN(C)CC2)c2cc1Nc1ncc(Cl)c(n1)Nc1ccc(cc1S(=O)(=O)C(C)C)/C=C\2  
 9161 C=CCc1c(OCc2cc(OC)ccc2Br)c(=O)n(C)c(=O)n1C>>COc1ccc2c(c1)COc1c(n(C)c(=O)n(C)c1=O)C/C  
 9162 C=CCn1c(N(c2ccc(F)cc2I)S(=O)(=O)c2ccc(C)cc2)cc2cc(Br)ccc21>>Cc1ccc(S(=O)(=O)N2c3ccc(F)cc3/C=C\Cn3c2cc2cc(Br)ccc23)cc1  
 9163 C=Cc1cc(OC)ccc1OCc1cc(OC)ccc1Br>>COc1ccc2c(c1)/C=C\c1ccc(OC)cc1CO2  
 9164 C=CCn1c(N(c2ccc(F)cc2I)S(=O)(=O)c2cccs2)cc2ccccc21>>O=S(=O)(c1cccs1)N1c2ccc(F)cc2/C=C\Cn2c1cc1ccccc12  
 9165 C=CC(C)c1c(OCc2ccccc2Br)c(=O)oc2ccccc12>>CC1/C=C\c2ccccc2COc2c1c1ccccc1oc2=O  
 9166 C=Cc1cccc(Nc2nc(Nc3ccc(N4CCN(C)CC4)c(Br)c3)ncc2Cl)c1>>CN1CCN(c2ccc3cc2/C=C\c2ccccc(c2)Nc2nc(ncc2Cl)N3)CC1  
 9167 C=CCn1c(N(c2ccc(F)cc2I)S(=O)(=O)c2ccc(C)cc2)cc2cc(OC)ccc21>>COc1ccc2c(c1)cc1n2C/C=C\c2cc(F)ccc2N1S(=O)(=O)c1ccc(C)cc1  
 9168 C=Cc1cc(Nc2ncc(Cl)c(Nc3cc(Br)ccc3C(=O)OC)n2)ccc1N1CCN(C)CC1>>COC(=O)c1ccc2cc1Nc1nc(ncc1Cl)Nc1ccc(N3CCN(C)CC3)c(c1)/C=C\2  
 9169 C=Cc1ccccc1OCc1ccccc1Br>>C1=C\c2ccccc2OCc2ccccc2/1  
 9170 C=CCn1c(N(c2ccc(Br)cc2I)S(=O)(=O)c2cccs2)cc2cc(C)ccc21>>Cc1ccc2c(c1)cc1n2C/C=C\c2cc(Br)cc2N1S(=O)(=O)c1cccs1  
 9171 C=CCn1c(N(c2ccc(F)cc2I)S(=O)(=O)c2cccs2)cc2cc(Br)ccc21>>O=S(=O)(c1cccs1)N1c2ccc(F)cc2/C=C\Cn2c1cc1cc(Br)ccc12  
 9172

9173 C=CCn1c(N(c2ccc(C)cc2I)S(=O)(=O)c2cccs2)cc2ccccc21>>Cc1ccc2c(c1)/C=C\Cn1c(cc3ccccc31)N2  
S(=O)(=O)c1cccs1  
 9174 C=CCc1c(OCc2ccccc2Br)c(=O)n(C)c(=O)n1C>>Cn1c2c(c(=O)n(C)c1=O)OCc1ccccc1/C=C\C2  
 9175 C=Cc1cc(C)ccc1OCc1cc(OC)ccc1Br>>COc1ccc2c(c1)COc1ccc(C)cc1/C=C\2  
 9176 C=Cc1cc(OC)ccc1OCc1ccccc1Br>>COc1ccc2c(c1)/C=C\c1ccccc1CO2  
 9177 C=CCn1c(N(c2ccc(C)cc2I)S(=O)(=O)c2cccs2)cc2cc(Br)ccc21>>Cc1ccc2c(c1)/C=C\Cn1c(cc3cc(Br)cc  
c31)N2S(=O)(=O)c1cccs1  
 9178 C=CCc1c(OCc2ccccc2Br)c(=O)oc2ccccc12>>O=c1oc2ccccc2c2c1OCc1ccccc1/C=C\C2  
 9179 C=Cc1c(OCc2ccccc2Br)ccc2ccccc12>>C1=C\c2c(ccc3ccccc23)OCc2ccccc2/1  
 9180 C=Cc1cc(OC)ccc1OS(=O)(=O)c1ccccc1Br>>COc1ccc2c(c1)/C=C\c1ccccc1S(=O)(=O)O2  
 9181 C=Cc1ccccc1OS(=O)(=O)c1ccccc1Br>>O=S1(=O)Oc2ccccc2/C=C\c2ccccc21  
 9182 C=CCn1c(N(c2ccc(Cl)cc2I)S(=O)(=O)c2ccc(C)cc2)cc2ccccc21>>Cc1ccc(S(=O)(=O)N2c3ccc(Cl)cc3/  
C=C\Cn3c2cc2ccccc23)cc1  
 9183 C=Cc1cc(C(C)(C)C)ccc1OCc1cc(OC)ccc1Br>>COc1ccc2c(c1)COc1ccc(C(C)(C)C)cc1/C=C\2  
 9184 C=CCn1c(N(c2ccccc2I)S(=O)(=O)c2cccs2)cc2cc(C)ccc21>>Cc1ccc2c(c1)cc1n2C/C=C\c2ccccc2N1S(  
=O)(=O)c1cccs1  
 9185 C=CCc1c(OCc2cc(OC)ccc2Br)c(=O)oc2ccccc12>>COc1ccc2c(c1)COc1c(c3ccccc3oc1=O)C/C=C\2  
 9186 C=CCn1c(N(c2ccc(F)cc2I)S(=O)(=O)c2cccs2)cc2cc(C)ccc21>>Cc1ccc2c(c1)cc1n2C/C=C\c2cc(F)ccc  
2N1S(=O)(=O)c1cccs1  
 9187 C=Cc1c(OCc2cc(OC)ccc2Br)ccc2ccccc12>>COc1ccc2c(c1)COc1ccc3ccccc3c1/C=C\2  
 9188 C=CCn1c(N(c2ccc(Cl)cc2I)S(C)(=O)=O)cc2cc([N+](=O)[O-]  
]ccc21>>CS(=O)(=O)N1c2ccc(Cl)cc2/C=C\Cn2c1cc1cc([N+](=O)[O-])ccc12  
 9189 C=CCn1c(N(c2ccc(Cl)cc2I)S(=O)(=O)c2ccc(C)cc2)cc2cc(C)ccc21>>Cc1ccc(S(=O)(=O)N2c3ccc(Cl)c  
c3/C=C\Cn3c2cc2cc(C)ccc23)cc1  
 9190 C=Cc1cc(C)ccc1OCc1ccccc1Br>>Cc1ccc2c(c1)/C=C\c1ccccc1CO2  
 9191 C=CCn1c(N(c2ccc(F)cc2I)S(=O)(=O)c2ccc(C)cc2)cc2ccccc21>>Cc1ccc(S(=O)(=O)N2c3ccc(F)cc3/C  
=C\Cn3c2cc2ccccc23)cc1  
 9192 C=Cc1cccc(Nc2ncc(Cl)c(Nc3cc(Br)ccc3OC)n2)c1>>COc1ccc2cc1Nc1nc(ncc1Cl)Nc1cccc(c1)/C=C\2  
 9193 C=Cc1ccccc1OCc1cc(OC)ccc1Br>>COc1ccc2c(c1)COc1ccccc1/C=C\2  
 9194 C=Cc1ccccc1N(Cc1cc(Br)ccc1I)C(C)=O>>CC(=O)N1Cc2cc(Br)ccc2/C=C\c2ccccc21  
 9195 C=Cc1ccc(N(C)S(C)(=O)=O)c(Nc2nc(Nc3cc(Br)c(N4CCN(C)CC4)cc3OC)ncc2Cl)c1>>COc1cc(N2C  
CN(C)CC2)c2cc1Nc1ncc(Cl)c(n1)Nc1cc(ccc1N(C)S(C)(=O)=O)/C=C\2  
 9196 C=CC(C)c1c(OC(=O)c2ccccc2I)c(=O)n(C)c(=O)n1C>>CC1/C=C\c2ccccc2C(=O)Oc2c1n(C)c(=O)n(C  
)c2=O  
 9197 C=CCn1c(N(c2ccc(C)cc2I)S(C)(=O)=O)cc2cc(Cl)ccc21>>Cc1ccc2c(c1)/C=C\Cn1c(cc3cc(Cl)ccc31)N  
2S(C)(=O)=O  
 9198 C=Cc1cccc(Nc2ncc(Cl)c(Nc3ccccc(Br)c3)n2)c1>>Clc1cnc2nc1Nc1cccc(c1)/C=C\c1cccc(c1)N2  
 9199 C=CC(=O)NC[C@@H](OC)[C@H](OC)c1ccccc1NC(=O)[C@@H](NC(=O)c1ccccc(Br)c1)C(C)C>>C  
O[C@@H]1CNC(=O)/C=C/c2ccccc2C(=O)N[C@@H](C(C)C)C(=O)Nc2ccccc2[C@H]1OC  
 9200 C=CC(=O)OCCCCCCCCC(CCc1ccccc1)OC(=O)[C@@H]1CCCCN1C(=O)C(=O)c1ccccc(I)c1>>O=C  
1/C=C/c2ccccc2C(=O)C(=O)N2CCCC[C@H]2C(=O)OC(CCc2ccccc2)CCCCCCCCO1  
 9201 C=CC(=O)NC[C@@H](OC)[C@H](OC)c1ccccc1NC(=O)[C@@H](NC(=O)c1ccccc(Br)c1)[C@@H](  
C)CC>>CC[C@H](C)[C@@H]1NC(=O)c2ccccc2C(=O)N[C@@H](OC)[C@H](OC)c2ccccc  
 9202 C=C[C@@H](OCc1ccc(OC)cc1)[C@H](CCCC)OC(=O)c1c(C)cccc1Oe1ccc2c(c1I)COC(C)(C)O2>>  
CCCC[C@H]1OC(=O)c2c(C)cccc2Oe2ccc3c(c2/C=C/[C@H]1OCc1ccc(OC)cc1)COC(C)(C)O3  
 9203 C=C[C@H](OCc1ccc(OC)cc1)[C@H](CCCC)OC(=O)c1c(C)cccc1Oe1ccc2c(c1I)COC(C)(C)O2>>  
CCCC[C@H]1OC(=O)c2c(C)cccc2Oe2ccc3c(c2/C=C/[C@H]1OCc1ccc(OC)cc1)COC(C)(C)O3  
 9204 C=CC(=O)NC[C@@H](OC)[C@H](OC)c1ccccc1NC(=O)[C@H](CC(C)C)NC(=O)c1ccccc(Br)c1>>C  
O[C@@H]1CNC(=O)/C=C/c2ccccc2C(=O)N[C@@H](CC(C)C)C(=O)Nc2ccccc2[C@H]1OC  
 9205 C=CS(=O)(=O)N(CC(=C)Br)[C@H](C(=O)OC)C(C)C>>C=C1C=CS(=O)(=O)N([C@H](C(=O)OC)C  
(C)C)C1  
 9206 C=CC(C)CCc1cccc(CC(C)(NC(=O)OC(C)(C)C)C(=O)OCc2cc(Cl)nc(N(C)S(C)(=O)=O)c2)c1>>CC1/  
C=C/c2cc(cc(N(C)S(C)(=O)=O)n2)COC(=O)C(C)(NC(=O)OC(C)(C)C)Cc2ccccc2)CC1  
 9207 C=CC(=O)OCCCCC(=O)CCCC(CCc1ccccc1)OC(=O)[C@@H]1CCCCN1C(=O)C(=O)c1ccccc(I)c1>>  
O=C1CCCCOC(=O)/C=C/c2ccccc2C(=O)C(=O)N2CCCC[C@H]2C(=O)OC(CCc2ccccc2)CCC1  
 9208 C=CC(=O)NC(CC(=O)N[C@@H](Cc1ccccc1)C(=O)N[C@@H](CC(C)C)C(=O)Nc1ccccc(Br)c1)c1c  
cccc1>>CC(C)C[C@@H]1NC(=O)[C@H](Cc2ccccc2)NC(=O)CC(c2ccccc2)NC(=O)/C=C/c2ccccc2)  
 9209 C=CCCOc1cc(=O)n(C)cc1-c1cc(NS(=O)(=O)CC)ccc1Oe1ccc(Cl)cc1I>>CCS(=O)(=O)Nc1ccc2c(c1)-  
c1cn(C)c(=O)cc1OCC/C=C/c1cc(Cl)ccc1O2  
 9210 C=C[C@H](NC(=O)OC(C)(C)C)[C@@H](O)[C@H](C)C(=O)NCC(=O)N[C@H](C)C(=O)Nc1cc(OC  
c2ccccc2)ccc1I>>C[C@@H]1C(=O)NCC(=O)N[C@H](C)C(=O)Nc2cc(OCc3ccccc3)ccc2/C=C/[C@H  
1(NC(=O)OC(C)(C)C)[C@H]1O

9211 C=CC(=O)NC[C@@H](OC)[C@H](OC)c1cccc1NC(=O)[C@H](Cc1cccc1)NC(=O)c1cccc(Br)c1>>  
 9212 CO[C@@H]1CNC(=O)/C=C/c2cccc(c2)C(=O)N[C@@H](Cc2cccc2)C(=O)Nc2cccc2[C@H]1OC  
 9213 C=CCC(CC(=C)Br)(C(=O)OCC)C(=O)OCC>>C=C1C=CCC(C(=O)OCC)(C(=O)OCC)C1  
 9214 C=C[C@H](OCc1ccc(OC)cc1)[C@@H](CCCC)OC(=O)c1c(C)cccc1Oc1ccc2c(c1Br)COC(C)(C)O2  
 9215 >>CCCC[C@H]1OC(=O)c2c(C)cccc2Oc2ccc3c(c2/C=C/[C@@H]1OCc1ccc(OC)cc1)COC(C)(C)O3  
 9216 C=C[C@@H](NC(=O)OC(C)(C)[C@H](O)[C@H](C)C(=O)NCC(=O)N[C@H](C)C(=O)Nc1cc(OC  
 9217 c2cccc2)ccc1I>>C[C@@H]1C(=O)NCC(=O)N[C@H](C)C(=O)Nc2cc(OCc3cccc3)ccc2/C=C/[C@  
 9218 @H](NC(=O)OC(C)(C)C)[C@@H]1O  
 9219 C=CC(=O)NC[C@@H](OC)[C@H](OC)c1cccc1NC(=O)[C@H](C)NC(=O)c1cccc(Br)c1>>CO[C@  
 9220 @H]1CNC(=O)/C=C/c2cccc(c2)C(=O)N[C@@H](C)C(=O)Nc2cccc2[C@H]1OC  
 9221 C=CC(=O)N[C@@H](Cc1cccc1)C(=O)N[C@@H](C)C(=O)N[C@@H](CC(C)C)C(=O)NCc1cccc(B  
 9222 r)c1>>CC(C)C[C@@H]1NC(=O)[C@H](C)NC(=O)[C@H](Cc2cccc2)NC(=O)/C=C/c2cccc(c2)CNC  
 9223 C=C[C@@H](NC(=O)OC(C)(C)[C@H](O)[C@H](C)C(=O)NCC(=O)N[C@H](C)C(=O)Nc1cc(OC  
 9224 )ccc1I>>COc1ccc2c(c1)NC(=O)[C@@H](C)NC(=O)CNC(=O)[C@@H](C)[C@@H](O)[C@H](NC(  
 9225 =O)OC(C)(C)C)/C=C/2  
 9226 C=CS(=O)(=O)N(CC(=C)Br)Cc1cccc1>>C=C1C=CS(=O)(=O)N(Cc2cccc2)C1  
 9227 C=CC(=O)OCCCCC(CCc1ccnc1)OC(=O)[C@@H]1CCCCN1C(=O)C(=O)c1cccc(I)c1>>O=C1/C=C/  
 9228 c2cccc(c2)C(=O)C(=O)N2CCCC[C@H]2C(=O)OC(CCc2ccnc2)CCCCO1  
 9229 BrC=Cc1cccc1.C=CCCC(=O)OCC>>CCOC(=O)CC/C=C/C=C/c1cccc1
