# Supplementary material for: Heck reaction prediction using a transformer model based on a transfer learning strategy
Source: Royal Society of Chemistry journal article supplement (doi:10.1039/d0cc02657c), 2020-01-01
Supplement: d0cc02657c1.zip [file d0cc02657c1.zip]

**Table S11. Dataset in our research where reactant contains multiple carbon-carbon double bonds of Heck reaction involving site-selectivity**

[illegible]

26 C=C1C(=O)O[C@H]2[C@H]1CC/C(C)=C/CC[C@@]1(C)O[C@@H]21.FC(F)(F)c1cccc1I>>C/C1=C  
C\CC[C@@]2(C)O[C@H]2[C@H]2OC(=O)/C=C/c3cccc3C(F)(F)F[C@@H]2CC1  
C=CCO[C@H]1CC(=O)O[C@H](C)C/C=C/C=C/[C@H](O[Si](C)(C)C(C)(C)C)[C@H](C)C[C@H]  
(CC(OC)OC)[C@H](O[C@@H]2O[C@H](C)[C@H](O[C@H]3C[C@@](C)(O)[C@@H](OC(=O)  
CC)[C@H](C)O3)[C@H](N(C)C)[C@H]2OC(C)=O)[C@H]1OC.O=[N+](O-  
27 )c1ccc(I)cc1>>CCC(=O)O[C@H]1[C@H](C)O[C@H](O[C@H]2[C@H](N(C)C)[C@@H](OC(C)  
=O)[C@H](O[C@@H]3[C@@H](OC)[C@H](OC/C=C/c4ccc([N+](=O)[O-  
)cc4)CC(=O)O[C@H](C)C/C=C/C=C/[C@H](O[Si](C)(C)C(C)(C)C)[C@H](C)C[C@@H]3CC(OC)  
O[C@H](C)C[C@@H]2[C@H](C)C[C@@H]1C1  
28 C=CCC(OCC(=C)Br)c1ccc(Cl)cc1>>C=C1COC(c2ccc(Cl)cc2)CC1=C  
29 C=CC(C)(O)CCC=C(C)C.Oc1ccc(OCc2ccccc2)cc1Br>>CC(C)=CCCC(C)(O)/C=C/c1cc(OCc2ccccc2)  
ccc1O  
C=Cc1cccc(C(=O)N[C@@H](c2ccccc2)[C@@H](O[Si](CC)(CC)CC)C(=O)O[C@H]2C[C@@]3(O)[  
C@@H](OC(=O)c4cccc(I)c4)[C@H]4[C@](C)(C(=O)[C@H](OC(C)=O)C(=C2C)C3(C)C)[C@@H](  
30 O[Si](CC)(CC)CC)C[C@H]2OC[C@]24OC(C)=O)c1>>CC[Si](CC)(CC)O[C@H]1C[C@H]2OC[C@  
@]2(OC(C)=O)[C@H]2[C@@H]3OC(=O)c4cccc(c4)/C=C/c4cccc(c4)C(=O)N[C@@H](c4ccccc4)[C  
@@H]1(O[Si](CC)(CC)CC)C(=O)O[C@H]4[C@]3(O)C(C)(C)C(=C4C)[C@@H](OC(C)=O)C(=O)I  
31 C=Cc1ccc2c(c1)C(=O)c1cccc1C2=O.Ic1ccc2c(=C3SC=CS3)c3ccccc3c(=C3SC=CS3)c2c1>>O=C1c2  
cccc2C(=O)c2cc(/C=C/c3ccc4c(=C5SC=CS5)c5ccccc5c(=C5SC=CS5)c4c3)ccc21  
32 C=C/C=C/C/CCCCC.CC(=O)c1ccc(I)cc1>>CCCCC/C=C/C=C/c1ccc(C(C)=O)cc1  
C=Cc1ccc(/C=C/c2ccc(N(C)C)cc2)cc1.CC1(C)C2=CC(=O)C=CC2=C(c2ccc(Br)cc2S(=O)(=O)O)c2cc  
33 c(O)cc21>>CN(C)c1ccc(/C=C/c2ccc(/C=C/c3ccc(C4=C5C=CC(=O)C=C5C(C)(C)c5cc(O)ccc54)c(S(=O)  
(=O)O)c3)cc2)cc1  
C=C[C@@H](C)[C@@H]1C/C=C/C(=O)N[C@H](Cc2ccc(OC)cc2)C(=O)NCCC(=O)N[C@@H](CC(  
34 C)C)C(=O)O1.COCOCc1ccc(I)cc1>>COCOCc1ccc(/C=C/[C@H](C)[C@@H]2C/C=C/C(=O)N[C@  
H](Cc3ccc(OC)cc3)C(=O)NCCC(=O)N[C@@H](CC(C)C)C(=O)O2)cc1  
35 C=Cc1ccc(C=C)cc1.Cc1ccc(Br)cc1>>C=Cc1ccc(/C=C/c2ccc(C)cc2)cc1  
C=Cc1ccc(/C=C/c2ccccc2)cc1.CC1(C)c2cc(I)ccc2N2Cc3cc([N+](=O)[O-  
36 ])ccc3OC21c1cccc1>>CC1(C)c2cc(/C=C/c3ccc(/C=C/c4ccccc4)cc3)ccc2N2Cc3cc([N+](=O)[O-  
)ccc3OC21c1cccc1  
37 C=C/C=C/C/c1cccc1.FC(F)(F)I>>FC(F)(F)/C=C/C=C/c1cccc1  
38 C=C(C)CC(OCC(=C)Br)c1ccc(OC)cc1>>C=C1C=C(C)CC(c2ccc(OC)cc2)OC1  
C=Cc1ccc(/C=C/c2ccc(/C=C/c3cc(OCCCCCCCCCCCCC)c(OCCCCCCCCCCCCC)c(OCCCCCCCCCCCCC  
39 C)c3)cc2)cc1.CCCCOc1c(C)cc(I)cc1C>>CCCCCCCCCCCCCOc1cc(/C=C/c2ccc(/C=C/c3ccc(/C=C/c4c  
c(C)c(OCCCC)c(C)c4)cc3)cc2)cc(OCCCCCCCCCCCCC)c1OCCCCCCCCCCCCC  
40 C=C(C)CC(OCC(=C)Br)c1ccc(-c2ccccc2)cc1>>C=C1C=C(C)CC(c2ccc(-c3ccccc3)cc2)OC1  
C=Cc1ccc(/C=C/c2ccc(/C=C/c3cc(OCCCCCCCCCCCCC)cc(OCCCCCCCCCCCCC)c3)cc2)cc1.O=Cc1cc  
41 c(Br)cc1>>CCCCCCCCCCCCCOc1cc(/C=C/c2ccc(/C=C/c3ccc(/C=C/c4ccc(C=O)cc4)cc3)cc2)cc(OC  
CCCCCCCCC)c1  
C=Cc1ccc(/C=C/c2cc(CCCCCC)c(C=O)cc2CCCCC)cc1.CCCCCC1cc(/C=C/c2ccc(C)cc2)c(CCCCC  
42 C)cc1Br>>CCCCC1cc(/C=C/c2ccc(/C=C/c3cc(CCCCCC)c(/C=C/c4ccc(C)cc4)cc3CCCCC)cc2)c(  
CCCCC)cc1C=O  
43 C=C/C=C/C(=O)N(CCCC)CCCC.FC(F)(F)c1ccc(Br)cc1>>CCCN(CCCC)C(=O)/C=C/C=C/c1ccc(C(  
F)(F)F)cc1  
44 C=C(C)CN1C(=O)[C@H](Oc2ccccc2)[C@@H]1[C@@H](CC(=C)Br)OC(C)=O>>C=C1/C=C(/C)CN  
2C(=O)[C@H](Oc3ccccc3)[C@@H]2[C@H](OC(C)=O)C1  
C=Cc1ccc2c(c1)c1cc(/C=C/c3ccc4c(c3)c3ccccc3n4CCCCC)ccc1n2CCCCC.CCCCCCn1c2ccc(  
45 I)cc2c2cc(C=O)ccc21>>CCCCCCn1c2ccccc2c2cc(/C=C/c3ccc4c(c3)c3cc(/C=C/c5ccc6c(c5)c5cc(C=  
O)ccc5n6CCCCC)ccc3n4CCCCC)ccc21  
46 C=CC(=O)N1N=Cc2ccccc2C1C=C(C)C.CCCc1nc(N)nc(N)c1Cc1cc(I)c(OC)c(OC)c1>>CCCc1nc(N)n  
c(N)c1Cc1cc(/C=C/C(=O)N2N=Cc3ccccc3C2C=C(C)C)c(OC)c(OC)c1  
47 C=CCC(OCC(=C)Br)c1ccoc1>>C=C1COC(c2ccoc2)CC1=C  
48 C=CC1CC=CCC1.Fc1ccc(I)cc1>>Fc1ccc(/C=C/C2CC=CCC2)cc1  
49 C=Cc1cccc1.CC[C@]12C=CCN3CC[C@]4(C(=C(C(=O)OC)C1)Nc1ccc(I)cc14)[C@@H]32>>CC[C  
@]12C=CCN3CC[C@]4(C(=C(C(=O)OC)C1)Nc1ccc(/C=C/c5ccccc5)cc14)[C@@H]32  
50 C=C1C(=O)O[C@H]2[C@H]1CC/C(C)=C/CC[C@@]1(C)O[C@@H]21.Clc1ccc(I)cc1>>C/C1=C\CC  
[C@@]2(C)O[C@H]2[C@H]2OC(=O)/C=C/c3ccc(Cl)cc3)[C@@H]2CC1  
51 C=CC(C)(O)CCC=C(C)C.Fc1cccc1Br>>CC(C)=CCCC(C)(O)/C=C/c1cccc1F  
52 C=C.CCCCC(CC)COc1cc(/C=C/c2ccc(/C=C/c3ccc(/C=C/c4ccc(I)cc4)cc3)cc2)c(OC(CC)CCCC)cc1  
C>>C=Cc1ccc(/C=C/c2ccc(/C=C/c3ccc(/C=C/c4cc(OC(CC)CCCC)c(C)cc4OCC(CC)CCCC)cc3)cc2)  
53 C=CCC(OCC(=C)Br)c1ccc(OC)cc1>>C=C1COC(c2ccc(OC)cc2)CC1=C  
54 C=CCCC=C(C)C.ClCc1cccc(Oc2ccccc2)c1>>C=C(CCCC=C(C)C)Cc1cccc(Oc2ccccc2)c1

55 C=COCCOC=C.Ic1cccc2cccc12>>C=COCCOC(=C)c1cccc2cccc12  
56 C=C/C=C/C(=O)N(CCCC)CCCC.COc1cccc(Br)c1>>CCCCN(CCCC)C(=O)/C=C/C=C/c1cccc(OC)c1  
57 O=C/C=C/C/c1cccc1O/C(=C/I)c1ccc2cccc2c1>>O=C1OC(c2ccc3cccc3c2)=C/C1=C\c1cccc1  
58 C=C[C@H](C)CCC=C(C)C.Clc1cccc1>>C=C(c1cccc1)[C@H](C)CCC=C(C)C  
59 C=Cc1ccc(OC)cc1.N#Cc1ccc(/C=C/c2cc(Br)cc(/C=C/c3ccc(C#N)cc3)c2)cc1>>COc1ccc(/C=C/c2cc(/C=C/c3ccc(C#N)cc3)cc(/C=C/c3ccc(C#N)cc3)c2)cc1  
60 C=Cc1ccc(/C=C/c2ccc(N(C)C)cc2)cc1.CN(C)c1ccc2c(-c3ccc(Br)cc3C(=O)[O-])c3ccc(=[N+](C)C)cc-3oc2c1>>CN(C)c1ccc(/C=C/c2ccc(C=Cc3ccc(-c4c5ccc(=[N+](C)C)cc-5oc5cc(N(C)C)ccc45)c(C(=O)[O-])c3)cc2)cc1  
61 C=C[C@H](C)CCC=C(C)C.O=S(=O)(Oc1cccc1)C(F)(F)F>>C=C(c1cccc1)[C@H](C)CCC=C(C)C  
62 C=CC[C@@H](C[C@H](CC=C)O[Si](C)(C)C(C)(C)C)Oc1c(Br)cccc1C(=O)OC(C)(C)C>>C=CC[C@H](C[C@H]1CC(=C)c2cccc(C(=O)OC(C)(C)C)c2O1)O[Si](C)(C)C(C)(C)C  
63 C=C/C=C\CCCCOCC.Ic1cccc2cccc12>>CCCC/C(=C\C=C\c1cccc2cccc12)OCC  
64 BrC1cnc1.C=CCU[C@@H]1CC(=O)O[C@H](C)C/C=C/[C@H](O[Si](C)(C)C)(C)C)[C@H](C)C[C@H](CC(OC)OC)[C@H](O[C@@H]2O[C@H](C)[C@H](O[C@H]3C[C@@](C)(O)[C@@H](OC(=O)CC)[C@H](C)O3)[C@H](N(C)C)[C@H]2OC(C)=O)[C@H]1OC>>CCC(=O)O[C@H]1[C@H](C)O[C@@H](O[C@H]2[C@H](N(C)C)[C@@H](OC(C)=O)[C@H](O[C@@H]3[C@@H](OC)[C@H](OC/C=C/c4cnenc4)CC(=O)O[C@H](C)C/C=C/C=C/[C@H](O[Si](C)(C)C)(C)C)[C@H](C)C1C1C@@H13C1C(OC)OC)O[C@@H]2C1C1C@@H11(C)O  
65 C=C[C@@](C)(/C=C/C/c1ccc(O)cc1)CCC=C(C)C.COc1ccc(Br)cc1C=O>>COc1ccc(/C=C/[C@@](C)(/C=C/c2ccc(O)cc2)CCC=C(C)C)cc1C=O  
66 C=C/C=C(/OCC)[Si](C)(C)C.COc1cccc1I>>CCO/C(=C/C=C/c1cccc1OC)[Si](C)(C)C  
67 C=CC(C)(O)CCC=C(C)C.Cc1cccc1Br>>CC(C)=CCCC(C)(O)/C=C/c1cccc1C  
68 C=CC(C)(O)CC/C=C\CCCCC=C(C)C.Oc1ccc(OCc2cccc2)cc1Br>>CC(C)=CCC/C(C)=C/CCC(C)(O)/C=C/c1ccc(OCc2cccc2)ccc1O  
69 C=CCN(CC=C)c1ccc2c(OS(=O)(=O)C(F)(F)F)cc(=O)[nH]c2c1.C=COCCCC>>C=CCN(CC=C)c1ccc2c(C(=C)OCCCC)cc(=O)[nH]c2c1  
70 C=C/C=C/c1cccc1.COC(=O)c1ccc(Br)cc1>>COC(=O)c1ccc(/C=C/C=C/c2cccc2)cc1  
71 C=C/C=C/c1cccc1.Cc1cc(-c2cccc2I)cc(C)c1O>>Cc1cc(-c2cccc2/C=C/C=C/c2cccc2)cc(C)c1O  
72 BrC1ccnc1.C=CCOC1=C(C)C(=O)O[C@H](CC)[C@@](C)(O)C=C(C)C(=O)[C@H](C)C[C@@](C)(OC)[C@H](O[C@@H]2O[C@H](C)C[C@H](N(C)C)[C@H]2OC(C)=O)[C@H]1C>>CC[C@H]1OC(=O)C(C)=C(OC/C=C/c2ccnc2)[C@H](C)[C@@H](O[C@@H]2O[C@H](C)C[C@H](N(C)C)[C@H]2OC(C)=O)[C@H](OC)C[C@@H](C)C(=O)C(C)=C[C@H]1(C)O  
73 C=C1C(=O)O[C@@H]2C[C@@]3(C)CCCC(=C)[C@@H]3C[C@H]12.Ic1ccnc1>>C=C1CCC[C@]2(C)C[C@H]3OC(=O)/C=C/c4ccnc4)[C@H]3C[C@@H]12  
74 BrC1ccc(-c2cccc2)cc1.C=CCO[C@@H]1CC(=O)O[C@H](C)C/C=C/C=C/[C@H](O[Si](C)(C)C)(C)C)[C@H](C)C[C@H](CC(OC)OC)[C@H](O[C@@H]2O[C@H](C)[C@@H](O[C@H]3C[C@@](C)(O)[C@@H](OC(=O)CC)[C@H](C)O3)[C@H](N(C)C)[C@H]2OC(C)=O)[C@H]1OC>>CCC(=O)O[C@H]1[C@H](C)O[C@@H](O[C@H]2[C@H](N(C)C)[C@@H](OC(C)=O)[C@H](O[C@@H]3[C@@H](OC)C[C@H](OC/C=C/c4ccc(-c5cccc5)cc4)CC(=O)O[C@H](C)C/C=C/C=C/[C@H](O[Si](C)(C)C)(C)C)[C@H](C)C[C@@H]3C(C)C)O[C@@H]2C1C1C@@H11(C)O  
75 CCCCCC/C(=C/I)OC(=O)/C=C/c1cccc1>>CCCCCCC1=C/C(=C\c2cccc2)C(=O)O1  
76 C=CCCCC(O)C=C(Br)c1ccc2c(c1)OCO2>>C=C1CCCC(O)C=C1c1ccc2c(c1)OCO2  
77 C=CC(C)(O)CCC=C(C)C.Ic1cccc1>>CC(C)=CCCC(C)(O)/C=C/c1cccc1  
78 C=Cc1ccc(-c2c(-c3ccc(C=C)cc3)c(=O)c2=O)cc1.COc1ccc(I)cc1>>C=Cc1ccc(-c2c(-c3ccc(/C=C/c4ccc(OC)cc4)cc3)c(=O)c2=O)cc1  
79 C=CC(C)O.I/C=C/C=C/CCCCOCc1cccc1>>CC(O)/C=C/C=C/C=C/CCCCOCc1cccc1  
80 C=C/C=C\CCCCOCC.COc1ccc(I)cc1>>CCCC/C(=C\C=C\c1ccc(OC)cc1)OCC  
81 C=Cc1ccc(/C=C/c2ccc(N(C)C)cc2)cc1.O=c1cc2oc3cc(O)c(F)cc3c(-c3ccc(I)cc3S(=O)(=O)O)c-2cc1F>>CN(C)c1ccc(/C=C/c2ccc(/C=C/c3ccc(-c4c5cc(F)c(=O)cc-5oc5cc(O)c(F)cc45)c(S(=O)(=O)O)c3)cc2)cc1  
82 C=CC(=O)N1N=Cc2cccc2C1C=C(C)C.COc1cc(Cc2cnc(N)nc2N)cc(I)c1OC>>COc1cc(Cc2cnc(N)nc2N)cc(/C=C/C(=O)N2N=Cc3cccc3C2C=C(C)C)c1OC  
83 C=CCC(CC(=C)Br)(C(=O)OCC)C(=O)OCC>>C=C1CC(C(=O)OCC)(C(=O)OCC)CC1=C  
84 C=CC[Si](OCC)(OCC)OCC.CCCCC(CC)COc1cc(/C=C/c2ccc(/C=C/c3ccc(Br)cc3)cc2)c(OCC(CC)CC)CC)cc1C>>CCCC(CC)COc1cc(/C=C/c2ccc(/C=C/c3ccc(/C=C/C[Si](OCC)(OCC)OCC)cc3)cc2)c(OCC(CC)CCCC)cc1C  
85 C=C/C=C/c1cccc1.CCCCC(Br)C(F)(F)F>>CCCCC(/C=C/C=C/c1cccc1)C(F)(F)F  
86 C=C/C=C\CCCCOCC.CC(=O)c1ccc(Br)cc1>>CCCC/C(=C\C=C\c1ccc(C(C)=O)cc1)OCC

C=Cc1ccc2c(c1)Sc1cc(/C=C/c3ccc4c(c3)Sc3ccccc3N4CCCCCCCC)ccc1N2CCCCCCCC.CCCCCCCC  
 87 N1c2ccc(Br)cc2Sc2cc(/C=C/c3ccc4c(c3)Sc3cc(/C=C/c5cc6c(c5)Sc5cc(C=O)ccc5N6CCCCCCCC)ccc3N4CCCCCCCC)ccc21  
 88 O=C(/C=C/c1ccccc1)O/C(=C\I)c1ccc(Br)cc1>>O=C1OC(c2ccc(Br)cc2)=C/C1=C\c1ccccc1  
 C=Cc1ccccc(C=O)O[C@H]2[C@H]3[C@](C)(C=O)[C@H](OC(C)=O)C4=C(C)[C@@H](OC(=O)[C@  
 89 @H](O[Si](C(C)C)(C(C)C)C(C)C)[C@H](C=C(C)C)NC(=O)c5ccccc(I)c5)C[C@]2(O)C4(C)C)[C@@  
 H](O[Si](CC)(CC)CC)C[C@H]2OC[C@]23OC(C)=O)c1>>C=C1c2cccc(c2)C(=O)N[C@@H](C=C(C  
 )C)[C@@H](O[Si](C(C)C)(C(C)C)C(C)C)C(=O)O[C@H]2C[C@@]3(O)[C@@H](OC(=O)c4ccccc1c4  
 90 )I[C@H]1I[C@]1(C)(C(=O)I[C@H](OC(C)=O)C(=C2C)C3(C)C)I[C@@H](O[Si](CC)(CC)CC)C[C@H]2  
 C=C1C(=O)O[C@]2C3=C(C)C(=O)C=C[C@]3(C)CC[C@@H]12.Fc1ccccc1I>>CC1=C2[C@H]3  
 91 OC(=O)/C=C/c4ccccc4F)I[C@@H]3CC[C@@]2(C)C=CC1=O  
 C=CC(=O)N1N=Cc2ccccc2C1C=C(C)C.CCOC1c(I)cc(Cc2cnc(N)nc2N)cc1OC>>CCOC1c(/C=C/C(=O  
 92 )N2N=Cc3ccccc3C2C=C(C)C)cc(Cc2cnc(N)nc2N)cc1OC  
 C=CC(=O)OC.CC(=O)Oc1c(CC=C(C)C)cc(I)cc1C/C=C(\C)CCC=C(C)C>>COC(=O)/C=C/c1cc(CC=  
 93 C(C)C)c(OC(C)=O)c(C/C=C(\C)CCC=C(C)C)c1  
 C=CCC[C@@H](C=C)CN(c1ccccc1Br)S(=O)(=O)c1ccc(C)cc1>>C=CCC[C@@H]1CN(S(=O)(=O)c2  
 94 ccc(C)cc2)c2ccccc2C1=C  
 C=CCCC(O)C=C(Br)c1ccc2ccccc2c1>>C=C1CCCC(O)C=C1c1ccc2ccccc2c1  
 95 C=CCC(OC=CC(=O)OCC)c1ccccc1CC1>>C=C1Cc2ccccc2C(OC=CC(=O)OCC)C1  
 96 Bre1ccc(OCc2ccccc2)c(OCc2ccccc2)c1.C=Cc1ccc(C=C)cc1>>C=Cc1ccc(/C=C/c2ccc(OCc3ccccc3)c(  
 97 OCc3ccccc3)c2)cc1  
 C=C1C(=O)O[C@H]2[C@H]1CCC(=C)[C@@H]1C[C@H](OC(C)=O)C(=C)[C@H]21.Cc1ccc(I)cc1  
 98 >>C=C1CC[C@H]2/C(=C\c3ccc(C)cc3)C(=O)O[C@@H]2[C@H]2C(=C)[C@@H](OC(C)=O)C[C@  
 C=C1C(=O)O[C@@H]2/C=C(\C)CC/C=C(\C)CC[C@@H]12.Ic1ccc2[nH]ccc2c1>>C/C1=C\ [C@H]2  
 99 OC(=O)/C(=C/c3ccc4[nH]ccc4c3)[C@@H]2CC/C(C)=C/CC1  
 C=C(Br)CCN1C(=O)C[C@@H]2C=CCC[C@@]21/C=C\ C(=O)OC>>C=C1CCN2C(=O)C[C@@H]3  
 100 C=CCC[C@@]32/C1=C/C(=O)OC  
 C=Cc1ccc(/C=C/c2ccc(N(c3ccc(OC(C)CC)cc3)c3ccc(OC(C)CC)cc2)cc1.O=Cc1ccc(Br)cc1>>C  
 101 CCCCCOc1ccc(N(c2ccc(/C=C/c3ccc(/C=C/c4ccc(C=O)cc4)cc3)cc2)c2ccc(OC(C)CC)cc2)cc1  
 C=C[C@@](C)(/C=C/c1ccc(O)cc1)CCC=C(C)C.COc1ccc(I)cc1>>COc1ccc(/C=C/[C@@](C)(/C=C/c  
 102 2ccc(O)cc2)CCC=C(C)C)cc1  
 C=C1C(=O)O[C@@H]2CC(C)=C([C@@H](C)CCOC(C)=O)[C@@H](OC(C)=O)[C@H]12.Fc1ccc(  
 103 I)cc1>>CC(=O)OCCC[C@H](C)C1=C(C)C[C@H]2OC(=O)/C(=C/c3ccc(F)cc3)[C@H]2[C@@H]1O  
 C=C/C=C(/OCC)C(=O)OC.COc1ccc(I)cc1>>CCO/C(=C/C=C/c1ccc(OC)cc1)C(=O)OC  
 104 C=Cc1ccc(/C=C/c2ccc(N(C)C)cc2OC)cc1.O=c1ccc2c(-c3ccc(I)cc3S(=O)(=O)c3ccc(O)cc3oc-  
 2c1>>COc1cc(N(C)C)ccc1/C=C/c1ccc(/C=C/c2ccc(-c3c4ccc(=O)cc-  
 4oc4cc(O)ccc34)c(S(=O)(=O)O)c2)cc1  
 C=CC1=CC=C(/C=C/c2ccc(OC)cc2)C2=CC(C(C)C)=CC=C(C)C2=C1C(=O)OC.O=[N+]( [O-  
 105 ])c1ccc(I)cc1>>COC(=O)C1=C2C(C)=CC=C(C(C)C)C=C2C(/C=C/c2ccc(OC)cc2)=CC=C1/C=C/c1cc  
 c([N+](=O)[O-])cc1  
 C=Cc1ccc(C)cc1.COc1ccc(/C=C/c2cc(Br)cc(/C=C/c3ccc(OC)cc3)c2)cc1>>COc1ccc(/C=C/c2cc(/C=C/  
 106 c3ccc(C)cc3)cc(/C=C/c3ccc(OC)cc3)c2)cc1  
 C=C[C@@H](C)[C@H](O)C/C=C/C(=O)OC.COc1ccc(I)cc1>>COC(=O)/C=C/C[C@H](O)[C@H](  
 107 C)/C=C/c1ccc(OC)cc1  
 O=C(/C=C/c1ccccc1)O/C(=C\I)C1CCCCC1>>O=C1OC(C2CCCCC2)=C/C1=C\c1ccccc1  
 108 C=C[Si](C)(C)c1ccccc1/C=C\c1ccc(C)cc1Br>>C=C1c2cc(C)ccc2/C=C\c2ccccc2[Si]1(C)C  
 109 C=CC(OCC(=C)Br)c1ccccc1>>C=C1COC(c2ccccc2)C1=C  
 110 C=C/C=C/CCCCC.COC(=O)c1ccc(I)cc1>>CCCCC/C=C/C=C/c1ccc(C(=O)OC)cc1  
 111 C=Cc1nnn(C=C)n1.Fc1ccccc1I>>C=Cn1nnc(/C=C/c2ccccc2F)n1  
 112 C=C/C=C/C(=O)N(CCCC)CCCC.N#Cc1ccc(Br)cc1>>CCCN(CCCC)C(=O)/C=C/C=C/c1ccc(C#N)c  
 113 Bre1cnc2ccccc2c1.C=CCOC1=C(C)C(=O)O[C@H](CC)[C@@](C)(O)C=C(C)C(=O)[C@H](C)C[C@  
 114 @](C)(OC)[C@H](O[C@@H]2O[C@H](C)C[C@H](N(C)C)[C@H]2OC(C)=O)[C@H]1C>>CC[C@  
 H]1OC(=O)C(C)=C(OC/C=C/c2cnc3ccccc3c2)[C@H](C)[C@@H](O[C@@H]2O[C@H](C)C[C@H](  
 N(C)C)I[C@H]2OC(C)=O)I[C@](C)(OC)C[C@@H](C)C(=O)C(C)=C[C@]1(C)O  
 115 C=C[C@@](C)(/C=C/c1ccc(OC)cc1)CCC=C(C)C.Oc1ccc(I)cc1>>COc1ccc(/C=C/[C@@](C)(/C=C/c2c  
 cc(O)cc2)CCC=C(C)C)cc1  
 116 C=CC=C(C)C.Ic1ccccc1>>CC(C)=C/C=C/c1ccccc1

BrC1cnc2cccc2c1.C=C[C@H]1CC(=O)O[C@H](C)C/C=C/[C@H](O[Si](C)(C)C(C)(C)[C@H]  
[C@H](C)C[C@H](CC(OC)OC)[C@H](O[C@@H]2O[C@H](C)[C@@H](O[C@H]3C[C@@](C)(O  
C(=O)CC)[C@@H](OC(=O)CCC)[C@H](C)O3)[C@H](N(C)C)[C@H]2OC(C)=O)[C@H]1OC>>CC  
CC(=O)O[C@H]1[C@H](C)O[C@@H](O[C@H]2[C@H](N(C)C)[C@@H](OC(C)=O)[C@H](O[C@  
@H]3[C@@H](OC)[C@H](OC/C=C/c4cnc5ccccc5c4)CC(=O)O[C@H](C)C/C=C/C=C/[C@H](O[Si](  
C)(C)C(C)(C)C)[C@H](C)C[C@@H]3CC(OC)OC)[C@H](O[C@@H]2O[C@H](C)[C@@H](O[C@H]3C[C@@]  
C=C1C(=O)O[C@@H]2/C=C(\C)CC/C=C(\C)CC[C@@H]12.Clc1ccc(I)cc1>>C/C1=C\C[C@H]2OC(=  
O)/C=(C/c3ccc(Cl)cc3)[C@@H]2CC/C(C)=C/CC1  
BrC1cccc1.C=C/C=C/C(=O)N(CCCC)CCCC>>CCCCN(CCCC)C(=O)/C=C/C=C/c1cccc1  
C=CCCC(O)C=C(Br)c1cccc(C)c1>>C=C1CCCC(O)C=C1c1cccc(C)c1  
C=C1C(=O)O[C@@H]2CC(C)=C([C@@H](C)CCOC(C)=O)[C@@H](OC(C)=O)[C@H]12.Ic1cccc  
c1>>CC(=O)OCCC[C@H](C)C1=C(C)C[C@H]2OC(=O)/C=(C/c3ccccc3)[C@H]2[C@@H]1OC(C)=  
C=CC(O)c1cccc1.I/C=C/C=C/CCCCOCc1cccc1>>OC(/C=C/C=C/C=C/CCCCOCc1cccc1)c1cccc1  
BrC1cnc2cccc12.C=CCO[C@@H]1CC(=O)O[C@H](C)C/C=C/C=C/[C@H](O[Si](C)(C)C(C)(C)C)  
[C@H](C)C[C@H](CC(OC)OC)[C@H](O[C@@H]2O[C@H](C)[C@@H](O[C@H]3C[C@@](C)(O  
[C@@H](OC(=O)CC)[C@H](C)O3)[C@H](N(C)C)[C@H]2OC(C)=O)[C@H]1OC>>CCC(=O)O[C@  
H]1[C@H](C)O[C@@H](O[C@H]2[C@H](N(C)C)[C@@H](OC(C)=O)[C@H](O[C@@H]3[C@@  
H)(OC)[C@H](OC/C=C/c4cncc5ccccc45)CC(=O)O[C@H](C)C/C=C/C=C/[C@H](O[Si](C)(C)C(C)(C)  
\C)\C)[C@H](C)C[C@@H]3CC(OC)OC)[C@H](O[C@@H]2O[C@H](C)[C@@H](O[C@H]3C[C@@]  
C=C1C(=O)O[C@H]2[C@H]1CCC(=C)[C@@H]1C[C@H](OC(C)=O)C(=C)[C@H]21.Ic1cccc1>>C  
=C1CC[C@H]2/C=C(\c3ccccc3)C(=O)O[C@@H]2[C@H]2C(=C)[C@@H](OC(C)=O)C[C@@H]12  
C=C1C(=O)O[C@H]2[C@H]1CC/C(C)=C/CC[C@@]1(C)O[C@@H]21.Fc1ccc(I)cc1>>C/C1=C\CC[  
C@@]2(C)O[C@H]2[C@H]2OC(=O)/C=(C/c3ccc(F)cc3)[C@@H]2CC1  
C=CCCC[C@@H](C=C)CN(c1cccc1Br)S(=O)(=O)c1ccc(C)cc1>>C=CCCC[C@@H]1CN(S(=O)(=O  
)c2ccc(C)cc2)c2cccc2C1=C  
C=Cc1ccc(/C=C/c2ccc(C(C)(C)C)cc2)cc1.Ic1ccc(C(c2cccc2)/(c2cccc2)c2cccc2)cc1>>CC(C)(C)c1c  
cc(/C=C/c2ccc(/C=C/c3ccc(C(c4cccc4)(c4cccc4)c4cccc4)cc3)cc2)cc1  
C=C[C@H](C)[C@@H](O)C/C=C/C(=O)OC.Ic1cccc1>>COC(=O)/C=C/C[C@H](O)[C@H](C)/C  
=C/c1cccc1  
C=CCC1c2cccc2CCN1CC(=C)I>>C=C1CC2c3ccccc3CCN2CC1=C  
C=C/C(Br)=C/[C@]1(C)C(=O)OC[C@]1(C)/C=C\C(=O)OC>>C=CC1=C[C@]2(C)C(=O)OC[C@]2(  
C)/C1=C/C(=O)OC  
C=Cc1ccc(C=C)cc1.O=Cc1ccc(Br)cc1>>C=Cc1ccc(/C=C/c2ccc(C(=O)cc2)cc1  
BrC1ccc(-  
n2ccnc2)cc1.C=CCO[C@@H]1CC(=O)O[C@H](C)C/C=C/C=C/[C@H](O[Si](C)(C)C(C)(C)C)[C@H]  
[C](C)C[C@H](CC(OC)OC)[C@H](O[C@@H]2O[C@H](C)[C@@H](O[C@H]3C[C@@](C)(O)[C@  
@H](OC(=O)CC)[C@H](C)O3)[C@H](N(C)C)[C@H]2OC(C)=O)[C@H]1OC>>CCC(=O)O[C@H]1[C  
@H](C)O[C@@H](O[C@H]2[C@H](N(C)C)[C@@H](OC(C)=O)[C@H](O[C@@H]3[C@@H](O  
C)[C@H](OC/C=C/c4ccc(-  
n5ccnc5)cc4)CC(=O)O[C@H](C)C/C=C/C=C/[C@H](O[Si](C)(C)C(C)(C)C)[C@H](C)C[C@@H]3C  
C(OC)OC)[C@H](O[C@@H]2O[C@H](C)[C@@H](O[C@H]3C[C@@]  
C=CC(C)(O)CCC=C(C)C.CC(C)(C)c1ccc(Br)cc1>>CC(C)=CCCC(C)(O)/C=C/c1ccc(C(C)(C)C)cc1  
C=C/C=C/C(=O)N(CCCC)CCCC.CCOC(=O)c1ccc(Br)cc1>>CCCCN(CCCC)C(=O)/C=C/C=C/c1ccc(  
C(=O)OCC)cc1  
C=C/C=C/C(\CCCC)OCC.Ic1cccc1>>CCCC/C(=C\C=C\Cc1cccc1)OCC  
C=CC(=O)NIN=Cc2ccccc2C1C=C.COc1cc(Cc2cnc(N)nc2N)cc(I)c1OC>>C=CC1c2ccccc2C=NN1C(  
=O)/C=C/c1ccc(Cc2cnc(N)nc2N)cc(OC)c1OC  
C=CC(=O)OC.CC(=O)Oc1ccc(I)cc1C/C=C(\C)CCC=C(C)C>>COC(=O)/C=C/c1ccc(OC(C)=O)c(C/C  
=C(\C)CCC=C(C)C)c1  
C=C[C@@H](C)[C@H](C/C(=C/CO)OS(=O)(=O)C(F)(F)F)O[Si](C)(C)C(C)(C)C)O[Si](C)(C)C(C)(C)  
)>>C=C1/C(=C\CO)C[C@H](O[Si](C)(C)C(C)(C)C)C[C@H]1O[Si](C)(C)C(C)(C)C  
C=C/C=C/c1cccc1.CCOC(=O)C(F)(F)I>>CCOC(=O)C(F)(F)/C=C/C=C/c1cccc1  
C=C1C(=O)O[C@H]2[C@H]1CCC(=C)[C@@H]1C[C@H](OC(C)=O)C(=C)[C@H]21.Cc1ccc(I)c([N  
+])(=O)[O-])c1>>C=C1CC[C@H]2/C(=C\c3ccc(C)cc3[N+])(=O)[O-  
])C(=O)O[C@@H]2[C@H]2C(=C)[C@@H](OC(C)=O)C[C@@H]12  
BrC1cccc1.C=CC(=C)C>>C=C(C)/C=C/c1cccc1  
C=CC(O)C1CCCC1.I/C=C/C=C/CCCCOCc1cccc1>>OC(/C=C/C=C/C=C/CCCCOCc1cccc1)C1C  
CCCC1  
C=CC(C)(C)[C@]1(OC)O[C@H](C[C@@H](OCc2ccc(OC)cc2)[C@@H](C)O[Si](C)(C)C(C)(C)C)/  
C(=C\C(=O)OC)[C@@H]1OC(C)=O.CC[Si](CC)(CC)O[C@@H](CCO)Cc1cccc(Cc2cccc(Br)c2)c1>>  
CC[Si](CC)(CC)O[C@@H](CCO)Cc1cccc(Cc2cccc(/C=C/C(C)(C)[C@]3(OC)O[C@H](C[C@@H](O  
Cc4ccc(OC)cc4)[C@@H](C)O[Si](C)(C)C(C)(C)C)/C(=C\C(=O)OC)[C@@H]3OC(C)=O)c2)c1

144 C=Cc1ccc(/C=C/c2cccn2C(=O)OC(C)(C)C)cc1.CCOC(=O)c1c(C)c(C)c(I)n1C(=O)OC(C)(C)C>>CCO  
C(=O)c1c(C)c(C)c(/C=C/c2ccc(/C=C/c3cccn3C(=O)OC(C)(C)C)cc2)n1C(=O)OC(C)(C)C  
145 C=CC[C@](C)(C=C)c1cccc1.Ic1cccc1>>C=C[C@](C)(C/C=C/c1cccc1)c1cccc1  
146 C=CCN(C)C(=O)C1(CC(=C)Br)CS/C(=C/c2ccccc2)C1=O>>C=C1CN(C)C(=O)C2(CS/C(=C/c3ccccc3  
C2=O)CC1=C  
147 C=C1C(=O)O[C@H]2C3=C(C)C(=O)C=C[C@]3(C)CC[C@H]12.Clc1ccc(I)cc1>>CC1=C2[C@H  
]3OC(=O)/C(=C/c4ccc(Cl)cc4)[C@H]3CC[C@]2(C)C=CC1=O  
148 COc1ccc(/C=C/C(=O)O/C(=C/I)c2ccc3ccccc3c2)cc1>>COc1ccc(/C=C2\C=C(c3ccc4ccccc4c3)OC2=O  
149 C=C(C)C(=C)C.Cc1ccc(I)cc1>>C=C(C)C(C)=Cc1ccc(C)cc1  
C=Cc1nc(C#N)c(C#N)n1CCCCC.CN(C)c1ccc(/C=C/c2ccc(N(c3ccc(I)cc3)c3ccc(/C=C/c4ccc(N(C)C)  
150 cc4)cc3)cc2)cc1>>CCCCCn1c(/C=C/c2ccc(N(c3ccc(/C=C/c4ccc(N(C)C)cc4)cc3)c3ccc(/C=C/c4ccc(  
N(C)C)cc4)cc3)cc2)nc(C#N)c1C#N  
151 C=Cc1ccc(OCOC)c(OCOC)c1.COCOc1cc(OS(=O)(=O)C(F)(F)F)cc(OCOC)c1C/C=C(\C)CCC=C(C)C  
>>COCOc1ccc(/C=C/c2cc(OCOC)c(C/C=C(\C)CCC=C(C)C)c(OCOC)c2)cc1OCOC  
152 C=CC(C)(O)CCC=C(C)C.Cc1ccc(O)c(Br)c1>>CC(C)=CCCC(C)(O)/C=C/c1cc(C)ccc1O  
C=Cc1ccc(N(C)C)cc1.CCCCN1C(=O)C(=C/C=C/c2ccc(I)cc2)C(=O)N(CCCC)C1=O>>CCCCN1C(=O  
153 )C(=C/C=C/c2ccc(/C=C/c3ccc(N(C)C)cc3)cc2)C(=O)N(CCCC)C1=O  
C=CCOC(=O)/C=C/c1ccc(OC(C)=O)c(OC(C)=O)c1.Ic1cccc1>>CC(=O)Oc1ccc(/C=C/C(=O)OC/C=

154 C/c2ccccc2)cc1OC(C)=O  
C=Cc1ccc(C=C)cc1.CCCCCCCCOCc1cc(C=O)c(OCCCCCCCC)cc1I>>C=Cc1ccc(/C=C/c2cc(OCCCC  
155 CCCC)c(C=O)cc2OCCCCCCCC)cc1  
C=CCCC[C@H](C=C)COc1cccc1Br>>C=CCCC[C@H]1COc2ccccc2C1=C  
156 C=CCCC(=C)C.Fc1ccc(CCl)c(F)c1>>C=C(C)CCC(=C)Cc1ccc(F)cc1F  
157 C=CC1CC(OC)=CC(=O)O1.Ic1ccc2c(c1)OC02>>COC1=CC(=O)OC(/C=C/c2ccc3c(c2)OC03)C1  
158 C=Cc1ccc(/C=C/c2cccs2)cc1.O=Cc1ccc(Br)cc1>>O=Cc1ccc(/C=C/c2ccc(/C=C/c3cccs3)cc2)cc1  
159 C=CCCC[C@H](C=C)CN(c1cccc1Br)S(=O)(=O)c1ccc(C)cc1>>C=CCCC[C@H]1CN(S(=O))(  
160 =O)c2ccc(C)cc2)c2ccccc2C1=C  
C=C1C(=O)O[C@H]2C[C@]3(C)CCCC(=C)[C@H]3C[C@H]12.Cn1c(=O)c2c(nc(Br)n2C)n(C)  
161 c1=O>>C=C1CCC[C@]2(C)C[C@H]3OC(=O)/C(=C/c4nc5c(c(=O)n(C)c(=O)n5C)n4C)[C@H]3C[C  
162 C=Cc1ccc(/C=C/c2ccc(C(C)(C)C)cc2)cc1.CCCCCOCc1ccc2cc(Br)ccc2c1>>CCCCCOCc1ccc2cc(/C=  
C/c3ccc(/C=C/c4ccc(C(C)(C)C)cc4)cc3)cc2c1  
C=Cc1ccc(/C=C/c2ccc(N(C)C)cc2)cc1.Cc1cc2c(-c3ccc(I)cc3S(=O)(=O)O)c3cc(C)c(=O)cc-  
163 3oc2cc1O>>Cc1cc2c(-  
c3ccc(/C=C/c4ccc(/C=C/c5ccc(N(C)C)cc5)cc4)cc3S(=O)(=O)O)c3cc(C)c(=O)cc-3oc2cc1O  
164 C=C[Si](C)(C)c1cccc1/C=C/c1cccc1Br>>C=C1c2ccccc2/C=C/c2ccccc2[Si]1(C)C  
C=C[C@](C)(CC=C(C)C)CO[Si](c1cccc1)(c1cccc1)C(C)(C)C.COc1ccc(I)cc1>>COc1ccc(/C=C/[C  
165 @](C)(CC=C(C)C)CO[Si](c2ccccc2)(c2ccccc2)C(C)(C)C)cc1  
C=Cc1ccc(C=C)cc1.Nc1ccc(I)cc1>>C=Cc1ccc(/C=C/c2ccc(N)cc2)cc1  
166 C=Cc1ccc(OCOC)cc1.COCOc1cc(OS(=O)(=O)C(F)(F)F)cc(OCOC)c1C/C=C(\C)CC/C=C(\C)CCC=C(  
167 C)C>>COCOc1ccc(/C=C/c2cc(OCOC)c(C/C=C(\C)CC/C=C(\C)CCC=C(C)C)c(OCOC)c2)cc1  
C=C1C(=O)O[C@H]2[C@H]1CCC(=C)[C@H]1C[C@H](OC(C)=O)C(=C)[C@H]21.O=[N+][O-  
168 ]c1cc(Cl)ccc1I>>C=C1CC[C@H]2/C=C(\c3ccc(Cl)cc3[N+](=O)[O-  
]C(=O)O[C@H]2[C@H]2C(=C)[C@H](OC(C)=O)C[C@H]12  
169 C=CC(C)(C)C1CCC(=O)N1CC(=C)Br>>C=C1CN2C(=O)CCC2C(C)(C)C1=C  
170 C=C1C(=O)O[C@H]2/C=C(\C)CC/C=C(\C)CC[C@H]12.Cc1ccc(I)cc1>>C/C1=C[C@H]2OC(=O  
C)/C(=C/c3ccc(C)cc3)[C@H]2CC/C(C)=C/CC1  
171 C=CS(=O)(=O)N(CC(=C)Br)[C@H](C(=O)OC)C(C)C>>C=C1C=CS(=O)(=O)N([C@H](C(=O)OC)C  
(C)C)C1  
172 C=C1C(=O)O[C@H]2[C@H]1CC/C(C)=C/CC[C@]1(C)O[C@H]21.Fc1cccc1I>>C/C1=C\CC[C  
@]2(C)O[C@H]2[C@H]2OC(=O)/C(=C/c3ccccc3F)[C@H]2CC1  
173 C=C[Si](C)(C)c1ccc(F)cc1/C=C/c1cccc1Br>>C=C1c2ccccc2/C=C/c2cc(F)ccc2[Si]1(C)C  
174 C=C1C(=O)O[C@H]2[C@H](C)C(=O)C/C=C(\C)CC[C@H]12.Clc1ccc(I)cc1>>C/C1=C\CC(  
=O)[C@H](C)C[C@H]2OC(=O)/C(=C/c3ccc(Cl)cc3)[C@H]2CC1  
175 C=CCCC[C@H](C=C)COc1cccc1Br>>C=CCCC[C@H]1COc2ccccc2C1=C  
C=C1C(=O)O[C@H]2[C@H]1CCC(=C)[C@H]1C[C@H](OC(C)=O)C(=C)[C@H]21.COc1cccc([N  
176 +](=O)[O-])c1I>>C=C1CC[C@H]2/C(=C/c3c(OC)ccc3[N+](=O)[O-  
]C(=O)O[C@H]2[C@H]2C(=C)[C@H](OC(C)=O)C[C@H]12  
177 C=CCCC=C(C)C.ClCc1cccc1-c1cccc1>>C=C(CCCC=C(C)C)Cc1cccc1-c1cccc1  
C=C[C@H](C)[C@H]1C/C=C/C(=O)N[C@H](Cc2ccc(OC)cc2)C(=O)NCCC(=O)O[C@H](CC(  
178 C)C)C(=O)O1.Ic1cccc1>>COc1ccc(C[C@H]2NC(=O)/C=C/C[C@H]([C@H](C)/C=C/c3ccccc3)O  
C(=O)[C@H](CC(C)C)OC(=O)CCNC2=O)cc1  
179 C=CC(C)(O)CCC=C(C)C.CC(=O)c1ccc(Br)cc1>>CC(=O)c1ccc(/C=C/C(C)(O)CCC=C(C)C)cc1

180 BrC1ccc2ccccc2c1.C=COCCOC=C>>C=COCCOC(=C)c1ccc2ccccc2c1  
181 C=C/C=C/C1CCCCN1S(=O)(=O)c1ccc(C)cc1.Clc1ccc(I)cn1>>Cc1ccc(S(=O)(=O)N2CCCCC2/C=C/C  
=C/c2ccc(Cl)nc2)cc1  
182 C=CCC(O)c1ccccc1C=CI>>C=C1C=Cc2ccccc2C(O)C1  
C=C(I)[C@H]1CC[C@H]2[C@@H]3CC=C4C[C@H](OC(C)=O)CC[C@]4(C)[C@H]3CC[C@]12  
183 C.C=CC(=O)OC>>C=C/C=C/C(=O)OC)[C@H]1CC[C@H]2[C@@H]3CC=C4C[C@H](OC(C)=O  
)CC[C@]4(C)[C@H]3CC[C@]12C  
184 C=CC(C)(O)CCC=C(C)C.FC(F)(F)c1ccc(Br)cc1>>CC(C)=CCCC(C)(O)/C=C/c1ccc(C(F)(F)F)cc1  
185 C=CC=O.CC(C)(C)c1cc(/C=C/c2cc(I)cc(/C=C/c3cc(C(C)(C)C)cc(C(C)(C)C)c3)c2)cc(C(C)(C)C)c1>>  
CC(C)(C)c1cc(/C=C/c2cc(/C=C/C=O)cc(/C=C/c3cc(C(C)(C)C)cc(C(C)(C)C)c3)c2)cc(C(C)(C)C)c1  
C=Cc1ccc(/C=C/c2ccc(N(C)C)cc2OC)cc1.Cc1cc2c(-c3ccc(I)cc3S(=O)(=O)O)c3cc(C)c(=O)cc-  
186 3oc2cc1O>>COc1cc(N(C)C)ccc1/C=C/c1ccc(/C=C/c2ccc(-c3c4cc(C)c(=O)cc-  
4oc4cc(O)c(C)cc34)c(S(=O)(=O)O)c2)cc1  
187 C=C/C=C(/OCC)C(=O)OC.Ic1ccccc1>>CCO/C(=C/C=C/c1ccccc1)C(=O)OC  
188 C=CCC[C@H]1C(OS(=O)(=O)C(F)(F)F)=C[C@@]2(C(C)C)C=C[C@]1(C)O2>>C=C1CC[C@H]2C1  
=C[C@@]1(C(C)C)C=C[C@]2(C)O1  
189 C=CCC1c2ccccc2C=NN1C(=O)C=C.COc1cc(Cc2cnc(N)nc2N)cc(I)c1OC>>C=CCC1c2ccccc2C=NN1  
C(=O)/C=C/c1cc(Cc2cnc(N)nc2N)cc(OC)c1OC  
190 O=C/C=C/C/c1ccccc1O/C(=C/I)C1CC1>>O=C1OC(C2CC2)=C/C1=C\c1ccccc1  
191 C=C[C@@](C)(/C=C/c1ccc(O)cc1)CCC=C(C)C.COc1ccccc1I>>COc1ccccc1/C=C/[C@@](C)(/C=C/c  
1ccc(O)cc1)CCC=C(C)C  
192 C=C1C(=O)O[C@@H]2/C=C(\C)CC/C=C(\C)CC[C@@H]12.COc1ccc(I)cc1>>COc1ccc(/C=C2/C(=O)  
O)O[C@@H]3/C=C(\C)CC/C=C(\C)CC[C@@H]23)cc1  
193 C=Cc1ccc(/C=C/c2cc(CCCCCC)c(C=O)cc2CCCCC)cc1.CCCCCCc1cc(/C=C/c2ccc(C(=O)OC)cc2)c  
(CCCCC)cc1Br>>CCCCCCc1cc(/C=C/c2ccc(/C=C/c3cc(CCCCCC)c(/C=C/c4ccc(C(=O)OC)cc4)cc3  
CCCCC)cc2)c(CCCCC)cc1C=O  
194 C=COCCOC=C.COc1ccc2cc(Br)ccc12>>C=COCCOC(=C)c1ccc2c(OC)cccc2c1  
195 C=CC1CC=CCC1.Clc1ccc(I)cc1>>Clc1ccc(/C=C/C2CC=CCC2)cc1  
C=Cc1ccc(/C=C/c2ccc(N(C)C)cc2OC)cc1.CN(C)c1ccc2c(c1)[Si](C)(C)C1=CC(=[N+](C)C)C=CC1=C  
196 2c1ccc(Br)cc1S(=O)(=O)[O-]  
>>COc1cc(N(C)C)ccc1/C=C/c1ccc(/C=C/c2ccc(C3=C4C=CC(=[N+](C)C)C=C4[Si](C)(C)c4cc(N(C)  
C)ccc43)c(S(=O)(=O)[O-])c2)cc1  
197 C=CCC(C=C(C)C)c1cc(C)c(OC)cc1OS(=O)(=O)C(F)(F)F>>C=C1CC(C=C(C)C)c2cc(C)c(OC)cc21  
198 C=C(C(=O)OC)[C@@H]1CC[C@]2(C)CC[C@H](O)C(=C)[C@@H]2C1.Cc1ccc(I)cc1>>C=C1[  
C@H](O)CC[C@]2(C)CC[C@H](/C(=C\c3ccc(C)cc3)C(=O)OC)C[C@@H]12  
199 C=CC[C@H]1C(=O)N(c2ccc(OC)cc2)[C@@H]1[C@H](CC(=C)Br)OC(C)=O>>C=C1/C=C\C[C@  
@H]2C(=O)N(c3ccc(OC)cc3)[C@@H]2[C@@H](OC(C)=O)C1  
200 C=CCOC1O[C@H](COC(C)=O)[C@@H](OC(C)=O)C=C1I>>C=C1COC2O[C@H](COC(C)=O)[C@  
@H](OC(C)=O)C=C12  
C=Cc1ccc2c(c1)c1cc(/C=C/c3ccc4c(c3)c3ccccc3n4CCCCCCCC)ccc1n2CCCCCCCC.N#CC(=C(c1ccc  
201 cc1)c1ccccc1)c1ccc(Br)cc1>>CCCCCCCCN1c2ccccc2c2cc(/C=C/c3ccc4c(c3)c3cc(/C=C/c5ccc(C(C#N  
)=C(c6ccccc6)c6ccccc6)cc5)ccc3n4CCCCCCCC)ccc21  
202 C=C1C(=O)O[C@@H]2/C=C(\C)CC/C=C(\C)CC[C@@H]12.Nc1ccc(I)cc1>>C/C1=C/[C@H]2OC(=  
O)/C(=C/c3ccc(N)cc3)[C@@H]2CC/C(C)=C/CC1  
203 C=C(C(=O)OC)C1C(I)=C(c2ccccc2)C2(C=CC(=O)C=C2)N1S(C)(=O)=O.C=CC(=O)OC>>C=C(C(=O)  
)OC)C1C(/C=C/C(=O)OC)=C(c2ccccc2)C2(C=CC(=O)C=C2)N1S(C)(=O)=O  
204 C=COCCOC=C.COc1ccc(Br)cc1>>C=COCCOC(=C)c1ccc(OC)cc1  
205 C=CC(C)(O)CCC=C(C)C.O=Cc1ccc(Br)cc1>>CC(C)=CCCC(C)(O)/C=C/c1ccc(C=O)cc1  
206 C=CCCC(O)C=C(Br)c1ccccc1>>C=C1CCCC(O)C=C1c1ccccc1  
207 C=C[C@@](C)(/C=C/c1ccc(O)cc1)CCC=C(C)C.Oc1ccc(I)cc1>>CC(C)=CCCC(C)(/C=C/c1ccc(O)cc1  
)C=C/c1ccc(O)cc1  
208 C=C[C@@](C)(/C=C/c1ccc(O)cc1)CCC=C(C)C.Nc1ccc(I)cc1>>CC(C)=CCC[C@@](C)(/C=C/c1ccc(  
N)cc1)/C=C/c1ccc(O)cc1  
209 C=Cc1ccccc1.CCCCOC(=O)/C=C/c1ccc(/C=C/C(=O)OCC)cc1Cl>>CCCCOC(=O)/C=C/c1ccc(/C=C/  
C(=O)OCC)cc1/C=C/c1ccccc1  
210 C=C/C=C(/OCC)[Si](C)(C)C.Cc1ccccc1I>>CCO/C(=C/C=C/c1ccccc1C)[Si](C)(C)C  
211 C=C[C@H](C)[C@H](O)C/C=C/C(=O)OC.N#Cc1ccc(I)cc1>>COC(=O)/C=C/C[C@H](O)[C@H  
(C)C=C/C/c1ccc(C#N)cc1  
212 C/C(I)=C/[C@H](C)CO[Si](C)(C)C(C)(C)C.C=C[C@H]1CC=C[C@@H](OC(C)C)O1>>CC(=C/[C  
@H](C)CO[Si](C)(C)C(C)(C)C)/C=C/[C@H]1CC=C[C@@H](OC(C)C)O1  
213 C=C/C=C/C1CCCCN1S(=O)(=O)c1ccc(C)cc1.Cc1ccccc(I)c1>>Cc1ccc(S(=O)(=O)N2CCCCC2/C=C/C  
=C/c2ccc(C)c2)cc1

```

1 C=C1C(=O)O[C@H]2C3=C(C)C(=O)C=C[C@H]3(C)CC[C@H]12.COC(=O)c1ccccc1c1>>COC(=
2 O)c1ccccc1/C=C2/C(=O)O[C@H]3C4=C(C)C(=O)C=C[C@H]4(C)CC[C@H]23)c1
3 O=C(/C=C/c1ccccc1)O/C(=C)I)c1ccc(Br)cc1>>O=C1OC(c2ccc(Br)cc2)=C/C1=C/c1ccccc1
4 C=CCC(OCC(=C)Br)c1ccccc1>>C=C1COC(c2ccccc2)CC1=C
5 C=C1C(=O)O[C@H]2[C@H]1CC/C(C)=C/CC[C@H]1(C)O[C@H]21.Ic1cncnc1>>C/C1=C\CC[C
6 @H]2(C)O[C@H]2[C@H]2OC(=O)/C(=C/c3cncnc3)[C@H]2CC1
7 C=CC(C)(O)CCC=C(C)C.N#Cc1ccc(O)c(Br)c1>>CC(C)=CCCC(C)(O)/C=C/c1ccc(C#N)ccc1O
8 C=C1C(=O)O[C@H]2/C=C(\C)CC/C=C(\C)CC[C@H]12.Oc1ccccc1I>>C/C1=C/[C@H]2OC(=O)
9 /C(=C/c3ccccc3O)[C@H]2CC/C(C)=C/CC1
10 C=C1C(=O)O[C@H]2[C@H]1CCC(=C)[C@H]1C[C@H](OC(C)=O)C(=C)[C@H]21.O=[N+](O-
11 )c1ccccc1I>>C=C1CC[C@H]2/C(=C/c3ccccc3[N+](=O)[O-
12 ]C(=O)O[C@H]2[C@H]2C(=C)[C@H](OC(C)=O)C[C@H]12
13 C=Cc1ccc(/C=C/c2ccc(N(C)C)cc2)cc1.O=c1ccc2c(-c3ccc(I)ccc3S(=O)(=O)O)c3ccc(O)cc3oc-
14 2c1>>CN(C)c1ccc(/C=C/c2ccc(/C=C/c3ccc(-c4c5ccc(=O)cc-
15 Br)c1ccc2ccccc2c1.C=CCO[C@H]1CC(=O)O[C@H](C)C/C=C/C=C/[C@H](O[Si](C)(C)C(C)(C)C)
16 [C@H](C)C[C@H](CC(OC)OC)[C@H](O[C@H]2O[C@H](C)[C@H](O[C@H]3C[C@H](C)(O)[
17 C@H](OC(=O)CC)[C@H](C)O3)[C@H](N(C)C)[C@H]2OC(C)=O)[C@H]1OC>>CCC(=O)O[C@
18 H]1[C@H](C)O[C@H](O[C@H]2[C@H](N(C)C)[C@H](OC(C)=O)[C@H](O[C@H]3[C@H]
19 [C@H](OC)[C@H](OC/C=C/c4ccc5ccccc5c4)CC(=O)O[C@H](C)C/C=C/C=C/[C@H](O[Si](C)(C)C(C)(C)
20 C)C)[C@H](C)C[C@H](CC(OC)OC)[C@H](O[C@H]2O[C@H](C)[C@H](O[C@H]3C[C@H](C)(O)[
21 C@H](OC(=O)CC)[C@H](C)O3)[C@H](N(C)C)[C@H]2OC(C)=O)[C@H]1OC>>CCC(=O)O[C@
22 H]1[C@H](C)O[C@H](O[C@H]2[C@H](N(C)C)[C@H](OC(C)=O)[C@H](O[C@H]3[C@H]
23 [C@H](OC)[C@H](OC/C=C/c4ccc5ccccc5c4)CC(=O)O[C@H](C)C/C=C/C=C/[C@H](O[Si](C)(C)C(C)(C)
24 C)C)[C@H](C)C[C@H](CC(OC)OC)[C@H](O[C@H]2O[C@H](C)[C@H](O[C@H]3C[C@H](C)(O)[
25 C@H](OC(=O)CC)[C@H](C)O3)[C@H](N(C)C)[C@H]2OC(C)=O)[C@H]1OC>>CCC(=O)O[C@
26 H]1[C@H](C)O[C@H](O[C@H]2[C@H](N(C)C)[C@H](OC(C)=O)[C@H](O[C@H]3[C@H]
27 [C@H](OC)[C@H](OC/C=C/c4ccc5ccccc5c4)CC(=O)O[C@H](C)C/C=C/C=C/[C@H](O[Si](C)(C)C(C)(C)
28 C)C)[C@H](C)C[C@H](CC(OC)OC)[C@H](O[C@H]2O[C@H](C)[C@H](O[C@H]3C[C@H](C)(O)[
29 C@H](OC(=O)CC)[C@H](C)O3)[C@H](N(C)C)[C@H]2OC(C)=O)[C@H]1OC>>CCC(=O)O[C@
30 H]1[C@H](C)O[C@H](O[C@H]2[C@H](N(C)C)[C@H](OC(C)=O)[C@H](O[C@H]3[C@H]
31 [C@H](OC)[C@H](OC/C=C/c4ccc5ccccc5c4)CC(=O)O[C@H](C)C/C=C/C=C/[C@H](O[Si](C)(C)C(C)(C)
32 C)C)[C@H](C)C[C@H](CC(OC)OC)[C@H](O[C@H]2O[C@H](C)[C@H](O[C@H]3C[C@H](C)(O)[
33 C@H](OC(=O)CC)[C@H](C)O3)[C@H](N(C)C)[C@H]2OC(C)=O)[C@H]1OC>>CCC(=O)O[C@
34 H]1[C@H](C)O[C@H](O[C@H]2[C@H](N(C)C)[C@H](OC(C)=O)[C@H](O[C@H]3[C@H]
35 [C@H](OC)[C@H](OC/C=C/c4ccc5ccccc5c4)CC(=O)O[C@H](C)C/C=C/C=C/[C@H](O[Si](C)(C)C(C)(C)
36 C)C)[C@H](C)C[C@H](CC(OC)OC)[C@H](O[C@H]2O[C@H](C)[C@H](O[C@H]3C[C@H](C)(O)[
37 C@H](OC(=O)CC)[C@H](C)O3)[C@H](N(C)C)[C@H]2OC(C)=O)[C@H]1OC>>CCC(=O)O[C@
38 H]1[C@H](C)O[C@H](O[C@H]2[C@H](N(C)C)[C@H](OC(C)=O)[C@H](O[C@H]3[C@H]
39 [C@H](OC)[C@H](OC/C=C/c4ccc5ccccc5c4)CC(=O)O[C@H](C)C/C=C/C=C/[C@H](O[Si](C)(C)C(C)(C)
40 C)C)[C@H](C)C[C@H](CC(OC)OC)[C@H](O[C@H]2O[C@H](C)[C@H](O[C@H]3C[C@H](C)(O)[
41 C@H](OC(=O)CC)[C@H](C)O3)[C@H](N(C)C)[C@H]2OC(C)=O)[C@H]1OC>>CCC(=O)O[C@
42 H]1[C@H](C)O[C@H](O[C@H]2[C@H](N(C)C)[C@H](OC(C)=O)[C@H](O[C@H]3[C@H]
43 [C@H](OC)[C@H](OC/C=C/c4ccc5ccccc5c4)CC(=O)O[C@H](C)C/C=C/C=C/[C@H](O[Si](C)(C)C(C)(C)
44 C)C)[C@H](C)C[C@H](CC(OC)OC)[C@H](O[C@H]2O[C@H](C)[C@H](O[C@H]3C[C@H](C)(O)[
45 C@H](OC(=O)CC)[C@H](C)O3)[C@H](N(C)C)[C@H]2OC(C)=O)[C@H]1OC>>CCC(=O)O[C@
46 H]1[C@H](C)O[C@H](O[C@H]2[C@H](N(C)C)[C@H](OC(C)=O)[C@H](O[C@H]3[C@H]
47 [C@H](OC)[C@H](OC/C=C/c4ccc5ccccc5c4)CC(=O)O[C@H](C)C/C=C/C=C/[C@H](O[Si](C)(C)C(C)(C)
48 C)C)[C@H](C)C[C@H](CC(OC)OC)[C@H](O[C@H]2O[C@H](C)[C@H](O[C@H]3C[C@H](C)(O)[
49 C@H](OC(=O)CC)[C@H](C)O3)[C@H](N(C)C)[C@H]2OC(C)=O)[C@H]1OC>>CCC(=O)O[C@
50 H]1[C@H](C)O[C@H](O[C@H]2[C@H](N(C)C)[C@H](OC(C)=O)[C@H](O[C@H]3[C@H]
51 [C@H](OC)[C@H](OC/C=C/c4ccc5ccccc5c4)CC(=O)O[C@H](C)C/C=C/C=C/[C@H](O[Si](C)(C)C(C)(C)
52 C)C)[C@H](C)C[C@H](CC(OC)OC)[C@H](O[C@H]2O[C@H](C)[C@H](O[C@H]3C[C@H](C)(O)[
53 C@H](OC(=O)CC)[C@H](C)O3)[C@H](N(C)C)[C@H]2OC(C)=O)[C@H]1OC>>CCC(=O)O[C@
54 H]1[C@H](C)O[C@H](O[C@H]2[C@H](N(C)C)[C@H](OC(C)=O)[C@H](O[C@H]3[C@H]
55 [C@H](OC)[C@H](OC/C=C/c4ccc5ccccc5c4)CC(=O)O[C@H](C)C/C=C/C=C/[C@H](O[Si](C)(C)C(C)(C)
56 C)C)[C@H](C)C[C@H](CC(OC)OC)[C@H](O[C@H]2O[C@H](C)[C@H](O[C@H]3C[C@H](C)(O)[
57 C@H](OC(=O)CC)[C@H](C)O3)[C@H](N(C)C)[C@H]2OC(C)=O)[C@H]1OC>>CCC(=O)O[C@
58 H]1[C@H](C)O[C@H](O[C@H]2[C@H](N(C)C)[C@H](OC(C)=O)[C@H](O[C@H]3[C@H]
59 [C@H](OC)[C@H](OC/C=C/c4ccc5ccccc5c4)CC(=O)O[C@H](C)C/C=C/C=C/[C@H](O[Si](C)(C)C(C)(C)
60 C)C)[C@H](C)C[C@H](CC(OC)OC)[C@H](O[C@H]2O[C@H](C)[C@H](O[C@H]3C[C@H](C)(O)[
61 C@H](OC(=O)CC)[C@H](C)O3)[C@H](N(C)C)[C@H]2OC(C)=O)[C@H]1OC>>CCC(=O)O[C@
62 H]1[C@H](C)O[C@H](O[C@H]2[C@H](N(C)C)[C@H](OC(C)=O)[C@H](O[C@H]3[C@H]
63 [C@H](OC)[C@H](OC/C=C/c4ccc5ccccc5c4)CC(=O)O[C@H](C)C/C=C/C=C/[C@H](O[Si](C)(C)C(C)(C)
64 C)C)[C@H](C)C[C@H](CC(OC)OC)[C@H](O[C@H]2O[C@H](C)[C@H](O[C@H]3C[C@H](C)(O)[
65 C@H](OC(=O)CC)[C@H](C)O3)[C@H](N(C)C)[C@H]2OC(C)=O)[C@H]1OC>>CCC(=O)O[C@
66 H]1[C@H](C)O[C@H](O[C@H]2[C@H](N(C)C)[C@H](OC(C)=O)[C@H](O[C@H]3[C@H]
67 [C@H](OC)[C@H](OC/C=C/c4ccc5ccccc5c4)CC(=O)O[C@H](C)C/C=C/C=C/[C@H](O[Si](C)(C)C(C)(C)
68 C)C)[C@H](C)C[C@H](CC(OC)OC)[C@H](O[C@H]2O[C@H](C)[C@H](O[C@H]3C[C@H](C)(O)[
69 C@H](OC(=O)CC)[C@H](C)O3)[C@H](N(C)C)[C@H]2OC(C)=O)[C@H]1OC>>CCC(=O)O[C@
70 H]1[C@H](C)O[C@H](O[C@H]2[C@H](N(C)C)[C@H](OC(C)=O)[C@H](O[C@H]3[C@H]
71 [C@H](OC)[C@H](OC/C=C/c4ccc5ccccc5c4)CC(=O)O[C@H](C)C/C=C/C=C/[C@H](O[Si](C)(C)C(C)(C)
72 C)C)[C@H](C)C[C@H](CC(OC)OC)[C@H](O[C@H]2O[C@H](C)[C@H
```



245 C=C1C(=O)O[C@H]2[C@H]1C[C@@H](O)/C(C)=C/CC[C@@]1(C)O[C@@H]21.Oc1ccc(I)cc1>>C  
 /C1=C\CC[C@@]2(C)O[C@H]2[C@H]2OC(=O)/C(=C/c3ccc(O)cc3)[C@@H]2[C@H]1O  
 246 C=COCCOC=C.Fc1ccc(Br)cc1>>C=COCCOC(=C)c1ccc(F)cc1  
 247 C=CCC(CC(=C)Br)(C(=O)OCC)C(=O)OCC>>C=C1C=CCC(C(=O)OCC)(C(=O)OCC)C1  
 248 C=CC(=O)OC.O=C1C=CC2(C=C1)OC(=O)C(I)=C2c1cccc1>>COC(=O)/C=C/C1=C(c2cccc2)C2(C  
 =CC(=O)C=C2)OC1=O  
 249 C=CCC(OCC(=C)Br)c1ccc(OC)c(OC)c1>>C=C1COC(c2ccc(OC)c(OC)c2)CC1=C  
 C=C1C(=O)O[C@H]2[C@H]1CCC(=C)[C@@H]1C[C@H](OC(C)=O)C(=C)[C@H]21.CC(=O)Nc1c  
 250 cc(I)cc1C(F)(F)F>>C=C1CC[C@H]2/C(=C\c3ccc(NC(C)=O)c(C(F)(F)F)c3)C(=O)O[C@@H]2[C@H]  
 2C(=C)[C@@H](OC(C)=O)C[C@@H]12  
 251 COc1ccc(/C=C/C(=O)O/C(=C\I)c2cccc2)cc1>>COc1ccc(/C=C2\C=C(c3ccccc3)OC2=O)cc1  
 C=C.CCCCC(CC)COc1cc(/C=C/c2ccc(/C=C/c3ccc(/C=C/c4ccc(/C=C/c5ccc(I)cc5)cc4)cc3)cc2)c(OC  
 252 (CC)CCCC)cc1C>>C=Cc1ccc(/C=C/c2ccc(/C=C/c3ccc(/C=C/c4ccc(/C=C/c5cc(OC(CC)CCCC)c(C)c  
 c5OCC(CC)CCCC)cc4)cc3)cc2)cc1  
 253 C=C1C(=O)O[C@@H]2/C=C/C(\C)CC/C=C(\C)CC[C@@H]12.Nc1ccc(I)cn1>>C/C1=C\ [C@H]2OC(=O)  
 O)/C(=C/c3ccc(N)nc3)[C@@H]2CC/C(C)=C/CC1  
 254 C=CC(=O)OC.CC(=O)Oc1c(C/C=C(\C)CCC=C(C)C)cc(I)cc1C/C=C(\C)CCC=C(C)C>>COC(=O)/C=  
 C/c1cc(C/C=C(\C)CCC=C(C)C)c(OC(C)=O)c(C/C=C(\C)CCC=C(C)C)c1  
 255 C=C1C(=O)O[C@@H]2C3=C(C)C(=O)C=C[C@]3(C)CC[C@@H]12.Fc1ccc(I)cc1>>CC1=C2[C@H]  
 3OC(=O)/C(=C/c4ccc(F)cc4)[C@@H]3CC[C@@]2(C)C=CC1=O  
 256 C=CCC(OCC(=C)Br)c1cccc(Cl)c1>>C=C1COC(c2cccc(Cl)c2)CC1=C  
 C=Cc1ccc(/C=C/c2ccc(N(C)C)cc2OC)cc1.O=c1cc2oc3cc(O)c(F)cc3c(-c3ccc(I)cc3S(=O)(=O)O)c-  
 257 2cc1F>>COc1cc(N(C)C)ccc1/C=C/c1ccc(/C=C/c2ccc(-c3c4cc(F)c(=O)cc-  
 4oc4cc(O)c(F)cc34)c(S(=O)(=O)O)c2)cc1  
 258 C=C1C(=O)O[C@@H]2[C@@H](C)C(=O)C/C=C(\C)CC[C@@H]12.CSc1ccccc1I>>CSc1ccccc1/C  
 =C1/C(=O)O[C@@H]2[C@@H](C)C(=O)C/C=C(\C)CC[C@@H]12  
 259 C=CC(=O)OC.CC(=O)Oc1ccc(I)cc1C/C=C(\C)CC/C=C(\C)CCC=C(C)C>>COC(=O)/C=C/c1ccc(OC(  
 C)=O)c(C/C=C(\C)CC/C=C(\C)CCC=C(C)C)c1  
 260 C=C/C=C/C(C)C.CN1CCC[C@H]1COc1cncc(Br)c1>>CN1CCC[C@H]1COc1cncc(/C=C/C=C/C(C)  
 C)(C)C)c1  
 261 C=C1C(=O)O[C@H]2[C@H]1C[C@@H](O)/C(C)=C/CC[C@@]1(C)O[C@@H]21.Fc1ccccc1I>>C/  
 C1=C\CC[C@@]2(C)O[C@H]2[C@H]2OC(=O)/C(=C/c3ccccc3F)[C@@H]2[C@H]1O  
 262 C=C/C=C/C/CCCCC.Clc1ccc(I)cc1>>CCCCC/C=C/C=C/c1ccc(Cl)cc1  
 263 C=Cc1ccc(/C=C/c2ccc(N(c3ccccc3)c3ccccc3)cc2)cc1.O=Cc1ccc(Br)cc1>>O=Cc1ccc(/C=C/c2ccc(/C=  
 C/c3ccc(N(c4ccccc4)c4ccccc4)cc3)cc2)cc1  
 264 C=C1C(=O)O[C@H]2[C@H]1CC/C(C)=C/CC[C@@]1(C)O[C@@H]21.Ic1ccccc1>>C/C1=C\CC[C  
 @]2(C)O[C@H]2[C@H]2OC(=O)/C(=C/c3ccccc3)[C@@H]2CC1  
 265 Brc1ccsc1.C=CC(C)(O)CCC=C(C)C>>CC(C)=CCCC(C)(O)/C=C/c1ccsc1  
 266 C=Cc1ccc(C=C)cc1.O=[N+]( [O-] )c1ccc(Br)cc1>>C=Cc1ccc(/C=C/c2ccc([N+](=O)[O-])cc2)cc1  
 267 C=Cc1ccc(C(=C(c2ccccc2)c2ccccc2)c2ccccc2)cc1.CCCCN1C(=O)c2ccc3c(Br)ccc(c23)C1=O>>CCC  
 CN1C(=O)c2ccc3c(/C=C/c4ccc(C(=C(c5ccccc5)c5ccccc5)c5ccccc5)cc4)ccc(c23)C1=O  
 268 C=C[C@@H](C)[C@@H](O)C/C=C/C(=O)OC.FC(F)(F)c1ccc(I)cc1>>COC(=O)/C=C/C[C@H](O)[C  
 @H](C)/C=C/c1ccc(C(F)(F)F)cc1  
 269 C=Cc1ccccc1.CCCCCCCCOC1cc(/C=C/c2ccc(OC)cc2)c(OCCCCCCCC)cc1/C=C/c1ccc(Br)cc1>>CC  
 CCCCCCOC1cc(/C=C/c2ccc(OC)cc2)c(OCCCCCCCC)cc1/C=C/c1ccc(/C=C/c2ccccc2)cc1  
 270 C=CC(C)(O)CCC=C(C)C.COc1ccc(O)c(Br)c1>>COc1ccc(O)c(/C=C/C(C)(O)CCC=C(C)C)c1  
 271 C=C1C(=O)O[C@H]2[C@H]1CC/C(C)=C/CC[C@@]1(C)O[C@@H]21.FC(F)(F)c1cccc(I)c1>>C/C1  
 =C\CC[C@@]2(C)O[C@H]2[C@H]2OC(=O)/C(=C/c3ccc(C(F)(F)F)c3)[C@@H]2CC1  
 272 C=CC(=O)OC(C)C.CC/C=C/C=C/C1=C(Br)CCCC1>>CC(C)(C)OC(=O)/C=C/C1=C/C=C/C(C)  
 O)CCCC1  
 273 Brc1ccccc1.C=C1C(C)=NN=C2C=C(c3ccccc3)N(C(C)=O)N12>>CC(=O)N1C(c2ccccc2)=CC2=NN=  
 C(C)/C(=C/c3ccccc3)N21  
 C=Cc1ccc2c(c1)C(CCCCCCCC)(CCCCCCCC)c1cc(/C=C/c3ccc4c(c3)C(CCCCCCCC)(CCCCCCCC)c  
 3ccccc3-4)ccc1-2.CCCCCCCCC1(CCCCCCCC)c2cc(Br)ccc2-  
 274 c2ccc(C=O)cc21>>CCCCCCCCC1(CCCCCCCC)c2ccccc2-  
 c2ccc(/C=C/c3ccc4c(c3)C(CCCCCCCC)(CCCCCCCC)c3cc(/C=C/c5ccc6c(c5)C(CCCCCCCC)(CCCC  
 CCCC)c5cc(C=O)ccc5-6)ccc3-4)cc21  
 275 C=CCOC(C)(C)CCCC(C)C=C.COc1cc(I)ccc1O>>C=CC(C)CCCC(C)(C)OC/C=C/c1ccc(O)c(OC)c1  
 276 C=CC(OC(=C)Br)c1ccc2c(cen2COCC[Si](C)(C)C)c1>>C=C1COC(c2ccc3c(cen3COCC[Si](C)(C)C)  
 c2)C1=C

C=CCO[C@H]1CC(=O)O[C@H](C)C/C=C/C=C/[C@H](O[Si](C)(C)C(C)(C)C)[C@H](C)C[C@H]  
 (CC(OC)OC)[C@H](O[C@@H]2O[C@H](C)[C@@H](O[C@H]3C[C@@](C)(O)[C@@H](OC(=O)  
 CC)[C@H](C)O3)[C@H](N(C)C)[C@H]2OC(C)=O)[C@H]1OC.FC(F)(F)c1ccc(I)cc1>>CCC(=O)O[  
 C@H]1[C@H](C)O[C@@H](O[C@H]2[C@H](N(C)C)[C@@H](OC(C)=O)[C@H](O[C@@H]3[C@  
 @H](OC)[C@H](OC/C=C/c4ccc(C(F)(F)F)cc4)CC(=O)O[C@H](C)C/C=C/C=C/[C@H](O[Si](C)(C)  
 C(C)(C)C)[C@H](C)C[C@@H]13CC(OC)OC)O[C@@H]2C[C@@H](C)O11(C)O  
 C=CCO[C@H]1CC(=O)O[C@H](C)C/C=C/C=C/[C@H](O[Si](C)(C)C(C)(C)C)[C@H](C)C[C@H]  
 (CC(OC)OC)[C@H](O[C@@H]2O[C@H](C)[C@@H](O[C@H]3C[C@@](C)(O)[C@@H](OC(=O)  
 CC)[C@H](C)O3)[C@H](N(C)C)[C@H]2OC(C)=O)[C@H]1OC.COc1ccc(I)cc1>>CCC(=O)O[C@H]  
 1[C@H](C)O[C@@H](O[C@H]2[C@H](N(C)C)[C@@H](OC(C)=O)[C@H](O[C@@H]3[C@  
 @H](OC)[C@H](OC/C=C/c4ccc(OC)cc4)CC(=O)O[C@H](C)C/C=C/C=C/[C@H](O[Si](C)(C)C(C)(C)C)[  
 C@H](C)C[C@@H]13CC(OC)OC)O[C@@H]2C[C@@H](C)O11(C)O  
 C=Cc1ccc(/C=C/c2cc(OC)c(N(C)C)cc2OC)cc1.O=c1ccc2c(-c3ccc(I)cc3S(=O)(=O)O)c3ccc(O)cc3oc-  
 2c1>>COc1cc(N(C)C)c(OC)cc1/C=C/c1ccc(/C=C/c2ccc(-c3c4ccc(=O)cc-  
 4oc4cc(O)ccc34)c(S(=O)(=O)O)c2)cc1  
 C=CC(N)=O.CC[C@]12C=CCN3CC[C@]4(C(=C(C(=O)OC)C1)Nc1ccc(I)cc14)[C@@H]32>>CC[C  
 @]12C=CCN3CC[C@]4(C(=C(C(=O)OC)C1)Nc1ccc(/C=C/C(N)=O)cc14)[C@@H]32  
 C=CCC1c2cc(OC)c(OC)cc2CCN1CC(=C)I>>C=C1CC2c3cc(OC)c(OC)cc3CCN2CC1=C  
 C=C1C(=O)O[C@H]2[C@H]1CC/C(C)=C/CC[C@]1(C)O[C@@H]21.Nc1cccc(I)c1>>C/C1=C\CC[  
 C@@]2(C)O[C@H]2[C@H]2OC(=O)/C(=C/c3cccc(N)c3)[C@@H]2CC1  
 Brc1cccs1.C=CC(C)(O)CCC=C(C)C>>CC(C)=CCCC(C)(O)/C=C/c1cccs1  
 C=CC(C)(O)CCC=C(C)C.FC(F)(F)c1ccccc1Br>>CC(C)=CCCC(C)(O)/C=C/c1ccccc1C(F)(F)F  
 C=CC(=O)OCC.CC[C@]12C=CCN3CC[C@]4(C(=C(C(=O)OC)C1)Nc1ccc(I)cc14)[C@@H]32>>CC  
 OC(=O)/C=C/c1ccc2c(c1)[C@@]13CCN4CC=C[C@@](CC)(CC(C(=O)OC)=C1N2)[C@H]43  
 C=C1C(=O)O[C@H]2[C@H]1CCC(=C)[C@@H]1C[C@H](OC(C)=O)C(=C)[C@H]21.Clc1ccc(I)cc1  
 >>C=C1CC[C@H]2/C(=C\c3ccc(Cl)cc3)C(=O)O[C@@H]2[C@H]2C(=C)[C@@H](OC(C)=O)C[C@  
 C=Cc1ccc(/C=C/c2ccc(N(c3ccccc3)c3ccccc4ccccc34)cc2)cc1.O=Cc1ccc(Br)s1>>O=Cc1ccc(/C=C/c2cc  
 c(/C=C/c3ccc(N(c4ccccc4)c4ccccc5ccccc45)cc3)cc2)s1  
 C=CC(=C)C.COc1ccc(I)cc1>>C=C/C(C)=C/c1ccc(OC)cc1  
 C=Cc1ccc2c(c1)Sc1cc(/C=C/c3ccc4c(c3)Sc3ccccc3N4CCCCCCCC)ccc1N2CCCCCCCC.O=Cc1ccc(I)  
 cc1>>CCCCCCCCN1c2ccccc2Sc2cc(/C=C/c3ccc4c(c3)Sc3cc(/C=C/c5ccc(C=O)cc5)ccc3N4CCCCC  
 C)ccc21  
 C=CC(C)(O)CC/C=C(\C)CC/C=C(\C)CCC=C(C)C.Oc1ccc(OCc2ccccc2)cc1Br>>CC(C)=CCC/C(C)=  
 C/CC/C(C)=C/CCC(C)(O)/C=C/c1cc(OCc2ccccc2)ccc1O  
 C=C1C(=O)O[C@@H]2/C=C(\C)CC/C=C(\C)CC[C@H]12.Cc1cc(I)ccc1N>>C/C1=C\ [C@H]2OC(  
 =O)/C=C/c3ccc(N)c(C)c3)[C@@H]2CC/C(C)=C/CC1  
 C=COCCOC=C.O=Cc1ccc(Br)cc1>>C=COCCOC(=C)c1ccc(C=O)cc1  
 C=C[C@@H](C)[C@@H]1C/C=C/C(=O)N[C@H](Cc2ccc(OC)c(Cl)c2)C(=O)NCC(C)(C)C(=O)O[C  
 @H](CC(C)C)C(=O)O1.Ic1ccccc1>>COc1ccc(C[C@H]2NC(=O)/C=C/C[C@@H]([C@H](C)/C=C/  
 c3ccccc3)OC(=O)[C@H](CC(C)C)OC(=O)C(C)(C)CNC2=O)cc1Cl  
 C=CC1CC(OC)=CC(=O)O1.COc1ccc(I)cc1>>COC1=CC(=O)OC(/C=C/c2ccc(OC)cc2)C1  
 Brc1ccccc1.C=C1C(=O)O[C@@H]2C[C@@]3(C)CCCC(=C)[C@@H]3C[C@H]12>>C=C1CCC[C@  
 ]2(C)C[C@H]3OC(=O)/C(=C/c4ccccc4)[C@H]3C[C@@H]12  
 C=Cc1ccc(/C=C/c2cccn2C)cc1.O=Cc1ccc(Br)cc1>>Cn1ccccc1/C=C/c1ccc(/C=C/c2ccc(C=O)cc2)cc1  
 C=CC(C)(O)CCC=C(C)C.Fc1ccc(Br)cc1>>CC(C)=CCCC(C)(O)/C=C/c1ccc(F)cc1  
 C=Cc1ccc2c(c1)C(CCCCCC)C(CCCCCC)c1cc(/C=C/c3ccc(N(c4ccccc4)c4ccccc4)cc3)ccc1-  
 2.CCCCCCCCC1(CCCCCC)C2cc(Br)ccc2-  
 c2ccc(C=O)cc21>>CCCCCCCCC1(CCCCCC)C2cc(C=O)ccc2-  
 c2ccc(/C=C/c3ccc4c(c3)C(CCCCCC)C(CCCCCC)c3cc(/C=C/c5ccc(N(c6ccccc6)c6ccccc6)cc5)cc  
 c3-4)cc21  
 C=C/C=C/C(=O)N(CCCC)CCCC.CC(C)(C)c1ccc(Br)cc1>>CCCCN(CCCC)C(=O)/C=C/C=C/c1ccc(C  
 (C)(C)C)cc1  
 C=C(C)CC(OC(=C)Br)c1ccccc(OC)c1>>C=C1C=C(C)CC(c2ccccc(OC)c2)OC1  
 C=C1C(=O)O[C@@H]2CC(C)=C([C@@H](C)CCOC(C)=O)[C@@H](OC(C)=O)[C@H]12.COc1c  
 cc(I)cc1>>COc1ccc(/C=C2/C(=O)O[C@@H]3CC(C)=C([C@@H](C)CCOC(C)=O)[C@@H](OC(C)  
 =O)[C@H]23)cc1  
 C=CC1(C)CCC(=O)C1.COC(=O)c1ccccc1/C=C\C=C=CI>>COC(=O)c1ccccc1/C=C\C=C\C=C\C1(C)CC  
 C(=O)C1  
 C=C1C(=O)O[C@H]2[C@H]1C[C@@H](O)/C(C)=C/CC[C@]1(C)O[C@@H]21.COc1ccccc(I)c1>>  
 COc1ccccc(/C=C2/C(=O)O[C@H]3[C@H]2C[C@@H](O)/C(C)=C/CC[C@]2(C)O[C@@H]32)c1  
 C=C1C(=O)O[C@@H]2C[C@@]3(C)CCCC(=C)[C@@H]3C[C@H]12.COc1cncc(Br)c1>>C=C1CC  
 C[C@]2(C)C[C@H]3OC(=O)/C(=C/c4cncc(OC)c4)[C@H]3C[C@@H]12

305 Cc1ccc(/C=C/C(=O)O/C(=C\I)c2ccccc2)cc1>>Cc1ccc(/C=C2\C=C(c3ccccc3)OC2=O)cc1  
306 C=Cc1ccc(C(=C(c2ccccc2)c2ccccc2)c2ccccc2)cc1.CCCCN1C(=O)c2cccc3cc(Br)cc(c23)C1=O>>CCC  
CN1C(=O)c2cccc3cc(/C=C/c4ccc(C(=C(c5ccccc5)c5ccccc5)c5ccccc5)cc4)cc(c23)C1=O  
307 C=C1C(=O)O[C@H]2[C@H]1CC/C(C)=C/CC[C@@]1(C)O[C@@H]21.Nc1ccc(I)cc1>>C/C1=C\CC[C@  
C@@]2(C)O[C@H]2[C@H]2OC(=O)/C(=C/c3ccc(N)cc3)[C@@H]2CC1  
308 C=Cc1ccc(/C=C/c2ccc(N)cc2)cc1.O=C(ON1C(=O)CCC1=O)c1ccc(I)cc1>>Nc1ccc(/C=C/c2ccc(/C=C/  
c3ccc(C(=O)ON4C(=O)CCC4=O)cc3)cc2)cc1  
309 C=C/C=C/c1ccccc1.FC(F)(F)C(F)(F)C(F)(F)C(F)(F)C(F)(F)Br>>FC(F)(F)C(F)(F)C(F)(F)C(F)(F)  
(F)C(F)(F)C(F)(F)/C=C/C=C/c1ccccc1  
310 C=CC(=O)N1N=Cc2ccccc2C1C=C(C)C.CCc1nc(N)nc(N)c1Cc1cc(I)c(OC)c(OC)c1>>CCc1nc(N)nc(N)  
)c1Cc1cc(/C=C/C(=O)N2N=Cc3ccccc3C2C=C(C)C)c(OC)c(OC)c1  
311 C=Cc1ccc(/C=C/c2ccc([N+](=O)[O-]  
312 )cc2)cc1.O=Cc1ccc(Br)cc1>>O=Cc1ccc(/C=C/c2ccc(/C=C/c3ccc([N+](=O)[O-])cc3)cc2)cc1  
313 C=C/C=C/C(=O)N(CCCC)CCCC.Cc1ccc(Br)cc1>>CCCCN(CCCC)C(=O)/C=C/C=C/c1ccc(C)cc1  
314 C=C1C(=O)O[C@H]2[C@H]1CC/C(C)=C/CC[C@@]1(C)O[C@@H]21.COC(=O)c1c(F)cccc1I>>CO  
C(=O)c1c(F)cccc1/C=C1/C(=O)O[C@H]2[C@H]1CC/C(C)=C/CC[C@@]1(C)O[C@@H]21  
315 C=C1C(=O)O[C@@H]2[C@@]3(C)CCCC(=C)[C@@H]3[C@H]12.COc1ccc(Br)cn1>>C=C1CC  
C[C@]2(C)C[C@H]3OC(=O)/C(=C/c4ccc(OC)nc4)[C@H]3[C@H]12.COc1ccc(Br)cn1>>C=C1CC  
316 C[C@]2(C)C[C@H]3OC(=O)/C(=C/c4ccc(OC)nc4)[C@H]3[C@H]12.COc1ccc(Br)cn1>>C=C1CC  
C[C@]2(C)C[C@H]3OC(=O)/C(=C/c4ccc(OC)nc4)[C@H]3[C@H]12.COc1ccc(Br)cn1>>C=C1CC  
317 C[C@]2(C)C[C@H]3OC(=O)/C(=C/c4ccc(OC)nc4)[C@H]3[C@H]12.COc1ccc(Br)cn1>>C=C1CC  
C[C@]2(C)C[C@H]3OC(=O)/C(=C/c4ccc(OC)nc4)[C@H]3[C@H]12.COc1ccc(Br)cn1>>C=C1CC  
318 C=C1C(=O)O[C@H]2[C@H]1CC/C(C)=C/CC[C@@]1(C)O[C@@H]21.FC(F)(F)c1ccc(I)cc1>>C/C1  
=C\CC[C@@]2(C)O[C@H]2[C@H]2OC(=O)/C(=C/c3ccc(C(F)(F)F)cc3)[C@@H]2CC1  
319 C=CC1CC(OC)=CC(=O)O1.Ic1ccccc1>>COC1=CC(=O)OC(/C=C/c2ccccc2)C1  
320 C=C/C=C/c1ccccc1.COc1ccc(OC(C)=O)c1c1>>COc1ccc(OC(C)=O)c(/C=C/C=C/c2ccccc2)c1  
321 Bre1cencel.C=C/C=C/C(=O)N(CCCC)CCCC>>CCCCN(CCCC)C(=O)/C=C/C=C/c1cencel  
322 C=Cc1ccc(/C=C/c2ccc(N(C)C)cc2OC)cc1.CC1(C)C2=CC(=O)C(F)=CC2=C(c2ccc(Br)cc2S(=O)(=O)  
323 O)c2cc(F)c(O)cc21>>COc1cc(N(C)C)ccc1/C=C/c1ccc(/C=C/c2ccc(C3=C4C=C(F)C(=O)C=C4C(C)(C)  
)c4cc(O)c(F)cc43)c(S(=O)(=O)O)c2cc1  
324 C=CC(=O)N1CC(=Cc2nccs2)C1.CC(C)(C)OC(=O)N1CC(=O)Nc2ncc(Br)cc2C1>>CC(C)(C)OC(=O)  
325 N1CC(=O)Nc2ncc(/C=C/C(=O)N3CC(=Cc4nccs4)C3)cc2C1  
326 C=CC(C)(O)CCC=C(C)C.COc1ccc(Br)cc1>>COc1ccc(/C=C/C(C)(O)CCC=C(C)C)cc1  
327 C=C1C(=O)O[C@H]2[C@H]1CCC(=C)[C@@H]1C[C@H](OC(C)=O)C(=C)[C@H]21.COC(=O)c1c  
328 cc(I)cc1>>C=C1CC[C@H]2/C(=C\c3ccc(C(=O)OC)cc3)C(=O)O[C@H]2[C@H]2C(=C)[C@@H](O  
329 C(C)=O)C[C@@H]12  
330 C=Cc1ccc(N(c2ccc(/C=C/c3ccc(S(=O)(=O)C(F)(F)F)cc3)cc2)c2ccc(/C=C/c3ccc(S(=O)(=O)C(F)(F)F)c  
331 c3)cc2)cc1.O=S(=O)(CCO)c1ccc(Br)cc1>>O=S(=O)(CCO)c1ccc(/C=C/c2ccc(N(c3ccc(/C=C/c4ccc(S  
332 =O)(=O)C(F)(F)F)cc4)cc3)c3ccc(/C=C/c4ccc(S(=O)(=O)C(F)(F)F)cc4)cc3)cc2)cc1  
333 Bre1ccccc1.C=CC1CC2C=CC1C2>>C1=CC2CC1CC2/C=C/c1ccccc1  
334 C=Cc1ccc(C=C)cc1.CCCCCCc1cc(/C=C/c2ccc(/C=C/c3ccc(CCCCCC)c(/C=C/c4ccc(/C=C/c5cc(CCCC  
335 CC)c(/C=C/c6ccc(C)cc6)cc5CCCCC)cc4)cc3CCCCC)cc2)c(CCCCCC)cc1Br>>C=Cc1ccc(/C=C/c2  
336 cc(CCCCCC)c(/C=C/c3ccc(/C=C/c4cc(CCCCCC)c(/C=C/c5ccc(/C=C/c6cc(CCCCCC)c(/C=C/c7ccc(C  
337 )cc7)cc6CCCCC)cc5)cc4CCCCC)cc3)cc2CCCCC)cc1  
338 C=Cc1ccc(C=C)cc1.N#Cc1ccc(Br)cc1>>C=Cc1ccc(/C=C/c2ccc(C#N)cc2)cc1  
339 C=C/C=C\C(CCCC)OCC.Cc1cccc(I)c1>>CCCC/C(=C\C=C\c1ccccc(C)c1)OCC  
340 C=C1C(=O)O[C@H]2[C@H]1CC/C(C)=C/CC[C@@]1(C)O[C@@H]21.Ic1cccs1>>C/C1=C\CC[C@  
341 @]2(C)O[C@H]2[C@H]2OC(=O)/C(=C/c3cccs3)[C@@H]2CC1  
342 Bre1ccc2[nH]ccc2c1.C=CCOC1=C(C)C(=O)O[C@H](CC)[C@@](C)(O)C=C(C)C(=O)[C@H](C)C[C  
343 @](C)(OC)[C@H](O)[C@@H]2O[C@H](C)C[C@H](N(C)C)[C@H]2OC(C)=O)[C@H]1C>>CC[C@  
344 @H]1OC(=O)C(C)=C(OC/C=C/c2ccc3[nH]ccc3c2)[C@H](C)[C@@H](O[C@@H]2O[C@H](C)C[C@  
345 @H](N(C)C)[C@H]2OC(C)=O)[C@]1(C)(OC)C[C@@H](C)C(=O)C(C)=C[C@]1(C)O  
346 C=CC1CC(OC)=CC(=O)O1.Fc1ccc(I)cc1>>COC1=CC(=O)OC(/C=C/c2ccc(F)cc2)C1  
347 C=C/C=C/C(=O)N(CCCC)CCCC.Clc1ccc(Br)cc1>>CCCCN(CCCC)C(=O)/C=C/C=C/c1ccc(Cl)cc1  
348 C=CC(=O)N1N=Cc2ccccc2C1C=C(C)C.CCOc1cc(Cc2cnc(N)nc2N)cc(I)c1OCC>>CCOc1cc(Cc2cnc(  
349 N)nc2N)cc(/C=C/C(=O)N2N=Cc3ccccc3C2C=C(C)C)c1OCC  
350 C=Cc1ccc(/C=C/c2ccc(N(c3ccc(OCCCCC)cc3)c3ccc(OCCCCC)cc3)cc2)cc1.O=Cc1ccc(Br)s1>>C  
351 CCCCCOc1ccc(N(c2ccc(/C=C/c3ccc(C=C/c4ccc(C=O)s4)cc3)cc2)c2ccc(OCCCCC)cc2)cc1  
352 C=Cc1ccc(/C=C/c2ccc(N(c3ccccc3)c3ccc4ccccc34)cc2)cc1.O=Cc1ccc(Br)cc1>>O=Cc1ccc(/C=C/c2c  
353 cc(/C=C/c3ccc(N(c4ccccc4)c4ccccc5ccccc45)cc3)cc2)cc1  
354 C=Cc1ccccc1.CCCCCCCCOc1cc(/C=C/c2ccc([N+](=O)[O-]  
355 )cc2)c(OCCCCCCCC)cc1/C=C/c1ccc(Br)cc1>>CCCCCCCCCOc1cc(/C=C/c2ccc([N+](=O)[O-]  
356 )cc2)c(OCCCCCCCC)cc1/C=C/c1ccc(/C=C/c2ccccc2)cc1  
357 Bre1ccse1.C=C/C=C/C(=O)N(CCCC)CCCC>>CCCCN(CCCC)C(=O)/C=C/C=C/c1ccse1

338 C=CCC(OCC(=C)Br)c1cccc1>>C=C1COC(c2cccc2)CC1=C  
339 C=CCCCC(O)C=C(Br)c1ccc(C)cc1>>C=C1CCCC(O)C=C1c1ccc(C)cc1  
340 C=CCN(C)C(=O)C1(CC(=C)Br)CC/C(=C\c2cccc2)C1=O>>C=C1CN(C)C(=O)C2(CC/C(=C\c3cccc  
3)C2=O)CC1=C  
341 C=CC(OCC(=C)Br)c1cccc(OC)c1>>C=C1COC(c2cccc(OC)c2)C1=C  
342 C=Cc1ccc(/C=C/c2ccc(N(C)C)cc2)cc1.CC1(C)C2=CC(=O)C(F)=CC2=C(c2ccc(Br)cc2S(=O)(=O)O)c2  
343 cc(F)c(O)cc21>>CN(C)c1ccc(/C=C/c2ccc(/C=C/c3ccc(C4=C5C=C(F)C(=O)C=C5C(C)(C)c5cc(O)c(F)  
cc54)c(S(=O)(=O)O)c3)cc2)cc1  
344 C=C/C=C/C(=O)N(CCCC)CCCC.Clc1cccc(Br)c1>>CCCCN(CCCC)C(=O)/C=C/C=C/c1cccc(Cl)c1  
345 C=C/C=C/C(=O)N(CCCC)CCCC.COc1cc(Br)cc(OC)c1>>CCCCN(CCCC)C(=O)/C=C/C=C/c1cc(OC)  
346 cc(OC)c1  
347 C=C/C=C/C(=O)N(CCCC)CCCC.COc1ccc(Br)cc1>>CCCCN(CCCC)C(=O)/C=C/C=C/c1ccc(OC)cc1  
348 C=CNC(=O)/C=C/c1cccc1.O=S(=O)(Oc1ccc2cccc2c1)C(F)(F)F>>C=C(NC(=O)/C=C/c1cccc1)c1c  
349 cc2cccc2c1  
350 C=CC(OCC(=C)Br)c1cccc(Cl)c1>>C=C1COC(c2cccc(Cl)c2)C1=C  
351 C=Cc1ccc(/C(=C(c2cccc2)C2CCC2)c2ccc3c(c2)c(F)nn3C2CCCCO2)cc1.Ic1ccnc1>>Fc1nn(C2CCC  
CO2)c2ccc(/C(=C/c3cccc3)C3CCC3)c3ccc(/C=C/c4ccnc4)cc3)cc12  
352 C=C.CCCCC(C)COc1cc(/C=C/c2ccc(/C=C/c3ccc(Br)cc2)c(OC(C)CCCC)cc1C>>C=Cc1ccc(/  
C=C/c2ccc(/C=C/c3ccc(OC(C)CCCC)c(C)cc3OC(C)CCCC)cc2)cc1  
353 C=CCO[C@H]1CC(=O)O[C@H](C)C/C=C/C=C/[C@H](O[Si](C)(C)C(C)(C)C)[C@H](C)C[C@H]  
(CC(OC)OC)[C@H](O[C@H]2O[C@H](C)[C@H](O[C@H]3C[C@H](O)[C@H](OC(=O)  
354 CC)[C@H](C)O3)[C@H](N(C)C)[C@H]2OC(C)=O)[C@H]1OC.Fc1ccc(I)cc1>>CCC(=O)O[C@H]1[  
C@H](C)O[C@H](O[C@H]2[C@H](N(C)C)[C@H](OC(C)=O)[C@H](O[C@H]3[C@H](O  
C)[C@H](OC/C=C/c4ccc(F)cc4)CC(=O)O[C@H](C)C/C=C/C=C/[C@H](O[Si](C)(C)C(C)(C)C)[C@  
H](C)C[C@H]1C@H13CC(OC)OC[C@H]1C@H12C@H1C@H11(C)O  
355 C=Cc1cccc1.CCCCCCCCOC1cc(/C=C/c2ccc(Br)cc2)c(OCCCCCCCC)cc1/C=C/c1cccc1>>CCCC  
CCCCOc1cc(/C=C/c2ccc(/C=C/c3cccc3)cc2)c(OCCCCCCCC)cc1/C=C/c1cccc1  
356 C=C1C(=O)O[C@H]2/C=C(C)CC/C=C(C)CC[C@H]12.Ic1cccc1>>C/C1=C/[C@H]2OC(=O)/  
357 C(=C/c3cccc3)[C@H]2CC/C(C)=C/CC1  
358 C=CCC1C=Cc2ccnc2N1C(=O)Oc1cccc1.CCOC(=O)CC(c1ccc(OC)nc1)c1nc(Br)cs1>>CCOC(=O)C  
359 C(c1ccc(OC)nc1)c1nc(/C=C/CC2C=Cc3ccnc3N2C(=O)Oc2cccc2)cs1  
360 C=CC(=O)N1N=Cc2cccc2C1C=C(C)C.COc1cc(C(=O)c2cnc(N)nc2N)cc(I)c1OC>>COc1cc(C(=O)c2  
361 cnc(N)nc2N)cc(/C=C/C(=O)N2N=Cc3cccc3C2C=C(C)C)c1OC  
362 C=C[C@H](C)[C@H](C/C=C/C(=O)OC(C)(C)O[Si](C)(C)C(C)(C)C.Ic1cccc1>>C[C@H](/C=C  
/c1cccc1)[C@H](C/C=C/C(=O)OC(C)(C)O[Si](C)(C)C(C)(C)C  
363 C=COCCOC=C.N#Cc1ccc(Br)cc1>>C=COCCOC(=C)c1ccc(C#N)cc1  
364 Cc1ccc(/C=C/C(=O)O/C(=C)I)C2CC2)cc1>>Cc1ccc(/C=C2\C=C(C3CC3)OC2=O)cc1  
365 C=CCOCC/C=C\CC.COc1cc(Br)ccc1O>>CC/C=C\CCOC/C=C/c1ccc(O)c(OC)c1  
366 C=CCC1c2[nH]c3cccc3c2CCN1CC(=C)I>>C=C1CC2c3[nH]c4cccc4c3CCN2CC1=C  
367 C=C/C=C/C(=O)OC.COc1c(CN(C(=O)C2CC2)c2cccc(Br)c2)ccc2c1OC(C)(C)C=C2>>COC(=O)/C=C  
368 /C=C/c1cccc(N(Cc2ccc3c(c2OC)OC(C)(C)C=C3)C(=O)C2CC2)c1  
369 C=C1C(=O)O[C@H]2[C@H]1C[C@H](O)/C(C)=C/CC[C@H]1(C)O[C@H]21.COc1cccc1I>>C  
370 Oc1cccc1/C=C1/C(=O)O[C@H]2[C@H]1C[C@H](O)/C(C)=C/CC[C@H]1(C)O[C@H]21  
371 C=CCOC(=O)/C=C/c1ccc(OC(C)=O)c(OC(C)=O)c1.Fc1ccc(I)cc1>>CC(=O)Oc1ccc(/C=C/C(=O)OC/  
C=C/c2ccc(F)cc2)cc1OC(C)=O  
C=C1C(=O)O[C@H]2[C@H]1CCC(=C)[C@H]1C[C@H](OC(C)=O)C(=C)[C@H]21.Cc1ccc(I)cc1[  
N+](=O)[O-]>>C=C1CC[C@H]2/C(=C\c3ccc(C)c([N+](=O)[O-]  
3)C(=O)O[C@H]2[C@H]2C(=C)[C@H](OC(C)=O)C[C@H]12  
364 C=CCC[C@H](C=C)COc1cccc1Br>>C=CCC[C@H]1COc2cccc2C1=C  
365 C=CC[C@H](OCc1cccc1)[C@H](OCc1cccc1)[C@H](/C=C/C[C@H](C)O[Si](C)(C)C(C)(C)C)O  
366 COC.COc1cc2c(c(OS(=O)(=O)C(F)(F)F)c1)C(=O)OC(C)(C)O2>>COCO[C@H](/C=C/C[C@H](C)O[  
Si](C)(C)C(C)(C)C)[C@H](OCc1cccc1)[C@H](C/C=C/c1cc(OC)cc2c1C(=O)OC(C)(C)O2)OCc1c  
367 C=Cc1ccc(C=C)cc1.COc1ccc(Br)cc1>>C=Cc1ccc(/C=C/c2ccc(OC)cc2)cc1  
368 C=Cc1ccc(/C=C/c2ccc(/C=C/c3ccc(OC(C)CCCC)cc(OC(C)CCCC)c3)cc2)cc1.CCCCCCOc1ccc2cc(Br)ccc  
2c1>>CCCCCOc1cc(/C=C/c2ccc(/C=C/c3ccc(/C=C/c4ccc5cc(OC(C)CCCC)ccc5c4)cc3)cc2)cc(OC(C)  
369 C=Cc1ccc(N(c2ccc(OC)cc2)c2ccc(OC)cc2)cc1.CC(C)(C)c1ccc(/C=C/c2ccc(/C=C/c3ccc(Br)cc3)cc2)cc  
1>>COc1ccc(N(c2ccc(/C=C/c3ccc(/C=C/c4ccc(/C=C/c5ccc(C(C)(C)C)cc5)cc4)cc3)cc2)c2ccc(OC)cc2)  
370 C=CC(O)(CO)CCC=C(C)C.COc1ccc(OC)c(Br)c1>>COc1ccc(OC)c(/C=C/C(O)(CO)CCC=C(C)C)c1  
371 C=CC(=O)N1N=Cc2cccc2C1C=C(C)C.COc1cc(Cc2c(C)nc(N)nc2N)cc(I)c1OC>>COc1cc(Cc2c(C)nc  
(N)nc2N)cc(/C=C/C(=O)N2N=Cc3cccc3C2C=C(C)C)c1OC  
C=C1C(=O)O[C@H]2[C@H]1CCC(=C)[C@H]1C[C@H](OC(C)=O)C(=C)[C@H]21.Cc1cccc1I>>  
C=C1CC[C@H]2/C(=C\c3cccc3)C(=O)O[C@H]2[C@H]2C(=C)[C@H](OC(C)=O)C[C@H]

372 C=C1C(=O)O[C@@H]2/C=C(\C)CC/C=C(\C)CC[C@@H]12.O=[N+](O-  
 373 )c1ccccc1I>>C/C1=C\[C@H]2OC(=O)/C(=C/c3ccccc3[N+](=O)[O-])[C@@H]2CC/C(C)=C/CC1  
 374 C=COCCOC=C.CC(=O)c1ccc(Br)cc1>>C=COCCOC(=C)c1ccc(C(C)=O)cc1  
 375 C=C[C@](C)(CCC=C(C)C)CO[Si](c1ccccc1)(c1ccccc1)C(C)(C)C.COc1ccc(I)cc1>>COc1ccc(/C=C/[C  
@](C)(CCC=C(C)C)CO[Si](c2ccccc2)(c2ccccc2)C(C)(C)C)cc1  
C=CS(=O)(=O)N(CC(=C)Br)Cc1ccccc1>>C=C1C=CS(=O)(=O)N(Cc2ccccc2)C1
