# Supplementary material for: Heck reaction prediction using a transformer model based on a transfer learning strategy
Source: Royal Society of Chemistry journal article supplement (doi:10.1039/d0cc02657c), 2020-01-01
Supplement: d0cc02657c1.zip [file d0cc02657c1.zip]

**Table S5C. Intermolecular Heck reaction dataset divided into validation dataset in our research for transformer-baseline and transformer-transfer learning models (Dataset for validation in experiment 1)**

| Reaction ID | Reaction SMILES                                                                                                                                                                                                                              |
|-------------|----------------------------------------------------------------------------------------------------------------------------------------------------------------------------------------------------------------------------------------------|
| 1           | <chem>C=C[C@@H](C)[C@H]1CC[C@H]2[C@@H]3CC(=O)[C@H]4C[C@H](O)CC[C@]4(C)[C@H]3CC[C@]21C.Ic1cccc2ccccc12&gt;&gt;C[C@H](/C=C/c1cccc2ccccc12)[C@H]1CC[C@H]2[C@@H]3CC(=O)[C@H]4C[C@H](O)CC[C@]4(C)[C@H]3CC[C@]21C</chem>                           |
| 2           | <chem>C=CCOc1cccc1C(C)(C)C.Ic1cccs1&gt;&gt;CC(C)(C)c1cccc1OC/C=C/c1cccs1</chem>                                                                                                                                                              |
| 3           | <chem>C=CC(=O)OC.C[C@H](NC(=O)OC(C)(C)C)c1nc(/C=C\Br)cs1&gt;&gt;COC(=O)/C=C/C=Cc1csc([C@@H](C)NC(=O)OC(C)(C)C)n1</chem>                                                                                                                      |
| 4           | <chem>C=CS(=O)(=O)N1CCC2(CC1)N=C(C1CCCCC1)NC2=O.CC(=O)Nc1cc(C)c(Br)c(C)c1&gt;&gt;CC(=O)Nc1cc(C)c(/C=C/S(=O)(=O)N2CCC3(CC2)N=C(C2CCCCC2)NC3=O)c(C)c1</chem>                                                                                   |
| 5           | <chem>C=CC(C)(C)C(=O)O.CC(=O)O[C@H](C)c1ccc2ccc(Br)cc2n1&gt;&gt;CC(=O)O[C@H](C)c1ccc2ccc(/C=C/C(C)(C)C(=O)O)cc2n1</chem>                                                                                                                     |
| 6           | <chem>Br1cnc(NCc2ccccc2)c2ccccc12.C=CC(C)=O&gt;&gt;CC(=O)/C=C/c1cnc(NCc2ccccc2)c2ccccc12</chem>                                                                                                                                              |
| 7           | <chem>COc1ccc(I)cc1.Cc1ccc(S(=O)(=O)/C=C2/C(F)(F)C23CCCCC3)cc1&gt;&gt;COc1ccc(/C(=C2/C(F)(F)C23CCCC3)S(=O)(=O)c2ccc(C)cc2)cc1</chem>                                                                                                         |
| 8           | <chem>C=C[C@H]1O[C@H](OC)[C@H](OCc2ccccc2)[C@@H](OCc2ccccc2)[C@H]1OCc1ccc2ccccc2c1.O=c1cc(-c2ccccc2)oc2cc(Br)ccc12&gt;&gt;CO[C@H]1O[C@H](/C=C/c2ccc3c(=O)cc(-c4ccccc4)oc3c2)[C@@H](OCc2ccc3ccccc3c2)[C@H](OCc2ccccc2)[C@H]1OCc1ccccc1</chem> |
| 9           | <chem>C=CC(=O)N(C)Cc1cc2ccccc2n1C.CC(C)(C)OC(=O)N1CC(=O)Nc2cc(Br)cnc21&gt;&gt;CN(Cc1cc2ccccc2n1C)C(=O)/C=C/c1cnc2c(c1)NC(=O)CN2C(=O)OC(C)(C)C</chem>                                                                                         |
| 10          | <chem>C=CC(=O)OC.FC(F)(F)CCCOc1ccc(OC(F)(F)c2ccc(Br)cc2)cc1&gt;&gt;COC(=O)/C=C/c1ccc(C(F)(F)Oc2cc(OC(F)(F)F)cc2)cc1</chem>                                                                                                                   |
| 11          | <chem>Br1cncnc1.C=CC(=O)OC&gt;&gt;COC(=O)/C=C/c1cncnc1</chem>                                                                                                                                                                                |
| 12          | <chem>C=CC(=O)OCC.Cc1sc2nc(COc3ccc(F)cc3)cc(=O)n2c1Br&gt;&gt;CCOC(=O)/C=C/c1c(C)sc2nc(COc3ccc(F)cc3)cc(=O)n12</chem>                                                                                                                         |
| 13          | <chem>C=Cc1ccccc1.COC(=O)/C=C/c1ccc(Br)cc1&gt;&gt;COC(=O)/C=C/c1ccc(/C=C/c2ccccc2)cc1</chem>                                                                                                                                                 |
| 14          | <chem>C=C1CCOC1=O.O=C(Nc1cccc(I)c1)C(F)(F)F&gt;&gt;O=C1OCC/C1=C/c1cccc(NC(=O)C(F)(F)F)c1</chem>                                                                                                                                              |
| 15          | <chem>C=CP(=O)(OCC)OCC.O=[N+](O-)[C-]1cccc1Br&gt;&gt;CCOP(=O)/C=C/c1cccc1[N+](=O)[O-]OCC</chem>                                                                                                                                              |
| 16          | <chem>C=Cc1ccccc1.Cn1c(/C=C/c2ccccc2)c(I)c(=O)c2ccccc21&gt;&gt;Cn1c(/C=C/c2ccccc2)c(/C=C/c2ccccc2)c(=O)c2ccccc21</chem>                                                                                                                      |
| 17          | <chem>Br1ccccc1.C=CCOc1cccc1C&gt;&gt;Cc1ccccc1OC/C=C/c1ccccc1</chem>                                                                                                                                                                         |
| 18          | <chem>Br1ccccc1.C=CCCCCCC&gt;&gt;CCCCC/C=C/c1ccccc1</chem>                                                                                                                                                                                   |
| 19          | <chem>C=CC(=O)OC.COc1cc(Br)c2c3c1O[C@@H]1[C@]34CCN(C)[C@H](C2)[C@]42C=C[C@@]1(OC)[C@H]1C(=O)NC(=O)[C@H]12&gt;&gt;COC(=O)/C=C/c1cc(OC)c2c3c1C[C@H]1N(C)CC[C@@]34[C@@H](O2)[C@@]2(OC)C=C[C@@]14[C@@H]1C(=O)NC(=O)[C@@H]12</chem>               |
| 20          | <chem>C=CCN1C(=O)C(=O)c2ccccc21.FC(F)(F)c1cc(Br)ccc1Cl&gt;&gt;O=C1C(=O)N(C/C=C/c2ccc(Cl)c(C(F)(F)F)c2)c2ccccc21</chem>                                                                                                                       |
| 21          | <chem>C=CC(F)(F)F.Clc1ccccc1Br&gt;&gt;FC(F)(F)/C=C/c1ccccc1Cl</chem>                                                                                                                                                                         |
| 22          | <chem>C=CP(=O)(OCC)OCC.COc1nc2ccc(Br)cc2nc1OC&gt;&gt;CCOP(=O)/C=C/c1ccc2nc(OC)c(OC)nc2c1)OC</chem>                                                                                                                                           |
| 23          | <chem>Br1cccc2ccccc12.C=CC(=O)OC&gt;&gt;COC(=O)/C=C/c1cccc2ccccc12</chem>                                                                                                                                                                    |
| 24          | <chem>C=CC(=O)O.COc1ccc([I+])c2ccccc2)cc1&gt;&gt;COc1ccc(/C=C/C(=O)O)cc1</chem>                                                                                                                                                              |
| 25          | <chem>C=CCN(C(=O)OC(C)(C)C)C(=O)OC(C)(C)C.COc1ccc(Br)cc1&gt;&gt;COc1ccc(/C=C/CN(C(=O)OC(C)(C)C)C(=O)OC(C)(C)C)cc1</chem>                                                                                                                     |
| 26          | <chem>C=CC(=O)OC.Cc1c(C)c(C)c(I)c(C)c1C&gt;&gt;COC(=O)/C=C/c1c(C)c(C)c(C)c(C)c1C</chem>                                                                                                                                                      |
| 27          | <chem>C=C[Si](C)(C)C.Ic1ccc[se]1&gt;&gt;C[Si](C)(C)/C=C/c1ccc[se]1</chem>                                                                                                                                                                    |
| 28          | <chem>C=CC(=O)OC(C)(C)C.Nc1ccc(Br)cn1&gt;&gt;CC(C)(C)OC(=O)/C=C/c1ccc(N)nc1</chem>                                                                                                                                                           |
| 29          | <chem>C=CC(=O)OCC.Fc1ccc(Cl)cc1&gt;&gt;CCOC(=O)/C=C/c1ccc(F)cc1</chem>                                                                                                                                                                       |
| 30          | <chem>C=CC(=O)O.Cc1cccc(S(=O)(=O)Nc2ccccc(I)c2)c1&gt;&gt;Cc1cccc(S(=O)(=O)Nc2ccccc(/C=C/C(=O)O)c2)c1</chem>                                                                                                                                  |
| 31          | <chem>C=CC(=O)O.Nc1ccc(Br)cn1&gt;&gt;Nc1ccc(/C=C/C(=O)O)cn1</chem>                                                                                                                                                                           |
| 32          | <chem>C=CC(=O)Nc1ccccc1NC(=O)OC(C)(C)C.CCOC(=O)C(CCO[Si](C)(C)C(C)(C)C)c1ccc(Br)cc1&gt;&gt;CCOC(=O)C(CCO[Si](C)(C)C(C)(C)C)c1ccc(/C=C/C(=O)Nc2ccccc2NC(=O)OC(C)(C)C)cc1</chem>                                                               |
| 33          | <chem>C=CC(=O)OCC.CCCCc1c(I)c(-c2ccccc2)n(C(=O)OC(C)(C)C)c1-c1ccccc1&gt;&gt;CCCCc1c(/C=C/C(=O)OCC)c(-c2ccccc2)n(C(=O)OC(C)(C)C)c1-c1ccccc1</chem>                                                                                            |
| 34          | <chem>C=CC(=O)OC(C)(C)C.COc1ccc(CNc2c(C)cc(C)cc21)cc1&gt;&gt;COc1ccc(CNc2c(C)cc(C)cc2/C=C/C(=O)OC(C)(C)C)cc1</chem>                                                                                                                          |
| 35          | <chem>C=Cc1ccc(N2CC(=O)N(CC[Si](C)(C)C)S2(=O)=O)c(OCc2ccccc2)c1.COc1cccc(Br)n1&gt;&gt;COc1cccc(/C=C/c2ccc(N3CC(=O)N(CC[Si](C)(C)C)S3(=O)=O)c(OCc3ccccc3)c2)n1</chem>                                                                         |

36 C=CC(=O)OCC.O=C1oc(-c2ccccc2)c(I)c2ccccc12>>CCOC(=O)/C=C/c1c(-c2ccccc2)oc(=O)c2ccccc12  
37 C=C[C@]1(C(=O)O)CC[C@H](OC)CC1.C[C@H](NC(=O)OC(C)(C)C)c1ccc2ccc(Br)cc2n1>>CO[  
38 C@H]1CC[C@]/C=C/c2ccc3ccc([C@H](C)NC(=O)OC(C)(C)C)nc3c2)(C(=O)O)CC1  
39 C=CS(C)(=O)=O.COC(=O)c1cc(-c2ccccc2)cc2c(I)en(COCC[Si](C)(C)C)c12>>COC(=O)c1cc(-  
40 c2ccccc2)cc2c(/C=C/S(C)(=O)=O)en(COCC[Si](C)(C)C)c12  
41 C=Cc1ccc(O)c(OC)c1.COC(=O)Cn1c(=O)c(Cl)nc2cc(Br)cnc21>>COC(=O)Cn1c(=O)c(/C=C/c2ccc(O  
42 )c(OC)c2)nc2cc(Br)cnc21  
43 C=CC(OC)OC.Fc1cc(I)ccc1C(F)(F)F>>COC(/C=C/c1ccc(C(F)(F)F)c(F)c1)OC  
44 C=CC(=O)OCCCC.O=C1[nH]c(=O)n([C@H]2C[C@H](O)[C@H](CO)O2)cc1I>>CCCCOC(=O)/C=  
45 C/c1cn([C@H]2C[C@H](O)[C@H](CO)O2)c(=O)[nH]c1=O  
46 C=CC(=O)OCC.CC(C)(CC1Cc2ccccc2C1)NC[C@H](O)COc1cc(Br)cc(F)c1F>>CCOC(=O)/C=C/c1  
47 cc(F)c(F)c(OC[C@H](O)CNC(C)(C)CC2Cc3ccccc3C2)c1  
48 C=CS(=O)(=O)c1ccccc1.O=Cc1c[nH]c2ccc(Br)cc12>>O=Cc1c[nH]c2ccc(/C=C/S(=O)(=O)c3ccccc3)c  
49 C=CC(N)=O.O=Cc1c(C2=NS(=O)(=O)c3cc(I)ccc3N2)c(O)c2cc(F)ccc2n1CCC1CC1>>NC(=O)/C=C/c1  
50 ccc2c(c1)S(=O)(=O)N=C(c1c(O)c3cc(F)ccc3n(CCC3CC3)c1=O)N2  
51 C=Cc1ccccc1.COC(=O)CCC/C=C/C[C@H]1[C@H]2CC[C@H](C2)[C@H]1NS(=O)(=O)c1ccc(Br)  
52 s1>>COC(=O)CCC/C=C/C[C@H]1[C@H]2CC[C@H](C2)[C@H]1NS(=O)(=O)c1ccc(/C=C/c2ccccc  
53 C=CC(=O)OC(C)(C)C.COC(=O)CN(CC(=O)OC)C(=O)c1ccc(I)cc1>>COC(=O)CN(CC(=O)OC)C(=O  
54 )c1ccc(/C=C/C(=O)OC(C)(C)C)cc1  
55 Bre1ccc2nc(-c3ccccc3)c(-c3ccccc3)nc2c1.C=Cc1ccccc1>>C(=C/c1ccc2nc(-c3ccccc3)c(-  
56 c3ccccc3)nc2c1)c1ccccc1  
57 C=CC=O.O=Cc1ccc(Br)cc1>>O=C/C=C/c1ccc(C=O)cc1  
58 C=CC=O.O=[N+](O-)]c1ccc(C2=C(I)C2(F)F)cc1>>O=C/C=C/C1=C(c2ccc([N+](=O)[O-]  
59 C=Cc1ccc(N(C)C)cc1.CCCCCN1C(=O)c2ccc3c(Br)ccc(c23)C1=O>>CCCCCN1C(=O)c2ccc3c(/  
60 C=C/c4ccc(N(C)C)cc4)ccc(c23)C1=O  
61 C=CCO.Ic1ccccc1>>OC/C=C/c1ccccc1  
62 C=CC(=O)N1N=Cc2ccccc2C1C(C)(C)C.COc1cc(Cc2cnc(N)nc2N)cc(I)c1OC>>COc1cc(Cc2cnc(N)nc  
63 2N)cc(/C=C/C(=O)N2N=Cc3ccccc3C2C(C)(C)C)c1OC  
64 C=Cc1ccc(OC)cc1.COc1ccc(-  
65 c2cc(=O)c3c(OC)cc(OC)c(I)c3o2)cc1OC>>COc1ccc(/C=C/c2c(OC)cc(OC)c3c(=O)cc(-  
66 c4ccc(OC)c(OC)c4)oc23)cc1  
67 C=CC(N)=O.CSc1nc2c(I)c(Cl)ccc2[nH]1>>CSc1nc2c(/C=C/C(N)=O)c(Cl)ccc2[nH]1  
68 C=CC(=O)OCC.CC(C)(C)OC(=O)NCc1cc2ccccc2nc1Cl>>CCOC(=O)/C=C/c1nc2ccccc2cc1CNC(=O)  
69 OC(C)(C)C  
70 C=CC(C)(C)O.COC(=O)c1c(OC)cc(OC)c(I)c1OC>>COC(=O)c1c(OC)cc(OC)c(/C=C/C(C)(C)O)c1OC  
71 C=CC(=O)OC.OCCCCCOCc1ccc2cc(Br)ccc2c1>>COC(=O)/C=C/c1ccc2cc(OCCCCCO)ccc2c1  
72 C=CC#N.O=[N+](O-)]c1ccc(I)cc1>>N#C/C=C/c1ccc([N+](=O)[O-])cc1  
73 C=CCO[C@H](C)C(=O)N1CCOCC1.OCc1ccc(I)cc1>>C[C@H](OC/C=C/c1ccc(CO)cc1)C(=O)N1  
74 CCOCC1  
75 C=Cc1ccc(C(C)(C)C)cc1.C[Si](C)(C)I>>CC(C)(C)c1ccc(/C=C/[Si](C)(C)C)cc1  
76 C=COCCCC.O=Cc1cc(Br)c2cc(Cl)ccc2o1>>CCCCO/C=C/c1cc(=O)oc2ccc(Cl)cc12  
77 C=Cc1cc2c(cc1Cn1cccn1)C(C)(C)CCC2(C)C.CCOC(=O)c1ccc(Br)cc1>>CCOC(=O)c1ccc(/C=C/c2cc  
78 3c(cc2Cn2cccn2)C(C)(C)CCC3(C)C)cc1  
79 C=CC(=O)OC(C)(C)C.COc1c2ccoc2c(Br)c2oc(=O)ccc12>>COc1c2ccoc2c(/C=C/C(=O)OC(C)(C)C)c  
80 2oc(=O)ccc12  
81 C=CC(=O)OCC.O=Cc1cc(I)ccc1O>>CCOC(=O)/C=C/c1ccc(O)c(C=O)c1  
82 C=Cc1ccc(N(C)C)cc1.Cc1nc2ccc(Br)cc2nc1-c1ccccc1>>Cc1nc2ccc(/C=C/c3ccc(N(C)C)cc3)cc2nc1-  
83 c1ccccc1  
84 CCCC=[11CH2].Ic1ccccc1>>CCC/C=[11CH]/c1ccccc1  
85 C=Cc1ccc(C(C)(C)C)cc1.CC(=O)c1ccc(Br)cc1>>CC(=O)c1ccc(/C=C/c2ccc(C(C)(C)C)cc2)cc1  
86 C=C[Si](C)(C)C.Ic1cccs1>>C[Si](C)(C)/C=C/c1cccs1  
87 C=CC(=O)OC.O=C(O)c1ccccc(Br)c1>>COC(=O)/C=C/c1ccccc(C(=O)O)c1  
88 C=C(C)C(=O)OCC.O=[N+](O-)]c1ccc(Cl)cc1>>CCOC(=O)/C(C)=C/c1ccc([N+](=O)[O-])cc1  
89 C=CCNS(=O)(=O)c1ccc(C)cc1.FC(F)(F)c1ccc(I)cc1>>Cc1ccc(S(=O)(=O)NC/C=C/c2ccc(C(F)(F)F)cc  
90 2)cc1  
91 C=CC(=O)OCC.Cc1c(O)cccc1Br>>CCOC(=O)/C=C/c1cccc(O)c1C  
92 C=CC(=O)OCC.CC(=O)c1ccccc1Br>>CCOC(=O)/C=C/c1ccccc1C(C)=O  
93 C=CC(C)=O.CC(=O)c1ccc(Br)cc1>>CC(=O)/C=C/c1ccc(C(C)=O)cc1  
94 C=CCN1C(=O)c2ccccc2C1=O.Clc1ccc(Br)cc1>>O=C1c2ccccc2C(=O)N1C/C=C/c1ccc(Cl)cc1  
95 C=Cc1ccc([Si](OCC)(OCC)OCC)cc1.CCOP(=O)(Cc1ccc(/C=C/c2ccc(Br)c3ccccc23)cc1)OCC>>CCO  
96 [Si](OCC)(OCC)c1ccc(/C=C/c2ccc(/C=C/c3ccc(CP(=O)(OCC)OCC)cc3)c3ccccc23)cc1

77 C=CC#N.IC(CC[Se]c1cccc1)=C(c1cccc1)c1cccc1>>N#C/C=C/C(CC[Se]c1cccc1)=C(c1cccc1)c1  
cccc1  
78 C=Cc1ccc(Br)cc1.Oc1cccc1I>>Oc1cccc1/C=C/c1ccc(Br)cc1  
79 C=CC(=O)OCc1cccc1.O=C1CO[C@@H]2Cc3ccc(Br)cc3[C@@H]2N1OCc1cccc1>>O=C(/C=C/c1  
ccc2c(c1)[C@@H]1[C@@H](C2)OCC(=O)N1OCc1cccc1)OCc1cccc1  
80 C=CS1cccc1.Ic1cccc1>>C=C/c1cccc1)\Sc1cccc1  
81 \*CN(Cc1cccc1)N=Nc1ccc(I)cc1.C=Cc1cccc1>>\*CN(Cc1cccc1)N=Nc1ccc(/C=C/c2ccccn2)cc1  
82 C=CC(=O)N1CC(=Cc2nccs2)C1.CC(C)(C)OC(=O)N1CC(=O)Nc2ncc(Br)cc2C1>>CC(C)(C)OC(=O)  
N1CC(=O)Nc2ncc(/C=C/C(=O)N3CC(=Cc4nccs4)C3)cc2C1  
83 C=CC(=O)OCC.CC1(C)OC=C(I)C(=O)O1>>CCOC(=O)/C=C/C1=COC(C)(C)OC1=O  
84 C=CC(=O)OCC.CC(C)(C)OC(=O)NCc1cccc(Br)c1>>CCOC(=O)/C=C/c1cccc(CNC(=O)OC(C)(C)C)c  
85 C=CC(=O)OC.Cc1cc(-c2ccc(Cl)cc2)n2nc(-c3cccc3)c(I)c2n1>>COC(=O)/C=C/c1c(-c2cccc2)nn2c(-  
c3ccc(Cl)cc3)cc(C)nc12  
86 C=Cc1cccc1.CCCCC(C)(Br)CC>>CCCCC(C)/C=C/c1cccc1)CC  
87 C=C(CC(=O)OC)C(=O)OC.COc1cccc2c(OC)c(Br)ccc12>>COC(=O)C/C(=C\c1ccc2c(OC)cccc2c1OC  
)C(=O)OC  
88 C=Cc1cccc1.CC(=O)Nc1ccc(Br)c[n+1]1[O-]>>CC(=O)Nc1ccc(/C=C/c2cccc2)c[n+1]1[O-]  
89 C=CC(N)=O.CC(=O)c1ccc(Br)cc1>>CC(=O)c1ccc(/C=C/C(N)=O)cc1  
90 C=Cc1cccc(C(F)(F)F)c1.CN(C(=O)c1cccc1)c1ccc2c(c1)[nH]c(=NC(=O)c1ccc(Br)s1)n2CCC(N)=O>  
>CN(C(=O)c1cccc1)c1ccc2c(c1)[nH]c(=NC(=O)c1ccc(/C=C/c3cccc(C(F)(F)F)c3)s1)n2CCC(N)=O  
91 C=CC(C)C(C)O.FC(F)(F)c1ccc(Br)cc1>>CC(O)C(C)/C=C/c1ccc(C(F)(F)F)cc1  
92 C=CCCCc1cccc(OC)c1.COc1cccc(Br)c1>>COc1cccc(/C=C/CCCC2cccc(OC)c2)c1  
93 C=CC(=O)OCC.Cc1nnn(Cc2cc(C(F)(F)F)ccc2Br)n1>>CCOC(=O)/C=C/c1ccc(C(F)(F)F)cc1Cn1nnc(C  
94 C=CC(=O)OCC.O=Cc1ccc(F)cc1Br>>CCOC(=O)/C=C/c1cc(F)ccc1C=O  
95 C=CC(=O)N(C)Cc1oc2cccc2c1C.O=C1Nc2ncc(Br)cc2C12CCC2>>Cc1c(CN(C)C(=O)/C=C/c2cnc3c  
(c2)C2(CCC2)C(=O)N3)oc2cccc12  
96 C=Cc1ccc(O)cc1.Fc1cc(Br)cc(F)c1F>>Oc1ccc(/C=C/c2cc(F)c(F)c(F)c2)cc1  
97 Br1ccccc1.C=CC(=O)OC(C)(C)C>>CC(C)(C)OC(=O)/C=C/c1ccccc1  
98 C=Cc1cccc(OC)c1.Nc1cccc(Br)c1>>COc1cccc(/C=C/c2cccc(N)c2)c1  
C=CC(=O)OC.COc1cccc2c(-  
99 c3cc(I)c4c(c3OCc3cccc3)[C@@H](C)N(Cc3cccc3)[C@@H](C)C4)c(C)cc(OC)c12>>COC(=O)/C=C/  
c1cc(-c2c(C)cc(OC)c3c(OC)cccc23)c(OCc2cccc2)c2c1C[C@@H](C)N(Cc1cccc1)[C@@H]2C  
C=CC(=O)OC.CC(C)(C)[Si](C)(C)OC[C@@H]1O[C@@H](n2nc(C(N)=O)c2I)[C@@H](O[Si](C)(C)C(  
100 C)(C)C)[C@@H]1O[Si](C)(C)C(C)(C)C>>COC(=O)/C=C/c1c(C(N)=O)ncn1[C@@H]1O[C@@H](CO[  
Si](C)(C)C(C)(C)C)[C@@H](O[Si](C)(C)C(C)(C)C)[C@@H]1O[Si](C)(C)C(C)(C)C  
101 C=CCNC(=O)OC(C)(C)C.O=C1CCCc2ccc(Cl)cc21>>C=C(CNC(=O)OC(C)(C)C)c1ccc2c(c1)C(=O)C  
102 C=C(NC(C)=O)C(=O)OC.CN(C)CCc1c[nH]c2ccc(Br)cc12>>COC(=O)/C=C/c1ccc2[nH]cc(CCN(C)C  
)c2c1)NC(C)=O  
103 C=CCOc1ccc(Cl)cc1.Ic1cccs1>>Clc1ccc(OC/C=C/c2ccs2)cc1  
104 C=CC(=O)OCC.O=C1CNe2c(Br)cccc2N1>>CCOC(=O)/C=C/c1cccc2c1NCC(=O)N2  
105 C=CC(=O)N1C(=O)OC[C@H]1c1cccc1.FC(F)(F)c1cncc(Br)c1>>O=C(/C=C/c1cncc(C(F)(F)F)c1)N1  
C(=O)OC[C@H]1c1cccc1  
106 C=CC(N)=O.CC(C)(C)OC(=O)NCc1cccc(Br)c1>>CC(C)(C)OC(=O)NCc1cccc(/C=C/C(N)=O)c1  
107 C=CC(OCC)OCC.COC(OC)c1cc([N+](=O)[O-])ccc1Br>>CCOC(/C=C/c1ccc([N+](=O)[O-]  
)cc1C(OC)OC)OCC  
108 C=Cc1ccc(F)cc1.CCOC(=O)C(C)Br>>CCOC(=O)C(C)/C=C/c1ccc(F)cc1  
109 C=CCC(=O)OC.COC(=O)c1c(Br)ccc2[nH]ccc12>>COC(=O)C/C=C/c1ccc2[nH]ccc2c1C(=O)OC  
110 Br1ccc2c(c1)OCO2.C=CC(C)=O>>CC(=O)/C=C/c1ccc2c(c1)OCO2  
111 C=CC(=O)OCCCC.Cn1nc(Br)c2ccc([N+](=O)[O-]  
)cc21>>CCCCOC(=O)/C=C/c1nn(C)c2cc([N+](=O)[O-])ccc12  
112 C=CCO.CC(C)(C)c1cccc1OS(=O)(=O)C(F)(F)F>>C=C(CO)c1cccc1C(C)(C)C  
113 C=Cc1ccc(/C=C/c2ccc(N(c3cccc3)c3cccc4cccc34)cc2)cc1.O=Cc1ccc(Br)cc1>>O=Cc1ccc(/C=C/c2c  
cc(/C=C/c3ccc(N(c4cccc4)c4cccc5cccc45)cc3)cc2)cc1  
114 C=Cc1cccc1OC.Oc1ccc(O)c(I)c1>>COc1cccc1/C=C/c1cc(O)ccc1O  
115 C=CCNC(=O)c1cccc1NC(=O)c1cccc1.Clc1cccc1I>>O=C(Nc1cccc1C(=O)NC/C=C/c1cccc1Cl)c  
1cccc1  
116 C=CC(=O)OC.O=[N+](O-)]c1ccc(I)cc1>>COC(=O)/C=C/c1ccc([N+](=O)[O-])cc1  
117 C=Cc1cccc1.CC(C)(C)c1ccc(Br)cc1>>C=C(c1cccc1)c1ccc(C(C)(C)C)cc1  
118 Br1ccc2ncccc2c1.C=Cc1cccc1>>C=C(c1ccc2ncccc2c1)\c1cccc1  
119 C=CC(C)=O.COc1ncc(Br)cn1>>COc1ncc(/C=C/C(C)=O)cn1  
120 C=Cc1ccc2cccc2c1.COc1ccc(I)cc1>>COc1ccc(/C=C/c2ccc3cccc3c2)cc1

121 C=CC(=O)OCC.Cc1cccc(Oc2cccc(Br)c2)c1>>CCOC(=O)/C=C/c1cccc(Oc2cccc(C)c2)c1  
122 C=CC(=O)OC.CC(=O)OCCCOnc1cc(I)c(=O)[nH]c1=O>>COC(=O)/C=C/c1cn(OCCOC(C)=O)c(=O)[  
nH]c1=O  
123 C=C[C@H]1O[C@@H]2OC(C)(C)O[C@@H]2[C@H]1O.O=C1ccc2cc(Br)ccc2o1>>CC1(C)O[C@H]  
2O[C@H]/C=C/c3ccc4oc(=O)ccc4c3)[C@H](O)[C@H]2O1  
124 C=CC(=O)OC(C)(C)C.CC(C)(C)O[C@H]1CC[C@@H]2C=C(C3=C(Br)CN(Cc4cccc4)CC3)CC[C@]  
12C>>CC(C)(C)OC(=O)/C=C/C1=C(C2=C[C@H]3CC[C@H](OC(C)(C)C)[C@@]3(C)CC2)CCN(Cc  
2cccc2)C1  
125 C=CCP(=O)(OCC)OCC.CCOC(=O)CNc1cccc(Br)c1>>CCOC(=O)CNc1cccc(/C=C/CP(=O)(OCC)OC  
C=C(CC(=O)O)C(=O)O.O=C1N[C@@]2(CC[C@H](c3ccc(Br)cc3)C2)CO1>>O=C(O)C/C(=C)c1cc  
126 c([C@H]2CC[C@]3(COC(=O)N3)C2)cc1)C(=O)O  
C=CC(=O)N(C)Cc1cccc(OC)c1OCC(C)C.O=C1CCc2cc(Br)enc2N1>>COc1cccc(CN(C)C(=O)/C=C/c  
127 2cnc3c(c2)CCC(=O)N3)c1OCC(C)C  
C=C(NC(=O)OCC[Si](C)(C)C)C(=O)OC.CC(C)(C)OC(=O)N[C@H](Cc1ccc(I)cc1)C(=O)OCc1cccc1  
128 >>COC(=O)/C=C/c1ccc(C[C@@H](NC(=O)OC(C)(C)C)C(=O)OCc2cccc2)cc1)NC(=O)OCC[Si](C)  
129 C=CC[C@@H](C)O.CC(C)Oc1cnc(Br)c1>>CC(C)Oc1cnc(/C=C/C[C@@H](C)O)c1  
C=CC(=O)OC.COC(=O)C1=NC2cc(Br)ccc2OC12CC2>>COC(=O)/C=C/c1ccc2c(c1)N=C(C(=O)OC)  
130 C1(CC1)O2  
131 C=Cc1cccc1.Fc1cccc1Br>>Fc1cccc1/C=C/c1cccc1  
132 C=CC(C)(C)C.Cc1cccc1OS(=O)(=O)C(F)(F)F>>C=C(c1cccc1C)C(C)(C)C  
133 C=C(C)C(=O)OCCCC.Clc1cccc1>>CCCCOC(=O)/C(C)=C/c1cccc1  
134 C=Cc1ccc(SC)cc1.Clc1c2ccc(Br)cc2nc2c1[nH]c1cccc12>>CSc1ccc(/C=C/c2ccc3c(Cl)c4[nH]c5cccc  
5c4nc3c2)cc1  
135 C=CCc1cc(OC)c(OC)cc1CC1c2cc(OC)c(OC)cc2CCN1C(=O)C(F)(F)F.COc1cc(I)c(CC2c3cc(OC)c(O  
C)cc3CCN2C(=O)C(F)(F)F)cc1OC>>COc1cc(/C=C/Cc2cc(OC)c(OC)cc2CC2c3cc(OC)c(OC)cc3CCN  
2C(=O)C(F)(F)F)c(CC2c3cc(OC)c(OC)cc3CCN2C(=O)C(F)(F)F)cc1OC  
C=CC(=O)OC(C)C.CN(C)c1ccc(-  
136 c2ccc(CN(C(=O)C3CCCCC3)c3cccc(Br)c3)cc2)cc1>>CC(C)OC(=O)/C=C/c1cccc(N(Cc2ccc(-  
c3ccc(N(C)C)cc3)cc2)C(=O)C2CCCCC2)c1  
137 C=CC(=O)N(C)C.O=[N+][([O-])c1ccc(Br)cc1>>CN(C)C(=O)/C=C/c1ccc([N+](=O)[O-])cc1  
138 C=CC(=O)OC.Oc1ccc(-c2ncc(Br)s2)cc1C12CC3CC(CC(C3)C1)C2>>COC(=O)/C=C/c1cnc(-  
c2ccc(O)c(C34CC5CC(CC(C5)C3)C4)c2)s1  
139 C=C(NC(C)=O)C(=O)OC.Clc1ccc(-c2cc(I)c3cccc3n2)cc1>>COC(=O)/C=C/c1cc(-  
c2ccc(Cl)cc2)nc2cccc12)NC(C)=O  
140 C=C1c2cccc2C1(C#N)CC.COc1ccc(Br)cc1OC>>CCC1(C#N)/C(=C/c2ccc(OC)c(OC)c2)c2cccc21  
141 C=CCNC(=O)OC(C)(C)C.Clc1cnc2cccc2c1>>C=C(CNC(=O)OC(C)(C)C)c1cnc2cccc2c1  
142 C=CC(=O)OC.O=C(O)c1ccc(I)cc1>>COC(=O)/C=C/c1ccc(C(=O)O)cc1  
143 C=CC(=O)N(C)Cc1c(C)n(C)c2cccc12.O=C1Nc2ncc(Br)cc2C12CCC2>>Cc1c(CN(C)C(=O)/C=C/c2c  
nc3c(c2)C2(CCC2)C(=O)N3)c2cccc2n1C  
144 C=Cc1ccc(Cl)cc1.CC(=O)NS(=O)(=O)c1ccc(Br)cc1>>CC(=O)NS(=O)(=O)c1ccc(/C=C/c2ccc(Cl)cc2)  
145 C=Cc1ccc(N(C)C(=O)OC(C)(C)C)cc1.FCCOCCOCCOc1ncc(I)cc1Br>>CN(C(=O)OC(C)(C)C)c1ccc(/  
C=C/c2cnc(OCCOCCOCCF)c(Br)c2)cc1  
146 C=CC(N)=O.CCCCCNC(=O)[C@H](Cc1ccc(Nc2cccc2C(=O)O)c(I)c1)NS(C)(=O)=O>>CCCCCNC(  
=O)[C@H](Cc1ccc(Nc2cccc2C(=O)O)c(/C=C/C(N)=O)c1)NS(C)(=O)=O  
147 C=CC(=O)OC.Clc1ccc(I)cc1>>COC(=O)/C=C/c1ccc(Cl)cc1  
148 C=CC(=O)OC.COC(=O)c1cnc1Br>>COC(=O)/C=C/c1cnc1C(=O)OC  
149 C=CC(=O)OC.CN(C(=O)c1ncc2c(c1I)c1cccc1n2S(=O)(=O)N(C)C)c1cccc1>>COC(=O)/C=C/c1c(C  
(=O)N(C)c2cccc2)ncc2c1c1cccc1n2S(=O)(=O)N(C)C  
150 C=Cc1ccc(C(C)(C)C)cc1.C[Si](C)(I)c1cccc1>>CC(C)(C)c1ccc(/C=C/[Si](C)(C)c2cccc2)cc1  
151 C=CC(=O)OC.CC(C)(C)OC(=O)N(CCc1c(Cl)ccnc1Br)C(=O)OC(C)(C)C>>COC(=O)/C=C/c1nccc(Cl)  
c1CCN(C(=O)OC(C)(C)C)C(=O)OC(C)(C)C  
152 C=CC(=O)OC.O=Cc1cc(Br)ccc1O>>COC(=O)/C=C/c1ccc(O)c(C=O)c1  
153 C=CC(=O)OC.COC(=O)c1cnc(-c2ccc(OC)cc2)c(I)c1>>COC(=O)/C=C/c1cc(C(=O)OC)cnc1-  
C=Cc1cccc1.CCN1C[C@]2(OC(=O)c3cc(I)ccc3NC(C)=O)CC[C@H](OC)[C@@]34[C@@H]2C[C  
154 @H]([C@@H]13)[C@@]1(O)C[C@H](OC)[C@H]2C[C@@H]4[C@]1(O)[C@H]2OC>>CCN1C[C  
@]2(OC(=O)c3cc(/C=C/c4cccc4)ccc3NC(C)=O)CC[C@H](OC)[C@@]34[C@@H]2C[C@H]([C@  
@H]13)[C@@]1(O)C[C@H](OC)[C@H]2C[C@@H]4[C@]1(O)[C@H]2OC  
155 Brc1cccc1.C=Cc1ccc(C(=O)O)cc1>>O=C(O)c1ccc(/C=C/c2cccc2)cc1  
156 C=CC(C)=O.O=[N+][([O-])c1ccc(C2=C(I)C2(F)F)cc1>>CC(=O)/C=C/C1=C(c2ccc([N+](=O)[O-  
])cc2)C1(F)F  
157 C=CC(=O)OCC.OCc1ccc(Br)cc1>>CCOC(=O)/C=C/c1ccc(CO)cc1

158 C=CC(OC)OC.N#Cc1ccc(I)cc1>>COC(/C=C/c1ccc(C#N)cc1)OC  
159 C=CC(O)C(F)(F)C(=O)OCC.COC(=O)c1ccccc1I>>CCOC(=O)C(F)(F)C(O)/C=C/c1ccccc1C(=O)OC  
160 C=CC(=O)OCC.CCCCN(CCCC)c1ccc(Br)cc1>>CCCN(CCCC)c1ccc(/C=C/C(=O)OCC)cc1  
161 C=Cc1ccccc1.COC(=O)c1cc(C#C[Si](C)(C)C)ccc1OS(=O)(=O)C(F)(F)F>>COC(=O)c1cc(C#C[Si](C)(C)C)ccc1/C=C/c1ccccc1  
162 C=CC(=O)OC.COc1c(CN(C(=O)c2ccccc2)c2cccc(Br)c2)ccc2c1OC(C)(C)[C@H](OC(C)=O)[C@H]2Sc1ccccc1>>COC(=O)/C=C/c1cccc(N(Cc2ccc3c(c2OC)OC(C)(C)[C@H](OC(C)=O)[C@H]3Sc2ccccc2)C(=O)c2ccccc2)c1  
163 C=Cc1ccccc1.CCCCCCCCCC(=O)N1CCN(c2ccc(Br)cc2)CC1>>CCCCCCCCC(=O)N1CCN(c2ccc(/C=C/c3ccccc3)cc2)CC1  
164 C=C(C)C(F)(F)F.COC(=O)c1ccc(I)cc1>>COC(=O)c1ccc(/C=C(\C)C(F)(F)F)cc1  
165 C=CC(=O)OC.Cc1ccccc1Cl>>COC(=O)/C=C/c1ccccc1C  
166 C=CC(C)=O.CC1(C)OC=C(I)C(=O)O1>>CC(=O)/C=C/C1=COC(C)(C)OC1=O  
167 C=Cc1ccccc1.Cc1cc(Br)ccc1N>>Cc1cc(/C=C/c2ccccc2)ccc1N  
168 C=C[C@](C)(C)(COC(F)F)C(=O)O.CC(C)[C@H](O)C(=O)N[C@@H](C)C(=O)N1CCC[C@@H](C(=O)N[C@H](C)c2ccc3ccc(Br)cc3n2)N1>>CC(C)[C@H](O)C(=O)N[C@@H](C)C(=O)N1CCC[C@@H](C(=O)N[C@H](C)c2ccc3ccc(/C=C/[C@](C)(C)COC(F)F)C(=O)O)cc3n2)N1  
169 C=CC(=O)OCC.FC(F)(F)c1cn2c(Br)cccc2n1>>CCOC(=O)/C=C/c1cccc2nc(C(F)(F)F)cn12  
170 C=CC(=O)c1ccccc1.Cc1ccc(Br)cc1>>Cc1ccc(/C=C/C(=O)c2ccccc2)cc1  
171 Brc1ccccc1.C=Cc1ccc(OC)cc1>>COc1ccc(/C=C/c2ccccc2)cc1  
172 Brc1ccccc1.C=Cc1ccccc1>>C(=C/c1ccccc1)\c1ccccc1  
173 C=COCC.O=c1oc2ccccc2cc1Br>>CCO/C=C/c1cc2ccccc2oc1=O  
174 C=CS(=O)(=O)F.Ic1cc2ccccc2s1>>O=S(=O)(F)/C=C/c1cc2ccccc2s1  
175 C=CC(=O)OC.COc1ccc(S(=O)(=O)N(C)c2ccc(I)c3cnn(C)c23)cc1>>COC(=O)/C=C/c1ccc(N(C)S(=O)(=O)c2ccc(OC)cc2)c2c1cnn2C  
176 C=Cc1ccccc1.O=C(c1ccccc1)c1ccc(Br)cc1>>O=C(c1ccccc1)c1ccc(/C=C/c2ccccc2)cc1  
177 C=CC=O.Cc1ccc(I)cc1>>Cc1ccc(/C=C/C(=O)O)cc1  
178 C=Cc1ccccc1.CC(C)(C)OC(=O)N[C@H](COc1cnc(Cl)c(Br)c1)Cc1ccccc1>>CC(C)(C)OC(=O)N[C@H](COc1cnc(Cl)c(/C=C/c2ccccc2)c1)Cc1ccccc1  
179 C=CS(C)(=O)=O.CC(=O)c1ccccc1Br>>CC(=O)c1ccc(/C=C/S(C)(=O)=O)c1  
180 C=CC(=O)OC(C)(C)C.COc1ccccc1I>>COc1ccccc1/C=C/C(=O)OC(C)(C)C  
181 C=CC(C)=O.Cc1ccc(N)c(I)c1>>CC(=O)/C=C/c1ccc(C)ccc1N  
182 C=CCNC(=O)OC(C)(C)C.O=S(=O)(Oc1ccccc1Cl)C(F)(F)F>>C=C(CNC(=O)OC(C)(C)C)c1ccccc1Cl  
183 C=CC(=O)OCC.Cc1nc(C)c(I)c(Cl)n1>>CCOC(=O)/C=C/c1c(C)nc(C)nc1Cl  
184 C=CC(OCC)OCC.O=Cc1ccc(Br)c1>>CCOC(/C=C/c1cccc(C=O)c1)OCC  
185 C=CC(=O)OCC.CS(=O)(=O)c1ccc(Br)cc1C(F)(F)F>>CCOC(=O)/C=C/c1ccc(S(C)(=O)=O)c(C(F)(F)F)C  
186 C=CC1OCCO1.CC1(C)Oc2ccc(Br)cc2O1>>CC1(C)Oc2ccc(/C=C/C3OCCO3)cc2O1  
187 C=CC(=O)OCCCC.Oc1ccccc1Br>>CCCCOC(=O)/C=C/c1ccccc1O  
188 C=CC(=O)OC(C)(C)C.Oc1ccc(C(=C2CCCCC2)c2ccc(Br)cc2Cl)cc1>>CC(C)(C)OC(=O)/C=C/c1ccc(C(=C2CCCCC2)c2ccc(O)cc2)c(Cl)c1  
189 C=CC(=O)OC(C)(C)C.O=Cc1ccc(Br)n1>>CC(C)(C)OC(=O)/C=C/c1cccc(C=O)n1  
190 C=Cc1ccc(C(F)(F)F)cc1.COC(=O)[C@H](Cc1ccc(O)c(I)c1)NC(=O)OC(C)(C)C>>COC(=O)[C@H](Cc1ccc(O)c(/C=C/c2ccc(C(F)(F)F)cc2)c1)NC(=O)OC(C)(C)C  
191 C=CC(=O)OCCCC.O=Cc1ccc(Br)s1>>CCCCOC(=O)/C=C/c1ccc(C=O)s1  
192 C=Cc1ccc2cc(F)c(F)cc2n1.O=C1c2cc(Br)ccc2COc2ccccc21>>O=C1c2cc(/C=C/c3ccc4cc(F)c(F)cc4n3)ccc2COc2ccccc21  
193 C=CC=O.O=[N+][O-]c1ccc(I)cc1>>O=C/C=C/c1ccc([N+](=O)[O-])cc1  
194 C=C.CC(=O)Nc1ccccc1Br>>C=Cc1c(C)cccc1NC(C)=O  
195 C=Cc1ccc(OC)cc1.FC(F)(F)C(F)(F)C(F)(F)C(F)(F)C(F)(F)C(F)(F)Br>>COc1ccc(/C=C/C(F)(F)C(F)(F)C(F)(F)C(F)(F)C(F)(F)C(F)(F)F)cc1  
196 C=CCC(C)C(=O)OCC.O=[N+][O-]c1ccc(Br)cc1>>CCOC(=O)C(C)C/C=C/c1ccc([N+](=O)[O-])cc1  
197 C=CCC(C)C(=O)OCC.Fc1ccc(Br)cc1>>CCOC(=O)C(C)C/C=C/c1ccc(F)cc1  
198 C=Cc1ccc(Cl)cc1.CC(=O)c1ccc(I)cc1>>CC(=O)c1ccc(/C=C/c2ccc(Cl)cc2)cc1  
199 C=Cc1ccc(OC)c(OC)c1.CCCCCCCCCOc1ccc2c(C)c(Br)c(=O)oc2c1>>CCCCCCCCOc1ccc2c(C)c(/C=C/C3ccc(OC)c(OC)c3)c(=O)oc2c1  
200 Brc1ccccc1Cc1cn2Cc1ccccc1.C=CC(=O)OC>>COC(=O)/C=C/c1cccc2c1cn2Cc1ccccc1  
201 Brc1ccccc1.C=Cc1cc(OC)cc(OC)c1>>COc1cc(/C=C/c2cccs2)cc(OC)c1  
202 C=C(C)C(=O)OC.CN(C)c1ccc(Br)cc1>>COC(=O)/C(C)=C/c1ccc(N(C)C)cc1  
203 C=Cc1ccccc1OCc1ccccc1.O=C(O)/C=C/c1ccccc1Br>>O=C(O)/C=C/c1ccccc1/C=C/c1ccccc1OCc1ccc  
204 C=CC(C)C(C)O.COc1ccc(Br)cc1>>COc1ccc(/C=C/C(C)C(C)O)cc1

205 C=CC(=O)O.N#Cc1ccc(I)cc1>>N#Cc1ccc(/C=C/C(=O)O)cc1  
 206 C=CC(=O)OC.O=C(c1ccccc1C(F)(F)F)c1sc2cc(O)ccc2c1Oc1ccc(Br)cc1>>COC(=O)/C=C/c1ccc(Oc2c(C(=O)c3ccccc3C(F)(F)F)sc3cc(O)ccc23)cc1  
 207 C=CCC(c1ccccc1)P(=O)(OC)OC.Ic1cccc2cccc12>>COP(=O)(OC)C(C/C=C/c1cccc2cccc12)c1ccccc  
 208 Br1ccc2c(Nc3ccccc3)nnc2c1.C=CC(=O)OC>>COC(=O)/C=C/c1ccc2c(Nc3ccccc3)nnc2c1  
 209 C=Cc1ccc(COC(C)=O)cc1.CCCCOc1ccc2c(c1)cc(C#N)c1ccc(Br)cc12>>CCCCOc1ccc2c(c1)cc(C#N)c1ccc(/C=C/c3ccc(COC(C)=O)cc3)cc12  
 210 C=CC(=O)OC.COC(=O)Cn1c(=O)oc2cc(Br)enc21>>COC(=O)/C=C/c1cnc2c(c1)oc(=O)n2CC(=O)OC  
 211 C=CNC(C)=O.N#Cc1ccc(Br)cc1>>C=C(NC(C)=O)c1ccc(C#N)cc1  
 212 C=CC=O.Cc1cccc(I)c1>>Cc1cccc(/C=C/C=O)c1  
 213 C=CC#N.Cc1nc(-c2ccccc2)c(Br)o1>>Cc1nc(-c2ccccc2)c(/C=C/C#N)o1  
 214 C=CC#N.CS(=O)(=O)c1ccc(I)c(C(=O)N2CCN(c3ccc(C#N)cc3)CC2)c1>>CS(=O)(=O)c1ccc(/C=C/C#N)c(C(=O)N2CCN(c3ccc(C#N)cc3)CC2)c1  
 215 C=Cc1cccn1.Cc1ncc(C#N)c(Nc2cc(Cl)c3[nH]ccc3c2C)c1I>>Cc1ncc(C#N)c(Nc2cc(Cl)c3[nH]ccc3c2C)c1/C=C/c1cccn1  
 216 C=Cc1ccccc1F.O=S(=O)(c1ccc(Br)cc1)c1ccccc1CN1CCCC(F)C1>>O=S(=O)(c1ccc(/C=C/c2ccccc2F)cc1)c1ccccc1CN1CCCC(F)C1  
 217 C=COC(C)(C)C.O=S(=O)(Oc1ccc(-c2ccccc2)cc1)C(F)(F)F>>C=C(OC(C)(C)C)c1ccc(-c2ccccc2)cc1  
 218 C=CCC(C)C(=O)OCC.COC(=O)c1ccc2cc(Br)ccc2c1>>CCOC(=O)C(C)C/C=C/c1ccc2cc(C(=O)OC)cc  
 219 C=CC(=O)OCC.COc1cc2nnc(Nc3ccc(I)cc3)c2cc1OC>>CCOC(=O)/C=C/c1ccc(Nc2nnc3cc(OC)c(O)C)cc23)cc1  
 220 C=CC(=O)OC(C)(C)C.O=[N+][O-]  
 221 ]c1cccc(S(=O)(=O)N2CCc3cc(Br)enc32)c1>>CC(C)(C)OC(=O)/C=C/c1cnc2c(c1)CCN2S(=O)(=O)c1cccc([N+](=O)[O-])c1  
 222 C=Cc1ccccc1C.Nc1cc([N+](=O)[O-])ccc1Br>>Cc1ccccc1/C=C/c1ccc([N+](=O)[O-])cc1N  
 223 C=CC(=O)OCC.COc1ccc(Cl)cc1-c1c(Br)c(=O)[nH]c2ccc(C(F)(F)F)cc12>>CCOC(=O)/C=C/c1c(-c2cc(Cl)ccc2OC)c2cc(C(F)(F)F)ccc2[nH]c1=O  
 224 C=CC(=O)Nc1ccc(OC)cc1.CC(C)(C)c1ccc2[nH]c3c(c2c1)CC(=O)Nc1ccc(I)cc1-  
 225 3>>COc1ccc(NC(=O)/C=C/c2ccc3c(c2)-c2[nH]c4ccc(C(C)(C)C)cc4c2CC(=O)N3)cc1  
 226 C=CC(=O)OCCCC.N#Cc1ccccc1Cl>>CCCCOC(=O)/C=C/c1ccccc1C#N  
 227 C=CC(=O)OCC.COC(=O)c1cccc(Cl)c1>>CCOC(=O)/C=C/c1cccc(C(=O)OC)c1  
 228 C=CC(=O)OCCCC.O=Cc1ccccc1Br>>CCCCOC(=O)/C=C/c1ccccc1C=O  
 229 C=CC(=O)OCC.COCOCc1ccc(Br)c1>>CCOC(=O)/C=C/c1cccc(COCOC)c1  
 230 Br1ccc(-c2ccccc2)cc1.C=CC(=O)OC>>COC(=O)/C=C/c1ccc(-c2ccccc2)cc1  
 231 C=CCP(=O)(OCC)OCC.CC(=O)Nc1cccc(Br)c1>>CCOP(=O)(C/C=C/c1cccc(NC(C)=O)c1)OCC  
 232 C=C(C)C=O.CN(C)c1ccc(I)cc1>>C/C(C=O)=C/c1ccc(N(C)C)cc1  
 233 C=CC(=O)N1N=Cc2ccccc2C1CCC.CCOc1cc(Cc2cnc(N)nc2N)cc(I)c1OCC>>CCCC1c2ccccc2C=NN1C(=O)/C=C/c1cc(Cc2cnc(N)nc2N)cc(OCC)c1OCC  
 234 C=CC(=O)OCC.Nc1ccc(F)nc1Br>>CCOC(=O)/C=C/c1nc(F)ccc1N  
 235 C=CCN1C(=O)c2ccccc2C1=O.Ic1cccn1>>O=C1c2ccccc2C(=O)N1C/C=C/c1cccn1  
 236 C=Cc1ccccc1.COc1ccc(Cn2nc(I)c3ccccc32)c1>>COc1ccc(Cn2nc(/C=C/c3ccccc3)c3ccccc32)c1  
 237 C=Cc1ccccc1.CCOC(=O)C(F)Br>>CCOC(=O)C(F)/C=C/c1ccccc1  
 238 C=CCCCCCC.COC(=O)c1ccc(Br)cc1>>C=C(CCCCCC)c1ccc(C(=O)OC)cc1  
 239 C=CCCCCCC.N(C(=O)OC(C)(C)C(=O)OC(C)(C)C.CC(C)N(CC[C@H](c1ccccc1)c1cc(Br)ccc1OCc1ccccc1)C(C)C>>CC(C)N(CC[C@H](c1ccccc1)c1cc(/C=C/CCCCCN(C(=O)OC(C)(C)C)C(=O)OC(C)(C)C)ccc1OCc1ccccc1)C(C)C  
 240 Br1ence2cccc12.C=Cc1ccccc1>>C(=C/c1ence2cccc12)\c1ccccc1  
 241 C=CC(=O)OC(C)(C)C.FC(F)(F)c1ccc(Br)en1>>CC(C)(C)OC(=O)/C=C/c1ccc(C(F)(F)F)nc1  
 242 C=CC(=O)O.Cc1cc(C)c([I+])c2c(C)cc(C)cc2C)c(C)c1>>Cc1cc(C)c(/C=C/C(=O)O)c(C)c1  
 243 C=CC(=O)OC.CC(C)n1cnc2c(NCc3ccccc3)nc(N3CCOCC3)nc21>>COC(=O)/C=C/c1cccc(CNc2nc(N3CCOCC3)nc3c2nnc3C(C)C)c1  
 244 C=CP(=O)(OCC)OCC.FC(F)(F)c1cccc(Br)c1>>CCOP(=O)(/C=C/c1cccc(C(F)(F)F)c1)OCC  
 245 C=C.Cc1cc(C)c(CCl)c(C)c1>>C=CCc1c(C)cc(C)cc1C  
 246 C=CC(=O)N1CC(c2oc3ccccc3c2C)C1.O=C1CCNc2cc(Br)enc2N1>>Cc1c(C2CN(C(=O)/C=C/c3cnc4c(c3)NCCCC(=O)N4)C2)oc2ccccc12  
 247 C=CC(=O)OCC.Clc1ccccc1I>>CCOC(=O)/C=C/c1ccccc1Cl  
 248 C=CCCC.Ic1ccccc1>>CCC/C=C/c1ccccc1  
 249 C=CC(=O)OC(C)(C)C.O=c1oc2cc(O)cc(F)c2c(Cc2ccc(Br)cc2)c1Cl>>CC(C)(C)OC(=O)/C=C/c1ccc(Cc2c(Cl)c(=O)oc3cc(O)cc(F)c23)cc1  
 250 C=CCCCCCC.CC(C)(C)OC(=O)n1ccc2cc(OS(=O)(=O)C(F)(F)F)ccc21>>C=C(CCCCCC)c1ccc2c(ccn2C(=O)OC(C)(C)C)c1

249 C=Cc1ccccc1.CCCCCOc1ccc(Br)c(F)c1>>CCCCCOc1ccc(/C=C/c2ccccc2)c(F)c1  
250 C=CCOc1cccc(C)c1.Ic1cccs1>>Cc1cccc(OC/C=C/c2cccs2)c1  
251 C=Cc1ccc(O)cc1.Nc1cccc(Br)c1>>Nc1cccc(/C=C/c2ccc(O)cc2)c1  
252 C=CCC(NCc1ccc(OC)cc1)c1cccc1.Ic1cccc1>>COc1ccc(CNC(C/C=C/c2cccc2)c2cccc2)cc1  
253 C=Cc1cc2cc(OC)c(OC)cc2oc1=O.COc1ccc(I)cc1>>COc1ccc(/C=C/c2cc3cc(OC)c(OC)cc3oc2=O)cc1  
254 C=Cc1ccc(C(F)(F)F)cc1.O=C1C(O)=C(I)C(=O)c2ccccc21>>O=C1C(O)=C(/C=C/c2ccc(C(F)(F)F)cc2)  
C(=O)c2ccccc21  
255 C=C(F)C(=O)OC.FC(F)(F)c1ccc(I)cc1>>COC(=O)/C(F)=C/c1ccc(C(F)(F)F)cc1  
256 C=CS(=O)c1cccc1.O=C(O)c1ccc(Br)cc1>>O=C(O)c1ccc(/C=C/S(=O)c2ccccc2)cc1  
257 C=CC(=O)OCC.CN(C)c1ccc(-c2ccccc2)c(I)c1>>CCOC(=O)/C=C/c1cc(N(C)C)ccc1-c1cccc1  
C=CCn1c(-  
258 c2ccccc2)nc2ccccc2c1=O.O=C(CN1C(=O)COc2ccccc21)c1ccc(Br)cc1>>O=C(CN1C(=O)COc2ccccc2  
1)c1ccc(/C=C/Cn2c(-c3ccccc3)nc3ccccc3c2=O)cc1  
259 C=CC(OCC)OCC.FC(F)(F)c1ccc(Cl)cc1>>CCOC(/C=C/c1ccc(C(F)(F)F)cc1)OCC  
260 C=CC(=O)OCC.COCC(=O)c1ccc(Cl)cc1>>CCOC(=O)/C=C/c1ccc(C(=O)OC)cc1  
C=Cc1cccc1.CCCCCCCCOC1cc(/C=C/c2ccc([N+](=O)[O-  
261 ])cc2)c(OCCCCCCCC)cc1/C=C/c1ccc(Br)cc1>>CCCCCCCCOC1cc(/C=C/c2ccc([N+](=O)[O-  
])cc2)c(OCCCCCCCC)cc1/C=C/c1ccc(/C=C/c2ccccc2)cc1  
262 C=CC(=O)OCC.Oc1ccc(Br)c(Cl)c1>>CCOC(=O)/C=C/c1ccc(O)cc1Cl  
263 C=Cc1c(F)c(F)c(F)c(F)c1F.N#Cc1ccc(Br)cc1>>N#Cc1ccc(/C=C/c2c(F)c(F)c(F)c(F)c2F)cc1  
264 Bre1n[nH]c2ccccc12.C=CC(=O)OCCCC>>CCCCOC(=O)/C=C/c1n[nH]c2ccccc12  
265 C=CC(=O)OC.COc1ccc(C(=C(I)CC[Se]c2ccccc2)c2ccc(OC)cc2)cc1>>COC(=O)/C=C/C(CC[Se]c1ccc  
cc1)=C(c1ccc(OC)cc1)c1ccc(OC)cc1  
266 C=CC(N)=O.O=CC1=C(Br)c2ccccc2CC1>>NC(=O)/C=C/C1=C(C=O)CCc2ccccc21  
267 C=Cc1ccc(OC)cc1.COc1cc(Br)c(C=O)cc1OC>>COc1ccc(/C=C/c2cc(OC)c(OC)cc2C=O)cc1  
268 C=CC(=O)OCC.O=[N+](O-)]c1ccc(-c2cnccc2Br)cc1>>CCOC(=O)/C=C/c1ccccc1-  
c1ccc([N+](=O)[O-])cc1  
269 C=CC(=O)OC.O=CC1=C(Br)c2ccccc2CC1>>COC(=O)/C=C/C1=C(C=O)CCc2ccccc21  
270 C=CC(=O)OC.COc1ccc2c(c1)CCN(c1ccc(C)c(F)c1)C2(C)c1ccc(Br)cc1>>COC(=O)/C=C/c1ccc(C2(C  
)c3ccc(OC)cc3CCN2c2ccc(C)c(F)c2)cc1  
271 COC[C@@H](/N=C(\c1cccc1)N1C=CCC[C@H]1c1cccc1)C(C)C.COc1ccc(I)cc1>>COC[C@@H](/  
N=C(\c1cccc1)N1C=C(c2ccc(OC)cc2)CC[C@H]1c1cccc1)C(C)C  
272 C=CC(=O)OCC.Cc1ccc(C#C/C=C/c2ccc(Br)cc2)cc1>>CCOC(=O)/C=C/c1ccc(/C=C/C#Cc2ccc(C)cc2  
C=CC(=O)OCc1cc(OCCCCCCCCCCCCCCCCC)c(OCCCCCCCCCCCCCCCCC)c(OCCCCCCCC  
273 CCCCCCCCCC)c1.COc1ccc(I)cc1>>CCCCCCCCCCCCCCCCCOc1cc(COC(=O)/C=C/c2ccc(OC)cc  
2)cc(OCCCCCCCCCCCCCCCCC)c1OCCCCCCCCCCCCCCCCC  
274 C/C(=N)c1c(C(C)C)cccc1C(C)C)n1ccc2ccc(Br)cc21.C=CC(=O)OC>>COC(=O)/C=C/c1ccc2cnn(/C(C)  
=N/c3c(C(C)C)cccc3C(C)C)c2c1  
275 C=CC(=O)N(C)Cc1cc2ccccc2n1C.CCn1c(=O)[nH]c2ncc(Br)cc21>>CCn1c(=O)[nH]c2ncc(/C=C/C(=  
O)N(C)Cc3cc4ccccc4n3C)cc21  
276 C=C.FC(F)(F)c1cc(Br)cc(C(F)(F)F)c1>>C=Cc1cc(C(F)(F)F)cc(C(F)(F)F)c1  
277 C=C(C)C.CCCC(Cl)c1cccc1>>CCCC(C=C(C)C)c1cccc1  
278 Bre1ccc2[nH]cc(CCc3ccccc3)c2c1.C=CC(=O)OC>>COC(=O)/C=C/c1ccc2[nH]cc(CCc3ccccc3)c2c1  
279 C=C[Si](CC)(CC)CC.COCC(=O)c1cccc1Br>>CC[Si](/C=C/c1cccc1C(=O)OC)(CC)CC  
280 Bre1ccc(-c2enc3ccccc3n2)cc1.C=CCn1c(-c2ccc(OC)cc2F)nc2ccccc2c1=O>>COc1ccc(-  
c2nc3ccccc3c(=O)n2C/C=C/c2ccc(-c3enc4ccccc4n3)cc2)c(F)c1  
281 C=CCCCC(=O)OC.O=[N+](O-)]c1ccc(Br)cc1>>COC(=O)CCCC/C=C/c1ccc([N+](=O)[O-])cc1  
282 C=CC(=O)OC(C)(C)C.Cc1ccc(I)cc1>>Cc1ccc(/C=C/C(=O)OC(C)(C)C)cc1  
283 C=CC(C)(C)O.Cc1cccc1Br>>Cc1cccc1/C=C/C(C)(C)O  
284 C=CCNS(=O)(=O)c1ccc(C)cc1.FC(F)(F)c1ccc(Br)cc1>>Cc1ccc(S(=O)(=O)NC/C=C/c2ccc(C(F)(F)F)c  
c2)cc1  
285 C=Cc1cccc1.Clc1ccc2ccccc2c1>>C(=C/c1ccc2ccccc2c1)\c1cccc1  
286 C=CC(=O)N(C)C.Fc1ccc(I)c1>>CN(C)C(=O)/C=C/c1ccc(F)c1  
287 C=CC(C)=O.Ic1c(-c2ccccc2)nnn1Cc1cccc1>>CC(=O)/C=C/c1c(-c2ccccc2)nnn1Cc1cccc1  
288 C=CCNC(N)=O.O=c1oc2enc3ccc(Br)cc3c2n1-  
c1cccc(C(F)(F)F)c1>>NC(=O)NC/C=C/c1ccc2ncc3oc(=O)n(-c4cccc(C(F)(F)F)c4)c3c2c1  
289 C=CC(C)(C)O.O=Cc1ccc(Br)o1>>CC(C)(O)/C=C/c1ccc(C=O)o1  
290 C=CS(=O)(=O)NCCc1cccc1.CC(C)(C)OC(=O)NCc1cccc1Br>>CC(C)(C)OC(=O)NCc1cccc1/C=C/  
S(=O)(=O)NCCc1cccc1  
291 C=CCN1C(=O)c2ccccc2C1=O.FC(F)(F)c1cccc1Br>>O=C1c2ccccc2C(=O)N1C/C=C/c1cccc1C(F)(F)

292 C=Cc1cccc1.Clc1ccc2c(c1)c(I)nn2C1CCCCO1>>Clc1ccc2c(c1)c(/C=C/c1cccc1)nn2C1CCCCO1  
293 C=Cc1ccc(C)cc1.CCOC(=O)C(F)(F)I>>CCOC(=O)C(F)(F)/C=C/c1ccc(C)cc1  
294 C=CP(=O)(O)O.Fc1cc(F)cc(Br)c1>>O=P(O)(O)/C=C/c1cc(F)cc(F)c1  
295 C=C(F)[Si](C)(c1cccc1)c1cccc1.Ic1cccc1>>C[Si](/C(F)=C/c1cccc1)(c1cccc1)c1cccc1  
296 C=CCC(C)C(=O)OCC.N#Cc1cccc1Br>>CCOC(=O)C(C)C/C=C/c1cccc1C#N  
297 C=Cc1cncnc1.COc1ccc(C)c(Nc2c(C#N)cnc3cc(Br)ccc23)c1>>COc1ccc(C)c(Nc2c(C#N)cnc3cc(/C=C/  
e4cncnc4)ccc23)c1  
298 C=C/C=C(/CCCC)OCC.Cc1cccc(I)c1>>CCCC/C(=C\C=C\c1cccc(C)c1)OCC  
299 C=Cc1cncnc1.CCCCCCCCCCCCCOc1ccc(I)cc1>>CCCCCCCCCCCCCOc1ccc(/C=C/c2cncnc2)cc1  
300 C=Cc1cccc(OCCO)c1.CCN1CCN(c2nc(Br)cc3ccsc23)CC1>>CCN1CCN(c2nc(/C=C/c3cccc(OCCO)c  
3)cc3ccsc23)CC1  
301 C=CC(=O)OCCCC.COc1c(C)cc(Br)cc1C>>CCCCOC(=O)/C=C/c1cc(C)c(OC)c(C)c1  
302 Bre1ccc(-c2ccccc2)cc1.C=CC(OCC)OCC>>CCOC(/C=C/c1ccc(-c2ccccc2)cc1)OCC  
303 C=Cc1cccc1C.Cc1cccc1Cl>>Cc1cccc1/C=C/c1cccc1C  
304 Bre1cncnc1.C=C[Si](CC)(CC)CC>>CC[Si](/C=C/c1cncnc1)(CC)CC  
C=Cc1c[nH]c2nc(NC(=O)C(C)(C)C)[nH]c(=O)c12.CCOC(=O)CC[C@H](C(=O)OCC)N1Cc2ccc(I)  
305 cc2C1=O>>CCOC(=O)CC[C@H](C(=O)OCC)N1Cc2ccc(/C=C/c3c[nH]c4nc(NC(=O)C(C)(C)C)[nH]  
lc(=O)c34)cc2C1=O  
306 C=CC(C)(O)CCC=C(C)C.COc1ccc(Br)cc1>>COc1ccc(/C=C/C(C)(O)CCC=C(C)C)cc1  
307 C=Cc1cccc1.O=S1(=O)c2ccccc2C2(CN1Cc1ccc(Br)cc1)OCCO2>>O=S1(=O)c2ccccc2C2(CN1Cc1cc  
c(/C=C/c3ccccc3)cc1)OCCO2  
308 C=C(C)C(=O)OC.N#Cc1cccc(Br)c1>>COC(=O)/C(C)=C/c1cccc(C#N)c1  
309 C=CCC1(O)CCN(C(=O)OC(C)(C)C)CC1.CCc1nn2c(C)cc(C)nc2c1Cc1ccc(Br)cc1>>CCc1nn2c(C)cc(  
C)nc2c1Cc1ccc(/C=C/CC2(O)CCN(C(=O)OC(C)(C)C)CC2)cc1  
310 C=CCOC(=O)NC.COc1cccc1I>>CNC(=O)OC/C=C/c1cccc1OC  
311 C=C(OC(C)=O)C(=O)OCC(F)(F)F.COc1ccc(I)c(OC)c1>>COc1ccc(/C=C(\OC(C)=O)C(=O)OCC(F)(F)  
)F)c(OC)c1  
312 C=CC(C)=O.COC(=O)c1c([Si](C)(C)C)c(I)cn1S(=O)(=O)N(C)C>>COC(=O)c1c([Si](C)(C)C)c(/C=C\  
C(C)=O)cn1S(=O)(=O)N(C)C  
313 C=Cc1ccc(OC)c(OC)c1.Cc1ccc(I)c2ccc(N(C)C)cc12>>COc1ccc(/C=C/c2ccc(C)c3cc(N(C)C)ccc23)cc  
314 C=CC(=O)OC.CC(C)(C)c1[nH]c2ccccc2c1[C@H]1CCCN(Cc2ccc(Br)cc2)C1>>COC(=O)/C=C/c1c  
cc(CN2CCC[C@H](c3c(C(C)(C)C)[nH]c4ccccc34)C2)cc1  
315 C=CC(=O)OCCCC.Cn1nc(Br)c2ccccc21>>CCCCOC(=O)/C=C/c1nn(C)c2ccccc12  
316 CC/C(=C\c1cccc1)c1cccc1.CN(C)CCOc1ccc(Br)cc1>>CC/C(=C(\c1cccc1)c1ccc(OCCN(C)C)cc1)c  
1cccc1  
317 C=C(C)C=O.COc1ccc(I)cc1>>COc1ccc(/C=C(\C)C=O)cc1  
318 C=CC(=O)OCC.COc1ncc(Cl)c(N)n1>>CCOC(=O)/C=C/c1cnc(OC)nc1N  
319 C=Cc1ccc(NC(=O)OC(C)(C)C)cc1.CC(=O)OCc1cc(Br)ccn1>>CC(=O)OCc1cc(/C=C/c2ccc(NC(=O)O  
C(C)(C)C)cc2)ccn1  
320 C=CC(=O)N(C)Cc1c(C)c2ccccc2n1C.O=C1CN(c2ccccc2)Cc2cc(Br)enc2N1>>Cc1c(CN(C)C(=O)/C=  
C/c2enc3c(c2)CN(c2ccccc2)CC(=O)N3)n(C)c2ccccc12  
321 C=Cc1cccc1.Oc1cccc(I)c1>>Oc1cccc(/C=C/c2ccccc2)c1  
322 C=CC(N)=O.O=CC1=C(Br)CCCCC1>>NC(=O)/C=C/C1=C(C=O)CCCCC1  
323 C=Cc1cccc(Cl)c1.N#Cc1ccc2cc(Br)ccc2c1>>N#Cc1ccc2cc(/C=C/c3cccc(Cl)c3)ccc2c1  
324 C=CC(=O)OC.CCn1cnc2c(NCc3cccc(Br)c3)nc(N3CCN(C)CC3)nc21>>CCn1cnc2c(NCc3cccc(/C=C/  
C(=O)OC)c3)nc(N3CCN(C)CC3)nc21  
325 C=CC(=O)OC(C)(C)C.FC1(F)Oc2ccccc1c2O1>>CC(C)(C)OC(=O)/C=C/c1cccc2c1OC(F)(F)O2  
326 C=C(NC(=O)OC(C)(C)C)C(=O)OCc1cccc1.CC(=O)OC1Cc2ccc(Br)cc2C1>>CC(=O)OC1Cc2ccc(/C  
=C/\NC(=O)OC(C)(C)C)C(=O)OCc3ccccc3)cc2C1  
327 C=CC(=O)OC(C)(C)C.CN1CCN(C(=O)CN2CC(=O)Nc3ncc(Br)cc3C2)CC1>>CN1CCN(C(=O)CN2C  
C(=O)Nc3ncc(/C=C/C(=O)OC(C)(C)C)cc3C2)CC1  
328 C=CCCC(=O)O.Cc1ccc(I)cc1>>Cc1ccc(/C=C/CCC(=O)O)cc1  
329 C=CC(=O)OCC.CC(=O)Nc1cccc1I>>CCOC(=O)/C=C/c1cccc1NC(C)=O  
330 C=C(NC(C)=O)C(=O)OC.CC(=O)Oc1cc(C)c(I)c(C(C)C)c1>>COC(=O)/C(=C/c1c(C)cc(OC(C)=O)cc1  
C(C)C)NC(C)=O  
331 C=CC(=O)OC.Cc1ccc(S(=O)(=O)n2ccc3cc(Br)ccc32)cc1>>COC(=O)/C=C/c1ccc2c(ccn2S(=O)(=O)c2  
ccc(C)cc2)c1  
332 C=Cc1cccc1.O=S(=O)(OC=C(c1cccc1)c1cccc1)C(F)(F)F>>C=C(C=C(c1cccc1)c1cccc1)c1cccc  
333 C=CC(=O)OCC.COc1cccc(OC)c1I>>CCOC(=O)/C=C/c1c(OC)cccc1OC  
334 C=Cc1cccc1.Cc1ccc2c(-c3ccc(Cl)cc3)c(Br)c(=O)oc2c1>>Cc1ccc2c(-  
c3ccc(Cl)cc3)c(/C=C/c3ccccc3)c(=O)oc2c1



335 C=CC#N.Cc1nc(C(C)C)ncc1I>>Cc1nc(C(C)C)ncc1/C=C/C#N  
336 C=CC(=O)OCC.O=C(OCc1cccc1)c1cc([N+](=O)[O-])ccc1Br>>CCOC(=O)/C=C/c1ccc([N+](=O)[O-])cc1C(=O)OCc1cccc1  
C=CC(=O)OCC.COc1cc(Br)c2c3c1O[C@@H]1[C@]34CCN(C)[C@H](C2)[C@]42C=C[C@@]1(OC  
337 )c1c(OC(C)=O)ccc(O)c12>>CCOC(=O)/C=C/c1cc(OC)c2c3c1C[C@H]1N(C)CC[C@@]34[C@@H](  
O2)[C@@]2(OC)C=C[C@@]14c1c(O)ccc(OC(C)=O)c12  
338 C=CC(=O)OC1CCCCC1.COc1ccc(I)cc1>>COc1ccc(/C=C/C(=O)OC2CCCCC2)cc1  
339 C=CC(O)c1cccc1Br.COc1ccc(I)cc1OC>>COc1ccc(/C=C/C(O)c2cccc2Br)cc1OC  
C=Cc1ccc(C=C)cc1.CCCCCc1cc(/C=C/c2ccc(/C=C/c3cc(CCCCCC)c(/C=C/c4ccc(/C=C/c5cc(CCCC  
340 CC)c(/C=C/c6ccc(C)cc6)cc5CCCCC)cc4)cc3CCCCC)cc2)c(CCCCCC)cc1Br>>C=Cc1ccc(/C=C/c2  
cc(CCCCCC)c(/C=C/c3ccc(/C=C/c4cc(CCCCCC)c(/C=C/c5ccc(/C=C/c6cc(CCCCCC)c(/C=C/c7ccc(C  
)cc7)cc6CCCCC)cc5)cc4CCCCC)cc3)cc2CCCCC)cc1  
341 C=CC(=O)OC(C)(C)C.Nc1cccc1Br>>CC(C)(C)OC(=O)/C=C/c1cccc1N  
342 C=CCCCCCCCCCCCC.CC1(C)OC(=O)c2c(cccc2OS(=O)(=O)C(F)(F)F)O1>>CCCCCCCCCCCCC/  
C=C/c1cccc2c1C(=O)OC(C)(C)O2  
343 Br1enc2c(c1)NCCCN2.C=CC(=O)N(C)Cc1oc2cccc2c1C>>Cc1c(CN(C)C(=O)/C=C/c2cnc3c(c2)NC  
CCN3)oc2cccc12  
344 C=Cc1ccc(C)ccc1C.O=Cc1cccc1Br>>Cc1ccc(C)c(/C=C/c2cccc2C=O)c1  
345 C=Cc1ccc(C(=O)OC)cc1.CC(C)(C)C(=O)Nc1nc2ncc(Br)cc2c(=O)[nH]1>>COC(=O)c1ccc(/C=C/c2cn  
c3nc(NC(=O)C(C)(C)C)[nH]c(=O)c3c2)cc1  
346 C=Cc1ccc(F)cc1.O=Cc1cccc1Br>>O=Cc1cccc1/C=C/c1ccc(F)cc1  
C=C[C@]1(O)CC[C@H]2[C@@H]3CCc4cc(O[Si](C)(C)C(C)(C)C)ccc4[C@H]3CC[C@@]21C.Clc1  
347 ccc(I)cn1>>CC(C)(C)[Si](C)(C)Oc1ccc2c(c1)CC[C@@H]1[C@@H]2CC[C@@]2(C)[C@H]1CC[C@  
@]2(O)/C=C/c1ccc(Cl)nc1  
348 C=CC(=O)OCC.CC(=O)c1cn(Cc2ccc(F)cc2)c2ccc(Br)cc2c1=O>>CCOC(=O)/C=C/c1ccc2c(c1)c(=O)c  
(C(C)=O)cn2Cc1ccc(F)cc1  
349 C=CC(CO)N1C(=O)c2cccc2C1=O.COc1ccc(OC)c(Br)c1>>COc1ccc(OC)c(/C=C/C(CO)N2C(=O)c3c  
cccc3C2=O)c1  
350 C=Cc1ccc(OC)cc1.CC(=O)c1ccc(Cl)cc1>>COc1ccc(/C=C/c2ccc(C(C)=O)cc2)cc1  
351 C=CC(=O)O.N#Cc1cccc(Br)c1>>N#Cc1cccc(/C=C/C(=O)O)c1  
352 C=Cc1cccc1.Nc1cccc(Br)c1>>Nc1cccc(/C=C/c2cccc2)c1  
353 C=Cc1cccc1.C[Si](C)(C)CI>>C[Si](C)(C)C/C=C/c1cccc1  
354 C=CC(C)=O.Cc1cccc1Br>>CC(=O)/C=C/c1cccc1C  
C=C1C(=O)O[C@H]2[C@H]1CC/C(C)=C/CC[C@@]1(C)O[C@H]21.COC(=O)c1c(F)cccc1I>>CO  
355 C(=O)c1c(F)cccc1/C=C1/C(=O)O[C@H]2[C@H]1CC/C(C)=C/CC[C@@]1(C)O[C@H]21  
356 Br1enc2cccc2c1.C=CC(=O)OCC>>CCOC(=O)/C=C/c1enc2cccc2c1  
357 Br1enc2nccnc12.C=CC(=O)OCC>>CCOC(=O)/C=C/c1ncc2nccnc12  
358 C=C[C@@H]1CCCCN1C(=O)OC(C)(C)C.FC(F)(F)c1ccc(I)cc1>>CC(C)(C)OC(=O)N1CCCC[C@H]  
1/C=C/c1ccc(C(F)(F)F)cc1  
359 C=Cc1nccc(C#N)c1Nc1ccc2[nH]ccc2c1C.ClCCOc1ccc(Br)cc1>>Cc1c(Nc2c(C#N)cncc2/C=C/c2ccc(  
OCCCl)cc2)ccc2[nH]ccc12  
360 Br1cccc1.C=Cc1ccc(C(C)=O)cc1>>CC(=O)c1ccc(/C=C/c2cccc2)cc1  
361 C=Cc1cccc1.ClC1CCCCC1>>C(=C/C1CCCCC1)\c1cccc1  
362 C=CC(=O)OC.COc1ccc2c(c1)CCN(c1ccc(CCC(C)C)c(Cl)c1)C2(C)c1ccc(Br)cc1>>COC(=O)/C=C/c1  
ccc(C2(C)c3ccc(OC)cc3CCN2c2ccc(CCC(C)C)c(Cl)c2)cc1  
363 C=CC(=O)OC.CC(=O)Oc1ccc(Br)cc1OC(C)=O>>COC(=O)/C=C/c1ccc(OC(C)=O)c(OC(C)=O)c1  
364 C=Cc1ccc(C#N)c(C#N)c1.Ic1ccc2c(c1)C1c3cccc4cccc(c34)C21>>N#Cc1ccc(/C=C/c2ccc3c(c2)C2c4c  
ccc5cccc(c45)C32)cc1C#N  
365 C=Cc1cccc1.CC(C)(C)OC(=O)N1CCC2(CC1)Oc1ccc(Br)cc1C2=O>>CC(C)(C)OC(=O)N1CCC2(CC  
1)Oc1ccc(/C=C/c3cccc3)cc1C2=O  
366 C=CC(=O)N(C)C.CCOC(=O)c1ncsc1NS(=O)(=O)Cc1cccc1Br>>CCOC(=O)c1ncsc1NS(=O)(=O)Cc1  
cccc1/C=C/C(=O)N(C)C  
367 C=CCCCN1C(=O)c2cccc2C1=O.CC(C)(C)c1ccc(OS(=O)(=O)C(F)(F)F)cc1>>C=C(CCCCN1C(=O)  
c2cccc2C1=O)c1ccc(C(C)(C)C)cc1  
368 C=CC(=O)O[C@H]1C[C@@H]2CC[C@@]1(C)C2(C)C.O=c1[nH]c(=O)n([C@H]2C[C@H](O)[C@  
@H](CO)O2)cc1I>>CC1(C)[C@H]2CC[C@]1(C)[C@@H](OC(=O)/C=C/c1cn([C@H]3C[C@H](O)[  
C@@H](CO)O3)c(=O)[nH]c1=O)C2  
369 C=Cc1ccc(F)cc1.Fc1cccc(I)c1>>Fc1ccc(/C=C/c2cccc(F)c2)cc1  
370 C=CC#N.Cn1c2cccc2c2nc3ccc(Cl)cc3c3cccc1c32>>Cn1c2cccc2c2nc3ccc(/C=C/C#N)cc3c3cccc1c3  
371 C=CC(=O)OC.Ic1cccc2cc[nH]c12>>COC(=O)/C=C/c1cccc2cc[nH]c12  
372 C=CC(=O)OC.Ic1ccc(OCc2cccc2)cn1>>COC(=O)/C=C\c1ccc(OCc2cccc2)cn1

373 C=Cc1ccncc1.C[C@@H](COc1cnc(Cl)c(Br)c1)NC(=O)OC(C)(C)C>>C[C@@H](COc1cnc(Cl)c(/C=C  
 /c2ccncc2)c1)NC(=O)OC(C)(C)C  
 374 C=Cc1ccncc1.CCCCCCOCc1ccc(Br)cc1F>>CCCCCCCCOc1ccc(/C=C/c2ccncc2)cc1F  
 375 C=C.Ic1cccc2cccc12>>C=Cc1cccc2cccc12  
 376 C=COCCCC.CC(=O)c1ccc(Br)cc1>>C=C(OCCCC)c1ccc(C(C)=O)cc1  
 377 C=C(C)C(=O)OC.O=Cc1ccc(Cl)cc1>>COC(=O)/C(C)=C/c1ccc(C=O)cc1  
 C=C[C@H]1C[C@H]2CC[C@@H](C(=O)OC)N2C(=O)[C@@](Cc2cccc2)(NC(=O)OCc2cccc2)[C  
 378 @@@H]1OC(C)=O.O=[N+](O-  
 )c1ccc(Br)cc1>>COC(=O)[C@@H]1CC[C@@H]2C[C@H](/C=C/c3ccc([N+](=O)[O-  
 ])cc3)[C@@H](OC(C)=O)[C@](Cc3cccc3)(NC(=O)OCc3cccc3)C(=O)N12  
 379 C=Cc1ccc(N)cc1.Oc1ccc(-c2oc3cc(O)cc(Br)c3c2-c2cc(O)cc(O)c2)cc1>>Nc1ccc(/C=C/c2cc(O)cc3oc(-  
 c4ccc(O)cc4)c(-c4cc(O)cc(O)c4)c23)cc1  
 380 C=CS(=O)(=O)F.Cc1ccc(S(=O)(=O)n2cc(I)c3cccc32)cc1>>Cc1ccc(S(=O)(=O)n2cc(/C=C/S(=O)(=O)  
 F)c3cccc32)cc1  
 381 BrC1=C(C2=CCCCO2)CCCC1.C=CC(=O)OC>>COC(=O)/C=C/C1=C(C2=CCCCO2)CCCC1  
 382 C=Cc1cccn1.COc1ccc(I)cc1>>COc1ccc(/C=C/c2cccn2)cc1  
 383 C=CC(N)=O.Cc1ccc(S(=O)(=O)n2cc(I)c3c(OCC(C)C)ncc32)cc1>>Cc1ccc(S(=O)(=O)n2cc(/C=C/C(  
 N)=O)c3c(OCC(C)C)ncc32)cc1  
 384 C=Cc1ccc(N)cc1.Cc1ccc(Br)cc1>>Cc1ccc(/C=C/c2ccc(N)cc2)cc1  
 385 C=Cc1cccc1.IC1CCCCC1>>C(=C/C1CCCCC1)\c1cccc1  
 386 C=Cc1ccc(F)cc1.O=S(=O)(c1cccc1)C(F)(F)Br>>O=S(=O)(c1cccc1)C(F)(F)/C=C/c1ccc(F)cc1  
 387 C=CC(=O)O.Cc1cccc1Br>>Cc1cccc1/C=C/C(=O)O  
 388 C=CCCC#N.Ic1cccc1>>N#CCCC/C=C/c1cccc1  
 389 C=CC(=O)OCC(C)CCCC.COc1ccc(Br)cc1>>CCCC(C)COC(=O)/C=C/c1ccc(OC)cc1  
 390 C=CC(=O)OCC.Cc1nnc(Cc2cc(Cl)ccc2Br)o1>>CCOC(=O)/C=C/c1ccc(Cl)cc1Cc1nnc(C)o1  
 391 C=Cc1ccncc1.CC(C)(C)OC(=O)N[C@H](COc1cnc(Br)c1)Cc1ccc2cccc2c1>>CC(C)(C)OC(=O)N[C  
 @H](COc1cnc(/C=C/c2ccncc2)c1)Cc1ccc2cccc2c1  
 392 C=CC(=O)OC.O=[N+](O-)c1cccc(I)c1>>COC(=O)/C=C/c1cccc([N+](=O)[O-])c1  
 393 C=CC(=O)OC.CN(C)c1ccc(Br)cc1>>COC(=O)/C=C/c1ccc(N(C)C)cc1  
 394 C=Cc1cccc1.O=C1C=CC(=O)c2c(I)cccc21>>O=C1C=CC(=O)c2c(/C=C/c3cccc3)cccc21  
 395 C=Cc1cccc1.Cc1cc(I)cc(C)n1>>Cc1cc(/C=C/c2cccc2)cc(C)n1  
 396 C=CC(=O)OC.Cc1cc2c(c(C)c1Br)CCC2=O>>COC(=O)/C=C/c1c(C)cc2c(c1C)CCC2=O  
 397 C=Cc1cccc([N+](=O)[O-])c1.Nc1ccc(I)cc1>>Nc1ccc(/C=C/c2cccc([N+](=O)[O-])c2)cc1  
 398 C=C(NC(=O)[C@H](Cc1cccc1)NC(=O)OC(C)(C)C(=O)OC.Ic1cccc1>>COC(=O)/C=C/c1cccc1  
 )NC(=O)[C@H](Cc1cccc1)NC(=O)OC(C)(C)C  
 399 C=CC(=O)N(C)Cc1oc2cccc2c1C.CC(C)(C)OC(=O)NCCN1Cc2cc(Br)cnc2NC1=O>>Cc1c(CN(C)C(  
 =O)/C=C/c2cnc3c(c2)CN(CCNC(=O)OC(C)(C)C(=O)N3)oc2cccc12  
 400 C=CCNS(=O)(=O)c1ccc(C)cc1.Cc1ccc(Br)cc1>>Cc1ccc(/C=C/CNS(=O)(=O)c2ccc(C)cc2)cc1  
 401 C=Cc1ccc(Cl)cc1.Cn1nc(Br)c2cccc21>>Cn1nc(/C=C/c2ccc(Cl)cc2)c2cccc21  
 402 C=Cc1ccc(Cl)cc1.O=P1(c2cccc2)C(Br)=Cc2cccc21>>O=P1(c2cccc2)C(/C=C/c2ccc(Cl)cc2)=Cc2cc  
 ccc21  
 403 COC[C@@H](/N=C(\c1cccc1)N1C=CCC[C@H]1c1cccc1)C(C)C.Cc1cccc(I)c1>>COC[C@@H](/N  
 =C(\c1cccc1)N1C=C(c2cccc(C)c2)CC[C@H]1c1cccc1)C(C)C  
 404 COC(=O)C(C/C=C/C(C)=O)NS(=O)(=O)c1ccc(C)cc1.Cc1ccc(Br)cc1>>COC(=O)C(C/C=C/C(C)=O)c  
 1ccc(C)cc1)NS(=O)(=O)c1ccc(C)cc1  
 405 C=Cc1ccc(OCC(=O)OCC)cc1.Oc1ccc(-c2oc3cc(O)cc(Br)c3c2-  
 c2cc(O)cc(O)c2)cc1>>CCOC(=O)COc1ccc(/C=C/c2cc(O)cc3oc(-c4ccc(O)cc4)c(-  
 406 C=Cc1cccc1Cl.Cc1ccc(Br)cc1>>Cc1ccc(/C=C/c2cccc2Cl)cc1  
 407 C=C.COC(=O)c1cccc(Br)c1NC(C)=O>>C=Cc1cccc(C(=O)OC)c1NC(C)=O  
 408 C=CCn1cccc1C(=O)c1ccc(C)cc1.C[C@H](Oc1cccc(I)c1)C(=O)N1CCOCC1>>Cc1ccc(C(=O)c2cccn2  
 C/C=C/c2cccc(O[C@@H](C)C(=O)N3CCOCC3)c2)cc1  
 409 C=CC(=O)Nc1cccc1NC(=O)OC(C)(C)C.COCC(=O)[C@H]1CN(C(C)C)C[C@@H]1c1ccc(Br)cc1>>  
 CCOC(=O)[C@H]1CN(C(C)C)C[C@@H]1c1ccc(/C=C/C(=O)Nc2cccc2NC(=O)OC(C)(C)C)cc1  
 410 C=CCN1C(=O)c2cccc2C1=O.Ic1cccc1>>O=C1c2cccc2C(=O)N1C/C=C/c1cccc1  
 C=C[C@H]1O[C@H]2OC(C)(C)O[C@@H]2[C@H]1O.O=c1cc(-  
 411 c2cccc2)oc2cc(Br)c(O)cc12>>CC1(C)O[C@H]2O[C@H](/C=C/c3cc4oc(-  
 c5cccc5)cc(=O)c4cc3O)[C@H](O)[C@H]2O1  
 C=CC(C)(C)C(=O)NC(C)(C)CO.CC(=O)OC[C@H]1O[C@@H](c2cc(Cc3ccc(Br)cc3Cl)c(C)cc2C)[C  
 412 @H](OC(C)=O)[C@@H](OC(C)=O)[C@@H]1OC(C)=O>>CC(=O)OC[C@H]1O[C@@H](c2cc(Cc3  
 ccc(/C=C/C(C)(C)C(=O)NC(C)(C)CO)cc3Cl)c(C)cc2C)[C@H](OC(C)=O)[C@@H](OC(C)=O)[C@@  
 413 C=CC(=O)OC.CC1(C)c2cccc2-c2ccc(I)cc21>>COC(=O)/C=C/c1ccc2c(c1)C(C)(C)c1cccc1-2

414 C=Cc1cccc1[N+](=O)[O-].Nc1cccc1I>>Nc1cccc1/C=C/c1cccc1[N+](=O)[O-]  
 415 C=C(OC(C)=O)C(=O)OCC(F)(F)F.COc1ccc(I)cc1OC>>COc1ccc(/C=C(\OC(C)=O)C(=O)OCC(F)(F)F)cc1OC  
 416 C=Cc1ccncc1.CCOc1ccc(Br)c(F)c1>>CCOc1ccc(/C=C/c2ccncc2)c(F)c1  
 417 C=CC(=O)OCc1cccc1.CCn1nnc2c(Cl)c(Br)ccc21>>CCn1nnc2c(Cl)c(/C=C/C(=O)OCc3cccc3)ccc21  
 418 C=Cc1ccc(C(F)(F)F)cc1.COC(=O)Cc1c(C)nn(Cc2ccc(Br)cc2)c1C>>COC(=O)Cc1c(C)nn(Cc2ccc(/C=C/C/c3ccc(C(F)(F)F)cc3)cc2)c1C  
 419 C=CC(=O)OC.CC(=O)c1cccc1Br>>COC(=O)/C=C/c1cccc1C(C)=O  
 420 C=Cc1ccc(OC)cc1.O=C(OCCCC(Br)C(F)(F)F)c1cccc1>>COc1ccc(/C=C/C(CCCOC(=O)c2cccc2)C(F)(F)F)cc1  
 421 C=CC(=O)OCc1cccc1.FC(F)(F)C1(c2cccc2)Nc2ccc(Br)cc2O1>>O=C(/C=C/c1ccc2c(c1)OC(c1cccc1)(C(F)(F)F)N2)OCc1cccc1  
 422 C=CC(F)(F)C(F)(F)C(F)(F)C(F)(F)F.CCCN(Cc1ccc(Br)cc1)C(=O)OC(C)(C)C>>CCCN(Cc1ccc(/C=C/C(F)(F)C(F)(F)C(F)(F)C(F)(F)cc1)C(=O)OC(C)(C)C  
 423 Brclcncc1.C=C/C=C/C(=O)N(CCCC)CCCC>>CCCCN(CCCC)C(=O)/C=C/C=C/c1cncc1  
 424 C=Cc1cncc1.CCCCCCN(CCCCC)c1ccc2c(c1)C(CC)(CC)c1cc(Br)ccc1-2>>CCCCCN(CCCCC)c1ccc2c(c1)C(CC)(CC)c1cc(/C=C/c3cncc3)ccc1-2  
 425 C=CC(=O)OC.COC(=O)c1c(C=O)cc(I)c(O)c1OC>>COC(=O)/C=C/c1cc(C=O)c(C(=O)OC)c(OC)c1O  
 426 \*CNCCCOCCOCCOCCCN(C(=O)COc1ccc(C(Cc2cc(OC)cc(OC)c2)NC(=O)c2ccc(C=C)cc2)cc1.CCc1ccc(I)cc1>>\*CNCCCOCCOCCOCCCN(C(=O)COc1ccc(C(Cc2cc(OC)cc(OC)c2)NC(=O)c2ccc(/C=C/c3ccc(CC)cc3)cc2)cc1  
 427 C=Cc1cccc1.Cc1cccc1OS(=O)(=O)C(F)(F)F>>C=C(c1cccc1)c1cccc1C  
 428 C=Cc1cnccn1.COC(=O)c1cc2ccc(=O)oc2cc1OS(=O)(=O)C(F)(F)F>>COC(=O)c1cc2ccc(=O)oc2cc1/C=C/c1cnccn1  
 429 C=Cc1ccc2cccc2c1.COc1ccc(Cl)c(I)c1>>COc1ccc(Cl)c(/C=C/c2ccc3cccc3c2)c1  
 430 C=CC(C)(C)O.COc1cc(OC)c2ccc(=O)oc2c1I>>COc1cc(OC)c2ccc(=O)oc2c1/C=C/C(C)(C)O  
 431 C=CC(=O)OC(C)(C)C.Oc1ccc(C=C2CCCCC2)c2ccc(Br)c(F)c2cc1>>CC(C)(C)OC(=O)/C=C/c1ccc(C(=C2CCCCC2)c2ccc(O)cc2)cc1F  
 432 C=CC(=O)OC.COc1ccc(-c2cc3cc(Br)cc(OC)c3o2)cc1OC>>COC(=O)/C=C/c1cc(OC)c2oc(-c3ccc(OC)c(OC)c3)cc2c1  
 433 C=CC(=O)OC(C)(C)C.CN(c1cccc1)c1cncc2c(I)enn12>>CN(c1cccc1)c1cncc2c(/C=C/C(=O)OC(C)(C)C)enn12  
 434 C=C(COC(C)=O)C(=O)OC.CCOC(=O)c1ccc(I)cc1>>CCOC(=O)c1ccc(/C=C(\COC(C)=O)C(=O)OC)c  
 435 C=CC(=O)OCC.CC(C)c1nn(-c2cccc2)c(-c2ccc(F)cc2)c1Br>>CCOC(=O)/C=C/c1c(C(C)C)nn(-c2cccc2)c1-c1ccc(F)cc1  
 436 C=CC(=O)Nc1cccc2ccnc12.Ic1ccc2c(c1)OCCO2>>O=C(/C=C/c1ccc2c(c1)OCCO2)Nc1cccc2ccnc1  
 437 C=CC(N)=O.COc1cc(Nc2ncc3c(C)nc(-c4cccc(Br)c4)n3n2)cc(OC)c1OC>>COc1cc(Nc2ncc3c(C)nc(-c4cccc(/C=C/C(N)=O)c4)n3n2)cc(OC)c1OC  
 438 C=C(C)C(=O)OC.O=Cc1ccc(Br)cc1>>COC(=O)/C(C)=C/c1ccc(C=O)cc1  
 439 C=Cc1ccc(OC)c(OC)c1.Oc1ccc(O)c(I)c1>>COc1ccc(/C=C/c2cc(O)ccc2O)cc1OC  
 440 C=CCC(C)(C)O.COC(=O)C[C@H]1COc2cc(O[C@H]3CCc4c(Oc5ccc(I)en5)ccc(F)c43)ccc21>>COC(=O)C[C@H]1COc2cc(O[C@H]3CCc4c(Oc5ccc(/C=C/CC(C)(C)O)en5)ccc(F)c43)ccc21  
 441 C=CCOC(C)C.Fc1ccc(C2(C(F)(F)F)c3ccc(Br)cn3)CO2)c(F)c1>>CC(C)OC/C=C/c1ccc(C(F)(F)C2(c3ccc(F)cc3F)CO2)nc1  
 442 C=Cc1cccc1.CO[C@H]1[C@H](OC(C)=O)[C@H](COC(C)=O)O[C@H]1n1cc(I)c(=O)[nH]c1=O>>CO[C@H]1[C@H](OC(C)=O)[C@H](COC(C)=O)O[C@H]1n1cc(/C=C/c2cccc2)c(=O)[nH]  
 443 C=CC=O.CC(=O)c1ccc(Br)cc1>>CC(=O)c1ccc(/C=C/C=O)cc1  
 444 C=CC(=O)OC(C)(C)C.O=C1c2cccc2CCc2cc(Br)ccc21>>CC(C)(C)OC(=O)/C=C/c1ccc2c(c1)CCc1ccc1C2=O  
 445 C=CC(=O)O[C@H]1C[C@H](C)CC[C@H]1C(C)C.O=Cc1cccc1Br>>CC(C)[C@H]1CC[C@H](C)C[C@H]1OC(=O)/C=C/c1cccc1C=O  
 446 C=CCOC(=O)OC.Ic1cccc1>>COC(=O)OC/C=C/c1cccc1  
 447 C=CC(C)(C)O.COc1ccc(/C=C/C(=O)c2ccc(OC)c(I)c2OC)cc1>>COc1ccc(/C=C/C(=O)c2ccc(OC)c(/C=C/C(C)(C)O)c2OC)cc1  
 448 C=CC(=O)OCCCC.Ic1cncc1>>CCCCOC(=O)/C=C/c1cncc1  
 449 C=CS(=O)(=O)N1CCC2(CC1)N=C(C1CCCC1)NC2=O.Cc1cccc1Br>>Cc1cccc1/C=C/S(=O)(=O)N1CCC2(CC1)N=C(C1CCCC1)NC2=O  
 450 C=CCN1CCP(C)(=O)CC1.Fc1cccc(COc2ccc(Nc3nnc4ccc(I)cc34)cc2Cl)c1>>CP1(=O)CCN(C/C=C/c2ccc3nnc(Nc4ccc(OCc5cccc(F)c5)c(Cl)c4)c3c2)CC1  
 451 C=CCOc1cccc1.FC(F)(F)c1ccc(Br)cc1>>FC(F)(F)c1ccc(/C=C/COc2cccc2)cc1  
 452 C=CC(=O)OC.COC(=O)Cc1cc(OC)c(OC)cc1I>>COC(=O)/C=C/c1cc(OC)c(OC)cc1CC(=O)OC

453 C=Cc1ccc(OC)cc1.COc1cc[nH]c1/C=C1\C(=O)Nc2cccc(I)c21>>COc1ccc(/C=C/c2cccc3c2/C(=C/c2[n  
H]ccc2OC)C(=O)N3)cc1  
454 C=Cc1cccc1.O=C1c2cccc2C(=O)N1CCc1ccc(Br)cc1>>O=C1c2cccc2C(=O)N1CCc1ccc(/C=C/c2cc  
ccc2)cc1  
455 C=Cc1ccc(C=O)cc1.Ic1ccc(C2OCCO2)cc1>>O=Cc1ccc(/C=C/c2ccc(C3OCCO3)cc2)cc1  
456 C=C(NC(C)=O)c1ccc(Cl)cn1.C=CC(=O)OCCCC>>C=C(NC(C)=O)c1ccc(/C=C/C(=O)OCCCC)cn1  
457 C=Cc1cccc1OC.CCOC(=O)C(F)I>>CCOC(=O)C(F)/C=C/c1cccc1OC  
458 C=Cc1cccc1.O=[N+](=[O-])c1secc1Br>>O=[N+](=[O-])c1secc1/C=C/c1cccc1  
459 C=CC(=O)OCC.CC(=O)c1cn(-c2cccc2)nc1OS(=O)(=O)C(F)(F)F>>CCOC(=O)/C=C/c1nn(-  
c2cccc2)cc1C(C)=O  
460 C=C/C=C/C(=O)N(CCCC)CCCC.Clc1ccc(Br)cc1>>CCCCN(CCCC)C(=O)/C=C/C=C/c1ccc(Cl)cc1  
461 C=CC(=O)OCC.Nc1ccc(Br)cc1C(F)(F)F>>CCOC(=O)/C=C/c1ccc(N)c(C(F)(F)F)c1  
462 C=CCC(=O)OC.FC(F)(F)c1ccc(I)cc1>>COC(=O)C/C=C/c1ccc(C(F)(F)F)cc1  
463 C=C.NC(=O)c1ccc(Cl)cc1Br>>C=Cc1cc(Cl)ccc1C(N)=O  
464 Brc1ccc(I)cc1.C=CS(=O)(=O)F>>O=S(=O)(F)/C=C/c1ccc(Br)cc1  
465 C=COC(C)(C)C.O=S(=O)(c1cccc1)C(F)(F)Br>>CC(C)(C)O/C=C/C(F)(F)S(=O)(=O)c1cccc1  
466 Brc1sc2cccc12.C=CCCCCCC>>C=C(CCCCCC)c1sc2cccc12  
467 C=CC(C)(C)O.C[C@@H]1N[C@@H](CO[Si](C)(C)C(C)(C)C)Cc2c(Br)cccc21>>C[C@@H]1N[C@  
@H](CO[Si](C)(C)C(C)(C)C)Cc2c(/C=C/C(C)(C)O)cccc21  
468 Brc1cccc1.C=CP(=O)(OCC)OCC>>CCOP(=O)/C=C/c1cccc1OCC  
469 C=CC(=O)OCC.Cc1cc(C)c(N)c(I)c1>>CCOC(=O)/C=C/c1cc(C)cc(C)c1N  
470 C=CC(=O)OC.Cc1ccc(S(=O)(=O)NCCC(Br)=C(c2cccc2)c2cccc2)cc1>>COC(=O)/C=C/C(CCNS(=O)(=O)c1ccc(C)cc1)=C(c1cccc1)c1cccc1  
471 C=Cc1cc(OC)c(O)c(OC)c1.Oc1cc(O)cc(I)c1>>COc1cc(/C=C/c2cc(O)cc(O)c2)cc(OC)c1O  
472 C=CC(=O)OC(C)(C)C.COC1CCC(C2=C[C@H]3CC[C@H](OC(C)(C)C)[C@@]3(C)CC2)=C(Br)C1>  
>COC1CCC(C2=C[C@H]3CC[C@H](OC(C)(C)C)[C@@]3(C)CC2)=C(/C=C/C(=O)OC(C)(C)C)C1  
Br1cnc2cccc2c1.C=CCO[C@]1(C)C[C@@H](C)C(=O)[C@H](C)C2NC(=O)O[C@]2(CC)[C@@H]  
(CC)OC(=O)/C(C)=C/[C@H](C)[C@H]1O[C@@H]1O[C@H](C)C[C@H](N(C)C)[C@H]1OC(=O)c1  
473 ccccc1>>CC[C@H]1OC(=O)/C(C)=C/[C@H](C)[C@@H](O[C@@H]2O[C@H](C)C[C@H](N(C)C)[  
C@H]2OC(=O)c2cccc2)[C@](C)(OC/C=C/c2cnc3cccc3c2)C[C@@H](C)C(=O)[C@H](C)C2NC(=O)O[C@]21CC  
C=C1C(=O)O[C@@H]2C[C@@]3(C)CCCC(=C)[C@@H]3C[C@H]12.COc1ccc(Br)cn1>>C=C1CC  
C[C@]2(C)C[C@H]3OC(=O)/C(=C/c4ccc(OC)nc4)[C@H]3C[C@@H]12  
474 C=CC(=O)OC.Ic1cn2c(n1)[C@@H](OCc1cccc1)[C@@H](OCc1cccc1)[C@H](OCc1cccc1)[C@H]  
475 ]2COc1cccc1>>COC(=O)/C=C/c1cn2c(n1)[C@@H](OCc1cccc1)[C@@H](OCc1cccc1)[C@H](  
OCc1cccc1)[C@H]2COc1cccc1  
476 C=COCCCC.CCN(CC)c1ccc2c(Br)cc(=O)oc2c1>>CCCCO/C=C/c1cc(=O)oc2cc(N(CC)CC)ccc12  
477 C=CC(=O)OCC.C[C@@H]1CN(C(=O)OC(C)(C)C)C[C@H]2Cc3ccc(Br)nc3N12>>CCOC(=O)/C=C/  
1ccc2c(n1)N1[C@H](C)CN(C(=O)OC(C)(C)C)C[C@H]1C2  
478 C=CC(=O)OC.O=C1c2cccc2NC12C(c1cccc1)=C(c1cccc1)c1ccc(Br)cc12>>COC(=O)/C=C/c1ccc2  
c(c1)C1(Nc3cccc3C1=O)C(c1cccc1)=C2c1cccc1  
C=CC(=O)OC.COC(=O)c1ccc(-  
479 c2cc(C(C)(C)C)cc3c2Oc2c(Br)cc(C(C)(C)C)cc2C3(C)C)cc1>>COC(=O)/C=C/c1cc(C(C)(C)C)cc2c1O  
c1c(-c3ccc(C(=O)OC)cc3)cc(C(C)(C)C)cc1C2(C)C  
480 C=CC(=O)OC(C)(C)C.CN(C)c1ccc(CNC(=O)c2cc(Br)cc(I)c2)cc1>>CN(C)c1ccc(CNC(=O)c2cc(Br)cc  
(/C=C/C(=O)OC(C)(C)C)c2)cc1  
481 Br1ccc(C(=C(c2cccc2)c2cccc2)c2cccc2)cc1.C=Cc1cccn1>>C(=C/c1cccn1)\c1ccc(C(=C(c2cccc  
2)c2cccc2)c2cccc2)cc1  
482 C=CS(=O)(=O)F.CC(C)(C)NC(=O)c1cc(I)ccn1>>CC(C)(C)NC(=O)c1cc(/C=C/S(=O)(=O)F)ccn1  
483 C=Cc1ccc(O)c(OC)c1.Oc1ccc(O)c(I)c1>>COc1cc(/C=C/c2cc(O)ccc2O)ccc1O  
C=CC(=O)OC(C)(C)C.Oc1ccc(-  
484 c2ccc(Br)cc2)cc1C12CC3CC(CC(C3)C1)C2>>CC(C)(C)OC(=O)/C=C/c1ccc(-  
c2ccc(O)c(C34CC5CC(CC(C5)C3)C4)c2)cc1  
C=Cc1cccc1.CC(=O)Oc1c(C(C)(C)C)ccc(-c2ccc(Br)c(-  
485 c3cc(C(C)(C)C)c(OC(C)=O)c(C(C)(C)C)c3)c2)cc1C(C)(C)C>>CC(=O)Oc1c(C(C)(C)C)cc(-  
c2ccc(/C=C/c3cccc3)c(-c3cc(C(C)(C)C)c(OC(C)=O)c(C(C)(C)C)c3)c2)cc1C(C)(C)C  
486 C=Cc1cccc1.Cc1nc(Br)c2c(c1O)COC(C)(C)OC2>>Cc1nc(/C=C/c2cccc2)c2c(c1O)COC(C)(C)OC2  
487 C=CC(=O)OCC.O=S(=O)(OC1=NCCCC1)C(F)(F)F>>CCOC(=O)/C=C/C1=NCCCC1  
488 C=Cc1cccc1.CC(C)c1ccc(I)cc1>>CC(C)c1ccc(/C=C/c2cccc2)cc1  
489 C=Cc1ccc(C)cc1.CCn1cncc1-c1ccc(Br)cc1>>CCn1cncc1-c1ccc(/C=C/c2ccc(C)cc2)cc1

490 C=CC(=O)OCCOC1CCC2C(C)CC(=O)OC2C1.COC(=O)C1CCC(Br)CC1>>COC(=O)C1CCC(/C=C/C(=O)OCC  
Oc2ccc3c(C)cc(=O)oc3c2)cc1  
 491 COC[C@H]/N=C(\c1cccc1)N1C=CCC[C@H]1C(C)C.COc1ccc(I)cc1>>COC[C@H]/N=C(\c  
1cccc1)N1C=C(c2ccc(OC)cc2)CC[C@H]1C(C)C  
 492 C=CC(=O)OC.COc1cc(-c2cc3cc(Br)cc(OC)c3o2)ccc1OCc1cccc1>>COC(=O)/C=C/c1cc(OC)c2oc(-  
c3ccc(OCc4cccc4)c(OC)c3)cc2c1  
 493 C=Cc1cccc([N+](=O)[O-])c1.FC(F)(F)Oc1cccc(Br)c1>>O=[N+](O-  
)c1cccc(/C=C/c2cccc(OC(F)(F)F)c2)c1  
 494 C=CC(=O)Oc1cccc1.Cn1ccc(I)cc1=O>>Cn1ccc(/C=C/C(=O)Oc2cccc2)cc1=O  
 495 C=CC(=O)OC.O=S(=O)(c1cccc(F)c1)N1CCc2cc(Br)cnc21>>COC(=O)/C=C/c1cnc2c(c1)CCN2S(=O)(  
=O)c1cccc(F)c1  
 496 C=CC(=O)OC.Cc1n[nH]c2cc(Br)ccc12>>COC(=O)/C=C/c1ccc2c(C)n[nH]c2c1  
 497 C=CC(=O)N(C)C.Ic1cccc1>>CN(C)C(=O)/C=C/c1cccc1  
 498 C=C(NC(C)=O)C(=O)OC.CCOC(=O)C1[nH]c2cc3c(nc2c1Br)CCC(C(C)(C)C)C3>>CCOC(=O)C1[nH]  
c2cc3c(nc2c1/C=C(\NC(C)=O)C(=O)OC)CCC(C(C)(C)C)C3  
 499 C=C(F)C(=O)OC.Ic1cccc1-c1cccc1>>COC(=O)/C(F)=C/c1cccc1-c1cccc1  
 500 C=CC(=O)OC.COc1ccc(CNc2c(C(=O)NCc3ccc(F)cc3F)c(=O)n(OCc3cccc3)c3ncc(Br)cc23)c(OC)c1  
>>COC(=O)/C=C/c1cnc2c(c1)c(NCc1ccc(OC)cc1OC)c(C(=O)NCc1ccc(F)cc1F)c(=O)n2OCc1cccc1  
 501 C=CC(=O)O.Cc1cccc(S(=O)(=O)N(C)c2ccc(I)cc2)c1>>Cc1cccc(S(=O)(=O)N(C)c2ccc(/C=C/C(=O)O)  
cc2)c1  
 502 Br1ccc2ccc3cccc4ccc1c2c34.C=C(CCO[Si](C)(C)C(C)(C)C)C(=O)OC>>COC(=O)/C=C/c1ccc2ccc3  
cccc4ccc1c2c34)CCO[Si](C)(C)C(C)(C)C  
 503 C=CC(C)=O.Clc1cccc1>>CC(=O)/C=C/c1cccc1  
 504 C=CC(=O)OC(C)(C)C.COc1cc(NCc2ccc(Br)cc2)cc(OC)c1OC>>COc1cc(NCc2ccc(/C=C/C(=O)OC(C)  
(C)C)cc2)cc(OC)c1OC  
 505 Br1cccn1.C=CC[C@H]1CCCN(C)C[C@H](OC(C)=O)[C@H](C)C[C@H](CC(OC)OC)[C@H](O[C  
@H]2O[C@H](C)[C@H](O[C@H]3C[C@@](C)(O)[C@H](OC(=O)CC)[C@H](C)O3)[C@H](  
N(C)C)[C@H]2OC(C)=O)[C@H](OC)[C@H](OC(=O)CC)CC(=O)O1>>CCC(=O)O[C@H]1[C@H]  
(C)O[C@H](O[C@H]2[C@H](N(C)C)[C@H](OC(C)=O)[C@H](O[C@H]3[C@@H](OC)[C@  
H](OC(=O)CC)CC(=O)O[C@H](C/C=C/c4ccnc4)CCCN(C)C[C@H](OC(C)=O)[C@H](C)C[C@  
@H]3CC(OC)OC)O[C@H]2C)C1C@H1(C)O  
 506 C=C(NC(=O)[C@H](Cc1cccc1)NC(=O)OC(C)(C)C)C(=O)OC.CC(C)[Si](Oc1ccc(I)cc1)(C(C)C)C(  
C)C>>COC(=O)/C=C/c1ccc(O[Si](C(C)C)(C(C)C)C(C)C)cc1)NC(=O)[C@H](Cc1cccc1)NC(=O)  
OC(C)(C)C  
 507 C=CCC(C)N(C)C(=O)OC(C)(C)C.Oc1cnc(Br)c1>>CC(C/C=C/c1cnc(O)c1)N(C)C(=O)OC(C)(C)C  
 508 C=Cc1cccc1.N[C@H](Cc1c[nH]c2c(Br)cccc12)C(=O)O>>N[C@H](Cc1c[nH]c2c(/C=C/c3cccc  
3)cccc12)C(=O)O  
 509 C=CC(=O)OC.FC(F)(F)c1ccc(Br)cc1>>COC(=O)/C=C/c1ccc(C(F)(F)F)cc1  
 510 C=CC(=O)OC.CC(C)(C)CN(Cc1ccc(Br)cc1)c1cc(C(F)(F)F)ncn1>>COC(=O)/C=C/c1ccc(CN(CC(C)(  
C)C)c2cc(C(F)(F)F)ncn2)cc1  
 511 C=Cc1cccc(O)c1.CC(C)n1nc(I)c2c(N)ncnc21>>CC(C)n1nc(/C=C/c2cccc(O)c2)c2c(N)ncnc21  
 512 C=Cc1cccc1.O=S(=O)(c1cccc1)C(F)(F)Br>>O=S(=O)(c1cccc1)C(F)(F)/C=C/c1cccc1  
 513 Br1ccc(I)cc1.C=Cc1cnc1>>Br1ccc(/C=C/c2cnc2)cc1  
 514 C=CS(=O)(=O)c1cccc1.CC(C)(C)OC(=O)N1CCC2(CC1)Oc1ccc(Br)cc1C2=O>>CC(C)(C)OC(=O)N  
1CCC2(CC1)Oc1ccc(/C=C/S(=O)(=O)c3cccc3)cc1C2=O  
 515 Cc1ccc(I)cc1C.NC(=O)/C=C/c1cccc1>>Cc1ccc(/C=C\C(N)=O)c2cccc2)cc1C  
 516 C=Cc1cnc1.C[Si](C)(C)CCOCn1nc(I)c2cc(C=O)ccc21>>C[Si](C)(C)CCOCn1nc(/C=C/c2cnc2)c2  
cc(C=O)ccc21  
 517 C=COCCCC.Cc1ccc2c(Br)cc(=O)oc2c1>>CCCCO/C=C/c1cc(=O)oc2cc(C)ccc12  
 518 C=CCc1c(OC)c(C)c2c(c1OC(C)=O)C(=O)OC2.COC(=O)c1cccc(C)c1Br>>COC(=O)c1cccc(C)c1/C=  
C/Cc1c(OC)c(C)c2c(c1OC(C)=O)C(=O)OC2  
 519 C=COCCCC.COc1cccc1Br>>C=C(OCCCC)c1cccc1OC  
 520 C=CC(=O)OC.CN(C)CCCOc1ccc(I)cc1>>COC(=O)/C=C/c1ccc(OCCCN(C)C)cc1  
 521 C=CC(=O)OCC.CCOC(=O)N1CCc2cc(Br)c(N)c(Cl)c2CC1>>CCOC(=O)/C=C/c1cc2c(c(Cl)c1N)CCN  
(C(=O)OCC)CC2  
 522 C=Cc1ccc(OC)cc1.FC(F)(F)c1cccc(Br)c1>>COc1ccc(/C=C/c2cccc(C(F)(F)F)c2)cc1  
 523 C=CC(=O)OCC.O=Cc1ccc2cccc2c1Br>>CCOC(=O)/C=C/c1c(C=O)ccc2cccc12  
 524 Br1cccn1.C=Cc1cccc1OC>>COc1cccc1/C=C/c1cccn1  
 525 C=C[C@H]1O[C@H]2OC(C)(C)O[C@H]2[C@H]1O.O=C1CC(c2cccc2)Oc2cc(Br)ccc21>>CC1  
(C)O[C@H]2O[C@H]/C=C/c3ccc4c(c3)OC(c3cccc3)CC4=O)[C@H](O)[C@H]2O1

526 Br1cccn1.C=CC(=O)N1C(=O)N(C)[C@H](C)[C@@H]1c1cccc1>>C[C@@H]1[C@H](c2cccc2)  
N(C(=O)/C=C/c2cccn2)C(=O)N1C  
527 C=C1COC(c2cc(OC)cc(OC)c2)C1(C(=O)OCC)C(=O)OCC.COc1ccc(I)cc1>>CCOC(=O)C1(C(=O)OC  
C)/C=C/c2ccc(OC)cc2)COC1c1cc(OC)cc(OC)c1  
528 C=CC(=O)OC.COc1ccc2c(c1)CCN(c1ccc(CC(C)C)cc1F)C2(C)c1ccc(Br)cc1>>COC(=O)/C=C/c1ccc(  
C2(C)c3ccc(OC)cc3CCN2c2ccc(CC(C)C)cc2F)cc1  
529 Br1cccs1.C=C>>C=Cc1ccs1  
530 C=CC(=O)OCC.Cc1cc(I)ccc1/C=C/c1cccc1>>CCOC(=O)/C=C/c1ccc(/C=C/c2cccc2)c(C)c1  
531 C=CC(OC)OC.FC(F)(F)c1cccc1I>>COC(/C=C/c1cccc1C(F)(F)F)OC  
532 C=C1CC(c2cccc2)OC1=O.COc1cccc(I)c1>>COc1cccc(/C=C2\CC(c3cccc3)OC2=O)c1  
Br1ccc(I)cc1.C=C1C(=O)O[C@@H]2CC(C)=C([C@@H](C)CCCOC(C)=O)[C@@H](OC(C)=O)[C  
533 @H]12>>CC(=O)OCCC[C@H](C)C1=C(C)C[C@H]2OC(=O)/C=C/c3ccc(Br)cc3)[C@H]2[C@@H]  
1OC(C)=O  
C=Cc1ccc(N(c2ccc(/C=C/c3ccc(S(=O)(=O)C(F)(F)F)cc3)cc2)c2ccc(/C=C/c3ccc(S(=O)(=O)C(F)(F)F)c  
534 c3)cc2)cc1.O=S(=O)(CCO)c1ccc(Br)cc1>>O=S(=O)(CCO)c1ccc(/C=C/c2ccc(N(c3ccc(/C=C/c4ccc(S(  
=O)(=O)C(F)(F)F)cc4)cc3)c3ccc(/C=C/c4ccc(S(=O)(=O)C(F)(F)F)cc4)cc3)cc2)cc1  
535 C=CC(=O)N1N=Cc2cccc2C1c1cc2cccc2o1.COc1cc(Cc2cnc(N)nc2N)cc(I)c1OC>>COc1cc(Cc2cnc(  
N)nc2N)cc(/C=C/C(=O)N2N=Cc3cccc3C2c2cc3cccc3o2)c1OC  
536 C=C.ClCc1cccc1I>>C=CCc1cccc1I  
537 C=CCCC.Cc1ccc(Br)cc1>>CCCC/C=C/c1ccc(C)cc1  
Br1enc2cccc2c1.C=CCO[C@]1(C)C[C@@H](C)C2=NCCN3C(=O)O[C@](C)([C@@H](CC)OC(=  
538 O)[C@H](C)C(=O)[C@H](C)[C@H]1O[C@@H]1O[C@H](C)C[C@H](N(C)C)[C@H]1O)[C@H]3[  
C@H]2C>>CC[C@H]1OC(=O)[C@H](C)C(=O)[C@H](C)[C@@H](O[C@@H]2O[C@H](C)C[C@  
H](N(C)C)[C@H]2O)[C@](C)(OC/C=C/c2cnc3cccc3c2)C[C@@H](C)C2=NCCN3C(=O)O[C@@]1(  
C)[C@H]3[C@H]2C  
539 C=CCCC(=O)O.CCOC(=O)Nc1cccc(Br)c1C>>CCOC(=O)Nc1cccc(/C=C/CCC(=O)O)c1C  
540 C=CC(=O)OC.COc1ccc(Br)cc1Cl>>COC(=O)/C=C/c1ccc(OC)c(Cl)c1  
541 C=Cc1ccc(OC)cc1.Clc1ccc(Br)cc1>>COc1ccc(/C=C/c2ccc(Cl)cc2)cc1  
542 C=CC(=O)NC(C)C.COc1ccc(Br)cc1>>COc1ccc(/C=C/C(=O)NC(C)C)cc1  
543 C=CC(=O)O.CCOC(=O)c1c[nH]c(Cc2ccc(I)cc2)n1>>CCOC(=O)c1c[nH]c(Cc2ccc(/C=C/C(=O)O)cc2  
544 C=COCCCC.FC(F)(F)c1cccc(Br)c1>>C=C(OCCCC)c1cccc(C(F)(F)F)c1  
545 C=CC(=O)OC.COC(=O)c1cc(I)ccc(C(=O)OC)c1>>COC(=O)/C=C/c1cc(C(=O)OC)cc(C(=O)OC)c1  
546 Br1ccc(C(c2cccc2)C23CC4CC(CC(C4)C2)C3)cc1.C=CC(=O)OCC>>CCOC(=O)/C=C/c1ccc(C(c2cc  
ccc2)C23CC4CC(CC(C4)C2)C3)cc1  
547 C=CCN1C(=O)c2cccc2C1=O.CSc1ccc(Br)cc1>>CSc1ccc(/C=C/CN2C(=O)c3cccc3C2=O)cc1  
548 C=CC(=O)OC.COc1ccc2c(c1)CCN(c1ccc(C(C)C)cc1)C2(c1ccc(Br)cc1)C(F)(F)F>>COC(=O)/C=C/c1  
ccc(C2(C(F)(F)F)c3ccc(OC)cc3CCN2c2ccc(C(C)C)cc2)cc1  
549 C=Cc1cccc1.N#Cc1ccc(Cl)cc1>>N#Cc1ccc(/C=C/c2cccc2)cc1  
550 C=CC(N)=O.Oc1ccc2c(c1)CCN(c1cccc1)C2c1ccc(I)cc1>>NC(=O)/C=C/c1ccc(C2c3ccc(O)cc3CCN2  
c2cccc2)cc1  
551 C=CC(C)=O.COc1ccc(I)c(N)c1>>COc1ccc(/C=C/C(C)=O)c(N)c1  
552 C=CS(=O)(=O)c1cccc1.CCOC(=O)/C=C/c1cc(Br)cc(Cc2cccn2)c1>>CCOC(=O)/C=C/c1cc(/C=C/S(  
=O)(=O)c2cccc2)cc(Cc2cccn2)c1  
553 C=C(c1cccc1)N(C)C(C)=O.CCOC(=O)CCCB>>CCOC(=O)CCC/C=C(\c1cccc1)N(C)C(C)=O  
554 C=CC(=O)OC.COc1c(CN(C(=O)c2cccc2)c2ccc(Br)c2)ccc2c1OC(C)(C)C=C2C#N>>COC(=O)/C=C  
/c1cccc(N(Cc2ccc3c(c2OC)OC(C)(C)C=C3C#N)C(=O)c2cccc2)c1  
555 C=CC(=O)OCCCC.CN(C)c1ccc(I)cc1>>CCCCOC(=O)/C=C/c1ccc(N(C)C)cc1  
556 C=Cc1ccc(C)c(C)c1.CCOC(=O)C(F)(F)Br>>CCOC(=O)C(F)(F)/C=C/c1ccc(C)c(C)c1  
557 C=Cc1ccc(OC)cc1.FC(F)(F)c1ccc(Br)cc1>>COc1ccc(/C=C/c2ccc(C(F)(F)F)cc2)cc1  
558 C=Cc1cccc(F)c1.CCOC(=O)C(F)Br>>CCOC(=O)C(F)/C=C/c1cccc(F)c1  
559 C=CC(=O)OC.O=C1Nc2cc(Br)ccc2C1=O>>COC(=O)/C=C/c1ccc2c(c1)NC(=O)C2=O  
560 C=CC(=O)OC.COc1ccc2c(c1)CCN(c1cccc(C(C)C)c1)C2(C)c1ccc(Br)cc1>>COC(=O)/C=C/c1ccc(C2(  
C)c3ccc(OC)cc3CCN2c2cccc(C(C)C)c2)cc1  
561 Br1ccc2[nH]ccc2c1.C=CC(=O)OCC>>CCOC(=O)/C=C/c1ccc2[nH]ccc2c1  
562 C=CC(C)=O.Ic1cccc2[nH]ccc12>>CC(=O)/C=C/c1cccc2[nH]ccc12  
563 C=COCCCC.Ic1cccc2cccc12>>C=C(OCCCC)c1cccc2cccc12  
564 Br1ccccc1.C=CC(N)=O>>NC(=O)/C=C/c1ccccc1  
565 C=CC(=O)O.Oc1ccc(Br)cc1>>O=C(O)/C=C/c1ccc(O)cc1  
566 C=Cc1cccc1.O=C(/C=C/c1ccs1)c1ccc(I)cc1>>O=C(/C=C/c1ccs1)c1ccc(/C=C/c2cccc2)cc1  
567 C=CCCO[Si](C)(C)C(C)(C)C.COc1cncc(Br)c1>>COc1cncc(/C=C/CCO[Si](C)(C)C(C)(C)C)c1

568 C=Cc1cccc1Cl.Oc1cccc1I>>Oc1cccc1/C=C/c1cccc1Cl  
569 C=CC(=O)OCCCC.O=Cc1cccc1I>>CCCCOC(=O)/C=C/c1cccc1C=O  
570 C=CC(=O)OC.Cc1cc2c(c(C)c1Br)C(=O)C(C)(C)C2>>COC(=O)/C=C/c1c(C)cc2c(c1C)C(=O)C(C)(C)  
571 C=CCc1cccc1.CC(C)(C)OC(=O)c1ccc(Br)cc1[N+](=O)[O-]  
572 ]>>CC(C)(C)OC(=O)c1ccc(/C=C/Cc2cccc2)cc1[N+](=O)[O-]  
573 C=CP(=O)(OCC)OCC.Clc1ccc(Br)cc1>>CCOP(=O)/C=C/c1ccc(Cl)cc1)OCC  
574 C=Cc1ccc(OC)cc1.COc1ccc(C(=O)c2cn(C)c(C3=NCCO3)c2-  
575 c2c(Br)ccc3cccc23)cc1>>COc1ccc(/C=C/Cc2ccc3cccc3c2-  
576 c2c(C(=O)c3ccc(OC)cc3)cn(C)c2C2=NCCO2)cc1  
577 C=CC#N.CN1c2cccc2C(C)(C)C12C=Cc1cc(I)ccc1O2>>CN1c2cccc2C(C)(C)C12C=Cc1cc(/C=C/C#  
578 N)ccc1O2  
579 C=C[Si](CC)(CC)CC.COc1ccc(Br)cc1>>CC[Si](/C=C/c1ccc(OC)cc1)(CC)CC  
580 C=Cc1ccc(O)cc1.Oc1cc(Br)cc(O)c1F>>Oc1ccc(/C=C/Cc2cc(O)c(F)c(O)c2)cc1  
581 Brc1ccsc1.C=CCNS(=O)(=O)c1ccc(C)cc1>>Cc1ccc(S(=O)(=O)NC/C=C/Cc2ccsc2)cc1  
582 C=CC(=O)OC(C)(C)C.CN1CCC2(CC1)Cc1cc(Br)enc1NC2=O>>CN1CCC2(CC1)Cc1cc(/C=C/C(=O)  
583 OC(C)(C)C)enc1NC2=O  
584 C=CS(C)(=O)=O.Cc1cc(C)c(Br)c(C)c1>>Cc1cc(C)c(/C=C/S(C)(=O)=O)c(C)c1  
585 C=Cc1cccc1.C[Si](C)(OS(=O)(=O)C(F)(F)F)OS(=O)(=O)C(F)(F)F>>C[Si](C)(/C=C/c1cccc1)OS(=O)(=O)C(F)(F)F  
586 C=Cc1cc2c(cc1C)C(C)(C)CCC2(C)C.CCOC(=O)c1ccc(OS(=O)(=O)C(F)(F)F)cc1>>C=C(c1ccc(C(=O)  
587 )OCC)cc1)c1cc2c(cc1C)C(C)(C)CCC2(C)C  
588 C=CC(=O)OCC.O=[N+](O-)]c1ccc(-c2cccc2)c(I)c1>>CCOC(=O)/C=C/c1cc([N+](=O)[O-])ccc1-  
589 c1cccc1  
590 C=CC(=O)OCC.CCOC(=O)CN1C(=O)[C@@H](N2C(=O)c3cccc3C2=O)Cc2cccc2C1c1ccc(Br)cc1  
591 >>CCOC(=O)/C=C/c1ccc(C2c3cccc3C[C@H](N3C(=O)c4cccc4C3=O)C(=O)N2CC(=O)OCC)cc1  
592 C=C(C)C(=O)OCC(C)C.Ic1cccc1>>C/C=C/c1cccc1)C(=O)OCC(C)C  
593 Brc1cccc1C1OCCO1.C=CC(=O)c1cccc1>>O=C(/C=C/c1cccc1C1OCCO1)c1cccc1  
594 C=CC(=O)OCC.Cc1ncnc(Nc2ccc3c(cnn3Cc3cccc(F)c3)c2)c1I>>CCOC(=O)/C=C/c1c(C)ncnc1Nc1ccc  
595 2c(cnn2Cc2cccc(F)c2)c1  
596 C=Cc1ccc(N2CCN(C(=O)OC(C)(C)C)CC2)cc1.Clc1cc(Br)cc(-  
597 c2ccncc2)c1>>CC(C)(C)OC(=O)N1CCN(c2ccc(/C=C/Cc3cc(Cl)cc(-c4ccncc4)c3)cc2)CC1  
598 C=CCC(=O)O.CC(=O)OC[C@H]1O[C@@H](Oc2nn(CCCOC(=O)c3cccc3)c(C(C)C)c2Cc2ccc(I)cc2  
599 )C[C@H](OC(C)=O)[C@@H](OC(C)=O)[C@H]1OC(C)=O>>CC(=O)OC[C@H]1O[C@@H](Oc2nn(C  
600 CCCOC(=O)c3cccc3)c(C(C)C)c2Cc2ccc(/C=C/CC(=O)O)cc2)[C@H](OC(C)=O)[C@@H](OC(C)=O  
601 )C[C@H]1OC(C)=O  
602 C=CC(=O)OC(C)(C)C.CN1CCC2(CC1)CC(=O)c1cc(Br)ccc1O2>>CN1CCC2(CC1)CC(=O)c1cc(/C=C/  
603 /C(=O)OC(C)(C)C)ccc1O2  
604 C=CC(=O)OCCCC.COc1ccc(Br)c2cccc12>>CCCCOC(=O)/C=C/c1ccc(OC)c2cccc12  
605 C=CC(=O)OC.COc1cc(Br)c(F)cc1[C@@H]1c2ccc3c(cnn3CC3CCCCO3)c2C[C@@H](C)N1CC(C)(F)  
606 F>>COC(=O)/C=C/c1cc(OC)c([C@@H]2c3ccc4c(cnn4CC3CCCCO4)c3C[C@@H](C)N2CC(C)(F)F)cc  
607 C=C1CC(c2cccc2)OC1=O.Ic1cccc1>>O=C1OC(c2cccc2)C/C1=C/c1cccc1  
608 C=C[Si](CC)(CC)CC.FC(F)(F)c1cccc1Br>>CC[Si](/C=C/c1cccc1C(F)(F)F)(CC)CC  
609 C=CCOC(C)=O.O=[N+](O-)]c1cccc([I+])c2cccc([N+](=O)[O-]  
610 ])c2)c1>>CC(=O)OC/C=C/c1cccc([N+](=O)[O-])c1  
611 C=CC(C)=O.Cc1ccc(C)c(Br)c1C>>CC(=O)/C=C/c1c(C)ccc(C)c1C  
612 C=C(CO[C@@H]1CCC[C@H](OCc2nc(-  
613 c3cccc(C)c3)oc2C)C1)C(=O)OCC.Cc1cc(I)ccc1F>>CCOC(=O)/C=C/c1ccc(F)c(C)c1)CO[C@@H]1C  
614 CC[C@H](OCc2nc(-c3cccc(C)c3)oc2C)C1  
615 Brc1cccc1.C=CC(=O)OCC>>CCOC(=O)/C=C/c1cccc1  
616 C=C(CC(=O)OC)C(=O)OC.COc1ccc(Br)c(CN(CC(F)(F)F)C(=O)OC(C)(C)C)c1>>COC(=O)/C=C/Cc1  
617 cccc(OC)cc1CN(CC(F)(F)F)C(=O)OC(C)(C)C(=O)OC  
618 C=CC(=O)O.C[Si](C)(C)CCOCn1cc(I)c(=O)[nH]c1=O>>C[Si](C)(C)CCOCn1cc(/C=C/C(=O)O)c(=O)  
619 [nH]c1=O  
620 C=C/C=C/c1cccc1.COc1ccc(OC(C)=O)c(I)c1>>COc1ccc(OC(C)=O)c(/C=C/C=C/c2cccc2)c1  
621 C=CC(=O)OC.CC(C)(C)C(=O)Oc1ccc2cccc2c1-  
622 c1c(OC(=O)C(C)(C)C)ccc2cc(I)ccc12>>COC(=O)/C=C/c1ccc2c(-  
623 c3c(OC(=O)C(C)(C)C)ccc4cccc34)c(OC(=O)C(C)(C)C)ccc2c1  
624 Brc1ccc2ncccc2c1.C=CC(=O)OC>>COC(=O)/C=C/c1ccc2ncccc2c1  
625 C=Cc1ccc(OCCC)cc1.Cn1c(=O)c2c(cc(Br)n2C)n(C)c1=O>>CCCOc1ccc(/C=C/Cc2cc3c(c(=O)n(C)c(=O)  
626 O)n3C)n2C)cc1  
627 C=CC(=O)OC.Nc1cc(Cl)nc(C2CC2)c1C=O>>COC(=O)/C=C/c1cc(N)c(C=O)c(C2CC2)n1

605 C=CB1OC(C)CC(C)(C)O1.C[C@H](c1ccc(Br)cc1)N1CCOCC1>>CC1CC(C)(C)OB(/C=C/c2ccc([C  
@H](C)N3CCOCC3)cc2)O1  
606 C=Cc1cccc1.CC(C)(C)C(=O)Nc1nc2ncc(Br)cc2c(=O)[nH]1>>CC(C)(C)C(=O)Nc1nc2ncc(/C=C/c3cc  
ccc3)cc2c(=O)[nH]1  
607 C=Cc1ccc(OC)c(O)c1.Oc1cc(O)cc(I)c1>>COc1ccc(/C=C/c2cc(O)cc(O)c2)cc1O  
608 C=C.CC(=O)Nc1ccc(C)cc1Br>>C=Cc1cc(C)ccc1NC(C)=O  
609 C=CC(=O)OC.CC1(C)CC(=O)Nc2ccc(Br)cc21>>COC(=O)/C=C/c1ccc2c(c1)C(C)(C)CC(=O)N2  
610 C=CC(=O)N(C)C.CN(C)c1ccc2cc(Br)ccc2c1>>CN(C)C(=O)/C=C/c1ccc2cc(N(C)C)ccc2c1  
611 Br1cccc1I.C=Cc1ccc2cccc2c1>>Br1cccc1/C=C/c1ccc2cccc2c1  
612 Br1ccsc1.C=C/C=C/C(=O)N(CCCC)CCCC>>CCCCN(CCCC)C(=O)/C=C/C=C/c1ccsc1  
613 C=CC=O.Ic1c(-c2cccc2)nnn1Cc1cccc1>>O=C/C=C/c1c(-c2cccc2)nnn1Cc1cccc1  
614 Br1cccc1.C=CS1cccc1>>C(=C/c1cccc1)\S1cccc1  
615 C=Cc1cccc1.Cc1ccc(/C=C/C(=O)c2ccc(Br)cc2)cc1>>Cc1ccc(/C=C/C(=O)c2ccc(/C=C/c3cccc3)cc2)  
616 Br1cnc2cccc2c1.C=CCCCCCCC>>CCCCCCCC/C=C/c1cnc2cccc2c1  
617 C=CC(=O)OC(C)(C)C.CN(C(=O)CSCc1cccc1)c1cccc1Br>>CN(C(=O)CSCc1cccc1)c1cccc1/C=C  
/C(=O)OC(C)(C)C  
618 C=Cc1cccc1.Nc1ccnc1Cl>>Nc1ccnc1/C=C/c1cccc1  
619 Br1cccc1.C=COC(CC)CCCC>>C=C(OC(CC)CCCC)c1cccc1  
620 C=CC(=O)OC.O=Cc1cccc1-c1cc(Cl)ccc1C=O>>COC(=O)/C=C/c1ccc(C=O)c(-c2cccc2C=O)c1  
621 C=CC(=O)OC(C)(C)C.O=S(=O)(c1cccc(Br)c1)c1ccc2cccc(F)c2n1>>CC(C)(C)OC(=O)/C=C/c1cccc(S  
(=O)(=O)c2ccc3cccc(F)c3n2)c1  
622 C=CC(=O)OC.CCOC(=O)c1cc(=O)c2cc(Br)ccc2o1>>CCOC(=O)c1cc(=O)c2cc(/C=C/C(=O)OC)ccc2  
623 C=CC(=O)OC.COc1c([C@H]2c3ccc4c(cnn4C4CCCCO4)c3C[C@H](C)N2CC(C)(F)F)ccc(Br)c1  
F>>COC(=O)/C=C/c1ccc([C@H]2c3ccc4c(cnn4C4CCCCO4)c3C[C@H](C)N2CC(C)(F)F)c(OC)c  
624 C=Cc1cccc1C.Cc1ccc2c(-c3cccc3)c(Br)c(=O)oc2c1>>Cc1ccc2c(-  
c3cccc3)c(/C=C/c3cccc3C)c(=O)oc2c1  
625 C=CC(=O)OCC.CCCn1ccc(Br)cc1=O>>CCcn1ccc(/C=C/C(=O)OCC)cc1=O  
626 C=CC(=O)OC.CCOC(=O)c1cc(=O)c2cccc(Br)c2o1>>CCOC(=O)c1cc(=O)c2cccc(/C=C/C(=O)OC)c2  
\*CNCCOCCOCCOCCNC(=O)COc1ccc(C(Cc2cc(OC)cc(OC)c2)NC(=O)c2ccc(C=C)cc2)cc1.Cc1c(  
627 F)cccc1I>>\*CNCCOCCOCCOCCNC(=O)COc1ccc(C(Cc2cc(OC)cc(OC)c2)NC(=O)c2ccc(/C=C/c3  
cccc(F)c3C)cc2)cc1  
628 C=CC(=O)N1CCC2(CC1)OCCO2.O=Cc1cccc1Br>>O=Cc1cccc1/C=C/C(=O)N1CCC2(CC1)OCCO  
629 C=Cc1cccc1.Ic1ccc(CN2CCOCC2)cc1>>C=C/c1ccc(CN2CCOCC2)cc1)\c1cccc1  
630 C=Cc1cccc1.COc1ccc(I)cc1>>COc1ccc(/C=C/c2cccc2)cc1  
631 Br1cccc2cccc12.C=CC(=O)OC(C)(C)C>>CC(C)(C)OC(=O)/C=C/c1ccc2cccc12  
632 C=CC(=O)OCC.O=S(=O)(Nc1cccc1)c1cccc(Br)c1>>CCOC(=O)/C=C/c1cccc(S(=O)(=O)Nc2cccc2)  
633 C=Cc1ccc(Cl)cc1.IC1CCCC1>>Clc1ccc(/C=C/C2CCCC2)cc1  
634 C=Cc1cc(OC)ccc1OC.Nc1ccc(I)cc1>>COc1ccc(OC)c(/C=C/c2ccc(N)cc2)c1  
635 C=CC(=O)OCC.Cc1cc(-n2nenn2)cc(I)c1N>>CCOC(=O)/C=C/c1cc(-n2nenn2)cc(C)c1N  
636 C=CP(=O)(OCC)OCC.COc1cccc1Br>>CCOP(=O)(/C=C/c1cccc1OC)OCC  
C=C1C(=O)O[C@H]2[C@H]1CCC(=C)[C@H]1C[C@H](OC(C)=O)C(=C)[C@H]21.COC(=O)c1c  
637 cc(I)cc1>>C=C1CC[C@H]2/C(=C)\c3ccc(C(=O)OC)cc3C(=O)O[C@H]2[C@H]2C(=C)[C@H](O  
C(C)=O)C[C@H]2  
638 C=CC(F)(F)C(F)(F)C(F)(F)C(F)(F)C(F)(F)C(F)(F)C(F)(F)F.CC1=Nc2ccc(I)cc2C1(C)C>>CC1=Nc2cc  
c(/C=C/C(F)(F)C(F)(F)C(F)(F)C(F)(F)C(F)(F)C(F)(F)C(F)(F)F)cc2C1(C)C  
639 C=CCCP(=O)(OC)OC.COc1ccc(I)cc1>>COc1ccc(/C=C/CCP(=O)(OC)OC)cc1  
640 C=CC(=O)OCC.O=C(O)c1cc2cc(Br)ccc2[nH]1>>CCOC(=O)/C=C/c1ccc2[nH]c(C(=O)O)cc2c1  
641 C=Cc1ccnc1.CN(C)c1ccc(Br)cc1>>CN(C)c1ccc(/C=C/c2ccnc2)cc1  
642 Br1cnc2cccc2c1.C=CCO[Si](C)(C)C(C)(C)C>>CC(C)(C)[Si](C)(C)OC/C=C/c1cnc2cccc2c1  
643 C=C[Si](C)(C)C.COc1cc(CC(C(=O)OC(C)(C)C)C(=O)OC(C)(C)C)c(I)c(OC)c1OC>>COc1cc(CC(C(=O)  
O)OC(C)(C)C)C(=O)OC(C)(C)C)c(/C=C/[Si](C)(C)C)c(OC)c1OC  
644 C=CC(=O)N(C)C.Cc1cccc(C)c1Cl>>Cc1cccc(C)c1/C=C/C(=O)N(C)C  
645 C=CC(=O)O.COc1ccc(S(=O)(=O)N(C)c2ccc(I)cc2)cc1OC>>COc1ccc(S(=O)(=O)N(C)c2ccc(/C=C/C(  
=O)O)cc2)cc1OC  
646 C=CC(=O)O.CN(c1ccc(I)cc1)S(=O)(=O)c1ccc(Cl)cc1>>CN(c1ccc(/C=C/C(=O)O)cc1)S(=O)(=O)c1cc  
c(Cl)cc1  
647 C=CC(=O)OC.CC(C)n1cnc2c(NCc3ccc(Br)cc3)nc(N3CCCC3)nc21>>COC(=O)/C=C/c1ccc(CNc2nc(  
N3CCCC3)nc3c2nen3C(C)C)cc1  
648 C=Cc1ccc(N(CCCCC)CCCCC)cc1.O=Cc1cc2ccc1CCc1ccc(c(Br)c1)CC2>>CCCCCN(CCCCC)  
c1ccc(/C=C/c2cc3ccc2CCc2ccc(c(C=O)c2)CC3)cc1



Br1ccc(NCc2ccnc2)nc1.C=CC(=O)OC(C)(C)C>>CC(C)(C)OC(=O)/C=C/c1ccc(NCc2ccnc2)nc1  
 Br1ccc2cccc2c1.C=CP(=O)(OCC)OCC>>CCOP(=O)/(C=C/c1ccc2cccc2c1)OCC  
 C=Cc1ccc(C(=O)OC)cc1.CC(C)(C)[Si](C)(C)Oc1ccnc1Br>>COC(=O)c1ccc(/C=C/c2cccc2O[Si](C)  
 (C)C(C)(C)C)cc1  
 C=CC(=O)Nc1ccc2ccnc12.CC(C)c1ccc(I)cc1>>CC(C)c1ccc(/C=C/C(=O)Nc2cccc3ccnc23)cc1  
 C=CC(=O)OC.CCc1nc2c(N)nc3cc(Br)ccc3c2n1CC(C)(C)O>>CCc1nc2c(N)nc3cc(/C=C/C(=O)OC)ccc  
 3c2n1CC(C)(C)O  
 C=CC#N.O=c1[nH]c(=O)n([C@H]2[C@@H](O)[C@H](CO)O2)cc1I>>N#C/C=C/c1cn([C@H]2[C@  
 H](O)[C@H](CO)O2)c(=O)[nH]c1=O  
 C=Cc1cccc1C(=O)O.Clc1ccc(I)cc1>>O=C(O)c1cccc1/C=C/c1ccc(Cl)cc1  
 C=CS(C)(=O)=O.COCC(=O)c1ccc(Br)cc1>>COC(=O)c1ccc(/C=C/S(C)(=O)=O)cc1  
 C=CC(C)=O.Nc1cc(Br)nc1I>>CC(=O)/C=C/c1cnc(Br)cc1N  
 C=CC(=O)N(C)OC.CCOC(=O)c1ccc(I)cc1>>CCOC(=O)c1ccc(/C=C/C(=O)N(C)OC)cc1  
 C=CCOc1cccc1.Cc1ccc(Br)cc1>>Cc1ccc(/C=C/COc2cccc2)cc1  
 C=CCCN1C(=O)c2cccc2C1=O.Clc1ccc(I)cc1>>O=C1c2cccc2C(=O)N1CC/C=C/c1ccc(Cl)cc1  
 C=CC(=O)OCC.O=c1cc(-c2cccc2)oc2cc(Br)ccc12>>CCOC(=O)/C=C/c1ccc2c(=O)cc(-  
 C=C[C@](CO)(CCC=C(C)C)OCc1ccc(OC)cc1.COc1ccc(OC(C)=O)cc1Br>>COc1ccc(CO[C@ @]/C=C/  
 C/e2cc(OC(C)=O)ccc2OC)(CO)CCC=C(C)C)cc1  
 C=C.Ic1cccc1>>C=Cc1cccc1  
 C=CC(=O)OCC.O=C(NCCc1cccc(Br)c1)OCc1cccc1>>CCOC(=O)/C=C/c1cccc(CCNC(=O)OCc2ccc  
 cc2)c1  
 Br1ccc(I)cc1.C=Cc1ccc(OCC)cc1>>CCOc1ccc(/C=C/c2ccc(Br)cc2)cc1  
 C=CC(=O)OCC.Cc1nnn(Cc2cc(C(F)F)ccc2Br)n1>>CCOC(=O)/C=C/c1ccc(C(F)F)cc1Cn1nnn(C)n1  
 C=CC(=O)OC(C)(C)C.O=[N+][O-]c1cccc(Br)c1>>CC(C)(C)OC(=O)/C=C/c1cccc([N+](=O)[O-])c1  
 C=COCCN(C)C.COc1ccc(Br)cc1>>C=C(OCCN(C)C)c1ccc(OC)cc1  
 C=Cc1cc(OC)c(O)c(OC)c1.O=c1ccc2ccc(OS(=O)(=O)C(F)(F)F)cc2o1>>COc1cc(/C=C/c2ccc3ccc(=O)  
 )oc3c2)cc(OC)c1O  
 Br1cccs1.C=CCS(N)(=O)=O>>NS(=O)(=O)C/C=C/c1cccs1  
 C=CC(=O)OC.Ic1ccsc1>>COC(=O)/C=C/c1ccsc1  
 C=CC(=O)CC.Cc1ccc(Br)cc1>>CCC(=O)/C=C/c1ccc(C)cc1  
 C=Cc1cccc1.Cc1nc(-c2cccc2)c(Br)o1>>Cc1nc(-c2cccc2)c(/C=C/c2cccc2)o1  
 C=CCON=C1[C@H](C)[C@H]2OC(=O)O[C@]2(C)[C@@H](CC)OC(=O)[C@@](C)(F)C(=O)[C@H]  
 ](C)[C@@H](O[C@@H]2O[C@H](C)C[C@H](N(C)C)[C@H]2OC(C)=O)[C@](C)(OC)C[C@H]1C.  
 Nc1cncc(Br)c1>>CC[C@H]1OC(=O)[C@@](C)(F)C(=O)[C@H](C)[C@@H](O[C@@H]2O[C@H](  
 C)C[C@H](N(C)C)[C@H]2OC(C)=O)[C@](C)(OC)C[C@@H](C)C(=NOC/C=C/c2cncc(N)c2)[C@H]  
 1(C)1C@H12OC(=O)O[C@]112C  
 C=CCC(O)c1c(C)noc1-c1ccc(Br)cc1.Ic1cccc1>>Cc1noc(-c2ccc(Br)cc2)c1C(O)C/C=C/c1cccc1  
 C=Cn1nnn(C)n1.Fc1cccc1I>>Cc1nnn(/C=C/c2cccc2F)n1  
 C=CC(=O)OC(C)(C)C.O=[N+][O-]c1cccc(I)c1>>CC(C)(C)OC(=O)/C=C/c1cccc([N+](=O)[O-])c1  
 C=Cc1cccc1.Nc1ccc(Cl)cc1Br>>Nc1ccc(Cl)cc1/C=C/c1cccc1  
 C=Cc1ccc(O)cc1.COc1ccc(I)c(OC)c1>>COc1ccc(/C=C/c2ccc(O)cc2)c(OC)c1  
 C=C[Si](CC)(CC)CC.COc1ccc2cc(Br)ccc2c1>>CC[Si]/(C=C/c1ccc2cc(OC)ccc2c1)(CC)CC  
 C=CC[C@H]1C[C@H]([C@H](O[Si](C(C)C)(C(C)C)C(C)C)e2ccc(OC)c(OC)c2)CO[C@@H]1c1ccc(  
 OC)c(OC)c1.COc1ccc(Br)cc1OC>>COc1ccc(/C=C/C[C@H]2[C@H]([C@H](O[Si](C(C)C)(C(C)C)  
 C(C)C)e3ccc(OC)c(OC)c3)CO[C@@H]2e2ccc(OC)c(OC)c2)cc1OC  
 C=Cc1cccc1N.COc1cc(OC)c(Br)c(OC)c1>>COc1cc(OC)c(/C=C/c2cccc2N)c(OC)c1  
 Br1ccc2[nH]ccc2c1.C=CCOC1=C(C)C(=O)O[C@H](CC)[C@@](C)(O)C=C(C)C(=O)[C@H](C)C[C@  
 @](C)(OC)[C@H](O[C@@H]2O[C@H](C)C[C@H](N(C)C)[C@H]2OC(C)=O)[C@H]1C>>CC[C@  
 H]1OC(=O)C(C)=C(OC/C=C/c2ccc3[nH]ccc3c2)[C@H](C)[C@@H](O[C@@H]2O[C@H](C)C[C@  
 H](N(C)C)[C@H]2OC(C)=O)[C@]l(C)(OC)C[C@@H](C)C(=O)C(C)=C[C@]1(C)O  
 C=Cc1ccc(OC)cc1.O=Cc1cccc(Br)c1>>COc1ccc(/C=C/c2cccc(C=O)c2)cc1  
 C=C(C)C(=O)OCCCC.COc1ccc(I)cc1>>CCCCOC(=O)/C(C)=C/c1ccc(OC)cc1  
 C=CS(=O)(=O)N1CCC2(CC1)N=C(C1CCCCC1)NC2=O.CNc1cc(C)c(Br)c(C)c1>>CNc1cc(C)c(/C=C/  
 /S(=O)(=O)N2CCC3(CC2)N=C(C2CCCCC2)NC3=O)c(C)c1  
 C=Cc1cccc1.Cc1cc(C)cc(I)c1>>Cc1cc(C)cc(/C=C/c2cccc2)c1  
 C=Cc1ccc(OC)cc1.IC1CCCCC1>>COc1ccc(/C=C/C2CCCCC2)cc1  
 C=CCOc1ccc(CCNC(=O)OC(C)(C)C)cc1.CC(C)N(CC[C@H](c1cccc1)c1cc(Br)ccc1OCc1cccc1)C(  
 C)C>>CC(C)N(CC[C@H](c1cccc1)c1cc(/C=C/COc2ccc(CCNC(=O)OC(C)(C)C)cc2)ccc1OCc1cccc

690 C=CCN.O=c1[nH]c(=O)n([C@@H]2O[C@H](COP(=O)(O)OP(=O)(O)OP(=O)(O)O)[C@@H](O)[C  
 @H]2O)cc1I>>NC/C=C/c1cn([C@@H]2O[C@H](COP(=O)(O)OP(=O)(O)OP(=O)(O)O)[C@@H](O)  
 [C@H]2O)c(=O)[nH]c1=O  
 691 C=Cc1ccc(C(=O)OC)cc1.CCCCC(Br)C(F)(F)F>>CCCCC(/C=C/c1ccc(C(=O)OC)cc1)C(F)(F)F  
 692 C=COCCN(C)C.Cc1cccc1OS(=O)(=O)C(F)(F)F>>C=C(OCCN(C)C)c1cccc1C  
 693 C=CC#N.N#Cc1ccc(Nc2nc(Nc3c(F)cc(I)cc3F)nnc2Cl)cc1>>N#C/C=C/c1cc(F)c(Nc2nnc(Cl)c(Nc3ccc(  
 C#N)cc3)n2)c(F)c1  
 694 C=Cc1cccc1.Oc1cccc1Br>>Oc1cccc1/C=C/c1cccc1  
 695 C=CC(=O)OCCCC.COC(=O)c1cc(Br)cc(C(=O)OC)n1>>CCCCOC(=O)/C=C/c1cc(C(=O)OC)nc(C(=O)  
 )OC)c1  
 696 C=C(NC(=O)OCc1cccc1)C(=O)OC.CC(=O)OCc1cc(OCc2cccc2)ccc1I>>COC(=O)/C=C/c1ccc(OC  
 c2cccc2)cc1COC(C)=O)NC(=O)OCc1cccc1  
 697 C=Cc1ccncc1.Nc1cc([N+](=O)[O-])ccc1Nc1ccc(Br)cc1>>Nc1cc([N+](=O)[O-]  
 ])ccc1Nc1ccc(/C=C/c2ccncc2)cc1  
 698 C=Cc1cc(C(=O)OCC)n[nH]1.CC(C)(C)C(=O)Nc1nc(O)c2cc(Br)enc2n1>>CCOC(=O)c1cc(/C=C/c2cn  
 c3nc(NC(=O)C(C)(C)C)nc(O)c3c2)[nH]n1  
 699 C=CC(=O)OC.COC(=O)CCn1c(=O)oc2cc(Br)enc21>>COC(=O)/C=C/c1cnc2c(c1)oc(=O)n2CCC(=O)  
 700 Br1cnc2cccc12.C=CC(=O)OC>>COC(=O)/C=C/c1cnc2cccc12  
 701 C=Cc1ccc(C)cc1.CC(=O)c1cccc1Br>>CC(=O)c1cccc1/C=C/c1ccc(C)cc1  
 702 C=CC(=O)Nc1cccc1NC(=O)OC(C)(C)C.CCOC(=O)[C@H]1CN(C)C[C@@H]1c1ccc(Br)cn1>>CCO  
 C(=O)[C@H]1CN(C)C[C@@H]1c1ccc(/C=C/C(=O)Nc2cccc2NC(=O)OC(C)(C)C)cn1  
 703 C=C.OC(c1ccc(Br)cc1)(C(F)(F)F)C(F)(F)F>>C=Cc1ccc(C(O)(C(F)(F)F)C(F)(F)F)cc1  
 704 C=Cc1ccc(Br)cc1.COc1ccc(I)cc1>>COc1ccc(/C=C/c2ccc(Br)cc2)cc1  
 705 C=Cc1ccc(F)cc1.O=Cc1ccc(Cl)cc1>>O=Cc1ccc(/C=C/c2ccc(F)cc2)cc1  
 706 C=C1C(=O)O[C@H]2[C@H]1CC/C(C)=C/CC[C@@]1(C)O[C@H]21.Ic1cccs1>>C/C1=C\CC[C@  
 @]2(C)O[C@H]2[C@H]2OC(=O)/C=C/c3cccs3)[C@H]2CC1  
 707 C=CC(=O)OC(C)(C)C.[C@H]1[C@H](NS(=O)(=O)c2ccc(I)cc2)C[C@@H]2[C@H]1C2(C)C>>C[  
 C@H]1[C@H](NS(=O)(=O)c2ccc(/C=C/C(=O)OC(C)(C)C)cc2)C[C@@H]2[C@H]1C2(C)C  
 708 C=CC(=O)O.CC1(C)C=Cc2c(ccc(I)c2[N+](=O)[O-]  
 ])O1>>CC1(C)C=Cc2c(ccc(/C=C/C(=O)O)c2[N+](=O)[O-])O1  
 709 C=CCN(C(=O)OC(C)(C)C)C(=O)OC(C)(C)C.FC(F)(F)c1ccc(Cl)cc1>>CC(C)(C)OC(=O)N(C/C=C/c1c  
 cc(C(F)(F)F)cc1)C(=O)OC(C)(C)C  
 710 C=CC1(C(=O)O)CCS(=O)(=O)CC1.CC(C)[C@H](O)C(=O)N[C@@H](C)C(=O)N1CCC[C@@H](C(  
 =O)N[C@H](C)c2ccc3ccc(Br)cc3n2)N1>>CC(C)[C@H](O)C(=O)N[C@@H](C)C(=O)N1CCC[C@@  
 H](C(=O)N[C@H](C)c2ccc3ccc(/C=C/C4(C(=O)O)CCS(=O)(=O)CC4)cc3n2)N1  
 711 C=Cc1ccc(OC)cc1.COc1ccc(Oc2cc(Cl)ccc2NC[C@@H]2CCCN2C(=O)OC(C)(C)C)cc1>>COc1ccc(/  
 C=C/c2ccc(NC[C@@H]3CCCN3C(=O)OC(C)(C)C)c(Oc3ccc(OC)cc3)c2)cc1  
 712 C=C1C(=O)O[C@H]2[C@H]1CC/C(C)=C/CC[C@@]1(C)O[C@H]21.FC(F)(F)c1ccc(I)cc1>>C/C1  
 =C\CC[C@@]2(C)O[C@H]2[C@H]2OC(=O)/C=C/c3ccc(C(F)(F)F)cc3)[C@H]2CC1  
 713 C=CCCCCCC.COc1cccc1CBr>>C=C(CCCCCC)Cc1cccc1OC  
 714 C=CC#N.Clc1ccc(Br)cc1>>N#C/C=C/c1ccc(Cl)cc1  
 715 Br1cccc2cccc12.C=CCCCCCC>>C=C(CCCCCC)c1cccc2cccc12  
 716 Br1ccc(-c2nc3cccc3[nH]2)cc1.C=CC(=O)OC>>COC(=O)/C=C/c1ccc(-c2nc3cccc3[nH]2)cc1  
 717 C=C.CC(=O)Nc1ccc(Br)cn1>>C=Cc1ccc(NC(C)=O)nc1  
 718 C=CC(=O)OC.O=C1Ne2cccc(Br)c2C1=O>>COC(=O)/C=C/c1cccc2c1C(=O)C(=O)N2  
 719 C=CC(=O)OCC.Cc1ccc(Br)c(Cn2nnc(C)n2)c1>>CCOC(=O)/C=C/c1ccc(C)cc1Cn1nnc(C)n1  
 720 C=C.COc1ccc([N+](=O)[O-])c(Br)c1>>C=Cc1cc(OC)ccc1[N+](=O)[O-]  
 721 C=Cc1ccc(CN(C)C)cc1.CCOC(=O)c1ccncc1Cl>>CCOC(=O)c1ccncc1/C=C/c1ccc(CN(C)C)cc1  
 722 C=Cc1cccc1.O=c1c(I)c(/C=C/c2ccc(Cl)cc2)[nH]c2cccc12>>O=c1c(/C=C/c2cccc2)c(/C=C/c2ccc(Cl  
 )cc2)[nH]c2cccc12  
 723 C=Cc1cccc1.COc1ccc(Br)c2cccc12>>COc1ccc(/C=C/c2cccc2)c2cccc12  
 724 Br1enc(NCCc2cccc2)c2cccc12.C=CC(=O)OCC>>CCOC(=O)/C=C/c1cnc(NCCc2cccc2)c2cccc1  
 725 C=Cc1ccc(OC)cc1.O=Cc1ccc(Br)cc1>>COc1ccc(/C=C/c2ccc(C=O)cc2)cc1  
 726 C=CCCC(=O)O.Ic1cccc1>>O=C(O)CC/C=C/c1cccc1  
 727 C=CC(=O)N(C)Cc1cccc(C(C)C)c1OCCC.CC1(C)NCc2cc(Br)enc2NC1=O>>CCCOc1c(CN(C)C(=O)/  
 C=C/c2cnc3c(c2)CNC(C)(C)C(=O)N3)cccc1C(C)C  
 728 C=Cc1ccc(Cl)cc1.CC(=O)c1cccc1Br>>CC(=O)c1cccc1/C=C/c1ccc(Cl)cc1  
 729 C=CC(=O)OC(C)(C)C.OCc1cccc(Br)c1>>CC(C)(C)OC(=O)/C=C/c1cccc(CO)c1  
 730 C=CC(=O)OCC.COc1cc(Nc2c(CCc3cccc3)nc3ccc(Br)cn23)cc(OC)c1OC>>CCOC(=O)/C=C/c1ccc2n  
 c(CCc3cccc3)c(Nc3cc(OC)c(OC)c(OC)c3)n2c1  
 731 C=Cc1cccc1.Ic1c(-c2cccc2)nnn1Cc1cccc1>>C=C/c1c(-c2cccc2)nnn1Cc1cccc1)\c1cccc1

C=Cc1cccc(C#N).CC(C)(C#N)(CCCN1CCN(CCOc2ccccc2Br)CC1)c1cccc1>>Cc1cccc(/C=C/c2ccc  
 cc2OCCN2CCN(CCCC(C#N)(c3ccccc3)C(C)C)CC2)n1  
 C=CCN1CCNCC1.CC(C)c1[nH]nc(O[C@@H]2O[C@H](COC(=O)c3ccccc3)[C@@H](F)[C@H](OC  
 (=O)c3ccccc3)[C@H]2OC(=O)c2ccccc2)c1Cc1ccc(Br)cc1>>CC(C)c1[nH]nc(O[C@@H]2O[C@H](C  
 OC(=O)c3ccccc3)[C@@H](F)[C@H](OC(=O)c3ccccc3)[C@H]2OC(=O)c2ccccc2)c1Cc1ccc(/C=C/C  
 N2CCNCC2)cc1  
 C=CC(=O)N1CC(c2oc3ccccc3c2C)C1.CN1CC(=O)Nc2ncc(Br)cc2C1>>Cc1c(C2CN(C(=O)/C=C/c3cn  
 c4c(c3)CN(C)CC(=O)N4)C2)oc2ccccc12  
 C=CC(C)(C)C(=O)NC(C)(C)CO.Cc1cc(OCc2ccccc2)c(C2O[C@H](COCc3ccccc3)[C@@H](OCc3ccc  
 cc3)[C@H](OCc3ccccc3)[C@H]2OCc2ccccc2)cc1Cc1ccc(Br)cc1>>Cc1cc(OCc2ccccc2)c(C2O[C@H]  
 (COCc3ccccc3)[C@@H](OCc3ccccc3)[C@H](OCc3ccccc3)[C@H]2OCc2ccccc2)cc1Cc1ccc(/C=C/C  
 C)(C)C(=O)NC(C)(C)CO)cc1  
 C=CC(F)F)C(F)F)C(F)F)C(F)F)C(F)F)F.N#Cc1ccc(Br)cc1>>N#Cc1ccc(/C=C/C(F)F)C(F)  
 (F)C(F)F)C(F)F)C(F)F)C(F)F)cc1  
 C=CC(=O)N(C)Cc1cc2ccccc2s1.CC1(C)C(=O)Nc2ncc(Br)cc21>>CN(Cc1cc2ccccc2s1)C(=O)/C=C/c1  
 cnc2c(c1)C(C)(C)C(=O)N2  
 C=C[Si](C)(C)c1ncccn1.Ic1cccc1>>C[Si](C)(/C=C/c1cccc1)c1ncccn1  
 C=CC(=O)OC.COc1cc2c(cc1OC)Oc1c(cc(Br)cc1OC)C=C2>>COC(=O)/C=C/c1cc2c(c(OC)c1)Oc1cc  
 (OC)c(OC)cc1C=C2  
 C=CC(=O)NC.C[C@]12C[C@@]34C=C(Se5cccc(I)c5)C(=O)[C@@](C)(CCC(=O)Nc5c(O)ccc(C(=O  
 )O)c5O)[C@@H]3[C@H](C[C@@H]1C4)O2>>CNC(=O)/C=C/c1cccc(SC2=C[C@]34C[C@H]5C[C  
 @H](O)[C@@]5(C)C3)[C@H]4[C@](C)(CCC(=O)Nc3c(O)ccc(C(=O)O)c3O)C2=O)c1  
 C=C.COc1cccc(I)c1>>C=Cc1cccc(OC)c1  
 Br1cccs1.C=Cc1ccc2cc(OC)ccc2c1>>COc1ccc2cc(/C=C/c3ccccc3)ccc2c1  
 C=Cc1ccc(CC(NC(=O)c2ccccc2)C(=O)OCC)cc1.CCOC(=O)C(F)Br>>CCOC(=O)C(F)/C=C/c1ccc(CC  
 (NC(=O)c2ccccc2)C(=O)OCC)cc1  
 C=CC(C)=O.O=Cc1cccc(Br)c1>>CC(=O)/C=C/c1cccc(C=O)c1  
 Br1ccc(-c2cnc3ccccc3n2)cc1.C=CCn1c(-c2ccc(C)cc2)nc2ccccc2c1=O>>Cc1ccc(-  
 c2nc3ccccc3c(=O)n2C/C=C/c2ccc(-c3cnc4ccccc4n3)cc2)cc1  
 C=CC(CO)N1C(=O)c2ccccc2C1=O.Cc1ccc(S(=O)(=O)Oc2ccc(Br)cc2)cc1>>Cc1ccc(S(=O)(=O)Oc2cc  
 c(/C=C/C(CO)N3C(=O)c4cccc4C3=O)cc2)cc1  
 C=Cc1ccc(OC(C)=O)cc1.CC(=O)OC[C@H]1O[C@@H](Oc2ccc(I)cc2)[C@H](OC(C)=O)[C@@H](  
 OC(C)=O)[C@@H]1OC(C)=O>>CC(=O)OC[C@H]1O[C@@H](Oc2ccc(/C=C/c3ccc(OC(C)=O)cc3)c  
 c2)[C@H](OC(C)=O)[C@@H](OC(C)=O)[C@@H]1OC(C)=O  
 C=Cc1ccc2ccccc2c1.N#Cc1ccc(Br)cc1>>N#Cc1ccc(/C=C/c2ccc3ccccc3c2)cc1  
 C=Cc1cccc([N+](=O)[O-])c1.CC(=O)Nc1ccc(Br)cc1>>CC(=O)Nc1ccc(/C=C/c2ccccc([N+](=O)[O-  
 C=CC(=O)OCCCC.CNC(=O)c1cccc(I)c1>>CCCCOC(=O)/C=C/c1cccc(C(=O)NC)c1  
 C=CC(=O)CC.Fc1ccc(Br)cc1>>CCC(=O)/C=C/c1ccc(F)cc1  
 C=Cc1cccc1.CC(=O)c1ccc(I)cc1>>CC(=O)c1ccc(/C=C/c2ccccc2)cc1  
 Br1ccccc1.C=CC1CC2C=CC1C2>>C1=CC2CC1CC2/C=C/c1cccc1  
 C=Cc1ccc2nc(OC)c(OC)nc2c1.COC(=O)c1c(Br)cccc1OC>>COC(=O)c1c(/C=C/c2ccc3nc(OC)c(OC)n  
 c3c2)cccc1OC  
 C=CC(=O)c1cccc1.O=C1C=C(Br)CCC1>>O=C1C=C(/C=C/C(=O)c2ccccc2)CCC1  
 Br1ccccc1.C=COCCO>>C=C(OCO)c1ccccc1  
 C=CC(=O)OCC.O=Cc1cc(C(F)F)F)ccc1Br>>CCOC(=O)/C=C/c1ccc(C(F)F)F)cc1C=O  
 C=CC[C@@H](C)CO.CCC(O[Si](C)(C)C(C)C)[C@H](C)/C=C(\C)I>>CCC(O[Si](C)(C)C(C)C(C)C  
 )][C@H](C)/C=C(C)/C=C/C[C@@H](C)CO  
 C=CCOc1cccc(C)c1.Ic1cccc1>>Cc1cccc(OC/C=C/c2ccccc2)c1  
 C=Cc1cc(OC)cc(OC)c1.COc1ccc(I)cc1>>COc1ccc(/C=C/c2ccc(OC)cc(OC)c2)cc1  
 C=CC(=O)O.Ic1cccc2cc[nH]c12>>O=C(O)/C=C/c1cccc2cc[nH]c12  
 C=CC(=O)N1N=Cc2ccccc2C1CCC.CCCc1nc(N)nc(N)c1Cc1cc(I)c(OC)c(OC)c1>>CCCc1nc(N)nc(N)  
 c1Cc1cc(/C=C/C(=O)N2N=Cc3ccccc3C2CCC)c(OC)c(OC)c1  
 C=Cc1cccc1.Fc1cc(Br)cc(F)c1F>>Fc1cc(/C=C/c2ccccc2)cc(F)c1F  
 Br1ccnc2ccccc12.C=CC[C@H]1CCCN(C)C[C@H](OC(C)=O)[C@H](C)C[C@H](CC(OC)OC)[C@  
 H](O[C@@H]2O[C@H](C)[C@@H](O[C@H]3C[C@@](C)(O)[C@@H](OC(=O)CC)[C@H](C)O3)  
 [C@H](N(C)C)[C@H]2OC(C)=O)[C@@H](OC)[C@H](OC(=O)CC)CC(=O)O1>>CCC(=O)O[C@H]  
 1[C@H](C)O[C@@H](O[C@H]2[C@H](N(C)C)[C@@H](OC(C)=O)[C@H](O[C@@H]3[C@@H](  
 OC)[C@H](OC(=O)CC)CC(=O)O[C@@H](C/C=C/c4ccnc5ccccc45)CCCN(C)C[C@H](OC(C)=O)[C  
 @H](C)C[C@@H]3C(C)N(C)N(C)N(C)C@H12C(C)C@H11(C)N  
 Br1ccc(-c2cccs2)s1.C=CC(=O)OC>>COC(=O)/C=C/c1ccc(-c2cccs2)s1  
 C=CC(=O)OCC.Cc1cc(I)ccc1/C=C/C#N>>CCOC(=O)/C=C/c1ccc(/C=C/C#N)c(C)c1

767 C=Cc1ccc(/C=C/c2ccc(N(c3ccc(OCCCCC)cc3)c3ccc(OCCCCC)cc3)cc2)cc1.O=Cc1ccc(Br)s1>>C  
CCCCCOc1ccc(N(c2ccc(/C=C/c3ccc(/C=C/c4ccc(C=O)s4)cc3)cc2)c2ccc(OCCCCC)cc2)cc1  
768 C=C[C@H](CCCCCCCC)CC(OC)OC.Clc1ccc(I)cc1>>CCCCCCCC[C@@H](/C=C/c1ccc(Cl)cc1)CC(  
OC)OC  
769 C=Cc1cccc1.O=S(=O)(Oc1cccc(C(F)(F)F)c1)C(F)(F)F>>C=C(c1cccc1)c1cccc(C(F)(F)F)c1  
770 C=CC(=O)OC(C)(C)C.O=[N+](=[O-])c1ccc(Br)cc1>>CC(C)(C)OC(=O)/C=C/c1ccc([N+](=O)[O-])cc1  
771 C=Cc1cc(OC)c(OC)c(OC)c1-c1cccc1.Cc1ccc(I)cc1>>COc1cc(/C=C/c2ccc(C)cc2)c(-  
c2cccc2)c(OC)c1OC  
772 C=Cc1cccc1.CCc1ccc(I)cc1>>CCc1ccc(/C=C/c2cccc2)cc1  
773 C=C(C#N)C(=O)N(CC)CC.COc1cc(I)ccc1O>>CCN(CC)C(=O)/C(C#N)=C/c1ccc(O)c(OC)c1  
774 C=CC(=O)OC.CC(C)=CCc1cc(I)cc(Cc(C)C)c1O>>COC(=O)/C=C/c1cc(CC=C(C)C)c(O)c(CC=C(  
C)C)c1  
775 C=CC(=O)N(C1CCCCC1)C1CCCCC1.CC(C)(C)OC(=O)c1cccc1Br>>CC(C)(C)OC(=O)c1cccc1/C=  
C/C(=O)N(C1CCCCC1)C1CCCCC1  
776 C=CCn1cnnn1.OC(Cn1cnnn1)(c1ccc(F)cc1F)C(F)(F)c1ccc(Br)cn1>>OC(Cn1cnnn1)(c1ccc(F)cc1F)C(  
F)(F)c1ccc(/C=C/Cn2cnnn2)cn1  
777 C=Cc1cccc1.CCOC(=O)/C=C/c1ccc(I)cc1C>>CCOC(=O)/C=C/c1ccc(/C=C/c2cccc2)cc1C  
778 C=Cc1ccc2c(c1)c1cccc1n2CCCCCCC.CCCCCCn1c2ccc(I)cc2c2cc(C=O)ccc21>>CCCCCCn1c2c  
cccc2c2cc(/C=C/c3ccc4c(c3)c3cc(C=O)ccc3n4CCCCCCC)ccc21  
779 C=C.O=[N+](=[O-])c1ccc(Br)cc1>>C=Cc1ccc([N+](=O)[O-])cc1  
780 C=C1Oc2cc(OC)cc(C(=O)OC)c2NC1=O.O=[N+](=[O-]  
])c1ccc(Br)cc1>>COC(=O)c1cc(OC)cc2c1NC(=O)/C=C/c1ccc([N+](=O)[O-])cc1)O2  
781 Brc1cccc1I.C=CP(=O)(OCC)OCC>>CCOP(=O)/C=C/c1cccc1Br)OCC  
782 C=CC(=O)OC(C)(C)C.CC(=O)N(c1c(C)cc(C)cc1I)C1C=CCCC1>>CC(=O)N(c1c(C)cc(C)cc1/C=C/C(  
=O)OC(C)(C)C)C1C=CCCC1  
783 C=CC(=O)OC.C[C@H](c1cccc1)N1C(=O)c2ccc(OS(=O)(=O)C(F)(F)F)cc2C1=O>>COC(=O)/C=C/c  
1ccc2c(c1)C(=O)N([C@H](C)c1cccc1)C2=O  
784 C=CC(=O)OC.COc1ccc2nc3c(cc2c1)C(OC)OC(c1cccc1)=C3I>>COC(=O)/C=C/C1=C(c2cccc2)OC(  
OC)c2cc3cc(OC)ccc3nc21  
785 C=CC(=O)OC1CCCCCCCCCCCC1.Ic1cccc1>>O=C(/C=C/c1cccc1)OC1CCCCCCCCCCCC1  
786 Brc1cccc2cccc12.C=CC(=O)OCCCC>>CCCCOC(=O)/C=C/c1cccc2cccc12  
787 C=CC[C@H](O[Si](c1cccc1)(c1cccc1)C(C)(C)C)[C@H]1OC(=O)[C@H]2OC(C)(C)O[C@H]21.Ic1  
cccc1>>CC1(C)O[C@@H]2C(=O)O[C@H]([C@H](C/C=C/c3cccc3)O[Si](c3cccc3)(c3cccc3)C(C  
)C(C)[C@@H]2O1  
788 C=Cc1cc([N+](=O)[O-]  
)ccc1OCOC[C@H](C)(C)C.COc1cccc1I>>COc1cccc1/C=C/c1cc([N+](=O)[O-]  
789 C=CC(=O)OCC.Oc1ccc(C(=C2CCCCC2)c2ccc(Br)cc2)cc1Cl>>CCOC(=O)/C=C/c1ccc(C(=C2CCC  
CCC2)c2ccc(O)c(Cl)c2)cc1  
790 C=CC#N.Clc1ccc(I)cc1>>N#C/C=C/c1ccc(Cl)cc1  
791 C=CC(=O)OCC.COc1ccc(Br)c(C(=O)OC(C)(C)C)c1>>CCOC(=O)/C=C/c1ccc(OC)cc1C(=O)OC(C)(C  
C=CC(=O)OCC.COc1ccc(Nc2nc(NC3CCCCC3)nc(Oc3ccc(I)cc3)n2)cc1Cl>>CCOC(=O)/C=C/c1ccc  
(Oc2nc(Nc3ccc(OC)c(Cl)c3)nc(NC3CCCCC3)n2)cc1  
793 C=CN1C(=O)c2cccc2C1=O.COc1cnc2cccc(Br)c2c1>>COc1cnc2cccc(/C=C/N3C(=O)c4cccc4C3=O  
)c2c1  
794 C=CC(=O)OCCCC.Cn1nc(Br)c2ccc(Cl)cc21>>CCCCOC(=O)/C=C/c1nn(C)c2cc(Cl)ccc12  
795 C=CCCCC(=O)OC.Cc1cccc1OS(=O)(=O)C(F)(F)F>>C=C(CCCC(=O)OC)c1cccc1C  
796 C=COCCCC.O=S1(=O)CCCN1Cc1cc(Br)cc(Cc2cccc2)c1>>C=C(OCCCC)c1cc(Cc2cccc2)cc(CN2C  
CCS2(=O)=O)c1  
797 Brc1ccsc1.C=CC(=O)O>>O=C(O)/C=C/c1ccsc1  
798 C=CP(=O)(OCC)OCC.N#Cc1ccc(Br)cc1>>CCOP(=O)/C=C/c1ccc(C#N)cc1)OCC  
799 C=CC(=O)N1CCOCC1.O=C(/C=C/c1ccc(Sc2cccc2Br)c(Cl)c1)N1CCOCC1>>O=C(/C=C/c1ccc(Sc2c  
cccc2/C=C/C(=O)N2CCOCC2)c(Cl)c1)N1CCOCC1  
800 C=CC(=O)CC.COC(=O)c1ccc(Br)cc1>>CCC(=O)/C=C/c1ccc(C(=O)OC)cc1  
801 C=Cc1ccc(OC)cc1.Clc1cccc1>>COc1ccc(/C=C/c2cccc2)cc1  
802 C=Cc1ccc(N(CCCC)CCCC)cc1.CCOC(OCC)c1ccc(/C=C/c2ccc(I)cc2)cc1>>CCCCN(CCCC)c1ccc(/C  
=C/c2ccc(/C=C/c3ccc(C(OCC)OCC)cc3)cc2)cc1  
803 C=CC(=O)O.O=S(=O)(Nc1cccc(I)c1)c1ccc(-c2cccc2)cc1>>O=C(O)/C=C/c1cccc(NS(=O)(=O)c2ccc(-  
c3cccc3)cc2)c1  
804 C=CCn1cc(C(=O)O)c(OC)n1.CCn1cc(I)c(=O)c2ccc(C)nc21>>CCn1cc(/C=C/Cn2cc(C(=O)O)c(OC)n2  
)c(=O)c2ccc(C)nc21

805 C=Cc1cccc1.Ic1ccc2c(c1)OCCOCCOCCOCCOCCO2>>C(=C/c1ccc2c(c1)OCCOCCOCCOCCOCC  
O2)\c1cccc1  
806 C=CC(=O)O.CC(C)(C)c1cc(I)c2c(c1)OCCOCCOCCOCCO2>>CC(C)(C)c1cc(/C=C/C(=O)O)c2c(c1)  
OCCOCCOCCOCCO2  
807 Brc1cccc1.C=CC(OCC)OCC>>CCOC(/C=C/c1cccc1)OCC  
808 C=CC(=O)OCC.CC(C)(C)[Si](C)(C)n1ccc2c(I)ccnc21>>CCOC(=O)/C=C/c1ccnc2c1ccn2[Si](C)(C)C(  
C)(C)C  
809 C=CC(=O)OCCCC.O=C1c2cccc2C(=O)N1c1ccc(I)cc1>>CCCCOC(=O)/C=C/c1ccc(N2C(=O)c3cccc  
c3C2=O)cc1  
810 C=Cc1ccc(F)cc1.Cc1c(Br)c(=O)oc2cccc12>>Cc1c(/C=C/c2ccc(F)cc2)c(=O)oc2cccc12  
811 C=Cc1ccc(N(c2cccc2)c2cccc2)cc1.CSc1ccc(Br)cc1>>CSc1ccc(/C=C/c2ccc(N(c3cccc3)c3cccc3)cc  
2)cc1  
812 C=Cc1ccnc1.CC(C)(C)OC(=O)N[C@H](COc1cc(Br)enc1Cl)Cc1c[nH]c2cccc12>>CC(C)(C)OC(=O  
N[C@H](COc1cc(/C=C/c2ccnc2)enc1Cl)Cc1c[nH]c2cccc12  
813 C=CC(=O)O.OC[C@H]1O[C@H](n2c(NCc3cccc(Br)c3)nc3cccc32)[C@H](O)[C@@H]1O>>O=C  
(O)/C=C/c1cccc(CNc2nc3cccc3n2[C@@H]2O[C@H](CO)[C@@H](O)[C@H]2O)c1  
814 C=CC(=O)OC(C)(C)C.CC(C)(C)OC(=O)N1CCC(C2=C[C@H]3CC[C@H](OC(C)(C)C)[C@@3(C)C  
C2)=C(Br)C1>>CC(C)(C)OC(=O)/C=C/C1=C(C2=C[C@H]3CC[C@H](OC(C)(C)C)[C@@3(C)CC2  
)CCN(C(=O)OC(C)(C)C)C1  
815 C=Cc1cccc([N+](=O)[O-])c1.O=Cc1ccc(Br)cc1>>O=Cc1ccc(/C=C/c2cccc([N+](=O)[O-])c2)cc1  
816 C=CC(=O)N1N=Cc2cccc2C1c1cc(C)cc(C)c1.COc1cc(Cc2cnc(N)nc2N)cc(I)c1OC>>COc1cc(Cc2cnc(  
N)nc2N)cc(/C=C/C(=O)N2N=Cc3cccc3C2c2cc(C)cc(C)c2)c1OC  
817 C=CC(=O)OCC.Cc1[nH]c2cccc2c1CCN(Cc1cccc(Br)c1)C(=O)OC(C)(C)C>>CCOC(=O)/C=C/c1ccc  
c(CN(CCc2c(C)[nH]c3cccc23)C(=O)OC(C)(C)C)c1  
818 C=CC1CC(OC)=CC(=O)O1.Fc1ccc(I)cc1>>COC1=CC(=O)OC(/C=C/c2ccc(F)cc2)C1  
819 C=CC(=O)OCC.CCC(C)c1cnc(C(C)CC)c(Cl)n1>>CCOC(=O)/C=C/c1nc(C(C)CC)enc1C(C)CC  
820 C=CC(=O)OC(C)(C)C.O=S(=O)(c1cccc(Br)c1)c1cccn1>>CC(C)(C)OC(=O)/C=C/c1cccc(S(=O)(=O)  
c2cccn2)c1  
821 C=CC(=O)OCC.Cc1cccc(I)c1>>CCOC(=O)/C=C/c1cccc(C)c1  
822 C=C(C)C(=O)OC.N#Cc1ccc(Br)cc1>>COC(=O)/C(C)=C/c1ccc(C#N)cc1  
823 C=Cc1ccc(C(=O)OC(C)(C)C)cc1.COc1ccc(I)cc1>>COc1ccc(/C=C/c2ccc(C(=O)OC(C)(C)C)cc2)cc1  
824 C=Cc1cc(OC)c(OC)c(OC)c1-c1cccc1.COc1ccc(I)cc1>>COc1ccc(/C=C/c2cc(OC)c(OC)c(OC)c2-  
c2cccc2)cc1  
825 C=CC1CC(OC)=CC(=O)O1.Ic1cccc1>>COC1=CC(=O)OC(/C=C/c2cccc2)C1  
826 C=CC(F)(F)F.Ic1ccc(OCc2cccc2)cc1>>FC(F)(F)/C=C/c1ccc(OCc2cccc2)cc1  
827 C=CC(=O)OC.COc1ccc2c(c1)CCN(c1ccc(CCC(C)C)cc1)C2(C)c1ccc(Br)cc1>>COC(=O)/C=C/c1ccc(  
C2(C)c3ccc(OC)cc3CCN2c2ccc(CCC(C)C)cc2)cc1  
828 C=CC(=O)OC.CCCNC(=O)c1ccc(Br)en1>>CCCN(C(=O)c1ccc(/C=C/C(=O)OC)en1  
829 Brc1ccnc1.C=CS(=O)(=O)N1CCC2(CC1)N=C(C1CCCC1)NC2=O>>O=C1NC(C2CCCC2)=NC1  
2CCN(S(=O)(=O)/C=C/c1ccnc1)CC2  
830 C=CC(N)=O.Oc1ccc2c(Cc3ccc(Br)cc3)nc2c1>>NC(=O)/C=C/c1ccc(Cc2nccc3cc(O)ccc23)cc1  
831 C=Cc1ccc([N+](=O)[O-]  
)cc1.CCCCCCCCOCc1cc(/C=C/c2ccc(Br)cc2)c(OCCCCCCCC)cc1C=O>>CCCCCCCCOCc1cc(/C=C/c2  
ccc(/C=C/c3ccc([N+](=O)[O-])cc3)cc2)c(OCCCCCCCC)cc1C=O  
832 C=CC(=O)OCc1cccc1.CCOC(=O)c1cccc1Br>>CCOC(=O)c1cccc1/C=C/C(=O)OCc1cccc1  
833 C=Cc1cccc(O)c1.Oc1ccc(O)c(I)c1>>Oc1cccc(/C=C/c2cc(O)ccc2O)c1  
834 C=Cc1ccc([N+](=O)[O-]  
)cc1.CCCCCCOCc1cc(I)ccc1OCCO>>CCCCCOCc1cc(/C=C/c2ccc([N+](=O)[O-])cc2)ccc1OCCO  
835 C=CC(=O)OCC.CC(Oc1ccc(Br)cc1)c1cccc1>>CCOC(=O)/C=C/c1ccc(OC(C)c2cccc2)cc1  
836 C=CC(=O)OC(C)(C)C.Cc1ccc(Br)cc1>>Cc1ccc(/C=C/C(=O)OC(C)(C)C)cc1  
837 C=C(NC(=O)OC(C)(C)C)(=O)OC.Nc1cc(C(F)(F)F)ccc1I>>COC(=O)/C=C/c1ccc(C(F)(F)F)cc1N)N  
C(=O)OC(C)(C)C  
838 Brc1cccc(CNc2nc(N3CCOCC3)nc3c2ncn3C2CCCC2)c1.C=CC(=O)OC>>COC(=O)/C=C/c1cccc(CNc  
2nc(N3CCOCC3)nc3c2ncn3C2CCCC2)c1  
839 C=CC(=O)OCC.O=Cc1cc(F)ccc1Br>>CCOC(=O)/C=C/c1ccc(F)cc1C=O  
C=CC(C)(C)C(=O)NC(C)(C)CO.CC(=O)OC[C@H]1O[C@@H](c2cc(Cc3ccc(Br)cc3)c(C)cc2C)[C@  
840 H](OC(C)=O)[C@@H](OC(C)=O)[C@@H]1OC(C)=O>>CC(=O)OC[C@H]1O[C@@H](c2cc(Cc3cc  
c(/C=C/C(C)(C)C(=O)NC(C)(C)CO)cc3)c(C)cc2C)[C@H](OC(C)=O)[C@@H](OC(C)=O)[C@@H]1  
841 Brc1ccnc1.C=Cc1cn(COCC[Si](C)(C)C)nc1-c1nc2ccc(OC)cc2n1COCC[Si](C)(C)C>>COc1ccc2nc(-  
c3nn(COCC[Si](C)(C)C)cc3/C=C/c3cccn3)n(COCC[Si](C)(C)C)c2c1

C=CC1(C(=O)O)COCOC1.CC(C)[C@H](O)C(=O)N[C@@H](C)C(=O)N1CCC[C@@H](C(=O)N[C  
 842 @H](C)c2ccc3ccc(Br)cc3n2)N1>>CC(C)[C@H](O)C(=O)N[C@@H](C)C(=O)N1CCC[C@@H](C(=O)N[C@H](C)c2ccc3ccc(/C=C/C4(C(=O)O)COCOC4)cc3n2)N1  
 C=CCn1c(-c2ccc(C)cc2)nc2cccc2c1=O.O=C(CN1C(=O)COc2cccc21)c1ccc(Br)cc1>>Cc1ccc(-  
 843 c2nc3cccc3c(=O)n2C/C=C/c2ccc(C(=O)CN3C(=O)COc4cccc43)cc2)cc1  
 C=CC(=O)OC(C)(C)C.CCN(CC)c1cc2oc(=O)c(C(=O)O)cc2cc1I>>CCN(CC)c1cc2oc(=O)c(C(=O)O)c  
 844 c2cc1/C=C/C(=O)OC(C)(C)C  
 C=C1CC(c2ccc(Cl)cc2)OC1=O.CC(C)(C)c1ccc(I)cc1>>CC(C)(C)c1ccc(/C=C2\CC(c3ccc(Cl)cc3)OC2  
 845 =O)cc1  
 C=CC(=O)OC(C)(C)C.COC(=O)c1cc(Br)sc1C>>COC(=O)c1cc(/C=C/C(=O)OC(C)(C)C)sc1C  
 C=CS(=O)(=O)NCc1ccc(F)cc1.Cc1ccc(CNC(=O)OC(C)(C)C)c(Br)c1>>Cc1ccc(CNC(=O)OC(C)(C)C)  
 847 c(/C=C/S(=O)(=O)NCc2ccc(F)cc2)c1  
 C=C[C@@H]1O[C@H](COC(C)=O)[C@@H](OC(C)=O)[C@H](OC(C)=O)[C@H]1OC(C)=O.CC(C  
 848 )(C)[Si](C)(C)Oc1cc(Br)ccc1[C@@H]1[C@@H](CC[C@H](O)c2ccc(F)cc2)C(=O)N1c1cccc1>>CC(  
 =O)OC[C@H]1O[C@@H](/C=C/c2ccc([C@@H]3[C@@H](CC[C@H](O)c4ccc(F)cc4)C(=O)N3c3cc  
 ccc3)c(O[Si](C)(C)C(C)C)c2)[C@H](OC(C)=O)[C@@H](OC(C)=O)[C@H]1OC(C)=O  
 849 C=CP(=O)(OCC)OCC.CCOC(=O)NC(Cc1ccc2cccc2c1Br)(C(=O)OCC)C(=O)OCC>>CCOC(=O)NC(  
 Cc1ccc2cccc2c1/C=C/P(=O)(OCC)OCC)(C(=O)OCC)C(=O)OCC  
 C=Cc1ccncc1.CCOC(=O)c1c(I)c2cc(-c3ccc(C(F)(F)F)cc3)ccc2n1-  
 850 c1ccc(OC2CCCC2)cc1>>CCOC(=O)c1c(/C=C/c2ccncc2)c2cc(-c3ccc(C(F)(F)F)cc3)ccc2n1-  
 c1ccc(OC2CCCC2)cc1  
 C=CC(=O)OC.Cc1cc(C)c2nc(C(C)C)n(Cc3ccc(Br)cc3)c2n1>>COC(=O)/C=C/c1ccc(Cn2c(C(C)C)nc3c  
 851 (C)cc(C)nc32)cc1  
 C=CC(=O)N1N=Cc2cccc2C1C=C(C)C.CCOc1cc(Cc2cnc(N)nc2N)cc(I)c1OCC>>CCOc1cc(Cc2cnc(  
 852 N)nc2N)cc(/C=C/C(=O)N2N=Cc3cccc3C2C=C(C)C)c1OCC  
 C=CC=O.CC(C)(C)CN(Cc1ccc(I)cc1)c1ccncc(C#N)n1>>CC(C)(C)CN(Cc1ccc(/C=C/C(=O)cc1)c1ccncc(  
 853 C#N)n1  
 Bre1ccc2c(c1)Cc1cccc1-  
 854 2.C=Cc1nc2c(=O)[nH]c(N)nc2n1[C@H]1C[C@H](O)[C@@H](CO)O1>>Nc1nc2c(nc(/C=C/c3ccc4c(  
 c3)Cc3cccc3-4)n2[C@H]2C[C@H](O)[C@@H](CO)O2)c(=O)[nH]1  
 855 C=COCCCC.O=Cc1ccc(Br)cc1>>C=C(OCCCC)c1ccc(C=O)cc1  
 C=CC(C)=O.COC(=O)c1cc(Br)en1C(=O)OC(C)(C)C>>COC(=O)c1cc(/C=C/C(C)=O)en1C(=O)OC(C  
 856 )(C)C  
 C=CC(=O)OCC.O=[N+](O-)[O-]c1ccc(-c2cccc2I)cc1>>CCOC(=O)/C=C/c1cccc1-c1ccc([N+](=O)[O-  
 857 Bre1ccc(OCc2cccc2)cc1.C=CC(=O)OC(C)(C)C>>CC(C)(C)OC(=O)/C=C/c1ccc(OCc2cccc2)cc1  
 C=CC(=O)OC.Fc1cc(Br)ccc1CN1CCCC(c2c(-  
 859 c3cccc3)[nH]c3cccc23)C1>>COC(=O)/C=C/c1ccc(CN2CCCC(c3c(-  
 Bre1ccc(/N=C/c2ccncc2)cc1.C=Cc1ccncc1>>C(=C/c1ccc(/N=C/c2ccncc2)cc1)\c1ccncc1  
 860 C=CC(=O)OC.COc1c(CN(C(=O)c2cccc2)c2ccc(Br)c2)ccc2c1OC(C)(C)[C@H](O)[C@H]2O>>CO  
 861 C(=O)/C=C/c1cccc(N(Cc2ccc3c(c2OC)OC(C)(C)[C@H](O)[C@H]3O)C(=O)c2cccc2)c1  
 C=CCC(C)C(=O)OCC.COc1cccc1Br>>CCOC(=O)C(C)C/C=C/c1cccc1OC  
 862 C=CC(=O)OC1CCCCC1.Ic1ccc(OC2CCCCO2)cc1>>O=C(/C=C/c1ccc(OC2CCCCO2)cc1)OC1CCCC  
 863 C=CC(=O)OC.COc1ccc(C#Cc2ccncc2Br)cc1>>COC(=O)/C=C/c1ncccc1C#Cc1ccc(OC)cc1  
 864 C=CC(=O)OC.Ic1ccc2c(c1)Cc1cccc1-2>>COC(=O)/C=C/c1ccc2c(c1)Cc1cccc1-2  
 865 C=Cc1ccc(Cl)cc1.O=S(=O)(c1cccc1)C(F)(F)Br>>O=S(=O)(c1cccc1)C(F)(F)/C=C/c1ccc(Cl)cc1  
 866 C=CC(=O)Nc1cccc1OC.COc1ccc2c(=O)c(I)coc2c1>>COc1ccc2c(=O)c(/C=C/C(=O)Nc3cccc3OC)c  
 867 oc2c1  
 C=CC(=O)OC.CC(C)(C)OC(=O)n1cc(I)c([Si](C)(C)C)c1>>COC(=O)/C=C/c1cn(C(=O)OC(C)(C)C)cc  
 868 1[Si](C)(C)C  
 C=CC(=O)OCc1cccc1.O=C1CO[C@@H]2Cc3ccc(Br)cc3[C@@H]2N1O>>O=C(/C=C/c1ccc2c(c1)[  
 869 C@H]1[C@@H](C2)OCC(=O)N1O)OCc1cccc1  
 C=CC(=O)OCC.Cc1ncc(I)c(C)n1>>CCOC(=O)/C=C/c1ncc(C)nc1C  
 870 C=CC(=O)OCC.Cn1c(I)c(-c2cccc2)c2cccc21>>CCOC(=O)/C=C/c1c(-c2cccc2)c2cccc2n1C  
 871 C=CC(=O)N(C)C.Cc1cccc1>>CN(C)C(=O)/C=C/c1cccc1  
 872 C=CS(=O)(=O)F.Cc1ccc(I)cc1>>Cc1ccc(/C=C/S(=O)(=O)F)cc1  
 873 C=CC(C)=O.CC(C)(C)c1ccc2[nH]c3c(c2c1)CC(=O)Nc1ccc(I)cc1-3>>CC(=O)/C=C/c1ccc2c(c1)-  
 874 c1[nH]c3ccc(C(C)(C)C)cc3c1CC(=O)N2  
 C=Cc1cccc(C)n1.C[Si](C)(C)I>>Cc1cccc(/C=C/[Si](C)(C)C)n1  
 875 C=CC(=O)OCC.O=C(O)c1cccc1I>>CCOC(=O)/C=C/c1cccc1C(=O)O  
 876 C=CC(N)=O.CC1(C)Cc2c(CN3CCC4(CC3)CCN(C(=O)c3ccncc3Br)CC4)cccc2O1>>CC1(C)Cc2c(CN  
 877 3CCC4(CC3)CCN(C(=O)c3ccncc3/C=C/C(N)=O)CC4)cccc2O1

878 Br1ccc2c(c1)c(Cc1ccccc1)cn2-  
 c1ccccc1.C=CC(=O)OC>>COC(=O)/C=C/c1ccc2c(c1)c(Cc1ccccc1)cn2-c1ccccc1  
 879 C=C.O/N=C/c1cc(Br)ccc1O>>C=Cc1ccc(O)c(/C=N/O)c1  
 880 C=CCOC(C)=O.Fc1ccc(I)cc1>>CC(=O)OC/C=C/c1ccc(F)cc1  
 881 C=Cc1ccccc1.O=C1c2cc(Br)ccc2-c2ccc(/C=C/c3ccccc3)cc21>>O=C1c2cc(/C=C/c3ccccc3)ccc2-  
 c2ccc(/C=C/c3ccccc3)cc21  
 882 C=CC(OC)OC.FC(F)c1ccc(I)cc1>>COC(/C=C/c1ccc(C(F)F)cc1)OC  
 883 C=CC(=O)OC.CCOCc1nc2c(N)nc3cc(Br)ccc3c2n1CC(C)(C)O>>CCOCc1nc2c(N)nc3cc(/C=C/C(=O)  
 OC)ccc3c2n1CC(C)(C)O  
 884 C=Cc1nc2ccccc2s1.C[C@H]1COCCOCCOC[C@H](C)OCc2cc(I)cc(n2)CO1>>C[C@H]1COCCOCC  
 OC[C@H](C)OCc2cc(/C=C/c3nc4ccccc4s3)cc(n2)CO1  
 885 C=CC(=O)OC(C)(C)C.O=C(O)c1ccc(I)cc1>>CC(C)(C)OC(=O)/C=C/c1ccc(C(=O)O)cc1  
 886 C=Cc1ccccc1.COc1cc(Br)cc(OC)c1OC>>COc1cc(/C=C/c2ccccc2)cc(OC)c1OC  
 887 C=CC(=O)OCC.Cc1en2c(Br)cccc2n1>>CCOC(=O)/C=C/c1cccc2nc(C)cn12  
 888 C=CC(=O)OCC.O=C(O)c1ccc(Br)o1>>CCOC(=O)/C=C/c1ccc(C(=O)O)o1  
 889 C=Cc1ccccc1.IC1CCCCC12OCCO2>>C(=C/C1CCCCC12OCCO2)\c1ccccc1  
 C=Cc1nc2c(N)nenc2n1[C@@H]1O[C@H](CO[Si](C)(C)C(C)(C)C)[C@@H](O[Si](C)(C)C(C)(C)C)[  
 890 C@H]1O[Si](C)(C)C(C)(C)C.Ic1cccc2ccccc12>>CC(C)(C)[Si](C)(C)OC[C@H]1O[C@@H](n2c(/C=  
 C/c3cccc4ccccc34)nc3c(N)nenc32)[C@H](O[Si](C)(C)C(C)(C)C)[C@@H]1O[Si](C)(C)C(C)(C)C  
 891 C=Cc1ccccc1C(=O)O.Cc1cc(C)cc(I)c1>>Cc1cc(C)cc(/C=C/c2ccccc2C(=O)O)c1  
 892 C=CC(OC(C)=O)c1ccccc1.O=[N+](O-)[c1ccc(I)cc1>>CC(=O)OC(/C=C/c1ccc([N+](=O)[O-  
 ])cc1)c1ccccc1  
 Br1cnc2ccccc2c1.C=CCON=C1C(C)CNC(C)C(CC)OC(=O)[C@H](C)[C@H](O[C@H]2C[C@@](C)  
 (OC)[C@H](O)[C@H](C)O2)[C@H](C)[C@H](O[C@H]2O[C@H](C)C[C@H](N(C)C)[C@H]  
 893 2O)[C@@](C)(O)C[C@H]1C>>CCC1OC(=O)[C@H](C)[C@H](O[C@H]2C[C@@](C)(OC)[C@@H]  
 )(O)[C@H](C)O2)[C@H](C)[C@H](O[C@H]2O[C@H](C)C[C@H](N(C)C)[C@H]2O)[C@@](  
 C)(O)C1C(C)=NOC/C=C/c2cnc3ccccc3c2(C)C)CNC1C  
 C=CC(=O)Nc1cc(C)ccc1C.COc1ccc2c(=O)c(I)ccc2c1>>COc1ccc2c(=O)c(/C=C/C(=O)Nc3cc(C)ccc3  
 894 C)ccc2c1  
 C=CC(CC)O[Si](C)(C)C(C)(C)C.COC(=O)CCCCCCCC1=C(Br)CCC1=O>>CCC(/C=C/C1=C(CCCC  
 895 CCCC(=O)OC)C(=O)CC1)O[Si](C)(C)C(C)(C)C  
 896 C=CC(N)=O.COc1ccc(I)cc1OC>>COc1ccc(/C=C/C(N)=O)cc1OC  
 C=Cc1ccc(/C=C/c2ccc(N(C)C)cc2OC)cc1.CC1(C)C2=CC(=O)C(F)=CC2=C(c2ccc(Br)cc2S(=O)(=O)  
 897 O)c2cc(F)c(O)cc21>>COc1cc(N(C)C)ccc1/C=C/c1ccc(/C=C/c2ccc(C3=C4C=C(F)C(=O)C=C4(C)(C  
 )c4cc(O)c(F)cc43)c(S(=O)(=O)O)c2)cc1  
 898 C=CC(=O)OC1CCCCC1.O=[N+](O-)[c1ccc(Br)cc1>>O=C(/C=C/c1ccc([N+](=O)[O-  
 899 C=C(NC(=O)OC(C)(C)C)C(=O)OC.Nc1cccc(I)c1>>COC(=O)/C=C/c1cccc(N)c1)NC(=O)OC(C)(C)C  
 C=CCC1(C)OC(=O)Nc2ccc(-c3cc(F)cc(Br)c3)cc21.COc1ccc(-c2oc3ccccc3c(=O)c2I)cc1>>COc1ccc(-  
 900 c2oc3ccccc3c(=O)c2/C=C/CC2(C)OC(=O)Nc3ccc(-c4cc(F)cc(Br)c4)cc32)cc1  
 C=CC(=O)Nc1ccccc1.O=c1c(I)c(-c2ccc(O)cc2)oc2cc(O)ccc12>>O=C(/C=C/c1c(-  
 901 c2ccc(O)cc2)oc2cc(O)ccc2c1=O)Nc1ccccc1  
 C=Cc1ccc(C(=O)OC)cc1.FC(F)(Br)c1ccc(-c2ccccc2)cc1>>COC(=O)c1ccc(/C=C/C(F)c2ccc(-  
 902 c3ccccc3)cc2)cc1  
 C=C(NC(C)=O)C(=O)OC.Cc1cccc(C(C)C)c1I>>COC(=O)/C=C/c1c(C)cccc1C(C)C)NC(C)=O  
 903 C=CC(C)=O.CCCCCCc1c(OS(=O)(=O)C(F)(F)F)c(C)c(C)c2c(C)c(C#Cc3ccccc3)enc12>>CCCCCc1  
 904 c(/C=C/C(C)=O)c(C)c(C)c2c(C)c(C#Cc3ccccc3)enc12  
 905 \*CN(Cc1ccccc1)N=Nc1ccc(I)cc1.C=CC#N>>\*CN(Cc1ccccc1)N=Nc1ccc(/C=C/C#N)cc1  
 906 C=Cc1ccccc1Cl.COC(=O)C(Cc1ccccc1I)C(=O)OC>>COC(=O)C(Cc1ccccc1/C=C/c1ccccc1Cl)C(=O)  
 907 C=Cc1ccccc1.COc1ccc(OS(=O)(=O)C(F)(F)F)cc1>>C=C(c1ccccc1)c1ccc(OC)cc1  
 908 C=CC(=O)OCC.O=Cc1c(F)cc(Br)cc1Cl>>CCOC(=O)/C=C/c1cc(F)c(C=O)c(Cl)c1  
 909 C=CC(=O)OCC.CC(C)(C)OC(=O)N1C[C@H]2C[C@H](C1)c1cc(Br)cc(=O)n1C2>>CCOC(=O)/C=  
 C/c1cc2n(c(=O)c1)C[C@H]1C[C@H]2CN(C(=O)OC(C)(C)C)C1  
 910 C=CB1OC(C)CC(C)(C)O1.F[C@H]1CCN(Cc2ccc(Br)cc2)C1>>CC1CC(C)(C)OB(/C=C/c2ccc(CN3  
 CC[C@H](F)C3)cc2)O1  
 911 C=CC(=O)OCC.FC(F)(F)c1cc(I)ccc1Br>>CCOC(=O)/C=C/c1ccc(Br)c(C(F)(F)F)c1  
 912 C=CC(=O)OC(C)(C)C.Cc1ccc(C=O)c(Br)c1>>Cc1ccc(C=O)c(/C=C/C(=O)OC(C)(C)C)c1  
 C=CC[C@H](CC(=O)OC(C)(C)C)C(=O)N[C@H](C(=O)N[C@H](C)c1ccccc1)C(C)(C)C.CCc1cc(Br)  
 913 ccc1-  
 c1ccccc1>>CCc1cc(/C=C/C[C@H](CC(=O)OC(C)(C)C)C(=O)N[C@H](C(=O)N[C@H](C)c2ccccc2)  
 C(C)(C)C)ccc1-c1ccccc1

914 C=CC(C)(C)O.O=S(=O)(c1ccccc1)n1c2c(c3cc(Br)ccc31)CCC2>>CC(C)(O)/C=C/c1ccc2c(c1)c1c(n2S(=O)(=O)c2ccccc2)CCC1  
 915 C=C(NC(C)=O)C(=O)OC.CC(C)(C)OC(=O)N[C@@H](COc1cc(C#N)ccc1I)CC(=O)OCc1ccccc1>>COC(=O)/C=C/c1ccc(C#N)cc1OC[C@@H](CC(=O)OCc1ccccc1)NC(=O)OC(C)(C)C)NC(C)=O  
 916 C=CC(=O)OC.FC(F)(F)c1ncc(Br)cn1>>COC(=O)/C=C/c1cnc(C(F)(F)F)nc1  
 917 C=Cc1cncnc1.CCCCCc1cc(-c2nc3c4ccccc4c4ccccc4c3[nH]2)sc1Br>>CCCCCc1cc(-c2nc3c4ccccc4c4ccccc4c3[nH]2)sc1/C=C/c1cncnc1  
 918 C=CC(=O)OCc1ccccc1.Nc1ccc(Br)cn1>>Nc1ccc(/C=C/C(=O)OCc2ccccc2)cn1  
 919 C=Cc1cc(OC(C)=O)cc(OC(C)=O)c1.COc1ccc([C@H]2Oc3ccc(Br)cc3[C@H]2c2cc(OC)cc(OC)c2)cc1>>COc1ccc([C@H]2Oc3ccc(/C=C/c4cc(OC(C)=O)cc(OC(C)=O)c4)cc3[C@H]2c2cc(OC)cc(OC)c2)cc1  
 920 C=CC(=O)OC.CC(C)(C)OC(=O)NC1CCc2cc(Br)ccc21>>COC(=O)/C=C/c1ccc2c(c1)CCC2NC(=O)OC(C)(C)C  
 921 C=CC(=O)OCCCC.N#Cc1ccc(I)cc1>>CCCCOC(=O)/C=C/c1ccc(C#N)cc1  
 922 C=CC(C)=O.O=C(NCc1ccc(Cl)cc1)c1cnc2c(F)cc(I)cc2c1O>>CC(=O)/C=C/c1cc(F)c2ncc(C(=O)NCc3ccc(Cl)cc3)c(O)c2c1  
 923 Br1cccc(N2CCCC2)n1.C=Cc1cncnc1>>C(=C/c1ccccc(N2CCCC2)n1)\c1cncnc1  
 924 C=CC[C@H](C[C@H](NC(=O)OC(C)(C)C)C(=O)OC(C)(C)C)C(=O)OC(C)(C)C.N#Cc1ccc2c(c1)/N=N\c1cc(C#N)cc1CC2>>CC(C)(C)OC(=O)N[C@@H](C[C@@H](C/C=C/c1ccc2c(c1)/N=N\c1cc(C#N)cc1CC2)C(=O)OC(C)(C)C)C(=O)OC(C)(C)C  
 925 Br1cnc2ccccc2c1.C=CCN(C(=O)OC(C)(C)C)C(=O)OC(C)(C)C>>CC(C)(C)OC(=O)N(C/C=C/c1cnc2ccccc2c1)C(=O)OC(C)(C)C  
 926 C=CC(CO)N1C(=O)c2ccccc2C1=O.CC(=O)c1ccc(Br)cc1>>CC(=O)c1ccc(/C=C/C(CO)N2C(=O)c3ccc(cc3C2=O)cc1  
 927 C=C(C)C(=O)OC.CC(=O)c1ccc(Br)cc1>>COC(=O)/C(C)=C/c1ccc(C(C)=O)cc1  
 928 C=CCc1cnc2cc(C=O)ccc21.CC(C)(C)OC(=O)NC1CCC(OC(=O)Nc2cc(Br)ccc2-c2ccccc2)CC1>>CC(C)(C)OC(=O)NC1CCC(OC(=O)Nc2cc(/C=C/CCn3cnc4cc(C=O)ccc43)ccc2-c2ccccc2)CC1  
 929 C=CC(C)O.COc1c(C)c(C)c(OC)c(I)c1C>>COc1c(C)c(C)c(OC)c(/C=C/C(C)O)c1C  
 930 C=CC#N.Cc1ccc(I)cc1>>Cc1ccc(/C=C/C#N)cc1  
 931 C=CC(=O)NCc1ccc(OC)cc1.CN(C)CCc1c[nH]c2ccc(Br)cc12>>COc1ccc(CNC(=O)/C=C/c2ccc3[nH]c(c(CCN(C)C)c3c2)cc1  
 932 C=CCC(C)C(=O)OCC.O=C(c1ccccc1)c1ccc(Br)cc1>>CCOC(=O)C(C)C/C=C/c1ccc(C(=O)c2ccccc2)c  
 933 C=Cc1ccc(C=C)cc1.N#Cc1ccc(Br)cc1>>C=Cc1ccc(/C=C/c2ccc(C#N)cc2)cc1  
 934 C=C[Si](C)(C)C.Ic1ccccc1>>C[Si](C)(C)/C=C/c1ccccc1  
 935 C=CC(OCC)OCC.O=Cc1ccc(Br)cc1>>CCOC(/C=C/c1ccc(C=O)cc1)OCC  
 936 C=Cc1ccc(F)cc1.O=Cc1ccc(Br)cc1>>O=Cc1ccc(/C=C/c2ccc(F)cc2)cc1  
 937 C=CCOC(C)=O.Cc1ccccc1Br>>CC(=O)OC/C=C/c1ccccc1C  
 938 C=CC(=O)OCC.CCOC(=O)CCOCc1cc(OC)c(OCc2ccccc2)cc1Br>>CCOC(=O)/C=C/c1cc(OCc2ccccc2)c(OC)cc1COCCC(=O)OCC  
 939 C=CC(=O)OCC.N#Cc1cccc(Oc2ccccc(Br)c2)c1>>CCOC(=O)/C=C/c1cccc(Oc2ccccc(C#N)c2)c1  
 940 C=CC(=O)OCC.Ic1oc2ccccc2c1-c1ccccc1>>CCOC(=O)/C=C/c1oc2ccccc2c1-c1ccccc1  
 941 C=CCCCCN1C(=O)c2ccccc2C1=O.Cc1ccccc1OS(=O)(=O)C(F)(F)F>>C=C(CCCCN1C(=O)c2ccccc2C1=O)c1ccccc1C
