# Supplementary material for: Heck reaction prediction using a transformer model based on a transfer learning strategy
Source: Royal Society of Chemistry journal article supplement (doi:10.1039/d0cc02657c), 2020-01-01
Supplement: d0cc02657c1.zip [file d0cc02657c1.zip]

**Table S4B. Data used for transformer-baseline and transformer-transfer learning models validation in Heck reaction (Dataset for validation in experiment 1)**

| Reaction ID | Reaction SMILES                                                                                                                                                                                                                                                                        |
|-------------|----------------------------------------------------------------------------------------------------------------------------------------------------------------------------------------------------------------------------------------------------------------------------------------|
| 1           | <chem>C=CC(=O)OCC.Cc1cccc(Oc2cccc(Br)c2)c1&gt;&gt;CCOC(=O)/C=C/c1cccc(Oc2cccc(C)c2)c1</chem>                                                                                                                                                                                           |
| 2           | <chem>COC(=O)C(C/C=C/C(C)=O)NS(=O)(=O)c1ccc(C)cc1.Cc1ccc(Br)cc1&gt;&gt;COC(=O)C(C/C=C/C(C)=O)c1ccc(C)cc1NS(=O)(=O)c1ccc(C)cc1</chem>                                                                                                                                                   |
| 3           | <chem>C=C[C@H]1O[C@@H]2OC(C)(C)O[C@@H]2[C@H]1O.O=C1CC(c2cccc2)Oc2cc(Br)ccc21&gt;&gt;CC1(C)O[C@H]2O[C@@H](/C=C/c3ccc4c(c3)OC(c3cccc3)CC4=O)[C@H](O)[C@H]2O1</chem>                                                                                                                      |
| 4           | <chem>C=CC(=O)OC.CN(C)c1ccc(Br)cc1&gt;&gt;COC(=O)/C=C/c1ccc(N(C)C)cc1</chem>                                                                                                                                                                                                           |
| 5           | <chem>C=CCC(=O)OC.COC(=O)c1c(Br)ccc2[nH]ccc12&gt;&gt;COC(=O)/C=C/c1ccc2[nH]ccc2c1C(=O)OC</chem>                                                                                                                                                                                        |
| 6           | <chem>C=CC(=O)OC.Cc1cc2c(c(C)c1Br)CCC2=O&gt;&gt;COC(=O)/C=C/c1c(C)cc2c(c1C)CCC2=O</chem>                                                                                                                                                                                               |
| 7           | <chem>C=C(OC(C)=O)C(=O)OCC(F)(F)F.COc1ccc(I)c(OC)c1&gt;&gt;COc1ccc(/C=C(\OC(C)=O)C(=O)OCC(F)(F)F)c(OC)c1</chem>                                                                                                                                                                        |
| 8           | <chem>C=CC(=O)OCC.Cc1cccc(Oc2cccc(Br)c2)c1&gt;&gt;CCOC(=O)/C=C/c1cccc(Oc2cccc(C)c2)c1</chem>                                                                                                                                                                                           |
| 9           | <chem>C=Cc1ccc(N(CCCC)CCCC)cc1.CCOC(OCC)c1ccc(/C=C/c2ccc(I)cc2)cc1&gt;&gt;CCCCN(CCCC)c1ccc(/C=C/c2ccc(/C=C/c3ccc(C(OCC)OCC)cc3)cc2)cc1</chem>                                                                                                                                          |
| 10          | <chem>C=C1C(=O)O[C@H]2[C@H]1CC/C(C)=C/CC[C@@]1(C)O[C@@H]21.COC(=O)c1c(F)cccc1I&gt;&gt;CO</chem>                                                                                                                                                                                        |
| 11          | <chem>C(=O)c1c(F)cccc1/C=C1/C(=O)O[C@H]2[C@H]1CC/C(C)=C/CC[C@@]1(C)O[C@@H]21</chem>                                                                                                                                                                                                    |
| 12          | <chem>C=CC(=O)OCCCC.N#Cc1cccc1Cl&gt;&gt;CCCCOC(=O)/C=C/c1cccc1C#N</chem>                                                                                                                                                                                                               |
| 13          | <chem>C=Cc1cccnc1.COc1ccc(C)c(Nc2c(C#N)cnc3cc(/C=C/c4cccc4)ccc23)c1&gt;&gt;COc1ccc(C)c(Nc2c(C#N)cnc3cc(/C=C/c4cccc4)ccc23)c1</chem>                                                                                                                                                    |
| 14          | <chem>C=CCCCc1cccc(OC)c1.COc1cccc(Br)c1&gt;&gt;COc1cccc(/C=C/CCCCc2cccc(OC)c2)c1</chem>                                                                                                                                                                                                |
| 15          | <chem>Brc1ccsc1.C=C&gt;&gt;C=Cc1ccsc1</chem>                                                                                                                                                                                                                                           |
| 16          | <chem>C=Cc1ccc(Cl)cc1.Cn1nc(Br)c2cccc21&gt;&gt;Cn1nc(/C=C/c2ccc(Cl)cc2)c2cccc21</chem>                                                                                                                                                                                                 |
| 17          | <chem>C=CC(O)c1cccc1Br.COc1ccc(I)cc1OC&gt;&gt;COc1ccc(/C=C/C(O)c2cccc2Br)cc1OC</chem>                                                                                                                                                                                                  |
| 18          | <chem>C=C[Si](C)(C)C.Ic1cccc1&gt;&gt;C[Si](C)(C)/C=C/c1cccc1</chem>                                                                                                                                                                                                                    |
| 19          | <chem>C=CC(=O)OCC.CC(C)(C)OC(=O)NCc1cccc(Br)c1&gt;&gt;CCOC(=O)/C=C/c1cccc(CNC(=O)OC(C)(C)C)c</chem>                                                                                                                                                                                    |
| 20          | <chem>C=CCN1C(=O)c2cccc2C1=O.FC(F)(F)c1cccc1Br&gt;&gt;O=C1c2cccc2C(=O)N1C/C=C/c1cccc1C(F)(F)</chem>                                                                                                                                                                                    |
| 21          | <chem>C=C(COC(C)=O)C(=O)OC.CCOC(=O)c1ccc(I)cc1&gt;&gt;CCOC(=O)c1ccc(/C=C(\COC(C)=O)C(=O)OC)c</chem>                                                                                                                                                                                    |
| 22          | <chem>C=CCNC(=O)OC(C)(C)C.Clc1cnc2cccc2c1&gt;&gt;C=C(CNC(=O)OC(C)(C)C)c1cnc2cccc2c1</chem>                                                                                                                                                                                             |
| 23          | <chem>C=C.COC(=O)c1cccc(Br)c1NC(C)=O&gt;&gt;C=Cc1cccc(C(=O)OC)c1NC(C)=O</chem>                                                                                                                                                                                                         |
| 24          | <chem>C=CC(=O)OC.CC(C)(C)OC(=O)N(CCCc1c(Cl)ccc1Br)C(=O)OC(C)(C)C&gt;&gt;COC(=O)/C=C/c1cccc(Cl)c1CCN(C(=O)OC(C)(C)C)C(=O)OC(C)(C)C</chem>                                                                                                                                               |
| 25          | <chem>C=Cc1nc2cccc2s1.C[C@H]1COCCOCCOC[C@H](C)OCc2cc(I)cc(n2)CO1&gt;&gt;C[C@H]1COCCOCCOC[C@H](C)OCc2cc(/C=C/c3nc4cccc4s3)cc(n2)CO1</chem>                                                                                                                                              |
| 26          | <chem>C=CC(C)(C)C(=O)NC(C)(C)CO.Cc1cc(OCc2cccc2)c(C2O[C@H](COCc3cccc3)[C@@H](OCc3cccc3)[C@H](OCc3cccc3)[C@H]2OCc2cccc2)cc1Cc1ccc(Br)cc1&gt;&gt;Cc1cc(OCc2cccc2)c(C2O[C@H](COCc3cccc3)[C@@H](OCc3cccc3)[C@H](OCc3cccc3)[C@H]2OCc2cccc2)cc1Cc1ccc(/C=C/C(C)(C)C(=O)NC(C)(C)CO)cc1</chem> |
| 27          | <chem>C=CC(=O)OC.CC1(C)CC(=O)Nc2ccc(Br)cc21&gt;&gt;COC(=O)/C=C/c1ccc2c(c1)C(C)(C)CC(=O)N2</chem>                                                                                                                                                                                       |
| 28          | <chem>C=CCn1cc(C(=O)O)c(OC)n1.CCn1cc(I)c(=O)c2ccc(C)nc21&gt;&gt;CCn1cc(/C=C/Cn2cc(C(=O)O)c(OC)n2)c(=O)c2ccc(C)nc21</chem>                                                                                                                                                              |
| 29          | <chem>C=CC(OCC)OCC.O=Cc1ccc(Br)cc1&gt;&gt;CCOC(/C=C/c1ccc(C=O)cc1)OCC</chem>                                                                                                                                                                                                           |
| 30          | <chem>C=Cc1cccc1.CC(=O)Oc1c(C(C)(C)C)cc(-c2ccc(Br)c-</chem>                                                                                                                                                                                                                            |
| 31          | <chem>c3cc(C(C)(C)C)c(OC(C)=O)c(C(C)(C)C)c3)c2cc1C(C)(C)C&gt;&gt;CC(=O)Oc1c(C(C)(C)C)cc(-c2ccc(/C=C/c3cccc3)c(-c3cc(C(C)(C)C)c(OC(C)=O)c(C(C)(C)C)c3)c2)cc1C(C)(C)C</chem>                                                                                                             |
| 32          | <chem>C=C(C)C(=O)OC.CN(C)c1ccc(Br)cc1&gt;&gt;COC(=O)/C(C)=C/c1ccc(N(C)C)cc1</chem>                                                                                                                                                                                                     |
| 33          | <chem>C=CC(O)C(F)(F)C(=O)OCC.COC(=O)c1cccc1I&gt;&gt;CCOC(=O)C(F)(F)C(O)/C=C/c1cccc1C(=O)OC</chem>                                                                                                                                                                                      |
| 34          | <chem>C=CC(=O)N(C)Cc1cc2cccc2n1C.CC(C)(C)OC(=O)N1CC(=O)Nc2cc(Br)enc21&gt;&gt;CN(Cc1cc2cccc2n1C)C(=O)/C=C/c1cnc2c(c1)NC(=O)N2C(=O)OC(C)(C)C</chem>                                                                                                                                      |
| 35          | <chem>C=Cc1ccc(O)c(OC)c1.COC(=O)Cn1c(=O)c(Cl)nc2cc(Br)enc21&gt;&gt;COC(=O)Cn1c(=O)c(/C=C/c2ccc(O)c(OC)c2)nc2cc(Br)enc21</chem>                                                                                                                                                         |
| 36          | <chem>C=C.CC(=O)Nc1ccc(Br)cn1&gt;&gt;C=Cc1ccc(NC(C)=O)nc1</chem>                                                                                                                                                                                                                       |
| 37          | <chem>C=Cc1cccc1.Cc1cc(I)cc(C)n1&gt;&gt;Cc1cc(/C=C/c2cccc2)cc(C)n1</chem>                                                                                                                                                                                                              |
| 38          | <chem>C=Cc1ccc(N(c2cccc2)c2cccc2)cc1.CSc1ccc(Br)cc1&gt;&gt;CSc1ccc(/C=C/c2ccc(N(c3cccc3)c3cccc3)cc2)cc1</chem>                                                                                                                                                                         |
| 39          | <chem>Brc1cncnc1.C=CC(=O)OC&gt;&gt;COC(=O)/C=C/c1cncnc1</chem>                                                                                                                                                                                                                         |
| 40          | <chem>C=Cn1nnc(C)n1.Fc1cccc1I&gt;&gt;Cc1nnn(/C=C/c2cccc2F)n1</chem>                                                                                                                                                                                                                    |
| 41          | <chem>C=CC(=O)OC.O=[N+](O-)[O-]c1ccc(I)cc1&gt;&gt;COC(=O)/C=C/c1ccc([N+](=O)[O-])cc1</chem>                                                                                                                                                                                            |

40 C=Cc1cccc1.O=[N+](O-)[O-]c1cccc1Br>>O=[N+](O-)[O-]c1cccc1/C=C/c1cccc1  
41 C=CC(=O)OCC.O=C(O)c1cccc1I>>CCOC(=O)/C=C/c1cccc1C(=O)O  
42 C=CS(C)(=O)=O.COC(=O)c1cc(-c2cccc2)cc2c(I)cn(COCC[Si](C)(C)C)c12>>COC(=O)c1cc(-  
43 c2cccc2)cc2c(/C=C/S(C)(=O)=O)cn(COCC[Si](C)(C)C)c12  
44 C=CC(=O)OC1CCCCCCCCCCCC1.Ic1cccc1>>O=C(/C=C/c1cccc1)OC1CCCCCCCCCCCC1  
45 C=Cc1ccc(F)cc1.O=S(=O)(c1cccc1)C(F)(F)Br>>O=S(=O)(c1cccc1)C(F)(F)/C=C/c1ccc(F)cc1  
46 C=Cc1cccc1.CCOC(=O)/C=C/c1ccc(I)cc1C>>CCOC(=O)/C=C/c1ccc(/C=C/c2cccc2)cc1C  
47 C=C(F)C(=O)OC.Ic1cccc1-c1cccc1>>COC(=O)/C(F)=C/c1cccc1-c1cccc1  
48 C=CP(=O)(OCC)OCC.FC(F)(F)c1cccc(Br)c1>>CCOP(=O)/C=C/c1cccc(C(F)(F)F)c1)OCC  
49 C=C1C(=O)O[C@@H]2C[C@@]3(C)CCCC(=C)[C@@H]3C[C@H]12.COc1ccc(Br)cn1>>C=C1CC  
50 C[C@]2(C)C[C@H]3OC(=O)/C=C/c4ccc(OC)nc4)[C@H]3C[C@@H]12  
51 C=CC(=O)OC(C)(C)C.CC(C)(C)O[C@H]1CC[C@@H]2C=C(C3=C(Br)CN(Cc4cccc4)CC3)CC[C@]  
52 12C>>CC(C)(C)OC(=O)/C=C/C1=C(C2=C[C@H]3CC[C@H](OC(C)(C)C)[C@@]3(C)CC2)CCN(Cc  
53 2cccc2)C1  
54 C=CC(CO)N1C(=O)c2cccc2C1=O.Cc1ccc(S(=O)(=O)Oc2ccc(Br)cc2)cc1>>Cc1ccc(S(=O)(=O)Oc2cc  
55 c(/C=C/C(CO)N3C(=O)c4cccc4C3=O)cc2)cc1  
56 C=Cc1cccc1.CC(C)c1ccc(I)cc1>>CC(C)c1ccc(/C=C/c2cccc2)cc1  
57 C=C[C@](CO)(CCC=C(C)C)OCc1ccc(OC)cc1.COc1ccc(OC(C)=O)cc1Br>>COc1ccc(CO[C@@](/C=  
58 C/c2cc(OC(C)=O)ccc2OC)(CO)CCC=C(C)C)cc1  
59 C=C(NC(=O)[C@@H](Cc1cccc1)NC(=O)OC(C)(C)C(=O)OC.CC(C)[Si](Oc1ccc(I)cc1)(C(C)C)C(  
60 C)C>>COC(=O)/C=C/c1ccc(O[Si](C(C)C)(C(C)C)C(C)C)cc1)NC(=O)[C@@H](Cc1cccc1)NC(=O)  
61 OC(C)(C)C  
62 C=COCCCC.COc1cccc1Br>>C=C(OCCCC)c1cccc1OC  
63 C=CC(=O)OC.C[C@@H](NC(=O)OC(C)(C)C)c1nc(/C=C\Br)cs1>>COC(=O)/C=C/C=Cc1csc([C@@  
64 H](C)NC(=O)OC(C)(C)C)n1  
65 C=CCn1ennn1.OC(Cn1ennn1)(c1ccc(F)cc1F)C(F)(F)c1ccc(Br)cn1>>OC(Cn1ennn1)(c1ccc(F)cc1F)C(  
66 F)(F)c1ccc(/C=C/Cn2ennn2)cn1  
67 C=Cc1cccc1.O=S(=O)(OC=C(c1cccc1)c1cccc1)C(F)(F)F>>C=C(C=C(c1cccc1)c1cccc1)c1cccc  
68 C=CC(OC)OC.N#Cc1ccc(I)cc1>>COC(/C=C/c1ccc(C#N)cc1)OC  
69 C=C(CC(=O)O)C(=O)O.O=C1N[C@@]2(CC[C@@H](c3ccc(Br)cc3)C2)CO1>>O=C(O)C/C(=C)c1cc  
70 c([C@@H]2CC[C@]3(COC(=O)N3)C2)cc1)C(=O)O  
71 C=CC(=O)OC.O=C(O)c1cccc(Br)c1>>COC(=O)/C=C/c1cccc(C(=O)O)c1  
72 Brc1cccc1.C=Cc1ccc(OC)cc1>>COc1ccc(/C=C/c2cccc2)cc1  
73 C=CC(=O)OC.CC(C)=CCc1cc(I)cc(CC=C(C)C)c1O>>COC(=O)/C=C/c1cc(CC=C(C)C)c(O)c(CC=C(  
74 C)C)c1  
75 C=C(F)C(=O)OC.FC(F)(F)c1ccc(I)cc1>>COC(=O)/C(F)=C/c1ccc(C(F)(F)F)cc1  
76 C=CC(=O)OCC.O=c1cc(-c2cccc2)oc2cc(Br)ccc12>>CCOC(=O)/C=C/c1ccc2c(=O)cc(-  
77 C=COCCCC.CCN(CC)c1ccc2c(Br)cc(=O)oc2c1>>CCCCO/C=C/c1cc(=O)oc2cc(N(CC)CC)ccc12  
78 C=C.Cc1cc(C)c(CCl)c(C)c1>>C=CCc1c(C)cc(C)cc1C  
79 C=CC(=O)OCC.COc1ncc(Cl)c(N)n1>>CCOC(=O)/C=C/c1ncc(OC)nc1N  
80 C=C[Si](C)(C)C.COc1cc(CC(C(=O)OC(C)(C)C)C(=O)OC(C)(C)C)c(I)c(OC)c1OC>>COc1cc(CC(C(=  
81 O)OC(C)(C)C)C(=O)OC(C)(C)C)c(/C=C/[Si](C)(C)C)c(OC)c1OC  
82 C=CC(=O)OCC.Cc1cc(-n2ennn2)cc(I)c1N>>CCOC(=O)/C=C/c1cc(-n2ennn2)cc(C)c1N  
83 C=C.COc1cccc(I)c1>>C=Cc1cccc(OC)c1  
84 C=C1C(=O)O[C@H]2[C@H]1CC/C(C)=C/CC[C@@]1(C)O[C@@H]21.FC(F)(F)c1ccc(I)cc1>>C/C1  
85 =C/CC[C@@]2(C)O[C@H]2[C@H]2OC(=O)/C=C/c3ccc(C(F)(F)F)cc3)[C@@H]2CC1  
86 C=CC(=O)OCC.CC(C)(C)OC(=O)N1C[C@@H]2C[C@H](C1)c1cc(Br)cc(=O)n1C2>>CCOC(=O)/C=  
87 C/c1cc2n(c(=O)c1)C[C@H]1C[C@@H]2CN(C(=O)OC(C)(C)C)C1  
88 C=CC(=O)NCc1ccc(OC)cc1.CN(C)CCc1c[nH]e2ccc(Br)cc12>>COc1ccc(CNC(=O)/C=C/c2ccc3[nH]c  
89 c(CCN(C)C)c3c2)cc1  
90 C=CC1CC(OC)=CC(=O)O1.Ic1cccc1>>COC1=CC(=O)OC(/C=C/c2cccc2)C1  
91 C=CC(=O)OCC.Oc1ccc(Br)c(Cl)c1>>CCOC(=O)/C=C/c1ccc(O)cc1Cl  
92 Brc1cccc(CNc2nc(N3CCOCC3)nc3c2nen3C2CCCC2)c1.C=CC(=O)OC>>COC(=O)/C=C/c1cccc(CNc  
93 2nc(N3CCOCC3)nc3c2nen3C2CCCC2)c1  
94 C=CCN.O=c1[nH]c(=O)n([C@@H]2O[C@H](COP(=O)(O)OP(=O)(O)OP(=O)(O)O)[C@@H](O)[C  
95 @H]2O)cc1I>>NC/C=C/c1cn([C@@H]2O[C@H](COP(=O)(O)OP(=O)(O)OP(=O)(O)O)[C@@H](O)  
96 [C@H]2O)c(=O)[nH]c1=O  
97 C=Cc1cccc1.Cc1nc(Br)c2c(c1O)COC(C)(C)OC2>>Cc1nc(/C=C/c2cccc2)c2c(c1O)COC(C)(C)OC2  
98 C=C1CC(c2cccc2)OC1=O.COc1cccc(I)c1>>COc1cccc(/C=C2)CC(c3cccc3)OC2=O)c1  
99 C=CS(=O)(=O)N1CCC2(CC1)N=C(C1CCCCC1)NC2=O.CNc1cc(C)c(Br)c(C)c1>>CNc1cc(C)c(/C=C  
100 /S(=O)(=O)N2CCC3(CC2)N=C(C2CCCCC2)NC3=O)c(C)c1  
101 C=CCOc1cccc1C(C)(C)C.Ic1cccs1>>CC(C)(C)c1cccc1OC/C=C/c1cccs1

82 C=Cc1ccc(Cl)cc1.O=P1(c2ccccc2)C(Br)=Cc2ccccc21>>O=P1(c2ccccc2)C(/C=C/c2ccc(Cl)cc2)=Cc2cc  
ccc21

83 C=CC(C)=O.Clc1ccccc1>>CC(=O)/C=C/c1ccccc1

84 C=CC(=O)OC.O=C1Nc2ccccc(Br)c2C1=O>>COC(=O)/C=C/c1cccc2c1C(=O)C(=O)N2

85 C=C(C)C(=O)OCCCC.COc1ccc(I)cc1>>CCCCOC(=O)/C(C)=C/c1ccc(OC)cc1

86 C=CC=O.CC(C)(C)CN(Cc1ccc(I)cc1)c1ccnc(C#N)n1>>CC(C)(C)CN(Cc1ccc(/C=C/C=O)cc1)c1ccnc(  
C#N)n1

87 C=CC(=O)OCC.COC(=O)c1cccc(Cl)c1>>CCOC(=O)/C=C/c1cccc(C(=O)OC)c1

88 C=CC(=O)O.CCOC(=O)c1c[nH]c(Cc2ccc(I)cc2)n1>>CCOC(=O)c1c[nH]c(Cc2ccc(/C=C/C(=O)O)cc2

89 C=CC(C)C(C)O.FC(F)(F)c1ccc(Br)cc1>>CC(O)C(C)/C=C/c1ccc(C(F)(F)F)cc1

90 C=C/C=C/c1ccccc1.COc1ccc(OC(C)=O)c(I)c1>>COc1ccc(OC(C)=O)c(/C=C/C=C/c2ccccc2)c1

91 C=COCCCC.Cc1ccc2c(Br)cc(=O)oc2c1>>CCCCO/C=C/c1cc(=O)oc2cc(C)ccc12

92 C=C(C)C(=O)OC.O=Cc1ccc(Br)cc1>>COC(=O)/C(C)=C/c1ccc(C=O)cc1

93 C=C(C)C(=O)OC.N#Cc1ccc(Br)cc1>>COC(=O)/C(C)=C/c1ccc(C#N)cc1

94 C=CC(=O)OC.CC(C)(C)c1[nH]c2ccccc2c1[C@@H]1CCCN(Cc2ccc(Br)cc2)C1>>COC(=O)/C=C/c1c  
cc(CN2CCC[C@@H](c3c(C(C)(C)C)[nH]c4ccccc34)C2)cc1

95 C=CC#N.Clc1ccc(Br)cc1>>N#C/C=C/c1ccc(Cl)cc1

96 C=CC(=O)OCC.FC(F)(F)c1cn2c(Br)cccc2n1>>CCOC(=O)/C=C/c1cccc2nc(C(F)(F)F)cn12

97 C=CP(=O)(OCC)OCC.COc1nc2ccc(Br)cc2nc1OC>>CCOP(=O)(/C=C/c1ccc2nc(OC)c(OC)nc2c1)OC

98 C=CC(=O)OC(C)(C)C.O=[N+][O-]c1ccc(Br)cc1>>CC(C)(C)OC(=O)/C=C/c1ccc([N+](=O)[O-])cc1

99 C=COC(C)(C)C.O=S(=O)(c1ccccc1)C(F)(F)Br>>CC(C)(C)O/C=C/C(F)(F)S(=O)(=O)c1ccccc1

100 C=CSelccccc1.Ic1ccccc1>>C(=C/c1ccccc1)Selccccc1

101 C=CC(OC)OC.FC(F)c1ccc(I)cc1>>COC(/C=C/c1ccc(C(F)F)cc1)OC

102 C=C(C)C(F)(F)F.COC(=O)c1ccc(I)cc1>>COC(=O)c1ccc(/C=C(C)C(F)(F)F)cc1

103 C=CCOc1ccc(CCNC(=O)OC(C)(C)C)cc1.CC(C)N(CC[C@H](c1ccccc1)c1cc(Br)ccc1OCc1ccccc1)C(  
C)C>>CC(C)N(CC[C@H](c1ccccc1)c1cc(/C=C/COc2ccc(CCNC(=O)OC(C)(C)C)cc2)ccc1OCc1ccccc  
Br)cc1ccccc1.C=CP(=O)(OCC)OCC>>CCOP(=O)(/C=C/c1ccccc1)OCC

104 C=CC(=O)OC.CN(C)CCCOc1ccc(I)cc1>>COC(=O)/C=C/c1ccc(OCCN(C)C)cc1

105 Br)cc1ccccc1.C=C/C=C/C(=O)N(CCCC)CCCC>>CCCN(CCCC)C(=O)/C=C/C=C/c1ccccc1

106 C=CC(=O)OC.CC(C)n1nc2c(NCc3ccccc(Br)c3)nc(N3CCOCC3)nc21>>COC(=O)/C=C/c1cccc(CNc2n  
c(N3CCOCC3)nc3c2ncn3C(C)C)c1

107 C=CCNS(=O)(=O)c1ccc(C)cc1.Cc1ccc(Br)cc1>>Cc1ccc(/C=C/CNS(=O)(=O)c2ccc(C)cc2)cc1

108 C=CCC(c1ccccc1)P(=O)(OC)OC.Ic1cccc2ccccc12>>COP(=O)(OC)C(C/C=C/c1cccc2ccccc12)c1ccccc

109 C=Cc1ccc([Si](OCC)(OCC)OCC)cc1.CCOP(=O)(Cc1ccc(/C=C/c2ccc(Br)c3ccccc23)cc1)OCC>>CCO

110 [Si](OCC)(OCC)c1ccc(/C=C/c2ccc(/C=C/c3ccc(CP(=O)(OCC)OCC)cc3)c3ccccc23)cc1

111 C=Cc1ccc(Br)cc1.COc1ccc(I)cc1>>COc1ccc(/C=C/c2ccc(Br)cc2)cc1

112 C=CCCCCCC(=O)OC.O=[N+][O-]c1ccc(Br)cc1>>COC(=O)CCCCC/C=C/c1ccc([N+](=O)[O-])cc1

113 C=Cc1ccccc1.Nc1cccc(Br)c1>>Nc1cccc(/C=C/c2ccccc2)c1

114 C=CC(=O)OCc1ccccc1.O=C1CO[C@@H]2Cc3ccc(Br)cc3[C@@H]2N1O>>O=C(/C=C/c1ccc2c(c1)[  
C@@H]1[C@@H](C2)OCC(=O)N1O)OCc1ccccc1

115 C=CC(=O)OCC.Cc1[nH]c2ccccc2c1CCN(Cc1ccc(Br)c1)C(=O)OC(C)(C)C>>CCOC(=O)/C=C/c1ccc  
c(CN(CCc2c(C)[nH]c3ccccc23)C(=O)OC(C)(C)C)c1

116 Br)cc1ccc2c(c1)OCO2.C=CC(C)=O>>CC(=O)/C=C/c1ccc2c(c1)OCO2

117 C=CC(=O)OCCCC.Cn1nc(Br)c2ccc(Cl)cc21>>CCCCOC(=O)/C=C/c1nn(C)c2cc(Cl)ccc12

118 C=Cc1ccc(C(=O)OC)cc1.CC(C)(C)C(=O)Nc1nc2ncc(Br)cc2c(=O)[nH]1>>COC(=O)c1ccc(/C=C/c2en  
c3nc(NC(=O)C(C)(C)C)[nH]c(=O)c3c2)cc1

119 C=CC(=O)OC.COC(=O)c1ccc(-  
c2cc(C(C)(C)C)cc3c2Oc2c(Br)cc(C(C)(C)C)cc2C3(C)C)cc1>>COC(=O)/C=C/c1cc(C(C)(C)C)cc2c1O  
c1c(-c3ccc(C(=O)OC)cc3)cc(C(C)(C)C)cc1C2(C)C

120 C=C[Si](C)(C)C.Ic1ccccc1>>C[Si](C)(C)/C=C/c1ccccc1

121 C=C(C)C(=O)OCCCC.Clc1ccccc1>>CCCCOC(=O)/C(C)=C/c1ccccc1

122 C=Cc1ccc(C)c(C)c1.CCOC(=O)C(F)(F)Br>>CCOC(=O)C(F)(F)/C=C/c1ccc(C)c(C)c1

123 C=CC(=O)OCC.Cc1ccc(Br)c(Cn2nnc(C)n2)c1>>CCOC(=O)/C=C/c1ccc(C)cc1Cn1nnc(C)n1

124 Br)cc1ccccc1.C=Cc1ccccc1>>C(=C/c1ccccc1)c1ccccc1

125 C=CC(=O)O.Cc1ccccc(S(=O)(=O)Nc2ccccc(I)c2)c1>>Cc1ccccc(S(=O)(=O)Nc2ccccc(/C=C/C(=O)O)c2)c1

126 C=CC(=O)OCC.CC(C)(CC1Cc2ccccc2C1)NC[C@@H](O)COc1cc(Br)cc(F)c1F>>CCOC(=O)/C=C/c1  
cc(F)c(F)c(OC[C@H](O)CNC(C)(C)CC2Cc3ccccc3C2)c1

127 C=CC(=O)OCC.O=Cc1cc(F)ccc1Br>>CCOC(=O)/C=C/c1ccc(F)cc1C=O

128 C=C[Si](C)(C)C.Ic1ccc[se]1>>C[Si](C)(C)/C=C/c1ccc[se]1

129 C=CC(=O)OCC.CCCCN(CCCC)c1ccc(Br)cc1>>CCCN(CCCC)c1ccc(/C=C/C(=O)OCC)cc1

130 C=Cc1ccccc1.Cc1ccc(/C=C/C(=O)c2ccc(Br)cc2)cc1>>Cc1ccc(/C=C/C(=O)c2ccc(/C=C/c3ccccc3)cc2)

131 C=CC=O.O=[N+][O-]c1ccc(I)cc1>>O=C/C=C/c1ccc([N+](=O)[O-])cc1

132 C=Cc1ccc(F)cc1.Cc1c(Br)c(=O)oc2ccccc12>>Cc1c(/C=C/c2ccc(F)cc2)c(=O)oc2ccccc12

133 C=CC(=O)OCC.O=C(O)c1ccc(Br)o1>>CCOC(=O)/C=C/c1ccc(C(=O)O)o1  
134 C=Cc1cncnc1.O=C(c1cccc1)c1ccc(Br)cc1>>O=C(c1cccc1)c1ccc(/C=C/c2cncnc2)cc1  
135 C=CP(=O)(OCC)OCC.N#Cc1ccc(Br)cc1>>CCOP(=O)(/C=C/c1ccc(C#N)cc1)OCC  
136 C=CC(=O)O.N#Cc1cccc(Br)c1>>N#Cc1cccc(/C=C/C(=O)O)c1  
137 C=C(CC(=O)OC)C(=O)OC.COc1ccc(Br)c(CN(CC(F)(F)F)C(=O)OC(C)(C)C)c1>>COC(=O)C/C(=C/c1ccc(OC)cc1CN(CC(F)(F)F)C(=O)OC(C)(C)C)c1OC  
138 C=Cc1ccc(OC)c(O)c(OC)c1.Oc1ccc(O)cc1>>COc1ccc(/C=C/c2cc(O)cc(O)c2cc(OC)c1O  
139 C=Cc1cccc1.Cc1ccc2c(-c3ccc(Cl)cc3)c(Br)c(=O)oc2c1>>Cc1ccc2c(-  
c3ccc(Cl)cc3)c(/C=C/c3cccc3)c(=O)oc2c1  
140 C=CC(=O)N(C)Cc1oc2cccc2c1C.CC(C)(C)OC(=O)NCCN1Cc2cc(Br)cnc2NC1=O>>Cc1c(CN(C)C(=O)/C=C/c2cnc3c(c2)CN(CCNC(=O)OC(C)(C)C(=O)N3)oc2cccc12  
141 C=CC(=O)OC.C[C@H](c1cccc1)N1C(=O)c2ccc(OS(=O)(=O)C(F)(F)F)cc2C1=O>>COC(=O)/C=C/c1ccc2c(c1)C(=O)N([C@H](C)c1cccc1)C2=O  
142 C=CC(=O)OC.COc1ccc2c(c1)CCN(c1ccc(C(C)C)cc1)C2(c1ccc(Br)cc1)C(F)(F)F>>COC(=O)/C=C/c1ccc(C2(C(F)(F)F)c3ccc(OC)cc3CCN2c2ccc(C(C)C)cc2)cc1  
143 C=CC(CO)N1C(=O)c2cccc2C1=O.COc1ccc(OC)c(Br)c1>>COc1ccc(OC)c(/C=C/C(CO)N2C(=O)c3cccc3C2=O)c1  
144 C=Cc1cc(OC(C)=O)cc(OC(C)=O)c1.COc1ccc([C@H]2Oc3ccc(Br)cc3[C@H]2c2cc(OC)cc(OC)c2)cc1>>COc1ccc([C@H]2Oc3ccc(/C=C/c4cc(OC(C)=O)cc(OC(C)=O)c4)cc3[C@H]2c2cc(OC)cc(OC)c2)cc1  
145 C=CC(=O)OC(C)(C)C.[C@H]1[C@H](NS(=O)(=O)c2ccc(I)cc2)C[C@@H]2[C@H]1C2(C)C>>C[C@H]1[C@H](NS(=O)(=O)c2ccc(/C=C/C(=O)OC(C)(C)C)cc2)C[C@@H]2[C@H]1C2(C)C  
146 C=Cc1cc(OC)c(O)c(OC)c1.O=c1ccc2ccc(OS(=O)(=O)C(F)(F)F)cc2o1>>COc1ccc(/C=C/c2ccc3ccc(=O)oc3c2)cc(OC)c1O  
147 C=Cc1cccc1.Nc1ccc(Cl)cc1Br>>Nc1ccc(Cl)cc1/C=C/c1cccc1  
148 C=CC(=O)N1CCC2(CC1)OCCO2.O=Cc1cccc1Br>>O=Cc1cccc1/C=C/C(=O)N1CCC2(CC1)OCCO  
149 C=CC(=O)NC.C[C@]12C[C@@]34C=C(Sc5cccc(I)c5)C(=O)[C@@](C)(CCC(=O)Nc5c(O)ccc(C(=O)O)c5O)[C@@H]3[C@H](C[C@@H]1C4)O2>>CNC(=O)/C=C/c1cccc(SC2=C[C@]34C[C@H]5C[C@H]1(O)[C@@]5(C)C3)[C@H]4[C@](C)(CCC(=O)Nc3c(O)ccc(C(=O)O)c3O)C2=O)c1  
150 C=CC(=O)N1CCOCC1.O=C(/C=C/c1ccc(Sc2cccc2Br)c(Cl)c1)N1CCOCC1>>O=C(/C=C/c1ccc(Sc2cccc2/C=C/C(=O)N2CCOCC2)c(Cl)c1)N1CCOCC1  
151 Brc1cnc(NCc2cccc2)c2cccc12.C=CC(C)=O>>CC(=O)/C=C/c1cnc(NCc2cccc2)c2cccc12  
152 C=Cc1cccc1.C[Si](C)(C)CI>>C[Si](C)(C)C/C=C/c1cccc1  
153 C=Cc1cccc1.Fc1cc(Br)cc(F)c1F>>Fc1cc(/C=C/c2cccc2)cc(F)c1F  
154 C=Cc1cccc([N+](=O)[O-])c1.FC(F)(F)Oc1ccc(Br)c1>>O=[N+](O-)  
c1ccc(/C=C/c2cccc(OC(F)(F)F)c2)c1  
155 C=CC(F)(F)F.Ic1ccc(OCc2cccc2)cc1>>FC(F)(F)/C=C/c1ccc(OCc2cccc2)cc1  
156 C=Cc1cccc1C(=O)O.Cc1cc(C)cc(I)c1>>Cc1cc(C)cc(/C=C/c2cccc2C(=O)O)c1  
157 C=Cc1cccc1OC.CCOC(=O)C(F)I>>CCOC(=O)C(F)/C=C/c1cccc1OC  
158 C=CC#N.Clc1ccc(I)cc1>>N#C/C=C/c1ccc(Cl)cc1  
159 C=CC(=O)N(C)Cc1cccc(OC)c1OCC(C)C.O=C1CCc2cc(Br)enc2N1>>COc1cccc(CN(C)C(=O)/C=C/c2cnc3c(c2)CCC(=O)N3)c1OCC(C)C  
160 Brc1ccnc1.C=CC(=O)N1C(=O)N(C)[C@H](C)[C@@H]1c1cccc1>>C[C@@H]1[C@H](c2cccc2)N(C(=O)/C=C/c2ccnc2)C(=O)N1C  
161 C=CCn1cnc2cc(C=O)ccc21.CC(C)(C)OC(=O)NC1CCC(OC(=O)Nc2cc(Br)ccc2-c2cccc2)CC1>>CC(C)(C)OC(=O)NC1CCC(OC(=O)Nc2cc(/C=C/CCn3cnc4ccc(C=O)ccc43)ccc2-c2cccc2)CC1  
162 C=Cc1cnc(C#N)c1Nc1ccc2[nH]ccc2c1C.ClCCOc1ccc(Br)cc1>>Cc1c(Nc2c(C#N)cncc2/C=C/c2ccc(OCCCl)cc2)ccc2[nH]ccc12  
163 C=Cc1cccc1.N#Cc1ccc(Cl)cc1>>N#Cc1ccc(/C=C/c2cccc2)cc1  
164 C=CC(C)O.COc1c(C)c(C)c(OC)c(I)c1>>COc1c(C)c(C)c(OC)c(/C=C/C(C)O)c1C  
165 C=Cc1ccc(C(C)(C)C)cc1.C[Si](C)(C)I>>CC(C)(C)c1ccc(/C=C/[Si](C)(C)C)cc1  
166 C=CC(=O)OCC.COc1cc2nnc(Nc3ccc(I)cc3)c2cc1OC>>CCOC(=O)/C=C/c1ccc(Nc2nnc3cc(OC)c(O)C)cc23)cc1  
167 C=Cc1cccc1.CC(C)(C)OC(=O)N1CCC2(CC1)Oc1ccc(Br)cc1C2=O>>CC(C)(C)OC(=O)N1CCC2(CC1)Oc1ccc(/C=C/c3cccc3)cc1C2=O  
168 C=Cc1nc2c(N)nnc2n1[C@@H]1O[C@H](CO[Si](C)(C)C(C)(C)C)[C@@H](O[Si](C)(C)C(C)(C)C)[C@H]1O[Si](C)(C)C(C)(C)C.Ic1cccc2cccc12>>CC(C)(C)[Si](C)(C)OC[C@H]1O[C@@H](n2c(/C=C/c3cccc4ccc34)nc3c(N)nnc32)[C@H](O[Si](C)(C)C(C)(C)C)[C@@H]1O[Si](C)(C)C(C)(C)C  
169 C=CC(=O)OC(C)(C)C.OCc1ccc(Br)c1>>CC(C)(C)OC(=O)/C=C/c1cccc(CO)c1  
170 C=Cc1ccc(O)cc1.Nc1cccc(Br)c1>>Nc1cccc(/C=C/c2ccc(O)cc2)c1  
171 C=CC(=O)OCC.Cc1cc(I)ccc1/C=C/c1cccc1>>CCOC(=O)/C=C/c1ccc(/C=C/c2cccc2)c(C)c1  
172 Brc1cccc1C1OCCO1.C=CC(=O)c1cccc1>>O=C(/C=C/c1cccc1C1OCCO1)c1cccc1  
173 C=Cc1ccc(OC)cc1.Clc1ccc(Br)cc1>>COc1ccc(/C=C/c2ccc(Cl)cc2)cc1

174 C=CC(=O)OC.COc1cc(-c2cc3cc(Br)cc(OC)c3o2)ccc1OCc1cccc1>>COC(=O)/C=C/c1cc(OC)c2oc(-  
c3ccc(OCc4cccc4)c(OC)c3)cc2c1  
175 C=CC(C)(C)O.COc1cc(OC)c2ccc(=O)oc2c1I>>COc1cc(OC)c2ccc(=O)oc2c1/C=C/C(C)(C)O  
176 C=CC(=O)OC.CC(C)(C)OC(=O)n1cc(I)c([Si](C)(C)C)c1>>COC(=O)/C=C/c1cn(C(=O)OC(C)(C)C)cc  
1[Si](C)(C)C  
177 C=CC(N)=O.Cc1ccc(S(=O)(=O)n2cc(I)c3c(OCC(C)C)nenc32)cc1>>Cc1ccc(S(=O)(=O)n2cc(/C=C/C(  
N)=O)c3c(OCC(C)C)nenc32)cc1  
178 C=CC(=O)N1N=Cc2cccc2C1c1cc(C)cc(C)c1.COc1cc(Cc2enc(N)nc2N)cc(I)c1OC>>COc1cc(Cc2enc(  
N)nc2N)cc(/C=C/C(=O)N2N=Cc3cccc3C2c2cc(C)cc(C)c2)c1OC  
179 C=CC=O.Cc1ccc(I)cc1>>Cc1ccc(/C=C/C=O)cc1  
180 C=Cc1cccc1.Clc1ccc2cccc2c1>>C(=C/c1ccc2cccc2c1)\c1cccc1  
181 C=CC(=O)Nc1cccn1.O=c1c(I)c(-c2ccc(O)cc2)oc2cc(O)ccc12>>O=C(/C=C/c1c(-  
c2ccc(O)cc2)oc2cc(O)ccc2c1=O)Nc1cccn1  
182 C=Cc1ccc2c(c1)c1cccc1n2CCCCCCC.CCCCCCN1c2ccc(I)cc2c2cc(C=O)ccc21>>CCCCCCCN1c2c  
cccc2c2cc(/C=C/c3ccc4c(c3)c3cc(C=O)ccc3n4CCCCCCC)ccc21  
183 C=CC(=O)OCC.CC(=O)Nc1cccc1I>>CCOC(=O)/C=C/c1cccc1NC(C)=O  
184 C=C[Si](CC)(CC)CC.COc1ccc(Br)cc1>>CC[Si](/C=C/c1ccc(OC)cc1)(CC)CC  
185 C=Cc1ccc(OC)c(OC)c1.Oc1ccc(O)c(I)c1>>COc1ccc(/C=C/c2cc(O)ccc2O)cc1OC  
186 C=CC(=O)OCC.COc1cccc(OC)c1I>>CCOC(=O)/C=C/c1c(OC)ccc1OC  
187 C=CC(=O)OCCCC.O=Cc1cccc1Br>>CCCCOC(=O)/C=C/c1cccc1C=O  
188 C=CCOc1ccc(Cl)cc1.Ic1ccs1>>Clc1ccc(OC/C=C/c2ccs2)cc1  
189 C=CC(=O)OCC.Cc1c(O)cccc1Br>>CCOC(=O)/C=C/c1cccc(O)c1C  
190 COC[C@H](/N=C(\c1cccc1)N1C=CCC[C@H]1C)C(C)C.COc1ccc(I)cc1>>COC[C@H](/N=C(\c  
1cccc1)N1C=C(c2ccc(OC)cc2)CC[C@H]1C)C(C)C  
191 C=CP(=O)(OCC)OCC.Clc1ccc(Br)cc1>>CCOP(=O)/C=C/c1ccc(Cl)cc1)OCC  
192 C=CC(=O)OC1CCCCC1.O=[N+](O-)]c1ccc(Br)cc1>>O=C(/C=C/c1ccc([N+](=O)[O-  
C=Cc1ccc(/C=C/c2ccc(N(C)C)cc2OC)cc1.CC1(C)C2=CC(=O)C(F)=CC2=C(c2ccc(Br)cc2S(=O)(=O)  
193 O)c2cc(F)c(O)cc21>>COc1cc(N(C)C)ccc1/C=C/c1ccc(/C=C/c2ccc(C3=C4C=C(F)C(=O)C=C4C(C)(C  
)c4cc(O)c(F)cc43)c(S(=O)(=O)O)c2)cc1  
194 C=Cc1cncc1.CCCCCCOCc1ccc(Br)cc1F>>CCCCCCCCOc1ccc(/C=C/c2cncc2)cc1F  
195 C=CC(=O)Nc1cccc2cncc12.CC(C)c1ccc(I)cc1>>CC(C)c1ccc(/C=C/C(=O)Nc2cccc3ccnc23)cc1  
196 C=CB1OC(C)CC(C)(C)O1.F[C@H]1CCN(Cc2ccc(Br)cc2)C1>>CC1CC(C)(C)OB(/C=C/c2ccc(CN3  
CC[C@H](F)C3)cc2)O1  
197 C=Cc1ccc(COC(C)=O)cc1.CCCCOc1ccc2c(c1)cc(C#N)c1ccc(Br)cc12>>CCCCOc1ccc2c(c1)cc(C#N)  
c1ccc(/C=C/c3ccc(COC(C)=O)cc3)cc12  
198 C=Cc1cncc1.CCCCCCN(CCCCCC)c1ccc2c(c1)C(CC)(CC)c1cc(Br)ccc1-  
2>>CCCCCCN(CCCCCC)c1ccc2c(c1)C(CC)(CC)c1cc(/C=C/c3cncc3)ccc1-2  
199 C=CC(=O)N1CC(=Cc2ncs2)C1.CC(C)(C)OC(=O)N1CC(=O)Nc2ncc(Br)cc2C1>>CC(C)(C)OC(=O)  
N1CC(=O)Nc2ncc(/C=C/C(=O)N3CC(=Cc4ncs4)C3)cc2C1  
200 C=Cc1cccc(OC)c1.Nc1cccc(Br)c1>>COc1cccc(/C=C/c2cccc(N)c2)c1  
201 C=CC(=O)O[C@H]1C[C@H](C)CC[C@H]1C(C)C.O=Cc1cccc1Br>>CC(C)[C@H]1CC[C@H](  
C)C[C@H]1OC(=O)/C=C/c1cccc1C=O  
202 C=CC(=O)OCC.O=[N+](O-)]c1ccc(-c2cccc2I)cc1>>CCOC(=O)/C=C/c1cccc1-c1ccc([N+](=O)[O-  
C=CC(=O)OC(C)(C)C.O=[N+](O-  
203 ]c1cccc(S(=O)(=O)N2CCc3cc(Br)enc32)c1>>CC(C)(C)OC(=O)/C=C/c1nc2c(c1)CCN2S(=O)(=O)c1  
cccc([N+](=O)[O-])c1  
204 C=Cc1ccc(C)cc1.CCn1cncc1-c1ccc(Br)cc1>>CCn1cncc1-c1ccc(/C=C/c2ccc(C)cc2)cc1  
205 C=Cc1ccc(OC)cc1.COc1cc(Br)c(C=O)cc1OC>>COc1ccc(/C=C/c2cc(OC)c(OC)cc2C=O)cc1  
206 C=CC(=O)OC(C)(C)C.Cc1ccc(Br)cc1>>Cc1ccc(/C=C/C(=O)OC(C)(C)C)cc1  
207 C=CC#N.CN1c2cccc2C(C)(C)C12C=Cc1cc(I)ccc1O2>>CN1c2cccc2C(C)(C)C12C=Cc1cc(/C=C/C#  
N)ccc1O2  
208 C=CC(=O)OCc1cccc1.FC(F)(F)C1(c2cccc2)Nc2ccc(Br)cc2O1>>O=C(/C=C/c1ccc2c(c1)OC(c1cccc  
c1)(C(F)(F)F)N2)OCc1cccc1  
209 C=C(NC(=O)OC(C)(C)C)(=O)OC.Nc1cccc(I)c1>>COC(=O)/C(=C/c1cccc(N)c1)NC(=O)OC(C)(C)C  
210 C=CC(=O)OC.COc1ccc(C#Cc2ccnc2Br)cc1>>COC(=O)/C=C/c1ncccc1C#Cc1ccc(OC)cc1  
211 C=Cc1ccc(C)cc1.CCOC(=O)C(F)(F)I>>CCOC(=O)C(F)(F)/C=C/c1ccc(C)cc1  
212 C=Cc1cccc1.Oc1cccc1Br>>Oc1cccc1/C=C/c1cccc1  
213 C=Cc1ccc2cccc2c1.COc1ccc(Cl)c(I)c1>>COc1ccc(Cl)c(/C=C/c2ccc3cccc3c2)c1  
214 C=CC(=O)OC.COC(=O)c1cc(I)cc(C(=O)OC)c1>>COC(=O)/C=C/c1cc(C(=O)OC)cc(C(=O)OC)c1  
215 C=Cc1cncc1.CCOc1ccc(Br)c(F)c1>>CCOc1ccc(/C=C/c2cncc2)c(F)c1  
216 C=CC(=O)O[C@H]1C[C@H]2CC[C@H]1(C)C2(C)C.O=c1[nH]c(=O)n([C@H]2C[C@H](O)[C@  
@H](CO)O2)cc1I>>CC1(C)[C@H]2CC[C@H]1(C)[C@H](OC(=O)/C=C/c1cn([C@H]3C[C@H](O)[  
C@H](CO)O3)c(=O)[nH]c1=O)C2

217 Br1ccc(C(c2ccccc2)C23CC4CC(CC(C4)C2)C3)cc1.C=CC(=O)OCC>>CCOC(=O)/C=C/c1ccc(C(c2cc  
 218 ccc2)C23CC4CC(CC(C4)C2)C3)cc1  
 219 C=CC(=O)OCc1ccccc1.CCOC(=O)c1ccccc1Br>>CCOC(=O)c1ccccc1/C=C/C(=O)OCc1ccccc1  
 219 Br1cccn1.C=Cc1cn(COCC[Si](C)(C)C)nc1-c1nc2ccc(OC)cc2n1COCC[Si](C)(C)C>>COc1ccc2nc(-  
 220 c3nn(COCC[Si](C)(C)C)cc3/C=C/c3ccccc3)n(COCC[Si](C)(C)C)c2c1  
 220 C=CC(=O)OC.COc1ccc2c(c1)CCN(c1ccc(CCC(C)C)cc1)C2(C)c1ccc(Br)cc1>>COC(=O)/C=C/c1ccc(  
 221 C2(C)c3ccc(OC)cc3CCN2c2ccc(CCC(C)C)cc1  
 221 C=C1COC(c2cc(OC)cc(OC)c2)C1(C(=O)OCC)C(=O)OCC.COc1ccc(I)cc1>>CCOC(=O)C1(C(=O)OC  
 222 C)/C(=C/c2ccc(OC)cc2)COC1c1cc(OC)cc(OC)c1  
 222 C=CCOC(C)=O.Fc1ccc(I)cc1>>CC(=O)OC/C=C/c1ccc(F)cc1  
 223 C=CS(=O)(=O)c1ccccc1.CCOC(=O)/C=C/c1cc(Br)cc(Cc2ccccc2)c1>>CCOC(=O)/C=C/c1cc(/C=C/S(  
 223 =O)(=O)c2ccccc2)cc(Cc2ccccc2)c1  
 224 C=Cc1ccccc1OCc1ccccc1.O=C(O)/C=C/c1ccccc1Br>>O=C(O)/C=C/c1ccccc1/C=C/c1ccccc1OCc1ccc  
 225 C=CC(=O)OC.Cc1cc2c(c(C)c1Br)C(=O)C(C)(C)C2>>COC(=O)/C=C/c1c(C)cc2c(c1C)C(=O)C(C)(C)  
 226 C=Cc1ccc(OC)cc1.CC(=O)c1ccc(Cl)cc1>>COc1ccc(/C=C/c2ccc(C(C)=O)cc2)cc1  
 227 C=CCNS(=O)(=O)c1ccc(C)cc1.FC(F)(F)c1ccc(I)cc1>>Cc1ccc(S(=O)(=O)NC/C=C/c2ccc(C(F)(F)F)cc  
 227 2)cc1  
 228 C=CC(F)(F)C(F)(F)C(F)(F)C(F)(F)F.CCCN(Cc1ccc(Br)cc1)C(=O)OC(C)(C)C>>CCCN(Cc1ccc(/C=C/  
 228 C(F)(F)C(F)(F)C(F)(F)C(F)(F)F)cc1)C(=O)OC(C)(C)C  
 229 Br1cnc(NCCc2ccccc2)c2ccccc12.C=CC(=O)OCC>>CCOC(=O)/C=C/c1cnc(NCCc2ccccc2)c2ccccc1  
 230 C=CC(=O)OCC.CN(C)c1ccc(-c2ccccc2)c(I)c1>>CCOC(=O)/C=C/c1cc(N(C)C)ccc1-c1ccccc1  
 231 C=CC(=O)OCC(C)CCCC.COc1ccc(Br)cc1>>CCCCC(C)COC(=O)/C=C/c1ccc(OC)cc1  
 232 C=CC(=O)OCC.CC1(C)OC=C(I)C(=O)O1>>CCOC(=O)/C=C/C1=COC(C)(C)OC1=O  
 233 C=CC(=O)OCC.CCC(C)c1cnc(C(C)CC)c(Cl)n1>>CCOC(=O)/C=C/c1nc(C(C)CC)enc1C(C)CC  
 234 C=COCCCC.Ic1ccc2ccccc12>>C=C(OCCCC)c1ccc2ccccc12  
 235 C=CC(C)(O)CCC=C(C)C.COc1ccc(Br)cc1>>COc1ccc(/C=C/C(C)(O)CCC=C(C)C)cc1  
 236 C=Cc1ccc(C)cc1.CC(=O)c1ccccc1Br>>CC(=O)c1ccccc1/C=C/c1ccc(C)cc1  
 237 C=CC(OCC)OCC.O=Cc1ccc(Br)cc1>>CCOC(/C=C/c1ccc(C=O)c1)OCC  
 238 C=Cc1ccccc(O)c1.CC(C)n1nc(I)c2c(N)ncnc21>>CC(C)n1nc(/C=C/c2ccccc(O)c2)c2c(N)ncnc21  
 239 C=CCO[C@H](C)C(=O)N1CCOCC1.OCc1ccc(I)cc1>>C[C@H](OC/C=C/c1ccc(CO)cc1)C(=O)N1  
 239 COCC1  
 240 C=CC(=O)OCC.COc1ccc(Nc2nc(NC3CCCCC3)nc(Oc3ccc(I)cc3)n2)cc1Cl>>CCOC(=O)/C=C/c1ccc  
 240 (Oc2nc(Nc3ccc(OC)c(Cl)c3)nc(NC3CCCCC3)n2)cc1  
 241 C=CC(C)C(C)O.COc1ccc(Br)cc1>>COc1ccc(/C=C/C(C)C(C)O)cc1  
 242 C=CC(N)=O.O=c1c(C2=NS(=O)(=O)c3cc(I)ccc3N2)c(O)c2cc(F)ccc2n1CCCC1CC1>>NC(=O)/C=C/c1  
 242 ccc2c(c1)S(=O)(=O)N=C(c1c(O)c3cc(F)ccc3n(CCC3CC3)c1=O)N2  
 243 C=CC(=O)OCC.OCc1ccc(Br)cc1>>CCOC(=O)/C=C/c1ccc(CO)cc1  
 244 C=CC#N.IC(CC[Se]c1ccccc1)=C(c1ccccc1)c1ccccc1>>N#C/C=C/C(CC[Se]c1ccccc1)=C(c1ccccc1)c1  
 244 cccc1  
 245 C=CC(=O)OCC.Cc1cc(I)ccc1/C=C/C#N>>CCOC(=O)/C=C/c1ccc(/C=C/C#N)c(C)c1  
 246 C=CC(F)(F)C(F)(F)C(F)(F)C(F)(F)C(F)(F)F.N#Cc1ccc(Br)cc1>>N#Cc1ccc(/C=C/C(F)(F)C(F)  
 246 (F)C(F)(F)C(F)(F)C(F)(F)C(F)(F)F)cc1  
 247 C=C.COc1ccc([N+](=O)[O-])c(Br)c1>>C=Cc1cc(OC)ccc1[N+](=O)[O-]  
 248 C=Cc1ccc(Cl)cc1.O=S(=O)(c1ccccc1)C(F)(F)Br>>O=S(=O)(c1ccccc1)C(F)(F)/C=C/c1ccc(Cl)cc1  
 249 C=CC(=O)OC(C)(C)C.FC1(F)Oc2ccccc(I)c2O1>>CC(C)(C)OC(=O)/C=C/c1ccc2c1OC(F)(F)O2  
 250 BrC1=C(C2=CCCCO2)CCCC1.C=CC(=O)OC>>COC(=O)/C=C/C1=C(C2=CCCCO2)CCCC1  
 251 C=CC(C)=O.COC(=O)c1c([Si](C)(C)C)c(I)cn1S(=O)(=O)N(C)C>>COC(=O)c1c([Si](C)(C)C)c(/C=C\  
 251 C(C)=O)cn1S(=O)(=O)N(C)C  
 252 Br1ccccc1.C=COCCO>>C=C(OCCO)c1ccccc1  
 253 C=Cc1ccccc1C.Nc1cc([N+](=O)[O-])ccc1Br>>Cc1ccccc1/C=C/c1ccc([N+](=O)[O-])cc1N  
 254 C=Cc1ccc(F)cc1.O=Cc1ccccc1Br>>O=Cc1ccccc1/C=C/c1ccc(F)cc1  
 255 C=Cc1ccccc1.COC(=O)CCC/C=C/C[C@H]1[C@H]2CC[C@H](C2)[C@H]1NS(=O)(=O)c1ccc(Br)  
 255 s1>>COC(=O)CCC/C=C/C[C@H]1[C@H]2CC[C@H](C2)[C@H]1NS(=O)(=O)c1ccc(/C=C/c2ccccc  
 256 C=C1C(=O)O[C@H]2[C@H]1CCC(=C)[C@H]1C[C@H](OC(C)=O)C(=C)[C@H]21.COC(=O)c1c  
 256 cc(I)cc1>>C=C1CC[C@H]2/C(=C/c3ccc(C(=O)OC)cc3)C(=O)O[C@H]2[C@H]2C(=C)[C@H]1(O  
 257 C(C)=O)C[C@H]2  
 257 C=Cc1ccc(C=O)cc1.Ic1ccc(C2OCCO2)cc1>>O=Cc1ccc(/C=C/c2ccc(C3OCCO3)cc2)cc1  
 258 C=C1c2ccccc2C1(C#N)CC.COc1ccc(Br)cc1OC>>CCC1(C#N)/C=C/c2ccc(OC)c(OC)c2)c2ccccc21  
 259 C=CCc1cc(OC)c(OC)cc1CC1c2cc(OC)c(OC)cc2CCN1C(=O)C(F)(F)F.COc1ccc(I)c(CC2c3cc(OC)c(O  
 259 C)cc3CCN2C(=O)C(F)(F)F)cc1OC>>COc1cc(/C=C/Cc2cc(OC)c(OC)cc2CC2c3cc(OC)c(OC)cc3CCN  
 259 2C(=O)C(F)(F)F)c(CC2c3cc(OC)c(OC)cc3CCN2C(=O)C(F)(F)F)cc1OC  
 260 C=CC(C)(C)O.Cc1ccccc1Br>>Cc1ccccc1/C=C/C(C)(C)O  
 261 C=Cc1ccc(Cl)cc1.IC1CCCCC1>>Clc1ccc(/C=C/C2CCCCC2)cc1

262 C=Cc1ccccc1.O=Cc1ccc(Br)ccc2-c2ccc(/C=C/c3ccccc3)ccc2-  
263 c2ccc(/C=C/c3ccccc3)ccc21  
264 C=CC(=O)OCc1ccccc1.CCn1nnc2c(Cl)c(Br)ccc21>>CCn1nnc2c(Cl)c(/C=C/C(=O)OCc3ccccc3)ccc21  
265 C=CC(=O)OC.Cc1cc(-c2ccc(Cl)cc2)n2nc(-c3ccccc3)c(I)c2n1>>COC(=O)/C=C/c1c(-c2ccccc2)nn2c(-  
266 c3ccc(Cl)cc3)ccc(C)nc12  
267 C=C(c1ccccc1)N(C)(C)C(=O).CCOC(=O)CCCBBr>>CCOC(=O)CCC/C=C(\c1ccccc1)N(C)(C)C(=O)  
268 Br1ccc2c(c1)Cc1ccccc1-  
269 2.C=Cc1nc2c(=O)[nH]c(N)nc2n1[C@H]1C[C@H](O)[C@@H](CO)O1>>Nc1nc2c(nc(/C=C/c3ccc4c(  
270 c3)Cc3ccccc3-4)n2[C@H]2C[C@H](O)[C@@H](CO)O2)c(=O)[nH]1  
271 C=CC(=O)OC.Cc1ccccc1Cl>>COC(=O)/C=C/c1ccccc1C  
272 C=CC(=O)OC.Oc1ccc(-c2ncc(Br)s2)cc1C12CC3CC(CC(C3)C1)C2>>COC(=O)/C=C/c1cnc(-  
273 c2ccc(O)c(C34CC5CC(CC(C5)C3)C4)c2)s1  
274 Br1cnc2ccccc2c1.C=CCON=C1C(C)CNC(C)C(CC)OC(=O)[C@H](C)[C@H](O[C@H]2C[C@@](C)  
275 (OC)[C@@H](O)[C@H](C)O2)[C@H](C)[C@@H](O[C@@H]2O[C@H](C)C[C@H](N(C)C)[C@H]  
276 2O)[C@@](C)(O)C[C@H]1C>>CCC1OC(=O)[C@H](C)[C@H](O[C@H]2C[C@@](C)(OC)[C@@H]  
277 ](O)[C@H](C)O2)[C@H](C)[C@@H](O[C@@H]2O[C@H](C)C[C@H](N(C)C)[C@H]2O)[C@@](  
278 C)(O)C[C@@H](C)C(=NOC/C=C/c2cnc3ccccc3c2)C(C)CNC1C  
279 C=CC1(C(=O)O)CCS(=O)(=O)CC1.CC(C)[C@H](O)C(=O)N[C@@H](C)C(=O)N1CCC[C@@H](C(  
280 =O)N[C@H](C)c2ccc3ccc(Br)cc3n2)N1>>CC(C)[C@H](O)C(=O)N[C@@H](C)C(=O)N1CCC[C@@  
281 H](C(=O)N)[C@H](C)c2ccc3ccc(/C=C/C4(C(=O)O)CCS(=O)(=O)CC4)cc3n2)N1  
282 C=CC1OCCO1.CC1(C)Oc2ccc(Br)cc2O1>>CC1(C)Oc2ccc(/C=C/C3OCCO3)cc2O1  
283 C=CC(OCC)OCC.FC(F)(F)c1ccc(Cl)cc1>>CCOC(/C=C/c1ccc(C(F)(F)F)cc1)OCC  
284 C=C.Ic1ccccc1>>C=Cc1ccccc1  
285 C=CC(=O)N(C)C.CN(C)c1ccc2cc(Br)ccc2c1>>CN(C)C(=O)/C=C/c1ccc2cc(N(C)C)ccc2c1  
286 C=CC(=O)N(C)OC.CCOC(=O)c1ccc(I)cc1>>CCOC(=O)c1ccc(/C=C/C(=O)N(C)OC)cc1  
287 C=Cc1ccc(Br)cc1.Oc1ccccc1I>>Oc1ccccc1/C=C/c1ccc(Br)cc1  
288 C=COCCN(C)C.Cc1ccccc1OS(=O)(=O)C(F)(F)F>>C=C(OCCN(C)C)c1ccccc1C  
289 Br1ccc2ccccc2c1.C=CP(=O)(OCC)OCC>>CCOP(=O)(/C=C/c1ccc2ccccc2c1)OCC  
290 C=C.O/N=C/c1cc(Br)ccc1O>>C=Cc1ccc(O)c(/C=N/O)c1  
291 C=CC(=O)OC.COc1ccc2c(-  
292 c3cc(I)c4c(c3OCc3ccccc3)[C@@H](C)N(Cc3ccccc3)[C@H](C)C4)c(C)cc(OC)c12>>COC(=O)/C=C/  
293 c1cc(-c2c(C)cc(OC)c3c(OC)ccccc23)c(OCc2ccccc2)c2c1C[C@@H](C)N(Cc1ccccc1)[C@@H]2C  
294 C=CC(=O)OC.CC(C)(C)C(=O)Oc1ccc2ccccc2c1-  
295 c1c(OC(=O)C(C)(C)C)ccc2cc(I)ccc12>>COC(=O)/C=C/c1ccc2c(-  
296 c3c(OC(=O)C(C)(C)C)ccc4ccccc34)c(OC(=O)C(C)(C)C)ccc2c1  
297 C=CC(=O)OCC.CCCn1ccc(Br)cc1=O>>CCCN1ccc(/C=C/C(=O)OCC)cc1=O  
298 C=Cc1ccc(F)cc1.Fc1ccccc1I>>Fc1ccc(/C=C/c2ccccc2)cc1  
299 C=CC(=O)OC.CCOC(=O)c1cc(=O)c2ccc(Br)c2o1>>CCOC(=O)c1cc(=O)c2ccccc2(/C=C/C(=O)OC)c2  
300 Br1ccc2ccc3ccc4ccc1c2c34.C=C(CCO[Si](C)(C)C(C)C)C(=O)OC>>COC(=O)/C=C/c1ccc2ccc3  
301 cccc4ccc1c2c34)CCO[Si](C)(C)C(C)C(C)C  
302 C=CCCCCN1C(=O)c2ccccc2C1=O.CC(C)(C)c1ccc(OS(=O)(=O)C(F)(F)F)cc1>>C=C(CCCCN1C(=O)  
303 c2ccccc2C1=O)c1ccc(C(C)(C)C)cc1  
304 C=CC(=O)OCC.O=Cc1ccc(F)cc1Br>>CCOC(=O)/C=C/c1cc(F)ccc1C=O  
305 Br1ccnc2ccccc12.C=CC[C@H]1CCCN(C)C[C@H](OC(C)=O)[C@H](C)C[C@H](CC(OC)OC)[C@  
306 H](O[C@@H]2O[C@H](C)[C@@H](O[C@H]3C[C@@](C)(O)[C@@H](OC(=O)CC)[C@H](C)O3)  
307 [C@H](N(C)C)[C@H]2OC(C)=O)[C@@H](OC)[C@H](OC(=O)CC)CC(=O)O1>>CCC(=O)O[C@H]  
308 1[C@H](C)O[C@@H](O[C@H]2[C@H](N(C)C)[C@@H](OC(C)=O)[C@H](O[C@@H]3[C@@H](  
309 OC)[C@H](OC(=O)CC)CC(=O)O[C@@H](C/C=C/c4ccnc5ccccc45)CCCN(C)C[C@H](OC(C)=O)[C  
310 @H](C)C[C@@H]3C(C)C(OC)OC)O[C@@H]2C(C)C[C@@H]1(C)O  
311 C=Cc1ccc2ccccc2c1.COc1ccc(I)cc1>>COc1ccc(/C=C/c2ccc3ccccc3c2)cc1  
312 C=CC(=O)OCC.Cc1nc(C)c(I)c(Cl)n1>>CCOC(=O)/C=C/c1c(C)nc(C)nc1Cl  
313 \*CN(Cc1ccccc1)N=Nc1ccc(I)cc1.C=CC#N>>\*CN(Cc1ccccc1)N=Nc1ccc(/C=C/C#N)cc1  
314 C=COCCCC.O=Cc1ccc(Br)cc1>>C=C(OCCCC)c1ccc(C=O)cc1  
315 C=Cc1ccccc1Cl.Oc1ccccc1I>>Oc1ccccc1/C=C/c1ccccc1Cl  
316 C=CC(=O)N(C)Cc1c(C)n(C)c2ccccc12.O=C1Ne2ncc(Br)cc2C12CCC2>>Cc1c(CN(C)C(=O)/C=C/c2c  
317 nc3c(c2)C2(CCC2)C(=O)N3)c2ccccc2n1C  
318 C=CCN1CCP(C)(=O)CC1.Fc1ccccc1COc2ccc(Nc3nenc4ccc(I)cc34)cc2Cl)c1>>CP1(=O)CCN(C/C=C/c  
319 2ccc3nenc(Nc4ccc(OCc5ccccc5)F)c5)c(Cl)c4)c3c2)CC1  
320 C=Cc1ccc(OC)c(OC)c1.CCCCCCCCOC1ccc2c(C)c(Br)c(=O)oc2c1>>CCCCCCCCOC1ccc2c(C)c(/C=C/  
321 C/c3ccc(OC)c(OC)c3)c(=O)oc2c1  
322 C=CC(=O)OCC.O=S(=O)(OC1=NCCCC1)C(F)(F)F>>CCOC(=O)/C=C/C1=NCCCC1  
323 Cc1ccc(I)cc1C.NC(=O)/C=C/c1ccccc1>>Cc1ccc(/C=C/C(N)=O)c2ccccc2)cc1C  
324 C=CC(=O)OC(C)(C)C.COC(=O)c1ccc(Br)sc1C>>COC(=O)c1ccc(/C=C/C(=O)OC(C)(C)C)sc1C

300 C=CC(=O)OC.COC(=O)CCn1c(=O)oc2cc(Br)cnc21>>COC(=O)/C=C/c1cnc2c(c1)oc(=O)n2CCC(=O)  
301 C=Cc1ccc(O)cc1.Fc1cc(Br)cc(F)c1F>>Oc1ccc(/C=C/c2cc(F)c(F)c(F)c2)cc1  
302 C=CP(=O)(O)O.Fc1cc(F)cc(Br)c1>>O=P(O)(O)/C=C/c1cc(F)cc(F)c1  
C=CC(=O)OC.Ic1cn2c(n1)[C@H](OCc1ccccc1)[C@@H](OCc1ccccc1)[C@H](OCc1ccccc1)[C@H]  
303 ]2COCc1ccccc1>>COC(=O)/C=C/c1cn2c(n1)[C@H](OCc1ccccc1)[C@@H](OCc1ccccc1)[C@H](  
OCc1ccccc1)[C@H]2COCc1ccccc1  
304 C=CC(=O)CC.COC(=O)c1ccc(Br)cc1>>CCC(=O)/C=C/c1ccc(C(=O)OC)cc1  
C=CC(C)(C)O.COc1ccc(/C=C/C(=O)c2ccc(OC)c(I)c2OC)cc1>>COc1ccc(/C=C/C(=O)c2ccc(OC)c(/C  
305 =C/C(C)(C)O)c2OC)cc1  
C=Cc1c(F)c(F)c(F)c(F)c1F.N#Cc1ccc(Br)cc1>>N#Cc1ccc(/C=C/c2c(F)c(F)c(F)c(F)c2F)cc1  
306 C=C.ClCc1ccccc1I>>C=CCc1ccccc1I  
307 C=CC(=O)c1ccccc1.O=C1C=C(Br)CCC1>>O=C1C=C(/C=C/C(=O)c2ccccc2)CCC1  
308 C=Cc1ccc(C(=O)OC)cc1.CC(C)(C)[Si](C)(C)Oc1ccnc1Br>>COC(=O)c1ccc(/C=C/c2ncccc2O[Si](C)  
309 (C)C(C)(C)C)cc1  
C=CC(=O)OCC.COc1cc(Nc2c(CCc3ccccc3)nc3ccc(Br)cn23)cc(OC)c1OC>>CCOC(=O)/C=C/c1ccc2n  
310 c(CCc3ccccc3)c(Nc3cc(OC)c(OC)c(OC)c3)n2c1  
C=CCCC(=O)O.Ic1ccccc1>>O=C(O)CC/C=C/c1ccccc1  
311 C=CCN1C(=O)c2ccccc2C1=O.Ic1ccnc1>>O=C1c2ccccc2C(=O)N1C/C=C/c1ccnc1  
312 C=Cc1ccccc1.Ic1ccc(CN2CCOCC2)cc1>>C=C/c1ccc(CN2CCOCC2)cc1\c1ccccc1  
313 C=C(NC(=O)OCC[Si](C)(C)C(=O)OC.CC(C)(C)OC(=O)N[C@H](Cc1ccc(I)cc1)C(=O)OCc1ccccc1  
314 >>COC(=O)/C=C/c1ccc(C[C@H](NC(=O)OC(C)(C)C(=O)OCc2ccccc2)cc1)NC(=O)OCC[Si](C)  
C=CCn1c(-  
315 c2ccccc2)nc2ccccc2c1=O.O=C(CN1C(=O)COc2ccccc21)c1ccc(Br)cc1>>O=C(CN1C(=O)COc2ccccc2  
1)c1ccc(/C=C/Cn2c(-c3ccccc3)nc3ccccc3c2=O)cc1  
316 C=C1CC(c2ccc(Cl)cc2)OC1=O.CC(C)(C)c1ccc(I)cc1>>CC(C)(C)c1ccc(/C=C2\CC(c3ccc(Cl)cc3)OC2  
=O)cc1  
317 Brc1cnc2ccccc2c1.C=CCN(C(=O)OC(C)(C)C(=O)OC(C)(C)C>>CC(C)(C)OC(=O)N(C/C=C/c1cnc2  
ccccc2c1)C(=O)OC(C)(C)C  
318 C=CC(=O)N(C)Cc1oc2ccccc2c1C.O=C1Nc2ncc(Br)cc2C12CCC2>>Cc1c(CN(C)C(=O)/C=C/c2cnc3c  
(c2)C2(CCC2)C(=O)N3)oc2ccccc12  
319 Brc1ccc2c(Nc3ccccc3)ncnc2c1.C=CC(=O)OC>>COC(=O)/C=C/c1ccc2c(Nc3ccccc3)ncnc2c1  
320 C=CC(OC)OC.Fc1cc(I)ccc1C(F)(F)F>>COC(/C=C/c1ccc(C(F)(F)F)c(F)c1)OC  
C=Cc1ccccc1.C[Si](C)(OS(=O)(=O)C(F)(F)F)OS(=O)(=O)C(F)(F)F>>C[Si](C)(/C=C/c1ccccc1)OS(=O)(=O)C(F)(F)F  
321 C=CC(=O)OCC.O=C(NCCc1ccc(Br)c1)OCc1ccccc1>>CCOC(=O)/C=C/c1cccc(CCNC(=O)OCc2ccc  
cc2)c1  
322 CC/C(=C\c1ccccc1)c1ccccc1.CN(C)CCOc1ccc(Br)cc1>>CC/C(=C(\c1ccccc1)c1ccc(OCCN(C)C)cc1)c  
1ccccc1  
323 C=C(NC(C)=O)C(=O)OC.CC(=O)Oc1cc(C)c(I)c(C(C)C)c1>>COC(=O)/C(=C/c1c(C)cc(OC(C)=O)cc1  
C(C)C)NC(C)=O  
324 C=Cc1ccc(OC(C)=O)cc1.CC(=O)OC[C@H]1O[C@@H](Oc2ccc(I)cc2)[C@H](OC(C)=O)[C@@H](  
OC(C)=O)[C@@H]1OC(C)=O>>CC(=O)OC[C@H]1O[C@@H](Oc2ccc(/C=C/c3ccc(OC(C)=O)cc3)c  
325 c2)[C@H](OC(C)=O)[C@@H](OC(C)=O)[C@@H]1OC(C)=O  
C=CC(=O)OC.Ic1ccsc1>>COC(=O)/C=C/c1ccsc1  
326 C=CC(=O)O.Oc1ccc(Br)cc1>>O=C(O)/C=C/c1ccc(O)cc1  
327 C=C(C)C(=O)OC.O=Cc1ccc(Cl)cc1>>COC(=O)/C(C)=C/c1ccc(C=O)cc1  
328 C=CC(=O)Nc1ccc(OC)cc1.CC(C)(C)c1ccc2[nH]c3c(c2c1)CC(=O)Nc1ccc(I)cc1-  
329 3>>COc1ccc(NC(=O)/C=C/c2ccc3c(c2)-c2[nH]c4ccc(C(C)(C)C)cc4c2CC(=O)N3)cc1  
C=Cc1cncnc1.CCOC(=O)c1c(I)c2cc(-c3ccc(C(F)(F)F)cc3)ccc2n1-  
330 c1ccc(OC2CCCC2)cc1>>CCOC(=O)c1c(/C=C/c2ccncc2)c2cc(-c3ccc(C(F)(F)F)cc3)ccc2n1-  
c1ccc(OC2CCCC2)cc1  
C=CC(=O)OC(C)(C)C.COC1CCC(C2=C[C@H]3CC[C@H](OC(C)(C)C)[C@@]3(C)CC2)=C(Br)C1>  
331 >COC1CCC(C2=C[C@H]3CC[C@H](OC(C)(C)C)[C@@]3(C)CC2)=C(/C=C/C(=O)OC(C)(C)C)C1  
C=Cc1ccccc1.Clc1ccc2c(c1)c(I)nn2C1CCCCO1>>Clc1ccc2c(c1)c(/C=C/c1ccccc1)nn2C1CCCCO1  
332 C=CC(=O)O.C[Si](C)(C)CCOCn1cc(I)c(=O)[nH]c1=O>>C[Si](C)(C)CCOCn1cc(/C=C/C(=O)O)c(=O)  
[nH]c1=O  
333 C=CCC(C)C(=O)OCC.O=C(c1ccccc1)c1ccc(Br)cc1>>CCOC(=O)C(C)C/C=C/c1ccc(C(=O)c2ccccc2)c  
334 C=Cc1ccccc1.IC1CCCCC1>>C(=C/C1CCCCC1)\c1ccccc1  
335 C=CC(C)=O.CC1(C)OC=C(I)C(=O)O1>>CC(=O)/C=C/C1=COC(C)(C)OC1=O  
336 C=CC(=O)OC.CCOCc1nc2c(N)nc3cc(Br)ccc3c2n1CC(C)(C)O>>CCOCc1nc2c(N)nc3cc(/C=C/C(=O)  
337 OC)ccc3c2n1CC(C)(C)O  
C=Cc1ccccc1.Ic1ccc2c(c1)OCCOCCOCCOCCOCCO2>>C(=C/c1ccc2c(c1)OCCOCCOCCOCCOCC  
338 O2)\c1ccccc1



339 C=CC(=O)OCc1ccccc1.O=C1CO[C@@H]2Cc3ccc(Br)cc3[C@@H]2N1OCc1ccccc1>>O=C(/C=C/c1  
 ccc2c(c1)[C@H]1[C@@H](C2)OCC(=O)N1OCc1ccccc1)OCc1ccccc1  
 340 C=Cc1ccc(OC)cc1.FC(F)(F)C(F)(F)C(F)(F)C(F)(F)C(F)(F)Br>>COc1ccc(/C=C/C(F)(F)C(F)(F)  
 )C(F)(F)C(F)(F)C(F)(F)C(F)(F)C(F)(F)cc1  
 341 C=Cc1ccc(OC)cc1.Clc1ccccc1>>COc1ccc(/C=C/c2ccccc2)cc1  
 342 C=Cc1ccccc1.O=S(=O)(c1ccccc1)C(F)(F)Br>>O=S(=O)(c1ccccc1)C(F)(F)/C=C/c1ccccc1  
 343 C=CC(=O)OC.Ic1cccc2cc[nH]c12>>COC(=O)/C=C/c1cccc2cc[nH]c12  
 344 C=Cc1ccccc1.IC1CCCCC12OCCO2>>C(=C/C1CCCCC12OCCO2)\c1ccccc1  
 345 C=CCOc1ccccc1.Cc1ccc(Br)cc1>>Cc1ccc(/C=C/COc2ccccc2)cc1  
 346 C=CC(=O)OC.CC(C)n1cnc2c(NCc3ccc(Br)cc3)nc(N3CCCC3)nc21>>COC(=O)/C=C/c1ccc(CNc2nc(  
 N3CCCC3)nc3c2ncn3C(C)C)cc1  
 347 C=Cc1ccc(C(=O)OC)cc1.CCCCC(Br)C(F)(F)F>>CCCCC(/C=C/c1ccc(C(=O)OC)cc1)C(F)(F)F  
 C=CC1(C(=O)O)COCOC1.CC(C)[C@H](O)C(=O)N[C@@H](C)C(=O)N1CCC[C@@H](C(=O)N[C  
 348 @H](C)c2ccc3ccc(Br)cc3n2)N1>>CC(C)[C@H](O)C(=O)N[C@@H](C)C(=O)N1CCC[C@@H](C(=O)  
 N[C@H](C)c2ccc3ccc(/C=C/C4(C(=O)O)COCOC4)cc3n2)N1  
 349 C=CC(C)=O.Ic1cccc2[nH]ccc12>>CC(=O)/C=C/c1cccc2[nH]ccc12  
 350 C=CCN1C(=O)c2ccccc2C1=O.Ic1ccccc1>>O=C1c2ccccc2C(=O)N1C/C=C/c1ccccc1  
 351 C=Cc1ccccc1.COC(=O)c1cc(C#C[Si](C)(C)C)ccc1OS(=O)(=O)C(F)(F)F>>COC(=O)c1cc(C#C[Si](C)  
 (C)C)ccc1/C=C/c1ccccc1  
 C=Cc1ccc(N(c2ccc(/C=C/c3ccc(S(=O)(=O)C(F)(F)F)cc3)cc2)c2ccc(/C=C/c3ccc(S(=O)(=O)C(F)(F)F)c  
 352 c3)cc2)cc1.O=S(=O)(CCO)c1ccc(Br)cc1>>O=S(=O)(CCO)c1ccc(/C=C/c2ccc(N(c3ccc(/C=C/c4ccc(S(  
 =O)(=O)C(F)(F)F)cc4)cc3)c3ccc(/C=C/c4ccc(S(=O)(=O)C(F)(F)F)cc4)cc3)cc2)cc1  
 353 C=CCCC.Ic1ccccc1>>CCC/C=C/c1ccccc1  
 354 COC[C@@H](/N=C(\c1ccccc1)N1C=CCC[C@H]1c1ccccc1)C(C)C.COc1ccc(I)cc1>>COC[C@@H](/  
 N=C(\c1ccccc1)N1C=C(c2ccc(OC)cc2)CC[C@H]1c1ccccc1)C(C)C  
 355 Bre1ccccc1.C=CC1CC2C=CC1C2>>C1=CC2CC1CC2/C=C/c1ccccc1  
 356 Bre1cnc2c(c1)NCCCN2.C=CC(=O)N(C)Cc1oc2ccccc2c1C>>Cc1c(CN(C)C(=O)/C=C/c2cnc3c(c2)NC  
 CCN3)oc2ccccc12  
 357 C=CC(=O)OC(C)(C)C.CN1CCC2(CC1)Cc1cc(Br)enc1NC2=O>>CN1CCC2(CC1)Cc1cc(/C=C/C(=O)  
 OC(C)(C)C)enc1NC2=O  
 358 C=CC(=O)OCCOc1ccc2c(C)cc(=O)oc2c1.COC(=O)c1ccc(Br)cc1>>COC(=O)c1ccc(/C=C/C(=O)OCC  
 Oc2ccc3c(C)cc(=O)oc3c2)cc1  
 359 C=Cc1ccccc1.O=C1C=CC(=O)c2c(I)cccc21>>O=C1C=CC(=O)c2c(/C=C/c3ccccc3)cccc21  
 360 C=CC(CO)N1C(=O)c2ccccc2C1=O.CC(=O)c1ccc(Br)cc1>>CC(=O)c1ccc(/C=C/C(CO)N2C(=O)c3ccc  
 cc3C2=O)cc1  
 361 C=CS(=O)c1ccccc1.O=C(O)c1ccc(Br)cc1>>O=C(O)c1ccc(/C=C/S(=O)c2ccccc2)cc1  
 362 C=CC(=O)OC.CC(=O)Oc1ccc(Br)cc1OC(C)=O>>COC(=O)/C=C/c1ccc(OC(C)=O)c(OC(C)=O)c1  
 363 C=CC(=O)OC1CCCCC1.Ic1ccc(OC2CCCCO2)cc1>>O=C(/C=C/c1ccc(OC2CCCCO2)cc1)OC1CCCC  
 364 C=CCCCCCC.CC(C)(C)OC(=O)n1ccc2cc(OS(=O)(=O)C(F)(F)F)ccc21>>C=C(CCCCCC)c1ccc2c(ccn  
 2C(=O)OC(C)(C)C)c1  
 365 C=CC(N)=O.O=CC1=C(Br)CCCCC1>>NC(=O)/C=C/C1=C(C=O)CCCCC1  
 366 Bre1ccc(I)cc1.C=Cc1cnc1>>Bre1ccc(/C=C/c2cnc2)cc1  
 367 C=Cc1ccc(OC)cc1.O=Cc1ccc(Br)cc1>>COc1ccc(/C=C/c2ccc(C=O)cc2)cc1  
 368 C=C.O=[N+](=[O-])c1ccc(Br)cc1>>C=Cc1ccc([N+](=O)[O-])cc1  
 369 C=Cc1ccccc1.O=S1(=O)c2ccccc2C2(CN1Cc1ccc(Br)cc1)OCCO2>>O=S1(=O)c2ccccc2C2(CN1Cc1cc  
 c(/C=C/c3ccccc3)cc1)OCCO2  
 370 C=CC(=O)O.Nc1ccc(Br)cn1>>Nc1ccc(/C=C/C(=O)O)cn1  
 371 C=Cc1ccccc1C.Cc1ccccc1Cl>>Cc1ccccc1/C=C/c1ccccc1C  
 C=Cc1ccc(C=C)cc1.CCCCCCc1cc(/C=C/c2ccc(/C=C/c3ccc(CCCCCC)c(/C=C/c4ccc(/C=C/c5ccc(CCCC  
 372 CC)c(/C=C/c6ccc(C)cc6)cc5CCCCC)cc4)cc3CCCCC)cc2)c(CCCCCC)cc1Br>>C=Cc1ccc(/C=C/c2  
 cc(CCCCCC)c(/C=C/c3ccc(/C=C/c4ccc(CCCCCC)c(/C=C/c5ccc(/C=C/c6ccc(CCCCCC)c(/C=C/c7ccc(C  
 )cc7)cc6CCCCC)cc5)cc4CCCCC)cc3)cc2CCCCC)cc1  
 C=CC(=O)OC.CCc1nc2c(N)nc3cc(Br)ccc3e2n1CC(C)(C)O>>CCc1nc2c(N)nc3cc(/C=C/C(=O)OC)ccc  
 373 3e2n1CC(C)(C)O  
 374 C=CC(=O)OCCCC.Ic1cnc1>>CCCCOC(=O)/C=C/c1cnc1  
 C=CC(=O)OC.CC(C)(C)[Si](C)(C)OC[C@H]1O[C@@H](n2cnc(C(N)=O)c2I)[C@H](O[Si](C)(C)C(  
 375 C)(C)C)[C@@H]1O[Si](C)(C)C(C)(C)C>>COC(=O)/C=C/c1c(C(N)=O)ncn1[C@@H]1O[C@H](CO[  
 Si](C)(C)C(C)(C)C)[C@@H](O[Si](C)(C)C(C)(C)C)[C@H]1O[Si](C)(C)C(C)(C)C  
 C=CC(=O)N1N=Cc2ccccc2C1c1cc2ccccc2o1.COc1ccc(Cc2cnc(N)nc2N)cc(1)c1OC>>COc1cc(Cc2cnc(  
 376 N)nc2N)cc(/C=C/C(=O)N2N=Cc3ccccc3C2c2cc3ccccc3o2)c1OC  
 C=Cc1ccc(Cl)cc1.CC(=O)NS(=O)(=O)c1ccc(Br)cc1>>CC(=O)NS(=O)(=O)c1ccc(/C=C/c2ccc(Cl)cc2)  
 377 C=Cc1cnc1.CCCCCCCCCCCCCOc1ccc(I)cc1>>CCCCCCCCCCCCCOc1ccc(/C=C/c2cnc2)cc1  
 378 C=Cc1cc2cc(OC)c(OC)cc2oc1=O.COc1ccc(I)cc1>>COc1ccc(/C=C/c2cc3cc(OC)c(OC)cc3oc2=O)cc1  
 379

380 Br1ccc2[nH]ccc2c1.C=CC(=O)OCC>>CCOC(=O)/C=C/c1ccc2[nH]ccc2c1  
381 COc1ccc(I)cc1.Cc1ccc(S(=O)(=O)/C=C2/C(F)(F)C23CCCCC3)cc1>>COc1ccc(/C(=C2/C(F)(F)C23CC  
382 CCC3)S(=O)(=O)c2ccc(C)cc2)cc1  
383 C=CC(=O)OCC.O=C1CNc2c(Br)cccc2N1>>CCOC(=O)/C=C/c1cccc2c1NCC(=O)N2  
384 C=Cc1ccc(C)(C)C)cc1.CC(=O)c1ccc(Br)cc1>>CC(=O)c1ccc(/C=C/c2ccc(C)(C)C)cc2)cc1  
385 C=CC(=O)OC.Cc1ccc(S(=O)(=O)n2ccc3cc(Br)ccc32)cc1>>COC(=O)/C=C/c1ccc2c(ccn2S(=O)(=O)c2  
386 ccc(C)cc2)c1  
387 C=CC(=O)OC(C)(C)C.COC(=O)CN(CC(=O)OC)C(=O)c1ccc(I)cc1>>COC(=O)CN(CC(=O)OC)C(=O  
388 )c1ccc(/C=C/C(=O)OC(C)(C)C)cc1  
389 C=C[C@H]1C[C@H]2CC[C@@H](C(=O)OC)N2C(=O)[C@@](Cc2ccccc2)(NC(=O)OCc2ccccc2)[C  
390 @H]1OC(C)=O.O=[N+](O-  
391 )c1ccc(Br)cc1>>COC(=O)[C@@H]1CC[C@@H]2C[C@H](/C=C/c3ccc([N+](=O)[O-  
392 ]cc3)[C@@H](OC(C)=O)[C@]1(Cc3ccccc3)(NC(=O)OCc3ccccc3)C(=O)N12  
393 C=CC(N)=O.O=CC1=C(Br)c2ccccc2CC1>>NC(=O)/C=C/C1=C(C=O)CCc2ccccc21  
394 C=Cc1cccn1.CCCCCCCCCC(=O)N1CCN(c2ccc(Br)cc2)CC1>>CCCCCCCCC(=O)N1CCN(c2ccc(/  
395 C=C/c3cccn3)cc2)CC1  
396 COC[C@H](/N=C(\c1cccc1)N1C=CCC[C@H]1c1cccc1)C(C)C.Cc1cccc(I)c1>>COC[C@@H](/N  
397 =C(\c1cccc1)N1C=C(c2cccc(C)c2)CC[C@H]1c1cccc1)C(C)C  
398 C=CC(=O)O.CC(C)(C)c1cc(I)c2c(c1)OCCOCCOCCOCCO2>>CC(C)(C)c1cc(/C=C/C(=O)O)c2c(c1)  
399 OCCOCCOCCOCCO2  
400 C=CC(=O)OC.COC(=O)Cn1c(=O)oc2cc(Br)cnc21>>COC(=O)/C=C/c1cnc2c(c1)oc(=O)n2CC(=O)OC  
401 C=CC(=O)OC(C)(C)C.O=S(=O)(c1cccc(Br)c1)c1cccn1>>CC(C)(C)OC(=O)/C=C/c1cccc(S(=O)(=O)  
402 c2cccn2)c1  
403 C=CCNC(=O)OC(C)(C)C.O=S(=O)(Oc1cccc1Cl)C(F)(F)F>>C=C(CNC(=O)OC(C)(C)C)c1ccccc1Cl  
404 Br1ccc2c(c1)c(Cc1ccccc1)cn2-  
405 c1ccccc1.C=CC(=O)OC>>COC(=O)/C=C/c1ccc2c(c1)c(Cc1ccccc1)cn2-c1ccccc1  
406 C=CC(=O)OC.CC(=O)OCCCOc1cc(I)c(=O)[nH]c1=O>>COC(=O)/C=C/c1cn(OCCCOc(C)=O)c(=O)[  
407 nH]c1=O  
408 C=CCCC.Cc1ccc(Br)cc1>>CCCC/C=C/c1ccc(C)cc1  
409 C=Cc1ccccc1.CC(=O)c1ccc(I)cc1>>CC(=O)c1ccc(/C=C/c2ccccc2)cc1  
410 C=CC(=O)OC.COc1cc2c(cc1OC)Oc1c(cc(Br)cc1OC)C=C2>>COC(=O)/C=C/c1cc2c(c(OC)c1)Oc1cc(  
411 OC)c(OC)cc1C=C2  
412 C=Cc1ccccc1.CCCCC(C)(Br)CC>>CCCC(C)(/C=C/c1ccccc1)CC  
413 C=CCc1c(OC)c(C)c2c(c1OC(C)=O)C(=O)OC2.COC(=O)c1cccc(C)c1Br>>COC(=O)c1cccc(C)c1/C=  
414 C/Cc1c(OC)c(C)c2c(c1OC(C)=O)C(=O)OC2  
415 C=Cc1ccc(N(CCCCC)CCCCC)cc1.O=Cc1cc2ccc1CCc1ccc(c(Br)c1)CC2>>CCCCCN(CCCCC)  
416 c1ccc(/C=C/c2cc3ccc2CCc2ccc(c(C=O)c2)CC3)cc1  
417 C=CCN(C(=O)OC(C)(C)C)C(=O)OC(C)(C)C.FC(F)(F)c1ccc(Cl)cc1>>CC(C)(C)OC(=O)N(C/C=C/c1c  
418 cc(C(F)(F)F)cc1)C(=O)OC(C)(C)C  
419 C=CC(=O)N(C)C.Cc1cccc(C)c1Cl>>Cc1cccc(C)c1/C=C/C(=O)N(C)C  
420 C=CC(=O)O.CC1(C)C=Cc2c(ccc(I)c2[N+](=O)[O-  
421 ]O1>>CC1(C)C=Cc2c(ccc(/C=C/C(=O)O)c2[N+](=O)[O-])O1  
422 C=Cc1ccc(OC)cc1.O=Cc1cccc(Br)c1>>COc1ccc(/C=C/c2cccc(C=O)c2)cc1  
423 C=CC(=O)OC(C)(C)C.COc1c2ccoc2c(Br)c2oc(=O)ccc12>>COc1c2ccoc2c(/C=C/C(=O)OC(C)(C)C)c  
424 2oc(=O)ccc12  
425 C=Cc1ccc(OCC(=O)OCC)cc1.Oc1ccc(-c2oc3cc(O)cc(Br)c3c2-  
426 c2cc(O)cc(O)c2)cc1>>CCOC(=O)COc1ccc(/C=C/c2cc(O)cc3oc(-c4ccc(O)cc4)c(-  
427 C=CC(=O)OC.COC(=O)c1c(C=O)cc(I)c(O)c1OC>>COC(=O)/C=C/c1cc(C=O)c(C(=O)OC)c(OC)c1O  
428 C=CCOC(=O)OC.Ic1ccccc1>>COC(=O)OC/C=C/c1ccccc1  
429 C=Cc1ccc(OC)cc1.FC(F)(F)c1cccc(Br)c1>>COc1ccc(/C=C/c2cccc(C(F)(F)F)c2)cc1  
430 C=CC(=O)O.COc1ccc(S(=O)(=O)N(C)c2ccc(I)cc2)cc1OC>>COc1ccc(S(=O)(=O)N(C)c2ccc(/C=C/C(  
431 =O)O)cc2)cc1OC  
432 C=Cc1ccc(N)cc1.Cc1ccc(Br)cc1>>Cc1ccc(/C=C/c2ccc(N)cc2)cc1  
433 C=C.Ic1cccc2ccccc12>>C=Cc1cccc2ccccc12  
434 C=CC(=O)Oc1ccccc1.Cn1ccc(I)cc1=O>>Cn1ccc(/C=C/C(=O)Oc2ccccc2)cc1=O  
435 C=Cc1ccc(C=C)cc1.N#Cc1ccc(Br)cc1>>C=Cc1ccc(/C=C/c2ccc(C#N)cc2)cc1  
436 C=Cc1cc(C)ccc1C.O=Cc1ccccc1Br>>Cc1ccc(C)c(/C=C/c2ccccc2C=O)c1  
437 C=Cc1ccc(C(=O)OC(C)(C)C)cc1.COc1ccc(I)cc1>>COc1ccc(/C=C/c2ccc(C(=O)OC(C)(C)C)cc2)cc1  
438 C=CC(=O)OCC.COc1cc(Br)c2c3c1O[C@H]1[C@]34CCN(C)[C@H](C2)[C@]42C=C[C@@]1(OC  
439 )c1c(OC(C)=O)ccc(O)c12>>CCOC(=O)/C=C/c1cc(OC)c2c3c1C[C@H]1N(C)CC[C@@]34[C@@H](  
440 O2)[C@@]2(OC)C=C[C@@]14c1c(O)ccc(OC(C)=O)c12  
441 C=CC(=O)OCC.O=c1oc(-c2ccccc2)c(I)c2ccccc12>>CCOC(=O)/C=C/c1c(-c2ccccc2)oc(=O)c2ccccc12  
442 C=Cc1ccccc1.COc1ccc(Br)c2ccccc12>>COc1ccc(/C=C/c2ccccc2)c2ccccc12

421 C=CC(=O)OC(C)(C)C.Oc1ccc(C(=C2CCCCC2)c2ccc(Br)cc2Cl)cc1>>CC(C)(C)OC(=O)/C=C/c1ccc(C(=C2CCCCC2)c2ccc(O)cc2)c(Cl)c1  
 422 C=Cc1ccc(OC)c(OC)c(OC)c1-c1ccccc1.COc1ccc(I)cc1>>COc1ccc(/C=C/c2cc(OC)c(OC)c(OC)c2-c2ccccc2)cc1  
 423 Br1cnc2ccccc2c1.C=CC(=O)OCC>>CCOC(=O)/C=C/c1cnc2ccccc2c1  
 424 C=CP(=O)(OCC)OCC.O=[N+][O-]c1ccccc1Br>>CCOP(=O)(/C=C/c1ccccc1[N+](=O)[O-])OCC  
 425 C=CC[C@H](O)[Si](c1ccccc1)(c1ccccc1)C(C)(C)C[C@H]1OC(=O)[C@H]2OC(C)(C)O[C@H]21.Ic1ccccc1>>CC1(C)O[C@H]2C(=O)O[C@H]([C@H](C/C=C/c3ccccc3)O[Si](c3ccccc3)(c3ccccc3)C(C)(C)C)[C@H]2O1  
 426 C=CC(=O)Nc1ccccc1NC(=O)OC(C)(C)C.CCOC(=O)[C@H]1CN(C)C[C@H]1c1ccc(Br)cn1>>CCO  
 427 C(=O)[C@H]1CN(C)C[C@H]1c1ccc(/C=C/C(=O)Nc2ccccc2NC(=O)OC(C)(C)C)cn1  
 428 Br1cccc2c1cnc2Cc1ccccc1.C=CC(=O)OC>>COC(=O)/C=C/c1cccc2c1cnc2Cc1ccccc1  
 429 C=CC(=O)OCC.Cc1cnc(Nc2ccc3c(cnn3Cc3ccccc(F)c3)c2)c1I>>CCOC(=O)/C=C/c1c(C)ncnc1Nc1ccc2c(cnn2Cc2ccccc(F)c2)c1  
 430 C=CC(=O)OCCCC.O=c1[nH]c(=O)n([C@H]2C[C@H](O)[C@H]2(CO)O2)cc1I>>CCCCOC(=O)/C=C/c1cn([C@H]2C[C@H](O)[C@H]2(CO)O2)c(=O)[nH]c1=O  
 431 C=CC(=O)OC(C)(C)C.CC(C)(C)OC(=O)N1CCC(C2=C[C@H]3CC[C@H](OC(C)(C)C)[C@@]3(C)CC2)=C(Br)C1>>CC(C)(C)OC(=O)/C=C/C1=C(C2=C[C@H]3CC[C@H](OC(C)(C)C)[C@@]3(C)CC2)CCN(C(=O)OC(C)(C)C)C1  
 432 C=C(C)C(=O)OCC(C)C.Ic1ccccc1>>C/C(=C/c1ccccc1)C(=O)OCC(C)C  
 433 C=CC(=O)OCC.Nc1ccc(F)nc1Br>>CCOC(=O)/C=C/c1nc(F)ccc1N  
 434 C=CC(=O)OC(C)(C)C.FC(F)(F)c1ccc(Br)cn1>>CC(C)(C)OC(=O)/C=C/c1ccc(C(F)(F)F)nc1  
 435 C=CCO.Ic1ccccc1>>OC/C=C/c1ccccc1  
 436 C=Cc1cncnc1.CN(C)c1ccc(Br)cc1>>CN(C)c1ccc(/C=C/c2cncnc2)cc1  
 437 C=CC(=O)OCc1ccccc1.Nc1ccc(Br)cn1>>Nc1ccc(/C=C/C(=O)OCc2ccccc2)cn1  
 438 C=Cc1ccc(CN(C)C)cc1.CCOC(=O)c1ccccc1Cl>>CCOC(=O)c1ccccc1/C=C/c1ccc(CN(C)C)cc1  
 439 C=CC(=O)O.O=S(=O)(Nc1ccccc1)c1ccc(-c2ccccc2)cc1>>O=C(O)/C=C/c1ccc(NS(=O)(=O)c2ccc(-c3ccccc3)cc2)c1  
 440 C=CS(C)(=O)=O.COC(=O)c1ccc(Br)cc1>>COC(=O)c1ccc(/C=C/S(C)(=O)=O)cc1  
 441 Br1ccc2ncccc2c1.C=Cc1ccccc1>>C(=C/c1ccc2ncccc2c1)c1ccccc1  
 442 C=CC(C)=O.Cc1ccc(C)c(Br)c1C>>CC(=O)/C=C/c1c(C)ccc(C)c1C  
 443 C=CC(=O)OCCCC.CN(C)c1ccc(I)cc1>>CCCCOC(=O)/C=C/c1ccc(N(C)C)cc1  
 444 C=CS(C)(=O)=O.Cc1cc(C)c(Br)c(C)c1>>Cc1cc(C)c(/C=C/S(C)(=O)=O)c(C)c1  
 445 C=CC(=O)OCCCC.O=C1c2ccccc2C(=O)N1c1ccc(I)cc1>>CCCCOC(=O)/C=C/c1ccc(N2C(=O)c3ccccc3C2=O)cc1  
 446 C=Cc1ccccc1.CC(C)(C)c1ccc(Br)cc1>>C=C(c1ccccc1)c1ccc(C(C)(C)C)cc1  
 447 C=CN1C(=O)c2ccccc2C1=O.COc1cnc2cccc(Br)c2c1>>COc1cnc2cccc(/C=C/N3C(=O)c4ccccc4C3=O)c2c1  
 448 Br1cnc2ccccc2c1.C=CCCCCCCC>>CCCCCCCC/C=C/c1cnc2ccccc2c1  
 449 Br1ccc(-c2cccs2)s1.C=CC(=O)OC>>COC(=O)/C=C/c1ccc(-c2cccs2)s1  
 450 Br1ccccc1.C=CCCCCCCC>>CCCCCCCC/C=C/c1ccccc1  
 451 Br1ccc2[nH]cc(CCc3ccccc3)c2c1.C=CC(=O)OC>>COC(=O)/C=C/c1ccc2[nH]cc(CCc3ccccc3)c2c1  
 452 C=Cc1ccccc1.COc1ccc(Cn2nc(I)c3ccccc32)c1>>COc1ccc(Cn2nc(/C=C/c3ccccc3)c3ccccc32)c1  
 453 C=CC(=O)Nc1cccc2ccnc12.Ic1ccc2c(c1)OCCO2>>O=C(/C=C/c1ccc2c(c1)OCCO2)Nc1cccc2ccnc1  
 454 C=CC(=O)OCC.Cc1nnn(Cc2cc(C(F)F)ccc2Br)n1>>CCOC(=O)/C=C/c1ccc(C(F)F)cc1Cn1nnc(C)n1  
 455 C=CC(=O)OCC.CC(C)c1nn(-c2ccccc2)c(-c2ccc(F)cc2)c1Br>>CCOC(=O)/C=C/c1c(C(C)C)nn(-c2ccccc2)c1-c1ccc(F)cc1  
 456 C=Cc1ccccc1[N+](=O)[O-].Nc1ccccc1I>>Nc1ccccc1/C=C/c1ccccc1[N+](=O)[O-]  
 457 C=CCN1C(=O)c2ccccc2C1=O.Clc1ccc(I)cc1>>O=C1c2ccccc2C(=O)N1CC/C=C/c1ccc(Cl)cc1  
 458 C=Cc1ccc(OCCC)cc1.Cn1c(=O)c2c(cc(Br)n2C)n(C)c1=O>>CCCOc1ccc(/C=C/c2cc3c(c(=O)n(C)c(=O)n3C)n2C)cc1  
 459 C=CC(=O)OC.FC(F)(F)c1ccc(Br)cn1>>COC(=O)/C=C/c1cnc(C(F)(F)F)nc1  
 460 C=Cc1cccc(F)c1.CCOC(=O)C(F)Br>>CCOC(=O)C(F)/C=C/c1cccc(F)c1  
 461 C=CC(=O)OC.Cc1ccc(S(=O)(=O)NCCC(Br)=C(c2ccccc2)c2ccccc2)cc1>>COC(=O)/C=C/C(CCNS(=O)(=O)c1ccc(C)cc1)=C(c1ccccc1)c1ccccc1  
 462 C=CC(N)=O.CC(=O)c1ccc(Br)cc1>>CC(=O)c1ccc(/C=C/C(N)=O)cc1  
 463 C=CC(=O)OC(C)C.COc1cc(NCc2ccc(Br)cc2)cc(OC)c1OC>>COc1cc(NCc2ccc(/C=C/C(=O)OC(C)(C)C)cc2)cc(OC)c1OC  
 464 C=CC(=O)OCC.Cc1cc(C)c(N)c(I)c1>>CCOC(=O)/C=C/c1cc(C)cc(C)c1N  
 465 C=CC(=O)OCC.COCOCc1ccccc(Br)c1>>CCOC(=O)/C=C/c1cccc(COCOC)c1  
 466 C=CC(=O)OC(C)(C)C.Nc1ccccc1Br>>CC(C)(C)OC(=O)/C=C/c1ccccc1N  
 467 C=CC(=O)O.Cc1ccccc1Br>>Cc1ccccc1/C=C/C(=O)O  
 468 C=C(NC(C)=O)C(=O)OC.Cc1cccc(C(C)C)c1I>>COC(=O)/C=C/c1c(C)cccc1C(C)C)NC(C)=O

468 C=CC(=O)OC.COc1ccc(S(=O)(=O)N(C)c2ccc(I)c3enn(C)c23)cc1>>COC(=O)/C=C/c1ccc(N(C)S(=O)  
(=O)c2ccc(OC)cc2)c2c1enn2C  
469 Brclccc(/N=C/c2ccncc2)cc1.C=Cc1ccncc1>>C(=C/c1ccc(/N=C/c2ccncc2)cc1)\c1ccncc1  
470 C=C(OC(C)=O)C(=O)OCC(F)(F)F.COc1ccc(I)cc1OC>>COc1ccc(/C=C(\OC(C)=O)C(=O)OCC(F)(F)F)  
cc1OC  
471 C=CC=O.Ic1c(-c2ccccc2)nnn1Cc1ccccc1>>O=C/C=C/c1c(-c2ccccc2)nnn1Cc1ccccc1  
472 C=CC(=O)OC1CCCCC1.COc1ccc(I)cc1>>COc1ccc(/C=C/C(=O)OC2CCCCC2)cc1  
473 C=Cc1ccccc([N+](=O)[O-])c1.Nc1ccc(I)cc1>>Nc1ccc(/C=C/c2ccccc([N+](=O)[O-])c2)cc1  
474 C=CC(=O)OC.O=S(=O)(c1ccccc(F)c1)N1CCc2cc(Br)cnc21>>COC(=O)/C=C/c1cnc2c(c1)CCN2S(=O)(  
=O)c1ccccc(F)c1  
475 CCCC=[11CH2].Ic1ccccc1>>CCC/C=[11CH]/c1ccccc1  
476 C=C(NC(=O)OC(C)(C)C)C(=O)OC.Nc1cc(C(F)(F)F)ccc1I>>COC(=O)/C=C/c1ccc(C(F)(F)F)cc1N)N  
C(=O)OC(C)(C)C  
477 C=CC(=O)OC(C)(C)C.COc1ccccc1I>>COc1ccccc1/C=C/C(=O)OC(C)(C)C  
478 C=CC(=O)OC(C)(C)C.CN(c1ccccc1)c1ncnc2c(I)enn12>>CN(c1ccccc1)c1ncnc2c(/C=C/C(=O)OC(C)(  
C)C)enn12  
Brclccc(I)cc1.C=C1C(=O)O[C@@H]2CC(C)=C([C@@H](C)CCCOC(C)=O)[C@@H](OC(C)=O)[C  
479 @H]12>>CC(=O)OCCC[C@H](C)C1=C(C)C[C@H]2OC(=O)/C=C/c3ccc(Br)cc3)[C@H]2[C@@H]  
1OC(C)=O  
480 C=CC(=O)OC(C)(C)C.O=[N+](O-)]c1ccccc(I)c1>>CC(C)(C)OC(=O)/C=C/c1ccccc([N+](=O)[O-])c1  
481 C=Cc1ccc(C#N)c(C#N)c1.Ic1ccc2c(c1)C1c3ccccc4cccc(c34)C21>>N#Cc1ccc(/C=C/c2ccc3c(c2)C2c4c  
ccc5ccccc(c45)C32)cc1C#N  
C=Cc1ccccc1.CCN1C[C@@]2(OC(=O)c3ccc(I)ccc3NC(C)=O)CC[C@H](OC)[C@@]34[C@@H]2C[C  
482 @H]([C@@H]13)[C@@]1(O)C[C@H](OC)[C@H]2C[C@@H]4[C@@]1(O)[C@H]2OC>>CCN1C[C  
@]2(OC(=O)c3ccc(/C=C/c4ccccc4)ccc3NC(C)=O)CC[C@H](OC)[C@@]34[C@@H]2C[C@H]([C@  
@H]13)[C@@]1(O)C[C@H](OC)[C@H]2C[C@@H]4[C@@]1(O)[C@H]2OC  
483 C=CCCP(=O)(OC)OC.COc1ccc(I)cc1>>COc1ccc(/C=C/CCP(=O)(OC)OC)cc1  
484 C=CC(=O)OC(C)(C)C.O=c1oc2cc(O)cc(F)c2c(Cc2ccc(Br)cc2)c1Cl>>CC(C)(C)OC(=O)/C=C/c1ccc(C  
c2c(Cl)c(=O)oc3ccc(O)cc(F)c23)cc1  
485 C=CC#N.O=c1[nH]c(=O)n([C@H]2C[C@H](O)[C@@H](CO)O2)cc1I>>N#C/C=C/c1cn([C@H]2C[C  
@H](O)[C@@H](CO)O2)c(=O)[nH]c1=O  
486 C=CCC(O)c1c(C)noc1-c1ccc(Br)cc1.Ic1ccccc1>>Cc1noc(-c2ccc(Br)cc2)c1C(O)/C=C/c1ccccc1  
487 C=C/C=C(\CCCC)OCC.Cc1ccccc(I)c1>>CCCC/C(=C\C=C\c1ccccc(C)c1)OCC  
488 C=CC(=O)OC.CC(C)(C)OC(=O)NC1CCc2cc(Br)ccc21>>COC(=O)/C=C/c1ccc2c(c1)CCC2NC(=O)O  
C(C)(C)C  
489 C=CC(C)=O.O=Cc1ccccc(Br)c1>>CC(=O)/C=C/c1ccccc(C=O)c1  
490 C=CP(=O)(OCC)OCC.COc1ccccc1Br>>CCOP(=O)/C=C/c1ccccc1OC)OCC  
C=CC(=O)OC.COc1cc(Br)c2c3c1O[C@@H]1[C@]34CCN(C)[C@H](C2)[C@]42C=C[C@@]1(OC)[  
491 C@H]1C(=O)NC(=O)[C@H]12>>COC(=O)/C=C/c1cc(OC)c2c3c1C[C@H]1N(C)CC[C@@]34[C@  
@H](O2)[C@@]2(OC)C=C[C@@]14[C@@H]1C(=O)NC(=O)[C@@H]12  
C=CC(=O)N1N=Cc2ccccc2C1CCC.CCCc1nc(N)nc(N)c1Cc1cc(I)c(OC)c(OC)c1>>CCCc1nc(N)nc(N)  
492 c1Cc1cc(/C=C/C(=O)N2N=Cc3ccccc3C2CCC)c(OC)c(OC)c1  
493 C=Cc1ccccc1.Nc1ccncc1Cl>>Nc1ccncc1/C=C/c1ccccc1  
494 C=Cc1ccccc1Cl.COC(=O)C(Cc1ccccc1I)C(=O)OC>>COC(=O)C(Cc1ccccc1/C=C/c1ccccc1Cl)C(=O)  
495 Brclccc1.C=Cc1ccc(C(C)=O)cc1>>CC(=O)c1ccc(/C=C/c2ccccc2)cc1  
Brclenc2ccccc2c1.C=CCO[C@]1(C)C[C@@H](C)C(=O)[C@H](C)C2NC(=O)O[C@]2(CC)[C@@H]  
(CC)OC(=O)/C(C)=C/[C@H](C)[C@H]1O[C@@H]1O[C@H](C)C[C@H](N(C)C)[C@H]1OC(=O)c1  
496 cccc1>>CC[C@H]1OC(=O)/C(C)=C/[C@H](C)[C@@H](O[C@@H]2O[C@H](C)C[C@H](N(C)C)[  
C@H]2OC(=O)c2ccccc2)[C@](C)(OC/C=C/c2cnc3ccccc3c2)C[C@@H](C)C(=O)[C@H](C)C2NC(=  
O)O[C@@]121CC  
497 C=Cc1ccccc1.Cn1c(/C=C/c2ccccc2)c(I)c(=O)c2ccccc21>>Cn1c(/C=C/c2ccccc2)c(/C=C/c2ccccc2)c(=  
O)c2ccccc21  
C=CCON=C1[C@H](C)[C@H]2OC(=O)O[C@]2(C)[C@@H](CC)OC(=O)[C@@](C)(F)C(=O)[C@H  
(C)[C@@H](O[C@H]2O[C@H](C)C[C@H](N(C)C)[C@H]2OC(C)=O)[C@](C)(OC)C[C@H]1C.  
498 Nc1cncc(Br)c1>>CC[C@H]1OC(=O)[C@@](C)(F)C(=O)[C@H](C)[C@@H](O[C@@H]2O[C@H](  
C)C[C@H](N(C)C)[C@H]2OC(C)=O)[C@](C)(OC)C[C@@H](C)C(=NOC/C=C/c2cncc(N)c2)[C@H  
1(C)[C@H]2OC(=O)O[C@@]112C  
499 C=C1CCOC1=O.O=C(Nc1ccccc(I)c1)C(F)(F)F>>O=C1OCC/C1=C/c1ccccc(NC(=O)C(F)(F)F)c1  
500 C=Cc1ccc(C(C)C)cc1.C[Si](C)(I)c1ccccc1>>CC(C)(C)c1ccc(/C=C/[Si](C)(C)c2ccccc2)cc1  
501 C=CC(OC)OC.FC(F)(F)c1ccccc1I>>COC(/C=C/c1ccccc1C(F)(F)F)OC  
502 C=CC=O.CC(=O)c1ccc(Br)cc1>>CC(=O)c1ccc(/C=C/C=O)cc1  
503 C=CCOc1ccccc(C)c1.Ic1cccs1>>Cc1ccccc(OC/C=C/c2cccs2)c1  
504 C=CC(=O)N(C)C.Ic1ccccc1>>CN(C)C(=O)/C=C/c1ccccc1

505 C=CC(=O)OCCCC.O=Cc1cccc1I>>CCCCOC(=O)/C=C/c1cccc1C=O  
506 C=CCOC(C)=O.Cc1cccc1Br>>CC(=O)OC/C=C/c1cccc1C  
507 C=Cc1cccn1.COc1ccc(I)cc1>>COc1ccc(/C=C/c2cccn2)cc1  
508 C=CC(=O)OC.Cc1n[nH]c2cc(Br)ccc12>>COC(=O)/C=C/c1ccc2c(C)n[nH]c2c1  
509 C=CC(=O)OC.COC(=O)c1cnc(-c2ccc(OC)cc2)c(I)c1>>COC(=O)/C=C/c1cc(C(=O)OC)cnc1-  
C=Cc1ccc(C(F)(F)F)c1.COC(=O)[C@H](Cc1ccc(O)c(I)c1)NC(=O)OC(C)(C)C>>COC(=O)[C@H](C  
510 c1ccc(O)c(/C=C/c2ccc(C(F)(F)F)cc2)c1)NC(=O)OC(C)(C)C  
511 Brc1ccc(OCc2ccccc2)cc1.C=CC(=O)OC(C)(C)C>>CC(C)(C)OC(=O)/C=C/c1ccc(OCc2ccccc2)cc1  
512 Brc1cccc2ccccc12.C=CCCCCCC>>C=C(CCCCCC)c1cccc2ccccc12  
513 C=CNC(C)=O.N#Cc1ccc(Br)cc1>>C=C(NC(C)=O)c1ccc(C#N)cc1  
514 C=Cc1ccc(O)cc1.COc1ccc(I)c(OC)c1>>COc1ccc(/C=C/c2ccc(O)cc2)c(OC)c1  
515 C=CC(OC(C)=O)c1cccc1.O=[N+][O-]c1ccc(I)cc1>>CC(=O)OC(/C=C/c1ccc([N+](=O)[O-]  
)cc1)c1cccc1  
516 C=COC(C)(C)C.O=S(=O)(Oc1ccc(-c2ccccc2)cc1)C(F)(F)F>>C=C(OC(C)(C)C)c1ccc(-c2ccccc2)cc1  
517 C=C(F)[Si](C)(c1cccc1)c1cccc1.Ic1cccc1>>C[Si](/C(F)=C/c1cccc1)(c1cccc1)c1cccc1  
518 Brc1ccc(-c2cnc3ccccc3n2)cc1.C=CCn1c(-c2ccc(C)cc2)nc2ccccc2c1=O>>Cc1ccc(-  
c2nc3ccccc3c(=O)n2C/C=C/c2ccc(-c3cnc4ccccc4n3)cc2)cc1  
519 C=Cc1ccc2nc(OC)c(OC)nc2c1.COC(=O)c1c(Br)cccc1OC>>COC(=O)c1c(/C=C/c2ccc3nc(OC)c(OC)n  
c3c2)cccc1OC  
520 C=CC(=O)N(C)Cc1c(C)c2ccccc2n1C.O=C1CN(c2ccccc2)Cc2cc(Br)cnc2N1>>Cc1c(CN(C)C(=O)/C=  
C/c2cnc3c(c2)CN(c2ccccc2)CC(=O)N3)n(C)c2ccccc12  
521 Brc1cccs1.C=Cc1cc(OC)cc(OC)c1>>COc1cc(/C=C/c2cccs2)cc(OC)c1  
522 C=Cc1cccc1.Cc1nc(-c2ccccc2)c(Br)o1>>Cc1nc(-c2ccccc2)c(/C=C/c2ccccc2)o1  
C=Cc1ccc(OC)cc1.COc1ccc(-  
523 c2cc(=O)c3c(OC)cc(OC)c(I)c3o2)cc1OC>>COc1ccc(/C=C/c2c(OC)cc(OC)c3c(=O)cc(-  
c4ccc(OC)c(OC)c4)oc23)cc1  
524 C=CC(=O)OC.COc1ccc(CNc2c(C(=O)NCc3ccc(F)cc3F)c(=O)n(OCc3ccccc3)c3ncc(Br)cc23)c(OC)c1  
>>COC(=O)/C=C/c1enc2c(c1)c(NCc1ccc(OC)cc1OC)c(C(=O)NCc1ccc(F)cc1F)c(=O)n2OCc1cccc1  
525 C=CC(=O)OCCCC.COC(=O)c1cc(Br)cc(C(=O)OC)n1>>CCCCOC(=O)/C=C/c1cc(C(=O)OC)nc(C(=O)  
)OC)c1  
526 C=CCP(=O)(OCC)OCC.CCOC(=O)CNc1cccc(Br)c1>>CCOC(=O)CNc1cccc(/C=C/CP(=O)(OCC)OC  
C=CCNC(=O)c1cccc1NC(=O)c1cccc1.Clc1cccc1I>>O=C(Nc1cccc1C(=O)NC/C=C/c1cccc1Cl)c  
527 1cccc1  
528 C=CC(=O)NC(C)C.COc1ccc(Br)cc1>>COc1ccc(/C=C/C(=O)NC(C)C)cc1  
529 C=CC(=O)OCC.CC(=O)c1cccc1Br>>CCOC(=O)/C=C/c1cccc1C(C)=O  
530 C=CCC(C)C(=O)OCC.O=[N+][O-]c1ccc(Br)cc1>>CCOC(=O)C(C)C/C=C/c1ccc([N+](=O)[O-])cc1  
531 Brc1ence2ccccc12.C=Cc1cccc1>>C=C/c1ence2ccccc12)c1cccc1  
532 C=CC(C)(C)O.COC(=O)c1c(OC)cc(OC)c(I)c1OC>>COC(=O)c1c(OC)cc(OC)c(/C=C/C(C)(C)O)c1OC  
533 Brc1ccc2nc(-c3ccccc3)c(-c3ccccc3)nc2c1.C=Cc1cccc1>>C=C/c1ccc2nc(-c3ccccc3)c(-  
c3ccccc3)nc2c1)c1cccc1  
534 C=CC(=O)OC.O=C1Nc2cc(Br)ccc2C1=O>>COC(=O)/C=C/c1ccc2c(c1)NC(=O)C2=O  
C=CC(=O)OC.COc1c(CN(C(=O)c2ccccc2)c2ccc(Br)c2)ccc2c1OC(C)(C)[C@H](OC(C)=O)[C@H]2S  
535 c1cccc1>>COC(=O)/C=C/c1cccc(N(Cc2ccc3c(c2OC)OC(C)(C)[C@H](OC(C)=O)[C@H]3Sc2ccccc2  
)C(=O)c2ccccc2)c1  
536 C=Cc1cc(OC)cc(OC)c1.COc1ccc(I)cc1>>COc1ccc(/C=C/c2cc(OC)cc(OC)c2)cc1  
537 C=Cc1ccc(Cl)cc1.CC(=O)c1ccc(I)cc1>>CC(=O)c1ccc(/C=C/c2ccc(Cl)cc2)cc1  
538 C=C(NC(=O)OC(C)(C)C)C(=O)OCc1cccc1.CC(=O)OC1Cc2ccc(Br)cc2C1>>CC(=O)OC1Cc2ccc(/C  
=C/NC(=O)OC(C)(C)C)C(=O)OCc3ccccc3)cc2C1  
539 Brc1ccc(NCc2cncnc2)nc1.C=CC(=O)OC(C)(C)C>>CC(C)(C)OC(=O)/C=C/c1ccc(NCc2cncnc2)nc1  
540 C=CC(C)=O.COc1ccc(I)c(N)c1>>COc1ccc(/C=C/C(C)=O)c(N)c1  
541 C=CCCC#N.Ic1cccc1>>N#CCCC/C=C/c1cccc1  
542 C=CC(=O)OCC.Nc1ccc(Br)cc1C(F)(F)F>>CCOC(=O)/C=C/c1ccc(N)c(C(F)(F)F)c1  
543 C=CC(=O)OCCCC.O=Cc1ccc(Br)s1>>CCCCOC(=O)/C=C/c1ccc(C=O)s1  
544 C=CC(=O)OCC.Ic1oc2ccccc2c1-c1cccc1>>CCOC(=O)/C=C/c1oc2ccccc2c1-c1cccc1  
C=CC[C@H]1C[C@H]([C@H](O[Si](C(C)C)(C(C)C)C)c2ccc(OC)c(OC)c2)CO[C@H]1c1ccc(  
545 OC)c(OC)c1.COc1ccc(Br)cc1OC>>COc1ccc(/C=C/C[C@H]2C[C@H]([C@H](O[Si](C(C)C)(C(C)C)  
C(C)C)c3ccc(OC)c(OC)c3)CO[C@H]2c2ccc(OC)c(OC)c2)cc1OC  
546 C=Cc1ccc(OC)cc1.FC(F)(F)c1ccc(Br)cc1>>COc1ccc(/C=C/c2ccc(C(F)(F)F)cc2)cc1  
547 C=C(CC(=O)OC)C(=O)OC.COc1cccc2c(OC)c(Br)ccc12>>COC(=O)C/C(=C\c1ccc2c(OC)cccc2c1OC  
)C(=O)OC  
C=CC(C)(C)C(=O)NC(C)(C)CO.CC(=O)OC[C@H]1O[C@H](c2cc(Cc3ccc(Br)cc3)c(C)cc2C)[C@  
548 H](OC(C)=O)[C@H](OC(C)=O)[C@H]1OC(C)=O>>CC(=O)OC[C@H]1O[C@H](c2cc(Cc3cc  
c(/C=C/C(C)(C)C(=O)NC(C)(C)CO)cc3)c(C)cc2C)[C@H](OC(C)=O)[C@H](OC(C)=O)[C@H]1

C=CC(=O)OCC.CCOC(=O)CN1C(=O)[C@H](N2C(=O)c3ccccc3C2=O)Cc2ccccc2C1c1ccc(Br)cc1  
>>CCOC(=O)/C=C/c1ccc(C2c3ccccc3C[C@H](N3C(=O)c4ccccc4C3=O)C(=O)N2CC(=O)OCC)cc1  
C=Cc1ccc(C(=O)OC)cc1.FC(F)(Br)c1ccc(-c2ccccc2)cc1>>COC(=O)c1ccc(/C=C/C(F)(F)c2cccc(-  
c3ccccc3)cc2)cc1  
C=CC(C)=O.COC(=O)c1cc(Br)cn1C(=O)OC(C)(C)C>>COC(=O)c1cc(/C=C/C(C)=O)cn1C(=O)OC(C)  
(C)C  
C=CC(=O)OC.COc1c([C@@H]2c3ccc4c(cnn4C4CCCCO4)c3C[C@H](C)N2CC(C)(F)F)ccc(Br)c1  
F>>COC(=O)/C=C/c1ccc([C@@H]2c3ccc4c(cnn4C4CCCCO4)c3C[C@H](C)N2CC(C)(F)F)c(OC)c  
C=C.NC(=O)c1ccc(Cl)cc1Br>>C=Cc1cc(Cl)ccc1C(N)=O  
C=Cc1ccc(N(C)C(=O)OC(C)(C)C)cc1.FCCOCCOCCOc1ncc(I)cc1Br>>CN(C(=O)OC(C)(C)C)c1ccc(/  
C=C/c2nc(OCCOCCOCCF)c(Br)c2)cc1  
Bre1ccencl.C=CC[C@H]1CCCN(C)C[C@H](OC(C)=O)[C@H](C)C[C@H](CC(OC)OC)[C@H](O)[C  
@@H]2O[C@H](C)[C@@H](O[C@H]3C[C@@](C)(O)[C@@H](OC(=O)CC)[C@H](C)O3)[C@H](  
N(C)C)[C@H]2OC(C)=O)[C@@H](OC)[C@H](OC(=O)CC)CC(=O)O1>>CCC(=O)O[C@H]1[C@H]  
(C)O[C@@H](O[C@H]2[C@H](N(C)C)[C@@H](OC(C)=O)[C@H](O[C@@H]3[C@@H](OC)[C@  
H](OC(=O)CC)CC(=O)O[C@@H](C/C=C/c4ccccc4)CCCN(C)C[C@H](OC(C)=O)[C@H](C)C[C@  
@H]3C(C)(O)C(C)C)@H1?C(C)C)@H1?C(C)C)@H1?C(C)C)@H1?C(C)C)@H1?C(C)C)@H1?  
C=CC(=O)OC(C)(C)C.CN1CCN(C(=O)CN2CC(=O)Nc3ncc(Br)cc3C2)CC1>>CN1CCN(C(=O)CN2C  
C(=O)Nc3ncc(/C=C/C(=O)OC(C)(C)C)cc3C2)CC1  
C=CC(=O)OCC.O=Cc1ccc2ccccc2c1Br>>CCOC(=O)/C=C/c1c(C=O)ccc2ccccc12  
C=CC(=O)OC.Fc1cc(Br)ccc1CN1CCCC(c2c(-  
c3ccccc3)[nH]c3ccccc23)C1>>COC(=O)/C=C/c1ccc(CN2CCCC(c3c(-  
C=Cc1ccc(C(F)(F)F)cc1.COC(=O)Cc1c(C)nn(Cc2ccc(Br)cc2)c1C>>COC(=O)Cc1c(C)nn(Cc2ccc(/C=  
C/c3ccc(C(F)(F)F)cc3)cc2)c1C  
C=CC(=O)OC.CCOC(=O)c1cc(=O)c2cc(Br)ccc2o1>>CCOC(=O)c1cc(=O)c2cc(/C=C/C(=O)OC)ccc2  
C=CS(=O)(=O)NCCc1ccccc1.CC(C)(C)OC(=O)NCc1ccccc1Br>>CC(C)(C)OC(=O)NCc1ccccc1/C=C/  
S(=O)(=O)NCCc1ccccc1  
C=C[C@H]1O[C@@H]2OC(C)(C)O[C@@H]2[C@H]1O.O=c1ccc2cc(Br)ccc2o1>>CC1(C)O[C@H]  
2O[C@H]/(C=C/c3ccc4oc(=O)ccc4c3)[C@H](O)[C@H]2O1  
C=CC(=O)OC.COc1ccc2c(c1)CCN(c1ccc(CC(C)C)cc1F)C2(C)c1ccc(Br)cc1>>COC(=O)/C=C/c1ccc(  
C2(C)c3ccc(OC)cc3CCN2c2ccc(CC(C)C)cc2F)cc1  
C=C.OC(c1ccc(Br)cc1)(C(F)(F)F)C(F)(F)F>>C=Cc1ccc(C(O)(C(F)(F)F)C(F)(F)F)cc1  
C=CS(C)(=O)=O.CC(=O)c1cccc(Br)c1>>CC(=O)c1cccc(/C=C/S(C)(=O)=O)c1  
C=CC(=O)OC(C)(C)C.COc1ccc(CNe2c(C)cc(C)cc2I)cc1>>COc1ccc(CNe2c(C)cc(C)cc2/C=C/C(=O)  
OC(C)(C)C)cc1  
C=Cc1cc([N+](=O)[O-  
)]ccc1OCOCC[Si](C)(C)C.COc1ccccc1I>>COc1ccccc1/C=C/c1cc([N+](=O)[O-  
C=CC(=O)N(C)C.Clc1ccccc1>>CN(C)C(=O)/C=C/c1ccccc1  
C=CC(=O)OCC.Cc1cccc(I)c1>>CCOC(=O)/C=C/c1cccc(C)c1  
C=CC(=O)O.CN(c1ccc(I)cc1)S(=O)(=O)c1ccc(Cl)cc1>>CN(c1ccc(/C=C/C(=O)O)cc1)S(=O)(=O)c1cc  
c(Cl)cc1  
C=COCCN(C)C.COc1ccc(Br)cc1>>C=C(OCCN(C)C)c1ccc(OC)cc1  
C=CC(=O)OCC.O=Cc1c(F)cc(Br)cc1Cl>>CCOC(=O)/C=C/c1cc(F)c(C=O)c(Cl)c1  
C=CC(N)=O.COc1cc(Nc2ncc3c(C)nc(-c4cccc(Br)c4)n3n2)cc(OC)c1OC>>COc1cc(Nc2ncc3c(C)nc(-  
c4cccc(/C=C/C(N)=O)c4)n3n2)cc(OC)c1OC  
C=CCn1c(-c2ccc(C)cc2)nc2ccccc2c1=O.O=C(CN1C(=O)COc2ccccc21)c1ccc(Br)cc1>>Cc1ccc(-  
c2nc3ccccc3c(=O)n2C/C=C/c2ccc(C(=O)CN3C(=O)COc4ccccc43)cc2)cc1  
C=CC(C)=O.Cc1ccccc1Br>>CC(=O)/C=C/c1ccccc1C  
C=C1CC(c2ccccc2)OC1=O.Ic1ccccc1>>O=C1OC(c2ccccc2)C/C1=C\c1ccccc1  
C=Cc1ccccc1C(=O)O.Clc1ccc(I)cc1>>O=C(O)c1ccccc1/C=C/c1ccc(Cl)cc1  
C=Cc1ccccc1.O=c1c(I)c(/C=C/c2ccc(Cl)cc2)[nH]c2ccccc12>>O=c1c(/C=C/c2ccccc2)c(/C=C/c2ccc(Cl  
)cc2)[nH]c2ccccc12  
Bre1ccc(-c2nc3ccccc3[nH]2)cc1.C=CC(=O)OC>>COC(=O)/C=C/c1ccc(-c2nc3ccccc3[nH]2)cc1  
C=Cc1ccccc1.Cc1cc(C)cc(I)c1>>Cc1cc(C)cc(/C=C/c2ccccc2)c1  
C=CCOC(=O)NC.COc1ccccc1I>>CNC(=O)OC/C=C/c1ccccc1OC  
C=CC(=O)OCC.CC(=O)c1cn(-c2ccccc2)nc1OS(=O)(=O)C(F)(F)F>>CCOC(=O)/C=C/c1nn(-  
c2ccccc2)cc1C(C)=O  
C=CC(=O)OC.FC(F)(F)c1ccc(Br)cc1>>COC(=O)/C=C/c1ccc(C(F)(F)F)cc1  
C=CCN1C(=O)c2ccccc2C1=O.CSc1ccc(Br)cc1>>CSc1ccc(/C=C/CN2C(=O)c3ccccc3C2=O)cc1  
C=Cc1c[nH]c2nc(NC(=O)C(C)(C)C)[nH]c(=O)c12.CCOC(=O)CC[C@H](C(=O)OCC)N1Cc2ccc(I)  
cc2C1=O>>CCOC(=O)CC[C@H](C(=O)OCC)N1Cc2ccc(/C=C/c3c[nH]c4nc(NC(=O)C(C)(C)C)[nH]  
lc(=O)c34)cc2C1=O  
Bre1cccs1.C=CCS(N)(=O)=O>>NS(=O)(=O)C/C=C/c1cccs1

587 C=CC[C@@H](C)CO.CCC(O[Si](C)(C)C(C)(C)C)[C@H](C)/C=C(\C)I>>CCC(O[Si](C)(C)C(C)(C)C  
) [C@H](C)/C=C(C)/C=C/C[C@@H](C)CO  
C=CC[C@H](CC(=O)OC(C)(C)C(=O)N[C@H](C(=O)N[C@H](C)c1cccc1)C(C)(C)C.CCc1cc(Br)  
588 ccc1-  
c1cccc1>>CCc1cc(/C=C/C[C@H](CC(=O)OC(C)(C)C(=O)N[C@H](C(=O)N[C@H](C)c2cccc2)  
C(C)(C)C)ccc1-c1cccc1  
589 C=Cc1cccc1.CCOC(=O)C(F)Br>>CCOC(=O)C(F)/C=C/c1cccc1  
C=CC(=O)OCC.CCCc1c(I)c(-c2cccc2)n(C(=O)OC(C)(C)C)c1-  
590 c1cccc1>>CCc1cc(/C=C/C(=O)OCC)c(-c2cccc2)n(C(=O)OC(C)(C)C)c1-c1cccc1  
591 Br1esc2cccc12.C=CCCCC>>C=C(CCCCC)c1esc2cccc12  
592 C=CC(=O)OC.O=C1c2cccc2NC12C(c1cccc1)=C(c1cccc1)c1ccc(Br)cc12>>COC(=O)/C=C/c1ccc2  
c(c1)C1(Nc3cccc3C1=O)C(c1cccc1)=C2c1cccc1  
C=C(CO[C@@H]1CCC[C@H](OCc2nc(-  
593 c3cccc(C)c3)oc2C)C1)C(=O)OCC.Cc1cc(I)ccc1F>>CCOC(=O)/C=C\c1ccc(F)c(C)c1)CO[C@@H]1C  
CC[C@H](OCc2nc(-c3cccc(C)c3)oc2C)C1  
594 Br1cccc1I.C=Cc1ccc2cccc2c1>>Br1cccc1/C=C/c1ccc2cccc2c1  
595 C=CC=O.O=Cc1ccc(Br)cc1>>O=C/C=C/c1ccc(C=O)cc1  
596 C=CC(F)(F)C(F)(F)C(F)(F)C(F)(F)C(F)(F)C(F)(F)C(F)(F)F.CC1=Nc2ccc(I)cc2C1(C)C>>CC1=Nc2cc  
c(/C=C/C(F)(F)C(F)(F)C(F)(F)C(F)(F)C(F)(F)C(F)(F)C(F)(F)F)cc2C1(C)C  
597 C=CS(=O)(=O)NCc1ccc(F)cc1.Cc1ccc(CNC(=O)OC(C)(C)C)c(Br)c1>>Cc1ccc(CNC(=O)OC(C)(C)C)  
c(/C=C/S(=O)(=O)NCc2ccc(F)cc2)c1  
598 C=Cc1cc2c(cc1Cn1cccn1)C(C)(C)CCC2(C)C.CCOC(=O)c1ccc(Br)cc1>>CCOC(=O)c1ccc(/C=C/c2cc  
3c(cc2Cn2cccn2)C(C)(C)CCC3(C)C)cc1  
599 C=Cc1ccc(F)cc1.O=Cc1ccc(Br)cc1>>O=Cc1ccc(/C=C/c2ccc(F)cc2)cc1  
C=CC(=O)OCc1cc(OCCCCCCCCCCCCCCCCC)c(OCCCCCCCCCCCCCCCCC)c(OCCCCCCCC  
600 CCCCCCCCCC)c1.COc1ccc(I)cc1>>CCCCCCCCCCCCCCCCCOc1cc(COC(=O)/C=C/c2ccc(OC)cc  
2)cc(OCCCCCCCCCCCCCCCCC)c1OCCCCCCCCCCCCCCCCC  
601 C=C[Si](CC)(CC)CC.COC(=O)c1cccc1Br>>CC[Si](/C=C/c1cccc1C(=O)OC)(CC)CC  
602 C=CC#N.CS(=O)(=O)c1ccc(I)c(C(=O)N2CCN(c3ccc(C#N)cc3)CC2)c1>>CS(=O)(=O)c1ccc(/C=C/C#  
N)c(C(=O)N2CCN(c3ccc(C#N)cc3)CC2)c1  
603 C=Cc1cccc1.Oc1ccc(I)c1>>Oc1ccc(/C=C/c2cccc2)c1  
604 C=CC(=O)OC.O=Cc1cccc1-c1cc(Cl)ccc1C=O>>COC(=O)/C=C/c1ccc(C=O)c(-c2cccc2C=O)c1  
605 C=Cc1cccc1.COC(=O)/C=C/c1ccc(Br)cc1>>COC(=O)/C=C/c1ccc(/C=C/c2cccc2)cc1  
606 C=CC(=O)N1N=Cc2cccc2C1CCC.CCOc1cc(Cc2cnc(N)nc2N)cc(I)c1OCC>>CCCC1c2cccc2C=NN  
1C(=O)/C=C/c1cc(Cc2cnc(N)nc2N)cc(OCC)c1OCC  
607 C=C[Si](CC)(CC)CC.COc1ccc2cc(Br)cc2c1>>CC[Si](/C=C/c1ccc2cc(OC)ccc2c1)(CC)CC  
608 C=Cc1cccc([N+](=O)[O-])c1.CC(=O)Nc1ccc(Br)cc1>>CC(=O)Nc1ccc(/C=C/c2cccc([N+](=O)[O-]  
C=CC(=O)N1C(=O)OC[C@H]1c1cccc1.FC(F)(F)c1cnc(Br)c1>>O=C(/C=C/c1cnc(C(F)(F)F)c1)N1  
609 C(=O)OC[C@H]1c1cccc1  
610 Br1cccc2cccc12.C=CC(=O)OC>>COC(=O)/C=C/c1cccc2cccc12  
611 C=CP(=O)(OCC)OCC.CCOC(=O)NC(Cc1ccc2cccc2c1Br)(C(=O)OCC)C(=O)OCC>>CCOC(=O)NC(  
Cc1ccc2cccc2c1/C=C/P(=O)(OCC)OCC)(C(=O)OCC)C(=O)OCC  
612 C=CCNC(=O)OC(C)(C)C.O=C1CCCc2ccc(Cl)cc21>>C=C(CNC(=O)OC(C)(C)C)c1ccc2c(c1)C(=O)C  
C=CC(=O)OC(C)(C)C.Oc1ccc(-  
613 c2ccc(Br)cc2)cc1C12CC3CC(CC(C3)C1)C2>>CC(C)(C)OC(=O)/C=C/c1ccc(-  
c2ccc(O)c(C34CC5CC(CC(C5)C3)C4)c2)cc1  
614 C=CCCCC(=O)OC.Cc1cccc1OS(=O)(=O)C(F)(F)F>>C=C(CCCC(=O)OC)c1cccc1C  
615 Br1cccc1.C=Cc1ccc(C(=O)O)cc1>>O=C(O)c1ccc(/C=C/c2cccc2)cc1  
616 C=C1C(=O)O[C@H]2[C@H]1CC/C(C)=C/CC[C@@]1(C)O[C@@H]21.Ic1cccs1>>C/C1=C\CC[C@  
@]2(C)O[C@H]2[C@H]2OC(=O)/C=C/c3cccs3)[C@@H]2CC1  
617 C=CC(=O)OC.CC1(C)c2cccc2-c2ccc(I)cc21>>COC(=O)/C=C/c1ccc2c(c1)C(C)(C)c1cccc1-2  
618 C=CC(=O)OC.COC(=O)c1cnc1Br>>COC(=O)/C=C/c1cnc1C(=O)OC  
619 C=Cc1ccc(O)cc1.Oc1cc(Br)cc(O)c1F>>Oc1ccc(/C=C/c2cc(O)c(F)c(O)c2)cc1  
620 C=CC(C)(C)O.O=S(=O)(c1cccc1)n1c2c(c3cc(Br)ccc31)CCC2>>CC(C)(O)/C=C/c1ccc2c(c1)c1c(n2S(  
=O)(=O)c2cccc2)CCC1  
621 C=CC(=O)OCC.O=C(O)c1cc2cc(Br)ccc2[nH]1>>CCOC(=O)/C=C/c1ccc2[nH]c(C(=O)O)cc2c1  
622 C=C(C#N)C(=O)N(CC)CC.COc1cc(I)ccc1O>>CCN(CC)C(=O)/C(C#N)=C/c1ccc(O)c(OC)c1  
623 C=C(C)C(=O)OC.CC(=O)c1ccc(Br)cc1>>COC(=O)/C(C)=C/c1ccc(C(C)=O)cc1  
C=CC(=O)OC.CCn1cnc2c(NCc3cccc(Br)c3)nc(N3CCN(C)CC3)nc21>>CCn1cnc2c(NCc3cccc(/C=C/  
624 C(=O)OC)c3)nc(N3CCN(C)CC3)nc21  
625 C=CC(C)=O.COc1ccc(Br)cn1>>COc1ccc(/C=C/C(C)=O)cn1  
626 C=CCCC(=O)O.Cc1ccc(I)cc1>>Cc1ccc(/C=C/CCC(=O)O)cc1

627 C=CS(=O)(=O)N1CCC2(CC1)N=C(C1CCCCC1)NC2=O.CC(=O)Nc1cc(C)c(Br)c(C)c1>>CC(=O)Nc1  
cc(C)c(/C=C/S(=O)(=O)N2CCC3(CC2)N=C(C2CCCCC2)NC3=O)c(C)c1  
628 C=Cc1cccc1C.Cc1ccc2c(-c3cccc3)c(Br)c(=O)oc2c1>>Cc1ccc2c(-  
c3cccc3)c(/C=C/c3cccc3C)c(=O)oc2c1  
629 C=CC=O.O=[N+][([O-])c1ccc(C2=C(I)C2(F)F)cc1>>O=C/C=C/C1=C(c2ccc([N+](=O)[O-]  
C=Cc1ccc(OC)cc1.COc1ccc(Oc2cc(Cl)ccc2NC[C@H]2CCCN2C(=O)OC(C)(C)C)cc1>>COc1ccc(/  
630 C=C/c2ccc(NC[C@H]3CCCN3C(=O)OC(C)(C)C)c(Oc3ccc(OC)cc3)c2)cc1  
631 C=CC(=O)OCC.Fc1ccc(Cl)cc1>>CCOC(=O)/C=C/c1ccc(F)cc1  
632 C=Cc1cc(OC)c(OC)c(OC)c1-c1cccc1.Cc1ccc(I)cc1>>COc1cc(/C=C/c2ccc(C)cc2)c(-  
c2cccc2)c(OC)c1OC  
633 C=CCN1C(=O)C(=O)c2cccc21.FC(F)(F)c1cc(Br)ccc1Cl>>O=C1C(=O)N(C/C=C/c2ccc(Cl)c(C(F)(F)  
F)c2)c2cccc21  
634 C=CC(N)=O.CC(C)(C)OC(=O)NCc1cccc(Br)c1>>CC(C)(C)OC(=O)NCc1cccc(/C=C/C(N)=O)c1  
635 C=C(NC(=O)[C@H](Cc1cccc1)NC(=O)OC(C)(C)C)(=O)OC.Ic1cccc1>>COC(=O)/C=C/c1cccc1  
)NC(=O)[C@H](Cc1cccc1)NC(=O)OC(C)(C)C  
636 C=CCC(C)C(=O)OCC.COc1cccc1Br>>CCOC(=O)C(C)C/C=C/c1cccc1OC  
637 C=Cc1ccc(N(C)C)cc1.Cc1nc2ccc(Br)cc2nc1-c1cccc1>>Cc1nc2ccc(/C=C/c3ccc(N(C)C)cc3)cc2nc1-  
c1cccc1  
638 C=CC(=O)OCCCC.CNC(=O)c1cccc(I)c1>>CCCCOC(=O)/C=C/c1cccc(C(=O)NC)c1  
639 C=CCC(C)C(=O)OCC.COC(=O)c1ccc2cc(Br)ccc2c1>>CCOC(=O)C(C)C/C=C/c1ccc2cc(C(=O)OC)cc  
640 C=CC(=O)OCC.O=[N+][([O-])c1ccc(-c2ncccc2Br)cc1>>CCOC(=O)/C=C/c1ccncc1-  
c1ccc([N+](=O)[O-])cc1  
641 C=CC(=O)CC.Cc1ccc(Br)cc1>>CCC(=O)/C=C/c1ccc(C)cc1  
642 C=CCCCCCCCCCCCC.CC1(C)OC(=O)c2c(cccc2OS(=O)(=O)C(F)(F)F)O1>>CCCCCCCCCCCCC/  
C=C/c1cccc2c1C(=O)OC(C)(C)O2  
643 C=CC(=O)OCC.N#Cc1cccc(Oc2cccc(Br)c2)c1>>CCOC(=O)/C=C/c1cccc(Oc2cccc(C#N)c2)c1  
644 C=CC(=O)OC(C)(C)C.Oc1ccc(C(=C2CCCCC2)c2ccc(Br)c(F)c2)cc1>>CC(C)(C)OC(=O)/C=C/c1ccc  
(C(=C2CCCCC2)c2ccc(O)cc2)cc1F  
645 C=Cc1ccc(C(F)(F)F)cc1.O=C1C(O)=C(I)C(=O)c2cccc21>>O=C1C(O)=C(/C=C/c2ccc(C(F)(F)F)cc2)  
C(=O)c2cccc21  
646 Brc1ccc(-c2cccc2)cc1.C=CC(OCC)OCC>>CCOC(/C=C/c1ccc(-c2cccc2)cc1)OCC  
647 C=Cc1ccc(NC(=O)OC(C)(C)C)cc1.CC(=O)OCc1cc(Br)ccn1>>CC(=O)OCc1cc(/C=C/c2ccc(NC(=O)O  
C(C)(C)C)cc2)ccn1  
648 Brc1cccc1.C=CC(N)=O>>NC(=O)/C=C/c1cccc1  
649 C=Cc1ccc(N)cc1.Oc1ccc(-c2oc3cc(O)cc(Br)c3c2-c2cc(O)cc(O)c2)cc1>>Nc1ccc(/C=C/c2cc(O)cc3oc(-  
c4ccc(O)cc4)c(-c4cc(O)cc(O)c4)c23)cc1  
650 C=CC(=O)OCCCC.N#Cc1ccc(I)cc1>>CCCCOC(=O)/C=C/c1ccc(C#N)cc1  
651 C=C.FC(F)(F)c1cc(Br)cc(C(F)(F)F)c1>>C=Cc1cc(C(F)(F)F)cc(C(F)(F)F)c1  
652 C=CC(=O)OC.CC(=O)c1cccc1Br>>COC(=O)/C=C/c1cccc1C(C)=O  
653 Brc1ccc(-c2cccc2)cc1.C=CC(=O)OC>>COC(=O)/C=C/c1ccc(-c2cccc2)cc1  
654 C=Cc1ccc(OC)c(OC)c1.Cc1ccc(I)c2ccc(N(C)C)cc12>>COc1ccc(/C=C/c2ccc(C)c3cc(N(C)C)ccc23)cc  
Brc1ccc2[nH]ccc2c1.C=CCOC1=C(C)C(=O)O[C@H](CC)[C@H](C)(O)C=C(C)C(=O)[C@H](C)C[C@  
@H](C)(OC)[C@H](O)[C@H]2O[C@H](C)C[C@H](N(C)C)[C@H]2OC(C)=O)[C@H]1C>>CC[C@  
@H]1OC(=O)C(C)=C(OC/C=C/c2ccc3[nH]ccc3c2)[C@H](C)[C@H](O)[C@H]2O[C@H](C)C[C@  
@H](N(C)C)[C@H]2OC(C)=O)[C@H](C)(OC)C[C@H](C)C(=O)C(C)=C[C@H](C)O  
656 C=Cc1ccc(Cl)cc1.CC(=O)c1cccc1Br>>CC(=O)c1cccc1/C=C/c1ccc(Cl)cc1  
657 C=CC(N)=O.CCCCCNC(=O)[C@H](Cc1ccc(Nc2cccc2C(=O)O)c(I)c1)NS(C)(=O)=O>>CCCCCNC(  
=O)[C@H](Cc1ccc(Nc2cccc2C(=O)O)c(/C=C/C(N)=O)c1)NS(C)(=O)=O  
658 C=CS(=O)(=O)F.Ic1cc2cccc2s1>>O=S(=O)(F)/C=C/c1cc2cccc2s1  
659 C=CC(C)=O.CCCCCC1c(OS(=O)(=O)C(F)(F)F)c(C)c(C)c2c(C)c(C#Cc3cccc3)cn12>>CCCCCCc1  
c(/C=C/C(C)=O)c(C)c(C)c2c(C)c(C#Cc3cccc3)cn12  
660 C=CC(=O)CC.Fc1ccc(Br)cc1>>CCC(=O)/C=C/c1ccc(F)cc1  
661 C=Cc1ccc(OC)c(O)c1.Oc1cc(O)cc(I)c1>>COc1ccc(/C=C/c2cc(O)cc(O)c2)cc1O  
662 C=CS(=O)(=O)N1CCC2(CC1)N=C(C1CCCCC1)NC2=O.Cc1cccc1Br>>Cc1cccc1/C=C/S(=O)(=O)  
N1CCC2(CC1)N=C(C1CCCCC1)NC2=O  
663 Brc1cccc2cccc12.C=CC(=O)OCCCC>>CCCCOC(=O)/C=C/c1cccc2cccc12  
664 C=CC(=O)OC.COc1ccc(C(=C(I)CC[Se]c2cccc2)c2ccc(OC)cc2)cc1>>COC(=O)/C=C/C(CC[Se]c1ccc  
cc1)=C(c1ccc(OC)cc1)c1ccc(OC)cc1  
665 C=COCCCC.O=S1(=O)CCCN1Cc1cc(Br)cc(Cc2cccc2)c1>>C=C(OCCCC)c1cc(Cc2cccc2)cc(CN2C  
CCS2(=O)=O)c1  
666 C=CC(=O)OC(C)(C)C.Nc1ccc(Br)cn1>>CC(C)(C)OC(=O)/C=C/c1ccc(N)nc1  
667 C=CC(=O)N(C)Cc1cc2cccc2s1.CC1(C)C(=O)Nc2ncc(Br)cc21>>CN(Cc1cc2cccc2s1)C(=O)/C=C/c1  
cn2c(c1)C(C)(C)C(=O)N2



668 Br1ccc(-c2nc3ccccc3n2)cc1.C=CCn1c(-c2ccc(OC)cc2F)nc2ccccc2c1=O>>COc1ccc(-  
c2nc3ccccc3c(=O)n2C/C=C/c2ccc(-c3nc4ccccc4n3)cc2)c(F)c1  
C=C[C@](C)(COC(F)F)C(=O)O.CC(C)[C@H](O)C(=O)N[C@@H](C)C(=O)N1CCC[C@H](C(=O)  
669 N[C@H](C)c2ccc3ccc(Br)cc3n2)N1>>CC(C)[C@H](O)C(=O)N[C@@H](C)C(=O)N1CCC[C@H](  
C(=O)N[C@H](C)c2ccc3ccc(/C=C/[C@](C)(COC(F)F)C(=O)O)cc3n2)N1  
670 C=CCP(=O)(OCC)OCC.CC(=O)Nc1cccc(Br)c1>>CCOP(=O)(C/C=C/c1cccc(NC(C)=O)c1)OCC  
C=C(NC(C)=O)C(=O)OC.CCOC(=O)c1[nH]c2cc3c(nc2c1Br)CCC(C(C)(C)C)C3>>CCOC(=O)c1[nH]  
671 c2cc3c(nc2c1/C=C(\NC(C)=O)C(=O)OC)CCC(C(C)(C)C)C3  
C=CC1CC(OC)=CC(=O)O1.Fc1ccc(I)cc1>>COC1=CC(=O)OC(/C=C/c2ccc(F)cc2)C1  
672 C=CC(=O)OC.COc1ccc2c(c1)CCN(c1cccc(C(C)C)c1)C2(C)c1ccc(Br)cc1>>COC(=O)/C=C/c1ccc(C2(  
673 C)c3ccc(OC)cc3CCN2c2cccc(C(C)C)c2)cc1  
C=CC(=O)O.N#Cc1ccc(I)cc1>>N#Cc1ccc(/C=C/C(=O)O)cc1  
674 C=C[C@H]1O[C@H]2OC(C)(C)O[C@H]2[C@H]1O.O=c1cc(-  
675 c2ccccc2)oc2cc(Br)c(O)cc12>>CC1(C)O[C@H]2O[C@H](/C=C/c3cc4oc(-  
c5ccccc5)cc(=O)c4cc3O)[C@H](O)[C@H]2O1  
C=C[C@H]1O[C@H](COC(C)=O)[C@H](OC(C)=O)[C@H](OC(C)=O)[C@H]1OC(C)=O.CC(C  
676 )(C)[Si](C)(C)Oc1cc(Br)ccc1[C@H]1[C@H](CC[C@H](O)c2ccc(F)cc2)C(=O)N1c1cccc1>>CC(  
=O)OC[C@H]1O[C@H](/C=C/c2ccc([C@H]3[C@H](CC[C@H](O)c4ccc(F)cc4)C(=O)N3c3cc  
ccc3)c(O)Si(C)(C)C(C)(C)c2)[C@H](OC(C)=O)[C@H](OC(C)=O)[C@H]1OC(C)=O  
677 C=C[C@H]1(C(=O)O)CC[C@H](OC)CC1.C[C@H](NC(=O)OC(C)(C)C)c1ccc2ccc(Br)cc2n1>>CO[  
C@H]1CC[C@](/C=C/c2ccc3ccc([C@H](C)NC(=O)OC(C)(C)C)nc3c2)(C(=O)O)CC1  
678 C=Cc1ccncc1.C[Si](C)(C)CCOCn1nc(I)c2cc(C=O)ccc21>>C[Si](C)(C)CCOCn1nc(/C=C/c2ccncc2)c2  
cc(C=O)ccc21  
C=Cc1ccncc1.CC(C)(C)OC(=O)N[C@H](COc1cc(Br)nc1Cl)Cc1c[nH]c2ccccc12>>CC(C)(C)OC(=O  
679 )N[C@H](COc1cc(/C=C/c2ccncc2)nc1Cl)Cc1c[nH]c2ccccc12  
C=CC(=O)c1cccc1.Cc1ccc(Br)cc1>>Cc1ccc(/C=C/C(=O)c2ccccc2)cc1  
680 C=CC(C)=O.CC(=O)c1ccc(Br)cc1>>CC(=O)/C=C/c1ccc(C(C)=O)cc1  
681 C=CC(N)=O.Oc1ccc2c(Cc3ccc(Br)cc3)nc2c1>>NC(=O)/C=C/c1ccc(Cc2nccc3cc(O)ccc23)cc1  
682 C=CCCCCCC.COC(=O)c1ccc(Br)cc1>>C=C(CCCCCC)c1ccc(C(=O)OC)cc1  
683 C=CCOC(C)C.Fc1ccc(C2(C(F)(F)c3ccc(Br)cn3)CO2)c(F)c1>>CC(C)OC/C=C/c1ccc(C(F)(F)C2(c3ccc  
684 (F)cc3F)CO2)nc1  
C=Cc1cccc1OC.Oc1ccc(O)c(I)c1>>COc1cccc1/C=C/c1cc(O)ccc1O  
685 C=CC(=O)OC(C)(C)C.O=C(O)c1ccc(I)cc1>>CC(C)(C)OC(=O)/C=C/c1ccc(C(=O)O)cc1  
686 C=CC(C)=O.Nc1cc(Br)nc1I>>CC(=O)/C=C/c1cnc(Br)cc1N  
687 C=COCCCC.O=c1cc(Br)c2cc(Cl)ccc2o1>>CCCCO/C=C/c1cc(=O)oc2ccc(Cl)cc12  
688 C=CC(=O)OCC.O=Cc1cc(I)ccc1O>>CCOC(=O)/C=C/c1ccc(O)c(C=O)c1  
689 C=CC(=O)OCC.Cn1c(I)c(-c2ccccc2)c2ccccc21>>CCOC(=O)/C=C/c1c(-c2ccccc2)c2ccccc2n1C  
690 C=CC(=O)OCCCC.Oc1cccc1Br>>CCCCOC(=O)/C=C/c1cccc1O  
691 C=C(C)C=O.CN(C)c1ccc(I)cc1>>C/C(C=O)=C\c1ccc(N(C)C)cc1  
692 C=CC(=O)OC.COc1cc(Br)c(F)cc1[C@H]1c2ccc3c(cnn3C3CCCCO3)c2C[C@H](C)N1CC(C)(F)  
693 F>>COC(=O)/C=C/c1cc(OC)c([C@H]2c3ccc4c(cnn4C4CCCCO4)c3C[C@H](C)N2CC(C)(F)F)cc  
694 C=CC(=O)O.Ic1cccc2cc[nH]c12>>O=C(O)/C=C/c1cccc2cc[nH]c12  
C=CCC1(O)CCN(C(=O)OC(C)(C)C)CC1.CCc1nn2c(C)cc(C)nc2c1Cc1ccc(Br)cc1>>CCc1nn2c(C)cc(  
695 C)nc2c1Cc1ccc(/C=C/CC2(O)CCN(C(=O)OC(C)(C)C)CC2)cc1  
C=Cc1ccc(OC)cc1.O=C(OCCCC(Br)C(F)(F)F)c1cccc1>>COc1ccc(/C=C/C(CCCOC(=O)c2ccccc2)C(  
696 F)(F)F)cc1  
C=C.CC(=O)Nc1cccc(C)c1Br>>C=Cc1c(C)cccc1NC(C)=O  
697 C=CC(=O)OCC.FC(F)(F)c1cc(I)ccc1Br>>CCOC(=O)/C=C/c1ccc(Br)c(C(F)(F)F)c1  
698 C=Cc1cc(OC)ccc1OC.Nc1ccc(I)cc1>>COc1ccc(OC)c(/C=C/c2ccc(N)cc2)c1  
699 C=CC(=O)OCC.Cc1nnc(Cc2cc(Cl)ccc2Br)o1>>CCOC(=O)/C=C/c1ccc(Cl)cc1Cc1nnc(C)o1  
700 C=Cc1cccc(C)n1.C[Si](C)(C)I>>Cc1cccc(/C=C/[Si](C)(C)C)n1  
701 C=CC(=O)N(C)C.CCOC(=O)c1nsc1NS(=O)(=O)Cc1cccc1Br>>CCOC(=O)c1nsc1NS(=O)(=O)Cc1  
702 ccccc1/C=C/C(=O)N(C)C  
C=CC(F)(F)F.Clc1cccc1Br>>FC(F)(F)/C=C/c1cccc1Cl  
703 C=CS(=O)(=O)c1cccc1.CC(C)(C)OC(=O)N1CCC2(CC1)Oc1ccc(Br)cc1C2=O>>CC(C)(C)OC(=O)N  
704 1CCC2(CC1)Oc1ccc(/C=C/S(=O)(=O)c3ccccc3)cc1C2=O  
C=CC(=O)N(C)Cc1cc2ccccc2n1C.CCn1c(=O)[nH]c2ncc(Br)cc21>>CCn1c(=O)[nH]c2ncc(/C=C/C(=O)  
705 )N(C)Cc3cc4ccccc4n3C)cc21  
C=Cc1ccc(OC)cc1.IC1CCCCC1>>COc1ccc(/C=C/C2CCCCC2)cc1  
706 C=CC(C)=O.CC(C)(C)c1ccc2[nH]c3c(c2c1)CC(=O)Nc1ccc(I)cc1-3>>CC(=O)/C=C/c1ccc2c(c1)-  
707 c1[nH]c3ccc(C(C)(C)C)cc3c1CC(=O)N2  
C=CC(=O)OCC.COc1ccc(Br)c(C(=O)OC(C)(C)C)c1>>CCOC(=O)/C=C/c1ccc(OC)cc1C(=O)OC(C)(C)

709 C=CC(=O)OC(C)(C)C.CN(C)c1ccc(CNC(=O)c2cc(Br)cc(I)c2)cc1>>CN(C)c1ccc(CNC(=O)c2cc(Br)cc(I)/C=C/C(=O)OC(C)(C)C)c2cc1  
 710 C=CC(=O)OC(C)(C)C.Cc1ccc(C=O)c(Br)c1>>Cc1ccc(C=O)c(/C=C/C(=O)OC(C)(C)C)c1  
 711 C=C(NC(=O)OCc1cccc1)C(=O)OC.CC(=O)OCc1cc(OCc2cccc2)ccc1I>>COC(=O)/C=C/c1ccc(OCc2cccc2)cc1COC(C)=O)NC(=O)OCc1cccc1  
 712 C=CC(=O)OC.COc1ccc(-c2cc3cc(Br)cc(OC)c3o2)cc1OC>>COC(=O)/C=C/c1cc(OC)c2oc(-c3ccc(OC)c(OC)c3)cc2c1  
 713 BrC1ccc2ncccc2c1.C=CC(=O)OC>>COC(=O)/C=C/c1ccc2ncccc2c1  
 714 C=CC(=O)OC.COC(=O)C1=NC2cc(Br)ccc2OC12CC2>>COC(=O)/C=C/c1ccc2c(c1)N=C(C(=O)OC)C1(CC1)O2  
 715 BrC1cnc2cccc2c1.C=CCO[C@]1(C)C[C@@H](C)C2=NCCN3C(=O)O[C@](C)([C@@H](CC)OC(=O)[C@H](C)C(=O)[C@H](C)[C@H]1O[C@@H]1O[C@H](C)C[C@H](N(C)C)[C@H]1O)[C@H]3[C@H]2C>>CC[C@H]1OC(=O)[C@H](C)C(=O)[C@H](C)[C@@H](O[C@@H]2O[C@H](C)C[C@H](N(C)C)[C@H]2O)[C@](C)(OC/C=C/c2cnc3cccc3c2)C[C@@H](C)C2=NCCN3C(=O)O[C@@]1(C)NC@H13IC@H12C  
 716 C=Cc1cccc1.COc1cc(Br)cc(OC)c1OC>>COc1cc(/C=C/c2cccc2)cc(OC)c1OC  
 717 C=CC(=O)OC.FC(F)(F)CCCOc1ccc(OC(F)(F)c2ccc(Br)cc2)cc1>>COC(=O)/C=C/c1ccc(C(F)(F)Oc2ccc(OC(F)(F)F)cc2)cc1  
 718 C=Cc1ccc(N2CCN(C(=O)OC(C)(C)C)CC2)cc1.Clc1cc(Br)cc(-c2ccncc2)c1>>CC(C)(C)OC(=O)N1CCN(c2ccc(/C=C/c3cc(Cl)cc(-c4ccncc4)c3)cc2)CC1  
 719 C=Cc1cccc1.Ic1c(-c2cccc2)nnn1Cc1cccc1>>C(=C/c1c(-c2cccc2)nnn1Cc1cccc1)c1cccc1  
 720 C=CC(=O)Nc1cccc1NC(=O)OC(C)(C)C.CCOC(=O)[C@H]1CN(C(C)C)C[C@@H]1c1ccc(Br)cc1>>CCOC(=O)[C@H]1CN(C(C)C)C[C@@H]1c1ccc(/C=C/C(=O)Nc2cccc2NC(=O)OC(C)(C)C)cc1  
 721 C=C/C=C/C(=O)N(CCCC)CCCC.Clc1ccc(Br)cc1>>CCCCN(CCCC)C(=O)/C=C/C=C/c1ccc(Cl)cc1  
 722 BrC1cccn1.C=CC(=O)OC(C)(C)C>>CC(C)(C)OC(=O)/C=C/c1cccn1  
 723 \*CNCCOCCOCCOCCNC(=O)COc1ccc(C(Cc2cc(OC)cc(OC)c2)NC(=O)c2ccc(C=C)cc2)cc1.CCc1ccc(I)cc1>>\*CNCCOCCOCCOCCNC(=O)COc1ccc(C(Cc2cc(OC)cc(OC)c2)NC(=O)c2ccc(/C=C/c3ccc(CC)cc3)cc2)cc1  
 724 C=Cc1cccc1.Cc1cccc1OS(=O)(=O)C(F)(F)F>>C=C(c1cccc1)c1cccc1C  
 725 C=CCC(=O)O.CC(=O)OC[C@H]1O[C@@H](Oc2nn(CCCOC(=O)c3cccc3)c(C(C)C)c2Cc2ccc(I)cc2)[C@H](OC(C)=O)[C@@H](OC(C)=O)[C@H](OC(C)=O)[C@H]1O[C@@H](Oc2nn(CCCOC(=O)c3cccc3)c(C(C)C)c2Cc2ccc(/C=C/CC(=O)O)cc2)[C@H](OC(C)=O)[C@@H](OC(C)=O)IC@H1OC(C)=O  
 726 BrC1cnc2cccc12.C=CC(=O)OC>>COC(=O)/C=C/c1cnc2cccc12  
 727 C=CC(C)=O.O=[N+](O-)]c1ccc(C2=C(I)C2(F)F)cc1>>CC(=O)/C=C/C1=C(c2ccc([N+](=O)[O-])cc2)C1(F)F  
 728 C=CC(=O)OCCCC.Cn1nc(Br)c2ccc([N+](=O)[O-])cc21>>CCCCOC(=O)/C=C/c1nn(C)c2cc([N+](=O)[O-])ccc12  
 729 C=Cc1cccc(C(F)(F)F)c1.CN(C(=O)c1cccc1)c1ccc2c(c1)[nH]c(=NC(=O)c1ccc(Br)s1)n2CCC(N)=O>>CN(C(=O)c1cccc1)c1ccc2c(c1)[nH]c(=NC(=O)c1ccc(/C=C/c3cccc(C(F)(F)F)c3)s1)n2CCC(N)=O  
 730 C=CCC(C)(C)O.COC(=O)C[C@@H]1COc2cc(O[C@@H]3CCc4c(Oc5ccc(I)en5)ccc(F)c43)ccc21>>COC(=O)C[C@@H]1COc2cc(O[C@@H]3CCc4c(Oc5ccc(/C=C/CC(C)(C)O)en5)ccc(F)c43)ccc21  
 731 BrC1ccc(C(=C(c2cccc2)c2cccc2)c2cccc2)cc1.C=Cc1cccn1>>C(=C/c1cccn1)c1ccc(C(=C(c2cccc2)c2cccc2)c2cccc2)cc1  
 732 C=C(C)C=O.COc1ccc(I)cc1>>COc1ccc(/C=C(\C)C=O)cc1  
 733 C=CC(=O)OC.Ic1ccc2c(c1)Cc1cccc1-2>>COC(=O)/C=C/c1ccc2c(c1)Cc1cccc1-2  
 734 C=Cc1ccc([N+](=O)[O-])cc1.CCCCCCCCOCc1cc(/C=C/c2ccc(Br)cc2)c(OCCCCCCCC)cc1C=O>>CCCCCCCCOCc1cc(/C=C/c2ccc(/C=C/c3ccc([N+](=O)[O-])cc3)cc2)c(OCCCCCCCC)cc1C=O  
 735 C=CC(=O)OC(C)(C)C.O=Cc1cccc(Br)n1>>CC(C)(C)OC(=O)/C=C/c1cccc(C=O)n1  
 736 C=CC(=O)OC.COc1ccc2c(c1)CCN(c1ccc(CCC(C)C)c(Cl)c1)C2(C)c1ccc(Br)cc1>>COC(=O)/C=C/c1ccc(C2(C)c3ccc(OC)cc3CCN2c2ccc(CCC(C)C)c(Cl)c2)cc1  
 737 C=CC(C)(C)O.O=Cc1ccc(Br)o1>>CC(C)(O)/C=C/c1ccc(C=O)o1  
 738 C=C.CC(=O)Nc1ccc(C)cc1Br>>C=Cc1cc(C)ccc1NC(C)=O  
 739 C=Cc1cccc(Cl)c1.N#Cc1ccc2cc(Br)ccc2c1>>N#Cc1ccc2cc(/C=C/c3cccc(Cl)c3)ccc2c1  
 740 C=CC(=O)OCC.CCOC(=O)CCOCc1cc(OC)c(OCCc2cccc2)cc1Br>>CCOC(=O)/C=C/c1cc(OCc2cccc2)c(OC)cc1COCCC(=O)OCC  
 741 C=CC(=O)OCC.Cc1nnn(Cc2cc(C(F)(F)F)ccc2Br)n1>>CCOC(=O)/C=C/c1ccc(C(F)(F)F)cc1Cn1nnc(C  
 742 C=Cc1ccc(F)cc1.O=Cc1ccc(Cl)cc1>>O=Cc1ccc(/C=C/c2ccc(F)cc2)cc1  
 743 C=CCCC(=O)O.CCOC(=O)Nc1cccc(Br)c1C>>CCOC(=O)Nc1cccc(/C=C/CCC(=O)O)c1C  
 744 C=CC#N.O=[N+](O-)]c1ccc(I)cc1>>N#C/C=C/c1ccc([N+](=O)[O-])cc1  
 745 C=CC(=O)N1N=Cc2cccc2C1C=C(C)C.CCOc1cc(Cc2cnc(N)nc2N)cc(I)c1OCC>>CCOc1cc(Cc2cnc(N)nc2N)cc(/C=C/C(=O)N2N=Cc3cccc3C2C=C(C)C)c1OCC

746 C=CC(=O)OCC.Clc1ccccc1I>>CCOC(=O)/C=C/c1ccccc1Cl  
747 C=COCCCC.FC(F)(F)c1cccc(Br)c1>>C=C(OCCCC)c1cccc(C(F)(F)F)c1  
748 C=CC(=O)N(C)Cc1cccc(C(C)C)c1OCCC.CC1(C)NCc2cc(Br)enc2NC1=O>>CCCOc1c(CN(C)C(=O)/  
C=C/c2enc3c(c2)CNC(C)(C)C(=O)N3)cccc1C(C)C  
749 C=CC(=O)Nc1cc(C)ccc1C.COc1ccc2c(=O)c(I)coc2c1>>COc1ccc2c(=O)c(/C=C/C(=O)Nc3cc(C)ccc3  
C)coc2c1  
750 C=Cc1ccccc1.CO[C@@H]1[C@H](OC(C)=O)[C@@H](COC(C)=O)O[C@H]1n1cc(I)c(=O)[nH]c1=  
O>>CO[C@@H]1[C@H](OC(C)=O)[C@@H](COC(C)=O)O[C@H]1n1cc(/C=C/c2ccccc2)c(=O)[nH]  
751 C=CC(CC)O[Si](C)(C)C(C)C.COC(=O)CCCCCCCC1=C(Br)CCC1=O>>CCC(/C=C/C1=C(CCCC  
CCCC(=O)OC)C(=O)CC1)O[Si](C)(C)C(C)C  
752 C=CC(=O)OC.O=Cc1cc(Br)ccc1O>>COC(=O)/C=C/c1ccc(O)c(C=O)c1  
753 C=CCCCCN1C(=O)c2ccccc2C1=O.Cc1ccccc1OS(=O)(=O)C(F)(F)F>>C=C(CCCCN1C(=O)c2ccccc2  
C1=O)c1ccccc1C  
754 C=Cc1cnccl1.Nc1cc([N+](=O)[O-])ccc1Nc1ccc(Br)cc1>>Nc1cc([N+](=O)[O-]  
755 )ccc1Nc1ccc(/C=C/c2cnccl2)cc1  
756 Bre1cces1.C=Cc1ccc2cc(OC)ccc2c1>>COc1ccc2cc(/C=C/c3cces3)ccc2c1  
757 C=CS(=O)(=O)F.Cc1ccc(I)cc1>>Cc1ccc(/C=C/S(=O)(=O)F)cc1  
758 C=CS(=O)(=O)F.CC(C)(C)NC(=O)c1cc(I)ccn1>>CC(C)(C)NC(=O)c1cc(/C=C/S(=O)(=O)F)ccn1  
759 C=CC(=O)OC(C)C.CN(C(=O)CSCc1ccccc1)c1ccccc1Br>>CN(C(=O)CSCc1ccccc1)c1ccccc1/C=C  
/C(=O)OC(C)(C)C  
760 Bre1cccc(N2CCCC2)n1.C=Cc1cnccl1>>C(=C/c1cccc(N2CCCC2)n1)\c1cnccl1  
761 C=CC(=O)OCC.COC(=O)c1ccc(Cl)cc1>>CCOC(=O)/C=C/c1ccc(C(=O)OC)cc1  
762 C=CC(=O)OC.Cc1cc(C)c2nc(C(C)C)n(Cc3ccc(Br)cc3)c2n1>>COC(=O)/C=C/c1ccc(Cn2c(C(C)C)nc3c  
(C)cc(C)nc32)cc1  
763 C=CC(C)(C)C.Cc1ccccc1OS(=O)(=O)C(F)(F)F>>C=C(c1ccccc1C)C(C)(C)C  
764 C=CCn1cccc1C(=O)c1ccc(C)cc1.C[C@H](Oc1cccc(I)c1)C(=O)N1CCOCC1>>Cc1ccc(C(=O)c2cccn2  
C/C=C/c2cccc(O[C@@H](C)C(=O)N3CCOCC3)c2)cc1  
765 C=CC(C)(C)C(=O)O.CC(=O)O[C@H](C)c1ccc2ccc(Br)cc2n1>>CC(=O)O[C@H](C)c1ccc2ccc(/C=C/  
C(C)(C)C(=O)O)cc2n1  
766 C=CC(=O)OCC.CS(=O)(=O)c1ccc(Br)cc1C(F)(F)F>>CCOC(=O)/C=C/c1ccc(S(C)(=O)=O)c(C(F)(F)F)  
767 C=Cc1cccn1.Cc1ncc(C#N)c(Nc2cc(Cl)c3[nH]ccc3c2C)c1I>>Cc1ncc(C#N)c(Nc2cc(Cl)c3[nH]ccc3c2  
C)c1/C=C/c1cccn1  
768 Bre1cnc2ccccc2c1.C=CCO[Si](C)(C)C(C)C>>CC(C)(C)[Si](C)(C)OC/C=C/c1cnc2ccccc2c1  
769 C=CC(=O)OC.Clc1ccc(I)cc1>>COC(=O)/C=C/c1ccc(Cl)cc1  
770 C=Cc1ccccc1.CCc1ccc(I)cc1>>CCc1ccc(/C=C/c2ccccc2)cc1  
771 C=C[C@@H](C)[C@H]1CC[C@H]2[C@@H]3CC(=O)[C@H]4C[C@H](O)CC[C@]4(C)[C@H]3CC  
772 [C@]21C.Ic1cccc2ccccc12>>C[C@H](/C=C/c1cccc2ccccc12)[C@H]1CC[C@H]2[C@@H]3CC(=O)  
[C@H]4C[C@H](O)CC[C@]4(C)[C@H]3CC[C@]21C  
773 C=CC(=O)OC.Cc1c(C)c(C)c(I)c(C)c1>>COC(=O)/C=C/c1c(C)c(C)c(C)c(C)c1C  
774 C=CCNC(N)=O.O=c1oc2cnc3ccc(Br)cc3c2n1-  
775 c1cccc(C(F)(F)F)c1>>NC(=O)NC/C=C/c1ccc2ncc3oc(=O)n(-c4cccc(C(F)(F)F)c4)c3c2c1  
776 C=C[C@@H]1CCCCN1C(=O)OC(C)(C)C.FC(F)(F)c1ccc(I)cc1>>CC(C)(C)OC(=O)N1CCCC[C@H]  
777 1/C=C/c1ccc(C(F)(F)F)cc1  
778 C=Cc1cc2c(cc1C)C(C)(C)CCC2(C)C.CCOC(=O)c1ccc(OS(=O)(=O)C(F)(F)F)cc1>>C=C(c1ccc(C(=O)  
)OCC)cc1)c1cc2c(cc1C)C(C)(C)CCC2(C)C  
779 C=CC(=O)OCC.CC(C)(C)[Si](C)(C)n1ccc2c(I)cnc21>>CCOC(=O)/C=C/c1cnc2c1ccn2[Si](C)(C)C(  
C)(C)C  
780 C=Cc1ccc(CC(NC(=O)c2ccccc2)C(=O)OCC)cc1.CCOC(=O)C(F)Br>>CCOC(=O)C(F)/C=C/c1ccc(CC  
(NC(=O)c2ccccc2)C(=O)OCC)cc1  
781 C=Cc1ccc(N(C)C)cc1.CCCCCCN1C(=O)c2cccc3c(Br)ccc(c23)C1=O>>CCCCCN1C(=O)c2cccc3c(/  
C=C/c4ccc(N(C)C)cc4)ccc(c23)C1=O  
782 C=CC(=O)N1CC(c2oc3ccccc3c2C)C1.CN1CC(=O)Nc2ncc(Br)cc2C1>>Cc1c(C2CN(C(=O)/C=C/c3en  
c4c(c3)CN(C)CC(=O)N4)C2)oc2ccccc12  
783 C=Cc1ccc(/C=C/c2ccc(N(c3ccc(OCCCCC)cc3)c3ccc(OCCCCC)cc3)cc2)cc1.O=Cc1ccc(Br)s1>>C  
784 CCCCCOc1ccc(N(c2ccc(/C=C/c3ccc(/C=C/c4ccc(C=O)s4)cc3)cc2)c2ccc(OCCCCC)cc2)cc1  
785 C=CC(=O)N1CC(c2oc3ccccc3c2C)C1.O=C1CCNc2cc(Br)enc2N1>>Cc1c(C2CN(C(=O)/C=C/c3cnc4c  
(c3)NCCCC(=O)N4)C2)oc2ccccc12  
786 Bre1ccccc1.C=CC(OCC)OCC>>CCOC(/C=C/c1ccccc1)OCC  
787 C=C(NC(C)=O)C(=O)OC.CC(C)(C)OC(=O)N[C@@H](COc1ccc(C#N)ccc1I)CC(=O)OCc1ccccc1>>C  
788 OC(=O)/C=C/c1ccc(C#N)cc1OC[C@@H](CC(=O)OCc1ccccc1)NC(=O)OC(C)(C)C)NC(C)=O  
789 C=CCN1C(=O)c2ccccc2C1=O.Clc1ccc(Br)cc1>>O=C1c2ccccc2C(=O)N1C/C=C/c1ccc(Cl)cc1  
790 C=CC(=O)OC.Ic1ccc(OCc2ccccc2)cn1>>COC(=O)/C=C\c1ccc(OCc2ccccc2)cn1  
791 C=Cc1ccccc1.ClC1CCCC1>>C(=C/C1CCCC1)\c1ccccc1

786 C=CC(OCC)OCC.COCC(OC)c1cc([N+](=O)[O-])ccc1Br>>CCOC(/C=C/c1ccc([N+](=O)[O-]  
787 C=Cc1ccc(F)cc1.CCOC(=O)C(C)Br>>CCOC(=O)C(C)/C=C/c1ccc(F)cc1  
788 C=CC(=O)OC.O=C(c1cccc1C(F)(F)F)c1sc2cc(O)ccc2c1Oe1ccc(Br)cc1>>COC(=O)/C=C/c1ccc(Oc2c  
(C(=O)c3cccc3C(F)(F)F)sc3cc(O)ccc23)cc1  
C=Cc1ccc(OC)cc1.COc1ccc(C(=O)c2cn(C)c(C3=NCCO3)c2-  
789 c2c(Br)ccc3cccc23)cc1>>COc1ccc(/C=C/c2ccc3cccc3c2-  
c2c(C(=O)c3ccc(OC)cc3)cn(C)c2C2=NCCO2)cc1  
790 C=CC(C)=O.Cc1ccc(N)c(I)c1>>CC(=O)/C=C/c1cc(C)ccc1N  
C=Cc1cncn1.COCC(=O)c1cc2ccc(=O)oc2cc1OS(=O)(=O)C(F)(F)F>>COC(=O)c1cc2ccc(=O)oc2cc1/C  
791 =C/c1cncn1  
792 C=CC#N.Cc1ccc(I)cc1>>Cc1ccc(/C=C/C#N)cc1  
793 C=CC(=O)OC(C)(C)C.O=[N+](O-)]c1cccc(Br)c1>>CC(C)(C)OC(=O)/C=C/c1cccc([N+](=O)[O-])c1  
794 Br1cncnc1.C=CS(=O)(=O)N1CCC2(CC1)N=C(C1CCCC1)NC2=O>>O=C1NC(C2CCCC2)=NC1  
2CCN(S(=O)(=O)/C=C/c1cncnc1)CC2  
795 C=CC(=O)OC.CC(C)(C)CN(Cc1ccc(Br)cc1)c1cc(C(F)(F)F)ncn1>>COC(=O)/C=C/c1ccc(CN(CC(C)(  
C)C)c2cc(C(F)(F)F)ncn2)cc1  
796 C=CC(=O)OC(C)(C)C.CCN(CC)c1cc2oc(=O)c(C(=O)O)cc2cc1I>>CCN(CC)c1cc2oc(=O)c(C(=O)O)c  
c2cc1/C=C/C(=O)OC(C)(C)C  
797 C=Cc1cccc1Cl.Cc1ccc(Br)cc1>>Cc1ccc(/C=C/c2cccc2Cl)cc1  
798 C=CC(=O)OC.Nc1cc(Cl)nc(C2CC2)c1C=O>>COC(=O)/C=C/c1cc(N)c(C=O)c(C2CC2)n1  
799 C=CC(=O)OC.COc1c(CN(C(=O)c2cccc2)c2cccc(Br)c2)ccc2c1OC(C)(C)[C@H](O)[C@H]2O>>CO  
C(=O)/C=C/c1cccc(N(Cc2ccc3c(c2OC)OC(C)(C)[C@H](O)[C@H]3O)C(=O)c2cccc2)c1  
800 C=CC(N)=O.CS1nc2c(I)c(Cl)ccc2[nH]1>>CS1nc2c(/C=C/C(N)=O)c(Cl)ccc2[nH]1  
801 C=CC(=O)OCCCC.Cn1nc(Br)c2cccc21>>CCCCOC(=O)/C=C/c1nn(C)c2cccc12  
802 C=Cc1ccc(/C=C/c2ccc(N(c3cccc3)c3cccc4cccc34)cc2)cc1.O=Cc1ccc(Br)cc1>>O=Cc1ccc(/C=C/c2c  
cc(/C=C/c3ccc(N(c4cccc4)c4cccc5cccc45)cc3)cc2)cc1  
803 C=COCC.O=c1oc2cccc2cc1Br>>CCO/C=C/c1cc2cccc2oc1=O  
804 C=CC(=O)OC.COc1ccc2nc3c(cc2c1)C(OC)OC(c1cccc1)=C3I>>COC(=O)/C=C/C1=C(c2cccc2)OC(  
OC)c2cc3cc(OC)ccc3nc21  
805 C=CC(=O)N(C)C.O=[N+](O-)]c1ccc(Br)cc1>>CN(C)C(=O)/C=C/c1ccc([N+](=O)[O-])cc1  
806 C=CCNS(=O)(=O)c1ccc(C)cc1.FC(F)(F)c1ccc(Br)cc1>>Cc1ccc(S(=O)(=O)NC/C=C/c2ccc(C(F)(F)F)c  
c2)cc1  
807 C=CS(=O)(=O)c1cccc1.O=Cc1c[nH]c2ccc(Br)cc12>>O=Cc1c[nH]c2ccc(/C=C/S(=O)(=O)c3cccc3)c  
808 C=CC#N.Cn1c2cccc2c2nc3ccc(Cl)cc3c3cccc1c32>>Cn1c2cccc2c2nc3ccc(/C=C/C#N)cc3c3cccc1c3  
809 C=C1Oe2cc(OC)cc(C(=O)OC)c2NC1=O.O=[N+](O-)]  
c1ccc(Br)cc1>>COC(=O)c1cc(OC)cc2c1NC(=O)/C=C/c1ccc([N+](=O)[O-])cc1)O2  
810 C=C(NC(C)=O)C(=O)OC.Cl1ccc(-c2cc(I)c3cccc3n2)cc1>>COC(=O)/C=C/c1cc(-  
c2ccc(Cl)cc2)nc2cccc12)NC(C)=O  
811 C=Cc1cccc1N.COc1cc(OC)c(Br)c(OC)c1>>COc1cc(OC)c(/C=C/c2cccc2N)c(OC)c1  
812 C=Cc1cccc(OCCO)c1.CCN1CCN(c2nc(Br)cc3ccsc23)CC1>>CCN1CCN(c2nc(/C=C/c3cccc(OCCO)c  
3)cc3ccsc23)CC1  
813 C=CC(=O)OC.COc1ccc(Br)cc1Cl>>COC(=O)/C=C/c1ccc(OC)c(Cl)c1  
814 C=CC(N)=O.CC1(C)Cc2c(CN3CCC4(CC3)CCN(C(=O)c3cncnc3Br)CC4)cccc2O1>>CC1(C)Cc2c(CN  
3CCC4(CC3)CCN(C(=O)c3cncnc3/C=C/C(N)=O)CC4)cccc2O1  
815 C=CB1OC(C)CC(C)(C)O1.C[C@H](c1ccc(Br)cc1)N1CCOCC1>>CC1CC(C)(C)OB(/C=C/c2ccc([C  
@H](C)N3CCOCC3)cc2)O1  
C=C[C@]1(O)CC[C@H]2[C@H]3CCc4cc(O[Si](C)(C)C(C)(C)C)ccc4[C@H]3CC[C@@]21C.Cl1  
816 ccc(I)cn1>>CC(C)(C)[Si](C)(C)Oe1ccc2c(c1)CC[C@@H]1[C@@H]2CC[C@@]2(C)[C@H]1CC[C@  
@]2(O)/C=C/c1ccc(Cl)nc1  
817 C=Cc1cccc1.Fc1cccc1Br>>Fc1cccc1/C=C/c1cccc1  
818 C=CCC(=O)OC.FC(F)(F)c1ccc(I)cc1>>COC(=O)C/C=C/c1ccc(C(F)(F)F)cc1  
819 C=Cc1ccc2cccc2c1.N#Cc1ccc(Br)cc1>>N#Cc1ccc(/C=C/c2ccc3cccc3e2)cc1  
C=Cc1cccc1.CCCCCCCCc1cc(/C=C/c2ccc([N+](=O)[O-]  
820 ])cc2)c(OCCCCCCCC)cc1/C=C/c1ccc(Br)cc1>>CCCCCCCCc1cc(/C=C/c2ccc([N+](=O)[O-]  
])cc2)c(OCCCCCCCC)cc1/C=C/c1ccc(/C=C/c2cccc2)cc1  
821 C=CC(=O)OC.COc1ccc2c(c1)CCN(c1ccc(C)c(F)c1)C2(C)c1ccc(Br)cc1>>COC(=O)/C=C/c1ccc(C2(C  
c3ccc(OC)cc3CCN2c2ccc(C)c(F)c2)cc1  
822 C=CCN(C(=O)OC(C)(C)C)C(=O)OC(C)(C)C.COc1ccc(Br)cc1>>COc1ccc(/C=C/CN(C(=O)OC(C)(C)  
C)C(=O)OC(C)(C)C)cc1  
823 C=CCOc1cccc1.FC(F)(F)c1ccc(Br)cc1>>FC(F)(F)c1ccc(/C=C/COc2cccc2)cc1  
824 C=CC(=O)OC.COC(=O)Cc1cc(OC)c(OC)cc1I>>COC(=O)/C=C/c1cc(OC)c(OC)cc1CC(=O)OC

825 C=CS(=O)(=O)F.Cc1ccc(S(=O)(=O)n2cc(I)c3ccccc32)cc1>>Cc1ccc(S(=O)(=O)n2cc(/C=C/S(=O)(=O)F)c3ccccc32)cc1  
 826 Br1ccccc1I.C=CP(=O)(OCC)OCC>>CCOP(=O)(/C=C/c1ccccc1Br)OCC  
 827 C=Cc1ccncc1.CCCCCC1cc(-c2nc3c4ccccc4c4ccccc4c3[nH]2)sc1Br>>CCCCCCc1cc(-c2nc3c4ccccc4c4ccccc4c3[nH]2)sc1/C=C/c1ccncc1  
 828 C=Cc1ccccc1.CC(C)(C)C(=O)Nc1nc2ncc(Br)cc2c(=O)[nH]1>>CC(C)(C)C(=O)Nc1nc2ncc(/C=C/c3ccccc3)cc2c(=O)[nH]1  
 829 C=Cc1ccccc1.CC(=O)Nc1ccc(Br)c[n+][O-]>>CC(=O)Nc1ccc(/C=C/c2ccccc2)c[n+][O-]  
 830 Br1ccccc1.C=CSc1ccccc1>>C(=C/c1ccccc1)Sc1ccccc1  
 831 C=CC(=O)OCC.CCOC(=O)N1CCc2cc(Br)c(N)c(Cl)c2CC1>>CCOC(=O)/C=C/c1cc2c(c(Cl)c1N)CCN(C(=O)OCC)CC2  
 832 C=Cc1ccncc1.CCCCCO1ccc(Br)c(F)c1>>CCCCCO1ccc(/C=C/c2ccncc2)c(F)c1  
 833 C=Cc1ccc(N2CC(=O)N(CC[Si](C)(C)C)S2(=O)=O)c(OCc2ccccc2)c1.CO1ccccc(Br)n1>>CO1ccccc(/C=C/c2ccc(N3CC(=O)N(CC[Si](C)(C)C)S3(=O)=O)c(OCc3ccccc3)c2)n1  
 834 C=CC(=O)OCC.O=C(OCc1ccccc1)c1cc([N+](=O)[O-])ccc1Br>>CCOC(=O)/C=C/c1ccc([N+](=O)[O-])cc1C(=O)OCc1ccccc1  
 835 C=CC(=O)OCC.CO1ccc(Cl)cc1-c1c(Br)c(=O)[nH]c2ccc(C(F)(F)F)cc12>>CCOC(=O)/C=C/c1c(-c2cc(Cl)ccc2OC)c2cc(C(F)(F)F)ccc2[nH]c1=O  
 836 C=Cc1ccccc1.Oc1ccc(O)c(I)c1>>Oc1ccccc1/C=C/c2cc(O)ccc2O)c1  
 837 Br1ccccc1.C=CCO1ccccc1C>>Cc1ccccc1OC/C=C/c1ccccc1  
 838 C=CC(=O)OC(C)(C)C.CC(=O)N(c1c(C)cc(C)cc1I)C1C=CCCC1>>CC(=O)N(c1c(C)cc(C)cc1/C=C/C(=O)OC(C)(C)C)C1C=CCCC1  
 839 C=CC(=O)OCC.Cc1ncc(I)c(C)n1>>CCOC(=O)/C=C/c1ncc(C)nc1C  
 840 C/C(=N)c1c(C(C)C)ccccc1C(C)C)n1ncc2ccc(Br)cc21.C=CC(=O)OC>>COC(=O)/C=C/c1ccc2cnn(/C(C)=N/c3c(C(C)C)ccccc3C(C)C)c2c1  
 841 C=CC(=O)OC.CO1c(CN(C(=O)c2ccccc2)c2ccccc(Br)c2)ccc2c1OC(C)(C)C=C2C#N>>COC(=O)/C=C/c1ccccc(N(Cc2ccc3c(c2OC)OC(C)(C)C=C3C#N)C(=O)c2ccccc2)c1  
 842 C=CC(=O)OC.CCCNC(=O)c1ccc(Br)en1>>CCCN(C(=O)c1ccc(/C=C/C(=O)OC)en1  
 843 C=C(NC(C)=O)C(=O)OC.CN(C)CCc1c[nH]c2ccc(Br)cc12>>COC(=O)/C=C/c1ccc2[nH]cc(CCN(C)C)c2c1NC(C)=O  
 844 C=CC(=O)OC(C)(C)C.CN1CCC2(CC1)CC(=O)c1cc(Br)ccc1O2>>CN1CCC2(CC1)CC(=O)c1cc(/C=C/C(=O)OC(C)(C)C)ccc1O2  
 845 C=CCO1ccccc1.Ic1ccccc1>>Cc1ccccc1OC/C=C/c2ccccc2)c1  
 846 C=CC(=O)OCC.CC(C)(C)OC(=O)NCc1cc2ccccc2nc1Cl>>CCOC(=O)/C=C/c1nc2ccccc2cc1CNC(=O)OC(C)(C)C  
 847 \*CNCCCOCCOCCOCCCN(C(=O)CO1ccc(C(Cc2cc(OC)cc(OC)c2)NC(=O)c2ccc(C=C)cc2)cc1.Cc1c(F)ccccc1I>>\*CNCCCOCCOCCOCCCN(C(=O)CO1ccc(C(Cc2cc(OC)cc(OC)c2)NC(=O)c2ccc(/C=C/c3ccccc(F)c3C)cc2)cc1  
 848 C=CC(=O)OC.O=CC1=C(Br)c2ccccc2CC1>>COC(=O)/C=C/C1=C(C=O)CCc2ccccc21  
 849 C=C(C)C(=O)OCC.O=[N+](O-)]c1ccc(Cl)cc1>>CCOC(=O)/C(C)=C/c1ccc([N+](=O)[O-])cc1  
 850 C=CC(C)=O.Ic1c(-c2ccccc2)nnn1Cc1ccccc1>>CC(=O)/C=C/c1c(-c2ccccc2)nnn1Cc1ccccc1  
 851 C=COCCCC.CC(=O)c1ccc(Br)cc1>>C=C(OCCCC)c1ccc(C(C)=O)cc1  
 852 C=CCCCCCCCN(C(=O)OC(C)(C)C)C(=O)OC(C)(C)C.CC(C)N(CC[C@H](c1ccccc1)c1cc(Br)ccc1OCc1ccccc1)C(C)C>>CC(C)N(CC[C@H](c1ccccc1)c1cc(/C=C/CCCCCN(C(=O)OC(C)(C)C)C(=O)OC(C)(C)C)ccc1OCc1ccccc1)C(C)C  
 853 C=CC[C@H](C)[C@H](NC(=O)OC(C)(C)C)C(=O)OC(C)(C)C)C(=O)OC(C)(C)C.N#Cc1ccc2c(c1)/N=Nc1cc(Br)ccc1CC2>>CC(C)(C)OC(=O)N[C@@H](C[C@@H](C/C=C/c1ccc2c(c1)/N=Nc1cc(C#N)ccc1CC2)C(=O)OC(C)(C)C)C(=O)OC(C)(C)C  
 854 C=C[C@H](CCCCCCCC)CC(OC)OC.Cl1ccc(I)cc1>>CCCCCCCC[C@@H](/C=C/c1ccc(Cl)cc1)CC(OC)OC  
 855 C=CC(=O)OCC.O=Cc1cc(C(F)(F)F)ccc1Br>>CCOC(=O)/C=C/c1ccc(C(F)(F)F)cc1C=O  
 856 Br1ccccc1.C=Cc1ccccc1OC>>CO1ccccc1/C=C/c1ccccc1  
 857 C=CC(=O)N(C1CCCCC1)C1CCCCC1.CC(C)(C)OC(=O)c1ccccc1Br>>CC(C)(C)OC(=O)c1ccccc1/C=C/C(=O)N(C1CCCCC1)C1CCCCC1  
 858 C=CC(=O)OCC.Oc1ccc(C(=C2CCCCC2)c2ccc(Br)cc2)cc1Cl>>CCOC(=O)/C=C/c1ccc(C(=C2CCCCC2)c2ccc(O)c(Cl)c2)cc1  
 859 C=Cc1ccc([N+](=O)[O-])cc1.CCCCCCO1cc(I)ccc1OCCO>>CCCCCO1ccc(/C=C/c2ccc([N+](=O)[O-])cc2)ccc1OCCO  
 860 C=Cc1ccncc1.CC(C)(C)OC(=O)N[C@H](CO1cnc(Br)c1)Cc1ccc2ccccc2c1>>CC(C)(C)OC(=O)N[C@H](CO1cnc(/C=C/c2ccncc2)c1)Cc1ccc2ccccc2c1  
 861 C=Cc1ccccc1.O=C(/C=C/c1cccs1)c1ccc(I)cc1>>O=C(/C=C/c1cccs1)c1ccc(/C=C/c2ccccc2)cc1  
 862 \*CN(Cc1ccccc1)N=Nc1ccc(I)cc1.C=Cc1ccccc1>>\*CN(Cc1ccccc1)N=Nc1ccc(/C=C/c2ccccc2)cc1  
 863 C=CC(=O)OCCCC.CO1c(C)cc(Br)cc1C>>CCCCOC(=O)/C=C/c1cc(C)c(OC)c(C)c1

864 C=CCC1(C)OC(=O)Nc2ccc(-c3cc(F)cc(Br)c3)cc21.COc1ccc(-c2oc3ccccc3c(=O)c2I)cc1>>COc1ccc(-  
c2oc3ccccc3c(=O)c2/C=C/CC2(C)OC(=O)Nc3ccc(-c4cc(F)cc(Br)c4)cc32)cc1  
865 C=CC(=O)OCC.Cc1ccc(C#C/C=C/c2ccc(Br)cc2)cc1>>CCOC(=O)/C=C/c1ccc(/C=C/C#Cc2ccc(C)cc2  
C=C[C@H]1O[C@H](OC)[C@H](OCc2ccccc2)[C@@H](OCc2ccccc2)[C@H]1OCc1ccc2ccccc2c1  
866 .O=c1cc(-c2ccccc2)oc2cc(Br)ccc12>>CO[C@H]1O[C@H](/C=C/c2ccc3c(=O)cc(-  
c4ccccc4)oc3c2)[C@@H](OCc2ccc3ccccc3c2)[C@H](OCc2ccccc2)[C@H]1OCc1ccccc1  
867 Brclccc(I)cc1.C=Cc1ccc(OCC)cc1>>CCOc1ccc(/C=C/c2ccc(Br)cc2)cc1  
868 Brclccc2nccnc12.C=CC(=O)OCC>>CCOC(=O)/C=C/c1ccc2nccnc12  
C=Cc1ccc(OC)cc1.COc1cc[nH]c1/C=C1\C(=O)Nc2ccc(I)c21>>COc1ccc(/C=C/c2ccccc3c2/C(=C/c2[n  
869 H]ccc2OC)C(=O)N3)cc1  
C=CC(=O)Nc1ccccc1NC(=O)OC(C)(C)C.CCOC(=O)C(CCO[Si](C)(C)C(C)(C)C)c1ccc(Br)cc1>>CC  
870 OC(=O)C(CCO[Si](C)(C)C(C)(C)C)c1ccc(/C=C/C(=O)Nc2ccccc2NC(=O)OC(C)(C)C)cc1  
871 C=Cc1ccccc1.COc1ccc(OS(=O)(=O)C(F)(F)F)cc1>>C=C(c1ccccc1)c1ccc(OC)cc1  
C=CC(=O)OC(C)C.CN(C)c1ccc(-  
872 c2ccc(CN(C(=O)C3CCCCC3)c3ccccc(Br)c3)cc2)cc1>>CC(C)OC(=O)/C=C/c1ccc(N(Cc2ccc(-  
c3ccc(N(C)C)cc3)cc2)C(=O)C2CCCCC2)c1  
873 C=CCO.CC(C)(C)c1ccccc1OS(=O)(=O)C(F)(F)F>>C=C(CO)c1ccccc1C(C)(C)C  
874 C=CC(=O)OCC.Cc1sc2nc(COc3ccc(F)cc3)cc(=O)n2c1Br>>CCOC(=O)/C=C/c1c(C)sc2nc(COc3ccc(F  
)cc3)cc(=O)n12  
875 C=CCC(C)C(=O)OCC.N#Cc1ccccc1Br>>CCOC(=O)C(C)C/C=C/c1ccccc1C#N  
876 Brcln[nH]c2ccccc12.C=CC(=O)OCCCC>>CCCCOC(=O)/C=C/c1n[nH]c2ccccc12  
C=CC(N)=O.Oc1ccc2c(c1)CCN(c1ccccc1)C2c1ccc(I)cc1>>NC(=O)/C=C/c1ccc(C2c3ccc(O)cc3CCN2  
877 c2ccccc2)cc1  
C=Cc1ccc2cc(F)c(F)cc2n1.O=C1c2cc(Br)ccc2COc2ccccc21>>O=C1c2cc(/C=C/c3ccc4cc(F)c(F)cc4n3  
878 )ccc2COc2ccccc21  
C=CC(N)=O.COc1ccc(I)cc1OC>>COc1ccc(/C=C/C(N)=O)cc1OC  
879 C=CC(=O)OCCCC.COc1ccc(Br)c2ccccc12>>CCCCOC(=O)/C=C/c1ccc(OC)c2ccccc12  
880 C=Cc1ccccc1.COc1ccc(I)cc1>>COc1ccc(/C=C/c2ccccc2)cc1  
881 C=CC=O.Cc1ccc(I)c1>>Cc1ccc(/C=C/C=O)c1  
882 C=CC(=O)O.Cc1ccc(S(=O)(=O)N(C)c2ccc(I)cc2)c1>>Cc1ccc(S(=O)(=O)N(C)c2ccc(/C=C/C(=O)O)  
883 cc2)c1  
Brclccsc1.C=CCNS(=O)(=O)c1ccc(C)cc1>>Cc1ccc(S(=O)(=O)NC/C=C/c2ccsc2)cc1  
884 C=CC(=O)OC.CN(C(=O)c1ccc2c(c1I)c1ccccc1n2S(=O)(=O)N(C)C)c1ccccc1>>COC(=O)/C=C/c1c(C  
885 (=O)N(C)c2ccccc2)ccc2c1c1ccccc1n2S(=O)(=O)N(C)C  
C=CC#N.Cc1nc(C(C)C)ccc1I>>Cc1nc(C(C)C)ccc1/C=C/C#N  
886 Brclccc2ccccc12.C=CC(=O)OC(C)(C)C>>CC(C)(C)OC(=O)/C=C/c1ccc2ccccc12  
887 C=CCC(NCc1ccc(OC)cc1)c1ccccc1.Ic1ccccc1>>COc1ccc(CNC(C/C=C/c2ccccc2)c2ccccc2)cc1  
888 C=CC(=O)OC(C)(C)C.O=S(=O)(c1ccc(Br)c1)c1ccc2ccccc(F)c2n1>>CC(C)(C)OC(=O)/C=C/c1ccc(S  
889 (=O)(=O)c2ccc3ccccc(F)c3n2)c1  
C=CCCCCCC.COc1ccccc1CBr>>C=C(CCCCCC)Cc1ccccc1OC  
890 C=Cc1ccc([N+](=O)[O-])c1.O=Cc1ccc(Br)cc1>>O=Cc1ccc(/C=C/c2ccccc([N+](=O)[O-])c2)cc1  
891 C=CC(=O)OCC.CC(Oc1ccc(Br)cc1)c1ccccc1>>CCOC(=O)/C=C/c1ccc(OC(C)c2ccccc2)cc1  
892 C=Cc1ccccc1F.O=S(=O)(c1ccc(Br)cc1)c1ccccc1CN1CCCC(F)C1>>O=S(=O)(c1ccc(/C=C/c2ccccc2F)  
893 cc1)c1ccccc1CN1CCCC(F)C1  
C=C(NC(C)=O)c1ccc(Cl)cn1.C=CC(=O)OCCCC>>C=C(NC(C)=O)c1ccc(/C=C/C(=O)OCCCC)cn1  
894 C=CC#N.N#Cc1ccc(Nc2nc(Nc3c(F)cc(I)cc3F)nnc2Cl)cc1>>N#C/C=C/c1cc(F)c(Nc2nnc(Cl)c(Nc3ccc(  
895 C#N)cc3)n2)c(F)c1  
C=CC(=O)OCC.CC(=O)c1cn(Cc2ccc(F)cc2)c2ccc(Br)cc2c1=O>>CCOC(=O)/C=C/c1ccc2c(c1)c(=O)c  
896 (C(C)=O)cn2Cc1ccc(F)cc1  
C=CC(=O)N1N=Cc2ccccc2C1C(C)(C)C.COc1cc(Cc2cnc(N)nc2N)cc(I)c1OC>>COc1cc(Cc2cnc(N)nc  
897 2N)cc(/C=C/C(=O)N2N=Cc3ccccc3C2C(C)(C)C)c1OC  
898 Brclccc(I)cc1.C=CS(=O)(=O)F>>O=S(=O)(F)/C=C/c1ccc(Br)cc1  
899 C=CC#N.Cc1nc(-c2ccccc2)c(Br)o1>>Cc1nc(-c2ccccc2)c(/C=C/C#N)o1  
C=CC(C)(C)C(=O)NC(C)(C)CO.CC(=O)OC[C@H]1O[C@H](c2cc(Cc3ccc(Br)cc3Cl)c(C)cc2C)[C  
900 @H](OC(C)=O)[C@@H](OC(C)=O)[C@@H]1OC(C)=O>>CC(=O)OC[C@H]1O[C@H](c2cc(Cc3  
ccc(/C=C/C(C)(C)C(=O)NC(C)(C)CO)cc3Cl)c(C)cc2C)[C@H](OC(C)=O)[C@@H](OC(C)=O)[C@@  
901 C=CC(=O)Nc1ccccc1OC.COc1ccc2c(=O)c(I)ccc2c1>>COc1ccc2c(=O)c(/C=C/C(=O)Nc3ccccc3OC)c  
oc2c1  
902 C=CC(=O)N(C)C.Fc1ccc(I)c1>>CN(C)C(=O)/C=C/c1ccc(F)c1  
903 Brclcccn1.C=CC(=O)OCC>>CCOC(=O)/C=C/c1cccn1  
904 C=CC(=O)OCC.O=S(=O)(Nc1ccccc1)c1ccc(Br)c1>>CCOC(=O)/C=C/c1ccc(S(=O)(=O)Nc2ccccc2)  
905 C=CC(=O)OC(C)(C)C.Cc1ccc(I)cc1>>Cc1ccc(/C=C/C(=O)OC(C)(C)C)cc1  
906 C=C(C)C(=O)OC.N#Cc1ccc(Br)c1>>COC(=O)/C(C)=C/c1ccc(C#N)c1

907 C=CC(=O)O.OC[C@H]1O[C@@H](n2c(NCc3cccc(Br)c3)nc3cccc32)[C@H](O)[C@@H]1O>>O=C  
(O)/C=C/c1cccc(CNc2nc3cccc3n2[C@@H]2O[C@H](CO)[C@@H](O)[C@H]2O)c1  
908 C=CC(=O)OC.O=C(O)c1ccc(I)cc1>>COC(=O)/C=C/c1ccc(C(=O)O)cc1  
909 C=Cc1ccncc1.Cc1cc(Br)ccc1N>>Cc1cc(/C=C/c2ccncc2)ccc1N  
910 C=Cc1ccncc1.CC(C)(C)OC(=O)N[C@H](COc1cnc(Cl)c(Br)c1)Cc1cccc1>>CC(C)(C)OC(=O)N[C@  
H](COc1cnc(Cl)c(/C=C/c2ccncc2)c1)Cc1cccc1  
911 C=CC(=O)OC.O=[N+](O-)[O-]c1cccc(I)c1>>COC(=O)/C=C/c1cccc([N+](=O)[O-])c1  
912 C=C[Si](C)(C)c1nccn1.Ic1cccc1>>C[Si](C)(C)/C=C/c1cccc1)c1nccn1  
913 C=Cc1ccc(O)c(OC)c1.Oc1ccc(O)c(I)c1>>COc1cc(/C=C/c2cc(O)ccc2O)ccc1O  
914 C=C[Si](CC)(CC)CC.FC(F)(F)c1cccc1Br>>CC[Si](/C=C/c1cccc1C(F)(F)F)(CC)CC  
915 Br1ccsc1.C=C/C=C/C(=O)N(CCCC)CCCC>>CCCCN(CCCC)C(=O)/C=C/C=C/c1ccsc1  
916 C=Cc1ccncc1.C[C@@H](COc1cnc(Cl)c(Br)c1)NC(=O)OC(C)(C)C>>C[C@@H](COc1cnc(Cl)c(/C=C/  
/c2ccncc2)c1)NC(=O)OC(C)(C)C  
917 C=Cc1cccc1.O=S(=O)(Oc1cccc(C(F)(F)F)c1)C(F)(F)F>>C=C(c1cccc1)c1cccc(C(F)(F)F)c1  
918 C=CC(=O)OCC.Cc1cn2c(Br)cccc2n1>>CCOC(=O)/C=C/c1cccc2nc(C)cn12  
919 C=CCC(C)C(=O)OCC.Fc1ccc(Br)cc1>>CCOC(=O)C(C)C/C=C/c1ccc(F)cc1  
920 Br1ccccc1.C=COC(CC)CCCC>>C=C(OC(CC)CCCC)c1ccccc1  
C=CCN1CCNCC1.CC(C)c1[nH]nc(O[C@@H]2O[C@H](COC(=O)c3cccc3)[C@@H](F)[C@H](OC  
921 (=O)c3cccc3)[C@H]2OC(=O)c2cccc2)c1Cc1ccc(Br)cc1>>CC(C)c1[nH]nc(O[C@@H]2O[C@H](C  
OC(=O)c3cccc3)[C@@H](F)[C@H](OC(=O)c3cccc3)[C@H]2OC(=O)c2cccc2)c1Cc1ccc(/C=C/C  
N2CCNCC2)cc1  
922 C=CC(=O)OCC.O=[N+](O-)[O-]c1ccc(-c2cccc2)c(I)c1>>CCOC(=O)/C=C/c1cc([N+](=O)[O-])ccc1-  
c1ccccc1  
923 C=Cc1cccc1.N[C@@H](Cc1c[nH]c2c(Br)cccc12)C(=O)O>>N[C@@H](Cc1c[nH]c2c(/C=C/c3cccc  
3)cccc12)C(=O)O  
924 C=CC(=O)OC.OCCCCCOc1ccc2cc(Br)ccc2c1>>COC(=O)/C=C/c1ccc2cc(OCCCCCO)ccc2c1  
925 C=Cc1cc(C(=O)OCC)n[nH]1.CC(C)(C)C(=O)Nc1nc(O)c2cc(Br)enc2n1>>CCOC(=O)c1cc(/C=C/c2cn  
c3nc(NC(=O)C(C)(C)C)nc(O)c3c2)[nH]n1  
926 C=CC[C@@H](C)O.CC(C)Oc1cnc(Br)c1>>CC(C)Oc1cnc(/C=C/C[C@@H](C)O)c1  
927 Br1ccncc1.C=C[Si](CC)(CC)CC>>CC[Si](/C=C/c1ccncc1)(CC)CC  
928 C=Cc1ccccc1.CC(C)(C)OC(=O)c1ccc(Br)cc1[N+](=O)[O-]  
>>CC(C)(C)OC(=O)c1ccc(/C=C/Cc2cccc2)cc1[N+](=O)[O-]  
929 C=Cc1cccc(C)n1.CC(C)C(C#N)(CCCN1CCN(CCOc2cccc2Br)CC1)c1ccccc1>>Cc1cccc(/C=C/c2ccc  
cc2OCCN2CCN(CCCC(C#N)(c3cccc3)C(C)C)CC2)n1  
930 Br1ccsc1.C=CC(=O)O>>O=C(O)/C=C/c1ccsc1  
931 C=CC(=O)O.Cc1cc(C)c([I+])c2c(C)cc(C)cc2C)c(C)c1>>Cc1cc(C)c(/C=C/C(=O)O)c(C)c1  
932 C=CC(=O)OCC.C[C@@H]1CN(C(=O)OC(C)(C)C)[C@H]2Cc3ccc(Br)nc3N12>>CCOC(=O)/C=C/c  
1ccc2c(n1)N1[C@H](C)CN(C(=O)OC(C)(C)C)[C@H]1C2  
933 C=Cc1ccccc1.O=C1c2cccc2C(=O)N1CCc1ccc(Br)cc1>>O=C1c2cccc2C(=O)N1CCc1ccc(/C=C/c2cc  
ccc2)cc1  
934 C=CC(C)(C)O.C[C@@H]1N[C@@H](CO[Si](C)(C)C(C)(C)C)Cc2c(Br)cccc21>>C[C@@H]1N[C@  
@H](CO[Si](C)(C)C(C)(C)C)Cc2c(/C=C/C(C)(C)O)cccc21  
935 C=CC(=O)OC(C)(C)C.O=C1c2cccc2CCc2cc(Br)ccc21>>CC(C)(C)OC(=O)/C=C/c1ccc2c(c1)CCc1cc  
ccc1C2=O  
936 C=CC(=O)O.COc1ccc([I+])c2cccc2)cc1>>COc1ccc(/C=C/C(=O)O)cc1  
937 C=CCOC(C)=O.O=[N+](O-)[O-]c1cccc([I+])c2cccc([N+](=O)[O-]  
)c2)c1>>CC(=O)OC/C=C/c1cccc([N+](=O)[O-])c1  
938 C=CC(C)=O.O=C(NCc1ccc(Cl)cc1)c1cnc2c(F)cc(I)cc2c1O>>CC(=O)/C=C/c1cc(F)c2ncc(C(=O)NCc3  
ccc(Cl)cc3)c(O)c2c1  
939 C=CCC(C)N(C)C(=O)OC(C)(C)C.Oc1cnc(Br)c1>>CC(C/C=C/c1cnc(O)c1)N(C)C(=O)OC(C)(C)C  
940 C=CCCO[Si](C)(C)C(C)(C)C.COc1cnc(Br)c1>>COc1cnc(/C=C/CCO[Si](C)(C)C(C)(C)C)c1  
941 C=CCc1cccc(F)c1N(Cc1cc(OC)ccc1Br)S(=O)(=O)c1ccc(C)cc1>>C=C1Cc2cccc(F)c2N(S(=O)(=O)c2c  
cc(C)cc2)Cc2cc(OC)ccc21  
942 C=CCc1cc(C)ccc1N(C(=O)c1ccccc1I)S(=O)(=O)c1ccc(C)cc1>>C=C1Cc2cc(C)ccc2N(S(=O)(=O)c2cc  
c(C)cc2)C(=O)c2cccc21  
943 C=Cc1cc(C)(C)C)ccc1N(C)C(=O)c1ccccc1I>>C=C1c2cccc2C(=O)N(C)c2ccc(C(C)(C)C)cc21  
944 C=CCCc1c(Br)encc1C1=N[C@H](c2cccc2)CO1>>C=C1CCc2c1cnc2C1=N[C@H](c2cccc2)CO1  
945 C=C[C@H](O[Si](C)(C)C(C)(C)C)[C@H](c1ccccc1)[C@H](C/C(I)=C/CO)O[Si](C)(C)C(C)(C)  
C>>C=C1/C(=C(CO)C[C@H](O[Si](C)(C)C(C)(C)C)[C@H](c2cccc2)[C@H]1O[Si](C)(C)C(C)(C)  
946 C=CC(=O)OCCCCC(Cc1ccncc1)OC(=O)[C@H]1CCCCN1C(=O)C(=O)c1cccc(I)c1>>O=C1/C=C/  
c2cccc(c2)C(=O)C(=O)N2CCCC[C@H]2C(=O)OC(CCc2ccncc2)CCCCO1  
947 C=CCc1cccc(C)c1N(C(=O)c1ccccc1I)S(=O)(=O)c1ccc(C)cc1>>C=C1Cc2cccc(C)c2N(S(=O)(=O)c2cc  
c(C)cc2)C(=O)c2cccc21

948 C=CCC(O)c1cc2ccc(OC)cc2nc1Cl>>C=C1CC(O)c2cc3ccc(OC)cc3nc21  
 949 C=CCc1c(OCc2cc(OC)ccc2Br)cc(C)n(C)c1=O>>C=C1Cc2c(cc(C)n(C)c2=O)OCc2cc(OC)ccc21  
 950 C=CCC(CCCl)CCCCCCCC>>C=C1CCC(CCCCCCCC)C1  
 951 C=CCOCc1nnn(Cc2ccc(C)cc2)c1I>>C=C1COCc2nnn(Cc3ccc(C)cc3)c21  
 952 C=C[C@H](Cn1c(Br)c(-  
 c2ccc(C(=O)NCc3ccccc3)cc2)c2c(N)ncnc21)NC(=O)OC(C)(C)C>>C=C1c2c(-  
 953 C=CCC(OC(=C)Br)c1ccccc1>>C=C1COC(c2ccccc2)CC1=C  
 954 C=Cc1cc(OC)ccc1OS(=O)(=O)c1ccccc1Br>>COc1ccc2c(c1)/C=C\c1ccccc1S(=O)(=O)O2  
 955 C=CCN(CC1=C(Br)CCCC1)c1ccc(Cl)cc1>>C=C1CN(c2ccc(Cl)cc2)CC2=C1CCCCC2  
 956 C=CCc1cc2c(C)cc(=O)oc2c(C)c1OCc1ccccc1I>>C=C1Cc2cc3c(C)cc(=O)oc3c(C)c2OCc2ccccc21  
 957 C=CCN(CCl)S(=O)(=O)c1ccccc1Br>>C=C1CCN(S(=O)(=O)c2ccccc2Br)C1  
 958 C=CCN(C(=O)c1ccc2ccccc2c1Br)C(C(=O)NC(C)(C)C)c1ccc(C)cc1>>C=C1CN(C(C(=O)NC(C)(C)C)  
 c2ccc(C)cc2)C(=O)c2ccc3ccccc3c21  
 959 C=C(C(=O)OCC)c1ccccc1CN(C(=O)C(F)(F)F)c1ccccc1I>>CCOC(=O)/C1=C/c2ccccc2N(C(=O)C(F)(  
 F)F)Cc2ccccc21  
 960 C=CCC(c1ccccc1)N(C)c1ccccc1I>>C=C1CC(c2ccccc2)N(C)c2ccccc21  
 961 C=COC(=O)c1ccccc1Br>>C=C1OC(=O)c2ccccc21  
 962 C=CCC(CBr)c1ccccc1>>C=C1CCC(c2ccccc2)C1  
 963 C=CC[C@H](N[S@](=O)C(C)(C)C)c1cc(F)ccc1Br>>C=C1C[C@H](N[S@](=O)C(C)(C)C)c  
 2cc(F)ccc21  
 964 C=CC[C@H](N[S@](=O)C(C)(C)C)c1ccccc1Br>>C=C1C[C@H](N[S@](=O)C(C)(C)C)c2ccccc21  
 965 C=CCCN([C@H](CC(C)C)C(=O)OC)S(=O)(=O)c1ccccc1Br>>C=C1CCN([C@H](CC(C)C)C(=O)  
 )OC)S(=O)(=O)c2ccccc21  
 966 C=CCOCc1c(Br)c(OC)c2ccccc2c1OC>>C=C1COCc2c1c(OC)c1ccccc1c2OC  
 967 C=CCN(CC1=C(Br)CCCC1)c1ccc(C)cc1>>C=C1CN(c2ccc(C)cc2)CC2=C1CCCC2  
 968 C=CCc1c(N(C)C(=O)c2ccccc2I)ccc2c1ccc(=O)n2C>>C=C1Cc2c(ccc3c2ccc(=O)n3C)N(C)C(=O)c2cc  
 ccc21  
 969 C=CCCCC(O)C=C(Br)c1ccc(C)cc1>>C=C1CCCC(O)C=C1c1ccc(C)cc1  
 970 C=CCN1c2c(Br)cc([N+](=O)[O-])cc2C(=O)N2C1C(C)(C)SC2(C)C>>C=C1CN2c3c1cc([N+](=O)[O-]  
 ])cc3C(=O)N1C2C(C)(C)SC1(C)C  
 971 C=CCc1ccccc1N(C(=O)c1ccccc1I)S(=O)(=O)c1ccc(C)cc1>>C=C1Cc2ccccc2N(S(=O)(=O)c2ccc(C)cc  
 2)C(=O)c2ccccc21  
 972 C=CCO[C@H]1[C@H](Sc2ccccc2Br)O[C@H](COCc2ccccc2)[C@H](OCc2ccccc2)[C@H]1OCc  
 1ccccc1>>C=C1CO[C@H]2[C@H](O[C@H](COCc3ccccc3)[C@H](OCc3ccccc3)[C@H]2OCc  
 2ccccc2)Sc2ccccc21  
 973 C=CC(F)(F)Oc1ccc(C#N)cc1Br>>C=C1c2cc(C#N)ccc2OC1(F)F  
 974 C=CCN(Cc1ccccc1I)S(=O)(=O)c1ccc(C)cc1>>C=C1CN(S(=O)(=O)c2ccc(C)cc2)Cc2ccccc21  
 975 C=CC(COc1ccccc1I)NC(=O)OCc1ccccc1>>C=C1c2ccccc2OCC1NC(=O)OCc1ccccc1  
 976 C=CCCCC(O)C1=C(Br)CCCCC1>>C=C1CCCC(O)C2=C1CCCCC2  
 977 C=CCn1c(-c2ccc3cc(OC)ccc3c2Br)nc2ccccc21>>C=C1Cn2c(nc3ccccc32)-c2ccc3cc(OC)ccc3c21  
 978 C=CCO[C@H](CS1c1ccccc1Br)[C@H]1O[C@H]2OC(C)(C)O[C@H]2[C@H]1OCc1ccccc1>>C=  
 C1CO[C@H]([C@H]2O[C@H]3OC(C)(C)O[C@H]3[C@H]2OCc2ccccc2)CS2ccccc21  
 979 C=Cc1ccccc1OCc1ccccc1Br>>C1=C\c2ccccc2OCc2ccccc2/1  
 980 C=CC(F)(F)Oc1ccccc1Br>>C=C1c2ccccc2OC1(F)F  
 981 C=CCn1c(N(c2ccc(F)cc2I)S(=O)(=O)c2ccc(C)cc2)cc2cc(OC)ccc21>>COc1ccc2c(c1)cc1n2C/C=C\c2c  
 c(F)ccc2N1S(=O)(=O)c1ccc(C)cc1  
 982 C=CCC(NC1ccc(C)cc1Br)(C(=O)OC)C(C)C>>C=C1CC(C(=O)OC)(C(C)C)NCc2ccc(C)cc21  
 983 C=CCN(C)C(=O)C1(CC(=C)Br)CC/C(=C\c2ccccc2)C1=O>>C=C1CN(C)C(=O)C2(CC/C(=C\c3ccccc  
 3)C2=O)CC1=C  
 984 C=CCc1ccccc1N(Cc1cc(OC)ccc1Br)S(=O)(=O)c1ccc(C)cc1>>C=C1Cc2ccccc2N(S(=O)(=O)c2ccc(C)  
 cc2)Cc2cc(OC)ccc21  
 985 C=CCCOCC1=C(Br)c2cc(OC)ccc2CC1>>C=C1CCOCC2=C1c1cc(OC)ccc1CC2  
 986 C=CCCCOc1ccccc1Br>>C=C1CCCOc2ccccc21  
 987 C=CCc1c(N(CC)C(=O)c2ccccc2I)ccc2oc(=O)ccc12>>C=C1Cc2c(ccc3oc(=O)ccc23)N(CC)C(=O)c2cc  
 ccc21  
 988 C=Cc1cc(O)ccc1N(C)C(=O)c1ccccc1I>>C=C1c2ccccc2C(=O)N(C)c2ccc(O)cc21  
 989 C=CCOc1ccc(C(NC(=O)c2ccccc2)C(=O)OC)cc1I>>C=C1COCc2ccc(C(NC(=O)c3ccccc3)C(=O)OC)cc  
 C=C[C@H](O[Si](C)(C)C(C)(C)C)[C@H](CCCO[Si](C)(C)C(C)(C)C)[C@H](CC(I)=CCO)O[S  
 990 i](C)(C)C(C)(C)C>>C=C1C(=CCO)C[C@H](O[Si](C)(C)C(C)(C)C)[C@H](CCCO[Si](C)(C)C(C)(  
 C)C)[C@H]1O[Si](C)(C)C(C)(C)C  
 991 C=C[C@H]1O[C@H]2OC(C)(C)O[C@H]2[C@H]1N(Cc1ccccc1Br)S(=O)(=O)c1ccc(C)cc1>>  
 C=C1c2ccccc2CN(S(=O)(=O)c2ccc(C)cc2)[C@H]2[C@H]1O[C@H]1OC(C)(C)O[C@H]12  
 992 C=CC1CCCN1Cc1ccccc1I>>C=C1c2ccccc2CN2CCCC12



993 C=CCCC(=O)N(Cc1cccc1)c1cccc1I>>C=C1CCC(=O)N(Cc2cccc2)c2cccc21  
 994 C=CC(OCC(=C)Br)c1cccc(OC)c1>>C=C1COC(c2cccc(OC)c2)C1=C  
 995 C=CCc1c(N(C)C(=O)Cc2cccc2I)ccc2c1ccc(=O)n2C>>C=C1Cc2c(ccc3c2ccc(=O)n3C)N(C)C(=O)Cc  
 996 2cccc21  
C=C(C)C.CCCC(Cl)c1cccc1>>CCCC(C=C(C)C)c1cccc1
