# Supplementary material for: Heck reaction prediction using a transformer model based on a transfer learning strategy
Source: Royal Society of Chemistry journal article supplement (doi:10.1039/d0cc02657c), 2020-01-01

**Table S14D. Comparisons and representative examples of transformer-transfer learning model' predictions, and the model makes chirality error in the reaction prediction of the test 1**

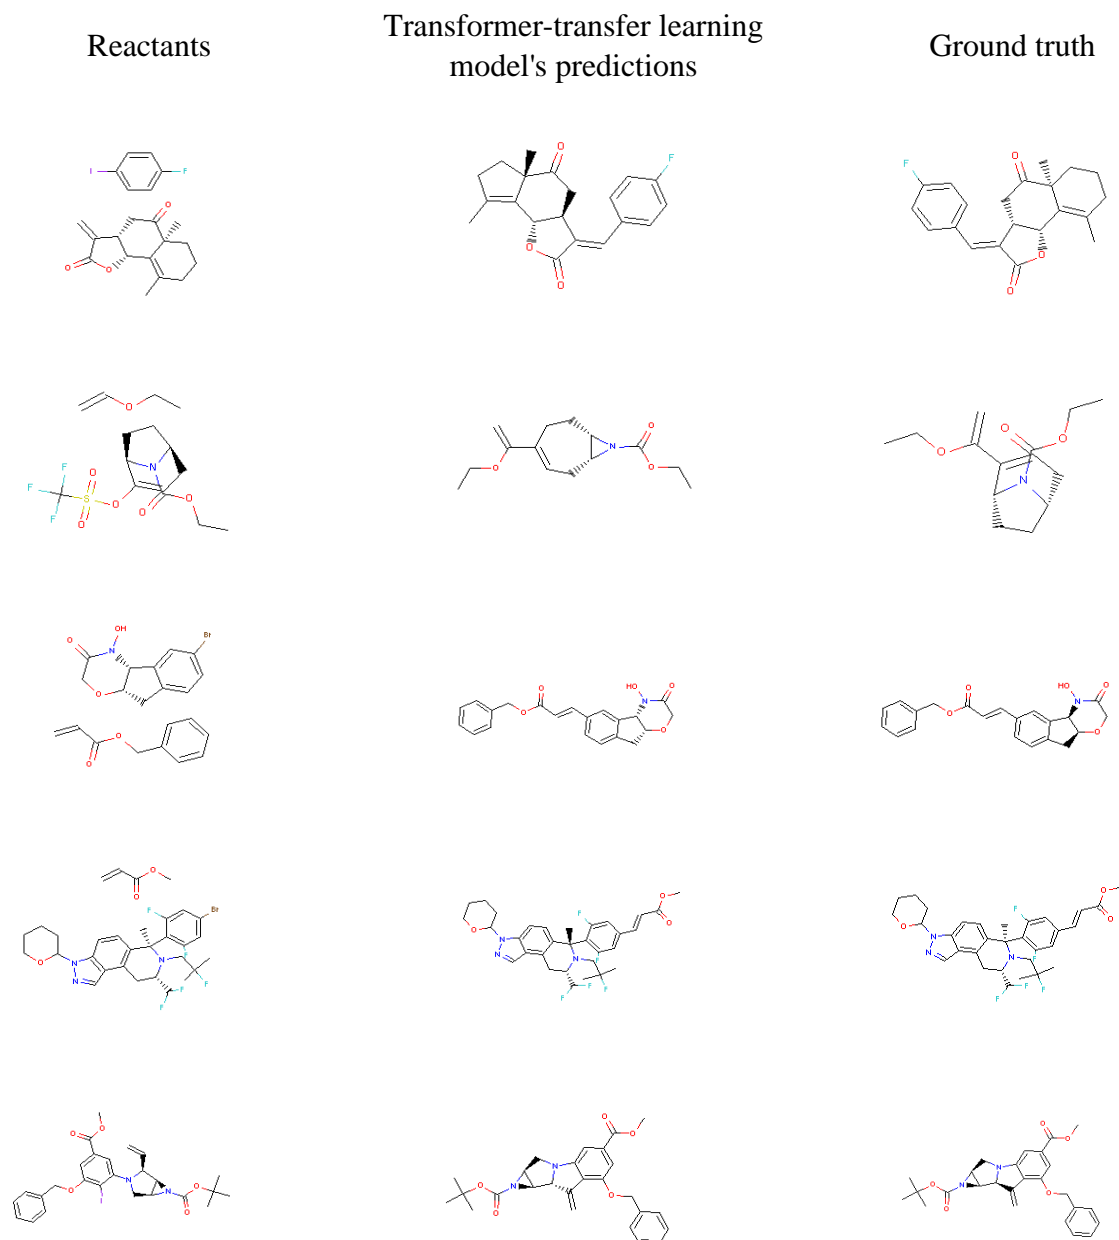

Supplement: d0cc02657c1.zip [file d0cc02657c1.zip]
