# Supplementary material for: Heck reaction prediction using a transformer model based on a transfer learning strategy
Source: Royal Society of Chemistry journal article supplement (doi:10.1039/d0cc02657c), 2020-01-01
Supplement: d0cc02657c1.zip [file d0cc02657c1.zip]

**Table S5A. Intermolecular Heck reaction dataset in our research for transformer-baseline and transformer-transfer learning models**

| Reaction ID | Reaction SMILES                                                                                                                                                                                                                                       |
|-------------|-------------------------------------------------------------------------------------------------------------------------------------------------------------------------------------------------------------------------------------------------------|
| 1           | <chem>C=CC(=O)OC(C)(C)C.N#Cc1ccc(NC=O)c(I)c1&gt;&gt;CC(C)(C)OC(=O)/C=C/c1cc(C#N)ccc1NC=O</chem>                                                                                                                                                       |
| 2           | <chem>C=CC(=O)Nc1ccc(Cl)cc1.CC(C)(C)c1ccc2[nH]c3c(c2c1)CC(=O)Nc1ccc(I)cc1-3&gt;&gt;CC(C)(C)c1ccc2[nH]c3c(c2c1)CC(=O)Nc1ccc(/C=C/C(=O)Nc2ccc(Cl)cc2)cc1-3</chem>                                                                                       |
| 3           | <chem>C=CC(=O)OC.COC(=O)[C@@H](Cc1ccc(OC)c(I)c1)NC(C)=O&gt;&gt;COC(=O)/C=C/c1cc(C[C@@H](N(C)=O)C(=O)C(=O)OC)ccc1OC</chem>                                                                                                                             |
| 4           | <chem>C=C(C)C(=O)OC.O=[N+](O-)[O-]c1cccc1I&gt;&gt;COC(=O)/C(C)=C/c1cccc1[N+](=O)[O-]</chem>                                                                                                                                                           |
| 5           | <chem>BrC1ccc2c(c1)OCO2.C=CC(=O)OCCCC&gt;&gt;CCCCOC(=O)/C=C/c1ccc2c(c1)OCO2</chem>                                                                                                                                                                    |
| 6           | <chem>C=Cc1ccc(C(C)=O)cc1.Cc1ccc(Br)cc1&gt;&gt;CC(=O)c1ccc(/C=C/c2ccc(C)cc2)cc1</chem>                                                                                                                                                                |
| 7           | <chem>C=CCn1c(C)c(C(=O)c2ccc(C)cc2)c2cc(OC)ccc21.C[C@@H](OCc1ccc(I)cc1)C(=O)O&gt;&gt;COc1ccc2c(c1)c(C(=O)c1ccc(C)cc1)c(C)n2C/C=C/c1ccc(CO[C@H](C)C(=O)O)cc1</chem>                                                                                    |
| 8           | <chem>C=C(C)C(=O)OC.Cc1ccc(I)cc1&gt;&gt;COC(=O)/C(C)=C/c1ccc(C)cc1</chem>                                                                                                                                                                             |
| 9           | <chem>C=C.FC(F)(F)c1cccc(CCl)c1&gt;&gt;C=CCc1ccc(C(F)(F)F)c1</chem>                                                                                                                                                                                   |
| 10          | <chem>C=CC(=O)OCC.Cc1cccc(C#C/C=C/c2ccc(Br)cc2)c1&gt;&gt;CCOC(=O)/C=C/c1ccc(/C=C/C#Cc2cccc(C)c2</chem>                                                                                                                                                |
| 11          | <chem>C=CCN(C(=O)OC(C)(C)C(=O)OC(C)(C)C.COC(=O)c1ccc(Cl)cc1&gt;&gt;COC(=O)c1ccc(/C=C/CN(C(=O)OC(C)(C)C)C(=O)OC(C)(C)C)cc1</chem>                                                                                                                      |
| 12          | <chem>C=CC(=O)OC.COc1ccc(CN(C)S(=O)(=O)c2ccc(Br)cc2)cc1&gt;&gt;COC(=O)/C=C/c1ccc(S(=O)(=O)N(C)C2ccc(OC)cc2)cc1</chem>                                                                                                                                 |
| 13          | <chem>C=CC(=O)OC.CC(C)n1cnc2c(NCc3ccc(Br)cc3)nc(N3CCN(C)CC3)nc21&gt;&gt;COC(=O)/C=C/c1ccc(CNc2nc(N3CCN(C)CC3)nc3c2ncn3C(C)C)cc1</chem>                                                                                                                |
| 14          | <chem>C=CC(=O)O[C@@H]1C[C@H](C)CC[C@H]1C(C)C.O=Cc1cccc1Br&gt;&gt;CC(C)[C@@H]1CC[C@@H](C)C[C@H]1OC(=O)/C=C/c1cccc1C=O</chem>                                                                                                                           |
| 15          | <chem>C=C(NC(C)=O)C(=O)OC.CN(C)CCc1c[nH]c2ccc(Br)cc12&gt;&gt;COC(=O)/C=C/c1ccc2[nH]cc(CCN(C)C)c2c1)NC(C)=O</chem>                                                                                                                                     |
| 16          | <chem>C=CC(=O)OC.O=C1Nc2c(Br)cccc2C1(F)F&gt;&gt;COC(=O)/C=C/c1cccc2c1NC(=O)C2(F)F</chem>                                                                                                                                                              |
| 17          | <chem>C=Cc1cnccl.CC(C)(C)OC(=O)N1CC[C@H]1COc1cnccl(Br)c1&gt;&gt;CC(C)(C)OC(=O)N1CC[C@H]1COc1cnccl(/C=C/c2cnccl2)c1</chem>                                                                                                                             |
| 18          | <chem>C=CC(=O)OC.Oc1ccc2nc(Br)sc2c1&gt;&gt;COC(=O)/C=C/c1nc2ccc(O)cc2s1</chem>                                                                                                                                                                        |
| 19          | <chem>C=Cc1ccc(Cl)cc1.CC(=O)c1ccc(Br)cc1&gt;&gt;CC(=O)c1ccc(/C=C/c2ccc(Cl)cc2)cc1</chem>                                                                                                                                                              |
| 20          | <chem>C=COCCCCC.O=S(=O)(OC1=CCCc2cccc21)C(F)(F)F&gt;&gt;C=C(OCCCC)C1=CCCc2cccc21</chem>                                                                                                                                                               |
| 21          | <chem>C=C/C=C/C(=O)N(CCCC)CCCC.N#Cc1ccc(Br)cc1&gt;&gt;CCCCN(CCCC)C(=O)/C=C/C=C/c1ccc(C#N)c</chem>                                                                                                                                                     |
| 22          | <chem>C=CC(=O)OCC.COc1cc(Br)c(CCNC(=O)OC(C)(C)C)cc1OCc1cccc1&gt;&gt;CCOC(=O)/C=C/c1cc(OC)c(OCc2cccc2)cc1CCNC(=O)OC(C)(C)C</chem>                                                                                                                      |
| 23          | <chem>C=Cc1ccc(C)cc1.COC(=O)c1ccc(Br)cc1&gt;&gt;COC(=O)c1ccc(/C=C/c2ccc(C)cc2)cc1</chem>                                                                                                                                                              |
| 24          | <chem>BrC1ccc(C2OCCO2)nc1.C=CC(=O)OCC&gt;&gt;CCOC(=O)/C=C/c1ccc(C2OCCO2)nc1</chem>                                                                                                                                                                    |
| 25          | <chem>C=Cc1ccc(C)cc1.CCOC(=O)C(F)(F)I&gt;&gt;CCOC(=O)C(F)(F)/C=C/c1ccc(C)cc1</chem>                                                                                                                                                                   |
| 26          | <chem>C=Cc1ccc2c(c1)CC[C@@H]1[C@@H]2CC[C@]2(C)[C@@H](O[Si](C)(C)C(C)(C)C)CC[C@@H]12.C[Si](C)(OS(=O)(=O)C(F)(F)F)OS(=O)(=O)C(F)(F)F&gt;&gt;CC(C)(C)[Si](C)(C)O[C@H]1CC[C@H]2[C@@H]3CCc4cc(/C=C/[Si](C)(C)OS(=O)(=O)C(F)(F)F)ccc4[C@H]3CC[C@]12C</chem> |
| 27          | <chem>BrC1cccc1.C=COCCN(C)C&gt;&gt;C=C(OCCN(C)C)c1cccc1</chem>                                                                                                                                                                                        |
| 28          | <chem>C=CC(=O)OC(C)(C)C.OCc1cccc(Br)c1&gt;&gt;CC(C)(C)OC(=O)/C=C/c1cccc(CO)c1</chem>                                                                                                                                                                  |
| 29          | <chem>C=Cc1cnccl.CCCCCCCCCC(=O)N1CCN(c2ccc(Br)cc2)CC1&gt;&gt;CCCCCCCCC(=O)N1CCN(c2ccc(/C=C/c3cnccl3)cc2)CC1</chem>                                                                                                                                    |
| 30          | <chem>C=C.COc1ccc(Br)c(NC(C)=O)c1&gt;&gt;C=Cc1ccc(OC)cc1NC(C)=O</chem>                                                                                                                                                                                |
| 31          | <chem>C=CC(=O)OCCCC.Clc1ccc(Br)cc1&gt;&gt;CCCCOC(=O)/C=C/c1ccc(Cl)cc1</chem>                                                                                                                                                                          |
| 32          | <chem>C=CC(=O)OC.CC(C)(C)/N=C/N1CCCCC1CCc1cccc1I&gt;&gt;COC(=O)/C=C/c1cccc1CCC1CCCCN1/C=N/C(C)(C)C</chem>                                                                                                                                             |
| 33          | <chem>C=CB1OC(C)CC(C)(C)O1.Clc1ccc(I)cc1&gt;&gt;CC1CC(C)(C)OB(/C=C/c2ccc(Cl)cc2)O1</chem>                                                                                                                                                             |
| 34          | <chem>C=C.O/N=C/c1cc(Br)ccc1O&gt;&gt;C=Cc1ccc(O)c(/C=N/O)c1</chem>                                                                                                                                                                                    |
| 35          | <chem>C=Cc1cccc1C.Cc1ccc2c(-c3cccc3)c(Br)c(=O)oc2c1&gt;&gt;Cc1ccc2c(-c3cccc3)c(/C=C/c3cccc3C)c(=O)oc2c1</chem>                                                                                                                                        |
| 36          | <chem>C=CC(=O)N(C)Cc1c(C)n(C)c2cccc12.O=C1Nc2ncc(Br)cc2C12CCC2&gt;&gt;Cc1c(CN(C)C(=O)/C=C/c2cnc3c(c2)C2(CCC2)C(=O)N3)c2cccc2n1C</chem>                                                                                                                |
| 37          | <chem>C=CC(=O)OCC.COc1ccc(-c2cnccl2Br)cc1&gt;&gt;CCOC(=O)/C=C/c1cnccl1-c1ccc(OC)cc1</chem>                                                                                                                                                            |
| 38          | <chem>C=Cc1cccc(O)c1.Oc1cccc(Br)c1&gt;&gt;Oc1cccc(/C=C/c2cccc(O)c2)c1</chem>                                                                                                                                                                          |

39 C=CCOc1ccccc1.FC(F)(F)c1ccc(Br)cc1>>FC(F)(F)c1ccc(/C=C/COc2ccccc2)cc1  
40 C=Cc1ccccc1.Cc1cccc(C)c1Cl>>Cc1cccc(C)c1/C=C/c1ccccc1  
41 C=CC(=O)OC.Ic1enn2c(-c3ccccc3)cc(-c3ccccc3)nc12>>COC(=O)/C=C/c1enn2c(-c3ccccc3)cc(-c3ccccc3)nc12  
42 CC(C)N(C(=O)/C=C/c1ccccc1)C(C)C.Cc1ccc(O)c(Br)c1>>Cc1ccc(O)c(/C(=C/C(=O)N(C(C)C)C(C)C)c2ccccc2)c1  
43 C=CC(=O)OC.Cc1ccc(NCc2ccccc2)c(Br)c1>>COC(=O)/C=C/c1cc(C)ccc1NCc1ccccc1  
44 C=CC#N.CC1Cc2cc(Br)ccc2O1>>CC1Cc2cc(/C=C/C#N)ccc2O1  
45 C=Cc1ccccc1.O=S(=O)(Oc1cccc(C(F)(F)F)c1)C(F)(F)F>>C=C(c1ccccc1)c1cccc(C(F)(F)F)c1  
46 C=CCC(C)C.COC(=O)c1ccc2cc(Br)ccc2c1>>COC(=O)c1ccc2cc(/C=C/CC(C)C)ccc2c1  
47 C=C.ClCc1cc2ccccc2s1>>C=CCc1cc2ccccc2s1  
48 C=CC(=O)OC(C)(C)C.COc1ccccc1Br>>COc1ccccc1/C=C/C(=O)OC(C)(C)C  
49 C=C[C@H](CCCC)OC1CCCCO1.COC(=O)CCCCC1=C(I)CCCC1=O>>CCCCC[C@H]/C=C/C1=C(C)CCCC(=O)OC(C(=O)CC1)OC1CCCCO1  
50 C=CCNC(=O)OC(C)(C)C.CCOC(=O)c1cc(Cl)c(OS(=O)(=O)C(F)(F)F)c(OC)c1>>C=C(CNC(=O)OC(C)(C)C)c1c(Cl)cc(C(=O)OCC)cc1OC  
51 C=CCC(C)C(=O)OCC.COc1ccc(I)cc1>>CCOC(=O)C(C)C/C=C/c1ccc(OC)cc1  
52 C=CC(CCCC)n1nnc2ccccc21.Cc1ccc(I)cc1>>CCCCC(/C=C/c1ccc(C)cc1)n1nnc2ccccc21  
53 Br1ccc2ccnc(N3CCCC3)c2c1.C=CC(=O)OC>>COC(=O)/C=C/c1ccc2ccnc(N3CCCC3)c2c1  
54 C=Cc1ccccc1.Cn1c(-c2ccc([N+](=O)[O-])cc2)c(I)c(=O)c2ccccc21>>Cn1c(-c2ccc([N+](=O)[O-])cc2)c(/C=C/c2ccccc2)c(=O)c2ccccc21  
55 C=Cc1ccccc1.N#Cc1ccc(OS(=O)(=O)C(F)(F)F)cc1>>C=C(c1ccccc1)c1ccc(C#N)cc1  
56 C=Cc1cc(OC(C)=O)cc(OC(C)=O)c1.CC(=O)Oc1ccc(Br)cc1OC(C)=O>>CC(=O)Oc1cc(/C=C/c2ccc(OC(C)=O)c(OC(C)=O)c2)cc(OC(C)=O)c1  
57 C=C.O=C(CC(=O)c1ccc(Br)cc1)c1ccccc1>>C=Cc1ccc(C(=O)CC(=O)c2ccccc2)cc1  
58 C=Cc1ccccc1.O=[N+](=[O-])c1ccc(Cl)nc1>>O=[N+](=[O-])c1ccc(/C=C/c2ccccc2)nc1  
59 C=CC(=O)OC.CN1C(=O)CN=C(c2ccccc2)c2ccc(Br)cc21>>COC(=O)/C=C/c1ccc2c(c1)N(C)C(=O)CN=C2c1ccccc1  
60 C=CC(=O)OC.O=C1c2ccc(OS(=O)(=O)C(F)(F)F)cc2C(=O)N1[C@H](COCc1ccccc1)c1ccccc1>>CO C(=O)/C=C/c1ccc2c(c1)C(=O)N([C@H](COCc1ccccc1)c1ccccc1)C2=O  
61 C=COCCCC.CC(=O)c1cccc(Cl)c1>>C=C(OCCCC)c1cccc(C(C)=O)c1  
62 C=CSCC.Ic1ccccc1>>CCS/C=C/c1ccccc1  
63 C=C(Br)CC.C=CC(=O)OCCCC>>C=C(/C=C/C(=O)OCCCC)CC  
64 C=CCOc1ccccc1.FC(F)(F)c1cccc(I)c1>>FC(F)(F)c1cccc(/C=C/COc2ccccc2)c1  
65 C=CC(=O)CC.CC(C)c1cc(C(C)C)c(Br)c(C(C)C)c1>>CCC(=O)/C=C/c1c(C(C)C)cc(C(C)C)cc1C(C)C  
66 C=CC(C)(C)C.COC(=O)c1ccc(Br)cc1>>COC(=O)c1ccc(/C=C/C(C)(C)C)cc1  
67 C=COCCCC.O=S(=O)(Oc1cccc(C(F)(F)F)c1)C(F)(F)F>>C=C(OCCCC)c1cccc(C(F)(F)F)c1  
68 \*CNCCCOCCOCCOCCNC(=O)COc1ccc(C(Cc2cc(OC)cc(OC)c2)NC(=O)c2ccccc(C=C)c2)cc1.FC(F)(F)c1ccc(I)cc1>>\*CNCCCOCCOCCOCCNC(=O)COc1ccc(C(Cc2cc(OC)cc(OC)c2)NC(=O)c2ccccc(/C=C/c3ccc(C(F)(F)F)cc3)c2)cc1  
69 Br1ccccc1.C=CS(=O)(=O)N1CCC2(CC1)N=C(C1CCCCC1)NC2=O>>O=C1NC(C2CCCCC2)=NC12CCN(S(=O)(=O)/C=C/c1ccccc1)CC2  
70 Br1cnc(Oc2ccccc2)c1.C=CCCO>>OCC/C=C/c1cnc(Oc2ccccc2)c1  
71 C=CC(=O)OCCCC.COc1ccc(Br)c(N(CC2COC(=O)O2)C(=O)C(C)(C)C)n1>>CCCCOC(=O)/C=C/c1c(cc(OC)nc1N(CC1COC(=O)O1)C(=O)C(C)(C)C  
72 C=CCCN1C(=O)c2ccccc2C1=O.Ic1ccc(C2(N3CCCCC3)CCCCC2)cc1>>O=C1c2ccccc2C(=O)N1CC(/C=C/c1ccc(C2(N3CCCCC3)CCCCC2)cc1  
73 C=Cc1ccc(Cl)cc1.O=c1cc(-c2ccccc2)oc2cc(Br)ccc12>>O=c1cc(-c2ccccc2)oc2cc(/C=C/c3ccc(Cl)cc3)ccc12  
74 C=CCCCCCCCCN1C(=O)c2ccccc2C1=O.O=S(=O)(Oc1ccc2ccccc2c1)C(F)(F)F>>C=C(CCCCCCCC N1C(=O)c2ccccc2C1=O)c1ccc2ccccc2c1  
75 Br1cnc2ccccc2c1.C=CC(=O)N(C)C>>CN(C)C(=O)/C=C/c1cnc2ccccc2c1  
76 C=CC(=O)OCC.Ic1ccc2c(c1)OCCOCCOCCOCCO2>>CCOC(=O)/C=C/c1ccc2c(c1)OCCOCCOCCO  
77 C=CC(=O)N(C)OC.Ic1ccc2ccnc2c1>>CON(C)C(=O)/C=C/c1ccc2ccnc2c1  
78 C=CC(OC)OC.FC(F)(F)c1cccc(I)c1>>COC(/C=C/c1cccc(C(F)(F)F)c1)OC  
79 Br1ccc2c(c1)OCCOCCOCCOCCOCCO2.C=C>>C=Cc1ccc2c(c1)OCCOCCOCCOCCOCCO2  
80 C=CC(=O)OCC.CC(C)(C)OC(=O)NCc1ccc(Br)cc1>>CCOC(=O)/C=C/c1ccc(CNC(=O)OC(C)(C)C)cc  
81 C=CC(=O)OCc1ccccc1.O=C1NCCCC[C@H]1N1Cc2c(I)cccc2C1=O>>O=C(/C=C/c1ccc2c1CN([C@H]1CCCCN1=O)C2=O)OCc1ccccc1  
82 C=CN1C(=O)c2ccccc2C1=O.FC(F)(F)c1ccc(Br)cc1>>O=C1c2ccccc2C(=O)N1/C=C/c1ccc(C(F)(F)F)c

83 C=C(NC(C)=O)C(=O)OC.O=[N+](O)c1cc(Br)ccc1F>>COC(=O)/C(=C/c1ccc(F)c([N+](=O)[O-])c1)NC(C)=O  
84 C=CCNC(=O)OC(C)(C)C.N#Cc1cccc1Cl>>C=C(CNC(=O)OC(C)(C)C)c1cccc1C#N  
85 C=COCCN(C)C.O=S(=O)(Oc1cccc2cccc12)C(F)(F)F>>C=C(OCCN(C)C)c1cccc2cccc12  
86 C=Cc1ccccc1.CCCCCCN(CCCCCC)c1ccc2c(c1)C(CC)(CC)c1cc(Br)ccc1-2>>CCCCCCN(CCCCCC)c1ccc2c(c1)C(CC)(CC)c1cc(/C=C/c3ccccc3)ccc1-2  
87 C=CCNC(=O)OCc1cccc1.Clc1cnc2cccc2c1>>C=C(CNC(=O)OCc1cccc1)c1cnc2cccc2c1  
88 \*CNCCOCCOCCOCCNC(=O)COc1ccc(C(Cc2cc(OC)cc(OC)c2)NC(=O)c2ccc(C=C)cc1.CCOc1ccc(I)cc1>>\*CNCCOCCOCCOCCNC(=O)COc1ccc(C(Cc2cc(OC)cc(OC)c2)NC(=O)c2ccc(/C=C/c3ccc(OC)cc3)cc2)cc1  
89 C=C(F)C(C)=O.Ic1cccc1>>CC(=O)/C(F)=C/c1cccc1  
90 Br1cccc2cccc12.C=CC(=O)OCC>>CCOC(=O)/C=C/c1cccc2cccc12  
91 C=CC(=O)OCCCC.Cn1nc(Cl)c2cccc21>>CCCCOC(=O)/C=C/c1nn(C)c2cccc12  
92 C=CC(=O)OC.CCn1cnc2c(NCc3cccc(Br)c3)nc(N3CCOCC3)nc21>>CCn1cnc2c(NCc3cccc(/C=C/C(=O)OC)c3)nc(N3CCOCC3)nc21  
93 C=Cc1ccc(O)c(OC)c1.COC(=O)Cn1c(=O)c(Cl)nc2ccnc21>>COC(=O)Cn1c(=O)c(/C=C/c2ccc(O)c(O)C)c2)nc2ccnc21  
94 C=CP(=O)(OCC)OCC.O=[N+](O)c1cccc(Br)c1>>CCOP(=O)/C=C/c1cccc([N+](=O)[O-])c1)OCC  
95 C=COCCCC.O=C(Cl)c1ccc2cccc2c1>>CCCCO/C=C/C(=O)c1ccc2cccc2c1  
96 C=C.O=[N+](O)c1ccc(Br)cc1>>C=Cc1ccc([N+](=O)[O-])cc1  
97 C=CC(=O)OC.CNc1cccc1I>>CNc1cccc1/C=C/C(=O)OC  
98 C=CC(F)(F)C(F)(F)C(F)(F)C(F)(F)F.CC1=Nc2ccc(I)cc2C1(C)C>>CC1=Nc2ccc(/C=C/C(F)(F)C(F)(F)C(F)(F)C(F)(F)C(F)(F)cc2C1(C)C  
99 C=CC(=O)OC.CC(C)(C)[Si](C)(C)OC[C@H]1O[C@@H](n2cnc(C(N)=O)c2I)[C@H](O[Si](C)(C)C(C)(C)C)[C@@H]1O[Si](C)(C)C(C)(C)C>>COC(=O)/C=C/c1c(C(N)=O)ncn1[C@@H]1O[C@H](CO[Si](C)(C)C(C)(C)C)[C@@H](O[Si](C)(C)C(C)(C)C)[C@H]1O[Si](C)(C)C(C)(C)C  
100 C=Cc1ccc2cccc2c1.Cc1ccc(Cl)cc1>>Cc1ccc(Cl)cc1/C=C/c1ccc2cccc2c1  
101 C=Cc1ccc(OC)cc1.O=[N+](O)c1ccc(I)cc1CO>>COc1ccc(/C=C/c2ccc([N+](=O)[O-])c(CO)c2)cc1  
102 C=Cc1cccc1.CC(=O)c1ccc(Br)cc1>>C=C(c1cccc1)c1ccc(C(C)=O)cc1  
103 C=CCc1ccc2ccnc2n1.CCOC(=O)CC(c1ccc(OC)nc1)c1ncc(Br)n1C>>CCOC(=O)CC(c1ccc(OC)nc1)c1ncc(/C=C/CCc2ccc3ccnc3n2)n1C  
104 C=CC(=O)OCc1cccc1.Oc1ccc2cc(Br)ccc2c1>>O=C(/C=C/c1ccc2cc(O)ccc2c1)OCc1cccc1  
105 C=Cc1cccn1.Clc1ccc(COc2cccc2)c(Br)c1>>Clc1ccc(COc2cccc2)c(/C=C/c2cccn2)c1  
106 C=CC[Si](C)(C)C.CC(=O)c1ccc(Br)cc1>>C=C(C[Si](C)(C)C)c1ccc(C(C)=O)cc1  
107 C=C1C(=O)O[C@H]2[C@H]1CC/C(C)=C/CC[C@@]1(C)O[C@@H]21.FC(F)(F)c1ccc(I)cc1>>C/C1=C[CC[C@@]2(C)O[C@H]2[C@H]2OC(=O)/C=C/c3ccc(C(F)(F)F)cc3)[C@@H]2CC1  
108 C=CC1(O)CCC1.COc1ccc(I)cc1>>COc1ccc(/C=C/C2(O)CCC2)cc1  
109 C=CC(=O)OCC.Cc1cc(O)ccc1Br>>CCOC(=O)/C=C/c1ccc(O)cc1C  
110 C=CC(=O)OC(C)(C)C.COc1ccc(Br)cc1OC>>COc1ccc(/C=C/C(=O)OC(C)(C)C)cc1OC  
111 C=CC(=O)OC.FS(F)(F)(F)c1cccc(I)c1>>COC(=O)/C=C/c1cccc(S(F)(F)(F)F)c1  
112 C=CC(=O)N1CCOCC1.COc1cc2c3cccc3nc3c4ccc(Cl)cc4n(C)c(c1)c23>>COc1cc2c3cccc3nc3c4ccc(/C=C/C(=O)N5CCOCC5)cc4n(C)c(c1)c23  
113 C=C[C@@H]1O[C@H](COC(C)=O)[C@@H](OC(C)=O)[C@H](OC(C)=O)[C@H]1OC(C)=O.CC(C)(C)[Si](C)(C)Oc1cc(Br)ccc1[C@@H]1[C@@H](CC[C@H](O)c2ccc(F)cc2)C(=O)N1c1cccc1>>CC(=O)OC[C@H]1O[C@@H](/C=C/c2ccc([C@@H]3[C@@H](CC[C@H](O)c4ccc(F)cc4)C(=O)N3c3ccc3)c(O[Si](C)(C)C(C)(C)C)c2)[C@H](OC(C)=O)[C@@H](OC(C)=O)[C@@H]1OC(C)=O  
114 C=Cc1ccc(N2CCN(C)CC2)nc1.C[Si](C)(C)CCOCn1nc(I)c2ccc(C=O)cc21>>CN1CCN(c2ccc(/C=C/c3nn(COCC[Si](C)(C)C)c4cc(C=O)ccc34)cn2)CC1  
115 C=CCCC.COC(=O)c1ccc2cc(Br)ccc2c1>>CCC/C=C/c1ccc2cc(C(=O)OC)ccc2c1  
116 C=CC(=O)OC(C)(C)C.CC(C)(C)OC(=O)CCOCc1cc([N+](=O)[O-])ccc1Br>>CC(C)(C)OC(=O)/C=C/c1ccc([N+](=O)[O-])cc1COCCC(=O)OC(C)(C)C  
117 C=CCN(C(=O)OCc1cccc1)C(=O)OC(C)(C)C.N#Cc1ccc(Br)cc1>>CC(C)(C)OC(=O)N(C/C=C/c1ccc(C#N)cc1)C(=O)OCc1cccc1  
118 Br1cccc1.C=Cc1ccc(Cl)cc1>>Clc1ccc(/C=C/c2cccc2)cc1  
119 C=CC(=O)OC.Cc1c(Br)ccc(NS(=O)(=O)c2cccn2)c1C(=O)OCc1cccc1>>COC(=O)/C=C/c1ccc(NS(=O)(=O)c2cccn2)c(C(=O)OCc2cccc2)c1C  
120 C=CC(=O)OCCCC.Cn1nc(Br)c2ccc(C#N)cc21>>CCCCOC(=O)/C=C/c1nn(C)c2cc(C#N)ccc12  
121 Br1cccn1.C=C>>C=Cc1cccn1  
122 C=COCC.O=Cc1ccc(Br)cc1>>C=C(OCC)c1ccc(C=O)cc1  
123 C=CC(OCC)OCC.CC(=O)c1ccc(I)cc1>>CCOC(/C=C/c1ccc(C(C)=O)cc1)OCC  
124 C=COCCOCCO.COC(=O)c1cccc1I>>COC(=O)c1cccc1/C=C/OCCOCCO

125 C=CC(=O)OCC.CC(C)(C)OC(=O)c1cc(COe2ccccc2)ccc1I>>CCOC(=O)/C=C/c1ccc(COe2ccccc2)cc1  
C(=O)OC(C)(C)C  
126 C=COCC.CCOC(=O)C(=O)Cl>>CCO/C=C/C(=O)C(=O)OCC  
127 C=CCCCO.CC(C)(C)c1ccc(Br)cc1>>C=C(CCCO)c1ccc(C(C)(C)C)cc1  
128 C=COCCCC.COe1ccccc1Cl>>C=C(OCCCC)c1ccccc1OC  
129 C=CCO.Clc1ccccc1>>C=C(CO)c1ccccc1  
130 C=Cc1cccc(Cl)c1.COC(=O)c1cc(OC)ccc1Br>>COC(=O)c1cc(OC)ccc1/C=C/c1cccc(Cl)c1  
C=CC(=O)OC.CC(C)(C)OC(=O)NC1(c2ccc(-c3nc4cc(Br)ccn4c3-  
131 c3ccccc3)cc2)CCC1>>COC(=O)/C=C/c1ccn2c(-c3ccccc3)c(-  
c3ccc(C4(NC(=O)OC(C)(C)C)CCC4)cc3)nc2c1  
132 C=C[Si](C)(C)c1ccccc1.COe1ccc(I)cc1>>COe1ccc(/C=C/[Si](C)(C)c2ccccc2)cc1  
133 C=Cc1ccc(OC)cc1.O=C(O)c1ccc(Br)cc1>>COe1ccc(/C=C/c2ccc(C(=O)O)cc2)cc1  
134 C=Cc1ccc(OC)cc1.CC(Br)C(=O)Oe1ccccc1>>COe1ccc(/C=C/C(C)C(=O)Oe2ccccc2)cc1  
135 C=CC(=O)N(C)Cc1oc2ccccc2c1C.CS(=O)(=O)N1CCNc2ncc(Br)cc2C1>>Cc1c(CN(C)C(=O)/C=C/c2  
cnc3c(c2)CN(S(C)(=O)=O)CCN3)oc2ccccc12  
136 C=Cc1ccccc1.Cc1ccc(Br)c1>>Cc1ccc(/C=C/c2ccccc2)c1  
137 C=Cc1ccccc1.COe1ccc(Cn2nc(I)c3ccccc32)c1>>COe1ccc(Cn2nc(/C=C/c3ccccc3)c3ccccc32)c1  
138 Brc1ccc2cnccc2c1.C=CC(=O)OCC>>CCOC(=O)/C=C/c1ccc2cnccc2c1  
139 C=C[C@]1(C(=O)O)CC[C@H](OC)CC1.C[C@H](NC(=O)OC(C)(C)C)c1ccc2ccc(Br)cc2n1>>CO[  
C@H]1CC[C@]/C=C/c2ccc3ccc([C@H](C)NC(=O)OC(C)(C)C)nc3c2)(C(=O)O)CC1  
140 C=C(NC(=O)OC(C)(C)C)C(=O)OC.Cc1cc(I)ccc1N>>COC(=O)/C=C/c1ccc(N)c(C)c1)NC(=O)OC(C)  
141 C=CC(=O)OCC.Ic1c(-c2ccccc2)nc2ccccc2c1-c1ccccc1>>CCOC(=O)/C=C/c1c(-  
c2ccccc2)nc2ccccc2c1-c1ccccc1  
142 C=C.Cc1ccc(S(=O)(=O)n2ccccc2CCl)cc1>>C=CCc1cccn1S(=O)(=O)c1ccc(C)cc1  
143 C=CC(=O)OC.FC(F)(F)c1ccc(NCc2ccccc2)c(Br)c1>>COC(=O)/C=C/c1cc(C(F)(F)F)ccc1NCc1ccccc1  
144 C=C(C)C(=O)OC.CN(C)c1ccc(Br)cc1>>COC(=O)/C(C)=C/c1ccc(N(C)C)cc1  
C=Cc1ccc(OC)c(OC)c1.CC(=O)OC[C@H]1O[C@@H](Oc2ccc(I)cc2)[C@H](OC(C)=O)[C@@H](O  
145 C(C)=O)[C@@H]1OC(C)=O>>COc1ccc(/C=C/c2ccc(O[C@@H]3O[C@H](COC(C)=O)[C@@H](O  
C(C)=O)[C@H](OC(C)=O)[C@H]3OC(C)=O)cc2)cc1OC  
146 Brc1ccccc1C1OCCO1.C=CC(=O)OC>>COC(=O)/C=C/c1ccccc1C1OCCO1  
147 C=C(CC(=O)OC)C(=O)OC.Ic1ccccc1>>COC(=O)C/C=C/c1ccccc1)C(=O)OC  
148 C=Cc1ccccc1.N#Cc1ccccc1-c1cc(Br)cn(-c2ccccc2)c1=O>>N#Cc1ccccc1-c1cc(/C=C/c2ccccc2)cn(-  
c2ccccc2)c1=O  
149 C=C1C(=O)O[C@@H]2C[C@@]3(C)CCCC(=C)[C@@H]3C[C@H]12.Cn1c(=O)c2c(nc(Br)n2C)n(C)  
c1=O>>C=C1CCC[C@]2(C)C[C@H]3OC(=O)/C(=C/c4nc5c(c(=O)n(C)c(=O)n5C)n4C)[C@H]3C[C  
150 C=CC[Si](C)(C)C.C[Si](C)(C)I>>C[Si](C)(C)/C=C/C[Si](C)(C)C  
151 C=Cc1ccc(O)cc1.Cn1nc(Br)c2ccccc21>>Cn1nc(/C=C/c2ccc(O)cc2)c2ccccc21  
152 C=Cc1ccccc1.Cc1ccc(-c2c(Br)c(=O)oc3cc(C)ccc23)cc1>>Cc1ccc(-  
c2c(/C=C/c3ccccc3)c(=O)oc3cc(C)ccc23)cc1  
153 C=C[C@@H](CO[Si](C)(C)C(C)(C)C)NC(=O)OCc1ccccc1.COe1ccc2cc(Br)ccc2c1>>COe1ccc2cc(/C  
=C/[C@@H](CO[Si](C)(C)C(C)(C)C)NC(=O)OCc3ccccc3)ccc2c1  
154 C=CCn1c(-c2ccc(OC)cc2F)nc2ccccc2c1=O.O=C(CN1C(=O)COe2ccccc21)c1ccc(Br)cc1>>COe1ccc(-  
c2nc3ccccc3c(=O)n2C/C=C/c2ccc(C(=O)CN3C(=O)COe4ccccc43)cc2)c(F)c1  
155 C=CC(=O)OC.CC1(C)c2ccccc2-c2ccc(I)cc21>>COC(=O)/C=C/c1ccc2c(c1)C(C)(C)c1ccccc1-2  
156 C=Cc1ccccc1.O=Cc1c[nH]c2ccc(Br)cc12>>O=Cc1c[nH]c2ccc(/C=C/c3ccccc3)cc12  
157 C=Cc1ccc(OC)cc1.O=Cc1ccccc1(Br)c1>>COe1ccc(/C=C/c2ccccc2)cc1  
158 C=CC(=O)OC.Cc1cc(-c2ccccc2)n2nc(-c3ccc(Cl)cc3)c(I)c2n1>>COC(=O)/C=C/c1c(-  
c2ccc(Cl)cc2)nn2c(-c3ccccc3)cc(C)nc12  
159 C=CC(=O)OC(C)(C)C.Fc1ccc(I)cc1>>CC(C)(C)OC(=O)/C=C/c1ccc(F)cc1  
160 C=Cc1ccc([N+](=O)[O-])cc1.Oc1ccc(I)cc1>>O=[N+](O-)]c1ccc(/C=C/c2ccc(O)cc2)cc1  
161 C=Cc1ccccc1.COC(=O)CCNc1ccc(Br)cc1>>COC(=O)CCNc1ccc(/C=C/c2ccccc2)cc1  
162 C=C(OC(C)=O)C(=O)OCC(F)(F)F.COe1ccc(I)cc1>>COe1ccc(/C=C(\OC(C)=O)C(=O)OCC(F)(F)F)cc  
163 C=C(F)C(=O)OC.Cc1ccccc1I>>COC(=O)/C(F)=C/c1ccccc1C  
164 C=CCCCCCCCC.Ic1ccccc1>>CCCCCCCCC/C=C/c1ccccc1  
165 C=CC(C)CC.Fc1ccc(CCl)c1>>C=C(Cc1ccc(F)c1)C(C)CC  
166 C=Cc1ccccc1.O=C(/C=C/c1ccccc1)c1ccc(I)cc1>>O=C(/C=C/c1ccccc1)c1ccc(/C=C/c2ccccc2)cc1  
167 C=Cc1ccccc1([N+](=O)[O-])c1.Ic1ccccc1>>O=[N+](O-)]c1ccc(/C=C/c2ccccc2)c1  
168 C=C(NC(=O)OC(C)(C)C)C(=O)OCc1ccccc1.CC(=O)OC1Cc2ccc(Br)cc2C1>>CC(=O)OC1Cc2ccc(/C  
=C/NC(=O)OC(C)(C)C)C(=O)OCc3ccccc3)cc2C1  
169 C=C[Si](C)(C)c1ccccc1.CC(=O)c1ccc(I)cc1>>CC(=O)c1ccc(/C=C/[Si](C)(C)c2ccccc2)cc1

170 C=CC(=O)OCC.CCCCCCCCCCCCc1cccc(Br)c1>>CCCCCCCCCCCCc1cccc(/C=C/C(=O)OCC)c1  
171 C=CC(N)=O.Cc1nc2cc(-c3ccccc3)c(-c3ccc(C4(NC(=O)OC(C)(C)C)CCC4)cc3)nn2c1Br>>Cc1nc2cc(-  
172 c3ccccc3)c(-c3ccc(C4(NC(=O)OC(C)(C)C)CCC4)cc3)nn2c1/C=C/C(N)=O  
173 C=Cc1cccc1.CCc1enc(CC)c(Cl)n1>>CCc1enc(CC)c(/C=C/c2ccccc2)n1  
174 C=CCCC(=O)OCc1cccc1.N#Cc1ccc(I)cc1C#N>>N#Cc1ccc(/C=C/CCC(=O)OCc2ccccc2)cc1C#N  
175 C=Cc1ccccn1.O=Cc1ccc2c(I)n[nH]c2c1>>O=Cc1ccc2c(/C=C/c3ccccc3)n[nH]c2c1  
176 C=C1C[C@H]2[C@@H]3CCc4cc(OC)ccc4[C@H]3CC[C@]2(C)C1=O.FC(F)(F)c1ccc(Br)cc1>>COc  
177 1ccc2c(c1)CC[C@@H]1[C@@H]2CC[C@]2(C)C(=O)/C=C/c3ccc(C(F)(F)F)cc3)[C@H]12  
178 C=CC(C)=O.C=CI>>C=C/C=C/C(C)=O  
179 C=CC(=O)OCCCC.CC(C)(C)c1ccc(I)cc1>>CCCCOC(=O)/C=C/c1ccc(C(C)(C)C)cc1  
180 C=CC(=O)OC.CCCCN1enc2c(NCc3cccc(Br)c3)nc(N3CCOCC3)nc21>>CCCN1enc2c(NCc3cccc(/C=  
181 C/C(=O)OC)c3)nc(N3CCOCC3)nc21  
182 C=CC(=O)OCC.CN(C)c1ccc(Br)cc1>>CCOC(=O)/C=C/c1ccc(N(C)C)cc1  
183 C=CC(C)=O.COc1ccc(I)cc1>>COc1ccc(/C=C/C(C)=O)cc1  
184 C=Cc1ccc(C)cc1.Oc1cccc1I>>Cc1ccc(/C=C/c2ccccc2O)cc1  
185 C=CC(C)=O.CCN1cc(I)c(=O)c2ccc(C)nc21>>CCN1cc(/C=C/C(C)=O)c(=O)c2ccc(C)nc21  
186 C=CC(=O)OCC.CC[C@]12C=CCN3CC[C@]4(C(=C(C(=O)OC)C1)Nc1ccc(I)cc14)[C@@H]32>>CC  
187 OC(=O)/C=C/c1ccc2c(c1)[C@@]13CCN4CC=C[C@@](CC)(CC(C(=O)OC)=C1N2)[C@H]43  
188 C=CC(=O)OC.Cc1ccc(Br)c(C=O)c1>>COC(=O)/C=C/c1ccc(C)cc1C=O  
189 C=Cc1cccc1.Clc1cccc1I>>Clc1cccc1/C=C/c1cccc1  
190 C=CNC(C)=O.N#Cc1ccc(Cl)cc1>>C=C(NC(C)=O)c1ccc(C#N)cc1  
191 Brc1cccc1.C=C[Si](C)(C)Cl>>C[Si](C)(Cl)/C=C/c1cccc1  
192 C=CCN1C(=O)c2ccccc2C1=O.N#Cc1ccc(Br)cc1>>N#Cc1ccc(/C=C/CN2C(=O)c3ccccc3C2=O)cc1  
193 C=CC(=O)OCC.Cc1ccc(I)cc1C>>CCOC(=O)/C=C/c1ccc(C)c(C)c1  
194 C/C(=N)c1c(C(C)C)cccc1C(C)C)n1nc2ccc(Br)cc21.C=CC(=O)OC>>COC(=O)/C=C/c1ccc2cnn(/C(C)  
195 =N/c3c(C(C)C)cccc3(C)C)c2c1  
196 Brc1cccc(I)c1.COC[C@@H](/N=C(\c1cccc1)N1C=CCC[C@H]1C)C(C)C>>COC[C@@H](/N=C(\c1  
197 ccccc1)N1C=C(c2ccc(Br)c2)CC[C@H]1C)C(C)C  
198 C=C1CC(c2ccc(C)cc2)OC1=O.Ic1cccc1-c1ccc2ccccc2e1>>Cc1ccc(C2C/C(=C)c3ccccc3-  
199 c3ccc4ccccc4c3)C(=O)O2)cc1  
200 C=C/C=C/CCCCC.COC(=O)c1ccc(I)cc1>>CCCCC/C=C/C=C/c1ccc(C(=O)OC)cc1  
201 C=CC(=O)OCC(CC)CCCC.Ic1cccc1>>CCCCC(CC)COC(=O)/C=C/c1cccc1  
202 Brc1ccc2ccc3ccccc4ccc1c2c34.C=Cc1ccc(C)cc1>>Cc1ccc(/C=C/c2ccc3ccc4ccccc5ccc2c3c45)cc1  
203 C=Cc1cccc1.COC1CCCC1I>>COC1CCCC1/C=C/c1cccc1  
204 C=Cc1ccc(F)cc1.OCc1ccc(F)cc1Br>>OCc1ccc(F)cc1/C=C/c1ccc(F)cc1  
205 C=Cc1ccc(OC)c(OC)c1.O=C(Nc1cccc1I)c1cccc2ccccc12>>COc1ccc(/C=C/c2ccccc2NC(=O)c2ccccc3  
206 ccccc23)cc1OC  
207 Brc1ccc2ccnc(N3CCCC3)c2c1.C=CC(C)=O>>CC(=O)/C=C/c1ccc2ccnc(N3CCCC3)c2c1  
208 C=C[C@H](CCCCCCCC)CC(OC)OC.Ic1cccc1>>CCCCCCCC[C@@H](/C=C/c1cccc1)CC(OC)OC  
209 C=CC(=O)O.O=S(=O)(Nc1cccc(I)c1)c1ccc(Cl)cc1>>O=C(O)/C=C/c1cccc(NS(=O)(=O)c2ccc(Cl)cc2)  
210 C=CC(=O)OC(C)(C)C.COc1ccc2c(C(=O)c3cc(OC)c(OC)c(OC)c3)cn(S(=O)(=O)c3cccc(Br)c3)c2c1>>  
211 COc1ccc2c(C(=O)c3cc(OC)c(OC)c(OC)c3)cn(S(=O)(=O)c3cccc(/C=C/C(=O)OC(C)(C)C)c3)c2c1  
212 C=Cc1ccncc1.O=[N+][([O-])c1cccc(I)c1>>O=[N+][([O-])c1cccc(/C=C/c2ccccc2)c1  
213 Brc1ccc(I)cc1.C=CC(=O)OC(C)(C)C>>CC(C)(C)OC(=O)/C=C/c1ccc(Br)cc1  
214 C=CCNC(=O)OC(C)(C)C.CC1(C)OC(=O)c2c(cc(OCc3ccc(F)cc3)cc2OS(=O)(=O)C(F)(F)F)O1>>C  
215 C(C)(C)OC(=O)NC/C=C/c1cc(OCCc2ccc(F)cc2)cc2c1C(=O)OC(C)(C)O2  
216 C=CC(=O)O.N[C@@H](Cc1c[nH]c2c(Br)cccc12)C(=O)O>>N[C@@H](Cc1c[nH]c2c(/C=C/C(=O)O)  
217 cccc12)C(=O)O  
218 C=Cc1cccc(C)n1.C[Si](C)(C)I>>Cc1cccc(/C=C/[Si](C)(C)C)n1  
219 C=CC(=O)OC.O=c1c(Br)cc2ccccc12>>COC(=O)/C=C/c1ccc2ccccc2c1=O  
220 C=Cc1ccc(OC)cc1.O=C(OCCCC(Br)C(F)(F)F)c1cccc1>>COc1ccc(/C=C/C(OCCCC(=O)c2ccccc2)C(  
221 F)(F)F)cc1  
222 C=CCCC(=O)O.FC(F)(F)c1ccc(I)cc1>>O=C(O)CC/C=C/c1ccc(C(F)(F)F)cc1  
223 C=Cc1cccc1.O=S(=O)(Oc1ccc2ncccc2c1)C(F)(F)F>>C=C(c1cccc1)c1ccc2ncccc2c1  
224 C=CC(=O)OC.CC(C)(C)OC(=O)Cn1c(Br)enc(NC2CCC2)c1=O>>COC(=O)/C=C/c1ccc(NC2CCC2)c(  
225 =O)n1CC(=O)OC(C)(C)C  
226 C=C1C(=O)O[C@H]2[C@H]1CCC(=C)[C@@H]1C[C@H](OC(C)=O)C(=C)[C@H]21.O=[N+][([O-]  
227 ])c1cc(Cl)ccc1I>>C=C1CC[C@H]2/C=C(\c3ccc(Cl)cc3[N+](=O)[O-]  
228 )C(=O)O[C@@H]2[C@H]2C(=C)[C@@H](OC(C)=O)C[C@@H]12  
229 C=COCCCC.COc1cc(Cl)cc(OC)c1>>C=C(OCCCC)c1cc(OC)cc(OC)c1

C=CC(=O)Nc1cccc2ccccc12.O=[N+](I(O-))c1cccc(I)c1>>O=C(/C=C/c1cccc([N+])(O-)  
 )c1)Nc1cccc2ccccc12  
 C=CC(=O)OC.COc1ccc(I)c(NC(=O)C(C)(C)C)c(OC)c1[Si](C)(C)C>>COC(=O)/C=C/c1cc(OC)c([Si](C)  
 )(C)C)c(OC)c1NC(=O)C(C)(C)C  
 C=CC(=O)OCCCC.CC(=O)c1ccc2cc(Br)ccc2o1>>CCCCOC(=O)/C=C/c1ccc2oc(C(C)=O)cc2c1  
 C=CCN(CC=C)c1ccc2c(OS(=O)(=O)C(F)(F)F)cc(=O)[nH]c2c1.C=COCCCC>>C=CCN(CC=C)c1ccc2  
 c(C(=C)OCCCC)cc(=O)[nH]c2c1  
 C=COCCCC.CC(=O)c1cccc(Br)c1>>C=C(OCCCC)c1cccc(C(C)=O)c1  
 C=CC(=O)OC.COc1ccc(Br)c2c3c1O[C@H]1[C@@H](O[Si](C)(C)C(C)(C)C)C=C[C@@H]4[C@@H]  
 (C2)N(C)CC[C@@]341>>COC(=O)/C=C/c1cc(OC)c2c3c1C[C@@H]1[C@H]4C=C[C@H](O[Si](C)(C)  
 C(C)(C)C)[C@H](O2)[C@]34CCN1C  
 C=CC(=O)OC(C)(C)C.Cn1c(=O)c2c(nc(Br)n2C)n(C)c1=O>>Cn1c(=O)c2c(nc(/C=C/C(=O)OC(C)(C)  
 C)n2C)n(C)c1=O  
 Br1nn(Cc2ccccc2)c2ccccc12.C=CC(=O)OCCCC>>CCCCOC(=O)/C=C/c1nn(Cc2ccccc2)c2ccccc12  
 C=Cc1ccc(/C=C/c2ccc(N)cc2)cc1.O=C(ON1C(=O)CCC1=O)c1ccc(I)cc1>>Nc1ccc(/C=C/c2ccc(/C=C/  
 c3ccc(C(=O)ON4C(=O)CCC4=O)cc3)cc2)cc1  
 C=CC(C)(C)O.O=S(=O)(c1cccc1)n1ccc2ccc(Br)cc21>>CC(C)(O)/C=C/c1ccc2ccn(S(=O)(=O)c3cccc  
 c3)c2c1  
 C=CC#N.CC(C)N(CC[C@H](c1cccc1)c1ccc(Br)ccc1OCc1cccc1)C(C)C>>CC(C)N(CC[C@H](c1ccc  
 cc1)c1ccc(/C=C/C#N)ccc1OCc1cccc1)C(C)C  
 C=Cc1ccc(C(=O)OC)cc1.FC(F)(F)C(F)(F)C(F)(F)C(F)(F)C(F)(F)Br>>COC(=O)c1ccc(/C=C/C  
 (F)(F)C(F)(F)C(F)(F)C(F)(F)C(F)(F)C(F)(F)F)cc1  
 BrC1=CCCCC12OCCO2.C=CC(=O)OC>>COC(=O)/C=C/C1=CCCCC12OCCO2  
 C=COCCCC.CC(C)(C)C(=O)Oc1ccc(OS(=O)(=O)C(F)(F)F)cc1>>C=C(OCCCC)c1ccc(OC(=O)C(C)(  
 C)C)cc1  
 C=Cc1cccc1.COc1ccc(C#Cc2ccc(Br)cc2)cc1>>COc1ccc(C#Cc2ccc(/C=C/c3ccccc3)cc2)cc1  
 C=Cc1cccc1.Ic1ccccc1>>C(=C/c1ccccc1)c1ccccc1  
 Br1ccc(-c2nc3ccccc3[nH]2)cc1.C=CC(=O)OC>>COC(=O)/C=C/c1ccc(-c2nc3ccccc3[nH]2)cc1  
 C=Cc1cccc1.Cc1cnc(C)c(Cl)n1>>Cc1cnc(C)c(/C=C/c2ccccc2)n1  
 C=CCCC.Oc1ccc(O)c(Br)c1>>CCCC/C=C/c1cc(O)ccc1O  
 C=CB1OC(C)CC(C)(C)O1.Fc1ccc(I)cc1>>CC1CC(C)(C)OB(/C=C/c2ccc(F)cc2)O1  
 C=C[C@H]1CN(S(=O)(=O)c2ccc(C)cc2)[C@H](c2ccc(OC)cc2)N1OC.Ic1ccccc1>>COc1ccc([C@@H]  
 ]2N(OC)[C@H](/C=C/c3ccccc3)CN2S(=O)(=O)c2ccc(C)cc2)cc1  
 C=Cc1cccc1.Clc1ccc2c(c1)oc1ccccc12>>C(=C/c1ccc2c(c1)oc1ccccc12)c1ccccc1  
 C=Cc1ccc(F)cc1.CCCCC(Br)C(F)(F)F>>CCCCC(/C=C/c1ccc(F)cc1)C(F)(F)F  
 C=CC(=O)OC(C)(C)C.COc1ccc2c(c1)CCN(c1ccc(C(C)C)s1)C2(C)c1ccc(Br)cc1>>COc1ccc2c(c1)CC  
 N(c1ccc(C(C)C)s1)C2(C)c1ccc(/C=C/C(=O)OC(C)(C)C)cc1  
 C=CC(=O)OC.OC/C=C/C1=C(Br)CCCC1>>COC(=O)/C=C/C1=C(/C=C/CO)CCCC1  
 C=Cc1ccc(C)c(C)c1.CCOC(=O)C(F)(F)Br>>CCOC(=O)C(F)(F)/C=C/c1ccc(C)c(C)c1  
 Br1cccc2ccccc12.C=CCS(N)(=O)=O>>NS(=O)(=O)C/C=C/c1cccc2ccccc12  
 C=COCCOC=C.COc1ccc(Br)cc1>>C=COCCOC(=C)c1ccc(OC)cc1  
 Br1ccc(-c2cccs2)s1.C=CC(=O)OCCCCC>>CCCCCOC(=O)/C=C/c1ccc(-c2cccs2)s1  
 C=CNC(C)=O.CC(=O)c1ccc(Br)cc1>>C=C(NC(C)=O)c1ccc(C(C)=O)cc1  
 C=Cc1ccc(OC)cc1.O=c1c(Br)c(-c2ccccc2)oc2ccccc12>>COc1ccc(/C=C/c2c(-  
 c3ccccc3)oc3ccccc3c2=O)cc1  
 C=CC[C@H](C)O.CC(C)Oc1cnc(Br)c1>>CC(C)Oc1cnc(/C=C/C[C@H](C)O)c1  
 C=Cc1cnc1.COc1cc(Nc2c(C#N)cnc3ccc(Br)ccc23)cc(OC)c1OC>>COc1cc(Nc2c(C#N)cnc3ccc(/C=C/  
 c4cnc1c4)ccc23)cc(OC)c1OC  
 C=Cc1cnc1.CCCCN(CCCC)c1ccc(/C=C/c2ccc(Br)cc2)cc1>>CCCN(CCCC)c1ccc(/C=C/c2ccc(/C=  
 C/c3ccccc3)cc2)cc1  
 C=CC(=O)OC(C)(C)C.CC(C)=CCc1cc(I)ccc1OC(=O)CCc1cccc(F)c1>>CC(C)=CCc1cc(/C=C/C(=O)  
 OC(C)(C)C)ccc1OC(=O)CCc1cccc(F)c1  
 C=C.COc1ccc(CCl)cc1>>C=CCc1ccc(OC)cc1  
 C=C[C@H]1C[C@H]2CC[C@@H](C(=O)OC)N2C(=O)[C@@](Cc2ccccc2)(NC(=O)OCc2ccccc2)[C  
 @@H]1OC(C)=O.O=[N+](I(O-  
 )c1ccc(Br)cc1>>COC(=O)[C@@H]1CC[C@@H]2C[C@H](/C=C/c3ccc([N+])(O-  
 )cc3)[C@@H](OC(C)=O)[C@]1(Cc3ccccc3)(NC(=O)OCc3ccccc3)C(=O)N12  
 C=CC(=O)N(C)Cc1oc2ccccc2c1C.O=C1CNc2cc(Br)cnc2N1>>Cc1c(CN(C(C)=O)/C=C/c2cnc3c(c2)  
 CNCC(=O)N3)oc2ccccc12  
 C=CCCCC(O)C(=O)OC.Fc1ccc(Br)cn1>>COC(=O)C(O)CCCC/C=C/c1ccc(F)nc1  
 C=CC(=O)OC.CN1C(=O)C(=O)c2ccc(Br)cc21>>COC(=O)/C=C/c1ccc2c(c1)N(C)C(=O)C2=O

255 C=CC(=O)OC.CN(C)CCCOc1ccc(I)cc1Br>>COC(=O)/C=C/c1ccc(OCCCN(C)C)c(Br)c1  
 256 C=Cc1cncnc1.COc1ccc(Br)cc1>>COc1ccc(/C=C/c2cncnc2)cc1  
 257 C=Cc1cccc1.FC(F)(F)c1cccc1I>>FC(F)(F)c1cccc1/C=C/c1cccc1  
 258 C=CC(=O)OC(C)(C)C.O=c1oc2cc(O)ccc2c(Cc2ccc(Br)cc2)c1Cl>>CC(C)(C)OC(=O)/C=C/c1ccc(Cc2  
 c(Cl)c(=O)oc3ccc(O)ccc23)cc1  
 259 C=C(C)C(=O)O.COc1ccc(I)cc1>>COc1ccc(/C=C(\C)C(=O)O)cc1  
 260 C=CCOC(C)=O.COc1ccc([I+][O-])c1ccc(OC)cc2>>COc1ccc(/C=C/COC(C)=O)cc1  
 261 C=CC(=O)OCC.O=[N+][O-]c1ccc(-c2cccc2I)cc1>>CCOC(=O)/C=C/c1cccc1-c1ccc([N+](=O)[O-]  
 C=CC(=O)OC.O=c1[nH]c(=O)n([C@H]2C[C@H](O)[C@@H](CO)O2)cc1I>>COC(=O)/C=C/c1cn([  
 C@H]2C[C@H](O)[C@@H](CO)O2)c(=O)[nH]c1=O  
 263 C=Cc1cccc1.O=c1oc2cc(F)ccc2c(-c2cccc2)c1Br>>O=c1oc2cc(F)ccc2c(-c2cccc2)c1/C=C/c1cccc1  
 264 C=C.COC(=O)c1cccc1Br>>C=Cc1cccc1C(=O)OC  
 265 C=CC(C)=O.N#Cc1c(-c2cccc(Br)c2)cc(-c2cccc2)nc1N>>CC(=O)/C=C/c1cccc(-c2cc(-  
 c3cccc3)nc(N)c2C#N)c1  
 266 C=Cc1cccc1.CCC(=O)Nc1ccc(Br)cc1C(=O)OC>>CCC(=O)Nc1ccc(/C=C/c2cccc2)cc1C(=O)OC  
 267 C=CC(=O)OC.COc1ccc2c(Oc3ccc(Br)cc3)csc2c1>>COC(=O)/C=C/c1ccc(Oc2csc3cc(OC)ccc23)cc1  
 268 C=C/C=C(/OCC)[Si](C)(C)C.Cc1cccc1I>>CCO/C=C/C=C/c1cccc1C)[Si](C)(C)C  
 269 C=C.COC(=O)c1ccc(Br)c([N+](=O)[O-])c1>>C=Cc1ccc(C(=O)OC)cc1[N+](=O)[O-]  
 270 C=CC(=O)OC(C)(C)C.O=Cc1ccc(I)cc1>>CC(C)(C)OC(=O)/C=C/c1ccc(C=O)cc1  
 271 C=Cc1cccc1C.Nc1cc([N+](=O)[O-])ccc1Br>>Cc1cccc1/C=C/c1ccc([N+](=O)[O-])cc1N  
 272 C=Cc1ccc(Br)cc1.CC(C)(C)OC(=O)NCC(=O)Nc1ccc(I)cc1>>CC(C)(C)OC(=O)NCC(=O)Nc1ccc(/C=  
 C/c2ccc(Br)cc2)cc1  
 273 C=Cc1ccc(OC)cc1.COc1ccc(OC)c(I)c1>>COc1ccc(/C=C/c2cc(OC)ccc2OC)cc1  
 274 C=C.COC(=O)c1ccc2cc(Br)ccc2c1>>C=Cc1ccc2cc(C(=O)OC)ccc2c1  
 275 C=CC(=O)OCC.O=Cc1cc([N+](=O)[O-])ccc1Br>>CCOC(=O)/C=C/c1ccc([N+](=O)[O-])cc1C=O  
 276 C=Cc1ccc([N+](=O)[O-])cc1.Oc1ccc(/N=N/c2ccc(Br)cc2)cc1>>O=[N+][O-]  
 ]c1ccc(/C=C/c2ccc(/N=N/c3ccc(O)cc3)cc2)cc1  
 277 C=CC(=O)Nc1cccc1NC(=O)OC(C)(C)C.CCN(CC)C1CCN(CC(C(=O)Nc2ccc(Cl)cc2)c2ccc(Br)cc2)C  
 1>>CCN(CC)C1CCN(CC(C(=O)Nc2ccc(Cl)cc2)c2ccc(/C=C/C(=O)Nc3cccc3NC(=O)OC(C)(C)C)cc2  
 278 C=C1c2cccc2C1(C#N)CC.COc1ccc(Br)cc1>>CCC1(C#N)/C=C/c2ccc(OC)cc2)c2cccc21  
 279 C=Cc1cccc1.COc1ccc(/C=C/c2ccc3ccc4ccc(Br)cc4c3c2)cc1>>COc1ccc(/C=C/c2ccc3ccc4ccc(/C=C/c  
 5cccc5)cc4c3c2)cc1  
 280 C=Cc1c(F)c(F)c(F)c(F)c1F.Ic1cc2cccc2s1>>Fc1c(F)c(F)c(/C=C/c2cc3cccc3s2)c(F)c1F  
 281 C=CS(=O)(=O)c1cccc1.Cn1cc(/C=C2\SC(=O)NC2=O)c2cc(Br)ccc21>>Cn1cc(/C=C2\SC(=O)NC2=  
 O)c2cc(/C=C/S(=O)(=O)c3cccc3)ccc21  
 \*CNCCOCCOCCOCCNC(=O)COc1ccc(C(Cc2cc(OC)cc(OC)c2)NC(=O)c2cccc(C=C)c2)cc1.FC(F)  
 282 (F)Oc1cccc(I)c1>>\*CNCCOCCOCCOCCNC(=O)COc1ccc(C(Cc2cc(OC)cc(OC)c2)NC(=O)c2cccc  
 (/C=C/c3cccc(OC(F)(F)F)c3)c2)cc1  
 283 Bre1enc2cccc2c1.C=Cc1cccc1>>C=C/c1enc2cccc2c1)\c1cccc1  
 284 C=Cc1cncnc1.CC(C)(C)OC(=O)N[C@H](COc1cncnc(Br)c1)Cc1c[nH]c2cccc12>>CC(C)(C)OC(=O)N  
 [C@H](COc1cncnc(/C=C/c2cncnc2)c1)Cc1c[nH]c2cccc12  
 285 C=CCOc1cccc1C.COc1ccc(I)cc1>>COc1ccc(/C=C/COc2cccc2C)cc1  
 \*CNCCOCCOCCOCCNC(=O)COc1ccc(C(Cc2cc(OC)cc(OC)c2)NC(=O)c2cccc(C=C)cc2)cc1.N#C  
 286 Cc1ccc(I)cc1>>\*CNCCOCCOCCOCCNC(=O)COc1ccc(C(Cc2cc(OC)cc(OC)c2)NC(=O)c2cccc(/C=  
 C/c3ccc(CC#N)cc3)cc2)cc1  
 287 C=COCCCC.Ic1cccc2cccc12>>C=C(OCCCC)c1cccc2cccc12  
 288 C=CC(=O)OC(C)(C)C.CCOC(=O)c1cncnc(Br)c1>>CCOC(=O)c1cncnc(/C=C/C(=O)OC(C)(C)C)c1  
 289 Bre1ccco1.C=Cc1cncnc2c1nnc2C1CCCCO1>>C=C/c1cncnc2c1nnc2C1CCCCO1)\c1ccco1  
 290 C=Cc1ccc2cccc2c1.CCOC(=O)C(F)(F)I>>CCOC(=O)C(F)(F)/C=C/c1ccc2cccc2c1  
 291 C=CC(=O)OC.O=[14CH]c1ccc(Br)cc1>>COC(=O)/C=C/c1ccc([14CH]=O)cc1  
 292 C=CCC1CCN(C(=O)c2cccc2)CC1.FC(F)(F)c1cc(Br)c2cccc(C(F)(F)F)c2n1>>O=C(c1cccc1)N1CCC  
 (C/C=C/c2cc(C(F)(F)F)nc3c(C(F)(F)F)cccc23)CC1  
 293 C=Cc1ccc(C(=O)OC)cc1.CC(C)(C)C(=O)Nc1nc2ncc(Br)cc2c(=O)[nH]1>>COC(=O)c1ccc(/C=C/c2en  
 c3nc(NC(=O)C(C)(C)[nH]c(=O)c3c2)cc1  
 294 C=COCCCC.O=S(=O)(Oc1cccc2c1CCC=C2)C(F)(F)F>>C=C(OCCCC)c1cccc2c1CCC=C2  
 295 C=CC(=O)OCC.Cc1cc(F)c(CCCN(C)C)cc1Br>>CCOC(=O)/C=C/c1cc(CCCN(C)C)c(F)cc1C  
 C=Cc1ccc(C)nc1.COc1cc(I)c2c3c1O[C@@H]1[C@@]34CCN(C)[C@H](C2)[C@]42C=C[C@@]1(OC)  
 296 c1c(O)ccc(O)c12>>COc1cc(/C=C/c2ccc(C)nc2)c2c3c1O[C@@H]1[C@@]34CCN(C)[C@H](C2)[C@]4  
 2C=C[C@@]1(OC)c1c(O)ccc(O)c12  
 297 C=C(C)C(=O)OC.Clc1cccc1>>COC(=O)/C(C)=C/c1cccc1

298 C=Cc1ccc(OC)cc1.O=C1CCC(c2ccc(Br)cc2)O1>>COc1ccc(/C=C/c2ccc(C3CCC(=O)O3)cc2)cc1  
 299 C=CC(C)=O.N#Cc1ccc(Br)cc1>>CC(=O)/C=C/c1ccc(C#N)cc1  
 300 C=CC(=O)OC(C)(C)C.COCC(=O)c1ccc(I)cc1OC(C)=O>>COC(=O)c1ccc(/C=C/C(=O)OC(C)(C)C)cc1  
 301 OC(C)=O  
 302 C=Cc1cccc1OC.IC1CCCCC1>>COc1cccc1/C=C/C1CCCCC1  
 303 C=Cc1c2cccc2cc2cccc12.Ic1ccc2c(c1)C1c3cccc4cccc(c34)C21>>C(=C/c1c2cccc2cc2cccc12)\c1c  
 304 cc2c(c1)C1c3cccc4cccc(c34)C21  
 305 C=CC(=O)OCC.CCOc1ccc(C(=O)CCC(=O)Nc2cc(-  
 306 c3cccc3)c(Cc3ccc(Br)cc3)s2)cc1OCC>>CCOC(=O)/C=C/c1ccc(Cc2sc(NC(=O)CCC(=O)c3ccc(OCC)  
 307 c(OCC)c3)cc2-c2cccc2)cc1  
 308 C=CC(=O)OC.CCCCCOc1ccc(-c2ccc(Br)cc2)cc1>>CCCCCOc1ccc(-c2ccc(/C=C/C(=O)OC)cc2)cc1  
 309 C=CC(=O)OC.CSc1c2c(I)cccc2nn1C1CCCCO1>>COC(=O)/C=C/c1cccc2nn(C3CCCCO3)c(SC)c12  
 310 C=Cc1ccc(C)cc1.COc1ccc(/C=C/c2cc(Br)cc/C=C/c3ccc(OC)cc3)c2)cc1>>COc1ccc(/C=C/c2cc/C=C/  
 311 c3ccc(C)cc3)cc(/C=C/c3ccc(OC)cc3)c2)cc1  
 312 C=C1CC(c2cccc2)OC1=O.CCOc1ccc(I)cc1>>CCOc1ccc(/C=C2\CC(c3cccc3)OC2=O)cc1  
 313 C=Cc1ccc(OC)cc1.Clc1ccc(/C=C/c2cccc2)cc1>>COc1ccc(/C=C/c2ccc(/C=C/c3cccc3)cc2)cc1  
 314 C=Cc1ccc2c(c1)CC2.C[Si](C)(C)OS(=O)(=O)C(F)(F)F>>C[Si](C)(C)/C=C/c1ccc2c(c1)CC2  
 315 C=COCCCC.O=Cc1cccc(Cl)c1>>C=C(OCCCC)c1cccc(C=O)c1  
 316 C=CC(OCC)OCC.CCN1c2cccc2Sc2cc(Br)ccc21>>CCOC(/C=C/c1ccc2c(c1)Sc1cccc1N2CC)OCC  
 317 C=COCCO.CC(=O)c1ccc(I)cc1>>C=C(OCCO)c1ccc(C(C)=O)cc1  
 318 C=CCCC(=O)O.Fc1ccc(I)cc1>>O=C(O)CC/C=C/c1ccc(F)cc1  
 319 C=Cc1ccc2cccc2c1.COc1ccc(Br)cc1>>COc1ccc(/C=C/c2ccc3cccc3c2)cc1  
 320 C=CC(=O)OC.O=c1[nH]c(=O)n([C@@H]2CO[C@H](CO)[C@H]2CO)cc1I>>COC(=O)/C=C/c1cn([  
 321 C@@H]2CO[C@H](CO)[C@H]2CO)c(=O)[nH]c1=O  
 322 C=Cc1cnccc1.CCCCCOc1ccc(Br)cc1F>>CCCCCOc1ccc(/C=C/c2cnccc2)cc1F  
 323 C=CC#N.COc1cc(C#N)ccc1Oc1cccc(I)c1>>COc1cc(C#N)ccc1Oc1cccc(/C=C/C#N)c1  
 324 C=CC(=O)N(C)C.CC(=O)c1ccc(Br)cc1>>CC(=O)c1ccc(/C=C/C(=O)N(C)C)cc1  
 325 C=C[Si](CC)(CC)CC.O=[N+](O-)]c1cccc1Br>>CC[Si](C)/C=C/c1cccc1[N+](=O)[O-](CC)CC  
 326 C=CC(=O)N(C)OC.Ic1ccc2cccc2c1>>CON(C)C(=O)/C=C/c1ccc2cccc2c1  
 327 C=CC(=O)OCC.Fc1c(F)c(F)c(Cl)c(F)c1F>>CCOC(=O)/C=C/c1c(F)c(F)c(F)c(F)c1F  
 328 C=CC(=O)OC.Oc1ccc2c(Cc3ccc(Br)cc3)cccc2c1>>COC(=O)/C=C/c1ccc(Cc2nccc3cc(O)ccc23)cc1  
 329 C=CC(=O)N(C)C.OCc1cccc(I)c1>>CN(C)C(=O)/C=C/c1cccc(CO)c1  
 330 C=CC[C@H]1O[C@@H]2O[C@@H]3(C)CC[C@H]4[C@H](C)CC[C@H]1[C@H]([C@H]1C)[C@]42OO3.  
 331 Cc1ccc(I)cc1>>Cc1ccc(/C=C/C[C@H]2O[C@@H]3O[C@@H]4(C)CC[C@H]5[C@H](C)CC[C@H]([C@H]2C)[C@]53OO4)cc1  
 332 C=Cc1ccc(O)c(OC)c1.COc1ccc(OC)c(I)c1>>COc1ccc(OC)c(/C=C/c2ccc(O)c(OC)c2)c1  
 333 C=Cc1ccc(O)cc1.Fc1cc(Br)cc(F)c1F>>Oc1ccc(/C=C/c2cc(F)c(F)c(F)c2)cc1  
 334 C=CCC(C)N(C)C(=O)OC(C)(C)C.CC(C)Oc1cnccc(Br)c1>>CC(C)Oc1cnccc(/C=C/CC(C)N(C)C(=O)OC  
 335 (C)(C)C)c1  
 336 C=C(C)C(=O)OC.Clc1ccc(Br)cc1>>COC(=O)/C(C)=C/c1ccc(Cl)cc1  
 337 C=CCC(O)CCCCC.Ic1cccc1>>CCCCCCC(O)C/C=C/c1cccc1  
 338 C=CC(=O)OC(C)(C)C.O=C1Nc2cccc2O/C1=C/c1ccc(Br)s1>>CC(C)(C)OC(=O)/C=C/c1ccc(/C=C2\  
 339 Oc3cccc3NC2=O)s1  
 340 C=CC#N.CN(C)S(=O)(=O)n1cc(I)c([Si](C)(C)C)c1>>CN(C)S(=O)(=O)n1cc(/C=C/C#N)c([Si](C)(C)C  
 341 C=Cc1ccc(C(=O)OC)cc1.O=C(N1CCOCC1)C(F)(F)Br>>COC(=O)c1ccc(/C=C/C(F)(F)C(=O)N2CCO  
 342 CC2)cc1  
 343 BrC1cccc1.C=CC(C)C(C)O>>CC(O)C(C)/C=C/c1cccc1  
 344 C=Cc1cccc1.CCN(c1ccc(C(=O)OC)cn1)c1cc(OCC(C)C)c(C(C)C)cc1I>>CCN(c1ccc(C(=O)OC)cn1)c  
 345 1cc(OCC(C)C)c(C(C)C)cc1/C=C/c1cccc1  
 346 C=Cc1cccc1.CN(C(=O)c1cccc1)c1ccc2c(c1)[nH]c(=NC(=O)c1ccc(Br)s1)n2CCC(N)=O>>CN(C(=O  
 347 )c1cccc1)c1ccc2c(c1)[nH]c(=NC(=O)c1ccc(/C=C/c3cccc3)s1)n2CCC(N)=O  
 348 C=CC(=O)OC.CCCCN1c(-c2ccc(Br)cc2)nc2cccc21>>CCCN1c(-  
 349 C=CC(=O)OCC.CC(C)(C)OC(=O)N1CCC2(CC1)Cc1cc(Br)enc1NC2=O>>CCOC(=O)/C=C/c1enc2c(  
 350 c1)CC1(CCN(C(=O)OC(C)(C)C)CC1)C(=O)N2  
 351 C=C1C(=O)O[C@@H]2CC(C)=C([C@@H](C)CCCOC(C)=O)[C@@H](OC(C)=O)[C@H]12.COc1c  
 352 cc(I)cc1>>COc1ccc(/C=C2/C(=O)O[C@@H]3CC(C)=C([C@@H](C)CCCOC(C)=O)[C@@H](OC(C)  
 353 =O)[C@H]23)cc1  
 354 C=Cc1ccc(Cl)cc1.COc1ccc(I)cc1OC>>COc1ccc(/C=C/c2ccc(Cl)cc2)cc1OC  
 355 C=CC(C)=O.COCCOc1cc2oc(=O)ccc2cc1OS(=O)(=O)C(F)(F)F>>COCOc1cc2oc(=O)ccc2cc1/C=C/C(  
 356 C=CS(C)(=O)=O.O=Cc1ccc(Br)cc1>>CS(=O)(=O)/C=C/c1ccc(C=O)cc1



342 C=Cc1ccc(OC)c(OC)c1.Ic1cccc2cccc12>>COc1ccc(/C=C/c2cccc3cccc23)cc1OC  
 343 C=CCN1C(=O)c2cccc2C1=O.FC(F)(F)c1cc(Br)cc(C(F)(F)F)c1>>O=C1c2cccc2C(=O)N1C/C=C/c1c  
 c(C(F)(F)F)cc(C(F)(F)F)c1  
 344 Br1ccenc1.C=Cc1nn(C(c2cccc2)(c2cccc2)c2cccc2)c2c(F)cc(C#N)cc12>>N#Cc1cc(F)c2c(c1)c(/C  
 =C/c1ccenc1)nn2C(c1cccc1)(c1cccc1)c1cccc1  
 345 C=Cc1cccc1.CC(=O)NS(=O)(=O)c1ccc(Br)cc1>>CC(=O)NS(=O)(=O)c1ccc(/C=C/c2cccc2)cc1  
 346 C=CC(=O)OCC.O=Cc1ccc(F)cc1Br>>CCOC(=O)/C=C/c1cc(F)ccc1C=O  
 347 C=Cc1cccc1N.COc1cccc(OC)c1Br>>COc1cccc(OC)c1/C=C/c1cccc1N  
 348 C=CC(=O)O.CC(C)(C)c1cc(I)c2c(c1)OCCOCCOCCOCCO2>>CC(C)(C)c1cc(/C=C/C(=O)O)c2c(c1)  
 OCCOCCOCCOCCO2  
 349 C=CC(=O)OC(C)(C)C.Fc1cccc1Oc1ncc2nc(-c3ccc(Br)cc3)oc2n1>>CC(C)(C)OC(=O)/C=C/c1ccc(-  
 c2nc3enc(Oc4cccc4F)nc3o2)cc1  
 350 C=CC(=O)N(C)Cc1cccc(OC)c1OCCC.CC1(C)NCc2cc(Br)enc2NC1=O>>CCCOc1c(CN(C)C(=O)/C=  
 C/c2enc3c(c2)CNC(C)(C)C(=O)N3)cccc1OC  
 351 C=Cc1cccc(OC)c1.Oc1ccc(O)c(I)c1>>COc1cccc(/C=C/c2ccc(O)ccc2O)c1  
 352 C=CC(N)=O.O=Cc1ccc(Cl)cc1>>NC(=O)/C=C/c1ccc(C=O)cc1  
 353 C=CC(=O)N1CCOCC1.COc1cc(Cl)ccc1C1=CCN(C(=O)OC(C)(C)C)CC1>>COc1cc(/C=C/C(=O)N2C  
 COCC2)ccc1C1=CCN(C(=O)OC(C)(C)C)CC1  
 354 C=Cc1ccc(OC)cc1.CC(=S)NS(=O)(=O)c1ccc(Br)cc1>>COc1cccc(/C=C/c2ccc(S(=O)(=O)NC(C)=S)cc2  
 C=CCNC(=O)c1cccc1NC(=O)c1cccc1.Fc1ccc(I)cc1>>O=C(Nc1cccc1C(=O)NC/C=C/c1ccc(F)cc1)  
 c1cccc1  
 355 C=CC(=O)N(C)Cc1oc2cccc2c1C.[C@H]1CNc2ncc(Br)cc2CN1C(=O)OC(C)(C)C>>Cc1c(CN(C)  
 C(=O)/C=C/c2enc3c(c2)CN(C(=O)OC(C)(C)C)[C@H](C)CN3)oc2cccc12  
 356 C=CC#N.Cc1cc(I)c2cccc2n1>>Cc1cc(/C=C/C#N)c2cccc2n1  
 357 C=CC(C)(C)O.Nc1cccc(I)c1>>CC(C)(O)/C=C/c1cccc(N)c1  
 358 C=CC(=O)OC(C)(C)C.COc1cc(CC(=O)Nc2ccc(I)cc2)ccc1NC(=O)Nc1cccc1C>>COc1cc(CC(=O)Nc  
 2ccc/C=C/C(=O)OC(C)(C)C)cc2)ccc1NC(=O)Nc1cccc1C  
 359 C=CC(C)(C)O.COc1c(I)c(=O)n(C)c2cccc12>>COc1c(/C=C/C(C)(C)O)c(=O)n(C)c2cccc12  
 360 C=Cc1ccc2c(c1)OCO2.COc1cc(C=O)c(Br)c(OC)c1OC>>COc1cc(C=O)c(/C=C/c2ccc3c(c2)OCO3)c(  
 OC)c1OC  
 361 C=CCCCC1=NOC(CC(=O)OC)(C(=O)OC)C1.FC(F)(F)c1cc(Cl)ccc1I>>COC(=O)CC1(C(=O)OC)C  
 C(CCCC/C=C/c2ccc(Cl)cc2C(F)(F)F)=NO1  
 362 C=CCN(C(=O)OC(C)(C)C)C(=O)OC(C)(C)C.CC(=O)c1ccc(Cl)cc1>>CC(=O)c1ccc(/C=C/CN(C(=O)  
 OC(C)(C)C)C(=O)OC(C)(C)C)cc1  
 363 C=CC(=O)OCC.COc1enc(C)c(Br)c1>>CCOC(=O)/C=C/c1cc(OC)enc1C  
 364 C=CC(=O)OCC.O=c1c(I)coc2cc(O)ccc12>>CCOC(=O)/C=C/c1coc2cc(O)ccc2c1=O  
 365 C=Cc1cccc1.CCOC(=O)COc1ccc(I)cc1>>CCOC(=O)COc1ccc(/C=C/c2cccc2)cc1  
 366 C=CC(=O)OC.Ic1ccc2nenc(Oc3cccc3)c2c1>>COC(=O)/C=C/c1ccc2nenc(Oc3cccc3)c2c1  
 367 C=CC(=O)O.Ic1cccs1>>O=C(O)/C=C/c1cccs1  
 368 C=CC(=O)OC.Oc1ccc(-c2ccc(Br)cc2)cc1C12CC3CC(CC(C3)C1)C2>>COC(=O)/C=C/c1ccc(-  
 c2ccc(O)c(C34CC5CC(CC(C5)C3)C4)c2)cc1  
 369 C=Cc1cccc1.CC(C)(C)OC(=O)N1CCC(Br)CC1>>CC(C)(C)OC(=O)N1CCC(/C=C/c2cccc2)CC1  
 370 C=Cc1cccc1.Cc1nc(Br)c(-c2cccc2)o1>>Cc1nc(/C=C/c2cccc2)c(-c2cccc2)o1  
 371 C=CN1C(=O)c2cccc2C1=O.COc1ccc(Br)cc1>>COc1ccc(/C=C/N2C(=O)c3cccc3C2=O)cc1  
 372 C=CC[C@H]1O[C@H](CNC(=O)OC(C)(C)C)[C@H]2OC(CC)(CC)O[C@H]12.COc1ccc2[nH]cc  
 373 (C3=C(Br)C(=O)NC3=O)c2c1>>CCC1(CC)O[C@H]2[C@H](C/C=C/C3=C(c4c[nH]c5ccc(OC)cc45)  
 C(=O)NC3=O)O[C@H](CNC(=O)OC(C)(C)C)[C@H]2O1  
 374 Br1ncccn1.C=Cc1cccc1OC>>COc1cccc1/C=C/c1ncccn1  
 375 C=CC(C)(C)CC(=O)OC.COc1ccc(I)cc1>>COC(=O)CC(C)(C)/C=C/c1ccc(OC)cc1  
 376 Br1ncc2cccc12.C=CC(=O)CC>>CCC(=O)/C=C/c1ncc2cccc12  
 377 C=CCO.Fc1cccc1Br>>C=C(CO)c1cccc1F  
 378 C=CC(=O)N1CCCCC1.Nc1nc(Br)ccc1-c1cccc1>>Nc1nc(/C=C/C(=O)N2CCCCC2)ccc1-c1cccc1  
 379 C=C(NC(C)=O)c1ccc(Cl)cn1.C=CC(=O)OCCCC>>C=C(NC(C)=O)c1ccc(/C=C/C(=O)OCCCC)cn1  
 380 C=CCc1c(C=O)cccc1OCc1cccc1.O=C(OCc1cccc1)c1ccc([N+](=O)[O-]  
 ]cc1Br>>O=Cc1cccc(OCc2cccc2)c1C/C=C/c1cc([N+](=O)[O-])ccc1C(=O)OCc1cccc1  
 381 C=Cc1ccc2c(c1)C1CCCC1N2c1ccc(C)cc1.N#Cc1cc([N+](=O)[O-]  
 ]ccc1Br>>Cc1ccc(N2c3ccc(/C=C/c4ccc([N+](=O)[O-])cc4C#N)cc3C3CCCC32)cc1  
 382 Br1cccs1.C=C1C[C@H]2[C@@H]3CCc4cc(OC)ccc4[C@H]3CC[C@]2(C)C1=O>>COc1ccc2c(c1)C  
 C[C@H]1[C@@H]2CC[C@]2(C)C(=O)/C=C/c3cccs3)C[C@@H]12  
 383 C=CC(=O)OC.CC(C)(C)OC(=O)Nc1cccc1Br>>COC(=O)/C=C/c1cccc1NC(=O)OC(C)(C)C

384 C=CC(=O)OCC.O=[N+](O-)]c1ccc(-c2ccncc2Br)cc1>>CCOC(=O)/C=C/c1cccc1-  
c1ccc([N+](=O)[O-])cc1  
385 C=CC(=O)OC.CS(=O)(=O)Nc1ccc(I)cc1F>>COC(=O)/C=C/c1ccc(NS(C)(=O)=O)c(F)c1  
386 C=CC(=O)OC.CON(C)C(=O)c1ccc(Br)cc1I>>COC(=O)/C=C/c1cc(Br)ccc1C(=O)N(C)OC  
387 C=Cc1ccc(C#N)c(C#N)c1.Ic1ccc2c(c1)C1c3cccc4cccc(c34)C21>>N#Cc1ccc(/C=C/c2ccc3c(c2)C2c4c  
ccc5cccc(c45)C32)cc1C#N  
Br1ccncc1.C=Cc1nc2c(OCC[Si](C)(C)C)nc(N)nc2n1[C@H]1C[C@H](O[Si](C)(C)C(C)(C)C)[C@@  
388 H](CO[Si](C)(C)C(C)(C)C)O1>>CC(C)(C)[Si](C)(C)OC[C@H]1O[C@@H](n2c(/C=C/c3ccncc3)nc3c  
(OCC[Si](C)(C)C)nc(N)nc32)C[C@@H]1O[Si](C)(C)C(C)(C)C  
Br1ccc2ccc3cccc4ccc1c2c34.C=C[C@H](CO[Si](C)(C)C(C)(C)C)NC(=O)OCc1cccc1>>CC(C)(C)[  
389 Si](C)(C)OC[C@@H](/C=C/c1ccc2ccc3cccc4ccc1c2c34)NC(=O)OCc1cccc1  
C=CC(=O)OC(C)(C)C.CC(C)(C)OC(=O)N1CCNc2ccc(Br)cc2C1>>CC(C)(C)OC(=O)/C=C/c1ccc2c(c  
390 1)CN(C(=O)OC(C)(C)C)CCN2  
C=COCCCC.COc1cc(C(=O)Cl)ccc(OC)c1OC>>CCCCO/C=C/C(=O)c1cc(OC)c(OC)c(OC)c1  
391 C=C[C@@H]1C[C@H](CC(=O)OCC)OC(C)(C)O1.COc1nccc(-n2nc(C(C)C)c(Br)c2-  
392 c2cccc(C(F)(F)F)c2)n1>>CCOC(=O)C[C@H]1C[C@@H](/C=C/c2c(C(C)C)nn(-c3ccnc(OC)n3)c2-  
c2cccc(C(F)(F)F)c2)OC(C)(C)O1  
393 C=CS(N)(=O)=O.COc1ccc(Br)cc1>>COc1ccc(/C=C/S(N)(=O)=O)cc1  
C=Cc1cccc1.CC(=O)OCC1Cn2c3cccc3c3c4c(c5c6cc(Br)ccc6n(c5c32)C1)C(=O)N(C(C)=O)C4>>C  
394 C(=O)OCC1Cn2c3cccc3c3c4c(c5c6cc(/C=C/c7cccc7)ccc6n(c5c32)C1)C(=O)N(C(C)=O)C4  
Br1cccc1I.C=C(F)[Si](C)(c1cccc1)c1cccc1>>C[Si](/C(F)=C/c1cccc1Br)(c1cccc1)c1cccc1  
395 Br1cnc2nc(-c3cccc3)c(-c3cccc3)nc2c1.C=CC#N>>N#C/C=C/c1cnc2nc(-c3cccc3)c(-  
396 C=C/C=C/C1CCCCN1S(=O)(=O)c1ccc(C)cc1.Clc1ccc(I)cn1>>Cc1ccc(S(=O)(=O)N2CCCC2/C=C/C  
397 =C/c2ccc(Cl)nc2)cc1  
C=Cc1cccc2cccc12.Clc1cccc2cccc12>>C(=C/c1cccc2cccc12)\c1cccc2cccc12  
398 C=CC(=O)OC.COc1ccc(Br)c(CC(=O)N2CCCC2)c1OCc1cccc1>>COC(=O)/C=C/c1ccc(OC)c(OCc2c  
399 cccc2)c1CC(=O)N1CCCC1  
C=Cc1ccc(Cl)cc1.Oc1ccc(Br)cc1>>Oc1ccc(/C=C/c2ccc(Cl)cc2)cc1  
400 C=CC(=O)OCC.COc1cc(Br)cc2nnn(C)c12>>CCOC(=O)/C=C/c1cc(OC)c2c(c1)nnn2C  
401 C=Cc1cncn1.CCCCN1c2ccc(Br)cc2Sc2cc(-c3nc4cccc4n3-  
402 c3cccc3)ccc21>>CCCCN1c2ccc(/C=C/c3cncn3)cc2Sc2cc(-c3nc4cccc4n3-c3cccc3)ccc21  
C=CC(=O)OC.COC(=O)c1ccc(-  
403 c2cc(C(C)(C)C)cc3c2Oc2c(Br)cc(C(C)(C)C)cc2C3(C)C)cc1>>COC(=O)/C=C/c1cc(C(C)(C)C)cc2c1O  
c1c(-c3ccc(C(=O)OC)cc3)cc(C(C)(C)C)cc1C2(C)C  
404 C=C.Oc1cccc(Br)c1>>C=Cc1cccc(O)c1  
405 C=CC(=O)OCC.COc1cccc1Br>>CCOC(=O)/C=C/c1cccc1OC  
406 C=COCCCC.Clc1ccc2c(c1)OCO2>>C=C(OCCCC)c1ccc2c(c1)OCO2  
407 C=Cc1cccc1.C[Si](C)(C)CBr>>C[Si](C)(C)C/C=C/c1cccc1  
C=CC(=O)N(C)Cc1oc2cccc2c1C.C[C@H]1CNc2ncc(Br)cc2CN1C(=O)OC(C)(C)C>>Cc1c(CN(C)C(  
408 =O)/C=C/c2nc3c(c2)CN(C(=O)OC(C)(C)C)[C@@H](C)CN3)oc2cccc12  
C=Cc1cccc1.O=C1CCC(Cl)O1>>O=C1CCC(C/C=C/c2cccc2)O1  
409 C=CC(=O)OCC.CC[C@@](C)(O)c1cc(Br)ccc1OCc1cccc1[C@@H](COCOC)NC(=O)OC(C)(C)C>>  
410 CCOC(=O)/C=C/c1ccc(OCc2cccc2)c(O[C@@](C)(CC)[C@@H](COCOC)NC(=O)OC(C)(C)C)c1  
C=Cc1cccc1.CC(C)(Br)CCc1ccc2c(c1)OCO2>>CC(C)(/C=C/c1cccc1)CCc1ccc2c(c1)OCO2  
411 C=CC(F)(F)C(F)(F)C(F)(F)C(F)(F)C(F)(F)F.CC1=Nc2ccc(I)cc2C1(C)C>>CC1=Nc2ccc(/C=C/  
412 C(F)(F)C(F)(F)C(F)(F)C(F)(F)C(F)(F)F)cc2C1(C)C  
C=CC(C)(O)CCC=C(C)C.Cc1ccc(O)c(Br)c1>>CC(C)=CCCC(C)(O)/C=C/c1cc(C)ccc1O  
413 Br1ese2cccc12.C=CCCCCCC>>C=C(CCCCCC)c1ese2cccc12  
414 C=Cc1cccc(C)c1.O=Cc1cccc1Br>>Cc1cccc(/C=C/c2cccc2C=O)c1  
415 C=Cc1ccc(OC)cc1.FC(F)(F)C(F)(F)C(F)(F)C(F)(F)C(F)(F)C(F)(F)Br>>COc1ccc(/C=C/C(F)(F)C(F)(F)  
416 )C(F)(F)C(F)(F)C(F)(F)C(F)(F)F)cc1  
C=CCOC(C)=O.Clc1ccc(I)c1>>CC(=O)OC/C=C/c1ccc(Cl)c1  
417 C=CC(=O)OCc1cccc1.C[Si](C)(C)CCOC(=O)c1ccc(I)cc1>>C[Si](C)(C)CCOC(=O)c1ccc(/C=C/C(=  
418 O)OCc2cccc2)cc1  
C=Cc1cccc1.O=[N+](O-)]c1ccc(Cl)cc1>>O=[N+](O-)]c1ccc(/C=C/c2cccc2)cc1  
419 C=CCCO.CC(C)(C)c1ccc(Br)cc1>>C=C(CCO)c1ccc(C(C)(C)C)cc1  
420 C=Cc1ccc2cccc2c1.FC(F)(F)I>>FC(F)(F)/C=C/c1ccc2cccc2c1  
421 C=CC(=O)OC.CC1(C)OC(=O)Nc2ccc(Br)cc21>>COC(=O)/C=C/c1ccc2c(c1)C(C)(C)OC(=O)N2  
422 C=CC(=O)NCCCCC.O=c1c(I)c(-c2ccc(O)cc2)oc2cc(O)ccc12>>CCCCCNC(=O)/C=C/c1c(-  
423 c2ccc(O)cc2)oc2cc(O)ccc2c1=O  
424 C=C(CP(=O)(OCC)OCC)C(=O)OCC.Oc1cccc1I>>CCOC(=O)/C=C/c1cccc1O)CP(=O)(OCC)OCC

425 C=CC(=O)N1N=Cc2ccccc2C1c1ccccc1.COc1cc(Cc2cnc(N)nc2N)cc(I)c1OC>>COc1cc(Cc2cnc(N)nc2  
N)cc(/C=C/C(=O)N2N=Cc3ccccc3C2c2ccccc2)c1OC  
426 C=CCCCCCC.O=S(=O)(OC1=CCCc2ccccc21)C(F)(F)F>>C=C(CCCCCC)C1=CCCc2ccccc21  
427 C=CC(=O)OCC.CCCCc1c(I)c(-c2ccccc2)n(C(=O)OC(C)(C)C)c1-  
c1ccccc1>>CCCCc1c(/C=C/C(=O)OCC)c(-c2ccccc2)n(C(=O)OC(C)(C)C)c1-c1ccccc1  
428 C=Cc1cc2ccc(N(CC)CC)cc2oc1=O.Ic1ccccc1>>CCN(CC)c1ccc2cc(/C=C/c3ccccc3)c(=O)oc2c1  
429 C=CCN(C(=O)OC(C)(C)C)C(=O)OC(C)(C)C.O=C1CCc2cc(Cl)ccc21>>CC(C)(C)OC(=O)N(C/C=C/C/c  
1ccc2c(c1)CCC2=O)C(=O)OC(C)(C)C  
430 C=Cc1ccccc1.O=Cc1cccc(Cl)c1>>O=Cc1cccc(/C=C/c2ccccc2)c1  
431 C=COCCCC.COc1ccc2cc(Br)ccc2c1>>C=C(OCCCC)c1ccc2cc(OC)ccc2c1  
432 C=CC(=O)OC.COc1cc([N+](=O)[O-])ccc1I>>COC(=O)/C=C/c1ccc([N+](=O)[O-])cc1OC  
433 C=CC=O.Fc1cnc(Br)c1>>O=C/C=C/c1cnc(F)c1  
434 C=CC(=O)N1CCOCC1.O=C(C=P(c1ccccc1)(c1ccccc1)c1ccccc1)c1ccc(I)cc1>>O=C(C=P(c1ccccc1)(c  
1ccccc1)c1ccccc1)c1ccc(/C=C/C(=O)N2CCOCC2)cc1  
435 BrC1=CCCCC1.C=C>>C=CC1=CCCCC1  
436 C=CCN1C(=O)c2ccccc2C1=O.CC(=O)c1ccc(Br)cc1>>CC(=O)c1ccc(/C=C/CN2C(=O)c3ccccc3C2=O  
C=Cc1ccc2c(c1)c1ccccc1n2CCCCCCCC.N#CC(=C(c1ccccc1)c1ccccc1)c1ccc(Br)cc1>>CCCCCCCCn  
1c2ccccc2c2cc(/C=C/c3ccc(C(C#N)=C(c4ccccc4)c4ccccc4)cc3)ccc21  
437 C=Cc1ccccc1.[2H]C(=O)c1ccccc1Br>>[2H]C(=O)c1ccccc1/C=C/c1ccccc1  
438 C=CC(=O)CCCCC.CC(=O)c1ccc(Br)cc1>>CCCCCC(=O)/C=C/c1ccc(C(C)=O)cc1  
439 C=Cc1ccccc1.N#Cc1ccccc1Cl>>N#Cc1ccccc1/C=C/c1ccccc1  
440 C=CCN(C(=O)c1ncn1C)[C@H](C)c1cc(F)cc(F)c1.O=C1Nc2ncccc2[C@@]12Cc1cc(Br)nc1C2>>C[  
C@H](c1cc(F)cc(F)c1)N(C/C=C/C1cnc2c(c1)C[C@@]1(C2)C(=O)Nc2ncccc21)C(=O)c1ncn1C  
C=Cc1nc2c(N)ncnc2n1[C@H]1C[C@H](O[Si](C)(C)C(C)(C)C)[C@@H](CO[Si](C)(C)C(C)(C)C)O1.  
441 Cc1ccc(I)cc1>>Cc1ccc(/C=C/c2nc3c(N)ncnc3n2[C@H]2C[C@H](O[Si](C)(C)C(C)(C)C)[C@@H](C  
O[Si](C)(C)C(C)(C)C)O2)cc1  
442 C=CC(=O)OCC.Oc1ccc(Br)c(Cl)c1>>CCOC(=O)/C=C/c1ccc(O)cc1Cl  
443 C=CC(=O)OC.CCc1ccc(N)c(Br)c1>>CCc1ccc(N)c(/C=C/C(=O)OC)c1  
444 C=CC(N)=O.Ic1cnc1>>NC(=O)/C=C/c1cnc1  
445 C=CC(=O)OC.CC1(C)Cc2cccc(I)c2O1>>COC(=O)/C=C/c1cccc2c1OC(C)(C)C2  
446 C=CC(=O)OC.O=Cc1cccc(Br)c1>>COC(=O)/C=C/c1cccc(C=O)c1  
447 C=CC(=O)OC.Ic1ccc(OCc2ccccc2)cn1>>COC(=O)/C=C/c1ccc(OCc2ccccc2)cn1  
448 Brc1ccc2ccccc2c1.C=COC(CC)CCCC>>C=C(OC(CC)CCCC)c1ccc2ccccc2c1  
449 C=Cc1ccc(OC)c(OC)c1.N#Cc1ccc(I)cc1>>COc1ccc(/C=C/c2ccc(C#N)cc2)cc1OC  
450 C=C1C[C@H]2[C@@H]3CCc4cc(OC)ccc4[C@H]3CC[C@]2(C)C1=O.N#Cc1ccc(Br)cc1>>COc1ccc  
2c(c1)CC[C@@H]1[C@@H]2CC[C@]2(C)C(=O)/C=C/c3ccc(C#N)cc3)C[C@@H]12  
451 C=COCCN(C)C.Cc1ccccc1Br>>C=C(OCCN(C)C)c1ccccc1C  
452 C=CC(=O)OC.CCOC(=O)c1ccc(I)cc1>>CCOC(=O)c1ccc(/C=C/C(=O)OC)cc1  
453 C=CC(N)=O.O=c1c(C2=NS(=O)(=O)c3cc(I)ccc3N2)c(O)c2cc(F)ccc2n1CCCC1CC1>>NC(=O)/C=C/c1  
ccc2c(c1)S(=O)(=O)N=C(c1c(O)c3cc(F)ccc3n(CCC3CC3)c1=O)N2  
454 C=CC(=O)Nc1ccccc1NC(=O)OC(C)(C)C.CCOC(=O)[C@H]1CN(c2ncccn2)C[C@@H]1c1ccc(Br)cc1  
>>CCOC(=O)[C@H]1CN(c2ncccn2)C[C@@H]1c1ccc(/C=C/C(=O)Nc2ccccc2NC(=O)OC(C)(C)C)cc  
455 C=Cl.C=CP(=O)(OC)OC>>C=C/C=C/P(=O)(OC)OC  
456 C=C1C(=O)N2C[C@H](O)C[C@@H]2[C@H]1O.Oc1ccc(I)cc1>>O=C1/C(=C/c2ccc(O)cc2)[C@H](  
O)[C@H]2C[C@@H](O)CN12  
457 C=CC(=O)OC(C)(C)C.COC(=O)c1cc(Cl)ccc1Br>>COC(=O)c1cc(Cl)ccc1/C=C/C(=O)OC(C)(C)C  
458 C=CC(F)(F)F.FC(F)(F)c1ccccc(Br)c1>>FC(F)(F)/C=C/c1ccccc(C(F)(F)F)c1  
459 C=COCCCC.COc1cc(Br)cc(OC)c1OC>>C=C(OCCCC)c1cc(OC)c(OC)c(OC)c1  
460 C=CC(=O)OCC.Cc1nc(-  
n2c(C)ccc2C)cc(N[C@H]2CC[C@H](O)CC2)c1Br>>CCOC(=O)/C=C/c1c(N[C@H]2CC[C@H](O)C  
C2)cc(-n2c(C)ccc2C)nc1C  
461 C=CC(=O)OC(C)(C)C.Oc1ccc(C(=C2CCOCC2)c2ccc(Br)cc2)cc1>>CC(C)(C)OC(=O)/C=C/c1ccc(C(  
=C2CCOCC2)c2ccc(O)cc2)cc1  
462 Brc1cnc1.C=Cc1cccc(OC)c1>>COc1cccc(/C=C/c2cnc2)c1  
463 C=CCC(C)(C)C.CC(C)(C)c1ccc(Br)cc1>>C=C(CC(C)(C)C)c1ccc(C(C)(C)C)cc1  
464 C=CC(=O)OCCCC.N#Cc1ccccc1Cl>>CCCCOC(=O)/C=C/c1ccccc1C#N  
465 C=CC(C)=O.N#Cc1ccc(N)c(I)c1>>CC(=O)/C=C/c1cc(C#N)ccc1N  
466 C=CC(=O)OCC.CC(C)(C)OC(=O)c1ccccc1I>>CCOC(=O)/C=C/c1ccccc1C(=O)OC(C)(C)C  
467 C=CC(=O)O.CC(C)(C)OC(=O)N[C@@H](Cc1c[nH]c2ccccc(Br)c12)C(=O)O>>CC(C)(C)OC(=O)N[C  
@@H](Cc1c[nH]c2ccccc(/C=C/C(=O)O)c12)C(=O)O  
468

469 Br1cccc(C2OCCO2)c1.C=CC(=O)OC>>COC(=O)/C=C/c1cccc(C2OCCO2)c1  
470 C#CC=C.Ic1ccc2[nH]ccc2c1>>C#C/C=C/c1ccc2[nH]ccc2c1  
471 C=Cc1ccc(OC)c(O)c1.COc1ccc(I)c(OC)c1>>COc1ccc(/C=C/c2ccc(OC)c(O)c2)c(OC)c1  
472 Br1ccc2ccnc(N3CCCCC3)c2c1.C=CC(C)=O>>CC(=O)/C=C/c1ccc2ccnc(N3CCCCC3)c2c1  
473 C=CC(=O)N(C)C.COc1ccc(I)cc1>>COc1ccc(/C=C/C(=O)N(C)C)cc1  
474 C=Cc1cccc1.COc1ccc(I)cc1>>COc1ccc(/C=C/c2cccc2)cc1  
475 C=CC(=O)OC.Ic1nn(Cc2cccc2)c2cccc12>>COC(=O)/C=C/c1nn(Cc2cccc2)c2cccc12  
476 C=CP(=O)(OCC)OCC.O=[N+][O-]c1ccc(Br)cc1>>CCOP(=O)(/C=C/c1ccc([N+](=O)[O-])cc1)OCC  
C=C(NC(=O)OCC[Si](C)(C)C)C(=O)OC.COc1ccc(-  
477 c2ccc(OC)c(/C=C(\NC(=O)OC(C)(C)C)C(=O)OCc3cccc3)c2)cc1I>>COC(=O)/C(=C/c1ccc(-  
c2ccc(OC)c(/C=C(\NC(=O)OC(C)(C)C)C(=O)OCc3cccc3)c2)ccc1OC)NC(=O)OCC[Si](C)(C)C  
C=C[C@H](C)[C@H](CCO[Si](C)(C)C(C)(C)C)OC(=O)[C@H](CC(C)C)NC(=O)OC(C)(C)C.COC  
478 OCc1ccc(I)cc1>>COCOCc1ccc(/C=C/[C@H](C)[C@H](CCO[Si](C)(C)C(C)(C)C)OC(=O)[C@H](  
CC(C)C)NC(=O)OC(C)(C)C)cc1  
479 C=CCN(C(=O)OC(C)(C)C)C(=O)OC(C)(C)C.Cc1cc(Nc2nnc3ccc(I)cc23)ccc1Oc1cc2nnen2cn1>>Cc1  
cc(Nc2nnc3ccc(/C=C/CN(C(=O)OC(C)(C)C)C(=O)OC(C)(C)C)cc23)ccc1Oc1cc2nnen2cn1  
480 C=CC(F)(F)C(F)(F)C(F)(F)C(F)(F)C(F)(F)C(F)(F)C(F)(F)C(F)(F)C(F)(F)C(F)(F)C(F)(F)F.N#Cc1ccc(Br)cc1>>N#Cc1ccc(/C  
=C/C(F)(F)C(F)(F)C(F)(F)C(F)(F)C(F)(F)C(F)(F)C(F)(F)C(F)(F)C(F)(F)C(F)(F)cc1  
481 C=CC(OC)OC.COC(=O)c1ccc(I)cc1>>COC(=O)c1ccc(/C=C/C(OC)OC)cc1  
482 C=CC(=O)CCC.Fc1ccc(Br)cc1>>CCCC(=O)/C=C/c1ccc(F)cc1  
483 C=C(F)[Si](C)(c1cccc1)c1cccc1.Cc1ccc(I)c(C)c1>>Cc1ccc(/C=C(F)[Si](C)(c2cccc2)c2cccc2)c(C  
484 C=C/C=C/C(=O)N(CCCC)CCCC.COc1ccc(Br)cc1>>CCCCN(CCCC)C(=O)/C=C/C=C/c1ccc(OC)cc1  
C=Cc1ccc(S(=O)(=O)c2cccc2F)cn1.N#Cc1cc(F)ccc1I>>N#Cc1cc(F)ccc1/C=C/c1ccc(S(=O)(=O)c2cc  
485 ccc2F)cn1  
C=Cc1ccc(C(=O)O[C@H]2CC[C@@]3(C)C(CC[C@H]4[C@@H]3CC[C@@]3(C)[C@H]4CC[C@  
486 @H]3[C@H](C)CC(C)C)C2)cc1.CCOC(=O)C(F)Br>>CCOC(=O)C(F)/C=C/c1ccc(C(=O)O[C@H  
]2CC[C@@]3(C)C(CC[C@H]4[C@@H]3CC[C@@]3(C)[C@H]4CC[C@H]3[C@H](C)CC(C)C)  
487 C=C(C)C(=O)OCC.Fc1cccc(I)c1>>CCOC(=O)/C(C)=C/c1cccc(F)c1  
488 CC(=O)/C=C/CCc1cccc1.Cc1ccc(Br)cc1>>CC(=O)/C=C(/CCc1cccc1)c1ccc(C)cc1  
489 C=CC(=O)O.COc1cccc1I>>COc1cccc1/C=C/C(=O)O  
490 C=CC(=O)Nc1cccc1C.COc1ccc2c(=O)c(I)ccc2c1>>COc1ccc2c(=O)c(/C=C/C(=O)Nc3cccc3C)ccc2  
491 C=Cc1cccc1.Ic1ccc(CN2CCOCC2)cc1>>C=C/c1ccc(CN2CCOCC2)cc1)\c1cccc1  
492 Br1ccc(/N=C/c2cnc2)cc1.C=Cc1cnc1>>C=C/c1ccc(/N=C/c2cnc2)cc1)\c1cnc1  
493 C=Cc1ccc(Cl)cc1.COc1ccc(Br)cc1>>COc1ccc(/C=C/c2ccc(Cl)cc2)cc1  
494 C=C(C)C(=O)OC.CC1(C)CCC(C)(C)c2cc(C(=O)c3ccc(I)cc3)ccc21>>COC(=O)/C(C)=C/c1ccc(C(=O)  
c2ccc3c(c2)C(C)(C)CCC3(C)C)cc1  
495 C=CC1(C)CCc2c(C)c(OC)c(C)c(C)c2O1.COCn1c(C)c(I)c(C)c1C=O>>COCn1c(C)c(/C=C/C2(C)CCc3  
c(C)c(OC)c(C)c(C)c3O2)c(C)c1C=O  
496 C=CC(=O)OC(C)(C)C.O=S(=O)(c1cccc(Br)c1)n1ccc2cnc21>>CC(C)(C)OC(=O)/C=C/c1cccc(S(=O  
)=(O)n2ccc3cnc32)c1  
497 C=CC(=O)OCC.Fc1cccc(Cn2ccc3cc(Nc4nnc4I)ccc32)c1>>CCOC(=O)/C=C/c1cnc1Nc1ccc2c(cnn  
2Cc2cccc(F)c2)c1  
498 C=C(C)C(=O)OC.Cc1cccc(C)c1Cl>>COC(=O)/C(C)=C/c1c(C)cccc1C  
499 C=CC(=O)NC(C)C.COc1ccc(OC)c1I>>COc1ccc(OC)c1/C=C/C(=O)NC(C)C  
500 C=CC(=O)OC.O=CC1=C(Br)c2cccc2CC1>>COC(=O)/C=C/C1=C(C=O)CCc2cccc21  
501 C=CC(=O)OC.O=C1c2cccc2C(=O)N1c1ccc(Br)c1F>>COC(=O)/C=C/c1cccc(N2C(=O)c3cccc3C2  
=O)c1F  
502 C=CB1OC(C)CC(C)(C)O1.Cc1ccc(I)cc1>>Cc1ccc(/C=C/B2OC(C)CC(C)(C)O2)cc1  
C=CC(=O)C(O[Si](CC)(CC)CC)c1c(OC)ccc(OC)c1OCc1cccc1.COC(=O)c1cc2cc(I)c(OCc3cccc3)c(  
503 OC)c2c(=O)o1>>CC[Si](CC)(CC)OC(C(=O)/C=C/c1cc2cc(C(=O)OC)oc(=O)c2c(OC)c1OCc1cccc1)  
c1c(OC)ccc(OC)c1OCc1cccc1  
504 C=Cc1nnn(C)n1.O=[N+][O-]c1ccc(Br)cc1>>Cn1nnc(/C=C/c2ccc([N+](=O)[O-])cc2)n1  
505 C=CC(=O)OC.CC(=O)Oc1ccc(Br)cc1OC(C)=O>>COC(=O)/C=C/c1ccc(OC(C)=O)c(OC(C)=O)c1  
506 C=CC(=O)OCC.COc1cc(C)c(Br)cn1>>CCOC(=O)/C=C/c1cnc(OC)cc1C  
C=CC(=O)C(O[Si](CC)(CC)CC)c1c(OCc2cccc2)c(OC)c2c(OC)c(OC)cc(OC)c2c1OC.COC(=O)c1cc2  
507 cc(I)c(OCc3cccc3)c(OC)c2c(=O)o1>>CC[Si](CC)(CC)OC(C(=O)/C=C/c1cc2cc(C(=O)OC)oc(=O)c2  
c(OC)c1OCc1cccc1)c1c(OCc2cccc2)c(OC)c2c(OC)c(OC)cc(OC)c2c1OC  
508 C=Cc1cc(C)ccc1C.O=Cc1cccc1Br>>Cc1ccc(C)c(/C=C/c2cccc2C=O)c1  
509 C=CC(C)=O.Clc1cccc1>>CC(=O)/C=C/c1cccc1  
510 C=CCO.N#Cc1cccc(Br)c1>>C=C(CO)c1cccc(C#N)c1

511 Br1ccc2c(c1)OCCOCCOCCOCCO2.C=CC(=O)O>>O=C(O)/C=C/c1ccc2c(c1)OCCOCCOCCOCCO  
512 C=C1C[C@H]2[C@@H]3CCc4cc(OC)ccc4[C@H]3CC[C@]2(C)C1=O.CC(=O)c1ccc(Br)cc1>>COc1  
513 ccc2c(c1)CC[C@]2[C@@H]1[C@@H]2CC[C@]2(C)C(=O)/C=C/c3ccc(C(C)=O)cc3)C[C@]2[H]12  
514 C=CC(=O)OC(C)(C)C.COC(=O)c1ccccc1Br>>COC(=O)c1ccccc1/C=C/C(=O)OC(C)(C)C  
515 C=CC(=O)OC.CC(C)Cn1c(=O)n(C)c(=O)c2c(Br)c(Cc3ccccc3C(F)(F)F)sc21>>COC(=O)/C=C/c1c(Cc  
516 2ccccc2C(F)(F)F)sc2c1c(=O)n(C)c(=O)n2CC(C)C  
517 C=C(NC(=O)OCc1ccccc1)C(=O)OC.CC(=O)OCc1c(I)ccc(NC(=O)OC(C)(C)C)c1C>>COC(=O)/C=C  
518 /c1ccc(NC(=O)OC(C)(C)C)c(C)c1COC(C)=O)NC(=O)OCc1ccccc1  
519 C=CCCCCCCC.Cc1ccccc1Br>>CCCCCCCC/C=C/c1ccccc1C  
520 C=CC(=O)OC.Cc1ccc(Br)c2c1N(Cc1ccc(C(F)(F)F)cc1)C(=O)C2=O>>COC(=O)/C=C/c1ccc(C)c2c1C  
521 (=O)C(=O)N2Cc1ccc(C(F)(F)F)cc1  
522 C=CC(=O)OC.CC(C)(C)OC(=O)/C=C/c1ccc(CN(C(=O)C2CCCC2)c2ccccc(Br)c2)cc1>>COC(=O)/C  
523 =C/c1ccc(N(Cc2ccc(/C=C/C(=O)OC(C)(C)C)cc2)C(=O)C2CCCC2)c1  
524 CC(=O)c1ccc(I)cc1.CCOC(=O)/C(F)=C\CCc1ccccc1>>CCOC(=O)/C(F)=C\CCc1ccccc1)c1ccc(C(C)=  
525 O)cc1  
526 C=CC(C)(C)O.CC(C)(C)[Si](C)(C)O[C@@H]1C=C(Br)C2(OCCC2)[C@H]2O[C@H]21>>CC(C)(O  
527 )/C=C/C1=C[C@@H](O[Si](C)(C)C(C)(C)C)[C@@H]2O[C@]21OCCC2  
528 C=CCC(C(=O)OCC)C(=O)OCC.CCOC(=O)c1ccc(I)cc1>>CCOC(=O)c1ccc(/C=C/CC(C(=O)OCC)C(  
529 =O)OCC)cc1  
530 C=CC(=O)OCC.COCCc1nc(O)c(I)c(COC)n1>>CCOC(=O)/C=C/c1c(O)nc(COC)nc1COC  
531 C=CC(=O)N1N=Cc2ccccc2C1C1CCC1.COc1cc(Cc2cnc(N)nc2N)cc(I)c1OC>>COc1cc(Cc2cnc(N)nc2  
532 N)cc(/C=C/C(=O)N2N=Cc3ccccc3C2C2CCC2)c1OC  
533 Br1ccccc1.C=CC#N>>N#C/C=C/c1ccccc1  
534 C=Cc1ccc(OC)cc1.CC(C)OC(=O)/C(Br)=C1\CCC1>>C=C(/C(C(=O)OC(C)C)=C1/CCC1)c1ccc(O  
535 C)cc1  
536 C=CC(=O)OC.FC(F)(F)c1ccccc(I)c1>>COC(=O)/C=C/c1ccccc(C(F)(F)F)c1  
537 C=CC(=O)OCC.O=Cc1ccc2ccccc2c1Br>>CCOC(=O)/C=C/c1c(C=O)ccc2ccccc12  
538 C=CC(=O)OCC.CC(C)(C)[Si](C)(C)OCc1cc(Br)ccn1>>CCOC(=O)/C=C/c1ccnc(CO[Si](C)(C)C(C)(C  
539 )C)c1  
540 C=CC(=O)OC(C)(C)C.Oc1ccc(C(=C2C3CCCC2CCC3)c2ccc(Br)cc2)cc1>>CC(C)(C)OC(=O)/C=C/c1  
541 ccc(C(=C2C3CCCC2CCC3)c2ccc(O)cc2)cc1  
542 C=CC(=O)OC(C)(C)C.CC1(C)Cc2cc(Br)cnc2NC1=O>>CC(C)(C)OC(=O)/C=C/c1cnc2c(c1)CC(C)(C  
543 C(=O)N2  
544 C=CC(=O)OCC.Cc1cc(C)cc(I)c1>>CCOC(=O)/C=C/c1cc(C)cc(C)c1  
545 C=Cc1ccc(Cl)cc1.Cc1ccc(Br)cc1>>Cc1ccc(/C=C/c2ccc(Cl)cc2)cc1  
546 C=CC(=O)OC(C)(C)C.Ic1ccccc1>>CC(C)(C)OC(=O)/C=C/c1ccccc1  
547 C=Cc1ccccc1.N#Cc1ccccc(Br)c1>>N#Cc1ccccc(/C=C/c2ccccc2)c1  
548 C=CC(=O)OCC.CC(C)(C)OC(=O)N[C@@H](CCC(=O)OCc1ccccc1)COc1cc(C#N)ccc1I>>CCOC(=O  
549 )/C=C/c1ccc(C#N)cc1OC[C@H](CCC(=O)OCc1ccccc1)NC(=O)OC(C)(C)C  
550 Br1ccccc1.C=Cc1ccc(C(C)=O)cc1>>CC(=O)c1ccc(/C=C/c2ccccc2)cc1  
551 C=CCCCCCCCCCCCC.CC1(C)OC(=O)c2c(cccc2OS(=O)(=O)C(F)(F)F)O1>>CCCCCCCCCCCCC/  
C=C/c1ccccc2c1C(=O)OC(C)(C)O2  
\*NC(=O)c1ccc(C=C)cc1.FC(F)(F)c1ccccc(I)c1>>\*NC(=O)c1ccc(/C=C/c2ccccc(C(F)(F)F)c2)cc1  
C=CC(=O)OC.Fc1cc(-n2ennn2)c(I)cc1Cl>>COC(=O)/C=C/c1cc(Cl)c(F)cc1-n1ennn1  
C=CC(=O)OCCCC.O=Cc1ccccc(Br)c1>>CCCCOC(=O)/C=C/c1ccccc(C=O)c1  
C=C1C(=O)O[C@@H]2C3=C(C)C(=O)C=C[C@]3(C)CC[C@]2[H]12.Fc1ccc(I)cc1>>CC1=C2[C@H]  
3OC(=O)/C=C/c4ccc(F)cc4)[C@@H]3CC[C@]2(C)C=CC1=O  
C=CC(=O)OCC.Cc1nc2cc(Br)ccc2s1>>CCOC(=O)/C=C/c1ccc2sc(C)nc2c1  
C=CCn1cc(C(=O)O)c(OC)n1.CCn1cc(I)c(=O)c2ccc(C)nc21>>CCn1cc(/C=C/Cn2cc(C(=O)O)c(OC)n2  
)c(=O)c2ccc(C)nc21  
C=CC(=O)OC.Cn1cc(I)c2ccccc2c1=O>>COC(=O)/C=C/c1cn(C)c(=O)c2ccccc12  
C=CC#N.FC(F)(F)c1cc(Cl)cc(C(F)(F)F)c1>>N#C/C=C/c1cc(C(F)(F)F)cc(C(F)(F)F)c1  
C=CC(=O)O.Fc1ccc(I)cc1>>O=C(O)/C=C/c1ccc(F)cc1  
C=CC(C)=O.COc1ccc2cc(I)ccc2c1>>COc1ccc2cc(/C=C/C(C)=O)ccc2c1  
C=CC(=O)OC(C)(C)C.CC(C)(C)O[C@H]1CC[C@H]2C=C(C3=C(Br)CN(S(=O)(=O)c4ccccc4)CC3)C  
C[C@@]21C>>CC(C)(C)OC(=O)/C=C/C1=C(C2=C[C@]3CC[C@H](OC(C)(C)C)[C@@]3(C)C  
C2)CCN(S(=O)(=O)c2ccccc2)C1  
C=C1CC(c2ccc(Cl)cc2)OC1=O.Cc1ccccc(I)c1>>Cc1ccccc(/C=C2\CC(c3ccc(Cl)cc3)OC2=O)c1  
C=CC(=O)OC.COc1cc([C@H]2Oc3c(OC)cc(Br)cc3[C@]2OC(C)=O)ccc1OC(C)=O>>COC(=O)  
/C=C/c1cc(OC)c2c(c1)[C@H](COC(C)=O)[C@]2[H](c1ccc(OC(C)=O)c(OC)c1)O2  
C=CC#N.O=CC1=C(Br)c2ccccc2CC1>>N#C/C=C/C1=C(C=O)CCc2ccccc21

552 C=CC(=O)OC.CC(C)[C@H]1C=C(OS(=O)(=O)C(F)(F)F)[C@@H](C)CC1>>COC(=O)/C=C/C1=C[C  
@H](C(C)C)CC[C@H]1C  
553 C=CCOC(C)=O.Cc1cccc1I>>CC(=O)OC/C=C/c1cccc1C  
554 Br1ccene1.C=CCCCCCCC>>CCCCCCCC/C=C/c1ccene1  
555 C=Cc1ccc2ccccc2c1.Cc1ccc(Br)cc1I>>Cc1ccc(Br)cc1/C=C/c1ccc2ccccc2c1  
556 C=Cc1ccc(OC)cc1.COc1ccc(Br)c(C=O)c1>>COc1ccc(/C=C/c2ccc(OC)cc2C=O)cc1  
\*CNCCOCCOCCOCCNC(=O)COc1ccc(C(Cc2cc(OC)cc(OC)c2)NC(=O)c2ccccc(C=C)c2)cc1.Cc1cc  
557 c(I)c(C)c1>>\*CNCCOCCOCCOCCNC(=O)COc1ccc(C(Cc2cc(OC)cc(OC)c2)NC(=O)c2ccccc(/C=C  
/c3ccc(C)cc3C)c2)cc1  
558 C=C.OC(c1ccc(Br)cc1)(C(F)(F)F)C(F)(F)F>>C=Cc1ccc(C(O)(C(F)(F)F)C(F)(F)F)cc1  
559 C=CC(=O)OC.CC1(C)CC(=C(c2ccc(Br)cc2)c2ccc3c(cnn3C3CCCCO3)c2)CC(C)(C)C1>>COC(=O)/C  
=C/c1ccc(C(=C2CC(C)(C)CC(C)(C)C2)c2ccc3c(cnn3C3CCCCO3)c2)cc1  
560 C=CCNC(=O)c1cccc1NC(=O)c1cccc1.COc1ccc(I)cc1>>COc1ccc(/C=C/CNC(=O)c2ccccc2NC(=O)  
c2ccccc2)cc1  
561 Br1cc(NC(c2ccccc2)(c2ccccc2)c2ccccc2)nc2c1nnn2C(c1cccc1)(c1cccc1)c1cccc1.C=CC(=O)OC>  
>COC(=O)/C=C/c1cc(NC(c2ccccc2)(c2ccccc2)c2ccccc2)nc2c1nnn2C(c1cccc1)(c1cccc1)c1cccc1  
562 C=C/C=C/C(=O)N(CCCC)CCCC.COc1cc(Br)cc(OC)c1>>CCCN(CCCC)C(=O)/C=C/C=C/c1cc(OC)  
cc(OC)c1  
563 C=CC(=O)OCC.F/C(Br)=C/c1cccc1>>CCOC(=O)/C=C/C(F)=C/c1cccc1  
564 C=COCCCC.Cc1cccc1Cl>>C=C(OC)CCCCc1cccc1C  
565 C=CC(=O)OCC.Cc1cccc(C)c1Cl>>CCOC(=O)/C=C/c1c(C)cccc1C  
566 C=CC(=O)N1N=Cc2ccccc2C1c1cc(C)cc(C)c1.COc1cc(Cc2cnc(N)nc2N)cc(I)c1OC>>COc1cc(Cc2cnc(  
N)nc2N)cc(/C=C/C(=O)N2N=Cc3ccccc3C2c2cc(C)cc(C)c2)c1OC  
567 C=CC(=O)OCC.Cn1c(Br)cccc1=O>>CCOC(=O)/C=C/c1cccc(=O)n1C  
568 Br1ccene1.C=CC(=O)CCCC>>CCCCC(=O)/C=C/c1ccene1  
569 C=Cc1cccc1.Cn1c(-c2ccc(Br)cc2)nc2ccccc21>>Cn1c(-c2ccc(/C=C/c3ccccc3)cc2)nc2ccccc21  
570 C=CC(=O)OC.O=Cc1cc(I)ccc1O>>COC(=O)/C=C/c1ccc(O)c(C=O)c1  
571 C=CC(=O)OCC.CCOC(=O)CCOCc1cc(OC)c(OCc2ccccc2)cc1Br>>CCOC(=O)/C=C/c1cc(OCc2ccccc  
2)c(OC)cc1COCCCC(=O)OCC  
572 C=CC(=O)OC(C)(C)C.O=[N+][O-]  
]c1ccc(CNc2ccc(Br)cc2)cc1>>CC(C)(C)OC(=O)/C=C/c1ccc(NC2ccc([N+](=O)[O-])cc2)cc1  
573 C=CC(=O)OC.O=CNc1ccc(Cl)cc1I>>COC(=O)/C=C/c1cc(Cl)ccc1NC=O  
574 C=CC(=O)Oc1ccc(OC)cc1.Ic1cccc1>>COc1ccc(OC(=O)/C=C/c2ccccc2)cc1  
575 C=CC(=O)OC(C)(C)C.Fc1cc(C(F)(F)F)ccc1Br>>CC(C)(C)OC(=O)/C=C/c1ccc(C(F)(F)F)cc1F  
576 C=C.CC(=O)c1cccc1Br>>C=Cc1cccc1C(C)=O  
577 C=CC(=O)O.O=[N+][O-]c1cccc(I)c1>>O=C(O)/C=C/c1cccc([N+](=O)[O-])c1  
578 C=CNC(C)=O.CCOC(=O)c1ccc(I)cc1>>C=C(NC(C)=O)c1ccc(C(=O)OCC)cc1  
579 C=Cc1ccc([N+](=O)[O-])cc1.O=Cc1ccc(Br)cc1>>O=Cc1ccc(/C=C/c2ccc([N+](=O)[O-])cc2)cc1  
580 Br1enc2ccccc2c1.C=CCO[Si](C)(C)C(C)(C)C>>CC(C)(C)[Si](C)(C)OC/C=C/c1enc2ccccc2c1  
581 C=CC(=O)O.COC(=O)c1cc2c(cc1Br)OCO2>>COC(=O)c1cc2c(cc1/C=C/C(=O)O)OCO2  
582 C=CN1CCCC1=O.FC(F)(F)I>>O=C1CCCN1/C=C/C(F)(F)F  
583 C=Cc1cccc1.CCCCCC1ccsc1Br>>CCCCC1ccsc1/C=C/c1cccc1  
584 C=Cc1ccc(Br)cc1.CC(C)(C)OCc1cccc(I)c1>>CC(C)(C)OCc1cccc(/C=C/c2ccc(Br)cc2)c1  
585 C=Cc1ccc(C(=O)OC)cc1.Clc1ccene1>>COC(=O)c1ccc(/C=C/c2ccenc2)cc1  
586 C=CC(N)=O.Oc1ccc2c(c1)CCN(c1cccc1)C2c1ccc(I)cc1>>NC(=O)/C=C/c1ccc(C2c3ccc(O)cc3CCN2  
c2ccccc2)cc1  
587 C=CC(N)=O.Ic1ccsc1>>NC(=O)/C=C/c1ccsc1  
588 Br1ccc2c(c1)CCc1cccc1N2.C=CC(=O)OC(C)(C)C>>CC(C)(C)OC(=O)/C=C/c1ccc2c(c1)CCc1cccc  
589 C=CCCCCCC.Fc1ccc(CCl)c(F)c1>>C=C(CCCCC)Cc1ccc(F)cc1F  
590 C=CCNC(=O)c1ccc(F)cc1NC(=O)c1ccc(C(F)(F)F)cc1.Ic1cccc1>>O=C(Nc1cc(F)ccc1C(=O)NC/C=C  
/c1cccc1)c1ccc(C(F)(F)F)cc1  
591 Br1ccc(-c2nc3ccccc3n2)cc1.C=CCn1c(-c2ccc(OC)c2)nc2ccccc2c1=O>>COc1cccc(-  
c2nc3ccccc3c(=O)n2C/C=C/c2ccc(-c3cnc4ccccc4n3)cc2)c1  
592 C=C1C(=O)O[C@@H]2/C=C(\C)CC/C=C(\C)CC[C@@H]12.Oc1cccc1I>>C/C1=C[C@H]2OC(=O)  
/C(=C/c3ccccc3O)[C@@H]2CC/C(C)=C/CC1  
593 C=Cc1ence(C#N)c1Nc1ccc2[nH]ccc2c1C.ClCCOc1ccc(Br)cc1>>Cc1c(Nc2c(C#N)nc22/C=C/c2ccc(  
OCCCl)cc2)ccc2[nH]ccc12  
594 C=Cc1ccc(C(C)(C)C)cc1.C[Si](C)(C)Cl>>CC(C)(C)c1ccc(/C=C/[Si](C)(C)C)cc1  
595 C=Cc1c(C)cc(C)cc1C.CCOC(=O)C(F)Br>>CCOC(=O)C(F)/C=C/c1c(C)cc(C)cc1C

[illegible]

629 C=CC(=O)OC.CCCCCCCCCC(F)(F)[C@H]1CC(c2ccc(Br)cc2)=N[C@@H]1C(=O)OCC>>CCCCC  
CCCC(F)(F)[C@H]1CC(c2ccc(/C=C/C(=O)OC)cc2)=N[C@@H]1C(=O)OCC  
 630 C=Cc1cccc1.COc1ccc(/C=C/c2[nH]c3cccc3c(=O)c2)cc1>>COc1ccc(/C=C/c2[nH]c3cccc3c(=O)c2  
/C=C/c2cccc2)cc1  
 631 Br1cccc2cccc12.C=CC(=O)C(C)CC(=O)OC>>COC(=O)CC(C)C(=O)/C=C/c1cccc2cccc12  
C=Cc1cccn1.CCN1C[C@]2(OC(=O)c3cc(I)ccc3NC(C)=O)CC[C@H](OC)[C@@]34[C@@H]2C[C  
 632 @H]([C@@H]13)[C@@]1(O)C[C@H](OC)[C@H]2C[C@@H]4[C@@]1(O)[C@H]2OC>>CCN1C[C  
@]2(OC(=O)c3cc(/C=C/c4cccn4)ccc3NC(C)=O)CC[C@H](OC)[C@@]34[C@@H]2C[C@H]([C@  
@H]13)[C@@]1(O)C[C@H](OC)[C@H]2C[C@@H]4[C@@]1(O)[C@H]2OC  
 633 C=Cc1ccc(C)cc1.IC1CCCCC1>>Cc1ccc(/C=C/C2CCCCC2)cc1  
 634 C=Cc1ccc(C(C)(C)C)cc1.C[Si](C)(C)I>>CC(C)(C)c1ccc(/C=C/[Si](C)(C)C)cc1  
 635 C=CCc1ccc(OC)c(OC)c1.O=C(O)c1ccc(CCl)cc1>>C=C(Cc1ccc(C(=O)O)cc1)Cc1ccc(OC)c(OC)c1  
 636 C=CC(=O)OCC.COCC1CCC(Nc2nc(N)nc(C)c2Br)CC1>>CCOC(=O)/C=C/c1c(C)nc(N)nc1NC1CCC(O  
C)CC1  
 637 C=Cc1cccc(OC)c1.COC(=O)c1cc2cc(Br)ccc2cc1OC(C)=O>>COC(=O)c1cc2cc(/C=C/c3cccc(OC)c3)c  
cc2cc1OC(C)=O  
 638 C=CC(=O)OC.COC(=O)c1cc(I)cc(C(=O)OC)c1>>COC(=O)/C=C/c1cc(C(=O)OC)cc(C(=O)OC)c1  
 639 C=Cc1ccc(C(C)(C)C)cc1.Cc1ccc([Si](C)(C)I)o1>>Cc1ccc([Si](C)(C)/C=C/c2ccc(C(C)(C)C)cc2)o1  
 640 C=COCCCC.Cc1cc(CO)ccc1I>>C=C(OCCCC)c1ccc(CO)cc1C  
 641 Br1cnc2cccc2c1.C=CC(C)(C)O>>CC(C)(O)/C=C/c1cnc2cccc2c1  
 642 C=CC(F)(F)C(F)(F)C(F)(F)C(F)(F)C(F)(F)F.Cc1ccc(Br)cc1>>Cc1ccc(/C=C/C(F)(F)C(F)(F)C(  
F)(F)C(F)(F)C(F)(F)C(F)(F)F)cc1  
 643 C=Cc1ccc(C)cc1.CCOC(=O)C1CCCN(c2cccc(Br)n2)C1>>CCOC(=O)C1CCCN(c2cccc(/C=C/c3ccc(C  
)cc3)n2)C1  
 644 C=Cc1cccc1.Cc1cc(Br)c2nnnn2c1>>Cc1cc(/C=C/c2cccc2)c2nnnn2c1  
 645 C=C[C@@](C)(/C=C/c1ccc(O)cc1)CCC=C(C)C.COc1ccc(Br)cc1C=O>>COc1ccc(/C=C/[C@@](C)(/  
C=C/c2ccc(O)cc2)CCC=C(C)C)cc1C=O  
 646 C=CC(=O)OCC.COc1cc(O)ccc1Br>>CCOC(=O)/C=C/c1ccc(O)cc1OC  
 647 C=CC(=O)OC.CCCCCc1ccc(N2CCc3cc(OC)ccc3C2(C)c2ccc(Br)cc2)cc1>>CCCCCc1ccc(N2CCc3cc(  
OC)ccc3C2(C)c2ccc(/C=C/C(=O)OC)cc2)cc1  
 648 C=CC(=O)OCC.Ic1cnn(CC2CC2)c1>>CCOC(=O)/C=C/c1cnn(CC2CC2)c1  
 649 C=COCCCC.O=S(=O)(Oc1ccc(-c2cccc2)cc1)C(F)(F)F>>C=C(OCCCC)c1ccc(-c2cccc2)cc1  
 650 C=Cc1cccn1.Ic1cccc1>>C(=C/c1cccn1)c1cccc1  
 651 Br1cccs1.C=CCn1nnc2cccc21>>C(=C/c1cccs1)Cn1nnc2cccc21  
 652 C=Cc1cnc1.CCCN1ccc2cc(Br)ccc21>>CCCN1ccc2cc(/C=C/c3ccncc3)ccc21  
 653 C=Cc1ccc(OC)cc1.Oc1cc(O)cc(I)c1>>COc1ccc(/C=C/c2cc(O)cc(O)c2)cc1  
 654 C=CNC(C)=O.CCOC(=O)c1ccc(Br)cc1>>C=C(NC(C)=O)c1ccc(C(=O)OCC)cc1  
 655 C=C[C@]1(CC)CCSc2cccc21.Ic1cccc1>>CC[C@@]1(/C=C/c2cccc2)CCSc2cccc21  
 656 C=Cc1cc(OC)c(O)c(OC)c1.COc1ccc(OC)c(I)c1>>COc1ccc(OC)c(/C=C/c2cc(OC)c(O)c(OC)c2)c1  
 657 C=Cc1nn(C2CCCCO2)c2nc(Cl)cc(C(=O)N3CCN(C(=O)OC(C)(C)C)CC3)c12.CN(C)Cc1cccc(I)c1>>  
CN(C)Cc1cccc(/C=C/c2nn(C3CCCCO3)c3nc(Cl)cc(C(=O)N4CCN(C(=O)OC(C)(C)C)CC4)c23)c1  
 658 C=CC(=O)O.COc1ccc(S(=O)(=O)Nc2cccc(I)c2)cc1OC>>COc1ccc(S(=O)(=O)Nc2cccc(/C=C/C(=O)O  
)c2)cc1OC  
 659 C=CC(=O)OC(C)(C)C.O=C(NC[C@H]1CCc2cc(I)ccc2O1)OCc1cccc1>>CC(C)(C)OC(=O)/C=C/c1c  
cc2c(c1)CC[C@H](CNC(=O)OCc1cccc1)O2  
 660 C=CCn1c(-c2ccc(OC)cc2)nc2cccc2c1=O.O=C(CN1C(=O)COc2cccc21)c1ccc(Br)cc1>>COc1ccc(-  
c2nc3cccc3c(=O)n2C/C=C/c2ccc(C(=O)CN3C(=O)COc4cccc43)cc2)cc1  
 661 C=CC(=O)OC(C)(C)C.O=[N+][O-]c1cccc(Br)c1>>CC(C)(C)OC(=O)/C=C/c1cccc([N+](=O)[O-])c1  
 662 C=C1Oe2cc(OC)cc(C(=O)OC)c2NC1=O.O=[N+][O-  
]c1ccc(Br)cc1>>COC(=O)c1cc(OC)cc2c1NC(=O)/C=C/c1cccc([N+](=O)[O-])cc1)O2  
 663 C=Cc1cccc1.COc1ccc(Br)c2cccc12>>COc1ccc(/C=C/c2cccc2)c2cccc12  
 664 C=CC(=O)OCC.Nc1cnc1Br>>CCOC(=O)/C=C/c1cnc1N  
 665 C=Cc1cccc1.Ic1c(COCc2cccc2)nnn1Cc1cccc1>>C(=C/c1c(COCc2cccc2)nnn1Cc1cccc1)c1cccc  
 666 C=CC(O)c1cccc1Br.COc1ccc(I)cc1OC>>COc1ccc(/C=C/C(O)c2cccc2Br)cc1OC  
 667 C=CCC(C)C.CC(C)(C)c1ccc(OS(=O)(=O)C(F)(F)F)cc1>>C=C(CC(C)C)c1ccc(C(C)(C)C)cc1  
 668 C=Cc1nc2cccc2s1.C[C@H]1COCCOCCOC[C@H](C)OCc2cc(I)cc(n2)CO1>>C[C@H]1COCCOCC  
OC[C@H](C)OCc2cc(/C=C/c3nc4cccc4s3)cc(n2)CO1  
 669 C=CC(=O)c1ccc(OC)cc1OC.Ic1cccc1>>COc1ccc(C(=O)/C=C/c2cccc2)c(OC)c1  
 670 C=CC(=O)OCC.COc1ccc(-c2cccc2Br)cc1>>CCOC(=O)/C=C/c1cccc1-c1ccc(OC)cc1  
 671 C=CCNC(=O)OC(C)(C)C.COC(=O)c1cccc(Br)c1>>C=C(CNC(=O)OC(C)(C)C)c1cccc(C(=O)OC)c1



672 C=CC(=O)OC(C)(C)C.CC(C)(C)OC(=O)N1CCC2(CC1)Cc1cc(Br)enc1NC2=O>>CC(C)(C)OC(=O)/C  
=C/c1enc2c(c1)CC1(CCN(C(=O)OC(C)(C)C)CC1)C(=O)N2  
673 C=Cc1cccc1.COc1ccc(-c2oc3c(I)c(OC)cc(O)c3c(=O)c2OC)cc1OC>>COc1ccc(-  
c2oc3c(/C=C/c4cccc4)c(OC)cc(O)c3c(=O)c2OC)cc1OC  
674 C=Cc1cccc1.O=Cc1ccc(Br)cc1>>C=C(c1cccc1)c1ccc(C=O)cc1  
675 C=CC(=O)OC.O=[N+][([O-])c1ccc(Br)c([N+](=O)[O-])c1>>COC(=O)/C=C/c1ccc([N+](=O)[O-]  
]cc1[N+](=O)[O-]  
676 C=CCCCCCC.COc1ccc(Cl)cc1>>CCCCC/C=C/c1ccc(OC)cc1  
677 C=Cc1cccc1OC.COC(=O)c1cc2cc(Br)ccc2cc1OC(C)=O>>COC(=O)c1cc2cc(/C=C/c3cccc3OC)ccc2  
cc1OC(C)=O  
678 C=CC(C)(O)CCC=C(C)C.COc1ccc(O)c(Br)c1>>COc1ccc(O)c(/C=C/C(C)(O)CCC=C(C)C)c1  
679 C=CC(C)(C)O.CC(C)(C)OC(=O)[C@H](Cc1cn(C(=O)OC(C)(C)C)c2cccc(I)c12)N=C(c1cccc1)c1ccc  
cc1>>CC(C)(O)/C=C/c1cccc2c1c[C@H](N=C(c1cccc1)c1cccc1)C(=O)OC(C)(C)C)cn2C(=O)OC(  
680 C=CCOc1ccc(OC)cc1.Ic1cccc2cccc12>>COc1ccc(OC/C=C/c2cccc3cccc23)cc1  
681 C=CC(F)(F)F.Cc1ccc(I)cc1>>Cc1ccc(/C=C/C(F)(F)F)cc1  
682 C=CS(=O)(=O)F.FC(F)(F)Oc1ccc(I)cc1>>O=S(=O)(F)/C=C/c1ccc(OC(F)(F)F)cc1  
683 C=Cc1cccc1.COc1ccc(N)c(Br)c1>>COc1ccc(N)c(/C=C/c2cccc2)c1  
684 C=C(C)C1(O)CCC2(CC1)OCCO2.COc1ccc(Br)cc1O>>COc1ccc(/C=C(\C)C2(O)CCC3(CC2)OCCO3)  
cc1O  
685 C=Cc1ccncc1.CCCCCCCCCCCCCOc1ccc(I)cc1>>CCCCCCCCCCCCCOc1ccc(/C=C/c2ccncc2)cc1  
686 C=CC(=O)OCc1cccc1.CCOC(=O)/C=C/c1cccc2c1oc1c(I)cccc12>>CCOC(=O)/C=C/c1cccc2c1oc1c(/  
C=C/C(=O)OCc3cccc3)cccc12  
687 Brc1cccc1.C=CC(N)=O>>NC(=O)/C=C/c1cccc1  
688 C=CC(=O)O.CC(C)(C)OC(=O)N[C@@H](Cc1cccc1Br)C(=O)O>>CC(C)(C)OC(=O)N[C@@H](Cc1  
cccc1/C=C/C(=O)O)C(=O)O  
689 C=Cc1ccc(OC)cc1.COc1cc(Br)c(C=O)cc1OC>>COc1ccc(/C=C/c2cc(OC)c(OC)cc2C=O)cc1  
690 Brc1ccs1.C=CCO>>C=C(CO)c1ccs1  
691 C=CC(=O)OCC.COc1cccc(OC)c1I>>CCOC(=O)/C=C/c1c(OC)cccc1OC  
692 C=Cc1cccc1.O=P(c1cccc1)(c1cccc1)c1sc2cccc2c1I>>O=P(c1cccc1)(c1cccc1)c1sc2cccc2c1/C=  
C/c1cccc1  
C=CCN(C(=O)[C@@H]1CCCN1C)[C@H](C)c1cc(F)cc(F)c1.O=C1Nc2ncccc2[C@]12Cc1ccc(Br)cc1  
693 C2>>C[C@H](c1cc(F)cc(F)c1)N(C/C=C/c1ccc2c(c1)C[C@@]1(C2)C(=O)Nc2ncccc21)C(=O)[C@@  
H]1CCCN1C  
C=CC(=O)OC(C)(C)C.CC(C)OC(=O)C[C@@H](c1ccc(Br)cc1)N(Cc1cccc1)[C@H](C)c1cccc1>>C  
694 C(C)OC(=O)C[C@@H](c1ccc(/C=C/C(=O)OC(C)(C)C)cc1)N(Cc1cccc1)[C@H](C)c1cccc1  
C=C(NC(=O)OC(C)(C)C)C(=O)OC.CN(C)c1ccc(I)cc1>>COC(=O)/C=C(c1ccc(N(C)C)cc1)NC(=O)O  
695 C(C)(C)C  
C=CCNC1=NCCN1.COc1cccc(I)c1>>COc1cccc(/C=C/CNC2=NCCN2)c1  
696 C=Cc1cccc1.CC(=O)OC[C@H]1O[C@@H](n2enc3c(Cl)nc(I)nc32)[C@H](OC(C)=O)[C@@H]1OC(  
C)=O>>CC(=O)OC[C@H]1O[C@@H](n2enc3c(Cl)nc(/C=C/c4cccc4)nc32)[C@H](OC(C)=O)[C@  
697 @H]1OC(C)=O  
C=CC(C)=O.Ic1c(-c2cccc2)nnn1Cc1cccc1>>CC(=O)/C=C/c1c(-c2cccc2)nnn1Cc1cccc1  
698 C=CC(=O)OCC.Cc1cc(F)c(CCN(C)C)cc1Br>>CCOC(=O)/C=C/c1cc(CCN(C)C)c(F)cc1C  
700 C=CC(=O)OC.ClCc1cccc1>>COC(=O)/C=C/Cc1cccc1  
C=CC(C)(C)C(=O)NC(C)(C)CO.Cc1cc(OCc2cccc2)c(C2O[C@H](COCc3cccc3)[C@@H](OCc3ccc  
701 cc3)[C@H](OCc3cccc3)[C@H]2OCc2cccc2)cc1Cc1ccc(Br)cc1>>Cc1cc(OCc2cccc2)c(C2O[C@H]  
(COCc3cccc3)[C@@H](OCc3cccc3)[C@H](OCc3cccc3)[C@H]2OCc2cccc2)cc1Cc1ccc(/C=C/C(  
C)(C)C(=O)NC(C)(C)CO)cc1  
702 C=C(CC(=O)OCC)C(=O)OCC.CC(=O)OCc1c(I)ccc(NC(=O)OC(C)(C)C)c1C>>CCOC(=O)C/C(=C\c1  
ccc(NC(=O)OC(C)(C)C)c(C)c1COC(C)=O)C(=O)OCC  
703 C=Cc1ccncc1.CCCCCCCCCCCCCOc1ccc(I)cc1>>CCCCCCCCCCCCCOc1ccc(/C=C/c2ccncc2)cc1  
704 C=CC(=O)OC.Cc1cc(F)ccc1C(=O)c1sc2cc(O)ccc2c1Oc1ccc(Br)cc1>>COC(=O)/C=C/c1ccc(Oc2c(C(  
=O)c3ccc(F)cc3)sc3cc(O)ccc23)cc1  
705 C=CC(=O)N(C)C.Fc1cccc(I)c1>>CN(C)C(=O)/C=C/c1cccc(F)c1  
706 C=Cc1ccc(/C=C/c2cccn2C)cc1.O=Cc1ccc(Br)cc1>>Cn1cccc1/C=C/c1ccc(/C=C/c2ccc(C=O)cc2)cc1  
707 C=Cc1ccc(N(c2ccc(OC)cc2)c2ccc(OC)cc2)cc1.Cc1cccc(Br)c1>>COc1ccc(N(c2ccc(/C=C/c3cccc(C)c3  
)cc2)c2ccc(OC)cc2)cc1  
708 C=CC(C)(C)O.COC(=O)c1cccc2nc3cccc(Br)c3nc12>>COC(=O)c1cccc2nc3cccc(/C=C/C(C)(C)O)c3n  
709 C=COCCCC.COCCN(c1cccc(Br)c1F)S(=O)(=O)c1cc(F)ccc1F>>C=C(OCCCC)c1cccc(N(COC)S(=O)(=  
O)c2cc(F)ccc2F)c1F  
710 Brc1cccc1.C=CC(F)(F)F>>FC(F)(F)/C=C/c1cccc1

711 C=Cc1c(OC)cc(OC)cc1OC.Cc1ccc(S(=O)(=O)Oc2ccccc3c(Br)ccnc23)cc1>>COc1cc(OC)c(/C=C/c2ccn  
c3c(OS(=O)(=O)c4ccc(C)cc4)ccccc23)c(OC)c1  
712 C=CC(=O)N(C)Cc1sc2ccccc2c1C.CC1(C)C(=O)Nc2ncc(Br)cc21>>Cc1c(CN(C)C(=O))/C=C/c2cnc3c(  
c2)C(C)(C)C(=O)N3)sc2ccccc12  
713 C=C[C@H]1OC(C)(C)O[C@H]1CCCCC.CC(C)(C)OC(=O)CCCC(=O)c1ccccc1Br>>CCCC[C@@H  
]1OC(C)(C)O[C@@H]1/C=C/c1ccccc1C(=O)CCCC(=O)OC(C)(C)C  
714 C=CC(=O)OC(C)(C)C.CC(C)=CCc1cc(I)cc(CC=C(C)C)c1O>>CC(C)=CCc1cc(/C=C/C(=O)OC(C)(C)  
C)cc(CC=C(C)C)c1O  
715 C=CC(=O)O.O=C(O)Cc1ccccc1Br>>O=C(O)/C=C/c1ccccc1CC(=O)O  
716 Brc1ccccc1.C=Cc1enn(-c2ccccc2)c1>>C(=C/c1enn(-c2ccccc2)c1)\c1ccccc1  
717 C=CC(=O)OC.CC(C)(C)C(=O)Oc1ccc(Br)c(CO[Si](C)(C)C(C)C)c1>>COC(=O)/C=C/c1ccc(OC(=  
O)C(C)(C)C)cc1CO[Si](C)(C)C(C)C  
718 C=CCN(C(=O)OC(C)(C)C)C(=O)OC(C)(C)C.Clc1ccccc1>>CC(C)(C)OC(=O)N(C/C=C/c1ccccc1)C(=  
O)OC(C)(C)C  
719 C=Cc1ccccc1.CC(C)(C)OC(=O)N[C@H](COc1nccc(Br)c1)Cc1ccc2ccccc2c1>>CC(C)(C)OC(=O)N[C  
@H](COc1nccc(/C=C/c2ccccc2)c1)Cc1ccc2ccccc2c1  
720 C=CC(=O)OC(C)(C)C.O=Cc1ccc(Br)cc1>>CC(C)(C)OC(=O)/C=C/c1ccc(C(=O))cc1  
721 C=Cc1ccc(N(c2ccccc2)c2ccccc2)cc1.CSc1ccc(Br)cc1>>CSc1ccc(/C=C/c2ccc(N(c3ccccc3)c3ccccc3)cc  
2)cc1  
722 C=CCN(C(=O)OC(C)(C)C)C(=O)OC(C)(C)C.COC(=O)c1ccc(Br)cc1>>COC(=O)c1ccc(/C=C/CN(C(=  
O)OC(C)(C)C)C(=O)OC(C)(C)C)cc1  
C=Cc1nn(C2CCCCO2)c2nc(-  
723 c3ccc(O)cc3)cc(C(=O)N3CCN(C(=O)OC(C)(C)CC3)c12.Fc1ccc(I)cc1>>CC(C)(C)OC(=O)N1CCN(  
C(=O)c2cc(-c3ccc(O)cc3)nc3c2c(/C=C/c2ccc(F)cc2)nn3C2CCCCO2)CC1  
C=CC(=O)OC.CC[C@@H]1C[C@H](N(Cc2cc(C(F)(F)F)cc(C(F)(F)F)c2)c2ncc(Br)cn2)CN1C(=O)O  
724 C(C)(C)C>>CC[C@@H]1C[C@H](N(Cc2cc(C(F)(F)F)cc(C(F)(F)F)c2)c2ncc(/C=C/C(=O)OC)cn2)CN  
1C(=O)OC(C)(C)C  
C=CCN1C(=O)C(C)(C)N(C(=O)OC(C)(C)C)[C@@]1(C)c1cc(F)cc(F)c1.C[Si](C)(C)CCOCN1C(=O  
725 )C2(Cc3cnc(Cl)cc3C2)c2ccccc21>>CC(C)(C)OC(=O)N1C[C@@](C)(c2cc(F)cc(F)c2)N(C/C=C/c2cc3  
c(cn2)CC2(C3)C(=O)N(COCC[Si](C)(C)C)c3ncccc32)C(=O)C1(C)C  
726 Brc1ccc2ccc3cccc4ccc1c2c34.C=Cc1ccc(Cl)cc1>>Clc1ccc(/C=C/c2ccc3ccc4cccc5ccc2c3c45)cc1  
727 C=Cc1ccc(O)cc1.COc1cc(I)cc(OC)c1>>COc1cc(/C=C/c2ccc(O)cc2)cc(OC)c1  
728 C=Cc1ccc(Cl)cc1.O=c1cc(-c2ccccc2)oc2ccc(Br)cc12>>O=c1cc(-  
c2ccccc2)oc2ccc(/C=C/c3ccc(Cl)cc3)cc12  
729 C=CP(=O)(OCC)OCC.Cc1ccc(Br)cc1>>CCOP(=O)/C=C/c1ccc(C)cc1OCC  
730 C=CC(F)(F)C(F)(F)C(F)(F)C(F)(F)F.Ic1ccc(OCc2ccccc2)cc1>>FC(F)(F)C(F)(F)C(F)(F)C(F)(F)/C=C/  
c1ccc(OCc2ccccc2)cc1  
731 C=CC(=O)OCCCC.Fc1ccc(Br)cc1F>>CCCCOC(=O)/C=C/c1ccc(F)c(F)c1  
732 C=CC(=O)OC.NC(=O)c1ccccc(I)c1>>COC(=O)/C=C/c1ccccc(C(N)=O)c1  
733 C=Cc1ccccc1.COC(=O)c1cc(C#C[Si](C)(C)C)ccc1OS(=O)(=O)C(F)(F)F>>COC(=O)c1cc(C#C[Si](C)  
(C)C)ccc1/C=C/c1ccccc1  
734 C=CC#N.O=[N+][O-]c1ccc(Br)cc1>>N#C/C=C/c1ccc([N+](=O)[O-])cc1  
C=Cc1ccc(/C=C/c2ccc(N(C)C)cc2OC)cc1.CN(C)c1ccc2c(c1)[Si](C)(C)C1=CC(=[N+](C)C)C=CC1=C  
735 2c1ccc(Br)cc1S(=O)(=O)[O-  
>>COc1cc(N(C)C)ccc1/C=C/c1ccc(/C=C/c2ccc(C3=C4C=CC(=[N+](C)C)C=C4[Si](C)(C)c4cc(N(C)  
C)ccc43)c(S(=O)(=O)[O-])c2)cc1  
736 C=C[Si](C)(C)C.Ic1cccs1>>C[Si](C)(C)/C=C/c1cccs1  
737 C=CSCC.CC(=O)c1ccc(Br)cc1>>CCS/C=C/c1ccc(C(C)=O)cc1  
738 C=Cc1ccc(C)cc1.O=c1cc(-c2ccccc2)oc2cc(Br)ccc12>>Cc1ccc(/C=C/c2ccc3c(=O)cc(-  
739 C=CC(C)(O)CCC=C(C)C.Fc1ccc(Br)cc1>>CC(C)=CCCC(C)(O)/C=C/c1ccc(F)cc1  
C=CC(=O)OC(C)(C)C.O=C1Ne2ccccc2O/C1=C\c1ccccc1Br>>CC(C)(C)OC(=O)/C=C/c1ccccc1/C=C  
740 1\Oc2ccccc2NC1=O  
741 C=C(C)C(=O)OC.COc1ccccc1I>>COC(=O)/C(C)=C/c1ccccc1OC  
742 Brc1ccc(I)nc1.C=CCNC(=O)c1ccccc1>>O=C(NC/C=C\c1ccc(Br)cn1)c1ccccc1  
743 C=Cc1ccc(-c2ccccc2)cc1.CC(C)(C)Br>>CC(C)(C)/C=C/c1ccc(-c2ccccc2)cc1  
744 C=C(NC(=O)OCc1ccccc1)C(=O)OC.CC(=O)OCc1cc(F)c(F)cc1Br>>COC(=O)/C(=C/c1cc(F)c(F)cc1C  
OC(C)=O)NC(=O)OCc1ccccc1  
745 C=CC(C)=O.Cn1c(=O)oc2cc(Br)cn21>>CC(=O)/C=C/c1cnc2c(c1)oc(=O)n2C  
746 C=CC(=O)OC.COc1ccccc1Br>>COC(=O)/C=C/c1ccccc1OC  
747 C=Cc1ccccc1.CCCCCCCC(=O)N1CCN(c2ccc(Br)cc2)CC1>>CCCCCCCC(=O)N1CCN(c2ccc(/C=C/c  
3ccccc3)cc2)CC1

748 Br1cccc1.C=CC(=O)CCCCC>>CCCCC(=O)/C=C/c1cccc1  
749 C=CC(=O)OC.O=[N+](=[O-])c1ccc(I)cc1>>COC(=O)/C=C/c1ccc([N+](=O)[O-])cc1  
750 C=CC(=O)NC(C)C.CCc1nc2cc(O)ccc2c(Oc2ccc(Br)cc2)c1-  
c1cccc1>>CCc1nc2cc(O)ccc2c(Oc2ccc(/C=C/C(=O)NC(C)C)cc2)c1-c1cccc1  
751 Br1ccc(I)cc1.C=Cc1ccc(C)cc1>>Cc1ccc(/C=C/c2ccc(Br)cc2)cc1  
752 C=Cc1ccc(Br)cc1.CCCCCCN(CCCCCC)c1ccc(I)cc1>>CCCCCN(CCCCCC)c1ccc(/C=C/c2ccc(Br)c  
c2)cc1  
753 C=CNC(C)=O.O=S(=O)(Oc1ccc(-c2cccc2)cc1)C(F)(F)F>>C=C(NC(C)=O)c1ccc(-c2cccc2)cc1  
754 C=CC(OCC)OCC.CC(=O)c1ccc(Br)cc1>>CCOC(/C=C/c1ccc(C(C)=O)cc1)OCC  
755 C=Cc1ccc(OC)cc1.COc1ccc(I)c(OC)c1>>COc1ccc(/C=C/c2ccc(OC)cc2OC)cc1  
756 C=CC12CCC(NC(=O)OC(C)(C)C)(CC1)CO2.COc1ccc2ncc(F)c(Br)c2n1>>COc1ccc2ncc(F)c(/C=C/C  
34CCC(NC(=O)OC(C)(C)C)(CC3)CO4)c2n1  
757 C=CC(=O)N(C)Cc1cc2cccc2n1C.CC(C)(C)OC(=O)N1CC(=O)Nc2cc(Br)cnc21>>CN(Cc1cc2cccc2n  
1C)C(=O)/C=C/c1cnc2c(c1)NC(=O)CN2C(=O)OC(C)(C)C  
758 C=Cc1cccc1.Cc1nc(-c2ccc(Br)cc2)cs1>>Cc1nc(-c2ccc(/C=C/c3cccc3)cc2)cs1  
759 C=COCCCC.Clc1cccc1>>C=C(OCCCC)c1cccc1  
760 C=CC(=O)OC.Cc1c(Br)cnc2c1nnn2C>>COC(=O)/C=C/c1cnc2c(nnn2C)c1C  
761 C=Cc1cccc1.CCCCCCCCOCc1cc(/C=C/c2ccc(Br)cc2)c(OCCCCCCCC)cc1/C=C/c1cccc1>>CCCCC  
CCCOc1cc(/C=C/c2ccc(/C=C/c3cccc3)cc2)c(OCCCCCCCC)cc1/C=C/c1cccc1  
762 Br/C=C/[Te]c1cccc1)c1cccc1.C=CC#N>>N#C/C=C/C(=C/[Te]c1cccc1)c1cccc1  
763 Br1cccc1.C=CCN1C(=O)c2cccc2C1=O>>O=C1c2cccc2C(=O)N1C/C=C/c1cccc1  
764 C=Cc1cccc1.CC(=O)c1cccc1Cl>>CC(=O)c1cccc1/C=C/c1cccc1  
765 C=Cc1cccc1.Oc1ccc(O)c(Br)c1>>Oc1ccc(O)c(/C=C/c2cccc2)c1  
766 C=CC(=O)OCC.CC(C)c1cc(C(C)C)c(I)c(C(C)C)c1>>CCOC(=O)/C=C/c1c(C(C)C)cc(C(C)C)cc1C(C)  
767 C=CC(=O)OCC.CC(C)(C)[Si](C)(C)n1c(=O)n([Si](C)(C)C(C)C)c2nc3ccc(Br)cc3cc21>>CCOC(=O  
)/C=C/c1ccc2nc3c(cc2c1)n([Si](C)(C)C(C)C)c(=O)n3[Si](C)(C)C(C)C  
768 C=C(c1cc(OC)c(OC)c(OC)c1)c1ccc(OC)c(Br)n1.C=CC(=O)OC>>C=C(c1cc(OC)c(OC)c(OC)c1)c1ccc  
(OC)c(/C=C/C(=O)OC)n1  
769 C=CC(=O)Nc1cccc1NC(=O)OC(C)(C)C.CN1C[C@H](c2ccc(Br)cc2F)[C@@H](C(=O)Nc2ccc(Cl)cc  
2)C1>>CN1C[C@H](c2ccc(/C=C/C(=O)Nc3cccc3NC(=O)OC(C)(C)C)cc2F)[C@@H](C(=O)Nc2ccc  
(Cl)cc2)C1  
770 C=Cc1ccc2cccc2c1.Cc1ccc(Br)cc1>>Cc1ccc(/C=C/c2ccc3cccc3c2)cc1  
771 C=C(CC)C(C)=O.Oc1cccc1I>>CC/C(=C/c1cccc1O)C(C)=O  
772 C=CC(=O)OC.CCCCCC1=C(I)C1(F)F>>CCCCC1=C(/C=C/C(=O)OC)C1(F)F  
773 C=CC(=O)OCCCOc1ccc(C(c2ccc(C(C)C)cc2)(c2ccc(C(C)C)cc2)c2ccc(C(C)C)cc2)cc1.CC(  
C)(C)c1ccc(C(c2ccc(OCCCOc3ccc(I)cc3)cc2)(c2ccc(C(C)C)cc2)c2ccc(C(C)C)cc2)cc1>>CC(C)  
(C)c1ccc(C(c2ccc(OCCCOc(=O)/C=C/c3ccc(OCCCOc4ccc(C(c5ccc(C(C)C)cc5)(c5ccc(C(C)C)C  
cc5)c5ccc(C(C)C)cc5)cc4)cc3)cc2)(c2ccc(C(C)C)cc2)c2ccc(C(C)C)cc2)cc1  
774 C=CCOC(=O)/C=C/c1ccc(OC(C)=O)c(OC(C)=O)c1.Fc1ccc(I)cc1>>CC(=O)Oc1ccc(/C=C/C(=O)OC/  
C=C/c2ccc(F)cc2)cc1OC(C)=O  
775 Br1c2cccc2cc2cccc12.C=CC(=O)CC>>CCC(=O)/C=C/c1c2cccc2cc2cccc12  
776 C=CC(=O)OCC.O=Cc1ccc2occ(Br)c2c1>>CCOC(=O)/C=C/c1cc2ccc(C=O)cc12  
777 Br1ccc2c(c1)-c1ncn1CCO2.C=CC(=O)OC(C)(C)C>>CC(C)(C)OC(=O)/C=C/c1ccc2c(c1)-  
778 Br1cccn1.C=CC(C)(C)O>>CC(C)(O)/C=C/c1cccn1  
779 C=CCNC(=O)OC(C)(C)C.Clc1cccc1>>C=C(CNC(=O)OC(C)(C)C)c1cccc1  
780 C=CC(=O)N(C)Cc1sc2cccc2c1C.O=C1Nc2ncc(Br)cc2C12CCC2>>Cc1c(CN(C)C(=O)/C=C/c2cnc3c(  
c2)C2(CCC2)C(=O)N3)sc2cccc12  
781 C=Cc1ccc(C)cc1.N#CCc1ccc(Br)cc1>>Cc1ccc(/C=C/c2ccc(CC#N)cc2)cc1  
782 C=CC(=O)OC.FC1(F)C(I)=C1c1ccc(Br)cc1>>COC(=O)/C=C/C1=C(c2ccc(Br)cc2)C1(F)F  
783 C=Cc1cccc(N)c1.CCN1c2ncc(I)cc2C(=O)N(C)c2ccc(Cl)nc21>>CCN1c2ncc(/C=C/c3cccc(N)c3)cc2C(  
=O)N(C)c2ccc(Cl)nc21  
784 C=CCOC(C)=O.C=CCc1ccc(Br)cc1>>C=CCc1ccc(/C=C/COC(C)=O)cc1  
785 C=Cc1ccc(OC)cc1.COc1ccc(Br)c(N)c1>>COc1ccc(/C=C/c2ccc(OC)cc2N)cc1  
786 C=CC(=O)OC(C)(C)C.Ic1ccsc1>>CC(C)(C)OC(=O)/C=C/c1ccsc1  
787 C=CC(=O)OC.Oc1cccc1I>>COC(=O)/C=C/c1cccc1O  
788 C=CC(=O)N(C)Cc1cc2cccc2n1C.O=c1[nH]c2cc(Br)cnc2[nH]1>>CN(Cc1cc2cccc2n1C)C(=O)/C=C/  
c1cnc2[nH]c(=O)[nH]c2c1  
789 C=Cc1ccc([Si](C)(OC)OC)cc1.CO[Si](C)(OC)c1ccc(Br)cc1>>CO[Si](C)(OC)c1ccc(/C=C/c2ccc([Si](  
C)(OC)OC)cc2)cc1  
790 C=CC(=O)OCC.FC(F)(F)c1cccc1I>>CCOC(=O)/C=C/c1cccc1C(F)(F)F

Br1ccc(-c2nc3cecccc3n)c1.C=CCn1c(-c2ccc(OC)cc2)ncc2ccccc2c1=O>>COe1ccc(-  
c2nc3cecccc3c(=O)n2C/C=C/c2ccc(-c3cnec4cecccc4n3)cc2)cc1  
C=CCOC(C)=O.CC(=O)c1ccc(I)cc1>>CC(=O)OC/C=C/c1ccc(C(C)=O)cc1  
C=CC(=O)OC(C)(C)C.COc1ccc(S(=O)(=O)c2ccc3ccc(Br)cc3n2)cc1>>COe1ccc(S(=O)(=O)c2ccc3ccc  
(/C=C/C/C(=O)OC(C)(C)C)cc3n2)cc1  
C=CP(=O)(OCC)OCC.Clc1ccc(Br)cc1>>CCOP(=O)/C=C/c1ccc(Cl)cc1)OCC  
C=CC(C)n1nn2cecccc21.Cc1ccc(I)cc1>>Cc1ccc(/C=C/C(C)n2nn3cecccc32)cc1  
C=C(c1cecccc1)[Si](C)(C)c1ceccen1.Ic1ccsc1>>C[Si](C)/(C=(C/c1ccsc1)c1cecccc1)c1ceccen1  
C=CC(=O)N(C)CCN(C)C.C[Si](C)(C)CCOCn1nc(I)c2ccc(C=O)cc21>>CN(C)CCN(C)C(=O)/C=C/c1  
nn(COCC[Si](C)(C)C)c2cc(C=O)ccc12  
C=CC(=O)OC.O=c1c(I)c(-c2ccc(O)cc2)oc2cc(O)ccc12>>COC(=O)/C=C/c1c(-  
c2ccc(O)cc2)oc2cc(O)ccc2c1=O  
C=C.C=CCCCC(=O)CCCC(C)OC(=O)c1c(OC)cc(OC)cc1OS(=O)(=O)C(F)(F)F>>C=CCCCC(=O)CC  
CC(C)OC(=O)c1c(C=C)cc(OC)cc1OC  
C=CC(=O)OC.Cc1ccsc1Br>>COC(=O)/C=C/c1secc1C  
Br1ceccc1.C=Cc1ccc(F)cc1>>Fc1ccc(/C=C/c2ceccc2)cc1  
C=CC(=O)Nc1cccc2eccne12.COe1ccc(I)cc1>>COe1ccc(/C=C/C(=O)Nc2cccc3cccene23)cc1  
C=CC(C)(C)O.CCOCOe1ccc(C(C)=O)c(OC)c1I>>CCOCOe1ccc(C(C)=O)c(OC)c1/C=C/C(C)(C)O  
C=Cc1ccc2c(c1)Sc1cc(/C=C/c3ccc4c(c3)Sc3cecccc3N4CCCCCCCC)ccc1N2CCCCCCCC.O=Cc1ccc(I)  
cc1>>CCCCCCCCN1c2ceccc2Sc2cc(/C=C/c3ccc4c(c3)Sc3cc(/C=C/e5ccc(C=O)cc5)ccc3N4CCCCC  
CC)ccc21  
C=CC(=O)NCCc1cccc(F)c1.COc1ccc2c(=O)c(I)coc2c1>>COc1ccc2c(=O)c(/C=C/C(=O)NCCc3cccc(F)  
)c3)coc2c1  
C=CC(=O)O.CCOC(=O)CCc1ceccc1-c1ceccc(I)c1>>CCOC(=O)CCc1ceccc1-c1ceccc(/C=C/C(=O)O)c1  
C=CC(=O)OCCCC.COc1ccc(CN(Cc2ccc(OC)cc2)c2ccc(Br)cn2)cc1>>CCCCOC(=O)/C=C/c1ccc(N(C  
c2ccc(OC)cc2)Cc2ccc(OC)cc2)nc1  
C=Cc1ccc(/C=C/c2ccc(C(C)(C)C)cc2)cc1.CCCCCCOe1ccc2cc(Br)ccc2c1>>CCCCCCOe1ccc2cc(/C=  
C/c3ccc(/C=C/c4ccc(C(C)(C)C)cc4)ccc3)ccc2c1  
C=Cc1ccc(F)cc1.Cc1nn(-c2ccc(C#N)c(Cl)c2)c(C)c1I>>Cc1nn(-  
c2ccc(C#N)c(Cl)c2)c(C)c1/C=C/c1ccc(F)cc1  
C=CCCCCCC.CC(=O)c1ceccc1Br>>CCCCC/C=C/c1ceccc1C(C)=O  
C=CN1C(=O)c2cecccc2C1=O.COC(=O)Cc1ccc(Br)cc1>>COC(=O)Cc1ccc(/C=C/N2C(=O)c3cecccc3C2  
=O)cc1  
Br1ccc(-c2cc(-c3cecccn3)nc(-c3ceccn3)c2)cc1.C=Cc1ceccc1>>C(=C/c1ccc(-c2cc(-c3cecccn3)nc(-  
c3ceccn3)c2)cc1)c1ceccc1  
C=Cc1ceccc1.OC/C=C/C1=C(Br)CCCC1>>OC/C=C/C1=C(/C=C/c2ceccc2)CCCC1  
C=CC(=O)OCCCC.CN(C)c1ccc(Cl)c1>>CCCCOC(=O)/C=C/c1ccc(N(C)C)c1  
C=CC(=O)O.COc1ccc(NS(=O)(=O)c2ccc(I)cc2)cc1OC>>COe1ccc(NS(=O)(=O)c2ccc(/C=C/C(=O)O)  
cc2)cc1OC  
C=Cc1cc(OC)c(OC)c(OC)c1-  
c1ccc2ceccc2c1.COe1ccc(I)cc1>>COe1ccc(/C=C/c2cc(OC)c(OC)c(OC)c2-c2ccc3cecccc3c2)cc1  
Br1cnc2nc(-c3ceccc3)c(-c3ceccc3)nc2c1.C=CC(=O)OC>>COC(=O)/C=C/clenc2nc(-c3ceccc3)c(-  
c3ceccc3)nc2c1  
C=Cc1ceccc1.COC(=O)c1ccc(I)c1>>COC(=O)c1ccc(/C=C/c2ceccc2)c1  
C=CC#N.Cc1ncecc1Br>>Cc1ncecc1/C=C/C#N  
C=Cc1ccc(C)cc1.CCn1nccl-c1ccc(Br)cc1>>CCn1nccl-c1ccc(/C=C/c2ccc(C)cc2)cc1  
C=CC(=O)OC(C)(C)C.Oc1ccc(Cl)cc1>>CC(C)(C)OC(=O)/C=C/c1ccc(O)cc1  
C=Cc1ccc(Cl)cc1.O=C1C(O)=C(I)C(=O)c2ceccc21>>O=C1C(O)=C(/C=C/c2ccc(Cl)cc2)C(=O)c2cccc  
C=C(Br)CC.C=Cc1ceccc1>>C=C(/C=C/c1ceccc1)CC  
C=CC(F)(F)C(F)(F)C(F)(F)C(F)(F)C(F)(F)C(F)(F)F.FC(=O)Nc1ccc(I)cc1>>CC(=O)Nc1ccc(/C=C/C(F)  
)(F)C(F)(F)C(F)(F)C(F)(F)C(F)(F)C(F)(F)F)cc1  
C=C/C=C/c1ceccc1.COC(=O)c1ccc(Br)cc1>>COC(=O)c1ccc(/C=C/C=C/c2ceccc2)cc1  
C=COCCCC.COC(=O)c1cc(OC)c(OC)cc1Br>>C=C(OCCCC)c1cc(OC)c(OC)cc1C(=O)OC  
C=CC(=O)Nc1ceccc1NC(=O)OC(C)(C).CCNC(=O)N1C[C@H](c2ccc(Br)cc2)[C@@H](C(=O)OCC  
)C1>>CCNC(=O)N1C[C@H](c2ccc(/C=C/C(=O)Nc3ceccc3NC(=O)OC(C)(C)cc2)[C@@H](C(=O)  
C=CC(=O)OC).CN(C)C1COc2c(Br)ccc3[nH]jc(c23)C1>>COC(=O)/C=C/c1ccc2[nH]jc3c2c1OCC(N(  
C)C)C3  
Br1ceccc1I.C=CC(F)(F)C(F)(F)C(F)(F)C(F)(F)C(F)(F)C(F)(F)F>>FC(F)(F)C(F)(F)C(F)(F)C(F)(F)C(  
F)(F)C(F)(F)/C=C/c1ceccc1Br  
C=CC(=O)c1ccc(OC)cc1OC.COc1ccc(I)cc1>>COc1ccc(/C=C/C(=O)c2ccc(OC)cc2OC)cc1  
C=CC(=O)OC(C)(C)C.FC(F)(F)c1ccc(I)cc1>>CC(C)(C)OC(=O)/C=C/c1ccc(C(F)(F)F)cc1

832 C=Cc1cccc1.O=c1oc2cccc2c(-c2cccc2)c1Br>>O=c1oc2cccc2c(-c2cccc2)c1/C=C/c1cccc1  
833 C=CC.ClCc1cccc(Oc2cccc2)c1>>C=C(C)Cc1cccc(Oc2cccc2)c1  
834 C=CC(=O)OC.Ic1ccc2c(c1)OCCOCCOCCOCCO2>>COC(=O)/C=C/c1ccc2c(c1)OCCOCCOCCOCC  
835 C=CC(=O)NC(C)(C)C.COc1cc2oc(-c3cccc3)c(I)c(=O)c2cc1OC>>COc1cc2oc(-  
c3cccc3)c(/C=C/C(=O)NC(C)(C)C)c(=O)c2cc1OC  
836 C=CN1C(=O)c2cccc2C1=O.Cc1ccc(S(=O)(=O)n2ccc3c(Br)cccc32)cc1>>Cc1ccc(S(=O)(=O)n2ccc3c  
/C=C/N4C(=O)c5cccc5C4=O)cccc32)cc1  
837 C=Cc1ccc(Cl)cc1.CS(=O)(=O)c1ccc(Br)cc1>>CS(=O)(=O)c1ccc(/C=C/c2ccc(Cl)cc2)cc1  
838 C=Cc1ccc(OC)cc1.COC(=O)[C@H](Cc1ccc(O)c(I)c1)NC(=O)OC(C)(C)C>>COC(=O)[C@H](Cc1ccc  
(O)c(/C=C/c2ccc(OC)cc2)c1)NC(=O)OC(C)(C)C  
839 C=CC(=O)N(C)OC.O=[N+](O-)]c1ccc(I)cc1>>CON(C)C(=O)/C=C/c1ccc([N+](=O)[O-])cc1  
840 C=CC(=O)OC.CC(C)c1cccc(Br)c1>>COC(=O)/C=C/c1cccc(C(C)C)c1  
841 C=CCc1cccc1.CC(C)(C)OC(=O)c1ccc(Br)cc1[N+](=O)[O-  
>>CC(C)(C)OC(=O)c1ccc(/C=C/CCc2cccc2)cc1[N+](=O)[O-]  
842 BrC1=C(C2=CCCCO2)CCCC1.C=CC(=O)OC(C)(C)C>>CC(C)(C)OC(=O)/C=C/C1=C(C2=CCCCO2  
)CCCC1  
843 C=Cc1ccc(N(CCCCC)CCCCC)cc1.O=Cc1cc2ccc1CCc1ccc(c(Br)c1)CC2>>CCCCCN(CCCCC)  
c1ccc(/C=C/c2cc3ccc2CCc2ccc(c(C=O)c2)CC3)cc1  
844 C=CC(=O)OCC.COc1cccc1I>>CCOC(=O)/C=C/c1cccc1OC  
C=CC[C@H](CC(=O)OC(C)(C)C)C(=O)N[C@H](C(=O)N[C@H](C)c1cccc1)C(C)(C)C.Fc1cc(Br)cc  
845 c1-c1cccc1>>C[C@H](NC(=O)[C@H](NC(=O)[C@H](C/C=C/c1ccc(-  
c2cccc2)c(F)c1)CC(=O)OC(C)(C)C)C(C)C)c1cccc1  
846 C=Cc1nc(C(=O)OCC)co1.Ic1cccc1>>CCOC(=O)c1coc(/C=C/c2cccc2)n1  
847 C=CC(C)=O.COc1c(Br)cc(OC)c2c(OC)cccc12>>COc1c(/C=C/C(C)=O)cc(OC)c2c(OC)cccc12  
C=CC(=O)N1CCOCC1.C[C@]12C[C@]34C=C(Sc5cccc(I)c5)C(=O)[C@](C)(CCC(=O)Nc5c(O)c  
848 cc(C(=O)O)c5O)[C@H]3[C@H](C[C@H]1C4)O2>>C[C@]12C[C@]34C=C(Sc5cccc(/C=C/C(  
=O)N6CCOCC6)c5)C(=O)[C@](C)(CCC(=O)Nc5c(O)ccc(C(=O)O)c5O)[C@H]3[C@H](C[C@]  
849 C=CCOc1cccc1C(C)(C)C.Ic1cccs1>>CC(C)(C)c1cccc1OC/C=C/c1cccs1  
850 C=CC#N.Cc1nc(-c2cccc2)c(Br)o1>>Cc1nc(-c2cccc2)c(/C=C/C#N)o1  
851 C=C[Si](C)(C)C.COC(=O)c1cc(I)cc([N+](=O)[O-  
>>COC(=O)c1cc(/C=C/[Si](C)(C)C)cc([N+](=O)[O-])c1  
852 C=Cc1ccc2c(c1)Sc1cccc1N2CC.O=[N+](O-  
>>CCN1c2cccc2Sc2cc(/C=C/c3ccc([N+](=O)[O-])ccc3)cc21  
853 C=C.CCCCC(CC)COc1cc(/C=C/c2ccc(/C=C/c3ccc(/C=C/c4ccc(I)cc4)ccc3)cc2)c(OCC(CC)CCCC)cc1  
C>>C=Cc1ccc(/C=C/c2ccc(/C=C/c3ccc(/C=C/c4cc(OCC(CC)CCCC)c(C)cc4OCC(CC)CCCC)ccc3)cc2)  
854 C=CC(=O)OCC.O=C(O)c1cc2cc(Br)ccc2[nH]1>>CCOC(=O)/C=C/c1ccc2[nH]c(C(=O)O)cc2c1  
855 C=CCCC(=O)O.CC(C)(C)c1ccc(I)cc1>>CC(C)(C)c1ccc(/C=C/CCC(=O)O)cc1  
856 C=Cc1ccc(OC)cc1.Nc1cccc1Br>>COc1ccc(/C=C/c2cccc2N)cc1  
857 Brc1ccc(OCc2cccc2)c(OCc2cccc2)c1.C=Cc1ccc(C=C)cc1>>C=Cc1ccc(/C=C/c2ccc(OCc3cccc3)c(  
OCc3cccc3)c2)cc1  
858 C=CC(=O)OC.CC(=O)c1cc(Br)ccc1O>>COC(=O)/C=C/c1ccc(O)c(C(C)=O)c1  
859 C=CC(C)=O.IC(CC[Se]c1cccc1)=C(c1cccc1)c1cccc1>>CC(=O)/C=C/C(CC[Se]c1cccc1)=C(c1ccc  
cc1)c1cccc1  
860 C=Cc1ccc(Cl)cc1.CC(=S)NS(=O)(=O)c1ccc(Br)cc1>>CC(=S)NS(=O)(=O)c1ccc(/C=C/c2ccc(Cl)cc2)c  
861 C=CCCC.CC(=O)c1ccc(Br)cc1>>CCC/C=C/c1ccc(C(C)=O)cc1  
862 Brc1cccc(OCc2ccc(OCc3cccc3)cc2)c1.C=CC(C)=O>>CC(=O)/C=C/c1cccc(OCc2ccc(OCc3cccc3)cc2)c  
863 C=CCC(C)(C)O.COC(=O)C[C@H]1COc2cc(O[C@H]3CCc4c(OC5ccc(I)cn5)ccc(F)c43)ccc21>>  
COC(=O)C[C@H]1COc2cc(O[C@H]3CCc4c(OC5ccc(/C=C/CC(C)(C)O)cn5)ccc(F)c43)ccc21  
864 C=CC#N.IC(CC[Se]c1cccc1)=C(c1cccc1)c1cccc1>>N#C/C=C/C(CC[Se]c1cccc1)=C(c1cccc1)c1  
cccc1  
\*CNCCCOCCOCCOCCCN(C(=O)COc1ccc(C(Cc2cc(OC)cc(OC)c2)NC(=O)c2ccc(C=C)cc2)cc1.Fc1cc  
865 c(I)c(F)c1>>\*CNCCCOCCOCCOCCCN(C(=O)COc1ccc(C(Cc2cc(OC)cc(OC)c2)NC(=O)c2ccc(/C=C/c  
3ccc(F)cc3F)cc2)cc1  
C=Cc1ccc(N(c2ccc(OC)cc2)c2ccc(OC)cc2)cc1.Cc1ccc(Br)cc1>>COc1ccc(N(c2ccc(/C=C/c3ccc(C)cc3  
866 )cc2)c2ccc(OC)cc2)cc1  
867 BrC1=CCCC2(C1)OCCO2.C=CC(=O)OC>>COC(=O)/C=C/C1=CCCC2(C1)OCCO2  
868 C=CC(OCC)OCC.Cc1cc(C)cc(Br)c1>>CCOC(/C=C/c1cc(C)cc(C)c1)OCC  
869 C=Cc1ccc(/C=C/c2ccc(C(C)(C)C)cc2)cc1.Ic1ccc(C(c2cccc2)(c2cccc2)c2cccc2)cc1>>CC(C)(C)c1c  
cc(/C=C/c2ccc(/C=C/c3ccc(C(c4cccc4)(c4cccc4)c4cccc4)cc3)cc2)cc1  
870 C=C(C)c1cccc1.COC(=O)c1cccc1I>>COC(=O)c1cccc1/C=C(C)c1cccc1

871 C=C1C(=O)O[C@H]2[C@H]1CCC(=C)[C@@H]1C[C@H](OC(C)=O)C(=C)[C@H]21.Cc1cccc1I>>  
872 C=C1CC[C@H]2/C(=C)\c3cccc3C)C(=O)O[C@@H]2[C@H]2C(=C)[C@@H](OC(C)=O)C[C@@H]  
873 C=Cc1ccncc1.COc1ccc(Br)cc1C=O>>COc1ccc(/C=C/c2ccncc2)cc1C=O  
874 C=Cc1cccc(O)c1.COc1cc(Br)cc(OC)c1F>>COc1ccc(/C=C/c2cccc(O)c2)cc(OC)c1F  
875 C=CC(C)(O)CCC=C(C)C.CC(=O)c1ccc(Br)cc1>>CC(=O)c1ccc(/C=C/C(C)(O)CCC=C(C)C)cc1  
876 C=CC#N.COC(=O)c1sc2cccc2c1Br>>COC(=O)c1sc2cccc2c1/C=C/C#N  
877 C=CC(=O)O.O=S(=O)(Nc1ccc(-c2cccc2)cc1)c1ccc(I)cc1>>O=C(O)/C=C/c1ccc(S(=O)(=O)Nc2ccc(-  
878 c3cccc3)cc2)cc1  
879 C=CC(=O)OC1CCCCC1.CC(=O)c1ccc(Br)cc1>>CC(=O)c1ccc(/C=C/C(=O)OC2CCCCC2)cc1  
880 C=CC(=O)OCCCC.Cc1cccc1Br>>CCCCOC(=O)/C=C/c1cccc1C  
881 Bre1ccc(C=C2CCCCC2)c2cccc2)cc1.C=CC(N)=O>>NC(=O)/C=C/c1ccc(C=C2CCCCC2)c2cccc  
882 c2)cc1  
883 C=C(C(=O)OC)[C@@H]1CC[C@@]2(C)CCC[C@@](C)(OCOC)[C@@H]2C1.Fc1ccc(Br)cc1>>CO  
884 CO[C@]1(C)CCC[C@]2(C)CC[C@@H](/C(=C)\c3ccc(F)cc3)C(=O)OC[C@H]21  
885 C=C(F)F.CCCCCC/C(F)=C(\F)I>>CCCCC/C(F)=C(\F)C=C(F)F  
886 Bre1cccc(N(c2cccc2)c2cccc2)n1.C=Cc1ccc(OC)cc1>>COc1ccc(/C=C/c2cccc(N(c3cccc3)c3cccc3)  
887 n2)cc1  
888 C=Cc1cccc(O)c1.COc1ccc(OC)c(I)c1>>COc1ccc(OC)c(/C=C/c2cccc(O)c2)c1  
889 C=C.Clc1cc(I)ccn1>>C=Cc1ccncc(Cl)c1  
890 C=Cc1cc([N+](=O)[O-]  
891 ]ccc1OCOCC[Si](C)(C)C.COc1cccc1I>>COc1cccc1/C=C/c1cc([N+](=O)[O-  
892 Bre1ccc(I)cc1.C=CCOc1cccc1>>Bre1ccc(/C=C/COc2cccc2)cc1  
893 C=Cc1cccc(O)c1.COc1ccc(Br)cc1>>COc1ccc(/C=C/c2cccc(O)c2)cc1  
894 C=CCO.COc1ccc2cc(Br)ccc2c1>>C=C(CO)c1ccc2cc(OC)ccc2c1  
895 C=CC#N.COC(=O)/C(Br)=C1\CCCO1>>COC(=O)C(/C=C/C#N)=C1\CCCO1  
896 C=CC#N.O=C1C=C(Br)CCC1>>N#C/C=C/C1=CC(=O)CCC1  
897 C=CCCCC.CC(=O)c1ccc(Br)cc1>>CCCCC/C=C/c1ccc(C(C)=O)cc1  
898 C=COCCCC.COc1ccc(Br)c(OC)n1>>C=C(OCCCC)c1ccc(OC)nc1OC  
899 C=CC(=O)OC(C)(C)C.O=C(c1cccc1)c1ccc(Cl)cc1>>CC(C)(C)OC(=O)/C=C/c1ccc(C(=O)c2cccc2)c  
900 C=Cc1ccc(Br)cc1.FC(F)(F)CI>>FC(F)(F)C/C=C/c1ccc(Br)cc1  
901 C=Cc1cccc1C(F)(F)F.CN(C(=O)c1cccc1)c1ccc2c(c1)[nH]c(=NC(=O)c1ccc(Br)s1)n2CCC(N)=O>>  
902 CN(C(=O)c1cccc1)c1ccc2c(c1)[nH]c(=NC(=O)c1ccc(/C=C/c3cccc3C(F)(F)F)s1)n2CCC(N)=O  
903 C=Cc1ccc(OCC(OC)OC)cc1.O=[N+](O-)]c1ccc(I)cc1CO>>COC(COc1ccc(/C=C/c2cccc([N+](=O)[O-  
904 ]c(CO)c2)cc1)OC  
905 C=CC(=O)OC.O=C(Nc1cccc(Br)c1)C1CCCCC1>>COC(=O)/C=C/c1cccc(NC(=O)C2CCCCC2)c1  
906 C=Cc1ccc(O)cc1.Oc1ccc(-c2oc3cc(O)cc(Br)c3c2-c2cc(O)cc(O)c2)cc1>>Oc1ccc(/C=C/c2cc(O)cc3oc(-  
907 c4ccc(O)cc4)c(-c4cc(O)cc(O)c4)c23)cc1  
908 C=CCO.Ic1cccc1>>OC/C=C/c1cccc1  
909 Bre1cncc2cccc12.C=CCN1C(=O)c2cccc2C1=O>>O=C1c2cccc2C(=O)N1C/C=C/c1cncc2cccc12  
910 C=CC(=O)N1N=Cc2cccc2C1CCC.COc1cc(Cc2cnc(N)nc2N)cc(I)c1OC>>CCCC1c2cccc2C=NN1C(  
911 =O)/C=C/c1cc(Cc2cnc(N)nc2N)cc(OC)c1OC  
912 C=CC(=O)OC.C=CC[C@H](O)c1ccc(Br)cc1>>C=CC[C@H](O)c1ccc(/C=C/C(=O)OC)cc1  
913 C=CC(=O)O.COC(=O)c1cccc1I>>COC(=O)c1cccc1/C=C/C(=O)O  
914 C=Cc1ccc(F)cc1.CC(=O)NS(=O)(=O)c1ccc(Br)cc1>>CC(=O)NS(=O)(=O)c1ccc(/C=C/c2ccc(F)cc2)cc  
915 C=Cc1ccncc1.CCCCCOc1ccc(I)cc1>>CCCCCOc1ccc(/C=C/c2ccncc2)cc1  
C=Cc1cccc1C.CCCCC(Br)C(F)(F)F>>CCCCC(/C=C/c1cccc1C)C(F)(F)F  
Bre1ccc2ccc3cccc4ccc1c2c34.C=CC(=O)OC>>COC(=O)/C=C/c1ccc2ccc3cccc4ccc1c2c34  
C=Cc1ccc(C(C)(C)C)cc1.O=Cc1ccc(Br)cc1>>CC(C)(C)c1ccc(/C=C/c2ccc(C=O)cc2)cc1  
C=CC(O)CC.Oc1ccc(I)c1>>CCC(O)/C=C/c1cccc(CO)c1  
C=C(NC(C)=O)C(=O)OC.O=[N+](O-)]c1ccc(I)cc1>>COC(=O)/C(=C/c1ccc([N+](=O)[O-  
C=Cc1ccc(F)cc1.COc1ccc(Br)cc1>>COc1ccc(/C=C/c2ccc(F)cc2)cc1  
C=CC(=O)OC.Cc1ccc(NC(=O)OC(C)(C)C)c(Br)c1>>COC(=O)/C=C/c1cc(C)ccc1NC(=O)OC(C)(C)C  
C=Cc1ccc(C(=O)OCC)cc1.CC1(C)CCC(=O)c2cc(Br)ccc21>>CCOC(=O)c1ccc(/C=C/c2ccc3c(c2)C(=O)  
913 CCC3(C)C)cc1  
914 Bre1cccc2cccc12.C=CC(F)(F)F>>FC(F)(F)/C=C/c1cccc2cccc12  
915 C=Cc1ccc(N(C)C(=O)OC(C)(C)C)cc1.FCCOCCOCCOc1ncc(I)cc1Br>>CN(C(=O)OC(C)(C)C)c1ccc(/  
C=C/c2cnc(OCCOCCOCCF)c(Br)c2)cc1

C=CC(=O)OCC.CCN1C[C@]2(OC(=O)c3cc(I)ccc3N)CC[C@H](OC)[C@]34[C@@H]1[C@H](C[C@H]23)[C@@]1(O)C[C@H](OC)[C@H]2C[C@]4[C@]1(O)[C@H]2OC>>CCOC(=O)/C=C/c1ccc(N)c(C(=O)O[C@@]23CC[C@H](OC)[C@]45[C@H]([C@H](C[C@H]24)[C@@]2(O)C[C@H](OC)[C@H]4C[C@@H]5[C@]2(O)[C@H]4OC)N(CC)C3)c1

916 C=Cc1ccc(Br)cc1.CCOC(=O)C(F)(F)I>>CCOC(=O)C(F)(F)/C=C/c1ccc(Br)cc1

917 C=CC(=O)OCC.CCOC(=O)c1ccc(I)cc1>>CCOC(=O)/C=C/c1ccc(C(=O)OCC)cc1

918 Br1ccc2cccc2c1.C=CCN(C(=O)OC(C)(C)C)C(=O)OC(C)(C)C>>CC(C)(C)OC(=O)N(C/C=C/c1ccc2cccc2c1)C(=O)OC(C)(C)C

919 C=Cc1cccn1.CC(=O)c1ccc(Br)cc1>>CC(=O)c1ccc(/C=C/c2cccn2)cc1

920 C=Cc1cccc(Cl)c1.FC(F)(F)Cl>>FC(F)(F)C/C=C/c1cccc(Cl)c1

921 C=CC(OC)OC.Ic1cccs1>>COC(/C=C/c1cccs1)OC

922 C=CC(=O)N(C)Cc1cc2cccc2n1C.CNc1n[nH]c2ncc(Br)cc12>>CNc1n[nH]c2ncc(/C=C/C(=O)N(C)Cc3cc4cccc4n3C)cc12

923 C=CC(=O)N1CCN(c2ncccc2C#N)CC1.N#Cc1cccc(I)c1>>N#Cc1cccc(/C=C/C(=O)N2CCN(c3ncccc3C#N)CC2)c1

924 C=Cc1cccc1.Cn1cncc1-c1cccc(Br)c1>>Cn1cncc1-c1cccc(/C=C/c2cccc2)c1

925 C=CC(O)c1cccc1OC.O=Cc1cccc1Br>>COc1cccc1C(O)/C=C/c1cccc1C=O

926 C=CC(=O)OC.Cc1c(CN(C)C)c2cccc2n1Cc1ccc(Br)cc1>>COC(=O)/C=C/c1ccc(Cn2c(C)c(CN(C)C)c3cccc32)cc1

927 C=CC(=O)OC.Cc1cn(-c2cc(Br)cc([N+](=O)[O-])c2)cn1>>COC(=O)/C=C/c1cc(-n2cn(C)c2)cc([N+](=O)[O-])c1

928 C=CC(CCC)OCc1cccc1.COc1ccc(Br)cc1>>CCCC(/C=C/c1ccc(OC)cc1)OCc1cccc1

929 C=Cc1ccc(N(CCCCCCCCCCO)CCCCCCCCCCCCO)cc1.O=C(c1ccc(Br)cc1)C(F)(F)F>>O=C(c1ccc(/C=C/c2ccc(N(CCCCCCCCCCO)CCCCCCCCCCCCO)cc2)cc1)C(F)(F)F

930 C=Cc1ccc(OC)cc1.Clc1cccc1>>COc1ccc(/C=C/c2cccc2)cc1

931 C=CC(=O)OC.Nc1ccc(Br)cc1I>>COC(=O)/C=C/c1cc(Br)ccc1N

932 C=CCN1C(=O)c2cccc2C1=O.COc1ccc2sc(CNc3nncc(-c4c(C)cc(Br)cc4C)n3)nc2c1>>COc1ccc2sc(CNc3nncc(-c4c(C)cc(/C=C/CN5C(=O)c6cccc6C5=O)cc4C)n3)nc2c1

933 C=CC(=O)OC.O=C1c2cccc2C(=O)c2cc(Br)ccc21>>COC(=O)/C=C/c1ccc2c(c1)C(=O)c1cccc1C2=C=CC1(O)CCC1.Ic1cccc2cccc12>>OC1(/C=C/c2cccc3cccc23)CCC1

934 C=CC(=O)OCC.Clc1cccs1>>CCOC(=O)/C=C/c1cccs1

935 C=CC(=O)OC.O=Cc1cc(F)ccc1Br>>COC(=O)/C=C/c1ccc(F)cc1C=O

936 C=CC(=O)CC.O=[N+](=[O-])c1ccc(I)cc1>>CCC(=O)/C=C/c1ccc([N+](=O)[O-])cc1

937 C=CC(=O)OCC.COc1ccc(Cl)cc1-c1c(Br)c(=O)n(C)c2ccc(C(F)(F)F)cc12>>CCOC(=O)/C=C/c1c(-c2cc(Cl)ccc2OC)c2cc(C(F)(F)F)ccc2n(C)c1=O

938 C=CC(=O)OCCCC.N#Cc1ccc(Cl)cc1>>CCCCOC(=O)/C=C/c1ccc(C#N)cc1

939 C=CC(=O)OC.CC1(C)C=C(c2oc3cccc3c2I)CC(C)(C)C1>>COC(=O)/C=C/c1c(C2=CC(C)(C)CC(C)(C)C2)oc2cccc12

940 C=CC(=O)OCC.N#Cc1ccc(Br)cc1>>CCOC(=O)/C=C/c1ccc(C#N)cc1

941 C=Cc1cccc1.Nc1cccc1I>>Nc1cccc1/C=C/c1cccc1

942 C=CCN.O=c1[nH]c(=O)n([C@@H]2O[C@H](COP(=O)(O)OP(=O)(O)OP(=O)(O)O)[C@@H](O)[C@H]2O)cc1I>>NC/C=C/c1cn([C@@H]2O[C@H](COP(=O)(O)OP(=O)(O)OP(=O)(O)O)[C@@H](O)[C@H]2O)c(=O)[nH]c1=O

943 C=CC(=O)OCCCC.CCOC(=O)Nc1ccc(C)cc1C1=C(I)CCN1S(=O)(=O)c1ccc(C)cc1>>CCCCOC(=O)/C=C/C1=C(c2cc(C)ccc2NC(=O)OCC)N(S(=O)(=O)c2ccc(C)cc2)CC1

944 C=Cc1ccc(CP(=O)(OC(C)(C)C)OC(C)(C)C)cc1.CC(C)O[Si](Cc1ccc(Br)cc1)(OC(C)C)OC(C)C>>CC(C)O[Si](Cc1ccc(/C=C/c2ccc(CP(=O)(OC(C)(C)C)OC(C)(C)C)cc2)cc1)(OC(C)C)OC(C)C

945 C=COCCCC.O=C(O)c1ccc(Cl)cc1>>C=C(OCCCC)c1ccc(C(=O)O)cc1

946 C=CC(=O)OC.CC(C)=CCc1cc(I)cc(CC=C(C)C)c1O>>COC(=O)/C=C/c1cc(CC=C(C)C)c(O)c(CC=C(C)C)c1

947 C=CC(OC)OCC.Cc1ncc(Br)cc1C#N>>CCOC(/C=C/c1ncc(C)c(C#N)c1)OCC

948 C=CC(=O)OC.N#Cc1ccc(Cl)cc1>>COC(=O)/C=C/c1ccc(C#N)cc1

949 C=CC1CCCC1.Cc1nc(-c2ccc(I)cc2)sc1-c1ccnc(N)n1>>Cc1nc(-c2ccc(/C=C/C3CCCC3)cc2)sc1-c1ccnc(N)n1

950 C=CC(=O)OCC.O=C(c1cccc1)N1CCc2c(cc(I)cc2[N+](=O)[O-])C1>>CCOC(=O)/C=C/c1cc2c(c([N+](=O)[O-])c1)CCN(C(=O)c1cccc1)C2

951 C=Cc1cccn1.CC(C)=C(C)Br>>CC(C)=C(C)/C=C/c1cccn1

952 C=CC(=O)OCC.Cc1nc(C)c(I)c(Cl)n1>>CCOC(=O)/C=C/c1c(C)nc(C)nc1Cl

953 C=CC(=O)OC(C)(C)C.COc1cc2cccc2c(Br)c1OC>>COc1cc2cccc2c(/C=C/C(=O)OC(C)(C)C)c1OC

954 C=CC(=O)OCC.O=C(O)c1cccc1I>>CCOC(=O)/C=C/c1cccc1C(=O)O

955

957 C=CCc1ccc(OC)cc1.COc1cc(I)ccc1O>>COc1ccc(C/C=C/c2ccc(O)c(OC)c2)cc1  
 958 C=COCCCC.Cn1c(=O)cc(Br)c2ccccc21>>CCCCO/C=C/c1cc(=O)n(C)c2ccccc12  
 959 C=CCCCCN1C(=O)c2ccccc2C1=O.FC(F)(F)c1cc(Br)c2cccc(C(F)(F)F)c2n1>>O=C1c2ccccc2C(=O)N  
 1CCCC/C=C/c1cc(C(F)(F)F)nc2c(C(F)(F)F)cccc12  
 960 C=CCCCCCC.c1ccc([I+])c2ccccc2)cc1>>CCCCC/C=C/c1ccccc1  
 961 C=CC(=O)OC.CC(=O)c1ccccc1I>>COC(=O)/C=C/c1ccccc1C(C)=O  
 962 C=Cc1ncnc2c1ncn2C1CCCCO1.COc1ccc(I)cc1>>COc1ccc(/C=C/c2ncnc3c2ncn3C2CCCCO2)cc1  
 963 C=CC(=O)N(C)C.Clc1nc(N2CCOCC2)c2oc3ncc(Br)cc3c2n1>>CN(C)C(=O)/C=C/c1nc2oc3c(N4CC  
 OCC4)nc(Cl)nc3c2c1  
 964 C=CC(C)(C)O.O=Cc1ccc(Br)o1>>CC(C)(O)/C=C/c1ccc(C=O)o1  
 965 C=CC(=O)OCC.COc1ccc(-c2ccccc2)c(I)c1>>CCOC(=O)/C=C/c1cc(OC)ccc1-c1ccccc1  
 966 C=CC(=O)OC.OCCc1ncccc1Br>>COC(=O)/C=C/c1ccccc1CCO  
 967 C=Cc1ccc2ccccc2c1.COC(=O)C(Cc1ccccc1I)C(=O)OC>>COC(=O)C(Cc1ccccc1/C=C/c1ccc2ccccc2c  
 1)C(=O)OC  
 968 C=Cc1ccccc1Cl.CCOC(=O)C(F)I>>CCOC(=O)C(F)/C=C/c1ccccc1Cl  
 Bre1ccc2c(c1)Cc1ccccc1-  
 969 2.C=C[C@H](CO[Si](C)(C)C(C)(C)NC(=O)OCc1ccccc1>>CC(C)(C)[Si](C)(C)OC[C@H](C=C/  
 c1ccc2c(c1)Cc1ccccc1-2)NC(=O)OCc1ccccc1  
 970 C=CC(=O)N1N=Cc2ccccc2C1CC(=O)OC.COc1cc(Cc2cnc(N)nc2N)cc(I)c1OC>>COC(=O)CC1c2cccc  
 c2C=NN1C(=O)/C=C/c1cc(Cc2cnc(N)nc2N)cc(OC)c1OC  
 971 C=Cc1ccccc1.COC(C#N)c1ccccc1Br>>COC(C#N)c1ccccc1/C=C/c1ccccc1  
 972 C=C1C(=O)O[C@H]2[C@H]1CC/C(C)=C/CC[C@H]1(C)O[C@H]21.Nc1ccc(I)cc1>>C/C1=C\CC[  
 C@@]2(C)O[C@H]2[C@H]2OC(=O)/C=C/c3ccc(N)cc3)[C@H]2CC1  
 973 C=CC(N)=O.FC(F)(F)Oc1ccc(I)c1>>NC(=O)/C=C/c1ccc(OC(F)(F)F)c1  
 974 C=Cc1ccccc1.COCn1nc(-c2ccccc2)c(Br)cc1=O>>COCn1nc(-c2ccccc2)c(/C=C/c2ccccc2)cc1=O  
 975 C=Cc1ccc(N(c2ccccc2)c2ccccc3ccccc23)cc1.O=Cc1ccc(Br)cc1F>>O=Cc1ccc(/C=C/c2ccc(N(c3ccccc3)  
 c3ccccc4ccccc34)cc2)cc1F  
 976 C=Cc1ccccc1.O=Cc1ccc(I)cc1>>O=Cc1ccc(/C=C/c2ccccc2)cc1  
 977 C=Cc1ccccc1.Nc1cc(F)c(F)cc1Br>>Nc1cc(F)c(F)cc1/C=C/c1ccccc1  
 978 C=CC(=O)OC(C)(C)C.O=C1N=c2cc(Br)enc2=N1>>CC(C)(C)OC(=O)/C=C/c1nc2c(c1)=NC(=O)N=  
 979 C=Cc1ccccc1.Ic1ncnc2ncn(Cc3ccccc3)c12>>C=C/c1ncnc2ncn(Cc3ccccc3)c12)\c1ccccc1  
 C=CC(=O)C(O[Si](CC)(CC)CC)c1c(OC)ccc(OC)c1OCc1ccccc1.COC(=O)C1Cc2cc(I)c(OCc3ccccc3)c  
 980 (OC)c2C(=O)O1>>CC[Si](CC)(CC)OC(C(=O)/C=C/c1cc2c(c(OC)c1OCc1ccccc1)C(=O)OC(C(=O)O  
 C)C2)c1c(OC)ccc(OC)c1OCc1ccccc1  
 981 C=CC(=O)OC.O=C(c1ccc(O)cc1)c1sc2cc(O)ccc2c1Oc1ccc(Br)cc1>>COC(=O)/C=C/c1ccc(Oc2c(C(=O)  
 c3ccc(O)cc3)sc3cc(O)ccc23)cc1  
 982 C=CC(=O)OCCCC.FC(F)(F)c1ccc(Cl)cc1>>CCCCOC(=O)/C=C/c1ccc(C(F)(F)F)cc1  
 983 Bre1nccn1.C=Cc1ccc(OC)c1>>COc1ccc(/C=C/c2nccn2)c1  
 984 C=Cc1cccn1.O=[N+](O-)]c1ccc(-c2cncnc2Br)cc1>>O=[N+](O-)]c1ccc(-  
 985 Bre1ccccc1.C=CP(=O)(OCC)OCC>>CCOP(=O)/C=C/c1ccccc1OCC  
 986 C=CC(=O)OCC.COc1ccc(Br)c(C2OCCCCO2)c1>>CCOC(=O)/C=C/c1ccc(OC)cc1C1OCCCCO1  
 987 C=CC(N)=O.CCn1c(=O)n(COCC[Si](C)(C)C)c2cccc(Oc3cc(Br)cc(C#N)c3)c21>>CCn1c(=O)n(COCC  
 [Si](C)(C)C)c2cccc(Oc3cc(C#N)cc(/C=C/C(N)=O)c3)c21  
 988 C=CC(=O)OC(C)(C)C.O=C(CN1CCOCC1)Nc1ccc(Br)en1>>CC(C)(C)OC(=O)/C=C/c1ccc(NC(=O)C  
 N2CCOCC2)nc1  
 989 C=CS(=O)(=O)c1ccccc1.Cn1cc(C=O)c2cc(Br)ccc21>>Cn1cc(C=O)c2cc(/C=C/S(=O)(=O)c3ccccc3)cc  
 990 C=C.C=CCCCC1(CCC[C@H](C)OC(=O)c2c(OC)cc(OC)cc2OS(=O)(=O)C(F)(F)F)OCCO1>>C=CCC  
 CC1(CCC[C@H](C)OC(=O)c2c(C=C)cc(OC)cc2OC)OCCO1  
 991 Bre1ccsc1.C=CS(N)(=O)=O>>NS(=O)(=O)/C=C/c1ccsc1  
 Bre1nc2ccccc2c1.C=CCO[C@H]1(C)C[C@H](C)C(=NO)[C@H](C)[C@@H](O)[C@H](C)(O)[C@@  
 992 H](CC)OC(=O)[C@H](C)[C@@H](O)[C@H](C)[C@H]1O[C@@H]1O[C@H](C)C[C@H](N(C)C)[  
 C@H]1O>>CC[C@H]1OC(=O)[C@H](C)[C@@H](O)[C@H](C)[C@@H](O)[C@@H]2O[C@H](C)  
 C[C@H](N(C)C)[C@H]2O)[C@H](C)(OC/C=C/c2cnc3ccccc3c2)C[C@@H](C)C(=NO)[C@H](C)[C@  
 993 H](O)[C@H](C)O  
 C=CC(=O)OC.Cc1c(Oc2cc(F)cc(C#N)c2)ccc(S(=O)(=O)C(F)(F)F)c1Br>>COC(=O)/C=C/c1c(S(=O)(  
 994 =O)C(F)(F)F)ccc(Oc2cc(F)cc(C#N)c2)c1C  
 C=C.Ic1ccc2ccccc12>>C=Cc1ccc2ccccc12  
 995 C=CC(=O)N(C)C.N#Cc1ccc(Br)cc1>>CN(C)C(=O)/C=C/c1ccc(C#N)cc1  
 996 C=CC(=O)OCCN(CC)CC.O=C(Nc1ccccc1)c1cc(=O)c2cc(Br)ccc2o1>>CCN(CC)CCOC(=O)/C=C/c1c  
 cc2oc(C(=O)Nc3ccccc3)ccc(=O)c2c1  
 997 C=Cc1ccc(OC)c(OC)c1.Ic1ccc(OCc2ccccc2)cc1>>COc1ccc(/C=C/c2ccc(OCc3ccccc3)cc2)cc1OC



998 C=CC(=O)OCC.Nc1ncnc2c1c(I)nn2C1Cc2ccccc2C1>>CCOC(=O)/C=C/c1nn(C2Cc3ccccc3C2)c2ncnc(N)c12  
 999 C=Cc1ccc(C(C#N)C#N)cc1.Cc1cncc(C)c1-c1c(C)cc(I)cc1C>>Cc1cncc(C)c1-c1c(C)cc(/C=C/c2ccc(C(C#N)C#N)cc2)cc1C  
 1000 C=Cc1scnc1C.Cc1ccc(Br)cc1>>Cc1ccc(/C=C/c2scnc2C)cc1  
 1001 \*CNCCCOCCOCCOCCNC(=O)COc1ccc(C(Cc2cc(OC)cc(OC)c2)NC(=O)c2ccccc(C=C)c2)cc1.Cc1cc([N+](=O)[O-])ccc1I>>\*CNCCCOCCOCCOCCNC(=O)COc1ccc(C(Cc2cc(OC)cc(OC)c2)NC(=O)c2ccccc(/C=C/c3ccc([N+](=O)[O-])cc3C)c2)cc1  
 1002 C=Cc1ccncc1.CC(C)(C)OC(=O)N[C@@H](COCc1ccccc1)COc1cncc(Br)c1>>CC(C)(C)OC(=O)N[C@@H](COCc1ccccc1)COc1cncc(/C=C/c2ccncc2)c1  
 1003 C=CCO[C@H]1O[C@H](COC(C)=O)[C@@H](OC(C)=O)[C@H](OC(C)=O)[C@@H]1OC(C)=O.Ic1ccc(-c2ccccc2)cc1>>CC(=O)OC[C@H]1O[C@H](OC/C=C/c2ccc(-c3ccccc3)cc2)[C@H](OC(C)=O)[C@@H](OC(C)=O)[C@H]1OC(C)=O  
 1004 C=CC(=O)OC(C)(C)C.Cc1cc(C#N)cc2nc(-c3ccc(Br)cc3)oc12>>Cc1cc(C#N)cc2nc(-c3ccc(/C=C/C(=O)OC(C)(C)C)cc3)oc12  
 1005 Br1ccncc1.C=CCN(C(=O)OC(C)(C)C)C(=O)OC(C)(C)C>>CC(C)(C)OC(=O)N(C/C=C/c1ccncc1)C(=O)OC(C)(C)C  
 1006 C=CC(=O)OCCN(C)C.Cc1ccc(NC(=O)c2coc3ccc(Br)cc3c2=O)cc1>>Cc1ccc(NC(=O)c2coc3ccc(/C=C/C(=O)OCCN(C)C)cc3c2=O)cc1  
 1007 C=C.O=S(=O)(Oc1ccc(I)cc1)C(F)(F)F>>C=Cc1ccc(OS(=O)(=O)C(F)(F)F)cc1  
 1008 C=CC(=O)OCC.CCOC(=O)c1ccccc1I>>CCOC(=O)/C=C/c1ccccc1C(=O)OCC  
 1009 C=Cc1ccccc1.COC(=O)c1cc(I)cc(C(=O)OC)c1>>COC(=O)c1cc(/C=C/c2ccccc2)cc(C(=O)OC)c1  
 1010 C=CCCCCCC.CC(C)[C@H]1C(=O)N[C@H](CO[Si](C)(C)C(C)(C)C)Cc2c[nH]c3cc(Br)cc(c23)N1C>>CCCCC/C=C/c1cc2c3c(c[nH]c3c1)C[C@@H](CO[Si](C)(C)C(C)(C)C)NC(=O)[C@H](C(C)C)N2  
 1011 C=Cc1ccc(N(C)C)cc1.FCCOCCOCCOc1ncc(I)cc1Br>>CN(C)c1ccc(/C=C/c2cnc(OCCOCCOCCF)c(Br)c2)cc1  
 1012 C=CC(=O)OC(C)(C)C.O=Cc1cccc(Br)c1>>CC(C)(C)OC(=O)/C=C/c1cccc(C=O)c1  
 1013 C=Cc1ccccc1.Cc1ccccc1OS(=O)(=O)C(F)(F)F>>C=C(c1ccccc1)c1ccccc1C  
 1014 C=CC(=O)NC(C)(C)C.O=c1c(I)c(-c2ccc(O)cc2)oc2cc(O)ccc12>>CC(C)(C)NC(=O)/C=C/c1c(-c2ccc(O)cc2)oc2cc(O)ccc2c1=O  
 1015 C=CC(=O)OCC.Cc1c(O)ccccc1Br>>CCOC(=O)/C=C/c1cccc(O)c1C  
 1016 C=CC#N.Cc1cc(Br)cc(C)c1N>>Cc1cc(/C=C/C#N)cc(C)c1N  
 1017 C=CC(=O)OCCCC.Cn1c(-c2ccccc2)c(I)c2ccccc21>>CCCCOC(=O)/C=C/c1c(-C=CC(=O)OCC.CC1(C)CC(=C(c2ccccc2)c2ccc(Br)cc2)CC(C)(C)C1>>CCOC(=O)/C=C/c1ccc(C(=C2CC(C)(C)CC(C)(C)C2)c2ccccc2)cc1  
 1018 C=CC(=O)OC(C)(C)C.Ic1enn(C(c2ccccc2)(c2ccccc2)c2ccccc2)c1>>CC(C)(C)OC(=O)/C=C/c1enn(C(c2ccccc2)(c2ccccc2)c2ccccc2)c1  
 1019 C=CC(=O)NCc1cccc(C(=O)OC(C)(C)C)c1.COc1ccc2[nH]cc(C3=C(Br)C(=O)NC3=O)c2c1>>COc1cc2[nH]cc(C3=C(/C=C/C(=O)NCc4cccc(C(=O)OC(C)(C)C)c4)C(=O)NC3=O)c2c1  
 1020 C=CC(=O)OC(C)(C)C.O=CNc1ccccc1I>>CC(C)(C)OC(=O)/C=C/c1ccccc1NC=O  
 1021 C=CS(=O)(=O)F.Oc1ccc(I)cc1>>O=S(=O)(F)/C=C/c1ccc(O)cc1  
 1022 C=Cc1ccc2ccccc2n1.O=Cc1ccc(Br)cc1>>O=Cc1ccc(/C=C/c2ccc3ccccc3n2)cc1  
 1023 C=CCCC(=O)O.Clc1ccc(I)cc1>>O=C(O)CC/C=C/c1ccc(Cl)cc1  
 1024 Br1ccccc1c1.C=CC(=O)OCC>>CCOC(=O)/C=C/c1cccc(Br)c1  
 1025 \*CNCCCOCCOCCOCCNC(=O)COc1ccc(C(Cc2cc(OC)cc(OC)c2)NC(=O)c2ccc(C=C)cc2)cc1.Cc1cc(c(I)cc1>>\*CNCCCOCCOCCOCCNC(=O)COc1ccc(C(Cc2cc(OC)cc(OC)c2)NC(=O)c2ccc(/C=C/c3ccc(C)cc3)cc2)cc1  
 1026 C=C/C=C/C(=O)N(CCCC)CCCC.CC(=O)c1ccc(Br)cc1>>CCCCN(CCCC)C(=O)/C=C/C=C/c1ccc(C(C)=O)cc1  
 1027 C=COCCCC.O=S(=O)(Oc1ccc2c(c1)[nH]c1ccccc12)C(F)(F)F>>C=C(OCCCC)c1ccc2c(c1)[nH]c1ccccc1  
 1028 C=Cc1ccc(S(=O)(=O)c2ccccc2F)cn1.Cc1cc(F)ccc1I>>Cc1cc(F)ccc1/C=C/c1ccc(S(=O)(=O)c2ccccc2F)cc1  
 1029 C=C.Cc1cccc([N+](=O)[O-])c1Br>>C=Cc1c(C)ccccc1[N+](=O)[O-]  
 1030 C=CC(=O)OC(C)(C)C.Fc1ccc(I)cn1>>CC(C)(C)OC(=O)/C=C/c1ccc(F)nc1  
 1031 C=CC(=O)OC.COc1ccc2c(c1)CCN(c1ccc(C(F)(F)F)cc1)C2(C)c1ccc(Br)cc1>>COC(=O)/C=C/c1ccc(C2(C)c3ccc(OC)cc3CCN2c2ccc(C(F)(F)F)cc2)cc1  
 1032 C=CC(=O)OCC.O=C(O)c1cccc(Br)c1>>CCOC(=O)/C=C/c1cccc(C(=O)O)c1  
 1033 C=CC(C)(C)O.COC(=O)c1ccc2nc3c(Br)cccc3nc12>>COC(=O)c1ccc2nc3c(/C=C/C(C)(C)O)cccc3n  
 1034 C=CC(=O)OC.O=[N+](O-)]c1ccc2cc(Br)cncc2c1>>COC(=O)/C=C/c1cnc2cc([N+](=O)[O-])ccc2c1  
 1035 C=CC(=O)OC(C)(C)C.Cc1cc(Br)ccc1C#N>>Cc1cc(/C=C/C(=O)OC(C)(C)C)ccc1C#N  
 1036 C=CC(=O)OC.COC(=O)c1c(C=O)cc(I)c(O)c1OC>>COC(=O)/C=C/c1cc(C=O)c(C(=O)OC)c(OC)c1O  
 1037

1038 C=CC(=O)OCC.Cn1c(I)c(-c2ccccc2)c2ccccc21>>CCOC(=O)/C=C/c1c(-c2ccccc2)c2ccccc2n1C  
1039 C=Cc1cccc(Cl)c1.CC(C)(C)Br>>CC(C)(C)/C=C/c1cccc(Cl)c1  
1040 C=C1C(=O)O[C@H]2[C@H]1CC/C(C)=C/CC[C@@]1(C)O[C@@H]21.FC(F)(F)c1cccc(I)c1>>C/C1  
1041 =C\CC[C@@]2(C)O[C@H]2[C@H]2OC(=O)/C=C/c3cccc(C(F)(F)F)c3[C@H]2CC1  
1042 C=CCCO.Clc1nc(Oc2ccccc2)c2cc(Br)cn2n1>>OCC/C=C/c1cc2c(Oc3ccccc3)nc(Cl)nn2c1  
1043 C=CC(=O)N1CCCCC1.CCc1nc2cc(O)cce2c(Oc2ccc(Br)cc2)c1-  
1044 c1ccccc1>>CCc1nc2cc(O)cce2c(Oc2ccc(/C=C/C(=O)N3CCCCC3)cc2)c1-c1ccccc1  
1045 C=Cc1ccc(C(C)(C)C)cc1.O=[N+][([O-])c1ccc(I)cc1>>CC(C)(C)c1ccc(/C=C/c2ccc([N+](=O)[O-]  
1046 Br)ccc2ccc3cccc4ccc1c2c34.C=Cc1nc2c(N)ncnc2n1[C@@H]1O[C@H](CO[Si](C)(C)C(C)(C)C)[C  
1047 @H](O[Si](C)(C)C(C)(C)C)[C@H]1O[Si](C)(C)C(C)(C)C>>CC(C)(C)[Si](C)(C)OC[C@H]1O[C@  
1048 @H](n2c(/C=C/c3ccc4cccc5cccc6ccc3c4c56)nc3c(N)ncnc32)[C@H](O[Si](C)(C)C(C)(C)C)[C@@H]1  
1049 O[Si](C)(C)C(C)(C)C  
1050 Br)ccc(C=C(c2ccccc2)c2ccccc2)cc1.C=Cc1ccc(-  
1051 c2ccc3c(c2)c2ccccc2n3CC)cc1>>CCn1c2ccccc2c2cc(-  
1052 C=CC(=O)OCc1ccccc1.CC(=O)c1ccccc1Br>>CC(=O)c1ccccc1/C=C/C(=O)OCc1ccccc1  
1053 C=CS(=O)(=O)F.Clc1cccc(I)c1>>O=S(=O)(F)/C=C/c1cccc(Cl)c1  
1054 C=Cn1nnc(SC)n1.Ic1ccccc1>>CSc1nnn(/C=C/c2ccccc2)n1  
1055 Br)ccc2ccccc2c1.C=CCO[C@@H]1CC(=O)O[C@H](C)C/C=C/C=C/[C@H](O[Si](C)(C)C(C)(C)C)  
1056 [C@H](C)C[C@H](CC(OC)OC)[C@H](O[C@@H]2O[C@H](C)[C@@H](O[C@H]3C[C@@](C)(O  
1057 C(=O)CC)[C@@H](OC(=O)CCC)[C@H](C)O3)[C@H](N(C)C)[C@H]2OC(C)=O)[C@H]1OC>>CC  
1058 CC(=O)O[C@H]1[C@H](C)O[C@@H](O[C@H]2[C@H](N(C)C)[C@@H](OC(C)=O)[C@H](O[C@  
1059 @H]3[C@@H](OC)[C@H](OC/C=C/c4cnc5ccccc5c4)CC(=O)O[C@H](C)C/C=C/C=C/[C@H](O[Si](  
1060 C)(C)C(C)(C)C)[C@H]1C[C@@H]3C[C@@H](OC)O[C@@H]2C[C@@H](OC(=O)CC  
1061 C=CC(=O)OCCCC.CCOC(CCNc1nc(SC)nc1Br)OCC>>CCCCOC(=O)/C=C/c1nc(SC)nc1NCCC(O  
1062 CC)OCC  
1063 C=CC(=O)OC.COc1c(CN(C(=O)c2ccccc2)c2cccc(Br)c2)ccc2c1OC(C)(C)[C@H](O)[C@H]2N1CCCC  
1064 C1>>COC(=O)/C=C/c1cccc(N(Cc2ccc3c(c2OC)OC(C)(C)[C@H](O)[C@H]3N2CCCCC2)C(=O)c2cc  
1065 C=C.CC(=O)Nc1ccccc1Br>>C=Cc1ccccc1NC(C)=O  
1066 C=Cc1cccc(F)n1.CCOC(=O)c1ccc(I)cc1>>CCOC(=O)c1ccc(/C=C/c2cccc(F)n2)cc1  
1067 Br)ccc(-  
1068 n2ccnc2)cc1.C=CCO[C@@H]1CC(=O)O[C@H](C)C/C=C/C=C/[C@H](O[Si](C)(C)C(C)(C)C)[C@H  
1069 ](C)C[C@H](CC(OC)OC)[C@H](O[C@@H]2O[C@H](C)[C@@H](O[C@H]3C[C@@](C)(O)[C@  
1070 @H](OC(=O)CC)[C@H](C)O3)[C@H](N(C)C)[C@H]2OC(C)=O)[C@H]1OC>>CCC(=O)O[C@H]1[C  
1071 @H](C)O[C@@H](O[C@H]2[C@H](N(C)C)[C@@H](OC(C)=O)[C@H](O[C@@H]3[C@@H](O  
1072 C)[C@H](OC/C=C/c4ccc(-  
1073 n5ccnc5)cc4)CC(=O)O[C@H](C)C/C=C/C=C/[C@H](O[Si](C)(C)C(C)(C)C)[C@H](C)C[C@@H]3C  
1074 C(OC)O[C@@H]2C[C@@H](OC)O[C@@H]1C  
1075 C=CC(=O)OC.Ic1ccsc1>>COC(=O)/C=C/c1ccsc1  
1076 C=CC(=O)O.O=Cc1ccc(I)cc1>>O=Cc1ccc(/C=C/C(=O)O)cc1  
1077 C=Cc1ccccc1.O=[N+][([O-])c1cc(I)cc([N+](=O)[O-])c1>>O=[N+][([O-]  
1078 )c1cc(/C=C/c2ccccc2)cc([N+](=O)[O-])c1  
1079 C=CC(=O)OCC.O=C1CCc2cc(Br)ccc21>>CCOC(=O)/C=C/c1ccc2c(c1)CCC2=O  
1080 Br)ccc(-c2cnc3ccccc3n2)cc1.C=CCn1c(-c2ccc(OC)cc2F)nc2ccccc2c1=O>>COc1ccc(-  
1081 c2nc3ccccc3c(=O)n2C/C=C/c2ccc(-c3cnc4ccccc4n3)cc2)c(F)c1  
1082 C=CC(=O)OC.Cc1cc(N(Cc2ccc(Br)cc2)CC(C)(C)C)nc(C)n1>>COC(=O)/C=C/c1ccc(CN(CC(C)(C)C)  
1083 c2cc(C)nc(C)n2)cc1  
1084 C=CC(=O)O.Fc1ccc(Br)c(F)c1>>O=C(O)/C=C/c1ccc(F)cc1F  
1085 C=Cc1ccccc1.IC(=C1CCCC1)c1ccccc1>>C(=C/c1ccccc1)\C(=C1CCCC1)c1ccccc1  
1086 C=Cc1cnccl.CCOc1ccc(I)cc1>>CCOc1ccc(/C=C/c2cncnc2)cc1  
1087 C=Cc1cccc(O)c1.CC(C)n1nc(I)c2c(N)ncnc21>>CC(C)n1nc(/C=C/c2cccc(O)c2)c2c(N)ncnc21  
1088 C=C1C(=O)O[C@@H]2C[C@@]3(C)CCCC(=C)[C@@H]3C[C@H]12.COc1cnc(Br)c1>>C=C1CC  
1089 C[C@@]2(C)C[C@H]3OC(=O)/C=C/c4cncnc(OC)c4)[C@H]3C[C@@H]12  
1090 C=COCCCC.O=C(O)c1cccc(Cl)c1>>C=C(OCCCC)c1cccc(C(=O)O)c1  
1091 C=C(NC(C)=O)C(=O)OC.CC[C@@]1(O)C(=O)OCc2c1cc1nc(c2=O)Cc2cc3c(Br)cccc3nc2-  
1092 1>>CC[C@@]1(O)C(=O)OCc2c1cc1nc(c2=O)Cc2cc3c(/C=C(\NC(C)=O)C(=O)OC)cccc3nc2-1  
1093 C=C1C(=O)O[C@@H]2C3=C(C)C(=O)C=C[C@]3(C)CC[C@@H]12.COC(=O)c1ccccc(I)c1>>COC(=O)  
1094 c1ccccc(/C=C2/C(=O)O[C@@H]3C4=C(C)C(=O)C=C[C@]4(C)CC[C@@H]23)c1  
1095 C=CC(=O)OCC.CC1(C)OC=C(I)C(=O)O1>>CCOC(=O)/C=C/C1=COCC(C)(C)OC1=O  
1096 Br)cccs1.C=CC(=O)OCCSc1ccccc1>>O=C(/C=C/c1cccs1)OCCSc1ccccc1  
1097 C=Cc1ccc(OC(C)=O)cc1.COc1ccc(I)cc(OC)c1OC>>COc1cc(/C=C/c2ccc(OC(C)=O)cc2)cc(OC)c1OC  
1098 C=CCN1C(=O)c2ccccc2C1=O.Cc1ccc(Br)cc1>>Cc1ccc(/C=C/CN2C(=O)c3ccccc3C2=O)cc1

1073 C=CC(=O)N(C)OC.N#Cc1ccc(Br)cc1>>CON(C)C(=O)/C=C/c1ccc(C#N)cc1  
1074 C=CC(=O)O.Cc1cccc(S(=O)(=O)N(C)c2ccc(I)cc2)c1>>Cc1cccc(S(=O)(=O)N(C)c2ccc(/C=C/C(=O)O)  
cc2)c1  
1075 C=CC(=O)OC.CN(C)Cc1cn(Cc2ccc(Br)cc2)c2ccccc12>>COC(=O)/C=C/c1ccc(Cn2cc(CN(C)C)c3cccc  
c32)cc1  
1076 C=CC(=O)OCC.Fc1ccc(Oc2nc(-c3ccc(Br)cc3)nc3ccsc23)c(F)c1>>CCOC(=O)/C=C/c1ccc(-  
c2nc(Oc3ccc(F)cc3F)c3sccc3n2)cc1  
1077 C=CC[Si](OCC)(OCC)OCC.CCCCC(C)COc1cc(/C=C/c2ccc(/C=C/c3ccc(Br)cc3)cc2)c(OCC(C)CC  
CC)cc1C>>CCCC(C)COc1cc(/C=C/c2ccc(/C=C/c3ccc(/C=C/C[Si](OCC)(OCC)OCC)cc3)cc2)c(O  
CC(C)CCCC)cc1C  
1078 C=CC(=O)OC.CC(C)(C)CN(Cc1ccc(Br)cc1)c1cc(C(F)(F)F)ncn1>>COC(=O)/C=C/c1ccc(CN(CC(C)(  
C)C)c2cc(C(F)(F)F)ncn2)cc1  
1079 CCOC(=O)/C(F)=C\CCc1cccc1.Ic1cccc1>>CCOC(=O)/C(F)=C\CCc1cccc1)c1cccc1  
1080 Cc1ccc(I)cc1.[11CH2]=Cc1cccc1>>Cc1ccc(/[11CH]=C/c2cccc2)cc1  
1081 Brc1ccc(I)cc1.C=Cc1c(F)c(F)c(F)c(F)c1F>>Fc1c(F)c(F)c(/C=C/c2ccc(Br)cc2)c(F)c1F  
1082 Brc1ccc(I)cc1.C=Cc1ccc(S(C)(=O)=O)cc1>>CS(=O)(=O)c1ccc(/C=C/c2ccc(Br)cc2)cc1  
C=Cc1ncnc2c1ncn2[C@H]1O[C@H](CO[Si](C)(C)C(C)(C)C)[C@@H](O[Si](C)(C)C(C)(C)C)[C@  
1083 H]1O[Si](C)(C)C(C)(C)C.Ic1cccc1>>CC(C)(C)[Si](C)(C)OC[C@H]1O[C@H](n2cnc3c(/C=C/c4cc  
ccc4)ncnc32)[C@H](O[Si](C)(C)C(C)(C)C)[C@@H]1O[Si](C)(C)C(C)(C)C  
1084 C=CC(=O)OCC.CCc1nc(CC)c(Cl)n1>>CCOC(=O)/C=C/c1nc(CC)nc1CC  
C=CC(C)(O)CC/C=C\CCCC=C(C)C.Oc1ccc(OCc2ccccc2)cc1Br>>CC(C)=CCC/C(C)=C/CCC(C)(O)  
1085 /C=C/c1ccc(OCc2ccccc2)ccc1O  
1086 C=Cc1cccc1.O=[N+][O-]c1ccc(I)cc1>>O=[N+][O-]c1ccc(/C=C/c2ccccc2)cc1  
1087 C=CC(=O)OCC.Clc1ccc2ccccc2c1>>CCOC(=O)/C=C/c1ccc2ccccc2c1  
1088 C=CCNS(=O)(=O)c1ccc(C)cc1.Cc1ccc(S(=O)(=O)n2cc(Br)c3ccccc32)cc1>>Cc1ccc(S(=O)(=O)NC/C  
=C/c2cn(S(=O)(=O)c3ccc(C)cc3)c3ccccc23)cc1  
1089 C=CC(=O)OC.O=c1oc2ccccc2cc1Br>>COC(=O)/C=C/c1cc2ccccc2oc1=O  
1090 C=Cc1ccc(O)cc1.COc1cc(Br)cc(OC)c1F>>COc1cc(/C=C/c2ccc(O)cc2)cc(OC)c1F  
1091 C=CC(=O)OC.N#Cc1ccc(-  
c2cn(S(=O)(=O)c3ccccc3)c3ncc(Br)cc23)cc1>>COC(=O)/C=C/c1cnc2c(c1)c(-  
1092 C=CC=O.FC(F)c1ccc(Br)cn1>>O=C/C=C/c1ccc(C(F)F)nc1  
1093 C=CC(=O)OC.COc1ccc(I)nn1>>COC(=O)/C=C/c1ccc(OC)nn1  
1094 C=CCN(Cc1cccc2ccccc12)C(=O)OCC.CC(=O)c1ccc(Br)cc1>>CCOC(=O)N(C/C=C/c1ccc(C(C)=O)cc  
1)Cc1cccc2ccccc12  
1095 C=CP(=O)(O)O.COc1ccc(N(c2ccc(I)cc2)c2ccc(OC)cc2)cc1>>COc1ccc(N(c2ccc(/C=C/P(=O)(O)O)cc  
2)c2ccc(OC)cc2)cc1  
1096 C=Cc1cncnc1.CCCCN(CCCC)c1ccc(Br)cc1>>CCCN(CCCC)c1ccc(/C=C/c2cncnc2)cc1  
1097 C=C.COc1ccc(I)cc1>>C=Cc1ccc(OC)cc1  
1098 C=CCN(C(=O)OC(C)(C)C)C(=O)OC(C)(C)C.FC(F)(F)c1ccc(Cl)cc1>>CC(C)(C)OC(=O)N(C/C=C/c1c  
cc(C(F)(F)F)cc1)C(=O)OC(C)(C)C  
1099 C=Cc1cncnc1.CC(C)(C)OC(=O)N[C@H](COc1cc(Br)cn1Cl)Cc1c[nH]c2ccccc12>>CC(C)(C)OC(=O  
)N[C@H](COc1cc(/C=C/c2cncnc2)cn1Cl)Cc1c[nH]c2ccccc12  
1100 C=CC(=O)OCCCC.COc1cccc(I)c1>>CCCCOC(=O)/C=C/c1cccc(OC)c1  
1101 C=CC(N)=O.CC(=O)c1ccc(I)cc1>>CC(=O)c1ccc(/C=C/C(N)=O)cc1  
1102 C=C(C)C(=O)OC.CC(=O)NS(=O)(=O)c1ccc(Br)cc1>>COC(=O)/C(C)=C/c1ccc(S(=O)(=O)NC(C)=O)  
1103 C=Cc1cccc(OC)c1OC.Nc1ccc(I)cc1>>COc1cccc(/C=C/c2ccc(N)cc2)c1OC  
1104 C=CC(=O)OC.CC(C)N(CCc1c(C)(C)O)[nH]c2ccccc12)Cc1ccc(Br)cc1>>COC(=O)/C=C/c1ccc(CN(  
CCc2c(C)(C)O)[nH]c3ccccc23)C(C)C)cc1  
1105 Brc1ccc2ccc3cccc4ccc1c2c34.C=CC=O>>O=C/C=C/c1ccc2ccc3cccc4ccc1c2c34  
1106 C=Cc1ccc2nc(OC)c(OC)nc2c1.COC(=O)c1ccoc1Br>>COC(=O)c1ccoc1/C=C/c1ccc2nc(OC)c(OC)nc2  
Brc1cnc2ccccc2c1.C=CCN(C(=O)OC(C)(C)C)C(=O)OC(C)(C)C>>CC(C)(C)OC(=O)N(C/C=C/c1cnc2  
1107 ccccc2c1)C(=O)OC(C)(C)C  
1108 C=Cc1cccc1.COc1ccc(-c2oc3ccccc3c(=O)c2Br)cc1>>COc1ccc(-  
1109 C=CC(N)=O.O=C(O)c1ccc(I)cc1>>NC(=O)/C=C/c1ccc(C(=O)O)cc1  
1110 C=CC(=O)OCC.O=[N+][O-]c1ccc(Br)cc1>>CCOC(=O)/C=C/c1ccc([N+](=O)[O-])cc1  
1111 C=Cc1ccc(O)cc1.Oc1cc(Br)cc(O)c1F>>Oc1ccc(/C=C/c2cc(O)c(F)c(O)c2)cc1  
1112 C=C(NC(C)=O)C(=O)OC.CCOC(=O)c1cc2c(Br)ccccc2[nH]1>>CCOC(=O)c1cc2c(/C=C\NC(C)=O)C(  
=O)OC)cccc2[nH]1  
1113 C=Cc1ccc(-c2ccc(OC)cc2CO)c(OCc2ccccc2)c1.COc1ccc(I)cc1Oc1ccc(C=O)cc1>>COc1ccc(-  
c2ccc(/C=C/c3ccc(OC)c(Oc4ccc(C=O)cc4)c3)cc2OCc2ccccc2)c(CO)c1  
1114 C=CC(N)=O.COc1ccc(I)c(OC)c1OC>>COc1ccc(/C=C/C(N)=O)c(OC)c1OC

1115 C=CC1CC(=O)N1.COc1ccc(I)cc1>>COc1ccc(/C=C/C2CC(=O)N2)cc1  
1116 C=CCn1c(-  
1117 c2ccc(OCC)cc2)nc2ccccc2c1=O.O=C(CN1C(=O)COc2ccccc21)c1ccc(Br)cc1>>CCOc1ccc(-  
1118 C=COCCOC(=O)C.CC(=O)c1ccc(Br)cc1>>C=COCCOC(=O)c1ccc(C(C)=O)cc1  
1119 C=CC(=O)OC.CN1CCN(CCc2cnn3ccccc23)C(c2ccc(Br)cc2)C1>>COC(=O)/C=C/c1ccc(C2CN(C)CC  
1120 N2CCc2cnn3ccccc23)cc1  
1121 C=Cc1ccccc1.CCOC(=O)c1cc(=O)c2ccccc(Br)c2o1>>CCOC(=O)c1cc(=O)c2ccccc(/C=C/c3ccccc3)c2o1  
1122 C=CC(=O)OCCCC.COc1cc([N+](=O)[O-])ccc1Br>>CCCCOC(=O)/C=C/c1ccc([N+](=O)[O-])cc1OC  
1123 Br1ccccc1I.C=Cc1ccc(Cl)cc1>>Clc1ccc(/C=C/c2ccccc2Br)cc1  
1124 Br1ccsc1.C=Cc1ccccc1>>C(=C/c1ccsc1)\c1ccccc1  
1125 C=CCCCCCC.O=S(=O)(Oc1ccccc1)C(F)(F)F>>C=C(CCCCCC)c1ccccc1  
1126 C=CC(=O)OCC.CC(C)(C)OC(=O)NCCc1cc(Br)ccc1F>>CCOC(=O)/C=C/c1ccc(F)c(CCNC(=O)OC(C  
1127 )(C)C)c1  
1128 C=Cc1ccccc1.Ic1ccc(-c2ccccc2)cc1>>C(=C/c1ccc(-c2ccccc2)cc1)\c1ccccc1  
1129 C=CC(=O)OCC.CC(C)(C)OC(=O)Nc1csc(Br)c1NC(=O)OC(C)(C)C>>CCOC(=O)/C=C/c1ccc(NC(=O  
1130 )OC(C)(C)C)c1NC(=O)OC(C)(C)C  
1131 Br1ccc2ccccc2c1.C=CC(=O)N(C)OC>>CON(C)C(=O)/C=C/c1ccc2ccccc2c1  
1132 C=CCN.Nc1nc(=O)n([C@H]2C[C@H](O)[C@@H](COP(=O)(O)OP(=O)(O)OP(=O)(O)O)O2)cc1I>>  
1133 NC/C=C/c1cn([C@H]2C[C@H](O)[C@@H](COP(=O)(O)OP(=O)(O)OP(=O)(O)O)O2)c(=O)nc1N  
1134 BrC1=C(C2=CCCC2)CCCC1.C=CC(=O)OC>>COC(=O)/C=C/C1=C(C2=CCCC2)CCCC1  
1135 C=CC(C)=O.CC(=O)OC[C@H]1O[C@H](n2cnc3c(Cl)nc(I)nc32)[C@H](OC(C)=O)[C@@H]1OC(  
1136 C)=O>>CC(=O)/C=C/c1nc(Cl)c2nnc([C@@H]3O[C@H](COC(C)=O)[C@@H](OC(C)=O)[C@H]3O  
1137 C(C)=O)c2n1  
1138 C=CC(=O)OCC.Nc1ccc(Br)cc1C(F)(F)F>>CCOC(=O)/C=C/c1ccc(N)c(C(F)(F)F)c1  
1139 C=Cc1cncnc1.O=[N+](=[O-])c1ccc(N(c2ccc(Br)cc2)c2ccc([N+](=O)[O-])cc2)cc1>>O=[N+](=[O-  
1140 ])c1ccc(N(c2ccc(/C=C/c3ccccc3)cc2)c2ccc([N+](=O)[O-])cc2)cc1  
1141 C=CC(=O)OC(C)(C)C.CC(C)CN1[C@H](C)Cc2c(ccc3[nH]ncc23)[C@H]1c1ccc(Br)cc1>>CC(C)CN1  
1142 [C@H](C)Cc2c(ccc3[nH]ncc23)[C@H]1c1ccc(/C=C/C(=O)OC(C)(C)C)cc1  
1143 C=C1ccc2ccccc2c1.CCN1c2ncc(Br)cc2C(=O)N(C)c2ccc(F)nc21>>CCN1c2ncc(/C=C/c3ccc4ccccc4c  
1144 3)cc2C(=O)N(C)c2ccc(F)nc21  
1145 C=CC(=O)OC(C)(C)C.OCCc1cc(Br)ccc1O>>CC(C)(C)OC(=O)/C=C/c1ccc(O)c(CCO)c1  
1146 C=CCCN1cc([N+](=O)[O-  
1147 ])cn1.CCOC(=O)c1ccc(Br)cc1>>CCOC(=O)c1ccc(/C=C/CCn2cc([N+](=O)[O-])cn2)cc1  
1148 Br1ccc2ccc3ccccc4ccc1c2c34.C=C(CCO[Si](C)(C)C(C)(C)C(=O)OC>>COC(=O)/C=C/c1ccc2ccc3  
1149 ccccc4ccc1c2c34)CCO[Si](C)(C)C(C)(C)C  
1150 C=Cl.C=CS(C)(=O)=O>>C=C/C=C/S(C)(=O)=O  
1151 C=CC(=O)NC(C)c1ccccc1.CCc1ccc(I)cc1>>CCc1ccc(/C=C/C(=O)NC(C)c2ccccc2)cc1  
1152 C=C(NC(=O)OCc1ccccc1)C(=O)OC.CC(=O)OCc1cc(C)ccc1I>>COC(=O)/C=C/c1ccc(C)cc1COC(C  
1153 =O)NC(=O)OCc1ccccc1  
1154 C=C1CC(c2ccc(C)cc2)OC1=O.Clc1ccccc(I)c1>>Cc1ccc(C2C/C(=C\c3ccccc(Cl)c3)C(=O)O2)cc1  
1155 C=CC(=O)OCCCC.Ic1cncnc1>>CCCCOC(=O)/C=C/c1cncnc1  
1156 C=Cc1ccccc1.Nc1ccc(I)cc1[N+](=O)[O-]>>Nc1ccc(/C=C/c2ccccc2)cc1[N+](=O)[O-]  
1157 C=Cc1ccc(N2CCN(C(=O)OC(C)(C)C)CC2)cc1.Clc1cc(Br)cc(-  
1158 c2ccncc2)c1>>CC(C)(C)OC(=O)N1CCN(c2ccc(/C=C/c3ccc(Cl)cc(-c4cncnc4)c3)cc2)CC1  
1159 C=Cc1ccccc1.Fc1ccccc(Br)c1>>Fc1ccccc(/C=C/c2ccccc2)c1  
1160 C=Cc1cn[nH]c1.CN(C(=O)c1ccccc1)c1ccc2c(c1)[nH]c(=NC(=O)c1ccc(Br)s1)n2CCC(N)=O>>CN(C(  
1161 =O)c1ccccc1)c1ccc2c(c1)[nH]c(=NC(=O)c1ccc(/C=C/c3cn[nH]c3)s1)n2CCC(N)=O  
1162 Br1ccccc1.C=CN(C)C(C)=O>>C=C(c1ccccc1)N(C)C(C)=O  
1163 C=Cc1ccc(C)cc1.O=Cc1cc(C(F)(F)F)ccc1Br>>Cc1ccc(/C=C/c2ccc(C(F)(F)F)cc2C=O)cc1  
1164 Br1ccc2ccc3ccccc4ccc1c2c34.C=Cc1ccc(OC)cc1>>COc1ccc(/C=C/c2ccc3ccc4ccccc5cccc2c3c45)cc1  
1165 C=Cc1ccc(C)cc1.Cc1ccc(S(=O)(=O)Oc2ccccc3c(Br)ccnc23)cc1>>Cc1ccc(/C=C/c2ccnc3c(OS(=O)(=O)  
1166 c4ccc(C)cc4)ccccc23)cc1  
1167 C=CC(=O)OCC.CCN1C[C@]2(OC(=O)c3cc(I)ccc3NC(C)=O)CC[C@H](OC)[C@]34[C@@H]1[C@  
1168 H](C[C@H]23)[C@@]1(O)C[C@H](OC)[C@H]2C[C@@H]4[C@]1(O)[C@H]2OC>>CCOC(=O)/C  
1169 =C/c1ccc(NC(C)=O)c(C(=O)O)[C@@]23CC[C@H](OC)[C@]45[C@H]([C@H](C[C@H]24)[C@@]2  
1170 (O)C[C@H](OC)[C@H]4C[C@@H]5[C@]2(O)[C@H]4OC)N(CC)C3)c1  
1171 C=C(F)[Si](C)(c1ccccc1)c1ccccc1.COc1ccccc(I)c1>>COc1ccccc(/C=C(F)[Si](C)(c2ccccc2)c2ccccc2)c1  
1172 C=Cc1cncnc1.CNc1ccc(Br)cc1>>CNc1ccc(/C=C/c2ccccc2)cc1  
1173 C=CC(=O)N(C)Cc1ccccc(Cl)c1OCCCC.CC1(C)NCc2cc(Br)nc2NC1=O>>CCCOc1c(Cl)ccccc1CN(C)C(  
1174 =O)/C=C/c1cnc2c(c1)CNC(C)(C)C(=O)N2

1155 C=CC(C)(C)O.CON=CCc1cn(S(=O)(=O)c2ccc(C)cc2)c2cccc(Br)c12>>CON=CCc1cn(S(=O)(=O)c2ccc  
c(C)cc2)c2cccc(/C=C/C(C)(C)O)c12  
1156 C=CC(=O)N1C(=O)OC[C@H]1c1cccc1.CC(C)(C)OP(C)(=O)Cc1ccc(Br)cc1>>CC(C)(C)OP(C)(=O)  
Cc1ccc(/C=C/C(=O)N2C(=O)OC[C@H]2c2cccc2)cc1  
1157 C=C[Si](C)(C)c1cccn1.CCOC(=O)c1ccc(/C=C/c2ccc(Br)cc2)cc1>>CCOC(=O)c1ccc(/C=C/c2ccc(/C=C/  
C/[Si](C)(C)c3cccn3)cc2)cc1  
1158 C=C1CC(c2ccc(Cl)cc2)OC1=O.Ic1cccc1>>O=C1OC(c2ccc(Cl)cc2)C/C1=C\c1cccc1  
1159 C=CC(=O)OC.CC(C)(C)OC(=O)n1c(Br)c(CCN2C(=O)c3ccccc3C2=O)c2ccccc21>>COC(=O)/C=C/c1  
c(CCN2C(=O)c3ccccc3C2=O)c2ccccc2n1C(=O)OC(C)(C)C  
1160 C=CC(=O)OCC.Cc1ccc(I)cc1>>CCOC(=O)/C=C/c1ccc(C)cc1  
1161 C=CCc1ccc(OC)cc1.Ic1cccc1>>COc1ccc(C/C=C/c2ccccc2)cc1  
1162 C=CC(=O)N(C)Cc1oc2ccccc2c1C.CC(C)(C)OC(=O)NCCC1Cc2cc(Br)enc2NC1=O>>Cc1c(CN(C)C(=O)/C=C/c2enc3c(c2)CC(CCN(C(=O)OC(C)(C)C(=O)N3)oc2ccccc12  
1163 Br1ccc2cc[nH]c2n1.C=Cc1cccc1>>C(=C/c1ccc2cc[nH]c2n1)\c1cccc1  
1164 C=CC(F)(F)C(F)(F)C(F)(F)F.CCCN(Cc1ccc(Br)cc1)C(=O)OC(C)(C)C>>CCCN(Cc1ccc(/C=C/  
C(F)(F)C(F)(F)C(F)(F)F)cc1)C(=O)OC(C)(C)C  
1165 C=CC(=O)N(C)Cc1oc2ccccc2c1C.CC1(C)C(=O)Nc2ncc(Br)cc21>>Cc1c(CN(C)C(=O)/C=C/c2enc3c(c2)C(C)(C)C(=O)N3)oc2ccccc12  
1166 C=CC(=O)OC.CC(C)c1cc(Br)c2c(c1)[C@]13CCCC[C@H]1CCCC3=N2>>COC(=O)/C=C/c1cc(C(C)C)cc2c1N=C1CCC[C@H]3CCCC[C@@]123  
C=Cc1nc2c(N)ncnc2n1[C@H]1O[C@H](CO[Si](C)(C)C(C)(C)C)[C@H]1O[Si](C)(C)C(C)(C)C[C@H]1O[Si](C)(C)C(C)(C)C.O=[N+](O-  
1167 )c1ccc(I)cc1>>CC(C)(C)[Si](C)(C)OC[C@H]1O[C@H](n2c(/C=C/c3ccc([N+](=O)[O-]l)cc3)nc3c(N)ncnc32)[C@H]1O[Si](C)(C)C(C)(C)C[C@H]1O[Si](C)(C)C(C)(C)C  
1168 Br1cccc1.C=C1C[C@H]2[C@H]3CCc4cc(OC)ccc4[C@H]3CC[C@]2(C)C1=O>>COc1ccc2c(c1)CC[C@H]1[C@H]2CC[C@]2(C)C(=O)/C(=C/c3ccccc3)C[C@H]12  
1169 C=Cc1ccncc1.CC(C)(C)OC(=O)NCCCOc1cncc(Br)c1>>CC(C)(C)OC(=O)NCCCOc1cncc(/C=C/c2ccncc2)c1  
1170 C=Cc1cncc1.CCN1c2ncc(Br)cc2C(=O)N(C)c2ccc(F)nc21>>CCN1c2ncc(/C=C/c3cncc3)cc2C(=O)N(C)c2ccc(F)nc21  
1171 Br1ccsc1.C=CC(=O)OCC>>CCOC(=O)/C=C/c1ccsc1  
1172 C=Cc1nc(C(=O)OCC)co1.COc1ccc(I)cc1>>CCOC(=O)c1coc(/C=C/c2ccc(OC)cc2)n1  
1173 C=CC(=O)OC.Ic1cccc1>>COC(=O)/C=C/c1cccc1  
1174 C=CC(=O)N(C)Cc1cc2ccccc2n1C.COc1nn(C(=O)OC(C)(C)C)c2ncc(Br)cc12>>COc1nn(C(=O)OC(C)(C)C)c2ncc(/C=C/C(=O)N(C)Cc3cc4ccccc4n3C)cc12  
1175 C=COCCO.COc1ccc(I)cc1>>C=C(OCCO)c1ccc(OC)cc1  
1176 C=CN1C(=O)c2ccccc2C1=O.CC(=O)c1ccc(Br)cc1>>CC(=O)c1ccc(/C=C/N2C(=O)c3ccccc3C2=O)cc  
1177 C=Cc1cc(O)c(OC)cc1F.COc1ccc(I)c(OC)c1>>COc1ccc(/C=C/c2cc(O)c(OC)cc2F)c(OC)c1  
1178 Br1enc2ccccc2c1.C=CC(=O)CC>>CCC(=O)/C=C/c1enc2ccccc2c1  
1179 C/C(I)=C[C@H](C)CO[Si](C)(C)C(C)(C)C.C=CC[C@H](C)CO>>CC(/C=C/C[C@H](C)CO)=C[C@H](C)CO[Si](C)(C)C(C)(C)C  
1180 C=Cc1ccc(C=O)cc1.COc1ccc(I)cc1>>COc1ccc(/C=C/c2ccc(C=O)cc2)cc1  
1181 C=Cc1ccc([Si](OC)(OC)OC)cc1.CC(C)SC(SC(C)C)C(=O)Nc1ccc(I)cc1>>CO[Si](OC)(OC)c1ccc(/C=C/c2ccc(NC(=O)C(SC(C)C)SC(C)C)cc2)cc1  
1182 C=Cc1cncc1.O=[N+](O-)]c1cccc(Br)c1>>O=[N+](O-)]c1cccc(/C=C/c2cncc2)c1  
1183 C=CC(=O)OC.CCOC(=O)Nc1cccc1C1=C(I)CCN1S(=O)(=O)c1ccc(C)cc1>>CCOC(=O)Nc1cccc1C1=C(/C=C/C(=O)OC)CCN1S(=O)(=O)c1ccc(C)cc1  
1184 C=CC(=O)OC.COC1=C(I)CON(Cc2ccccc2)[C@H]1[C@H]1COC(C)(C)O1>>COC(=O)/C=C/C1=C(OC)[C@H]([C@H]2COC(C)(C)O2)N(Cc2ccccc2)OC1  
C=Cc1ccc(N(c2ccccc2)c2ccccc2)cc1.CCCCCCCCCC1(CCCCCCCCCC)c2cc(Br)ccc2-  
1185 c2ccc(C=O)cc21>>CCCCCCCCCCCC1(CCCCCCCCCC)c2cc(C=O)ccc2-  
c2ccc(/C=C/c3ccc(N(c4ccccc4)c4ccccc4)cc3)cc21  
1186 C=CC(=O)OC.Nc1ncnc2c1c(I)cn2[C@H]1C[C@H](O)[C@H](CO)O1>>COC(=O)/C=C/c1cn([C@H]2[C@H](O)[C@H](CO)O2)c2nnc(N)c12  
1187 Br1ccc2secc2c1.C=CCN1C(=O)c2ccccc2C1=O>>O=C1c2ccccc2C(=O)N1C/C=C/c1ccc2secc2c1  
1188 C=CC(=O)OCC.Cc1nc(N)nc(NC2CCC(O)CC2)c1Br>>CCOC(=O)/C=C/c1c(C)nc(N)nc1NC1CCC(O)  
1189 Br1cccn1.C=CS(C)(=O)=O>>CS(=O)(=O)/C=C/c1cccn1  
1190 Br1ccc(-c2enc3ccccc3n2)cc1.C=CCn1c(-c2ccccc2)nc2ccccc2c1=O>>O=c1c2ccccc2nc(-c2ccccc2)n1C/C=C/c1ccc(-c2enc3ccccc3n2)cc1  
1191 Br1ccc(C(=C2Cc3ccccc3C2)c2ccc3c(cnn3C3CCCCO3)c2)cc1.C=CC(=O)OC>>COC(=O)/C=C/c1ccc(C(=C2Cc3ccccc3C2)c2ccc3c(cnn3C3CCCCO3)c2)cc1

1192 C=CC(=O)OC(C)(C)C.Cn1cc(Br)nn1>>Cn1cc(/C=C/C(=O)OC(C)(C)C)nn1  
1193 C=CCOC(C)=O.O=[N+](O-)]c1cccc([I+])c2cccc([N+](=O)[O-]  
1194 ]c2)c1>>CC(=O)OC/C=C/c1cccc([N+](=O)[O-])c1  
1195 C=CCCN1C(=O)c2cccc2C1=O.Ic1cccc1>>O=C1c2cccc2C(=O)N1CC/C=C/c1cccc1  
1196 C=CNC(C)=O.COc1ccc2ccc(OS(=O)(=O)C(F)(F)F)cc2c1>>C=C(NC(C)=O)c1ccc2ccc(OC)cc2c1  
1197 C=Cc1ccccc1.O=[N+](O-)]c1ccc(N(c2ccc(Br)cc2)c2ccc([N+](=O)[O-])cc2[N+](=O)[O-]  
1198 ]c([N+](=O)[O-])c1>>O=[N+](O-)]c1ccc(N(c2ccc(/C=C/c3ccccc3)cc2)c2ccc([N+](=O)[O-]  
1199 ]cc2[N+](=O)[O-])c([N+](=O)[O-])c1  
1200 C=CC(=O)Nc1ccccc1.Oc1ccc(Br)nc1>>O=C(/C=C/c1ccc(O)cn1)Nc1ccccc1  
1201 C=CC(=O)N1N=Cc2cccc2C1c1cc2cccc2s1.COc1cc(Cc2ccc(N)nc2N)cc(I)c1OC>>COc1cc(Cc2ccc(N)nc2N)cc(/C=C/C(=O)N2N=Cc3cccc3C2c2cc3cccc3s2)c1OC  
1202 C=CCOc1ccc(OC)cc1.Cc1ccc(I)cc1>>COc1ccc(OC/C=C/c2ccc(C)cc2)cc1  
1203 C=CCCC#N.Ic1cccc1>>N#CCCC/C=C/c1cccc1  
1204 C=CC#N.Cc1c(Br)ccc2c1nnn2C>>Cc1c(/C=C/C#N)ccc2c1nnn2C  
1205 C=Cc1ccc(OC)c(OC)c1.COc1ccc(-  
1206 c2cc(=O)c3c(OC)cc(OC)c(I)c3o2)cc1OC>>COc1ccc(/C=C/c2c(OC)cc(OC)c3c(=O)cc(-  
1207 c4ccc(OC)c(OC)c4)cc23)cc1OC  
1208 C=CC(=O)OC(C)(C)C.CC1(C)C(=O)Nc2ccc(Br)cc2C1O>>CC(C)(C)OC(=O)/C=C/c1ccc2c(c1)C(O)C  
1209 (C)(C)C(=O)N2  
1210 C=C.CC(C)(C)C1CC=C(Br)CC1>>C=CC1=CCC(C(C)(C)C)CC1  
1211 C=Cc1ccc2ccc(Cl)cc2n1.CC(C)(O)c1cccc1CC[C@H](SCC1(CC#N)CC1)c1cccc(Br)c1>>CC(C)(O)  
1212 c1cccc1CC[C@H](SCC1(CC#N)CC1)c1cccc(/C=C/c2ccc3ccc(Cl)cc3n2)c1  
1213 C=CC(=O)OC(C)(C)C.Cc1ccc(I)cc1>>Cc1ccc(/C=C/C(=O)OC(C)(C)C)cc1  
1214 C=CC(=O)NCc1cccc1.CC(C)(C)OC(=O)c1cccc1Br>>CC(C)(C)OC(=O)c1cccc1/C=C/C(=O)NCc1c  
1215 cccc1  
1216 C=CC(=O)OC.CCc1cccc1Br>>CCc1cccc1/C=C/C(=O)OC  
1217 C=Cc1ccccc1.Cc1ccc(Br)cc1>>Cc1ccc(/C=C/c2ccccc2)cc1  
1218 C=CC(=O)N1CCC(Cc2nnc(C)o2)CC1.Clc1ccc(Br)c(Cn2nccn2)c1>>Cc1nnc(Cc2CCN(C(=O)/C=C/c3  
1219 ccc(Cl)cc3Cn3nccn3)CC2)o1  
1220 C=CC(=O)OC.Cc1cccc1Cl>>COC(=O)/C=C/c1cccc1C  
1221 C=Cc1cccc1Cl.COC(=O)c1cccc1I>>COC(=O)c1cccc1/C=C/c1cccc1Cl  
1222 C=CC(=O)OC.FC(F)(F)c1cc(Cl)cc(C(F)(F)F)c1>>COC(=O)/C=C/c1cc(C(F)(F)F)cc(C(F)(F)F)c1  
1223 C=CC(=O)NCCc1cccc1F.COc1ccc2c(=O)c(I)ccc2c1>>COc1ccc2c(=O)c(/C=C/C(=O)NCCc3ccccc3F  
1224 )ccc2c1  
1225 C=CC(=O)OC(C)(C)C.CCOC(=O)c1ccc(I)cc1>>CCOC(=O)c1ccc(/C=C/C(=O)OC(C)(C)C)cc1  
1226 C=Cc1ccccc1.FC(F)(F)c1cc(Br)cc(C(F)(F)F)c1>>FC(F)(F)c1cc(/C=C/c2ccccc2)cc(C(F)(F)F)c1  
1227 C=CCC(C)O.CN(C)c1cccc(Br)c1>>CC(O)C/C=C/c1cccc(N(C)C)c1  
1228 C=C1C(=O)O[C@H]2[C@H]1CC/C(C)=C/CC[C@H]1(C)O[C@H]21.Fc1ccc(I)cc1>>C/C1=C[CC[C@H]2(C)O[C@H]2[C@H]2OC(=O)/C(=C/c3ccc(F)cc3)[C@H]2CC1  
1229 C=Cc1ccc2c(c1)C1CCCC1N2c1ccc(C)cc1.Cn1nc2c(Br)ccc(Nc3ncc(C4OCCO4)cn3)c2n1>>Cc1ccc(N  
1230 2c3ccc(/C=C/c4ccc(Nc5ncc(C6OCCO6)cn5)c5nn(C)nc45)cc3C3CCCC32)cc1  
1231 C=CC(=O)OCC.FC(F)(F)c1cccc(Oc2cccc(Br)c2)c1>>CCOC(=O)/C=C/c1cccc(Oc2cccc(C(F)(F)F)c2)c  
1232 C=Cc1ccc2ccccc2c1.COc1ccc(Cl)c(I)c1>>COc1ccc(Cl)c(/C=C/c2ccc3ccccc3c2)c1  
1233 Br1cccc2ccccc12.C=C[Si](CC)(CC)CC>>CC[Si](/C=C/c1cccc2ccccc12)(CC)CC  
1234 Br1ccc(-c2nc3ccccc3n3ccccc23)cc1.C=CC(=O)OC>>COC(=O)/C=C/c1ccc(-  
1235 C=CC(N)=O.CC[C@H]1(O)C(=O)OCc2c1cc1n(c2=O)Cc2cc3c(Br)cccc3nc2-  
1236 1>>CC[C@H]1(O)C(=O)OCc2c1cc1n(c2=O)Cc2cc3c(/C=C/C(N)=O)cccc3nc2-1  
1237 C=CC(=O)OC(C)(C)C.O=CNc1ccc(Cl)cc1I>>CC(C)(C)OC(=O)/C=C/c1cc(Cl)ccc1NC=O  
1238 C=C1C(=O)O[C@H]2[C@H]1CCC(=C)[C@H]1C[C@H](OC(C)=O)C(=C)[C@H]21.Clc1ccc(I)cc1  
1239 >>C=C1CC[C@H]2/C(=C/c3ccc(Cl)cc3)C(=O)O[C@H]2[C@H]2C(=C)[C@H](OC(C)=O)C[C@H]2C  
1240 C=Cc1ccc(C(F)(F)F)cc1.IC1CCCCC1>>FC(F)(F)c1ccc(/C=C/C2CCCCC2)cc1  
1241 C=CCNS(=O)(=O)c1ccc(C)cc1.Nc1ccccc1I>>Cc1ccc(S(=O)(=O)NC/C=C/c2ccccc2N)cc1  
1242 C=CC(C)(C)C.CC(=O)c1ccc(Br)cc1>>CC(=O)c1ccc(/C=C/C(C)(C)C)cc1  
1243 C=C(NC(=O)OCc1ccccc1)C(=O)OC.CC(=O)OCc1c(Br)ccc(NC(=O)OC(C)(C)C)c1C>>COC(=O)/C(=O)  
1244 C/c1ccc(NC(=O)OC(C)(C)C)c(C)c1COC(C)=O)NC(=O)OCc1ccccc1  
1245 C=CCNC(=O)C(F)(F)F.Nc1nc(=O)n([C@H]2C[C@H](O)[C@H](CO)O2)cc1I>>Nc1nc(=O)n([C@H]2C[C@H](O)[C@H](CO)O2)cc1  
1246 C=CC(=O)OC.NC(=O)c1ccc(-  
1247 c2cn(S(=O)(=O)c3ccccc3)c3ncc(Br)cc23)cc1>>COC(=O)/C=C/c1ccc2c(c1)c(-  
1248 c1ccc(C(N)=O)cc1)cn2S(=O)(=O)c1ccccc1  
1249 C=CC#N.Cc1cccc(NS(=O)(=O)c2ccc(Br)cc2)c1>>Cc1cccc(NS(=O)(=O)c2ccc(/C=C/C#N)cc2)c1

1234 C=C[C@@H](C)[C@@H](O)C/C=C/C(=O)OC.COc1ccc(I)cc1>>COC(=O)/C=C/C[C@H](O)[C@H](  
C)/C=C/c1ccc(OC)cc1  
1235 C=COCC.Fc1ccc(Br)cc1>>C=C(OCC)c1ccc(F)cc1  
1236 C=Cc1ccc(OC)c(OC)c1C(=O)OC.CC(C)(C)OC(=O)NCCc1cc2c(cc1I)OCO2>>COC(=O)c1c(/C=C/c2c  
c3c(cc2CCNC(=O)OC(C)(C)C)OCO3)ccc(OC)c1OC  
1237 C=CC(=O)OC.CC(=O)Oc1ccc(I)cc1C/C=C(\C)CC/C=C(\C)CCC=C(C)C>>COC(=O)/C=C/c1ccc(OC(  
C)=O)c(C/C=C(\C)CC/C=C(\C)CCC=C(C)C)c1  
1238 CC(=O)/C=C/CC(NS(=O)(=O)c1ccc(C)cc1)c1ccccc1.N#Cc1ccc(Br)cc1>>CC(=O)/C=C(/CC(NS(=O)(  
=O)c1ccc(C)cc1)c1ccccc1)c1ccc(C#N)cc1  
1239 C=Cc1ccc(N(c2ccccc2)c2ccccc2)cc1.Cn1c2ccc(Br)cc2c2cc(C=O)ccc21>>Cn1c2ccc(C=O)cc2c2cc(/C=  
C/c3ccc(N(c4ccccc4)c4ccccc4)cc3)ccc21  
1240 Brc1ccc(C(=C(c2ccccc2)c2ccccc2)c2ccccc2)cc1.C=Cc1ccc(-  
c2ccc3c4ccccc4n(CC)c3c2)cc1>>CCn1c2ccccc2c2ccc(-  
c3ccc(/C=C/c4ccc(C(=C(c5ccccc5)c5ccccc5)c5ccccc5)cc4)cc3)cc21  
1241 C=Cc1ccc(OC(C)=O)cc1.OCCCC(Br)C(F)(F)F>>CC(=O)Oc1ccc(/C=C/C(CCCO)C(F)(F)F)cc1  
1242 C=CC(=O)OC(C)(C)C.CC(C)(C)OC(=O)n1ccc2cc(I)ccc21>>CC(C)(C)OC(=O)/C=C/c1ccc2c(ccn2C(=  
O)OC(C)(C)C)c1  
1243 C=CC(=O)OCC.Oc1ccc(I)cc1>>CCOC(=O)/C=C/c1ccc(O)cc1  
1244 C=CC(=O)N1N=Cc2ccccc2C1c1cc2ccccc2n1C.COc1cc(Cc2cnc(N)nc2N)cc(I)c1OC>>COc1cc(Cc2cn  
c(N)nc2N)cc(/C=C/C(=O)N2N=Cc3ccccc3C2c2cc3ccccc3n2C)c1OC  
1245 C=Cc1cccc(C(F)(F)F)c1.CN(C(=O)c1ccccc1)c1ccc2c(c1)[nH]c(=NC(=O)c1ccc(Br)s1)n2CCC(N)=O>  
>CN(C(=O)c1ccccc1)c1ccc2c(c1)[nH]c(=NC(=O)c1ccc(/C=C/c3cccc(C(F)(F)F)c3)s1)n2CCC(N)=O  
1246 C=Cc1cccc1.CN(C)c1ccc(I)c(C(F)(F)F)c1>>CN(C)c1ccc(/C=C/c2ccccc2)c(C(F)(F)F)c1  
C=Cc1ccc(OC)c(O)c1.CC(=O)OC[C@H]1O[C@H](Oc2ccc(I)cc2)[C@H](OC(C)=O)[C@H](OC(  
1247 C)=O)[C@H]1OC(C)=O>>COc1ccc(/C=C/c2ccc(O[C@H]3O[C@H](COC(C)=O)[C@H](OC(  
C)=O)[C@H](OC(C)=O)[C@H]3OC(C)=O)cc2)cc1O  
1248 C=CC[C@H](NC(=O)OC(C)(C)C)C(=O)OC.COC(=O)c1ccccc1I>>COC(=O)c1ccccc1/C=C/C[C@  
@H](NC(=O)OC(C)(C)C)C(=O)OC  
1249 C=C(C)C=O.CN(C)c1ccc(I)cc1>>C/C(C=O)=C\c1ccc(N(C)C)cc1  
1250 C=CCOc1ccc(OC)cc1.Ic1ccccc1>>COc1ccc(OC/C=C/c2ccccc2)cc1  
1251 C=Cc1nc2ccccc2s1.CCN(CC)S(=O)(=O)c1ccc(Br)cc1F>>CCN(CC)S(=O)(=O)c1ccc(/C=C/c2nc3cccc  
c3s2)cc1F  
1252 C=CCCCCCC.N#Cc1ccccc1OS(=O)(=O)C(F)(F)F>>C=C(CCCCCC)c1ccccc1C#N  
1253 C=Cc1ccc2c(c1)OCO2.O=c1ccc2ccc(OS(=O)(=O)C(F)(F)F)cc2o1>>O=c1ccc2ccc(/C=C/c3ccc4c(c3)O  
CO4)cc2o1  
1254 C=CC(=O)OCC.FC(F)(F)c1cn2ccc(Br)cc2n1>>CCOC(=O)/C=C/c1cn2cc(C(F)(F)F)nc2c1  
1255 C=CC(=O)OCC.CC1(C)CC(=C(c2ccc(Br)cc2)c2ccc(O)c(Cl)c2)CC(C)(C)C1>>CCOC(=O)/C=C/c1ccc  
(C(=C2CC(C)(C)CC(C)(C)C2)c2ccc(O)c(Cl)c2)cc1  
1256 C=CC(OC)OC.IC1CCCC1>>COC(/C=C/C1CCCC1)OC  
1257 C=Cc1cncnc1.COC(=O)[C@H](Cc1ccc(O)c(I)c1)NC(=O)OC(C)(C)C>>COC(=O)[C@H](Cc1ccc(O)c  
(/C=C/c2cncnc2)c1)NC(=O)OC(C)(C)C  
1258 C=CC(CO)N1C(=O)c2ccccc2C1=O.COc1ccc(Br)cc1>>COc1ccc(/C=C/C(CO)N2C(=O)c3ccccc3C2=O  
1259 C=CC(=O)OCC.COc1ccc(Br)c1CO[Si](C)(C)C(C)(C)C>>CCOC(=O)/C=C/c1cccc(OC)c1CO[Si](C)(  
C)C(C)(C)C  
1260 C=CC(=O)OC.COc1ccc2c(c1)CCN(c1ccc(C(C)(C)C)cc1)C2(C)c1ccc(Br)cc1>>COC(=O)/C=C/c1ccc(  
C2(C)c3ccc(OC)cc3CCN2c2ccc(C(C)(C)C)cc2)cc1  
1261 C=CC(=O)OCCCC.Cc1cc(C)c(Br)c(C)c1>>CCCCOC(=O)/C=C/c1c(C)cc(C)cc1C  
1262 C=Cc1ccccc1.Cc1cc(I)ccn1>>Cc1cc(/C=C/c2ccccc2)ccn1  
1263 C=CC(=O)OC.Fc1cc(Br)c2[nH]c3c(c2c1)CCC3>>COC(=O)/C=C/c1cc(F)cc2c3c([nH]c12)CCC3  
1264 C=CCN[C@H](C)c1cccc2ccccc12.FC(F)(F)c1ccc(Br)c1>>C[C@H](NC/C=C/c1cccc(C(F)(F)F)c1)  
c1cccc2ccccc12  
1265 C=CC(=O)OC.CC(C)(C)OC(=O)ON1CCc2c([nH]c3c(Br)ccccc23)C1c1ccccc1>>COC(=O)/C=C/c1cccc  
2c3c([nH]c12)C(c1ccccc1)N(OC(=O)OC(C)(C)C)CC3  
1266 C=CC(=O)OC.O=Cc1ccc(I)cc1>>COC(=O)/C=C/c1ccc(C=O)cc1  
1267 C=COCCCC.COC(=O)c1cnc(Br)c1>>C=C(OCCCC)c1cnc(C(=O)OC)c1  
1268 C=CC=O.CC(C)(C)OC(=O)COc1ccc(Cl)c(I)c1>>CC(C)(C)OC(=O)COc1ccc(Cl)c(/C=C/C=O)c1  
1269 C=CCC(C)C.Cc1ccccc1OS(=O)(=O)C(F)(F)F>>C=C(CC(C)C)c1ccccc1C  
1270 C=CC(=O)OCC.Nc1ccc(CO)cc1I>>CCOC(=O)/C=C/c1cc(CO)ccc1N  
1271 C=CCP(=O)(OCC)OCC.Clc1ccccc(I)c1>>CCOP(=O)(C/C=C/c1cccc(Cl)c1)OCC  
1272 C=Cc1cccc(OC)c1.CC(C)(C)OC(=O)c1ccc(Br)cc1[N+](=O)[O-]  
]>>COc1cccc(/C=C/c2ccc(C(=O)OC(C)(C)C)c([N+](=O)[O-])c2)c1

1273 C=Cc1ccc(N(C)C)cc1.CCOC(=O)C(C)Br>>CCOC(=O)C(C)/C=C/c1ccc(N(C)C)cc1  
1274 C=CN(C)C(C)=O.Fc1ccc(Br)cc1>>C=C(c1ccc(F)cc1)N(C)C(C)=O  
1275 C=CC(=O)OC.COc1ccc(Cn2nc(I)c3c(NC4CCOCC4)nc32)cc1>>COC(=O)/C=C/c1nn(Cc2ccc(OC)c  
c2)c2ccnc(NC3CCOCC3)c12  
1276 C=Cc1ccccc1.OCCCCCOc1ccc2cc(Br)ccc2c1>>OCCCCCOc1ccc2cc(/C=C/c3ccccc3)ccc2c1  
1277 C=CC(=O)OCC.Cc1nnc(N)c1I>>CCOC(=O)/C=C/c1c(C)nnc1N  
C=CC(=O)Nc1ccc2nnc([C@H]3C[C@H](OC(=O)c4ccc(C)cc4)[C@@H](COC(=O)c4ccc(C)cc4)O3)c  
2c1.C[Si](C)(C)CCOCn1cc(I)c(=O)[nH]c1=O>>Cc1ccc(C(=O)OC[C@H]2O[C@@H](n3cnc4ccc(NC(=O)/C=C/c5cn(COCC[Si](C)(C)C)c(=O)[nH]c5=O)cc43)C[C@@H]2OC(=O)c2ccc(C)cc2)cc1  
1278 C=Cc1cc(OCc2ccccc2)ccc1OCc1ccccc1.O=C(NCCc1ccccc1)c1cc(I)ccc1O>>O=C(NCCc1ccccc1)c1cc  
(/C=C/c2cc(OCc3ccccc3)ccc2OCc2ccccc2)ccc1O  
C=Cc1ccc(/C=C/c2ccc(N(C)C)cc2OC)cc1.O=c1cc2oc3cc(O)c(F)cc3c(-c3ccc(I)cc3S(=O)(=O)O)c-  
1280 2cc1F>>COc1cc(N(C)C)ccc1/C=C/c1ccc(/C=C/c2ccc(-c3c4cc(F)c(=O)cc-  
4oc4cc(O)c(F)cc34)c(S(=O)(=O)O)c2)cc1  
C=CC(=O)OC.C[Si](C)(C)c1cc2n(c(=O)c1I)CCC21OCCO1>>COC(=O)/C=C/c1c([Si](C)(C)C)cc2n(c  
1=O)CCC21OCCO1  
1281 C=Cc1ccccc1.CCCCCCCCCCCCCI>>CCCCCCCCCCCCC/C=C/c1ccccc1  
1282 C=Cc1nnc2c1nnc2C1CCCCO1.Ic1ccccc1>>C(=C/c1nnc2c1nnc2C1CCCCO1)\c1ccccc1  
1283 C=CC(C)(C)O.COc1cc(OC)c2ccc(=O)oc2c1I>>COc1cc(OC)c2ccc(=O)oc2c1/C=C/C(C)(C)O  
1284 C=Cc1ccc(OC)cc1.COc1cc2cc(Br)c(=O)oc2cc1OC>>COc1ccc(/C=C/c2cc3cc(OC)c(OC)cc3oc2=O)cc  
1285 C=CC(=O)O.FC(F)(F)c1ccc(I)c(Br)c1>>O=C(O)/C=C/c1ccc(C(F)(F)F)cc1Br  
1286 C=CC(=O)OC(C)(C)C.Nc1ccc(CO)cc1I>>CC(C)(C)OC(=O)/C=C/c1cc(CO)ccc1N  
1287 C=CC[Si](C)(C)C.Cc1ccc(Br)cc1>>C=C(C[Si](C)(C)C)c1ccc(C)cc1  
1288 C=CC(=O)OC.CCCc1oc([C@@H](Cc2ccccc2)NC(=O)OC(C)(C)C)cc1I>>CCCc1oc([C@@H](Cc2cc  
ccc2)NC(=O)OC(C)(C)C)cc1/C=C/C(=O)OC  
1289 C=CC(=O)OC(C)(C)C.COc1ccc(I)c([N+](=O)[O-  
1290 ])c1>>COc1ccc(/C=C/C(=O)OC(C)(C)C)c([N+](=O)[O-])c1  
1291 C=CC(=O)OC.COC(=O)c1cc(Br)c2ccccc2n1>>COC(=O)/C=C/c1cc(C(=O)OC)nc2ccccc12  
1292 C=CC(N)=O.O=C1Nc2ccc(Br)cc2C1=O>>NC(=O)/C=C/c1ccc2c(c1)C(=O)C(=O)N2  
Br1c(-c2ccccc2)nn(-c2ccnc(Nc3ccccc3)n2)c1-  
1293 c1ccccc1.C=C[C@@H]1C[C@H](CC(=O)OCC)OC(C)(C)O1>>CCOC(=O)C[C@H]1C[C@@H](/C=  
C/c2c(-c3ccccc3)nn(-c3ccnc(Nc4ccccc4)n3)c2-c2ccccc2)OC(C)(C)O1  
1294 C=Cc1ccc(C)c1.CC(=S)NS(=O)(=O)c1ccc(Br)cc1>>CC(=S)NS(=O)(=O)c1ccc(/C=C/c2ccc(C)cc2)cc  
Br1CCCCC1.C=Cc1ccc(C(=O)N(Cc2ccccc2)Cc2ccccc2)c1>>O=C(c1ccccc1/C=C/C2CCCCC2)c1)N(  
1295 Cc1ccccc1)Cc1ccccc1  
C=CCN1CCP(C)(=O)CC1.Fc1cccc(COc2ccc(Nc3nnc4ccc(I)cc34)cc2Cl)c1>>CP1(=O)CCN(C/C=C/c  
1296 2ccc3nnc(Nc4ccc(OCc5ccccc5)F)c5)c(Cl)c4)c3c2)CC1  
1297 C=CC(=O)OCCCC.O=C(c1ccccc1)c1ccc(Cl)cc1>>CCCCOC(=O)/C=C/c1ccc(C(=O)c2ccccc2)cc1  
1298 C=CC(=O)OCc1ccccc1.Cc1ccc(I)cc1>>Cc1ccc(/C=C/C(=O)OCc2ccccc2)cc1  
1299 C=Cc1ccccc1.Cc1ccc(/C=C/C(=O)c2ccc(Br)cc2)cc1>>Cc1ccc(/C=C/C(=O)c2ccc(/C=C/c3ccccc3)cc2)  
C=CC(=O)NCO.C[C@]12C[C@@]34C=C(Sc5ccccc5)C(=O)[C@@](C)(CCC(=O)Nc5c(O)ccc(C(=O)O)c5O)[C@@H]3[C@H](C[C@@H]1C4)O2>>C[C@]12C[C@@]34C=C(Sc5ccccc5/C=C/C(=O)NC  
1300 O)c5O)[C@@H]3[C@H](C[C@@H]1C4)O2>>C[C@]12C[C@@]34C=C(Sc5ccccc5/C=C/C(=O)NC  
O)c5O)[C@@H]3[C@H](C[C@@H]1C4)O2  
1301 C=Cc1ccccc1.O=S(=O)(Oc1ccc(CO)cc1)C(F)(F)F>>C=C(c1ccccc1)c1ccc(CO)cc1  
1302 C=COCCCC.O=c1cc(Br)c2ccc(F)cc2[nH]1>>CCCCO/C=C/c1cc(=O)[nH]c2cc(F)ccc12  
1303 C=C1C(=O)O[C@H]2[C@H]1C[C@@H](O)/C(C)=C/CC[C@@]1(C)O[C@@H]21.Nc1ccc(I)cc1>>C  
/C1=C/CC[C@@]2(C)O[C@H]2[C@H]2OC(=O)/C(=C/c3ccc(N)cc3)[C@@H]2C[C@H]1O  
1304 C=CC(C)=O.Cc1cc(C)c([I+])c2c(C)cc(C)cc2C)c(C)c1>>CC(=O)/C=C/c1c(C)cc(C)cc1C  
1305 C=CC(=O)Nc1ccccc1.COc1ccc(-c2oc3cc(OC)ccc3c(=O)c2I)cc1>>COc1ccc(-  
c2oc3cc(OC)ccc3c(=O)c2/C=C/C(=O)Nc2ccccc2)cc1  
1306 C=CC(C)(C)O.COC(=O)c1c(OC)cc(OC)c(I)c1OC>>COC(=O)c1c(OC)cc(OC)c(/C=C/C(C)(C)O)c1OC  
1307 C=CC(=O)O.Cc1ccc(S(=O)(=O)N(C)c2ccccc(I)c2)cc1>>Cc1ccc(S(=O)(=O)N(C)c2ccccc(/C=C/C(=O)O)  
c2)cc1  
C=CC(=O)OC.Ic1nn(C(c2ccccc2)(c2ccccc2)c2ccccc2)c2ccnc(OC3CCCCC3)c12>>COC(=O)/C=C/c1n  
1308 n(C(c2ccccc2)(c2ccccc2)c2ccccc2)c2ccnc(OC3CCCCC3)c12  
C=CCCC.COC(=O)CCn1c(=O)c2cc(I)ccc2n(Cc2cn(C(=O)NC(C)(C)C)c3ccccc23)c1=O>>CCC/C=C/c  
1309 1ccc2c(c1)c(=O)n(CCC(=O)OC)c(=O)n2Cc1cn(C(=O)NC(C)(C)C)c2ccccc12  
C=Cc1ccc2c(c1)CC2.C[Si](C)(OS(=O)(=O)C(F)(F)F)OS(=O)(=O)C(F)(F)F>>C[Si](C)(/C=C/c1ccc2c(  
1310 c1)CC2)OS(=O)(=O)C(F)(F)F  
C=CC(=O)[C@@]1(O)C[C@H]2CC[C@]1(C)C2(C)C.Clc1ccc(I)cc1>>CC1(C)[C@@H]2CC[C@]1  
1311 (C)[C@@](O)(C(=O)/C=C/c1ccc(Cl)cc1)C2



C=CC(=O)OCC.CCOC(=O)CN1C(=O)[C@H](N2C(=O)c3cccc3C2=O)Cc2ccccc2C1c1ccc(Br)cc1  
>>CCOC(=O)/C=C/c1ccc(C2c3cccc3C[C@H](N3C(=O)c4cccc4C3=O)/C(=O)N2CC(=O)OCC)cc1  
C=CC(=O)Nc1cccc(OC)c1.COc1ccc2c(=O)c(I)coc2c1>>COc1cccc(NC(=O)/C=C/c2coc3cc(OC)ccc3c  
2=O)c1  
C=CCNC(=O)OC(C)(C)C.O=C(c1cccc1)c1ccc(Br)cc1>>C=C(CNC(=O)OC(C)(C)C)c1ccc(C(=O)c2c  
cccc2)cc1  
C=Cc1ccnec1.Nc1enc(Cl)c(Br)c1>>Nc1enc(Cl)c(/C=C/c2ccnce2)c1  
Brclenc2ccccc2c1.C=CP(=O)(OCC)OCC>>CCOP(=O)/(C=C/c1enc2ccccc2c1)OCC  
C=Cc1cccn1.Cc1c(Ne2c(I)encc2C#N)ccc2[nH]ccc12>>Cc1c(Ne2c(C#N)encc2/C=C/c2cccn2)ccc2[n  
H]ccc12  
C=Cc1ccc(CN2CCN(C(=O)OC(C)(C)C)CC2)cn1.Cc1c(Ne2c(I)encc2C#N)ccc2[nH]ccc12>>Cc1c(Ne2  
c(C#N)encc2/C=C/c2ccc(CN3CCN(C(=O)OC(C)(C)C)CC3)cn2)ccc2[nH]ccc12  
C=Cc1ccc(C)cc1C.[Si](C)(C)OS(=O)(=O)C(F)(F)F>>Cc1ccc(/C=C/[Si](C)(C)C)c(C)c1  
C=CC(=O)OCC.CC(Oc1ccc(Br)cc1)c1cccc1>>CCOC(=O)/C=C/c1ccc(OC(C)e2ccccc2)cc1  
C=CC(=O)OC.O=C1Ne2cccc(Br)c2C12OCO2>>COC(=O)/C=C/c1cccc2c1C1(OCCO1)C(=O)N2  
C=CC(=O)NCc1cccc1F.COc1ccc2c(=O)c(I)coc2c1>>COc1ccc2c(=O)c(/C=C/C(=O)NCc3ccccc3F)co  
Brclccnc1.C=Cn1c(-c2ccccc2)c(-c2ccccc2)oc1=O>>O=c1oc(-c2ccccc2)c(-  
C=CCOC(C)=O.Fc1ccc(I)cc1>>CC(=O)OC/C=C/c1ccc(F)cc1  
C=CCN(C(=O)C(C)(C)C)[C@H](C)c1cccc1.O=C1Ne2ncccc2[C@@]12Cc1cc(Br)enc1C2>>C[C@H]  
(c1cccc1)N(C/C=C/c1enc2c(I)C[C@@]1(C2)C(=O)Ne2ncccc21)C(=O)C(C)(C)C  
C=CC(=O)OCCCC.COC(CNc1ncnc1Cl)OC>>CCCCOC(=O)/C=C/c1ncnc1NCC(OC)OC  
C=C[C@H]1O[C@@H]2OC(C)(C)O[C@@H]2[C@H]1O.O=c1cc(-  
c2ccccc2)oc2ccc(Br)cc12>>CC1(C)O[C@H]2O[C@H]/C=C/c3ccc4oc(-  
c5ccccc5)cc(=O)c4c3][C@H](O)[C@H]2O1  
C=C[Si](OCC)(OCC)OCC.CCCCCCCC0c1ccc2cc(Br)ccc2c1>>CCCCCCCCOc1ccc2cc(/C=C/[Si](O  
CC)(OCC)OCC)ccc2c1  
C=CC(=O)OCC.CC1(C)CC(=C(c2ccc(O)cc2)c2ccc(Br)cc2)CC(C)(C)C1>>CCOC(=O)/C=C/c1ccc(C(  
=C2CC(C)(C)CC(C)(C)C2)c2ccc(O)cc2)cc1  
Brclcccc2ccccc12.C=C[Si](C)(C)c1cccc1>>C[Si](C)(/C=C/c1cccc2ccccc12)c1cccc1  
Brclccnc1.C=C[P@](C)(=O)c1cccc1>>C[P@](=O)/(C=C/c1ccnec1)c1cccc1  
C=CC(=O)N1[C@@H]2C[C@H]3CC[C@]2(CS1(=O)=O)C3(C)C.Clc1ccc(I)en1>>CC1(C)[C@@H]2  
CC[C@]13CS(=O)(=O)N(C(=O)/C=C/c1ccc(Cl)nc1)[C@@H]3C2  
Brclccc(-c2enc3ccccc3n2)cc1.C=CCn1c(-c2ccc(F)cc2)nc2ccccc2c1=O>>O=c1c2ccccc2nc(-  
c2ccc(F)cc2)n1C/C=C/c1ccc(-c2enc3ccccc3n2)cc1  
C=CC[C@H]1O[C@H](COC(=O)c2ccccc2)[C@@H](OC(=O)c2ccccc2)[C@H](OC(=O)c2ccccc2)[C  
@@H]1OC(=O)c1cccc1.Ic1ccc(-c2ccccc2)cc1>>O=C(OC[C@H]1O[C@H](C/C=C/c2ccc(-  
c3ccccc3)cc2)[C@@H](OC(=O)c2ccccc2)[C@@H](OC(=O)c2ccccc2)[C@@H]1OC(=O)c1cccc1)c1  
cccc1  
C=CC(=O)OCC.O=C1CCCc2ccc(Br)cc2C1>>CCOC(=O)/C=C/c1ccc2c(c1)CC(=O)CCC2  
C=Cc1ccnec1.Nc1cccc1Br>>Nc1cccc1/C=C/c1ccnec1  
C=CC(=O)OC(F)(F)C(F)(F)C(F)(F)C(F)(F)C(F)(F)C(F)(F)C(F)(F)C[F@]12C  
[C@@]34C=C(Sc5ccc(I)cc5)C(=O)[C@@](C)(CCC(=O)Nc5c(O)ccc(C(=O)O)c5O)[C@@H]3[C@H]  
(C[C@@H]1C4)O2>>C[C@]12C[C@@]34C=C(Sc5ccc(/C=C/C(=O)OC(F)(F)C(F)(F)C(F)(F)C(F)(F)  
C(F)(F)C(F)(F)C(F)(F)C(F)(F)C(F)(F)C(F)(F)cc5)C(=O)[C@@](C)(CCC(=O)Nc5c(O)ccc(C(=O)O)  
c5O)f(C@@H13f(C@@H1(Cl)C@@H11C4)O2  
C=Cc1cccc1.Cc1ccc(-c2oc3ccccc3c(=O)c2Br)cc1>>Cc1ccc(-c2oc3ccccc3c(=O)c2/C=C/c2ccccc2)cc1  
C=Cc1ccc2c(cnn2C2CCCO2)c1.FC(F)Oc1ccc(Nc2ncc(Br)cn2)cc1Cl>>FC(F)Oc1ccc(Nc2ncc(/C=C/c  
3ccc4c(cnn4C4CCCC4)c3)cn2)cc1Cl  
C=Cc1ccc(F)c1.N[C@H](Cc1c[nH]c2c(Br)cccc12)C(=O)O>>N[C@@H](Cc1c[nH]c2c(/C=C/c3cc  
cc(F)c3)cccc12)C(=O)O  
C=Cc1ccnec1.CN(C)c1ccc(Br)cc1>>CN(C)c1ccc(/C=C/c2ccnce2)cc1  
C=CS(N)(=O)=O.CCc1cc(Br)cc(C(=O)c2ccccc2)c1>>CCc1cc(/C=C/S(N)(=O)=O)cc(C(=O)c2ccccc2)  
C=CC(=O)OC.O=c1[nH]c(=O)n([C@@H]2O[C@H](CO)[C@@H](O)[C@H]2F)cc1I>>COC(=O)/C=  
C/c1cn([C@@H]2O[C@H](CO)[C@@H](O)[C@H]2F)c(=O)[nH]c1=O  
Brclc2ccccc2cc2ccccc12.C=CC(OCC)OCC>>CCOC(/C=C/c1c2ccccc2cc2ccccc12)OCC  
C=C[Si](C)(C)C.Cc1ccc(C)c(I)c(C)c1>>Cc1ccc(C)c(/C=C/[Si](C)(C)C)c(C)c1  
C=Cc1nc2c(N)ncnc2n1[C@H]1C[C@H](O[Si](C)(C)C(C)(C)C)[C@@H](CO[Si](C)(C)C(C)(C)C)O1.  
O=[N+]( [O-])c1ccc(I)cc1>>CC(C)(C)[Si](C)(C)OC[C@H]1O[C@@H](n2c(/C=C/c3ccc([N+] (=O) [O- ]  
 )cc3)nc3c(N)ncnc32)C[C@@H]1O[Si](C)(C)C(C)(C)C  
C=Cc1ccc(Cl)cc1.N#CCc1ccc(Br)cc1>>N#CCc1ccc(/C=C/c2ccc(Cl)cc2)cc1  
C=Cc1ccccc1.O=C(N1CCOCC1)C(F)(F)Br>>O=C(N1CCOCC1)C(F)(F)/C=C/c1cccc1

1349 C=CC(=O)OCC.COc1ccc(Nc2nc(NC3CCCCC3)nc(Oc3ccc(I)cc3)n2)cc1Cl>>CCOC(=O)/C=C/c1ccc  
(Oc2nc(Nc3ccc(OC)c(Cl)c3)nc(NC3CCCCC3)n2)cc1  
1350 C=CC(=O)N1CCCCC1.O=c1c(I)c(-c2ccc(O)cc2)oc2cc(O)ccc12>>O=C(/C=C/c1c(-  
c2ccc(O)cc2)oc2cc(O)ccc2c1=O)N1CCCCC1  
1351 C=Cc1cccc1.CC(C)(C)OC(=O)N1C[C@H]2C[C@H](C1)c1cc(Br)cc(=O)n1C2>>CC(C)(C)OC(=O)  
N1C[C@H]2C[C@H](C1)c1cc(/C=C/c3cccc3)cc(=O)n1C2  
1352 C=CC(=O)OC.COc1ncc(I)c(OC)n1>>COC(=O)/C=C/c1ncc(OC)nc1OC  
1353 C=Cc1ccncc1.O=C(c1cccc1)c1ccc(Br)cc1>>O=C(c1cccc1)c1ccc(/C=C/c2ccncc2)cc1  
1354 C=C(Br)CCO.C=CC(=O)CC>>C=C(/C=C/C(=O)CC)CCO  
C=CC(=O)OC.C[C@]12C[C@]134C=C(Sc5cccc(I)c5)C(=O)[C@](C)(CCC(=O)Nc5c(O)ccc(C(=O)  
1355 )O)c5O)[C@H]3[C@H](C[C@H]1C4)O2>>COC(=O)/C=C/c1cccc(SC2=C[C@]34C[C@H]5C[C@H]  
[O](O)[C@]15(C)C3)[C@H]4[C@]1(C)(CCC(=O)Nc3c(O)ccc(C(=O)O)c3O)C2=O)c1  
C=CC(=O)OC(C)(C)C.COC(=O)/C=C/c1cccc(N(Cc2cccc2Br)C(=O)C2CCCCC2)c1>>COC(=O)/C=C/  
1356 C/c1cccc(N(Cc2cccc2/C=C/C(=O)OC(C)(C)C(=O)C2CCCCC2)c1  
C=Cc1ccc2cccc2c1.COc1ccc(C)c(I)c1>>COc1ccc(C)c(/C=C/c2ccc3cccc3c2)c1  
1357 C=C(F)[Si](C)(c1cccc1)c1cccc1.Fc1cccc1I>>C[Si](/C(F)=C/c1cccc1F)(c1cccc1)c1cccc1  
1358 C=CCNC(=O)c1cc(C)cc(Br)c1NC(=O)c1cccc1.Ic1cccc1>>Cc1cc(Br)c(NC(=O)c2cccc2)c(C(=O)N  
1359 C/C=C/c2cccc2)c1  
Cc1ccc(I)cc1.NC(=O)/C=C/c1cccc1>>Cc1ccc(/C=C/C(N)=O)c2cccc2)cc1C  
1360 C=CC(=O)OC.Cn1ccc2c(Br)cccc21>>COC(=O)/C=C/c1cccc2c1cn2C  
1361 Brc1ccc2[nH]cc(CCc3cccc3)c2c1.C=CC(=O)OC>>COC(=O)/C=C/c1ccc2[nH]cc(CCc3cccc3)c2c1  
1362 C=CC(=O)OC.CC(C)(C)OC(=O)NCc1cccc1Br>>COC(=O)/C=C/c1cccc1CNC(=O)OC(C)(C)C  
1363 C=CC(=O)OC.O=Cc1ccc(Br)cc1>>COC(=O)/C=C/c1ccc(C=O)cc1  
1364 C=Cc1cc([N+](=O)[O-]  
1365 ])ccc1OCOCC[Si](C)(C)C.COC(=O)c1ccc(I)cc1>>COC(=O)c1ccc(/C=C/c2cc([N+](=O)[O-]  
])ccc2OCOCC[Si](C)(C)C)cc1  
1366 C=Cc1ccc2cccc2c1.CCOC(=O)C(F)(F)Br>>CCOC(=O)C(F)(F)/C=C/c1ccc2cccc2c1  
1367 C=CC(=O)OC(C)(C)C.Cc1c(-c2ccc(O)cc2)oc2ccc(Br)cc12>>Cc1c(-  
c2ccc(O)cc2)oc2ccc(/C=C/C(=O)OC(C)(C)C)cc12  
1368 C=CC(=O)OC(C)(C)C.Cc1cccc(C=O)c1Br>>Cc1cccc(C=O)c1/C=C/C(=O)OC(C)(C)C  
1369 C=CC(=O)OC.Nc1cc(Cl)ccc1Br>>COC(=O)/C=C/c1ccc(Cl)cc1N  
C=CCOC(=O)/C=C/c1ccc(OC(C)=O)c(OC(C)=O)c1.Ic1cccc1>>CC(=O)Oc1ccc(/C=C/C(=O)OC/C=  
1370 C/c2cccc2)cc1OC(C)=O  
C=CC(=O)OC.FC(F)(F)CCCOc1ccc(C(F)(F)Oc2ccc(Br)cc2)cc1>>COC(=O)/C=C/c1ccc(OC(F)(F)c2c  
1371 cc(OCCCC(F)(F)F)cc2)cc1  
C=CC(C)(C)O.Cc1ccc(-c2oc3cccc3c(=O)c2Br)cc1>>Cc1ccc(-  
1372 C=CC(=O)N(C)Cc1cccc(OC)c1OCCC.CC1(C)COc2cc(Br)enc2NC1=O>>CCCOc1c(CN(C)C(=O)/C=  
1373 C/c2enc3c(c2)OCC(C)(C)C(=O)N3)cccc1OC  
C=C[C@H]1C[C@H](O[Si](C)(C)C(C)C)CC[C@]1(C)C1CC[C@]2(C)C(CCC23OCCO3)[C  
1374 @H]1OC(C)=O.CCOc1ccc(Br)cc1>>CCOc1ccc(/C=C/[C@H]2C[C@H](O[Si](C)(C)C(C)C(C)C)C  
C[C@]2(C)C2CC[C@]3(C)C(CCC34OCCO4)[C@H]2OC(C)=O)cc1  
1375 C=CN(C)C(C)=O.COc1ccc(Cl)cc1>>C=C(c1ccc(OC)cc1)N(C)C(C)=O  
1376 C=CC(=O)OC(C)(C)C.COc1ccc(S(=O)(=O)n2ccc3cc(Br)enc32)cc1>>COc1ccc(S(=O)(=O)n2ccc3cc(/  
C=C/C(=O)OC(C)(C)C)enc32)cc1  
1377 Brc1ccc2nc(-c3cccc3)c(-c3cccc3)nc2c1.C=Cc1cccc1>>C=C/c1ccc2nc(-c3cccc3)c(-  
c3cccc3)nc2c1)c1cccc1  
1378 C=CCNC(=O)OC(C)(C)C.CCOC(=O)CC(c1ccc(C)c(CN2CC(C)Cc3cc(Br)ccc3S2(=O)=O)c1)c1ccc2c(  
c1)nnn2C>>CCOC(=O)CC(c1ccc(C)c(CN2CC(C)Cc3cc(/C=C/CNC(=O)OC(C)(C)C)ccc3S2(=O)=O)c  
1)c1ccc2c(c1)nnn2C  
C=CC1=CC=C/C=C/c2ccc(OC)cc2)C2=CC(C(C)C)=CC=C(C)C2=C1C(=O)OC.O=[N+](O-  
1379 )c1ccc(I)cc1>>COC(=O)C1=C2C(C)=CC=C(C(C)C)C=C2C(/C=C/c2ccc(OC)cc2)=CC=C1/C=C/c1cc  
c([N+](=O)[O-])cc1  
C=Cc1ccncc1.C[C@H](COc1ncc(Cl)c(I)c1)NC(=O)OC(C)(C)C>>C[C@H](COc1ncc(Cl)c(/C=C/c2cc  
1380 ncc2)c1)NC(=O)OC(C)(C)C  
C=CCOc1cccc1C.CC(=O)c1ccc(I)cc1>>CC(=O)c1ccc(/C=C/COc2cccc2C)cc1  
1381 C=CC(=O)OC(C)(C)C.O=C1Ne2ncc(Br)cc2CN2CCC[C@H]12>>CC(C)(C)OC(=O)/C=C/c1ncc2c(c  
1382 1)CN1CCC[C@H]1C(=O)N2  
C=CC(=O)OCC.Cc1nc(C)c(I)c(=O)[nH]1>>CCOC(=O)/C=C/c1c(C)nc(C)[nH]c1=O  
1383 C=Cc1ccc(C)cc1.CCOC(=O)C(F)I>>CCOC(=O)C(F)/C=C/c1ccc(C)cc1  
1384 C=Cc1cccc1O.Oc1cc(O)cc(I)c1>>Oc1cc(O)cc(/C=C/c2cccc2O)c1  
1385 C=Cc1ccncc1.Ic1cccc1>>C(=C/c1ccncc1)c1cccc1

1387 C=CC(=O)O.FC1(F)Oc2cccc(Br)c2O1>>O=C(O)/C=C/c1cccc2c1OC(F)(F)O2  
1388 C=Cc1cccc1.O=[N+](O-)]c1cccc1Br>>O=[N+](O-)]c1cccc1/C=C/c1cccc1  
1389 C=Cc1cccc(Cl)c1.Oc1cccc1I>>Oc1cccc1/C=C/c1cccc(Cl)c1  
1390 Br1cccc2[nH]ccc12.C=Cn1enc2c(Nc3ccc(P(C)(C)=O)cc3)nenc21>>CP(C)(=O)c1ccc(Nc2ncnc3c2ncn  
3/C=C/c2cccc3[nH]ccc23)cc1  
1391 C=CC(=O)OC.CCC(CC)(c1ccc(OC)c(C)c1)c1cc(C)c(Br)s1>>CCC(CC)(c1ccc(OC)c(C)c1)c1cc(C)c(/C  
=C/C(=O)OC)s1  
1392 Br1ccc(-c2nc3cccc3n2)cc1.C=CCn1c(-c2ccc(OCC)cc2)nc2cccc2c1=O>>CCOc1ccc(-  
c2nc3cccc3c(=O)n2C/C=C/c2ccc(-c3enc4cccc4n3)cc2)cc1  
1393 C=CC(=O)OC.C[C@H]1CC[C@H]2COCC2=C1Br>>COC(=O)/C=C/C1=C2COC[C@@H]2CC[C@  
@H]1C  
1394 C=Cc1cc(C(=O)OCC)n[nH]1.CC(C)(C)C(=O)Nc1nc(O)c2cc(Br)cnc2n1>>CCOC(=O)c1cc(/C=C/c2cn  
c3nc(NC(=O)C(C)(C)C)nc(O)c3c2)[nH]n1  
1395 C=CC(=O)OC(C)(C)C.CC1(C)COc2cc(Br)cnc2NC1=O>>CC(C)(C)OC(=O)/C=C/c1cnc2c(c1)OCC(C)  
(C)C(=O)N2  
C=Cc1nc2c(N)ncnc2n1[C@H]1C[C@H](O[Si](C)(C)C(C)(C)C)[C@@H](CO[Si](C)(C)C(C)(C)C)O1.  
1396 Ic1cccc1>>CC(C)(C)[Si](C)(C)OC[C@H]1O[C@@H](n2c(/C=C/c3cccc3)nc3c(N)ncnc32)[C@@  
H]1O[Si](C)(C)C(C)(C)C  
1397 C=CC(=O)OCCCC.Cc1cccc(C)c1I>>CCCCOC(=O)/C=C/c1c(C)cccc1C  
1398 C=CC(=O)OCC.CC(C)(C)OC(=O)c1cc([N+](=O)[O-])ccc1Br>>CCOC(=O)/C=C/c1ccc([N+](=O)[O-]  
)cc1C(=O)OC(C)(C)C  
1399 C=CCNC(=O)OC(C)(C)C.FC(F)(F)c1cccc(Br)c1>>C=C(CNC(=O)OC(C)(C)C)c1cccc(C(F)(F)F)c1  
1400 C=CC(=O)OC.Cc1cnc(Br)c1>>COC(=O)/C=C/c1cnc(C)c1  
1401 C=C[Si](CC)(CC)CC.N#Cc1ccc(Br)cc1>>CC[Si](/C=C/c1ccc(C#N)cc1)(CC)CC  
1402 C=CC(=O)OC(C)(C)C.Oc1ccc(Br)cc1>>CC(C)(C)OC(=O)/C=C/c1ccc(O)cc1  
1403 C=CC(=O)N(C)C.CN(C)c1ccc2cc(Br)ccc2c1>>CN(C)C(=O)/C=C/c1ccc2cc(N(C)C)ccc2c1  
1404 C=CC(=O)OCC.NC(=O)c1cccc(I)c1>>CCOC(=O)/C=C/c1cccc(C(N)=O)c1  
1405 C=CC(=O)OC.CC(=O)Oc1ccc(Br)c(OC(C)=O)c1>>COC(=O)/C=C/c1ccc(OC(C)=O)cc1OC(C)=O  
1406 C=Cc1cnc2cccc12.CCCCCCCCCCNc1ccc(Br)c(C(F)(F)F)c1>>CCCCCCCCCNc1ccc(/C=C/c2ccn  
c3cccc23)c(C(F)(F)F)c1  
1407 C=Cc1ccc(C(C)(C)C)cc1.Cc1ccc(Br)cc1>>Cc1ccc(/C=C/c2ccc(C(C)(C)C)cc2)cc1  
1408 C=Cc1ccc([N+](=O)[O-])cc1.Ic1cccc1>>O=[N+](O-)]c1ccc(/C=C/c2cccc2)cc1  
1409 BrC1CCCCC1.C=Cc1ccc(C(=O)N(Cc2cccc2)Cc2cccc2)cc1>>O=C(c1ccc(/C=C/C2CCCCC2)cc1)N(  
Cc1cccc1)Cc1cccc1  
1410 Br1cncnc1.C=CC(=O)OC>>COC(=O)/C=C/c1cncnc1  
1411 C=Cc1cccc1.Nc1ccc(F)cc1Br>>Nc1ccc(F)cc1/C=C/c1cccc1  
1412 C=Cc1cccc(CN2CCN(C(C)=O)CC2)n1.Cc1c(Nc2c(I)cncc2C#N)ccc2[nH]ccc12>>CC(=O)N1CCN(Cc  
2cccc(/C=C/c3cncc(C#N)c3Nc3ccc4[nH]ccc4c3C)n2)CC1  
1413 C=CC#N.Nc1ccc(Br)c2c1COC2>>N#C/C=C/c1ccc(N)c2c1COC2  
Br1ccc(I)cc1.C=C[C@@H](C)[C@H]1CC[C@H]2[C@@H]3CC(=O)[C@H]4C[C@H](O)CC[C@]4  
1414 (C)[C@H]3CC[C@@]21C>>C[C@H](/C=C/c1ccc(Br)cc1)[C@H]1CC[C@H]2[C@@H]3CC(=O)[C  
@H]4C[C@H](O)CC[C@]4(C)[C@H]3CC[C@@]21C  
1415 C=CCCCC(=O)OC.Cc1cccc1OS(=O)(=O)C(F)(F)F>>C=C(CCCC(=O)OC)c1cccc1C  
1416 C=Cc1ccc2cccc2c1.FC(F)(F)C(F)(F)C(F)(F)C(F)(F)C(F)(F)C(F)(F)Br>>FC(F)(F)C(F)(F)C(F)(F)C(F)  
(F)C(F)(F)C(F)(F)/C=C/c1ccc2cccc2c1  
1417 C=CC(=O)N(C)C.CC1(C)c2cc(C(O)(C(F)(F)F)C(F)(F)F)ccc2NC2c3cc(I)ccc3OCC21>>CN(C)C(=O)/  
C=C/c1ccc2c(c1)C1Nc3ccc(C(O)(C(F)(F)F)C(F)(F)F)cc3C(C)(C)C1CO2  
1418 C=CC(=O)OCCCC.Ic1ccnc1>>CCCCOC(=O)/C=C/c1ccnc1  
1419 C=Cc1cnc(C#N)c1.Cc1cc(Br)cc(C)c1I>>Cc1cc(Br)cc(C)c1/C=C/c1cnc(C#N)c1  
1420 C=CC(=O)OCC.O=C(O)c1ccc(Br)cc1>>CCOC(=O)/C=C/c1ccc(C(=O)O)cc1  
1421 C=CCN1C(=O)c2cccc2C1=O.COc1ccc(Br)cc1>>COc1ccc(/C=C/CN2C(=O)c3cccc3C2=O)cc1  
1422 C=CC(N)=O.Ic1ccc2c(c1)OCCOCCOCCOCCO2>>NC(=O)/C=C/c1ccc2c(c1)OCCOCCOCCOCCO2  
1423 C=C.ClCc1cc2cccc2o1>>C=CCc1cc2cccc2o1  
1424 C=CC(=O)OC.CN1CCc2c(c3cccc3n2Cc2ccc(Br)cc2)C1>>COC(=O)/C=C/c1ccc(Cn2c3c(c4cccc42)  
CN(C)CC3)cc1  
1425 C=CC(=O)Nc1cccc1NC(=O)OC(C)(C)C.COC(=O)C(CC1CCN(C)CC1)c1ccc(Br)cc1>>COC(=O)C(C  
C1CCN(C)CC1)c1ccc(/C=C/C(=O)Nc2cccc2NC(=O)OC(C)(C)C)cc1  
1426 C=CC(=O)OCC.COc1ccc(Br)c(CC2CCC(=O)N(Cc3cccc3)C2)c1>>CCOC(=O)/C=C/c1ccc(OC)cc1C  
C1CCC(=O)N(Cc2cccc2)C1  
1427 C=CC(=O)OC.CCCc1ccc(N2CCc3cc(OC)ccc3C2(C)c2ccc(Br)cc2)cc1Cl>>CCCc1ccc(N2CCc3cc(OC)  
ccc3C2(C)c2ccc(/C=C/C(=O)OC)cc2)cc1Cl

C=CC(C)(C)O.CC(C)(C)OC(=O)N1CCC[C@H](Nc2ncc(C(F)(F)F)c(-  
1428 c3cn(S(=O)(=O)c4cccc4)c4cc(Br)ccc34)n2)C1>>CC(C)(O)/C=C/c1ccc2c(-  
c3nc(N[C@H]4CCCN(C(=O)OC(C)(C)C4)ncc3C(F)(F)F)en(S(=O)(=O)c3cccc3)c2c1  
1429 C=CC(=O)OCCCC.O=C(c1ccc(Br)cc1)N1CCCC1>>CCCCOC(=O)/C=C/c1ccc(C(=O)N2CCCC2)cc1  
1430 C=CC(=O)OCCCCC.CN1C(=O)c2ccc(Cl)cc2[C@@](C)(CC#N)[C@H]1c1cccc1>>CCCCCOC(=O)/C=C/c1ccc2c(c1)[C@@](C)(CC#N)[C@@H](c1cccc1)N(C)C2=O  
1431 C=CC(=O)OC.CC(C)(C)OC(=O)CCc1ccc(CN(C(=O)C2CCCC2)c2cccc(Br)c2)cc1>>COC(=O)/C=C/c1cccc(N(Cc2ccc(CCC(=O)OC(C)(C)C)cc2)C(=O)C2CCCC2)c1  
1432 C=CC#N.Fc1c(Cl)cccc1Br>>N#C/C=C/c1cccc(Cl)c1F  
1433 C=CS(=O)(=O)F.Cc1cc(I)ccc1Br>>Cc1cc(/C=C/S(=O)(=O)F)ccc1Br  
1434 C=CCCCC.CC(C)(C)OC(=O)Nc1cccc(OS(=O)(=O)C(F)(F)F)c1>>C=C(CCCCC)c1cccc(NC(=O)OC(C)(C)C)c1  
1435 Br1ccc(N2CCOCC2)c2cccc12.C=CC(=O)OCc1cccc1>>O=C(/C=C/c1ccc(N2CCOCC2)c2cccc12)OCc1cccc1  
1436 C=Cc1ccc(C(=O)OC)cc1.CCCCC(Br)C(F)(F)F>>CCCCC(/C=C/c1ccc(C(=O)OC)cc1)C(F)(F)F  
1437 C=C[Si](CC)(CC)CC.FC(F)(F)c1ccc(Br)cc1>>CC[Si](/C=C/c1ccc(C(F)(F)F)cc1)(CC)CC  
1438 C=CC(C)(C)O.CN(C)C(=O)c1cccc2nc3c(Br)cccc3nc12>>CN(C)C(=O)c1cccc2nc3c(/C=C/C(C)(C)O)c3cc3nc12  
1439 C=CC(=O)OCC.Nc1cc2ccc(Br)cc2cn1>>CCOC(=O)/C=C/c1ccc2cc(N)ncc2c1  
1440 C=Cc1cccc1.O=[N+][O-]c1ccc(Br)cc1>>O=[N+][O-]c1ccc(/C=C/c2cccc2)cc1  
1441 C=C1C[C@H]2[C@@H]3CCc4cc(OC)ccc4[C@H]3CC[C@]2(C)C1=O.O=[N+][O-]c1ccc(Br)cc1>>COc1ccc2c(c1)CC[C@H]1[C@@H]2CC[C@]2(C)C(=O)/C=C/c3ccc([N+](=O)[O-])cc3)C[C@@H]12  
1442 C=CCOCC.COC(=O)/C=C/c1cccc(N(Cc2ccc(Br)cc2)C(=O)C2CCCC2)c1>>CCOC/C=C/c1ccc(CN(C(=O)C2CCCC2)c2cccc(/C=C/C(=O)OC)c2)cc1  
1443 C=Cc1cccc1.O=S(=O)(c1cccc1)C(F)(F)Br>>O=S(=O)(c1cccc1)C(F)(F)/C=C/c1cccc1  
1444 C=CC(=O)O.O=S(=O)(Nc1ccc(I)cn1)c1ccc(-c2cccc2)cc1>>O=C(O)/C=C/c1ccc(NS(=O)(=O)c2ccc(-c3cccc3)cc2)nc1  
1445 C=CC(=O)OCC.Cc1ccc(-c2nc3ccc(/N=N/c4ccc([N+](=O)[O-])cc4)cc3c(-c3cccc3)c2I)cc1>>CCOC(=O)/C=C/c1c(-c2ccc(C)cc2)nc2ccc(/N=N/c3ccc([N+](=O)[O-])cc3)cc2c1-c1cccc1  
1446 C=C[C@H](C(=O)N1C(=O)OC(C)(C)[C@@H]1C(C)C)[C@H](O[Si](C)(C)C(C)(C)C)c1ccc(OS(=O)(=O)c2ccc(C)cc2)cc1.Cc1ccc(S(=O)(=O)Oc2ccc(I)cc2)cc1>>Cc1ccc(S(=O)(=O)Oc2ccc(/C=C/[C@H](C(=O)N3C(=O)OC(C)(C)[C@@H]3C(C)C)[C@H](O[Si](C)(C)C(C)(C)C)c3ccc(OS(=O)(=O)c4ccc(C)cc4)cc3)cc2)cc1  
1447 C=CC(=O)OC(C)(C)C.COc1cc(N(C)Cc2ccc(Br)cc2)cc(OC)c1OC>>COc1cc(N(C)Cc2ccc(/C=C/C(=O)OC(C)(C)C)cc2)cc(OC)c1OC  
1448 C=CC(=O)NCc1ccc(F)cc1F.COc1ccc2c(=O)c(I)coc2c1>>COc1ccc2c(=O)c(/C=C/C(=O)NCc3ccc(F)cc3F)coc2c1  
1449 C=Cc1ccc(N(c2cccc2)c2cccc3cccc23)cc1.O=Cc1ccc(Br)cc1>>O=Cc1ccc(/C=C/c2ccc(N(c3cccc3)c3cccc4cccc34)cc2)cc1  
1450 C=C(C)C(=O)OC.CC(=S)NS(=O)(=O)c1ccc(Br)cc1>>COC(=O)/C(C)=C/c1ccc(S(=O)(=O)NC(C)=S)c  
1451 C=CC(=O)OCCCC.COc1ccc(I)cc1>>CCCCOC(=O)/C=C/c1ccc(OC)cc1  
1452 Br1cccn1.C=Cc1ccc(C(=O)O)cc1>>O=C(O)c1ccc(/C=C/c2ccnc2)cc1  
1453 C=Cc1cccc1.Ic1cccc2cc3c(nc12)-c1c(ccc2cccc12)CC3>>C(=C/c1cccc2cc3c(nc12)-c1c(ccc2cccc12)CC3)\c1cccc1  
1454 C=CC(OCC)OCC.CN1c2cccc2Sc2cc(Br)ccc21>>CCOC(/C=C/c1ccc2c(c1)Sc1cccc1N2C)OCC  
1455 C=Cc1ccc2c(c1)Sc1cccc1N2CCCCCCCC.O=Cc1ccc(I)cc1>>CCCCCCCCN1c2cccc2Sc2cc(/C=C/c3ccc(C=O)cc3)ccc21  
1456 C=CCNC(=O)OC(C)(C)C.Clc1ccc2cccc2c1>>C=C(CNC(=O)OC(C)(C)C)c1ccc2cccc2c1  
1457 C=C1N=C(c2cccc2)[C@H](C(C)C)N(C(=O)OC(C)(C)C)C1=O.COc1ccc(I)cc1>>COc1ccc(/C=C2\N=C(c3cccc3)[C@H](C(C)C)N(C(=O)OC(C)(C)C)C2=O)cc1  
1458 C=CC(=O)OC.COC(=O)c1ccc(Br)o1>>COC(=O)/C=C/c1ccc(C(=O)OC)o1  
1459 C=C.Fc1cc(Br)ccc1-c1cccc1>>C=Cc1ccc(-c2cccc2)c(F)c1  
1460 C=CC(C)(O)CCC=C(C)C.CC(C)(C)c1ccc(Br)cc1>>CC(C)=CCCC(C)(O)/C=C/c1ccc(C(C)(C)C)cc1  
1461 C=Cc1ccc(OC)cc1.Cn1c(/C=C/c2cccc2)c(I)c(=O)c2cccc21>>COc1ccc(/C=C/c2c(/C=C/c3cccc3)n(C)c3cccc3c2=O)cc1  
1462 C=CC(=O)OC.CC(C)(C)OC(=O)N1CCN(c2cccc3cc(I)cn23)CC1>>COC(=O)/C=C/c1cnc2c(N3CCN(C(=O)OC(C)(C)C)CC3)cccc2c1  
1463 C=CC(=O)OC.CC(C)=CBr>>COC(=O)/C=C/C=C(C)C  
1464 C=CC(O)C(F)(F)C(F)(F)F.Ic1cccc1>>OC(/C=C/c1cccc1)C(F)(F)C(F)(F)F

1465 C=CC(=O)N1N=Cc2ccccc2C1CCC(F)(F)F.COc1cc(Cc2cnc(N)nc2N)cc(I)c1OC>>COc1cc(Cc2cnc(N)nc2N)cc(/C=C/C(=O)N2N=Cc3ccccc3C2CCC(F)(F)F)c1OC  
C=Cc1cn(COCC[Si](C)(C)C)nc1-

1466 c1nc2ccc(OC)cc2n1COCC[Si](C)(C)C.COc1cncc(Br)c1>>COc1cncc(/C=C/c2cn(COCC[Si](C)(C)C)nc2-c2nc3ccc(OC)cc3n2COCC[Si](C)(C)C)c1

1467 C=CC(CC)OC(C)=O.Ic1cccc1>>CCC(/C=C/c1cccc1)OC(C)=O

1468 C=CC(=O)OCC.O=C1C(O)=C(I)C(=O)c2ccccc21>>CCOC(=O)/C=C/C1=C(O)C(=O)c2ccccc2C1=O

1469 C=CC=O.Clc1ccc(I)cc1>>O=C/C=C/c1ccc(Cl)cc1

1470 C=Cc1ccc(N2CCN(C(=O)OC(C)(C)C)CC2)cc1.Fc1cc(Br)cc(Cn2ccnc2)c1>>CC(C)(C)OC(=O)N1CCN(c2ccc(/C=C/c3cc(F)cc(Cn4ccnc4)c3)cc2)CC1

1471 C=Cc1cccc1.Cc1ccc(S(=O)(=O)C2ccccc2I)cc1>>Cc1ccc(S(=O)(=O)C2ccccc2/C=C/c2ccccc2)cc1

1472 C=CC(F)(F)C(F)(F)C(F)(F)C(F)(F)C(F)(F)F.COc1ccc(Br)cc1>>COc1ccc(/C=C/C(F)(F)C(F)(F)C(F)(F)C(F)(F)C(F)(F)C(F)(F)F)cc1

1473 C=Cc1cccc1.CCOC(=O)c1ccc(I)cc1>>CCOC(=O)c1ccc(/C=C/c2ccccc2)cc1

1474 C=CC(=O)OC(C)(C)C.COc1cc(C(=O)c2cn(S(=O)(=O)c3cccc(Br)c3)c3ccccc23)cc(OC)c1OC>>COc1cc(C(=O)c2cn(S(=O)(=O)c3cccc(/C=C/C(=O)OC(C)(C)C)c3)c3ccccc23)cc(OC)c1OC

1475 C=C.O=Cc1ccc(Br)cc1>>C=Cc1ccc(C=O)cc1

1476 C=CC(CC)OC1CCCCO1.COC(=O)CCCCCCCC1=C(I)CCC1=O>>CCC(/C=C/C1=C(CCCCCCCC(=O)OC)C(=O)CC1)OC1CCCCO1

1477 C=CC(C)=O.IC1=CO[C@H](COCc2ccccc2)[C@H](OCc2ccccc2)[C@@H]1OCc1cccc1>>CC(=O)/C=C/C1=CO[C@H](COCc2ccccc2)[C@H](OCc2ccccc2)[C@@H]1OCc1cccc1

1478 C=Cc1cccc1.Fc1cc(Br)cc(F)c1F>>Fc1cc(/C=C/c2ccccc2)cc(F)c1F  
Br1cccc2ccccc12.C=Cc1nc2c(N)ncnc2n1[C@@H]1O[C@H](CO[Si](C)(C)C(C)(C)C)[C@@H](O[Si](C)(C)C(C)(C)C)[C@H]1O[Si](C)(C)C(C)(C)C>>CC(C)(C)[Si](C)(C)OC[C@H]1O[C@@H](n2c(/C=C/c3cccc4ccccc34)nc3c(N)ncnc32)[C@H](O[Si](C)(C)C(C)(C)C)[C@@H]1O[Si](C)(C)C(C)(C)C

1479 C=CC(=O)OC(C)(C)C.CCCCc1ccc(C=O)c(Br)n1>>CCCCc1ccc(C=O)c(/C=C/C(=O)OC(C)(C)C)n1

1480 C=CC(=O)OC(C)(C)C.Nc1ccc(I)cc1Br>>CC(C)(C)OC(=O)/C=C/c1ccc(N)c(Br)c1

1481 C=CC=O.FC1(F)C(I)=C1c1cccc1>>O=C/C=C/C1=C(c2ccccc2)C1(F)F

1482 C=CC(=O)OC.CNc1ncc(I)cc1C(=O)OC(C)(C)C>>CNc1ncc(/C=C/C(=O)OC)cc1C(=O)OC(C)(C)C

1483 C=Cc1ccc2ccccc2c1.COc1cc(C=O)c(Br)c(OC)c1OC>>COc1cc(C=O)c(/C=C/c2ccc3ccccc3c2)c(OC)c1

1484 C=CC[Si](C)(C)C.Fc1ccc(Br)cc1>>C=C(C[Si](C)(C)C)c1ccc(F)cc1

1485 C=Cc1cccc1NC(=O)C(F)(F)F.CC(C)(C)[Si](C)(C)OC[C@H]1O[C@@H](c2ccc(Br)cc2)C[C@@H]1O[Si](C)(C)C(C)(C)C>>CC(C)(C)[Si](C)(C)OC[C@H]1O[C@@H](c2ccc(/C=C/c3ccccc3NC(=O)C(F)(F)F)cc2)C[C@@H]1O[Si](C)(C)C(C)(C)C

1486 C=CC(=O)OCC.CCOC(=O)CCOCc1cccc1Br>>CCOC(=O)/C=C/c1cccc1COCCC(=O)OCC

1487 C=CC(=O)OCc1cccc1.COC(=O)c1cc2c(Br)c(OC)ccc2[nH]1>>COC(=O)c1cc2c(/C=C/C(=O)OCc3ccccc3)c(OC)ccc2[nH]1

1488 C=CC(=O)OCCCC.Cc1cc(C)cc(Br)c1>>CCCCOC(=O)/C=C/c1cc(C)cc(C)c1

1489 C=CC(=O)N1C(=O)OC[C@H]1c1cccc1.FC(F)(F)c1cncc(Br)c1>>O=C(/C=C/c1cncc(C(F)(F)F)c1)N1C(=O)OC[C@H]1c1cccc1

1490 C=Cc1ccc(O)cc1.Nc1ccc(Br)cc1>>Nc1ccc(/C=C/c2ccc(O)cc2)cc1

1491 C=CC(=O)O.O=S(=O)(Nc1ccc(I)cc1)c1ccc(OC(F)(F)F)cc1>>O=C(O)/C=C/c1ccc(NS(=O)(=O)c2ccc(OC(F)(F)F)cc2)cc1

1492 C=Cc1cccc(Cl)c1.CC(=O)Nc1ccc(Br)cc1>>CC(=O)Nc1ccc(/C=C/c2cccc(Cl)c2)cc1

1493 C=CNC(C)=O.CCOC(=O)c1sc2nc(C)ccc(C)c2c1Br>>CCOC(=O)c1sc2nc(C)ccc(C)c2c1/C=C/NC(C)=O

1494 C=CCCN1C(=O)c2ccccc2C1=O.Ic1ccc(C2OCCO2)cc1>>O=C1c2ccccc2C(=O)N1CC/C=C/c1ccc(C2OCCO2)cc1

1495 C=Cc1cccc1.Cc1nc(Br)c(-c2ccccc2)n(Cc2ccccc2)c1=O>>Cc1nc(/C=C/c2ccccc2)c(-c2ccccc2)n(Cc2ccccc2)c1=O

1496 Br1enc2ccccc2c1.C=CC=O>>O=C/C=C/c1enc2ccccc2c1

1497 C=C.CC(=O)c1ccc(I)cc1>>C=Cc1ccc(C(C)=O)cc1

1498 C=CC(=O)OCC.OCc1ccc(I)c(OCc2ccc3ccccc3e2)c1>>CCOC(=O)/C=C/c1ccc(CO)cc1OCCc1ccc2ccccc2c1

1499 C=CC(=O)OCC.Oc1ccc(C(=C2CCCCC2)c2ccc(Br)cc2)cc1F>>CCOC(=O)/C=C/c1ccc(C(=C2CCCCC2)c2ccc(O)c(F)c2)cc1

1500 C=CC(=O)OC(C)(C)C.FC(F)(F)c1cc(Br)ccc1Cl>>CC(C)(C)OC(=O)/C=C/c1ccc(Cl)c(C(F)(F)F)c1

1501 C=Cc1cc(OC(C)=O)cc(OC(C)=O)c1.CC(=O)Oc1ccc(I)cc1>>CC(=O)Oc1ccc(/C=C/c2cc(OC(C)=O)cc(OC(C)=O)c2)cc1

1502 C=Cc1cccc1.IC1CCCC12OCCO2>>C(=C/C1CCCC12OCCO2)\c1cccc1

1503 C=Cc1ccc(OC)cc1.N#Cc1cc2sc3ccccc3c2c2cc(Br)ccc12>>COc1ccc(/C=C/c2ccc3c(C#N)cc4sc5ccccc5c4c3c2)cc1

1504

1505 C=Cc1ccc2ccccc2n1.CN1C(=O)CC[C@]2(C)c3ccc(Br)cc3CC[C@@H]12>>CN1C(=O)CC[C@]2(C)c  
3ccc(/C=C/c4ccc5ccccc5n4)cc3CC[C@@H]12  
1506 Br1ccc2ccc3ccccc4ccc1c2c34.C=Cc1ccc(OC(C)(C)C)cc1>>CC(C)(C)Oc1ccc(/C=C/c2ccc3ccc4ccccc5c  
cc2c3c45)cc1  
1507 C=Cc1ccccc1.CC(C)(C)OC(=O)N[C@H](COc1cncc(Br)c1)Cc1c[nH]c2ccccc12>>CC(C)(C)OC(=O)N  
[C@H](COc1cncc(/C=C/c2ccccc2)c1)Cc1c[nH]c2ccccc12  
1508 C=CC(=O)OC.Cc1ccc(S(=O)(=O)NCCC(Br)=C(c2ccccc2)c2ccccc2)cc1>>COC(=O)/C=C/C(CCNS(=O)  
(=O)c1ccc(C)cc1)=C(c1ccccc1)c1ccccc1  
1509 C=CC(=O)OCC.COCC(=O)c1cc(I)c2c(c1)C[C@]1(O2)[C@H](C)CC[C@H](OC(C)=O)C1(C)C>>CCO  
C(=O)/C=C/c1cc(C(=O)OC)cc2c1O[C@]1(C2)[C@H](C)CC[C@H](OC(C)=O)C1(C)C  
1510 C=Cc1ccc(C=C)cc1.O=Cc1ccc(Br)cc1>>C=Cc1ccc(/C=C/c2ccc(C=O)cc2)cc1  
1511 C=CC(=O)OC(C)(C)C.COCC(=O)c1cc(Br)cc2ccccc12>>COC(=O)c1cc(/C=C/C(=O)OC(C)(C)C)cc2ccc  
cc12  
1512 C=Cc1nnn(C)n1.Cc1ccc(I)cc1>>Cc1ccc(/C=C/c2nnn(C)n2)cc1  
1513 C=CC(=O)NCCc1ccc(O)cc1.Oc1ccc(I)cc1>>O=C(/C=C/c1ccc(O)cc1)NCCc1ccc(O)cc1  
1514 Br1csc2ccccc12.C=CP(=O)(OCC)OCC>>CCOP(=O)/C=C/c1csc2ccccc12)OCC  
1515 C=CNC(C)=O.CCOC(=O)c1sc2nnc(C)c(C)c2c1Br>>CCOC(=O)c1sc2nnc(C)c(C)c2c1/C=C/NC(C)=O  
1516 C=C1C(=O)O[C@H]2[C@H]1CC/C(C)=C/CC[C@]1(C)O[C@H]21.Ic1cccs1>>C/C1=C\CC[C@  
@]2(C)O[C@H]2[C@H]2OC(=O)/C=C/c3cccs3)[C@H]2CC1  
1517 C=CC(=O)OC.CCCn1cnc2c(NCc3ccccc(Br)c3)nc(N3CCN(C)CC3)nc21>>CCCN1cnc2c(NCc3ccccc(/  
C=C/C(=O)OC)c3)nc(N3CCN(C)CC3)nc21  
1518 C=CCNC(=O)OC(C)(C)C.Clc1cnc2ccccc2c1>>C=C(CNC(=O)OC(C)(C)C)c1cnc2ccccc2c1  
1519 C=CC(=O)OCC.Fc1ccccc1I>>CCOC(=O)/C=C/c1ccccc1F  
1520 C=CC(=O)OC(C(F)(F)F)C(F)(F)F.Ic1ccccc1>>O=C(/C=C/c1ccccc1)OC(C(F)(F)F)C(F)(F)F  
1521 Br1cccn1.C=CC[C@H](C)O>>C[C@H](O)C/C=C/c1cccn1  
1522 C=C[Si](C)(C)C.CC1(C)OC(=O)c2c(cccc2OS(=O)(=O)C(F)(F)F)O1>>CC1(C)OC(=O)c2c(/C=C/[Si](  
C)(C)C)cccc2O1  
1523 C=Cc1ccc(F)cc1.O=C(O)c1ccc(Br)cc1>>O=C(O)c1ccc(/C=C/c2ccc(F)cc2)cc1  
1524 C=Cc1cc(OC)c(OC)c(OC)c1.O=[N+][O-]c1ccc(I)cc1>>COc1cc(/C=C/c2ccc([N+](=O)[O-]  
)cc2)cc(OC)c1OC  
1525 C=CC(=O)N1N=Cc2ccccc2C1CCC.COc1cc(C(=O)c2cnc(N)nc2N)cc(I)c1OC>>CCCC1c2ccccc2C=N  
N1C(=O)/C=C/c1cc(C(=O)c2cnc(N)nc2N)cc(OC)c1OC  
1526 C=Cc1ccc(OC)cc1.Fc1ccc(Br)cc1>>COc1ccc(/C=C/c2ccc(F)cc2)cc1  
1527 C=Cc1nnn(-c2ccccc2)n1.Ic1ccccc1>>C(=C/c1nnn(-c2ccccc2)n1)\c1ccccc1  
1528 C=Cc1ccc(C)cc1.CS(=O)(=O)c1ccc(Br)cc1>>Cc1ccc(/C=C/c2ccc(S(C)(=O)=O)cc2)cc1  
1529 C=CC(=O)OCCCC.Cc1ccc2c(Br)nn(C)c2c1>>CCCCOC(=O)/C=C/c1nn(C)c2cc(C)ccc12  
1530 C=CC(=O)OCC.CCn1nnc2c(C)c(Br)ccc21>>CCOC(=O)/C=C/c1ccc2c(nnn2CC)c1C  
Br1cncn1.C=CCO[C@H]1CC(=O)O[C@H](C)C/C=C/C=C/[C@H](O[Si](C)(C)C)(C)C)[C@H]  
(C)C[C@H](CC(OC)OC)[C@H](O[C@H]2O[C@H](C)[C@H](O[C@H]3C[C@@](C)(O)[C@@  
H](OC(=O)CC)[C@H](C)O3)[C@H](N(C)C)[C@H]2OC(C)=O)[C@H]1OC>>CCC(=O)O[C@H]1[C  
@H](C)O[C@@H](O[C@H]2[C@H](N(C)C)[C@@H](OC(C)=O)[C@H](O[C@@H]3[C@@H](OC)  
[C@H](OC/C=C/c4cnnc4)CC(=O)O[C@H](C)C/C=C/C=C/[C@H](O[Si](C)(C)C)(C)C)[C@H](C)  
C/C@@H]3CC(OC)OC)[C@H]2C/C@@H]1C)O  
1532 C=CC(=O)OCC.COc1cc(/C=C/c2ccc(Br)cc2)cc(OC)c1OC>>CCOC(=O)/C=C/c1ccc(/C=C/c2cc(OC)c(  
OC)c(OC)c2)cc1  
1533 C=Cc1cc(OC)cc(OC)c1.Clc1ccc(I)cc1>>COc1cc(/C=C/c2ccc(Cl)cc2)cc(OC)c1  
1534 C=Cc1ccccc1.Ic1ccc2[nH]c3ccccc3c2c1>>C(=C/c1ccc2[nH]c3ccccc3c2c1)\c1ccccc1  
1535 C=CCNC(=O)OC(C)(C)C.CC(=O)c1ccc(Cl)cc1>>C=C(CNC(=O)OC(C)(C)C)c1ccc(C(C)=O)cc1  
1536 C=CC(=O)OC.Cn1c(=O)n(CC2COC(C)(C)O2)c(=O)c2ccc(Br)cc21>>COC(=O)/C=C/c1ccc2c(=O)n(C  
C3COC(C)(C)O3)c(=O)n(C)c2c1  
1537 C=Cc1ccccc1.FC(F)(F)c1ccc(Br)cc1>>FC(F)(F)c1ccc(/C=C/c2ccccc2)cc1  
1538 C=Cc1cc(OCCC)c(OCCC)c(OCCC)c1.O=C1c2ccccc2C(=O)N1c1ccc(I)cc1>>CCCOc1cc(/C=C/c2ccc(  
N3C(=O)c4ccccc4C3=O)cc2)cc(OCCC)c1OCCC  
1539 Br1ccc(-c2ccccc2)cc1.C=Cc1ccccc1>>C(=C/c1ccc(-c2ccccc2)cc1)\c1ccccc1  
1540 C=CC(=O)OC.O=C(NCc1ccc(F)cc1F)c1c(NCCO)c2cc(Br)enc2n(OCc2ccccc2)c1=O>>COC(=O)/C=C  
/c1cnc2c(c1)c(NCCO)c(C(=O)NCc1ccc(F)cc1F)c(=O)n2OCc1ccccc1  
1541 C=CC(=O)OC(C)(C)C.COCC(OC)c1cc2c(cc1Br)OCO2>>COC(OC)c1cc2c(cc1/C=C/C(=O)OC(C)(C)C  
)OCO2  
1542 C=CCC(=O)OCC(C)C.COc1cc(Br)c(OC)c2ccccc12>>COc1cc(/C=C/CC(=O)OCC(C)C)c(OC)c2ccccc  
1543 C=CC(=O)c1ccccc1.O=C1C=C(Br)CCC1>>O=C1C=C(/C=C/C(=O)c2ccccc2)CCC1  
1544 C=COCCCC.Cc1ccc(Cl)c1>>C=C(OCCCC)c1ccc(C)c1

C=CC(C)(C)O=Cc1cccc1Br>>CC(C)(C)/C=C/c1cccc1C=O  
C=Cc1cccc1.N#Cc1ccc(Br)cc1>>N#Cc1ccc(/C=C/c2cccc2)cc1  
C=CC(=O)NCCCN(CCCCNC(=O)OC(C)(C)C(=O)OC(C)(C)C.O=C(O)CC[C@ @]12CCCC(=O)C[C  
@ @H]1Oc1ccc(Br)cc12>>CC(C)(C)OC(=O)NCCCCN(CCCNC(=O)/C=C/c1ccc2c(c1)[C@]1(CCC(=  
O)O)CCC(=O)C[C@ @H]1O2)C(=O)OC(C)(C)C  
C=CC(=O)OCC.Oc1c(F)cc(Br)cc1F>>CCOC(=O)/C=C/c1cc(F)c(O)c(F)c1  
C=Cc1ccc(C=O)cc1.CCc1cc(I)ccc1/N=N/N(CC)CC>>CCc1cc(/C=C/c2ccc(C=O)cc2)ccc1/N=N/N(CC  
C=Cc1cccc1.COC(=O)c1cccc1Br>>COC(=O)c1cccc1/C=C/c1cccc1  
C=CC(=O)OCC.O=C(Nc1cccc1Cl)c1ccc(Br)o1>>CCOC(=O)/C=C/c1ccc(C(=O)Nc2cccc2Cl)o1  
C=C[C@ @H](CO[Si](c1cccc1)(c1cccc1)C(C)(C)C)NS(C)(=O)=O.CC(=O)Oc1ccc(Br)cc1>>CC(=O)  
)Oc1ccc(/C=C/[C@ @H](CO[Si](c2cccc2)(c2cccc2)C(C)(C)C)NS(C)(=O)=O)cc1  
C=CC(=O)OC.O=c1c(Cc2cccc2)c(-  
c2cccs2)oc2c(Cc3cccc3)cc(Cl)cc12>>COC(=O)/C=C/c1cc(Cc2cccc2)c2oc(-  
c3cccs3)c(Cc3cccc3)c(=O)c2c1  
C=CC(F)(F)C(F)(F)C(F)(F)C(F)(F)C(F)(F)C(F)(F)C(F)(F).FC(F)(F)c1ccc(Br)cc1>>FC(F)(F)  
c1ccc(/C=C/C(F)(F)C(F)(F)C(F)(F)C(F)(F)C(F)(F)C(F)(F)C(F)(F)C(F)(F)F)cc1  
C=C[C@H]1O[C@ @H](Sc2cccc2)[C@H](OCc2cccc2)[C@ @H](OCc2cccc2)[C@ @H]1OCc1ccc(  
OC)cc1.O=c1cc(-  
c2cccc2)oc2cc(Br)ccc12>>COc1ccc(CO[C@H]2[C@H](OCc3cccc3)[C@ @H](OCc3cccc3)[C@H]  
(Sc3cccc3)O[C@ @H]2/C=C/c2ccc3c(=O)cc(-c4cccc4)oc3c2)cc1  
C=Cc1ccc(OCCCCCCCCCCCC)cc1.Oc1ccc(I)cc1>>CCCCCCCCCCCCOc1ccc(/C=C/c2ccc(O)cc2)cc  
Brc1cccn1.C=Cc1cccc1OC>>COc1cccc1/C=C/c1cccn1  
C=CC(=O)OCC.COc1cc2ncnc(Nc3ccc(I)cc3)c2cc1OC>>CCOC(=O)/C=C/c1ccc(Nc2ncnc3cc(OC)c(O  
C)cc23)cc1  
C=CS(=O)(=O)NCc1ccc(OC)cc1.CC(C)(C)OC(=O)NCc1cccc1Br>>COc1ccc(CNS(=O)(=O)/C=C/c2  
cccc2CNC(=O)OC(C)(C)C)cc1  
C=CC(=O)OCC.Cc1nc(N)nc(NCc2cccc2)c1I>>CCOC(=O)/C=C/c1c(C)nc(N)nc1NCc1cccc1  
C=Cc1ccc(N(C)C)cc1.Cc1nc2cc(Br)ccc2nc1-c1cccc1>>Cc1nc2cc(/C=C/c3ccc(N(C)C)cc3)ccc2nc1-  
c1cccc1  
C=CCN(C(=O)OC(C)(C)C)C(=O)OC(C)(C)C.O=C(c1cccc(Br)c1)C1CCCC1>>CC(C)(C)OC(=O)N(  
C/C=C/c1cccc(C(=O)C2CCCC2)c1)C(=O)OC(C)(C)C  
C=CC(F)(F)C(F)(F)C(F)(F)C(F)(F)C(F)(F)C(F)(F)F.O=P(c1cccc1)(c1cccc1)c1ccc(Br)cc1>>O=P(c1  
cccc1)(c1cccc1)c1ccc(/C=C/C(F)(F)C(F)(F)C(F)(F)C(F)(F)C(F)(F)C(F)(F)F)cc1  
C=CC(N)=O.Ic1cccs1>>NC(=O)/C=C/c1cccs1  
C=Cc1ccncc1.O=C1c2cc(Br)ccc2-c2ccc(/C=C/c3ccncc3)cc21>>O=C1c2cc(/C=C/c3ccncc3)ccc2-  
c2ccc(/C=C/c3ccncc3)cc21  
C=Cc1encc(C#N)c1Nc1ccc2[nH]ccc2c1C.COc1cc(Br)ccc1CN1CCN(C)CC1>>COc1cc(/C=C/c2cncc(  
C#N)c2Nc2ccc3[nH]ccc3c2C)ccc1CN1CCN(C)CC1  
C=CCCCCCCCC(=O)OC.CCC1=C(I)CCC1=O>>CCC1=C(/C=C/CCCCCCCCC(=O)OC)CCC1=O  
Brc1cncc2cccc12.C=CCO[C@ @H]1CC(=O)O[C@H](C)C/C=C/C=C/[C@H](O[Si](C)(C)C(C)(C)C)  
[C@H](C)C[C@H](CC(OC)OC)[C@H](O[C@ @H]2O[C@H](C)[C@ @H](O[C@H]3C[C@ @](C)(O)  
[C@ @H](OC(=O)CC)[C@H](C)O3)[C@H](N(C)C)[C@H]2OC(C)=O)[C@H]1OC>>CCC(=O)O[C@  
H]1[C@H](C)O[C@ @H](O[C@H]2[C@H](N(C)C)[C@ @H](OC(C)=O)[C@H](O[C@ @H]3[C@ @  
H](OC)[C@H](OC/C=C/c4cncc5cccc45)CC(=O)O[C@H](C)C/C=C/C=C/[C@H](O[Si](C)(C)C(C)(C)  
(C)C)/C@H1(C)C/C@ @H13C(C)C(C)C(C)C@ @H12C(C)C(C)C@ @H1(C)C  
C=CC(=O)OCC.COc1ccc(-c2cc3c(Br)ccc(OC)c3o2)cc1OC>>CCOC(=O)/C=C/c1ccc(OC)c2oc(-  
c3ccc(OC)c(OC)c3)cc12  
C=Cc1cccc1.Cc1ccc(I)cc1>>Cc1ccc(/C=C/c2cccc2)cc1  
C=Cc1cccc1[N+](=O)[O-  
],O=C1C(O)=C(I)C(=O)c2cccc21>>O=C1C(O)=C(/C=C/c2cccc2[N+](=O)[O-])C(=O)c2cccc21  
C=CC=O.FC1(F)C(I)=C1c1ccc(Br)cc1>>O=C/C=C/C1=C(c2ccc(Br)cc2)C1(F)F  
C=Cc1cccc1.CCC(Br)CC>>CCC(/C=C/c1cccc1)CC  
C=CC#N.Cc1nc(Br)c(-c2cccc2)o1>>Cc1nc(/C=C/C#N)c(-c2cccc2)o1  
C=CC(=O)N(C)Cc1cccc(OC(F)(F)F)c1OCC.CC1(C)NCc2cc(Br)cncc2NC1=O>>CCOc1c(CN(C)C(=O)  
/C=C/c2enc3c(c2)CNC(C)(C)C(=O)N3)cccc1OC(F)(F)F  
C=CC(=O)OCC.CCOC(=O)c1nc2cc(F)c(Br)cn2c1I>>CCOC(=O)/C=C/c1c(C(=O)OCC)nc2cc(F)c(Br)  
Brc1cccn1.C=Cc1cccn1>>C(=C/c1cccn1)\c1cccn1  
C=Cc1ccc(OC)c(OC)c1.O=C(Nc1cccc1I)C1CCCC1>>COc1ccc(/C=C/c2cccc2NC(=O)C2CCCC2  
)cc1OC  
C=CC(C)=O.O=c1oc(Br)cc2cccc12>>CC(=O)/C=C/c1cc2cccc2c(=O)o1

1580 C=Cc1ccc(N(c2ccccc2)c2ccccc2)cc1.CCCCCCCCCCCCCCCCCn1c2ccc(I)cc2c2cc(C=O)ccc21>>CCC  
CCCCCCCCCCCCCCCCn1c2ccc(C=O)cc2c2cc(/C=C/c3ccc(N(c4ccccc4)c4ccccc4)cc3)ccc21  
1581 C=Cc1ccccc1.O=c1oc2ccccc2cc1Br>>O=c1oc2ccccc2cc1/C=C/c1ccccc1  
1582 C=COCCCC.CC(=O)c1ccc(Br)c2ccccc12>>C=C(OCCCC)c1ccc(C(C)=O)c2ccccc12  
1583 C=COCCCC.CC(C)(C)c1ccc(OS(=O)(=O)C(F)(F)F)cc1>>C=C(OCCCC)c1ccc(C(C)(C)C)cc1  
1584 C=Cc1ccc(C(=C(c2ccccc2)c2ccccc2)c2ccccc2)cc1.CCCCN1C(=O)c2cccc3c(Br)ccc(c23)C1=O>>CCC  
CN1C(=O)c2cccc3c(/C=C/c4ccc(C(=C(c5ccccc5)c5ccccc5)c5ccccc5)cc4)ccc(c23)C1=O  
1585 C=CC(=O)OC.[2H]C(=O)c1c(F)cc(Br)cc1F>>[2H]C(=O)c1c(F)cc(/C=C/C(=O)OC)cc1F  
1586 C=CC(=O)OC.IC(CC[Se]c1ccccc1)=C(c1ccccc1)c1ccccc1>>COC(=O)/C=C/C(CC[Se]c1ccccc1)=C(c1  
ccccc1)c1ccccc1  
1587 C=CC(C)(C)O.O=S(=O)(c1ccccc1)n1c2c(c3cc(Br)ccc31)CCC2>>CC(C)(O)/C=C/c1ccc2c(c1)c1c(n2S(  
=O)(=O)c2ccccc2)CCC1  
1588 C=CC(=O)O.O=S(=O)(Nc1ccc(I)cc1)c1ccccc1>>O=C(O)/C=C/c1ccc(NS(=O)(=O)c2ccccc2)cc1  
1589 C=CC=O.Ic1c(-c2ccccc2)nnn1Cc1ccccc1>>O=C/C=C/c1c(-c2ccccc2)nnn1Cc1ccccc1  
1590 C=Cc1ccc(OC)c(OC)c1.O=c1c(Br)c(-c2ccccc2)oc2ccccc12>>COc1ccc(/C=C/c2c(-  
c3ccccc3)oc3ccccc3c2=O)cc1OC  
1591 C=CC(=O)OC(C)(C)C.CC(=O)O[IH2](OC(C)=O)c1c(C)cc(C)cc1C>>Cc1cc(C)c(/C=C/C(=O)OC(C)(  
C)C)c(C)c1  
1592 C=CC(=O)OCCCC.Cc1ccc(Br)c(C)c1>>CCCCOC(=O)/C=C/c1ccc(C)cc1C  
1593 C=C(CC(=O)OCC)C(=O)OCC.Cc1c(N)ccc(I)c1[N+](=O)[O-]  
>>CCOC(=O)C/C=C(C)c1ccc(N)c(C)c1[N+](=O)[O-]C(=O)OCC  
1594 C=Cc1ccncc1.CC(C)(C)OC(=O)N[C@H](COc1cncc(Br)c1)Cc1sc2ccccc12>>CC(C)(C)OC(=O)N[C  
@H](COc1cncc(/C=C/c2cncc2)c1)Cc1sc2ccccc12  
1595 Brc1ncc(C2CC2)nc1.C=CC(=O)OCC>>CCOC(=O)/C=C/c1ncc(C2CC2)nc1  
1596 Brc1ccccc1I.C=C1CC(c2ccc(Cl)cc2)OC1=O>>O=C1OC(c2ccc(Cl)cc2)C/C1=C/c1ccccc1Br  
1597 C=Cc1ccccc1.O=C1C(O)=C(I)C(=O)c2ccccc21>>O=C1C(O)=C(/C=C/c2ccccc2)C(=O)c2ccccc21  
1598 C=CN1C(=O)CCC1=O.Ic1ccc2c(c1)OCCOCCOCCOCCO2>>O=C1CCC(=O)N1/C=C/c1ccc2c(c1)OC  
COCCOCCOCCO2  
1599 C=CC(=O)OC.Cc1[nH]c2ccccc2c1CCN1CCCC1c1ccc(Br)cc1>>COC(=O)/C=C/c1ccc(C2CCCN2CCc  
2c(C)[nH]c3ccccc23)cc1  
1600 C=CC(=O)OCC(CC)CCCC.COc1ccc(Br)cc1>>CCCC(CC)COC(=O)/C=C/c1ccc(OC)cc1  
1601 C=CC(=O)OC(C)(C)C.COCOCc1ccc(Br)cc1C>>COCOCc1ccc(/C=C/C(=O)OC(C)(C)C)cc1C  
1602 C=CC(=O)OCC.Cc1cc(OCc2ccccc2)ccc1Br>>CCOC(=O)/C=C/c1ccc(OCc2ccccc2)cc1C  
1603 Brc1ncc(NCCc2ccccc2)c2ccccc12.C=CC(=O)OC(C)(C)C>>CC(C)(C)OC(=O)/C=C/c1ncc(NCCc2cccc  
c2)c2ccccc12  
1604 C=Cc1cc2c(nn1)Oe1ccccc1O2.Fc1cc(F)cc(Br)c1>>Fc1cc(F)cc(/C=C/c2cc3c(nn2)Oe2ccccc2O3)c1  
1605 C=CCP(=O)(OCC)OCC.COc1nc2ccc(Br)cc2nc1OC>>CCOP(=O)(C/C=C/c1ccc2nc(OC)c(OC)nc2c1)  
C=CC(=O)OCC.N#Cc1cccc(OC[C@H](Cc2ccc(OC3CCN(C(=O)OCc4ccccc4)CC3)cc2)NS(=O)(=O)c  
2ccc(I)cc2)c1>>CCOC(=O)/C=C/c1ccc(S(=O)(=O)N[C@H](COc2cccc(C#N)c2)Cc2ccc(OC3CCN(C(  
=O)OCc4ccccc4)CC3)cc2)cc1  
1607 C=Cc1ccc(OC)cc1.CCOC(=O)C(F)(F)I>>CCOC(=O)C(F)(F)/C=C/c1ccc(OC)cc1  
1608 C=CC(=O)OC.CS(=O)(=O)Nc1cc2ccc(Br)cc2c(N2CCCCC2)n1>>COC(=O)/C=C/c1ccc2cc(NS(C)(=O  
)=O)nc(N3CCCCC3)c2c1  
1609 C=CC(=O)Nc1ccc(OC)cc1.O=c1c(I)coc2cc(O)ccc12>>COc1ccc(NC(=O)/C=C/c2coc3cc(O)ccc3c2=O  
1610 C=Cc1ccc(O)cc1.COc1ccc(I)c(OC)c1>>COc1ccc(/C=C/c2ccc(O)cc2)c(OC)c1  
1611 C=SCC.N#Cc1ccc(Br)cc1>>CCS/C=C/c1ccc(C#N)cc1  
1612 C=CC(=O)O.CN(c1ccc(I)cc1)S(=O)(=O)c1cccs1>>CN(c1ccc(/C=C/C(=O)O)cc1)S(=O)(=O)c1cccs1  
1613 C=CCN1C(=O)c2ccccc2C1=O.Cc1ccc(I)cc1>>Cc1ccc(/C=C/CN2C(=O)c3ccccc3C2=O)cc1  
1614 C=CC(=O)O.O=C(c1ccccc1)c1ccc(Br)cc1>>O=C(O)/C=C/c1ccc(C(=O)c2ccccc2)cc1  
1615 Brc1ccc2cnccc2c1.C=Cc1ccccc1>>C(=C/c1ccc2cnccc2c1)\c1ccccc1  
1616 C=CC(=O)OC1CCCCC1.Ic1ccccc1>>O=C(/C=C/c1ccccc1)OC1CCCCC1  
C=Cc1ccc([N+](=O)[O-]  
1617 ]cc1.CCCCCCCCCOc1cc(/C=C/c2ccc(Br)cc2)c(OCCCCCCCC)cc1C=O>>CCCCCCCCOc1cc(/C=C/c2  
ccc(/C=C/c3ccc([N+](=O)[O-])cc3)cc2)c(OCCCCCCCC)cc1C=O  
1618 Brc1ccccc1.C=CCCCCCC>>CCCCC/C=C/c1ccccc1  
1619 C=CP(=O)(O)O.Fc1cccc(F)c1I>>O=P(O)(O)/C=C/c1c(F)cccc1F  
1620 C=CC(=O)OC.CCOc1c(C(C)n2nc(C)c3c(N)ncnc32)cc(Cl)c(C)c1I>>CCOc1c(C(C)n2nc(C)c3c(N)ncnc  
32)cc(Cl)c(C)c1/C=C/C(=O)OC  
1621 C=CC(=O)OC.COc1ccc(I)nc1>>COC(=O)/C=C/c1ccc(OC)cn1  
1622 C=Cc1ccc(F)cc1.COc1cc(C=O)c(Br)c(OC)c1OC>>COc1cc(C=O)c(/C=C/c2ccc(F)cc2)c(OC)c1OC



1623 C=C[C@@H](C)[C@H]1CC[C@H]2[C@@H]3CC(=O)[C@H]4C[C@H](O)CC[C@]4(C)[C@H]3CC  
[C@@]21C.Clc1ccc(I)cc1>>C[C@H](/C=C/c1ccc(Cl)cc1)[C@H]1CC[C@H]2[C@@H]3CC(=O)[C@  
H]4C[C@H](O)CC[C@]4(C)[C@H]3CC[C@]21C  
1624 C=Cc1ccc(C#N)c1Nc1ccc2[nH]ccc2c1C.Cc1cc(CN2CCN(C)CC2)ccc1I>>Cc1cc(CN2CCN(C)CC2)c  
cc1/C=C/c1ccc(C#N)c1Nc1ccc2[nH]ccc2c1C  
1625 Br1cccc(-c2cccn2)c1.C=CC(=O)OCCCC>>CCCCOC(=O)/C=C/c1cccc(-c2cccn2)c1  
1626 C=CC(=O)O.Clc1cccc(Br)c1>>O=C(O)/C=C/c1cccc(Cl)c1  
1627 C=CC(=O)OC(C)(C)C.CCCOc1ccc(Br)c(C(=O)OC)c1>>CCCOc1ccc(/C=C/C(=O)OC(C)(C)C)c(C(=O)  
)OC)c1  
1628 C=Cc1ccc(C)cc1.Cc1ccc(N)c(Br)c1>>Cc1ccc(/C=C/c2cc(C)ccc2N)cc1  
1629 C=CC(=O)O.COc1ccc(S(=O)(=O)N(C)c2cccc(I)c2)cc1OC>>COc1ccc(S(=O)(=O)N(C)c2cccc(/C=C/C  
(=O)O)c2)cc1OC  
1630 COC[C@H](/N=C(\c1cccc1)N1C=CCC[C@H]1C(C)C.C.Ic1cccc2ccccc12>>COC[C@H](/N=C(  
\c1cccc1)N1C=C(c2cccc3ccccc23)CC[C@H]1C(C)C  
1631 C=Cc1ccc(N(CCCC)CCCC)cc1.CN(C)c1ccc(/C=C/c2nc3ccc(Br)cc3nc2-  
c2cccc2)cc1>>CCCCN(CCCC)c1ccc(/C=C/c2ccc3nc(/C=C/c4ccc(N(C)C)cc4)c(-c4ccccc4)nc3c2)cc1  
1632 Br1ccsc1.C=Cc1cccn1>>C(=C/c1cccn1)\c1ccsc1  
1633 C=CC(=O)N1C(=O)OC[C@H]1c1cccc1.CC(C)(C)OP(=O)(Cc1ccc(Br)cc1)OC(C)(C)C>>CC(C)(C)  
OP(=O)(Cc1ccc(/C=C/C(=O)N2C(=O)OC[C@H]2c2cccc2)cc1)OC(C)(C)C  
1634 Br1cccc1.C=Cc1cccn1>>C(=C/c1cccn1)\c1cccc1  
1635 C=CC(=O)OC.Nc1nc(=O)n([C@H]2C[C@H](O)[C@H](CO)O2)cc1I>>COC(=O)/C=C/c1cn([C@H  
]2C[C@H](O)[C@H](CO)O2)c(=O)nc1N  
1636 C=CC(=O)OC(C)(C)C.COC(=O)c1cc(I)ccc1OC(C)=O>>COC(=O)c1cc(/C=C/C(=O)OC(C)(C)C)ccc1  
OC(C)=O  
1637 C=CC(=O)OC.O=C(NCc1ccc(F)cc1)c1nc(Br)c2cccn2c1O>>COC(=O)/C=C/c1nc(C(=O)NCc2ccc(F)c  
c2)c(O)c2ncccc12  
1638 C=CCCCCCC.Cc1cccc(OS(=O)(=O)C(F)(F)F)c1>>C=C(CCCCCC)c1cccc(C)c1  
1639 C=Cc1ccc2ccc(Cl)cc2n1.CC(C)(O)c1cccc1CC[C@H](SCC1(CC(=O)O)CC1)c1cccc(Br)c1>>CC(C  
)O)c1cccc1CC[C@H](SCC1(CC(=O)O)CC1)c1cccc(/C=C/c2ccc3ccc(Cl)cc3n2)c1  
1640 Br1ccc(I)cc1.C=CC(=O)N(C)OC>>CON(C)C(=O)/C=C/c1ccc(Br)cc1  
1641 C=Cc1ccc(SC)cc1.Clc1c2cc(Br)ccc2nc2c1oc1cccc12>>CSc1ccc(/C=C/c2ccc3nc4c(oc5ccccc54)c(Cl)  
c3c2)cc1  
1642 C=CC(=O)OCCCC.CC(C)c1cccc1I>>CCCCOC(=O)/C=C/c1cccc1C(C)C  
1643 C=CC(=O)OC(C)(C)C.Cc1cccc1Br>>Cc1cccc1/C=C/C(=O)OC(C)(C)C  
C=C(CO[C@H]1CCC[C@H](OCc2nc(-  
1644 c3cccc(C)c3)oc2C)C1)C(=O)OCC.Cc1cc(I)ccc1F>>CCOC(=O)/C=C(\c1ccc(F)c(C)c1)CO[C@H]1C  
CC[C@H](OCc2nc(-c3cccc(C)c3)oc2C)C1  
1645 Br1cccc2ccccc12.C=Cc1ccc(OC)cc1>>COc1ccc(/C=C/c2cccc3ccccc23)cc1  
1646 C=CC(=O)O.FC(F)(F)C1(c2cccc(Br)c2)N=N1>>O=C(O)/C=C/c1ccc(C2(C(F)(F)F)N=N2)c1  
1647 C=C(C)c1cccc1.Cc1ccc(Br)cc1>>C/C(=C/c1ccc(C)cc1)c1cccc1  
1648 C=CCNS(=O)(=O)c1ccc(C)cc1.FC(F)(F)c1ccc(Br)cc1>>Cc1ccc(S(=O)(=O)NC/C=C/c2ccc(C(F)(F)F)c  
c2)cc1  
1649 C=CC(=O)OCC.O=c1ccoc2ccc(Br)cc12>>CCOC(=O)/C=C/c1ccc2occc(=O)c2c1  
1650 C=CC(=O)OCC.O=C(Nc1ccc(Cl)cc1)c1cccc(Br)c1>>CCOC(=O)/C=C/c1cccc(C(=O)Nc2ccc(Cl)cc2)c  
1651 C=CC(=O)OC.COC(=O)c1ccc2ccccc2c1Br>>COC(=O)/C=C/c1c(C(=O)OC)ccc2ccccc12  
1652 C=CC(=O)OCC.O=c1oc(-c2ccccc2)c(I)c2sc3c(c12)CCC3>>CCOC(=O)/C=C/c1c(-  
c2ccccc2)oc(=O)c2c3c(sc12)CCC3  
1653 C=CC(=O)OC.COcn1nc(-c2ccccc2)c(Br)cc1=O>>COcn1nc(-c2ccccc2)c(/C=C/C(=O)OC)cc1=O  
1654 C=CC(=O)OC.CC(C)(C)OC(=O)N(CCc1c(Cl)ccnc1Br)C(=O)OC(C)(C)C>>COC(=O)/C=C/c1nccc(Cl)  
c1CCN(C(=O)OC(C)(C)C)C(=O)OC(C)(C)C  
1655 C=CC(=O)OCc1cccc1.Ic1cccc1>>O=C(/C=C/c1cccc1)OCc1cccc1  
1656 C=CC(=O)OCC.FC(F)(F)c1ccc(I)cc1>>CCOC(=O)/C=C/c1ccc(C(F)(F)F)cc1  
1657 C=CC(=O)OC(C)(C)C.COc1nc(Cl)ccc1[N+](=O)[O-  
>>COc1nc(/C=C/C(=O)OC(C)(C)C)ccc1[N+](=O)[O-]  
1658 C=CC(=O)OC(C)(C)C.CN(C)c1ccc(Br)cc1>>CN(C)c1ccc(/C=C/C(=O)OC(C)(C)C)cc1  
1659 C=COCCCC.FC(F)(F)c1cccc(Br)c1>>C=C(OCCCC)c1cccc(C(F)(F)F)c1  
1660 C=Cc1ccc(C)cc1.COC(=O)c1ccc(I)cc1>>COC(=O)c1ccc(/C=C/c2ccc(C)cc2)cc1  
1661 C=CC(=O)OC.CCc1cc2c(C)nc(C)nc2n1Cc1ccc(Br)cc1>>CCc1cc2c(C)nc(C)nc2n1Cc1ccc(/C=C/C(=O)  
)OC)cc1  
1662 C=C(OC(C)=O)C(=O)OCC(F)(F)F.COc1ccc(I)c(OC)c1>>COc1ccc(/C=C(\OC(C)=O)C(=O)OCC(F)(F)  
)F)c(OC)c1

1663 C=Cc1ccc(F)cc1.Cn1c(=O)c2c(cc(Br)n2C)n(C)c1=O>>Cn1c(=O)c2c(cc(/C=C/c3ccc(F)cc3)n2C)n(C)c  
1664 C=CCCN1C(=O)c2ccccc2C1=O.O=C(O)c1ccc(I)cc1O>>O=C(O)c1ccc(/C=C/CCN2C(=O)c3ccccc3C2  
1665 =O)cc1O  
1665 BrC1cccn2nnnc12.C=CC(=O)OC>>COC(=O)/C=C/c1cccn2nnnc12  
1666 C=CCCN1cnc2cc(C=O)ccc21.CC(C)(C)OC(=O)NC1CCC(OC(=O)Nc2cc(Br)ccc2-  
1666 c2ccccc2)CC1>>CC(C)(C)OC(=O)NC1CCC(OC(=O)Nc2cc(/C=C/CCn3cnc4ccc(C=O)ccc43)ccc2-  
1666 c2ccccc2)CC1  
1667 C=CC(=O)OCC.Oc1ccc(I)c(C(F)(F)F)c1C(F)(F)F>>CCOC(=O)/C=C/c1ccc(O)c(C(F)(F)F)c1C(F)(F)F  
1668 C=CCO.COC(=O)c1ccc(Br)cc1>>C=C(CO)c1ccc(C(=O)OC)cc1  
1668 C=Cc1ccc(/C=C/c2ccc(N(C)C)cc2OC)cc1.O=c1ccc2c(-c3ccc(I)cc3S(=O)(=O)O)c3ccc(O)cc3oc-  
1669 2c1>>COc1cc(N(C)C)ccc1/C=C/c1ccc(/C=C/c2ccc(-c3c4ccc(=O)cc-  
1669 4oc4cc(O)ccc34)c(S(=O)(=O)O)c2cc1  
1670 C=CSc1ccccc1.O=Cc1ccc(Br)cc1>>O=Cc1ccc(/C=C/Sc2ccccc2)cc1  
1671 C=Cc1ccc(OC)cc1.CCCCCCOCc1ccc2c(C)c(Br)c(=O)oc2c1>>CCCCCCCCOc1ccc2c(C)c(/C=C/c3c  
1671 cc(OC)cc3)c(=O)oc2c1  
1672 C=C[C@H](C)CCC=C(C)C.Clc1ccccc1>>C=C(c1ccccc1)[C@H](C)CCC=C(C)C  
1673 C=CC(=O)OCC.Clc1ccc(Br)cc1>>CCOC(=O)/C=C/c1ccc(Cl)cc1  
1674 C=CC(=O)OC.CC=CCn1cc(I)c(=O)[nH]c1=O>>CC=CCn1cc(/C=C/C(=O)OC)c(=O)[nH]c1=O  
1675 C=CC(N)=O.CSc1nc2c(I)c(Cl)ccc2[nH]1>>CSc1nc2c(/C=C/C(N)=O)c(Cl)ccc2[nH]1  
1676 C=CC(=O)OC(C)(C)C.O=C(O)c1ccc(Br)s1>>CC(C)(C)OC(=O)/C=C/c1ccc(C(=O)O)s1  
1677 C=CC(=O)OCC[Si](C)(C)C.O=C(C(=O)N1CCCC[C@H]1C(=O)O)c1ccc(I)c1>>C[Si](C)(C)CCOC(=  
1677 O)/C=C/c1cccc(C(=O)C(=O)N2CCCC[C@H]2C(=O)O)c1  
1678 C=CC(=O)OCCCC.CN(C)c1ccc(I)cc1>>CCCCOC(=O)/C=C/c1ccc(N(C)C)cc1  
1679 C=CC(=O)OCCCC.Nc1ncnc2c1c(I)cn2[C@H]1C[C@H](O)[C@H](CO)O1>>CCCCOC(=O)/C=C/c  
1679 1cn([C@H]2C[C@H](O)[C@H](CO)O2)c2ncnc(N)c12  
1680 C=C(C(=O)OC)[C@H]1CC[C@H]2(C)CCC[C@H](C)(OCOC)[C@H]2C1.Ic1ccccc1>>COCO[  
1680 C@H]1(C)CCC[C@H]2(C)CC[C@H](C)/C=C/c3ccccc3C(=O)OC[C@H]21  
1681 C=CCOCc1ccccc1.Ic1ccc2[nH]ccc2c1>>C(=C/c1ccc2[nH]ccc2c1)\COCc1ccccc1  
1682 BrC1cc2ccc1CCc1ccc(cc1)CC2.C=C>>C=Cc1cc2ccc1CCc1ccc(cc1)CC2  
1683 C=Cc1ccc(F)cc1.CCOC(=O)C(F)(F)Br>>CCOC(=O)C(F)(F)/C=C/c1ccc(F)cc1  
1684 C=C(CC(=O)OCC)C(=O)OCC.Ic1ccccc1>>CCOC(=O)C/C(=C/c1ccccc1)C(=O)OCC  
1685 C=COCCOCCO.COc1ccc(Br)cc1>>C=C(OCCOCCO)c1ccc(OC)cc1  
1686 C=C.COC(=O)c1cccc(Br)c1NC(C)=O>>C=Cc1cccc(C(=O)OC)c1NC(C)=O  
1687 BrC1ccccc1I.C=CC(=O)O>>O=C(O)/C=C/c1ccccc1Br  
1688 C=CC(=O)OCC.CC(=O)Nc1ccccc1I>>CCOC(=O)/C=C/c1ccccc1NC(C)=O  
1689 BrC1cccn1.C=CC(=O)OC>>COC(=O)/C=C/c1cccn1  
1690 C=Cc1ccc2c(c1)Sc1ccccc1N2CCCCCCCC.CCCCCCCCN1c2ccc(Br)cc2Sc2cc(C=O)ccc21>>CCCCC  
1690 CCCN1c2ccccc2Sc2cc(/C=C/c3ccc4c(c3)Sc3cc(C=O)ccc3N4CCCCCCCC)ccc21  
1691 C=CC(=O)OC(C)(C)C.O=C(Nc1ccc(Cl)c(F)c1Br)C(F)(F)F>>CC(C)(C)OC(=O)/C=C/c1c(NC(=O)C(F  
1691 )F)F)ccc(Cl)c1F  
1692 C=CS(=O)(=O)F.Ic1ccccc1>>O=S(=O)(F)/C=C/c1ccccc1  
1693 C=Cc1ccccc1C.Oc1ccccc1I>>Cc1ccccc1/C=C/c1ccccc1O  
1693 C=CC(=O)OC.Cc1cc(-c2nn(C(c3ccccc3)(c3ccccc3)c3ccccc3)c3cc([N+](=O)[O-  
1694 ]c(Br)cc23)ccn1>>COC(=O)/C=C/c1cc2c(-  
1694 c3ccnc(C)c3)nn(C(c3ccccc3)(c3ccccc3)c3ccccc3)c2cc1[N+](=O)[O-]  
1695 C=Cc1cnc(C#N)c1Nc1ccc2[nH]ccc2c1C.Clc1ccc(Br)n1>>Cc1c(Nc2c(C#N)cncc2/C=C/c2cccc(Cl)n  
1695 2)ccc2[nH]ccc12  
1696 C=CC(=O)OCCCCCCCCCCCCCCCCC.C[C@H]12C[C@@H]34C=C(Sc5ccc(I)cc5)C(=O)[C@@H](C)(  
1696 CCC(=O)Nc5c(O)ccc(C(=O)O)c5O)[C@@H]3[C@H](C[C@H]1C4)O2>>CCCCCCCCCCCCCCC  
1696 CCOC(=O)/C=C/c1ccc(SC2=C[C@H]34C[C@H]5C[C@H](O[C@@H]5(C)C3)[C@H]4[C@H](C)(CCC(  
1696 =O)Nc3c(O)ccc(C(=O)O)c3O)C2=O)cc1  
1697 C=CC(=O)OCC.N#Cc1ccc(Br)cc1F>>CCOC(=O)/C=C/c1ccc(C#N)c(F)c1  
1698 C=CC(=O)OC.O=c1[nH]c(=O)n([C@@H]2CO[C@H](CO)[C@@H](O)C2)cc1I>>COC(=O)/C=C/c1c  
1698 n([C@@H]2CO[C@H](CO)[C@@H](O)C2)c(=O)[nH]c1=O  
1699 C=CC(=O)OCCCC.O=[N+](O-)[O-]c1ccccc1I>>CCCCOC(=O)/C=C/c1ccccc1[N+](=O)[O-]c1  
1699 C=CC(=O)N1CCOCC1.C[C@H]12C[C@@H]34C=C(Sc5ccc(I)cc5)C(=O)[C@@H](C)(CCC(=O)Nc5c(O)c  
1700 cc(C(=O)O)c5O)[C@@H]3[C@H](C[C@H]1C4)O2>>C[C@H]12C[C@@H]34C=C(Sc5ccc(/C=C/C(=  
1700 O)N6CCOCC6)cc5)C(=O)[C@@H](C)(CCC(=O)Nc5c(O)ccc(C(=O)O)c5O)[C@@H]3[C@H](C[C@H]1  
1701 C=CC(=O)OCCCC.N#Cc1ccc(Br)cc1>>CCCCOC(=O)/C=C/c1ccc(C#N)cc1  
1702 C=CS(C)(=O)=O.FC(F)(F)c1ccc(Br)cc1>>CS(=O)(=O)/C=C/c1ccc(C(F)(F)F)cc1

C=Cc1nc2c(N)ncnc2n1[C@H]1C[C@H](O[Si](C)(C)C(C)(C)C)[C@@H](CO[Si](C)(C)C(C)(C)C)O1.  
 1703 Cc1ccc(Br)cc1>>Cc1ccc(/C=C/c2nc3c(N)ncnc3n2[C@H]2C[C@H](O[Si](C)(C)C(C)(C)C)[C@@H](CO[Si](C)(C)C(C)(C)C)O2)cc1  
 1704 C=CC(=O)OC.CCc1ccc(Br)cc1>>CCc1ccc(/C=C/C(=O)OC)cc1  
 1705 C=CN1CCCCC1=O.O=S(=O)(Oc1ccccc1Br)C(F)(F)F>>C=C(c1ccccc1Br)N1CCCCC1=O  
 1706 C=CC(O)(CO)CCC=C(C)C.COc1ccc(OC)c(Br)c1>>COc1ccc(OC)c(/C=C/C(O)(CO)CCC=C(C)C)c1  
 1707 C=CC(=O)OC.Cc1ccc(N)c(I)c1>>COC(=O)/C=C/c1cc(C)ccc1N  
 1708 C=CC(F)(F)F.Ic1ccc(OCc2ccccc2)cc1>>FC(F)(F)/C=C/c1ccc(OCc2ccccc2)cc1  
 1709 C=CC(=O)OCC.Cc1nc(-n2c(C)ccc2C)cc(NC2CC2)c1Br>>CCOC(=O)/C=C/c1c(NC2CC2)cc(-n2c(C)ccc2C)nc1C  
 1710 C=Cc1ccc2ccccc2c1.COC(=O)c1ccc(Cl)cc1I>>COC(=O)c1ccc(Cl)cc1/C=C/c1ccc2ccccc2c1  
 1711 C=CC(=O)OCC.CCOC(=O)Nc1ccccc1C1=C(I)CCN1S(=O)(=O)c1ccc(C)cc1>>CCOC(=O)/C=C/C1=C(c2ccccc2NC(=O)OCC)N(S(=O)(=O)c2ccc(C)cc2)CC1  
 1712 Brc1cccc2ccccc12.C=Cc1ccccc1>>C=C(c1cccc2ccccc12)\c1ccccc1  
 1713 C=C(F)[Si](C)(c1ccccc1)c1ccccc1.COC(=O)c1ccccc1I>>COC(=O)c1ccccc1/C=C(\F)[Si](C)(c1ccccc1)c1ccccc1  
 1714 C=CCCc1ccc(CC)cc1.O=C1CCOc2cc(Br)ccc21>>CCc1ccc(CC/C=C/c2ccc3c(c2)OCCC3=O)cc1  
 1715 C=CNC(C)=O.COC(=O)c1cccc(OS(=O)(=O)C(F)(F)F)c1>>C=C(NC(C)=O)c1cccc(C(=O)OC)c1  
 1716 C=Cc1cccc(F)c1.CCNC(=O)c1cc(-c2cc(Br)c(OCc3ccccc3)cc2OCc2ccccc2)on1>>CCNC(=O)c1cc(-c2cc(/C=C/c3cccc(F)c3)c(OCc3ccccc3)cc2OCc2ccccc2)on1  
 1717 C=Cc1cnc(F)c(Br)c1.CC(C)(C)OC(=O)N1CC[C@H]1COc1cnc(Cl)c(I)c1>>CC(C)(C)OC(=O)N1CC[C@H]1COc1cnc(Cl)c(/C=C/c2cnc(F)c(Br)c2)c1  
 1718 Brc1cccc2ccccc12.C=CC(OCC)OCC>>CCOC(/C=C/c1cccc2ccccc12)OCC  
 1719 Brc1cccc2ccccc12.C=CC(=O)OCCCC>>CCCCOC(=O)/C=C/c1cccc2ccccc12  
 1720 Brc1cccs1.C=CC(=O)OCC>>CCOC(=O)/C=C/c1cccs1  
 1721 C=CC(C)=O.O=[N+](O-)]c1ccc(C2=C(I)C2(F)F)cc1>>CC(=O)/C=C/C1=C(c2ccc([N+](=O)[O-])cc2)C1(F)F  
 1722 C=CCCC.Ic1ccccc1>>CCC/C=C/c1ccccc1  
 1723 C=Cc1csc2ccccc12.CCOC(=O)C(F)I>>CCOC(=O)C(F)/C=C/c1csc2ccccc12  
 1724 C=CC(=O)N1C(=O)OC[C@H]1c1ccccc1.CC(C)(C)OC(=O)C(C(=O)OC(C)(C)C)c1ccc(Br)cc1>>C(C)(C)OC(=O)C(C(=O)OC(C)(C)C)c1ccc(/C=C/C(=O)N2C(=O)OC[C@H]2c2ccccc2)cc1  
 1725 C=CC(=O)OCC(CC)CCCC.Cc1ccccc1Cl>>CCCC(CC)COC(=O)/C=C/c1ccccc1C  
 1726 C=CC(=O)OCC.Cc1cc(I)ccc1/C=C/c1ccccc1>>CCOC(=O)/C=C/c1ccc(/C=C/c2ccccc2)c(C)c1  
 1727 C=CC(=O)OC.O=Cc1ccc(I)cc1O>>COC(=O)/C=C/c1ccc(C(=O)c(O)c1  
 1728 C=Cc1ccccc1.O=[N+](O-)]c1ccc(/C=C/c2ccc(I)cc2)cc1>>O=[N+](O-)]c1ccc(/C=C/c2ccc(/C=C/c3ccccc3)cc2)cc1  
 1729 Brc1ccccc1.C=Cc1ccccc1>>C(=C/c1ccccc1)\c1ccccc1  
 1730 C=C1C[C@H]2[C@@H]3CCc4cc(OC)ccc4[C@H]3CC[C@H]2(C)C1=O.FC(F)(F)c1ccccc1Br>>COc1c  
 1731 C=C.C=CCCCCCCCCOC(=O)c1c(OC)cc(OC)cc1OS(=O)(=O)C(F)(F)F>>C=CCCCCCCCCOC(=O)c1c(C=C)cc(OC)cc1OC  
 1732 C=Cc1ccc(/C=C(c2ccccc2)C2CCC2)c2ccc3c(c2)c(F)nn3C2CCCCO2)cc1.Ic1ccccc1>>Fc1nn(C2CCC  
 1733 CO2)c2ccc(/C=C(c3ccccc3)C3CCC3)c3ccc(/C=C/c4ccccc4)cc3)cc12  
 1734 C=Cc1ccccc1C(=O)OC.COC(=O)c1cc2cc(Br)ccc2cc1OC(C)=O>>COC(=O)c1ccccc1/C=C/c1ccc2cc(OC(C)=O)c(C(=O)OC)cc2c1  
 1735 C=CC(=O)OC.CC(C)(C)c1ccc(I)c(O)c1>>COC(=O)/C=C/c1ccc(C(C)(C)C)cc1O  
 1736 C=Cc1ccc(Cl)cc1.IC1CCCCC1>>Clc1ccc(/C=C/C2CCCCC2)cc1  
 1737 C=CC(=O)Nc1ccc(-c2ccc(C(=O)NCCN3CCCC3)c(NCC)n2)cc1F.Nc1ccc(Br)cn1>>CCNc1nc(-c2ccc(NC(=O)/C=C/c3ccc(N)nc3)c(F)c2)ccc1C(=O)NCCN1CCCCC1  
 1738 C=CCC1CCCCC1.Nc1ccc(Br)cc1F>>Nc1ccc(/C=C/CC2CCCCC2)cc1F  
 1739 C=Cc1ccc(OC)cc1.COC(=O)c1cc(OC)ccc1Br>>COC(=O)c1cc(OC)ccc1/C=C/c1ccc(OC)cc1  
 1740 C=CC(=O)O.O=C1CCC(N2Cc3cccc(Br)c3C2=O)C(=O)N1>>O=C(O)/C=C/c1cccc2c1C(=O)N(C1CC  
 1741 C(=O)NC1=O)C2  
 1742 Brc1ccccc1.C=CCON=C1[C@H](C)[C@H]2OC(=O)O[C@H]2(C)[C@@H](CC)OC(=O)[C@H](C)C(=O)[C@H](C)[C@@H](O[C@H]2O[C@H](C)C[C@H](N(C)C)[C@H]2OC(C)=O)[C@H](C)(OC)C[C@H]1C>>CC[C@H]1OC(=O)[C@H](C)C(=O)[C@H](C)[C@@H](O[C@H]2O[C@H](C)C[C@H](N(C)C)[C@H]2OC(C)=O)[C@H](C)(OC)C[C@H]1C(=NOC/C=C/c2ccccc2)[C@H](C)[C@H]2OC  
 1743 C=CC(=O)OCC.CCN(CCC1OCCO1)C(=O)c1ccc(Br)cc1>>CCOC(=O)/C=C/c1ccc(C(=O)N(CC)CCC2OCCO2)cc1  
 1744 C=Cc1ccc(C)cc1.O=c1c(Br)c(-c2ccccc2)oc2ccccc12>>Cc1ccc(/C=C/c2c(-  
 1745 C=C.Cc1cccc(Br)c1>>C=Cc1cccc(C)c1

1744 C=CC(=O)OC.COc1ccc(/C=C/c2c(Br)ccc(OC)c2O)cc1OC>>COC(=O)/C=C/c1ccc(OC)c(O)c1/C=C/c  
1745 1ccc(OC)c(OC)c1  
1746 C=Cc1cccc(F)c1.Oc1ccccc1I>>Oc1ccccc1/C=C/c1cccc(F)c1  
1747 C=COCCCC.CC(=O)c1ccc(Cl)cc1>>C=C(OCCCC)c1ccc(C(C)=O)cc1  
1748 C=Cc1n[nH]c2cc([C@@H]3C[C@@]34C(=O)Nc3ccc(OC)cc34)ccc12.CN1CCN(C(=O)c2ccc(Br)cc2)  
1749 CC1>>COc1ccc2c(c1)[C@]1(C[C@H]1c1ccc3c(/C=C/c4ccc(C(=O)N5CCN(C)CC5)cc4)n[nH]c3c1)C(  
1750 C=Cc1ccc(OC(C)=O)cc1.Ic1ccccc1>>CC(=O)Oc1ccc(/C=C/c2ccccc2)cc1  
1751 C=Cc1nc(C#N)c(C#N)n1CCCCC.CN(C)c1ccc(/C=C/c2ccc(N(c3ccc(I)cc3)c3ccc(/C=C/c4ccc(N(C)C)  
1752 cc4)cc3)cc2)cc1>>CCCCCn1c(/C=C/c2ccc(N(c3ccc(/C=C/c4ccc(N(C)C)cc4)cc3)c3ccc(/C=C/c4ccc(  
1753 N(C)C)cc4)cc3)cc2)nc(C#N)c1C#N  
1754 C=CC(=O)N(C)Cc1sc2ccccc2c1C.O=C1Nc2ncc(Br)cc2C12CCCCC2>>Cc1c(CN(C)C(=O)/C=C/c2cnc  
1755 3c(c2)C2(CCCCC2)C(=O)N3)sc2ccccc12  
1756 C=Cc1ccc(OC)cc1.COc1ccc(I)cc1>>CCOc1ccc(/C=C/c2ccc(OC)cc2)cc1  
1757 Brc1cccc2ccccc12.C=CC(C)=O>>CC(=O)/C=C/c1cccc2ccccc12  
1758 C=CCNS(=O)(=O)c1cc(C(F)(F)F)cc(C(F)(F)F)c1.FC(F)(F)c1ccc(I)cc1>>O=S(=O)(NC/C=C/c1ccc(C(  
1759 F)(F)F)cc1)c1cc(C(F)(F)F)cc(C(F)(F)F)c1  
1760 C=CC(=O)OC(C)C.CC(=O)C=C(C)C(C)CCCC1>>CC(C)(C)OC(=O)/C=C/C1=C(/C=C/CO)CCCC1  
1761 C=CCC(=O)OC.CS[C@H]1O[C@@H](c2ccc(C)c(Cc3ccc(Cl)cc3)c2)[C@H](OC(C)=O)[C@@H](OC  
1762 (C)=O)[C@@H]1OC(C)=O>>COC(=O)C/C=C/c1ccc(Cc2cc([C@@H]3O[C@H](SC)[C@@H](OC(C  
1763 )=O)[C@H](OC(C)=O)[C@H]3OC(C)=O)ccc2C)cc1  
1764 C=CC(=O)NC(C)(C)C.C[C@]12C[C@@]34C=C(Sc5ccc(I)cc5)C(=O)[C@@](C)(CCC(=O)Nc5c(O)cc  
1765 c(C(=O)O)c5O)[C@@H]3[C@H](C[C@@H]1C4)O2>>CC(C)(C)NC(=O)/C=C/c1ccc(SC2=C[C@]34  
1766 C[C@H]5[C@H](O[C@@]5(C)C3)[C@H]4[C@](C)(CCC(=O)Nc3c(O)ccc(C(=O)O)c3O)C2=O)cc1  
1767 C=Cc1cncnc1.COc1ccccc1CNc1ccc2cc(Br)ccc2n1>>COc1ccccc1CNc1ccc2cc(/C=C/c3ccccc3)ccc2n1  
1768 C=COCCCC.Fc1ccc(Br)c(F)c1>>C=C(OCCCC)c1ccc(F)cc1F  
1769 Brc1ccc(N2CCOCC2)nc1.C=CC(=O)OC>>COC(=O)/C=C/c1ccc(N2CCOCC2)nc1  
1770 C=CC(=O)OCCCC.O=C1c2ccccc2C(=O)N1c1ccccc1I>>CCCCOC(=O)/C=C/c1ccccc1N1C(=O)c2ccc  
1771 cc2C1=O  
1772 C=CC(=O)OCC.COc1ccc2c(Br)cc(F)c(O)c2n1>>CCOC(=O)/C=C/c1cc(F)c(O)c2nc(OC)ccc12  
1773 C=CC(=O)C1=CN(CC(C)C)CCC1(C)C.COc1ccc(Br)cc1>>COc1ccc(/C=C/C(=O)C2=CN(CC(C)C)CC  
1774 C2(C)C)cc1  
1775 C=C(NC(C)=O)C(=O)OC.Clc1ccc(Br)cc1>>COC(=O)/C=C/c1ccc(Cl)cc1)NC(C)=O  
1776 Brc1ccccc1I.C=CP(=O)(OCC)OCC>>CCOP(=O)(/C=C/c1ccccc1Br)OCC  
1777 C=C.Cc1nsc1I>>C=Cc1scnc1C  
1778 C=Cc1ccccc1.CC(=O)Oc1ccc(I)cc1>>CC(=O)Oc1ccc(/C=C/c2ccccc2)cc1  
1779 C=C[Si](CC)(CC)CC.FC(F)(F)c1cc(Br)cc(C(F)(F)F)c1>>CC[Si](/C=C/c1cc(C(F)(F)F)cc(C(F)(F)F)c1)  
1780 (CC)CC  
1781 C=CC(=O)OCC.CC[C@]1(O)C[C@@H]2CN(CCc3c([nH]c4ccc(I)cc34)[C@@](C(=O)OC)(c3cc4c(cc  
1782 3OC)N(C)[C@H]3[C@@](O)(C(=O)OC)[C@H](OC(C)=O)[C@]5(CC)C=CCN6CC[C@]43[C@@H]  
1783 65)C2)C1>>CCOC(=O)/C=C/c1ccc2[nH]c3c(c2c1)CCN1C[C@@H](C[C@@](O)(CC)C1)C[C@]3(C(  
1784 =O)OC)c1cc2c(cc1OC)N(C)[C@H]1[C@@](O)(C(=O)OC)[C@H](OC(C)=O)[C@]3(CC)C=CCN4CC  
1785 I[C@]121I[C@@H]43  
1786 C=CC(=O)OCc1ccccc1.Fc1cc(Br)ccc1N1CCOCC1>>O=C(/C=C/c1ccc(N2CCOCC2)c(F)c1)OCc1ccccc  
1787 C=CCn1c(-  
1788 c2ccc(F)cc2)nc2ccccc2c1=O.O=C(CN1C(=O)COc2ccccc21)c1ccc(Br)cc1>>O=C(CN1C(=O)COc2ccc  
1789 cc21)c1ccc(/C=C/Cn2c(-c3ccc(F)cc3)nc3ccccc3c2=O)cc1  
1790 Brc1c2ccccc2cc2ccccc12.C=CC(=O)OCCCC>>CCCCOC(=O)/C=C/c1c2ccccc2cc2ccccc12  
1791 C=CC(=O)OC.O=c1[nH]c(=O)n([C@H]2C=C[C@@H](CO)O2)cc1I>>COC(=O)/C=C/c1cn([C@H]2  
1792 C=C[C@@H](CO)O2)c(=O)[nH]c1=O  
1793 C=Cc1ccccc1.Cn1cnc1-c1ccc(Br)o1>>Cn1cnc1-c1ccc(/C=C/c2ccccc2)o1  
1794 C=CC(C)=O.FC(F)C(F)(F)Cn1nnc(-c2ccccc2)c1I>>CC(=O)/C=C/c1c(-c2ccccc2)nnn1CC(F)(F)C(F)F  
1795 C=CC(=O)OC(C)(C)C.COc1ccc(S(=O)(=O)c2ccc3ccccc(Br)c3n2)cc1>>COc1ccc(S(=O)(=O)c2ccc3ccc  
1796 c(/C=C/C(=O)OC(C)(C)C)c3n2)cc1  
1797 Brc1ccccc1.C=Cc1nn(C(c2ccccc2)(c2ccccc2)c2ccccc2)c2ccc(C#N)c(OC)c12>>COc1c(C#N)ccc2c1c(/  
1798 C=C/c1ccccc1)nn2C(c1ccccc1)(c1ccccc1)c1ccccc1  
1799 C=CC(=O)OC.Cc1cccc(C)c1-  
1800 c1cccc(C2CCc3cc(Br)ccc3O2)c1>>COC(=O)/C=C/c1ccc2c(c1)CCC(c1cccc(-c3c(C)cccc3C)c1)O2  
1801 C=C(NC(=O)OCC[Si](C)(C)C)C(=O)OC.CC(C)(C)OC(=O)N[C@@H](Cc1ccc(I)cc1)C(=O)OCc1ccccc  
1802 c1>>COC(=O)/C=C/c1ccc(C[C@H](NC(=O)OC(C)(C)C)C(=O)OCc2ccccc2)cc1)NC(=O)OCC[Si](C)  
1803 Brc1ccc(/N=N/c2ccccc2)cc1.C=Cc1ccc(OC)cc1>>COc1ccc(/C=C/c2ccc(/N=N/c3ccccc3)cc2)cc1  
1804 C=Cc1ccccc(O)c1.Oc1cc(O)cc(I)c1>>Oc1ccccc(/C=C/c2cc(O)cc(O)c2)c1

1781 CCC(=O)/C=C/CC(CCC1CCCC1)NS(=O)(=O)c1ccc(C)cc1.Cc1ccc(Br)cc1>>CCC(=O)/C=C/CC(CCC1  
CCCC1)NS(=O)(=O)c1ccc(C)cc1)c1ccc(C)cc1  
1782 C=C1C(=O)O[C@H]2[C@H]1CC/C(C)=C/CC[C@@]1(C)O[C@H]21.Ic1CCCC1>>C/C1=C/CC[C  
@@]2(C)O[C@H]2[C@H]2OC(=O)/C(=C/c3CCCC3)[C@@H]2CC1  
1783 BrC1ccc2oc(-c3cc[nH]n3)cc2c1.C=CC(=O)OCC>>CCOC(=O)/C=C/c1ccc2oc(-c3cc[nH]n3)cc2c1  
1784 BrC1cncnc1.C=CS(=O)(=O)N1CCC2(CC1)N=C(C1CCCCC1)NC2=O>>O=C1NC(C2CCCCC2)=NC1  
2CCN(S(=O)(=O)/C=C/c1cncnc1)CC2  
1785 BrC1CCCC1.C=C1C(=O)O[C@@H]2C[C@@]3(C)CCCC(=C)[C@@H]3C[C@H]12>>C=C1CCC[C@  
]2(C)C[C@H]3OC(=O)/C(=C/c4CCCC4)[C@H]3C[C@@H]12  
1786 C=CCOC(C)=O.Ic1CCCC1>>CC(=O)OC/C=C/c1CCCC1  
1787 C=CC(=O)OC.O=[N+][([O-])c1cccc([I+])c2cccc([N+](=O)[O-  
])c2)c1>>COC(=O)/C=C/c1CCCC([N+](=O)[O-])c1  
1788 BrC1cc2CCCC2c2CCCC12.C=Cc1cccn1>>C(=C/c1cc2CCCC2c2CCCC12)\c1cccn1  
1789 C=CC(=O)OC.COc1ccc2c(c1)CCN(c1ccc(C(C)C)cc1)C2(C)c1ccc(Br)cc1>>COC(=O)/C=C/c1ccc(C2(  
C)c3ccc(OC)cc3CCN2c2ccc(C(C)C)cc2)cc1  
1790 C=Cc1ccc(F)cc1.Cc1ccc(I)cc1>>Cc1ccc(/C=C/c2ccc(F)cc2)cc1  
1791 C=CCO[C@H](C)C(=O)N1CCOCC1.OCc1ccc(I)cc1>>C[C@@H](OC/C=C/c1ccc(CO)cc1)C(=O)N1  
CCOCC1  
1792 C=CC(=O)OCC.Cc1noc(-c2CCCC2)c1I>>CCOC(=O)/C=C/c1c(C)noc1-c1CCCC1  
1793 C=CC(=O)O.Cc1ccc(S(=O)(=O)n2c(Cc3ccc(I)cc3)nc3CCCC32)cc1>>Cc1ccc(S(=O)(=O)n2c(Cc3ccc(/  
C=C/C(=O)O)cc3)nc3CCCC32)cc1  
1794 C=CC(=O)OCC.CC(=O)O[IH2](OC(C)=O)c1CCCC1>>CCOC(=O)/C=C/c1CCCC1  
1795 C=Cc1cncnc1.CCCCOc1ccc(Br)c(F)c1>>CCCOc1ccc(/C=C/c2cncnc2)c(F)c1  
1796 C=C1C(=O)O[C@H]2[C@H]1C[C@@H](O)/C(C)=C/CC[C@@]1(C)O[C@@H]21.Oc1ccc(I)cc1>>C  
/C1=C/CC[C@@]2(C)O[C@H]2[C@H]2OC(=O)/C(=C/c3ccc(O)cc3)[C@@H]2C[C@H]1O  
1797 C=CCCCCCC.COc1ccc(Br)c1[N+](=O)[O-]>>CCCCC/C=C/c1ccc(OC)c1[N+](=O)[O-]  
1798 C=CC(=O)N(C)C.FC(F)(F)c1ccc(Cl)cc1>>CN(C)C(=O)/C=C/c1ccc(C(F)(F)F)cc1  
1799 C=CCNS(=O)(=O)c1ccc(C)cc1.Ic1CCCC1>>Cc1ccc(S(=O)(=O)NC/C=C/c2CCCC2)cc1  
1800 C=Cc1ccc(OC)cc1.Cc1ccc(Br)cc1>>COc1ccc(/C=C/c2ccc(C)cc2)cc1  
1801 C=Cc1cncnc1.C[C@H](COc1cnc(Cl)c(Br)c1)NC(=O)OC(C)(C)C>>C[C@H](COc1cnc(Cl)c(/C=C/c2c  
cnc2)c1)NC(=O)OC(C)(C)C  
1802 C=CS(C)(=O)=O.COC(=O)c1ccc(-c2CCCC2)cc2c(I)cn(COCC[Si](C)(C)C)c12>>COC(=O)c1ccc(-  
c2CCCC2)cc2c(/C=C/S(C)(=O)=O)cn(COCC[Si](C)(C)C)c12  
1803 BrC1CCCC2CCCC12.C=C[C@H]1CN2CC[C@H]1C[C@@H]2[C@H](O)c1cnc2ccc(OC)cc12>>COc1c  
cc2nccc([C@@H](O)[C@H]3C[C@@H]4CCN3C[C@@H]4/C=C/c3CCCC4CCCC34)c2c1  
1804 C=CC(=O)Nc1CCCC1NC(=O)OC(C)(C)C.CCOC(=O)[C@H]1CN(C)C[C@@H]1c1ccc(Br)cn1>>CCO  
C(=O)[C@H]1CN(C)C[C@@H]1c1ccc(/C=C/C(=O)Nc2CCCC2NC(=O)OC(C)(C)C)cn1  
1805 C=C.COC(=O)c1cc(OC)ccc1Br>>C=Cc1ccc(OC)cc1C(=O)OC  
1806 C=Cc1CCCC1OC.CCOC(=O)C(F)I>>CCOC(=O)C(F)/C=C/c1CCCC1OC  
1807 C=C/C=C/c1CCCC1.COc1ccc(OC(C)=O)c(I)c1>>COc1ccc(OC(C)=O)c(/C=C/C=C/c2CCCC2)c1  
1808 C=Cc1ccc(Cl)cc1.COc1cc(C=O)c(Br)c(OC)c1OC>>COc1cc(C=O)c(/C=C/c2ccc(Cl)cc2)c(OC)c1OC  
1809 C=Cc1ccc(OC)cc1.O=c1c2ccc(Br)cc2cnn1CCCN1CCNCC1>>COc1ccc(/C=C/c2ccc3c(=O)n(CCCN4  
CCNCC4)nc3c2)cc1  
1810 C=Cc1ccc(OCCCCC)c(OCCCCC)c1.O=Cc1ccc(Br)cc1>>CCCCCOc1ccc(/C=C/c2ccc(C=O)cc2)c  
c1OCCCCC  
1811 C=Cc1CCCC1.Nc1ccc(Br)cc1I>>Nc1ccc(Br)cc1/C=C/c1CCCC1  
1812 C=CC1(O)CCC1.CC(C)(C)c1ccc(I)cc1>>CC(C)(C)c1ccc(/C=C/C2(O)CCC2)cc1  
1813 BrC1ccc2ccc3CCCC4ccc1c2c34.C=CC(=O)OCCO>>O=C(/C=C/c1ccc2ccc3CCCC4ccc1c2c34)OCCO  
1814 BrC1ccc2CCCC2c1.C=CC(OC)OCC>>CCOC(/C=C/c1ccc2CCCC2c1)OCC  
1815 C=Cc1ccc2c(c1)OCO2.C[Si](C)(C)I>>C[Si](C)(C)/C=C/c1ccc2c(c1)OCO2  
1816 C=Cc1CCCC1.CS(=O)(=O)c1ccc(Br)cc1>>CS(=O)(=O)c1ccc(/C=C/c2CCCC2)cc1  
1817 C=CC(N)=O.CC(=O)c1ccc(Br)cc1>>CC(=O)c1ccc(/C=C/C(N)=O)cc1  
1818 C=CC(=O)OC.Cc1cc2c(c(C)c1Br)C(=O)C(C)(C)C2>>COC(=O)/C=C/c1c(C)cc2c(c1C)C(=O)C(C)(C)  
1819 BrC1c(-c2CCCC2)nc2cccn12.C=CC(=O)OC>>COC(=O)/C=C/c1c(-c2CCCC2)nc2cccn12  
C=Cc1ccc(N(c2CCCC2)c2CCCC2)cc1.CCCCCCCCC1(CCCCCC)c2cc(Br)ccc2-  
1820 c2ccc(C=O)cc21>>CCCCCCCCC1(CCCCCC)c2cc(C=O)ccc2-  
c2ccc(/C=C/c3ccc(N(c4CCCC4)c4CCCC4)cc3)cc21  
1821 C=CC(=O)OCC.Cc1nc(Br)c([N+](=O)[O-])n1C>>CCOC(=O)/C=C/c1nc(C)n(C)c1[N+](=O)[O-]  
1822 C=CC(=O)OC(C)(C)C.O=[N+][([O-])c1ccc(Cl)cc1>>CC(C)(C)OC(=O)/C=C/c1ccc([N+](=O)[O-])cc1  
1823 C=CCN(C(=O)OC(C)(C)C)C(=O)OC(C)(C)C.O=C(c1CCCC1)c1ccc(Cl)cc1>>CC(C)(C)OC(=O)N(C/C  
=C/c1ccc(C(=O)c2CCCC2)cc1)C(=O)OC(C)(C)C



C=CCO[C@H]1CC(=O)O[C@H](C)C/C=C/C=C/[C@H](O[Si](C)(C)C(C)(C)C)[C@H](C)C[C@H]  
 (CC(OC)OC)[C@H](O[C@H]2O[C@H](C)[C@H](O[C@H]3C[C@@](C)(O)[C@@H](OC(=O)  
 CC)[C@H](C)O3)[C@H](N(C)C)[C@H]2OC(C)=O)[C@H]1OC.O=[N+](O-  
 1870 )c1ccc(I)cc1>>CCC(=O)O[C@H]1[C@H](C)O[C@H](O[C@H]2[C@H](N(C)C)[C@@H](OC(C)  
 =O)[C@H](O[C@@H]3[C@@H](OC)[C@H](OC/C=C/c4ccc([N+](=O)[O-  
 ])cc4)CC(=O)O[C@H](C)C/C=C/C=C/[C@H](O[Si](C)(C)C(C)(C)C)[C@H](C)C[C@@H]3CC(OC)  
 OCN(C)C@H1?C(C)C@H1?C@H1?C@H1?  
 1871 C=CC(=O)OCC.Cc1nc(-c2ccccc2)sc1Br>>CCOC(=O)/C=C/c1sc(-c2ccccc2)nc1C  
 1872 C=CC(=O)OC.Ic1enn(Cc2ccccc2)c1>>COC(=O)/C=C/c1enn(Cc2ccccc2)c1  
 1873 Br1ccccc1.C=CC1CC2C=CC1C2>>C1=CC2CC1CC2/C=C/c1ccccc1  
 1874 C=Cc1ccc(OC)cc1.Cc1ccccc1Br>>COc1ccc(/C=C/c2ccccc2C)cc1  
 C=C1C(=O)O[C@H]2[C@H]1CCC(=C)[C@@H]1C[C@H](OC(C)=O)C(=C)[C@H]21.COC(=O)c1c  
 1875 cc(I)cc1>>C=C1CC[C@H]2/C(=C/c3ccc(C(=O)OC)cc3)C(=O)O[C@H]2[C@H]2C(=C)[C@@H](O  
 C(C)=O)C[C@@H]12  
 1876 C=CC(=O)OC.CCCCCC(O)c1cccc2ccc(Br)cc12>>CCCCC(O)c1cccc2ccc(/C=C/C(=O)OC)cc12  
 1877 C=Cc1ccccc1.COc1cc(C=O)c(Br)c(OC)c1OC>>COc1cc(C=O)c(/C=C/c2ccccc2)c(OC)c1OC  
 C=Cc1ccc(N(C)C)cc1.Cc1nc2ccc(Br)cc2nc1-c1ccccc1>>Cc1nc2ccc(/C=C/c3ccc(N(C)C)cc3)cc2nc1-  
 1878 c1ccccc1  
 C=CC(=O)OC(C)(C)C.CC(C)=CCc1cc(I)ccc1OC(=O)CC1CCCCC1>>CC(C)=CCc1cc(/C=C/C(=O)O  
 1879 C(C)(C)C)ccc1OC(=O)CC1CCCCC1  
 C=CC(=O)OCC.Cc1cc(C#N)ccc1-c1scsc1Br>>CCOC(=O)/C=C/c1scsc1-c1ccc(C#N)cc1C  
 1880 C=CC(=O)OC(C)(C)C.CC(=O)c1ccc(Cl)c(F)c1Br>>CC(=O)c1ccc(Cl)c(F)c1/C=C/C(=O)OC(C)(C)C  
 1881 C=Cc1cccc2ccccc12.IC1CCCCC1>>C(=C/C1CCCCC1)c1cccc2ccccc12  
 1882 C=CC(=O)N(C)OC.COc1ccc(Br)cc1>>COc1ccc(/C=C/C(=O)N(C)OC)cc1  
 1883 Br1ccc2c(c1)c(Cc1ccccc1)cn2-  
 1884 c1ccccc1.C=CC(=O)OC>>COC(=O)/C=C/c1ccc2c(c1)c(Cc1ccccc1)cn2-c1ccccc1  
 C=CC(=O)OC.Cc1nn2c(-c3ccccc3)cc(-c3ccccc3)nc2c1I>>COC(=O)/C=C/c1c(C)nn2c(-c3ccccc3)cc(-  
 1885 c3ccccc3)nc12  
 C=CC(=O)OC(C)(C)C.O=[N+](O-)c1ccc(Cl)c([N+](=O)[O-  
 1886 ])c1>>CC(C)(C)OC(=O)/C=C/c1ccc([N+](=O)[O-])cc1[N+](=O)[O-]  
 C=CC(=O)OCc1cc(OCCCCCCCCCCCCCCCCC)c(OCCCCCCCCCCCCCCCCC)c(OCCCCCCCC  
 1887 CCCCCCCCCC)c1.Ic1ccccc1>>CCCCCCCCCCCCCCCCCOc1cc(COC(=O)/C=C/c2ccccc2)cc(OCC  
 CCCCCCCCCCCCCC)c1OCCCCCCCCCCCCCCCCC  
 C=Cc1cenc(F)c1.CC(C)(C)OC(=O)N1CC[C@H]1COc1enc(Cl)c(I)c1>>CC(C)(C)OC(=O)N1CC[C@H  
 1888 ]1COc1enc(Cl)c(/C=C/c2cenc(F)c2)c1  
 C=Cc1ccc(N(C)C)cc1.CCCCN1C(=O)C(=C/C=C/c2ccc(I)cc2)C(=O)N(CCCC)C1=O>>CCCN1C(=O  
 1889 )C(=C/C=C/c2ccc(/C=C/c3ccc(N(C)C)cc3)cc2)C(=O)N(CCCC)C1=O  
 C=CC(=O)OC(C)(C)C.CCCOc1ccc(Br)cc1-  
 1890 c1nc2c(CCC)nn(C)c2c(=O)[nH]1>>CCCOc1ccc(/C=C/C(=O)OC(C)(C)C)cc1-  
 c1nc2c(CCC)nn(C)c2c(=O)[nH]1  
 C=Cc1cenc1.CC(C)(C)OC(=O)N[C@H](COc1cenc(Br)c1)Cc1ccccc1>>CC(C)(C)OC(=O)N[C@H](C  
 1891 Oc1cenc(/C=C/c2cenc2)c1)Cc1ccccc1  
 C=CC(=O)OCCCC.CSc1ccc(I)cc1>>CCCCOC(=O)/C=C/c1ccc(SC)cc1  
 1892 C=Cc1cccc([N+](=O)[O-])c1.FC(F)(F)Oc1ccc(Br)c1>>O=[N+](O-  
 1893 )c1cccc(/C=C/c2cccc(OC(F)(F)F)c2)c1  
 C=CC(=O)OC(C)(C)C.N#Cc1ccc(I)cc1>>CC(C)(C)OC(=O)/C=C/c1ccc(C#N)cc1  
 1894 C=Cc1cccn1.CCOCc1nc2c(N)nc3cc(Br)ccc3c2n1CCCOC>>CCOCc1nc2c(N)nc3cc(/C=C/c4cccn4)c  
 1895 cc3c2n1CCCOC  
 Br1cnc2ccccc2c1.C=CCC[C@H]1COC(C)(C)N1C(=O)OC(C)(C)C>>CC(C)(C)OC(=O)N1[C@@H](  
 1896 CC/C=C/c2cnc3ccccc3c2)COC1(C)C  
 C=CC(=O)OC.COc1c(CN(C(=O)c2ccccc2)c2ccc(Br)c2)ccc2c1OC(C)(C)[C@H](OC(C)=O)[C@H]2S  
 1897 c1ccccc1>>COC(=O)/C=C/c1ccc(N(Cc2ccc3c(c2OC)OC(C)(C)[C@H](OC(C)=O)[C@H]3Sc2ccccc2  
 )C(=O)c2ccccc2)c1  
 C=Cc1ccc(OC)cc1.FC(F)(F)c1ccc(Br)cc1>>COc1ccc(/C=C/c2ccc(C(F)(F)F)cc2)cc1  
 1898 C=CCC(O)c1ccc(-  
 1899 c2cenc(OC)c2)cc1F.COC(=O)[C@@H](C)[C@H](c1ccc(I)c(O)c1)C1CC1>>COC(=O)[C@@H](C)[C  
 @H](c1ccc(/C=C/C(C)C)O)c2ccc(-c3cenc(OC)c3)cc2F)c(O)c1)C1CC1  
 1900 C=CC(=O)OC.COc1ccc(Br)cc1>>C=C(C(=O)OC)c1ccc(OC)cc1  
 C=Cc1ccccc1.COc1ccc(Br)c(N)c1>>COc1ccc(/C=C/c2ccccc2)c(N)c1  
 1901 C=CCCN1C(=O)c2ccccc2C1=O.Ic1ccc(-c2ccccc2)cc1>>O=C1c2ccccc2C(=O)N1CC/C=C/c1ccc(-  
 1902 c2ccccc2)cc1  
 C=Cc1ccc(C)cc1.Cc1ccccc1Br>>Cc1ccc(/C=C/c2ccccc2C)cc1  
 1903

1904 C=CC(=O)OCC.Ic1cnn(C2CCCCO2)c1>>CCOC(=O)/C=C/c1cnn(C2CCCCO2)c1  
 1905 C=Cc1cn(C)cn1.Oc1ccc(-c2sc3cc(O)ccc3c2Oc2ccc(Br)cc2)cc1>>Cn1cnc(/C=C/c2ccc(Oc3c(-c4ccc(O)cc4)sc4cc(O)ccc34)cc2)c1  
 1906 C=CC(=O)OC.O=S(=O)(c1ccc(Cl)cc1)N1CCc2cc(Br)cn2c1>>COC(=O)/C=C/c1cnc2c(c1)CCN2S(=O)(=O)c1ccc(Cl)cc1  
 1907 C=CC(=O)OC.O=c1[nH]c(=O)n([C@@H]2C[C@H](CO)[C@H]2CO)cc1I>>COC(=O)/C=C/c1cn([C@@H]2C[C@H](CO)[C@H]2CO)c(=O)[nH]c1=O  
 1908 C=Cc1cccc([N+](=O)[O-])c1.COC(=O)c1cccc1I>>COC(=O)c1cccc1/C=C/c1cccc([N+](=O)[O-])c1  
 1909 C=CP(=O)(c1cccc1)C(C)(C)C.Cc1ccc2ccccc2c1Br>>Cc1ccc2ccccc2c1/C=C/P(=O)(c1cccc1)C(C)(C)C=CC(C)=O.C=CCc1ccc2c1c(Br)cn2S(=O)(=O)c1ccc(C)cc1>>C=CCc1ccc2c1c(/C=C/C(C)=O)cn2S(=O)(=O)c1ccc(C)cc1  
 1911 C=CC(C)OC(=O)NC.COc1cccc(I)c1>>CNC(=O)OC(C)/C=C/c1cccc(OC)c1  
 1912 C=C(OC)C(=O)OC.COc1ccc(I)cc1>>COC(=O)/C=C/c1ccc(OC)cc1OC  
 1913 C=Cc1cccc1C(=O)O.FC(F)(F)c1cc(I)cc(C(F)(F)F)c1>>O=C(O)c1cccc1/C=C/c1cc(C(F)(F)F)cc(C(F)(F)F)c1  
 1914 C=CC(=O)OC(C)(C)C.CC(=O)Cc1cccc1Br>>CC(=O)Cc1cccc1/C=C/C(=O)OC(C)(C)C  
 1915 Br1cccc1.C=CN1CCCCC1=O>>C=C(c1cccc1)N1CCCCC1=O  
 1916 C=CC(C)=O.COc1cc(OC)nc(Cl)n1>>COc1cc(OC)nc(/C=C/C(C)=O)n1  
 1917 C=COCCCCO.COC(=O)c1ccc(I)cc1>>COC(=O)c1ccc(/C=C/OCCCCO)cc1  
 1918 C=Cc1ccc(N(C)C(=O)OC(C)(C)C)cc1.OCCOCCOCCOCCOc1ccc(I)cn1>>CN(C(=O)OC(C)(C)C)c1ccc(/C=C/c2ccc(OCCOCCOCCOCCO)nc2)cc1  
 1919 C=CC(=O)OC.COc1cncc(Br)c1>>COC(=O)/C=C/c1cncc(OC)c1  
 1920 C=C/C=C\CCCC)OCC.COc1ccc(I)cc1>>CCCC/C=C\C=C\c1ccc(OC)cc1OCC  
 1921 C=CC(=O)OC.COc1ccc2c(c1)CCN(c1ccc(C)cc1)C2(C)c1ccc(Br)cc1>>COC(=O)/C=C/c1ccc(C2(C)c3ccc(OC)cc3CCN2c2ccc(C)cc2)cc1  
 1922 C=CC(=O)OCC.Cc1cc(C)cc(-c2ccccc2I)c1>>CCOC(=O)/C=C/c1cccc1-c1cc(C)cc(C)c1  
 1923 C=CC(C)(C)C(=O)NC(C)(C)CO.CC(=O)OC[C@H]1O[C@@H](c2cc(Cc3ccc(Br)cc3Cl)c(C)cc2C)[C@H](OC(C)=O)[C@@H](OC(C)=O)[C@@H]1OC(C)=O>>CC(=O)OC[C@H]1O[C@@H](c2cc(Cc3ccc(/C=C/C(C)(C)C(=O)NC(C)(C)CO)cc3Cl)c(C)cc2C)[C@H](OC(C)=O)[C@@H](OC(C)=O)[C@@H]1OC(C)=O)Br1ccc(-c2cnc3ccccc3n2)cc1.C=CCn1c(-c2ccc(C(F)(F)F)cc2)nc2ccccc2c1=O>>O=c1c2ccccc2nc(-c2ccc(C(F)(F)F)cc2)n1C/C=C/c1ccc(-c2cnc3ccccc3n2)cc1  
 1925 C=Cc1cc(OC)c(OC)c(OC)c1-c1cccc1.Ic1cccc1>>COc1cc(/C=C/c2ccccc2)c(-c2ccccc2)c(OC)c1OC  
 1926 C=Cc1cccc1.O=C1OC2(C(I)=C(c3ccccc3)c3ccccc32)c2ccccc21>>O=C1OC2(C(/C=C/c3ccccc3)=C(c3ccccc3)c3ccccc32)c2ccccc21  
 1927 C=CC(=O)OC(C)(C)C.O=C(O)Cc1ccc(Br)cc1>>CC(C)(C)OC(=O)/C=C/c1ccc(CC(=O)O)cc1  
 1928 C=Cc1ccc(/C=C/c2ccc([N+](=O)[O-])cc2)cc1.O=Cc1ccc(Br)cc1>>O=Cc1ccc(/C=C/c2ccc(/C=C/c3ccc([N+](=O)[O-])cc3)cc2)cc1  
 1929 C=C(NC(C)=O)C(=O)OC.CC(C)c1cc(Br)ccc1N>>COC(=O)/C=C\c1ccc(N)c(C(C)C)c1NC(C)=O  
 1930 C=Cc1ccc(Cl)cc1.Cl>>C/C=C/c1ccc(Cl)cc1  
 1931 C=CC(=O)OC(C)(C)C.CC(C)OC(=O)c1ccsc1Br>>CC(C)OC(=O)c1ccsc1/C=C/C(=O)OC(C)(C)C  
 1932 C=CCOc1cccc1.Cc1ccc(I)cc1C>>Cc1ccc(/C=C/COc2ccccc2)cc1C  
 1933 C=CCN1C(=O)c2ccccc2C1=O.Ic1ccc(C2(N3CCCCC3)CCCCC2)cc1>>O=C1c2ccccc2C(=O)N1C/C=C/C/c1ccc(C2(N3CCCCC3)CCCCC2)cc1  
 1934 C=Cc1ccc2ccccc2c1.Fc1ccc(Br)cc1>>Fc1ccc(/C=C/c2ccc3ccccc3c2)cc1  
 1935 C=CC(=O)O.O=C(O)c1cc(Br)cs1>>O=C(O)/C=C/c1csc(C(=O)O)c1  
 1936 C=CN1C(=O)c2ccccc2C1=O.COc1cnc2cccc(Br)c2c1>>COc1cnc2cccc(/C=C/N3C(=O)c4ccccc4C3=O)c2c1  
 1937 Br1cnc2ccccc2c1.C=CCO>>C=C(CO)c1cnc2ccccc2c1  
 1938 C=Cc1cncc1.CC(C)(C)OC(=O)NCCOc1cncc(Br)c1>>CC(C)(C)OC(=O)NCCOc1cncc(/C=C/c2cnccBr1ccc(-c2ccc(OCCCN3CCCCC3)cc2)cc1.C=CC(=O)OCC>>CCOC(=O)/C=C/c1ccc(-c2ccc(OCCCN3CCCCC3)cc2)cc1  
 1940 C=CC(=O)OCCCC.COC(=O)c1ccc(Br)cc1>>CCCCOC(=O)/C=C/c1ccc(C(=O)OC)cc1  
 1941 C=CC(OC)OC.FC(F)c1ccc(I)cc1>>COC(/C=C/c1ccc(C(F)F)cc1)OC  
 1942 C=Cc1ccc(COC(C)=O)cc1.COc1ccc2c(c1)cc(C#N)c1ccc(Br)cc12>>COc1ccc2c(c1)cc(C#N)c1ccc(/C=C/c3ccc(COC(C)=O)cc3)cc12C=CCn1c(-c2ccc(Cl)cc2)nc2ccccc2c1=O.O=C(CN1C(=O)COc2ccccc21)c1ccc(Br)cc1>>O=C(CN1C(=O)COc2ccccc21)c1ccc(/C=C/Cn2c(-c3ccc(Cl)cc3)nc3ccccc3c2=O)cc1  
 1944 C=Cc1ccc(C)cc1C.[Si](C)(OS(=O)(=O)C(F)(F)F)OS(=O)(=O)C(F)(F)F>>Cc1ccc(/C=C/[Si](C)(C)OS(=O)(=O)C(F)(F)F)c(C)c1  
 1945 C=CCNC1=NCCN1.Cc1cccc1I>>Cc1cccc1/C=C/CNC1=NCCN1



1946 Br1cccc1.C=Cc1nc2c(N)ncnc2n1[C@@H]1O[C@H](CO[Si](C)(C)C(C)(C)C)[C@@H](O[Si](C)(C)C(C)(C)C)[C@H]1O[Si](C)(C)C(C)(C)C>>CC(C)(C)[Si](C)(C)OC[C@H]1O[C@@H](n2c(/C=C/c3ccc3)nc3c(N)ncnc32)[C@H](O[Si](C)(C)C(C)(C)C)[C@@H]1O[Si](C)(C)C(C)(C)C  
 1947 C=CC(=O)OCC.Clc1ccc2nc(-c3cccc3)c(I)c(-c3cccc3)c2c1>>CCOC(=O)/C=C/c1c(-c2cccc2)nc2ccc(Cl)cc2c1-c1cccc1  
 1948 C=CC(=O)OC.CN(C)CCCOc1ccc(I)cc1Cl>>COC(=O)/C=C/c1ccc(OCCCN(C)C)c(Cl)c1  
 1949 \*C(=O)C(=C)C.N#Cc1c(O)c(Cl)c(I)c(O)c1C#N>>\*C(=O)/C(C)=C/c1c(O)c(C#N)c(C#N)c(O)c1Cl  
 1950 C=CC(=O)OCCCC.Cn1cc(I)c(=O)c2cccc21>>CCCCOC(=O)/C=C/c1cn(C)c2cccc2c1=O  
 1951 C=C(CC(=O)OC)C(=O)OC.Cc1ccc(I)cc1>>COC(=O)C/C(=C)c1ccc(C)cc1C(=O)OC  
 1952 C=CC(=O)O.Cc1cccc1I>>Cc1cccc1/C=C/C(=O)O  
 1953 Br1ccc2cccc2c1.C=Cc1ccc(C(=O)O)cc1>>O=C(O)c1ccc(/C=C/c2ccc3cccc3c2)cc1  
 1954 C=Cc1ccc(OC)cc1.[O-][N+](=Nc1ccc(Br)cc1)c1cccc1>>COc1ccc(/C=C/c2ccc(N=[N+])([O-])c3cccc3)cc2)cc1  
 1955 C=C[C@H]1O[C@@H](Sc2cccc2)[C@H](OCc2cccc2)[C@@H](OCc2cccc2)[C@@H]1OCc1ccc(OC)cc1.O=c1cc(-c2cccc2)oc2ccc(I)cc12>>COc1ccc(CO[C@H]2[C@H](OCc3cccc3)[C@@H](OCc3cccc3)[C@H](Sc3cccc3)O[C@@H]2/C=C/c2ccc3oc(-c4cccc4)cc(=O)c3c2)cc1  
 1956 C=CC(=O)OCCCC.CC(C)=C(C)Br>>CCCCOC(=O)/C=C/C(C)=C(C)C  
 1957 C=C1c2cccc2C1(C#N)CC.CN(C)c1ccc(Br)cc1>>CCC1(C#N)/C(=C/c2ccc(N(C)C)cc2)c2cccc21  
 1958 C=CC(=O)OC.COc1cc(Br)c(C=O)c(OC)c1>>COC(=O)/C=C/c1cc(OC)cc(OC)c1C=O  
 1959 C=Cc1ccc(C=O)cc1.Ic1ccc(C2OCCO2)cc1>>O=Cc1ccc(/C=C/c2ccc(C3OCCO3)cc2)cc1  
 1960 C=Cc1cccc1.CCOC(=O)C(F)I>>CCOC(=O)C(F)/C=C/c1cccc1  
 1961 C=CC(=O)OCCCC.Cc1ccc(S(=O)(=O)NCCc2c(Br)[nH]c3cccc23)cc1>>CCCCOC(=O)/C=C/c1[nH]c2cccc2c1CCNS(=O)(=O)c1ccc(C)cc1  
 1962 Br1cncc2cccc12.C=Cc1cn(COCC[Si](C)(C)C)nc1-c1nc(C(F)(F)F)en1COCC[Si](C)(C)C>>C[Si](C)(C)CCOCn1cc(/C=C/c2cncc3cccc23)c(-c2nc(C(F)(F)F)en2COCC[Si](C)(C)C)n1  
 1963 C=Cc1ccc([N+](=O)[O-])cc1.CCOc1ccc(/N=N/c2ccc(Br)cc2O)cc1>>CCOc1ccc(/N=N/c2ccc(/C=C/c3ccc([N+](=O)[O-])cc3)cc2O)cc1  
 1964 C=CCNS(=O)(=O)c1ccc(C)cc1.Cc1cccc1OS(=O)(=O)C(F)(F)F>>C=C(CNS(=O)(=O)c1ccc(C)cc1)c1cccc1C  
 1965 Br1cncc1.C=C/C=C/C(=O)N(CCCC)CCCC>>CCCCN(CCCC)C(=O)/C=C/C=C/c1cncc1  
 1966 Br1ccc2cccc2c1.C=CN1CCCCC1=O>>C=C(c1ccc2cccc2c1)N1CCCCC1=O  
 1967 C=CCO[Si](C)(C)C(C)(C)C.CC(=O)c1ccc(Br)cc1>>CC(=O)c1ccc(/C=C/CO[Si](C)(C)C(C)(C)C)cc1  
 1968 C=CC(=O)C1=CN(CC(C)C)CCC1(C)C.Ic1cccc1>>CC(C)CN1C=C(C(=O)/C=C/c2cccc2C(C)(C)C  
 1969 C=C(CC(=O)O)C(=O)O.O=C1N[C@@]2(CC[C@@H](c3ccc(Br)cc3)C2)CO1>>O=C(O)C/C(=C)c1ccc([C@@H]2CC[C@]3(COC(=O)N3)C2)cc1C(=O)O  
 1970 Br1cnc2c(c1)CCCCN2.C=CC(=O)N(C)Cc1oc2cccc2c1C>>Cc1c(CN(C)C(=O)/C=C/c2cnc3c(c2)CCCN3)oc2cccc12  
 1971 C=Cc1ccc(C(=O)OC)cc1.CC1(C)c2ccc(Br)cc2C(C)(C)N1[O]>>COC(=O)c1ccc(/C=C/c2ccc3c(c2)C(C)(C)N([O])C3(C)C)cc1  
 1972 C=CC(=O)OC.CCn1cnc2ccc(Br)cc21>>CCn1cnc2ccc(/C=C/C(=O)OC)cc21  
 1973 Br1cncc2cccc12.C=CCC(C)C(=O)OCC>>CCOC(=O)C(C)C/C=C/c1cncc2cccc12  
 1974 C=CCNC(=O)C(F)(F)F.Cn1c2cccc2c2nc3ccc(Cl)cc3c3cc(OS(=O)(=O)C(F)(F)F)cc1c32>>Cn1c2cccc2c2nc3ccc(Cl)cc3c3cc(/C=C/CNC(=O)C(F)(F)F)cc1c32  
 1975 C=Cc1cncc1.COc1ccc2c(c1)cc(C#N)c1ccc(Br)cc12>>COc1ccc2c(c1)cc(C#N)c1ccc(/C=C/c3cncc3)c  
 1976 C=CC(=O)OC.CC(C)(C)c1[nH]c2cccc2c1C1CCCN(Cc2ccc(Br)cc2Cl)C1>>COC(=O)/C=C/c1ccc(CN2CCCC(c3c(C(C)(C)C)[nH]c4cccc34)C2)c(Cl)c1  
 1977 C=CC(C)(C)C.Cc1cccc1OS(=O)(=O)C(F)(F)F>>C=C(c1cccc1C)C(C)(C)C  
 1978 C=Cc1ccc(OC)cc1.CCCCC(I)C(F)(F)C(=O)OCC>>CCCCC(/C=C/c1ccc(OC)cc1)C(F)(F)C(=O)OCC  
 1979 C=C1C(=O)O[C@H]2[C@H]1C[C@@H](O)/C(C)=C/CC[C@@]1(C)O[C@@H]21.COc1ccc(I)cc1>>COc1ccc(/C=C2/C(=O)O[C@H]3[C@H]2C[C@@H](O)/C(C)=C/CC[C@@]2(C)O[C@@H]32)cc1  
 1980 C=CC(=O)OC.O=[N+](O-)]c1cccc1Br>>COC(=O)/C=C/c1cccc1[N+](=O)[O-]  
 1981 C=CS(=O)(=O)c1cccc1.CC(C)(C)OC(=O)N1CCC2(CC1)Oc1ccc(Br)cc1C2=O>>CC(C)(C)OC(=O)N1CCC2(CC1)Oc1ccc(/C=C/S(=O)(=O)c3cccc3)cc1C2=O  
 1982 C=Cc1ccc(OC)cc1.COC(=O)c1cc2cc(Br)ccc2cc1OC(C)=O>>COC(=O)c1cc2cc(/C=C/c3ccc(OC)cc3)cc2cc1OC(C)=O  
 1983 C=CCCCC(C(=O)OC)S(=O)(=O)c1cccc1.Ic1cccc1>>COC(=O)C(CCCC/C=C/c1cccc1)S(=O)(=O)c1cccc1  
 1984 C=Cc1ccc(OC)cc1OC.Nc1ccc(I)cc1>>COc1ccc(/C=C/c2ccc(N)cc2)c(OC)c1

1985 Br1ccccnc1.C=COCCO>>C=C(OCCO)c1cccc1  
Br1cnc2cccc2c1.C=CCO[C@]1(C)C[C@@H](C)C(=O)[C@H](C)[C@H]2N(OC)C(=O)O[C@]2(C)

1986 [C@@H](CC)OC(=O)[C@H](C)C(=O)[C@H](C)[C@H]1O[C@@H]1O[C@H](C)C[C@H](N(C)C)[  
C@H]1O>>CC[C@H]1OC(=O)[C@H](C)C(=O)[C@H](C)[C@@H](O[C@@H]2O[C@H](C)C[C@  
H]1N(C)C)[C@H]2O)[C@]1(C)(OC/C=C/c2cnc3cccc3c2)C[C@@H](C)C(=O)[C@H](C)[C@H]2N(O

1987 C=Cc1ccc2c(c1)Sc1cccc1N2CC.COC(=O)c1ccc(Br)cc1>>CCN1c2cccc2Sc2cc(/C=C/c3ccc(C(=O)O  
C)cc3)ccc21

1988 C=CC(=O)OCC.CCOC(=O)CCOCc1cc(OC)ccc1Br>>CCOC(=O)/C=C/c1ccc(OC)cc1COCCCC(=O)OC

1989 C=CCCCCCC.Cc1cc(C)c(OS(=O)(=O)C(F)(F)F)c(C)c1>>C=C(CCCCCC)c1c(C)cc(C)cc1C

1990 C=CC(=O)N1CCCC1.CC(C)(C)OC(=O)N1CCc2cc(Br)ccc2C1>>CC(C)(C)OC(=O)N1CCc2cc(/C=C/C  
(=O)N3CCCC3)ccc2C1

1991 C=CC(=O)OC(C)(C)C.COC(=O)Cc1ccc2oc(-c3ccc(Br)cc3F)nc2c1>>COC(=O)Cc1ccc2oc(-  
c3ccc(/C=C/C(=O)OC(C)(C)C)cc3F)nc2c1

1992 C=CN1CCCC1=O.Cc1ccc(OS(=O)(=O)C(F)(F)F)c(Br)c1>>C=C(c1ccc(C)cc1Br)N1CCCC1=O

1993 C=CC(=O)OC(C)(C)C.O=C1c2ccc(Br)cc2CCN1c1cc(F)ccc1Cl>>CC(C)(C)OC(=O)/C=C/c1ccc2c(c1)  
CCN(c1cc(F)ccc1Cl)C2=O

1994 C=CCOC.CCN(C)/C=N/c1cc2cccc(Br)c2nc1C>>CCN(C)/C=N/c1cc2cccc(/C=C/COC)c2nc1C

1995 C=CC=O.COC(=O)C1=Nc2cc(I)ccc2OC12CC2>>COC(=O)C1=Nc2cc(/C=C/C=O)ccc2OC12CC2

1996 C=CC(=O)OC.COc1cc(Br)cc2cc(-c3ccc4c(c3)OCO4)oc12>>COC(=O)/C=C/c1cc(OC)c2oc(-  
c3ccc4c(c3)OCO4)cc2c1

1997 C=C[C@H](CCCCCCCC)CC(OC)OC.Clc1ccc(I)cc1>>CCCCCCCC[C@@H](/C=C/c1ccc(Cl)cc1)CC(  
OC)OC  
C=CC(=O)OC(F)(F)C(F)(F)C(F)(F)C(F)(F)C(F)(F)C(F)(F)C(F)(F)C(F)(F)C(F)(F)C(F)(F)C[F][C@]12C

1998 [C@@]34C=C(Sc5cccc(I)c5)C(=O)[C@@](C)(CCC(=O)Nc5c(O)ccc(C(=O)O)c5O)[C@@H]3[C@H]  
([C[C@@H]1C4)O2>>C[C@]12[C@@]34C=C(Sc5cccc(/C=C/C(=O)OC(F)(F)C(F)(F)C(F)(F)C(F)(F)  
)C(F)(F)C(F)(F)C(F)(F)C(F)(F)C(F)(F)C(F)(F)C(F)(F)c5)C(=O)[C@@](C)(CCC(=O)Nc5c(O)ccc(C(=O)O)  
c5O)[C@@H]3[C@H]1C4)O2

1999 Br1cccc1.C=CC(C)=O>>CC(=O)/C=C/c1cccc1

2000 C=C1CC(c2cccc2)OC1=O.FC(F)(F)c1cccc1I>>O=C1OC(c2cccc2)C/C1=C/c1cccc1C(F)(F)F

2001 C=CC(=O)OC(C)(C)C.Clc1cccc1I>>CC(C)(C)OC(=O)/C=C/c1cccc1Cl

2002 C=CC(=O)OCC.COc1nc(Br)cc2cccc12>>CCOC(=O)/C=C/c1cc2cccc2c(OC)n1

2003 C=Cc1cccc1.[O-][N+](=Nc1ccc(Br)cc1)c1cccc1>>[O-][N+](=Nc1ccc(/C=C/c2cccc2)cc1)c1cccc1

2004 Br1cccc1NCc1cccc1.C=CC(=O)OC>>COC(=O)/C=C/c1cccc1NCc1cccc1

2005 C=CC(=O)OCC.COC(=O)c1ccc(I)cc1>>CCOC(=O)/C=C/c1ccc(C(=O)OC)cc1

2006 C=CCCCCCCC.COc1ccc(I)cc1>>CCCCCCCC/C=C/c1ccc(OC)cc1

2007 COc1ccc(I)cc1.Cc1ccc(S(=O)(=O)/C=C2/C(F)(F)C2(C)C(C)(C)C)cc1>>COc1ccc(/C(=C2/C(F)(F)C2(  
C)C(C)(C)C)S(=O)(=O)c2ccc(C)cc2)cc1

2008 C=CCOC(C)=O.Cc1cccc(C)c1I>>CC(=O)OC/C=C/c1c(C)cccc1C

2009 C=CS(=O)(=O)F.COc1cccc(I)c1>>COc1cccc(/C=C/S(=O)(=O)F)c1

2010 C=CC(=O)OC.CC(C)(C)[Si](C)(C)OC[C@H]1O[C@H](c2ccc(Br)cc2)C=C[C@@H]1O[Si](C)(C)C(C  
)C(C)>>COC(=O)/C=C/c1ccc([C@@H]2C=C[C@H](O[Si](C)(C)C(C)(C)C)[C@@H](CO[Si](C)(C)C  
(C)(C)C)O2)cc1

2011 C=CC(=O)OC.Cn1cnc2c(NCc3ccc(Br)cc3)nc(N3CCCCC3)nc21>>COC(=O)/C=C/c1ccc(CNc2nc(N3C  
CCCC3)nc3c2ncn3C)cc1

2012 C=CC#N.CN1C(c2cccc2)=C(I)c2ccsc2S1(=O)=O>>CN1C(c2cccc2)=C(/C=C/C#N)c2ccsc2S1(=O)=  
COC[C@@H](/N=C(\c1cccc1)N1C=CCC[C@H]1c1cccc1)C(C)C.Cc1cccc(I)c1>>COC[C@@H](/N  
=C(\c1cccc1)N1C=C(c2cccc(C)c2)CC[C@H]1c1cccc1)C(C)C

2013 C=CC(=O)O.CC(=O)Nc1ccc(F)cc1I>>CC(=O)Nc1ccc(F)cc1/C=C/C(=O)O

2014 Br1esc2cccc12.C=CC(=O)OC>>COC(=O)/C=C/c1esc2cccc12

2015 C=CC(=O)O.CCOC(=O)c1c[nH]c(Cc2ccc(I)cc2)n1>>CCOC(=O)c1c[nH]c(Cc2ccc(/C=C/C(=O)O)cc2

2016 C=CC(=O)OC(C)(C)C.FC(F)(F)c1ccc(Br)c(Cl)c1>>CC(C)(C)OC(=O)/C=C/c1ccc(C(F)(F)F)cc1Cl

2017 C=C[C@H]1O[C@H](OC)[C@H](OCc2cccc2)[C@@H](OCc2cccc2)[C@@H]1OCc1ccc2cccc2c1  
.O=c1ccoc2cc(Br)cc12>>CO[C@H]1O[C@H](/C=C/c2ccc3c(=O)ccoc3c2)[C@@H](OCc2ccc3cccc  
3c2)[C@H](OCc2cccc2)[C@H]1OCc1cccc1

2018 C=C.Cc1ccc(Br)c([N+](=O)[O-])c1>>C=Cc1ccc(C)cc1[N+](=O)[O-]

2019 C=Cc1ccc(Br)cc1.Cc1c(Nc2c(I)cncc2C#N)ccc2[nH]ccc12>>Cc1c(Nc2c(C#N)cncc2/C=C/c2ccc(Br)cc  
2)ccc2[nH]ccc12

2020 C=CCNC(=O)OC(C)(C)C.CC(=O)c1ccc(Br)cc1>>C=C(CNC(=O)OC(C)(C)C)c1ccc(C(C)=O)cc1

2021 C=CC(=O)OC.COc1ncc(Br)en1>>COC(=O)/C=C/c1ncc(OC)nc1

2022 C=CC(=O)OC1CCCCC1.O=[N+](O-)c1ccc(Br)cc1>>O=C(/C=C/c1ccc([N+](=O)[O-]

2023

2024 C=CC(=O)OC.CC(C)(C)c1[nH]c2cccc2c1C1CCCN(Cc2ccc(Br)cc2F)C1>>COC(=O)/C=C/c1ccc(CN2CCCC(c3c(C(C)(C)C)[nH]c4cccc34)C2)c(F)c1

2025 Br1ccsc1.C=CC(CCC)OCc1ccccc1>>CCCC(/C=C/c1ccsc1)OCc1ccccc1

2026 Br1cccc2cccc12.C=CN1CCCC1=O>>C=C(c1cccc2cccc12)N1CCCC1=O

2027 C=CC(=O)NC.C[C@]12C[C@@]34C=C(Sc5ccc(I)cc5)C(=O)[C@@](C)(CCC(=O)Nc5c(O)ccc(C(=O)O)c5O)[C@@H]3[C@H](C[C@@H]1C4)O2>>CNC(=O)/C=C/c1ccc(SC2=C[C@]34C[C@H]5C[C@@H](O)[C@@]5(C)C3)[C@H]4[C@](C)(CCC(=O)Nc3c(O)ccc(C(=O)O)c3O)C2=O)cc1

2028 C=CC12CCC(NC(=O)OC(C)(C)C)(CC1)CO2.COc1ccc2ncc(Cl)c(Br)c2n1>>COc1ccc2ncc(Cl)c(/C=C/C34CCC(NC(=O)OC(C)(C)C)(CC3)CO4)c2n1

2029 C=CCC(=O)OC.CC(C)(CC1Cc2cccc2C1)NC[C@@H](O)COc1c(Br)cccc1C#N>>COC(=O)/C=C/c1cccc(C#N)c1OC[C@H](O)CNC(C)(C)CC1C2cccc2C1

2030 C=Cc1cc(OC)c(OC)c1.COc1cc(C=O)c(Br)c(OC)c1OC>>COc1cc(/C=C/c2c(C=O)cc(OC)c(OC)c2OC)cc(OC)c1OC

2031 C=CC(=O)OC(C)(C)C.O=C1CN(CCCN2CCOCC2)Cc2cc(Br)cnc2N1>>CC(C)(C)OC(=O)/C=C/c1cnc2c(c1)CN(CCCN1CCOCC1)CC(=O)N2

2032 C=CC(=O)O.O=C1Nc2ccc(Br)cc2C1=O>>O=C(O)/C=C/c1ccc2c(c1)C(=O)C(=O)N2

2033 Br1cccs1.C=CC(=O)OC(C)(C)C>>CC(C)(C)OC(=O)/C=C/c1cccs1

2034 C=CC(=O)OCC.Ic1ccc2[nH]ccc2c1>>CCOC(=O)/C=C/c1ccc2[nH]ccc2c1

2035 C=CC(=O)OCC.Fc1cccc(Oc2cccc(Br)c2)c1>>CCOC(=O)/C=C/c1cccc(Oc2cccc(F)c2)c1

2036 Br1cnc2cccc2c1.C=CS(C)(=O)=O>>CS(=O)(=O)/C=C/c1cnc2cccc2c1

2037 C=CC(=O)OCC.CC(=O)c1ccc(I)cc1>>CCOC(=O)/C=C/c1ccc(C(C)=O)cc1

2038 C=CS(C)(=O)=O.CC(C)CCn1nc(-c2cccs2)c(O)c(C2=NS(=O)(=O)c3cc(I)ccc3N2)c1=O>>CC(C)CCn1nc(-C=COCCc1.Oc1ccc(Br)cc1>>C=C(OCCCC)c1ccc(OC)cc1

2039 C=CCNC(=O)COC.Cc1ccc(Oc2ccc(Nc3ncnc4ccc(I)cc34)cc2C)cn1>>COCC(=O)NC/C=C/c1ccc2ncnc(Nc3ccc(Oc4ccc(C)nc4)c(C)c3)c2c1

2040 C=CC(C)=O.Cc1ccc2[nH]c3c(c2c1)CC(=O)Nc1ccc(I)cc1-3>>CC(=O)/C=C/c1ccc2c(c1)-c1[nH]c3ccc(C)cc3c1CC(=O)N2

2041 C=Cc1cncnc1.CCN(CCOc1ccc(OC(C)=O)cc1)c1ccc(I)cc1>>CCN(CCOc1ccc(OC(C)=O)cc1)c1ccc(/C=C/c2cncnc2)cc1

2042 C=CC(=O)OC.COc1cccc(N(Cc2ccc(Br)cc2)CC(C)(C)C)n1>>COC(=O)/C=C/c1ccc(CN(CC(C)(C)C)c2cnc(OC)n2)cc1

2043 C=CC(=O)OCCCC.Oc1ccc(I)cc1>>CCCCOC(=O)/C=C/c1ccc(O)cc1

2044 C=Cc1nn(C2CC2)c2ncnc(N)c12.Clc1cccc(I)c1>>Nc1ncnc2c1c(/C=C/c1cccc(Cl)c1)nn2C1CC1

2045 C=Cc1cccc([N+](=O)[O-])c1.O=C1C(O)=C(I)C(=O)c2cccc21>>O=C1C(O)=C(/C=C/c2cccc([N+](=O)[O-])c2)cc1

2046 C=CC(=O)N(C)Cc1nc2cccc2s1.CCn1c(=O)[nH]c2ncc(Br)cc21>>CCn1c(=O)[nH]c2ncc(/C=C/C(=O)N(C)Cc3nc4cccc4s3)cc21

2047 C=Cc1ccc(C)cc1.O=[N+](O-)c1ccc(Br)cc1>>Cc1ccc(/C=C/c2ccc([N+](=O)[O-])cc2)cc1

2048 C=Cc1nnn(C)n1.Ic1ccccc1>>Cn1nnn(/C=C/c2ccccc2)n1

2049 C=CC1CCCCC1.Cc1nc(-c2ccc(I)cc2)sc1-c1cnc(N)n1>>Cc1nc(-c2ccc(/C=C/C3CCCCC3)cc2)sc1-c1cnc(N)n1

2050 C=COC(CC)CCCCC.N#Cc1ccc(Br)cc1>>C=C(OC(CC)CCCCC)c1ccc(C#N)cc1

2051 C=CC(=O)NCc1ccccc1.COc1ccc(-c2oc3cc(OC)ccc3c(=O)c2I)cc1>>COc1ccc(-c2oc3cc(OC)ccc3c(=O)c2/C=C/C(=O)NCc2ccccc2)cc1

2052 C=CC(C)(C)O.Nc1cccc(Br)c1>>CC(C)(O)/C=C/c1cccc(N)c1

2053 C=CCCO.CC(=O)OC[C@H]1O[C@@H](n2cc(Cc3ccc(Br)cc3)c3c(C)cccc32)[C@H](OC(C)=O)[C@@H](OC(C)=O)[C@@H]1OC(C)=O>>CC(=O)OC[C@H]1O[C@@H](n2cc(Cc3ccc(/C=C/CCO)cc3)c3c(C)cccc32)[C@H](OC(C)=O)[C@@H](OC(C)=O)[C@@H]1OC(C)=O

2054 C=Cc1ccc(C(C)(C)C)cc1.Cc1ccc2c(-c3ccccc3)c(Br)c(=O)oc2c1>>Cc1ccc2c(-c3ccccc3)c(/C=C/c3ccc(C(C)(C)C)cc3)c(=O)oc2c1

2055 C=CC1CCCCC1.Cc1ccc(Br)cc1>>Cc1ccc(/C=C/C2CCCCC2)cc1

2056 C=CCC(O)c1c(C)noc1-c1ccc(Br)cc1.Ic1ccccc1>>Cc1noc(-c2ccc(Br)cc2)c1C(O)/C=C/c1ccccc1

2057 C=C[C@H]1O[C@@H]2OC(C)(C)O[C@@H]2[C@H]1O.O=C1CCOc2cc(Br)ccc21>>CC1(C)O[C@H]2O[C@H](/C=C/c3ccc4c(c3)OCCC4=O)[C@H](O)[C@H]2O1

2058 \*CN(Cc1ccccc1)N=Nc1ccc(I)cc1.C=Cc1ccccc1>>\*CN(Cc1ccccc1)N=Nc1ccc(/C=C/c2ccccc2)cc1

2059 C=CS(=O)(=O)F.Ic1ccc2ccccc2c1>>O=S(=O)(F)/C=C/c1ccc2ccccc2c1

2060 Br1ccncc1.C=CS(N)(=O)=O>>NS(=O)(=O)/C=C/c1ccncc1

2061 C=Cn1nnn(-c2ccc(C)cc2)n1.Fc1ccccc1I>>Cc1ccc(-c2nnn(/C=C/c3ccccc3F)n2)cc1

2062 C=COCCCC.N#Cc1cccc(Br)c1>>C=C(OCCCC)c1cccc(C#N)c1

2063 Br1cnc2c(c1)OCCCN2.C=CC(=O)OCC>>CCOC(=O)/C=C/c1cnc2c(c1)OCCCN2

2064

2065 C=Cc1cccc1.Ic1cccc2cccc12>>C(=C/c1cccc2cccc12)\c1cccc1  
 2066 C=CC(=O)OC.CCOC(=O)c1cc(=O)c2cccc(Br)c2o1>>CCOC(=O)c1cc(=O)c2cccc(/C=C/C(=O)OC)c2  
 2067 C=Cc1cccc(C=O)c1.CN1CCN(c2cc3c(cc2NS(C)(=O)=O)c(I)nn3C2CCCCO2)CC1>>CN1CCN(c2cc3c(cc2NS(C)(=O)=O)c(/C=C/c2cccc(C=O)c2)nn3C2CCCCO2)CC1  
 2068 C=SCC.Cc1cccc(Br)c1>>CCS/C=C/c1cccc(C)c1  
 2069 C=CC(=O)OC(C)(C)C.Cc1ccc(S(=O)(=O)n2cc(C=O)c3c(Br)cccc32)cc1>>Cc1ccc(S(=O)(=O)n2cc(C=O)c3c(/C=C/C(=O)OC(C)(C)C)cccc32)cc1  
 2070 C=CC#N.CCOC(=O)c1cccc(I)c1>>CCOC(=O)c1cccc(/C=C/C#N)c1  
 2071 C=CC=O.CC(=O)c1ccc(Br)cc1>>CC(=O)c1ccc(/C=C/C=O)cc1  
 2072 C=CC(=O)OC.O=Cc1sccc1Br>>COC(=O)/C=C/c1ccsc1C=O  
 2073 C=CC(=O)OC.CC(C)(C)c1nn(-c2ccc(C(F)(F)F)cn2)cc1I>>COC(=O)/C=C/c1cn(-c2ccc(C(F)(F)F)cn2)nc1C(C)(C)C  
 2074 C=C(CC(=O)OC)C(=O)OC.Cc1cccc1I>>COC(=O)C/C(=C)\c1cccc1C)C(=O)OC  
 2075 C=CC(=O)OC.Ic1cccc1C[Se]c1cccc1>>COC(=O)/C=C/c1cccc1C[Se]c1cccc1  
 2076 C=Cc1cncnc1.CN(C)CCOc1cnc(Br)c1>>CN(C)CCOc1cnc(/C=C/c2cncnc2)c1  
 2077 C=Cc1nc2cccc2s1.CCN(CC)S(=O)(=O)c1ccc(Br)cc1Cl>>CCN(CC)S(=O)(=O)c1ccc(/C=C/c2nc3cccc c3s2)cc1Cl  
 2078 C=CC(=O)OC.Cc1cc(C)cc(I)c1>>COC(=O)/C=C/c1cc(C)cc(C)c1  
 2079 C=CC(=O)N(C)c1cccc1.Clc1cccc1>>CN(C(=O)/C=C/c1cccc1)c1cccc1  
 2080 C=Cc1ccc(N(C)C)cc1.CCCn1c(=O)c(C)nc2ccc(Br)cc21>>CCCN1c(=O)c(C)nc2ccc(/C=C/c3ccc(N(C)C)cc3)cc21  
 2081 C=CC(=O)OC(C)(C)C.O=S(=O)(c1ccc(Br)cc1)n1nc2cccc21>>CC(C)(C)OC(=O)/C=C/c1ccc(S(=O)(=O)n2nc3cccc32)cc1  
 2082 C=Cc1ccc(F)cc1.Cc1ccc2c(-c3cccc3)c(Br)c(=O)oc2c1>>Cc1ccc2c(-c3cccc3)c(/C=C/c3ccc(F)cc3)c(=O)oc2c1  
 2083 C=CC(=O)OCC.Cc1ccc(S(=O)(=O)n2cc(C=O)c3c(Br)cccc32)cc1>>CCOC(=O)/C=C/c1cccc2c1c(C=O)cn2S(=O)(=O)c1ccc(C)cc1  
 2084 C=CC(=O)OC.CC(C)(C)O[C@H]1CC[C@H]2C=C(C3=C(Br)CCCC3)CC[C@H]12C>>COC(=O)/C=C/C1=C(C2=C[C@H]3CC[C@H](OC(C)(C)C)[C@H]3(C)CC2)CCCC1  
 2085 C=Cc1ccc2cccc2c1.O=C(OCCCC(Br)C(F)(F)F)c1cccc1>>O=C(OCCCC(/C=C/c1ccc2cccc2c1)C(F)(F)F)c1cccc1  
 2086 C=CC(=O)O.O=[N+](O-)]c1c(I)ccc2c1C=CC1(O2)C2CC3CC(C2)CC1C3>>O=C(O)/C=C/c1ccc2c(c1[N+](=O)[O-])C=CC1(O2)C2CC3CC(C2)CC1C3  
 2087 C=CC(=O)OCC.O=Cc1c(F)cc(Br)cc1F>>CCOC(=O)/C=C/c1cc(F)c(C=O)c(F)c1  
 2088 C=Cc1cccc1.Cc1ccc(N)c(Br)c1>>Cc1ccc(N)c(/C=C/c2cccc2)c1  
 2089 C=CC(=O)OCCCC.O=[N+](O-)]c1cccc([I+])c2cccc([N+](=O)[O-])c2c1>>CCCCOC(=O)/C=C/c1cccc([N+](=O)[O-])c1  
 2090 C=CC(N)=O.O=[N+](O-)]c1ccc(Br)cc1>>NC(=O)/C=C/c1ccc([N+](=O)[O-])cc1  
 2091 C=Cc1ccc(Cl)cc1.N#Cc1ccc2cc(Br)ccc2c1>>N#Cc1ccc2cc(/C=C/c3ccc(Cl)cc3)ccc2c1  
 2092 C=CC(=O)OC.COC(=O)C1=Nc2cc(Br)ccc2OC12CC2>>COC(=O)/C=C/c1ccc2c(c1)N=C(C(=O)OC)C1(CC1)O2  
 2093 C=CC(=O)OC(C)(C)C.O=C(O)c1ccc(I)cc1>>CC(C)(C)OC(=O)/C=C/c1ccc(C(=O)O)cc1  
 2094 C=Cc1ccc(C)cc1.COc1cccc1Br>>COc1cccc1/C=C/c1ccc(C)cc1  
 2095 C=CC(C)(C)O.Nc1cccc1Br>>CC(C)(O)/C=C/c1cccc1N  
 2096 C=CCC(=O)O.CC(=O)OC[C@H]1O[C@H](Oc2n[nH]c(C(C)C)c2Cc2ccc(Br)cc2)[C@H](OC(C)=O)[C@H](OC(C)=O)[C@H]1OC(C)=O>>CC(=O)OC[C@H]1O[C@H](Oc2n[nH]c(C(C)C)c2Cc2ccc(/C=C/CC(=O)O)cc2)[C@H](OC(C)=O)[C@H](OC(C)=O)[C@H]1OC(C)=O  
 2097 CCOC(=O)/C(F)=C\CCc1cccc1.COc1ccc(I)cc1>>CCOC(=O)/C(F)=C\CCc1cccc1)c1ccc(OC)cc1  
 2098 C=CC(OCC)OCC.FC(F)(F)c1cccc(I)c1>>CCOC(/C=C/c1cccc(C(F)(F)F)c1)OCC  
 2099 C=Cc1ccc(OC)cc1.O=c1cc(-c2cccc2)oc2ccc(Br)cc12>>COc1ccc(/C=C/c2ccc3oc(-c4cccc4)cc(=O)c3c2)cc1  
 2100 Brclenc2cccc2c1.C=CC(=O)OCC>>CCOC(=O)/C=C/c1enc2cccc2c1  
 2101 C=CC[C@H](C)N(C)C(=O)OC(C)(C)C.CC(C)(C)CC(=O)N1CC[C@H](Oc2cncc(Br)c2)C1>>C[C@H](C/C=C/c1nccc(O[C@H]2CCN(C(=O)CC(C)(C)C)C2)c1)N(C)C(=O)OC(C)(C)C  
 2102 C=CC(=O)OCc1cccc1.O=C1CO[C@H]2Cc3ccc(Br)cc3[C@H]2N1O>>O=C(/C=C/c1ccc2c(c1)[C@H]1[C@H](C2)OCC(=O)N1O)OCc1cccc1  
 2103 C=CC(=O)OC.CC(=O)Nc1ccc(I)cc1>>COC(=O)/C=C/c1ccc(NC(C)=O)cc1  
 2104 Brleesc1.C=CCN1C(=O)c2cccc2C1=O>>O=C1c2cccc2C(=O)N1C/C=C/c1ccsc1  
 2105 C=Cc1cccc(C(F)(F)F)c1.Cn1c(=O)c2c(cc(Br)n2C)n(C)c1=O>>Cn1c(=O)c2c(cc(/C=C/c3cccc(C(F)(F)F)c3)n2C)n(C)c1=O

2106 C=CC(=O)OCCCC.Fc1cccc(Br)c1>>CCCCOC(=O)/C=C/c1cccc(F)c1  
2107 C=Cc1ccc(OCCCCCCCCCCCC)c(OCCCCCCCCCCCC)c1.Oc1ccc(I)cc1>>CCCCCCCCCCCCCOc1cc  
c(/C=C/c2ccc(O)cc2)cc1OCCCCCCCCCCCCC  
2108 C=CC(=O)OC.Cn1nnc(N(Cc2cc(C(F)(F)F)cc(C(F)(F)F)c2)Cc2cc(C(F)(F)F)cnc2Cl)n1>>COC(=O)/C=  
C/c1ncc(C(F)(F)F)cc1CN(Cc1cc(C(F)(F)F)cc(C(F)(F)F)c1)c1nnn(C)n1  
2109 C=Cc1ccc([N+](=O)[O-]  
]cc1.Cc1cc(OCCO)c(C)cc1I>>Cc1cc(OCCO)c(C)cc1/C=C/c1ccc([N+](=O)[O-])cc1  
2110 C=CC(C)(C)C(=O)NC(C)(C)CO.CC(=O)OC[C@H]1O[C@H](c2cc(Cc3ccc(Br)cc3C)c(C)cc2C)[C  
@H](OC(C)=O)[C@H](OC(C)=O)[C@H]1OC(C)=O>>CC(=O)OC[C@H]1O[C@H](c2cc(Cc3  
ccc(/C=C/C(C)(C)C(=O)NC(C)(C)CO)cc3C)c(C)cc2C)[C@H](OC(C)=O)[C@H](OC(C)=O)[C@H]  
2111 C=CCn1c(C)c(C(=O)c2ccc(C)cc2)c2cc(Cl)ccc21.C[C@H](OCc1cccc(Br)c1)C(=O)N1CCOCC1>>C  
c1ccc(C(=O)c2c(C)n(C/C=C/c3cccc(CO[C@H](C)C(=O)N4CCOCC4)c3)c3ccc(Cl)cc23)cc1  
2112 C=CC(=O)NCCN(CCCNC(=O)OC(C)(C)C(=O)OC(C)(C)C.COC(=O)N[C@H]1[C@H](Oc2ccc(I  
)cc2)O[C@H](C)[C@H](OC(C)=O)[C@H]1OC(C)=O>>COC(=O)N[C@H]1[C@H](Oc2ccc(/  
C=C/C(=O)NCCN(CCCNC(=O)OC(C)(C)C(=O)OC(C)(C)C)cc2)O[C@H](C)[C@H](OC(C)=O)[  
C@H]1OC(C)=O  
2113 C=CC(OCC)OCC.O=Cc1ccc2ccccc2c1Br>>CCOC(/C=C/c1c(C=O)ccc2ccccc12)OCC  
2114 C=CC(=O)OC(C)(C)C.O=C1CN(CCN2CCOCC2)Cc2cc(Br)cnc2N1>>CC(C)(C)OC(=O)/C=C/c1cnc2  
c(c1)CN(CCN1CCOCC1)CC(=O)N2  
2115 C=CC(=O)OC(C)(C)C.COc1ccc2c(C(=O)c3cc(OC)c(OC)c(OC)c3)cn(S(=O)(=O)c3ccc(Br)cc3)c2c1>>  
COc1ccc2c(C(=O)c3cc(OC)c(OC)c(OC)c3)cn(S(=O)(=O)c3ccc(/C=C/C(=O)OC(C)(C)C)cc3)c2c1  
2116 C=CC(=O)OC.O=Cc1cc(Cl)ccc1Br>>COC(=O)/C=C/c1ccc(Cl)cc1C=O  
2117 C=COCC.COc1ccc(Br)cc1>>C=C(OCC)c1ccc(OC)cc1  
2118 C=CC(=O)N(C)Cc1cc2ccccc2s1.CC1(C)C(=O)Nc2ncc(Br)cc21>>CN(Cc1cc2ccccc2s1)C(=O)/C=C/c1  
cnc2c(c1)C(C)(C)C(=O)N2  
2119 C=CC(=O)OCCCC.O=C(/C=C/c1ccc(Br)cc1)c1ccc2sc3ccccc3c2c1>>CCCCOC(=O)/C=C/c1ccc(/C=C  
/C(=O)c2ccc3sc4ccccc4c3c2)cc1  
2120 C=Cc1cccc1.Cc1cc(I)cc(C)c1O>>Cc1cc(/C=C/c2ccccc2)cc(C)c1O  
2121 Brc1ccc(-c2coen2)cc1.C=CC(=O)OCC>>CCOC(=O)/C=C/c1ccc(-c2coen2)cc1  
2122 C=CC(=O)OC(C)(C)C.COc1cc(NCc2ccc(Br)cn2)cc(OC)c1OC>>COc1cc(NCc2ccc(/C=C/C(=O)OC(C  
)C(C)cn2)cc(OC)c1OC  
2123 C=CC(=O)OCCCC.O=[N+](O-)]c1ccc(Br)cc1>>CCCCOC(=O)/C=C/c1ccc([N+](=O)[O-])cc1  
2124 C=C1C(=O)O[C@H]2/C=C(\C)CC/C=C(\C)CC[C@H]12.COc1cccc1I>>COc1cccc1/C=C1/C(=  
O)O[C@H]2/C=C(\C)CC/C=C(\C)CC[C@H]12  
2125 C=CC(=O)O.COc1cc(I)ccc1O>>COc1cc(/C=C/C(=O)O)ccc1O  
2126 Brc1ccc2oc(-c3cc[nH]n3)cc2c1.C=CC#N>>N#C/C=C/c1ccc2oc(-c3cc[nH]n3)cc2c1  
2127 C=Cc1ccc2ccccc2c1.FC(F)(F)Cl>>FC(F)(F)C/C=C/c1ccc2ccccc2c1  
2128 C=Cc1cccc1.CC(C)=C(C)Br>>CC(C)=C(C)/C=C/c1cccc1  
2129 C=CC(=O)Nc1ccc(F)cc1.COc1ccc2c(=O)c(I)coc2c1>>COc1ccc2c(=O)c(/C=C/C(=O)Nc3ccc(F)cc3)co  
c2c1  
2130 Brc1cccc1.C=CCOc1ccc(C)cc1>>Cc1ccc(OC/C=C/c2ccccc2)cc1  
2131 C=CC(=O)Oc1cccc1.IC(CC[Se]c1cccc1)=C(c1cccc1)c1cccc1>>O=C(/C=C/C(CC[Se]c1cccc1)=C  
(c1cccc1)c1cccc1)Oc1cccc1  
2132 C=CC(=O)OC.OC[C@H]1O[C@H](Oc2ccc(I)cc2)C[C@H]1O>>COC(=O)/C=C/c1ccc(O[C@H]2  
C[C@H](O)[C@H](CO)O2)cc1  
2133 Brc1ccc(-c2ccccc2)cc1.C=C(NC(C)=O)C(=O)OC>>COC(=O)/C=C/c1ccc(-c2ccccc2)cc1)NC(C)=O  
2134 C=CC(=O)OCCCC.COc1ccc(Br)c(CCNC(=O)OC(C)(C)C)c1C>>CCCCOC(=O)/C=C/c1ccc(OC)c(C)c  
1CCNC(=O)OC(C)(C)C  
2135 C=CC(=O)OC.Cc1cc2c(c(C)c1Br)CCC2>>COC(=O)/C=C/c1c(C)cc2c(c1C)CCC2  
2136 C=CC(=O)OC.CC(=O)N1CCc2cc(I)ccc21>>COC(=O)/C=C/c1ccc2c(c1)CCN2C(C)=O  
2137 C=Cc1cccc1C.Ic1cccc1>>Cc1cccc1/C=C/c1cccc1  
2138 C=Cc1cccc1.O=C(/C=C/c1ccc1)c1ccc(I)cc1>>O=C(/C=C/c1ccc1)c1ccc(/C=C/c2ccccc2)cc1  
2139 C=CC=O.Cc1ccc(I)c1>>Cc1ccc(/C=C/C=O)c1  
2140 C=C1C(=O)O[C@H]2/C=C(\C)CC/C=C(\C)CC[C@H]12.Cc1cc(I)ccc1N>>C/C1=C[C@H]2OC(  
=O)/C=C/c3ccc(N)c(C)c3)[C@H]2CC/C(C)=C/CC1  
2141 Brc1ccc(C=C(c2ccccc2)c2ccccc2)cc1.C=Cc1ccc(-  
c2ccc3c4ccccc4n(CC)c3c2)cc1>>CCn1c2ccccc2c2ccc(-  
2142 C=CP(=O)(OCC)OCC.Ic1cccc1>>CCOP(=O)/C=C/c1cccc1)OCC  
2143 C=CC(=O)OCC.Nc1cccc(I)c1>>CCOC(=O)/C=C/c1cccc(N)c1

2144 C=Cc1ccc2c(c1)C(=O)N([C@@H](CCC(=O)OCC)C(=O)OCC)C2.CC(C)(C)C(=O)Nc1nc2[nH]cc(I)c2  
 c(=O)[nH]1>>CCOC(=O)CC[C@@H](C(=O)OCC)N1Cc2ccc(/C=C/c3c[nH]c4nc(NC(=O)C(C)(C)C)[  
 nH]c(=O)c34)cc2C1=O  
 C=CC(=O)OC(C)(C)C.CCCOC1ccc(Br)cc1-  
 2145 c1nc2c(c(C)nn2CCC)c(=O)[nH]1>>CCCOc1ccc(/C=C/C(=O)OC(C)(C)C)cc1-  
 c1nc2c(c(C)nn2CCC)c(=O)[nH]1  
 C=CC(=O)OC(C)(C)C.CC(C)(C)O[C@H]1CCC[C@H]2C=C(C3=C(Br)CCCC3)CC[C@@]21C>>CC(  
 2146 C)(C)OC(=O)/C=C/C1=C(C2=C[C@@H]3CCC[C@H](OC(C)(C)C)[C@@]3(C)CC2)CCCC1  
 C=Cc1ccccn1.CN(C(=O)c1cccc1)c1ccc2c(c1)[nH]c(=NC(=O)c1ccc(Br)s1)n2CCC(N)=O>>CN(C(=O  
 2147 )c1cccc1)c1ccc2c(c1)[nH]c(=NC(=O)c1ccc(/C=C/c3cccn3)s1)n2CCC(N)=O  
 2148 C=CC[C@@H](C)O.CC(C)Oc1cncc(Br)c1>>CC(C)Oc1cncc(/C=C/C[C@@H](C)O)c1  
 2149 C=CC#N.CCOC(=O)Nc1cccc1C1=C(I)CCN1S(=O)(=O)c1ccc(C)cc1>>CCOC(=O)Nc1cccc1C1=C(/  
 C=C/C#N)CCN1S(=O)(=O)c1ccc(C)cc1  
 2150 C=C(c1ccc(OC)c(I)c1)c1cc(OC)c(OC)c(OC)c1.C=CC(=O)OC>>C=C(c1ccc(OC)c(/C=C/C(=O)OC)c1)  
 c1cc(OC)c(OC)c(OC)c1  
 2151 C=CC(=O)OC.CCCc1nc2c(C)cc(C)nc2n1Cc1ccc(Br)cc1>>CCCc1nc2c(C)cc(C)nc2n1Cc1ccc(/C=C/C(  
 =O)OC)cc1  
 2152 C=CC(=O)OC(C)(C)C.COc1ccc(S(=O)(=O)n2ccc3cc(Br)cn32)cc1OC>>COc1ccc(S(=O)(=O)n2ccc3c  
 c(/C=C/C(=O)OC(C)(C)C)cn32)cc1OC  
 2153 C=CC(=O)OC.OCCc1cccc1Br>>COC(=O)/C=C/c1cccc1CCO  
 2154 C=CC(C)=O.COC(=O)c1cc(Br)cn1C(=O)OC(C)(C)C>>COC(=O)c1cc(/C=C/C(C)=O)cn1C(=O)OC(C  
 )(C)C  
 2155 C=C(F)C(=O)OC.COC(=O)c1cccc1I>>COC(=O)/C(F)=C/c1cccc1C(=O)OC  
 2156 C=Cc1ccc(-c2cccs2)cc1.CC(C)(C)Br>>CC(C)(C)/C=C/c1ccc(-c2cccs2)cc1  
 2157 C=CCCN(C)C(=O)OC(C)(C)C.CCSc1cncc(Br)c1>>CCSc1cncc(/C=C/CCN(C)C(=O)OC(C)(C)C)c1  
 2158 C=C1C(=O)O[C@@H]2C[C@@]3(C)CCCC(=C)[C@@H]3C[C@H]12.Ic1ccnc1>>C=C1CCC[C@]  
 2159 2(C)C[C@H]3OC(=O)/C(=C/c4cccn4)[C@H]3C[C@@H]12  
 2159 C=Cc1cccc(N)n1.Cn1c(=O)c2c(cc(Br)n2C)n(C)c1=O>>Cn1c(=O)c2c(cc(/C=C/c3cccc(N)n3)n2C)n(C)  
 2160 C=CC(C)O.COc1c(C)c(C)c(OC)c(I)c1C>>COc1c(C)c(C)c(OC)c(/C=C/C(C)O)c1C  
 2161 C=CC(=O)OC.O=S(=O)(c1cccc(Cl)c1)N1CCc2cc(Br)cn21>>COC(=O)/C=C/c1nc2c(c1)CCN2S(=O  
 )(=O)c1cccc(Cl)c1  
 2162 C=CC(=O)OCC.Cc1nc(-c2ccccc2)c(Br)o1>>CCOC(=O)/C=C/c1oc(C)nc1-c1cccc1  
 2163 C=Cc1ccc(/C=C/c2ccc(N(C)C)cc2)cc1.O=c1ccc2c(-c3ccc(I)cc3S(=O)(=O)O)c3ccc(O)cc3oc-  
 2164 2c1>>CN(C)c1ccc(/C=C/c2ccc(/C=C/c3ccc(-c4c5ccc(=O)cc-  
 C=Cc1cccc1.Cc1noc(C)c1I>>Cc1noc(C)c1/C=C/c1cccc1  
 2165 C=CC(=O)OCC.Cc1[nH]c2cccc2c1CCN(Cc1cccc(Br)c1)C(=O)OC(C)(C)C>>CCOC(=O)/C=C/c1ccc  
 c(CN(CCc2c(C)[nH]c3cccc23)C(=O)OC(C)(C)C)c1  
 2166 C=CC(=O)OC.Cn1nc(-c2ccccc2)c(Br)cc1=O>>COC(=O)/C=C/c1cc(=O)n(C)nc1-c1cccc1  
 2167 C=Cc1cccc(Br)c1.CCOC(=O)C(F)I>>CCOC(=O)C(F)/C=C/c1cccc(Br)c1  
 2168 C=CCCP(=O)(OC)OC.Ic1cccc1>>COP(=O)(CC/C=C/c1cccc1)OC  
 2169 C=CC(=O)OC.CCC1(CN2[C@H](C)Cc3c([nH]c4cccc34)[C@H]2c2c(F)cc(Br)cc2F)CC1>>CCC1(C  
 N2[C@H](C)Cc3c([nH]c4cccc34)[C@H]2c2c(F)cc(/C=C/C(=O)OC)cc2F)CC1  
 2170 C=COCCCCCCC.COc1ccc(Br)cc1>>C=C(OCCCCCCC)ccc1ccc(OC)cc1  
 2171 C=CC(=O)OC(C)(C)C.FC(F)Oc1ccc(Br)cn1>>CC(C)(C)OC(=O)/C=C/c1ccc(OC(F)F)nc1  
 2172 C=CC(=O)OC.CCN(CC)c1ccc(-c2oc3cc(Br)ccc3c(=O)c2O)cc1>>CCN(CC)c1ccc(-  
 c2oc3cc(/C=C/C(=O)OC)ccc3c(=O)c2O)cc1  
 2173 C=Cc1ccc(C)cc1.Cn1cncc1-c1ccc(Br)cc1>>Cc1ccc(/C=C/c2ccc(-c3cncc3C)cc2)cc1  
 2174 C=CC(=O)N(C)Cc1oc2cccc2c1C.CC(C)(C)OC(=O)N1CCNc2ncc(Br)cc2C1>>Cc1c(CN(C)C(=O)/C=  
 C/c2cnc3c(c2)CN(C(=O)OC(C)(C)C)CCN3)oc2cccc12  
 2175 C=CC(=O)OCCCC.Cn1nc(Br)c2cccc(Cl)c21>>CCCCOC(=O)/C=C/c1nn(C)c2c(Cl)cccc12  
 2176 C=CS(C)(=O)=O.FC(F)(F)c1cc(Br)cc(C(F)(F)F)c1>>CS(=O)(=O)/C=C/c1cc(C(F)(F)F)cc(C(F)(F)F)c1  
 2177 C=Cc1cccc1.FC(F)(F)C(=C(Br)c1cccc1)N1CCOCC1>>FC(F)(F)C(=C(/C=C/c1cccc1)c1cccc1)N1  
 CCOCC1  
 C=CC(=O)CCC.CCC1=C[C@@H]2CN(C1)Cc1c([nH]c3ccc(I)cc13)[C@@](C(=O)OC)(c1cc3c(cc1O  
 2178 C)N(C)[C@H]1[C@@](O)(C(=O)OC)[C@H](OC(C)=O)[C@]4(CC)C=CCN5CC[C@]31[C@@H]54)  
 C2>>CCCC(=O)/C=C/c1ccc2[nH]c3c(c2c1)CN1CC(CC)=C[C@H](C1)C[C@]3(C(=O)OC)c1cc2c(cc1  
 OC)N(C)[C@H]1[C@@](O)(C(=O)OC)[C@H](OC(C)=O)[C@]3(CC)C=CCN4CC[C@]21[C@@H]4  
 C=C[C@H](NC(=O)OCc1cccc1)C(=O)O.Ic1cccs1>>O=C(N[C@@H](/C=C/c1cccs1)C(=O)O)OCc1c  
 ccc1  
 2179 C=CC(=O)OCc1cccc1.CC(C)(C)OC(=O)NCc1cc2cccc2nc1Cl>>CC(C)(C)OC(=O)NCc1cc2cccc2nc  
 1/C=C/C(=O)OCc1cccc1  
 2180

2181 C=CC(=O)OCC.Fc1cc2cnccc2cc1Br>>CCOC(=O)/C=C/c1cc2cnccc2cc1F  
2182 C=CCC(C)O.Cc1ccc(Br)cc1[N+](=O)[O-]>>Cc1ccc(/C=C/CC(C)O)cc1[N+](=O)[O-]  
2183 C=C1C(=O)O[C@H]2[C@H]1CC/C(C)=C/CC[C@@]1(C)O[C@H]21.Ic1ccsc1>>C/C1=C\CC[C@  
@]2(C)O[C@H]2[C@H]2OC(=O)/C=C/c3ccccc3)[C@@H]2CC1  
2184 C=CC(=O)OC.FC(F)(F)CCCOc1ccc(OC(F)(F)c2ccc(Br)cc2)cc1>>COC(=O)/C=C/c1ccc(C(F)(F)Oc2c  
cc(OC(C)(F)(F)F)cc2)cc1  
2185 C=CC#N.Cn1c2cccc2c2nc3ccc(Cl)cc3c3cccc1c32>>Cn1c2cccc2c2nc3ccc(/C=C/C#N)cc3c3cccc1c3  
2186 C=CC(=O)OC.Cc1ccc(C2(/C=C(/I)c3ccccc3)C(=O)N(C)c3ccccc32)cc1>>COC(=O)/C=C/C(=C/C1(c2  
ccc(C)cc2)C(=O)N(C)c2ccccc21)c1ccccc1  
2187 C/C(I)=C/C#N.C=CC=O>>CC(=C/C#N)/C=C/C=O  
2188 C=Cc1ccccc1.Cc1cc(C)cc(I)c1>>Cc1cc(C)cc(/C=C/c2ccccc2)c1  
2189 C=C1C(=O)O[C@H]2[C@H]1CC/C(C)=C/CC[C@@]1(C)O[C@H]21.Fc1ccccc1I>>C/C1=C\CC[C@  
@]2(C)O[C@H]2[C@H]2OC(=O)/C=C/c3ccccc3F)[C@@H]2CC1  
2190 C=CC(=O)OC.CC1(C)CC(=C(c2ccc(Br)cc2)c2ccc3c(c2)c(F)nn3C2CCCCO2)CC(C)(C)C1>>COC(=O  
)C=C/c1ccc(C(=C2CC(C)(C)CC(C)(C)C2)c2ccc3c(c2)c(F)nn3C2CCCCO2)cc1  
2191 C=CC(=O)OC.Cc1cc2c(c(C)c1Br)CC(C)(C)C2=O>>COC(=O)/C=C/c1c(C)cc2c(c1C)CC(C)(C)C2=O  
2192 C=CC(N)=O.COc1ccc2c(c1)C(Br)=C(C=O)CC2>>COc1ccc2c(c1)C(/C=C/C(N)=O)=C(C=O)CC2  
2193 C=CC(=O)OC.CC(=O)Nc1ccc(Cl)cc1I>>COC(=O)/C=C/c1cc(Cl)ccc1NC(C)=O  
2194 C=C[Si](C)(C)C.COc1cc(CC(C(=O)OC(C)(C)C)C(=O)OC(C)(C)C)c(I)c(OC)c1OC>>COc1cc(CC(C(=O  
OC(C)(C)C)C(=O)OC(C)(C)C)c(/C=C/[Si](C)(C)C)c(OC)c1OC  
2195 C=COCCCC.COc1ccc2c(Br)cc(=O)cc2c1>>CCCCO/C=C/c1cc(=O)cc2cc(OC)ccc12  
2196 C=CC(=O)OCC.CC1(C)CC(=C(c2ccc(Br)cc2)c2ccc(O)c(Cl)c2)CC(C)(C)O1>>CCOC(=O)/C=C/c1ccc  
(C(=C2CC(C)(C)OC(C)(C)C2)c2ccc(O)c(Cl)c2)cc1  
2197 C=CC(=O)OC(C)(C)C.CC(C)c1cc(C(C)C)c(Br)c(C(C)C)c1>>CC(C)c1cc(C(C)C)c(/C=C/C(=O)OC(C)  
(C)C)c(C(C)C)c1  
2198 C=Cc1ccc(CNC(=O)OC(C)(C)C)cc1.Cc1noc(-c2ccccc2)c1I>>Cc1noc(-  
c2ccccc2)c1/C=C/c1ccc(CNC(=O)OC(C)(C)C)cc1  
2199 C=CS(=O)(=O)F.CC(=O)c1ccc(I)cc1>>CC(=O)c1ccc(/C=C/S(=O)(=O)F)cc1  
2200 Brc1ccnc1.C=CC(F)(F)F>>FC(F)(F)/C=C/c1ccnc1  
2201 Brc1ccccc1.C=CS c1ccccc1>>C(=C/c1ccccc1)\Sc1ccccc1  
2202 C=CCN1C(=O)c2ccccc2C1=O.O=C1NCCc2cc(Br)ccc21>>O=C1NCCc2cc(/C=C/CN3C(=O)c4ccccc4  
C3=O)ccc21  
2203 C=CC(=O)OCCCC.O=C1c2cccc2C(=O)N1c1ccc(I)cc1>>CCCCOC(=O)/C=C/c1ccc(N2C(=O)c3cccc  
c3C2=O)cc1  
2204 C=CCCO.CCCCCCCCCCOc1enc(-c2ccc(Br)cc2)nc1>>CCCCCCCCCOc1enc(-  
C=CC(=O)OCC.Oc1ccc(C(=C2CCCCC2)c2ccc(Br)cc2)cc1Cl>>CCOC(=O)/C=C/c1ccc(C(=C2CCC  
CCC2)c2ccc(O)c(Cl)c2)cc1  
2206 C=CC(=O)OCCCC.Ic1ccccc1>>CCCCC(=O)/C=C/c1ccccc1  
2207 Brc1ccc2cnnc(N3CCOCC3)c2c1.C=Cc1ccncc1>>C(=C/c1ccc2cnnc(N3CCOCC3)c2c1)\c1ccncc1  
2208 C=CC(=O)OC.CC(C)(C)OC(=O)N1CCc2ccc(Br)cc2C1>>COC(=O)/C=C/c1ccc2c(c1)CN(C(=O)OC(C  
)C)CC2  
2209 C=C(NC(=O)OC(C)(C)C)C(=O)OC.CC(C)(C)OC(=O)Nc1ccc(I)cc1>>COC(=O)/C=C/c1ccc(NC(=O)  
OC(C)(C)C)cc1)NC(=O)OC(C)(C)C  
2210 C=CC(OCC)OCC.Fc1ccccc1I>>CCOC(/C=C/c1ccccc1F)OCC  
2211 C=CC(=O)NCc1ccccc1.O=c1c(I)coc2cc(O)ccc12>>O=C(/C=C/c1coc2cc(O)ccc2c1=O)NCc1ccccc1  
2212 C=CCN(C(=O)C(C)(C)C)[C@@H]1CCc2ccccc21.O=C1Nc2ncccc2[C@@]12Cc1cc(Br)enc1C2>>CC(  
C)(C)C(=O)N(C/C=C/c1enc2c(c1)C[C@@]1(C2)C(=O)Nc2ncccc21)[C@@H]1CCc2ccccc21  
2213 C=CS(=O)(=O)CC.CN1CCC(c2c[nH]c3ccc(Br)cc23)CC1>>CCS(=O)(=O)/C=C/c1ccc2[nH]cc(C3CC  
N(C)CC3)c2c1  
2214 C=CCOC(C)=O.Ic1cccs1>>CC(=O)OC/C=C/c1cccs1  
C=Cc1ccc(C(=O)N[C@@H](CCSC)C(=O)OC)c(-  
2215 c2ccccc2C)c1.O=C(c1ccccc1)c1ccncc1Br>>COC(=O)[C@H](CCSC)NC(=O)c1ccc(/C=C/c2cnccc2C(  
=O)c2ccccc2)cc1-c1ccccc1C  
2216 C=C.Clc1ccc(I)c1>>C=Cc1ccc(Cl)c1  
C=Cc1ccc2c(c1)CC[C@@H]1[C@@H]2CC[C@]2(C)[C@@H](O[Si](C)(C)C(C)(C)C)CC[C@@H]1  
2217 2.C[Si](C)(C)I>>CC(C)(C)[Si](C)(C)O[C@H]1CC[C@H]2[C@@H]3CCc4cc(/C=C/[Si](C)(C)C)ccc4  
[C@H]3CC[C@]12C  
2218 C=COCCCC.Cc1ccc(Br)c(C)n1>>C=C(OCCCC)c1ccc(C)nc1C  
2219 C=CC(=O)OC(C)(C)C.Ic1ccc(-c2ccccc2)cc1>>CC(C)(C)OC(=O)/C=C/c1ccc(-c2ccccc2)cc1  
2220 C=CC(C)=O.c1ccc([I+](c2ccccc2)cc1>>CC(=O)/C=C/c1ccccc1

C=Cc1cn(COCC[Si](C)(C)C)nc1-  
 2221 c1nc2ccc(OC)cc2n1COCC[Si](C)(C)C.COC(=O)c1nccc(Br)c1>>COC(=O)c1nccc(/C=C/c2cn(COCC[Si](C)(C)C)nc2-c2nc3ccc(OC)cc3n2COCC[Si](C)(C)C)c1  
 2222 C=CCNC(=O)OC(C)(C)C.COc1ccc(OS(=O)(=O)C(F)(F)F)c(Cl)c1>>C=C(CNC(=O)OC(C)(C)C)c1ccc(OC)cc1Cl  
 2223 C=C(NC(C)=O)C(=O)OC.O=C(c1cccc1)c1ccc(Br)cc1>>COC(=O)/C(=C/c1ccc(C(=O)c2ccccc2)cc1)NC(C)=O  
 2224 C=CC(=O)OC.COCCOc1ccc(C)nc1Br>>COCCOc1ccc(C)nc1/C=C/C(=O)OC  
 2225 C=CC(=O)OC.Cc1ccc(I)cc1>>COC(=O)/C=C/c1ccc(C)cc1  
 2226 C=C(OC(C)=O)C(=O)OCC(F)(F)F.CC1(C)CCc2cc(I)ccc2O1>>CC(=O)O/C(=C/c1ccc2c(c1)CCC(C)(C)O2)C(=O)OCC(F)(F)F  
 2227 C=CC(=O)O.CC(C)(C)OC(=O)N[C@@H](Cc1ccc(Br)cc1)C(=O)O>>CC(C)(C)OC(=O)N[C@@H](Cc1ccc(/C=C/C(=O)O)cc1)C(=O)O  
 2228 C=Cc1cccc1.O=c1c(Br)c(-c2ccccc2)oc2ccccc12>>O=c1c(/C=C/c2ccccc2)c(-c2ccccc2)oc2ccccc12  
 2229 C=CC#N.O=c1cc(I)cnn1Cc1cccc1>>N#C/C=C/c1cnn(Cc2ccccc2)c(=O)c1  
 2230 C=C.Cc1ccc(Cl)cc1>>C=Cc1ccc(C)cc1  
 2231 C/C1=C/CC[C@](C)(O[Si](C)(C)C(C)(C)C)[C@H]2C=C(OS(=O)(=O)C(F)(F)F)[C@@H](Cl)O2.C=COCC>>C=C(OCC)C1=C[C@H]2O[C@@H]1C/C(C)=C\CC[C@]2(C)O[Si](C)(C)C(C)(C)C  
 2232 C=CC(=O)OC.C[Si](C)(C)/C=C/C1=C(Br)CCCC1>>COC(=O)/C=C/C1=C/C(=C/[Si](C)(C)C)CCCC1  
 2233 C=Cc1ccc(OC(C)=O)cc(OC(C)=O)c1.COc1ccc([C@H]2Oc3ccc(Br)cc3[C@H]2c2cc(OC)cc(OC)c2)cc1>>COc1ccc([C@H]2Oc3ccc(/C=C/c4cc(OC(C)=O)cc(OC(C)=O)c4)cc3[C@H]2c2cc(OC)cc(OC)c2)cc1  
 2234 C=CC(C)=O.CC#Cc1nccc(Br)c1>>CC#Cc1nccc(/C=C/C(C)=O)c1  
 2235 C=CC(C)(O)CCC=C(C)C.Oc1ccc(OCc2ccccc2)cc1Br>>CC(C)=CCCC(C)(O)/C=C/c1cc(OCc2ccccc2)ccc1O  
 2236 C=CC(=O)N1N=Cc2ccccc2C1C.COc1cc(Cc2cnc(N)nc2N)cc(I)c1OC>>COc1cc(Cc2cnc(N)nc2N)cc(/C=C/C(=O)N2N=Cc3ccccc3C2C)c1OC  
 2237 C=CSel1nccn1.Ic1cccc1>>C(=C/c1cccc1)\Sel1nccn1  
 2238 C=C[C@H](OC)[C@@H](C)[C@@H](OC)[C@@H](C)COCOC.Ic1cccc1>>COCOC[C@H](C)[C@@H](OC)[C@H](C)[C@H](/C=C/c1cccc1)OC  
 2239 C=Cc1cc2c(cc1Cn1ccn1)C(C)(C)CCC2(C)C.CCOC(=O)c1ccc(Br)cc1>>CCOC(=O)c1ccc(/C=C/c2cc3c(cc2Cn2ccn2)C(C)(C)CCC3(C)C)cc1  
 2240 C=CC(=O)Nc1cccc2ccnc12.Cc1ccc(I)cc1>>Cc1ccc(/C=C/C(=O)Nc2cccc3ccnc23)cc1C  
 2241 C=CC(=O)OC.CCCCCCCCC(=O)NCc1cc(OC)c(OCOCCOC)cc1I>>CCCCCCCCC(=O)NCc1cc(OC)c(OCOCCOC)cc1/C=C/C(=O)OC  
 2242 C=CCN(C(=O)OC(C)(C)C)C(=O)OC(C)(C)C.Clc1cccs1>>CC(C)(C)OC(=O)N(C/C=C/c1cccs1)C(=O)OC(C)(C)C  
 2243 C=COCCCC.CN1CCc2cc(Br)ccc21>>C=C(OCCCC)c1ccc2c(c1)CCN2C  
 2244 C=CC(=O)OCC.Cn1cc(C(=O)Nc2ccc(-c3ccccc3)c(C(F)(F)F)c2)c(=O)c2ccc(Br)cc21>>CCOC(=O)/C=C/c1ccc2c(=O)c(C(=O)Nc3ccc(-c4ccccc4)c(C(F)(F)F)c3)cn(C)c2c1  
 2245 C=CC(=O)OC.Nc1ccc(C(=O)O)cc1I>>COC(=O)/C=C/c1cc(C(=O)O)ccc1N  
 2246 C=CCNC(=O)c1cc(C)on1.Ic1ccc2c(c1)OCCO2>>Cc1cc(C(=O)NC/C=C/c2ccc3c(c2)OCCO3)no1  
 2247 C=Cc1ccc(OC)cc1.COC(=O)Cn1c(=O)c(Cl)nc2cc(Br)cnc21>>COC(=O)Cn1c(=O)c(/C=C/c2ccc(OC)c2)nc2cc(Br)cnc21  
 2248 C=CC(=O)OC.COc1cc(Br)cc(F)c1C=O>>COC(=O)/C=C/c1cc(F)c(C=O)c(OC)c1  
 2249 C=CC(N)=O.COc1cccc2c1CCC(C=O)=C2Br>>COc1cccc2c1CCC(C=O)=C2/C=C/C(N)=O  
 2250 C=CN1C(=O)c2ccccc2C1=O.OC(c1ccc(C(F)(F)F)cc1)c1cncnc1Br>>O=C1c2ccccc2C(=O)N1/C=C/c1cncnc1C(O)c1ccc(C(F)(F)F)cc1  
 2251 C=CC(=O)OC(C)(C)C.CCOC(=O)/C(Br)=C1\CCCO1>>CCOC(=O)C(/C=C/C(=O)OC(C)(C)C)=C1\CCO1  
 2252 C=CCCCCCC.Cc1cccc1Br>>C=C(CCCCCC)c1cccc1C  
 2253 C=Cc1cccc1.Cn1c(=O)c2c(cc(Br)n2C)n(C)c1=O>>Cn1c(=O)c2c(cc(/C=C/c3ccccc3)n2C)n(C)c1=O  
 2254 C=CC(=O)OCC.Cc1ccc(-c2c(CNC(=O)OC(C)(C)C)c(CC(C)C)nc3ccc(OS(=O)(=O)C(F)(F)F)cc23)cc1>>CCOC(=O)/C=C/c1ccc2nc(CC(C)C)c(CNC(=O)OC(C)(C)C)c(-c3ccc(C)cc3)c2c1  
 2255 C=CC(=O)N1N=Cc2ccccc2C1C=C(C)C.COc1cc(Cc2cnc(N)nc2N)cc(I)c1OC>>COc1cc(Cc2cnc(N)nc2N)cc(/C=C/C(=O)N2N=Cc3ccccc3C2C=C(C)C)c1OC  
 2256 C=Cc1cccc1O.COc1cccc1Br>>COc1cccc1/C=C/c1cccc1O  
 2257 C=CC(=O)OC.Cc1[nH]c2ccccc2c1C1CCCN1Cc1ccc(Br)cc1>>COC(=O)/C=C/c1ccc(CN2CCCC2c2c(C)[nH]c3ccccc23)cc1  
 2258 C=Cc1c(F)c(F)c(F)c(F)c1F.Ic1cccc2ccccc12>>Fc1c(F)c(F)c(/C=C/c2cccc3ccccc23)c(F)c1F



2259 C=CC[Si](C)(C)C.N#Cc1ccc(Br)cc1>>C=C(C[Si](C)(C)C)c1ccc(C#N)cc1  
2260 C=CC(C)=O.O=C1Cc2c([nH]c3ccc(F)cc23)-c2cc(I)ccc2N1>>CC(=O)/C=C/c1ccc2c(c1)-  
c1[nH]c3ccc(F)cc3c1CC(=O)N2  
2261 C=CC(=O)OCCCC.CC(=O)c1ccc(Cl)cc1>>CCCCOC(=O)/C=C/c1ccc(C(C)=O)cc1  
2262 C=CC(=O)OC.Cc1cccc(Br)c1>>COC(=O)/C=C/c1cccc(C)c1  
2263 C=Cc1ccc2c(c1)C1c3cccc4cccc(c34)C21.N#Cc1ccc(I)cc1C#N>>N#Cc1ccc(/C=C/c2ccc3c(c2)C2c4ccc  
c5cccc(c45)C32)cc1C#N  
2264 C=CC(=O)N(C)OC.Cc1ccc(I)cc1>>CON(C)C(=O)/C=C/c1ccc(C)cc1  
2265 C=Cc1ccc(C=O)cc1.COC(=O)c1cc(OC)c(OC)cc1I>>COC(=O)c1cc(OC)c(OC)cc1/C=C/c1ccc(C=O)cc  
2266 C=CCO.O=C(c1cccc1)c1ccc(Br)cc1>>C=C(CO)c1ccc(C(=O)c2cccc2)cc1  
2267 Br1cccc1.C=C1c2cccc2C1(C#N)CC>>CCC1(C#N)/C=C/c2cccc2)c2cccc21  
2268 C=CC(=O)OC(C)(C)C.Cl1ccc(Br)cc1>>CC(C)(C)OC(=O)/C=C/c1ccc(Cl)cc1  
C=C[C@H]1COC(C)(C)O1.CCOC(=O)[C@@H](Cc1cc(Br)ccc1OCc1ccnc(-  
2269 c2cccc2OC)n1)OC(C)=O>>CCOC(=O)[C@H](Cc1cc(/C=C/[C@H]2COC(C)(C)O2)ccc1OCc1ccnc  
(-c2cccc2OC)n1)OC(C)=O  
2270 Br1cccc2cc[nH]c12.C=CC(=O)O>>O=C(O)/C=C/c1cccc2cc[nH]c12  
2271 C=Cc1ccncc1.O=C1CCC(c2ccc(Br)cc2)O1>>O=C1CCC(c2ccc(/C=C/c3ccncc3)cc2)O1  
C=Cc1cc([N+](=O)[O-  
2272 ])ccc1OCOCC[Si](C)(C)C.N#Cc1cccc1I>>C[Si](C)(C)CCOCOc1ccc([N+](=O)[O-  
])cc1/C=C/c1cccc1C#N  
2273 C=Cc1ccc(CCl)cc1.Ic1cccc1>>ClCc1ccc(/C=C/c2cccc2)cc1  
2274 C=CC(=O)OC.CC1(c2ccc(I)cc2)CC1>>COC(=O)/C=C/c1ccc(C2(C)CC2)cc1  
2275 C=C(NC(=O)OC(C)(C)C)C(=O)OC.Nc1ccc(I)cc1>>COC(=O)/C=C/c1ccc(N)cc1)NC(=O)OC(C)(C)C  
2276 C=CC(C)=O.CCCCCC1=C(I)C1(F)F>>CCCCC1=C(/C=C/C(C)=O)C1(F)F  
Br1cccc1.C=C[C@H]1CN2CC[C@H]1C[C@@H]2[C@H](O)c1ccnc2ccc(OC)cc12>>COc1ccc2ncc  
c([C@@H](O)[C@H]3C[C@@H]4CCN3C[C@@H]4/C=C/c3cccc3)c2c1  
2277 C=Cc1ccncc1.Fc1ccc(Cl)cc1>>Fc1ccc(/C=C/c2ccncc2)cc1  
2278 C=C.COc1ccc2cc(Br)ccc2c1>>C=Cc1ccc2cc(OC)ccc2c1  
2279 Br1cccc1.C=Cn1nnc(-c2ccc(C)cc2)n1>>Cc1ccc(-c2nnn(/C=C/c3cccc3)n2)cc1  
2280 C=Cc1cccc1.Cc1cc(I)nc(C(C)C)n1>>Cc1cc(/C=C/c2cccc2)nc(C(C)C)n1  
2281 C=CC(=O)OC.O=[N+](O-)]c1ccc(Br)cc1>>COC(=O)/C=C/c1ccc([N+](=O)[O-])cc1  
2282 C=CC(=O)c1ccc(OC)cc1OC.CC(=O)Oc1ccc(I)cc1>>COc1ccc(C(=O)/C=C/c2ccc(OC(C)=O)cc2)c(OC  
2283 C=CC(=O)O.N[C@H](Cc1c[nH]c2ccc(Br)cc12)C(=O)O>>N[C@H](Cc1c[nH]c2ccc(/C=C/C(=O)  
2284 O)cc12)C(=O)O  
2285 C=CCN1C(=O)c2cccc2C1=O.Cl1ccc(I)cc1>>O=C1c2cccc2C(=O)N1C/C=C/c1ccc(Cl)cc1  
2286 C=CC(=O)N(C)C.Cc1cc(Br)cc(C)c1O>>Cc1cc(/C=C/C(=O)N(C)C)cc(C)c1O  
2287 C=CC(=O)O[C@H]1C(C)(C)[C@H]2CC[C@]1(C)C2.O=Cc1cccc1Br>>CC1(C)[C@H]2CC[C@](C)  
(C2)[C@H]1OC(=O)/C=C/c1cccc1C=O  
2288 C=CC(=O)O.O=c1[nH]ccc2c(I)cccc12>>O=C(O)/C=C/c1cccc2c(=O)[nH]ccc12  
2289 C=CC(=O)OCC.O=C1c2ccc(Br)cc2CN1CC(F)(F)F>>CCOC(=O)/C=C/c1ccc2c(c1)CN(CC(F)(F)F)C2  
2290 C=CC(=O)OC(C)(C)C.O=S(=O)(c1cccc(Br)c1)n1ccc2ccnc21>>CC(C)(C)OC(=O)/C=C/c1cccc(S(=O)  
)(=O)n2ccc3ccnc32)c1  
2291 C=CC(C)(O)CC/C=C/C(C)CC/C=C/C(C)CCC=C(C)C.Oc1ccc(OCc2cccc2)cc1Br>>CC(C)=CCC/C(C)=  
C/CC/C(C)=C/CCC(C)(O)/C=C/c1cc(OCc2cccc2)ccc1O  
2292 C=Cc1ccc(OC)cc1.Nc1ccc(I)cc1>>COc1ccc(/C=C/c2ccc(N)cc2)cc1  
2293 C=CC(=O)OCCOCCOCCOCCOC.CC(C)Oc1nc(N)nc(Nc2ccc(I)cc2)n1>>COCCOCCOCCOCCOC(=  
O)/C=C/c1ccc(Nc2nc(N)nc(OC(C)C)n2)cc1  
2294 CC(=O)/C=C/CC(CCc1cccc1)NS(=O)(=O)c1ccc(C)cc1.Cc1ccc(Br)cc1>>CC(=O)/C=C/CC(CCc1ccc  
cc1)NS(=O)(=O)c1ccc(C)cc1)c1ccc(C)cc1  
\*CNCCOCCOCCOCCCN(C(=O)COc1ccc(C(Cc2cc(OC)cc(OC)c2)NC(=O)c2cccc(C=C)c2)cc1.Cc1cc  
2295 c(I)cc1C>>\*CNCCOCCOCCOCCCN(C(=O)COc1ccc(C(Cc2cc(OC)cc(OC)c2)NC(=O)c2cccc(/C=C/c  
3ccc(C)c(C)c3)c2)cc1  
2296 BrC1CC2CCC1C2.C=Cc1cccc1>>C(=C/C1CC2CCC1C2)\c1cccc1  
2297 C=CS(=O)(=O)N1CCC2(CC1)N=C(C1CCCC1)NC2=O.Cc1cccc1Br>>Cc1cccc1/C=C/S(=O)(=O)  
N1CCC2(CC1)N=C(C1CCCC1)NC2=O  
2298 C=CC(=O)N(C)Cc1cccc(OC(F)(F)F)c1OCCC.CC1(C)NCc2cc(Br)ccc2NC1=O>>CCCOc1c(CN(C)C(  
=O)/C=C/c2ccc3c(c2)CNC(C)(C)C(=O)N3)cccc1OC(F)(F)F  
2299 C=CC(=O)OCC.N#Cc1cc(Br)ccc1OCc1cccc1>>CCOC(=O)/C=C/c1ccc(OCc2cccc2)c(C#N)c1  
2300 C=CS(=O)(=O)F.O=S(=O)(F)c1ccc(I)cc1>>O=S(=O)(F)/C=C/c1ccc(S(=O)(=O)F)cc1  
2301 C=Cc1cccc1.Cc1ccc2c(-c3cccc3)c(Br)c(=O)cc2c1>>Cc1ccc2c(-

C=CC(=O)Nc1cccc1NC(=O)OC(C)(C)C.O=C(Nc1ccc(Cl)cc1)[C@H]1CN(CC(F)F)C[C@@H]1c1ccc  
 2302 (Br)cc1>>CC(C)(C)OC(=O)Nc1cccc1NC(=O)/C=C/c1ccc([C@H]2CN(CC(F)F)C[C@@H]2C(=O)Nc  
 2ccc(Cl)cc2)cc1  
 2303 C=CC(=O)N(C)C.COc1ccc(Cl)cc1>>COc1ccc(/C=C/C(=O)N(C)C)cc1  
 2304 C=Cc1ccncc1.COCCOCCn1c2cccc2c2cc(Br)ccc21>>COCCOCCn1c2cccc2c2cc(/C=C/c3ccncc3)ccc  
 2305 C=CCCCCCC.Clc1cccc1>>C=C(CCCCCC)c1cccc1  
 2306 Br1cccc2cccc12.C=CC(=O)OC>>COC(=O)/C=C/c1cccc2cccc12  
 2307 Br1cccc1.C=CS(N)(=O)=O>>NS(=O)(=O)/C=C/c1cccc1  
 2308 C=C[Si](CC)(CC)CC.FC(F)(F)c1cccc1Br>>CC[Si](/C=C/c1cccc1C(F)(F)F)(CC)CC  
 2309 Br1cncc2cccc12.C=CC=O>>O=C/C=C/c1cncc2cccc12  
 2310 C=CC(=O)OC.Cc1cc2c(cc1Br)OCO2>>COC(=O)/C=C/c1cc2c(cc1C)OCO2  
 2311 C=Cc1ccc(C=C)cc1.COc1ccc(Br)cc1>>C=Cc1ccc(/C=C/c2ccc(OC)cc2)cc1  
 2312 C=CC(=O)OCc1cccc1.CCn1nnc2c(F)c(Br)ccc21>>CCn1nnc2c(F)c(/C=C/C(=O)OCc3cccc3)ccc21  
 2313 C=Cc1ccc2ccc(Cl)cc2n1.COC(=O)c1cccc1CCC(=O)c1ccc(Br)c1>>COC(=O)c1cccc1CCC(=O)c1cc  
 cc(/C=C/c2ccc3ccc(Cl)cc3n2)c1  
 2314 C=C[C@H]1O[C@@H]2OC(C)(C)O[C@@H]2[C@H]1OCc1cccc1.Ic1cccc1>>CC1(C)O[C@H]2O  
 [C@H](/C=C/c3cccc3)[C@H](OCc3cccc3)[C@H]2O1  
 2315 C=CC(=O)OC.N#Cc1c(Br)cncc1I>>COC(=O)/C=C/c1cncc(Br)c1C#N  
 2316 C=Cc1cc2c(c(=O)n(C)c(=O)n2C)n1C.N#Cc1cccc(Br)c1>>Cn1c(=O)c2c(cc/C=C/c3cccc(C#N)c3)n2C  
 )n(C)c1=O  
 2317 C=CC(=O)OC.Cc1ccc(Br)cc1CO>>COC(=O)/C=C/c1ccc(C)c(CO)c1  
 2318 C=CC(=O)OCC.CN(C)c1ccc(-c2cccc2I)cc1>>CCOC(=O)/C=C/c1cccc1-c1ccc(N(C)C)cc1  
 2319 C=Cc1cccn1.CCOC(=O)c1ccc(Br)cc1>>CCOC(=O)c1ccc(/C=C/c2cccn2)cc1  
 2320 C=Cc1ccncc1.CCCOc1ccc(I)cc1>>CCCOc1ccc(/C=C/c2ccncc2)cc1  
 2321 Br1ccc(-c2cccs2)s1.C=CC(=O)OCC>>CCOC(=O)/C=C/c1ccc(-c2cccs2)s1  
 2322 C=Cc1cccc(C#N)c1.Nc1ncc(Cl)cc1Br>>N#Cc1cccc(/C=C/c2cc(Cl)cncc2N)c1  
 2323 C=Cc1ccc(OC(C)=O)cc1.CCOC(=O)C(F)(F)I>>CCOC(=O)C(F)(F)/C=C/c1ccc(OC(C)=O)cc1  
 2324 C=CC(=O)OC.CC(C)(C)c1[nH]c2cccc2c1[C@H]1CCCN(Cc2ccc(Br)cc2)C1>>COC(=O)/C=C/c1c  
 cc(CN2CCC[C@H](c3c(C(C)(C)C)[nH]c4cccc34)C2)cc1  
 C=Cc1ccc(C(=O)O[C@H]2CC[C@H]3[C@@H]4CCC5=CC(=O)CC[C@]5(C)[C@H]4CC[C@]23C)c  
 2325 c1.CC(C)(C)Br>>CC(C)(C)/C=C/c1ccc(C(=O)O[C@H]2CC[C@H]3[C@@H]4CCC5=CC(=O)CC[C@  
 @]5(C)[C@H]4CC[C@]23C)cc1  
 2326 C=C.CC(=O)Nc1ccc(I)cc1>>C=Cc1ccc(NC(C)=O)cc1  
 2327 C=CCN.O=c1[nH]c(=O)n([C@H]2O[C@H](CO)[C@@H](O)[C@H]2O)cc1I>>NC/C=C/c1cn([C@  
 @H]2O[C@H](CO)[C@@H](O)[C@H]2O)c(=O)[nH]c1=O  
 2328 C=CC(=O)OCC.O=c1cc(I)cn1Cc1cccc1>>CCOC(=O)/C=C/c1enn(Cc2cccc2)c(=O)c1  
 2329 C=Cc1cccc1.O=c1oe2cc(Oc3cccc3)ccc2c(-c2cccc2)c1Br>>O=c1oe2cc(Oc3cccc3)ccc2c(-  
 c2cccc2)c1/C=C/c1cccc1  
 2330 C=CC(C)=O.O=C(Nc1ccc(OC(F)(F)F)cc1)c1cnc(N2CC[C@H](O)C2)c(Br)c1>>CC(=O)/C=C/c1cc(  
 C(=O)Nc2ccc(OC(F)(F)F)cc2)cncc1N1CC[C@H](O)C1  
 2331 C=CC(=O)OCC.CC(C)(C)OC(=O)N1CCC(C#N)(c2cccc2Br)CC1>>CCOC(=O)/C=C/c1cccc1C1(C#  
 N)CCN(C(=O)OC(C)(C)C)CC1  
 2332 C=Cc1ccc(C(F)(F)F)cc1.O=C1C(O)=C(I)C(=O)c2cccc21>>O=C1C(O)=C(/C=C/c2ccc(C(F)(F)F)cc2)  
 C(=O)c2cccc21  
 2333 Br1cccc2cccc12.C=Cc1cccc1>>C(=C/c1cccc2cccc12)\c1cccc1  
 2334 C=Cc1ccc(N)cc1.COc1ccc(Br)cc1>>COc1ccc(/C=C/c2ccc(N)cc2)cc1  
 2335 C=Cc1ccc(C)cc1.Cc1ccc(I)cc1>>Cc1ccc(/C=C/c2ccc(C)cc2)cc1  
 2336 C=CC#N.CCn1cc(I)c(=O)c2ccc(C)nc21>>CCn1cc(/C=C/C#N)c(=O)c2ccc(C)nc21  
 2337 C=Cc1senc1C.COc1ccc(Br)cc1>>COc1ccc(/C=C/c2senc2C)cc1  
 2338 C=CC#N.O=c1[nH]c(=O)n([C@H]2C[C@H](O)[C@@H](CO)O2)cc1I>>N#C/C=C/c1cn([C@H]2C[  
 C@H](O)[C@@H](CO)O2)c(=O)[nH]c1=O  
 2339 C=Cc1ccc([N+](=O)[O-])cc1.COC(=O)c1ccc(Br)cc1>>COC(=O)c1ccc(/C=C/c2ccc([N+](=O)[O-]  
 C=CC[C@H]1C[C@H]([C@@H](O[Si](C(C)C)(C(C)C)C(C)C)c2ccc(OC)c(OC)c2)CO[C@H]1c1  
 2340 ccc(OC)c(OC)c1.COc1ccc(Br)cc1OC>>COc1ccc(/C=C/C[C@H]2C[C@H]([C@@H](O[Si](C(C)  
 C)(C(C)C)C(C)C)c3ccc(OC)c(OC)c3)CO[C@H]2c2ccc(OC)c(OC)c2)cc1OC  
 2341 C=Cc1cccc1.O=C(Oc1cccc1)c1ccc(Br)cc1>>O=C(Oc1cccc1)c1ccc(/C=C/c2cccc2)cc1  
 2342 C=Cc1ccncc1.Oc1ccc(Br)cc1>>Oc1ccc(/C=C/c2ccncc2)cc1  
 2343 C=CS(=O)(=O)Nc1cccc(OC2CCN(C(=O)OC(C)(C)C)CC2)c1.N#Cc1cccc(Br)c1>>CC(C)(C)OC(=O)  
 N1CCC(Oc2cccc(NS(=O)(=O)/C=C/c3cccc(C#N)c3)c2)CC1

C=CC(=O)OC.COc1cccc2c(-  
 2344 c3cc(I)c4c(c3OCc3cccc3)[C@@H](C)N(Cc3cccc3)[C@H](C)C4)c(C)cc(OC)c12>>COC(=O)/C=C/  
 c1cc(-c2c(C)cc(OC)c3c(OC)cccc23)c(OCc2cccc2)c2c1C[C@@H](C)N(Cc1cccc1)[C@@H]2C  
 2345 C=CC(N)=O.Cc1nc(Br)c2c(c1O)COC(C)(C)OC2>>Cc1nc(/C=C/C(N)=O)c2c(c1O)COC(C)(C)OC2  
 2346 C=CC(=O)N(C)OC.N#Cc1cccc2c(Br)cccc12>>CON(C)C(=O)/C=C/c1cccc2c(C#N)cccc12  
 2347 C=Cc1cccc(F)c1.N#Cc1ccc2cc(Br)ccc2c1>>N#Cc1ccc2cc(/C=C/c3cccc(F)c3)ccc2c1  
 2348 Br1cccs1.C=CC(C)(O)CCC=C(C)C>>CC(C)=CCCC(C)(O)/C=C/c1cccs1  
 2349 Br1cccn1.C=CC(N)=O>>NC(=O)/C=C/c1cccn1  
 2350 C=CCCCCCC.COc1ccc(Cl)cc1>>C=C(CCCCCC)c1ccc(OC)cc1  
 2351 C=Cc1cccc1OCc1cccc1.O=C(O)/C=C/c1cccc1Br>>O=C(O)/C=C/c1cccc1/C=C/c1cccc1OCc1ccc  
 2352 BrC1=C(C2=COCCO2)CCCC1.C=CC(=O)OC(C)(C)C>>CC(C)(C)OC(=O)/C=C/C1=C(C2=COCCO2  
 )CCCC1  
 2353 C=Cc1ccnc1.CC(C)(C)OC(=O)N[C@H](COc1cncc(Br)c1)Cc1cccc2cccc12>>CC(C)(C)OC(=O)N[C  
 @H](COc1cncc(/C=C/c2ccnc2)c1)Cc1cccc2cccc12  
 2354 C=Cc1cccc1C.N#Cc1ccc(Cl)cc1>>Cc1cccc1/C=C/c1ccc(C#N)cc1  
 2355 C=CCCCCCC.Cc1nc2cc(Br)ccc2s1>>C=C(CCCCCC)c1ccc2sc(C)nc2c1  
 2356 C=Cc1cc(OC)c(OC)c(OC)c1.CC(C)(C)C(=O)Nc1nc(NC(=O)C(C)(C)C)c2cc(Br)cn2n1>>COc1cc(/C=  
 C/c2cnc3nc(NC(=O)C(C)(C)C)nc(NC(=O)C(C)(C)C)c3c2)cc(OC)c1OC  
 2357 C=Cc1cccc1.CC(C)(C)c1nc(C(F)(F)F)cc2c(I)c(-  
 c3cccc3)oc12>>CC(C)(C)c1nc(C(F)(F)F)cc2c(/C=C/c3cccc3)c(-c3cccc3)oc12  
 2358 C=CC(=O)OCC.Ic1ccnc1>>CCOC(=O)/C=C/c1ccnc1  
 2359 C=CCCC#N.Ic1cccc1>>N#CCC/C=C/c1cccc1  
 2360 Br1cccc2cccc12.C=CS(=O)(=O)c1cccc1>>O=S(=O)(/C=C/c1cccc2cccc12)c1cccc1  
 2361 C=C1C(=O)O[C@H]2[C@H]1CC/C(C)=C/CC[C@@]1(C)O[C@H]21.Nc1cccc(I)c1>>C/C1=C\CC[  
 C@@]2(C)O[C@H]2[C@H]2OC(=O)/C(=C/c3cccc(N)c3)[C@H]2CC1  
 2362 C=C.Cn1cc(I)cn1>>C=Cc1cnn(C)c1  
 2363 C=Cc1ccc(OC)cc1.N#Cc1ccc(/C=C/c2cc(Br)cc(/C=C/c3ccc(C#N)cc3)c2)cc1>>COc1ccc(/C=C/c2cc(/  
 C=C/c3ccc(C#N)cc3)cc(/C=C/c3ccc(C#N)cc3)c2)cc1  
 2364 C=CC(=O)N1N=Cc2cccc2C1C1CCCC1.COc1cc(Cc2cnc(N)nc2N)cc(I)c1OC>>COc1cc(Cc2cnc(N)  
 nc2N)cc(/C=C/C(=O)N2N=Cc3cccc3C2C2CCCC2)c1OC  
 2365 C=CC(=O)OCC.O=C(OCc1cccc1)c1cc([N+](=O)[O-])ccc1Br>>CCOC(=O)/C=C/c1ccc([N+](=O)[O-]  
 ])cc1C(=O)OCc1cccc1  
 2366 Br1cccc1.C=CC(=O)C(C)CC(=O)OC>>COC(=O)CC(C)C(=O)/C=C/c1cccc1  
 2367 Br1ccc2c(c1)c1cccc1n2-  
 c1cccc1.C=Cc1ccc(C(=O)OC)cc1>>COC(=O)c1ccc(/C=C/c2ccc3c(c2)c2cccc2n3-c2cccc2)cc1  
 2368 C=CC(=O)OC.Ic1c(-c2cccc2)nn2c(-c3cccc3)cc(-c3cccc3)nc12>>COC(=O)/C=C/c1c(-  
 c2cccc2)nn2c(-c3cccc3)cc(-c3cccc3)nc12  
 2369 C=CS(=O)(=O)F.Ic1cccs1>>O=S(=O)(F)/C=C/c1cccs1  
 2370 C=CC(=O)OC(C)(C)C.COc1cc(Br)cc(F)c1C1c2ccc3c(cnn3C3CCCCO3)c2CC(C)(C)N1C[C@H](C)CF  
 >>COc1cc(/C=C/C(=O)OC(C)(C)C)cc(F)c1C1c2ccc3c(cnn3C3CCCCO3)c2CC(C)(C)N1C[C@H](C)C  
 2371 C=Cc1ccc(C)cc1.Cc1cc(I)cc(C)c1O>>Cc1ccc(/C=C/c2cc(C)c(O)c(C)c2)cc1  
 2372 C=C(C)c1cccc1.Cc1cc(C)cc(I)c1>>C/C(=C)c1cc(C)cc(C)c1)c1cccc1  
 2373 C=CC(=O)OC.O=C1Nc2cc(Br)ccc2C1=O>>COC(=O)/C=C/c1ccc2c(c1)NC(=O)C2=O  
 2374 C=Cc1cc(OCc2cccc2)c(OCc2cccc2)nn1.Cc1cc(C(F)(F)F)ccc1Br>>Cc1cc(C(F)(F)F)ccc1/C=C/c1cc(  
 OCc2cccc2)c(OCc2cccc2)nn1  
 2375 C=CC(=O)OC(C)(C)C.O=S(=O)(c1ccc(F)cc1)n1ccc2cc(Br)cn21>>CC(C)(C)OC(=O)/C=C/c1cnc2c(c  
 cn2S(=O)(=O)c2ccc(F)cc2)c1  
 2376 C=CC(=O)OC.COc1cccc(Br)c1>>COC(=O)/C=C/c1cccc(OC)c1  
 2377 Br1cccn1.C=CCO>>C=C(CO)c1cccn1  
 2378 C=Cc1ccc(N(C)C)cc1.CCCn1c(=O)c(C)nc2cc(Br)ccc21>>CCN1c(=O)c(C)nc2cc(/C=C/c3ccc(N(C)C)  
 cc3)ccc21  
 2379 C=CC(=O)OC.CC(C)N(C(=O)Cc1c(Br)cccc1I)C(C)C>>COC(=O)/C=C/c1cccc(Br)c1CC(=O)N(C(C)C  
 )C(C)C  
 2380 C=CC(=O)c1cccc1.Ic1cccc1>>O=C(/C=C/c1cccc1)c1cccc1  
 2381 C=C[Si](C)(C)C.Ic1ccc[se]1>>C[Si](C)(C)/C=C/c1ccc[se]1  
 2382 C=Cn1nnc(CC)n1.Ic1cccc1>>CCc1nnn(/C=C/c2cccc2)n1  
 2383 C=CC(=O)OC(C)(C)C.CN1Cc2cc(Br)cn2NCCC1=O>>CN1Cc2cc(/C=C/C(=O)OC(C)(C)C)cn2NCC  
 C1=O  
 C=CC(=O)C(O[Si](CC)(CC)CC)c1c(OC)ccc(OC)c1OCc1cccc1.COc1c(OCc2cccc2)c(I)cc2c1C(=O)  
 2384 OC2>>CC[Si](CC)(CC)OC(C(=O)/C=C/c1cc2c(c(OC)c1OCc1cccc1)C(=O)OC2)c1c(OC)ccc(OC)c1  
 OCc1cccc1

[illegible]

C=C[C@H](C)(C)(C)[C@H](CCCC(=O)OC)(C)C(C)(C)C.CCCCCC(=O)c1n  
 2423 cc(Br)c2ccccc12>>CCCCC(=O)c1ncc(/C=C/[C@H](O[Si](C)(C)(C)(C)[C@H](CCCC(=O)OC  
 )O[Si](C)(C)(C)(C)c2ccccc12  
 2424 C=C1CC(c2ccc(C)cc2)OC1=O.FC(F)(F)c1ccccc1I>>Cc1ccc(C2C/C(=C)c3ccccc3C(F)(F)F)C(=O)O2)c  
 2425 C=C.Ic1ccc(-c2ccccc2)cc1>>C=Cc1ccc(-c2ccccc2)cc1  
 2426 C=COCCCC.N#Cc1ccc(OS(=O)(=O)C(F)(F)F)cc1>>C=C(OCCCC)c1ccc(C#N)cc1  
 2427 C=Cc1ccccc1.N#CCCCCCCC1>>N#CCCCCCC/C=C/c1ccccc1  
 2428 C=CC(=O)N1N=Cc2ccccc2C1c1ccco1.COc1cc(Cc2cnc(N)nc2N)cc(I)c1OC>>COc1cc(Cc2cnc(N)nc2  
 N)cc(/C=C/C(=O)N2N=Cc3ccccc3C2c2ccco2)c1OC  
 2429 C=C(NC(=O)OCC[Si](C)(C)C)C(=O)OC.CC(C)(C)OC(=O)N/C(=C)c1ccc(Br)cc1)C(=O)OCc1ccccc1>  
 >COC(=O)/C(=C/c1ccc(/C=C(\NC(=O)OC(C)(C)C)C(=O)OCc2ccccc2)cc1)NC(=O)OCC[Si](C)(C)C  
 2430 C=Cc1ccccc1.O=S(=O)(Oc1ccccc1Cl)C(F)(F)F>>C=C(c1ccccc1)c1ccccc1Cl  
 2431 C=CSe1ccccc1.Fc1ccc(Br)cc1>>Fc1ccc(/C=C/Sc2ccccc2)cc1  
 2432 C=CC[C@H](NC(=O)OC(C)(C)C)C(=O)OC.COC(=O)c1ccc(Br)cc1>>COC(=O)c1ccc(/C=C/C[C@H]  
 (NC(=O)OC(C)(C)C)C(=O)OC)cc1  
 2433 C=Cc1ccc(F)cc1.O=Cc1ccc(Cl)cc1>>O=Cc1ccc(/C=C/c2ccc(F)cc2)cc1  
 2434 C=CC(=O)OC.Nc1ccc(C(F)(F)F)cc1Br>>COC(=O)/C=C/c1ccc(C(F)(F)F)ccc1N  
 2435 Br1ccc(Oc2ccccc2)cc1.C=CC(=O)NCCc1c(C)[nH]c2c(F)ccc(C)c12>>Cc1[nH]c2c(F)ccc(C)c2c1CCN  
 C(=O)/C=C/c1ccc(Oc2ccccc2)cc1  
 C=CC(=O)OCCCC.O=C(Cc1c(-  
 2436 c2cccc(Br)c2)c2cc(CN3CCN(c4ccccc4)CC3)c(Cl)cc2oc1=O)Nc1ccc(F)cc1C(F)(F)F>>CCCCOC(=O)/  
 C=C/c1ccccc(-c2c(CC(=O)Nc3ccc(F)cc3C(F)(F)F)c(=O)oc3cc(Cl)c(CN4CCN(c5ccccc5)CC4)cc23)c1  
 2437 C=Cc1ccccc1.Nc1ccc([N+](=O)[O-])cc1Br>>Nc1ccc([N+](=O)[O-])cc1/C=C/c1ccccc1  
 2438 C=CC(F)(F)C(F)(F)C(F)(F)C(F)(F)C(F)(F)C(F)(F)C(F)(F)C(F)(F)C(F)(F)C(F)(F)C(F)(F)F.COC(=O)c1ccc(Br)cc1C>>COC(=O)c1ccc(/C=C/C(F)(F)C(F)(F)C(F)(F)C(F)(F)C(F)(F)C(F)(F)C(F)(F)C(F)(F)F)cc1C  
 2439 C=CC(=O)Nc1ccc(Cl)c(C(F)(F)F)c1.Ic1ccc(Cc2ccccc2)cc1>>O=C(/C=C/c1ccc(Cc2ccccc2)cc1)Nc1cc  
 c(Cl)c(C(F)(F)F)c1  
 2440 C=CC(=O)OC.CCc1nn2c(C)cc(C)nc2c1Cc1ccc(Br)cc1>>CCc1nn2c(C)cc(C)nc2c1Cc1ccc(/C=C/C(=O)  
 )OC)cc1  
 2441 Br1ccc2ccccc2c1.C=CC(F)(F)F>>FC(F)(F)/C=C/c1ccc2ccccc2c1  
 C=Cc1ccc2c(c1)C(CCCCCCCC)(CCCCCCCC)c1ccccc1-  
 2442 2.CCCCCCCCC1(CCCCCCCC)c2cc(Br)ccc2-  
 c2ccc(C=O)cc21>>CCCCCCCCC1(CCCCCCCC)c2ccccc2-  
 2443 C=CC(=O)OCC.COC(=O)c1ccccc(Cl)c1>>CCOC(=O)/C=C/c1ccccc(C(=O)OC)c1  
 2444 C=CC(=O)OCC.Cc1nnn(Cc2cc(Cl)ccc2Br)n1>>CCOC(=O)/C=C/c1ccc(Cl)cc1Cn1nnc(C)n1  
 2445 C=CC(=O)OCCCC.O=C1Nc2ccccc2CN1c1cc(OCc2neccc2F)ccc1Br>>CCCCOC(=O)/C=C/c1ccc(OC  
 c2neccc2F)cc1N1Cc2ccccc2NC1=O  
 2446 Br1ccsc1.C=CCNS(=O)(=O)c1ccc(C)cc1>>Cc1ccc(S(=O)(=O)NC/C=C/c2ccsc2)cc1  
 2447 C=Cc1ccccc1.COc1ccc(Br)c(C=O)c1>>COc1ccc(/C=C/c2ccccc2)c(C=O)c1  
 2448 C=CC(=O)OCC.CN1C(=O)C(C)(C)c2cc(Br)ccc21>>CCOC(=O)/C=C/c1ccc2c(c1)C(C)(C)C(=O)N2C  
 2449 C=CC#N.Cc1cc(Br)cc(C)c1Nc1ccnc(NC2CCN(C(=O)OC(C)(C)C)CC2)n1>>Cc1cc(/C=C/C#N)cc(C)c  
 1Nc1ccnc(NC2CCN(C(=O)OC(C)(C)C)CC2)n1  
 2450 Br1ccc2ccc3ccccc4ccc1c2c34.C=CC(=O)OCCCCC(C)C>>CC(C)CCCCCOC(=O)/C=C/c1ccc2ccc3cc  
 ccc4ccc1c2c34  
 2451 C=CC(=O)OCC.COc1ccc(Br)c(C=O)c1>>CCOC(=O)/C=C/c1ccc(OC)cc1C=O  
 2452 C=CC(=O)OC(C)(C)C.Cc1ccc(C=O)c(Br)c1>>Cc1ccc(C=O)c(/C=C/C(=O)OC(C)(C)C)c1  
 2453 C=CC(=O)OC.Ic1nn(C(c2ccccc2)(c2ccccc2)c2ccccc2)c2ccnc(OC3CCOCC3)c12>>COC(=O)/C=C/c1n  
 n(C(c2ccccc2)(c2ccccc2)c2ccccc2)c2ccnc(OC3CCOCC3)c12  
 2454 C=CC(=O)O.Ic1ccc(CNc2neccc(-c3ccccc3)n2)cc1>>O=C(O)/C=C/c1ccc(CNc2neccc(-c3ccccc3)n2)cc1  
 2455 C=CC(=O)OCCCC.Cc1ccc(I)cc1>>CCCCOC(=O)/C=C/c1ccc(C)cc1  
 2456 C=COCCN(C)C.Cc(=O)c1ccc(Br)cc1>>C=C(OCCN(C)C)c1ccc(C(=O)OC)cc1  
 2457 C=CC(=O)OC.Cc1sc2nc(COc3ccc(F)cc3)cc(=O)n2c1Br>>CCOC(=O)/C=C/c1c(C)sc2nc(COc3ccc(F)  
 )cc3)cc(=O)n12  
 2458 C=Cn1nnnc1CC.Ic1ccccc1>>CCc1nnnn1/C=C/c1ccccc1  
 2459 C=C.COC(=O)c1ccccc(C)c1Br>>C=Cc1c(C)cccc1C(=O)OC  
 C=CC(=O)OC.CC1(C)CC(Nc2ccc(Br)c(F)c2[N+](=O)[O-]  
 2460 )CC(C)(C)C1>>COC(=O)/C=C/c1ccc(NC2CC(C)(C)CC(C)(C)C2)c([N+](=O)[O-])c1F  
 2461 C=Cc1ccccc1.Cn1ccc(Br)n1>>Cn1ccc(/C=C/c2ccccc2)n1  
 2462 C=CS(=O)(=O)c1ccccc1.CC(=O)n1cc(C[C@H]2CCCN2C)c2cc(Br)ccc21>>CC(=O)n1cc(C[C@H]2C  
 CCN2C)c2cc(/C=C/S(=O)(=O)c3ccccc3)ccc21  
 2463 C=Cc1ccccc1.Cn1nc(Br)c2ccccc21>>Cn1nc(/C=C/c2ccccc2)c2ccccc21

[illegible]

2502 C=CC(=O)OCC.CSc1nc(C)c(I)c(NC(C)C)n1>>CCOC(=O)/C=C/c1c(C)nc(SC)nc1NC(C)C  
2503 C=CC(=O)N(C)OC.Oc1ccc(I)cc1>>CON(C)C(=O)/C=C/c1ccc(O)cc1  
2504 C=CC(=O)OCC.Fc1cc(Br)cc2none12>>CCOC(=O)/C=C/c1cc(F)c2none2c1  
2505 C=Cc1ccncc1.CCNc1ccc(Br)cc1>>CCNc1ccc(/C=C/c2ccncc2)cc1  
2506 Bre1cccc1.C=C[S@](=O)c1ccc(C)cc1>>C1ccc([S@](=O)/C=C/c2cccc2)cc1  
2507 C=Cc1cccc1.CCCCOC(=O)/C=C/c1ccc(Cl)cc1>>CCCCOC(=O)/C=C/c1ccc(/C=C/c2cccc2)cc1  
2508 C=CC(=O)Oc1cccc1.COc1ccc(I)cc1>>COc1ccc(/C=C/C(=O)Oc2cccc2)cc1  
2509 C=CC(=O)OCC.COc1ccc(OC)c(Cc2ccc(Br)cc2)c1>>CCOC(=O)/C=C/c1ccc(Cc2cc(OC)ccc2OC)cc1  
2510 C=C(CC(=O)OC)C(=O)OC.COc1ccc(I)cc1>>COC(=O)C/C(=C/c1ccc(OC)cc1)C(=O)OC  
2511 C=CC(=O)OC.O=C1c2cccc2C(=O)N1c1ccc(I)cc1>>COC(=O)/C=C/c1ccc(N2C(=O)c3cccc3C2=O)c  
2512 C=CC=O.O=[N+](O-)]c1cccc1I>>O=C/C=C/c1cccc1[N+](=O)[O-]  
Bre1c2cccc2cc2cccc12.C=Cc1ccc(-c2ccc3nc(-c4cccn4)cc(-  
2513 c4cccc4)c3c2)cc1>>C(=C/c1c2cccc2cc2cccc12)c1ccc(-c2ccc3nc(-c4cccn4)cc(-c4cccc4)c3c2)cc1  
2514 C=COCC.Cc1ccc(I)cc1>>C=C(OCC)c1ccc(C)cc1  
2515 C=CN1CCCC1=O.Fc1ccc(Br)c1>>C=C(c1ccc(F)c1)N1CCCC1=O  
2516 C=CCCC.COc1ccc(Br)cc1>>CCC/C=C/c1ccc(OC)cc1  
2517 Bre1cccs1.C=CN1C(=O)c2cccc2C1=O>>O=C1c2cccc2C(=O)N1/C=C/c1cccs1  
2518 C=Cc1ccc(OC)cc1.CCN(CC)c1ccc2cc(C(=O)OCc3cc(I)ccc3[N+](=O)[O-]  
2519 )c(=O)oc2c1>>CCN(CC)c1ccc2cc(C(=O)OCc3cc(/C=C/c4ccc(OC)cc4)ccc3[N+](=O)[O-]  
C=CC(=O)N(C)C.Cc1ccc(C(=O)c2c(I)c(-  
2520 c3cccc3)n3c2c(C=O)cc2cccc23)cc1>>Cc1ccc(C(=O)c2c(/C=C/C(=O)N(C)C)c(-  
c3cccc3)n3c2c(C=O)cc2cccc23)cc1  
2521 C=C(C)C(=O)OCC.Cn1ccc(I)cc1=O>>CCOC(=O)/C(C)=C/c1cnn(C)c(=O)c1  
C=CCC[C@H]1N[C@@H]1C(=O)c1cccc1.Ic1cccc1>>O=C(c1cccc1)[C@H]1N[C@@H]1CC/C=C/  
2522 /c1cccc1  
C=CC(=O)OC(C)(C)C.COc1ccc(CNc2ccc(Br)cn2)cc1>>COc1ccc(CNc2ccc(/C=C/C(=O)OC(C)(C)C)c  
2523 n2)cc1  
C=C[Si](C)(C)C.O=[N+](O-)]c1cccc(I)c1>>C[Si](C)(C)/C=C/c1cccc([N+](=O)[O-])c1  
2524 C=Cc1ccc(OC)cc1OC.CCOC(=O)C(C)Br>>CCOC(=O)C(C)/C=C/c1ccc(OC)cc1OC  
2525 C=CC(=O)O.Cc1cc(C)cc(I)c1>>Cc1cc(C)cc(/C=C/C(=O)O)c1  
2526 C=CC(=O)OCC.CC(C)(C)C(=O)Nc1cccc1I>>CCOC(=O)/C=C/c1cccc1NC(=O)C(C)(C)C  
2527 C=CC(=O)OCCCC.Fc1cccc1I>>CCCCOC(=O)/C=C/c1cccc1F  
2528 C=C[Si](C)(C)CC.O=C(c1cccc1)c1ccc(Br)cc1>>CC[Si](/C=C/c1ccc(C(=O)c2cccc2)cc1)(CC)CC  
2529 C=C.O=C(CC(=O)C(F)(F)F)c1ccc(Br)c2cccc12>>C=Cc1ccc(C(=O)CC(=O)C(F)(F)F)c2cccc12  
2530 C=CN1CCCC1=O.COc1ccc2c(c1)CCC=C2OS(=O)(=O)C(F)(F)F>>C=C(C1=CCc2cc(OC)ccc21)N1  
CCCC1=O  
2531 C=CC(=O)Oc1cccc1.O=c1cc(I)cnn1Cc1cccc1>>O=C(/C=C/c1cnn(Cc2cccc2)c(=O)c1)Oc1cccc1  
2532 C=Cc1ccc(OC)cc1.COc1ccc(Br)c1>>COc1ccc(/C=C/c2cccc(OC)c2)cc1  
2533 C=CC(=O)OC(C)(C)C.COC(=O)Cc1ccc2oc(-c3ccc(Br)cc3)nc2c1>>COC(=O)Cc1ccc2oc(-  
c3ccc(/C=C/C(=O)OC(C)(C)C)cc3)nc2c1  
2534 C=CC(=O)OCC.CCOC(=O)c1ccc(Br)cc1C>>CCOC(=O)/C=C/c1ccc(C(=O)OCC)c(C)c1  
2535 C=CC(=O)OCC.CC(C)(C)OC(=O)N1CCc2ccc(Br)cc2CC1>>CCOC(=O)/C=C/c1ccc2c(c1)CCN(C(=O)  
)OC(C)(C)C)CC2  
2536 C=CC(=O)OC.CC(=O)O[C@H]1CC(=O)N(Cc2cc3c(cc2I)OCO3)[C@@H]1[Se]c1cccc1>>COC(=O)  
/C=C/c1cc2c(cc1CN1C(=O)C[C@H](OC(C)=O)[C@H]1[Se]c1cccc1)OCO2  
2537 C=CC(=O)OC(C)(C)C.COc1cc(Br)cc(OC)c1OC>>COc1cc(/C=C/C(=O)OC(C)(C)C)cc(OC)c1OC  
2538 C=C(C)C(=O)OCC.CCOC(=O)c1cc(=O)c2cc(Br)ccc2o1>>CCOC(=O)/C(C)=C/c1ccc2oc(C(=O)OCC)  
cc(=O)c2c1  
2539 C=CC(=O)OC(C)(C)C.Oc1ccc(C(=C2CCCCC2)c2ccc(Br)cc2Cl)cc1>>CC(C)(C)OC(=O)/C=C/c1ccc(  
C(=C2CCCCC2)c2ccc(O)cc2)c(Cl)c1  
2540 C=Cc1ccc(OC)cc1.COc1ccc(N)c(Br)c1>>COc1ccc(/C=C/c2cc(OC)ccc2N)cc1  
2541 C=COCCCC.Cc1cccc(Br)c1>>C=C(OCCCC)c1cccc(C)c1  
2542 C=CC(=O)OCCCC.CCOC(=O)Nc1cc(OC)ccc1C1=C(I)CCN1S(=O)(=O)c1ccc(C)cc1>>CCCCOC(=O)  
/C=C/C1=C(c2ccc(OC)cc2NC(=O)OCC)N(S(=O)(=O)c2ccc(C)cc2)CC1  
2543 C=CC(=O)OC(C)(C)C.O=Cc1cccc1Br>>CC(C)(C)OC(=O)/C=C/c1cccc1C=O  
2544 C=CCCCCCC.CC(C)(C)c1ccc(Br)cc1>>C=C(CCCCCC)c1ccc(C(C)(C)C)cc1  
2545 C=CCOc1cccc1.COC(=O)/C=C/c1cccc(N(Cc2ccc(Br)cc2)C(=O)C2CCCCC2)c1>>COC(=O)/C=C/c1  
cccc(N(Cc2ccc(/C=C/COc3cccc3)cc2)C(=O)C2CCCCC2)c1  
2546 C=CC(=O)OC.Cc1cn2ccc(Br)cc2n1>>COC(=O)/C=C/c1ccn2cc(C)nc2c1

[illegible]



2589 C=Cc1ccc(F)cc1.C[Si](C)(C)Cl>>C[Si](C)(C)/C=C/c1ccc(F)cc1  
2590 C=CCNC(=O)[C@H](CC)NC(=O)OC(C)(C)C.CC(C)(C)OC(=O)n1cc(Br)c2ccccc21>>CC[C@H](NC(=O)OC(C)(C)C)C(=O)NC/C=C/c1cn(C(=O)OC(C)(C)C)c2ccccc12  
2591 C=Cc1cccn1.Cc1c(Nc2c(I)cncc2C#N)cc(Cl)c2[nH]ccc12>>Cc1c(Nc2c(C#N)cncc2/C=C/c2cccn2)cc(Cl)c2[nH]ccc12  
2592 C=CC(=O)OC.Cc1cc(F)cc(C)c1C(=O)c1sc2cc(O)ccc2c1Oc1ccc(Br)cc1>>COC(=O)/C=C/c1ccc(Oc2c(C(=O)c3c(C)cc(F)cc3C)sc3cc(O)ccc23)cc1  
2593 C=CC(=O)OCCCC.N#Cc1ccc(Br)cc1F>>CCCCOC(=O)/C=C/c1ccc(C#N)c(F)c1  
2594 C=CC(=O)NCc1ccc(OC)cc1.O=c1c(I)coc2cc(O)ccc12>>COc1ccc(CNC(=O)/C=C/c2coc3cc(O)ccc3c2=O)cc1  
2595 C=CC(=O)OC(C)(C)C.COc1ccc(Br)c(OC)c1>>COc1ccc(/C=C/C(=O)OC(C)(C)C)c(OC)c1  
2596 C=CC(OC)OC.CCOc1ccc(I)cc1>>CCOc1ccc(/C=C/C(OC)OC)cc1  
2597 Brc1ccc(C=C(c2ccccc2)c2ccccc2)cc1.C=Cc1ccc(-n2c3ccccc3c3ccccc32)cc1>>C(=C(c1ccccc1)c1ccccc1)c1ccc(/C=C/c2ccc(-C=Cc1ccc(C=O)cc1.O=S(=O)(c1ccc(Br)cc1)C(F)(F)F)>>O=Cc1ccc(/C=C/c2ccc(S(=O)(=O)C(F)(F)F)c2)cc1  
2598 Brc1ccc2ccccc12.C=CS(C)(=O)=O>>CS(=O)(=O)/C=C/c1ccc2ccccc12  
2600 C=CC(=O)OC(C)(C)C.O=c1ccc2cc(Br)cn2[nH]1>>CC(C)(C)OC(=O)/C=C/c1cn2[nH]c(=O)ccc2c1  
2601 C=C[Si](C)(C)c1cccn1.Ic1ccsc1>>C[Si](C)(C)/C=C/c1ccsc1)c1cccn1  
2602 C=CCCC=C(C)C.ClCc1ccccc1-c1ccccc1>>C=C(CCCC=C(C)C)Cc1ccccc1-c1ccccc1  
2603 C=CC(=O)OCC.Cc1ccccc1I>>CCOC(=O)/C=C/c1ccccc1C  
2604 C=CC(=O)OCC.CC(C)c1c[n+](O-)]c(C(C)C)c(C)n1>>CCOC(=O)/C=C/c1nc(C(C)C)c[n+](O-  
2605 C=CCC(=O)OC.O=c1ccn(Cc2ccc(I)cc2)c(=O)[nH]1>>COC(=O)C/C=C/c1ccc(Cn2ccc(=O)[nH]c2=O)  
2606 C=COCCCC.COc1ccc(OS(=O)(=O)C(F)(F)F)cc1>>C=C(OCCCC)c1ccc(OC)cc1  
2607 C=CCNC(=O)OC(C)(C)C.N#Cc1ccc(Br)cc1>>C=C(CNC(=O)OC(C)(C)C)c1ccc(C#N)cc1  
2608 C=Cc1ccccc1.Cc1ccc(Cl)c1>>Cc1ccc(/C=C/c2ccccc2)c1  
BrC1ccc(-c2ccccc2)cc1.C=CCO[C@@H]1CC(=O)O[C@H](C)C/C=C/C=C/[C@H](O[Si](C)(C)C(C)(C)C)[C@H](C)C[C@H](CC(OC)OC)[C@H](O[C@@H]2O[C@H](C)[C@H](O[C@H]3C[C@@](C)(O)[C@H](OC(=O)CC)[C@H](C)O3)[C@H](N(C)C)[C@H]2OC(C)=O)[C@H]1OC>>CCC(=O)O[C@H]1[C@H](C)O[C@@H](O[C@H]2[C@H](N(C)C)[C@H](OC(C)=O)[C@H](O[C@@H]3[C@@H](OC)[C@H](OC/C=C/c4ccc(-c5ccccc5)cc4)CC(=O)O[C@H](C)C/C=C/C=C/[C@H](O[Si](C)(C)C(C)(C)C)[C@H](C)C[C@@H]3C(C)(O)C)O[C@H]1C)O[C@@H]2C)O[C@H]2[C@H]2OC(=O)/C=C/c3ccccc3F)[C@@H]2C[C@H]1O  
2610 C=C1CCOC1=O.O=C(Nc1ccccc1)c1C(F)(F)F>>O=C1OCC/C1=C/c1cccc(NC(=O)C(F)(F)F)c1  
2611 C=COCCCC.Cc1ccc(I)cc1>>C=C(OCCCC)c1ccc(C)cc1  
2612 C=CCCC(=O)O.Ic1ccc2c(c1)OCO2>>O=C(O)CC/C=C/c1ccc2c(c1)OCO2  
2613 C=CC(=O)OC(C)(C)C.Clc1ccc(I)cc1>>CC(C)(C)OC(=O)/C=C/c1ccc(Cl)cc1  
2614 C=CS(N)(=O)=O.Ic1ccccc1>>NS(=O)(=O)/C=C/c1ccccc1  
2615 C=CC(CCC)OCc1ccccc1.Fc1ccc(Br)cc1>>CCCC(/C=C/c1ccc(F)cc1)OCc1ccccc1  
2616 C=C1C(=O)O[C@H]2[C@H]1C[C@@H](O)/C(C)=C/CC[C@@]1(C)O[C@@H]21.Fc1ccccc1I>>C/C1=C/CC[C@@]2(C)O[C@H]2[C@H]2OC(=O)/C=C/c3ccccc3F)[C@@H]2C[C@H]1O  
2617 C=CC(=O)OC(C)(C)C.O=C1CCNc2cc(Br)cn2N1>>CC(C)(C)OC(=O)/C=C/c1cn2c(c1)NCCC(=O)N  
2618 C=Cc1ccc(OC)cc1.CC(C)(C)c1ccc(Br)cc1>>C=C(c1ccc(OC)cc1)c1ccc(C(C)(C)C)cc1  
2619 C=C1C(=O)O[C@@H]2/C=C(C)CC/C=C(C)CC[C@@H]12.Ic1ccccc1>>C/C1=C/[C@H]2OC(=O)/C(=C/c3ccccc3)[C@@H]2CC/C(C)=C/CC1  
2620 C=CC(=O)OCC.Cc1nc(N)nc(N[C@H]2CC[C@@H](OCC(N)=O)CC2)c1Br>>CCOC(=O)/C=C/c1c(C)nc(N)nc1N[C@H]1CC[C@@H](OCC(N)=O)CC1  
2621 C=CC(F)(F)F.COc1ccc(I)cc1>>COc1ccc(/C=C/C(F)(F)F)cc1  
2622 C=CCCC(C)=O.Fc1ccc(I)cc1>>CC(=O)CC/C=C/c1ccc(F)cc1  
2623 C=Cc1ccc(-c2ccccc2)cc1.COc1cc(C=O)c(Br)c(OC)c1OC>>COc1cc(C=O)c(/C=C/c2ccc(-c3ccccc3)cc2)c(OC)c1OC  
2624 C=Cc1ccccc1.CC/C=C(/Br)OC1CCCCC1>>CC/C=C(/C=C/c1ccccc1)OC1CCCCC1  
2625 C=CC(=O)OCC.CC(C)(C)OC(=O)N1CCN(c2ccc(Br)cn2)CC1>>CCOC(=O)/C=C/c1ccc(N2CCN(C(=O)OC(C)(C)C)CC2)nc1  
2626 BrC1ccccc1I.C=C[Si](C)(C)C>>C[Si](C)(C)/C=C/c1ccccc1Br  
2627 C=C[C@@H](CO[Si](c1ccccc1)(c1ccccc1)C(C)(C)C)NS(C)(=O)=O.Oc1ccc(I)cc1>>CC(C)(C)[Si](O[C@H](C)/C=C/c1ccc(O)cc1)NS(C)(=O)=O)(c1ccccc1)c1ccccc1  
2628 C=Cc1ccc(Cl)cc1.CCOC(=O)C(F)(F)I>>CCOC(=O)C(F)(F)/C=C/c1ccc(Cl)cc1  
2629 C=CC(=O)OCC.Cc1ccc(-c2ccccc2I)cc1>>CCOC(=O)/C=C/c1ccccc1-c1ccc(C)cc1

2630 C=C[C@@H]1CCCCN1C(=O)OC(C)(C)C.CC(=O)c1ccc(I)cc1>>CC(=O)c1ccc(/C=C/[C@@H]2CCC  
CN2C(=O)OC(C)(C)C)cc1  
2631 C=C.O=Cc1cccc(Br)c1>>C=Cc1cccc(C=O)c1  
2632 C=COCC.CC(=O)c1ccc(Br)cc1>>C=C(OCC)c1ccc(C(C)=O)cc1  
2633 C=Cc1cccc1.CCCCCC(C)Br>>CCCCC(C)/C=C/c1cccc1  
2634 Br1cccc(-c2cccn2)c1.C=Cc1cccc1>>C(=C/c1cccc(-c2cccn2)c1)\c1cccc1  
2635 C=C[Si](C)(C)C.CC(C)N(C(=O)c1cccc1I)C(C)C>>CC(C)N(C(=O)c1cccc1/C=C/[Si](C)(C)C)C(C)C  
C=CC(=O)OC.Cc1[nH]c(-  
2636 c2ccccc2)c(Br)c1C(=O)C(=O)N1CCN(c2cccc(C(F)(F)F)c2)CC1>>COC(=O)/C=C/c1c(-  
c2ccccc2)[nH]c(C)c1C(=O)C(=O)N1CCN(c2cccc(C(F)(F)F)c2)CC1  
2637 C=CCn1ccn1.CC(=O)OCC1Cn2c3ccc(CO)cc3c3c4c(c5c6cc(Br)ccc6n(c5c32)C1)C(=O)N(C(C)=O)C  
4>>CC(=O)OCC1Cn2c3ccc(CO)cc3c3c4c(c5c6cc(/C=C/Cn7ccnc7)ccc6n(c5c32)C1)C(=O)N(C(C)=O)  
2638 C=CCN1C(=O)c2ccccc2C1=O.COC(=O)c1ccc(Br)o1>>COC(=O)c1ccc(/C=C/CN2C(=O)c3ccccc3C2  
=O)o1  
2639 Br1ccc(-c2ccccc2)cc1.C=CC(=O)OC(C)(C)C>>CC(C)(C)OC(=O)/C=C/c1ccc(-c2ccccc2)cc1  
2640 C=C.ClC1cccc1I>>C=CC1cccc1I  
2641 C=Cc1ccc(N(c2ccc(C)cc2)c2ccc(C)cc2)cc1.Cn1nc2c(Br)ccc(Nc3ncc(C4OCCO4)cn3)c2n1>>Cc1ccc(N  
(c2ccc(C)cc2)c2ccc(/C=C/c3ccc(Nc4ncc(C5OCCO5)en4)c4nn(C)nc34)cc2)cc1  
2642 C=CCCc1ccc(CC)cc1.O=C1CCc2ccc(Br)cc21>>CCc1ccc(CC/C=C/c2ccc3c(c2)C(=O)CC3)cc1  
2643 C=C(C)C(=O)OC.O=C1C(O)=C(I)C(=O)c2ccccc21>>COC(=O)/C(C)=C/C1=C(O)C(=O)c2ccccc2C1=  
2644 C=CC(=O)OC.Cc1noc(C)c1I>>COC(=O)/C=C/c1c(C)noc1C  
2645 C=CCCNc1cccc1.Ic1cccc1>>C(=C/c1cccc1)\CCCNc1cccc1  
2646 Br1cccs1.C=CC(=O)OCCCC>>CCCCOC(=O)/C=C/c1cccs1  
2647 C=CCCCC.COc1cccc1CBr>>C=C(CCCCC)Cc1cccc1OC  
C=Cc1ccncc1.CCCCCCCCCCCCCO1cc(/C=C/c2ccc(I)cc2)cc(OCCCCCCCCCCCCC)c1OCCCCCCCCC  
2648 CCCC>>CCCCCCCCCCCCCO1cc(/C=C/c2ccc(/C=C/c3ccncc3)cc2)cc(OCCCCCCCCCCCCC)c1OCCC  
CCCCCCCCC  
2649 C=CC(N)=O.N#Cc1ccc(I)cc1>>N#Cc1ccc(/C=C/C(N)=O)cc1  
2650 C=Cc1cccc1.Cc1ccc2c(-c3ccccc3)c(Br)c(=O)oc2c1>>Cc1ccc2c(-  
c3ccccc3)c(/C=C/c3ccccc3)c(=O)oc2c1  
2651 C=CC=O.Ic1cnn(C(c2ccccc2)(c2ccccc2)c2ccccc2)c1>>O=C/C=C/c1cnn(C(c2ccccc2)(c2ccccc2)c2ccccc  
2)c1  
2652 C=CC(=O)OC(C)(C)C.CCCCc1ccc(I)cc1>>CCCCc1ccc(/C=C/C(=O)OC(C)(C)C)cc1  
2653 C=CC(N)=O.O=CC1=C(Br)c2ccccc2CC1>>NC(=O)/C=C/C1=C(C=O)CCc2ccccc21  
2654 Br1cccc1C1OCCO1.C=CC(=O)c1cccc1>>O=C(/C=C/c1cccc1C1OCCO1)c1cccc1  
2655 C=C(CC(N=C(c1cccc1)c1cccc1)C(=O)OC)C(=O)OC.Ic1cccc1>>COC(=O)/C(=C/c1cccc1)CC(N=  
C(c1cccc1)c1cccc1)C(=O)OC  
2656 C=Cc1ccc(OC)cc1.O=Cc1ccc(Br)cc1>>COc1ccc(/C=C/c2ccc(C=O)cc2)cc1  
2657 Br1cnc2ccccc2c1.C=CC[C@H]1COC(C)(C)N1C(=O)OC(C)(C)C>>CC(C)(C)OC(=O)N1[C@@H](C  
/C=C/c2cnc3ccccc3c2)COC1(C)C  
2658 C=Cc1ccc(C(C)(C)C)cc1.CCOC(=O)C(F)(F)Br>>CCOC(=O)C(F)(F)/C=C/c1ccc(C(C)(C)C)cc1  
2659 Br1cnc(-c2ccccc2)c1.C=CCO>>OCC/C=C/c1cnc(-c2ccccc2)c1  
2660 C=Cc1cccc1.COc1cc(Br)cc(OC)c1OC>>COc1cc(/C=C/c2ccccc2)cc(OC)c1OC  
2661 C=Cc1cccc1.COc1nc(Br)c(-c2ccccc2)n(Cc2ccccc2)c1=O>>COc1nc(/C=C/c2ccccc2)c(-  
c2ccccc2)n(Cc2ccccc2)c1=O  
2662 C=CC(=O)OCC.Cc1nnn2cc(Br)ccc12>>CCOC(=O)/C=C/c1ccc2c(C)nnn2c1  
2663 C=Cc1ccc(C)cc1.CCOC(=O)C(F)Br>>CCOC(=O)C(F)/C=C/c1ccc(C)cc1  
2664 C=C/C=C/CCCCC.CC(=O)c1ccc(I)cc1>>CCCCC/C=C/C=C/c1ccc(C(C)=O)cc1  
2665 C=C1c2ccccc2C1(C#N)CC.Clc1ccc(Br)cc1>>CCC1(C#N)/C(=C/c2ccc(Cl)cc2)c2ccccc21  
2666 C=CS(=O)(=O)c1cccc1.O=Cc1ccc(Br)cc1>>O=Cc1ccc(/C=C/S(=O)(=O)c2ccccc2)cc1  
2667 C=CC(=O)N1N=Cc2ccccc2C1c1cc2ccccc2o1.COc1cc(Cc2cnc(N)nc2N)cc(I)c1OC>>COc1cc(Cc2cnc(  
N)nc2N)cc(/C=C/C(=O)N2N=Cc3ccccc3C2c2cc3ccccc3o2)c1OC  
2668 C=C(C)C(=O)NC.Clc1cccc1>>CNC(=O)/C(C)=C/c1cccc1  
2669 Br1cccc1.C=Cc1ccc(OC)cc1>>COc1ccc(/C=C/c2ccccc2)cc1  
2670 C=C(OC(C)=O)C(=O)OCC(F)(F)F.COc1ccc(I)cc1OC>>COc1ccc(/C=C(\OC(C)=O)C(=O)OCC(F)(F)F  
)cc1OC  
2671 C=Cc1cc(OC)cc(OC)c1.O=C(O)c1ccc(Br)cc1>>COc1cc(/C=C/c2ccc(C(=O)O)cc2)cc(OC)c1  
2672 C=C(NC(C)=O)C(=O)OC.CC(=O)Oc1cc(C)c(I)c(C(C)C)c1>>COC(=O)/C(=C/c1c(C)cc(OC(C)=O)cc1  
C(C)C)NC(C)=O  
2673 C=Cc1cccc1.CC(=O)c1ccc(I)cc1>>CC(=O)c1ccc(/C=C/c2ccccc2)cc1



2712 C=CC(C)=O.COC(=O)c1cc2cc(I)c(OCc3ccccc3)c(OC)c2c(=O)o1>>COC(=O)c1cc2cc(/C=C/C(C)=O)c(OCc3ccccc3)c(OC)c2c(=O)o1  
 2713 C=CCNC(=O)OC(C)(C)C.O=C1CCc2cc(Cl)ccc21>>C=C(CNC(=O)OC(C)(C)C)c1ccc2c(c1)CCC2=O  
 2714 Br1cccc1.C=Cc1scnc1C>>Cc1nesc1/C=C/c1cccc1  
 2715 Br1cccc1.C=C1C(C)=NN=C2C=C(c3ccccc3)N(C(C)=O)N12>>CC(=O)N1C(c2ccccc2)=CC2=NN=C(C)/C=C(c3ccccc3)N21  
 2716 C=CC(=O)OC.Cc1ccc(Br)c([N+](=O)[O-])c1>>COC(=O)/C=C/c1ccc(C)cc1[N+](=O)[O-]  
 2717 C=CC[C@]1(C)c2ccccc2N(C)[C@H]1c1cccc1.Ic1cccc1>>CN1c2ccccc2[C@@](C)(C/C=C/c2ccccc2)[C@@H]1c1cccc1  
 2718 C=COCCCC.CCN(CC)c1ccc2c(Br)cc(=O)oc2c1>>CCCCO/C=C/c1cc(=O)oc2cc(N(CC)CC)ccc12  
 2719 C=CCn1c(-c2ccc(C(F)(F)F)cc2)nc2ccccc2c1=O.O=C(CN1C(=O)COc2ccccc21)c1ccc(Br)cc1>>O=C(CN1C(=O)COc2ccccc21)c1ccc(/C=C/Cn2c(-c3ccc(C(F)(F)F)cc3)nc3ccccc3c2=O)cc1  
 2720 C=CC(=O)OCCCC.OCc1ccc(OCc2ccccc2)c(Br)n1>>CCCCOC(=O)/C=C/c1nc(CO)ccc1OCCc1cccc  
 2721 C=C(OC)C(=O)OC.COC(=O)c1cccc(I)c1>>COC(=O)/C=C/c1cccc(C(=O)OC)c1OC  
 2722 C=CC(=O)OCC.Oc1ccc(F)cc1Br>>CCOC(=O)/C=C/c1cc(F)ccc1O  
 2723 C=CCC(=O)O.C[C@]1(C)O)c1ccc2ccc(Br)cc2c1>>C[C@]1(C)O)c1ccc2ccc(/C=C/CC(=O)O)cc2c1  
 2724 C=CC(=O)OC.COc1c([C@@H]2c3ccc4c(cnn4C4CCCCO4)c3C[C@]1(C)N2CC(C)(F)F)ccc(Br)c1F>>COC(=O)/C=C/c1ccc([C@]12c3ccc4c(cnn4C4CCCCO4)c3C[C@]1(C)N2CC(C)(F)F)cc(OC)c  
 2725 C=CC(=O)OC(C)(C)C.COc1cccc(S(=O)(=O)n2ccc3cc(Br)enc32)c1>>COc1cccc(S(=O)(=O)n2ccc3cc(/C=C/C(=O)OC(C)(C)C)enc32)c1  
 2726 C=COCCN(C)C.Clc1ccc(Br)cc1>>C=C(OCCN(C)C)c1ccc(Cl)cc1  
 2727 C=CS(=O)(=O)F.Ic1ccc(-c2ccccc2)cc1>>O=S(=O)(F)/C=C/c1ccc(-c2ccccc2)cc1  
 2728 C=C1CC(c2ccccc2)OC1=O.Ic1cccc1>>O=C1OC(c2ccccc2)C/C1=C\c1cccc1  
 2729 C=CC(=O)OC.Oc1ccc(-c2ncc(Br)s2)cc1C12CC3CC(CC(C3)C1)C2>>COC(=O)/C=C/c1ncc(-c2ccc(O)c(C34CC5CC(CC(C5)C3)C4)c2)s1  
 2730 C=Cc1ccc(C(=O)OC)cc1.O=[N+](=[O-])c1ccc(Br)cc1>>COC(=O)c1ccc(/C=C/c2ccc([N+](=O)[O-]C=CCCCOc1ccc(CNC(=O)OC(C)(C)C)cc1.CC(C)N(CC[C@H](c1cccc1)c1cc(Br)ccc1OCc1cccc1  
 2731 C(C)C>>CC(C)N(CC[C@H](c1cccc1)c1cc(/C=C/CCCCc2ccc(CNC(=O)OC(C)(C)C)cc2)ccc1OCc1cccc1)C(C)C  
 2732 Br1ccc2c(c1)OCO2.C=CC(C)=O>>CC(=O)/C=C/c1ccc2c(c1)OCO2  
 2733 C=CC(=O)OC.CCn1cnc2c(NCc3ccccc3)nc(N3CCN(C)CC3)nc21>>CCn1cnc2c(NCc3ccccc3/C=C/C(=O)OC)c3)nc(N3CCN(C)CC3)nc21  
 2734 C=C(F)C(C)=O.COc1cccc1I>>COc1cccc1/C=C(\F)C(C)=O  
 2735 C=CC(=O)OC.CCn1nnc2c(C)c(Br)ccc21>>CCn1nnc2c(C)c(/C=C/C(=O)OC)ccc21  
 2736 C=CC(=O)OC.O=C1c2ccccc2C(=O)N1c1cccc(I)c1>>COC(=O)/C=C/c1cccc(N2C(=O)c3ccccc3C2=O)  
 2737 Br1cccc1.C=Cn1nnc(-c2ccc(C(F)(F)F)cc2)n1>>FC(F)(F)c1ccc(-c2nnn(/C=C/c3ccccc3)n2)cc1  
 2738 Br1ccenc1.C=CC(N)=O>>NC(=O)/C=C/c1ccenc1  
 2739 C=CC(=O)OCCCC.O=Cc1ccc(Br)cc1>>CCCCOC(=O)/C=C/c1ccc(C=O)cc1  
 2740 C=Cc1cccc1.Cc1cc(C)c(Br)c(C)c1>>Cc1cc(C)c(/C=C/c2ccccc2)c(C)c1  
 2741 C=CC(=O)OCCCC.Cc1nc(-c2ccc(Br)cc2)cs1>>CCCCOC(=O)/C=C/c1ccc(-c2csc(C)n2)cc1  
 2742 Br1ccc(I)cc1.C=CC(=O)CCCC>>CCCCC(=O)/C=C/c1ccc(Br)cc1  
 2743 C=CCCC.Cc1ccc(Br)cc1>>CCCC/C=C/c1ccc(C)cc1  
 2744 C=CC1=CC(C)(C)N([O])C(C)(C)C1.CC1(C)C=C(I)CC(C)(C)N1[O]>>CC1(C)C=C(/C=C/C2=CC(C)(C)N([O])C(C)(C)C2)CC(C)(C)N1[O]  
 2745 C=CCNS(=O)(=O)c1ccc(C)cc1.Fc1ccc(I)cc1>>Cc1ccc(S(=O)(=O)NC/C=C/c2ccc(F)cc2)cc1  
 2746 C=CC(=O)OC.CC[C@]12C=CCN3CC[C@@]4(c5cc(Br)c(OC)cc5N(C)[C@H]4[C@@](O)(C(=O)OC)[C@@H]1OC(C)=O)[C@@H]32>>CC[C@]12C=CCN3CC[C@@]4(c5cc(/C=C/C(=O)OC)c(OC)cc5N(C)[C@H]4[C@@](O)(C(=O)OC)[C@@H]1OC(C)=O)[C@@H]32  
 2747 C=CC(=O)OC.COC(=O)c1c(Br)c(F)cc2nn(C)cc12>>COC(=O)/C=C/c1c(F)cc2nn(C)cc2c1C(=O)OC  
 2748 C=Cc1ccc(OC)cc1.Oc1cc(Br)cc(O)c1F>>COc1ccc(/C=C/c2cc(O)c(F)c(O)c2)cc1  
 2749 Br1ccc(NCc2ccncc2)nc1.C=CC(=O)OC(C)(C)C>>CC(C)(C)OC(=O)/C=C/c1ccc(NCc2ccncc2)nc1  
 2750 Br1cccc1.C=C(CC(=O)OC)C(=O)OC>>COC(=O)C/C=C\C1cccc1)C(=O)OC  
 2751 C=CC(=O)CC.CC(C)(C)c1ccc(Br)cc1>>CCC(=O)/C=C/c1ccc(C(C)(C)C)cc1  
 2752 C=C[C@H]1O[C@H](OC)[C@H](OCc2ccccc2)[C@@H](OCc2ccccc2)[C@@H]1OCc1ccc2ccccc2c1.O=c1cc(-c2ccccc2)oc2cc(Br)ccc12>>CO[C@H]1O[C@H](/C=C/c2ccc3c(=O)cc(-c4ccccc4)oc3c2)[C@@H](OCc2ccc3ccccc3c2)[C@H](OCc2ccccc2)[C@H]1OCc1cccc1  
 2753 C=C(NC(=O)[C@@H](Cc1cccc1)NC(=O)OC(C)(C)C(=O)OC.CC(C)[Si](Oc1ccc(I)cc1)(C(C)C)C(C)C>>COC(=O)/C=C(c1ccc(O[Si](C(C)C)(C(C)C)C(C)C)cc1)NC(=O)[C@@H](Cc1cccc1)NC(=O)OC(C)(C)C

2754 C=CC(=O)OC.CC(C)=CCc1c(I)ncn1C>>COC(=O)/C=C/c1ncn(C)c1CC=C(C)C  
2755 C=Cc1ccccn1.CC1(Br)CCN(C(=O)OC(C)(C)C)CC1>>CC1(/C=C/c2ccccn2)CCN(C(=O)OC(C)(C)C)C  
2756 C=Cc1cc(C(C)(C)C)c(O)c(C(C)(C)C)c1.Cc1cncc(C)c1-c1c(C)cc(I)cc1C>>Cc1cncc(C)c1-c1c(C)cc(/C=C/c2cc(C(C)(C)C)c(O)c(C(C)(C)C)c2)cc1C  
2757 C=CC(C)=O.CC(C)(C)OC(=O)Nc1csc(Br)c1NC(=O)OC(C)(C)C>>CC(=O)/C=C/c1scc(NC(=O)OC(C)(C)C)c1NC(=O)OC(C)(C)C  
2758 C=CC(=O)OCC.CC1(C)CC(=O)C2=C(C1)Oc1c(I)c(-c3cccc3)oc(=O)c1C2c1cccc(O)c1>>CCOC(=O)/C=C/c1c(-c2cccc2)oc(=O)c2c1OC1=C(C(=O)CC(C)(C)C1)C2c1cccc(O)c1  
2759 C=Cc1ccc(OC)cc1.Cc1ccc(I)cc1>>COc1ccc(/C=C/c2ccc(C)cc2)cc1  
2760 C=CC=O.Cc1ccc(I)cc1>>Cc1ccc(/C=C/C=O)cc1  
2761 C=CC(=O)OCCCC.O=C(O)c1ccc(Br)cc1>>CCCCOC(=O)/C=C/c1ccc(C(=O)O)cc1  
2762 C=CC(=O)OC.O=[N+][O-]c1ccc(Cl)c([N+](=O)[O-])c1>>COC(=O)/C=C/c1ccc([N+](=O)[O-])cc1[N+](=O)[O-]  
2763 C=Cc1ccc2c(c1)OC(F)(F)O2.CC(C)(C)Br>>CC(C)(C)/C=C/c1ccc2c(c1)OC(F)(F)O2  
2764 C=Cc1ccc(OC)cc1.O=c1cc(-c2cccc2)oc2cc(Br)ccc12>>COc1ccc(/C=C/c2ccc3c(=O)cc(-c4cccc4)oc3c2)cc1  
2765 C=C(F)C(=O)OC.COc1ccc(C(c2ccc(I)cc2)=C2[C@H]3C[C@H]4C[C@H](C[C@H]2C4)C3)cc1>>CO  
2766 C(=O)/C(F)=C/c1ccc(C(c2ccc(OC)cc2)=C2[C@H]3C[C@H]4C[C@H](C[C@H]2C4)C3)cc1  
2767 C=C(C)c1cccc1.lc1ccc2c(c1)OCCOCCOCCOCCO2>>C/C(=C)c1ccc2c(c1)OCCOCCOCCOCCO2)c1cccc1  
2768 Br1cccc2cccc12.C=C>>C=Cc1cccc2cccc12  
2769 C=CCC(=O)OC.O=S(=O)(Oc1ccc(C(=C2C3CCCC2CCC3)c2ccc(O)cc2)cc1)C(F)(F)F>>COC(=O)C/C=C/c1ccc(C(=C2C3CCCC2CCC3)c2ccc(O)cc2)cc1  
2770 C=Cc1cccc1.N#CCc1ccc(Cl)cc1>>N#CCc1ccc(/C=C/c2cccc2)cc1  
2771 C=CC(=O)OC.Nc1ccc(F)cc1I>>COC(=O)/C=C/c1cc(F)ccc1N  
2772 C=Cc1ccc(-c2c(-c3ccc(OC)cc3)c(=O)c2=O)cc1.COc1ccc(I)cc1>>COc1ccc(/C=C/c2ccc(-c3c(-c4ccc(OC)cc4)c(=O)c3=O)cc2)cc1  
2773 C=Cc1cccc(C)c1.CCOC(=O)C(F)Br>>CCOC(=O)C(F)/C=C/c1cccc(C)c1  
2774 Br1ccc(C(c2ccc3c(cnn3C3CCCCO3)c2)=C2[C@H]3C[C@H]4C[C@H](C[C@H]2C4)C3)cc1.C=CC(=O)OC>>COC(=O)/C=C/c1ccc(C(c2ccc3c(cnn3C3CCCCO3)c2)=C2[C@H]3C[C@H]4C[C@H](C[C@H]2C4)C3)cc1  
2775 C=CC(=O)O.COC(=O)c1ccc(Br)cc1>>COC(=O)c1ccc(/C=C/C(=O)O)cc1  
2776 C=Cc1ccc(F)cc1.Cc1c(Br)c(=O)oc2cccc12>>Cc1c(/C=C/c2ccc(F)cc2)c(=O)oc2cccc12  
2777 C=CC(OC)OC.IC1CCCCC1>>COC(/C=C/C1CCCCC1)OC  
2778 C=COCCCCO.O=C(O)c1cc(Br)c2nc(N3CCOCC3)cc(=O)n2c1>>C=C(OCCCCO)c1cc(C(=O)O)cn2c(=O)cc(N3CCOCC3)nc12  
2779 C=CC=O.CS(=O)(=O)Oc1ccc(I)c([N+](=O)[O-])c1>>CS(=O)(=O)Oc1ccc(/C=C/C=O)c([N+](=O)[O-])c1  
2780 C=CC(=O)OC.Oc1ccc(Br)cc1F>>COC(=O)/C=C/c1ccc(O)c(F)c1  
2781 C=CC[C@H]1C[C@H]([C@H](O)c2ccc(OC)c(OC)c2)CO[C@H]1c1ccc(OC)c(OC)c1.COc1ccc(Br)cc1OC>>COc1ccc(/C=C/C[C@H]2C[C@H]([C@H](O)c3ccc(OC)c(OC)c3)CO[C@H]2c2ccc(OC)c(OC)c2)cc1OC  
2782 C=COCCCC.O=c1cc(Br)c2cc(F)ccc2[nH]1>>CCCCO/C=C/c1cc(=O)[nH]c2ccc(F)cc12  
2783 Br1ccc2ccc3cccc4ccc1c2c34.C=CC(=O)OCC(CC)CCCC>>CCCCC(CC)COC(=O)/C=C/c1ccc2ccc3cccc4ccc1c2c34  
2784 C=CCCCO.CC(C)(C)c1ccc(OS(=O)(=O)C(F)(F)F)cc1>>C=C(CCCO)c1ccc(C(C)(C)C)cc1  
2785 C=COCCCC.Fc1ccc(Br)cc1>>C=C(OCCCC)c1ccc(F)cc1  
2786 C=CCCCCCCCCCCCCCCCC.c1ccc([I+](c2cccc2)cc1>>CCCCCCCCCCCCCCCCC/C=C/c1cccc1  
2787 C=CC(=O)OCC.O=C[13c]1[13cH][13cH][13c](Br)[13cH][13cH]1>>CCOC(=O)/C=C/[13c]1[13cH][13cH][13c](C=O)[13cH][13cH]1  
2788 C=CCO[Si](CC)(CC)CC.COc1cccc(CCl)c1>>C=C(CO[Si](CC)(CC)CC)Cc1cccc(OC)c1  
2789 C=CCCCO.CC(C)(C)c1ccc(OS(=O)(=O)C(F)(F)F)cc1>>C=C(CCO)c1ccc(C(C)(C)C)cc1  
2790 C=C(c1ccc(Cl)cc1)N(C)C(C)=O.CCOC(=O)CCBr>>CCOC(=O)CCC/C=C(\c1ccc(Cl)cc1)N(C)C(C)C  
2791 C=CCCN1Cc2cc(C=O)ccc2C1=O.O=C(O[C@H]1CN2CCC1CC2)C1(c2cccc(Br)c2)CCCCC1>>O=Cc1ccc2c(c1)CN(CC/C=C/c1cccc(C3(C(=O)O[C@H]4CN5CCCC4CC5)CCCCC3)c1)C2=O  
2792 C=Cc1cccc1.CC(C)(C)c1ccc2c(-c3cccc3)c(Br)c(=O)oc2c1>>CC(C)(C)c1ccc2c(-c3cccc3)c(/C=C/c3cccc3)c(=O)oc2c1  
2793 Br1cccc(I)c1.C=CC(F)(F)C(F)(F)C(F)(F)C(F)(F)C(F)(F)F>>FC(F)(F)C(F)(F)C(F)(F)C(F)(F)C(F)(F)F  
2794 C(F)(F)C(F)(F)/C=C/c1cccc(Br)c1  
2795 C=C1C(=O)O[C@H]2/C=C(\C)CC/C=C(\C)CC[C@H]12.Nc1ccc(I)cn1>>C/C1=C[C@H]2OC(=O)/C=C/c3ccc(N)nc3[C@H]2CC/C(C)=C/CC1

2794 C=CC(=O)OCC.O=c1[nH]c2ccccc2c(Br)c1O>>CCOC(=O)/C=C/c1c(O)c(=O)[nH]c2ccccc12  
 2795 C=CC(=O)OC(C)(C)C.CCOC(=O)/C=C/c1cc(Br)cc(Oc2ccccc2)c1>>CCOC(=O)/C=C/c1cc/C=C/C(=O)OC(C)(C)Ccc(Oc2ccccc2)c1  
 2796 C=CC(=O)OC.FS(F)(F)(F)c1ccc(I)cc1>>COC(=O)/C=C/c1ccc(S(F)(F)(F)(F)F)cc1  
 2797 C=Cc1ccccc1.Cc1cccc(Br)c1O>>Cc1cccc(/C=C/c2ccccc2)c1O  
 2798 C=Cc1ccccc1.Cc1cc(Cl)ccc1Br>>Cc1cc(Cl)ccc1/C=C/c1ccccc1  
 2799 C=Cc1ccc2ccccc2c1.COC(=O)c1ccc(OCc2ccccc2)cc1OS(=O)(=O)C(F)(F)F>>COC(=O)c1ccc(OCc2ccccc2)cc1/C=C/c1ccc2ccccc2c1  
 2800 C=Cc1ccc(O)cc1.COc1ccccc1Br>>COc1ccccc1/C=C/c1ccc(O)cc1  
 2801 C=CCO[Si](C)(C)C(C)(C)C.COc1ccc(Br)cc1>>COc1ccc(/C=C/CO[Si](C)(C)C(C)(C)C)cc1  
 2802 C=CP(=O)(OCC)OCC.FC(F)(F)c1ccc(Br)cc1>>CCOP(=O)/C=C/c1ccc(C(F)(F)F)cc1OCC  
 2803 C=CC(=O)OC.Cc1c(COc2ccc(Br)cc2F)noc1-c1ccc(C(F)(F)F)cc1>>COC(=O)/C=C/c1ccc(OCc2noc(-c3ccc(C(F)(F)F)cc3)c2C)c(F)c1  
 2804 C=CC(=O)OCC.COc1ccc2nccc(Br)c2c1>>CCOC(=O)/C=C/c1ccccc2ccc(OC)cc12  
 2805 C=CCNC(=O)OC(C)(C)C.CCOC(=O)CC(c1ccc(C)c(CN2CC(C)Cc3cc(Br)ccc3S2(=O)=O)c1)c1ccc(F)cc1F>>CCOC(=O)CC(c1ccc(C)c(CN2CC(C)Cc3cc(/C=C/CNC(=O)OC(C)(C)C)ccc3S2(=O)=O)c1)c1ccc(F)cc1F  
 2806 C=CC(=O)OC.COc1ccc(Br)c(NCc2ccccc2)c1>>COC(=O)/C=C/c1ccc(OC)cc1NCc1ccccc1  
 2807 C=CC(=O)N(CC)CC.Cn1nc(Br)c2ccccc21>>CCN(CC)C(=O)/C=C/c1nn(C)c2ccccc12  
 2808 C=CS(=O)(=O)F.O=[N+][O-]c1ccc(I)cc1>>O=[N+][O-]c1ccc(/C=C/S(=O)(=O)F)cc1  
 2809 C=CS(=O)(=O)NCCCCCCCCC.CC(C)(C)OC(=O)NCc1cc(F)ccc1Br>>CCCCCCCCNS(=O)(=O)/C=C/c1ccc(F)cc1CNC(=O)OC(C)(C)C  
 2810 C=CC(=O)OC.OC1CC2(CCN(Cc3ccccc3)CC2)Oc2ccc(Br)cc21>>C=C(C(=O)OC)c1ccc2c(c1)C(O)CC1(CCN(Cc3ccccc3)CC1)O2  
 2811 C=Cc1ccccc1.Cc1cccc(NC(=O)c2cccc(I)c2)n1>>Cc1cccc(NC(=O)c2cccc(/C=C/c3ccccc3)c2)n1  
 2812 C=CC(=O)O.O=C(O)c1ccc(Br)cc1>>O=C(O)/C=C/c1ccc(C(=O)O)cc1  
 2813 C=Cc1ccc(C#N)cc1.Oc1ccc(/N=N/c2ccc(Br)cc2)cc1>>N#Cc1ccc(/C=C/c2ccc(/N=N/c3ccc(O)cc3)cc2)  
 2814 C=CCCN1C(=O)c2ccccc2C1=O.Cc1cccc(I)c1>>Cc1cccc(/C=C/CCN2C(=O)c3ccccc3C2=O)c1  
 2815 C=Cc1c(F)c(F)c(F)c1F.N#Cc1c(F)c(F)c(Br)c(F)c1F>>N#Cc1c(F)c(F)c(/C=C/c2c(F)c(F)c(F)c(F)c2F)c(F)c1F  
 2816 C=CC(=O)OC(C)(C)C.Nc1ccccc1I>>CC(C)(C)OC(=O)/C=C/c1ccccc1N  
 2817 C=CC(=O)OC.CCC(CC)(c1ccc(OCc2ccccc2)c(C)c1)c1cn(C)c2cc(Br)ccc12>>CCC(CC)(c1ccc(OCc2ccccc2)c(C)c1)c1cn(C)c2cc(/C=C/C(=O)OC)ccc12  
 2818 C=CC(=O)O.Ic1ccc2c(c1)OCCOCCOCCOCCOCCO2>>O=C(O)/C=C/c1ccc2c(c1)OCCOCCOCCOCCOCCO2  
 2819 Brc1ccccc1.C=CC(=O)N(C)C>>CN(C)C(=O)/C=C/c1ccccc1  
 2820 C=CC(=O)NC(C)C.Ic1ccccc1>>CC(C)NC(=O)/C=C/c1ccccc1  
 2821 Brc1ccccc1.C=CCOC(C)=O>>CC(=O)OC/C=C/c1ccccc1  
 2822 C=Cc1nn(C2CCCCO2)c2cc([N+](=O)[O-])ccc12.Cc1cc(C)nc(Br)c1>>Cc1cc(C)nc(/C=C/c2nn(C3CCCCO3)c3cc([N+](=O)[O-])ccc23)c1  
 2823 C=C[Si](CC)(CC)CC.Cc1ccccc1Br>>CC[Si](/C=C/c1ccccc1C)(CC)CC  
 2824 C=CC#N.CC(C)n1cnc2c(Cl)nc(I)nc21>>CC(C)n1cnc2c(Cl)nc(/C=C/C#N)nc21  
 2825 C=CC(=O)OC.Nc1ccc(Br)cc1>>COC(=O)/C=C/c1ccc(N)cc1  
 2826 C=CC(=O)OC(C)(C)C.COc1cc(COCCC(=O)OC(C)(C)C)c(Br)c(OC)c1OC>>COc1cc(COCCC(=O)OC(C)(C)C)c(/C=C/C(=O)OC(C)(C)C)c(OC)c1OC  
 2827 C=CC(F)(F)F.COC(=O)c1cnn2cc(Br)ccc12>>COC(=O)c1cnn2cc(/C=C/C(F)(F)F)ccc12  
 2828 C=CC(=O)c1ccc(C)cc1.COc1ncc(I)c(OC)n1>>COc1ncc(/C=C/C(=O)c2ccc(C)cc2)c(OC)n1  
 2829 C=CCN1CCNCC1.CC(C)c1[nH]nc(O[C@@H]2O[C@H](COC(=O)c3ccccc3)[C@@H](F)[C@H](OC(=O)c3ccccc3)[C@H]2OC(=O)c2ccccc2)c1Cc1ccc(Br)cc1>>CC(C)c1[nH]nc(O[C@@H]2O[C@H](COC(=O)c3ccccc3)[C@@H](F)[C@H](OC(=O)c3ccccc3)[C@H]2OC(=O)c2ccccc2)c1Cc1ccc(/C=C/CN2CCNCC2)cc1  
 2830 C=CS(=O)(=O)F.Cc1ccc(S(=O)(=O)n2ccc3cc(I)ccc32)cc1>>Cc1ccc(S(=O)(=O)n2ccc3cc(/C=C/S(=O)(=O)F)ccc32)cc1  
 2831 C=CCN(C(=O)C(F)(F)F)c1ccccc1C#Cc1ccccc1.CC(=O)c1ccc(I)cc1>>CC(=O)c1ccc(/C=C/CN(C(=O)C(F)(F)F)c2ccccc2C#Cc2ccccc2)cc1  
 2832 Brc1ccc(SCCN(COC2CCCCO2)c2ccccc2)cc1.C=Cc1ccc([N+](=O)[O-])cc1>>O=[N+][O-]c1ccc(/C=C/c2ccc(SCCN(COC2CCCCO2)c3ccccc3)cc2)cc1  
 2833 C=Cc1ccccc1.CC(=O)Nc1ccccc1Br>>CC(=O)Nc1ccccc1/C=C/c1ccccc1  
 2834 C=CC(=O)OC(C)(C)C.CCN(CC)c1ccc2c(CO[Si](C)(C)C(C)(C)C)c(Br)c(=O)oc2c1>>CCN(CC)c1ccc2c(CO[Si](C)(C)C(C)(C)C)c(/C=C/C(=O)OC(C)(C)C)c(=O)oc2c1  
 2835 C=C[Si](C)(C)C.O=[N+][O-]c1ccc(I)cc1>>C[Si](C)(C)/C=C/c1ccc([N+](=O)[O-])cc1



2876 Br1cccc(N2CCCC2)n1.C=Cc1ccccc1>>C(=C/c1cccc(N2CCCC2)n1)\c1ccccc1  
 2877 Br1ccc(I)cc1.C=Cc1ccccc1>>Br1ccc(/C=C/c2ccccc2)cc1  
 2878 C=CC(=O)N1[C@@H]2C[C@H]3CC[C@]2(CS1(=O)=O)C3(C)C.Ic1ccccc1>>CC1(C)[C@@H]2CC[C@]13CS(=O)(=O)N(C(=O)/C=C/c1ccccc1)[C@@H]3C2  
 2879 C=CC1(O)CCC1.Fc1ccc(I)cc1>>OC1(/C=C/c2ccc(F)cc2)CCC1  
 2880 C=COCCCC.CNc1ccc(Br)en1>>C=C(OCCCC)c1cnc(NC)nc1  
 2881 C=CC=O.CC(C)(C)CN(Cc1ccc(I)cc1)c1ccnc(C#N)n1>>CC(C)(C)CN(Cc1ccc(/C=C/C=O)cc1)c1ccnc(C#N)n1  
 2882 C=CCNC1=NCCN1C(=O)OCC.CC(=O)OCC1Cn2c3ccccc3c3c4c(c5c6cc(Br)ccc6n(c5c32)C1)C(=O)N(C(C)=O)C4>>CCOC(=O)N1CCN=C1NC/C=C/c1ccc2c(c1)c1c3c(c4c5ccccc5n5c4c1n2CC(COC(C)=O)C5)CN(C(C)=O)C3=O  
 2883 C=Cc1ccc2ccccc2c1.COC(=O)c1ccccc1I>>COC(=O)c1ccccc1/C=C/c1ccc2ccccc2c1  
 2884 C=CC(=O)OC(C)(C)C.Nc1cc(Cl)ccc1I>>CC(C)(C)OC(=O)/C=C/c1ccc(Cl)cc1N  
 2885 C=Cc1ccccc1.O=[N+](O-)]c1ccc(C(O)c2ccccc2I)cc1>>O=[N+](O-)]c1ccc(C(O)c2ccccc2/C=C/c2ccccc2)cc1  
 2886 C=Cc1ccc(OC)cc1.Nc1ccc(Br)cc1>>COc1ccc(/C=C/c2ccc(N)cc2)cc1  
 2887 Br1cccc(N2CCCC2)c1.C=CC(=O)OCCCC>>CCCCOC(=O)/C=C/c1cccc(N2CCCC2)c1  
 2888 Br1ccccc1.C=Cc1ccccc1>>C(=C/c1ccccc1)\c1ccccc1  
 2889 C=CCOc1ccc(Br)cc1.COc1ccc(I)cc1>>COc1ccc(/C=C/COc2ccc(Br)cc2)cc1  
 2890 C=Cc1ccccc1.CCOC(=O)c1ccc(Br)cc1>>CCOC(=O)c1ccc(/C=C/c2ccccc2)cc1  
 2891 C=C[C@@H]1CCCCN1C(=O)OC(C)(C)C.Cc1ccc(I)cc1>>Cc1ccc(/C=C/[C@@H]2CCCCN2C(=O)OC(C)(C)C)cc1  
 2892 C=Cc1ccc(OC)cc1.CCCCCNC(=O)CCL>>CCCCCNC(=O)C/C=C/c1ccc(OC)cc1  
 2893 Br1ccccc1.C=Cc1ccc(C(F)(F)F)cc1>>FC(F)(F)c1ccc(/C=C/c2ccccc2)cc1  
 2894 C=CC(=O)OC(C)(C)C.O=C(c1enn(-c2ccccc2)c1)c1cc(Br)ccc1O>>CC(C)(C)OC(=O)/C=C/c1ccc(O)c(C(=O)c2cnn(-c3ccccc3)c2)c1  
 2895 C=CC(=O)OC(C)(C)C.CCCc1nc(N(C)c2ccccc2)n2ncc(I)c2n1>>CCCc1nc(N(C)c2ccccc2)n2ncc(/C=C/C(=O)OC(C)(C)C)c2n1  
 2896 C=C.CC(C)(C)OC(=O)n1cc(CCl)c2ccccc21>>C=CCc1en(C(=O)OC(C)(C)C)c2ccccc12  
 2897 C=CC(=O)CCC.CN(C)c1ccc(Br)cc1>>CCCC(=O)/C=C/c1ccc(N(C)C)cc1  
 2898 C=CC(=O)OC.O=C(c1ccccc1)c1ccc(I)cc1>>COC(=O)/C=C/c1ccc(C(=O)c2ccccc2)cc1  
 2899 C=CC(=O)OCC.Cn1cc(-c2ccccc2I)c2ccccc21>>CCOC(=O)/C=C/c1ccccc1-c1en(C)c2ccccc12  
 2900 Br1ccc(I)cc1.C=C1C(=O)O[C@@H]2CC(C)=C([C@@H](C)CCCOC(C)=O)[C@@H](OC(C)=O)[C@H]12>>CC(=O)OCCC[C@H](C)C1=C(C)C[C@H]2OC(=O)/C(=C/c3ccc(Br)cc3)[C@H]2[C@@H]1OC(C)=O  
 2901 C=Cc1ccc(OC(C)=O)cc1.CC(=O)OC[C@H]1O[C@@H](Oc2cc(I)cc(OC(C)=O)c2)[C@H](OC(C)=O)[C@@H](OC(C)=O)[C@@H]1OC(C)=O>>CC(=O)OC[C@H]1O[C@@H](Oc2cc(/C=C/c3ccc(OC(C)=O)cc3)cc(OC(C)=O)c2)[C@H](OC(C)=O)[C@@H](OC(C)=O)[C@@H]1OC(C)=O  
 2902 C=CC(=O)OC.CC1c2ccc(Br)cc2CCN1C(=O)OC(C)(C)C>>COC(=O)/C=C/c1ccc2c(c1)CCN(C(=O)OC(C)(C)C)C2C  
 2903 C=CC(OC)OC.COc1ccccc1I>>COc1ccccc1/C=C/C(OC)OC  
 2904 C=COCCCC.COc1cccc2cc(Br)ccc12>>C=C(OCCCC)c1ccc2c(OC)cccc2c1  
 2905 Br1ccc(/C=C/c2ccccc2)c2nsnc12.C=Cc1ccc2c(c1)c1ccccc1n2CCCC>>CCCCn1c2ccccc2c2cc(/C=C/c3ccc(/C=C/c4ccccc4)c4nsnc34)ccc21  
 2906 C=CC(OC)OCC.Fc1ccc(Br)cc1>>CCOC(/C=C/c1ccc(F)cc1)OCC  
 2907 C=CC(=O)OCCCC.Fc1cc(Br)ccc1I>>CCCCOC(=O)/C=C/c1ccc(Br)cc1F  
 2908 C=C(NC(C)=O)C(=O)OC.Nc1ccc(Br)cc1N1CCCCC1>>COC(=O)/C(=C/c1ccc(N)c(N2CCCCC2)c1)N(C(C)=O)  
 2909 C=Cc1ccccc1.O=S(=O)(Oc1ccc(Cl)cc1)C(F)(F)F>>C=C(c1ccccc1)c1ccc(Cl)cc1  
 2910 Br1ccc2cc[nH]c2c1.C=Cc1ccccc1>>C(=C/c1ccc2cc[nH]c2c1)\c1ccccc1  
 2911 C=CC(=O)OC.N#Cc1ccc(-c2nc3ncc(Br)cc3o2)cc1>>COC(=O)/C=C/c1cnc2nc(-c3ccc(C#N)cc3)oc2c1  
 2912 C=CC(=O)OC.Cc1c[nH]c2c(Br)cc(F)cc12>>COC(=O)/C=C/c1cc(F)cc2c(C)c[nH]c12  
 2913 C=CC#N.O=S(=O)(Nc1ccccc1)c1ccccc(Br)c1>>N#C/C=C/c1ccccc1(S(=O)(=O)Nc2ccccc2)c1  
 2914 C=CC(=O)OCCCC.O=C(c1ccccc1)c1ccc(Br)cc1>>CCCCC(=O)/C=C/c1ccc(C(=O)c2ccccc2)cc1  
 2915 C=Cc1ccccc1.Fc1ccc(I)cc1F>>Fc1ccc(/C=C/c2ccccc2)cc1F  
 2916 C=CS(C)(=O)=O.CC(C)(C)OC(=O)NC(C(=O)OCc1ccccc1)c1ccc(Br)cc1>>CC(C)(C)OC(=O)NC(C(=O)OCc1ccccc1)c1ccc(/C=C/S(C)(=O)=O)cc1  
 2917 C=CN(C)(C)=O.Cc1ccccc1Br>>C=C(NC(C)=O)c1ccccc1C  
 2918 C=Cc1nc2c(N)ncnc2n1[C@H]1C[C@H](O[Si](C)(C)C(C)(C)C)[C@@H](CO[Si](C)(C)C(C)(C)C)O1.N#Cc1ccc(Br)cc1>>CC(C)(C)[Si](C)(C)OC[C@H]1O[C@@H](n2c(/C=C/c3ccc(C#N)cc3)nc3c(N)ncnc32)[C@@H]1O[Si](C)(C)C(C)(C)C



2919 C=CC(=O)OC.Cc1cc(-c2ccccc2)n2nc(C)c(I)c2n1>>COC(=O)/C=C/c1c(C)nn2c(-c3ccccc3)cc(C)nc12  
 2920 C=CC(=O)CCCCC.Cc1ccc(Br)cc1>>CCCCC(=O)/C=C/c1ccc(C)cc1  
 Br1cccc2cccc12.C=Cc1nc2c(N)ncn2n1[C@H]1C[C@H](O[Si](C)(C)C(C)(C)C)[C@@H](CO[Si](C)(C)C(C)(C)C)O1>>CC(C)(C)[Si](C)(C)OC[C@H]1O[C@@H](n2c(/C=C/c3cccc4cccc34)nc3c(N)ncnc32)C[C@H]1O[Si](C)(C)C(C)(C)C  
 2922 C=CC(=O)OC.Cc1ccc(Br)cc1>>COC(=O)/C=C/c1ccc(C)cc1  
 C=CC(=O)OCC.CCOc1ccc(C(=O)CCC(=O)Nc2nc(-  
 2923 c3ccccc3)c(Cc3ccccc3)s2)cc1Br>>CCOC(=O)/C=C/c1cc(C(=O)CCC(=O)Nc2nc(-  
 c3ccccc3)c(Cc3ccccc3)s2)ccc1OCC  
 2924 C=COCCCC.O=S(=O)(Oe1cccc1-c1cccc1)C(F)(F)F>>C=C(OCCCC)c1cccc1-c1cccc1  
 2925 C=CS(=O)c1cccc1.COc1c(C)c(Br)c(OC)c2cccc12>>COc1c(C)c(/C=C/S(=O)c2cccc2)c(OC)c2cccc  
 2926 C=CC(=O)O.N#Cc1cc(Br)ccc1F>>N#Cc1cc(/C=C/C(=O)O)ccc1F  
 2927 C=CC(=O)OC.Ic1ncccc1OCc1cccc1>>COC(=O)/C=C/c1ncccc1OCc1cccc1  
 2928 C=CC(C)O.c1ccc([I+](c2cccs2)cc1>>CC(O)/C=C/c1cccs1  
 2929 C=CCCCCCC.CC(C)(C)OC(=O)n1ccc2cc(Br)ccc21>>C=C(CCCCC)c1ccc2c(ccn2C(=O)OC(C)(C)C  
 2930 C=Cc1ccc(F)cc1.CCCCC(I)C(F)(F)C(=O)OCC>>CCCCC(/C=C/c1ccc(F)cc1)C(F)(F)C(=O)OCC  
 2931 C=CC#N.CSc1nc(N)nc(-c2ccco2)c1I>>CSc1nc(N)nc(-c2ccco2)c1/C=C/C#N  
 2932 C=CC(=O)N1N=Cc2ccccc2C1CC(=O)OCC.COc1cc(Cc2cnc(N)nc2N)cc(I)c1OC>>CCOC(=O)CC1c2c  
 cccc2C=NN1C(=O)/C=C/c1cc(Cc2cnc(N)nc2N)cc(OC)c1OC  
 2933 C=CC(=O)OC.CC(C)(C)OC(=O)N1CCC(Cc2nc3ncc(Br)cc3o2)CC1>>COC(=O)/C=C/c1cnc2nc(CC3  
 CCN(C(=O)OC(C)(C)C)CC3)oc2c1  
 2934 C=CC(=O)OC(C)(C)C.Fc1cccc(Br)c1>>CC(C)(C)OC(=O)/C=C/c1cccc(F)c1  
 2935 C=C/C=C/C(=O)N(CCCC)CCCC.Cc1ccc(Br)cc1>>CCCCN(CCCC)C(=O)/C=C/C=C/c1ccc(C)cc1  
 2936 C=CCC(O)Cc1cccc1.COC(=O)c1cccc1>>COC(=O)c1cccc1/C=C/CC(O)Cc1cccc1  
 2937 C=CC(=O)OC(C)(C)C.CC(C)=CCc1cc(I)ccc1OC(=O)c1ccncc1>>CC(C)=CCc1cc(/C=C/C(=O)OC(C)(C)C)ccc1OC(=O)c1ccncc1  
 2938 C=CC(=O)N(C)Cc1oc2ccccc2c1C.CC1(C)NCc2cc(Br)cnc2NC1=O>>Cc1c(CN(C)C(=O)/C=C/c2cnc3  
 c(c2)CNC(C)(C)C(=O)N3)oc2ccccc12  
 2939 C=CC(=O)O.Cc1ccc(S(=O)(=O)N(C)c2ccc(I)cc2)cc1>>Cc1ccc(S(=O)(=O)N(C)c2ccc(/C=C/C(=O)O)c  
 c2)cc1  
 2940 C=CC[Si](C)(C)C.COC(=O)c1ccc(Br)cc1>>C=C(C[Si](C)(C)C)c1ccc(C(=O)OC)cc1  
 2941 C=CC(=O)OCC.Cc1ccncc1Br>>CCOC(=O)/C=C/c1ccncc1C  
 2942 C=Cc1ccc(N(C)C)cc1.CCCCC1=C(CCCC)P(=O)(c2ccccc2)c2cc3cc(I)ccc3cc21>>CCCCC1=C(CCCC  
 )P(=O)(c2ccccc2)c2cc3cc(/C=C/c4ccc(N(C)C)cc4)ccc3cc21  
 2943 C=CC(=O)OCCCC.CCOC(=O)c1cccc(-c2c(-  
 2944 c3ccccc3)oc3ccc(Br)cc23)c1>>CCCCOC(=O)/C=C/c1ccc2oc(-c3ccccc3)c(-  
 C=CC(=O)OC.COc1cc(C2OCCO2)c(Br)c(OC)c1OC>>COC(=O)/C=C/c1c(C2OCCO2)cc(OC)c(OC)c  
 2945 C=CC(CO)N1C(=O)c2ccccc2C1=O.CC(=O)c1ccc(Br)cc1>>CC(=O)c1ccc(/C=C/C(CO)N2C(=O)c3ccc  
 cc3C2=O)cc1  
 2946 C=CC(N)=O.CCc1cccc1Br>>CCc1cccc1/C=C/C(N)=O  
 2947 C=Cc1cccc1.Cn1c2ccccc2c2c(-c3ccccc3)c(I)ccc21>>Cn1c2ccccc2c2c(-  
 2948 C=Cc1cc(OC)cc(OC)c1.Oc1ccc(-c2coccc2-c2ccc(Br)cc2)cc1>>COc1cc(/C=C/c2ccc(-c3coccc3-  
 c3ccc(O)cc3)cc2)cc(OC)c1  
 2949 C=Cc1ncnc2c1ncn2C1CCCCO1.Ic1ccco1>>C(=C/c1ncnc2c1ncn2C1CCCCO1)c1ccco1  
 2950 C=CC(=O)O.COc1ccc([I+](c2ccccc2)cc1>>COc1ccc(/C=C/C(=O)O)cc1  
 2951 C=CC(=O)OCC.O=S(=O)(Oe1ccc2ccoc2c1)C(F)(F)F>>CCOC(=O)/C=C/c1ccc2ccoc2c1  
 2952 C=CC(=O)O.Cn1c(=O)oc2cc(Br)cnc21>>Cn1c(=O)oc2cc(/C=C/C(=O)O)cnc21  
 2953 C=COCCN(C)C.O=S(=O)(Oe1cccc1)C(F)(F)F>>C=C(OCCN(C)C)c1cccc1  
 2954 C=CC(=O)OC.CC(=O)n1cc(I)cn1>>COC(=O)/C=C/c1cnn(C(C)=O)c1  
 2955 C=CC(=O)OCC.Cc1nc(N)nc(N[C@H]2CC[C@H](OCC(N)=O)CC2)c1Br>>CCOC(=O)/C=C/c1c(C)n  
 c(N)nc1N[C@H]1CC[C@H](OCC(N)=O)CC1  
 2956 C=CC(=O)O.Ic1ccc2c(c1)OCCOCCOCCOCCO2>>O=C(O)/C=C/c1ccc2c(c1)OCCOCCOCCOCCO2  
 2957 C=Cc1ccc(OC(C)=O)cc1.CC(=O)OC[C@H]1O[C@H](Oe2ccc(I)cc2)[C@H](OC(C)=O)[C@@H](  
 OC(C)=O)[C@@H]1OC(C)=O>>CC(=O)OC[C@H]1O[C@H](Oe2ccc(/C=C/c3ccc(OC(C)=O)cc3)c  
 c2)[C@H](OC(C)=O)[C@@H](OC(C)=O)[C@@H]1OC(C)=O  
 2958 C=CC(=O)OC.O=Cc1cccc(Cl)c1>>COC(=O)/C=C/c1cccc(C=O)c1  
 2959 C=Cc1ccncc1.CC(C)(C)OC(=O)N[C@H](COc1cnc(Br)c1)C(=O)O>>CC(C)(C)OC(=O)N[C@H](CO  
 c1cnc(/C=C/c2cnc2)c1)C(=O)O  
 2960 C=Cc1ccc(C)cc1.O=Cc1cc(F)ccc1Br>>Cc1ccc(/C=C/c2ccc(F)cc2C=O)cc1  
 2961 C=CC(OCC)OCC.O=Cc1cccc1Br>>CCOC(/C=C/c1cccc1C=O)OCC

2962 C=CC(=O)OC.CC(=O)c1cc2cc(Br)ccc2o1>>COC(=O)/C=C/c1ccc2oc(C(C)=O)cc2c1  
 2963 C=CC(=O)OC.CC(C)(C)OC(=O)c1ccc(I)cc1>>COC(=O)/C=C/c1ccc(C(=O)OC(C)(C)C)cc1  
 2964 C=C(F)C(=O)OC.N#Cc1cccc(I)c1>>COC(=O)/C(F)=C/c1cccc(C#N)c1  
 2965 C=Cc1cccn1C(=O)OC(C)(C)C.O=Cc1ccc(I)cc1>>CC(C)(C)OC(=O)n1cccc1/C=C/c1ccc(C=O)cc1  
 2966 C=COCCO.COc1cccc1Br>>C=C(OCCO)c1cccc1OC  
 2967 C=CC(=O)OCCCC.O=Cc1cccc1I>>CCCCOC(=O)/C=C/c1cccc1C=O  
 2968 Br1ccc(-c2nc3cccc3s2)cc1.C=Cc1ccc2c(c1)Sc1cccc1N2CC>>CCN1c2cccc2Sc2cc(/C=C/c3ccc(-c4nc5cccc5s4)cc3)ccc21  
 2969 C=CCOc1cccc1.FC(F)(F)c1ccc(I)cc1>>FC(F)(F)c1ccc(/C=C/COc2cccc2)cc1  
 2970 C=Cc1cccc1.COC(=O)Cn1c(=O)c(Cl)nc2cccc21>>COC(=O)Cn1c(=O)c(/C=C/c2cccc2)nc2cccc21  
 2971 C=CC(=O)N1N=Cc2cccc2C1CCC.CCOc1c(I)cc(Cc2cnc(N)nc2N)cc1OC>>CCCC1c2cccc2C=NN1C(=O)/C=C/c1cc(Cc2cnc(N)nc2N)cc(OC)c1OCC  
 2972 C=CCn1c(-c2cccc(OC)c2)nc2cccc2c1=O.O=C(CN1C(=O)COc2cccc21)c1ccc(Br)cc1>>COc1cccc(-c2nc3cccc3c(=O)n2C/C=C/c2ccc(C(=O)CN3C(=O)COc4cccc43)cc2)c1  
 2973 C=C(NC(C)=O)C(=O)OCc1cccc1.CCc1cc(Br)ccc1N>>CCc1cc(/C=C/(NC(C)=O)C(=O)OCc2cccc2)ccc1N  
 2974 C=CC(C)(C)O.O=C(c1cccc1)c1ccc(Br)cc1>>CC(C)(O)/C=C/c1ccc(C(=O)c2cccc2)cc1  
 2975 C=CC(=O)N(C)C.COc1cc(Br)ccc1Cc1c(C)nc(N)nc1OS(=O)(=O)c1c(C(C)C)cc(C(C)C)cc1C(C)C>>COc1cc(/C=C/C(=O)N(C)C)ccc1Cc1c(C)nc(N)nc1OS(=O)(=O)c1c(C(C)C)cc(C(C)C)cc1C(C)C  
 2976 Br1cccs1.C=CCCCCCCC>>CCCCCCCC/C=C/c1cccs1  
 2977 C=CC(=O)OC(C)(C)C.CC(=O)Nc1cc(Cl)c(F)cc1Br>>CC(=O)Nc1cc(Cl)c(F)cc1/C=C/C(=O)OC(C)(C)C  
 2978 C=CC(=O)OCCCC.CCN(c1cccc1)c1cccc(Br)n1>>CCCCOC(=O)/C=C/c1cccc(N(CC)c2cccc2)n1  
 2979 C=C1CC(c2ccc(Cl)cc2)OC1=O.Fc1cccc(I)c1>>O=C1OC(c2ccc(Cl)cc2)/C1=C\c1cccc(F)c1  
 2980 C=CC(=O)OCC.COc1cc(-c2cc3cc(Br)cc(OC)c3o2)ccc1OCc1cccc1>>CCOC(=O)/C=C/c1cc(OC)c2oc(-c2cc3cc(Br)cc(OC)c3o2)ccc1OCc1cccc1  
 2981 C=Cc1ccc(OC)c(OC)c1.COc1cc(Br)cc(OC)c1F>>COc1ccc(/C=C/c2cc(OC)c(F)c(OC)c2)cc1OC  
 2982 C=CC(=O)OCC.COc1cc(C)c(Br)c(CC#N)c1>>CCOC(=O)/C=C/c1c(C)cc(OC)cc1CC#N  
 2983 Br1ccc2cccc2c1.C=CC(=O)C(C)CC(=O)OC>>COC(=O)CC(C)C(=O)/C=C/c1ccc2cccc2c1  
 2984 C=CC(=O)N(C)OC.N#Cc1cc2ccc(Br)cc2cc1C#N>>CON(C)C(=O)/C=C/c1ccc2cc(C#N)c(C#N)cc2c1  
 2985 C=CC(C)(C)O.COc1ccc(Br)cc1>>COc1ccc(/C=C/C(C)(C)O)cc1  
 2986 Br1ccenc1.C=COCCCC>>C=C(OCCCC)c1ccenc1  
 2987 C=CC(=O)OC.COCCOc1cc(C(C)(C)C)ccc1I>>COCCOc1cc(C(C)(C)C)ccc1/C=C/C(=O)OC  
 2988 C=CC(=O)OC.CCCCCCCCCC(F)(F)C1CC(c2ccc(Br)cc2)=NN1C>>CCCCCCCCC(F)(F)C1CC(c2ccc(/C=C/C(=O)OC)cc2)=NN1C  
 2989 C=CC(=O)OCC.COC(=O)c1cccc1I>>CCOC(=O)/C=C/c1cccc1C(=O)OC  
 2990 C=CC(=O)N(C)C.Nc1n[nH]c2c(Br)ccc(-c3ccc([N+](=O)[O-])cc3)c12>>CN(C)C(=O)/C=C/c1ccc(-c2ccc([N+](=O)[O-])cc2)c2c(N)n[nH]c12  
 2991 C=CCCCCCC.O=S(=O)(Oc1cccc1Cl)C(F)(F)F>>C=C(CCCCCC)c1cccc1Cl  
 2992 C=CC(=O)O.O=S(=O)(Nc1ccc(I)cc1)c1ccc(Cl)cc1>>O=C(O)/C=C/c1ccc(NS(=O)(=O)c2ccc(Cl)cc2)c1  
 2993 C=COCCCC.CC(=O)c1ccc(I)cc1>>C=C(OCCCC)c1ccc(C(C)=O)cc1  
 2994 BrC1CCCCC1.C=Cc1cccc1Cl>>Clc1cccc1/C=C/C1CCCCC1  
 2995 C=Cc1nc2c(N)ncnc2n1[C@H]1C[C@H](O)[C@@H](CO)O1.CC(=O)c1ccc(Br)cc1>>CC(=O)c1ccc(/C=C/c2nc3c(N)ncnc3n2[C@H]2C[C@H](O)[C@@H](CO)O2)cc1  
 2996 C=C(OC)C(=O)OC.Ic1cccc2cccc12>>COC(=O)/C(=C/c1cccc2cccc12)OC  
 2997 Br1cccc2cc[nH]c12.C=CC(=O)N(C)C>>CN(C)C(=O)/C=C/c1cccc2cc[nH]c12  
 2998 C=C[C@@H]1CCCCN1C(=O)OC(C)(C)C.CCc1ccc(I)cc1>>CCc1ccc(/C=C/[C@@H]2CCCCN2C(=O)OC(C)(C)C)cc1  
 2999 C=CC(=O)N(C)C.FC(F)(F)c1cccc(I)c1>>CN(C)C(=O)/C=C/c1cccc(C(F)(F)F)c1  
 3000 C=Cc1ccc(N(c2cccc2)c2cccc2)cc1.CCCCCCN1c2ccc(Br)cc2Sc2cc(/C=C/c3ccc4c(c3)Sc3cc(C=O)cc c3N4CCCCC)ccc21>>CCCCCN1c2ccc(C=O)cc2Sc2cc(/C=C/c3ccc4c(c3)Sc3cc(/C=C/c5ccc(N(c6cccc6)c6cccc6)cc5)ccc3N4CCCCC)ccc21  
 3001 COC[C@@H](/N=C\c1cccc1)N1C=CCC[C@H]1C)C(C)C.Clc1cccc1>>COC[C@@H](/N=C\c1cccc1)N1C=C(c2cccc2)CC[C@H]1C)C(C)C  
 3002 C=CC(=O)OC.CCn1cnc2c(NCc3cccc(Br)c3)nc(N3CCCC3)nc21>>CCn1cnc2c(NCc3cccc(/C=C/C(=O)OC)c3)nc(N3CCCC3)nc21  
 3003 C=CC(=O)OC(C)(C)C.CC(C)(C)O[C@H]1CC[C@H]2C=C(C3=C(Br)CC4(CC3)OCCO4)CC[C@@]21C>>CC(C)(C)OC(=O)/C=C/C1=C(C2=C[C@@H]3CC[C@H](OC(C)(C)C)[C@@]3(C)CC2)CCC2(C1)OCCO2  
 3004 C=CC(=O)OC(C)(C)C.Nc1cc(I)ccc1Br>>CC(C)(C)OC(=O)/C=C/c1ccc(Br)c(N)c1  
 3005 Br1ccsc1.C=CC(=O)O>>O=C(O)/C=C/c1ccsc1

3006 Br1cnc2[nH]ccc2c1.C=CC(=O)OC(C)(C)C>>CC(C)(C)OC(=O)/C=C/c1cnc2[nH]ccc2c1  
3007 Br1cnc2nc(-c3cccc3)oc2c1.C=CC(=O)OC>>COC(=O)/C=C/c1cnc2nc(-c3cccc3)oc2c1  
3008 Br/C(=C/[Te]c1cccc1)c1cccc1.C=CC(=O)OCC>>CCOC(=O)/C=C/C(=C/[Te]c1cccc1)c1cccc1  
3009 C=CCNS(=O)(=O)c1ccc(C)cc1.N#Cc1cccc1Br>>Cc1ccc(S(=O)(=O)NC/C=C/c2cccc2C#N)cc1  
3010 C=CC(=O)OCC.Clc1ncc(Br)cn1>>CCOC(=O)/C=C/c1cnc(Cl)nc1  
3011 C=CC(=O)OC(C)(C)C.C=CC1=C(Br)CCCC1>>C=CC1=C/C=C/C(=O)OC(C)(C)CCCC1  
3012 C=Cc1cccc1F.CCOC(=O)C(F)Br>>CCOC(=O)C(F)/C=C/c1cccc1F  
3013 C=CC(=O)OC(C)(C)C.CC(C)(C)OC(=O)CCc1ccc(CN(C(=O)C2CCCC2)c2cccc(Br)c2)cc1>>CC(C)(  
C)OC(=O)/C=C/c1cccc(N(Cc2ccc(CCC(=O)OC(C)(C)C)cc2)C(=O)C2CCCC2)c1  
3014 C=C[Si](C)(C)C.O=[N+][([O-])c1cccc1I>>C[Si](C)(C)/C=C/c1cccc1[N+](=O)[O-]  
3015 C=Cc1cccc1.CN(C)c1ccc(-c2ccc(CN(C(=O)C3CCCC3)c3cccc(I)c3)cc2)cc1>>CN(C)c1ccc(-  
c2ccc(CN(C(=O)C3CCCC3)c3cccc/C=C/c4cccc4)c3)cc2)cc1  
3016 C=CC(=O)OCC.COc1cc2oc(C(=O)c3cc(OC)c(OC)c(OC)c3)cc2cc1I>>CCOC(=O)/C=C/c1cc2cc(C(=O)  
)c3cc(OC)c(OC)c(OC)c3)oc2cc1OC  
3017 C=C1CC(c2ccc(Cl)cc2)OC1=O.Ic1cccc1-  
c1ccc2cccc2c1>>O=C1OC(c2ccc(Cl)cc2)C/C1=C\c1cccc1-c1ccc2cccc2c1  
3018 C=CC(CC)O[Si](C)(C)C(C)(C)C.COC(=O)CCCCCCCC1=C(Br)CCC1=O>>CCC/C=C/C1=C(CCCC  
CCCC(=O)OC)C(=O)CC1O[Si](C)(C)C(C)(C)C  
3019 C=Cc1cccc(O)c1.Nc1cccc1Br>>Nc1cccc1/C=C/c1cccc(O)c1  
3020 C=CC(=O)OCCCC.Clc1cccc(I)c1>>CCCCOC(=O)/C=C/c1cccc(Cl)c1  
3021 C=C(OC)C1=C(Br)CCCC1.C=CC(=O)OC(C)(C)C>>C=C(OC)C1=C/C=C/C(=O)OC(C)(C)CCCC1  
3022 C=CC(=O)OC.CCOC(=O)c1ccc(Br)cc1>>CCOC(=O)c1ccc(/C=C/C(=O)OC)cc1  
3023 C=Cc1cccc1.Fc1cccc1I>>Fc1cccc1/C=C/c1cccc1  
3024 C=CC(=O)OCC.CCOC(=O)c1ccc(-c2cccc2I)cc1>>CCOC(=O)/C=C/c1cccc1-c1ccc(C(=O)OCC)cc1  
3025 C=CC#N.Cc1nn2c(-c3cccc3)cc(-c3cccc3)nc2c1I>>Cc1nn2c(-c3cccc3)cc(-  
C=CC(=O)NCCCCCNC(=O)OCC1c2cccc2-  
3026 c2cccc21.O=c1[nH]c(=O)n([C@H]2CO[C@H](CO)[C@H](O)C2)cc1I>>O=C/C=C/c1cn([C@  
@H]2CO[C@H](CO)[C@H](O)C2)c(=O)[nH]c1=O)NCCCCCNC(=O)OCC1c2cccc2-c2cccc21  
3027 C=CC(=O)OCC.CCCCC(=C(c1ccc(O)cc1)c1ccc(O)cc1)c1ccc(Br)cc1>>CCCCC(=C(c1ccc(O)cc1)c1cc  
c(O)cc1)c1ccc(/C=C/C(=O)OCC)cc1  
3028 C=CC(=O)OC.Ic1cn(C(c2cccc2)(c2cccc2)c2cccc2)c(N=P(c2cccc2)(c2cccc2)c2cccc2)n1>>COC  
(=O)/C=C/c1cn(C(c2cccc2)(c2cccc2)c2cccc2)c(N=P(c2cccc2)(c2cccc2)c2cccc2)n1  
3029 C=Cc1ccc(C)cc1.COc1cccc(Br)c1>>COc1cccc(/C=C/c2ccc(C)cc2)c1  
3030 C=Cc1cccc1.CCOC(=O)/C=C/c1ccc(I)cc1C>>CCOC(=O)/C=C/c1ccc(/C=C/c2cccc2)cc1C  
3031 Br1ccc(I)cc1.C=CS(=O)(=O)F>>O=S(=O)(F)/C=C/c1ccc(Br)cc1  
3032 Br1cc2ccc3cccc3c2c2c1ccc1cccc12.C=CC(=O)OC>>COC(=O)/C=C/c1cc2ccc3cccc3c2c2c1ccc1c  
cccc12  
3033 C=CC(=O)OC.C[C@]12CC[C@H]3c4cc(I)c(O)cc4CC[C@H]3[C@H]1CC[C@H]2O>>COC(=  
O)/C=C/c1cc2c(cc1O)CC[C@H]1[C@H]2CC[C@]2(C)[C@H](O)CC[C@H]12  
3034 Br1cccc1.C=CCCC(C)=O>>CC(=O)CC/C=C/c1cccc1  
3035 Br1cccc1.C=CN1C(=O)c2cccc2C1=O>>O=C1c2cccc2C(=O)N1/C=C/c1cccc1  
3036 C=CC(=O)NC(C)C.COc1ccc(I)cc1>>COc1ccc(/C=C/C(=O)NC(C)C)cc1  
3037 C=CC(=O)OCC.FC(F)(F)c1ccc(I)c(Cl)c1>>CCOC(=O)/C=C/c1ccc(C(F)(F)F)cc1Cl  
3038 C=CC(C)=O.COc1ncc(Br)cn1>>COc1ncc(/C=C/C(C)=O)cn1  
3039 C=CC(=O)OC.Cc1nc2ccc(I)cc2s1>>COC(=O)/C=C/c1ccc2nc(C)sc2c1  
3040 C=CC(=O)N1CCOCC1.COc1cc2c3cc(Cl)ccc3nc3c4cccc4n(C)c(c1)c23>>COc1cc2c3cc(/C=C/C(=O)  
N4CCOCC4)ccc3nc3c4cccc4n(C)c(c1)c23  
3041 C=CC(=O)N(C)C.O=[N+][([O-])c1ccc(Br)cc1>>CN(C)C(=O)/C=C/c1ccc([N+](=O)[O-])cc1  
C=CC(=O)OC.COc1ccc(-  
3042 c2ccc(CN(C(=O)CC(C)(C)C)c3nccc4cc(Br)ccc34)cc2)cc1C>>COC(=O)/C=C/c1ccc2c(N(Cc3ccc(-  
c4ccc(OC)c(C)c4)cc3)C(=O)CC(C)(C)C)nccc2c1  
3043 C=CC(=O)OCC.COc1ccc(-c2nccc2Br)cc1>>CCOC(=O)/C=C/c1cncnc1-c1ccc(OC)cc1  
3044 Br1ccsc1.C=CCNC(=O)OC(C)(C)C>>CC(C)(C)OC(=O)NC/C=C/c1ccsc1  
3045 C=CC(=O)OC(C)(C)C.COc1ccc2cc(Br)ccc2c1>>COc1ccc2cc(/C=C/C(=O)OC(C)(C)C)ccc2c1  
3046 C=Cc1cccc1.Oc1ccc(/N=N/c2ccc(Br)cc2)cc1>>Oc1ccc(/N=N/c2ccc(/C=C/c3cccc3)cc2)cc1  
C=Cc1ccc(/C=C/c2ccc(N(C)C)cc2OC)cc1.CC1(C)C2=CC(=O)C(F)=CC2=C(c2ccc(Br)cc2S(=O)(=O)  
3047 O)c2cc(F)c(O)cc21>>COc1cc(N(C)C)ccc1/C=C/c1ccc(/C=C/c2ccc(C3=C4C=C(F)C(=O)C=C4C(C)(C  
)c4cc(O)c(F)cc43)c(S(=O)(=O)O)c2)cc1  
3048 C=CCNS(=O)(=O)c1ccc(C)cc1.FC(F)(F)c1ccc(I)cc1>>Cc1ccc(S(=O)(=O)NC/C=C/c2ccc(C(F)(F)F)cc  
2)cc1

3049 C=C(C)C(=O)Nc1ccccc1.Clc1ccccc1>>C/C(=C\c1ccccc1)C(=O)Nc1ccccc1  
3050 C=CC(=O)N(C)Cc1oc2ccccc2c1C.CC(C)(C)OC(=O)N1CCN(c2cc3cc(Br)cnc3[nH]c2=O)CC1>>Cc1c  
CN(C)C(=O)/C=C/c2cnc3[nH]c(=O)c(N4CCN(C(=O)OC(C)(C)C)CC4)cc3c2)oc2ccccc12  
3051 C=Cc1ccccc1.CCCCCCCCCCCCCC1>>CCCCCCCCCCCCC/C=C/c1ccccc1  
3052 C=CS(=O)(=O)N1CCC2(CC1)OCCO2.Cc1cc(N2C(=O)NC(=O)C2(C)C)cc(C)c1Br>>Cc1cc(N2C(=O)  
NC(=O)C2(C)C)cc(C)c1/C=C/S(=O)(=O)N1CCC2(CC1)OCCO2  
3053 C=CC(=O)OC.Ic1ccccc1C#CCOC1CCCCO1>>COC(=O)/C=C/c1ccccc1C#CCOC1CCCCO1  
3054 C=CC(=O)OC.CC1(C)CC(=C(c2ccc3c(cnn3C3CCCCO3)c2)c2c(F)cc(Br)cc2F)CC(C)(C)C1>>COC(=O)  
/C=C/c1cc(F)c(C(=C2CC(C)(C)CC(C)(C)C2)c2ccc3c(cnn3C3CCCCO3)c2)c(F)c1  
3055 C=CC(=O)OCCCC.Ic1ccc2ccccc2c1>>CCCCOC(=O)/C=C/c1ccc2ccccc2c1  
3056 C=CC(=O)OC.Cc1ccc(S(=O)(=O)n2cc(I)c3c(Br)cccc32)cc1>>COC(=O)/C=C/c1cn(S(=O)(=O)c2ccc(  
C)cc2)c2ccccc(Br)c12  
3057 C=COCCCC.Clc1ccc2ccccc2c1>>C=C(OCCCC)c1ccc2ccccc2c1  
3058 C=CP(=O)(OCC)OCC.CCOC(=O)CNe1ccccc(Br)c1>>CCOC(=O)CNe1ccccc(/C=C/P(=O)(OCC)OCC)c  
3059 C=Cc1ccccc1.O=c1ccoc2c(Br)cccc12>>O=c1ccoc2c(/C=C/c3ccccc3)cccc12  
3060 C=CC(=O)OC(CC)CCCC.CC(=O)c1ccc(Cl)cc1>>CCCC(CC)OC(=O)/C=C/c1ccc(C(C)=O)cc1  
3061 Bre1ccene1.C=Cc1cn(COCC[Si](C)(C)C)nc1-c1nc2ccc(OC)cc2n1COCC[Si](C)(C)C>>COc1ccc2nc(-  
c3nn(COCC[Si](C)(C)C)cc3/C=C/c3ccccc3)n(COCC[Si](C)(C)C)c2c1  
3062 C=Cc1ccc(C(C)(C)C)cc1.C[Si](C)(C)OS(=O)(=O)C(F)(F)F>>CC(C)(C)c1ccc(/C=C/[Si](C)(C)C)cc1  
3063 C=Cc1ccccc1.COc1ccc2c(-c3ccccc3)c(Br)c(=O)oc2c1>>COc1ccc2c(-  
c3ccccc3)c(/C=C/c3ccccc3)c(=O)oc2c1  
3064 C=CC(=O)OCC.Cc1c(Br)cnc2c1nnn2C>>CCOC(=O)/C=C/c1cnc2c(nnn2C)c1C  
3065 C=Cc1ccc(F)cc1.C[Si](C)(C)I>>C[Si](C)(C)/C=C/c1ccc(F)cc1  
3066 C=CC[C@H]1C(=O)N(c2ccccc2)[C@@H]1c1ccc(OC)cc1.OCc1ccc(Br)cc1>>COc1ccc([C@@H]2[C  
@@H]1C/C=C/c3ccc(CO)cc3)C(=O)N2c2ccccc2)cc1  
3067 C=Cc1ccc(N(CCCC)CCCC)cc1.CN(C)c1ccc(/C=C/c2nc3cc(Br)ccc3nc2-  
c2ccccc2)cc1>>CCCCN(CCCC)c1ccc(/C=C/c2ccc3nc(-c4ccccc4)c(/C=C/c4ccc(N(C)C)cc4)nc3c2)cc1  
C=C[C@H]1C[C@H]2CC[C@H]1C(=O)OC)N2C(=O)[C@@](C2ccccc2)(NC(=O)OCc2ccccc2)[C  
@H]1OC(C)=O.O=[N+][O-  
3068 ]c1ccc(Br)cc1>>COC(=O)[C@@H]1CC[C@H]2C[C@H]1(/C=C/c3ccc([N+](=O)[O-  
]cc3)[C@H](OC(C)=O)IC@1(Cc3ccccc3)(NC(=O)OCc3ccccc3)C(=O)N12  
3069 C=CC(=O)OC.O=c1[nH]c(=O)n([C@H]2O[C@H](CO)[C@H](O)[C@H]2O)cc1I>>COC(=O)/C=C/  
c1cn([C@H]2O[C@H]2O[C@H](CO)[C@H](O)[C@H]2O)c(=O)[nH]c1=O  
3070 C=CC(C)(C)O.COC(=O)N1c2ccccc2[C@@]2(CCNC2=O)[C@]2(CCNC(=O)OC(C)(C)C)c3c(Br)cccc  
3N(C)[C@H]12>>COC(=O)N1c2ccccc2[C@@]2(CCNC2=O)[C@]2(CCNC(=O)OC(C)(C)C)c3c(/C=C/  
C/C(C)(C)O)cccc3N(C)[C@H]12  
3071 C=Cc1ccccc1.Cc1ccc(NC(=O)OC(C)(C)C)c(Br)c1>>Cc1ccc(NC(=O)OC(C)(C)C)/C=C/c2ccccc2)c1  
3072 C=Cc1ccc(Cl)cc1.FC(F)(F)C(F)(F)C(F)(F)C(F)(F)C(F)(F)Br>>O=Cc1ccccc1/C=C/C(F)(F)C(  
F)(F)C(F)(F)C(F)(F)C(F)(F)C(F)(F)F)c1  
3073 C=CC(O)c1cc(OC)c(OC)c(OC)c1Br.COc1ccc(I)cc1OC>>COc1ccc(/C=C/C(O)c2cc(OC)c(OC)c(OC)c  
2Br)cc1OC  
3074 C=Cc1ccccc1.Cc1ccc(NC(=O)OC(C)(C)C)c(Br)c1>>Cc1ccc(NC(=O)OC(C)(C)C)/C=C/c2ccccc2)c1  
3075 C=Cc1ccc(Cl)cc1.FC(F)(F)C(Br)CCc1ccccc1>>FC(F)(F)C(/C=C/c1ccc(Cl)cc1)CCc1ccccc1  
3076 C=Cc1ccc(N(C)C)cc1.CCCCCCN1C(=O)c2ccccc3c(Br)ccc(c23)C1=O>>CCCCCN1C(=O)c2ccccc3c(/  
C=C/c4ccc(N(C)C)cc4)ccc(c23)C1=O  
3077 C=CCCN1C(=O)c2ccccc2C1=O.Cc1ccccc1I>>Cc1ccccc1/C=C/CCN1C(=O)c2ccccc2C1=O  
3078 C=CCN1C(=O)c2ccccc2C1=O.Clc1ccc(Br)cc1>>O=C1c2ccccc2C(=O)N1C/C=C/c1ccc(Cl)cc1  
3079 C=Cc1ccccc1.CO)n1.Cc1ncc(C#N)c(Nc2ccc3[nH]ccc3c2C)c1I>>Cc1ncc(C#N)c(Nc2ccc3[nH]ccc3c2C)c  
1/C=C/c1ccccc1CO)n1  
3080 C=Cc1ccc(O)c(OC)c1.CCCCCCCCOCc1ccc2c(C)c(Br)c(=O)oc2c1>>CCCCCCCCOCc1ccc2c(C)c(/C=C/  
c3ccc(O)c(OC)c3)c(=O)oc2c1  
3081 C=CC(C)=O.Cc1ccc(I)cc1>>CC(=O)/C=C/c1ccc(C)cc1  
3082 C=CC(OCC)OCC.Fc1ccccc(Br)c1>>CCOC(/C=C/c1ccccc1)OCC  
3083 C=CC(=O)O.O=S(=O)(Nc1ccc(I)cc1)c1cccs1>>O=C(O)/C=C/c1ccc(NS(=O)(=O)c2cccs2)cc1  
3084 C=C[C@H]1CN2CC[C@H]1C[C@@H]2[C@H](O)c1ccnc2ccc(OC)cc12.FC(F)(F)c1ccc(Br)cc1>>CO  
c1ccc2nccc([C@@H](O)[C@H]3C[C@H]4CCN3C[C@@H]4/C=C/c3ccc(C(F)(F)F)cc3)c2c1  
3085 C=Cc1ccccc1.O=Cc1ccc(F)cc1Br>>O=Cc1ccc(F)cc1/C=C/c1ccccc1  
3086 C=C(CC(=O)OC)C(=O)OC.FC(F)(F)c1ccc(I)cc1>>COC(=O)C/C=C\c1ccc(C(F)(F)F)cc1)C(=O)OC  
3087 C=C(NC(C)=O)C(=O)OC.Cc1ccc(S(=O)(=O)n2ccc3c(Br)cccc32)cc1>>COC(=O)/C=C/c1ccccc2c1ccn  
2S(=O)(=O)c1ccc(C)cc1)NC(C)=O  
C=C1C(=O)O[C@H]2[C@H]1CCC(=C)[C@@H]1C[C@H](OC(C)=O)C(=C)[C@H]21.Cc1ccc(I)cc1  
>>C=C1CC[C@H]2/C=C\c3ccc(C)cc3)C(=O)O[C@@H]2[C@H]2C(=C)[C@@H](OC(C)=O)C[C@

3088 C=CC(=O)OC(C)(C)C.COc1ccc(CNc2c(Br)cc(C)cc2I)cc1>>COc1ccc(CNc2c(Br)cc(C)cc2/C=C/C(=O)OC(C)(C)C)cc1  
3089 C=CC(=O)OCC.COc1ncc(I)c2ncccc12>>CCOC(=O)/C=C/c1enc(OC)c2cccn12  
3090 C=CC(=O)O.Fc1ccc(Br)cc1F>>O=C(O)/C=C/c1ccc(F)c(F)c1  
3091 C=CC(=O)OC.COc1cc(-c2cc3cc(Br)cc(OC)c3o2)ccc1OCc1cccc1>>COC(=O)/C=C/c1cc(OC)c2oc(-c3ccc(OCc4cccc4)c(OC)c3)cc2c1  
3092 C=CCOc1cccc1.Ic1cccs1>>C(=C/c1cccs1)\COc1cccc1  
3093 C=CCC(C)C.CCOC(=O)c1ccc(I)cc1>>CCOC(=O)c1ccc(/C=C/CC(C)C)cc1  
3094 Br1ccc(I)cc1.C=CC(=O)OC>>COC(=O)/C=C/c1ccc(Br)cc1  
3095 \*CNCCCOCCOCCOCCCN(C(=O)COc1ccc(C(Cc2cc(OC)cc(OC)c2)NC(=O)c2cccc(C=C)c2)cc1.CC(C)(C)c1ccc(I)cc1>>\*CNCCCOCCOCCOCCCN(C(=O)COc1ccc(C(Cc2cc(OC)cc(OC)c2)NC(=O)c2cccc(/C=C/c3ccc(C(C)(C)C)cc3)c2)cc1  
3096 C=CC(=O)OC(C)(C)C.O=[N+][([O-])c1cccc1I>>CC(C)(C)OC(=O)/C=C/c1cccc1[N+](=O)[O-]  
3097 C=CC(=O)C(C)CC(=O)OC.C=CC(C)(C)O[C@H]1COc2ccc(Br)cc2OC1(C)C>>C=CC(C)(C)O[C@H]1COc2ccc(/C=C/C(=O)C(C)CC(=O)OC)cc2OC1(C)C  
3098 C=C(c1cccc1)[Si](C)(C)c1cccn1.Ic1ccccc1>>C[Si](C)(/C(=C/c1cccc1)c1ccccc1)c1cccn1  
3099 C=CC(=O)OC(C)(C)C.COC1CCC(C2=C[C@H]3CC[C@H](OC(C)(C)C)[C@@]3(C)CC2)=C(Br)C1>>COC1CCC(C2=C[C@H]3CC[C@H](OC(C)(C)C)[C@@]3(C)CC2)=C/C=C/C(=O)OC(C)(C)C1  
3100 C=CS(=O)(=O)NCCCCCCCC.Cc1ccc(CNC(=O)OC(C)(C)C)c(Br)c1>>CCCCCCCCNS(=O)(=O)/C=C/c1cc(C)ccc1CNC(=O)OC(C)(C)C  
3101 Br1cc2ccc1CCc1ccc(cc1)CC2.C=Cc1ccccc1>>C(=C/c1cc2ccc1CCc1ccc(cc1)CC2)c1ccccc1  
3102 C=Cc1ccc(OC)cc1.O=c1oc2cccc2cc1Br>>COc1ccc(/C=C/c2cc3cccc3oc2=O)cc1  
3103 C=CC(C)(O)CCC=C(C)C.Fc1ccccc1Br>>CC(C)=CCCC(C)(O)/C=C/c1ccccc1F  
3104 C=CC(F)(F)F.Fc1ccc(Br)c1>>Fc1ccc(/C=C/C(F)(F)F)c1  
3105 C=CC(=O)OCC.CC(C)(C)OC(=O)NCc1cc2cccc2nc1Cl>>CCOC(=O)/C=C/c1nc2cccc2cc1CNC(=O)OC(C)(C)C  
3106 C=CC#N.Nc1ccc(I)cc1>>N#C/C=C/c1ccc(N)cc1  
3107 C=CC(=O)OC.COc1ccc(Cl)cc1>>COc1ccc(/C=C/C(=O)OC)cc1  
3108 C=CC(=O)OC.CC1(C)CC(=C(c2ccc(Br)cc2)c2ccc3c(c2)c(F)nn3C2CCCCO2)CC(C)(C)O1>>COC(=O)/C=C/c1ccc(C(=C2CC(C)(C)OC(C)(C)C2)c2ccc3c(c2)c(F)nn3C2CCCCO2)cc1  
3109 C=CC(O)CC.c1ccc([I+])c2cccs2)cc1>>CCC(O)/C=C/c1cccs1  
3110 C=CCN(C(=O)OC(C)(C)C)C(=O)OC(C)(C)C.Fc1ccc(Cl)cc1>>CC(C)(C)OC(=O)N(C/C=C/c1ccc(F)cc1)C(=O)OC(C)(C)C  
3111 C=CCOC(C)=O.Ic1ccc(-c2cccc2)cc1>>CC(=O)OC/C=C/c1ccc(-c2cccc2)cc1  
3112 C=Cc1cc(OC)cc(OC)c1.CC1(C)C=C(I)CC(C)(C)N1[O]>>COc1cc(/C=C/C2=CC(C)(C)N([O])C(C)(C)C2)cc(OC)c1  
3113 C=CC(=O)OCC.O=[N+][([O-])c1cccc(I)c1>>CCOC(=O)/C=C/c1cccc([N+](=O)[O-])c1  
3114 C=Cc1ccccc1.COc1ccc(Br)c(C)c1>>COc1ccc(/C=C/c2cccc2)c(C)c1  
3115 C=Cc1ccccc1.CN1CC(c2ccc(Br)cc2)CCC1=O>>CN1CC(c2ccc(/C=C/c3cccc3)cc2)CCC1=O  
3116 C=CC(=O)OC(C)(C)C.C[Si](C)(C)CCOCON1CCc2c(ncc3c2c(I)cn3Cc2ccc(F)cc2)C1=O>>CC(C)(C)OC(=O)/C=C/c1cn(Cc2ccc(F)cc2)c2nc3c(c12)CCN(OCOCC[Si](C)(C)C)C3=O  
3117 C=Cc1ccc(O)cc1.Oc1cc(O)cc(I)c1>>Oc1ccc(/C=C/c2cc(O)cc(O)c2)cc1  
3118 C=CCN1C(=O)c2cccc2C1=O.Nc1ncc(Br)cn1>>Nc1ncc(/C=C/CN2C(=O)c3cccc3C2=O)cn1  
3119 C=C[C@]@H](O[Si](C)(C)C(C)(C)C)[C@H](CCCC(=O)OC)O[Si](C)(C)C(C)(C)C.CCCCCC(=O)c1nc2cccc2cc1Br>>CCCCC(=O)c1nc2cccc2cc1/C=C/[C@]@H](O[Si](C)(C)C(C)(C)C)[C@H](CCCC(=O)OC)O[Si](C)(C)C(C)(C)C  
3120 C=Cc1ccc(OC)c1.Cn1c(=O)c2c(cc(Br)n2C)n(C)c1=O>>COc1cccc(/C=C/c2cc3c(c(=O)n(C)c(=O)n3C)n2C)c1  
3121 C=C(NC(C)=O)C(=O)OC.COc1cc(C)c(I)c(C)c1>>COC(=O)/C=C/c1c(C)cc(OC)cc1C)NC(C)=O  
3122 C=CC(CCC)OCc1cccc1.CC(=O)c1ccc(Br)cc1>>CCCC(/C=C/c1ccc(C(C)=O)cc1)OCc1cccc1  
3123 C=CC(=O)O.O=[N+][([O-])c1ccc(Cl)cc1>>O=C(O)/C=C/c1ccc([N+](=O)[O-])cc1  
3124 C=CC(C)=O.Ic1cccc2[nH]ccc12>>CC(=O)/C=C/c1cccc2[nH]ccc12  
3125 C=CS(=O)(=O)F.Cc1ccc(S(=O)(=O)n2cc(I)cn2)cc1>>Cc1ccc(S(=O)(=O)n2cc(/C=C/S(=O)(=O)F)cn2)  
3126 C=C.C=CCCCCCC(C)OC(=O)c1c(OC)cc(OC)cc1OS(=O)(=O)C(F)(F)F>>C=CCCCCCC(C)OC(=O)c1c(C=C)cc(OC)cc1OC  
3127 C=CC(=O)O.C[C@]12C[C@@]34C=C(Sc5cccc(I)c5)C(=O)[C@@](C)(CCC(=O)Nc5c(O)ccc(C(=O)O)c5O)[C@]@H]3[C@H](C[C@]@H]1C4)O2>>C[C@]12C[C@@]34C=C(Sc5cccc(/C=C/C(=O)O)c5)C(=O)[C@]@H](C)(CCC(=O)Nc5c(O)ccc(C(=O)O)c5O)[C@]@H]3[C@H](C[C@]@H]1C4)O2  
3128 C=Cc1ccc(OC)cc1.CCCCN1c(C(=O)NC(C)(C)C)nc(Br)c1C(=O)NC(C)(C)C>>CCCN1c(C(=O)NC(C)(C)C)nc(/C=C/c2ccc(OC)cc2)c1C(=O)NC(C)(C)C  
3129 C=CN1CCCC1=O.O=S(=O)(Oc1ccccc1Br)C(F)(F)F>>C=C(c1ccccc1Br)N1CCCC1=O

3130 C=Cc1cccc1.COc1ccc(Br)cc1OC>>COc1ccc(/C=C/c2ccccc2)cc1OC  
3131 Br1ccc(-c2nco2)o1.C=Cc1cccc1>>C=C/c1ccc(-c2nco2)o1)\c1cccc1  
3132 C=CC(=O)OCCCC.O=Cc1ccc(Br)s1>>CCCCOC(=O)/C=C/c1ccc(C=O)s1  
3133 C=CCOC(C)=O.Ic1cccc2ccccc12>>CC(=O)OC/C=C/c1cccc2ccccc12  
3134 C=CCNC(=O)OC(C)(C)C.O=C1CCc2cc(Br)ccc21>>C=C(CNC(=O)OC(C)(C)C)c1ccc2c(c1)CCC2=O  
3135 C=CC(=O)O.CCOC(=O)/C=C/c1ccc([Si](C)(C)C)cc2c1oc1c(I)cc([Si](C)(C)C)cc12>>CCOC(=O)/C=C/  
c1cc([Si](C)(C)C)cc2c1oc1c(/C=C/C(=O)O)cc([Si](C)(C)C)cc12  
3136 C=CC(=O)OC(C)(C)C.CC1cc(O)ccc1I>>CC1cc(O)ccc1/C=C/C(=O)OC(C)(C)C  
3137 C=Cc1nc(C)c(OC(=O)C(C)(C)C)c2c1COC2OC.COc1ccc(I)cc1>>COc1ccc(/C=C/c2nc(C)c(OC(=O)C(  
C)(C)C)c3c2COC3OC)cc1  
3138 CC(=O)/C=C/CC(NS(=O)(=O)c1ccc(C)cc1)c1ccc(C(F)(F)F)cc1.Cc1ccc(Br)cc1>>CC(=O)/C=C/CC(N  
S(=O)(=O)c1ccc(C)cc1)c1ccc(C(F)(F)F)cc1)c1ccc(C)cc1  
3139 C=CC1CC1.Nc1cccc1Br>>Nc1cccc1/C=C\C1CC1  
3140 C=CC(=O)OC.COC(=O)c1ccc(Br)c(C(=O)OC)n1>>COC(=O)/C=C/c1ccc(C(=O)OC)nc1C(=O)OC  
3141 C=CCCCCCC(=O)OC.CC1(C)C(=O)N(c2ccc(C#N)c(C(F)(F)F)c2)C(=S)N1c1ccc(Br)c(F)c1>>COC(=  
O)CCCCC/C=C/c1ccc(N2C(=S)N(c3ccc(C#N)c(C(F)(F)F)c3)C(=O)C2(C)C)cc1F  
3142 C=CC(=O)OCC.CC1(C)CC(=C(c2ccc(Br)cc2)c2ccc(O)c(F)c2)CC(C)(C)O1>>CCOC(=O)/C=C/c1ccc(  
C(=C2CC(C)(C)OC(C)(C)C2)c2ccc(O)c(F)c2)cc1  
3143 C=COCCN(C)C.Cc1ccc(Br)cc1>>C=C(OCCN(C)C)c1ccc(C)cc1  
3144 C=Cc1cccc1.O=c1cc(-c2ccccc2)oc2cc(Br)ccc12>>O=c1cc(-c2ccccc2)oc2cc(/C=C/c3ccccc3)ccc12  
3145 C=CC(=O)OC.O=C(C=P(c1cccc1)(c1cccc1)c1cccc1)c1ccc(I)cc1>>COC(=O)/C=C/c1ccc(C(=O)C=  
P(c2ccccc2)(c2ccccc2)c2ccccc2)cc1  
3146 C=CC(=O)O.O=S(=O)(Nc1ccc(I)cc1)c1ccc(-c2ccccc2)cc1>>O=C(O)/C=C/c1ccc(NS(=O)(=O)c2ccc(-  
c3ccccc3)cc2)cc1  
3147 C=Cc1cccc1.Cn1nc(Br)c(=O)c2ccccc21>>Cn1nc(/C=C/c2ccccc2)c(=O)c2ccccc21  
3148 C=CC(=O)OCC.COc1cc(Br)cc(OC(F)(F)F)c1>>CCOC(=O)/C=C/c1cc(OC)cc(OC(F)(F)F)c1  
3149 C=Cc1ccc(OC)cc1.CCCCOC(=O)/C=C/c1ccc(Cl)cc1>>CCCCOC(=O)/C=C/c1ccc(/C=C/c2ccc(OC)cc  
2)cc1  
3150 C=Cc1ccncc1.CN(C(=O)c1cccc1)c1ccc2c(c1)[nH]c(=NC(=O)c1ccc(Br)s1)n2CCC(N)=O>>CN(C(=O  
c1cccc1)c1ccc2c(c1)[nH]c(=NC(=O)c1ccc(/C=C/c3ccncc3)s1)n2CCC(N)=O  
3151 C=Cc1nc(C)c(OC(=O)C(C)(C)C)c2c1COC2OC.COC(=O)c1ccc(I)cc1>>COC(=O)c1ccc(/C=C/c2nc(C)  
c(OC(=O)C(C)(C)C)c3c2COC3OC)cc1  
3152 C=CC(=O)OCC.Cc1ccc(C(N)=O)cc1I>>CCOC(=O)/C=C/c1cc(C(N)=O)ccc1C  
3153 C=CC(OCC)OCC.Cc1ccc(Br)cc1>>CCOC(/C=C/c1ccc(C)cc1)OCC  
3154 Br1c2ccccc2cc2ccccc12.C=CP(=O)(OCC)OCC>>CCOP(=O)(/C=C/c1c2ccccc2cc2ccccc12)OCC  
3155 Br1cncc2ccccc12.C=CC(=O)OC(C)(C)C>>CC(C)(C)OC(=O)/C=C/c1cncc2ccccc12  
3156 C=C(C(=O)OC)C1C(I)=C(c2ccccc2)C2(C=CC(=O)C=C2)N1S(C)(=O)=O.C=CC(=O)OC>>C=C(C(=O  
)OC)C1C(/C=C/C(=O)OC)=C(c2ccccc2)C2(C=CC(=O)C=C2)N1S(C)(=O)=O  
3157 C=Cc1cccc1.COc1ccc(CNc2c(C(=O)NCc3ccc(F)cc3F)c(=O)n(OCc3ccccc3)c3ncc(Br)cc23)c(OC)c1>  
>COc1ccc(CNc2c(C(=O)NCc3ccc(F)cc3F)c(=O)n(OCc3ccccc3)c3ncc(/C=C/c4ccccc4)cc23)c(OC)c1  
3158 C=CCCCCCC.Cc1ccc(Br)cc1>>CCCCC/C=C/c1ccc(C)cc1  
3159 C=Cc1ccc(N)cc1.O=C(O)c1ccc(I)cc1>>Nc1ccc(/C=C/c2ccc(C(=O)O)cc2)cc1  
3160 C=CC(=O)Oc1cccc1.Nc1nc(N)c2cc(I)ccc2n1>>Nc1nc(N)c2cc(/C=C/C(=O)Oc3ccccc3)ccc2n1  
3161 C=C(Br)CCO.C=CC(=O)CCCC>>C=C(/C=C/C(=O)CCCC)CCO  
3162 C=CC(=O)OC.CC1nc2c(C)cc(C)nc2n1Cc1ccc(Br)cc1>>CCc1nc2c(C)cc(C)nc2n1Cc1ccc(/C=C/C(=O  
)OC)cc1  
3163 C=CC(=O)OCC.C[C@H](c1cccc2ccccc12)N(CC1CN(C)c2ccc(Br)cc2O1)C(=O)OC(C)(C)C>>CCOC(  
=O)/C=C/c1ccc2c(c1)OC(CN(C(=O)OC(C)(C)C)[C@H](C)c1cccc3ccccc13)CN2C  
3164 C=C[Si](C)(C)c1cccn1.Cc1ccc(I)cc1>>Cc1ccc(/C=C/[Si](C)(C)c2cccn2)cc1  
3165 C=CCNC1=NCCN1.Ic1cccc1>>C(=C/c1cccc1)\CNC1=NCCN1  
3166 C=CC(=O)OC.Cn1c2c(c3ccc(I)cc3c1=O)C(=O)c1cccc1-  
2>>COC(=O)/C=C/c1ccc2c3c(n(C)c(=O)c2c1)-c1cccc1C3=O  
3167 C=CCC(=O)OC.COc1c(Br)cc2c3c(cccc13)OC(C)(C)O2>>COC(=O)C/C=C/c1cc2c3c(cccc3c1OC)OC(  
C)(C)O2  
C=CC(=O)Nc1cccc1NC(=O)OC(C)(C)C.CC(NCCN1CCOCC1)(C(=O)Nc1ccc(C(F)(F)F)cc1)c1ccc(B  
r)cc1>>CC(C)(C)OC(=O)Nc1cccc1NC(=O)/C=C/c1ccc(C(C)(NCCN2CCOCC2)C(=O)Nc2ccc(C(F)(  
F)F)cc2)cc1  
C=Cc1ccc([Si](OCC)(OCC)OCC)cc1.CCOP(=O)(Cc1ccc(/C=C/c2ccc3c(c2)Cc2cc(Br)ccc2-  
3)cc1)OCC>>CCO[Si](OCC)(OCC)c1ccc(/C=C/c2ccc3c(c2)Cc2cc(/C=C/c4ccc(CP(=O)(OCC)OCC)cc  
4)ccc2-3)cc1  
3170 Br1cccn1.C=Cc1cccc(OC)c1>>COc1cccc(/C=C/c2cccn2)c1

3171 C=C(NC(C)=O)C(=O)OC.Cc1cccc(C(C)C)c1I>>COC(=O)/C(=C/c1c(C)cccc1C(C)C)NC(C)=O  
3172 C=CC(=O)O.O=[N+][O-]  
3173 ]c1ccc(S(=O)(=O)Nc2ccc(I)cc2)cc1>>O=C(O)/C=C/c1ccc(NS(=O)(=O)c2ccc([N+](=O)[O-])cc2)cc1  
3174 C=CS(=O)(=O)F.Fc1ccc(I)c(F)c1>>O=S(=O)(F)/C=C/c1ccc(F)cc1F  
3175 C=CC(=O)OC.COc1ccc(C2=Cc3nc4cccc4cc3C(CC(C)=O)N2c2ccc(Br)cc2)cc1>>COC(=O)/C=C/c1c  
3176 cc(N2C(c3ccc(OC)cc3)=Cc3nc4cccc4cc3C2CC(C)=O)cc1  
3177 C=CC(N)=O.CC(C)(C)OC(=O)NC1(c2ccc(-c3nn4c(Br)cnc4cc3-  
3178 c3cccc3)cc2)CCC1>>CC(C)(C)OC(=O)NC1(c2ccc(-c3nn4c(/C=C/C(N)=O)cnc4cc3-  
3179 C=Cc1ccc(C(=O)OC)[nH]1.CC(C)(C)C(=O)Nc1nc(O)c2cc(Br)cnc2n1>>COC(=O)c1ccc(/C=C/c2cnc3  
3180 nc(NC(=O)C(C)(C)C)nc(O)c3c2)[nH]1  
3181 C=CC(C)(O)CCC=C(C)C.FC(F)(F)c1cccc1Br>>CC(C)=CCCC(C)(O)/C=C/c1cccc1C(F)(F)F  
3182 Brc1ccc(-c2cnc2)o1.C=Cc1ccc(C)cc1>>Cc1ccc(/C=C/c2ccc(-c3cnc3)o2)cc1  
3183 C=CCCO.CC(C)Oc1cnc(Br)c1>>CC(C)Oc1cnc(/C=C/CCO)c1  
3184 C=CC(C)(C)O.O=c1cc(-c2cccc2)oc2cc(Br)ccc12>>CC(C)(O)/C=C/c1ccc2c(=O)cc(-c3cccc3)oc2c1  
3185 Brc1cccc1.C=COCCOC=C>>C=COCCOC(=C)c1cccc1  
3186 C=Cc1cccc1.C[Si](C)(C)CCOCn1nc(I)c2cnc(Oc3ccc(F)cc3F)nc21>>C[Si](C)(C)CCOCn1nc(/C=C/c2  
3187 cccc2)c2cnc(Oc3ccc(F)cc3F)nc21  
3188 C=CC(=O)OCC.CC(=O)O[C@H]1CC[C@H]2[C@H]3[C@H](CC[C@]12C)c1ccc(O)cc1C[C@H]3Sc  
3189 1ccc(Br)cc1>>CCOC(=O)/C=C/c1ccc(S[C@]@H]2Cc3cc(O)ccc3[C@H]3CC[C@]4(C)[C@]@H](OC(  
3190 C)=O)CC[C@H]4[C@]@H]32)cc1  
3191 C=Cc1ccc(C#N)cc1.CC(C)=C(C)Br>>CC(C)=C(C)/C=C/c1ccc(C#N)cc1  
3192 C=CC(=O)OC.O=[N+][O-]c1cccc1Cl>>COC(=O)/C=C/c1cccc1[N+](=O)[O-]  
3193 C=Cc1cccc1.Clc1cn[nH]c1>>C(=C/c1cn[nH]c1)\c1cccc1  
3194 C=Cc1ccc2c(c1)OCO2.Cn1c(=O)c2c(cc(Br)n2C)n(C)c1=O>>Cn1c(=O)c2c(cc(/C=C/c3ccc4c(c3)OCO  
3195 4)n2C)n(C)c1=O  
3196 Brc1cncn1.C=CC[C@H]1C(=O)N(c2cccc2)[C@]@H]1c1ccc(OC)cc1>>COc1ccc([C@]@H]2[C@]@  
3197 H](C/C=C/c3cncn3)C(=O)N2c2cccc2)cc1  
3198 C=Cc1cccc1.N#Cc1cnc(Br)c1>>N#Cc1cnc(/C=C/c2cccc2)c1  
3199 C=Cc1cccc1.CC[C@]@](OC)(C(=O)OC)c1cc2n(c(=O)c1OS(=O)(=O)C(F)(F)F)CCC2>>CC[C@]@](  
3200 OC)(C(=O)OC)c1cc2n(c(=O)c1/C=C/c1cccc1)CCC2  
3201 C=CC(=O)Nc1cccc(C)c1.COc1ccc2c(=O)c(I)coc2c1>>COc1ccc2c(=O)c(/C=C/C(=O)Nc3cccc(C)c3)c  
3202 oc2c1  
3203 C=CC(=O)OC.COC(=O)c1cccc2c1oc1ccc(-c3esc(-c4ccc(I)cc4)n3)cc12>>COC(=O)/C=C/c1ccc(-  
3204 c2nc(-c3ccc4oc5c(C(=O)OC)cccc5c4c3)cs2)cc1  
3205 C=C.Cc1cc(C)c(CCl)c(C)c1>>C=CCc1c(C)cc(C)cc1C  
3206 C=C.Cc1cccc1Br>>C=Cc1cccc1C  
3207 C=CCC(=O)O.CC(=O)OC[C@H]1O[C@]@H](Oc2cccc3occc(/C=C/c4ccc(Br)cc4)c23)[C@H](OC(C)=  
3208 O)[C@]@H](OC(C)=O)[C@]@H]1OC(C)=O>>CC(=O)OC[C@H]1O[C@]@H](Oc2cccc3occc(/C=C/c4c  
3209 cc(/C=C/CC(=O)O)cc4)c23)[C@H](OC(C)=O)[C@]@H](OC(C)=O)[C@]@H]1OC(C)=O  
3210 C=Cc1ccc(C#N)cc1.FC(F)(F)CI>>N#Cc1ccc(/C=C/CC(F)(F)F)cc1  
3211 Brc1enc2[nH]c3ncccc3c2c1.C=CC(=O)N(C)Cc1cc2cccc2n1C>>CN(Cc1cc2cccc2n1C)C(=O)/C=C/c  
3212 1cnc2[nH]c3ncccc3c2c1  
3213 C=COCCO.Clc1ccc2cccc2c1>>C=C(OCCO)c1ccc2cccc2c1  
3214 C=Cc1cccc1.CCN1C[C@]2(OC(=O)c3cc(I)ccc3NC(C)=O)CC[C@H](OC)[C@]@]34[C@]@H]2[C@  
3215 @H]([C@]@H]13)[C@]@]1(O)C[C@H](OC)[C@H]2[C@]@H]4[C@]1(O)[C@H]2OC>>CCN1C[C@  
3216 @]2(OC(=O)c3cc(/C=C/c4cccc4)ccc3NC(C)=O)CC[C@H](OC)[C@]@]34[C@]@H]2[C@H]([C@  
3217 @H]13)[C@]@]1(O)C[C@H](OC)[C@H]2[C@]@H]4[C@]1(O)[C@H]2OC  
3218 C=Cc1cccc1O.COc1ccc(Br)cc1>>COc1ccc(/C=C/c2cccc2O)cc1  
3219 C=C(F)[Si](C)(c1cccc1)c1cccc1.COc1ccc(I)cc1>>COc1ccc(/C=C(\F)[Si](C)(c2cccc2)c2cccc2)cc1  
3220 C=Cc1ccc([N+](=O)[O-])c1.Cn1cc(I)c(=O)c2cccc21>>Cn1cc(/C=C/c2cccc([N+](=O)[O-]  
3221 ])c2)c(=O)c2cccc21  
3222 C=CC(=O)CC.Cc1cc(C)c(Br)c(C)c1>>CCC(=O)/C=C/c1c(C)cc(C)cc1C  
3223 C=CC(=O)CC.O=C(c1cccc1)c1ccc(Br)cc1>>CCC(=O)/C=C/c1ccc(C(=O)c2cccc2)cc1  
3224 C=CC(=O)OCCCCCCCCCCCCCCCCC.C[C@]12C[C@]34C=C(Sc5cccc(I)c5)C(=O)[C@]@](C)(  
3225 CCC(=O)Nc5c(O)ccc(C(=O)O)c5O)[C@]@H]3[C@H](C[C@]@H]1C4)O2>>CCCCCCCCCCCCCCCC  
3226 CCCOC(=O)/C=C/c1cccc(SC2=C[C@]34C[C@H]5C[C@H](O[C@]@]5(C)C3)[C@H]4[C@]@](C)(CCC  
3227 (=O)Nc3c(O)ccc(C(=O)O)c3O)C2=O)c1  
3228 C=Cc1cncn1.C[C@H](COc1cnc(Cl)c(I)c1)N(C)C(=O)OC(C)(C)C>>C[C@H](COc1cnc(Cl)c(/C=C/c  
3229 2cncn2)c1)N(C)C(=O)OC(C)(C)C  
3230 Brc1ccc(I)cc1.C=C[Si](C)(C)C>>C[Si](C)(C)/C=C/c1ccc(Br)cc1  
3231 C=Cc1ccc(C)cc1.O=c1cc(-c2cccc2)oc2ccc(Br)cc12>>Cc1ccc(/C=C/c2ccc3oc(-

3209 C=Cc1cc(OC)c(OC)c(OC)c1-  
 c1ccc2c(c1)OCO2.COc1ccc(I)cc1>>COc1ccc(/C=C/c2cc(OC)c(OC)c(OC)c2-c2ccc3c(c2)OCO3)cc1  
 3210 C=CCCN(C)C(=O)c1cccc1.Nc1cccc(I)c1>>CN(CC/C=C/c1cccc(N)c1)C(=O)c1cccc1  
 3211 C=CC(=O)OCC.CN1CCc2ccc(Br)cc2C1>>CCOC(=O)/C=C/c1ccc2c(c1)CN(C)CC2  
 3212 C=Cc1cccc1.O=C1OCc2cc(Br)ccc21>>O=C1OCc2cc(/C=C/c3ccccc3)ccc21  
 3213 Brc1ccsc1.C=Cc1ccc(OC)cc1>>COc1ccc(/C=C/c2ccsc2)cc1  
 3214 C=CC(OCC)OCC.Cc1ccc(C=O)c(Br)c1>>CCOC(/C=C/c1cc(C)ccc1C=O)OCC  
 3215 Brc1cccc1.C=CCO>>C=C(CO)c1cccc1  
 3216 C=CC(=O)OCCCC.Fc1ccc(Br)cc1>>CCCCOC(=O)/C=C/c1ccc(F)cc1  
 3217 C=Cc1cccc1.N#Cc1ccc(N)c(Br)c1>>N#Cc1ccc(N)c(/C=C/c2ccccc2)c1  
 3218 C=CC(=O)OC(C)(C)C.CCn1ccc(-c2ccc(Br)cc2)n1>>CCn1ccc(-c2ccc(/C=C/C(=O)OC(C)(C)C)cc2)n1  
 3219 C=CC(=O)OCC.N#Cc1ccc(Cl)cc1>>CCOC(=O)/C=C/c1ccc(C#N)cc1  
 3220 C=CC#N.Clc1ccc(Br)cc1>>N#C/C=C/c1ccc(Cl)cc1  
 3221 C=CC(=O)OC.Cn1cnc2c(NCc3cccc(Br)c3)nc(N3CCCCC3)nc21>>COC(=O)/C=C/c1cccc(CNc2nc(N3CCCCC3)nc3c2nen3C)c1  
 3222 C=Cc1ccc([Si](OC)(OC)OC)cc1.CC(C)(C)OP(=O)(Cc1ccc(/C=C/c2c3ccccc3c(Br)c3ccccc23)cc1)OC(C)(C)C>>CO[Si](OC)(OC)c1ccc(/C=C/c2c3ccccc3c(/C=C/c3ccc(CP(=O)(OC(C)(C)C)OC(C)(C)C)cc3)c3ccccc23)cc1  
 3223 C=CCC1CCCC1.CC(C)(C)c1ccc(Br)cc1>>C=C(CC1CCCC1)c1ccc(C(C)(C)C)cc1  
 3224 CC[C@H]1CCC=CN1/C(=N/[C@H](COC)C(C)C)c1cccc1.Ic1cccc1>>CC[C@H]1CCC(c2cccc c2)=CN1/C(=N/[C@H](COC)C(C)C)c1cccc1  
 3225 C=CCOc1ccc(C)cc1.Ic1cccc1>>Cc1ccc(OC/C=C/c2ccccc2)cc1  
 3226 C=CCNC(=O)OC(C)(C)C.FC(F)(F)c1ccc(Cl)cc1>>C=C(CNC(=O)OC(C)(C)C)c1ccc(C(F)(F)F)cc1  
 3227 C=CC(=O)CCC.Cc1cc(C)c(Br)c(C)c1>>CCCC(=O)/C=C/c1c(C)cc(C)cc1C  
 3228 C=C[C@H]1O[C@H]2OC(C)(C)O[C@H]2[C@H]1OC.COc1ccc(I)cc1>>COc1ccc(/C=C/[C@H]2 O[C@H]3OC(C)(C)O[C@H]3[C@H]2OC)cc1  
 3229 Brc1cnc2ccccc2c1.C=COCCCC>>C=C(OCCCC)c1cnc2ccccc2c1  
 3230 C=Cc1cccc1.C[Si](C)(OS(=O)(=O)C(F)(F)F)OS(=O)(=O)C(F)(F)F>>C[Si](C)(/C=C/c1cccc1)OS(= O)(=O)C(F)(F)F  
 3231 C=CC[C@H](C[C@H](NC(=O)OC(C)(C)C)C(=O)OC(C)(C)C)C(=O)OC(C)(C)C.N#Cc1ccc2c(c1)/N= Nc1cc(Br)ccc1CC2>>CC(C)(C)OC(=O)N[C@H](C[C@H](C/C=C/c1ccc2c(c1)/N=Nc1cc(C#N)c cc1CC2)C(=O)OC(C)(C)C)C(=O)OC(C)(C)C  
 3232 C=CC(=O)OC.Nc1ccc(Cl)cc1I>>COC(=O)/C=C/c1cc(Cl)ccc1N  
 3233 C=CC(=O)N(C)Cc1sc2ccccc2c1C.O=C1Nc2ncc(Br)cc2C12CCCC2>>Cc1c(CN(C)C(=O)/C=C/c2cnc3 c(c2)C2(CCCC2)C(=O)N3)sc2ccccc12  
 3234 C=CC(=O)OC.CC(C)(C)OC(=O)N1CCC(CN(C(=O)C2CCCCC2)c2cccc(Br)c2)CC1>>COC(=O)/C=C/ c1cccc(N(CC2CCN(C(=O)OC(C)(C)C)CC2)C(=O)C2CCCCC2)c1  
 3235 Brc1cenc1.C=Cc1cccc1OC>>COc1cccc1/C=C/c1cenc1  
 3236 C=CC1(C(=O)O)COC(C)(C)CO1.CC(C)[C@H](O)C(=O)N[C@H](C)C(=O)N1CCC[C@H](C(=O )N[C@H](C)c2ccc3ccc(Br)cc3n2)N1>>CC(C)[C@H](O)C(=O)N[C@H](C)C(=O)N1CCC[C@H] (C(=O)N[C@H](C)c2ccc3ccc(/C=C/C4(C(=O)O)COC(C)(C)CO4)cc3n2)N1  
 3237 C=Cc1cccc1C.Cc1cccc1Cl>>Cc1cccc1/C=C/c1cccc1C  
 3238 C=CC(=O)OCC.O=C(O)c1ccc(I)cc1>>CCOC(=O)/C=C/c1ccc(C(=O)O)cc1  
 3239 C=CC(C)=O.C[Si](C)(C)c1ccc1I>>CC(=O)/C=C/c1ccc1[Si](C)(C)C  
 3240 C=CC(=O)N1N=Cc2ccccc2C1CCC.Nc1ncc(Cc2cc(I)c3c(c2)OCO3)c(N)n1>>CCCC1c2ccccc2C=NN1 C(=O)/C=C/c1cc(Cc2cnc(N)nc2N)cc2c1OCO2  
 3241 Brc1ccc2c(cen2-c2ccccc2)c1.C=CC(=O)OC>>COC(=O)/C=C/c1ccc2c(cen2-c2ccccc2)c1  
 3242 Brc1ccc2[nH]cc(CCc3ccccc3)c2c1.C=CC(=O)OCC>>CCOC(=O)/C=C/c1ccc2[nH]cc(CCc3ccccc3)c2c  
 3243 C=C[Si](CC)(CC)CC.O=Cc1cccc(Br)c1>>CC[Si](/C=C/c1cccc(C=O)c1)(CC)CC  
 3244 C=CP(=O)(OCC)OCC.O=P(/C=C/c1cccc(Br)c1)(c1cccc1)c1cccc1>>CCOP(=O)(/C=C/c1cccc(/C=C/ P(=O)(c2ccccc2)c2ccccc2)c1)OCC  
 3245 C=CC(=O)O.CN(C)c1cccc2c(S(=O)(=O)Nc3ccc(I)cc3)cccc12>>CN(C)c1cccc2c(S(=O)(=O)Nc3ccc(/C =C/C(=O)O)cc3)cccc12  
 3246 C=Cc1ccc(C#N)cc1.CCOC(C)n1cc(I)cn1>>CCOC(C)n1cc(/C=C/c2ccc(C#N)cc2)cn1  
 3247 C=CC[C@H](NC(=O)OC(C)(C)C)C(=O)OC.COc1ccc(I)cc1>>COC(=O)[C@H](C/C=C/c1ccc(OC)cc1 )NC(=O)OC(C)(C)C  
 3248 C=CC(C)=O.Cc1cccc(I)c1>>CC(=O)/C=C/c1cccc(C)c1  
 3249 C=CS(C)(=O)=O.O=Cc1cccc(Br)c1>>CS(=O)(=O)/C=C/c1cccc(C=O)c1  
 3250 C=CS(=O)(=O)F.Ic1cc2ccccc2s1>>O=S(=O)(F)/C=C/c1cc2ccccc2s1  
 3251 C=C1CC(c2ccc(C)cc2)OC1=O.Nc1cccc1I>>Cc1ccc(C2C/C(=C/c3ccccc3N)C(=O)O2)cc1



C=CC[C@H]1C[C@H]([C@H](O[Si](C(C)C)(C(C)C)(C(C)C)c2ccc(OC)c(OC)c2)CO[C@@H]1c1ccc(OC)c(OC)c1.COc1ccc(Br)cc1OC>>COc1ccc(/C=C/C[C@H]2C[C@H]([C@H](O[Si](C(C)C)(C(C)C)(C(C)C)c3ccc(OC)c(OC)c3)CO[C@@H]2c2ccc(OC)c(OC)c2)cc1OC  
 3252 C=C1COC(c2cc(OC)cc(OC)c2)C1(C(=O)OCC)C(=O)OCC.COc1ccc(I)cc1>>CCOC(=O)C1(C(=O)OCC)C/C(=C/c2ccc(OC)cc2)COC1c1cc(OC)cc(OC)c1  
 3253 C=Cc1ccc(C)cc1.CCOC(=O)C(C)Br>>CCOC(=O)C(C)/C=C/c1ccc(C)cc1  
 3254 Br1ccc2c(c1)Sc1ccccc1N2.C=Cc1ccc(OC)cc1>>COc1ccc(/C=C/c2ccc3c(c2)Sc2ccccc2N3)cc1  
 3255 C=Cc1ccc2ccccc2c1.Ic1ccccc1>>C(=C/c1ccc2ccccc2c1)\c1ccccc1  
 3256 C=C.Nc1ccc(Br)cc1>>C=Cc1ccc(N)cc1  
 3257 Br1ccc(CN2CCCC(c3c(-c4ccccc4)[nH]c4ccccc34)C2)cc1.C=CC(=O)OC>>COC(=O)/C=C/c1ccc(CN2CCCC(c3c(-c4ccccc4)[nH]c4ccccc34)C2)cc1  
 3258 C=C[Si](CC)(CC)CC.Fc1ccccc1Br>>CC[Si](/C=C/c1ccccc1F)(CC)CC  
 3259 C=CC(=O)OC.CC(C)c1nn(Cc2ccccc2)cc1I>>COC(=O)/C=C/c1cn(Cc2ccccc2)nc1C(C)C  
 3260 C=CC(=O)CC.O=Cc1ccc(Br)cc1>>CCC(=O)/C=C/c1ccc(C=O)cc1  
 3261 C=CCOCc1ccccc1.CC1(c2ccccc2Br)CC(=O)C1>>CC1(c2ccccc2/C=C/CCOCc2ccccc2)CC(=O)C1  
 3262 C=Cc1ccc(OC)cc1.COC(=O)/C=C/c1ccc(N(Cc2ccc(Br)cc2)C(=O)C2CCCCC2)c1>>COC(=O)/C=C/c1ccc(N(Cc2ccc(/C=C/c3ccc(OC)cc3)cc2)C(=O)C2CCCCC2)c1  
 3263 C=CC(N)=O.Clc1ccc2occc12>>NC(=O)/C=C/c1ccc2occc12  
 3264 C=CC(=O)OC.Cc1n[nH]c2cc(Br)ccc12>>COC(=O)/C=C/c1ccc2c(C)n[nH]c2c1  
 3265 C=CC(C)(C)C.COc1nc(Br)ccc1C1CC1>>COc1nc(/C=C/C(C)(C)C)ccc1C1CC1  
 3266 C=Cc1ccccc(C)c1.COC(=O)c1ccccc1I>>COC(=O)c1ccccc1/C=C/c1ccccc(C)c1  
 3267 \*CNCCCOCCOCCOCCNC(=O)COc1ccc(C(Cc2cc(OC)cc(OC)c2)NC(=O)c2ccccc(C=C)c2)cc1.Ic1ccc2ccccc2c1>>\*CNCCCOCCOCCOCCNC(=O)COc1ccc(C(Cc2cc(OC)cc(OC)c2)NC(=O)c2ccccc(/C=C/c3ccc4ccccc4c3)c2)cc1  
 3268 C=CS(C)(=O)=O.O=C1Nc2ccc(I)cc2/C1=C/c1ccc[nH]1>>CS(=O)(=O)/C=C/c1ccc2c(c1)/C(=C/c1ccc[nH]1)C(=O)N2  
 3269 C=CC(=O)OC.Cc1ccc(C=O)c(Br)n1>>COC(=O)/C=C/c1nc(C)ccc1C=O  
 3270 C=CCNC(=O)OC(C)(C)C.O=S(=O)(Oc1ccc(F)cc1Cl)C(F)(F)F>>C=C(CNC(=O)OC(C)(C)C)c1ccc(F)cc1Cl  
 3271 C=CC(=O)OCCCC.CC(=O)O[IH2](OC(C)=O)c1ccccc1>>CCCCOC(=O)/C=C/c1ccccc1  
 3272 C=CC(=O)CCC.Cc1ccccc1Br>>CCCC(=O)/C=C/c1ccccc1C  
 3273 C=CC(OCC)OCC.O=Cc1cc2c(cc1Br)OCO2>>CCOC(/C=C/c1cc2c(cc1C=O)OCO2)OCC  
 3274 C=CC(N)=O.O=[N+](O-)]c1ccc(I)c1>>NC(=O)/C=C/c1ccc([N+](=O)[O-])c1  
 3275 C=CC(=O)OCCCCC.Ic1ccccc1>>CCCCCOC(=O)/C=C/c1ccccc1  
 3276 C=Cc1ccccc1.COc1ccc(-c2nc3ccccc3c3cc4cc(Br)ccn4c23)cc1>>COc1ccc(-c2nc3ccccc3c3cc4cc(/C=C/c5ccccc5)ccn4c23)cc1  
 3277 C=CC(C)=O.C[Si](C)(C)CN(Cc1cc2c(cc1I)OCO2)C(CCOC(=O)c1ccccc1)[Si](C)(C)C>>CC(=O)/C=C/c1cc2c(cc1CN(C[Si](C)(C)C)C(CCOC(=O)c1ccccc1)[Si](C)(C)C)OCO2  
 3278 C=CC(=O)OC.OCCCCCOCc1ccc2cc(Br)ccc2c1>>COC(=O)/C=C/c1ccc2cc(OCCCCCOC)ccc2c1  
 3279 C=CC(=O)C(O[Si](CC)(CC)CC)c1c(OCc2ccccc2)c(OC)c2c(OC)c(OC)cc(OC)c2c1OC.Ic1ccccc1OCc1ccccc1>>CC[Si](CC)(CC)OC(C(=O)/C=C/c1ccccc1OCc1ccccc1)c1c(OCc2ccccc2)c(OC)c2c(OC)c(OC)cc(OC)c2c1OC  
 3280 C=CC(=O)OCC.Cc1cc(F)ccc1Br>>CCOC(=O)/C=C/c1ccc(F)cc1C  
 3281 C=CC(OCC)OCC.CCOC(=O)c1ccc(I)cc1>>CCOC(=O)c1ccc(/C=C/C(OCC)OCC)cc1  
 3282 C=CCOCc1ccccc1.Cc1cc(C)cc(I)c1>>Cc1cc(C)cc(/C=C/COc2ccccc2)c1  
 3283 C=CC(=O)OCC.COc1cc(-c2cc3cc(Br)cc(OC)c3o2)cc(OC)c1OC>>CCOC(=O)/C=C/c1cc(OC)c2oc(-c3cc(OC)c(OC)c(OC)c3)cc2c1  
 3284 C=CC(=O)OC(C)(C)C.Oc1cc(F)ccc1Br>>CC(C)(C)OC(=O)/C=C/c1ccc(F)cc1O  
 3285 Br1ccc(-c2nnc(-c3ccccc4ccccc34)o2)cc1.C=CC[Si](OCC)(OCC)OCC>>CCO[Si](C/C=C/c1ccc(-c2nnc(-c3ccccc4ccccc34)o2)cc1)(OCC)OCC  
 3286 C=CCCO[Si](C)(C)C(C)C.CC1(c2ccccc2Br)CC(=O)C1>>CC1(c2ccccc2/C=C/CCO[Si](C)(C)C(C)(C)C)CC(=O)C1  
 3287 C=Cc1ccccc1.COC(=O)c1ccc(N)c(I)c1>>COC(=O)c1ccc(N)c(/C=C/c2ccccc2)c1  
 3288 Br1c2ccccc2cc2ccccc12.C=CC(=O)OC>>COC(=O)/C=C/c1c2ccccc2cc2ccccc12  
 3289 C=CCCC(=O)O.Ic1ccsc1>>O=C(O)CC/C=C/c1ccsc1  
 3290 C=Cc1ccccc1Cl.CCOC(=O)C(Cc1ccccc1I)C(C)=O>>CCOC(=O)C(Cc1ccccc1/C=C/c1ccccc1Cl)C(C)=O  
 3291 C=CC1CCCCC1.COc1ccc(Br)cc1>>COc1ccc(/C=C/C2CCCCC2)cc1  
 3292 C=Cc1ccccc1.CC(C)(C)OC(=O)c1ccc(Br)cc1[N+](=O)[O-]  
 3293 ]>>CC(C)(C)OC(=O)c1ccc(/C=C/c2ccccc2)cc1[N+](=O)[O-]

3294 C=CC(=O)OCC.N#Cc1c(-c2cccc(Br)c2)cc(-c2ccccc2)nc1N>>CCOC(=O)/C=C/c1cccc(-c2cc(-  
 3295 c3ccccc3)nc(N)c2C#N)c1  
 3296 C=CC(=O)OCCCC.N#Cc1ccc(I)cc1>>CCCCOC(=O)/C=C/c1ccc(C#N)cc1  
 3297 C=CC(=O)O.CN(c1cccc(I)c1)S(=O)(=O)c1ccc(Cl)cc1>>CN(c1cccc(/C=C/C(=O)O)c1)S(=O)(=O)c1cc  
 3298 c(Cl)cc1  
 3299 C=CC(C)(C)O.C[C@H]1N[C@@H](CO[Si](C)(C)C(C)(C)C)Cc2c(Br)cccc21>>C[C@H]1N[C@  
 3300 @H](CO[Si](C)(C)C(C)(C)C)Cc2c(/C=C/C(C)(C)O)cccc21  
 3301 Br1ccc2ccc3cccc4ccc1c2c34.C=Cc1ccc2c(c1)Sc1ccccc1N2CC>>CCN1c2ccccc2Sc2cc(/C=C/c3ccc4c  
 3302 cc5cccc6ccc3c4c56)ccc21  
 3303 C=CC(C)(C)O.Cc1cc(O[Si](C)(C)C(C)(C)C)c(I)cc1O[Si](C)(C)C(C)(C)C>>Cc1cc(O[Si](C)(C)C(C)(C)  
 3304 )C)c(/C=C/C(C)(C)O)cc1O[Si](C)(C)C(C)(C)C  
 3305 C=C[C@H](C)[C@H]1CC[C@H]2[C@@H]3CC(=O)[C@H]4C[C@H](O)CC[C@]4(C)[C@H]3CC  
 3306 [C@]21C.Ic1cccc1>>C[C@H](/C=C/c1cccc1)[C@H]1CC[C@H]2[C@@H]3CC(=O)[C@H]4C[C  
 3307 @H](O)CC[C@]4(C)[C@H]3CC[C@]21C  
 3308 C=Cc1cccc1.CCCCOC(=O)/C=C/c1ccc(Br)cc1Cl>>CCCCOC(=O)/C=C/c1ccc(/C=C/c2ccccc2)cc1Cl  
 3309 C=CC(=O)OCC.Cc1cccc1-c1cccc1I>>CCOC(=O)/C=C/c1cccc1-c1cccc1C  
 3310 C=C(NC(C)=O)C(=O)OCc1cccc1.CCOC(=O)COc1ccc(Br)cc1OCc1cccc1>>CCOC(=O)COc1ccc(/C  
 3311 =C(/NC(C)=O)C(=O)OCc2ccccc2)cc1OCc1cccc1  
 3312 C=C.CCCCC(CC)COc1cc(/C=C/c2ccc(/C=C/c3ccc(Br)cc3)cc2)c(OCC(CC)CCCC)cc1C>>C=Cc1ccc(/  
 3313 C=C/c2ccc(/C=C/c3ccc(OCC(CC)CCCC)c(C)cc3OCC(CC)CCCC)cc2)cc1  
 3314 C=CS(=O)(=O)F.Cl1ccc(I)cc1>>O=S(=O)(F)/C=C/c1ccc(Cl)cc1  
 3315 C=CC(=O)OCC.COc1cc2nnc(Oc3ccc(I)cc3)c2cc1OC>>CCOC(=O)/C=C/c1ccc(Oc2nnc3cc(OC)c(O  
 3316 C)cc23)cc1  
 3317 C=CC(=O)OCC.Cc1cnc2[nH]c3c(C)cc(Br)cc3c2c1>>CCOC(=O)/C=C/c1cc(C)c2[nH]c3ncc(C)cc3c2c  
 3318 C=C(c1cc(OC)c(OC)c(OC)c1)c1oc2cc(OC)c(I)cc2c1C.C=CC(=O)OCC>>C=C(c1cc(OC)c(OC)c(OC)c  
 3319 1)c1oc2cc(OC)c(/C=C/C(=O)OCC)cc2c1C  
 3320 C=Cc1ccc2ccccc2c1.Cc1cccc1I>>Cc1cccc1/C=C/c1ccc2ccccc2c1  
 3321 C=CC(=O)Nc1cccc1.COc1ccc2c(=O)c(I)ccc2c1>>COc1ccc2c(=O)c(/C=C/C(=O)Nc3ccccc3)ccc2c1  
 3322 Br1ccc2ccnc(N3CCCCC3)c2c1.C=CC(=O)OC(C)(C)C>>CC(C)(C)OC(=O)/C=C/c1ccc2ccnc(N3CCC  
 3323 CC3)c2c1  
 3324 C=Cc1cccc1OC.Nc1cccc1Br>>COc1cccc1/C=C/c1cccc1N  
 3325 C=CCCCCCCC.N#Cc1ccc(Br)cc1>>CCCCCCCC/C=C/c1ccc(C#N)cc1  
 3326 C=CC(=O)OCC.Cc1ccc(-c2oc3ccccc3c(=O)c2Br)cc1>>CCOC(=O)/C=C/c1c(-  
 3327 c2ccc(C)cc2)oc2ccccc2c1=O  
 3328 C=CC(=O)N(C)OC.Cc1ccc(Br)cc1>>CON(C)C(=O)/C=C/c1ccc(C)cc1  
 3329 C=Cc1cnc2ccccc12.CCCCCCCC(=O)N1CCN(c2ccc(Br)cc2)CC1>>CCCCCCCC(=O)N1CCN(c2ccc(  
 3330 /C=C/c3ccnc4ccccc34)cc2)CC1  
 3331 C=CC(=O)OC.CCN(CC)C(=O)c1cc(OC)c(OC)cc1Br>>CCN(CC)C(=O)c1cc(OC)c(OC)cc1/C=C/C(=O)  
 3332 C=CCCCCN1C(=O)c2ccccc2C1=O.CC(C)(C)c1ccc(OS(=O)(=O)C(F)(F)F)cc1>>C=C(CCCCN1C(=O)  
 3333 c2ccccc2C1=O)c1ccc(C(C)(C)C)cc1  
 3334 Br1cccc1.C=Cc1ccc2ccccc2c1>>C(=C/c1ccc2ccccc2c1)\c1cccc1  
 3335 C=CC(=O)OCC.Ic1cccc1>>CCOC(=O)/C=C/c1cccc1  
 3336 C=CSc1cccc1.O=C(c1cccc1)c1ccc(Br)cc1>>O=C(c1cccc1)c1ccc(/C=C/Sc2ccccc2)cc1  
 3337 C=C(F)C(=O)OC.COc1cccc1I>>COC(=O)/C(F)=C/c1cccc1OC  
 3338 C=CNCO.COc1cc(Br)ccc1F>>COc1cc(/C=C/NC=O)ccc1F  
 3339 C=Cc1cccc1.CC(=O)Nc1ccc(Br)c[n+][O-]>>CC(=O)Nc1ccc(/C=C/c2ccccc2)c[n+][O-]  
 3340 C=CCOc1ccc(Cl)cc1.COc1ccc(I)cc1>>COc1ccc(/C=C/COc2ccc(Cl)cc2)cc1  
 3341 C=Cc1ccc(C(C)(C)C)cc1.C[Si](C)(I)c1cccc1>>CC(C)(C)c1ccc(/C=C/[Si](C)(C)c2ccccc2)cc1  
 3342 C=Cc1ccnc1.COc1ccc(Br)cc1>>COc1ccc(/C=C/c2ccnc2)cc1  
 3343 C=CC(CO)N1C(=O)c2ccccc2C1=O.Ic1cccc1>>O=C1c2ccccc2C(=O)N1C(/C=C/c1cccc1)CO  
 3344 Br1cccc2ccccc12.C=C(C)C(=O)OC>>COC(=O)/C(C)=C/c1cccc2ccccc12  
 3345 C=Cc1cccc1.Nc1cccc(Br)n1>>Nc1cccc(/C=C/c2ccccc2)n1  
 3346 C=CC(=O)OC.CCN(CC)C(=O)n1c(Br)c(C)c2ccccc21>>CCN(CC)C(=O)n1c(/C=C/C(=O)OC)c(C)c2cc  
 3347 ccc21  
 3348 C=CC(=O)C(C)CC(=O)OC.C=CC(C)(C)OC(C)(C)[C@H]1COc2ccc(Br)cc2O1>>C=CC(C)(C)OC(C  
 3349 )(C)[C@H]1COc2ccc(/C=C/C(=O)C(C)CC(=O)OC)cc2O1  
 3350 C=COCCCC.O=c1cc(N2CCOCC2)oc2c(Br)csc12>>C=C(OCCCC)c1csc2c(=O)cc(N3CCOCC3)oc12  
 3351 C=CC(O)c1cccc1Br.COc1cccc(I)c1>>COc1cccc(/C=C/C(O)c2ccccc2Br)c1  
 3352 C=CC(=O)N(C)C.C[C@H]1COCc2nc3c(N)nc4cc(Br)ccc4c3n21>>C[C@H]1COCc2nc3c(N)nc4cc(/C  
 3353 =C/C(=O)N(C)C)ccc4c3n21

C=C1C(=O)O[C@H]2[C@H]1CCC(=C)[C@@H]1C[C@H](OC(C)=O)C(=C)[C@H]21.Cc1ccc(I)cc1[  
 3336 N+](=O)[O-]>>C=C1CC[C@H]2/C=C\C3CCCC(C)c([N+](=O)[O-]  
 ]c3)C(=O)O[C@H]2[C@H]1C[C@H](OC(C)=O)C[C@H]12  
 3337 C=Cc1ccc(C(=O)OC)cc1.FC(F)(Br)c1ccc(-c2cccc2)cc1>>COC(=O)c1ccc(/C=C/C(F)(F)c2ccc(-  
 c3cccc3)cc2)cc1  
 3338 C=CC(=O)CC.COc1ccc(Br)cc1>>CCC(=O)/C=C/c1ccc(OC)cc1  
 3339 C=C[C@H](O[Si](C)(C)C(C)(C)C)[C@H](CCCC(=O)OCC)O[Si](C)(C)C(C)(C)C.O=Cc1cccc(Br)c1>  
 >CCOC(=O)CCC[C@H](O[Si](C)(C)C(C)(C)C)[C@H](/C=C/c1cccc(C=O)c1)O[Si](C)(C)C(C)(C)C  
 3340 C=C(NC(C)=O)C(=O)OC.CCOC(=O)c1[nH]c2cccc2c1Br>>CCOC(=O)c1[nH]c2cccc2c1/C=C(\NC(  
 C)=O)C(=O)OC  
 3341 C=Cc1ccncc1.CCCCCCc1cc(-c2nc3c4cccc4c4cccc4c3[nH]2)sc1Br>>CCCCCc1cc(-  
 c2nc3c4cccc4c4cccc4c3[nH]2)sc1/C=C/c1ccncc1  
 3342 C=CC(=O)OCCCC.O=C1CCC(N2C(=O)c3cccc(I)c3C2=O)C(=O)N1>>CCCCOC(=O)/C=C/c1cccc2c1  
 3343 C(=O)N(C1CCC(=O)NC1=O)C2=O  
 3344 Brc1ccncc1.C=COCCCC>>C=C(OCCCC)c1ccncc1  
 3345 C=Cc1ccncc1.CC(C)(C)OC(=O)N1CC[C@H]1COc1cnc(Cl)c(I)c1>>CC(C)(C)OC(=O)N1CC[C@H]1  
 COc1cnc(Cl)c(/C=C/c2ccncc2)c1  
 3346 C=CC(=O)OCC.CNc1nc(C)c2cc(Br)c(=O)n(C3CCCC3)c2n1>>CCOC(=O)/C=C/c1cc2c(C)nc(NC)nc2  
 3347 n(C2CCCC2)c1=O  
 3348 C=Cc1cccc1.O=S(=O)(Oc1cccc1)C(F)(F)F>>C=C(c1cccc1)c1cccc1  
 3349 C=CC(=O)OC.O=c1oc2cc(Br)cnc2n1Cc1cccc1>>COC(=O)/C=C/c1cnc2c(c1)oc(=O)n2Cc1cccc1  
 3350 C=CC(=O)NCCCCCNC(=O)C(F)(F)F.CC(=O)OC[C@H]1C=C[C@H](n2cc(I)c(=O)[nH]c2=O)O1  
 3351 >>CC(=O)OC[C@H]1C=C[C@H](n2cc(/C=C/C(=O)NCCCCCNC(=O)C(F)(F)F)c(=O)[nH]c2=O)  
 3352 C=CCCCOC(C)=O.CC(C)(C)c1ccc(OS(=O)(=O)C(F)(F)F)cc1>>C=C(CCCOC(C)=O)c1ccc(C(C)(  
 C)C)cc1  
 3353 C=CC(=O)OC.Cc1cc(-c2cccc2)n2nc(-c3cccc3)c(I)c2n1>>COC(=O)/C=C/c1c(-c2cccc2)nn2c(-  
 c3cccc3)cc(C)nc12  
 3354 C=C(NC(C)=O)C(=O)O.COc1ccc(Br)cc1>>COc1ccc(/C=C(\NC(C)=O)C(=O)O)cc1  
 3355 C=CC(=O)OC(C)(C)C.COC(=O)c1cc(C)c(OS(=O)(=O)C(F)(F)F)c(C)c1>>COC(=O)c1cc(C)c(/C=C/C  
 (=O)OC(C)(C)C)c(C)c1  
 3356 Brc1ccc(OCc2cccc2)cc1.C=CCCC(=O)[C@H]1CCCN1C(=O)C(=O)C(C)(C)CC>>CCC(C)(C)C(=O)  
 C(=O)N1CCC[C@H]1C(=O)CC/C=C/c1ccc(OCc2cccc2)cc1  
 3357 C=Cc1c(F)c(F)c(F)c(F)c1F.Cc1ccc2c(-c3cccc3)c(Br)c(=O)oc2c1>>Cc1ccc2c(-  
 c3cccc3)c(/C=C/c3c(F)c(F)c(F)c(F)c3F)c(=O)oc2c1  
 3358 C=CC(=O)CCC.CC(=O)c1ccc(Br)cc1>>CCCC(=O)/C=C/c1ccc(C(C)=O)cc1  
 3359 C=C[C@H](C)[C@H]1CC[C@H]2[C@H]3CC(=O)[C@H]4C[C@H](O)CC[C@H]4(C)[C@H]3CC  
 3360 [C@H]21C.O=[N+](O-)]c1ccc(I)cc1>>C[C@H](/C=C/c1ccc([N+](=O)[O-]  
 ]cc1)[C@H]1CC[C@H]2[C@H]3CC(=O)[C@H]4C[C@H](O)CC[C@H]4(C)[C@H]3CC[C@H]21  
 3361 C=CCCCO[C@H]1O[C@H](COC(C)=O)[C@H](OC(C)=O)[C@H](OC(C)=O)[C@H]1OC(C)=O.O  
 3362 =C(OC[C@H]1O[C@H](n2cc(I)c(=O)[nH]c2=O)C[C@H]1OC(=O)c1cccc1)c1cccc1>>CC(=O)  
 3363 OC[C@H]1O[C@H](OCCC/C=C/c2cn([C@H]3C[C@H](OC(=O)c4cccc4)[C@H](COC(=O)c4ccc  
 cc4)O3)c(=O)[nH]c2=O)[C@H](OC(C)=O)[C@H](OC(C)=O)[C@H]1OC(C)=O  
 3364 C=Cc1ccc([N+](=O)[O-])cc1.O=[N+](O-)]c1cc(I)cc([N+](=O)[O-])c1>>O=[N+](O-]  
 3365 ]c1ccc(/C=C/c2cc([N+](=O)[O-])cc([N+](=O)[O-])c2)cc1  
 3366 C=CCN(C(=O)OC(C)(C)C)C(=O)OC(C)(C)C.O=C1CCCc2ccc(Br)cc21>>CC(C)(C)OC(=O)N(C/C=C/  
 c1ccc2c(c1)C(=O)CCC2)C(=O)OC(C)(C)C  
 3367 C=CC(=O)OC.CC(=O)c1cccc1Br>>COC(=O)/C=C/c1cccc1C(C)=O  
 3368 C=CC(=O)OC.N#Cc1ccc(-c2cncc3ccc(Br)cc23)c2cccc12>>COC(=O)/C=C/c1ccc2cncc(-  
 c3ccc(C#N)c4cccc34)c2c1  
 3369 C=CC(=O)OCCCC.Cc1ccc(Br)c1>>CCCCOC(=O)/C=C/c1ccc(C)c1  
 3370 C=CC(=O)NCc1cccc1.O=c1c(I)c(-c2ccc(O)cc2)oc2cc(O)ccc12>>O=C(/C=C/c1c(-  
 c2ccc(O)cc2)oc2cc(O)ccc2c1=O)NCc1cccc1  
 3371 C=Cc1ccc(OC)cc1.CCOC(=O)C(F)(F)Br>>CCOC(=O)C(F)(F)/C=C/c1ccc(OC)cc1  
 3372 C=Cc1cccc1.COC(=O)CCC/C=C\C[C@H]1[C@H]2CC[C@H](C2)[C@H]1NS(=O)(=O)c1ccc(Br)  
 3373 s1>>COC(=O)CCC/C=C\C[C@H]1[C@H]2CC[C@H](C2)[C@H]1NS(=O)(=O)c1ccc(/C=C/c2cccc  
 3374 C=C[Si](C)(C)c1cccn1.CC(=O)c1ccc(/C=C/c2ccc(Br)cc2)cc1>>CC(=O)c1ccc(/C=C/c2ccc(/C=C/[Si](  
 C)(C)c3cccn3)cc2)cc1  
 3375 C=CC(=O)OC.CC(=O)Oc1ccc2c(I)cccc1-2>>COC(=O)/C=C/c1cccc2c(OC(C)=O)ccc1-2  
 3376 \*CNCCCOCCOCCOCCNC(=O)COc1ccc(C(Cc2cc(OC)cc(OC)c2)NC(=O)c2cccc(C=C)c2)cc1.COC(  
 3377 =O)c1cc(I)ccc1OC>>\*CNCCCOCCOCCOCCNC(=O)COc1ccc(C(Cc2cc(OC)cc(OC)c2)NC(=O)c2cc  
 cc(/C=C/c3ccc(OC)c(C(=O)OC)c3)c2)cc1

BrC1nccc2ccccc12.C=CCOC1=C(C)C(=O)O[C@H](CC)[C@@](C)(O)C=C(C)C(=O)[C@H](C)C[C@  
3369 @](C)(OC)[C@H](O[C@@H]2O[C@H](C)C[C@H](N(C)C)[C@H]2OC(C)=O)[C@H]1C>>CC[C@  
H]1OC(=O)C(C)=C(OC/C=C/c2nccc3ccccc23)[C@H](C)[C@@H](O[C@@H]2O[C@H](C)C[C@H](  
N(C)C)[C@H]2OC(C)=O)[C@](C)(OC)C[C@@H](C)C(=O)C(C)=C[C@]1(C)O  
3370 C=CS(=O)(=O)c1ccccc1.FC(F)(F)c1ccc(Br)cc1>>O=S(=O)/C=C/c1ccc(C(F)(F)F)cc1c1ccccc1  
3371 C=CC(=O)OC.Cc1cc(Cl)ccc1C(F)(F)F>>COC(=O)/C=C/c1ccc(C(F)(F)F)c(C)c1  
3372 C=C.CCOC(=O)c1cc(Br)ccc1C>>C=Cc1ccc(C)c(C(=O)OCC)c1  
3373 C=Cc1ccccc1.ClC12CC3CC(CC(C3)C1)C2>>C(=C/C12CC3CC(CC(C3)C1)C2)\c1ccccc1  
3374 C=Cc1ccccc1.O=C1CCCCc2cc(Br)ccc21>>O=C1CCCCc2cc(/C=C/c3ccccc3)ccc21  
3375 C=CC(=O)OCC.Cc1nn(C)c(Oc2cc(Br)ccc2Cl)c1C=O>>CCOC(=O)/C=C/c1ccc(Cl)c(Oc2c(C=O)c(C)n  
n2C)c1  
3376 C=CC(C)=O.COC(=O)C1(C(=O)OC)CC1Cc1cc(OC)ccc1I>>COC(=O)C1(C(=O)OC)CC1Cc1cc(OC)c  
cc1/C=C/C(C)=O  
3377 C=CN1C(=O)CCC1=O.FC(F)(F)Oc1ccc(Br)cc1>>O=C1CCC(=O)N1/C=C/c1ccc(OC(F)(F)F)cc1  
3378 C=CC(=O)OC(C)(C)C.C=CC1=C(Br)C(O[Si](C)(C)C(C)(C)C)CCC1>>C=CC1=C(/C=C/C(=O)OC(C)  
(C)C)C(O[Si](C)(C)C(C)(C)C)CCC1  
3379 C=CCCP(=O)(OC)OC.COc1ccc(I)cc1>>COc1ccc(/C=C/CCP(=O)(OC)OC)cc1  
3380 C=C(C(=O)OC)[C@@H]1CC[C@@]2(C)CCC[C@@](C)(OCOC)[C@@H]2C1.O=Cc1ccc(Br)cc1>>  
COCO[C@]1(C)CCC[C@]2(C)CC[C@H](/C=C/c3ccc(C=O)cc3)C(=O)OC[C@H]21  
3381 C=C(COC(C)=O)C(=O)OCC(F)(F).COc1ccc(I)cc1CC=C(C)C>>COc1ccc(/C=C(\OC(C)=O)C(=O)OC  
C(F)(F)F)cc1CC=C(C)C  
3382 C=Cc1ccccc1.Cc1ccc(I)c2c1[C@@]1(OC2)O[C@H](CO[Si](C)(C)C(C)(C)C)[C@H]2OC(C)(C)O[C  
@H]21>>Cc1ccc(/C=C/c2ccccc2)c2c1[C@@]1(OC2)O[C@H](CO[Si](C)(C)C(C)(C)C)[C@H]2OC(C  
)C)O[C@H]21  
3383 C=CC(=O)OC.COc1c(I)c(NC(=O)C(C)(C)C)c(OC)c([Si](C)(C)C)c1OC>>COC(=O)/C=C/c1c(NC(=O)  
C(C)(C)C)c(OC)c([Si](C)(C)C)c(OC)c1OC  
3384 C=CCN(C(=O)OCC)c1ccccc2ccccc12.Clc1ccccc1>>CCOC(=O)N(C/C=C/c1ccccc1)c1ccccc2ccccc12  
3385 C=Cc1ccccc1.CC(C)c1ncc(C(C)C)c(Cl)n1>>CC(C)c1ncc(C(C)C)c(/C=C/c2ccccc2)n1  
3386 C=CCOC1CCCCO1.O=CNc1ccccc1I>>O=CNc1ccccc1/C=C\COC1CCCCO1  
3387 C=CC(=O)OC.CCn1cc(I)c(=O)c2ccc(C)nc21>>CCn1cc(/C=C/C(=O)OC)c(=O)c2ccc(C)nc21  
3388 C=CC(=O)OC.Cc1nc2ccc(Br)cn2c1Cc1ccccc1OC(F)F>>COC(=O)/C=C/c1ccc2nc(C)c(Cc3ccccc3OC(  
F)F)n2c1  
3389 C=Cc1ccc(OC)c(OC)c1C(=O)OC.COc1c(I)c(CCNC(=O)OC(C)(C)C)cc2c1OCO2>>COC(=O)c1c(/C=  
C/c2c(CCNC(=O)OC(C)(C)C)cc3c(c2OC)OCO3)ccc(OC)c1OC  
3390 BrC1enc2ccccc2e1.C=C[Si](CC)(CC)CC>>CC[Si](/C=C/c1enc2ccccc2e1)(CC)CC  
3391 C=CC(O)c1ccccc1C.O=Cc1ccccc1Br>>Cc1ccccc1C(O)/C=C/c1ccccc1C=O  
3392 C=CC(O)c1cc(OC)c(OC)c(OC)c1Br.Ic1ccccc1>>COc1cc(C(O)/C=C/c2ccccc2)c(Br)c(OC)c1OC  
3393 C=CC(=O)OC.COc1ccc2cc(Br)ccc2c1Cl>>COC(=O)/C=C/c1ccc2c(Cl)c(OC)ccc2c1  
3394 BrC1cccs1.C=Cc1cc(OC)cc(OC)c1>>COc1cc(/C=C/c2cccs2)cc(OC)c1  
3395 C=CC(=O)OCc1ccccc1.Fc1cccc(Cn2nc(I)c3ccccc32)c1>>O=C(/C=C/c1nn(Cc2cccc(F)c2)c2ccccc12)O  
Cc1ccccc1  
3396 C=C(F)C(=O)OC.O=Cc1ccc(I)o1>>COC(=O)/C(F)=C/c1ccc(C=O)o1  
3397 C=CC(=O)OCC.COc1ccc(Cn2c(=O)ccc3cc(Br)ccc32)cc1>>CCOC(=O)/C=C/c1ccc2c(ccc(=O)n2Cc2c  
cc(OC)cc2)c1  
3398 C=Cc1ccccc1O.Oc1cc(Br)cc(O)c1F>>Oc1ccccc1/C=C/c1cc(O)c(F)c(O)c1  
3399 C=Cc1ccccc1.COc1ccccc1Br>>COc1ccccc1/C=C/c1ccccc1  
3400 C=CC(C)(C)O.Nc1nccc(Br)c1I>>CC(C)(O)/C=C/c1c(N)cncc1Br  
3401 C=CC(=O)OCC.Fc1ccc(I)cc1>>CCOC(=O)/C=C/c1ccc(F)cc1  
3402 C=CC[C@H]1O[C@@H]2O[C@@]3(C)CC[C@H]4[C@H](C)CC[C@@H]([C@H]1C)[C@]42OO3.  
Cc1ccccc(I)c1>>Cc1ccccc(/C=C/C[C@H]2O[C@@H]3O[C@@]4(C)CC[C@H]5[C@H](C)CC[C@@H  
1([C@H]2C)[C@]53OO4)c1  
3403 C=CC(=O)OC(C)(C)C.CC1(C)C(=O)N(c2ccc(C#N)c(C(F)(F)F)c2)C(=S)N1c1ccc(Br)c(F)c1>>CC(C)(  
C)OC(=O)/C=C/c1ccc(N2C(=S)N(c3ccc(C#N)c(C(F)(F)F)c3)C(=O)C2(C)C)cc1F  
3404 C=CC(=O)OCCO.C[C@]12C[C@@]34C=C(Sc5ccc(I)cc5)C(=O)[C@@](C)(CCC(=O)Nc5c(O)ccc(C(  
=O)O)c5O)[C@@H]3[C@H](C[C@@H]1C4)O2>>C[C@]12C[C@@]34C=C(Sc5ccc(/C=C/C(=O)O  
CCO)cc5)C(=O)[C@@](C)(CCC(=O)Nc5c(O)ccc(C(=O)O)c5O)[C@@H]3[C@H](C[C@@H]1C4)O2  
3405 C=Cc1ccc(F)cc1.FC(F)(F)C(F)(F)C(F)(F)C(F)(F)C(F)(F)C(F)(F)Br>>Fc1ccc(/C=C/C(F)(F)C(F)(F)C(F)  
(F)C(F)(F)C(F)(F)C(F)(F)F)cc1  
3406 C=C[C@@H]1CCCCN1C(=O)OC(C)(C)C.COc1ccc(I)cc1>>COc1ccc(/C=C/[C@@H]2CCCCN2C(=  
O)OC(C)(C)C)cc1

3407 C=Cc1ccc(F)cc1.C[Si](C)(OS(=O)(=O)C(F)(F)F)OS(=O)(=O)C(F)(F)F>>C[Si](C)(/C=C/c1ccc(F)cc1)OS(=O)(=O)C(F)(F)F  
 3408 C=CC(=O)OCCCC.FC(F)(F)c1ccccc1Br>>CCCCOC(=O)/C=C/c1ccccc1C(F)(F)FBr1cnc2ccccc2c1.C=CCON=C1[C@H](C)[C@H]2OC(=O)O[C@]2(C)[C@@H](CC)OC(=O)[C@@](C)(F)C(=O)[C@H](C)[C@@H](O[C@@H]2O[C@H](C)C[C@H](N(C)C)[C@H]2OC(C)=O)[C@](C)(OC)C[C@H]1C>>CC[C@H]1OC(=O)[C@@](C)(F)C(=O)[C@H](C)[C@@H](O[C@@H]2O[C@H](C)C[C@H](N(C)C)[C@H]2OC(C)=O)[C@](C)(OC)C[C@@H](C)C(=NOC/C=C/c2cnc3ccccc3c2)1C@H1(C)1C@H12OC(=O)O1C@112C  
 3409 C=CC(=O)N1CCOCC1.CCCCC(C)(Br)CC>>CCCCC(C)(/C=C/C(=O)N1CCOCC1)CC  
 3410 C=CC(=O)OCCCC.COC(c1ccccc1)c1cnn2c(-c3ccccc3)c(Br)c3ccccc3c12>>CCCCOC(=O)/C=C/c1c(-c2ccccc2)n2ncc(C(OC)c3ccccc3)c2c2ccccc12  
 3411 C=Cc1ccc(OCCO)cc1.CCN1CCN(c2nc(Br)cc3ccsc23)CC1>>CCN1CCN(c2nc(/C=C/c3ccc(OCCO)cc3)cc3ccsc23)CC1  
 3412 C=CC(=O)OCC.Cc1cc(I)nc(C)n1>>CCOC(=O)/C=C/c1cc(C)nc(C)n1  
 3413 Br1ccccc1I.C=CC(N)=O>>NC(=O)/C=C/c1ccccc1Br  
 3414 C=Cc1cc(C(F)(F)F)cc(C(F)(F)F)c1.FC(F)(F)c1ccc(Br)cc1>>FC(F)(F)c1ccc(/C=C/c2cc(C(F)(F)F)cc(C(F)(F)F)c2)cc1  
 3415 C=CC(=O)NCc1ccc(F)c(-c2ccccc(CN3CCN(C(=O)OC(C)(C)C)[C@@H](C)C3)c2)c1.CCc1nc2c(cnn2CC)c(NC2CCOCC2)c1I>>CCc1nc2c(cnn2CC)c(NC2CCOCC2)c1/C=C/C(=O)NCc1ccc(F)c(-c2ccccc(CN3CCN(C(=O)OC(C)(C)C)[C@@H](C)C3)c2)c1  
 3416 C=C.CC(=O)c1ccc(Br)c1>>C=Cc1ccc(C(C)=O)c1  
 3417 C=CNC(C)=O.O=S(=O)(Oc1ccccc1)C(F)(F)F>>C=C(NC(C)=O)c1ccccc1  
 3418 C=CCCC(=O)OCC.CCN(CC)C(=O)Oc1c(Br)cccc1OC>>CCOC(=O)CC/C=C/c1cccc(OC)c1OC(=O)N(CC)CC  
 3419 C=CC(=O)OCCCC.O=[N+](O-)[O-]c1ccc(Br)c1>>CCCCOC(=O)/C=C/c1cccc([N+](=O)[O-])c1  
 3420 C=Cc1ccccc1.CC(C)(C)OC(=O)N1CCC[C@H]1COc1cnc(Cl)c(I)c1>>CC(C)(C)OC(=O)N1CCC[C@H]1COc1cnc(Cl)c(/C=C/c2ccccc2)c1  
 3421 C=CC(=O)OCC.COc1cc(Br)cnc1[N+](=O)[O-]>>CCOC(=O)/C=C/c1cnc([N+](=O)[O-])c(OC)c1  
 3422 C=CC(=O)NC(C)C.COc1ccc(CNc2c(C(=O)NCc3ccc(F)cc3F)c(=O)n(OCc3ccccc3)c3ncc(Br)cc23)c(O)C1>>COc1ccc(CNc2c(C(=O)NCc3ccc(F)cc3F)c(=O)n(OCc3ccccc3)c3ncc(/C=C/C(=O)NC(C)C)cc23)c(OC)c1  
 3423 Br1ccccc2[nH]cc(Cc3ccc4ccccc4c3)c12.C=CC(=O)OC>>COC(=O)/C=C/c1cccc2[nH]cc(Cc3ccc4ccccc4c3)c12  
 3424 C=CC(=O)OCC.Fc1ccc(-c2c(Br)c(C(F)(F)F)nn2-c2ccccc2)cc1>>CCOC(=O)/C=C/c1c(C(F)(F)F)nn(-c2ccccc2)c1-c1ccc(F)cc1  
 3425 C=C(F)C(=O)OC.CC(=O)c1ccc(I)cc1>>COC(=O)/C(F)=C/c1ccc(C(C)=O)cc1  
 3426 Br1cccc(CNc2nc(N3CCOCC3)nc3c2ncn3C2CCCC2)c1.C=CC(=O)OC>>COC(=O)/C=C/c1cccc(CNc2nc(N3CCOCC3)nc3c2ncn3C2CCCC2)c1  
 3427 C=Cc1ccccc1.Oc1ccccc1Br>>Oc1ccccc1/C=C/c1ccccc1  
 3428 C=CC(=O)OCC.O=Cc1ccc(Br)c1>>CCOC(=O)/C=C/c1cccc(C=O)c1  
 3429 Br1cnc2ccccc2c1.C=CCO/N=C1/[C@H](C)[C@H]2OC(=O)O[C@]2(C)[C@@H](CC)OC(=O)[C@H](C)[C@@H](O)[C@H](C)[C@@H](O[C@H]2O[C@H](C)C[C@H](N(C)C)[C@H]2OC(C)=O)[C@](C)(OC)C[C@H]1C>>CC[C@H]1OC(=O)[C@H](C)[C@@H](O)[C@H](C)[C@@H](O[C@H]2O[C@H](C)C[C@H](N(C)C)[C@H]2OC(C)=O)[C@](C)(OC)C[C@@H](C)/C(=N\OC/C=C/c2cnc3ccccc3c2)1C@H1(C)1C@H12OC(=O)O1C@112C  
 3430 C=C[C@]1(O)CC[C@H]2[C@@H]3CCc4cc(O[Si](C)(C)C(C)C)ccc4[C@H]3CC[C@@]21C.Clc1ccc(I)cn1>>CC(C)(C)[Si](C)(C)Oc1ccc2c(c1)CC[C@@H]1[C@@H]2CC[C@@]2(C)[C@H]1CC[C@@]2(O)/C=C/c1ccc(Cl)nc1  
 3431 C=CC(N)=O.O=CC1=C(Br)CCCC1>>NC(=O)/C=C/C1=C(C=O)CCCCC1  
 3432 C=CC(=O)N(C)OC.COc1ccc(I)cc1>>COc1ccc(/C=C/C(=O)N(C)OC)cc1  
 3433 C=CC(O)C1CCCCC1.I/C=C/C=C/CCCCOCc1ccccc1>>OC(/C=C/C=C/C=C/CCCCOCc1ccccc1)C1CCCCC1  
 3434 C=Cc1ccc2c(c1)c1cc(/C=C/c3ccc4c(c3)c3ccccc3n4CCCCCCCC)ccc1n2CCCCCCCC.N#CC(=C(c1ccc(cc1)c1ccccc1)c1ccc(Br)cc1>>CCCCCCCCn1c2ccccc2c2cc(/C=C/c3ccc4c(c3)c3cc(/C=C/c5ccc(C(C#N)=C(c6ccccc6)c6ccccc6)cc5)ccc3n4CCCCCCCC)ccc21  
 3435 C=Cc1ccc2c(c1)OCO2.CCCCCCCCOC1ccc2c(C)c(Br)c(=O)oc2c1>>CCCCCCCCOC1ccc2c(C)c(/C=C/c3ccc4c(c3)OCO4)c(=O)oc2c1  
 3436 C=CC(=O)OCC(CC)CCCC.CC(=O)c1ccc(Cl)cc1>>CCCCC(CC)COC(=O)/C=C/c1ccc(C(C)=O)cc1  
 3437 C=CC(=O)OCC.O=Cc1ccccc1Br>>CCOC(=O)/C=C/c1ccccc1C=O  
 3438 C=CC(=O)OCC.C[Si](C)(C)c1ccc1I>>CCOC(=O)/C=C/c1ccc1[Si](C)(C)C  
 3439

3440 C=Cc1cccc1.O=C1C=CC(=O)c2c(I)cccc21>>O=C1C=CC(=O)c2c(/C=C/c3cccc3)cccc21  
3441 C=Cc1ccc(C#N)cc1.[O-][N+](=Nc1ccc(Br)cc1)c1cccc1>>N#Cc1ccc(/C=C/c2ccc(N=[N+])([O-]  
3442 ]c3cccc3)cc2)cc1  
3443 Brc1ccc2cccc2c1.C=CN(C)C(C)=O>>C=C(c1ccc2cccc2c1)N(C)C(C)=O  
3444 C=Cc1ccc(N(c2cccc2)c2cccc2)cc1.FC(F)(F)C(F)(F)C(F)(F)C(F)(F)C(F)(F)C(F)(F)C(F)(F)Br>>FC(F)  
(F)C(F)(F)C(F)(F)C(F)(F)C(F)(F)C(F)(F)C(F)(F)C(F)(F)/C=C/c1ccc(N(c2cccc2)c2cccc2)cc1  
3445 C=CC(=O)OC.CCNC(=O)Nc1cc2c(Br)ccc(C)c2cn1>>CCNC(=O)Nc1cc2c(/C=C/C(=O)OC)ccc(C)c2c  
C=C[C@H]1O[C@@H]2OC(C)(C)O[C@@H]2[C@H]1O.O=c1cc(-  
3446 c2cccc2)oc2cc(Br)ccc12>>CC1(C)O[C@H]2O[C@H](/C=C/c3ccc4c(=O)cc(-  
c5cccc5)oc4c3)[C@H](O)[C@H]2O1  
3447 C=Cc1ccc(O)cc1.COc1ccc(Br)cc1>>COc1ccc(/C=C/c2ccc(O)cc2)cc1  
3448 C=CC(=O)OCCCC.CCCOC(=O)c1ccc(Br)cc1>>CCCCOC(=O)/C=C/c1ccc(C(=O)OCCCC)cc1  
3449 C=CCC(=O)OCC(C)C.COc1c(Br)cc(OC)c2c(OC)cccc12>>COc1c(/C=C/CC(=O)OCC(C)C)cc(OC)c2c  
(OC)cccc12  
3450 C=CC(N)=O.CCCCCNC(=O)[C@H](Cc1ccc(Nc2cccc2C(=O)O)c(I)c1)NS(C)(=O)=O>>CCCCNC(  
=O)[C@H](Cc1ccc(Nc2cccc2C(=O)O)c(/C=C/C(N)=O)c1)NS(C)(=O)=O  
3451 C=C(NC(=O)OC(C)(C)C)C(=O)OC.Nc1cc(N)cc(I)c1>>COC(=O)/C=C/c1cc(N)cc(N)c1)NC(=O)OC(  
C)(C)C  
3452 C=CCN(C(=O)C(C)(C)CCl)[C@@H]1CCc2cccc21.O=C1Nc2ncccc2[C@@]12Cc1cc(I)enc1C2>>CC  
(C)(CCl)C(=O)N(C/C=C/c1cnc2c(c1)C[C@@]1(C2)C(=O)Nc2ncccc21)[C@@H]1CCc2cccc21  
3453 C=C[C@H](C)CCC=C(C)C.O=S(=O)(Oc1cccc1)C(F)(F)F>>C=C(c1cccc1)[C@H](C)CCC=C(C)C  
3454 C=CCN1C(=O)c2cccc2C1=O.FC(F)(F)c1cccc1Br>>O=C1c2cccc2C(=O)N1C/C=C/c1cccc1C(F)(F)  
3455 C=C[Si](C)(C)C.Cc1ccc(I)cc1>>Cc1ccc(/C=C/[Si](C)(C)C)cc1  
Brc1ccnc1.C=CC[C@H]1CCCN(C)C[C@H](OC(C)=O)[C@H](C)C[C@H](CC(OC)OC)[C@H](O)[C  
@@H]2O[C@H](C)[C@@H](O[C@H]3C[C@@](C)(O)[C@@H](OC(=O)CC)[C@H](C)O3)[C@H](  
N(C)C)[C@H]2OC(C)=O)[C@@H](OC)[C@H](OC(=O)CC)CC(=O)O1>>CCC(=O)O[C@H]1[C@H]  
(C)O[C@@H](O[C@H]2[C@H](N(C)C)[C@@H](OC(C)=O)[C@H](O[C@@H]3[C@@H](OC)[C@  
H](OC(=O)CC)CC(=O)O[C@@H](C/C=C/c4ccnc4)CCCN(C)C[C@H](OC(C)=O)[C@H](C)C[C@  
@H]3CC(C)C)O)O[C@@H]1C @ @H12C)C1C @ @H11(C)N  
3456 C=CC(=O)OC.Fc1cccc1Br>>COC(=O)/C=C/c1cccc1F  
3457 C=CCC(C)C(=O)OCC.O=C(c1cccc1)c1ccc(Br)cc1>>CCOC(=O)C(C)C/C=C/c1ccc(C(=O)c2cccc2)c  
3458 C=Cc1ccc(CO)cn1.Cc1c(Nc2c(I)cncc2C#N)ccc2[nH]ccc12>>Cc1c(Nc2c(C#N)cncc2/C=C/c2ccc(CO)c  
n2)ccc2[nH]ccc12  
3459 C=CC(=O)OC.COc1ccc(N)c(I)c1>>COC(=O)/C=C/c1cc(OC)ccc1N  
3460 C=C(C)C(=O)OC.CC(=O)c1ccc(Cl)cc1>>COC(=O)/C(C)=C/c1ccc(C(C)=O)cc1  
3461 C=CC(=O)OCC.Nc1ccc(Br)cn1>>CCOC(=O)/C=C/c1ccc(N)nc1  
3462 C=Cc1cccc1OC.Cc1ccc(OS(=O)(=O)C(F)(F)F)cc1>>C=C(c1ccc(C)cc1)c1cccc1OC  
3463 C=CS c1cccc1.COc1ccc(Br)cc1>>COc1ccc(/C=C/Sc2cccc2)cc1  
3464 Brc1cc2c(cc1C1OCCO1)OCO2.C=CC(=O)OC(C)(C)C>>CC(C)(C)OC(=O)/C=C/c1cc2c(cc1C1OCCO  
1)OCO2  
3465 C=CC(=O)OCC.Cc1nnn(Cc2cc(OC(F)F)ccc2Br)n1>>CCOC(=O)/C=C/c1ccc(OC(F)F)cc1Cn1nnn(C)n  
3466 C=CC(=O)OCC.O=S(=O)(OC1=NCCCC1)C(F)(F)F>>CCOC(=O)/C=C/C1=NCCCC1  
3467 C=CC(=O)OCCCC.O=C1Nc2ccc(Br)cc2C1=O>>CCCCOC(=O)/C=C/c1ccc2c(c1)C(=O)C(=O)N2  
3468 C=CC(=O)OCC.O=Cc1c(F)cc(Br)cc1Cl>>CCOC(=O)/C=C/c1cc(F)c(C=O)c(Cl)c1  
3469 Brc1cnc2cccc2c1.C=CC(=O)N(C)OC>>CON(C)C(=O)/C=C/c1cnc2cccc2c1  
3470 C=CCOc1cccc1.Cc1cccc1I>>Cc1cccc1/C=C/COc1cccc1  
3471 C=CC(=O)OC(C)(C)C.O=c1oc2cc(O)cc(F)c2c(Cc2ccc(Br)cc2)c1Cl>>CC(C)(C)OC(=O)/C=C/c1ccc(C  
c2c(Cl)c(=O)oc3cc(O)cc(F)c23)cc1  
3472 C=CC[C@H]1O[C@@H]2O[C@@]3(C)CC[C@H]4[C@H](C)CC[C@@H]([C@H]1C)[C@]42OO3.  
Cc1cccc1I>>Cc1cccc1/C=C/C[C@H]1O[C@@H]2O[C@@]3(C)CC[C@H]4[C@H](C)CC[C@@H]  
([C@H]1C)[C@]42OO3  
3473 C=CC(=O)OC.Cc1cc(C)c(Br)c(C)c1>>COC(=O)/C=C/c1c(C)cc(C)cc1C  
3474 C=CC(=O)OCCCC.CCOC(=O)c1ccc(Br)cc1>>CCCCOC(=O)/C=C/c1ccc(C(=O)OCC)cc1  
3475 C=CC(=O)OC(C)(C)C.Nc1ccc(Br)c(F)c1>>CC(C)(C)OC(=O)/C=C/c1ccc(N)cc1F  
3476 Brc1cccc2cccc12.C=CC(=O)OC(C)(C)C>>CC(C)(C)OC(=O)/C=C/c1cccc2cccc12  
3477 C=CC(=O)N1CCOCC1.Oc1ccc2c(c1)CCN(c1cccc1)C2c1ccc(I)cc1>>O=C(/C=C/c1ccc(C2c3ccc(O)c  
c3CCN2c2cccc2)cc1)N1CCOCC1  
3478 C=CC#N.Cn1c(=O)c(I)cn([C@H]2[C@H](O[Si](C)(C)C(C)(C)C)[C@@H](CO[Si](C)(C)C(C)(C)C)  
O2)c1=O>>Cn1c(=O)c(/C=C/C#N)cn([C@H]2[C@H](O[Si](C)(C)C(C)(C)C)[C@@H](CO[Si](C)(C)  
(C)(C)C)O2)c1=O  
3479 C=CC(=O)OCC.CN(C)Cc1cccc(Br)c1>>CCOC(=O)/C=C/c1cccc(CN(C)C)c1

3480 C=CCOc1cccc1.CC(C)(C)OC(=O)/C=C/c1ccc(CN(C(=O)C2CCCCC2)c2cccc(Br)c2)cc1>>CC(C)(C)  
 OC(=O)/C=C/c1ccc(CN(C(=O)C2CCCCC2)c2cccc(/C=C/COc3cccc3)c2)cc1  
 3481 C=CC(=O)N(C)OC.N#Cc1ccc2ccc(Br)cc2c1>>CON(C)C(=O)/C=C/c1ccc2ccc(C#N)cc2c1  
 3482 C=Cc1cccc1.O=Cc1c(F)cccc1Br>>O=Cc1c(F)cccc1/C=C/c1cccc1  
 3483 C=CC(=O)OCC.CC(C)Nc1ccc(Br)n(CC(=O)OC(C)(C)C)c1=O>>CCOC(=O)/C=C/c1cnc(NC(C)C)c(=O)n1CC(=O)OC(C)(C)C  
 C=Cc1ccc(C(=O)N[C@@H](CCSC)C(=O)OC)c(-  
 3484 c2cccc2C)c1.OC1(c2cnc2Br)CCCCC1>>COC(=O)[C@H](CCSC)NC(=O)c1ccc(/C=C/c2cnc2C2(O)CCCCC2)cc1-c1cccc1C  
 C=CCCN1C(=O)c2cccc2C1=O.Cc1cc(Cl)c2cccc2n1>>Cc1cc(/C=C/CCN2C(=O)c3cccc3C2=O)c2cccc2n1  
 3485 C=COCCCC.CNc1ccc(Br)cn1>>C=C(OCCCC)c1ccc(NC)nc1  
 3486 C=Cc1cccc1.Ic1ccc(Cn2cc(-c3cccc3)nn2)cc1>>C(=C/c1ccc(Cn2cc(-c3cccc3)nn2)cc1)\c1cccc1  
 3487 C=CC(N)=O.Cc1cc(Cl)ccc1C(F)(F)F>>Cc1cc(/C=C/C(N)=O)ccc1C(F)(F)F  
 3488 C=CC(=O)OC(C)(C)C.COC(=O)c1ccc(Br)o1>>COC(=O)c1ccc(/C=C/C(=O)OC(C)(C)C)o1  
 3489 Br1ccc2c(c1)c1cccc1n2-c1cccc1.C=Cc1ccc(N)cc1>>Nc1ccc(/C=C/c2ccc3c(c2)c2cccc2n3-c2cccc2)cc1  
 3490 C=CC(=O)OCC.Nc1ccc(Br)nc1I>>CCOC(=O)/C=C/c1nc(Br)ccc1N  
 3491 C=CC(=O)OC(C)(C)C.COC(=O)c1cc(Br)sc1C>>COC(=O)c1cc(/C=C/C(=O)OC(C)(C)C)sc1C  
 3492 C=Cc1ccc(Br)cc1.ClCc1cccc1>>Br1ccc(/C=C/Cc2cccc2)cc1  
 3493 C=CC(=O)O.Cc1cc(C)c([I+])c2c(C)cc(C)cc2C)c(C)c1>>Cc1cc(C)c(/C=C/C(=O)O)c(C)c1  
 3494 C=CC(=O)O.Oc1ccc(I)cc1F>>O=C(O)/C=C/c1ccc(O)c(F)c1  
 3495 C=CC(=O)OC.COc1ccc(I)cn1>>COC(=O)/C=C/c1cnc(OC)nc1  
 3496 C=Cc1ccc(C(=O)OCC)cc1.CCC(CC)=C1CCC(C)(C)c2ccc(Br)cc21>>CCOC(=O)c1ccc(/C=C/c2ccc3c(c2)C(=C(CC)CC)CCC3(C)C)cc1  
 3497 C=CC(=O)OC.CCOC(=O)c1c2cccc-2c(C(=O)OCC)c1Cl>>CCOC(=O)c1c2cccc-2c(C(=O)OCC)c1/C=C/C(=O)OC  
 3498 C=Cc1ccc(F)cc1.Clc1ccc(I)cc1>>Fc1ccc(/C=C/c2ccc(Cl)cc2)cc1  
 3499 C=CC(=O)OCC.COc1ccc2c(Oc3ccc(Br)cc3)c(-c3cccc3)c(-c3cccc3)nc2c1>>CCOC(=O)/C=C/c1ccc(Oc2c(-c3cccc3)c(-c3cccc3)nc3cc(OC)ccc23)cc1  
 3500 C=CC(=O)OC(C)(C)C.O=C1Nc2ccc(Br)cc2CN2CCC[C@H]12>>CC(C)(C)OC(=O)/C=C/c1cnc2c(c1)CN1CCC[C@H]1C(=O)N2  
 3501 C=CC1CCCC1.CC(C)(C)c1ccc(Br)cc1>>C=C(c1ccc(C(C)(C)C)cc1)C1CCCCC1  
 3502 C=C[C@H](C)(C)/C=C/c1ccc(O)cc1)CCC=C(C)C.COc1cccc1I>>COc1cccc1/C=C/[C@@](C)(/C=C/c1ccc(O)cc1)CCC=C(C)C  
 3503 C=CC(=O)OC(C)(C)C.N#Cc1cccc(Br)c1>>CC(C)(C)OC(=O)/C=C/c1cccc(C#N)c1  
 3504 C=C(NC(=O)OCc1cccc1)C(=O)OC.CC(C)(C)[Si](C)(C)O[C@H]1Cc2c(Br)cc(OCc3cccc3)cc2N(S(=O)(=O)c2cccc2[N+](=O)[O-])C1>>COC(=O)/C=C/c1cc(OCc2cccc2)cc2c1C[C@H](O[Si](C)(C)C(C)(C)CN2S(=O)(=O)c1ccc cc1[N+](=O)[O-])NC(=O)OCc1cccc1  
 3505 C=CCC1c2cccc2C=NN1C(=O)C=C.COc1cc(Cc2cnc(N)nc2N)cc(I)c1OC>>C=CCC1c2cccc2C=NN1C(=O)/C=C/c1cc(Cc2cnc(N)nc2N)cc(OC)c1OC  
 3506 Br1cnc(NCc2cccc2)c2cccc12.C=CC(=O)OCC>>CCOC(=O)/C=C/c1cnc(NCc2cccc2)c2cccc12  
 3507 C=CC(=O)OCCCC.Clc1cccc2cccc12>>CCCCOC(=O)/C=C/c1cccc2cccc12  
 3508 C=CC(=O)OCC.CC1(C)CC(=C(c2ccc(Br)cc2)c2ccc(O)c(F)c2)CC(C)(C)C1>>CCOC(=O)/C=C/c1ccc(C(=C2CC(C)(C)CC(C)(C)C2)c2ccc(O)c(F)c2)cc1  
 3509 C=CC(=O)OCC.Nc1nc(=O)n([C@@H]2O[C@H](CO)[C@@H](O)[C@@H]2F)cc1I>>CCOC(=O)/C=C/c1cn([C@@H]2O[C@H](CO)[C@@H](O)[C@@H]2F)c(=O)nc1N  
 3510 C=Cc1ccc(F)cc1.N[C@@H](Cc1c[nH]c2ccc(Br)cc12)C(=O)O>>N[C@@H](Cc1c[nH]c2ccc(/C=C/c3ccc(F)cc3)cc12)C(=O)O  
 3511 \*CNCCCOCCOCCOCCNC(=O)COc1ccc(C(Cc2cc(OC)cc(OC)c2)NC(=O)c2cccc(C=C)c2)cc1.COc1ccc(I)c([N+](=O)[O-])c1>>\*CNCCCOCCOCCOCCNC(=O)COc1ccc(C(Cc2cc(OC)cc(OC)c2)NC(=O)c2cccc(/C=C/c3ccc(OC)cc3[N+](=O)[O-])c2)cc1  
 3512 C=Cc1nc2c(N)ncnc2n1[C@@H]1O[C@H](CO[Si](C)(C)C(C)(C)C)[C@@H](O[Si](C)(C)C(C)(C)C)[C@H]1O[Si](C)(C)C(C)(C)C.Cc1ccc(Br)cc1>>Cc1ccc(/C=C/c2nc3c(N)ncnc3n2[C@@H]2O[C@H](CO[Si](C)(C)C(C)(C)C)[C@@H](O[Si](C)(C)C(C)(C)C)[C@H]2O[Si](C)(C)C(C)(C)C)cc1  
 3513 C=CC(=O)OC.COc1ccc2c(c1)c(I)nn2C(=O)OC(C)(C)C>>COC(=O)/C=C/c1nn(C(=O)OC(C)(C)C)c2cc(OC)cc12  
 3514

C=Cc1ccc(/C=C/c2ccc(N(C)C)cc2)cc1.O=c1cc2oc3cc(O)c(F)cc3c(-c3ccc(I)cc3S(=O)(=O)O)c-  
 3515 2cc1F>>CN(C)c1ccc(/C=C/c2ccc(/C=C/c3ccc(-c4c5cc(F)c(=O)cc-  
 5oc5cc(O)c(F)cc45)c(S(=O)(=O)O)c3)cc2)cc1  
 3516 C=COCCCC.COC(=O)Cc1ccccc1Br>>C=C(OCCCC)c1ccccc1CC(=O)OC  
 3517 C=CC(=O)OCC.CCc1cc(OCc2ccccc2)ccc1Br>>CCOC(=O)/C=C/c1ccc(OCc2ccccc2)cc1CC  
 3518 Br1ccc2ccccc2c1.C=Cc1ccccc1>>C=C/c1ccc2ccccc2c1)\c1ccccc1  
 3519 C=CC(=O)OCCCC.Cc1cc(C)c(I)c(C)c1>>CCCCOC(=O)/C=C/c1c(C)cc(C)cc1C  
 3520 C=CC(=O)OC.CCC(C)c1ccc(N2CCc3cc(OC)ccc3C2(C)c2ccc(Br)cc2)cc1>>CCC(C)c1ccc(N2CCc3cc(OC)ccc3C2(C)c2ccc(/C=C/C(=O)OC)cc2)cc1  
 3521 C=CC(=O)OCC.CCc1c[n+](O)c(CC)c(Cl)n1>>CCOC(=O)/C=C/c1nc(CC)c[n+](O)c1CC  
 3522 C=CCn1nnc2ccccc21.COc1ccc(I)cc1>>COc1ccc(/C=C/Cn2nnc3ccccc32)cc1  
 3523 C=Cc1ccc(Cl)cc1.COC(=O)c1ccccc1>>COC(=O)c1ccccc1/C=C/c1ccc(Cl)cc1  
 3524 C=CC(F)(F)C(F)(F)C(F)(F)C(F)(F)C(F)(F)C(F)(F)F.COC(=O)c1ccc(I)cc1>>COC(=O)c1ccc(/C=C/C(F)(F)C(F)(F)C(F)(F)C(F)(F)C(F)(F)C(F)(F)cc1  
 3525 C=CC(=O)OC.C[C@@H]1CN(c2ncc(Br)cc2C(F)(F)F)CCN1C(=O)OC(C)(C)C>>COC(=O)/C=C/c1nc  
 c(N2CCN(C(=O)OC(C)(C)C)[C@H](C)C2)c(C(F)(F)F)c1  
 3526 C=CC(=O)OC.CC(O)(CSc1ccc2c(Br)cccc12)C(=O)Nc1ccc(C#N)c(C(F)(F)F)c1>>COC(=O)/C=C/c1c  
 ccc2c(SCC(C)(O)C(=O)Nc3ccc(C#N)c(C(F)(F)F)c3)cccc12  
 3527 C=CC(=O)NC(C)C.Cc1cc(C)c(Br)c(C)c1>>Cc1cc(C)c(/C=C/C(=O)NC(C)C)c(C)c1  
 3528 C=Cc1ccc(O)c(OC)c1.COc1cc(Br)cc(OC)c1F>>COc1cc(/C=C/c2cc(OC)c(F)c(OC)c2)ccc1O  
 3529 C=CCN1C(=O)c2ccccc2C1=O.Oc1ccc(Br)cc1>>O=C1c2ccccc2C(=O)N1C/C=C/c1ccc(O)cc1  
 3530 C=Cc1ccc(-c2ccnc(-c3ccccc3)c2)cc1.OCCCCCOc1ccc(Br)cc1>>OCCCCCOc1ccc(/C=C/c2ccc(-c3ccnc(-c4ccccc4)c3)cc2)cc1  
 3531 C=Cc1ccc(C(=O)OC)cc1.COc1ccc(I)cc1>>COC(=O)c1ccc(/C=C/c2ccc(OC)cc2)cc1  
 3532 C=CC(=O)OC.COc1ccc2c(c1)CCN(c1ccc(CC(C)C)cc1F)C2(C)c1ccc(Br)cc1>>COC(=O)/C=C/c1ccc(C2(C)c3ccc(OC)cc3CCN2c2ccc(CC(C)C)cc2F)cc1  
 3533 C=Cc1ccccc1.COC(=O)[C@]1(NC(=O)OC(C)(C)C)CCc2cc(Br)ccc2C1>>COC(=O)[C@]1(NC(=O)OC(C)(C)C)CCc2cc(/C=C/c3ccccc3)ccc2C1  
 3534 C=Cc1ccc(OC)c1OC.O=c1ccc2ccc(OS(=O)(=O)C(F)(F)F)cc2o1>>COc1cccc(/C=C/c2ccc3ccc(=O)oc3c2)c1OC  
 3535 \*COC(=O)/C=C/c1cccc(N(Cc2ccc(Br)cc2)C(=O)C2CCCCC2)c1.C=Cc1ccccc1>>\*COC(=O)/C=C/c1c  
 ccc(N(Cc2ccc(/C=C/c3ccccc3)cc2)C(=O)C2CCCCC2)c1  
 3536 C=CC(=O)OC(C)(C)C.COc1ccc(CNc2c(I)cc(C)cc2[Si](C)(C)C)cc1>>COc1ccc(CNc2c(/C=C/C(=O)OC(C)(C)C)cc2[Si](C)(C)C)cc1  
 3537 Br1cccs1.C=CB1OC(C)CC(C)(C)O1>>CC1CC(C)(C)OB(/C=C/c2cccs2)O1  
 3538 C=CCN(C(=O)OC(C)(C)C)C(=O)OC(C)(C)C.Clc1cnc2ccccc2c1>>CC(C)(C)OC(=O)N(C/C=C/c1cnc2ccccc2c1)C(=O)OC(C)(C)C  
 3539 C=CC(=O)OC.Fc1nccc1Br>>COC(=O)/C=C/c1ccnc1F  
 3540 Br1ccccc1.C=Cn1nnc(-c2ccccc2C#N)n1>>N#Cc1ccccc1-c1nnn(/C=C/c2ccccc2)n1  
 3541 C=CCC(C)C(=O)OCC.O=Cc1ccc(Br)cc1>>CCOC(=O)C(C)C/C=C/c1ccc(C=O)cc1  
 3542 C=CC(=O)OC(C)(C)C.Cc1c(Br)cccc1[N+](=O)[O-]  
 3543 C=CC(C)=O.COC(=O)C1=C(OS(=O)(=O)C(F)(F)F)C(C)(C)CCC1>>COC(=O)C1=C(/C=C/C(C)=O)C(C)(C)CCC1  
 3544 C=Cc1ccc(OC)cc1.C[Si](C)(C)OS(=O)(=O)C(F)(F)F>>COc1ccc(/C=C/[Si](C)(C)C)cc1  
 3545 C=CS(=O)c1ccccc1.COC(=O)c1ccc(Br)cc1>>COC(=O)c1ccc(/C=C/S(=O)c2ccccc2)cc1  
 3546 C=C(NC(=O)OC(C)(C)C)C(=O)OCc1ccccc1.CC(C)(C)OC(=O)N/C(=C)c1ccc(Br)cc1)C(=O)OCc1ccccc1>>CC(C)(C)OC(=O)N/C(=C)c1ccc(/C=C(\NC(=O)OC(C)(C)C)C(=O)OCc2ccccc2)cc1)C(=O)OCc1c  
 3547 C=CC(=O)C(C)CC(=O)OC.COc1ccc(Br)cc1>>COC(=O)CC(C)C(=O)/C=C/c1ccc(OC)cc1  
 3548 C=CC(N)=O.FC(F)(F)Oc1ccccc1I>>NC(=O)/C=C/c1ccccc1OC(F)(F)F  
 3549 C=Cc1ccc(Cl)c1.O=C1CCC(c2ccc(Br)cc2)O1>>O=C1CCC(c2ccc(/C=C/c3ccccc(Cl)c3)cc2)O1  
 3550 C=CCCCCCC.O=S(=O)(Oc1ccc2ccccc12)C(F)(F)F>>C=C(CCCCCC)c1ccc2ccccc12  
 3551 C=CCOC(C)=O.O=[N+](O)c1ccc(Br)cc1>>CC(=O)OC/C=C/c1ccc([N+](=O)[O-])cc1  
 C=Cc1nn(C2CCCCO2)c2nc(-  
 3552 c3ccc(O)cc3)cc(C(=O)N3CCN(C(=O)OC(C)(C)CC3)c12.O=C1CCCN1c1ccc(I)c1>>CC(C)(C)OC(=O)N1CCN(C(=O)c2cc(-c3ccc(O)cc3)nc3c2c(/C=C/c2ccccc(N4CCCC4=O)c2)nn3C2CCCCO2)CC1  
 3553 C=Cc1ccc(OC)c(OC)c1.COc1ccc2c(c1)cc(C#N)c1ccc(Br)cc12>>COc1ccc2c(c1)cc(C#N)c1ccc(/C=C/c3ccc(OC)c(OC)c3)cc12  
 3554 C=CC(=O)OC.CC1(C)CC(=O)Nc2ccc(Br)cc21>>COC(=O)/C=C/c1ccc2c(c1)C(C)(C)CC(=O)N2  
 3555 C=CC(=O)OCC.OCc1c(-c2ccccc2)nc2cc(Br)ccn12>>CCOC(=O)/C=C/c1ccn2c(CO)c(-c3ccccc3)nc2c1  
 3556 C=CC(=O)OC(C)(C)C.CC(C)=CCc1cc(I)ccc1OC(=O)CCc1ccccc1F>>CC(C)=CCc1cc(/C=C/C(=O)OC(C)(C)C)ccc1OC(=O)CCc1ccccc1F



3557 C=Cc1cccc1.CC(=O)NCCc1cccc1Br>>CC(=O)NCCc1cccc1/C=C/c1cccc1  
3558 C=CC(=O)OC.CC(C)[C@@H]1C=C(OS(=O)(=O)C(F)(F)F)[C@H](C)CC1>>COC(=O)/C=C/C1=C[C@  
@@H](C(C)C)CC[C@H]1C  
3559 C=CC(=O)OCC.Cc1nc(Br)c(-c2cccc2)o1>>CCOC(=O)/C=C/c1nc(C)oc1-c1cccc1  
3560 C=CC(C)O.Cc1cccc(I)c1>>Cc1cccc(/C=C/C(C)O)c1  
3561 C=CC(=O)OC.Cc1cc2c(c(C)c1Br)CCC2=O>>COC(=O)/C=C/c1c(C)cc2c(c1C)CCC2=O  
3562 C=CC(=O)OCCCC.N#Cc1cccc(Br)c1>>CCCCOC(=O)/C=C/c1cccc(C#N)c1  
3563 C=CC(=O)OC.Ic1c(-c2cccc2)oc2cccc12>>COC(=O)/C=C/c1c(-c2cccc2)oc2cccc12  
3564 C=C[C@H]1O[C@@H]2OC(C)(C)O[C@@H]2[C@H]1OC.Ic1cccc1>>CO[C@H]1[C@@H](/C=C/c  
2cccc2)O[C@@H]2OC(C)(C)O[C@H]12  
3565 C=CS(=O)(=O)F.O=S(=O)(F)Oc1ccc(I)cc1>>O=S(=O)(F)/C=C/c1ccc(OS(=O)(=O)F)cc1  
3566 C=CC(OCC)OCC.Fc1ccc(I)cc1>>CCOC(/C=C/c1ccc(F)cc1)OCC  
3567 C=CC(N)=O.COc1cc(Br)cc(C)c1N>>COc1cc(/C=C/C(N)=O)cc(C)c1N  
3568 C=CC#N.O=c1oc2cnc3ccc(Br)cc3c2n1-c1cccc(C(F)(F)F)c1>>N#C/C=C/c1ccc2ncc3oc(=O)n(-  
c4cccc(C(F)(F)F)c4)c3c2c1  
3569 C=CC(=O)OC.O=C(O)c1ccc(Br)c2cccc12>>COC(=O)/C=C/c1ccc(C(=O)O)c2cccc12  
3570 C=CC(=O)OC.CC(C)(C)OC(=O)NCCCN1c2c(c3ccc(Br)cc3c1=O)C(=O)c1cccc1-  
2>>COC(=O)/C=C/c1ccc2c3c(n(CCCNC(=O)OC(C)(C)C)c(=O)c2c1)-c1cccc1C3=O  
3571 C=CC(=O)OC(C)(C)C.O=Cc1cc(F)ccc1Br>>CC(C)(C)OC(=O)/C=C/c1ccc(F)cc1C=O  
3572 C=CCCCCCC.Cc1ccc(C)c(OS(=O)(=O)C(F)(F)F)c1>>C=C(CCCCCC)c1cc(C)ccc1C  
3573 C=CC(=O)OC.CC(C)(C)c1ccc(Cn2nc(I)c3cccc32)cc1>>COC(=O)/C=C/c1nn(Cc2ccc(C(C)(C)C)cc2)  
c2cccc12  
3574 C=Cc1cccc1.Fc1c(F)c(F)c(Br)c(F)c1F>>Fc1c(F)c(F)c(/C=C/c2cccc2)c(F)c1F  
3575 C=Cc1cccc(O)c1.Oc1ccc(O)c(I)c1>>Oc1cccc(/C=C/c2cc(O)ccc2O)c1  
3576 C=Cc1ccc(N(C)C)cc1.OCCOc1ncc(I)cc1Br>>CN(C)c1ccc(/C=C/c2cnc(OCCO)c(Br)c2)cc1  
3577 C=CC#N.COc1c(CN(C(=O)C2CC2)c2cccc(Br)c2)ccc2c1OC(C)(C)C=C2>>COc1c(CN(C(=O)C2CC2)  
c2cccc(/C=C/C#N)c2)ccc2c1OC(C)(C)C=C2  
C=CCC(=O)O.Cc1cc(Cl)ccc1Cc1cc([C@@H]2S[C@H](COCc3cccc3)[C@@H](OCc3cccc3)[C@H]  
(OCc3cccc3)[C@H]2OCc2cccc2)c(OCc2cccc2)cc1C>>Cc1cc(/C=C/CC(=O)O)ccc1Cc1cc([C@@H]  
2S[C@H](COCc3cccc3)[C@@H](OCc3cccc3)[C@H](OCc3cccc3)[C@H]2OCc2cccc2)c(OCc2c  
3579 C=CC(=O)OCCSc1cccc1.Cc1ccc(Br)cc1>>Cc1ccc(/C=C/C(=O)OCCSc2cccc2)cc1  
3580 C=CC(=O)OC.Fc1cncc(Br)c1>>COC(=O)/C=C/c1cncc(F)c1  
3581 C=CC(=O)OCC.COc1ccc(I)c([N+](=O)[O-])c1>>CCOC(=O)/C=C/c1ccc(OC)cc1[N+](=O)[O-]  
3582 C=CCCCC.CC(=S)NS(=O)(=O)c1ccc(Br)cc1>>CCCC/C=C/c1ccc(S(=O)(=O)NC(C)=S)cc1  
3583 C=CC(=O)OC.O=C1Cc2c([nH]c3ccc(C(F)(F)F)cc23)-c2cc(I)ccc2N1>>COC(=O)/C=C/c1ccc2c(c1)-  
c1[nH]c3ccc(C(F)(F)F)cc3c1CC(=O)N2  
3584 C=CC(=O)OCCCC.Oc1cccc1Br>>CCCCOC(=O)/C=C/c1cccc1O  
3585 C=C[Si](C)(C)C.COC(=O)c1cccc1I>>COC(=O)c1cccc1/C=C/[Si](C)(C)C  
3586 C=Cc1ccc(Cl)cc1.COc1ccc(I)cc1>>COc1ccc(/C=C/c2ccc(Cl)cc2)cc1  
Br1ccc2c(c1)Cc1cccc1-  
3587 2.C=Cc1nc2c(=O)[nH]c(N)nc2n1[C@H]1C[C@H](O)[C@@H](CO)O1>>Nc1nc2c(nc(/C=C/c3ccc4c(  
c3)Cc3cccc3-4)n2[C@H]2C[C@H](O)[C@@H](CO)O2)c(=O)[nH]1  
3588 C=Cc1cccc1.Cc1nc(C(C)C)nc1I>>Cc1nc(C(C)C)nc1/C=C/c1cccc1  
3589 C=CC(=O)OC.COc1ccc2nc(-c3cccc3)c(I)n2c1>>COC(=O)/C=C/c1c(-c2cccc2)nc2ccc(OC)cn12  
3590 C=Cc1cccc1.CCCCN1c2ccc(Br)cc2Sc2cc(-c3nc4cccc4n3-  
c3cccc3)ccc21>>CCCCN1c2ccc(/C=C/c3cccc3)cc2Sc2cc(-c3nc4cccc4n3-c3cccc3)ccc21  
3591 C=Cc1cccc1.Cc1cccc1Cl>>Cc1cccc1/C=C/c1cccc1  
C=C1C(=O)O[C@@H]2CC(C)=C([C@@H](C)CCCOC(C)=O)[C@@H](OC(C)=O)[C@H]12.COc1c  
3592 c(I)cc(OC)c1OC>>COc1cc(/C=C2/C(=O)O[C@@H]3CC(C)=C([C@@H](C)CCCOC(C)=O)[C@@H]  
(OC(C)=O)[C@H]23)cc(OC)c1OC  
3593 C=CC(=O)OCC.COc1nc2ccc(Br)cc2nc1OC>>CCOC(=O)/C=C/c1ccc2nc(OC)c(OC)nc2c1  
3594 C=CC(=O)OCC.Cc1nc(N)nc(N[C@H]2CC[C@H](OCCO)CC2)c1Br>>CCOC(=O)/C=C/c1c(C)nc(N)n  
c1N[C@H]1CC[C@H](OCCO)CC1  
3595 C=CCCCCO[Si](C)(C)C(C)(C)C.Clc1cccc1>>C=C(CCCCCO[Si](C)(C)C(C)(C)C)c1cccc1  
3596 C=Cc1cccc1.O=[N+](O-)]c1ccc(I)cc1>>O=[N+](O-)]c1ccc(/C=C/c2cccc2)cc1  
3597 C=Cc1cccc(OC)c1.C[Si](C)(C)I>>COc1cccc(/C=C/[Si](C)(C)C)c1  
3598 C=CC(=O)OCC.O=C(N1CCc2cc(Br)c(F)cc2C1)C(F)(F)F>>CCOC(=O)/C=C/c1cc2c(cc1F)CN(C(=O)  
C(F)(F)F)CC2  
3599 C=Cc1cn(C(c2cccc2)(c2cccc2)c2cccc2)en1.CC(=O)Oc1ccc2ccc(Cl)ccc1-  
2>>CC(=O)Oc1ccc2ccc(/C=C/c3cn(C(c4cccc4)(c4cccc4)c4cccc4)cn3)ccc1-2

3600 C=CC(=O)OC.O=C(O)c1cccc1I>>COC(=O)/C=C/c1cccc1C(=O)O  
3601 C=CC(=O)OC(C)(C)C.Cc1cc(Br)sc1C=O>>Cc1cc(/C=C/C(=O)OC(C)(C)C)sc1C=O  
3602 C=CC(=O)OC.OCc1cccc(Br)c1>>COC(=O)/C=C/c1cccc(CO)c1  
3603 C=CC(OCC)OCC.CC(C)(C)c1cccc1OS(=O)(=O)C(F)(F)F>>C=C(c1cccc1C(C)(C)C)C(OCC)OCC  
3604 C=CC(=O)OCCCC.COC(=O)c1ccc(I)cc1>>CCCCOC(=O)/C=C/c1ccc(C(=O)OC)cc1  
3605 C=CC(=O)OCC.Cc1cc(-n2ncnn2)cc(I)c1N>>CCOC(=O)/C=C/c1cc(-n2ncnn2)cc(C)c1N  
3606 C=CC(=O)OCC.COc1cc(I)c2c3c1O[C@@H]1[C@]34CCN(C)[C@H](C2)[C@]42C=C[C@@]1(OC)c  
1c(O)cc(Cl)c(O)c12>>CCOC(=O)/C=C/c1cc(OC)c2c3c1C[C@H]1N(C)CC[C@@]34[C@H](O2)[C  
@@]2(OC)C=C[C@@]14c1c(O)c(Cl)cc(O)c12  
C=CCC(O)c1ccc(-  
3607 c2cc(OC)ncc2F)cn1.COC(=O)[C@@H](C)[C@H](c1ccc(I)c(O)c1)C1CC1>>COC(=O)[C@@H](C)[C  
@H](c1ccc(/C=C\CC(O)c2ccc(-c3cc(OC)ncc3F)en2)c(O)c1)C1CC1  
3608 C=Cc1cc2ccc(N(CC)CC)cc2oc1=O.O=Cc1ccc(Br)cc1>>CCN(CC)c1ccc2cc(/C=C/c3ccc(C=O)cc3)c(=  
O)oc2c1  
3609 C=COCCCC.O=S(=O)(Oc1ccc2ccccc2c1)C(F)(F)F>>C=C(OCCCC)c1ccc2ccccc2c1  
3610 C=CC(=O)Nc1ccc(C)cc1.CC(C)(C)c1ccc2[nH]c3c(c2c1)CC(=O)Nc1ccc(I)cc1-  
3>>Cc1ccc(NC(=O)/C=C/c2ccc3c(c2)-c2[nH]c4ccc(C(C)(C)C)cc4c2CC(=O)N3)cc1  
3611 C=Cc1cc(OC)c(OC)c(OC)c1.Nc1ccc(I)cc1>>COc1cc(/C=C/c2ccc(N)cc2)cc(OC)c1OC  
3612 C=Cc1ccc(N(c2ccccc2)c2ccccc2)cc1.Cc1ccc(Br)cc1>>Cc1ccc(/C=C/c2ccc(N(c3ccccc3)c3ccccc3)cc2)  
3613 Brc1ncccn1.C=Cc1ccc(OC)cc1>>COc1ccc(/C=C/c2ncccn2)cc1  
3614 C=CC(=O)CCCC.COc1ccc(I)cc1>>CCCCC(=O)/C=C/c1ccc(OC)cc1  
3615 C=C(NC(=O)OC(C)(C)C)C(=O)OC.CC(C)(C)OC(=O)N(C(=O)OC(C)(C)C)c1ncc(I)cn1>>COC(=O)/C  
(=C/c1cnc(N(C(=O)OC(C)(C)C)C(=O)OC(C)(C)C)nc1)NC(=O)OC(C)(C)C  
3616 C=Cc1ccc(OC)cc1.CC(C)(C)Br>>COc1ccc(/C=C/C(C)(C)C)cc1  
3617 C=CC(=O)OC(C)(C)C.Nc1ncc(Br)cc1CN1CCCCC1>>CC(C)(C)OC(=O)/C=C/c1cnc(N)c(CN2CCCC  
3618 C=C(OC)C(=O)OC.CC(=O)Nc1ccc(I)cc1>>COC(=O)/C=C/c1ccc(NC(C)=O)cc1)OC  
3619 C=Cc1cncnc1.CCOC(=O)c1[nH]c(C(C)(C)C)nc1I>>CCOC(=O)c1[nH]c(C(C)(C)C)nc1/C=C/c1cncnc1  
3620 C=CC(=O)OCCCC.Fc1cc(Br)ccc1OC(F)(F)F>>CCCCOC(=O)/C=C/c1ccc(OC(F)(F)F)c(F)c1  
3621 C=CN1C(=O)c2ccccc2C1=O.OC(c1ccc(C(F)(F)F)cc1)c1nccn1Br>>O=C1c2ccccc2C(=O)N1/C=C/c1  
cncnc1C(O)c1ccc(C(F)(F)F)cc1  
3622 C=CC(=O)O.O=S(=O)(Nc1ccc(I)cc1)c1cccc2ccccc12>>O=C(O)/C=C/c1ccc(NS(=O)(=O)c2cccc3cccc  
c23)cc1  
3623 C=C(Br)CO[Si](C)(C)C(C)(C)C.C=CC(=O)OC>>C=C(/C=C/C(=O)OC)CO[Si](C)(C)C(C)(C)C  
3624 C=C1C(=O)O[C@@H]2C[C@@H](C)C(=O)C/C=C(\C)CC[C@@H]12.CSc1ccccc1I>>CSc1ccccc1/C  
=C1/C(=O)O[C@@H]2C[C@@H](C)C(=O)C/C=C(\C)CC[C@@H]12  
3625 C=Cc1ccc(C)cc1.Fc1ccc(Br)cc1>>Cc1ccc(/C=C/c2ccc(F)cc2)cc1  
3626 Brc1ncc2ccccc12.C=CC(=O)OC>>COC(=O)/C=C/c1cnc2ccccc12  
3627 C=CC(=O)O.CC(=O)Nc1ncc(Br)cc1C>>CC(=O)Nc1ncc(/C=C/C(=O)O)cc1C  
3628 C=CC(=O)N1CC(c2oc3ccccc3c2C)C1.CN1CC(=O)Nc2ncc(Br)cc2C1>>Cc1c(C2CN(C(=O)/C=C/c3cn  
c4c(c3)CN(C)CC(=O)N4)C2)oc2ccccc12  
3629 C=CC(=O)OCC.Cc1cn(Cc2ccc(I)cc2)c(=O)[nH]c1=O>>CCOC(=O)/C=C/c1ccc(Cn2cc(C)c(=O)[nH]c  
2=O)cc1  
C=Cc1ccc(OC)cc1.COc1ccc(-  
3630 c2cc(=O)c3c(OC)cc(OC)c(I)c3o2)cc1>>COc1ccc(/C=C/c2c(OC)cc(OC)c3c(=O)cc(-  
c4ccc(OC)cc4)oc23)cc1  
3631 C=CC(=O)OC(C)(C)C.CC(C)(C)n1nnc(-c2ccc(Br)cc2)n1>>CC(C)(C)OC(=O)/C=C/c1ccc(-  
c2nnn(C(C)(C)C)n2)cc1  
3632 C=Cc1cccc(OC)c1.CN(C(=O)c1cccc1)c1ccc2c(c1)[nH]c(=NC(=O)c1ccc(Br)s1)n2CCC(N)=O>>COc  
1cccc(/C=C/c2ccc(C(=O)N=c3[nH]c4cc(N(C)C(=O)c5ccccc5)ccc4n3CCC(N)=O)s2)c1  
3633 C=CC(C)=O.CCCCCCCCCCCCCCc1cc(O)ccc1I>>CCCCCCCCCCCCCc1cc(O)ccc1/C=C/C(C)  
3634 C=Cc1ccccc1.COc1ccc(-c2c(I)c(=O)c3ccccc3n2C)cc1>>COc1ccc(-  
c2c(/C=C/c3ccccc3)c(=O)c3ccccc3n2C)cc1  
3635 C=CS(=O)(=O)Nc1ccc(OC2CCN(C(=O)OC(C)(C)C)CC2)cc1.N#Cc1ccc(Br)cc1>>CC(C)(C)OC(=O)  
N1CCC(Oc2ccc(NS(=O)(=O)/C=C/c3ccc(C#N)cc3)cc2)CC1  
3636 C=CC(=O)OCC.CN(C)c1ccc(-c2ccccc2)c(I)c1>>CCOC(=O)/C=C/c1cc(N(C)C)ccc1-c1ccccc1  
3637 C=Cc1ccc(C)cc1.Nc1ccc(Cl)cc1Br>>Cc1ccc(/C=C/c2cc(Cl)ccc2N)cc1  
3638 C=CC(=O)OCCCC.CC(C)(C)c1ccc(Br)cc1>>CCCCOC(=O)/C=C/c1ccc(C(C)(C)C)cc1  
3639 C=CC(=O)O.Nc1ccccc1Br>>Nc1ccccc1/C=C/C(=O)O  
3640 C=CCOc1cccc(C)c1.Ic1cccs1>>Cc1cccc(OC/C=C/c2cccs2)c1  
3641 C=CC(=O)OC(C)(C)C.Fc1ccc(Br)cc1>>CC(C)(C)OC(=O)/C=C/c1ccc(F)cc1

C=CC(=O)OC(C)(C)C.[C@]12C[C@@]34C=C(Sc5ccc(I)cc5)C(=O)[C@@](C)(CCC(=O)Nc5c(O)cc  
3642 c(C(=O)O)c5O)[C@@H]3[C@H](C[C@@H]1C4)O2>>CC(C)(C)OC(=O)/C=C/c1ccc(SC2=C[C@]34  
3643 C[C@H]5C[C@H](O)[C@@]5(C)C3)[C@H]4[C@](C)(CCC(=O)Nc3c(O)ccc(C(=O)O)c3O)C2=O)cc1  
C=CC(N)=O.Clc1ccc(Br)cc1>>NC(=O)/C=C/c1ccc(Cl)cc1  
3644 C=CC(=O)OC.COC(=O)/C=C/c1cc2cc(Br)ccc2cc1OCc1cccc1>>COC(=O)/C=C/c1ccc2cc(OCc3cccc  
c3)c(/C=C/C(=O)OC)cc2c1  
3645 C=CC(=O)OC.CC12CCCC(Br)=C1N(Cc1ccc3cccc3c1)C(=O)C2>>COC(=O)/C=C/C1=C2N(Cc3cccc4  
cccc4c3)C(=O)CC2(C)CCC1  
3646 C=CCNC(=O)c1cc(C)on1.CCOC(=O)c1cccc(I)c1>>CCOC(=O)c1cccc(/C=C/CNC(=O)c2cc(C)on2)c1  
3647 C=CC(=O)OC.Nc1cnc(F)cc1Br>>COC(=O)/C=C/c1cc(F)nc1N  
3648 C=CC(=O)OC.COc1ccc2[nH]ccc2c1Br>>COC(=O)/C=C/c1c(OC)ccc2[nH]ccc12  
3649 Brc1cccn2nnnc12.C=Cc1cc(OC)c(OC)c(OC)c1>>COc1cc(/C=C/c2cccn3nnnc23)cc(OC)c1OC  
\*CNCCOCCOCCOCCCN(C(=O)COc1ccc(C(Cc2cc(OC)cc(OC)c2)NC(=O)c2ccc(C=C)cc2)cc1.CC(=  
3650 O)c1ccc(I)cc1>>\*CNCCOCCOCCOCCCN(C(=O)COc1ccc(C(Cc2cc(OC)cc(OC)c2)NC(=O)c2ccc(/C  
=C/c3ccc(C(C)=O)cc3)cc2)cc1  
3651 C=CN1C(=O)c2cccc2C1=O.CC(C)(C)OC(=O)Cc1ccc(Br)cc1>>CC(C)(C)OC(=O)Cc1ccc(/C=C/N2C  
(=O)c3cccc3C2=O)cc1  
3652 C=CC(=O)OCC.CCOC(=O)CCOCc1cc(OCc2cccc2)c(OC)cc1Br>>CCOC(=O)/C=C/c1cc(OC)c(OCc  
2cccc2)cc1COCCC(=O)OCC  
3653 C=C[C@@H](CO)NS(C)(=O)=O.Oc1ccc(I)cc1>>CS(=O)(=O)N[C@@H](/C=C/c1ccc(O)cc1)CO  
3654 C=Cc1ccc(F)cc1.O=[N+][O-]c1ccc(Br)cc1>>O=[N+][O-]c1ccc(/C=C/c2ccc(F)cc2)cc1  
3655 C=CC(N)=O.Cc1cc(Br)c2nc(-c3ccc(C4(NC(=O)OC(C)(C)C)CCC4)cc3)c(-  
c3cccc3)n2c1>>Cc1cc(/C=C/C(N)=O)c2nc(-c3ccc(C4(NC(=O)OC(C)(C)C)CCC4)cc3)c(-  
3656 C=Cc1ccc(OC)cc1.COc1cc(Br)cc(OC)c1OC>>COc1ccc(/C=C/c2cc(OC)c(OC)c(OC)c2)cc1  
3657 C=Cc1cccn1.COc1c(C)cc(Br)cc1C>>COc1c(C)cc(/C=C/c2cccn2)cc1C  
C=CC(NC(=O)OC)C(=O)O.CC(=O)OC[C@H]1O[C@@H](n2cnc3c(=O)n4c(I)c(C)nc4n(C)c32)[C@H  
3658 ](OC(C)=O)[C@@H]1OC(C)=O>>COC(=O)NC(/C=C/c1c(C)nc2n(C)c3c(ncn3[C@@H]3O[C@H](C  
OC(C)=O)[C@@H](OC(C)=O)[C@H]3OC(C)=O)c(=O)n12)C(=O)O  
3659 C=CCO[Si](C)(C)C(C)(C)C.FC(F)(F)c1ccc(Br)cc1>>CC(C)(C)[Si](C)(C)OC/C=C/c1ccc(C(F)(F)F)cc1  
3660 C=CC(=O)OC.CC(C)Oc1ccc(N2CCc3cc(O)ccc3C2(C)c2ccc(Br)cc2)cc1>>COC(=O)/C=C/c1ccc(C2(C  
)c3ccc(O)cc3CCN2c2ccc(OC(C)C)cc2)cc1  
3661 C=Cc1cccc1.O=[N+][O-]c1cccc(Cl)c1>>O=[N+][O-]c1cccc(/C=C/c2cccc2)c1  
3662 C=CC1=Cc2cccc2CC1.CCOC(=O)C(F)Br>>CCOC(=O)C(F)/C=C/C1=Cc2cccc2CC1  
3663 C=CC(=O)N(C)Cc1c(C)c2cccc2n1C.O=C1CN(c2cccc2)Cc2cc(Br)cnc2N1>>Cc1c(CN(C)C(=O)/C=  
C/c2cnc3c(c2)CN(c2cccc2)CC(=O)N3)n(C)c2cccc12  
3664 C=Cc1cccc(OCCO)c1.CCN1CCN(c2nc(Br)cc3ccsc23)CC1>>CCN1CCN(c2nc(/C=C/c3cccc(OCCO)c  
3)cc3ccsc23)CC1  
3665 C=Cc1cccc1.Cc1cc([N+](=O)[O-])ccc1I>>Cc1cc([N+](=O)[O-])ccc1/C=C/c1cccc1  
3666 C=C(CC(=O)OC)C(=O)OC.Clc1ccc(I)cc1>>COC(=O)C/C(=C\c1ccc(Cl)cc1)C(=O)OC  
3667 Brc1cccn1.C=CC(=O)OCCCC>>CCCCOC(=O)/C=C/c1cccn1  
3668 C=Cc1cccc([N+](=O)[O-])c1.O=Cc1ccc(Br)cc1>>O=Cc1ccc(/C=C/c2cccc([N+](=O)[O-])c2)cc1  
3669 C=CC(=O)OC.Cc1cc(C)c(NCc2cccc2)c(Br)c1>>COC(=O)/C=C/c1cc(C)cc(C)c1NCc1cccc1  
3670 C=C(OC)C1=C(Br)CCCC1.C=CC(=O)N1[C@H]2C[C@H]3CC[C@]2(CS1(=O)=O)C3(C)C>>C=C(O)  
C)C1=C(/C=C/C(=O)N2[C@H]3C[C@H]4CC[C@]3(CS2(=O)=O)C4(C)C)CCCC1  
3671 Brc1coc2ncccc12.C=CC(=O)OCC>>CCOC(=O)/C=C/c1coc2ncccc12  
3672 C=COCCCC.Fc1ccc(Cl)c1>>C=C(OCCCC)c1ccc(F)c1  
3673 C=Cc1cnc(C#N)c1Nc1ccc2[nH]ccc2c1C.COCCOc1ccc(Br)cc1OCCOC>>COCCOc1ccc(/C=C/c2cnc  
c(C#N)c2Nc2ccc3[nH]ccc3c2C)cc1OCCOC  
3674 Brc1cccn1.C=Cc1c(C)n(Cc2cccc2)ccc1=O>>Cc1c(/C=C/c2cccn2)c(=O)ccn1Cc1cccc1  
3675 C=CC#N.Cc1cc(I)cc(C)n1>>Cc1cc(/C=C/C#N)cc(C)n1  
3676 C=Cc1ccc(OC)cc1.Oc1ccc2cccc2c1Br>>COc1ccc(/C=C/c2c(O)ccc3cccc23)cc1  
3677 C=CC#N.O=P(c1cccc1)(c1cccc1)c1ccc(Br)cc1>>N#C/C=C\Cc1ccc(P(=O)(c2cccc2)c2cccc2)cc1  
3678 C=CCC#N.CC(C)CCC[C@]H](C)[C@H]1CC[C@H]2C(OS(=O)(=O)C(F)(F)F)=CCC[C@@]21C>>  
CC(C)CCC[C@]H](C)[C@H]1CC[C@H]2C(/C=C/C#N)=CCC[C@@]21C  
3679 C=COCCCC.O=C(Cl)c1ccsc1>>CCCCO/C=C/C(=O)c1ccsc1  
3680 Brc1cccc1.C=CCN(Cc1cccc2cccc12)C(=O)OCC>>CCOC(=O)N(C/C=C/c1cccc1)Cc1cccc2cccc12  
3681 C=Cc1cc(OC)c(O)c(OC)c3)c(=O)oc2c1>>CCCCCCCCOc1ccc2c(C)c(Br)c(=O)oc2c1>>CCCCCCCCOc1ccc2c(C)c(/  
C=C/c3cc(OC)c(O)c(OC)c3)c(=O)oc2c1  
3682 C=CC(=O)OC.C[C@@H]1CCC[C@H](NC(=O)OC(C)(C)C)c2cc(cen2)-  
c2cc(I)c(N)cc2NC1=O>>COC(=O)/C=C/c1cc2c(cc1N)NC(=O)[C@H](C)CCC[C@H](NC(=O)OC(C)(  
C)C)c1cc-2ccn1

3683 C=CN1C(=O)c2ccccc2C1=O.Cc1ccc(CNC(=O)Cc2cccc(Br)c2)cc1C>>Cc1ccc(CNC(=O)Cc2cccc(/C=C/N3C(=O)c4ccccc4C3=O)c2)cc1C  
 3684 C=CC(=O)OCC.Cc1nnn(Cc2cc(C(F)(F)F)ccc2Br)n1>>CCOC(=O)/C=C/c1ccc(C(F)(F)F)cc1Cn1nnc(CBr)cn1.C=CCO[C@H]1[C@H](C)[C@@H](O[C@@H]2O[C@H](C)C[C@H](N(C)C)[C@H]2O)[C@](C)(OC)C[C@@H](C)/C(=N\O)[C@H](C)[C@@H](O)[C@](C)(O)[C@@H](CC)OC(=O)[C@@H]1C>>CC[C@H]1OC(=O)[C@H](C)[C@@H](OC/C=C/c2cncc2)[C@H](C)[C@@H](O[C@@H]12O[C@H](C)C[C@H](N(C)C)[C@H]2O)[C@](C)(OC)C[C@@H](C)/C(=N\O)[C@H](C)[C@@H](C=CC(=O)OC.O=Cc1cc(C(F)(F)F)ccc1Br>>COC(=O)/C=C/c1ccc(C(F)(F)F)cc1C=O  
 3685 C=Cc1nc2c(N)ncn2n1[C@@H]1O[C@H](CO[Si](C)(C)C(C)(C)C)[C@@H](O[Si](C)(C)C(C)(C)C)[C@H]1O[Si](C)(C)C(C)(C)C.Cc1cccc1Br>>Cc1cccc1/C=C/c1nc2c(N)ncn2n1[C@@H]1O[C@H](CO[Si](C)(C)C(C)(C)C)[C@@H](O[Si](C)(C)C(C)(C)C)[C@H]1O[Si](C)(C)C(C)(C)C  
 3686 BrC1=C(C2=C[C@@H]3CCCC[C@H]3CC2)CCCC1.C=CC(=O)OC(C)(C)C>>CC(C)(C)OC(=O)/C=C/C1=C(C2=C[C@@H]3CCCC[C@H]3CC2)CCCC1  
 3687 C=CC(OCC)OCC.Cc1cccc(I)c1>>CCOC(/C=C/c1cccc(C)c1)OCC  
 3688 C=CC(C)=O.Cc1cc(C)c(N)c(I)c1>>CC(=O)/C=C/c1cc(C)cc(C)c1N  
 3689 C=CC(OCC)OCC.Cc1cccc(Br)c1>>CCOC(/C=C/c1cccc(C)c1)OCC  
 3690 C=CC(=O)OC(C)(C)C.O=S(=O)(c1cccc(Br)c1)c1ccc2cccc(F)c2n1>>CC(C)(C)OC(=O)/C=C/c1cccc(S(=O)(=O)c2ccc3cccc(F)c3n2)c1  
 3691 C=CC(=O)OCC.Fc1ccc(Br)c(OCc2ccccc2I)c1>>CCOC(=O)/C=C/c1cccc1COc1cc(F)ccc1Br  
 3692 C=Cc1cccc1.Cc1ccc2c(-c3ccc(Cl)cc3)c(Br)c(=O)oc2c1>>Cc1ccc2c(-c3ccc(Cl)cc3)c(/C=C/c3ccccc3)c(=O)oc2c1  
 3693 C=Cc1cccc1C(=O)OC.COc1nc2ccc(Br)cc2nc1OC>>COC(=O)c1cccc1/C=C/c1ccc2nc(OC)c(OC)nc2  
 3694 C=CC(=O)OC.CC1(C)N=NC(c2ccccc2)=C1I>>COC(=O)/C=C/C1=C(c2ccccc2)N=NC1(C)C  
 3695 C=Cc1ccc(OC)cc1.COc1ccc(-c2cc(=O)c3c(OC)cc(OC)c(I)c3o2)cc1OC>>COc1ccc(/C=C/c2c(OC)cc(OC)c3c(=O)cc(-c4ccc(OC)c(OC)c4)oc23)cc1  
 3696 Br1ccc(C(c2ccccc2)C23CC4CC(CC(C4)C2)C3)cc1.C=CC(=O)OCC>>CCOC(=O)/C=C/c1ccc(C(c2ccccc2)C23CC4CC(CC(C4)C2)C3)cc1  
 3697 C=CC(=O)OCc1cn(S(=O)(=O)c2ccccc2[N+](=O)[O-])c2ccc([N+](=O)[O-])cc12.CC(=O)OCCc1ccc(I)cc1>>CC(=O)OCCc1ccc(/C=C/C(=O)OCc2cn(S(=O)(=O)c3ccccc3[N+](=O)[O-])c3ccc([N+](=O)[O-])cc23)cc1  
 3698 C=Cc1cccc1.CCn1cncc1-c1ccc(Br)cc1>>CCn1cncc1-c1ccc(/C=C/c2ccccc2)cc1  
 3699 C=Cc1cccc1.Nc1ccc(Cl)cc1Br>>Nc1ccc(Cl)cc1/C=C/c1cccc1  
 3700 C=CC(C)=O.Ic1ccc2cc[nH]c2c1>>CC(=O)/C=C/c1ccc2cc[nH]c2c1  
 3701 C=CCNC(=O)OC(C)(C)C.O=C(c1cccc1)c1ccc(Cl)cc1>>C=C(CNC(=O)OC(C)(C)C)c1ccc(C(=O)c2ccccc2)cc1  
 3702 C=Cc1cccc1.Nc1ccc(C(F)(F)F)cc1Br>>Nc1ccc(C(F)(F)F)cc1/C=C/c1cccc1  
 3703 C=CC=O.COc1ccc(COCC/C=C(\C)I)cc1>>COc1ccc(COCC/C=C(C)/C=C/C=O)cc1  
 3704 C=CC(=O)Nc1cccc1NC(=O)OC(C)(C)C.COC(=O)C(CCC1CCCN1C)c1ccc(Br)cc1>>COC(=O)C(CC1CCCN1C)c1ccc(/C=C/C(=O)Nc2ccccc2NC(=O)OC(C)(C)C)cc1  
 3705 C=CNC(C)=O.N#Cc1ccc(OS(=O)(=O)C(F)(F)F)cc1>>C=C(NC(C)=O)c1ccc(C#N)cc1  
 3706 Br1enc(NCc2ccccc2)c2ccccc12.C=CC(C)=O>>CC(=O)/C=C/c1enc(NCc2ccccc2)c2ccccc12  
 3707 C=C.O=Cc1cc(Br)ccc1[N+](=O)[O-]>>C=Cc1ccc([N+](=O)[O-])c(C=O)c1  
 3708 C=Cc1ccc(OC)cc1.COc1ccc2c(=O)c(I)cc2c1>>CCOc1ccc(/C=C/c2cc3cc(OC)ccc3c2=O)cc1  
 3709 C=Cc1ccc(OC)cc1.COc1cc(Br)c(C=O)c(OC)c1>>COc1ccc(/C=C/c2cc(OC)cc(OC)c2C=O)cc1  
 3710 C=CC(OCC)OCC.FC(F)(F)c1ccc(Cl)cc1>>CCOC(/C=C/c1ccc(C(F)(F)F)cc1)OCC  
 3711 C=Cc1ccc(C(=O)OCC)cc1.CC1(C)CCC(=C2CCCCC2)c2cc(Br)ccc21>>CCOC(=O)c1ccc(/C=C/c2ccc3c(c2)C(=C2CCCCC2)CCC3(C)C)cc1  
 3712 C=CC(OCC)OCC.O=Cc1cccc(F)c1Br>>CCOC(/C=C/c1c(F)cccc1C=O)OCC  
 3713 C=CC(=O)OC.Cc1cc2cc(Br)ccc2[nH]1>>COC(=O)/C=C/c1ccc2[nH]c(C)cc2c1  
 3714 C=C(OC(C)=O)C(=O)OCC(F)(F)F.Ic1cccc1>>CC(=O)O/C=C/c1cccc1C(=O)OCC(F)(F)F  
 3715 Br1ccc2c(c1)OCO2.C=Cc1ccc(OC(C)=O)cc1>>CC(=O)Oc1ccc(/C=C/c2ccc3c(c2)OCO3)cc1  
 3716 Br1enc2ccccc2c1.C=CC(=O)CCC>>CCCC(=O)/C=C/c1enc2ccccc2c1  
 3717 C=C(NC(=O)OCC[Si](C)(C)C)C(=O)OC.CC(C)(C)OC(=O)N[C@H](Cc1ccc(I)cc1)C(=O)OCc1cccc1>>COC(=O)C(=C/c1ccc(C[C@@H](NC(=O)OC(C)(C)C)C(=O)OCc2ccccc2)cc1)NC(=O)OCC[Si](C)C=CC(=O)OC(C)(C)C.CCC(C(=O)c1ccc(Br)cc1)c1ccc(F)cc1Cl>>CCC(C(=O)c1ccc(/C=C/C(=O)OC(C)(C)C)cc1)c1ccc(F)cc1Cl  
 3718 C=CC(=O)OCCN(C)C.O=C(Nc1cccc1)c1cc(=O)c2cc(Br)ccc2o1>>CN(C)CCOC(=O)/C=C/c1ccc2oc(C(=O)Nc3ccccc3)cc(=O)c2c1  
 3719 C=C(NC(=O)OCc1cccc1)C(=O)OC.CC(=O)OCc1cc(Cl)ccc1I>>COC(=O)/C=C/c1ccc(Cl)cc1COC(C(=O)Nc1cccc1)C(=O)OCc1cccc1  
 3720  
 3721  
 3722



3763 C=C(F)C(=O)OC.FC(F)(F)c1ccc(I)cc1>>COC(=O)/C(F)=C/c1ccc(C(F)(F)F)cc1  
3764 C=CP(=O)(O)O.FC(F)(F)c1ccc(Br)cc1>>O=P(O)(O)/C=C/c1ccc(C(F)(F)F)cc1  
3765 COC[C@@H]/N=C(\c1cccc1)N1C=CCC[C@H]1C)C(C)C.COc1ccc(I)cc1>>COC[C@@H]/N=C(\c1cccc1)N1C=C(c2ccc(OC)cc2)CC[C@H]1C)C(C)C  
3766 Br1enc2cccc2c1.C=CCCCCCCC>>CCCCCCCC/C=C/c1enc2cccc2c1  
3767 C=CCC(C)C(=O)OCC.N#Cc1cccc1Br>>CCOC(=O)C(C)C/C=C/c1cccc1C#N  
3768 C=CC(=O)OC.CN1CC[C@]23CCCC[C@H]2[C@H]1Cc1cc(I)c(N)cc13>>COC(=O)/C=C/c1cc2c(cc1N)[C@@]13CCCC[C@H]1[C@@H](C2)N(C)CC3  
3769 C=Cc1cccc1.COC(=O)c1ccnc1Cl>>COC(=O)c1ccnc1/C=C/c1cccc1  
3770 C=CC(=O)OC.COc1c(CN(C(=O)c2cccc2)c2ccc(Br)c2)ccc2c1OC(C)(C)[C@@H](OC(C)=O)[C@H]2OC(C)=O>>COC(=O)/C=C/c1cccc(N(Cc2ccc3c(c2OC)OC(C)(C)[C@@H](OC(C)=O)[C@H]3OC(C)=O)C(=O)c2cccc2)c1  
3771 C=Cc1cccc1OC.Nc1ccc(Br)cc1>>COc1cccc1/C=C/c1ccc(N)cc1  
3772 C=CC(=O)OC.O=C1C=CC2(C=C1)OC(=O)C(I)=C2c1cccc1>>COC(=O)/C=C/C1=C(c2cccc2)C2(C=CC(=O)C=C2)OC1=O  
3773 C=CS(=O)(=O)F.Ic1ccc(Oc2cccc2)cc1>>O=S(=O)(F)/C=C/c1ccc(Oc2cccc2)cc1  
3774 C=Cc1cc2cccc2oc1=O.O=[N+][([O-])c1ccc(Br)cc1>>O=c1oc2cccc2cc1/C=C/c1ccc([N+](=O)[O-]C=CC1CCN(C(=O)OC(C)C)CC1.CS(=O)(=O)N1CCN(c2ccc(Br)en2)CC1>>CC(C)OC(=O)N1CCC(/C=C/c2ccc(N3CCN(S(C)(=O)=O)CC3)nc2)CC1  
3775 C=CC[Si](C)(C)C.ClCc1cccc(Br)c1>>C=C(Cc1cccc(Br)c1)C[Si](C)(C)C  
3776 C=Cc1ccc(-c2cccc2)cc1.COC(=O)c1cc(C(=O)OC)c2cc(Br)ccc2n1>>COC(=O)c1cc(C(=O)OC)c2cc(/C=C/c3ccc(-c4cccc4)cc3)ccc2n1  
3777 C=CC(=O)OCCCC.FC(F)(F)c1ccc(Br)cc1>>CCCCOC(=O)/C=C/c1ccc(C(F)(F)F)cc1  
3778 C=CC(=O)OC.CO[C@H]1O[C@H](COC2O[C@H](COC(C)=O)[C@@H](OC(C)=O)C=C21)[C@@H](OCc2cccc2)[C@H](OCc2cccc2)[C@H]1OCc1cccc1>>COC(=O)/C=C/C1=C[C@H](OC(C)=O)[C@@H](COC(C)=O)OC1OC[C@H]1O[C@H](OC)[C@H](OCc2cccc2)[C@@H](OCc2cccc2)[C@@H]1OCc1cccc1  
3779 C=CN1CCCC1=O.Clc1ccc2c(c1)OCO2>>C=C(c1ccc2c(c1)OCO2)N1CCCC1=O  
3780 Br1cccc(I)c1.C=CC(=O)OCCCC>>CCCCOC(=O)/C=C/c1cccc(Br)c1  
3781 C=CC(=O)OCC.Cc1nc(C(C)C)nc1I>>CCOC(=O)/C=C/c1enc(C(C)C)nc1C  
3782 C=Cc1ccc2cccc2c1.N#Cc1ccc(I)cc1>>N#Cc1ccc(/C=C/c2ccc3cccc3c2)cc1  
3783 C=CC(=O)OC(C)(C)C.O=Cc1cccc(Br)n1>>CC(C)(C)OC(=O)/C=C/c1cccc(C=O)n1  
3784 C=CC(=O)O.Ic1ccc2[nH]ccc2c1>>O=C(O)/C=C/c1ccc2[nH]ccc2c1  
3785 C=C[C@H](O)[C@@H](O)COCc1ccc(OC)cc1.Ic1cccc1>>COc1ccc(COC[C@H](O)[C@@H](O)/C=C/c2cccc2)cc1  
3786 C=CC(C)(C)O.CC(=O)O[C@H]1C(Br)=C[C@@H](O[Si](C)(C)C(C)(C)C)[C@@H]2O[C@H]12>>C(C(=O)O[C@H]1C(/C=C/C(C)(C)O)=C[C@@H](O[Si](C)(C)C(C)(C)C)[C@@H]2O[C@H]12  
3787 C=CC(=O)OC.COC(=O)c1ccnc1Br>>COC(=O)/C=C/c1ncccc1C(=O)OC  
3788 C=Cc1ccc(/C=C/c2ccc(N(c3cccc3)c3cccc4cccc34)cc2)cc1.O=Cc1ccc(Br)s1>>O=Cc1ccc(/C=C/c2ccc(/C=C/c3ccc(N(c4cccc4)c4cccc5cccc45)cc3)cc2)s1  
3789 C=CC(=O)OC(C)(C)C.COc1ccc2cccc2c1Br>>COc1ccc2cccc2c1/C=C/C(=O)OC(C)(C)C  
3790 C=CN1CCCC1=O.CCCCC(Br)C(F)(F)F>>CCCCC(/C=C/N1CCCC1=O)C(F)(F)F  
3791 C=Cc1ccc(F)cc1.COC(=O)c1cc(Br)ccc1OS(=O)(=O)C(F)(F)F>>C=C(c1ccc(F)cc1)c1ccc(Br)cc1C(=O)C=C[C@@](C)(/C=C/c1ccc(O)cc1)CCC=C(C)C.COc1ccc(I)cc1>>COc1ccc(/C=C/[C@@](C)(/C=C/c2ccc(O)cc2)CCC=C(C)C)cc1  
3792 C=COCCCC.Cc1ccc(Br)cc1>>C=C(OCCCC)c1ccc(C)cc1  
3793 C=CCCCCCCCCCCCC.c1ccc([I+](c2cccc2)cc1>>CCCCCCCCCCCCCCCC/C=C/c1cccc1  
3794 Br1enc2cccc2c1.C=CCCCC>>C=C(CCCCC)c1enc2cccc2c1  
3795 C=CCCCCCC.CC(C)(C)c1ccc(OS(=O)(=O)C(F)(F)F)cc1>>C=C(CCCCC)c1ccc(C(C)(C)C)cc1  
3796 Br1c2cccc2cc2cccc12.C=CS(C)(=O)=O>>CS(=O)(=O)/C=C/c1c2cccc2cc2cccc12  
3797 C=Cc1cccc1O.COc1ccc(I)c(OC)c1>>COc1ccc(/C=C/c2cccc2O)c(OC)c1  
3798 C=CC(N)=O.O=C(Nc1ccc(I)cc1)Nc1cc(C(F)(F)F)ccc1F>>NC(=O)/C=C/c1ccc(NC(=O)Nc2cc(C(F)(F)F)ccc2F)cc1  
3800 C=Cc1cccc1.CN(C)CCCC(=O)c1cccc(Br)c1>>CN(C)CCCC(=O)c1cccc(/C=C/c2cccc2)c1  
3801 C=CC(=O)OC(C)(C)C.O=Cc1ccc(Br)s1>>CC(C)(C)OC(=O)/C=C/c1ccc(C=O)s1  
3802 C=CC(OC(C)=O)c1cccc1.O=[N+][([O-])c1ccc(I)cc1>>CC(=O)OC(/C=C/c1ccc([N+](=O)[O-])cc1)c1cccc1  
3803 C=C(C)C(=O)OC.Cc1ccsc1Br>>COC(=O)/C(C)=C/c1sccc1C

C=CCS(=O)(=O)NC(C)(C)C(=O)OCc1cccc1.CC(=O)OC[C@H]1O[C@@H](Oc2n[nH]c(C(C)C)c2C  
3805 c2ccc(Br)cc2)[C@H](OC(C)=O)[C@@H](OC(C)=O)[C@@H]1OC(C)=O>>CC(=O)OC[C@H]1O[C  
@@H](Oc2n[nH]c(C(C)C)c2Cc2ccc(/C=C/CS(=O)(=O)NC(C)(C)C(=O)OCc3cccc3)cc2)[C@H](OC(  
C)=O)[C@@H](OC(C)=O)[C@@H]1OC(C)=O  
3806 C=CC(=O)N(CC)CC.O=C1Cc2c([nH]c3c(I)cccc23)-  
c2ccnc2N1>>CCN(CC)C(=O)/C=C/c1cccc2c3c([nH]c12)-c1ccnc1NC(=O)C3  
C=C[C@H]1O[C@H](OC)[C@H](OCc2cccc2)[C@@H](OCc2cccc2)[C@@H]1OCc1ccc2cccc2c1  
3807 .O=c1ccoc2ccc(Br)cc12>>CO[C@H]1O[C@H](/C=C/c2ccc3occc(=O)c3c2)[C@@H](OCc2ccc3cccc  
3c2)[C@H](OCc2cccc2)[C@H]1OCc1cccc1  
3808 C=CC(=O)OC.CC(=O)c1cccc(Br)c1>>COC(=O)/C=C/c1cccc(C(C)=O)c1  
3809 C=Cc1ccnc1.Cn1cc(-c2cnc(N)c(C(=O)N[C@@H]3CCN(C(=O)c4ccc(I)cc4)C3)c2)cn1>>Cn1cc(-  
c2cnc(N)c(C(=O)N[C@@H]3CCN(C(=O)c4ccc(/C=C/c5ccnc5)cc4)C3)c2)cn1  
3810 C=CCN1C(=O)C2(CCCC2)NC[C@@]1(C)c1cc(F)cc(F)c1.O=C1Nc2ncccc2[C@@]12Cc1ccc(Br)cc1C2  
>>C[C@@]1(c2cc(F)cc(F)c2)CNC2(CCCC2)C(=O)N1C/C=C/c1ccc2c(c1)[C@@]1(C2)C(=O)Nc2nc  
3811 C=CC(=O)OCC.Clc1ccc(-n2cnnn2)c(I)c1>>CCOC(=O)/C=C/c1cc(Cl)ccc1-n1cnnn1  
3812 C=CC(C)=O.CC1=C(I)C(C)(C)C[C@H](O[Si](C)(C)C(C)(C)C)C1>>CC(=O)/C=C/C1=C(C)C[C@@  
H](O[Si](C)(C)C(C)(C)C)CC1(C)C  
3813 C=Cc1cccc1.CCCCCCN1c2ccc(I)cc2Sc2cc(C=O)ccc21>>CCCCCN1c2ccc(C=O)cc2Sc2cc(/C=C/c3  
cccc3)ccc21  
3814 C=CC(=O)OC.COc1cccc(I)c1>>COC(=O)/C=C/c1cccc(OC)c1  
3815 CCC1(C)/C(=C\S(=O)(=O)c2ccc(C)cc2)C1(F)F.COc1ccc(I)cc1>>CCC1(C)/C(=C(/c2ccc(OC)cc2)S(=  
O)(=O)c2ccc(C)cc2)C1(F)F  
3816 C=CC(=O)N1N=Cc2cccc2C1Cc1cccc1.COc1cc(Cc2cnc(N)nc2N)cc(I)c1OC>>COc1cc(Cc2cnc(N)nc  
2N)cc(/C=C/C(=O)N2N=Cc3cccc3C2Cc2cccc2)c1OC  
3817 C=Cc1ccc(CC)cc1.CCOc1ccc(-n2cnc3cc(Br)enc32)cc1>>CCOc1ccc(-  
n2cnc3cc(/C=C/c4ccc(CC)cc4)enc32)cc1  
3818 C=CC(=O)OC(C)(C)C.CCN(CC)c1cc2oc(=O)c(C(=O)O)cc2cc1I>>CCN(CC)c1cc2oc(=O)c(C(=O)O)c  
c2cc1/C=C/C(=O)OC(C)(C)C  
3819 C=CC(=O)Oc1cccc1.O=Cc1cccc1Br>>O=Cc1cccc1/C=C/C(=O)Oc1cccc1  
3820 C=CC(=O)OCCCC.Fc1cccc1Br>>CCCCOC(=O)/C=C/c1cccc1F  
3821 C=Cc1cccc1Cl.O=C1Nc2cccc(I)c2/C1=C/c1ccc[nH]1>>O=C1Nc2cccc(/C=C/c3cccc3Cl)c2/C1=C/c1  
ccc[nH]1  
3822 C=CC(=O)OC.CC(C)(C)OC(=O)N1CCC2(CCN(c3ncccc3Oc3ccc(F)cc3Br)C2)C1>>COC(=O)/C=C/c1  
cc(F)ccc1Oc1cnnc1N1CCC2(CCN(C(=O)OC(C)(C)C)C2)C1  
3823 C=Cc1ccc(OC)cc1.Cc1ccc(Cl)cc1>>COc1ccc(/C=C/c2ccc(C)cc2)cc1  
3824 C=Cc1ccnc1.CCCCCCCCCOc1ccc(I)cc1>>CCCCCCCCCOc1ccc(/C=C/c2ccnc2)cc1  
C=C.CCCCC(CC)COc1cc(/C=C/c2ccc(/C=C/c3ccc(/C=C/c4ccc(/C=C/c5ccc(I)cc5)cc4)cc3)cc2)c(OCC  
3825 (CC)CCCC)cc1C>>C=Cc1ccc(/C=C/c2ccc(/C=C/c3ccc(/C=C/c4ccc(/C=C/c5cc(OCC(CC)CCCC)c(C)c  
c5OCC(CC)CCCC)cc4)cc3)cc2)cc1  
3826 C=CCNC(=O)OC(C)(C)C.O=S(=O)(Oc1cccc1Cl)C(F)(F)F>>C=C(CNC(=O)OC(C)(C)C)c1cccc1Cl  
3827 C=CC(=O)OCC(CC)CCCC.Clc1cccc1>>CCCCC(CC)COC(=O)/C=C/c1cccc1  
3828 C=CC(=O)OCC.COC(=O)c1ccc(Cl)cc1>>CCOC(=O)/C=C/c1ccc(C(=O)OC)cc1  
3829 C=CC(=O)OC(CC)CCCC.O=[N+][O-]c1ccc(Cl)cc1>>CCCCC(CC)OC(=O)/C=C/c1ccc([N+](=O)[O-]  
)cc1  
3830 C=Cc1cccc1.COc1cccc(Br)c1>>COc1cccc(/C=C/c2cccc2)c1  
3831 C=CC(=O)OCC.Cc1noc(C)c1I>>CCOC(=O)/C=C/c1c(C)noc1C  
3832 C=C(C#N)C(=O)N(CC)CC.COc1cc(I)ccc1O>>CCN(CC)C(=O)/C(C#N)=C/c1ccc(O)c(OC)c1  
C=CC[C@H](OCc1cccc1)[C@H](OCc1cccc1)[C@@H](/C=C/C[C@H](C)O[Si](C)(C)C(C)(C)C)O  
3833 COC.COc1cc2c(c(OS(=O)(=O)C(F)(F)F)c1)C(=O)OC(C)(C)O2>>COCO[C@H](/C=C/C[C@H](C)O[  
Si](C)(C)C(C)(C)C)[C@@H](OCc1cccc1)[C@H](C/C=C/c1cc(OC)cc2c1C(=O)OC(C)(C)O2)OCc1c  
3834 C=CC(=O)N(C)OC.Nc1cccc1I>>CON(C)C(=O)/C=C/c1cccc1N  
3835 C=Cc1cccc1.C[Si](C)(C)c1cc2n(c(=O)c1I)CCC21OCCO1>>C[Si](C)(C)c1cc2n(c(=O)c1/C=C/c1cccc  
c1)CCC21OCCO1  
3836 C=CC(=O)OCC.O=Cc1ccc(Br)cc1>>CCOC(=O)/C=C/c1ccc(C=O)cc1  
3837 C=CCCCCCC.Cc1cccc1OS(=O)(=O)C(F)(F)F>>C=C(CCCCCC)c1cccc1C  
C=CS(=O)(=O)F.C[C@@]12CC[C@@H]3c4ccc(OS(=O)(=O)Oc5ccc(I)cc5)cc4CC[C@H]3[C@@H]1C  
3838 CC2=O>>C[C@@]12CC[C@@H]3c4ccc(OS(=O)(=O)Oc5ccc(/C=C/S(=O)(=O)F)cc5)cc4CC[C@H]3[C@  
@@H]1CCCC2=O  
3839 C=Cc1cccc1.CCOC(=O)c1cc(=O)c2cc(Br)ccc2o1>>CCOC(=O)c1cc(=O)c2cc(/C=C/c3cccc3)ccc2o1  
3840 C=CC(=O)OCC.Cc1nc(-n2c(C)ccc2C)cc(NC(C)C)c1Br>>CCOC(=O)/C=C/c1c(NC(C)C)cc(-  
n2c(C)ccc2C)nc1C

3841 C=CC(=O)OC.CC1(C)CC(=C(c2ccc3c(cnn3C3CCCCO3)c2)c2c(F)cc(Br)cc2F)CC(C)(C)O1>>COC(=O)/C=C/c1cc(F)c(C(=C2CC(C)(C)OC(C)(C)C2)c2ccc3c(cnn3C3CCCCO3)c2)c(F)c1  
3842 Brclense1.C=CC(=O)OC(C)(C)C>>CC(C)(C)OC(=O)/C=C/c1ense1  
3843 C=CC(C)(C)C.O=C(c1ccccc1)c1ccc(Br)cc1>>CC(C)(C)/C=C/c1ccc(C(=O)c2ccccc2)cc1  
C=CC(C)(C)C(=O)NC(C)(C)C(=O)O.COc1cc(C(C)C)c(Cc2ccc(Br)cc2C)cc1[C@H]1O[C@H](COC(C)=O)[C@@H](OC(C)=O)[C@H](OC(C)=O)[C@H]1OC(C)=O>>COc1cc(C(C)C)c(Cc2ccc(/C=C/C(C)(C)C(=O)NC(C)(C)C(=O)O)cc2C)cc1[C@@H]1O[C@H](COC(C)=O)[C@H](OC(C)=O)[C@H](OC(C)=O)[C@H]1OC(C)=O  
3844 OC(C)=O)[C@H]1OC(C)=O  
3845 C=C.CCOc1ccc(Br)cc1>>C=Cc1ccc(OCC)cc1  
3846 C=Cc1ccccc1.N#Cc1ccc(I)cc1>>N#Cc1ccc(/C=C/c2ccccc2)cc1  
C=CC(=O)OCC.CN(C)c1ccc(-  
3847 c2ccc(CN(C(=O)C3CCCCC3)c3ccccc(Br)c3)cc2)cc1>>CCOC(=O)/C=C/c1cccc(N(Cc2ccc(-  
c3ccc(N(C)C)cc3)cc2)C(=O)C2CCCCC2)c1  
3848 C=CC(=O)OC.CC(C)(C)OC(=O)N1CCC(C(=O)Nc2ccc(I)cc2C(=O)Nc2ccc(Cl)cn2)CC1>>COC(=O)/C=C/c1ccc(NC(=O)C2CCN(C(=O)OC(C)(C)C)CC2)c(C(=O)Nc2ccc(Cl)cn2)c1  
C=CC(=O)OCC.CC1(C)C(=O)N(c2ccc(C#N)c(C(F)(F)F)c2)C(=S)N1c1ccc(I)c(F)c1>>CCOC(=O)/C=C/c1ccc(N2C(=S)N(c3ccc(C#N)c(C(F)(F)F)c3)C(=O)C2(C)C)cc1F  
3849 C=C.O=C(CC(=O)C(F)(F)F)c1ccc(Br)s1>>C=Cc1ccc(C(=O)CC(=O)C(F)(F)F)s1  
3850 C=Cc1ccc(OC)cc1.Nc1ccc(Cl)cc1Br>>COc1ccc(/C=C/c2cc(Cl)cn2N)cc1  
3851 C=CCNC(=O)c1ccccc1NC(=O)c1ccccc1.Ic1ccc2ccccc2c1>>O=C(Nc1ccccc1C(=O)NC/C=C/c1ccc2ccccc2c1)c1ccccc1  
3852 C=CC(=O)OC.COc1ccc(Br)c(C)c1>>COC(=O)/C=C/c1ccc(OC)cc1C  
3853 C=Cc1ccc(OC)cc1.O=[N+](=[O-])c1ccc(Cl)cc1>>COc1ccc(/C=C/c2ccc([N+](=O)[O-])cc2)cc1  
3854 C=C.OCc1ccccc1I>>C=Cc1ccccc1CO  
3855 C=C(C)C(=O)OCCO.O=C1C(O)=C(I)C(=O)c2ccccc21>>C/C=C\C1=C(O)C(=O)c2ccccc2C1=O)C(=O)OCCO  
C=CCC#N.CS[C@H]1O[C@@H](c2ccc(C)c(Cc3ccc(Cl)cc3)c2)[C@H](OC(C)=O)[C@@H](OC(C)=O)[C@H]1OC(C)=O>>CS[C@H]1O[C@@H](c2ccc(C)c(Cc3ccc(/C=C/C/C#N)cc3)c2)[C@H](OC(C)=O)[C@@H](OC(C)=O)[C@H]1OC(C)=O  
3857 C=C.COc1ccc2cc(Br)ccc2c1[N+](=O)[O-]>>C=Cc1ccc2c([N+](=O)[O-])c(OC)ccc2c1  
3858 C=C(NC(=O)OCc1ccccc1)C(=O)OC.CC(=O)OCc1cc(NC(=O)OC(C)(C)C)c(C)cc1I>>COC(=O)/C=C/c1cc(C)c(NC(=O)OC(C)(C)C)cc1COC(C)=O)NC(=O)OCc1ccccc1  
3859 Brclence(OCc2ccccc2)c1.C=CC(=O)OCCCC>>CCCCOC(=O)/C=C/c1nccc(OCc2ccccc2)c1  
3860 C=CC(=O)OC.C=CI>>C=C/C=C/C(=O)OC  
3861 C=Cc1ccc(OC)cc1.CCOC(=O)C(C)(C)Br>>CCOC(=O)C(C)(C)/C=C/c1ccc(OC)cc1  
3862 C=CC(=O)OCC.Cc1nc2ccc(Cl)cc2c(=O)n1-c1ccccc1>>CCOC(=O)/C=C/c1ccc2nc(C)n(-  
3863 c3ccccc3)c(=O)c2c1  
3864 C=CS(=O)c1ccccc1.FC(F)(F)c1ccc(Br)cc1>>O=S(/C=C/c1ccc(C(F)(F)F)cc1)c1ccccc1  
3865 C=CC(=O)OC(C)(C)C.O=Cc1ccsc1Br>>CC(C)(C)OC(=O)/C=C/c1sccc1C=O  
3866 C=Cc1ccccc1.c1ccc([I+](c2ccccc2)cc1)>>C(=C/c1ccccc1)c1ccccc1  
3867 C=CC(=O)OC(C)(C)C.CC(C)=CCc1cc(I)ccc1OC(=O)CCc1ccccc1>>CC(C)=CCc1cc(/C=C/C(=O)OC(C)(C)C)ccc1OC(=O)CCc1ccccc1  
C=CC(=O)OC(C)(C)C.COc1ccc(S(=O)(=O)c2ccc3cc(Br)ccc3n2)cc1>>COc1ccc(S(=O)(=O)c2ccc3cc(/C=C/C(=O)OC(C)(C)C)ccc3n2)cc1  
3868 C=CC(C)=O.CC1=C(OS(=O)(=O)C(F)(F)F)C(C)([13CH3])CCC1>>CC(=O)/C=C/C1=C(C)CCCC1(C)[13CH3]  
3869 Brclccc2cc[nH]c2c1.C=CC(=O)OC>>COC(=O)/C=C/c1ccc2cc[nH]c2c1  
3870 C=CC(=O)OC.COC(=O)c1cc(OC)c(=O)c2c(OC)c(OC)cc(Br)c2c1>>COC(=O)/C=C/c1cc(OC)c(OC)c2c(=O)c(OC)cc(C(=O)OC)cc12  
3871 C=Cc1ccc(OC)cc1.CCCCOc1ccc2c(c1)cc(C#N)c1ccc(Br)cc12>>CCCCOc1ccc2c(c1)cc(C#N)c1ccc(/C=C/c3ccc(OC)cc3)cc12  
3872 C=CC(=O)OC(C)(C)C.O=S(=O)(c1ccccc(Br)c1)c1ccc2ccccc(Cl)c2n1>>CC(C)(C)OC(=O)/C=C/c1cccc(S(=O)(=O)c2ccc3ccccc(Cl)c3n2)c1  
3873 C=CC(=O)OCc1cc(OCCCCCCCCCCCCCCCCCCCC)C(OCCCCCCCCCCCCCCCCCCCC)C(OCCCCCCCCCCCCCCCCCCCC)C1.COc1ccc(I)cc1>>CCCCCCCCCCCCCCCCCCCCOc1cc(COC(=O)/C=C/c2ccc(OC)cc2)cc(OCCCCCCCCCCCCCCCCCCCC)C1OCCCCCCCCCCCCCCCCCCCC  
3874 C=CC(=O)OCCCC.FC(F)(F)c1ccccc(Br)c1>>CCCCOC(=O)/C=C/c1cccc(C(F)(F)F)c1  
3875 C=C[C@H](C)[C@H]1C/C=C/C(=O)N[C@H](Cc2ccc(OC)c(Cl)c2)C(=O)NCC(C)(C)C(=O)O[C@H]1C  
3876 C=Cc1ccccc1.Ic1ccccc1>>COc1ccc(C[C@H]2NC(=O)/C=C/C[C@H]([C@H](C)/C=C/c3ccccc3)OC(=O)[C@H](CC(C)C)OC(=O)C(C)(C)CNC2=O)cc1Cl  
3877 C=CC(CCC)OCc1ccccc1.CC(C)(C)c1ccc(Br)cc1>>CCCC(/C=C/c1ccc(C(C)(C)C)cc1)OCc1ccccc1



3878 C=CC(C)(C)O.Cc1ccc(Br)cc1>>Cc1ccc(/C=C/C(C)(C)O)cc1  
3879 C=CC(C)OC(C)=O.C[Si](C)(C)Oc1ccc(-c2ccc(Br)cc2)nc1>>CC(=O)OC(C)/C=C/c1ccc(-  
c2ccc(O[Si](C)(C)C)cn2)cc1  
3880 C=CC(=O)OCC.O=C1oc(-c2cccc2)c(I)c2sc3c(c12)CCCCC3>>CCOC(=O)/C=C/c1c(-  
c2cccc2)oc(=O)c2c3c(sc12)CCCCC3  
3881 C=CC(=O)OC.CC(C)(C)c1[nH]c2cccc2c1[C@H]1CCCN(Cc2ccc(Br)cc2)C1>>COC(=O)/C=C/c1ccc(  
CN2CCC[C@H](c3c(C(C)(C)C)[nH]c4cccc34)C2)cc1  
3882 C=Cc1ccc(OCC)cc1.O=[N+][O-]c1ccc(I)cc1CO>>CCOc1ccc(/C=C/c2ccc([N+](=O)[O-]  
3883 Br)ccc2cn[nH]c2c1.C=CC(N)=O>>NC(=O)/C=C/c1ccc2cn[nH]c2c1  
3884 C=CN1CCCCC1=O.O=S(=O)(Oc1cc(F)ccc1Br)C(F)(F)F>>C=C(c1cc(F)ccc1Br)N1CCCCC1=O  
3885 C=CC(=O)OCC.CS(=O)(=O)c1ccc(Br)cc1C(F)(F)F>>CCOC(=O)/C=C/c1ccc(S(C)(=O)=O)c(C(F)(F)F  
3886 C=CC(C)(C)O.CC(=O)O[C@H]1C(Br)=C[C@H](O[Si](C)(C)C(C)(C)C)[C@H]2O[C@H]12>>  
CC(=O)O[C@H]1C(/C=C/C(C)(C)O)=C[C@H](O[Si](C)(C)C(C)(C)C)[C@H]2O[C@H]12  
3887 C=Cc1ccc(C=C)cc1.N#Cc1ccc(Br)cc1>>C=Cc1ccc(/C=C/c2ccc(C#N)cc2)cc1  
3888 C=CC(=O)N(C)Cc1oc2cccc2c1C.Nc1ccc(Br)cc1OCc1cccc1>>Cc1c(CN(C)C(=O)/C=C/c2cnc(N)c(  
OCc3cccc3)c2)oc2cccc12  
3889 Br)ccc2cccc12.C=CC[C@H](NC(=O)OC(C)(C)C(=O)OC>>COC(=O)[C@H](C/C=C/c1cccc2cc  
ccc12)NC(=O)OC(C)(C)C  
3890 C=CC1(C(=O)O)COC(=O)OC1.CC(C)[C@H](O)C(=O)N[C@H](C)C(=O)N1CCC[C@H](C(=O)  
N[C@H](C)c2ccc3ccc(Br)cc3n2)N1>>CC(C)[C@H](O)C(=O)N[C@H](C)C(=O)N1CCC[C@H](  
C(=O)N[C@H](C)c2ccc3ccc(/C=C/C4(C(=O)O)COC(=O)OC4)cc3n2)N1  
3891 Br)ccc2nccnc12.C=CC(=O)OCC>>CCOC(=O)/C=C/c1ccc2nccnc12  
3892 C=CC(=O)OC(C)(C)C.CCCCCC(=O)Oc1ccc(I)cc1CC=C(C)C>>CCCCC(=O)Oc1ccc(/C=C/C(=O)O  
C(C)(C)C)cc1CC=C(C)C  
3893 C=CC(=O)OCCCC.CC(=O)Nc1cccc(F)c1I>>CCCCOC(=O)/C=C/c1c(F)cccc1NC(C)=O  
3894 Br)cccnc1.C=CC(=O)CCC>>CCCC(=O)/C=C/c1cccnc1  
3895 C=CC(=O)OC.Fc1ccc(-c2ncc(I)nc2-c2ccc(F)cc2)cc1>>COC(=O)/C=C/c1ccc(-c2ccc(F)cc2)c(-  
c2ccc(F)cc2)n1  
3896 C=CC(=O)OCC.Cc1ccc(C)c(Cl)n1>>CCOC(=O)/C=C/c1cc(C)ccc1C  
3897 C=CC(=O)OCC.CCOC(=O)Cc1c(I)cn(C)c1C=O>>CCOC(=O)/C=C/c1cc(C)c(C=O)c1CC(=O)OCC  
3898 C=CC(=O)OCC.O=Cc1cc(I)ccc1O>>CCOC(=O)/C=C/c1ccc(O)c(C=O)c1  
3899 C=CC(=O)OCC.CC(=O)O[IH2](OC(C)=O)c1c(C)cc(C)cc1C>>CCOC(=O)/C=C/c1c(C)cc(C)cc1C  
3900 CCCC=[11CH2].Nc1ccc(I)cc1>>CCC/C=[11CH]/c1ccc(N)cc1  
3901 C=Cc1cccc1.CCCCOc1ccc2c(c1)cc(C#N)c1ccc(Br)cc12>>CCCCOc1ccc2c(c1)cc(C#N)c1ccc(/C=C/c  
3cccc3)cc12  
3902 C=CC(=O)OC(C)(C)C.COc1ccc2c(Oc3ccc(Br)cc3)csc2c1>>COc1ccc2c(Oc3ccc(/C=C/C(=O)OC(C)(C  
)C)cc3)csc2c1  
3903 C=CC(=O)OC(C)(C)C.O=S(=O)(Oc1ccc(I)cc1)C(F)(F)F>>CC(C)(C)OC(=O)/C=C/c1ccc(OS(=O)(=O)  
C(F)(F)F)cc1  
3904 C=Cc1ccc(/C=C/c2ccc(N(C)C)cc2OC)cc1.Cc1cc2c(-c3ccc(I)cc3S(=O)(=O)O)c3cc(C)c(=O)cc-  
3oc2cc1O>>COc1cc(N(C)C)ccc1/C=C/c1ccc(/C=C/c2ccc(-c3c4cc(C)c(=O)cc-  
4oc4cc(O)c(C)cc34)c(S(=O)(=O)O)c2)cc1  
3905 Br)ccsc1.C=CC(=O)OC(C)(C)C>>CC(C)(C)OC(=O)/C=C/c1ccsc1  
3906 C=CC(=O)OCC.Oc1ccc(C(=C2CCCCC2)c2ccc(Br)cc2F)cc1>>CCOC(=O)/C=C/c1ccc(C(=C2CCCC  
CC2)c2ccc(O)cc2)c(F)c1  
3907 C=CP(=O)(OCC)OCC.CS(=O)(=O)c1ccc([C@H](CC2CCCC2)C(=O)Nc2ccc(Br)cn2)cc1>>CCOP(=  
O)/C=C/c1ccc(NC(=O)[C@H](CC2CCCC2)c2ccc(S(C)(=O)=O)cc2)nc1)OCC  
3908 C=C[C@](C)(CC=C(C)C)CO[Si](c1cccc1)(c1cccc1)C(C)(C)C.COc1ccc(I)cc1>>COc1ccc(/C=C/[C  
@](C)(CC=C(C)C)CO[Si](c2cccc2)(c2cccc2)C(C)(C)C)cc1  
3909 C=Cc1cc(OC)cc(OC)c1.NCc1ccc(I)cc1>>COc1cc(/C=C/c2ccc(CN)cc2)cc(OC)c1  
3910 C=C.COC(=O)c1ccc(I)cc1>>C=Cc1ccc(C(=O)OC)cc1  
3911 C=CC(N)=O.O=C(Nc1cccc(I)c1)Nc1cc(C(F)(F)F)ccc1F>>NC(=O)/C=C/c1cccc(NC(=O)Nc2cc(C(F)(F  
)F)ccc2F)c1  
3912 C=CC(=O)CC.CC(=O)c1cccc1Br>>CCC(=O)/C=C/c1cccc1C(C)=O  
3913 C=CS(C)(=O)=O.CC(C)(C)c1ccc(Br)cc1>>CC(C)(C)c1ccc(/C=C/S(C)(=O)=O)cc1  
3914 C=CC(=O)OC.O=[N+][O-]c1cccc(I)c1>>COC(=O)/C=C/c1cccc([N+](=O)[O-])c1  
3915 C=CC(=O)c1cccc(C)c1.COc1ccc(I)c(OC)n1>>COc1ccc(/C=C/C(=O)c2cccc(C)c2)c(OC)n1  
3916 C=CC(C)(C)O.COc1cc(C=O)c(Br)cc1OCc1cccc1>>COc1cc(C=O)c(/C=C/C(C)(C)O)cc1OCc1cccc1  
3917 C=Cc1cccc(C)c1.O=C(ON1CCc2c(Br)cccc2C1)C(F)(F)F>>Cc1cccc(/C=C/c2cccc3c2CCN(OC(=O)C(  
F)(F)F)C3)c1

3918 C=CCNC(=O)c1ccc(F)cc1NC(=O)c1ccc(OC)cc1.Ic1cccc1>>COc1ccc(C(=O)Nc2cc(F)ccc2C(=O)NC/  
 C=C/c2cccc2)cc1  
 3919 C=CC(=O)N1N=Cc2cccc2C1C=C(C)C.CCOc1c(I)cc(Cc2cnc(N)nc2N)cc1OC>>CCOc1c(/C=C/C(=O)  
 )N2N=Cc3cccc3C2C=C(C)C)cc(Cc2cnc(N)nc2N)cc1OC  
 3920 C=CC(=O)OC.Cc1cc2c(c(C)c1Br)CC(C)(C)C2>>COC(=O)/C=C/c1c(C)cc2c(c1C)CC(C)(C)C2  
 3921 C=Cc1ccc(C)cc1.Clc1cccc1>>Cc1ccc(/C=C/c2cccc2)cc1  
 3922 C=CC(=O)NCc1cccc(F)c1.COc1ccc2c(=O)c(I)coc2c1>>COc1ccc2c(=O)c(/C=C/C(=O)NCc3cccc(F)c3  
 )coc2c1  
 3923 C=COCCCC.O=C1c2cccc(OS(=O)(=O)C(F)(F)F)c2C(=O)c2cccc(OCc3cccc3)c21>>C=C(OCCCC)c1  
 cccc2c1C(=O)c1cccc(OCc3cccc3)c1C2=O  
 3924 C=Cc1ccc(OC)cc1.Cc1ccc(S(=O)(=O)Oc2cccc3c(Br)ccnc23)cc1>>COc1ccc(/C=C/c2ccnc3c(OS(=O)(  
 =O)c4ccc(C)cc4)cccc23)cc1  
 3925 C=C.COc1ccc(Br)cc1>>C=Cc1ccc(OC)cc1  
 3926 C=Cc1ccc(N(CC)CC)cc1.CC(C)[Si](OCc1cc(=O)oc2cc(I)ccc12)(C(C)C)C(C)C>>CCN(CC)c1ccc(/C=  
 C/c2ccc3c(CO[Si](C(C)C)(C(C)C)C(C)C)cc(=O)oc3c2)cc1  
 3927 C=CC(=O)OC(C)(C)C.Ic1ccnc1>>CC(C)(C)OC(=O)/C=C/c1ccnc1  
 3928 C=CC(=O)NC(C)C.Cc1ccc(Br)cc1>>Cc1ccc(/C=C/C(=O)NC(C)C)cc1  
 3929 C=Cc1cnc2cccc12.CN1C(=O)CC[C@]2(C)c3ccc(Br)cc3CC[C@H]12>>CN1C(=O)CC[C@]2(C)c  
 3ccc(/C=C/c4cnc5cccc45)cc3CC[C@H]12  
 3930 COC[C@H](/N=C(\c1cccc1)N1C=CCC[C@H]1C)(C)C.Cc1cccc(I)c1>>COC[C@H](/N=C(\c1  
 ccccc1)N1C=C(c2cccc(C)c2)CC[C@H]1C)(C)C  
 3931 Br1cccc1.C=CC[C@H]1CCCN(C)C[C@H](OC(C)=O)[C@H](C)C[C@H](CC(OC)OC)[C@H](O)[C  
 @H]2O[C@H](C)[C@H](O[C@H]3C[C@H](C)(O)[C@H](OC(=O)CC)[C@H](C)O3)[C@H](  
 N(C)C)[C@H]2OC(C)=O)[C@H](OC)[C@H](OC(=O)CC)CC(=O)O1>>CCC(=O)O[C@H]1[C@H]  
 (C)O[C@H](O[C@H]2[C@H](N(C)C)[C@H](OC(C)=O)[C@H](O[C@H]3[C@H](OC)[C@  
 H](OC(=O)CC)CC(=O)O[C@H](C/C=C/c4cccc4)CCCN(C)C[C@H](OC(C)=O)[C@H](C)C[C@  
 H]13CC(OC)C(C)C(C)C@H12C(C)C@H11/C(C)C  
 3932 C=CC(=O)OC.Cc1ccc2cc(Br)ccc2n1>>COC(=O)/C=C/c1ccc2nc(C)ccc2c1  
 3933 C=CC(=O)NCc1ccc(F)cc1F.O=c1c(I)coc2cc(O)ccc12>>O=C(/C=C/c1coc2cc(O)ccc2c1=O)NCc1ccc(F  
 )cc1F  
 3934 C=Cc1cccc1.Cc1cc(C)c2oc(=O)c(Br)c(-c3cccc3)c2c1>>Cc1cc(C)c2oc(=O)c(/C=C/c3cccc3)c(-  
 c3cccc3)c2c1  
 3935 Br1cncnc1.C=Cc1ccc(Cn2cc(C)c(=O)[nH]c2=O)cc1>>Cc1cn(Cc2ccc(/C=C/c3cncnc3)cc2)c(=O)[nH]  
 3936 C=CC1CC(OC)=CC(=O)O1.Ic1cccc1>>COC1=CC(=O)OC(/C=C/c2cccc2)C1  
 3937 C=Cc1cccc1.CCN(CC)CC(=O)Nc1c(C)ccc(Br)c1C>>CCN(CC)CC(=O)Nc1c(C)ccc(/C=C/c2cccc2)c  
 3938 C=C(NC(C)=O)C(=O)OC.CC(C)(C)OC(=O)N[C@H](COc1cc(C#N)ccc1I)CC(=O)OCc1cccc1>>C  
 OC(=O)/C=C/c1ccc(C#N)cc1OC[C@H](CC(=O)OCc1cccc1)NC(=O)OC(C)(C)C)NC(C)=O  
 3939 C=CC(=O)OC.CC(C)c1oc2cc3oc(=O)ccc3cc2c1OS(=O)(=O)C(F)(F)F>>COC(=O)/C=C/c1c(C(C)C)oc  
 2cc3oc(=O)ccc3cc12  
 3940 Br1ccc2cccc2c1.C=CP(=O)(OCC)OCC>>CCOP(=O)(/C=C/c1ccc2cccc2c1)OCC  
 3941 C=COCC(C)C.O=S(=O)(Oc1ccc(-c2cccc2)cc1)C(F)(F)F>>C=C(OCC(C)C)c1ccc(-c2cccc2)cc1  
 3942 C=C(NC(C)=O)C(=O)OC.CC(C)(C)OC(=O)NCCOc1cc(C#N)ccc1I>>COC(=O)/C=C/c1ccc(C#N)cc1  
 OCCNC(=O)OC(C)(C)C)NC(C)=O  
 3943 C=CCCCCCC.COc1ccc(Br)cc1>>CCCCC/C=C/c1ccc(OC)cc1  
 3944 C=Cc1ccc(C(C)(C)C)cc1.COC(=O)/C=C/c1cccc(N(Cc2ccc(Br)cc2)C(=O)C2CCCC2)c1>>COC(=O)/  
 C=C/c1ccc(N(Cc2ccc(/C=C/c3ccc(C(C)(C)C)cc3)cc2)C(=O)C2CCCC2)c1  
 3945 C=CC(=O)OCC.Cn1ncc(I)cc1=O>>CCOC(=O)/C=C/c1nnn(C)c(=O)c1  
 3946 C=CC(=O)OCC.Clc1ccc1>>CCOC(=O)/C=C/c1ccc1  
 3947 C=CC(=O)OC(C)(C)C.CC(=O)c1cc2cc(Br)ccc2o1>>CC(=O)c1cc2cc(/C=C/C(=O)OC(C)(C)C)ccc2o1  
 3948 C=CCOc1cccc1.Ic1cccc1>>C(=C/c1cccc1)\COc1cccc1  
 3949 C=CC(=O)OCCCC.COc1cc(Br)cc(OC)c1OC>>CCCCOC(=O)/C=C/c1cc(OC)c(OC)c(OC)c1  
 3950 C=CC(C)(C)O.CC(C)(C)OC(=O)NCCc1cc2c(cc1I)OCO2>>CC(C)(O)/C=C/c1cc2c(cc1CCNC(=O)OC  
 (C)(C)C)OCO2  
 3951 C=Cc1ccc(OC)cc1.Clc1ccc(Br)cc1>>COc1ccc(/C=C/c2ccc(Cl)cc2)cc1  
 3952 C=CC1(c2ccc(Cl)cc2)CCN(C(=O)OC(C)(C)C)CC1.O=c1[nH]cnc2cc(Br)ccc12>>CC(C)(C)OC(=O)N1  
 CCC(/C=C/c2ccc3c(=O)[nH]cnc3c2)(c2ccc(Cl)cc2)CC1  
 3953 C=CC(C)(C)O.Cc1ccc(S(=O)(=O)n2cc(CCO[Si](C)(C)C(C)(C)C)c3c(Br)cccc32)cc1>>Cc1ccc(S(=O)(  
 =O)n2cc(CCO[Si](C)(C)C(C)(C)C)c3c(/C=C/C(C)(C)O)cccc32)cc1  
 3954 C=C/C=C(/OCC)C(=O)OC.COc1ccc(I)cc1>>CCO/C=C/C=C/c1ccc(OC)cc1)C(=O)OC  
 3955 C=CB1OC(C)CC(C)(C)O1.C[C@H](c1ccc(Br)cc1)N1CCOCC1>>CC1CC(C)(C)OB(/C=C/c2ccc([C  
 @H](C)N3CCOCC3)cc2)O1

3956 C=COCCCC.Cc1cc(Br)c2nc(N3CCOCC3)cc(=O)n2c1>>C=C(OCCCC)c1cc(C)cn2c(=O)cc(N3CCOC3)nc12  
 3957 C=CC(=O)OCCCC.Nc1cccc1I>>CCCCOC(=O)/C=C/c1cccc1N  
 3958 C=Cc1cccc1.O=S(=O)(Oc1cccc1C(F)(F)F)C(F)(F)F>>C=C(c1cccc1)c1cccc1C(F)(F)F  
 3959 C=CC(=O)N1N=Cc2cccc2C1C(C)CC.COc1cc(Cc2cnc(N)nc2N)cc(I)c1OC>>CCC(C)C1c2cccc2C=NN1C(=O)/C=C/c1cc(Cc2cnc(N)nc2N)cc(OC)c1OC  
 3960 C=CS(=O)(=O)F.Cc1cccc(I)c1>>Cc1cccc(/C=C/S(=O)(=O)F)c1  
 3961 C=CCC(C)O.FC(F)(F)c1cnc(Cl)c1>>CC(O)C/C=C/c1cnc(C(F)(F)F)c1  
 3962 C=CC(=O)OCC.C=CCn1nnc2c(C)c(Br)ccc21>>C=CCn1nnc2c(C)c(/C=C/C(=O)OCC)ccc21  
 3963 C=Cc1cccc1.Cc1cc(C)c(OC(=O)C#Cc2cccc2)c(Br)c1>>Cc1cc(C)c(OC(=O)C#Cc2cccc2)c(/C=C/c2cccc2)c1  
 3964 C=CS(=O)(=O)F.Ic1cnn(-c2cccc2)c1>>O=S(=O)(F)/C=C/c1cnn(-c2cccc2)c1  
 3965 C=CC(=O)OC.CC(C)n1cnc2c(NCc3cccc(Br)c3)nc(N3CCCC3)nc21>>COC(=O)/C=C/c1cccc(CNc2nc(N3CCCC3)nc3c2nnc3C(C)C)c1  
 3966 C=Cc1ccc([N+](=O)[O-])cc1.FC(F)(F)Oc1cccc(I)c1>>O=[N+](O-)]c1ccc(/C=C/c2cccc(OC(F)(F)F)c2)cc1  
 3967 C=Cc1ccc(OC)cc1.Cc1c(Br)c(=O)oc2cc(N)ccc12>>COc1ccc(/C=C/c2c(C)c3ccc(N)cc3oc2=O)cc1  
 3968 C=CC(=O)N1CCCCC1.CC(C)(C)c1ccc([N+](=O)[O-])cc1Br>>CC(C)(C)c1ccc([N+](=O)[O-])cc1/C=C/C(=O)N1CCCCC1  
 3969 C=Cc1cccc2cccc12.COC(=O)c1cccc1I>>COC(=O)c1cccc1/C=C/c1cccc2cccc12  
 3970 C=Cc1cccc1.O=C1CCC(c2cccc2)=C1OS(=O)(=O)C(F)(F)F>>O=C1CCC(c2cccc2)=C1/C=C/c1cccBrC1CCOCC1.C=Cc1cccc1>>C(=C/C1CCOCC1)c1cccc1  
 3971 C=CC(OC)OC.Ic1ccc(-c2cccc2)cc1>>COC(/C=C/c1ccc(-c2cccc2)cc1)OC  
 3972 C=CC(C)=O.Ic1nnc2nnc(Cc3cccc3)c12>>CC(=O)/C=C/c1nnc2nnc(Cc3cccc3)c12  
 3973 C=CC(=O)OC.C[C@H]1C[C@@H](n2c(Nc3ccc(C(F)(F)F)cc3)nc3cc(Br)ccc32)CC(C)(C)C1>>COC(=O)/C=C/c1ccc2c(c1)nc(Nc1ccc(C(F)(F)F)cc1)n2[C@@H]1C[C@H](C)CC(C)(C)C1  
 3974 C=CC(=O)OC.CCn1cnc2c(NCc3cccc(Br)c3)nc(N3CCCCC3)nc21>>CCn1cnc2c(NCc3cccc(/C=C/C(=O)OC)c3)nc(N3CCCCC3)nc21  
 3975 C=CC(=O)OC(C)(C)C.CCOC(=O)c1c(OS(=O)(=O)C(F)(F)F)c2cccc2n1C>>CCOC(=O)c1c(/C=C/C(=O)OC(C)(C)C)c2cccc2n1C  
 3976 C=CC(=O)OCC.CCN1C[C@]2(OC(=O)c3cc(Br)ccc3NC(C)=O)CC[C@H](OC)[C@]34[C@@H]1[C@@H](C)[C@H]23)[C@@]1(O)C[C@H](OC)[C@H]2[C@@H]4[C@]1(O)[C@H]2OC>>CCOC(=O)/C=C/c1ccc(NC(C)=O)c(C(=O)O[C@@]23CC[C@H](OC)[C@]45[C@H]([C@H](C)[C@H]24)[C@@]2(O)C[C@H](OC)[C@H]4C[C@@H]5[C@]12(O)[C@H]4OC)N(CC)C3)c1  
 3977 C=Cc1cccc([N+](=O)[O-])c1.Nc1ccc(I)cc1>>Nc1ccc(/C=C/c2cccc([N+](=O)[O-])c2)cc1  
 3978 C=Cc1cccc1.COC(=O)/C=C/c1ccc(Br)cc1>>COC(=O)/C=C/c1ccc(/C=C/c2cccc2)cc1  
 3979 C=CC(=O)OCC.CN(C[C@H](O)CNC(C)(C)CC1Cc2cccc2C1)S(=O)(=O)c1cc(Br)cc(C(F)(F)F)c1>>CCOC(=O)/C=C/c1cc(C(F)(F)F)cc(S(=O)(=O)N(C)C[C@H](O)CNC(C)(C)CC2Cc3cccc3C2)c1  
 3980 C=CC(=O)OC(C)(C)C.CCOC(=O)CN1Cc2cc(Br)cnc2NC1=O>>CCOC(=O)CN1Cc2cc(/C=C/C(=O)OC(C)(C)C)cnc2NC1=O  
 3981 C=CC(=O)OCC.Cc1cccc1Br>>CCOC(=O)/C=C/c1cccc1C  
 3982 C=CC(=O)N(C)C.COc1cccc1I>>COc1cccc1/C=C/C(=O)N(C)C  
 3983 C=Cc1ccc([Si](OC)(OC)OC)cc1.CCOP(=O)(Cc1ccc(Br)cc1)OCC>>CCOP(=O)(Cc1ccc(/C=C/c2ccc([Si](OC)(OC)OC)cc2)cc1)OCC  
 3984 \*CNCCCOCCOCCOCCNC(=O)COc1ccc(C(Cc2cc(OC)cc(OC)c2)NC(=O)c2cccc(C=C)c2)cc1.Cc1cc(I)ccc1[N+](=O)[O-]  
 3985 ]>>\*CNCCCOCCOCCOCCNC(=O)COc1ccc(C(Cc2cc(OC)cc(OC)c2)NC(=O)c2cccc(/C=C/c3ccc([N+](=O)[O-])c(C)c3)c2)cc1  
 3986 C=CC(=O)OCCCC.Cn1nc(Br)c2ccc([N+](=O)[O-])cc21>>CCCCOC(=O)/C=C/c1nn(C)c2cc([N+](=O)[O-])ccc12  
 3987 C=CC(=O)NC(C)(C)C.COc1ccc(-c2oc3cc(OC)ccc3c(=O)c2I)cc1>>COc1ccc(-c2oc3cc(OC)ccc3c(=O)c2/C=C/C(=O)NC(C)(C)C)cc1  
 3988 C=CCC(C)O.COc1cnc(Br)c1>>COc1cnc(/C=C/CC(C)O)c1  
 3989 Br1ccnc1.C=CC[C@@H](C)O>>C[C@@H](O)C/C=C/c1ccnc1  
 3990 C=CC(=O)C1CC1.OC/C=C/C1=C(Br)CCCC1>>O=C(/C=C/C1=C(/C=C/CO)CCCC1)C1CC1  
 3991 C=CC(=O)OCCSc1cccc1.Ic1cccc1>>O=C(/C=C/c1cccc1)OCCSc1cccc1  
 3992 C=CC(=O)OC.O=c1[nH]c(=O)n([C@H]2C[C@@H](CO)[C@H](O)C2)cc1I>>COC(=O)/C=C/c1cn([C@H]2C[C@@H](CO)[C@H](O)C2)c(=O)[nH]c1=O  
 3993 C=CS(=O)(=O)F.CC(C)[Si](Oc1ccc(I)cc1)(C(C)C)C(C)C>>CC(C)[Si](Oc1ccc(/C=C/S(=O)(=O)F)cc1)(C(C)C)C(C)C  
 3994 C=CC(=O)N(C)C.CCOC(=O)/C=C/c1cccc1Br>>CCOC(=O)/C=C/c1cccc1/C=C/C(=O)N(C)C

3995 C=C[Si](C)(C)C.O=c1oc2ccccc2cc1Br>>C[Si](C)(C)/C=C/c1cc2ccccc2oc1=O  
C=Cc1ccc2c(c1)Sc1ccccc1N2CCCC.CCCCN1c2ccc(Br)cc2Sc2cc(-c3nc4ccccc4n3-  
3996 c3ccccc3)ccc21>>CCCN1c2ccccc2Sc2cc(/C=C/c3ccc4c(c3)Sc3cc(-c5nc6ccccc6n5-  
c5ccccc5)ccc3N4CCCC)ccc21  
3997 C=Cc1cccc([N+](=O)[O-])c1.Ic1csccl-c1ccccc1>>O=[N+](O)c1cccc(/C=C/c2csccl-c2ccccc2)c1  
3998 C=CC(=O)OCC.O=S(=O)(Oc1ccc(C(=C2CCCCC2)c2ccc(O)cc2)cc1)C(F)(F)F>>CCOC(=O)/C=C/c1c  
cc(C(=C2CCCCC2)c2ccc(O)cc2)cc1  
3999 C=CC(=O)OC.COC1OC(c2ccc(C)cc2)=C(I)c2nc3ccccc3cc21>>COC(=O)/C=C/C1=C(c2ccc(C)cc2)O  
C(OC)c2cc3ccccc3nc21  
4000 Br1ccccc1.C=CCOc1cccc(C)c1>>Cc1cccc(OC/C=C/c2ccccc2)c1  
4001 C=C1CC(O)c2cc3ccccc3nc21.Ic1ccccc1>>OC1C/C(=C\c2ccccc2)c2nc3ccccc3cc21  
4002 C=C(NC(=O)OC(C)(C)C)C(=O)OC.Ic1ccccc1>>COC(=O)/C(=C/c1ccccc1)NC(=O)OC(C)(C)C  
4003 C=CC(=O)Nc1ccccc1.O=C1Cc2c([nH]c3c(I)ccccc23)-c2ccccc2N1>>O=C(/C=C/c1cccc2c3c([nH]c12)-  
c1ccccc1NC(=O)C3)Nc1ccccc1  
4004 C=CC(C)=O.CN1C(c2ccccc2)=C(I)c2ccsc2S1(=O)=O>>CC(=O)/C=C/C1=C(c2ccccc2)N(C)S(=O)(=O)  
c2sccc21  
4005 C=Cc1cc(O)c(OC)cc1F.COc1cc(Br)cc(OC)c1F>>COc1cc(F)c(/C=C/c2cc(OC)c(F)c(OC)c2)cc1O  
4006 C=Cc1ccccc1C.Cl1ccccc1>>Cc1ccccc1/C=C/c1ccccc1  
4007 C=CC(=O)OCC.CC(C)c1nn(-c2cncn2)c(-c2ccc(F)cc2)c1Br>>CCOC(=O)/C=C/c1c(C(C)C)nn(-  
c2cncn2)c1-c1ccc(F)cc1  
4008 C=CC(=O)OCC.CC(=O)c1ccc(Br)cc1>>CCOC(=O)/C=C/c1ccc(C(C)=O)cc1  
4009 C=CC(=O)N(C)C.Cc1ccc(Br)s1>>Cc1ccc(/C=C/C(=O)N(C)C)s1  
4010 C=CC(=O)OC.COc1cc2oc(-c3ccccc3)c(I)c(=O)c2cc1OC>>COC(=O)/C=C/c1c(-  
c2ccccc2)oc2cc(OC)c(OC)cc2c1=O  
4011 C=CC(=O)c1ccccc1.Cl1ccc(I)cc1>>O=C(/C=C/c1ccc(Cl)cc1)c1ccccc1  
4012 Br1ccccc1.C=CC(CCC)OCc1ccccc1>>CCCC(/C=C/c1ccccc1)OCc1ccccc1  
4013 C=CC(C)(C)O.Cc1cc(C)c(Br)c(C)c1>>Cc1cc(C)c(/C=C/C(C)(C)O)c(C)c1  
4014 C=Cc1ccccc1.C[Si](C)(Cl)c1ccccc1>>C[Si](C)(C)/C=C/c1ccccc1c1ccccc1  
4015 C=Cc1ccccc1.COc1ccc(I)cc1>>COc1ccc(/C=C/c2ccccc2)cc1  
4016 C=CC(=O)OC.Cc1cc(N[C@H]2C[C@@H](C)CC(C)(C)C2)c([N+](=O)[O-]  
]cc1Br>>COC(=O)/C=C/c1cc([N+](=O)[O-])c(N[C@H]2C[C@@H](C)CC(C)(C)C2)cc1C  
4017 C=C/C=C(\CCCC)OCC.Cc1cccc(I)c1>>CCCC/C(=C\C=C\c1cccc(C)c1)OCC  
4018 C=CC(=O)OC(C)(C)C.COC(=O)CCc1cccc(N(Cc2ccc(Br)cc2)C(=O)C2CCCCC2)c1>>COC(=O)CCc1  
cccc(N(Cc2ccc(/C=C/C(=O)OC(C)(C)C)cc2)C(=O)C2CCCCC2)c1  
4019 C=C(OC(C)=O)C(=O)OCC(F)(F)F.CC(C)=CCc1cc(I)ccc1OCc1ccccc1>>CC(=O)O/C(=C\c1ccc(OCc2  
ccccc2)c(CC=C(C)C)c1)C(=O)OCC(F)(F)F  
4020 C=C.Fc1ccccc1I>>C=Cc1ccccc1F  
4021 C=CC(=O)OCC.O=C(O)c1cccc2c(Br)cccc12>>CCOC(=O)/C=C/c1cccc2c(C(=O)O)cccc12  
4022 C=Cc1ccc(C)cc1.CC(=O)c1ccccc1Br>>CC(=O)c1ccccc1/C=C/c1ccc(C)cc1  
4023 C=CCC(N=[N+]=[N-])c1ccccc1.Ic1ccccc1>>[N-]=[N+]=NC(C/C=C/c1ccccc1)c1ccccc1  
4024 C=CC(=O)OC(C)(C)C.C[C@H]1[C@H](NS(=O)(=O)c2ccc(I)cc2)C[C@@H]2C[C@H]1C2(C)C>>C[  
C@H]1[C@H](NS(=O)(=O)c2ccc(/C=C/C(=O)OC(C)(C)C)cc2)C[C@@H]2C[C@H]1C2(C)C  
4025 C=Cc1ccc(Cl)cc1.CC(=O)c1ccccc1Br>>CC(=O)c1ccccc1/C=C/c1ccc(Cl)cc1  
4026 C=CC(=O)OC.Fc1ccc(Br)nc1>>COC(=O)/C=C/c1ccc(F)cn1  
4027 C=CC(=O)OCC.CCOC(=O)c1cc(Br)nc1N>>CCOC(=O)/C=C/c1cnc(N)c(C(=O)OCC)c1  
4028 C=CC(=O)OC.CC(=O)n1nc(C)c(I)c1C>>COC(=O)/C=C/c1c(C)nn(C(C)=O)c1C  
4029 C=CC(=O)O.Oc1ccc(I)cc1>>O=C(O)/C=C/c1ccc(O)cc1  
4030 C=Cc1ccc(S(=O)(=O)c2ccccc2F)cn1.Ic1ccccc1>>O=S(=O)(c1ccc(/C=C/c2ccccc2)nc1)c1ccccc1F  
4031 C=Cc1ccc(C#N)cc1.Cc1ccc(S(=O)(=O)Oc2ccccc3c(Br)ccnc23)cc1>>Cc1ccc(S(=O)(=O)Oc2ccccc3c(/C  
=C/c4ccc(C#N)cc4)ccnc23)cc1  
4032 C=CC(=O)OCC.CC(C)(C)OC(=O)N1CCc2c(ccc(Br)c2F)C1>>CCOC(=O)/C=C/c1ccc2c(c1F)CCN(C(  
=O)OC(C)(C)C)C2  
4033 C=Cc1ccc(C(C)(C)C)cc1.Cc1cc(Br)ccc1I>>Cc1cc(Br)ccc1/C=C/c1ccc(C(C)(C)C)cc1  
4034 C=CC(=O)OCCCC.CC(C)n1cnc2c(Cl)nc(I)nc21>>CCCCOC(=O)/C=C/c1nc(Cl)c2ncn(C(C)C)c2n1  
4035 C=CC(=O)OC.Cl1cnoc(-c2ccccc2)c1I>>COC(=O)/C=C/c1c(Cl)noc1-c1ccccc1  
4036 Br1ccc(CCN2CCOCC2)cc1.C=Cc1n[nH]c2cc([C@@H]3C[C@@]34C(=O)Nc3ccc(OC)cc34)ccc12>  
>COc1ccc2c(c1)[C@]1(C[C@H]1c1ccc3c(/C=C/c4ccc(CCN5CCOCC5)cc4)n[nH]c3c1)C(=O)N2  
4037 C=CC(=O)OC(C)(C)C.O=c1oc(Br)cc2ccccc12>>CC(C)(C)OC(=O)/C=C/c1cc2ccccc2c(=O)o1  
4038 C=Cc1ccccc1.COC(=O)c1ccc(I)cc1>>COC(=O)c1ccc(/C=C/c2ccccc2)cc1  
4039 C=CC(C)CC(=O)O.COc1ccc(I)cc1>>COc1ccc(/C=C/C(C)CC(=O)O)cc1

4040 C=CC(=O)OC.Cc1ccc(S(=O)(=O)n2cc(C=O)c3c(Br)cccc32)cc1>>COC(=O)/C=C/c1cccc2c1c(C=O)cn  
2S(=O)(=O)c1ccc(C)cc1  
4041 C=CS(=O)(=O)F.O=Cc1ccc(I)cc1>>O=Cc1ccc(/C=C/S(=O)(=O)F)cc1  
4042 C=CCCC(=O)O.Cc1ccc(I)cc1>>Cc1ccc(/C=C/CCC(=O)O)cc1  
4043 C=Cc1cccc1.COC(=O)c1cc(C(=O)OC)c2cc(Br)ccc2n1>>COC(=O)c1cc(C(=O)OC)c2cc(/C=C/c3cccc  
c3)ccc2n1  
4044 C=Cc1ccc(C)cc1.CSc1ccc(Br)cc1>>CSc1ccc(/C=C/c2ccc(C)cc2)cc1  
4045 C=CC(=O)OCC.O=C(NC1CCCCC1)c1cc(Br)cn(Cc2ccc(F)cc2)c1=O>>CCOC(=O)/C=C/c1cc(C(=O)  
NC2CCCCC2)c(=O)n(Cc2ccc(F)cc2)c1  
4046 C=C(NC(=O)OCC[Si](C)(C)C)C(=O)OC.CC(C)(C)OC(=O)N/C(=C/c1cccc(Br)c1)C(=O)OCc1cccc1>  
>COC(=O)/C=C/c1cccc(/C=C/\NC(=O)OC(C)(C)C(=O)OCc2cccc2)c1)NC(=O)OCC[Si](C)(C)C  
4047 Br1cccc2cccc12.C=C1C[C@H]2[C@@H]3CCc4cc(OC)ccc4[C@H]3CC[C@]2(C)C1=O>>COc1ccc  
2c(c1)CC[C@H]1[C@@H]2CC[C@]2(C)C(=O)/C(=C/c3cccc4cccc34)C[C@H]12  
4048 C=Cc1ccc(/C=C/c2ccc(N(c3cccc3)c3cccc3)cc2)cc1.O=Cc1ccc(Br)cc1>>O=Cc1ccc(/C=C/c2ccc(/C=  
C/c3ccc(N(c4cccc4)c4cccc4)cc3)cc2)cc1  
4049 C=Cc1ccc2c(c1)c1cccc1n2CCCCC.CCCCCCN1c2ccc(I)cc2c2cc(C=O)ccc21>>CCCCCN1c2c  
cccc2c2cc(/C=C/c3ccc4c(c3)c3cc(C=O)ccc3n4CCCCC)ccc21  
4050 C=C.CC(=O)Nc1ccc(Br)cn1>>C=Cc1ccc(NC(C)=O)nc1  
4051 C=C[C@H](COC(C)=O)NS(C)(=O)=O.CC(=O)Oc1ccc(I)cc1>>CC(=O)OC[C@H](/C=C/c1ccc(OC(  
C)=O)cc1)NS(C)(=O)=O  
4052 C=Cc1ccnc(F)c1.CC(C)(C)OC(=O)N[C@H](COc1cncc(Br)c1)Cc1c[nH]c2cccc12>>CC(C)(C)OC(=O  
)N[C@H](COc1cncc(/C=C/c2ccnc(F)c2)c1)Cc1c[nH]c2cccc12  
4053 C=Cc1cccc1.Clc1ccc(I)cc1>>Clc1ccc(/C=C/c2cccc2)cc1  
4054 C=CC(=O)OC(C)(C)C.CCOC(=O)c1cc(-c2cccc2)n(-  
c2ccc(I)cc2)c1C(=O)c1cccc1>>CCOC(=O)c1cc(-c2cccc2)n(-  
4055 C=CC(C)=O.[13CH3]C1=C(OS(=O)(=O)C(F)(F)F)C([13CH3])([13CH3])CCC1>>CC(=O)/C=C/C1=C  
([13CH3])CCCC1([13CH3])[13CH3]  
4056 C=CC#N.COc1ccc(I)cc1>>COc1ccc(/C=C/C#N)cc1  
4057 Br1cccc1I.C=CC(=O)OC>>COC(=O)/C=C/c1cccc1Br  
4058 C=CC(=O)OCCCC.Ic1ccc(-c2cccc2)cc1>>CCCCOC(=O)/C=C/c1ccc(-c2cccc2)cc1  
4059 C=CC(=O)OCc1cccc1.COc1ccc(I)cc1>>COc1ccc(/C=C/C(=O)OCc2cccc2)cc1  
4060 C=CCn1cncl.CC(=O)OCC1Cn2c3cccc3c3c4c(c5c6cc(Br)ccc6n(c5c32)C1)C(=O)N(C(C)=O)C4>>C  
C(=O)OCC1Cn2c3cccc3c3c4c(c5c6cc(/C=C/Cn7ccnc7)ccc6n(c5c32)C1)C(=O)N(C(C)=O)C4  
4061 C=CC=O.Fc1ccc(Br)cc1>>O=C/C=C/c1ccc(F)cc1  
4062 C=CCOc1cccc1C.Ic1cccc1>>Cc1cccc1OC/C=C/c1cccc1  
4063 C=CC#N.COc1ccc2c(c1)C(Br)=C(C=O)CC2>>COc1ccc2c(c1)C(/C=C/C#N)=C(C=O)CC2  
4064 C=CC(=O)OC.COC(=O)Cc1cc(OC)c(OC)cc1I>>COC(=O)/C=C/c1cc(OC)c(OC)cc1CC(=O)OC  
4065 C=CC(=O)OC.COc1cc2nnc(Nc3cccc(Cl)c3F)c2cc1OS(=O)(=O)C(F)(F)F>>COC(=O)/C=C/c1cc2c(N  
c3cccc(Cl)c3F)nnc2cc1OC  
4066 C=CC(=O)OCC.O=C1Nc2ccc(Br)cc2C1=O>>CCOC(=O)/C=C/c1ccc2c(c1)C(=O)C(=O)N2  
4067 C=C[Si](CC)(CC)CC.CC(=O)c1cccc1Br>>CC[Si](/C=C/c1cccc1C(C)=O)(CC)CC  
4068 C=CCN(C(=O)OCc1cccc1)C(=O)OC(C)(C)C.COC(=O)c1ccc(Br)cc1>>COC(=O)c1ccc(/C=C/CN(C(  
=O)OCc2cccc2)C(=O)OC(C)(C)C)cc1  
4069 C=COCCCC.O=Cc1ccc(I)cc1>>C=C(OCCCC)c1ccc(C=O)cc1  
4070 C=C[C@H]1CCCCN1C(=O)OC(C)(C)C.FC(F)(F)c1ccc(I)cc1>>CC(C)(C)OC(=O)N1CCCC[C@H]  
1/C=C/c1ccc(C(F)(F)F)cc1  
4071 C=CC(=O)OC.COc1ccc(Cl)cc1>>COC(=O)/C=C/c1ccc(OC)cc1  
4072 C=CC1(O)CCC2(CC1)OCCO2.COC(=O)c1ccc(Br)o1>>COC(=O)c1ccc(/C=C/C2(O)CCC3(CC2)OCC  
O3)o1  
4073 Br1coc2cnccc12.C=CC(=O)OCC>>CCOC(=O)/C=C/c1coc2cnccc12  
4074 C=Cc1ccc(C=O)s1.CCCCCC(=O)Nc1cc(OCCN(CCOc2cc(NC(=O)CCCC)nc(NC(=O)CCCC)c2)c2  
ccc(Br)cc2)cc(NC(=O)CCCC)n1>>CCCCC(=O)Nc1cc(OCCN(CCOc2cc(NC(=O)CCCC)nc(NC(=  
O)CCCC)c2)c2ccc(/C=C/c3ccc(C=O)s3)cc2)cc(NC(=O)CCCC)n1  
4075 C=CC(=O)OC.COc1c(CN(C(=O)c2cccc2)c2cccc(Br)c2)ccc2c1OC(C)(C)C=C2C#N>>COC(=O)/C=C  
/c1cccc(N(Cc2ccc3c(c2OC)OC(C)(C)C=C3C#N)C(=O)c2cccc2)c1  
4076 C=CCNC(=O)OC(C)(C)C.N#Cc1cccc(Cl)c1>>C=C(CNC(=O)OC(C)(C)C)c1cccc(C#N)c1  
4077 C=Cc1cncc1.CCCCCCOc1ccc(Br)c(F)c1>>CCCCCOc1ccc(/C=C/c2cncc2)c(F)c1  
4078 C=CC(C)=O.COC(=O)c1ccc(N)c(I)c1>>COC(=O)c1ccc(N)c(/C=C/C(C)=O)c1  
4079 C=CC(=O)OC.COc1c(CN(C(=O)C2CC2)c2cccc(Br)c2)ccc2c1OC(C)(C)C=C2>>COC(=O)/C=C/c1ccc  
c(N(Cc2ccc3c(c2OC)OC(C)(C)C=C3)C(=O)C2CC2)c1  
4080 C=CC(=O)OC.COC(=O)c1c(-c2cccc2)ccc(OC)c1Br>>COC(=O)/C=C/c1c(OC)ccc(-

4081 C=Cc1ccc(Cl)cc1.O=C(O)c1ccc(Br)cc1F>>O=C(O)c1ccc(/C=C/c2ccc(Cl)cc2)cc1F  
 4082 C=CC(=O)OC.Oc1cccc(-c2ncc(Br)cn2)c1>>COC(=O)/C=C/c1cnc(-c2cccc(CO)c2)nc1  
 4083 C=Cc1ccc(F)cc1.O=c1oc2cccc2cc1Br>>O=c1oc2cccc2cc1/C=C/c1ccc(F)cc1  
 4084 C=Cc1ccc(OC)cc1.Cc1ccc2cc(Br)ccc2n1>>COc1ccc(/C=C/c2ccc3nc(C)ccc3c2)cc1  
 4085 C=CC(=O)OC.CN(C)S(=O)(=O)n1cc(I)c([Si](C)(C)C)c1>>COC(=O)/C=C/c1cn(S(=O)(=O)N(C)C)cc1[Si](C)(C)C  
 4086 Brclnccc(-c2cccc2)c1.C=CC(=O)OC>>COC(=O)/C=C/c1nccc(-c2cccc2)c1  
 4087 C=Cc1cnccl1.COc1ccc(Br)c(F)c1>>COc1ccc(/C=C/c2cnccl2)c(F)c1  
 4088 C=CC(=O)O.Clc1cccc1>>O=C(O)/C=C/c1cccc1  
 4089 Brclccc(-c2nc3cccc3c3c[nH]cc23)cc1.C=CC(=O)OC>>COC(=O)/C=C/c1ccc(-c2nc3cccc3c3c[nH]cc23)cc1  
 4090 Brclccc2c(c1)OCO2.C=CC(OCC)OCC>>CCOC(/C=C/c1ccc2c(c1)OCO2)OCC  
 4091 C=CC(=O)C(C)CC(=O)OC.COc1ccc(Br)cc1OC>>COC(=O)CC(C)C(=O)/C=C/c1ccc(OC)c(OC)c1  
 4092 C=Cc1ccc2cccc2c1.FC(F)(F)c1cccc1I>>FC(F)(F)c1cccc1/C=C/c1ccc2cccc2c1  
 4093 C=CC(=O)c1cccc1.COc1ccc(I)cc1>>COc1ccc(/C=C/C(=O)c2cccc2)cc1  
 4094 C=Cc1ccc(-c2cccc2)cc1.O=c1oc2cccc2cc1Br>>O=c1oc2cccc2cc1/C=C/c1ccc(-c2cccc2)cc1  
 4095 C=CC(=O)OCC.Cc1cc(C)c(Br)c(C)c1>>CCOC(=O)/C=C/c1c(C)cc(C)cc1C  
 4096 C=Cc1cccc1.Fc1ccc(Br)c(F)c1>>Fc1ccc(/C=C/c2cccc2)c(F)c1  
 4097 C=CC(=O)OC.Cc1cc([N+](=O)[O-])c(Cl)cc1I>>COC(=O)/C=C/c1cc(Cl)c([N+](=O)[O-])cc1C  
 4098 C=CC#N.Ic1nnc2nen(Cc3cccc3)c12>>N#C/C=C/c1nnc2nen(Cc3cccc3)c12  
 4099 C=CS(=O)(=O)F.O=S(=O)(F)/C=C/c1cccc(I)c1>>O=S(=O)(F)/C=C/c1cccc(/C=C/S(=O)(=O)F)c1  
 4100 C=Cc1cccc1.CC(=O)c1cc2cc(Br)ccc2o1>>CC(=O)c1cc2cc(/C=C/c3cccc3)ccc2o1  
 4101 C=CC[C@H](NC(=O)OCc1cccc1)C(=O)OC(C)(C)C.COc1ccc(I)cc1>>COc1ccc(/C=C/C[C@H](NC(=O)OCc2cccc2)C(=O)OC(C)(C)C)cc1  
 4102 C=CC(C)=O.COc1ccc(I)c(N)c1>>COc1ccc(/C=C/C(C)=O)c(N)c1  
 4103 C=CC(=O)OCCCC.Cc1cc2c(cc1N1C3c(C(F)(F)F)nc(Br)c3NC1=O)OC(c1ncccc1F)CC2>>CCCCOC(=O)/C=C/c1cnc(C(F)(F)F)c2c1NC(=O)N(c1cc3c(cc1C)CCC(c1ncccc1F)O3)C2  
 4104 C=Cc1ccc2nc(OC)c(OC)nc2c1.COC(=O)c1c(Br)cccc1OC>>COC(=O)c1c(/C=C/c2ccc3nc(OC)c(OC)nc3c2)cccc1OC  
 4105 C=Cc1cccc1.O=c1oc2cc(Cl)ccc2c(-c2cccc2)c1Br>>O=c1oc2cc(Cl)ccc2c(-C(C)C(=O)C(=O)OC.COc1ccc(CN(Cc2ccc(OC)cc2)c2ncc(I)cn2)cc1>>COC(=O)/C=C/c1cnc(N(Cc2ccc(OC)cc2)Cc2ccc(OC)cc2)nc1)NC(C)=O  
 4106 C=Cc1cc(OC(C)=O)cc(OC(C)=O)c1.COc1ccc([C@@H]2Oc3ccc(Br)cc3[C@@H]2c2cc(OC)cc(OC)c2)cc1>>COc1ccc([C@@H]2Oc3ccc(/C=C/c4cc(OC(C)=O)cc(OC(C)=O)c4)cc3[C@@H]2c2cc(OC)cc(OC)c2)cc1  
 4107 Brclncc2cccc2c1.C=CCO[C@]1(C)C[C@@H](C)C(=O)[C@H](C)[C@@H](O)[C@](C)(O)[C@@H](CC)OC(=O)[C@H](C)C(=O)[C@H](C)[C@H]1O[C@@H]1O[C@H](C)C[C@H](N(C)C)[C@H]1OC(=O)c1cccc1>>CC[C@H]1OC(=O)[C@H](C)C(=O)[C@H](C)[C@@H](O[C@@H]2O[C@H](C)[C@H](N(C)C)[C@H]2OC(=O)c2cccc2)[C@](C)(OC/C=C/c2nc3cccc3c2)C[C@@H](C)C(=O)[C@H]1(C)C[C@@H](O)C@11(C)O  
 4108 Brclncc1.C=Cc1ccc(OC)cc1>>COc1ccc(/C=C/c2cncc2)cc1  
 4109 C=CC(=O)OCC.Fc1nc(Br)ccc1Cl>>CCOC(=O)/C=C/c1ccc(Cl)c(F)n1  
 4110 C=CC(=O)OCCO.C[C@]12C[C@@]34C=C(Sc5cccc(I)c5)C(=O)[C@@](C)(CCC(=O)Nc5c(O)ccc(C(=O)O)c5O)[C@@H]3[C@H](C[C@@H]1C4)O2>>C[C@]12C[C@@]34C=C(Sc5cccc(/C=C/C(=O)OCCO)c5)C(=O)[C@@](C)(CCC(=O)Nc5c(O)ccc(C(=O)O)c5O)[C@@H]3[C@H](C[C@@H]1C4)O2  
 4111 Brclccnc1.C=C[Si](CC)(CC)CC>>CC[Si](/C=C/c1ccnc1)(CC)CC  
 4112 C=CC(C)(C)O.O=c1ccoc2ccc(Br)cc12>>CC(C)(O)/C=C/c1ccc2occc(=O)c2c1  
 4113 C=CC(=O)OC.CCc1cccc(CC)c1Br>>CCc1cccc(CC)c1/C=C/C(=O)OC  
 4114 C=C1C(=O)O[C@H]2[C@H]1CC/C(C)=C/CC[C@]1(C)O[C@@H]21.FC(F)(F)c1cccc1I>>C/C1=C\CC[C@@]2(C)O[C@H]2[C@H]2OC(=O)/C=C/c3cccc3C(F)(F)F[C@@H]2CC1  
 4115 C=Cc1cccc1.O=c1c(I)c[nH]c2cccc12>>O=c1c(/C=C/c2cccc2)c[nH]c2cccc12  
 4116 C=CC(=O)OC.O=C1CCC(N2C(=O)c3ccc(Br)cc3C2=O)C(=O)N1>>COC(=O)/C=C/c1ccc2c(c1)C(=O)N(C1CCC(=O)NC1=O)C2=O  
 4117 Brclccc2c(c1)OCO2.C=CC(=O)OCC>>CCOC(=O)/C=C/c1ccc2c(c1)OCO2  
 4118 C=C(NC(C)=O)C(=O)OC.Ic1nnc(N(Cc2cccc2)Cc2cccc2)nc1>>COC(=O)/C=C/c1nnc(N(Cc2cccc2)Cc2cccc2)nc1)NC(C)=O  
 4119 C=CP(=O)(OCC)OCC.COP(=O)(OC)[C@]1(NC=O)C[C@@H]1c1ccc(Br)cc1>>CCOP(=O)(/C=C/c1ccc([C@H]2C[C@@]2(NC=O)P(=O)(OC)OC)cc1)OCC  
 4120 C=CC#N.Cc1ccc(I)cc1>>Cc1ccc(/C=C/C#N)cc1  
 4121 C=CC(C)(C)C.Ic1cccc1>>CC(C)(C)/C=C/c1cccc1  
 4122

4123 C=Cc1ccc(OCc2ccccc2)cc1.Nc1nc(N)c2cc(I)ccc2n1>>Nc1nc(N)c2cc(/C=C/c3ccc(OCc4ccccc4)cc3)cc  
 4124 C=CS(=O)(=O)F.CC(C)(C)NC(=O)c1cc(I)ccn1>>CC(C)(C)NC(=O)c1cc(/C=C/S(=O)(=O)F)ccn1  
C=CC(=O)OCCCC.COc1ccc2cc([N+](=O)[O-])ccc2c1-  
 4125 c1c(OC(=O)C(C)(C)C)ccc2cc(Br)ccc12>>CCCCOC(=O)/C=C/c1ccc2c(-c3c(OC)ccc4cc([N+](=O)[O-])ccc34)c(OC(=O)C(C)(C)C)ccc2c1  
 4126 Br1ccc(-c2nc(-c3ccccc3)c(-c3ccccc3)[nH]2)cc1.C=Cc1cncnc1>>C(=C/c1ccc(-c2nc(-c3ccccc3)c(-c3ccccc3)[nH]2)cc1)\c1cncnc1  
 4127 C=CC(=O)Nc1ccccc1NC(=O)OC(C)(C)C.COC(=O)C(O)c1ccc(Br)cc1>>COC(=O)C(O)c1ccc(/C=C/C(=O)Nc2ccccc2NC(=O)OC(C)(C)C)cc1  
 4128 C=Cc1ccccc1.CNC(=O)c1ccccc1Sc1ccc2c(I)nn(C(C)=O)c2c1>>CNC(=O)c1ccccc1Sc1ccc2c(/C=C/c3ccccc3)nn(C(C)=O)c2c1  
 4129 C=CC(OC)OC.FC(F)(F)c1ccc(Br)cn1>>COC(/C=C/c1ccc(C(F)(F)F)nc1)OC  
 4130 C=CC(=O)OC.CCOC(=O)c1ccccc1I>>CCOC(=O)c1ccccc1/C=C/C(=O)OC  
 4131 C=CC=O.Oc1ccccc1I>>O=C/C=C/c1ccccc1O  
 4132 C=CS(=O)(=O)N1CCC2(CC1)N=C(C1CCCCC1)NC2=O.CC(=O)Nc1cc(C)c(Br)c(C)c1>>CC(=O)Nc1cc(C)c(/C=C/S(=O)(=O)N2CCC3(CC2)N=C(C2CCCCC2)NC3=O)c(C)c1  
 4133 C=CC(=O)OCC.CCNc1nc(SC)nc(C)c1I>>CCNc1nc(SC)nc(C)c1/C=C/C(=O)OCC  
 4134 C=Cc1ccccc1.Oc1ccc(Br)cc1F>>Oc1ccc(/C=C/c2ccccc2)cc1F  
 4135 C=Cc1cc(OC)c(O)c(OC)c1.O=c1ccc2ccc(OS(=O)(=O)C(F)(F)F)cc2o1>>COc1cc(/C=C/c2ccc3ccc(=O)oc3c2)cc(OC)c1O  
 4136 C=Cc1ccc(OC)cc1.CC(CC=O)CCCC(C)(C)Br>>COc1ccc(/C=C/C(C)(C)CCCC(C)CC=O)cc1  
 4137 C=Cc1cc(O[Si](C)(C)C(C)(C)C)cc(O[Si](C)(C)C(C)(C)C)c1.CC(=O)Oc1ccc(I)cc1>>CC(=O)Oc1ccc(/C=C/c2cc(O[Si](C)(C)C(C)(C)C)cc(O[Si](C)(C)C(C)(C)C)c2)cc1  
 4138 C=Cc1ccccc1.O=c1oc2cc(C(F)(F)F)ccc2c(-c2ccccc2)c1Br>>O=c1oc2cc(C(F)(F)F)ccc2c(-c2ccccc2)c1/C=C/c1ccccc1  
 4139 COc1ccc(I)cc1.Cc1ccc(S(=O)(=O)/C=C2/C(F)(F)C23CCCCC3)cc1>>COc1ccc(/C=C2/C(F)(F)C23CCCCC3)S(=O)(=O)c2ccc(C)cc2)cc1  
 4140 C=C[C@ @]1(O)[C@ @H]([C@H]2COC(C)(C)O2)O[C@ @H]2OC(C)(C)O[C@ @H]21.O=c1cc(-c2ccccc2)oc2cc(Br)ccc12>>CC1(C)OC[C@H]([C@H]2O[C@ @H]3OC(C)(C)O[C@ @H]3[C@ @]2(O)/C=C/c2ccc3c(=O)cc(-c4ccccc4)oc3c2)O1  
 4141 C=CC(=O)OC(C)(C)C.CCC(=C(c1ccc(F)cc1)c1ccc(F)cc1)c1ccc(Br)cc1>>CCC(=C(c1ccc(F)cc1)c1ccc(F)cc1)c1ccc(/C=C/C(=O)OC(C)(C)C)cc1  
 4142 C=Cc1ccc([N+](=O)[O-])cc1.CCCCCCOc1cc(I)ccc1OCCO>>CCCCCOc1cc(/C=C/c2ccc([N+](=O)[O-])cc2)ccc1OCCO  
 4143 C=Cc1ccccc1.CC(=O)Oc1ccc(Br)cc1>>CC(=O)Oc1ccc(/C=C/c2ccccc2)cc1  
 4144 C=Cc1cc(CN2CCN(C)CC2)ccn1.Cc1c(Nc2c(I)cncc2C#N)ccc2[nH]ccc12>>Cc1c(Nc2c(C#N)cncc2/C=C/c2cc(CN3CCN(C)CC3)ccn2)ccc2[nH]ccc12  
 4145 C=CC(=O)OCCCC.O=C1c2ccccc2C(=O)N1c1ccccc(I)c1>>CCCCOC(=O)/C=C/c1ccccc(N2C(=O)c3ccc(cc3C2=O)c1  
 4146 C=Cc1ccccc1.Cc1ccsc1Br>>Cc1ccsc1/C=C/c1ccccc1  
 4147 C=C/C=C/C/CCCCC.Clc1ccc(I)cc1>>CCCCC/C=C/C=C/c1ccc(Cl)cc1  
 4148 C=Cc1ccccc1.N#Cc1cc2ccc(Br)cc2c1ccc1ccccc12>>N#Cc1cc2ccc(/C=C/c3ccccc3)cc2c1ccc1ccccc1  
 4149 C=Cc1cncnc1.COc1ccc(C)c(Nc2c(C#N)cncc3cc(Br)ccc23)c1>>COc1ccc(C)c(Nc2c(C#N)cncc3cc(/C=C/c4ccccc4)ccc23)c1  
 4150 C=CC(=O)OCCCC.Nc1ccc(F)cc1I>>CCCCOC(=O)/C=C/c1cc(F)ccc1N  
 4151 C=CC(=O)N1N=Cc2ccccc2C1C=C(C)C.CCOc1cc(Cc2cnc(N)nc2N)cc(I)c1OCC>>CCOc1cc(Cc2cnc(N)nc2N)cc(/C=C/C(=O)N2N=Cc3ccccc3C2C=C(C)C)c1OCC  
 4152 C=Cc1ccccc1.ClC1CCCCC1>>C(=C/C1CCCCC1)\c1ccccc1  
 4153 C=Cc1ccccc1.COc1cc(Br)c(C=O)c(OC)c1>>COc1cc(/C=C/c2ccccc2)c(C=O)c(OC)c1  
 4154 C=Cc1ccccc1.Oc1ccc(Br)cc1>>Oc1ccc(/C=C/c2ccccc2)cc1  
 4155 Br1ccccc1.C=CS(=O)(=O)c1ccccc1>>O=S(=O)(/C=C/c1ccccc1)c1ccccc1  
 4156 C=CC(=O)OC.COc1ccc2c(c1)CCN(c1ccccc1)C2(C)c1ccc(Br)cc1>>COC(=O)/C=C/c1ccc(C2(C)c3ccc(OC)cc3CCN2c2ccccc2)cc1  
 4157 C=Cc1ccc(OC)cc1.C[Si](C)(C)I>>COc1ccc(/C=C/[Si](C)(C)C)cc1  
 4158 C=COC(C)(C)C.O=S(=O)(c1ccccc1)C(F)(F)Br>>CC(C)(C)O/C=C/C(F)(F)S(=O)(=O)c1ccccc1  
 4159 C=CS(=O)(=O)F.CCOC(=O)c1ccccc1I>>CCOC(=O)c1ccccc1/C=C/S(=O)(=O)F  
 4160 C=CS(=O)c1ccccc1.O=C(O)c1ccc(Br)cc1>>O=C(O)c1ccc(/C=C/S(=O)c2ccccc2)cc1  
 4161 C=CC(N)=O.Fc1cc(Br)cc(C(F)(F)F)c1>>NC(=O)/C=C/c1cc(F)cc(C(F)(F)F)c1  
 4162 C=CC(=O)OC(C)(C)C.O=C1CNe2ncc(Br)cc2CN1>>CC(C)(C)OC(=O)/C=C/c1cnc2c(c1)CNC(=O)CN  
 4163 Br1cnc2ccccc12.C=CS(C)(=O)=O>>CS(=O)(=O)/C=C/c1cnc2ccccc12

C=CC(=O)OC.Cc1cc(Br)ccc1-c1nc2c(C)nn(C3CCCCC3)c2c(=O)[nH]1>>COC(=O)/C=C/c1ccc(-  
c2nc3c(C)nn(C4CCCCC4)c3c(=O)[nH]2)c(OC)c1  
C=Cc1ccc2e(c1)c1cc(/C=C/c3ccc4c(c3)c3cccc3n4CCCCCCC)ccc1n2CCCCCCC.CCCCCCN1c2ccc(  
I)cc2c2cc(C=O)ccc21>>CCCCCCN1c2cccc2c2cc(/C=C/c3ccc4c(c3)c3cc(/C=C/c5ccc6c(c5)c5cc(C=  
O)ccc5n6CCCCCCC)ccc3n4CCCCCCC)ccc21  
C=CC(=O)OC.Cc1c(/C=C/c2cccc2)c2cc(Br)ccc2n1-  
c1cccc1>>COC(=O)/C=C/c1ccc2c(c1)c(/C=C/c1cccc1)c(C)n2-c1cccc1  
C=CCNC(=O)NC(C)(C)CO.Cc1cc(OCc2cccc2)c([C@ @H]2S[C@H](COCc3cccc3)[C@ @H](OCc3  
cccc3)[C@H](OCc3cccc3)[C@H]2OCc2cccc2)cc1Cc1ccc(Br)cc1>>Cc1cc(OCc2cccc2)c([C@ @H]  
2S[C@H](COCc3cccc3)[C@ @H](OCc3cccc3)[C@H](OCc3cccc3)[C@H]2OCc2cccc2)cc1Cc1cc  
c(/C=C/CNC(=O)NC(C)(C)CO)cc1  
C=CCO[C@ @H]iCC(=O)O[C@H](C)U/C=U/U/[C@H](O)Si(C)(C)U(C)(C)U[C@H](C)U[C@H]  
(CC(OC)OC)[C@H](O[C@ @H]2O[C@H](C)[C@ @H](O[C@H]3C[C@ @](C)(O)[C@ @H](OC(=O)  
CC)[C@H](C)O3)[C@H](N(C)C)[C@H]2OC(C)=O)[C@H]1OC.Ic1cccc1>>CCC(=O)O[C@H]1[C  
@H](C)O[C@ @H](O[C@H]2[C@H](N(C)C)[C@ @H](OC(C)=O)[C@H](O[C@ @H]3[C@ @H](OC)  
[C@H](OC/C=C/c4cccc4)CC(=O)O[C@H](C)C/C=C/C=C/[C@H](O)Si(C)(C)C(C)(C)C)[C@H](C)  
C[C@ @H]13C(C)(N)C(N)C[N]C@ @H1?C)C[C@ @H]11(C)N  
C=CC(F)(F)F.O=C(O)c1ccc(I)cc1>>O=C(O)c1ccc(/C=C/C(F)(F)F)cc1  
C=CC(=O)Nc1cccc1NC(=O)OC(C)(C)C.COCC(=O)[C@H]1CN(CC(C)(C)O)C[C@ @H]1c1ccc(Br)c  
c1>>CCOC(=O)[C@H]1CN(CC(C)(C)O)C[C@ @H]1c1ccc(/C=C/C(=O)Nc2cccc2NC(=O)OC(C)(C)  
C=CS(=O)(=O)c1cccc1.O=[N+][[O-]]c1ccc(Br)cc1>>O=[N+][[O-]  
C=CC(=O)OCC.O=Cc1cc(OCc2cccc2)ccc1Br>>CCOC(=O)/C=C/c1ccc(OCc2cccc2)cc1C=O  
C=Cc1cccc1.O=c1c(I)c(-c2cccc2)oc2cccc12>>O=c1c(/C=C/c2cccc2)c(-c2cccc2)oc2cccc12  
C=CCNC(=O)C(F)(F)F.CC(C)CN(C=Nc1nc(=O)n([C@H]2C[C@H](O)[C@ @H](CO)O2)cc1I)CC(C)  
C>>CC(C)CN(C=Nc1nc(=O)n([C@H]2C[C@H](O)[C@ @H](CO)O2)cc1/C=C/CNC(=O)C(F)(F)FC  
C=Cc1cccc(N)c1.CCN1c2ncc(I)cc2C(=O)N(C)c2ccenc21>>CCN1c2ncc(/C=C/c3cccc(N)c3)cc2C(=O)  
N(C)c2ccenc21  
C=CC(=O)OCC.C[Si](C)(C)CN(Cc1cc2c(cc1I)OCO2)C(CC1OCCO1)[Si](C)(C)C>>CCOC(=O)/C=C/  
c1cc2c(cc1CN(C[Si](C)(C)C)C(CC1OCCO1)[Si](C)(C)C)OCO2  
C=CC(=O)OCC.COC(=O)c1cc(Br)c2ccc(C)nc2c1OC>>CCOC(=O)/C=C/c1cc(C(=O)OC)c(OC)c2nc(C)  
)ccc12  
C=Cc1cccc(Cl)c1.Cn1c(=O)c2c(cc(Br)n2C)n(C)c1=O>>Cn1c(=O)c2c(cc(/C=C/c3cccc(Cl)c3)n2C)n(C)  
c1=O  
C=CC(=O)OC.CC(C)(C)OC(=O)NC1(c2ccc(-c3nc4c5cc(Br)ccc5nn4ccc3-  
c3cccc3)cc2)CCC1>>COC(=O)/C=C/c1ccc2nn3cc(-c4cccc4)c(-  
c4ccc(C5(NC(=O)OC(C)(C)C)CCC5)cc4)nc3c2c1  
C=C1C(=O)O[C@ @H]2C[C@ @H](C)C(=O)C/C=C(\C)CC[C@ @H]12.Clc1ccc(I)cc1>>C/C1=C\CC(  
=O)[C@H](C)C[C@H]2OC(=O)/C=C/c3ccc(Cl)cc3)[C@ @H]2CC1  
C=Cc1ccc(C(C)(C)C)cc1.CC[Si](CC)(OS(=O)(=O)C(F)(F)F)OS(=O)(=O)C(F)(F)F>>CC[Si]/C=C/c1c  
cc(C(C)(C)C)cc1)(CC)OS(=O)(=O)C(F)(F)F  
C=C.Ic1cccc1>>C=Cc1cccc1  
C=Cc1ccc(C)cc1.O=[N+][[O-]]c1ccc(Cl)cc1>>Cc1ccc(/C=C/c2ccc([N+](=O)[O-])cc2)cc1  
C=Cc1ccc(N(C)C)cc1.C[Si](C)(C)I>>CN(C)c1ccc(/C=C/[Si](C)(C)C)cc1  
C=CC(=O)OC(CC)CCCC.FC(F)(F)c1ccc(Cl)cc1>>CCCCC(CC)OC(=O)/C=C/c1ccc(C(F)(F)F)cc1  
C=CC(=O)OC.COC(=O)c1cc(C#C[Si](C)(C)C)ccc1OS(=O)(=O)C(F)(F)F>>COC(=O)/C=C/c1ccc(C#  
C[Si](C)(C)C)cc1C(=O)OC  
C=CC(=O)Nc1cccc1.O=C1Cc2c([nH]c3ccc(I)cc23)-  
c2ccenc2N1>>O=C/C=C/c1ccc2[nH]c3c(e2c1)CC(=O)Nc1ncccc1-3)Nc1cccc1  
C=Cc1cccc([N+](=O)[O-])c1.CC(=O)Nc1ccc(Br)cc1>>CC(=O)Nc1ccc(/C=C/c2cccc([N+](=O)[O-]  
C=CC(=O)OC.Ic1cc2cccc2s1>>COC(=O)/C=C/c1cc2cccc2s1  
C=CC(=O)OCC.COc1cc(Br)c(C=O)cc1OC>>CCOC(=O)/C=C/c1cc(OC)c(OC)cc1C=O  
C=C[Si](C)(C)C.Clc1ccc(I)cc1>>C[Si](C)(C)/C=C/c1ccc(Cl)cc1  
C=CC#N.CCN1c2ncc(I)cc2C(=O)N(C)c2ccenc21>>CCN1c2ncc(/C=C/C#N)cc2C(=O)N(C)c2ccenc21  
C=CC(=O)OC.CC(=O)c1cccc(I)c1>>COC(=O)/C=C/c1cccc(C(C)=O)c1  
Br1ccc2ccenc2c1.C=C[C@H]1C[C@ @H](n2ccc3c(Cl)ncnc32)[C@ @H]2OC(C)(C)O[C@ @H]21>>  
CC1(C)O[C@ @H]2[C@H](O1)[C@ @H]/C=C/c1ccc3ccenc3c1)C[C@H]2n1ccc2c(Cl)ncnc21  
C=CCN1C(=O)c2cccc2C1=O.Cc1cc(C)cc(Br)c1>>Cc1cc(C)cc(/C=C/CN2C(=O)c3cccc3C2=O)c1  
C=CC(OCC)OCC.COc1cc(Br)c(C=O)cc1OC>>CCOC(/C=C/c1cc(OC)c(OC)cc1C=O)OCC  
Br1cnenc1.C=Cc1cccc1>>C(=C/c1cnenc1)c1cccc1



C=CC(=O)OCC.CC(C)Cn1c(CNC(=O)OC(C)(C)C)c(-  
 4198 c2cccc2)c2cc(Br)ccc2c1=O>>CCOC(=O)/C=C/c1ccc2c(=O)n(CC(C)C)c(CNC(=O)OC(C)(C)C)c(-  
 c3cccc3)c2c1  
 4199 C=C[C@](CO)(CCC=C(C)C)OCc1ccc(OC)cc1.COc1ccc(OC(C)=O)cc1Br>>COc1ccc(CO[C@](C)/C=C/  
 C/c2cc(OC(C)=O)ccc2OC)(CO)CCC=C(C)C)cc1  
 4200 C=CCN(C)C(=O)OC(C)(C)C.CC(=O)c1ccc(Cl)cc1>>CC(=O)c1ccc(/C=C/CN(C)C(=O)OC(C)(C)C)cc  
 4201 C=CC(=O)OCC.CC(C)(C)OC(=O)NCCCOc1cc(C#N)ccc1I>>CCOC(=O)/C=C/c1ccc(C#N)cc1OCCC  
 NC(=O)OC(C)(C)C  
 4202 C=C(C(=O)OC)[C@H]1CC[C@H]2(C)CCC[C@H](C)(OCOC)[C@H]2C1.COC(=O)c1cccc1Br  
 >>COCO[C@H]1(C)CCC[C@H]2(C)CC[C@H](C)/C(=C)c3cccc3C(=O)OC(C)=O)OC(C)[C@H]21  
 C=CC(C)(C)C(=O)NC(C)(C)CO.CC(=O)OC[C@H]1O[C@H](c2cc(Cc3ccc(Br)cc3F)c(C)cc2C)[C@  
 4203 H](OC(C)=O)[C@H](OC(C)=O)[C@H]1OC(C)=O>>CC(=O)OC[C@H]1O[C@H](c2cc(Cc3ccc  
 c(/C=C/C(C)(C)C(=O)NC(C)(C)CO)cc3F)c(C)cc2C)[C@H](OC(C)=O)[C@H](OC(C)=O)[C@H]  
 4204 C=CC(C)(O)CCC=C(C)C.N#Cc1ccc(O)c(Br)c1>>CC(C)=CCCC(C)(O)/C=C/c1cc(C#N)ccc1O  
 4205 C=CC(C)=O.COc1ccc2cc(Br)ccc2c1>>COc1ccc2cc(/C=C/C(C)=O)ccc2c1  
 C=CCON=C1[C@H](C)[C@H]2OC(=O)O[C@H]2(C)[C@H](CC)OC(=O)[C@H](C)[C@H](O)[C  
 @H](C)[C@H](O)[C@H]2O[C@H](C)C[C@H](N(C)C)[C@H]2OC(C)=O)[C@H](C)(OC)C[C@H]  
 4206 1C.Nc1ncccc1Br>>CC[C@H]1OC(=O)[C@H](C)[C@H](O)[C@H](C)[C@H](O)[C@H]2O[C  
 @H](C)C[C@H](N(C)C)[C@H]2OC(C)=O)[C@H](C)(OC)C[C@H](C)C(=NOC/C=C/c2ccnc2N)[C  
 @H](C)1C.C@H12OC(=O)O[C@H]112C  
 4207 C=CC(=O)N1CCCC1.O=C1Nc2ccc(Br)cc2C1=O>>O=C1Nc2ccc(/C=C/C(=O)N3CCCC3)cc2C1=O  
 4208 C=CCNC(=O)C(F)(F)F.CN(C)C=Nc1nc(=O)n([C@H]2C[C@H](O)[C@H](CO)O2)cc1I>>CN(C)C  
 =Nc1nc(=O)n([C@H]2C[C@H](O)[C@H](CO)O2)cc1/C=C/CNC(=O)C(F)(F)F  
 4209 C=Cc1cccc(Cl)c1.Cn1nc(Br)c2cccc21>>Cn1nc(/C=C/c2cccc(Cl)c2)c2cccc21  
 4210 C=Cc1ccc(C)cc1.Cc1cccc(I)c1>>Cc1ccc(/C=C/c2cccc(C)c2)cc1  
 4211 C=CC(C)=O.CC1=C(OS(=O)(=O)C(F)(F)F)C(C)(C)C[C@H](O[Si](C)(C)C(C)(C)C)C1>>CC(=O)/C=  
 C/C1=C(C)C[C@H](O[Si](C)(C)C(C)(C)C)CC1(C)C  
 4212 C=Cc1ccc(F)cc1.CC(=O)c1ccc(Br)cc1>>CC(=O)c1ccc(/C=C/c2ccc(F)cc2)cc1  
 4213 C=Cc1cccc1.FC(F)(F)Oc1ccc(I)c(Br)c1>>FC(F)(F)Oc1ccc(/C=C/c2cccc2)c(Br)c1  
 4214 C=Cc1ccc(SC)cc1.CN(C)CCc1ncc2cc(Br)ccc2c1=O>>CSc1ccc(/C=C/c2ccc3c(=O)n(CCCN(C)C)ncc  
 3c2)cc1  
 4215 C=Cc1cccc1.COC(=O)c1ccc(Br)cc1NC(=O)c1cccc1>>COC(=O)c1ccc(/C=C/c2cccc2)cc1NC(=O)c  
 1cccc1  
 4216 C=CC(=O)N(C)C.CCOC(=O)c1ccc(Br)cc1>>CCOC(=O)c1ccc(/C=C/C(=O)N(C)C)cc1  
 4217 C=CC(=O)OC.O=C(Nc1cc(Br)ccn1)C1CCCCC1>>COC(=O)/C=C/c1ccnc(NC(=O)C2CCCCC2)c1  
 4218 C=COCCOC=C.Fc1ccc(Br)cc1>>C=COCCOC(=C)c1ccc(F)cc1  
 4219 C=Cc1ccc(F)cc1.O=Cc1cccc1Br>>O=Cc1cccc1/C=C/c1ccc(F)cc1  
 4220 C=CC(=O)OC.Clc1encc(Br)c1>>COC(=O)/C=C/c1encc(Cl)c1  
 4221 C=CCN1C(=O)c2cccc2C1=O.CSc1ccc(Br)cc1>>CSc1ccc(/C=C/CN2C(=O)c3cccc3C2=O)cc1  
 4222 Brc1cccc(N2CCCC2)n1.C=CC(=O)OCCCC>>CCCCOC(=O)/C=C/c1cccc(N2CCCC2)n1  
 4223 C=Cc1ccc(OC)c(O)c1.COc1ccc(OC)c(I)c1>>COc1ccc(OC)c(/C=C/c2ccc(OC)c(O)c2)c1  
 4224 C=CC(=O)C(O[Si](CC)(CC)CC)c1c(OC)ccc(OC)c1OCc1cccc1.COc1cccc(I)c1OCc1cccc1>>CC[Si]  
 (CC)(CC)OC(C(=O)/C=C/c1cccc(OC)c1OCc1cccc1)c1c(OC)ccc(OC)c1OCc1cccc1  
 \*CNCCOCCOCCOCCNC(=O)COc1ccc(C(Cc2cc(OC)cc(OC)c2)NC(=O)c2cccc(C=C)c2)cc1.N#C  
 4225 Cc1cccc1I>>\*CNCCOCCOCCOCCNC(=O)COc1ccc(C(Cc2cc(OC)cc(OC)c2)NC(=O)c2cccc(/C=  
 C/c3cccc3CC#N)c2)cc1  
 4226 Brc1encc1.C=CC(=O)OC(C)(C)C>>CC(C)(C)OC(=O)/C=C/c1encc1  
 4227 Brc1cccn1.C=CS(N)(=O)=O>>NS(=O)(=O)/C=C/c1cccn1  
 4228 C=CC(=O)OC(C)(C)C.O=[N+](O-)]c1cccc(I)c1>>CC(C)(C)OC(=O)/C=C/c1cccc([N+](=O)[O-])c1  
 4229 C=CC(=O)OC.Cc1ccc(C(=C(I)CCSc2cccc2)c2ccc(C)cc2)cc1>>COC(=O)/C=C/C(CCS1cccc1)=C(c  
 1ccc(C)cc1)c1ccc(C)cc1  
 4230 C=CC(=O)NCc1ccc(OC)cc1.CN(C)CCc1c[nH]c2ccc(Br)cc12>>COc1ccc(CNC(=O)/C=C/c2ccc3[nH]c  
 c(CCN(C)C)c3c2)cc1  
 4231 C=CS(=O)(=O)F.Ic1cccc2c1sc1cccc12>>O=S(=O)(F)/C=C/c1cccc2c1sc1cccc12  
 4232 C=CC(=O)OC.Nc1cccc(I)c1>>COC(=O)/C=C/c1cccc(N)c1  
 4233 C=CC(=O)OCCN(C)C.COc1ccc(NC(=O)c2cc(=O)c3cc(Br)ccc3o2)cc1>>COc1ccc(NC(=O)c2cc(=O)c  
 3cc(/C=C/C(=O)OCCN(C)C)ccc3o2)cc1  
 4234 C=CCC(C)C(=O)OCC.COC(=O)c1ccc2cc(Br)ccc2c1>>CCOC(=O)C(C)C/C=C/c1ccc2cc(C(=O)OC)cc  
 4235 C=CC#N.CCOc1noc(C)c1I>>CCOc1noc(C)c1/C=C/C#N  
 4236 C=CC(=O)OC.O=c1c(I)cc2cc(O)ccc12>>COC(=O)/C=C/c1cc2cc(O)ccc2c1=O  
 4237 C=Cc1ccc(C)cc1.FC(F)(F)CI>>Cc1ccc(/C=C/CC(F)(F)F)cc1

4238 C=CC#N.C[Si](C)(C)c1ccccc1I>>C[Si](C)(C)c1ccccc1/C=C/C#N  
 4239 C=Cc1cc(OC)c(O)c(OC)c1.Oc1ccc(O)c(I)c1>>COc1cc(/C=C/c2cc(O)ccc2O)cc(OC)c1O  
 4240 C=Cc1ccc(C(F)(F)F)cc1.CN(C(=O)c1ccccc1)c1ccc2c(c1)[nH]c(=NC(=O)c1ccc(Br)s1)n2CCC(N)=O>  
 >CN(C(=O)c1ccccc1)c1ccc2c(c1)[nH]c(=NC(=O)c1ccc(/C=C/c3ccc(C(F)(F)F)cc3)s1)n2CCC(N)=O  
 4241 C=CC(=O)O.Oc1ccc(Br)cc1>>O=C(O)/C=C/c1ccc(O)cc1  
 4242 C=Cc1ccccc1.O=Cc1ccccc1Br>>O=Cc1ccccc1/C=C/c1ccccc1  
 4243 C=CC(=O)OC.COc1ccc(CN2C(=O)C(=O)c3c(Br)cccc32)cc1>>COC(=O)/C=C/c1cccc2c1C(=O)C(=O)  
 )N2Cc1ccc(OC)cc1  
 C=Cc1ccc(C)nc1.CCN1C[C@]2(OC(=O)c3cc(I)ccc3NC(C)=O)CC[C@H](OC)[C@]34[C@@H]1[C@  
 4244 H](C[C@H]23)[C@@]1(O)C[C@H](OC)[C@H]2C[C@@H]4[C@]1(O)[C@H]2OC>>CCN1C[C@]2  
 (OC(=O)c3cc(/C=C/c4ccc(C)nc4)ccc3NC(C)=O)CC[C@H](OC)[C@]34[C@@H]1[C@H](C[C@H]23  
 )[C@@]1(O)C[C@H](OC)[C@H]2C[C@@H]4[C@]1(O)[C@H]2OC  
 C=CC(=O)NC1CCc2ccccc21.Cc1cn(-c2ccc(Br)cc2C#N)cn1>>Cc1cn(-  
 4245 c2ccc(/C=C/C(=O)NC3CCc4ccccc43)cc2C#N)cn1  
 C=Cc1ccccc1.CCCCCCCCCC(=O)N1CCN(c2ccc(Br)cc2)CC1>>CCCCCCCCC(=O)N1CCN(c2ccc(/  
 4246 C=C/c3ccccc3)cc2)CC1  
 C=COCC.COCC(=O)N1[C@@H]2CC=C(OS(=O)(=O)C(F)(F)F)[C@H]1CC2>>C=C(OCC)C1=CC[C  
 4247 @H]2CC[C@H]1N2C(=O)OCC  
 C=Cc1ccc(Cl)cc1.Cc1ccc(O)c(I)c1>>Cc1ccc(O)c(/C=C/c2ccc(Cl)cc2)c1  
 4248 C=CC(=O)OC.O=C1c2ccc(OS(=O)(=O)C(F)(F)F)cc2C(=O)N1[C@@H](COCC1ccccc1)c1ccccc1>>C  
 4249 OC(=O)/C=C/c1ccc2c(c1)C(=O)N([C@@H](COCC1ccccc1)c1ccccc1)C2=O  
 Bre1enc2nc(Cc3CCN(Cc4ccccc4)CC3)oc2c1.C=CC(=O)OC>>COC(=O)/C=C/c1enc2nc(Cc3CCN(Cc  
 4250 4ccccc4)CC3)oc2c1  
 Bre1ccc2c(cnn2C2CCCCO2)c1.C=Cc1ccccc1>>C(=C/c1ccc2c(cnn2C2CCCCO2)c1)\c1ccccc1  
 4251 C=CC(C)(C)C(=O)NC(C)(C)C(=O)O.COc1cc(C(C)C)c(Cc2ccc(Br)cc2)cc1[C@@H]1O[C@H](COC(  
 4252 C)=O)[C@@H](OC(C)=O)[C@H](OC(C)=O)[C@H]1OC(C)=O>>COc1cc(C(C)C)c(Cc2ccc(/C=C/C(  
 C)(C)C(=O)NC(C)(C)C(=O)O)cc2)cc1[C@@H]1O[C@H](COC(C)=O)[C@@H](OC(C)=O)[C@H](O  
 C(C)=O)[C@H]1OC(C)=O  
 4253 C=CC(=O)OC(C)(C)C.CCCCc1cc(Cl)c2ccccc2n1>>CCCCc1cc(/C=C/C(=O)OC(C)(C)C)c2ccccc2n1  
 4254 C=CC(=O)OCC.CN1Cc2cc(Br)ccc2C1=O>>CCOC(=O)/C=C/c1ccc2c(c1)CN(C)C2=O  
 4255 C=CC(=O)OC.COc1ccc(-c2cc3cc(Br)cc(OC)c3o2)cc1OC>>COC(=O)/C=C/c1cc(OC)c2oc(-  
 c3ccc(OC)c(OC)c3)cc2c1  
 4256 \*NC(=O)c1ccc(C=C)cc1.Cc1ccc(C#N)cc1I>>\*NC(=O)c1ccc(/C=C/c2cc(C#N)ccc2C)cc1  
 4257 C=CC(=O)OC.CC(C)(C)[Si](C)(C)OC(CCO)c1ccccc2ccc(Br)cc12>>COC(=O)/C=C/c1ccc2ccccc(C(C  
 O)O[Si](C)(C)C(C)(C)C)c2c1  
 4258 C=CC(=O)OC.Ic1ccc1>>COC(=O)/C=C/c1ccc1  
 4259 C=CC(=O)OC(C)(C)C.CC(C)(C)OC(=O)CCOCc1cc2c(cc1Br)OCO2>>CC(C)(C)OC(=O)/C=C/c1cc2c  
 (cc1COCCC(=O)OC(C)(C)C)OCO2  
 4260 C=Cc1ccccc1.C[Si](C)(C)I>>C[Si](C)(C)/C=C/c1ccccc1  
 4261 C=Cc1ccc(Cl)cc1.CC(=O)NS(=O)(=O)c1ccc(Br)cc1>>CC(=O)NS(=O)(=O)c1ccc(/C=C/c2ccc(Cl)cc2)  
 4262 C=Cc1ccc(OC)c2oc(CCCC)cc12.COc1ccc(Br)en1>>CCCCc1cc2c(/C=C/c3ccc(OC)nc3)ccc(OC)c2o1  
 4263 C=CS(C)(=O)=O.CC(=O)c1ccc(Br)cc1>>CC(=O)c1ccc(/C=C/S(C)(=O)=O)cc1  
 4264 C=Cc1ccc(N(c2ccccc2)c2ccccc2)cc1.CCCCC(C)CN1C(=O)c2ccc3c(Br)ccc(c23)C1=O>>CCCCC(C  
 C)CN1C(=O)c2ccc3c(/C=C/c4ccc(N(c5ccccc5)c5ccccc5)cc4)ccc(c23)C1=O  
 4265 C=CCC(O)C1(Sc2ccccc2)CCCCC1.Ic1ccccc1>>OC(C/C=C/c1ccccc1)C1(Sc2ccccc2)CCCCC1  
 4266 C=Cc1ccccc1F.O=S(=O)(c1ccc(Br)cc1)c1ccccc1CN1CCCC(F)C1>>O=S(=O)(c1ccc(/C=C/c2ccccc2F)  
 cc1)c1ccccc1CN1CCCC(F)C1  
 4267 Bre1ccc2ccc3ccccc4ccc1c2c34.C=Cc1ccc(OC(C)=O)cc1>>CC(=O)Oc1ccc(/C=C/c2ccc3ccc4ccccc5ccc2  
 c3c45)cc1  
 4268 C=CCN(C(=O)C(F)(F)F)c1ccccc1C#Cc1ccccc1.COc1ccc(I)cc1>>COc1ccc(/C=C/CN(C(=O)C(F)(F)F)  
 c2ccccc2C#Cc2ccccc2)cc1  
 Bre1cc2ccccc2c2ccccc12.C=Cc1nc2c(N)ncnc2n1[C@@H]1O[C@H](CO[Si](C)(C)C(C)(C)C)[C@@H  
 4269 ](O[Si](C)(C)C(C)(C)C)[C@H]1O[Si](C)(C)C(C)(C)C>>CC(C)(C)[Si](C)(C)OC[C@H]1O[C@@H](n  
 2c(/C=C/c3cc4ccccc4c4ccccc34)nc3c(N)ncnc32)[C@H](O[Si](C)(C)C(C)(C)C)[C@@H]1O[Si](C)(C)  
 4270 C=CC(=O)O.Cc1ccc(S(=O)(=O)Nc2ccc(I)cc2)cc1>>Cc1ccc(S(=O)(=O)Nc2ccc(/C=C/C(=O)O)cc2)cc1  
 4271 C=CC(=O)OC.COc1cc[nH]c1/C=C/C1(C(=O)Nc2ccc(I)c21)>>COC(=O)/C=C/c1cccc2c1/C=C/c1[nH]c  
 cc1OC)C(=O)N2  
 4272 C=CC(=O)OC(C)(C)C.O=Cc1cc(O)ccc1Br>>CC(C)(C)OC(=O)/C=C/c1ccc(O)cc1C=O  
 4273 C=CC(O)CCCCC.c1ccc([I+](c2cccs2)cc1)>>CCCCC(O)/C=C/c1cccs1  
 4274 C=CC=O.CCCCCC1=C(I)C1(F)F>>CCCCC1=C(/C=C/C=O)C1(F)F

4275 C=Cc1ccc(OC)cc1.COc1ccc2c(c1)cc(C#N)c1ccc(Br)cc12>>COc1ccc(/C=C/c2ccc3c(C#N)cc4cc(OC)ccc4c3c2)cc1  
 4276 C=CC=O.COC(=O)c1ccc(I)cc1OC>>COC(=O)c1ccc(/C=C/C=O)cc1OC  
 4277 C=Cc1ccc2ccccc2c1.CCN1c2ncc(I)cc2C(=O)N(C)c2ccnc21>>CCN1c2ncc(/C=C/c3ccc4ccccc4c3)cc2C(=O)N(C)c2ccnc21  
 4278 C=CC(=O)CC.CCOc1ncc(Br)c2ccccc12>>CCOc1ncc(/C=C/C(=O)CC)c2ccccc12  
 4279 C=CC(=O)OCCN(C)C.Cc1ccc(NC(=O)c2cc(=O)c3cc(Br)ccc3o2)cc1C>>Cc1ccc(NC(=O)c2cc(=O)c3cc(/C=C/C(=O)OCCN(C)C)ccc3o2)cc1C  
 4280 C=CC(=O)O.O=C1c2ccccc2CCc2ccc(Br)cc21>>O=C(O)/C=C/c1ccc2c(c1)C(=O)c1ccccc1CC2  
 4281 Br1cnc2ccccc12.C=CC(=O)OCCCC>>CCCCOC(=O)/C=C/c1cnc2ccccc12  
 4282 Br1cccs1.C=CCOc1ccccc1>>C(=C/c1cccs1)\COc1ccccc1  
 4283 C=CC(=O)OC(C)(C)C.COc1ccc(CCC(=O)Oc2ccc(I)cc2CC=C(C)C)cc1>>COc1ccc(CCC(=O)Oc2ccc(/C=C/C(=O)OC(C)(C)C)cc2CC=C(C)C)cc1  
 4284 C=CP(=O)(OCC)OCC.Cc1cccc(Br)c1>>CCOP(=O)(/C=C/c1cccc(C)c1)OCC  
 4285 C=CC(O)c1cc(OC)c(OC)c(OC)c1.Br.COc1ccccc(I)c1>>COc1ccccc(/C=C/C(O)c2cc(OC)c(OC)c(OC)c2B  
 4286 C=Cc1cc2cc(OC)c(OC)cc2oc1=O.O=[N+][([O-])c1ccc(I)cc1>>COc1cc2cc(/C=C/c3ccc([N+](=O)[O-])cc3)c(=O)oc2cc1OC  
 4287 C=CC(=O)OCC.COc1ncc(Br)c(N)n1>>CCOC(=O)/C=C/c1cnc(OC)nc1N  
 4288 C=CC(=O)O.Cc1ccc(NS(=O)(=O)c2ccc(I)cc2)cc1>>Cc1ccc(NS(=O)(=O)c2ccc(/C=C/C(=O)O)cc2)cc1  
 4289 C=CCCC(=O)O.Ic1cccs1>>O=C(O)CC/C=C/c1cccs1  
 4290 C=Cc1cncnc1.CCCCCCCCOCc1ccc(I)cc1>>CCCCCCCCOCc1ccc(/C=C/c2ccncc2)cc1  
 4291 C=CC(=O)OC(C)(C)C.O=C(C=C(c1ccccc1)c1ccccc1)c1ccccc1Br>>CC(C)(C)OC(=O)/C=C/c1ccccc1C(=O)C=C(c1ccccc1)c1ccccc1  
 4292 C=CC(=O)O.Cc1cc(Br)cc(C)c1N>>Cc1cc(/C=C/C(=O)O)cc(C)c1N  
 4293 C=Cc1cc(C(C)(C)C)c(OC(C)=O)c(C(C)(C)C)c1.CC1(C)c2ccc(I)cc2C(C)(C)N1[O]>>CC(=O)Oc1c(C(C)(C)C)cc(/C=C/c2ccc3c(c2)C(C)(C)N([O])C3(C)C)cc1C(C)(C)C  
 4294 C=CS(=O)(=O)c1ccccc1.COc1ccc(Br)cc1>>COc1ccc(/C=C/S(=O)(=O)c2ccccc2)cc1  
 4295 Br1cc2ccccc2c2ccccc12.C=CC(=O)OC>>COC(=O)/C=C/c1cc2ccccc2c2ccccc12  
 4296 C=CC#N.CS(=O)(=O)c1ccc(I)c(C(=O)N2CCN(c3ccc(C#N)cc3)CC2)c1>>CS(=O)(=O)c1ccc(/C=C/C#N)c(C(=O)N2CCN(c3ccc(C#N)cc3)CC2)c1  
 4297 C=CCNC(=O)OC(C)(C)C.COC(=O)c1ccc(Cl)cc1>>C=C(CNC(=O)OC(C)(C)C)c1ccc(C(=O)OC)cc1  
 4298 C=CC1(O)CCC2(CC1)OCCO2.CCOC(=O)c1ccccc(I)c1>>CCOC(=O)c1ccccc(/C=C/C2(O)CCC3(CC2)OCCO3)c1  
 4299 C=Cc1ccc(F)cc1.CC(C)(C)Br>>CC(C)(C)/C=C/c1ccc(F)cc1  
 4300 Br1ccc(-c2cnc3ccccc3n2)cc1.C=CCn1c(-c2ccc([N+](=O)[O-])cc2)nc2ccccc2c1=O>>O=c1c2ccccc2nc(-c2ccc([N+](=O)[O-])cc2)n1C/C=C/c1ccc(-  
 4301 C=CC(=O)O.COc1ccc(I)cc1>>COc1ccc(/C=C/C(=O)O)cc1  
 4302 C=CC(=O)OC(C)(C)C.FC(F)Cn1cc(I)cn1>>CC(C)(C)OC(=O)/C=C/c1cnn(CC(F)F)c1  
 4303 C=CC(=O)OC.O=[N+][([O-])c1ccccc1Cl>>COC(=O)/C=C/c1cnc1[N+](=O)[O-]  
 4304 C=CNC(C)=O.N#Cc1ccc(Br)cc1>>C=C(NC(C)=O)c1ccc(C#N)cc1  
 4305 C=CC(N)=O.Nc1cnc1Br>>NC(=O)/C=C/c1ccnc1N  
 4306 C=Cc1ccccc1.Clc1ccc(-c2cnc3ccccc23)cc1>>C(=C/c1ccc(-c2cnc3ccccc23)cc1)\c1ccccc1  
 4307 C=C(OC(=O)c1ccccc1)C(=O)OC.CC(=O)OCc1c(I)ccc(NC(=O)OC(C)(C)C)c1C>>COC(=O)/C=C/c1ccccc1ccc(NC(=O)OC(C)(C)C)c(C)c1COC(C)=O)OC(=O)c1ccccc1  
 4308 C=C(F)C(=O)OC.Ic1ccccc1>>COC(=O)/C(F)=C/c1ccccc1  
 4309 C=Cc1ccc(N(c2ccc(OCCCCC)cc2)c2ccc(OCCCCC)cc2)cc1.O=Cc1ccc(Br)cc1>>CCCCCOCc1ccc(N(c2ccc(/C=C/c3ccc(C=O)cc3)cc2)c2ccc(OCCCCC)cc2)cc1  
 4310 C=CC(=O)OCC.CC(C)(C)OC(=O)c1cc(Cn2cccn2)ccc1I>>CCOC(=O)/C=C/c1ccc(Cn2cccn2)cc1C(=O)OC(C)(C)C  
 4311 C=CC(=O)OC(C)(C)C.COc1cccc(CCC(=O)Oc2ccc(I)cc2CC=C(C)C)c1>>COc1cccc(CCC(=O)Oc2ccc(/C=C/C(=O)OC(C)(C)C)cc2CC=C(C)C)c1  
 4312 C=Cc1ccc(F)c(F)c1.COc1ccc(CN2C(=O)C(=C(c3ccc(O)cc3)c3ccc(O)cc3)c3cc(Br)ccc32)cc1>>COc1ccc(CN2C(=O)C(=C(c3ccc(O)cc3)c3ccc(O)cc3)c3cc(/C=C/c4ccc(F)c(F)c4)ccc32)cc1  
 4313 C=Cc1ccc(OC)cc1.Cn1c(/C=C/c2ccc(Cl)cc2)c(I)c(=O)c2ccccc21>>COc1ccc(/C=C/c2c(/C=C/c3ccc(Cl)cc3)n(C)c3ccccc3c2=O)cc1  
 4314 C=C1C(=O)O[C@H]2[C@H]1CCC(=C)[C@H]1C[C@H](OC(C)=O)C(=C)[C@H]21.COc1ccccc([N+](=O)[O-])c1I>>C=C1CC[C@H]2/C=C(\c3c(OC)ccccc3[N+](=O)[O-])C(=O)O[C@@H]2[C@H]2C(=C)[C@H]1(OC(C)=O)C[C@H]12  
 4315 C=Cc1ccccc1OC.Cc1c(Nc2c(I)cncc2C#N)ccc2[nH]ccc12>>COc1ccccc1/C=C/c1cncc(C#N)c1Nc1ccc2[nH]ccc2c1C  
 4316 Br1ccsc1.C=Cc1ccccc1N>>Nc1ccccc1/C=C/c1ccsc1

4317 C=CC(N)=O.COC(=O)c1ccc(I)cc1>>COC(=O)c1ccc(/C=C/C(N)=O)cc1  
 4318 C=C(OC)C1=C(Br)C(O[Si](C)(C)C(C)C)CCC1.C=CC(=O)OC(C)(C)C>>C=C(OC)C1=C(/C=C/C(=O)OC(C)(C)C)C(O[Si](C)(C)C(C)C)CCC1  
 4319 C=CC(=O)OC.O=Cc1ccc(Cl)cc1>>COC(=O)/C=C/c1ccc(C=O)cc1  
 4320 C=CP(=O)(OCC)OCC.CN(C)c1ccc(Br)cc1>>CCOP(=O)(/C=C/c1ccc(N(C)C)cc1)OCC  
 4321 C=CC(=O)OCC.CCC(C)c1nc(C(C)CC)c(Cl)n1>>CCOC(=O)/C=C/c1nc(C(C)CC)nc1C(C)CC  
 4322 C=CCN(C(=O)OC(C)(C)C)C(=O)OC(C)(C)C.COc1cc(Cl)cc(OC)c1OC>>COc1cc(/C=C/CN(C(=O)OC(C)(C)C)C(=O)OC(C)(C)C)cc(OC)c1OC  
 4323 C=CCc1c(OCc2ccccc2)ccc2c(=O)ccoc12.Ic1ccccc1>>O=c1ccoc2c(C/C=C/c3ccccc3)c(OCc3ccccc3)cc  
 4324 C=CCN(C(=O)OC(C)(C)C)C(=O)OC(C)(C)C.Cc1cccc(Cl)c1>>Cc1cccc(/C=C/CN(C(=O)OC(C)(C)C)C(=O)OC(C)(C)C)c1  
 4325 CC(=O)/C=C/CC(NS(=O)(=O)c1ccc(C)cc1)C(C)C.Cc1ccc(Br)cc1>>CC(=O)/C=C(/CC(NS(=O)(=O)c1ccc(C)cc1)C(C)C)c1ccc(C)cc1  
 4326 C=C(Br)CC.C=Cc1ccc(OC)cc1>>C=C(/C=C/c1ccc(OC)cc1)CC  
 4327 C=CC(=O)OC(C)(C)C.O=S(=O)(c1ccc(Br)cc1)c1ccc2ccccc2n1>>CC(C)(C)OC(=O)/C=C/c1ccc(S(=O)(=O)c2ccc3ccccc3n2)cc1  
 4328 C=CC(=O)OC(C)(C)C.COc1ccc(Br)cc1C=O>>COc1ccc(/C=C/C(=O)OC(C)(C)C)cc1C=O  
 4329 C=CCn1c(-c2ccccc2)nc2ccccc2c1=O.O=C(CN1C(=O)COc2ccccc21)c1ccc(Br)cc1>>O=C(CN1C(=O)COc2ccccc21)c1ccc(/C=C/Cn2c(-c3ccccc3)nc3ccccc3c2=O)cc1  
 4330 C=Cc1ccc2c(c1)C(CCCCCCCC)(CCCCCCCC)c1cc(/C=C/c3ccc4c(c3)C(CCCCCCCC)(CCCCCCCC)c3ccccc3-4)ccc1-2.CCCCCCCCC1(CCCCCCCC)c2cc(Br)ccc2-c2ccc(C=O)cc21>>CCCCCCCCC1(CCCCCCCC)c2ccccc2-c2ccc(/C=C/c3ccc4c(c3)C(CCCCCCCC)(CCCCCCCC)c3cc(/C=C/c5ccc6c(c5)C(CCCCCCCC)(CCCCCCCC)c5cc(C=O)ccc5-6)ccc3-4)cc21  
 4331 C=COCCCC.COc1cccc(Br)c1>>C=C(OCCCC)c1cccc(OC)c1  
 4332 C=CC(=O)OC.CCCN(CCC)C1CCc2cc(Br)ccc2C1>>CCCN(CCC)C1CCc2cc(/C=C/C(=O)OC)ccc2C1  
 4333 Br1cccc2ccccc12.C=CCCCCCC>>C=C(CCCCCC)c1cccc2ccccc12  
 4334 C=Cc1cccc1.CC(=O)c1cccc(Cl)c1>>CC(=O)c1cccc(/C=C/c2ccccc2)c1  
 4335 C=CC(=O)OC.CCc1ccc(I)cc1CO>>CCc1ccc(/C=C/C(=O)OC)cc1CO  
 4336 Br1ccc(OCCCCc2ccccc2)cc1.C/C=C(\CCO)C(=O)OCC>>CCOC(=O)/C(CCO)=C(\C)c1ccc(OCCCCc2ccccc2)cc1  
 4337 C=C(NC(=O)OCC)C(=O)OC.CCOC(=O)c1[nH]c2ccccc2c1Br>>CCOC(=O)N/C(=C\c1c(C(=O)OCC)[nH]c2ccccc12)C(=O)OC  
 4338 C=CC(=O)N(C)C.Oc1ccc2c(c1)CCN(c1ccccc1)C2c1ccc(I)cc1>>CN(C)C(=O)/C=C/c1ccc(C2c3ccc(O)cc3CCN2c2ccccc2)cc1  
 4339 CC(=O)/C=C/CC(NS(=O)(=O)c1ccc(C)cc1)C1CCCCC1.Cc1ccc(Br)cc1>>CC(=O)/C=C(/CC(NS(=O)(=O)c1ccc(C)cc1)C1CCCCC1)c1ccc(C)cc1  
 4340 Br1cccc(I)c1.C=CS(=O)(=O)F>>O=S(=O)(F)/C=C/c1cccc(Br)c1  
 4341 C=C(NC(=O)OC(C)(C)C)C(=O)OC.N#Cc1cccc(I)c1>>COC(=O)/C=C/c1cccc(C#N)c1)NC(=O)OC(C)(C)C  
 4342 C=Cc1cccc(O)c1.Nc1ccc(Br)cc1>>Nc1ccc(/C=C/c2ccccc2)c2cc1  
 4343 C=CC(=O)OC.COc1cc(Br)c2c3c1O[C@@H]1[C@@]34CCN(C)[C@H](C2)[C@]42C=C[C@@]1(OC)[C@H]1C(=O)NC(=O)[C@H]12>>COC(=O)/C=C/c1cc(OC)c2c3c1C[C@H]1N(C)CC[C@@]34[C@@H](O2)[C@@]2(OC)C=C[C@@]14[C@@H]1C(=O)NC(=O)[C@@H]12  
 4344 C=CC(=O)OCC.CC(C)(C)OC(=O)N(Cc1cccc(Br)c1)c1nc(C(F)(F)F)co1>>CCOC(=O)/C=C/c1cccc(CN(C(=O)OC(C)(C)C)c2nc(C(F)(F)F)co2)c1  
 4345 C=CC(=O)OCC.C[Si](C)(C)CN(Cc1cc2c(cc1I)OCO2)C[Si](C)(C)C>>CCOC(=O)/C=C/c1cc2c(cc1CN(C[Si](C)(C)C)C[Si](C)(C)C)OCO2  
 4346 C=C.FC(F)(F)c1ccc(I)cc1>>C=Cc1ccc(C(F)(F)F)cc1  
 4347 C=CC(=O)O.COC(=O)c1cc(Br)cs1>>COC(=O)c1cc(/C=C/C(=O)O)cs1  
 4348 C=Cc1ccc(C#N)cc1.CC(C)=CBr>>CC(C)=C/C=C/c1ccc(C#N)cc1  
 4349 C=Cc1ccc(C)c(C)c1.COc1ccc(CN2C(=O)C(=C(c3ccc(O)cc3)c3ccc(O)cc3)c3cc(Br)ccc32)cc1>>COc1ccc(CN2C(=O)C(=C(c3ccc(O)cc3)c3ccc(O)cc3)c3cc(/C=C/c4ccc(C)c(C)c4)ccc32)cc1  
 4350 C=Cc1ccccc1.CN1C(=O)CC[C@H]1c1nc(Br)c1>>CN1C(=O)CC[C@H]1c1nc(Br)c1cc1  
 4351 C=Cc1ccc(C(=O)OCC)cc1.CCSC1=CCC(C)(C)c2ccc(Br)cc21>>CCOC(=O)c1ccc(/C=C/c2ccc3c(c2)C(SCC)=CCC3(C)C)cc1  
 4352 C=CC(=O)OC.CC(=O)Nc1ccccc1I>>COC(=O)/C=C/c1ccccc1NC(C)=O  
 4353 C=Cc1ccccc1.COC(=O)c1cc(C)cc(I)c1>>COC(=O)c1cc(C)cc(/C=C/c2ccccc2)c1  
 4354 C=CCC(=O)OC(C)(C)C.C[C@H](O)c1ccc2ccc(Br)cc2n1>>C[C@H](O)c1ccc2ccc(/C=C/CC(=O)OC(C)(C)C)cc2n1

4355 C=CC[C@@H](NC(=O)OC(C)(C)C(=O)OC.COC(=O)c1cscc1Br>>COC(=O)c1cscc1/C=C/C[C@@H](NC(=O)OC(C)(C)C(=O)OC  
 4356 C=Cc1cccc1C.O=Cc1cccc1Br>>Cc1cccc1/C=C/c1cccc1C=O  
 4357 C=CC(=O)OCC(CC)CCCC.COc1ccc(Cl)cc1>>CCCC(CC)COC(=O)/C=C/c1ccc(OC)cc1  
 4358 C=Cc1ccc(F)cc1.N#Cc1ccc(Br)cc1>>N#Cc1ccc(/C=C/c2ccc(F)cc2)cc1  
 4359 C=Cc1cccc1C.Cc1ccc(N)c(Br)c1>>Cc1ccc(N)c(/C=C/c2ccccc2C)c1  
 4360 C=CC(=O)OCC.Nc1c(I)cnc(Cl)c1Br>>CCOC(=O)/C=C/c1cnc(Cl)c(Br)c1N  
 4361 C=CC(=O)OCC.Cc1ccc(Br)c(Cn2nnc(C)n2)c1>>CCOC(=O)/C=C/c1ccc(C)cc1Cn1nnc(C)n1  
 4362 C=CC(C)=O.CNC(=O)c1c2cc(C3CC3)c(I)cc2nn1-c1ccc(Br)cc1>>CNC(=O)c1c2cc(C3CC3)c(/C=C/C(C)=O)cc2nn1-c1ccc(Br)cc1  
 4363 BrC1cnc2ccccc12.C=CP(=O)(OCC)OCC>>CCOP(=O)/C=C/c1cnc2ccccc12)OCC  
 4364 C=Cc1ccc2cc(F)c(F)cc2n1.OC1c2cc(Br)ccc2OCc2ncccc21>>OC1c2cc(/C=C/c3ccc4cc(F)c(F)cc4n3)cc2OCc2ncccc21  
 4365 C=Cc1cccc1.CCCCCCCCOC1cc(/C=C/c2ccc([N+](=O)[O-])cc2)c(OCCCCCCCC)cc1/C=C/c1ccc(Br)cc1>>CCCCCCCCOC1cc(/C=C/c2ccc([N+](=O)[O-])cc2)c(OCCCCCCCC)cc1/C=C/c1ccc(/C=C/c2ccccc2)cc1  
 4366 C=Cc1cccc1.Nc1ccc(Cl)cc1I>>Nc1ccc(Cl)cc1/C=C/c1cccc1  
 4367 C=C[Si](CC)(CC)CC.COc1ccc(Br)cc1>>CC[Si](/C=C/c1ccc(OC)cc1)(CC)CC  
 4368 C=CC(=O)OC(C)(C)C.CN1CCN(C(=O)/C=C/c2ccc(Br)cc2)CC1>>CN1CCN(C(=O)/C=C/c2ccc(/C=C/C(=O)OC(C)(C)C)cc2)CC1  
 4369 C=CC(=O)OCCCC.CCN(CC)c1ccc(Br)cc1>>CCCCOC(=O)/C=C/c1ccc(N(CC)CC)cc1  
 4370 C=COCCCC.Clc1cccs1>>C=C(OCCCC)c1cccs1  
 4371 C=CC(=O)OCC.Cc1ccc(I)c([N+](=O)[O-])c1>>CCOC(=O)/C=C/c1ccc(C)cc1[N+](=O)[O-]  
 4372 C=Cc1ccc(OC(C)=O)cc1.O=Cc1ccc(N(c2ccccc2)c2ccc(Br)cc2)cc1>>CC(=O)Oc1ccc(/C=C/c2ccc(N(c3ccccc3)c3ccc(C=O)cc3)cc2)cc1  
 4373 C=CC(=O)O.O=C(O)c1cccc(I)c1>>O=C(O)/C=C/c1cccc(C(=O)O)c1  
 4374 C=Cc1ccnc1.COc1ccc2c(ccc3ccc4ccc(Br)cc4c32)c1>>COc1ccc2c(ccc3ccc4ccc(/C=C/c5ccccc5)cc4c32)c1  
 4375 C=CC(=O)OC(C)(C)C.O=[N+](O-)]c1cccc(S(=O)(=O)N2CCc3cc(Br)cnc32)c1>>CC(C)(C)OC(=O)/C=C/c1cnc2c(c1)CCN2S(=O)(=O)c1cccc([N+](=O)[O-])c1  
 4376 C=Cc1cccc1.COC(=O)c1cc(Br)ccc1Cl>>COC(=O)c1cc(/C=C/c2ccccc2)ccc1Cl  
 4377 C=Cc1cnccl1.CC(C)=CBr>>CC(C)=C/C=C/c1cnccl1  
 4378 C=CC(OCC)OCC.Clc1ccc(I)cc1>>CCOC(/C=C/c1ccc(Cl)cc1)OCC  
 4379 C=CCO[C@]1(C)C[C@H](C)C(=O)[C@H](C)[C@H](O)[C@H](C)(O)[C@H](CC)OC(=O)[C@H](C)C(=O)[C@H](C)[C@H]1O[C@H]1O[C@H](C)C[C@H](N(C)C)[C@H]1OC(=O)c1cccc1.Clc1ccc(I)cc1>>CC[C@H]1OC(=O)[C@H](C)C(=O)[C@H](C)[C@H](O)[C@H]2O[C@H](C)C[C@H](N(C)C)[C@H]2OC(=O)c2ccccc2)[C@H](C)(OC/C=C/c2ccc(Cl)cc2)[C@H](C)C(=O)[C@H](C)[C@H](O)[C@H](O)[C@H]1(C)O  
 4380 OCc1cccc1I.[11CH2]=Cc1cccc1>>OCc1cccc1/[11CH]=C/c1cccc1  
 4381 BrC1ccc1cc1.C=Cc1cccc(OC)c1>>COc1cccc(/C=C/c2ccc(Br)cc2)c1  
 4382 C=Cc1ccnc1.C[C@H]1CC[C@H](Cn2cc(I)c3nc(C#N)nc(-c4cncc(Cl)c4)c32)CC1>>C[C@H]1CC[C@H](Cn2cc(/C=C/c3ccccc3)c3nc(C#N)nc(-c4cncc(Cl)c4)c32)CC1  
 4383 C=C.ClCc1csc2ccccc12>>C=CCc1csc2ccccc12  
 4384 OCCOCCOCCOC1ccc(I)cn1.[2H]C([2H])([2H])N(C(=O)OC(C)(C)C)c1ccc(C=C)cc1>>[2H]C([2H])([2H])N(C(=O)OC(C)(C)C)c1ccc(/C=C/c2ccc(OCCOCCOCCO)nc2)cc1  
 4385 C=CC(=O)OC.N#Cc1ccc(I)cc1Cl>>COC(=O)/C=C/c1ccc(C#N)c(Cl)c1  
 4386 C=CC(=O)OCCCC.CCOC(=O)/C=C/c1cc(Br)cnc1C(=O)N(CC)CC>>CCCCOC(=O)/C=C/c1cnc(C(=O)N(CC)CC)c(/C=C/C(=O)OCC)c1  
 4387 C=Cc1ccc(O)cc1.COC(=O)Cn1c(=O)c(Cl)nc2ccccc21>>COC(=O)Cn1c(=O)c(/C=C/c2ccc(O)cc2)nc2ccccc21  
 4388 C=CC(=O)OC.COc1c(CN(C(=O)c2ccccc2)c2ccc(Br)c2)ccc2c1OC(C)(C)[C@@H](O)[C@H]2O>>COC(=O)/C=C/c1cccc(N(Cc2ccc3c(c2OC)OC(C)(C)[C@@H](O)[C@H]3O)C(=O)c2ccccc2)c1  
 4389 C=C1CC(c2ccc(Cl)cc2)OC1=O.COc1ccc(I)c1>>COc1cccc(/C=C2)CC(c3ccc(Cl)cc3)OC2=O)c1  
 4390 C=CN1C(=O)c2ccccc2C1=O.Cc1ccc(Cl)cc1>>Cc1ccc(/C=C/N2C(=O)c3ccccc3C2=O)cc1  
 4391 C=CC(=O)OC(C)(C)C.Cc1cc(C)cc(I)c1>>Cc1cc(C)cc(/C=C/C(=O)OC(C)(C)C)c1  
 4392 C=Cc1ccc(OC)cc1.Cc1ncc(-c2ccc(Cl)cc2)n1C>>COc1ccc(/C=C/c2ccc(-c3cnc(C)n3C)cc2)cc1  
 4393 C=Cc1ccc(Cl)cc1.CCOC(=O)C(C)(C)Br>>CCOC(=O)C(C)(C)/C=C/c1ccc(Cl)cc1  
 4394 C=CN1CCCC1=O.COc1ccc(Cl)cc1>>C=C(c1ccc(OC)cc1)N1CCCC1=O

4395 C=C[C@](C)(CCC=C(C)C)CO[Si](c1ccccc1)(c1ccccc1)C(C)(C)C.COc1ccc(I)cc1>>COc1ccc(/C=C/[C  
@](C)(CCC=C(C)C)CO[Si](c2ccccc2)(c2ccccc2)C(C)(C)C)cc1  
4396 C=CC(=O)OCC.CCCCc1ccc(-c2ccc(I)cc2OCCO)cc1>>CCCCc1ccc(-  
c2ccc(/C=C/C(=O)OCC)cc2OCCO)cc1  
4397 C=CC(=O)OC.COc1ccc(-c2oc3cc(OC)ccc3c(=O)c2I)cc1>>COC(=O)/C=C/c1c(-  
c2ccc(OC)cc2)oc2cc(OC)ccc2c1=O  
4398 C=CC(=O)OCC.CCc1nc2cc(OC)ccc2c(Oc2ccc(Br)cc2)c1-c1ccccc1>>CCOC(=O)/C=C/c1ccc(Oc2c(-  
c3ccccc3)c(CC)nc3cc(OC)ccc23)cc1  
4399 C=CC(=O)OCCCC.O=[N+][([O-])c1ccccc1Br>>CCCCOC(=O)/C=C/c1ccccc1[N+](=O)[O-]  
C=C[C@ @H](C)[C@H]1CC[C@H]2[C@ @H]3CC(=O)[C@H]4C[C@H](O)CC[C@]4(C)[C@H]3CC  
4400 [C@ @]21C.Ic1cccc2ccccc12>>C[C@H](/C=C/c1cccc2ccccc12)[C@H]1CC[C@H]2[C@ @H]3CC(=O  
)[C@H]4C[C@H](O)CC[C@]4(C)[C@H]3CC[C@ @]21C  
4401 C=CC(=O)N(C)C.Ic1ccccc1C#Cc1ccccc1>>CN(C)C(=O)/C=C/c1ccccc1C#Cc1ccccc1  
4402 C=CC(OCC)OCC.O=[N+][([O-])c1ccc(Br)cn1>>CCOC(/C=C/c1ccc([N+](=O)[O-])nc1)OCC  
4403 C=CC(N)=O.COc1ccc(Br)cc1>>COc1ccc(/C=C/C(N)=O)cc1  
4404 C=CC(=O)OC.COc1cc2c(cc1OC)Oc1c(cc(Br)cc1OC)C=C2>>COC(=O)/C=C/c1cc2c(c(OC)c1)Oc1cc(  
OC)c(OC)cc1C=C2  
4405 C=C1C(=O)O[C@ @H]2/C=C(\C)CC/C=C(\C)CC[C@ @H]12.Cc1ccc(I)cc1>>C/C1=C/[C@H]2OC(=  
O)/C=C/c3ccc(C)cc3)[C@ @H]2CC/C(C)=C/CC1  
4406 C=Cc1ccc(OC)cc1.N#CCc1ccc(Br)cc1>>COc1ccc(/C=C/c2ccc(CC#N)cc2)cc1  
4407 C=Cc1ccnc2ccccc12.CCCCN(CCCCC)c1ccc(Br)c(C)c1>>CCCCN(CCCCC)c1ccc(/C=C/c2ccnc3cc  
ccc23)c(C)c1  
4408 C=CC(=O)Nc1ccccc1.CC(C)(C)c1ccc2[nH]c3c(c2c1)CC(=O)Nc1ccc(I)cc1-  
3>>CC(C)(C)c1ccc2[nH]c3c(c2c1)CC(=O)Nc1ccc(/C=C/C(=O)Nc2ccccc2)cc1-3  
4409 C=CC(=O)OCC.Nc1cc(OC(F)(F)F)ccc1Br>>CCOC(=O)/C=C/c1ccc(OC(F)(F)F)cc1N  
4410 C=Cc1ccc([Si](OC)(OC)OC)cc1.CCOP(=O)(Cc1ccc(/C=C/c2ccc(Br)cc2)cc1)OCC>>CCOP(=O)(Cc1c  
cc(/C=C/c2ccc(/C=C/c3ccc([Si](OC)(OC)OC)cc3)cc2)cc1)OCC  
4411 C=C.Ic1ccc2[nH]ccc2c1>>C=Cc1ccc2[nH]ccc2c1  
4412 C=CC(=O)OC(C)(C)C.CCOC(=O)c1cnc(Cc2ccc(Br)c2)c2cc(OC)c(OC)cc12>>CCOC(=O)c1cnc(Cc2  
cccc(/C=C/C(=O)OC(C)(C)c2)c2cc(OC)c(OC)cc12  
4413 C=Cc1ccccc1O.COc1cc(Br)cc(OC)c1F>>COc1cc(/C=C/c2ccccc2O)cc(OC)c1F  
4414 C=CC(=O)OCCCC.OCc1ccc(I)cc1>>CCCCOC(=O)/C=C/c1ccc(CO)cc1  
4415 C=CC(=O)OC(C)(C)C.COc1ccc(Br)c(C=O)c1>>COc1ccc(/C=C/C(=O)OC(C)(C)C)c(C=O)c1  
4416 C=COCCN(C)C.COc1ccc(Br)cc1>>C=C(OCCN(C)C)c1ccc(OC)cc1  
4417 C=CC#N.O=C(C=P(c1ccccc1)(c1ccccc1)c1ccccc1)c1ccc(I)cc1>>N#C/C=C/c1ccc(C(=O)C=P(c2ccccc  
2)(c2ccccc2)c2ccccc2)cc1  
4418 C=CC(=O)OC.COc1ccc2c(c1)CCN(c1ccc(CCC(C)C)c(Cl)c1)C2(C)c1ccc(Br)cc1>>COC(=O)/C=C/c1  
ccc(C2(C)c3ccc(OC)cc3CCN2c2ccc(CCC(C)C)c(Cl)c2)cc1  
4419 C=C(NC(=O)OCc1ccccc1)C(=O)OC.CC(=O)OCc1cc(OCc2ccccc2)ccc1I>>COC(=O)/C=C/c1ccc(OC  
c2ccccc2)cc1COC(C)=O)NC(=O)OCc1ccccc1  
4420 C=CP(=O)(OCC)OCC.CC(C)(C)OC(=O)Nc1ccccc1Br>>CCOP(=O)(/C=C/c1ccccc1NC(=O)OC(C)(C)  
C)OCC  
4421 Brc1cc2ccccc2[se]1.C=CC(=O)OC>>COC(=O)/C=C/c1cc2ccccc2[se]1  
4422 C=CC(=O)O.Cc1cccc(S(=O)(=O)Nc2ccccc(I)c2)c1>>Cc1cccc(S(=O)(=O)Nc2ccccc(/C=C/C(=O)O)c2)c1  
4423 C=Cc1cc(OC)c(O)c(OC)c1.COc1cc(I)cc(OC)c1>>COc1cc(/C=C/c2cc(OC)c(O)c(OC)c2)cc(OC)c1  
4424 C=CC(=O)O.O=S(=O)(Nc1ccc(I)cc1)c1ccc(C(F)(F)F)c1>>O=C(O)/C=C/c1ccc(NS(=O)(=O)c2ccccc(C  
(F)(F)F)c2)cc1  
C=Cc1ccc(/C=C/c2ccccc2)cc1.CC1(C)c2cc(I)ccc2N2Cc3cc([N+](=O)[O-  
4425 ])ccc3OC21c1ccccc1>>CC1(C)c2cc(/C=C/c3ccc(/C=C/c4ccccc4)cc3)ccc2N2Cc3cc([N+](=O)[O-  
])ccc3OC21c1ccccc1  
4426 Brc1cncc2cccn12.C=CC(=O)OCC>>CCOC(=O)/C=C/c1cncc2cccn12  
4427 C=CC(=O)OC.CC(=O)c1ccc(OS(=O)(=O)C(F)(F)F)cc1>>COC(=O)/C=C/c1ccc(C(C)=O)cc1  
4428 C=Cc1cccn1.O=[N+][([O-])c1ccc2c(I)nn(C3CCCCO3)c2c1>>O=[N+][([O-  
])c1ccc2c(/C=C/c3cccn3)nn(C3CCCCO3)c2c1  
4429 C=CS(=O)c1ccccc1.Cc1ccccc1Br>>Cc1ccccc1/C=C/S(=O)c1ccccc1  
4430 C=CC(=O)OC.COc1ccc(Br)c(OC)c1>>COC(=O)/C=C/c1ccc(OC)cc1OC  
4431 C=Cc1ccc(OC)c(OC)c1.COc1ccc(CN2C(=O)C(=C(c3ccc(O)cc3)c3ccc(O)cc3)c3cc(Br)ccc32)cc1>>C  
Oc1ccc(CN2C(=O)C(=C(c3ccc(O)cc3)c3ccc(O)cc3)c3cc(/C=C/c4ccc(OC)c(OC)c4)ccc32)cc1  
4432 C=CCN1ccccc1C(=O)c1ccc(C)cc1.COC(=O)C(C)(C)OCc1ccccc(Br)c1>>COC(=O)C(C)(C)OCc1ccccc(/C  
=C/Cn2ccccc2C(=O)c2ccc(C)cc2)c1  
4433 C=CC(=O)OCC.Nc1ccc(Cl)cc1Br>>CCOC(=O)/C=C/c1cc(Cl)ccc1N

4434 C=CC(=O)OC.O=C(c1ccc(I)cc1)c1ccc(Oc2ccccc2)cc1>>COC(=O)/C=C/c1ccc(C(=O)c2ccc(Oc3ccccc3)cc2)cc1  
4435 C=C.NC(=O)c1cc(Cl)ccc1Br>>C=Cc1ccc(Cl)cc1C(N)=O  
4436 C=Cc1cccn1.CNC(=O)c1ccccc1Sc1ccc2c(I)nn(C3CCCCO3)c2c1>>CNC(=O)c1ccccc1Sc1ccc2c(/C=C/c3ccccc3)nn(C3CCCCO3)c2c1  
4437 C=CCNC(=O)OC(C)(C)C.O=Cc1cccc(Cl)c1>>C=C(CNC(=O)OC(C)(C)C)c1cccc(C=O)c1  
4438 C=CC(C)(C)O.CC(C)(C)c1ccc(Br)cc1>>CC(C)(O)/C=C/c1ccc(C(C)(C)C)cc1  
4439 COC[C@@H](/N=C(\c1ccccc1)N1C=CCC[C@H]1c1ccc(O)C(C)C.Ic1ccccc1>>COC[C@@H](/N=C(\c1ccccc1)N1C=C(c2ccccc2)CC[C@H]1c1ccc(O)C(C)C  
4440 C=Cc1ccccc1.COC(=O)c1ccc2c(c1)CCc1cc(Br)ccc1-2>>COC(=O)c1ccc2c(c1)CCc1cc(/C=C/c3ccccc3)ccc1-2  
4441 C=CC(=O)OC.O=c1[nH]c2cc(Br)ccc2c2c1CCC2>>COC(=O)/C=C/c1ccc2c3c(c(=O)[nH]c2c1)CCC3  
4442 C=CC(=O)OCC.O=c1oc2ccccc2c(OS(=O)(=O)C(F)(F)F)c1C(c1ccccc1)c1ccccc1>>CCOC(=O)/C=C/c1c(C(c2ccccc2)c2ccccc2)c(=O)oc2ccccc12  
4443 C=CC(N)=O.O=C(c1ccccc1)c1ccc(Cl)cc1I>>NC(=O)/C=C/c1cc(Cl)ccc1C(=O)c1ccccc1  
4444 C=CCNC(=O)OC(C)(C)C.O=C1CCCc2ccc(Br)cc21>>C=C(CNC(=O)OC(C)(C)C)c1ccc2c(c1)C(=O)C  
4445 C=Cc1cccn1.Oc1ccccc1I>>Oc1ccccc1/C=C/c1cccn1  
4446 C=C/C=C/C(=O)N(CCCC)CCCC.COc1cccc(Br)c1>>CCCN(CCCC)C(=O)/C=C/C=C/c1cccc(OC)c1  
4447 C=CCN1C(=O)c2ccccc2C1=O.COCCOCOc1ccc(C#N)cc1Br>>COCCOCOc1ccc(C#N)cc1/C=C/CN1C(=O)c2ccccc2C1=O  
4448 C=CC(=O)OCC.CC(C)(CC1Cc2ccccc2C1)NC[C@@H](O)COc1c(Br)cccc1C#N>>CCOC(=O)/C=C/c1cccc(C#N)c1OC[C@H](O)CNC(C)(C)CC1Cc2ccccc2C1  
4449 C=CC(=O)c1ccccc1.Cc1ccc(Br)cc1>>Cc1ccc(/C=C/C(=O)c2ccccc2)cc1  
4450 C=Cc1ccccc1.ClCc1ccc(-c2ccccc2)cc1>>C(=C/c1ccccc1)\Cc1ccc(-c2ccccc2)cc1  
4451 C=Cc1ccccc1.CCc1cc(/C=C/c2ccc(/C=C/c3ccc(/N=N/N(CC)CC)cc3)cc2)c(CC)cc1I>>CCc1cc(/C=C/c2ccc(/C=C/c3ccc(/N=N/N(CC)CC)cc3)cc2)c(CC)cc1/C=C/c1ccccc1  
4452 C=Cc1ccc2c(ccc(=O)n2COCC[Si](C)(C)C)c1.FC(F)Oc1ccc(Nc2ncc(Br)cn2)cc1Cl>>C[Si](C)(C)CCOCn1c(=O)ccc2cc(/C=C/c3ncc(Nc4ccc(OC(F)F)c(Cl)c4)nc3)ccc21  
4453 C=Cc1ccc(O)cc1.COc1cccc(Br)c1>>COc1cccc(/C=C/c2ccc(O)cc2)c1  
4454 C=CC(=O)O.Oc1ccc(I)cc1Cl>>O=C(O)/C=C/c1ccc(O)c(Cl)c1  
4455 C=CC(=O)OCC.Cc1cc(C)c(I)c(C)c1>>CCOC(=O)/C=C/c1c(C)cc(C)cc1C  
4456 C=CC(OCC)OCC.CCCN1c2ccccc2Sc2cc(Br)ccc21>>CCCN1c2ccccc2Sc2cc(/C=C/C(OCC)OCC)ccc2  
4457 C=CC(=O)OCC.COc1cc(Nc2ncc(Br)c(Nc3ccccc3)n2)cc(OC)c1OC>>CCOC(=O)/C=C/c1ncc(Nc2ccc(O)c(OC)c(OC)c2)nc1Nc1cccn1  
4458 C=CCC(C)C.CC(C)(C)c1ccccc1OS(=O)(=O)C(F)(F)F>>C=C(CC(C)C)c1ccccc1C(C)(C)C  
4459 C=CN1CCCC1=O.CC(=O)c1ccc(Br)cc1>>C=C(c1ccc(C(C)=O)cc1)N1CCCC1=O  
4460 C=CCOC(C)=O.CC(C)(C)OC(=O)NCCc1cc2c(cc1I)OCO2>>CC(=O)OC/C=C/c1cc2c(cc1CCNC(=O)OC(C)(C)OCO2  
4461 Br1ccc(I)cc1.C=CCNC(=O)c1cc(C)on1>>Cc1cc(C(=O)NC/C=C/c2ccc(Br)cc2)no1  
4462 C=CC(=O)OC(C)(C)C.CC(C)(C)OC(=O)Nc1ccc(C(=O)OCc2ccccc2)c(CCCOc2c(OCc3ccccc3)ccc(Br)c2C=O)c1>>CC(C)(C)OC(=O)/C=C/c1ccc(OCc2ccccc2)c(OCc2cc(NC(=O)OC(C)(C)C)ccc2C(=O)OCc2ccccc2)c1C=O  
4463 C=CC(=O)N1N=Cc2ccccc2C1C=C(C)C.CCCc1nc(N)nc(N)c1Cc1cc(I)c(OC)c(OC)c1>>CCc1nc(N)nc(N)c1Cc1cc(/C=C/C(=O)N2N=Cc3ccccc3C2C=C(C)C)c(OC)c(OC)c1  
4464 Br1ccc(Cc2ccccc2)cc1.C=CC(=O)OCC>>CCOC(=O)/C=C/c1ccc(Cc2ccccc2)cc1  
4465 C=CC(OC(C)=O)C(=O)OCC.c1ccc([I+]c2ccccc2)cc1>>CCOC(=O)C(/C=C/c1ccccc1)OC(C)=O  
4466 C=Cc1ccc(Cl)cc1.O=Cc1ccc(Br)cc1>>O=Cc1ccc(/C=C/c2ccc(Cl)cc2)cc1  
4467 C=CC(=O)N1CCOCC1.CN(C(=O)CSCc1ccccc1)c1ccccc1Br>>CN(C(=O)CSCc1ccccc1)c1ccccc1/C=C/C(=O)N1CCOCC1  
4468 C=Cc1ccccc1.CCCCCCCC0c1cc(/C=C/c2ccc(OC)cc2)c(OCCCCCCCC)cc1/C=C/c1ccc(Br)cc1>>CCCCCCC0c1cc(/C=C/c2ccc(OC)cc2)c(OCCCCCCCC)cc1/C=C/c1ccc(/C=C/c2ccccc2)cc1  
4469 C=C(C)C(=O)OCC.COcn1nc(-c2ccccc2)c(Br)cc1=O>>CCOC(=O)/C(C)=C/c1cc(=O)n(COC)nc1-C=CC(=O)OCC.Cc1ccc(S(=O)(=O)n2c(I)ccc3c(Br)cn(C)c(=O)c32)cc1>>CCOC(=O)/C=C/c1cc2c(Br)c n(C)c(=O)c2n1S(=O)(=O)c1ccc(C)cc1  
4470 C=CCNC(=O)c1ccccc1NC(=O)c1ccccc1.Cc1ccc(I)cc1>>Cc1ccc(/C=C/CNC(=O)c2ccccc2NC(=O)c2ccccc2)cc1  
4471 Br1ccc2oc(-c3cc[nH]n3)cc2c1.C=Cc1ccccc1>>C(=C/c1ccc2oc(-c3cc[nH]n3)cc2c1)\c1ccccc1  
4472 C=Cc1ccccc1OC.Oc1ccc(O)c(I)c1>>COc1ccccc1/C=C/c1cc(O)ccc1O  
4473 C=CCCCCCCCCO.COCCOc1cc(OC)c(OCOC)c(Br)c1OCOC>>COCOc1cc(OC)c(OCOC)c(/C=C/CCC CCCCCO)c1OCOC  
4474 C=C.N#Cc1ccc(I)cc1>>C=Cc1ccc(C#N)cc1





C=C[C@@H](CC(=O)OC(C)(C)C)NC(=O)c1cc(-  
 4513 c2c(OC)cccc2OC)n(C2CCCC2)n1.Fc1ccc(Br)cc1>>COc1cccc(OC)c1-  
 c1cc(C(=O)N[C@@H](/C=C/c2ccc(F)cc2)CC(=O)OC(C)(C)C)nn1C1CCCC1  
 4514 C=CC(=O)Oc1cccc1.Cn1ncc(I)cc1=O>>Cn1ncc(/C=C/C(=O)Oc2cccc2)cc1=O  
 Br1ccc(I)cc1.C=CC(F)(F)C(F)(F)C(F)(F)C(F)(F)C(F)(F)F>>FC(F)(F)C(F)(F)C(F)(F)C(F)(F)  
 4515 C(F)(F)C(F)(F)/C=C/c1ccc(Br)cc1  
 C=Cc1ccc(C)cc1.COc1ccc(I)cc1>>COc1ccc(/C=C/c2ccc(C)cc2)cc1  
 4516 C=Cc1ccc(OC)cc1.FC(F)(F)Oc1cccc(I)c1>>COc1ccc(/C=C/c2cccc(OC(F)(F)F)c2)cc1  
 4517 C=CC(=O)OCC.COc1ccc2ccc(Br)cc2n1>>CCOC(=O)/C=C/c1ccc2ccc(OC)nc2c1  
 4518 C=CC(=O)OC(C)(C)C.COc1ccc(Cl)cc1>>COc1ccc(/C=C/C(=O)OC(C)(C)C)cc1  
 4519 C=CC(=O)C(C)(C)CO[Si](C)(C)C(C)(C)C.O=[N+](O-  
 4520 )c1ccc(I)cc1>>CC(C)(CO[Si](C)(C)C(C)(C)C(=O)/C=C/c1ccc([N+](=O)[O-])cc1  
 C=Cc1cccc1F.CN(C(=O)c1ncc2c(c1I)c1cccc1n2S(=O)(=O)N(C)C)c1cccc1>>CN(C(=O)c1ncc2c(c  
 4521 1/C=C/c1cccc1F)c1cccc1n2S(=O)(=O)N(C)C)c1cccc1  
 C=CC(=O)OC(C)(C)C.O=C(NCc1ccc(OC(F)(F)F)cc1)c1cc(Br)cc(I)c1>>CC(C)(C)OC(=O)/C=C/c1cc(  
 4522 Br)cc(C(=O)NCc2ccc(OC(F)(F)F)cc2)c1  
 C=CS(=O)(=O)F.Oc1cccc1I>>O=S(=O)(F)/C=C/c1cccc1O  
 4523 C=CC(C)(C)[C@]1(OC)O[C@H](C[C@H](OCc2ccc(OC)cc2)[C@H](C)O[Si](C)(C)C(C)(C)C/  
 C(=C\C(=O)OC)[C@H]1OC(C)=O.CC[Si](CC)(CC)O[C@H](CCO)Cc1cccc(Cc2cccc(Br)c2)c1>>  
 4524 CC[Si](CC)(CC)O[C@H](CCO)Cc1cccc(Cc2cccc(/C=C/C(C)(C)[C@]3(OC)O[C@H](C[C@H](O  
 Cc4ccc(OC)cc4)[C@H](C)O[Si](C)(C)C(C)(C)C/C(=C\C(=O)OC)[C@H]3OC(C)=O)c2)c1  
 C=CC(=O)OCC.Cc1nc(-n2c(C)ccc2C)cc(NC2CCCC2)c1Br>>CCOC(=O)/C=C/c1c(NC2CCCC2)cc(-  
 4525 n2c(C)ccc2C)nc1C  
 C=CCOc1cccc1.COc1cccc1I>>COc1cccc1/C=C/COc1cccc1  
 4526 C=CC(=O)N(C)C.COc1ccc(I)c1>>COc1ccc(/C=C/C(=O)N(C)C)c1  
 4527 Br1cccs1.C=COCCCC>>C=C(OCCCC)c1cccs1  
 4528 C=CC(N)=O.CC(C)c1ccc(I)cc1>>CC(C)c1ccc(/C=C/C(N)=O)cc1  
 4529 C=Cc1ccc(OC(C)=O)cc1.COC(=O)CCcn1cc(C(=O)OC)c2c(Br)cccc21>>COC(=O)CCcn1cc(C(=O)O  
 4530 C)c2c(/C=C/c3ccc(OC(C)=O)cc3)cccc21  
 C=Cc1cccc(Cl)c1.O=S(=O)(c1cccc1)C(F)(F)Br>>O=S(=O)(c1cccc1)C(F)(F)/C=C/c1cccc(Cl)c1  
 4531 C=CC(N)=O.CCOC(=O)C1=Cc2cc(Br)cc(Cl)c2OC1C(F)(F)F>>CCOC(=O)C1=Cc2cc(/C=C/C(N)=O)  
 4532 cc(Cl)c2OC1C(F)(F)F  
 C=CC(=O)OC.COC(=O)C1=Nc2cc(I)ccc2OC12CC2>>COC(=O)/C=C/c1ccc2c(c1)N=C(C(=O)OC)C1  
 4533 (CC1)O2  
 C=CC(=O)OC.COc1ccc2c(c1)CCN(c1cccc1C(C)C)C2(C)c1ccc(Br)cc1>>COC(=O)/C=C/c1ccc(C2(C  
 4534 )c3ccc(OC)cc3CCN2c2cccc2C(C)C)cc1  
 C=CC(=O)OCCCC.Cc1cc([N+](=O)[O-])ccc1Cl>>CCCCOC(=O)/C=C/c1ccc([N+](=O)[O-])cc1C  
 4535 C=C.COc1ccc(NC(C)=O)c(Br)c1>>C=Cc1cc(OC)ccc1NC(C)=O  
 4536 Br1cccc1.C=CCN(C(=O)OC(C)(C)C)C(=O)OC(C)(C)C>>CC(C)(C)OC(=O)N(C/C=C/c1cccc1)C(=  
 4537 O)OC(C)(C)C  
 C=Cc1cccc1.Cc1cc(I)ccc1-c1cccc1>>Cc1cc(/C=C/c2cccc2)ccc1-c1cccc1  
 4538 C=CC(=O)OC(C)(C)C.CC(C)(C)OC(=O)N1CCC(C2=C[C@H]3CC[C@H](OC(C)(C)C)[C@@]3(C)C  
 4539 C2)=C(Br)C1>>CC(C)(C)OC(=O)/C=C/C1=C(C2=C[C@H]3CC[C@H](OC(C)(C)C)[C@@]3(C)CC2  
 )CCN(C(=O)OC(C)(C)C)C1  
 C=CCCC(=O)OCC.CC(C)(CC1Cc2cccc2C1)NC[C@H](O)COc1cc(Br)cc(F)c1F>>CCOC(=O)CC/  
 4540 C=C/c1cc(F)c(F)c(OC[C@H](O)CNC(C)(C)CC2Cc3cccc3C2)c1  
 Br1ncc2ncnc12.C=C>>C=Cc1ncc2ncnc12  
 4541 C=Cc1cc[n+](O-  
 4542 )cc1.COc1cc(Nc2c(C#N)nc3cc(Br)ccc23)cc(OC)c1OC>>COc1cc(Nc2c(C#N)nc3cc(/C=C/c4cc[n+](  
 [O-])cc4)ccc23)cc(OC)c1OC  
 C=CC(=O)OC.CCOC(=O)C/C=C/C(=O)OC)=C(Cl)c1cccc1>>CCOC(=O)C/C=C/C(=O)OC)=C(Cl  
 4543 =C\C(=O)OC)c1cccc1  
 C=CCCC[Si](C)(C)C(C)(C)C.COc1nccc(Br)c1>>COc1nccc(/C=C/CCO[Si](C)(C)C(C)(C)C)c1  
 4544 C=C[C@@H](CCCC)O[Si](C)(C)C(C)(C)C.COC(=O)CCC[C@H](O[Si](C)(C)C(C)(C)C)[C@@H](  
 4545 /C=C/c1cccc1Br)O[Si](C)(C)C(C)(C)C>>CCCC[C@H](/C=C/c1cccc1/C=C/[C@@H](O[Si](C)(C)  
 C(C)(C)C)[C@H](CCCC(=O)OC)O[Si](C)(C)C(C)(C)C)O[Si](C)(C)C(C)(C)C  
 C=CC(=O)OC.O=C1c2cccc2NC12C(c1cccc1)=C(c1cccc1)c1ccc(Br)cc12>>COC(=O)/C=C/c1ccc2  
 4546 c(c1)C1(Nc3cccc3C1=O)C(c1cccc1)=C2c1cccc1  
 C=CC[C@H](CC(=O)OC(C)(C)C(=O)N[C@H](C(=O)NC)C(C)(C)C.FC(F)(F)c1cc(Br)ccc1-  
 4547 c1cccc1>>CNC(=O)[C@@H](NC(=O)[C@H](C/C=C/c1ccc(-  
 c2cccc2)c(C(F)(F)F)c1)CC(=O)OC(C)(C)C(C)(C)C



C=Cc1nc2c(N)ncnc2n1[C@@H]1O[C@H](CO[Si](C)(C)C(C)(C)C)[C@@H](O[Si](C)(C)C(C)(C)C)[  
 4590 C@H]1O[Si](C)(C)C(C)(C)C.N#Cc1ccc(Br)cc1>>CC(C)(C)[Si](C)(C)OC[C@H]1O[C@@H](n2c/C  
 =C/c3ccc(C#N)cc3)nc3c(N)ncnc32)[C@H](O[Si](C)(C)C(C)(C)C)[C@@H]1O[Si](C)(C)C(C)(C)C  
 4591 C=Cc1cccc1.Oc1ccc(-c2ccc2-c2ccc(Br)cc2)cc1>>Oc1ccc(-c2ccc2-c2ccc(/C=C/c3ccccc3)cc2)cc1  
 4592 C=Cc1ccc(CCOC(C)=O)cc1.O=C(O)c1ccc(I)cc1>>CC(=O)OCCc1ccc(/C=C/c2ccc(C(=O)O)cc2)cc1  
 4593 C=CC(=O)OCC.Nc1ccc(Br)cc1I>>CCOC(=O)/C=C/c1cc(Br)ccc1N  
 4594 C=CC(N)=O.O=C(c1cccc1)c1ccc(I)cc1>>NC(=O)/C=C/c1ccc(C(=O)c2ccccc2)cc1  
 4595 Brc1cccc1I.C=Cc1cccc(C)c1>>Cc1cccc(/C=C/c2ccccc2Br)c1  
 4596 C=C[C@H]1CCCCN1C(=O)OC(C)(C)C.O=[N+](O-  
 4597 )c1ccc(I)cc1>>CC(C)(C)OC(=O)N1CCCC[C@H]1/C=C/c1ccc([N+](=O)[O-])cc1  
 C=CC(C)=O.CCCCc1nnn(CC(F)(F)C(F)F)c1>>CCCCc1nnn(CC(F)(F)C(F)F)c1/C=C/C(C)=O  
 4598 C=Cc1cncnc1.Cn1cc(C(CNC(=O)OC(C)(C)C)c2cncc(Br)c2)c2ccccc21>>Cn1cc(C(CNC(=O)OC(C)(C)  
 C)c2cncc(/C=C/c3cncnc3)c2)c2ccccc21  
 4599 C=CN1C(=O)c2ccccc2C1=O.Ic1ccc(C2(N3CCCCC3)CCCCC2)cc1>>O=C1c2ccccc2C(=O)N1/C=C/c  
 1ccc(C2(N3CCCCC3)CCCCC2)cc1  
 4600 C=Cc1cc(OCc2ccccc2)c(OCc2ccccc2)nn1.Fc1cc(Br)cc(F)c1C(F)(F)F>>Fc1cc(/C=C/c2cc(OCc3ccccc3  
 )c(OCc3ccccc3)nn2)cc(F)c1C(F)(F)F  
 4601 COC[C@H](/N=C(\c1cccc1)N1C=CCC[C@H]1C(C)C).Fc1ccc(I)cc1>>COC[C@H](/N=C(\c1c  
 cccc1)N1C=C(c2ccc(F)cc2)CC[C@H]1C(C)C  
 4602 C=CC(=O)OC(C)(C)C.FC(F)(F)c1ccc(Br)cc1>>CC(C)(C)OC(=O)/C=C/c1ccc(C(F)(F)F)cc1  
 4603 C=C(NC(=O)OC(C)(C)C)C(=O)OC.Nc1cccc(I)c1>>COC(=O)/C=C/c1cccc(N)c1)NC(=O)OC(C)(C)C  
 4604 C=CC(OC)OC.Fc1cc(C(F)(F)F)ccc1I>>COC(/C=C/c1ccc(C(F)(F)F)cc1F)OC  
 4605 C=CC(=O)O.Oc1cccc1I>>O=C(O)/C=C/c1cccc1O  
 4606 Brc1ccc(N(c2ccccc2)c2ccccc2)cc1.C=Cc1ccc(C(=O)OC)c(OC)c1>>COC(=O)c1ccc(/C=C/c2ccc(N(c3  
 cccc3)c3ccccc3)cc2)cc1OC  
 4607 Brc1ccc(I)cc1.C=C(F)C(=O)OC>>COC(=O)/C(F)=C/c1ccc(Br)cc1  
 4608 C=CS(=O)(=O)F.O=C(N[C@H](Cc1ccc(I)cc1)C(=O)OCc1cccc1)OCC1c2ccccc2-  
 c2ccccc21>>O=C(N[C@H](Cc1ccc(/C=C/S(=O)(=O)F)cc1)C(=O)OCc1cccc1)OCC1c2ccccc2-  
 c2ccccc21  
 4609 C=CC(=O)OC.Oc1ccc2cc(Br)ccc2c1>>COC(=O)/C=C/c1ccc2cc(O)ccc2c1  
 4610 C=Cc1cccc1C.Nc1ccc(Cl)cc1Br>>Cc1cccc1/C=C/c1cc(Cl)ccc1N  
 4611 C=CC(=O)OC.Nc1cc(F)ccc1I>>COC(=O)/C=C/c1ccc(F)cc1N  
 4612 C=CC(=O)OC(C)(C)C.O=S(=O)(c1ccc(Br)cc1)n1ccc2cnccc21>>CC(C)(C)OC(=O)/C=C/c1ccc(S(=O)(  
 =O)n2ccc3cnccc32)cc1  
 4613 C=CS(=O)c1cccc1.O=[N+](O-)c1ccc(Br)cc1>>O=[N+](O-)c1ccc(/C=C/S(=O)c2ccccc2)cc1  
 4614 C=CC(=O)OC(C)(C)C.O=S(=O)(c1cccc(Br)c1)n1ccc2ccccc21>>CC(C)(C)OC(=O)/C=C/c1cccc(S(=O)  
 )(=O)n2ccc3ccccc32)c1  
 4615 C=Cc1cccc1C.Cc1ccc(Br)c(N)c1>>Cc1ccc(/C=C/c2ccccc2C)c(N)c1  
 4616 C=Cc1ccc(O[Si](C)(C)C(C)(C)C)c(OC)c1.C[Si](C)(OS(=O)(=O)C(F)(F)F)OS(=O)(=O)C(F)(F)F>>CO  
 c1cc(/C=C/[Si](C)(C)OS(=O)(=O)C(F)(F)F)ccc1O[Si](C)(C)C(C)(C)C  
 4617 C=Cc1ccc(Cl)cc1.O=Cc1cc(F)ccc1Br>>O=Cc1cc(F)ccc1/C=C/c1ccc(Cl)cc1  
 4618 C=Cc1cccc1C(=O)O.FC(F)(F)c1ccc(I)cc1>>O=C(O)c1cccc1/C=C/c1ccc(C(F)(F)F)cc1  
 4619 C=C(NC(C)=O)C(=O)OC.Ic1ccc2c(c1)oc1cccc12>>COC(=O)/C(=Cc1ccc2c(c1)oc1cccc12)NC(C)=  
 4620 Brc1cccc1.C=Cc1cccc(C)c1>>Cc1cccc(/C=C/c2ccccc2)c1  
 4621 Brc1ccc(I)cc1.C=Cc1ccc(O)cc1>>Oc1ccc(/C=C/c2ccc(Br)cc2)cc1  
 4622 C=CC(=O)OC.COC(=O)[C@@H]1c2cc(Br)ccc2O[C@@H]1c1ccc(OCc2ccccc2)cc1>>COC(=O)/C=C  
 /c1ccc2c(c1)[C@@H](C(=O)OC)[C@@H](c1ccc(OCc3ccccc3)cc1)O2  
 4623 C=CCCCCCCCC(=O)O.Ic1ccc2c(c1)OCCOCCOCCOCCO2>>O=C(O)CCCCCCCC/C=C/c1ccc2c(c  
 1)OCCOCCOCCOCCO2  
 4624 C=CC(=O)OCCCCCCCCC.Ic1cccc1>>CCCCCCCCOC(=O)/C=C/c1cccc1  
 C=Cc1cn(COCC[Si](C)(C)C)nc1-  
 4625 c1nc2ccc(OC)cc2n1COCC[Si](C)(C)C.O=Cc1cncc(Br)c1>>COc1ccc2nc(-  
 c3nn(COCC[Si](C)(C)C)cc3/C=C/c3cncc(C=O)c3)n(COCC[Si](C)(C)C)c2c1  
 4626 C=CC(=O)OC.FC(F)C(F)(F)Cn1nnc(-c2ccccc2)c1I>>COC(=O)/C=C/c1c(-  
 4627 C=CC(C)=O.CC(=O)O[IH2](OC(C)=O)c1cccc1>>CC(=O)/C=C/c1cccc1  
 C=Cc1cccc(O[Si](C)(C)C(C)(C)C)c1.C[Si](C)(OS(=O)(=O)C(F)(F)F)OS(=O)(=O)C(F)(F)F>>CC(C)(  
 4628 C)[Si](C)(C)Oc1cccc(/C=C/[Si](C)(C)OS(=O)(=O)C(F)(F)F)c1  
 4629 C=C(NC(C)=O)C(=O)OC.Cc1cccc1I>>COC(=O)/C=C/c1cccc1C)NC(C)=O  
 4630 C=CC(C)=O.COc1cc(Br)c(OC)c2ccccc12>>COc1cc(/C=C/C(C)=O)c(OC)c2ccccc12  
 4631 C=Cc1ccc2ccccc2c1.Clc1cccc1>>C(=C/c1ccc2ccccc2c1)\c1cccc1  
 4632 C=CC(=O)OCC.Fc1c(Br)ccc2cnccc12>>CCOC(=O)/C=C/c1ccc2cnccc2c1F

C=CC(=O)O[C@H]1C[C@@H]2CC[C@@]1(C)C2(C)C.O=c1[nH]c(=O)n([C@H]2C[C@H](O)[C@  
 4633 @H](CO)O2)cc1I>>CC1(C)[C@H]2CC[C@]1(C)[C@@H](OC(=O)/C=C/c1cn([C@H]3C[C@H](O)[  
 C@@H](CO)O3)c(=O)[nH]c1=O)C2  
 C=CC(=O)OC(C)(C)C.COC(=O)c1ccc(I)cc1>>COC(=O)c1ccc(/C=C/C(=O)OC(C)(C)C)cc1  
 4634 Cc1ccc(I)cc1.NC(=O)/C=C/c1ccccc1>>Cc1ccc(/C=C/C(N)=O)c2ccccc2)cc1  
 4635 C=Cc1ccc(Cl)c1.CN1CCN(c2cccc(Br)n2)CC1>>CN1CCN(c2cccc(/C=C/c3cccc(Cl)c3)n2)CC1  
 4636 C=C(F)C(C)=O.Ic1cccc2ccccc12>>CC(=O)/C(F)=C/c1cccc2ccccc12  
 4637 C=CC(=O)OC.CC(C)(C)OC(=O)N1CC2(CC(=O)c3cc(Br)ccc3O2)C1>>COC(=O)/C=C/c1ccc2c(c1)C(  
 4638 =O)CC1(CN(C(=O)OC(C)(C)C)C1)O2  
 C=CC(=O)OC.CC(=O)Oc1ccc(I)cc1CC=C(C)C>>COC(=O)/C=C/c1ccc(OC(C)=O)c(CC=C(C)C)c1  
 4639 C=Cc1ccccc1.C[Si](C)(C)[Si](C)(C)C1[Si](C)(C)[Si](C)(C)C(c2ccc(I)cc2)[Si](C)(C)[Si]1(C)C>>C[Si]  
 4640 (C)(C)[Si](C)(C)C1[Si](C)(C)[Si](C)(C)C(c2ccc(/C=C/c3ccccc3)cc2)[Si](C)(C)[Si]1(C)C  
 C=Cc1ccccc1.CCN(c1ccccc1)c1ccc(Br)n1>>CCN(c1ccccc1)c1ccc(/C=C/c2ccccc2)n1  
 4641 C=CC(=O)OCc1ccccc1.Clc1ccccc1>>O=C(/C=C/c1ccccc1)OCc1ccccc1  
 4642 C=CC(=O)OCC.Nc1ccc(Br)c(F)c1>>CCOC(=O)/C=C/c1ccc(N)cc1F  
 4643 C=CC(=O)N1C(=O)OC[C@@H]1Cc1ccccc1.CC(C)(C)OP(=O)(Cc1ccc(Br)cc1)OC(C)(C)C>>CC(C)(  
 4644 C)OP(=O)(Cc1ccc(/C=C/C(=O)N2C(=O)OC[C@@H]2Cc2ccccc2)cc1)OC(C)(C)C  
 C=CC(OCC)OCC.CN(C)c1ccc(Br)cc1>>CCOC(/C=C/c1ccc(N(C)C)cc1)OCC  
 4645 Brc1ccc(-c2nnc(-c3ccccc4ccccc34)o2)cc1.C=C>>C=Cc1ccc(-c2nnc(-c3ccccc4ccccc34)o2)cc1  
 4646 C=CC(N)=O.COc1c2[nH]c3ccc(F)cc3c2c(Br)c2c1[nH]c1ccc(F)cc12>>COc1c2[nH]c3ccc(F)cc3c2c(/C  
 4647 =C/C(N)=O)c2c1[nH]c1ccc(F)cc12  
 Brc1ccc2c(c1)OCO2.C=Cc1ccccc1>>C(=C/c1ccccc1)\c1ccc2c(c1)OCO2  
 4648 C=Cc1ccc(/C=C/c2ccc(N(c3ccc(OCCCCC)cc3)c3ccc(OCCCCC)cc3)cc2)cc1.O=Cc1ccc(Br)s1>>C  
 4649 CCCCCOc1ccc(N(c2ccc(/C=C/c3ccc(/C=C/c4ccc(C=O)s4)cc3)cc2)c2ccc(OCCCCC)cc2)cc1  
 C=CC(OCC)OCC.N#Cc1ccc(Br)cc1>>CCOC(/C=C/c1ccc(C#N)cc1)OCC  
 4650 C=CC(=O)O[C@H]1C[C@@H](C)CC[C@@H]1C(C)C.O=Cc1ccccc1Br>>CC(C)[C@H]1CC[C@H](  
 4651 C)C[C@@H]1OC(=O)/C=C/c1ccccc1C=O  
 C=CC1CC(=O)N1.Nc1ccc(I)cc1>>Nc1ccc(/C=C/C2CC(=O)N2)cc1  
 4652 C=Cc1ccc(F)cc1.O=S(=O)(c1ccccc1)C(F)(F)Br>>O=S(=O)(c1ccccc1)C(F)(F)/C=C/c1ccc(F)cc1  
 4653 C=C[Si](C)(C)c1ccccc1.Ic1ccccc1>>C[Si](C)(C)/C=C/c1ccccc1)c1ccccc1  
 4654 Brc1ccccc1.C=CCC(CCCC#N)C(=O)OC>>COC(=O)C(C/C=C/c1ccccc1)CCCC#N  
 4655 C=CC(C)(C)O.COc1cc2oc(=O)ccc2cc1Br>>COc1cc2oc(=O)ccc2cc1/C=C/C(C)(C)O  
 4656 C=CC(=O)OCC.CCc1ccc(-c2ccccc2Br)cc1>>CCOC(=O)/C=C/c1ccccc1-c1ccc(CC)cc1  
 4657 C=COCCCC.Clc1cccc2ccccc12>>C=C(OCCCC)c1cccc2ccccc12  
 4658 C=CC(=O)CC.CCC(CC)(c1ccc(O)cc1)c1ccc(Br)c(C)c1>>CCC(=O)/C=C/c1ccc(C(CC)(CC)c2ccc(O)cc  
 4659 2)cc1C  
 Brc1cccc2ccccc12.C=C(NC(C)=O)C(=O)O>>CC(=O)N/C(=C/c1cccc2ccccc12)C(=O)O  
 4660 C=CC(=O)O.NS(=O)(=O)c1ccc(S(=O)(=O)Nc2ccc(I)cc2)cc1>>NS(=O)(=O)c1ccc(S(=O)(=O)Nc2ccc(  
 4661 /C=C/C(=O)O)cc2)cc1  
 C=CC[C@H](NC(=O)OCc1ccccc1)C(=O)OC(C)(C)C.Clc1ccc(I)cc1>>CC(C)(C)OC(=O)[C@H](C/C=  
 4662 C/c1ccc(Cl)cc1)NC(=O)OCc1ccccc1  
 C=CC(=O)OC.COc1nc(SC)nc(C)c1I>>COC(=O)/C=C/c1c(C)nc(SC)nc1OC  
 4663 C=CC(=O)OC.CC(C)(C)OC(=O)c1cc(F)ccc1Br>>COC(=O)/C=C/c1ccc(F)cc1C(=O)OC(C)(C)C  
 4664 C=Cc1ccc(OC)cc1.COC(=O)c1ccccc1I>>COC(=O)c1ccccc1/C=C/c1ccc(OC)cc1  
 4665 C=CC(F)(F)F.COC(=O)c1ccc(I)cc1>>COC(=O)c1ccc(/C=C/C(F)(F)F)cc1  
 4666 Brc1cnc2ccccc2c1.C=CCO[C@]1(C)C[C@@H](C)CN(C)[C@H](C)[C@@H](O)[C@](C)(O)[C@@H]  
 4667 ](CC)OC(=O)[C@H](C)[C@@H](O[C@H]2C[C@@](C)(OC)[C@@H](O[Si](C)(C)C)[C@H](C)O2)  
 [C@H](C)[C@H]1O[C@H]1O[C@H](C)C[C@H](N(C)C)[C@H]1O[Si](C)(C)C>>CC[C@H]1OC(  
 =O)[C@H](C)[C@@H](O[C@H]2C[C@@](C)(OC)[C@@H](O[Si](C)(C)C)[C@H](C)O2)[C@H](C)  
 [C@@H](O[C@H]2O[C@H](C)C[C@H](N(C)C)[C@H]2O[Si](C)(C)C)[C@](C)(OC/C=C/c2cnc3c  
 cccc3c2)C[C@@H](C)CN(C)C[C@@H](C)C[C@@H](N)C[C@@H](O)C[C@]1(C)O  
 C=CCCCCCC.O=[N+](O-)[c1ccccc1]OS(=O)(=O)C(F)(F)F>>C=C(CCCCCC)c1ccccc1[N+](=O)[O-]  
 4668 C=CC(=O)OC.FC(F)(F)c1ccc(Br)cc1>>COC(=O)/C=C/c1ccc(C(F)(F)F)cc1  
 4669 C=Cc1ccc(CN(C)C)cc1.CCOC(=O)c1ccccc1Cl>>CCOC(=O)c1ccccc1/C=C/c1ccc(CN(C)C)cc1  
 4670 Brc1ccccc1.C=Cc1cc2ccc(N(CC)CC)cc2oc1=O>>CCN(CC)c1ccc2cc(/C=C/c3ccccc3)c(=O)oc2c1  
 4671 C=CC(=O)OC.Nc1cc(C(F)(F)F)cc(C(F)(F)F)c1Br>>COC(=O)/C=C/c1c(N)cc(C(F)(F)F)cc1C(F)(F)F  
 4672 C=CC(C)=O.Clc1ccc(I)cc1>>CC(=O)/C=C/c1ccc(Cl)cc1  
 4673 C=CC(=O)OCCCC.O=[N+](O-)[c1ccccc1]I>>CCCCOC(=O)/C=C/c1ccccc1[N+](=O)[O-]  
 4674 C=CC(=O)NCCCCCNC(=O)OC(C)(C)C.CC(=O)OC[C@@H]1C=C[C@H](n2cc(I)c(=O)[nH]c2=O)  
 4675 O1>>CC(=O)OC[C@@H]1C=C[C@H](n2cc(/C=C/C(=O)NCCCCCNC(=O)OC(C)(C)C)c(=O)[nH]c

4676 Br1ccc(-c2ccccc2)nc1.C=CC(=O)OCc1ccccc1>>O=C(/C=C/c1ccc(-c2ccccc2)nc1)OCc1ccccc1  
4677 C=CC(=O)O.CC(=O)Nc1ccc(Br)cn1>>CC(=O)Nc1ccc(/C=C/C(=O)O)cn1  
4678 C=CC(=O)CCC.COc1ccc(Br)cc1>>CCCC(=O)/C=C/c1ccc(OC)cc1  
4679 C=CC(=O)OC(C)(C)C.COC(=O)c1ccc(Br)c(F)c1>>COC(=O)c1ccc(/C=C/C(=O)OC(C)(C)C)c(F)c1  
4680 C=COC(CC)CCCC.COc1ccc(Br)cc1>>C=C(OC(CC)CCCC)c1ccc(OC)cc1  
4681 C=Cc1ccccc1.CCCCC(Br)C(F)(F)F>>CCCCC(/C=C/c1ccccc1)C(F)(F)F  
4682 C=CCN1C(=O)c2ccccc2C1=O.COc1ccc(I)cc1>>COc1ccc(/C=C/CN2C(=O)c3ccccc3C2=O)cc1  
4683 C=CC(=O)N1N=Cc2ccccc2C1Cc1ccc(C)cc1.COc1cc(Cc2cnc(N)nc2N)cc(I)c1OC>>COc1cc(Cc2cnc(N)nc2N)cc(/C=C/C(=O)N2N=Cc3ccccc3C2Cc2ccc(C)cc2)c1OC  
4684 C=Cc1ccccc1.CC(C)(C)OC(=O)N[C@H](COc1cnc(Br)c1)Cc1ccc(O)c1>>CC(C)(C)OC(=O)N[C@H](COc1cnc(/C=C/Cc2cnc2)c1)Cc1ccc(O)c1  
4685 C=Cc1ccc(OC)cc1.CC(C)(C)c1ccc(Br)cc1>>COc1ccc(/C=C/Cc2ccc(C(C)(C)C)cc2)cc1  
4686 C=Cc1ccc(O)c(OC)c1.COC(=O)Cn1c(=O)c(Cl)nc2ccccc21>>COC(=O)Cn1c(=O)c(/C=C/Cc2ccc(O)c(O)C)c2nc2ccccc21  
4687 C=CC(=O)N1N=Cc2ccccc2C1CCCC.COc1cc(Cc2cnc(N)nc2N)cc(I)c1OC>>CCCCC1c2ccccc2C=NN1C(=O)/C=C/c1cc(Cc2cnc(N)nc2N)cc(OC)c1OC  
4688 C=CC(C)(C)C.Cc1c(Br)c(=O)oc2cc(N)ccc12>>Cc1c(/C=C/C(C)(C)C)c(=O)oc2cc(N)ccc12  
4689 C=CC(=O)OC.COc1ccc(Br)cc1Cl>>COCOc1ccc(/C=C/C(=O)OC)cc1Cl  
4690 C=CC(=O)O.CC(C)c1cc(C(C)C)c(S(=O)(=O)Nc2ccc(I)cc2)cc1C(C)C>>CC(C)c1cc(C(C)C)c(S(=O)(=O)Nc2ccc(/C=C/C(=O)O)cc2)cc1C(C)C  
4691 Br1cnc2ccccc2c1.C=CCNC(=O)OC(C)(C)C>>C=C(CNC(=O)OC(C)(C)C)c1cnc2ccccc2c1  
4692 C=Cc1ccccc1Cl.Cc1ccc(Br)cc1>>Cc1ccc(/C=C/Cc2ccccc2Cl)cc1  
4693 C=CC(=O)OCC.COc1ccc(Oc2cc(Br)ccc2NC[C@@H]2CCCN2C(=O)OC(C)(C)C)cc1>>CCOC(=O)/C=C/c1ccc(NC[C@@H]2CCCN2C(=O)OC(C)(C)C)c(Oc2ccc(OC)cc2)c1  
4694 C=Cc1cnc1.Cc1cc(Nc2ccc([N+](=O)[O-])cc2N)ccc1Br>>Cc1cc(Nc2ccc([N+](=O)[O-])cc2N)ccc1/C=C/c1cnc1  
4695 C=CS(=O)(=O)F.O=Cc1ccccc1I>>O=Cc1ccccc1/C=C/S(=O)(=O)F  
4696 C=C(F)C(C)=O.Ic1ccccc1-c1ccccc1>>CC(=O)/C(F)=C/c1ccccc1-c1ccccc1  
4697 C=C(C)[C@H](C(=O)OC)N1C(=O)c2ccccc2C1=O.Ic1ccccc1>>COC(=O)[C@@H](/C(C)=C/c1ccccc1)N1C(=O)c2ccccc2C1=O  
4698 C=CC(OC)OC.FC(F)(F)c1ccccc1I>>COC(/C=C/c1ccccc1C(F)(F)F)OC  
4699 C=CC(=O)N1N=Cc2ccccc2C1C(CC)CC.COc1cc(Cc2cnc(N)nc2N)cc(I)c1OC>>CCC(CC)C1c2ccccc2C=NN1C(=O)/C=C/c1cc(Cc2cnc(N)nc2N)cc(OC)c1OC  
4700 C=Cc1ccc(OC)cc1.COc1cc(I)cc(OC)c1>>COc1ccc(/C=C/Cc2cc(OC)cc(OC)c2)cc1  
4701 C=CC(=O)OC.CCCCc1ccc(N2CCc3cc(OC)ccc3C2(C)c2ccc(Br)cc2)cc1>>CCCCc1ccc(N2CCc3cc(OC)ccc3C2(C)c2ccc(/C=C/C(=O)OC)cc2)cc1  
4702 C=CCCN1C(=O)c2ccccc2C1=O.Nc1cccc(Br)c1>>Nc1cccc(/C=C/CN2C(=O)c3ccccc3C2=O)c1  
4703 C=CC(OC)OCC.O=[N+](O-)]c1ccc(Br)c1>>CCOC(/C=C/c1ccc([N+](=O)[O-])c1)OCC  
4704 C=C(NC(C)=O)C(=O)OC.Cc1cc(C)c(I)c(C)c1>>COC(=O)/C(=C/c1c(C)cc(C)cc1C)NC(C)=O  
4705 CCOC(=O)c1ccc(I)cc1.OC/C=C/c1ccccc1>>CCOC(=O)c1ccc(/C=C/c2ccccc2CO)cc1  
4706 C=CC(=O)OC.CC(C)(C)OC(=O)NC1(C(=O)OC(C)(C)C)CCOC1c1ccc(Br)cc1>>COC(=O)/C=C/c1ccc(C2OCCC2(NC(=O)OC(C)(C)C)C(=O)OC(C)(C)C)cc1  
4707 C=Cc1ccc(OC(=O)OCC)cc1.Oc1ccc(-c2oc3cc(O)cc(Br)c3c2-c2cc(O)cc(O)c2)cc1>>CCOC(=O)COc1ccc(/C=C/Cc2cc(O)cc3oc(-c4ccc(O)cc4)c(-C=Cc1ccccc1)c1.COc1cc(CC(=O)Nc2ccccc(I)c2)ccc1OCCNC(=O)OC(C)(C)C>>COc1cc(CC(=O)Nc2ccccc(/C=C/Cc3ccccc1)c3)c2)ccc1OCCNC(=O)OC(C)(C)C  
4708 C=CC(=O)OCC.Ic1nn(Cc2ccccc2)c2ccccc12>>CCOC(=O)/C=C/c1nn(Cc2ccccc2)c2ccccc12  
4709 C=CC(C)(C)O.COC(=O)C(Cc1cn(S(=O)(=O)c2ccc(C)cc2)c2ccc(Br)c12)NC(C)=O>>COC(=O)C(Cc1cn(S(=O)(=O)c2ccc(C)cc2)c2ccc(/C=C/C(C)(C)O)c12)NC(C)=O  
4710 C=CC(=O)OC(C)(C)C.CNc1c(C)cc(C)cc1I>>CNc1c(C)cc(C)cc1/C=C/C(=O)OC(C)(C)C  
4711 C=CC(OC(C)=O)c1ccccc1.Ic1ccccc1>>CC(=O)OC(/C=C/c1ccccc1)c1ccccc1  
4712 C=CC(=O)OC(C)(C)C.COc1ccc(CNc2c(C)cc(C)cc2I)cc1>>COc1ccc(CNc2c(C)cc(C)cc2/C=C/C(=O)OC(C)(C)C)cc1  
4713 C=CC(=O)OCC.Cc1cc(N)ccc1Br>>CCOC(=O)/C=C/c1cnc(N)cc1C  
4714 C=CC(=O)N(C)Cc1ccccc(OC)c1OCC(C)C.O=C1CCc2cc(Br)nc2N1>>COc1ccccc(CN(C)C(=O)/C=C/Cc2cnc3c(c2)CCC(=O)N3)c1OCC(C)C  
4715 C=C.CC(=O)Nc1cc(C)ccc1Br>>C=Cc1ccc(C)cc1NC(C)=O  
4716 C=CC(=O)OCC.Cc1ccc(C=O)c(Br)c1>>CCOC(=O)/C=C/c1cc(C)ccc1C=O  
4717 C=CCOCCCCC#N.CC(C)N(CC[C@H](c1ccccc1)c1cc(Br)ccc1OCc1ccccc1)C(C)C>>CC(C)N(CC[C@H](c1ccccc1)c1cc(/C=C/Cc2OCCCCC#N)ccc1OCc1ccccc1)C(C)C  
4718 Br1ccsc1.C=CC(=O)OC>>COC(=O)/C=C/c1ccsc1

4720 C=CC(=O)OCC.CN1C(c2ccccc2)=C(I)c2ccsc2S1(=O)=O>>CCOC(=O)/C=C/C1=C(c2ccccc2)N(C)S(=O)(=O)c2sccc21  
4721 C=Cc1ccc(N(c2ccccc2)c2ccccc2)cc1.CC(C)(C)OC(=O)CCCCCCCCC0c1cc(Br)ccc1C=O>>CC(C)(C)OC(=O)CCCCCCCCC0c1cc(/C=C/c2ccc(N(c3ccccc3)c3ccccc3)cc2)ccc1C=O  
4722 C=Cc1cccc1.CC(=S)NS(=O)(=O)c1ccc(Br)cc1>>CC(=S)NS(=O)(=O)c1ccc(/C=C/c2ccccc2)cc1  
4723 C=Cc1ccc(C)cc1.CC(=O)NS(=O)(=O)c1ccc(Br)cc1>>CC(=O)NS(=O)(=O)c1ccc(/C=C/c2ccc(C)cc2)c  
4724 C=CC(=O)OCC0c1ccc2c(C)cc(=O)oc2c1.COC(=O)c1ccc(Br)cc1>>COC(=O)c1ccc(/C=C/C(=O)OCC0c2ccc3c(C)cc(=O)oc3c2)cc1  
4725 C=CS(=O)(=O)NCc1ccc(F)cc1.Cc1ccc(CNC(=O)OC(C)(C)C)c(Br)c1>>Cc1ccc(CNC(=O)OC(C)(C)C)c(/C=C/S(=O)(=O)NCc2ccc(F)cc2)c1  
4726 C=Cc1ccc(N(c2ccccc2)c2ccccc2)cc1.CCCCCCN1c2ccc(Br)cc2Sc2cc(C=O)ccc21>>CCCCCCN1c2ccc(C=O)cc2Sc2cc(/C=C/c3ccc(N(c4ccccc4)c4ccccc4)cc3)ccc21  
4727 C=CC(=O)OC.O=c1[nH]c(=O)n([C@@H]2C[C@H](O)[C@H](CO)C2)cc1I>>COC(=O)/C=C/c1cn([C@@H]2C[C@H](O)[C@H](CO)C2)c(=O)[nH]c1=O  
4728 Br1ccc2ccccc2c1.C=COCCCC>>C=C(OCCCC)c1ccc2ccccc2c1  
4729 C=CC(=O)N(Cc1ccc2nc(NC(=O)C(C)(C)C)[nH]c(=O)c2n1)c1ccc(C(=O)N[C@@H](CCC(=O)OCC)C(=O)OCC)cc1.CC(=O)OC[C@H]1O[C@@H](n2cnc(C(N)=O)c2I)[C@@H]2OC(C)(C)O[C@H]12>>CCOC(=O)CC[C@H](NC(=O)c1ccc(N(Cc2ccc3nc(NC(=O)C(C)(C)C)[nH]c(=O)c3n2)C(=O)/C=C/c2c(C(N)=O)ncn2[C@@H]2O[C@H](CO(C)=O)[C@H]3OC(C)(C)O[C@H]32)cc1)C(=O)OCC  
4730 C=C(NC(C)=O)C(=O)OC.CC(C)(C)OC(=O)N[C@H](CCC(=O)OCc1ccccc1)COc1cc(C#N)ccc1I>>COC(=O)/C=C/c1ccc(C#N)cc1OC[C@H](CCC(=O)OCc1ccccc1)NC(=O)OC(C)(C)C)NC(C)=O  
4731 C=CC#N.COc1ccc2c(c1)CCC(C=O)=C2Br>>COc1ccc2c(c1)CCC(C=O)=C2/C=C/C#N  
4732 C=CC(=O)OC.Oc1ccc(/C=C/c2ccc(Br)cc2)cc1O>>COC(=O)/C=C/c1ccc(/C=C/c2ccc(O)c(O)c2)cc1  
4733 Br1ccc(-c2nc3ccccc3n2Cc2ccccc2)cc1.C=CC(=O)OCC>>CCOC(=O)/C=C/c1ccc(-c2nc3ccccc3n2Cc2ccccc2)cc1  
4734 C=Cc1ccc(C(=O)OC)cc1.CC(C)(C)[Si](C)(C)Oc1cccn1Br>>COC(=O)c1ccc(/C=C/c2ncccc2O[Si](C)(C)C(C)(C)C)cc1  
4735 C=C(NC(C)=O)C(=O)OC.CC(C)(C)OC(=O)NCC0c1cc(C#N)ccc1I>>COC(=O)/C=C/c1ccc(C#N)cc1OCCNC(=O)OC(C)(C)C)NC(C)=O  
4736 C=Cc1enc2ccccc2c1.CN1C(=O)CC[C@]2(C)c3ccc(Br)cc3CC[C@H]12>>CN1C(=O)CC[C@]2(C)c3ccc(/C=C/c4enc5ccccc5c4)cc3CC[C@H]12  
4737 C=Cc1ccc(Cl)cc1.COC(=O)c1ccc(I)cc1>>COC(=O)c1ccc(/C=C/c2ccc(Cl)cc2)cc1  
4738 C=CC(=O)OC.CC(C)n1enc2c(Nc3ccc(Br)cc3)nc(N3CCOCC3)nc21>>COC(=O)/C=C/c1ccc(Nc2nc(N3CCOCC3)nc3c2ncn3C(C)C)cc1  
4739 C=CC(=O)OC.CC1(C)Cc2c(Br)c(-c3cncnc3)nn2C1>>COC(=O)/C=C/c1c(-  
4740 C=CC(=O)OC(C)(C)C.OCc1ccc(Br)cc1>>CC(C)(C)OC(=O)/C=C/c1ccc(CO)cc1  
4741 CC(=O)/C=C/CC(NS(=O)(=O)c1ccc(C)cc1)c1ccccc1.CCOC(=O)c1ccc(Br)cc1>>CCOC(=O)c1ccc(/C(=C/C(C)=O)CC(NS(=O)(=O)c2ccc(C)cc2)c2ccccc2)cc1  
4742 C=CS(=O)c1ccccc1.O=C(c1ccccc1)c1ccc(Br)cc1>>O=C(c1ccccc1)c1ccc(/C=C/S(=O)c2ccccc2)cc1  
4743 C=CC(=O)OC.O=S(=O)(c1ccccc1)n1cc(-c2ccccc2)c2cc(Br)enc21>>COC(=O)/C=C/c1enc2c(c1)c(-c1ccccc1)cn2S(=O)(=O)c1ccccc1  
4744 C=CC(=O)OCC.CCC(=C(c1ccc(O)cc1)c1ccc(O)cc1)c1ccc(Br)c1>>CCOC(=O)/C=C/c1ccc(C(CC)=C(c2ccc(O)cc2)c2ccc(O)cc2)c1  
4745 C=Cc1cncnc1.O=Cc1ccc(Br)cc1>>O=Cc1ccc(/C=C/c2cncnc2)cc1  
4746 C=Cc1ccccc1.O=Cc1ccc(Br)cc1>>O=Cc1ccc(/C=C/c2ccccc2)cc1  
4747 C=CC(=O)OC.O=S(=O)(c1ccccc1)n1c(I)cc2ccnc21>>COC(=O)/C=C/c1cc2ccnc2n1S(=O)(=O)c1cc  
4748 C=CC(=O)OC.OCc1ccc(Br)n1>>COC(=O)/C=C/c1ccccc(CO)n1  
4749 C=CC(=O)OC.CCOC1=N[C@H](C(C)C)C(OCC)=N[C@H]1Cc1c(/C=C/C(=O)OC)n(C(=O)OC(C)(C)C)c2cc(OC)c  
4750 cc12>>CCOC1=N[C@H](C(C)C)C(OCC)=N[C@H]1Cc1c(/C=C/C(=O)OC)n(C(=O)OC(C)(C)C)c2cc(OC)ccc12  
4751 C=CC(=O)OCC.COc1ccc(-c2c(-c3ccc(OC)cc3)c3c(nc4cccn43)c3ccc(Br)cc23)cc1>>CCOC(=O)/C=C/c1ccc2c(c1)c(-c1ccc(OC)cc1)c(-c1ccc(OC)cc1)c1c2nc2cccn21  
4752 C=Cc1ccccc1.C[C@]12CC[C@@H]3c4ccc(OS(=O)(=O)C(F)(F)F)cc4CC[C@H]3[C@@H]1CCC2=O>>C=C(c1ccccc1)c1ccc2c(c1)CC[C@H]1[C@@H]2CC[C@]2(C)C(=O)CC[C@H]12  
4753 C=CCCN1C(=O)c2ccccc2C1=O.CCOCc1nc2enc3cc(Br)ccc3c2n1CCCOC(C)C>>CCOCc1nc2enc3cc(/C=C/CCN4C(=O)c5ccccc5C4=O)ccc3c2n1CCCOC(C)C  
4754 C=CC(=O)OC(C)(C)C.Nc1ccc(I)cc1>>CC(C)(C)OC(=O)/C=C/c1ccc(N)cc1  
4755 Br1ccc2ccccc2c1.C=Cc1cccn1>>C(=C/c1ccc2ccccc2c1)\c1cccn1  
4756 C=CC(=O)OCC.Nc1cc(F)c(Br)cc1I>>CCOC(=O)/C=C/c1cc(Br)c(F)cc1N



4790 C=Cc1ccncc1.CC(C)(C)OC(=O)N[C@@H](COc1cncc(Br)c1)Cc1c[nH]c2ccccc12>>CC(C)(C)OC(=O)  
N[C@@H](COc1cncc(/C=C/c2ccncc2)c1)Cc1c[nH]c2ccccc12  
4791 C=COCC.Ic1cccc2ccccc12>>C=C(OCC)c1cccc2ccccc12  
4792 C=Cc1ccncc1.CCCCOc1ccc(Br)cc1F>>CCCOc1ccc(/C=C/c2ccncc2)cc1F  
4793 C=Cc1ccccc1.COc1ccccc1CNc1ccc2c(Br)cccc2n1>>COc1ccccc1CNc1ccc2c(/C=C/c3ccccc3)cccc2n1  
4794 C=Cc1ccc(OC)cc1.COc1ccc(/C=C/c2c(I)c(=O)c3ccccc3n2C)cc1>>COc1ccc(/C=C/c2c(/C=C/c3ccc(O  
C)cc3)n(C)c3ccccc3c2=O)cc1  
4795 C=Cc1ccc(Cl)cc1.Cc1ccc(S(=O)(=O)Oc2cccc3c(Br)ccnc23)cc1>>Cc1ccc(S(=O)(=O)Oc2cccc3c(/C=C  
/c4ccc(Cl)cc4)ccnc23)cc1  
C=Cc1ccccc1[N+](=O)[O-  
4796 ].COC(=O)c1cc2cc(Br)ccc2cc1OC(C)=O>>COC(=O)c1cc2cc(/C=C/c3ccccc3[N+](=O)[O-  
]ccc2cc1OC(C)=O  
C=CC(=O)OC.COC(=O)c1c([Si](C)(C)C)c(I)cn1S(=O)(=O)N(C)C>>COC(=O)/C=C/c1cn(S(=O)(=O)  
4797 N(C)C)c(C(=O)OC)c1[Si](C)(C)C  
C=CC(=O)OC.O=c1[nH]c(=O)n([C@H]2C[C@H](O)[C@]3(CO)C[C@H]23)cc1I>>COC(=O)/C=C/c  
4798 1cn([C@H]2C[C@H](O)[C@]3(CO)C[C@H]23)c(=O)[nH]c1=O  
C=C(OC)C1=C(Br)CCCC1.C=CC(=O)OC>>C=C(OC)C1=C(/C=C/C(=O)OC)CCCC1  
4799 C=Cc1ccc(OC)c(O[Si](C)(C)C(C)(C)C)c1.COc1cc(I)cc(OC)c1OC>>COc1ccc(/C=C/c2cc(OC)c(OC)c(  
4800 OC)c2)cc1O[Si](C)(C)C(C)(C)C  
C=CCC(C)C(=O)OCC.O=[N+][O-]c1ccc(Br)cc1>>CCOC(=O)C(C)C/C=C/c1ccc([N+](=O)[O-])cc1  
4801 C=CC(=O)OCC.O=C1CCc2cc(Br)cn2N1>>CCOC(=O)/C=C/c1cn2c(c1)CCC(=O)N2  
4802 C=CC(=O)OCCCC.COc1ccc2ccc(F)c(Br)c2n1>>CCCCOC(=O)/C=C/c1c(F)ccc2ccc(OC)nc12  
4803 C=Cc1ccccc2ccccc12.CC(C)c1ccc(Br)cc1>>CC(C)c1ccc(/C=C/c2cccc3ccccc23)cc1  
4804 C=CC(=O)OCC.COc1ccc(-c2ccc([N+](=O)[O-])cc2Br)cc1>>CCOC(=O)/C=C/c1cc([N+](=O)[O-  
4805 ]ccc1-c1ccc(OC)cc1  
C=CC(=O)OC.CCC(CC)(c1ccc(OCc2ccccc2)c(C)c1)c1c[nH]c2cc(Br)ccc12>>CCC(CC)(c1ccc(OCc2c  
4806 cccc2)c(C)c1)c1c[nH]c2cc(/C=C/C(=O)OC)ccc12  
C=CC(=O)OCC.Cn1ccc(Br)cc1=O>>CCOC(=O)/C=C/c1ccn(C)c(=O)c1  
4807 C=CC(O)c1cc(OC)c(OC)cc1Br.Ic1ccccc1>>COc1cc(Br)c(C(O)/C=C/c2ccccc2)cc1OC  
4808 C=CC(=O)OCC(CC)CCCC.Cc1ccc(Br)cc1>>CCCC(CC)COC(=O)/C=C/c1ccc(C)cc1  
4809 C=CC(=O)OC.O=S(=O)(c1ccccc1)n1cc(-c2cccn2)c2cc(Br)cn21>>COC(=O)/C=C/c1cn2c(c1)c(-  
4810 c1cccn1)cn2S(=O)(=O)c1ccccc1  
C=CC#N.Nc1ccccc1I>>N#C/C=C/c1ccccc1N  
4811 C=Cc1ccccc1.O=C1C(I)=C(c2ccccc2)[C@]23c4ccccc4C=C[C@H]2c2ccccc2CN13>>O=C1C(/C=C/c2  
4812 cccc2)=C(c2ccccc2)[C@]23c4ccccc4C=C[C@H]2c2ccccc2CN13  
C=CC(=O)OC.COc1ccc(I)c(C=O)c1>>COC(=O)/C=C/c1ccc(OC)cc1C=O  
4813 C=CC(=O)OCC.CC(C)(C)OC(=O)N[C@@H](Cc1cc(Br)ccc1[N+](=O)[O-  
4814 ]C(=O)OC(C)(C)C>>CCOC(=O)/C=C/c1ccc([N+](=O)[O-  
]c(C[C@H](NC(=O)OC(C)(C)C)C(=O)OC(C)(C)C)c1  
4815 C=C[C@@H](C)[C@H](C/C=C/C(=O)OC(C)(C)C)O[Si](C)(C)C(C)(C)C.O=C(c1ccccc1)c1ccc(Br)cc  
1>>C[C@H](/C=C/c1ccc(C(=O)c2ccccc2)cc1)[C@H](C/C=C/C(=O)OC(C)(C)C)O[Si](C)(C)C(C)(C)  
4816 C=CC(=O)N(C)Cc1cc2ccccc2s1.CCn1c(=O)[nH]c2ncc(Br)cc21>>CCn1c(=O)[nH]c2ncc(/C=C/C(=O)  
N(C)Cc3cc4ccccc4s3)cc21  
4817 C=CCN(C(=O)OCC)c1cccc2ccccc12.CC(=O)c1ccc(Cl)cc1>>CCOC(=O)N(C/C=C/c1ccc(C(C)=O)cc1)  
c1cccc2ccccc12  
4818 C=C1C(=O)N2C[C@H](O)C[C@@H]2[C@H]1O.O=[N+][O-  
]c1ccc(I)cc1>>O=C1/C(=C/c2ccc([N+](=O)[O-])cc2)[C@H](O)[C@H]2C[C@@H](O)CN12  
4819 C=Cc1ccccc(SC)c1.CC(C)c1ccc2sc3ccc(Br)cc3c(=O)c2c1>>CSc1cccc(/C=C/c2ccc3sc4ccc(C(C)C)cc4c  
(=O)c3c2)c1  
4820 C=CC#N.O=Cc1ccccc1Br>>N#C/C=C/c1ccccc1C=O  
4821 Brc1cccn1.C=CCC(C)C(=O)OCC>>CCOC(=O)C(C)C/C=C/c1cccn1  
4822 C=CC(=O)O.COC(=O)CN(CC(=O)OC)c1ccc(I)cc1>>COC(=O)CN(CC(=O)OC)c1ccc(/C=C/C(=O)O)  
4823 C=Cc1ccc(OC)cc1.O=C(Nc1ccccc1I)C1CCCC1>>COc1ccc(/C=C/c2ccccc2NC(=O)C2CCCC2)cc1  
4824 C=Cc1ccc(OC)cc1.Cc1ccc(I)s1>>COc1ccc(/C=C/c2ccc(C)s2)cc1  
C=CC1(C(=O)O)COCCOC1.CC(C)[C@H](O)C(=O)N[C@@H](C)C(=O)N1CCC[C@@H](C(=O)N[  
4825 C@H](C)c2ccc3ccc(Br)cc3n2)N1>>CC(C)[C@H](O)C(=O)N[C@@H](C)C(=O)N1CCC[C@@H](C(  
=O)N[C@H](C)c2ccc3ccc(/C=C/C4(C(=O)O)COCCOC4)cc3n2)N1  
4826 Brc1ccc(-c2nc3ccccc3n2)cc1.C=CCn1c(-c2ccc(C)cc2)nc2ccccc2c1=O>>Cc1ccc(-  
c2nc3ccccc3c(=O)n2C/C=C/c2ccc(-c3nc4ccccc4n3)cc2)cc1  
4827 C=CC(=O)OC.CCc1ccccc1C(=O)c1sc2cc(O)ccc2c1Oc1ccc(Br)cc1>>CCc1ccccc1C(=O)c1sc2cc(O)ccc  
2c1Oc1ccc(/C=C/C(=O)OC)cc1



4828 BrC1encc(OC2CCOCC2)c1.C=CC1CCN(C(=O)OC(C)(C)C)C1>>CC(C)(C)OC(=O)N1CCC(/C=C/c2c  
ncc(OC3CCOCC3)c2)C1  
4829 C=CC(=O)CCC.CC(C)(C)c1ccc(Br)cc1>>CCCC(=O)/C=C/c1ccc(C(C)(C)C)cc1  
4830 C=CCCCCCC.FC(F)(F)c1ccc(Br)cc1>>C=C(CCCCCC)c1ccc(C(F)(F)F)cc1  
4831 C=CC(=O)OC(C)(C)C.CSc1nc(N(C)c2ccccc2)n2ncc(I)c2n1>>CSc1nc(N(C)c2ccccc2)n2ncc(/C=C/C(=O)OC(C)(C)C)c2n1  
4832 BrC1ccenc1.C=Cc1cccc(Nc2ncccc2[N+](=O)[O-])c1>>O=[N+][O-  
4833 C=Cc1cccc(Cl)c1.CCOC(=O)C(F)I>>CCOC(=O)C(F)/C=C/c1cccc(Cl)c1  
4834 C=CC(=O)OC.FC(F)(F)Oc1ccc(-  
c2ccc3c(Br)nc(C(F)(F)F)n3c2)cc1>>COC(=O)/C=C/c1nc(C(F)(F)F)n2cc(-c3ccc(OC(F)(F)F)cc3)ccc12  
4835 C=CC(=O)O.COC(=O)c1ccc(I)cc1>>COC(=O)c1ccc(/C=C/C(=O)O)cc1  
4836 C=Cc1cccc1.Clc1ccc(Br)cc1>>Clc1ccc(/C=C/c2ccccc2)cc1  
4837 C=C(I)[C@H]1CC[C@H]2[C@@H]3CC=C4C[C@@H](OC(C)=O)CC[C@]4(C)[C@H]3CC[C@]12  
C.C=CC(=O)OC>>C=C/C=C/C(=O)OC)[C@H]1CC[C@H]2[C@@H]3CC=C4C[C@@H](OC(C)=O)CC[C@]4(C)[C@H]3CC[C@]12C  
4838 C=Cc1cccc([N+](=O)[O-])c1.Oc1cccc1I>>O=[N+][O-]c1cccc(/C=C/c2ccccc2O)c1  
4839 C=Cc1ccc(N2CC(=O)N(CC[Si](C)(C)C)S2(=O)=O)c(OCc2ccccc2)c1.COc1cccc(Br)n1>>COc1cccc(/  
C=C/c2ccc(N3CC(=O)N(CC[Si](C)(C)C)S3(=O)=O)c(OCc3ccccc3)c2)n1  
4840 COC[C@H]/N=C(\c1cccc1)N1C=CCC[C@H]1C(C)C.C.Ic1ccc2c(c1)OCO2>>COC[C@H]/N=  
C(\c1cccc1)N1C=C(c2ccc3c(c2)OCO3)CC[C@H]1C(C)C  
4841 C=Cc1cccc1.COc1cc(I)c2c3c1O[C@@H]1[C@]34CCN(C)[C@H](C2)[C@]42C=C[C@@]1(OC)c1c  
(OC(C)=O)ccc(O)c12>>COc1cc(/C=C/c2ccccc2)c2c3c1O[C@@H]1[C@]34CCN(C)[C@H](C2)[C@]  
42C=C[C@@]1(OC)c1c(OC(C)=O)ccc(O)c12  
4842 C=CC(=O)OCC.NC(=O)c1cc(I)cc(OCc2ccccc2)c1>>CCOC(=O)/C=C/c1cc(OCc2ccccc2)cc(C(N)=O)c  
4843 BrC1cccc2ccccc12.C=COCCCC>>C=C(OCCCC)c1cccc2ccccc12  
4844 C=CC(=O)OC.Cc1c(Br)ccc2c1N(C)C(=O)C2=O>>COC(=O)/C=C/c1ccc2c(c1C)N(C)C(=O)C2=O  
4845 BrC1cc(I)c2ccccc2n1.C=CC(=O)OC>>COC(=O)/C=C/c1cc(Br)nc2ccccc12  
4846 BrC1ccc2[nH]ccc2c1.C=COCCCC>>C=C(OCCCC)c1ccc2[nH]ccc2c1  
4847 C=CC(=O)OCC.Cc1nnn(Cc2cc(C#N)ccc2Br)n1>>CCOC(=O)/C=C/c1ccc(C#N)cc1Cn1nnc(C)n1  
4848 C=CC(=O)OC(C)(C)C.Fc1cc(C(F)(F)F)cc(F)c1Br>>CC(C)(C)OC(=O)/C=C/c1c(F)cc(C(F)(F)F)cc1F  
4849 BrC1ccc2ccccc2c1.C=Cc1nc2c(N)ncnc2n1[C@@H]1O[C@H](CO[Si](C)(C)C(C)(C)C)[C@@H](O[Si]  
(C)(C)C(C)(C)C)[C@H]1O[Si](C)(C)C(C)(C)C>>CC(C)(C)[Si](C)(C)OC[C@H]1O[C@@H](n2c(/C  
=C/c3ccc4ccccc4c3)nc3c(N)ncnc32)[C@H](O[Si](C)(C)C(C)(C)C)[C@@H]1O[Si](C)(C)C(C)(C)C  
4850 C=CC(=O)N(C)C.COc1ccc(CNc2c(C=O)NCc3ccc(F)cc3F)c(=O)n(OCc3ccccc3)c3ncc(Br)cc23)c(OC)  
c1>>COc1ccc(CNc2c(C=O)NCc3ccc(F)cc3F)c(=O)n(OCc3ccccc3)c3ncc(/C=C/C(=O)N(C)C)cc23)c(  
4851 C=CC(=O)OC1CCCCC1.Ic1ccc(OC2CCCCO2)cc1>>O=C/C=C/c1ccc(OC2CCCCO2)cc1)OC1CCCC  
4852 C=CC(C)=O.Cn1c(I)nc1Sc1cccc1>>CC(=O)/C=C/c1nc(Sc2ccccc2)n1C  
4853 C=CC(=O)OC.O=C(O)Cc1cccc(Br)c1>>COC(=O)/C=C/c1cccc(CC(=O)O)c1  
4854 C=CC(=O)OC.CCOC(=O)c1ccc(NC=O)c(I)c1>>CCOC(=O)c1ccc(NC=O)c(/C=C/C(=O)OC)c1  
4855 C=CC(=O)OCc1cccc1.Nc1ccc(Br)en1>>Nc1ccc(/C=C/C(=O)OCc2ccccc2)en1  
4856 BrC1ccc2ccc3ccccc4ccc1c2c34.C=CC(=O)OCC(F)(F)F>>O=C(/C=C/c1ccc2ccc3ccccc4ccc1c2c34)OCC(  
F)(F)F  
4857 C=Cc1ccc(C#N)cc1.N[C@@H](Cc1c[nH]c2ccc(Br)cc12)C(=O)O>>N#Cc1ccc(/C=C/c2ccc3[nH]cc(C[  
C@H](N)C(=O)O)c3c2)cc1  
4858 C=COCC(C)=O.Ic1cccc1>>CC(=O)O/C=C/c1cccc1  
4859 C=Cc1ccnc1.C[Si](C)(C)CCOCn1nc(I)c2ccc([C@@H]3C[C@@]34C(=O)Nc3ccccc34)cc21>>C[Si](  
C)(C)CCOCn1nc(/C=C/c2ccccc2)c2ccc([C@@H]3C[C@@]34C(=O)Nc3ccccc34)cc21  
4860 C=CC(=O)OC.COc1ccc2c(c1)CCN(c1ccc(C(C)C)c(F)c1)C2(C)c1ccc(Br)cc1>>COC(=O)/C=C/c1ccc(  
C2(C)c3ccc(OC)cc3CCN2c2ccc(C(C)C)c(F)c2)cc1  
4861 C=COCCCC.COc1cc(Br)cc(OC)c1>>C=C(OCCCC)c1cc(OC)cc(OC)c1  
4862 C=Cc1ccc(CN2C(=O)c3ccccc3C2=O)cc1.CC(C)(C)Br>>CC(C)(C)/C=C/c1ccc(CN2C(=O)c3ccccc3C2  
=O)cc1  
4863 C=CC(C)(C)O.Cc1ccc(N)c(Br)c1>>Cc1ccc(N)c(/C=C/C(C)(C)O)c1  
4864 C=CC(=O)OC(C)(C)C.CC(=O)c1ccc(I)cc1>>CC(=O)c1ccc(/C=C/C(=O)OC(C)(C)C)cc1  
4865 C=CC(=O)OCc1cccc1.Cc1ccc(-n2nc3c4cc(Br)ccc4[nH]c(=O)n3c2=O)cc1>>Cc1ccc(-  
n2nc3c4cc(/C=C/C(=O)OCc5ccccc5)ccc4[nH]c(=O)n3c2=O)cc1  
4866 C=C/C=C/C(=O)N(CCCC)CCCC.Clc1ccc(Br)cc1>>CCCCN(CCCC)C(=O)/C=C/C=C/c1ccc(Cl)cc1  
4867 C=CC(=O)OCC.O=S(=O)(Oc1cccc2c1CCO2)C(F)(F)F>>CCOC(=O)/C=C/c1cccc2c1CCO2  
4868 C=Cc1ccnc1.Nc1cccc(Br)c1>>Nc1cccc(/C=C/c2ccccc2)c1  
4869 C=Cc1ccnc1.CC(C)(C)OC(=O)N[C@H](COc1ccccc1Br)Cc1cccc1>>CC(C)(C)OC(=O)N[C@H](C  
Oc1ccccc1/C=C/c1ccccc1)Cc1cccc1

4870 C=CC(=O)OC1CCCCC1.CC(=O)c1ccc(I)cc1>>CC(=O)c1ccc(/C=C/C(=O)OC2CCCCC2)cc1  
 4871 \*CN(Cc1cccc1)N=Nc1ccc(I)cc1.C=CC(=O)OC(C)(C)C>>\*CN(Cc1cccc1)N=Nc1ccc(/C=C/C(=O)O  
 C(C)(C)C)cc1  
 4872 C=Cc1cccn1.COc1ccc(I)cc1>>COc1ccc(/C=C/c2cccn2)cc1  
 4873 C=Cc1cccc1.CCCCCCBr>>CCCCCCC/C=C/c1cccc1  
 4874 C=CS(=O)(=O)F.COc1ccc(I)cc1>>COc1ccc(/C=C/S(=O)(=O)F)cc1  
 4875 C=CC(=O)OC.COc1ccc(-c2nc3ccc(Br)cc3nc2-c2ccc(OC)cc2)cc1>>COC(=O)/C=C/c1ccc2nc(-  
 c3ccc(OC)cc3)c(-c3ccc(OC)cc3)nc2c1  
 4876 Bre1cccc1.C=COCCO>>C=C(OCCO)c1cccc1  
 4877 C=CC(O)C(F)(F)C(=O)OCC.COC(=O)c1cccc1I>>CCOC(=O)C(F)(F)C(O)/C=C/c1cccc1C(=O)OC  
 4878 C=CCc1ccc2ccnc2n1.CCOC(=O)CC(c1ccc(OC)c(F)c1)c1nc(Br)c(C)o1>>CCOC(=O)CC(c1ccc(OC)  
 c(F)c1)c1nc(/C=C/CCc2ccc3ccnc3n2)c(C)o1  
 4879 Bre1ccnc1.C=Cc1cc2c(c(=O)n(C)c(=O)n2C)n1C>>Cn1c(=O)c2c(cc(/C=C/c3ccnc3)n2C)n(C)c1=O  
 4880 C=CC(=O)OCC.O=C(Nc1cccc1I)c1ccc([N+](=O)[O-]  
 ])cc1>>CCOC(=O)/C=C/c1cccc1NC(=O)c1ccc([N+](=O)[O-])cc1  
 4881 C=Cc1cccc1Cl.Cn1nc(Br)c2cccc21>>Cn1nc(/C=C/c2cccc2Cl)c2cccc21  
 4882 C=Cc1ccc(OC)cc1.CC(=O)NS(=O)(=O)c1ccc(Br)cc1>>COc1ccc(/C=C/c2ccc(S(=O)(=O)NC(C)=O)cc  
 2)cc1  
 4883 C=CCP(=O)(OCC)OCC.CC(=O)Nc1cccc(Br)c1>>CCOP(=O)(C/C=C/c1cccc(NC(C)=O)c1)OCC  
 4884 Bre1cccc2cccc12.C=COCCCC>>C=C(OCCCC)c1cccc2cccc12  
 4885 C=Cc1ccc(N(C)C)cc1.COc1cc(C=O)c(OC)cc1Br>>COc1cc(/C=C/c2ccc(N(C)C)cc2)c(OC)cc1C=O  
 4886 C=C(C)Cc1ccc(OS(=O)(=O)C(F)(F)F)c(C)c1.C=CC(=O)OCC>>C=C(C)Cc1ccc(/C=C/C(=O)OCC)c(C  
 4887 C=CC(CO)N1C(=O)c2cccc2C1=O.COc1cccc(Br)c1>>COc1cccc(/C=C/C(CO)N2C(=O)c3cccc3C2=  
 4888 C=Cc1ccc(OC)c(OC)c1.Cn1cc(I)c(=O)c2cccc21>>COc1ccc(/C=C/c2cn(C)c3cccc3c2=O)cc1OC  
 4889 C=Cc1cccc1[N+](=O)[O-].Nc1cccc1I>>Nc1cccc1/C=C/c1cccc1[N+](=O)[O-]  
 4890 C=Cc1ccc(C)nc1.CN1C2CCC1c1c([nH]c3ccc(Br)cc13)C2>>Cc1ccc(/C=C/c2ccc3[nH]c4c(c3c2)C2CC  
 C(C4)N2C)cn1  
 4891 C=CC(=O)OC.COc1ccc(OC)c(NC(=O)C(C)(C)C)c1I>>COC(=O)/C=C/c1c(OC)ccc(OC)c1NC(=O)C(  
 C)(C)C  
 4892 C=CC(=O)OCC.Cc1c(Br)ccc2c1nnn2C>>CCOC(=O)/C=C/c1ccc2c(nnn2C)c1C  
 4893 C=C[C@H](C)[C@H](C/C=C/C(=O)OC(C)(C)C)O[Si](C)(C)C(C)(C)C.Ic1cccc1>>C[C@H](/C=C  
 /c1cccc1)[C@H](C/C=C/C(=O)OC(C)(C)C)O[Si](C)(C)C(C)(C)C  
 4894 C=CC(=O)O.Cc1c[nH]c2c(Br)cc(F)cc12>>Cc1c[nH]c2c(/C=C/C(=O)O)cc(F)cc12  
 4895 C=CC(=O)OC(C)(C)C.Cc1cc(Br)ccc1-c1noc(-  
 c2ccc(OC(C)C)c(C(F)(F)F)c2)n1>>Cc1cc(/C=C/C(=O)OC(C)(C)C)ccc1-c1noc(-  
 c2ccc(OC(C)C)c(C(F)(F)F)c2)n1  
 4896 C=CC(=O)O.c1ccc([I+](=O)c2cccc2)cc1>>O=C(O)/C=C/c1cccc1  
 4897 C=CC(=O)OCc1cccc1.CCOC(=O)c1cccc1Br>>CCOC(=O)c1cccc1/C=C/C(=O)OCc1cccc1  
 4898 C=CC(=O)OC.O=C(Cc1cccc(Br)c1)c1ccc(-c2cccc2)o1>>COC(=O)/C=C/c1cccc(CC(=O)c2ccc(-  
 c3cccc3)o2)c1  
 4899 C=Cc1cccc1.O=C(Oc1cccc1)c1ccc(Br)o1>>O=C(Oc1cccc1)c1ccc(/C=C/c2cccc2)o1  
 4900 C=Cc1ccc(OC)cc1.CCOC(=O)C1CCCN(c2cccc(Br)n2)C1>>CCOC(=O)C1CCCN(c2cccc(/C=C/c3ccc(  
 OC)cc3)n2)C1  
 4901 C=CC(=O)OC(C)(C)C.Nc1cccc(Br)c1F>>CC(C)(C)OC(=O)/C=C/c1cccc(N)c1F  
 4902 C=CC(=O)OCC.O=c1c(Br)coc2cccc12>>CCOC(=O)/C=C/c1coc2cccc2c1=O  
 4903 C=Cc1ccc(OC)cc1.COC(=O)[C@H](Cc1cccc1)NC(=O)C(F)(F)Br>>COC(=O)[C@H](Cc1cccc1)NC  
 (=O)C(F)(F)/C=C/c1ccc(OC)cc1  
 4904 C=C(NC(C)=O)C(=O)OC.Nc1ccc(Br)c2cccc12>>COC(=O)/C=C/c1ccc(N)c2cccc12)NC(C)=O  
 4905 C=COCCCC.O=c1cc(Br)c2ccc(Cl)cc2[nH]1>>CCCCO/C=C/c1cc(=O)[nH]c2cc(Cl)ccc12  
 4906 C=CC(=O)OC.CCc1nc2ccnc2n1Cc1ccc(Br)cc1>>CCc1nc2ccnc2n1Cc1ccc(/C=C/C(=O)OC)cc1  
 4907 C=CC(=O)N1N=Cc2cccc2C1CCC.COc1cc(Cc2cnc(N)nc2N)cc(I)c1OCc1cccc1>>CCCC1c2cccc2C  
 =NN1C(=O)/C=C/c1cc(Cc2cnc(N)nc2N)cc(OC)c1OCc1cccc1  
 4908 C=Cc1ccnc1.CCCCCCOCc1ccc(Br)cc1F>>CCCCCOCc1ccc(/C=C/c2ccnc2)cc1F  
 4909 COC[C@H](/N=C(\c1cccc1)N1C=CCC[C@H]1C)C(C)C.FC(F)(F)c1ccc(I)c1>>COC[C@H](/N  
 =C(\c1cccc1)N1C=C(c2cccc(C(F)(F)F)c2)CC[C@H]1C)C(C)C  
 4910 C=C1C[C@H]2[C@H]3CCc4cc(OC)ccc4[C@H]3CC[C@H]2(C)C1=O.COc1cccc(Br)c1>>COc1cccc  
 (/C=C2[C@H]3[C@H]4CCc5cc(OC)ccc5[C@H]4CC[C@H]3(C)C2=O)c1  
 4911 C=CC(=O)OCC.Ic1cccc1N(Cc1cccc1)Cc1cccc1>>CCOC(=O)/C=C/c1cccc1N(Cc1cccc1)Cc1ccc  
 4912 C=COCCCC.Cc1cc(OS(=O)(=O)C(F)(F)F)c2cccc2n1>>C=C(OCCCC)c1cc(C)nc2cccc12  
 4913 C=CC(=O)OC.O=Cc1ccc(C(F)(F)F)cc1Br>>COC(=O)/C=C/c1cc(C(F)(F)F)ccc1C=O



4949 C=CC(=O)OC.COC(=O)c1c(Br)ccc2nn(C)cc12>>COC(=O)/C=C/c1ccc2nn(C)cc2c1C(=O)OC  
 4950 C=CC(=O)OCC.O=c1ccoc2cc(Br)ccc12>>CCOC(=O)/C=C/c1ccc2c(=O)ccoc2c1  
 4951 C=C1c2ccccc2C1(C#N)CC.COc1cc(Br)cc(OC)c1OC>>CCC1(C#N)/C(=C/c2cc(OC)c(OC)c(OC)c2)c2  
 ccccc21  
 4952 C=CC(=O)OCCCC.COc1c(C)cc(Br)cc1C>>CCCCOC(=O)/C=C/c1cc(C)c(OC)c(C)c1  
 4953 C=CP(=O)(OCC)OCC.COc1ccccc1Br>>CCOP(=O)/C=C/c1ccccc1OC)OCC  
 4954 C=CS(=O)c1ccccc1.CC(=O)Nc1ccc(Br)cc1>>CC(=O)Nc1ccc(/C=C/S(=O)c2ccccc2)cc1  
 4955 C=Cc1ccc(CP(=O)(OCC)OCC)cc1.CCCc1cc(C=O)c(CCC)cc1Br>>CCCc1cc(/C=C/c2ccc(CP(=O)(OC  
 C)OCC)cc2)c(CCC)cc1C=O  
 4956 C=CC(=O)OC.CO[C@H]1O[C@H](COC(C)=O)[C@H](OC(C)=O)C=C1I>>COC(=O)/C=C/C1=C[C  
 @H](OC(C)=O)[C@H](COC(C)=O)O[C@H]1OC  
 4957 Brc1cnc2[nH]c3ccccc3c2c1.C=CC(=O)N(C)Cc1cc2ccccc2n1C>>CN(Cc1cc2ccccc2n1C)C(=O)/C=C/c  
 1cnc2[nH]c3ccccc3c2c1  
 4958 C=CC#N.COc1cc(I)ccc1N>>COc1cc(/C=C/C#N)ccc1N  
 4959 C=C(CC(=O)OC)C(=O)OC.COc1ccccc2c(OCc3ccccc3)c(Br)ccc12>>COC(=O)C/C(=C\c1ccc2c(OC)cc  
 cc2c1OCc1ccccc1)C(=O)OC  
 4960 C=CCc1c(O)c(/N=N/c2ccc(Br)cc2)cc2c(C)cc(=O)oc12.C=Cc1ccccc1>>C=CCc1c(O)c(/N=N/c2ccc(/C  
 =C/c3ccccc3)cc2)cc2c(C)cc(=O)oc12  
 4961 C=CC(=O)OCC.COc1c(-c2ccccc2Cl)cc2cnc(NC(C)C)nc2c1Br>>CCOC(=O)/C=C/c1c(OC)c(-  
 c2ccccc2Cl)cc2cnc(NC(C)C)nc12  
 4962 C=CC(=O)C(C)CC(=O)OC.C=CC(C)(C)OC(C)(C)[C@H]1COc2ccc(Br)cc2O1>>C=CC(C)(C)OC(C)(  
 C)[C@H]1COc2ccc(/C=C/C(=O)C(C)CC(=O)OC)cc2O1  
 4963 C=CC(=O)OC.O=S(=O)(c1ccccc1)N1CCc2cc(Br)enc21>>COC(=O)/C=C/c1cnc2c(c1)CCN2S(=O)(=O)c1ccccc1  
 4964 C=CC(=O)OC(C)(C)C.CCOC(=O)Cc1ccccc1Br>>CCOC(=O)Cc1ccccc1/C=C/C(=O)OC(C)(C)C  
 4965 C=C1CC(c2ccccc2)OC1=O.Cc1ccccc(I)c1>>Cc1ccccc(/C=C2\CC(c3ccccc3)OC2=O)c1  
 4966 C=CC(=O)OC.Cc1cc(C)cc(Br)c1>>COC(=O)/C=C/c1cc(C)cc(C)c1  
 4967 C=CC(=O)OCCCC.COc1ccc(Br)c(OC)c1>>CCCCOC(=O)/C=C/c1ccc(OC)cc1OC  
 4968 C=CC(=O)OC(C)(C)C.CC(C)CN1C(c2ccc(Br)cc2)c2ccc3c(cnn3C3CCCCO3)c2CC1(C)C>>CC(C)CN  
 1C(c2ccc(/C=C/C(=O)OC(C)(C)C)cc2)c2ccc3c(cnn3C3CCCCO3)c2CC1(C)C  
 4969 C=CC(N)=O.Fc1ccc(I)c(Cl)c1>>NC(=O)/C=C/c1ccc(F)cc1Cl  
 4970 BrC1CCCCC1.C=Cc1ccc(OC)cc1>>COc1ccc(/C=C/C2CCCCC2)cc1  
 4971 C=COCCCC.O=C(c1ccccc1)c1ccccc(Br)c1>>C=C(OCCCC)c1ccccc(C(=O)c2ccccc2)c1  
 4972 C=Cc1ccccc1.IC1CCCCC1>>C(=C/C1CCCCC1)\c1ccccc1  
 4973 Brc1c2ccccc2cc2ccccc12.C=Cc1ccccc1>>C(=C/c1c2ccccc2cc2ccccc12)\c1ccccc1  
 4974 C=CC(=O)N(C)OC.NC(=O)c1ccccc(I)c1>>CON(C)C(=O)/C=C/c1ccccc(C(N)=O)c1  
 4975 C=C(NC(=O)OCc1ccccc1)C(=O)OC.CC(C)(C)[Si](C)(C)OC[C@H]1CN(Cc2ccccc2)c2cc(OCc3ccccc  
 c3)cc(I)c21>>COC(=O)/C(=C/c1cc(OCc2ccccc2)cc2c1[C@H](CO[Si](C)(C)C(C)(C)CN2Cc1ccccc  
 1)NC(=O)OCc1ccccc1  
 4976 C=CC(OC)OCC.O=Cc1ccc(Cl)cc1Br>>CCOC(/C=C/c1cc(Cl)ccc1C=O)OCC  
 4977 C=CCCCCCCC.COc1ccc(Br)cc1>>CCCCCCCC/C=C/c1ccc(OC)cc1  
 4978 C=Cc1ccc(OC)c(OC)c1.Cc1ccc(I)c2ccc(N(C)C)cc12>>COc1ccc(/C=C/c2ccc(C)c3cc(N(C)C)ccc23)cc  
 4979 C=C(F)C(=O)OC.O=S(=O)(c1ccccc1)n1cc(I)c2ccccc21>>COC(=O)/C(F)=C/c1cn(S(=O)(=O)c2ccccc2  
 )c2ccccc12  
 4980 C=CP(=O)(c1ccccc1)c1ccccc1.Cc1ccc2ccccc2c1Br>>Cc1ccc2ccccc2c1/C=C/P(=O)(c1ccccc1)c1ccccc  
 4981 C=CC(=O)OCc1ccccc1.Ic1ccn(-c2ccccc2)n1>>O=C(/C=C/c1ccn(-c2ccccc2)n1)OCc1ccccc1  
 4982 C=Cc1nc(C)c(OC(=O)C(C)(C)C)c2c1COC2OC.Ic1ccccc1>>COC1OCc2c(/C=C/c3ccccc3)nc(C)c(OC(  
 =O)C(C)(C)C)c21  
 4983 C=CC(C)C)n1nnc2ccccc21.Cc1ccc(I)cc1>>CCC(/C=C/c1ccc(C)cc1)n1nnc2ccccc21  
 4984 C=Cc1ccc(OCOC)cc1.COCOc1cc(OS(=O)(=O)C(F)(F)F)cc(OCOC)c1C/C=C(\C)CC/C=C(\C)CCC=C(  
 C)C>>COCOc1ccc(/C=C/c2cc(OCOC)c(C/C=C(\C)CC/C=C(\C)CCC=C(C)C)c(OCOC)c2)cc1  
 C=CC[C@H](CC(=O)OC(C)(C)C)C(=O)N[C@H](C(=O)N[C@H](C)c1ccccc1)C(C)(C)C.Cc1ccc(Br)cc  
 4985 c1-  
 c1ccccc1>>Cc1cc(/C=C/C[C@H](CC(=O)OC(C)(C)C)C(=O)N[C@H](C(=O)N[C@H](C)c2ccccc2)C(  
 C=CS(=O)(=O)c1ccccc1.O=C(c1ccccc1)c1ccc(Br)cc1>>O=C(c1ccccc1)c1ccc(/C=C/S(=O)(=O)c2cccc  
 c2)cc1  
 4986 C=CC(=O)OC(C)(C)C.[2H]C1([2H])CCc2cc(Br)ccc21>>[2H]C1([2H])CCc2cc(/C=C/C(=O)OC(C)(C)  
 C)ccc21  
 4987 C=CCN1C(=O)C2(CCCC2)NC[C@@]1(C)c1cc(F)cc(F)c1.O=C1Nc2ccccc2[C@@]12Cc1cc(Br)enc1  
 4988 C2>>C[C@@]1(c2cc(F)cc(F)c2)CNC2(CCCC2)C(=O)N1C/C=C/c1cnc2c(c1)C[C@@]1(C2)C(=O)Nc  
 4989 C=CC(=O)OCC.CCNc1nc(C)c(I)c(NC2CCCC2)n1>>CCNc1nc(C)c(/C=C/C(=O)OCC)c(NC2CCCC

4990 C=CC(C)=O.CCCCCCCCCCCCCCc1ccc(I)c(O)c1>>CCCCCCCCCCCCCc1ccc(/C=C/C(C)=O)c  
(O)c1  
4991 C=CC(=O)OC(C)(C)C.COc1ccccc1CCC(=O)Oc1ccc(I)cc1CC=C(C)C>>COc1ccccc1CCC(=O)Oc1ccc  
(/C=C/C(O)OC(C)(C)C)cc1CC=C(C)C  
4992 C=CN1CCCC1=O.Cc1ccc(Br)cc1>>C=C(c1ccc(C)cc1)N1CCCC1=O  
Br1cnc2ccccc2c1.C=CCO[C@@]1(C)C[C@@H](C)C(=O)[C@H](C)[C@@H](O)[C@](C)(O)[C@  
4993 @H](CC)OC(=O)[C@H](C)C(=O)[C@H](C)[C@H]1O[C@@H]1O[C@H](C)C[C@H](NC)[C@H]1  
O>>CC[C@H]1OC(=O)[C@H](C)C(=O)[C@H](C)[C@@H](O[C@@H]2O[C@H](C)C[C@H](NC)[  
C@H]2O)[C@@](C)(OC/C=C/c2cnc3ccccc3c2)C[C@@H](C)C(=O)[C@H](C)[C@@H](O)[C@]1(C  
4994 C=Cc1cccc(OC)c1OC.O=C1C(O)=C(I)C(=O)c2ccccc21>>COc1cccc(/C=C/C2=C(O)C(=O)c3ccccc3C  
2=O)c1OC  
4995 C=CC(=O)N1CCCC1.COc1cc(Br)c(C=O)cc1OCc1ccccc1>>COc1cc(/C=C/C(=O)N2CCCC2)c(C=O)c  
c1OCc1ccccc1  
4996 C=CS(C)(=O)=O.N#Cc1ccccc1Br>>CS(=O)(=O)/C=C/c1ccccc1C#N  
4997 C=CCP(=O)(OCC)OCC.Cc1ccc(I)cc1>>CCOP(=O)(C/C=C/c1ccc(C)cc1)OCC  
4998 C=CC(=O)OC.CN(C)c1ccc(I)cc1>>COC(=O)/C=C/c1ccc(N(C)C)cc1  
4999 C=CC(=O)OCc1ccccc1.Nc1ncc(Br)cn1>>Nc1ncc(/C=C/C(=O)OCc2ccccc2)cn1  
5000 C=CC(=O)OC.Cn1cnc2c(NCc3ccccc(Br)c3)nc(N3CCOCC3)nc21>>COC(=O)/C=C/c1cccc(CNc2nc(N3  
CCOCC3)nc3c2ncn3C)c1  
5001 C=CC(=O)OCCCC.COC(CNc1nc(SC)nc1Br)OC>>CCCCOC(=O)/C=C/c1cnc(SC)nc1NCC(OC)OC  
5002 C=CCNC(=O)OC(C)(C)C.COc1cc(-c2csc3c(I)cnc(N)c23)ccc1NC(=O)c1cc2ccccc2n1C>>COc1cc(-  
c2csc3c(/C=C/CNC(=O)OC(C)(C)C)cnc(N)c23)ccc1NC(=O)c1cc2ccccc2n1C  
5003 C=C(F)C(=O)OC.COc1ccc(I)cc1>>COC(=O)/C(F)=C/c1ccc(OC)cc1  
5004 BrC1CCCCC1.C=Cc1ccccc1>>C(=C/C1CCCCC1)\c1ccccc1  
\*CNCCCOCCOCCOCCNC(=O)COc1ccc(C(Cc2cc(OC)cc(OC)c2)NC(=O)c2ccccc(C=C)c2)cc1.Cc1cc  
5005 c(F)c(I)c1>>\*CNCCCOCCOCCOCCNC(=O)COc1ccc(C(Cc2cc(OC)cc(OC)c2)NC(=O)c2ccccc(/C=C/  
c3cc(C)ccc3F)c2)cc1  
5006 C=CC(=O)CCCC.CCc1cc(C)cc(CC)c1Br>>CCCCC(=O)/C=C/c1c(CC)cc(C)cc1CC  
5007 C=CC(=O)O.CC(=O)c1ccc(I)cc1>>CC(=O)c1ccc(/C=C/C(=O)O)cc1  
5008 C=Cc1ccc(N(c2ccc(OC)cc2)c2ccc(OC)cc2)cc1.Cn1c2ccc(Br)cc2c2cc(C=O)ccc21>>COc1ccc(N(c2ccc  
(/C=C/c3ccc4c(c3)c3cc(C=O)ccc3n4C)cc2)c2ccc(OC)cc2)cc1  
5009 Br1ccccc2[nH]ccc12.C=Cc1ccccc1>>C(=C/c1cccc2[nH]ccc12)\c1ccccc1  
5010 Br1cc2ccccc2c2ccccc12.C=Cc1ccccc1>>C(=C/c1cc2ccccc2c2ccccc12)\c1ccccc1  
5011 C=CC(=O)N(C)Cc1cc2ccccc2n1C.O=c1[nH]c2ncc(Br)cc2o1>>CN(Cc1cc2ccccc2n1C)C(=O)/C=C/c1c  
nc2[nH]c(=O)oc2c1  
5012 C=CC(=O)OCC.O[C@@H]1CCCC[C@H]1Nc1nc2ccc(Cn3cnc4cc(I)ccc43)cc2s1>>CCOC(=O)/C=C/  
c1ccc2c(c1)ncn2Cc1ccc2nc(N[C@@H]3CCCC[C@H]3O)sc2c1  
5013 C=CC(=O)OC.Cc1cc(C)c(N)c(I)c1>>COC(=O)/C=C/c1cc(C)cc(C)c1N  
5014 C=Cc1ccc2ccc(Cl)cc2n1.N#CCCC(c1ccc(Br)c1)n1ccc2ccccc(OCC#N)c21>>N#CCCC(c1cccc(/C=  
C/c2ccc3ccc(Cl)cc3n2)c1)n1ccc2ccccc(OCC#N)c21  
5015 C=CC(=O)OC.N#Cc1ccccc1Br>>COC(=O)/C=C/c1ccccc1C#N  
5016 C=Cc1ccccc1.CCOC(=O)Cc1ccc(Br)cc1>>CCOC(=O)Cc1ccc(/C=C/c2ccccc2)cc1  
5017 C=CC(=O)OC.N#Cc1ccc(-c2cc(I)cc(-c3ccco3)c2)cc1>>COC(=O)/C=C/c1cc(-c2ccc(C#N)cc2)cc(-  
c2ccco2)c1  
5018 C=Cc1ccc(N(C)C)cc1.O=CC#Cc1ccc(I)cc1>>CN(C)c1ccc(/C=C/c2ccc(C#CC=O)cc2)cc1  
5019 C=CCCCCCCC.CC(=O)c1ccc(Br)cc1>>CCCCCCCC/C=C/c1ccc(C(C)=O)cc1  
5020 C=CC(=O)OCC.COc1ccc(Cl)cc1Br>>CCOC(=O)/C=C/c1cc(Cl)ccc1OC  
Br1cnc2ccccc2c1.C=CCC1CCN(C)C[C@H](OC(C)=O)[C@H](C)C[C@H](CC(OC)OC)[C@H](O)[C  
5021 @H]2O[C@H](C)[C@@H](O[C@H]3C[C@@](C)(O)[C@@H](OC(=O)CC)[C@H](C)O3)[C@H](  
N(C)C)[C@H]2OC(C)=O)[C@@H](OC)[C@H](OC(=O)CC)CC(=O)N1>>CCC(=O)O[C@H]1[C@H]  
(C)O[C@@H](O[C@H]2[C@H](N(C)C)[C@@H](OC(C)=O)[C@H](O[C@@H]3[C@@H](OC)[C@  
H](OC(=O)CC)CC(=O)NC(C/C=C/c4cnc5ccccc5c4)CCN(C)C[C@H](OC(C)=O)[C@H](C)C[C@H  
13CC(OC)OC)O[C@@H]2C)C[C@@H]1(C)O  
5022 Br1ccc(-c2cnc(C3CC3)o2)cc1.C=CC(=O)OCC>>CCOC(=O)/C=C/c1ccc(-c2cnc(C3CC3)o2)cc1  
5023 C=Cc1nnn(C)n1.CC(C)(C)c1ccc(I)cc1>>Cn1nnc(/C=C/c2ccc(C(C)(C)C)cc2)n1  
5024 C=CC(=O)CCC.Ic1ccccc1>>CCCC(=O)/C=C/c1ccccc1  
5025 C=CC(C)=O.CC1(C)OC=C(I)C(=O)O1>>CC(=O)/C=C/C1=COC(C)(C)OC1=O  
5026 C=CC(=O)OCCCC.CCCc1ccc(I)cc1>>CCCCOC(=O)/C=C/c1ccc(CCC)cc1  
5027 C=C1CC(c2ccc(C)cc2)OC1=O.CCOC1ccc(I)cc1>>CCOC1ccc(/C=C2)CC(c3ccc(C)cc3)OC2=O)cc1  
5028 Br1ccccc(SCc2csc(-c3ccccc3)n2)c1.C=CC(=O)OC>>COC(=O)/C=C/c1cccc(SCc2csc(-c3ccccc3)n2)c1  
5029 C=CC(=O)OC.O=Cc1ccccc1-c1cc(Cl)ccc1C=O>>COC(=O)/C=C/c1ccc(C=O)c(-c2ccccc2C=O)c1

5030 C=CC(=O)OCC.COc1ccc(I)cc1>>CCOC(=O)/C=C/c1ccc(OC)cc1  
 5031 C=CC(=O)OC.FC(F)(F)c1ncc(Br)cn1>>COC(=O)/C=C/c1cnc(C(F)(F)F)nc1  
 5032 C=Cc1ccc(OC)c(O)c1.COc1cc(I)cc(OC)c1>>COc1cc(/C=C/c2ccc(OC)c(O)c2)cc(OC)c1  
 5033 C=CC(=O)OC(C)(C)C.COc1ccc(S(=O)(=O)N2CCc3cc(Br)cn32)cc1>>COc1ccc(S(=O)(=O)N2CCc3cc(Br)cn32)cc1  
 5034 C=Cc1ccc(C(C)(C)C)cc1.CCCCC(Br)C(F)(F)F>>CCCCC(/C=C/c1ccc(C(C)(C)C)cc1)C(F)(F)F  
 5035 C=CC(=O)OC.COc1ccc2c(=O)c(I)ccc2c1>>COC(=O)/C=C/c1ccc2cc(OC)ccc2c1=O  
 5036 C=C.Cc1ccc(I)cc1>>C=Cc1ccc(C)cc1  
 5037 Br1cc2ccccc2c2ccccc12.C=Cc1nc2c(N)ncnc2n1[C@H]1C[C@H](O[Si](C)(C)C(C)(C)C)[C@@H](C O[Si](C)(C)C(C)(C)C)O1>>CC(C)(C)[Si](C)(C)OC[C@H]1O[C@@H](n2c(/C=C/c3cc4ccccc4c4cccc c34)nc3c(N)ncnc32)C[C@@H]1O[Si](C)(C)C(C)(C)C  
 5038 C=CC(=O)OC.O=S(=O)(c1cccc(F)c1)N1CCc2cc(Br)cn21>>COC(=O)/C=C/c1cnc2c(c1)CCN2S(=O)(=O)c1cccc(F)c1  
 5039 C=CN1C(=O)c2ccccc2C1=O.O=[N+](O- )c1ccc(Br)cc1>>O=C1c2ccccc2C(=O)N1/C=C/c1ccc([N+](=O)[O-])cc1  
 5040 C=COC(CC)CCCCC.O=Cc1ccc(Br)cc1>>C=C(OC(CC)CCCCC)c1ccc(C=O)cc1  
 5041 C=CC(=O)OC.N#Cc1c(-c2cccc(Br)c2)cc(-c2ccccc2)nc1N>>COC(=O)/C=C/c1cccc(-c2cc(- c3ccccc3)nc(N)c2C#N)c1  
 5042 C=CC#N.COc1cccc2c(OS(=O)(=O)C(F)(F)F)ccc12>>COc1cccc2c(/C=C/C#N)ccc12  
 5043 C=C(C)C(=O)OCCCCC.O=Cc1ccc(Cl)cc1>>CCCCOC(=O)/C(C)=C/c1ccc(C=O)cc1  
 5044 Br1ccc([C@@H]2CCCCO2)cc1.C=CC(=O)OCC>>CCOC(=O)/C=C/c1ccc([C@@H]2CCCCO2)cc1  
 5045 C=Cc1ccc(OC)cc1.COC(=O)c1cc(OC)c(OC)cc1I>>COC(=O)c1cc(OC)c(OC)cc1/C=C/c1ccc(OC)cc1  
 5046 C=CC(=O)OCC.CCOC(=O)C1(c2cccc(Br)c2)CC1>>CCOC(=O)/C=C/c1cccc(C2(C(=O)OCC)CC2)c1  
 5047 C=C(C)C=O.CC(C)(C)OC(=O)Nc1ccc(I)cc1>>C/C(C=O)=C\c1ccc(NC(=O)OC(C)(C)C)cc1  
 5048 C=CC(=O)OC.COC(=O)c1cccc(Br)n1>>COC(=O)/C=C/c1cccc(C(=O)OC)n1  
 5049 C=CC(O)C(F)(F)C(F)(F)C(F)(F)C(F)(F)C(F)(F)C(F)(F)F.Ic1ccccc1>>OC(/C=C/c1ccccc1)C(F)(F)C(F)(F)C(F)(F)C(F)(F)C(F)(F)C(F)(F)C(F)(F)F  
 5050 C=CC(=O)OC.O=C1NCCN1c1ccc(Br)cc1F>>COC(=O)/C=C/c1ccc(N2CCNC2=O)c(F)c1  
 5051 C=CC(=O)OCC.FC(F)(F)c1cc(-c2nccc(Br)n2)cc(C(F)(F)F)c1>>CCOC(=O)/C=C/c1cnc(- c2cc(C(F)(F)F)cc(C(F)(F)F)c2)n1  
 5052 Br1c2ccccc2c(-c2ccccc2)c2cc3ccccc3cc12.C=CC(=O)OCC>>CCOC(=O)/C=C/c1c2ccccc2c(- c2ccccc2)c2cc3ccccc3cc12  
 5053 C=C(c1ccccc1)N(C)C(C)=O.CCOC(=O)CCCBrc>>CCOC(=O)CCC/C=C(\c1ccccc1)N(C)C(C)=O  
 5054 C=CC(=O)O.Cc1cccc(Br)c1>>Cc1cccc(/C=C/C(=O)O)c1  
 5055 C=CC(=O)CC.O=[N+](O- )c1ccc(Br)cc1>>CCC(=O)/C=C/c1ccc([N+](=O)[O-])cc1  
 5056 C=Cc1ccc(C(C)=O)cc1.COc1ccc(Br)cc1>>COc1ccc(/C=C/c2ccc(C(C)=O)cc2)cc1  
 5057 Br1ccccc2ccccc12.C=CCC(C)C(=O)OCC>>CCOC(=O)C(C)C/C=C/c1cccc2ccccc12  
 5058 C=CC(=O)NC(C)(C)C.CC(=O)Cc1ccccc1Br>>CC(=O)Cc1ccccc1/C=C/C(=O)NC(C)(C)C  
 5059 C=CC(=O)OC.Cc1cc(C)c2nc(CC(C)C)n(Cc3ccc(Br)cc3)c2n1>>COC(=O)/C=C/c1ccc(Cn2c(CC(C)C)n c3c(C)cc(C)nc32)cc1  
 5060 C=CC(N)=O.CCc1cccc(Br)c1>>CCc1cccc(/C=C/C(N)=O)c1  
 5061 Br1ccocl.C=CS(=O)c1ccccc1>>O=S(/C=C/c1ccocl)c1ccccc1  
 5062 C=CC(=O)OCCCC.Cn1nc(Br)c2ccc(Cl)cc21>>CCCCOC(=O)/C=C/c1nn(C)c2cc(Cl)ccc12  
 5063 C=C1C(=O)O[C@H]2C3=C(C)CCC[C@]3(C)C(=O)C[C@@H]12.Fc1ccc(I)cc1>>CC1=C2[C@@H]3 OC(=O)/C=C/c4ccc(F)cc4)[C@@H]3CC(=O)[C@@]2(C)CCC1  
 5064 C=CC(=O)O.Clc1ccc(I)cc1>>O=C(O)/C=C/c1ccc(Cl)cc1  
 5065 C=C(NC(C)=O)C(=O)OC.Cc1cc(OCc2ccccc2)cc(C)c1I>>COC(=O)/C=C/c1c(C)cc(OCc2ccccc2)cc1 C)NC(C)=O  
 5066 C=CC(=O)OC.CCCNC(=O)c1ccc(Br)cn1>>CCNC(=O)c1ccc(/C=C/C(=O)OC)cn1  
 5067 C=CC(=O)OC.CC(C)(C)c1[nH]c2ccccc2c1C1CCCN(Cc2ccc(Br)cc2)C1>>COC(=O)/C=C/c1ccc(CN2 CCCC(c3c(C(C)(C)C)[nH]c4ccccc34)C2)cc1  
 5068 C=CC(=O)OC.CC(=O)OC[C@H]1O[C@H](Oc2ccc(I)cc2)[C@H](OC(C)=O)[C@@H](OC(C)=O)[C @H]1OC(C)=O>>COC(=O)/C=C/c1ccc(O[C@H]2O[C@H](COC(C)=O)[C@@H](OC(C)=O)[C@ H](OC(C)=O)[C@H]2OC(C)=O)cc1  
 5069 C=Cc1cccc(O)c1.Oc1cc(Br)cc(O)c1F>>Oc1cccc(/C=C/c2cc(O)c(F)c(O)c2)c1  
 5070 C=Cc1ccc(OC(C)=O)cc1.COc1cc(OC(C)=O)ccc1Br>>COc1cc(OC(C)=O)ccc1/C=C/c1ccc(OC(C)=O) C=CCN1C(=O)C(=O)c2ccccc21.FC(F)(F)c1cc(Br)ccc1Cl>>O=C1C(=O)N(C/C=C/c2ccc(Cl)c(C(F)(F) F)c2)c2ccccc21  
 5071 C=C1C(=O)O[C@H]2[C@H]1CC/C(C)=C/CC[C@@]1(C)O[C@@H]21.Clc1ccc(I)cc1>>C/C1=C\CC [C@@]2(C)O[C@H]2[C@H]2OC(=O)/C=C/c3ccc(Cl)cc3)[C@@H]2CC1

5073 C=CC(=O)OC(C)(C)C.COC(=O)C1Cc2cc(Br)enc2NC1=O>>COC(=O)C1Cc2cc(/C=C/C(=O)OC(C)(C)C)enc2NC1=O  
5074 C=CS(=O)c1cccc1.COc1ccc(Br)cc1>>COc1ccc(/C=C/S(=O)c2ccccc2)cc1  
5075 C=CS(N)(=O)=O.Nc1cc(-c2cccc(Br)c2)ncn1>>Nc1cc(-c2cccc(/C=C/S(N)(=O)=O)c2)ncn1  
5076 C=CC(=O)N(C)C.CCN(c1cccc1)c1cccc(Br)n1>>CCN(c1cccc1)c1cccc(/C=C/C(=O)N(C)C)n1  
C=CCC(CO[Si](C)(C)C(C)C)c1cccc1[N+](=O)[O-]  
5077 ].O=c1c2ccccc2sc2ccc(I)cc12>>CC(C)(C)[Si](C)(C)OCC(C/C=C/c1ccc2sc3ccccc3c(=O)c2c1)c1cccc1[N+](=O)[O-]  
5078 C=Cc1cccn1.Nc1ccc(Cl)cc1Br>>Nc1ccc(Cl)cc1/C=C/c1cccn1  
C=CC(=O)[C@H](CCNC(=O)OC(C)(C)C)O[Si](C)(C)C(C)(C)C.COC(=O)n1c(Br)c(CCO[Si](C)(C)C(C)(C)C)c2ccccc21>>COC(=O)n1c(/C=C/C(=O)[C@H](CCNC(=O)OC(C)(C)C)O[Si](C)(C)C(C)(C)C)c(CCO[Si](C)(C)C(C)(C)C)c2ccccc21  
5079 C=CC(=O)OC.Cc1ccc(S(=O)(=O)N2CCC(I)=C2c2ccccc2NC(=O)OC(C)(C)C)cc1>>COC(=O)/C=C/C1=C(c2ccccc2NC(=O)OC(C)(C)C)N(S(=O)(=O)c2ccc(C)cc2)CC1  
C=C(NC(C)=O)C(=O)OC.CC(=O)Oc1cc(C)c(I)c(C)c1C>>COC(=O)/C=C/c1c(C)cc(OC(C)=O)c(C)c1C)NC(C)=O  
5081 C=CC=O.Cc1ccc(-c2c(C#N)c(CC(C)C)nc3ccc(Br)cc23)cc1>>Cc1ccc(-c2c(C#N)c(CC(C)C)nc3ccc(/C=C/C=O)cc23)cc1  
5082 C=CC(=O)OCC.COc1ccc2c3c1O[C@@H]1[C@]34CCN(C)[C@H](C2)[C@]42C=C[C@@]1(OC)[C@H]1C(=O)N(c3ccc(Br)cc3)C(=O)[C@H]12>>CCOC(=O)/C=C/c1ccc(N2C(=O)[C@H]3[C@@H](C2=O)[C@@]424C=C[C@]3(OC)[C@@H]3Oc5c(OC)ccc6c5[C@@]32CCN(C)[C@@H]4C6)cc1Br1cnc2ccccc2c1.C=CCOC1=C(C)C(=O)O[C@H](CC)[C@@](C)(O)C=C(C)C(=O)[C@H](C)C[C@@](C)(OC)[C@H](O[C@@H]2O[C@H](C)C[C@H](N(C)C)[C@H]2OC(C)=O)[C@H]1C>>CC[C@H]1OC(=O)C(C)=C(OC/C=C/c2cnc3ccccc3c2)[C@H](C)[C@@H](O[C@@H]2O[C@H](C)C[C@H](N(C)C)[C@H]2OC(C)=O)[C@]1(C)(OC)C[C@@H](C)C(=O)C(C)=C[C@]1(C)O  
5083 C=CC(N)=O.CCOC(=O)c1cccc(I)c1>>CCOC(=O)c1cccc(/C=C/C(N)=O)c1  
5084 C=Cc1ccccc1.Cc1ccc2c(-c3ccc(F)cc3)c(Br)c(=O)oc2c1>>Cc1ccc2c(-c3ccc(F)cc3)c(/C=C/c3ccccc3)c(=O)oc2c1  
5085 C=Cc1cncn1.CN(C(=O)c1cccc1)c1ccc2c(c1)[nH]c(=NC(=O)c1ccc(Br)s1)n2CCC(N)=O>>CN(C(=O)c1cccc1)c1ccc2c(c1)[nH]c(=NC(=O)c1ccc(/C=C/c3cncn3)s1)n2CCC(N)=O  
5086 C=C(C(=O)OC)[C@@H]1CC[C@@]2(C)CCC[C@@]1(C)(OCOC)[C@@H]2C1.Cc1ccc(I)cc1>>COC O[C@]1(C)CCC[C@]2(C)CC[C@@H]1/C=C/c3ccc(C)cc3)C(=O)OC)C[C@H]21  
5087 C=Cc1scnc1C.C[Si](C)(C)CCOCn1nc(I)c2ccc(C=O)cc21>>Cc1nsc1/C=C/c1nn(COCC[Si](C)(C)C)c2cc(C=O)ccc12  
5088 C=CC[C@@H](NC(=O)OC(C)(C)C)C(=O)O.Ic1ccncc1>>CC(C)(C)OC(=O)N[C@H](C/C=C/c1ccncc1)C(=O)O  
5089 Nc1ccc(I)cc1.[11CH2]=Cc1ccccc1>>Nc1ccc(/[11CH]=C/c2ccccc2)cc1  
5090 C=C.OCc1ccc(I)cc1>>C=Cc1ccc(CO)cc1  
5091 C=CC(N)=O.COC(=O)c1ccccc1I>>COC(=O)c1ccccc1/C=C/C(N)=O  
5092 C=CC(=O)OCC.CC(C)(C)OC(=O)NCCOc1cc(C#N)ccc1I>>CCOC(=O)/C=C/c1ccc(C#N)cc1OCCNC(=O)OC(C)(C)C  
5093 C=Cc1ccc(Cl)cc1.CCn1c(Br)cc2c1c(=O)n(C)c(=O)n2C>>CCn1c(/C=C/c2ccc(Cl)cc2)cc2c1c(=O)n(C)c(=O)n2C  
5094 C=CC(C)=O.O=S(=O)(Oc1ccc2ccn(Cc3ccccc3)c2n1)C(F)(F)F>>CC(=O)/C=C/c1ccc2ccn(Cc3ccccc3)C=CC(=O)OC.CC(=O)Oc1ccccc1Br>>COC(=O)/C=C/c1ccccc1OC(C)=O  
5095 Br1cnc2ccccc2c1.C=CCO[C@]1(C)C[C@@H](C)C(=O)[C@H](C)[C@H]2N(C)C(=O)O[C@]2(C)[C@@H](CC)OC(=O)[C@H](C)C(=O)[C@H](C)[C@H]1O[C@@H]1O[C@H](C)C[C@H](N(C)C)[C@H]1O>>CC[C@H]1OC(=O)[C@H](C)C(=O)[C@H](C)[C@@H](O[C@@H]2O[C@H](C)C[C@H](N(C)C)[C@H]2O)[C@]1(C)(OC/C=C/c2cnc3ccccc3c2)C[C@@H](C)C(=O)[C@H]1(C)[C@H]2N(C)C(C=CC(=O)OCC.C[C@@H]1CN(C(=O)OC(C)(C)C)C[C@H]2Cc3ccc(Br)nc3N12>>CCOC(=O)/C=C/c1ccc2c(n1)N1[C@H](C)CN(C(=O)OC(C)(C)C)C[C@H]1C2  
5096 C=CC(=O)OCC.CCc1nc2c(N)nc3cc(Br)ccc3c2n1CC1CCOCC1>>CCOC(=O)/C=C/c1ccc2c(c1)nc(N)c1nc(CC)n(CC3CCOCC3)c12  
5097 C=CS(C)(=O)=O.Cc1ccc(Br)cc1>>Cc1ccc(/C=C/S(C)(=O)=O)cc1  
5098 C=Cc1ccc(C(=O)O)cc1.Oc1ccc(-c2oc3cc(O)cc(Br)c3c2-c2cc(O)cc(O)c2)cc1>>O=C(O)c1ccc(/C=C/c2cc(O)cc3oc(-c4ccc(O)cc4)c(-c4cc(O)cc(O)c4)c23)cc1  
5099 C=COCCCC.FC(F)c1ccc(Cl)cc1>>C=C(OCCCC)c1ccc(C(F)(F)F)cc1  
5100 Br1ccc(N2c3ccccc3N(c3ccccc3)c3c2c2ccccc2c2ccccc32)cc1.C=Cc1cccn1>>C(=C/c1cccn1)\c1ccc(N2c3ccccc3N(c3ccccc3)c3c2c2ccccc2c2ccccc32)cc1  
5101 C=Cc1ccc(C)cc1.O=Cc1ccc(Br)c1>>Cc1ccc(/C=C/c2ccccc(C=O)c2)cc1  
5102 C=CC(=O)CC.Ic1sccl-c1ccccc1>>CCC(=O)/C=C/c1sccl-c1ccccc1

5107 C=Cc1ccc(N(CCCC)CCCC)cc1.CCCn1c(=O)c(C)nc2ccc(Br)cc21>>CCCCN(CCCC)c1ccc(/C=C/c2ccc3nc(C)c(=O)n(CCC)c3c2)cc1  
5108 Br1cnc2cccc12.C=Cc1cn(COCC[Si](C)(C)C)nc1-c1nc2ccc(OC)cc2n1COCC[Si](C)(C)C>>COc1ccc2nc(-c3nn(COCC[Si](C)(C)C)cc3/C=C/c3encc4cccc34)n(COCC[Si](C)(C)C)c2c1  
5109 C=Cc1cccc1.Cc1ccc(S(=O)(=O)Nc2ccccc2Br)cc1>>Cc1ccc(S(=O)(=O)Nc2ccccc2/C=C/c2ccccc2)cc1  
5110 C=COCCCC.O=c1cc(Br)c2ccc(F)cc2o1>>CCCCO/C=C/c1cc(=O)oc2cc(F)ccc12  
5111 C=C[C@@H]1COC(C)(C)N1C(=O)OCc1cccc1.O=[N+](O-)]c1cccc1I>>CC1(C)OC[C@@H](/C=C/c2ccccc2[N+](=O)[O-])N1C(=O)OCc1cccc1  
5112 C=CC(=O)OC(C)(C)C.COc1cc(CNc2ccc(Br)cn2)cc(OC)c1OC>>COc1cc(CNc2ccc(/C=C/C(=O)OC(C)(C)C)cn2)cc(OC)c1OC  
5113 C=CC(=O)N(C)Cc1oc2ccccc2c1C.CC(C)(C)OC(=O)NCC1Cc2cc(Br)cnc2NC1=O>>Cc1c(CN(C)C(=O)/C=C/c2cnc3c(c2)CC(CNC(=O)OC(C)(C)C)C(=O)N3)oc2ccccc12  
5114 C=CC(=O)OC.Oc1cc(-c2ccc(Br)cc2)cc(C23CC4CC(CC(C4)C2)C3)c1O>>COC(=O)/C=C/c1ccc(-c2cc(O)c(O)c(C34CC5CC(CC(C5)C3)C4)c2)cc1  
5115 C=CC(=O)N(C)C.CCN(CC)C(=O)C1CCCN(c2ccccc(Br)n2)C1>>CCN(CC)C(=O)C1CCCN(c2ccccc(/C=C/C(=O)N(C)C)n2)C1  
5116 Br1ccc2c(c1)Cc1cccc1-2.C=CC[C@H](CC(=O)OC(C)(C)C)C(=O)N[C@H](C(=O)N[C@H](C)c1cccc1)C(C)(C)C>>C[C@@H](NC(=O)[C@@H](NC(=O)[C@H](C/C=C/c1ccc2c(c1)Cc1cccc1-2)CC(=O)OC(C)(C)C)C(C)C)c1cccc1  
5117 C=Cc1cccc1C.COc1ccc(N)c(I)c1>>COc1ccc(N)c(/C=C/c2ccccc2C)c1  
5118 C=CCCCCCC.Cc1ccc(Cl)cc1>>CCCCC/C=C/c1ccc(C)cc1  
5119 C=CCCCCCC(=O)OC.O=[N+](O-)]c1ccc(Br)cc1>>COC(=O)CCCC/C=C/c1ccc([N+](=O)[O-])cc1  
5120 C=CS(=O)(=O)Oc1cccc1.N#Cc1ccc(Br)cc1>>N#Cc1ccc(/C=C/S(=O)(=O)Oc2ccccc2)cc1  
5121 C=Cc1cccc1.O=C(O)c1ccc(Br)cc1>>O=C(O)c1ccc(/C=C/c2ccccc2)cc1  
5122 C=CC#N.COc1ccc2c(c1)CCN(c1ccc(F)cc1)C2(C)c1ccc(Br)cc1>>COc1ccc2c(c1)CCN(c1ccc(F)cc1)C2(C)c1ccc(/C=C/C#N)cc1  
5123 C=Cc1cccc1F.N#Cc1ccc2cc(Br)ccc2c1>>N#Cc1ccc2cc(/C=C/c3ccccc3F)ccc2c1  
5124 C=Cc1ccc2c(c1)Sc1cccc1N2CC.O=Cc1ccc(Br)cc1>>CCN1c2ccccc2Sc2cc(/C=C/c3ccc(C=O)cc3)ccc  
5125 C=Cc1cc(OCCCCCCCCCCCCC)c(OCCCCCCCCCCCCC)c(OCCCCCCCCCCCCC)c1.Oc1ccc(I)cc1>>CCCCCCCCCCCCCOc1cc(/C=C/c2ccc(O)cc2)cc(OCCCCCCCCCCCCC)c1OCCCCCCCCCCCCC  
5126 Br1cnc2cccc12.C=CCNC(=O)OC(C)(C)C>>C=C(CNC(=O)OC(C)(C)C)c1cnc2cccc12  
5127 C=CCOc1cccc1.Clc1ccc(Br)c1>>Clc1ccc(/C=C/COc2ccccc2)c1  
5128 C=CC(=O)OC(C)(C)C.CC(=O)c1ccc(Cl)cc1Br>>CC(=O)c1ccc(Cl)cc1/C=C/C(=O)OC(C)(C)C  
5129 C=Cc1cccc1.O=c1c(Br)c(-c2ccc([N+](=O)[O-])cc2)oc2ccccc12>>O=c1c(/C=C/c2ccccc2)c(-c2ccc([N+](=O)[O-])cc2)oc2ccccc12  
5130 C=Cc1cnc(Br)c1.CC(C)(C)OC(=O)N1CCC[C@H]1COc1cnc(Cl)c(I)c1>>CC(C)(C)OC(=O)N1CCC[C@H]1COc1cnc(Cl)c(/C=C/c2ccnc(Br)c2)c1  
5131 C=CC(=O)OCCCC.O=C(O)c1ccc(I)cc1>>CCCCOC(=O)/C=C/c1ccc(C(=O)O)cc1  
5132 Br1ccc2ncn2c1.C=CC(=O)OC>>COC(=O)/C=C/c1ccc2ncn2c1  
5133 C=CC(=O)OCC.CC(=O)c1cc2cc(Br)ccc2o1>>CCOC(=O)/C=C/c1ccc2oc(C(C)=O)cc2c1  
5134 C=C1OC(=O)OC1(C)C.Ic1cccc2ccccc12>>CC1(C)OC(=O)O/C1=C\c1cccc2ccccc12  
5135 C=Cc1cccc1.CCOC(=O)c1ccc(Br)cc1C>>CCOC(=O)c1ccc(/C=C/c2ccccc2)cc1C  
5136 C=CC(=O)OCC.Clc1cccn1>>CCOC(=O)/C=C/c1cccn1  
5137 C=C[Si](CC)(CC)CC.Cc1cc(C)c(Br)c(C)c1>>CC[Si](/C=C/c1c(C)cc(C)cc1C)(CC)CC  
5138 C=Cc1ccc(C#N)cc1.CCOC(=O)C(F)(F)Br>>CCOC(=O)C(F)(F)/C=C/c1ccc(C#N)cc1  
5139 C=CC(=O)OC.CC(C)(C)c1ccc(N)c(Br)c1>>COC(=O)/C=C/c1cc(C(C)(C)C)ccc1N  
5140 C=C1C(=O)O[C@H]2[C@H]1CCC(=C)[C@@H]1C[C@H](OC(C)=O)C(=C)[C@H]21.FC(F)(F)c1ccc(I)c1>>C=C1CC[C@H]2/C=C\C3CCCC(C(F)(F)F)c3C(=O)O[C@@H]2[C@H]2C(=C)[C@@H](OC(C)=O)C[C@@H]12  
5141 C=C1CC(c2ccc(Cl)cc2)OC1=O.FC(F)(F)c1cccc1I>>O=C1OC(c2ccc(Cl)cc2)/C1=C\c1cccc1C(F)(F)  
5142 C=CC(=O)OC(C)(C)C.CS(=O)(=O)c1ccc(Br)cc1>>CC(C)(C)OC(=O)/C=C/c1ccc(S(C)(=O)=O)cc1  
5143 C=Cc1nn[nH]1.CC(C)CN(CC(C)C)c1ccc(Br)cc1[N+](=O)[O-]>>CC(C)CN(CC(C)C)c1ccc(/C=C/c2nn[nH]2)cc1[N+](=O)[O-]  
5144 C=CC(OC)OC.Nc1cnc1I>>COC(/C=C/c1cnc1N)OC  
5145 C=CC(=O)OCC.COCCOc1ccc(I)c([N+](=O)[O-]  
5146 C=CC(=O)OC.CCCCCCCCN1C(=O)NC(c2ccccc2)(c2ccc(I)cc2)C1=O>>CCCCCCCCCN1C(=O)NC(c2ccccc2)(c2ccc(/C=C/C(=O)OC)cc2)C1=O  
5147 Br1ccc(-c2cnc3ccccc3n2)cc1.C=CCn1c(-c2ccc(OC)cc2OC)nc2ccccc2c1=O>>COc1ccc(-c2nc3ccccc3c(=O)n2C/C=C/c2ccc(-c3cnc4ccccc4n3)cc2)c(OC)c1



5148 C=CC(=O)OC(C)(C)C.CC(C)OC(=O)c1cscc1Br>>CC(C)OC(=O)c1cscc1/C=C/C(=O)OC(C)(C)C  
 5149 C=C(Br)CCO.C=CC(=O)OCCCC>>C=C(/C=C/C(=O)OCCCC)CCO  
 5150 C=Cc1cccc1.Fc1ccc(Br)cc1>>Fc1ccc(/C=C/c2ccccc2)cc1  
 5151 C=CC(=O)OCC.CN1c2ccccc2C(C)(C)C12C=Cc1cc(I)ccc1O2>>CCOC(=O)/C=C/c1ccc2c(c1)C=CC1(O2)N(C)c2ccccc2C1(C)C  
 5152 C=CC(=O)OC(C)(C)C.Ic1ccc2ccccc2c1>>CC(C)(C)OC(=O)/C=C/c1ccc2ccccc2c1  
 5153 Brc1cccc1.C=CCCCC>>C=C(CCCCC)c1cccc1  
 5154 C=CC(=O)OCCCC.Ic1cccs1>>CCCCOC(=O)/C=C/c1cccs1  
 5155 C=C/C=C/C(=O)N(CCCC)CCCC.Clc1cccc(Br)c1>>CCCN(CCCC)C(=O)/C=C/C=C/c1cccc(Cl)c1  
 5156 C=CC(C)(C)C.COC(=O)c1ccc(Br)cc1C>>COC(=O)c1ccc(/C=C/C(C)(C)C)cc1C  
 5157 C=Cc1ccc(-c2ccnc(N)n2)s1.Clc1cccc2sc(Br)nc12>>Nc1cccc(-c2ccc(/C=C/c3nc4c(Cl)cccc4s3)s2)n1  
 5158 C=Cc1cnc(C#N)c1Nc1ccc2[nH]ccc2c1C.Clc1cc(Br)ccn1>>Cc1c(Nc2c(C#N)cncc2/C=C/c2ccnc(Cl)c2)ccc2[nH]ccc12  
 5159 C=CC(=O)OCC.CC1(C)CC(=O)C2=C(C1)N(c1ccc(I)cc1)C1=C(C(=O)CC(C)(C)C1)C2c1cccc(O)c1>>CCOC(=O)/C=C/c1ccc(N2C3=C(C(=O)CC(C)(C)C3)C(c3ccccc(O)c3)C3=C2CC(C)(C)CC3=O)cc1  
 5160 Brc1cccn1.C=CS(=O)c1cccc1>>O=S(/C=C/c1cccn1)c1cccc1  
 5161 C=Cc1cccc1.Oc1cccc(I)c1>>Oc1cccc(/C=C/c2ccccc2)c1  
 5162 C=Cc1cc2cc(OC)c(OC)cc2oc1=O.O=Cc1ccc(I)cc1>>COc1cc2cc(/C=C/c3ccc(C=O)cc3)c(=O)oc2cc1O  
 5163 C=CS(=O)(=O)c1cccc1.CC(=O)c1ccc(Br)cc1>>CC(=O)c1ccc(/C=C/S(=O)(=O)c2ccccc2)cc1  
 5164 C=CC(=O)OC(C)(C)C.FC(F)(F)c1ccc(Br)nc1>>CC(C)(C)OC(=O)/C=C/c1ccc(C(F)(F)F)cn1  
 5165 C=C1CC(c2ccccc2)OC1=O.Fc1cccc(I)c1>>O=C1OC(c2ccccc2)C/C1=C\c1cccc(F)c1  
 5166 C=Cc1cccc1.Cc1ccc2c(-c3ccc(C(F)(F)F)cc3)c(Br)c(=O)oc2c1>>Cc1ccc2c(-c3ccc(C(F)(F)F)cc3)c(/C=C/c3ccccc3)c(=O)oc2c1  
 5167 C=CC(=O)OC(C)(C)C.O=Cc1c(Br)cccc1OCc1cccc1>>CC(C)(C)OC(=O)/C=C/c1cccc(OCc2ccccc2)c1C=O  
 5168 Brc1ccc2ccccc2c1.C=Cc1nc2c(=O)[nH]c(N=CN(C)C)nc2n1[C@@H]1C[C@H](O)[C@@H](COC(c2ccccc2)(c2ccc(OC)cc2)c2ccc(OC)cc2)O1>>COc1ccc(C(OC[C@H]2O[C@H](n3c(/C=C/c4ccc5ccccc5c4)nc4c(=O)[nH]c(N=CN(C)C)nc43)C[C@@H]2O)(c2ccccc2)c2ccc(OC)cc2)cc1  
 5169 C=CC(=O)OCC.CCn1cc(Br)cn1>>CCOC(=O)/C=C/c1enn(CC)c1  
 5170 C=CC(=O)OC(C)(C)C.Oc1ccc(C(=C2CCCC2)c2ccc(Br)cc2)cc1>>CC(C)(C)OC(=O)/C=C/c1ccc(C(=C2CCCC2)c2ccc(O)cc2)cc1  
 5171 C=CC(=O)N(C)C.Cc1cccc1Br>>Cc1cccc1/C=C/C(=O)N(C)C  
 5172 C=CC(=O)NC(c1cccc(C(F)(F)F)c1)C(F)(F)F.O=C(O)c1ccc(I)cc1C(F)(F)F>>O=C(/C=C/c1ccc(C(=O)O)c(C(F)(F)F)c1)NC(c1cccc(C(F)(F)F)c1)C(F)(F)F  
 5173 C=COCCCC.CC(=O)Nc1ccc(OS(=O)(=O)C(F)(F)F)cc1>>C=C(OCCCC)c1ccc(NC(C)=O)cc1  
 5174 C=Cc1ccc([N+](=O)[O-])c(O)c1.Oc1ccc(-c2oc3cc(O)cc(Br)c3c2-c2cc(O)cc(O)c2)cc1>>O=[N+](O-)]c1ccc(/C=C/c2cc(O)cc3oc(-c4ccc(O)cc4)c(-c4cc(O)cc(O)c4)c23)cc1O  
 5175 C=CCC(C)N(C)C(=O)OC(C)(C)C.O=C1c2ccccc2C(=O)N1c1cccc(Br)c1>>CC(C/C=C/c1cccc(N2C(=O)c3ccccc3C2=O)c1)N(C)C(=O)OC(C)(C)C  
 5176 C=Cc1cccc1.Ic1cccn1>>C(=C/c1cccn1)c1cccc1  
 5177 C=CC(=O)OC(C)(C)C.CCn1nnc2c(C)c(Br)ccc21>>CCn1nnc2c(C)c(/C=C/C(=O)OC(C)(C)C)ccc21  
 5178 C=CC(=O)OCC.CC(=O)c1ccc(Cl)cc1>>CCOC(=O)/C=C/c1ccc(C(C)=O)cc1  
 5179 C=Cc1ccc(C=O)cc1.CCCN(Cc1ccc(CCC(F)(F)C(F)(F)C(F)(F)C(F)(F)C(F)(F)C(F)(F)C(F)(F)F)cc1)/N=N/c1ccc(I)cc1>>CCCN(Cc1ccc(CCC(F)(F)C(F)(F)C(F)(F)C(F)(F)C(F)(F)C(F)(F)C(F)(F)F)cc1)/N=N/c1ccc(/C=C/c2ccc(C=O)cc2)cc1  
 5180 C=CC(C)=O.[2H]C([2H])([2H])C1=C(OS(=O)(=O)C(F)(F)F)C(C)(C)CCC1>>[2H]C([2H])([2H])C1=C(C(/C=C/C(C)=O)C(C)(C)CCC1  
 5181 C=CC(=O)OC.CN1CCC(Nc2ccccc2)CC1>>COC(=O)/C=C/c1cccc1NC1CCN(C)CC1  
 5182 C=CC(C)=O.Cc1cccc(C)c1Br>>CC(=O)/C=C/c1c(C)cccc1C  
 5183 C=CC(=O)OC.COc1c(NC(=O)C(C)(C)C)c(I)c(OC)c(OC)c1NC(=O)C(C)(C)C>>COC(=O)/C=C/c1c(NC(=O)C(C)(C)C)c(OC)c(NC(=O)C(C)(C)C)c(OC)c1OC  
 5184 C=CC(=O)OC.COC(=O)c1ccc(I)cc1>>COC(=O)/C=C/c1ccc(C(=O)OC)cc1  
 5185 C=Cc1cccc1.O=S(=O)(OC1=CCCCC1)C(F)(F)F>>C=C(C1=CCCCC1)c1cccc1  
 5186 C=Cc1cccn1.CC(C)(C)OC(=O)N[C@H](COc1cccc(Br)n1)Cc1c[nH]c2ccccc12>>CC(C)(C)OC(=O)N[C@H](COc1cccc(/C=C/c2ccccc2)n1)Cc1c[nH]c2ccccc12  
 5187 C=CC(=O)O.O=S(=O)(Nc1ccc(I)cc1)c1ccc2oc3ccccc3c2c1>>O=C(O)/C=C/c1ccc(NS(=O)(=O)c2ccc3oc4ccccc4c3c2)cc1  
 5188 C=CC=O.Clc1cccc1>>O=C/C=C/c1cccc1  
 5189 C=CC(OC)OCC.COC(OC)c1cc([N+](=O)[O-])ccc1Br>>CCOC(/C=C/c1ccc([N+](=O)[O-])cc1C(OC)OC)OCC

5190 C=CC(=O)OC.CS(=O)(=Nc1nc2ccccc2cc1Br)c1ccccc1>>COC(=O)/C=C/c1cc2ccccc2nc1N=S(C)(=O)c1ccccc1  
 5191 C=CC(=O)OC(C)(C)C.COc1cc(OC)c(Br)c(OC)c1>>COc1cc(OC)c(/C=C/C(=O)OC(C)(C)C)c(OC)c1  
 5192 Br1ccccc1.C=Cc1ccc(C)cc1>>Cc1ccc(/C=C/c2ccccc2)cc1  
 5193 C=C(F)C(=O)OC.O=[N+](=[O-])c1ccccc1I>>COC(=O)/C(F)=C/c1ccccc1([N+](=O)[O-])c1  
 5194 C=CC#N.CC(=O)Nc1ccccc1I>>CC(=O)Nc1ccccc1/C=C/C#N  
 5195 C=Cc1ccc(N(C)C)cc1.CCCCC1=C(CCCC)P(=O)(c2ccccc2)c2cc(I)ccc21>>CCCCC1=C(CCCC)P(=O)(c2ccccc2)c2cc(/C=C/c3ccc(N(C)C)cc3)ccc21  
 5196 C=CCC(O)c1cnc(-c2cc(OC)nc2F)cn1.COC(=O)[C@@H](C)[C@H](c1ccc(I)c(O)c1)C1CC1>>COC(=O)[C@@H](C)[C@H](c1ccc(/C=C\CC(O)c2cnc(-c3cc(OC)nc3F)cn2)c(O)c1)C1CC1  
 5197 C=Cc1ccccc1.CCOC(=O)c1c(OC)nn(C)c1I>>CCOC(=O)c1c(OC)nn(C)c1/C=C/c1ccccc1  
 5198 C=CCOC(=O)OC.Ic1ccccc1>>COC(=O)OC/C=C/c1ccccc1  
 5199 Br1ccc(-c2cccs2)s1.C=CC(=O)OCCCC>>CCCCOC(=O)/C=C/c1ccc(-c2cccs2)s1  
 5200 C=CC(=O)OC.O=Cc1ccc2ccccc2c1Br>>COC(=O)/C=C/c1c(C=O)ccc2ccccc12  
 5201 C=Cc1cc2cc(OC)c(OC)cc2oc1=O.O=Cc1ccc(Br)cc1>>COc1cc2cc(/C=C/c3ccc(C=O)cc3)c(=O)oc2cc1  
 5202 C=Cc1ccc2ccccc2c1.O=Cc1ccc(Br)cc1>>O=Cc1ccc(/C=C/c2ccc3ccccc3c2)cc1  
 5203 C=CC(=O)O.CCc1nc2c(cnn2CC)c(NC2CCOCC2)c1I>>CCc1nc2c(cnn2CC)c(NC2CCOCC2)c1/C=C/C(=O)O  
 5204 C=CCN.COc1ccc2c(=O)c(I)coc2c1>>COc1ccc2c(=O)c(/C=C/CN)coc2c1  
 5205 C=Cc1ccccc1.Nc1ccc(Br)c1>>Nc1ccc(/C=C/c2ccccc2)c1  
 5206 C=CC(=O)OCC.Cc1ccc(C2=C(I)c3cc(C)ccc3S(=O)(=O)N2C)cc1>>CCOC(=O)/C=C/C1=C(c2ccc(C)c2)N(C)S(=O)(=O)c2ccc(C)cc21  
 5207 C=CCO.Cc1ccc(Br)cc1>>C=C(CO)c1ccc(C)cc1  
 5208 C=Cc1ccccc1.O=C(c1ccccc1)c1ccc(Br)cc1>>O=C(c1ccccc1)c1ccc(/C=C/c2ccccc2)cc1  
 5209 C=C[Si](CC)(CC)CC.COc1ccc2cc(Br)ccc2c1>>CC[Si](/C=C/c1ccc2cc(OC)ccc2c1)(CC)CC  
 5210 C=CCN(C(=O)OC(C)(C)C)C(=O)OC(C)(C)C.Cc1ccc(Br)cc1>>Cc1ccc(/C=C/CN(C(=O)OC(C)(C)C)C(=O)OC(C)(C)C)cc1  
 5211 C=Cc1ccc(N(c2ccccc2)c2ccccc2)cc1.O=Cc1c(F)cc(Br)cc1F>>O=Cc1c(F)cc(/C=C/c2ccc(N(c3ccccc3)c3ccccc3)cc2)cc1F  
 5212 C=C.COc1ccc(I)cc1OC>>C=Cc1ccc(OC)c(OC)c1  
 5213 C=Cc1ccc([N+](=O)[O-])cc1.[O-][N+](=Nc1ccc(Br)cc1)c1ccccc1>>O=[N+](=[O-])c1ccc(/C=C/c2ccc(N=[N+](=[O-])c3ccccc3)cc2)cc1  
 5214 C=C[C@](C)(C)(COC(F)(F)F)C(=O)O.CC(C)[C@H](O)C(=O)N[C@@H](C)C(=O)N1CCC[C@@H](C(=O)N[C@H](C)c2ccc3ccc(Br)cc3n2)N1>>CC(C)[C@H](O)C(=O)N[C@@H](C)C(=O)N1CCC[C@@H](C(=O)N[C@H](C)c2ccc3ccc(/C=C/[C@](C)(COC(F)(F)F)C(=O)O)cc3n2)N1  
 5215 C=Cc1ccccc1.Ic1ccc2c(c1)OCCOCCOCCOCCO2>>C(=C/c1ccc2c(c1)OCCOCCOCCOCCO2)\c1ccccc1  
 5216 Br1cccn2nnnc12.C=Cc1ccccc1>>C(=C/c1cccn2nnnc12)\c1ccccc1  
 5217 C=CC(=O)OC.O=CNc1ccccc1I>>COC(=O)/C=C/c1ccccc1NC=O  
 5218 C=CCC[C@H]1CCC(=O)N1CCCc1ccc(C(=O)OC(C)C)s1.FC(F)(F)c1ccccc1I>>CC(C)OC(=O)c1ccc(CCCN2C(=O)CC[C@@H]2CC/C=C/c2ccccc2(C(F)(F)F)c2)s1  
 5219 Br1ccccc1.C=CC1SC=NC1C>>CC1N=CSC1/C=C/c1ccccc1  
 5220 Br1ccncc1.C=Cc1ccc(Cn2cc(C)c(=O)n(C)c2=O)cc1>>Cc1cn(Cc2ccc(/C=C/c3ccncc3)cc2)c(=O)n(C)c  
 5221 C=CC(=O)OC.Cc1ccccc1C(=O)c1sc2cc(O)ccc2c1-c1ccc(Br)cc1>>COC(=O)/C=C/c1ccc(-c2c(C(=O)c3ccccc3C)sc3cc(O)ccc23)cc1  
 5222 COc1ccc(I)cc1.Cc1ccc(S(=O)(=O)/C=C2)C(C)(C)C2(F)F>>COc1ccc(/C(=C2/C(C)(C)C2(F)F)S(=O)(=O)c2ccc(C)cc2)cc1  
 5223 C=CC(=O)OC.COc1c(CN(C(=O)c2ccccc2)c2ccccc(Br)c2)ccc2c1OC(C)(C)[C@H](OC(C)=O)[C@H]2N1CCCCC1>>COC(=O)/C=C/c1cccc(N(Cc2ccc3c(c2OC)OC(C)(C)[C@H](OC(C)=O)[C@H]3N2CCC2)C(=O)c2ccccc2)c1  
 5224 C=CC(=O)OCCCC.COc1ccc(Cl)cc1>>CCCCOC(=O)/C=C/c1ccc(OC)cc1  
 5225 C=CCON=C1[C@H](C)[C@H]2OC(=O)O[C@]2(C)[C@@H](CC)OC(=O)[C@@](C)(F)C(=O)[C@H](C)[C@@H](O[C@@H]2O[C@H](C)C[C@H](N(C)C)[C@H]2OC(C)=O)[C@](C)(OC)C[C@H]1C.Nc1cnc(Br)c1>>CC[C@H]1OC(=O)[C@@](C)(F)C(=O)[C@H](C)[C@@H](O[C@@H]2O[C@H](C)C[C@H](N(C)C)[C@H]2OC(C)=O)[C@](C)(OC)C[C@H](C)C(=NOC/C=C/c2cnc(N)c2)[C@H]1(C)C[C@H]2OC(=O)O[C@]2@112C  
 5226 C=CC1CCCCC1.O=Cc1ccc(Br)o1>>O=Cc1ccc(/C=C/C2CCCCC2)o1  
 5227 C=CCOC(C)=O.Cc1ccc(I)cc1>>CC(=O)OC/C=C/c1ccc(C)cc1  
 5228 C=C(NC(=O)OC(C)(C)C)C(=O)OCc1ccccc1.Ic1ccccc1C1OCCCCO1>>CC(C)(C)OC(=O)N/C(=C\c1ccc1C1OCCCCO1)C(=O)OCc1ccccc1  
 5229 Br1coc2ccncc12.C=CC(=O)OCC>>CCOC(=O)/C=C/c1coc2ccncc12

5230 C=CC(=O)OC.O=C1Cc2c(I)cccc2N1>>COC(=O)/C=C/c1cccc2c1CC(=O)N2  
5231 C=CCCC(=O)O.N#Cc1ccc(Br)cc1>>N#Cc1ccc(/C=C/CCC(=O)O)cc1  
5232 C=CC(=O)O.C[Si](C)(C)CCOCn1cc(I)c(=O)[nH]c1=O>>C[Si](C)(C)CCOCn1cc(/C=C/C(=O)O)c(=O)  
[nH]c1=O  
5233 C=CC(=O)OC.CC(C)(C)OC(=O)n1nc(I)c2cccc21>>COC(=O)/C=C/c1nn(C(=O)OC(C)(C)C)c2cccc1  
C=Cc1ccc2c(c1)c1cccc1n2CC.CCn1c2cccc2c2cc(-  
5234 n3c(C)nc4ccc(Br)cc4c3=O)ccc21>>CCn1c2cccc2c2cc(/C=C/c3ccc4nc(C)n(-  
c5ccc6c(c5)c5cccc5n6CC)c(=O)c4c3)ccc21  
5235 Br/C(=C/[Te]c1cccc1)c1cccc1.C=CCCC>>CCCC/C=C/C(=C/[Te]c1cccc1)c1cccc1  
Br1cnc2cccc2c1.C=CCO[C@]1(C)C[C@H](C)C(=O)[C@H](C)[C@H]2N(N)C(=O)O[C@]2(C)[  
5236 C@H](CC)OC(=O)[C@H](C)C(=O)[C@H](C)[C@H]1O[C@H]1O[C@H](C)C[C@H](N(C)C)[C  
@H]1O>>CC[C@H]1OC(=O)[C@H](C)C(=O)[C@H](C)[C@H](O[C@H]2O[C@H](C)C[C@H]  
(N(C)C)[C@H]2O)[C@H]1C)(OC/C=C/c2nc3cccc3c2)C[C@H]1(C)C(=O)[C@H]1(C)[C@H]2N(N)C  
5237 C=CC(=O)OC.FC(F)(F)c1ccc(I)cc1>>COC(=O)/C=C/c1ccc(C(F)(F)F)cc1  
5238 C=CC1CC(OC)=CC(=O)O1.COc1ccc(I)cc1>>COC1=CC(=O)OC(/C=C/c2ccc(OC)cc2)C1  
5239 C=CC(C)(C)CC(=O)O.COc1ccc(I)cc1>>COc1ccc(/C=C/C(C)(C)CC(=O)O)cc1  
5240 C=Cc1ccc2cccc2c1.CC(C)(C)Br>>CC(C)(C)/C=C/c1ccc2cccc2c1  
5241 C=Cc1cccc1.COc1ccc2cc(Br)ccc2c1>>COc1ccc2cc(/C=C/c3cccc3)ccc2c1  
5242 C=CC(N)=O.Cn1c2cccc2c2nc3ccc(Cl)cc3c3cccc1c32>>Cn1c2cccc2c2nc3ccc(/C=C/C(N)=O)cc3c3c  
ccc1c32  
5243 C=CC(=O)OCC.CCOC(=O)c1ccc(-c2cccc2)c(I)c1>>CCOC(=O)/C=C/c1cc(C(=O)OCC)ccc1-  
5244 C=C[C@H]1COC(C)(C)N1C(=O)OCc1cccc1.COC(=O)c1ccc(Br)cc1>>COC(=O)c1ccc(/C=C/[C@  
@H]2COC(C)(C)N2C(=O)OCc2cccc2)cc1  
5245 C=CC(=O)OCC.FC(F)(F)c1ccc(Cl)cc1>>CCOC(=O)/C=C/c1ccc(C(F)(F)F)cc1  
5246 C=C.N#Cc1cccc(Br)c1>>C=Cc1cccc(C#N)c1  
5247 C=CCCCCCC.ClCc1cccc1>>C=C(CCCCCC)Cc1cccc1  
5248 C=Cc1ccc2c(c1)CC2.C[Si](C)(C)I>>C[Si](C)(C)/C=C/c1ccc2c(c1)CC2  
5249 C=C(NC(=O)OCc1cccc1)C(=O)OC.CC(=O)OCc1cc(NC(=O)OC(C)(C)C)c(C)cc1Br>>COC(=O)/C(=  
C/c1cc(C)c(NC(=O)OC(C)(C)C)cc1COC(C)=O)NC(=O)OCc1cccc1  
5250 C=CC(=O)OC.COc1ccc(S(=O)(=O)N2CCc3cc(Br)cc(OCc4cccc4)c32)cc1>>COC(=O)/C=C/c1cc2c(c  
(OCc3cccc3)c1)N(S(=O)(=O)c1ccc(OC)cc1)CC2  
5251 C=CC(=O)OCC.Oc1ccc(Br)cc1>>CCOC(=O)/C=C/c1ccc(O)cc1  
5252 C=CC(=O)OCC.O=Cc1cc2cccc2nc1I>>CCOC(=O)/C=C/c1nc2cccc2cc1C=O  
5253 C=COCCCC.COc1cncc(Br)c1>>C=C(OCCCC)c1cncc(OC)c1  
C=C[C@H]1C[C@H]2CC[C@H](C(=O)OC)N2C(=O)[C@@](Cc2cccc2)(NC(=O)OCc2cccc2)[  
5254 C@H]1OC(C)=O.O=[N+][[O-]  
]c1ccc(Br)cc1>>COC(=O)[C@@H]1CC[C@@H]2C[C@@H](/C=C/c3ccc([N+](=O)[O-]  
)cc3)[C@H]1(OC(C)=O)[C@H](Cc3cccc3)(NC(=O)OCc3cccc3)C(=O)N12  
Br1ccc(-  
5255 c2nc3cccc3s2)cc1.C=Cc1ccc(N(c2cccc2)c2cccc2)cc1>>C=C/c1ccc(N(c2cccc2)c2cccc2)cc1)c1c  
cc(-c2nc3cccc3s2)cc1  
5256 C=CC(=O)OC(C)(C)C.O=C1c2cccc2CCc2cc(Br)ccc21>>CC(C)(C)OC(=O)/C=C/c1ccc2c(c1)CCc1cc  
ccc1C2=O  
5257 C=Cc1cc(OC(C)=O)cc(OC(C)=O)c1.CC(=O)Oc1ccc(Cl)cc1>>CC(=O)Oc1ccc(/C=C/c2cc(OC(C)=O)c  
c(OC(C)=O)c2)cc1  
5258 C=Cc1ccc(Cl)cc1.N#Cc1ccc(Br)cc1>>N#Cc1ccc(/C=C/c2ccc(Cl)cc2)cc1  
5259 C=Cc1cccc1.Nc1ccc(Br)cn1>>Nc1ccc(/C=C/c2cccc2)cn1  
5260 C=Cc1ccc(Cl)cc1.O=c1c(Br)c(-c2cccc2)oc2cccc12>>O=c1c(/C=C/c2ccc(Cl)cc2)c(-  
c2cccc2)oc2cccc12  
5261 C=CC(=O)N1CCOCC1.CC(C)(C)OC(=O)c1cccc1Br>>CC(C)(C)OC(=O)c1cccc1/C=C/C(=O)N1CC  
OCC1  
5262 C=CC(=O)CC.COC(=O)c1ccc(Br)cc1>>CCC(=O)/C=C/c1ccc(C(=O)OC)cc1  
5263 C=CC(=O)OC.Nc1cc(C(F)(F)F)ccc1Br>>COC(=O)/C=C/c1ccc(C(F)(F)F)cc1N  
5264 C=C(C)C(=O)OCC.Clc1ccco1>>CCOC(=O)/C(C)=C/c1ccco1  
5265 C=CC(=O)OC.CC1CC(C=O)=C(Br)c2cccc21>>COC(=O)/C=C/C1=C(C=O)CC(C)c2cccc21  
5266 C=Cc1ccc(-c2cccc2)cc1.CCOC(=O)C(F)I>>CCOC(=O)C(F)/C=C/c1ccc(-c2cccc2)cc1  
5267 C=C[C@H](CC(C)C)NC(=O)OC(C)(C)C.CC1(C)OC(=O)c2c(cccc2OS(=O)(=O)C(F)(F)F)O1>>CC(C  
)C[C@H](/C=C/c1ccc2c1C(=O)OC(C)(C)O2)NC(=O)OC(C)(C)C  
5268 C=C[C@@H](C)[C@@H](O)C/C=C/C(=O)OC.Ic1cccc1>>COC(=O)/C=C/C[C@H](O)[C@H](C)/C  
=C/c1cccc1

5269 C=C[C@@](C)(/C=C/c1ccc(OC)cc1)CCC=C(C)C.Oc1ccc(I)cc1>>COc1ccc(/C=C/[C@](C)(/C=C/c2c  
cc(O)cc2)CCC=C(C)C)cc1  
5270 BrC1=C(C2=C[C@H]3CCCC[C@H]3CC2)CCCC1.C=CC(=O)OC>>COC(=O)/C=C/C1=C(C2=C[C@  
@H]3CCCC[C@H]3CC2)CCCC1  
5271 C=CC=O.Ic1ccccc1>>O=C/C=C/c1ccccc1  
5272 Br/C(=C/[Te]c1ccccc1)c1ccccc1.C=Cc1ccccc1>>C([Te]c1ccccc1)=C(/C=C/c1ccccc1)c1ccccc1  
5273 C=C.Cc1cc(C)c(I)c(C)c1>>C=Cc1c(C)cc(C)cc1C  
5274 C=CC(=O)Nc1ccccc1.O=c1c(I)c(-c2ccc(O)cc2)oc2cc(O)ccc12>>O=C(/C=C/c1c(-  
c2ccc(O)cc2)oc2cc(O)ccc2c1=O)Nc1ccccc1  
5275 C=CC(=O)N1CCN(C)CC1.Clc1nc(N2CCOCC2)c2oc3ncc(Br)cc3c2n1>>CN1CCN(C(=O)/C=C/c2cnc  
3oc4c(N5CCOCC5)nc(Cl)nc4c3c2)CC1  
5276 Br1cccs1.C=CC(=O)OC>>COC(=O)/C=C/c1cccs1  
5277 C=CC(=O)NC(C)C.COc1ccc(Br)cc1>>COc1ccc(/C=C/C(=O)NC(C)C)cc1  
5278 C=CC(=O)OC.CC[C@H]1(O)C(=O)OCc2c1cc1n(c2=O)Cc2cc3c(Br)cccc3nc2-  
1>>CC[C@H]1(O)C(=O)OCc2c1cc1n(c2=O)Cc2cc3c(/C=C/C(=O)OC)cccc3nc2-1  
5279 C=CC(=O)OCC.Cc1ccccc(Br)c1>>CCOC(=O)/C=C/c1ccccc(C)c1  
5280 C=CC(=O)OC.O=Cc1ccc(F)cc1Br>>COC(=O)/C=C/c1cc(F)ccc1C=O  
5281 Br1ccccc1.C=CC(=O)OCC>>CCOC(=O)/C=C/c1ccccc1  
5282 C=CC(=O)O.Nc1ccc(Br)en1>>Nc1ccc(/C=C/C(=O)O)en1  
5283 C=CC(=O)OCC.CC(C)c1nn(-c2ccccc2)c(-c2ccc(F)cc2)c1Br>>CCOC(=O)/C=C/c1c(C(C)C)nn(-  
c2ccccc2)c1-c1ccc(F)cc1  
5284 C=CC(=O)CC.O=Cc1ccccc1Br>>CCC(=O)/C=C/c1ccccc1C=O  
5285 C=CCN1C(=O)c2ccccc2C1=O.Fc1cc(Br)cc(F)c1F>>O=C1c2ccccc2C(=O)N1C/C=C/c1cc(F)c(F)c(F)c  
5286 C=CC(=O)OCCCC.Oc1ccccc(Br)c1>>CCCCOC(=O)/C=C/c1ccccc(O)c1  
5287 C=CC(=O)OC.COc1c(CNc2ccccc(Br)c2)ccc2c1OC(C)(C)C=C2>>COC(=O)/C=C/c1ccccc(NC2ccccc3c(c  
2OC)OC(C)(C)C=C3)c1  
5288 C=CC(=O)OCC.COC(=O)[C@H]12CCC(C)(C)C[C@H]1C1=CC[C@H]3[C@@H]4(C)C=C(I)C(=O)C(  
C)(C)[C@H]4CC[C@@H]3(C)[C@H]1(C)CC2>>CCOC(=O)/C=C/C1=C[C@@H]2(C)[C@H](CC[C@  
@H]3(C)[C@@H]2CC=C2[C@@H]4CC(C)(C)CC[C@H]4(C(=O)OC)CC[C@H]23C(C)(C)C1=O  
5289 C=Cc1ccccc1.N#Cc1ccc2cc(Br)ccc2c1>>N#Cc1ccc2cc(/C=C/c3ccccc3)ccc2c1  
5290 C=CC(=O)OCCCC.Clc1ccccc1Br>>CCCCOC(=O)/C=C/c1ccccc1Cl  
5291 C=CC(=O)OCCCC.Cc1ccccc(I)c1>>CCCCOC(=O)/C=C/c1ccccc(C)c1  
C=CC(=O)OCC.Cc1cc2c(-  
5292 c3ccccc(Br)c3)c(CC(=O)Nc3ccc(F)cc3C(F)(F)F)c(=O)oc2cc1Cl>>CCOC(=O)/C=C/c1ccccc(-  
c2c(CC(=O)Nc3ccc(F)cc3C(F)(F)F)c(=O)oc3cc(Cl)c(C)cc23)c1  
5293 C=CC(=O)N(C)C.O=Cc1ccccc1Br>>CN(C)C(=O)/C=C/c1ccccc1C=O  
5294 C=Cc1ccc(Cl)cc1.Cn1nc(Br)c2ccccc21>>Cn1nc(/C=C/c2ccc(Cl)cc2)c2ccccc21  
5295 C=CCP(=O)(OCC)OCC.COc1ccc(I)cc1>>CCOP(=O)(C/C=C/c1ccc(OC)cc1)OCC  
\*CNCCCCOCCOCCOCCNC(=O)COc1ccc(C(Cc2cc(OC)cc(OC)c2)NC(=O)c2ccccc(C=C)c2)cc1.FC(F)  
5296 (F)Oc1ccc(I)cc1>>\*CNCCCCOCCOCCOCCNC(=O)COc1ccc(C(Cc2cc(OC)cc(OC)c2)NC(=O)c2ccccc  
(/C=C/c3ccc(OC(F)(F)F)cc3)c2)cc1  
5297 C=CC(C)=O.Nc1cc(Br)ccc1I>>CC(=O)/C=C/c1cnc(Br)cc1N  
5298 C=CCC(c1ccccc1)P(=O)(OC)OC.Ic1ccccc1>>COP(=O)(OC)C(C/C=C/c1ccccc1)c1ccccc1  
5299 C=CC(=O)OCCCC.COc1ccc2ncc(F)c(Br)c2n1>>CCCCOC(=O)/C=C/c1c(F)cnc2ccc(OC)nc12  
C=C[C@H]1C[C@H](CC(=O)OCC)OC(C)(C)O1.FC(F)(F)c1ccccc(-c2c(Br)ccc2-  
5300 c2ccnc(Nc3ccccc3)n2)c1>>CCOC(=O)C[C@H]1C[C@H](/C=C/c2cnn(-c3ccnc(Nc4ccccc4)n3)c2-  
c2ccccc(C(F)(F)F)c2)OC(C)(C)O1  
5301 C=Cc1cc(OC)c(OC)c(OC)c1.O=Cc1ccc(Br)cc1>>COc1cc(/C=C/c2ccc(C=O)cc2)cc(OC)c1OC  
5302 C=Cc1ccnc2ccccc12.CCCCN(CCCC)c1ccc(Br)c(Cl)c1>>CCCN(CCCC)c1ccc(/C=C/c2ccnc3c  
cccc23)c(Cl)c1  
5303 C=Cc1nnn(C=C)n1.Fc1ccccc1I>>C=Cn1nnc(/C=C/c2ccccc2F)n1  
C=CCn1c(-  
5304 c2ccc(OC)cc2OC)nc2ccccc2c1=O.O=C(CN1C(=O)COc2ccccc21)c1ccc(Br)cc1>>COc1ccc(-  
C=Cc1ccc(OC(C)=O)cc1.CN1c2ccccc2Sc2cc(Br)ccc21>>CC(=O)Oc1ccc(/C=C/c2ccc3c(c2)Sc2ccccc2  
N3C)cc1  
5306 C=CC(N)=O.O=C(c1ccccc1)c1ccccc1I>>NC(=O)/C=C/c1ccccc1C(=O)c1ccccc1  
5307 C=CCNC(=O)OC(C)(C)C.N#Cc1ccccc1Br>>C=C(CNC(=O)OC(C)(C)C)c1ccccc1C#N  
5308 C=Cc1ccc(CC#N)cc1.CCOC(=O)C(F)Br>>CCOC(=O)C(F)/C=C/c1ccc(CC#N)cc1  
5309 C=Cc1ccc2c(c1)c1ccccc1n2CCCCCCCC.O=Cc1ccc(Br)cc1>>CCCCCCCCN1c2ccccc2c2cc(/C=C/c3cc  
c(C=O)cc3)ccc21  
5310 C=CC(=O)OCC.Ic1oc2ccccc2c1-c1ccccc1>>CCOC(=O)/C=C/c1oc2ccccc2c1-c1ccccc1

5311 C=C.O=[N+][O-]c1ccc(I)cc1>>C=Cc1ccc([N+](=O)[O-])cc1  
5312 C=CC(=O)OC(C)(C)C.CC(C)(C)OC(=O)n1cc(C=O)c2c(Br)cccc21>>CC(C)(C)OC(=O)/C=C/c1cccc2c  
1c(C=O)cn2C(=O)OC(C)(C)C  
5313 Br1ccc(/C(=C2/CCc3cccc32)c2ccc3c(cnn3C3CCCCO3)c2)cc1.C=CC(=O)OC>>COC(=O)/C=C/c1  
ccc(/C(=C2/CCc3cccc32)c2ccc3c(cnn3C3CCCCO3)c2)cc1  
5314 C=CC(=O)OC.Nc1ccc(I)cc1>>COC(=O)/C=C/c1ccc(N)cc1  
5315 C=CC(=O)OC(C)(C)C.CCCCCCCCc1ccc(C(=O)OC)c(Cl)c1>>CCCCCCCCc1ccc(C(=O)OC)c(/C=C/  
C(=O)OC(C)(C)C)c1  
5316 C=CC(OCC)OCC.Fc1cccc(I)c1>>CCOC(/C=C/c1cccc(F)c1)OCC  
5317 C=CC(=O)OC(C)(C)C.CC(C)(C)OC(=O)CCOCc1cccc([N+](=O)[O-]  
]c1Br>>CC(C)(C)OC(=O)/C=C/c1c(COCCC(=O)OC(C)(C)C)cccc1[N+](=O)[O-]  
5318 C=CC(=O)OC.COC(=O)/C=C/c1cccc(N(Cc2ccc(Br)cc2)C(=O)C2CCCC2)c1>>COC(=O)/C=C/c1ccc  
(CN(C(=O)C2CCCC2)c2cccc(/C=C/C(=O)OC)c2)cc1  
5319 C=CC(=O)OCC.COC(=O)c1cccc(I)c1>>CCOC(=O)/C=C/c1cccc(C(=O)OC)c1  
5320 C=CCOc1cccc1.COc1ccc(I)cc1>>COc1ccc(/C=C/COc2cccc2)cc1  
5321 C=COCCN(C)C.N#Cc1ccc(Br)cc1>>C=C(OCCN(C)C)c1ccc(C#N)cc1  
5322 C=CC(C)=O.COC(=O)c1c(OC)c(OC)cc2occ(I)c(=O)c12>>COC(=O)c1c(OC)c(OC)cc2occ(/C=C/C(C)  
=O)c(=O)c12  
C=CC(=O)NCCCCCCCCCN=[N+]=[N-  
5323 ].COC1=CC2[C@@H]3Cc4c(I)cc(OC)c(O)c4[C@]2(CCN3C)CC1=O>>COC1=CC2[C@@H]3Cc4c(/  
C=C/C(=O)NCCCCCCCCCN=[N+]=[N-])cc(OC)c(O)c4[C@]2(CCN3C)CC1=O  
5324 C=CC(=O)OC(C)(C)C.Fc1ccc(CNc2ccc(Br)cn2)cc1>>CC(C)(C)OC(=O)/C=C/c1ccc(NCc2ccc(F)cc2)n  
5325 C=COC(CC)CCCC.Fc1ccc(Br)cc1>>C=C(OC(CC)CCCC)c1ccc(F)cc1  
5326 Br1ccc2ccc3cccc4ccc1c2c34.C=CC(=O)OCCCCC>>CCCCCOC(=O)/C=C/c1ccc2ccc3cccc4ccc1c  
5327 \*CN(Cc1cccc1)N=Nc1ccc(I)cc1.C=CC#N>>\*CN(Cc1cccc1)N=Nc1ccc(/C=C/C#N)cc1  
5328 C=Cc1cccc1.O=c1ccoc2c(Br)c(OCc3cccc3)ccc12>>O=c1ccoc2c(/C=C/c3cccc3)c(OCc3cccc3)ccc  
5329 C=Cc1cccc1.C[Si](C)(C)I>>C[Si](C)(C)/C=C/c1cccc1  
5330 C=C(NC(C)=O)C(=O)OC.CCc1cc(OC(C)=O)cc(C)c1I>>CCc1cc(OC(C)=O)cc(C)c1/C=C(\NC(C)=O)  
C(=O)OC  
5331 C=CC(=O)OC.O=C(O)c1ccc(Br)o1>>COC(=O)/C=C/c1ccc(C(=O)O)o1  
5332 C=CC(=O)OC(C)(C)C.CC(=O)Oc1ccc(I)cc1CC=C(C)C>>CC(=O)Oc1ccc(/C=C/C(=O)OC(C)(C)C)cc  
1CC=C(C)C  
5333 C=CC(=O)OCC.COc1cccc(-c2cccc2I)c1>>CCOC(=O)/C=C/c1cccc1-c1cccc(OC)c1  
5334 C=CC(=O)OC.CC(C)(C)OC(=O)N1CCC2(CC(=O)c3cc(Br)ccc3O2)C1>>COC(=O)/C=C/c1ccc2c(c1)  
C(=O)CC1(CCN(C(=O)OC(C)(C)C)C1)O2  
5335 C=Cc1ccccc1.O=[N+][O-]c1ccc(Nc2ccc(Br)cc2)c([N+](=O)[O-])c1>>O=[N+][O-]  
]c1ccc(Nc2ccc(/C=C/c3ccccc3)cc2)c([N+](=O)[O-])c1  
5336 C=CC(NC(=O)OC(C)(C)C)C(C)C.COC(=O)c1c(Br)ccn1C>>COC(=O)c1c(/C=C/C(NC(=O)OC(C)(C)  
C)C(C)C)ccn1C  
5337 C=CC(=O)OC.O=Cc1c(F)cc(Br)cc1Cl>>COC(=O)/C=C/c1cc(F)c(C=O)c(Cl)c1  
5338 C=CC(OCC)OCC.COc1ccc(Br)c(C=O)c1>>CCOC(/C=C/c1ccc(OC)cc1C=O)OCC  
5339 C=CC(=O)N1CCc2cc(OC)c(OC)cc2C1.Cn1c(-  
c2cccc2)c(I)c2ccccc21>>COc1cc2c(cc1OC)CN(C(=O)/C=C/c1c(-c3cccc3)n(C)c3cccc13)CC2  
5340 C=CC(=O)OC.C=CC[C@@H](O)c1ccc(Br)cc1>>C=CC[C@@H](O)c1ccc(/C=C/C(=O)OC)cc1  
5341 C=Cc1ccc(OC)cc1.Cc1oc2cccc2c(=O)c1Br>>COc1ccc(/C=C/c2c(C)oc3cccc3c2=O)cc1  
5342 C=CC(=O)OC.COc1ccc2c(c1)CCN(c1ccc(F)cc1)C2(C)c1ccc(Br)c(C)c1>>COC(=O)/C=C/c1ccc(C2(C)  
)c3ccc(OC)cc3CCN2c2ccc(F)cc2)cc1C  
5343 C=CC(=O)OCC.COc1cc(F)cc(Br)c1>>CCOC(=O)/C=C/c1cc(F)cc(OC)c1  
5344 C=CCNC(=O)c1cc(C)on1.Cc1ccc(I)cc1>>Cc1ccc(/C=C/CNC(=O)c2cc(C)on2)cc1  
5345 C=CC(=O)OCC.Fc1cccc1Oc1cccc(Br)c1>>CCOC(=O)/C=C/c1cccc(Oc2cccc2F)c1  
5346 C=Cc1ccc(C)cc1.CC(=O)c1ccc(I)cc1>>CC(=O)c1ccc(/C=C/c2ccc(C)cc2)cc1  
5347 C=CC(=O)OC.Nc1ccc(F)nc1Br>>COC(=O)/C=C/c1nc(F)ccc1N  
5348 C=Cc1ccc2c(c1)OCCO2.CC(C)(C)OC(=O)c1ccc(Br)cc1[N+](=O)[O-]  
>>CC(C)(C)OC(=O)c1ccc(/C=C/c2ccc3c(c2)OCCO3)cc1[N+](=O)[O-]  
5349 Br1cccc(I)c1.C=CC(=O)OC>>COC(=O)/C=C/c1cccc(Br)c1  
5350 C=Cc1ccc(NC(=O)OC(C)(C)C)cc1.CC(=O)OCc1cc(Br)ccn1>>CC(=O)OCc1cc(/C=C/c2ccc(NC(=O)O  
C(C)(C)C)cc2)ccn1  
5351 C=CC(=O)OC.O=Cc1c(F)cc(Br)cc1F>>COC(=O)/C=C/c1cc(F)c(C=O)c(F)c1  
5352 C=C[C@@H](OCc1cccc1)[C@@H](O)CCCC.COCOc1cccc(Br)c1>>CCCC[C@H](O)[C@@H](/  
C=C/c1cccc(OCOC)c1)OCc1cccc1

C=CC(C)=O.CC(C)(C)[Si](C)(C)OC[C@H]1O[C@H](c2ccc(Br)cc2)C=C[C@@H]1O[Si](C)(C)C(C)(C)C>>CC(=O)/C=C/c1ccc([C@@H]2C=C[C@H](O[Si](C)(C)C(C)(C)C)[C@@H](CO[Si](C)(C)C(C)(C)C)O2)cc1

5353 C=Cc1ccc(F)cc1.O=Cc1cn(C2CCCCO2)nc1I>>O=Cc1cn(C2CCCCO2)nc1/C=C/c1ccc(F)cc1

5354 C=CC(=O)OCC.CCc1nc2cc(OC)ccc2c(Oc2ccc(Br)cc2)c1-

5355 c1cccc(C(F)(F)F)c1>>CCOC(=O)/C=C/c1ccc(Oc2c(-c3cccc(C(F)(F)F)c3)c(CC)nc3cc(OC)ccc23)cc1

5356 C=Cc1cccc1.CC[C@]12C=CCN3CC[C@]4(C(=C(C(=O)OC)C1)Nc1ccc(I)cc14)[C@@H]32>>CC[C@]12C=CCN3CC[C@]4(C(=C(C(=O)OC)C1)Nc1ccc(/C=C/c5cccc5)cc14)[C@@H]32

5357 C=Cc1cccc1.IC1CCCCC1>>C(=C/C1CCCCC1)\c1cccc1

5358 C=CC(=O)OCC.Cn1cccc1Cl>>CCOC(=O)/C=C/c1cccn1C

5359 C=CC(=O)OCC.COc1ccc(CCNC(=O)c2nn(Cc3cccc3)c3ccc(Br)cc23)cc1OC>>CCOC(=O)/C=C/c1ccc2c(c1)c(C(=O)NCCc1ccc(OC)c(OC)c1)nn2Cc1cccc1

5360 C=C[Si](C)(C)C.COc1ccc(I)cc1>>COc1ccc(/C=C/[Si](C)(C)C)cc1

5361 C=CC(=O)NCc1cccc1.CC(C)(C)c1ccc2[nH]c3c(c2c1)CC(=O)Nc1ccc(I)cc1-

3>>CC(C)(C)c1ccc2[nH]c3c(c2c1)CC(=O)Nc1ccc(/C=C/C(=O)NCc2cccc2)cc1-3

5362 C=CCN(C(=O)C(C)C)[C@H](C)c1cc(F)cc(F)c1.O=C1Nc2ncccc2[C@]12Cc1ccc(Br)cc1C2>>CC(C)C(=O)N(C/C=C/c1ccc2c(c1)C[C@@]1(C2)C(=O)Nc2ncccc21)[C@H](C)c1cc(F)cc(F)c1

5363 C=Cc1cccc(OC)c1.C[Si](C)(C)OS(=O)(=O)C(F)(F)F>>COc1cccc(/C=C/[Si](C)(C)C)c1

5364 C=CC(=O)OCCCC.CC(C)(C)C(=O)Oc1ccc2cccc2c1-

c1c(O)ccc2cc(Br)ccc12>>CCCCOC(=O)/C=C/c1ccc2c(-

5365 C=CC(=O)OCC.Fc1ccc(Br)cc1>>CCOC(=O)/C=C/c1ccc(F)cc1

5366 C=CC(C)(O)CCC=C(C)C.Cc1cccc1Br>>CC(C)=CCCC(C)(O)/C=C/c1cccc1C

5367 C=CC(CO)N1C(=O)c2cccc2C1=O.Cc1ccc(S(=O)(=O)Oc2ccc(Br)cc2)cc1>>Cc1ccc(S(=O)(=O)Oc2ccc(/C=C/C(CO)N3C(=O)c4cccc4C3=O)cc2)cc1

5368 Bre1ccc(I)cc1.C=Cc1ccc(OC)cc1>>CCOc1ccc(/C=C/c2ccc(Br)cc2)cc1

5369 C=Cc1ccncc1.CCCCN(CCCC)c1ccc(I)cc1>>CCCN(CCCC)c1ccc(/C=C/c2ccncc2)cc1

5370 C=Cc1ccncc1.C[Si](C)(C)CCOCn1nc(I)c2ccc(C=O)cc21>>C[Si](C)(C)CCOCn1nc(/C=C/c2ccncc2)c2ccc(C=O)cc21

5371 C=Cc1nnn(C)n1.Fc1cccc1I>>Cn1nnn(/C=C/c2cccc2F)n1

5372 Bre1cc2ccc3cccc4ccc(c1)c2c34.C=CC(=O)OC>>COC(=O)/C=C/c1cc2ccc3cccc4ccc(c1)c2c34

5373 C=Cc1cccc1.O=[N+][O-]c1cccc1I>>O=[N+][O-]c1cccc1/C=C/c1cccc1

5374 C=CC(=O)OCCCC.C=Cc1ccc(Br)cc1>>C=Cc1ccc(/C=C/C(=O)OCCCC)cc1

C=CC(=O)OCCCC.COc1ccc2cc(Br)ccc2c1-

5375 c1c(P(=O)(c2cccc2)c2cccc2)ccc2cccc12>>CCCCOC(=O)/C=C/c1ccc2c(-

c3c(P(=O)(c4cccc4)c4cccc4)ccc4cccc34)c(OC)ccc2c1

5376 C=CCCCN1C(=O)c2cccc2C1=O.FC(F)(F)c1cnc2c(Br)ccnc2c1>>O=C1c2cccc2C(=O)N1CCCC/C=C/c1ccnc2cc(C(F)(F)F)ccnc12

5377 C=Cc1cc2cc(OC)c(OC)cc2oc1=O.O=[N+][O-]c1ccc(Br)cc1>>COc1cc2cc(/C=C/c3ccc([N+](=O)[O-])cc3)c(=O)cc2cc1OC

5378 C=CC(=O)N1N=Cc2cccc2C1CCC.CCCc1nc(N)nc(N)c1Cc1cc(I)c(OC)c(OC)c1>>CCCc1nc(N)nc(N)c1Cc1cc(/C=C/C(=O)N2N=Cc3cccc3C2CCC)c(OC)c(OC)c1

5379 C=CS(=O)(=O)c1cccc1.Cc1cccc1Br>>Cc1cccc1/C=C/S(=O)(=O)c1cccc1

5380 C=C[C@H](O[Si](C)(C)C(C)(C)C)[C@H](CCCC(=O)OCC)O[Si](C)(C)C(C)(C)C.O=Cc1ccc(Br)cc1>>CCOC(=O)CCC[C@H](O[Si](C)(C)C(C)(C)C)[C@H]/C=C/c1ccc(C=O)cc1O[Si](C)(C)C(C)(C)C

5381 C=CC(=O)OCC.Cc1c[n+][O-]c(c1)c(Cl)n1>>CCOC(=O)/C=C/c1nc(C)c[n+][O-]c1C

5382 C=CS(=O)(=O)F.CCc1ccc(I)cc1>>CCc1ccc(/C=C/S(=O)(=O)F)cc1

5383 Bre1ccc2ccc3cccc4ccc1c2c34.C=C[C@@H](CO[Si](C)(C)C(C)(C)C)NC(=O)OCc1cccc1>>CC(C)(C)[Si](C)(C)OC[C@H]/C=C/c1ccc2ccc3cccc4ccc1c2c34)NC(=O)OCc1cccc1

5384 C=Cc1ccc2ccc(Cl)cc2n1.COC(=O)c1cccc1CCC(SCC1(CC(=O)O)CC1)c1cccc(Br)c1>>COC(=O)c1ccc1CCC(SCC1(CC(=O)O)CC1)c1cccc(/C=C/c2ccc3ccc(Cl)cc3n2)c1

5385 C=CCCCCCC.O=S(=O)(Oc1ccc(C(F)(F)F)cc1)C(F)(F)F>>C=CCCCC)c1ccc(C(F)(F)F)cc1

5386 C=CC(=O)OCC.CCOC(=O)/C=C/c1cccc1Br>>CCOC(=O)/C=C/c1cccc1/C=C/C(=O)OCC

5387 C=C[Si](C)(C)CC.CC.N#Cc1cccc1Br>>CC[Si](/C=C/c1cccc1C#N)(CC)CC

5388 C=Cc1cc(OC)cc(OC)c1.N#Cc1ccc(I)cc1>>COc1cc(/C=C/c2ccc(C#N)cc2)cc(OC)c1

5389 C=CC(=O)OCc1cccc1.CC(C)(C)OC(=O)c1cccc1Br>>CC(C)(C)OC(=O)c1cccc1/C=C/C(=O)OCc1cccc1

5390 C=Cc1ccc2ccc(Cl)cc2n1.COC(=O)c1cccc1CC[C@H](O)c1cccc(Br)c1>>COC(=O)c1cccc1CC[C@H](O)c1cccc(/C=C/c2ccc3ccc(Cl)cc3n2)c1

5391 C=CC(N)=O.Cc1cc(Br)cc(C)c1Nc1ccnc(Nc2ccc(C#N)cc2)n1>>Cc1cc(/C=C/C(N)=O)cc(C)c1Nc1ccnc(Nc2ccc(C#N)cc2)n1

C=CCC(=O)O.CC(=O)OC[C@H]1O[C@@H](Oc2nn(CCCOC(=O)c3ccccc3)c(C(C)C)c2Cc2ccc(I)cc2  
5392 ))[C@H](OC(C)=O)[C@@H](OC(C)=O)[C@H]1OC(C)=O>>CC(=O)OC[C@H]1O[C@@H](Oc2nn(  
CCCOC(=O)c3ccccc3)c(C(C)C)c2Cc2ccc(/C=C/CC(=O)O)cc2)[C@H](OC(C)=O)[C@@H](OC(C)=O  
5393 ))[C@H]1OC(C)=O  
C=CC(=O)OCC.Cc1ccc(S(=O)(=O)n2ccc3c(Br)cccc32)cc1>>CCOC(=O)/C=C/c1cccc2c1ccn2S(=O)(=O)c1ccc(C)cc1  
5394 C=CS(=O)(=O)NCc1ccc(OC)cc1.CC(C)(C)OC(=O)NCc1cc(F)ccc1Br>>COc1ccc(CNS(=O)(=O)/C=C/  
c2ccc(F)cc2CNC(=O)OC(C)(C)C)cc1  
5395 C=CC(=O)OCc1cccc1.O=C1NCCCC[C@H]1N1Cc2cc(Br)ccc2C1=O>>O=C(/C=C/c1ccc2c(c1)CN  
([C@H]1CCCCNC1=O)C2=O)OCc1cccc1  
5396 C=CCN(C(=O)OC(C)(C)C)(=O)OC(C)(C)C.N#Cc1cccc1Cl>>CC(C)(C)OC(=O)N(C/C=C/c1cccc1  
C#N)C(=O)OC(C)(C)C  
5397 C=Cc1cccc(F)c1.CCOC(=O)C(F)Br>>CCOC(=O)C(F)/C=C/c1cccc(F)c1  
C=C(C)C(=O)OC.COc1cc(Br)c2c3c1O[C@H]1[C@@H](O[Si](C)(C)C(C)(C)C)C=C[C@H]4[C@  
5398 @H](C2)N(C)CC[C@H]341>>COC(=O)/C(C)=C/c1cc(OC)c2c3c1C[C@H]1[C@H]4C=C[C@H](  
O[Si](C)(C)C(C)(C)C)[C@H](O2)[C@H]34CCN1C  
5399 C=CC1(O)CCCCC1.O=C(NCCC(O)c1cc(F)cc(Br)c1)C(F)(F)F>>O=C(NCCC(O)c1cc(F)cc(/C=C/C2(  
O)CCCCC2)c1)C(F)(F)F  
5400 C=CC(=O)OCCC.C[C@H]12C[C@@H]34C=C(Sc5cccc(I)c5)C(=O)[C@@H](C)(CCC(=O)Nc5c(O)ccc(C(  
=O)O)c5O)[C@H]3[C@H](C[C@H]1C4)O2>>CCOC(=O)/C=C/c1cccc(SC2=C[C@H]34C[C@H]  
15C[C@H](O[C@@H]5(C)C3)[C@H]4[C@H](C)(CCC(=O)Nc3c(O)ccc(C(=O)O)c3O)C2=O)c1  
5401 C=CC(=O)OCC.CCCCOc1ccc(C(=O)Nc2cccc2I)cc1>>CCCOc1ccc(C(=O)Nc2cccc2/C=C/C(=O)O  
CC)cc1  
5402 C=CC(=O)OC1CCCCC1.Ic1cccc2cccc12>>O=C(/C=C/c1cccc2cccc12)OC1CCCCC1  
5403 C=Cc1cccc1.Clc1ccc(Br)c1>>Clc1ccc(/C=C/c2cccc2)c1  
5404 C=C(F)C(=O)OC.Ic1cccc1-c1cccc1>>COC(=O)/C(F)=C/c1cccc1-c1cccc1  
5405 C=COCCCC.O=c1cc(Br)c2cccc2o1>>CCCCO/C=C/c1cc(=O)oc2cccc12  
5406 C=CC(=O)OC.Ic1ccc(-c2cccs2)s1>>COC(=O)/C=C/c1ccc(-c2cccs2)s1  
5407 C=Cc1cccc1.CC(C)(C)C(=O)Nc1nc2ncc(Br)cc2c(=O)[nH]1>>CC(C)(C)C(=O)Nc1nc2ncc(/C=C/c3cc  
ccc3)cc2c(=O)[nH]1  
5408 Bre1sc2cccc12.C=CC(=O)OC(C)(C)C>>CC(C)(C)OC(=O)/C=C/c1sc2cccc12  
5409 C=CC(=O)OCC.FC(F)(F)c1ccc(Br)cn1>>CCOC(=O)/C=C/c1ccc(C(F)(F)F)nc1  
5410 Bre1ccc2cccc2c1.C=CCO>>C=C(CO)c1ccc2cccc2c1  
5411 C=CC(=O)OC.Ic1ccoc1>>COC(=O)/C=C/c1ccoc1  
5412 C=CC(=O)OCC.O=Cc1ccc(Cl)cc1>>CCOC(=O)/C=C/c1ccc(C=O)cc1  
5413 C=Cc1cccc1.O=Cc1cccc1Cl>>O=Cc1cccc1/C=C/c1cccc1  
5414 C=Cc1cccc1.Cn1cncc1-c1ccc(Br)cc1>>Cn1cncc1-c1ccc(/C=C/c2cccc2)cc1  
5415 C=Cc1ccc(OC)c(O)c1.Oc1cc(Br)cc(O)c1F>>COc1ccc(/C=C/c2cc(O)c(F)c(O)c2)cc1O  
5416 C=C(NC(=O)OC(C)(C)C)(=O)OCc1cccc1.COC(=O)c1cccc(I)c1>>COC(=O)c1cccc(/C=C/(NC(=O)  
OC(C)(C)C)C(=O)OCc2cccc2)c1  
5417 C=CCNC(=O)OC(C)(C)C.CC(=O)c1cccc1I>>C=C(CNC(=O)OC(C)(C)C)c1cccc1C(C)=O  
C=Cc1cc(C(C)(C)C)c(O)c(C(C)(C)C)c1.Cc1cncc(C)c1-  
5418 c1c(C)cc(OS(=O)(=O)C(F)(F)F)cc1C>>Cc1cncc(C)c1-  
c1c(C)cc(/C=C/c2cc(C(C)(C)C)c(O)c(C(C)(C)C)c2)cc1C  
5419 Bre1cccc1C1OCCCO1.C=CC(=O)OCC>>CCOC(=O)/C=C/c1cccc1C1OCCCO1  
5420 C=CC1CC(=O)N1.COc1cccc(I)c1>>COc1cccc(/C=C/C2CC(=O)N2)c1  
5421 C=Cc1ccc(Br)cc1.COc1ccc(I)cc1>>COc1ccc(/C=C/c2ccc(Br)cc2)cc1  
5422 C=Cc1cncc1.CCCCCCCCCCOc1ccc(I)cc1>>CCCCCCCCCOc1ccc(/C=C/c2cncc2)cc1  
5423 C=CC1(C(=O)OCC)CCC(=O)CC1.C[C@H](NC(=O)OC(C)(C)C)c1ccc2ccc(Br)cc2n1>>CCOC(=O)  
C1(/C=C/c2ccc3ccc([C@H](C)NC(=O)OC(C)(C)C)nc3c2)CCC(=O)CC1  
5424 C=CC(C)(C)O.Nc1cc(Br)ccc1C(=O)O>>CC(C)(O)/C=C/c1ccc(C(=O)O)c(N)c1  
5425 C=CC(=O)OC(C)(C)C.CC(=O)Nc1ccc(Br)cc1>>CC(=O)Nc1ccc(/C=C/C(=O)OC(C)(C)C)cc1  
5426 C=CC(=O)OCC.Oc1cccc(I)c1>>CCOC(=O)/C=C/c1cccc(O)c1  
Bre1ccc(C=C(c2cccc2)c2cccc2)c2cccc2)cc1.C=Cc1ccc(-  
5427 c2cccc3c(c2)c2cccc2n3CC)cc1>>CCn1c2cccc2c2cc(-  
c3ccc(/C=C/c4ccc(C=C(c5cccc5)c5cccc5)c5cccc5)cc4)cc3)ccc21  
5428 C=Cc1cccc1.Clc1ccc2cccc2c1>>C(=C/c1ccc2cccc2c1)\c1cccc1  
5429 C=CC(=O)N(C)Cc1oc2ccc(C)cc2c1C.O=C1Nc2ncc(Br)cc2C12CCC2>>Cc1ccc2oc(CN(C)C(=O)/C=C  
/c3cncc4c(c3)C3(CCC3)C(=O)N4)c(C)c2c1  
5430 C=Cc1ccc(F)cc1.CCOC(=O)C(F)Br>>CCOC(=O)C(F)/C=C/c1ccc(F)cc1

5431 C=CC(=O)Nc1cccc1.O=c1c(I)c(-c2ccc(O)cc2)oc2cc(O)ccc12>>O=C(/C=C/c1c(-  
c2ccc(O)cc2)oc2cc(O)ccc2c1=O)Nc1cccc1  
5432 C=Cc1cccc1.Clc1cccc(I)c1>>Clc1cccc(/C=C/c2ccccc2)c1  
5433 C=CC(=O)OCC.Cc1c(Br)cccc1[N+](=O)[O-]>>CCOC(=O)/C=C/c1cccc([N+](=O)[O-])c1C  
5434 C=CC(=O)OCC.CCC(=O)c1cccc(Br)c1>>CCOC(=O)/C=C/c1cccc(C(=O)CC)c1  
5435 C=CC(=O)N1CCCC1.CC(C)(C)OC(=O)c1cccc1Br>>CC(C)(C)OC(=O)c1cccc1/C=C/C(=O)N1CCC  
5436 C=CCC(=O)OC.COC(=O)c1c(Br)ccc2[nH]ccc12>>COC(=O)/C=C/c1ccc2[nH]ccc2c1C(=O)OC  
5437 C=Cc1cccc1.CC(C)(C)OC(=O)N1CCC2(CC1)Oc1ccc(Br)cc1C2=O>>CC(C)(C)OC(=O)N1CCC2(CC  
1)Oc1ccc(/C=C/c3ccccc3)cc1C2=O  
5438 C=Cc1ccc(C)cc1.Cc1ccc(Br)cc1>>Cc1ccc(/C=C/c2ccc(C)cc2)cc1  
5439 Bre1ccc(Cn2c(-c3ccccc3)nc3ccccc32)cc1.C=Cc1cccc1>>C(=C/c1ccc(Cn2c(-  
c3ccccc3)nc3ccccc32)cc1)c1cccc1  
5440 C=CC(=O)OC.COc1cccc1Sc1cc(C)c(I)cc1[N+](=O)[O-]>>COC(=O)/C=C/c1cc([N+](=O)[O-]  
)c(Sc2ccccc2OC)cc1C  
5441 C=Cc1cncnc1.Cc1cccc1Br>>Cc1cccc1/C=C/c1cncnc1  
5442 C=CCCCCCC.ClCc1ccc(-c2ccccc2)cc1>>C=C(CCCCCC)Cc1ccc(-c2ccccc2)cc1  
5443 C=CC(=O)Nc1cccc(Cl)c1.COc1ccc2c(=O)c(I)coc2c1>>COc1ccc2c(=O)c(/C=C/C(=O)Nc3cccc(Cl)c3)  
coc2c1  
5444 C=CCOc1ccc(Cl)cc1.Ic1cccs1>>Clc1ccc(OC/C=C/c2cccs2)cc1  
5445 C=CC(=O)OC(C)(C)C.O=Cc1cc(Cl)ccc1Br>>CC(C)(C)OC(=O)/C=C/c1ccc(Cl)cc1C=O  
5446 C=CCNC(=O)c1ccc(F)cc1NC(=O)c1cccc1.Ic1ccccc1>>O=C(Nc1cc(F)ccc1C(=O)NC/C=C/c1cccc1)  
c1cccc1  
5447 C=COCCCC.O=Cc1cccc(Br)c1>>C=C(OCCCC)c1cccc(C=O)c1  
5448 C=Cc1cncnc1.Cc1cccc(Br)c1>>Cc1cccc(/C=C/c2cncnc2)c1  
5449 C=Cc1ccc(/C=C/c2ccc(N(C)C)cc2)cc1.CC1(C)C2=CC(=O)C(F)=CC2=C(c2ccc(Br)cc2S(=O)(=O)O)c2  
cc(F)c(O)cc21>>CN(C)c1ccc(/C=C/c2ccc(/C=C/c3ccc(C4=C5C=C(F)C(=O)C=C5C(C)(C)c5cc(O)c(F)  
cc54)c(S(=O)(=O)O)c3)cc2)cc1  
5450 C=Cc1ccc(F)cc1.C[Si](C)(C)OS(=O)(=O)C(F)(F)F>>C[Si](C)(C)/C=C/c1ccc(F)cc1  
5451 C=Cc1cccc1.Cc1ccc(S(=O)(=O)n2ccc3c(Br)cccc32)cc1>>Cc1ccc(S(=O)(=O)n2ccc3c(/C=C/c4ccccc4  
)cccc32)cc1  
5452 C=COCCCC.CN(C)c1ncc(Br)cn1>>C=C(OCCCC)c1cnc(N(C)C)nc1  
5453 C=Cc1cccc1.O=[N+](O-)]c1cccc1Cl>>O=[N+](O-)]c1cccc1/C=C/c1cccc1  
5454 C=Cc1ccc(C(=O)N[C@@H](CCSC)C(=O)OC)c(-  
c2ccccc2C)c1.OC(c1cncnc1Br)C12CC3CC(CC(C3)C1)C2>>COC(=O)[C@@H](CCSC)NC(=O)c1ccc(/  
C=C/c2cncnc2C(O)C23CC4CC(CC(C4)C2)C3)cc1-c1cccc1C  
5455 C=CC(=O)OCC.Fc1cccc(Cn2nc(I)c3ccccc32)c1>>CCOC(=O)/C=C/c1nn(Cc2cccc(F)c2)c2ccccc12  
5456 C=CC(=O)OC.Nc1cnc(Br)c1>>COC(=O)/C=C/c1cc(N)ccn1  
5457 C=CS(N)(=O)=O.Cc1cccc(C)c1Br>>Cc1cccc(C)c1/C=C/S(N)(=O)=O  
5458 Bre1c2ccccc2cc2ccccc12.C=C[C@@H](CO[Si](C)(C)C(C)(C)NC(=O)OCc1cccc1>>CC(C)(C)[Si]  
(C)(C)OC[C@@H](/C=C/c1c2ccccc2cc2ccccc12)NC(=O)OCc1cccc1  
5459 C=CC(=O)OC.CSc1ccc(Br)cc1>>COC(=O)/C=C/c1ccc(SC)cc1  
5460 C=CC(=O)OC.N#Cc1ccc(-c2cc(I)cc(C=O)c2)cc1>>COC(=O)/C=C/c1cc(C=O)cc(-c2ccc(C#N)cc2)c1  
5461 C=Cc1senc1C.CC(=O)OCC1Cn2c3ccccc3c3c4c(c5c6cc(Br)ccc6n(c5c32)C1)C(=O)N(C(C)=O)C4>>C  
C(=O)OCC1Cn2c3ccccc3c3c4c(c5c6cc(/C=C/c7senc7C)ccc6n(c5c32)C1)C(=O)N(C(C)=O)C4  
5462 C=C[Si](C)(C)c1cccn1.Cc1cccc1I>>Cc1cccc1/C=C/[Si](C)(C)c1cccn1  
5463 C=CC(=O)OC(C)(C)C.CCOC(=O)c1cc(I)nn1COCC[Si](C)(C)C>>CCOC(=O)c1cc(/C=C/C(=O)OC(C)  
(C)C)nn1COCC[Si](C)(C)C  
5464 C=Cc1ccc(F)cc1.N[C@@H](Cc1c[nH]c2c(Br)cccc12)C(=O)O>>N[C@@H](Cc1c[nH]c2c(/C=C/c3cc  
c(F)cc3)cccc12)C(=O)O  
5465 C=Cc1cccc1.O=C1c2ccccc2C(=O)N1CCc1ccc(Br)cc1>>O=C1c2ccccc2C(=O)N1CCc1ccc(/C=C/c2cc  
ccc2)cc1  
5466 C=CP(=O)(OCC)OCC.COc1ccc(Br)cc1>>CCOP(=O)(/C=C/c1ccc(OC)cc1)OCC  
5467 Bre1ccnc1.C=Cc1cnc2ccc(Nc3cc(C(C)C)enn3)nc2c1>>CC(C)c1cnn(Cc2ccc3ncc(/C=C/c4ccccc4)cc  
3n2)c1  
5468 C=CC(=O)OC(C)(C)C.Cc1cc(C(=C2CCCC2)c2ccc(O)cc2)ccc1Br>>Cc1cc(C(=C2CCCC2)c2ccc(O  
)cc2)ccc1/C=C/C(=O)OC(C)(C)C  
5469 C=CCCCCN.ClCc1ccc(-c2ccccc2)cc1>>C=C(CCCCN)Cc1ccc(-c2ccccc2)cc1  
5470 C=CC(=O)OCCCC.Clc1cc(Br)ccc1I>>CCCCOC(=O)/C=C/c1ccc(Br)cc1Cl  
5471 C=CCN(C(=O)OC(C)(C)C)C(=O)OC(C)(C)C.FC(F)(F)c1cccc(Br)c1>>CC(C)(C)OC(=O)N(C/C=C/c1  
cccc(C(F)(F)F)c1)C(=O)OC(C)(C)C  
5472 C=CC(=O)OCC.Cc1ccc2ccccc2c1Br>>CCOC(=O)/C=C/c1c(C)ccc2ccccc12



5473 C=Cc1ccc(C)cc1.Cc1ccc(-c2oc3ccccc3c(=O)c2Br)cc1>>Cc1ccc(/C=C/c2c(-c3ccc(C)cc3)oc3ccccc3c2=O)cc1  
 5474 C=CC(=O)OC.COCC(=O)c1ccccc(Br)c1>>COC(=O)/C=C/c1ccccc(C(=O)OC)c1  
 5475 C=CC(=O)OC(C)(C)C.[C@H](c1ccccc1)N(Cc1ccccc1)[C@H](CC(=O)OC(C)(C)C)c1ccc(Br)cc1>>C[C@H](c1ccccc1)N(Cc1ccccc1)[C@H](CC(=O)OC(C)(C)C)c1ccc(/C=C/C(=O)OC(C)(C)C)cc1  
 5476 C=CC(=O)OCCCC.Nc1ccccc1Br>>CCCCOC(=O)/C=C/c1ccccc1N  
 5477 C=CC1CC(OC)=CC(=O)O1.Ic1ccc2c(c1)OCO2>>COC1=CC(=O)OC(/C=C/c2ccc3c(c2)OCO3)C1  
 5478 C=CC(=O)OC.C=CC[C@H](O)c1ccccc(Br)c1>>C=CC[C@H](O)c1ccccc(/C=C/C(=O)OC)c1  
 5479 C=Cc1ccc(/C=C/c2ccc(N(C)C)cc2)cc1.CC1(C)C2=CC(=O)C=CC2=C(c2ccc(Br)cc2S(=O)(=O)O)c2ccc(O)cc21>>CN(C)c1ccc(/C=C/c2ccc(/C=C/c3ccc(C4=C5C=CC(=O)C=C5C(C)(C)c5cc(O)ccc54)c(S(=O)(=O)O)c3)cc2)cc1  
 5480 C=CC(=O)OCC.COc1ccc(-c2oc3cc(OC)ccc3c(=O)c2I)cc1>>CCOC(=O)/C=C/c1c(-c2ccc(OC)cc2)oc2cc(OC)ccc2c1=O  
 5481 Br1ccccc1.C=CC(=O)OCC(C)C>>CC(C)COC(=O)/C=C/c1ccccc1  
 5482 C=CC(=O)OCC.O=C1OC2(CCCCC2)OC=C1I>>CCOC(=O)/C=C/C1=COC2(CCCCC2)OC1=O  
 5483 C=CC(=O)N(C)OC.CCOC(=O)c1ccc(I)cc1>>CCOC(=O)c1ccc(/C=C/C(=O)N(C)OC)cc1  
 5484 C=CS(=O)c1ccccc1.Ic1ccccc1>>O=S(/C=C/c1ccccc1)c1ccccc1  
 5485 C=CCOC(=O)NC.COc1ccccc1I>>CNC(=O)OC/C=C/c1ccccc1OC  
 5486 Br1ccccc1.C=Cc1nnn(-c2ccccc2)n1>>C(=C/c1nnn(-c2ccccc2)n1)\c1ccccc1  
 5487 C=CCNC(=O)OC(C)(C)C.O=S(=O)(Oc1ccc(C(F)(F)F)c1Cl)C(F)(F)F>>C=C(CNC(=O)OC(C)(C)C)c1ccc(C(F)(F)F)c1Cl  
 5488 Br1ccccc1.C=Cc1ccc(C=O)cc1>>O=Cc1ccc(/C=C/c2ccccc2)cc1  
 5489 Br1ccccc1.C=Cc1ccccc1>>C(=C/c1ccccc1)\c1ccccc1  
 5490 C=Cc1ccccc1.CN(C)[C@H](COc1cnc(Br)c1)Cc1c[nH]c2ccccc12>>CN(C)[C@H](COc1cnc(/C=C/c2ccccc2)c1)Cc1c[nH]c2ccccc12  
 5491 C=CC(=O)OCCCC.CCCCCc1cn(Cc2ccc(I)cc2)nn1>>CCCCCc1cn(Cc2ccc(/C=C/C(=O)OCCCC)cc2)nn1  
 5492 C=CC[C@H]1CC2(OCCO2)[C@H](C)[C@@H](c2ccccc2)N1C(=O)OCc1ccccc1.COc1cc(Br)nc(OC)n1>>COc1cc(/C=C/C[C@H]2CC3(OCCO3)[C@H](C)[C@@H](c3ccccc3)N2C(=O)OCc2ccccc2)nc(O)  
 5493 C=Cc1ccc2ccccc12.FC(F)(F)c1ccccc1I>>FC(F)(F)c1ccccc1/C=C/c1ccc2ccccc12  
 5494 C=Cc1cnc(C#N)c1Nc1ccc2[nH]ccc2c1C.COc1ccc(CN2CCN(C)CC2)cc1I>>COc1ccc(CN2CCN(C)CC2)cc1/C=C/c1cnc(C#N)c1Nc1ccc2[nH]ccc2c1C  
 5495 C=C[C@H]1OC2(CCCCC2)O[C@H]1CO[Si](C)(C)C(C)(C)C.CC1(C)OC(=O)c2c(cccc2OS(=O)(=O)C(F)(F)F)O1>>CC1(C)OC(=O)c2c(/C=C/[C@H]3OC4(CCCCC4)O[C@H]3CO[Si](C)(C)C(C)(C)C)cccc2O1  
 5496 Br1cnc2c(c1)CNC1(CCCC1)CN2.C=CC(=O)OC(C)(C)C>>CC(C)(C)OC(=O)/C=C/c1cnc2c(c1)CNC1(CCCC1)CN2  
 5497 C=Cc1ccccc1N.COc1ccc(Br)c(OC)c1>>COc1ccc(/C=C/c2ccccc2N)c(OC)c1  
 5498 C=C[C@H](O[Si](C)(C)C(C)(C)C)[C@H](CCCC(=O)OCC)O[Si](C)(C)C(C)(C)C.O=Cc1ccccc1Br>>CCOC(=O)CCC[C@H](O[Si](C)(C)C(C)(C)C)[C@H](/C=C/c1ccccc1C=O)O[Si](C)(C)C(C)(C)C  
 5499 C=Cc1ccc(C=C)cc1.O=[N+](=[O-])c1ccc(Br)cc1>>C=Cc1ccc(/C=C/c2ccc([N+](=O)[O-])cc2)cc1  
 5500 C=CC(=O)OCC.COc1ccc(Br)c(C(F)(F)F)c1C>>CCOC(=O)/C=C/c1ccc(OC)c(C)c1C(F)(F)F  
 5501 C=CC(=O)OC.CCCOC(=O)/C=C/c1ccc(I)cc1>>CCCCOC(=O)/C=C/c1ccc(/C=C/C(=O)OC)cc1  
 5502 C=C[C@H]1O[C@H]2OC(C)(C)O[C@H]2[C@H]1OC.COCC(=O)[C@H](Cc1ccc(I)cc1)NC(=O)OC(C)(C)C>>COC(=O)[C@H](Cc1ccc(/C=C/[C@H]2O[C@H]3OC(C)(C)O[C@H]3[C@H]2OC)c1)NC(=O)OC(C)(C)C  
 5503 C=CC(=O)N1[C@H]2C[C@H]3CC[C@H]2(CS1(=O)=O)C3(C)C.Ic1ccccc1>>CC1(C)[C@@H]2CC[C@H]13CS(=O)(=O)N(C(=O)/C=C/c1ccccc1)[C@H]3C2  
 5504 C=CC(=O)OCC.CCOC(=O)c1cc(-c2ccccc2)n(-c2ccc(I)cc2)c1C(=O)c1ccccc1>>CCOC(=O)/C=C/c1ccc(-n2c(-c2ccc(I)cc2)c1C(=O)c1ccccc1)cc1  
 5505 C=CC(=O)OCC.Clc1ccc(Br)cn1>>CCOC(=O)/C=C/c1ccc(Cl)cn1  
 5506 C=CC(=O)OC.COc1ccccc1Br>>COC(=O)/C=C/c1ccccc1OC  
 5507 C=Cc1ccc(NC)cc1.OCCOc1ncc(I)cc1Br>>CNc1ccc(/C=C/c2cnc(OCCO)c(Br)c2)cc1  
 5508 C=C(NC(C)=O)C(=O)OC.Ic1ccccc1>>COC(=O)/C=C/c1ccccc1NC(C)=O  
 5509 C=Cc1ccc(C#N)cc1.N[C@@H](Cc1c[nH]c2c(Br)cccc12)C(=O)O>>N#Cc1ccc(/C=C/c2ccccc3c(C[C@H](N)C(=O)O)c[nH]c23)cc1  
 5510 C=CC(=O)OCC.COc1cc(Br)cc2cc(-c3ccccc3)oc12>>CCOC(=O)/C=C/c1cc(OC)c2oc(-c3ccccc3)cc2c1  
 5511 C=CC(=O)OC(C)(C)C.Nc1ccc(I)c2ccc(-c3ccc(Oc4ccccc4)cc3)c12>>CC(C)(C)OC(=O)/C=C/c1cnc(N)c2c(-c3ccc(Oc4ccccc4)cc3)csc12  
 5512 C=C.ClCc1ccccc1>>C=CCc1ccccc1

5513 C=Cc1ccc2c(c1)c1cccc1n2CCCC.O=Cc1ccc(Br)cc1>>CCCCn1c2ccccc2c2cc(/C=C/c3ccc(C=O)cc3)c  
cc21

5514 C=C(F)C(=O)OC.COc1cccc(I)c1>>COC(=O)/C(F)=C/c1cccc(OC)c1  
C=Cc1cccc1.CCC1=C(C)c2cc3[nH]c(c(C)c3CO)c(Br)c3nc(c4c5[nH]c(cc1n2)c(C)c5C(=O)C4)[C@@

5515 H](CCC(=O)OC)[C@@H]3C>>CCC1=C(C)c2cc3[nH]c(c(C)c3CO)c(/C=C/c3ccccc3)c3nc(c4c5[nH]c(c  
cc1n2)c(C)c5C(=O)C4)[C@@H](CCC(=O)OC)[C@@H]3C

5516 C=Cc1ccc(C)cc1.COc1ccc(Br)cc1>>COc1ccc(/C=C/c2ccc(C)cc2)cc1

5517 C=CC1CCCCC1.Nc1cccc1Br>>Nc1cccc1/C=C/C1CCCCC1

5518 C=CC(=O)OC.Ic1enn(C2CCCCO2)c1>>COC(=O)/C=C/c1enn(C2CCCCO2)c1

5519 C=C(NC(=O)[C@H](Cc1cccc1)NC(=O)OC(C)(C)C(=O)OC.Ic1cccc1>>COC(=O)/C(=C/c1cccc1  
)NC(=O)[C@H](Cc1cccc1)NC(=O)OC(C)(C)C

5520 C=CS(N)(=O)=O.CCc1cccc(CC)c1Br>>CCc1cccc(CC)c1/C=C/S(N)(=O)=O

5521 Br1enc2ccccc2c1.C=CC(C)=O>>CC(=O)/C=C/c1enc2ccccc2c1

5522 C=CC(=O)OC(C)(C)C.[Si](C)(C)c1cccc(Br)n1>>CC(C)(C)OC(=O)/C=C/c1cccc([Si](C)(C)C)n1  
C=CC(=O)OC.O=S(=O)(c1cccc1)n1cc(-c2ccccc2)c2cc(Br)cnc21>>COC(=O)/C=C/c1cnc2c(c1)c(-

5523 c1ccccc1)cn2S(=O)(=O)c1ccccc1

5524 C=CC(=O)O.O=C(O)c1cc(Br)ccc1O>>O=C(O)/C=C/c1ccc(O)c(C(=O)O)c1

5525 C=C(C)C(=O)OC.CC(C)n1enc2c(Cl)nc(I)nc21>>COC(=O)/C(C)=C/c1nc(Cl)c2nen(C(C)C)c2n1

5526 C=CC(C)(C)O.Nc1ccc(Br)cc1>>CC(C)(O)/C=C/c1ccc(N)cc1

5527 C=CCCP(=O)(OC)OC.Fc1ccc(I)cc1>>COP(=O)(CC/C=C/c1ccc(F)cc1)OC

5528 C=Cc1cccc1.COc1ccc(/C=C/c2ccc(I)cc2)cc1>>COc1ccc(/C=C/c2ccc(/C=C/c3ccccc3)cc2)cc1  
C=CS(=O)(=O)Nc1ccc(OC2CCN(C(=O)OC(C)(C)C)CC2)cc1.N#Cc1cccc(Br)c1>>CC(C)(C)OC(=O)

5529 N1CCC(Oc2ccc(NS(=O)(=O)/C=C/c3ccccc(C#N)c3)cc2)CC1  
C=Cc1ccc2c(c1)CC[C@@H]1[C@@H]2CC[C@]2(C)C(=O)CC[C@H]12.CCOC(=O)C(F)I>>CCO

5530 C(=O)C(F)/C=C/c1ccc2c(c1)CC[C@H]1[C@@H]2CC[C@]2(C)C(=O)CC[C@H]12  
C=Cc1ccc(-c2ccccc2)cc1.COC(=O)c1ccccc1I>>COC(=O)c1ccccc1/C=C/c1ccc(-c2ccccc2)cc1

5531 C=Cc1ccc(OCCC)cc1.Cn1c(=O)c2c(cc(Br)n2C)n(C)c1=O>>CCCOc1ccc(/C=C/c2cc3c(c(=O)n(C)c(=  
O)n3C)n2C)cc1

5533 Br1ccccc1.C=CC[Si](C)(C)C>>C=C(C[Si](C)(C)C)c1ccccc1

5534 C=Cc1cccc1.COC(=O)c1cc(OC)c(OC)cc1I>>COC(=O)c1cc(OC)c(OC)cc1/C=C/c1ccccc1

5535 C=CC(C)(C)O.COc1ccc(/C=C/C(=O)c2ccc(OC)c(I)c2OC)cc1>>COc1ccc(/C=C/C(=O)c2ccc(OC)c(/C  
=C/C(C)(C)O)c2OC)cc1

5536 C=CC(=O)OC(C)(C)C.FC1(F)Oc2cccc(I)c2O1>>CC(C)(C)OC(=O)/C=C/c1cccc2c1OC(F)(F)O2  
Br1cn(C2CCCCC2)c(-

5537 c2ccc(OCc3ccccc3)cc2)n1.C=CC(=O)OC(C)(C)C>>CC(C)(C)OC(=O)/C=C/c1cn(C2CCCCC2)c(-  
c2ccc(OCc3ccccc3)cc2)n1

5538 C=CC=O.COc1ccc(-c2ccc(CN(C(=O)CC(C)(C)C)c3nccc4cc(Br)ccc34)cc2)cc1C>>COc1ccc(-  
c2ccc(CN(C(=O)CC(C)(C)C)c3nccc4cc(/C=C/C(=O)ccc34)cc2)cc1C

5539 C=COCCCC.CCOC(=O)c1ccc(OS(=O)(=O)C(F)(F)F)cc1>>C=C(OCCCC)c1ccc(C(=O)OCC)cc1  
\*NCCCCOCCOCCOCCNC(=O)COc1ccc(C(Cc2cc(OC)cc(OC)c2)NC(=O)c2cccc(C=C)c2)cc1.O=C(

5540 Oc1ccc([N+](=O)[O-]  
)cc1)c1cccc(I)c1>>\*NCCCCOCCOCCOCCNC(=O)COc1ccc(C(Cc2cc(OC)cc(OC)c2)NC(=O)c2ccc  
c(/C=C/c3ccccc(C(=O)Oc4ccc([N+](=O)[O-])cc4)c3)c2)cc1

5541 C=CC(C)=O.O=Cc1cccc1Br>>CC(=O)/C=C/c1cccc1C=O  
C=C[C@H]1O[C@H](OC)[C@H](OCc2ccccc2)[C@@H](OCc2ccccc2)[C@@H]1OCc1ccc2ccccc2c1

5542 .O=c1cc(-c2ccccc2)oc2ccc(I)cc12>>CO[C@H]1O[C@H](/C=C/c2ccc3oc(-  
c4ccccc4)cc(=O)c3c2)[C@@H](OCc2ccc3ccccc3c2)[C@H](OCc2ccccc2)[C@H]1OCc1ccccc1

5543 Br1enc2[nH]cnc2c1.C=CC(=O)N(C)Cc1cc2ccccc2n1C>>CN(Cc1cc2ccccc2n1C)C(=O)/C=C/c1cnc2[  
nH]cnc2c1

5544 C=CC(=O)OC.Cc1ccc(I)cc1>>C=C(C(=O)OC)c1ccc(C)cc1

5545 C=CC(=O)OC.CC(C)NCCCn1c(Sc2cc3c(cc2I)OCO3)nc2c(N)ncnc21>>COC(=O)/C=C/c1cc2c(cc1Sc1  
nc3c(N)ncnc3n1CCCN(C)C)OCO2

5546 C=CC(CCCCC)OC1CCCCO1.COC(=O)CCCCC1=C(I)CCC1=O>>CCCCCC(/C=C/C1=C(CCCCC(=  
O)OC)C(=O)CC1)OC1CCCCO1

5547 C=CC(=O)OCCCC.Ic1nenc2nen(Cc3ccccc3)c12>>CCCCOC(=O)/C=C/c1nenc2nen(Cc3ccccc3)c12

5548 C=Cc1cccc1.Cc1ccc([N+](=O)[O-])cc1Cl>>Cc1ccc([N+](=O)[O-])cc1/C=C/c1ccccc1

5549 C=Cc1cccc1.Cc1cc(C)c(OS(=O)(=O)C(F)(F)F)c(C)c1>>C=C(c1ccccc1)c1c(C)cc(C)cc1C

5550 C=Cc1csc2c(N)ncnc12.CCOC(=O)c1ccc(C)c(I)c1>>CCOC(=O)c1ccc(C)c(/C=C/c2csc3c(N)ncnc23)c1

5551 C=Cc1ccc(C(C)(C)C)cc1.CC(=O)c1ccc(Br)cc1>>CC(=O)c1ccc(/C=C/c2ccc(C(C)(C)C)cc2)cc1

5552 C=CC(=O)OCC.Cc1cc(F)c(CN(C)C)cc1Br>>CCOC(=O)/C=C/c1cc(CN(C)C)c(F)cc1C

5553 C=Cc1cccc1.COC(=O)/C=C/c1cccc(N(Cc2ccc(Br)cc2)C(=O)C2CCCC2)c1>>COC(=O)/C=C/c1ccc  
c(N(Cc2ccc(/C=C/c3cccc3)cc2)C(=O)C2CCCC2)c1  
 5554 C=CP(=O)(O)O.COc1ccc(Br)cc1>>COc1ccc(/C=C/P(=O)(O)O)cc1  
 5555 C=CCCCCCC.CC(C)(C)OC(=O)n1ccc2cc(OS(=O)(=O)C(F)(F)F)ccc21>>C=C(CCCCCC)c1ccc2c(ccn  
2C(=O)OC(C)(C)C)c1  
C=CB1OC(=O)CN(C)CC(=O)O1.Cc1nn(C)c(=O)c(-  
 5556 c2c(F)ccc(Cl)c2Br)c1OC(=O)C(C)C>>Cc1nn(C)c(=O)c(-  
c2c(F)ccc(Cl)c2/C=C/B2OC(=O)CN(C)CC(=O)O2)c1OC(=O)C(C)C  
 5557 C=CC#N.Nc1nc(N)c2c(I)cn([C@H]3C[C@H](O)[C@@H](CO)O3)c2n1>>N#C/C=C/c1cn([C@H]2C[  
C@H](O)[C@@H](CO)O2)c2nc(N)nc(N)c12  
 5558 C=CC(=O)OCC.COc1ccc(C#C/C=C/c2ccc(Br)cc2)cc1>>CCOC(=O)/C=C/c1ccc(/C=C/C#Cc2ccc(OC)  
cc2)cc1  
 5559 C=CC(=O)OCC.Cc1cc(I)cn1>>CCOC(=O)/C=C/c1ccnc(C)c1  
 5560 C=CC(=O)OCCCC.Clc1ccc(I)cn1>>CCCCOC(=O)/C=C/c1ccc(Cl)nc1  
 5561 C=Cc1ccncc1.CCCOc1ccc(Br)c(F)c1>>CCCOc1ccc(/C=C/c2ccncc2)c(F)c1  
 5562 C=C(C)C(=O)OC.CC(=O)c1ccc(Br)cc1>>COC(=O)/C(C)=C/c1ccc(C(C)=O)cc1  
Brclnccnc1.C=CCO[C@H]1[C@H](C)[C@@H](O[C@@H]2O[C@H](C)[C@H](N(C)C)[C@H]2O  
C(C)=O)[C@](C)(OC)C[C@@H](C)/C=N\OCc2cccc2)[C@H](C)[C@H]2OC(=O)O[C@]2(C)[C@  
 5563 @H](CC)OC(=O)[C@@H]1C>>CC[C@H]1OC(=O)[C@H](C)[C@@H](OC/C=C/c2cnccn2)[C@H](  
C)[C@@H](O[C@@H]2O[C@H](C)[C@H](N(C)C)[C@H]2OC(C)=O)[C@](C)(OC)C[C@@H](C)  
/C(=N\OCc2cccc2)lC@H1(C)lC@H2OC(=O)O1C@112C  
 5564 C=CC#N.O=Cc1cccc(Br)c1>>N#C/C=C/c1cccc(C=O)c1  
 5565 C=CCC(C)C(=O)OCC.COc1ccc(Br)cc1>>CCOC(=O)C(C)C/C=C/c1ccc(OC)cc1  
 5566 C=CCCCCCC.COc1ccc(I)cc1>>CCCCC/C=C/c1ccc(OC)cc1  
 5567 Brclcccc1.C=CC(OCC)OCC>>CCOC(/C=C/c1cccc1)OCC  
 5568 C=Cc1ccc(C)cc1.CC(=O)c1ccc(Cl)cc1>>CC(=O)c1ccc(/C=C/c2ccc(C)cc2)cc1  
 5569 C=Cc1cccc1.Clc1ccc2c(c1)c(I)nn2C1CCCCO1>>Clc1ccc2c(c1)c(/C=C/c1cccc1)nn2C1CCCCO1  
 5570 C=CC(=O)OCC.Cc1cc2c(cc1C(F)(F)F)NC(=O)CC(c1cccc(Br)c1)=N2>>CCOC(=O)/C=C/c1cccc(C2=  
Nc3cc(C)c(C(F)(F)F)cc3NC(=O)C2)c1  
 5571 C=CC(=O)OC(C)C.COC(=O)c1cc2cc(I)c(OCc3cccc3)c(OC)c2c(=O)o1>>COC(=O)c1cc2cc(/C=C  
/C(=O)OC(C)(C)C)c(OCc3cccc3)c(OC)c2c(=O)o1  
 5572 C=CC(C)(C)O.lc1cccc1>>CC(C)(O)/C=C/c1cccc1  
 5573 C=CC(=O)OC(C)(C)C.O=C1Nc2ccc(Br)cc2C(=O)N2C[C@H](O)C[C@@H]12>>CC(C)(C)OC(=O)/C  
=C/c1ccc2c(c1)C(=O)N1C[C@H](O)C[C@H]1C(=O)N2  
 5574 C=CCN(C(=O)OC(C)(C)C)C(=O)OC(C)(C)C.N#Cc1ccc(Cl)cc1>>CC(C)(C)OC(=O)N(C/C=C/c1ccc(  
C#N)cc1)C(=O)OC(C)(C)C  
 5575 C=Cc1cccc1.O=C(Nc1cccc1)c1nccc(Cl)c1I>>O=C(Nc1cccc1)c1nccc(Cl)c1/C=C/c1cccc1  
 5576 C=Cc1ccc(N)cc1.CCN1c2ncc(I)cc2C(=O)N(C)c2ccncc21>>CCN1c2ncc(/C=C/c3ccc(N)cc3)cc2C(=O)  
N(C)c2ccncc21  
 5577 C=COCCCC.O=S(=O)(Oc1cccc2cccc12)C(F)(F)F>>C=C(OCCCC)c1cccc2cccc12  
 5578 C=CC(C)=O.CC(C)(C)OC(=O)Nc1ccsc1Br>>CC(=O)/C=C/c1sccc1NC(=O)OC(C)(C)C  
 5579 C=CC(=O)OCC.O=c1c2cccc2c(Br)c2n1CCC2>>CCOC(=O)/C=C/c1c2n(c(=O)c3cccc13)CCC2  
 5580 C=CC(=O)OC.Oc1cc(-c2ccc(Br)cc2)cc(C23CC4CC(CC(C4)C2)C3)c1>>COC(=O)/C=C/c1ccc(-  
c2cc(O)cc(C34CC5CC(CC(C5)C3)C4)c2)cc1  
 5581 C=CC(=O)OC(C)(C)C.COc1cc(COCCC(=O)OC(C)(C)C)c(Br)cc1OCc1cccc1>>COc1cc(COCCC(=O)  
)OC(C)(C)C)c(/C=C/C(=O)OC(C)(C)C)cc1OCc1cccc1  
 5582 C=CC(=O)N(C)C.COc1nc(Nc2ccc(C#N)cc2)nc(Nc2c(C)cc(/C=C/C#N)cc2C)c1I>>COc1nc(Nc2ccc  
(C#N)cc2)nc(Nc2c(C)cc(/C=C/C#N)cc2C)c1/C=C/C(=O)N(C)C  
 5583 C=CC(=O)OC.CCn1c(=O)c2c(C)n(C3CCCCO3)nc2c2cc(I)ccc21>>CCn1c(=O)c2c(C)n(C3CCCCO3)n  
c2c2cc(/C=C/C(=O)OC)ccc21  
 5584 Brclccsc1.C=CC(=O)OCCCC>>CCCCOC(=O)/C=C/c1ccsc1  
 5585 C=Cc1ccc(OC)cc1.CC(C)(C)C(=O)Nc1nc(NC(=O)C(C)(C)C)c2cc(Br)cncc2n1>>COc1ccc(/C=C/c2ncc  
3nc(NC(=O)C(C)(C)C)nc(NC(=O)C(C)(C)C)c3c2)cc1  
Brclccc2[nH]ccc2c1.C=CCOC1=C(C)C(=O)O[C@H](CC)[C@@](C)(O)C=C(C)C(=O)[C@H](C)C[C  
 5586 @@](C)(OC)[C@H](O[C@@H]2O[C@H](C)[C@H](N(C)C)[C@H]2OC(C)=O)[C@H]1C>>CC[C  
@H]1OC(=O)C(C)=C(OC/C=C/c2ccc3[nH]ccc3c2)[C@H](C)[C@@H](O[C@@H]2O[C@H](C)[C  
@H1(N(C)C)lC@H2OC(C)=O)lC@l(C)(OC)C[C@@H](C)C(=O)C(C)=C[C@]11(C)O  
 5587 C=CC(=O)OCC.CC(C)(CC1Cc2cccc2C1)NC[C@@H](O)COc1ccc(Br)c(F)c1F>>CCOC(=O)/C=C/c1  
ccc(OC[C@H](O)CNC(C)(C)CC2Cc3cccc3C2)c(F)c1F  
 5588 Brclcccc2cccc12.C=CNC(C)=O>>C=C(NC(C)=O)c1cccc2cccc12

5589 C=CC(=O)OC.CC(C)(C)[Si](C)(C)OCCc1ccc(NC(=O)CCCc2ccc(Br)cc2)cc1>>COC(=O)/C=C/c1ccc(  
CCCC(=O)Nc2ccc(CCO[Si](C)(C)C(C)(C)C)cc2)cc1  
5590 C=CC(=O)OC(C)(C)C.Cc1ccc(S(=O)(=O)Nc2c(C)cc(C)cc2I)cc1>>Cc1ccc(S(=O)(=O)Nc2c(C)cc(C)cc  
2/C=C/C(=O)OC(C)(C)C)cc1  
5591 C=CC(=O)OC(C)(C)C.CC(C)(C)OC(=O)CCOCc1ccccc1Br>>CC(C)(C)OC(=O)/C=C/c1ccccc1COCC  
C(=O)OC(C)(C)C  
5592 C=CC(=O)N1N=Cc2ccccc2C1Cc1ccc(OC)cc1.COc1cc(Cc2cnc(N)nc2N)cc(I)c1OC>>COc1ccc(CC2c3  
ccccc3C=NN2C(=O)/C=C/c2cc(Cc3cnc(N)nc3N)cc(OC)c2OC)cc1  
5593 C=CC(=O)OCC.COc1cc(Br)c(C2OCCCCO2)cc1OC>>CCOC(=O)/C=C/c1cc(OC)c(OC)cc1C1OCCCCO1  
5594 C=CC(=O)OC.CC(=O)Oc1c(C)cc(I)cc1CC=C(C)C>>COC(=O)/C=C/c1cc(C)c(OC(C)=O)c(CC=C(C)  
C=CC(C)(C)C(=O)NC(C)(C)CO.CC(=O)OC[C@H]1O[C@H](c2cc(Cc3ccc(Br)cc3)c(C)cc2C)[C@  
5595 H](OC(C)=O)[C@H](OC(C)=O)[C@H]1OC(C)=O>>CC(=O)OC[C@H]1O[C@H](c2cc(Cc3cc  
c(/C=C/C(C)(C)C(=O)NC(C)(C)CO)cc3)c(C)cc2C)[C@H](OC(C)=O)[C@H](OC(C)=O)[C@H]1  
5596 C=C.COC(=O)c1ccc(NC(C)=O)c(Br)c1>>C=Cc1cc(C(=O)OC)ccc1NC(C)=O  
5597 C=Cc1ccc(N(CCCC)CCCC)cc1.O=Cc1ccc(Br)s1>>CCCCN(CCCC)c1ccc(/C=C/c2ccc(C=O)s2)cc1  
5598 C=CC(=O)OC(C)(C)C.CC(=O)Nc1ccc(I)cc1>>CC(=O)Nc1ccc(/C=C/C(=O)OC(C)(C)C)cc1  
5599 C=Cc1ccccc1.CO[C@H]1[C@H](OC(C)=O)[C@H](COC(C)=O)O[C@H]1n1cc(I)c(=O)[nH]c1=  
O>>CO[C@H]1[C@H](OC(C)=O)[C@H](COC(C)=O)O[C@H]1n1cc(/C=C/c2ccccc2)c(=O)[nH]  
5600 C=CNC(C)=O.CCOC(=O)c1ccc(Cl)cc1>>C=C(NC(C)=O)c1ccc(C(=O)OCC)cc1  
5601 Brc1cccc(CNc2ccc3ccccc3c2)c1.C=CC(=O)OCC>>CCOC(=O)/C=C/c1cccc(CNc2ccc3ccccc3c2)c1  
5602 C=CP(=O)(OCC)OCC.FC(F)(F)c1cccc(Br)c1>>CCOP(=O)(/C=C/c1cccc(C(F)(F)F)c1)OCC  
5603 C=CCC(C(=O)OCC)C(=O)OCC.Ic1ccccc1>>CCOC(=O)C(C/C=C/c1ccccc1)C(=O)OCC  
5604 C=Cc1senc1C.CCOC(=O)C(F)(F)Br>>CCOC(=O)C(F)(F)/C=C/c1senc1C  
5605 C=CCCCCCCCC.FC(F)(F)c1ccc(Br)cc1>>CCCCCCCC/C=C/c1ccc(C(F)(F)F)cc1  
5606 C=CC(=O)OCC.O=S(=O)(Oc1ccccc1)C(F)(F)F>>CCOC(=O)/C=C/c1ccccc1  
5607 C=CC(=O)OCC.O=c1[nH]c(=O)n([C@H]2O[C@H](CO)[C@H](O)[C@H]2O)cc1I>>CCOC(=O)  
/C=C/c1cn([C@H]2O[C@H](CO)[C@H](O)[C@H]2O)c(=O)[nH]c1=O  
5608 C=CC(=O)OC(C)(C)C.CC(=O)c1ccc(Cl)cc1>>CC(=O)c1ccc(/C=C/C(=O)OC(C)(C)C)cc1  
5609 C=Cc1ccccc1Cl.COCOc1c(OC)ccc(C)c1I>>COCOc1c(OC)ccc(C)c1/C=C/c1ccccc1Cl  
5610 C=CC(C)(C)O.CCOC(Cc1cn(S(=O)(=O)c2ccc(C)cc2)c2ccccc(Br)c12)OCC>>CCOC(Cc1cn(S(=O)(=O)  
c2ccc(C)cc2)c2ccccc(/C=C/C(C)(C)O)c12)OCC  
5611 C=CC(=O)OC.C[C@H]1[C@H](O)[C@H](CO)O[C@H]1n1cc(I)c(=O)[nH]c1=O>>COC(=O)/C=C/  
c1cn([C@H]2O[C@H](CO)[C@H](O)[C@H]2C)c(=O)[nH]c1=O  
5612 C=CC(=O)OC.Cc1ccc(S(=O)(=O)n2cc(I)cn2)cc1>>COC(=O)/C=C/c1cnn(S(=O)(=O)c2ccc(C)cc2)c1  
5613 C=CC(=O)O.COc1ccc(S(=O)(=O)NCc2ccc(I)cc2)cc1OC>>COc1ccc(S(=O)(=O)NCc2ccc(/C=C/C(=O)  
O)cc2)cc1OC  
5614 C=CC(C)=O.COc1ccc(Cl)cc1>>COc1ccc(/C=C/C(C)=O)cc1  
5615 C=Cc1ccccc1.Cc1nc(-c2ccccc2)c(Br)o1>>Cc1nc(-c2ccccc2)c(/C=C/c2ccccc2)o1  
5616 C=Cc1ccccc1.COc1cc[nH]c1/C=C1\C(=O)Nc2ccccc(I)c21>>COc1cc[nH]c1/C=C1\C(=O)Nc2ccccc(/C=  
C/c3ccccc3)c21  
5617 C=CC(=O)OC.Cc1c(Br)ccc2c1N(Cc1ccc(C(F)(F)F)cc1)C(=O)C2=O>>COC(=O)/C=C/c1ccc2c(c1C)N  
(Cc1ccc(C(F)(F)F)cc1)C(=O)C2=O  
5618 C=CC(=O)OC.CC(C)(C)OC(=O)n1cc(C=O)c2c(Br)ccccc21>>COC(=O)/C=C/c1ccc2c1c(C=O)cn2C(=  
O)OC(C)(C)C  
5619 C=CB1OC(C)CC(C)(C)O1.CCOc1nn(CC)cc1S(=O)(=O)N1C[C@H](CCC(=O)OC)Oc2ccc(Br)cc21>>  
CCOc1nn(CC)cc1S(=O)(=O)N1C[C@H](CCC(=O)OC)Oc2ccc(/C=C/B3OC(C)CC(C)(C)O3)cc21  
5620 C=Cc1cenncc1.CCN1c2ncc(I)cc2C(=O)N(C)c2ccc(Cl)nc21>>CCN1c2ncc(/C=C/c3cenncc3)cc2C(=O)N(  
C)c2ccc(Cl)nc21  
5621 C=Cn1nnc(-c2ccccc2C#N)n1.Ic1ccccc1>>N#Cc1ccccc1-c1nnn(/C=C/c2ccccc2)n1  
5622 C=Cc1ccc(/C=C/c2cc(CCCCCC)c(C=O)cc2CCCCC)cc1.CCCCCCc1cc(/C=C/c2ccc(C(=O)OC)cc2)c  
(CCCCC)cc1Br>>CCCCCc1cc(/C=C/c2ccc(/C=C/c3cc(CCCCCC)c(/C=C/c4ccc(C(=O)OC)cc4)cc3  
CCCCC)cc2)c(CCCCC)cc1C=O  
5623 C=CC(=O)OC(C)(C)C.O=S(=O)(c1ccc(Br)c1)c1ccc2ccccc2n1>>CC(C)(C)OC(=O)/C=C/c1ccc(S(=  
O)(=O)c2ccc3ccccc3n2)c1  
5624 C=CC(=O)OCC.Clc1ccccc1Br>>CCOC(=O)/C=C/c1ccccc1Cl  
5625 C=Cc1cenncc1.CC[C@H](COc1cnc(Cl)c(Br)c1)NC(=O)OC(C)(C)C>>CC[C@H](COc1cnc(Cl)c(/  
C=C/c2cenncc2)c1)NC(=O)OC(C)(C)C  
5626 C=CC(=O)OC(C)(C)C.Ic1ccc(OCc2ccccc2)cn1>>CC(C)(C)OC(=O)/C=C/c1ccc(OCc2ccccc2)cn1  
5627 C=CCCO.CC(=O)Nc1ccccc1Br>>C=C(CCO)c1ccccc1NC(C)=O  
5628 C=CC(=O)OCC.COc1ccc2c(=O)c(I)coc2c1>>CCOC(=O)/C=C/c1coc2cc(OC)ccc2c1=O  
5629 C=CC(OC)OC.COc1ccc(I)c(F)c1>>COc1ccc(/C=C/C(OC)OC)c(F)c1

5630 C=Cc1ccc(OC)cc1.COc1ccc(Br)cc1>>COc1ccc(/C=C/c2ccc(OC)cc2)cc1  
5631 C=CC(N)=O.CN1CCOC(c2ccccc2)c2cc(Br)ccc2C1>>CN1CCOC(c2ccccc2)c2cc(/C=C/C(N)=O)ccc2C  
5632 C=CC(=O)OC.O=[N+](O-)]c1ccccc1I>>COC(=O)/C=C/c1ccccc1[N+](=O)[O-]  
5633 Brc1nccc2ccccc12.C=Cc1ccccc1>>C(=C/c1nccc2ccccc12)\c1ccccc1  
5634 C=CC(=O)OCC.O=C(O)Cc1ccc(Br)cc1>>CCOC(=O)/C=C/c1ccc(CC(=O)O)cc1  
5635 C=Cc1ccc(OC)cc1.Cc1ccc2c(-c3ccccc3)c(Br)c(=O)oc2c1>>COc1ccc(/C=C/c2c(-  
c3ccccc3)c3ccc(C)cc3oc2=O)cc1  
5636 C=CC(C)(C)O.CN(C)C(=O)c1cccc2nc3ccccc(Br)c3nc12>>CN(C)C(=O)c1cccc2nc3ccccc(/C=C/C(C)(C)  
O)c3nc12  
5637 C=CC(=O)OC(C)(C)C.O=C(CCc1ccccc1)Nc1ccc(Br)cc1I>>CC(C)(C)OC(=O)/C=C/c1cc(Br)ccc1NC(  
=O)CCc1ccccc1  
5638 C=Cc1ccc([N+](=O)[O-])cc1.Oc1cc(Br)ccc1/N=N/c1ccccc1>>O=[N+](O-  
)]c1ccc(/C=C/c2ccc(/N=N/c3ccccc3)c(O)c2)cc1  
5639 C=Cc1cc(OC)c(OC)c(OC)c1-c1ccccc1.Cc1ccc(I)cc1>>COc1cc(/C=C/c2ccc(C)cc2)c(-  
c2ccccc2)c(OC)c1OC  
5640 C=Cc1ccccc1.Cc1ncc(-c2ccc(Cl)cc2)n1C>>Cc1ncc(-c2ccc(/C=C/c3ccccc3)cc2)n1C  
5641 C=CS(=O)(=O)NCCCCCCCC.COc1ccc(Br)c(CNC(=O)OC(C)(C)C)c1>>CCCCCCCCNS(=O)(=O)/C  
=C/c1ccc(OC)cc1CNC(=O)OC(C)(C)C  
5642 C=Cc1ccc(C#N)cc1.FC(F)(F)c1nc(I)c2ncccn12>>N#Cc1ccc(/C=C/c2nc(C(F)(F)F)n3cccn23)cc1  
5643 C=CB1OC(C)CC(C)(C)O1.COC(=O)CC[C@H]1CN(S(=O)(=O)c2ccc(C(F)(F)F)c2)c2cc(Br)ccc2O1>  
>COC(=O)CC[C@H]1CN(S(=O)(=O)c2ccc(C(F)(F)F)c2)c2cc(/C=C/B3OC(C)CC(C)(C)O3)ccc2O1  
5644 C=Cc1ccccc1.Nc1nc(N)c2cc(I)ccc2n1>>Nc1nc(N)c2cc(/C=C/c3ccccc3)ccc2n1  
5645 C=CC#N.Cn1ncc(I)cc1=O>>Cn1ncc(/C=C/C#N)cc1=O  
5646 C=Cc1ccc(C(C)(C)C)cc1.FC(F)(F)C(F)(F)C(F)(F)C(F)(F)C(F)(F)Br>>CC(C)(C)c1ccc(/C=C/C  
(F)(F)C(F)(F)C(F)(F)C(F)(F)C(F)(F)C(F)(F)cc1  
5647 C=CC(=O)OCCOc1ccccc1.Ic1ccccc1>>O=C(/C=C/c1ccccc1)OCCOc1ccccc1  
5648 C=CC#N.Cc1noc(C)c1I>>Cc1noc(C)c1/C=C/C#N  
5649 C=Cc1ccc(C(=O)N[C@H](CCSC)C(=O)OC)c(-  
c2ccccc2C)c1.OC(c1ccccc1)c1cncnc1Br>>COC(=O)[C@H](CCSC)NC(=O)c1ccc(/C=C/c2nccc2C(O)  
c2ccccc2)cc1-c1ccccc1C  
5650 Brc1ccncc1.C=CCC(C)O>>CC(O)C/C=C/c1ccncc1  
5651 C=Cc1ccccc(C)c1.Cc1ccc(OS(=O)(=O)C(F)(F)F)cc1>>C=C(c1ccc(C)cc1)c1ccccc(C)c1  
5652 Brc1ncc2ccccc2c1.C=Cc1ccccc([N+](=O)[O-])c1>>O=[N+](O-)]c1ccc(/C=C/c2ncc3ccccc3c2)c1  
5653 C=C(C)c1ccccc1.O=[N+](O-)]c1ccc(Cl)cc1>>C/C(=C/c1ccc([N+](=O)[O-])cc1)c1ccccc1  
5654 C=CC(=O)OC.N#Cc1ccc(N)c(Br)c1>>COC(=O)/C=C/c1cc(C#N)ccc1N  
5655 C=CC(=O)OCC.Cc1cc(C)c(N)c(I)c1>>CCOC(=O)/C=C/c1cc(C)cc(C)c1N  
5656 C=CC(=O)N(C)OC.Cc1ccccc(I)c1>>CON(C)C(=O)/C=C/c1ccccc(C)c1  
5657 C=C(C(=O)OC)N1CC[C@H](NC(=O)OC(C)(C)C)C1=O.FC(F)(F)Oc1cc2c(NC(c3ccccc3)(c3ccccc3)c  
3ccccc3)nccc2cc1Br>>COC(=O)/C(=C/c1cc2cnc(NC(c3ccccc3)(c3ccccc3)c3ccccc3)c2cc1OC(F)(F)F  
)N1CC[C@H](NC(=O)OC(C)(C)C)C1=O  
5658 C=CC(=O)OCCCC.O=[N+](O-)]c1ccccc1Cl>>CCCCOC(=O)/C=C/c1ccccc1[N+](=O)[O-]  
5659 C=CCCCCCC.O=S(=O)(Oc1ccc(Oc2ccccc2)c1)C(F)(F)F>>C=C(CCCCCC)c1ccccc(Oc2ccccc2)c1  
5660 C=CCN(C(=O)OC(C)(C)C)C(=O)OC(C)(C)C.Clc1ccccc1>>CC(C)(C)OC(=O)N(C/C=C/c1ccccc1)C(=  
O)OC(C)(C)C  
5661 C=Cc1ccccc1.CC(C)n1cnc2c(Cl)nc(I)nc21>>CC(C)n1cnc2c(Cl)nc(/C=C/c3ccccc3)nc21  
5662 C=C[Si](CC)(CC)CC.COC(=O)c1ccc(Br)cc1>>CC[Si](/C=C/c1ccc(C(=O)OC)cc1)(CC)CC  
5663 C=CC(=O)OC.COc1ccc2ccccc2c1I>>COC(=O)/C=C/c1c(OC)ccc2ccccc12  
5664 Brc1ccoc1.C=Cc1ccccc1NS(=O)(=O)c1ccc(C)cc1>>Cc1ccc(S(=O)(=O)Nc2ccccc2/C=C/c2ccoc2)cc1  
5665 C=CCN(C(=O)OC(C)(C)C)C(=O)OC(C)(C)C.N#Cc1ccccc1Br>>CC(C)(C)OC(=O)N(C/C=C/c1ccccc1  
C#N)C(=O)OC(C)(C)C  
5666 COC(=O)C(C/C=C/C(C)=O)NS(=O)(=O)c1ccc(C)cc1.Cc1ccc(Br)cc1>>COC(=O)C(C/C(=C/C(C)=O)c  
1ccc(C)cc1)NS(=O)(=O)c1ccc(C)cc1  
5667 C=Cc1ccc(C)cc1.O=c1oc2ccccc2c(-c2ccccc2)c1Br>>Cc1ccc(/C=C/c2c(-c3ccccc3)c3ccccc3oc2=O)cc1  
5668 C=CC(=O)OC.COCCOc1ccc(Br)c(COCCOCCOCCOCCOCCN(C(=O)OC(C)(C)C)c1>>COCCOc1ccc(/C  
=C/C(=O)OC)c(COCCOCCOCCOCCOCCN(C(=O)OC(C)(C)C)c1  
5669 C=CCCCC(=O)OC.O=S(=O)(Oc1ccc(C(=C2C3CCCC2CCC3)c2ccc(O)cc2)cc1)C(F)(F)F>>COC(=O)  
CCC/C=C/c1ccc(C(=C2C3CCCC2CCC3)c2ccc(O)cc2)cc1  
5670 C=CC(=O)C(C)CC(=O)OC.COc1ccccc(Br)c1>>COC(=O)CC(C)C(=O)/C=C/c1ccccc(OC)c1  
5671 C=Cc1ccccc1.CCOC(=O)C(F)(F)I>>CCOC(=O)C(F)(F)/C=C/c1ccccc1  
5672 C=Cc1cc(OC)c(OC)c(OC)c1-  
c1ccc(C(C)(C)C)cc1.COc1ccc(I)cc1>>COc1ccc(/C=C/c2cc(OC)c(OC)c(OC)c2-

5673 C=CC(=O)OC.OCCc1cccc1Br>>COC(=O)/C=C/c1cccc1CCCO  
5674 C=Cc1ccc(Cl)cc1.O=Cc1cccc1Br>>O=Cc1cccc1/C=C/c1ccc(Cl)cc1  
5675 C=CC(O)CC.Clc1ccc(I)cc1>>CCC(O)/C=C/c1ccc(Cl)cc1  
5676 C=Cc1cc(OC)c(OC)c(OC)c1-  
c1ccc(OC)c(OC)c1.COc1ccc(I)cc1>>COc1ccc(/C=C/c2cc(OC)c(OC)c(OC)c2-c2ccc(OC)c(OC)c2)cc1  
5677 C=Cc1cccc1.CCCCCCCCCCCCCCc1ccc(I)c(O)c1>>CCCCCCCCCCCCCCCCc1ccc(/C=C/c2cccc2  
)c(O)c1  
5678 C=CC(=O)OC.CC(C)n1cnc2c(NCc3cccc(Br)c3)nc(N3CCCC3)nc21>>COC(=O)/C=C/c1cccc(CNc2n  
c(N3CCCC3)nc3c2ncn3C(C)C)c1  
5679 C=C1CC(c2cccc2)OC1=O.CC(C)(C)c1ccc(I)cc1>>CC(C)(C)c1ccc(/C=C2)CC(c3cccc3)OC2=O)cc1  
5680 C=CC(N)=O.CCOC(=O)c1ccc(I)cc1>>CCOC(=O)c1ccc(/C=C/C(N)=O)cc1  
5681 C=CC(=O)OCCCC.Cc1cc(Br)ccc1I>>CCCCOC(=O)/C=C/c1ccc(Br)cc1C  
5682 C=C1SCCCS1=O.Ic1cccc1>>O=S1CCCS/C1=C\c1cccc1  
5683 C=Cc1cccc1.Ic1cccc2cc3c(nc12)-c1cccc1CC3>>C(=C/c1cccc2cc3c(nc12)-c1cccc1CC3)\c1cccc1  
5684 Brc1ccc2ccc3ccc4cccc4c3c2c1.C=Cc1ccc(OC)cc1>>COc1ccc(/C=C/c2ccc3ccc4ccc5cccc5c4c3c2)cc  
C=CC(=O)OC.O=C(c1cccc1)c1cn(-  
c2cccc2)c2ccc(Br)cc12>>COC(=O)/C=C/c1ccc2c(c1)c(C(=O)c1cccc1)cn2-c1cccc1  
5686 C/N=C1/Ne2ncc(Br)cc2OC1(C)C.C=CC(=O)N(C)Cc1sc2cccc2c1C>>C/N=C1/Ne2ncc(/C=C/C(=O)N  
(C)Cc3sc4cccc4c3C)cc2OC1(C)C  
5687 C=CC(=O)N1N=Cc2cccc2C1C(C)C.COc1cc(Cc2cnc(N)nc2N)cc(I)c1OC>>COc1cc(Cc2cnc(N)nc2N)  
cc(/C=C/C(=O)N2N=Cc3cccc3C2C(C)C)c1OC  
5688 C=Cc1cccc1.COC(=O)c1cc(C(=O)OC)c2c(Br)cccc2n1>>COC(=O)c1cc(C(=O)OC)c2c(/C=C/c3cccc  
3)cccc2n1  
5689 Brc1ccsc1.C=Cc1ccncc1>>C(=C/c1ccsc1)\c1ccncc1  
5690 C=Cc1ccc(F)cc1.CCOC(=O)C(F)I>>CCOC(=O)C(F)/C=C/c1ccc(F)cc1  
5691 C=CC(=O)OC.CCN1c2ncc(I)cc2C(=O)N(C)c2ccnc21>>CCN1c2ncc(/C=C/C(=O)OC)cc2C(=O)N(C)  
c2ccnc21  
5692 C=CC#N.[2H]C([2H])([2H])c1cc(I)cc(C([2H])([2H])[2H])c1N>>[2H]C([2H])([2H])c1cc(/C=C/C#N)c  
c(C([2H])([2H])[2H])c1N  
5693 C=CC(=O)N1CCOCC1.CSc1ccc(Br)cc1>>CSc1ccc(/C=C/C(=O)N2CCOCC2)cc1  
5694 C=CC(=O)N(C)Cc1oc2cccc2c1C.CCC1(CC)C(=O)Nc2ncc(Br)cc21>>CCC1(CC)C(=O)Nc2ncc(/C=C  
/C(=O)N(C)Cc3oc4cccc4c3C)cc21  
5695 C=CC(=O)OC(C)(C)C.Nc1ccc(Br)cc1I>>CC(C)(C)OC(=O)/C=C/c1ccc(Br)cc1N  
5696 C=C(CC(=O)OC)C(=O)OC.N#Cc1cccc1I>>COC(=O)C/C(=C\c1cccc1C#N)C(=O)OC  
5697 C=CC(=O)OCC.CCOC(=O)c1cc(Cl)cc(Br)c1>>CCOC(=O)/C=C/c1cc(Cl)cc(C(=O)OCC)c1  
5698 C=Cc1ccc(Br)cc1.Oc1cccc1I>>Oc1cccc1/C=C/c1ccc(Br)cc1  
5699 Brc1cc2c(cc1C1OCCO1)OCO2.C=CC(=O)OC>>COC(=O)/C=C/c1cc2c(cc1C1OCCO1)OCO2  
5700 C=CCCCC(=O)OC.CC(C)(C)c1cccc1OS(=O)(=O)C(F)(F)F>>C=C(CCCC(=O)OC)c1cccc1C(C)(C)  
5701 C=CC1CC=CCC1.Fc1ccc(I)cc1>>Fc1ccc(/C=C/C2CC=CCC2)cc1  
5702 C=Cc1cccc1.CC(C)Oc1nc(N)nc(Nc2ccc(I)cc2)n1>>CC(C)Oc1nc(N)nc(Nc2ccc(/C=C/c3cccc3)cc2)n  
5703 C=CC(=O)OC.Cc1ccc(C#N)c(Br)n1>>COC(=O)/C=C/c1nc(C)ccc1C#N  
5704 C=C.O=C(CC(=O)c1cccc(Br)c1)c1cccc1>>C=Cc1cccc(C(=O)CC(=O)c2cccc2)c1  
5705 C=CC(C)OC(C)=O.CCOc1cnc(-c2ccc(Br)cc2)nc1>>CCOc1cnc(-c2ccc(/C=C/C(C)OC(C)=O)cc2)nc1  
5706 C=Cc1cccc1.IC1=C(c2cccc2)[Se]CC1>>C(=C/c1cccc1)\C1=C(c2cccc2)[Se]CC1  
5707 C=CC(=O)N(C)OC.N#Cc1ccc(I)cc1>>CON(C)C(=O)/C=C/c1ccc(C#N)cc1  
5708 C=CC(=O)OC(C)(C)C.CC(=O)c1cn(-c2cccc2)nc1OS(=O)(=O)C(F)(F)F>>CC(=O)c1cn(-  
c2cccc2)nc1/C=C/C(=O)OC(C)(C)C  
5709 C=CB1OC(C)CC(C)(C)O1.F[C@@H]1CCN(Cc2ccc(Br)cc2)C1>>CC1CC(C)(C)OB(/C=C/c2ccc(CN3  
CC[C@@H](F)C3)cc2)O1  
5710 C=Cc1ccc(CP(=O)(O)O)cc1.CC(C)SC(SC(C)C)C(=O)Nc1ccc(I)cc1>>CC(C)SC(SC(C)C)C(=O)Nc1cc  
c(/C=C/c2ccc(CP(=O)(O)O)cc2)cc1  
5711 C=C1C(=O)O[C@H]2[C@H]1CCC(=C)[C@@H]1C[C@H](OC(C)=O)C(=C)[C@H]21.Cc1ccc(I)c([N  
+])(=O)[O-])c1>>C=C1CC[C@H]2/C=C\c3ccc(C)cc3[N+](=O)[O-  
])C(=O)O[C@@H]2[C@H]2C(=C)[C@@H](OC(C)=O)C[C@@H]12  
5712 C=CC(=O)N1CCC(Cc2nnc(C)o2)CC1.Cc1nnn(Cc2cc(F)ccc2Br)n1>>Cc1nnn(Cc2cc(F)ccc2/C=C/C(=O)  
N2CCC(Cc3nnc(C)o3)CC2)n1  
5713 C=CC(=O)OCCCC.C[C@@]12C[C@@]34C=C(Sc5ccc(I)cc5)C(=O)[C@@](C)(CCC(=O)Nc5c(O)ccc(  
C(=O)O)c5O)[C@@H]3[C@H](C[C@@H]1C4)O2>>CCCCOC(=O)/C=C/c1ccc(SC2=C[C@@]34C[C@  
H]5C1C@H](O)[C@@]5(C)C3)[C@H]4[C@@](C)(CCC(=O)Nc3c(O)ccc(C(=O)O)c3O)C2=O)cc1  
5714 C=CN1C(=O)[C@H]2CN(C(=O)OC(C)(C)C)CCN2C1=O.Clc1ccc(I)cc1>>CC(C)(C)OC(=O)N1CC  
N2C(=O)N(/C=C/c3ccc(Cl)cc3)C(=O)[C@@H]2C1

5715 C=C1CC(c2ccc(C)cc2)OC1=O.COc1cccc(I)c1>>COc1cccc(/C=C2\CC(c3ccc(C)cc3)OC2=O)c1  
5716 C=Cn1nnnc1C.Ic1cccc1>>Cc1nnnn1/C=C/c1cccc1  
5717 Brc1ccc(I)cc1.C=Cc1ccc(C=O)cc1>>O=Cc1ccc(/C=C/c2ccc(Br)cc2)cc1  
5718 C=Cc1cccc1.CCOC(=O)C1(C(C)=O)CCC(I)=C1C>>CCOC(=O)C1(C(C)=O)CCC(/C=C/c2cccc2)=  
5719 C=CCCCCCCCCO.COCOc1cc(Br)c(OCOC)c(OC)c1>>COCOc1cc(/C=C/CCCCCCCCO)c(OCOC)c(OC)c1  
5720 C=Cc1cccc1.CC(C)=CBr>>CC(C)=C/C=C/c1cccc1  
5721 C=CS(=O)(=O)F.CC(=O)c1cccc(I)c1>>CC(=O)c1cccc(/C=C/S(=O)(=O)F)c1  
5722 C=CCOC(C)C.Fc1ccc(C2(C(F)(F)c3ccc(Br)cn3)CO2)c(F)c1>>CC(C)OC/C=C/c1ccc(C(F)(F)C2(c3ccc(F)cc3F)CO2)nc1  
5723 C=CS(=O)(=O)F.O=[N+](I)c1cccc(I)c1>>O=[N+](I)c1cccc(/C=C/S(=O)(=O)F)c1  
5724 C=C(C)C(=O)OC.COc1ccc(Br)cc1>>COC(=O)/C(C)=C/c1ccc(OC)cc1  
5725 C=CC(C)=O.COc1cc(Br)c2c3c1O[C@H]1[C@@H](O[Si](C)(C)C(C)(C)C)C=C[C@@H]4[C@@H](C2)N(C)CC[C@@]341>>COc1cc(/C=C/C(C)=O)c2c3c1O[C@H]1[C@@H](O[Si](C)(C)C(C)(C)C)C=C[C@@H]4[C@@H](C2)N(C)CC[C@@]341  
5726 C=CC(=O)O.C[C@]12C[C@@]34C=C(Sc5ccc(I)cc5)C(=O)[C@@](C)(CCC(=O)Nc5c(O)ccc(C(=O)O)c5O)[C@@H]3[C@H](C[C@@H]1C4)O2>>C[C@]12C[C@@]34C=C(Sc5ccc(/C=C/C(=O)O)cc5)C(=O)[C@@](C)(CCC(=O)Nc5c(O)ccc(C(=O)O)c5O)[C@@H]3[C@H](C[C@@H]1C4)O2  
5727 C=CC(=O)OC(C)(C)C.Cn1cnc1Br>>Cn1cnc1/C=C/C(=O)OC(C)(C)C  
5728 C=Cc1cncnc1.CCCCCCOc1ccc(Br)c(F)c1>>CCCCCOc1ccc(/C=C/c2cncnc2)c(F)c1  
5729 Brc1ccc(N2c3cccc3N(c3cccc3)c3c2c2cccc2c2cccc32)cc1.C=Cc1cncnc1>>C(=C/c1ccc(N2c3cccc3N(c3cccc3)c3c2c2cccc2c2cccc32)cc1)c1cncnc1  
5730 C=CS(=O)(=O)F.Cc1cccc1I>>Cc1cccc1/C=C/S(=O)(=O)F  
5731 C=Cc1ccc(CN(C)C)cc1.C[Si](C)(C)CCOCn1nc(I)c2ccc([C@@H]3C[C@@]34C(=O)Nc3cccc34)cc21>>CN(C)Cc1ccc(/C=C/c2nn(COCC[Si](C)(C)C)c3cc([C@@H]4C[C@@]45C(=O)Nc4cccc45)ccc23  
5732 C=CC[C@H](C)N(C)C(=O)OC(C)(C)C.O=C(CCC(F)(F)F)N1CC[C@H](Oc2cc(Br)enc2Cl)C1>>C[C@@H](C/C=C/c1cnc(Cl)c(O[C@@H]2CCN(C(=O)CCC(F)(F)F)C2)c1)N(C)C(=O)OC(C)(C)C  
5733 Brc1enc2cccc2c1.C=Cc1cncnc1>>C(=C/c1cnc2cccc2c1)c1cncnc1  
5734 Brc1ccc2c(cnn2C2CCCCO2)c1.C=Cc1ncc(N)en1>>Nc1enc(/C=C/c2ccc3c(cnn3C3CCCCO3)c2)nc1  
5735 C=CC(=O)OC.CCN(CC)C(=O)Oc1cncnc1I>>CCN(CC)C(=O)Oc1cncnc1/C=C/C(=O)OC  
5736 C=Cc1ccc(OC)cc1.CCOC(=O)C(C)Br>>CCOC(=O)C(C)/C=C/c1ccc(OC)cc1  
5737 C=CC(N)=O.O=Cc1ccc(I)cc1>>NC(=O)/C=C/c1ccc(C=O)cc1  
5738 C=CC(=O)O.Cc1ccc(C)n1-c1ccc(Br)cc1>>Cc1ccc(C)n1-c1ccc(/C=C/C(=O)O)cc1  
5739 C=Cc1ccc(OC)cc1.CN1CCCN(c2cccc(Br)n2)CC1>>COc1ccc(/C=C/c2cccc(N3CCCN(C)CC3)n2)cc1  
5740 C=C(CP(=O)(OCC)OCC)C(=O)OCC.Ic1cccc1>>CCOC(=O)/C(=C/c1cccc1)CP(=O)(OCC)OCC  
5741 C=CC(=O)OCc1cccc1.CCOC(=O)/C=C/c1ccc2ccc(Br)cc2c1>>CCOC(=O)/C=C/c1ccc2ccc(/C=C/C(=O)OCc3cccc3)cc2c1  
5742 C=Cc1ccc(OC(C)=O)cc1.CCn1c2ccc(Br)cc2c2cc(C=O)ccc21>>CCn1c2ccc(C=O)cc2c2cc(/C=C/c3ccc(OC(C)=O)cc3)ccc21  
5743 C=Cc1cccc1.CCCCC(C)(Br)CC>>CCCCC(C)/C=C/c1cccc1)CC  
5744 C=Cc1ccc(Cl)cc1.CC(=O)c1ccc(I)cc1>>CC(=O)c1ccc(/C=C/c2ccc(Cl)cc2)cc1  
5745 C=CP(=O)(OCC)OCC.CCOC(=O)NC(Cc1ccc2cccc2c1Br)(C(=O)OCC)C(=O)OCC>>CCOC(=O)NC(Cc1ccc2cccc2c1/C=C/P(=O)(OCC)OCC)(C(=O)OCC)C(=O)OCC  
5746 C=CC(=O)OCC.CC(C)(CC1Cc2cccc2C1)NC[C@@H](O)COc1cc(Br)ccc1F>>CCOC(=O)/C=C/c1ccc(F)c(OC[C@H](O)CNC(C)(C)CC2Cc3cccc3C2)c1  
5747 C=CP(=O)(OCC)OCC.COc1nc2ccc(Br)cc2nc1OC>>CCOP(=O)/C=C/c1ccc2nc(OC)c(OC)nc2c1)OC  
5748 C=CC(=O)OC(C)(C)C.N#Cc1ccc(Br)cc1>>CC(C)(C)OC(=O)/C=C/c1ccc(C#N)cc1  
5749 C=CC(=O)Nc1cccc1NC(=O)OC(C)(C)C.CCOC(=O)C(CCO[Si](C)(C)C(C)(C)C)c1ccc(Br)cc1>>CCOC(=O)C(CCO[Si](C)(C)C(C)(C)C)c1ccc(/C=C/C(=O)Nc2cccc2NC(=O)OC(C)(C)C)cc1  
5750 C=CN(C(=O)COC.O=S(=O)(Oc1ccc2cccc2c1)C(F)(F)F)>>C=CN(C(=O)COC)c1ccc2cccc2c1  
5751 C=Cc1cccc1.CCOC(=O)C(C)(F)Br>>CCOC(=O)C(C)(F)/C=C/c1cccc1  
5752 C=CC(=O)OC(C)(C)C.Oc1ccc(C=C2CCCCC2)c2ccc(Br)cc2)cc1>>CC(C)(C)OC(=O)/C=C/c1ccc(C(=C2CCCCC2)c2ccc(O)cc2)cc1  
5753 C=CC(=O)OC.Nc1cc(Br)ccn1>>COC(=O)/C=C/c1cnc(N)c1  
5754 C=CC(=O)Nc1cccc2ccnc12.CCc1ccc(I)cc1>>CCc1ccc(/C=C/C(=O)Nc2cccc3ccnc23)cc1  
5755 C=CC(C)=O.Nc1c(Br)ccnc1I>>CC(=O)/C=C/c1cnc(Br)c1N  
5756 Brc1ccc(-c2cccc2)c2cccc12.C=CC(=O)OCC>>CCOC(=O)/C=C/c1ccc(-c2cccc2)c2cccc12  
5757 C=CC(=O)OCC.CC(C)(C)OC(=O)N1C[C@@H]2C[C@H](C1)c1cc(Br)cc(=O)n1C2>>CCOC(=O)/C=C/c1ccc2n(c(=O)c1)C[C@H]1C[C@@H]2CN(C(=O)OC(C)(C)C)C1  
5758 C=Cc1cccc1.Fc1cccc1Br>>Fc1cccc1/C=C/c1cccc1





5800 C=Cc1ccc2c(c1)c1ccccc1n2CCCCCCCC.CCCCCCCn1c2ccc(I)cc2c2cc(C=O)ccc21>>CCCCCCCCn  
1c2ccccc2c2cc(/C=C/c3ccc4c(c3)c3cc(C=O)ccc3n4CCCCCCCC)ccc21  
5801 C=CC(=O)OC.Cn1c(Br)enc1Sc1ccccc1>>COC(=O)/C=C/c1enc(Sc2ccccc2)n1C  
5802 C=C.Cc1ccc([N+](=O)[O-])c(Br)c1>>C=Cc1cc(C)ccc1[N+](=O)[O-]  
5803 C=Cc1ccc(F)cc1.Fc1cc(Br)cc(OCc2ccccc2)c1>>Fc1ccc(/C=C/c2cc(F)cc(OCc3ccccc3)c2)cc1  
5804 C=CCN1C(=O)c2ccccc2C1=O.Cn1c(=O)oc2cc(Br)enc21>>Cn1c(=O)oc2cc(/C=C/CN3C(=O)c4ccccc4  
C3=O)enc21  
5805 C=CC1CC(=O)N1.O=[N+](I)[O-]c1ccccc1I>>O=C1CC(/C=C/c2ccccc2[N+](=O)[O-])N1  
5806 C=Cc1ccccc1.Cn1c(/C=C/c2ccccc2)c(I)c(=O)c2ccccc21>>Cn1c(/C=C/c2ccccc2)c(/C=C/c2ccccc2)c(=O)c2ccccc21  
5807 C=Cc1ccc(C#N)cc1.N#CCc1ccc(Br)cc1>>N#CCc1ccc(/C=C/c2ccc(C#N)cc2)cc1  
5808 C=CC(OCC)OCC.FC(F)(F)c1ccc(Br)cc1>>CCOC(/C=C/c1ccc(C(F)(F)F)cc1)OCC  
5809 C=CC=O.COC(=O)COc1ccccc(I)c1>>COC(=O)COc1ccccc(/C=C/C=O)c1  
5810 C=CC(C)(C)O.O=c1c(Br)c(-c2ccccc2)oc2ccccc12>>CC(C)(O)/C=C/c1c(-c2ccccc2)oc2ccccc2c1=O  
5811 C=CS(N)(=O)=O.Cc1cc(C)c(Br)c(C)c1>>Cc1cc(C)c(/C=C/S(N)(=O)=O)c(C)c1  
5812 C=CC(=O)N(C)Cc1cc2ccccc2n1C.CC1(C)NCc2cc(Br)enc2NC1=O>>CN(Cc1cc2ccccc2n1C)C(=O)/C  
=C/c1enc2c(c1)CNC(C)(C)C(=O)N2  
5813 C=CC(=O)OC.CC(=O)OCCCN(CCCCO[Si](c1ccccc1)(c1ccccc1)C(C)(C)C(=O)[C@@H]1c2cc(Br)  
ccc2O[C@H]1c1ccc(OCc2ccccc2)cc1>>COC(=O)/C=C/c1ccc2c(c1)[C@@H](C(=O)N(CCCCO[Si](c  
1ccccc1)(c1ccccc1)C(C)(C)C)CCOC(C)=O)[C@H](c1ccc(OCc3ccccc3)cc1)O2  
5814 C=CC(=O)OC(C)(C)C.COc1ccccc(S(=O)(=O)N2CCc3cc(Br)enc32)c1>>COc1ccccc(S(=O)(=O)N2CCc3  
cc(/C=C/C(=O)OC(C)(C)C)enc32)c1  
5815 C=CP(C)(=O)c1ccccc1.Cc1ccc2ccccc2c1Br>>Cc1ccc2ccccc2c1/C=C/P(C)(=O)c1ccccc1  
5816 C=CCc1ccccc1.CC(C)(C)c1ccc(Br)cc1>>C=C(Cc1ccccc1)c1ccc(C(C)(C)C)cc1  
5817 C=CC(=O)OCCCC.N#CCc1ccc(Br)cc1>>CCCCOC(=O)/C=C/c1ccc(CC#N)cc1  
5818 Br1ccc2c(c1)OCO2.C=Cc1ccc(C)cc1>>Cc1ccc(/C=C/c2ccc3c(c2)OCO3)cc1  
5819 C=CC(=O)OC.CN1c2ccc(Br)cc2Sc2cc(CCN(C=O)OCc3ccccc3)ccc21>>COC(=O)/C=C/c1ccc2c(c1)S  
c1cc(CCN(C=O)OCc3ccccc3)ccc1N2C  
5820 C=CN1C(=O)c2ccccc2C1=O.COc1ccc(Cl)cc1>>COc1ccc(/C=C/N2C(=O)c3ccccc3C2=O)cc1  
5821 C=C(C)C(=O)OCC.Ic1ccccc1>>CCOC(=O)/C(C)=C/c1ccccc1  
Br1enc2ccccc2c1.C=CCON=C1[C@H](C)[C@H]2OC(=O)O[C@]2(C)[C@@H](CC)OC(=O)[C@H]  
(C)C(=O)[C@H](C)[C@@H](O[C@@H]2O[C@H](C)C[C@H](N(C)C)[C@H]2OC(C)=O)[C@](C)(  
OC)C[C@H]1C>>CC[C@H]1OC(=O)[C@H](C)C(=O)[C@H](C)[C@@H](O[C@@H]2O[C@H](C)  
C[C@H](N(C)C)[C@H]2OC(C)=O)[C@](C)(OC)C[C@@H](C)C(=NOC/C=C/c2enc3ccccc3c2)[C@  
H](C)[C@H]2OC(=O)O[C@]212C  
5823 C=CC(O)c1cc(OC)c(OC)cc1Br.COc1ccccc(I)c1>>COc1ccccc(/C=C/C(O)c2cc(OC)c(OC)cc2Br)c1  
5824 C=Cc1ccc(F)cc1.CS(=O)(=O)c1ccc(Br)cc1>>CS(=O)(=O)c1ccc(/C=C/c2ccc(F)cc2)cc1  
5825 C=C.Fc1ccc(I)en1>>C=Cc1ccc(F)nc1  
5826 C=CCCCCCC.COc1ccc(OS(=O)(=O)C(F)(F)F)cc1>>C=C(CCCCCC)c1ccc(OC)cc1  
5827 C=CC(OC)OC.N#CCc1ccc(I)cc1>>COC(/C=C/c1ccc(C#N)cc1)OC  
5828 C=Cc1ccccc1.Cc1ccc(Br)nc1>>Cc1ccc(/C=C/c2ccccc2)nc1  
5829 C=CC(=O)OCC.COc1enc(Cl)c(N)n1>>CCOC(=O)/C=C/c1ncc(OC)nc1N  
5830 C=CC(=O)OC.COc1cc(C#N)ccc1Br>>COC(=O)/C=C/c1ccc(C#N)cc1OC  
5831 C=CC#N.CCOC(=O)c1cn(CC)c2nc(C)c(Br)cc2c1=O>>CCOC(=O)c1cn(CC)c2nc(C)c(/C=C/C#N)cc2c  
5832 C=C(NC(C)=O)C(=O)OC.Nc1ccc(Br)cc1CCO>>COC(=O)/C(=C\c1ccc(N)c(CCO)c1)NC(C)=O  
5833 C=COCCCCC.COC(=O)Cc1cc(OC)c(OC)cc1Br>>C=C(OCCCCC)c1cc(OC)c(OC)cc1CC(=O)OC  
5834 C=CC(OCC)OCC.CCCCC(CC)CN1c2ccccc2Sc2cc(Br)ccc21>>CCCCC(CC)CN1c2ccccc2Sc2cc(/C=C  
/C(OCC)OCC)ccc21  
5835 C=CC(C)OC(C)=O.Ic1ccccc1>>CC(=O)OC(C)/C=C/c1ccccc1  
5836 C=CC(=O)OC(C)(C)C.CC(C)(C)OC(=O)N1CCN(c2ncnc3c(Br)ccccc23)CC1>>CC(C)(C)OC(=O)/C=C/  
c1ccccc2c(N3CCN(C(=O)OC(C)(C)C)CC3)ncnc12  
5837 C=Cc1ccc(OC)cc1.FC(F)(F)C(F)(F)C(F)(F)C(F)(F)C(F)(F)C(F)(F)C(F)(F)C(F)(F)C(F)(F)C(F)(F)Br>>COc1cc  
c(/C=C/C(F)(F)C(F)(F)C(F)(F)C(F)(F)C(F)(F)C(F)(F)C(F)(F)C(F)(F)C(F)(F)C(F)(F)C(F)(F)cc1  
5838 C=CC(=O)NCc1ccc(C)cc1.O=c1c(I)coc2cc(O)ccc12>>Cc1ccc(CNC(=O)/C=C/c2coc3cc(O)ccc3c2=O)  
5839 C=CS(=O)(=O)F.Ic1cc2ccccc2o1>>O=S(=O)(F)/C=C/c1cc2ccccc2o1  
5840 C=C(F)C(C)=O.FC(F)(F)c1ccccc(I)c1>>CC(=O)/C(F)=C/c1ccccc(C(F)(F)F)c1  
5841 C=C[C@@H](C)[C@H](CCOCc1ccc(OC)cc1)O[Si](C)(C)C(C)(C)C.Ic1ccccc1>>COc1ccc(COCC[C@  
H](O[Si](C)(C)C(C)(C)C)[C@H](C)/C=C/c2ccccc2)cc1

C=C[C@@H]1C[C@H](CC(=O)OCC)OC(C)(C)O1.CCC(C)c1c(Br)c(-c2ccc(F)cc2)nn1-  
 5842 c1ccnc(Nc2ccccc2)c1>>CCOC(=O)C[C@H]1C[C@H](/C=C/c2c(-c3ccc(F)cc3)nn(-  
 c3ccnc(Nc4ccccc4)c3)c2C(C)CC)OC(C)(C)O1  
 5843 C=Cc1cccc(Cl)c1.N#Cc1ccc2cc(Br)ccc2c1>>N#Cc1ccc2cc(/C=C/c3cccc(Cl)c3)ccc2c1  
 5844 C=CCCCCCC.CN(C)c1cccc1OS(=O)(=O)C(F)(F)F>>C=C(CCCCCC)c1cccc1N(C)C  
 5845 C=CS(=O)(=O)NC.Nc1ncc(Cl)cc1Br>>CNS(=O)(=O)/C=C/c1cc(Cl)cnc1N  
 5846 C=CC(=O)O.O=S(=O)(Nc1cccc(I)c1)c1cccs1>>O=C(O)/C=C/c1cccc(NS(=O)(=O)c2cccs2)c1  
 5847 Brc1ccccc1.C=CC(=O)CC>>CCC(=O)/C=C/c1ccccc1  
 5848 C=Cc1nnn(C)n1.COC(=O)c1cccc(Br)c1>>COC(=O)c1cccc(/C=C/c2nnn(C)n2)c1  
 5849 C=C(NC(C)=O)C(=O)OC.Clc1ccc(-c2cc(I)c3ccccc3n2)cc1>>COC(=O)/C=C/c1cc(-  
 c2ccc(Cl)cc2)nc2ccccc12)NC(C)=O  
 5850 C=CC(=O)N(C)C.CC(=O)c1ccc(I)cc1>>CC(=O)c1ccc(/C=C/C(=O)N(C)C)cc1  
 5851 C=CC(=O)OC.O=C1c2ccc(OS(=O)(=O)C(F)(F)F)cc2C(=O)N1c1ccccc1>>COC(=O)/C=C/c1ccc2c(c1)  
 C(=O)N(c1ccccc1)C2=O  
 5852 C=Cc1ccc(Cl)cc1.O=CN(C=O)CCCC(Br)C(F)(F)F>>O=CN(C=O)CCCC(/C=C/c1ccc(Cl)cc1)C(F)(F)F  
 5853 C=CC(=O)OC.COc1cc(C)c(Br)cn1>>COC(=O)/C=C/c1cnc(OC)cc1C  
 5854 C=CC(=O)OCCCC.CC(C)(C)OC(=O)c1ccccc1Br>>CCCCOC(=O)/C=C/c1ccccc1C(=O)OC(C)(C)C  
 5855 C=CC(=O)OCC.CCN(Cc1cc(=O)n2c(Br)c(C)sc2n1)c1ccc(F)cc1>>CCOC(=O)/C=C/c1c(C)sc2nc(CN(  
 CC)c3ccc(F)cc3)cc(=O)n12  
 5856 C=CCNC(=O)OC(C)(C)C.Cc1ccc(OS(=O)(=O)C(F)(F)F)c(Cl)c1>>C=C(CNC(=O)OC(C)(C)C)c1ccc(  
 C)cc1Cl  
 5857 C=CC(=O)OC.CC(C)(C)OC(=O)c1ccccc1Br>>COC(=O)/C=C/c1ccccc1C(=O)OC(C)(C)C  
 5858 C=Cc1ccc2ccccc2c1.CCN1c2ncc(I)cc2C(=O)N(C)c2ccc(Cl)nc21>>CCN1c2ncc(/C=C/c3ccc4ccccc4c3  
 )cc2C(=O)N(C)c2ccc(Cl)nc21  
 5859 C=CC(=O)OCC.COc1cc(I)c2c3c1O[C@@H]1[C@]34CCN(C)[C@H](C2)[C@]42C=C[C@@]1(OC)c  
 1c(OC(C)=O)ccc(O)c12>>CCOC(=O)/C=C/c1cc(OC)c2c3c1C[C@H]1N(C)CC[C@@]34[C@@H](O  
 2)[C@]2(OC)C=C[C@@]14c1c(O)ccc(OC(C)=O)c12  
 5860 C=CC(C)(C)O.COC(=O)/C=C/c1cn(S(=O)(=O)c2ccc(C)cc2)c2ccccc(Br)c12)NC(C)=O>>COC(=O)/C(  
 =C/c1cn(S(=O)(=O)c2ccc(C)cc2)c2ccccc(/C=C/C(C)(C)O)c12)NC(C)=O  
 5861 C=CC(=O)OC(C)(C)C.COC(=O)C(C)C.Cc1cc(Cl)ccc1Br>>COC(=O)Cc1cc(Cl)ccc1/C=C/C(=O)OC(C)(C)C  
 5862 C=CC(N)=O.Cc1ccc(S(=O)(=O)n2cc(I)c3c(OC(C)C)nnc32)cc1>>Cc1ccc(S(=O)(=O)n2cc(/C=C/C(  
 N)=O)c3c(OC(C)C)nnc32)cc1  
 5863 C=CC(=O)OC(C)(C)C.CC(C)=CCc1cc(I)ccc1OC(=O)CCc1ccc(F)cc1>>CC(C)=CCc1cc(/C=C/C(=O)  
 OC(C)(C)C)ccc1OC(=O)CCc1ccc(F)cc1  
 5864 C=CC(OC)OCC.CC(C)(C)c1ccc(I)cc1>>CCOC(/C=C/c1ccc(C(C)(C)C)cc1)OCC  
 5865 Brc1ccsc1.C=COCCO>>C=C(OCCO)c1ccsc1  
 5866 C=CC(=O)OCC.Cc1nc(N)nc(NC2CCC(OCCO)CC2)c1Br>>CCOC(=O)/C=C/c1c(C)nc(N)nc1NC1CC  
 C(OCCO)CC1  
 5867 C=Cc1ccccc1.CC1=C(C)C(C)(C(=O)c2ccc(Br)cc2)C(C)=C1C>>CC1=C(C)C(C)(C(=O)c2ccc(/C=C/c3  
 cccc3)cc2)C(C)=C1C  
 5868 C=Cc1ccccc1.CN(Cc1ccccc1)c1cccc(Br)n1>>CN(Cc1ccccc1)c1cccc(/C=C/c2ccccc2)n1  
 5869 C=CCNC(=O)c1ccccc1NC(=O)c1ccccc1.Clc1ccccc1I>>O=C(Nc1ccccc1C(=O)NC/C=C/c1ccccc1Cl)c  
 1ccccc1  
 5870 C=CC(C)(C)O.Cc1ccccc1Br>>Cc1ccccc1/C=C/C(C)(C)O  
 5871 C=CC(COC(C)=O)OC(C)=O.c1ccc([I+])c2ccccc2)cc1>>CC(=O)OCC(/C=C/c1ccccc1)OC(C)=O  
 5872 Brc1cccn1.C=Cc1cccn1>>C(=C/c1cccn1)\c1cccn1  
 5873 BrC1=C(C2=CCCO2)CCCC1.C=CC(=O)OC>>COC(=O)/C=C/C1=C(C2=CCCO2)CCCC1  
 5874 C=Cc1ccc(OC)cc1.Oc1ccc(I)cc1>>COc1ccc(/C=C/c2ccc(O)cc2)cc1  
 C=CCO[C@@H]1CC(=O)O[C@H](C)C/C=C/C=C/[C@H](O[Si](C)(C)C(C)(C)C)[C@H](C)C[C@H]  
 (CC(OC)OC)[C@H](O[C@@H]2O[C@H](C)[C@H](O[C@H]3C[C@@](C)(O)[C@@H](OC(=O)  
 CC)[C@H](C)O3)[C@H](N(C)C)[C@H]2OC(C)=O)[C@H]1OC.COc1ccc(I)cc1>>CCC(=O)O[C@H]  
 5875 1[C@H](C)O[C@@H](O[C@H]2[C@H](N(C)C)[C@H]2OC(C)=O)[C@H](OC(C)=O)[C@H](O[C@@H]3[C@H]  
 (OC)[C@H](OC/C=C/c4ccc(OC)cc4)CC(=O)O[C@H](C)C/C=C/C=C/[C@H](O[Si](C)(C)C(C)(C)C)[  
 C@H](C)C[C@H]1C@H13CC(OC(C)C)N(C)C@H12C(C)C@H11(C)N  
 5876 Brc1ccc(C#Cc2ccc(I)c2)cc1.C=CC(=O)OC>>COC(=O)/C=C/c1cccc(C#Cc2ccc(Br)cc2)c1  
 5877 C=CC(=O)OCC.O=[N+](=[O-])c1ccc(I)cc1>>CCOC(=O)/C=C/c1ccc([N+](=[O-])[O-])cc1  
 5878 Brc1ccc2c(ccn2-c2ccnc2)c1.C=CC(=O)OCC>>CCOC(=O)/C=C/c1ccc2c(ccn2-c2ccnc2)c1  
 5879 C=CS(=O)c1ccccc1.CC(=O)c1ccc(Br)cc1>>CC(=O)c1ccc(/C=C/S(=O)c2ccccc2)cc1  
 5880 C=CC#N.COc1ccc(CNc2c(C)cc(C)cc2I)cc1>>COc1ccc(CNc2c(C)cc(C)cc2/C=C/C#N)cc1  
 5881 C=Cc1ccc2ccccc2c1.CCOC(=O)C(F)Br>>CCOC(=O)C(F)/C=C/c1ccc2ccccc2c1  
 5882 C=CC#N.Cc1noc(-c2ccccc2)c1I>>Cc1noc(-c2ccccc2)c1/C=C/C#N



5927 C=CC(N)=O.Ic1cn(C(c2ccccc2)(c2ccccc2)c2ccccc2)c(N=P(c2ccccc2)(c2ccccc2)c2ccccc2)n1>>NC(=O)/C=C/c1cn(C(c2ccccc2)(c2ccccc2)c2ccccc2)c(N=P(c2ccccc2)(c2ccccc2)c2ccccc2)n1  
5928 C=Cc1ccncc1.O=C(NCc1cn(OCc2ccccc2)nc1I)OCc1ccccc1>>O=C(NCc1cn(OCc2ccccc2)nc1/C=C/c1ccncc1)OCc1ccccc1  
5929 C=CC(=O)O.FC1(F)Oc2ccccc(I)c2O1>>O=C(O)/C=C/c1ccccc2c1OC(F)(F)O2  
5930 C=CC#N.Cn1c2c(c3ccc(I)cc3c1=O)C(=O)c1ccccc1-2>>Cn1c2c(c3ccc(/C=C/C#N)cc3c1=O)C(=O)c1ccccc1-2  
5931 C=CC(=O)OC.Nc1ccccc1Br>>COC(=O)/C=C/c1ccccc1N  
5932 C=CC(=O)OC(C)(C)C.CC(=O)Cc1cc2c(cc1Br)OCO2>>CC(=O)Cc1cc2c(cc1/C=C/C(=O)OC(C)(C)C)OCO2  
5933 C=C(C(=O)OC)[C@@H]1CC[C@H]2(C)CC[C@H](OCOC)C(=C)[C@H]2C1.Cc1ccc(Br)cc1>>C=C1[C@H](OCOC)CC[C@H]2(C)CC[C@H](/C=C/c3ccc(C)cc3)C(=O)OC[C@H]12  
5934 Br1ccc(I)cc1.C=CCP(=O)(OCC)OCC>>CCOP(=O)(C/C=C/c1ccc(Br)cc1)OCC  
5935 Br1cccs1.C=Cc1ccc(C(=O)O)cc1>>O=C(O)c1ccc(/C=C/c2cccs2)cc1  
5936 C=CN1C(=O)c2ccccc2C1=O.FC(F)(F)c1ccc(Cl)cc1>>O=C1c2ccccc2C(=O)N1/C=C/c1ccc(C(F)(F)F)c  
5937 C=COCCCC.Cc1ccc2c(Br)cc(=O)oc2c1>>CCCCO/C=C/c1cc(=O)oc2cc(C)ccc12  
5938 Br1ccc(OCCN2CCCC2)cc1.C=Cc1c(C)ccc(C#N)c1Nc1ccc2[nH]ccc2c1C>>Cc1ncc(C#N)c(Nc2ccc3[nH]ccc3c2C)c1/C=C/c1ccc(OCCN2CCCC2)cc1  
5939 C=CCCCCCC.Cc1cc(C)cc(OS(=O)(=O)C(F)(F)F)c1>>C=C(CCCCCC)c1cc(C)cc(C)c1  
5940 C=C(C)C(=O)OC.Cc1ccccc1Cl>>COC(=O)/C(C)=C/c1ccccc1C  
5941 Br1ccc2ccccc2c1.C=Cc1ccc(OC)cc1>>COc1ccc(/C=C/c2ccc3ccccc3c2)cc1  
5942 C=C[C@H](O)[C@H](O)COCc1ccc(OC)cc1.Cc1ccccc1I>>COc1ccc(COC[C@H](O)[C@H](O)/C=C/c2ccccc2C)cc1  
5943 C=CCCCO.CC(C)(C)c1ccccc1OS(=O)(=O)C(F)(F)F>>C=C(CCCCO)c1ccccc1C(C)(C)C  
5944 C=CC(N)=O.FC(F)(F)c1cc(Cl)cc(C(F)(F)F)c1>>NC(=O)/C=C/c1cc(C(F)(F)F)cc(C(F)(F)F)c1  
5945 C=CCOC(C)=O.Fc1ccccc(I)c1>>CC(=O)OC/C=C/c1ccccc(F)c1  
5946 C=CCN1C(=O)c2ccccc2C1=O.Ic1ccccc1>>O=C1c2ccccc2C(=O)N1C/C=C/c1ccccc1  
5947 C=CC(=O)OC(C)(C)C.O=Cc1ccc(Cl)cc1>>CC(C)(C)OC(=O)/C=C/c1ccc(C=O)cc1  
5948 C=CC(=O)OC(C)(C)C.Cc1c(Br)ccc2c1nnn2C>>Cc1c(/C=C/C(=O)OC(C)(C)C)ccc2c1nnn2C  
5949 C=CC(=O)OCC.Cc1nc(-n2c(C)ccc2C)cc(NC2CCOCC2)c1Br>>CCOC(=O)/C=C/c1c(NC2CCOCC2)cc(-n2c(C)ccc2C)nc1C  
5950 C=Cc1ccc(OC)cc1OC.CCOC(=O)C(C)(C)Br>>CCOC(=O)C(C)(C)/C=C/c1ccc(OC)cc1OC  
5951 C=Cc1ccccc1.Nc1cc(Cl)ccc1Br>>Nc1cc(Cl)ccc1/C=C/c1ccccc1  
5952 C=CC[C@H](CC(=O)OC(C)(C)C)C(=O)N[C@H](C(=O)N[C@H](C)c1ccccc1)C(C)(C)C.O=S(=O)(O)c1ccc(-c2ccccc2)c(Cl)c1)C(F)(F)F>>C[C@H](NC(=O)[C@H](NC(=O)[C@H](C/C=C/c1ccc(-c2ccccc2)c(Cl)c1)CC(=O)OC(C)(C)C)C(C)(C)C)c1ccccc1  
5953 C=CC(N)=O.CCc1cc(Br)ccc1Cl>>CCc1cc(/C=C/C(N)=O)ccc1Cl  
5954 C=CC(=O)OC.IC(CCSc1ccccc1)=C(c1ccccc1)c1ccccc1>>COC(=O)/C=C/C(CCSc1ccccc1)=C(c1ccccc1)c1ccccc1  
5955 C=C(F)C(C)=O.Cc1ccc(I)cc1>>CC(=O)/C(F)=C/c1ccc(C)cc1  
5956 C=CC(=O)OC(C)(C)C.C=CC1=C(Br)C(O)CCC1>>C=CC1=C(/C=C/C(=O)OC(C)(C)C)C(O)CCC1  
5957 C=Cc1c(C)cc(C)cc1C.FC(F)(F)c1ccc(Br)cc1>>Cc1cc(C)c(/C=C/c2ccc(C(F)(F)F)cc2)c(C)c1  
5958 C=Cc1ccccc1.Cc1ccc(OS(=O)(=O)C(F)(F)F)cc1>>C=C(c1ccccc1)c1ccc(C)cc1  
5959 C=C[C@H]1O[C@H]2OC3(CCCCC3)O[C@H]2[C@H]1C.Ic1ccccc1>>C[C@H]1[C@H](/C=C/c2ccccc2)O[C@H]2OC3(CCCCC3)O[C@H]21  
5960 C=CCCCCCC.O=S(=O)(Oc1ccccc2ccncc12)C(F)(F)F>>C=C(CCCCCC)c1ccccc2ccncc12  
5961 C=Cc1ccncc1.C[Si](C)(C)CCOCn1nc(I)c2cc(C=O)ccc21>>C[Si](C)(C)CCOCn1nc(/C=C/c2ccncc2)c2cc(C=O)ccc21  
5962 C=CCP(=O)(OCCCC)OCCCC.Ic1ccccc1>>CCCCOP(=O)(C/C=C/c1ccccc1)OCCCC  
5963 Br1ccccc1C1OCCCCO1.C=CC(=O)OC>>COC(=O)/C=C/c1ccccc1C1OCCCCO1  
5964 C=CC(=O)OC(C)(C)C.Cc1cc(Br)cc(C)c1N>>Cc1cc(/C=C/C(=O)OC(C)(C)C)cc(C)c1N  
5965 C=CCn1c(-c2ccc(C)cc2)nc2ccccc2c1=O.O=C(CN1C(=O)COc2ccccc21)c1ccc(Br)cc1>>Cc1ccc(-c2nc3ccccc3c(=O)n2C/C=C/c2ccc(C(=O)CN3C(=O)COc4ccccc43)cc2)cc1  
5966 C=CC(=O)O.Cc1ccc(S(=O)(=O)Nc2ccccc(I)c2)cc1>>Cc1ccc(S(=O)(=O)Nc2ccccc(/C=C/C(=O)O)c2)cc1  
5967 C=COCCCC.CC(=O)c1ccc(Br)cc1>>C=C(OCCCC)c1ccc(C(C)=O)cc1  
5968 C=CC(=O)N1N=Cc2ccccc2C1c1ccccc1C.COc1ccc(Cc2ncc(N)nc2N)cc(I)c1OC>>COc1cc(Cc2ncc(N)nc2N)cc(/C=C/C(=O)N2N=Cc3ccccc3C2c2ccccc2C)c1OC  
5969 C=Cc1ccc(C)cc1.O=[N+](O-)[c1ccc(I)c1>>Cc1ccc(/C=C/c2ccccc([N+](=O)[O-])c2)cc1  
5970 C=CC(=O)OC.Cc1cc(OC(=O)OC(C)(C)C)cc(C)c1I>>COC(=O)/C=C/c1c(C)cc(OC(=O)OC(C)(C)C)cc  
5971 C=CCOc1ccccc1C.COc1ccccc1I>>COc1ccccc1/C=C/COc1ccccc1C

5972 C=Cc1cccc1.COC(=O)C(CCC(=O)C(C)C)Cc1cccc1I>>COC(=O)C(CCC(=O)C(C)C)Cc1cccc1/C=C/c1cccc1  
 5973 C=Cc1nc2c(N)ncnc2n1[C@H]1C[C@H](O[Si](C)(C)C(C)(C)C)[C@@H](CO[Si](C)(C)C(C)(C)C)O1.COc1ccc(Br)cc1>>COc1ccc(/C=C/c2nc3c(N)ncnc3n2[C@H]2C[C@H](O[Si](C)(C)C(C)(C)C)[C@@H](CO[Si](C)(C)C(C)(C)C)O2)cc1  
 5974 C=CC(=O)OC.CCN(CC)c1ccc2cc(Br)ccc2c1>>CCN(CC)c1ccc2cc(/C=C/C(=O)OC)ccc2c1  
 5975 C=CC(=O)OCC.Ic1c(-c2cccc2)c2cccc2c2cccc12>>CCOC(=O)/C=C/c1c(-  
 5976 C=CC(=O)OC.Cc1nc(Br)c2c(c1O)COC(C)(C)OC2>>COC(=O)/C=C/c1nc(C)c(O)c2c1COC(C)(C)OC2  
 5977 C=Cc1cccc1.OCc1ccc(Cl)cc1>>OCc1ccc(/C=C/c2cccc2)cc1  
 5978 Br1ccc2ccc3cccc4ccc1c2c34.C=Cc1nc2c(N)ncnc2n1[C@H]1C[C@H](O[Si](C)(C)C(C)(C)C)[C@@H](CO[Si](C)(C)C(C)(C)C)O1>>CC(C)(C)[Si](C)(C)OC[C@H]1O[C@@H](n2c(/C=C/c3ccc4cccc5ccc6ccc3c4c5)nc3c(N)ncnc32)C[C@@H]1O[Si](C)(C)C(C)(C)C  
 5979 Br1ccc2ccc3cccc4ccc1c2c34.C=Cc1nc2c(N(C(=O)c3cccc3)C(=O)c3cccc3)ncnc2n1CC(=O)OCC>>CCOC(=O)Cn1c(/C=C/c2ccc3ccc4cccc5ccc2c3c45)nc2c(N(C(=O)c3cccc3)C(=O)c3cccc3)ncnc21  
 5980 C=CC(=O)N1CCOCC1.CC(C)(C)c1ccc2[nH]c3c(c2c1)CC(=O)Nc1ccc(/C=C/C(=O)N2CCOCC2)cc1-3>>CC(C)(C)c1ccc2[nH]c3c(c2c1)CC(=O)Nc1ccc(/C=C/C(=O)N2CCOCC2)cc1-3  
 5981 C=CC(=O)OCc1cccc1.O=C1NCCCC[C@@H]1N1C(=O)c2cccc(I)c2C1=O>>O=C(/C=C/c1cccc2c1C(=O)N([C@H]1CCCCNC1=O)C2=O)OCc1cccc1  
 5982 C=CC(=O)OC(C)(C)C.CC(C)=CCc1cc(I)cc2c1OC(C)(C)C=C2>>CC(C)=CCc1cc(/C=C/C(=O)OC(C)(C)C)cc2c1OC(C)(C)C=C2  
 5983 C=Cc1c(F)c(F)c(F)c(F)c1F.N#Cc1ccc(Br)cc1>>N#Cc1ccc(/C=C/c2c(F)c(F)c(F)c(F)c2F)cc1  
 5984 C=C1C(=O)O[C@H]2[C@H]1CC/C(C)=C/CC[C@@]1(C)O[C@@H]21.CCc1ccc(I)cc1>>CCc1ccc(/C=C2/C(=O)O[C@H]3[C@H]2CC/C(C)=C/CC[C@@]2(C)O[C@@H]32)cc1  
 5985 Br1ccc(I)cc1.C=CP(=O)(OCC)OCC>>CCOP(=O)/C=C/c1ccc(Br)cc1OCC  
 5986 C=Cc1ccncc1.Cc1cc(Br)ccc1N>>Cc1cc(/C=C/c2ccncc2)ccc1N  
 5987 C=CC(=O)OCC.CC(C)(C)OC(=O)N1CCCC2(C1)CN(C(=O)OCC[Si](C)(C)C)c1ccc(Br)cc12>>CCOC(=O)/C=C/c1ccc2c(c1)C1(CCN(C(=O)OC(C)(C)C)C1)CN2C(=O)OCC[Si](C)(C)C  
 5988 Br1cccc2c3c([nH]c12)C1CCN(CC1)C3.C=Cc1ccncc1>>C(=C/c1cccc2c3c([nH]c12)C1CCN(CC1)C3)c1ccncc1  
 5989 C=CC(=O)OC.CC(=O)OCc1cc(I)cc(COC(C)=O)c1OC(C)=O>>COC(=O)/C=C/c1cc(COC(C)=O)c(OC(C)=O)c(COC(C)=O)c1  
 5990 C=Cc1cc(O)c(OC)cc1F.COc1ccc(OC)c(I)c1>>COc1ccc(OC)c(/C=C/c2cc(O)c(OC)cc2F)c1  
 5991 C=CC=O.O=Cc1ccc(Br)cc1>>O=C/C=C/c1ccc(C=O)cc1  
 5992 C=C.Fc1ccc(I)cc1>>C=Cc1ccc(F)cc1  
 5993 C=CC(=O)OC.C[C@]12C[C@@]14C=C(Sc5ccc(I)cc5)C(=O)[C@@](C)(CCC(=O)Nc5c(O)ccc(C(=O)O)c5O)[C@@H]3[C@H](C[C@@H]1C4)O2>>COC(=O)/C=C/c1ccc(SC2=C[C@]34C[C@H]5C[C@@H](O[C@@]15(C)C3)[C@H]4[C@](C)(CCC(=O)Nc3c(O)ccc(C(=O)O)c3O)C2=O)cc1  
 5994 C=Cc1ccncc1.Nc1cncc(Br)c1>>Nc1cncc(/C=C/c2ccncc2)c1  
 5995 C=CC(=O)OCC.Fc1ccc(Oc2cccc(Br)c2)cc1>>CCOC(=O)/C=C/c1cccc(Oc2ccc(F)cc2)c1  
 5996 C=CCOc1ccc(C)cc1.Cc1ccc(I)cc1>>Cc1ccc(/C=C/COc2ccc(C)cc2)cc1  
 5997 C=CC(=O)O.Cc1cccc1Br>>Cc1cccc1/C=C/C(=O)O  
 5998 C=Cc1cccc1.Clc1ccccn1>>C(=C/c1ccccn1)c1cccc1  
 5999 Br1ccc2cccc2c1.C=CC=O>>O=C/C=C/c1ccc2cccc2c1  
 6000 C=CC(C)=O.COc1cc2c(cc1Br)[C@H]1CCCC[C@H]1N2C(=O)C(C)(C)C>>COc1cc2c(cc1/C=C/C(C)=O)[C@H]1CCCC[C@H]1N2C(=O)C(C)(C)C  
 6001 C=CC(=O)N1CCOCC1.Cn1c2cccc2c2nc3ccc(Cl)cc3c3cc(OS(=O)(=O)C(F)(F)F)cc1c32>>Cn1c2cccc2c2nc3ccc(Cl)cc3c3cc(/C=C/C(=O)N4CCOCC4)cc1c32  
 6002 C=CC1(O)CCN(C(=O)OC(C)(C)C)CC1.CCc1nn2c(C)cc(C)nc2c1Cc1ccc(Br)cc1>>CCc1nn2c(C)cc(C)nc2c1Cc1ccc(/C=C/C2(O)CCN(C(=O)OC(C)(C)C)CC2)cc1  
 6003 C=CC(=O)OCC.CS(=O)(=O)c1ccc(Br)cc1Cl>>CCOC(=O)/C=C/c1ccc(S(C)(=O)=O)c(Cl)c1  
 6004 C=CC(=O)OC.CN(C)c1ccc2cc(Br)ccc2c1>>COC(=O)/C=C/c1ccc2cc(N(C)C)ccc2c1  
 6005 C=CC(=O)NCCO.COc1ccc(CNc2c(C(=O)NCC3ccc(F)cc3F)c(=O)n(OCc3cccc3)c3ncc(Br)cc23)c(OC)c1>>COc1ccc(CNc2c(C(=O)NCC3ccc(F)cc3F)c(=O)n(OCc3cccc3)c3ncc(/C=C/C(=O)NCCO)cc23)c(C=CC(=O)OCC.O=Cc1ccc(I)cc1>>CCOC(=O)/C=C/c1ccc(C=O)cc1  
 6006 C=CC(=O)OCC.O=Cc1ccc(I)cc1>>CCOC(=O)/C=C/c1ccc(C=O)cc1  
 6007 C=CC(=O)OCc1cccc1.O=C(O)c1ccc(Br)c2cccc12>>O=C(/C=C/c1ccc(C(=O)O)c2cccc12)OCc1ccc  
 6008 C=CC(=O)Nc1cccc1Cl.COc1ccc2c(=O)c(I)cc2c1>>COc1ccc2c(=O)c(/C=C/C(=O)Nc3cccc3Cl)cc2  
 6009 C=CC(=O)OC(C)(C)C.COc1cc(Br)cc(F)c1[C@]1(C)c2ccc3c(cnn3C3CCCCO3)c2C[C@@H](C)N1CC(C)(F)F>>COc1cc(/C=C/C(=O)OC(C)(C)C)cc(F)c1[C@]1(C)c2ccc3c(cnn3C3CCCCO3)c2C[C@@H](C)N1CC(C)(F)F  
 6010 C=C1C(=O)O[C@@H]2CC(C)=C([C@@H](C)CCCOC(C)=O)[C@@H](OC(C)=O)[C@H]12.Ic1cccc1>>CC(=O)OCCC[C@H](C)C1=C(C)C[C@H]2OC(=O)/C=C/c3cccc3[C@H]2[C@@H]1OC(C)=

6011 C=Cc1cccc1.CC(C)(C)C(=O)Nc1nc2ncc(Cl)nc2c(=O)[nH]1>>CC(C)(C)C(=O)Nc1nc2ncc(/C=C/c3cc  
ccc3)nc2c(=O)[nH]1  
6012 C=CCC1(O)CCN(C(=O)OC(C)(C)C)CC1.CCc1nn2c(C)cc(C)nc2c1Cc1ccc(Br)cc1>>CCc1nn2c(C)cc(  
C)nc2c1Cc1ccc(/C=C/CC2(O)CCN(C(=O)OC(C)(C)C)CC2)cc1  
6013 Brclnn(C2CCCCO2)c2cccc12.C=CC(=O)OCCCC>>CCCCOC(=O)/C=C/c1nn(C2CCCCO2)c2cccc1  
6014 C=C.COC(=O)c1cccc(NC(C)=O)c1Br>>C=Cc1c(NC(C)=O)cccc1C(=O)OC  
6015 Brclccc(-c2cccs2)cc1.C=CC(=O)OCCCC>>CCCCOC(=O)/C=C/c1ccc(-c2cccs2)cc1  
6016 C=CN1C(=O)c2cccc2C1=O.COc1cc(Br)cc(OC)c1OC>>COc1cc(/C=C/N2C(=O)c3cccc3C2=O)cc(O  
C)c1OC  
6017 C=CCc1cccc1.Cc1cccc1OS(=O)(=O)C(F)(F)F>>C=C(Cc1cccc1)c1cccc1C  
6018 C=CC(=O)OCC.O=[N+](O-)]c1cccc(Cl)c1>>CCOC(=O)/C=C/c1cccc([N+](=O)[O-])c1  
6019 C=CC#N.N#Cc1ccc(I)cc1>>N#C/C=C/c1ccc(C#N)cc1  
6020 C=CC(=O)N1N=Cc2cccc2C1c1cccc(F)c1.COc1cc(Cc2cnc(N)nc2N)cc(I)c1OC>>COc1cc(Cc2cnc(N)  
nc2N)cc(/C=C/C(=O)N2N=Cc3cccc3C2c2cccc(F)c2)c1OC  
6021 C=CC(=O)OC(C)(C)C.Cc1ccc(S(=O)(=O)C2cccc2I)cc1>>Cc1ccc(S(=O)(=O)C2cccc2/C=C/C(=O  
)OC(C)(C)C)cc1  
6022 C=CCN(C(=O)OC(C)(C)C)C(=O)OC(C)(C)C.Cc1ccc(Cl)cc1>>Cc1ccc(/C=C/CN(C(=O)OC(C)(C)C)C  
(=O)OC(C)(C)C)cc1  
6023 C=Cc1ccc(OC)cc1.COc1ccc(/C=C/c2[nH]c3cccc3c(=O)c2I)cc1>>COc1ccc(/C=C/c2[nH]c3cccc3c(=O)  
c2/C=C/c2ccc(OC)cc2)cc1  
6024 C=CC(=O)N(C)C.O=Cc1cccc(Br)c1>>CN(C)C(=O)/C=C/c1cccc(C=O)c1  
6025 C=C[C@H](C)[C@H]1C/C=C(=O)N[C@H](Cc2ccc(OC)cc2)C(=O)NCCC(=O)O[C@H](CC(  
C)C)C(=O)O1.Ic1cccc1>>COc1ccc(C[C@H]2NC(=O)/C=C/C[C@H]([C@H](C)/C=C/c3cccc3)O  
C(=O)[C@H](CC(C)C)OC(=O)CCNC2=O)cc1  
6026 C=CC#N.CC(=O)OC[C@H]1O[C@H](n2cnc(C(N)=O)c2I)[C@H](OC(C)=O)[C@H]1OC(C)=O>  
>CC(=O)OC[C@H]1O[C@H](n2cnc(C(N)=O)c2/C=C/C#N)[C@H](OC(C)=O)[C@H]1OC(C)=O  
6027 C=CC(=O)OCCCC.Cc1ccc(C)c(Br)c1>>CCCCOC(=O)/C=C/c1cc(C)ccc1C  
6028 C=CC(=O)OCC.O=Cc1ccc(Br)nc1>>CCOC(=O)/C=C/c1ccc(C=O)cn1  
6029 C=CCN1C(=O)c2cccc2C1=O.CS(=O)(=O)c1ccc(Br)cc1>>CS(=O)(=O)c1ccc(/C=C/CN2C(=O)c3cccc  
c3C2=O)cc1  
6030 C=Cc1cccc1.Ic1enn2c(-c3cccc3)cc(-c3cccc3)nc12>>C=C/c1enn2c(-c3cccc3)cc(-  
c3cccc3)nc12)\c1cccc1  
6031 C=Cc1cccc1C.Cc1ccc(I)c1N>>Cc1cccc1/C=C/c1ccc(C)c1N  
6032 Brclcccc1.C=CC(=O)OCC(CC)CCCC>>CCCCC(CC)COC(=O)/C=C/c1cccc1  
6033 C=COC[C@H]1CCCN1C.O=S(=O)(OC1=CCCc2cccc2I)C(F)(F)F>>CN1CCC[C@H]1CO/C=C/C  
1=CCCc2cccc2I  
6034 C=CC(=O)OC.CCOC(=O)Nc1cccc1C1=C(I)CCO1>>CCOC(=O)Nc1cccc1C1=C(/C=C/C(=O)OC)C  
6035 C=C(F)[Si](C)(c1cccc1)c1cccc1.Ic1cccc1>>C[Si](/C(F)=C/c1cccc1)(c1cccc1)c1cccc1  
6036 CCCC=[11CH2].Ic1cccc1>>CCC/C=[11CH]/c1cccc1  
6037 C=CC(=O)OC(C)(C)C.Cc1ccc(Br)cc1>>Cc1ccc(/C=C/C(=O)OC(C)(C)C)cc1  
6038 C=CC(=O)N[C@H](C)c1cccc2cccc12.FC(F)(F)c1cccc(Br)c1>>C[C@H](NC(=O)/C=C/c1cccc(C(F  
)F)c1)c1cccc2cccc12  
6039 C=C.COC(=O)c1cc(Br)cc(C(=O)OC)nc1>>C=Cc1cc(C(=O)OC)nc(C(=O)OC)c1  
6040 C=CC(=O)OC.CC(C)(C)OC(=O)N1C[C@H](F)C[C@H]1C(=O)Nc1cccc(Br)c1F>>COC(=O)/C=C/c1  
cccc(NC(=O)[C@H]2C[C@H](F)CN2C(=O)OC(C)(C)C)c1F  
6041 C=CC(=O)OC.CC(=O)OCC(COC(C)=O)OCn1cc(I)c(=O)[nH]c1=O>>COC(=O)/C=C/c1cn(COC(COC  
(C)=O)COC(C)=O)c(=O)[nH]c1=O  
6042 C=CC(=O)OC.CC(C)c1cc(Br)c2c(c1)C1(C)CCCC1=N2>>COC(=O)/C=C/c1cc(C(C)C)cc2c1N=C1C  
CCCC12C  
6043 C=CC(=O)OC.Fc1cc(Br)ccc1CN1CCCC(c2c[nH]c3cccc23)C1>>COC(=O)/C=C/c1ccc(CN2CCCC(c  
3c[nH]c4cccc34)C2)c(F)c1  
6044 C=CC(=O)OC(C)(C)C.O=S(=O)(Oc1ccc(Br)cc1)C(F)(F)F>>CC(C)(C)OC(=O)/C=C/c1ccc(OS(=O)(=O)  
C(F)(F)F)cc1  
6045 Brclcccc1.C=C[C@H]1COC(C)(C)N1C(=O)OCc1cccc1>>CC1(C)OC[C@H](/C=C/c2cccc2)  
N1C(=O)OCc1cccc1  
6046 C=Cc1cccc1OC.CN(C(=O)c1cccc1)c1ccc2c(c1)[nH]c(=NC(=O)c1ccc(Br)s1)n2CCC(N)=O>>COc1c  
cccc1/C=C/c1ccc(C(=O)N=c2[nH]c3cc(N(C)C(=O)c4cccc4)ccc3n2CCC(N)=O)s1  
6047 C=CC(=O)OC.CC(C)(C)OC(=O)N1CCC2(CC1)Oc1ccc(Br)cc1C2=O>>COC(=O)/C=C/c1ccc2c(c1)C(  
=O)C1(CCN(C(=O)OC(C)(C)C)CC1)O2  
6048 Brclcccc1I.C=CC(=O)OCCCC>>CCCCOC(=O)/C=C/c1cccc1Br  
6049 C=CC(=O)OC.Clc1cccc(I)c1>>COC(=O)/C=C/c1cccc(Cl)c1

6050 C=Cc1ccc(C)cc1.CC(=O)c1ccc(Br)cc1>>CC(=O)c1ccc(/C=C/c2ccc(C)cc2)cc1  
6051 C=Cc1ccc(N(CCCCCCCCCCCC)CCCCCCCCCCCC)cc1.O=Cc1c2ccccc2c(Br)c2ccccc12>>CCCCC  
CCCCCN(CCCCCCCCCCCC)c1ccc(/C=C/c2c3ccccc3c(C=O)c3ccccc23)cc1  
6052 C=CC(=O)O.Cc1cccc(S(=O)(=O)N(C)c2ccccc1)c1>>Cc1cccc(S(=O)(=O)N(C)c2ccccc1/C=C/C(=O)  
O)c2)c1  
6053 C=Cc1ccccc1.CCCOC(=O)/C=C/c1ccc(/C=C/C(=O)OCC)cc1Cl>>CCCOC(=O)/C=C/c1ccc(/C=C/  
C(=O)OCC)cc1/C=C/c1ccccc1  
6054 C=CSelccccc1.Ic1ccccc1>>C(=C/c1ccccc1)\Sc1ccccc1  
6055 C=CC(=O)OC.FC1(F)C(I)=C1c1ccccc1>>COC(=O)/C=C/C1=C(c2ccccc2)C1(F)F  
6056 C=CC(=O)OCC.Cc1cccc(I)c1C>>CCOC(=O)/C=C/c1cccc(C)c1C  
6057 C=C[C@H](C)[C@H]1CC[C@H](C)c2c1cc(C)oc2=O.CC(C)=Cl>>CC(C)=C/C=C/[C@H](C)[C@H]1  
CC[C@H](C)c2c1cc(C)oc2=O  
6058 C=CC(=O)O.O=C1CCc2cc(Br)ccc21>>O=C(O)/C=C/c1ccc2c(c1)CCC2=O  
6059 C=Cc1ccc(N(c2ccccc2)c2ccccc2)cc1.O=Cc1ccc(Br)cc1F>>O=Cc1ccc(/C=C/c2ccc(N(c3ccccc3)c3cccc  
c3)cc2)cc1F  
6060 C=C(C)C(=O)OC(C)(C)C.COc1ccc(I)cc1>>COc1ccc(/C=C(\C)C(=O)OC(C)(C)C)cc1  
6061 C=CC(=O)OC1CCCCCCCCCCCC1.Ic1ccccc1>>O=C(/C=C/c1ccccc1)OC1CCCCCCCCCCCC1  
6062 Brclccs1.C=Cc1ccccc1>>C(=C/c1cccs1)\c1ccccc1  
6063 C=Cc1ccc(F)cc1.Ic1ccccc1>>Fc1ccc(/C=C/c2ccccc2)cc1  
6064 C=C(C(=O)OC)[C@@H]1CC[C@@]2(C)CCC[C@@](C)(OCOC)[C@@H]2C1.COc1cccc(I)c1>>CO  
CO[C@]1(C)CCC[C@]2(C)CC[C@@H](/C=C\c3cccc(OC)c3)C(=O)OC)C[C@H]21  
6065 C=CC(=O)N(C1CCCCC1)C1CCCCC1.CC(C)(C)OC(=O)c1ccccc1Br>>CC(C)(C)OC(=O)c1ccccc1/C=  
C/C(=O)N(C1CCCCC1)C1CCCCC1  
6066 C=CS(=O)(=O)c1ccccc1.N#Cc1ccc(Br)cc1>>N#Cc1ccc(/C=C/S(=O)(=O)c2ccccc2)cc1  
6067 Br1cnc2nc(CCC3CCN(Cc4ccccc4)CC3)oc2c1.C=CC(=O)OC>>COC(=O)/C=C/c1cnc2nc(CCC3CCN  
(Cc4ccccc4)CC3)oc2c1  
6068 C=C(C(=O)OC)[C@@H]1CC[C@@]2(C)CCC[C@@](C)(OCOC)[C@@H]2C1.Cn1c(=O)oc2cc(Br)c  
nc21>>COCO[C@]1(C)CCC[C@]2(C)CC[C@@H](/C=C\c3cnc4c(c3)oc(=O)n4C)C(=O)OC)C[C@H]21  
6069 C=CC(=O)OC.COc1cc(Br)ccc1C=O>>COC(=O)/C=C/c1ccc(C=O)c(OC)c1  
6070 C=Cc1ccc(N(c2ccc3ccccc3c2)c2ccc3ccccc3c2)cc1.COc1cc(C=O)c(OC)cc1I>>COc1cc(/C=C/c2ccc(N(  
c3ccc4ccccc4c3)c3ccc4ccccc4c3)cc2)c(OC)cc1C=O  
6071 C=Cc1ccccc1.Fc1ccc(Cl)cc1>>Fc1ccc(/C=C/c2ccccc2)cc1  
6072 C=CC(=O)OCC.COc1ccc(OC)c(Cc2ccc(I)cc2)c1>>CCOC(=O)/C=C/c1ccc(Cc2cc(OC)ccc2OC)cc1  
6073 C=Cc1ccc(O)c(OC)c1.O=c1ccc2ccc(OS(=O)(=O)C(F)(F)F)cc2o1>>COc1cc(/C=C/c2ccc3ccc(=O)oc3c  
2)cc1O  
6074 Br1ccccc1I.C=CC(=O)OCC>>CCOC(=O)/C=C/c1ccccc1Br  
6075 C=CC(=O)OC(C)(C)C.CC(=O)N(c1c(C)cc(C)cc1I)C1C=CCCC1>>CC(=O)N(c1c(C)cc(C)cc1/C=C/C(  
=O)OC(C)(C)C)C1C=CCCC1  
6076 C=C(CC(F)(F)C(=O)OCC)c1ccc(C)cc1.CCOC(=O)C(F)(F)I>>CCOC(=O)C(F)(F)/C=C(\CC(F)(F)C(=  
O)OCC)c1ccc(C)cc1  
6077 C=Cc1ccc(C)cc1.Cc1ccc(Br)c(C=O)c1>>Cc1ccc(/C=C/c2ccc(C)cc2C=O)cc1  
6078 C=CC(=O)OCCCC.CC(C)(C)c1cc(Br)cc(C(C)(C)C)c1>>CCCCOC(=O)/C=C/c1cc(C(C)(C)C)cc(C(C)(  
C)C)c1  
6079 C=COCCCC.COc1ccccc1Br>>C=C(OCCCC)c1ccccc1OC  
6080 Br1cccn1.C=Cc1ccc(C(=O)OC(C)(C)C)c(Nc2ccc(F)cc2)c1>>CC(C)(C)OC(=O)c1ccc(/C=C/c2cccn  
2)cc1Nc1ccc(F)cc1  
6081 C=CCOC(C)=O.COC(=O)c1cc(Br)ccc1[N+](=O)[O-  
]>>COC(=O)c1cc(/C=C/COC(C)=O)ccc1[N+](=O)[O-]  
6082 C=Cc1ccccc1.CCCCCCCCCCCCC(=O)Nc1ccccc1Br>>CCCCCCCCCCCC(=O)Nc1ccccc1/C=C/c1cccc  
6083 C=COCCO.O=C(c1ccccc1)c1ccc(Br)cc1>>C=C(OCCO)c1ccc(C(=O)c2ccccc2)cc1  
6084 C=CC(C)(C)O.FC(F)(F)c1ccc(Br)cc1>>CC(C)(O)/C=C/c1ccc(C(F)(F)F)cc1  
6085 C=CC(=O)O[C@H]1C[C@H]2C[C@@H]([C@@H]1C)C2(C)C.O=Cc1ccccc1Br>>C[C@@H]1[C@  
@H](OC(=O)/C=C/c2ccccc2C=O)C[C@H]2C[C@@H]1C2(C)C  
6086 C=Cc1ccc(C)cc1.COC(=O)c1cc(OC)c(OC)cc1I>>COC(=O)c1cc(OC)c(OC)cc1/C=C/c1ccc(C)cc1  
6087 C=Cc1ccc(Cl)cc1.Ic1ccs1>>Clc1ccc(/C=C/c2cccs2)cc1  
6088 C=CC(=O)OC.CN(C)c1nccc(N(Cc2ccc(Br)cc2)CC(C)(C)C)n1>>COC(=O)/C=C/c1ccc(CN(CC(C)(C)  
C)c2ccnc(N(C)C)n2)cc1  
6089 C=Cc1ccc(OC)cc1.Oc1ccc(-c2nc3cccn3c2-c2ccc(Br)cc2)cc1>>COc1ccc(/C=C/c2ccc(-c3c(-  
c4ccc(O)cc4)nc4cccn34)cc2)cc1  
6090 Br1ccc(-c2cccs2)s1.C=Cc1ccc(C=O)cc1>>O=Cc1ccc(/C=C/c2ccc(-c3cccs3)s2)cc1

6091 C=C(NC(=O)OC(C)(C)C)C(=O)OC.CCOC(=O)c1[nH]c2ccccc2c1Br>>CCOC(=O)c1[nH]c2ccccc2c1/  
C=C(\NC(=O)OC(C)(C)C)C(=O)OC  
6092 C=CCOC(C)=O.Cc1ccc(I)c(C)c1>>CC(=O)OC/C=C/c1ccc(C)cc1C  
6093 Brc1ccccc1-c1ccccc1.C=CC(=O)OCCCC>>CCCCOC(=O)/C=C/c1ccccc1-c1ccccc1  
6094 C=CC(=O)OCC.C[C@H](NC(=O)OC(C)(C)C)c1ccc(Br)cc1>>CCOC(=O)/C=C/c1ccc([C@H](C)NC(=O)OC(C)(C)C)cc1  
6095 C=CC(=O)OCCCC.O=[N+](O-  
6096 ]c1cnc2c(C3OCCO3)cc(Br)cc2c1>>CCCCOC(=O)/C=C/c1cc(C2OCCO2)c2ncc([N+](=O)[O-])cc2c1  
6097 C=Cc1ccc(C)cc1.COC(=O)c1ccccc1I>>COC(=O)c1ccccc1/C=C/c1ccc(C)cc1  
6098 C=CC(=O)OC.CN(C)c1cccc2c(S(=O)(=O)N3CCc4cc(Br)cnc43)cccc12>>COC(=O)/C=C/c1cnc2c(c1)  
CCN2S(=O)(=O)c1cccc2c(N(C)C)cccc12  
6099 C=Cc1n[nH]c2cc([C@@H]3C[C@H]34C(=O)Nc3ccc(OC)cc34)ccc12.CN1CCN(c2ccc(Br)cc2)CC1>  
>COc1ccc2c(c1)[C@H]1(C[C@H]1c1ccc3c(/C=C/c4ccc(N5CCN(C)CC5)cc4)n[nH]c3c1)C(=O)N2  
6100 Brc1ccc(I)cc1.C=CC(=O)OC1CCCC1>>O=C(/C=C/c1ccc(Br)cc1)OC1CCCC1  
6101 Brc1ccc2[nH]ccc2c1.C=CC(=O)O>>O=C(O)/C=C/c1ccc2[nH]ccc2c1  
6102 C=COCCCC.Oc1ccc(Br)c(O)c1>>C=C(OCCCC)c1ccc(O)cc1O  
6103 C=Cc1cncn1.Cc1c(Nc2c(I)cnc2C#N)ccc2[nH]ccc12>>Cc1c(Nc2c(C#N)cnc2/C=C/c2cncn2)ccc2[nH]ccc12  
6104 C=Cc1ccccc1.CCCCCn1cc(C(=O)NC23CC4CC(CC(C4)C2)C3)c(=O)c2cc(I)ccc21>>CCCCCn1cc(C(=O)NC23CC4CC(CC(C4)C2)C3)c(=O)c2cc(/C=C/c3ccccc3)ccc21  
6105 C=C(Br)CC.C=Cc1cncn1>>C=C(/C=C/c1cncn1)CC  
6106 C=CC(=O)N(C)C.O=[N+](O-)c1ccc(I)cc1>>CN(C)C(=O)/C=C/c1ccc([N+](=O)[O-])cc1  
6107 C=CCC(C)C(=O)OCC.CC(=O)c1ccc(Br)cc1>>CCOC(=O)C(C)C/C=C/c1ccc(C(C)=O)cc1  
6108 C=CC(=O)OCC.O=[N+](O-)c1cccc(Br)c1>>CCOC(=O)/C=C/c1cccc([N+](=O)[O-])c1  
6109 Brc1ccccc1.C=CCn1cc([N+](=O)[O-])cn1>>O=[N+](O-)c1cnn(CC/C=C/c2ccccc2)c1  
6110 C=CCOc1ccccc1C(C)(C)C.Ic1ccccc1>>CC(C)(C)c1ccccc1OC/C=C/c1ccccc1  
6111 C=Cc1ccccc1.Cc1ccc2ccccc2c1Br>>Cc1ccc2ccccc2c1/C=C/c1ccccc1  
6112 C=CC(=O)O.O=C(O)c1ccccc1I>>O=C(O)/C=C/c1ccccc1C(=O)O  
6113 C=CC(=O)NCc1ccc(F)c(F)c1.O=c1c(I)coc2cc(O)ccc12>>O=C(/C=C/c1coc2cc(O)ccc2c1=O)NCc1ccc(F)c(F)c1  
6114 Brc1ccccc1.C=CC(=O)N(C)OC>>CON(C)C(=O)/C=C/c1ccccc1  
6115 C=CC(=O)OC.Fc1c(F)c(F)c(Br)c(F)c1F>>COC(=O)/C=C/c1c(F)c(F)c(F)c(F)c1F  
6116 C=CCS(=O)(=O)c1ccccc1.CCOC(=O)/C=C/c1cc(Br)cc(Cc2ccnc2)c1>>CCOC(=O)/C=C/c1cc(/C=C/C/CS(=O)(=O)c2ccccc2)cc(Cc2ccnc2)c1  
6117 C=CCN1C(=O)c2ccccc2C1=O.FC(F)(F)c1ccc(Br)c1>>O=C1c2ccccc2C(=O)N1C/C=C/c1ccc(C(F)(F)F)c1  
6118 C=CC(=O)OC.O=c1oc2cc(Br)cnc2n1CCc1ccccc1>>COC(=O)/C=C/c1cnc2c(c1)oc(=O)n2CCc1ccccc1  
6119 C=CC(C)(C)O.CCNC(=O)C[C@H]1N=C(c2ccc(Br)cc2)c2cc(OC)ccc2-n2c(C)nnc21>>CCNC(=O)C[C@H]1N=C(c2ccc(/C=C/C(C)(C)O)cc2)c2cc(OC)ccc2-n2c(C)nnc21  
6120 C=COCCCC.Fc1ccc(Br)c1>>C=C(OCCCC)c1ccc(F)c1  
6121 C=CC(=O)N(C)Cc1cn(C)c2ccccc12.O=C1Nc2ncc(Br)cc2C12CCC2>>CN(Cc1cn(C)c2ccccc12)C(=O)/C=C/c1cnc2c(c1)C1(CCC1)C(=O)N2  
6122 C=C1C(=O)O[C@H]2C[C@H](C)C(=O)C/C=C(\C)CC[C@H]12.Fc1ccc(I)cc1>>C/C1=C\CC(=O)[C@H](C)C[C@H]2OC(=O)/C=C/c3ccc(F)cc3)[C@H]2CC1  
6123 C=Cc1ccccc1.Cn1c(-c2ccccc2)c(I)c(=O)c2ccccc21>>Cn1c(-  
6124 C=CC(=O)OC.O=S(=O)(c1ccccc1)n1cc(-c2ccc(F)cc2)c2cc(Br)cnc21>>COC(=O)/C=C/c1cnc2c(c1)c(-c1ccc(F)cc1)cn2S(=O)(=O)c1ccccc1  
6125 C=Cc1ccc(OC)cc1.FC(F)(F)Oc1ccc(I)cc1>>CCOc1ccc(/C=C/c2ccc(OC(F)(F)F)cc2)cc1  
6126 C=COCCOC=C.Ic1ccc2ccccc12>>C=COCCOC(=C)c1ccc2ccccc12  
6127 C=CC(=O)OCC.CCOC(=O)CCOC(C)c1cc(OC)c(OC)cc1Br>>CCOC(=O)/C=C/c1cc(OC)c(OC)cc1C(C)OCCCC(=O)OCC  
6128 C=CC(=O)OC.Ic1ccccc1NCc1ccccc1>>COC(=O)/C=C/c1ccccc1NCc1ccccc1  
6129 C=Cc1ccc(NC(=O)OC(C)(C)C)cc1.O=C(OC[C@H]1O[C@H](n2cc(I)c(=O)[nH]c2=O)C[C@H]1OC(=O)c1ccccc1)c1ccccc1>>CC(C)(C)OC(=O)Nc1ccc(/C=C/c2cn([C@H]3C[C@H](OC(=O)c4ccccc4)[C@H](COC(=O)c4ccccc4)O3)c(=O)[nH]c2=O)cc1  
6130 C=C.COC(=O)Cc1c(C(=O)OC)c2n(c(=O)c1Br)CCC2O>>C=Cc1c(CC(=O)OC)c(C(=O)OC)c2n(c1=O)CCC2O  
6131 C=CC#N.O=[N+](O-)c1cccc(I)c1>>N#C/C=C/c1cccc([N+](=O)[O-])c1



C=Cc1ccc(/C=C/c2ccc(N(C)C)cc2)cc1.Cc1cc2c(-c3ccc(I)cc3S(=O)(=O)O)c3cc(C)c(=O)cc-  
 6132 3oc2cc1O>>Cc1cc2c(-  
 c3ccc(/C=C/c4ccc(/C=C/c5ccc(N(C)C)cc5)cc4)cc3S(=O)(=O)O)c3cc(C)c(=O)cc-3oc2cc1O  
 6133 C=CC(=O)OCC.OCc1cccc(Br)n1>>CCOC(=O)/C=C/c1cccc(CO)n1  
 6134 C=Cc1ccc(N(c2cccc2)c2cccc3cccc23)cc1.O=Cc1c(F)cc(Br)cc1F>>O=Cc1c(F)cc(/C=C/c2ccc(N(c3c  
 cccc3)c3cccc4cccc34)cc2)cc1F  
 6135 C=Cc1ccc(N(C)C)cc1.O=C/C=C/c1ccc(I)cc1>>CN(C)c1ccc(/C=C/c2ccc(/C=C/C=O)cc2)cc1  
 6136 C=CC=O.O=[N+][O-]c1ccc(Br)cc1>>O=C/C=C/c1ccc([N+](=O)[O-])cc1  
 6137 C=Cc1ccc(/C=C/c2ccc(/C=C/c3cc(OCCCCC)cc(OCCCCC)c3)cc2)cc1.CCCCCCOc1ccc2cc(Br)ccc  
 2c1>>CCCCCOc1cc(/C=C/c2ccc(/C=C/c3ccc(/C=C/c4ccc5cc(OCCCCC)ccc5c4)cc3)cc2)cc(OCCC  
 6138 C=CC(=O)CCC.O=C(c1cccc1)c1ccc(Br)cc1>>CCCC(=O)/C=C/c1ccc(C(=O)c2cccc2)cc1  
 6139 C=Cc1cccc1.O=c1c(I)c(/C=C/c2cccc2)[nH]c2cccc12>>O=c1c(/C=C/c2cccc2)c(/C=C/c2cccc2)[n  
 H]c2cccc12  
 6140 C=CC(=O)OC.FC(F)(F)c1cccc(Br)c1>>COC(=O)/C=C/c1cccc(C(F)(F)F)c1  
 6141 C=CC(=O)OC(C)(C)C.CN(c1cccc1)c1ncnc2c(I)cnn12>>CN(c1cccc1)c1ncnc2c(/C=C/C(=O)OC(C)(  
 C)C)cnn12  
 6142 C=Cc1ncnc2c1ncn2C1CCCCO1.Ic1cccs1>>C(=C/c1ncnc2c1ncn2C1CCCCO1)\c1cccs1  
 6143 C=COCCCC.CC=Cc1ccc(OS(=O)(=O)C(F)(F)F)c(OC)c1>>C=C(OCCCC)c1ccc(C=CC)cc1OC  
 6144 C=Cc1cccc1.CCOC(=O)c1cccc1I>>CCOC(=O)c1cccc1/C=C/c1cccc1  
 6145 Brc1cccc2cc[nH]c12.C=Cc1cccc1>>C(=C/c1cccc2cc[nH]c12)\c1cccc1  
 6146 C=Cc1cncnc1.O=S(=O)(c1ccc(Br)cc1)C(F)(F)C(F)(F)C(F)(F)C(F)(F)C(F)(F)C(F)(F)C(F)(F)C(F)(F)F>  
 >O=S(=O)(c1ccc(/C=C/c2cncnc2)cc1)C(F)(F)C(F)(F)C(F)(F)C(F)(F)C(F)(F)C(F)(F)C(F)(F)C(F)(F)F  
 6147 C=CCc1cccc1.CC(C)(C)c1ccc(OS(=O)(=O)C(F)(F)F)cc1>>C=C(Cc1cccc1)c1ccc(C(C)(C)C)cc1  
 6148 C=Cc1cccc1.C[Si](Cl)(c1cccc1)c1cccc1>>C[Si](/C=C/c1cccc1)(c1cccc1)c1cccc1  
 6149 C=CC(=O)OCC.COc1ncc(Cl)c(N)n1>>CCOC(=O)/C=C/c1cnc(OC)nc1N  
 6150 C=CCOC(C)=O.COC(=O)c1ccc(I)cc1>>COC(=O)c1ccc(/C=C/COC(C)=O)cc1  
 6151 C=CC(=O)N(C(C)C)C(C)C.Cc1ccc(I)s1>>Cc1ccc(/C=C/C(=O)N(C(C)C)C(C)C)s1  
 6152 C=CC(=O)OC.CC(C)(C)OC(=O)N1CCN2C(=O)c3c(Br)cccc3OCC2C1>>COC(=O)/C=C/c1cccc2c1C(  
 =O)N1CCN(C(=O)OC(C)(C)C)CC1CO2  
 6153 C=C1CC(c2cccc2)OC1=O.Clc1cccc(I)c1>>O=C1OC(c2cccc2)C/C1=C\c1cccc(Cl)c1  
 6154 C=CC(C)(C)O.CC(=O)Oc1ccc2ccc(=O)oc2c1I>>CC(=O)Oc1ccc2ccc(=O)oc2c1/C=C/C(C)(C)O  
 6155 C=CN(C)C(C)=O.Fc1cccc1Br>>C=C(c1cccc1F)N(C)C(C)=O  
 6156 C=C[Si](OCC)(OCC)OCC.COc1ccc(/C=C/c2ccc(I)cc2)cc1>>CCO[Si](/C=C/c1ccc(/C=C/c2ccc(OC)cc  
 2)cc1)(OCC)OCC  
 6157 C=CC(=O)OC(C)(C)C.Clc1cnc2cccc12>>CC(C)(C)OC(=O)/C=C/c1cnc2cccc12  
 6158 C=CC(C)=O.O=Cc1ccc(Br)cc1>>CC(=O)/C=C/c1ccc(C=O)cc1  
 6159 C=CN1CCCC1=O.Fc1ccc(Br)cc1>>C=C(c1ccc(F)cc1)N1CCCC1=O  
 6160 C=CC(=O)OCC.CC1(C)Cc2cc(Br)ccc2C1=O>>CCOC(=O)/C=C/c1ccc2c(c1)CC(C)(C)C2=O  
 6161 C=Cc1ccc(OC)c(O)c1.COc1cc(Br)cc(OC)c1F>>COc1ccc(/C=C/c2cc(OC)c(F)c(OC)c2)cc1O  
 C=CC[C@H](CC(=O)OC(C)(C)C)C(=O)N[C@H](C(=O)N[C@H](C)c1cccc1)C(C)(C)C.CCc1cc(Br)  
 6162 ccc1-  
 c1cccc1>>CCc1cc(/C=C/C[C@H](CC(=O)OC(C)(C)C)C(=O)N[C@H](C(=O)N[C@H](C)c2cccc2)  
 C(C)(C)C)ccc1-c1cccc1  
 6163 C=Cc1cccc(O)c1.COc1cccc(Br)c1>>COc1cccc(/C=C/c2cccc(O)c2)c1  
 6164 C=CS(=O)(=O)F.Cc1ccc(S(=O)(=O)n2cc(I)c3cccc32)cc1>>Cc1ccc(S(=O)(=O)n2cc(/C=C/S(=O)(=O)  
 F)c3cccc32)cc1  
 6165 C=CC(=O)OCC.Cn1c(=O)c(Br)c(-c2cccc2)c2cccc21>>CCOC(=O)/C=C/c1c(-  
 c2cccc2)c2cccc2n(C)c1=O  
 6166 C=CC(=O)OCC.Cc1cc(I)c2cccc2n1>>CCOC(=O)/C=C/c1cc(C)nc2cccc12  
 6167 C=Cc1cn(COCC[Si](C)(C)C)nc1-  
 c1nc2ccc(OC)cc2n1COCC[Si](C)(C)C.Cc1cncnc1Br>>COc1ccc2nc(-  
 6168 C=Cc1cccc1.Nc1ncc(Cl)cc1Br>>Nc1ncc(Cl)cc1/C=C/c1cccc1  
 C=CC(=O)OC(C)(C)C.COc1ccc2nc(S(=O)(=O)c3cccc(Br)c3)ccc2c1>>COc1ccc2nc(S(=O)(=O)c3cccc  
 6169 (/C=C/C(=O)OC(C)(C)C)c3)ccc2c1  
 C=Cc1cccc1.FC(F)(F)c1ccc(Cl)cc1>>FC(F)(F)c1ccc(/C=C/c2cccc2)cc1  
 6170 Brc1cc2cccc2c2cccc12.C=CC(=O)OCCCC>>CCCCOC(=O)/C=C/c1cc2cccc2c2cccc12  
 6171 C=CC#N.Cc1cc(I)ccn1>>Cc1cc(/C=C/C#N)ccn1  
 6172 C=Cc1ccc2c(c1)OCO2.Ic1ccc(OCc2cccc2)cc1>>C(=C/c1ccc2c(c1)OCO2)\c1ccc(OCc2cccc2)cc1  
 6173 C=CC(=O)OC.Nc1ccc(Br)cc1[N+](=O)[O-]>>COC(=O)/C=C/c1ccc(N)c([N+](=O)[O-])c1

6175 C=CC#N.CNC(=O)c1c(-c2ccc(F)cc2)oc2nc(N(C)S(C)(=O)=O)c(I)cc12>>CNC(=O)c1c(-  
6176 c2ccc(F)cc2)oc2nc(N(C)S(C)(=O)=O)c(/C=C/C#N)cc12  
6177 C=C.NC(=O)c1cccc1Br>>C=Cc1cccc1C(N)=O  
6178 C=CC(=O)OCC.Cc1nc(-c2ccccc2)nc(N)c1I>>CCOC(=O)/C=C/c1c(C)nc(-c2ccccc2)nc1N  
6179 C=Cc1cccc1.CCOC(=O)NCCc1cc(OC)c(OC)cc1I>>CCOC(=O)NCCc1cc(OC)c(OC)cc1/C=C/c1cccc  
6180 C=Cc1ccc(OC)cc1.CCCCC(Br)C(=O)OC>>CCCCC(/C=C/c1ccc(OC)cc1)C(=O)OC  
6181 C=CC(F)(F)C(F)(F)C(F)(F)C(F)(F)C(F)(F)C(F)(F)F.CC(C)c1cc(I)cc(C(C)C)c1N>>CC(C)c1cc(/C=C/C  
6182 (F)(F)C(F)(F)C(F)(F)C(F)(F)C(F)(F)C(F)(F)F)cc(C(C)C)c1N  
6183 C=Cc1ccc(C(=O)OC)cc1.CC1(C)NC(C)(C)c2cc(Br)ccc21>>COC(=O)c1ccc(/C=C/c2ccc3c(c2)C(C)(C  
6184 )NC3(C)C)cc1  
6185 C=CC(=O)OCC.Cc1cn2c(Br)cccc2n1>>CCOC(=O)/C=C/c1cccc2nc(C)cn12  
6186 C=CCCC(=C)C.Fc1ccc(CCl)c(F)c1>>C=C(C)CCC(=C)Cc1ccc(F)cc1F  
6187 C=Cc1cn(COCC[Si](C)(C)C)nc1-  
6188 c1nc2ccc(OC)cc2n1COCC[Si](C)(C)C.N#Cc1cncc(Br)c1>>COc1ccc2nc(-  
6189 c3nn(COCC[Si](C)(C)C)cc3/C=C/c3cncc(C#N)c3)n(COCC[Si](C)(C)C)c2c1  
6190 C=Cc1ccc(N)cc1.CN(C(=O)c1cccc1)c1ccc2c(c1)[nH]c(=NC(=O)c1ccc(Br)s1)n2CCC(N)=O>>CN(C(  
6191 =O)c1cccc1)c1ccc2c(c1)[nH]c(=NC(=O)c1ccc(/C=C/c3ccc(N)cc3)s1)n2CCC(N)=O  
6192 C=Cc1ccncc1.O=[N+][O-]c1ccncc1Nc1cccc(/C=C/c2cncc(Br)c2)c1>>O=[N+][O-  
6193 ]c1ccncc1Nc1cccc(/C=C/c2cncc(/C=C/c3cncc3)c2)c1  
6194 C=CC(=O)OC.COc1cncc(C)c1I>>COC(=O)/C=C/c1c(C)ncnc1OC  
6195 C=CC(=O)OC(C)(C)C.CC(C)(C)OC(=O)CC1(C(=O)OC(C)(C)C)CC(c2cc(Br)cc(OCc3ccccc3)c2)=NO  
6196 1>>CC(C)(C)OC(=O)/C=C/c1cc(OCc2ccccc2)cc(C2=NOC(CC(=O)OC(C)(C)C)(C(=O)OC(C)(C)C)C  
6197 C=COCCCC.Fc1ccc(Cl)cc1>>C=C(OC(C)C)c1ccc(F)cc1  
6198 C=CC(=O)O.Cc1ccc(I)cc1>>Cc1ccc(/C=C/C(=O)O)cc1  
6199 C=CC(=O)OCC.COc1ccc(Br)c(C(=O)OC(C)(C)C)c1>>CCOC(=O)/C=C/c1ccc(OC)cc1C(=O)OC(C)(C  
6200 C=CC(=O)OC.CCOC(=O)CSc1ccc(Br)cc1>>CCOC(=O)CSc1ccc(/C=C/C(=O)OC)cc1  
6201 Br1ccc(I)cc1.C=CC(N)=O>>NC(=O)/C=C/c1ccc(Br)cc1  
6202 C=CP(=O)(OCC)OCC.CCOC(=O)CNc1cccc1Br>>CCOC(=O)CNc1cccc1/C=C/P(=O)(OCC)OCC  
6203 C=CC(C)=O.CC(=O)c1ccc(Br)cc1>>CC(=O)/C=C/c1ccc(C(C)=O)cc1  
6204 C=C[Si](CC)(CC)CC.FC(F)(F)c1cccc(Br)c1>>CC[Si](/C=C/c1cccc(C(F)(F)F)c1)(CC)CC  
6205 C=CC(=O)OC(C)(C)C.Ic1ccc2[nH]ccc2c1>>CC(C)(C)OC(=O)/C=C/c1ccc2[nH]ccc2c1  
6206 C=CC(N)=O.CCN(CC)c1ccc(NC(=O)C2(NC(=O)OCC(C)C)CCc3cc(Br)ccc3C2)cc1>>CCN(CC)c1ccc  
6207 (NC(=O)C2(NC(=O)OCC(C)C)CCc3cc(/C=C/C(N)=O)ccc3C2)cc1  
6208 C=CC(=O)CCCC.Cc1ccc(S(=O)(=O)Nc2ccccc2I)cc1>>CCCCC(=O)/C=C/c1cccc1NS(=O)(=O)c1  
6209 ccc(C)cc1  
6210 C=CCN(C(=O)c1cc(C)nn1C)[C@H](C)c1cc(F)cc(F)c1.O=C1Nc2ncccc2[C@]12Cc1ccc(Br)cc1C2>>C  
6211 c1cc(C(=O)N(C/C=C/c2ccc3c(c2)C[C@@]2(C3)C(=O)Nc3ncccc32)[C@H](C)c2cc(F)cc(F)c2)n(C)n1  
6212 C=CS(=O)(=O)F.Ic1cccc2c1oc1cccc12>>O=S(=O)(F)/C=C/c1cccc2c1oc1cccc12  
6213 C=CC(=O)OCC.CC(C)(C)[Si](C)(C)OCc1cc(=O)c(OS(=O)(=O)C(F)(F)F)co1>>CCOC(=O)/C=C/c1co  
6214 c(CO[Si](C)(C)C(C)C)cc1=O  
6215 C=CCNC(=O)OC(C)(C)C.COC(=O)c1ccc(Br)cc1>>C=C(CNC(=O)OC(C)(C)C)c1ccc(C(=O)OC)cc1  
6216 C=Cc1ccncc1.CC(C)(C)c1ccc(N2Cc3cccc(Br)c3C2=O)cc1>>CC(C)(C)c1ccc(N2Cc3cccc(/C=C/c4ccnc  
6217 c4)c3C2=O)cc1  
6218 Br1cncc2ccccc2c1.C=CCO[C@]1(C)C[C@@H](C)C(=O)[C@H](C)[C@H]2NC(=O)O[C@]2(CC)[C  
6219 @H](CC)OC(=O)[C@H](C)C(=O)[C@H](C)[C@H]1O[C@H]1O[C@H](C)C[C@H](N(C)C)[C  
6220 @H]1OC(=O)c1cccc1>>CC[C@H]1OC(=O)[C@H](C)C(=O)[C@H](C)[C@@H](O[C@@H]2O[C  
6221 @H](C)C[C@H](N(C)C)[C@H]2OC(=O)c2ccccc2)[C@](C)(OC/C=C/c2ncc3ccccc3c2)C[C@@H](C)  
6222 C(=O)I[C@H](C)I[C@H]2NC(=O)O[C@]112CC  
6223 C=Cc1ccc(C(F)(F)F)cc1.COC(=O)[C@H](Cc1ccc(O)c(I)c1)NC(=O)OC(C)(C)C>>COC(=O)[C@H](C  
6224 c1ccc(O)c(/C=C/c2ccc(C(F)(F)F)cc2)c1)NC(=O)OC(C)(C)C  
6225 C=CC(=O)OCC.Cc1cccc(Cn2nc(I)c3ccccc32)c1>>CCOC(=O)/C=C/c1nn(Cc2cccc(C)c2)c2ccccc12  
6226 C=CC(=O)Nc1ccc(C)cc1.COc1ccc2c(=O)c(I)cc2c1>>COc1ccc2c(=O)c(/C=C/C(=O)Nc3ccc(C)cc3)c  
6227 oc2c1  
6228 C=CC(=O)OC.CC(C)(C)OC(=O)N1CCC2(CC1)CC(=O)c1ccc(Br)cc1O2>>COC(=O)/C=C/c1ccc2c(c1  
6229 )OC1(CCN(C(=O)OC(C)(C)C)CC1)CC2=O  
6230 C=CCCC(=O)O.CCOC(=O)Nc1cccc(Br)c1C>>CCOC(=O)Nc1cccc(/C=C/CCC(=O)O)c1C  
6231 C=CC#N.O=Cc1ccc(Cl)cc1>>N#C/C=C/c1ccc(C=O)cc1  
6232 C=CC(=O)c1cccc1.Nc1c(I)ccc2c1C(=O)c1cccc1C2=O>>Nc1c(/C=C/C(=O)c2ccccc2)ccc2c1C(=O)c  
6233 1cccc1C2=O  
6234 C=Cc1cccc2ccccc12.CCOC(=O)C(F)I>>CCOC(=O)C(F)/C=C/c1cccc2ccccc12

C=CC(N)=O.CC(C)(C)OC(=O)NC1(c2ccc(-c3nc4c5cccc(Br)c5nn4cc3-  
 6214 c3cccc3)cc2)CCC1>>CC(C)(C)OC(=O)NC1(c2ccc(-c3nc4c5cccc(/C=C/C(N)=O)c5nn4cc3-  
 c3cccc3)cc2)CCC1  
 6215 C=CC(=O)NCc1cccc1.COc1cc2oc(-c3cccc3)c(I)c(=O)c2cc1OC>>COc1cc2oc(-  
 c3cccc3)c(/C=C/C(=O)NCc3cccc3)c(=O)c2cc1OC  
 6216 C=Cc1cc2c(c(=O)n(C)c(=O)n2C)n1C.CC(=O)c1cccc(Br)c1>>CC(=O)c1cccc(/C=C/c2cc3c(c(=O)n(C)  
 c(=O)n3C)n2C)c1  
 6217 BrC1nc2cccc2c1.C=Cc1ccncc1>>C(=C/c1nc2cccc2c1)\c1ccncc1  
 6218 C=CC(=O)OC(C)(C)C.COC(=O)[C@H]1c2c(Br)ccc(OC)c2O[C@@H]1c1ccc(OC)c(OC)c1>>COC(=O)  
 [C@H]1c2c(/C=C/C(=O)OC(C)(C)C)ccc(OC)c2O[C@@H]1c1ccc(OC)c(OC)c1  
 6219 C=C(C(=O)OC)[C@@H]1CC[C@@H]2(C)CC[C@@H](O)C(=C)[C@@H]2C1.Cc1ccc(I)cc1>>C=C1[  
 C@H](O)CC[C@H]2(C)CC[C@@H](/C=C/c3ccc(C)cc3)C(=O)OC[C@H]2  
 6220 C=CC(=O)OC.COc1ccc(C(=C(I)CC[Se]c2cccc2)c2ccc(OC)cc2)cc1>>COC(=O)/C=C/C(CC[Se]c1ccc  
 cc1)=C(c1ccc(OC)cc1)c1ccc(OC)cc1  
 6221 C=Cc1cccc1.c1ccc([I+](c2cccc2)cc1)>>C(=C/c1cccc1)\c1cccc1  
 6222 C=C(NC(C)=O)C(=O)OC.CCc1cc(Br)ccc1N>>CCc1cc(/C=C(/NC(C)=O)C(=O)OC)ccc1N  
 6223 C=Cc1cccc1.Cc1ncc(I)c(C)n1>>Cc1ncc(/C=C/c2cccc2)c(C)n1  
 6224 C=C[Si](CC)(CC)CC.COc1cccc1Br>>CC[Si](/C=C/c1cccc1OC)(CC)CC  
 6225 C=Cc1cncn1.C[Si](C)(C)CCOCn1nc(I)c2ccc(C=O)cc21>>C[Si](C)(C)CCOCn1nc(/C=C/c2cncn2)c2  
 ccc(C=O)cc21  
 6226 C=CC(=O)OC.CC(C)c1ccc(C(C)C)c(Br)c1>>COC(=O)/C=C/c1cc(C(C)C)ccc1C(C)C  
 6227 C=Cc1cccc1.CC(C)N(C(=O)O)c1ccc(Br)cc1(C)C>>CC(C)N(C(=O)O)c1ccc(/C=C/c2cccc2)cc1(C(  
 6228 C=Cc1cccc1.CCOC(=O)C(F)(F)Br>>CCOC(=O)C(F)(F)/C=C/c1cccc1  
 6229 C=CC(=O)OC.O=C1c2ccc(OS(=O)(=O)C(F)(F)cc2C(=O)N1CC(c1cccc1)c1cccc1>>COC(=O)/C=  
 C/c1ccc2c(c1)C(=O)N(CC(c1cccc1)c1cccc1)C2=O  
 6230 C=CC(=O)OC.O=C1CCc2cc(Br)ccc21>>COC(=O)/C=C/c1ccc2c(c1)CCC2=O  
 6231 C=CC(=O)OC(C)(C)C.CN1CCC2(CC1)CC(=O)c1cc(Br)ccc1O2>>CN1CCC2(CC1)CC(=O)c1cc(/C=C/  
 /C(=O)OC(C)(C)C)ccc1O2  
 6232 C=Cc1cccc1.CCCCCCOc1ccc2cc(Br)ccc2c1>>CCCCCOc1ccc2cc(/C=C/c3cccc3)ccc2c1  
 6233 C=Cc1ccc(S(=O)(=O)c2cccc2F)cn1.Fc1ccc(I)c1>>O=S(=O)(c1ccc(/C=C/c2cccc(F)c2)nc1)c1cccc1  
 6234 C=CC(=O)OCC.Cc1ccc(Br)cc1>>CCOC(=O)/C=C/c1ccc(C)cc1  
 6235 C=Cc1ccc(O)cc1.COc1ccc(OC)c(I)c1>>COc1ccc(OC)c(/C=C/c2ccc(O)cc2)c1  
 6236 C=CC(=O)OC.COc1c(CN(C(=O)c2cccc2)c2ccc(Br)c2)ccc2c1OC(C)(C)[C@H](O)[C@H]2O>>CO  
 C(=O)/C=C/c1cccc(N(Cc2ccc3c(c2OC)OC(C)(C)[C@H](O)[C@H]3O)C(=O)c2cccc2)c1  
 BrC1ccc2c(c1)Cc1cccc1-  
 6237 2.C=Cc1nc2c(=O)[nH]c(N=CN(C)C)nc2n1[C@@H]1C[C@H](O)[C@@H](COC(c2cccc2)(c2ccc(O  
 C)cc2)c2ccc(OC)cc2)O1>>COc1ccc(C(OC[C@H]2O[C@H](n3c(/C=C/c4ccc5c(c4)Cc4cccc4-  
 5)nc4c(=O)[nH]c(N=CN(C)C)nc43)C[C@@H]2O)(c2cccc2)c2ccc(OC)cc2)cc1  
 6238 C=CC(=O)OC(C)(C)C.COc1ccc(CNc2ccc(C)cc2I)cc1>>COc1ccc(CNc2ccc(C)cc2/C=C/C(=O)OC(C)(  
 C)C)cc1  
 6239 C=CC(=O)O.O=[N+](O-)\c1cccc1Cl>>O=C(O)/C=C/c1cccc1[N+](=O)[O-]  
 6240 C=C[C@]1(CCCCC)CCSc2cccc21.Ic1cccc1>>CCCCC[C@]1(/C=C/c2cccc2)CCSc2cccc21  
 6241 C=CC(=O)OCC.NC(=O)c1cc(O)cc(I)c1>>CCOC(=O)/C=C/c1cc(O)cc(C(N)=O)c1  
 6242 C=CC(=O)OC.COC(=O)CCn1c(=O)oc2cc(Br)cnc21>>COC(=O)/C=C/c1nc2c(c1)oc(=O)n2CCC(=O)  
 6243 C=CC(=O)OCC.FC(F)(F)c1cccc(I)c1>>CCOC(=O)/C=C/c1cccc(C(F)(F)F)c1  
 6244 C=Cc1cncn1.Cc1ccc(Nc2c(C#N)cnc3cc(Br)ccc23)c(C)c1>>Cc1ccc(Nc2c(C#N)cnc3cc(/C=C/c4cncnc  
 4)ccc23)c(C)c1  
 6245 BrC1ccc(-c2cccc2)cc1.C=CC(=O)OC>>COC(=O)/C=C/c1ccc(-c2cccc2)cc1  
 6246 C=CCOc1ccc(C)cc1.COc1ccc(I)cc1>>COc1ccc(/C=C/COc2ccc(C)cc2)cc1  
 6247 C=CC(=O)OCCCC.CNC(=O)c1cccc(I)c1>>CCCCOC(=O)/C=C/c1cccc(C(=O)NC)c1  
 6248 C=Cc1cccc1.CC(C)(C)C1CC=C(Cl)CC1>>CC(C)(C)C1CC=C(/C=C/c2cccc2)CC1  
 6249 C=CC(=O)OC(C)(C)C.COc1ccc(Br)c(CC(C)=O)c1>>COc1ccc(/C=C/C(=O)OC(C)(C)C)c(CC(C)=O)c  
 6250 C=Cc1cccc1O.Fc1cc(Br)cc(F)c1F>>Oc1cccc1/C=C/c1cc(F)c(F)c1  
 6251 C=CC(=O)OC.COcn1c(C=O)c(I)c2cccc21>>COcn1c(C=O)c(/C=C/C(=O)OC)c2cccc21  
 6252 C=C(C)C(=O)OC.N#Cc1ccc(Br)cc1>>COC(=O)/C(C)=C/c1ccc(C#N)cc1  
 6253 BrC1CCCCC1.C=Cc1ccc(Cl)cc1>>Clc1ccc(/C=C/C2CCCCC2)cc1  
 6254 C=Cc1cccc([N+](=O)[O-])c1.NC(=O)c1ncc(Br)c1>>NC(=O)c1ncc(/C=C/c2cccc([N+](=O)[O-]  
 6255 C=CC(=O)OC.COc1ccc(CNc2c(C(=O)NCc3ccc(F)cc3F)c(=O)n(OCc3cccc3)c3ncc(Br)cc23)c(OC)c1  
 >>COC(=O)/C=C/c1nc2c(c1)c(NCc1ccc(OC)cc1OC)c(C(=O)NCc1ccc(F)cc1F)c(=O)n2OCc1cccc1  
 6256 C=Cc1ccc(C)cc1.Cc1ccc(OS(=O)(=O)C(F)(F)cc1)>>C=C(c1ccc(C)cc1)c1ccc(C)cc1

6257 C=CCNS(=O)(=O)c1ccccc1.O=S(=O)(Oc1ccccc1Cl)C(F)(F)F>>C=C(CNS(=O)(=O)c1ccccc1)c1ccccc  
6258 C=Cc1ccccc1.O=Cc1ccc2c(I)nn(C3CCCCO3)c2c1>>O=Cc1ccc2c(/C=C/c3ccccc3)nn(C3CCCCO3)c2  
6259 C=CCn1ccnc1.CCOC(=O)c1ccc(I)cc1Cl>>CCOC(=O)c1ccc(/C=C/Cn2ccnc2)cc1Cl  
6260 C=CNC(=O)/C=C/c1ccccc1.O=S(=O)(Oc1ccc2ccccc2c1)C(F)(F)F>>C=C(NC(=O)/C=C/c1ccccc1)c1c  
cc2ccccc2c1  
6261 C=CC(=O)OC.O=c1[nH]c(=O)n([C@@H]2C=CC[C@@H]2CO)cc1I>>COC(=O)/C=C/c1cn([C@@H  
]2C=CC[C@@H]2CO)c(=O)[nH]c1=O  
6262 C=CC(=O)N(C)C.CC(=O)c1ccc(Cl)cc1>>CC(=O)c1ccc(/C=C/C(=O)N(C)C)cc1  
6263 C=Cc1cc(OC)c(O)c(OC)c1.COc1cc(Br)cc(OC)c1F>>COc1cc(/C=C/c2cc(OC)c(F)c(OC)c2)cc(OC)c1O  
6264 C=CCOc1ccccc1.Ic1ccsc1>>C(=C/c1ccsc1)\COc1ccccc1  
6265 C=C[Si](C)(C)C.COc1cccc(I)c1>>COc1cccc(/C=C/[Si](C)(C)C)c1  
6266 C=CC(=O)N(C)Cc1cc2ccccc2n1C.O=c1[nH]c2ncc(Br)cc2n1C1CC1>>CN(Cc1cc2ccccc2n1C)C(=O)/  
C=C/c1cnc2[nH]c(=O)n(C3CC3)c2c1  
6267 C=Cc1cccc2ccccc12.COC(=O)C(Cc1ccccc1I)C(=O)OC>>COC(=O)C(Cc1ccccc1/C=C/c1cccc2ccccc1  
2)C(=O)OC  
C=CC(=O)OC.CC(=O)OC[C@H]1O[C@H](Oc2ccc(I)cc2)[C@H](OC(C)=O)[C@@H](OC(C)=O)[C  
6268 @H]1OC(C)=O>>COC(=O)/C=C/c1ccc(O[C@H]2O[C@H](COC(C)=O)[C@H](OC(C)=O)[C@H](O  
C(C)=O)[C@H]2OC(C)=O)cc1  
6269 C=Cc1cncnc1.CCCCOc1ccc(I)cc1>>CCCCOc1ccc(/C=C/c2ccccc2)cc1  
6270 C=CC(F)(F)C(F)(F)C(F)(F)C(F)(F)C(F)(F)F.O=Cc1ccc(Br)cc1>>O=Cc1ccc(/C=C/C(F)(F)C(F)  
(F)C(F)(F)C(F)(F)C(F)(F)C(F)(F)cc1  
6271 C=Cc1ccc(F)cc1.C[C@H](c1ccc(Br)cn1)[C@@](O)(Cn1cncn1)c1ccc(F)cc1F>>C[C@H](c1ccc(/C=C/  
c2ccc(F)cc2)cn1)[C@@](O)(Cn1cncn1)c1ccc(F)cc1F  
6272 C=CC(=O)O.CC1(C)C=Cc2c(ccc(/C=C/C(=O)O)c2[N+])(=O)[O-  
]O1>>CC1(C)C=Cc2c(ccc(/C=C/C(=O)O)c2[N+])(=O)[O-]O1  
6273 C=CC(=O)O[C@@H]1C[C@@H]2CC[C@@]1(C)C2(C)C.O=Cc1ccccc1Br>>CC1(C)[C@H]2CC[C  
@]1(C)[C@H](OC(=O)/C=C/c1ccccc1C=O)C2  
6274 C=Cn1cnc2c(NC)ncnc21.Cc1ccc(NC(=O)c2ccccc(C(F)(F)F)c2)cc1I>>CNc1cnc2c1cnc2/C=C/c1cc(NC  
(=O)c2ccccc(C(F)(F)F)c2)cc1C  
C=CC[C@H](C[C@H](NC(=O)OC(C)(C)C)C(=O)OC(C)(C)C)C(=O)OC(C)(C)C.CC(C)(C)OC(=O)c1  
6275 ccc(NC(=O)c2ccc3c(c2)/N=N\c2cc(Br)ccc2CC3)cc1>>CC(C)(C)OC(=O)N[C@@H](C[C@@H](C/C=  
C/c1ccc2c(c1)/N=N\c1ccc(C(=O)Nc3ccccc(C(=O)OC(C)(C)C)cc3)ccc1CC2)C(=O)OC(C)(C)C)C(=O)OC  
C=CC(=O)O.CN(c1ccccc(I)c1)S(=O)(=O)c1ccc(-  
6276 c2ccccc2)cc1>>CN(c1ccccc(/C=C/C(=O)O)c1)S(=O)(=O)c1ccc(-c2ccccc2)cc1  
6277 C=Cc1ccccc1C(=O)O.Clc1ccc(I)cc1>>O=C(O)c1ccccc1/C=C/c1ccc(Cl)cc1  
6278 C=CC(=O)OC.Fc1ccc(I)c1>>COC(=O)/C=C/c1ccc(F)c1  
6279 C=CP(=O)(O)O.O=[N+](O-)]c1ccc(Br)cc1>>O=[N+](O-)]c1ccc(/C=C/P(=O)(O)O)cc1  
6280 C=CCN(C(=O)C(C)(C)C)[C@H](C)c1cc(F)cc(F)c1.O=C1Nc2ncccc2[C@@]12Cc1cc(Br)nc1C2>>C[  
C@H](c1cc(F)cc(F)c1)N(C/C=C/c1cnc2c(c1)C[C@@]1(C2)C(=O)Nc2ncccc21)C(=O)C(C)(C)C  
6281 C=CC(=O)OC.O=c1[nH]c(=O)n([C@@H]2C[C@H](CO)[C@H]2O)cc1I>>COC(=O)/C=C/c1cn([C@  
@H]2C[C@H](CO)[C@H]2O)c(=O)[nH]c1=O  
6282 C=CC(=O)N(Cc1ccccc1)Cc1ccccc1.CC(C)(C)OC(=O)c1ccccc1Br>>CC(C)(C)OC(=O)c1ccccc1/C=C/  
C(=O)N(Cc1ccccc1)Cc1ccccc1  
6283 C=CCn1c(=O)c(-c2ccc(OC)cc2)cc2cc(OC)c(OC)cc21.O=C(O)Cc1ccc(Br)cc1>>COc1ccc(-  
c2cc3cc(OC)c(OC)cc3n(C/C=C/c3ccc(CC(=O)O)cc3)c2=O)cc1  
6284 C=CC(=O)OC.COc1cc(Br)c(C=O)cc1OC>>COC(=O)/C=C/c1cc(OC)c(OC)cc1C=O  
6285 Brc1ccc(-c2cnc3ccccc3n2)cc1.C=CCn1c(-c2cc(OC)ccc2OC)nc2ccccc2c1=O>>COc1ccc(OC)c(-  
c2nc3ccccc3c(=O)n2C/C=C/c2ccc(-c3cnc4ccccc4n3)cc2)c1  
6286 C=CC(=O)OC.O=CC1=C(Br)CCCC1>>COC(=O)/C=C/C1=C(C=O)CCCC1  
6287 C=CC(=O)OC.COc1ccc(OC)c(Cc2ccc(I)cc2)c1>>COC(=O)/C=C/c1ccc(Cc2cc(OC)ccc2OC)cc1  
C=Cc1cn(COCC[Si](C)(C)C)nc1-  
6288 c1nc(C(F)(F)F)cn1COCC[Si](C)(C)C.O=Cc1cnc(Br)c1>>C[Si](C)(C)CCOCn1cc(/C=C/c2nccc(C=O)  
c2)c(-c2nc(C(F)(F)F)cn2COCC[Si](C)(C)C)n1  
6289 C=Cc1cncnc1.CC(C)(C)OC(=O)N[C@H](COc1cc(Br)ccn1)Cc1c[nH]c2ccccc12>>CC(C)(C)OC(=O)N  
[C@H](COc1cc(/C=C/c2ccccc2)ccn1)Cc1c[nH]c2ccccc12  
6290 C=C[C@@]1(C)COC(C)(C)O1.CCOCOc1c(C)c(C)c(OCOC)c(I)c1C>>CCOCOc1c(C)c(C)c(OCOC  
C)c(/C=C/[C@@]2(C)COC(C)(C)O2)c1C  
6291 C=CC(=O)OCC.CCn1ccc(Br)cc1=O>>CCOC(=O)/C=C/c1ccn(CC)c(=O)c1  
6292 Brc1ccccc1I.C=Cc1ccccc1>>Brc1ccccc1/C=C/c1ccccc1  
6293 C=CC(=O)OC(C)(C)C.Oc1ccc(C=C2CCCC2)c2ccc(Br)cc2)cc1F>>CC(C)(C)OC(=O)/C=C/c1ccc(C(  
=C2CCCC2)c2ccc(O)c(F)c2)cc1

6294 C=Cc1ccc(N(c2ccccc2)c2ccccc2)cc1.N#CC(=C(c1ccccc1)c1ccccc1)c1ccc(Br)cc1>>N#CC(=C(c1ccccc1)c1ccccc1)c1ccc(/C=C/c2ccc(N(c3ccccc3)c3ccccc3)cc2)cc1

6295 BrC1ccc2ccc3ccc4ccccc4c3c2c1.C=Cc1ccc(COC(C)=O)cc1>>CC(=O)OCc1ccc(/C=C/c2ccc3ccc4ccc5ccccc5c4c3c2)cc1

6296 C=Cc1cccc([N+])(=O)[O-])c1.CN(C(=O)c1ccccc1)c1ccc2c(c1)[nH]c(=NC(=O)c1ccc(Br)s1)n2CCC(N)=O>>CN(C(=O)c1ccccc1)c1ccc2c(c1)[nH]c(=NC(=O)c1ccc(/C=C/c3cccc([N+])(=O)[O-])c3)s1)n2CCC(N)=O

6297 C=Cc1ccc(/C=C/C/c2cccn2C(=O)OC(C)(C)C)cc1.CCOC(=O)c1c(C)c(C)c(I)n1C(=O)OC(C)(C)C>>CCOC(=O)c1c(C)c(C)c(/C=C/C/c2ccc(/C=C/C/c3cccn3C(=O)OC(C)(C)C)cc2)n1C(=O)OC(C)(C)C

6298 BrC1cccc(-c2cccn2)c1.C=CC(=O)OCC>>CCOC(=O)/C=C/c1cccc(-c2cccn2)c1

6299 C=CC(=O)OC(C)(C)C.O=S(=O)(c1cccc(Br)c1)N1CCc2cccn2c1>>CC(C)(C)OC(=O)/C=C/c1cccc(S(=O)(=O)N2CCc3cccn3c2)c1

6300 C=CC(=O)OCC.Cc1cc2cnccc2c(F)c1Br>>CCOC(=O)/C=C/c1c(C)cc2cnccc2c1F

6301 C=CC(=O)OCC.CC(C)(C)[Si](C)(C)n1ccc2c(I)ccnc21>>CCOC(=O)/C=C/c1ccnc2c1ccn2[Si](C)(C)C(C)(C)C

6302 BrC1ccnc2ccccc12.C=CC[C@H]1CCCN(C)C[C@H](OC(C)=O)[C@H](C)C[C@H](CC(OC)OC)[C@H](O[C@@H]2O[C@H](C)[C@@H](O[C@H]3C[C@@](C)(O)[C@@H](OC(=O)CC)[C@H](C)O3)[C@H](N(C)C)[C@H]2OC(C)=O)[C@@H](OC)[C@H](OC(=O)CC)CC(=O)O1>>CCC(=O)O[C@H]1[C@H](C)O[C@@H](O[C@H]2[C@H](N(C)C)[C@@H](OC(C)=O)[C@H](O[C@@H]3[C@@H](OC)[C@H](OC(=O)CC)CC(=O)O[C@@H](C/C=C/c4ccnc5ccccc45)CCCN(C)C[C@H](OC(C)=O)[C@H](C)C[C@@H]13C[C@@H](OC)OC)O[C@@H]2C)[C@@H]1(C)O

6303 C=Cc1ccc(C(C)(C)C)cc1.C[Si](C)(OS(=O)(=O)C(F)(F)F)OS(=O)(=O)C(F)(F)F>>CC(C)(C)c1ccc(/C=C/[Si](C)(C)OS(=O)(=O)C(F)(F)F)cc1

6304 C=COCCCC.COC(=O)c1ccc(Cl)cc1>>C=C(OCCCC)c1ccc(C(=O)OC)cc1

6305 C=CC(=O)OC.COc1cc(Br)c(N)cc1C>>COC(=O)/C=C/c1cc(OC)c(C)cc1N

6306 BrC12CC3CC(CC(C3)C1)C2.C=Cc1ccc(OC)cc1>>COc1ccc(/C=C/C23CC4CC(CC(C4)C2)C3)cc1

6307 C=C[C@H]1O[C@@H]2OC(C)(C)O[C@@H]2[C@H]1O.O=c1cc(-c2ccccc2)oc2cc(Br)c(O)cc12>>CC1(C)O[C@H]2O[C@H](/C=C/c3cc4oc(-c5ccccc5)cc(=O)c4cc3O)[C@H](O)[C@H]2O1

6308 C=CC(=O)OC.Cc1ccc(F)cc1C(=O)c1sc2cc(O)ccc2c1Oc1ccc(Br)cc1>>COC(=O)/C=C/c1ccc(OCc2c(C(=O)c3cc(F)ccc3C)sc3cc(O)ccc23)cc1

6309 BrC1cncc2ccccc12.C=CC(=O)N(C)C>>CN(C)C(=O)/C=C/c1cncc2ccccc12

6310 BrC1ccccc1.C=Cc1ccc(C#N)cc1>>N#Cc1ccc(/C=C/c2ccccc2)cc1

6311 C=CCCc1ccccc1.COC(=O)c1ccc2cc(Br)ccc2c1>>COC(=O)c1ccc2cc(/C=C/CCc3ccccc3)ccc2c1

6312 C=CC(=O)OC(C)(C)C.C=CI>>C=C/C=C/C(=O)OC(C)(C)C

6313 C=CS(=O)(=O)F.Ic1ccsc1>>O=S(=O)(F)/C=C/c1ccsc1

6314 C=Cc1ccccc1.Cc1cccc(C)c1I>>Cc1cccc(C)c1/C=C/c1ccccc1

6315 C=CC(=O)OC.CCOC(=O)C1(/C(C)=C(/I)c2ccccc2)CCCC1=O>>CCOC(=O)C1(/C(C)=C(/C=C/C(=O)OC)c2ccccc2)CCCC1=O

6316 C=CC(=O)N(C)Cc1cccc(C(C)C)c1OCCC.O=C1CNc2cc(Br)cn2N1>>CCCOc1c(CN(C)C(=O)/C=C/c2cn3c(c2)CNCC(=O)N3)cccc1C(C)C

6317 C=COCCCCC.O=Cc1ccc(Br)cc1>>C=C(OCCCCC)c1ccc(C=O)cc1

6318 C=CC(=O)OC(C)(C)C.O=C1Nc2ncc(Br)cc2CN1CCN1CCOCC1>>CC(C)(C)OC(=O)/C=C/c1cncc2c(c1)CN(CCN1CCOCC1)C(=O)N2

6319 C=C(c1ccc(OC)c(Br)c1)c1cc(OC)c(OC)c(OC)c1.C=CC(=O)OC>>C=C(c1ccc(OC)c(/C=C/C(=O)OC)c1)c1cc(OC)c(OC)c(OC)c1

6320 C=CC(=O)OC(C)(C)C.CC(C)(C)OC(=O)CCOCc1cc(OCc2ccccc2)ccc1Br>>CC(C)(C)OC(=O)/C=C/c1ccc(OCc2ccccc2)cc1COCCCC(=O)OC(C)(C)C

6321 BrC1cccn1.C=CC(=O)OC(C)(C)C>>CC(C)(C)OC(=O)/C=C/c1cccn1

6322 C=CCC(=O)O.Cc1cc(OCc2ccccc2)c([C@@H]2S[C@H](COCc3ccccc3)[C@@H](OCc3ccccc3)[C@H](OCc3ccccc3)[C@H]2OCc2ccccc2)cc1Cc1ccc(Br)cc1>>Cc1cc(OCc2ccccc2)c([C@@H]2S[C@H](COCc3ccccc3)[C@@H](OCc3ccccc3)[C@H](OCc3ccccc3)[C@H]2OCc2ccccc2)cc1Cc1ccc(/C=C/CC(C=C[Si](C)(C)c1cccn1.Ic1ccccc1>>C[Si](C)(/C=C/c1ccccc1)c1cccn1

6323 C=CC(=O)OC(C)(C)C.O=[N+][O-])c1ccc(S(=O)(=O)N2CCc3ccc(Br)cn32)cc1>>CC(C)(C)OC(=O)/C=C/c1cncc2c(c1)CCN2S(=O)(=O)c1ccc([N+])(=O)[O-])cc1

6324 BrC1enc2c(c1)COCCN2.C=CC(=O)OC(C)(C)C>>CC(C)(C)OC(=O)/C=C/c1cncc2c(c1)COCCN2

6325 C=CC(=O)OC.CC(C)(C)OC(=O)N1CCCC2(CC1)CC(=O)c1cc(Br)ccc1O2>>COC(=O)/C=C/c1ccc2c(c1)C(=O)CC1(CCCN(C(=O)OC(C)(C)C)CC1)O2

6326 C=CC(O)CCCCC.Clc1ccc(I)cc1>>CCCCC(O)/C=C/c1ccc(Cl)cc1

6327 BrC1cccc(-n2enc3ccccc32)c1.C=Cc1cc(OC)c(OC)c(OC)c1>>COc1cc(/C=C/c2cccc(-n3cn4ccccc43)c2)cc(OC)c1OC

6328

6329 C=CN1CCCCC1=O.O=S(=O)(Oc1ccc2ccccc2c1Br)C(F)(F)F>>C=C(c1ccc2ccccc2c1Br)N1CCCCC  
6330 C=CCCN1C(=O)c2ccccc2C1=O.FC(F)(F)c1ccc(I)cc1>>O=C1c2ccccc2C(=O)N1CC/C=C/c1ccc(C(F)(F)F)cc1  
6331 C=Cc1ccc(OC)cc1.CSc1oc2ccc(Br)cc2c1-c1ccccc1>>COc1ccc(/C=C/c2ccc3oc(SC)c(-  
6332 C=CC(=O)OCC.O=c1c(Br)c(-c2ccc(Cl)cc2)oc2ccccc12>>CCOC(=O)/C=C/c1c(-  
6333 c2ccc(Cl)cc2)oc2ccccc2c1=O  
6333 C=CC(=O)N(C)[C@H](C)c1oc2ccccc2c1C.CC1(C)COc2cc(Br)cnc2NC1=O>>Cc1c([C@@H](C)N(C)C(=O)/C=C/c2cnc3c(c2)OCC(C)(C)C(=O)N3)oc2ccccc12  
6334 C=CCCCCCC.N#Cc1ccc(Br)cc1>>CCCCC/C=C/c1ccc(C#N)cc1  
6335 C=CCOc1ccccc1.COc1ccc(Br)cc1>>COc1ccc(/C=C/COc2ccccc2)cc1  
6336 C=Cc1cncnc1Cl.COC(=O)[C@H](CCSC)NC(=O)c1ccc(I)cc1-  
6337 c1ccccc1C>>COC(=O)[C@H](CCSC)NC(=O)c1ccc(/C=C/c2cncnc2Cl)cc1-c1ccccc1C  
6337 C=Cc1ccc(C(=O)OC)cc1.Cc1ccccc1Br>>COC(=O)c1ccc(/C=C/c2ccccc2C)cc1  
6338 C=CC(=O)OCC.Nc1cc(-n2ccc3cncnc32)ncc1Br>>CCOC(=O)/C=C/c1cnc(-n2ccc3cncnc32)cc1N  
6339 C=CC(=O)N1C(=O)OC[C@H]1c1ccccc1.CC(C)(C)OP(=O)(Cc1ccccc1)Cc1ccc(Br)cc1>>CC(C)(C)OP(=O)(Cc1ccccc1)Cc1ccc(/C=C/C(=O)N2C(=O)OC[C@H]2c2ccccc2)cc1  
6340 C=CC(=O)OC.CC(C)(C)OC(=O)NCCc1ccc(Br)cc1CCNC(=O)OC(C)(C)C>>COC(=O)/C=C/c1ccc(CCNC(=O)OC(C)(C)C)c(CCNC(=O)OC(C)(C)C)c1  
6341 C=Cc1ccc(OC)cc(OC)c1.COc1ccc(I)cc1>>COc1ccc(/C=C/c2cc(OC)cc(OC)c2)cc1  
6342 C=Cc1ccc(CN(C)C)cc1.C[Si](C)(C)CCOCn1nc(I)c2ccc(C=O)cc21>>CN(C)Cc1ccc(/C=C/c2nn(COCC[Si](C)(C)C)c3cc(C=O)ccc23)cc1  
6343 C=COCCCC.COC(=O)c1ccccc1Br>>C=C(OCCCC)c1ccccc1C(=O)OC  
6344 C=CC(=O)OC(C)(C)C.Fc1ccc(Br)c(F)c1>>CC(C)(C)OC(=O)/C=C/c1ccc(F)cc1F  
6345 C=CS(=O)(=O)NCCCCCCCC.CC(C)(C)OC(=O)NCCc1ccccc1Br>>CCCCCCCCNS(=O)(=O)/C=C/c1ccccc1CCNC(=O)OC(C)(C)C  
6346 Br1ccccc1.C=C(C)C(=O)OC(C)(C)C>>C/C(=C)c1ccccc1C(=O)OC(C)(C)C  
6347 C=CCC1CCCCC1.C[C@H](NC(=O)OC(C)(C)C)c1nc2ccccc(Br)c2c(=O)n1-  
6348 c1ccccc1>>C[C@H](NC(=O)OC(C)(C)C)c1nc2ccccc(/C=C/CC3CCCCC3)c2c(=O)n1-c1ccccc1  
6348 C=CC(=O)OC.CC(C)(O)c1[nH]c2ccccc2c1C1CCCN(Cc2ccc(Br)cc2F)C1>>COC(=O)/C=C/c1ccc(CN2CCCC(c3c(C(C)(C)O)[nH]c4ccccc34)C2)c(F)c1  
6349 C=CCn1cc(C(=O)OCC)c(=O)c2ccc(C)nc21.CCn1cc(I)c(=O)c2ccc(C)nc21>>CCOC(=O)c1cn(C/C=C/2cn(CC)c3nc(C)ccc3c2=O)c2nc(C)ccc2c1=O  
6350 C=CC(=O)OC.O=Cc1cc(Cl)ccc1OS(=O)(=O)C(F)(F)F>>COC(=O)/C=C/c1ccc(Cl)cc1C=O  
6351 C=CC[Si](C)(C)C.O=Cc1ccc(Br)cc1>>C=C(C[Si](C)(C)C)c1ccc(C=O)cc1  
6352 C=CC(=O)NCc1ccccc1.O=C1Cc2c([nH]c3ccc(I)cc23)-  
6353 c2ccccc2N1>>O=C(/C=C/c1ccc2[nH]c3c(c2c1)CC(=O)Nc1ccccc1-3)NCc1ccccc1  
6353 C=CC(=O)OC.O=[N+](O-  
6354 )c1cc(OCc2ccccc2)ccc1I>>COC(=O)/C=C/c1ccc(OCc2ccccc2)cc1[N+](=O)[O-]  
6354 C=COCCOC=C.O=Cc1ccc(Br)cc1>>C=COCCOC(=C)c1ccc(C=O)cc1  
6355 C=CC(=O)OCC.O=[N+](O-)c1ccc(-c2ccccc2)c(I)c1>>CCOC(=O)/C=C/c1cc([N+](=O)[O-])ccc1-  
6356 c1ccccc1  
6356 C=CC(=O)OCCCC.CC(C)c1cc(C(C)C)c(Br)c(C(C)C)c1>>CCCCOC(=O)/C=C/c1c(C(C)C)cc(C(C)C)c1C(C)C  
6357 C=CC(=O)NCCc1ccc(O)cc1.COc1ccc(I)cc1Br>>COc1ccc(/C=C/C(=O)NCCc2ccc(O)cc2)cc1Br  
6358 C=Cc1ccccc(O)c1.COc1ccc(I)c(OC)c1>>COc1ccc(/C=C/c2ccccc(O)c2)c(OC)c1  
6359 C=CCNC(=O)OC(C)(C)C.CC(=O)c1ccccc(Cl)c1>>C=C(CNC(=O)OC(C)(C)C)c1ccccc(C(C)=O)c1  
6360 C=CC(C)(C)O.O=[N+](O-  
6361 )CCc1c[nH]c2ccccc(I)c12>>CC(C)(O)/C=C/c1ccccc2[nH]cc(CC[N+](=O)[O-])c12  
6361 C=CC(C)(C)O.CC(=O)c1ccc(Br)cc1>>CC(=O)c1ccc(/C=C/C(C)(C)O)cc1  
6362 C=Cc1ccc(C(C)(C)C)cc1.CCOC(=O)C(F)I>>CCOC(=O)C(F)/C=C/c1ccc(C(C)(C)C)cc1  
6363 C=CC(=O)OC.C[C@H](Nc1nnc2sc(Br)cc12)c1ccccc1>>COC(=O)/C=C/c1cc2c(N[C@H](C)c3ccc  
6364 cc3)nnc2s1  
6364 C=CC(=O)OCCCC.FC(F)(F)c1cc(Br)cc(C(F)(F)F)c1>>CCCCOC(=O)/C=C/c1cc(C(F)(F)F)cc(C(F)(F)C=Cc1nn(C(c2ccccc2)(c2ccccc2)c2ccccc2)OC3CCCCC3)c12.Cn1cc(I)cn1>>Cn1cc(/C=C/c2nn  
6365 (C(c3ccccc3)(c3ccccc3)c3ccccc3)c3cnc(OC4CCCC4)c23)en1  
6366 C=C.CC(=O)CC(=O)c1ccc(Br)cc1>>C=Cc1ccc(C(=O)CC(C)=O)cc1  
6367 C=CC(=O)OCCCC.CCOC(=O)c1ccc(-c2nc(-  
6368 c3cc(OC)cc(OC)c3)sc2Cl)cc1>>CCCCOC(=O)/C=C/c1sc(-c2cc(OC)cc(OC)c2)nc1-  
6368 C=Cc1ccccc(CN2CCN(C)CC2)n1.Cc1c(Nc2c(I)ncnc2C#N)cc(Cl)c2[nH]ccc12>>Cc1c(Nc2c(C#N)cncc  
6369 2/C=C/c2ccccc(CN3CCN(C)CC3)n2)cc(Cl)c2[nH]ccc12  
6369 Br1cncnc1.C=CC(=O)CCCCC>>CCCCC(=O)/C=C/c1cncnc1

6370 C=CB1OC(C)CC(C)(C)O1.COc1ccc(I)cc1>>COc1ccc(/C=C/B2OC(C)CC(C)(C)O2)cc1  
C=CC(=O)OC.CC(=O)c1ccc(-

6371 c2cn(S(=O)(=O)c3ccccc3)c3ncc(Br)cc23)cc1>>COC(=O)/C=C/c1cnc2c(c1)c(-  
c1ccc(C(C)=O)cc1)cn2S(=O)(=O)c1ccccc1

6372 C=CC(=O)OCC.O=C(NCc1ccc(Cl)cc1)c1cnc2c(F)cc(I)cc2c1O>>CCOC(=O)/C=C/c1cc(F)c2ncc(C(=O)  
)NCc3ccc(Cl)cc3)c(O)c2c1

6373 C=CC(=O)OC.COC1(OC)C(Br)=CCON(Cc2ccccc2)[C@@H]1[C@H]1COC(C)(C)O1>>COC(=O)/C  
=C/C1=CCON(Cc2ccccc2)[C@H]([C@H]2COC(C)(C)O2)C1(OC)OC

6374 C=CC(=O)OC.Cc1ccc(-  
c2c(Br)n(CCCO[Si](C)(C)C(C)(C)C)c3ncnc(N)c23)cc1>>COC(=O)/C=C/c1c(-

6375 C=C/C=C/C(=O)N(CCCC)CCCC.CCOC(=O)c1ccc(Br)cc1>>CCCN(CCCC)C(=O)/C=C/C=C/c1ccc(  
C(=O)OCC)cc1

6376 C=CC(C)=O.Cc1ccc(C)c(Br)c1C>>CC(=O)/C=C/c1c(C)ccc(C)c1C

6377 C=CC(=O)N(C)C.C[C@H](Nc1cnc2sc(Br)cc12)c1ccccc1>>C[C@H](Nc1cnc2sc(/C=C/C(=O)N  
(C)C)cc12)c1ccccc1

6378 Br1ccc(C=C2CCCCC2)c2ccccc2)cc1.C=CC(=O)OC(C)(C)C>>CC(C)(C)OC(=O)/C=C/c1ccc(C(=C  
2CCCCC2)c2ccccc2)cc1

6379 C=CN1C(=O)c2ccccc2C1=O.Ic1ccccc1>>O=C1c2ccccc2C(=O)N1/C=C/c1ccccc1

6380 C=CS(=O)(=O)NCCc1ccccc1.CC(C)(C)OC(=O)NCc1ccccc1Br>>CC(C)(C)OC(=O)NCc1ccccc1/C=C/  
S(=O)(=O)NCCc1ccccc1

6381 C=C(NC(C)=O)C(=O)OC.COC(=O)c1ccc(I)c1>>COC(=O)/C(=C/c1ccc(C(=O)OC)c1)NC(C)=O

6382 C=CCN(C(=O)OC(C)(C)C)C(=O)OC(C)(C)C.Cc1ccccc1Cl>>Cc1ccccc1/C=C/CN(C(=O)OC(C)(C)C  
C(=O)OC(C)(C)C

6383 C=CC(C)=O.O=C1Nc2ccc(I)cc2/C1=C/c1ccc[nH]1>>CC(=O)/C=C/c1ccc2c(c1)/C(=C/c1ccc[nH]1)C(  
=O)N2

6384 C=CC(=O)O.Cc1ccc2c([C@@H]3O[C@H](COCc4ccccc4)[C@@H](OCc4ccccc4)[C@H](OCc4ccccc  
c4)[C@H]3OCc3ccccc3)cn(Cc3ccc(I)cc3)c12>>Cc1ccc2c([C@@H]3O[C@H](COCc4ccccc4)[C@@H](OCc4ccccc4)[C@H](OCc4ccccc4)[C@H]3OCc3ccccc3)cn(Cc3ccc(/C=C/C(=O)O)cc3)c12

6385 C=C.O=Cc1cc(Br)ccc1O>>C=Cc1ccc(O)c(C=O)c1

6386 C=CC(=O)CCCCC.COc1ccc(Br)cc1>>CCCCC(=O)/C=C/c1ccc(OC)cc1

6387 C=CN1CCCCC1=O.COc1ccc2c(c1)CCC=C2OS(=O)(=O)C(F)(F)F>>C=C(C1=CCCc2cc(OC)ccc21)  
N1CCCCC1=O

6388 C=C(Br)CCO.C=Cc1ccccc1>>C=C(/C=C/c1ccccc1)CCO

6389 C=Cc1ccccc1O.Nc1ccc(Br)c1>>Nc1ccc(/C=C/c2ccccc2O)c1

6390 Br1ccsc1.C=CC(=O)CCC>>CCCC(=O)/C=C/c1ccsc1

6391 C=CC(C)OC(C)=O.CCCCCCCCCCOc1cnc(-c2ccc(Br)cc2)nc1>>CCCCCCCCCOc1cnc(-  
c2ccc(/C=C/C(C)OC(C)=O)cc2)nc1

6392 C=CC(C)C(C)O.FC(F)(F)c1ccc(Br)cc1>>CC(O)C(C)/C=C/c1ccc(C(F)(F)F)cc1

6393 C=CC(=O)OCC.CSc1nc(C)c(I)c(NC2CCOC2)n1>>CCOC(=O)/C=C/c1c(C)nc(SC)nc1NC1CCOC1  
C=CC(=O)N(C)C.CC(=O)O[C@H]1CC[C@H]2[C@H]3[C@H](CC[C@]12C)c1ccc(O)cc1C[C@H]3

6394 Sc1ccc(Br)cc1>>CC(=O)O[C@H]1CC[C@H]2[C@H]3[C@H](CC[C@]12C)c1ccc(O)cc1C[C@H]3S  
c1ccc(/C=C/C(=O)N(C)C)cc1

6395 C=CCC(C(=O)OC)C(=O)OC.COc1ccccc1Br>>COC(=O)C(C/C=C/c1ccccc1OC)C(=O)OC

6396 CCOC(=O)c1ccccc1)c1.[11CH2]=Cc1ccccc1>>CCOC(=O)c1ccccc1/[11CH]=C/c2ccccc2)c1

6397 C=CC(F)(F)C(F)(F)C(F)(F)C(F)(F)C(F)(F)C(F)(F)C(F)(F)C(F)(F)C(F)(F)C(F)(F)C(F)(F)C(F)(F)C(F)(F)F.CC(=O)c1ccc(Br)cc1>>CC(=O)c1  
ccc(/C=C/C(F)(F)C(F)(F)C(F)(F)C(F)(F)C(F)(F)C(F)(F)C(F)(F)C(F)(F)C(F)(F)C(F)(F)F)cc1

6398 C=CS(=O)(=O)N1CCC2(CC1)N=C(C1CCCC1)NC2=O.CNc1cc(C)c(Br)c(C)c1>>CNc1cc(C)c(/C=C  
/S(=O)(=O)N2CCC3(CC2)N=C(C2CCCC2)NC3=O)c(C)c1

6399 C=Cc1ccccc1.CSc1ccc(Br)cc1>>CSc1ccc(/C=C/c2ccccc2)cc1

6400 C=CC(=O)O.O=[N+][O-]c1ccc(I)cc1>>O=C(O)/C=C/c1ccc([N+](=O)[O-])cc1

6401 C=Cc1ccccc1.Fc1ccc(I)c1>>Fc1ccc(/C=C/c2ccccc2)c1

6402 C=CC(=O)OC.CC(=O)NC1CC2(CCN(Cc3ccccc3)CC2)Oc2ccc(Br)cc21>>COC(=O)/C=C/c1ccc2c(c1)  
C(NC(C)=O)CC1(CCN(Cc3ccccc3)CC1)O2

6403 C=C(NC(C)=O)C(=O)OC.Fc1ccccc1Br>>COC(=O)/C=C/c1ccccc1F)NC(C)=O

6404 C=CCc1ccccc1.Ic1ccccc1>>C(=C/c1ccccc1)Cc1ccccc1

6405 C=CC(=O)OCC.CCn1c(-c2ccc(Br)cc2)nc2ccccc21>>CCOC(=O)/C=C/c1ccc(-c2nc3ccccc3n2CC)cc1

6406 C=C(F)[Si](C)(c1ccccc1)c1ccccc1.O=[N+][O-]c1ccc(I)cc1>>C[Si](/C(F)=C/c1ccc([N+](=O)[O-]  
)cc1)(c1ccccc1)c1ccccc1

6407 C=CC(=O)OC.COC(=O)c1ccc2c1oc1ccc(-c3sc(-c4cccc(I)c4)n3)cc12>>COC(=O)/C=C/c1cccc(-  
c2nc(-c3ccc4oc5c(C(=O)OC)cccc5c4c3)cs2)c1

6408 C=CC(=O)N1N=Cc2ccccc2C1C=C(C)C.COc1cc(C(=O)c2cnc(N)nc2N)cc(I)c1OC>>COc1cc(C(=O)c2  
cnc(N)nc2N)cc(/C=C/C(=O)N2N=Cc3ccccc3C2C=C(C)C)c1OC  
6409 C=Cc1ccccc1.Clc1ccc2c(Br)ccnc2c1>>Clc1ccc2c(/C=C/c3ccccc3)ccnc2c1  
6410 C=CC#N.COC(=O)c1ncccc1Br>>COC(=O)c1ncccc1/C=C/C#N  
6411 C=CC(=O)Nc1ccc(OCC)cc1.COc1ccc2c(=O)c(I)coc2c1>>CCOc1ccc(NC(=O)/C=C/c2coc3cc(OC)ccc  
3c2=O)cc1  
6412 C=Cc1ccccc1.CN(C(=O)c1ncc2c(c1I)c1ccccc1n2S(=O)(=O)N(C)C)c1ccccc1>>CN(C(=O)c1ncc2c(c1/  
C=C/c1ccccc1)c1ccccc1n2S(=O)(=O)N(C)C)c1ccccc1  
6413 C=CC(=O)OC(C)(C)C.O=S(=O)(c1ccccc(Br)c1)c1ccc2cc(Cl)ccc2n1>>CC(C)(C)OC(=O)/C=C/c1cccc(  
S(=O)(=O)c2ccc3cc(Cl)ccc3n2)c1  
6414 Br1ccccc1.C=SCC>>CCS/C=C/c1ccccc1  
6415 C=CC(=O)NCCc1ccc(F)cc1.O=c1c(I)coc2cc(O)ccc12>>O=C(/C=C/c1coc2cc(O)ccc2c1=O)NCCc1ccc  
(F)cc1  
6416 C=CC(OCC)OCC.COc1ccc(C=O)c(Br)c1>>CCOC(/C=C/c1cc(OC)ccc1C=O)OCC  
6417 C=CC(=O)O.O=C(O)c1ccccc(Br)c1>>O=C(O)/C=C/c1ccccc(C(=O)O)c1  
6418 C=CCc1c(OCCCCC2c2ccccc(OCC(=O)OC)c2CCC(=O)OC)ccc2c1CCCC2=O.Ic1ccccc1>>COC(=  
O)CCCOc1cccc(CCCCCCOc2ccc3c(c2C/C=C/c2ccccc2)CCCC3=O)c1CCC(=O)OC  
6419 C=C[Si](C)(C)c1ccccc1.O=C(c1ccccc1)c1ccc(Br)cc1>>C[Si](C)(C)/C=C/c1ccc(C(=O)c2ccccc2)cc1)c1c  
ccccc1  
6420 C=CC(=O)OC(C)(C)C.COC(=O)c1ncccc1Br>>COC(=O)c1ncccc1/C=C/C(=O)OC(C)(C)C  
6421 C=CC(=O)O.Oc1ccc(/C=C/c2ccc(Br)cc2)cc1O>>O=C(O)/C=C/c1ccc(/C=C/c2ccc(O)c(O)c2)cc1  
6422 Br1cccs1.C=Cc1ccc2cc(OC)ccc2c1>>COc1ccc2cc(/C=C/c3cccs3)ccc2c1  
6423 C=CC(=O)OCC.Clc1ccccc1I>>CCOC(=O)/C=C/c1ccccc1Cl  
6424 C=Cc1ccccc1.CC(C)(C)P(=O)(n1ccc2c(Br)ccccc21)C(C)(C)C>>CC(C)(C)P(=O)(n1ccc2c(/C=C/c3ccccc  
c3)ccccc21)C(C)(C)C  
6425 C=Cc1ccc(OC)cc1OC.CCCCCCCC0c1ccc2c(C)c(Br)c(=O)oc2c1>>CCCCCCCC0c1ccc2c(C)c(/C=C/  
c3ccc(OC)cc3OC)c(=O)oc2c1  
6426 C=C[Si](C)(C)c1ccccc1.CC(C)(C)c1ccc(Br)cc1>>CC(C)(C)c1ccc(/C=C/[Si](C)(C)c2ccccc2)cc1  
6427 C=Cc1ccccc1.O=Cc1ccc(F)c1Br>>O=Cc1ccc(F)c1/C=C/c1ccccc1  
6428 C=C(NC(=O)[C@H](Cc1ccccc1)NC(=O)[C@H](Cc1ccccc1)NC(=O)OC(C)(C)C(=O)OC.COC(=O)  
c1ccc(I)cc1>>COC(=O)/C=C/c1ccc(C(=O)OC)cc1)NC(=O)[C@H](Cc1ccccc1)NC(=O)[C@H](Cc1cc  
ccc1)NC(=O)OC(C)(C)C  
6429 C=C(C)C(=O)OC.N#Cc1ccc(Br)c1>>COC(=O)/C(C)=C/c1ccccc(C#N)c1  
6430 C=CCC(=O)OCC(C)C.COc1ccc(OC)c(Br)c1>>COc1ccc(OC)c(/C=C/CC(=O)OCC(C)C)c1  
6431 C=Cc1ccc(C(=O)OC(C)(C)C)cc1.COc1ccc(I)cc1>>COc1ccc(/C=C/c2ccc(C(=O)OC(C)(C)C)cc2)cc1  
6432 C=CCc1cccc([C@H]2O[C@H](COC(C)=O)[C@@H](OC(C)=O)[C@H](OC(C)=O)[C@@H]2OC(C)  
=O)c1.CNC(=O)c1cc(I)cc(C(=O)NC)c1>>CNC(=O)c1cc(/C=C/Cc2cccc([C@H]3O[C@H](COC(C)=O  
)[C@@H](OC(C)=O)[C@H](OC(C)=O)[C@@H]3OC(C)=O)c2)cc(C(=O)NC)c1  
6433 C=CC(=O)N1C(=O)OC[C@@H]1c1ccccc1.Oc1ccc2c(Br)ccccc12>>O=C(/C=C/c1ccccc2c(O)ccccc12)N  
1C(=O)OC[C@@H]1c1ccccc1  
6434 C=CC(=O)OC(C)(C)C.O=C(NCc1ccc(OC(F)(F)F)c1)c1cc(Br)cc(I)c1>>CC(C)(C)OC(=O)/C=C/c1cc(  
Br)cc(C(=O)NCc2cccc(OC(F)(F)F)c2)c1  
6435 C=CS(=O)(=O)F.CCOC(=O)c1ccc(I)cc1>>CCOC(=O)c1ccc(/C=C/S(=O)(=O)F)cc1  
6436 C=Cc1ccccc1.Clc1ncc(I)c(Nc2ccccc2)n1>>Clc1ncc(/C=C/c2ccccc2)c(Nc2ccccc2)n1  
6437 C=CC1(C(=O)O)COCOC1.CC(C)[C@H](O)C(=O)N[C@@H](C)C(=O)N1CCC[C@@H](C(=O)N[C  
@H](C)c2ccc3ccc(Br)cc3n2)N1>>CC(C)[C@H](O)C(=O)N[C@@H](C)C(=O)N1CCC[C@@H](C(=O)  
N[C@H](C)c2ccc3ccc(/C=C/C4(C(=O)O)COCOC4)cc3n2)N1  
6438 C=Cc1ccccc1.N#CCCCCCCCBr>>N#CCCCCCCC/C=C/c1ccccc1  
6439 C=CC(=O)OCc1ccccc1.CCOC(=O)N1c2ccc(OC)nc2C(N(Cc2cc(C(F)(F)F)cc(C(F)(F)F)c2)c2ncc(Br)cn  
2)CC1CC>>CCOC(=O)N1c2ccc(OC)nc2C(N(Cc2cc(C(F)(F)F)cc(C(F)(F)F)c2)c2ncc(/C=C/C(=O)OCc  
3ccccc3)cn2)CC1CC  
6440 Br1cncc2ccccc12.C=CNC(C)=O>>C=C(NC(C)=O)c1cncc2ccccc12  
6441 C=CC(=O)OC.CCOC(=O)C1=CN(c2ccccc2OC)C=C(C(=O)OCC)C1c1ccc(Br)c1>>CCOC(=O)C1=C  
N(c2ccccc2OC)C=C(C(=O)OCC)C1c1ccc(/C=C/C(=O)OC)c1  
6442 C=CCCc1ccccc1.O=C(O)Cc1ccc(Br)cc1>>O=C(O)Cc1ccc(/C=C/CCc2ccccc2)cc1  
6443 Br1cncc1.C=CC(=O)OCCCC>>CCCCOC(=O)/C=C/c1cncc1  
6444 C=C1C(=O)O[C@H]2C3=C(C)CCC[C@]3(C)C(=O)C[C@@H]12.COc1ccc(I)c(OC)c1>>COc1ccc(/C  
=C2/C(=O)O[C@H]3C4=C(C)CCC[C@]4(C)C(=O)C[C@@H]23)c(OC)c1  
6445 C=CCCCCN1C(=O)c2ccccc2C1=O.CC(C)(C)c1ccc(Br)cc1>>C=C(CCCCN1C(=O)c2ccccc2C1=O)c1c  
cc(C(C)(C)C)cc1  
6446 C=CC(OCC)OCC.Cc1ccc(I)cc1>>CCOC(/C=C/c1ccc(C)cc1)OCC



6447 C=C(F)[Si](C)(c1ccccc1)c1ccccc1.CCc1ccccc1I>>CCc1ccccc1/C=C(\F)[Si](C)(c1ccccc1)c1ccccc1  
6448 C=CC(=O)OCC.Cc1[nH]cc2c(=O)n(-c3ccc(Cl)cc3)nc-2c1Br>>CCOC(=O)/C=C/c1c2nn(-  
c3ccc(Cl)cc3)c(=O)c-2c[nH]c1C  
6449 C=Cc1ccccc1.Cn1cc(I)c(=O)c2ccccc21>>Cn1cc(/C=C/c2ccccc2)c(=O)c2ccccc21  
6450 C=CS(=O)(=O)NC1CCCC1.COc1ccc(Br)c(CNC(=O)OC(C)(C)C)c1>>COc1ccc(/C=C/S(=O)(=O)NC2  
CCCC2)c(CNC(=O)OC(C)(C)C)c1  
6451 C=Cc1cn(C(c2ccccc2)(c2ccccc2)c2ccccc2)cn1.CC(=O)Oc1cc(C=O)c2ccc(Cl)ccc1-  
2>>CC(=O)Oc1cc(C=O)c2ccc(/C=C/c3cn(C(c4ccccc4)(c4ccccc4)c4ccccc4)cn3)ccc1-2  
6452 C=C1c2ccccc2C1(C#N)CC.CC(=O)c1ccc(Br)cc1>>CCC1(C#N)/C(=C/c2ccc(C(C)=O)cc2)c2ccccc21  
6453 C=CNC(C)=O.COc1cc(Br)cc(OC)c1OC>>C=C(NC(C)=O)c1cc(OC)c(OC)c(OC)c1  
6454 C=C(F)C(=O)OC.Fc1ccc(I)cc1>>COC(=O)/C(F)=C/c1ccc(F)cc1  
6455 C=CC(OC)OC.CC(C)(C)c1ccc(I)cc1>>COC(/C=C/c1ccc(C(C)(C)C)cc1)OC  
6456 C=Cc1cncnc1.COc1cc(Br)cc(OC)c1>>COc1cc(/C=C/c2cncnc2)cc(OC)c1  
6457 C=CC(=O)OCCCC.Cc1ccc2ccccc2c1Br>>CCCCOC(=O)/C=C/c1c(C)ccc2ccccc12  
6458 C=Cc1ccc(C#N)cc1.OCCCC(Br)C(F)(F)F>>N#Cc1ccc(/C=C/C(CCCO)C(F)(F)F)cc1  
C=CCCCC(=O)N(C)CC(O)C(O)C(O)C(O)CO.CC(C)(C)[Si](C)(C)OC(CCC1C(=O)N(c2ccc(F)cc2)C1  
6459 c1ccc(Br)cc1)c1ccc(F)cc1>>CN(CC(O)C(O)C(O)C(O)CO)C(=O)CCC/C=C/c1ccc(C2C(CCC(O[Si](C)  
(C)C(C)(C)C)c3ccc(F)cc3)C(=O)N2c2ccc(F)cc2)cc1  
C=C[C@H](C)N1C(=O)c2ccccc2C1=O.COC(=O)c1c(Br)ccn1C>>COC(=O)c1c(/C=C/[C@H](C)N2C  
6460 (=O)c3ccccc3C2=O)ccn1C  
6461 C=CP(=O)(OCC)OCC.O=[N+](O-)c1ccc(I)cc1>>CCOP(=O)(/C=C/c1ccc([N+](=O)[O-])cc1)OCC  
6462 C=Cc1ccc(OC(C)=O)cc1.COc1cc(I)cc(OC)c1>>COc1cc(/C=C/c2ccc(OC(C)=O)cc2)cc(OC)c1  
6463 Brc1ccc2[nH]ccc2c1.C=CC(=O)N(C)OC>>CON(C)C(=O)/C=C/c1ccc2[nH]ccc2c1  
6464 C=CC(C)=O.Ic1ccccc1N(Cc1ccccc1)Cc1ccccc1>>CC(=O)/C=C/c1ccccc1N(Cc1ccccc1)Cc1ccccc1  
6465 C=Cc1ccc(C)cc1.Cc1ccc(Cl)cc1>>Cc1ccc(/C=C/c2ccc(C)cc2)cc1  
C=CC(=O)OCc1cn(S(=O)(=O)c2ccccc2[N+](=O)[O-])c2ccc([N+](=O)[O-]  
6466 )cc12.Ic1ccc(CCCOC2CCCCO2)cc1>>O=C(/C=C/c1ccc(CCCOC2CCCCO2)cc1)OCc1cn(S(=O)(=O)  
c2ccccc2[N+](=O)[O-])c2ccc([N+](=O)[O-])cc12  
6467 C=CC(=O)OCC.Clc1ccc(I)cn1>>CCOC(=O)/C=C/c1ccc(Cl)nc1  
6468 C=CC(=O)OC(C)(C)C.Nc1ccc(I)cn1>>CC(C)(C)OC(=O)/C=C/c1cnc(N)nc1  
6469 C=CCN(C(=O)C(C)(C)C)[C@H](C)c1cc(F)cc(F)c1.O=C1Nc2ncccc2[C@]12Cc1ccc(Br)cc1C2>>C[C  
@H](c1cc(F)cc(F)c1)N(C/C=C/c1ccc2c(c1)C[C@]1(C2)C(=O)Nc2ncccc21)C(=O)C(C)(C)C  
6470 C=C1C(=O)O[C@]2/C=C(\C)CC/C=C(\C)CC[C@]2H]12.Clc1ccc(I)cc1>>C/C1=C/[C@H]2OC(=O)  
C(=O)/C=C/c3ccc(Cl)cc3)[C@]2CC/C(C)=C/CC1  
6471 BrC1CCCCC1.C=Cc1ccccc1>>C(=C/C1CCCCC1)\c1ccccc1  
6472 C=CC(=O)OCC.CC(C)(C)OC(=O)c1ccccc1Br>>CCOC(=O)/C=C/c1ccccc1C(=O)OC(C)(C)C  
6473 C=Cc1ccc(C)cc1.O=Cc1ccc(Cl)cc1>>Cc1ccc(/C=C/c2ccc(C=O)cc2)cc1  
6474 C=CC(=O)OCC.COc1cc(Br)cc2cc(-c3ccc4c(c3)OCO4)oc12>>CCOC(=O)/C=C/c1cc(OC)c2oc(-  
c3ccc4c(c3)OCO4)cc2c1  
6475 C=Cc1ccccc1.Clc1cncnc1>>C(=C/c1cncnc1)\c1ccccc1  
6476 C=Cc1ccccc1.Cn1c2ccccc2c2cc(I)ccc21>>Cn1c2ccccc2c2cc(/C=C/c3ccccc3)ccc21  
C=C[C@]@H](O[Si](C)(C)C(C)(C)C)[C@H](CCCC(=O)OC)O[Si](C)(C)C(C)(C)C.CCCCCC(=O)c1n  
6477 c(Br)cc2ccccc12>>CCCCC(=O)c1nc(/C=C/[C@]@H](O[Si](C)(C)C(C)(C)C)[C@H](CCCC(=O)OC)  
O[Si](C)(C)C(C)(C)C)cc2ccccc12  
C=CC(=O)OC(C)(C)C.CN(C)CCN1Cc2cc(Br)enc2NC1=O>>CN(C)CCN1Cc2cc(/C=C/C(=O)OC(C)(  
6478 C)C)enc2NC1=O  
6479 C=CC(=O)O.Nc1ccc(C(F)(F)F)cc1>>Nc1ccc(C(F)(F)F)cc1/C=C/C(=O)O  
6480 C=COCCCC.CC(=O)Nc1ccc(Br)cn1>>C=C(OCCCC)c1ccc(NC(C)=O)nc1  
6481 C=CC(=O)OCC.CNc1nc(-n2c(C)ccc2C)nc(C)c1Br>>CCOC(=O)/C=C/c1c(C)nc(-n2c(C)ccc2C)nc1NC  
6482 C=CC(=O)OC.Cc1ccc(S(=O)(=O)Nc2ccccc2Sc2ccc(I)s2)cc1>>COC(=O)/C=C/c1ccc(Sc2ccccc2NS(=O)  
(=O)c2ccc(C)cc2)s1  
6483 C=C(CC(=O)O)C(=O)O.COc1ccc(Br)c(CN(CC(F)(F)F)C(=O)OC(C)(C)C)c1>>COc1ccc(/C=C(\CC(=O)  
O)O)C(=O)O)c(CN(CC(F)(F)F)C(=O)OC(C)(C)C)c1  
6484 C=Cc1cncnc1.CC(C)(C)OC(=O)N[C@H](COc1cnc(Cl)c(Br)c1)Cc1c[nH]c2ccccc12>>CC(C)(C)OC(=O)  
N[C@H](COc1cnc(Cl)c(/C=C/c2cncnc2)c1)Cc1c[nH]c2ccccc12  
6485 Brc1ccccc1.C=CCS(N)(=O)=O>>NS(=O)(=O)C/C=C/c1ccccc1  
6486 C=CC(N)=O.O=C(O)c1ccc(I)c1>>NC(=O)/C=C/c1ccc(C(=O)O)c1  
6487 C=C/C=C/C(=O)N(CCCC)CCCC.FC(F)(F)c1ccc(Br)cc1>>CCCN(CCCC)C(=O)/C=C/C=C/c1ccc(C(  
F)(F)F)cc1  
6488 Brc1ccccc1.C=Cc1ccc(OC)cc1>>COc1ccc(/C=C/c2ccccc2)cc1  
6489 C=CC(=O)OCC.Nc1ccc(F)nc1Br>>CCOC(=O)/C=C/c1nc(F)ccc1N

6490 C=C/C=C/c1cccc1.CCOC(=O)C(F)(F)I>>CCOC(=O)C(F)(F)/C=C/C=C/c1cccc1  
6491 C=CC(=O)OCC(CC)CCCC.O=[N+](O-  
6492 ]c1ccc(Cl)cc1>>CCCC(CC)COC(=O)/C=C/c1ccc([N+](=O)[O-])cc1  
6493 C=CC(=O)OC(C)(C)C.N#CCc1cccc(Br)c1>>CC(C)(C)OC(=O)/C=C/c1cccc(CC#N)c1  
6494 C=CC(=O)O.CN(c1ccc(I)cc1)S(=O)(=O)c1ccc(Cl)cc1>>CN(c1ccc(/C=C/C(=O)O)cc1)S(=O)(=O)c1cc  
6495 c(Cl)cc1  
6496 C=C.COC(=O)c1ccc(Br)c(NC(C)=O)c1>>C=Cc1ccc(C(=O)OC)cc1NC(C)=O  
6497 C=CCC1CCCC1.COC(=O)c1ccc2cc(Br)ccc2c1>>COC(=O)c1ccc2cc(/C=C/CC3CCCC3)ccc2c1  
6498 C=Cc1ccc(/C=C/c2ccc(/C=C/c3cc(OCCCCCCCCCCCC)cc(OCCCCCCCCCCCC)c3)cc2)cc1.O=Cc1cc  
6499 c(Br)cc1>>CCCCCCCCCCCCOe1cc(/C=C/c2ccc(/C=C/c3ccc(/C=C/c4ccc(C=O)cc4)cc3)cc2)cc(OCC  
6500 CCCCCCCCCC)c1  
6501 C=C1C(=O)O[C@@H]2CC(C)=C([C@@H](C)CCOC(C)=O)[C@@H](OC(C)=O)[C@H]12.Fc1ccc(  
6502 I)cc1>>CC(=O)OCCC[C@H](C)C1=C(C)C[C@H]2OC(=O)/C(=C/c3ccc(F)cc3)[C@H]2[C@@H]1O  
6503 C=Cc1ccc(N(c2cccc2)c2cccc2)cc1.O=Cc1ccc(Br)c2nc(-c3cccc3)c(-  
6504 c3cccc3)nc12>>O=Cc1ccc(/C=C/c2ccc(N(c3cccc3)c3cccc3)cc2)c2nc(-c3cccc3)c(-c3cccc3)nc12  
6505 C=CS(=O)(=O)F.Ic1cc2cccc12>>O=S(=O)(F)/C=C/c1cc2cccc12  
6506 C=Cc1ccc2cccc2c1.CCOC(=O)C(F)I>>CCOC(=O)C(F)/C=C/c1ccc2cccc2c1  
6507 C=Cc1ccc(CC(NC(=O)c2cccc2)C(=O)OCC)cc1.CCOC(=O)C(F)Br>>CCOC(=O)C(F)/C=C/c1ccc(CC  
6508 (NC(=O)c2cccc2)C(=O)OCC)cc1  
6509 Br1ccnc1.C=C1C[C@H]2[C@@H]3CCc4cc(OC)ccc4[C@H]3CC[C@]2(C)C1=O>>COc1ccc2c(c1)  
6510 CC[C@]2[H]1[C@]2CC[C@]2(C)C(=O)/C(=C/c3ccnc3)C[C@]2[H]12  
6511 C=CC(=O)OC.CC(=O)OC[C@H]1O[C@@H](Oc2ccc(I)cc2)[C@H](OC(C)=O)[C@@H](OC(C)=O)[  
6512 C@H]1OC(C)=O>>COC(=O)/C=C/c1ccc(O[C@@H]2O[C@H](COC(C)=O)[C@H](OC(C)=O)[C@H  
6513 ](OC(C)=O)[C@H]2OC(C)=O)cc1  
6514 Br1cccc1.C=CS(=O)(=O)CC>>CCS(=O)(=O)/C=C/c1cccc1  
6515 C=COC[C@]1H1CCCN1C.COc1ccc2c(c1)CCC=C2OS(=O)(=O)C(F)(F)F>>COc1ccc2c(c1)CCC=C2  
6516 /C=C/OC[C@]1H1CCCN1C  
6517 C=CC(C)=O.COc1cccc(Cn2nc(I)c3cccc32)c1>>COc1cccc(Cn2nc(/C=C/C(C)=O)c3cccc32)c1  
6518 C=C/C=C(\CCCC)OCC.Ic1cccc2cccc12>>CCCC/C(=C\C=C\C1cccc2cccc12)OCC  
6519 C=C(F)C(=O)OC.Cc1cc(C)c(I)c(C)c1>>COC(=O)/C(F)=C/c1c(C)cc(C)cc1C  
6520 C=CC(=O)OC(C)(C)C.COc1ccc(S(=O)(=O)N2CCc3cc(Br)ccc32)cc1OC>>COc1ccc(S(=O)(=O)N2CC  
6521 c3cc(/C=C/C(=O)OC(C)(C)C)ccc32)cc1OC  
6522 C=C[C@H]1O[C@@H]2OC(C)(C)O[C@@H]2[C@H]1OC.Cc1ccc(I)cc1>>CO[C@H]1[C@@H](/C=  
6523 C/c2ccc(C)cc2)O[C@@H]2OC(C)(C)O[C@H]12  
6524 C=CC(=O)OC(C)(C)C.O=C1Nc2cccc2O/C1=C\c1cc(Br)cc1>>CC(C)(C)OC(=O)/C=C/c1cc(/C=C2\  
6525 Oc3cccc3NC2=O)c1  
6526 C=CC#N.CN1c2cccc2C(C)(C)C12C=Cc1cc(I)ccc1O2>>CN1c2cccc2C(C)(C)C12C=Cc1cc(/C=C/C#  
6527 N)ccc1O2  
6528 C=CC(=O)OC.Nc1ccnc1Br>>COC(=O)/C=C/c1cccc1N  
6529 C=CC(C)=O.COc1ccc(Br)cc1>>COc1ccc(/C=C/C(C)=O)cc1  
6530 C=CC(=O)OC.CCOC(=O)c1cn(CC)c2nc(C)c(Br)cc2c1=O>>CCOC(=O)c1cn(CC)c2nc(C)c(/C=C/C(=O)  
6531 OC)cc2c1=O  
6532 Br1ccc2cccc2c1.C=CC(=O)OCC>>CCOC(=O)/C=C/c1ccc2cccc2c1  
6533 C=Cc1cccc1C.Cc1ccc(N)c1Br>>Cc1cccc1/C=C/c1c(C)ccc1N  
6534 C=CC(=O)OC.CCCN1c(C(=O)NC(C)(C)C)nc(Br)c1C(=O)NC(C)(C)C>>CCCN1c(C(=O)NC(C)(C)  
6535 C)nc(/C=C/C(=O)OC)c1C(=O)NC(C)(C)C  
6536 C=Cc1cccc1.O=C(Nc1cc(C(F)(F)F)cc(C(F)(F)F)c1)c1cc(I)ccc1O>>O=C(Nc1cc(C(F)(F)F)cc(C(F)(F)  
6537 F)c1)c1cc(/C=C/c2cccc2)ccc1O  
6538 C=Cc1cccc1.COc1cc(OC)c(OC)cc1/C=C/C(=O)c1ccc(I)cc1>>COc1cc(OC)c(OC)cc1/C=C/C(=O)c1c  
6539 cc(/C=C/c2cccc2)cc1  
6540 C=Cc1ccc(OC(=O)OC(C)(C)C)cc1.O=S(=O)(c1ccc(Br)cc1)N(CCO)CCO>>CC(C)(C)OC(=O)Oc1ccc(  
6541 /C=C/c2ccc(S(=O)(=O)N(CCO)CCO)cc2)cc1  
6542 C=CC(N)=O.CC1(C)Cc2c(CN3CCCC4(CC3)CCN(C(=O)c3ccnc3Br)CC4)cccc2O1>>CC1(C)Cc2c(CN  
6543 3CCCC4(CC3)CCN(C(=O)c3ccnc3/C=C/C(N)=O)CC4)cccc2O1  
6544 C=Cc1ccc([Si](OCC)(OCC)OCC)cc1.CCOP(=O)(Cc1ccc(/C=C/c2ccc(Br)c3cccc23)cc1)OCC>>CCO  
6545 [Si](OCC)(OCC)c1ccc(/C=C/c2ccc(/C=C/c3ccc(CP(=O)(OCC)OCC)cc3)c3cccc23)cc1  
6546 C=CC(=O)OCCCCCCCCCCCCC.O=c1[nH]c(=O)n([C@H]2C[C@H](O)[C@@H](CO)O2)cc1I>>CCC  
6547 CCCCCCCCCCOC(=O)/C=C/c1cn([C@H]2C[C@H](O)[C@@H](CO)O2)c(=O)[nH]c1=O  
6548 C=CC(=O)OC.Cc1nc(Br)c(-  
6549 c2cccc2)n(Cc2cccc2)c1=O>>COC(=O)/C=C/c1nc(C)c(=O)n(Cc2cccc2)c1-c1cccc1  
6550 C=C(C(=O)OCC)c1cccc1Br.CC(C)(C)OC(=O)Nc1cccc1I>>CCOC(=O)/C(=C/c1cccc1NC(=O)OC(  
6551 C)(C)C)c1cccc1Br

6527 C=CC(=O)OC.NCCc1cccc(Br)c1>>COC(=O)/C=C/c1cccc(CCN)c1  
6528 C=CC(=O)OCC.CC(C)(C)OC(=O)N1CCC(=O)C(I)=C1c1cccc1>>CCOC(=O)/C=C/C1=C(c2cccc2)  
N(C(=O)OC(C)(C)C)CCC1=O  
6529 C=CC(=O)OC.COc1ccc2c(c1)CCN(c1ccc(CCC(C)C)cc1)C2(C)c1ccc(Br)cc1>>COC(=O)/C=C/c1ccc(  
C2(C)c3ccc(OC)cc3CCN2c2ccc(CCC(C)C)cc2)cc1  
6530 C=CC(=O)OC(C)(C)C.COc1ccc(Br)c(C(C)OCCC(=O)OC(C)(C)C)c1>>COc1ccc(/C=C/C(=O)OC(C)(  
C)C)c(C(C)OCCC(=O)OC(C)(C)C)c1  
6531 C=CC(=O)OC(C)(C)C.COc1ccc(Br)c(COCCC(=O)OC(C)(C)C)c1>>COc1ccc(/C=C/C(=O)OC(C)(C)C  
)c(COCCC(=O)OC(C)(C)C)c1  
6532 C=Cc1cccc1.CC(=O)Nc1cccc1I>>CC(=O)Nc1cccc1/C=C/c1cccc1  
6533 C=CC(=O)O.c1ccc([I+])c2cccs2)cc1>>O=C(O)/C=C/c1cccs1  
6534 C=C.O=C1Nc2ccc(I)cc2C1=O>>C=Cc1ccc2c(c1)C(=O)C(=O)N2  
6535 C=Cc1cccc1.COC(=O)[C@@]1(NC(=O)OC(C)(C)C)CCc2cc(Br)ccc2C1>>COC(=O)[C@@]1(NC(=  
O)OC(C)(C)C)CCc2cc(/C=C/c3cccc3)ccc2C1  
6536 C=CC(=O)OC.COc1ccc2c(c1)CCN(c1ccc(C3CCC3)cc1)C2(C)c1ccc(Br)cc1>>COC(=O)/C=C/c1ccc(C  
2(C)c3ccc(OC)cc3CCN2c2ccc(C3CCC3)cc2)cc1  
6537 C=CC(=O)OC(C)(C)C.CN(C(=O)CSCc1cccc1)c1cccc1Br>>CN(C(=O)CSCc1cccc1)c1cccc1/C=C  
/C(=O)OC(C)(C)C  
6538 C=CC(=O)N1C(=O)CC[C@H]1COC(c1cccc1)(c1cccc1)c1cccc1.CCc1ccc(Br)c2[nH]ccc12>>CCc1  
ccc(/C=C/C(=O)N2C(=O)CC[C@H]2COC(c2cccc2)(c2cccc2)c2cccc2)c2[nH]ccc12  
6539 C=CC(=O)OCc1cccc1.O=[N+](=[O-])c1ccc(I)cc1>>O=C(/C=C/c1ccc([N+](=O)[O-])cc1)OCc1cccc1  
6540 C=CC(C)=O.Fc1ccc(Br)cc1>>CC(=O)/C=C/c1ccc(F)cc1  
6541 C=Cc1cc(OCCCCCCCCCCCC)cc(OCCCCCCCCCCCC)c1.Oc1ccc(I)cc1>>CCCCCCCCCCCCCOc1cc(  
/C=C/c2ccc(O)cc2)cc(OCCCCCCCCCCCC)c1  
6542 C=CCCC(=O)OCC.COc1cccc1I>>CCOC(=O)CC/C=C/c1cccc1OC  
6543 C=C[C@H]1COC(C)(C)N1C(=O)OCc1cccc1.CCCCCN1cc(Br)c2c([N+](=O)[O-]  
)cccc21>>CCCCCN1cc(/C=C/[C@H]2COC(C)(C)N2C(=O)OCc2cccc2)c2c([N+](=O)[O-])cccc21  
C=CC(=O)OC.NS(=O)(=O)c1ccc(-  
6544 c2cn(S(=O)(=O)c3cccc3)c3ncc(Br)cc23)cc1>>COC(=O)/C=C/c1cnc2c(c1)c(-  
c1ccc(S(N)(=O)=O)cc1)cn2S(=O)(=O)c1cccc1  
6545 Brc1ccsc1.COC(=O)/C=C/c1cccc1>>COC(=O)/C=C(/c1cccc1)c1ccsc1  
6546 C=CC(=O)OCC.Cn1nnc2c(C(F)(F)F)c(Br)ccc21>>CCOC(=O)/C=C/c1ccc2c(nnn2C)c1C(F)(F)F  
6547 C=C(F)C(C)=O.Clc1ccc(I)cc1>>CC(=O)/C(F)=C/c1ccc(Cl)cc1  
6548 C=COCCCC.CN(C)c1ccc(Br)cn1>>C=C(OCCCC)c1ccc(N(C)C)nc1  
Br1ccc(-  
6549 c2cccc2)cc1.C=CC[C@H](CC(=O)OC(C)(C)C)C(=O)N[C@H](C(=O)NC(c1cccc1)c1cccc1)C(C)(C  
)C>>CC(C)(C)OC(=O)C[C@@H](C/C=C/c1ccc(-  
c2cccc2)cc1)C(=O)N[C@H](C(=O)NC(c1cccc1)c1cccc1)C(C)(C)C  
6550 C=Cc1ccc(CO)cn1.Cc1ncc(C#N)c(Nc2ccc3[nH]ccc3c2C)c1I>>Cc1ncc(C#N)c(Nc2ccc3[nH]ccc3c2C)c  
1/C=C/c1ccc(CO)cn1  
6551 C=Cc1ccc(C(C)=O)cc1.IC1CCCCC1>>CC(=O)c1ccc(/C=C/C2CCCCC2)cc1  
C=Cc1ccc2c(c1)Sc1cccc1N2CCCCCCCCCCCCCCCCC.CCCCCCCCCCCCCCN1c2ccc(I)cc2c2cc(  
6552 C=O)ccc21>>CCCCCCCCCCCCCCCCN1c2cccc2Sc2cc(/C=C/c3ccc4c(c3)c3cc(C=O)ccc3n4CCCC  
CCCCCCCCCCCC)ccc21  
6553 C=COCCCC.Ic1cccc1>>C=C(OCCCC)c1cccc1  
6554 C=Cc1ccc([N+](=O)[O-])cc1.COc1ccc2c(=O)c(I)coc2c1>>COc1ccc2c(=O)c(/C=C/c3ccc([N+](=O)[O-]  
)cc3)coc2c1  
6555 C=CCNC(=O)OCc1cccc1.N#Cc1ccc(Cl)cc1>>C=C(CNC(=O)OCc1cccc1)c1ccc(C#N)cc1  
6556 C=CC=O.CC(C)(C)c1cc(/C=C/c2cc(I)cc(/C=C/c3cc(C(C)(C)C)cc(C(C)(C)C)c3)c2)cc(C(C)(C)C)c1>>  
CC(C)(C)c1cc(/C=C/c2cc(/C=C/C=O)cc(/C=C/c3cc(C(C)(C)C)cc(C(C)(C)C)c3)c2)cc(C(C)(C)C)c1  
6557 Br1ccc2cccc2c1.C=COCCO>>C=C(OCCO)c1ccc2cccc2c1  
C=CC(=O)OCC.COc1cc(I)c2c3c1O[C@@H]1[C@]34CCN(C)[C@H](C2)[C@]42C=C[C@@]1(OC)[  
6558 C@H]1C(=O)N(c3cccc3)C(=O)[C@H]12>>CCOC(=O)/C=C/c1cc(OC)c2c3c1C[C@H]1N(C)CC[C@  
@]34[C@@H](O2)[C@@]2(OC)C=C[C@@]14[C@@H]1C(=O)N(c3cccc3)C(=O)[C@H]12  
6559 C=Cc1cccc1.O=c1oc2c(ccc3cccc32)c(-c2cccc2)c1Br>>O=c1oc2c(ccc3cccc32)c(-  
c2cccc2)c1/C=C/c1cccc1  
6560 C=CS(C)(=O)=O.C[C@H]1COCc2nc3cnc4cc(Br)ccc4c3n21>>C[C@H]1COCc2nc3cnc4cc(/C=C/S(C)  
(=O)=O)ccc4c3n21  
6561 C=Cc1ccc(OC)c(O)c1.Oc1cc(O)cc(I)c1>>COc1ccc(/C=C/c2cc(O)cc(O)c2)cc1O  
6562 C=C(F)C(=O)OC.N#Cc1ccc(I)cc1>>COC(=O)/C(F)=C/c1ccc(C#N)cc1  
6563 C=CC(=O)OCC.Clc1ccc(I)cc1>>CCOC(=O)/C=C/c1ccc(Cl)cc1

6564 C=Cc1cccc(C)n1.CC(C)C(C#N)(CCCN1CCN(CCOc2ccccc2Br)CC1)c1cccc1>>Cc1cccc(/C=C/c2cccc2OCCN2CCN(CCCC(C#N)(c3ccccc3)C(C)C)CC2)n1  
 6565 C=CCOCc1cccc1.Cc1cccc1OS(=O)(=O)C(F)(F)F>>C=C(CCOc1cccc1)c1cccc1C  
 6566 C=CC(=O)OCCCC.CCN(CC)c1cccc(Br)c1>>CCCCOC(=O)/C=C/c1cccc(N(CC)CC)c1  
 6567 Br1cccc1.C=Cc1cccc1>>C(=C/c1cccc1)/c1cccc1  
 6568 C=CC(=O)OC.O=Cc1cc(-c2ccc(Br)cc2)cc(C23CC4CC(CC(C4)C2)C3)c1O>>COC(=O)/C=C/c1ccc(-c2cc(C=O)c(O)c(C34CC5CC(CC(C5)C3)C4)c2)cc1  
 6569 Br1cnc2ccccc2c1.C=CCON=C1C(C)CNC(C)C(CC)OC(=O)[C@H](C)[C@H](O[C@H]2C[C@@](C)(OC)[C@H](O)[C@H](C)O2)[C@H](C)[C@H](O[C@H]2O[C@H](C)C[C@H](N(C)C)[C@H]2O)[C@@](C)(O)C[C@H]1C>>CCC1OC(=O)[C@H](C)[C@H](O[C@H]2C[C@@](C)(OC)[C@H](O)[C@H](C)O2)[C@H](C)[C@H](O[C@H]2O[C@H](C)C[C@H](N(C)C)[C@H]2O)[C@@](C)(O)C[C@H](C)C(=NOC/C=C/c2cnc3ccccc3c2)C(C)CNC1C  
 6570 Br1ccc2oc(-c3cc[nH]n3)cc2c1.C=CC(=O)OCCCC>>CCCCOC(=O)/C=C/c1ccc2oc(-c3cc[nH]n3)cc2c1  
 6571 C=Cc1cccc1.Nc1cccc2c(C3CCC3)nc(I)c12>>Nc1cccc2c(C3CCC3)nc(/C=C/c3ccccc3)c12  
 6572 C=Cc1ccc(C)cc1.Cl1cccc(Br)c1>>Cc1ccc(/C=C/c2cccc(Cl)c2)cc1  
 6573 C=CC(=O)OC(C)(C)C.FC(F)(F)c1ccc(I)c(Cl)c1>>CC(C)(C)OC(=O)/C=C/c1ccc(C(F)(F)F)cc1Cl  
 6574 C=Cc1ccc(OC)cc1.O=Cc1cccc1Br>>COc1ccc(/C=C/c2ccccc2C=O)cc1  
 6575 C=C/C=C/c1cccc1.Cc1cc(-c2ccccc2I)cc(C)c1O>>Cc1cc(-c2ccccc2/C=C/C=C/c2ccccc2)cc(C)c1O  
 6576 C=Cc1ccc(C)cc1.CCOC(=O)C(C)(C)Br>>CCOC(=O)C(C)(C)/C=C/c1ccc(C)cc1  
 6577 C=CC(=O)OCCCC.CCc1ccc(I)cc1>>CCCCOC(=O)/C=C/c1ccc(CC)cc1  
 6578 C=CC(=O)OC.OCCc1cccc1Br>>COC(=O)/C=C/c1cccc1CCO  
 6579 Br1cccn1.C=CS(=O)(=O)c1cccc1>>O=S(=O)/C=C/c1cccn1)c1cccc1  
 6580 C=CC(=O)OC.O=Cc1cccc1Br>>COC(=O)/C=C/c1cccc1C=O  
 6581 C=CCOC(C)=O.CC(C)(C)c1ccc([I+])c2ccc(C(C)(C)C)cc2cc1>>CC(=O)OC/C=C/c1ccc(C(C)(C)C)cc1  
 6582 Br1cnc2ccccc2c1.C=CC(=O)OCCCC>>CCCCOC(=O)/C=C/c1cnc2ccccc2c1  
 6583 C=C(C)C(=O)OC.COc1ccc(Cl)cc1>>COC(=O)/C(C)=C/c1ccc(OC)cc1  
 6584 C=CCC(=O)O.Cc1cc(OCc2ccccc2)c([C@H]2O[C@H](COCc3ccccc3)[C@H](OCc3ccccc3)[C@H](OCc3ccccc3)[C@H]2OCc2ccccc2)cc1Cc1ccc(Br)cc1>>Cc1cc(OCc2ccccc2)c([C@H]2O[C@H](COCc3ccccc3)[C@H](OCc3ccccc3)[C@H](OCc3ccccc3)[C@H]2OCc2ccccc2)cc1Cc1ccc(/C=C/CC C=CCCC(=O)OCC.O=S(=O)(O)c1ccc(C=C2C3CCCC2CCC3)c2ccc(O)cc2cc1)C(F)(F)F>>CCOC(=O)CC/C=C/c1ccc(C=C2C3CCCC2CCC3)c2ccc(O)cc2cc1  
 6585 C=C[Si](C)(C)c1cccn1.COc1cccc(I)c1>>COc1cccc(/C=C/[Si](C)(C)c2cccn2)c1  
 6587 Br1ccc(-c2nc3ccccc3n2Cc2ccccc2)cc1.C=CC(=O)OC>>COC(=O)/C=C/c1ccc(-c2nc3ccccc3n2Cc2ccccc2)cc1  
 6588 \*CNCCOCCOCCOCCNC(=O)COc1ccc(C(Cc2cc(OC)cc(OC)c2)NC(=O)c2ccc(C=C)cc2)cc1.Cc1c(F)cccc1I>>\*CNCCOCCOCCOCCNC(=O)COc1ccc(C(Cc2cc(OC)cc(OC)c2)NC(=O)c2ccc(/C=C/c3cccc(F)c3)cc2)cc1  
 6589 C=CC(=O)N1CCN(C(C)=O)CC1.COc1cc2c3ccccc3nc3c4ccc(Cl)cc4n(C)c(c1)c23>>COc1cc2c3ccccc3nc3c4ccc(/C=C/C(=O)N5CCN(C(C)=O)CC5)cc4n(C)c(c1)c23  
 6590 C=CC(=O)OCC.Fc1cccc(I)c1>>CCOC(=O)/C=C/c1cccc(F)c1  
 6591 C=C(C)C(=O)O.O=S(=O)(Nc1ccc(I)cc1)c1cccc1>>C/C=C/c1ccc(NS(=O)(=O)c2ccccc2)cc1C(=O)O  
 6592 C=CC(=O)OC(C)(C)C.FC(F)(F)c1cccc1I>>CC(C)(C)OC(=O)/C=C/c1cccc1C(F)(F)F  
 6593 C=CC(=O)OC.CN(C)CCCOc1ccc(I)cc1>>COC(=O)/C=C/c1ccc(OCCN(C)C)cc1  
 6594 C=CC(OCC)OCC.COC(C)(OC)c1cccc1Br>>CCOC(/C=C/c1cccc1C(C)(OC)OC)OCC  
 6595 C=CS(=O)(=O)F.CC(C)(C)c1ccc(I)cc1>>CC(C)(C)c1ccc(/C=C/S(=O)(=O)F)cc1  
 6596 C=CC(C)=O.Cc1ccc(N)c(I)c1>>CC(=O)/C=C/c1cc(C)ccc1N  
 6597 C=Cn1cnc2c(NC)ncnc21.O=Cc1cccc(I)c1>>CNc1cnc2c1ncn2/C=C/c1cccc(C=O)c1  
 6598 C=CC(=O)O.O=C(O)c1ccc(I)cc1>>O=C(O)/C=C/c1ccc(C(=O)O)cc1  
 6599 C=CC(=O)OCC.CC(C)(C)OC(=O)NCc1cccc(Br)c1>>CCOC(=O)/C=C/c1cccc(CNC(=O)OC(C)(C)C)c1  
 6600 C=Cc1cccc1.CC[C@@]1(O)C(=O)OCc2c1cc1n(c2=O)Cc2cc3c(Br)cccc3nc2-1>>CC[C@@]1(O)C(=O)OCc2c1cc1n(c2=O)Cc2cc3c(/C=C/c4ccccc4)cccc3nc2-1  
 6601 C=CC(=O)OC.Cn1ccc(I)cc1=O>>COC(=O)/C=C/c1cnn(C)c(=O)c1  
 6602 C=CC(=O)N(C)Cc1sc2ccccc2c1C.CCOC(=O)c1cc2cc(Br)cn2[nH]c1=O>>CCOC(=O)c1cc2cc(/C=C/C(=O)N(C)Cc3sc4ccccc4c3)cn2[nH]c1=O  
 6603 C=CC(=O)OC(C)(C)C.COC1CCC(C2=C[C@H]3CC[C@H](OC(C)(C)C)[C@@]3(C)CC2)=C(Br)C1>>COC1CCC(C2=C[C@H]3CC[C@H](OC(C)(C)C)[C@@]3(C)CC2)=C(/C=C/C(=O)OC(C)(C)C)C  
 6604 C=CC(=O)Nc1ccc(OC)cc1.COc1ccc2c(=O)c(I)ccc2c1>>COc1ccc(NC(=O)/C=C/c2ccc3cc(OC)ccc3c2=O)cc1  
 6605 C=CS(=O)(=O)F.Fc1ccc(I)cc1>>O=S(=O)(F)/C=C/c1ccc(F)cc1  
 6606 C=CC(=O)OC.Ic1ccn(C2CCCCO2)n1>>COC(=O)/C=C/c1ccn(C2CCCCO2)n1

6607 C=CC#N.CC(=O)Nc1ccccc1Br>>CC(=O)Nc1ccccc1/C=C/C#N  
C=CCc1cc(OC)c(OC)cc1CC1c2cc(OC)c(OC)cc2CCN1C(=O)C(F)(F)F.COc1cc(I)c(CC2c3cc(OC)c(O  
6608 C)cc3CCN2C(=O)C(F)(F)F)cc1OC>>COc1cc(/C=C/Cc2cc(OC)c(OC)cc2CC2c3cc(OC)c(OC)cc3CCN  
2C(=O)C(F)(F)F)c(CC2c3cc(OC)c(OC)cc3CCN2C(=O)C(F)(F)F)cc1OC  
6609 C=CC(=O)n1cccn1.O=c1c(I)c(-c2ccc(O)cc2)oc2cc(O)ccc12>>O=C(/C=C/c1c(-  
c2ccc(O)cc2)oc2cc(O)ccc2c1=O)n1cccn1  
6610 Br1ccccc1C#Cc1ccccc1.C=CC(=O)OC>>COC(=O)/C=C/c1ccccc1C#Cc1ccccc1  
6611 C=CC(=O)OCCCC.CN(C)c1ccc(Br)cc1>>CCCCOC(=O)/C=C/c1ccc(N(C)C)cc1  
6612 C=C1CC(c2ccc(C)cc2)OC1=O.CC(C)(C)c1ccc(I)cc1>>Cc1ccc(C2C/C(=C\c3ccc(C(C)C)cc3)C(=O)  
O2)cc1  
6613 C=Cc1ncnc2c1ncn2C1CCCCO1.C[Si](C)(C)Oc1ccccc1I>>C[Si](C)(C)Oc1ccccc1/C=C/c1ncnc2c1ncn  
2C1CCCCO1  
6614 Br1ccc2c(ccn2/C(=C\c2ccccc2)c2ccccc2)c1.C=CC(=O)OC>>COC(=O)/C=C/c1ccc2c(ccn2/C(=C\c2c  
ccccc2)c2ccccc2)c1  
6615 C=CC(=O)OC(C)(C)C.CCN1C(=O)c2ccc(Br)cc2C1=O>>CCN1C(=O)c2ccc(/C=C/C(=O)OC(C)(C)C)  
cc2C1=O  
6616 C=CC(=O)N1N=Cc2ccccc2C1CCC.CCOc1cc(Cc2cnc(N)nc2N)cc(I)c1OCC>>CCCC1c2ccccc2C=NN  
1C(=O)/C=C/c1cc(Cc2cnc(N)nc2N)cc(OCC)c1OCC  
6617 C=CC(=O)OC.CC(=O)Cc1cccc(Br)c1>>COC(=O)/C=C/c1cccc(CC(C)=O)c1  
6618 C=Cc1ccc(OC)cc1.CS(=O)(=O)c1ccc(Br)cc1>>COc1ccc(/C=C/c2ccc(S(C)(=O)=O)cc2)cc1  
6619 C=CCC(C)C(=O)OCC.Cc1ccc(Br)cc1>>CCOC(=O)C(C)C/C=C/c1ccc(C)cc1  
\*CNCCCOCCOCCOCCNC(=O)COc1ccc(C(Cc2cc(OC)cc(OC)c2)NC(=O)c2ccccc(C=C)c2)cc1.Cc1cc  
6620 cc(I)c1>>\*CNCCCOCCOCCOCCNC(=O)COc1ccc(C(Cc2cc(OC)cc(OC)c2)NC(=O)c2ccccc(/C=C/c3  
ccccc(C)c3)c2)cc1  
6621 C=C.COC(=O)c1ccc(Cl)cc1Br>>C=Cc1cc(Cl)ccc1C(=O)OC  
6622 C=CP(=O)(O)O.N#Cc1ccc(Br)cc1>>N#Cc1ccc(/C=C/P(=O)(O)O)cc1  
6623 C=CC(=O)OCCCC.CC(=O)Nc1ccc2c(Br)nn(C)c2c1>>CCCCOC(=O)/C=C/c1nn(C)c2cc(NC(C)=O)cc  
6624 C=C.CC(=O)c1ccc(Br)cc1>>C=Cc1ccc(C(C)=O)cc1  
6625 C=CCC(=O)OCCCC.Ic1ccccc1>>CCCCOC(=O)C/C=C/c1ccccc1  
6626 C=CC(=O)OCC.O=C(Nc1ccccc1I)C12CC3CC(CC(C3)C1)C2>>CCOC(=O)/C=C/c1ccccc1NC(=O)C1  
2CC3CC(CC(C3)C1)C2  
6627 C=CC(=O)OC.CCOC(=O)c1ccc(-c2ccccc2)n(-c2ccc(I)cc2)c1C(=O)c1ccccc1>>CCOC(=O)c1ccc(-  
c2ccccc2)n(-c2ccc(/C=C/C(=O)OC)cc2)c1C(=O)c1ccccc1  
6628 C=COCC.N#Cc1ccc(Br)cc1>>C=C(OCC)c1ccc(C#N)cc1  
6629 C=CC#N.Cc1cc(-c2ccccc2)n2nc(-c3ccccc3)c(I)c2n1>>Cc1cc(-c2ccccc2)n2nc(-  
6630 C=CC(C)(C)O.COc1cc(Br)c(C=O)cc1OC>>COc1cc(C=O)c(/C=C/C(C)(C)O)cc1OC  
C=CC(=O)OCC.COCC1OC(c2ccccc2)=C(I)c2ccccc21>>CCOC(=O)/C=C/C1=C(c2ccccc2)OC(OC)c2cc  
6631 ccc21  
6632 C=CN1C(=O)c2ccccc2C1=O.Cc1ccc(I)cc1>>Cc1ccc(/C=C/N2C(=O)c3ccccc3C2=O)cc1  
6633 C=Cc1ccncc1.CN1CCC[C@H]1COc1cncc(Br)c1>>CN1CCC[C@H]1COc1cncc(/C=C/c2ccncc2)c1  
6634 C=Cc1ccccc1.N[C@@H](Cc1c[nH]c2c(Br)ccccc12)C(=O)O>>N[C@@H](Cc1c[nH]c2c(/C=C/c3ccccc  
3)ccccc12)C(=O)O  
6635 C=Cc1ccc(OC)c(OC)c1.Oc1ccc(O)c(I)c1>>COc1ccc(/C=C/c2cc(O)ccc2O)cc1OC  
C=Cc1ccc(Sc2ccccc2)cc1.CCCCCCCCCC1(CCCCCCCCCC)c2cc(I)ccc2-c2ccc([N+](=O)[O-  
6636 ])cc21>>CCCCCCCCCCCC1(CCCCCCCCCC)c2cc(/C=C/c3ccc(Sc4ccccc4)cc3)ccc2-  
c2ccc([N+](=O)[O-])cc21  
6637 C=Cc1ccccc1.O=Cc1c(Br)sc2ccccc12>>O=Cc1c(/C=C/c2ccccc2)sc2ccccc12  
6638 C=CC(=O)OC.Ic1ccc2ccccc2c1>>COC(=O)/C=C/c1ccc2ccccc2c1  
C=CC(=O)OC(C)C.CN(C)c1ccc(-  
6639 c2ccc(CN(C(=O)C3CCCCC3)c3ccccc(Br)c3)cc2)cc1>>CC(C)OC(=O)/C=C/c1cccc(N(Cc2ccc(-  
c3ccc(N(C)C)cc3)cc2)C(=O)C2CCCCC2)c1  
6640 C=Cc1ccc(OC)cc1.Cc1ccc(OC(=O)C(C)(C)Br)cc1>>COc1ccc(/C=C/C(C)(C)C(=O)Oc2ccc(C)cc2)cc1  
6641 C=CC(=O)N1N=Cc2ccccc2C1C=C(C)C.CC1nc(N)nc(N)c1Cc1cc(I)c(OC)c(OC)c1>>CCc1nc(N)nc(N  
)c1Cc1cc(/C=C/C(=O)N2N=Cc3ccccc3C2C=C(C)C)c(OC)c(OC)c1  
6642 C=Cc1ccc(OC)cc1.Cc1ccc(OS(=O)(=O)C(F)(F)F)cc1>>C=C(c1ccc(C)cc1)c1ccc(OC)cc1  
CC/C(=C\c1ccccc1)c1ccccc1.CN(C)CCOc1ccc(Br)cc1>>CC/C(=C\c1ccccc1)c1ccc(OCCN(C)C)cc1)c  
6643 1ccccc1  
C=C1C(=O)O[C@@H]2C3=C(C)C(=O)C=C[C@]3(C)CC[C@@H]12.Clc1ccc(I)cc1>>CC1=C2[C@H  
6644 ]3OC(=O)/C(=C/c4ccc(Cl)cc4)[C@@H]3CC[C@@]2(C)C=CC1=O  
6645 C=CC(=O)OC.N#Cc1cccc(Br)c1>>COC(=O)/C=C/c1cccc(C#N)c1

6646 C=CC(=O)OC.COc1cc2c(c(I)c1OC)CCN(C(=O)OC(C)(C)C)CC2c1cccc1>>COC(=O)/C=C/c1c2c(cc(OC)c1OC)C(c1cccc1)CN(C(=O)OC(C)(C)C)CC2  
6647 C=C(C)C=O.COc1ccc(I)cc1>>COc1ccc(/C=C(\C)C=O)cc1  
6648 C=C.CC(=O)Nc1cccc(C)c1Br>>C=Cc1c(C)cccc1NC(C)=O  
6649 C=CC(=O)OC.Nc1cc(F)ccc1Br>>COC(=O)/C=C/c1ccc(F)cc1N  
6650 C=Cc1ccc(C)cc1.Ic1cccc1>>Cc1ccc(/C=C/c2cccc2)cc1  
6651 C=CC(=O)OC.COc1cc(C(=O)c2c(Br)oc3c(OC(C)=O)c(OC)ccc23)cc(OC)c1OC>>COC(=O)/C=C/c1oc2c(OC(C)=O)c(OC)ccc2c1C(=O)c1cc(OC)c(OC)c(OC)c1  
6652 C=CC(=O)OC.COc1cc2c(cc1Br)[C@H]1CCCC[C@H]1N2C(=O)C(C)(C)C>>COC(=O)/C=C/c1cc2c(cc1OC)N(C(=O)C(C)(C)C)[C@@H]1CCCC[C@H]1  
6653 C=Cc1ccc(C)cc1.O=S(=O)(c1cccc1)C(F)(F)Br>>Cc1ccc(/C=C/C(F)(F)S(=O)(=O)c2cccc2)cc1  
6654 C=Cc1ccc(C)nc1.CC(C)c1oc2cc3oc(=O)ccc3cc2c1OS(=O)(=O)C(F)(F)F>>Cc1ccc(/C=C/c2c(C(C)C)oc3cc4oc(=O)ccc4cc23)cn1  
6655 Br1ccenc1.C=Cc1ccc(OC)cc1>>COc1ccc(/C=C/c2ccenc2)cc1  
6656 C=CC1CC(=O)N1.Cc1cccc(I)c1>>Cc1cccc(/C=C/C2CC(=O)N2)c1  
6657 C=CC(=O)N1N=Cc2cccc2C1CCCC.COc1cc(Cc2enc(N)nc2N)cc(I)c1OC>>CCCCC1c2cccc2C=NN1C(=O)/C=C/c1cc(Cc2enc(N)nc2N)cc(OC)c1OC  
6658 C=CC=O.O=[N+](O-)[O-]c1ccc(I)cc1>>O=C/C=C/c1ccc([N+](=O)[O-])cc1  
6659 C=Cc1ccc(C)nc1.COC(=O)c1cc2ccc(=O)oc2cc1OS(=O)(=O)C(F)(F)F>>COC(=O)c1cc2ccc(=O)oc2cc1/C=C/c1ccc(C)nc1  
6660 C=CC(C)(C)O.O=c1oc2cccc2cc1Br>>CC(C)(O)/C=C/c1cc2cccc2oc1=O  
6661 C=C(C)C(=O)OC.CC(C)(N)c1cccc(Br)c1>>COC(=O)/C(C)=C/c1cccc(C(C)(C)N)c1  
6662 C=CC(=O)OCC.O=Cc1en(-c2cccc2)nc1OS(=O)(=O)C(F)(F)F>>CCOC(=O)/C=C/c1nn(-C=CC(=O)OC(C)(C)C.N#Cc1ccc(S(=O)(=O)N2CCc3cc(Br)enc32)cc1>>CC(C)(C)OC(=O)/C=C/c1cnc2c(c1)CCN2S(=O)(=O)c1ccc(C#N)cc1  
6663 C=CC(O)c1cccc1Br.Ic1cccc1>>OC(/C=C/c1cccc1)c1cccc1Br  
6664 C=CC(O)CN1CCN(c2ccc(CCC)cc2)CC1.O=c1ccc2cc(Br)ccc2[nH]1>>CCCc1ccc(N2CCN(CC(O)/C=C/c3ccc4[nH]c(=O)ccc4c3)CC2)cc1  
6665 C=CC(=O)OCC.CCOC(=O)c1cccc(Br)c1>>CCOC(=O)/C=C/c1cccc(C(=O)OCC)c1  
6666 C=C[C@H]1O[C@@H]2OC(C)(C)O[C@@H]2[C@H]1O.O=C1/C(=C/c2cccc2)Oc2ccc(Br)cc21>>C1(C)O[C@H]2O[C@H](/C=C/c3ccc4c(c3)C(=O)/C(=C/c3cccc3)O4)[C@H](O)[C@H]2O1  
6667 C=CC(=O)NC(C)C.C[C@]12C[C@]134C=C(Sc5ccc(I)cc5)C(=O)[C@@](C)(CCC(=O)Nc5c(O)ccc(C(=O)O)c5O)[C@]13[C@H](C)[C@H]1C4)O2>>CC(C)NC(=O)/C=C/c1ccc(SC2=C[C@]34C[C@H]5C[C@H](O)[C@@]5(C)C3)[C@H]4[C@]1(C)(CCC(=O)Nc3c(O)ccc(C(=O)O)c3O)C2=O)cc1  
6668 C=CC(C)(C)C(=O)NC(C)(C)C(=O)O.CC(=O)OC[C@H]1O[C@@H](c2cc(Cc3ccc(Br)cc3C)c(C(C)C)cc2OC(C)=O)[C@H](OC(C)=O)[C@@H](OC(C)=O)[C@@H]1OC(C)=O>>CC(=O)OC[C@H]1O[C@@H](c2cc(Cc3ccc(/C=C/C(C)(C)C(=O)NC(C)(C)C(=O)O)cc3C)c(C(C)C)cc2OC(C)=O)[C@H](OC(C)=O)[C@@H](OC(C)=O)[C@@H]1OC(C)=O  
6669 C=Cc1ccc(Br)cc1.CCOC(=O)C(F)I>>CCOC(=O)C(F)/C=C/c1ccc(Br)cc1  
6670 C=CC(=O)OC.CCn1cc(CC(=O)NC)c2c(OC)c(Br)cc(F)c21>>CCn1cc(CC(=O)NC)c2c(OC)c(/C=C/C(=O)OC)cc(F)c21  
6671 C=CC(=O)OC(C)(C)C.Fc1cccc(I)c1>>CC(C)(C)OC(=O)/C=C/c1cccc(F)c1  
6672 C=COCCCC.O=C(Cl)c1cccc1>>CCCCO/C=C/C(=O)c1cccc1  
6673 C=CC(=O)OC.Cn1nnc2cc(Br)ccc21>>COC(=O)/C=C/c1ccc2c(c1)nnn2C  
6674 C=Cc1cccc1Cl.O=C1CCC(c2ccc(Br)cc2)O1>>O=C1CCC(c2ccc(/C=C/c3cccc3Cl)cc2)O1  
6675 C=C[C@@H]1COC(C)(C)N1C(=O)OC(C)(C)C.Ic1cccc1>>CC(C)(C)OC(=O)N1[C@H](/C=C/c2ccc(cc2)COC1(C)C  
6676 C=Cc1cccc1O.Oc1cccc1Br>>Oc1cccc1/C=C/c1cccc1O  
6677 C=Cc1cccc1.CC(C)c1oc2cc3oc(=O)ccc3cc2c1OS(=O)(=O)C(F)(F)F>>CC(C)c1oc2cc3oc(=O)ccc3cc2c1/C=C/c1cccc1  
6678 C=CC(=O)OC(C)(C)C.CCOC(=O)Nc1cccc1C1=C(I)CCN1S(=O)(=O)c1ccc(C)cc1>>CCOC(=O)Nc1cccc1C1=C(/C=C/C(=O)OC(C)(C)C)CCN1S(=O)(=O)c1ccc(C)cc1  
6679 C=CCC(C)C.ClCc1cccc(Oc2cccc2)c1>>C=C(Cc1cccc(Oc2cccc2)c1)CC(C)C  
6680 C=CC(=O)OC(C)(C)C.CC(C)OC(=O)c1sccc1Br>>CC(C)OC(=O)c1sccc1/C=C/C(=O)OC(C)(C)C  
6681 C=Cc1ccc(N(C)C(=O)OC(C)(C)C)cc1.OCCOCCOCCOc1ccc(I)cn1>>CN(C(=O)OC(C)(C)C)c1ccc(/C=C/c2ccc(OCCOCCOCCO)nc2)cc1  
6682 C=Cc1cccc1.N#Cc1ccc(Cl)cc1>>N#Cc1ccc(/C=C/c2cccc2)cc1  
6683 C=Cc1ccc(F)cc1.CC(C)(C)Cn1c(N)nc2ccc(Cl)nc21>>CC(C)(C)Cn1c(N)nc2ccc(/C=C/c3ccc(F)cc3)nc2  
6684 C=Cc1cccc1.COc1ccc(/C=C/C(=O)c2ccc(I)cc2)cc1OC>>COc1ccc(/C=C/C(=O)c2ccc(/C=C/c3cccc3)cc2)cc1OC  
6685 Br1enc(NCCc2cccc2)c2cccc12.C=CC(=O)OCC>>CCOC(=O)/C=C/c1cnc(NCCc2cccc2)c2cccc1

6687 C=CCN(C(=O)c1c(C)noc1C)[C@H](C)c1cc(F)cc(F)c1.O=C1Nc2ncccc2[C@@]12Cc1cc(Br)enc1C2>  
>Cc1noc(C)c1C(=O)N(C/C=C/c1enc2c(c1)C[C@@]1(C2)C(=O)Nc2ncccc21)[C@H](C)c1cc(F)cc(F)c  
6688 C=CC(=O)C(O)c1c(OC)ccc(OC)c1OCOC.COCOc1cccc1I>>COCOc1cccc1/C=C/C(=O)C(O)c1c(O  
C)ccc(OC)c1OCOC  
6689 C=CC(=O)OCC.COC(=O)/C=C/c1cccc(N(Cc2ccc(Br)cc2)C(=O)C2CCCCC2)c1>>CCOC(=O)/C=C/c1  
ccc(CN(C(=O)C2CCCCC2)c2cccc(/C=C/C(=O)OC)c2)cc1  
6690 C=CC(=O)OC.CN1c2cccc2Sc2cc(Br)ccc21>>COC(=O)/C=C/c1ccc2c(c1)Sc1cccc1N2C  
6691 C=Cc1cccc(Cl)c1.COC(=O)c1cccc1I>>COC(=O)c1cccc1/C=C/c1cccc(Cl)c1  
6692 C=Cc1ccc(Br)cc1.CCOC(=O)c1ccc(I)cc1>>CCOC(=O)c1ccc(/C=C/c2ccc(Br)cc2)cc1  
6693 C=CC(=O)O.CC1(C)C=Cc2cc(I)c([N+](=O)[O-]  
]cc2O1>>CC1(C)C=Cc2cc(/C=C/C(=O)O)c([N+](=O)[O-])cc2O1  
6694 C=CC(=O)OC.CN1C(=O)C(=O)c2c(Br)cccc21>>COC(=O)/C=C/c1cccc2c1C(=O)C(=O)N2C  
6695 Br1ccc(-c2ccncc2)cc1.C=Cc1cccc1>>C(=C/c1cccc1)\c1ccc(-c2ccncc2)cc1  
6696 C=CC(=O)OC.CCOc1noc(C)c1I>>CCOc1noc(C)c1/C=C/C(=O)OC  
6697 C=CC(=O)OC.COCCn1cc(I)en1>>COCCn1cc(/C=C/C(=O)OC)en1  
6698 C=CC(=O)OCC.Oc1ccc(Br)c(F)c1F>>CCOC(=O)/C=C/c1ccc(O)c(F)c1F  
6699 C=Cc1cccc(SC)c1.COc1ccc2cc(Br)c(=O)oc2c1>>COc1ccc2cc(/C=C/c3cccc(SC)c3)c(=O)oc2c1  
6700 C=CC(=O)OCC.Clc1cccc2cccc12>>CCOC(=O)/C=C/c1cccc2cccc12  
6701 C=Cc1cccc1.Cc1cccc(C(=O)Oc2cccc2-c2cccc2I)c1N>>Cc1cccc(C(=O)Oc2cccc2-  
c2cccc2/C=C/c2cccc2)c1N  
6702 Br1ccc(-c2cccc2)cc1.C=CC(OCC)OCC>>CCOC(/C=C/c1ccc(-c2cccc2)cc1)OCC  
6703 C=CC(=O)OC(C)(C)C.COc1ccc(NCc2ccc(Br)cc2)cc1>>COc1ccc(NCc2ccc(/C=C/C(=O)OC(C)(C)C)c  
c2)cc1  
6704 C=CCOc1cccc1.FC(F)(F)c1cccc(Br)c1>>FC(F)(F)c1cccc(/C=C/COc2cccc2)c1  
6705 C=CC(CO)N1C(=O)c2cccc2C1=O.COc1ccc(OC)c(Br)c1>>COc1ccc(OC)c(/C=C/C(CO)N2C(=O)c3c  
cccc3C2=O)c1  
6706 C=CCNC(=O)OC(C)(C)C.O=C(c1cccc(Br)c1)C1CCCCC1>>C=C(CNC(=O)OC(C)(C)C)c1cccc(C(=O  
)C2CCCCC2)c1  
6707 C=CS(=O)(=O)F.CC(C)c1ccc(I)cc1>>CC(C)c1ccc(/C=C/S(=O)(=O)F)cc1  
6708 C=Cc1cccc1.O=[N+](=[O-])c1ccc(I)c1>>O=[N+](=[O-])c1ccc(/C=C/c2cccc2)c1  
6709 C=Cc1cc(OCc2cccc2)ccc1OCc1cccc1.CCCCCCNC(=O)c1cc(I)ccc1O>>CCCCCNC(=O)c1cc(/C=  
C/c2cc(OCc3cccc3)ccc2OCc2cccc2)ccc1O  
6710 C=C[C@](C)(COC(F)F)C(=O)O.CC(C)[C@H](O)C(=O)N[C@@H](C)C(=O)N1CCC[C@H](C(=O)  
N[C@H](C)c2ccc3ccc(Br)cc3n2)N1>>CC(C)[C@H](O)C(=O)N[C@@H](C)C(=O)N1CCC[C@H](  
C(=O)N[C@H](C)c2ccc3ccc(/C=C/[C@](C)(COC(F)F)C(=O)O)cc3n2)N1  
6711 C=CCCCCCCCC.O=Cc1cc(Br)cc(C=O)c1O>>CCCCCCCCC/C=C/c1cc(C=O)c(O)c(C=O)c1  
6712 C=CC(=O)OC.COc1c(CN(C(=O)C2CC2)c2ccc(Br)cc2)ccc2c1OC(C)(C)C=C2>>COC(=O)/C=C/c1ccc  
(N(Cc2ccc3c(c2OC)OC(C)(C)C=C3)C(=O)C2CC2)cc1  
6713 C=COCCCC.O=c1cc(Br)c2cccc2[nH]1>>CCCCO/C=C/c1cc(=O)[nH]c2cccc12  
6714 C=CC.CC1(c2cccc2Br)CC(=O)C1>>C/C=C/c1cccc1C1(C)CC(=O)C1  
6715 C=CCNC(=O)c1cc(C)on1.O=[N+](=[O-])c1ccc(I)c1>>Cc1cc(C(=O)NC/C=C/c2cccc([N+](=O)[O-]  
C=Cc1ccc(F)cc1.COC(=O)Cn1c(=O)c(Cl)nc2ccncc21>>COC(=O)Cn1c(=O)c(/C=C/c2ccc(F)cc2)nc2c  
cnc21  
6717 C=CCC(C)C(=O)O.COc1ccc(I)cc1>>COc1ccc(/C=C/CC(C)C(=O)O)cc1  
6718 C=C[Si](C)(C)c1nccn1.Ic1cccc1>>C[Si](C)(C)/C=C/c1cccc1c1nccn1  
6719 C=Cc1cnccl.COc1ccc(Cl)c(Nc2c(C#N)cnc3cc(Br)ccc23)c1>>COc1ccc(Cl)c(Nc2c(C#N)cnc3cc(/C=C  
/c4ccncc4)ccc23)c1  
6720 C=CC(=O)OC(C)(C)C.O=Cc1cccc1Cl>>CC(C)(C)OC(=O)/C=C/c1cccc1C=O  
6721 C=CS(=O)(=O)F.O=Cc1ccc(I)cc1>>O=Cc1ccc(/C=C/S(=O)(=O)F)cc1  
6722 C=CC(=O)OC(C)(C)C.CC(C)(C)O[C@H]1CC[C@H]2C=C(C3=C(Br)CC(O[Si](C)(C)C(C)(C)C  
C3)CC[C@]12C>>CC(C)(C)OC(=O)/C=C/C1=C(C2=C[C@H]3CC[C@H](OC(C)(C)C)[C@@]3(C)C  
C2)CCC(O[Si](C)(C)C(C)(C)C)C1  
6723 C=CC(=O)N(CC)CC.O=C1Cc2c([nH]c3ccc(I)cc23)-  
c2ccncc2N1>>CCN(CC)C(=O)/C=C/c1ccc2[nH]c3c(c2c1)CC(=O)Nc1ncccc1-3  
6724 C=CCCCC(=O)OC.CC(C)(C)c1ccc(OS(=O)(=O)C(F)(F)F)cc1>>C=C(CCCC(=O)OC)c1ccc(C(C)(C)C  
6725 C=CC(=O)OC.COc1cccc1Cl>>COC(=O)/C=C/c1cccc1OC  
C=C[C@H]1O[C@H](OC)[C@H](OCc2cccc2)[C@@H](OCc2cccc2)[C@H]1OCc1ccc2cccc2c1  
6726 .O=c1cc(-c2cccc2)oc2ccc(Br)cc12>>CO[C@H]1O[C@H]/C=C/c2ccc3oc(-  
c4cccc4)ccc(=O)c3c2)[C@@H](OCc2ccc3cccc3c2)[C@H](OCc2cccc2)[C@H]1OCc1cccc1  
6727 C=CC(=O)O.Cc1cc(Br)c([N+](=O)[O-]  
)c(C)c1NC(=O)CC(C)(C)C>>Cc1cc(/C=C/C(=O)O)c([N+](=O)[O-])c(C)c1NC(=O)CC(C)(C)C

6728 C=Cc1nnn(C)n1.COc1ccc(I)cc1>>COc1ccc(/C=C/c2nnn(C)n2)cc1  
6729 C=Cc1ccc(Br)cc1.COc1ccc(CNc2c(C)cc(C)cc2I)cc1>>COc1ccc(CNc2c(C)cc(C)cc2/C=C/c2ccc(Br)cc2)cc1  
6730 C=CC(=O)OC.COC(=O)c1ccc(C(F)(F)F)nc1Br>>COC(=O)/C=C/c1nc(C(F)(F)F)ccc1C(=O)OC  
6731 C=Cc1cccc([N+](=O)[O-])c1.Clc1cccc(Br)c1>>O=[N+](O-)]c1cccc(/C=C/c2cccc(Cl)c2)c1  
6732 C=Cc1ccc(OC)c(O)c1.CC(=O)OC[C@H]1O[C@@H](Oc2ccc(I)cc2)[C@H](OC(C)=O)[C@@H]1OC(C)=O>>COc1ccc(/C=C/c2ccc(O[C@@H]3O[C@H](COC(C)=O)[C@@H](OC(C)=O)[C@H]3OC(C)=O)cc2)cc1O  
6733 C=Cc1cccc1.Cc1ccc(C=O)c(Br)c1>>Cc1ccc(C=O)c(/C=C/c2cccc2)c1  
6734 C=CC[C@H](C(=O)N1[C@H]2C[C@@H]3CC[C@@]2(CS1(=O)=O)C3(C)C)[C@H](O)CCCCC.Cc1ccc(Br)cc1>>CCCCC[C@@H](O)[C@@H](C/C=C/c1ccc(C)cc1)C(=O)N1[C@H]2C[C@@H]3CC[C@@]2(CS1(=O)=O)C3(C)C  
6735 \*CNCCOCCOCCOCCNC(=O)COc1ccc(C(Cc2cc(OC)cc(OC)c2)NC(=O)c2ccc(C=C)cc2)cc1.Cc1cc(C)cc(I)c1>>\*CNCCOCCOCCOCCNC(=O)COc1ccc(C(Cc2cc(OC)cc(OC)c2)NC(=O)c2ccc(/C=C/c3cc(C)cc(C)c3)cc2)cc1  
6736 C=Cc1cccc(OC)c1.FC(F)(F)c1cccc1I>>COc1cccc(/C=C/c2cccc2C(F)(F)F)c1  
6737 C=CCn1cccc1C(=O)O.CC(C)(C)OC(=O)COc1cccc(I)c1>>CC(C)(C)OC(=O)COc1cccc(/C=C/Cn2cccc2C(=O)O)c1  
6738 Br1cccc1.C=CC(=O)OC(C)(C)C>>CC(C)(C)OC(=O)/C=C/c1cccc1  
6739 C=CCn1cccc1C(=O)c1ccc(C)cc1.C[C@H](Oc1cccc(I)c1)C(=O)N1CCOCC1>>Cc1ccc(C(=O)c2cccn2C/C=C/c2cccc(O[C@@H](C)C(=O)N3CCOCC3)c2)cc1  
6740 C=CC(=O)OCC.COC(=O)c1ccc(I)ccc1N>>CCOC(=O)/C=C/c1ccc(N)c(C(=O)OC)c1  
6741 C=CC(=O)OC.CC(=O)c1ccc(Br)cc1>>COC(=O)/C=C/c1ccc(C(C)=O)cc1  
6742 Br1ccncc1.C=Cc1cccc(OC)c1>>COc1cccc(/C=C/c2ccncc2)c1  
6743 C=CP(C)(=O)c1cccc1.CC(C)Oc1ccc2cccc2c1Br>>CC(C)Oc1ccc2cccc2c1/C=C/P(C)(=O)c1cccc1  
6744 Br1ccc2c(c1)CC2.C=C>>C=Cc1ccc2c(c1)CC2  
6745 C=CC(=O)OCC.Cc1cc(O)c(Br)cc1C#N>>CCOC(=O)/C=C/c1cc(C#N)c(C)cc1O  
6746 Br1ccc(-c2nnc(-c3cccc4cccc34)o2)cc1.C=C[Si](C)(OCC)OCC>>CCO[Si](C)(/C=C/c1ccc(-c2nnc(-c3cccc4cccc34)o2)cc1)OCC  
6747 C=CC(OCC)OCC.Cc1cccc1Br>>CCOC(/C=C/c1cccc1C)OCC  
6748 C=CCN(C(=O)C(C)(C)C)[C@@H]1CCc2cccc21.O=C1Nc2ncccc2[C@]12Cc1ccc(Br)cc1C2>>CC(C)(C)C(=O)N(C/C=C/c1ccc2c(c1)C[C@@]1(C2)C(=O)Nc2ncccc21)[C@@H]1CCc2cccc21  
6749 C=CC(=O)OC(C)(C)C.CC1(C)CCC(=C(c2ccc(O)cc2)c2ccc(Br)cc2)CC1>>CC1(C)CCC(=C(c2ccc(O)c2)c2ccc(/C=C/C(=O)OC(C)(C)C)cc2)CC1  
6750 Br1ccc2c(c1)Sc1cccc1N2.C=Cc1ccncc1>>C(=C/c1ccc2c(c1)Sc1cccc1N2)c1ccncc1  
6751 Br1ccncc1.C=CC(=O)CC>>CCC(=O)/C=C/c1ccncc1  
6752 C=CC(=O)OCC.O=Cc1cc(F)ccc1Br>>CCOC(=O)/C=C/c1ccc(F)cc1C=O  
6753 Br1ccc2cc1CCc1cccc(c1)CC2.C=Cc1ccc2cc1CCc1cccc(c1)CC2>>C(=C/c1ccc2cc1CCc1cccc(c1)CC2)c1ccc2cc1CCc1cccc(c1)CC2  
6754 Br1cccs1.C=Cc1ccc2cccc2c1>>C(=C/c1cccs1)c1ccc2cccc2c1  
6755 C=CCC(=O)O.Cc1n[nH]c2cc(Br)ccc12>>Cc1n[nH]c2cc(/C=C/CC(=O)O)ccc12  
6756 C=Cc1ccc(OC)cc1.COc1cc[nH]c1/C=C1\C(=O)Nc2cccc(I)c21>>COc1ccc(/C=C/c2cccc3c2/C(=C/c2[nH]c2OC)C(=O)N3)cc1  
6757 C=CC(=O)OC.C[C@H]1C[C@@H](n2c(Nc3ccc(OC(F)(F)F)cc3)nc3cc(Br)ccc32)CC(C)(C)C1>>COC(=O)/C=C/c1ccc2c(c1)nc(Nc1ccc(OC(F)(F)F)cc1)n2[C@@H]1C[C@H](C)CC(C)(C)C1  
6758 COC[C@@H](N=C\c1cccc1)N1C=CCC[C@H]1C(C)C.Ic1cccs1>>COC[C@@H](N=C\c1cccc1)N1C=C(c2cccs2)CC[C@H]1C(C)C  
6759 C=C(F)[Si](C)(c1cccc1)c1cccc1.CC(=O)c1ccc(I)cc1>>CC(=O)c1ccc(/C=C(\F)[Si](C)(c2cccc2)c2cccc2)cc1  
6760 C=C[C@@H](C)[C@@H](O)C/C=C/C(=O)OC.N#Cc1ccc(I)cc1>>COC(=O)/C=C/C[C@H](O)[C@H](C)/C=C/c1ccc(C#N)cc1  
6761 C=Cc1c(F)c(F)c(F)c1F.N#Cc1ccc(I)c2cccc12>>N#Cc1ccc(/C=C/c2c(F)c(F)c(F)c2F)c2cccc  
6762 C=CC(=O)OC.COc1ccc(Br)cc1OC>>COC(=O)/C=C/c1ccc(OC)c(OC)c1  
6763 C=CC(=O)OC.Cc1cc2c(c(C)c1Br)C(=O)CC2>>COC(=O)/C=C/c1c(C)cc2c(c1C)C(=O)CC2  
6764 C=CC(=O)OCC.Clc1cccc(Oc2cccc(Br)c2)c1>>CCOC(=O)/C=C/c1cccc(Oc2cccc(Cl)c2)c1  
6765 C=CC(=O)OCC.Ic1cccc1C#CCOC1CCCCO1>>CCOC(=O)/C=C/c1cccc1C#CCOC1CCCCO1  
6766 C=C(C)C(=O)OCC.Cn1cccc1Cl>>CCOC(=O)/C(C)=C/c1cccn1C  
6767 C=CC(=O)OC.O=C1Nc2cccc(Br)c2C1=O>>COC(=O)/C=C/c1cccc2c1C(=O)C(=O)N2  
6768 C=CC(=O)OCCO.C[C@H](Nc1ncnc2sc(Br)cc12)c1cccc1>>C[C@@H](Nc1ncnc2sc(/C=C/C(=O)OCCO)cc12)c1cccc1



C=CC(=O)N1CC(=C2ccc2)C1.CC(C)(C)OC(=O)N1CC(=O)Nc2ncc(Br)cc2C1>>CC(C)(C)OC(=O)  
 N1CC(=O)Nc2ncc(/C=C/C(=O)N3CC(=Cc4nccs4)C3)cc2C1  
 Brclccc2ccnc(N3CCOCC3)c2c1.C=CC(=O)OCC>>CCOC(=O)/C=C/c1ccc2ccnc(N3CCOCC3)c2c1  
 C=Cc1nccc(C#N)c1Nc1ccc2[nH]ccc2c1C.CN1CCN(Cc2cccc(Br)c2)CC1>>Cc1c(Nc2c(C#N)cncc2/C=C/  
 C/c2cccc(CN3CCN(C)CC3)c2)ccc2[nH]ccc12  
 C=CC(C)(O)CCC=C(C)C.Ic1cccc1>>CC(C)=CCCC(C)(O)/C=C/c1cccc1  
 C=C(CC(=O)OCC)C(=O)OCC.COc1cccc2c(OCc3cccc3)c(Br)ccc12>>CCOC(=O)C/C(=C/c1ccc2c(O  
 C)cccc2c1OCc1cccc1)C(=O)OCC  
 C=CC(=O)OC.C[C@H](OC[C@H]1CO1)c1cccc1Br>>COC(=O)/C=C/c1cccc1[C@H](C)OC[C@H]1CO1  
 C=Cc1cccc1.Nc1ccc(O)cc1I>>Nc1ccc(O)cc1/C=C/c1cccc1  
 C=Cc1cccc1.Ic1ccc2c(c1)OCCOCCOCCOCCOCCO2>>C(=C/c1ccc2c(c1)OCCOCCOCCOCCOCC  
 O2)\c1cccc1  
 C=CC(=O)OC(C)(C)C.COC(=O)CN(CC(=O)OC)C(=O)c1ccc(I)cc1>>COC(=O)CN(CC(=O)OC)C(=O)  
 )c1ccc(/C=C/C(=O)OC(C)(C)C)cc1  
 C=Cc1ccc(SC)cc1.Clc1c2ccc(Br)cc2nc2c1[nH]c1cccc12>>CSc1ccc(/C=C/c2ccc3c(Cl)c4[nH]c5cccc  
 5c4nc3c2)cc1  
 C=CC[C@H]1C(=O)N(c2cccc2)[C@H]1c1ccc(OC)cc1.COCOc1ccc(Br)cc1>>COCOc1ccc(/C=C/C  
 [C@H]2C(=O)N(c3cccc3)[C@H]2c2ccc(OC)cc2)cc1  
 C=CCCC.Cc1ccc(S(=O)(=O)Nc2cccc2I)cc1>>CCCC/C=C/c1cccc1NS(=O)(=O)c1ccc(C)cc1  
 C=Cc1ccc(OC)cc1.N#Cc1cccc(Br)c1>>COc1ccc(/C=C/c2cccc(C#N)c2)cc1  
 Brclnc2cccc2c1.C=CCO[C@H]1(C)C[C@H](C)C(=O)[C@H](C)[C@H]2NC(=O)O[C@H]2(C)[C@  
 @H](CC)OC(=O)[C@H](C)[C@H](O[C@H]2C[C@H](C)(OC)[C@H](OC(C)=O)[C@H](C)O2)  
 [C@H](C)[C@H]1O[C@H]1O[C@H](C)C[C@H](N(C)C)[C@H]1OC(C)=O>>CC[C@H]1OC(=O)  
 [C@H](C)[C@H](O[C@H]2C[C@H](C)(OC)[C@H](OC(C)=O)[C@H](C)O2)[C@H](C)[C@H]  
 H)(O[C@H]2O[C@H](C)C[C@H](N(C)C)[C@H]2OC(C)=O)[C@H](C)(OC/C=C/c2cnc3cccc3c2)C  
 [C@H]1(C)C(=O)Nc2cccc2I)cc1>>CCCC/C=C/c1cccc1NS(=O)(=O)c1ccc(C)cc1  
 C=Cc1ccc(OC)cc1.N#Cc1cccc(Br)c1>>COc1ccc(/C=C/c2cccc(C#N)c2)cc1  
 Brclnc2cccc2c1.C=CCO[C@H]1(C)C[C@H](C)C(=O)[C@H](C)[C@H]2NC(=O)O[C@H]2(C)[C@  
 @H](CC)OC(=O)[C@H](C)[C@H](O[C@H]2C[C@H](C)(OC)[C@H](OC(C)=O)[C@H](C)O2)  
 [C@H](C)[C@H]1O[C@H]1O[C@H](C)C[C@H](N(C)C)[C@H]1OC(C)=O>>CC[C@H]1OC(=O)  
 [C@H](C)[C@H](O[C@H]2C[C@H](C)(OC)[C@H](OC(C)=O)[C@H](C)O2)[C@H](C)[C@H]  
 H)(O[C@H]2O[C@H](C)C[C@H](N(C)C)[C@H]2OC(C)=O)[C@H](C)(OC/C=C/c2cnc3cccc3c2)C  
 [C@H]1(C)C(=O)Nc2cccc2I)cc1>>CCCC/C=C/c1cccc1NS(=O)(=O)c1ccc(C)cc1  
 C=CC(=O)OC.Cc1ccc(Cl)cc1>>COC(=O)/C=C/c1ccc(C)cc1  
 C=Cc1ccc(N(c2cccc2)c2cccc2)cc1.CC(C)(C)OC(=O)CCCCCOc1cc(Br)ccc1C=O>>CC(C)(C)OC  
 (=O)CCCCCOc1cc(/C=C/c2ccc(N(c3cccc3)c3cccc3)cc2)ccc1C=O  
 C=Cc1ccc(C)cc1.Oc1ccc(Br)cc1>>Cc1ccc(/C=C/c2ccc(O)cc2)cc1  
 C=CC(=O)N(C)C.O=c1ccc(-c2nc(-  
 c3ccc(OC(F)(F)F)cc3)no2)cn1Cc1cccc(Br)c1>>CN(C)C(=O)/C=C/c1cccc(Cn2cc(-c3nc(-  
 c4ccc(OC(F)(F)F)cc4)no3)ccc2=O)c1  
 C=CCOc1cccc1.Cc1ccc(Br)cc1>>Cc1ccc(/C=C/COc2cccc2)cc1  
 C=CC(=O)OCC.CC(C)(C)OC(=O)CSc1ccc(Br)cc1>>CCOC(=O)/C=C/c1ccc(SCC(=O)OC(C)(C)C)cc1  
 Brclccc2c3c([nH]c12)C1CCN(CC1)C3.C=Cc1ccc(C)nc1>>Cc1ccc(/C=C/c2cccc3c4c([nH]c23)C2CC  
 N(CC2)C4)cn1  
 C=CC(N)=O.Cc1cc(Br)cc(C)c1N>>Cc1cc(/C=C/C(N)=O)cc(C)c1N  
 C=Cc1ccc(CN(CC)CC)cc1.CCOC(=O)c1cccc1Br>>CCOC(=O)c1cccc1/C=C/c1ccc(CN(CC)CC)cc1  
 C=CCc1ccc(OC)c(OC)c1.COC(=O)c1cc(OC)c(OC)cc1Br>>COC(=O)c1cc(OC)c(OC)cc1/C=C/Cc1ccc  
 (OC)c(OC)c1  
 C=CC1CCCCC1.Cc1cccc1OS(=O)(=O)C(F)(F)F>>C=C(c1cccc1C)C1CCCCC1  
 C=CC(=O)Nc1cccc1.O=c1c(I)coc2cc(O)ccc12>>O=C(/C=C/c1coc2cc(O)ccc2c1=O)Nc1cccc1  
 C=Cc1cc(OC(C)=O)cc(OC(C)=O)c1.CC(C)(Oc1ccc(C(=O)c2ccc(Cl)cc2)cc1)C(=O)Oc1ccc(I)cc1>>C  
 C(=O)Oc1cc(/C=C/c2ccc(OC(=O)C(C)(C)Oc3ccc(C(=O)c4ccc(Cl)cc4)cc3)cc2)cc(OC(C)=O)c1  
 C=CC(=O)OCCCC.O=c1[nH]c(=O)n([C@H]2C[C@H](O)[C@H]2(CO)O2)cc1I>>CCCCOC(=O)/C=C/  
 C/c1cn([C@H]2C[C@H](O)[C@H]2(CO)O2)c(=O)[nH]c1=O  
 C=CC(=O)OC.CCc1nc2c(N)nc3cc(Br)ccc3c2n1CC(C)(C)O>>CCc1nc2c(N)nc3cc(/C=C/C(=O)OC)ccc  
 3c2n1CC(C)(C)O  
 C=CC(=O)OCCCC.Fc1ccc(I)cc1>>CCCCOC(=O)/C=C/c1ccc(F)cc1  
 C=CC(=O)OC.Cc1cccc(Br)n1>>COC(=O)/C=C/c1cccc(C)n1  
 C=CC(=O)OCC.C[Si](C)(C)c1cnc1Br>>CCOC(=O)/C=C/c1cnc1[Si](C)(C)C  
 C=C1C(=O)O[C@H]2/C=C(\C)CC/C=C(\C)CC[C@H]2.FC(F)(F)c1cccc(I)c1>>C/C1=C/[C@H]  
 2OC(=O)/C=C/c3cccc(C(F)(F)F)c3[C@H]2CC/C(C)=C/CC1  
 C=Cc1cccc1.Ic1nc2cccc2c1-c1cccc1>>C(=C/c1nc2cccc2c1-c1cccc1)\c1cccc1  
 C=CC(C)=O.FC1(F)C(I)=C1c1ccc(Br)cc1>>CC(=O)/C=C/C1=C(c2ccc(Br)cc2)C1(F)F  
 C=CC(=O)OC.COc1ccc(C=O)c(Br)c1OC>>COC(=O)/C=C/c1c(C=O)ccc(OC)c1OC  
 C=Cc1cccn2nc(Cl)nc12.CN(c1cccc1Br)S(C)(=O)=O>>CN(c1cccc1/C=C/c1cccn2nc(Cl)nc12)S(C)(=O)=O

6806 C=C[C@@H]1COC(C)(C)N1C(=O)OCc1cccc1.Ic1cccc1>>CC1(C)OC[C@@H]/(C=C/c2cccc2)N1  
C(=O)OCc1cccc1  
6807 C=CC#N.COC(=O)c1ccc(I)cc1>>COC(=O)c1ccc(/C=C/C#N)cc1  
6808 C=Cc1cccc1.O=C(c1ccc(Br)cc1)N1C(=O)c2cccc2S1(=O)=O>>O=C(c1ccc(/C=C/c2cccc2)cc1)N1C  
(=O)c2cccc2S1(=O)=O  
6809 C=CC(=O)OC(C)(C)C.COc1ccc(-c2c(C)noc2-  
c2cc(Br)c(OCc3cccc3)cc2OCc2cccc2)cc1>>COc1ccc(-c2c(C)noc2-  
6810 Br1cccc1.C=CS(=O)c1cccc1>>O=S(/C=C/c1cccc1)c1cccc1  
6811 C=CC(=O)OCC.Cc1ccc(S(=O)(=O)Cc2cccc2I)cc1>>CCOC(=O)/C=C/c1cccc1CS(=O)(=O)c1ccc(C)  
C=CC[C@@H]1C[C@@H]([C@@H](O)c2ccc(OC)c(OC)c2)CO[C@@H]1c1ccc(OC)c(OC)c1.COc1ccc  
6812 (Br)cc1OC>>COc1ccc(/C=C/C[C@@H]2C[C@@H]([C@@H](O)c3ccc(OC)c(OC)c3)CO[C@@H]2c2c  
cc(OC)c(OC)c2)cc1OC  
6813 C=Cc1cnc(C)nc1OC[C@@H]1C[C@@H]1c1ccc(OC)cn1.Cc1ccc(Br)cn1>>COc1ccc([C@@H]2C[C@@H]  
]2COc2nc(C)nc2/C=C/c2ccc(C)nc2)nc1  
6814 C=CC(=O)OC.CO[C@@H]1[C@@H](OC(C)=O)[C@@H](COC(C)=O)O[C@@H]1n1cc(I)c(=O)[nH]c1=  
O>>COC(=O)/C=C/c1cn([C@@H]2O[C@@H](COC(C)=O)[C@@H](OC(C)=O)[C@@H]2OC)c(=O)[nH  
6815 C=CC(=O)OCC.Cc1cc(F)cc(CN(C)C)c1Br>>CCOC(=O)/C=C/c1c(C)cc(F)cc1CN(C)C  
6816 C=Cc1cccc1OC.FC(F)(F)c1cccc1I>>COc1cccc1/C=C/c1cccc1C(F)(F)F  
6817 C=C.Ic1cccc1>>C=Cc1cccc1  
6818 C=C1c2cccc2C1(C#N)CC.N#Cc1ccc(Br)cc1>>CCC1(C#N)/C(=C/c2ccc(C#N)cc2)c2cccc21  
6819 C=Cc1cccc(C=O)c1.CCOC(=O)C(F)(F)Br>>CCOC(=O)C(F)(F)/C=C/c1cccc(C=O)c1  
6820 C=CC(=O)OC.Nc1cc(Cl)ccc1I>>COC(=O)/C=C/c1ccc(Cl)cc1N  
6821 C=C(C)C(=O)OC.O=Cc1ccc(Br)cc1>>COC(=O)/C(C)=C/c1ccc(C=O)cc1  
6822 C=CC(=O)OC.O=C1CCC(N2C(=O)c3cccc(I)c3C2=O)C(=O)N1>>COC(=O)/C=C/c1cccc2c1C(=O)N(  
C1CCC(=O)NC1=O)C2=O  
6823 Br1ccc2[nH]c3ncccc3c2c1.C=CC(=O)N(C)Cc1cc2cccc2n1C>>CN(Cc1cc2cccc2n1C)C(=O)/C=C/c  
1ccc2[nH]c3ncccc3c2c1  
6824 C=CS(=O)(=O)c1cccc1.Cl1ccc(I)cc1>>O=S(=O)/C=C/c1ccc(Cl)cc1)c1cccc1  
6825 C=Cc1nnn(C)n1.N#Cc1cccc(Br)c1>>Cn1nnc(/C=C/c2cccc(C#N)c2)n1  
6826 C=CC(=O)OC(C)(C)C.CN1CCC2(CC1)Cc1cc(Br)enc1NC2=O>>CN1CCC2(CC1)Cc1cc(/C=C/C(=O)  
OC(C)(C)enc1NC2=O  
6827 C=Cc1scnc1C.FC(F)(F)C(F)(F)C(F)(F)C(F)(F)C(F)(F)C(F)(F)Br>>Cc1nsc1/C=C/C(F)(F)C(F)(F)C(F)(F)  
(F)C(F)(F)C(F)(F)C(F)(F)F  
6828 C=CC(=O)OCC.CCCn1ccc(Br)cc1=O>>CCCN1ccc(/C=C/C(=O)OCC)cc1=O  
6829 Br1cccc(N(c2cccc2)c2cccc2)n1.C=Cc1cccc(Cl)c1>>Cl1cccc(/C=C/c2cccc(N(c3cccc3)c3cccc3)n  
2)c1  
6830 C=CCN(C(=O)OC(C)(C)C)C(=O)OC(C)(C)C.N#Cc1ccc(Br)cc1>>CC(C)(C)OC(=O)N(C/C=C/c1ccc(  
C#N)cc1)C(=O)OC(C)(C)C  
6831 C=Cc1cccc1.Nc1ccc(Br)cc1>>Nc1ccc(/C=C/c2cccc2)cc1  
6832 C=CC(=O)Nc1ccc(OC)cc1.CC(C)(C)c1ccc2[nH]c3c(c2c1)CC(=O)Nc1ccc(I)cc1-  
3>>COc1ccc(NC(=O)/C=C/c2ccc3c(c2)-c2[nH]c4ccc(C(C)(C)C)cc4c2CC(=O)N3)cc1  
6833 Br1cccc1.C=COC(CC)CCCC>>C=C(OC(CC)CCCC)c1cccc1  
6834 Br1nn(C2CCCCO2)c2cccc12.C=Cc1cccn1>>C=C/c1nn(C2CCCCO2)c2cccc12)\c1cccn1  
6835 C=CC(=O)N1CCOCC1.Cn1c2cccc2c2nc3ccc(Cl)cc3c3cccc1c32>>Cn1c2cccc2c2nc3ccc(/C=C/C(=O)  
N4CCOCC4)cc3c3cccc1c32  
6836 C=Cc1cncnc1.CCCOc1ccc(Br)cc1F>>CCCOc1ccc(/C=C/c2cncnc2)cc1F  
6837 Br1cncnc1.C=CC(=O)OCCCC>>CCCCOC(=O)/C=C/c1cncnc1  
6838 C=CC(=O)OC.COc1nc(C)enc1N(C(=O)OCC(C)C)S(=O)(=O)c1cncnc1-  
c1ccc(I)cc1>>COC(=O)/C=C/c1ccc(-c2ncccc2S(=O)(=O)N(C(=O)OCC(C)C)c2ncc(C)nc2OC)cc1  
6839 C=CC(=O)OC.CC(=O)OCCCOnc1cc(I)c(=O)[nH]c1=O>>COC(=O)/C=C/c1cn(OCCOC(C)=O)c(=O)[  
nH]c1=O  
6840 C=COC(CC)CCCC.Ic1cccc2cccc12>>C=C(OC(CC)CCCC)c1cccc2cccc12  
6841 C=CC(CCCC)(CCCC)n1nnc2cccc21.Cc1ccc(I)cc1>>CCCCC(/C=C/c1ccc(C)cc1)(CCCC)n1nnc2cccc  
\*CNCCCOCCOCCOCCCN(C(=O)COc1ccc(C(Cc2cc(OC)cc(OC)c2)NC(=O)c2ccc(C=C)cc2)cc1.O=Cc  
6842 1ccc(I)cc1>>\*CNCCCOCCOCCOCCCN(C(=O)COc1ccc(C(Cc2cc(OC)cc(OC)c2)NC(=O)c2ccc(/C=C/  
c3ccc(C=O)cc3)cc2)cc1  
6843 C=Cc1cccc1.COc1ccc(C=O)c(Br)c1>>COc1ccc(C=O)c(/C=C/c2cccc2)c1  
6844 Br1cnc2c(c1)NCCCN2.C=CC(=O)N(C)Cc1oc2cccc2c1C>>Cc1c(CN(C)C(=O)/C=C/c2cnc3c(c2)NC  
CCN3)oc2cccc12  
6845 C=Cc1ccc(C#N)cc1.N#Cc1cc2sc3cccc3c2c2cc(Br)ccc12>>N#Cc1ccc(/C=C/c2ccc3c(C#N)cc4sc5ccc  
cc5c4c3c2)cc1

6846 C=CN1CCCC1=O.O=C1CCC(N2C(=O)c3ccc(Br)cc3C2=O)C(=O)N1>>O=C1CCC(N2C(=O)c3ccc(/C  
=C/N4CCCC4=O)cc3C2=O)C(=O)N1  
6847 C=Cc1cccc1.COc1ccc(Br)cc1F>>COc1ccc(/C=C/c2ccccc2)cc1F  
6848 C=CC(=O)OC.Fc1ccc(C(=C(I)CC[Se]c2ccccc2)c2ccc(F)cc2)cc1>>COC(=O)/C=C/C(CC[Se]c1cccc1)  
=C(c1ccc(F)cc1)c1ccc(F)cc1  
6849 C=CC(=O)OC.COc1ccc2c(c1)CCN(c1ccc(C3CC3)cc1)C2(C)c1ccc(Br)cc1>>COC(=O)/C=C/c1ccc(C2  
(C)c3ccc(OC)cc3CCN2c2ccc(C3CC3)cc2)cc1  
6850 C=CC(=O)OCCCC.COc1cc(Br)cc(OC)c1>>CCCCOC(=O)/C=C/c1cc(OC)cc(OC)c1  
6851 C=CCN1C(=O)c2ccccc2C1=O.FC(F)(F)c1ccc(Br)cc1>>O=C1c2ccccc2C(=O)N1C/C=C/c1ccc(C(F)(F)  
F)cc1  
6852 C=C(Br)CC1(C)Cc2ccccc2C1=O.C=CC(=O)OCC>>C=C(/C=C/C(=O)OCC)CC1(C)Cc2ccccc2C1=O  
6853 C=CC(=O)OCCCC.COc1ccccc1Br>>CCCCOC(=O)/C=C/c1ccccc1OC  
6854 C=CC(=O)OCC.Ic1cccc2ccccc12>>CCOC(=O)/C=C/c1cccc2ccccc12  
6855 C=CC(=O)OC.Cc1cccc(C)c1C(=O)c1sc2cc(O)ccc2c1Oc1ccc(Br)cc1>>COC(=O)/C=C/c1ccc(Oc2c(C(  
=O)c3c(C)cccc3C)sc3cc(O)ccc23)cc1  
6856 C=CC(=O)OC.Cc1ccc2c(c1)OS(=O)(=O)C(F)(F)F)CCC=C2>>COC(=O)/C=C/c1c(C)ccc2c1CCC=C2  
6857 C=CC(=O)OC(C)(C)C.COc1c2ccoc2c(Br)c2oc(=O)ccc12>>COc1c2ccoc2c(/C=C/C(=O)OC(C)(C)C)c  
2oc(=O)ccc12  
6858 C=CCC(C(=O)OC)C(=O)OC.CC(C)(C)Oc1ccc(Br)cc1>>COC(=O)C(C/C=C/c1ccc(OC(C)(C)C)cc1)C(  
=O)OC  
6859 C=CC(=O)N1N=Cc2ccccc2C1CCC.COc1cc(Cc2c(C)nc(N)nc2N)cc(I)c1OC>>CCCC1c2ccccc2C=NN  
1C(=O)/C=C/c1cc(Cc2c(C)nc(N)nc2N)cc(OC)c1OC  
6860 C=Cc1ccc(OC)cc1.CC(C)(Br)CCOC(=O)c1ccc(F)cc1>>COc1ccc(/C=C/C(C)(C)CCOC(=O)c2ccc(F)cc  
2)cc1  
6861 C=CC(=O)N1N=Cc2ccccc2C1c1nc2ccccc2s1.COc1cc(Cc2cnc(N)nc2N)cc(I)c1OC>>COc1cc(Cc2cnc(  
N)nc2N)cc(/C=C/C(=O)N2N=Cc3ccccc3C2c2nc3ccccc3s2)c1OC  
6862 C=Cc1cccc(C=O)c1.COc1c(CN(C(=O)C2CC2)c2ccc(Br)c2)ccc2c1OC(C)(C)C=C2>>COc1c(CN(C(=  
O)C2CC2)c2ccc(/C=C/c3ccccc(C=O)c3)c2)ccc2c1OC(C)(C)C=C2  
6863 C=CC(C)(O)CCC=C(C)C.COc1ccc(Br)cc1>>COc1ccc(/C=C/C(C)(O)CCC=C(C)C)cc1  
6864 Brc1cccc2[nH]ccc12.C=CC(=O)OC>>COC(=O)/C=C/c1cccc2[nH]ccc12  
6865 C=Cc1ccccc1OC.COc1ccc(I)c(OC)c1>>COc1ccc(/C=C/c2ccccc2OC)c(OC)c1  
6866 C=CC(=O)O.N#Cc1ccc(Br)c1>>N#Cc1ccc(/C=C/C(=O)O)c1  
6867 C=CC(=O)OC.CCCCc1nc2c(N)nc3cc(Br)ccc3c2n1CC(C)C>>CCCCc1nc2c(N)nc3cc(/C=C/C(=O)OC)  
ccc3c2n1CC(C)C  
6868 C=CC(C)(C)O.O=c1c(Br)coc2ccccc12>>CC(C)(O)/C=C/c1coc2ccccc2c1=O  
6869 C=CC(C)(C)O.Nc1ncc(Br)cn1>>CC(C)(O)/C=C/c1cnc(N)nc1  
6870 C=CC(=O)CCC.Cc1ccc(Br)cc1>>CCCC(=O)/C=C/c1ccc(C)cc1  
6871 C=CC(=O)OC.CCn1cnc2c(NCc3cccc(Br)c3)nc(N3CCC(C)CC3)nc21>>CCn1cnc2c(NCc3cccc(/C=C/C(  
=O)OC)c3)nc(N3CCC(C)CC3)nc21  
6872 C=CC(=O)OC.FC(F)(F)c1ccccc1I>>COC(=O)/C=C/c1ccccc1C(F)(F)F  
6873 C=CC(=O)OC.COc1c(CN(C(=O)c2ccccc2)c2ccc(Br)c2)ccc2c1OC(C)(C)[C@H](O)[C@H]2Sc1ccccc  
1>>COC(=O)/C=C/c1ccc(N(Cc2ccc3c(c2OC)OC(C)(C)[C@H](O)[C@H]3Sc2ccccc2)C(=O)c2ccccc2  
6874 C=CC(=O)N(C)Cc1cc2ccccc2n1C.COc1ccc(Cn2nc(N)c3cc(Br)enc32)cc1>>COc1ccc(Cn2nc(N)c3ccc(/  
C=C/C(=O)N(C)Cc4cc5ccccc5n4C)enc32)cc1  
6875 C=CCN1C(=O)c2ccccc2C1=O.CCOC(=O)c1ccc(Br)cc1>>CCOC(=O)c1ccc(/C=C/CN2C(=O)c3ccccc3  
C2=O)cc1  
6876 C=CC(=O)OCc1ccccc1.O=Cc1cc(Oc2ccc(F)cc2F)ccc1I>>O=Cc1cc(Oc2ccc(F)cc2F)ccc1/C=C/C(=O)  
OCc1ccccc1  
6877 C=CC(=O)OC(C)(C)C.CCCc1ccc(Br)cc1>>CCCc1ccc(/C=C/C(=O)OC(C)(C)C)cc1  
6878 C=CC(N)=O.CC(C)n1cc(-c2nc(Br)c(N)nc2-c2ccccc2)ccc1=O>>CC(C)n1cc(-  
c2nc(/C=C/C(N)=O)c(N)nc2-c2ccccc2)ccc1=O  
6879 C=CC(=O)OC.O=C(c1ccccc1)c1ccc(Br)cc1>>COC(=O)/C=C/c1ccc(C(=O)c2ccccc2)cc1  
6880 C=CC(=O)OCC.COnc1c(=O)c2ccccc2c2cc(Br)ccc21>>CCOC(=O)/C=C/c1ccc2c(c1)c1ccccc1c(=O)n2  
6881 C=Cc1ccccc1.O=S1(=O)c2ccccc2C2(CN1Cc1ccc(Br)cc1)OCCO2>>O=S1(=O)c2ccccc2C2(CN1Cc1cc  
c(/C=C/C3ccccc3)cc1)OCCO2  
6882 C=Cc1ccccc1C.COc1ccc(I)c1N>>COc1ccc(/C=C/c2ccccc2C)c1N  
6883 C=CCNC(N)=O.O=c1oc2cnc3ccc(Br)cc3c2n1-  
c1cccc(C(F)(F)F)c1>>NC(=O)NC/C=C/c1ccc2ncc3oc(=O)n(-c4cccc(C(F)(F)F)c4)c3c2c1  
6884 C=Cc1ccccc1.CCCCCCNC(=O)CCl>>CCCCCNC(=O)C/C=C/c1ccccc1  
6885 C=CCC(C)C(=O)OCC.Cc1ccccc1Br>>CCOC(=O)C(C)C/C=C/c1ccccc1C  
6886 C=Cc1cccc(C=O)c1.FC(F)(F)I>>O=Cc1ccc(/C=C/C(F)(F)F)c1

C=CC(N)=O.COc1ccc2sc(-c3cncc(Br)c3)nc2c1>>COc1ccc2sc(-c3cncc(/C=C/C(N)=O)c3)nc2c1  
C=Cc1cccc1.Cc1cccc1I>>Cc1cccc1/C=C/c1cccc1  
C=CC(=O)OC CCC.CNc1cc(Cl)ccc1[N+](=O)[O-]>>CCCCOC(=O)/C=C/c1ccc([N+](=O)[O-]  
C=CC(=O)OCC(CC)CCCC.COc1cccc(Cl)c1>>CCCC(C)(C)COC(=O)/C=C/c1cccc(OC)c1  
C=C(C)(C)=(O)OC.COc1ccc(I)cc1>>COC(=O)/C(C)=C/c1ccc(OC)cc1  
C=Cc1ccc(OC(C)(C))cc1.FC(F)(F)C(F)(F)C(F)(F)Br>>CC(C)(C)Oc1ccc(/C=C/C(F)(F)C(F)(F)C(F)(  
F)F)cc1  
C=CC(=O)N1CCN(C)CC1.CC(C)(C)c1ccc2[nH]c3c(c2c1)CC(=O)Nc1ccc(I)cc1-  
3>>CN1CCN(C(=O)/C=C/c2ccc3c(c2)-c2[nH]c4ccc(C(C)(C)C)cc4c2CC(=O)N3)CC1  
C=CC=O.O=[N+]([O-])c1ccc(C2=C(I)C2(F)F)cc1>>O=C/C=C/C1=C(c2ccc([N+](=O)[O-]  
C=CC(=O)OC.O=CC1=C(Br)CCCC1>>COC(=O)/C=C/C1=C(C=O)CCCC1  
C=Cc1cc(OCCCC)c(C=O)cc1OCCCC.CCN(CC)/N=N/c1ccc(I)cc1>>CCCCOc1cc(/C=C/c2ccc(/N=N/  
N(CC)CC)cc2)c(OCCCC)cc1C=O  
C=CC(=O)OC CCC.COc1cccc(Br)c1>>CCCCOC(=O)/C=C/c1cccc(OC)c1  
C=CC(=O)OCC.Cc1cc(I)ccc1/C=C/C#N>>CCOC(=O)/C=C/c1ccc(/C=C/C#N)c(C)c1  
C=CC(=O)O.CCOC(=O)/C=C/c1cccc2c1Oc1c(I)cccc1C2(C)C>>CCOC(=O)/C=C/c1cccc2c1Oc1c(/C=  
C/C(=O)O)cccc1C2(C)C  
C=C[Si](C)(C)C.COc1cc(CO)c(I)c(OC)c1OC>>COc1cc(CO)c(/C=C/[Si](C)(C)C)c(OC)c1OC  
C=CC(=O)N1N=Cc2cccc2C1C1CCCC1.COc1cc(Cc2cnc(N)nc2N)cc(I)c1OC>>COc1cc(Cc2cnc(N)nc  
2N)cc(/C=C/C(=O)N2N=Cc3cccc3C2C2CCCC2)c1OC  
C=CC(N)=O.COc1ncccc1I>>COc1ncccc1/C=C/C(N)=O  
C=CCn1c(=O)oc2cc(C=O)ccc21.O=C(Nc1cc(Br)ccc1-  
c1cccc1)O[C@H]1CN2CCC1CC2>>O=Cc1ccc2c(c1)oc(=O)n2C/C=C/c1ccc(-  
c2cccc2)c(NC(=O)O[C@H]2CN3CCC2CC3)c1  
C=CC(F)(F)C(F)(F)C(F)(F)C(F)(F)C(F)(F)C(F)(F)C(F)(F)C(F)(F)C(F)(F)C(F)(F).FOc1encc(Br)c1>>COc1encc(/C=  
C/C(F)(F)C(F)(F)C(F)(F)C(F)(F)C(F)(F)C(F)(F)C(F)(F)C(F)(F)C(F)(F)C(F)(F)C(F)(F)c1  
C=CCCCCCC.CCOC(=O)c1ccc(OS(=O)(=O)C(F)(F)F)cc1>>C=C(CCCCCC)c1ccc(C(=O)OCC)cc1  
C=CC(=O)N(C(C)C)C(C)C.Clc1ccc(I)cc1>>CC(C)N(C(=O)/C=C/c1ccc(Cl)cc1)C(C)C  
C=C(CC(=O)OC)C(=O)OC.FC(F)(F)Oc1ccc(I)cc1>>COC(=O)C/C(=C)c1ccc(OC(F)(F)F)cc1)C(=O)O  
C=CC#N.CCOC(=O)/C=C/c1ccc(Br)cc1>>CCOC(=O)/C=C/c1ccc(/C=C/C#N)cc1  
C=CC(=O)OCC.O=Cc1cc2c(cc1Br)OCO2>>CCOC(=O)/C=C/c1cc2c(cc1C=O)OCO2  
C=Cc1ccc1.CCCCCOc1ccc(Br)c(F)c1>>CCCCCOc1ccc(/C=C/c2ccnce2)c(F)c1  
C=CC(=O)Nc1cccc1C(=O)OCC.CC(C)(C)OC(=O)Nc1nccc(Br)c1>>CCOC(=O)c1cccc1NC(=O)/C=  
C/c1encc(NC(=O)OC(C)(C)C)c1  
Cc1ccc(S(=O)(=O)/C=C2\C(C)(C)C2(F)F)cc1.Ic1cccc1>>Cc1ccc(S(=O)(=O)/C=(C2\C(C)(C)C2(F)F)  
c2cccc2)cc1  
C=Cc1cc(OC)ccc1OC.Nc1ccc(I)cc1>>COc1ccc(OC)c(/C=C/c2ccc(N)cc2)c1  
C=CC#N.Cc1nc(C(C)C)nc1I>>Cc1nc(C(C)C)nc1/C=C/C#N  
C=CCC(=O)O.CCOC(=O)c1ccc(I)cc1>>CCOC(=O)c1ccc(/C=C/CC(=O)O)cc1  
C=COCCCCO.COc1ccc(Br)cc1>>C=C(OCCCCO)c1ccc(OC)cc1  
C=CC(=O)OC.O=S(=O)(c1cccc2cccc12)N1CCe2cc(Br)cne21>>COC(=O)/C=C/c1ene2c(c1)CCN2S(  
=O)(=O)c1cccc2cccc12  
C=CC(=O)OCc1ccc2ccc3cccc4ccc1c2c34.O=C(O)c1ccc(I)cc1>>O=C(/C=C/c1ccc(C(=O)O)cc1)OCc1  
ccc2ccc3cccc4ccc1c2c34  
C=CC(N)=O.Cc1cccc1I>>Cc1cccc1/C=C/C(N)=O  
C=CC(=O)OCC(CC)CCCC.N#Cc1cccc1Cl>>CCCC(C)(C)COC(=O)/C=C/c1cccc1C#N  
Brc1ccc2[nH]ccc2c1.C=CS(=O)(=O)c1cccc1>>O=S(=O)/C=C/c1ccc2[nH]ccc2c1)c1cccc1  
Brc1cccc1I.C=CC(=O)N(C)C>>CN(C)C(=O)/C=C/c1cccc1Br  
C=CCNC(=O)OC(C)(C)C.CC(=O)c1cccc1Br>>C=C(CNC(=O)OC(C)(C)C)c1cccc1C(C)=O  
C=C(NC(=O)OC(C)(C)C)C(=O)OC.N#Cc1ccc(N)c(I)c1>>COC(=O)/C=C/c1cc(C#N)ccc1N)NC(=O)  
OC(C)(C)C  
C=Cc1ccc(CP(=O)(OCC)OCC)cc1.CCCOc1cc(C=O)c(OCCC)cc1Br>>CCCOc1cc(/C=C/c2ccc(CP(=O)  
(OCC)OCC)cc2)c(OCCC)cc1C=O  
Brc1ccc(Oc2ceccc2)cc1.C=CC(=O)N1CCOCCI>>O=C(/C=C/c1ccc(Oc2ceccc2)cc1)N1CCOCCI  
C=Cc1ccc1.COC(=O)/C=C/c1ccc(Cl)cc1>>COC(=O)/C=C/c1ccc(/C=C/c2ccnce2)cc1  
C=CC(=O)N(C)OC.Nc1cccc(I)c1>>CON(C)C(=O)/C=C/c1cccc(N)c1  
C=CC(=O)CCC.N#Cc1ccc(Br)cc1>>CCCC(=O)/C=C/c1ccc(C#N)cc1  
C=Cc1ccc(C#N)cc1.CCCCOc1ccc2c(c1)cc(C#N)c1ccc(Br)cc12>>CCCCOc1ccc2c(c1)cc(C#N)c1ccc(/  
C=C/c3ccc(C#N)cc3)cc12  
Brc1ccc(I)cc1.C=CCn1nn2ceccc21>>Brc1ccc(/C=C/Cn2nn3ceccc32)cc1

6932 C=CC(=O)NCCc1ccc(F)cc1.COc1ccc(-c2oc3cc(OC)ccc3c(=O)c2I)cc1>>COc1ccc(-  
c2oc3cc(OC)ccc3c(=O)c2/C=C/C(=O)NCCc2ccc(F)cc2)cc1  
6933 C=CC(=O)OCCCC.Cn1nc(Br)c2cc([N+](=O)[O-]  
]ccc21>>CCCCOC(=O)/C=C/c1nn(C)c2ccc([N+](=O)[O-])cc12  
6934 C=COCCO.Fc1ccc(Br)cc1>>C=C(OCO)c1ccc(F)cc1  
6935 Br1ccenc1.C=C[C@@H]1CCCN1C(=O)OC(C)(C)C>>CC(C)(C)OC(=O)N1CCC[C@H]1/C=C/c1ccc  
6936 C=CC(=O)OC(C)(C)C.Cl1ccc(Sc2cn(C3CC3)nc2-c2ccc(Br)cc2)cc1>>CC(C)(C)OC(=O)/C=C/c1ccc(-  
c2nn(C3CC3)cc2Sc2ccc(Cl)cc2)cc1  
6937 C=Cc1ccc(Cl)cc1.COc1cccc(I)c1>>COc1cccc(/C=C/c2ccc(Cl)cc2)c1  
6938 C=Cc1cnc(C#N)c1Nc1ccc2[nH]ccc2c1C.COc1c(Br)cccc1CN1CCN(C)CC1>>COc1c(/C=C/c2cnc(C  
#N)c2Nc2ccc3[nH]ccc3c2C)cccc1CN1CCN(C)CC1  
6939 C=Cn1cnc2c(NC)ncnc21.Cc1cccc(C)c1I>>Cn1cnc2c1ncn2/C=C/c1c(C)cccc1C  
6940 C=CC(=O)OC.CCOC(=O)c1cc(=O)c2cc(Br)ccc2o1>>CCOC(=O)c1cc(=O)c2cc(/C=C/C(=O)OC)ccc2  
6941 C=CC(=O)OCC.COc1c(C)c2c(c(C)c1I)C(c1cccc1)(c1cccc1)c1cccc1-  
2>>CCOC(=O)/C=C/c1c(C)c2c(c(C)c1OC)-c1cccc1C2(c1cccc1)c1cccc1  
6942 C=CC(=O)OC(C)(C)C.Oc1ccc(C=C2CCCC2)c2ccc(Br)cc2F)cc1>>CC(C)(C)OC(=O)/C=C/c1ccc(C(  
=C2CCCC2)c2ccc(O)cc2)c(F)c1  
6943 C=CP(=O)(OCC)OCC.N#Cc1ccc(Br)cc1>>CCOP(=O)(/C=C/c1ccc(C#N)cc1)OCC  
6944 C=CC(=O)OCC.O=Cc1ccc(Cl)cc1Br>>CCOC(=O)/C=C/c1cc(Cl)ccc1C=O  
6945 C=CC(=O)OC(C)(C)C.Cc1nc(I)ccc1OCc1cccc1>>Cc1nc(/C=C/C(=O)OC(C)(C)C)ccc1OCc1cccc1  
6946 C=Cc1cncnc1.CC(C)(C)OC(=O)N[C@H](COc1cnc(Cl)c(Br)c1)Cc1cccc1>>CC(C)(C)OC(=O)N[C@  
H](COc1cnc(Cl)c(/C=C/c2cncnc2)c1)Cc1cccc1  
6947 BrC=Cc1cccc1.C=C>>C=CC=Cc1cccc1  
6948 C=CCC(NCc1ccc(OC)cc1)c1cccc1.Ic1cccc1>>COc1ccc(CNC(C/C=C/c2cccc2)c2cccc2)cc1  
6949 C=C.COc1cc(I)cc(OC)c1>>C=Cc1cc(OC)cc(OC)c1  
6950 C=CC(=O)OC(C)(C)C.O=S(=O)(c1ccc(Br)cc1)n1ccc2ccnc21>>CC(C)(C)OC(=O)/C=C/c1ccc(S(=O)(  
=O)n2ccc3ccnc32)cc1  
6951 C=Cc1ccc(OC)cc1.O=C1Nc2cccc(I)c2/C1=C/c1ccc[nH]1>>COc1ccc(/C=C/c2cccc3c2/C(=C/c2ccc[nH  
]2)C(=O)N3)cc1  
Br1cnc2cccc2c1.C=CCO[C@]1(C)C[C@@H](C)C(=O)[C@H](C)[C@H]2NC(=O)O[C@@H]2[C@  
@H](CC)OC(=O)[C@H](C)C(=O)[C@H](C)[C@H]1O[C@@H]1O[C@H](C)C[C@H](N(C)C)[C@H  
6952 ]1OC(=O)c1cccc1>>CC[C@H]1OC(=O)[C@H](C)C(=O)[C@H](C)[C@@H](O[C@@H]2O[C@H](  
C)C[C@H](N(C)C)[C@H]2OC(=O)c2cccc2)[C@](C)(OC/C=C/c2cnc3cccc3c2)C[C@@H](C)C(=O  
)IC@H1(C)IC@H12NC(=O)OIC@H112  
6953 C=Cc1cccc(C)c1.CCOC(=O)C(Cc1cccc1I)C(C)=O>>CCOC(=O)C(Cc1cccc1/C=C/c1cccc(C)c1)C(C  
C=C/C=C/c1cccc1.FC(F)(F)C(F)(F)C(F)(F)C(F)(F)C(F)(F)Br>>FC(F)(F)C(F)(F)C(F)(F)C(F)(  
6954 F)C(F)(F)C(F)(F)/C=C/C=C/c1cccc1  
6955 C=CCN1C(=O)c2cccc2C1=O.O=[N+](O-  
]c1ccc(I)cc1>>O=C1c2cccc2C(=O)N1C/C=C/c1ccc([N+](=O)[O-])cc1  
6956 C=CCCCCCC.CC1(C)OC(=O)c2c(ccc2OS(=O)(=O)C(F)(F)F)O1>>CCCCC/C=C/c1cccc2c1C(=O)  
OC(C)(C)O2  
6957 C=C.CC(=O)Nc1cc(Cl)ccc1Br>>C=Cc1ccc(Cl)cc1NC(C)=O  
6958 C=CCCCC(C(=O)OC)C(=O)OC.Ic1cccc1>>COC(=O)C(CCCC/C=C/c1cccc1)C(=O)OC  
6959 C=CC(=O)OC.CC(=O)Oc1cccc1-c1nnn(Cc2cccc2)c1I>>COC(=O)/C=C/c1c(-  
c2cccc2OC(C)=O)nnn1Cc1cccc1  
6960 C=CC(C)(C)O.COc1ccc(C(C)=O)c(O)c1I>>COc1ccc(C(C)=O)c(O)c1/C=C/C(C)(C)O  
6961 C=CC(=O)N1CCCC1.COc1cc(Br)c(C(=O)OC(C)(C)C)cc1OC>>COc1cc(/C=C/C(=O)N2CCCC2)c(C(  
=O)OC(C)(C)C)cc1OC  
6962 C=CC(=O)OCCOC.C[C@@H](Nc1cnc2sc(Br)cc12)c1cccc1>>COCCOC(=O)/C=C/c1cc2c(N[C@H  
](C)c3cccc3)ncnc2s1  
6963 C=Cc1cc(OC)c(OC)c(OC)c1-  
c1ccc(F)c(F)c1.COc1ccc(I)cc1>>COc1ccc(/C=C/c2cc(OC)c(OC)c(OC)c2-c2ccc(F)c(F)c2)cc1  
6964 C=CC(=O)OC(C)(C)C.N#Cc1c(-c2cccc(Br)c2)cc(-c2cccc2)nc1N>>CC(C)(C)OC(=O)/C=C/c1cccc(-  
c2cc(-c3cccc3)nc(N)c2C#N)c1  
6965 Br1ccenc1.C=CS(N)(=O)=O>>NS(=O)(=O)/C=C/c1ccnc1  
6966 C=Cc1cccc1.CCCCOC(=O)/C=C/c1cccc(Cl)c1>>CCCCOC(=O)/C=C/c1cccc(/C=C/c2cccc2)c1  
6967 C=CC(C)=O.O=[N+](O-)c1ccc(I)cc1>>CC(=O)/C=C/c1ccc([N+](=O)[O-])cc1  
6968 C=COCCCC.O=c1cc(Br)c2cc(Cl)ccc2o1>>CCCCO/C=C/c1cc(=O)oc2ccc(Cl)cc12  
6969 C=C.COC(=O)c1ccc(Br)cc1>>C=Cc1ccc(C(=O)OC)cc1  
6970 C=CC(=O)CCCC.CC(C)(C)c1ccc(Br)cc1>>CCCCC(=O)/C=C/c1ccc(C(C)(C)C)cc1  
6971 C=CC(=O)O.Cc1cc(C)cc(Br)c1>>Cc1cc(C)cc(/C=C/C(=O)O)c1

6972 C=Cc1ccc([Si](OC)(OC)OC)cc1.CCOP(=O)(Cc1ccc(/C=C/c2c3cccc3c(Br)c3cccc23)cc1)OCC>>CC  
OP(=O)(Cc1ccc(/C=C/c2c3cccc3c(/C=C/c3ccc([Si](OC)(OC)OC)cc3)c3cccc23)cc1)OCC  
6973 Br1ccc(C(=C(c2cccc2)c2cccc2)c2cccc2)cc1.C=Cc1ccccn1>>C(=C/c1ccccn1)\c1ccc(C(=C(c2cccc  
2)c2cccc2)c2cccc2)cc1  
6974 C=CC(=O)OCC.Cc1ncc(Br)c(N)c1I>>CCOC(=O)/C=C/c1c(C)ncc(Br)c1N  
6975 C=COCCCC.COc1cccc(Cl)c1>>C=C(OCCCC)c1cccc(OC)c1  
6976 C=Cc1ccc(-c2c(-c3ccc(C=C)cc3)c(=O)c2=O)cc1.COc1ccc(I)cc1>>C=Cc1ccc(-c2c(-  
c3ccc(/C=C/c4ccc(OC)cc4)cc3)c(=O)c2=O)cc1  
6977 C=CC(=O)OC.COc1ccc(Br)c([N+](=O)[O-])c1>>COC(=O)/C=C/c1ccc(OC)cc1[N+](=O)[O-]  
6978 C=C(F)[Si](C)(c1cccc1)c1cccc1.FC(F)(F)c1ccc(I)cc1>>C[Si](/C(F)=C/c1ccc(C(F)(F)F)cc1)(c1cccc  
1)c1cccc1  
6979 C=CC(=O)OC.O=C1C(=O)N(Cc2cccc2)c2cccc(Br)c21>>COC(=O)/C=C/c1cccc2c1C(=O)C(=O)N2C  
c1cccc1  
6980 C=CS(=O)(=O)NCC(C)C.COc1ccc(Br)c(CNC(=O)OC(C)(C)C)c1>>COc1ccc(/C=C/S(=O)(=O)NCC(  
C)C)c(CNC(=O)OC(C)(C)C)c1  
6981 Br1ccc2ccc3cccc4ccc1c2c34.C=CC(=O)OCC(C)C>>CC(C)COC(=O)/C=C/c1ccc2ccc3cccc4ccc1c2c3  
6982 C=CC(=O)OCCN(C)C.Ic1enn2c(-c3cccc3)cc(-c3cccc3)nc12>>CN(C)CCOC(=O)/C=C/c1enn2c(-  
c3cccc3)cc(-c3cccc3)nc12  
6983 C=CCc1cccc1.COC(=O)c1ccc(I)cc1Nc1ccc(F)cc1>>COC(=O)c1ccc(/C=C/Cc2cccc2)cc1Nc1ccc(F)c  
6984 C=CS(=O)(=O)F.Cc1ccc(I)c(C)c1>>Cc1ccc(/C=C/S(=O)(=O)F)c(C)c1  
6985 C=CC(=O)OC(C)(C)C.O=C(Cc1cccc1)c1ccc(Br)cc1>>CC(C)(C)OC(=O)/C=C/c1ccc(C(=O)Cc2cccc  
2)cc1  
6986 C=C[Si](CC)(CC)CC.CN(C)c1ccc(Br)cc1>>CC[Si](/C=C/c1ccc(N(C)C)cc1)(CC)CC  
6987 C=Cc1ccc2cccc2c1.CC(=O)c1ccc(Br)cc1>>CC(=O)c1ccc(/C=C/c2ccc3cccc3c2)cc1  
6988 C=Cc1cccc1.Cc1ccc(N)c1Br>>Cc1ccc(N)c1/C=C/c1cccc1  
6989 C=C(NC(=O)OC(C)(C)C)C(=O)OC.COc1ccc(C=O)cc1Oc1ccc(I)cc1>>COC(=O)/C(=C/c1ccc(Oc2cc(  
C=O)ccc2OC)cc1)NC(=O)OC(C)(C)C  
6990 C=CC(=O)CCCCC.N#Cc1ccc(Br)cc1>>CCCCC(=O)/C=C/c1ccc(C#N)cc1  
6991 C=CCCCO.C[Si](C)(C)Oc1ccc(-c2ccc(Br)cc2)nc1>>C[Si](C)(C)Oc1ccc(-c2ccc(/C=C/CCCO)cc2)nc1  
6992 C=CC(=O)OC(C)(C)C.Cc1cc(O)ccc1Br>>Cc1cc(O)ccc1/C=C/C(=O)OC(C)(C)C  
6993 C=Cc1cccc([N+](=O)[O-])c1.O=[N+](O-)]c1ccc(I)cc1>>O=[N+](O-  
]c1ccc(/C=C/c2cccc([N+](=O)[O-])c2)cc1  
6994 C=CCN(C(=O)OC(C)(C)C)C(=O)OC(C)(C)C.O=C1CCCc2ccc(Cl)cc21>>CC(C)(C)OC(=O)N(C/C=C/  
c1ccc2c(c1)C(=O)CCC2)C(=O)OC(C)(C)C  
6995 C=C(NC(C)=O)C(=O)OC.CC(=O)c1ccc(Br)cc1>>COC(=O)/C(=C/c1ccc(C(C)=O)cc1)NC(C)=O  
6996 C=Cc1ccc(N2CCN(C(C)=O)CC2)cc1.Fc1cc(Br)cc(Cn2ccnc2)c1>>CC(=O)N1CCN(c2ccc(/C=C/c3cc(  
F)cc(Cn4ccnc4)c3)cc2)CC1  
6997 C=CC(=O)OC.O=C1Nc2cccc(I)c2/C1=C/c1ccc[nH]1>>COC(=O)/C=C/c1cccc2c1/C(=C/c1ccc[nH]1)C  
(=O)N2  
6998 C=C1c2cccc2C1(C#N)CC.COc1ccc(Br)cc1OC>>CCC1(C#N)/C(=C/c2ccc(OC)c(OC)c2)c2cccc21  
6999 C=CC(=O)N(C)Cc1oc2cccc2c1C.CC(C)(C)OC(=O)NCCN1Cc2cc(Br)cnc2NC1=O>>Cc1c(CN(C)C(  
=O)/C=C/c2cnc3c(c2)CN(CCNC(=O)OC(C)(C)C)C(=O)N3)oc2cccc12  
7000 C=CC(=O)OC.COc1cc(I)c(-c2c(Cl)cccc2[N+](=O)[O-  
]c(OCc2cccc2)c1>>COC(=O)/C=C/c1cc(OC)cc(OCc2cccc2)c1-c1c(Cl)cccc1[N+](=O)[O-]  
7001 C=CC(=O)NCc1cccc1.COc1ccc2c(=O)c(I)coc2c1>>COc1ccc2c(=O)c(/C=C/C(=O)NCc3cccc3)coc2  
7002 C=Cc1cccc(F)c1.COc1ccc2c(=O)c(I)coc2c1>>COc1ccc2c(=O)c(/C=C/c3cccc(F)c3)coc2c1  
7003 C=CC(=O)OCC.Clc1ennc(C2CC2)c1>>CCOC(=O)/C=C/c1ennc(C2CC2)c1  
7004 C=CC(=O)OC(C)(C)C.O=C1Nc2cccc2O/C1=C/c1ccc(Br)cc1>>CC(C)(C)OC(=O)/C=C/c1ccc(/C=C2\  
Oc3cccc3NC2=O)cc1  
7005 C=Cc1ccc([N+](=O)[O-])cc1.COc1ccc(I)cc1>>COc1ccc(/C=C/c2ccc([N+](=O)[O-])cc2)cc1  
7006 C=CC(=O)Nc1ccc(Cl)cc1.COc1ccc2c(=O)c(I)coc2c1>>COc1ccc2c(=O)c(/C=C/C(=O)Nc3ccc(Cl)cc3)  
coc2c1  
7007 C=CC(=O)OC.COc1cccc2c(I)nn(C(=O)OC(C)(C)C)c12>>COC(=O)/C=C/c1nn(C(=O)OC(C)(C)C)c2c  
(OC)cccc12  
7008 C=CCCCC.CS(=O)(=O)c1ccc(CCl)cc1>>C=C(CCCC)Cc1ccc(S(C)(=O)=O)cc1  
7009 C=Cc1ccc(OC)cc1.COc1cc(Br)cc(OC)c1F>>COc1ccc(/C=C/c2cc(OC)c(F)c(OC)c2)cc1  
7010 C=CC(=O)OCCCC.O=c1[nH]c(=O)n([C@H]2C[C@H](O)[C@@H](CO)O2)cc1Br>>CCCCOC(=O)/  
C=C/c1cn([C@H]2C[C@H](O)[C@@H](CO)O2)c(=O)[nH]c1=O  
7011 Br1cccc1.C=Cc1nc2c(=O)[nH]c(N=CN(C)C)nc2n1[C@@H]1C[C@H](O)[C@@H](COC(c2cccc2)  
(c2ccc(OC)cc2)c2ccc(OC)cc2)O1>>COc1ccc(C(OC[C@H]2O[C@H](n3c(/C=C/c4cccc4)nc4c(=O)[n  
H]c(N=CN(C)C)nc43)C[C@@H]2O)(c2cccc2)c2ccc(OC)cc2)cc1

7012 C=C[Si](C)(C)C.Ic1ccoc1>>C[Si](C)(C)/C=C/c1ccoc1

7013 C=CC(=O)O.COc1ccc(S(=O)(=O)N(C)c2ccc(I)cc2)cc1OC>>COc1ccc(S(=O)(=O)N(C)c2ccc(/C=C/C(=O)O)cc2)cc1OC

7014 C=Cc1cccc1.COC(=O)/C(Br)=C1\CCCC1>>C=C(/C(C(=O)OC)=C1/CCCC1)c1cccc1

7015 C=Cc1cccc1.O=C(C=C(c1cccc1)c1cccc1)c1cccc1Br>>O=C(C=C(c1cccc1)c1cccc1)c1cccc1/C=C/c1cccc1

7016 C=CC(=O)OC.Cc1cc(Br)cc(NC(=O)C2CCCCC2)c1>>COC(=O)/C=C/c1cc(C)cc(NC(=O)C2CCCCC2)

7017 C=Cc1cc(OCc2ccccc2)ccc1OCc1cccc1.O=C(NCCc1ccc(F)cc1)c1cc(I)ccc1O>>O=C(NCCc1ccc(F)cc1)c1cc(/C=C/c2cc(OCc3ccccc3)ccc2OCc2ccccc2)ccc1O

7018 C=CCc1cccc1.CN(C(=O)c1ncc2c(c1I)c1cccc1n2S(=O)(=O)N(C)C)c1cccc1>>CN(C(=O)c1ncc2c(c1/C=C/Cc1cccc1)c1cccc1n2S(=O)(=O)N(C)C)c1cccc1

7019 C=COCCCC.O=S(=O)(Oc1cccc2c1CCCC2)C(F)(F)F>>C=C(OCCCC)c1cccc2c1CCCC2

7020 C=Cc1cccc1.CC(=O)c1cn(C)c2c(Br)cccc12>>CC(=O)c1cn(C)c2c(/C=C/c3ccccc3)cccc12

7021 C=CC(=O)n1c(C)ccc1C.Ic1cccc1>>Cc1ccc(C)n1C(=O)/C=C/c1cccc1

7022 C=CCCO.Cc1cc(Br)ccc1Cc1c(O[C@@H]2O[C@H](COC(=O)c3ccccc3)[C@@H](OC(=O)c3ccccc3)[C@@H](OC(=O)c3ccccc3)[C@H]2OC(=O)c2ccccc2)n[nH]c1C(C)C>>Cc1cc(/C=C/CCO)ccc1Cc1c(O[C@@H]2O[C@H](COC(=O)c3ccccc3)[C@@H](OC(=O)c3ccccc3)[C@H](OC(=O)c3ccccc3)[C@H]2OC(=O)c2ccccc2)n[nH]c1C(C)C

7023 Br1cccc2[nH]ncc12.C=CC(N)=O>>NC(=O)/C=C/c1cccc2[nH]ncc12

7024 C=Cc1cccc(C#N)c1Nc1ccc2[nH]ccc2c1C.ClCCOc1cccc(Br)c1>>Cc1c(Nc2c(C#N)cncc2/C=C/c2cccc(OCCCCl)c2)ccc2[nH]ccc12

7025 Br1cccc2c(c1)OCO2.C=Cc1cccc1>>C(=C/c1ccc2c(c1)OCO2)\c1cccc1

7026 C=Cc1cccc1.O=c1c(I)c(/C=C/c2ccc(Cl)cc2)[nH]c2ccccc12>>O=c1c(/C=C/c2ccccc2)c(/C=C/c2ccc(Cl)cc2)[nH]c2ccccc12

7027 C=CC(=O)OCC.COc1cccc(I)c1>>CCOC(=O)/C=C/c1cccc(OC)c1

7028 C=C/C=C(\CCCC)OCC.CC(=O)c1ccc(Br)cc1>>CCCC/C(=C\C=C\c1ccc(C(C)=O)cc1)OCC

7029 Br1ccc2[nH]ccc2c1.C=CC(=O)OCC>>CCOC(=O)/C=C/c1ccc2[nH]ccc2c1

7030 C=CC(=O)NCCc1ccc(F)cc1.O=c1c(I)c(-c2ccc(O)cc2)oc2cc(O)ccc12>>O=C(/C=C/c1c(-c2ccc(O)cc2)oc2cc(O)ccc2c1=O)NCCc1ccc(F)cc1

7031 C=CCCCCCCCCCCCC.COc1cccc(Br)c1[N+](=O)[O-]>>CCCCCCCCCCCCC/C=C/c1cccc(OC)c1[N+](=O)[O-]

7032 Br1cnc2ccccc2c1.C=CCN(C(=O)OCc1cccc1)C(=O)OC(C)(C)C>>CC(C)(C)OC(=O)N(C/C=C/c1cnc2ccccc2c1)C(=O)OCc1cccc1

7033 BrC1=C(C2=CCCCO2)CCCC1.C=CC(=O)OC>>COC(=O)/C=C/C1=C(C2=CCCCO2)CCCC1

7034 C=CC(=O)OC.CC(C)(C)OC(=O)NC1CCc2cc(Br)ccc21>>COC(=O)/C=C/c1ccc2c(c1)CCC2NC(=O)OC(C)(C)C

7035 C=CCCC=C(C)C.ClCc1cccc(Oc2ccccc2)c1>>C=C(CCCC=C(C)C)Cc1cccc(Oc2ccccc2)c1

7036 Br1cccn1.C=CCNC(=O)OC(C)(C)C>>CC(C)(C)OC(=O)NC/C=C/c1cccn1

7037 C=CC(=O)OC.Ic1cn2c(n1)[C@@H](OCc1cccc1)[C@@H](OCc1cccc1)[C@H](OCc1cccc1)[C@H]2COCc1cccc1>>COC(=O)/C=C/c1cn2c(n1)[C@@H](OCc1cccc1)[C@@H](OCc1cccc1)[C@H](OCc1cccc1)[C@H]2COCc1cccc1

7038 C=C(NC(C)=O)C(=O)OC.COC1=C(I)CON(Cc2ccccc2)[C@H]1[C@H]1COC(C)(C)O1>>COC(=O)/C(=C/C1=C(OC)[C@H]([C@H]2COC(C)(C)O2)N(Cc2ccccc2)OC1)NC(C)=O

7039 Br1ccc(-c2ccccc2)cc1.C=CC[C@H](CC(=O)OC(C)(C)C(=O)N[C@H](C(=O)N[C@H](C)c1cccc1)C(C)(C)C>>C[C@H](NC(=O)[C@@H](NC(=O)[C@H](C/C=C/c1ccc(-c2ccccc2)cc1)CC(=O)OC(C)(C)C(C)(C)C)c1cccc1

7040 C=Cc1cc(C)ccc1C.CCCCc1ccc(/C=C/c2ccc(I)cc2)cc1>>CCCCc1ccc(/C=C/c2ccc(/C=C/c3cc(C)ccc3C)cc2)cc1

7041 C=CC(C)(C)O.N#Cc1cccc2nc3cccc(Br)c3nc12>>CC(C)(O)/C=C/c1cccc2nc3cccc(C#N)c3nc12

7042 C=CCO.CC(=O)Oc1ccc(I)cc1>>CC(=O)Oc1ccc(/C=C/CO)cc1

7043 C=CC(=O)OC.CC(C)(C)OC(=O)N1Cc2c(O)ccc(Br)c2C1>>COC(=O)/C=C/c1ccc(O)c2c1CN(C(=O)OC(C)(C)C)C2

7044 C=C[Si](CC)(CC)CC.Ic1cccc1>>CC[Si](/C=C/c1cccc1)(CC)CC

7045 C=CC=C(C)C.Ic1cccc1>>CC(C)=C/C=C/c1cccc1

7046 C=Cc1cccc1.CCOC(=C(Br)c1cccc1)C(F)(F)F>>CCOC(=C(/C=C/c1cccc1)c1cccc1)C(F)(F)F

7047 C=CCOc1cccc1CC.Ic1cccc1>>CCc1cccc1OC/C=C/c1cccc1

7048 Br1ccc(-c2ccncc2)cc1.C=CCN1C(=O)c2ccccc2C1=O>>O=C1c2ccccc2C(=O)N1C/C=C/c1ccc(-c2ccncc2)cc1

7049 C=CC(=O)OC.Ic1cccc2cc[nH]c12>>COC(=O)/C=C/c1cccc2cc[nH]c12

7050 C=C(C)C(C)=O.Oc1cccc1I>>CC(=O)/C(C)=C/c1cccc1O

7051 C=CS(=O)(=O)F.Oc1cc(O)cc(I)c1>>O=S(=O)(F)/C=C/c1cc(O)cc(O)c1  
Br1cnc2ccccc2c1.C=CCO[C@]1(C)C[C@H](C)C(=O)[C@H](C)C2NC(=O)O[C@]2(CC)[C@H](CC)OC(=O)/C(C)=C/[C@H](C)[C@H]1O[C@H]1O[C@H](C)C[C@H](N(C)C)[C@H]1OC(=O)c1

7052 ccccc1>>CC[C@H]1OC(=O)/C(C)=C/[C@H](C)[C@@H](O[C@@H]2O[C@H](C)C[C@H](N(C)C)[C@H]2OC(=O)c2ccccc2)[C@](C)(OC/C=C/c2cnc3ccccc3c2)C[C@H](C)C(=O)[C@H](C)C2NC(=O)O[C@]121CC

7053 C=CC(OCC)OCC.Cc1ccccc1I>>CCOC(/C=C/c1ccccc1C)OCC

7054 C=CC[C@H](NC(=O)OC(C)(C)C)C(=O)OC.Ic1ccccc1>>COC(=O)[C@H](C/C=C/c1ccccc1)NC(=O)OC(C)(C)C

7055 C=CP(=O)(OCC)OCC.Clc1ccc(I)cc1>>CCOP(=O)(/C=C/c1ccc(Cl)cc1)OCC

7056 C=CC(=O)OC(C)(C)C.O=C(OCCc1ccccc1)c1cc(Br)cc(I)c1>>CC(C)(C)OC(=O)/C=C/c1cc(Br)cc(C(=O)OCCc2ccccc2)c1

7057 C=CC(=O)OC.COc1ccc2c(c1)CCN(c1ccc(CC(F)(F)F)cc1)C2(C)c1ccc(Br)cc1>>COC(=O)/C=C/c1ccc(C2(C)c3ccc(OC)cc3CCN2c2ccc(CC(F)(F)F)cc2)cc1

7058 C=Cc1cnccl.CC(C)(C)OC(=O)N[C@H](COc1cnc(Br)c1)C(c1ccccc1)c1ccccc1>>CC(C)(C)OC(=O)N[C@H](COc1cnc(/C=C/c2cnc2)c1)C(c1ccccc1)c1ccccc1

7059 C=Cc1ccccc1.COC(=O)[C@]12Cc3cc4cc(Br)ccc4nc3C[C@H]1CCN(C(=O)OC(C)(C)C)C2>>COC(=O)[C@]12Cc3cc4cc(/C=C/c5ccccc5)ccc4nc3C[C@@H]1CCN(C(=O)OC(C)(C)C)C2

7060 C=CC(=O)OC(C)(C)C.Nc1ccc(F)cc1I>>CC(C)(C)OC(=O)/C=C/c1cc(F)ccc1N

7061 Br1ccc(C=C2CCCC2)c2ccc3c(cnn3C3CCCCO3)c2)cc1.C=CC(=O)OC>>COC(=O)/C=C/c1ccc(C(=C2CCCC2)c2ccc3c(cnn3C3CCCCO3)c2)cc1

7062 C=CN(C)C(C)=O.Cc1ccc(Br)cc1>>C=C(c1ccc(C)cc1)N(C)C(C)=O

7063 C=CC(=O)OC.O=[N+](O-)]c1ccc(C2=C(I)C2(F)F)cc1>>COC(=O)/C=C/C1=C(c2ccc([N+](=O)[O-])cc2)C1(F)F

7064 C=CCN(C(=O)OC(C)(C)C)C(=O)OC(C)(C)C.CC(=O)c1cccc(Br)c1>>CC(=O)c1cccc(/C=C/CN(C(=O)OC(C)(C)C)C(=O)OC(C)(C)C)c1

7065 C=C(NC(=O)OCc1ccccc1)C(=O)OC.CC(=O)OCc1cc(OCc2ccccc2)ccc1Br>>COC(=O)/C=C/c1ccc(OCc2ccccc2)cc1COC(C)=O)NC(=O)OCc1ccccc1

7066 C=CC(=O)OC(C)(C)C.Cc1oc2c(C)c3oc(=O)cc(C)c3cc2c1Br>>Cc1oc2c(C)c3oc(=O)cc(C)c3cc2c1/C=C/C(=O)OC(C)(C)C

7067 C=C[Si](CC)(CC)CC.O=[N+](O-)]c1ccc(Br)cc1>>CC[Si](/C=C/c1ccc([N+](=O)[O-])cc1)(CC)CC

7068 C=CC(=O)N1CCC2(CC1)OCCO2.CC(C)(C)OC(=O)c1ccccc1Br>>CC(C)(C)OC(=O)c1ccccc1/C=C/C(=O)N1CCC2(CC1)OCCO2

7069 C=CN1C(=O)c2ccccc2C1=O.CNC(=O)c1cc(Oc2cccc(I)c2)ccn1>>CNC(=O)c1cc(Oc2cccc(/C=C/N3C(=O)c4ccccc4C3=O)c2)ccn1

7070 C=Cc1ccccc1.Cc1cnc2c1c(I)cn2[C@@H]1O[C@H](CO)[C@@H](O)[C@@]1(C)F>>Cc1cnc2c1c(/C=C/c1ccccc1)cn2[C@@H]1O[C@H](CO)[C@@H](O)[C@@]1(C)F

7071 C=CC(=O)NC.C[C@]12C[C@@]34C=C(Sc5ccccc(I)c5)C(=O)[C@@](C)(CCC(=O)Nc5c(O)ccc(C(=O)O)c5O)[C@@H]3[C@H](C[C@@H]1C4)O2>>CNC(=O)/C=C/c1ccccc(SC2=C[C@]34C[C@H]5C[C@H](O)[C@@]5(C)C3)[C@H]4[C@]1(C)(CCC(=O)Nc3c(O)ccc(C(=O)O)c3O)C2=O)c1

7072 C=CC#N.Clc1ccccc1>>N#C/C=C/c1ccccc1

7073 C=Cc1ccccc1.O=[N+](O-)]c1cccc(Br)c1>>O=[N+](O-)]c1cccc(/C=C/c2ccccc2)c1

7074 C=CC(N)=O.Cc1cccc(I)c1>>Cc1cccc(/C=C/C(N)=O)c1

7075 C=CC(OCC)OCC.O=Cc1cc(Cl)ccc1Br>>CCOC(/C=C/c1ccc(Cl)cc1C=O)OCC

7076 C=Cc1ccc(OC)cc1.FC(F)(F)c1cccc(Br)c1>>COc1ccc(/C=C/c2cccc(C(F)(F)F)c2)cc1

7077 C=Cc1ccc(C(C)(C)C)cc1.COc1ccc(Br)cc1>>COc1ccc(/C=C/c2ccc(C(C)(C)C)cc2)cc1

7078 C=CC(=O)OC(C)(C)C.CC(C)(C)OC(=O)N1C[C@H](O)C[C@H]1c1ccc(Br)cc1>>CC(C)(C)OC(=O)/C=C/c1ccc([C@H]2[C@@H](O)CN2C(=O)OC(C)(C)C)cc1

7079 C=Cc1cc(OC)cc(OC)c1.Ic1ccc(OCc2ccccc2)cc1>>COc1cc(/C=C/c2ccc(OCc3ccccc3)cc2)cc(OC)c1

7080 C=CC(=O)OCCCC.COc1ccccc1I>>CCCCOC(=O)/C=C/c1ccccc1OC

7081 C=C(NC(C)=O)C(=O)OC.CCOC(=O)c1[nH]c2cc3c(nc2c1Br)CCC(C(C)(C)C)C3>>CCOC(=O)c1[nH]c2cc3c(nc2c1/C=C(\NC(C)=O)C(=O)OC)CCC(C(C)(C)C)C3

7082 C=Cc1ccc(C)cc1.CCCCC(Br)C(F)(F)F>>CCCCC(/C=C/c1ccc(C)cc1)C(F)(F)F

7083 C=CCN(C)c1cccn1.COC(=O)[C@H](Cc1ccc(OS(=O)(=O)C(F)(F)F)cc1)n1ccccc1>>COC(=O)[C@H](Cc1ccc(/C=C/CN(C)c2cccn2)cc1)n1ccccc1

7084 C=CCN(C(=O)OC(C)(C)C)C(=O)OC(C)(C)C.COc1cc(Br)cc(OC)c1OC>>COc1cc(/C=C/CN(C(=O)OC(C)(C)C)C(=O)OC(C)(C)C)cc(OC)c1OC

7085 C=CC(=O)OCC.Cc1oc2ccccc2c(=O)c1Br>>CCOC(=O)/C=C/c1c(C)oc2ccccc2c1=O

7086 C=Cc1ccc(O)c(OC)c1.COC(=O)Cn1c(=O)c(Cl)nc2cc(Br)enc21>>COC(=O)Cn1c(=O)c(/C=C/c2ccc(O)c(OC)c2)nc2cc(Br)enc21

7087 C=CC(=O)OC.Clc1ccccc1Br>>COC(=O)/C=C/c1ccccc1Cl



7088 C=CC(C)=O.IC1=CO[C@H](COCc2ccccc2)[C@@H](OCc2ccccc2)[C@@H]1OCc1ccccc1>>CC(=O)  
/C=C/C1=CO[C@H](COCc2ccccc2)[C@@H](OCc2ccccc2)[C@@H]1OCc1ccccc1  
7089 C=CC(=O)OC.COc1c(O)cc(-c2ccc(Br)cc2)cc1C12CC3CC(CC(C3)C1)C2>>COC(=O)/C=C/c1ccc(-  
c2cc(O)c(OC)c(C34CC5CC(CC(C5)C3)C4)c2)cc1  
7090 C=Cc1ccc(OC2CCCCO2)cc1.O=[N+][([O-])c1ccc(I)cc1CO>>O=[N+][([O-]  
)]c1ccc(/C=C/c2ccc(OC3CCCCO3)cc2)cc1CO  
C=Cc1nc2c(N)ncnc2n1[C@@H]1O[C@H](CO[Si](C)(C)C(C)(C)C)[C@@H](O[Si](C)(C)C(C)(C)C)[  
7091 C@H]1O[Si](C)(C)C(C)(C)C.CC(=O)c1ccc(Br)cc1>>CC(=O)c1ccc(/C=C/c2nc3c(N)ncnc3n2[C@@H]  
12O[C@H](CO[Si](C)(C)C(C)(C)C)[C@@H](O[Si](C)(C)C(C)(C)C)[C@H]2O[Si](C)(C)C(C)(C)C)cc  
7092 C=CC(=O)OCCSc1ccccc1.O=[N+][([O-])c1ccc(Br)cc1>>O=C/C=C/c1cccc([N+](=O)[O-]  
)]c1OCCSc1ccccc1  
7093 C=Cc1ccc(C=C)cc1.Nc1ccc(I)cc1>>C=Cc1ccc(/C=C/c2ccc(N)cc2)cc1  
7094 Brc1ccc(C2=CCC3(CC2)OCCO3)cc1.C=CC1CCC(CCC)CC1>>CCCC1CCC(/C=C/c2ccc(C3=CCC4(  
CC3)OCCO4)cc2)CC1  
7095 C=Cc1ccc(OC)cc1.FC(F)(F)C(F)(F)C(F)(F)C(F)(F)C(F)(F)C(F)(F)C(F)(F)Br>>COc1ccc(/C=C/C(F)(F)  
)C(F)(F)C(F)(F)C(F)(F)C(F)(F)C(F)(F)C(F)(F)C(F)(F)cc1  
7096 \*CNCCOCCOCCOCCNC(=O)COc1ccc(C(Cc2cc(OC)cc(OC)c2)NC(=O)c2ccccc(C=C)c2)cc1.Cc1cc  
c(I)cc1F>>\*CNCCOCCOCCOCCNC(=O)COc1ccc(C(Cc2cc(OC)cc(OC)c2)NC(=O)c2ccccc(/C=C/c  
3ccc(C)c(F)c3)c2)cc1  
7097 C=CC(F)(F)C(F)(F)C(F)(F)C(F)(F)C(F)(F)C(F)(F)C(F)(F)F.COC(=O)c1ccc(Br)cc1>>COC(=O)c1ccc(/C=C/C  
(F)(F)C(F)(F)C(F)(F)C(F)(F)C(F)(F)C(F)(F)C(F)(F)cc1  
7098 C=CNC(C)=O.O=S(=O)(Oc1ccc(Cl)cc1)C(F)(F)F>>C=C(NC(C)=O)c1ccc(Cl)cc1  
7099 C=C/C=C(/OCC)[Si](C)(C)C.COc1ccccc1I>>CCO/C(=C/C=C/c1ccccc1OC)[Si](C)(C)C  
7100 C=CC(N)=O.Ic1ccc2c(c1)OCO2>>NC(=O)/C=C/c1ccc2c(c1)OCO2  
C=CC[C@H](CC(=O)OC(C)(C)C)(=O)N[C@H](C(=O)N[C@H](C)c1ccccc1)C(C)(C)C.COc1cc(Br)  
7101 ccc1-  
c1ccccc1>>COc1cc(/C=C/C[C@H](CC(=O)OC(C)(C)C)(=O)N[C@H](C(=O)N[C@H](C)c2ccccc2)  
C(C)(C)C)ccc1-c1ccccc1  
7102 C=CC(=O)Nc1ccccc1OC.COc1ccc2c(=O)c(I)coc2c1>>COc1ccc2c(=O)c(/C=C/C(=O)Nc3ccccc3OC)c  
oc2c1  
7103 C=Cc1ccccc1.Cc1ccc(I)c1>>Cc1ccc(/C=C/c2ccccc2)c1  
C=CC#N.CCOc1ccc(C(=O)CCC(=O)Nc2cc(-  
7104 c3ccccc3)c3ccc(Br)cc3n2)cc1OCC>>CCOc1ccc(C(=O)CCC(=O)Nc2cc(-  
c3ccccc3)c3ccc(/C=C/C#N)cc3n2)cc1OCC  
C=CCO[C@@H]1CC(=O)O[C@H](C)C/C=C/C/[C@H](O[Si](C)(C)C(C)(C)C)[C@H](C)C[C@H]  
(CC(OC)OC)[C@H](O[C@@H]2O[C@H](C)[C@@H](O[C@H]3C[C@@](C)(O)[C@@H](OC(=O)  
7105 CC)[C@H](C)O3)[C@H](N(C)C)[C@H]2OC(C)=O)[C@H]1OC.FC(F)(F)c1ccc(I)cc1>>CCC(=O)O[  
C@H]1[C@H](C)O[C@@H](O[C@H]2[C@H](N(C)C)[C@@H](OC(C)=O)[C@H](O[C@@H]3[C@  
@H](OC)[C@H](OC/C=C/c4ccc(C(F)(F)F)cc4)CC(=O)O[C@H](C)C/C=C/C=C/[C@H](O[Si](C)(C)  
C(C)(C)C)[C@H](C)C[C@H](C)C[C@H]13CC(OC)OC)O[C@H]2C)C[C@H]1C[C@H](C)O  
7106 C=CC(=O)OCC.FC(F)(F)c1cc(Br)c2ccccc(C(F)(F)F)c2n1>>CCOC(=O)/C=C/c1cc(C(F)(F)F)nc2c(C(F)  
(F)F)ccccc12  
7107 C=CCN1C(=O)c2ccccc2C1=O.Fc1ccc(Br)cc1>>O=C1c2ccccc2C(=O)N1C/C=C/c1ccc(F)c1  
7108 C=CCN1C(=O)c2ccccc2C1=O.OCc1ccc(Br)cc1>>O=C1c2ccccc2C(=O)N1C/C=C/c1ccc(CO)cc1  
7109 C=C/C=C(/OCC)C(=O)OC.Ic1ccccc1>>CCO/C(=C/C=C/c1ccccc1)C(=O)OC  
7110 C=Cc1ccc(F)cc1.CC(=O)c1ccc(Cl)cc1>>CC(=O)c1ccc(/C=C/c2ccc(F)cc2)cc1  
7111 C=Cc1ccc(F)cc1.COC(=O)c1cc([N+](=O)[O-])ccc1Cl>>COC(=O)c1cc([N+](=O)[O-]  
)]ccc1/C=C/c1ccc(F)cc1  
7112 C=Cc1ccc(/C=C/c2ccc(C=O)cc2)cc1.COCCOCCOCCOCC(COCCOCCOCCOCC)Oc1ccc(I)cc1>>COC  
COCCOCCOCC(COCCOCCOCCOCC)Oc1ccc(/C=C/c2ccc(/C=C/c3ccc(C=O)cc3)cc2)cc1  
7113 C=CCN1CCN(C(=O)OC(C)(C)C)CC1=O.CCc1nn2c(C)cc(C)nc2c1Cc1ccc(Br)cc1>>CCc1nn2c(C)cc(  
C)nc2c1Cc1ccc(/C=C/CN2CCN(C(=O)OC(C)(C)C)CC2=O)cc1  
7114 C=CC(=O)OC.N#Cc1ccc(Cl)c(F)c1Br>>COC(=O)/C=C/c1c(C#N)ccc(Cl)c1F  
7115 C=C(NC(C)=O)C(=O)OCc1ccccc1.COC(=O)/C(=C/c1ccc(Br)cc1)NC(=O)OC(C)(C)C>>COC(=O)/C(  
=C/c1ccccc1/C=C(\NC(C)=O)C(=O)OCc2ccccc2)c1)NC(=O)OC(C)(C)C  
7116 C=Cc1ccccc1OC.Nc1ccc(Br)cc1>>COc1ccccc1/C=C/c1ccc(N)cc1  
7117 C=C(C)C(=O)OC(C)(C)C.Ic1ccccc1>>C/C(=C/c1ccccc1)C(=O)OC(C)(C)C  
7118 C=CC(=O)OCC.N#Cc1ccc(Oc2ccccc(Br)c2)c1>>CCOC(=O)/C=C/c1ccc(Oc2ccccc(C#N)c2)c1  
7119 C=CC(=O)OC(C)(C)C.CN1CC(=O)Nc2ncc(Br)cc2C1>>CN1CC(=O)Nc2ncc(/C=C/C(=O)OC(C)(C)C)  
cc2C1  
7120 C/C=C/C(=O)OC.Ic1ccccc1>>COC(=O)/C=C/C/c1ccccc1  
7121 Brc1ccccc1.C=CCOc1ccccc1C>>Cc1ccccc1OC/C=C/c1ccccc1

7122 C=Cc1cccc1.FC(F)(F)c1cccc(Cl)c1>>FC(F)(F)c1cccc(/C=C/c2cccc2)c1  
7123 C=CC(=O)OC.COClO[C@H](COC(C)=O)[C@@H](OC(C)=O)C=C1I>>COC(=O)/C=C/C1=C[C@H](OC(C)=O)[C@@H](COC(C)=O)OC1OC  
7124 C=CC(=O)CC.CCc1cc(C)cc(CC)c1Br>>CCC(=O)/C=C/c1c(CC)cc(C)cc1CC  
7125 C=Cc1ccc(N(c2ccc(OC)cc2)c2ccc(OC)cc2)cc1.O=Cc1ccc(Br)cc1>>COc1ccc(N(c2ccc(/C=C/c3ccc(C=O)cc3)cc2)c2ccc(OC)cc2)cc1  
7126 C=CB1OC(C)CC(C)(C)O1.C=CI>>C=C/C=C/B1OC(C)CC(C)(C)O1  
7127 C=CC(OCC)OCC.COc1ccc(I)cc1>>CCOC(/C=C/c1ccc(OC)cc1)OCC  
7128 C=Cc1c(F)c(F)c(F)c(F)c1F.CC(C)CCCC(C)(C)Br>>CC(C)CCCC(C)(C)/C=C/c1c(F)c(F)c(F)c(F)c1F  
7129 C=CC(=O)NCCCCC.COc1ccc(-c2oc3cc(OC)ccc3c(=O)c2I)cc1>>CCCCCNC(=O)/C=C/c1c(-c2ccc(OC)cc2)oc2cc(OC)ccc2c1=O  
7130 C=CC(=O)Nc1cc(C)ccc1C.COc1ccc2c(=O)c(I)coc2c1>>COc1ccc2c(=O)c(/C=C/C(=O)Nc3cc(C)ccc3C)coc2c1  
7131 C=Cc1cccc1.O=c1c(Br)coc2cccc12>>O=c1c(/C=C/c2cccc2)coc2cccc12  
7132 C=C.FC(F)(F)c1cc(Br)cc(C(F)(F)F)c1>>C=Cc1cc(C(F)(F)F)cc(C(F)(F)F)c1  
7133 C=CC(=O)OC.Cc1ccc(S(=O)(=O)n2ccc3cc(I)ccc32)cc1>>COC(=O)/C=C/c1ccc2c(ccn2S(=O)(=O)c2cc(C)cc2)c1  
7134 C=CCCCCCCCCCCCC.c1ccc([I+](c2cccc2)cc1>>CCCCCCCCCCCCC/C=C/c1cccc1  
7135 C=CCNS(=O)(=O)c1cc(C(F)(F)F)cc(C(F)(F)F)c1.Clc1ccc(Br)cc1>>O=S(=O)(NC/C=C/c1ccc(Cl)cc1)c1cc(C(F)(F)F)cc(C(F)(F)F)c1  
7136 CC(=O)/C=C/CC(NS(=O)(=O)c1ccc(C)cc1)C1CC1.Cc1ccc(Br)cc1>>CC(=O)/C=C(/CC(NS(=O)(=O)c1ccc(C)cc1)C1CC1)c1ccc(C)cc1  
7137 C=CC(=O)N(C)Cc1cc2cccc2n1C.CN(C)c1n[nH]c2ncc(Br)cc12>>CN(Cc1cc2cccc2n1C)C(=O)/C=C/c1cnc2[nH]nc(N(C)C)c2c1  
7138 C=Cc1ccc(OC(F)(F)F)cc1.Cn1nc(I)c2ccc(C=O)cc21>>Cn1nc(/C=C/c2ccc(OC(F)(F)F)cc2)c2ccc(C=O)cc21  
7139 C=CC1CC(=O)N1.COc1cccc1I>>COc1cccc1/C=C/C1CC(=O)N1  
7140 C=C.COC(=O)c1cc(Cl)ccc1Br>>C=Cc1ccc(Cl)cc1C(=O)OC  
7141 Brc1cccc1.C=Cc1cccc1C>>Cc1cccc1/C=C/c1cccc1  
7142 C=Cc1cccc1.COC(=O)c1ccc(Br)cc1>>COC(=O)c1ccc(/C=C/c2cccc2)cc1  
7143 C=CC(=O)OC.COc1ccc2c(c1)CCN(c1ccc(F)cc1)C2(C)c1ccc(Br)cc1>>COC(=O)/C=C/c1ccc(C2(C)c3ccc(OC)cc3CCN2c2ccc(F)cc2)cc1  
7144 C=CC(=O)OCC.Cc1ncc(I)c(C)n1>>CCOC(=O)/C=C/c1cnc(C)nc1C  
7145 C=CC(=O)OC.CCCCc1c(I)c(OC(C)=O)c2ccccn12>>CCCCc1c(/C=C/C(=O)OC)c(OC(C)=O)c2ccccn1  
7146 C=C(NC(=O)OC(C)(C)C)C(=O)OCc1cccc1.Ic1cccc1>>CC(C)(C)OC(=O)N/C(=C)c1cccc1C(=O)OCc1cccc1  
7147 C=CCC(=O)O.Cc1cn(Cc2ccc(I)cc2)c(=O)[nH]c1=O>>Cc1cn(Cc2ccc(/C=C/CC(=O)O)cc2)c(=O)[nH]c1=O  
7148 C=CCC(=O)OC.Cc1nc2ccc(I)cc2s1>>COC(=O)/C=C/c1ccc2nc(C)sc2c1  
7149 C=Cc1cccc1.N#Cc1cc2ccc3cccc3c2c2cc(Br)ccc12>>N#Cc1cc2ccc3cccc3c2c2cc(/C=C/c3cccc3)cc  
7150 C=CS(N)(=O)=O.Cc1cccc(Br)c1C>>Cc1cccc(/C=C/S(N)(=O)=O)c1C  
7151 C=Cc1cc(C)ccc1C.CCOC(=O)C(F)Br>>CCOC(=O)C(F)/C=C/c1cc(C)ccc1C  
7152 C=Cc1ccc(F)cc1.O=Cc1cccc1S(=O)(=O)c1ccc(Br)cc1>>O=Cc1cccc1S(=O)(=O)c1ccc(/C=C/c2ccc(F)cc2)cc1  
7153 C=C(F)C(=O)OC.Ic1ccsc1>>COC(=O)/C(F)=C/c1ccsc1  
7154 C=CC(=O)OC.Cc1ccc(S(=O)(=O)n2ccc3cc(Br)ccc32)cc1>>COC(=O)/C=C/c1ccc2c(ccn2S(=O)(=O)c2ccc(C)cc2)c1  
7155 C=Cc1cccn1.COC(=O)c1cc2ccc(=O)oc2cc1OS(=O)(=O)C(F)(F)F>>COC(=O)c1cc2ccc(=O)oc2cc1/C=C/c1cccn1  
7156 C=CCO[Si](C)(C)C(C)(C)C.O=Cc1ccc(Br)cc1>>CC(C)(C)[Si](C)(C)OC/C=C/c1ccc(C=O)cc1  
7157 Brc1cccc2cccc12.C=CC(=O)N(C)OC>>CON(C)C(=O)/C=C/c1cccc2cccc12  
7158 C=CC(=O)OC.O=C(O)c1cccc(Br)c1>>COC(=O)/C=C/c1cccc(C(=O)O)c1  
7159 C=CC(=O)OCCCC.CCOC(=O)Nc1cccc1C1=C(I)CCN1S(=O)(=O)c1ccc(C)cc1>>CCCCOC(=O)/C=C/C1=C(c2cccc2NC(=O)OCC)N(S(=O)(=O)c2ccc(C)cc2)CC1  
7160 C=CC(=O)OC.Cn1nc(NC(=O)c2ccc3cccc3c2)c2c(I)cccc21>>COC(=O)/C=C/c1cccc2c1c(NC(=O)c1ccc3cccc3c1)nn2C  
7161 C=CC(=O)OCC.O=[N+](O-)]c1cccc1I>>CCOC(=O)/C=C/c1cccc1[N+](=O)[O-]  
7162 C=CC(=O)OC(C)(C)C.COC(=O)c1c(N)c(Br)cc2c1CCCC2>>COC(=O)c1c(N)c(/C=C/C(=O)OC(C)(C)cc2c1CCCC2  
7163 C=CC(=O)N(C)Cc1oc2cccc2c1C.O=C1Nc2ncc(Br)cc2CN2CCC[C@@H]12>>Cc1c(CN(C)C(=O)/C=C/c2cnc3c(c2)CN2CCC[C@H]2C(=O)N3)oc2cccc12

7164 C=CC(C)=O.O=C1Cc2c([nH]c3ccccc23)-c2cc(I)ccc2N1>>CC(=O)/C=C/c1ccc2c(c1)-c1[nH]c3ccccc3c1CC(=O)N2  
 7165 Br1cccc1.C=Cc1ccc(N(c2cccc(OC)c2)c2cccc(OC)c2)cc1>>COc1cccc(N(c2ccc(/C=C/c3ccccc3)cc2)c2cccc(OC)c2)c1  
 7166 C=Cc1ccc(F)cc1.CCOC(=O)C(C)Br>>CCOC(=O)C(C)/C=C/c1ccc(F)cc1  
 7167 Br1ccccc1.C=CC(=O)OCC>>CCOC(=O)/C=C/c1ccccc1  
 7168 C=C(Br)CC.C=CC(=O)CCCC>>C=C(/C=C/C(=O)CCCC)CC  
 7169 C=CC(=O)OCC.Oc1ccccc1I>>CCOC(=O)/C=C/c1ccccc1O  
 7170 C=CC(=O)OCC.Cc1ccc(C2OCCCC2)c(Br)c1>>CCOC(=O)/C=C/c1cc(C)ccc1C1OCCCC1  
 7171 C=C(NC(=O)OC(C)(C)C)C(=O)OC.COC(=O)c1ccc(N)c(I)c1>>COC(=O)/C(=C/c1cc(C(=O)OC)ccc1N)NC(=O)OC(C)(C)C  
 7172 C=CS(=O)(=O)c1ccccc1.Ic1ccccc1>>O=S(=O)/C=C/c1ccccc1)c1ccccc1  
 7173 Br1ccc2ccc3cccc4ccc1c2c34.C=CP(=O)(OCC)OCC>>CCOP(=O)/C=C/c1ccc2ccc3cccc4ccc1c2c34  
 7174 C=Cc1ccc(OC)c(OC)c1.CC(=O)OC[C@H]1O[C@@H](Oc2ccc(I)cc2)[C@H](OC(C)=O)[C@@H]1O  
 7175 C(C)=O>>COc1ccc(/C=C/c2ccc(O[C@@H]3O[C@H](COC(C)=O)[C@@H](OC(C)=O)[C@H]3OC(C)=O)cc2)cc1OC  
 7176 C=CCN(C(=O)C(C)(C)[C@H](C)c1ccccc1.O=C1Nc2ncccc2[C@]12Cc1ccc(Br)cc1C2>>C[C@H](c1ccccc1)N(C/C=C/c1ccc2c(c1)C[C@@]1(C2)C(=O)Nc2ncccc21)C(=O)C(C)(C)C  
 7177 Br1cccc2ccccc12.C=CC(=O)CC>>CCC(=O)/C=C/c1cccc2ccccc12  
 7178 C=CC(=O)OCC.Clc1cccc(Br)c1>>CCOC(=O)/C=C/c1cccc(Cl)c1  
 7179 Br1cccc(N2CCN(c3ncccn3)CC2)n1.C=Cc1ccccc1>>C(=C/c1cccc(N2CCN(c3ncccn3)CC2)n1)\c1cccc  
 7180 C=CC(=O)OCC.CC(C)(C)OC(=O)/C=C/c1ccc(CN(C(=O)C2CCCC2)c2cccc(Br)c2)cc1>>CCOC(=O)/C=C/c1cccc(N(Cc2ccc(/C=C/C(=O)OC(C)(C)C)cc2)C(=O)C2CCCC2)c1  
 7181 C=CC(N)=O.COc1ccc(Br)cc1OC>>COc1ccc(/C=C/C(N)=O)cc1OC  
 7182 C=CC(N)=O.COc1cccc(I)c1>>COc1cccc(/C=C/C(N)=O)c1  
 7183 C=Cc1ccc(OC)cc1.COC(=O)/C(Br)=C1/CCCO1>>C=C(/C(C(=O)OC)=C1/CCCO1)c1ccc(OC)cc1  
 7184 C=CC(=O)N1CCOCC1.CC(=O)OCCc1ccc2c3cc(Cl)ccc3nc3c4cccc4n(C)c(c1)c23>>CC(=O)OCCc1ccc2c3cc(/C=C/C(=O)N4CCOCC4)ccc3nc3c4cccc4n(C)c(c1)c23  
 7185 C=CS(=O)(=O)c1ccccc1.CCOC(=O)/C=C/c1cc(Br)cc(Cc2ccccc2)c1>>CCOC(=O)/C=C/c1cc(/C=C/S(=O)(=O)c2ccccc2)cc(Cc2ccccc2)c1  
 7186 Br1ccccc1.C=Cc1nnn(C)n1>>Cn1nnn(/C=C/c2ccccc2)n1  
 7187 C=CC(=O)OCCCC.FC(F)(F)c1ccc(I)cc1>>CCCCOC(=O)/C=C/c1ccc(C(F)(F)F)cc1  
 7188 C=Cc1ccccc1.CCc1ccc(I)cc1>>CCc1ccc(/C=C/c2ccccc2)cc1  
 7189 C=C[C@](C)(O)CO.Clc1ccccc1Br>>C[C@](O)(/C=C/c1ccccc1Cl)CO  
 7190 C=CCc1ccccc1.CC(C)(C)c1ccccc1OS(=O)(=O)C(F)(F)F>>C=C(Cc1ccccc1)c1ccccc1C(C)(C)C  
 7191 C=C1C(=O)O[C@H]2[C@H]1C[C@@H](O)/C(C)=C/CC[C@@]1(C)O[C@@H]21.Cc1ccc(I)cc1>>C  
 7192 /C1=C/CC[C@@]2(C)O[C@H]2[C@H]2OC(=O)/C(=C/c3ccc(C)cc3)[C@@H]2[C@H]1O  
 7193 C=CC(=O)Nc1ccccc1NC(=O)OC(C)(C)C.CCOC(=O)[C@H]1CN(C(C)(C)C)C[C@@H]1c1ccc(Br)cc1  
 7194 >>CCOC(=O)[C@H]1CN(C(C)(C)C)C[C@@H]1c1ccc(/C=C/C(=O)Nc2ccccc2NC(=O)OC(C)(C)C)cc  
 7195 C=CC(=O)OC.Ic1[nH]c2ccccc2c1CCOC1CCCCO1>>COC(=O)/C=C/c1[nH]c2ccccc2c1CCOC1CCC  
 7196 Br1ccc2ccccc2c1.C=CS(N)(=O)=O>>NS(=O)(=O)/C=C/c1ccc2ccccc2c1  
 7197 C=C1C(=O)O[C@@H]2C[C@@]3(C)CCCC(=C)[C@@H]3C[C@H]12.COc1ccc(Br)cn1>>C=C1CC  
 7198 C[C@@]2(C)C[C@H]3OC(=O)/C(=C/c4ccc(OC)nc4)[C@H]3C[C@@H]12  
 7199 C=CC(=O)OC.CC1(c2cc(-c3ccc(Br)cc3)ccc2O)CCCCC1>>COC(=O)/C=C/c1ccc(-c2ccc(O)c(C3(C)CCCCC3)c2)cc1  
 7200 C=CC(=O)N(C)C.C[C@]12C[C@@]34C=C(Sc5ccccc(I)c5)C(=O)[C@@](C)(CCC(=O)Nc5c(O)ccc(C(=O)O)c5O)[C@@H]3[C@H](C[C@H](C[C@H]1C4)O2>>CN(C)C(=O)/C=C/c1cccc(SC2=C[C@]34C[C@H]  
 7201 15C[C@H](O)[C@@]5(C)C3)[C@H]4[C@@](C)(CCC(=O)Nc3c(O)ccc(C(=O)O)c3O)C2=O)c1  
 7202 C=Cc1ccccc1.CCCCOC(=O)/C=C/c1ccc(Br)cc1>>CCCCOC(=O)/C=C/c1ccc(/C=C/c2ccccc2)cc1  
 7203 Br1ccc2ccccc2c1.C=COCCCCO>>C=C(OCCCCO)c1ccc2ccccc2c1  
 7204 C=Cc1ccc(F)cc1.O=Cc1ccc(Br)cc1>>O=Cc1ccc(/C=C/c2ccc(F)cc2)cc1  
 7205 C=CC(=O)OC.Cc1cc(C)n2nc(C)c(I)c2n1>>COC(=O)/C=C/c1c(C)nn2c(C)cc(C)nc12  
 7206 C=CC(=O)N1CCOCC1.O=Cc1ccccc1Br>>O=Cc1ccccc1/C=C/C(=O)N1CCOCC1  
 7207 C=CC(=O)OC(C)(C)C.Nc1ccccc1Br>>CC(C)(C)OC(=O)/C=C/c1ccccc1N  
 7208 \*CNCCCOCCOCCOCCCN(C(=O)COc1ccc(C(Cc2cc(OC)cc(OC)c2)NC(=O)c2ccc(C=C)cc2)cc1.N#Cc  
 7209 1ccccc(I)c1>>\*CNCCCOCCOCCOCCCN(C(=O)COc1ccc(C(Cc2cc(OC)cc(OC)c2)NC(=O)c2ccc(/C=C/c3ccccc(C#N)c3)cc2)cc1  
 7210 C=Cc1c2ccccc2cc2ccccc12.FC(F)(F)c1ccc(Br)cc1>>FC(F)(F)c1ccc(/C=C/c2c3ccccc3cc3ccccc23)cc1  
 7211 C=Cc1ccc(OC)c(OC)c1.COc1cc(Br)c(CCNC(C)=O)cc1OC>>COc1ccc(/C=C/c2cc(OC)c(OC)cc2CCN  
 7212 C(C)=O)cc1OC

7206 C=C[C@H](CCCCCCCC(=O)OC)O[Si](C)(C)C(C)(C)C.CCC1=C(Br)CCC1=O>>CCC1=C(/C=C/[  
C@H](CCCCCCCC(=O)OC)O[Si](C)(C)C(C)(C)C)CCC1=O  
7207 C=CC(=O)N(C)C.Clc1cccc1>>CN(C)C(=O)/C=C/c1cccc1  
7208 C=CCOc1ccc(C)cc1.Ic1cccs1>>Cc1ccc(OC/C=C/c2cccs2)cc1  
7209 C=Cc1cccc1.CCCCCCCCCCCCCBr>>CCCCCCCCCCCC/C=C/c1cccc1  
7210 Brc1cccc1.C=Cc1cccc1Cl>>Clc1cccc1/C=C/c1cccc1  
7211 C=CC(=O)NC(C)(C)C.COC(=O)/C=C/c1cccc(N(Cc2ccc(Br)cc2)C(=O)C2CCCC2)c1>>COC(=O)/C  
=C/c1cccc(N(Cc2ccc(/C=C/C(=O)NC(C)(C)C)cc2)C(=O)C2CCCC2)c1  
7212 C=Cc1ccncc1.CCN(CC)c1ccc2c(c1)C(C)(C)c1cc(Br)ccc1-  
2>>CCN(CC)c1ccc2c(c1)C(C)(C)c1cc(/C=C/c3ccncc3)ccc1-2  
7213 C=CC(N)=O.O=C/C1=C(\Br)CCCCC1>>NC(=O)/C=C/C1=C(\C=O)CCCCC1  
7214 C=CCO.CC(C)(C)c1cccc1OS(=O)(=O)C(F)(F)F>>C=C(CO)c1cccc1C(C)(C)C  
7215 C=C[C@H]1CCCCN1C(=O)OC(C)(C)C.CC(=O)Oc1ccc(I)cc1>>CC(=O)Oc1ccc(/C=C/[C@H]2C  
CCCN2C(=O)OC(C)(C)C)cc1  
7216 C=CC(=O)OC.COCCOc1ccc(Br)c(COCCOCCOCCNC(=O)OC(C)(C)C)c1>>COCCOc1ccc(/C=C/C(=O)  
OC)c(COCCOCCOCCNC(=O)OC(C)(C)C)c1  
7217 C=CC(=O)OCCCC.CCCCc1ccc(I)cc1>>CCCCOC(=O)/C=C/c1ccc(CCCC)cc1  
7218 Brc1cccs1.C=CCS(N)(=O)=O>>NS(=O)(=O)C/C=C/c1cccs1  
7219 C=CC(=O)OCc1cccc1.CC(C)(C)OC(=O)N1CCCc2cc(Br)enc21>>CC(C)(C)OC(=O)N1CCCc2cc(/C=  
C/C(=O)OCc3ccccc3)enc21  
7220 C=CC(=O)OCC.COCC(=O)CCOCc1cc2c(cc1Br)OCO2>>CCOC(=O)/C=C/c1cc2c(cc1COCCC(=O)O  
CC)OCO2  
7221 C=COCCO.Cc1ccc(Br)cc1>>C=C(OCCO)c1ccc(C)cc1  
7222 C=COCCCC.COc1ccc2nccc(OS(=O)(=O)C(F)(F)F)c2n1>>C=C(OCCCC)c1ccnc2ccc(OC)nc12  
7223 C=Cc1cccc1.FC(F)(F)c1ccc(Br)c1>>FC(F)(F)c1ccc(/C=C/c2ccccc2)c1  
7224 C=Cc1ccc(C(C)(C)C)cc1.CCOC(=O)C(F)(F)I>>CCOC(=O)C(F)(F)/C=C/c1ccc(C(C)(C)C)cc1  
7225 C=CC(=O)Nc1cccc1NC(=O)OC(C)(C)C.CCOC(=O)[C@H]1CN(Cc2ccccc2)C[C@H]1c1ccc(Br)cc  
1>>CCOC(=O)[C@H]1CN(Cc2ccccc2)C[C@H]1c1ccc(/C=C/C(=O)Nc2ccccc2NC(=O)OC(C)(C)C)  
7226 Brc1ccc2ccnc2c1.C=CC(=O)OC>>COC(=O)/C=C/c1ccc2ccnc2c1  
7227 C=CC(C)=O.O=C(O)c1ccc(CNC(=O)c2ccc(I)cc2)cc1>>CC(=O)/C=C/c1ccc(C(=O)NCc2ccc(C(=O)O)  
cc2)cc1  
7228 C=CC(=O)OCC.Clc1ccc(C#C/C=C/c2cccc(Br)c2)cc1>>CCOC(=O)/C=C/c1cccc(/C=C/C#Cc2ccc(Cl)c  
c2)c1  
7229 C=Cc1ccc(Br)cc1.C=Cc1cccc1>>C=Cc1ccc(/C=C/c2ccccc2)cc1  
7230 C=CC(=O)OC(C)(C)C.O=C1CCc2cc(Br)enc2N1>>CC(C)(C)OC(=O)/C=C/c1cnc2c(c1)CCC(=O)N2  
7231 C=C1C(=O)O[C@H]2[C@H]1C[C@H](O)/C(C)=C/CC[C@H]1(C)O[C@H]21.Ic1cccc1>>C/C1  
=C\CC[C@H]2(C)O[C@H]2[C@H]2OC(=O)/C=C/c3ccccc3[C@H]2[C@H]1O  
7232 C=CC(N)=O.CC1(C)OC(=O)Nc2ccc(Br)cc21>>CC1(C)OC(=O)Nc2ccc(/C=C/C(N)=O)cc21  
7233 C=COCCCC.Cc1cccc(Cl)c1C>>C=C(OCCCC)c1cccc(C)c1C  
7234 C=CC(=O)OC(C)(C)C.Nc1ccc(Cl)cc1I>>CC(C)(C)OC(=O)/C=C/c1cc(Cl)ccc1N  
7235 C=CC#N.CC(C)(C)[Si](C)(C)OC[C@H]1O[C@H](c2ccc(Br)cc2)C=C[C@H]1O[Si](C)(C)C(C)(C)  
C>>CC(C)(C)[Si](C)(C)OC[C@H]1O[C@H](c2ccc(/C=C/C#N)cc2)C=C[C@H]1O[Si](C)(C)C(C)(C)  
7236 C=CC(=O)OC.Cc1cc(I)ccc1[N+](=O)[O-]>>COC(=O)/C=C/c1ccc([N+](=O)[O-])c(C)c1  
7237 C=CCCCCCC.COC(=O)c1ccc(Br)cc1>>C=C(CCCCCC)c1ccc(C(=O)OC)cc1  
7238 C=CC(=O)OCCCC.O=C(c1cccc1)c1ccc(Br)cc1>>CCCCOC(=O)/C=C/c1ccc(C(=O)c2ccccc2)cc1  
7239 C=CC(=O)OC(C)(C)C.COC(=O)Cc1cc(OC(C)C)c(OC)c(OC)c1Br>>COC(=O)Cc1cc(OC(C)C)c(OC)c  
(OC)c1/C=C/C(=O)OC(C)(C)C  
7240 C=Cc1cccc1.O=S(=O)(Oc1cccc2c1N(c1nccn1)CCC2)C(F)(F)F>>C=C/c1cccc2c1N(c1nccn1)CCC  
2)c1cccc1  
7241 C=CC(=O)OCCCC.Ic1ccc2[nH]ccc2c1>>CCCCOC(=O)/C=C/c1ccc2[nH]ccc2c1  
7242 C=CC(F)(F)C(F)(F)C(F)(F)C(F)(F)C(F)(F)F.N#Cc1ccc(Br)cc1>>N#Cc1ccc(/C=C/C(F)(F)C(F)  
(F)C(F)(F)C(F)(F)C(F)(F)F)cc1  
7243 C=Cc1cccc1.O=c1ccoc2cc(Br)ccc12>>O=c1ccoc2cc(/C=C/c3ccccc3)ccc12  
7244 C=CC(=O)OCC.O=C(O)c1cccc(I)c1>>CCOC(=O)/C=C/c1cccc(C(=O)O)c1  
C=Cc1ccc(-c2cc(C(C)(C)C)c(OC(C)=O)c(C(C)(C)C)c2)cc1Br.CC(=O)Oc1c(C(C)(C)C)cc(-  
c2ccc(C)c(I)c2)cc1C(C)(C)C>>CC(=O)Oc1c(C(C)(C)C)cc(-c2ccc(/C=C/c3ccc(-  
c4cc(C(C)(C)C)c(OC(C)=O)c(C(C)(C)C)c4)ccc3C)c(Br)c2)cc1C(C)(C)C  
7246 C=CC(=O)OC.CC1(CC(N(Cc2cc3c(cc21)OCO3)C[Si](C)(C)C)[Si](C)(C)C)OCCO1>>C=C(C(=O)OC)  
c1cc2c(cc1CN(C[Si](C)(C)C)C(C)C(CC1(C)OCCO1)[Si](C)(C)C)OCO2  
7247 C=CC(=O)OCC.Nc1ncccc1I>>CCOC(=O)/C=C/c1ccncc1N

7248 C=CCN(C(=O)C(C)(C)C)C1CCCCC1.O=C1Nc2ncccc2[C@@]12Cc1cc(Br)enc1C2>>CC(C)(C)C(=O)N(C/C=C/c1enc2c(c1)C[C@@]1(C2)C(=O)Nc2ncccc2)C1CCCCC1

7249 C=CS1cccc1.CC(=O)c1ccc(Br)cc1>>CC(=O)c1ccc(/C=C/Sc2cccc2)cc1

7250 C=CCc1ccc(OCc2cccc2)c(OC)c1.O=C(O)/C=C/c1cccc1Br>>COc1cc(C/C=C/c2cccc2/C=C/C(=O)O)ccc1OCc1cccc1

7251 C=C[C@H]1COC(C)(C)N1C(=O)OCc1cccc1.COc1ccc(I)cc1>>COc1ccc(/C=C/[C@@H]2COC(C)(C)N2C(=O)OCc2cccc2)cc1

7252 C=CN(C(=O)c1ccc(C(=O)N[C@@H](CCC(=O)OCC)C(=O)OCC)cc1.CC(C)(C)C(=O)Nc1nc2ncc(Br)cc2c(=O)[nH]1>>CCOC(=O)CC[C@H](NC(=O)c1ccc(N(C=O)/C=C/c2nc3nc(NC(=O)C(C)(C)C)[nH]c(=O)c3c2)cc1)C(=O)OCC

7253 C=CCO[C@H]1O[C@H](COC(C)=O)[C@@H](OC(C)=O)[C@H](OC(C)=O)[C@@H]1OC(C)=O.Ic1cccc1-c1cccc1>>CC(=O)OC[C@H]1O[C@H](OC/C=C/c2cccc2-c2cccc2)[C@@H](OC(C)=O)[C@@H](OC(C)=O)[C@@H]1OC(C)=O

7254 C=Cc1cccc1.Cn1c(/C=C/c2ccc(Cl)cc2)c(I)c(=O)c2cccc21>>Cn1c(/C=C/c2ccc(Cl)cc2)c(/C=C/c2ccc(Cl)cc2)c(=O)c2cccc21

7255 C=CS1cccc1.N#Cc1ccc(Br)cc1>>N#Cc1ccc(/C=C/Sc2cccc2)cc1

7256 C=CC(=O)OC.CC(C)(C)c1cc(-c2ccc(Br)cc2)ccc1O>>COC(=O)/C=C/c1ccc(-C=CC(=O)OC.O=C(O)Cc1ccc(Br)cc1>>COC(=O)/C=C/c1ccc(CC(=O)O)cc1

7257 C=Cc1cccc1.O=C1C[C@H](c2ccc(Cl)cc2Br)CN1>>O=C1C[C@H](c2ccc(Cl)cc2/C=C/c2cccc2)CN

7258 C=COCCCC.O=c1ccc2ccc(OS(=O)(=O)C(F)(F)F)cc2o1>>C=C(OCCCC)c1ccc2ccc(=O)oc2c1

7259 C=Cc1cccc1O.Nc1ccc(Br)cc1>>Nc1ccc(/C=C/c2cccc2O)cc1

7260 C=COCCCC.CC(=O)c1cncc(Br)c1>>C=C(OCCCC)c1cncc(C(C)=O)c1

7261 Br1ccc(NCc2ccncc2)cc1.C=CC(=O)OC(C)(C)C>>CC(C)(C)OC(=O)/C=C/c1ccc(NCc2ccncc2)cc1

7262 C=Cc1ccc(SCC[Si](C)(C)C)cc1.O=[N+][O-]c1cc(/C=C/c2cccc2)ccc1I>>C[Si](C)(C)CCSc1ccc(/C=C/c2ccc(/C=C/c3cccc3)cc2[N+](=O)[O-]C=CC(=O)OC.CC(C)n1nc2c(NCc3ccc(Br)cc3)nc(N3CCOCC3)nc21>>COC(=O)/C=C/c1ccc(CNc2nc(N3CCOCC3)nc3c2ncn3C(C)C)cc1

7263 C=CC(=O)OCC.[2H]c1c([2H])c(C([2H])([2H])[2H])c([2H])c([2H])c1C(=O)c1cccc(Br)n1>>[2H]c1c([2H])c(C([2H])([2H])[2H])c([2H])c([2H])c1C(=O)c1cccc(/C=C/C(=O)OCC)n1

7264 C=CCCCCCCCC.c1ccc([I+](c2cccc2)cc1>>CCCCCCCCC/C=C/c1cccc1

7265 C=CC#N.O=C(O)c1ccc(I)cc1>>N#C/C=C/c1ccc(C(=O)O)cc1

7266 C=CC(=O)N1CC(c2oc3cccc3c2C)C1.O=C1CCNc2cc(Br)enc2N1>>Cc1c(C2CN(C(=O)/C=C/c3nc4c(c3)NCCC(=O)N4)C2)oc2cccc12

7267 C=CC(=O)OC(C)(C)C.COc1ccc(S(=O)(=O)c2nc3cccc3cc2Br)cc1>>COc1ccc(S(=O)(=O)c2nc3cccc3cc2/C=C/C(=O)OC(C)(C)C)cc1

7268 C=COCCCC.Clc1ccc(Br)cc1>>CCCCO/C=C/c1ccc(Cl)cc1

7269 Br1ccc(-c2nc3cccc3n3cccc23)cc1.C=CC(=O)OCC>>CCOC(=O)/C=C/c1ccc(-C=CCNC(=O)OC(C)(C)C.O=C(OC[C@H]1O[C@@H](n2cc(I)c(=O)[nH]c2=O)C[C@@H]1OC(=O)c1cccc1)c1cccc1>>CC(C)(C)OC(=O)NC/C=C/c1cn([C@H]2C[C@H](OC(=O)c3cccc3)[C@@H](C)OC(=O)c3cccc3)O2)c(=O)[nH]c1=O

7270 C=CC(=O)NC(C)C.Cc1ccc(I)cc1>>Cc1ccc(/C=C/C(=O)NC(C)C)cc1

7271 C=Cc1cccc1.CCOC(=O)CCc1cc(-c2ccc(Br)cc2)ccc1S(=O)(=O)c1cccc1>>CCOC(=O)CCc1cc(-c2ccc(/C=C/c3cccc3)cc2)ccc1S(=O)(=O)c1cccc1

7272 C=Cc1cccc1.C[Si](C)(C)Cl>>C[Si](C)(C)/C=C/c1cccc1

7273 Br1cccc1.C=COCCCC>>C=C(OCCCC)c1cccc1

7274 C=CC(=O)OC.Ic1c(-c2cccc2)nnn1Cc1cccc1>>COC(=O)/C=C/c1c(-c2cccc2)nnn1Cc1cccc1

7275 C=CC(=O)OC(C)(C)C.CC(=O)c1cccc1I>>CC(=O)c1cccc1/C=C/C(=O)OC(C)(C)C

7276 C=CCN(C(=O)OC(C)(C)C)C(=O)OC(C)(C)C.CC(=O)c1ccc(Br)cc1>>CC(=O)c1ccc(/C=C/CN(C(=O)OC(C)(C)C)C(=O)OC(C)(C)C)cc1

7277 C=CCO1cccc1.Fc1ccc(Br)cc1>>Fc1ccc(/C=C/COc2cccc2)cc1

7278 C=CC(=O)OC.COc1cc(C#N)ccc1I>>COC(=O)/C=C/c1ccc(C#N)cc1OC

7279 C=CCCCCCCC.FC(F)(F)c1cc(Br)cc(C(F)(F)F)c1>>CCCCCCCCC/C=C/c1cc(C(F)(F)F)cc(C(F)(F)F)c1

7280 C=CS(=O)(=O)F.Cc1ccc(S(=O)(=O)n2c3cccc3c3cc(I)ccc32)cc1>>Cc1ccc(S(=O)(=O)n2c3cccc3c3cc(/C=C/S(=O)(=O)F)ccc32)cc1

7281 C=Cc1cccc1Br.O=[N+][O-]c1cccc1I>>O=[N+][O-]c1cccc1/C=C/c1cccc1Br

7282 C=Cc1ccc([Si](OC)(OC)OC)cc1.CO[Si](OC)(OC)c1ccc(Br)cc1>>CO[Si](OC)(OC)c1ccc(/C=C/c2ccc([Si](OC)(OC)OC)cc2)cc1

7283 C=CC(=O)OCC.COc1cc(OC)nc(I)n1>>CCOC(=O)/C=C/c1nc(OC)cc(OC)n1

7284 C=Cc1cc(OC)c(OC)c(OC)c1.O=C(O)c1ccc(Br)cc1>>COc1cc(/C=C/c2ccc(C(=O)O)cc2)cc(OC)c1OC

7285 C=CS(=O)(=O)NC1CCCC1.Cc1ccc(CNC(=O)OC(C)(C)C)c(Br)c1>>Cc1ccc(CNC(=O)OC(C)(C)C)c(/C=C/S(=O)(=O)NC2CCCC2)c1

7286

7287

7288

7289 C=Cc1cccc1.Oc1cccc1I>>Oc1cccc1/C=C/c1cccc1  
7290 C=Cc1ccc(OC)cc1.O=[N+](O-)]c1ccc(-n2cc(I)cn2)cc1>>COc1ccc(/C=C/c2cnn(-c3ccc([N+](=O)[O-])cc3)c2)cc1  
7291 C=CC(=O)OC(C)(C)C.CCOC(=O)Cc1ccc(Br)cc1Cl>>CCOC(=O)Cc1ccc(/C=C/C(=O)OC(C)(C)C)cc1  
7292 C=CC(=O)O.O=Cc1ccc(Cl)cc1>>O=Cc1ccc(/C=C/C(=O)O)cc1  
7293 C=C1C[C@H]2[C@@H]3CCc4cc(OC)ccc4[C@H]3CC[C@]2(C)C1=O.Fc1ccc(Br)cc1>>COc1ccc2c(c1)CC[C@H]1[C@@H]2CC[C@]2(C)C(=O)/C(=C/c3ccc(F)cc3)[C@H]12  
7294 C=CC(=O)OC.CCCCCC#CI>>CCCCC#C/C=C/C(=O)OC  
7295 C=CC(OCC)OCC.COc1cccc(I)c1>>CCOC(/C=C/c1cccc(OC)c1)OCC  
7296 C=CC(=O)OC.Fc1ccc(I)cc1>>COC(=O)/C=C/c1ccc(F)cc1  
7297 C=C(NC(=O)OC(C)(C)C)C(=O)OCc1cccc1.CC(C)(C)OC(=O)C(C)(C)c1ccc(I)cc1>>CC(C)(C)OC(=O)N/C(=C/c1ccc(C(C)(C)C(=O)OC(C)(C)C)cc1)C(=O)OCc1cccc1  
7298 C=CC(=O)OC.Fc1ccc(I)cc1F>>COC(=O)/C=C/c1ccc(F)c(F)c1  
7299 C=CC(=O)OCCCC.NC(=O)c1ccc(I)cc1>>CCCCOC(=O)/C=C/c1ccc(C(N)=O)cc1  
7300 C=CC1CC=CCC1.Clc1ccc(I)cc1>>Clc1ccc(/C=C/C2CC=CCC2)cc1  
7301 C=Cc1ccc(Cl)cc1.C[Si](C)(OS(=O)(=O)C(F)(F)F)OS(=O)(=O)C(F)(F)F>>C[Si](C)(/C=C/c1ccc(Cl)cc1)OS(=O)(=O)C(F)(F)F  
7302 C=CCC(C)C.COc1cccc1CCL>>C=C(Cc1cccc1OC)CC(C)C  
7303 C=CC(=O)CCCCC.CC(C)=C(C)Br>>CCCCC(=O)/C=C/C(C)=C(C)C  
7304 C=Cc1ccc(O)cc1.CC(C)(C#N)c1cc(Br)cc(Cn2cncn2)c1>>CC(C)(C#N)c1cc(/C=C/c2ccc(O)cc2)cc(Cn2cncn2)c1  
7305 C=Cc1cccc1.O=Cc1cc(F)ccc1Br>>O=Cc1cc(F)ccc1/C=C/c1cccc1  
7306 Bre1ccc2c(c1)c(CCc1cccc1)cn2-c1cccc1.C=CC(=O)OC>>COC(=O)/C=C/c1ccc2c(c1)c(CCc1cccc1)cn2-c1cccc1  
7307 C=CC(C)=O.O=Cc1cccc(Br)c1>>CC(=O)/C=C/c1cccc(C=O)c1  
7308 \*CNCCCOCCOCCOCCNC(=O)COc1ccc(C(Cc2cc(OC)cc(OC)c2)NC(=O)c2cccc(C=C)c2)cc1.Fc1ccc(F)c(I)c1>>\*CNCCCOCCOCCOCCNC(=O)COc1ccc(C(Cc2cc(OC)cc(OC)c2)NC(=O)c2cccc(/C=C/c3cc(F)ccc3F)c2)cc1  
7309 C=Cc1ccc(C)nc1.COC(=O)c1cc(I)ccc1NC(C)=O>>COC(=O)c1cc(/C=C/c2ccc(C)nc2)ccc1NC(C)=O  
7310 C=CC(=O)OCC.COc1ccc(Cl)cc1>>CCOC(=O)/C=C/c1ccc(OC)cc1  
7311 C=C(NC(=O)OCC[Si](C)(C)C)C(=O)OC.CC(C)(C)OC(=O)N/C(=C/c1ccc(-c2ccc(I)cc2)cc1)C(=O)OCc1cccc1>>COC(=O)/C=C/c1ccc(-c2ccc(/C=C(\NC(=O)OC(C)(C)C)C(=O)OCc3cccc3)cc2)cc1)NC(=O)OCC[Si](C)(C)C  
7312 C=C(C)C(=O)OC.Oc1cccc(Br)c1>>COC(=O)/C(C)=C/c1cccc(O)c1  
7313 \*CN(Cc1cccc1)N=Nc1cccc1I.C=CC(=O)OC(C)(C)C>>\*CN(Cc1cccc1)N=Nc1cccc1/C=C/C(=O)OC(C)(C)C  
7314 C=CC(=O)OC.CCOCc1nc2c(N)nc3cc(Br)ccc3c2n1CCCCN1CCCS1(=O)=O>>CCOCc1nc2c(N)nc3cc(/C=C/C(=O)OC)ccc3c2n1CCCCN1CCCS1(=O)=O  
7315 C=Cc1cnc(C#N)c1Nc1ccc2[nH]ccc2c1C.Clc1ccc(Br)cn1>>Cc1c(Nc2c(C#N)cncc2/C=C/c2ccc(Cl)nc2)ccc2[nH]ccc12  
7316 Bre1ccc2c(c1)CCC1(CCN(Cc3cccc3)CC1)O2.C=CC(=O)OC>>COC(=O)/C=C/c1ccc2c(c1)CCC1(CCN(Cc3cccc3)CC1)O2  
7317 C=CC(=O)OC(C)(C)C.Cc1ccc(Br)c(CO)c1>>Cc1ccc(/C=C/C(=O)OC(C)(C)C)c(CO)c1  
7318 C=Cc1ccc(O)cc1.Nc1cccc1Br>>Nc1cccc1/C=C/c1ccc(O)cc1  
7319 C=Cc1cccc1C.CCOC(=O)C(F)(F)I>>CCOC(=O)C(F)(F)/C=C/c1cccc1C  
7320 C=CCCCCCN(C(=O)OC(C)(C)C)C(=O)OC(C)(C)C.CC(C)N(CC[C@H](c1cccc1)c1cc(Br)ccc1OCc1cccc1)C(C)C>>CC(C)N(CC[C@H](c1cccc1)c1cc(/C=C/CCCCCN(C(=O)OC(C)(C)C)C(=O)OC(C)(C)C)ccc1OCc1cccc1)C(C)C  
7321 C=Cc1cc(OC)cc(OC)c1.CCOC(=O)c1ccc(I)cc1>>CCOC(=O)c1ccc(/C=C/c2cc(OC)cc(OC)c2)cc1  
7322 Cc1ccc(S(=O)(=O)/C=C2\C(C)(C)C2(F)F)cc1.Clc1ccc(I)cc1>>Cc1ccc(S(=O)(=O)/C(=C2\C(C)(C)C2(F)F)c2ccc(Cl)cc2)cc1  
7323 C=Cc1cncnc1.Cc1cc(N(c2ccc([N+](=O)[O-])cc2[N+](=O)[O-])c2ccc([N+](=O)[O-])cc2[N+](=O)[O-])ccc1Br>>Cc1cc(N(c2ccc([N+](=O)[O-])cc2[N+](=O)[O-])c2ccc([N+](=O)[O-])cc2[N+](=O)[O-])ccc1/C=C/c1cncnc1  
7324 C=Cc1cccc1.O=S(=O)(OC=C(c1cccc1)c1cccc1)C(F)(F)F>>C=C(C=C(c1cccc1)c1cccc1)c1cccc1  
7325 C=Cc1cncnc1.CCOCc1ccc(Br)c(F)c1>>CCOCc1ccc(/C=C/c2cncnc2)c(F)c1  
7326 C=CC(C)=O.Oc1ccc(Cl)cc1>>CC(=O)/C=C/c1ccc(O)cc1  
7327 C=Cc1ccc(Cl)cc1.O=P1(c2cccc2)C(Br)=Cc2cccc21>>O=P1(c2cccc2)C(/C=C/c2ccc(Cl)cc2)=Cc2cccc21  
7328 C=Cc1ccc(C)cc1.Cc1c(Br)c(=O)cc2cccc12>>Cc1ccc(/C=C/c2c(C)c3cccc3cc2=O)cc1  
7329 C=CC(=O)OC.Cc1cc(F)ccc1Br>>COC(=O)/C=C/c1ccc(F)cc1C

C=Cc1ccncc1.CCOC(=O)c1c(I)c2cc(-c3ccc(C(F)(F)F)cc3)ccc2n1-  
 7330 c1ccc(OC2CCCC2)cc1>>CCOC(=O)c1c(/C=C/c2ccncc2)c2cc(-c3ccc(C(F)(F)F)cc3)ccc2n1-  
 c1ccc(OC2CCCC2)cc1  
 7331 C=CCOc1cccc1C(C)C.Ic1cccs1>>CC(C)c1ccccc1OC/C=C/c1cccs1  
 7332 C=CCOC(C)=O.Cc1ccc(S(=O)(=O)NCCc2cc3c(cc2I)OCO3)cc1>>CC(=O)OC/C=C/c1cc2c(cc1CCNS(  
 =O)(=O)c1ccc(C)cc1)OCO2  
 C=CCO[C@H]1O[C@H](COC(C)=O)[C@@H](OC(C)=O)[C@H](OC(C)=O)[C@@H]1OC(C)=O.Ic  
 7333 1ccccc1>>CC(=O)OC[C@H]1O[C@H](OC/C=C/c2ccccc2)[C@@H](OC(C)=O)[C@@H](OC(C)=O)[  
 C@@H]1OC(C)=O  
 7334 C=CC(=O)OC.N#Cc1ccc(I)cc1>>COC(=O)/C=C/c1ccc(C#N)cc1  
 7335 C=CN1CCCC1=O.O=S(=O)(Oc1ccc2ccccc2c1Br)C(F)(F)F>>C=C(c1ccc2ccccc2c1Br)N1CCCC1=O  
 7336 C=Cn1nnc(C)n1.Fc1ccccc1I>>Cc1nnn(/C=C/c2ccccc2F)n1  
 7337 C=COCCCC.O=S1(=O)CCCN1Cc1cc(Br)cc(Cc2ccccc2)c1>>C=C(OCCCC)c1cc(Cc2ccccc2)cc(CN2C  
 CCS2(=O)=O)c1  
 7338 C=CC(=O)OCC.Fc1ccc(Br)c1>>CCOC(=O)/C=C/c1cccc(F)c1  
 7339 C=CC(=O)OC(C)(C)C.O=C(c1ccc(I)cc1)c1ccncc1Cl>>CC(C)(C)OC(=O)/C=C/c1ccc(C(=O)c2ccncc2  
 Cl)cc1  
 7340 C=CC(=O)NCc1ccc(F)cc1.COc1ccc2c(=O)c(I)coc2c1>>COc1ccc2c(=O)c(/C=C/C(=O)NCc3ccc(F)cc3  
 )coc2c1  
 7341 C=CC(=O)OC.COC(=O)c1c(C)nc(OC)c(C#N)c1-c1ccc(Br)cc1>>COC(=O)/C=C/c1ccc(-  
 c2c(C#N)c(OC)nc(C)c2C(=O)OC)cc1  
 7342 C=CC(=O)N(C)OC.O=[N+](O-)]c1ccccc(I)c1>>CON(C)C(=O)/C=C/c1ccccc([N+](=O)[O-])c1  
 7343 C=CC(=O)N1CCOCC1.O=C(/C=C/c1ccc(Sc2ccccc2Br)c(Cl)c1)N1CCOCC1>>O=C(/C=C/c1ccc(Sc2c  
 cccc2/C=C/C(=O)N2CCOCC2)c(Cl)c1)N1CCOCC1  
 7344 C=CCN(C(=O)C1(C(F)(F)F)CC1)[C@H](C)c1cc(F)cc(F)c1.O=C1Nc2ncccc2[C@@]12Cc1cc(Br)enc1  
 C2>>C[C@H](c1cc(F)cc(F)c1)N(C/C=C/c1cnc2c(c1)C[C@@]1(C2)C(=O)Nc2ncccc21)C(=O)C1(C(F  
 )(F)F)CC1  
 7345 C=C(CC(=O)OC)C(=O)OC.COc1ccc(Br)c(CN(CC(F)(F)F)C(=O)OC(C)(C)C)c1>>COC(=O)C/C(=C\c  
 1ccc(OC)cc1CN(CC(F)(F)F)C(=O)OC(C)(C)C(=O)OC  
 C=CC(C)(C)C(=O)NC(C)(C)CO.CC(=O)OC[C@H]1O[C@H](c2cc(Cc3ccc(Br)cc3C(C)C)c(C)cc2C  
 7346 )][C@H](OC(C)=O)[C@@H](OC(C)=O)[C@@H]1OC(C)=O>>CC(=O)OC[C@H]1O[C@H](c2cc(  
 Cc3ccc(/C=C/C(C)(C)C(=O)NC(C)(C)CO)cc3C(C)C)c(C)cc2C)[C@H](OC(C)=O)[C@@H](OC(C)=  
 O)[C@@H]1OC(C)=O  
 7347 C=CC#N.CCCc1nc2cc(Br)cc2n1CCN(CC)CC>>CCCCc1nc2cc(/C=C/C#N)cc2n1CCN(CC)CC  
 7348 C=CC(=O)OC(C)(C)C.Nc1ncc(I)c2scc(Br)c12>>CC(C)(C)OC(=O)/C=C/c1cnc(N)c2c(Br)csc12  
 7349 C=CC(CC(=O)OC)[Si](C)(C)C.c1ccc([I+](c2ccccc2)cc1)>>COC(=O)CC(/C=C/c1ccccc1)[Si](C)(C)C  
 7350 C=CCCN1C(=O)c2ccccc2C1=O.Clc1ccc(I)cc1>>O=C1c2ccccc2C(=O)N1CC/C=C/c1ccc(Cl)cc1  
 7351 C=Cc1ccccc1.CC(=O)c1cn(-c2ccccc2)nc1OS(=O)(=O)C(F)(F)F>>CC(=O)c1cn(-  
 c2ccccc2)nc1/C=C/c1ccccc1  
 7352 C=Cc1cc(OC)c(OC)c(OC)c1-  
 c1ccc(F)c(C)c1.COc1ccc(I)cc1>>COc1ccc(/C=C/c2cc(OC)c(OC)c(OC)c2-c2ccc(F)c(C)c2)cc1  
 7353 C=CC(=O)OC.Cc1nccc(N(Cc2ccc(Br)cc2)CC(C)(C)C)n1>>COC(=O)/C=C/c1ccc(CN(CC(C)(C)C)c2c  
 enc(C)n2)cc1  
 7354 C=CC(=O)OC.O=c1c2ccccc2cc(Br)c2ccccc12>>COC(=O)/C=C/c1cc2ccccc2c(=O)c2ccccc12  
 7355 C=Cc1ccccc(N)n1.CN(C(=O)c1ccccc1)c1ccc2c(c1)[nH]c(=NC(=O)c1ccc(Br)s1)n2CCC(N)=O>>CN(C(  
 =O)c1ccccc1)c1ccc2c(c1)[nH]c(=NC(=O)c1ccc(/C=C/c3ccccc(N)n3)s1)n2CCC(N)=O  
 7356 C=C(NC(C)=O)C(=O)OC.C[Si](C)(C)CCOCn1nc(I)c2cc(Br)ccc21>>COC(=O)/C(=C/c1nn(COCC[Si]  
 (C)(C)C)c2ccc(Br)cc12)NC(C)=O  
 7357 Bre1cccs1.C=CCN(C(=O)OC(C)(C)C)C(=O)OC(C)(C)C>>CC(C)(C)OC(=O)N(C/C=C/c1cccs1)C(=O)  
 OC(C)(C)C  
 7358 Bre1ccccc1.C=Cc1ccc(N(c2ccc(C)cc2)c2ccc(C)cc2)cc1>>Cc1ccc(N(c2ccc(C)cc2)c2ccc(/C=C/c3ccccc  
 3)cc2)cc1  
 7359 C=Cc1ccccc1C.Nc1ccc([N+](=O)[O-])cc1Br>>Cc1ccccc1/C=C/c1cc([N+](=O)[O-])ccc1N  
 7360 C=CC(=O)OC(C)(C)C.Cc1cc(Br)enc1N1CCN(C(=O)OC(C)(C)C)CC1>>Cc1cc(/C=C/C(=O)OC(C)(C)  
 C)enc1N1CCN(C(=O)OC(C)(C)C)CC1  
 7361 C=CC(=O)OC.O=C1CN=C(c2ccccc2)c2ccc(Br)cc2N1>>COC(=O)/C=C/c1ccc2c(c1)NC(=O)CN=C2c  
 1ccccc1  
 7362 C=CC(=O)OCC.CCC1=C(I)C2(CCCC2)C(=O)O1>>CCOC(=O)/C=C/C1=C(CC)OC(=O)C12CCCC2  
 7363 C=Cc1cc(OC)ccc1OC.CCCCCCOCc1ccc2c(C)c(Br)c(=O)oc2c1>>CCCCCCCCOc1ccc2c(C)c(/C=C/  
 c3cc(OC)ccc3OC)c(=O)oc2c1  
 7364 C=CC.O=C1CC(c2ccccc2)(c2ccccc2Br)C1>>C/C=C\c1ccccc1C1(c2ccccc2)CC(=O)C1

7365 C=Cc1ccc(OC)cc1.O=P1(c2ccccc2)C(Br)=Cc2ccccc21>>COc1ccc(/C=C/C2=Cc3ccccc3P2(=O)c2cccc2)cc1  
 7366 C=CC(=O)OCCCC.Oc1ccccc1I>>CCCCOC(=O)/C=C/c1ccccc1O  
 7367 C=Cc1ccccc1.COC(=O)c1cc2ccc(=O)oc2cc1OS(=O)(=O)C(F)(F)F>>COC(=O)c1cc2ccc(=O)oc2cc1/C=C/c1ccccc1  
 7368 C=CC(=O)OCC.Nc1ccc(I)cc1>>CCOC(=O)/C=C/c1ccc(N)cc1  
 7369 Br1ccccc1.C=CCn1nnc2ccccc21>>C(=C/c1ccccc1)\Cn1nnc2ccccc21  
 7370 C=Cc1cccc(F)c1.O=Cc1cccc(Br)c1>>O=Cc1cccc(/C=C/c2cccc(F)c2)c1  
 7371 C=Cc1ccccc1.CC(C)c1cnnc(Nc2ccc3ncc(Br)cc3n2)c1>>CC(C)c1cnnc(Nc2ccc3ncc(/C=C/c4ccccc4)cc3n2)c1  
 7372 C=CNC(C)=O.Cc1ccc(Br)cc1>>C=C(NC(C)=O)c1ccc(C)cc1  
 7373 C=CC(=O)OCC.CC(C)Oc1ccc(Br)cc1C=O>>CCOC(=O)/C=C/c1ccc(OC(C)C)c(C=O)c1  
 7374 C=Cc1ccccc1.Cc1cc(C)nc(I)n1>>Cc1cc(C)nc(/C=C/c2ccccc2)n1  
 7375 C=CC(=O)OC.Cc1cc(C)c(C(=O)c2sc3cc(O)ccc3c2Oc2ccc(Br)cc2)c(C)c1>>COC(=O)/C=C/c1ccc(Oc2c(C(=O)c3c(C)cc(C)cc3C)sc3cc(O)ccc23)cc1  
 7376 C=CC(=O)OC.O=c1oc(Br)cc2ccccc12>>COC(=O)/C=C/c1cc2ccccc2c(=O)o1  
 7377 C=CC(=O)O.FC(F)(F)c1ccc(I)cc1>>O=C(O)/C=C/c1ccc(C(F)(F)F)cc1  
 7378 C=CC(=O)OC.COC(=O)c1c(Br)ccc(NC(C)=O)c1[N+](=O)[O-]>>COC(=O)/C=C/c1ccc(NC(C)=O)c([N+](=O)[O-])c1C(=O)OC  
 7379 C=Cc1ccc(OC(C)=O)cc1.CC(=O)OC[C@H]1O[C@@H](Oc2ccc(I)cc2)[C@H](OC(C)=O)[C@@H]1OC(C)=O>>CC(=O)OC[C@H]1O[C@@H](Oc2ccc(/C=C/c3ccc(OC(C)=O)cc3)cc2)[C@H](OC(C)=O)[C@@H]1OC(C)=O  
 7380 C=CC(=O)OC.CC(=O)c1ccc(I)cc1>>COC(=O)/C=C/c1ccc(C(C)=O)cc1  
 7381 C=CC(=O)OCCCC.Fc1ccc(Br)c(F)c1>>CCCCOC(=O)/C=C/c1ccc(F)cc1F  
 7382 C=CS(=O)(=O)F.COc1ccccc1I>>COc1ccccc1/C=C/S(=O)(=O)F  
 7383 \*CNCCCOCCOCCOCCNC(=O)COc1ccc(C(Cc2cc(OC)cc(OC)c2)NC(=O)c2ccc(C=C)cc2)cc1.O=[N+](O-)]c1ccccc1I>>\*CNCCCOCCOCCOCCNC(=O)COc1ccc(C(Cc2cc(OC)cc(OC)c2)NC(=O)c2ccc(/C=C/c3ccccc3[N+](=O)[O-])cc2)cc1  
 7384 C=CCNC(=O)OC(C)(C)C.N#Cc1ccc(Br)c1>>C=C(CNC(=O)OC(C)(C)C)c1ccccc1(C#N)c1  
 7385 C=Cc1ccccc1.O=Cc1sc2ccccc2c1Br>>O=Cc1sc2ccccc2c1/C=C/c1ccccc1  
 7386 C=Cc1ccccc1.CC(=O)c1ccc(Br)s1>>CC(=O)c1ccc(/C=C/c2ccccc2)s1  
 7387 C=CC(=O)OCC.Nc1ccccc1I>>CCOC(=O)/C=C/c1ccccc1N  
 7388 C=CC(=O)OCCCC.O=Cc1ccccc1Br>>CCCCOC(=O)/C=C/c1ccccc1C=O  
 7389 C=Cc1ccc(OC)c(OC)c1.COc1cc(I)cc(OC)c1>>COc1cc(/C=C/c2ccc(OC)c(OC)c2)cc(OC)c1  
 7390 C=Cc1c(F)c(F)c(F)c1F.Ic1ccccc1>>Fc1c(F)c(F)c(/C=C/c2ccccc2)c(F)c1F  
 7391 Br1ccccc2c(-c3ccccc3)ccccc12.C=CC(=O)OCC>>CCOC(=O)/C=C/c1ccccc2c(-c3ccccc3)ccccc12  
 7392 C=CC(=O)OC.COc1ccc(Cl)cc1I>>COC(=O)/C=C/c1cc(Cl)ccc1OC  
 7393 C=CC(=O)OC.CCN(CC)S(=O)(=O)Oc1ccccc1I>>CCN(CC)S(=O)(=O)Oc1ccccc1/C=C/C(=O)OC  
 7394 C=Cc1ccccc1.Cc1cc(C)c([Cl+]c2ccccc2)c(C)c1>>C(=C/c1ccccc1)c1ccccc1  
 7395 C=CC(=O)OC.Cc1ccccc1I>>COC(=O)/C=C/c1ccccc1C  
 7396 C=CC(=O)OC.O=c1oc2cc(Br)cn2n1CCc1cnccc1>>COC(=O)/C=C/c1cn2c(c1)oc(=O)n2CCc1cnccc1  
 7397 C=Cc1ccccc1.O=Cc1ccc(Cl)cc1>>O=Cc1ccc(/C=C/c2ccccc2)cc1  
 7398 C=CC(=O)OC(C)(C)C.O=[N+](O-)]c1ccc(Br)cc1>>CC(C)(C)OC(=O)/C=C/c1ccc([N+](=O)[O-])cc1  
 7399 C=CCNC1=NCCN1.Oc1ccc(I)cc1>>Oc1ccc(/C=C/CNC2=NCCN2)cc1  
 7400 C=Cc1ccc(Cl)cc1.CCOC(=O)C(Cc1ccccc1I)C(C)=O>>CCOC(=O)C(Cc1ccccc1/C=C/c1ccc(Cl)cc1)C(C)=O  
 7401 C=CC(=O)OC.Ic1cn2c(n1)[C@H](OCc1ccccc1)[C@@H](OCc1ccccc1)[C@H](OCc1ccccc1)[C@H]2COCc1ccccc1>>COC(=O)/C=C/c1cn2c(n1)[C@H](OCc1ccccc1)[C@@H](OCc1ccccc1)[C@H](OCc1ccccc1)[C@H]2COCc1ccccc1  
 7402 C=C[C@@H](O[Si](C)(C)C(C)(C)C)[C@H](CCCC(=O)OC)O[Si](C)(C)C(C)(C)C.CCCCCC(=O)c1ccccc1Br>>CCCCC(=O)c1ccccc1/C=C/[C@@H](O[Si](C)(C)C(C)(C)C)[C@H](CCCC(=O)OC)O[Si](C)(C)C(C)(C)C  
 7403 C=CC#N.COc1cc(Cl)ccc1Br>>COc1cc(Cl)ccc1/C=C/C#N  
 7404 C=CC(=O)OCC.CC(=O)c1cn(Cc2ccc(F)cc2)c2ccc(Br)cc2c1=O>>CCOC(=O)/C=C/c1ccc2c(c1)c(=O)c(C(C)=O)cn2Cc1ccc(F)cc1  
 7405 C=CC(C)=O.CN1c2ccccc2C(C)(C)C12C=Cc1cc(I)ccc1O2>>CC(=O)/C=C/c1ccc2c(c1)C=CC1(O2)N(C)c2ccccc2C1(C)C  
 7406 C=CC(C)OC(C)=O.CCCCCCCCOC1cnc(-c2ccc(Br)cc2)nc1>>CCCCCCCCOC1cnc(-c2ccc(/C=C/C(C)OC(C)=O)cc2)nc1



7407 C=CC(=O)OC.Nc1cc(Cl)nc(C2CC2)c1C=O>>COC(=O)/C=C/c1cc(N)c(C=O)c(C2CC2)n1  
7408 C=CC(=O)O.CC(C)(C)c1ccc(S(=O)(=O)Nc2ccc(I)cc2)cc1>>CC(C)(C)c1ccc(S(=O)(=O)Nc2ccc(/C=C/C(=O)O)cc2)cc1  
7409 C=CC(C)(C)O.CO n1cc(C=O)c2c(I)cccc21>>CO n1cc(C=O)c2c(/C=C/C(C)(C)O)cccc21  
7410 Br1cccc1I.C=CC(=O)OCCSc1cccc1>>O=C(/C=C/c1cccc1Br)OCCSc1cccc1  
7411 C=CC(=O)OC.CC(C)(C)OC(=O)NCCc1c[nH]c2ccc(Br)cc12>>COC(=O)/C=C/c1ccc2[nH]cc(CCNC(=O)OC(C)(C)C)c2c1  
7412 Br1ccc2c(c1)OCCOCCOCCOCCO2.C=CP(=O)(OCC)OCC>>CCOP(=O)(/C=C/c1ccc2c(c1)OCCOCCOCCOCCO2)OCC  
7413 C=Cc1ccc(OC)c(OC)c1.CCCCCCCC0c1ccc2c(C)c(Br)c(=O)oc2c1>>CCCCCCCC0c1ccc2c(C)c(/C=C/C3ccc(OC)c(OC)c3)c(=O)oc2c1  
7414 C=Cc1ccc(N)cc1.Cc1ccc(Br)cc1>>Cc1ccc(/C=C/c2ccc(N)cc2)cc1  
7415 C=COCC.O=C(Cl)c1cccc1>>CCO/C=C/C(=O)c1cccc1  
7416 C=Cc1cnc(Br)c1.CC(C)(C)OC(=O)N1CC[C@H]1COc1nc(Cl)c(I)c1>>CC(C)(C)OC(=O)N1CC[C@H]1COc1nc(Cl)c(/C=C/c2cnc(Br)c2)c1  
7417 C=Cc1cccc(C(=O)OC)c1.COC(=O)c1cc2cc(Br)ccc2cc1OC(C)=O>>COC(=O)c1cccc(/C=C/c2ccc3cc(OC(C)=O)c(C(=O)OC)cc3c2)c1  
7418 Br1cncc2cccc12.C=CCCN1C(=O)c2cccc2C1=O>>O=C1c2cccc2C(=O)N1CC/C=C/c1cncc2cccc1  
7419 C=Cc1cccc1.O=C1CCC(c2ccc(Br)cc2)O1>>O=C1CCC(c2ccc(/C=C/c3cccc3)cc2)O1  
7420 C=CC(=O)OCC.COc1cc(F)c2nccc(Br)c2c1>>CCOC(=O)/C=C/c1cnc2c(F)cc(OC)cc12  
7421 C=CC(=O)OCC.O=[N+][([O-])c1cccc(O)c1Br>>CCOC(=O)/C=C/c1c(O)cccc1[N+](=O)[O-]  
7422 C=C[Si](C)(C)C.COc1cc(CO[Si](C)(C)C)c(I)c(OC)c1OC>>COc1cc(CO[Si](C)(C)C)c(/C=C/[Si](C)(C)C)c(OC)c1OC  
7423 C=CCCCCCC.Cl1cccc1>>CCCCC/C=C/c1cccc1  
7424 C=COCCCC.Oc1cccc(Br)c1>>C=C(OCCCC)c1cccc(O)c1  
7425 COC[C@H](/N=C(\c1cccc1)N1C=CCC[C@H]1c1cccc1)C(C)C.COc1ccc(I)cc1>>COC[C@H](/N=C(\c1cccc1)N1C=C(c2ccc(OC)cc2)CC[C@H]1c1cccc1)C(C)C  
7426 C=Cc1ccc(F)cc1.Cn1cc(I)c(=O)c2cccc21>>Cn1cc(/C=C/c2ccc(F)cc2)c(=O)c2cccc21  
7427 C=CC(=O)N(C)Cc1oc2cccc2c1C.CC1(C)CNc2ncc(Br)cc2O1>>Cc1c(CN(C)C(=O)/C=C/c2cnc3c(c2)OC(C)(C)CN3)oc2cccc12  
7428 C=CCNC(=O)OC(C)(C)C.Cc1cccc(Cl)c1>>C=C(CNC(=O)OC(C)(C)C)c1cccc(C)c1  
7429 C=CC(=O)OC.CC(=O)Oc1cc(I)c(O)c(C#N)c1C#N>>COC(=O)/C=C/c1cc(OC(C)=O)c(C#N)c(C#N)c1  
7430 C=Cc1ccc(N(C)C)cc1.O=Cc1ccc(I)cc1>>CN(C)c1ccc(/C=C/c2ccc(C=O)cc2)cc1  
7431 C=C(NC(C)=O)C(=O)OC.CO C(=O)c1cccc1I>>COC(=O)/C=C/c1cccc1C(=O)OC)NC(C)=O  
7432 C=CC(=O)OCC.Cn1ncc2nc3ccc(Br)cc3c(Cl)c21>>CCOC(=O)/C=C/c1ccc2nc3cnn(C)c3c(Cl)c2c1  
7433 C=Cc1ccc(C)cc1C.COc1ccc2cccc2c1I>>COc1ccc2cccc2c1/C=C/c1ccc(C)cc1C  
7434 C=CCCN1C(=O)c2cccc2C1=O.Cc1ccc(I)cc1>>Cc1ccc(/C=C/CCN2C(=O)c3cccc3C2=O)cc1  
7435 C=Cc1ccc(OC)cc1.COc1ccc(C(=O)c2cn(C)c(C3=NCCO3)c2-c2c(Br)ccc3cccc23)cc1>>COc1ccc(/C=C/c2ccc3cccc3c2-c2c(C(=O)c3ccc(OC)cc3)cn(C)c2C2=NCCO2)cc1  
7436 CC(=O)/C=C/CC(NS(=O)(=O)c1ccc(C)cc1)c1cccc1.COc1ccc(Br)cc1>>COc1ccc(/C=C(\C(C)=O)CC(NS(=O)(=O)c2ccc(C)cc2)c2cccc2)cc1  
7437 C=C(NC(=O)OC(C)(C)C)C(=O)OC.Ic1cnc(N(Cc2cccc2)Cc2cccc2)nc1>>COC(=O)/C=C/c1cnc(N(Cc2cccc2)Cc2cccc2)nc1)NC(=O)OC(C)(C)C  
7438 C=CC(=O)O.FC(F)(F)c1ccc(I)c(Cl)c1>>O=C(O)/C=C/c1ccc(C(F)(F)F)cc1Cl  
7439 C=CC(N)=O.O=[N+][([O-])c1cccc(Br)c1>>NC(=O)/C=C/c1cccc([N+](=O)[O-])c1  
7440 C=COCCCC.O=c1cc(Br)c2cc(F)ccc2o1>>CCCCO/C=C/c1cc(=O)oc2ccc(F)cc12  
7441 C=CC(=O)OC.CCSc1cc(I)nc1-c1nc2cc(C(F)(F)F)enc2n1C>>CCSc1cc(/C=C/C(=O)OC)enc1-c1nc2cc(C(F)(F)F)enc2n1C  
7442 C=CC(=O)OC.CC(C)OC(=O)N1CC(I)=C(c2cccc2)N1C(=O)OC(C)C>>COC(=O)/C=C/C1=C(c2cccc2)N(C(=O)OC(C)C)N(C(=O)OC(C)C)C1  
7443 Br1ccncc1.C=CCCC(C(=O)OCC)C(=O)OCC>>CCOC(=O)C(CCC/C=C/c1ccncc1)C(=O)OCC  
7444 C=C[Si](C)(C)C.Ic1ccsc1>>C[Si](C)(C)/C=C/c1ccsc1  
7445 C=CC(=O)OC(C)(C)C.CC(OCCC(=O)OC(C)(C)C)c1cc2c(cc1Br)OCO2>>CC(OCCC(=O)OC(C)(C)C)c1cc2c(cc1/C=C/C(=O)OC(C)(C)C)OCO2  
7446 C=CC(=O)OCCO.O=C1Nc2ccc(Br)cc2C1=O>>O=C(/C=C/c1ccc2c(c1)C(=O)C(=O)N2)OCCO  
7447 C=Cc1ccc(/C=C/c2cccs2)cc1.O=Cc1ccc(Br)cc1>>O=Cc1ccc(/C=C/c2ccc(/C=C/c3cccs3)cc2)cc1  
7448 Br1ccc2nccn2c1.C=CS(=O)(=O)c1cccc1>>O=S(=O)(/C=C/c1ccc2nccn2c1)c1cccc1  
7449 C=CC(=O)OC.Ic1nn(-c2cccc2)c2ncccc12>>COC(=O)/C=C/c1nn(-c2cccc2)c2ncccc12  
7450 C=CC(OCC)OCC.O=[N+][([O-])c1ccc(Br)cc1>>CCOC(/C=C/c1ccc([N+](=O)[O-])cc1)OCC

7451 C=CCCCCCC.COC(=O)CCCCC1=C(I)CCC1=O>>CCCCC/C=C/C1=C(CCCCC(=O)OC)C(=O)CC1  
7452 Br1ccc2c(c1)OCCOCCOCCOCCO2.C=CP(=O)(OC(C)C)OC(C)C>>CC(C)OP(=O)/(C=C/c1ccc2c(c1)  
7453 )OCCOCCOCCOCCO2)OC(C)C  
7454 C=CC(C)C(C)O.COc1ccc(Br)cc1>>COc1ccc(/C=C/C(C)C(C)O)cc1  
7455 C=CC(=O)OCc1cccc1.CC(C)(C)OC(=O)CC1(C(=O)OC(C)(C)C)CC(c2cc(OCc3cccc3)ccc2Br)=NO  
1>>CC(C)(C)OC(=O)CC1(C(=O)OC(C)(C)C)CC(c2cc(OCc3cccc3)ccc2/C=C/C(=O)OCc2cccc2)=N  
7456 C=CCO[C@]1(C)C[C@H](C)C(=O)[C@H](C)[C@H](O)[C@](C)(O)[C@H](CC)OC(=O)[C@  
7457 H](C)C(=O)[C@H](C)[C@H]1O[C@H]1O[C@H](C)C[C@H](N(C)C)[C@H]1OC(=O)c1cccc1.Ic  
7458 1cccc1>>CC[C@H]1OC(=O)[C@H](C)C(=O)[C@H](C)[C@H](O)[C@H]2O[C@H](C)C[C@H]  
7459 (N(C)C)[C@H]2OC(=O)c2cccc2[C@H](C)(OC/C=C/c2cccc2)C[C@H](C)C(=O)[C@H](C)[C@  
7460 C=CC(=O)OCC.O=C1CNc2c(Br)cccc2N1>>CCOC(=O)/C=C/c1ccc2c1NCC(=O)N2  
7461 C=Cc1cccc1.CCOC(=O)c1ccc(N)c(Br)c1>>CCOC(=O)c1ccc(N)c(/C=C/c2cccc2)c1  
7462 C=CCCCCCC.OCc1cccc1Br>>CCCCC/C=C/c1cccc1CO  
7463 C=CC(F)(F)C(F)(F)C(F)(F)C(F)(F)C(F)(F)F.CC(=O)c1ccc(Br)cc1>>CC(=O)c1ccc(/C=C/C(F)(  
7464 F)C(F)(F)C(F)(F)C(F)(F)C(F)(F)C(F)(F)F)cc1  
7465 C=C.Clc1ccc(Br)cc1>>C=Cc1ccc(Cl)cc1  
7466 C=CC(=O)OC.COc1ccc(Br)c(C=O)c1>>COC(=O)/C=C/c1ccc(OC)cc1C=O  
7467 Br1cccs1.C=Cc1cccn1>>C(=C/c1cccs1)\c1cccn1  
7468 C=Cc1cccn1.CCN1C[C@]2(OC(=O)c3cc(I)ccc3NC(C)=O)CC[C@H](OC)[C@@]34[C@@H]2C[C@  
7469 H]([C@@H]13)[C@@]1(O)C[C@H](OC)[C@H]2C[C@H]4[C@]1(O)[C@H]2OC>>CCN1C[C@  
7470 @]2(OC(=O)c3cc(/C=C/c4cccn4)ccc3NC(C)=O)CC[C@H](OC)[C@@]34[C@@H]2C[C@H]([C@  
7471 @H]13)[C@@]1(O)C[C@H](OC)[C@H]2C[C@H]4[C@]1(O)[C@H]2OC  
7472 C=CC(=O)OC.COc1cccc(I)c1NC(=O)C(C)(C)C>>COC(=O)/C=C/c1cccc(OC)c1NC(=O)C(C)(C)C  
7473 C=Cc1ccc(C(F)(F)F)cc1.COC(=O)Cc1c(C)nn(Cc2ccc(Br)cc2)c1C>>COC(=O)Cc1c(C)nn(Cc2ccc(/C=  
7474 C/c3ccc(C(F)(F)F)cc3)cc2)c1C  
7475 C=CC(=O)OC.CCCc1cc2n(c(=O)c1I)CCC21OCCO1>>CCCc1cc2n(c(=O)c1/C=C/C(=O)OC)CCC21O  
7476 CCO1  
7477 C=Cc1ccc(F)cc1.COc1ccc(I)cc1>>COc1ccc(/C=C/c2ccc(F)cc2)cc1  
7478 Br1ccc2cccc2c1.C=CC(=O)OCCCC>>CCCCOC(=O)/C=C/c1ccc2cccc2c1  
7479 C=Cc1cccc1Cl.Ic1cccc1>>Clc1cccc1/C=C/c1cccc1  
7480 C=CC(=O)O.O=[N+](O-)]c1cccc1Br>>O=C(O)/C=C/c1cccc1[N+](=O)[O-]  
7481 C=CC(=O)OC.COc1cc(Br)cc([N+](=O)[O-])c1>>COC(=O)/C=C/c1cc(OC)cc([N+](=O)[O-])c1  
7482 C=CC(=O)OC.CC(C)n1cnc2c(NCc3cccc(Br)cc3)nc(N3CCN(C)CC3)nc21>>COC(=O)/C=C/c1cccc(CN  
7483 c2nc(N3CCN(C)CC3)nc3c2ncn3C(C)C)c1  
7484 C/C=C(NC(=O)OC(C)(C)C(=O)OC.CN(C)c1ccc(I)cc1>>COC(=O)/C(NC(=O)OC(C)(C)C)=C(C)c  
7485 1ccc(N(C)C)cc1  
7486 Br1ccc2c(c1)Sc1cccc1N2.C=Cc1ccc(OC(C)=O)cc1>>CC(=O)Oc1ccc(/C=C/c2ccc3c(c2)Sc2cccc2N  
7487 3)cc1  
7488 C=CC(N)=O.CC(C)(C)OC(=O)NCc1cccc(Br)c1>>CC(C)(C)OC(=O)NCc1cccc(/C=C/C(N)=O)c1  
7489 C=CC(=O)OC.CCc1nc2c(C)cc(C)nn2c1Cc1ccc(Br)cc1>>CCc1nc2c(C)cc(C)nn2c1Cc1ccc(/C=C/C(=O  
7490 )OC)cc1  
7491 C=CCOc1cccc1C.Cc1ccc(I)cc1>>Cc1ccc(/C=C/COc2cccc2C)cc1  
7492 C=Cc1cccc1.CCOc1ccc(Br)cc1>>CCOc1ccc(/C=C/c2cccc2)cc1  
7493 C=CC1(O)CCC1.Ic1ccsc1>>OC1(/C=C/c2ccsc2)CCC1  
7494 C=CC(=O)OCC.O=C(Nc1cccc1I)C(F)(F)C(F)(F)C(F)(F)F>>CCOC(=O)/C=C/c1cccc1NC(=O)C(F)(  
7495 F)C(F)(F)C(F)(F)F  
7496 C=CC(=O)N(C)C.O=CNCc1cccc1I>>CN(C)C(=O)/C=C/c1cccc1NC=O  
7497 C=CC(=O)OCC.COCOCc1cccc(Br)c1>>CCOC(=O)/C=C/c1cccc(COCOC)c1  
7498 C=CC(=O)OCc1cccc1.Oc1ccc(Br)c(Cl)c1>>O=C(/C=C/c1ccc(O)cc1Cl)OCc1cccc1  
7499 C=CCNC1=NCCN1.COc1ccc(I)cc1>>COc1ccc(/C=C/CNC2=NCCN2)cc1  
7500 C=Cc1cccn1.Cc1c(Nc2c(I)cncc2C#N)cc(Cl)c2[nH]ccc12>>Cc1c(Nc2c(C#N)cncc2/C=C/c2ccncc2)cc  
7501 (Cl)c2[nH]ccc12  
7502 C=Cc1cccn1.CC(C)(C)OC(=O)NCC(c1cccc1)c1cncc(Br)c1>>CC(C)(C)OC(=O)NCC(c1cccc1)c1cn  
7503 cc(/C=C/c2ccncc2)c1  
7504 C=CC(=O)OC(C)(C)C.COc1cccc1NCc1ccc(Br)cc1>>COc1cccc1NCc1ccc(/C=C/C(=O)OC(C)(C)C)  
7505 C=CC(=O)OCC.C[C@H]1c2cccc2CCN1C(=O)c1cc(-c2cccc2)n2nc(-  
7506 c3ccc(Br)cc3F)cc2n1>>CCOC(=O)/C=C/c1ccc(-c2cc3nc(C(=O)N4CCc5cccc5[C@H]4C)cc(-  
7507 c4cccc4)n3n2)c(F)c1  
7508 C=CC(=O)OC(C)(C)C.Ic1cccc2cccc12>>CC(C)(C)OC(=O)/C=C/c1cccc2cccc12  
7509 C=CC(=O)OC.O=c1oc2enc3ccc(Br)cc3c2n1-  
7510 c1cccc(C(F)(F)F)c1>>COC(=O)/C=C/c1ccc2ncc3oc(=O)n(-c4cccc(C(F)(F)F)c4)c3c2c1

7491 C=C1C(=O)O[C@H]2[C@H]1C[C@@H](O)/C(C)=C/CC[C@@]1(C)O[C@@H]21.COc1cccc(I)c1>>  
COc1cccc(/C=C2/C(=O)O[C@H]3[C@H]2C[C@@H](O)/C(C)=C/CC[C@@]2(C)O[C@@H]32)c1  
7492 C=CCN1C(=O)c2cccc2C1=O.CN(C)c1ccc(Br)cc1>>CN(C)c1ccc(/C=C/CN2C(=O)c3cccc3C2=O)cc  
7493 C=Cc1cccc1.CC(=O)c1cccc(Br)c1>>CC(=O)c1cccc(/C=C/c2cccc2)c1  
7494 C=Cc1ccc(Cl)cc1.Cc1cc(C)c(/C=C/C(=O)O)c(Br)c1>>Cc1cc(C)c(/C=C/C(=O)O)c(/C=C/c2ccc(Cl)cc2  
7495 C=Cc1cc(OC)c(OC)c(OC)c1-c1ccc(Cl)cc1.COc1ccc(I)cc1>>COc1ccc(/C=C/c2cc(OC)c(OC)c(OC)c2-  
c2ccc(Cl)cc2)cc1  
7496 C=CC(=O)OC.O=[N+](=[O-])c1ccc(Br)c(NCc2cccc2)c1>>COC(=O)/C=C/c1ccc([N+](=O)[O-  
])cc1NCc1cccc1  
7497 C=CC(=O)OCC.Cc1cc(Br)ccc1O>>CCOC(=O)/C=C/c1ccc(O)c(C)c1  
7498 C=CC(=O)OC.O=c1[nH]c(=O)n([C@@H]2O[C@H](CO)[C@@H](O)[C@H]2O)cc1I>>COC(=O)/C=  
C/c1cn([C@@H]2O[C@H](CO)[C@@H](O)[C@H]2O)c(=O)[nH]c1=O  
7499 C=CC(=O)OCC.Fc1cccc(Br)c1C1OCCCCO1>>CCOC(=O)/C=C/c1cccc(F)c1C1OCCCCO1  
7500 C=CCOC(C)=O.CC(C)(C)OC(=O)n1cc(I)c2cccc21>>CC(=O)OC/C=C/c1cn(C(=O)OC(C)(C)C)c2ccc  
7501 C=CC(=O)OCC.COc1ccc(Br)cc1I>>CCOC(=O)/C=C/c1ccc(Br)ccc1OC  
7502 C=CCc1ccc2c(c1)OCO2.CS(=O)(=O)c1ccc(CCl)cc1>>C=C(Cc1ccc(S(C)(=O)=O)cc1)Cc1ccc2c(c1)O  
7503 BrC12CC3CC(CC(C3)C1)C2.C=Cc1cccc1>>C=C/C12CC3CC(CC(C3)C1)C2)c1cccc1  
7504 C=CC(=O)OC.O=C1Cc2cc(Br)ccc2N1>>COC(=O)/C=C/c1ccc2c(c1)CC(=O)N2  
7505 C=CC(=O)NCc1cccc(C(=O)OC(C)(C)C)c1.O=C1NC(=O)C(c2c[nH]c3cccc23)=C1Br>>CC(C)(C)OC  
(=O)c1cccc(CNC(=O)/C=C/C2=C(c3c[nH]c4cccc34)C(=O)NC2=O)c1  
7506 C=C1CC(c2cccc2)OC1=O.Nc1cccc1I>>Nc1cccc1/C=C1\CC(c2cccc2)OC1=O  
7507 C=CCn1cnnn1.OC(Cn1cnnn1)(c1ccc(F)cc1F)C(F)(F)c1ccc(Br)cn1>>OC(Cn1cnnn1)(c1ccc(F)cc1F)C(  
F)(F)c1ccc(/C=C/Cn2cnnn2)cn1  
7508 C=CC(=O)OCC.COc1ccc(Br)cc1CC(=O)Nc1cnc(C(=O)NC(C)(C)C)c1>>CCOC(=O)/C=C/c1ccc(OC)  
c(CC(=O)Nc2cnc(C(=O)NC(C)(C)C)c2)c1  
7509 C=Cc1cncnc1.O=Cc1cccc1Br>>O=Cc1cccc1/C=C/c1cncnc1  
7510 C=CC(=O)OCC.O=c1oc2cccc2cc1Br>>CCOC(=O)/C=C/c1cc2cccc2oc1=O  
7511 C=CC(=O)NCCc1ccc(F)cc1.COc1ccc2c(=O)c(I)coc2c1>>COc1ccc2c(=O)c(/C=C/C(=O)NCCc3ccc(F)  
cc3)coc2c1  
7512 C=CC(=O)OC.COc1ccc2c(c1)CCN(c1ccc(C(C)C)cc1F)C2(C)c1ccc(Br)cc1>>COC(=O)/C=C/c1ccc(C  
2(C)c3ccc(OC)cc3CCN2c2ccc(C(C)C)cc2F)cc1  
7513 C=CS(=O)(=O)NCc1cccc1.COc1ccc(Br)c(CNC(=O)OC(C)(C)C)c1>>COc1ccc(/C=C/S(=O)(=O)NCc  
2cccc2)c(CNC(=O)OC(C)(C)C)c1  
7514 C=CC(=O)N1N=Cc2cccc2C1c1cccc1.COc1cc(Cc2cnc(N)nc2N)cc(I)c1OC>>COc1cc(Cc2cnc(N)nc2  
N)cc(/C=C/C(=O)N2N=Cc3cccc3C2c2ccs2)c1OC  
7515 C=CC(=O)O.COc1cccc(I)c1>>COc1cccc(/C=C/C(=O)O)c1  
7516 C=Cc1cc(OC)cc(OC)c1.CC(C)(Oc1ccc(C(=O)c2ccc(Cl)cc2)cc1)C(=O)Oc1ccc(I)cc1>>COc1cc(/C=C/c  
2ccc(OC(=O)C(C)(C)Oc3ccc(C(=O)c4ccc(Cl)cc4)cc3)cc2)cc(OC)c1  
7517 C=CC(=O)OC(C)(C)C.CC(C)(C)O[C@H]1CC[C@@H]2C=C(C3=C(Br)CN(S(=O)(=O)c4cccc4)CC3  
)CC[C@]12C>>CC(C)(C)OC(=O)/C=C/C1=C(C2=C[C@H]3CC[C@H](OC(C)(C)C)[C@@]3(C)CC2  
)CCN(S(=O)(=O)c2cccc2)C1  
7518 C=C.N#Cc1cccc(I)c1>>C=Cc1cccc(C#N)c1  
7519 C=CCOc1cccc1.CC(=O)c1ccc(Br)cc1>>CC(=O)c1ccc(/C=C/COc2cccc2)cc1  
7520 C=Cc1cccc1.O=c1cc(-c2cccc2)oc2ccc(Br)cc12>>O=c1cc(-c2cccc2)oc2ccc(/C=C/c3cccc3)cc12  
7521 C=Cc1nc2c(N)ncnc2n1[C@@H]1O[C@H](CO[Si](C)(C)C(C)(C)C)[C@@H](O[Si](C)(C)C(C)(C)C)[  
C@H]1O[Si](C)(C)C(C)(C)C.Ic1cccc2cccc12>>CC(C)(C)[Si](C)(C)OC[C@H]1O[C@@H](n2c(/C=  
C/c3cccc4cccc34)nc3c(N)ncnc32)[C@H](O[Si](C)(C)C(C)(C)C)[C@@H]1O[Si](C)(C)C(C)(C)C  
7522 C=CC(=O)OC(C)(C)C.CC(C)CN1CCc2c(ccc3[nH]ncc23)C1c1ccc(Br)cc1>>CC(C)CN1CCc2c(ccc3[n  
H]ncc23)C1c1ccc(/C=C/C(=O)OC(C)(C)C)cc1  
7523 C=CC(=O)OCC.Cc1cc2ncc(Br)cc2n1-c1ccc(C#N)cc1>>CCOC(=O)/C=C/c1nc2cc(C)n(-  
c3ccc(C#N)cc3)c2c1  
7524 C=CC#N.O=C1Cc2c([nH]c3ccc(C(F)(F)F)cc23)-c2cc(I)ccc2N1>>N#C/C=C/c1ccc2c(c1)-  
c1[nH]c3ccc(C(F)(F)F)cc3c1CC(=O)N2  
7525 C=Cc1cc([N+](=O)[O-])cn1C.COC(=O)c1cc(Br)cn1C>>COC(=O)c1cc(/C=C/c2cc([N+](=O)[O-  
])cn2C)cn1C  
7526 BrC1cccc(OCc2cccc2)c1.C=CC(OCC)OCC>>CCOC(/C=C/c1cccc(OCc2cccc2)c1)OCC  
7527 C=C.Cc1cccc(C(N)=O)c1Br>>C=Cc1c(C)cccc1C(N)=O  
7528 C=CC(C)=O.Ic1ccc2[nH]ccc2c1>>CC(=O)/C=C/c1ccc2[nH]ccc2c1  
7529 C=CC(=O)OC.Fc1cc(Br)ccc1CN1CCCC(c2c(-  
c3cccc3)[nH]c3cccc23)C1>>COC(=O)/C=C/c1ccc(CN2CCCC(c3c(-  
7530 C=CC(CCC)OCc1cccc1.Cc1cccc1Br>>CCCC(/C=C/c1cccc1C)OCc1cccc1

7531 Br1cccc1.C=C/C=C/C(=O)N(CCCC)CCCC>>CCCCN(CCCC)C(=O)/C=C/C=C/c1cccc1  
7532 C=Cc1cccc1.O=c1cc(Br)c2cccc2o1>>O=c1cc(/C=C/c2cccc2)c2cccc2o1  
7533 C=Cc1cccc1.COC(=O)c1cccc1I>>COC(=O)c1cccc1/C=C/c1cccc1  
7534 C=CS(N)(=O)=O.CCc1ccc(Br)cc1>>CCc1ccc(/C=C/S(N)(=O)=O)cc1  
7535 C=C(NC(C)=O)C(=O)OC.CC(=O)Oc1cc(C)c(I)c(C)c1>>COC(=O)/C=C/c1c(C)cc(OC(C)=O)cc1C)N  
7536 C=C1C(=O)O[C@@H]2/C=C(\C)CC/C=C(\C)CC[C@@H]12.Ic1ccc2[nH]ccc2c1>>C/C1=C/[C@H]2  
7537 OC(=O)/C=C/c3ccc4[nH]ccc4c3)[C@@H]2CC/C(C)=C/CC1  
7538 C=Cc1ccncc1.CC(C)(C)OC(=O)N[C@H](COc1ccc(Br)cn1)Cc1cccc1>>CC(C)(C)OC(=O)N[C@H](C  
7539 Oc1ccc(/C=C/c2ccncc2)cn1)Cc1cccc1  
7540 C=CC(=O)OCC.Cc1cccc1Cl>>CCOC(=O)/C=C/c1cccc1C  
7541 C=Cc1ccc(N)cc1.Oc1ccc(-c2oc3cc(O)cc(Br)c3c2-c2cc(O)cc(O)c2)cc1>>Nc1ccc(/C=C/c2cc(O)cc3oc(-  
7542 c4ccc(O)cc4)c(-c4cc(O)cc(O)c4)c23)cc1  
7543 C=CN1CCCC1=O.O=C1c2cccc2C(=O)N1c1cccc(I)c1>>O=C1CCCN1/C=C/c1cccc(N2C(=O)c3cccc  
7544 3C2=O)c1  
7545 C=Cc1ccc(F)cc1.Fc1cccc(I)c1>>Fc1ccc(/C=C/c2cccc(F)c2)cc1  
7546 C=C(NC(C)=O)C(=O)OC.Cc1cc(C)cc(I)c1>>COC(=O)/C=C/c1cc(C)cc(C)c1)NC(C)=O  
7547 C=CC(=O)OCC.CC(C)(C)Nc1nc2cc(Br)ccc2c1CCO2>>CCOC(=O)/C=C/c1ccc2c3c(c(NC(C)(C)C)n  
7548 c2c1)CCO3  
7549 C=CC(=O)OC(C)(C)C.O=[N+](O-)[c1cccc1Cl]>>CC(C)(C)OC(=O)/C=C/c1cccc1[N+](=O)[O-]  
7550 C=CCN(C(=O)OC(C)(C)C)C(=O)OC(C)(C)C.O=C1CCc2cc(Br)ccc21>>CC(C)(C)OC(=O)N(C/C=C/c  
7551 1ccc2c(c1)CCC2=O)C(=O)OC(C)(C)C  
7552 C=CC(=O)OC.Cn1c(-c2ccc(Br)cc2)nc2cccc21>>COC(=O)/C=C/c1ccc(-c2nc3cccc3n2C)cc1  
7553 C=CC(C)(C)O.COc1ccc(CCN(C)C)cc1I>>COc1ccc(CCN(C)C)cc1/C=C/C(C)(C)O  
7554 C=CC(N)=O.COc1ccc(I)cc1>>COc1ccc(/C=C/C(N)=O)cc1  
7555 C=C(C)c1cccc1.Cc1ccc(I)cc1>>C/C(=C/c1ccc(C)cc1)c1cccc1  
7556 C=CCc1cccc1.Cn1nc(Br)c2cccc21>>Cn1nc(/C=C/Cc2cccc2)c2cccc21  
7557 C=CC(=O)OC(C)(C)C.Ic1ccc(Cc2ncc(-c3cccc3)[nH]2)cc1>>CC(C)(C)OC(=O)/C=C/c1ccc(Cc2ncc(-  
7558 c3cccc3)[nH]2)cc1  
7559 Br1cccc1.C=Cc1ccc(N(c2ccc(OC)cc2)c2ccc(OC)cc2)cc1>>COc1ccc(N(c2ccc(/C=C/c3cccc3)cc2)c  
7560 2ccc(OC)cc2)cc1  
7561 C=CC(=O)N(C)Cc1sc2cccc2c1C.CC1(C)NCc2cc(Br)cn2NC1=O>>Cc1c(CN(C)C(=O)/C=C/c2nc3c  
7562 (c2)CNC(C)(C)C(=O)N3)sc2cccc12  
7563 C=CC(=O)OC.CCOC(=O)c1cccc(I)c1>>CCOC(=O)c1cccc(/C=C/C(=O)OC)c1  
7564 C=Cc1nc2c(N)ncnc2n1[C@H]1C[C@H](O[Si](C)(C)C(C)(C)C)[C@@H](CO[Si](C)(C)C(C)(C)C)O1.  
7565 CC(=O)c1ccc(Br)cc1>>CC(=O)c1ccc(/C=C/c2nc3c(N)ncnc3n2[C@H]2C[C@H](O[Si](C)(C)C(C)(C)C)  
7566 C)[C@@H](CO[Si](C)(C)C(C)(C)C)O2)cc1  
7567 C=C[C@H]1O[C@@H](Sc2cccc2)[C@H](OCc2cccc2)[C@@H](OCc2cccc2)[C@@H]1OCc1ccc(  
7568 OC)cc1.O=c1cc(-  
7569 c2cccc2)oc2ccc(Br)cc12>>COc1ccc(CO[C@H]2[C@H](OCc3cccc3)[C@@H](OCc3cccc3)[C@H]  
7570 (Sc3cccc3)O[C@@H]2/C=C/c2ccc3oc(-c4cccc4)cc(=O)c3c2)cc1  
7571 C=Cc1cccc(CN2CCN(C)CC2)n1.Cc1ncc(C#N)c(Nc2ccc3[nH]ccc3c2C)c1Br>>Cc1ncc(C#N)c(Nc2ccc  
7572 3[nH]ccc3c2C)c1/C=C/c1cccc(CN2CCN(C)CC2)n1  
7573 C=CC#N.CC1(C)O[C@H]2CCC=C(Br)[C@H]2O1>>CC1(C)O[C@H]2CCC=C(/C=C/C#N)[C@H]2  
7574 C=CC(=O)OC.Ic1cccc1N1CC=CC1>>COC(=O)/C=C/c1cccc1N1CC=CC1  
7575 C=CC(=O)OC.COc1ccc2c(c1)CCN(c1ccc(CC(C)C)c(C)c1)C2(C)c1ccc(Br)cc1>>COC(=O)/C=C/c1ccc  
7576 (C2(C)c3ccc(OC)cc3CCN2c2ccc(CC(C)C)c(C)c2)cc1  
7577 C=CC(=O)N(C)OC.Cc1cccc1I>>CON(C)C(=O)/C=C/c1cccc1C  
7578 C=Cc1ccc(OC)cc1.N#CC(CBr)(c1cccc1)c1cccc1>>COc1ccc(/C=C/CCC(C#N)(c2cccc2)c2cccc2  
7579 C=Cc1ccc(F)cc1.Cc1nn(C)c(=O)c(-c2c(F)ccc(Cl)c2Br)c1OC(=O)C(C)C>>Cc1nn(C)c(=O)c(-  
7580 c2c(F)ccc(Cl)c2/C=C/c2ccc(F)cc2)c1OC(=O)C(C)C  
7581 C=CC(=O)OCC.OCc1ccc(Br)cc1>>CCOC(=O)/C=C/c1ccc(CO)cc1  
7582 Br1cccs1.C=CS(N)(=O)=O>>NS(=O)(=O)/C=C/c1cccs1  
7583 C=CC(OC)OC.Ic1ccc2cccc2c1>>COC(/C=C/c1ccc2cccc2c1)OC  
7584 C=CC(=O)OC.Oc1cccc(Br)c1>>COC(=O)/C=C/c1cccc(O)c1  
7585 C=CC(=O)OC.Clc1ccc(I)cc1>>COC(=O)/C=C/c1ccc(Cl)cc1  
7586 C=Cc1cccc(OC)c1.Nc1cccc1Br>>COc1cccc(/C=C/c2cccc2N)c1  
7587 C=CN(C)C(C)=O.COc1ccc2c(c1)CCC=C2OS(=O)(=O)C(F)(F)F>>C=C(C1=CCc2cc(OC)ccc21)N(C  
7588 )C(C)=O

C=CC(C)(C)C(=O)NC(C)(C)CO.COc1cc(Br)ccc1Cc1cc([C@@H]2O[C@H](COC(C)=O)[C@@H](O  
7571 C(C)=O)[C@H](OC(C)=O)[C@H]2OC(C)=O)c(C)cc1C>>COc1cc(/C=C/C(C)(C)C(=O)NC(C)(C)CO  
ccc1Cc1cc([C@@H]2O[C@H](COC(C)=O)[C@@H](OC(C)=O)[C@H](OC(C)=O)[C@H]2OC(C)=O  
7572 C=CC(=O)OCC.Fc1ccc(Br)c(C2OCCCO2)c1>>CCOC(=O)/C=C/c1ccc(F)cc1C1OCCCO1  
C=Cc1ccc(/C=C/c2ccc(N(c3ccc(OCCCCC)cc3)c3ccc(OCCCCC)cc3)cc2)cc1.O=Cc1ccc(Br)cc1>>C  
7573 CCCCCOc1ccc(N(c2ccc(/C=C/c3ccc(/C=C/c4ccc(C=O)cc4)cc3)cc2)c2ccc(OCCCCC)cc2)cc1  
7574 C=CC(=O)OC.O=C1oc2ccccc2cc1-c1ccc(I)cc1>>COC(=O)/C=C/c1ccc(-c2cc3ccccc3oc2=O)cc1  
7575 C=Cc1cccn1.O=[N+](=[O-])c1ccc2c(Br)nn(C3CCCCO3)c2c1>>O=[N+](=[O-  
])c1ccc2c(/C=C/c3cccn3)nn(C3CCCCO3)c2c1  
7576 C=CC(=O)N(C)OC.FC(F)(F)c1ccc(I)cc1>>CON(C)C(=O)/C=C/c1ccc(C(F)(F)F)cc1  
7577 C=CC(=O)OC.COc1cc(C=O)c(Br)c(OC)c1>>COC(=O)/C=C/c1c(C=O)cc(OC)cc1OC  
7578 C=C[C@H]1CCCCN1C(=O)OC(C)(C)C.Cc1cccc(C)c1I>>Cc1cccc(C)c1/C=C/[C@H]1CCCCN1  
C(=O)OC(C)(C)C  
7579 C=COCC.Cc1ccc(I)cc1>>CCO/C=C/c1ccc(C)cc1  
7580 C=Cc1ccc(OC)c(OC)c1.CCOC(=O)C(F)I>>CCOC(=O)C(F)/C=C/c1ccc(OC)c(OC)c1  
7581 Brc1ccc2ccccc2c1.C=Cc1c(F)c(F)c(F)c(F)c1F>>Fc1c(F)c(F)c(/C=C/c2ccc3ccccc3c2)c(F)c1F  
7582 C=CC(=O)OCC.COc1ncc(Br)c(N)c1I>>CCOC(=O)/C=C/c1c(OC)ncc(Br)c1N  
7583 C=CC(=O)OC(C)(C)C.COc1ccc(CCNC(=O)c2cc(Br)cc(I)c2)cc1>>COc1ccc(CCNC(=O)c2cc(Br)cc(/C  
=C/C(=O)OC(C)(C)C)c2)cc1  
7584 C=CCN1C(=O)C2(CCCC2)NC[C@@]1(C)c1cc(F)cc(F)c1.N#Cc1cc2c(cc1Br)C[C@@]1(C2)C(=O)Nc  
2ncccc21>>C[C@]1(c2cc(F)cc(F)c2)CNC2(CCCC2)C(=O)N1C/C=C/c1cc2c(cc1C#N)C[C@]1(C2)  
C(=O)Nc2ncccc21  
7585 C=CC(=O)OC(C)(C)C.CCOC(=O)CN1CC(=O)Nc2ncc(Br)cc2C1>>CCOC(=O)CN1CC(=O)Nc2ncc(/  
C=C/C(=O)OC(C)(C)C)cc2C1  
7586 C=CC(=O)OC.O=C(Oc1ccc(OC(=O)c2ccccc2)c(I)c1)c1ccccc1>>COC(=O)/C=C/c1cc(OC(=O)c2ccccc  
2)ccc1OC(=O)c1ccccc1  
7587 C=CC1(C)OC(=O)Nc2ccc(-c3cc(F)cc(Br)c3)cc21.COc1ccc(-c2oc3ccccc3c(=O)c2I)cc1>>COc1ccc(-  
c2oc3ccccc3c(=O)c2/C=C/C2(C)OC(=O)Nc3ccc(-c4cc(F)cc(Br)c4)cc32)cc1  
7588 BrC1=C(C2=CCCCO2)CCCC1.C=Cc1ccccc1>>C1=C(C2=C(/C=C/c3ccccc3)CCCC2)OCCC1  
7589 C=CC(=O)OC.O=Cc1ccc([N+](=O)[O-])cc1Br>>COC(=O)/C=C/c1cc([N+](=O)[O-])ccc1C=O  
7590 C=Cc1ccnc(F)c1.CC(C)(C)OC(=O)N1CCC[C@H]1COc1nc(Cl)c(I)c1>>CC(C)(C)OC(=O)N1CCC[C  
@H]1COc1nc(Cl)c(/C=C/c2ccnc(F)c2)c1  
7591 C=CCO.Fc1cccc(Br)c1>>C=C(CO)c1cccc(F)c1  
7592 C=C[C@](C)(COCC[Si](C)(C)C)C(=O)O.CC(=O)O[C@H](C)c1ccc2ccc(Br)cc2n1>>CC(=O)O[C@H  
(C)c1ccc2ccc(/C=C/[C@](C)(COCC[Si](C)(C)C)C(=O)O)cc2n1  
7593 C=CC(=O)OCC.Cn1nnc2cc(Br)enc21>>CCOC(=O)/C=C/c1enc2c(c1)nnn2C  
7594 C=CC(N)=O.Cc1ccc(Br)cc1>>Cc1ccc(/C=C/C(N)=O)cc1  
7595 C=Cc1ccc(OC)c(OC)c1.Cc1oc2ccccc2c(=O)c1Br>>COc1ccc(/C=C/c2c(C)oc3ccccc3c2=O)cc1OC  
7596 C=CC(=O)N(C)Cc1oc2ccccc2c1C.CC1(C)Oe2cc(Br)enc2NC1=O>>Cc1c(CN(C)C(=O)/C=C/c2enc3c(  
c2)OC(C)(C)C(=O)N3)oc2ccccc12  
7597 C=Cc1ccc(COC(C)=O)cc1.CCCCOc1ccc2c(c1)cc(C#N)c1ccc(Br)cc12>>CCCCOc1ccc2c(c1)cc(C#N)  
c1ccc(/C=C/c3ccc(COC(C)=O)cc3)cc12  
7598 C=CC#N.CC(=O)c1ccc(Br)cc1>>CC(=O)c1ccc(/C=C/C#N)cc1  
7599 C=CC#N.Cc1cc(-c2ccccc2)n2nc(-c3ccc(Cl)cc3)c(I)c2n1>>Cc1cc(-c2ccccc2)n2nc(-  
c3ccc(Cl)cc3)c(/C=C/C#N)c2n1  
7600 C=CC(=O)N1N=Cc2ccccc2C1C(C)(C)C.COc1cc(Cc2enc(N)nc2N)cc(I)c1OC>>COc1cc(Cc2enc(N)nc  
2N)cc(/C=C/C(=O)N2N=Cc3ccccc3C2C(C)(C)C)c1OC  
7601 C=Cc1ccc(N(CCCC)CCCC)cc1.CCCCCCCCCC1(CCCCCCCCCC)c2cc(Br)ccc2-  
c2ccc(C=O)cc21>>CCCCCCCCCCCC1(CCCCCCCCCC)c2cc(C=O)ccc2-  
c2ccc(/C=C/c3ccc(N(CCCC)CCCC)cc3)cc21  
7602 C=Cc1ccc(Cl)cc1.CCn1c(=O)c2c(cc(Br)n2C)n(CC)c1=O>>CCn1c(=O)c2c(cc(/C=C/c3ccc(Cl)cc3)n2C  
)n(CC)c1=O  
7603 C=Cc1ccccc1C(=O)O.Cc1cc(C)cc(I)c1>>Cc1cc(C)cc(/C=C/c2ccccc2C(=O)O)c1  
7604 C=C[C@H]1O[C@H]2OC(C)(C)O[C@@H]2[C@H]1O.O=C1ccoc2cc(Br)ccc12>>CC1(C)O[C@H]  
2O[C@H](/C=C/c3ccc4c(=O)ccoc4c3)[C@H](O)[C@H]2O1  
7605 C=Cc1ccnc1.CCCCCCOc1ccc(Br)cc1F>>CCCCCOc1ccc(/C=C/c2ccncc2)cc1F  
7606 C=CC(C)(C)O.Fc1ccc(Br)cc1>>CC(C)(O)/C=C/c1ccc(F)cc1  
7607 C=Cc1ccc(OC)cc1.Oc1ccccc1I>>COc1ccc(/C=C/c2ccccc2O)cc1  
7608 C=CS(=O)(=O)NCc1ccc(F)cc1.CC(C)(C)OC(=O)NCc1ccccc1Br>>CC(C)(C)OC(=O)NCc1ccccc1/C=  
C/S(=O)(=O)NCc1ccc(F)cc1  
7609 C=CC(C)=O.O=[N+](=[O-])c1ccc(Br)cc1>>CC(=O)/C=C/c1ccc([N+](=O)[O-])cc1

7610 C=CC(=O)OCCOCC.Cc1[nH]c(=O)c2c(N)nn(C)c2c1Br>>CCOCCOC(=O)/C=C/c1c(C)[nH]c(=O)c2c(N)nn(C)c12  
7611 C=CC(=O)OCC.COc1ccc(-c2cc3cc(Br)cc(OC)c3o2)cc1OC>>CCOC(=O)/C=C/c1cc(OC)c2oc(-c3ccc(OC)c(OC)c3)cc2c1  
7612 C=CC(=O)OC.Cc1c(Br)ccc2c1nnn2C>>COC(=O)/C=C/c1ccc2c(nnn2C)c1C  
7613 C=CC(=O)O.CCCCC(CC)Cn1c2ccc(Br)cc2c2cc(C=O)ccc21>>CCCCC(CC)Cn1c2ccc(C=O)cc2c2cc(/C=C/C(=O)O)ccc21  
7614 C=COCCCC.O=c1cc(Br)c2ccc3ccccc3c2[nH]1>>CCCCO/C=C/c1cc(=O)[nH]c2c1ccc1ccccc12  
7615 C=CC(=O)OC(C)(C)C.CC(C)(C)[Si](C)(C)/C=C/C1=C(Br)CCCC1>>CC(C)(C)OC(=O)/C=C/C1=C(/C=C/[Si](C)(C)C(C)(C)C)CCCC1  
7616 C=C(NC(C)=O)C(=O)OC.N#Cc1ccc(Br)cc1>>COC(=O)/C(=C/c1ccc(C#N)cc1)NC(C)=O  
7617 Br1ccccc1.C=CC(=O)N1CCOCC1>>O=C(/C=C/c1ccccc1)N1CCOCC1  
7618 C=CC(=O)OC.OCc1ccccc1Br>>COC(=O)/C=C/c1ccccc1CO  
7619 C=Cc1ccccc1.CC(C)(C)OC(=O)N1CCC[C@H]1COc1cnc(Cl)c(I)c1>>CC(C)(C)OC(=O)N1CCC[C@H]1COc1cnc(Cl)c(/C=C/c2ccccc2)c1  
7620 C=Cc1ccccc1.COc1ccc(-c2oc3cc(OC)c(I)c(O)c3c(=O)c2OC)cc1OC>>COc1ccc(-c2oc3cc(OC)c(/C=C/c4ccccc4)c(O)c3c(=O)c2OC)cc1OC  
7621 C=Cc1ccc(CN(C)C)cn1.Cc1c(Nc2c(I)cncc2C#N)ccc2[nH]1>>Cc1c(Nc2c(C#N)cncc2/C=C/c2ccc(CN(C)C)cn2)ccc2[nH]1ccc12  
7622 C=CS(=O)(=O)c1ccccc1.Cc1ccc(Br)cc1>>Cc1ccc(/C=C/S(=O)(=O)c2ccccc2)cc1  
7623 C=CC(=O)OC.Cc1cc(C)c2nc(C(C)C)n(Cc3ccc(Br)cc3)c2n1>>COC(=O)/C=C/c1ccc(Cn2c(C(C)C)nc3c(C)cc(C)nc32)cc1  
7624 C=Cc1ccc(C(C)(C)C)cc1.CC(C)(C)Br>>CC(C)(C)/C=C/c1ccc(C(C)(C)C)cc1  
7625 C=CC(=O)OC(C)(C)C.O=C(NC[C@H]1CCc2cc(I)ccc2O1)OCc1ccccc1>>CC(C)(C)OC(=O)/C=C/c1ccc2c(c1)CC[C@H](CNC(=O)OCc1ccccc1)O2  
7626 C=CC(=O)OCC(CC)CCCC.CC(C)CCCC(C)CCCC(C)CCOc1ccc(I)cc1>>CCCCC(CC)COC(=O)/C=C/c1ccc(OC(C)CCCC(C)CCCC(C)C)cc1  
7627 C=CC(C)O.Ic1ccccc1>>CC(O)/C=C/c1ccccc1  
7628 C=CC(=O)OCc1ccccc1.CC(=O)O[C@H]1CC(=O)N(Cc2cc3c(cc2I)OCO3)[C@@H]1[Se]c1ccccc1>>CC(=O)O[C@H]1CC(=O)N(Cc2cc3c(cc2/C=C/C(=O)OCc2ccccc2)OCO3)[C@@H]1[Se]c1ccccc1  
7629 Br1ccccc1.C=Cc1ccccc1>>C(=C/c1ccccc1)\c1ccccc1  
7630 C=CC(=O)OC(C)(C)C.CCC(=C(c1ccc(O)cc1)c1ccc(O)cc1)c1ccc(Br)cc1>>CCC(=C(c1ccc(O)cc1)c1ccc(O)cc1)c1ccc(/C=C/C(=O)OC(C)(C)C)cc1  
7631 C=CC(=O)OCC(CC)CCCC.Ic1ccccc1>>CCCCC(CC)COC(=O)/C=C/c1ccccc1  
7632 C=Cc1ccccc1.O=Cc1ccc(OS(=O)(=O)C(F)(F)F)c1>>C=C(c1ccccc1)c1ccc(C=O)c1  
7633 C=CC(=O)OCCCC.CC(=O)O[IH2](OC(C)=O)c1c(C)cc(C)cc1C>>CCCCOC(=O)/C=C/c1c(C)cc(C)cc1  
7634 C=CSCC.O=C(c1ccccc1)c1ccc(Br)cc1>>CCS/C=C/c1ccc(C(=O)c2ccccc2)cc1  
7635 C=CC(=O)N(CC)CC.O=Cc1ccc(Cl)cc1>>CCN(CC)C(=O)/C=C/c1ccc(C=O)cc1  
7636 C=CC(N)=O.Cc1cc(Br)cc(C)c1O>>Cc1cc(/C=C/C(N)=O)cc(C)c1O  
7637 Br1ccc2ccccc2c1.C=CC(=O)OC>>COC(=O)/C=C/c1ccc2ccccc2c1  
7638 COC[C@H](/N=C(\c1ccccc1)N1C=CCC[C@H]1C)(C)C.Cc1ccccc1I>>COC[C@H](/N=C(\c1ccccc1)N1C=C(c2ccccc2C)CC[C@H]1C)(C)C  
7639 C=CC(=O)OC.CC(=O)Oc1ccc(Br)cc1CC=C(C)C>>COC(=O)/C=C/c1ccc(OC(C)=O)c(CC=C(C)C)c1  
7640 C=CC(C)(C)O.COc1ccc2ccc(=O)oc2c1I>>COc1ccc2ccc(=O)oc2c1/C=C/C(C)(C)O  
7641 C=C1CC(c2ccc(Cl)cc2)OC1=O.Nc1ccccc1I>>Nc1ccccc1/C=C1\CC(c2ccc(Cl)cc2)OC1=O  
7642 C=Cc1cncn1.Cc1cc2c(cc1[N+](=O)[O-])c(I)nn2C1CCCCO1>>Cc1cc2c(cc1[N+](=O)[O-])c(/C=C/c1cncn1)nn2C1CCCCO1  
7643 Br1ccc(/C=C/c2ccc(N(c3ccccc3)c3ccccc3)cc2)cc1.C=Cc1cncn1>>C(=C/c1ccc(/C=C/c2ccc(N(c3ccc3)c3ccccc3)cc2)cc1)\c1cncn1  
7644 C=CC(=O)OC.CC(C)(C)OC(=O)NCCc1ccc(Br)cc1>>COC(=O)/C=C/c1ccc(CCNC(=O)OC(C)(C)C)cc1  
7645 C=CB1OC(C)CC(C)(C)O1.COC(=O)/C=C/C(I)>>COC(=O)/C=C(C)\C=C\B1OC(C)CC(C)(C)O1  
7646 C=Cc1ccccc1.COc1cc(I)cc(OC)c1OC>>COc1cc(/C=C/c2ccccc2)cc(OC)c1OC  
7647 C=CC(=O)OC.Cn1c2ccccc2c2nc3ccc(Cl)cc3c3ccccc1c32>>COC(=O)/C=C/c1ccc2nc3c4ccccc4n(C)c4ccccc2c1)c34  
7648 C=CCCCCCC.CC(C)(C)c1ccccc1OS(=O)(=O)C(F)(F)F>>C=C(CCCCCC)c1ccccc1C(C)(C)C  
7649 C=Cc1ccccc1.COc1cc(Br)c2c3c1O[C@H]1[C@@H](O[Si](C)(C)C(C)(C)C)C=C[C@@H]4[C@@H](C2)N(C)CC[C@@]341>>COc1cc(/C=C/c2ccccc2)c2c3c1O[C@H]1[C@@H](O[Si](C)(C)C(C)(C)C)C=C[C@@H]4[C@@H](C2)N(C)CC[C@@]341  
7650 C=CCOC(C)=O.COC(=O)c1ccc(Br)cc1>>COC(=O)c1ccc(/C=C/COC(C)=O)cc1

C=CC[C@@H]1O[C@H](COC(C)=O)[C@H]2OC(CC)(CC)O[C@@H]12.CC(C)(C)[Si](C)(C)Oc1ccc  
 7651 2[nH]cc(C3=C(Br)C(=O)NC3=O)c2c1>>CCC1(CC)O[C@H]2[C@H](C/C=C/C3=C(c4c[nH]c5ccc(O[  
 Si](C)(C)C(C)(C)C)cc45)C(=O)NC3=O)O[C@H](COC(C)=O)[C@H]2O1  
 7652 C=CS(C)(=O)=O.COc1ccc(Br)cc1>>COc1ccc(/C=C/S(C)(=O)=O)cc1  
 7653 C=CC(=O)OCC.CC1=NC[C@H](c2ccccc2Br)O1>>CCOC(=O)/C=C/c1ccccc1[C@H]1CN=C(C)O1  
 7654 C=CC(=O)OCCCC.Clc1cccc(Br)c1>>CCCCOC(=O)/C=C/c1cccc(Cl)c1  
 7655 C=C1C(=O)O[C@@H]2/C=C(\C)CC/C=C(\C)CC[C@@H]12.O=[N+](O-  
 )c1ccccc1I>>C/C1=C[C@H]2OC(=O)/C=C/c3ccccc3[N+](=O)[O-])[C@@H]2CC/C(C)=C/CC1  
 C=CCO[C@H]1O[C@H](COC(C)=O)[C@@H](OC(C)=O)[C@H](OC(C)=O)[C@@H]1OC(C)=O.Ic  
 7656 1cccc2ccccc12>>CC(=O)OC[C@H]1O[C@H](OC/C=C/c2cccc3ccccc23)[C@@H](OC(C)=O)[C@@  
 H](OC(C)=O)[C@@H]1OC(C)=O  
 7657 C=CC(=O)OC.Cc1ccc(OS(=O)(=O)C(F)(F)F)c(Br)n1>>COC(=O)/C=C/c1nc(C)ccc1OS(=O)(=O)C(F)(  
 7658 C=C(C)C(=O)OCC(C)C.Ic1cccc1>>C/C=C(\c1cccc1)C(=O)OCC(C)C  
 7659 C=Cc1ccccc1N.CN(C(=O)c1ccccc1)c1ccc2c(c1)[nH]c(=NC(=O)c1ccc(Br)s1)n2CCC(N)=O>>CN(C(=  
 O)c1ccccc1)c1ccc2c(c1)[nH]c(=NC(=O)c1ccc(/C=C/c3ccccc3N)s1)n2CCC(N)=O  
 7660 C=CNC(C)=O.CN(C)c1cccc(OS(=O)(=O)C(F)(F)F)c1>>C=C(NC(C)=O)c1cccc(N(C)C)c1  
 7661 C=Cc1cncnc1.CCCCN(CCCC)c1ccc2cc(Br)ccc2c1>>CCCN(CCCC)c1ccc2cc(/C=C/c3ccccc3)ccc2c1  
 7662 C=C1C(=O)O[C@H]2[C@H]1C[C@@H](O)/C(C)=C/CC[C@@]1(C)O[C@@H]21.COc1ccccc1I>>C  
 Oc1ccccc1/C=C1/C(=O)O[C@H]2[C@H]1C[C@@H](O)/C(C)=C/CC[C@@]1(C)O[C@@H]21  
 7663 C=Cc1n[nH]c2cc([C@@H]3C[C@@]34C(=O)Nc3ccc(OC)cc34)ccc12.CN(C)Cc1c(F)cc(Br)cc1F>>C  
 Oc1ccc2c(c1)[C@]1(C[C@H]1c1ccc3c(/C=C/c4cc(F)c(CN(C)C)c(F)c4)n[nH]c3c1)C(=O)N2  
 7664 C=Cc1ccccc1.Ic1ccc2c(c1)C1c3cccc4cccc(c34)C21>>C=C/c1ccc2c(c1)C1c3cccc4cccc(c34)C21)\c1c  
 cccc1  
 7665 C=Cc1ccccc1.FC(F)(F)Oc1ccc(Br)cc1>>FC(F)(F)Oc1ccc(/C=C/c2ccccc2)cc1  
 7666 C=CC(=O)OC.Ic1sccl-c1ccccc1>>COC(=O)/C=C/c1sccl-c1ccccc1  
 7667 C=Cc1ccccc1.O=[N+](O-)c1ccc(OS(=O)(=O)C(F)(F)F)cc1>>C=C(c1ccccc1)c1ccc([N+](=O)[O-  
 7668 C=C(NC(C)=O)C(=O)OC.Fc1cccc(Br)c1>>COC(=O)/C=C/c1cccc(F)c1)NC(C)=O  
 7669 C=Cc1ccc(OC(C)=O)cc1.CCCCC(Br)C(F)(F)F>>CCCCC(/C=C/c1ccc(OC(C)=O)cc1)C(F)(F)F  
 7670 C=CS(=O)(=O)F.FS(F)(F)(F)c1ccc(I)cc1>>O=S(=O)(F)/C=C/c1ccc(S(F)(F)(F)(F)F)cc1  
 7671 C=C.ClCc1cccc(Oc2ccccc2)c1>>C=CCc1cccc(Oc2ccccc2)c1  
 7672 C=C(COC(C)=O)C(=O)OC.CCOC(=O)c1ccc(I)cc1>>CCOC(=O)c1ccc(/C=C(\COC(C)=O)C(=O)OC)c  
 7673 C=CC(=O)OC(C)(C)C.CCOC(=O)c1cc2cc(Br)ccc2[nH]1>>CCOC(=O)c1cc2cc(/C=C/C(=O)OC(C)(C)  
 C)ccc2[nH]1  
 7674 C=CC(=O)OC(C)(C)C.COc1ccc(-c2ccc(Br)cn2)cc1OC>>COc1ccc(-  
 c2ccc(/C=C/C(=O)OC(C)(C)C)cn2)cc1OC  
 7675 C=Cc1cncnc1.CC(=O)Oc1ccc(Br)c1>>CC(=O)Oc1cncnc1/C=C/c2ccccc2)c1  
 7676 C=COCCCC.O=C1CCCc2c(OS(=O)(=O)C(F)(F)F)cccc21>>C=C(OCCCC)c1ccc2c1CCCC2=O  
 7677 C=Cc1cccn1.O=[N+](O-)c1cccc(I)c1>>O=[N+](O-)c1cccc(/C=C/c2ccccc2)c1  
 7678 C=CCCCBr.ClCc1cccc(Oc2ccccc2)c1>>C=C(CCCBr)Cc1cccc(Oc2ccccc2)c1  
 7679 C=Cc1cccc(OC)c1.C[Si](C)(C)Cl>>COc1cccc(/C=C/[Si](C)(C)C)c1  
 7680 C=CC(=O)N(C)OC.N#Cc1ccc2c(Br)cccc2c1>>CON(C)C(=O)/C=C/c1cccc2cc(C#N)ccc12  
 7681 C=CC(=O)OC.COC(=O)Cc1ccc(N)c(I)c1>>COC(=O)/C=C/c1cc(CC(=O)OC)ccc1N  
 7682 C=C(C)C(=O)OC.O=[N+](O-)c1ccc(I)cc1>>COC(=O)/C(C)=C/c1ccc([N+](=O)[O-])cc1  
 7683 C=CC(=O)c1ccccc1.COc1ccc(I)c(OC)n1>>COc1ccc(/C=C/C(=O)c2ccccc2)c(OC)n1  
 7684 C=CC(=O)OCC.COCn1nc(-c2ccccc2)c(Br)cc1=O>>CCOC(=O)/C=C/c1cc(=O)n(COC)nc1-c1ccccc1  
 7685 C=Cc1ccccc(F)c1.CCN1c2ncc(I)cc2C(=O)N(C)c2ccccc21>>CCN1c2ncc(/C=C/c3ccccc(F)c3)cc2C(=O)  
 N(C)c2ccccc21  
 7686 C=CC(=O)N(C)C.Cc1ccc(-c2ccccc2Br)cc1>>Cc1ccc(-c2ccccc2/C=C/C(=O)N(C)C)cc1  
 7687 C=CC(=O)OCC.O=[N+](O-)c1sccl1Br>>CCOC(=O)/C=C/c1sccl1[N+](=O)[O-]  
 7688 C=CCCCC(=O)OCC.O=S(=O)(Oc1ccc(C(=C2C3CCCC2CCC3)c2ccc(O)cc2)cc1)C(F)(F)F>>CCOC(  
 =O)CCCC/C=C/c1ccc(C(=C2C3CCCC2CCC3)c2ccc(O)cc2)cc1  
 7689 C=CP(=O)(OCC)OCC.CC(=O)Nc1ccc(Br)cc1>>CCOP(=O)/C=C/c1ccc(NC(C)=O)cc1)OCC  
 7690 C=Cc1ccc(OC)cc1.CCCCC(Br)C(F)(F)F>>CCCCC(/C=C/c1ccc(OC)cc1)C(F)(F)F  
 7691 C=CC(=O)OC(C)(C)C.Fc1cccc1I>>CC(C)(C)OC(=O)/C=C/c1ccccc1F  
 7692 C=CC(=O)OC(C)(C)C.COc1ccc(CNc2ccc(Br)cc2)cc1>>COc1ccc(CNc2ccc(/C=C/C(=O)OC(C)(C)C)c  
 c2)cc1  
 7693 C=Cc1cc2ccccc2oc1=O.Ic1ccccc1>>O=c1oc2ccccc2cc1/C=C/c1ccccc1  
 7694 C=Cc1ccccc1.O=Cc1c(Br)ccc2ccccc12>>O=Cc1c(/C=C/c2ccccc2)ccc2ccccc12  
 7695 C=Cc1cncnc1.CCCCCCCCOCc1ccc(Br)c(F)c1>>CCCCCCCCOCc1ccc(/C=C/c2ccccc2)c(F)c1

7696 \*CNCCCOCCOCCOCCNC(=O)COc1ccc(C(Cc2cc(OC)cc(OC)c2)NC(=O)c2ccc(C=C)cc2)cc1.O=[N  
 7697 +])([O-]  
 7698 ]c1ccc(I)cc1>>\*CNCCCOCCOCCOCCNC(=O)COc1ccc(C(Cc2cc(OC)cc(OC)c2)NC(=O)c2ccc(/C=  
 7699 C/c3ccc(I)cc1>>COC(=O)/C=C/c1ccn(C)n1  
 7700 C=CC#N.O=S(=O)(Oc1cc2ccc(Br)cc12)C(F)(F)F>>N#C/C=C/c1cc2ccc(Br)cc12  
 7701 C=CC(=O)OC(C)(C)C.O=C1C=CC23C(c4cccc4)=C(Br)C(=O)N2Cc2ccccc2C3C1>>CC(C)(C)OC(=O)/C=C/C1=C(c2ccccc2)C23C=CC(=O)CC2c2ccccc2CN3C1=O  
 7702 C=Cc1ccc(C(F)(F)F)cc1.Clc1cccc(/C=C/c2ccccc2)c1>>FC(F)(F)c1ccc(/C=C/c2ccccc(/C=C/c3ccccc3)c2)cc1  
 7703 C=CC(=O)OC.Cn1ccc(I)n1>>COC(=O)/C=C/c1ccn(C)n1  
 7704 C=CCCO.CC(=O)OC[C@H]1O[C@@H](Oc2n[nH]c(C(C)C)c2Cc2ccc(Br)cc2C)[C@H](OC(C)=O)[C@H](OC(C)=O)[C@@H]1OC(C)=O>>CC(=O)OC[C@H]1O[C@@H](Oc2n[nH]c(C(C)C)c2Cc2ccc(/C=C/CCO)cc2C)[C@H](OC(C)=O)[C@@H](OC(C)=O)[C@@H]1OC(C)=O  
 7705 C=Cc1ccc(O)cc1.COc1cc(Br)cc(OC)c1>>COc1cc(/C=C/c2ccc(O)cc2)cc(OC)c1  
 7706 Brc1cccc(N(c2ccccc2)c2ccccc2)c1.C=Cc1ccc(C(=O)O)cc1>>O=C(O)c1ccc(/C=C/c2ccccc(N(c3ccccc3)c3ccccc3)c2)cc1  
 7707 C=CC(=O)NCCCN(CCCCN(=O)OC(C)(C)C(=O)OC(C)(C)C.COC(=O)N[C@H]1[C@@H](Oc2ccc(I)cc2)O[C@H](C)[C@@H](OC(C)=O)[C@@H]1OC(C)=O>>COC(=O)N[C@H]1[C@@H](Oc2ccc(/C=C/C(=O)NCCCN(CCCCN(=O)OC(C)(C)C(=O)OC(C)(C)C)cc2)O[C@H](C)[C@@H](OC(C)=O)[C@@H]1OC(C)=O  
 7708 C=CC(=O)OC.Nc1ccc(OC(F)(F)F)cc1Br>>COC(=O)/C=C/c1cc(OC(F)(F)F)ccc1N  
 7709 C=Cc1ccc(S(=O)(=O)c2ccccc2F)cn1.Oc1cc(F)ccc1I>>O=S(=O)(c1ccc(/C=C/c2ccc(F)cc2O)nc1)c1ccc  
 7710 C=Cc1ccc(N(C)C)cc1.CC(C)c1cccc(C(C)C)c1N1C(=O)c2ccccc3c(Br)ccc(c23)C1=O>>CC(C)c1cccc(C(C)C)c1N1C(=O)c2ccccc3c(/C=C/c4ccc(N(C)C)cc4)ccc(c23)C1=O  
 7711 C=CCNS(=O)(=O)c1ccc(C)cc1.Cc1cccc(N)c1Br>>Cc1ccc(S(=O)(=O)NC/C=C/c2c(C)cccc2N)cc1  
 7712 C=Cc1ccncc1.Cc1cc(N2CCCC2)nc(Cl)n1>>Cc1cc(N2CCCC2)nc(/C=C/c2ccncc2)n1  
 7713 C=CC(=O)OCC.CCNc1nc(N)nc(C)c1I>>CCNc1nc(N)nc(C)c1/C=C/C(=O)OCC  
 7714 C=Cc1cccc(Cl)c1.CCOC(=O)C(Cc1ccccc1)C(C)=O>>CCOC(=O)C(Cc1ccccc1/C=C/c1cccc(Cl)c1)C(C)=O  
 7715 C=Cc1nc2c(N)ncnc2n1[C@@H]1O[C@H](CO[Si](C)(C)C(C)C)[C@@H](O[Si](C)(C)C(C)C)[C@H]1O[Si](C)(C)C(C)C.Cc1cccc1>>CC(C)(C)[Si](C)(C)OC[C@H]1O[C@@H](n2c(/C=C/c3ccccc3)nc3c(N)ncnc32)[C@H](O[Si](C)(C)C(C)C)[C@@H]1O[Si](C)(C)C(C)C  
 7716 C=CC(=O)Oc1ccccc1.N#Cc1ccc(Cl)cc1>>N#Cc1ccc(/C=C/C(=O)Oc2ccccc2)cc1  
 7717 Brc1ccc2c(c1)OCO2.C=CC(=O)OC>>COC(=O)/C=C/c1ccc2c(c1)OCO2  
 7718 C=COCCCl.Cc1ccncc1-c1c(OS(=O)(=O)C(F)(F)F)ccc2ccccc12>>C=C(OCCCl)c1ccc2ccccc2c1-c1nccccc1C  
 7719 C=CC(C)O.CC(C)(C)OC(=O)NCCc1cc2c(cc1I)OCO2>>CC(O)/C=C/c1cc2c(cc1CCNC(=O)OC(C)(C)C)OCO2  
 7720 C=CCNC(=O)c1ccccc1.COc1ccc(I)cc1>>COc1ccc(/C=C/C\NCC(=O)c2ccccc2)cc1  
 7721 C=CC(=O)OCC.O=C1NCc2c1c1c(c3c2c2cc(Br)ccc2n3CCCO)Cc2ccccc2-1>>CCOC(=O)/C=C/c1ccc2c(c1)c1c3c(c4c(c1n2CCCO)Cc1ccccc1-4)C(=O)NC3  
 7722 C=Cc1ccc(Cl)cc1.CC(C)(C)OC(=O)N(C(=O)OC(C)(C)C)C1=NC(C)(c2ccccc(Br)c2)CCS1>>CC(C)(C)OC(=O)N(C(=O)OC(C)(C)C)C1=NC(C)(c2ccccc(/C=C/c3ccc(Cl)cc3)c2)CCS1  
 7723 C=C/C=C/C(C)(C)C.CN1CCC[C@H]1COc1cncc(Br)c1>>CN1CCC[C@H]1COc1cncc(/C=C/C=C/C(C)(C)C)c1  
 7724 Brc1ccncc1.C=Cc1cccc(OC)c1>>COc1cccc(/C=C/c2ccncc2)c1  
 7725 Brc1ccc(I)cc1.C=CCN1C(=O)c2ccccc2C1=O>>O=C1c2ccccc2C(=O)N1C/C=C/c1ccc(Br)cc1  
 7726 C=C[C@@H](CC(OC)OC)c1ccccc1.COc1ccc(I)cc1>>COc1ccc(/C=C/[C@@H](CC(OC)OC)c2ccccc2  
 7727 C=CC(=O)O.O=[N+])([O-])c1cccc(Br)c1>>O=C(O)/C=C/c1cccc([N+](=O)[O-])c1  
 7728 C=CCNC(=O)OC(C)(C)C.O=C1CCCc2ccc(Cl)cc21>>C=C(CNC(=O)OC(C)(C)C)c1ccc2c(c1)C(=O)C  
 7729 C=Cc1ccccc1.Ic1ccccc1>>C(=C/c1ccccc1)c1ccccc1  
 7730 C=CCCN1C(=O)c2ccccc2C1=O.Cc1ccc2ncc(Br)cc2c1>>Cc1ccc2ncc(/C=C/CCN3C(=O)c4ccccc4C3=O)cc2c1  
 7731 C=Cc1cc(OC)cc(OC)c1.Nc1ccc(I)cc1>>COc1cc(/C=C/c2ccc(N)cc2)cc(OC)c1  
 7732 C=CC(C)=O.O=C(c1ccccc1)c1ccc(Br)cc1>>CC(=O)/C=C/c1ccc(C(=O)c2ccccc2)cc1  
 7733 C=Cc1ccc(OC)cc1.COc1cc(I)cc(OC)c1OC>>COc1ccc(/C=C/c2cc(OC)c(OC)c(OC)c2)cc1  
 7734 C=COCCCC.O=C(Cl)c1ccc(Br)cc1>>CCCCO/C=C/C(=O)c1ccc(Br)cc1  
 7735 C=CC(=O)OCC.Cc1ccc(S(=O)(=O)n2cc(-c3ccc(OC4CCOCC4)c(C#N)c3)c3cc(Br)enc32)cc1>>CCOC(=O)/C=C/c1ncc2c(c1)c(-c1ccc(OC3CCOCC3)c(C#N)c1)cn2S(=O)(=O)c1ccc(C)cc1  
 7736 C=CCN1C(=O)c2ccccc2C1=O.Nc1ccc(Br)cc1>>Nc1ccc(/C=C/CN2C(=O)c3ccccc3C2=O)cc1



7734 C=CC1CCCCC1.CC(C)(C)c1ccccc1OS(=O)(=O)C(F)(F)F>>C=C(c1ccccc1C(C)(C)C)C1CCCCC1  
7735 C=C.Clc1ccccc1I>>C=Cc1ccccc1Cl  
7736 C=CC(=O)OC(C)(C)C.CC(C)(C)O[C@H]1CC[C@@H]2C=C(C3=C(Br)CC4(CC3)OCCO4)CC[C@]1  
2C>>CC(C)(C)OC(=O)/C=C/C1=C(C2=C[C@H]3CC[C@H](OC(C)(C)C)[C@@]3(C)CC2)CCC2(C1)  
7737 C=Cc1ccc(O)cc1.Oc1ccc(Br)cc1>>Oc1ccc(/C=C/c2ccc(O)cc2)cc1  
7738 C=CS(=O)(=O)N1CCC2(CC1)N=C(C1CCCCC1)NC2=O.Cc1cc(N2CCNC2=O)cc(C)c1Br>>Cc1cc(N  
2CCNC2=O)cc(C)c1/C=C/S(=O)(=O)N1CCC2(CC1)N=C(C1CCCCC1)NC2=O  
7739 C=CC(F)(F)C(F)(F)C(F)(F)C(F)(F)F.O=Cc1ccc(Br)cc1>>O=Cc1ccc(/C=C/C(F)(F)C(F)(F)C(F)(F)C(F)(F)cc1  
7740 C=Cc1ccc(OC)cc1.CCOC(=O)CCCB>>CCOC(=O)CCC/C=C/c1ccc(OC)cc1  
7741 C=CCO[Si](C)(C)C(C)(C)C.CC(C)(C)c1ccc(Br)cc1>>CC(C)(C)c1ccc(/C=C/CO[Si](C)(C)C(C)(C)C)c  
7742 C=CC(=O)OCC.O=C1CCC(Cc2ccccc2Br)CN1Cc1ccccc1>>CCOC(=O)/C=C/c1ccccc1CC1CCC(=O)  
N(Cc2ccccc2)C1  
7743 C=C/C=C/C1CCCCN1S(=O)(=O)c1ccc(C)cc1.Cc1cccc(I)c1>>Cc1ccc(S(=O)(=O)N2CCCCC2/C=C/C  
=C/c2ccccc(C)c2)cc1  
7744 C=CC(=O)OCCCC.Clc1ccc(I)cc1>>CCCCOC(=O)/C=C/c1ccc(Cl)cc1  
7745 C=CC(=O)OC.COC(=O)Cn1c(=O)oc2cc(Br)enc21>>COC(=O)/C=C/c1enc2c(c1)oc(=O)n2CC(=O)OC  
7746 C=CC(=O)O.Cc1cc(Nc2ncnc3ccc(I)cc23)ccc1Oc1cc2nnnc2cn1>>Cc1cc(Nc2ncnc3ccc(/C=C/C(=O)O)  
cc23)ccc1Oc1cc2nnnc2cn1  
7747 C=Cc1ccccc1C.Nc1cc(Cl)ccc1I>>Cc1ccccc1/C=C/c1ccc(Cl)cc1N  
7748 C=CCCO[Si](C)(C)C(C)(C)C.COc1cccc(CCl)c1>>C=C(CCO[Si](C)(C)C(C)(C)C)Cc1cccc(OC)c1  
7749 C=CCOC(C)=O.Cc1ccccc1Br>>CC(=O)OC/C=C/c1ccccc1C  
7750 C=CC#N.O=[N+](O-)]c1ccc(I)cc1>>N#C/C=C/c1ccc([N+](=O)[O-])cc1  
7751 C=Cc1ccc(-n2ccc3cenc32)nc1.Ic1ccccc1>>C(=C/c1ccc(-n2ccc3cenc32)nc1)c1ccccc1  
7752 C=CC(=O)COCCCC.CC(=O)c1ccc(I)cc1>>CCCCOC(=O)/C=C/c1ccc(C(C)=O)cc1  
7753 C=CC(=O)N(C)OC.Nc1ccc(I)cc1>>CON(C)C(=O)/C=C/c1ccc(N)cc1  
7754 C=Cc1ccccc1.Cc1ccc(-c2c(I)nc3sc4ccccc4n23)cc1>>Cc1ccc(-  
C=CCn1c(-  
7755 c2ccc(OC)c(OC)c2OC)nc2ccccc2c1=O.O=C(CN1C(=O)COc2ccccc21)c1ccc(Br)cc1>>COc1ccc(-  
c2nc3ccccc3c(=O)n2C/C=C/c2ccc(C(=O)CN3C(=O)COc4ccccc43)cc2)c(OC)c1OC  
7756 C=CC(=O)OC(C)(C)C.Cc1c[nH]c2ccccc(Br)c12>>Cc1c[nH]c2ccccc(/C=C/C(=O)OC(C)(C)C)c12  
7757 C=CC(=O)OC.COC(=O)[C@@H]1CCc2c(C(C)=O)cc(OS(=O)(=O)C(F)(F)F)c(=O)n21>>COC(=O)/C  
=C/c1cc(C(C)=O)c2n(c1=O)[C@H](C(=O)OC)CC2  
7758 C=CS(C)(=O)=O.COC(=O)c1ccc(Br)cc1>>COC(=O)c1ccc(/C=C/S(C)(=O)=O)cc1  
7759 C=CS(=O)(=O)N1CCC2(CC1)N=C([C@H]1CC[C@H](C)CC1)NC2=O.CNc1cc(C)c(Br)c(C)c1>>CN  
c1cc(C)c(/C=C/S(=O)(=O)N2CCC3(CC2)N=C([C@H]2CC[C@H](C)CC2)NC3=O)c(C)c1  
7760 C=CC(=O)OCC.CC(=O)c1cn(-c2ccccc2)nc1OS(=O)(=O)C(F)(F)F>>CCOC(=O)/C=C/c1nn(-  
c2ccccc2)cc1C(C)=O  
7761 C=Cc1ccccc1.COC(=O)CCc1ccc(OCc2ccccc(Br)c2)cc1>>COC(=O)CCc1ccc(OCc2ccccc(/C=C/c3ccccc  
3)c2)cc1  
7762 C=CC(=O)OC.COc1cccc(OC)c1I>>COC(=O)/C=C/c1c(OC)cccc1OC  
7763 C=CCOc1ccccc1.Cc1cccc(I)c1>>Cc1cccc(/C=C/COc2ccccc2)c1  
7764 C=C.COC(=O)C=CBr>>C=CC=CC(=O)OC  
7765 C=CCP(=O)(OCC)OCC.Ic1ccccc1>>CCOP(=O)(C/C=C/c1ccccc1)OCC  
7766 C=CC(=O)OC(C)(C)C.COc1ccc(CNC(=O)c2cc(Br)cc(I)c2)cc1>>COc1ccc(CNC(=O)c2cc(Br)cc(/C=C  
/C(=O)OC(C)(C)C)c2)cc1  
7767 C=CC(=O)OC.CC(C)(F)CN1[C@H](C(F)F)Cc2c(ccc3c2cnn3C2CCCCO2)[C@@]1(C)c1c(F)cc(Br)cc  
1F>>COC(=O)/C=C/c1cc(F)c([C@]2(C)c3ccc4c(cnn4C4CCCCO4)c3C[C@@H](C(F)F)N2CC(C)(C)F  
7768 Br1cenc2ccccc12.C=Cc1ccccc1>>C(=C/c1cenc2ccccc12)c1ccccc1  
7769 Br1ccc2[nH]ccc2c1.C=CC(C)=O>>CC(=O)/C=C/c1ccc2[nH]ccc2c1  
7770 C=CC(=O)OC.CCCCCc1ccc(I)cc1>>CCCCCc1ccc(/C=C/C(=O)OC)cc1  
7771 C=Cc1ccccc1.O=C(Oc1ccc(I)cc1)c1ccccc1>>O=C(Oc1ccc(/C=C/c2ccccc2)cc1)c1ccccc1  
7772 C=C(C)C(F)(F)F.COC(=O)c1ccc(I)cc1>>COC(=O)c1ccc(/C=C/C(C)C(F)(F)F)cc1  
7773 C=Cc1ccc(C(F)(F)F)cc1.Cc1ccc(Br)cc1>>Cc1ccc(/C=C/c2ccc(C(F)(F)F)cc2)cc1  
7774 C=Cc1cenc1.CCCCCCOc1ccc(Br)cc1F>>CCCCCCOc1ccc(/C=C/c2cenc2)cc1F  
7775 C=CC#N.CCOC(=O)/C=C/c1ccc(I)cc1C>>CCOC(=O)/C=C/c1ccc(/C=C/C#N)cc1C  
7776 C=CN1C(=O)c2ccccc2C1=O.FC(F)(F)Oc1ccc(Br)cc1OC(F)(F)F>>O=C1c2ccccc2C(=O)N1/C=C/c1cc  
c(OC(F)(F)F)c(OC(F)(F)F)c1  
7777 C=CC(=O)OCC.Oc1ccc(Br)c(C(F)(F)F)c1>>CCOC(=O)/C=C/c1ccc(O)cc1C(F)(F)F  
7778 C=CC(=O)OC(C)(C)C.COc1ncc(Br)c(OC)n1>>COc1ncc(/C=C/C(=O)OC(C)(C)C)c(OC)n1

7779 C=CC(=O)OC.O=C1OC2CC(Br)CNC2N1CCc1ccccn1>>COC(=O)/C=C/c1cnc2c(c1)oc(=O)n2CCc1ccccn1  
7780 C=CC(=O)OC.COC(=O)c1ccc(N)c(I)c1>>COC(=O)/C=C/c1cc(C(=O)OC)ccc1N  
7781 C=CC#N.COc1ccc2c(=O)c(I)coc2c1>>COc1ccc2c(=O)c(/C=C/C#N)coc2c1  
7782 C=C[Si](CC)(CC)CC.O=Cc1ccc(Br)cc1>>CC[Si](/C=C/c1ccc(C=O)cc1)(CC)CC  
7783 C=CC(C)(C)O.CC(C)(C)OC(=O)NCC(=O)Nc1cccc1I>>CC(C)(O)/C=C/c1cccc1NC(=O)CNC(=O)O  
C(C)(C)C  
C=C[C@H]1C[C@H]1B1O[C@@H](C(OC)(c2ccccc2)c2ccccc2)[C@H](C(OC)(c2ccccc2)c2ccccc2  
7784 )O1.Ic1cccc1>>COC(c1cccc1)(c1cccc1)[C@@H]1OB([C@H]2C[C@H]2/C=C/c2ccccc2)O[C@  
H]1C(OC)(c1cccc1)c1cccc1  
7785 C=Cc1ccc(OC)cc1.O=[N+](I[O-])c1ccc(Br)cc1>>COc1ccc(/C=C/c2ccc([N+](=O)[O-])cc2)cc1  
7786 C=Cc1ccc(C)c(C)c1.COc1cc(I)cc(OC)c1OC>>COc1cc(/C=C/c2ccc(C)c(C)c2)cc(OC)c1OC  
7787 C=CCn1cccc1C(=O)c1ccc(C)cc1.CCOC(=O)c1cccc(I)c1>>CCOC(=O)c1cccc(/C=C/Cn2cccc2C(=O)c  
2ccc(C)c2)c1  
7788 C=CC(C)(O)CCC=C(C)C.O=Cc1ccc(Br)cc1>>CC(C)=CCCC(C)(O)/C=C/c1ccc(C=O)cc1  
7789 C=CC[Si](C)(C)C.Cc1ccc(S(=O)(=O)Nc2ccccc2I)cc1>>Cc1ccc(S(=O)(=O)Nc2ccccc2/C=C/C[Si](C)(  
C)C)cc1  
7790 C=CC(=O)OCC.Cc1cc(Br)ccn1>>CCOC(=O)/C=C/c1ccnc(C)c1  
7791 C=CC(C)=O.CC(C)(C)OC(=O)n1cc(I)c([Si](C)(C)C)c1>>CC(=O)/C=C/c1cn(C(=O)OC(C)(C)C)cc1[Si  
](C)(C)C  
7792 C=CCC(C)(C)C.CC(C)(C)c1ccc(OS(=O)(=O)C(F)(F)F)cc1>>C=C(CC(C)(C)C)c1ccc(C(C)(C)C)cc1  
7793 C=Cc1ccc(N(c2ccc(OC)cc2)c2ccc(OC)cc2)cc1.CC(C)(C)c1ccc(/C=C/c2ccc(/C=C/c3ccc(Br)cc3)cc2)cc  
1>>COc1ccc(N(c2ccc(/C=C/c3ccc(/C=C/c4ccc(/C=C/c5ccc(C(C)(C)C)cc5)cc4)cc3)cc2)c2ccc(OC)cc2)  
7794 C=CC(=O)OC.Ic1cccc2c1NCC2>>COC(=O)/C=C/c1cccc2c1NCC2  
7795 C=Cc1cc(OC)cc(OC)c1.COc1cc(C=O)c(Br)c(OC)c1OC>>COc1cc(/C=C/c2c(C=O)cc(OC)c(OC)c2OC  
)cc(OC)c1  
Br1ccnc1.C=CCOC1=C(C)C(=O)O[C@H](CC)[C@@](C)(O)C=C(C)C(=O)[C@H](C)[C@@](C)(  
7796 OC)[C@H](O[C@@H]2O[C@H](C)C[C@H](N(C)C)[C@H]2OC(C)=O)[C@H]1C>>CC[C@H]1OC(  
=O)C(C)=C(OC/C=C/c2ccnc2)[C@H](C)[C@@H](O[C@@H]2O[C@H](C)C[C@H](N(C)C)[C@H]  
2OC(C)=O)[C@H](C)(OC)C[C@@H](C)C(=O)C(C)=C[C@@H](C)O  
7797 C=CS(N)(=O)=O.Cc1ccc(C)c(Br)c1>>Cc1ccc(C)c(/C=C/S(N)(=O)=O)c1  
C=CC(=O)OCC.COc1ccc(COC(=O)C)c2c(-  
7798 c3cccc(Br)c3)c3cc(C)c(Cl)cc3oc2=O)cc1>>CCOC(=O)/C=C/c1cccc(-  
c2c(CC(=O)OC)c3ccc(OC)cc3)c(=O)oc3cc(Cl)c(C)cc23)c1  
7799 C=CC1(C(=O)OC)CCOCC1.C[C@H](NC(=O)OC(C)(C)C)c1ccc2ccc(Br)cc2n1>>COC(=O)C1(/C=  
C/c2ccc3ccc([C@@H](C)NC(=O)OC(C)(C)C)nc3c2)CCOCC1  
7800 C=CC(=O)OC.Cc1cn(Cc2ccc3c(c2)OCCO3)c2c(Br)cc(F)cc12>>COC(=O)/C=C/c1cc(F)cc2c(C)cn(Cc  
3ccc4c(c3)OCCO4)c12  
7801 C=CC(=O)OC.COC(=O)c1cc(C)cc(I)c1>>COC(=O)/C=C/c1cc(C)cc(C(=O)OC)c1  
7802 C=CC(=O)Nc1cccc1NC(=O)OC(C)(C)C.CCOC(=O)[C@H]1CN(CCF)C[C@H]1c1ccc(Br)cc1>>C  
COC(=O)[C@H]1CN(CCF)C[C@H]1c1ccc(/C=C/C(=O)Nc2ccccc2NC(=O)OC(C)(C)C)cc1  
7803 C=Cc1ccc(C(=O)OC)cc1.CC1(C)CCC(=O)c2cc(Br)ccc21>>COC(=O)c1ccc(/C=C/c2ccc3c(c2)C(=O)C  
CC3(C)C)cc1  
7804 C=C(C)C(=O)OCCCC.Clc1cccc1>>CCCCOC(=O)/C(C)=C/c1cccc1  
7805 C=CC(=O)OC.O=C(C=P(c1cccc1)(c1cccc1)c1cccc1)c1ccc(Br)cc1>>COC(=O)/C=C/c1ccc(C(=O)C  
=P(c2ccccc2)(c2ccccc2)c2ccccc2)cc1  
7806 Br1ccc(I)cc1.C=Cc1ccc(F)cc1>>Fc1ccc(/C=C/c2ccc(Br)cc2)cc1  
7807 C=CC(=O)OC(C)(C)C.COc1ccc(I)cc1N>>COc1ccc(/C=C/C(=O)OC(C)(C)C)cc1N  
7808 C=Cc1ccc(CN(C)C)cc1.COC(=O)c1cccc1Br>>COC(=O)c1cccc1/C=C/c1ccc(CN(C)C)cc1  
7809 C=C(NC(C)=O)C(=O)OC.O=[N+](I[O-])c1ccc(Br)cc1>>COC(=O)/C=C/c1ccc([N+](=O)[O-]  
)cc1)NC(C)=O  
7810 Br1ccc2ncccc2c1.C=Cc1ccc(OC)cc1>>COc1ccc(/C=C/c2ccc3ncccc3c2)cc1  
7811 C=Cc1cccc1.CCOC(=O)c1ccc(OS(=O)(=O)C(F)(F)F)cc1>>C=C(c1cccc1)c1ccc(C(=O)OCC)cc1  
7812 C=CCCCCCCCC.O=Cc1ccc(Br)cc1>>CCCCCCCCC/C=C/c1ccc(C=O)cc1  
7813 Br1ccncc1.C=CS(C)(=O)=O>>CS(=O)(=O)/C=C/c1ccncc1  
7814 Br1ccc2c(c1)Sc1cccc1N2.C=Cc1ccc(N)cc1>>Nc1ccc(/C=C/c2ccc3c(c2)Sc2ccccc2N3)cc1  
7815 C=Cc1ccc2c(c1)Sc1cccc1N2CC.CCN(c1cccc1)c1ccc(Br)cc1>>CCN(c1cccc1)c1ccc(/C=C/c2ccc3c(c  
2)Sc2ccccc2N3CC)cc1  
7816 C=C.CCOP(=O)(Cc1ccc(Br)cc1)OCC>>C=Cc1ccc(CP(=O)(OCC)OCC)cc1  
7817 CC(=O)O[C@H]1CCC2C3C(CC[C@H]2)C1c1ccc(O)cc1C[C@H]3Sc1ccc(Br)cc1.[C]C(=O)C=C>>[  
C]C(=O)/C=C/c1ccc(S[C@H]2Cc3cc(O)ccc3CC[C@H]4(C)C(CC[C@H]4OC(C)=O)C32)cc1  
7818 C=CC(=O)c1ccc(OC)cc1.COc1ncc(I)c(OC)n1>>COc1ccc(C(=O)/C=C/c2cnc(OC)nc2OC)cc1

7819 C=C/C=C/C(=O)N(CCCC)CCCC.CC(C)(C)c1ccc(Br)cc1>>CCCCN(CCCC)C(=O)/C=C/C=C/c1ccc(C  
(C)(C)C)cc1  
7820 C=CC(=O)CC.Cc1ccccc1Br>>CCC(=O)/C=C/c1ccccc1C  
7821 C=CC#N.CN(C(=O)c1ncc2c(c1I)c1ccccc1n2S(=O)(=O)N(C)C)c1ccccc1>>CN(C(=O)c1ncc2c(c1/C=C  
/C#N)c1ccccc1n2S(=O)(=O)N(C)C)c1ccccc1  
7822 C=CC(=O)Oc1ccccc1.Ic1ccccc1>>O=C(/C=C/c1ccccc1)Oc1ccccc1  
7823 C=CC(=O)O.Cc1ccc(Br)cc1>>Cc1ccc(/C=C/C(=O)O)cc1  
7824 C=Cc1ccncc1.Ic1ccc2c(c1)OCO2>>C(=C/c1ccc2c(c1)OCO2)\c1ccncc1  
7825 C=CC(=O)OC.CC(=O)Oc1ccc(OC(C)=O)c(Br)c1>>COC(=O)/C=C/c1cc(OC(C)=O)ccc1OC(C)=O  
7826 C=CC(=O)O.COC(=O)c1c(I)cc2c(c1OCc1ccccc1)OCO2>>COC(=O)c1c(/C=C/C(=O)O)cc2c(c1OCc1  
ccccc1)OCO2  
7827 C=Cc1ccc2ccccc2c1.CCOC(=O)c1ccccc1Br>>CCOC(=O)c1ccccc1/C=C/c1ccc2ccccc2c1  
7828 C=CC(=O)N(C)C.Cc1cccc(C)c1Br>>Cc1cccc(C)c1/C=C/C(=O)N(C)C  
7829 C=CC(=O)OC(C)(C)C.[C@H](c1ccccc1)N(Cc1ccccc1)[C@H](CC(=O)OC(C)(C)C)c1ccccc1I>>C  
[C@H](c1ccccc1)N(Cc1ccccc1)[C@H](CC(=O)OC(C)(C)C)c1ccccc1/C=C/C(=O)OC(C)(C)C  
7830 C=CCCC(C)=O.Ic1ccccc1>>CC(=O)CC/C=C/c1ccccc1  
7831 C=CC(=O)OCC.CC(C)(C)OC(=O)N1CCCCc2ccc(Cl)nc21>>CCOC(=O)/C=C/c1ccc2c(n1)N(C(=O)O  
C(C)(C)C)CCCC2  
7832 C=CC(=O)Nc1cccc2ccnc12.Fc1ccc(I)cc1>>O=C(/C=C/c1ccc(F)cc1)Nc1cccc2ccnc12  
7833 C=CC(=O)OC.OCc1cc(-c2ccc(Br)cc2)cc(C23CC4CC(CC(C4)C2)C3)c1O>>COC(=O)/C=C/c1ccc(-  
c2cc(CO)c(O)c(C34CC5CC(CC(C5)C3)C4)c2)cc1  
C=CC(C)(C)O.CC1(C)CC(Nc2nccc(-  
7834 c3cn(COCC[Si](C)(C)C)c4cc(Cl)c(F)cc34)n2)CC(C)(C)N1>>CC(C)(O)/C=C/c1cc2c(cc1F)c(-  
c1ccnc(NC3CC(C)(C)NC(C)(C)C3)n1)cn2COCC[Si](C)(C)C  
7835 C=CC(=O)OC.CC(C)(C)OC(=O)N1CCCC2(CC1)NC(=O)c1cc(Br)ccc1O2>>COC(=O)/C=C/c1ccc2c(c1  
)C(=O)NC1(CCN(C(=O)OC(C)(C)C)CC1)O2  
7836 C=CC(N)=O.Fc1cccc(I)c1>>NC(=O)/C=C/c1cccc(F)c1  
7837 Br1ccc(/C=C/c2ccccc2)cc1.C=Cc1ccc(SCC[Si](C)(C)C)cc1>>C[Si](C)(C)CCSc1ccc(/C=C/c2ccc(/C=  
C/c3ccccc3)cc2)cc1  
7838 C=Cc1ccncc1.Cc1nc(Br)c2c(c1O)COC(C)(C)OC2>>Cc1nc(/C=C/c2ccncc2)c2c(c1O)COC(C)(C)OC2  
7839 C=CC(=O)OCC.COc1cccc(Br)c1C>>CCOC(=O)/C=C/c1cccc(OC)c1C  
7840 Br1ccsc1.C=CC(C)(O)CCC=C(C)C>>CC(C)=CCCC(C)(O)/C=C/c1ccsc1  
7841 C=CC(=O)OC.COc1ccc2c(c1)CCN(c1ccc(CC(C)C)cc1)C2(C)c1ccc(Br)cc1>>COC(=O)/C=C/c1ccc(C  
2(C)c3ccc(OC)cc3CCN2c2ccc(CC(C)C)cc2)cc1  
7842 C=Cc1ccccc1.COc1cccc(Cl)c1>>COc1cccc(/C=C/c2ccccc2)c1  
7843 C=C(C)C(=O)OCCO.Ic1ccccc1>>C/C=C/c1ccccc1)C(=O)OCCO  
7844 C=CCN(C(=O)OC(C)(C)C)C(=O)OC(C)(C)C.COc1cccc(Br)c1>>COc1cccc(/C=C/CN(C(=O)OC(C)(C  
)C)C(=O)OC(C)(C)C)c1  
7845 C=CC(=O)OCC.COc1ccc(Br)nc1>>CCOC(=O)/C=C/c1ccc(OC)cn1  
7846 C=CC(=O)OC.O=Cc1ccncc1Br>>COC(=O)/C=C/c1nccccc1C=O  
Br1enc2ccccc2c1.C=CCO[C@]1(C)C[C@H](C)C(=O)[C@H](C)[C@H](O)[C@](C)(O)[C@H]  
[C@H](CC)OC(=O)[C@H](C)[C@H](O)[C@H]2C[C@](C)(OC)[C@H](O)[C@H](C)O2)[C@H](C)[  
7847 C@H]1O[C@H]1O[C@H](C)C[C@H](N(C)C)[C@H]1O>>CC[C@H]1OC(=O)[C@H](C)[C@H]  
[O][C@H]2C[C@](C)(OC)[C@H](O)[C@H](C)O2)[C@H](C)[C@H](O)[C@H]2O[C@H](C  
)C[C@H](N(C)C)[C@H]2O)[C@H](C)(OC/C=C/c2ncc3ccccc3c2)C[C@H](C)C(=O)[C@H](C)[C@  
7848 C=Cc1ccccc1.CC1=C(OS(=O)(=O)C(F)(F)F)CCCC1>>C=C(C1=C(C)CCCC1)c1ccccc1  
7849 C=Cc1ccccc1.Cc1ccc(I)cc1[N+](=O)[O-]>>Cc1ccc(/C=C/c2ccccc2)cc1[N+](=O)[O-]  
7850 C=CS(=O)(=O)c1ccccc1.Cc1ccc(S(=O)(=O)n2ccc3cc(Br)ccc32)cc1>>Cc1ccc(S(=O)(=O)n2ccc3ccc(/C  
=C/S(=O)(=O)c4ccccc4)ccc32)cc1  
7851 C=CC(=O)OC.Nc1nc(N)c2c(I)cn([C@H]3C[C@H](O)[C@H](CO)O3)c2n1>>COC(=O)/C=C/c1cn(  
[C@H]2C[C@H](O)[C@H](CO)O2)c2nc(N)nc(N)c12  
7852 C=CC(=O)OC(C)(C)C.COC(=O)/C(Br)=C1\CCCC1>>COC(=O)C(/C=C/C(=O)OC(C)(C)C)=C1\CCC  
7853 C=CC(=O)CC.Fc1ccc(Br)cc1>>CCC(=O)/C=C/c1ccc(F)cc1  
7854 C=Cc1ccc2cc(F)c(F)cc2n1.OC1c2cc(Br)ccc2OCc2ccncc21>>OC1c2cc(/C=C/c3ccc4cc(F)c(F)cc4n3)cc  
c2OCc2ccncc21  
7855 C=Cc1ccccc1O.Oc1ccc(O)c(I)c1>>Oc1ccc(O)c(/C=C/c2ccccc2O)c1  
7856 C=CCCC(C)=O.Oc1ccc(I)cc1>>CC(=O)CC/C=C/c1ccc(O)cc1  
C=C(NC(C)=O)C(=O)OC.CC(C)(C)[Si](C)(C)OC[C@H]1O[C@H](c2ccc(Br)cc2)C=C[C@H]1O[Si  
7857 ](C)(C)C(C)(C)C>>COC(=O)/C=C/c1ccc([C@H]2C=C[C@H](O[Si](C)(C)C(C)(C)C)[C@H](C  
O[Si](C)(C)C(C)(C)C)O2)cc1)NC(C)=O

7858 C=CC(=O)OCCCC.Ic1c(-c2ccccc2)c2ccccc2c2c1ncc1ccccc12>>CCCCOC(=O)/C=C/c1c(-  
c2ccccc2)c2ccccc2c2c1ncc1ccccc12  
7859 C=Cc1ccccc1.IC1CCCCC1>>C(=C/C1CCCCC1)\c1ccccc1  
7860 C=Cc1ccc(CO)cc1.IC1CCCCC1>>OCc1ccc(/C=C/C2CCCCC2)cc1  
7861 C=CC(=O)OC(C)(C)C.COc1cc(NCc2ccc(Br)cc2)cc(OC)c1OC>>COc1cc(NCc2ccc(/C=C/C(=O)OC(C)  
(C)C)cc2)cc(OC)c1OC  
7862 C=C(C)C(=O)O.O=C1C(O)=C(I)C(=O)c2ccccc21>>C/C(=C\C1=C(O)C(=O)c2ccccc2C1=O)C(=O)O  
7863 C=CC(=O)OC.O=C1C(=O)N(Cc2ccc(C(F)(F)F)cc2)c2ccccc(Br)c21>>COC(=O)/C=C/c1ccccc2c1C(=O)  
C(=O)N2Cc1ccc(C(F)(F)F)cc1  
7864 C=CC(=O)OC.COc1cc(I)c(CCN(S(=O)(=O)c2ccc(C)cc2)cc1OC>>COC(=O)/C=C/c1cc(OC)c(OC)cc1C  
CNS(=O)(=O)c1ccc(C)cc1  
7865 C=CC(=O)OCC.CC(=O)Nc1ccc(I)cc1>>CCOC(=O)/C=C/c1ccc(NC(C)=O)cc1  
7866 C=COCCCC.COc1ccc(I)cc1>>C=C(OCCCC)c1ccc(OC)cc1  
7867 C=Cc1ccccc1.Cc1oc2ccccc2c(=O)c1Br>>Cc1oc2ccccc2c(=O)c1/C=C/c1ccccc1  
7868 C=CC(=O)OCN1C(=O)c2ccccc2C1=O.CCOC(=O)CSc1ccc(Br)cc1>>CCOC(=O)CSc1ccc(/C=C/C(=O)  
)OCN2C(=O)c3ccccc3C2=O)cc1  
7869 C=CN1C(=O)c2ccccc2C1=O.Ic1ccc2c(c1)OCCOCCOCCOCCO2>>O=C1c2ccccc2C(=O)N1/C=C/c1c  
cc2c(c1)OCCOCCOCCOCCO2  
7870 C=COCCCC.COC(=O)c1ccc(Br)cc1>>C=C(OCCCC)c1ccc(C(=O)OC)cc1  
7871 C=CC(C)=O.FC(F)(F)c1ccc(Br)cc1>>CC(=O)/C=C/c1ccc(C(F)(F)F)cc1  
7872 C=CC(=O)OCC.CCCCN(CCCC)c1ccc(Br)cc1>>CCCN(CCCC)c1ccc(/C=C/C(=O)OCC)cc1  
7873 C=CC(=O)N1CCOCC1.CCc1nc2c(N)nc3cc(Br)ccc3c2n1CC1CCOCC1>>CCc1nc2c(N)nc3cc(/C=C/C(  
=O)N4CCOCC4)ccc3c2n1CC1CCOCC1  
7874 COC[C@@H]/N=C(\c1ccccc1)N1C=CCC[C@H]1C)C(C)C.Ic1ccccc1>>COC[C@@H]/N=C(\c1ccc  
cc1)N1C=C(c2ccccc2)CC[C@H]1C)C(C)C  
7875 C=C(NC(C)=O)C(=O)OC.Ic1ccccc1C1OCCCO1>>COC(=O)/C(=C/c1ccccc1C1OCCCO1)NC(C)=O  
7876 C=Cc1ccc(C#N)cc1.Cn1nc(Br)c2ccccc21>>Cn1nc(/C=C/c2ccc(C#N)cc2)c2ccccc21  
7877 Brc1ccc2ncccc2c1.C=Cc1ccccc1>>C(=C/c1ccc2ncccc2c1)\c1ccccc1  
7878 C=Cc1cc(O)c(OC)cc1F.Oc1cc(O)cc(I)c1>>COc1cc(F)c(/C=C/c2cc(O)cc(O)c2)cc1O  
7879 C=CC(=O)OCC.COc1cccc(Oc2cccc(Br)c2)c1>>CCOC(=O)/C=C/c1cccc(Oc2cccc(OC)c2)c1  
7880 C=C(NC(C)=O)C(=O)OC.Cc1cccc(C)c1Br>>COC(=O)/C(=C/c1c(C)cccc1C)NC(C)=O  
7881 C=CC(=O)OCC.O=[N+](O-)\c1ccc(-c2ncccc2Br)cc1>>CCOC(=O)/C=C/c1ccccc1-  
c1ccc([N+](=O)[O-])cc1  
7882 C=Cc1ccc(Cl)cc1.C=Cc1ccccc1>>C=Cc1ccc(/C=C/c2ccccc2)cc1  
7883 C=CC(=O)NCc1ccc(F)cc1.O=c1c(I)coc2cc(O)ccc12>>O=C(/C=C/c1coc2cc(O)ccc2c1=O)NCc1ccc(F)  
7884 C=CC(=O)OC.CN(C(=O)c1ncc2c(c1I)c1ccccc1n2S(=O)(=O)N(C)C)c1ccccc1>>COC(=O)/C=C/c1c(C  
(=O)N(C)c2ccccc2)ncc2c1c1ccccc1n2S(=O)(=O)N(C)C  
7885 C=CC(=O)OC.O=c1[nH]c(=O)n([C@H]2O[C@@H](CO)[C@H](O)[C@@H]2F)cc1I>>COC(=O)/C=  
C/c1cn([C@H]2O[C@@H](CO)[C@H](O)[C@@H]2F)c(=O)[nH]c1=O  
7886 C=C1ccccc1.CCOC(=O)c1ccccc1Br>>CCOC(=O)c1ccccc1/C=C/c1ccccc1  
\*CNCCCOCOCOCOCNC(=O)COc1ccc(C(Cc2cc(OC)cc(OC)c2)NC(=O)c2ccccc(C=C)c2)cc1.O=[N  
+](O-)\c1ccc(I)c([N+](=O)[O-]  
7887 ]c1>>\*CNCCCOCOCOCOCNC(=O)COc1ccc(C(Cc2cc(OC)cc(OC)c2)NC(=O)c2ccccc(/C=C/c3ccc  
([N+](=O)[O-])cc3I[N+](=O)[O-])c2)cc1  
7888 C=CC(=O)OCC(C)CCCC.COc1ccc(I)cc1>>CCCC(C)COC(=O)/C=C/c1ccc(OC)cc1  
7889 C=Cc1ccccc1.O=Cc1ccc2ccccc2c1Br>>O=Cc1ccc2ccccc2c1/C=C/c1ccccc1  
7890 C=Cc1ccc(OC)cc1.C[Si](C)(OS(=O)(=O)C(F)(F)F)OS(=O)(=O)C(F)(F)F>>COc1ccc(/C=C/[Si](C)(C)  
OS(=O)(=O)C(F)(F)F)cc1  
7891 C=CN1CCCC1=O.O=S(=O)(Oc1ccc(-c2ccccc2)cc1)C(F)(F)F>>C=C(c1ccc(-  
C=Cc1nc2c(N)ncnc2n1[C@@H]1O[C@H](CO[Si](C)(C)C(C)(C)C)[C@@H](O[Si](C)(C)C(C)(C)C)[  
7892 C@H]1O[Si](C)(C)C(C)(C)C.COc1ccc(Br)cc1>>COc1ccc(/C=C/c2nc3c(N)ncnc3n2[C@@H]2O[C@  
H](CO[Si](C)(C)C(C)(C)C)[C@@H](O[Si](C)(C)C(C)(C)C)[C@H]2O[Si](C)(C)C(C)(C)C)cc1  
7893 C=CN1CCCCC1=O.Cc1ccc(OS(=O)(=O)C(F)(F)F)c(Br)c1>>C=C(c1ccc(C)cc1Br)N1CCCCC1=O  
7894 C=CC(=O)OC.COC(=O)c1ccccc1Br>>COC(=O)/C=C/c1ccccc1C(=O)OC  
7895 C=CC(=O)O.COC(=O)c1ccccc1Br>>COC(=O)c1ccccc1/C=C/C(=O)O  
7896 C=Cc1ccc(OC)cc1.CCOC(=O)c1ccc(Br)cc1>>CCOC(=O)c1ccc(/C=C/c2ccc(OC)cc2)cc1  
7897 C=CCCO.CC(C)(C)c1ccccc1OS(=O)(=O)C(F)(F)F>>C=C(CCO)c1ccccc1C(C)(C)C  
7898 Brc1ccc(/C=C/c2ccc(-n3c4ccccc4c4ccccc43)cc2)cc1.C=Cc1ccccc1>>C(=C/c1ccc(/C=C/c2ccc(-  
n3c4ccccc4c4ccccc43)cc2)cc1)\c1ccccc1  
7899 CCOC(=O)/C=C/[C@H]1COC(C)(C)O1.Ic1ccccc1>>CCOC(=O)/C=C(\c1ccccc1)[C@H]1COC(C)(C)  
7900 C=C(NC(=O)OC(C)(C)C)C(=O)OC.Oc1ccc(I)cc1>>COC(=O)/C(=C/c1ccc(O)cc1)NC(=O)OC(C)(C)C

7901 C=CC=O.C[C@H](NC(=O)OC(C)(C)C)c1nc2cccc(Br)c2c(=O)n1-c1cccc1>>C[C@H](NC(=O)OC(C)(C)C)c1nc2cccc(/C=C/C=O)c2c(=O)n1-c1cccc1  
 7902 C=Cc1cccc1.Nc1cccc1Br>>Nc1cccc1/C=C/c1cccc1  
 7903 C=CC(C)=O.O=C(NCc1ccc(Cl)cc1)c1cnc2c(F)cc(I)cc2c1O>>CC(=O)/C=C/c1cc(F)c2ncc(C(=O)NCCc3ccc(Cl)cc3)c(O)c2c1  
 7904 C=COCCO.N#Cc1ccc(Br)cc1>>C=C(OCCO)c1ccc(C#N)cc1  
 7905 C=COCCCC.Cc1ccc(Cl)cc1>>C=C(OCCCC)c1ccc(C)cc1  
 7906 C=C(c1ccc(C)cc1)N(C)C(C)=O.CCOC(=O)CCCB>>CCOC(=O)CCC/C=C(\c1ccc(C)cc1)N(C)C(C)=C=CCc1cccc1.COC(=O)c1ccc(CCl)cc1>>C=C(Cc1cccc1)Cc1ccc(C(=O)OC)cc1  
 7907 C=CCCN1C(=O)c2cccc2C1=O.FC(F)(F)c1cccc(CCl)c1>>C=C(CCN1C(=O)c2cccc2C1=O)Cc1cccc(C(F)(F)F)c1  
 7908 Br1ccsc1.C=COCCCC>>C=C(OCCCC)c1ccsc1  
 7909 C=CC(=O)OC.Ic1cccc1>>C=C(C(=O)OC)c1cccc1  
 7910 Br1ccc2cccc2c1.C=C>>C=Cc1ccc2cccc2c1  
 7911 C=Cc1ccc(Cl)cc1.CCOC(=O)C(F)I>>CCOC(=O)C(F)/C=C/c1ccc(Cl)cc1  
 7912 Br1cccc1I.C=C1CC(c2ccc(C)cc2)OC1=O>>Cc1ccc(C2C/C(=C\c3cccc3Br)C(=O)O2)cc1  
 7913 C=Cc1ccc(C)nc1.CN1C2CCC1c1c([nH]c3c(Br)cccc13)C2>>Cc1ccc(/C=C/c2cccc3c4c([nH]c23)CC2C CC4N2C)cn1  
 7914 C=CC(=O)OCC.C[Si](C)(C)c1cccc2c1oc1c(I)cccc12>>CCOC(=O)/C=C/c1cccc2c1oc1c([Si](C)(C)C)c1cccc12  
 7915 Br1ccc2cccc2c1.C=CC(=O)OC(C)(C)C>>CC(C)(C)OC(=O)/C=C/c1ccc2cccc2c1  
 7916 C=Cc1cccc1.Cc1cc2c(C)c(Nc3c(I)cccc3C#N)ccc2[nH]1>>Cc1cc2c(C)c(Nc3c(C#N)cccc3/C=C/c3cccc3)ccc2[nH]1  
 7917 C=CS(=O)(=O)F.Fc1cc(I)cc(F)n1>>O=S(=O)(F)/C=C/c1cc(F)nc(F)c1  
 7918 C/C(I)=C/[C@H](C)CO[Si](C)(C)C(C)(C)C.C=C[C@H]1CC=C[C@H](OC(C)C)O1>>CC(=C/[C@H](C)CO[Si](C)(C)C(C)(C)C)/C=C/[C@H]1CC=C[C@H](OC(C)C)O1  
 7919 \*CNCCOCCOCCOCCCN(C(=O)COc1ccc(C(Cc2cc(OC)cc(OC)c2)NC(=O)c2ccc(C=C)cc2)cc1.Oc1ccc(I)cc1>>\*CNCCOCCOCCOCCCN(C(=O)COc1ccc(C(Cc2cc(OC)cc(OC)c2)NC(=O)c2ccc(/C=C/c3cccc(O)cc3)cc2)cc1  
 7920 C=CCN(C(=O)OCc1cccc1)C(=O)OC(C)(C)C.CC(=O)c1cccc(Br)c1>>CC(=O)c1cccc(/C=C/CN(C(=O)O)CCc2cccc2)C(=O)OC(C)(C)C)c1  
 7921 C=CC(=O)OCC.O=c1c(Br)c(-c2cccc2)oc2cccc12>>CCOC(=O)/C=C/c1c(-c2cccc2)oc2cccc2c1=O  
 7922 C=COCCCC.CC(=O)c1ccc(Br)s1>>C=C(OCCCC)c1ccc(C(C)=O)s1  
 7923 C=C(C)C(=O)OCCCC.COc1ccc(I)cc1>>CCCCOC(=O)/C(C)=C/c1ccc(OC)cc1  
 7924 Br1ccc(I)cc1.C=Cc1ccc(Cl)cc1>>Clc1ccc(/C=C/c2ccc(Br)cc2)cc1  
 7925 C=CC(=O)OCC.COc1ccc(-c2cccc2I)cc1>>CCOC(=O)/C=C/c1cccc1-c1ccc(OC)cc1  
 7926 C=Cc1cccc1.N#CCc1ccc(Br)cc1>>N#CCc1ccc(/C=C/c2cccc2)cc1  
 7927 C=Cc1ccc(F)cc1.CCOC(=O)C(C)(C)Br>>CCOC(=O)C(C)(C)/C=C/c1ccc(F)cc1  
 7928 C=Cc1c[nH]c2nc(NC(=O)C(C)(C)C)[nH]c(=O)c12.CCOC(=O)CC[C@H](C(=O)OCC)N1Cc2ccc(I)cc2C1=O>>CCOC(=O)CC[C@H](C(=O)OCC)N1Cc2ccc(/C=C/c3c[nH]c4nc(NC(=O)C(C)(C)C)[nH]lc(=O)c34)cc2C1=O  
 7929 C=Cc1cccc1.COc1ccc(-c2c(Br)c(=O)oc3cc(C)ccc23)cc1>>COc1ccc(-c2c(/C=C/c3cccc3)c(=O)oc3cc(C)ccc23)cc1  
 7930 C=Cc1ccc2c(c1)OCO2.C[Si](C)(C)OS(=O)(=O)C(F)(F)F>>C[Si](C)(C)/C=C/c1ccc2c(c1)OCO2  
 7931 C=CC(=O)OC.Nc1c(F)cccc1Br>>COC(=O)/C=C/c1cccc(F)c1N  
 7932 C=CC(=O)OC.Cc1ccc(C(=O)NC2CC2)cc1-n1cnc2ccc(I)cc2c1=O>>COC(=O)/C=C/c1ccc2ncn(-c3cc(C(=O)NC4CC4)ccc3C)c(=O)c2c1  
 7933 C=CC(=O)OC.O=Cc1ccc(Br)cn1>>COC(=O)/C=C/c1ccc(C=O)nc1  
 7934 C=Cc1cccc1.ClC1cccc1>>C(=C/c1cccc1)\Cc1cccc1  
 7935 C=Cc1cccc1C.CCOC(=O)C(C)Br>>CCOC(=O)C(C)/C=C/c1cccc1C  
 7936 C=C1C[C@H]2[C@H]3CCc4cc(OC)ccc4[C@H]3CC[C@H]2(C)C1=O.Cc1cccc(Br)c1>>COc1ccc2c(c1)CC[C@H]1[C@H]2CC[C@H]2(C)C(=O)/C(=C/c3cccc(C)c3)C[C@H]12  
 7937 C=CC(=O)OCC.Cc1nc(-n2c(C)ccc2C)cc(N[C@H]2CC[C@H](OCCO)CC2)c1Br>>CCOC(=O)/C=C/c1c(N[C@H]2CC[C@H](OCCO)CC2)cc(-n2c(C)ccc2C)nc1C  
 7938 C=CC(=O)OC(C)(C)C.O[C@H]1CC[C@H]2C=C(C3=C(Br)CN(Cc4cccc4)CC3)CC[C@H]12C>>CC(C)(C)OC(=O)/C=C/C1=C(C2=C[C@H]3CC[C@H](OC(C)(C)C)[C@H]3(C)CC2)CCN(Cc2cccc2)C1  
 7939 Br1cccc1.C=COCCCC>>C=C(OCCCC)c1cccc1  
 7940 C=CC(=O)OC.Ic1ccsc1>>COC(=O)/C=C/c1ccsc1  
 7941 C=Cc1ccc(C(=O)OCC)cc1.CCOC(=O)C(F)Br>>CCOC(=O)c1ccc(/C=C/C(F)C(=O)OCC)cc1  
 7942

C=Cc1nc2c(N)ncnc2n1[C@@H]1O[C@H](CO[Si](C)(C)C(C)(C)C)[C@@H](O[Si](C)(C)C(C)(C)C)[  
 7943 C@H]1O[Si](C)(C)C(C)(C)C.CC(=O)c1ccc(Cl)cc1>>CC(=O)c1ccc(/C=C/c2nc3c(N)ncnc3n2[C@@H]  
 2O[C@H](CO[Si](C)(C)C(C)(C)C)[C@@H](O[Si](C)(C)C(C)(C)C)[C@H]2O[Si](C)(C)C(C)(C)C)cc  
 7944 C=CC(C)=O.CCOC(=O)c1cn(CC)c2nc(C)c(Br)cc2c1=O>>CCOC(=O)c1cn(CC)c2nc(C)c(/C=C/C(C)=  
 O)cc2c1=O  
 7945 C=CC(=O)N(C)Cc1cc2ccccc2n1C.O=C1Cc2cc(Br)cn2N1>>CN(Cc1cc2ccccc2n1C)C(=O)/C=C/c1cn  
 c2c(c1)CC(=O)N2  
 7946 Br1ccc(OCc2ccccc2)cc1.C=CC(=O)OC(C)(C)C>>CC(C)(C)OC(=O)/C=C/c1ccc(OCc2ccccc2)cc1  
 7947 C=Cc1ccc(N(CCCC)CCCC)cc1.CCCn1c(=O)c(/C=C/c2ccc(N(C)C)cc2)nc2ccc(Br)cc21>>CCCCN(CC  
 CC)c1ccc(/C=C/c2ccc3nc(/C=C/c4ccc(N(C)C)cc4)c(=O)n(CCC)c3c2)cc1  
 7948 C=CC(=O)OCC.Clc1ccc(Oc2cccc(Br)c2)cc1>>CCOC(=O)/C=C/c1cccc(Oc2ccc(Cl)cc2)c1  
 7949 C=CC(=O)OC(C)(C)C.O=C1CN(C(=O)OCc2ccccc2)Cc2cc(Br)cn2N1>>CC(C)(C)OC(=O)/C=C/c1cn  
 c2c(c1)CN(C(=O)OCc1ccccc1)CC(=O)N2  
 7950 C=CC(=O)O.Fc1cc(Cl)c(Br)cc1F>>O=C(O)/C=C/c1cc(F)c(F)cc1Cl  
 \*CNCCCOCCOCCOCCNC(=O)COc1ccc(C(Cc2cc(OC)cc(OC)c2)NC(=O)c2ccccc(C=C)c2)cc1.N#C  
 7951 Cc1cccc(I)c1>>\*CNCCCOCCOCCOCCNC(=O)COc1ccc(C(Cc2cc(OC)cc(OC)c2)NC(=O)c2ccccc(/C  
 =C/c3cccc(CC#N)c3)c2)cc1  
 7952 C=CCCCC(=O)OC.CC(C)(C)c1ccc(Br)cc1>>C=C(CCCC(=O)OC)c1ccc(C(C)(C)C)cc1  
 7953 C=Cc1cnc2ccccc12.CCCCCCCCCC(=O)N1CCN(c2ccc(Br)cc2)CC1>>CCCCCCCCC(=O)N1CCN(  
 c2ccc(/C=C/c3ccnc4ccccc34)cc2)CC1  
 7954 C=CS(=O)(=O)NCc1ccccc1.CC(C)(C)OC(=O)NCCc1ccccc1Br>>CC(C)(C)OC(=O)NCCc1ccccc1/C=  
 C/S(=O)(=O)NCc1ccccc1  
 7955 C=CC(=O)OCCCC.COc1ccc2cccc([N+](=O)[O-])c2c1-  
 c1c(OC(=O)C(C)(C)C)ccc2cc(Br)ccc12>>CCCCOC(=O)/C=C/c1ccc2c(-  
 c3c(OC)ccc4cccc([N+](=O)[O-])c34)c(OC(=O)C(C)(C)C)ccc2c1  
 7956 Br1cccc(OCC2CCOCC2)c1.C=CCNC(=O)C(F)(F)F>>O=C(NC/C=C/c1cccc(OCC2CCOCC2)c1)C(F)  
 7957 C=CN(C)=O.COC(=O)c1cccc(Br)c1>>C=C(NC(C)=O)c1cccc(C(=O)OC)c1  
 7958 C=Cc1ccccc1.CC(C)(C)OC(=O)n1ccc2cc(OS(=O)(=O)C(F)(F)F)ccc21>>C=C(c1ccccc1)c1ccc2c(ccn2  
 C(=O)OC(C)(C)C)c1  
 7959 C=Cc1ccc(SC)cc1.Clc1c2cc(Br)ccc2nc2c1[nH]c1ccccc12>>CSc1ccc(/C=C/c2ccc3nc4c([nH]c5ccccc5  
 4)c(Cl)c3c2)cc1  
 7960 C=CCCCCCC.Cc1ccccc1Br>>CCCCC/C=C/c1ccccc1C  
 7961 Br1cccc2ccccc12.C=CS(=O)(=O)Oc1ccccc1>>O=S(=O)(/C=C/c1cccc2ccccc12)Oc1ccccc1  
 7962 C=Cc1ccccc1Cl.COC(=O)C(Cc1ccccc1)C(=O)OC>>COC(=O)C(Cc1ccccc1/C=C/c1ccccc1Cl)C(=O)  
 7963 C=CS(=O)(=O)c1ccccc1.O=C1NC(=O)/C=C/c2c[nH]c3ccc(Br)cc23)S1>>O=C1NC(=O)/C=C/c2c[n  
 H]c3ccc(/C=C/S(=O)(=O)c4ccccc4)cc23)S1  
 7964 C=Cc1ccccc1.CC(Cl)c1ccccc1>>CC(/C=C/c1ccccc1)c1ccccc1  
 7965 C=COCCCC.O=C(Cl)c1ccoc1>>CCCCO/C=C/C(=O)c1ccoc1  
 7966 C=COCC.COc1ccc(I)cc1>>CCO/C=C/c1ccc(OC)cc1  
 7967 C=CC(OCC)OCC.O=Cc1ccc(F)cc1Br>>CCOC(/C=C/c1cc(F)ccc1C=O)OCC  
 7968 C=CC(=O)OC.N#Cc1ccc(NC=O)c(I)c1>>COC(=O)/C=C/c1cc(C#N)ccc1NC=O  
 7969 Br1ccc(-c2ccccc2)cc1.C=CP(=O)(OCC)OCC>>CCOP(=O)(/C=C/c1ccc(-c2ccccc2)cc1)OCC  
 7970 C=CC(=O)OC.COc1c(CN(C(=O)c2ccccc2)c2cccc(Br)c2)ccc2c1OC(C)(C)CC2>>COC(=O)/C=C/c1ccc  
 c(N(Cc2ccc3c(c2OC)OC(C)(C)CC3)C(=O)c2ccccc2)c1  
 7971 C=Cc1cccn1.Cc1ncc(C#N)c(Nc2ccc3[nH]ccc3c2C)c1I>>Cc1ncc(C#N)c(Nc2ccc3[nH]ccc3c2C)c1/C=  
 C/c1cccn1  
 7972 C=CC(=O)OC(C)(C)C.Cc1ccc(N)c(I)c1>>Cc1ccc(N)c(/C=C/C(=O)OC(C)(C)C)c1  
 7973 C=Cc1ccccc1.COc1ccc(OS(=O)(=O)C(F)(F)F)cc1>>C=C(c1ccccc1)c1ccc(OC)cc1  
 7974 C=Cc1ccccc1.O=P1(c2ccccc2)C(Br)=Cc2ccccc21>>O=P1(c2ccccc2)C(/C=C/c2ccccc2)=Cc2ccccc21  
 7975 C=CC(=O)Nc1cn(Cc2cccc(C(F)(F)F)c2)cn1.COC(=O)c1ccc(Br)cn1>>COC(=O)c1ccc(/C=C/C(=O)Nc  
 2cn(Cc3cccc(C(F)(F)F)c3)cn2)cn1  
 C=CC(=O)OC(C)(C)C.Cc1c(O)ccc2c(Cc3ccc(Br)cc3)c(-  
 7976 c3ccc(OC(F)(F)F)cc3)c(=O)oc12>>Cc1c(O)ccc2c(Cc3ccc(/C=C/C(=O)OC(C)(C)C)cc3)c(-  
 c3ccc(OC(F)(F)F)cc3)c(=O)oc12  
 7977 C=CC(=O)NC(C)(C)C.O=C1C(O)=C(I)C(=O)c2ccccc21>>CC(C)(C)NC(=O)/C=C/C1=C(O)C(=O)c2c  
 cccc2C1=O  
 7978 C=Cc1ccncc1.Fc1ccc(I)c(F)c1>>Fc1ccc(/C=C/c2ccncc2)c(F)c1  
 7979 C=C[C@@](CO)(CCC)OCc1ccc(OC)cc1.Ic1ccccc1>>CCC[C@@](/C=C/c1ccccc1)(CO)OCc1ccc(OC  
 7980 C=CC(=O)OC.O=Cc1cc(Br)ccc1O>>COC(=O)/C=C/c1ccc(O)c(C=O)c1  
 7981 C=CCCC(=O)O.COc1ccc(I)cc1>>COc1ccc(/C=C/CCC(=O)O)cc1

7982 C=CC[C@@H](C(=O)OC(C)C)[C@H](O)C(=O)OC(C)C.CCOc1ccc(Br)cc1>>CCOc1ccc(/C=C/C[C  
 @H](C(=O)OC(C)C)[C@H](O)C(=O)OC(C)C)cc1  
 7983 C=Cc1ccc(N(c2ccccc2)c2ccccc2)cc1.CCOC(=O)C(F)(F)Br>>CCOC(=O)C(F)(F)/C=C/c1ccc(N(c2ccccc  
 2)c2ccccc2)cc1  
 7984 C=CCc1cccc1.Fc1cccc(CCl)c1>>C=C(Cc1cccc1)Cc1cccc(F)c1  
 7985 C=Cc1ccc([Si](C)(C)C(C)C)cc1.[Si](C)(C)I>>CC(C)(C)[Si](C)(C)Oc1ccc(/C=C/[Si](C)(C)C)cc  
 7986 C=C.Oc1cc(Br)c2oc(-c3ccc(O)c(F)c3)nc2c1>>C=Cc1cc(O)cc2nc(-c3ccc(O)c(F)c3)oc12  
 7987 C=CC(=O)O.COc1ccc(S(=O)(=O)Nc2ccc(I)cc2)cc1>>COc1ccc(S(=O)(=O)Nc2ccc(/C=C/C(=O)O)cc2  
 7988 C=CC(=O)OC.CC(C)(C)OC(=O)N1CCCC2(CC(=O)c3cc(Br)ccc3O2)C1>>COC(=O)/C=C/c1ccc2c(c1  
 )C(=O)CC1(CCCN(C(=O)OC(C)C)C1)O2  
 7989 C=C(CC(=O)OC)C(=O)OC.COc1cccc2c(OC)c(Br)ccc12>>COC(=O)C/C(=C/c1ccc2c(OC)cccc2c1OC  
 )C(=O)OC  
 7990 C=Cc1cccc1.COc1ccc(-c2oc3ccccc3c(=O)c2Br)cc1OC>>COc1ccc(-  
 c2oc3ccccc3c(=O)c2/C=C/c2ccccc2)cc1OC  
 7991 C=Cc1ccc(OC)cc1.Nc1cccc(Br)c1>>COc1ccc(/C=C/c2ccccc(N)c2)cc1  
 7992 C=Cc1ccc2ccccc2n1.Cc1cc(N2CCCC2)nc(Cl)n1>>Cc1cc(N2CCCC2)nc(/C=C/c2ccc3ccccc3n2)n1  
 7993 C=CC(=O)OC.Cn1cnc(Br)c1CC=C1CCCCC1>>COC(=O)/C=C/c1nnc(C)c1CC=C1CCCCC1  
 7994 C=CC(=O)O.CC(=O)c1ccc(Br)cc1>>CC(=O)c1ccc(/C=C/C(=O)O)cc1  
 7995 C=Cc1ccc([N+](=O)[O-]  
 ])cc1.O=C1C(O)=C(I)C(=O)c2ccccc21>>O=C1C(O)=C(/C=C/c2ccc([N+](=O)[O-  
 7996 C=CC(=O)OC.COC(=O)c1ccccc1I>>COC(=O)/C=C/c1ccccc1C(=O)OC  
 7997 Brc1cnnc1.C=Cc1cccc1OC>>COc1cccc1/C=C/c1cnnc1  
 7998 C=Cc1cnnc1.CC(C)(C)OC(=O)N[C@@H](CCc1cccc1)COc1cnnc(Br)c1>>CC(C)(C)OC(=O)N[C@@  
 @H](CCc1cccc1)COc1cnnc(/C=C/c2cnnc2)c1  
 7999 C=CC(=O)OCC.Clc1cc(Br)cc2c1NCCCC2>>CCOC(=O)/C=C/c1cc(Cl)c2c(c1)CCCN2  
 8000 C=CC(=O)OCC.O=C1CCc2c(Br)ccc(OCc3ccccc3)c21>>CCOC(=O)/C=C/c1ccc(OCc2ccccc2)c2c1CC  
 C2=O  
 8001 C=Cc1cnnc1.Oc1cccc1Br>>Oc1cccc1/C=C/c1cnnc1  
 8002 C=Cc1cccc1.COC(=O)/C=C/c1ccccc1Cl>>COC(=O)/C=C/c1ccccc1/C=C/c1ccccc1  
 8003 C=CC(F)(F)C(F)(F)C(F)(F)C(F)(F)C(F)(F)F.Fc1ccc(Br)cc1>>Fc1ccc(/C=C/C(F)(F)C(F)(F)C(F)(F)C(F)(F)C(F)(F)C(F)(F)cc1  
 C=Cc1cc([N+](=O)[O-]  
 8004 ])ccc1OCOCC[Si](C)(C)C.COc1cccc(I)c1>>COc1cccc(/C=C/c2cc([N+](=O)[O-  
 8005 C=CC(=O)OCCCC.COC(=O)c1ccccc1I>>CCCCOC(=O)/C=C/c1ccccc1C(=O)OC  
 8006 C=Cc1cccc1.Cc1cc(C)cc(Br)c1>>Cc1cc(C)cc(/C=C/c2ccccc2)c1  
 C=CC(=O)OCC.COc1cc(Br)c2c3c1O[C@@H]1[C@]34CCN(C)[C@H](C2)[C@]42C=C[C@@@]1(OC  
 8007 )c1c(OC(C)=O)ccc(O)c12>>CCOC(=O)/C=C/c1cc(OC)c2c3c1C[C@H]1N(C)CC[C@@@]34[C@@H](  
 O2)[C@@@]2(OC)C=C[C@@@]14c1c(O)ccc(OC(C)=O)c12  
 8008 C=CC(=O)OCC.COc1cc(Br)c(C)c2nnn(C)c12>>CCOC(=O)/C=C/c1cc(OC)c2c(nnn2C)c1C  
 8009 C=C(NC(C)=O)C(=O)OC.CCc1cccc(C)c1I>>CCc1cccc(C)c1/C=C(\NC(C)=O)C(=O)OC  
 8010 C=CC(=O)OC.COc1ccccc1Br>>COc1ccccc1/C=C/C(=O)OC  
 C=CP(=O)(OCC)OCC.CC1C[C@@H]2CC(N3[C@H]4CCC[C@@H]3C[C@H](n3c(=O)c(Cl)nc5cccc  
 8011 c53)C4)[C@H](C1)C2>>CCOP(=O)/C=C/c1nc2ccccc2n([C@@H]2C[C@@H]3CCC[C@H](C2)N3  
 C2C[C@H]3CC(C)C[C@H](C2)C3)c1=O)OCC  
 8012 C=Cc1ccc(Cl)cc1.COC(=O)C(Cc1cccc1I)C(=O)OC>>COC(=O)C(Cc1cccc1/C=C/c1ccc(Cl)cc1)C(=  
 O)OC  
 8013 C=CC(OCC)OCC.O=Cc1ccc(Br)cc1>>CCOC(/C=C/c1ccc(C=O)cc1)OCC  
 8014 C=CC(=O)OC(C)(C)C.COc1ccc(Br)cn1>>COc1ccc(/C=C/C(=O)OC(C)(C)C)cn1  
 8015 Brc1ccc(-c2cccs2)s1.C=CC(=O)OC>>COC(=O)/C=C/c1ccc(-c2cccs2)s1  
 8016 C=CC(N)=O.CCOC(=O)c1ccccc1Br>>CCOC(=O)c1ccccc1/C=C/C(N)=O  
 8017 C=CC(=O)OC.CCN(CC)c1ccc2cc(-c3oc4cc(Br)ccc4c(=O)c3O)oc2c1>>CCN(CC)c1ccc2cc(-  
 c3oc4cc(/C=C/C(=O)OC)ccc4c(=O)c3O)oc2c1  
 8018 C=Cc1cccc1.COC(=O)c1ccc(Cl)cc1>>COC(=O)c1ccc(/C=C/c2ccccc2)cc1  
 8019 C=CS(=O)(=O)NCC(C)C.CC(C)(C)OC(=O)NCCc1cccc1Br>>CC(C)CNS(=O)(=O)/C=C/c1ccccc1CC  
 NC(=O)OC(C)(C)C  
 8020 C=CC(=O)N(C)C.N#Cc1cccc1Cl>>CN(C)C(=O)/C=C/c1ccccc1C#N  
 8021 C=Cc1ccc(Cl)cc1.O=[N+](O-)]c1ccc(Br)cc1>>O=[N+](O-)]c1ccc(/C=C/c2ccc(Cl)cc2)cc1  
 8022 C=Cc1ccc(S(=O)(=O)c2ccccc2F)cn1.Oc1ccccc1I>>O=S(=O)(c1ccc(/C=C/c2ccccc2O)nc1)c1ccccc1F  
 8023 C=Cc1cccc1.Clc1cccc1Br>>Clc1cccc1/C=C/c1ccccc1  
 8024 C=CC(=O)OCC.Ic1ccccc1-c1oc2ccccc12>>CCOC(=O)/C=C/c1ccccc1-c1oc2ccccc12

8025 C=CP(=O)(OCC)OCC.COC(=O)C1Cc2c(Br)cccc2CN1C(=O)OC>>CCOP(=O)/(C=C/c1cccc2c1CC(C(=O)OC)N(C(=O)OC)C2)OCC  
 8026 C=CC(=O)OC.CCOCc1nc2c(N)nc3cc(Br)ccc3c2n1CC(C)(C)O>>CCOCc1nc2c(N)nc3cc(/C=C/C(=O)OC)ccc3c2n1CC(C)(C)O  
 8027 C=CC(=O)OC.Cn1c(=O)oc2cc(Br)cnc21>>COC(=O)/C=C/c1cnc2c(c1)oc(=O)n2C  
 8028 C=CC(=O)OCc1cccc1.CCn1nnc2c(C)c(Br)cc(OC)c21>>CCn1nnc2c(C)c(/C=C/C(=O)OCc3ccccc3)cc(OC)c21  
 8029 C=CC(=O)OC.N#Cc1cc(Cl)ccc1C(F)(F)F>>COC(=O)/C=C/c1ccc(C(F)(F)F)c(C#N)c1  
 8030 C=CC(=O)OC.CC(=O)OC[C@H]1OC=C(I)[C@@H](OC(C)=O)[C@@H]1OC(C)=O>>COC(=O)/C=C/C1=CO[C@H](COC(C)=O)[C@@H](OC(C)=O)[C@@H]1OC(C)=O  
 8031 C=Cc1cncn1.COC(=O)c1cc2ccc(=O)oc2cc1OS(=O)(=O)C(F)(F)F>>COC(=O)c1cc2ccc(=O)oc2cc1/C=C/c1cncn1  
 8032 Br1c2nc(c(-c3ccccc3)c3ccc([nH]3)c(-c3ccccc3)c3nc(c(-c4ccccc4)c4ccc1[nH]4)C=C3)C=C2.C=Cc1cccc1>>C1=Cc2nc1c(/C=C/c1cccc1)c1ccc([nH]1)c(-c1cccc1)c1nc(c(-c3ccccc3)c3ccc([nH]3)c2-c2ccccc2)C=C1  
 8033 C=Cc1cccc([N+](=O)[O-])c1.COc1ccc2c(=O)c(I)coc2c1>>COc1ccc2c(=O)c(/C=C/c3ccccc([N+](=O)[O-])c3)coc2c1  
 8034 C=CC(=O)OC(C)(C)C.COc1ccc(-c2sc3cc(OC)ccc3c2C(=O)c2ccc(Br)cc2)cc1>>COc1ccc(-c2sc3cc(OC)ccc3c2C(=O)c2ccc(/C=C/C(=O)OC(C)(C)C)cc2)cc1  
 8035 C=CC[C@H]1C(=O)N(c2ccccc2)[C@@H]1c1ccc(OC)cc1.FC(F)(F)c1ccc(Br)cc1>>COc1ccc([C@@H]2[C@@H](C/C=C/c3ccc(C(F)(F)F)cc3)C(=O)N2c2ccccc2)cc1  
 8036 C=Cc1ccc(OC)cc1.O=[N+](=[O-])c1cccc(Br)c1>>COc1ccc(/C=C/c2ccccc([N+](=O)[O-])c2)cc1  
 8037 C=CN1C(=O)c2ccccc2C1=O.COc1ccc2cccc(Br)c2n1>>COc1ccc2cccc(/C=C/N3C(=O)c4ccccc4C3=O)c2n1  
 8038 C=CC(=O)Nc1cccc1NC(=O)OC(C)(C)C.CCOC(=O)[C@H]1CN(C(C)C)C[C@@H]1c1ccc(Br)cc1>>CCOC(=O)[C@H]1CN(C(C)C)C[C@@H]1c1ccc(/C=C/C(=O)Nc2ccccc2NC(=O)OC(C)(C)C)cc1  
 8039 C=C[Si](C)(C)c1cccn1.CN(C)c1ccc(Br)cc1>>CN(C)c1ccc(/C=C/[Si](C)(C)c2cccn2)cc1  
 8040 C=COCCO.O=C(c1cccc1)c1ccc(I)cc1>>C=C(OCCO)c1ccc(C(=O)c2ccccc2)cc1  
 8041 C=CC(=O)OC.COC(=O)c1nc(N(Cc2ccccc2)Cc2ccccc2)ccc1Br>>COC(=O)/C=C/c1ccc(N(Cc2ccccc2)Cc2ccccc2)nc1C(=O)OC  
 8042 C=Cc1ccc(C)cc1.FC(F)(F)c1cccc1I>>Cc1ccc(/C=C/c2ccccc2C(F)(F)F)cc1  
 8043 Br1ccnc1.C=CCNS(=O)(=O)c1ccc(C)cc1>>Cc1ccc(S(=O)(=O)NC/C=C/c2ccnc2)cc1  
 8044 Br1cnc2ccccc2c1.C=CC(=O)OC(C)(C)C>>CC(C)(C)OC(=O)/C=C/c1cnc2ccccc2c1  
 8045 C=Cc1cccc(OC)c1.Nc1ccc(Br)cc1>>COc1cccc(/C=C/c2ccc(N)cc2)c1  
 8046 C=C(F)C(C)=O.Ic1ccc2[nH]ccc2c1>>CC(=O)/C(F)=C/c1ccc2[nH]ccc2c1  
 8047 Br1cccc2c1cc(-c1ccc(I)cc1)n2-c1nccn1.C=CC(=O)OCC>>CCOC(=O)/C=C/c1ccc(-c2cc3c(Br)cccc3n2-c2nccn2)cc1  
 8048 C=CP(=O)(c1cccc1)c1cccc1OC.C[P@](=O)(/C=C/c1cccc(Br)c1)c1cccc1>>COc1cccc1P(=O)(/C=C/c1cccc(/C=C/[P@](C)(=O)c2ccccc2)c1)c1cccc1  
 8049 C=CN1C(=O)c2ccccc2C1=O.COC(=O)Cc1cccc(Br)c1>>COC(=O)Cc1cccc(/C=C/N2C(=O)c3ccccc3C2=O)c1  
 8050 Br1cccc2cc[nH]c12.C=C(C)C(=O)OC>>COC(=O)/C(C)=C/c1cccc2cc[nH]c12  
 8051 C=Cc1cccc1O.Nc1cccc1Br>>Nc1cccc1/C=C/c1cccc1O  
 8052 C=CC(C)(C)C(=O)O.CC(=O)O[C@H](C)c1ccc2ccc(Br)cc2n1>>CC(=O)O[C@H](C)c1ccc2ccc(/C=C/C(C)(C)C(=O)O)cc2n1  
 8053 C=CC(O)(CF)CF.FC(F)(F)c1ccc(Cl)c(Br)c1>>OC(/C=C/c1cc(C(F)(F)F)ccc1Cl)(CF)CF  
 8054 C=Cc1ccc(C(=O)OC)cc1.COC(=O)c1cc2cc(Br)ccc2cc1OC(C)=O>>COC(=O)c1ccc(/C=C/c2ccc3cc(O)C(C)=O)c(C(=O)OC)cc3c2)cc1  
 8055 C=Cc1cc(C)c(OCOCCOC)c(C)c1.Cc1c(Br)c(=O)oc2ccccc12>>COCCOCOCc1c(C)cc(/C=C/c2c(C)c3ccccc3oc2=O)cc1C  
 8056 C=CC(=O)OC.Fc1ccc(Br)cc1>>COC(=O)/C=C/c1ccc(F)cc1  
 8057 Br1cccc2ccccc12.C=Cc1cc2ccc(OC)cc2oc1=O>>COc1ccc2cc(/C=C/c3ccccc4ccccc34)c(=O)oc2c1  
 8058 C=Cc1ccc(OC)cc1.Cc1c(Br)c(=O)oc2ccccc12>>COc1ccc(/C=C/c2c(C)c3ccccc3oc2=O)cc1  
 8059 C=CC(C)(C)O.Nc1cccc1I>>CC(C)(O)/C=C/c1cccc1N  
 8060 C=CC(=O)OCC.O=c1oc(-c2ccccc2)c(I)c2ccccc12>>CCOC(=O)/C=C/c1c(-c2ccccc2)oc(=O)c2ccccc12  
 8061 C=Cc1cccc1.O=c1[nH]c(=O)n([C@H]2C[C@H](O)[C@@H](CO)O2)cc1I>>O=c1[nH]c(=O)n([C@H]2C[C@H](O)[C@@H](CO)O2)cc1/C=C/c1cccc1  
 8062 C=Cc1cccc1.O=c1ccoc2cc(OCc3ccccc3)c(Br)cc12>>O=c1ccoc2cc(OCc3ccccc3)c(/C=C/c3ccccc3)cc1  
 8063 C=Cc1cccc1.O=C1OC(O)c2cc(Br)ccc21>>O=C1OC(O)c2cc(/C=C/c3ccccc3)ccc21  
 8064 C=CCN(C(=O)C1CCOCC1)[C@H](C)c1cc(F)cc(F)c1.O=C1Nc2ncccc2[C@]12Cc1ccc(Br)cc1C2>>C[C@H](c1cc(F)cc(F)c1)N(C/C=C/c1ccc2c(c1)C[C@@]1(C2)C(=O)Nc2ncccc21)C(=O)C1CCOCC1



8065 C=CC(=O)OCCCC.Nc1ccc(I)cc1>>CCCCOC(=O)/C=C/c1ccc(N)cc1  
8066 C=C(NC(C)=O)C(=O)OC.Fc1cc(Br)ccc1-c1ccccc1>>COC(=O)/C(=C/c1ccc(-  
8067 C=CC(=O)N(C)Cc1cc2ccccc2n1C.CCn1c(=O)[nH]c2ncc(Br)cc21>>CCn1c(=O)[nH]c2ncc(/C=C/C(=  
O)N(C)Cc3cc4ccccc4n3C)cc21  
8068 C=Cc1ccccc1.COC(=O)Cn1c(=O)c(Cl)nc2ccnc21>>COC(=O)Cn1c(=O)c(/C=C/c2ccccc2)nc2ccnc21  
8069 C=Cc1ccccc1.CCCCCCOc1ccc(I)cc1>>CCCCCOc1ccc(/C=C/c2ccccc2)cc1  
8070 C=C[C@H]1O[C@@H]2OC(C)(C)O[C@@H]2[C@H]1OC.O=[N+](O-  
8071 )c1ccc(I)cc1>>CO[C@H]1[C@@H](/C=C/c2ccc([N+](=O)[O-  
C=CC(=O)N(C)C.Clc1nc(N2CCOCC2)c2sc3ncc(Br)cc3c2n1>>CN(C)C(=O)/C=C/c1cnc2sc3c(N4CC  
OCC4)nc(Cl)nc3c2c1  
8072 C=CC(=O)NC(C)(C)C.Cc1ccccc1Cl>>Cc1ccccc1/C=C/C(=O)NC(C)(C)C  
8073 C=Cc1ccc2ccccc2c1.O=C1c2ccccc2C(=O)N1CCCC(Br)C(F)(F)F>>O=C1c2ccccc2C(=O)N1CCCC(/C  
=C/c1ccc2ccccc2c1)C(F)(F)F  
8074 C=COC(C)(C)C.O=S(=O)(Oc1ccc(-c2ccccc2)cc1)C(F)(F)F>>C=C(OC(C)(C)C)c1ccc(-c2ccccc2)cc1  
8075 C=CN(C=O)NCCCC.O=S(=O)(Oc1ccc2ccccc2c1)C(F)(F)F>>C=C(NC(=O)NCCCC)c1ccc2ccccc2c1  
8076 C=CC(=O)Nc1ccccc2ccnc12.Ic1ccccc1>>O=C(/C=C/c1ccccc1)Nc1ccccc2ccnc12  
8077 C=CC(=O)N(C)C.C[C@H]1C[C@@H](n2c(Nc3ccc(OC(F)(F)F)cc3)nc3cc(Br)ccc32)CC(C)(C)C1>>C  
[C@H]1C[C@@H](n2c(Nc3ccc(OC(F)(F)F)cc3)nc3cc(/C=C/C(=O)N(C)C)ccc32)CC(C)(C)C1  
8078 C=Cc1ccc(C(=O)OC)c1.Nc1ccc(I)c1>>COC(=O)c1ccc(/C=C/c2ccccc(N)c2)c1  
8079 C=COCCCC.CNc1nc(C)c2cc(Br)c(=O)n(C3CCCC3)c2n1>>CCCCO/C=C/c1cc2c(C)nc(NC)nc2n(C2C  
CCC2)c1=O  
8080 Brc1ccc2oc3ccc(N(c4ccccc4)c4ccccc4)cc3c2c1.C=Cc1ccccc1>>C(=C/c1ccc2oc3ccc(N(c4ccccc4)c4cc  
ccc4)cc3c2c1)c1ccccc1  
8081 C=CCNC(=O)OC(C)(C)C.Cc1cc(Cl)c(OS(=O)(=O)C(F)(F)F)cc1C>>C=C(CNC(=O)OC(C)(C)C)c1cc(  
C)c(C)cc1Cl  
8082 C=CC(=O)OC.CC(=O)OC[C@H]1O[C@@H](Oc2ccc(I)cc2)[C@H](OC(C)=O)[C@@H](OC(C)=O)[  
C@@H]1OC(C)=O>>COC(=O)/C=C/c1ccc(O[C@@H]2O[C@H](COC(C)=O)[C@@H](OC(C)=O)[  
C@H](OC(C)=O)[C@H]2OC(C)=O)cc1  
8083 C=Cc1cc2cc(OC)c(OC)cc2oc1=O.Ic1ccccc1>>COc1cc2cc(/C=C/c3ccccc3)c(=O)oc2cc1OC  
8084 C=CC(C)=O.O=C1Cc2c([nH]c3ccc(C(F)(F)F)cc23)-c2cc(I)ccc2N1>>CC(=O)/C=C/c1ccc2c(c1)-  
c1[nH]c3ccc(C(F)(F)F)cc3c1CC(=O)N2  
8085 C=CC(=O)OCC.O=c1oc(-c2ccccc2)c(I)c2sc3c(c12)CCCC3>>CCOC(=O)/C=C/c1c(-  
c2ccccc2)oc(=O)c2c3c(sc12)CCCC3  
8086 C=CC(=O)OCC.CCc1ccc(I)cc1>>CCOC(=O)/C=C/c1ccc(CC)cc1  
8087 C=CC(N)=O.O=CC1=C(Br)CCCC1>>NC(=O)/C=C/C1=C(C=O)CCCC1  
8088 C=CC(=O)OC.COc1ccccc(Br)n1>>COC(=O)/C=C/c1ccccc(OC)n1  
8089 C=CCN(C)C(=O)OC(C)(C)C.Cc1ccc(Cl)cc1>>Cc1ccc(/C=C/CN(C)C(=O)OC(C)(C)C)cc1  
8090 C=CC(=O)NC(C)(C)C.C[C@]12C[C@@]34C=C(Sc5ccccc(I)c5)C(=O)[C@@](C)(CCC(=O)Nc5c(O)cc  
c(C(=O)O)c5O)[C@@H]3[C@H](C[C@@H]1C4)O2>>CC(C)(C)NC(=O)/C=C/c1ccccc(SC2=C[C@]3  
4C[C@H]5C[C@H](O[C@@]5(C)C3)[C@H]4[C@](C)(CCC(=O)Nc3c(O)ccc(C(=O)O)c3O)C2=O)c1  
8091 C=C.ClCc1ccccc(Br)c1>>C=CCc1ccccc(Br)c1  
8092 C=Cc1ccccc1.COc1ccc(Cl)c(Nc2c(C#N)cnc3cc(OS(=O)(=O)C(F)(F)F)c(OC)cc23)c1>>COc1ccc(Cl)c(  
Nc2c(C#N)cnc3cc(/C=C/c4ccccc4)c(OC)cc23)c1  
8093 C=CC(=O)OCC.CCOC(=O)N1CCc2cc(Br)c(N)c(Cl)c2CC1>>CCOC(=O)/C=C/c1cc2c(c(Cl)c1N)CCN  
(C(=O)OCC)CC2  
8094 Brc1cccs1.C=CS(C)(=O)=O>>CS(=O)(=O)/C=C/c1cccs1  
8095 C=C[C@H]1C[C@H](CC(=O)OC(C)(C)C)OC(C)(C)O1.CC(C)c1nc(N(C)S(C)(=O)=O)nc(-  
c2ccc(F)cc2)c1Br>>CC(C)c1nc(N(C)S(C)(=O)=O)nc(-  
c2ccc(F)cc2)c1/C=C/[C@@H]1C[C@H](CC(=O)OC(C)(C)C)OC(C)(C)O1  
8096 C=CC(=O)OCC.Cc1cc(Br)ccc1I>>CCOC(=O)/C=C/c1ccc(Br)cc1C  
8097 C=CC(=O)c1ccc(OC)cc1OC.COc1ccc(I)c(OC)c1>>COc1ccc(/C=C/C(=O)c2ccc(OC)cc2OC)c(OC)c1  
8098 C=CCC(=O)OC.O=S(=O)(c1ccccc1)n1cc(-c2ccccc2)c2cc(Br)ccc21>>COC(=O)C/C=C/c1cnc2c(c1)c(-  
c1ccccc1)en2S(=O)(=O)c1ccccc1  
8099 C=Cc1ccc(C)nc1.CN1CCc2[nH]c3c(Br)cccc3c2C1>>Cc1ccc(/C=C/c2ccccc3c4c([nH]c23)CCN(C)C4)c  
8100 C=CC(=O)OCC.Cc1ncc(-c2ccc(Br)cc2)o1>>CCOC(=O)/C=C/c1ccc(-c2cnc(C)o2)cc1  
8101 C=Cc1ccc(OC)c(OC)c1.Oc1ccccc1I>>COc1ccc(/C=C/c2ccccc2O)cc1OC  
8102 C=Cc1ccc(NC)cc1.FCCOCCOCCOc1nccc(I)cc1Br>>CNc1ccc(/C=C/c2cnc(OCCOCCOCCF)c(Br)c2)c  
8103 C=CP(=O)(O)O.Fc1cc(Br)cc(F)c1C(F)(F)F>>O=P(O)(O)/C=C/c1cc(F)c(C(F)(F)F)c(F)c1  
8104 C=Cc1ccccc1.Cc1cc(I)c2ccccc2n1>>Cc1cc(/C=C/c2ccccc2)c2ccccc2n1  
8105 C=Cc1ccccc1.CCOC(=O)[C@H]1[C@@H]2C(Br)=C(C(=O)OC)O[C@H]12>>CCOC(=O)[C@@H]1[  
C@H]2OC(C(=O)OC)=C(/C=C/c3ccccc3)[C@H]21

8106 C=C.COc1cc(Br)cc(OC)c1>>C=Cc1cc(OC)cc(OC)c1  
8107 C=CC(=O)OC.O=C(c1cccc1)c1ccc(Cl)cc1>>COC(=O)/C=C/c1ccc(C(=O)c2cccc2)cc1  
8108 C=Cc1ccc(C(F)(F)F)nc1.Cc1nn(C)c(=O)c(-c2c(F)ccc(Cl)c2Br)c1OC(=O)C(C)C>>Cc1nn(C)c(=O)c(-c2c(F)ccc(Cl)c2/C=C/c2ccc(C(F)(F)F)nc2)c1OC(=O)C(C)C  
8109 C=Cc1ccc(OC)cc1.COC(=O)c1cccc(Br)c1>>COC(=O)c1cccc(/C=C/c2ccc(OC)cc2)c1  
8110 C=CC(OC(C)=O)C(C)C.Ic1cccc1>>CC(=O)OC(/C=C/c1cccc1)C(C)C  
8111 C=CC(=O)OCC.Cc1nc(C(C)C)nc(N)c1I>>CCOC(=O)/C=C/c1c(C)nc(C(C)C)nc1N  
8112 C=C1CC(c2ccc(C)cc2)OC1=O.Fc1cccc(I)c1>>Cc1ccc(C2C/C=C/c3cccc(F)c3)C(=O)O2)cc1  
8113 C=CN1C(=O)c2cccc2C1=O.COC(=O)c1cc(OC(C)C)nc1Br>>COC(=O)c1cc(OC(C)C)nc1/C=C/N1C(=O)c2cccc2C1=O  
8114 C=CC(=O)OCC.COc1cccc(Cl)c1>>CCOC(=O)/C=C/c1cccc(OC)c1  
8115 C=CC[C@H](CC(=O)OC(C)(C)C)C(=O)N[C@H](C(=O)NC)C(C)(C)C.Cc1cc(OS(=O)(=O)C(F)(F)F)ccc1-c1cccc1>>CNC(=O)[C@@H](NC(=O)[C@H](C/C=C/c1ccc(-c2cccc2)c(C)c1)CC(=O)OC(C)(C)C)C(C)C  
8116 C=CC(=O)OC.COc1cc(Br)ccc1C#N>>COC(=O)/C=C/c1ccc(C#N)c(OC)c1  
8117 C=CC(=O)OC(C)(C)C.COC(=O)c1ccc(Br)c(C)c1>>COC(=O)c1ccc(/C=C/C(=O)OC(C)(C)C)c(C)c1  
8118 C=CC[C@](C)(C=C)c1cccc1.Ic1cccc1>>C=C[C@](C)(C/C=C/c1cccc1)c1cccc1  
8119 C=Cc1ccc2ccc(Cl)cc2n1.CC(C)(O)c1cccc1CCC(=O)c1ccc(Br)c1>>CC(C)(O)c1cccc1CCC(=O)c1ccc(/C=C/c2ccc3ccc(Cl)cc3n2)c1  
8120 C=CC(=O)OC(C)(C)C.O=[N+](O-)]c1ccc(Oc2cnc2I)c(F)c1>>CC(C)(C)OC(=O)/C=C/c1cccc1Oc1ccc([N+](=O)[O-])cc1F  
8121 C=Cc1cccc1.Cc1ccc([N+](=O)[O-])cc1Br>>Cc1ccc([N+](=O)[O-])cc1/C=C/c1cccc1  
8122 C=Cc1ccc(N(c2cccc(C)c2)c2cccc(C)c2)cc1.Ic1cccc1>>Cc1cccc(N(c2ccc(/C=C/c3cccc3)cc2)c2cccc(C)c2)c1  
8123 C=COCCCC.O=c1cc(Br)c2ccc(Cl)cc2o1>>CCCCO/C=C/c1cc(=O)oc2cc(Cl)ccc12  
8124 C=CC1(O)CCCCC1.[2H]C(O)(CCNC(=O)C(F)(F)F)c1cccc(Br)c1>>[2H]C(O)(CCNC(=O)C(F)(F)F)c1cccc(/C=C/C2(O)CCCCC2)c1  
8125 C=CC1(O)CCCCC1.O=C(NC[C@H](O)[C@@H](O)c1cccc(Br)c1)C(F)(F)F>>O=C(NC[C@H](O)[C@@H](O)c1cccc(/C=C/C2(O)CCCCC2)c1)C(F)(F)F  
8126 C=CS(=O)(=O)F.Oc1cccc(I)c1>>O=S(=O)(F)/C=C/c1cccc(O)c1  
8127 C=CCOc1ccc(CCNC(=O)OC(C)(C)C)cc1.CC(C)N(CC[C@H](c1cccc1)c1cc(Br)ccc1OCc1cccc1)C(C)C>>CC(C)N(CC[C@H](c1cccc1)c1cc(/C=C/CCOc2ccc(CCNC(=O)OC(C)(C)C)cc2)ccc1OCc1cccc1)C(C)C  
8128 C=CC(=O)OC(C)(C)C.Cc1nc(Cc2ccc(I)cc2)[nH]c1C(=O)c1cccc1>>Cc1nc(Cc2ccc(/C=C/C(=O)OC(C)(C)C)cc2)[nH]c1C(=O)c1cccc1  
8129 C=Cc1cccc1.O=c1c(Br)c(-c2ccc(Cl)cc2)oc2cccc12>>O=c1c(/C=C/c2cccc2)c(-c2ccc(Cl)cc2)oc2cccc12  
8130 C=CCO.Cc1cccc(I)c1>>Cc1cccc(/C=C/CO)c1  
8131 C=CC(=O)OC.O=C1Nc2ccc(Br)cc2C1=O>>COC(=O)/C=C/c1ccc2c(c1)C(=O)C(=O)N2  
8132 C=Cc1ccc(S(=O)(=O)c2cccc2F)cn1.Fc1ccc(I)c(Cl)c1>>O=S(=O)(c1ccc(/C=C/c2ccc(F)cc2Cl)nc1)c1cccc1F  
8133 C=CCNC(=O)OC(C)(C)C.CC1(C)OC(=O)c2c(cc(OCCCN3CCOCC3)cc2OS(=O)(=O)C(F)(F)F)O1>>CC(C)(C)OC(=O)NC/C=C/c1cc(OCCCN2CCOCC2)cc2c1C(=O)OC(C)(C)O2  
8134 C=Cc1ccc(OC)cc1.O=C(N1CCOCC1)C(F)(F)Br>>COc1ccc(/C=C/C(F)(F)C(=O)N2CCOCC2)cc1  
8135 C=Cc1cccc1C.CCOC(=O)C(F)I>>CCOC(=O)C(F)/C=C/c1cccc1C  
8136 C=C[C@H](C)[C@H](O)C/C=C/C(=O)OC.FC(F)(F)c1ccc(I)cc1>>COC(=O)/C=C/C[C@H](O)[C@H](C)/C=C/c1ccc(C(F)(F)F)cc1  
8137 C=Cc1ncccc1O[Si](C)(C)C(C)C.N#Cc1ccc(Br)cc1>>CC(C)(C)[Si](C)(C)Oc1ccnc1/C=C/c1ccc(C#N)cc1  
8138 C=Cc1ccc(OC)cc1.CCOC(=O)C(F)I>>CCOC(=O)C(F)/C=C/c1ccc(OC)cc1  
8139 Br1ccc(N2CCOCC2)c2nsnc12.C=Cc1ccnc1>>C(=C/c1ccc(N2CCOCC2)c2nsnc12)\c1ccnc1  
8140 C=CC(=O)OC(C)(C)C.OC/C=C/C=C/C1=C(Br)CCCC1>>CC(C)(C)OC(=O)/C=C/C1=C(/C=C/C=C/C(C)O)CCCC1  
8141 C=C.COCC(=O)c1ccc(CCl)cc1>>C=CCc1ccc(C(=O)OC)cc1  
8142 C=CC[C@H](O[Si](c1cccc1)(c1cccc1)C(C)(C)C)[C@H]1OC(=O)[C@H]2OC(C)(C)O[C@H]21.Ic1cccc1>>CC1(C)O[C@@H]2C(=O)O[C@H]([C@H](C/C=C/c3cccc3)O[Si](c3cccc3)(c3cccc3)C(C)C)[C@H]2O1  
8143 C=CC(C)(O)CCCCCCCCCN1C(=O)c2cccc2C1=O.CC(C)(C)[Si](C)(C)O[C@H]1C=C(Br)[C@@H](O)[C@@H]2O[C@H]12>>CC(O)/C=C/C1=C[C@H](O[Si](C)(C)C(C)(C)C)[C@H]2O[C@H]2[C@@H]1O)CCCCCCCCCN1C(=O)c2cccc2C1=O  
8144 C=Cc1cccn1.O=C1CCC(c2ccc(Br)cc2)O1>>O=C1CCC(c2ccc(/C=C/c3cccn3)cc2)O1

8145 C=Cc1ccc(OC)cc1.Cn1c(=O)c2c(cc(Br)n2C)n(C)c1=O>>COc1ccc(/C=C/c2cc3c(c(=O)n(C)c(=O)n3C)n2C)cc1  
8146 C=Cc1cccc(C)c1.IC1CCCCC1>>Cc1cccc(/C=C/C2CCCCC2)c1  
8147 C=Cc1cncnc1.CC(C)(C)OC(=O)N[C@H](COc1cncnc(Br)c1)Cc1cccc(C#N)c1>>CC(C)(C)OC(=O)N[C@H](COc1cncnc(/C=C/c2cncnc2)c1)Cc1cccc(C#N)c1  
8148 C=Cc1cc(C)c(OCOCCOC)c(C)c1.COc1ccc2c(C)c(Br)c(=O)oc2c1>>COCCOCOCc1c(C)cc(/C=C/c2c(C)c3ccc(OC)cc3oc2=O)cc1C  
8149 C=C(C(=O)OC)[C@@H]1CC[C@@]2(C)CCC[C@@](C)(OCOC)[C@@H]2C1.COc1ccc(I)cc1>>CO  
CO[C@@]1(C)CCC[C@@]2(C)CC[C@@H](/C=C/c3ccc(OC)cc3)C(=O)OC[C@H]21  
8150 C=CCOC(C)=O.O=[N+](O-)[O-]c1ccc(I)cc1>>CC(=O)OC/C=C/c1ccc([N+](=O)[O-])cc1  
8151 C=CC(C)=O.CC(C)Oc1ccc(Oc2ncc(I)s2)cc1>>CC(=O)/C=C/c1cnc(Oc2ccc(OC(C)C)cc2)s1  
8152 C=CC(=O)OC.COC(=O)c1cnc(-c2ccc(OC)cc2)c(I)c1>>COC(=O)/C=C/c1cc(C(=O)OC)cnc1-  
8153 C=Cc1cncnc1.O=Cc1cc(Br)ccc1O>>O=Cc1cc(/C=C/c2cncnc2)ccc1O  
8154 C=Cc1cccc1OC.COc1ccc(Br)cc1>>COc1ccc(/C=C/c2cccc2OC)cc1  
8155 C=CC(=O)CCCCC.O=Cc1ccc(Br)cc1>>CCCCC(=O)/C=C/c1ccc(C=O)cc1  
8156 C=CC(=O)OCC.O=C(O)c1coc(Br)c1>>CCOC(=O)/C=C/c1cc(C(=O)O)co1  
8157 C=Cc1ccc(Cl)cc1.Oc1cccc1I>>Oc1cccc1/C=C/c1ccc(Cl)cc1  
8158 C=CCCC(=O)OCC.CC(C)(CC1Cc2cccc2C1)NC[C@H](O)COc1c(Br)cccc1C#N>>CCOC(=O)CC/  
C=C/c1cccc(C#N)c1OC[C@H](O)CNC(C)(C)CC1Cc2cccc2C1  
8159 C=CC(=O)OC.O=c1cc(Br)c2cccc2o1>>COC(=O)/C=C/c1cc(=O)oc2cccc2  
8160 Bre1enc2cccc2c1.C=CC(=O)OC>>COC(=O)/C=C/c1cnc2cccc2c1  
8161 C=CC(=O)NCc1ccc(C)cc1.COc1ccc2c(=O)c(I)coc2c1>>COc1ccc2c(=O)c(/C=C/C(=O)NCc3ccc(C)cc3)coc2c1  
8162 C=CC(=O)OC(C)(C)C.Cc1cc(Cl)c2cccc2n1>>Cc1cc(/C=C/C(=O)OC(C)(C)C)c2cccc2n1  
8163 C=CC(=O)OC.COc1ccc(C(=C(I)CCSc2cccc2)c2ccc(OC)cc2)cc1>>COC(=O)/C=C/C(CCSc1cccc1)=  
C(c1ccc(OC)cc1)c1ccc(OC)cc1  
8164 C=CN1C(=O)c2cccc2C1=O.COc1ccc2ccc(Br)cc2n1>>COc1ccc2ccc(/C=C/N3C(=O)c4cccc4C3=O)cc2n1  
8165 C=Cc1ccc(S(=O)(=O)c2cccc2F)cn1.Fc1cccc1I>>O=S(=O)(c1ccc(/C=C/c2cccc2F)nc1)c1cccc1F  
8166 C=CC(=O)OC(C)(C)C.FC(F)(F)c1cccc1Br>>CC(C)(C)OC(=O)/C=C/c1cccc1C(F)(F)F  
8167 C=C/C=C/c1cccc1.FC(F)(F)C(Br)CCc1cccc1>>FC(F)(F)C(/C=C/C=C/c1cccc1)CCc1cccc1  
8168 C=CC#N.COcn1nc(-c2cccc2)c(Br)cc1=O>>COCn1nc(-c2cccc2)c(/C=C/C#N)cc1=O  
8169 C=C(C)C(=O)OC.Ic1cccc1>>COC(=O)/C(C)=C/c1cccc1  
8170 C=CC(=O)OC.CC(C)(C)OC(=O)N1CCC[C@H]1c1ccc(Br)cc1>>COC(=O)/C=C/c1ccc([C@@H]2CC  
CN2C(=O)OC(C)(C)C)cc1  
8171 C=CC(=O)OCC.Cc1cccc([C@@H](C)OC[C@H]2CO2)c1Br>>CCOC(=O)/C=C/c1c(C)cccc1[C@@H](C)OC[C@H]1CO1  
8172 C=Cc1nc2cccc2s1.CCN(CC)S(=O)(=O)c1ccc(Br)cc1C>>CCN(CC)S(=O)(=O)c1ccc(/C=C/c2nc3cccc3s2)cc1C  
8173 C=CC(N)=O.O=C(O)/C=C/c1cccc(Br)c1>>NC(=O)/C=C/c1cccc(/C=C/C(=O)O)c1  
8174 C=CC(=O)OC.COc1cccc(C#N)c1I>>COC(=O)/C=C/c1c(C#N)cnc1OC  
8175 C=CC(=O)OC.COc1ccc(C#Cc2ccnc2Br)cc1>>COC(=O)/C=C/c1cccc1C#Cc1ccc(OC)cc1  
8176 C=Cc1cc2c(cc1C)C(C)(C)CCC2(C)C.CCOC(=O)c1ccc(OS(=O)(=O)C(F)(F)F)cc1>>C=C(c1ccc(C(=O)OCC)cc1)c1cc2c(cc1C)C(C)(C)CCC2(C)C  
8177 C=CC(=O)OC(C)(C)C.COC(=O)c1cccc(Br)c1>>COC(=O)c1cccc(/C=C/C(=O)OC(C)(C)C)c1  
8178 C=Cc1cccc1.COc1ccc(/N=N/c2ccc(I)cc2)cc1>>COc1ccc(/N=N/c2ccc(/C=C/c3cccc3)cc2)cc1  
8179 C=Cc1cncnc1.CCCCCCCS(=O)(=O)c1ccc(Br)cc1>>CCCCCCCS(=O)(=O)c1ccc(/C=C/c2cncnc2)c  
C=Cc1ccc(N2CCN(C(=O)OC(C)(C)C)CC2)cc1.Fc1cc(Br)cc(-  
8180 c2cncnc2)c1>>CC(C)(C)OC(=O)N1CCN(c2ccc(/C=C/c3cc(F)cc(-c4cncnc4)c3)cc2)CC1  
8181 C=CC(=O)OC(C)(C)C.OCc1cccc(I)c1>>CC(C)(C)OC(=O)/C=C/c1cccc(CO)c1  
8182 C=CCN(C(=O)C(C)(C)C)[C@H](C)c1ccc(C)c(F)c1.O=C1Ne2ncccc2[C@@]12Cc1cc(Br)cncc1C2>>C  
c1ccc([C@@H](C)N(C/C=C/c2cnc3c(c2)C[C@@]2(C3)C(=O)Ne3ncccc32)C(=O)C(C)(C)C)cc1F  
8183 C=CCC(C)N(C)C(=O)OC(C)(C)C.CCOC1cncnc(Br)c1>>CCOC1cncnc(/C=C/CC(C)N(C)C(=O)OC(C)(C)C)cc1  
8184 C=CC(=O)OC.Cn1nc(I)c2ccnc21>>COC(=O)/C=C/c1nn(C)c2ncccc12  
8185 C=CC(=O)OC.COc1cc(I)cc(CC=C(C)C)c1OC(C)=O>>COC(=O)/C=C/c1cc(CC=C(C)C)c(OC(C)=O)c(OC)c1  
8186 C=CC(=O)O.O=C(O)/C=C/c1cc(Br)cs1>>O=C(O)/C=C/c1ccc(/C=C/C(=O)O)c1  
C=Cc1ccc(N(c2ccc(/C=C/c3ccc(S(=O)(=O)C(F)(F)F)cc3)cc2)c2ccc(/C=C/c3ccc(S(=O)(=O)C(F)(F)F)c  
8187 c3)cc2)cc1.O=S(=O)(CCO)c1ccc(Br)cc1>>O=S(=O)(CCO)c1ccc(/C=C/c2ccc(N(c3ccc(/C=C/c4ccc(S(=O)(=O)C(F)(F)F)cc4)cc3)c3ccc(/C=C/c4ccc(S(=O)(=O)C(F)(F)F)cc4)cc3)cc2)cc1  
8188 C=CC(=O)OCCCC.Oc1ccc(Br)cc1>>CCCCOC(=O)/C=C/c1ccc(O)cc1

8189 C=CC(=O)OC.COc1ccc(I)c([N+](=O)[O-])c1>>COC(=O)/C=C/c1ccc(OC)cc1[N+](=O)[O-]  
8190 Brc1ccc(Oc2ccccc2)cc1.C=Cc1ccccc1>>C(=C/c1ccc(Oc2ccccc2)cc1)\c1ccccc1  
8191 C=C[C@H]1O[C@@H]2OC(C)(C)O[C@@H]2[C@H]1O.O=c1ccoc2ccc(Br)cc12>>CC1(C)O[C@H]  
2O[C@H]/C=C/c3ccc4occc(=O)c4c3)[C@H](O)[C@H]2O1  
8192 C=CC(=O)OC.O=Cc1ccc(Br)cc1F>>COC(=O)/C=C/c1ccc(C=O)c(F)c1  
8193 C=C.Cc1cccc(I)c1>>C=Cc1cccc(C)c1  
8194 C=C.Cc1c(Br)c(C(F)(F)F)nn1C>>C=Cc1c(C(F)(F)F)nn(C)c1C  
8195 C=CC(=O)OC(C)(C)C.Cc1ccc(Cl)cc1N1CCN(c2nnc3c2c(Br)nn3C2CCCCO2)CC1>>Cc1ccc(Cl)cc1  
N1CCN(c2nnc3c2c(/C=C/C(=O)OC(C)(C)C)nn3C2CCCCO2)CC1  
8196 C=C1CC(c2ccccc2)OC1=O.Ic1ccccc1-c1ccc2ccccc2c1>>O=C1OC(c2ccccc2)/C1=C\c1ccccc1-  
c1ccc2ccccc2c1  
8197 C=Cc1ccccc1C.CCOC(=O)C(F)Br>>CCOC(=O)C(F)/C=C/c1ccccc1C  
8198 C=Cc1cncnc1.CCOCc1c2ccc(Br)cc2c2cc(C=O)ccc21>>CCOCc1c2ccc(C=O)cc2c2cc(/C=C/c3cnc  
c3)ccc21  
8199 C=CC(=O)OC.CC(C)(C)OC(=O)N1CCc2ccc(Br)cc2CC1>>COC(=O)/C=C/c1ccc2c(c1)CCN(C(=O)O  
C(C)(C)C)CC2  
8200 C=CC(=O)OC.CCOC(=O)c1ccc(Cl)cc1>>CCOC(=O)c1ccc(/C=C/C(=O)OC)cc1  
8201 C=Cc1ccccc1C.Cc1ccc(Br)cc1>>Cc1ccc(/C=C/c2ccccc2C)cc1  
8202 C=CC(=O)OCC.O=C(NCCc1cccc(Br)c1)OCc1ccccc1>>CCOC(=O)/C=C/c1cccc(CCNC(=O)OCc2ccc  
cc2)c1  
8203 C=CC(C)=O.COC(=O)C1=Ne2cc(I)ccc2OC12CC2>>COC(=O)C1=Ne2cc(/C=C/C(C)=O)ccc2OC12C  
8204 C=CC(=O)N(C)OC.COc1ccccc1I>>COc1ccccc1/C=C/C(=O)N(C)OC  
8205 C=CCOc1ccccc1.Cc1ccc(I)cc1>>Cc1ccc(/C=C/COc2ccccc2)cc1  
8206 C=CCCCBr.COc1ccc(CCl)cc1>>C=C(CCCBr)Cc1ccc(OC)cc1  
8207 C=CC(=O)OC.Fc1ccc(Br)cn1>>COC(=O)/C=C/c1ccc(F)nc1  
8208 C=CCCCC.O=S(=O)(Oc1ccc2ccccc2c1)C(F)(F)F>>C=C(CCCCC)c1ccc2ccccc2c1  
8209 C=Cc1ccccc1N.COc1cc(OC)c(Br)c(OC)c1>>COc1cc(OC)c(/C=C/c2ccccc2N)c(OC)c1  
8210 C=CC[C@H](C)CO.CCC(O[Si](C)(C)C(C)(C)C)[C@H](C)/C=C(\C)I>>CCC(O[Si](C)(C)C(C)(C)C  
)C[C@H](C)/C=C(C)/C=C/C[C@H](C)CO  
8211 Brc1cnc2ccccc12.C=CCN(C(=O)OC(C)(C)C(=O)OC(C)(C)C>>CC(C)(C)OC(=O)N(C/C=C/c1cnc  
2ccccc12)C(=O)OC(C)(C)C  
8212 C=C.Cc1nc(C)c(I)c(Cl)n1>>C=Cc1c(C)nc(C)nc1Cl  
8213 C=CC(OCC)OCC.COc1ccccc1I>>CCOC(/C=C/c1ccccc1OC)OCC  
8214 C=CC(=O)N(C)C.CCc1nc2cc(O)ccc2c(Oc2ccc(Br)cc2)c1-  
c1ccccc1>>CCc1nc2cc(O)ccc2c(Oc2ccc(/C=C/C(=O)N(C)C)cc2)c1-c1ccccc1  
8215 C=CC(F)(F)C(F)(F)C(F)(F)C(F)(F)C(F)(F)F.Ic1ccc(OCc2ccccc2)cc1>>FC(F)(F)C(F)(F)C(F)(F)  
)C(F)(F)C(F)(F)C(F)(F)/C=C/c1ccc(OCc2ccccc2)cc1  
8216 C=CP(=O)(OCC)OCC.CC(=O)NC(C#N)c1cccc(Br)c1>>CCOP(=O)(/C=C/c1cccc(C(C#N)NC(C)=O)c  
1)OCC  
8217 C=CC(=O)N(C)Cc1sc2ccc(C)c2c1C.O=C1CCCc2cc(Br)cnc2N1>>Cc1sc2sc(CN(C)C(=O)/C=C/c3cnc  
4c(c3)CCCC(=O)N4)c(C)c12  
8218 Brc1ccnc1.C=CCCC(=O)OC>>COC(=O)CC/C=C/c1ccccc1  
8219 C=CCN1Cc2cc3ccccc3nc2C1=O.O=C(O)Cc1ccc(Br)cc1>>O=C(O)Cc1ccc(/C=C/CN2Cc3cc4ccccc4nc  
3C2=O)cc1  
8220 C=CC(=O)N(C)Cc1cc2ccccc2n1C.O=C1Ne2ncc(Br)cc2C12CCC2>>CN(Cc1cc2ccccc2n1C)C(=O)/C=  
C/c1cnc2c(c1)C1(CCC1)C(=O)N2  
8221 Brc1c2ccccc2cc2ccccc12.C=CCn1nnc2ccccc21>>C(=C/c1c2ccccc2cc2ccccc12)\Cn1nnc2ccccc21  
8222 C=CC(=O)OC(C)(C)C.COc1ccc(Br)c(C)c1>>COc1ccc(/C=C/C(=O)OC(C)(C)C)c(C)c1  
8223 C=CC#N.CC(=O)c1ccc(Cl)cc1>>CC(=O)c1ccc(/C=C/C#N)cc1  
8224 C=Cc1ccccc1.COc1cc(Br)c(C=O)cc1OC>>COc1cc(C=O)c(/C=C/c2ccccc2)cc1OC  
8225 C=CC(=O)OC.CC(C)(C)OC(=O)NC1(c2ccc(-c3nc4c5ccccc(Br)c5nn4cc3-  
c3ccccc3)cc2)CCC1>>COC(=O)/C=C/c1cccc2c1nn1cc(-c3ccccc3)c(-  
c3ccc(C4(NC(=O)OC(C)(C)C)CCC4)cc3)nc21  
8226 C=C1C(=O)O[C@@H]2C3=C(C)C(=O)C=C[C@]3(C)CC[C@H]2.Fc1ccccc1I>>CC1=C2[C@H]3  
OC(=O)/C=C/c4ccccc4F)[C@@H]3CC[C@]2(C)C=CC1=O  
8227 C=CC(=O)OCC.Cc1nnn(Cc2cc(C(F)F)ccc2Br)n1>>CCOC(=O)/C=C/c1ccc(C(F)F)cc1Cn1nnc(C)n1  
C=C[C@@H](C)[C@@H]1C/C=C(=O)N[C@H](Cc2ccc(OC)cc2)C(=O)NCCC(=O)N[C@@H](CC(  
C)C)C(=O)O1.COCOCc1ccc(I)cc1>>COCOCc1ccc(/C=C/[C@@H](C)[C@@H]2C/C=C(=O)N[C@  
H](Cc3ccc(OC)cc3)C(=O)NCCC(=O)N[C@@H](CC(C)C)C(=O)O2)cc1  
8229 Brc1ccccc1.C=CC(=C)C>>C=C(C)/C=C/c1ccccc1

8230 C=CC(F)(F)C(F)(F)C(F)(F)C(F)(F)C(F)(F)C(F)(F)C(F)(F)F.CC1=Nc2ccc(I)cc2C1(C)C>>CC1=Nc2cc  
c(/C=C/C(F)(F)C(F)(F)C(F)(F)C(F)(F)C(F)(F)C(F)(F)C(F)(F)F)cc2C1(C)C

8231 C=CC(=O)OC.COC(=O)c1c(Br)c(Cl)cc2nn(C)cc12>>COC(=O)/C=C/c1c(Cl)cc2nn(C)cc2c1C(=O)OC

8232 Brc1ccc2[nH]ccc2c1.C=CC(=O)OC>>COC(=O)/C=C/c1ccc2[nH]ccc2c1

8233 C=CC(C)=O.COC(=O)c1c([Si](C)(C)C)c(I)cn1S(=O)(=O)N(C)C>>COC(=O)c1c([Si](C)(C)C)c(/C=C\ C(C)=O)cn1S(=O)(=O)N(C)C

8234 Cc1ccc(Br)cc1.Cc1ccc(S(=O)(=O)NC(C/C=C/C(=O)C2CCCC2)c2ccccc2)cc1>>Cc1ccc(/C(=C\C(=O) C2CCCC2)CC(NS(=O)(=O)c2ccc(C)cc2)c2ccccc2)cc1

8235 C=CC(O)CCCCC.I/C=C/C=C/C/CCCCOCc1ccccc1>>CCCCCC(O)/C=C/C=C/C=C/CCCCOCc1ccccc1

8236 Brc1ccc(/N=N/c2ccccc2)cc1.C=Cc1ccc(C#N)cc1>>N#Cc1ccc(/C=C/c2ccc(/N=N/c3ccccc3)cc2)cc1

8237 C=CC(=O)OC(C)(C)C.O=C1Nc2ccc(Br)cc2C1=O>>CC(C)(C)OC(=O)/C=C/c1ccc2c(c1)C(=O)C(=O)

8238 Brc1ccccc1.C=CCOc1ccccc1C(C)(C)C>>CC(C)(C)c1ccccc1OC/C=C/c1ccccc1

8239 C=CC(=O)OC(C)(C)C.N#Cc1cccc(I)c1>>CC(C)(C)OC(=O)/C=C/c1cccc(C#N)c1  
C=Cc1ccc2c(c1)CC[C@H]1[C@@H]2CC[C@]2(C)[C@H](O[Si](C)(C)C(C)(C)C)CC[C@H]1

8240 2.C[Si](C)(C)OS(=O)(=O)C(F)(F)F>>CC(C)(C)[Si](C)(C)O[C@H]1CC[C@H]2[C@@H]3CCc4cc(/C =C/[Si](C)(C)C)ccc4[C@H]3CC[C@]12C

8241 C=CC(=O)OC.OCc1ccc2cc(Br)ccc2c1>>COC(=O)/C=C/c1ccc2cc(CO)ccc2c1

8242 C=CC(=O)OCC.O=Cc1en(Cc2ccccc2)c2ccc(Br)cc12>>CCOC(=O)/C=C/c1ccc2c(c1)c(C=O)cn2Cc1cc

8243 C=CC(=O)[C@@]1(O)C[C@H]2CC[C@]1(C)C2(C)C.COc1ccc(I)cc1>>COc1ccc(/C=C/C(=O)[C@@ ]2(O)C[C@H]3CC[C@]2(C)C3(C)C)cc1

8244 C=CC(=O)N(C)C.Cc1cccc(C)c1Cl>>Cc1cccc(C)c1/C=C/C(=O)N(C)C

8245 C=CC(=O)OCC.O=C(c1ccccc1)C(F)(F)c1ccccc1>>CCOC(=O)/C=C/c1ccccc1C(F)(F)C(=O)c1ccccc1

8246 C=CC(=O)N1N=Cc2ccccc2C1c1ccc(F)cc1.COc1cc(Cc2cnc(N)nc2N)cc(I)c1OC>>COc1cc(Cc2cnc(N) nc2N)cc(/C=C/C(=O)N2N=Cc3ccccc3C2c2ccc(F)cc2)c1OC

8247 C=CSc1ccccc1.O=[N+](O-)]c1ccc(Br)cc1>>O=[N+](O-)]c1ccc(/C=C/Sc2ccccc2)cc1

8248 C=CS(=O)(=O)NCc1ccccc1.CC(C)(C)OC(=O)NCc1cc(F)ccc1Br>>CC(C)(C)OC(=O)NCc1cc(F)ccc1/  
C=C/S(=O)(=O)NCc1ccccc1

8249 C=CC(=O)OC.CN1c2nccc(I)c2N(C)c2c(C=O)ccnc21>>COC(=O)/C=C/c1ccnc2c1N(C)c1c(C=O)ccnc

8250 C=Cc1ccccc1.CC(=O)Nc1ccc(I)cc1>>CC(=O)Nc1ccc(/C=C/c2ccnc2)cc1

8251 C=Cc1ccccc1OC.Cn1c(=O)c2c(cc(Br)n2C)n(C)c1=O>>COc1ccccc1/C=C/c1cc2c(c(=O)n(C)c(=O)n2C

8252 C=Cc1ccccc1C(F)(F)F.O=C(O)c1ccc(Br)c1>>O=C(O)c1ccc(/C=C/c2ccccc2C(F)(F)F)c1

8253 C=CC#N.CC(=O)c1ccc(I)cc1>>CC(=O)c1ccc(/C=C/C#N)cc1

8254 C=CC(N)=O.COc1ccc2c(c1)CCC(C=O)=C2Br>>COc1ccc2c(c1)CCC(C=O)=C2/C=C/C(N)=O

8255 Brc1ccc(I)cc1.C=CC(=O)OCCCC>>CCCCOC(=O)/C=C/c1ccc(Br)cc1

8256 C=CCC(C)C(=O)OCC.COc1ccccc1Br>>CCOC(=O)C(C)C/C=C/c1ccccc1OC

8257 C=Cc1ccc2c(c1)C(=O)c1ccccc1C2=O.Ic1ccc2c(=C3SC=CS3)c3ccccc3c(=C3SC=CS3)c2c1>>O=C1c2  
ccccc2C(=O)c2cc(/C=C/c3ccc4c(=C5SC=CS5)c5ccccc5c(=C5SC=CS5)c4c3)ccc21

8258 C=Cc1ccc2cc(F)c(F)cc2n1.O=C1c2cc(Br)ccc2COc2ccccc21>>O=C1c2cc(/C=C/c3ccc4cc(F)c(F)cc4n3  
)ccc2COc2ccccc21

8259 C=Cc1ccccc1.Cc1ccc(S(=O)(=O)Oc2ccc3c(Br)ccnc23)cc1>>Cc1ccc(S(=O)(=O)Oc2ccc3c(/C=C/c4c  
ccn4)ccnc23)cc1

8260 C=CCCCCCC.CCOC(=O)/C=C\Br>>CCCCCC/C=C/C=CC(=O)OCC

8261 C=C(C)C(=O)OC.Clc1ccccc1>>COC(=O)/C(C)=C/c1ccccc1

8262 C=CC(=O)OCCCC.N#Cc1ccccc1Br>>CCCCOC(=O)/C=C/c1ccccc1C#N

8263 C=CC(=O)OC(C)(C)C.O=C1C[C@H](O)[C@@H]([Se]c2ccccc2)N1Cc1cc2c(cc1I)OCO2>>CC(C)(C)  
OC(=O)/C=C/c1cc2c(cc1CN1C(=O)C[C@H](O)[C@H]1[Se]c1ccccc1)OCO2

8264 C=C(F)C(=O)OC.Ic1ccc2ccccc2c1>>COC(=O)/C(F)=C/c1ccc2ccccc2c1

8265 C=Cc1ccc(OC)cc1.FC(F)(F)c1ccc(Cl)cc1>>COc1ccc(/C=C/c2ccc(C(F)(F)F)cc2)cc1

8266 C=C.O=[N+](O-)]c1cc(I)cc([N+](=O)[O-])c1>>C=Cc1cc([N+](=O)[O-])cc([N+](=O)[O-])c1

8267 C=Cc1ccccc1.COC(=O)c1cc2cc(Br)ccc2cc1OC(C)=O>>COC(=O)c1cc2cc(/C=C/c3ccccc3)ccc2cc1OC  
(C)=O

8268 Brc1ccc(/C=C/c2ccnc2)c2nsnc12.C=Cc1ccc2c(c1)Sc1ccccc1N2CCCC>>CCCCN1c2ccccc2Sc2cc(/C =C/c3ccc(/C=C/c4ccnc4)c4nsnc34)ccc21

8269 C=CC(=O)OC.COc1ccc2c(c1)CCN(c1ccc(C(C)C)cc1)C2(c1ccc(Br)cc1)C(F)(F)F>>COC(=O)/C=C/c1  
ccc(C2(C(F)(F)F)c3ccc(OC)cc3CCN2c2ccc(C(C)C)cc2)cc1

8270 C=CC(=O)OC(C)(C)C.CC(C)(C)OC(=O)N1CCc2cc(Cl)cc3c2C1Cc1ccccc1-  
3>>CC(C)(C)OC(=O)/C=C/c1cc2c3c(c1)-c1ccccc1CC3N(C(=O)OC(C)(C)C)CC2  
COC[C@H](/N=C(\c1ccccc1)N1C=CCC[C@H]1C(C)C.Clc1cccc(I)c1>>COC[C@H](/N=C(\c1  
ccccc1)N1C=C(c2cccc(Cl)c2)CC[C@H]1C(C)C)C

8271 C=CC(C)O.COc1ccc2cc(Br)ccc2c1>>COc1ccc2cc(/C=C/C(C)O)ccc2c1

8272 C=CCNC(=O)c1cc(C)on1.COc1ccc(I)cc1>>COc1ccc(/C=C/CNC(=O)c2cc(C)on2)cc1

8273

8274 C=CC(=O)OC.CC(C)n1enc2c(NCc3ccc(Br)cc3)nc(N3CCCC3)nc21>>COC(=O)/C=C/c1ccc(CNc2nc(N3CCCC3)nc3e2nnc3C(C)C)cc1

8275 C=CC(=O)OCC.CCOC(=O)c1enc2c(C)cc(OC)cc2c1Br>>CCOC(=O)/C=C/c1c(C(=O)OCC)enc2c(C)c(OC)cc12

8276 C=CC(=O)OCC.CC(C)(C)OC(=O)NC1(C(=O)Nc2ccc(I)cc2)CCC1>>CCOC(=O)/C=C/c1ccc(NC(=O)C2(NC(=O)OC(C)(C)C)CCC2)cc1

8277 C=CC(=O)O.O=c1c2ccc(F)cc2n(Cc2ccc(Br)cc2)c(=O)n1CCc1cccc1>>O=C(O)/C=C/c1ccc(Cn2c(=O)n(CCc3cccc3)c(=O)c3ccc(F)cc32)cc1

8278 C=CC(=O)OC.IC1=CO[C@H](COCc2ccccc2)[C@H](OCc2ccccc2)[C@@H]1OCc1cccc1>>COC(=O)/C=C/C1=CO[C@H](COCc2ccccc2)[C@H](OCc2ccccc2)[C@@H]1OCc1cccc1

8279 C=CC(=O)OCC.O=c1cc(-c2ccccc2)oc2ccc(Br)cc12>>CCOC(=O)/C=C/c1ccc2oc(-

8280 C=CCNC(=O)OC(C)(C)C.O=Cc1cccc(Br)c1>>C=C(CNC(=O)OC(C)(C)C)c1cccc(C=O)c1

8281 C=CC(C)(C)O.COC(=O)[C@H](Cc1c(I)n(C(=O)OC(C)(C)C)c2ccccc12)N(C(=O)OC(C)(C)C(=O)OC(C)(C)C)>>COC(=O)[C@H](Cc1c(I)n(C(=O)OC(C)(C)C)c2ccccc12)N(C(=O)OC(C)(C)C(=O)OC(C)(C)C

8282 C=CC(=O)OC(C)(C)C.Nc1ncc(Cl)cc1Br>>CC(C)(C)OC(=O)/C=C/c1cc(Cl)enc1N

8283 C=CC(=O)OC.CCN(CC)c1cccc(Br)c1>>CCN(CC)c1cccc(/C=C/C(=O)OC)c1

8284 C=CCC(C)N(C)C(=O)OC(C)(C)C.Nc1ncc(Br)cn1>>CC(C/C=C/c1enc(N)nc1)N(C)C(=O)OC(C)(C)C

8285 C=Cc1ccc2nc(OC)c(OC)nc2c1.COC(=O)c1cccc(Br)c1>>COC(=O)c1cccc(/C=C/c2ccc3nc(OC)c(OC)nc3c2)c1

8286 C=CC(C)=O.O=C(O)c1ccc(Cl)cc1>>CC(=O)/C=C/c1ccc(C(=O)O)cc1

8287 C=CC(=O)N1CCOCC1.CC(=O)Cc1cccc1Br>>CC(=O)Cc1cccc1/C=C/C(=O)N1CCOCC1

8288 C=C(C)c1cccc1.Fc1c(F)c(F)c(Br)c(F)c1F>>C/C(=C)c1c(F)c(F)c(F)c1F)c1cccc1

8289 C=CC(=O)N(C)Cc1oc2ccccc2c1C.O=C1Nc2ncc(Br)cc2CNC12CCCC2>>Cc1c(CN(C)C(=O)/C=C/c2nc3c(c2)CNC2(CCCC2)C(=O)N3)oc2ccccc12

8290 C=Cc1cc(OC)cc(OC)c1.Fc1ccc(I)cc1>>COc1cc(/C=C/c2ccc(F)cc2)cc(OC)c1

8291 C=CC(=O)OC.Cc1cccc(S(=O)(=O)NCCc2ccccc2Br)cc1>>COC(=O)/C=C/c1cccc1CCNS(=O)(=O)c1c cc(C)cc1

8292 C=CC(=O)OCC.COc1ccc(Oc2ccccc(Br)c2)cc1>>CCOC(=O)/C=C/c1cccc(Oc2ccc(OC)cc2)c1

8293 C=CC(=O)OC.Cc1cccc(I)c1>>COC(=O)/C=C/c1cccc(C)c1

8294 Br1ccc2ncccc2c1.C=CC[C@H]1CCCN(C)C[C@H](OC(C)=O)[C@H](C)C[C@H](CC(OC)OC)[C@H](O[C@@H]2O[C@H](C)[C@@H](O[C@H]3C[C@@H](C)(O)[C@@H](OC(=O)CC)[C@H](C)O3)[C@H](N(C)C)[C@H]2OC(C)=O)[C@@H](OC)[C@H](OC(=O)CC)CC(=O)O1>>CCCC(=O)O[C@H]1[C@H](C)O[C@@H](O[C@H]2[C@H](N(C)C)[C@@H](OC(C)=O)[C@H](O[C@@H]3[C@@H](OC)[C@H](OC(=O)CC)CC(=O)O[C@@H](C/C=C/c4ccc5ncccc5c4)CCCN(C)C[C@H](OC(C)=O)[C@@H]1(C)C)[C@@H]3CC(OC)OC)O[C@@H]2C)[C@@H]1(C)O

8295 Br1cccn1.C=CC(=O)OC(C)(C)C>>CC(C)(C)OC(=O)/C=C/c1cccn1

8296 Br1ccc2c(c1)OCO2.C=Cc1cccc1N>>Nc1cccc1/C=C/c1ccc2c(c1)OCO2

8297 C=CC(C)=O.CCCCCCc1c(OS(=O)(=O)C(F)(F)F)c(C)c(C)c2c(C)c(C#Cc3ccccc3)enc12>>CCCCCCc1c(/C=C/C(C)=O)c(C)c(C)c2c(C)c(C#Cc3ccccc3)enc12

8298 C=CC(=O)OCCCC.N#Cc1cccc(I)c1>>CCCCOC(=O)/C=C/c1cccc(C#N)c1

8299 C=CC(=O)OC.FC(F)(F)c1ccc(Br)cn1>>COC(=O)/C=C/c1ccc(C(F)(F)F)nc1

8300 C=[Si](C)(C)C.COc1cccc1I>>COc1cccc1/C=C/[Si](C)(C)C

8301 C=CC(F)(F)F.O=[N+][O-]c1ccc(I)c(Cl)c1>>O=[N+][O-]c1ccc(/C=C/C(F)(F)F)c(Cl)c1

8302 C=CC(=O)OC(C)(C)C.C[Si](C)(C)/C=C/C1=C(Br)CCCC1>>CC(C)(C)OC(=O)/C=C/C1=C(/C=C/[Si](C)(C)C)CCCC1

8303 C=CC#N.COc1ccc(I)cc1CC(C)C>>COc1ccc(/C=C/C#N)cc1CC(C)C

8304 C=CC(=O)OC.CC(=O)OC[C@H]1OC=C(I)[C@@H](OC(C)=O)[C@H]1OC(C)=O>>COC(=O)/C=C/C1=CO[C@H](COC(C)=O)[C@H](OC(C)=O)[C@@H]1OC(C)=O

8305 C=CC(=O)N1CCOCC1.C[C@H]1COCc2nc3c(N)nc4cc(Br)ccc4c3n21>>C[C@H]1COCc2nc3c(N)nc4cc(/C=C/C(=O)N5CCOCC5)ccc4c3n21

8306 C=CC(=O)OC.COc1ncc(Br)c(OC)n1>>COC(=O)/C=C/c1enc(OC)nc1OC

8307 Br1ccc(CN2CC3CCC(C2)O3)cc1.C=CB1OC(C)CC(C)(C)O1>>CC1CC(C)(C)OB(/C=C/c2ccc(CN3CC4CCC(C3)O4)cc2)O1

8308 C=CC(=O)OC(C)(C)C.O=S(=O)(c1cccc(Br)c1)c1cccn1>>CC(C)(C)OC(=O)/C=C/c1cccc(S(=O)(=O)c2cccn2)c1

8309 C=CN1C(=O)c2ccccc2C1=O.COc1ccc(I)cc1>>COc1ccc(/C=C/N2C(=O)c3ccccc3C2=O)cc1

8310 C=CC(=O)OC.COc1ccc(S(=O)(=O)N2CCc3cc(Br)cc([N+](=O)[O-])c32)cc1>>COC(=O)/C=C/c1cc2c(c([N+](=O)[O-])c1)N(S(=O)(=O)c1ccc(OC)cc1)CC2

8311 Br1ccc(-c2cccc(C34CC5CC(CC(C5)C3)C4)c2)cc1.C=CC(=O)OC>>COC(=O)/C=C/c1ccc(-c2cccc(C34CC5CC(CC(C5)C3)C4)c2)cc1

8312 C=Cc1cccc1.Cn1nc(NC(=O)C(C)(C)C)c2cc(I)enc21>>Cn1nc(NC(=O)C(C)(C)C)c2cc(/C=C/c3cccc3)enc21

8313 C=CC(=O)OCC.FC(F)(F)c1ccc(Br)c(C2OCCCO2)c1>>CCOC(=O)/C=C/c1ccc(C(F)(F)F)cc1C1OCCC

8314 C=Cc1cccc1.Nc1cc(Cl)ccc1I>>Nc1cc(Cl)ccc1/C=C/c1cccc1

8315 C=CCNC(=O)c1cccc1NC(=O)c1cccc1.Ic1cccc1>>O=C(Nc1cccc1C(=O)NC/C=C/c1cccc1)c1cccc

8316 C=CC(=O)N1CCCCC1.Cn1nc(Br)c2cccc21>>Cn1nc(/C=C/C(=O)N2CCCCC2)c2cccc21

8317 C=CC(=O)OCC.Cc1nc(C)c(I)c(N)n1>>CCOC(=O)/C=C/c1c(C)nc(C)nc1N

8318 C=Cc1cccc1.Clc1cccs1>>C(=C/c1cccs1)\c1cccc1

8319 C=CC(=O)OC.IC1=CO[C@H](COCc2cccc2)[C@@H](OCc2cccc2)[C@@H]1OCc1cccc1>>COC(=O)/C=C/C1=CO[C@H](COCc2cccc2)[C@@H](OCc2cccc2)[C@@H]1OCc1cccc1

8320 C=Cc1ccc(CN2CCN(C)CC2)cn1.Cc1c(Nc2c(I)encc2C#N)cc(Cl)c2[nH]ccc12>>Cc1c(Nc2c(C#N)cncc2/C=C/c2ccc(CN3CCN(C)CC3)cn2)cc(Cl)c2[nH]ccc12

8321 C=Cc1cenc1.CCCCCCOc1ccc(I)cc1>>CCCCCCOc1ccc(/C=C/c2ccncc2)cc1

8322 C=CCN(C(=O)OCc1cccc1)C(=O)OC(C)(C)C.CC(=O)c1ccc(Br)cc1>>CC(=O)c1ccc(/C=C/CN(C(=O)OCc2cccc2)C(=O)OC(C)(C)C)cc1

8323 C=Cc1enccn1.Fc1ccc(Br)cc1>>Fc1ccc(/C=C/c2cnccn2)cc1

8324 Br1ccc2ncccc2c1.C=CC(=O)OC>>COC(=O)/C=C/c1ccc2ncccc2c1

8325 C=CC=O.Ic1ccc(-c2cccc2)cc1>>O=C/C=C/c1ccc(-c2cccc2)cc1

8326 C=CC(=O)OC.Cc1cc(CCNC(=O)OC(C)(C)C)c(C)c(I)c1O>>COC(=O)/C=C/c1c(C)c(CCNC(=O)OC(C)(C)C)cc(C)c1O

8327 BrC1CCCCC1.C=Cc1ccc(C)cc1>>Cc1ccc(/C=C/C2CCCCC2)cc1

8328 C=C.COC(=O)c1ccc(C)cc1Br>>C=Cc1cc(C)ccc1C(=O)OC

8329 C=CCN(Cc1cc(F)cc(F)c1)C(=O)C(C)(C)C.O=C1Nc2ncccc2[C@@]12Cc1cc(Br)enc1C2>>CC(C)(C)C(=O)N(C/C=C/c1cnc2c(c1)C[C@@]1(C2)C(=O)Nc2ncccc21)Cc1cc(F)cc(F)c1

8330 C=CC(=O)O.Ic1cccc2cccc12>>O=C(O)/C=C/c1cccc2cccc12

8331 Br1ccc2ccc3cccc4ccc1c2c34.C=Cc1cccc1>>C(=C/c1ccc2ccc3cccc4ccc1c2c34)\c1cccc1

8332 C=CC(=O)OC.Cc1ccc(S(=O)(=O)n2cc(I)c([Si](C)(C)C)c2)cc1>>COC(=O)/C=C/c1cn(S(=O)(=O)c2cc c(C)cc2)cc1[Si](C)(C)C

8333 C=CC(=O)OC(C)(C)C.Oc1ccc(C(=C2CCCCC2)c2ccc(Br)c(F)c2)cc1>>CC(C)(C)OC(=O)/C=C/c1ccc (C(=C2CCCCC2)c2ccc(O)cc2)cc1F

8334 Br1enc2cccc2c1.C=CCCN1C(=O)c2cccc2C1=O>>O=C1c2cccc2C(=O)N1CC/C=C/c1enc2cccc2c

8335 C=CCC1(C)OC(=O)Nc2ccc(-c3cc(F)cc(Br)c3)cc21.COc1ccc(-c2oc3cccc3c(=O)c2I)cc1>>COc1ccc(- c2oc3cccc3c(=O)c2/C=C/CC2(C)OC(=O)Nc3ccc(-c4cc(F)cc(Br)c4)cc32)cc1

8336 Br1enc2cccc2c1.C=CCO[C@@]1(C)C[C@H](C)C(=O)[C@H](C)[C@H]2NC(=O)O[C@]2(C)[C @@@H](CC)OC(=O)[C@H](C)C(=O)[C@H](C)[C@H]1O[C@H]1O[C@H](C)C[C@H](N(C)C)[C @H]1OC(C)=O>>CC[C@H]1OC(=O)[C@H](C)C(=O)[C@H](C)[C@H](O[C@H]2O[C@H](C) C[C@H](N(C)C)[C@H]2OC(C)=O)[C@@](C)(OC/C=C/c2cnc3cccc3c2)C[C@H](C)C(=O)[C@H] (C)C[C@H]2NC(=O)O[C@]2C

8337 C=CC1(O)CCC1.Cc1cccc1I>>Cc1cccc1/C=C/C1(O)CCC1

8338 C=CC(OC)OC.Fc1cc(I)ccc1C(F)(F)F>>COC(/C=C/c1ccc(C(F)(F)F)c(F)c1)OC

8339 C=CC(=O)CCC.COc1ccc2cc(Br)ccc2c1>>CCCC(=O)/C=C/c1ccc2cc(OC)ccc2c1

8340 C=CC(=O)Nc1cccc2ccnc12.COc1ccc(I)c1>>COc1ccc(/C=C/C(=O)Nc2cccc3ccnc23)c1

8341 C=CCNC(=O)OC(C)(C)C.COc1cc2c(c(OS(=O)(=O)C(F)(F)F)c1)C(=O)OC(C)(C)O2>>COc1cc(/C=C/ CNC(=O)OC(C)(C)C)c2c(c1)OC(C)(C)OC2=O

8342 C=CC(=O)OC(C)(C)C.Clc1cc(-c2cccc2)nc2cccc12>>CC(C)(C)OC(=O)/C=C/c1cc(- c2cccc2)nc2cccc12

8343 C=CC(=O)OCCCC.CC(=O)c1ccc(I)cc1>>CCCCOC(=O)/C=C/c1ccc(C(C)=O)cc1

8344 C=C(C)c1cccc1.O=[N+][([O-])c1ccc(I)cc1>>C/C(=C/c1ccc([N+](=O)[O-])cc1)c1cccc1

8345 C=COCC.O=c1oc2cccc2cc1Br>>CCO/C=C/c1cc2cccc2oc1=O

8346 C=CC(=O)OC.COc1ccc(Br)cc1Cl>>COC(=O)/C=C/c1ccc(OC)c(Cl)c1

8347 C=CCC(=O)OC(C)(C)C.COc1cc(N(C)C(=O)OC(C)(C)C)c(Br)cn1>>COc1cc(N(C)C(=O)OC(C)(C)C)c (/C=C/CC(=O)OC(C)(C)C)cn1

8348 C=CCC(O)c1ccc(- c2cc(OC)ncc2F)cc1.COC(=O)[C@@H](C)[C@H](c1ccc(I)c(O)c1)C1CC1>>COC(=O)[C@@H](C)[C @H](c1ccc(/C=C/CC(O)c2ccc(-c3cc(OC)ncc3F)cc2)c(O)c1)C1CC1

8349 C=CCNC(=O)OC(C)(C)C.CCOC(=O)CC(c1ccc(C)c(CN2CC(C)Cc3cc(Br)ccc3S2(=O)=O)c1)c1ccc(F) cc1C>>CCOC(=O)CC(c1ccc(C)c(CN2CC(C)Cc3cc(/C=C/CNC(=O)OC(C)(C)C)ccc3S2(=O)=O)c1)c1 ccc(F)cc1C

8350 C=CC(=O)OC.Oc1ccc(Br)cc1>>COC(=O)/C=C/c1ccc(O)cc1

8351 C=CC(=O)Nc1cccc1NC(=O)OC(C)(C)C.CN1C[C@H](c2ccc(Br)cc2)[C@@H](C(=O)Nc2ccc(Cl)cc2 )C1>>CN1C[C@H](c2ccc(/C=C/C(=O)Nc3cccc3NC(=O)OC(C)(C)C)cc2)[C@@H](C(=O)Nc2ccc(Cl

8352 C=CCC1C=Cc2ccnc2N1C(=O)Oc1cccc1.CCOC(=O)CC(c1ccc(OC)nc1)c1nc(Br)cs1>>CCOC(=O)C  
C(c1ccc(OC)nc1)c1nc(/C=C/CC2C=Cc3ccnc3N2C(=O)Oc2ccccc2)cs1  
8353 C=Cc1ccnc1.CC(=O)Nc1ccc(Br)cc1>>CC(=O)Nc1ccc(/C=C/c2ccnc2)cc1  
8354 C=Cc1ccc(C(F)(F)F)cc1.O=Cc1ccc(Br)cc1>>O=Cc1ccc(/C=C/c2ccc(C(F)(F)F)cc2)cc1  
C=Cc1ccc(F)cc1.COC(=O)[14c]1[14cH][14c]([N+](=O)[O-  
8355 )]1[14cH][14cH][14c]1Br>>COC(=O)[14c]1[14cH][14c]([N+](=O)[O-  
)]1[14cH][14cH][14c]1/C=C/c1ccc(F)cc1  
8356 C=CC(=O)N1N=Cc2ccccc2C1C=C.COc1cc(Cc2cnc(N)nc2N)cc(I)c1OC>>C=CC1c2ccccc2C=NN1C(  
=O)/C=C/c1cc(Cc2cnc(N)nc2N)cc(OC)c1OC  
8357 C=CC(=O)OCCCC.Fc1cccc(I)c1>>CCCCOC(=O)/C=C/c1cccc(F)c1  
8358 Br1cccc2ccccc12.C=CS(=O)c1cccc1>>O=S(/C=C/c1cccc2ccccc12)c1cccc1  
8359 C=CC(N)=O.O=Cc1ccc(I)o1>>NC(=O)/C=C/c1ccc(C=O)o1  
8360 Br1ccc2[nH]ccc2c1.C#CC=C>>C#C/C=C/c1ccc2[nH]ccc2c1  
8361 C=CC(=O)OCCCC.Cc1cccc(C)c1Br>>CCCCOC(=O)/C=C/c1c(C)cccc1C  
8362 Br1ccc2ccc3cccc4ccc1c2c34.C=CC(=O)OC(C)(C)C>>CC(C)(C)OC(=O)/C=C/c1ccc2ccc3cccc4ccc1c  
2c34  
8363 C=Cc1cccc1.O=[N+](O-)]c1secc1Br>>O=[N+](O-)]c1secc1/C=C/c1cccc1  
Br1cccc1.C=Cc1cc(-c2cc(C(C)(C)C)c(OC(C)=O)c(C(C)(C)C)c2)cc(-  
8364 c2cc(C(C)(C)C)c(OC(C)=O)c(C(C)(C)C)c2)c1>>CC(=O)Oc1c(C(C)(C)C)cc(-  
c2cc(/C=C/c3ccccc3)cc(-c3cc(C(C)(C)C)c(OC(C)=O)c(C(C)(C)C)c3)c2)cc1C(C)(C)C  
C=CC(=O)OC.CS(=O)(=O)N(Cc1cccc1)c1oc2ccccc2c1I>>COC(=O)/C=C/c1c(N(Cc2ccccc2)S(C)(=  
8365 O)=O)oc2ccccc12  
8366 C=Cc1cccc1.CC(C)(C)c1ccc(Br)cc1>>C=C(c1cccc1)c1ccc(C(C)(C)C)cc1  
8367 C=CC(C)=O.Cc1cccc1Br>>CC(=O)/C=C/c1cccc1C  
8368 CC(=O)/C=C/CC(NS(=O)(=O)c1ccc(C)cc1)c1cccc1.Cn1ccc2cc(Br)ccc21>>CC(=O)/C=C(/CC(NS(=  
O)(=O)c1ccc(C)cc1)c1cccc1)c1ccc2c(cen2C)c1  
8369 C=CC(=O)O.Fc1ccc(Br)cc1>>O=C(O)/C=C/c1ccc(F)cc1  
8370 Br1ccc(-c2ccccc2)cc1.C=CC(=O)OCC>>CCOC(=O)/C=C/c1ccc(-c2ccccc2)cc1  
8371 C=CC[C@H]1C(=O)N(c2ccccc2)[C@H]1c1ccc(OC)cc1.OCc1cccc1Br>>COc1ccc([C@@H]2[C@  
@H](C/C=O/c3ccccc3CO)C(=O)N2c2ccccc2)cc1  
8372 C=CC(=O)OC.C[C@H]1CC=C[C@H]2[C@H]1C(=O)N(Cc1cccc1)[C@H]2c1cccc(Br)c1>>COC(  
=O)/C=C/c1cccc([C@H]2[C@H]3C=CC[C@H](C)[C@H]3C(=O)N2Cc2ccccc2)c1  
8373 C=CC(=O)OC.COc1ccc(S(=O)(=O)N(C)c2ccc(I)c3cnn(C)c23)cc1>>COC(=O)/C=C/c1ccc(N(C)S(=O)  
(=O)c2ccc(OC)cc2)c2c1cnn2C  
8374 C=CC(=O)OC1CCCCC1.COc1ccc(I)cc1>>COc1ccc(/C=C/C(=O)OC2CCCCC2)cc1  
8375 C=Cc1ccc(CP(=O)(OCC)OCC)cc1.CCCCCCCCc1cc(C=O)c(CCCCCCCC)cc1Br>>CCCCCCCCc1cc(  
/C=C/c2ccc(CP(=O)(OCC)OCC)cc2)c(CCCCCCCC)cc1C=O  
8376 C=Cc1ccnc1.Cc1cc(N(c2ccc([N+](=O)[O-])cc2)c2ccc([N+](=O)[O-  
)]cc2)ccc1Br>>Cc1cc(N(c2ccc([N+](=O)[O-])cc2)c2ccc([N+](=O)[O-])cc2)ccc1/C=C/c1ccnc1  
8377 Br1ccnc1.C=CC(C)=O>>CC(=O)/C=C/c1ccnc1  
8378 C=CC(=O)OCCCC.CCOC(=O)c1ccc(I)cc1>>CCCCOC(=O)/C=C/c1ccc(C(=O)OCC)cc1  
8379 C=Cc1ccc(OC)c(OC)c1.CC(C)C(=O)Nc1cccc1I>>COc1ccc(/C=C/c2ccccc2NC(=O)C(C)C)cc1OC  
8380 C=C.COc1cccc(I)c1>>C=Cc1cccc(OC)c1  
8381 C=CC(=O)OCC.COc1cc(Br)c(CC2CCC(=O)N(Cc3ccccc3)C2)cc1OC>>CCOC(=O)/C=C\c1cc(OC)c(  
OC)cc1CC1CCC(=O)N(Cc2ccccc2)C1  
8382 C=C(C(=O)OCC)c1cccc1Br.Oc1cccc1I>>CCOC(=O)/C(=C/c1cccc1O)c1cccc1Br  
8383 C=CC(=O)OCC.CCOC(=O)CCOCc1cc(OC)c(OC)c(OC)c1Br>>CCOC(=O)/C=C/c1c(COCCC(=O)OC  
C)cc(OC)c(OC)c1OC  
8384 C=CCOc1ccc(Cl)cc1.Ic1cccc1>>Clc1ccc(OC/C=C/c2ccccc2)cc1  
C=Cc1ccc([N+](=O)[O-  
8385 )]cc1.C[C@H]1CC(=O)Nc2cccc(Br)c2N1>>C[C@H]1CC(=O)Nc2cccc(/C=C/c3ccc([N+](=O)[O-  
)]cc3)c2N1  
8386 C=Cc1cccc1.O=Cc1ccc(Br)s1>>O=Cc1ccc(/C=C/c2ccccc2)s1  
8387 C=C(F)C(=O)OC.FC(F)(F)c1cc(I)cc(C(F)(F)F)c1>>COC(=O)/C(F)=C/c1cc(C(F)(F)F)cc(C(F)(F)F)c1  
8388 BrC1CCCC1.C=Cc1cccc1>>C(=C/C1CCCC1)\c1cccc1  
8389 C=CC(O)c1cccc1Br.COc1ccc(I)c(OC)c1OC>>COc1ccc(/C=C/C(O)c2ccccc2Br)c(OC)c1OC  
8390 C=Cc1ccc2ccccc2c1.Cc1cccc1Br>>Cc1cccc1/C=C/c1ccc2ccccc2c1  
8391 C=CC(=O)O.COc1cc(/C=C/c2ccc(Br)cc2)cc(OC)c1O>>COc1cc(/C=C/c2ccc(/C=C/C(=O)O)cc2)cc(O  
C)c1O  
8392 C=CC(O)c1cccc1.I/C=C/C=C/CCCCOCc1cccc1>>OC(/C=C/C=C/C=C/CCCCOCc1cccc1)c1cccc1



8393 C=CC(=O)O.O=[N+](O-)]c1cccc([I+])c2cccc([N+](=O)[O-]  
8394 C=C1CC(c2ccc(Cl)cc2)OC1=O.Fc1cccc1I>>O=C1OC(c2ccc(Cl)cc2)C/C1=C\c1cccc1F  
8395 Brc1ccc2cccc2c1.C=CN1CCCC1=O>>C=C(c1ccc2cccc2c1)N1CCCC1=O  
8396 C=CCO.COc1ccc2ncc(F)c(I)c2n1>>C=C(CO)c1c(F)cnc2ccc(OC)nc12  
8397 C=CC(=O)OCC.O=S(=O)(Oc1ccc(C(=C2C3CCCC2CCC3)c2ccc(O)cc2)cc1)C(F)(F)F>>CCOC(=O)/C  
=C/c1ccc(C(=C2C3CCCC2CCC3)c2ccc(O)cc2)cc1  
8398 Brc1ccc2ccc3cccc4ccc1c2c34.C=CC(=O)OCC>>CCOC(=O)/C=C/c1ccc2ccc3cccc4ccc1c2c34  
8399 C=CCOc1ccc(OC)cc1.Ic1cccs1>>COc1ccc(OC/C=C/c2cccs2)cc1  
8400 C=CC(=O)OC(C)(C)C.COc1ccc(-c2sc3cc(OC)ccc3c2Oc2ccc(Br)cc2)cc1>>COc1ccc(-  
c2sc3cc(OC)ccc3c2Oc2ccc(/C=C/C(=O)OC(C)(C)C)cc2)cc1  
8401 C=CC(=O)Nc1cccc1.COc1cc2oc(-c3cccc3)c(I)c(=O)c2cc1OC>>COc1cc2oc(-  
c3cccc3)c(/C=C/C(=O)Nc3cccc3)c(=O)c2cc1OC  
8402 C=CC(=O)OC(C)(C)C.O=C(Cc1ccc(Br)cc1)OCc1cccc1>>CC(C)(C)OC(=O)/C=C/c1ccc(CC(=O)OCc  
2cccc2)cc1  
8403 C=C1C(=O)O[C@H]2[C@H]1CC/C(C)=C/CC[C@@]1(C)O[C@H]21.Ic1cnnc1>>C/C1=C\CC[C@  
@@]2(C)O[C@H]2[C@H]2OC(=O)/C(=C/c3cnnc3)[C@@H]2CC1  
8404 C=CC(=O)OC(C)(C)C.COc1c2occc2c(Br)c2ccc(=O)oc12>>COc1c2occc2c(/C=C/C(=O)OC(C)(C)C)c  
2ccc(=O)oc12  
8405 C=CC(=O)N1CCOCC1.Cc1onc(-c2cccc2)c1I>>Cc1onc(-c2cccc2)c1/C=C/C(=O)N1CCOCC1  
8406 C=C.O=C(O)c1ccc(I)cc1>>C=Cc1ccc(C(=O)O)cc1  
8407 C=Cc1ccc(OC)c(OC)c1.CCn1c(=O)c2c(nc(I)n2C)n(CC)c1=O>>CCn1c(=O)c2c(nc(/C=C/c3ccc(OC)c(  
OC)c3)n2C)n(CC)c1=O  
8408 Brc1cccc2cccc12.C=Cc1ccc(C)cc1>>Cc1ccc(/C=C/c2cccc3cccc23)cc1  
8409 Brc1ccc2ccc3cccc4ccc1c2c34.C=Cc1ccc(C(C)(C)C)cc1>>CC(C)(C)c1ccc(/C=C/c2ccc3cccc4cccc5ccc2  
c3c45)cc1  
8410 C=Cc1ccc(OC)cc1.CC(=O)c1ccc(Cl)cc1>>COc1ccc(/C=C/c2ccc(C(C)=O)cc2)cc1  
8411 C=C.O=[N+](O-)]c1cc(Br)cc([N+](=O)[O-])c1>>C=Cc1cc([N+](=O)[O-])cc([N+](=O)[O-])c1  
8412 C=CC(=O)OC(C)(C)C.Cc1cc(Br)cnc1N>>Cc1cc(/C=C/C(=O)OC(C)(C)C)cnc1N  
8413 C=C(C)c1cccc1.Clc1ccc(Br)cc1>>C/C=C\c1ccc(Cl)cc1)c1cccc1  
8414 C=CC(=O)OC.O=C1c2ccc(OS(=O)(=O)C(F)(F)F)cc2C(=O)N1C(c1cccc1)c1cccc1>>COC(=O)/C=C  
/c1ccc2c(c1)C(=O)N(C(c1cccc1)c1cccc1)C2=O  
8415 C=CC(C)(C)O.N#Cc1cccc1Br>>CC(C)(O)/C=C/c1cccc1C#N  
8416 Brc1ccc(I)cc1.C=Cc1ccc(CP(=O)(OC(C)(C)C)OC(C)(C)C)cc1>>CC(C)(C)OP(=O)(Cc1ccc(/C=C/c2cc  
c(Br)cc2)cc1)OC(C)(C)C  
8417 C=Cc1cccc1.O=C(C=P(c1cccc1)(c1cccc1)c1cccc1)c1ccc(I)cc1>>O=C(C=P(c1cccc1)(c1cccc1)c  
1cccc1)c1ccc(/C=C/c2cccc2)cc1  
8418 C=Cc1cccc1.COc1ccc2c(=O)c(I)coc2c1>>COc1ccc2c(=O)c(/C=C/c3cccc3)coc2c1  
8419 C=CCCP(=O)(OC)OC.Cc1ccc(I)cc1>>COP(=O)(CC/C=C/c1ccc(C)cc1)OC  
8420 C=CC(=O)OC(C)(C)C.Cc1ccc(Br)cn1>>Cc1ccc(/C=C/C(=O)OC(C)(C)C)cn1  
8421 C=CCNC(=O)OC(C)(C)C.N#Cc1ccc(Cl)cc1>>C=C(CNC(=O)OC(C)(C)C)c1ccc(C#N)cc1  
8422 C=CC(=O)OC.COc1cc(Br)c(F)cc1[C@H]1c2ccc3c(cnn3C3CCCCO3)c2C[C@H](C)N1CC(C)(F)  
F>>COC(=O)/C=C/c1cc(OC)c([C@H]2c3ccc4c(cnn4C4CCCCO4)c3C[C@H](C)N2CC(C)(F)F)cc  
8423 Brc1ccc(CNc2cccc2)cc1.C=CC(=O)OC(C)(C)C>>CC(C)(C)OC(=O)/C=C/c1ccc(CNc2cccc2)cc1  
8424 C=CCNC(=O)OC(C)(C)C.O=S(=O)(Oc1cc(F)ccc1Cl)C(F)(F)F>>C=C(CNC(=O)OC(C)(C)C)c1cc(F)c  
cc1Cl  
8425 C=CC(=O)CCC.O=[N+](O-)]c1ccc(Br)cc1>>CCCC(=O)/C=C/c1ccc([N+](=O)[O-])cc1  
8426 C=CC(=O)OC.O=S(=O)(c1ccc(F)cc1)N1CCc2cc(Br)cnc21>>COC(=O)/C=C/c1cnc2c(c1)CCN2S(=O)(  
=O)c1ccc(F)cc1  
8427 Brc1cnnc1.C=C>>C=Cc1cnnc1  
8428 C=C(C)C(=O)OC.Clc1cccc(Br)c1>>COC(=O)/C(C)=C/c1cccc(Cl)c1  
8429 C=Cc1ccc(F)cc1.COC(=O)Cn1c(=O)c(Cl)nc2cccc21>>COC(=O)Cn1c(=O)c(/C=C/c2ccc(F)cc2)nc2cc  
ccc21  
8430 C=CC(=O)O.Oc1cccc(I)c1>>O=C(O)/C=C/c1cccc(O)c1  
8431 C=CCP(=O)(OCC)OCC.O=C(O)c1cccc(I)c1>>CCOP(=O)(C/C=C/c1cccc(C(=O)O)c1)OCC  
8432 C=CC(N)=O.Oc1ccc2c(Cc3ccc(Br)cc3)nccc2c1>>NC(=O)/C=C/c1ccc(Cc2nccc3cc(O)ccc23)cc1  
8433 C=CC(=O)OCC.O=S(=O)(Nc1cccc1)c1cccc(Br)c1>>CCOC(=O)/C=C/c1cccc(S(=O)(=O)Nc2cccc2)  
8434 C=Cc1c(C)cc(C)cc1C.Cc1cc(C)c(Cl)c(C)c1>>Cc1cc(C)c(/C=C/c2c(C)cc(C)cc2C)c(C)c1  
8435 C=CN1CCCC1=O.CCOC(=O)C(F)(F)Br>>CCOC(=O)C(F)(F)/C=C/N1CCCC1=O  
8436 C=CC(=O)OCC.CCc1nc2cc(OC)ccc2c(Oc2cccc(Br)c2)c1-c1cccc1>>CCOC(=O)/C=C/c1cccc(Oc2c(-  
c3cccc3)c(CC)nc3cc(OC)ccc23)c1

8437 C=Cc1cc(OC)c(OC)c(OC)c1.COc1cccc(I)cc1>>COc1cccc(/C=C/c2cc(OC)c(OC)c(OC)c2)cc1

8438 BrC1cnc2[nH]ncc2c1.C=CC(=O)N(C)Cc1cc2cccc2n1C>>CN(Cc1cc2cccc2n1C)C(=O)/C=C/c1cnc2[nH]ncc2c1

8439 C=C(NC(=O)OC(C)(C)C)C(=O)OC.CC(=O)OCc1cc(OCc2cccc2)ccc1I>>COC(=O)/C(=C/c1ccc(OCc2cccc2)cc1COC(C)=O)NC(=O)OC(C)(C)C

8440 C=CC(=O)OCC.Cc1nc(N)nc(NC2CCOC2)c1I>>CCOC(=O)/C=C/c1c(C)nc(N)nc1NC1CCOC1

8441 C=CC(=O)NCCc1ccc(O)cc1.COc1cc(I)ccc1O>>COc1cc(/C=C/C(=O)NCCc2ccc(O)cc2)ccc1O

C=Cc1cccc(S(=O)(=O)N(Cc2ccc(OC)cc2)C2ccc(OC)cc2)c1-

8442 c1nnn(Cc2ccc(OC)cc2)n1.CC(C)(C)OC(=O)Nc1ccc(Br)cn1>>COc1ccc(CN(Cc2ccc(OC)cc2)S(=O)(=O)c2cccc(/C=C/c3ccc(NC(=O)OC(C)(C)C)nc3)c2-c2nnn(Cc3ccc(OC)cc3)n2)cc1

8443 C=CC(=O)OC(C)(C)C.CC(C)(C)c1cc(Cl)c2cccc2n1>>CC(C)(C)OC(=O)/C=C/c1cc(C(C)(C)C)nc2cccc12

8444 C=CNC(=O)Cc1cccc1.O=S(=O)(Oc1ccc2cccc2c1)C(F)(F)F>>C=C(NC(=O)Cc1cccc1)c1ccc2cccc

8445 C=COCCO.CC(=O)c1ccc(Br)cc1>>C=C(OCCO)c1ccc(C(C)=O)cc1

8446 C=CC(=O)OC(C)(C)C.CCOC(=O)N1CCC2(CC1)CC(=O)c1cc(Br)ccc1O2>>CCOC(=O)N1CCC2(CC1)CC(=O)c1cc(/C=C/C(=O)OC(C)(C)C)ccc1O2

8447 C=CCCCCCC.CC(=O)c1ccc(Br)cc1>>C=C(CCCCCC)c1ccc(C(C)=O)cc1

8448 C=C.Cc1ccc([C@@H](C)CCO)c(Br)c1>>C=Cc1cc(C)ccc1[C@@H](C)CCO

8449 C=CC(=O)OC.COC(=O)/C=C/c1cc(Cl)cc2c(=O)cc(-c3cccc3)oc12>>COC(=O)/C=C/c1cc(/C=C/C(=O)OC)c2oc(-c3cccc3)cc(=O)c2c1

8450 C=C(I)C(C)(C)OCCc1cccc1.C=CC(=O)OCC>>C=C(/C=C/C(=O)OCC)C(C)(C)OCCc1cccc1

8451 C=CCOc1ccc(CCNc(=O)OC(C)(C)C)cc1.CC(C)N(CC[C@H](c1cccc1)c1cc(Br)ccc1OCc1cccc1)C(C)C>>CC(C)N(CC[C@H](c1cccc1)c1cc(/C=C/COc2ccc(CCNc(=O)OC(C)(C)C)cc2)ccc1OCc1cccc

8452 C=C1CC(c2ccc(C)cc2)OC1=O.Fc1cccc1I>>Cc1ccc(C2C/C(=C/c3cccc3F)C(=O)O2)cc1

8453 C=Cc1cccc1.O=Cc1ccc(Br)c1>>O=Cc1ccc(/C=C/c2cccc2)c1

8454 C=Cc1cccc1.CC(C)(C)c1ccc(OS(=O)(=O)C(F)(F)F)c1>>C=C(c1cccc1)c1ccc(C(C)(C)C)c1

8455 C=CN1CCCC1=O.FC(F)(Br)c1nc2cccc2o1>>O=C1CCCN1/C=C/C(F)(F)c1nc2cccc2o1

8456 C=Cc1ccc(C=O)cc1.CCN(CC)/N=N/c1ccc(I)cc1>>CCN(CC)/N=N/c1ccc(/C=C/c2ccc(C=O)cc2)cc1

8457 C=CC(=O)OC.CC(=O)Nc1ccc(Br)cc1>>COC(=O)/C=C/c1ccc(NC(C)=O)cc1

8458 C=CC(=O)CC.Cc1ccc(Br)cc1>>CCC(=O)/C=C/c1ccc(C)cc1

8459 C=CS(=O)(=O)F.O=S(=O)(Nc1ccc(I)cc1)(Oc1cccc1)N1CCCC1>>O=S(=O)(F)/C=C/c1ccc(N=S(=O)(Oc2cccc2)N2CCCC2)cc1

8460 C=CC(CCCCCCCC(=O)OC)OC1CCCCO1.CCC1=C(I)CCC1=O>>CCC1=C(/C=C/C(CCCCCCCC(=O)OC)OC2CCCCO2)CCC1=O

8461 C=CC(C)(C)C.O=c1oc2cccc2cc1Br>>CC(C)(C)/C=C/c1cc2cccc2oc1=O

8462 C=CC(=O)OCCCC.CC(=O)OC[C@H]1O[C@H](n2cnc3c(Cl)nc(I)nc32)[C@H](OC(C)=O)[C@@H]1OC(C)=O>>CCCCOC(=O)/C=C/c1nc(Cl)c2ncn([C@H]3O[C@H](COC(C)=O)[C@H](OC(C)=O)[C@H]3OC(C)=O)c2n1

8463 C=Cc1cc(OCc2cccc2)c(OCc2cccc2)nn1.FC(F)(F)c1ccc(Cl)cc1C(F)(F)F>>FC(F)(F)c1ccc(/C=C/c2cc(OCc3cccc3)c(OCc3cccc3)nn2)cc1C(F)(F)F

8464 C=Cc1ccc(C(=O)OCC)cc1.CC1(C)CC=C(Sc2cccc2)c2cc(Br)ccc21>>CCOC(=O)c1ccc(/C=C/c2ccc3c(c2)C(Sc2cccc2)=CCC3(C)C)cc1

8465 C=CC(=O)OC(C)(C)C.COC(=O)c1cc2c(Oc3ccc(Br)cc3)cncc2s1>>COC(=O)c1cc2c(Oc3ccc(/C=C/C(=O)OC(C)(C)C)cc3)cncc2s1

8466 C=CCC(C)N(C)C(=O)OC(C)(C)C.Cc1cc(Br)cn1N>>Cc1cc(/C=C/CC(C)N(C)C(=O)OC(C)(C)C)cn1

8467 C=CCC(=O)OC.Cc1ccc(CNc2ccc3c(Br)cccc3n2)o1>>COC(=O)C/C=C/c1cccc2nc(NCc3ccc(C)o3)ccc

C=Cc1ccc(/C=C/c2cc(CCCCCC)c(C=O)cc2CCCCC)cc1.CCCCCCc1cc(/C=C/c2ccc(C)cc2)c(CCCCCC)c1Br>>CCCCCCc1cc(/C=C/c2ccc(/C=C/c3cc(CCCCCC)c(/C=C/c4ccc(C)cc4)cc3CCCCC)cc2)c(CCCCCC)cc1C=O

8468 C=Cc1en(C(c2cccc2)(c2cccc2)c2cccc2)cn1.CS(=O)(=O)N1CCC(C2c3ccc(Cl)cc3C=C(Br)c3cccn32)CC1>>CS(=O)(=O)N1CCC(C2c3ccc(Cl)cc3C=C(/C=C/c3cn(C(c4cccc4)(c4cccc4)c4cccc4)cn3)c3cccn32)CC1

8470 BrC1cccc1.C=C(CP(=O)(OCC)OCC)C(=O)OCC>>CCOC(=O)/C(=C/c1cccc1)CP(=O)(OCC)OCC

8471 BrC1cc2cccc2c2cccc12.C=C[C@H](CO[Si](C)(C)C(C)C)NC(=O)OCc1cccc1>>CC(C)(C)[Si](C)(C)OC[C@H](/C=C/c1cc2cccc2c2cccc12)NC(=O)OCc1cccc1

8472 C=CC(=O)OCC.Cc1ccc(Oc2ccc(Br)c2)c1>>CCOC(=O)/C=C/c1cccc(Oc2ccc(C)c2)c1

8473 C=CCCC(=O)CCCC[Se]c1cccc1.Ic1cccc1>>O=C(CC/C=C/c1cccc1)CCCC[Se]c1cccc1

8474 C=Cc1cnc1.CCNc1ccc(C(c2ccc(Br)cc2)c2ccc(NCC)cc2)cc1>>CCNc1ccc(C(c2ccc(/C=C/c3ccncc3)c2)c2ccc(NCC)cc2)cc1

8475 C=CC(=O)OCC.O=[N+][O-]c1cc(Cl)ccc1Br>>CCOC(=O)/C=C/c1ccc(Cl)cc1[N+](=O)[O-]

8476 C=CC(=O)OCc1ccccc1.Cc1oc(-c2ccccc2)cc1CCOc1ccnc2c(Cl)cccc12>>Cc1oc(-c2ccccc2)cc1CCOc1ccnc2c(/C=C/C(=O)OCc3ccccc3)cccc12  
C=CC(=O)OC.CN(C)c1ccc(-  
8477 c2ccc(CN(C(=O)C3CCOCC3)c3cc(Br)ccn3)cc2)cc1>>COC(=O)/C=C/c1ccnc(N(Cc2ccc(-c3ccc(N(C)C)cc3)cc2)C(=O)C2CCOCC2)c1  
8478 C=CC(=O)OC.CC(=O)O[IH2](OC(C)=O)c1ccccc1>>COC(=O)/C=C/c1ccccc1  
8479 C=CB1OC(C)CC(C)(C)O1.O=[N+][([O-])c1ccc(I)cc1>>CC1CC(C)(C)OB(/C=C/c2ccc([N+](=O)[O-])cc2)O1  
8480 C=CNC(C)=O.CCOC(=O)/C=C(\C)OS(=O)(=O)C(F)(F)F>>C=C(NC(C)=O)/C(C)=C/C(=O)OCC  
8481 Br1ccc(I)cc1.C=CC(=O)OCC>>CCOC(=O)/C=C/c1ccc(Br)cc1  
8482 C=Cc1ccc(F)cc1.CC(=S)NS(=O)(=O)c1ccc(Br)cc1>>CC(=S)NS(=O)(=O)c1ccc(/C=C/c2ccc(F)cc2)cc1  
8483 Br1ccc2c(cnn2C2CCCCO2)c1.C=CC(=O)OCC>>CCOC(=O)/C=C/c1ccc2c(cnn2C2CCCCO2)c1  
8484 C=Cc1ccc2c(c1)Sc1ccccc1N2CC.CCn1c2ccccc2c2cc(Br)ccc21>>CCN1c2ccccc2Sc2cc(/C=C/c3ccc4c(c3)c3ccccc3n4CC)ccc21  
8485 Br1cnc2ccccc2c1.C=Cc1ccc(C(C)=O)cc1>>CC(=O)c1ccc(/C=C/c2cnc3ccccc3c2)cc1  
8486 C=CC(=O)OC.CC(C)c1ccc(I)cc1>>COC(=O)/C=C/c1ccc(C(C)C)cc1  
8487 Br1ccccc1.C=C(NC(=O)OC(C)(C)C)C(=O)OCc1ccccc1>>CC(C)(C)OC(=O)N/C(=C\c1ccccc1)C(=O)OCc1ccccc1  
8488 C=Cc1cncnc1.Cc1ccc(Br)cc1>>Cc1ccc(/C=C/c2cncnc2)cc1  
8489 C=Cc1cc(OC(C)=O)cc(OC(C)=O)c1.O=[N+][([O-])c1ccc(I)cc1>>CC(=O)Oc1cc(/C=C/c2ccc([N+](=O)[O-])cc2)cc(OC(C)=O)c1  
8490 C=CC(N)=O.FC(F)(F)c1ccc(I)c(Cl)c1>>NC(=O)/C=C/c1ccc(C(F)(F)F)cc1Cl  
8491 C=CC(=O)OC.C=CC[C@H](O)c1ccccc(Br)c1>>C=CC[C@H](O)c1ccccc(/C=C/C(=O)OC)c1  
8492 C=Cc1ccccc1C.Nc1ccccc1Br>>Cc1ccccc1/C=C/c1ccccc1N  
8493 C=Cc1ccc(OC)c(OC)c1.Cc1nc(Br)c2c(c1O)COC(C)(C)OC2>>COc1ccc(/C=C/c2nc(C)c(O)c3c2COC(C)(C)OC3)cc1OC  
8494 C=Cc1nc2c(N)nnc2n1[C@H]1C[C@H](O[Si](C)(C)C(C)(C)C)[C@H](CO[Si](C)(C)C(C)(C)C)O1.Cc1ccccc1Br>>Cc1ccccc1/C=C/c1nc2c(N)nnc2n1[C@H]1C[C@H](O[Si](C)(C)C(C)(C)C)[C@H](CO[Si](C)(C)C(C)(C)C)O1  
8495 C=Cc1ccc(C(=C(c2ccccc2)c2ccccc2)cc1.CCCCN1C(=O)c2cccc3cc(Br)cc(c23)C1=O>>CCC  
8496 C=Cc1ccc(N)c1.CN(C(=O)c1ccccc1)c1ccc2c(c1)[nH]c(=NC(=O)c1ccc(Br)s1)n2CCC(N)=O>>CN(C(=O)c1ccccc1)c1ccc2c(c1)[nH]c(=NC(=O)c1ccc(/C=C/c3ccccc(N)c3)s1)n2CCC(N)=O  
8497 C=Cc1ccccc1.CN1C[C@H]2C[C@H](Cn3c2ccc(Br)c3=O)C1=O>>CN1C[C@H]2C[C@H](Cn3c2ccc(/C=C\c2ccccc2)c3=O)C1=O  
8498 C=CC(F)(F)F.Cl1ccccc1Br>>FC(F)(F)/C=C/c1ccccc1Cl  
8499 C=Cc1ccc2ccccc2c1.CCCCC(Br)C(F)(F)F>>CCCCC(/C=C/c1ccc2ccccc2c1)C(F)(F)F  
8500 C=Cc1ccc2c(c1)c1ccc(/C=C/c3ccc(N(c4ccccc4)c4ccccc4)cc3)cc1n2CCCCCCCC.CCCCCCCn1c2ccc(I)cc2c2cc(C=O)ccc21>>CCCCCCCCn1c2ccc(C=O)cc2c2cc(/C=C/c3ccc4c(c3)c3ccc(/C=C/c5ccc(N(c6ccccc6)c6ccccc6)cc5)cc3n4CCCCCCCC)ccc21  
8501 C=Cc1ccc(OC(C)(C)C)cc1.FC(F)(F)C(F)(F)C(F)(F)C(F)(F)C(F)(F)C(F)(F)Br>>CC(C)(C)Oc1ccc(/C=C/C(F)(F)C(F)(F)C(F)(F)C(F)(F)C(F)(F)C(F)(F)F)cc1  
8502 C=CC(=O)OC.CC(C)(C)c1cc(Br)cc(C=O)c1O>>COC(=O)/C=C/c1cc(C=O)c(O)c(C(C)(C)C)c1  
8503 C=CC(=O)OCC.Fc1cc(Br)ccc1I>>CCOC(=O)/C=C/c1ccc(Br)cc1F  
8504 C=CCCC#N.CC(C)(C)c1ccc(Br)cc1>>C=C(CCCC#N)c1ccc(C(C)(C)C)cc1  
8505 C=CC(=O)OC(C)(C)C.Cc1ccc(CNC(=O)c2cc(Br)cc(I)c2)cc1>>Cc1ccc(CNC(=O)c2cc(Br)cc(/C=C/C(=O)OC(C)(C)C)c2)cc1  
8506 C=CC(=O)OC.FC(F)(F)c1cc(Cl)ccc1I>>COC(=O)/C=C/c1ccc(Cl)cc1C(F)(F)F  
8507 C=Cc1ccc(C(=O)OC)cc1.COc1ccc(Cn2nc(I)c3c(NC4CCCCC4)nccc32)cc1>>COC(=O)c1ccc(/C=C/c2nn(Cc3ccc(OC)cc3)c3cnc(NC4CCCCC4)c23)cc1  
8508 C=CC(=O)c1ccc(OC)cc1OC.COc1cc(OC)c(OC)cc1I>>COc1ccc(C(=O)/C=C/c2cc(OC)c(OC)cc2OC)c(OC)c1  
8509 C=CC(=O)C(C)COCc1ccccc1.Ic1ccccc1>>CC(COCc1ccccc1)C(=O)/C=C/c1ccccc1  
8510 Br1ccc(I)cc1.C=Cc1ccc(C(C)(C)C)cc1>>CC(C)(C)c1ccc(/C=C/c2ccc(Br)cc2)cc1  
8511 C=CC(=O)OCC.COc1cc(Br)cc(OC)c1>>CCOC(=O)/C=C/c1cc(OC)cc(OC)c1  
8512 C=Cc1cncnc1.CC(C)(C)OC(=O)N[C@H](COc1ccccc(Br)c1)Cc1c[nH]c2ccccc12>>CC(C)(C)OC(=O)N[C@H](COc1ccccc(/C=C/c2cncnc2)c1)Cc1c[nH]c2ccccc12  
8513 C=CC(=O)OC.COc1ccc2c(c1)CCN(c1ccccc(F)c1)C2(C)c1ccc(Br)cc1>>COC(=O)/C=C/c1ccc(C2(C)c3ccc(OC)cc3CCN2c2ccccc(F)c2)cc1  
8514 C=CC(=O)OC.C[C@H](c1ccccc1)N1C(=O)c2ccc(OS(=O)(=O)C(F)(F)F)cc2C1=O>>COC(=O)/C=C/c1ccc2c(c1)C(=O)N([C@H](C)c1ccccc1)C2=O

8515 C=CC(=O)OC.COc1ccc2c(c1)CCN(c1ccc(C)c(F)c1)C2(C)c1ccc(Br)cc1>>COC(=O)/C=C/c1ccc(C2(C)c3ccc(OC)cc3CCN2c2ccc(C)c(F)c2)cc1  
8516 C=CC1CC(=O)N1.Cc1ccccc1I>>Cc1ccccc1/C=C/C1CC(=O)N1  
8517 C=Cc1ccccc1.Cc1ccc(Br)c(N)c1>>Cc1ccc(/C=C/c2ccccc2)c(N)c1  
8518 C=CC(=O)[C@@]1(O)C[C@H]2CC[C@]1(C)C2(C)C.Ic1ccccc1>>CC1(C)[C@@H]2CC[C@@]1(C)[C@@](O)(C(=O)/C=C/c1ccccc1)C2  
8519 C=CC(=O)OC(C)(C)C.CC(=O)c1ccc(Br)cc1>>CC(=O)c1ccc(/C=C/C(=O)OC(C)(C)C)cc1  
8520 C=COCCCC.COc1cccc(C(=O)Cl)c1>>CCCCO/C=C/C(=O)c1cccc(OC)c1  
8521 C=CC(=O)OC.O=C1c2ccc(OS(=O)(=O)C(F)(F)F)cc2C(=O)N1CCc1ccccc1>>COC(=O)/C=C/c1ccc2c(c1)C(=O)N(CCc1ccccc1)C2=O  
8522 N#C/C=C/c1ccccc1.Oc1cccc(I)c1>>N#C/C=C(/c1ccccc1)c1cccc(O)c1  
8523 C=CC(C)(C)C.FC(F)(F)c1ccc(Br)cc1>>CC(C)(C)/C=C/c1ccc(C(F)(F)F)cc1  
8524 C=CC(=O)OCCCC.COc1ccc(Br)c(NC(=O)C(C)(C)C)n1>>CCCCOC(=O)/C=C/c1ccc(OC)nc1NC(=O)C(C)(C)C  
8525 C=Cc1ccccc1.CCC(OC)(C(=O)OC)c1cc2n(c(=O)c1OS(=O)(=O)C(F)(F)F)CCC2>>CCC(OC)(C(=O)OC)c1cc2n(c(=O)c1/C=C/c1ccccc1)CCC2  
8526 C=Cc1ccccc1.CC(C)c1ccc(I)cc1>>CC(C)c1ccc(/C=C/c2ccccc2)cc1  
8527 C=CC(=O)OCCCC.Nc1nc2c(c(I)cn2[C@H]2C[C@H](O)[C@@H](CO)O2)c(=O)[nH]1>>CCCCOC(=O)/C=C/c1cn([C@H]2C[C@H](O)[C@@H](CO)O2)c2nc(N)[nH]c(=O)c12  
8528 C=Cc1ccc(C(=O)OC[C@H]2O[C@H]3OC(C)(C)O[C@H]3OC(C)(C)O[C@H]32)cc1.CCOC(=O)C(F)Br>>CCOC(=O)C(F)/C=C/c1ccc(C(=O)OC[C@H]2O[C@H]3OC(C)(C)O[C@H]3[C@H]3OC(C)(C)O[C@H]32)cc1  
8529 C=Cc1ccc(C)cc1.Cn1cccc1-c1ccc(Br)c1>>Cc1ccc(/C=C/c2cccc(-c3cnnc3C)c2)cc1  
8530 C=CC(=O)OCC.CCOC(=O)C1=C(C)N(c2cccc(C(F)(F)F)c2)C(=O)N(Cc2cccc(Br)c2)C1c1ccc(C#N)cc1>>CCOC(=O)/C=C/c1cccc(CN2C(=O)N(c3cccc(C(F)(F)F)c3)C(C)=C(C(=O)OCC)C2c2ccc(C#N)cc2  
8531 C=CC(=O)N1C(=O)OC[C@@H]1Cc1ccccc1.[C@H](C)(C)CN(Cc1cc2c(cc1/C=C/C(=O)N1C(=O)OC[C@@H]1Cc1ccccc1)OCO2)C(CC1OCCO1)[Si](C)(C)C>>[C@H](C)(C)CN(Cc1cc2c(cc1/C=C/C(=O)N1C(=O)OC[C@@H]1Cc1ccccc1)OCO2)C(CC1OCCO1)[Si](C)(C)C  
8532 Br1ccccc1.COC[C@@H](/N=C(\c1ccccc1)N1C=CCC[C@H]1C)C(C)C>>COC[C@@H](/N=C(\c1ccccc1)N1C=C(c2ccccc2)CC[C@H]1C)C(C)C  
8533 C=CC(=O)OC.O=C(c1ccc(Br)cc1)C1CC1>>COC(=O)/C=C/c1ccc(C(=O)C2CC2)cc1  
8534 C=CCS(=O)(=O)c1ccccc1.c1ccc([I+](c2ccccc2)cc1)>>O=S(=O)(C/C=C/c1ccccc1)c1ccccc1  
8535 C=CC(=O)OCCCC.O=Cc1ccc(Cl)cc1>>CCCCOC(=O)/C=C/c1ccc(C=O)cc1  
8536 C=C1CC(c2ccc(Cl)cc2)OC1=O.CC(C)(C)c1ccc(I)cc1>>CC(C)(C)c1ccc(/C=C2\CC(c3ccc(Cl)cc3)OC2=O)cc1  
8537 C=C1CC(c2ccc(C)cc2)OC1=O.Cc1cccc(I)c1>>Cc1ccc(C2C/C(=C\c3ccccc(C)c3)C(=O)O2)cc1  
8538 Br1ccccc1.C=CCCC(=O)CC(=O)OC>>COC(=O)CC(=O)CC/C=C/c1ccccc1  
8539 C=CC#N.N#Cc1c(-c2cccc(Br)c2)cc(-c2ccccc2)nc1N>>N#C/C=C/c1ccccc(-c2ccc(-  
8540 C=CC(=O)C(C)C.COc1ccc2cc(Br)ccc2c1>>COc1ccc2cc(/C=C/C(=O)C(C)C)ccc2c1  
8541 C=CCCCCCC.CC(=O)Nc1ccccc1OS(=O)(=O)C(F)(F)F>>C=C(CCCCCC)c1ccccc1NC(C)=O  
8542 Br1ccc(N2CCCCC2)c2nsnc12.C=Cc1ccccc1>>C(=C/c1ccc(N2CCCCC2)c2nsnc12)\c1ccccc1  
8543 Br1cccn2nnnc12.C=Cc1ccc(C(C)(C)C)cc1>>CC(C)(C)c1ccc(/C=C/c2cccn3nnnc23)cc1  
8544 C=CCOC(C)(C)CCCC(C)C=C.COc1cc(I)ccc1O>>C=CC(C)CCCC(C)(C)OC/C=C/c1ccc(O)c(OC)c1  
8545 C=Cc1ccccc1.CC(C)(C)Br>>CC(C)(C)/C=C/c1ccccc1  
8546 C=CC(=O)OCC.Cc1ccc(C#C/C=C/c2ccc(Br)cc2)cc1>>CCOC(=O)/C=C/c1ccc(/C=C/C#Cc2ccc(C)cc2  
8547 C=CC(=O)OCC(CC)CCCC.FC(F)(F)c1ccc(Cl)cc1>>CCCC(CC)COC(=O)/C=C/c1ccc(C(F)(F)F)cc1  
8548 Br1ccoc1.C=CB1OC(C)CC(C)(C)O1>>CC1CC(C)(C)OB(/C=C/c2ccoc2)O1  
8549 C=Cc1ccc(O)cc1.Oc1ccc(O)c(I)c1>>Oc1ccc(/C=C/c2ccc(O)ccc2O)cc1  
8550 C=Cc1ccc(C)cc1.CN(C)c1ccc(Cl)cc1>>Cc1ccc(/C=C/c2ccc(N(C)C)cc2)cc1  
8551 C=Cc1cccs1.Cc1nnc2c1c(I)cn2[C@@H]1O[C@H](CO)[C@@H](O)[C@@]1(C)F>>Cc1nnc2c1c(/C=C/c1cccs1)cn2[C@@H]1O[C@H](CO)[C@@H](O)[C@@]1(C)F  
8552 C=CC(=O)O.O=S(=O)(Nc1ccc(I)cc1)c1ccccc2cccn12>>O=C(O)/C=C/c1ccc(NS(=O)(=O)c2ccccc3cccn23)cc1  
8553 Br1ccc2ccccc2c1.C=CC[C@H]1CCCN(C)C[C@H](OC(C)=O)[C@H](C)C[C@H](CC(OC)OC)[C@H](O)[C@@H]2O[C@H](C)[C@@H](O)[C@H]3C[C@@](C)(O)[C@@H](OC(=O)CC)[C@H](C)O3)[C@H](N(C)C)[C@H]2OC(C)=O)[C@@H](OC)[C@H](OC(=O)CC)CC(=O)O1>>CCC(=O)O[C@H]1[C@H](C)O[C@@H](O)[C@H]2[C@H](N(C)C)[C@@H](OC(C)=O)[C@H](O)[C@H]3[C@H](OC)[C@H](OC(=O)CC)CC(=O)O[C@@H](C/C=C/c4cccc5ccccc5c4)CCCN(C)C[C@H](OC(C)=O)[C@H](C)C[C@H](OC(=O)CC)CC(=O)O[C@@H](C/C=C/c2(O)CCC2)c1  
8554 C=CC1(O)CCC1.Cc1ccccc(I)c1>>Cc1ccccc(/C=C/C2(O)CCC2)c1  
8555 C=C.CC(=O)Nc1ccc(C)cc1Br>>C=Cc1cc(C)ccc1NC(C)=O

8556 C=CC#N.Oc1ccnc2ccc(Br)cc12>>N#C/C=C/c1ccc2nccc(O)c2c1  
8557 C=CC(=O)O.O=[N+](O-)]c1c(I)ccc2c1C=CC1(CCCC1)O2>>O=C(O)/C=C/c1ccc2c(c1[N+](=O)[O-])C=CC1(CCCC1)O2  
8558 C=CC(=O)OC(C)(C)C.N#Cc1ccc(Cl)cc1>>CC(C)(C)OC(=O)/C=C/c1ccc(C#N)cc1  
8559 C=Cc1ccc(OC)cc1.COc1ccc(Oc2cc(Cl)ccc2NC[C@@H]2CCCN2C(=O)OC(C)(C)C)cc1>>COc1ccc(/C=C/c2ccc(NC[C@@H]2CCCN3C(=O)OC(C)(C)C)c(Oc3ccc(OC)cc3)c2)cc1  
8560 C=CC(=O)OCC.COc1ccc(Cn2nc(I)c3ccnc32)cc1>>CCOC(=O)/C=C/c1nn(Cc2ccc(OC)cc2)c2ncccc12  
8561 C=CC(=O)OC.COc1nc(C)c(I)c(OC)n1>>COC(=O)/C=C/c1c(C)nc(OC)nc1OC  
8562 C=CC(=O)O.N[C@@H](Cc1c[nH]c2c(I)cccc12)C(=O)O>>N[C@@H](Cc1c[nH]c2c(/C=C/C(=O)O)c3ccc12)C(=O)O  
8563 C=C[Si](CC)(CC)CC.COCC(=O)c1cccc1Br>>CC[Si](/C=C/c1cccc1C(=O)OC)(CC)CC  
8564 C=Cc1cccc1.Oc1ccc2cccc2c1Br>>Oc1ccc2cccc2c1/C=C/c1cccc1  
8565 C=CC(=O)OC.CCOC(=O)c1cc(Br)c2cc(Cc3ccc(F)cc3)ccc2c1OC>>CCOC(=O)c1cc(/C=C/C(=O)OC)c2cc(Cc3ccc(F)cc3)ccc2c1OC  
8566 C=CC(=O)N(C)C.C[C@]12C[C@@]34C=C(Sc5ccc(I)cc5)C(=O)[C@@](C)(CCC(=O)Nc5c(O)ccc(C(=O)O)c5O)[C@@H]3[C@H](C[C@@H]1C4)O2>>CN(C)C(=O)/C=C/c1ccc(SC2=C[C@]34C[C@H]5C[C@H](O[C@@]5(C)C3)[C@H]4[C@](C)(CCC(=O)Nc3c(O)ccc(C(=O)O)c3O)C2=O)cc1  
8567 C=C(C)[C@H](C(=O)OC)N1C(=O)c2cccc2C1=O.Ic1cccc1>>COC(=O)[C@H](/C(C)=C/c1cccc1)N1C(=O)c2cccc2C1=O  
8568 C=Cc1cc(OC(C)=O)cc(OC(C)=O)c1.CC(=O)Oc1ccc(Br)cc1>>CC(=O)Oc1ccc(/C=C/c2cc(OC(C)=O)c(OC(C)=O)c2)cc1  
8569 C=Cc1sc(C=O)c2c1OCCO2.CCN(CC)/N=N/c1ccc(I)cc1>>CCN(CC)/N=N/c1ccc(/C=C/c2sc(C=O)c3c2OCCO3)cc1  
8570 C=Cc1cccc1.C[Si](C)(C)CCOCn1nc(I)c2ccc(C=O)cc21>>C[Si](C)(C)CCOCn1nc(/C=C/c2cccc2)c2ccc(C=O)cc21  
8571 C=CC(=O)OCC.COc1cc(I)c2c3c1O[C@@H]1[C@]34CCN(C)[C@H](C2)[C@]42C=C[C@@]1(OC)c1c(O)ccc(O)c12>>CCOC(=O)/C=C/c1cc(OC)c2c3c1C[C@H]1N(C)CC[C@@]34[C@@H](O2)[C@@]2(OC)C=C[C@@]14c1c(O)ccc(O)c12  
8572 C=COCCCC.O=S(=O)(Oc1ccc2c(c1)OCO2)C(F)(F)F>>C=C(OCCCC)c1ccc2c(c1)OCO2  
8573 Br1enc2cccc2c1.C=CCN1C(=O)c2cccc2C1=O>>O=C1c2cccc2C(=O)N1C/C=C/c1enc2cccc2c1  
8574 C=Cc1ccc(OC)cc1OC.Nc1cccc(I)c1>>COc1ccc(/C=C/c2cccc(N)c2)c(OC)c1  
8575 C=Cc1ccc(C(F)(F)F)cc1.CCOC(=O)C(F)I>>CCOC(=O)C(F)/C=C/c1ccc(C(F)(F)F)cc1  
8576 C=CC[C@@H]1CCc2cccc2N1C.COc1ccc(Br)cc1OC>>COc1ccc(/C=C/C[C@@H]2CCc3cccc3N2C)cc1OC  
8577 Br1ccc2c(c1)OCO2.C=CCN1C(=O)c2cccc2C1=O>>O=C1c2cccc2C(=O)N1C/C=C/c1ccc2c(c1)OC  
8578 C=Cc1ccc(OC)cc1.COc1ccc(C=O)c(Br)c1>>COc1ccc(/C=C/c2cc(OC)ccc2C=O)cc1  
8579 C=C(NC(C)=O)C(=O)OC.CC(=O)Oc1cc(C(C)C)c(I)c(C(C)C)c1>>COC(=O)/C=C/c1c(C(C)C)cc(OC(C)=O)cc1C(C)C)NC(C)=O  
8580 C=CC(=O)OCCCC.OCc1cccc(I)c1>>CCCCOC(=O)/C=C/c1cccc(CO)c1  
8581 C=CC#N.Cc1ccc(Br)cc1>>Cc1ccc(/C=C/C#N)cc1  
8582 C=CC(C)=O.IC1CCCCC1>>CC(=O)/C=C/C1CCCCC1  
8583 C=CC(=O)OC(C)(C)C.Fc1cc(F)cc(Br)c1>>CC(C)(C)OC(=O)/C=C/c1cc(F)cc(F)c1  
8584 CC(=O)/C=C/CC(NS(=O)(=O)c1ccc(C)cc1)c1cccc1.CC(=O)c1cccc(Br)c1>>CC(=O)/C=C/CC(NS(=O)(=O)c1ccc(C)cc1)c1cccc1)c1cccc(C(C)=O)c1  
8585 C=Cc1ncc(N)cn1.CN(C(=O)c1cccc1)c1ccc2c(c1)[nH]c(=NC(=O)c1ccc(Br)s1)n2CCC(N)=O>>CN(C(=O)c1cccc1)c1ccc2c(c1)[nH]c(=NC(=O)c1ccc(/C=C/c3ncc(N)cn3)s1)n2CCC(N)=O  
8586 C=Cc1ccc(C(=O)OC)cc1.CCOC(=O)C(F)(F)Br>>CCOC(=O)C(F)(F)/C=C/c1ccc(C(=O)OC)cc1  
8587 C=CC(=O)OC(C)(C)C.Cc1nn(C)c(C)c1Br>>Cc1nn(C)c(C)c1/C=C/C(=O)OC(C)(C)C  
8588 C=CC(=O)OC.Cc1ccc2nc3c(cc2c1)c(I)c(-c1cccc1)c1sccc13>>COC(=O)/C=C/c1c(-c2cccc2)c2sccc2c2nc3ccc(C)cc3cc12  
8589 C=CC(=O)OC.COc1ccc2c(c1)c(I)nn2Cc1cccc1>>COC(=O)/C=C/c1nn(Cc2cccc2)c2ccc(OC)cc12  
8590 C=Cc1ccc(C(=O)O)cc1.CC(=O)c1ccc(Br)cc1>>CC(=O)c1ccc(/C=C/c2ccc(C(=O)O)cc2)cc1  
8591 C=CC(=O)OCC.FC(F)(F)c1cn2c(Br)cccc2n1>>CCOC(=O)/C=C/c1ccc2nc(C(F)(F)F)cn12  
8592 C=C(C)C(=O)OC(C)(C)C.N#Cc1ccc(Br)cc1N>>C/C=C\c1ccc(C#N)c(N)c1C(=O)OC(C)(C)C  
8593 C=Cc1cccc1.COC(=O)C(Cc1cccc1I)C(=O)OC>>COC(=O)C(Cc1cccc1/C=C/c1cccc1)C(=O)OC  
8594 C=Cc1cccc1.CNc1cccc1I>>CNc1cccc1/C=C/c1cccc1  
8595 C=Cc1cccc1.COc1ccc(/C=C/C(=O)c2ccc(Br)cc2)cc1>>COc1ccc(/C=C/C(=O)c2ccc(/C=C/c3cccc3)c2)cc1  
8596 C=CCCC(=O)O.Ic1cccc1>>O=C(O)CC/C=C/c1cccc1  
8597 C=CC(=O)OCC.Cc1cc(I)nc(C(C)C)n1>>CCOC(=O)/C=C/c1cc(C)nc(C(C)C)n1  
8598 C=Cc1cccc1.Cc1ccc(O)c(I)c1>>Cc1ccc(O)c(/C=C/c2cccc2)c1

8599 C=Cc1cccc1.O=[N+](O)c1ccc(Cl)c([N+](=O)[O-])c1>>O=[N+](O-  
8600 )c1ccc(/C=C/c2cccc2)c([N+](=O)[O-])c1  
C=CC(=O)OC.COC(=O)c1cc2cc([N+](=O)[O-]  
8601 )c(Br)cc2s1>>COC(=O)/C=C/c1cc2sc(C(=O)OC)cc2c1[N+](=O)[O-]  
C=Cc1ccc(OC)cc1.N[C@@H](Cc1c[nH]c2c(Br)cccc12)C(=O)O>>COc1ccc(/C=C/c2cccc3c(C[C@H](  
8602 N)C(=O)O)c[nH]c23)cc1  
C=CC(=O)OC(CC)CCCC.N#Cc1cccc1Cl>>CCCCC(CC)OC(=O)/C=C/c1cccc1C#N  
8603 C=CC(=O)OCC.N#Cc1cccc1Ic1>>CCOC(=O)/C=C/c1cccc(C#N)c1  
8604 Br1cccc1.C=CCOc1ccc(OC)cc1>>COc1ccc(OC/C=C/c2cccc2)cc1  
8605 C=CC(=O)OCC.CCC(C)c1c[n+](O)c(C(C)CC)c(Cl)n1>>CCOC(=O)/C=C/c1nc(C(C)CC)c[n+](O-  
8606 )c1C(C)CC  
C=CC(=O)OC(C)(C)C.COc1cccc(NCc2ccc(Br)cc2)c1>>COc1cccc(NCc2ccc(/C=C/C(=O)OC(C)(C)C  
8607 cc2)c1  
C=CC(=O)OC.COc1cccc1I>>COC(=O)/C=C/c1cccc1OC  
8608 C=C/C=C(C\CCCC)OCC.Cc1cccc1I>>CCCC/C(=C\C=C\c1cccc1C)OCC  
8609 C=CC(N)=O.CCc1nc2cc(O)ccc2c(Oc2ccc(Br)cc2)c1-  
c1cccc1>>CCc1nc2cc(O)ccc2c(Oc2ccc(/C=C/C(N)=O)cc2)c1-c1cccc1  
8610 Br1cccc1.C=C(NC(=O)OC(C)(C)C)(C)C(=O)OC>>COC(=O)/C(=C/c1cccc1)NC(=O)OC(C)(C)C  
8611 C=Cc1ccc(Br)cc1.Ic1cccc1>>Br1ccc(/C=C/c2cccc2)cc1  
8612 C=CC(=O)OC(C)(C)C.Cc1ccc(NC=O)c(I)c1>>Cc1ccc(NC=O)c(/C=C/C(=O)OC(C)(C)C)c1  
8613 C=Cc1cccc1.Nc1c(Br)ccc2c1OCO2>>Nc1c(/C=C/c2cccc2)ccc2c1OCO2  
8614 C=CC(=O)OCc1cccc1.Ic1cces1>>O=C(/C=C/c1cces1)OCc1cccc1  
8615 C=C(C)C(=O)OC.CC(=O)c1cccc(Br)c1>>COC(=O)/C(C)=C/c1cccc(C(C)=O)c1  
8616 C=Cc1ccc([Si](OC)(OC)OC)cc1.CC(C)(C)OP(=O)(Cc1ccc(/C=C/c2ccc(Br)cc2)cc1)OC(C)(C)C>>CO[  
Si](OC)(OC)c1ccc(/C=C/c2ccc(/C=C/c3ccc(CP(=O)(OC(C)(C)C)OC(C)(C)C)cc3)cc2)cc1  
8617 C=Cc1sc(C=O)c(CCCCCC)c1CCCCC.CN(CC1CO1)c1ccc(I)cc1>>CCCCCc1c(C=O)sc(/C=C/c2cc  
c(N(C)CC3CO3)cc2)c1CCCCC  
8618 C=CC(=O)O.O=C(O)c1ccc(Cl)cc1>>O=C(O)/C=C/c1ccc(C(=O)O)cc1  
8619 C=CC(=O)OCC.Cc1sc(NCc2cccc(Br)c2)n1>>CCOC(=O)/C=C/c1cccc(CNc2nc(C)cs2)c1  
8620 C=CC(C)=O.CCCc1nnn(Cc2cccc2)c1I>>CCCCc1nnn(Cc2cccc2)c1/C=C/C(C)=O  
8621 C=C1CC(c2cccc2)OC1=O.COc1cccc(I)c1>>COc1cccc(/C=C2(CC(c3cccc3)OC2=O)c1  
8622 C=CC(=O)OCCCC.Nc1ccc(Br)cc1>>CCCCOC(=O)/C=C/c1ccc(N)cc1  
C=Cc1ccc(C(=O)N[C@@H](CCSC)C(=O)OC)c(-  
8623 c2cccc2C)c1.O=C(c1cnc1Br)C12CC3CC(CC(C3)C1)C2>>COC(=O)[C@H](CCSC)NC(=O)c1ccc(/  
C=C/c2cnc2C(=O)C23CC4CC(CC(C4)C2)C3)cc1-c1cccc1C  
8624 C=Cc1ccnc1Cl.Cc1c(Nc2c(I)cncc2C#N)ccc2[nH]ccc12>>Cc1c(Nc2c(C#N)cncc2/C=C/c2ccnc2Cl)cc  
c2[nH]ccc12  
8625 Br1ccc(OCCN2CCCC2)cc1.C=Cc1cncc(C#N)c1Nc1ccc2[nH]ccc2c1C>>Cc1c(Nc2c(C#N)cncc2/C=C  
/c2ccc(OCCN3CCCC3)cc2)ccc2[nH]ccc12  
8626 C=CC(=O)OCc1cccc1.COC(=O)CC1(CC(=O)OC)CC(c2cc(OCc3cccc3)ccc2Br)=NO1>>COC(=O)C  
C1(CC(=O)OC)CC(c2cc(OCc3cccc3)ccc2/C=C/C(=O)OCc2cccc2)=NO1  
8627 C=CC(=O)OC(C)(C)C.COC(=O)/C=C/c1cccc(N(Cc2ccc(Br)cc2)C(=O)C2CCCC2)c1>>COC(=O)/C  
=C/c1cccc(N(Cc2ccc(/C=C/C(=O)OC(C)(C)C)cc2)C(=O)C2CCCC2)c1  
8628 C=CC(=C)C.COc1ccc(I)cc1>>C=C/C(C)=C/c1ccc(OC)cc1  
8629 Br1cncc(OCc2cccc2)c1.C=CCCO>>OCC/C=C/c1cncc(OCc2cccc2)c1  
8630 C=COC(CC)CCCCC.CC(=O)c1ccc(Br)cc1>>C=C(OC(CC)CCCCC)c1ccc(C(C)=O)cc1  
8631 C=CC(=O)OCC.Clc1cccc(I)c1>>CCOC(=O)/C=C/c1cccc(Cl)c1  
8632 C=CC(=O)OC.O=c1cc(I)enn1Cc1cccc1>>COC(=O)/C=C/c1enn(Cc2cccc2)c(=O)c1  
8633 C=CC(=O)OC.COC(=O)CCOCc1cc(OCc2cccc2)c(OC)cc1Br>>COC(=O)/C=C/c1cc(OC)c(OCc2cccc  
c2)cc1COCCC(=O)OC  
8634 C=CC(=O)OCC.Cc1ccc(N)c(I)c1>>CCOC(=O)/C=C/c1cc(C)ccc1N  
8635 C=Cc1ccc(CC(=O)OC(C)(C)C)cc1.COc1cc(/C=C/c2ccc(CNC(=O)OC(C)(C)C)cc2)c(OC)cc1I>>COc1  
cc(/C=C/c2ccc(CC(=O)OC(C)(C)C)cc2)c(OC)cc1/C=C/c1ccc(CNC(=O)OC(C)(C)C)cc1  
8636 C=CC(=O)OC(C)(C)C.Cn1c(-c2cccc2)c(I)c2cccc21>>Cn1c(-  
c2cccc2)c(/C=C/C(=O)OC(C)(C)C)c2cccc21  
8637 C=Cc1cc(OC)c(OC)c(OC)c1-c1ccc(OC)cc1.COc1ccc(I)cc1>>COc1ccc(/C=C/c2cc(OC)c(OC)c(OC)c2-  
c2ccc(OC)cc2)cc1  
8638 C=CC(=O)OC.Ic1c(C[Se]c2cccc2)c(-c2cccc2)c2cccc2c1-  
c1cccc1>>COC(=O)/C=C/c1c(C[Se]c2cccc2)c(-c2cccc2)c2cccc2c1-c1cccc1

C=CC(=O)OCc1cc(OC)CCCCCCCCCCCCCCCCCCCCC)c(OC)CCCCCCCCCCCCCCCCCCCCC)c(OC)CCCCCCCC  
8639 CCCCCCCCCC)c1.CC(=O)c1ccc(I)cc1>>CCCCCCCCCCCCCCCCCCCCCOCc1cc(COC(=O)/C=C/c2ccc(C  
(C)=O)cc2)cc(OC)CCCCCCCCCCCCCCCCCCCCC)c1OC)CCCCCCCCCCCCCCCCCCCCC  
8640 C=CCN.O=c1[nH]c(=O)n([C@H]2C[C@H](O)[C@@H](COP(=O)(O)OP(=O)(O)OP(=O)(O)O2)cc  
1I>>NC/C=C/c1cn([C@H]2C[C@H](O)[C@@H](COP(=O)(O)OP(=O)(O)OP(=O)(O)O2)c(=O)[n  
8641 C=CC(=O)OC(C)(C)C.Nc1ccc(Br)cc1>>CC(C)(C)OC(=O)/C=C/c1ccc(N)cc1  
8642 C=Cc1ccncc1.CCCc1cc(Br)c(F)c(C#N)c1>>CCc1cc(C#N)c(F)c(/C=C/c2ccncc2)c1  
8643 C=C[C@H]1O[C@@H]2OC(C)(C)O[C@@H]2[C@H]1O.O=c1ccc2cc(Br)ccc2o1>>CC1(C)O[C@H]  
2O[C@H](/C=C/c3ccc4oc(=O)ccc4c3)[C@H](O)[C@H]2O1  
8644 Brc1ccc2ccccc2c1.C=COCCOC=C>>C=COCCOC(=C)c1ccc2ccccc2c1  
8645 Brc1ccc(I)cc1.C=Cc1ccncc1>>Brc1ccc(/C=C/c2ccncc2)cc1  
\*CNCCOCCOCCOCCOCCNC(=O)COc1ccc(C(Cc2cc(OC)cc(OC)c2)NC(=O)c2ccc(C=C)cc2)cc1.FC(F)  
8646 (F)Oc1ccccc1I>>\*CNCCOCCOCCOCCOCCNC(=O)COc1ccc(C(Cc2cc(OC)cc(OC)c2)NC(=O)c2ccc(/C  
=C/c3ccccc3OC(F)(F)F)cc2)cc1  
8647 C=Cc1ccc(N(C)C)cc1.C[Si](C)(OS(=O)(=O)C(F)(F)F)OS(=O)(=O)C(F)(F)F>>CN(C)c1ccc(/C=C/[Si](  
C)(C)OS(=O)(=O)C(F)(F)F)cc1  
8648 C=CS(=O)(=O)N1CCC2(CC1)N=C(C1CCCC1)NC2=O.CC(=O)Nc1ccc(Br)c(C)c1>>CC(=O)Nc1ccc  
(/C=C/S(=O)(=O)N2CCC3(CC2)N=C(C2CCCC2)NC3=O)c(C)c1  
8649 C=CC(=O)OCC.CC(C)(CC1Cc2ccccc2C1)NC[C@@H](O)COc1c(Br)ccc(F)c1F>>CCOC(=O)/C=C/c1  
ccc(F)c(F)c1OC[C@H](O)CNC(C)(C)CC1Cc2ccccc2C1  
8650 C=CC#N.O=Cc1ccc(Br)cc1>>N#C/C=C/c1ccc(C=O)cc1  
8651 C=CC(=O)N(C)Cc1oc2ccccc2c1C.CC(C)(C)OC(=O)NC1Cc2cc(Br)enc2NC1=O>>Cc1c(CN(C)C(=O)/  
C=C/c2enc3c(c2)CC(NC(=O)OC(C)(C)C(=O)N3)oc2ccccc12  
8652 C=CC(=O)N(C)Cc1cccc(OC)c1OCC(C)C.CC1(C)NCc2cc(Br)enc2NC1=O>>COc1cccc(CN(C)C(=O)/  
C=C/c2enc3c(c2)CNC(C)(C)C(=O)N3)c1OCC(C)C  
C=C1C(=O)O[C@H]2[C@H]1CCC(=C)[C@@H]1C[C@H](OC(C)=O)C(=C)[C@H]21.O=[N+](O-  
8653 )c1ccccc1I>>C=C1CC[C@H]2/C(=C/c3ccccc3[N+](=O)[O-  
])C(=O)O[C@@H]2[C@H]2C(=C)[C@@H](OC(C)=O)C[C@@H]12  
8654 C=CC(C)=O.Nc1ncc(Br)cn1>>CC(=O)/C=C/c1ncc(N)nc1  
8655 C=CC(=O)O.O=[N+](O-)]c1c(I)ccc2c1C=CC1(CCCCC1)O2>>O=C(O)/C=C/c1ccc2c(c1[N+](=O)[O-  
])C=CC1(CCCCC1)O2  
8656 C=Cc1ccccc1.Nc1cc(F)ccc1Br>>Nc1cc(F)ccc1/C=C/c1ccccc1  
8657 C=CCCC.COC(=O)CCCCCCCC1=C(I)CCC1=O>>CCC/C=C/C1=C(CCCCCCCC(=O)OC)C(=O)CC1  
8658 C=CCc1c(OC)c(C)c2c(c1OC(C)=O)C(=O)OC2.COC(=O)c1cccc(C)c1Br>>COC(=O)c1cccc(C)c1/C=  
C/Cc1c(OC)c(C)c2c(c1OC(C)=O)C(=O)OC2  
8659 C=CCCCCCC.CC(=O)c1ccc(Cl)cc1>>CCCCC/C=C/c1ccc(C(C)=O)cc1  
8660 C=CNC(=O)OCCC.O=S(=O)(Oc1ccc2ccccc2c1)C(F)(F)F>>C=C(NC(=O)OCCC)c1ccc2ccccc2c1  
8661 C=CC(=O)NCCCc1ccccc1.COC(=O)C1CC(c2ccc(C(=O)C(=O)c3ccc(Br)cc3)cc2)=NO1>>COC(=O)C  
1CC(c2ccc(C(=O)C(=O)c3ccc(/C=C/C(=O)NCCC4ccccc4)cc3)cc2)=NO1  
8662 C=CC#N.N#Cc1ccc(Nc2nc(Nc3c(F)cc(I)cc3F)nnc2Cl)cc1>>N#C/C=C/c1cc(F)c(Nc2nnc(Cl)c(Nc3ccc(  
C#N)cc3)n2)c(F)c1  
8663 C=Cc1nc(Cl)nc2c1ccn2COCC[Si](C)(C)C.CCN(c1ncccc1Br)S(C)(=O)=O>>CCN(c1ncccc1/C=C/c1nc  
(Cl)nc2c1ccn2COCC[Si](C)(C)C)S(C)(=O)=O  
8664 C=Cc1ccc(F)cc1.CCOC(=O)C(F)(F)I>>CCOC(=O)C(F)(F)/C=C/c1ccc(F)cc1  
8665 C=Cc1ccccc1.COC(=O)c1cc(S(C)(=O)=O)c(Br)cc1C>>COC(=O)c1cc(S(C)(=O)=O)c(/C=C/c2ccccc2)  
cc1C  
8666 C=CC(=O)OC(C)(C)C.Cc1ccc2c(Br)ccc(N(C)C)c2n1>>Cc1ccc2c(/C=C/C(=O)OC(C)(C)C)ccc(N(C)C  
)c2n1  
8667 Brc1ccccc1I.C=CC(=O)N(C)OC>>CON(C)C(=O)/C=C/c1ccccc1Br  
8668 Brc1cccc(N2CCCC2)n1.C=Cc1ccccc1>>C(=C/c1cccc(N2CCCC2)n1)\c1ccccc1  
8669 C=CC(=O)OC(C)(C)C.CC(C)(C)OC(=O)/C=C/c1ccc(CN(C(=O)C2CCCC2)c2ccccc(Br)c2)cc1>>CC(  
C)(C)OC(=O)/C=C/c1ccc(CN(C(=O)C2CCCC2)c2ccccc(/C=C/C(=O)OC(C)(C)C)c2)cc1  
8670 Brc1esc2ccccc12.C=CC=O>>O=C/C=C/c1esc2ccccc12  
8671 C=Cc1ccc(C(=O)OC)cc1.Cc1nn(-c2ccc(C#N)c(Cl)c2)c(C)c1I>>COC(=O)c1ccc(/C=C/c2c(C)nn(-  
c3ccc(C#N)c(Cl)c3)c2C)cc1  
8672 C=CC(=O)OCC.COc1ccc(Br)cn1>>CCOC(=O)/C=C/c1ccc(OC)nc1  
8673 C=CC(=O)NCc1ccc(OC)cc1.COc1ccc2c(=O)c(I)cc2c1>>COc1ccc(CNC(=O)/C=C/c2coc3cc(OC)ccc  
3c2=O)cc1  
8674 C=CC(OC)OC.COc1ccccc1I>>COc1ccccc(/C=C/C(OC)OC)c1  
8675 C=Cc1ccc2c(c1)OCO2.FC1(F)Oc2ccc(Br)cc2OC1(F)F>>FC1(F)Oc2ccc(/C=C/c3ccc4c(c3)OCO4)cc2  
OC1(F)F

8676 \*CNCCCCOCCOCCOCCNC(=O)COc1ccc(C(Cc2cc(OC)cc(OC)c2)NC(=O)c2ccc(C=C)cc2)cc1.N#Cc  
 1ccc(I)cc1C#N>>\*CNCCCCOCCOCCOCCNC(=O)COc1ccc(C(Cc2cc(OC)cc(OC)c2)NC(=O)c2ccc(/  
 8677 C=C/c3ccc(C#N)c(C#N)c3)cc2)cc1  
 Bre1ccc(-c2cccs2)cc1.C=Cc1cccc1>>C(=C/c1ccc(-c2cccs2)cc1)\c1cccc1  
 8678 C=CC(=O)NCCCc1cccc1.CC(C)(C)OC(=O)C1CC(c2ccc(C(=O)C(=O)c3ccc(Br)cc3)cc2)=NO1>>CC  
 (C)(C)OC(=O)C1CC(c2ccc(C(=O)C(=O)c3ccc(/C=C/C(=O)NCCCc4cccc4)cc3)cc2)=NO1  
 8679 Bre1cccc1.C=Cc1ccc(C(=O)O)cc1>>O=C(O)c1ccc(/C=C/c2cccc2)cc1  
 8680 C=CC(N)=O.Ic1cccc1>>NC(=O)/C=C/c1cccc1  
 C=CC(=O)OC.COc1cc(Br)c2c3c1O[C@H]1[C@H]34CCN(C)[C@H](C2)[C@H]42C=C[C@@H]1(OC)[  
 8681 C@H]1[C@@H](O)N(c3cccc3)C(=O)[C@H]12>>COC(=O)/C=C/c1cc(OC)c2c3c1[C@H]1N(C)C  
 C[C@H]34[C@@H](O2)[C@@H]2(OC)C=C[C@@H]14[C@@H]1C(=O)N(c3cccc3)[C@H](O)[C@@  
 8682 C=Cc1ccncc1.COc1cc(Nc2c(C#N)cnc3ccc(Br)cc23)cc(OC)c1OC>>COc1cc(Nc2c(C#N)cnc3ccc(/C=C  
 /c4cnccc4)cc23)cc(OC)c1OC  
 8683 C=CC(=O)OCc1cccc1.C[Si](C)(C)CCOC(=O)c1cccc(I)c1>>C[Si](C)(C)CCOC(=O)c1cccc(/C=C/C(=O)  
 OCc2cccc2)c1  
 8684 C=CC(=O)N(C)Cc1sc2cccc2c1C.CCC1(CC)C(=O)Nc2ncc(Br)cc21>>CCC1(CC)C(=O)Nc2ncc(/C=C  
 /C(=O)N(C)Cc3sc4cccc4c3C)cc21  
 8685 C=Cc1cccc1.CC(C)(C)C(=O)Nc1nc(NC(=O)C(C)(C)C)c2cc(Br)cnc2n1>>CC(C)(C)C(=O)Nc1nc(NC(  
 =O)C(C)(C)C)c2cc(/C=C/c3cccc3)cnc2n1  
 8686 C=CC(=O)OCCCC.COc1ccc2cccc2c1Br>>CCCCOC(=O)/C=C/c1c(OC)ccc2cccc12  
 8687 C=Cc1ccc(OC)cc1.COc1ccc(I)cc1>>COc1ccc(/C=C/c2ccc(OC)cc2)cc1  
 C=Cc1ccc([N+](=O)[O-  
 8688 ])cc1.COC(=O)[C@H](Cc1ccc(O)c(I)c1)NC(=O)OC(C)(C)C>>COC(=O)[C@H](Cc1ccc(O)c(/C=C/c2  
 ccc([N+](=O)[O-])cc2)c1)NC(=O)OC(C)(C)C  
 8689 C=CC(C)(CO)OC.O=Cc1c[nH]c2cccc(I)c12>>COC(C)(/C=C/c1cccc2[nH]cc(C=O)c12)CO  
 Bre1ccc(-c2nnc(-c3cccc4cccc34)o2)cc1.C=C[Si](OCC)(OCC)OCC>>CCO[Si](/C=C/c1ccc(-c2nnc(-  
 8690 c3cccc4cccc34)o2)cc1)(OCC)OCC  
 C=CC(OCC)OCC.O=Cc1cccc(Br)c1>>CCOC(/C=C/c1cccc(C=O)c1)OCC  
 8691 Bre1cccc1C1OCCCO1.C=CC#N>>N#C/C=C/c1cccc1C1OCCCO1  
 8692 C=CC(C)(O)CCC=C(C)C.FC(F)(F)c1ccc(Br)cc1>>CC(C)=CCCC(C)(O)/C=C/c1ccc(C(F)(F)F)cc1  
 8693 C=CC(=O)OC.O=C(O)c1ccc(I)cc1>>COC(=O)/C=C/c1ccc(C(=O)O)cc1  
 8694 C=CC(=O)OCC.O=Cc1cc(Cl)ccc1Br>>CCOC(=O)/C=C/c1ccc(Cl)cc1C=O  
 8695 C=CC(=O)OC.CNc1cc(Cl)ccc1[N+](=O)[O-]>>CNc1cc(/C=C/C(=O)OC)ccc1[N+](=O)[O-]  
 8696 C=CC(=O)OC(C)(C)C.CC(=O)O[C@H]1CC(=O)N(Cc2cc3c(cc2I)OCO3)[C@@H]1[Se]c1cccc1>>C  
 C(=O)O[C@H]1CC(=O)N(Cc2cc3c(cc2/C=C/C(=O)OC(C)(C)OCO3)[C@@H]1[Se]c1cccc1  
 8697 C=Cc1nc2c(N)nenc2n1[C@@H]1O[C@H](CO[Si](C)(C)C(C)(C)C)[C@@H](O[Si](C)(C)C(C)(C)C)[  
 C@H]1O[Si](C)(C)C(C)(C)C.Clc1cccc1>>CC(C)(C)[Si](C)(C)OC[C@H]1O[C@@H](n2c(/C=C/c3c  
 cccc3)nc3c(N)nenc32)[C@H](O[Si](C)(C)C(C)(C)C)[C@@H]1O[Si](C)(C)C(C)(C)C  
 8698 C=C1C(=O)O[C@@H]2/C=C(\C)CC/C=C(\C)CC[C@@H]12.COc1ccc(I)cc1>>COc1ccc(/C=C2/C(=O)  
 O)[C@@H]3/C=C(\C)CC/C=C(\C)CC[C@@H]23)cc1  
 8699 C=C.NC(=O)c1ccc(Cl)cc1Br>>C=Cc1cc(Cl)ccc1C(N)=O  
 8700 C=Cc1cccc1.COc1cccc(OS(=O)(=O)C(F)(F)F)c1>>C=C(c1cccc1)c1cccc(OC)c1  
 8701 C=CC(=O)NC(c1cccc1)C(C(C)=O)C(C)=O.Ic1cccc1>>CC(=O)C(C(C)=O)C(NC(=O)/C=C/c1cccc  
 8702 1)c1cccc1  
 C=Cc1ccc(OC)c(OC)c1.Nc1ccc(I)cc1>>COc1ccc(/C=C/c2ccc(N)cc2)cc1OC  
 8703 C=C(C)C(=O)OC.Cc1ccc(Br)cc1>>COC(=O)/C(C)=C/c1ccc(C)cc1  
 8704 C=CC(=O)OC(C)(C)C.O=C1Nc2cccc2O/C1=C/c1ccc(Br)o1>>CC(C)(C)OC(=O)/C=C/c1ccc(/C=C2\O  
 8705 c3cccc3NC2=O)o1  
 C=Cc1ccc(C(=O)OC)cc1.CC(C)(C)c1cc(Br)cc(C=O)c1O>>COC(=O)c1ccc(/C=C/c2cc(C=O)c(O)c(C(  
 8706 C)(C)C)c2)cc1  
 C=C(F)[Si](C)(c1cccc1)c1cccc1.Clc1cccc1I>>C[Si](/C(F)=C/c1cccc1Cl)(c1cccc1)c1cccc1  
 8707 C=Cc1ccncc1.N[C@@H](Cc1c[nH]c2c(Br)cccc12)C(=O)O>>N[C@@H](Cc1c[nH]c2c(/C=C/c3cnccc  
 8708 3)cccc12)C(=O)O  
 C=CC(N)=O.Cc1cc(F)ccc1Br>>Cc1cc(F)ccc1/C=C/C(N)=O  
 8709 C=CC(=O)OC(C)(C)C.Cc1cc2c(Cc3ccc(Br)cc3)c(-  
 8710 c3ccc(OC(F)(F)F)cc3)c(=O)oc2cc1O>>Cc1cc2c(Cc3ccc(/C=C/C(=O)OC(C)(C)C)cc3)c(-  
 c3ccc(OC(F)(F)F)cc3)c(=O)oc2cc1O  
 8711 C=C(C)C(=O)OC.O=C(O)c1ccc(I)cc1>>COC(=O)/C(C)=C/c1ccc(C(=O)O)cc1  
 8712 C=CCC(c1cccc1)P(=O)(OC)OC.Ic1cccc2cccc12>>COP(=O)(OC)C(C/C=C/c1cccc2cccc12)c1cccc  
 8713 C=Cc1ccncc1.O=Cc1ccc(N(c2ccc(Br)cc2)c2ccc(C=O)cc2)cc1>>O=Cc1ccc(N(c2ccc(C=O)cc2)c2ccc(/  
 C=C/c3cnccc3)cc2)cc1



8714 C=CN1C(=O)c2ccccc2C1=O.Cc1ccc(S(=O)(=O)n2cc(I)c3c(Br)cccc32)cc1>>Cc1ccc(S(=O)(=O)n2cc(/  
C=C/N3C(=O)c4ccccc4C3=O)c3c(Br)cccc32)cc1  
8715 C=Cc1ccc(N2CCN(C(=O)OC(C)(C)C)CC2)cc1.Clc1cc(Br)cc(Cn2ccnc2)c1>>CC(C)(C)OC(=O)N1CC  
N(c2ccc(/C=C/c3cc(Cl)cc(Cn4ccnc4)c3)cc2)CC1  
8716 C=CS(=O)(=O)c1ccccc1.O=Cc1c[nH]c2ccc(Br)cc12>>O=Cc1c[nH]c2ccc(/C=C/S(=O)(=O)c3ccccc3)c  
8717 C=CCC(=O)OC.FC(F)(F)c1ccc(I)cc1>>COC(=O)C/C=C/c1ccc(C(F)(F)F)cc1  
8718 C=C.O=Cc1ccc(Br)cc1O>>C=Cc1ccc(C=O)c(O)c1  
8719 C=Cc1ccc(SC)cc1.Clc1c2ccc(Br)cc2nc2c1oc1ccccc12>>CSc1ccc(/C=C/c2ccc3c(Cl)c4oc5ccccc5c4nc3  
c2)cc1  
8720 C=CC(=O)OC.O=S(=O)(Oc1ccc2ccn(Cc3ccccc3)c2n1)C(F)(F)F>>COC(=O)/C=C/c1ccc2ccn(Cc3ccccc  
c3)c2n1  
8721 C=Cc1ccccc1.CCCCCC(C)I>>CCCCC(C)/C=C/c1ccccc1  
8722 C=Cc1ccc(OC)cc1.COC(=O)Cn1c(=O)c(Cl)nc2ccnc21>>COC(=O)Cn1c(=O)c(/C=C/c2ccc(OC)cc2)n  
c2ccnc21  
8723 C=C(CC(=O)OCC)C(=O)OCC.COc1ccc2c(OC)c(Br)ccc12>>CCOC(=O)C/C=C/c1ccc2c(OC)cccc2c  
1OC)C(=O)OCC  
8724 C=CC(=O)OC.O=[N+](O-)]c1cc(Cl)cc(I)c1>>COC(=O)/C=C/c1cc(Cl)cc([N+](=O)[O-])c1  
8725 C=CCOC(C)=O.Cc1ccc(I)c1>>CC(=O)OC/C=C/c1ccccc(C)c1  
8726 C=CC(C)=O.CC(C)(C)c1ccc(Br)cc1>>CC(=O)/C=C/c1ccc(C(C)(C)C)cc1  
8727 C=CC(=O)OCC.CCCCOC(=O)/C=C/c1ccc(Br)cc1Cl>>CCCCOC(=O)/C=C/c1ccc(/C=C/C(=O)OCC)c  
8728 C=CCCCN1C(=O)c2ccccc2C1=O.Cc1ccccc1OS(=O)(=O)C(F)(F)F>>C=C(CCCCN1C(=O)c2ccccc2  
C1=O)c1ccccc1C  
8729 C=Cc1ccccc1.C[Si](C)(C)Cl>>C[Si](C)(C)C/C=C/c1ccccc1  
8730 C=CC(=O)OC.Oc1nc(-c2ccnc2)nc2ccc(I)cc12>>COC(=O)/C=C/c1ccc2nc(-c3ccnc3)nc(O)c2c1  
C=Cc1ccc(/C=C/c2ccc(/C=C/c3cc(OCCCCCCCCCCC)c(OCCCCCCCCCCC)c(OCCCCCCCCCCC  
8731 C)c3)cc2)cc1.CCCCOc1c(C)cc(I)cc1C>>CCCCCCCCCCCCCOc1cc(/C=C/c2ccc(/C=C/c3ccc(/C=C/c4c  
c(C)c(OCCCC)c(C)c4cc3)cc2)cc(OCCCCCCCCCCC)c1OCCCCCCCCCCC  
8732 Br1ccs1.C=C[Si](CC)(CC)CC>>CC[Si](/C=C/c1ccs1)(CC)CC  
8733 C=CCCCCO[Si](c1ccccc1)(c1ccccc1)C(C)(C)C.CC1(C)OC(=O)c2c(cccc2OS(=O)(=O)C(F)(F)F)O  
1>>CC1(C)OC(=O)c2c(/C=C/CCCCCO[Si](c3ccccc3)(c3ccccc3)C(C)(C)C)cccc2O1  
8734 C=CC(=O)OC.O=C(OCc1ccccc1)N1OCC(I)=C1c1ccccc1>>COC(=O)/C=C/C1=C(c2ccccc2)N(C(=O)  
OCc2ccccc2)OC1  
8735 C=Cc1ncnc(C#N)c1Nc1ccc2[nH]ccc2c1C.COc1cc(CN2CCN(C)CC2)ccc1I>>COc1cc(CN2CCN(C)CC  
2)ccc1/C=C/c1ncnc(C#N)c1Nc1ccc2[nH]ccc2c1C  
8736 C/C(=N)O)c1ccc(Br)cc1.C=CC(=O)OC>>COC(=O)/C=C/c1ccc(/C(C)=N/O)cc1  
8737 C=CC(=O)OCC.Cc1nnc(Cc2cc(Cl)ccc2Br)o1>>CCOC(=O)/C=C/c1ccc(Cl)cc1Cc1nnc(C)o1  
8738 Br1ccc2ccc3ccc4ccccc4c3c2c1.C=Cc1ccnc1>>C(=C/c1ccc2ccc3ccc4ccccc4c3c2c1)\c1ccnc1  
8739 C=CC(=O)OCC.CC(C)c1nn(-c2nc3ccccc3s2)c(-c2ccc(F)cc2)c1Br>>CCOC(=O)/C=C/c1c(C(C)C)nn(-  
c2nc3ccccc3s2)c1-c1ccc(F)cc1  
8740 C=COCCCC.O=S(=O)(Oc1ccc(F)cc1)C(F)(F)F>>C=C(OCCCC)c1ccc(F)cc1  
8741 C=COCCOC=C.N#Cc1ccc(Br)cc1>>C=COCCOC(=C)c1ccc(C#N)cc1  
8742 C=CC(=O)OCCCC.COc1ccc([IH2](OC(C)=O)OC(C)=O)c1>>CCCCOC(=O)/C=C/c1ccc(OC)c1  
8743 C=Cc1ccccc1.CC(=O)c1ccc(OS(=O)(=O)C(F)(F)F)c1>>C=C(c1ccccc1)c1ccc(C(C)=O)c1  
8744 C=CC(N)=O.O=C1C(O)=C(I)C(=O)c2ccccc21>>NC(=O)/C=C/C1=C(O)C(=O)c2ccccc2C1=O  
8745 C=CCNS(=O)(=O)c1ccc(C)cc1.Cc1ccc(Br)cc1>>Cc1ccc(/C=C/CNS(=O)(=O)c2ccc(C)cc2)cc1  
8746 C=CC(=O)OC.Cc1ccc(C(=C(I)CC[Se]c2ccccc2)c2ccc(C)cc2)cc1>>COC(=O)/C=C/C(CC[Se]c1ccccc1  
)=C(c1ccc(C)cc1)c1ccc(C)cc1  
8747 C=Cc1ccnc1.N#Cc1cnc2cc(Br)sc2c1Nc1ccc(Oc2ccccc2)cc1>>N#Cc1cnc2cc(/C=C/c3ccnc3)sc2c1N  
c1ccc(Oc2ccccc2)cc1  
8748 C=CC(=O)O.OC[C@H]1O[C@@H](n2c(NC3ccccc(Br)c3)nc3ccccc32)[C@H](O)[C@@H]1O>>O=C  
(O)/C=C/c1ccc(CNc2nc3ccccc3n2[C@@H]2O[C@H](CO)[C@@H](O)[C@H]2O)c1  
8749 C=CC(=O)OCC.Fc1ccccc1Br>>CCOC(=O)/C=C/c1ccccc1F  
8750 C=CC(=O)OCC.O=C(c1ccccc1)c1ccc(Cl)cc1>>CCOC(=O)/C=C/c1ccc(C(=O)c2ccccc2)cc1  
8751 C=C.O=C(CC(=O)C(F)(F)F)c1ccc(Br)cc1>>C=Cc1ccc(C(=O)CC(=O)C(F)(F)F)cc1  
8752 C=CC(=O)OC(C)(C)C.COCOc1ccc(I)nc1Cl>>COCOc1ccc(/C=C/C(=O)OC(C)(C)C)nc1Cl  
8753 C=Cc1ccccc1.Oc1ccc(Br)c1>>Oc1ccc(/C=C/c2ccccc2)c1  
8754 C=CC(OC)OC.O=[N+](O-)]c1ccccc(I)c1>>COC(/C=C/c1ccccc([N+](=O)[O-])c1)OC  
\*CNCCOCCOCCOCCNC(=O)COc1ccc(C(Cc2cc(OC)cc(OC)c2)NC(=O)c2ccc(C=C)cc2)cc1.CC(C  
8755 )(C)OC(=O)n1ccc2cc(I)ccc21>>\*CNCCOCCOCCOCCNC(=O)COc1ccc(C(Cc2cc(OC)cc(OC)c2)N  
C(=O)c2ccc(/C=C/c3ccc4c(ccn4C(=O)OC(C)(C)C)c3)cc2)cc1  
8756 Br1ccsc1.C=C[Si](CC)(CC)CC>>CC[Si](/C=C/c1ccsc1)(CC)CC

8757 C=COC.CCOC(=O)C(=O)Cl>>CCOC(=O)C(=O)/C=C/OC  
8758 C=Cc1cccc1.CC(C)(C)C(=O)Nc1cccn1Cl>>CC(C)(C)C(=O)Nc1cccn1/C=C/c1cccc1  
8759 C=Cc1ccc(OC(C)=O)cc1.FC(F)(F)C(Br)CCc1cccc1>>CC(=O)Oc1ccc(/C=C/C(Cc2cccc2)C(F)(F)F  
8760 C=Cc1cccc(C)c1.Cc1ccc(Br)cc1>>Cc1ccc(/C=C/c2cccc(C)c2)cc1  
8761 C=CC(=O)OC.C[C@H](c1cccc1)N1C(=O)c2ccc(OS(=O)(=O)C(F)(F)F)cc2C1=O>>COC(=O)/C=C/c  
1ccc2c(c1)C(=O)N([C@H](C)c1cccc1)C2=O  
8762 C=CC(=O)OC.Cc1cccc([N+](=O)[O-])c1Br>>COC(=O)/C=C/c1c(C)cccc1[N+](=O)[O-]  
8763 C=CC(O)C(F)(F)C(=O)OCC.Ic1cccc1>>CCOC(=O)C(F)(F)C(O)/C=C/c1cccc1  
8764 C=CC(=O)O.CCOC(=O)Cn1cc(I)c(=O)[nH]c1=O>>CCOC(=O)Cn1cc(/C=C/C(=O)O)c(=O)[nH]c1=O  
8765 C=C(NC(C)=O)C(=O)OC.CC(=O)Oc1ccc(I)c(C)c1>>COC(=O)/C=C/c1ccc(OC(C)=O)cc1C)NC(C)=  
8766 C=CCOC(C)=O.CC(C)(C)c1ccc(I)cc1>>CC(=O)OC/C=C/c1ccc(C(C)(C)C)cc1  
8767 CCOC(=O)c1ccc(I)cc1.COC[C@@H](/N=C\c1cccc1)N1C=CCC[C@H]1C(C)C>>CCOC(=O)c1c  
cc(C2=CN/C(=N/[C@H](COC)C(C)C)c3cccc3)[C@H](C)CC2)cc1  
8768 Brc1ccc(C2=CCCCc3cccc32)cc1.C=CC(=O)OC>>COC(=O)/C=C/c1ccc(C2=CCCCc3cccc32)cc1  
8769 Brc1ccc2c(c1)OCO2.C=C(NC(C)=O)C(=O)O>>CC(=O)N/C(=C\c1ccc2c(c1)OCO2)C(=O)O  
8770 C=CC(=O)OCCCC.Ic1cccc2cccc12>>CCCCOC(=O)/C=C/c1cccc2cccc12  
8771 C=Cc1cccn1.Cn1cc(C[C@@H](COc2cncc(Br)c2)NC(=O)OC(C)(C)C)c2cccc21>>Cn1cc(C[C@@H  
](COc2cncc(/C=C/c3cncc3)c2)NC(=O)OC(C)(C)C)c2cccc21  
C=CCn1c(-c2ccc([N+](=O)[O-]  
8772 ])cc2)nc2cccc2c1=O.O=C(CN1C(=O)COc2cccc21)c1ccc(Br)cc1>>O=C(CN1C(=O)COc2cccc21)c  
1ccc(/C=C/Cn2c(-c3ccc([N+](=O)[O-])cc3)nc3cccc3c2=O)cc1  
8773 C=CC(C)(C)O.O=c1ccc2ccc(OCc3cccc3)c(I)c2o1>>CC(C)(O)/C=C/c1c(OCc2cccc2)ccc2ccc(=O)oc  
8774 C=CC(=O)OCc1cccc1.CC(C)(C)OC(=O)N1CCC2(CC1)Cc1cc(Br)cn1NC2=O>>CC(C)(C)OC(=O)N  
1CCC2(CC1)Cc1cc(/C=C/C(=O)OCc3cccc3)cn1NC2=O  
8775 C=Cc1cccc1.CCn1cncc1-c1ccc(Br)o1>>CCn1cncc1-c1ccc(/C=C/c2cccc2)o1  
8776 C=Cc1cccc1Br.CCOC(=O)C(F)I>>CCOC(=O)C(F)/C=C/c1cccc1Br  
8777 C=CC(=O)N(C)C.COC(=O)c1cc(Br)cc2c1OC(c1cccc1)(c1cccc1)O2>>COC(=O)c1cc(/C=C/C(=O)N  
(C)C)cc2c1OC(c1cccc1)(c1cccc1)O2  
8778 C=CC(C)=O.Nc1ccc(Cl)cc1>>CC(=O)/C=C/c1ccc(N)cc1  
8779 C=CC(=O)OCC.CC(C)(CC1Cc2cccc2C1)NCC(O)c1sccl1Br>>CCOC(=O)/C=C/c1ccsc1C(O)CNC(C  
)(C)CC1Cc2cccc2C1  
8780 C=CC1CC(OC)=CC(=O)O1.Fc1ccc(I)cc1>>COC1=CC(=O)OC(/C=C/c2ccc(F)cc2)C1  
8781 C=CC(=O)OC.COc1ccc(I)cc1>>COC(=O)/C=C/c1ccc(OC)cc1  
8782 C=CC(=O)OCC.COc1ccc(Cl)cc1-c1c(Br)c(=O)[nH]c2ccc(C(F)(F)F)cc12>>CCOC(=O)/C=C/c1c(-  
c2cc(Cl)ccc2OC)c2cc(C(F)(F)F)ccc2[nH]c1=O  
8783 C=Cc1cccc(O[Si](C)(C)C(C)(C)C)c1.C[Si](C)(C)OS(=O)(=O)C(F)(F)F>>CC(C)(C)[Si](C)(C)Oc1cccc  
(/C=C/C[Si](C)(C)C)c1  
8784 C=CC(=O)OC(C)(C)C.Oc1nn(-c2cccc2)cc1Br>>CC(C)(C)OC(=O)/C=C/c1nn(-c2cccc2)nc1O  
8785 C=COCCCC.Cc1cc(Br)c2nc(N3CCN(C)CC3)cc(=O)n2c1>>C=C(OCCCC)c1cc(C)cn2c(=O)cc(N3CC  
N(C)CC3)nc12  
8786 C=Cc1cccn1.Oc1cccc(Br)c1>>Oc1cccc(/C=C/c2cncc2)c1  
8787 C=CC(=O)OCC.Ic1cccs1>>CCOC(=O)/C=C/c1cccs1  
8788 C=CC(=O)OC.O=C1Nc2c(Br)cccc2C1=O>>COC(=O)/C=C/c1cccc2c1NC(=O)C2=O  
8789 C=Cc1cccc1C.Cc1ccc(I)cc1>>Cc1ccc(/C=C/c2cccc2C)cc1  
8790 C=CC(=O)N(C)C.CCOC(=O)c1ncsc1NS(=O)(=O)Cc1cccc1Br>>CCOC(=O)c1ncsc1NS(=O)(=O)Cc1  
cccc1/C=C/C(=O)N(C)C  
8791 C=CC(=O)OC.CC(=O)c1ccc(Cl)cc1>>COC(=O)/C=C/c1ccc(C(C)=O)cc1  
8792 C=CC(=O)OC.Cc1cc(OCc2cccc2)ccc1Br>>COC(=O)/C=C/c1ccc(OCc2cccc2)cc1C  
8793 C=C(CC(=O)OC)C(=O)OC.O=[N+](O-)]c1ccc(I)cc1>>COC(=O)C/C(=C\c1ccc([N+](=O)[O-]  
])cc1)C(=O)OC  
8794 C=CC1(C)CCC(=O)C1.COC(=O)c1cccc1/C=C\C=C>>COC(=O)c1cccc1/C=C\C=C\C=C\C1(C)CC  
C(=O)C1  
8795 C=CC(=O)OC.Cc1c[nH]c2c(Br)cccc12>>COC(=O)/C=C/c1cccc2c(C)c[nH]c12  
8796 C=CC(=O)OC.COc1ccc2cc(Br)ccc2c1>>C=C(C(=O)OC)c1ccc2cc(OC)ccc2c1  
8797 C=CC(CC)O[Si](C)(C)C(C)(C)C.COCCc1cccc1Br>>CCC(/C=C/c1cccc1COC)O[Si](C)(C)C(C)(C)C  
8798 C=CNC(C)=O.COC(=O)c1cccc(I)c1>>C=C(NC(C)=O)c1cccc(C(=O)OC)c1  
8799 C=C[C@@](C)(/C=C/c1ccc(O)cc1)CCC=C(C)C.Nc1ccc(I)cc1>>CC(C)=CCC[C@@](C)(/C=C/c1ccc(  
N)cc1)/C=C/c1ccc(O)cc1  
8800 C=Cc1cccc(CO)n1.Cc1c(Nc2c(I)cncc2C#N)ccc2[nH]ccc12>>Cc1c(Nc2c(C#N)cncc2/C=C/c2cccc(CO)  
n2)ccc2[nH]ccc12

8801 Br1cccc2cccc12.CC(=O)/C=C/CC(NS(=O)(=O)c1ccc(C)cc1)c1cccc1>>CC(=O)/C=C/CC(NS(=O)(=O)c1ccc(C)cc1)c1cccc1)c1cccc2cccc12  
8802 C=CC(=O)N1N=Cc2cccc2C1C=C(C)C.COc1cc(Cc2c(C)nc(N)nc2N)cc(I)c1OC>>COc1cc(Cc2c(C)nc(N)nc2N)cc(/C=C/C(=O)N2N=Cc3cccc3C2C=C(C)C)c1OC  
8803 C=C(NC(C)=O)c1ccc(Cl)cn1.C=CC(=O)NC(C)(C)C>>C=C(NC(C)=O)c1ccc(/C=C/C(=O)NC(C)(C)C)C  
8804 C=CC(=O)OCC.CC(=O)Nc1ccc(Br)cc1>>CCOC(=O)/C=C/c1cc(Br)ccc1NC(C)=O  
8805 C=CC(N)=O.FC(F)(F)Oc1ccc(I)cc1>>NC(=O)/C=C/c1ccc(OC(F)(F)F)cc1  
C=Cc1ccc2c(c1)Sc1cc(/C=C/c3ccc4c(c3)Sc3cccc3N4CCCCCCCC)ccc1N2CCCCCCCC.CCCCCCCC  
8806 N1c2ccc(Br)cc2Sc2cc(C=O)ccc21>>CCCCCCCCN1c2cccc2Sc2cc(/C=C/c3ccc4c(c3)Sc3cc(/C=C/c5c  
cc6c(c5)Sc5cc(C=O)ccc5N6CCCCCCCC)ccc3N4CCCCCCCC)ccc21  
C=CC(=O)OC.CC(C)(C)C(=O)Oc1ccc2cccc2c1-  
8807 c1c(OC(=O)C(C)(C)C)ccc2cc(I)ccc12>>COC(=O)/C=C/c1ccc2c(-  
c3c(OC(=O)C(C)(C)C)ccc4cccc34)c(OC(=O)C(C)(C)C)ccc2c1  
8808 C=CC(=O)OC(C)(C)C.CC(=O)c1cccc1Br>>CC(=O)c1cccc1/C=C/C(=O)OC(C)(C)C  
C=CC(=O)OC.O=C(c1cccc1C(F)(F)F)c1sc2cc(O)ccc2c1Oc1ccc(Br)cc1>>COC(=O)/C=C/c1ccc(Oc2c  
8809 (C(=O)c3cccc3C(F)(F)F)sc3cc(O)ccc23)cc1  
8810 Br1cccn1.C=CCO>>C=C(CO)c1cccn1  
8811 C=CC(=O)OC.CSc1cccc1I>>COC(=O)/C=C/c1cccc1SC  
C=C[13C](=O)N(Cc1cccc1)OC.CC1=C(OS(=O)(=O)C(F)(F)F)C(C)(C)CCC1>>CON(Cc1cccc1)[13  
8812 C](=O)/C=C/C1=C(C)CCCC1(C)C  
8813 Br1ccc2ccc3cccc4ccc1c2c34.C=CC(=O)OCCCC>>CCCCOC(=O)/C=C/c1ccc2ccc3cccc4ccc1c2c34  
8814 Br1cccc2[nH]ccc12.C=COCCCC>>C=C(OCCCC)c1cccc2[nH]ccc12  
C=CC(OCC)OCC.COCCOc1ccc(-c2cc(CC(C)C)n(-c3ccc(Br)cc3C(=O)OC)c2-  
8815 c2ccc(OCOC)cc2)cc1>>CCOC(/C=C/c1ccc(-n2c(CC(C)C)cc(-c3ccc(OCOC)cc3)c2-  
c2ccc(OCOC)cc2)c(C(=O)OC)c1)OCC  
8816 C=Cc1ccc(N(C)C)cc1.FC(F)(F)c1cccc1I>>CN(C)c1ccc(/C=C/c2cccc2C(F)(F)F)cc1  
C=CC(=O)OC(C)(C)C.CC(C)=CCc1cc(I)ccc1OC(=O)CCCc1cccc1>>CC(C)=CCc1cc(/C=C/C(=O)O  
8817 C(C)(C)C)ccc1OC(=O)CCCc1cccc1  
C=Cc1ccc(O)c(OC)c1.Oc1ccc(O)c(I)c1>>COc1cc(/C=C/c2cc(O)ccc2O)ccc1O  
8818 C=C/C=C(\CCCC)OCC.Ic1cccc1>>CCCC/C=C\C=C\c1cccc1)OCC  
8819 C=CC(=O)CC.CC(=O)c1ccc(Br)cc1>>CCC(=O)/C=C/c1ccc(C(C)=O)cc1  
8820 C=CC1CCCC1.Nc1ncc(Cl)cc1Br>>Nc1ncc(Cl)cc1/C=C/C1CCCC1  
8821 C=Cc1ccc2ccc3cccc4ccc1c2c34.O=Cc1ccc(Br)cc1>>O=Cc1ccc(/C=C/c2ccc3ccc4cccc5ccc2c3c45)cc1  
8822 C=CC(=O)OC.CC(=O)OC[C@H]1O[C@@H](n2cnc(C(N)=O)c2I)[C@H](OC(C)=O)[C@@H]1OC(C  
8823 )=O>>COC(=O)/C=C/c1c(C(N)=O)ncn1[C@@H]1O[C@H](COC(C)=O)[C@@H](OC(C)=O)[C@H]  
C=CC(=O)OC.CCOC(=O)C(C)(c1ccc(Cl)cc1)C(C#N)C#N>>CCOC(=O)C(C)(c1ccc(/C=C/C(=O)OC)c  
8824 c1)C(C#N)C#N  
C=Cc1ccc(C(F)(F)F)cc1.CCCOC(=O)/C=C/c1ccc(Cl)cc1>>CCCCOC(=O)/C=C/c1ccc(/C=C/c2ccc(C  
8825 (F)(F)F)cc2)cc1  
C=Cc1ccc(O)cc1.Nc1cccc(Br)c1>>Nc1cccc(/C=C/c2ccc(O)cc2)c1  
8826 C=CC(=O)O.N#Cc1ccc(Br)cc1>>N#Cc1ccc(/C=C/C(=O)O)cc1  
8827 C=CCO.Cc1ccc(Br)cc1>>Cc1ccc(/C=C/CO)cc1  
8828 C=CC(OC)OC.COc1ccc(I)cc1F>>COc1ccc(/C=C/C(OC)OC)cc1F  
8829 C=Cc1ccc(O)c(O)c1.Oc1ccc(O)c(I)c1>>Oc1ccc(O)c(/C=C/c2ccc(O)c(O)c2)c1  
8830 C=CC(=O)OC.Nc1ncc(Br)cn1>>COC(=O)/C=C/c1cnc(N)nc1  
8831 C=C(NC(=O)OCc1cccc1)C(=O)OC.CC(=O)OCc1cc(C)ccc1Br>>COC(=O)/C=C/c1ccc(C)cc1COC(  
8832 C)=O)NC(=O)OCc1cccc1  
C=Cc1ccc(OC)cc1.CC(=O)c1ccc(Br)cc1>>COc1ccc(/C=C/c2ccc(C(C)=O)cc2)cc1  
8833 C=Cc1ccc(O)c(C(=O)OCC(C)C)c1.Cc1cccn1NS(=O)(=O)c1ccc(I)cc1>>Cc1cccn1NS(=O)(=O)c1ccc  
8834 (/C=C/c2ccc(O)c(C(=O)OCC(C)C)c2)cc1  
C=CCC(C)(C)C.CC(C)(C)c1cccc1OS(=O)(=O)C(F)(F)F>>C=C(C(C)(C)C)c1cccc1C(C)(C)C  
8835 C=C1CC(c2ccc(C)cc2)OC1=O.Ic1cccc1>>Cc1ccc(C2C/C(=C\c3cccc3)C(=O)O2)cc1  
8836 C=CC(=O)OCC.CC(C)(C)OC(=O)NC1Cc2ccc(Br)cc2C1>>CCOC(=O)/C=C/c1ccc2c(c1)CC(NC(=O)  
8837 OC(C)(C)C)C2  
C=CC(=O)OC.FC(F)(F)c1cccc(C2CSc3cc(Br)ccc3O2)c1>>COC(=O)/C=C/c1ccc2c(c1)SCC(c1cccc(C(  
8838 F)(F)F)c1)O2  
C=C.COc1ccc(Br)c(C(N)=O)c1>>C=Cc1ccc(OC)cc1C(N)=O  
8839 C=C.N#Cc1ccc(Br)cc1>>C=Cc1ccc(C#N)cc1  
8840 C=Cc1ccncc1.O=[N+][O-]c1ccc(Br)cc1>>O=[N+][O-]c1ccc(/C=C/c2ccncc2)cc1  
8841

C=C(CC(=O)OC)C(=O)OC.CC(C)(C)OC(=O)NCCCCOCCOCCOCCCN(Cc1cc(O[Si](c2ccccc2)(c2cccc  
 8842 c2)C(C)(C)C)ccc1Br)C(=O)OCc1cccc1>>COC(=O)C/C(=C/c1ccc(O[Si](c2ccccc2)(c2ccccc2)C(C)(C  
 )C)cc1CN(CCCOCCOCCOCCCN(C(=O)OC(C)(C)C)C(=O)OCc1cccc1)C(=O)OC  
 8843 C=CCN(C(=O)OC(C)(C)C)C(=O)OC(C)(C)C.COc1ccc(Br)cc1>>COc1ccc(/C=C/CN(C(=O)OC(C)(C)  
 C)C(=O)OC(C)(C)C)cc1  
 8844 C=CC(N)=O.CC1CC(C=O)=C(Br)c2ccccc21>>CC1CC(C=O)=C(/C=C/C(N)=O)c2ccccc21  
 8845 C=Cc1ccc([N+](=O)[O-])cc1.O=Cc1cccc1Br>>O=Cc1cccc1/C=C/c1ccc([N+](=O)[O-])cc1  
 8846 Brc1ccnc1.C=C/C=C/C(=O)N(CCCC)CCCC>>CCCN(CCCC)C(=O)/C=C/C=C/c1ccnc1  
 8847 C=CC(=O)OCC.Nc1ncc(C2CC2)cc1Br>>CCOC(=O)/C=C/c1cc(C2CC2)nc1N  
 8848 C=COCCCC.CN(C)CCc1sc2ccccc2c1Br>>C=C(OCCCC)c1c(CCN(C)C)sc2ccccc12  
 8849 C=Cc1cccn1.CNC(=O)c1cccc1Sc1ccc2c(I)n[nH]c2c1>>CNC(=O)c1cccc1Sc1ccc2c(/C=C/c3cccn3  
 )n[nH]c2c1  
 8850 C=CC(=O)N1N=Cc2ccccc2C1c1ccc(C)cc1.COc1cc(Cc2cnc(N)nc2N)cc(I)c1OC>>COc1cc(Cc2cnc(N)  
 nc2N)cc(/C=C/C(=O)N2N=Cc3ccccc3C2c2ccc(C)cc2)c1OC  
 8851 C=CN1CCCC1=O.O=S(=O)(Oc1cc(F)ccc1Br)C(F)(F)F>>C=C(c1cc(F)ccc1Br)N1CCCC1=O  
 8852 C=CC(=O)OC.N#Cc1ccnc1Br>>COC(=O)/C=C/c1ncccc1C#N  
 8853 C=CC(=O)[C@@]1(O)C[C@H]2CC[C@]1(C)C2(C)C.Cc1ccc(I)cc1>>Cc1ccc(/C=C/C(=O)[C@@]2(  
 O)C[C@H]3CC[C@]2(C)C3(C)C)cc1  
 8854 C=CC(C)=O.CCc1ccc2c(c1)C(OS(=O)(=O)C(F)(F)F)=CC(C)(C)CO2>>CCc1ccc2c(c1)C(/C=C/C(C)=  
 O)=CC(C)(C)CO2  
 8855 Brc1cccc1.C=C(C)C(=O)OC>>COC(=O)/C(C)=C/c1cccc1  
 8856 C=CC(=O)OC.Clc1ccc(Br)cc1>>COC(=O)/C=C/c1ccc(Cl)cc1  
 8857 C=Cc1ccc(OC)cc1.C[Si](C)(C)Cl>>COc1ccc(/C=C/[Si](C)(C)C)cc1  
 8858 Ic1cccc1.[11CH2]=Cc1cccc1>>C(=[11CH])/c1cccc1)c1cccc1  
 8859 C=CC(=O)N(C)OC.N#Cc1ccc2cc(Br)ccc2c1>>CON(C)C(=O)/C=C/c1ccc2cc(C#N)ccc2c1  
 8860 C=CCc1ccc2ccnc2n1.CCOC(=O)CC(c1ccc(OC)c(F)c1)c1nc(Br)cn1C>>CCOC(=O)CC(c1ccc(OC)c  
 (F)c1)c1nc(/C=C/CCc2ccc3ccnc3n2)cn1C  
 8861 C=CC(=O)OC.CC(C)=CCc1cc(I)ccc1O>>COC(=O)/C=C/c1ccc(O)c(CC=C(C)C)c1  
 8862 C=Cc1ccc(Cl)cc1.Oc1ccc2ccccc2c1Br>>Oc1ccc2ccccc2c1/C=C/c1ccc(Cl)cc1  
 8863 C=Cc1ccc(C=C)cc1.CCCCCCc1cc(/C=C/c2ccc(/C=C/c3cc(CCCCCC)c(/C=C/c4ccc(/C=C/c5cc(CCCC  
 CC)c(/C=C/c6ccc(C)cc6)cc5CCCCC)cc4)cc3CCCCC)cc2)c(CCCCCC)cc1Br>>C=Cc1ccc(/C=C/c2  
 cc(CCCCCC)c(/C=C/c3ccc(/C=C/c4cc(CCCCCC)c(/C=C/c5ccc(/C=C/c6cc(CCCCCC)c(/C=C/c7ccc(C  
 )cc7)cc6CCCCC)cc5)cc4CCCCC)cc3)cc2CCCCC)cc1  
 8864 C=CCC(C)N(C)C(=O)OC(C)(C)C.COc1ccc(Br)cn1>>COc1ccc(/C=C/CC(C)N(C)C(=O)OC(C)(C)C)c  
 8865 C=Cc1cncnc1.CCN(CC)c1ccc(Br)cc1>>CCN(CC)c1ccc(/C=C/c2cncnc2)cc1  
 8866 C=Cc1cccc1.Cc1cc(Br)ccc1C#N>>Cc1cc(/C=C/c2ccccc2)ccc1C#N  
 8867 C=Cc1ccc(OC)cc1.N#Cc1ccc(Br)cc1>>COc1ccc(/C=C/c2ccc(C#N)cc2)cc1  
 8868 C=CC(=O)OCC.Oc1c(F)cc(Br)cc1F>>CCOC(=O)/C=C/c1cc(F)c(CO)c(F)c1  
 8869 C=Cc1ccc2c(c1)CC[C@@H]1[C@@H]2CC[C@]2(C)C(=O)CC[C@@]12C.CCOC(=O)C(F)Br>>CC  
 OC(=O)C(F)/C=C/c1ccc2c(c1)CC[C@@H]1[C@@H]2CC[C@]2(C)C(=O)CC[C@@]12C  
 8870 C=Cc1cccc(C)c1.Oc1cccc1I>>Cc1cccc(/C=C/c2ccccc2O)c1  
 8871 C=CC(N)=O.N#Cc1c(-c2cccc(Br)c2)cc(-c2ccccc2)nc1N>>N#Cc1c(-c2cccc(/C=C/C(N)=O)c2)cc(-  
 c2ccccc2)nc1N  
 8872 C=Cc1cccc(Cl)c1.O=Cc1cccc(Br)c1>>O=Cc1cccc(/C=C/c2cccc(Cl)c2)c1  
 8873 C=CC(=O)OCCCC.COc1ccc2cc(Br)ccc2c1>>CCCCOC(=O)/C=C/c1ccc2cc(OC)ccc2c1  
 8874 C=CC(=O)OC.N#Cc1ccc(Br)c(F)c1>>COC(=O)/C=C/c1ccc(C#N)cc1F  
 8875 Brc1cccc2c1cc(-c1ccc(I)cc1)n2-c1nccn1.C=CC(=O)OC>>COC(=O)/C=C/c1ccc(-c2cc3c(Br)cccc3n2-  
 c2nccn2)cc1  
 8876 C=CC(=O)OC.CC(C)=CCc1c(Br)ncn1C>>COC(=O)/C=C/c1nnc(C)c1CC=C(C)C  
 8877 C=CC(=O)NC(C)C.C[C@]12[C@@]34C=C(Sc5cccc(I)c5)C(=O)[C@@](C)(CCC(=O)Nc5c(O)ccc(  
 C(=O)O)c5O)[C@@H]3[C@H](C[C@@H]1C4)O2>>CC(C)NC(=O)/C=C/c1cccc(SC2=C[C@]34[C  
 @H]5[C]C@H](O)C@@]5(C)C3)[C@H]4[C@](C)(CCC(=O)Nc3c(O)ccc(C(=O)O)c3O)C2=O)c1  
 8878 C=COCCN(C)C.Cc1cccc1OS(=O)(=O)C(F)(F)F>>C=C(OCCN(C)C)c1cccc1C  
 8879 C=CC(C)(C)C.COc1cc(Br)ccc1O>>COc1cc(/C=C/C(C)(C)C)ccc1O  
 C=Cc1ccc2c(c1)C(CCCCCCCC)(CCCCCCCC)c1cc(/C=C/c3ccc(N(c4ccccc4)c4ccccc4)cc3)ccc1-  
 2.CCCCCCCCC1(CCCCCCCC)c2cc(Br)ccc2-  
 8880 c2ccc(C=O)cc21>>CCCCCCCCC1(CCCCCCCC)c2cc(C=O)ccc2-  
 c2ccc(/C=C/c3ccc4c(c3)C(CCCCCCCC)(CCCCCCCC)c3cc(/C=C/c5ccc(N(c6ccccc6)c6ccccc6)cc5)cc  
 c3-4)cc21  
 8881 C=CCC(C)N(C)C(=O)OC(C)(C)C.Oc1cnc(Br)c1>>CC(C/C=C/c1ncc(O)c1)N(C)C(=O)OC(C)(C)C  
 8882 C=CC(=O)OCC.CC1OCCC1Sc1c(I)nc2ccccc12>>CCOC(=O)/C=C/c1cnc2ccccc2c1SC1CCOC1C

8883 C=CS(C)(=O)=O.CC(C)c1cc(C(C)C)c(Br)c(C(C)C)c1>>CC(C)c1cc(C(C)C)c(/C=C/S(C)(=O)=O)c(C(C)C)c1  
8884 C=CC(=O)OC.CC(C)(C)OC(=O)n1cc(I)c([Si](C)(C)C)c1>>COC(=O)/C=C/c1cn(C(=O)OC(C)(C)C)cc1[Si](C)(C)C  
8885 C=Cc1ccccc1.O=C(c1ccc(F)cc1)N1CCC(O)(Cn2cnc3c(cnn3-c3ccc(Br)cc3)c2=O)CC1>>O=C(c1ccc(F)cc1)N1CCC(O)(Cn2cnc3c(cnn3-c3ccc(/C=C/c4ccccc4)cc3)c2=O)CC1  
8886 C=CC(=O)OC.O=c1[nH]c(=O)n([C@H]2O[C@H](CO)[C@H](O)[C@H]2F)cc1I>>COC(=O)/C=C/c1cn([C@H]2O[C@H](CO)[C@H](O)[C@H]2F)c(=O)[nH]c1=O  
8887 C=CC(=O)OC.Clc1cccc(Br)c1>>COC(=O)/C=C/c1cccc(Cl)c1  
8888 C=CC(=O)OCC.Ic1cn(C(c2ccccc2)(c2ccccc2)c2ccccc2)c(N=P(c2ccccc2)(c2ccccc2)c2ccccc2)n1>>CCOC(=O)/C=C/c1cn(C(c2ccccc2)(c2ccccc2)c2ccccc2)c(N=P(c2ccccc2)(c2ccccc2)c2ccccc2)n1  
8889 C=Cc1cc(OC)cc(OC)c1.COc1cc(I)cc(OC)c1OC>>COc1cc(/C=C/c2cc(OC)c(OC)c(OC)c2)cc(OC)c1  
8890 C=Cc1ccccc1.CC[C@]12C=CCN3CC[C@]4(c5cc(Br)c(OC)cc5N(C)[C@H]4[C@@](O)(C(=O)OC)[C@H]1OC(C)=O)[C@H]32>>CC[C@]12C=CCN3CC[C@]4(c5cc(/C=C/c6ccccc6)c(OC)cc5N(C)[C@H]4[C@@](O)(C(=O)OC)[C@H]1OC(C)=O)[C@H]32  
8891 C=Cc1ccccc1.O=c1ccoc2ccc(Br)cc12>>O=c1ccoc2ccc(/C=C/c3ccccc3)cc12  
8892 C=CC1(O)CCC1.Clc1ccc(I)cc1>>OC1(/C=C/c2ccc(Cl)cc2)CCC1  
8893 C=Cc1cncnc1.C[C@H](COc1cnc(Cl)c(Br)c1)NC(=O)OC(C)(C)C>>C[C@H](COc1cnc(Cl)c(/C=C/c2ccncc2)c1)NC(=O)OC(C)(C)C  
8894 C=CC(=O)O[C@H]1C[C@H](C)CC[C@H]1C(C)C.COc1cc(Br)c(C=O)c(OC)c1>>COc1cc(/C=C/C(=O)O[C@H]2C[C@H](C)CC[C@H]2C(C)C)c(C=O)c(OC)c1  
8895 C=Cc1ccccc1.O=C(OC[C@H]1O[C@H](n2cc(I)c(=O)[nH]c2=O)C[C@H]1OC(=O)c1ccccc1)c1ccccc1>>O=C(OC[C@H]1O[C@H](n2cc(/C=C/c3ccccc3)c(=O)[nH]c2=O)C[C@H]1OC(=O)c1ccccc1)c1ccccc1  
8896 BrC1CCCCC1.C=Cc1cccc(Cl)c1>>Clc1cccc(/C=C/C2CCCCC2)c1  
8897 C=Cc1ccc(Br)cc1.Fc1ccc(I)cc1>>Fc1ccc(/C=C/c2ccc(Br)cc2)cc1  
8898 C=CCC1(C)c2ccccc2N(C)C1c1ccccc1.COc1ccc(I)cc1>>COc1ccc(/C=C/CC2(C)c3ccccc3N(C)C2c2ccccc2)cc1  
8899 C=Cc1ccc(-n2c3ccccc3c3ccccc32)cc1.CCCCC(CC)CN1C(=O)c2cccc3c(Br)ccc(c23)C1=O>>CCCCC(CC)CN1C(=O)c2cccc3c(/C=C/c4ccc(-n5c6ccccc6c6ccccc65)cc4)ccc(c23)C1=O  
8900 C=CC(=O)NC(C)(C)C.COc1ccc(I)cc1>>COc1ccc(/C=C/C(=O)NC(C)(C)C)cc1  
8901 C=CC(=O)OC.CC(C)(C)OC(=O)N1CCC2(CC1)CC(=O)c1cc(Br)ccc1O2>>COC(=O)/C=C/c1ccc2c(c1)C(=O)CC1(CCN(C(=O)OC(C)(C)C)CC1)O2  
8902 C=CC(=O)OC.Ic1cccc2ccccc12>>COC(=O)/C=C/c1cccc2ccccc12  
8903 C=CC(N)=O.CCN1c2ncc(I)cc2C(=O)N(C)c2ccncc21>>CCN1c2ncc(/C=C/C(N)=O)cc2C(=O)N(C)c2cnc21  
8904 C=Cc1ccc(C(F)(F)F)cc1.Ic1ccccc1>>FC(F)(F)c1ccc(/C=C/c2ccccc2)cc1  
8905 C=C.ClCc1ccc(-c2ccccc2)cc1>>C=CCc1ccc(-c2ccccc2)cc1  
8906 Brclc2ccccc2cc2ccccc12.C=Cc1nc2c(N)ncnc2n1[C@H]1C[C@H](O[Si](C)(C)C(C)(C)C)[C@@H](C)O[Si](C)(C)C(C)(C)C)O1>>CC(C)(C)[Si](C)(C)OC[C@H]1O[C@H](n2c(/C=C/c3c4ccccc4cc4cccc34)nc3c(N)ncnc32)C[C@@H]1O[Si](C)(C)C(C)(C)C  
8907 C=Cc1ccc(C)cc1C.C[Si](C)(C)I>>Cc1ccc(/C=C/[Si](C)(C)C)c(C)c1  
8908 C=C(Br)CC.C=Cc1ccc(C#N)cc1>>C=C/C=C/c1ccc(C#N)cc1)CC  
8909 Brclcncc1.C=Cc1ccc(/C=C/c2ccc(N(C)C)cc2)cc1>>CN(C)c1ccc(/C=C/c2ccc(/C=C/c3ccncc3)cc2)cc1  
8910 C=CC(=O)Nc1ccccc1NC(=O)OC(C)(C)C.CCOC(=O)[C@H]1CN(C)C[C@H]1c1ccc(Br)cc1>>CCOC(=O)[C@H]1CN(C)C[C@H]1c1ccc(/C=C/C(=O)Nc2ccccc2NC(=O)OC(C)(C)C)cc1  
8911 C=C.CC(=O)Oc1cccc(I)c1>>C=Cc1cccc(OC(C)=O)c1  
8912 Brclccnc1.C=CC(C)(O)CCC=C(C)C>>CC(C)=CCCC(C)(O)/C=C/c1ccncc1  
8913 C=C1CN(C(=O)OCC)N1C(=O)OCC.Ic1ccccc1>>CCOC(=O)N1C/C(=C/c2ccccc2)N1C(=O)OCC  
8914 BrC1=CCCc2ccccc21.C=CCCCCCC>>C=C(CCCCCC)C1=CCCc2ccccc21  
8915 C=C.COc1ccccc1Br>>C=Cc1ccccc1OC  
8916 C=C.O=[N+][([O-])c1cc(Cl)ccc1Br>>C=Cc1ccc(Cl)cc1[N+](=O)[O-]  
8917 C=Cc1ccccc1.COc1ccc(CCl)cc1>>COc1ccc(C/C=C/c2ccccc2)cc1  
8918 C=CC(=O)OC.Clc1ccc(S(=O)(=O)n2ccc3c(Br)cccc32)cc1>>COC(=O)/C=C/c1cccc2c1ccn2S(=O)(=O)c1ccc(C)cc1  
8919 C=CCOC(C)=O.COc1ccc(I)cc1>>COc1ccc(/C=C/COC(C)=O)cc1  
8920 C=CCCCC(=O)O.N#Cc1ccc(Br)cc1>>N#Cc1ccc(/C=C/CCCC(=O)O)cc1  
8921 C=CCNC(=O)OC(C)(C)C.COc1ccc(Br)c(C=O)c1O>>COc1ccc(/C=C/CNC(=O)OC(C)(C)C)c(C=O)c1

8922 C=CC(=O)OC.Cc1ccc(S(=O)(=O)n2cc(I)c(-c3ccccc3)c2)cc1>>COC(=O)/C=C/c1cn(S(=O)(=O)c2ccc(C)cc2)cc1-c1ccccc1  
 8923 C=CC(=O)OC.C[C@@H](NC(=O)OC(C)(C)C)c1nc(/C=C\Br)cs1>>COC(=O)/C=C/C=Cc1csc([C@@H](C)NC(=O)OC(C)(C)C)n1  
 8924 Br1ccc2cc[nH]c2c1.C=CC(=O)O>>O=C(O)/C=C/c1ccc2cc[nH]c2c1  
 8925 C=Cc1nc2c(=O)[nH]c(N=CN(C)C)nc2n1[C@H]1C[C@H](O)[C@@H](CO)O1.CC(=O)c1ccc(Br)cc1>>CC(=O)c1ccc(/C=C/c2nc3c(=O)[nH]c(N=CN(C)C)nc3n2[C@H]2C[C@H](O)[C@@H](CO)O2)cc1  
 8926 C=COCCO.COc1ccc(Br)cc1>>C=C(OCCO)c1ccc(OC)cc1  
 8927 C=COCCCC.Fc1ccccc1Cl>>C=C(OCCCC)c1ccccc1F  
 8928 Br1ccc2c(Nc3ccccc3)ncnc2c1.C=CC(=O)OC>>COC(=O)/C=C/c1ccc2c(Nc3ccccc3)ncnc2c1  
 8929 C=CC.O=[N+](O-)]c1ccc(Br)cc1>>C/C=C/c1ccc([N+](=O)[O-])cc1  
 8930 C=Cc1cncnc1.CCOc1ccc(Br)cc1F>>CCOc1ccc(/C=C/c2cncnc2)cc1F  
 8931 C=C(Br)CC.C=CC(=O)CC>>C=C(/C=C/C(=O)CC)CC  
 8932 C=CC(=O)OC(C)(C)C.Cc1c(Br)ccc(OCc2ccccc2)c1C>>Cc1c(/C=C/C(=O)OC(C)(C)C)ccc(OCc2ccccc2)c1C  
 8933 C=CC(=O)NCO.C[C@]12C[C@@]34C=C(Sc5ccc(I)cc5)C(=O)[C@@](C)(CCC(=O)Nc5c(O)ccc(C(=O)O)c5O)[C@@H]3[C@H](C[C@@H]1C4)O2>>C[C@]12C[C@@]34C=C(Sc5ccc(/C=C/C(=O)NCO)cc5)C(=O)[C@@](C)(CCC(=O)Nc5c(O)ccc(C(=O)O)c5O)[C@@H]3[C@H](C[C@@H]1C4)O2  
 8934 C=CC(=O)OCC(C)CCCC.COc1ccc(I)cc1>>CCCCC(C)COC(=O)/C=C/c1ccc(OC)cc1  
 8935 Br1ccccc1.C=C(NC(C)=O)C(=O)OC>>COC(=O)/C(=C/c1ccccc1)NC(C)=O  
 8936 C=CC(=O)OCC.Cn1nc(-c2ccccc2)c(Br)cc1=O>>CCOC(=O)/C=C/c1cc(=O)n(C)nc1-c1ccccc1  
 8937 C=Cc1ccc(C)cc1.Cc1c(Br)c(=O)oc2cc(N)ccc12>>Cc1ccc(/C=C/c2c(C)c3ccc(N)cc3oc2=O)cc1  
 8938 C=CC(=O)OCCCC.COc1ccc2cc(Br)ccc2c1-c1c(OC)ccc2ccccc12>>CCCCOC(=O)/C=C/c1ccc2c(-c3c(OC)ccc4ccccc34)c(OCOC)ccc2c1  
 8939 C=CC(=O)CC.CC(C)=C(C)Br>>CCC(=O)/C=C/C(C)=C(C)C  
 8940 C=C(NC(=O)OC(C)(C)C)C(=O)OC.Cc1cc(N)ccc1I>>COC(=O)/C=C/c1ccc(N)cc1C)NC(=O)OC(C)(C=Cc1scnc1C.O=C1CCC(c2ccc(Br)cc2)O1>>Cc1ncsc1/C=C/c1ccc(C2CCC(=O)O2)cc1  
 8941 C=C.COc1ccccc(CCl)c1>>C=CCc1ccccc(OC)c1  
 8942 Br1cncnc1.C=CCC(C)C(=O)OCC>>CCOC(=O)C(C)C/C=C/c1cncnc1  
 8943 C=CC(F)=C1CCN(Cc2ccccc2)CC1.Ic1ccccc1>>FC(/C=C/c1ccccc1)=C1CCN(Cc2ccccc2)CC1  
 8944 Br1cccc2ccccc12.C=CC(=O)N1CCOCC1>>O=C(/C=C/c1ccc2ccccc12)N1CCOCC1  
 8945 Br1ccc(C(=C(c2ccccc2)c2ccccc2)c2ccccc2)cc1.C=Cc1cncnc1>>C(=C/c1ccc(C(=C(c2ccccc2)c2ccccc2)c2ccccc2)cc1)c1cncnc1  
 8946 C=CC(=O)OCC.CC(C)c1nc(C(C)C)c(Cl)n1>>CCOC(=O)/C=C/c1nc(C(C)C)nc1C(C)C  
 8947 C=Cc1ccccc1.Cc1cc(I)cc(C)n1>>Cc1cc(/C=C/c2ccccc2)cc(C)n1  
 8948 C=CC(=O)OC.Ic1ccc2c(c1)Cc1ccccc1-2>>COC(=O)/C=C/c1ccc2c(c1)Cc1ccccc1-2  
 8949 C=CCN(C(=O)c1scnc1C)[C@H](C)c1cc(F)cc(F)c1.O=C1Nc2ncccc2[C@@]12Cc1cc(Br)enc1C2>>Cc1ccsc1C(=O)N(C/C=C/c1nc2c(c1)C[C@@]1(C2)C(=O)Nc2ncccc21)[C@H](C)c1cc(F)cc(F)c1  
 8950 C=CC(=O)OC.CN(C)C(=O)c1cn(Cc2ccc(Br)cc2)c2ccccc12>>COC(=O)/C=C/c1ccc(Cn2cc(C(=O)N(C)C)c3ccccc32)cc1  
 8951 C=CC(=O)OC.CC(C)(C)c1ccc(Cn2nnc(-c3cn(Cc4ccccc4)nn3)c2I)cc1>>COC(=O)/C=C/c1c(-c2cn(Cc3ccccc3)nn2)nnn1Cc1ccc(C(C)(C)C)cc1  
 8952 Br1ccc2ccccc2n1.C=Cc1ccccc1>>C(=C/c1ccc2ccccc2n1)c1ccccc1  
 8953 C=Cc1ccc(N(c2ccc(C)cc2)c2ccc(C)cc2)cc1.O=Cc1ccc(Br)cc1>>Cc1ccc(N(c2ccc(C)cc2)c2ccc(/C=C/c3ccc(C=O)cc3)cc2)cc1  
 8954 C=CC(=O)OC(C)(C)C.O=Cc1ccccc(I)c1>>CC(C)(C)OC(=O)/C=C/c1ccccc(C=O)c1  
 8955 C=CC(=O)OC.O=C(c1ccccc1)c1sc2cc(O)ccc2c1Oc1ccc(Br)cc1>>COC(=O)/C=C/c1ccc(Oc2c(C(=O)c3ccccc3)sc3cc(O)ccc23)cc1  
 8956 C=CC(=O)OC(C)(C)C.O=C1CCC(N2C(=O)c3ccccc(Br)c3C2=O)C(=O)N1>>CC(C)(C)OC(=O)/C=C/c1ccccc2c1C(=O)N(C1CCC(=O)NC1=O)C2=O  
 8957 C=CC(=O)OC.CC(C)(C)CN(Cc1ccc(Br)cc1)c1cnc(Cl)n1>>COC(=O)/C=C/c1ccc(CN(CC(C)(C)C)c2cnc(Cl)n2)cc1  
 8958 Br1ccc2c(c1)OCO2.C=CC1OCCO1>>C(=C/C1OCCO1)\c1ccc2c(c1)OCO2  
 8959 C=CC(=O)OC(C)(C)C.Oc1ccc(I)cc1>>CC(C)(C)OC(=O)/C=C/c1ccc(O)cc1  
 8960 C=CC(=O)OCC.CC(C)(C)Oc1ccc(Br)nc1C#N>>CCOC(=O)/C=C/c1ccc(OC(C)(C)C)c(C#N)n1  
 8961 C=CC(=O)N1CCC2(CC1)OCCO2.O=Cc1ccccc1Br>>O=Cc1ccccc1/C=C/C(=O)N1CCC2(CC1)OCCO  
 8962 C=CC1CCCCC1.Cc1ccccc1Br>>Cc1ccccc1/C=C/C1CCCCC1  
 8963 C=Cc1ccccc1.Clc1ccc2ccccc12>>C(=C/c1ccc2ccccc12)\c1ccccc1  
 8964 C=Cc1ccccc1.Fc1ccccc1Cl>>Fc1ccccc1/C=C/c1ccccc1  
 8965 Br1ccc(-c2cncnc2)cc1.C=CC(N)=O>>NC(=O)/C=C/c1ccc(-c2cncnc2)cc1

8967 C=CC(OCC)OCC.O=[N+](O)c1ccc(I)cc1>>CCOC(/C=C/c1ccc([N+](=O)[O-])cc1)OCC  
 8968 C=CC(=O)NCCCCC(=O)OC.CC(=O)OC[C@H]1C=C[C@H](n2cc(I)c(=O)[nH]c2=O)O1>>COC(=O)CCCCNC(=O)/C=C/c1cn([C@H]2C=C[C@H](COC(C)=O)O2)c(=O)[nH]c1=O  
 8969 C=Cc1ccc(C)cc1.O=c1oc2ccccc2cc1Br>>Cc1ccc(/C=C/c2cc3ccccc3oc2=O)cc1  
 8970 C=CC(=O)OC.CC(C)(C)OC(=O)Nc1ccsc1Br>>COC(=O)/C=C/c1sccc1NC(=O)OC(C)(C)C  
 C=Cc1cccc([N+](=O)[O-]  
 8971 ]c1.N[C@H](Cc1c[nH]c2c(Br)cccc12)C(=O)O>>N[C@H](Cc1c[nH]c2c(/C=C/c3cccc([N+](=O)[O-])c3)cccc12)C(=O)O  
 C=CC(=O)OC(C)(C)C.CC(C)(F)CN1[C@H](c2c(F)cc(Br)cc2F)c2ccc3c(cnn3C3CCCCO3)c2C[C@H]1C(F)F>>CC(C)(F)CN1[C@H](c2c(F)cc(/C=C/C(=O)OC(C)(C)C)cc2F)c2ccc3c(cnn3C3CCCCO3)c2C[C@H]1C(F)F  
 8972 C=CCN1C(=O)c2ccccc2C1=O.Ic1ccccc1>>O=C1c2ccccc2C(=O)N1C/C=C/c1ccccc1  
 8973 C=CC(=O)OCC.Cc1ccc(Br)c(C=O)c1>>CCOC(=O)/C=C/c1ccc(C)cc1C=O  
 8974 C=CCN1C(=O)c2ccccc2C1=O.COC(=O)c1ccc(Br)cc1>>COC(=O)c1ccc(/C=C/CN2C(=O)c3ccccc3C2=O)cc1  
 8975 Br1ccsc1.C=C>>C=Cc1ccsc1  
 8976 C=C[C@H]1CN2CC[C@H]1C[C@H]2[C@H](O)c1ccnc2ccc(OC)cc12.COc1ccc(Br)cc1>>COc1ccc(/C=C/[C@H]2CN3CC[C@H]2C[C@H]3[C@H](O)c2ccnc3ccc(OC)cc23)cc1  
 8977 C=CCOc1ccccc1C(C)C.Ic1ccccc1>>CC(C)c1ccccc1OC/C=C/c1ccccc1  
 8978 C=CC(=O)OCC.CC(C)[C@H]1CC[C@H]2(C)C[C@H]1c1c(c(Br)cc3c1[nH]c1ccccc13)O2>>CCOC(=O)/C=C/c1cc2c([nH]c3ccccc32)c2c1O[C@H]1(C)CC[C@H](C(C)C)[C@H]2C1  
 8979 C=CC(=O)Nc1ccccc1NC(=O)OC(C)(C)C.O=C(Nc1ccc(C(F)(F)F)cc1)C(O)c1ccc(Br)cc1>>CC(C)(C)OC(=O)Nc1ccccc1NC(=O)/C=C/c1ccc(C(O)C(=O)Nc2ccc(C(F)(F)F)cc2)cc1  
 8980 C=CC#N.CC(=O)Nc1ccc(I)cc1>>CC(=O)Nc1ccc(/C=C/C#N)cc1  
 8981 C=C(C)C(=O)OC.O=Cc1ccc(Cl)cc1>>COC(=O)/C(C)=C/c1ccc(C=O)cc1  
 8982 C=CC(=O)N(C)Cc1cccc(OC)c1OCCC.CC(C)(C)OC(=O)N1CCNc2ncc(Br)cc2C1>>CCCOc1c(CN(C)C(=O)/C=C/c2cnc3c(c2)CN(C(=O)OC(C)(C)CCN3)ccccc1OC  
 8983 C=Cc1ccccc1.C[C@H]1CC(=O)Nc2cccc(Br)c2N1>>C[C@H]1CC(=O)Nc2cccc(/C=C/c3ccccc3)c  
 8984 C=CS(C)(=O)=O.Fc1ccc(Br)cc1>>CS(=O)(=O)/C=C/c1ccc(F)cc1  
 8985 C=CC(=O)C1=CN(C(C)(C)C)CCC1(C)C.Ic1ccccc1>>CC1(C)CCN(C(C)(C)C)C=C1C(=O)/C=C/c1ccc  
 8986 C=Cc1ccc(N(CC)CCO)cc1.CS(=O)(=O)c1ccc(/C=C/c2ccc(Br)cc2)cc1>>CCN(CCOC)c1ccc(/C=C/c2ccc  
 8987 (/C=C/c3ccc(S(C)(=O)=O)cc3)cc2)cc1  
 Br1ccsc1.C=Cc1ccc(C(=O)OC(C)(C)C)c(Nc2ccc(F)cc2)c1>>CC(C)(C)OC(=O)c1ccc(/C=C/c2ccsc2)c  
 8988 c1Nc1ccc(F)cc1  
 C=Cc1ccc(OC)cc1.Cc1ccc(S(=O)(=O)N(Cc2ccccc2)c2cc3ccc(Br)cc3c(=O)o2)cc1>>COc1ccc(/C=C/c2  
 8989 ccc3cc(N(Cc4ccccc4)S(=O)(=O)c4ccc(C)cc4)oc(=O)c3c2)cc1  
 8990 C=Cc1ccccc1.CC(C)(C)c1ccc(I)cc1>>CC(C)(C)c1ccc(/C=C/c2ccccc2)cc1  
 8991 C=Cc1cc(C)c(OCOCCOC)c(C)c1.O=[N+](O-  
 8992 ]c1ccc2nc(Cl)ccc2c1>>COCCOCOc1c(C)cc(/C=C/c2ccc3cc([N+](=O)[O-])ccc3n2)cc1C  
 C=Cc1ccccc1.Nc1cc([N+](=O)[O-])ccc1Nc1ccc(Br)cc1>>Nc1cc([N+](=O)[O-]  
 8993 ]ccc1Nc1ccc(/C=C/c2ccccc2)cc1  
 C=CC(=O)OCC.O=c1cc(-c2ccccc2)oc2cc(Br)ccc12>>CCOC(=O)/C=C/c1ccc2c(=O)cc(-  
 8994 C=CCc1nc(-  
 c2ccccc2)oc1C.CCOC(=O)C1(Oc2ccc(I)cc2)CCC1>>CCOC(=O)C1(Oc2ccc(/C=C/Cc3nc(-  
 8995 C=CCOc1ccccc1)c1.Ic1ccccc1>>Cc1ccc(OC/C=C/c2ccccc2)c1  
 8996 C=CC(=O)OC1CCCCC1.Cc1ccc(I)cc1>>Cc1ccc(/C=C/C(=O)OC2CCCCC2)cc1  
 8997 C=CS(C)(=O)=O.COc1ccccc1Br>>COc1ccccc1/C=C/S(C)(=O)=O  
 8998 C=CC(=O)OC.Cc1ccsc1C(=O)c1sc2cc(O)ccc2c1Oc1ccc(Br)cc1>>COC(=O)/C=C/c1ccc(Oc2c(C(=O)c3sccc3C)sc3cc(O)ccc23)cc1  
 C=CCS(=O)(=O)NCCNC(=O)OCc1ccccc1.CC(=O)OC[C@H]1O[C@H](Oc2n[nH]c(C(C)C)c2Cc2c  
 8999 cc(Br)cc2)[C@H](OC(C)=O)[C@H](OC(C)=O)[C@H]1OC(C)=O>>CC(=O)OC[C@H]1O[C@H](Oc2n[nH]c(C(C)C)c2Cc2ccc(/C=C/CS(=O)(=O)NCCNC(=O)OCc3ccccc3)cc2)[C@H](OC(C)=O)[C@H](OC(C)=O)[C@H]1OC(C)=O  
 C=CC(C)(C)O.Clc1ccccc1>>CC(C)(O)/C=C/c1ccccc1  
 9000 C=COCCCC.Fc1ccccc1Br>>C=C(OCCCC)c1ccccc1F  
 9001 C=Cc1cnc2c(ccn2C(=O)OC(C)(C)C)c1OC.CCN1CCN(Cc2ccc(NC(=O)c3ccc(C)c(I)c3)cc2C(F)(F)F)C  
 9002 C1>>CCN1CCN(Cc2ccc(NC(=O)c3ccc(C)c(/C=C/c4cnc5c(ccn5C(=O)OC(C)(C)C)c4OC)c3)cc2C(F)(C=Cc1ccccc1.CC(C)(C)OC(=O)N[C@H](COc1cnc(Br)c1)C(=O)Nc1ccc2ccccc2c1>>CC(C)(C)OC(=O)N[C@H](COc1cnc(/C=C/c2ccccc2)c1)C(=O)Nc1ccc2ccccc2c1  
 9003 C=CC(=O)O.COc1cc(I)ccc1Br>>COc1cc(/C=C/C(=O)O)ccc1Br  
 9004 C=CCCCCCC.COc1cc(Br)cc(OC)c1>>C=C(CCCCCC)c1cc(OC)cc(OC)c1  
 9005

[illegible]



9043 C=CC(=O)OC.Cc1cc(C(=O)c2ccc3c(c2)C(C)(C)CCC3(C)C)ccc1Br>>COC(=O)/C=C/c1ccc(C(=O)c2c  
 cc3c(c2)C(C)(C)CCC3(C)C)cc1C  
 9044 C=CC(=O)OCCCC.CCCCc1ccc(Br)cc1>>CCCCOC(=O)/C=C/c1ccc(CCCC)cc1  
 9045 C=CC(=O)O.O=[N+][O-]  
 ]c1c(I)ccc2c1C=CC1(CCCCCC1)O2>>O=C(O)/C=C/c1ccc2c(c1)[N+](=O)[O-  
 C=Cc1ccc(C(=O)OC)cc1.COc1cc[nH]c1/C=C1\C(=O)Nc2cccc(I)c21>>COC(=O)c1ccc(/C=C/c2cccc3  
 c2/C(=C/c2[nH]ccc2OC)C(=O)N3)cc1  
 9046 C=C1C(=O)O[C@H]2[C@H]1CCC(=C)[C@@H]1C[C@H](OC(C)=O)C(=C)[C@H]21.Ic1cccc1>>C  
 =C1CC[C@H]2/C(=C\C3cccc3)C(=O)O[C@@H]2[C@H]2C(=C)[C@@H](OC(C)=O)C[C@@H]12  
 C=C1C(=O)O[C@H]2[C@H]1CCC(=C)[C@@H]1C[C@H](OC(C)=O)C(=C)[C@H]21.CC(=O)Nc1c  
 cc(I)cc1C(F)(F)F>>C=C1CC[C@H]2/C(=C\C3cccc(NC(C)=O)c(C(F)(F)F)c3)C(=O)O[C@H]2[C@H]  
 2C(=C)[C@@H](OC(C)=O)C[C@@H]12  
 9047 C=CC(=O)N1CCCC1.O=Cc1cc(OCc2cccc2)ccc1Br>>O=Cc1cc(OCc2cccc2)ccc1/C=C/C(=O)N1CC  
 C=Cc1ccc(C(=O)OC)cc1.Cn1cc(I)c(=O)c2cccc21>>COC(=O)c1ccc(/C=C/c2cn(C)c3cccc3c2=O)cc1  
 9048 C=CC(=O)OCCCC.Cn1ccc2cc(Br)ccc21>>CCCCOC(=O)/C=C/c1ccc2c(cen2C)c1  
 9049 C=CCC(C)O.CC(C)(C)c1ccc(OS(=O)(=O)C(F)(F)F)cc1>>C=C(CC(C)O)c1ccc(C(C)(C)C)cc1  
 9050 C=CC(=O)OC(C)(C)C.COc1ccc(S(=O)(=O)c2ccc3c(Br)cccc3n2)cc1>>COc1ccc(S(=O)(=O)c2ccc3c(/  
 C=C/C(=O)OC(C)(C)C)cccc3n2)cc1  
 9051 C=CC(=O)OCc1cccc1.CCn1nnc2c(Cl)c(Br)ccc21>>CCn1nnc2c(Cl)c(/C=C/C(=O)OCc3cccc3)ccc21  
 9052 C=Cc1ccncc1.CC(C)[C@@H](COc1nccc(Br)c1)NC(=O)OC(C)(C)C>>CC(C)[C@@H](COc1nccc(/C  
 =C/c2ccncc2)c1)NC(=O)OC(C)(C)C  
 9053 C=CC(=O)OC(C)(C)C.CC(C)(C)O[C@H]1CC[C@H]2C=C(C3=C(Br)CCCC3)CC[C@H]12C>>CC(C  
 )(C)OC(=O)/C=C/C1=C(C2=C[C@H]3CC[C@H](OC(C)(C)C)[C@@H]3(C)CC2)CCCC1  
 9054 C=CC(=O)OC(C)(C)C.CN(C)c1ccc(CNc2ccc(Br)cn2)cc1>>CN(C)c1ccc(CNc2ccc(/C=C/C(=O)OC(C)  
 (C)C)cn2)cc1  
 9055 C=Cc1ccc(OC(C)=O)cc1.FCCOCCOCCOc1ncc(I)cc1Br>>CC(=O)Oc1ccc(/C=C/c2enc(OCCOCCOC  
 CF)c(Br)c2)cc1  
 9056 Br1ccncc1.C=CC(=O)CC>>CCC(=O)/C=C/c1ccncc1  
 9057 C=Cc1ccc(C(=O)OCC)cc1.C[Si](C)(OS(=O)(=O)C(F)(F)F)OS(=O)(=O)C(F)(F)F>>CCOC(=O)c1ccc(/  
 C=C/[Si](C)(C)OS(=O)(=O)C(F)(F)F)cc1  
 9058 C=CC(=O)OCC.COc1cccc(-c2cccc2)c1I>>CCOC(=O)/C=C/c1c(OC)cccc1-c1cccc1  
 9059 C=CS(=O)(=O)F.CC(C)[Si](Oc1cccc(I)c1)(C(C)C)C(C)C>>CC(C)[Si](Oc1cccc(/C=C/S(=O)(=O)F)c1  
 )(C(C)C)C(C)C  
 9060 C=Cc1cc(OC(=O)c2cccc2)cc(OC(=O)c2cccc2)c1.O=C(Oc1ccc(I)cc1)c1cccc1>>O=C(Oc1ccc(/C=C  
 /c2cc(OC(=O)c3cccc3)cc(OC(=O)c3cccc3)c2)cc1)c1cccc1  
 9061 C=Cc1cccn1.CC(C)(C)Br>>CC(C)(C)/C=C/c1cccn1  
 9062 C=CC(=O)OC.O=C1c2cccc2C(=O)N1c1cccc1I>>COC(=O)/C=C/c1cccc1N1C(=O)c2cccc2C1=O  
 C=Cc1ccc(/C=C/c2ccc(OCCCCCCCCCCCC)cc2)cc1.CCCCOc1c(C)cc(I)cc1C>>CCCCCCCCCCCCCO  
 c1ccc(/C=C/c2ccc(/C=C/c3cc(C)c(OCCCC)c(C)c3)cc2)cc1  
 9063 C=C/C=C/c1cccc1.FC(F)(F)I>>FC(F)(F)/C=C/C=C/c1cccc1  
 9064 C=Cc1ccc(OC)cc1.O=c1c(I)c(/C=C/c2ccc(Cl)cc2)[nH]c2cccc12>>COc1ccc(/C=C/c2c(/C=C/c3ccc(Cl  
 )cc3)[nH]c3cccc3c2=O)cc1  
 9065 C=COCCCCC.O=[N+][O-]c1ccc(Br)cc1>>C=C(OCCCC)c1ccc([N+](=O)[O-])cc1  
 9066 C=Cc1ccc(C=C)cc1.Cc1ccc(Br)cc1>>C=Cc1ccc(/C=C/c2ccc(C)cc2)cc1  
 9067 C=CC(=O)OC.N#CCn1c(=O)oc2cc(Br)cn21>>COC(=O)/C=C/c1cnc2c(c1)oc(=O)n2CC#N  
 9068 C=CC(=O)OCCCC.O=C1CCC(N2C(=O)c3ccc(Br)cc3C2=O)C(=O)N1>>CCCCOC(=O)/C=C/c1ccc2c  
 (c1)C(=O)N(C1CCC(=O)NC1=O)C2=O  
 9069 C=CC(=O)OC(C)(C)C.CCOC(=O)c1sc(Br)cc1C>>CCOC(=O)c1sc(/C=C/C(=O)OC(C)(C)C)cc1C  
 9070 C=CC(=O)OC(C)(C)C.N#CCc1ccc(Br)cc1>>CC(C)(C)OC(=O)/C=C/c1ccc(CC#N)cc1  
 9071 Br1cnc2nc(-c3cccc3)c(-  
 c3cccc3)nc2c1.C=CCN1C(=O)c2cccc2C1=O>>O=C1c2cccc2C(=O)N1C/C=C/c1cnc2nc(-  
 c3cccc3)c(-c3cccc3)nc2c1  
 9072 Br1cccc1.C=Cc1cc2cccc2oc1=O>>O=c1oc2cccc2cc1/C=C/c1cccc1  
 9073 Br1cccn1.C=CC(=O)N1C(=O)N(C)[C@H](C)[C@@H]1c1cccc1>>C[C@H]1[C@H](c2cccc2)  
 N(C(=O)/C=C/c2ccncc2)C(=O)N1C  
 9074 Br1ccc2cccc2c1.C=COCC>>C=C(OCC)c1ccc2cccc2c1  
 9075 C=C(C)C(=O)OC.Cc1cc(-c2cccc2)n2nc(C)c(I)c2n1>>COC(=O)/C(C)=C\C1c(C)nn2c(-  
 C=CB1OC(C)CC(C)(C)O1.COC(=O)c1cccc1I>>COC(=O)c1cccc1/C=C/B1OC(C)CC(C)(C)O1  
 9076 C=C(F)C(C)=O.Ic1cc2cccc2c2cccc12>>CC(=O)/C(F)=C/c1cc2cccc2c2cccc12  
 9077 C=COCC.COc1ccc(I)cc1>>C=C(OCC)c1ccc(OC)cc1  
 9078 C=C(OC(C)=O)C(=O)OCC.COc1ccc(I)cc1>>CCOC(=O)/C(=C/c1ccc(OC)cc1)OC(C)=O  
 9079

C=Cc1cccs1.O=[N+][([O-])c1ccc(Br)cc1]>>O=[N+][([O-])c1ccc(/C=C/c2cccs2)cc1  
 C=Cc1ccccc1.CC[C]1c[n+][([O-])c(CC)c(Cl)n1]>>CC[C]1c[n+][([O-])c(CC)c(/C=C/c2ccccc2)n1  
 C=Cc1cccc(OC)c1.Nc1cccc(Br)c1>>COc1cccc(/C=C/c2cccc(N)c2)c1  
 C=CC(=O)OC.Cc1ccc(Br)c(N)c1>>COC(=O)/C=C/c1ccc(C)cc1N  
 Brc1ccc(NCc2ccccc2)nc1.C=CC(=O)OC(C)(C)C>>CC(C)(C)OC(=O)/C=C/c1ccc(NCc2ccccc2)nc1  
 C=Cc1ccccc1.Cc1ccc(Br)c2nnnn12>>Cc1ccc(/C=C/c2ccccc2)c2nnnn12  
 C=CCCCCCC.FC(F)(F)c1ccc(Cl)cc1>>C=C(CCCCCC)c1ccc(C(F)(F)F)cc1  
 C=Cc1ccccc1.COC1(OC)C(=O)c2ccc(Br)cc2C1=O>>COC1(OC)C(=O)c2ccc(/C=C/c3ccccc3)cc2C1=O  
 C=CCn1c(-c2ccc(CC)cc2)nc2ccccc2c1=O.O=C(CN1C(=O)COc2ccccc21)c1ccc(Br)cc1>>CCc1ccc(-  
 c2nc3ccccc3c(=O)n2C/C=C/c2ccc(C(=O)CN3C(=O)COc4ccccc43)cc2)cc1  
 C=Cc1cc2ccc(OC)cc2oc1=O.Ic1ccccc1>>COc1cc2ccc(/C=C/c3ccccc3)c(=O)oc2c1  
 C=CCOC(C)=O.Cc1cc(C)c(I)c(C)c1>>CC(=O)OC/C=C/c1c(C)cc(C)cc1C  
 C=CC(C)O.I/C=C/C=C/CCCCOCc1ccccc1>>CC(O)/C=C/C=C/C=C/CCCCOCc1ccccc1  
 C=Cc1ccccc1.CCOC(=O)C(C)(C)Br>>CCOC(=O)C(C)(C)/C=C/c1ccccc1  
 C=C(C(=O)OC)N1CC[C@H](NC(=O)OCc2ccccc2)C1=O.Fc1c(Br)ccc2c(NC(c3ccccc3)(c3ccccc3)c3cc  
 cccc3)nccc12>>COC(=O)/C(=C/c1ccc2c(NC(c3ccccc3)(c3ccccc3)c3ccccc3)nccc2c1F)N1CC[C@H](N  
 C(=O)OCc2ccccc2)C1=O  
 C=CC1COC2(CCCCC2)OC1.Cc1ccc(S(=O)(=O)n2cc(C=O)c3c(Br)ccccc32)cc1>>Cc1ccc(S(=O)(=O)n  
 2cc(C=O)c3c(/C=C/C4COC5(CCCCC5)OC4)ccccc32)cc1  
 C=CC(=O)OC(C)(C)C.O=C(O)Cc1cccc(Br)c1>>CC(C)(C)OC(=O)/C=C/c1cccc(CC(=O)O)c1  
 C=CC(=O)OC(C)(C)C.O=C(CCc1ccccc1)Nc1cc(Br)cc(I)c1>>CC(C)(C)OC(=O)/C=C/c1cc(Br)cc(NC(  
 =O)CCc2ccccc2)c1  
 C=Cc1ccc(OC)c(OC)c1.CC(=O)Oc1ccc(I)cc1>>COc1ccc(/C=C/c2ccc(OC(C)=O)cc2)cc1OC  
 C=CCc1ccc(OCCNC(=O)OC(C)(C)C)c(OC)c1.O=C(O)/C=C/c1ccccc1Br>>COc1cc(C/C=C/c2ccccc2/  
 C=C/C(=O)O)ccc1OCCNC(=O)OC(C)(C)C  
 C=Cc1ccc(OC(C)=O)cc1.Fc1cc(Br)cc(OCc2ccccc2)c1>>CC(=O)Oc1ccc(/C=C/c2cc(F)cc(OCc3ccccc3  
 )c2)cc1  
 C=Cc1nc2c(=O)[nH]c(NC(=O)C(C)C)nc2n1[C@@H]1O[C@H](CO[Si](C)(C)C(C)(C)C)[C@@H](O[  
 Si](C)(C)C(C)(C)C)[C@H]1O[Si](C)(C)C(C)(C)C.CC(C)(C)[Si](C)(C)OC[C@H]1O[C@@H](n2cc(I)  
 c(N)nc2=O)[C@H](O[Si](C)(C)C(C)(C)C)[C@@H]1O[Si](C)(C)C(C)(C)C>>CC(C)C(=O)Nc1nc2c(n  
 c(/C=C/c3cn([C@H]4O[C@H](CO[Si](C)(C)C(C)(C)C)[C@H](O[Si](C)(C)C(C)(C)C)[C@H]4O[  
 Si](C)(C)C(C)(C)C)c(=O)nc3N)n2[C@H]2O[C@H](CO[Si](C)(C)C(C)(C)C)[C@H](O[Si](C)(C)C  
 )C(C)(C)C)[C@H]2O[Si](C)(C)C(C)(C)C)c(=O)nH1  
 C=CC(=O)OCC.Cc1ccc(O)c(Br)c1>>CCOC(=O)/C=C/c1cc(C)ccc1O  
 C=Cc1ccc2cc(N(c3ccccc3)c3ccccc3)ccc2c1.CC(C)(C)c1ccc(N2C(=O)c3cccc4c(Br)ccc(c34)C2=O)cc1  
 >>CC(C)(C)c1ccc(N2C(=O)c3cccc4c(/C=C/c5cccc6cc(N(c7ccccc7)c7ccccc7)ccc6c5)ccc(c34)C2=O)cc  
 C=C/C=C/c1ccccc1.CCCCC(Br)C(F)(F)F>>CCCCC(/C=C/C=C/c1ccccc1)C(F)(F)F  
 C=CS(=O)(=O)c1ccccc1.Cn1ccc2cc(Br)ccc21>>Cn1ccc2cc(/C=C/S(=O)(=O)c3ccccc3)ccc21  
 C=CC(N)=O.COc1cc(Nc2ncc3c(C)nc(-c4cccc(Br)c4)n3n2)cc(OC)c1OC>>COc1cc(Nc2ncc3c(C)nc(-  
 c4cccc(/C=C/C(N)=O)c4)n3n2)cc(OC)c1OC  
 C=Cc1ccc(F)cc1.N#CCCS(=O)(=O)c1ccc(Br)cc1>>N#CCCS(=O)(=O)c1ccc(/C=C/c2ccc(F)cc2)cc1  
 C=CC(N)=O.CCOC(=O)c1cn(CC)c2ccc(I)cc2c1=O>>CCOC(=O)c1cn(CC)c2ccc(/C=C/C(N)=O)cc2c1  
 C=CC(N)=O.CCCCC1(CCCC)C(=O)C(C2=NS(=O)(=O)c3cc(I)ccc3N2)=C(O)c2cc(F)ccc21>>CCCC  
 C1(CCCC)C(=O)C(C2=NS(=O)(=O)c3ccc(/C=C/C(N)=O)ccc3N2)=C(O)c2cc(F)ccc21  
 C=CN(C)C(C)=O.Clc1ccc2c(c1)OCO2>>C=C(c1ccc2c(c1)OCO2)N(C)C(C)=O  
 \*CNCCCOCCOCCOCCCN(C(=O)COc1ccc(C(Cc2cc(OC)cc(OC)c2)NC(=O)c2cccc(C=C)c2)cc1.Cc1cc  
 ccc1I>>\*CNCCCOCCOCCOCCCN(C(=O)COc1ccc(C(Cc2cc(OC)cc(OC)c2)NC(=O)c2cccc(/C=C/c3ccc  
 ccc3C)c2)cc1  
 C=C(CC(=O)OC)C(=O)OC.Fc1ccc(I)cc1>>COC(=O)C/C(=C/c1ccc(F)cc1)C(=O)OC  
 C=CCNS(=O)(=O)c1cc(C(F)(F)F)cc(C(F)(F)F)c1.COc1ccc(Br)cc1>>COc1ccc(/C=C/CNS(=O)(=O)c2  
 cc(C(F)(F)F)cc1(C(F)(F)F)c2)cc1  
 C=Cc1ccc2cc(c1)Sc1ccc4n2CCCCC.CCCCCCN1c2ccc(Br)cc2Sc2cc(C=O)ccc21>>CCCCCN1c2  
 cccc2Sc2cc(/C=C/c3ccc4c(c3)Sc3cc(C=O)ccc3N4CCCCC)ccc21  
 C=CC(N)=O.COc1ccccc1I>>COc1ccccc1/C=C/C(N)=O  
 C=CC(=O)OC(C)(C)C.COC(=O)[C@@H]1c2cc(Br)ccc2O[C@H]1c1ccc(OC)c(OC)c1>>COC(=O)[C  
 @H]1c2cc(/C=C/C(=O)OC(C)(C)C)ccc2O[C@H]1c1ccc(OC)c(OC)c1  
 C=Cc1ccc(C=C)cc1.N#CCc1ccc(Br)cc1>>C=Cc1ccc(/C=C/c2ccc(CC#N)cc2)cc1  
 C=Cc1cccc2ccccc12.Oc1ccccc1I>>Oc1ccccc1/C=C/c1cccc2ccccc12  
 C=Cc1ccccc(O)c1.Nc1cccc(Br)c1>>Nc1cccc(/C=C/c2cccc(O)c2)c1  
 C=CC#N.CC(C)(C)c1ccc2[nH]c3c(c2c1)CC(=O)Nc1ccc(I)cc1-  
 3>>CC(C)(C)c1ccc2[nH]c3c(c2c1)CC(=O)Nc1ccc(/C=C/C#N)cc1-3

[illegible]

9168 C=CS(=O)(=O)NCCc1ccccc1.CC(C)(C)OC(=O)NCCc1ccccc1Br>>CC(C)(C)OC(=O)NCCc1ccccc1/C  
=C/S(=O)(=O)NCCc1ccccc1  
9169 C=Cc1ccccc1.CN(C(=O)c1ccccc1)c1ccc2c(c1)[nH]c(=NC(=O)c1ccc(Br)s1)n2CCC(N)=O>>CN(C(=O)  
)c1ccccc1)c1ccc2c(c1)[nH]c(=NC(=O)c1ccc/C=C/c3ccccc3)s1)n2CCC(N)=O  
9170 C=CC(=O)OC.COCC(=O)c1ccccc1[N+](=O)[O-]c1I>>COC(=O)/C=C/c1c(C(=O)OC)ccccc1[N+](=O)[O-  
9171 C=CC1(O)CCC1.FC(F)(F)c1ccc(I)cc1>>OC1/C=C/c2ccc(C(F)(F)F)cc2)CCC1  
9172 C=CC(=O)OC.Cc1cc(CCN(C(=O)OC(C)(C)C)cc(I)c1O>>COC(=O)/C=C/c1cc(CCN(C(=O)OC(C)(C)C)  
cc(C)c1O  
9173 C=C(C)c1ccccc1.Clc1ccc(I)cc1>>C/C=C/Cc1ccc(Cl)cc1)c1ccccc1  
9174 C=CC(OC(C)=O)OC(C)=O.O=C1c2ccc(Br)cc2CCN1CCCc1ccccc1>>CC(=O)OC(/C=C/c1ccc2c(c1)C  
CN(CCCc1ccccc1)C2=O)OC(C)=O  
9175 C=CC(=O)N(CC)CC.CC(C)(C)c1ccc2[nH]c3c(c2c1)CC(=O)Nc1ccc(I)cc1-  
3>>CCN(CC)C(=O)/C=C/c1ccc2c(c1)-c1[nH]c3ccc(C(C)(C)C)cc3c1CC(=O)N2  
9176 C=CCC(=O)OC(C)(C)C.C[C@H](O)c1ccc2ccc(Br)cc2n1>>C[C@H](O)c1ccc2ccc(/C=C/CC(=O)  
OC(C)(C)C)cc2n1  
9177 COC(=O)/C=C/C(=O)OC.Ic1ccccc1>>COC(=O)/C=C(/C(=O)OC)c1ccccc1  
9178 C=CC(=O)COCCCC.Cc1ccccc1I>>CCCCOCC(=O)/C=C/c1ccccc1C  
9179 C=CC(=O)OC.Fc1cc(Br)c2[nH]ccc2c1>>COC(=O)/C=C/c1cc(F)cc2cc[nH]c12  
9180 C=CC(=O)OCC.FC(F)(F)c1ccc(Br)cc1>>CCOC(=O)/C=C/c1ccc(C(F)(F)F)cc1  
9181 C=CC(=O)OC.Oc1ccc(Br)cc1Cl>>COC(=O)/C=C/c1ccc(O)c(Cl)c1  
9182 C=CC#N.COc1cc(C(C)(C)C)c(OC)cc1Br>>COc1cc(C(C)(C)C)c(OC)cc1/C=C/C#N  
9183 C=CC(=O)OC(C)(C)C.Cc1ccccc1I>>Cc1ccccc1/C=C/C(=O)OC(C)(C)C  
9184 C=CNC(C)=O.CC(=O)c1ccc(OS(=O)(=O)C(F)(F)F)cc1>>C=C(NC(C)=O)c1ccc(C(C)=O)cc1  
9185 Brc1ccc(C(=C(c2ccccc2)c2ccccc2)c2ccccc2)cc1.C=Cc1ccc(-  
n2c3ccccc3c3ccccc32)cc1>>C(=C/c1ccc(-  
9186 C=CC(=O)OC(C)(C)C.COc1ccc(NCc2ccc(Br)cc2)cc1OC>>COc1ccc(NCc2ccc(/C=C/C(=O)OC(C)(C)  
C)cc2)cc1OC  
C=CC(=O)CCCOc1ccc(C(c2ccc(C(C)(C)C)cc2)(c2ccc(C(C)(C)C)cc2)c2ccc(C(C)(C)C)cc2)cc1.CC(C)(  
9187 C)c1ccc(C(c2ccc(OCCCOc3ccc(I)cc3)cc2)(c2ccc(C(C)(C)C)cc2)c2ccc(C(C)(C)C)cc2)cc1>>CC(C)(C)  
c1ccc(C(c2ccc(OCCCOc3ccc(/C=C/C(=O)CCCOc4ccc(C(c5ccc(C(C)(C)C)cc5)(c5ccc(C(C)(C)C)cc5)c  
5ccc(C(C)(C)C)cc5)cc4)cc3)cc2)(c2ccc(C(C)(C)C)cc2)c2ccc(C(C)(C)C)cc2)cc1  
9188 C=CC(=O)OC(C)(C)C.FC(F)(F)Oc1ccc(CNc2ccc(Br)cc2)cc1>>CC(C)(C)OC(=O)/C=C/c1ccc(NCc2cc  
c(OC(F)(F)F)cc2)cc1  
9189 C=CC(=O)OC(C)(C)C.COc1cc(C(=O)c2cn(Cc3ccc(Br)cc3)c3ccccc23)cc(OC)c1OC>>COc1cc(C(=O)c  
2cn(Cc3ccc(/C=C/C(=O)OC(C)(C)C)cc3)c3ccccc23)cc(OC)c1OC  
9190 C=CS(C)(=O)=O.Ic1ccccc1>>CS(=O)(=O)/C=C/c1ccccc1  
9191 Brc1ccccc1I.C=C1CC(c2ccccc2)OC1=O>>O=C1OC(c2ccccc2)C/C1=C\Cc1ccccc1Br  
9192 C=CN1C(=O)c2ccccc2C1=O.OC(c1ccc(Cl)cc1)c1nccccc1Br>>O=C1c2ccccc2C(=O)N1/C=C/c1ccccc1  
C(O)c1ccc(Cl)cc1  
9193 C=CCC.ClCc1ccccc1I>>C=C(CC)Cc1ccccc1I  
9194 C=CC(=O)N(C)C.Cc1ccc(I)cc1>>Cc1ccc(/C=C/C(=O)N(C)C)cc1  
9195 C=Cc1ccccc1.Nc1ccccc1Cl>>Nc1ccccc1/C=C/c1ccccc1  
9196 C=CC(=O)OC(C)(C)C.COc1ccc(C(=O)c2ccc3c(ccn3Cc3ccc(Br)cc3)c2)cc1>>COc1ccc(C(=O)c2ccc3c  
(ccn3Cc3ccc(/C=C/C(=O)OC(C)(C)C)cc3)c2)cc1  
9197 C=Cc1ccccc1(OC)c1.C[Si](C)(OS(=O)(=O)C(F)(F)F)OS(=O)(=O)C(F)(F)F>>COc1ccccc1/C=C/[Si](C)(C  
)OS(=O)(=O)C(F)(F)F)c1  
9198 C=CC(=O)OC(C)(C)C.O=C(c1ccccc1)c1ccc(Br)cc1>>CC(C)(C)OC(=O)/C=C/c1ccc(C(=O)c2ccccc2)c  
9199 C=Cc1ccccc1.COc1ccc(/C=C/C(=O)c2ccc(I)cc2)cc1>>COc1ccc(/C=C/C(=O)c2ccc(/C=C/c3ccccc3)cc  
2)cc1  
9200 C=Cc1ccc2ccccc2c1.COc1ccc(I)cc1>>COc1ccc(/C=C/c2ccc3ccccc3c2)cc1  
9201 C=CC(=O)OCC(C)CCCC.COc1ccc(Br)cc1>>CCCCC(C)COC(=O)/C=C/c1ccc(OC)cc1  
9202 C=CC(=O)OCC.COc1ccccc1[IH2](OC(C)=O)OC(C)=O)c1>>CCOC(=O)/C=C/c1ccccc1(OC)c1  
9203 C=CC(=O)OC.O=S(=O)(c1ccccc1)n1c2nccccc2c2c(OS(=O)(=O)C(F)(F)F)nc3ccccc3c21>>COC(=O)/C  
=C/c1nc2ccccc2c2c1c1ccccc1n2S(=O)(=O)c1ccccc1  
9204 C=Cc1ccccc1O.COc1ccc(Br)c1>>COc1ccc(/C=C/c2ccccc2O)c1  
9205 C=Cc1cc(OCCCCCCCCC)c(OCCCCCCCCC)c(OCCCCCCCCC)c1.O=Cc1ccc(Br)cc1>>CCCCCCCCCOc1c  
c(/C=C/c2ccc(C=O)cc2)cc(OCCCCCCCCC)c1OCCCCCCCCC  
9206 C=Cc1ccc(Cl)cc1.Cc1ccc(I)cc1>>Cc1ccc(/C=C/c2ccc(Cl)cc2)cc1

BrC1ccc2ncccc2c1.C=CCON=C1[C@H](C)[C@H]2OC(=O)O[C@]2(C)[C@@H](CC)OC(=O)[C@@]  
 (C)(F)C(=O)[C@H](C)[C@@H](O[C@@H]2O[C@H](C)C[C@H](N(C)C)[C@H]2OC(C)=O)[C@](  
 9207 C)(OC)C[C@H]1C>>CC[C@H]1OC(=O)[C@@](C)(F)C(=O)[C@H](C)[C@@H](O[C@@H]2O[C@  
 H)(C)C[C@H](N(C)C)[C@H]2OC(C)=O)[C@](C)(OC)C[C@@H](C)C(=NOC/C=C/c2ccc3ncccc3c2)  
 IC@H1(C)IC@H12OC(=O)O[C@]112C  
 9208 C=CC(=O)OCC.Clc1ncc(I)c2ncccc12>>CCOC(=O)/C=C/c1ncc(Cl)c2cccn12  
 9209 C=Cc1ccc(C)cc1.O=Cc1ccc(Br)cc1>>Cc1ccc(/C=C/c2ccc(C=O)cc2)cc1  
 9210 C=Cc1c(F)c(F)c(F)c(F)c1F.IC1CCCCC1>>Fc1c(F)c(F)c(/C=C/C2CCCCC2)c(F)c1F  
 9211 C=C[Si](C)(C)c1cccn1.Cc1cccc(I)c1>>Cc1cccc(/C=C/[Si](C)(C)c2cccn2)c1  
 9212 CC(=O)/C=C/CC(NS(=O)(=O)c1ccc(C)cc1)c1cccc1.Cc1ccc(Br)cc1>>CC(=O)/C=C/CC(NS(=O)(=O)  
 )c1ccc(C)cc1)c1cccc1)c1ccc(C)cc1  
 9213 C=Cc1ccc2c(c1)CC[C@@H]1[C@@H]2CC[C@]2(C)C(=O)CC[C@@H]12.CCOC(=O)C(F)(F)Br>>  
 CCOC(=O)C(F)(F)/C=C/c1ccc2c(c1)CC[C@@H]1[C@@H]2CC[C@]2(C)C(=O)CC[C@@H]12  
 9214 C=CCC1(C(=O)OC)CCCCC1.COc1ccc(I)cc1>>COC(=O)C1(C/C=C/c2ccc(OC)cc2)CCCCC1  
 9215 C=CC(=O)OC(C)(C)C.COc1cccc(Br)c1>>COc1cccc(/C=C/C(=O)OC(C)(C)C)c1  
 9216 C=CC(=O)OCC.Ic1ccc2c(c1)OCCOCCOCCOCCOCCO2>>CCOC(=O)/C=C/c1ccc2c(c1)OCCOCCO  
 CCOCCOCCO2  
 9217 C=CC(=O)N(C)Cc1cccc(C(C)C)c1OCCC.CC1(C)NCc2cc(Br)cnc2NC1=O>>CCCOc1c(CN(C)C(=O)/  
 C=C/c2cnc3c(c2)CNC(C)(C)C(=O)N3)cccc1C(C)C  
 9218 C=Cc1cccc1Cl.Oc1cccc1I>>Oc1cccc1/C=C/c1cccc1Cl  
 9219 C=Cc1cccc1.COc1ccc(/C=C/c2ccc(I)cc2)cc1>>COCOc1ccc(/C=C/c2ccc(/C=C/c3cccc3)cc2)cc1  
 9220 C=Cc1cccc1.O=C(/C=C/c1c[nH]c2ccc(Cl)cc12)c1ccc(I)cc1>>O=C(/C=C/c1c[nH]c2ccc(Cl)cc12)c1cc  
 c(/C=C/c2cccc2)cc1  
 9221 C=Cc1ccc(OC)cc1.COc1ccc(Br)c([N+](=O)[O-])c1>>COc1ccc(/C=C/c2ccc(OC)cc2[N+](=O)[O-])cc1  
 9222 C=CC(=O)OC.CC(C)(C)OC(=O)N1Cc2ccc(Br)cc2C1>>COC(=O)/C=C/c1ccc2c(c1)CN(C(=O)OC(C)(  
 C)C)C2  
 9223 C=Cc1ccc(OC)c(OC)c1.Nc1cccc1I>>COc1ccc(/C=C/c2cccc2N)cc1OC  
 9224 C=Cc1cnc1.CCCCOc1ccc2c(c1)cc(C#N)c1ccc(Br)cc12>>CCCOc1ccc2c(c1)cc(C#N)c1ccc(/C=C/c  
 3cnc3)cc12  
 9225 C=Cc1ccc(O)cc1.COC(=O)Cn1c(=O)c(Cl)nc2ccnc21>>COC(=O)Cn1c(=O)c(/C=C/c2ccc(O)cc2)nc2c  
 ccnc21  
 9226 C=C[C@H]1O[C@@H]2OC(C)(C)O[C@@H]2[C@H]1O.O=C1CC(c2cccc2)Oc2cc(Br)ccc21>>CC1  
 (C)O[C@H]2O[C@H](/C=C/c3ccc4c(c3)OC(c3cccc3)CC4=O)[C@H](O)[C@H]2O1  
 9227 C=CC(C)(C)O.CC(=O)Oc1c(I)c(=O)n(C)c2cccc12>>CC(=O)Oc1c(/C=C/C(C)(C)O)c(=O)n(C)c2cccc  
 9228 C=CC1CCCCC1.O=S(=O)(Oc1cccc1)C(F)(F)F>>C=C(c1cccc1)C1CCCCC1  
 9229 C=CC(=O)OC.Cc1ccc(I)c(C)c1>>COC(=O)/C=C/c1ccc(C)cc1C  
 9230 C=Cc1ccc(Cl)cc1.Ic1cccc1>>Clc1ccc(/C=C/c2cccc2)cc1  
 9231 C=CC(=O)OCC.Nc1cc(Br)nc1I>>CCOC(=O)/C=C/c1ncc(Br)cc1N  
 9232 C=Cc1cc(OC(C)=O)cc(OC(C)=O)c1.Nc1ccc(I)cc1>>CC(=O)Oc1cc(/C=C/c2ccc(N)cc2)cc(OC(C)=O)c  
 9233 BrC1cnc1.C=Cc1ccc(OC)cc1>>COc1ccc(/C=C/c2ccncc2)cc1  
 9234 C=Cc1cnc1.CC(C)(C)OC(=O)N1CCC[C@H]1COc1ncc(Cl)c(I)c1>>CC(C)(C)OC(=O)N1CCC[C@  
 H]1COc1ncc(Cl)c(/C=C/c2ccncc2)c1  
 9235 C=Cc1ccc(C(C)(C)C)cc1.O=Cc1cccc1Br>>CC(C)(C)c1ccc(/C=C/c2cccc2C=O)cc1  
 9236 C=Cc1ccc(F)cc1.O=Cc1ccc(I)o1>>O=Cc1ccc(/C=C/c2ccc(F)cc2)o1  
 9237 C=CCCc1ccc2ccnc2n1.CCOC(=O)/C=C/C(c1ncc(OC)nc1)c1nc(Br)cs1>>CCOC(=O)/C=C/C(c1ncc(OC)  
 nc1)c1nc(/C=C/C2ccc3ccnc3n2)cs1  
 9238 C=Cc1cccc1.CCCCCCCCCC(=O)Nc1ccc(Br)cc1>>CCCCCCCCCCCC(=O)Nc1ccc(/C=C/c2cccc  
 2)cc1  
 9239 C=CC(=O)OC.Nc1c(I)cc(Br)c2c1C(=O)NC2=O>>COC(=O)/C=C/c1cc(Br)c2c(c1N)C(=O)NC2=O  
 9240 C=CC(=O)OC(C)(C)C.COc1ccc2c(C(=O)c3cc(OC)c(OC)c(OC)c3)cn(Cc3ccc(Br)cc3)c2c1>>COc1ccc  
 2c(C(=O)c3cc(OC)c(OC)c(OC)c3)cn(Cc3ccc(/C=C/C(=O)OC(C)(C)C)cc3)c2c1  
 BrC1cnc2cccc2c1.C=CCO[C@@H]1CC(=O)O[C@H](C)C/C=C/C=C/[C@H](O[Si](C)(C)C(C)(C)C)  
 [C@H](C)C[C@H](CC(OC)OC)[C@H](O[C@@H]2O[C@H](C)[C@@H](O[C@H]3C[C@@](C)(O)  
 9241 [C@@H](OC(=O)CC)[C@H](C)O3)[C@H](N(C)C)[C@H]2OC(C)=O)[C@H]1OC>>CCC(=O)O[C@  
 H]1[C@H](C)O[C@@H](O[C@H]2[C@H](N(C)C)[C@@H](OC(C)=O)[C@H](O[C@@H]3[C@@  
 H](OC)[C@H](OC/C=C/c4cnc5cccc5c4)CC(=O)O[C@H](C)C/C=C/C=C/[C@H](O[Si](C)(C)C(C)(C)  
 )C)[C@H](C)C[C@@H]12C(=O)N(C)O[C@H]2C(=O)N(C)O[C@H]12C(=O)N(C)O  
 9242 C=C.Cc1ccc(C(N)=O)c(Br)c1>>C=Cc1cc(C)ccc1C(N)=O  
 9243 C=Cc1cccn1.O=[N+](O-)]c1cccc(Br)c1>>O=[N+](O-)]c1cccc(/C=C/c2cccn2)c1  
 9244 C=C[Si](C)(C)C.Ic1cccc1>>C[Si](C)(C)/C=C/c1cccc1  
 9245 BrC1cccc1.C=CC=O>>O=C/C=C/c1cccc1

9246 C=COCCCC.N#Cc1ccc(Cl)cc1>>C=C(OCCCC)c1ccc(C#N)cc1  
 9247 Br1cccc1.C=COCC>>C=C(OCC)c1cccc1  
 9248 C=CCP(=O)(OCC)OCC.CCOC(=O)CNe1cccc(Br)c1>>CCOC(=O)CNe1cccc(/C=C/CP(=O)(OCC)OC  
 9249 C=CC(=O)OC.Cc1cc(Br)cc(C)c1N>>COC(=O)/C=C/c1cc(C)c(N)c(C)c1  
 9250 C=Cc1cccc(C)c1.CCN1c2ncc(I)cc2C(=O)N(C)c2cccn21>>CCN1c2ncc(/C=C/c3cccc(C)c3)cc2C(=O)N(C)c2cccn21  
 9251 Br1ccncc1.C=C[Si](CC)(CC)CC>>CC[Si](/C=C/c1ccncc1)(CC)CC  
 9252 C=Cc1cccc1.O=S(=O)(Oc1cccc2cccn12)C(F)(F)F>>C=C(c1cccc1)c1cccc2cccn12  
 9253 C=CC(=O)OC.CC(=O)Oc1ccc(I)cc1C/C=C(\C)CCC=C(C)C>>COC(=O)/C=C/c1ccc(OC(C)=O)c(C/C=C(\C)CCC=C(C)C)c1  
 9254 C=CC(=O)OC(C)(C)C.COc1cccc([IH2])(OC(C)=O)OC(C)=O)c1>>COc1cccc(/C=C/C(=O)OC(C)(C)C)Cc1ccc(I)cc1.Cc1ccc(S(=O)(=O)/C=C2/C(C)(C)C2(F)F)cc1>>Cc1ccc(/C(=C2/C(C)(C)C2(F)F)S(=O)(=O)c2ccc(C)cc2)cc1  
 9255 C=CS(N)(=O)=O.Cc1ccc(Br)c(C)c1>>Cc1ccc(/C=C/S(N)(=O)=O)c(C)c1  
 9256 C=CC(=O)OCC.COc1ccc2cccc(Br)c2n1>>CCOC(=O)/C=C/c1cccc2ccc(OC)nc12  
 9257 C=Cc1cc(OC)c(OC)c(OC)c1-c1cccc1.COc1ccc(I)cc1>>COc1ccc(/C=C/c2cc(OC)c(OC)c(OC)c2-c2cccc2)cc1  
 9258 C=CC(=O)OC.CCc1ccc(-c2nc(C)c(Br)s2)cc1>>CCc1ccc(-c2nc(C)c(/C=C/C(=O)OC)s2)cc1  
 9259 C=CP(=O)(OCC)OCC.Cc1cccc1Br>>CCOP(=O)(/C=C/c1cccc1C)OCC  
 9260 C=CCCc1cccc1.C=Cc1ccc(CCl)cc1>>C=Cc1ccc(CC(=C)CCc2cccc2)cc1  
 9261 Br1cncc1.C=CCN1C(=O)c2cccc2C1=O>>O=C1c2cccc2C(=O)N1C/C=C/c1cncc1  
 9262 C=CC(=O)OC.O=C1c2ccc(OS(=O)(=O)C(F)(F)F)cc2C(=O)N1Cc1cccc1>>COC(=O)/C=C/c1ccc2c(c1)C(=O)N(Cc1cccc1)C2=O  
 9263 C=Cc1cccc(O)c1.COc1cccc1Br>>COc1cccc1/C=C/c1cccc(O)c1  
 9264 C=CC(N)=O.O=Cc1ccc(Br)cc1>>NC(=O)/C=C/c1ccc(C=O)cc1  
 9265 C=C[Si](C)(C)C.CC(=O)c1ccc(I)cc1>>CC(=O)c1ccc(/C=C/[Si](C)(C)C)cc1  
 9266 C=Cc1ccc(N(c2cccc2)c2cccc2)cc1.CC(C)(C)Br>>CC(C)(C)/C=C/c1ccc(N(c2cccc2)c2cccc2)cc1  
 9267 C=CCCN1C(=O)c2cccc2C1=O.Clc1ccc(I)c1>>O=C1c2cccc2C(=O)N1CC/C=C/c1cccc(Cl)c1  
 9268 C=CC(N)=O.CCOC(=O)c1ccc(Br)cc1>>CCOC(=O)c1ccc(/C=C/C(N)=O)cc1  
 9269 C=CC(=O)OCC.COc1ccc(C(c2ccc(Br)cc2F)=C2[C@H]3C[C@H]4C[C@H](C[C@H]2C4)C3)cc1>>C  
 9270 COC(=O)/C=C/c1ccc(C(c2ccc(OC)cc2)=C2[C@H]3C[C@H]4C[C@H](C[C@H]2C4)C3)c(F)c1  
 9271 C=CC(=O)OC.CC(C)(C)OC(=O)NCCOCc1nnn(CCO)c1I>>COC(=O)/C=C/c1c(COCCNC(=O)OC(C)(C)C)nnn1CCO  
 9272 C=CCCC#N.Cc1cccc1OS(=O)(=O)C(F)(F)F>>C=C(CCCC#N)c1cccc1C  
 9273 C=CC(C)=O.Cc1ccc(I)c(Br)c1>>CC(=O)/C=C/c1ccc(C)cc1Br  
 9274 C=Cc1cc2cc(OC)c(OC)cc2oc1=O.COc1ccc(I)cc1>>COc1ccc(/C=C/c2cc3cc(OC)c(OC)cc3oc2=O)cc1  
 9275 C=Cc1cccc1C(F)(F)F.CCS(=O)(=O)c1ccc(Cl)nc1-c1nc2cc(C(F)(F)F)nc2n1C>>CCS(=O)(=O)c1ccc(/C=C/c2cccc2C(F)(F)F)nc1-c1nc2cc(C(F)(F)F)nc2n1C  
 9276 C=C[Si](C)(C)c1cccc1.CC(=O)c1ccc(Br)cc1>>CC(=O)c1ccc(/C=C/[Si](C)(C)c2cccc2)cc1  
 9277 C=CC(=O)Nc1cccc2cccn12.Ic1ccc2c(c1)OCCO2>>O=C(/C=C/c1ccc2c(c1)OCCO2)Nc1cccc2cccn1  
 9278 C=CC(=O)OC(C)(C)C.Oc1ccc(-c2ccc(Br)cc2)cc1C12CC3CC(CC(C3)C1)C2>>CC(C)(C)OC(=O)/C=C/c1ccc(-c2ccc(O)c(C34CC5CC(CC(C5)C3)C4)c2)cc1  
 9279 Br1cccc1.C=Cc1cccc([N+](=O)[O-])c1>>O=[N+](O)c1cccc(/C=C/c2cccc2)c1  
 9280 C=CC(OCC)OCC.COc1ccc(Br)cc1>>CCOC(/C=C/c1ccc(OC)cc1)OCC  
 9281 C=CC(N)=O.Clc1cccc1>>NC(=O)/C=C/c1cccc1  
 9282 C=Cc1ccncc1.CCCCCCCC(=O)N1CCN(c2ccc(Br)cc2)CC1>>CCCCCCCC(=O)N1CCN(c2ccc(/C=C/c3ccncc3)cc2)CC1  
 9283 Br1cccc1.C=C(C)c1cccc1>>C/C(=C/c1cccc1)c1cccc1  
 9284 C=CC(=O)OCC.Cc1ccc(-c2cccc2)c(I)c1>>CCOC(=O)/C=C/c1cc(C)ccc1-c1cccc1  
 9285 C=C[C@@H]1CCCCN1C(=O)OC(C)(C)C.Ic1cccc1>>CC(C)(C)OC(=O)N1CCCC[C@H]1/C=C/c1cc  
 9286 C=CC(=O)OC.CC(=O)Oc1ccc(I)cc1>>COC(=O)/C=C/c1ccc(OC(C)=O)cc1  
 9287 Br1ccc(/C=C/c2cccc2)cc1.C=C[Si](C)(C)c1cccn1>>C[Si](C)(/C=C/c1ccc(/C=C/c2cccc2)cc1)c1cccn1  
 9288 C=CC(=O)OC.Cc1nc2cc(-c3cccc3)c(-c3ccc(C4(NC(=O)OC(C)(C)C)CCC4)cc3)nn2c1Br>>COC(=O)/C=C/c1c(C)nc2cc(-c3cccc3)c(-c3ccc(C4(NC(=O)OC(C)(C)C)CCC4)cc3)nn12  
 9289 C=CB1OC(C)CC(C)(C)O1.Ic1cccc1>>CC1CC(C)(C)OB(/C=C/c2cccc2)O1

9290 Br1ccc2c(c1)c(Cc1cccc1)cn2Cc1cccc1.C=CC(=O)OC>>COC(=O)/C=C/c1ccc2c(c1)c(Cc1cccc  
1)cn2Cc1cccc1  
9291 C=C/C=C/C(=O)OC.COc1c(CN(C(=O)C2CC2)c2cccc(Br)c2)ccc2c1OC(C)(C)C=C2>>COC(=O)/C=C  
/C=C/c1cccc(N(Cc2ccc3c(c2OC)OC(C)(C)C=C3)C(=O)C2CC2)c1  
9292 CCOC(=O)/C(F)=C\CCc1cccc1.COC(=O)c1cccc1I>>CCOC(=O)/C(F)=C\CCc1cccc1)c1cccc1C(  
=O)OC  
9293 C=Cc1ccc(Cl)cc1.O=S(=O)(c1cccc1)C(F)(F)Br>>O=S(=O)(c1cccc1)C(F)(F)/C=C/c1ccc(Cl)cc1  
9294 C=CC(=O)OC.CC(=O)Oc1c(CC=C(C)C)cc1C/C=C\CCC=C(C)C>>COC(=O)/C=C/c1cc(CC=  
C(C)C)c(OC(C)=O)c(C/C=C\CCC=C(C)C)c1  
9295 C=Cc1cccc([N+](=O)[O-])c1.Cc1ccc(Br)cc1>>Cc1ccc(/C=C/c2cccc([N+](=O)[O-])c2)cc1  
9296 C=CC(=O)N(C)C.COC(=O)/C=C/c1cccc(N(Cc2ccc(Br)cc2)C(=O)C2CCCC2)c1>>COC(=O)/C=C/c1  
cccc(N(Cc2ccc(/C=C/C(=O)N(C)C)cc2)C(=O)C2CCCC2)c1  
9297 C=CCOc1cccc1.Cl1ccc(Br)cc1>>Cl1ccc(/C=C/COc2cccc2)cc1  
9298 C=CC(=O)NCCc1ccc(F)cc1.COc1cc2oc(-c3cccc3)c(I)c(=O)c2cc1OC>>COc1cc2oc(-  
c3cccc3)c(/C=C/C(=O)NCCc3ccc(F)cc3)c(=O)c2cc1OC  
9299 Br1ccc(-c2nc3cccc3n2)cc1.C=CCn1c(-c2ccc(Cl)cc2)nc2cccc2c1=O>>O=c1c2cccc2nc(-  
c2ccc(Cl)cc2)n1C/C=C/c1ccc(-c2nc3cccc3n2)cc1  
9300 C=CC(OCC)OCC.CC(C)(C)c1ccc(OS(=O)(=O)C(F)(F)F)cc1>>C=C(c1ccc(C(C)(C)C)cc1)C(OCC)OC  
9301 C=CC(=O)OCCCC.Cc1cc(I)ccc1Br>>CCCCOC(=O)/C=C/c1ccc(Br)c(C)c1  
9302 C=CC(=O)OCC.COc1nc(Cl)c(NC2CCN(C(=O)OC(C)(C)C)CC2)n1>>CCOC(=O)/C=C/c1ncc(OC)nc  
1NC1CCN(C(=O)OC(C)(C)C)CC1  
9303 C=CC(=O)OCc1cccc1.O=C1CO[C@H]2Cc3ccc(Br)cc3[C@H]2N1O>>O=C(/C=C/c1ccc2c(c1)[C@  
@H]1[C@H](C2)OCC(=O)N1O)OCc1cccc1  
9304 C=CC(=O)O.CC(C)=CCc1cc(I)cc(CC=C(C)C)c1O>>CC(C)=CCc1cc(/C=C/C(=O)O)cc(CC=C(C)C)c1  
9305 C=CC(=O)O.Cl1ccc(Br)cc1>>O=C(O)/C=C/c1ccc(Cl)cc1  
9306 C=CCOc1cccc(C)c1.COc1ccc(I)cc1>>COc1ccc(/C=C/COc2cccc(C)c2)cc1  
9307 C=Cc1cnccl1.Cc1cc(Nc2ccc([N+](=O)[O-])cc2[N+](=O)[O-])ccc1Br>>Cc1cc(Nc2ccc([N+](=O)[O-]  
])cc2[N+](=O)[O-])ccc1/C=C/c1cnccl1  
9308 C=CC(=O)OC.O=Cc1cccc(Br)n1>>COC(=O)/C=C/c1cccc(C=O)n1  
9309 C=CC(=O)NCCCN(C)C.CC(=O)OCC1Cn2c3cccc3c3c4c(c5c6cc(Br)ccc6n(c5c32)C1)C(=O)N(C(C)=  
O)C4>>CC(=O)OCC1Cn2c3cccc3c3c4c(c5c6cc(/C=C/C(=O)NCCCN(C)C)ccc6n(c5c32)C1)C(=O)N(  
C(C)=O)C4  
9310 C=CC(=O)OC.CC(C)(C)c1nn(Cc2cccc2)cc1I>>COC(=O)/C=C/c1cn(Cc2cccc2)nc1C(C)(C)C  
9311 C=CCN1C(=O)c2cccc2C1=O.Fc1ccc(I)cc1>>O=C1c2cccc2C(=O)N1C/C=C/c1ccc(F)cc1  
9312 C=CCC(=O)O.CC(C)c1[nH]nc(O[C@H]2O[C@H](COC(=O)c3cccc3)[C@H](F)[C@H](OC(=O)  
c3cccc3)[C@H]2OC(=O)c2cccc2)c1Cc1ccc(Br)cc1>>CC(C)c1[nH]nc(O[C@H]2O[C@H](COC(=O)  
c3cccc3)[C@H](F)[C@H](OC(=O)c3cccc3)[C@H]2OC(=O)c2cccc2)c1Cc1ccc(/C=C/CC(=O)  
C=Cc1ccc(N(CCCC)CCCC)cc1.CCOC(OCC)c1ccc(/C=C/c2ccc(I)cc2)cc1>>CCCCN(CCCC)c1ccc(/C  
=C/c2ccc(/C=C/c3ccc(C(OCC)OCC)cc3)cc2)cc1  
9313 C=CCCCCCC.COc1cccc1OS(=O)(=O)C(F)(F)F>>C=C(CCCCCC)c1cccc1OC  
9314 C=Cc1n[nH]c2cc([C@H]3C[C@@]34C(=O)Nc3cccc34)ccc12.Cc1ccc(Br)cn1>>Cc1ccc(/C=C/c2n[  
nH]c3cc([C@H]4C[C@@]45C(=O)Nc4cccc45)ccc23)cn1  
9315 C=CC(=O)OC.O=c1[nH]c(=O)n([C@H]2C[C@H](O)[C@H](CO)C2)cc1I>>COC(=O)/C=C/c1cn([  
C@H]2C[C@H](O)[C@H](CO)C2)c(=O)[nH]c1=O  
9316 C=Cc1ccc(OC(C)=O)cc1.COc1c(Br)ccc2c(OC)c(/C=C/c3cnccc3)ccc12>>COc1c(/C=C/c2cnccc2)ccc2  
c(OC)c(/C=C/c3ccc(OC(C)=O)cc3)ccc12  
9317 C=CS(=O)(=O)F.Cc1cc(C)cc(I)c1>>Cc1cc(C)cc(/C=C/S(=O)(=O)F)c1  
9318 C=CC(=O)OC.Cn1nc(Br)c1CC=C1CCCC1>>COC(=O)/C=C/c1ncn(C)c1CC=C1CCCC1  
9319 Br1cccc1.C=C(C)C(=O)OCCO>>C/C=C\c1cccc1)C(=O)OCCO  
9320 C=CC(=O)OC(C)(C)C.CC(C)=CCc1cc(I)ccc1O>>CC(C)=CCc1cc(/C=C/C(=O)OC(C)(C)C)ccc1O  
9321 C=CN1C(=O)c2cccc2C1=O.Cc1ccc(Br)cc1>>Cc1ccc(/C=C/N2C(=O)c3cccc3C2=O)cc1  
9322 C=CC(=O)OC(C)(C)C.CC(=O)O[IH2](OC(C)=O)c1cccc1>>CC(C)(C)OC(=O)/C=C/c1cccc1  
9323 C=CC(N)=O.FC(F)(F)c1ccc(I)c1>>NC(=O)/C=C/c1ccc(C(F)(F)F)c1  
9324 C=C.CCOC(=O)c1c[nH]c(=O)c(I)c1>>C=Cc1cc(C(=O)OCC)c[nH]c1=O  
9325 C=Cc1cc([N+](=O)[O-]  
9326 ])ccc1OCOCC[Si](C)(C)C.COC(=O)c1cccc(I)c1>>COC(=O)c1cccc(/C=C/c2cc([N+](=O)[O-]  
])ccc2OCOCC[Si](C)(C)C)c1  
9327 C=CCOC(C)=O.OCc1cccc1I>>CC(=O)OC/C=C/c1cccc1CO  
9328 C=CC(=O)O.O=c1nc(O)c(I)cn1[C@H]1CC[C@H](CO)O1>>O=C(O)/C=C/c1cn([C@H]2CC[C@H]  
H](CO)O2)c(=O)nc1O  
9329 C=C.CC(C)(C)OC(=O)n1c(CCl)cc2cccc21>>C=CCc1cc2cccc2n1C(=O)OC(C)(C)C

9330 C=CC(=O)O.CC(C)(C)OC(=O)Nc1ccc(Br)cc1>>CC(C)(C)OC(=O)Nc1ccc(/C=C/C(=O)O)cc1  
 9331 C=CC(=O)Nc1cccc1NC(=O)OC(C)(C)C.COC(=O)C(CCCCl)c1ccc(Br)cc1>>COC(=O)C(CCCCl)c1c  
 cc(/C=C/C(=O)Nc2cccc2NC(=O)OC(C)(C)C)cc1  
 9332 C=Cc1ccc(N)cc1.CCN1c2ncc(I)cc2C(=O)N(C)c2ccc(Cl)nc21>>CCN1c2ncc(/C=C/c3ccc(N)cc3)cc2C(  
 =O)N(C)c2ccc(Cl)nc21  
 9333 C=C(NC(C)=O)C(=O)OC.Fc1ccc(Br)cc1>>COC(=O)/C(=C/c1ccc(F)cc1)NC(C)=O  
 C=Cc1ccc(C(=O)N[C@@H](CCSC)C(=O)OC)c(-  
 9334 c2cccc2C)c1.OC(c1cnccl1Br)C1CCCC1>>COC(=O)[C@H](CCSC)NC(=O)c1ccc(/C=C/c2nccc2C  
 (O)C2CCCC2)cc1-c1cccc1C  
 9335 C=Cc1cccc1.IC1CCCC1>>C(=C/C1CCCC1)\c1cccc1  
 9336 C=CC(CCCCCCCC(=O)OC)O[Si](C)(C)C(C)(C)C.CCC1=C(Br)CCC1=O>>CCC1=C(/C=C/C(CCCC  
 CCCC(=O)OC)O[Si](C)(C)C(C)(C)C)CCC1=O  
 9337 C=Cc1cccc1.CCC(C)c1cnc(C(C)CC)c(Cl)n1>>CCC(C)c1cnc(C(C)CC)c(/C=C/c2cccc2)n1  
 9338 C=CC(=O)c1ccc(OC)cc1OC.COc1ccc(I)cc1OC>>COc1ccc(C(=O)/C=C/c2ccc(OC)c(OC)c2)c(OC)c1  
 9339 C=Cc1ccc(Cl)cc1.O=Cc1ccc(O)c(Br)c1>>O=Cc1ccc(O)c(/C=C/c2ccc(Cl)cc2)c1  
 9340 C=CS(=O)(=O)F.FC(F)(F)c1ccc(I)cc1>>O=S(=O)(F)/C=C/c1ccc(C(F)(F)F)cc1  
 9341 C=Cc1cc(C(C)(C)C)c(O)c(C(C)(C)C)c1.Cc1cnc(C)c1-c1c(C)cc(Br)cc1C>>Cc1cnc(C)c1-  
 c1c(C)cc(/C=C/c2cc(C(C)(C)C)c(O)c(C(C)(C)C)c2)cc1C  
 9342 C=CC(O[Si](C)(C)C(C)(C)C)C(CCCC)O[Si](C)(C)C(C)(C)C.O=Cc1ccc(Br)cc1>>CCCCC(O[Si](C  
 )(C)C(C)(C)C)C(/C=C/c1ccc(C=O)cc1)O[Si](C)(C)C(C)(C)C  
 9343 C=CC(=O)N1CCOCC1.O=C1Nc2ccc(Br)cc2C1=O>>O=C1Nc2ccc(/C=C/C(=O)N3CCOCC3)cc2C1=  
 9344 C=C(C)C(=O)OC.COC(=O)c1cccc1Cl>>COC(=O)/C(C)=C/c1cccc1C(=O)OC  
 9345 C=C.COc1ccc([N+](=O)[O-])c(Br)c1>>C=Cc1cc(OC)ccc1[N+](=O)[O-]  
 9346 C=CCCCCN1C(=O)c2cccc2C1=O.FC(F)(F)c1ccc2c(Br)ccnc2c1>>O=C1c2cccc2C(=O)N1CCCC/C  
 =C/c1cnc2cc(C(F)(F)F)ccc12  
 9347 C=CC[C@H](CC(=O)OC(C)(C)C)C(=O)N[C@H](C(=O)NC(c1cccc1)c1cccc1)C(C)(C)C.Fc1cc(Br)  
 ccc1-c1cccc1>>CC(C)(C)OC(=O)C[C@@H](C/C=C/c1ccc(-  
 c2cccc2)c(F)c1)C(=O)N[C@H](C(=O)NC(c1cccc1)c1cccc1)C(C)(C)C  
 9348 C=CC(=O)OCc1cccc1.Cc1noc(C)c1-c1cnc2c(I)cn(S(=O)(=O)c3cccc3)c2c1>>Cc1noc(C)c1-  
 c1cnc2c(/C=C/C(=O)OCc3cccc3)cn(S(=O)(=O)c3cccc3)c2c1  
 9349 C=CC(=O)OC.CC(C)(C)OC(=O)N1CCC(CCc2nc3ncc(Br)cc3o2)CC1>>COC(=O)/C=C/c1cnc2nc(CC  
 C3CCN(C(=O)OC(C)(C)C)CC3)oc2c1  
 9350 C=CC(C)=O.Cn1ccc2cc(Br)ccc21>>CC(=O)/C=C/c1ccc2c(ccn2C)c1  
 9351 C=Cc1cccc1.O=P(c1cccc1)(c1cccc1)c1ccc(/C=C/c2ccc3ccc4ccc(Br)cc4c3c2)cc1>>O=P(c1cccc1)(  
 c1cccc1)c1ccc(/C=C/c2ccc3ccc4ccc(/C=C/c5cccc5)cc4c3c2)cc1  
 9352 C=Cl.C=C[Si](OC)(OC)OC>>C=C/C=C/[Si](OC)(OC)OC  
 9353 C=CCCP(=O)(OC)OC.Clc1ccc(I)cc1>>COP(=O)(CC/C=C/c1ccc(Cl)cc1)OC  
 9354 C=Cc1ccc(OC)c(OC)c1.COc1cc(Br)c(C=O)cc1OC>>COc1ccc(/C=C/c2cc(OC)c(OC)cc2C=O)cc1OC  
 9355 C=Cc1cccc1.Nc1cc([N+](=O)[O-])ccc1Br>>Nc1cc([N+](=O)[O-])ccc1/C=C/c1cccc1  
 9356 Br[C@H]1C[C@@H]2CC[C@H]1C2.C=Cc1ccc(OC)cc1>>COc1ccc(/C=C/[C@H]2C[C@@H]3CC[C@  
 H]2C3)cc1  
 9357 COC[C@@H](/N=C(\c1cccc1)N1C=CCC[C@H]1C)C(C)C.Ic1cc2cccc2o1>>COC[C@@H](/N=C(\  
 c1cccc1)N1C=C(c2cc3cccc3o2)CC[C@H]1C)C(C)C  
 9358 C=CC(=O)OCCN(C)C.O=C(Nc1ccc(Cl)c1)c1cc(=O)c2cc(Br)ccc2o1>>CN(C)CCOC(=O)/C=C/c1ccc  
 2oc(C(=O)Nc3cccc(Cl)c3)cc(=O)c2c1  
 9359 C=CC(=O)O.Cc1cccc(S(=O)(=O)Nc2ccc(I)cc2)c1>>Cc1cccc(S(=O)(=O)Nc2ccc(/C=C/C(=O)O)cc2)c1  
 9360 C=CC#N.Ic1cccc1>>N#C/C=C/c1cccc1  
 \*CNCCOCCOCCOCCOCCNC(=O)COc1ccc(C(Cc2cc(OC)cc(OC)c2)NC(=O)c2ccc(C=C)cc2)cc1.COc1  
 9361 ccc(I)cc1>>\*CNCCOCCOCCOCCOCCNC(=O)COc1ccc(C(Cc2cc(OC)cc(OC)c2)NC(=O)c2ccc(/C=C/c  
 3ccc(OC)cc3)cc2)cc1  
 9362 C=CC(=O)OC(C)(C)C.O=S(=O)(c1ccc(Cl)cc1)n1ccc2cc(Br)cn21>>CC(C)(C)OC(=O)/C=C/c1cnc2c(  
 ccn2S(=O)(=O)c2ccc(Cl)cc2)c1  
 9363 C=CP(=O)(O)O.Fc1cc(F)cc(Br)c1>>O=P(O)(O)/C=C/c1cc(F)cc(F)c1  
 9364 C=Cc1cccn1.Cc1ncc(C#N)c(Nc2cc(Cl)c3[nH]ccc3c2C)c1I>>Cc1ncc(C#N)c(Nc2cc(Cl)c3[nH]ccc3c2  
 C)c1/C=C/c1cccn1  
 9365 C=CC(=O)OC.COC(=O)c1c(Br)ccc2nn(C)c(C)c12>>COC(=O)/C=C/c1ccc2nn(C)c(C)c2c1C(=O)OC  
 9366 C=CC(=O)OC.CC(C)(C)OC(=O)NCc1ccc(Br)cc1>>COC(=O)/C=C/c1ccc(CNC(=O)OC(C)(C)C)cc1  
 9367 C=CC(C)O.COC(=O)c1ccc(I)cc1>>COC(=O)c1ccc(/C=C/C(C)O)cc1  
 9368 C=CC(=O)OCC.Cc1cc(C)nc(I)n1>>CCOC(=O)/C=C/c1nc(C)cc(C)n1  
 9369 C=CN1CCCC1=O.O=C1CCC(N2C(=O)c3cccc(I)c3C2=O)C(=O)N1>>O=C1CCC(N2C(=O)c3cccc(/C  
 =C/N4CCCC4=O)c3C2=O)C(=O)N1



9370 C=Cc1ccc(C(F)(F)F)cc1.COC(=O)c1cccc1I>>COC(=O)c1cccc1/C=C/c1ccc(C(F)(F)F)cc1  
 9371 C=CC(OC)OC.Cc1cccc1I>>COC(/C=C/c1cccc1C)OC  
 9372 C=CC(=O)O.O=S(=O)(Nc1cccc(I)c1)c1ccc(-c2cccc2)cc1>>O=C(O)/C=C/c1cccc(NS(=O)(=O)c2ccc(-c3cccc3)cc2)c1  
 9373 C=Cc1ccc2ccc(Cl)cc2n1.CC(C)(O)c1cccc1CC[C@H](O)c1cccc(Br)c1>>CC(C)(O)c1cccc1CC[C@H](O)c1cccc(/C=C/c2ccc3ccc(Cl)cc3n2)c1  
 9374 C=CC(=O)OC.CN(C)S(=O)(=O)n1cc([Si](C)(C)C)c(Br)c1[Si](C)(C)C>>COC(=O)/C=C/c1c([Si](C)(C)C)cn(S(=O)(=O)N(C)C)c1[Si](C)(C)C  
 9375 C=CC(=O)N1N=Cc2cccc2C1c1cccc1.COc1cc(Cc2cnc(N)nc2N)cc(I)c1OC>>COc1cc(Cc2cnc(N)nc2N)cc(/C=C/C(=O)N2N=Cc3cccc3C2c2cccc2)c1OC  
 9376 C=CC(=O)OCC.CCOC(=O)CCOCc1cc(OCc2cccc2)ccc1Br>>CCOC(=O)/C=C/c1ccc(OCc2cccc2)cc1COCCC(=O)OCC  
 9377 C=CC(=O)O.O=Cc1ccc(Br)cc1>>O=Cc1ccc(/C=C/C(=O)O)cc1  
 9378 Br1ccc(C(=C2C3CCCC2CCC3)c2ccc3c(cnn3C3CCCCO3)c2)cc1.C=CC(=O)OC>>COC(=O)/C=C/c1ccc(C(=C2C3CCCC2CCC3)c2ccc3c(cnn3C3CCCCO3)c2)cc1  
 9379 C=CC(=O)OCC.FC(F)(F)c1cc(I)ccc1Br>>CCOC(=O)/C=C/c1ccc(Br)c(C(F)(F)F)c1  
 9380 C=CCC(C)C(=O)OCC.N#Cc1ccc(Br)cc1>>CCOC(=O)C(C)C/C=C/c1ccc(C#N)cc1  
 9381 C=CC(C)=O.O=Cc1ccc(Cl)cc1>>CC(=O)/C=C/c1ccc(C=O)cc1  
 9382 C=Cc1cc(OC)c(O)c(OC)c1.Oc1cc(O)cc(I)c1>>COc1cc(/C=C/c2cc(O)cc(O)c2)cc(OC)c1O  
 9383 COC[C@H](/N=C(\c1cccc1)N1C=CCC[C@H]1c1cccc1)C(C)C.FC(F)(F)c1cccc(I)c1>>COC[C@H](/N=C(\c1cccc1)N1C=C(c2cccc(C(F)(F)F)c2)CC[C@H]1c1cccc1)C(C)C  
 9384 C=Cc1ccc([Si](OC)(OC)OC)cc1.CCOP(=O)(Cc1ccc(/C=C/c2ccc(-c3ccc(Br)cc3)cc2)cc1)OCC>>CCOP(=O)(Cc1ccc(/C=C/c2ccc(-c3ccc(/C=C/c4ccc([Si](OC)(OC)OC)cc4)cc3)cc2)cc1)OCC  
 9385 C=COCCCC.Cc1c(Br)c(=O)n(C2CCCC2)c2nc(Nc3ccc(N4CCN(C(=O)OC(C)(C)C)CC4)cn3)nc12>>C=C(OCCCC)c1c(C)c2cnc(Nc3ccc(N4CCN(C(=O)OC(C)(C)C)CC4)cn3)nc2n(C2CCCC2)c1=O  
 9386 Br1cccn1.C=Cc1ccc(Cn2cc(C)c(=O)[nH]c2=O)cc1>>Cc1cn(Cc2ccc(/C=C/c3cccn3)cc2)c(=O)[nH]  
 9387 C=Cc1cccc1.COc1cccc1I>>COc1cccc1/C=C/c1cccc1  
 9388 Br1cnc2cccc2c1.C=CCO[C@]1(C)C[C@H](C)C(=O)[C@H](C)[C@@]2(O)NC(=O)O[C@]2(C)[C@@H](CC)OC(=O)[C@H](C)[C@@H](O[C@H]2C[C@@](C)(OC)[C@@H](O[Si](C)(C)C)[C@H](C)O2)[C@H](C)[C@H]1O[C@@H]1O[C@H](C)C[C@H](N(C)C)[C@H]1O[Si](C)(C)C>>CC[C@H]1OC(=O)[C@H](C)[C@@H](O[C@H]2C[C@@](C)(OC)[C@@H](O[Si](C)(C)C)[C@H](C)O2)[C@H](C)[C@@H](O[C@@H]2O[C@H](C)C[C@H](N(C)C)[C@H]2O[Si](C)(C)C)[C@](C)(OC/C=C/c2cnc3cccc3c2)C[C@H](C)C(=O)N[C@H](C)C[C@@]2(O)NC(=O)O[C@]2(C)[C@@H](CC)OC(=O)[C@H](C)[C@@H](O[C@H]2C[C@@](C)(OC)[C@@H](O[Si](C)(C)C)[C@H](C)O2)[C@H](C)[C@H]1O[C@@H]1O[C@H](C)C[C@H](N(C)C)[C@H]1O[Si](C)(C)C  
 9389 C=C[Si](C)(C)C.O=c1ccc2ccc(O)c(I)c2o1>>C[Si](C)(C)/C=C/c1c(O)ccc2ccc(=O)oc12  
 9390 BrC1=C(C2=CCN(Cc3cccc3)CC2)CCCC1.C=CC(=O)OC(C)(C)C>>CC(C)(C)OC(=O)/C=C/C1=C(C2=CCN(Cc3cccc3)CC2)CCCC1  
 9391 C=C[Si](C)(C)c1cccn1.Ic1cccn1>>C[Si](C)(C)/C=C/c1cccn1)c1cccn1  
 9392 C=CS(=O)(=O)Oc1cccc1.COc1ccc(Br)cc1>>COc1ccc(/C=C/S(=O)(=O)Oc2cccc2)cc1  
 9393 C=Cc1ccc(OC)cc1.Clc1ccc(-c2enc3cccn23)cc1>>COc1ccc(/C=C/c2ccc(-c3enc4cccn34)cc2)cc1  
 9394 BrC=Cc1cccc1.C=CCCC(=O)OCC>>CCOC(=O)CC/C=C/C=C/c1cccc1  
 9395 C=C[C@@](C)(/C=C/c1ccc(O)cc1)CCC=C(C)C.CCOc1ccc(I)cc1>>CCOc1ccc(C=C[C@@](C)(/C=C/c2ccc(O)cc2)CCC=C(C)C)cc1  
 9396 C=C(C)C(=C)C.Cc1ccc(I)cc1>>C=C(C)C(C)=Cc1ccc(C)cc1  
 9397 C=Cc1ccc(/C=C/c2ccc(N(C)C)cc2)cc1.CN(C)c1ccc2c(-c3ccc(Br)cc3C(=O)[O-])c3ccc(=[N+](C)C)cc-3oc2c1>>CN(C)c1ccc(/C=C/c2ccc(C=Cc3ccc(-c4c5ccc(=[N+](C)C)cc-5oc5cc(N(C)C)ccc45)c(C(=O)[O-])c3)cc2)cc1  
 9398 C=C(C)C.O=[N+](O-)[O-]c1ccc(Br)c1>>CC(C)=Cc1cccc([N+](=O)[O-])c1  
 9399 C=C(C)C.CC(C)(Cl)c1cccc1>>CC(C)=CC(C)(C)c1cccc1  
 9400 C=C(C)C.CC(Cl)c1cccc1>>CC(C)=CC(C)c1cccc1  
 9401 C=C(C)C.CCCC(Cl)c1cccc1>>CCCC(C=C(C)C)c1cccc1  
 9402 C=C(C)C.CCCC(=O)/C=C/Cl>>CCCC(=O)/C=C/C=C(C)C  
 9403 C=C(C)C.CC(=O)/C=C/Cl>>CC(=O)/C=C/C=C(C)C  
 9404 C=C(C)C.O=[N+](O-)[O-]c1ccc(Cl)c1>>CC(C)=Cc1cccc([N+](=O)[O-])c1  
 9405 C=C(C)C.ClC(c1cccc1)c1cccc1>>CC(C)=CC(c1cccc1)c1cccc1
